# Supplementary material for: A precise chloroplast genome of Nelumbo nucifera (Nelumbonaceae) evaluated with Sanger, Illumina MiSeq, and PacBio RS II sequencing platforms: insight into the plastid evolution of basal eudicots
Source: PubMed Central journal article supplement (PMC4245832; doi:10.1186/s12870-014-0289-0), 2014-11-19
Supplement: 12870_2014_289_MOESM1_ESM.pdf [file 12870_2014_289_MOESM1_ESM.pdf]

Additional file 1. 133 taxa from 56 orders included in phylogenetic analyses with APG III ordinal classification.

| <b>Taxon</b>                   | <b>APGIII Order</b> | <b>GenBank Accession Number</b> | <b>Genes Not Included</b>                                                      |
|--------------------------------|---------------------|---------------------------------|--------------------------------------------------------------------------------|
| <b>Gymnosperms(3)</b>          |                     |                                 |                                                                                |
| <i>Picea abies</i>             | Coniferales         | NC_021456                       | <i>ndhA, ndhB, ndhC, ndhD, ndhE, ndhF, ndhG, ndhH, ndhI, ndhJ, ndhK, rps16</i> |
| <i>Cycas taitungensis</i>      | Cycadales           | NC_009618                       |                                                                                |
| <i>Ginkgo biloba</i>           | Ginkgoales          | NC_016986                       | <i>psbZ, ycf1</i>                                                              |
| <b>Basal Angiosperms (7)</b>   |                     |                                 |                                                                                |
| <i>Amborella trichopoda</i>    | Amborellales        | NC_005086                       | <i>petL, psal, psbM</i>                                                        |
| <i>Illicium oligandrum</i>     | Austrobaileyales    | NC_009600                       |                                                                                |
| <i>Chloranthus spicatus</i>    | Chloranthales       | NC_009598                       |                                                                                |
| <i>Nuphar advena</i>           | Nymphaeales         | NC_008788                       |                                                                                |
| <i>Nymphaea alba</i>           | Nymphaeales         | NC_006050                       |                                                                                |
| <i>Trithuria inconspicua</i>   | Nymphaeales         | NC_020372                       | <i>clpP</i>                                                                    |
| <b>Magnoliids(5)</b>           |                     |                                 |                                                                                |
| <i>Drimys granadensis</i>      | Canellales          | NC_008456                       |                                                                                |
| <i>Calycanthus floridus</i>    | Laurales            | NC_004993                       |                                                                                |
| <i>Liriodendron tulipifera</i> | Magnoliales         | NC_008326                       | <i>rpl22</i>                                                                   |
| <i>Magnolia kwangsiensis</i>   | Magnoliales         | NC_015892                       | <i>rpl22</i>                                                                   |
| <i>Piper cenocladum</i>        | Piperales           | NC_008457                       |                                                                                |
| <b>Monocots (29)</b>           |                     |                                 |                                                                                |
| <i>Acorus calamus</i>          | Acorales            | NC_007407                       | <i>accD</i>                                                                    |
| <i>Lemna minor</i>             | Alismatales         | NC_010109                       | <i>infA</i>                                                                    |
| <i>Colocasia esculenta</i>     | Alismatales         | NC_016753                       | <i>infA</i>                                                                    |
| <i>Elodea canadensis</i>       | Alismatales         | NC_018541                       |                                                                                |
| <i>Najas flexilis</i>          | Alismatales         | NC_021936                       | <i>infA, ndhA, ndhB, ndhC, ndhD,</i>                                           |

---

|                               |             |           |                                                                                                                                                                                                                                                                                                                                              |
|-------------------------------|-------------|-----------|----------------------------------------------------------------------------------------------------------------------------------------------------------------------------------------------------------------------------------------------------------------------------------------------------------------------------------------------|
|                               |             |           | <i>ndhE, ndhF, ndhG, ndhH, ndhI, ndhJ, ndhK, psbH</i>                                                                                                                                                                                                                                                                                        |
| <i>Spirodela polyrhiza</i>    | Alismatales | NC_015891 | <i>infA, rpl20, rps12</i>                                                                                                                                                                                                                                                                                                                    |
| <i>Wolffia australiana</i>    | Alismatales | NC_015899 | <i>infA, rps12</i>                                                                                                                                                                                                                                                                                                                           |
| <i>Bismarckia nobilis</i>     | Arecales    | NC_020366 |                                                                                                                                                                                                                                                                                                                                              |
| <i>Cocos nucifera</i>         | Arecales    | NC_022417 |                                                                                                                                                                                                                                                                                                                                              |
| <i>Elaeis guineensis</i>      | Arecales    | NC_017602 |                                                                                                                                                                                                                                                                                                                                              |
| <i>Pseudophoenix vinifera</i> | Arecales    | NC_020364 |                                                                                                                                                                                                                                                                                                                                              |
| <i>Phoenix dactylifera</i>    | Arecales    | NC_013991 |                                                                                                                                                                                                                                                                                                                                              |
| <i>Phalaenopsis aphrodite</i> | Asparagales | NC_007499 | <i>ndhA, ndhB, ndhC, ndhD, ndhE, ndhF, ndhG, ndhH, ndhI, ndhJ, ndhK, ycf1</i>                                                                                                                                                                                                                                                                |
| <i>Cymbidium aloifolium</i>   | Asparagales | NC_021429 | <i>ndhA, ndhB, ndhC, ndhD, ndhF, ndhG, ndhH, ndhI, ndhK,</i>                                                                                                                                                                                                                                                                                 |
| <i>Erycina pusilla</i>        | Asparagales | NC_018114 | <i>ndhA, ndhB, ndhC, ndhD, ndhE, ndhF, ndhG, ndhH, ndhI, ndhJ, ndhK, ycf1</i>                                                                                                                                                                                                                                                                |
| <i>Neottia nidus-avis</i>     | Asparagales | NC_016471 | <i>atpA, atpB, atpE, atpF, atpH, atpI, ccsA, cemA, matK, ndhA, ndhB, ndhC, ndhD, ndhE, ndhF, ndhG, ndhH, ndhI, ndhJ, ndhK, petA, petB, petD, petG, petL, petN, psaA, psaB, psaC, psaI, psaJ, psbA, psbB, psbC, psbD, psbE, psbF, psbH, psbI, psbJ, psbK, psbL, psbM, psbN, psbT, psbZ, rbcL, rpoA, rpoB, rpoC1, rpoC2, rps18, ycf3, ycf4</i> |
| <i>Oncidium Gower Ramsey</i>  | Asparagales | NC_014056 | <i>ndhA, ndhB, ndhC, ndhD, ndhF, ndhG, ndhH, ndhI, ndhJ, ndhK, ycf1</i>                                                                                                                                                                                                                                                                      |
| <i>Rhizanthella gardneri</i>  | Asparagales | NC_014874 | <i>atpA, atpB, atpE, atpF, atpH, atpI, ccsA, cemA, matK, ndhA, ndhB, ndhC, ndhD, ndhE, ndhF, ndhG, ndhH, ndhI, ndhJ, ndhK, petA, petB, petD, petG, petL, petN, psaA, psaB, psaC, psaI, psaJ, psbA, psbB, psbC, psbD,</i>                                                                                                                     |

---

---

|                                     |              |                   |                                                                                                                                                               |
|-------------------------------------|--------------|-------------------|---------------------------------------------------------------------------------------------------------------------------------------------------------------|
|                                     |              |                   | <i>psbE, psbF, psbH, psbI, psbJ, psbK, psbL, psbM, psbN, psbT, psbZ, rbcL, rpl22, rpl32, rpl33, rpoA, rpoB, rpoC1, rpoC2, rps12, rps15, rps16, ycf3, ycf4</i> |
| <i>Dioscorea elephantipes</i>       | Dioscoreales | NC_009601         | <i>rps16</i>                                                                                                                                                  |
| <i>Veratrum patulum</i>             | Liliales     | NC_022715         | <i>infA, rps16</i>                                                                                                                                            |
| <i>Bambusa emeiensis</i>            | Poales       | NC_015830         | <i>accD, ycf1, ycf2</i>                                                                                                                                       |
| <i>Oryza sativa</i>                 | Poales       | NC_001320         | <i>accD, psaJ, ycf1, ycf2</i>                                                                                                                                 |
| <i>Lolium perenne</i>               | Poales       | NC_009950         | <i>accD, ycf1, ycf2</i>                                                                                                                                       |
| <i>Saccharum officinarum</i>        | Poales       | NC_006084         | <i>accD, psbA, ycf1, ycf2</i>                                                                                                                                 |
| <i>Sorghum bicolor</i>              | Poales       | NC_008602         | <i>accD, ycf1, ycf2</i>                                                                                                                                       |
| <i>Triticum aestivum</i>            | Poales       | NC_002762         | <i>accD, ycf1, ycf2</i>                                                                                                                                       |
| <i>Typha latifolia</i>              | Poales       | NC_013823         |                                                                                                                                                               |
| <i>Zea mays</i>                     | Poales       | NC_001666         | <i>accD, ycf1, ycf2</i>                                                                                                                                       |
| <i>Heliconia collinsiana</i>        | Zingiberales | NC_020362         |                                                                                                                                                               |
| <b>Eudicots (90)</b>                |              |                   |                                                                                                                                                               |
| <i>Brassaiopsis hainla</i>          | Apiales      | NC_022811         |                                                                                                                                                               |
| <i>Daucus carota</i>                | Apiales      | NC_008325         |                                                                                                                                                               |
| <i>Schefflera delavayi</i>          | Apiales      | NC_022813         |                                                                                                                                                               |
| <i>Panax ginseng</i>                | Apiales      | NC_006290         |                                                                                                                                                               |
| <i>Metapanax delavayi</i>           | Apiales      | NC_022812         |                                                                                                                                                               |
| <i>Ilex cornuta</i> Lindl. & Paxton | Aquifoliales | GQ997298-GQ997380 |                                                                                                                                                               |
| <i>Guizotia abyssinica</i>          | Asterales    | NC_010601         |                                                                                                                                                               |
| <i>Helianthus annuus</i>            | Asterales    | NC_007977         |                                                                                                                                                               |
| <i>Lactuca sativa</i>               | Asterales    | NC_007578         | <i>ycf1</i>                                                                                                                                                   |
| <i>Artemisia frigida</i>            | Asterales    | NC_020607         |                                                                                                                                                               |
| <i>Trachelium caeruleum</i>         | Asterales    | NC_010442         | <i>accD, clpP, infA, ndhK, rpl23</i>                                                                                                                          |
| <i>Jacobaea vulgaris</i>            | Asterales    | NC_015543         | <i>rpoC1</i>                                                                                                                                                  |

---

---

|                                            |                   |                                                                                                                                      |                          |
|--------------------------------------------|-------------------|--------------------------------------------------------------------------------------------------------------------------------------|--------------------------|
| <i>Berberidopsis<br/>corallina</i> Hook.f. | Berberidopsidales | EU002158,<br><br>EU002171,<br><br>EU002201,<br><br>EU002274,<br><br>EU002295,<br><br>EU002385,<br><br>EU002466,<br>GQ997932-GQ998004 |                          |
| <i>Ehretia<br/>acuminata</i> R.Br.         | Boraginaceae      | GQ997215-GQ997297                                                                                                                    |                          |
| <i>Arabidopsis<br/>thaliana</i>            | Brassicales       | NC_000932                                                                                                                            | <i>infA</i>              |
| <i>Brassica napus</i>                      | Brassicales       | NC_016734                                                                                                                            | <i>infA</i>              |
| <i>Carica papaya</i>                       | Brassicales       | NC_010323                                                                                                                            | <i>infA</i>              |
| <i>Buxus<br/>microphylla</i>               | Buxales           | NC_009599                                                                                                                            |                          |
| <i>Fagopyrum<br/>esculentum</i>            | Caryophyllales    | NC_010776                                                                                                                            | <i>rpl23</i>             |
| <i>Spinacia<br/>oleracea</i>               | Caryophyllales    | NC_002202                                                                                                                            | <i>rpl23</i>             |
| <i>Silene conica</i>                       | Caryophyllales    | NC_016729                                                                                                                            | <i>infA, matK, rpl23</i> |
| <i>Euonymus<br/>americanus</i> L.          | Celastrales       | EU002160,<br>EU002170,<br>EU002193,<br>EU002277,<br>EU002321,<br>EU002409,<br>EU002500,<br>GQ998147-GQ998219                         |                          |
| <i>Cornus florida</i> L.                   | Cornales          | EU002157,<br>EU002175,<br>EU002215,<br>EU002276,<br>EU002311,<br>EU002377,<br>EU002491,<br>GQ998074-GQ998146                         | <i>psbT</i>              |
| <i>Staphylea</i>                           | Crossosomatales   | EU002168,                                                                                                                            | <i>infA</i>              |

---

---

|                                        |              |                                                                                                 |                                                                       |
|----------------------------------------|--------------|-------------------------------------------------------------------------------------------------|-----------------------------------------------------------------------|
| <i>colchica</i> Steven                 |              | EU002189,<br>EU002261,<br>EU002285,<br>EU002364,<br>EU002453,<br>EU002543,<br>GQ998725-GQ998796 |                                                                       |
| <i>Cucumis sativus</i>                 | Cucurbitales | NC_007144                                                                                       | <i>infA</i>                                                           |
| <i>Corynocarpus laevigata</i>          | Cucurbitales | NC_014807                                                                                       | <i>infA, ndhD</i>                                                     |
| <i>Dillenia indica</i> L               | Dilleniaceae | GQ997132-GQ997214                                                                               |                                                                       |
| <b><i>Lonicera japonica</i> Thunb.</b> | Dipsacales   | GQ997381-GQ997463                                                                               |                                                                       |
| <i>Rhododendron simsii</i> Planch      | Ericales     | GQ997782-GQ997859                                                                               | <i>accD, clpP, rpl33, ycf1, ycf2</i>                                  |
| <i>Cicer arietinum</i>                 | Fabales      | NC_011163                                                                                       | <i>infA, rpl22, rps16, ycf4</i>                                       |
| <i>Glycine max</i>                     | Fabales      | NC_007942                                                                                       | <i>infA, rpl22, ycf4</i>                                              |
| <i>Millettia pinnata</i>               | Fabales      | NC_016708                                                                                       | <i>infA, rpl22</i>                                                    |
| <i>Lotus japonicus</i>                 | Fabales      | NC_002694                                                                                       | <i>infA, rpl22</i>                                                    |
| <i>Phaseolus vulgaris</i>              | Fabales      | NC_009259                                                                                       | <i>infA, rpl22, rpl33, rps16</i>                                      |
| <i>Trifolium subterraneum</i>          | Fabales      | NC_011828                                                                                       | <i>accD, infA, ndhB, ndhK, rpl22, rpl32, rps16, rps18, ycf1, ycf4</i> |
| <i>Castanea mollissima</i>             | Fagales      | NC_014674                                                                                       | <i>infA, rpl22</i>                                                    |
| <i>Aucuba japonica</i> Thunb.          | Garryales    | GQ997049-GQ997131                                                                               |                                                                       |
| <i>Coffea arabica</i>                  | Gentianales  | NC_008535                                                                                       |                                                                       |
| <i>Asclepias syriaca</i>               | Gentianales  | NC_022432                                                                                       | <i>accD, clpP</i>                                                     |
| <i>Catharanthus roseus</i>             | Gentianales  | NC_021423                                                                                       |                                                                       |
| <i>Erodium texanum</i>                 | Geraniales   | NC_014569                                                                                       | <i>accD, infA, ycf1, ycf2</i>                                         |
| <i>Geranium palmatum</i>               | Geraniales   | NC_014573                                                                                       | <i>clpP, infA, ycf1, ycf2</i>                                         |
| <i>Monsonia speciosa</i>               | Geraniales   | NC_014582                                                                                       | <i>accD, clpP, infA, rps12, ycf1, ycf2</i>                            |
| <i>Pelargonium x hortorum</i>          | Geraniales   | NC_008454                                                                                       | <i>accD, infA, rpoA</i>                                               |
| <i>Gunnera manicata</i> Linden         | Gunnerales   | EU002162,<br>EU002179,<br>EU002226,                                                             | <i>psbH</i>                                                           |

---

---

|                                                |              |                                                                       |                                                                                                                                                                                                                                                                                                                                                         |
|------------------------------------------------|--------------|-----------------------------------------------------------------------|---------------------------------------------------------------------------------------------------------------------------------------------------------------------------------------------------------------------------------------------------------------------------------------------------------------------------------------------------------|
|                                                |              | EU002279,<br>EU002325,<br>EU002413,<br>EU002504,<br>GQ998292-GQ998364 |                                                                                                                                                                                                                                                                                                                                                         |
| <i>Boea hygrometrica</i>                       | Lamiales     | NC_016468                                                             | <i>cemA, psbB, psbI, psbZ, rps19</i>                                                                                                                                                                                                                                                                                                                    |
| <i>Salvia multiorrhiza</i>                     | Lamiales     | NC_020431                                                             |                                                                                                                                                                                                                                                                                                                                                         |
| <i>Utricularia gibba</i>                       | Lamiales     | NC_021449                                                             | <i>petD</i>                                                                                                                                                                                                                                                                                                                                             |
| <i>Olea woodiana</i><br><i>subsp. woodiana</i> | Lamiales     | NC_015608                                                             | <i>ccsA, cemA, infA, ndhK, psbZ, rps12</i>                                                                                                                                                                                                                                                                                                              |
| <i>Jasminum nudiflorum</i>                     | Lamiales     | NC_008407                                                             | <i>accD</i>                                                                                                                                                                                                                                                                                                                                             |
| <i>Cistanche deserticola</i>                   | Lamiales     | NC_021111                                                             | <i>accD, atpA, atpB, atpE, atpF, atpH, atpI, ccsA, cemA, ndhA, ndhB, ndhC, ndhD, ndhE, ndhF, ndhG, ndhH, ndhI, ndhJ, ndhK, petA, petB, petD, petG, petL, petN, psaA, psbA, psbB, psbC, psbD, psbE, psbF, psbH, psbI, psbJ, psbK, psbL, psbN, psbT, psbZ, rbcL, rpl23, rpoA, rpoB, rpoC1, rpoC2, ycf1, ycf3, ycf4</i>                                    |
| <i>Epifagus virginiana</i>                     | Lamiales     | NC_001568                                                             | <i>atpA, atpB, atpE, atpF, atpH, atpI, ccsA, cemA, ndhA, ndhB, ndhC, ndhD, ndhE, ndhF, ndhG, ndhH, ndhI, ndhJ, ndhK, petA, petB, petD, petG, petL, petN, psaA, psbA, psbB, psbC, psbD, psbE, psbF, psbH, psbI, psbJ, psbK, psbL, psbM, psbN, psbT, psbZ, rbcL, rpl14, rpl22, rpl23, rpl32, rpoA, rpoB, rpoC1, rpoC2, rps15, rps16, ycf1, ycf3, ycf4</i> |
| <i>Lindenbergia philippensis</i>               | Lamiales     | NC_022859                                                             | <i>accD, matK, ndhF, ndhK, psbF, psbI, rpoC1, rps15, ycf1</i>                                                                                                                                                                                                                                                                                           |
| <i>Hevea brasiliensis</i>                      | Malpighiales | NC_015308                                                             | <i>infA</i>                                                                                                                                                                                                                                                                                                                                             |
| <i>Ricinus communis</i>                        | Malpighiales | NC_016736                                                             | <i>infA</i>                                                                                                                                                                                                                                                                                                                                             |
| <i>Manihot</i>                                 | Malpighiales | NC_010433                                                             | <i>infA</i>                                                                                                                                                                                                                                                                                                                                             |

---

---

|                         |              |                           |                                      |
|-------------------------|--------------|---------------------------|--------------------------------------|
| <i>esculenta</i>        |              |                           |                                      |
| <i>Populus</i>          | Malpighiales | NC_009143                 | <i>infA, rpl32, rps16, ycf1</i>      |
| <i>trichocarpa</i>      |              |                           |                                      |
| <i>Gossypium</i>        | Malvales     | NC_007944                 | <i>infA, rpl22</i>                   |
| <i>hirsutum</i>         |              |                           |                                      |
| <i>Allosyncarpia</i>    | Myrtales     | NC_022413                 | <i>infA, psbL</i>                    |
| <i>ternata</i>          |              |                           |                                      |
| <i>Angophora</i>        | Myrtales     | NC_022412                 | <i>infA, psbL</i>                    |
| <i>costata</i>          |              |                           |                                      |
| <i>Corymbia eximia</i>  | Myrtales     | NC_022409                 | <i>infA, psbL</i>                    |
| <i>Stockwellia</i>      | Myrtales     | NC_022414                 | <i>infA, psbL</i>                    |
| <i>quadrifida</i>       |              |                           |                                      |
| <i>Eucalyptus</i>       | Myrtales     | NC_008115                 | <i>infA, psbL</i>                    |
| <i>globulus</i>         |              |                           |                                      |
| <i>Oenothera elata</i>  | Myrtales     | NC_002693                 | <i>infA</i>                          |
| <i>Oxalis latifolia</i> | Oxalidales   | EU002165,                 | <i>infA, rpl32, rps16</i>            |
| <i>Kunth</i>            |              | EU002186,                 |                                      |
|                         |              | EU002248,                 |                                      |
|                         |              | EU002282,                 |                                      |
|                         |              | EU002350,                 |                                      |
|                         |              | EU002438,                 |                                      |
|                         |              | EU002528,                 |                                      |
|                         |              | GQ998511-GQ998580         |                                      |
| <i>Platanus</i>         | Proteales    | NC_008335                 |                                      |
| <i>occidentalis</i>     |              |                           |                                      |
| <i>Nelumbo lutea</i>    | Proteales    | NC_015605 (in this study) |                                      |
|                         |              |                           |                                      |
| <i>Nelumbo</i>          | Proteales    | NC_015610 (in this study) |                                      |
| <i>nucifera</i>         |              |                           |                                      |
| <i>Meliosma aff.</i>    | Sabiaceae    | GQ997464-GQ997546         |                                      |
| <i>cuneifolia</i>       |              |                           |                                      |
| <i>Franch.</i>          |              |                           |                                      |
| <i>Phoradendron</i>     | Santalales   | GQ997713-GQ997781         | <i>infA, ndhA, ndhB, ndhC, ndhD,</i> |
| <i>leucarpum (Raf.)</i> |              |                           | <i>ndhE, ndhF, ndhG, ndhH, ndhI,</i> |
| <i>Reveal &amp;</i>     |              |                           | <i>ndhJ, ndhK, rpl33, rps15</i>      |
| <i>M.C.Johnst.</i>      |              |                           |                                      |
| <i>Ximenia</i>          | Santalales   | GQ997860-GQ997931         | <i>All ndh genes</i>                 |
| <i>americana L</i>      |              |                           |                                      |
| <i>Heuchera</i>         | Saxifragales | EU002163,                 |                                      |
| <i>sanguinea Engelm</i> |              | EU002180,                 |                                      |
|                         |              | EU002228,                 |                                      |
|                         |              | EU002280,                 |                                      |
|                         |              | EU002327,                 |                                      |

---

---

|                                              |                 |                                                                                                              |                                                                                                     |
|----------------------------------------------|-----------------|--------------------------------------------------------------------------------------------------------------|-----------------------------------------------------------------------------------------------------|
|                                              |                 | EU002415,<br>EU002506,<br>GQ998365-GQ998437                                                                  |                                                                                                     |
| <i>Ranunculus<br/>macranthus</i>             | Ranunculales    | NC_008796                                                                                                    | <i>infA</i>                                                                                         |
| <i>Berberis bealei</i>                       | Ranunculales    | NC_022457                                                                                                    | <i>psbZ, rpoA</i>                                                                                   |
| <i>Nandina<br/>domestica</i>                 | Ranunculales    | NC_008336                                                                                                    |                                                                                                     |
| <i>Megaleranthis<br/>saniculifolia</i>       | Ranunculales    | NC_012615                                                                                                    |                                                                                                     |
| <i>Morus indica</i>                          | Rosales         | NC_008359                                                                                                    | <i>infA</i>                                                                                         |
| <i>Fragaria<br/>chiloensis</i>               | Rosales         | NC_019601                                                                                                    | <i>infA</i>                                                                                         |
| <i>Prunus persica</i>                        | Rosales         | NC_014697                                                                                                    | <i>infA</i>                                                                                         |
| <i>Citrus sinensis</i>                       | Sapindales      | NC_008334                                                                                                    | <i>infA</i>                                                                                         |
| <i>Atropa<br/>belladonna</i>                 | Solanales       | NC_004561                                                                                                    | <i>infA</i>                                                                                         |
| <i>Cuscuta<br/>exaltata</i>                  | Solanales       | NC_009963                                                                                                    | <i>infA, ndhA, ndhB, ndhC, ndhD,<br/>ndhE, ndhF, ndhG, ndhH, ndhI,<br/>ndhJ, ndhK, rpl23, rps16</i> |
| <i>Capsicum<br/>annuum</i>                   | Solanales       | NC_018552                                                                                                    | <i>infA</i>                                                                                         |
| <i>Solanum<br/>bulbocastanum</i>             | Solanales       | NC_007943                                                                                                    |                                                                                                     |
| <i>Ipomoea<br/>purpurea</i>                  | Solanales       | NC_009808                                                                                                    | <i>infA</i>                                                                                         |
| <i>Nicotiana<br/>tabacum</i>                 | Solanales       | NC_001879                                                                                                    | <i>infA</i>                                                                                         |
| <i>Trochodendron<br/>aralioides</i>          | Trochodendrales | NC_021426                                                                                                    |                                                                                                     |
| <i>Tetracentron<br/>sinense</i>              | Trochodendrales | NC_021425                                                                                                    |                                                                                                     |
| <i>Vitis vinifera</i>                        | Vitales         | NC_007957                                                                                                    |                                                                                                     |
| <i>Bulnesia<br/>arborea (Jacq.)<br/>Engl</i> | Zygophyllales   | EU002159,<br>EU002172,<br>EU002205,<br>EU002275,<br>EU002299,<br>EU002388,<br>EU002478,<br>GQ998005-GQ998073 | <i>infA, rps16, ycf1, ycf2</i>                                                                      |

---
