# Supplementary material for: A precise chloroplast genome of Nelumbo nucifera (Nelumbonaceae) evaluated with Sanger, Illumina MiSeq, and PacBio RS II sequencing platforms: insight into the plastid evolution of basal eudicots
Source: PubMed Central journal article supplement (PMC4245832; doi:10.1186/s12870-014-0289-0), 2014-11-19
Supplement: 12870_2014_289_MOESM4_ESM.pdf [file 12870_2014_289_MOESM4_ESM.pdf]

Additional file 4. Primers for chloroplast sequence amplification in our study.

| <b>Primer</b> | <b>Primer sequence</b>      |
|---------------|-----------------------------|
| Cps1F         | GGAAAGGGTAGAAGAATGGGACCTAT  |
| Cps1R         | GTACCGAGGGTTCGAATCCCTCTCTT  |
| Cps2F         | AAGAGAGGGATTTCGAACCCTCGGTAC |
| Cps2R         | GGAACTATTCGTACGTTGTTGAATAG  |
| Cps3F         | CTATTCAACAACGTACGAATAGTTCC  |
| Cps3R         | ATCAGGCGACACCCGGATTTGAACTG  |
| Cps4F         | CAGTTCAAATCCGGGTGTCGCCTGAT  |
| Cps4R         | AGAGATGGCCGAGTGGTTGATAGCTC  |
| Cps5F         | GAGCTATCAACCACTCGGCCATCTCT  |
| Cps5R         | TCCCGTCAGACTTGAACCTAGTAAA   |
| Cps6F         | TTAACTAGGTTCAAGTCTGACGGGA   |
| Cps6R         | CAACCTCGGATCGTTGGTGAGGAACA  |
| Cps7F         | TGTTCCTCACCAACGATCCGAGGTTG  |
| Cps7R         | GGTGTCCATCCGATGCATCCGCTATG  |
| Cps8F         | CATAGCGGATGCATCGGATGGACACC  |
| Cps8R         | ACAACGGTATGAACACGATACCAAGG  |
| Cps9F         | CCTTGGTATCGTGTTTCATACCGTTGT |
| Cps9R         | GCACGTGTCTGAATGGATCAGAGAAGG |
| Cps10F        | CCTTCTCTGATCCATTCGACACGTGC  |
| Cps10R        | GATTCCTTGGTTCGGACCGAAGAAGC  |
| Cps11F        | GCTTCTTCGGTCCGAACCAAGGAATC  |
| Cps11R        | CCTCAGTAGCTCAGTGGTAGAGCGGT  |
| Cps12F        | ACCGCTCTACCACTGAGCTACTGAGG  |
| Cps12R        | CGGCCCTTTGGGAATTCTTCAAGCTC  |
| Cps13F        | GAGCTTGAAGAATTCCCAAAGGGCCG  |
| Cps13R        | GACATAAGAGATGTCGTTTCTAGTCT  |
