# Supplementary material for: A precise chloroplast genome of Nelumbo nucifera (Nelumbonaceae) evaluated with Sanger, Illumina MiSeq, and PacBio RS II sequencing platforms: insight into the plastid evolution of basal eudicots
Source: PubMed Central journal article supplement (PMC4245832; doi:10.1186/s12870-014-0289-0), 2014-11-19
Supplement: 12870_2014_289_MOESM5_ESM.pdf [file 12870_2014_289_MOESM5_ESM.pdf]

Additional file 5. The DNA sequences alignment of the genes from 133 species used in the phylogenetic analyses.

>Aucuba

```
ATGGAAAGATGGTGGTTTAATTTCGATGTTCTTTCTAAGTAAATCAATGGACAGTCTTGG
TCC TATTGAAAATATCAGTGAA-----GATCCGACTATAAATGATACGACTAAAAAGATTCA
TAGTTACAGTAATGTTGATAATTTATTCGGTATCAAAGACATTGGGAATTTTCATCGCTGA
TGACACTTTTTT TAGTTAGGGATAGTAATGGAGACAGTTATTCTATATATTTTTGATATTGAA
AATCAGATTTTTGAAATTGACAATGATCAT-----TCTTTTCTGAATGAACTAGAAAGTTCT
TTTTATAGTTATCGGAAT-----AATGGATCTAAGAGTGACGATCCCTACTATGATCG
TTATATGTATGATACTCAATATAGTTGGAATAATCACATTAATAGTTGCATTGATAGTTATC
TTGAG-----TCTCAAATCCGTATTGATACTTCCATTGGAAGTGGTAGTGACAATTATGGT--
---TACATTTATAGTTCCATTTGTGGTAGCGAAGGTTCCGGTATACAAACCAGCACGAAT
GGTAGTGATTTAACTATAAGAGAAAGTTCTAATGATCTCGATGTAAC TAAAAATACAG
GCATTTGTGGATTCAATGTGAAAATTGTTATGGATTA AATTATAAGAAATTTTTTAAATC
AAAAATGAATATTTGTGAACAATGTGGATATCATTTGAAAATGAGTAGTTCAGATAGAA
TCGAATTTTCGATCGATCCAGGTACTTGGGATCCTATGGATGAAGACATGGTATCTCTGG
ATCCCATTTGAATTTCAATTCGGAGGAAGAGCCTTATAAAGATCGTATCGATTCTTATCAA
GAAAGACAGGATTA ACTGAGGCTGTTCAAACAGGTATAGGCCAACTAAACGGTATTCC
CATAGCAATTGGGGTTATGGATTTTCAGTTTATGGGGGGTAGTATGGGATCCGTAGTCCG
GGAGAAAATCACCCGTTTGATTGAGTACGCTACCAATCAATTTCTACCTCTTATTATAGT
GTGTGCTTCCGGGGGGGCACGCATGCAAGAAGGAAGTTTGAGCTTGATGCAAATGGCT
AAAATATCGTCTGCTTTATATGATTATCAATCAAATAAAAAGTTATTCTATGTAGCAATCC
TTACATCTCTACTACTGGTGGGGTGACAGCTAGTTTTTGGTATGTTGGGGGATATCATT
TTGCTGAACCCAATGCCTACATTGCATTTGCGGGTAAAAGAGTAATTGAACAAACATTG
AATAAACAGTCCCTGAAGGTTCA CAAGCGGCTGAATATTTATTCCAGAAGGGCTTATT
CGATCTAATCGTACCACGTAATCCTTTAAAAGATGTTCTGAGTGAGTTATTGCAGCTCCA
CGCCTTCTTTCTTTGACT-----ATGGTAACCATTCGAGCCGACGAAATTAGTAAT
ATTATACGTGAACGTATTGAGCAATATAATAGAGAAGTAAAGATTGTAAATACCGGGAC
CGTACTTCAGGTAGGCGATGGCATTGCTCGTATTCATGGTCTTGATGAAGTAATGGCGG
GCGAATTAGTAGAATTTGAAGAGGGTACAATAGGCATTGCTCTAAATTTGGAATCAAAT
AATGTTGGTGTGTATTAATGGGTGATGTTTTGATGATACAAGAAGGAAGTTCTGTAAA
AGCAACAGGAAAAATTGCTCAGATCCCAGTGAGTGAGGCCTATTTGGGTCGTGTTATA
AATGCCCTGGCTAAACCTATTGATGGTAGAGGTGAAATTTAGCTTCTGAATCCCGGTT
AATTGAATCTCCCGCTCCAGGTATTATTTGCGGGCGTTCCGTATATGAGCCTCTTCAAAC
GGGACTTATTGCTATTGATTCGATGATCCCTATAGGACGTGGTCAGCGAGAATTAATTAT
TGGGGACAGACAGACTGGTAAAACAGCAGTAGCCACAGATACGATTCTCAATCAACA
AGGTCAAATGTAATATGTGTTTATGTAGCTATTGGTCAAAAAGCATCTTCGGTGGCTC
AGGTAGTACTACTTTCCAGGAAAGGGGAGCCATGGAATACACTATTGTGGTAGCCGA
AGCAGCGGATTCCCCTGCTACATTACAATACCTTGCTCCTTATACAGGAGCAGCTCTGG
CTGAATATTTTATGTACCGTGAACGACACACTTCAATCATTTATGATGATCCCTCAAAC
AAGCACAAGCTTATCGCCAAATGTCTCTTCTATTACGAAGACCGCCTGGTCGTGAAGCT
TATCCAGGGGATGTTTTTTATTTGCATTCACGCCTTTTGAAAGAGCCGCTAAATCAAG
TTCTAGTTTAGGTGAAGGAAGTATGACTGCTTTACCAATAGTTGAAACTCAATCGGGAG
```

ATGTTTCGGCTTATATTCTACTAATGTAATTTCCATTACGGATGGACAAATATTCTTATC  
CGCCGATCTATTCAATGCTGGAATCAGACCTGCTATTAATGTGGGTATCTCCGTTTCCAG  
AGTGGGGTCTGCAGCTCAAATTAAGGCCATGAAACAAGTCGCTGGCAAATTAATAA  
GAACTGGCGCAATTCGCAGAAGCTTAGAAGCCTTTGCACAATTTGCTTCTGATCTCGATAA  
AGCTACTCAGAATCAATTGGCAAGAGGTCAACGATTACGTGAATTGCTCAAACAATCC  
CAAGCAGCCCCCTCACGGTGGAGAACAGATAATGACTATTTATACCGGAACAAATG  
GTTATCTTGATTCATTAGAAATTGGACAGGTAAGGAAATTTCTTGTTGAGTTACGTACTT  
ACTTAAAACTAATAAGCCTCAGTTCCAAGAAATCATATCTTCTACCAAGACATTTACC  
GAGGAAGCAGAAACCCTTTTGAAAGAAGCTATTCAGGAACAGATGGAACGTTTATAC  
TTCAGGAACAAGCAATGAGAATCAATCCTACTAGTTCTGGTTCTGGGATTTCCACGCTC  
GAAAAAATAACCTGGGTCGTATCGCCAAATCATTGGTCCAGTACTGGATGTAGCTT  
TTCCGCCGGCAAGATGCCTAATTTATAACGCTCTGGTAGTTAAGGGTCGAGATATTG  
CCGGTCAACCAATTAATGTGACTTGTGAGGTACAACAATTATTAGGAAACAATCGAGTT  
AGAGCTGTAGCTATGAGTGCTACAGATGGTCTAACGAGAGGAATGGAAGTGATTGACA  
CGGGAGCTCCTCTAAGTGTTCCGGTTGGTGGATCGACTCTCGGACGAATTTCAACGT  
GCTTGGAGAGCCTGTTGATAATTTAGGTCTGTAGATACTCGTATAACATCTCCTATTCAT  
AGATCTGCGCCCGCCTTTATACAGTTAGATACAAATTTCTCTATTTTTGAAACAGGAATT  
AAAGTAGTAGATCTTTTAGCCCCTTATCGCCGTGGAGGAAAAATCGGACTATTCGGGGG  
AGCTGGAGTGGGTAAAACAGTACTAATTATGGAATTGATTAACAATATTGCCAAAGCTC  
ACGGGGGTGTATCCGTATTTGGCGGAGTGGGTGAACGTACTCGTGAAGGAAATGATCT  
TTACATGGAAATGAAAGAATCCGGAGTAATTAATGAACAAAATATTGCAGAATCAAAA  
GTGGCTCTAGTTTACGGTCAGATGAATGAACCGCCGGGAGCTCGTATGAGAGTTGGTT  
TGACTGCCCTAACCATGGCGGAATATTTCCGCGATGTTAATGAACAAGACGTACTTCTA  
TTTATCGACAATATCTTCCGTTTCGTTCAAGCAGGATCCGAAGTATCGGCCTTATTGGGT  
AGAATGCCTTCCGCTGTGGGTATCAACCCACCCTTAGTACCGAAATGGGTACTTTACA  
AGAAAGAATTACTTCTACCAAAGAAGGGTCCATAACTTCTATTCAAGCAGTTTATGTAC  
CTGCAGACGATTTGACCGACCCTGCTCCTGCTACAACATTTGCACATTTAGATGCTACT  
ACCGTACTATCAAGAGGATTGGCTGCCAAAGGTATCTATCCAGCAGTAGATCCTTTAGA  
TTCAACGTCAACTATGCTTCAACCCCGGATCGTTGGGGAGGAACATTATGAAACTGCG  
CAAAGAGTTAAGGAACTTTACAACGTTACAAAGAAGTTCAGGACATTATAGCTATCCT  
TGGGTTGGACGAATTATCCGAAGAGGATCGTTTAAACCGTAGCAAGAGCGGAAAAATT  
GAGCGTTTCTTATCACAACCTTTTTTCGTAGCAGAAGTATTTACCGGTTCTCCAGGAAA  
ATATGTTGGTCTAGCAGAAACAATTAGAGGGTTTCAATTGATCCTTTCCGGAGAATTAG  
ATAGTCTTCCCTGAACAGGCCTTTTATTTGGTAGGTAACATCGATGAAGCTACCGCGAAG  
GCTATGAACTTAGAAATGGAGAGCAATTTGAAGAAAATGAGCTTAAATCTTTGTGTACT  
GACCCCTAATAGAATTGTTTGGGATTCAGAAGTGAAAGAAATCATTTTATCTACTAATAG  
TGGTCAAATTGGTGTATTACCAAACCACGCCCTATTGCCACAGCTGTAGATATAGGTAT  
TTAAGAATACGCCTTAAACGACCAATGGGTAACGATGGCTCTGATGGGTGGTTTTGCTA  
GAATAGGCAATAATGAGATCACTATTTTAGTAAATGATGCGGAGAAGGGTAGTGACATT  
GATCCACAAGAAGCTCGGGAGACTCTTGAAATAGCGGAAGCTAATTTGAGAAAAGCT  
GAAGGAAAGAGACAAACAATTGAGGCAAATCTAGCTCTCCGACGAGCTAGGACACGA  
GTAGAGTCTATCAACGCGATTTCAATGAAAAATGTAACCGATTCTTTTCGTTTCTTTGGG  
CCACTGGCCATCCGCCGGGAGTTTCGGGTTTAAATACCGATATTTTAGCAACAAATCCAA  
TAAATCTAAGTGATGCTTGGTGTATTGATCTTTTTTGGAAAGGGAGTGTTAAGTGATT

TATTAGATAATCGAAAACAGAGGATCTTGAATACTATTCGAAATTCAGAAGAACTGCGT  
GAGGGGGCCATTGAACAGTTGGAAAAAGCCCGTGCTCGCTTACGGAAAGTGGAATG  
GAAGCAGATCGGTTTCGAGTGAATGGATACTCTGAGATAGAGCGAGAAAAATTGAATT  
TGATTAATTCAACTTATAAGACTTTGGAACAATTAGAAAATTACAAAAACGAACTATT  
CATTTTGAACAACAAAGGGCGATTAATCAAGTCCGACAACGGGTTTTCCAACAAGCGT  
TACAAGGGGCTCTAGGAACTCTGAATAGTTGTTTGAACAACGAGTTACATTTACGTACC  
ATCAGTGCCAATATTGGCATGTTGGGGGCGATGAAAGAAATAACTGATATGAATCCACT  
GATTTCTGCCGCTTCCGTTATTGCTGCTGGATTGGCCGTAGGGCTTGCTTCTATTGGACC  
TGGAGTTGGTCAAGGTACTGCTGCGGGTCAAGCTGTAGAAGGTATCGCGAGACAGCCT  
GAGGCGGAAGGAAAAATACGAGGTACTTTATTACTTAGTCTAGCTTTTATGGAAGCTTT  
AACTATTTATGGACTGGTTGTAGCATTAGCACTTTTATTTGCGAATCCTTTTGTATGAAT  
GTTCTATCATGTTCCATCAATACACTAAAGGGGTTATATGATATATCTGGTGTGGAAGTA  
GGCCAACATTTCTATTGGAAAATAGGAGGTTTCCAAGTCCATGGCCAAGTACTTATTAC  
TTCTTGGGTTGTAATTGCTATCTTATTAGGTTTCAGCCACTATAGCTGTTTCGGAACCCACA  
AACCATTCCGACTGGGGGTCAGAATTTCTTCGAATATGTCCTTGAATTCATTGAGATG  
TGAGTAAAACACTCAAATTGGAGAAGAATATGGTCCTTGGGTTCCTTTTATTGGAACATG  
TTTCTATTTATTTTTGTTTTCTAATTGGTCAGGAGCTCTTTTACCTTGGAAAATCATACAAT  
TACCTCATGGGGAGTTAGCCGCACCCACGAATGATATAAATACTACTGTTGCTTTGGCTT  
TACTCACGTCAGTGGCATATTTCTATGCAGGTCTTACCAAAAAAGGATTAGGTTATTTTCG  
GAAAATATATTCAACCAACCCCAATCCTTTTACCCATTAACATCTTGGAAAGATTTACAA  
AGCCTTTATCACTTAGTTTTTCGACTTTTTCGGAATATATTAGCTGATGAATTAGTAGTTGT  
TGTTCTTGTTCCTTAGTACCTTCAGTCATTCTTATACCCGTCATGTTCTTGGATTATTT  
ACAAGCGGTATTCAAGCTCTATTTTTGCAACCTTAGCCGCGGCTTATATAGGTGAATCT  
ATGGAGGGCCATCATATGATATTTTTAACTTTAGAGCATATATTAATCATATTTCTTTTTTC  
GATCGTTTCAATTGTAATTACAATTCATTTGATAACCTTATTAGTCGATGAAATCGTAAA  
ACTATATGATTTCGTCAGAAAAGGGCATGATAGCTATTTTTTTCTGTATAACAGGATTATTA  
GCCACTCGTTGGATTATTTCGGGACATTTCCCACTAAGTAATTTATATGAGTCATTAATCT  
TCCTTTTCATGGAGTTTCTCCATTATTCATATAGTTCCATAT-----AAAAAGAAAAATTATTT  
AAGTACAATAACTGCGCCAAGTGTTATTTTTACACAAGGCTTTGTTACTTCGGGTCTTTT  
AATTGAAATACATCAATCCAGAATATTAGTACCTGCTCTCCAATCCGAGTGGTTAATAAT  
GCATGTAAGTATGATGATATTGGGCTATGCAGCTCTTTTATGTGGATCATTATTATCAGTA  
GCACTTCTAGTTATTACATTTGAAAAAACGAAAGATTTTTTGT-----AAAGAAATCGA  
ATACATGAATGAAAGAGATAATGTTTTACGAAATACTTCT-----GCTAAGAATTATTAC  
AGGTCCCAATTGATTCAACAATTGGATTATTGGAGTTATCGTGTATTAGTCTAGGGTTT  
CTCTTTTTAACCATAGGTATTCTGTCGGGAGCAATATGGGCTAATGAAGCATGGGGATCA  
TATTGGAATTGGGACCCAAAGGAACTTGGGCATTTATTACTTGGATCGTATTTCGCGATT  
TATTTACATACTCGGACAAATAAAAATTTGCAGGGTGCAAATCCGCAATTGTGGCGTC  
TATAGGCTTTTTTATAATTTGGATATGCTATTTTGGAGTCAATCTATTAGGAATAGGTCTA  
CATAGTTATGGTTCATTTACATTAACGATGGCAAAAAAGAAAGCATTACCCCTCTTTTA  
TATCTTGCATCTTTAGTATTTTTGCCCTGGTGGATTTCTCTCTCATTTAATAAAAAGTCTGG  
AATCTTGGGTTACGAATTGGTGAATACTAGGCAATCCGAACTTTTTTGAATGATATTC  
AAGAAAAAGTATTCTAGAAAAATTCATAGAATTAGAGGAACTCCTCTTCTTGGACGA  
AATGATCAAGGAATACTCGGAGACACAATAAAAAGCTTCGTATA---ATCCACAAAGA  
AACGATCCAATTAATCAAGATACACAATGAGGATCGTATCCATACGATTTTGCATTTCTC

GACAAATATAATCTGTTTCGTTATTCTAAGCGGTTGTTCTATTTTGGGTAATGAAGAGCT  
TGTTATTCTTAACTCTTGGGCTCAGGAATTCCTATATAACTTAAGCGATACAGTCAAAGC  
TTTTCTATTCTTTTATTAAGTATTTGATTCGATTCCATTCACCCCATGGTTGGGAA  
CTAATGATTGGTTATGTCTACAAAGATTTGGATTTGTTTATAATGATCAAATTATATCTG  
GTCTTGTTCCTACTTTCCAGTCATTCTAGATACAATTTTTAAATATTGGATTTTCCGTTA  
TTAAATCGTGTATCTCCGTCACTTGTAGTGATTTATCATTCAATGAATGACATGCCTATT  
GGTGTTCCTAAAAGTACCCTTCCGAAATCCTGGAGAGGAAGATGCATCTTGGGTTGACG  
TATACAACCGACTTTATCGAGAAAGATTACTTTTTTTAGGCCAAGAGGTTGATAGCGAG  
ATCTCGAATCAACTTATTGGTCTTATGGTATATCTCAGTATCGAAGATGATACCAAAGAT  
CTGTATTTGTTTATAAATTCTCCTGGCGGATGGGTAATACCTGGAGTAGCTATTTATGATA  
CGATGCAATTTGTGCGACCAGATGTACATAAATATGCATGGGATTAGCTGCTTCAATGG  
GATCTTTTATCCTGGTCGGAGGAGAAATTACCAAACGTCTAGCATTCCCTCACGCCAGG  
GTAATGATCCATCAACCTGCTAGTTCCTTTTTATGAAGCACAAACGGGAGAATTTATCCT  
GGAAGCGGAAGAAGTGTGAAACTGCGTGAAAGCCTCACAAAGGTTTATGTACAAAG  
AACGGGCAAACCCTTATGGGTTGTATCCGAAGACATGGAAAGAGATGTTTTTATGTGAG  
CAACAGAAGCCCAAGCTTATGGAATTGTTGATCTTGTAGCGGTTGAAATGAAAGAACA  
AAAATGGATTCATGAAGGTTTAATTACTGAATCGCTTCCCAATGGTATGTTCCGGGTTTCG  
TTTAGATAATGAAGAAATGATTCTAGGTTATGTTTCAGGAAAGATCCGACGTAGTTTTAT  
ACGGATACTGCCAGGAGATAGAGTCAAATTTGAAGTAAGTCGTTATGATTCAACCAGA  
GGGCGTATAATTTATCGACTCCGCAACAAGGATTCTGAAGGATATGGAGGAATTCCAAAG  
ATATTTACAG--GATAGATCTCAGCAACACGACTTCCTATATCCACTTATCTTTCAGGAGT  
ATATTTATGCACTTGCTCATGATCATGGTTTAAACAGGTTCTGACAATAAATCCAGCTTAC  
TAATTGTGAAACGTTTAATTATTTCGAATGATCAACAGAATCATTGATTATTCCTGTAA  
TGATTCTAACCAAAATCAACTTTTTGGGAAGAATTTGTATTCTCAAATGATATCAGAGGT  
ATTTGCAGTCATTGTGGAAATTCCATTTTCTCTACGATTAATAGCTTCCCTGATAGTAAA  
ATCTCATAATTTACGATCAATTCATTCAATATTTCCCTTTTTTCGAGAACAATTTTTCACAT  
CTAAATTATGTGTTAGATATGTTAATACCCACCCCGTCCATCTGGAAATCTTGGTTCAA  
ACCCTTCGCTACTGGGTAAAAGATGCCTCTTCTTTGCATTTATTACGATTCTTTCTCTAC  
GAGTATCGTAATTGGAATAGTCTTATTACTAAACCCAGCTCTTCTTTTTCAAACAAGA  
TTATCTTTTTCTTATATAATGCTCATGTATGTGAATACGAATCTATCTTCGCTTTTCTCTG  
TAACCAATCTTCTTATTACGATCAACATCTTCTGAAGCCTTTCTTGAGCGAATCTATTT  
CTATGGAAAATAGAATGTCTTGTAGAAGTCTTTGCTAAGGTTTTTAACCTGTGGTTGT  
TCAAGGATCCTAACATGCATTATGTTAGGTATCAAGGCAAATCAATTATGGCTTCAAAA  
GGTACGTCTCTTTTGATGAATAAATGGAATATTACCTTATCAATTTTTGGCAATGTCATT  
TTTACCTGTGGTCTCACCCAGGAAGGATTTATATAAATCAATTATCCAATCATTCCCTTG  
ACTTTATGGGCTATTTTTCAAGTGTGCGACTAAACCCCTCAATGGTACGAAGTCAAATG  
CTAGAAAATTCATTTCTAATCGATAATGCTATT-----AAGAAGTTCGATACCATTGTTCCA  
ATTATTCCTCTGATTGGATCATTGGCTAAAGCGAAATTTGTAAACGTATTAGGGTATCCC  
ATTAGTAAGCCGGTTCGGGCCGATTTATCAGATTCTGATATTATTGACCGATTGGGCGT  
ATATGCAGAAATTTTTCTCATTATCATAGCGGATCCTCAAAAAAAAAAAGAGTTTGTATCGA  
ATAAAGTATATACTTCGACTTTCTTGTGCTAGAACTTTGGCCCGGAAACACAAAAGTAG  
TGTACGTTTTTTTTGAAAAGATTAGGCTCGGAATTATTGGAAGAATTCTTTATGGCGGA  
AGAACAAGTTCCTTTGACCTTCCCAAGACGGGTTTGGTATTTGGATATTTTTGTAT  
CAACGATTTGGCGAATCATGAAATGATAATTGAT--ATAACAGAAGTACAA--GCTATCA



ATTCTTTTTCCAGATTGGAATCC---TTAAAAGAGATCTATGGGATCATATGGATGCTTGTC  
CCTATTTTGACTCTTGTATTAGGAATTACAATAGGCGTACTAGTAATTGTTTGGTTAGAA  
AGAGAAATATCTGCAGGGATACAACAACGTATTGGACCTGAATACGCCGGCCCTTTGG  
GAATTCTTCAAGCTCTAGCAGATGGTACAAAATTACTTTTCAAAGAAAATATTTTCCAT  
CTAGAGGAGATACTCGTTTATTTAGTATCGGACCATCCATAGCAGTTATATCAATTTTCCT  
AAGTTATTCAGTAATTCCTTTTGGATATCGCCTTGTTCTAGCCGATCTCAGTATCGGTGTT  
TTTTTATGGATCGCCATTTCAAGTATTGCTCCTGTTGGACTTCTTATGTCAGGATATGGAT  
CAAATAATAAGTATTCTTTTTTAGGTGGTCTACGGGGCTGCTGCTCAATCAATTAGTTATG  
AAATACCATTAACCTCTATGTGTGTTATCAATATCTCTACTATCTAACAGTTCAAGTACAGT  
TGATATAGTTGAAGCGCAATCAAATATGGTTTTGGGGGGTGGAAATTTATGGCGTCAAC  
CTATAGGGTTGATCGTTTTTCTAATTTCTCCCTAGCCGAGTGTGAGAGATTACCTTTTG  
ATTTACCAGAAGCAGAAGAAGATTAGTAGCAGGTTATCAAACCGAATATTCAGGTATT  
AAATTTGGTTTATTTTACATTGCTTCGTATCTGAATCTACTAGTTTCTTCATTATTTGTAAC  
AATCTTTACTTGGGAGGTTGGAATCTTCTATTCCGTACATATTCGTTCCCTGAGCTTTTT  
GACATAAATAAACAGGTAGAGTCTTTGGAACAATAATTGGTATCTTTATTACATTAGCT  
AAAACCTTATTTGTTCTTGTTCAATCCTATCACAACAAGATGGACTTTACCGAGACTGAG  
AATGGACCAACTATTAATCTTGATGGAAATTTCTTTTACCTATTTCTCTAGGTAATTTA  
TTATTAACAACCTTCTCCCAACTTTTTTCACTGATGATCTGGCATGTACAGAATGAAAAC  
TTCATTCTCGATTCTACGAGAATTTTTATGAAAGCCTTTCATTTGCTTCTCTTCGATGGA  
AGTTTTATTTTCCCAGAATGTATCCTAATTTTTGGCCTAATTCTTCTTCTGATGATCGATT  
CAACCTCTGATCAAAAAGATATACCTTGGTTATATTTCACTCTTCAACAAGTTTAGTAA  
TGAGCATAACGGCCCTATTGTTCCGATGGAGAGAAGAACCCTATGATTAGCTTTTCGGGA  
AATTTCCAAACGAACAATTTCAACGAAATCTTTCAATTTCTTATTTTACTATGTTCAACT  
CTATGTATTCCTCTATCCGTAGAGTACATTGAATGTACAGAAATGGCTATAACAGAGTTT  
CTCTTATTCGTATTAACAGCTACTCTAGGAGGAATGTTTTTATGCGGTGCTAACGATTTA  
ATAACTATCTTTGTAGCTCCAGAATGTTTCAGTTTATGCTCCTACCTATTATCTGGATATA  
CCAAGAAAGATGTACGGTCTAATGAGGCTACTATGAAATATTTACTCATGGGGGGGGCA  
AGCTCTTCTATTTTGGTTCATGGTTTCTCTTGGCTATATGGTTCATCCGGGGGAGAGATC  
GAGCTTCAAGAAATAGTGAATGGTCTTATCAATACACAAATGTATAACTCCCCAGGAAT  
TTCAATTGCGCTCATATTCATCACTGTAGGAATTGGGTTCAAGCTTTCCCCAGCCCTTC  
TCATCAATGGACTCCTGACGTATACGAAGGATCTCCCACTCCAGTCGTTGCTTTTTCTTC  
TGTTACTTCGAAAGTAGCTGCTTCAGCTTCAGCCACTCGAATTTTCGATATTCCTTTTTA  
TTTTCTCATCAAACGAATGGCATCTTCTTCTGGAAATCCTAGCTATTTTTAGCATGATATTG  
GGAAATCTCATTGCTATTACTCAAACAAGCATGAAACGTATGCTTGCATATTCGTCCATA  
GGTCAAATCGGATATGTAATTATTGGAATAATTGTTGGAGACTCAAATGATGGATATGCA  
AGCATGATAACTTATATGCTGTTCTATATCTCCATGAATCTAGGAACTTTTGCTTGCATTG  
TATTATTTGGTCTACGTACCGGAACTGATAACATTCGAGATTATGCAGGATTATACACGA  
AAGATCCTTTTTTGGCTCTCTTTTAGCCCTATGTCTCTTATCCCTAGGAGGCCTTCCTC  
CACTAGCAGGTTTTTTTCGGAAAACCTCTATTTATTCTGGTGTGGATGGCAGGCAGGCCTA  
TATTTCTTGGTTTTAATAGGACTCCTTACAAGCGTTGTTTCTATCTACTATTATCTAAAAA  
TAATCAAGTTATTAATGACTGGACGAAACCAAGAAATAACCCCTCACGTGCGAAATTAT  
AGAAGATCTCCTTTAAGATCAAACAATTCCATCGAATTGAGTATGATTGTATGTGTGATA  
GCATCTACTATACCAGGAATATCAATGAACCCGATTATTGCAATTGCTCAGGATACCCCT  
TTTTATGTTTCTGCTTTACGAATATGATATTTTTTGGGCATTTCTAATAATATCAAGTATTGT

TCCTATTTTGGCATTGTAATTTCCGGAATTTAGCCCCGATTAGCAAAGGACCAGAGA  
AACTCTCTAGTTATGAATCGGGTATAGAACCAATGGGCGATGCTTGGTTACAATTTCGA  
ATCCGTTATTATATGTTTGTCTAGTTTTTGTGTTTTTGTATGTTGAAACGGTTTTTCTTTA  
TCCATGGGCAATGAGTTTTGATGTATTGGGTGTATCTGTATTTATAGAAGCTTTCATTTTC  
GTGCTTATCTTAATTGTTGGTTCAGTTTATGCATGGCGAAAGGGGGCATTGGAATGGTCT  
ACGAATTATTTTCCTTGGTTAACAATAATTGTAGTTTTTCCAATATCTGCGGGTTCCTTAA  
TTTTTTTTCTTCCACATAGAGGAAATAGGGTAATTCGGTGGTATACTATTTTTATATGTAT  
TTTAGAACTCCTTCTAATGACTTACGTATTCGGTTATCATTCCAATCGGACGATCCATTA  
ATTCAACTGGTGGAGGATTATAAATGGATCAATTTTTTTGATTTCCGTTGGAGATTGGGA  
ATTGATGGGTTTTCTATAGGACTTATTTACTGACGGGATTCATCACCCTTTAGCTACTT  
TAGCGGCTTGGCCAGTACTCGAGATTCTCGATTATTCATTTCTGATGTTAGCAATGT  
ACAGCGGTCAAATAGGATCATTTCCTTCTCGAGACCTTTTACTTTTTTTCATCATGTGGG  
AGTTAGAATTAATCCCATTTATCTACTTTTAGCCATATGGGGGGGAAAGAAACGTCTGT  
ACTCAGCTACAAAATTCATTTGTACACGGCGGGAGGTTCCGTTTTTCTTACTGGGA  
GTTCTGGGTGTCGGTTTTATATGGTTCCTATGAACCAACATTAATTTGAAACATCAGCT  
AATCAATCGTATCCTGTGGCCTTGGAAATAATATCTATATTGGGTTTTTTATTGCTTTTG  
CTGTTAAATCGCCGATTATACCCCTACATACATGGTTACCAGATACCCATGGAGAAGCAC  
ATTACAGTACTTGTATGCTTTTAGCCGGAATCTTATTAATAAATGGGAGCGTATGGATTGG  
TGCGAATCAATATGGAATTATTACCTCACGCTCATTTCCTATTTTCTCCTTGGTTGATAAT  
AGTAGGCACAATGCAAATAATTTATGCAGCTTCAACATCTTCTGGCCAACGGAATTTAA  
AAAAAGAATAGCATATCCTCTGTGTCTCATATGGGTTTCATAATTATAGGAATTGGCT  
CTATAACCGAGACAGGACTCAATGGAGCCCTTTTACAAATAATCTCTCATGGATTATTG  
GTGCTGCACTTTTTTCTTGGCAGGAACGAGTTATGATAGAATACGTCTTGTATTCTTG  
ACGAAATGGGCGGAATAGCTATCCCAATGCCAAAATATTTACAATGTTTCAGTAGCTTT  
TCGATGGCCTCCCTTGCATTACCGGGTATGAGTGGTTTTATTGCAGAATTGATAGTATTT  
TTTGGAATAATTACCAGCCAAAATTTCTTTTAATGCCAAAATACTAATTACTTTTGTA  
ATGGCAATTGGAATGATATTAACCTCCTATTTATTCATTATCTATGTCACGTCAAATGTTCTA  
TGGATACAAGCTATGTAATGCTCCAACTCTTCTTTTTTTGATTCTGGACCGCGAGAGTT  
ATTTCTTTCCCTCTCTATCTTTTTTACCCGCAATAGGTATTGGTATATATCCGGATTTCTGTC  
TTTCACTATCAGTTGATAAGGTGCAAGTTATTCTATCTCATTTTTTTTTATAGAATGATGCT  
CGAACATGTACTTGTGTTTTGAGTGCCTATTTATTTTCTATCGGTATCTATGGATTGATCACA  
AGTCGGAATATGGTTAGAGCCCTTATGTGTCTTGAACCTATATTGAATGCAGTTAATCTC  
AATTTTGTAACATTTTCTGATTTTTTTGATAGTCGTCAATTAAGGGAGCCATTTTCTCA  
ATTTTGTATAGCTATTGCAGCCGCTGAAGCGGCTATTGGCTTGGCTATTGTTTCATCA  
ATTTATCGTAACAGAAAATCAACTCGTATCAACCAATCGAATTTGTTGAATAAAATGGA  
ACAGACATATCAATATGCATGGATCATACTTTTCGTTCCACTTCCAGTTCCTATATTAATC  
GGAGTGGGACTTCTTCTTTTTCCGACGGCAACAAAAATCTTCGTCTGATGTGGGCTTT  
TTATAGTGTGTTTTATTGTTAAGTATAGTCATGATTTTTTCGATCAATATATCTATTCATCAA  
TAAATAGCAGTTCTATCTATCAATATGTATGGTCTTGGATCATCAATAATGATTTTTCTTTA  
GACTTTGGCTACTTGATCGATCCACTTCTTCTATTAATGTCATTAATAATCACTACTGTTG  
GAATTATGGTCTGATTTATAGTGATAATTATATGTCTCACGATCAAGGATTTTGAGATT  
TTTTGCTTATATGGGTTTGTTCAGTACTTCCATGTTAGGATTAGTTACTAGTTCTAATTTG  
ATACAAATTTATATTTTTTGGGAATTGGTTGGAATATGTTTCGTATCTATTAATAGGGTTTT  
GGTTCACACGACCTGTTGCGGCAAATGCTTCTCAAAAAGCCTTTGTAACATAATCGTGTA

GGGGATTTTGGTTTATTATTAGGAATTTTAGGTTTTTATTGGATAACAGGTAGTTTTGAAT  
TTCGGGATTTATTTGAAATATTCAATAACAATGAAGTCAATTTTTTATTGTTATTTTATG  
CGCCGTTCTATTATTTGCCGGTGCAGTTGCTAAATCTGCACAATCCCCCTTCATGTATG  
GTTACCTGATGCTATGGAAGGGCCTACTCCTATTTCCGGCTCTTATACATGCTGCTACTAT  
GGTAGCAGCGGGAATTTTCTTATAGCTCGGCTTATTCCTCTTTTCATAGTCATACCTTAC  
ATAATGAATTTAATCTCTTTGATAGGGATAATAACAGTCTTATTAGGAGCTACTTTAGCTC  
TTGCTCAAAAAGACATTAAGAGAGGTTTAGCCTATTCTACAATGTCTCAATTGGGTTATA  
TGATGTTAGCTCTAGGTATGGGGTCTTATCGAAGTGCTTTATTTCAATTTGATTACTCATGC  
TTATTCGAAAGCTTTATTGTTTTTAGGATCCGGATCCATTATTCATTCAATGGAAACTATT  
GTTGGATATTCTCCAGATAAAAGTCAGAATATGGTTCTTATGGGGGGTTTAACAAAACA  
TGTGCCAATTACTAAAAGTCTTTTTTATTAGGTACACTTTCTCTTTGTGGTATTCCACCT  
CTTGCTTGTTTTTGGTCCAAAGATGAAATCTTAATGATACTTGGTTGTATTCGCCGATT  
TTCGCAATAATAGCTTGGGCCACAGTGGGATTAAGTGCATTTTATATGTTTCGAATCTAT  
TTACTTACTTTTGAAGGACATTTAAACGTTAATTTCAAATTACAGTGGCAAAAAAAA  
TACCTCTTTCTATTCAATATCTCTATGGGGTAAAAGAAGTTCGAACAAAATTAATAAA---  
TTAGTAACTTTATTAATAAATGAATTTTTTTTCATTTGGAAATAAGAACAATTTCTTCGTATC  
CTTATGAATCGGACAATACTATGTTATTTCTCTACTTGTATTGGTTCTATTTACTTTGTTC  
GTTGGAGCTCTAGGAATTCCTTTGATTTGGATATATTATCCAAGTGGTAACTCCGTCT  
ATAAACCTTTTACATCAAATTTGAAT--GATATAGATTGGTATGAATTTGTAAAAGATGC  
AGTTTTTTCAATCAGTATGGCTTTTTTTGGAATATTATAGCGTCTTTTTTATATAAACCC  
GTTTATTCATCTTTACAAAATTTGGACTTACTTAATTCATTTGTTATTCTTTGGGACAAAA  
TTATAAATGGCATATATGATTGGTCTTATAATCGTGCTTACATAGATTCTTTTTTATACAACA  
TCCTTAACTGGGGGAATAAGAAGATTGGCTGAATTAAGTCAATTTTTTTGATAGACGAAT  
AATTGATGGAATTACGAATGGAGTGGGTGTTATGAGTTTCTTTGTAGGAGAAGGTATCA  
AATATGTAGGGGGCGGG---CGCATCTCTTCTTATCTTTTCTTGTATTTATCTTATGTATCAA  
TCTTTTTATTCAATTTTTCTATGGATTTACCTGGACCAATACATGATTTCTTTTAGTCTTT  
CTGGGATCGGGTCTTATATTAGGAGCTCTAGGAGTGGTATTACTTCCAATCCAATTTAT  
TCTGCCTTTTCGCTGGGATTAGTTCTTGTTTGTATATCCTTATTCTATATTCTATCGAATTC  
CCATTTTGTGGCTGCTGCGCAACTCCTTATTTATGTAGGAGCTATAAATGTTTTAATCATT  
TTTGCTGTGATGTTTCATGAATGGCTCAGAATATTACAAAGATTTTCATCTTTGGACCATT  
GGGGACGGGGTTACTTCGATGGTTTGTACAAGTATTTTTGTTTCACTAATGACTACTATT  
CCAGATACGTCATGGTACGGGATTATTTGGACTACAAGATCAAACCAAATTGTAGAGCA  
AGATTTGATAAGTAATAGTCAACAAATTGGGATTCATTTATCGACAGATTTTTTTCTTCC  
ATTTGAATCATTTCATAAATCTTTTAGTTGCTTTAATAGGTGCAATTGCTGTAGCGCGT  
---ATGACTGCACAAGCTACAAGAAAAGACCTCATGATAGTCAATATGGGTCTCAACAC  
CCATCAATGCATGGTGTCTTCGACTCATCGTTACTTTAGATGGTGAAGATGTTATTGAC  
TGTGAACCAATATTGGGTTATTTACACAGAGGGATGGAGAAAATTGCGGAAAACCGAA  
CAATTATAAATTTTACCTTATGTAACACGTTGGGATTATTTAGCTACTATGTTTACAGAA  
AGCAATAACTGTAAATGCACCAGAGCAATTAGGCAATATCCAAGTACCTAAAAGGGCT  
AGCTATATCAGAGTCATTATGTTGGAGTTGAGTCGTATAGCTTCCCATTTGTTATGGCTT  
GGTCTTTTTATGGCGGATATTGGCGCACAAACCCCTTCTTCTATATTTTTTCGAGAAAGA  
GAATTAATATATGACCTATTCGAAGCTGCCACTGGTATGCGAATGATGCATAATTATTTTC  
GTATCGGAGGAGTCGCTGCTGATCTACCTCATGGCTGGATAGATAAATGTTTAGACTTTT  
GCGATTATTTTTTAACAAGGATTGCTGAATATCAAAGCTTATTACACGAAATCCTATTT

TTTTAGAACGAGTTGAAGGAGTGGGCTTTATTAGTGGAGAAGAAGCAATAAATTGGGG  
TTTATCAGGACCAATGCTACGAGCTTCCGGAATACAATGGGATCTCCGTAAAGTTGATC  
ATTATGAGTGTTACGACGAGTTTGAATTGGGAAGTTCAATGGCAAAAAGAGGGAGATTC  
ATTAGCTCGTTATTTAGTACGAATCGGTGAAATGACAGAATCCATAAAAATTATTCAACA  
GGCCCTGGAAGGAATTCCAGGGGGGCCCTATGAGAATTTAGAAATACGACGCTTTGAC  
AAAGTAAGAGATGCCGACTGGAATGATTTTGAATATCGATTCATTAGTAAAAAACCCTC  
TCCGACTTTTGAATTGTCTGAAGCAAGAACTTTATGTAAGAGTCTGAAGCTCCAAAAGGA  
GAATTGGGAATTTTCTGATAGGAGATCAAAGTGTTTTTCTTGGAGATGGAAAATTCG  
CCCCCGGGTTTTATCAATTTGCAAATCCTTCCCTCAGTTAGTTAAAAAATGAAATTGG  
CTGATATTATGACGATACTAGGTAGTATAGATATCATTATGGGAGAAGTTGATCGTATGTT  
CTCTATGGTAACTGAGTTCATGAATTATGGTCAACAAACAATACGAGCTGCAAGGTACA  
TTGGTCAAGGTTTCATGATTACCTTATCCCATGCGAATCGTTTACCTGTA ACTATTCAATA  
CCCCTACGAAAAATTGATCACACCCGAACGTTTCCGGGGCCGAATCCACTTTGAATTTG  
ATAAATGCATTGCTTGTGAAGTATGTGTTCTGTATGTCCTATAGATCTACCCGTTGTTGA  
TTGGAATTCGAAACTGATATTCGAAAGAAACGATTGCTTAATTACAGTATTGATTTG  
GGATCTGTATATTTTGTGGTAATTGCGTTGAGTATTGTCCAACAAATTGTTTATCGATGA  
CTGAAGAATATGAACTTTCTACTTATGATCGTACGAATTAATTATAATCAAATTGCTTT  
GGGTCGGTTACCAATGTCAATAATTGACGATTACACAATTCGAACAATTGTAAATTCG---  
-----ATGCAGGGTCGTTTGTCTGCTTGGCTAGTCAAGCAT  
GGGCTAATTCATAGATCTTTGGGCTTTGATTACCAAGGAATAGAACTTTACAAATAAA  
GCCCCGAGGATTGGCATTCCATTGCTGTCAATTTATATGTATATGGTTACAATTATCTACGC  
TCCAATGTGCCTATGATGTAGCACCTGGCGGACTGTTAGCTAGTGTGTATCATCTTACG  
AGAATAGAGTATGGTGTGGATCAACCGGAAGAGGTATGCATAAAGGTATTTACCCCAA  
GGAGGAATCCTAGAATCCGTCCGTTTTCTGGGTTTGGAAAAGTGTGGATTTTCAAGA  
ACGGGAATCTTATGATATGTTGGGAATCTCTTATGATAATCATCCACGTTTGAACGTAT  
CTTAATGCCTGAAAGTTGGATAGGATGGCCCTTACGTAAGGATTATATTGCCCCCAATTT  
TTATGAAATACAAGATGCTCAT-----  
-----ATGGCGAAAGGGGGCATTGGAATGGTCTTAGCTCCTGAATATTCAGACAAT  
AAAAAGAAAAAGGGAAAAATAAGATTGAGACA---ATTATGAATTCCATTGAGTTTCCT  
TACTTGATCGAACAACCCCAAATTCAGTTATTTCAACTACATTAATGATCTTTCAAAT  
TGGTCAAGACTCTCTAGTTTATGGCCGCTTCTCTATGGTACCAGTTGTTGCTTCATTGAA  
TTTGCTTCACTAATAGGCTCACGATTGACTTTGATCGTTATGGACTAGTACCAAGATCG  
AGTCCTAGACAAGCGGACCTAATTTTAAACAGCCGGAACAGTAACAATGAAAATGGCTC  
CCTCTTTAGTGAGATTATATGAGCAAATGCCTGAACCAAATATGTTATTGCTATGGGAG  
CATGTACAATTACAGGGGGGATGTTTCACTACTGATTCTTATAGTACTGTTCCGGGGAGTC  
GATAAACTAATTCCTGTGGATGTCTATTTGCCGGGCTGTCCACCTAAACCGGAAGCAGT  
TATAGATGCTATAACAAAACCTTCGTAAGAAAATATCTCGAGAAATCTATGAAGATAGAAT  
TAGGTCTCAACGCGAGAATCGGTGTTTTACTACCAATCACAAGTTTCATGTTGGACGCA  
GTATTCATACTGGAAAGTATGATCAAGGATTCCTCTATCAACCGCCATCTATTGCAGAGA  
TCTCTCCTGAAACATTTTTCAAATACAAAAGTTCAGTATCTTCCATAAATTAGTGAATA  
TGCAA ACTAGAAATACTTTTTCTTGGATAAAGGAACAGATTACTCGATCCATTTCCGTAT  
CGCTCATGATATATATCATAACTCGGACATCCATTTCAAGTGCATATCCCATTTTTGCACA  
GCAGGGTTATGAAAATCCACGAGAAGCGACTGGGCGTATTGTATGCGCCAATTGCCATT  
TAGCTAATAAGCCCGTGGATATTGAGGTTCCACAAGCGGTACTTCTGATACTGTATTTG

AGGCAGTTGTTCTGAATTCCTTATGATATACAAATGAAACAAGTTCTTGCTAATGGGAAA  
AAAGGGGGTTTGAATGTGGGGGCTGTTCTTATTTTACCGGAGGGGTTTGAATTAGCTCC  
TCCCAGATCGTATTTCTCCTGAGATGAAAGAAAAGATAGGCAATCTGTCTTTTCAGGGCT  
ATCGCCCCAATAAAAAAATATTCTTGTGATAGGCCCGTTCCTGGCCAGAAATATAGT  
GAAATCACCTTTCTATTCTTTCCCCGGACCCCGCTACTAAGAAAGATGTTCACTTCTTA  
AAATATCCTATATACGTAGGCGGAAACAGGGGAAGGGGTCAGATTTATCCCGATGGGAG  
CAAGAGTAACAATACGGTTTATAATGCTACAGCAGCAGGTATAGTAAGCAAATCATAC  
GAAAAGAAAAGGGGGGATATGAAATAACCATAACGGATGCATCGGATGGACGTCAAGC  
GGTTAATATTATCCCTCCAGGACCAGAACTTCTTGTTCAGAAGGTGAATCTATCAAATT  
TGATCAACCATTAACGAGTAATCCTAATGTGGGTGGATTGGTTCAGGGAGATGCAGAAA  
TAGTACTTCAAGATCCATTACGTGTCCAAGGCCTTTTGTCTTCTTGGCATCTGTTATTT  
TGGCACAAATCTTTTTGGTTCTTAAAAAGAAACAGTTCGAGAAGGTTCAATTGTCCGA  
AATGAATTCATGAGTAAAGTCTATGATTGGTTCGAAGAACGTCTTGAGATTCAGGCGA  
TTGCGGATGATATAACTAGTAAATATGTTCTCCCATGTCAACATATTTTATTGTCTGGG  
AGGAATTACGCTTACTTGTTTTTTAGTACAAGTAGCTACAGGGTTTGCTATGACTTTTTA  
CTATCGTCCGACCGTTACTGAAGCTTTTGTCTGTTCATATATAATGACCGAAGCTAA  
CTTTGGTTGGTTAATCCGATCAGTTCATCGATGGTCGGCAAGTATGATGGTACTAATGAT  
GATCCTGCATGTATTTTCGTGTGTATCTACCGGTGGATTAAAAAACCTCGCGAATTGA  
CTTGGGTACAGGTGTGGTTCTGGGTGTATTGACCGCATCTTTTGGCGTAACTGGTTATT  
CCTTACCTCGGGACCAAATTGGTTATTGGGCAGTGAAAATTGTAACAGGTGTACCTGA  
AGCTATTCTGTAAATAGGATCGCCTTTGGTAGAATTATTGCGTGGAAGTGCTAGTGTGG  
GACAATCCACCTTGACTCGTTTTTATAGTTTACACACTTTTGTATTGCCGCTTCTTACTG  
CCGTATTTATGTTAATGCACTTTCCAATGATACGTAAACAAGGCATTTCTGGTCTTTAA  
TGGGAGTAACAAAAAACCTGACTTGAATGATCCTGTATTAAGAGCTAAATTGGCTAA  
AGGTATGGGTCATAATTATTACGGAGAGCCCGCATGGCCCAATGATCTTTTATATATTTTT  
CCAGTAGTAATTCTTGGCACTATTGCATGTAACGTAGGCTTAGCGGTTCTAGAACCATC  
AATGATTGGTGAACCAGCAGATCCATTTGCAACCCCTTGGAATATTACCTGAATGGT  
ATTTCTTTCCCGTATTTCAAATACTTCGTACAGTACCCAATAAATTGTTGGGTGTTCTTTT  
AATGGTTTCAGTACCCGCCGATTATTAACAGTACCTTTTTTAGAGAATGTTAATAAATT  
CCAAAATCCATTTGCGCGTCCAGTAGCGACAACCGTCTTTTTGATTGGTACCGCAGTGG  
CCTTTGGTTGGGTATTGGTGCAACATTGCCTATTGATAAATCCCTAACTTTAGGTCTTT  
TTATGATTGAAGTTTTTCTATTTGGAATCGTGTTAGGTCTAATTCCTATTACTTTGGCTGG  
ATTATTCGTAACGCATATTTACAATACAGGCGTGGTGATCAGTTGGACCTTATGCCTAC  
TATAACTAGTTATTTTGGTTTTCTACTAGTGTCTTTAACTATAACCTCAGCTCTATTTATTG  
GTCTGAGCAAATACGACTTATTATGGATATAGTAAGTCTCGCTTGGGCTGCTTTAATGG  
TAGTCTTTACATTTTCCCTTCTACTCGTAGTGTGGGGAAGAAGTGGGCTCATGATTATC  
GTTTCGCCGGAACCAGAAGTCAAATTTTGGTAGATAGGGATCACATAAAAACGTCTTT  
CGAGGAATGGGCCAGACCGGGTCATTTCTCAAGAACAATAGCTAAAGGCCCTGATACT  
ACCACTTGGATCTGGAACCTACATGCTGATGCTCACGATTCGATAGCCATAACAGTGA  
TTTGGAGGAGATTTCTCGAAAGGTATTTAGTGCCCATTTCCGGTCAACTCTCCATCATCTT  
TCTTTGGCTGAGTGGCATGTATTTCCACGGTGCTCGTTTTTCCAATTATGAAGCCTGGCT  
AAGCGATCCAACCTCACATTGGGCCTAGTGCCAGGTGGTTTGGCCAATAGTGGGTCAA  
GAAATATTGAATGGTGTGATGTGGGCGGGGTTTCCGAGGAATACAAATAACCTCTGGTTT  
TTTTCAGATTTGGCGAGCATCTGGAATAACTAGTGAATTACAACCTATTGTACCGCAAT

TGGTGCATTGGTCTTTGCAGCGTTAATGCTTTTTGCTGGTTGGTTTCATTATCATAAAGC  
GGCTCCAAAATTGGCTTGGTTTCAAGATGTAGAATCCATGTTGAATCACCATTTAGCGG  
GGCTACTAGGACTTGGGTCTCTCGCTTGGGCGGGGCATCAAGTACATGTGTCTTTACCG  
ATTAACCAATTTCTAAACGCTGGAGTAGATCCTAAAGAGATAACCACTTCCTCATGAATTT  
ATCTTGAATCGGGATCTTTTGGCTCAACTTTATCCCAGTTTTGCCGAGGGAGCAACCCC  
ATTTTTACCTTGAATTGGTCAAATATGCAGAAATTTCTTACTTTTTCGCGGAGGATTAGA  
TCCAGTAACTGGGGGTCTATGGCTAACCGATATTGTACACCATCATTTAGCTATTGCAAT  
TCTTTTCTGATAGCAGGCCACATGTATAGGACCAACTGGGGGATTGGTCATGGCCTAA  
AAGATATTTTAGAAGCTCATAAGGGTCCATTTACAGGCCAGGGTCATAAAGGACTATAT  
GAGATCCTAACACGTCATGGCATGCTCAATTATCTCTTAACCTAGCTATGTTAGGCTCT  
TTAACCATTTGTTGAGCTCACCATATGTATTCCATGCCCCCTTATCCATATCTAGCTACTG  
ACTATGGTACACAATTGTCATTGTTACACATCACATGTGGATTGGTGGATTTCTCATAG  
TTGGTGTGCTGCTGCGCATGCAGCCATTTTTATGGTAAGAGACTATGATCCAACCTACTCGAT  
ACAACGATCTATTAGATCGTGTCTTAGGCATCGTGATGCAATCATATCACATCTCAACT  
GGGCATGTATATTTTTAGGCTTTCACAGTTTTGGTTTGTATATTCATAATGATACCATGAG  
TGCTTTAGGGCGTCTCAAGATATGTTTTAGATAACCGCGATACAATTACAACCCGTCTT  
TGCTCAATGGATACAAAACACCCATGCTTTAGCACCTGGTGCAACGGCTCCTGGTGCA  
ACAACAAGCACCAGTTTAACTTGGGGGGGTGGTGATTTAGTAGCAGTGGGTGGCAAG  
GTGGCTTTGTTACCTATTCCATTGGGAACCGCAGATTTTTTGGTACACCACATTCATGCA  
TTTACAATTCATGTAACGGTATTGATCCTCCTGAAAGGTGTTCTCTTTGCTCGTAGCTCC  
CGTTTGATACCGGATAAAGCAAATCTTGGTTTTTCGTTTTCTTGTGATGGACCTGGAAG  
AGGGGGGACATGTCAAGTATCGGCTTGGGATCATGTCTTCTTAGGACTATTCTGGATGT  
ACAATGCAATTTTCGGTAGTAATATTCCATTTTCAGTTGGAAAATGCAGTCAGATGTTTGG  
GGCAGTATAAGTGATCAAGGGGTAGTAACCTCATATCACGGGAGGCAACTTTGCGCAGA  
GTTCTATTACCATTAATGGGTGGCTCCGCGATTTCTTATGGGCACAGGCATCCCAGGTAA  
TTCAGTCTTATGGTTCTTCATTATCTGCATACGGCCTGTTTTCTTAGGTGCTCATTTTGT  
ATGGGCTTTTAGTTTAAATGTTTCTATTTCAGCGGACGTGGTTATTGGCAAGAACTTATTGA  
ATCTATCGTTTGGGCTCATAATAAATTAAGTTGCTCCTGCTACTCAGCCGAGAGCTTT  
GAGCATTGTACAAGGACGTGCTGTAGGAGTAACCCATTACCTTCTGGGTGGAATTGCC  
ACAACATGGGCGTTCTTCTTAGCAAGAATTATTGCAGTAGGAATGGCATTAAAGATTTCC  
AAGGTTTAGCCAAGGCTTAGCTCAGGACCCCACTACTCGTCGTATTTGGTTTGGTATTG  
CTACCGCACATGACTTCGAGAGTCATGATGATATTACTGAGGAACGTCTTTATCAGAATA  
TTTTTGCTTCTCACTTCGGGCAATTAGCAATAATTTTTCTGTGGACTTCCGGAATCTGT  
TTCATGTGGCTTGGCAAGGAAATTTGAGGCATGGGTACAGGACCCTTACATGTAAGA  
CCTATTGCTCATGCAATTTGGGATCCCCATTTGGTCAACCAGCTGTGGAAGCTTTTACT  
CGAGGGGGTGTCTTTGGCCCAGTGAATATCGCTTATTCTGGTGTATTATCAGTGGTGGTAT  
ACAATCGGTTTACGCACTAATGAGGATCTTTATACTGGAGCTTTTTTTCTATTATTTCTTT  
CTGCTATATCCTTAATAGCAAGTTGGTTACTTACAACCGAAATGGAAACCGAGTGTT  
TCGTGGTTCAAAAATGCCGAATCTCGTCTCAATCATCATTTGTCAGGACTCTTCGGCGT  
AAGTTCCTTGGCTTGGACAGGGCATTAGTACATGTGCTATTCTGGATCCAGAGGGG  
AGTACGTCGGATGGAATAATTTCTTAGATGTATTACCGCACCCCAAGGATTAGGCCA  
CTTTTACAGGTCAGTGAATCTTTATGCTCAAACCCAGATTCAAGTAGTCATTTATTT  
GGCACCTCCAAGGAGCAGGAACCGCCATTCTTACTCTTCTCGGGGGATTCCATCCAC  
AAACGCAAAGTTTATGGCTGACTGATATGGCTCATCATCATTTAGCTATTGCATTTATTTT

TCTCGTTGCTGGTCATATGTATAGAACTAACTTCGGGATTGGGCACAGTATGAACGATCT  
TTAGATGCACATATTCCCTCCCGGGGGAGGTTGGGACGTGGACATAAGGGTCTTTATG  
ACACAATCAATAACTCGCTTCATTTTCAATTAGGCCTTGCTCTAGCTTCTTTAGGGGTTA  
TTACTTCCTTGGTAGCTCAACACATGTATTCTTTACCTGCTTATGCATTCATAGCACAAG  
ACTTTACTACTCAAGCTGCGTTATATACTCATCATCAATATATCGCGGGATTTCATCATGAC  
GGGAGCTTTTGGCTCATGGAGCTATATTCTTCATTAGAGATTACAATCCGGAGCAGAATG  
AAGATAATGTATTGGCAAGAATGTTAGACCATAAAGAAGCTATCATATCTCATTTAAGTT  
GGGCCAGCCTCTTTCTGGGATTCCATACCTTGGGACTTTATGTTCATAATGATGTCATGC  
TTGCCTTTGGTACTCCGGAGAAACAAATTTTGATCGAACCTATATTTGCTCAATGGATAC  
AATCTGCTCATGGTAAACTTCATACGGGTTTCGATGTACTTTTATCTTCAACGAGTGGTC  
CGGCATTCAATGCCGGTTCGAAGCATCTGGTTGCCCGGTTGGTTAAATGCTGTAAATGAG  
-----AATAGTAATTCACTATTCTTAACAATAGGTCCTGGAGACTTTTTGGTTCATCATGCT  
ATTGCTCTGGGTTTACATACAACACTACATTGATCTTAGTAAAAGGTGCTTTAGATGCACGT  
GGTTCCAAGTTAATGCCAGATAAAAAGGATTTTCGGTTATAGTTTTCCGTGCGATGGCCC  
AGGACGAGGCGGTACTTGTGATATTTAGCTTGGGACGCATTTTATTTGGCAGTTTTTT  
GGATGTTAAATACCATTGGATGGGTTACTTTTTATTGGCATTGGAAGCACATCACATTAT  
GGCAGGGTAACGTTTCGCAGTTTAATGAATCTTCCACTTATTTGATGGGCTGGTTAAGA  
GATTATTTATGGTTAAACTCTTCACAACTTATCAATGGATATAACCCTTTTGGTATGAATA  
GTTTATCGGTTTGGGCGTGGATGTTCTTATTTGGACATCTTGTTTGGGCTACTGGATTTA  
TGTTCTTAATTCCTGGCGTGGGTATTGGCAGGAATTGATTGAAACTTTAGCATGGGCT  
CATGAACGCACACCTTTGGCCAATTTGATTCGCTGGAGAGATAAACAGTGGCCCTTTC  
CATTGTGCAAGCAAGATTGGTTGGATTAGCCCACTTTTCTGTAGGTTATATATTTCACTTA  
TGCAGCTTTCCTGATTGCCTCTACGTCCGGGCAAATTTGGTATGTCACATTCAGTAAAGAT  
TTATGATACATGTATAGGGTGTACTCAATGTGTCCGAGCCTGCCCCACTGATGTATTAGA  
AATGATACCCTGGGACGGATGTAAAGCTAAACAAATTGCTTCTGCTCCAAGAACAGAG  
GATTGTGTCGGTTGTAAGAGATGCGAATCTGCCTGTCCAACGGATTTCTTGAGTGTTCG  
AGTTTATTTAGGGAATGAATCAACTCGTAGCATGGGTCTAGGTTATATGACAACCTTTCAA  
CTTCCCTCCATTTTTGTGCCTTTAGTAGGCCTAGTATTTCCGGCAATTGCAATGGCTTC  
TTATCTCTTCATGTTCAAAAAACAAGATTGTTATGCGAGATCTAAAAACATATCTCTC  
CGTGGCACCCGTACTAAGTACGCTATGGTTGGGGTCTTTAGCGGGTCTATTGATAGAGA  
TTAATCGTTTTTTCCCGGATGCGTTGACATTTCCCTTTTTTTTTCATTCATGACTGCAATTT  
AGAGAGACGCGAAAGCGAAAGCCTATGGGGTCGTTTCTGTAACCTGGATAACCAGCACT  
GAAAACCGTCTTTACATTGGATGGTTTGGTGTTTTGTATGATCCCTACCTTATTGACCGCA  
ACTTCTGTATTTATTATCGCCTTCATTGCTGCCCTCCAGTAGATATTGATGGTATTTCGTG  
AACCTGTTTCTGGATCTCTACTTTATGGAAACAATATTATCTCAGGTGCCATTATTCCGA  
CTTCTGCAGCTATAGGTTTGCATTTTTACCCAATATGGGAAGCGGCATCCGTTGATGAAT  
GGTTATAACAACGGCGGTCCTTATGAACTAATTGTTCTACACTTCTTACTTGGTGTAGCTT  
GTTACATGGGTCGTGAGTGGGAGCTTAGTTTCCGTCTGGGTATGCGACCTTGGATTGCT  
GTTGCATATTCAGCTCCTGTTGCAGCTGCTACCGCTGTTTTCTTGATCTACCCAATTGGT  
CAAGGAAGTTTTTCTGATGGTATGCCTCTAGGAATCTCTGGTACTTTCAACTTCATGATT  
GTATTCCAGGCTGAGCACAAACATCCTTATGCACCCATTTACATGTTAGGCGTAGCTGG  
TGATTCGGCGGCTCCCTATTCAGTGCTATGCATGGTTCCTTGGTAACTTCTAGTTTGAT  
CAGGGAAACCACAGAAAATGAATCTGCTAATGAAGGTTACAGATTCGGTCAAGAGGG  
AGAAACTTATAATATCGTAGCCGCTCATGGTTATTTTGGTCGATTGATCTTCCAATATGCT

AGTTTCAACAACCTCTCGTTCGTTACATTTCTTCTAGCTGCTTGGCCTGTAGTAGGTATC  
TGGTTTACCGCTTTAGGTATCAGCACTATGGCTTTCAACCTAAATGGTTTCAATTTCAAC  
CAATCTGTAGTTGATAGTCAAGGTCGTGTAATTAACACTTGGGCTGATATCATTAAACCGT  
GCTAACCTTGGTATGGAAGTTATGCATGAACGTAATGCTCATAACTTTCTCTAGACCTA  
GCTGCTATTGAAGCTCCATCTACAAATGGAATGGGTTTGCCTTGGTATCGTGTTCATAAC  
GTTGTATTGAATGATCCCGGCCGGTTGCTTTCTGTCCATATAATGCATACAGCTCTGGTT  
GCTGGTTGGGCTGGTTCGATGGCTCTGTATGAATTAGCAGTTTTTGTATCCTTCTGACCCT  
GTTCTTGATCCAATGTGGAGACAGGGCATGTTTCGTTATAACCCTTCATGACCCGTTTAGG  
AATAACCAACTCATGGGGCGGTTGGAGTATTACA---GGAGGGGCTATAACGAATCCGGG  
TATTTGGAGTTACGAAGGTGTAGCCGGGGCACATATTGTGTTTTCTGGTTTATGCTTCTT  
GGCAGCTATCTGGCATTGGGTGTATTGGGATCTAGAAATATTTTGTGATGAACGTACAG  
GAAAACCTTCTTTGGATTTGCCAAAATCTTTGGAATTCATTTATTTCTCTCAGGGGTGG  
CTTGCTTTGGTTTTGGTGCATTTTCATGTAACAGGTTTGTATGGTCTGGAATATGGGTGT  
CCGATCCTTATGGACTAACAGGAAAAGTACAACCTGTAAATCCAGCGTGGGGCGTGGA  
AGTTTTGATCCTTTTGTTCGGGAGGAATAGCCTCTCATCATATTGCAGCAGGGACAT  
TGGGCATATTAGCGGGTCTATTCCATCTTAGCGTCCGCCCCGCCACAACGTTTATACAAA  
GGATTACGTATGGGAATATTGAAACCGTCCTTTCCAGTAGTATCGCTGCTGTCTTTTTT  
GCAGCTTTTGTGTTGCCGGAATATGTGGTATGGTTCAGCAACTACCCCCATCGAATT  
ATTTGGGCCACTCGTTATCAATGGGATCAGGGGTACTTCCAGCAAGAGATATATCGAA  
GAGTTAGTGCTGGGCTAGCTGAAAATCGAAGTTTATCAGAAGTCTGGTCTAAAATTCCT  
GAAAAATTAGCTTTTTTATGATTACATCGGCAATAATCCGGCAAAAAGGGGGATTATTAG  
AGCGGGCTCAATGGATAACGGGGATGGAATAGCGGTCCGATGGTTAGGACACCCTATC  
TTAGAGATAAAGAAGGGCGTGAACCTTTTTGTACGTCGTATGCCTACTTTTTTTGAAAC  
ATTTCCGGTCGTTTTTGGTAGACGGCGACGGAATTGTTAGAGCCGATGTTTCTTTTAGAA  
GGCAGAATCGAAGTATAGTGTCGAACAAGTAGGTGTAACCTGTTGAATTCTACGGCGG  
TGAACCTCAATGGAGTCAGTTATAGTGATCCCGCTACTGTGAAAAAATATGCTAGACGTG  
CTCAATTGGGTGAAATTTTTGAATTAGATCGTGCTACTTTGAAATCTGATGGTGTTTTTT  
GTAGCAGTCCAAGGGGTTGGTTTACTTTTTGGGCATGCTTCATTTGCTTTGCTTCTTCT  
TCGGACACATTTGGCATGGTGCTAGAACCTTGTTCAGAGATGTTTTTGTGGTATTGAC  
CCAGATTTGGATGCTCAAGTAGAATTTGGAGCATTCCAAAACTTGGAGATCCAACCTA  
CAAGACGACAAGTAGTT-----GTGGAAACGCTCTTTAATGGAAC  
TTAGCTTTAGCTGGTTCGTGACCAAGAAACCACCGTTTCGCTTGGTGGGCCGGCAAT  
GCCCCACTTATCAATTTATCCGGTAAACTACTAGGGGCTCATGTCCGCCATGCCGGATTA  
ATCGTATTCTGGGCCGGAGCAATGAACCTATTTGAGGTGGCTCATTTTCGTACCAGAAAA  
ACCTATGTATGAACAAGGATTAATTTTACTTCCCCACCTAGCTACGCTAGGTTGGGGGGT  
AGGTCCCTGGGGGGGAAGTTATAGACACCTTTCCATACTTTGTATCTGGAGTACTTCATTT  
AATTTCTCTGCAGTATTGGGATTTGGCGGTATTTATCATGCACTTCTGGGACCTGAGAC  
CCTTGAAGAATCTTTTCCATCTTTCGGTTATGTATGGAAAGATAGAAATAAAATGACCA  
CAATTTTAGGTATTCATTAATCTTGTTAGGTATAGGTGCTTTTCTTCTAGTATTCAAGGC  
TCTTTATTTTGGGGGCATATATGATACCTGGGCTCCGGGAGGGGGAGATGTAAGAAAAA  
TTACTAACTTGACCTTAGCCCAAGTATTATTTGGTTATTTACTAAAATCGCCCTTTGG  
GGGGGAAGGATGGATTGTTAGTGTGGATGATTTGGAAGATATAATCGGAGGGCATGTAT  
GGTTAGGTTCCATTTGTATACTTGGTGGAAATCTGGCATATCTTAACCAACCCCTTCGCGT  
GGGCTCGACGTGCACTTGTATGGTCTGGAGAGGCTTACTTATCTTATAGTTTAGGGGCT



TTAGCTGTCTTTGGGTGTCATTGCTTGTTGTTTTGTCTGGTTCAATAATACCGCTTATCCTA  
GTGAGTTTTACGGCCCCACTGGACCAGAAGCTTCTCAAGCTCAAGCATTACTTTTTCTA  
GTTAGAGACCAACGTCTTGGGGCTAACGTGGGATCCGCTCAAGGACCTACTGGGTTAG  
GTAAGTATCTAATGCGTTCCTCGACTGGAGAGGTCATTTTTGGAGGAGAACTATGCGT  
TTTTGGGATCTGCGTGCTCCCTGGTTAGAACCTCTAAGGGGTCCAAATGGGTTGGACTT  
AAGTAGGCTGAAAAAAGATATAACAACCTTGGCAAGAACGGCGTTCCGCAGAATATATG  
ACTCATGCTCCTTTAGGTTCTTTAAATTCCTGTTGGTGGCGTGGCTACCGAAATCAATGC  
AGTCAATTATGTCTCTCCTAGAAGTTGGTTAGCTACCTCTCATTTTTGTTCTAGGCTTCTT  
CCTCTTCGTAGGTCATTTGTGGCACGCGGAAGGGCTCGTGCAGCTGCAGCAGGATTT  
GAAAAAGGAATTGATCGTGATTTTGAACCTGTTCTTTCCATGACCCCTCTTAATATGACT  
ATAGCCCTTGGTAAATTTACCAAAGACGAAAAT---TTATTTGATATTATGGATGACTGGTT  
ACGGAGGGACCGTTTCGTTTTTTGTAGGCTGGTCCGGTCTATTGCTCTTTCCTTGTGCCTA  
TTTTGCTTTAGGGGGTTGGTTCACAGGTACAACCTTTGTAACCTCATGGTATACCCATG  
GATTGGCTAGTTCCTATTTGGAAGGCTGCAATTTCTTAACTGCCGCAGTCTCTACTCCTG  
CTAATAGTTTAGCACATTCTTTGTTGTTACTATGGGGTCCTGAAGCACAAGGAGATTTTA  
CTCGTTGGTGTCAATTAGGCGGTCTGTGGATTTTTGTTGCTCTCCATGGCGCTTTCGGA  
CTAATAGGTTTCATGTTACGTCAATTTCGAGCTTGTCTGATCTGTTCAATTGCGACCTTAT  
AATGCAATCGCATTCTCTGCTCCAATTGCTGTTTTTTGTTTCTGTATTTCTGATTTATCCAC  
TAGGTCAATCTGGTTGGTTCTTTGCGCCTAGTTTTGGTGTAGCAGCTATATTTTCGATTCA  
TCCTCTTTTTTCAAGGGTTTCATAATTGGACGTTGAACCCATTTTCATATGATGGGAGTTG  
CCGGTGTATTGGGCGCTGCTTTGCTATGCGCTATTCATGGTGTACTGTAGAAAATACTT  
TATTTGAAGATGGTGATGGCGCAAATACATTCCGTGCTTTTAAACCCAACTCAAGCTGAA  
GAAACTTATTCAATGGTCACTGCTAACCGCTTTTGGTCCCAAATCTTTGGGGTTGCTTT  
TTCCAATAAACGTTGGTTACATTTCTTTATGTTATTTGTACCAGTAACCGGTTTATGGATG  
AGTGCTCTTGGAGTAGTCGGTCTGGCCCTGAACCTACGTGCCTATGACTTCGTTTTCTCA  
GGAAATTCGTGCGGCGGAAGATCCTGAATTTGAGACTTTCTACACCAAAAATATTCTCT  
TAAATGAAGGTATTCGTGCTTGGATGGCGGCTCAAGATCAGCCTCATGAAAACCTTATA  
TTCCCTGAGGAGTTCTACCACGTGGAAACGCTCTTATGTCTGGAAGCACAGGAGAAC  
GTTCTTTTTGCTGATATTATTACCAGTATTCGATACTGGGTCATTCATAGCATTACTATACCT  
TCCCTATTCATTGCGGGTTGGTTATTCGTCAGCACCGGTTTAGCTTACGATGTGTTTGG  
AGCCCTCGGCCAAACGAGTATTTACAGAGAGCCGACAAGGAATTCATTAATAACTG  
GCCGTTTTGATTCTTTGGAACAACCTCGATGAATTTAGTAGATCTTTTATGACTATAGATC  
GAACCTATCCAATCTTTACAGTGCGATGGTTGGCTGTTACGGCCTAGCTGTACCTACC  
GTTTCTTTTTTGGGGTCAATATCAGCAATGCAGTTCATCCAACGAATGGCTACACAAAC  
TGTTGAGAACAGTTCTAGATCTGGT---CCAAGACGAACTACTGTAGGGAGTTTATTGAA  
ACCATTGAATTCGGAATATGGTAAAGTAGCTCCTGGATGGGGAACGACTCCTTTGATGG  
GTGTTGCAATGGCTCTATTTGCGATATTTCTATCTATTATTTTGGAGATTTATAATTCTCC  
GTTTTATTGGATGGAATTTCAATGAATATGCTTACTCTTAAACTCTTCGTTTACACAGTA  
GTGATATTCTTTGTTTCTCTTTCATCTTTGGATTCTTATCTAATGATCCAGGACGTAATC  
CCGGACGTGAAGAAATGGCCGATACTACTGGAAGGATTCCTCTTTGGATAATAGGTA  
GTAATGTTATTCTTGTGATCGGTTTAAATAGGTATTTCTTTTATGGTTTCATATCCGGAT  
TGGGTTTCATCTCTGATGCTTAATATCTTTAGTTTGTATCTGTATCTGTCTTAATTCTGCCCT  
TTAT---AGTAGTTTTTTCTTACCAAATGCCCCGAGGCATATGCTTTTTTGAATCCAATCG  
TAGATGTTATGCCAGTCATACCTCTGTTCTTTTTTCTTCTTAGCCTTTGTTTGGCAAGCTG

CGGTAAGTTTTCGAATGACACAATCAAACCCGAACGAACAAAATGTTGAATTGAATCG  
TACCAGTCTCTACTGGGGGTTATTACTCATCTTTGTAAGTTGCTGTTTTATTTTCCAATTAT  
TTCTTCAATATGGAAGTCAATATTCTTGCATTTATTGCTACTGCACTGTTCAATTCTAGTTC  
CTACTGCCTTTCTACTTATCATTACGTAACCAATCAGTCAAATGATATGGAAACAG  
CAACCCTAGTTGCCATCTTTATATCTGGTTTACTTGTAAGTTTTACTGGGTACGCCTTATA  
TACCGCTTTTGGGCAACCTTCTCAACAATAAGAGATCCTTTTGAGGAACATGGGGAC  
ATGGAAGCATTGGTTTATACATTCCTCTTAGTCTCGACTCTAGGGATAATTTTTTTTCGCTA  
TCTTTTTTCGAGAACCGCCTAAAGTTCCAATAAAAAGATGAAAATGACTCTTGCTTTC  
CAATTGGCTGTTTTTGCATTAATTGCTACTTCATCAATCTTATTGATTAGTGTACCCGTTG  
TATTTGCTTCTCCTGATGGTTGGTCAAGTAACAAAATGTTGTATTTTCTGGTACATCAT  
TATGGATTGGGTTAGTCTTTCTGGTAGGTATCCTTAATTCTCTCATCTCT-----  
ATGTCACCACAAACAGAGACTAAAGCAAGTGTGGATTCAAAGCTGGTGTTAAAGATT  
ACAAATTGACTTATTATACTCCTGACTATGAAACCAAGATACTGATATCTTGGCAGCAT  
TCCGAGTAACTCCTCAACCTGGAGTTCCACCTGAAGAAGCAGGGGCTGCAGTAGCTG  
CCGAATCTTCTACTGGTACATGGACAACCTGTGTGGACCGATGGACTTACCAGCCTTGAT  
CGTTACAAAGGGCGATGCTACCACATTGAGCCCCTTGGTGGAGAAGAAAGTCAATTTA  
TTGCTTATGTAGCTTACCCTTTAGACCTTTTTGAAGAAGGTTCTGTTACTAACATGTTTA  
CTTCCATTGTGGGTAATGTATTTGGGTTCAAAGCCCTGCGCGCTCTACGTCTGGAAGAT  
CTGCGAATCCCTGTTGCTTATACTAAAACCTTTCCAAGGCCCGCCTCATGGTATCCAAGT  
TGAGAGAGATAAATTGAACAAGTATGGTTCGTCCTGTTGGGATGTACTATTAACCTA  
AATTGGGATTATCTGCTAAAACCTACGGTAGAGCAGTTTATGAATGTCTTCGCGGTGGA  
CTTGATTTTACCAAAGATGATGAGAACGTGAACTCCCAACCTTATGCGTTGGAGAGA  
TCGTTTCTTATTTTGTGCCGAAGCAATTTATAAAGCACAGGCTGAAACAGGTGAAATCA  
AAGGGCATTACTTGAATGCTACTGCAGGTACATGCGAAGATATGATGAAAAGGGCTGTA  
TTTGCTAGAGAGTTGGGAGTTCCTATCGTAATGCATGACTACTTAACAGGGGGATTAC  
TGCAAATACTAGCTTGGCTTTTTATTGCCGAGATAATGGACTACTTCTTCACATCCACCG  
CGAATGCATGCAGTTATTGATAGACAGAAGAATCATGGTATGCACTTCCGTGTACTAG  
CTAAAGCGTTACGTATGTCTGGCGGAGATCATATTCACGCTGGTACCGTAGTAGGTA  
CTTGAAGGGGAAAGAGAAATAACTTTGGGCTTTGTTGATTTACTGCGTGATGATTTTAT  
TGAAAAGATCGAAGTTCGCGGTATTTATTTCACTCAAGATTGGGTCTCTCTACCAGGTG  
TTCTGCCCGTGGCTTCGGGGGTATTACGTTTGGCATATGCCTGCTCTGACCGAGATC  
TTTGAGATGATTCCGTACTACAGTTCGGTGGAGGAACTATAAGGACACCCTTGGGGAA  
ATGCACCGGGTGCCGTAGCTAATCGAGTAGCTCTAGAAGCATGTGTACAAGCTCGTAAT  
GAGGGACGTGATCTTGTCTGAGGGTAATGAAATTATCCGTGAGGCTTCAAATGGA  
GTCCTGAACTAGCTGCTGCTTGTGAGGTATGGAAGGAGATCAAATTTGAATTTCCAGC  
AATGGATACTTTG-----ATGGCGATACATTTATACAAAACCTTCTACCCCGAGCACACGCA  
ATGGAACCGTAGACAGTCAAGTCAAATCCAATCCACGAAATAATTTGATCTCTGGACA  
GCATCGTTGTGGTAAAGGTCGTAATGCCAGAGGAATCATTACCGCAGGGCATAGAGGG  
GGAGGTCATAAGCGTCTATACCGTAAAATCGATTTTCGACGGAATGAAAAGACATATA  
TGGTAGAATCGTAACCATAGAATACGACCCTAATCGAAATGCATACATTTGTCTCATACA  
CTATGGGGATGGTGAGAAGAGATATATTTTACATCCCAGAGGGGCTATAATTGGAGATA  
CCGTTGTTTCTGGTACAGAAGTTCCTATAAAAATGGGAAATGCCCTACCTTTGACCGAT  
ATGCCCTTAGGCACGGCCATACATAACATAGAAATCACACTTGGAAAGGGTGGACAATT  
AGCTAGAGCAGCGGGTGCTGTAGCGAAACTGATTGCAAAGAGGGGAAATCGGCCAC

ATTAAAATTACCTTCTGGGGAGGTCCGTTTGGATATCCAAAACTGCTCAGCAACAGTCG  
GACAAGTGGGGAATGTTGGAGTGAACCAGAAAAGTTTGGGTAGAGCCGGATCTAAGC  
GTTGGCTAGGTAAGCGTCCTGTAGTAAGAGGAGTAGTTATGAACCCTGTAGACCATCCC  
CATGGGGGTGGTGAAGGGAAGGCCCAATTGGTAGAAAAAAACCCACAACCCCTTGG  
GGTTATCCTGCACTTGGGAAGAAGAAGTAGAAAAAGGAATAAATATAGTGATAATTTGAT  
TCTTCGCCGCCGTAGTAAAATGATTCAACCTCAGACCTATTTGAATGTAGCGGATAACA  
GCGGGGCCCGCAATTGATGTGTATTTCGAATCATAGGAGCTAGC---AATCGCCGATATGC  
TCATATTGGTGACGTTATTGTTGCTGTGATCAAAGAAGCAGTACCCAATATGTCCCTAGA  
AAGATCAGAAGTGGTCAGAGCTGTAATTGTACGTACCTGTAAAGA ACTCAAACGTGAC  
AACGGTATGATAATACGATATGATGACAATGCTGCAGTTGTCATTGATCAAGAAGGAAA  
TCCAAAAGGAACTCGAGTTTTTGGTGCGATCGCCGGGAATTGAGACAGTTAAATTTT  
ACTAAAATAGTTTCATTAGCTCCCGAGGTATTAATGCTTAGTCCCAAAGAACCAGATT  
CCGTAAACAACATAGAGGAAGAATGAAGGGAATATCTTATCGAGGTAATCATATTTGTT  
TCGGTAAATACGCTCTTCAGGCACTTGAACCTGCTTGGATCACATCTAGACAAATAGAA  
GCAGGTGACGAGCAATGACACGAAATGCACGTCGTGGTGGAAAAATATGGGTACGTA  
TATTTCCAGACAAACCTGTTACAATAAGACCCACAGAAACACGTATGGGTTCCGGGAA  
AGGATCCCCTGAATATTGGGTAGCTGTTGTTAAACCCGGCCGAATACTTTATGAAATGG  
GTGGAGTAACAGAAAATATAGCCAGAAGGGCTATTTCAATAGCAGCATCCAAAATGCCT  
ATACGAACTCAATTTATTATTTTCGGGAATGACCAGAATTAACGGGGATATATAGCTCGG  
AGACGTAGAACAAAAATTCGTTTATTTGCATCCAGCTTTCGAGGAGCTCATTCAAGGCT  
TACTAGA ACTATTTCTCAACAGAAAATAAGAGCTTTGGTTTCGGCTCATCGGGATAGGA  
ATAAGCAAAAAGAGAAATTTTCGTCGTTTGTGGATCACTCGGATAAACGCAGTAATCCGC  
GAA---AGGGGAGTATCCTATAGTTATAGTCGATTAATACATGATCTGTACAAGAGACAGT  
TGCTTCTTAATCGTAAAATACTTGCACAAATAGCTATATCAAATAGGAATTGTTTTTATAT  
GATTTCCAACGAGATCATAAAGAAGTAGATTGGAAGGAATCCACCCGAATAATTATGC  
TAAAGGAAGTATACGCTTTAGGTCAACATATATGTATGTCTGCGGACAAAGCACGAAGA  
GTAATTGATCAAATTCGTGGACGTTCCCTATGAGGAAACACTTATGATACTAGA ACTCAT  
GCCTTATCGAGCATGTTATCCCATTTTTAAATTGGTTTATTCGGCAGCAGCAAATGCTAG  
TTACAATATGGGTTCTAACGAAGCCGATTTAATCATTAGTAAAGCCGAAGTCAACGAGG  
GTACTACCGCGAAGAAATTTAAACCCCGAGCTAGGGGACGTAGTTTTCCGATAAAAAG  
ACCTACCTGTACATAACTATTGTAGTGAAAAGATATCTCCTTAGATGGGGGAGTATGGGA  
CAAAAAAATGGATGGAATCAAATATGCAGTATTTACAGACAAAAGTATTCGGTTATTGG  
GGAAAAAT---CAATATACTTCTAATGTCTGAATCAGGATCAACTAGGACAGAAATAAAGC  
ATTGGGTCTGA ACTCTTCTTTGGTGTCAAGGTAATAGCTATGAATAGTCAGCGACTTCCG  
GGAAAGGGTAGAAGAATGGGACCTATTATGGGACATACAATGCATTACAGACGTATGAT  
CATTACGCTTCAACCGGGTTATTCTATTCCACCTCTTAGAAAAGAAAAGA ACTATGGCAG  
TTCCAAAAAACGTACTTCTATATCAAAAAAGCATATTCGTAAAAATATTTGGAAAAGG  
AAAGGATATTGGGCAGCGTTAAAAGCTTTTTTCGTTAGGAAAATCTCTTTCTACCGGGAA  
TTCAAAAAGTTTTTTTTGTGCAACAAACACAAACAATGGCCAAGGGGAAAGATGTCCG  
AGTAACGGTTATTTTGGAAATGTACCAGTTGTGCCCGAAACGGTGTTAAT-----AAGGTAT  
CAAGGGGCATTTCCAGATATATTA CTCAAAGAACC GGCGCAATACGCCAAATCGATTG  
GAATTGAGAAAATTCTGTCCCTATTGTTACAACATACAAGTCATGGGGAGATAAAGAA  
AATGAAAATAAGGGCTTCTGTTTCGTAAAATTTGTGAAAAATGTCTGACTAATCCGTAGGC  
GAGGACGAATTAGAGTAATTTGTTCCAACCCGAGACATAAACAAGACAAGGAATGGT

TCGAGAGAAAGTAACAGTATCTACTCGGACACTGCAGTGGAAGTGTGTTGAATCAAGA  
GCAGACAGTAAGCGTCTTTATTATGGGCGCTTTATTCTGTCTCCACTTATGAAAAGTCA  
AGCCGACACAATAGGCATTGCGATGCGAAGAGCTTTGCTTGGAGAAATAGAAGGAACA  
TGTATCACACGCGCAAAATCTGAG-----AAAATACCACACGAATATTCTACCATAGTGGG  
TATTCAAGAATCAATACATGAAATTTTAATGAATTTGAAAGAAATTGTATTGAGAAGTAA  
TCTATATGGAACCTGTGACACATCTATTTGTGTGTCAGAGGTCCTGGATATATAACTGCTCA  
AGATATCATCTTACCGCCTTATGTAGAAATCGTTGATAAGACACAGCATATAGCTAGCTT  
GACAGAACCCATTGATTTGTGTATTGGATTACAAATCGAGAGGAATCGCGGATATCTTAT  
AAAAACGCCAAAT--AACTTTGATGGAAGTTAT-----CCCATAGACGCTGTATTCATGCCT  
GTTTCGAAACGTGAATTATAGTATTCATTCTTATGGGAATGGGAATGAAAAACAAGAGAT  
ACTTTTTCTCGAAATATGGACAAATGGAAGTTTAACTCCGAAAGAAGCACTTCATGAA  
GCCTCCCGAAATTTGATTGATTTATTTATCCCCTTTCTACATATGGAAGAAGAA-----AAC  
TTACATTTAGAGGACAATCAA---CACACGGTTCCTTTATCCCCTTTTACCTTTCATGATAA  
ATTGGCT--AAACTAAGAAAAACAACAAAC---AAAATAGCATTGAAATCGATTTTATTG  
ATCAATCAGAATTGCCTCCCAGGATCTATAATTGCCTCAAAGGTCCAATATATATACATT  
ATTGGACCTTTTGAATAACAGCCAAGAAGATCTTATGAAAATTGAACAGTTTCGCATAC  
AAGATGTAACAGATATTGGGCATTCTGGAAAAACAT-----TTTGCAATTGACGAAAA  
AGAAGTTTTAATGCTCCGGGATGGA---AATGAGGGAATGTCTACAATACCTGGGTTTAA  
TCAGATACAATTTGAAGGATTTTGTAGGTTTATTGATCAGGGCTTGACGGAAGAACTTT  
CTAAGTTTCCAAAAATTGAAGATACAGATCAAGAAATAGAATTTCAATTATTTGTGGAA  
ACATATCAATTGGTAGAACCGTTGATAAAGAAAGAGATGCTGTGTATGAATCACTCAC  
CTATTCTGCGGAATTATATGTATCCGCGGGATTAATTTGGAAAACCAGTAGGGATATGCA  
AGAACAACAATTTTATTGGAAACATTCCTCTAATGAATTCCTGGGAACCTTCTATAGT  
AAATGGAATATATAGAATTGTGATCAATCAATATTGCAAAGCCCCGGGATTTATTACCG  
GTCAGAATTGGACCATAACGGAATTTTCGGTTTATACCGGCACCATAATATCAGATTGGG  
GAGGAAGATCAGAATTAGAGATTGATAGAAAAGCAAGGATATGGGCTCGTGTGAGTAG  
GAAACAACAAAATATCTATTCTAGTTCTATCATCAGCTATGGGTTTCGAATCTAAGAGAAAT  
TCTAGAGAATGTTTGTCTATCCTGAAATTTTTTTGTCTTTTCTGAATGATAAGGAGAGAAA  
AAAGATTGGGTCAAAGAAAATGCCATTTTGGAGTTTATCAACAATTTGCTTGTGTAG  
GCGGGGATCCGGTCTTTTCTGAATCATTATGTAAGGAATTACAAAAGAAATCTTTCAA  
CAAAGATGTGAATTAGGAAGGATTGGTTCGACGAAATATGAACCGGAGACTGAACCTTG  
ATATACCCCGAACAATACATTTTTTGTACCGCGAGATATATTGGCGGCCGCGGATCATT  
TGATTGGAATTAATTTGGAATGGGTACACTTGACGAT-----ATGAATCATTGAAAAATA  
AACGTATTCGTTCTGTAGCGGATCTTTTACAAGATCAATTCGGATTGGCTCTGGTTCGTT  
TAGAAAATGCGGTTTCGAGGAACTATATGCGGAGCAATTAGG---CATAAATTG---ATCCCG  
ACCCCTCAGAATTTGGTAACTTCAACTCCA-----TTAACAACACTTATGAATCTTTT  
TTCGGTTTATACCCATTATCTCAAGTTTTTGGATCGAACTAATCCATTGACACAAATAGTT  
CATGGGAGAAAATTGAGTTATTTGGGTCTTGGAGGACTGACAGGGCGAACTGCTAGTT  
TTCGGATACGAGATATCCATCCTAGTCACTATGGGCGTATTTGCCAATTGATACATCTG  
AAGGAATCAATGTTGGACTTATTGGATCCTTAGCAATTCATGCGAGGATTGGTCATTGG  
GGG---TCTCTAGAAAGCCCGTTTTAT-----AAAATTTCTGAGAGATCAACAGGG-----GT  
ACGGATCCTTTATTTATCACCAGGTAGAGATGAATACTATAGGGTAGCGGCAGGAAATT  
CTTTGGCCTTGAATCAGGGTATTCAGGAAGAACAGGTTGTTCCAGCTCGATACCGTCA  
AGAATTCCTGACTATTGCATGGGAACAGGTTTCATCTTTCGAAGTATTTTTCCCTTCCAATA

TTTTTCTATTGGTGCTTCTCTCATTCCTTTTATCGAACATAATGATGCGAATCGGGCTTTA  
ATGAGTTCTAATATGCAACGTCAAGCAGTCCCCTTTCTCGGTCTGAGAAATGCATTGT  
TGGAAC TGGGTTGGAACGCCAAGCGGCTCTAGATTCAGGGGCTCTTGCTATAGCCGAA  
CGTGAGGGGAAGATCATTTATACTGATACTGATAAGATCCTTTTTATCAGGTAATGGAGA  
AACTCTAAGCATTCCATTAGTTATGTATCAACGTTCCAACAAAATACTTGTATGCATCA  
AAAACCC CAGGTT CAGCGGGGTAAATGCATTA AAAAGGGACAAATTTTAGCGGACGGT  
GCCGCTACAGTTGGTGGCGAACTCGCTTTAGGGAAAAACGTATTAGTAGCTTATATGCC  
ATGGGAAGGTTACAATTTTGAAGATGCAGTACTAATTAGCGAGCGCTTGGTATATGAGG  
ATATTTATACTTCTTTTCACATACGGAAATATGAAATTAAGACTCATGTGACAAGCCAAG  
GC---CCTGAAAGGGTCACTAACGAAATACCGCATTTAGAAGCCATTTACTCCGCAATT  
TAGACAAAATGGAATTGTAATGCTGGGATCTTGGGTAGAGACGGGTGATATTTTAGTA  
GGTAAATTAACGCCCCAGATGGTGAAGAA--TCGTCTGATGCCCCGGAAGATAGATTG  
TTACGAGCCATACTTGGCATT CAGGTATCTACTTCAAAGAACTTGTCTAAA ACTACC  
TATAGGTGGTAGGGGTCGGGTTATTGATGTGAGATGGATCCAGAAAAAGGGG---GGTTC  
TAGTTATAATCCAGAAACGATTTCGTGTATATATTTACAGAAACGGGAAATCAAAGTAG  
GCGATAAAGTAGCTGGAAGACATGGAATAAGGGTATCATTTCCAAAATTTTGCCTAGA  
CAAGATATGCCTTATTTGCAAGATGGAAGACCCGTTGATATGGTTTTTAACCCATTAGGA  
GTACCTT CACGAATGAATGTAGGACAAATATTTGAATGTTCACTCGGGTTAGCAGGAGG  
TCTGCTAGACAGACATTATCGAATAGCACCTTTTGATGAGAGATATGAACAAGAAGCTT  
CGAGAAA ACTAGTGT TTTCTGAATTATATGAAGCCAGTAAGCAAACAGCGAATCCGTG  
GGTATTTGAACCCGAGTATCCAGGAAAAAGCAGAATATTTGATGGAAGAACGGGGGAT  
CTTTTTGAACAACCCGTTATAATAGGAAAGCCTTATATCTTGAAATTAATTCATCAAGTT  
GATGATAAAATCCATGGACGTTCCAGCGGACATTATGCGCTTGT TACGCAACAACCCCT  
TAGAGGAAGGGCCAAGCAAGGGGGACAACGGGTAGGAGAGATGGAGGTTTGGGCTTT  
AGAAGGATTTGGTGTGCTCATATTTTACAAGAGATGCTTACTTATAAATCTGATCATATT  
AGAGCTCGCCAGGAAGTACTTGGTACTACGATCATTGGAGGAACAATACCTAATCCCG  
AGGATGCTCCAGAATCTTTTCGATTACTCGTTCGAGA ACTACGATCTTTGGCTCTGGAA  
CTGAATCATTCCCTTGTATCTGAGAAGAACTTCCAGATTAATAAGAAGGAAGCTATGAA  
TCAGAATTTTCTTCTATGATCGATCGGTATAAACATCAACAGCTCCGAATTGGATCAGT  
TTCTCCTCAACAAATAAGTGCTTGGGCTACTAAAATCCTGCCTAATGGAGAGATAGTTG  
GAGAGGTGACAAAACCATATACTTTTCATTACAAAACCAATAAACCGGAAAAAGATGG  
ATTATTTGTGAAAGAATTTTGGGCCTATAAAAAGTGGGATTTGTGCTTGTGGAAATTA  
TCGAGTAATCGGAAATGAAAAAGAAGACCCGAAATTTTGTGAACAATGCGGAGTTCGA  
ATTTATTGATTCTCGGATACGAAGGTATCAAATGGGCTACATCAA ACTCGCATGCCAGT  
AACCCATGTGTGGTATTTGAAACGTCTTCC TAGTTATATTGCGAATCTTTTAGATAAACC  
TCTTAAAGAATTAGAAGGCCTGGTATATTGCGAT-----TTTTCTTTTGCTAGGCC---ATAG  
CTAAAAACCTACTTTCTTACGATTACGAGGTACATT CGAATATGAAATCCAATCCTGG  
AAATACAGCATCCACTTTTTTTTACTACCCAAGGTTTCGATACATTCGCAATCGAGAA  
ATCTCTACTGGAGCAGGTGCTATCCGAGAACAATTAGCCGATCTAGATTTACGAATTATT  
ATAGATAATTCATTGGTAGAATGGAAAGAATTAGGGGAAGAG---GGGACCTTAGGGAAAT  
GAATGGGAAGATCGAAAAGTTGGAAGAAGAAAGGATTTTTTGGTTAGACGTATGGAAT  
TGGCTAAGAATTTTATT CGAACAAACATAGAACCAGAATGGATGGTTTTGTGTCTATTA  
CCGGTCTTCCCTGAGTTGAGACCAATCATT CAGATAGATGGGGGCAA ACTAATGAG  
CTCGGATATTAATGAACTCTATAGAAGAGTTATCTATCGGAACAATACTCTTACCGATCT

ATTAACAACAAGTAGATCTACGCCAGGAGAATTAGTAATGTGTCAGGAGAAATTGGTA  
CAAGAAGCCGTGGATACCCTTCTTGATAATGGAATCCGCGGACAACCAATGAGGGACG  
GTCATAATAAAGTTTACAAGTCGTTTTTCAGATGTAATTGAAGGCAAAGAAGGAAGATTT  
CGTGAAACTCTGCTCGGTAAACGGGTCGATTATTCAGGGCGTTCCGTCATTGTCGTGGG  
CCCTTCACTTTCATTACATCGATGTGGATTGCCTCGCGAAATAGCAATAGAGCTTTTCCA  
GACATTTGTAATTCGTGGTCTAATTAGACAACATCTTGCTTCGAACATAGGAGTTGCTA  
AGAGTAAAATTCGGGAAAAAGAACCGATTGTATGGGAAATACTTCAAGAAGTTATACA  
GGGGCATCCTGTATTGCTGAATAGAGCGCCTACCCTGCATAGATTAGGCATACAGGCAT  
TCCAGCCCATTTTAGTGGAAGGGCGTGCTATTTGTTTACATCCATTAGTTTGTAAGGGAT  
TCAATGCAGACTTTGATGGGGATCAAATGGCTGTTTCATGTACCTTTATCTTTGGAGGCT  
CAAGCGGAGGCCCGTTTACTTATGTTTTCTCATATGAATCTTTTGTCTCCAGCCATTGGG  
GATCCCATTTCCGTACCAACCCAAGATATGCTTATTGGACTTTATGTATTAACGAGTGGG  
AACCGTCGAGGTATTTGTGTAAATAGGTATAATCCCTGGAATCGC-----AGAAACTATC  
AAAATGAAAGAAGCGACCATAATAACTATATGGATACG-----GAACCCTTTTTTTGTAA  
TTCCTATGATGCAATCGGGGCTTATCGGCAGAAACGAATCAATTTAGATAGTCCTTTGTG  
GCTCCGGTGGCGACTAGATCAACGT--GTTATTGCTTCA-----AGAGAAGTTCCCATCGA  
AGTTCACTATGAATCTTTAGGTACCTATTATGAGATTTATGGACACTATCTAATAGTAAGA  
AGTATAAAAAAAGAAATCTTTTTATATACATTTCGAACCACTGTTGGTTCATATTTCTCTTT  
ATCGAGAAATCGAAGAAGCCATACAGGGGTTTTGTGAGGCTGTTTCATATGGTACC-----  
-----ATGGAGGTACTTATGGCAGAACGGGCCAATCTAGTCTTTCACAATAAAGT  
GATAGACGGAAGTCCATGAAACGACTTATTAGTAGATTAATAGATCACTTCGGAATGG  
CATATACATCACACATCCTGGATCAAGTAAAGACTCTGGGTTTCCAACAAGCTACTGCT  
ACATCCATTTCAATAGGAATTGATGATCTTTTAAACAATACCTTCTAAGGGATGGCTAGTT  
CAAGACGCTGAACAACAAAGTTTGATTTTGGAAAAACACCATCATTATGGGAATGTAC  
ACGCAGTAGAAAAATTACGTCAATCCATTGAGATATGGTATGCTACAAGTGAATATTTG  
CGACAAGAAATGAATCCTAATTTTAGGATGACTGACCCTTTTAAATCCAGTTCATATAATG  
TCTTTTTTCGGGAGCTAGAGGAAATGCATCTCAGGTACATCAATTAGTCGGTATGAGAGG  
ATTAATGTCGGATCCCCAAGGACAAATGATTGATTTACCCATTCAAAGCAATTTACGCG  
AAGGACTCTCTTTAACAGAATATATCATTCTTGCTACGGAGCCCGTAAAGGGGTTGTG  
GATACGGCTGTACGAACATCAGATGCTGGATATCTCACGCGCCGACTTGTGGAAGTAGT  
TCAACACATTGTTGTACGTGCAACAGATTGTGGCACCGTCCGAGGTATTTCTGTGAGTC  
CTCGAAATGGGATGATGCCG---GAAAGGTTTTTTATCCAAACATTAATTGGTCGTGTATT  
AGCAGATGATATATATATGGGTCCACGTTGTATTGCCACTCGAAATCAAGATATTGGGAT  
TGGACTTGTCAATCGATTCATAACC-----TTTTCGAGCACAACCAATATCTATTCG  
AACTCCCTTTACTTGTAGGAGTACATCTTGGATCTGTGATTATGTTATGGCCGGAGTCC  
TACTCATGGCGACCTGGTTGAATTGGGAGAAGCTGTAGGTATTATTGCAGGTCAATCTA  
TTGGAGAACCGGGTACTCAATTAACATTAAGAAGTCTTTCATACTGGCGGAGTATTCACA  
GGGGTACTGCAGAACATGTGAGAGCCCTTCTAATGGAAAAATAAAATTCATGAGG  
ATTTGGTTCATCCGACACGTACACGTCACGGACATCCTGCCTTTCTATGTTCTATAGACT  
TGTATGTAATATTGAGAGTGAAGATATTATACATAATGTGAATATTCCACCCAAAAGTT  
TTCTTTTAGTTCAAACGATCAATATGTAGAATCAGAACAAGTGATTGCTGAGATTCGT  
GCGGGAACATCCACT---TTAAATTTGAAAGAGAAGGTTTCGAAAACATATTTATTCTGAC  
TCAGAGGGAGAA---ATGCATTGGAGTACTGATGTGTATCATGTGCCTGAATTTACATATG  
GTAATGTTTCATCTTTACCAAAAACAAGTCATTTATGGATATTATTAGGAGGACCGTGCA

GA-----TCAAGTCTAGTCTCCCTTCCGCTCCACAAGGATCAAGATCAAATGAACGTTTCAT  
-----TCTCTTTCTGTCAAGCGAAGAGATATTTCTAACCTCTCA-----GTAAC TAATGATCA  
G--GCGAGACACAAATTATTTAGTTCCGATTTTTCTGGTAAA---GAATATAGGATTCATGA  
TGAT--TCAGAACAGAATCGAATCATATGTACTGGTCGTTGTAATCTCATATATCCG---GC  
CATTCTCCACGAGAATTCT-----GATTTATTGGCAAAGAGGGCGAAGAAATAGATTCATCA  
TTTCACTCCAATCGAGTCAAGAACGCGAGAACGAACTAATGCCCCGTTTCAGGTATCTC  
GATTGAAATACCC-----ATAAATGGTATTTTTCCGTCGAAATAGTATTCTTGCCTATTTTCGA  
CGACCTCGATATCGAAGAAAGAGTTCGGGAATTACTAAATATGGGACTATAGAAATGC  
CCTCAATCGTAAAAAAGATGAT-----TTGATTGAGTATCGAGGA---GTCAAGGAATTTA  
GGCCAAAATACATGAAAGTAGATCGATTTTTTTTTCATTCCCGAGGAAGTGTATCTCTTAC  
CCGGATCTTCTCCATAATGGTACGGAACAATAGTATCATTGGGGTAGATACACAAATCA  
CTTTAAATACAAGAAGCCGAGTAGGCGGGTGGTCCGAGTGGAGAGAAAAAAAAAAAA  
GAATTGAACTTAAAATCTTTTCTGGAGATATCCATTTTCTGGAGAGACAGATAAAAATAT  
CCCGACATAGTGGCGTTTTGATACCA---CCGGGA---ACGGTAAAAACAAATTTTAAGGA  
ATCCAAAAA-----TTGAAAGATTGGATCTATGTCCAACGG-----ATCACACCTAGTAAG--  
---AAAAGTTTTTTGTTTTGTTTCGACCTGTCGTCACATATGAAATAAGGGATGGTATA  
AATTTAGCAACACTTTTCCCCCGGATCTGTTGCAGGAAAGGGATAATGTGCAATTTTCG  
AGTTGTCAATTATATCCTTTATGGAAATGGCAAACCAATTCGGGGAATTTCTGACACAA  
GTATTCAATTAGTTCCGACTTGTTTAGTATTGAATTGGGACCAAGACAAAAA-----A  
GTGCCTCTAGCAAAGAAGCCCGCGCTTCTTTGTTGAAATAAGGACAAATGTTTTGATT  
CGAGATTTCTTAAGAATCGACTTAGTGAAATGCCCTATTTCTTATATTGGAAAAAGGAAT  
GATCCATCGGGTCCGGATTGATCTCTGAT---AATGGATCAGATCGCACCAATATCACTC  
CCTTTTCTTCCATTTATTCCTAT-----TCCAAGGCAAGGATTCAACAACCCCTTAACCA  
AAATCAAGGAACTATTCATACCTTGTGAAATAGA-----ATAAGGAATGCCAATCTTTG  
ATAATTTTGTATCATCCAATTGTTCTCGAATGGGTCCA-----TTGAACGATGTAAAATAT  
CACAATGTG-----ATAAAGAATCA---CCCCTAATTCTAATTAGGAATTTGTTTGGCCCT  
TTAGGAACA-----GCCCTTCAAATTGGGAATTTTGATTCA-----TTTTACCATTTA-----ATA  
ACTCATAATCAGATCTTG---GTAAC TAATTATTTGCAACTTGACAAT-----TTAAAACAG  
ACTTTTCAAGGACTTAAA-----TATTATTTAATGGATGAAAAT-----GGGAAAATTTATAA  
TCCTGACCCCTGCAGTAACATCATTTTGAATCCATTCAATTTGAATTGGTATTTTTCTCCAT  
CACAATTATTGTGAAGAGACATCT--ACAATAATTAGTCTTGGGCAGTTTATTTGTGAAA  
ATGTATGTATAGCCAAAAATGGACCACAT---CTAAAA-----TCGGGTCAAGTTCTAATTGT  
TCAA---GTTGACTCTGTAGTAATACGATCAGCTAAGTCCTATTTAGCCACCCAGGAGC  
AACCGTTCATGGCCATTATGGGGAAATCCTTTATGAAGGAGATACATTAGTTACATTTAT  
ATATGAAAAATCGAGATCTGGTGATATAACGCAAGGTCTTCCAAAAGTGGAACAGGTG  
TTAGAAGTGC GTTCGATTGATTCAATATCGATGAATCTAGAAAAGAGGGTTGAGGGTTG  
GAACGAATGTATAACAAGAATTCTTGGAAATCCTTGGGGATTCTTGATTGGTGCTGAGC  
TAACTATAGCGCAAAGTCGTATCTTTGGTTAATAAGATCCAAAGAGTTTATCGATCCC  
AGGGGGTGCAGATCCATAATAGGCATCTAGAAATTATTGTACGTCAAATAACCTCAAAA  
GTTTTGGTTTTAGAA-----GATGGAATGTCTAATGTTTTTTTACCCGGAGAACTAATTG  
GATTGTTGCGAGCGGAACGAATGGGGCGCGCTTTGGAAGAAGGGATCTGTTACCGAG  
CCGTCTTATTGGGAATAACAAGAGCTTCTCTCAATACTCAAAGTTTCATATCTGAAGCTA  
GTTTTCAAGAACTGCTCGAGTTTTAGCAAAGCAGCTCTCCGGGGTTCGTATCGATTG  
GTAAAAGGCCTGAAAGATAATGTTGTTCTGGGGGGGATGATACCCGTTGGTACTGGAT

TTAAAGGATTA-----GTGCATCTTTCAAGGCAACATAACAACATTCCT-----TTGGAAACT  
AAAAAGAAGAATCTATTCGAGAGGGAAATGAGA-----GATATTTTGTTCATCACAGAA  
AATTATTAGATTCTTGCCTTTCAAAGAATTTCCATGATATATCAGAACAACCATTTATAGG  
A-----TTTAATGATTTTCATGACAAGAAGATATTGGAACATAAATTTGGAAGAGA  
TGATGGAGGCGGGGGTTCATTTTGGCCATGGTACTAGGAAATGGAATCCTAAAATGGCA  
TCTTATATCTCTGCAAAACGTAAGGGTATTCATATTACAAATCTTACTAGAACTGCTCGT  
TTTTTATCAGAAGCTTGTGATTTGGTTTTTGTATGCAGCAAGTAGGGGAAAACAATTCTT  
AATTGTTGGTACAAAAAATAAAGTAGCTGATTCAGTAGCACGGGCTGCAATAAAGGCT  
CGGTGTCATTATGTTAATAAAAAATGGCTCGGCGGTATGTTAACAAATTTGGTCCACTAC  
AGAAACGAGACTTCATAAGTTCAGGGACTTGAGAACAGAACAACAAAAACAGGGAGAC  
TCAACCGTCTTCCGAAAAGAGATGCAGCTATGTTGAAAAGACAATTATCTCGCTTGCA  
AACATATCTCGGCGGGATTAATATATGACAGGGTTACCCGATATTGTAATCATTGTTGAT  
CAGCACGAAGAATATACGGCCCTTCGAGAGTGTATCACTTTGGGAATCCAACAATTTG  
TTTACTCGATACAAATTTGTGACCCCGATCTCGCAGATATTTTCGATTCCAGCGAACGATG  
ACGCTATATCTTCAATCCGATTAATTCTTAACAAATTAGTATTCGCAATTTGTGAGGGTC  
GTTCT--AGCTATATAAGAAATCCTATGGGACAAAAAATAAATCCACTTGGTTTCAGACT  
TGGTACAACCCAAGGTCATCATTCCCTTTGGTTTGCACAACCAAAAAATTATTCTGAAG  
GTCCTACAAGAAGATCAAAAACTAAGAGATTGTATCAAGAATTATGTACAAAAAATATG  
AAAATACCCTCTGGC--GTCGAGGGAATTGCACGTATAGAAATTCAAAAAAGAATCGAT  
CTCATCCAGGTTATAATTTTTATGGGATTTCCAAAGTTATTAATAGAAAGTCGGCCCGCA  
-----GGAATCGAAGAATTACAGATGAATCTACAAAAAGAATTTAATTGTGTGAATCG  
AAAACCTAACATTGCTATCACAAGAATTGCAAAACCTTACGGAAACCCTAATATTCTTG  
CAGAATTTATAGCCGGCCAATTAATAAATAGAGTTTCTTTTCGAAAAGCAATGAAAAA  
AGCTATTGAATTAAGTGAACAAGCAGATACAAAAGGAATTCAAATACAAATTGCAGGG  
CGTATCGACGGAAAAGAAATTGCACGTGTGAATGGATCAGAGAAGGTAGGGTTCCCC  
TACAAACCATTTCGAGCTAAAATAGATTATTGTTCCCTATACAGTTTCGAACTATTTATGGGG  
TATTAGGCATAAAAATTTGGATATTTATAGACCAGGAAATGTCGCGTTATCGAGGACCTC  
GTTTCAAAAAAATACGTCGCCTGGGGGCATTACCAGGACTAACTAATAAAGGCCTAG  
AGCCGGAAGTGATCTTAGAAACCAATCGCGTTCCGGGAAA---AAATCTCAATATCGTAT  
TCGCTTAGAAGAAAAACAATAATTGCGTTTTTCATTATGGTCTTACAGAACGACAATTAC  
TGAAATACGTCCGTATCGCCAGAAAAGCCAAGGGTCAACAGGTCAAGTTTTACTACA  
ATTACTTGAAATGCGTTTTGGATAACATCCTTTTTTCGATTGGGTATGGCTTCGACTATTCC  
CGGAGCCCGTCAATTAGTTAACCATAGACATATTTTAGTTAATGGTTCGTATAGTAGATAT  
ACCAAGTTATCGCTGCAAACCACGCGATATTATTACAGCGAGGGATGAACAAAAATCC  
AGAGCTCTGATTCAAATTCGCTCGATTCATCCACTCGT--GAGGAATTGCCAAAACAT  
TTGACTCTTCACCCATTCCA-----TATAAAGGATTAGTCAATCAAATAATAGATAGTAAA  
TGGGTTCGTTTTGAAAATAAATGAATTGCTAGTTGTAGAATATTATTCTCGTCAGACTATG  
TCACGTCGAGGTAAGTGCAGAAGAAAAAACTGCAAAATCCGATCCAATTTATCGTAATC  
GATTAGTTAACATGTTGGTTAACCGTATTCTGAAACACGGAAAAAAATCATTGGCTTAT  
CAAATTATCTATCGAGCCGTGAAAAGATTCAACAAAAGACAGAAACAATCCACTAT  
CTGTTTTACGTCAAGCAATACGTGGAGTAACTCCCGATATAGCAGTAAAAGCAAGACG  
TGTAGGTGGATCGACTCATCAAGTTCCCATGAAATAGGATCCACACAAGGAAAAGCA  
CTTGCCATTCGTTGGTTATTAGCGGCATCCCGAAAACGCCCCGGGTCGAAATATGGCTTT  
CAAATTAAGTTCCGAATTAGTGGATGCTGCCAAAGGGAGTGGCGATGCCATACGCAA



AAGGAAGAGACTCATAGAATGGCAGAGGCAAATAGAGCTTTTGCACATTTTCGTATGG  
GTAGGGACACTATTGCTGAGATAATAACCTCTATACGAAATGCTGATATGGATAGAAAA  
AGAGTGGTTCGAATAGCATCTACTAATATTACCGAAAATATTATTAATACTTTTACGA  
GAAGTTTTTATCGAAAACGTGAGAAAACATCGAGAAAACAACAAAGATTTTTTGGTTT  
TAACCCTGCGACATAGAAGA-----AATAAGAAAGGGCCTTAT-----ATCAATTTTTTAAA  
TTTTAAACGGATCAGTCGACCTGGTCTACGAATCTATTCTAACTATCAACGAATTTCTAG  
AATTTTAGGTGGGATGGGAATTGTCATTCTTTCTACTTCTCGGGGTATAATGACAGACCG  
AGAAGCTCGACTAGAAGGAATCGGTGGAGAAATTTTGTGTTATATATGGATGGCAAAA  
GCTATACCGAGAATTGGTTCACGTAGAACTGGACGTATTGGTTCACGTAAGAGTGCAC  
GTAGAATACCAAAGGGAGTTATTTCATGTTCAAGCAAGTTTCAATAATACCATTGTGACT  
ATTACCGATGTACGGGGTCGGGTAGTTTTCTTGGTCTCCGCCGGTACTTGTGGATTCAA  
GGGTACAAGAAGAGGGACACCATTTGCTGCTCAAACCGCAGCAGGAAATGCTATTCGT  
ACAGTAGTAGATCAGGGTATGCAACGAGCAGAAGTCATGATAAAAGGTCCCGGTCTCG  
GAAGAGACGCAGCATTACGAGCTATTCGTAGAAGTGGTATACTATTACTTTTCGTACGG  
GATGTAACCCCTATGCCACATAATGGCTGTAGACCTCCGAAAAAAGACGTGTGATGC  
CAACTATTAACAACCTTATTAGAAATACAAGACAGCCAATCAGAAATGTCATGAAATCC  
CCCGTCTTCGGGGATGCCCTCAGCGTCGAGGAACATGTACTAGGGTGTATACTATCAC  
CCCAAAAAACCAAACCTCTGCCTTACGTAAAGTTGCCAGAGTACGATTAACCTCTGGA  
TTTGAATCACTGCTTATATAACCGGTATTGGCCATAATCACAAGAACATTCTGTAGTC  
TTAGTAAGAGGGGGAAGGGTTAAGGATTTACCCGGTGTGAGATATCACATTGTTTCGAG  
GAACCCTAGATGCTGTGCGGAGTAAAGGATCGTCAACAAGGGCGTTCTAAATATGGGGT  
AAAAAAGCCAAAAATGGCAAGGAAAAGTTTGATTTCAGAGGGAGAAAAAGAGGAAAA  
ATTTGGAACAGAAATATCATTGATTTCGTAGATCTTCAAAAAAAGAAATAAGC-----A  
AAGTTCCGTCGTTGAGTGACAAATGGGAAATTTATGGAAAATTACAATCCCCGCCGCG  
GAATAGTGCACCTACACGTCTTCATCGGCGTTGTTTTTCGACCGGAAGACCGAGAGCT  
AACTATCGAGACTTTGGACTATCTGGACACATACTTCGTGAAATGGTTCACGCATGTTT  
GTTGCCAGGGGCAACAAGATCAAGTTGGATGGTAAAAAATTCATTCAATTCAGTTATTT  
CACAA-----GAAGAAAACACAGAAAACAGGGGGTCCGTTGAATTTCAAGTATTCAGTT  
TCACCAATAAGATACGGAGACTTACTTCACATTTGGAATTGCACAAAAAAGATTATTTA  
TCTCAGAAGGGTCTACGGAAAATTTTGGGAAAACGCCAACGGCTGCTGACTTATTTGT  
CAAAAAAATAAAGTACGTTATAAGAATTAATAGGTCAGTTGAATATTCGAGAGATA  
AAAACCTCGT-----ATGGTAAAACCTTCGTTTGAAACGATGTGGTAGAAAGCAACGAGCCG  
TCTATCGAATCGTTGCAATTGATGTTTCGATCCCGAAGAGAAGGAAGAGATCTTCGGAG  
AGTGGGTTTTTATGATCCGATAAAGAATCAAACCTATTTAAACGTTCCCTACTATTCTATAT  
TTCCTTGAAAAAGGTGCTCAACCTACAGGAACTGTTTCAGGATATTTTAAAGAAGGCAG  
AGGTTTTTAAGGAACTTCGCCCTAAT-----ATGGATAAATCCAAGCGACCTTTT  
CTGAAATCCAACGATCTTTTCGTAGGCGTTTGCCCCGATTCAATCGGGGGATCGAAT  
TGATTATAGAAACATGAGTTAATTAAGTCGATTTATTAGTGAACAAGGAAAAATATTATC  
TAGACGAGTGAATAGATTGACCTTGAAACAACAACGATTAATTACTATTGCTATAAAAC  
AAGCTCGTATTTTATCTTTGTTACCTTTTCTTAATAATGAAAA-----CAATTTGAAAGGG  
CCGAGTCGACCGCTAGAACTACTGGTCTTAGAACCAGAAATAAAGTGACACGTTCACT  
AAAAAAAATCCTTTTGTAGCGAATCATTATTAAGAAAAATTGAGAACTTAACACA  
AAAGCAGACAAAGAAATAATAGTAACTTGGTCCCGGGCATCTACCATTATACCCACAAT  
GATAGGCCATACTATTGCTATCCATAATGGAAAGGAACATTTGCCTATTTATATAACAGAT

CGCATGGTAGGCCACAAATTGGGAGAATTTTCACCTACTTTAAATTTCCGAGGACATGC  
GAAAAGCGATAATAGATCTCGTCGTATGATTTTGAAATCTTTTCTACTAGGTAATCTAGT  
ATCCTTATGCATGAAGATAATCAATTCGGTCGTTGTGGTGGGACTCTATTATGGATTCT  
GACCACATTCTCCATAGGGCCCTCTTATCTCTCCTTCTCCGAGCTCAGGTTATGGAAG  
AAGGAGAAGAAGGAACCGAGAAGAAGGTATCAGCAACAACCTGGTTTTATTACGGGAC  
AGCTCATGATGTTTCATATCGATCTATTATGCACCTCTGCATCTAGCATTGGGTAGACCTCA  
TACAATAACTGTCTTAGCTCTACCATATCTTTTGTTCATTTCTTCTGGAACAATCACAA  
ACACTTTTTTTGATTATGGATCTACTACCAGAAATCAATGCGTAATCTCAGCATTCAATG  
TGATTCCCTGAATAATCTCATTTTTCAATTATTCAACCATTTCATTTTACCAAGTTCAATG  
TTAGCTAGATTAGTCAACATTTATATGTTTCGATGCAACAACAAGATGTTATTGTAAACA  
AGTAGTTTTGTTGGTTGGTTAATTGGTCACATTTTATTCATGAAATGGGTTGGATTGGTA  
TTAGTCTGGATACGGCAAATCATTCTATTAGATCGTACATTCGATCTAATAAGTACCTT  
GGGTCAGAATTGAGAAATTCTACGGCTCGGATCTTTAGTATTCTTTTATTATTACCTGT  
GTCTACTATTTAGGAAGAATACCGTCACCCATTTTTACTAAGAACTGAAAGAAACCGA  
AGAAGATAAACCTCTTGTGACCCTTCTTTTTGATTATAACCGATGGAATCGCCCATTCCG  
TTACATAAAAAATAATAGATTTGAGAAAGCTGTAAGAAATGAAATGTCACAATATTTTTT  
TTACACATGTCGAAATGATGGAAAACAAAGAATATCGTTTACATATCCGCTCAGTTTGT  
CAACTTTTTGGGAAATGATAGCAAAAAGGATATCCCTGTCTACTAGAAAACTCTCC  
TCTGATGAACCAGACAGTGATTGGGTTTATACTAACAACAAAAAAGTAAC---TTGAAC  
AACGAGTTTTTAAACAGAATTGAAGCTTTAAACAAGAGATCCCTTCCCTCTGGATATACT  
CGAAAAAAGGACTAGATTGTGTAATGATGAGACTAAAAAAGAATACTTGCATAAAATG  
TATGATCCTTTATTGAACGGACCATACCGTGGAACAATAAAAAAAGGGTTTCCCCTAT  
AGAGCCATTTGGAATAAATCGAATTCATGCTATCCTTTACAAAGAATTTGAACAGAAAT  
ACCCTAATGGTAAATCTATTGGAATAAAAGAAATCAGTAAAAAAGTCCCTCGATGGTCA  
TACAAATTAATCGATTTGGAACAACAATCA---GGACAGATTCGTTCAAGAAAAGCTAAA  
CGCGTAGTTATTTTTACTGATGCTTTGATACGCTATTCGCAACAATCGGATTTTCGTCAA  
AACATAATCAAAGGTTCTATGCGCGCTCAAAGGCGTAAAACATTTATTTGGGAACTATT  
TCAAGCTAATGTTTCATTCCCCCTTTTTTTGGACAGACTAAATAAAACCTCCCTTTTTTC  
TTTTGATATT-----TCCGGAATGATGAAAATCTTTTTTCAAATAGAAAGGAGAAACCAC  
GGATAGAGATAGCAGAAGCGTGGGATACCATTCCATTTGCGCAAGTAATAAGAGGTTCT  
ATGTTAATAACTCAATCGATTCTTAGAAAATATATTATATTACCTTCATTGATAATAGCTAA  
AAATTTGAGCCGTATGTTATTATTGCAACTTCCCGAGTGGTCTGAGGATTTAGAAGAAT  
GGAATAAAGAAATGCATGTTAAATGTACCTATAATGGTGTTCAATTATCAGAAACAGAA  
TTCCGAAAAATTGGTTAACAGACGGTATTCAGATAAAAATCCTATTTCCCTTCTGTCTG  
AAACCTTGGCACAATCTAAAAAAGGACAAAAAGATGATTTTTGTTTTTTAACAGTTT  
GGGGAATGGAAGCTGAACTTCCTTTTGGTTCTCCTCGAAAACGACCTTCCTTTTTTGA  
GCCATTTTTAAGGAACTGGAAAAAAAATTGGAAAATTAATAAAGAAAGTATTTTCTA  
GTT---CTAAGAGTTTTAAAAGAAAGAACAAAATTACTTCTAACGGTTTCAAAGAAATA  
AAAAAATGGGTTAGTAAAAGTGTTCTA-----TTTCTAAAAAGAATACTAAAAGAACTCT  
CAAAGTAAATGATTCTATAATCAGCAATCAGATAATTCATGAATCATTTAGTCAAATCG  
GATCTCCAGATTGGACAAATTATTCAGTACAGAAAAAAAATGAAGGATCTGGCTGA  
TAGAACAAGGACAATCCGAAATCAAATCGAAAGAATTACAAAAGAGAAAAAAAAG  
TCCTAACAAAACAAGTTATAATGATAAAAGATTAGAATCGCCAAAAAATATTTGGCAAA  
TATTCAAAAGAAAAAATGATCGATTTCATCTGTAAATTACATTATTTTATAAACTTTTCGT

TGAAAAAATATACATATATATATTTCTATGTATCATTAATATTTCCCAGAATCAATACACAAC  
TTTTT--CACTTTATTTTCATATGACTTATCCTCCTTGTCAACAAGCATATGTATTTTACAAAT  
TATCACAAATCCAACCTTATTAACCTTGTATAAATTAAGATCTGTTCTTCAATATACGTCTTT  
TTTTCTTAAGACTGAAATAAAGGATTTTTTTTACACAAGGAATATTTCAATTCTGAATTAAG  
CCATAAAAAACCTCAAAGTTATGGCATGAATCAATGGAAAACTGGTTAAGGGGGCGT  
TATCAATATGATTTATCTCAGATTAGGTGGGCTAGATTAATACCACAAAAATGGCGAAAT  
AGAGTCAATTGGCGCCGTACGGCTCAAATCAAATAAATGGGATTCATATGAAAAAG  
ACCA-----TTAATTCATTACAAAAACAA---AATGTCAAAAAATGCTATAAATATGATTT  
TTTATCATATAAATCTATTAATGGTAATATTATGTATTTCAGATAGAAAATTTTTTGATTGGA  
AAATTCTCAATTTTTGTCTTAGATTTTTTGATTGGATGGGAATGAATGAAGAAATACTAA  
ATCGTTGGTTCTTCCAGAATTTGTGCTACTTTATAATTCATATAAAAATAAAATCGTGGGT  
TATACCAAACAAATTACTTCTTTTACGTTACAAGAGCAACACGGAAGCAGAACTAAAA  
TCCCTCCTGAAACGTTATTTGCTTTTTCAATTGAGATGGGACGATGCTTTGAATCAAAG  
AATGATCAATAATATCAAAGTATATTGTCTCCTGCTTAGACTTATAAATCCAAGAAAAAT  
TACTATATCCTCGATTCAAAGGAGAGAAATGAGTCTGGATATAATGCTGGTTCAGAAGA  
ATTTAACTCTTCCAGAATTAATGAAA---GGAGTGTTGATTATCGAACCCCTTCGTCTGTC  
CGTAAAAAATGATGGACAATTTTTTATGTATCAAACCATAGGTATTTCAATTGGTTCATAA  
GAGTAAGTACAATCATTATGATTTATTTGTTCTGAAAATATTTTATCAGCTAAACGGCGT  
AGAGAATTGAGAATTCTAATTTGTTTTAGATTTATTTGGCCTAATTATCGATTAGAAGATT  
TAGCTTGTATGAATCGCTATTGGTTTGATACCAATAATGGGAGTCGTTTTCAGTATGTTAA  
AGATACATATGTATCCAATGAAAGGACATCAATTCAAATCCTGGATTTTCGAATTGAGA  
GAGATATTGAGAGAGATCAAGAATTCTCACTATTTCTTAGATTCATGGACCCAATTCAAT  
TCAGTGGGATCTTTCATTCACATTTTTTCCACCAAGAACGTTTTATAAACTTTTTGAC  
CCCCGAATTTGGAGTATCCTACTTTCA---CGCAATTCA-----CAGGGTTCAACAAGCAAT  
CGATATTTACG-----ATCAAGGGT---GTAATACTCTTTGTAGTAGCGGTCCTTATATATC  
GT-----ATTAACAATCGAAATATGGTCGAAAGAAAAAATCTCTATTTGATAGGGCTT  
CTTCCT-----ATACCTATGAATTCATTGGACCCAGAAATGATACATTGGAAGAAT  
CCGTT---GGGCTTCCAATATCAATAGGTTGATTGTTTCG---CTCCTGTATCTTCCAAAAG  
GAAAAAATATCTCGGAGAGTTGTTTCTGAATCCGAAAGAGAGTACTTGGGTTCTCCC  
AATACT-----AAAAGTTTAGCATGCCTGAATCTAACTGGGGTTTCGCGGTGGTGG  
AGGAACTGGATCGGAAAAAAGAGG-----GATTCTAGTTGTAAGATATCTAAT-----GAA  
ACCGTCGCTGGAATTGAGATCTTATTCAAAGAGAAAGATATCAA---TATCTGGAGTTT  
CTTTTTGTATATTATATGGAT-----GATCCGATCCGCAAGGACCATGATTGGGAATTGTTG  
ATCGTCTTTCTCTGAGGAAGAGGCGAAATATAATCAACTTG-----AATTCGGGACCACTA  
TTCGAAATCTTAGTGAAACACTGGATTTGTTATCTCATGTCTGCTTTTCGTGAAAAATA  
CCAATTGAAGTGGAGGGT---TTCTTCAAACAACAAGGG---GCTGGGTCAACTATTCAAT  
CAAATGAAATTGAGCACGTTTCCCAT-----CTCTTCTCGAGAAACAAGTGGCCTATTCT  
TTGCAAAATTGTGCTCAATTTTCATATGTGGCAATCCGCCAAGATCTCTTCGTT-----A  
GTTGGGGGAAG---AATCCGCACGAATCGGATTTTTTGAGGAAC---GTATCGAGAGAGAA  
TTGATTTGGTTAGACAATGTGTGGTTGGTAAACAAGGATCGG-----TTTTTTAGC-----  
AAGGTACGGAATGTATCGTCAAATATTCAATATGATTCC-----ACAAGA-----TCTAGTT  
TCGTTCAAGTAACGGATTCTAGCCAATTGAAAGGATCTTCT--GATCAATCCAGAGATCA  
TTTGGATTCCATTAGT-----AATGAGGATTCGGAA-----TAT  
CACACATTGATCAATCAAAGAGAGATTCAACAATAAAAGAAAGATCGATTCTT--TGG

GAT-----CCTTCCTTTCTTCAAACGGAACGAACAGAGATAGAATCAGAC-----CGATTCCC  
CAAA-----TGCCTTTCTGGATATTCC-----TCAATGTCCCGGCTATTTCGCG---GAACGTGAG  
AAGCAGATGATTAATCATCTGCTTCCGGAAGAAATCGAAGAATTTCTT-----GGGAATCC  
TACAAGATCCGTTCTGTTCTTTTTTCTCTGATAGATGG-----TCAGAACTTCAT--CTGGGT  
TCGAATCCTACTGAGAGGTCCACTAGAGATCAG-----AAATTGTTGAAGAAACAAC  
AAGATCTTTCT--TTTGTCCCTTCCAGGCGATCGGAA-----AATCAAGAAATGGTTAA  
TATATTCAAGATAATTACGTATTTACAAAAT-----ACCGTCTCAATTCATCCTATTTTCATCA  
GATCCGGGATGTGATATGGTTCCG---AAGGATGAACCGGAT--ATGGACAGTTCCAATAA  
GATTTCAATTCTTGAAAAAAATCCATTTTTTGATTTA-----TTTCATCTATTCATGACCGG  
AACAGGGAAGGATACACGTTA-----CACCACGATTTTGAATCAGAA-----GAGAGATTTC  
AAGAAATGGCAGATCTATTCATCTATCAATAACCGAGCCG---GATCTGGTGTATCATAA  
GGGATTTGCCTTTTCTATTGATTCCTACGGATTGGATCAAAAACAA-----TTCTTGAATGA  
GGTATTCAACTCCAGGGATGAATCGAAAAAGAAATCT-----TTATTGGTTCTACCTCCT  
ATTTTTTAT-----GAAGAGAATGAATCTTTTTATCGAAGGATCAGAAAAAATGGGTCCG  
G---ATCTCCTGCGGGAATGATTTGGAAGATCCAAAACCAAAAATAGTGGTATTTGCTAG  
CAACAACATAATGGAGGCAGTCAATCAATATAGATTGATCCGAAATCTGATTCAAATCC  
AATATAGCACCTATGGG-----TGCATAAGAAATGTATTGAATCAATTCTTTTTAATGAAT---  
-----AGATCCGATCGCAACTTCGAATATGGA-----ATTCAAAGGGATCAAATAGGAAAG  
GATACTCTGAATCATAGAACTATAATGAAATATACGATCAACCAACATTTATCGAATTTG  
AAAAAG---AGTCAGAAGAAATGGTTTCGATCCT-----CTTATTTCTCGAACCGAGAGA  
TCCATGAATCGGGATCCTGATGCATATAGATACAAATGGTCCAATGGGAGCAAGAATTT  
CCAGGAACATTTGGAACATTTCTGTTTCTGAGCAGAAGAGCCGT-----TTTCAAGTAGT  
GTTTCGATCGATTACGTATTAATCAATATTCGATTGATTGGTCTGAGGTTATCGACAAAAA  
AGATTTGTCTAAGCCACTTCGTTTCTTTTTGTCCAAG-----TCACTTCTT  
TTTTTGTCC-----AAGTTGTTTTCTTTTTGTCTAAC---TCACTTCTTTTTTCT  
TTGTGAGTTTTCGGGAATATCCCATTCATAGGTCCGAG---ATCTACATCTAT--GAATTGA  
AAGGTCCGAATGATCAACTCTGCAATCAGTTGTTAGAATCAATAGGTCTTCAAATTGTT  
CATTTGAAAAAATTGAAACCCTTC-----TTATTGGAT-----GATCATGATACTTCC---CAA  
AAATCGAAATTCTTGATCAATGGAGGAACAATATCACCTTTTTGTTCAATAAGATACC  
A---AAGTGG---ATGATTGACTCATTCCATACTAGA-----AATAATTGCAGGAAATCCTTTG  
ATAACACGGATTTCCTATTTCTCAATGATATTCCACGATCAAGACAATTGGCTGAATCCCG  
TGAAACCATTTATAGAAAGTTCATTGATATCTTCTTTTTATAAAGCAAATCGACTTCGAT  
TCTTGAATAATCCACATCACTTCTGCTTCTAT-----TGTAACAAAAGATTCCCTTTTTATGT  
G-----GAAAGGGCCCGTATCAAT-----AATTATGATTTTACGTATGGA---CAATTCCTC  
AATATCTTGTTTCATTTCGCAACAAA---ATATTTTCTTTGTGCGTCCGGTAAA-----AAAAAC  
ATGCTTTTTGGGGG---AGAGATACTATTTACCAATCGAGTACAGGTATCTAACATATT  
CATACCTAACGATTTCCACAAAGTGGT--GACGAAACGTATAACTTGTACAAATCT-----  
---TTCCATTTTCCAAGTCGATCCGATCCATTCGTTTCGT-----AGAGCTATTTACTCGATCGC  
AGACATTTCTGGAACACCTCTAACAGAGGGACAAATAGTCAATTTTGAAGAAGTAT  
TGTC AACCTCTTTCAGATATGAATCTATCTGATTCAGAAGGGAAGAACTTGCATCAGTA  
TCTCAAT-----TTCAATTCAAACATGGGTTTGATTCACTCCATGTTCTGAGAAATATTT  
ACCATCCGAAAAG-----AGGAAAAAA-----CGGAGTCTTTGTCTAAAG-----  
AAATGCGTTGAGAAAGGGCAGATGTATAGAACCTTTCAACGAGATAGTGCTTTTTTCAA  
CTCTCTCAAATGGAATCTATTCCAAACATATATGCCATGGTTCCTTACTTCGACAGGGT

ACAAATATCTAAATTTGATATTTTTAGATACTTTTTTCAGACCTATTG-----CCGATACTAAG  
TAGC---AGTCAAAAATTTGTATCCATTTTTTCATGATATTATGCATGGATCAGATATATCATG  
CGAATTCCTCAGAAAAAATTG-----TGTCTTCCACAATGGAATCTG---ATAAAT  
GAGATTCGAGTAAGTGTTTACATAAT-----CTTCTTCTGTCCGAAGAAAGGATTCATCG  
AAAT-----AATGAGTCACCATTGATATCGACACATCTGAGATCGCCAAATGTTCTGGGAGT  
TC---CTCTATTCAATCTTTTTCTTCTTCTTGTTGCTGGATAT---CTCGTTCGTACACATCT  
TCTCTTTGTTTCCCGG-----GCCTCTAGTGAGTTACAGACAGAGTTCGAAAAGGTCAAA  
TCTTTGATGATTCCATCATCTATGATTGAGTTGCGAAAACCTTCTGGATAGGTATCTTACA  
TCTGAACCGAATCTTTCTGGTTAAAGAATCTCTTTCTAGTTGCTCTGGAACAATTAGG  
AGATTCTCTAGAAGAAATATGGGGTTCTGCTTCTGGCGCAACATGCTATTGGGTGGTG  
GTCCCACT-----TATGGG---GTCAGT-----TCTAAGAAGAAATATTTGAATATCAA  
TCTCATCGATCTCATAAGTCTCATA-----CCAAATCCCATCAATCGAATCACTTTTTTC  
GAGAAATACGAGACATCTAAGTCATACAAGTAAAGAGATCTATTCAATTGATAAGAAAA  
GAAAAACGTGAACGGGGATTGGATTGATGATAAAATAGAATCCTGGGTCGCGAACAG  
CGATTTCGATTGATGATGAAGAAAGAGAATTTTTGGTTCAGTTCTCC-----ACCTAACGA  
CA-----GAAAAAAGGATTGATCAAATTTTATTGAGTCTGACT---CATAGTGATCATTTA-----  
-----TCAAAGAATGACTCTGGTTATCAAATAATTGAACAACCGGGAGCAATTTACTTA  
CGATACTTAGTTGACATTCAT-----AAAAAGTATCTAATGAATTATGAGTTCAATACATCC  
TGTTTAGCAGAAAGACGGATATTCCTTGCTCATTATCAGACAATCACTTAT-----TCACAA  
ACTTCGTGTGGGGCTAATAGTTTTTCATTTCCCATCTCATGGA-----AAACCCTTTTCGC  
TCCGCTTAGCCTTATCCCCCTCT---AGGGGTATTTTAGTGATAGGTTCTATAGGAACTGG  
ACGATCCTATTTGGTCAAATACCTAGCGACAAACTCCTATGTTCCCTTTCATTACGGTATT  
TCTGAACAAGTTCCTGGATAACAAGCCTAAAGGTTTTCTTATTGAT-----GATATC  
GAT---ATTGATGATAGTGACGATATTGATGATAGTGAC-----  
-----GATATCGATCGTGACCTTGATACGGAGCTG---GAACTGCTAACTAG  
GATGAATGCGCTAACTATGGATATGATGTCGGAA-----ATAGACCAATTTTATATCACCC  
TTCAATTCGAATTAGCAAAAGCAATGTCTCCTTGCATAATATGGATTCCAAACATTCATG  
ATCTGGATGTGAATGAGTCGAATTACTTATCCCTCGGTCTATTAGTGAACCATCTCTCCA  
GG-----GATTGTGAAAGATGTTCC---ACTAGAAATATTCTTGTTATTGCTTCGACTCATA  
TTCCCCAAAAGTGGATCCCGCTCTAATAGCCCCGAATAAATTAATACGTGCATTAAG  
ATACGAAGGCTTCTTATTCACAACAACGAAAGCACTTTTTCACTCTTTCATATACTAGG  
GGATTTCACTTGGAAAAGAAAATGTTCCATACT-----AATGGATTTCGGGTCCATAACCAT  
GGGTTCCAATGCACGAGATCTTGTAGCACTTACCAATGAGGCCCTATCGATTAGTATTAC  
ACAGAAGAAATCAATTATAGACACTAATACAATTAGGTGCGCTCTTCATAGACAACTT  
GGGATTTGCGA-----TCCCAGGTAAGATCGGTTTCCAGGATCATGGGATCCTTTTCTATCA  
GATAGGAAGGGCTGTAGCACAAAATGTACTTCTAAGTAATTGCCCCATAGATCCTATATC  
TATCTATATGAAGAAGAAA-----TCATGTAACGAAGGGGATTCTTATTTGTACAAATGGTA  
CTTCGAACTTGGAAACGAGCATGAAGAAATTAACGATACTTCTTTATCTTTTGTGATTGTT  
CTGCCGGATCGGTCGCTCAAGATCTTTGGTCTCTACCC-----GGACCCGATGAAAAA---A  
ATGGGATCACTTCTTATGGACTCGTTGAGAATGATTCT---GATCTAGTTCATGGCCTATTA  
GAAGTAGAAGGCGCTCTGGTGGGA-----TCTTCACGGACAGAAAAAGATTGCAGTCAG  
TTTGATAATGAT-----CGAGTGACATTGCTTCTTCGGCCCGAACCAAGGAAT---CCCTTAG  
ATATGATGCAAAACGGATCTTGTTCTATCCTTGATCAGAGATTTCTCTATGAAAAATAC---  
---GAATCGGAGTTTGAAGAA---GGGGAGGGAGAAGGAGCCCTTGACCCGCAACAG-----

-----ATAGAGGAGGAT-----TTATTCAATCAC-----ATAGTTTGGGCTCCT-----AGAATA  
TGGCGCCCT-----TGGGGCTTTCTATTTGATTGTATCGAAAGGCCCAATGAATTGGGAT  
TTCCC---TATGGGTCCAGGTCATTTCCGGGGCAAG-----CGGATCATTATGATGAAGAG  
GATGAGCTTCAAGAGAATGATTTCGGAGTTCCTTGCAGAGTGAACCGTGCAGTACCAGA  
CACGAGATAGATCTTCCAAAGAACAAGGCCTTTTTCGAATAAGCCAATTCATTTGGGAC  
CCTGCGGATCCACTCTTTTTCCTATTCAA---GATCAGCCCCTTGGCTCTGTGTTTTAC  
ATCGAGAATTATTTGCAGATGAAGAGATGTCAAAGGGGCTTCTTACTTCCCAAACAGAT  
CCTCCTACATCTATATATAAACGCTGGTTTTATC-----AAGAATACGCAAGAAAAGCACTTC  
GAATTGTTGATTAATCGTCAGAGATGGCTTAGA-----ACCAATAGTTCATTATCT-----A  
ATGGATCTTCCGTTCTAAT-----ACTCTATCCGAGAGTTATCAGTATTTATCAAATCTGTT  
CCTATCTAAC---GGAAGGCTATTGGATCAAATGACAAAGACATTGTTGAGAAAAAGATG  
GCTTTTCCCGGATGAAATGAAAATTGGATTC-----ATG-----ATGCCTAGA  
TCGCGG---ATAAATGGAAATTTATTGATAAGACCTTTTCAATTGTAGCCAATATCTTATT  
ACGAATAATTCCGACAACCTCAGGAGAAAAAGAGGCATTTACCTATTATAGAGATGGG--  
---ATGTCAGCTCAATCCGAAGGAAATTATGCGGAAGCTTTACAGAATTATTATGAAGCT  
ATGCGACTAGAAATTGATCCCTATGATCGAAGTTATATACTCTATAATATAGGCCTCATCC  
ACACAAGTAACGGGAGAACATACGAAAGCTTTGGAATATTATTTTCGAGCACTAGAACG  
AAACCCATTCTTACCACAAGCTTTTAATAATATGGCCGTGATCTGTCATTAC---CGGGGA  
GAACAGGCCATTCGACAGGGAGATTCTGAAATTGCGGAGGCTTGGTTCGATCAAGCCG  
CTGAGTATTGGAAACAGGCTATAGCGCTTACCCAGGTAATTATATTGAAGCGCATAATT  
GGTTGAAGATCACGAGGCGTTTCGAA-----ATGAGTTGGCGATCAGAACATATATGGATA  
GAACTTATAAGGGGGTCTCGAAAAATAAGTAATTTCTGCTGGGCCTTTATCCTTTTTTTA  
GGTTCATTAGGATTCTTATTGGTTGGAACCTCCAGTTATCTTGGTAGAAATTTGATATCTT  
TTTTTTCGTCTCAACAAATCATTTTTTTTCCACAAGGGATCGTGATGTCTTTCTATGGGA  
TCGCGGGTTTCTTTATTAGTTCCTATTTGTGGTGCACAATTTGTGGAATGTAGGTAGTG  
GTTATGATCGATTCGATAGAAAAGAAGGAATAGTTTGTATTTTTCGTTGGGGATTTCTTG  
GAAAGAATCGTCGCATATTCCTCCGATTCCTTATAAAAGATATTCAGTCCGTCAGAATAG  
AAGCTAAAGAGAGTATTTATGCTCGTCTGCTTTTATATGGACATCAGAGGCCAGGGG  
GCCATTCCCTTGACTCGTACTGATGAGAAT---TTGACTCCACGAGAAATTGAACAAAAA  
GCTGCTGAATTGGCCTATTTCTTGCGTGTACCAATTGAAGTGTTT

>Berberidopsis

ATGGAAAAACGGTGGTTCAATTCGATGTTGTCTCTAAGTAAATCAATGGACAGTCTTGG  
TCCATTGAAAATACCAGTGGAAGCGAAGATCCGAGTATAAATGATACGGATAAAAAACA  
TTCATAGTTACAGTAATGTTGATCATTTATTCGTCTGTCAGGGACATTCGGAATTTTCATCT  
CTGATGACACTTTTTTAGTTAGAGATAGTAATGGGGACAGTTATTCATATATTTTGATAT  
TGAAAATCATATTTTTGAGGTTGACAATGATCAT-----TCTTTTCTGAGTGAAGTAGAAA  
GTTATTTTTATAGTTATAGGAATTCTAGTTATCTGAATACTGGATCTAAGAGTGATGATCC  
TACTATAATCGTTACATGTATGATACTAAATATAGTTGGAATAATCACATTAATAGTTGCA  
TTGACAGTTATCTTCAA-----TCTCAAATCCGTATTGATAGT-----TACGGTAGTGCCAA  
TTACAGT-----TACATTTATAGTTACATTTGTGGTAGCGAGAGTTTCAGTATAAAAAGTAG  
CATGAATGGTGGTGATTTAACTATAAGAGAAAGTTCTAATGATCTCGATGTAACCTCAA  
AATACAGGCATTTGTGGGTTCAATGCGAAAATTGTTATGGATTAATTATAAGAAATTTT  
TTAAGTCAAAAATGAATATTTGTGAACAATGTGGATACCATTTGAAAATGAGTAGTTCA  
GATAGAATCGAACTTTTCGATTGATCCAGGTACTTGGGATCCTATGGATGAAGACATGGT

CTCTCTGGATCCCATTGAATTTTCATTCCGGAGGAGGAACCTTATAAAGATCGTATCGATTCT  
TTATCAAAGAAAGACAGGATTAAGTGGGCTGTTCAAACAGGCATAGGCCAACTAAAC  
GGTATTCCCATAGCAATTGGGGTTATGGATTTTTCAGTTTATGGGGGGTAGTATGGGATCC  
GTAGTAGGGGAGAAAATCACTCGTTTGATCGAGTATGCTACCAATAAATTTCTACCACT  
TATTATAGTGTGTGCTTCCGGAGGGGCACGCATGCAAGAAGGAAGTTTGAGCTTGATG  
CAAATGGCTAAAATATCTTCTGCTTTATATGATTATCAATCAAATAAAAAGTTATTCTATG  
TATCAATCCTTACATCTCCTACTACTGGTGGGGTGACAGCCAGTTTTGGTATGTTGGGA  
GATATCATTATTGCCGAACCCAATGCCTACATTGCATTTGCAGGTAAAAGAGTAATTGAA  
CAAACATTGAATAAGACAGTACCTGAAGGTTACAAGCGGCCGAATATTTATTCCATAA  
GGGTTTATTTGATCTAATCGTACCACGTAATCCTTTAAAAGGCGTTCTGAGTGAGTTGTT  
TAAGCTCCACGCTTCTTTCTTTGAAT-----ATGGTAACCATTCGAGCCGACGAA  
ATTAGTAATATTATCCGTGAACGTATTGAGCAATATAATAGAGAAGTAAAGATTGTAAT  
ACCGGTACCGTACTTCAAGTAGGCGATGGCATTGCTCGTATTATGTTGTTGATGAAGT  
AATGGCAGGTGAATTAGTAGAATTTGAAGAGGGTACAATAGGCATTGCTCTAAATTTGG  
AATCAAATAATGTTGGTGTGTTATTAATGGGTGACGGTTTGTGATGATACAAGAGGGAAGT  
TCTGTAAAAGCAACAGGAAGAATTGCTCAGATACCGGTGAGTGAGGCTTATTTGGGTC  
GTGTTATAAATGCTCTGGCTAAACCTATTGATGGTAGAGGTGAAATTTTCAGCTTCTGAAT  
CTCGGTTAATTGAATCTCCCGCTCCGGGTATTATTTTCGAGACGTTCCGTATATGAGCCTC  
TTCAAACGGGGCTTATTGCTATTGATTCAATGATCCCTATAGGACGTGGTCAGCGAGAA  
TTAATTATTGGGGACAGACAGACCGGTAACAGCAGTAGCCACAGATACGATTCTCA  
ATCAACAAGGGCAAATGTAATATGTGTTTATGTAGCTATTGGTCAAAAAGCATCTTCT  
GTGGCTCAGGTAGTTAATACTTTTCAGGAAAGGGGAGCGATGGAATACACTATTGTGGT  
AGCCGAAACGGCGGATTCCCTGCTACATTACAATACCTCGCTCCTTATACAGGAGCAG  
CTCTGGCTGAATATTTTATGTACCGTGAACGACACACTTCAATCATTATGATGATCTCT  
CCAAACAAGCACAAGCTTATCGCCAAATGTCGCTTCTATTACGAAGACCACCCGGTCG  
TGAAGCTTATCCAGGAGATGTTTTTTTATTTGCATTCACGCCTTTTGGAAAGAGCCGCTA  
AATCAAGTTCTCGTTTAGGTGAAGGAAGTATGACTGCTTTACCAATAGTTGAGACTCAA  
TCGGGAGATGTTTCGGCTTATATCCTACTAATGTAATTTCCATTACAGATGGACAAATAT  
TCTTATCCGCCGATCTATTCAATGCTGGAATCAGACCGGCTATTAATGTGGGTATTTCCG  
TTCCAGAGTAGGATCTGCGGCTCAAATTAAGCCATGAAACAAGTAGCTGGCAAATT  
AAAATTGGAAGTGGCACAATTCGCAGAATTAGAAGCCTTTGCGCAATTCGCTTCTGATC  
TCGATAAAGCTACTCAGAATCAATTGGCAAGAGGTCAACGATTACGTGAATTGCTCAA  
ACAATCCCAATCAGCCCTCTCACGGTGGGAAGAACAGATAATGACTATTTATACTGGAA  
CGAATGGTTATCTTGATTCATTAGAAATTGGACAGGTAAGGAAATTTCTCGTTGAGTTA  
CGTACTTACTTAAAAACGAATAAACCTCAGTTCCAAGAAATCATATCTTCTACCAAGAC  
ATTCACCGAGGAAGCAGAAGCTCTTTTGAAGAAGCTATTCAGGAACAAATGGAACG  
CTTCTACTTCAGGAACAAGCAATGAGAATCAATCCTACTACTTCTGGTCCGGTACTGGA  
CCACGCTTGAAAAAAAACCTGGGGCGTATCGCTCAAATCATTGGTCCGGTACTGGA  
TGTAGCTTTTCTCCGGGCAAGATGCCTAATTTACAACGCTCTGGTAGTTAAGGGTC  
GAGATACTGTCCGTCAACCAATTAATGTGACTTGTGAGGTACAGCAATTATTAGGAAAT  
AATCGAGTTAGGGCTGTAGCTATGAGTGCTACAGATGGTCTAATGAGAGGAATGGAAG  
TGATTGACACGGGAGCTCCTTTAAGTGTTCAGTCGGTGGAGCGACTCTCGGACGAAT  
TTTCAACGTGCTTGGAGAGCCTGTTGATAATTTAGGTCCTGTAGATACTCGCACAAAT  
CTCCTATTCATAGATCTGCGCCCGCCTTTATACAGTTAGATACAAAATTATCTATTTTGA

AACAGGAATTAAGTAGTAGATCTTTTAGCCCCCTATCGCCGTGGAGGAAAAATCGGA  
CTATTCGGGGGAGCTGGAGTGGGTAAAACAGTACTCATTATGGAATTGATCAACAACAT  
TGCCAAAGCTCATGGAGGTGTATCTGTATTTGGCGGAGTAGGTGAACGTACTCGTGAA  
GGAAATGATCTTTACATGGAAATGAAAGAATCTGGAGTGATTAATGAACAAAATATTGC  
AGAATCAAAGTGGCTCTAGTCTACGGTCAGATGAATGAACCGCCGGGAGCTCGTATG  
AGAGTTGGTTTACTGCCCTAACTATGGCGGAATATTTCCGAGATGTTAATGAACAAGA  
CGTACTTCTATTTATCGACAATATCTTCCGTTTCGTCCAAGCAGGATCCGAAGTATCTGC  
CTTATTAGGTAGAATGCCCTTCCGCTGTGGGTATCAACCCACCCTTAGTACCGAAATGG  
GTACTTTACAAGAAAGAATTACTTCTACCAAAGAAGGGTCCATAACTTCTATTCAAGCA  
GTTTATGTACCTGCGGACGATTTGACCGACCCTGCTCCTGCCACGACATTTGCACATTT  
AGATGCTACTACCGTACTATCAAGAGGATTAGCTGCCAAAGGTATCTATCCAGCAGTAG  
ATCCTTTAGATTCAACGTCAACTATGCTCCAACCTCGGATCGTTGGTGAGGAACATTAT  
GAAACTGCGCAACAAGTTAAGCAAACCTCTACAACGTTACAAAGAACTTCAGGACATTA  
TAGCTATCCTTGGGTTGGACGAATTATCCGAAGAGGATCGTTTAAACCGTAGCAAGAGCA  
CGAAAAATTGAGCGTTTCTTATCACAACCCTTTTTTCGTAGCAGAAGTATTTACCGGTTT  
TCCAGGGAAATATGTTGGTCTAGCAGAAACAATTAGAGGGTTTCAATTGATCCTTTCCG  
GAGAATTAGATGGTCTTCTGAACAGGCCTTTTTATTTGGTAGGTAACATCGATGAAGCT  
ACCGCGAAGGCTATGAACTTAGAAATGGAGAACAATTGAAGAAAATGACCTTAAATC  
TTTGTGTACTGACCCCTAATCGAATTGTTTGGGATTCAGAAGTGAAAGAAATCATTTTAT  
CTACTAATAGTGGCCAAATTGGCGTATTACCAAATCATGCCCTATTGCTACAGCTGTAG  
ATATAGGTATTTTGAAGAATACGCCTTAAACGACCAATGGTTAACGATGGCTCTGATGGG  
GGTTTTGCTAGAATAGGCAATAATGAGATCACTGTTTTAGTAAATGATGCGGAGAAGGG  
TAGTGACATTGATCCACAAGAAGCTCAGCAAACCTTTGAAATAGCGGAAGCTAACTTG  
AGGAAAGCTGAAGGCAAGAGACAAACAATTGAGGCAAATCTAGCTCTCAGACGAGCT  
AGGACACGAGTAGAGGCTATCAATGTGATTTGATGAAAAATGTAACCGATTCTTTTCGT  
TTCTTGGGTCACCTGGCCATCCGCCGGGAGTTTCGGGTTTAAATACCGATATTTTAGCAA  
CAAATCCAATAAATCTAAGTGTAGTACTTGGTGTATTGATCTTTTTTGGAAAGGGAGTG  
TTAAGTGATTTATTAGATAATCGAAAACAGAGGATCTTGAATACTATTGAAATTCAGAA  
GAACTACGCGAAGGGGCCATTGAACAGCTGGAAAAAGCCCGGGCTCGCTTACGGAAA  
GTTGAAATGGAAGCAGATGAGTTTCGAGTGAATGGATACTCTGAGATAGAACGAGAAA  
AATTGAATTTGATTAATCAACTTATAAGACTTTGGAACAATTAGAAAATTACAAAAATG  
AAACCATTATTTTGAAGAACAAGAGCGATTAATCAAGTCCGACAGCGGGTTTTCCA  
ACAAGCCTTACAAGGAGCTCTAGGAACTCTAAATAGTTGTTTGAACAACGAGTTACAT  
TTACGTACCATCAGTGCCAATATTGGCATGTTTGGGGCGATGAAAGAAATAACTGATAT  
GAATCCACTGATTGCTGCTGCTTCCGTTATTGCTGCTGGATTGGCCGTAGGGCTTGCTT  
CTATTGGACCTGGAGTTGGTCAAGGTACTGCTGCGGGCCAAGCTGTAGAAGGTATCGC  
GAGACAGCCCAGGCGGAGGGAAAAATACGAGGTACTTTATTGCTTAGTCTGGCTTTT  
ATGGAAGCTTTAACAATTTATGGACTGGTTGTAGCATTAGCGCTTTTATTTGCGAATCCT  
TTTGTATGAATGTTCTATCATGTTCCATCAACACACTAAAAGGGATATACGATATATCCG  
GTGTGGAAGTAGGCCAACATTTCTATTGGCAAATAGGAGGTTTCCAAGTCCATGCCCA  
AGTACTTATAACTTCTTGGGTTGTAATTGCTATCTTATTAGGTTTCCAGCCACTATAGCTGTT  
CGAATCCACAACCATTCGACTGACGGTCAGAATTTCTTCGAATATGTCCTTGAATT  
CATTCGAGACGTGAGCAAACTCAGATTGGAGAAGAATATGGTCCTTGGGTTCCCTTTA  
TTGAACTCTGTTTCTATTTATTTTGTCTAATTGGTCCGGGGCTTTTTACCTTGAA



AATCATAACAGTTACCTCATGGGGAGTTAGCCGCACCCACAAATGATATAAAATACTACCG  
TTGCTTTAGCTTTACTCACGTCAGTGGCATATTTCTATGCGGGTCTTACCAAAAAAGGAT  
TAGGTTATTTCCGGTAAATACATTCAACCAACTCCAATCCTTTTACCCATTAACATCTTAG  
AAGATTTACAAAAACCTTTATCACTTAGTTTTCGACTTTTCGGGAATATATTAGCTGATG  
AATTAGTAGTTGTTGTTCTTGTTCCTTTAGTACCTTCAGTGGTTCCTATACCTGTCATGTT  
CCTTGGATTATTACAAGTGGTATTCAAGCTTATTFTTTGCAACTTTAGCCGCGGCTTAT  
ATAGGCGAATCTATGGAGGGTCATCATATGATATTTTCGACTTTAGAGCATATATTAATC  
ATATCTCCTTTTCGATCGTTTCAATTGTAATTACAATTCATTTGATAACCTTATTAGTCGAT  
GAAATCATAGGACTATACGATTCGTGAGAAAAGGGCATGATAGCCACTTTTTTCTGTATA  
ACAGGATTATTAGTCACTCGTTGGGTTTATTCCGGGCATTTCCCATTAAGTGATTATATG  
AATCATTAATCTTCCTTTCATGGAGTTTCGCCATTATTCATATGGTTCCGTATTTT---AAAT  
ATAAAAATCATTTAAGCGCAATAACCGCGCCAAGTGCTATTTTTTACCCAAGGCTTTGCT  
ACTTCAGGTCTTTTAACTGAAATGCATCAATCCGCAATATTAGTACCTGCTCTCCAATCC  
CAGTGGTTAATGATGCACGTAAGTATGATGGTATTGGGCTATGCAGCTCTTTTATGTGGA  
TCATTATTATCAGTAGCACTTCTAGTCATTACATTTGAAAAACATAAGGATTTTTTGGT  
AAAAGCAATGAGATCCAATACATGGATGAAAGAAACAATGTTTTACAAAATACTTCTTT  
TTTTTCGGTTAGGAATTATTACAGATCCCAATTGATTCAACAATTGGATCGTTGGAGTTA  
TCGTGTTATTAGTCTAGGATTTATCTTTTTAACCATAGGTATTCTCTCGGGAGCAGTATGG  
GCTAATGAGGCATGGGGATCATATTGGAATTGGGACCCAAAGGAAACTTGGGCATTTAT  
TACTTGGACCATATTCGCGATTTATTACATACTCGAACAAACACAAATTTGCAAGGTGT  
AAATTCCGCAATTGTGGCTTCTCTGGGCTTTCTTATAATTTGGATATGCTATTTTGGGGTC  
AATCTATTAGGAATAGGACTACATAGTTATGGTTCATTTACATTAACAATGACAAAAAAG  
AAAGCATTCACTCCTCTTCTATATCTTGCATCTATAGTATTTTTGCCCTGGTGGATCTCTC  
TCTCATTTAATAAAAAGTCTGGAATCTTGGGTTACTAATTGGTGAATACTAGGCAATCCG  
AACTTTTTTTGAATGATATTCAAGAAAAAATATTCTAGAAAAATTCATAGAATTAGAG  
GAGCTCCTCCTCTTGGACGAAATGATAAAGGAATACCCAGGGACACATCTACAAAAGC  
TTCGTATAGGA---CACAAAGAAACGATCCAATTGATCAAGATGCACAATGAGGATCGTA  
TCCATACGATTTTGCATTTCTCGACAAATATAATCTGTTTCGTTATTCTAAGTGGTTATTC  
TATTTTGGGTAATGAAGAACTTGTTATTCTTAACTCTTGGGTTTCAGGAATTCCTATATAA  
CTTAAGCGACACAATAAAAAGCTTTTTCTATTCTTTTATTAACCGATTTATGTATCGGATTC  
CATTCGCCCCATGGTTGGGAATAATGATTGGCTCTGTCTACAAAGATTTTGGATTTGCT  
CATAACGATCAAATTATATCTGGTCTTGTTCCTTTCCAGTCACTTAGATACAATTT  
TTAAATATTGGATCTTCCGTTATTTAAATCGTGTATCTCCGTCACTTGTAGTGATTTATCAT  
TCAATGAATGACATGCCTATTGGTGTTCAAAAGTACCTTTTCGAAGTCTTGGAGAGGA  
AGATGCATCTTGGGTTGACGTATAACAACCGACTTTATCGAGAAAGATTACTTTTTTTAGG  
CCAAGAGGTTGATAGCGAGATCTCGAATCAACTTATTGGTCTTATGGTATATCTCAGTAT  
AGAGGATGATACCAAAAATTTGTATTTGTTTATAAACTCTCCTGGCGGATGGGTAATACC  
CGGAGTAGCTATTTATGATACTATGCAATTTGTGCGACCAAATGTACATACAATATGCAT  
GGGATTAGCCGCTTCAATGGGATCTTTTATCCTGGCCGAGGAGAAATTACCAAACGTC  
TAGCATTCCCTCACGCCAGGGTAATGATCCATCAACCTGCTAGTTCTTTTTTATGAGGCAC  
AAACGGGAGAATTTATCTGGAAGCGGAAGAAGTCTGAGACTGCGCGAAAGCCTCA  
CAAGGGTTTATGCACAAAGAACGGGCAAATCCTTATGGGTTGTATCCGAAGACATGGA  
AAGGGATGTTTTTATGTGAGCAACAGAAGCCCAAATCATGGAATTGTTGATCTTGTAG  
CGGTTGAAATGAAAGAACAAAAATGGATTCATGAAGGTTAATTACTGAATCACTTCCC

AATGGTATGTTCCGGGTTTCGTTTATAGATAATGAAGATCTGATTCTAGGTTATGTTTCAGGA  
AGGATCCGACGTAGTTTTATACGGATACTACCAGGAGATAGAGTCAAAATTGAAGTAAG  
TCGTTATGATTCAACCAGAGGGCGTATAATTTATAGACTCCGCAACAAGGATTTCGAGCG  
ATATGGAGGAATTCCAAGGATATTTAGAA---GATAAATCTCGGCAACATGACTTCCTATA  
TCCACTTATCTTTCAGGAGTATATTTATGCGCTTGCTCATGATCAT-----GCAGGTTATGAC  
AATAAATCCAGTTCACTAATTGTGAAACGGTTAATTACTCGAATGTATCAACAGAATCAT  
TTGATTATTTCCGCTAATGATTCTAACCAAAAATCCTTTTTTTGGGAAGAATTTGTATTCTC  
AAATGATATCAGAAGGATTTGCAGTCATTGTGGAAATTCCATTTCCCTACGATTAGTAT  
CTTCCCTAATAGTAAAATCTCATAAATTACGATCAATTCATTCAATATTTCTTTTTTAGA  
GGATAAATCTCACATTTAAATTATGTGTTAGATATACTAATACCCACCCCTGTCCATCTG  
GAAATCTTGGTTCAAACCCTTCGCTACTGGGTGAAAGATGCCTCTTCTTTGCATTTATTA  
CGATTATTTCTCCACGAGTATCGTAAT-----TGGAATAGTCTTAAATCCATTTCCATTTTT  
CAAAACAAAGATTACTCTTGTTCCTATATAATTTCTCATGTATGTGAATACGAATCCGTCT  
TTGTTTTTCTACGTAACCAATCTTCTCATTTACTATCAACATCTTCTGGAGCCCTTCTTGA  
ACGAATATATTTCTATGGAAAATAGAACATGTAGAA---GTCTTTGCTAAAGATTTTATCC  
TATGGTTGTGCAAGGATCCTTTTCATGCATTATGTTAGGTATCAAGGAAAATCAATTCTGG  
CTTCAAAGGGGACGCCTCTTCTGATGAATAAATGGAAATATTACCTTGTCAATTTCTGG  
CAATGTCATTTTTACGTGTGGGCTCAACCAGGAAGGATCTATATAAACCAATTATCCAAT  
CATTCTCTCAACTTTATGGGCTATCTTTCAAGTGTGCGACTAAACCTTTCAGTGGTACG  
GAGTCAAATGCTAGAAAATGCATTTCTAATAGATAAGTCCAGT-----AAGAAGTTTGATC  
CCATAGTTCCAATTATTCCTTTGATTGGATCATTGGCTAAAGCGAAATTTTGTAACGTATT  
AGGGCATCCCATTAGTAAGCCGGTCTGGGCCGATTTATCAGATTCTGATATTATCGACCG  
ATTTGGACGTATATGCAGAAATCTTCTCATTATCACAGCGGATCTTCAAAAAAAAAAGA  
GTTTGTATCGAATAAAGTATATACTTCGACTTTCTTGTGCTAGAACTTTGGCTCGTAAAC  
ACAAAAGTACTGTACGTGCTTTTTTGAAAAGATTAGGTTTCGGAATTATTGGGAGAATTC  
CTTACGGAGGAAGAACAAGTTCTTTCTTTGATCTTCCCAAGACGGATTTGGTATTTGGA  
TATTATTTGTATCAATGATCTGGCCAATCATGAAATGATAATTGAT---ACAACAGAAGTAC  
AA---GCTATCAATTCTTTTTCTAGATTGGAATCC---TTAAAAGAGGTCTATGGGATCATAT  
GGATGTTTGTCCCTATTTTTACTCCTGTATTGGGAATCACAATAGGTGTAAGTAAATTGT  
GTGGTTAGAAAGAGAAATATCCGCAGGGATACAACAACGTATTGGACCGGAATACGCC  
GGCCCTTTGGGAATTCTTCAAGCTCTAGCAGATGGGACAAAACCTCTTTTCAAAGAGA  
ATCTTCTTCCATCTAGAGGAGATACTCGTTTATTTCAGTATCGGACCATCCATAGCAGTCG  
TATCAATTCTACTAAGTTATTTCAGTAATTCCTTTTGGCTATCGCCTTGTCTAGCTGATCT  
CAGTATCGGTGTTTTTTTATGGATCGCCATTTCAAGTATTGCTCCCATTGGACTTCTTATG  
TCAGGCTATGGATCAAATAATAAATATTCTTTTTTAGGTGGTCTACGAGCTGCTGCCCAA  
TCAATTAGTTATGAAATACCATTAACCTCTATGTGTGTTATCAATATCTCTACTATCTAATAG  
TTCAAGTACAGTTGATATAGTTGAGGCGCAGTCAAAATATGGTTTTTTGGGGGTGGAATT  
TGTGGCGTCAACCTATAGGGTTTATCGTTTTTCTAATTTCTTCCCTAGCAGAATGTGAGA  
GATTACCTTTTGATTTACCAGAAGCAGAGGAAGAATTAGTAGCAGGTTATCAAACCTGAA  
TATTCAGGTATCAAATTTGGTTTATTTTACGTTGCTTCCCTATCTAAATCTACTAGTTTCTTC  
ATTATTTGTAACAGTTCTTTACTTGGGCGGTTGGAATCTTTCTATTCCGTACATATTCGTT  
CCTGAGCTTTTTGAAATAAATAAAGTGAATGGAGTCTTTGGAACGACAATTGGCATCTT  
TATTACATTAGCTAAAACCTATTTGTTCCTGTTTCCTATCACAACAAGATGGACTTTA  
CCTAGGCTGAGAATGGACCAACTATTAATCTTGGATGGAAATTTCTTTTACCTATTTCT

CTAGGTAATCTATTATTAACAACCTTCTTCCCAACTCCTTTCACTGATGATCTGGCATGTA  
CAGAATGAAAACCTTCATTCTCGATTCTACGAGAATTTTTATGAAAGCGTTTCATTTGCTT  
CTCTTCGATGGAAGTTTTATTTTCCCAGAATGTATCCTAATTTTTGGCCTAATTCTTCTTC  
TGATGATCGATTCAACCTCTGATCAAAAAGATATACCTTGGTTATATTTTCATCTCTTCAA  
CAAGTTTAGTAATGAGCATAACGGCCCTATTGTTCCGATGGAGAGAAGAACCTATGATT  
AGCTTTTCGGGAAATTTCCAAACGAACAATTTCAACGAAATCTTTCAATTTCTTATTTTA  
CTATGTTCAACTCTATGTATTCCTCTATCCGTAGAGTACATTGAATGTACAGAAATGGCTA  
TAACAGAGTTTCTGTTATTCATATTAACAGCTACTCTAGGAGGAATGTTTTTATGCGGTG  
CTAACGATTTAATAACTATCTTTGTAGCTCCAGAATGTTTCAGTTTATGCTCCTACCTATT  
ATCTGGATATACCAAGAAAGATGTACGGTCTAATGAGGCTACTACGAAATATTTACTCAT  
GGGTGGGGCAAGCTCTTCTATTCTGGTTCATGGTTTCTTGGCTATATGGTTCATCCGG  
GGGAGAGATCGAGCTTCAAGAAATAGTGAATGGTCTTATCAATACACAAATGTATAACT  
CCCCAGGAATTTCAATTGCGCTTATATTCATCACTGTAGGAATTGGGTTCAGCTTTCCC  
CAGCCCCTTCTCATCAATGGACTCCTGACGTATACGAAGGATCTCCACTCCAGTCGTT  
GCTTTTCTTCTGTTACTTCGAAAGTAGCTGCTTCAGCTTCAGCCACTCGAATTTTCGAT  
ATTCCTTTTATTTCTCATCAAACGAATGGCATCTTCTTCTGGAAATCCTAGCTATTCTTA  
GCATGATATTGGGGAATCTCATTGCTATTACTCAAACAAGCATGAAACGTATGCTTGCAT  
ATTCGTCCATAGGTCAAATCGGATATGTAATTATTGGAATAATTGTTGGAGACTCAAATG  
ATGGATATGCAAGCATGATAACTTATATGCTGTTCTATATCTCCATGAATCTAGGAACTTT  
TGCTCGCATTGTATCATTGGTCTACGTACCGGAACCTGATAACATTCGAGATTATGCAGG  
ATTATACACGAAAGATCCTTTTTTGGCTCTCTCTTTAGCCCTATGTCTCTTATCCCTAGGA  
GGTCTTCCCTCCACTAGCAGGTTTTTTCGGAAAACCTCCATTTATTCTGGTGTGGATGGCA  
GGCAGGCCTATATTTCTTGGTTTCAATAGGACTCCTTACGAGCGTTGTTTCTATCTACTAT  
TATCTAAAATAATCAAGTTATTAATGACTGGACGAAACCAAGAAATAACCCCTCACGT  
GCGAAATTATAGAAGATCTCCTTTAAGATCAAACAATTCCATCGAATTGAGTATGATTGT  
ATGTGTGATAGCATCTACTATAACCAGGAATATCAATGAACCCGATTATTGCAATTGCTCA  
GGATAACCTTTTTATGTTTCTGCTTTACGAATATGATATTTTCTGGGCATTTCTAATAATAT  
CAAGCGTTATTCCATTTTTGGCATTCTAATTTCCGGAGTTTTAGCTCCGATTAGCAAAG  
GACCAGAGAACTTTCTAGTTATGAATCGGGTATAGAACCAATGGGCGATGCTTGGTTA  
CAATTTAGAATCCGGTATTATATGTTGCTCTAGTTTTTGTGTTTTTGTATGTTGAAACGG  
TTTTTCTTTATCCATGGGCAATGAGTTTCGATGTATTGGGTGTATCTGTATTTATAGAAGC  
TTTCATTTTCGTGCTTATCCTAATTGTTGGTTCAGTTTATGCATGGCGAAAAGGAGCATT  
GGAATGGTCTACGAATTAATTTCCCTTGGTTAAACAATAATTGTAGTTTTGCCGATATCTGC  
GGGTTCTTTAATTTTCTTTCTCCCTCATAGAGGAAATAAGATAATTAGGTGGTATACTATA  
TGTATATGTATACTAGAACTCCTTCTAACGACCTATGCATTCTGTTATCATTTCCAATTCG  
ACGATCCATTAATTCAACTGGCGGAGGATTATAAATGGATCGATTTTTTTGATTTCCACT  
GGAGATTGGGAATAGATGGACTTTCTATAGGGCCCATTTTACTGACGGGATTTATCACTA  
CTTTAGCTACTTTAGCGGCTTGGCCAGTTACTCGAGATTCCTCGATTATTTCAATTTCTGAT  
GTTAGCAATGTACAGCGGTCAAATAGGATCATTTTCTTCTCGAGACCTTTTACTTTTTTT  
CATCATGTGGGAGTTAGAATTAATTTCCGTTTATCTACTTCTATCCATGTGGGGAGGAAA  
GAAACGTCTGTACTCAGCTACAAAGTTTATTTTGTACTGCAGGAGGTTCCGTCTTTC  
TCTTAATGGGAGTTCTGGGTGTGGTTTTATATGGTTCCAATGAACCAACATTAATTTTG  
AAACATCAACTAATCAATCATATCCTGTACCATTTGGAAATAATATTCTATATTGGATTTCT  
TATTGCTTTTTGCTGTCAAATCACCGATTATACCTCTACATACATGGTTACCAGATACCCAC

GGAGAAGCACATTACAGTACTTGTATGCTTCTAGCTGGAATCTTATTA AAAAATGGGAGC  
GTATGGATTGGTTCGGATCAATATGGAATTATTACCTCACGCTCATTCTATATTTTCTCCT  
TGGTTAATGATAGTAGGCACAATGCAAATAATCTATGCAGCTTTAACATCTCCTGGTCAA  
CGTAATTTAAAAAAAAGAATAGCCTACTCCTCTGTATCTCATATGGGTTTCATAATTATA  
GGAATTTGTTCTATAACCGATACGGGACTCAATGGAGCCATTTACAAATAATCTCTCAT  
GGATTTATTGGTGCTGCGCTTTTTTTCTTGGCAGGAATGAGTTATGATAGAATACGTCTT  
GTTTATCTCGATGAAATGGGCGGAATAGCTATCCCAATGCCAAAAATATTTACGATGTTT  
AGTAGCTTCTCGATGGCTTCCCTTGCATTACCAGGTATGAGTGGTTTTGTTGCAGAATT  
GATAGTCTTTTTTGGATAATTACCAGCCAAAAATATCTTTTAATGCCAAAAATACTAAT  
TACTTTTGTAATGGCAATTGGAATGATATTAACGCCTATTTATTATTATCTATGTCACGC  
CAGATGTTCTATGGATAAAGCTATTTAATGCTCCAAACTCTATTTTTTTTGATTCTGGAC  
CGCGAGAATTATTTGTTTTGATCTCTATCTTTCTACCCGTAATAGGTATTGGTATTTACCC  
GGATTTTGTCTCTCACTATCAGTTGACAAGGTCGAAGCTATTCTATCTAATTATTTTTAT  
AGAATGATGCTTGAACATGTACTTGTTTTTGAGTGCCTATTTATTTTCTATCGGTATCTATG  
GATTGATCACGAGCCGAAATATGGTTAGAGCCCTTATGTGTCTTGAACCTTATATTGAATG  
CAGTTAATATGAATTTTCGTAACATTTTCTGATTTTTTTGATAGTCGCCAATTAAGGAG  
ACATTTTCTCAATTTTTGTTATAGCTATTGCAGCCGCTGAAGCAGCTATTGGACCAGCTA  
TAGTTTCGTCAATTTATCGTAACAGAAAATCAACTCGTATCAATCAATCTAATTTATTGA  
ATAAGATGGAACATACATATCAATATGCATGGATCATACCTTTCGTTCCACTTCCAGTTC  
CTATGTTAATAGGAGTGGGACTTCTCCTTTTTCCGACGGCAACAAAAAATCTTCGTCGT  
ATGTGGGCTTTTCTAGTGTTTTATTGTTACTTATAGTTATGATTTTTTTCGATCGATCTGTC  
TATTCAGCAAATAAATAGCAGTTCTATCTATCAGTATGTATGGTCTTGGATCATCAATAAT  
GATTTTTCTTTAGAGTTCGGCTACTTGATCGATCCACTTACTTCTATTATGTCAATATTA  
TCACTACTGTTGGAATTATGGTCTTATTTATAGTGACAATTATATGTCTCATGATCAAGG  
ATATTTGAGATTTTTTGCTTATATGAGTTTTTCCAATACTTCCATGTTGGGATTAGTTACT  
AGTTCTAATTTGATACAAATTTATATTTTTTGGGAATTAGTTGGAATGTGTTTCGTATCTAT  
TAATAGGTTTTTGGTTCACACGACCTATTGCGGCAAATGCTTGTCAAAAAGCCTTTGTA  
ACTAATCGTGTAGGGGATTTGGTTTATTATTAGGAATTTTAGGTTTTTATTGGATAACAG  
GTAGTTTCGAATTTTCGGGATTTGTTTCGAAATATTCAATAACAATGAGGTCAATTTTGTAT  
TTGTTACTTTGTGTGCCTCCCTATTATTTGCCGGTGCAGTTGCGAAATCTGCGCAATTCC  
CCCTTCATGTATGGTTACCTGATGCCATGGAGGGGCTACTCCTATTTTCGGCCCTTATAC  
ATGCTGCTACCATGGTAGCAGCGGGGATTTTTCTTGTAGCTCGGCTTCTCCTCTTTTCA  
TAGTCATACCTTACATAATGAATCTAATATCTTTGATAGGTATAATAACAGTATTATTAGG  
AGCTACTTTAGCTCTTGCTCAAAAAGACATTAAGAGAGGTTTAGCCTATTCTACAATGT  
CTCAATTGGGTTATATGATGTTAGCTCTAGGTATGGGGTCTTATCGAGCTGCTTTATTTC  
TTTGATTACTCATGCTTATTCGAAAGCATTATTGTTTTTLAGGATCTGGATCAGTTATTCAT  
TCAATGGAAGCTGTTGTTGGATATTCTCCAGATAAAAGTCAGAATATGGTCTTATGGG  
AGGTTTAAACAAAACATGTGCCAATTACAAAAACTGCTTTTTTTATTAGGTACACTTTCTCT  
TTGTGGTATTCCACCTCTTGCTTGTTTTTTGGTCCAAAGATGAAATTCTTAATGATAGTTG  
GTTGTATTCACCGATTTTCGCAATAATAGCTTGTCCACAGCAGGATTAACCGCATTTTA  
TATGTTTCGGATCTATTTACTTACTTTTGAAGGGCATTAAACGTTCAATTTCAAATAC  
AGTGGCCAAAAAATAGCCTGTTCTATTCAATATCTCTATGGGGTAAAGAAGGGCCGA  
AAACTATTAACAAAAATTTATTAACCTTTATTAACAATGAATTTTTTTTCGTTTGGCAATA  
GAAGACTTCTCCTATCCTCGTGAATCAGGCAATACTATGCTATTCCTCTGCTTGTATT

GGGCCTATTTACTTTGTTTCGTTGGATCCATAGGAATTCCTTTTCGGTTTGGATATATTATCC  
AAATGGTTAACTCCGTCTATAAACCTTTTACACCAAATTCGAAT--TCTGTGGATTGGT  
ATGAATTTGTGACAAATGCAATTTTTTCAGTCAGTATAGCTTATTTTCGGAATATTTATAGC  
GTTTTTTTTATATAAACCTGTTTATTCATCTTTACAAAATTTGAACTTAATTAATTCATTTG  
CTACTCTTTGGGACAAAATAATAAATGTGCTATATGATTGGTCATATAATCGTGGTTACAT  
AGATGCTTTTTATGCAACATCCTTAACTAAGGGTATAAGAGGATTGGCTGAACTAACTC  
ATTTTTTTGATAGACGAGTAATTGATGGAATTACGAATGGGTTTGGTGTACAAGTTTCT  
TTGTAGGAGAGGGTATCAAATATGTAGGGGGTGGG---CGCATCTCTTCTTATCTCTTCTT  
CTATTTATCTTATATA-----ATGGATTTACCCGGACCAATACATGATTTTCTT  
TTAGTTTTTCTGGGATCAGGTCTTATATTAGGGGGTCTCGGAGTGGTATTACTTACCAAT  
CCAATTTATTCTGCATTTTCATTGGGATTGGTTCTTATTTGTATATCTTTATTCTATATTCTA  
TCGAACTCCCATTTTGTAGCTGCTGCACAGCTCCTTATTTACGTAGGAGCTATAAATGTT  
TTAATCATATTTGCTGTGATGTTTCATGAATGGTTCAGAATATTACAAAGATTTTCATCTTT  
GGACCATTGGAGATGGGGTACTTCGCTGGTTTGTACGAGTATTTTTGTTTCATTAATTA  
CTACTATTCCAGATACGTCATGGTACGGGATTATTTGGACTACAAGATCAAACCAGATTA  
TAGAACAAAGATTTGATAAGTAATAGCCAACAAATTGGGATTCATTTATCAACAGATTTTT  
TTCTTCCGTTTGAACCTCATTTGATAAATCTTTTTAGTTGCTTTGATAGGGGCAATTGCTG  
TGGCTCGTCAGATGACTGTACCAGCTACAAGAAAAGACCTCATGATAGTCAATATGGGT  
CCTCACCATCCATCAATGCATGGTGTCTTCGACTCATCGTACTCTAGATGGTGAAGAT  
GTTATTGACTGTGAACCAATATTGGGTTATTTACACAGAGGGATGGAAAAAATTGCGGA  
AAATCGAACAAATTATACAATATCTGCCTTATGTAACACGTTGGGATTATTTAGCTACTATG  
TTCACAGAAGCAATAACCGTAAATGCACCAGAGCAGTTGGGAAATATTCAGGTCCCTA  
AACGGGCCAGCTATATCAGAGTAATTATGTTGGAGTTGAGTCGTATAGCTTCTCATTTGT  
TATGGCTTGGCCCTTTTATGGCAGATATTGGTGCACAGACTCCTTTCTTCTATATTTTTCAG  
AGAAAGAGAATTGGTATATGATCTATTCGAAGCTGCCACCGGTATGAGAATGATGCATA  
ATTATTTTCGTATCGGAGGAGTAGCTGCTGATCTACCTCATGGCTGGATAGATAAATGTT  
TGGATTTCTGCGATTATTTTTTAACAGGGGTTGCTGAATATCAAAGCTTATTACACGAA  
ATCCCGTTTTTTTGAACGAGTTGAAGGGGTAGGCATTATTGGCGGAGAGGAAGCAAT  
AAATTGGGGTTTATCAGGACCAATGCTACGAGCTTCCGGAATACAATGGGATCTTCGTA  
AAGTTGATCATTATGAGTGTACGACGAATTTGATTGGGAAGTCCAATGGCAAAAAGA  
AGGAGATTCATTAGCTCGTTATTTAGTACGAATCAGTGAAATGACGGAATCCATAAAAA  
TTATCCAACAGGCTCTGGAAGGAATTCCGGGGGGCCCTATGAGAATTTAGAAATCCG  
GCGCTTTGATAGAGTAAGGGATCCCGAATGGAATGATTTTGAATATCGATTCATTAGTAA  
AAAGCCTTCTCCTACTTTTGAATTGTCGAAACAAGAACTTTATGTGAGAGTCGAAGCG  
CCAAAGGGGGAATTGGGAATTTTTCTGATAGGAGATCAGAGTGTTTTTCTTGGAGATG  
GAAAATTCGTCCACCGGGTTTTATCAATTTGCAAATCTTCTCAGTTAGTTAAAAGAA  
TGAAATTGGCTGATATTATGACAATACTAGGTAGCATAGATATCATTATGGGAGAAGTTG  
ATCGTATGTTCCCTATGGTAACTGGATTTCATGAATTATGGTCAACAAACAGTACGAGCTG  
CAAGGTACATTGGTCAAAGTTTCATGGTTACCTTATCCACGCGAATCGTTTACCTGTA  
ACTATTCAATATCCTTATGAAAAATTGATCACATCGGAGCGTTTCCGCGGTGCAATCCAC  
TTTGAATTTGATAAATGCATTGCTTGTGAAGTATGTGTTTCGTGTATGTCCTATAGATCTAC  
CCGTTGTTGATTGGAAATTGGAACTGATATTCGAAAGAAACGATTGCTTAATTACAGT  
ATTGATTTTCGGAATCTGTATATTTGTGGTAATTGTGTTGAGTATTGTCCAACAAATTTGTT  
TATCAATGACTGAAGAATACGAACTTTCTACTTATGATCGTCACGAATTGAATTATAATC

AAATTGCTTTGGGTCGTTTACCAATGTCAGTAATTGACGATTACACAATTCGAACAATTT  
TGAATTCG---ATAAAAAATAGA-----ATGCAGGGTCGTTTGTCTGCT  
TGGCTAGTCAAGCATGGGCTAGTTTCATAGATCTTTGGGCTTCGATTACCAAGGAATAGA  
GACTTTACAAATAAAGCCCGAGGATTGGCATTCCATTGCTGTCATTTTATATGTATATGG  
TTACAATTATCTACGTTCCCAATGTGCCTATGATGTAGCACCAGGCGGACTGTTAGCTAG  
TGTGTATCATCTTACGAGAATAGAGTATGGTGTGGATCAACCGGAAGAGGTATGCATAA  
AAGTATTTGCCCAAGGAGGAATCCTAGAATTCCGTCTGTTTTTTGGGTTTGGAAAAGT  
GCGGATTTTCAAGAACGTGAATCTTATGATATGTTGGGAATCTCTTATGATAATCATCCA  
CGCCTGAAACGTATCTTAATGCCCGAAAGTTGGATAGGATGGCCCTTACGTAAGGATTA  
TATTGCCCCCAATTTTTATGAAATACAAGATGCTCATATGGGCAATGAGTTTCGATGTATT  
GGGTGTATCTGTATTTATAGAAGCTTTCATTTTCGTGCTTATCCTAATTGTTGGTTCAGTT  
TATGCATGGCGAAAAGGAGCATTGGAATGGTCTTAGCTCCTGAATATTCAGACAATAAA  
AAGAAAAAAGGAAAAAAGAACATTGAGACAGTTATGAATCCATTGAGTTTCCCT  
TACTTGATCGAACAACCCAAAATTCAGCTATTTAACTACATCAAATGATCTTTCAAATT  
GGTCAAGACTCTCTAGTTTATGGCCGCTTCTCTATGGTACCAGTTGTTGCTTCATTGAAT  
TTGCTTCATTAATAGGTTTCACGATTCGACTTTGATCGTTATGGACTGGTACCAAGATCGA  
GTCCTAGACAAGCGGACCTAATTTAACAGCTGGCACAGTAACAATGAAAATGGCTCC  
TTCTTTAGTGAGATTATATGAGCAAATGCCTGAACCAAAATATGTTATTGCTATGGGAGC  
ATGTACAATTACAGGAGGGATGTTTCAGTACCGATTCTTATAGTACTGTTTCGGGGAGTCG  
ATAAGCTAATTCCTGTGGATGTCTATTTGCCGGGCTGTCCACCTAAACCGGAAGCGGTT  
ATAGATGCTATAACAAAACCTTCGTAAGAAAATATCTCGAGAAATCTATGAAGATAGAATT  
AGGTCTCAAGAGGAGAATCGGTGTTTTACTACCAATCACAAGTTTCATGTTGGACGCA  
GTAATCATACTGGAAATTATAATCAAGGATTACTCTATCAATCGCCATCTACTTCAGAGA  
TCCCTCCTGAAACATTTTTCAAATACAAAAGTTTCAGTATCTTCCCACGAATTAGTGAATA  
TGCAAACTAGAAATACCTTTTCTTGGATAAAGGAACAGATTACTCGATCTATTTCCGTAT  
CGTTCATGATATATAATAACTCGGACATCCATTTCAAATGCATATCCCATTTTTGCACA  
GCAGGGTTATGAAAATCCACGAGAGGCGACTGGGCGTATTGTATGTGCCAATTGCCATT  
TAGCTAATAAACCCGTGGATATTGAGGTTCCACAAGCGGTACTTCCTGATACTGTATTTG  
AAGCAGTTGTTGCAATTCCTTATGATATGCAACTGAAACAAGTTCTTGCTAATGGTAAA  
AAAGGGGCTTTGAATGTAGGGGCTGTTCTTATTTTACCTGAGGGGTTTGAATTAGCCCC  
CCCCGATCGTATTTCTCCTGAGATGAAAGAAAAGATAGGCAATCTGTCTTTTCAGAGCT  
ATCGCCCCACTAAAAAAATATTCTTGTGATAGGTCCTGTTCCCTGGTCAGAAATATAGT  
GAAATCACCTTTCTTATTTCCCCGGACCCCGCTACTAAGAAAGATGTTCACTTCTTA  
AAATATCCCATATACGTAGGCGGAAACAGGGGGAGGGGTCAGATTTATCCCACGCGGA  
GCAAGAGTAACAATACGGTTTATAATGCTACAGCAGCAGGTATAGTAAGCAAAAATCATA  
CGAAAAGAAAAGAGAGGATACGAAATAACCATAGCAGATGCATCGGATGGACGTCAA  
GTGGTTGATATTATCCCTCCAGGACCAGAACTTCTTGTTCAGAGGGTGAATCTATCAA  
ACTTGATCAACCATTAACGAGTAATCCTAATGTGGGTGGATTTGGTCAGGGAGATGCAG  
AAATAGTACTTCAAGATCCATTACGTGTCCAAGGCCTTTTGTCTTTTTGGCATCTGTTA  
TTTTGGCACAAATCTTTTTGGTCTTAAAAAGAAACAGTTTCGAGAAGGTTCAATTGTCC  
GAAATGAATTTTCATGAGTAAAGTCTATGATTGGTTCGAAGAACGTCTAGAGATTCAGGC  
GATTGCAGATGATATACTAGTAAATACGTTCCCTCCTCATGTTAACATATTTTATTGTCTA  
GGAGGAATTACGCTTACTTGTTTTTTGTAGTACAAGTAGCTACGGGGTTTGGCTATGACTTTT  
TACTATCGTCCGACTGTTACTGAGGCTTTTTGCTTCTGTTCAATACATAATGACTGAAGCT

AACTTTGGTTGGTTAATCCGATCAGTTCATCGATGGTTCGGCAAGTATGATGGTTCTAATG  
ATGATCCTGCACGTATTTTCGTGTGTATCTCACCGGTGGATTTAAAAACCTCGCGAATT  
GACTTGGGTTACAGGCGTGGTTCCTGGCTGTATTGACCGCGTCTTTTGGTGTAACCTGGTT  
ATTCCTTACCTCGGGACCAAATTGGTTATTGGGCAGTAAAAATTGTAACAGGCGTACCT  
GAAGCTATTCCTGTAATAGGATCGCCTTTGGTAGAGTTATTACGCGGAAGTGCTAGTGT  
GGGACAATCCACTTTAACCCGCTTTTATAGTTTACACACTTTTGTATTGCCTCTGCTTAC  
TGCCGTATTTATGTTAATGCACTTCCCAATGATACGTAAACAAGGTATTTCTGGTCCTTT  
AATGGGAGTAACAAAAAACCTGACTTGAATGATCCTGTATTAAGAGCTAAATTAGCTA  
AAGGGATGGGTCATAATTATTACGGAGAACCCGCATGGCCCAATGATCTTTTATATATTT  
TTCCAGTAGTCATTCTAGGTACTATTGCATGTAACGTAGGCTTAGCGGTTCTAGAACCAT  
CAATGATTGGTGAACCGGCAGATCCATTTGCAACTCCTTTGGAAATATTACCTGAATGG  
TATTTCTTTCCCGTATTTCAAATACTTCGTACAGTACCCAATAAGTTATTGGGTGTTCTTT  
TAATGGTTTCAGTACCTGCGGGATTATTAACAGTACCTTTTTTGGAGAATGTTAATAAAT  
TCCAAAATCCATTTTCGTTCGTCCAGTAGCGACAACCGTCTTTTTTGGTTGGTACCGCAGTG  
GCCCTTTGGTTAGGCATTGGAGCAACATTACCTATTGATAAATCCCTAACTTTAGGTCTT  
TTTATGATTGAAGTTTTTCTATTTGGAATCGTGTTAGGTCTAATTCCTATTACTTTGGCTG  
GATTATTCGTAACCTGCATATTTACAATACAGGCGTGGTGATCAGTTGGACCTTATGCCTA  
CTATAACTAGTTATTTTCGGTTTTTCTACTAGCGGCTTTAACTATAACCTCAGCTCTATTTAT  
TGGTCTGAGCAAAATACGACTTATTATGGATATAGTAAGTCTCGCTTGGGCTGCTTTAAT  
GGTAGTCTTTACATTTTCTCTTTCACTCGTAGTATGGGGAAGAAGTGGACTCATGATTAT  
TCGTTTCGCCGGAACCAGAAGTAAAAATTTTGGTAGATAGGGATCCTATAAAAACTTCTT  
TCGAGGAATGGGCCAGACCCGGCCATTTCTCAAGAACAATAGCTAAGGGCCCTGATAC  
TACCACTTGGATCTGGAACCTACATGCTGATGCTCACGATTTTCGATAGCCATAACAGTG  
ATTTGGAGGAGATCTCTCGAAAAGTATTTAGTGCCCATTTTCGGTCAACTCTCCATCATCT  
TTCTTTGGCTGAGTGGCATGTATTTCCACGGTGCTCGTTTTTCCAATTATGAAGCATGGC  
TAAGCGATCCTACTCACATTGGACCTAGTGCCAGGTGGTTTTGGCCAATAGTAGGCCAA  
GAAATATTGAATGGTGTATGTGGGTGGGGTTTTCCGAGGAATACAAATAACCTCTGGTTT  
TTTTTCAGCTTTGGCGAGCATCTGGAATAACTAGTGAATTACAACCTCTATTGTACCGCAAT  
TGGTGCATTGGTTTTTGCAGCGTTAATGCTTTTTTGCTGGTTGGTTCCATTATCACAAAGC  
TGCTCCAAAATTGGCTTGGTTCCAAGATGTAGAATCTATGTTGAATCACCATTTAGCGG  
GGCTACTAGGACTTGGGTCTCTTTCTTGGGCGGGGCATCAAGTACATGTATCTTTACCG  
ATTAACCAATTTCTAAACGCTGGAGTAGATCCTAAAGAGATAACCACTTCCTCATGAATTT  
ATCTTGAATCGGGATCTTTTGGCTCAACTTTATCCCAGTTTTGCCGAGGGAGCAACCCC  
ATTTTTACCTTGAATTGGTCAAATATGCGGAATTTCTTACTTTTTCGTGGAGGATTAGA  
TCCAGTAACTGGGGGTCTATGGCTGACCGATATTGCGCACCATCATTTAGCTATTGCAAT  
TCTTTTCTGATAGCGGGTACATGTATAGGACTAATTGGGGCATTGGTCATGGCCTAAA  
AGATATTTTAGAGGCTCATAAAGGTCCATTTACAGGCCAGGGCCATAAAGGCCTATATG  
AGATACTAACAACGTCATGGCATGCTCAATTATCTCTTAACTAGCTATGTTAGGCTCTT  
TAACCATTGTTGTAGCTCACCATATGTATTCCATGCCTCCTTATCCATATCTAGCTACTGA  
CTATGGTACACAACCTGTCATTGTTACACATCACATGTGGATTGGTGGATTTCTCATAGT  
TGGTGCTGCTGCGCATGCAGCTATTTTTATGGTAAGAGACTATGATCCAACCTACTCGATA  
CAACGATCTATTAGATCGTGTCTTAGGCATCGCGATGCAATCATATCACATCTCAACTG  
GGCATGTATATTTCTAGGCTTTACAGTTTTGGTTTTGTATATTCATAATGATACCATGAGT  
GCTTTAGGGCGTCCCAAGATATGTTTTTCAGATACCGCTATAACAATTACAACCCGCTCTTT

GCTCAATGGATACAAAACACCCATGCTTTAGCACCTGGTGCAACGGCTCCTGGTGCAA  
CAACAAGTACCAGTTTACTTGGGGGGTGGTGATTTAGTAGCAGTGGGTGGCAAGGT  
AGCTTTGTTACCCATTCCATTAGGAACCGCAGATTTTTTGGTACATCACATTCATGCATT  
TACGATTCATGTGACAGTCTTGATACTCTTGAAGGGTGTCTATTTGCTCGTAGCTCCCG  
TTTGATAACCGATAAAGCAAATCTTGGTTTTCGGTTCCCTTGTGATGGACCTGGAAGAG  
GGGTACGTGTCAAGTATCCGCTTGGGATCATGTCTTCTTAGGGCTATTCTGGATGTACA  
ATGCAATTTCCGGTAGTAATATTCCATTTTCAGTTGGAAAATGCAGTCAGACGTTTGGGGT  
AGTATAAGTGATCAAGGGGTGGTAACTCATATCACGGGAGGAACTTTGCGCAGAGTT  
CCATTACTATTAATGGGTGGCTCCGCGATTTCTTATGGGCACAGGCATCTCAGGTAATC  
AGTCTTATGGTTCTTCATTATCTGCATATGGCCTCTTTTTCTTAGGTGCTCATTTTGTATG  
GGCTTTTAGTTAATGTTTCTATTTCAGCGGGCGTGGTTATTGGCAAGAACTTATTGAATC  
CATCGTTTGGGCTCATAATAAATTAAGTTGCTCCTGCTACTCAGCCTAGAGCCTTGA  
GCATTGTACAAGGACGTGCTGTAGGAGTAACCCATTACCTTCTGGGTGGAATTGCCAC  
AACATGGGCGTCTTCTTAGCAAGAATTATTGCAGTAGGAATGGCATTAAAGATTTCCAA  
GGTTTAGCCAAGGCTTAGCTCAGGACCCACTACTCGTCGTATTTGGTTTGGTATTGCT  
ACCGCACATGACTTCGAGAGTCATGATGATTAATGAGGAACGTCTTTATCAGAATATT  
TTTGCTTCTCACTTCGGGCAATTAGCAATAATTTTTCTGTGGACTTCCGGAAATCTGTTT  
CATGTAGCTTGGCAAGGAAATTTGAGTCATGGGTACAGGACCCTTTACACGTAAGAC  
CTATTGCTCATGCAATTTGGGATCCTCATTTTGGTCAACCGGCTGTGGAAGCTTTTACTC  
GAGGGGGTGGCTCTTGGCCCAGTGAATATCGCTTATTCTGGTGTATTATCAGTGGTGGTATA  
CAATCGGTTTACGCACTAATGAAGATCTTTATACTGGAGCTCTTTTTCTATTATTTCTTTC  
TGCCATATCCTTAATAGCGGGTTGGTTACACCTACAACCGAAATGGAAACCGAGCGTTT  
CATGGTTCAAAAATGCCGAATCTCGTCTCAATCATCATTTGTCAGGACTCTTCGGAGTA  
AGTTCCTTGGCTTGGACAGGACATTTAGTCCATGTCGCTATTCTGGAGCCAGGGGGG  
AGTACGTTTCGATGGAATAATTTCTTAGATGTATTACCGCATCCCCAAGGGTTAGGACCA  
CTTTTACAGGTCAGTGGAAATCTTATGCTCAAAACCCCGATTCAAGTAGTCATTTATTT  
GGTACCTCCAAGGAGCAGGAACTGCCATTCTAACCTTCTCGGGGGATTCCATCCAC  
AAACGCAAAGTTTATGGCTGACTGATATTGCTCATCATCATTTAGCTATTGCATTTATTTT  
TCTCATTGCTGGTCATATGTATAGAATACTTCGGGATTGGGCACAGTATGAAAGATCT  
TTAGAAGCACATATTCCTCCTGGGGGACGATTGGGACGTGGACATAAGGGTCTTTATG  
ACACAATCAATAATTCGATTCATTTTCAATTAGGCCTTGCTCTAGCCTCTTTAGGGGTTA  
TTACTTCCTTGGTAGCTCAACACATGTAATCTTTGCCTGCTTATGCGTTCATAGCACAAG  
ACTTTACTACTCAAGCTGCGTTATATACTCATCCAATAACATCGCAGGATTCATCATGA  
CAGGAGCTTTTGGCTCATGGAGCTATATTTTTTCATTAGAGATTACAATCCGGAACAGAAT  
GAGGATAATGTATTGGCAAGAATGTTAGACCATAAAGAAGCTATCATATCCCATTTAAGT  
TGGGCCAGCCTCTTTCTAGGGTTCACATCCTTGGGACTTTATGTTTCATAATGATGTCATG  
CTTGCCCTTGGTACTCCGGAGAAACAAATCTTGATCGAACCTATATTTGCTCAATGGATA  
CAATCTGCTCATGGTAAAACCTCATATGGGTTCGATGTAATTTTATCTTCAACGAATGGC  
CCGGCATTCAATGCGGGTCGAAGCATATGGTTGCCTGGCTGGTTAAATGCTGTTAATGA  
G-----AATAGTAATTCACTATTCTTAACAATAGGTCCTGGAGACTTTTTGGTTCATCATGC  
TATTGCTCTAGGTTTACATACTACATTGATCTTAGTAAAAGGTGCTTTAGACGCGCG  
TGGTTCCAAGTTAATGCCAGATAAAAAGATTTCCGGTTATAGTTTTCTTGGCAGTGGTC  
CGGGGCGGGCGGTACTTGTGATATTTCCGGCTTGGGACGCATTTTATTTGGCAGTTTTC  
TGGATGTTAAATACCATTGGATGGGTACTTTTTATTGGCATTGGAAGCACATCACATTA



TGGCAGGGTAACGTTTCACAATTTAATGAATCTTCCACTTATTTGATGGGATGGTTAAG  
AGATTATCTATGGTTAAACTCTTCACAACCTTATCAATGGATATAACCCTTTTGGTATGAAT  
AGTTTATCGGTCTGGGCATGGATGTTCTTATTTGGACATCTTGTGGGGCTACTGGATTT  
ATGTTCTTAATTTCTGGCGTGGATATTGGCAAGAATTGATTGAAACTTTAGCATGGGCT  
CATGAACGCACACCTTTGGCCAATTTGATTGATGGAGAGATAAACCAGTGGCTCTTTC  
CATTGTGCAAGCAAGATTGGTTGGATTAGCCCATTTTTCTGTAGGTTATATATTTCACTTAT  
GCGGCTTTCTTGATTGCCTCTACATCGGGTAAATTTGGTATGTCACATTCAGTAAAGATT  
TATGATACATGTATAGGGTGTACTCAATGTGTCCGAGCGTGCCCCACAGATGTATTAGAA  
ATGATACCTTGGGACGGATGTAAAGCTAAGCAAATTGCTTCTGCTCCAAGAACAGAGG  
ACTGTGTTGGTTGTAAGAGATGTGAATCCGCCTGTCCAACAGATTTCTTGAGTGTTCGA  
GTTTATTTATGGCATGAAACAACGCGCAGCATGGGTCTAGCTTATATGACAACATCAAC  
TTCCCTCTATTTTTGTGCCTTTAGTAGGCCTAGTATTTCCGGCAATTGCAATGGCTTCTT  
TATCTCTTCATGTTCAAAAAACAAGATTGTTATGCGAGATCTAAAAACATATCTCTCCG  
TGGCACCGGTAATAAGTACTCTATGGTTCCGGTCTTTAGCAGGTCTATTGATAGAGATC  
AATCGTTTTTTCCAGATGCGTTGACATTCCCTTTTTTTTTCATTCATGACTGTAATTTAG  
AGAGACGCGAAAGCGAAAGCCTATGGGGTGCCTTCTGTAACCTGGATAACCAGCACTG  
AAAACCGTCTTTACATTGGATGGTTTGGTGTGTGATGATCCCTACCTTATTGACCGCAA  
CTTCTGTATTTATTATCGCCTTCATTGCTGCTCCTCCAGTAGATATTGATGGTATTTCGTGA  
ACCTGTTTCTGGATCTCTACTTTATGGAAACAATATTATCTCTGGTGCCATTATTCTACT  
TCTGCAGCTATAGGTTTGCACCTTTTACCCGATATGGGAAGCGGCATCCGTTGATGAATG  
GTTATAACAATGGTGGTCCCTTATGAGCTAATTGTTCTACACTTCTTACTTGGTGTAGCTTG  
TTACATGGGTTCGTGAGTGGGAACCTTAGTTTCCGTCTGGGTATGCGCCCTTGGATTGCTG  
TTGCATATTCAGCTCCTGTTGCAGCTGCTACTGCTGTTTTTCTTGATCTACCCAATTGGTC  
AAGGAAGCTTTTCTGATGGTATGCCTCTAGGAATCTCTGGTACTTTCAACTTCATGATTG  
TATTCCAGGCTGAGCACAACATCCTTATGCACCCATTTACATGTTAGGCGTAGCTGGT  
GTATTCGGCGGCTCCCTATTCAGTGCTATGCATGGTTCCTTGGTAACTCTAGTTTGATC  
AGGGAAACCACAGAAAATGAATCTGCTAATGAAGGTTACAGATTCGGTCAAGAGGAA  
GAAACTTATAATATCGTAGCTGCTCATGGTTATTTTGGCCGATTGATCTTCCAATATGCTA  
GTTTCAACAATTCTCGTTCTTTACATTTCTTCCCTAGCTGCTTGGCCTGTAGTAGGTATCT  
GGTTCACTGCTTTAGGTATCAGCACCATGGCTTTCAACCTAAATGGTTTCAATTTCAAC  
CAATCTGTAGTTGATAGTCAAGGTCGTGTAATTAATACTTGGGCTGATATTATTAACCGT  
GCTAACCTTGGTATGGAAGTTATGCATGAACGTAATGCTCATAACTTCCCTCTAGACCTA  
GCTGCTATCGAAGCTCCATCTACAAATGGA---GGTTTTGCCTTGGTATCGTGTTACATCCG  
TCGTATTGAATGATCCCGGTCGGTTGCTTTCTGTCCATATAATGCATACAGCTCTGGTTG  
CTGGTTGGGCTGGTTTCGATGGCTCTATATGAATTAGCAGTTTTTTGATCCCTCTGACCCCG  
TTCTTGATCCAATGTGGAGACAAGGTATGTTTCGTTATAACCCTTCATGACTCGTTTAGGAA  
TAACCAATTCATGGGGTGGTTGGAGTATCACA---GGAGGGACTATAACAAATCCGGGTA  
TTTGGAGTTACGAAGGTGTGGCCGGGGCACATATTGTATTTTCTGGCTTGTGCTTCTTG  
GCAGCTATCTGGCATTGGGTGTATTGGGATCTAGAAATATTTTGTGATGAACGTACAGG  
AAAACCTTCTTTGGATTTGCCAAGATCTTTGGAATTCATTTATTTCTCTCAGGGGTGGC  
TTGCTTTGGTTTTGGCGCATTTTCATGTAACAGGCTTATATGGTCCTGGAATATGGGTGTC  
CGATCCTTATGGACTAACTGGAAAAGTACAATCTGTAAATCCAGCGTGGGGCGTGGAA  
GGTTTTGATCCTTTTTGTTCCGGGAGGAATAGCCTCTCATCATATTGCGGCAGGGACATT  
GGGCATATTAGCGGGCCTATTCCATCTTAGTGTCCGCCCGCCCCAACGTCTATACAAAG

GATTACGTATGGGCAATATTGAAACCGTCCTTTCTAGTAGTATCGCTGCTGTCTTTTTTG  
CAGCTTTTGTGTTGCTGGAACCTATGTGGTATGGTTCAGCAACTACCCCGATCGAATTAT  
TTGGTCCCCTCGTTATCAATGGGATCAGGGATACTTTCAGCAAGAAATATATCGAAGA  
GTTGGTGTCTGGGTTATCCGAAAATCAAAGTTTATCAGAAGCTTGGTCTAAAATTCCTGA  
AAAATTAGCTTTTTATGATTATATCGGCAATAATCCGGCAAAGGGGGATTATTCAGAGC  
GGGCTCAATGGACAACGGGGATGGAATAGCCGTTGGATGGTTAGGACACCCTATCTTT  
AGAGATAAAGAAGGGCGTGAACTTTTGTACGTCGTATGCCTACTTTTTTTGAAACATT  
TCCAGTTGTTTTGGTAGACGGAGACGGAATTGTTAGAGCCGATGTTCTTTTTAGAAAG  
GCAGAATCGAAGTATAGTGTGCAACAAGTAGGTGTAAGTGTGAGTTCTATGGTGGCG  
AACTCAATGGAGTCAGTTATAGTGAGCCTGCTACTGTGAAAAAATATGCTAGACGCGCT  
CAATTGGGTGAAATTTTTGAATTAGATCGTGTACTTTGAAATCCGATGGTGTTTTTCGT  
AGCAGTCCAAGAGGTTGGTTTACTTTTTGGACATGCTTCGTTTGCTCTGCTCTTCTTTTTC  
GGACACATTTGGCATGGTGCTAGAACCTTGTTTCAGAGATGTTTTTGCTGGTATTGACCC  
AGATTTGGATGCTCAAGTGGAAATTTGGAGCATTCCAAAAACTTGGAGATCCAACCTACA  
AAAAGACAAGTAGTC-----GTGGAAACGCTCTTTAATGGAACCT  
TAGCTTTAGCTGGTCGTGACCAAGAAACCACCGGTTTCGCTTGGTGGGCGGGGAATGC  
CCGACTTATCAATTTATCCGGTAAACTACTCGGGGCTCATGTAGCCCATGCCGGATTAAT  
CGTATTCTGGGCGGAGCAATGAACCTATTTGAAGTGGCTCATTTCGTCCAGAGAAA  
CCCATGTATGAACAAGGATTAATTTACTTCCCCACCTAGCTACTCTAGGTTGGGGGGTA  
GGTCTTGGGGGGGAAGTTATAGACACCTTTCATACTTTGTATCTGGAGTACTTCACTT  
AATTTCTCTGCAGTATTGGGCTTTGGCGGTATTTATCATGCACTTTTGGGACCTGAGAC  
TCTTGAAGAATCTTTCCATTCTTCGGTTATGTATGGAAAGATAGAAATAAAATGACCAC  
AATTTGGGTATTCACTTAATCTTGTAGGTATAGGTGCTTTTCTTCTAGTATTCAAGGCT  
CTTTATTTGGGGGCGTATATGATACCTGGGCTCCCGGAGGGGGAGATGTAAGAAAAAT  
TACCAACTTGACCCTTAGCCCAAGTGTATATTTGGTTATTTACTAAAATCGCCCTTTGG  
AGGAGAAGGATGGATTGTTAGTGTGGACGATTTGGAAGATATAATCGGAGGACATGTAT  
GGTTAGGTTCCATTTGTATACTTGGTGGAAATCTGGCATATCTTAACCAAACCCTTTGCAT  
GGGCTCGCCGTGCACTTGTATGGTCTGGAGAGGCTTACTTGTCTTATAGTTTLAGGCGCT  
TTAGCTGTCTTTGGTTTCATTGCGTGTGCTTTGTCTGGTTCAATAATACCGCTTATCCTA  
GTGAGTTTTACGGGCCCACTGGACCAGAAGCTTCTCAAGCTCAAGCATTACTTTTCTA  
GTTAGAGACCAACGTCTTGGGGCTAACGTGGGATCCGCTCAAGGACCTACTGGTTTAG  
GTAAATATCTAATGCGTTCCCCGACCGGAGAAGTCATTTTTGGAGGAGAACTATGCGT  
TTTTGGGATCTGCGTGCTCCCTGGTTAGAACCCTCTAAGGGGTCCAAATGGTTTGGACTT  
GAGTAGGCTGAAAAAAGACATAACAACCTTGGCAAGAACGGCGTTCCGCGGAATATATG  
ACTCATGCTCCTTTAGGTTCTTTAAATCTGTGGGTGGCGTAGCTACCGAGATCAATGC  
AGTCAATTATGTCTCTCCTAGAAGTTGGTTATCTACCTCTCATTTTGTCTAGGATTCTTC  
CTATTCTAGGTCATTTGTGGCACGCGGGAAGGGCTCGTGCAGCTGCAGCAGGATTTG  
AAAAAGGAATTGATCGTGATTTTTGAACCTGTTCTTTCCATGACCCCTCTTAACATGACT  
ATAGCCCTTGGTAAATTTACCAAAGACGAAAAT--TTATTTGATATTATGGATGACTGGTT  
ACGGAGGGACCGTTTCGTTTTTTGTAGGTTGGTTCAGGTCTATTGCTCTTTCCTTGTGCTTA  
TTTTCGCTTTAGGAGGTTGGTTCACAGGTACAACCTTTGTAACTTCATGGTATACCCATGG  
ATTGGCCAGTTCCTATTTGGAAGGCTGCAATTTCTTAACCGCCGCAGTTTCTACTCCTG  
CTAATAGTTTAGCACATCTTTGTGTACTATGGGGTCTGAAGCACAAAGGAGATTTTA  
CTCGTTGGTGTCAATTAGGCGGTCTGTGGACTTTTGTGCTCTCCATGGCGCTTTCGGA

CTAATAGGTTTCATGTTACGTCAATTTCGAACTTGCTCGATCTGTTCAATTGCGACCTTAT  
AATGCAATCGCATTCTCTGCTCCAATTGCTGTTTTTGTCTGTATTCTGATTTATCCAT  
TAGGTCAGTCTGGTTGGTCTTTTGCACCCAGTTTCGGTGTAGCAGCTATATTTAGATTCA  
TTCTCTTTTTTCAAGGGTTTCATAATTGGACATTGAACCCATTTTCATATGATGGGAGTTG  
CCGGTGTATTGGGCGCTGCTCTGCTATGCGCTATTCATGGTGCTACCGTAGAAAATACTT  
TATTTGAAGATGGTGATGGTGCAAATACATTCCGTGCTTTTAAACCCAACCTCAAGCTGAA  
GAAACTTATTCAATGGTCACCGCTAACCGCTTTTGGTCCCAAATCTTTGGGGTTGCTTT  
TTCCAATAAACGTTGGTTACATTTCTTTATGTTATTTGTACCAGTAACCGGTTTATGGATG  
AGTGCTCTTGGAGTAGTCGGTCTGGCTCTGAACCTACGTGCCTATGACTTCGTTTCCCA  
GGAAATCCGTGCAGCGGAAGATCCTGAATTTGAGACTTTCTACACCAAAAATATTCTCT  
TAAACGAAGGTATTCGTGCTTGGATGGCGGCTCAAGATCAGCCTCATGAAAACCTTATA  
TTCCCTGAGGAGTTCTACCCCGTGGAACGCTCTTATGTCTGGAAGCACAGGAGAAC  
GTTCTTTTGTGATATTATTACCAGTATTCGATACTGGGTCATTCATAGCATTACTATACT  
TCCCTATTCAATGCAGGTTGGTTATTCGTCAGCACGGGTTTAGCTTACGATGTGTTTGGG  
AGCCCTCGGCCAAACGAGTATTTACAGAGAGCCGACAAGGAATTCCATTAATAACTG  
GCCGTTTTGATTCTTTGGAACAACCTCGATGAATTTAGTAGATCCTTTATGACCATAGATC  
GAACCTATCCAATTTTACAGTGCCTGGTTGGCTGTTACGGACTAGCTGTACCTACC  
GTTCTTTTTTGGGGTCAATATCAGCAATGCAGTTCATCCAACGAATGGCTACACAAAC  
CGTTGAGGGTAGTTCTAGATCTGGT---CCAAGACGAACTATTATAGGGGATTTATTGAAA  
CCATTGAATTCGGAATATGGCAAAGTAGCTCCTGGATGGGGAACACTACTCCTTTGATGGG  
TGTCGCAATGGCTCTATTTGCGATATTCCTATCTATTATTTTGGAGATTTATAATTCTCCG  
TTTTACTGGATGGAATTTAATGAATATGCTTACTCTCAAACCTTTCGTTTATACAGTAGT  
GATCTTTTTTGTCTCTCTTCATCTTCGGATTCTATCTAATGATCCAGGACGTAATCCT  
GGACGTGAAGAAATGGCCGATACTACTGGAAGGATTCCTCTTTGGCTAATAGGTAAGT  
AACTGGTATTCTGTGATCGGTTAATAGGTATTTCTTTTATGGTTCATATCCGGATTG  
GGTTCATCCCTGATGCTTAATATCTTTAGTTTGATCTGTATCTGTCTTAATTCTGCCCTTA  
T---AGTAATTTTTTCTTCGCCAAATTGCCCGAGGCCTACGCTTTTTTGAATCCAATCGTA  
GATTTTATGCCAGTCATACCTGTGCTCTTTTTTCTCTTAGCCTTTGTTTGGCAAGCTGCT  
GTAAGTTTTCGAACGACACAATCAAACCCGAACGAACAAAATGTTGAATTGAATCGTA  
CCAGTCTCTACTGGGGTTATTACTCATTTTTGTACTTGCTGTTTTATTTCCAATTATTT  
CTTCAATATGGAAGTAAATATTTCTTGCATTTATTGCTACTGCACTGTTCAATCTAGTTCCT  
ACTGCTTTTTTACTTATCATCTACGTAAAAACAGTTAGTCAAATGATATGGAAACAGC  
AACCTAGTCGCCATCTCTATATCTGGTTTACTTGTAAGTTTACTGGGTACGCCTTATAT  
ACCGCTTTTGGGCAACCTCTCAACAACCTAAGAGATCCATTCGAGGAACACGGGGACA  
TGGAAGCATTGGTTTATACATTTCTCTTAGTCTCGACTCTAGGGATAATTTTTTTCGCTAT  
CTTTTTTCGAGAACCCTAAAGTTCCAACCTAAAAGTTGAAAATGACTATTGCTTTCC  
AATTGGCTGTTTTTGCATTAATTGCTACTTCATCAATCTTACTGATTAGTGTACCCGTTGT  
ATTTGCTTCTCCTGATGGTTGGTCAAGTAACAAAATGTTGTATTTTCCGGTACATCATT  
ATGGATTGGATTAGTCTTTCTGGTGGGTATCCTTAATTCTCTCATCTCT-----A  
TGTCACCACAAACAGAGACTAAAGCAAGTGCTGGATTCAAAGCTGGTGTAAAGATTA  
CAAATTGACTTATTACTCCTGAATATGAAACCAAAGATACTGATATCTTGGCAGCATT  
CCGAGTAACTCCTCAACCTGGAGTTCCACCTGAGGAAGCAGGGGCCGCGGTAGCTGC  
CGAATCTTCTACTGGTACATGGACAACCTGTGTGGACCGATGGACTTACCAGCCTTGATC  
GTTACAAAGGACGATGCTACCACATCGAGCCCGTTGCTGGAGCAGAAAATCAATTTATT

GCTTATGTAGCTTACCCCTTAGACCTTTTTGAAGAAGGTTCTGTTACTAACATGTTTACT  
TCCATTGTGGGTAATGTATTTGGGTTCAAAGCCCTGCGCGCTCTACGTCTGGAGGATCT  
CGAATCCCTCCTGCTTATTCTAAAACCTTTCCAAGGCCCGCCTCATGGCATCCAAGTTG  
AGAGAGATAAATTGAACAAGTATGGTCGTCCCTGTTGGGATGTACTATTAAACCTAAA  
TTGGGGTTATCTGCTAAGAACTACGGTAGAGCAGTTTATGAATGTCTTCGCGGTGGACT  
TGATTTTACCAAAGATGATGAGAACGTGAACTCCAACCATTTATGCGTTGGAGAGAC  
CGTTTCTTATTTTGTGCCGAAGCACTTTATAAAGCACAGGCTGAAACAGGTGAAATCAA  
AGGGCATTACTTGAATGCTACTGCAGGTACATGCGAAGATATGATGAAAAGGGCTGTGT  
TTGCCAGAGAATTGGGAGTTCCTATCGTAATGCATGACTACTTAACAGGGGGGTTCACT  
GCAAATACTACCTGGCTCATTATTGCCGAGATAATGGCCTACTTCTTACATCCATCGT  
GCAATGCATGCAGTTATTGATAGACAGAAGAATCATGGTATACACTTTCGTGTACTAGCT  
AAAGCGTTACGTATGTCTGGTGGAGATCATATTCCTCTGGTACCGTAGTAGGTAACCT  
TGAAGGGGAAAGAGACATCACTTTGGGCTTTGTTGATTTACTACGTGATGATTATATTG  
AAAAGACCGAAGTCGAGGTATTTATTTCCCTCAAGATTGGGTCTCTCTACCAGGTGTT  
CTGCCCGTGGCTTCGGGAGGTATTCACGTTTGGCATATGCCTGCTCTGACCGAGATCTT  
TGGAGATGATTCCGTACTACAGTTCGGTGGAGGAACTTTAGGACACCCTTGGGGAAAT  
GCACCGGGTGCCGTAGCTAATCGAGTAGCTCTAGAAGCATGTGTACAAGCTCGTAATG  
AGGGACGTGATCTTGCTCGTGAGGGTAATGAAATTATCCGTGAGGCTAGTAACTGGAG  
TCCTGAACTAGCTGCTGCTTGTGCGGTATGGAAGGAGATCAAATTTGAATTCGAAGCA  
ATGGATATTTTGGATAAGATGGCGATACATTTATACAAAACCTTCTACCCCGAGCACACGC  
AATGGAGCCGTAGACAGTCAAGTGAAATCCAATCCACGAAATAATTTGATCTATGGACA  
GCATCGTTGTGGTAAAGGTCGTAATGCCAGAGGAATCATTACCGCAGGGCATAAGAGGG  
GGAGGTCATAAGCGTCTATACCGTAAAATCGATTTTCGACGGAATGAAAAAGACATATA  
TGGTAGAATCGTAACCATAGAATACGACCCTAATCGAAATGCATACATTTGTCTCATA  
CTATGGGGATGGTGAGAAGAGATATATTTTACATCCCAGAGGGGCTATAATTGGAGATA  
CCATTGTTTCTGGTACAGAAGTTCCTATAAAAATGGGAAATGCCCTACCTTTGACCGATA  
TGCCCTTAGGCACGGCCATAACATAGAAATCACACTTGGAAAGGGTGGACAATT  
AGCTAGAGCAGCGGGTGTGTAGCGAAACTGATTGCAAAAAGAGGGGAAATCGGCCAC  
ATTAATAATTACCTTCTGGGGAGGTCCGTTTGTATCCAAAACTGCTCAGCAACAGTCG  
GACAAGTGGGGAATGTTGGGGTAAACCAGAAAAGTTTGGGTAGAGCCGGATCTAAGT  
GTTGGCTAGGTAAGCGTCTGTAGTAAGAGGAGTAGTTATGAACCCTGTAGACCATCCC  
CATGGGGGTGGTGAAGGGAGGGCCCCAATTGGTAGAAAAAACCACAACCCTTGG  
GGTTATCTCTGCACTTGGGAAGAAGAAGTAGAAAAAGGAATAAATATAGTGATAATTTGAT  
TCTTCGTGCGCGTAGTAAAATGATTCAACCTCAGACCCATTTGAATGTAGCGGACAACA  
GCGGGGCTCGAGAATTAATGTGTATTCTGAATCATAGGAGCTAGT--AATCGCCGATATGC  
TCATATTGGTGATGTTATTGTTGCTGTGATCAAAGAAGCCGTACCAAATATGCCCTAGA  
AAGATCAGAAGTGATCAGAGCTGTAATTGTACGTACCTGTAAAGAACTCAAACGCGAC  
AACGGTATGATAATACGATATGATGACAATGCTGCAGTTGTTCATTGATCAAGAAGGAAA  
TCCAAAAGGAACTCGAGTTTTTGGTGCGATCGCCGAGAATTGAGACAGTTAAATTTT  
ACTAAAATAGTTTCATTAGCTCCTGAGGTATTAATGCTTAGTCCAAAAGAACCAGATT  
CCGTAAACAACATAGAGGAAGAATGAAGGGAATATCTTATCGAGGTAATCGTATTTGTT  
TCGGTAGATATGCTCTTCAGGCACTTGAACCCGCTTGGATCACATCTAGACAAATAGAA  
GCAGGGCGACGCGCAATGACACGAAATGCACGTCGTGGTGGAAAAATATGGGTACGTA  
TATTTCCAGACAAACCAGTTACAGTAAGACCTACGGAAACACGTATGGGTTCCGGGAA

AGGGTCCCCCGAATATTGGGTAGCTGTTGTAAACCGGGTTCGAATACTTTATGAAATGG  
GCGGAGTAGCAGAAAATATAGCCAGAAAGGCTATTTCAATAGCGGCGTCCAAAATGCC  
TATACGAACTCAATTCATTATTTTCGGGAATGACCAGAATTAGACGAGGATATATAGCTCG  
GAGACGTAGAACAAAACCTTCGTTTATTTGCATCAAGCTTTTCGAGGGGCTCATTCAAGA  
CTTACTCGAACTATTACTCAACAGAAAATAAGAGCTTTGGTTTCGGCCCATCGGGATAG  
AGATAGGCAAAAGAGAGATTTTCGTGCTTTGTGGATTACTCGGATAAACGCAGTAATTC  
GCGAG---AATAGGGTATCCTATAGTTATAGTAGATTAATACATGATCTGTACAAAAGACA  
GTTGCTTCTTAATCGTAAAATACTTGCACAAAATAGCTATATCAAATAGGAATTGTCTTTAT  
ATGATTTCCAATGAGATCATAAAA-----GAAGTATACGCTTT  
AGGTCAACATATATCTATGTCTGCTCACAAAGCGCGAAGAGTAATTGATCAGATTCGTG  
GACGTTCTACGAGGAAACACTTATGATACTCGAACTCATGCCTTATCGAGCATGTTATC  
CCATTTTTAAATTGGTTTATTCTGCAGCAGCAAATGCTAGTCACAATATGGGTTTCAACG  
AAGCAGATTTAGTCATTAGTAAAGCTGAAGTGAACGAGGGTACTACCGTGAAAAAATT  
AAAACCCCGAGCTCGAGGACGTAGTTTTCCGATAAAAAGACCTACTTGTCAATAACTA  
TTGTATTGAAAGATATATCCTTAGATGAGGGAGTATGGGACAAAAAATGGATGGAATC  
AAATATGCAGTATTTACAGACAAAAGTATTCGGTTATTGGGGAAAAAT---CAATATACTT  
CTAATGTGCAATCAGGATCAACTAGGACAGAAATAAAGCATTGGATCGAACTCTTCTTT  
GGTGTCAAGGTAATAGCTATGAATAGTCATCGACTCCCGGAAAGGGTAGAAGAATGG  
GACCTATTATGGGACATAACAATGCATTACAGACGTATGATCATTACGCTTCAACCGGGTT  
ATTCTATTCCACCTCTTAGAAAGAAAAGAACTATGGCAGTTCAAAAAAACGTACTTCT  
CTGTCAAAAAGCGTATTCGTAATAATTTGGAAAAGGAAGGGATATTGGGCAGCGT  
TAAAAGCTTTTTTCGTTAGCGAAATCTCTTTCTACCGGAAATTCAAAAAGTTTTTTTGTG  
CAACAAAACAAA---ATGGCCAAAGGTAAAGATGTCCGAATAACGGTTATTTTGGAAATGT  
ACCAGTTGT---GCCCGAAC-----GTTAATAAGGAA-----GGCATTTCAGATATATTA  
AAAAGAATCGACACAATACGCCTAGTCGATTGGAATTGAGAAAATTCTGTCCCTATTGT  
TACAAACATACGATTCATGGGGAGATAAAGAAAATGAAAATAAGGGCCTCTGTTCGTA  
AAATTTGTGAAAATGTGCGACTGATCCGTAGGCGGGGACGAATTATAGTAATTTGTTCC  
AACCCGAGACATAAACAAAGACAAGGAATGGTTCGAGAGAAAGTAACAGTATCTACT  
CGGACACTACAGTGGAATGTGTTGAATCAAGAGCAGACAGTAAGCGTCTTTATTATG  
GACGCTTTATTCTGTCTCCACTTATGAAAGGTCAAGCCGACACAATAGGCATTGCGATG  
CGAAGAGCTTTGCTTGGAGAAATAGAAGGAACATGTATCACACGTGCAAAATCTGAG--  
----AAAATACCACACGAATATTCTACCATAGTAGGTATTCAAGAATCAGTACATGAAATTT  
TAATGAATTTGAAAGAAATTGTATTGAGAAGTAATCTATATGGAACCTGCGACGCGTCTA  
TTTGTGTCAGGGGTCCTGGATATGTAAGTCTCAAGACATCATCTCACCACCTTCTGTG  
GAAATCGTTGATAATACACAGCATATAGCTAGCTTGACGGAACCAATCGATTTGTGTATT  
GGATTACAAATCGAGAGGAATCGCGGATATCGTATAAAAACACTAAAT-----AACGACG  
GAAGTTAT-----CCTATAGATGCTGTATTTCATGCCTGTTTCGAAATGCGAATCATAGTATTCA  
TTCTTATGGAATGGGAATGAAAAACAAGAGATACTTTTTCTCGAAATATGGACAAATG  
GAAGTTAACTCCTAAAGAAGCACTTCATGAAGCCTCCCGAATTTGATTGATTTATTTA  
TTCCTTTTCTACATGCGGAAGAAGAA-----AACTTACATTTAGAGGACAATCAA---CACA  
AAGCTACTTTCCCCCTTTTACCTTTTCATGATAGATTGGCT--AACTAAGGAAAAACAA  
AAAA-----ATAGCGTTGAAATATATTTTATTGACCAATTAGAATTGCCTCCAGGATCTA  
TAATTGCCTCAAAGGTCCAATATACATACATTATCGGACCTTTTGAATAACAGTCAAGA  
AGATCTTATGAAAATTGAACATTTTCGCATAGAAGATGAAAACAGATATTGGGCATTCT

AGAAAAGCAT-----TTCACAATTGATTTACCGAAAAATAAGATGCTCCGGGATGGAAAT--  
-GAGGGAATGTCTACAATACCTGGGTTTAATCAGATACAATTTGAAGGATTTTGTAGGTT  
CATTGATCAGGGCTTGACGGAAGAACTTTTTAAGTTTCCAAAAATTGAAGATACAGATC  
AAGAAATTGAATTTCAATTATTTGTGGAAAGATATCAATTGGTAGAACCGTTGATAAAA  
GAAAGAAATGCTGTGTATGAATCACTCACATATTCTTCTGAATTATATGTATCCGCGGGA  
TTAATTTGGAAAACCGTAGGGATATGCAAGAACAACCATTTTTATTGGAAACATTCC  
TCTAATGAATCCCTGGGAACTTCTATAGTAAATGGAATATACAGAATTGTGATCAATCA  
AATATTGCAAAGCCCCGGTATTTATTACCGGTCAGAATTGGACCATAACGGAATTTTCGG  
TCTATACCGGCACCATAATATCAGATTGGGGAGGAAGATCAGAATTAGAGATTGATAGA  
AAAGCAAGGATATGGGCTCGTGTGAGTAGGAAACAGAAAATATCTATTCTAGTTCTATC  
ATCAGCTATGGGTTTCGAATCTAAGAGAAATTCTAGAGAATGTTTGCTACCCTGAAATTT  
TCTTGTCTTTCCTGAATGATAAGGAGAAAAAAAATTGGGTCAAAGAAAATGCCAT  
TTTGGAGTTTTATCAACAATTTGCTTGTGTAGGCGGGGATCCGGTATTTTCTGAATCCTT  
ATGTAAGGAATTACAAAAGAAATCTTTTCAACAAAGGTGTGAATTAGGAAGGATTGGT  
CGACGAAATATGAACCGGAGACTGAACCTTGATATACCTCAGAACAATACATTTCTGTT  
ACCGCGAGATATATTGGCAGCTGTGGATCATTGATTGGAATGAAATTTGGAATGGGTA  
CACTTGACGAT-----ATGAATCATTGAAAAATAAACGTATTTCGTTCTGTAGCGGATCTCT  
TACAAGATCAATTCGGATTGGCTCTGGTTCGTTTAGAAAACGTGGTTCGAGGAACTATA  
TGTGGAGCAATTAGG---CATAAATTGATA---CCGACTCCTCAGAATTTGGTAACTTCAAC  
TCCA-----TTAACAACCACTTATGAATCTTTTTTTCGGCTTACACCCATTATCTCAAGT  
TTTGGATCGAACTAATCCATTAACACAAATAGTTCATGGGAGAAAATCGAGTTATTTGG  
GCCCTGGAGGATTGACAGGGCGAACTGCTAGTTTTTCGGATACGAGATATCCATCCTAGT  
CACTATGGGCGTATTTGCCCAATTGACACGTCTGAAGGAATCAATGTTGGACTTATTGG  
ATCCTTAGCAATTCATGCGAGGATTGGTCATTGGGGG---TCTCTAGAAAGCCCATTTTAT-  
-----GAAATTTCT-----GAGAGATCAAAAAAGGTACGGATGCTTTATTTATCACCAAGTA  
GAGATGAATACTATATGGTAGCGGCAGGAAATCTTTGGCCTTGAATCAGGGTATTTCAG  
GAAGAACAGGTTGTTCCAGCTCGATACCGTCAAGAGTTCCTGACTATTGCATGGGAAC  
AGGTTTCATCTTCGAAGTATCTTCCCTTCCAATATTTTTCTATTGGAGCTTCCCTCATTCC  
TTTTATCGAGCATAATGATGCGAATCGGGCTTTAATGAGTTCTAATATGCAACGTCAAGC  
AGTTCGGCTTTCTCGGCCGAGAAGTGCATTGTTGGAACGTTGGGTTGGAACGCCAAGCG  
GCTCTAGATTGAGGGTTCTCGCTATAGCCGAACACGAGGGAAAGATCATTTATAACCGC  
TACTGACAAGATCATTTTATCAGGTAATGGAGATACTCTAAGCATTCCATTACTTATGTAT  
CAACGTTCCAACAAAATACTTGTATGCATCAAAAACCCAGGTTTCGGCGGGGTAAT  
GCATTA AAAAGGGACAGATTTTAGCGGATGGTGCCGCTACAGTTGGCGGCGAACTCGC  
TTTGGGGAAAAACGTATTAGTAGCTTATATGCCATGGGAAGGTTACAATTCTGAAGATG  
CGGTACTCATTAGCGAGCGTCTAGTATACGGAGATATTTATACTTCTTTTACATACGTA  
AATATGAAATTCAGACTCATGTGACAAGCCAAGGC---CCTGAAAGGGTCACTAAGGAA  
ATACCACATTTAGAAGCCATTTACTCCGCAATTTAGACAAAAATGGAATTGTGATGCT  
GGGATCTTGGGTAGAGGCGGGTGATATTTAGTAGGTAATTAACGCCCCAGATGGCGA  
AAGAA---TCATCGTATGCCCCGGAAGATAGATTATTACGAGCCATACTTGGCATTAGGT  
ATCCACTTCAAAGGAACTTGTCTAAACTACCTATAGGTGGTAGGGGTCGAGTTATTG  
ATGTGAGATGGATCCCGAAAAAGGGG---GGTCTAGTTATAATCCAGAAATGATTCGTG  
TATATATTTACAGAAACGTGAAATCAAAGTAGGTGATAAAGTAGCTGGAAGACATGG  
AAATAAAGGTATCGTTTCAAAAATTTGCCTAGACAAGATATGCCTTATTTGCAAGATG

GAAGACCTGTTGATATGGTCTTCAATCCATTAGGAGTACCTTCACGAATGAATGTAGGA  
CAGATATTTGAATGTTTCGCTCGGGTTAACGGGGGGTCTGCTAGACAGACATTATCGAAT  
AGCACCCCTTTGATGAGAGATATGAACAAGAGGCTTCGAGAAAAGTGTGTTTTCTGAA  
TTATATGAAGCCAGTAAGCAAACAGCGAATCCATGGGTATTTGAACCCGAGTATCCGGG  
AAAAAGCAGAATATTTGATGGAAGAACGGGAGATCCTTTTGAACAACCTGTTATAATA  
GGAAAGCCTTATATCTTGAAATTAATTCATCAAGTTGATGATAAAATCCATGGACGTTCC  
AGTGGACATTATGCACTTGTACACAACAACCCCTTAGAGGAAGGGCCAAGCAAGGG  
GGACAACGGGTAGGAGAAATGGAGGTTTGGGCCCTAGAGGGATTTGGTGTGCTAATA  
TTTTACAAGAGATGCTTACTTATAAATCTGATCATATTAGAGCTCGCCAGGAAGTACTTG  
GTACTACGATCATTGGAGGAACAATACCTAATCCTGAGGATGCTCCAGAATCTTTTCGA  
TTGCTCGTTCGAGAATTACGATCTTTGGCTCTAGAACTGAATCATTTCCTTGTATCTGAG  
AAGAACTTCCAGATTAATAGGAAGGAAGCT-----ATGATCGATCGGTATAAA  
CATCAACAACCTCCGAATTGGATCAGTTTCTCCTCAACAAATAAGTGCTTGGGCCAAAA  
AAATCCTACCTAATGGAGAGATAGTTGGAGAGGTGACAAAACCTATACTTTTCATTAC  
AAAACCAATAAACCGGAAAAAGATGGATTATTTGTGAAAGAATTTTGGGCCTATAAA  
AAGTGGAAATTTGTGCTTGTGGAAATTATCGAGTAATCGGAGATGAAAAAGAAGACCCG  
AAATTTTGTGAACAATGCGGAGTCGAATTTGTTGATTCTCGGATACGAAGATATCAAAT  
GGGCTACATCAAACCTGGCATGCCAGTAACCCATGTGTGGTATTTGAAACGTCTTCTTA  
GTTATATCGCGAATCTTTTAGATAAACCTCTTAAAGAATTAGAAGGCCTAGTATACTGCG  
AT-----TTTTCTTTTGCTAGGCC---ATAGCTAAAAACCTACTTTCTTACGATTACGAGGT  
TCATTTCGAATATGAAATCCAATCCTGGAAATACAGCATCCCACTTTTTTTTACTACCCAA  
GGTTTCGATACATTTGAAATCGAGAAATCTCTACTGGAGCAGGTGCTATCCGAGAACA  
ATTAGCCGATCTGGATTTGCGAATTATTATAGATGATTCATTGGTAGAATGGAAAGAATT  
AGGGGAAGAA---GGCCCCACAGGAAATGAATGGGAAGATCGAAAAATTGGAAGAAGA  
AAGGATTTTTTGGTTAGACGCATGGAATTAGCTAAGCATTTTATTCGAACAAATGTAAA  
ACCAGAGTGGATGGTTTTGTGTCTATTACCAGTTCTTCTCCCGAGTTGAGACCGATCA  
TTCAGATAGATGGGGGTAAACTAATGAGCTCGGATATTAATGAACTTTATAGAAGAGTTA  
TCTATCGGAACAATACTCTTACCGATCTATTAACAACAAGTAGATCTACACCAGGGGAA  
TTAGTAATGTGTCAGGAGAAATTGGTACAAGAAGCCGTGGATACACTTCTTGATAATGG  
AATCCGTGGACAACCAATGAGGGACGGTCATAATAAAGTTTACAAGTCGTTTTTCAGAT  
GTAATTGAAGGCAAAGAGGGAAAGATTTTCGCGAGACTCTGCTTGGCAAACGGGTGCGATT  
ATTCAGGGCGTTCCGTCATTGTCTGATGGCCCTTCACTTTCATTACATCGATGTGGATTGC  
CTCGCGAAATAGCAATAGAGCTTTTCCAGACATTTGTAATTCGTGGTCTAATTAGACAA  
CATCTTGCTTCGAACATAGGAGTTGCTAAGAGTAAAATTCGGGAAAAAGAACCGATTG  
TATGGGAAATACTTCAGGAAGTTATGCAGGGGCACCCTGTATTGCTGAATAGAGCACCT  
ACTCTGCATAGATTAGGCATACAGGCATTCCAACCCATTTTAGTGGAAGGGCGTGCTAT  
TTGTTTACATCCATTAGTTCGTAAGGGATTCAATGCAGACTTTGATGGGGATCAAATGG  
CTGTTTCATGTACCTTTATCTTTGGAGGCTCAAGCGGAGGCTCGTTTACTTATGTTTTCTC  
ATATGAATCTCCTGTCTCCAGCTATTGGGGATCCCATTTCCGTACCAACGCAAGATATGC  
TTATTGGACTCTATGTATTAACGAGCGGGAATCGTCGAGGTATTTGTGCAAATAGGTATA  
ATCCATGTAATCGCAGAAAC-----TATCAAAATGAAAGAATTGACGATAATAACTATAA  
GTATACGAAAGAAAAAGAACCCTTTTTTTGTAATTCCTATGATGCAATTGGAGCTTATCG  
GCAGAAAAGAATCAATTTAGATAGTCTTTGTGGCTCCGGTGGCGACTAGATCAACGC-  
-GTTATTGCTTCA-----AGAGAAGCTCCCATCGAAGTTCATGATGCAATCTTTGGGTACCT

ATCATGAGATTTATGGGCACTATCTAATAGTAAGAAGTGTAAAAAAAGAAATTCTTTTTTA  
TATACATTCTGAACCACTGTTGGTCATATTTCTCTTTATCGAGAAATCGAAGAAGCCATAC  
AAGGATTTTGTCTGGGCTGCTCATATGGTACC-----ATGGAGGTACTTATG  
GCAGAACGGGCAATCTGGTCTTTCACAATAAAGTGATAGATGGAAGTCCATGAAAC  
GACTTATTAGCAGATTAATAGATCACTTCGGAATGGCATATACATCACACATCCTGGATC  
AAGTAAAGACTCTGGGTTTCCAGCAAGCCACTGCTACATCCATTTTCATTAGGAATTGAT  
GATCTTTTAAACAATACCTTCTAAAGGATGGCTAGCCCAAGATGCTGAACAACAAAGTTT  
GATTTTGGAAAAACACCATCATTATGGGAATGTACACGCGGTAGAAAAATTACGTCAAT  
CCATTGAGATATGGTATGCTACAAGTGAATATTTGCGACAAGAAATGAATCCTAATTTTA  
GGATGACTGACCCTTTAATCCAGTCCATATAATGTCTTTTTCGGGAGCTAGAGGAAAT  
GCATCTCAGGTACACCAATTAGTAGGTATGAGAGGATTAATGTCGGATCCCCAAGGACA  
AATGATTGATTTACCCATTCAAAGCAATTTACGCGAAGGACTCTCTTTAACAGAATATAT  
AATTTCTTGCTACGGAGCCCGCAAAGGAGTTGTGGATACTGCTGTACGAACATCAGAT  
GCTGGATATCTCACGCGCAGACTTGTGAAAGTAGTTCAACACATTGTTGTACGTAGAAC  
AGATTGTGGCACCATCCGAGGTATTTCTGTGAGTCCTCGAAATGGGATGATGCCG---GA  
AAGAATTTTTATCCAAACATTAATTGGTCGTGTATTAGCAGACGATATATATATGGGCC  
ACGATGCATTGCCGCTCGAAATCAAGATATTGGGATTGGACTTGTCAATCGATTCATAA  
CC-----TTTCGAGCACAACCAATATCTATTCGAACTCCTTTTACTTGTAGGAGTA  
CATCTTGGATCTGTGATTATGTTATGGACGGAGTCCACTCATGGCGACCTGGTTCGAAT  
TGGGAGAAGCTGTAGGTATTATTGCAGGTCAATCTATTGGAGAACCAGGTACTCAACTA  
ACATTAAGAACTTTTCATACCGGCGGAGTATTCACAGGGGGTACTGCAGAACATGTACG  
AGCCCCTTCTAATGGAAAAATAAAATTCAATGAGGATTTGGTTCATCCACACGTACAC  
GTCATGGGCATCCTGCTTTTCTATGTTATATAGACTTGTATGTAAGTATTGAGAGTGAAG  
ATATTCTACATAACGTGAATATTCCACCAAAAAGCTTTCTTTTAGTTCAAAATGATCAAT  
ATGTAGAATCAGAACAAGTGATTGCTGAGATTCGCGCGGGAACATCCACT---TTGAATT  
TTAAAGAGAGGGTTTCGAAAACATATTTATTCTGACTCAGAGGGAGAA---ATGCACTGGA  
GTACCGATGTGTACCATGCACCTGAATTTACATATGGTAATGTTTCATCTTTACCAAAAA  
CAAGTCATTTATGGATATTATCAGGAGGTCCGTGCAGA-----TCCAGTGTAGCCCCTTTTT  
CGCTCCACAAGGATCAAGATCAAATGAATGTTTCAT-----TCTCTTTCTGTGCAACGAAGA  
TATATTTCTAACCTCTCA-----GTGACTAATGATCAA---GTGAGACACAAATCTTTAGTT  
CGTATTTTTCTGGTAAAAAGGAAGGTAGGATTCCTGATTAT---TCAGAACTTAATCGAAT  
TATAGGCACTAGTCGTTGTAATCTCATATATCCT---GCCATTCTCTACGAGAATTCT-----G  
ATTTATTGGCAAAGAGGGCGAAAAAATAGATTCATCATCCCATTCCAATCGATTCAAGAA  
CGAGAGAAAGAACTAATGCCCGTTCAGGTATCTCGATTGAAATACCC-----ATAAATGG  
TATTTCCGTAGAAATAGTATTCTTGCTTATTTTCGATGATCCTCGATACAGAAGAAAGAG  
TTCGGGAATTAATAATATGGGACTATAGAGGTGCATTCAATCGTCAAAAAAGAGGAT--  
----TTGATTGAGTATCGAGGA---GTCAAAGAATTTAGGCCAAAATACATGAAAGTAGATC  
GATTTTTTTTTCATTCCCGAGGAAGTGCATATCTTACCCGGATCTTCTTCCATAATGGTAC  
GGAACAATAGTATCATTGGAGTAAATACACAAATCACTTTAAATACAAGAAGCAGAGTA  
GGCGGATTGGTCCGAGTGGAGAGAAAAAAGGATTGAACTTAAAATCTTTTCT  
GGAGATATCCATTTTCTGGAGAGACAGATAAGATATCCCGACACAGTGGCATCTTGAT  
ACCACCAGGAACG-----GGAAAAGCAAATCCAAGGAATCCAAAAA-----TTGAAAAG  
TTGGATCTATGTCCAACGG-----ATCACACCTACCAAG-----AAAAAGTATTTTGTTTTGG  
TTCGACCCGTAGTCACATATGAAATAGCAGACGGTATAAATTTAGCAACACTTTTCCCC



CAGGATCTGTTGCAGGAAAGGGATAATGTGCAACTTCGAGTTGTCAATTATATCCTTTAT  
GGAAATAGCAAACCAATTTCGGAGAATTTCTGACACAAGTATTCAATTAGTTTCGGACTTG  
TTAGTATTGAATTGGGACCAAGACAAAAA-----AGTTCTTCTATCGAAGAGGCCCA  
TGCCTCCTTTGTTGAAGTAAAGACAAATGGTTTGATTTCGAGATTTCTAAGAATCGACT  
TAGTGAATCCCCTATTTCTGATACCGGAAAAAGGAATGATCCGTCAGGTTTCAGGATTG  
ATTTCTGAT--AGTGGATCAGATCGCACCAATATCAATCCGTTTTATTCCATTTATTCCAA  
GGCAAGG---ATTCAACAATCACTTAGCCAA-----AATCAAGGAACTATTTCGTACGTT  
GTTGAATAGA-----ATAAGGAATGCCAATCTTTGATAATTTTGTATCATCCAATTGTT  
CTCGAATGGGTCCA-----TTCAACAGTGTAATAATCACAATGTG-----ATAAAAGAAT  
CAGATCCCCTAATTCCAATTAGGAATTTGTTGGGTCTTTAGGAACA-----GCCCTTCAA  
ATTGCGAATTTTTATTCA-----TTTTACCATTTA-----ATAACTCATAATCAGATCTTG--GTA  
ACTAACTATTTGCAACTTGACAAT-----TTAAAACAGGCT--CAAGTACTTAAA-----T  
ATTATTTAATGGATGAAAAT-----GGGAGAATTTATAATCCCGATCCATGCAGTAACATCC  
TTTTGAATCCATTCAATTTGAATTGGTATTTTCTCCATCACAATTATTGTGAAGAGACAT  
CC---ACAAAATGAGTCTTGGACAGTTTATTTGTGAAAATGTATGTATAGCCAAAAACG  
GACCACAC---CTAAA-----TCGGGTCAAGTTCTAATTGTTCAA---GTTGACTATGTAGTA  
ATAAGATTAGCTAAGCCTTATTTGGCCACCCCAGGAGCAACTGTTTCATGGCCATTATGG  
GGAAATCCTTTACGAAGGAGATACATTAGTTACATTTATATATGAAAAATCGAGATCTGG  
TGATATAACGCAGGGTCTTCCAAAAGTGGAACAAGTGTTAGAAGTGCGTTCGATTGAT  
TCAATATCGATGAATCTAGAAAAGAGGGTTAAGGGTTGGAACGAACATATAACAAGAA  
TTCTTGGAATTCCTTGGGGATTCTTGATCGGTGCTGAGCTAACTATAGTGCAAAGTCGT  
ATCTCTTTGGTTAATAAGATCCAAAAGGTTTATCGATCCCAGGGGGTGCAGATCCATAAT  
AGGCATATAGAAATTATTGTACGTCAAATAACATCAAAGTGTTAGTTTCAGAA-----G  
ATGGAATGTCTAATGTTTTTTCACCCGGAGAGCTAATTGGATTGTTGCGAGCGGAACGA  
ACGGGGCGTGCTTTAGAAGAAGCGATCTGTTACCGAGCCATCTTATTGGGAATAACGA  
GAGCATCTTTGAATACTCAAAGTTTCATATCCGAAGCGAGTTTTCAAGAACTGCTCGA  
GTTTTAGCAAAGCTGCTCTCCGGGGTTCGATCGATTGGTTGAAAGGCCTGAAAGAGA  
ACGTTGTTCTCGGGGGGATGATACCCGTTGGTACCGGATTCAAAGGATTA-----GTGCAC  
CGTTCAAGGCAACATAACAACATT-----CTTTTGGAAACCAAAAAGAAGAATCTATTCG  
AGGGGGAAATGAGA-----GATATTTTGTCCACCACAGAGAATTATTCGATTCCTTGCGTT  
TCAAAGAATTTCCATGATACATCAGAACAATCATTTATGGGA-----TTGAATGTT  
AATATGACAAGAAGATATTGGAACATCAATTTGGAAGAGATGATGGAAGCAGGAGTTC  
ATTTTGGCCATGGTACTAGGAAATGGAATCCTAGAATGGCACCTTATATCTCTGCAAAG  
CGTAAAGGTATTCATATTACAAATCTTACTAGAAGTCCCGTTTTTTATCAGAAGCTTGT  
GATTTAGTTTTTGTATGCAGCAAGTAGGGGAAAAACAATTCTTAATTGTTGGTACCAAAAA  
TAAAGCAGCTGATTCAGTAGCATGGGCTGCAATAAGGGCTCGGTGTCATTATGTTAATA  
AAAAATGGCTCGGTGGTATGTTAACGAATTGGTCCACTACAGAAACGAGACTTCATAA  
GTTACGGGACTTGAGAACGGAACAAAAGACGGGGAGACTCAACCGTCTTCCGAAAA  
GAGATGCAGCTATGTTGAAGAGACAATTATCTCACTTGCAAACATATCTGGGTGGGATT  
AAATATATGACGGGGTTGCCCGATATTGTAATCATCGTTGATCAGCAAGAAGAATATACG  
GCCCTTCGAGAATGTATCACTTTGGGAATCCCAACGATTTGTTAATCGATACAAATTGT  
GACCCGGATCTCGCAGATATTTGATTCCAGCGAATGATGACGCTATAGCTTCAATCCGA  
TTAATCTTAACAAATTAGTATTCGAATTTGTGAGGGTCGTTCT--AGCTATATAAGAAA  
TCCTATGGGACAAAAATAAATCCACTTGGTTTCAGACTTGGTACAACCAAGGTCATC

ATTCCTTTGGTTTGCACAACCAAAAAATTATTCCGAGGGTCTACAAGAAGATCAAAA  
AATACGGGATTGTATCAAGAATTATGTACAAAAAATATGAGAATATCCTCTGGT--GTC  
GAGGGAATTGCACGTATAGAGATTCAAAAAGAATTGATCTGATCCAGGTCATAATCTA  
TATGGGATTCCTCAAAGTTATTAATAGAGGGTAGACCACGA-----GGAATCGAAGAAT  
TACAGATGAATATACAAAAAGAATTTAATTGTGTGAACCGAAAATAACATTGCTATT  
ACAAGAATTGCAAAACCTTACGGACACCCTAATATTCTTGCAGAATTTATAGCCGGACA  
ATTAAGAATAGAGTTTCATTTTCGCAAGGCAATGAAAAAGCTATTGAATTAACCTGAAC  
AAGCAGATACAAAAGGAATCAAGTACAAATTGCAGGGCGTATCGACGGAAAAGAAA  
TTGCACGTGTGCAATGGATCAGAGAAGGTAGGGTTCCCCTACAAACCATTTCGAGCTAA  
AATTGATTATTGTTCCCTATACAGTTGGAACCTATCTATGGGGTATTGGGCATAAAAATTTG  
GATATTTATAGACGAGGAAATGTCGCGTTACCGAGGGCCTCGTTTCAAAAAAATACGCC  
GTCTGGGGGCTTTACCGGGACTAACTAATAAAAGGCCTAGAGCCGGAAGTGATCTTAG  
AAACCAATCGCGTTCCGGGAAA---AGATCTCAATATCGTATTCGTCCTAGAAGAAAAACA  
AAAATTGCGTTTTTCATTATGGTCTTACAGAACGACAATTACTTAAATACGTTTCGTATCGC  
TGAAAAGCCAAAGGGTCAACAGGTCAGGTTTTACTACAATTACTTGAATGCGTTTG  
GATAACATCCTTTTTCGATTGGGTATGGCTTCGACTATTCTGGAGCCCGCCAATTAGTT  
AACCATAGACATATTTTAGTTAACGGTCGTATAGTAGATATACCAAGTTATCGCTGCAAA  
CCCCGAGATATTATTACAGCGAGGGATGAACAAAATCCAAAGCTCTGATTCAAAATTA  
TCTTGATTCATCCCCCAT--GAGGAATTGCCAAACCATTTGACTCTTCACCCATTCCAA-  
----TATAAAGGATTAGTCAATCAAATAATAGATAGTAAATGGGTTCGGTTTGAAAATAAAT  
GAATTGCTAGTCGTAGAATATTATTCCTCGTACACTATGTCACGTCGAGGTACTGCAGA  
AGAAAACCTGCAAAATCCGATCCAATTTATCGTAATCGATTAGTTAACATGTTGGTTA  
ACCGTATTCTGAAACACGGAAAAAATCATTGGCTTATCAAATTATCTATCGAGCCGTG  
AAAAGATTCAACAAAAGACAGAAACAATCCACTATCTGTTTTACGTCAAGCAATAC  
GTGGAGTAACCTCCCGATATAGCAGTAAAAGCAAGACGTGTAGGCGGATCGACTCATCA  
AGTTCCCATGAAATAGGATCCACACAAGGAAAAGCACTTGCCATTCGTTGGTTATTAG  
GGGCATCCCGAAAACGTCCGGGTGCAAAATATGGCTTTCAAATTAAGTTCCGAATTAGTG  
GATGCTGCCAAAGGGAGTGGCGATGCCATACGCAAAAAGGAAGAGACTCATAGAATG  
GCAGAGGCAAATAGAGCTTTTGCACATTTTCGTATGGGCAGGGACACTATTGCTGACAT  
AATAACCTCTATACGAAATGCTGACATAGATAGAAAAGGAACGGTTCGAATAGCATTTA  
CTAACATCACCGAAAACATTGTTAAATACTTTTACGAGAAGGTTTTATCGAAAACGTG  
AGGAAACATCGGGAAAGCAACAAATATTTTTTAGTTTCAACCCTGCGACATAGAAGG---  
---AATAGGAAAAGACCATATAGA-----AATATTTTAAATTTAAAACGGATCAGTCGACC  
CGGTCTACGAATCTATTCTAACTATCAACGAATTCCTAGAAATTTAGGTGGGATGGGGAT  
TGTAATTTCTTCTACTTCTCGAGGTATAATGACAGACCGAGAGGCTCGACTAGAAGGAA  
TCGGCGGAGAAATTTTGTGTTATATATGGATGGCAAAACCTATACCAAGAATTGGTTCA  
CGTAGGAATGGACGTATTGGTTCACGTAAGAGTGCACGTAGAATACCAAGGGAGTTA  
TTCATGTTCAAGCAAGTTTCAACAATACCATTGTGACTGTTACAGATGTACGGGGTTCGG  
GTGGTTTCTTGGTCTCTGCCGGTACTTGTGGATTACGGGGTACAAGAAGAGGGACAC  
CATTTGCTGCTCAAACCGCAGCAGGAAATGCTATTTCGTACGGTAGTGGATCAAGGTATG  
CAACGAGCAGAAGTCATGATAAAGGGTCCGGGTCTCGGAAGAGATGCAGCATTACGA  
GCTATTCGTAGAAGTGGTATACTATTAAGTTTCGTACGGGATGTAACCTCCTATGCCACAT  
AATGGCTGTAGACCCCTAAAAAAGACGTGTGATGCCAACTATTAACAACCTATTAG  
AAACACAAGACAGCCAATCAGAAATGTCACAAAATCCCCGCTCTTCGGGGATGTCCT

CAGCGCCGAGGAACATGTACTAGGGTGTATACTATCACCCCCAAAAACCAAACCTCTG  
CCTTACGTAAAGTTGCCAGAGTACGATTAACCTCTGGATTTGAAATCACTGCTTATATAC  
CTGGTATTGGCCATAATTCACAAGAACATTCTGTAGTCTTAGTAAGAGGGGGAAAGGGTT  
AAGGATTTACCCGGTGTGAGATATCACATTGTTTCGAGGAACCCTAGATGCTGTCGGAGT  
AAAGGATCGTCAACAAGGGCGTTCTAAATATGGGGTCAAAAAGCCAAAAATGGCAAG  
GAAAAGTTTGATTACAGAGGGAGAAGAAGAGGCCAAAAATTGGAACAGAAATATCATT  
GATTCGTCGATCCTCAAAAAAAGAAATAAGC-----AAAGTTCGGTCATTGAGTGACA  
AATGGGAAATTCATGGAAAGTTACAATCCCCACCACGTAATAGTGCACCTACACGTCTT  
CATCGACGTTGTTTTTCGACCGGAAGACCGAGAGCTAACTATCGAGACTTTGGGTATC  
CGACACATACTTCGTGAAATGGTTCATGCATGTTTGTGGCCAGGGGCAACAAGATCA  
AGTTGGATGGTAAAAAATTCATTCATCTCGGTTATTTTCGCAAGAAGAA-----AACAGG  
-----GGGTCTGTTGAATTTCAAGTATTCAGTTTCACCAATAAGATACGGAACTTACTTC  
ACATTTGGAATTGCACAGAAAAGACTATTTATCTCAGAGAGGTCTACGGAAAATTCTGG  
GAAAACGTCAACGGCTGCTGGCTTATTTGTCAAAAAAAAATAGAGTACGTTATAAAGA  
ATTAATTGGTCAGTTGAATATTCGAGAGCCAAAAACTCGT-----ATGGTAAAACCTTCGTT  
TGAAACGATGTGGTAGAAAGCAACGAGCCGTCTATCGAATCGTTGCAATTGATGTTTCG  
ATCCCGAAGAGAAGGAAGAGATCTTCGGAAAGTGGGTTTTTATGATCCGATAAAGAAT  
CAAACCTATTTAAATGTTCTGATATTCTATATTTCTTGA AAAAGGTGCTCAACCTACA  
GGAACCTGTTGATGATATTTTAAAGAAGGCGGAGGTTTTTAAAGAACTTCGCCTTAATCA  
ACCCAAATTAAT---ATGGATAAATCCAAGCGACCTTTTTTTAAATCCAAGCGATCTTT  
CGTAGGCGTTTTGCCCCGATCCAATCGGGGGATCGAATTGATTATAGAAACATGAGTTT  
AATTAGTCGATTTATTAGTGAACAAGGAAAAATATTATCTAGACGAGTGAATAGATTGA  
CCTTGAAACAACAACGATTAATTACTATTGCTATAAAACAAGCTCGTATTTTATCTTCGT  
TACCTTTTTCTTAATAATGAGAAA-----CAATTTGAAAGAATCGAGTCGACCCCTAGA  
ACTGGTCTTAGAACCAGAAATAAAGTGACACGTTCACTAAAAAAAATCCCTTTGTAG  
CAAATCATTTATTAAGAAAAATTGATAAGCTTAACACAAAGGCGGAAAAAGAAATAAT  
AGTAACTTGGTCCCGGCATCTACCATTATACCCACAATGATCGGCCATACTATTGCTAT  
CCATAATGGAAAGGAGCATTGCTTATTTATATAACAGATCGTATGGTAGGCCACAAATT  
GGGAGAATTTGCACCTACTCTAAATTTCCGGGGACATGCAAAAAACGATAATAGATCTC  
GTCGTATGATTTTTAAATCTTTTCTACTAGGTAATCTAGTATCCTTATGCATGAAGATAAT  
CAATTCGGTCGTTGTGGTCGGACTCTATTATGGATTTCTGACCACATTCTCCATAGGGCC  
CTCTTATCTCTTCTTCTCCGAGCTCAGGTTATGGAAGAAGGAGAAGACGGAACCGAG  
AAGAAGGTATCAGCAACAACCTGGTTTTATTACGGGACAGCTCATGATGTTTCATATCGAT  
CTATTATGCGCCTCTGCATCTAGCATTGGGTAGACCTCATAACAATACTGTCGTAGCTCT  
ACCGTATCTTTGTTTCATTTCTTCTGGAACAATCACAAACACTTTTTTTGATTATGGATCT  
ACTACCAGAAATCAATGCGTAATCTCAGCATTCAATGTGTATTCCTGAATAATCTCATT  
TTTCAATTATTCAACCATTTCAATTTTACCAAGTTCAATGTTAGCCAGATTAGTCAACATTT  
ATATGTTTTCGATGCAACAACAAGATGTTATTTGTAACAAGTAGTTTTGTTGGTTGGTTAA  
TTGGTCACATTTTATTCATGAAATGGGTTGGATTGGTATTAGTCTGGATACGGCAAAATA  
ATTCTATTAGATCTCTTATTCGATCTAATAAGTACCTTGTGTGAGAATTGAGAAATCTAT  
GGCTCGAATCTTTAGTATTCTTATTTTATTACCTGTGTCTACTATTTAGGCAGAATACCG  
TCACCCATTCTTACTAAGAACTGAAAGAAACCGAAGAAGATAAACCTCTTGTAACCTC  
TTCTTTTCGACTATAAACGATGGAATCGTCCATTGCGATATATAAAAAATGATAGATTTG  
CAAATGCTGTAAGAAATGAAATGTCACAATATTTTTTTTTATACATGTCGAAGTGATGGA

AAACAAAGAATATCTTTTACGTATCCACCCAGTTTATCAACTTTTGGGGAAATGATACA  
AAGAAAGATGTCTTTGTCCACAACAGAAAACTCTCCTCGGATGAACTGTATAATCATT  
GGATTTATAACCAATGAACAAAAAAGGAAC--CTAAGCAACGAGTTTATAAAAAGAATTG  
CGGCTCTAGACAAGGGATCTCTTTCGATGGATGTACTIONGAAAAAAGGATTCGATTGTGT  
AATGATGAGACTAAAAAAGAATACTTGCCTAAAATGTATGATCCTTTCTTGAATGGACC  
CTATCGTGGAACAATCAAAAAAATGTTTTTCATCTATAGAAACAGTTTGGTTAAATAAGA  
TTCATGGTATACTT--CGCGAATTTGAACAGAAAGATCTCAATGATCAATCTATTGGAAT  
AAACGAAATGAGTAAAAAAGTCCCTCGATGGTCATACAAATTAATCGATTTGGAACAA  
CAAGAGGGGGGAGAGATTCGCTCAAGAAAAGCCAAACGTGTAGTTATTTTTACTGATG  
CTTTGATACGTTATTCGCAACAATCGGATTTTCGTCGAGACATAATCAAAGGTTCTATGC  
GCGCTCAAAGACGTAAAACAGTTATTTGGGAACTATTTCAAGCAAATGCACATTCCCC  
GCTTTTTTTGGACAGAATAGACAAATCCCCCTTTTTTTCTTTTGATATC-----TCCGGACT  
GATGAAACTCATTTTTAGAAATAGAAAAGAGAAAGCACGGATAGAAATAGCAGAAGTT  
TGGGATACCATTCTATTTGCTCAAGTAATAAGAGGTTTCATGTTAGTAACCCAATCGATT  
CTTAGAAAATATGTTATATCCCTTCATTGATAATAGCTAAAAATATCGGTTCGTATATTATT  
ATTTCAATTTCCCGAATGGTCTGAGGATTTAAAGGGGTGGAATAGAGAAATGCATGTTA  
AATGCACCTATAATGGTGTTCATTATCAGAAACAGAATTTCCGAAAAACTGGTTAACA  
GACGGTATTCAGATAAAGATCCTATTTCCTTTTTGTCTGAAACCTTGGCATAGATCTAAG  
AAAGGACAAAAAATGATTTTTGTTTTTTAACAGTTTGGGGAATGGAAGCTGAACTGC  
CTTTTGGTTCTCCAGAAAACGACCTTCCTTTTTTGAACCCATTTTTAAAGAACTCGAA  
AAAAAATTATAAAATTGAAAAAGAAGTGTTCCTAGTT--CTAAGAGGTTTAAAGAA  
AGAACAATTTGTTTCTAGAGGTCTCAAAAGAAAAAATAATGGGTTCTCAAAAGC  
GTTCTA-----TTTATAAAAAGAATAACAAAAGAACTCTCAAAAGCAAATGATTATATAAT  
CAGTAATCGGATGATTCATGAATCGTCCATTCAAATTCGATCTATGGATTGGACAAATTA  
TTCACTGACAGAAAAAATAATGAAGGATCTAACTGATAGAACAAGCACAATCAGAAA  
TCAAATAGAAAGAATTACAAAAGACAAGAAAAAAGTCCCTAACAAAACAAGTTATGA  
TGCTAAAAGATTAGAATCACCAAAAAATATTTGGCAGGTAGTAAAAAGAAGAAATGCT  
CGATTAATCCGTAAATCACATTATTTTTTAAATTTTTGATTGAAAGGATATACATAGATA  
TCTTTCTATGTATCATTAAATATTCCCAGAGTCAATGCACAACCTTTTT--CACTTTATTTTCGT  
GTGACTTATCCTCCTTGTCACAAGCATATGTATTTTACAAATTAGCACAAAGCCCAAGTTA  
TTAACTTGATAAGTTAAGATCTGTCTTCAATATACATCTTTTTTTCTTAAGAAAAAAA  
GAAAGGATTATTTTACACAAGGAATATTTTATTCCGAATTAAGGCATAAGAACTTCGG  
AATCTGGAATGAATCAATGGAAAAACTGGTTAAAGGGTCATTATCAATACGATTTATCT  
CAGATTAGATGGTCTAGATTAGTGCCACAAAAATGGCGAAATAGAATCAATGAACGTC  
GTACGGCTCAAAAT---AACAAATGGGATTCATATGAAAAAGACCAA-----TTAATTCATTA  
CAAAAAACAAGATAATTTTTAAAAAACACTATAGATATGATCTTTTATCATATAAATATATT  
AATGATGATATTATGTATCCGAATAGAAAATATTTTGATTGGAGAATTCTCCATTTTTGTC  
TTAGACTTTTTGATTGGATGGGAATGAATGAAGAAATACTAAATCGTTGGTTCTTCCCA  
GAACTTGTGCTACTTTATAATGCATATAAGATTAAACCATGGGTTATACCAATCAAATTA  
CTTCTTTTAAATCCAAGAGCAACACGGAAGCAGAACTCGATTTCTTCCCTGAAAAGATA  
TTTGCTTTTTCAATTGAGATGGAACGATCCTTTGAATCAAAGATTGATCAATAATATCAA  
AGTATATTGTCTCCTGCTTAGACTAATAAATCCAAGAGAAATTGCTATATCCTCTATTCAA  
AGGAGAGAAATGAGTCTGGATATAATGCTTATTCAGAAGAATTTAACTCTTACAGAATT  
GATGAAA---GGGATATTGGTTATTGAGCCAGTTCGTCTGTCTGTAAAAAGTGATGGACA

ATTTATTATGTATCAAACCATAGTAATTTTCATTGGTTCATAAGAGTAAGCACAATCATTCT  
GATTTGCTTGTTCCCTGAAAATATTTTATCGCCTAGACGTCGTAGAGAATTGAGAATTCTA  
ATTTGTTTCAGATTTCTTTGGCCCAATTATCGATTAGAAGATTTAGCTTGTATGAATCGCT  
ATTGGTTTGATACCAACAATGGCAGTCGTTTCAGTATGGTAAGGATACATATGTATCCAA  
TGAAAGGACATCAATTCAAATCCTGGATTTTCGAATTGAGAGAGATATTGAGAGAGATC  
AAGAATTCTCACTATTTCTTAGATTCATGGACCCAATTCAATTCAGTGGGATCTTTCAAT  
CACATTTTTTTCCACCAAGAACGTTTTATAAACTCTTTGACCCCGAATTTGGAGTATC  
CTACTTTCA---CGCAATTCA-----CAGGGTTCAACAAGCAATCGATATTTC-----ACGAT  
CAAGGGTGTAGTACTCTTTGTAGTAGCG---GTCCTTATATATCGT-----ATTAACAATC  
GAAATATGGTTCGAAAGAAAAATCTCTATTTGATAGGGCTTCTTCTCT-----ATACC  
TATGAATTCGATTGGACCCAGAAATGATACATTGGAAGAATCCTTT--GGGTCTTCCAAT  
ATCAATAGGTTGATTGCTTCG---CTCTTGATCTTCCAAAAGGAAAAAAGATCTCTGAG  
AGTTCTTTCTGGATCCGAAAGAGAGTACTTGGGTTCTCCCAATAACT-----AAAA  
GTGTATCATGCCTGAATCTAACTGGGGTTCGCGGTGGTGGAGGAACTGGATCGGAAAA  
AAGAGG-----AATTCTAGTTGTAAGATATCTAAT-----GAAACCGTCGCTGGAATTGAG  
ATCTCATTCAAAGAGAAAGATATCAA---TATCTGGAGTTTCTTTTTGTATATTATATGGA  
T-----GATCCGATCCGCAAGGACCATGATTGGGAATTGTTTGATCGTCTTCTCTGAGGA  
AGAGGCGAAACATAATCAACTTG-----AATTCGGGACAGCTATTCGAAATCTTAGTGAA  
ACACTGGATTTGTTATCTCATGTCTGCTTTTCGTGAAAAAATACCAATTGAAGTGGAGG  
GT--TTCTTCAAACAACAAGGG---GCTGGGTCAACTATTCAATCAAATGATATTGAGCAT  
CTTTCCCAT-----CTCTTCTCGAGAAACAAGTGGGCTATTTCTTTGCAAATGTGCTCAA  
TTTCATATGTGGCAATTCCGCCAAGATCTCTTCGTT-----AGTTGGGGGAAG---AATCC  
GCACGAATCGGATTTTTTGAGGAAC---GTATCGAGAGAGAATTGGATTTGGTTAGACAA  
TGTGTGGTTGGTAAACAAGGATCGG-----TTTTTTAGC-----AAGGTACGGAATGTATC  
GTCAAATATTCAATATGATTCC-----ACAAGA-----TCTAGTTTCGTTCAAGTAACGGAT  
TCTAGCCAATTGAAAGGATCTTCT--GATCAATCCAGAGATCATTGGATTCCATTAGT---  
-----AATGAGGATTCGGAA-----TATCACACATTGATCAATCA  
AAGAGAGATTCAACAATAAAAGAAAGATCGATTCTT---TGGGAT-----CCTTCTTTCT  
TCAAACGGAACGAACAGAGATAGAATCAGAC-----CGATTCCCGAAA-----TGCCTTTCT  
GGATATTCC-----TCAATGTCCCGGCTATTACG---GAACGTGAGAAGCAGATGAATAAT  
CATCTGCTTCCGGAAGAAATCGAAGAATTT-----CTTGGGAATCCTACAAGATCCATTCG  
TTCTTTTTTCTCTGACAGATGG-----TCAGAACTTCAT--CTGGGTTCGAATCCTACTGAG  
AGGTCCACTAGAGATCAG-----AAATTGTTGAAGAAAGAACAAGATGTTTCT--TTT  
GTCCCTTCCAGGCGATCGGAA-----AATAAAGAAATGGTTAATATATTCAAGATAATT  
ACGTATTTACAAAAT-----ACCGTCTCAATTCATCCTATTTTCATCAGATCCGGGATGTGATA  
TGGTTCCG---AAGGATGAACCGGAT--ATGGACAGTTCCAATAAGATTTCAATCTTGAAC  
AAAAATCCATTTTTTGTATTA-----TTTCATCTATTCCATGACCGGAACAGGGGGGGGATAC  
ACGTTA-----CACCACGATTTTGAATCAGAA-----GAGAGATTTCAAGAAATGGCAGATC  
TATTCATCTATCAATAACCGAGCCG--GATCTGGTGTATCATAAGGGATTTGCCTTTTCT  
ATTGATTCCCTACGGATTGGATCAAAAACAA-----TTCTTGAATGAGGTATTCAACTCCAG  
GGATGAATCGAAAAAGAAATCTTTA-----TTGGTTCTACCTCCTATTTTTTAT-----GAA  
GAGAATGAATCTTTTTATCGAAGGATCAGAAAAAATGGGTCCG---ATCTCCTGCGGG  
AATGATTTGGAAGATCCAAAACCAAAAATAGTGGTATTTGCTAGCAACAACATAATGGA  
GGCAGTCAATCAATATAGATTGATCCGAAATCTGATTCAAATCCAATATAGCACCTATGG

G-----TACATAAGAAATGTATTGAATCGATTCTTTTTAATGAAT-----AGATCCGATCGCA  
ACTTCGAATATGGAATTCAA-----AGGGATCAAATAGGAAACGATACTCTGAATCATA  
GAACTAGAATGAAATATACGATTAACCAACATTTATCGAATTTGAAAAAG---AGTCAGA  
AGAAATGGTTTCGATCCT-----CTTATTTTTATTTCTCGAACCGAGAGATCCATGAATCGGG  
ATCCTGATGCATATAGATACAAATGGTCCAATGGGAGCAAGAATTTCCAGGAACATTTG  
GAACATTTCTGTTTCTGAGCAGAAGAGCCGT-----TTTCAAGTAGTGTTTCGATCGATTA  
CGTATTAATCAATATTCGATTGATTGGTCTGAGGTTATCGACAAAAAAGATTTGTCTAAG  
TCACTTCGTTTCTTTTTGTCCAAGTCACTTCTT-----TTTTGTCC-----  
-----AAGTTGCTTCTCTTTTTGTCTAACTCACTTCCT--TTTTTCTTTGTGAGTTTCGG  
GAATATCCCATTCCATAGGTCCGAG---ATCCACATCTAT--GAATTGAAAGGTCCGAATGA  
TCAACTCTGCAGTCAGTTGTTAGAATCAATAGGTCTTCAAATCGTTCATTTGAAAAAAT  
GGAAACCCTTC-----TTATTGGAT-----GATCATGATACTTCC--CAAAAATCGAAATTCT  
TGATCAATGGAGGAACAATATCACCATTTTTGTTCAATAAGATACCA---AAGTGG---ATG  
ATTGACTCATTCCATACTAGA-----ATAATCGCAGGAAATCCTTTGATAACACGGATTCC  
TATTTCTCAATGATATCCCACGATCAAGACAATTGGCTGAATCCCGTGAAACCATTTTCAT  
AGAAGTTCATTGATATCTTCTTTTTATAAAGCAAATCGACTTCGATTCTTGAATAATCCA  
CATCACTTCTGCTTCTAT-----TGTAACAAAAGATTCCTTTT-----TAT--GTGGAAAAG  
GCCCCGATCAATAATTATGAT-----TTTACGTATGGA---CAATTCCTCAATATCTTGTTCAAT  
CGCAACAAA--ATATTTCTTTGTACGTCCGTAAA-----AAAAACATGCTTTTTGGGGG--  
--AGAGATACTATTTACCAATCGAGTCACAGGTATCTAACATATTCATACCTAACGATTT  
TCCACAAAAGTGGTGACGAAACG---TATAACTGTACAAATCT-----TTCCATTTTCCAA  
TTCGATCCGATCCATTCGTTTCGT-----AGAGCTATTTACTCGATCGCAGACATTTCTGGAA  
CACCTCTAACAGAGGGACAAATAGTCAATTTGAAAGAACTTATTGTCAACCTCTTTCA  
GATATGAATCTATCTGATTCAGAAGGGAAGAAGTTCATCAGTATCTCAAT-----TTCAAC  
TCAAACATGGGTTTGATTCACACTCCATGTTCTGAGAAATATTTACCATCCGAAAAG-----  
-AGGAAAAA-----CGGAGTCTTTGTCTAAAG-----AAATGCGTTGAGAAA  
GGGCAGATGTATAGAACCCTTCAACGAGATAGTGCTTTTTTCAACTCTCTCAAAATGGAA  
TCTATTCCAAACATATATGCCATGGTTCCTTACTTCGACAGGGTACAAATATCTAAATTTG  
ATATTTTTAGATACTTTTTTCAGAC---CTATTGCCGATACTAAGTAGCAGT-----CAAAAATT  
TGTATCCCTTTTTTCATGATATTATGCATGGATCAGATATATCATGGCGAATTCTTCAGAAA  
AAATTG-----TGTCTTCCACAATGGAAT--CTGATAAGTGAGATTTTCGAGTAAGT  
GTTTACATAAT-----CTTCTTCTGTCCGAAGAAATGATTCATCGAAATAATGAGTCA-----C  
CATTGATATCGACACATCTGAGATCGCCAAATGTTTCGGGAGTTC---CTCTATTCAATCCT  
TTTCTTCTTCTTGTGCTGGATAT--CTCGTTCGTACACATCTTCTCTTTGTTTCCCGA---  
---GCCTCTAGTGAGTTACAGACAGAGTTCGAAAAGGTCAAATCTTTGATGATTCCATCA  
TACATGATTGAGTTGCGAAAACCTTCTGGATAAATATCCTACATCTGAACCGAATTCTTTC  
TGGTTAAAGAATCTCTTTCTAGTTGCTCTGGAACAATTAGGAGATTCTCTAGAAGAAAT  
ATGGGGTCTGTTTCTGGCGGCAACATGCTATTGGGTGGTGGTCCC-----GCTTAT  
GGG---GTCAAATCAATACGTTCTAAGAAGAAATATTTGAATATCAATCTCATCGATATCAT  
CGATCTCATA---AGTATCATACCAAATCCCATCAATCGAATCACTTTTTTCGAGAAATACG  
AGACATCTAAGTCATACAAGTAAAGAGATCTATTCATTGATAAGAAAAAGAAAAACG  
TGAACGGTGATTGGATTGATGATAAATAGAATCCTGGGTCGCGAACAGTGATTTCGATT  
GATGATGAAGAAAGAGAATTCCTGGTTCAGTTCTCC-----ACCTTAACGACA-----GAAA  
AAAGGATTGATCAAATTCATTGAGTCTGACT--CATAGTGATCATTTATCA-----A

AGAATGACTCTGGTTATCAAATGATTGAACAACCGGGAGCAATTTACTTACGATACTTA  
GTTGACATTCAT-----AAAAAGTATCTAATGAATTATGAGTTCAATACATCCTGTTTAGCA  
GAAAGACGGATATTCCTTGCTCATTATCAGACAATCACTTAT-----TCACAAACCTCGTGT  
GGGGCTAATAGTTTTTCATTTCCCATCTCATGGA-----AAACCCTTTTCGCTCCGCTTAG  
CCCTATCCCCCTCT--AGGGGTATTTTAGTGATAGGTTCTATAGGAACTGGACGATCCTAT  
TTGGTCAAATACCTAGCGACAAACTCCTATGTTCCCTTTCATTACGGTATTTCTGAACAAG  
TTCTGGATAACAAGCCTAAAGGTTTTCTTATTGAT-----GATATCGATGATATTGA  
TGCTAGTGACGATATTGATGCTAGTGACGATATTGATGATAGT-----  
-----GACGATATCGATCGTGACCTTGATACGGAGCTGGAGCTGCTAACTATGATGAA  
TGCGCTA-----ACTATGGATATGATGCCG-----GAAATAGACCGATTTTATATCACCT  
TCAATTCGAATTAGCAAAAAGCAATGTCTCCTTGATAATATGGATTCCAAACATTCATGA  
TCTGGATGTGAATGAGTCGAATTACTTATCCCTCGGCCTATTAGTGAACCTATCTCTCC----  
---AGGGATTGTGAAAGATGTTCC---ACTAGAAATATTCTTGTTATTGCTTCGACTCATATT  
CCCCAAAAGTGGATCCCGCTCTAATAGCTCCGAATAAATTAATACATGCATTAAGATA  
CGAAGGCTTCTTATTCCACAACAACGAAAGCACTTTTTCACTCTTTCATATACTAGGGG  
ATTTCACTTGGAAAAGAAAATGTTCCATACT-----AATGGATTCCGGTCCATAACCATGG  
GTTCCAATGCACGAGATCTTGTAGCACTTACCAATGAGGCCCTATCGATTAGTATTACAC  
AGAAGAAATCCATTATAGACACTAATAATAGATCCGCTCTTCATAGACAAACTTGGG  
ATTTGCGA-----TCCCAGGTAAGATCGGTTTCAGGATCATGGGATCCTTTTCTATCAGAT  
AGGAAGGGCTATTGCACAAAATGTACTTCTAAGTAATTGCCCATAGATCCTATATCTAT  
CTATATGAAGAAGAAA-----TCATGTAACGAGGGGGATTCTTATTTGTACAAATGGTACT  
TCGAACTTGGAACGAGCATGAAGAAATTAACGATACTTCTTTATCTTTTGAGTTGTTCT  
GCCGGATCGGTCGCTCAAGATCTTTGGTCTCTACCC-----GGACCCGATGAAAAA---AAT  
GGGATCACTTCTTATGGACTCGTTGAGAATGATTCT--GATCTAGTTCATGGCCTATTAGA  
AGTAGAAGGCGCTCTGGTGGGA-----TCCTCACGAACAGAAAAAGATTGCAGTCAGTT  
TGATAATGAT-----CGAGTGACATTGCTTCTTCGGCCCGAACCAAGGAAT--CCCTTAGAT  
ATGATGCAAAATGGATCTTGTCTATCGTTGATCAGAGATTTCTCTATGAAAAA-----TAC  
GAATCGGAGTTTGAAGAA---GGGGAAGGAGAAGGAGCCCTCAACCCGCAA-----C  
AGATAGAGGAGGAT-----TTATTCAATCAC-----ATAGTTTGGGCTCCT-----AGAATAT  
GGCGCCCT-----TGGGGCTTTCTATTTGATTGTATCGAAAGGCCCAATGAATTGGGATT  
TCCC---TATTGGGCCAGGTCAATTCGGGGCAAG-----CGGATCATTTATGATGAAGAGG  
ATGAGCTTCAAGAGAATGATTCGGAGTCTTGCAGAGTGGAACCGTGCAGTACCAGAC  
ACGAGATAGATCTTCCAAAGAACAAGGCTTTTTTCGAATAAGCCAATTCATTTGGGACC  
CTGCAGATCCACTCTTTTTTCTATTCAA---GATCAGCCCTTTGTCTCTGTGTTTTACAT  
CGAGAATTCTTTGCAGATGAAGAGATGTCAAAGGGGCTTCTTACTTCCCAAACAGATC  
CTCCTACATCTATATAAACGCTGGTTTATC-----AAGAATACGCAAGAAAAGCACTTCG  
AATTGTTGATTAATCACCAGAGATGGCTTAGA-----ACCAATAGTTCATTATCT-----AAT  
GGATCTTTCCGTTCTAAT-----ACTCCATCCGAGAGTTATCAGTATTTATCAAATCTGTTC  
TATCTAAC--GGAACGCTATTGGATCAAATGACAAAGACATTGTTGAGAAAAAGATGGC  
TTTTCCCGGATGAAATGAAAATTGGATTC-----ATG-----ATGCCTAGATC  
GCGG---ATAAATGGAAATTTTATTGATAAGACCTTTTCAATTGTAGCCAATATCTTATTAC  
GAATAATTCCGACAACCTTCAGGAGAAAAAGAGGCATTTACCTATTATAGAGATGGG-----  
ATGTCGGCTCAATCCGAAGGAAATTATGCGGAAGCTTTACAGAATTATTATGAAGCTAT  
GCGACTAGAAATTGATCCCTATGATCGAAGTTATATACTCTATAACATAGGCCTTATCCA

CACAAGTAACGGAGAACATACAAAAGCTTTGGAATATTATTTTCGGGCACTAGAACGA  
AACCCGTTCTTACCACAAGCTTTTAATAATATGGCCGTGATCTGTCATTAC--CGGGGAG  
AACAGGCCATTTCGACAGGGAGATTCTGAAATTGCAGAGGCTTGGTTCGATCAAGCAGC  
TGAGTATTGGAAACAAGCTATAGCGCTTACTCCTGGTAATTATATTGAAGCGCATAATTG  
GTTGAAGATCACGAGGCGTTTCGAA-----ATGAGTTGGCGATCAGAACGTATATGGATA  
GAACTTATAACGGGGTCTCGAAAAACAAGTAATTTCTGCTGGGCCTTTATCCTTTTTTTTA  
GGTTCATTAGGATTCTTATTGGTTGGAACCTCCAGTTATCTTGGTCGGAATTTGATATCTT  
TATTTCCGTCCTCAGCAAATCATTTTTTTTCCACAAGGGATTGTGATGTCTTTCTATGGGA  
TCGCAGGTCTCTTTATTAGCTCCTATTTGTGGTGCACAATTCGTGGAATGTAGGTAGTG  
GTTATGATCGATTTCGATAGAAAAGAAGGAATAGTGTGTATTTTTTCGTTGGGGATTTCTTG  
GAAAAAATCGTCGCATCTTCCTCCGATTCTTATGAAAGATATTCAGTCCATCAGAATAG  
AAGTTAAAGAGGGTATTTATGCCCGTCGTGTCCTTTATATGGAAACCAGAGGCCAGGGG  
GCCATTCCCTTGACTCGTACTGATGAGAAT--TTGACTCCACGAGAAATTGAACAAAAA  
GCTGCTGAATTGGCCTATTTCTTGCGTGTACCAATTGAAGTATTT

>Bulnesia

-----  
-----  
-----ATGAAAAATCACGAAAAT-----  
-----TACCAAGATTCTTATTACAAC-----TCAGATACTGAGTCGAATTGGAATAAT  
CACATCAATCGTTGCATTAATAGTTATTTAAT-----TCTCAAATGAAC-----  
-----TACATTTTCAATTATAATGAAAATGAAAGTCAAAGTCCATAAAAACTA  
GCATCAACGAGAGTGAA-----ATCAAAAATGAT-----CAGAAGCCTGATATAAGTC  
AATTGTGGGTTCAATGCGAAAATTGTTTTGAATTAAATTATAAAAGATTTTTGAAGTCA  
AAGATGAATATTTGTGAACATTGTGGATATCATCTGAAAATGAGTAGTTCAGATAGAATA  
GAACTTTCGATTGATCCGGGTACTTGGGATCCTATGGATGAAGAAATGGTATTGGATGA  
ACCAGAAGAAGAATCTCGTCTTTCTGATCCATATCCCGATTATATTTCTTCTTATCAAAG  
AAAGACAGGATTAACTGAGGCTGTTCAAACGGGTACAGGTCGACTCAATGGTATTCTT  
GTAGCAATTGGGGTTATGGATTTTTCAGTTTATCGGAGGTAGTATGGGATCCGTAGTCGGT  
GAGAAAATTACTCGTTTGATTGACTATGCTATTAATCAACATTTACCTCTTATTATAGTAT  
GTGCTTCTGGTGGAGCTCGCATGCAAGAAGGAAGTTTTAGCTTGATGCAAAATGGCTAA  
AATATCTTCTGTTTTATATAGTTATAAAAAAAGAAAGGGTTATTTTATGTATCAATTCTT  
ACATCTCCTACTACTGGTGGGGTGACAGCGAGTTTTGGTATGTTGGGG-----  
-----ATATCATTATTG  
CCGAGCCTCATGCCT-----ATATTGCATTTGCGGGTAAAAGAG-----  
-----ATGGTAACCATTTCGAGCTGATGAAATTAGGAATATTATCCGTGAACGTATTGA  
GCAATATAATCGAGAAGTCAAATTGTAAATACCGGTACCGTGCTTCAAGTAGGTGACG  
GTATTGCTCGTATTTATGGTCTCGATGAAGTAATGGCAGGGGAATTAGTAGAGTTTGAA  
GAGGGTACCGTAGGCATTGCTCTTAATTTAGAATCCAAGAATGTTGGTGTGTGTTAAT  
GAGTGATGGTTTGATGATACAAGAGGGAAGCTCTGTAAAATCAACGGGAAGAATTGCT  
CAGATACCTGTGAGTGAGGCTTATTTGGGTCGTGTTCTAAATGCTTTGGCTAAACCTATT  
GATGGTAGAGGTGAAATTTTCAGCTTCTGAATCTCGGTTAATTGAATCTCCCGCTCCAGG  
TATTGTTTCAAGACGTTCTGTATATGAGCCTCTTCAAACAGGACTGATTGCTATTGATTC  
AATGATACCTATAGGACGTGGTCAACGAGAATTAATTATTGGGGACAGACAGACCGGTA  
AAACAGCAGTGGCTACTGATACGATTCTGAATCAACAAGGAGAAAATGTAATATGCGT



TTATGTAGCTATTGGCCAAAAAGCATCTTCTGTAGCTCAGGTGGTGACTIONTTACAGG  
AAAAGGGAGCAATGGAATATACTATTGTAGTAGCAGAACCCGCGGATTCTCCTGCTACA  
TTACAATATCTCGCTCCTTATACAGGAGCAGCTTTGGCTGAATATTTTATGTACCGTAAA  
CGTCATACTTTAGTGATTTATGATGATCTCTCAAACAAGCACAGGCTTATCGACAAATG  
TCTCTTCTATTACGAAGACCACCTGGACGAGAAGCTTATCCAGGAGATGTTTTTTATTT  
GCATTCACGTCTTTTGGAAAAGAGCTGCTAAACTAAATTCTAGTTTAGGTGAAGGAAGTA  
TGACTGCTTTACCGATAGTTGAGACCCAATCAGGAGATGTTTCAGCTTATATTCCTACTA  
ATGTAATTTCCATTACAGATGGGCAAATATTCTTATCTGCCGATCTATTCAATGCTGGCAT  
CAGACCTGCTATTGATGTAGGTATTTCCGTTTCCAGAGTAGGATCGGCAGCCCAAATTA  
AAGCCATGAAACAAGTAGCTGGTAAATCAAATTGGACTTAGCGCAATTCACAGAATT  
AGAATCATTGACAAATTTGCTTCTGATCTCGACAAACTACTCAGAAGCAATTGGCAA  
GAGGTCGACGATTACGTGAACTTCTGAAACAATCCCAATCAGATCCACTTCCGGTGGA  
AGAACAGATCCTGACTATTTATACCGGAACAAATGGTTATCTTGATTCATTAGAGATTGA  
TCAGGTAAAGAAATTTCTTGGTGATTTACGTACTTATTTGAAAACGAATAAACCTAAGT  
TCAAAGAAATTATATCTTCTACCAAGACATTTACCAATGAAGCAGAAGCTCTTTTAAA  
GAAGCTATTCAGGAACAGATGGAACGCTTTCTACTTCAGGAACAAGTAATGAGAACGA  
ATCCTTCTACTTCAGGTTCTGGGGTTTCCGCACTTGAAAAAAAANNCCTGGGACATATA  
GTTCAAATCATTGGTCCCGTATTGGATGTAGCGTTTCCCTCCCGGAAATGCCTAAGAT  
TTACAATGCTCTCGTAGTGAAGGCTGAAAATACTGTTGGTCAAGAAATTAATGTCACTT  
GTGAAGTACAGCAATTATTAGGAAATAATCGAGTTAGGGCTGTAGCTATGAGCGCTACA  
GATGGTCTAATGAGAGGAATGGAAGTTATTGACACAGGAGCTCCTTTAAGTGTTCCCGT  
CGGTGGAGTGACTTTAGGACGAATTTCAACGTACTIONTGGGGAACCTGTTGACAATTA  
GGCCCTGTAGATACTAGCACAACTCTCCCATTCATAAGTCTGCGCCTGCCTTTATACAG  
TTAGATACAAAATTATCTATTTTTGAAACAGGAATTAAGTAGTTGATCTTTTAGCCCCT  
TATCGTCGGGGAGGAAAGATAGGACTCTTCGGTGGAGCTGGAGTAGGTAAAACAGTAC  
TGATTATGGAATTGATTAACAACATTGCCAAAGCTCACGGGGGTGTATCTGTATTTGGC  
GGAGTAGGTGAACGTACTIONCGTGAAGGAAATGATCTTTACATGGAAATGAAAGAATCTG  
GAGTCATTAATGAAACAAATCTTTCAGAATCAAAGTTGCGTTAGTATATGGTCAGATG  
AATGAACCACCGGGGGCTCGTATGAGAGTTGGTTTGACTGCCCTAACTATGGCGGAATA  
TTCCGAGACGTTAATAAACAAGACGTGCTTCTATTTATTGACAATATTTTTTCGTTTCGT  
TCAAAGCAGGATCTGAAGTATCTGCTTTATTAGGTAGGATGCCTTCAGCTGTGGGTTATC  
AACCTACCCTTAGTACCGAAATGGGTTCTTTACAAGAAAGAATTACTTCTACCAAACAA  
GGGTCTATAACTTCTATCCAAGCAGTTTATGTACCTGCGGACGATTTGACCGATCCCGCT  
CCTGCTACGACATTTGCACATTTAGATGCTACTACCGTACTATCAAGAGGATTGGCCGC  
AAAAGGTATCTATCCAGCAGTTGATCCTTTAGATTCAACATCAACTATGCTTCAACCTCA  
AATCGTAGGAGAGGAACATTATGAAACTGCGCAACAAGTTAAGCAAACCTTTACAACGT  
TATAAAGAACTTCAAGATATTATAGCCATTCTTGGTTTGGACGAATTATCCGAAGAGGAT  
CGTTAACCCTAGCAAGAGCACGAAAAATTGAGCGTTTCTTATCACAACCCTTTTTTCGT  
AGCAGAAGTATTTACGGGTTCTCCTGGGAAATATGTTGGTCTAGCAGAAACAATTAGGG  
GGTTTCAATTGATCCTTTCCGGAGAATTAGATAGTCTTCCCTGAACAGGCTTTCTATTTAG  
TAGGTAATATTGATGAAGCTACTGCGAAGGCTACGAATTTAGAA-----ATGA  
CCTTCAATCTTTGTGTACTIONACTCGAAATCGAATTGTTTGGGATTCAGAAGTGAAAGAA  
ATCATTTTATCTACTAATAGTGACAAATTGGCATATTACCAAACCATGCACCTATTGCC  
ACAGCCGTAGATATAAGTATTTTAAAATACGTCTTAATGAACAATGGATAACAATGTTT

CTGATGGATGGTTTTGCTAGAATAAGAAATAATGAGGTCACTATTTTAGTAAAGGATGC  
AGAGAAGGGTAGTGATATTGATCCACAAGAGGGCGAAACAACTCTTGAAATGGCAGA  
AGCTGACTTGAAAAAGCTGAAGGAAAAAGACAAACAATTGAAGCAACTCTAGCTCT  
CAAACGAGCTAAGACAAGAGTAGAGGCTATCAATTTTGTAATATGAATAATTTAACCG  
ATTCTTTCATTTCTTTAGGTCATTGGCCGTCGCCGAGAGCTTCGGGTTAATACCGATA  
TTTTAGCAACGAATCCAATAAATCTAGGTATAGTGATTGGTGTATTGATCTTTTTTGGAA  
AGGGAGTGTTAAGTGATTTATTAGATAATCGAAAACAGAGAATCTTGAATACTCTTCGA  
AACTCAGAAGAAGTGAAGGGGCCATTGAACAGTTGGAAAAAGCTCGAACCCGT  
TTACAGAAAGTTGAAATGGAAGCAGATCAGTTTCGAGTGAATGGATATTCTGAGATAG  
AAAAGCAAAAATTGAATTTGATTAATTCAACTTACAAGACTTTGGAACAATTAGAAAAT  
TACAAAAATGAAACGATTTCGTTTTGAAGAACAAGAGCAATTAATCAAGTCCGACAAC  
GGTTTTTCAACAAGCCTTACAAGGAGCTTTAGTCACTTTGAATAGTTGTTTGAACAAC  
GAGTTACATTTTCGTACTATAAATGCGAATATTGATCTGTTTGGGAAGATGAAAGAAATA  
ACTGATATGAATCCACTTATTTCTGCCGCTTCTGTTATTGCTGCTGGATTGGCTGTAGGA  
CTTGCTTCAATTGGACCTGGGATTGGTCAAGGGACTGCTGCGGGCCAAGCTGTAGAAG  
GTATTGCGAGACAACCCCAAGCGGAGGGAAAAATACGAGGTAATTTATTGCTTAGTTT  
GGCTTTTATGGAAGCTTTAACAATTTATGGACTAGTTGTAGCATTAGCTCTTTTATTTGC  
GAATCCTTTTGTATTGACTGTTCTATTATGTTCCATGAACACACTCAAAGGGTTATATGAT  
CTATCTGGTGTAGAAGTAGGCCAACATTTCTATTGGCAACTAGGAGCTTTCCAAGTGCA  
TGCCAAGTACTTATTACTTCTTGGGTTGTAATTTTATCTTATTAGGTTTCATCCATTATA  
GCTGTTCCGAATCCACAAACCATTCCACTAATGGTCAGAATTTCTTCGAATATGTCCTT  
GAATTCATTCGAGATGTCAGTAAACACAGATTGGAGAAGAATATGGTCCATGGGTCC  
ATTTATTGGAAGTATGTTTTTATTTATTTTTGTTTTCGAACTGGTCAGGGGCTCTTTTACCT  
TGGAATCATAACAGTTACCTCATGGGGAATTAGCTGCGCCCACAAATGATATAAATACT  
ACTGTTGCTCTAGCTTTACTCACGTCAGTAGCATATTTCTATGCTGGTATTAGCAAAAAG  
GGATTAAGTTATTTCCGGTAAATATATTAACCAACTCCAATCCTGTTACCCATTAACATCT  
TAGAAGATTTACAAAACCTTTATCACTTAGTTTTTCGACTTTTTTGAAATATATTAGCAG  
ATGAATTAGTAGTTGTTGTTCTTGTTCCTTTAGTACCTTTGTTGGTTCCGATACCTGTCAT  
GTTCTTGGTTTATTTACAAGTGGTATTCAAGCTCTTATTTTTGCAACTTTAGCTGCGGC  
TTATATAGGCGAATCTATGGAGGGTCATCATATGATATTTTTGACTTTAGAACATATATTA  
ACTCATATATCCTTTTCAATCATTCTATTGTAATTATAATTCATTTGATAATTTTATTCATC  
GATGAAATTATAGAACTATATGATTCGTCCGAAAAGGGCATGATTGCTATTTTTTTATGCA  
TAACGGGATTAATTTACTCGTTGGATTCTTTAGGGCATTTCATTAAGTGATTATA  
TGAATCCTTAATATGTCTTTCATGGAGTTTGTCCATTGTTTCATATAGTTTCTACTGGAAA  
AAACATGCAAATCCTTTCAGTACAATAACTAGGTCAAGCGCTATTTTGACACAAGGATT  
TGCTACTTCAGGTCTTTTAACTGGAATGCATCAATCCGTAATCTTAGTACCCGCTCTTCA  
ATCTCAATGGTTAATGATGCACGTAAGTATGATGATATTGGGTTATGCAGCTCTTTTATTT  
GGATCTTTATATCAGTAGCTCTCTTAGTTATTCAATTTAGAAAATTTCTTCAATATTTTTGA  
TAAAAACAAGAGATTCAATACATGAAAGAAAAAGGAAATATTTTGTTA-----  
ACCTTAAATTATTACAAATTTCAATTGATTGAACAATTAGATCATTGGAGTTCTCGTATTA  
TTAGTTTAGGTTTTATCTTTTTAAACCATAGGTATTCTTTCGGGAGCGGTATGGGCTAATG  
AAGCATGGGGATCTTATTGGAATTGGGATCCAAAAGAACTTGGGCCTTTATTACTTGG  
CTCATCTTTGCTATTTATTTACATATTAGAACAATAAAAAATTTTGAGAGTATCAATTCG  
CAATTGTGTCTTCTGTAGGTTTTTTTTATAATTTGGATATGTTATTTGGGGTCAATCTATTA



TTTCTCATTATTTTAGCGGATCCTCAAAAAAAAAAGAATTTATATCGCATAAAAATATATACT  
TAGACTTTCTTGTGTGAAAACCTTTGGCTCGTAAGCACAAAAGTACTGTACGCGCTTTGT  
TGAAAAAATTAGGTTTCTGGAAGAGTTTTNATACAGGAAGAACAATACTCTT  
TCGTTTCTTTTTCAAGACGGATTTGGTATTTGGATATATTTCTCGCAATGATCTTTTCGA  
ATTATCAAATGATCATTAAATGCAACA---GAAGTACAA---GATATCAATTCTTTTTCTATATT  
TCAATTA---CAAAAAGAATCCTATGAGATTCTATGGGCGCTGATCCCTATTTTGGACTCTG  
GTATTGGGAATTACAATAGGTGTATTAGTAATTGTGTGGTTAGAAAGAGAAATATCTGCA  
GTAATACAACAACGTATTGGACCTGAATACGCAGGTCCTTTTGGGAATCTTCAATCTTTA  
GCAGACGGAACAAAATTACTTTTCAAAGAGAATCTTTTCCATCTAGGGGAGATACTAA  
CTTATTCAGTATCGGACCATCCATAGCAGTAATATCAATTTTATTAAGTTATTCAGTAATT  
CCTTTTGGATATAATCTTATTTTATCTGATCTAAATATTGGTGTTTTTTTATGGATTGCCGT  
TTCAAGCATTGCTCCCATTGGACTTCTTATGTCAGGGTATGGATCCAACAATAAATATTC  
CTTTTAGGTGGTTTAAGAGCTGCTGCTCAATCAATTAGTTATGAAATACCATTAACTCT  
TTGTGTCTTATCAATATCTCTACTATCTAACAGTTCAAGTACAGTTGATATAGTTGAAAC  
ACAATCAAATATGGGCTTTGGGGATGGAATTTATGGCGTCAACCTATAGGATTTATCAT  
TTTTTTAATTTCTTCTTTGGCAGAATGCGAAAGATTACCCTTTGATTTACCGGAAGCAGA  
AGAAGAATTAGTAGCAGGCTACCAAACCGAATATTCAGGTATTAATTTGGTTTGTTTTA  
TGTGCTTCTTATCTAAATCTATTAGTTTCTTCAATTATTTGTAACAGTTCTTTATTTGGGCG  
GTTGGAATCTATCTATTCCATACATATTTGTTCCCTGAACTTTTTGAAATAAATAGAACGA  
GTAGCATTTTTCAAATGACAATTAATATTTTATTACATTAGCCAAAACATATTTGTTCTT  
ATTCATTTTCGATCGCAACAAGATGGACTTTACCTAGATTAAGAATGGACCAATTATTA  
TCTTGGATGGAAATTTCTTTTACCATTCTCTCGGGAATCTATTATTAACAACCTTCGTTT  
CAGCTCCTTTCACTC-----ATGAAATCCTTTCATTG  
CTTCTCTTCGATGGAAGTTTGATTTTCCAGAATGTATCCTAATTTTTGGTCTCATTCTTC  
TTCTGATGATCGATTTAACCTCTGATCAAAAAGATATACCTTGGTTATATTTTATCTCTTC  
AACAAAGTTTAGTAATGAGCATAACGGTCTTATTGTTCCGATGGAGAGAAGAACCTATGA  
TTAGCTTTTCGGGAAATTTCCAAACGAACAATTTCAACGAACTTTTTCAATTTCTTATTT  
TATTATGTTCAACTTTATGTATTCCTATATCCGTAGAGTACATTGAATGTACAGAAATGGC  
TATAACAGAGTTTCTTTTATTCATATTAACAGCTACTCTAGGAGGAATGTTTTTATGCGGT  
GCTAACGATTTAATAACTATCTTTGTAGCTCCAGAATGTTTCAGTTTATGCTCCTACCTAT  
TATCTGGATATACTAAGAAAGATGTACGGTCTAATGAGGCTACTACGAAATATTTACTCA  
TGGGGGGGGCAAGCTCTTCTATTCTGGTTCATGCTTTCTCTTGGTTATATGGTTCATCCG  
GGGGAGAGATCGAACTTCAAGAAATAGTGAATGGTCTTATCAATACACAAATGTATAAC  
TCCCCAGGAATTTCAATTGCGCTTATATTCATTACTGTAGGAATTGGGTTCAAGCTTTCC  
CCAGCCCCTTCTCATCAATGGACTCCTGACGTATACGAAGGATCTCCCACTCCAGTCGT  
TGCTTTTCTTTCTGTTACTTCGAAAGTAGCTGCTTCAGCTTCAGCCACTCGAATTTTTGA  
TATTCCTTTTTATTTCTCATCAAACGAATGGCATCTTCTTCTGGAATCCTAGCTATTCTT  
AGCATGATATTGGGAAATTTCAATTGCTATTACTCAAACAACATGAAACGCATGCTTGC  
ATATTCGTCCATCGGTCAAATCGGATATGTAATTATTGGAATAATTGTTGGAGACTTCAAT  
GGTGGATATGCAAGTATGATCACTTATATGCTGTTCTATATCTCTATGAATCTAGGAACTT  
TTGCTTGCAATTGTATCATTTGGTCTACGCACCGGAACGGATAACATTCGAGATTATGCAG  
GATTATACACGAAAGATCCTTTTTTGGCTCTCTCTTTAGCCCTATGTCTCTTATCCCTAGG  
AGGTCTTCCTCCACTAGCAGGTTTTTTTCGGAAAACCTCATTATTCTGGTGTGGATGGC  
AGGCAGGTCTATATTTATTAGTTTCAATAGGACTCTTTACGAGCGTTGTTTCTATCTACTA

TTATCTAAAAATAATCAAGTTATTCATGACTGGACGAAACCAAGAAATAACCCCTCACG  
TGCGAAATTATAGAAGATCGCCTTTCAGATCAAAAAATCCATCGAATTGAGTATGATT  
GTATGTGTGATAGCATCTACTATACCAGGAATATCAATGAACCCGATTATTGAAATTGCT  
CAGGATACCCTTTTTATGTTTCTACTTTATGAATATGATCTCTTTTGGGCATTTCTAATAAT  
ATCAAGTGTAATTCCTATTTTGGCATTTCATTTCTGGAGTTTTAGCCCCGATTAGCAA  
AGGTCCAGAGAACTTTCTAGCTATGAATCGGGCATAGAACCGATGGGTGATGCTTGG  
TTACAATTTCGAATCCGTTATTATATGTTTGTCTAGTTTTTGTGGTTTTTGTATGTTGAAA  
CGTTTTTCTTTATCCATGGGCAATGAGTTTTGATATATTAGGTGTATCTGTATTTATAGA  
AGCTTTGATTTTCGTGCTTATCTTAATTGTTGGTTTAGTTTATGCGTGGCGAAAGGGGGC  
ATTGGAATGGTCTACGAATGATTTTCCTTGGTTAACACTAATTGTTGTTTTTCCAATATTG  
GCGGGTTCCTTCATTTTTTTTCTGCCTCAGAGAGGGAATAAAACAATTAGGTGGTATAC  
TATATGTGTATGCATCTTAGAGCTTCTTCTGACAACCTATGCATTCTGTTATTATTTAAAT  
TAGATGATCCTTTAATCCAATTAGGAGAGGATTATCAATGGATCCCTTTTTTGGATTTGA  
CTGGAGATTGGGAATCGATGGACTTTCTATAGGACCTATTTTACTGACTGGATTTATTAC  
CACTTTAGCTACGTTAGCGGCTTGGCCAATTACTIONGAGATTCCAGATTCTTTCATTTTT  
GATGTTAGCAATGTATAGTGGTCAAATAGGATTATTCTCATCTCGAGACATTTTACTTTTT  
TTTATCATGTGGGAGTTAGAATTAATCCTGTTTATTTACTTCTATCCATGTGGGGTGGGA  
AAAAACGTCTTTATTTCAGCTACAAAGTTTATTTTATATACTGCGGGAGGTTCCATTTTTC  
TATTAATAGGAGTTCTGGGTATTGGTTTATATGGTTCCAATCAACCAATATTAATTTTTGA  
AACATCAGCTAACCAATCTTATCCTATAGCATTAGAAATTATATTCTATATTGGATTTTTTA  
TTGCATTTCGTGTTAAATTACCAATTCTGCCCTTACATACATGGTTGCCAGACACTCACG  
GAGAGGCACATTACAGTACTTGTATGCTTCTAGCTGGAATATTATTAATAAATGGGAGCAT  
ATGGCTTGGTTCGGATCAATATGGAATTATTACCCACGCCAATTCTCTATTTTCTCCTTG  
TTTGGTGATAATAGGTACATTACAAATAATCTATGCAGCTTCAACATCTCCAGGTCAACG  
TAATTTAAAAAAAAGAATAGCATATTCGTCTGTATCTCATATGGGTTTTATAATTATAGGA  
ATTGGATCTATCAATGATATGGGACTCAATGGAGTCATTTTACAAATAATTTACATGGA  
TTTATTGGAGCTGCACTTTTTTTCTTAGCAGGAACAAGTTATGATCGGATACGTCTTGTT  
TATCTTGACGAAATGGGTGGAATGGCTATAACCGATTCCAAAAATATTTACGATGTTCAAT  
ATCTTATCAATGGCATCCCTCGCATTACCGGGGATGAGCGGTTTTGTTTCAGAATTGATA  
GTCTTTTTTGGAAATAATTACGAGCCAAAATATCTTTTAAATGGCAAAAATACTAATTACT  
TTTGTATGGCAATTGGAATGATATTAATCCTATTTATTTCATTATCGATGCTACGTCAA  
TGTTCTATGGATATAAACTATTTAGTACTTCAAATTCGTATTTCTTTGATTCTGGACCACG  
AGAATTATTTATTTCTATTTTCGATTCTTCTACCTGTAATAAGTATTGGTATTTATCCGGATT  
TTATTATCTCCTTATCCGTTGACAAGGTGGAAGCAATTTTATCTAAGTATTTTTATAGAAT  
GATGCTAGAACATGTACTTGTGTTTGGAGTGCTTATTTATTTTCTATAGGTATTTATGGATTAA  
TTACGAGTCGGAATATGGTTAGAGCACTTATGTGTCTCGAACTTATGCTTAATGCAGTG  
AATATAAATTTGTAACATTTTCTGACTTTTTTGTATAGTCGCAATTAAGGAAATATTT  
TCTCAATTTTTGTATAGCTATTGCAGCTGCTGAAGCTGCTATTGGACTAGCTATTGTTT  
CTTCAATTTATCGTAACAGAAAATCAACTTGTATCAATCAATCAAATTTATTGAATAAGA  
TGGAACATATGTATCAATATTCATGGATCATACTTTTCTTCCACTTCCAGTTCCATTTTT  
AATAGGAGTTGGGCTTATATTGTTTCCGACAGCTACAAAAAATTTTCGCCGTATATGGGC  
TTTTCTAGTATTTTATTGTTAAGTATAGCCATGATTTTTTCAACTGAGTTGTCTATTTCAG  
CAAATAAATAGTAATCTATCTATCAATATGTAGGGTCTTGGACTATCAATAATGATTTTT  
CTTTTGAATTAGGCTATTGCATTGATCCACTTACTTGTATTATGTCAATCTTAATAACTAC

TGTTGCAATTCTGGTTCTTTTTTATAGTGACAATTATATGTTCTATGATGAAGGATATTTG  
AGATTTTTTGCTTATATAAGTTTTTTCACACTTCAATGTTAGGATTAGTTACTAGTTCGA  
ATTTGATACAAATTTATATTTTTTGGGAATTAGTTGGACTTTGTTCTTATCTATTAATTGGT  
TTTTGGTTTACACGACCTAGTGCAGCAAGTGCTTGTCAAAAAGCATTGTGTAACATAATCG  
TG TAGGGGATTTTGGCTTATTATTAGGAATTTAGGTTTTTATTGGATAACAGGTAGTTTC  
GAATTTGAGATTTGTTTCGAAATATCAAAAAAT---GAGATTAATTCTTTATTTCTTTCTTT  
ATGCTCCTTCTTATTATTCACTGGTGCAGTTGCTAAATCTGCCAATTCCCTCTTCATGTA  
TGGTTACCAGACGCTATGGAAGGTCCGACCCCGATCTCAGCTTTGATACATGCGGCTAC  
TATGGTAGCTGCGGGAATTTTTCTTGTAGCCCGTCTTCTTCTCTTTTTATAGTTGTACCT  
TATATTATGAATATAATTGCTATTCTAGGCATAATAACACTACTGTTTCGGAGCTACTTTAG  
CTCTTGCTCAAAAAGATGTTAAGAGAGGTTTAGCTTATTTCGACAATGTCTCAATTGGGC  
TATATGATGTTAGCTCTAGGTATGGGGTCTTATCGAGCTGGTTTATTTCAATTTGATTACTC  
ATGCTTATTCTAAAGCATTGTTATTTTTAGGATCCGGATCTATTATTCATTCAATGGAAAG  
TCTTGTGGATTTCTCCGAATAAAAAGTCAAAATCTAGTTATCATGGGTGGTTAAAAAA  
GCATGTGCCGATTACAAAACTGCCTTTTTATTAGGTACACTTTCACTTTGTGGTATTCC  
ACCTCTTGCTTGTTTTTGGTCTAAAGATGAAATCTTTTATGATAGTTGGTTATATTCATCG  
ATCTTCGCCATAATAGCTTGTTCACGGCAGGATTGACTGCATTTTATATGTTTCGGATTT  
ATTTACTTATTTTCGAAGGACATTTCAACTTTCATTTTCAAATACAGTGGAAAAAAA  
AGTAGTTCATTCTATTCAATATCGATATGGGGTAAAGAAGGAAAAAAAATTATTA  
CAATAATCTATTTACACCAAATATAAATTTTTTGAATTCATAAAAAT---ATTTTTTGT  
TCCTCGTGAGTCAGATAATACTATGCTATTTCCAATGATTATATTAGTTCTATTTACTTTGT  
TTATTGGAGCGATAGGA-----TTGGATTTTGATTTATTATCAAAATTGTTAACTCCATCTAT  
AAATCTTTTAGAACAACTTCAAAT---TCTGAGGGTTGG---CAATTTTTGACAAATGCAA  
CTTTTTTCAGTAAGTATAGCTTTTATTGGAATATTTATAGCGTCTTTTTTATATAATCCCTTT  
TATTCGTCTTTAACAAATTTTCATTTAATGAATTTATTTTATATTCTTTGGGACAAAATAAT  
CAATTTTATCTATGATTGGTCATATAATCGCGGTTACATAGATTATTTTTACGAAATATTAT  
TTATCAAAGTATAAGAAAATTATCTGAATTCACTCATTTTTTTGATAGACGAATAATTG  
ATGGAATTCAAATGGGTTTGGTATTACTAGTTTTTTTTGTGGCAGAAGGTATCCGATAG  
TGGGGAGTGGG---CGTATCTCGTCTTATCTTTTATTATATTATCCTATGTGTTAATTTTTTT  
ATTGATATACTACATGGATTTACCAGGACCAATACACGATTTTATTTTAGTTTTCTGGGA  
TCAGGTCTTATATTAGGAAGTTTAGGAGTAGTATTATTAGCAACTCAATGTATTCTGCTT  
TTTCATTAGGATTGGTTCTTTTTTGTATATCTTTATTATATATTTTCATCAAACCTCCATTTG  
TAGCTGCAGCAACTTCTTATTTATGTGGGAGCTATAAATGTTTAAATCATATTTGCTGT  
GATGTTTCATGAACAATTCGGAATATCCAAGAATTTCAATATTTAACCTTTTCGGAATGG  
AATTACTTCCCTGGTTTGTATAAGTATTTTTTTTTTCACTAGTGACTACTATTTTAGATACG  
TCATGGTATAGTATTATTTGGACTACTAGATCAAATCATATTATAGAACAAGAGTTAATCA  
ATAATAGTCAACAAATTGGGATTCATTTATCAACAGATTTTTTCTTCCCTTTGAACTCA  
TTTCAATTAATCTTTTAGTTTCTTTGATAGGTGCAATTGCTATGGCTCGTCAAATGAATAT  
ACCAGCAACAAGAAAAGACTTAATGATAATCAATATGGGTCCCCATCACCCGTCTATGC  
ACGGTGTCTTCGGTTGATAGTTACTCTAGATGGTGAAGATGTTATTGATTGTGAACCCA  
TATTGGGTTATTTACACCGAGGGATGGAATAATTGCAGAAAACCGAACAATTATACAA  
TATTTGCCTTATGTAACCCGTTGGGACTATTTAGCTACTATGTTACAGAAGCAATAACT  
GTAATGGACCAGAACAATTAGGAAATATTCAAATACCAAAAAGAGCCAGCTATATCA  
GAGTCATTATGTTGGAATTAAGTCGTATCGCTTACATCTTTTATGGCTTGGACCTTTTAT

GGCAGATATTGGTGCACAGACTCCATTTTTCTATATTTTCAGAGAAAGAGAATTAATATA  
TGATCTATTCTGAAGCTGCCACCGGTATGAGAATGATGCATAATTATTTTCGTATTGGAGG  
AGTAGCAGCCGATCTACCTTATGGTTGGATAGATAAATGTTTGGATTTTTGCGATTATTTT  
TCAAAGGGGATTTCTGAATATAAAAACTTATTACCAGAAATCCTATTTTTTTTAGAACGA  
GTTGAGGGAGTAGGCATTATTGGTGAAGAGGAAGCAATCAATTGGGGTTTATCAGGAC  
CAATGTTACGAGCTTCTGGAATAAAATGGGATCTTCGTAAAGTTGATCATTATGAGTCTT  
ATGACGAATTTGATTGGGAAGTCCAGTGGCAAAAAGAAGGAGATTCTCTTGCTCGTTA  
TTTAGTTCTGAATTAGTGAAATGGCTGAATCTATCAAAATTATTCAACAAGCTCTGGAAG  
GAATTCAGGAGGCCCTTATGAGAATTTGGAACTCGATGTTTTGATAAAAAGAGGGG  
TCCAAAGTGGGGTGATTTTGAATATCGATTCATTAGTAAAAACCTTCTCCTACATTTGA  
ATTGCCAAAACAAGAACTTTATGTGAGAGTTGAGGCACCAAAAAGGAGAATTAGGAATT  
TTTCTGATAGGAGATCAGAGCGGGTTTTCTTGGAGATGGAAAATTCGTCCGCCAGGTTT  
TATCAATTTGCAAATTCCTCCTCAATTAGTTAAAAGAATGAAATTGGCTGATATTATGAC  
AATACTAGGAAGCATAGATATAATTATGGGGGAGGTTGATCGTATGTTCCCTATGGTAAC  
TGGGTTTCATGAATTATGGTCAACAACCGTACGAGCTGCAAGATACATCGGTCAAGGTT  
TCATGATTACTTTATCCACGCAAATCGTTTACCCGTAACTATTCAATATCCTTATGAAAA  
ATTAATAACATCAGAACGTTTCCGCGGTCAATTCAATTTGAATTTGATAAATGTATTGC  
TTGTGAAGTATGTGTTTCGTGTATGTCCATTGATCTCCCTGTTGTTGATTGGAAATTCGA  
AAATGATATTCGAAAAAACGATTATTTAATTACAGTATTGATTTTGGAAATTTGTATCTTT  
TGTGGTAATTGTGTTGAGTATTGCCCGACAAATTGTTTATCTATGACTGAAGAATATGAA  
CTTTCTACTTATGATCGTCATGAATTAATTATAATCAAATTGCTTTGGGTTCGTTTACCAA  
TACCAGTATTTGATGACTATAACAATTCGAACAATTTGAATTCG-----  
-----ATGCAGGGTCCTTTGTCTGCTTGGCTATTTAAACATGGTTTAGTTCATAGAT  
CTTTGGGTTTCGATTACCAAGGAATCGAACTTTACAAGTAAAATCCAAAGATTGGTAT  
TCCATTGCTGTAATTTTATATGTATATGGTTACAATTATCTACGTTCCCAATGTGCCTATGA  
TGTAGCACCCGGTGGGCTTTTAGCTAGTGTATCATCTTACAAGAATAACGTATGGTAT  
AGATCAACCAGAAGAGGTATGCATCAAAGTATTTGCTCCAAGGGTGGATCCTAAAATTC  
CGTCTGTTTTCTGGGTTTGGAAAAGTGCAGGATTTTCAAGAACGCGAATCTTACGATAG  
TTAGGAATCTTTTATGATAATCATCCACGCTTGAACGCATCTTAATGCCTGAAAGTTGG  
ATAGGATGGCCTTTACGTAAGGATTATATTGCCCCCAATTTTATGAAATACAAGATGCT  
CAT-----  
-----ATGAATTCATTGAGTTTCCTTTACT  
TGATCGAACAACAAAAATTCAGTTATTTCAACTACATTAATGATTTTTCCAATTGGTC  
AAGACTTTCCAGTTTATGGCCACTTCTGTATGGTACGAGTTGTTGCTTCATTGAATTTGC  
TTCATTAATAGGTTCAAGATTCGATTTTATGATCGTTATGGATTAGTACCAAGATCGAGTCC  
TAGACAAGCAGATCTCATTTTAAACAGCCGGCACAGTAACAATGAAAATGGCTCCTTCTT  
TAGTAAGATTATATGAACAAATGCCTGAACCAAAATATGTGATTGCTATGGGAGCCTGTA  
CAATTACAGGAGGGATGTTCAAGTACTGATTCGTATAGTACTGTCCGGGGAGTCGATAAG  
CTAATTCCTGTGGATATCTATTTACCGGGTTGTCCGCCTAAACCGGAAGCGGTGATAGAT  
GCTATAACAAAACCTTCGTAAGAAAATATCTCGAGAAATCTATGAAGATCGAATTCAGTA  
TCAA---GAGAATCGGTGTTTTACTACTACTCACAAATTTTCATGTCAGACGCAGTACTCAT  
ACCGGAAATTATGAACAAGGATTACTTTATCAATCGCCATTTACTTCAGAAATACCTACT  
-----TTTTTAAAATATAAAAAGTTCAGTATCTTCTCACGAATTTCTGAATATGCAAACTAGA  
AAGATTTTTTCTTGGATCAATGAAAAGATTACTCAATCCATTTCCATATCGTTTCTATTTA

TAATAATGACTGATGCATCCATTTCAAATGCATATCCCATTTTTGCGCAGCAAGGTTATG  
AAAATCCACGAGAAGCTACTGGACGGATTGTATGTGCAAACCTGCCATTTAGCGAATAA  
ACCTGTAGATATTGAGGTTCCACAAGCGGTACTTCCCTGATACTGTATTTGAAGCAGTTAT  
TCGAATTCCTATGATAAGCAACTTAAACAAGTTCTTGCTAATGGTAAAAAGGGGTCTT  
TAAATGTAGGAGCTGTTCTTATCTTACCCGAGGGTTTTGAATTAGCTCCCTCGGATCGTA  
TTTCGCCCCGAGATGAGAGAAAAGATAGGCAATCTATATTTTCAGAGTTATCGTCCCAAT  
CAAAAAAATATTCTTGTGATAGGTCCCGTTTCCGGTCAGAAATATAAGTAAATCACTTT  
TCCTATCCTTTCCCGGACCCCTTCTACTAATAAAGATGTTTACTTCTTAAATATCCATA  
TATGTGGGTGGGAACAGGGGAAGAGGTCAGATTTATCCAGATGGGAGTAAGAGTAATA  
ATACAGTTTATAATGCTACAGCAGGAGGTATAGTAAGCAAATTTTACGAAAAGAAAA  
GGGGGTACGAAATCACCATATCGGATCCATCCAATGGGCGTCAAGTAGTTGATATTATT  
CCACCAGGACCAGAACTTCTTGTTCGGAGGGTGAATCTATCAAACCTTGATCAACCATT  
AACAGTAATCCTAATGTGGGTGGATTGGTTCAGGGAGATGCAGAAATAGTACTTCAA  
GATCCATTACGTGTTCAAGGCCTTTTGTCTTCTTTGCATCTGTTATTTTGGCACAAATC  
TTTTTGGTTCTTAAAAAGAAACAATTTGAAAAAGTTCAACTATCGGAAATGAATTTTAT  
GAGTAAAGTTTATGATTGGTTCGAAGAACGTCTCGAGATTCAGGCCATTGCAGATGATA  
TAACTAGTAAATATGTTCCCTCCCATGTTAATATCTTTTATTGTTTAGGAGGAATTACGCT  
TACTTGTTTTTTAGTACAAGTAGCTACAGGGTTTGCTATGACTTTTTACTATCGTCCAAC  
TGTTACTGACGCTTTTGTTCGGTTCAATACATAATGACGGAAGCGAACTTTGGTTGGT  
TAATCCGATCAGTTCATCGATGGTTCGGCAAGTATGATGGTTCTAATGATGATCCTGCACG  
TGTTTCGCGTGTATCTTACTGGTGGTTTTAAAAAACCTCGAGAATTAACCTGGGTGACG  
GGTGTGATTCTGGCTGTATTGACGGCATCTTTTGGTGTAACCTGGTTATTCTTTACCTTGG  
GATCAAATTGGTTATTGGGCAGTCAAATTGTAACAGGCGTACCTGAAGCGATTCCCTGT  
AATAGGTTCCCCTTTGGTAGAGTTATTACGTGGAAGTGCTAGTGTAGGACAATCCACTT  
TAACTCGTTTTTATAGTTTACACACTTTTTGTATTACCTCTTCTTACTGCTGTATTTATGTTA  
ATGCACTTCCCAATGATACGTAAACAAGGTATTTCTGGTCTTTAATGGGAGTAACAAA  
AAAACCTGACTTGAATGATCCTGTATTAAGAGCTAAATTGGCTAAGGGAATGGGTCATA  
ATTACTATGGAGAACCCGCATGGCCAAATGATCTTTTATATATTTTTCCAGTAGTAATTTT  
AGGTACTATTGCATGTAACGTTGGTTTAGCGTTTTGGAACCATCAATGATTGGTGAAC  
CGGCAGATCCTTTTGCAACTCCTTTGGAAATCTTACCTGAATGGTATTTTTTCCCTGTAT  
TTCAAATACTTCGTACAGTACCCAATAAGTTATTGGGCGTTCTTTAATGGTTTCGGTAC  
CTGCGGGATTATTAATAGTACCTTTTTTGGAAAATGTGAATAAATTCCAAAATCCATTC  
GTCGCCCAGTAGCAACAACCTGTTTTTTTTGATTGGTACTGTAGTGGCTCTTTGGTTGGGG  
ATTGGTGCAACATTGCCTATTGATCAATCGTTACTTTAGGTCTTTTTATGATTGAAGTTT  
TTCTATTTGGAATTGTCTTAGGTCCTAATTCCTATTACTTTGGCTGGATTATTTGTAACCTGC  
ATATTTACAATACAGACGTGGTGATCAGTTGGACTTTATGCCTACTATAACTAGTTATTTT  
GGTTTTCTACTAGCAGCTTTAACTATTACTTCAGCTCTATTTATTGGTTTGAGCAAGATA  
CGACTTATTATGGATATAATAAGTCTTTCTTGGGCTGCGTTAATGGTAGTCTTTACATTTT  
CTCTTTCGCTTGTAGTATGGGGGAGAAGTGGACTCATGATTATTCGTTACCCGGAACAA  
GAAGTCAAATTTTTGGTAGATCGGGATCCCGTAAAAACTTCTTTCGAGGAATGGGCTA  
AACCTGGCCATTTCTCAAGAACAATAGCTAAAGGGCCAGATACTACCACTTGGATCTG  
GAATCTACACGCTGATGCTCACGATTTTCGATAGCCATACCAATGATTGGAGGAAATTT  
CTAGAAAAGTATTTAGTGCACATTTTGGTCAACTATCCATCATCTTTCTTTGGCTAAGTG  
GCATGTATTTTACGGTGCTCGGTTTTCAAATTATGAAGCATGGTTAAGCGATCCTACTC



ACATTGGACCTAGTGCGCAGGTAGTTTGGCCAATAGTGGGCCAAGAAATATTGAATGG  
TGATGTGGGTGGAGGTTTCCGAGGAATACAAATAACCTCTGGTTTTTTTTCAAATGTGGC  
GAGCATCTGGAATAACTAATGAATTGCAGCTCTATTGTACAGCAATTGGTGCATTGATTT  
TTGCAGCGTTAATGCTTTTTGCCGTTGGTTCATTATCACAAAGCTGCTCCAAAATTG  
TCTTGGTTTCAAGACGTAGAATCCATGTTGAATCACCATTTAGCAGGGCTACTAGGACT  
TGGATCTCTTGGTTGGGCAGGACATCAAATACATGTATCTTTACCAATTAACCAATTTCT  
AAACGCTGGAGTAGATCCTAAAGAAATCCCACTTCTCATGAATTTATCTTGAATCGGG  
ATCTTTTGGCTCAACTTTATCTAGCTTTGCTGAGGGAGCAACTCCATTTTTCACTTTGA  
ATTGGTCAAAATATGCGGAATTTCTTACATTTCTGTGGAGGATTAGATCCAGTAACTGGG  
GGTCTATGGTTGACTGATATTGCACATCATATTAGCTATTGCTATTCTTTTCTTAATAG  
CGGGTCACATGTATAGGACCAATTGGGGCATTGGTTCATGATATCAAAGATCTTTTAGAG  
GCTCATAAAGGTCCATTTACAGGCCAGGGACATAAAGGTCTATATGAGATCCTAACAAAC  
GTCATGGCATGCTCAATTATCTCTTAACTAGCTATGTTAGGCTCTTTAACTATTATTGTA  
GCTCATCATATGTATTCCATGCCCCCTTATCCATATTTAGCTACTGACTATGGTACACAAC  
TGTCATTGTTACACATCACATGTGGATTGGCGGATTTTTGATAGTTGGTGTCTGCTGCGC  
ATGCAGCTATTTTTATGGTAAGAGATTATGATCCAATACTACTCGATAACAACGATCTATTAGA  
TCGTGTCCTTAGACATCGTGATGCAATCATATCACATCTTAATTGGGTATGTATCTTTCTA  
GGGTTTCACAGTTTTGGTTTATATATTCATAATGATACCATGAGTGCTTTAGGGCGCCCT  
CAAGATATGTTTTCTGATACTGCTATAACAATTACAACCTGTCTTTGCTCAATGGATACAA  
AACACACATGCTTTAGCCCCTAGCACAACGGCTCCAGGTGCAACAACAAGCACTAGTT  
TGACTTGGGGGGCTAGTAATTTAGTTGCAGTGGGTGGTAAAGTGGCTTTGTTACCTATT  
CCATTAGGAACCGCAGATTTTTTGGTCCATCACATTCATGCATTTACAATTCATGTGACG  
GTATTGATACTCCTGAAAGGAGTTCTGTTTTGCTCGTAGCTCTCGTTTGATACCAGATAAA  
GCAAATCTTGGTTTTCTGTTTTCTTGTGATGGACCCGGAAGAGGAGGAACATGTCAAG  
TATCCGCTTGGGATCATGTTTTCTTAGGTCTGTTTTGGATGTACAACGCAATTCAGTAG  
TAATATTCCATTTTAGTTGGAAAATGCAGTCAGATGTTTGGGGTAGTATAAGCGATCAAG  
GTGTTGTAACATCAATTACCGGAGGAACTTTGCGCAGAGTTCCATTACGATTAATGGT  
TGGCTTCGTGATTTCTTATGGGCGCAGGCGTCCAGGTAATTCAGTCTTATGGCTCTTCA  
TTATCTGCATATGGTCTCTTTTTTCTAGGTGCTCATTTTGTATGGGCTTTCAGTTTAATGT  
TTCTATTACGCGGGCGTGGTTATTGGCAAGAACTTATTGAGTCCATAGTTTGGGCTCATA  
ATAAATTAAGAGTTGCTCCTGCTATTACAGCCTAGAGCCTTGAGCATTGTACAGGGACGT  
GCTGTAGGGGTAACCTATTACCTTCTGGGTGGAATTGCCACAACATGGGCGTTCTTCTT  
AGCAAGAATTATTGCAGTAGGAATGGCATTAAAGATTTCCAAGGTTTAGCCAAGGCTTAG  
CTCAAGACCCCACTACTCGTCGTATTTGGTTTGGTATTGCTACCGCGCATGACTTCGAA  
AGTCATGATGATATTACTGAGGAACGTCTTTATCAGAATATTTTTGCTTCTCATTTCGGA  
CAATTAGCAATCATTTTTCTGTGGACTTCCGGAAACCTGTTTCATGTAGCTTGGCAAGG  
AAATTTGAGCAATGGGTACAGGACCCTTTGCACGTAAGACCTATTGCTCATGCAATTT  
GGGATCCTCATTTTTGGTCAACCGGCTGTAGAAGCCTTTACTAGAGGAGGTGCTCTTGGC  
CCAGTCAATATTGCTTATTCTGGCGTTTATCAGTGGTGGTATAACAATTGGTTTACGTACTA  
ATGAAGATCTTTATACAGGATCCCTTTTTCTATTATTTCTTTCCGCACTATTCTTGATAGC  
GGGTTGGTTACATTTACAACCGAAATGGAAACCAAGCGTCTCATGGTTCAAAAATGCC  
GAATCTCGTCTAAATCATCATTTGTCAGGACTCTTCGGAGTCAGTTCCTTAGCTTGGAC  
AGGACATTTAGTCCATGTTGCTATTCTGGATCCAGGGGCGAATATGTTTCGATGGAATAA  
TTTCTTAGATGTATTACCGCATCCCAAGGGTTAGGCCCTTTTTACAGGTTTCAGTGGGA

ATCTTTATGCTCAAAATCCTGATTCGAGTAGTCATTTATTTGGTACCTCCCAAGGAGCAG  
GAACTGCCATTCTAACCCCTTCTTGGAGGGTTCCATCCACAAACACAAAGTTTATGGCTG  
ACTGATATTGCACATCATCATTTAGCTATTGCATTTATTTTTCTTGTTGCTGGTCATATGTA  
TAGAACTAACTTCGGGATCGGGCACAGTATCAAAGATCTTTTAGAAACACACATTCCTC  
CGGGGGGAGATTGGGCCGTGGGCATAAGGGTCTTTACGACACAATTAATAATTCGCTT  
CATTTTCAATTAGGCCTTGCCCTAGCTTCTTTAGGGGTATTACTTCTTTGGTAGCTCAA  
CACATGTATTCTTTACCTGCTTATGCCTTCATAGCGCAGGATTTTACTACTCAAGCTGCC  
CTATATACTCATACCAATACATCGCAGGATTCATTATGACAGGAGCTTTTGCTCATGGG  
GCTATATTTTTTATTAGAGATTACAATCCAGAACAGAATAAGGATAATGTATTGGCAAGA  
ATGTTAGATCATAAAGAAGCTATCATATCCCATTTAAGTTGGGCCAGCCTATTTTTAGGA  
TTCCACACTCTTGGACTTTATGTTTATAATGATGTCATGCTTGCTTTCGGTACTCCAGAG  
AAACAAATCTTGATCGAACCTATCTTTGCCCAATGGATAACAATCTGCTCATGGTAAAAC  
TTCATATGGTTTCGATGTACTTTTATCTTCAAAAAGTAGCCAGCATTCAACGCGGGTCA  
AAGTATATGGTTGCCTGGCTGGTTAAATGCTATTAATGAG-----AATAGTAATCACTATT  
CTTAACAATAGGTCCTGGAGATTTTTTGGTTCATCATGCAATTGCCTTAGGATTACATAC  
AACTACATTGATTTTAGTAAAAGGTGCTTTAGACGCACGTGGTTCAAAGTTAATGCCAG  
ATAAAAAGATTTTGGTTATAGTTTTCTTGCACGGTCCAGGACGGGGTGGGACTTGT  
GATATTTTCACTTGGGACGCATTTTATTTGGCCGTTTTCTGGATGTTAAATACCATTGGA  
TGGGTTACTTTTTATTGGCATTGGAAACACATTACATTATGGCAGGGAAACGTTTCACA  
GTTTAATGAATCATCCACTTATTTGATGGGATGGTTAAGGGATTATCTATGGTTAAACTC  
GTCACAGCTTATCAATGGATATAATCCTTTTGGTATGAATAGTTTATCAGTCTGGGCATG  
GATGTTTTTATTTGGGCATCTTGTGTTGGGCTACTGGATTTATGTTCTTAATTTCTGGCGT  
GGATATTGGCAGGAATTGATTGAAACTTTAGCATGGGCTCATGAACGTACACCTTTGGC  
TAATTTGATTCGATGGAGAGATAAACCAGTAGCTCTTTCCATTGTACAAGCAAGGTTAG  
TTGGATTAGCCCACTTTTCTGTTGGTTATATATTTACTTATGCGGCTTTCTTGATTGCCTCT  
ACATCGGGCAAATTTGGTATGTACATTCAGTAAAGATTTATGATACATGTATAGGGTGT  
ACTCAATGTGTCAGAGCTTGCCCTACAGATGTATTAGAAATGATACCTTGGGACGGTTG  
TAAAGCTAAACAAATTGCTTCTGCTCCAAGAACAGAGGATTGTGTTGGTTGTAAGAGA  
TGTGAATCCGCTTGTCCAACAGATTTCTTAAGTGTTTCGAGTTTATTTATGGCATGAAACA  
ACTCGAAGCATGGCTCTAGCTTATATGACATTTCTAAGCTTTCCCTCTATTTTTGTCCCTT  
TAGTGGGTTTAGTATTTCCGGCAATTGCAATGGCTTCTTTATTTCTTTATATTCAAAAAA  
ACAAAATTTGATGCGAGATCTAAAACATATCTCTCTACGGCACCGGTATTAAGTACT  
CTATGGTTTGGATCTTTAGCAGGTCTATTAATAGAAATTAATCGTTTTTTCCCGATGCGT  
TGACATTCCCCTTTTTTTTCAATTCATGACTGCAATTTTAGAGAGACGCGAAAGCGAAAGC  
CTATGGGGTCGCTTCTGTAACCTGGATCACAGCACTGAAAACCGTCTTTACATTGGCTG  
GTTCCGGTGTGTTTATGATGATCCCTACTTTATTAACCGCAACTTCTGTATTTATATCGCCTT  
ATTGCTGCTCCTCCAGTAGATATTGATGGTATTCGTGAACCTGTTTCTGGATCTCTACTTT  
ATGGTAAACAATATTATTTCTGGTGCCATTATTCCTACTTCTGCAGCTATAGGTTTGCCTT  
TTACCCAATCTGGGAAGCAGCGTCTGTTGACGAGTGGTTATACAATGGCGGTCTTATG  
AGTTAATTGTTCTACACTTCTTACTTGGTGTAGCTTGTACATGGGTTCGTGAGTGGGAA  
CTTAGTTTTCCGTTTAGGTATGCGCCCTTGGATTGCTGTTGCATATTCAGCTCCTGTTGCA  
GCTGCAACTGCTGTTTTCTTGATTTATCCAATTGGTCAAGGAAGTTTTTCTGACGGTATG  
CCGTTAGGAATCTCTGGTACTTTTAACTTCATGATTGTATTCCAGGCTGAGCACAAATC  
CTTATGCACCCATTCCACATGTTAGGCGTAGCTGGTGTATTTCGGCGGTTCCCTTTTCACT

GCTATGCATGGTTCCTTGGTAACTTCTAGTTTGATCAGGGAAACCACAGAAAATGAATC  
TGCTAATGCAGGTTATCGATTTGGTCAAGAGGAAGAACTTATAATATCGTTGCTGCTCA  
TGGTTATTTTGGACGATTAATCTTCCAATATGCTAGTTTTAACAAATTCTCGTTCCTTACAT  
TTCTCCTAGCTGCTTGGCCTGTAGTAGGTATTTGGTTCACCTTCTTAGGTATCAGCACT  
ATGGCTTTTAACTTAAACGGTTTCAATTTCAACCAATCTGTAGTTGATAGTCAAGGTCG  
CATCATTAATACCTGGGCTGATATTATTAACCGTGCTAACCTTGGTATGGAAGTTATGCAT  
GAACGTAATGCTCACAATTTCCCTCTAGACCTAGCTTCGGTTGAAGCTCCATCTATTAAT  
GGAATGGGTTTGCCTTGGTATCGTGTTCACTAGTGTGTTTTGAATGATCCTGGTTCGTTTG  
CTTCTGTCCATATCATGCATACAGCTCTTGTGCGGTTGGGCTGGTTCGATGGCTCTA  
TATGAATTAGCAGTTTTTGTATCCCTCTGATCCCATCTTGATCCAATGTGGAGGCAGGGC  
ATGTTTCGTTATACCTTTCATGACTCGTTTAGGAATAACGAATTCATGGGGTGGCTGGAGT  
ATTACA--GGAGGGACTGTAACAAATCCTGGTATTTGGAGTTACGAAGGCGTAGCTGCG  
GCACATATTGTGTTTTCTGGCTTGTGTTTTTGGCAGCTATTTGGCATTGGGTGTATTGG  
GATCTAGAAATATTTGTGATGAACGTACAGGAAAACCTTCTTTGGATTTGCCTAAGAT  
CTTTGGAATTCATTTATTTCTTTCAGGATTAGCTTGCTTTGGTTTTGGGGCATTTCATGTA  
ACAGGATTGTATGGTCCCTGGAATCTGGGTGTCCGATCCTTATGGACTAACTGGGAAGGT  
ACAACCTGTAAGTCCAGCTTGGGGTGTGGAAGGTTTTGATCCTTTTGTCCGGGAGGA  
ATAGCCTCTCATCATATTGCAGCAGGGACGCTGGGCATATTAGCGGGATTATTTTCATCTT  
AGTGTCCGTCCGCCGCAACGTCTATACAAAGGATTACGTATGGGTAATATTGAAACCGT  
ACTTTCTAGCAGTATTGCTGCTGTCTTTTTTGCAGCTTTTGTGTTGCTGGAACCTATGTG  
GTATGGGTCAGCAACTACCCCGATCGAATTATTTGGTCCACTCGTTACCAATGGGATCA  
GGGATATTTCCAGCAAGAAATCTATCGAAGAGTTAATGCTGCTCTATCCGAGAATCAAA  
GTCATCTGAAGCTTGGTCTCAAATTCCTGAAAAATTAGCCTTTTATGATTATATAGGCA  
ATAATCCAGCAAAAGGAGGATTATTTAGAGCAGGCTCAATGGACAATGGGGATGGAAT  
AGCTGTTGGGTGGTTAGGGCATCCTATTTTTAGAGATAAAGAAGGACGTGAACTCTTTG  
TGCGTCGTATGCCTACTTTTTTTGAAACATTTCCAGTTGTTTTGGTAGATGGAGATGGAA  
TTGTTCCGCGCCGATGTTCCTTTTAGACGAGCAGAATCTAAATATAGTGTCAACAAGTA  
GGTGTAACAGTTGAGTTTTATGGCGGTGAACTAAATGGAGTTAGTTATAGTGATCCAGC  
TACTGTGAAAAATATGCTAGACGTGCTCAATTGGGTGAAATTTTTGAATTAGATCGTG  
CTACTTTGAAATCCGATGGTGTTTTTTCGTAGTAGTCCGAGGGGTTGGTTTACTTTTGG  
CATGCTTCATTTGCTCTACTTTTCTTCTTCGGACATATTTGGCATGGTGTCTAGAACCCTG  
TTCAGAGATGTTTTTGTGCTGGTATTGACCCGGATTTGGATACTCAAGTGGAAATTTGGAGC  
ATTCCAAAAAATTGGAGATCCAATAAAAAAGACAAGTTGTT-----  
----GTGGAAACGCTCTTTAATGGAACTTTAGCTTTAGCCGGTCGTGACCAAGAAACCAC  
TGGGTTTCGCTTGGTGGGCCGGAATGCACGACTTATCAATTTATCCGGTAAACTGTTGG  
GAGCTCATGTAGCCCATGCTGGATTAATCGTATTCTGGGCCGAGCAATGAATCTATTTG  
AAGTGGCTCATTTTGTACCAGAGAAGCCTATGTATGAACAAGGATTAATTTGCTTCCA  
CATTTAGCTACTTTAGGTTGGGGAGTAGGTCTGGCGGGGAAGTGATAGACACGTTTCC  
ATACTTTGTATCGGGAGTACTTCATTTAATCTCCTCTGCAGTATTGGGCTTCGGTGGTATT  
TATCATGCACTTCTGGGACCCGAGACCCTTGAAGAATCTTTTCCATTCTTCGGTTATGTA  
TGGAAGATAGAAATAAAATGACCACAATTTGGGTATTCATTTAATTTTATTAGGTCTA  
GGTGTCTTTCTTCTAGTATTCAAGGCTCTTATTTTGGTGGCGTATATGATACCTGGGCTC  
CAGGTGGAGGAGATGTAAGAAAAATTAGCAACTTGACTCTTAACCCGAGTGTTATATTT  
GGTTATTTATTGAAATCCCCTTTTGGGGGAGAGGGATGGATTGTTAGTGTGGATGATTA

GAAGATATAATTGGAGGACATGTATGGTTAGGTTCCATTTGTATACTTGGTGGAATCTGG  
CATATCTTAACCAAACCTTTTCGCATGGGCTCGTCGTGCACTTGTATGGTCTGGAGAAGC  
TTACCTATCTTATAGTTTAGGAGCTTTATCTGTTTTTCGGTTTTTCATTGCTTGTGCTTTGTC  
TGGTTTAAATAACTGCTTATCCTAGTGAGTTTTATGGGCCTACTGGACCAGAAGCTTCT  
CAAGCTCAAGCATTACTTTTCTAGTTAGAGACCAACGTCTTGGTGCTAACGTAGGATC  
CGCTCAAGGGCCTACCGTTTTAGGTAAATATCTAATGCGCTCTCCGACCGGAGAAATTA  
TTTTTGGGGGCGAAACTATGCGTTTTTTGGGACCTACGTGCTCCTTGGTTAGAACCTCTA  
AGAGGCCCTAACGGTTTGGACTTGAGTAGAATTAAGATATCCAGCCTTGGCAAG  
AACGACGTTCCGCGGAATATATGACTCATGCTCCTTATAGGTTCTTTAAATTCCGTGGGTG  
GCGTAGCTACCGAGATCAATGCAGTCAATTATGTTTTCTCCTAGAAGTTGGTTAGCTACTT  
CTCATTTTTGTTCTAGGATTCTTCTATTTGTAGGTCAATTTATGGCACGCAGGAAGGGCTC  
GTGCCGCTGCAGCAGGATTTGAAAAAGGAATTGATCGTGATACTGAACCTGTTCTTTTC  
ATGACTCCTCTAACATGACTATAGCCCTTGGTAAATTTACCAAAGACGAAAAT---TTAT  
TTGATATTATGGATGACTGGTTACGTAGGGACCGTTTTCGTTTTTGTAGGTTGGTCTGGTC  
TATTGCTCTTTCCTTGTGCCTATTTTGTCTTAGGAGGTTGGTTTACAGGTACAACCTTTG  
TAACTTCATGGTATACTCATGGATTGGCTAGCTCTTATTTGGAAGGTTGCAACTTCTTAA  
CCGCTGCAGTTTCTACTCCTGCTAATAGTTTAGCGCATTCTTTGTTGTTACTATGGGGTC  
CTGAAGCACAAGGAGATTTTACTCGTTGGTGTCAATTAGGCGGTCTATGGACTTTTTGTT  
GCTCTACATGGTGCTTTTTGGACTAATAGGTTTCATGTTACGTCAATTTGAACTTGCTAGA  
TCTGTTCAATTGCGTCCTTATAATGCAATCTCATTTCCTGCTCCAATTGCTGTTTTTGT  
CTGTATTCCTGATTTATCCCCTAGGTCAGTCTGGTTGGTTCTTTGCACCTAGTTTTGGTG  
TAGCAGCTATCTTTCGATTCATCCTTTTTTTCCAAGGGTTTCATAATTGGACATTAAACC  
CTTTTCATATGATGGGAGTTGCTGGTGTAATTGGGCGCTGCTTTACTATGCGCTATTCATG  
GTGCTACCGTAGAAAATACTTTATTTGAGGACGGTGATGGTGCAAACACATTCCGCGCT  
TTAATCCAACCTCAAGCTGAAGAACTTATTCAATGGTTACTGCTAATCGCTTTTGGTCC  
CAAATCTTTGGGGTTGCTTTTTCTAATAAACGTTGGTTACATTTCTTTATGTTATTTGTAC  
CAGTAACTGGTTTATGGATGAGTGCTCTTGGAGTAGTCGGTCTAGCTTTGAACTACGT  
GCCTATGACTTCGTTTTCTCAAGAAATCCGTGCAGCAGAAGATCCTGAATTTGAACTTT  
CTACACAAAAAATATCCTATTAATGAAGGTATTCGTGCTTGGATGGCGGCTCAAGATC  
AGCCTCATGAAAACCTTATATCCCTGAGGAGGTTCTACCACGTGGAAACGCTCTTATG  
TCTGGAAGTACAGGAGAACGTTCTTTTGTGATATTATTACTAGTATTCGATTTGGGTC  
ATTCATAGCATTACTATACTTCCCTATTCATTGCGGGTTGGCTATTTGTCAGCACGGGTT  
TAGCTTATGATGATTTTGAAGCCCTCGCCCAAACGAATATTTTACAGAGAGCAGACAA  
GGAATTCCATTAATAACTGAACGTTTTGATTCTTTGGAACAACCTGAATGAATTTAGTAGA  
TCTTTTATGACCATAGATCGAACCTATCCAATTTTTTACAGTACGATGGTTGGCTGTTTCAT  
GGACTAGCTGTACCTACCGTTTTCTTTTTTGGGATCAATATCAGCAATGCAGTTCATCCAA  
CGAATGGCTACACAACTGCTGAGAGTAATTCTAGATCTAGT---CCAAGACGAACTCCT  
GTAGGGAGTTTATGAAACCAATTGAATTCTGAATATGGTAAAGTAGCTCCTGGATGGGG  
AACTACTCCTTTGATGGGTGTTGCAATGGCCTTATTCGCGGTATTCTTATCGATTATTTG  
GAGATTTATAATCTTCCGTTTTACTGGATGGAATTTCAATGAATATGCTTACTTTAAAC  
TATTTGTTTATACGGTAGTGATCTTTTTTGTCTCTCTTCATTTTTGGATTCTATCTAAT  
GATCCAGGACGTAATCCTGGACGTGAAGAAATGGCAGATACTACTGGAAGGATTCTC  
TTTGGATAATAGGTACTTTAACTGGTATTCTTTTATCGGTTTAAATAGGTATTTCTTTTAT  
GGTTCATATTCTGGATTGGGTTTCATCCCTTATGCTTAATATATTTAGTTTGTATCTGATCTG

GTTTAACTCTGATCTTTATTCAAATCATTFTTTTATCGGCAAAATTGCCTGAAGCGTACGC  
TTTTTTGAGCCCAATCGTAGATTTTATGCCAGTAATTCCTTTACTCTTTTTTCTATTAGCT  
TTTGTGGCAAGCTTCTGTAAGTTTCGAATGACACGATCCAACCCAAATGAACAAA  
TGTCGAATTGAATCGTACCAGTCTTTACTGGGGATTATTACTCATTFTTTGTACTTGCTGTT  
TTATTTCCAATTATTTCTTCAATATGGAAGTAAATATTGCCGCATTTATTGCTACTGCATT  
ATTCGTTCTAGTTCCACTGCTTTTTTAATAATAATATACGTAAAAACAGTTAGTCAAAA  
C---ATGGAAACAGCAACTCTAGTCGCCATCTCTATATCTGGTTTACTTGTGAGTTTTACT  
GGGTATGCCTTATATACTGCTTTTTGGGCAGCCCTCTCAACAATAAGAGATCCGTTTCGA  
GGAGCACGGGGACATGGAAGCATTGGTTTATACATTTCTTTTAGTCTCGACTCTAGGAA  
TAATTTTTTTTGGCTATTTTTTTTCGAGAACCCGCCTAAAGTTCCAATAAAAAGATGAAA  
TGACTATTGCTTTCCAGTTAGCTGTTTTTGCATTAATTATTACTTCCCTCAATATTATTGATT  
AGTGTCCCCGTTGTATTTGCTTCCCCTGAAGGTTGGTCTAGTAACAAAAGATTGTATT  
TTCTGGTACATCATTATGGATTGGATTAGTCTTCCCTGGTGGGTATACTTAATTCTCTCATC  
TCT-----ATGTCACCACAAACAGAGACTAAAGCAAGTGTGGATTCAAAGCT  
GGTGTTAAAGATTATAAATTGACTTATTATACTCCTGAATATGAAACAAAAGATACTGAT  
ATTTTGGCAGCATTTCGAGTAACCCCTCAACCTGGAGTTCCGCCCCGAAGAAGCAGGGG  
CTGCAGTAGCTGCTGAATCTTCTACTGGTACATGGACAACCTGTGTGGACTGATGGACTT  
ACCAGTCTTGATCGTTACAAAGGACGATGCTACAACATTGAGCCTGTAGCTGGAGAAG  
AAAATCAATATATTGCTTATGTAGCTTACCCGTTAGACCTTTTTGAAGAAGGTTCCGTTA  
CTAACATGTTTACTTCCATTGTGGGTAATGTCTTTGGGTTCAAAGCCCTGCGTGTCTAC  
GTTTGGAGGATTTGCGAATTCCAAAGTCTTATATTAATAAACTTTTCGAAGGACCACCTCAT  
GGTATCCAAGTTGAGAGAGATAAATTGAATAAGTATGGTTCGTCCTTTATTGGGATGTACT  
ATTAAACCTAAATTAGGTCTATCCGCGAAGAATTATGGTAGAGCAGTTTATGAATGTCTT  
CGAGGTGGACTTGATTTTACCAAAGATGATGAGAACGTTAACTCCCAACCATTTATGCG  
TTGGAGAGACCGTTTCCTATTTTGTGCCGAAGCACTTTTTAAAGCACAAGCTGAAACA  
GGTGAGATCAAAGGACATTACTTAAATGCTACTGCAGGTACATGCGAAGAAATGATCA  
AAAGGGCTGTGTGTGCCAGAGAATTGGGAGCTCCTATCGTAATGCACGATTACTTAAC  
AGGTGGATTCACTGCAAATACTAGTTTGGCTCATTATTGCCGAGATAATGGTCTACTTCT  
TCACATTCACCGTGCAATGCATGCAGTTATTGATAGACAGAAGAATCATGGTATGCATTT  
CCGTGTATTAGCTAAAGCTTTACGCTTGTCCGGAGGAGATCATATTCACGCTGGTACCGT  
AGTAGGTAACCTGAAAGGGGAAAGAGAGATTACTTTAGGCTTTGTTGATTTACTACGTG  
ATGATTTTGTGAAAAAGATCGAAGCCGCGGTATTTATTTACCCAAGATTGGGTCTCT  
TTGCCAGGAGTTATACCTGTTGCTTCAGGTGGTATTACGTTTGGCATATGCCTGCTCTA  
ACCGAGATTTTTGGAGATGATTCCGTACTACAATTTGGTGGAGGAACTTTAGGACATCC  
TTGGGGTAATGCACCTGGTGCCGTAGCGAATCGAGTAGCTCTAGAAGCGTGTGTACAA  
GCTCGTAATGAGGGACGTGATCTTGCTCGTGAAGGGAATACAATTATCCGTGAGGCTAG  
CAAATGGAGTCCTGAGTTAGCTGCTGCTTGTGAAGTATGGAAGGAGATCAAATTTGAA  
TTCCCTGCAATGGATACTTTA-----ATGGCGATACATTTATACAAAACCTTCTACCCCGAGA  
ACACGCAATGGAGCTTTAGACAGTCAAGTGAATCCAATCCACGAAAGAATTTGATTT  
ATGGACAGCATCGTTGT---AAAGGTCGTAATGCCAGAGGAATCATTACTGTAAGGCATA  
GAGGGGGAGGTCATAAGCGTCTATATCGTAAATAGATTTTCGACGGAAGGAAAAAGA  
CATATATGGTAGAATCGTAACCATAGAATACGACCCTAATCGAAATGCATACATTTGTCT  
CATCCACTATGGGGATGGTGAGAAGAGATATATTTTACATCCCAGAGGGGCTATAATTG  
GAGATACCATTGTATCTGGTACAGAAGTTCCTATCCAAATGGGAAATGCCCTACCTTTG

ACCGAGATGCCCTTAGGCACGGCCATACATAACATCGAAATCACATTTGGAAAGGGTG  
GACAATTAGTTAGAGCAGCAGGTGCTGTAGCAAACTAATTGCAAAAGAGGGGAAAT  
CGGCCACATTAATAATTACCTTCTGGGGAGGTCCGTTTAATATCCAAAAATTGCTCAGCA  
ACAGTTGGACAAGTGGGTAATGTTGGGGTGAACCAGAAAAGTTTGGATCGAGCCGGA  
TCGAAATGTTGGCTAGGTAAGCGTCTGTAGTCAGAGGAGTAGTTATGAACCCTGTAG  
ACCACCCGCACGGGGGTGGGGAAGGAAGAGCGCCAATTGGCAGAAAAAACCCGCA  
ACCCCTTGGGGTTATCCTGCGCTTGAAGAAGAAGTAGAAAAAGGAATAAATATAGTG  
AGAATTTGATTCTTCGTGACGTAGT---ATGATTCAACCTCAAACCCATTTGAATGTAGC  
GGATAACAGCGGGGCCCAAGAATTGATGTGTATTGCAATCATAGGAGCTAGT---AATCG  
TCGATATGCCCATATTGGTGTATTTATTGTTGCTGTAATAAAAGAAGCAATACCAAACAC  
ACCGATCGAAAAATCAGAAGTTATTTCGAGCGGTAATTGTGCGTACTTCTAAAGAATAA  
AACGTGACAACGGTATGATAATACGATATGATGACAACGCTGCAGTGATCATTGATCAA  
GAGGGAAATCCAAAAGGAAGTTCGAATTTTTGGTGCAATCCCCCGTGAATTGAGACAAT  
TCAATTTACAAAAATAGTTTCATTAGCACCCGAAGTATTAATGCTTAGTCCAAAAAGA  
ACTAGATTCCGTAAACAACATAGAGGAAGATTAAGGAAGATCTTATCGAGGGAATC  
GTATTTGTTTCGCTAGATATGCTCTTCAAGCACTTGAACCTGCTTGGATAACATCTAGAC  
AAATAGAAGCAGGTGACGAGCAATGACACGAAATATACGCCGTGGTGGAAAAATATG  
GGTACGTATCTTCCAGACAAACCAGTTACAATGAGACCTGCAGAAACGCGTATGGGT  
TCGGGAAAAGGATCCCCAGAATATTGGGTCGCTGTCGTTAAACCCGGCAGGATACTTTA  
TGAGATGGGAGGAGTATCTGAAAATATAGCCAGAAGAGCTATTTCAATAGCAGCATCCA  
AAATGCCCATACGAACTCAATTCATTATTGCAGAAATGACCAGAATTAACGAGGATAT  
ATAGCACATAGACGTAGAGCAAAAATTCGTTTATTTGTATCAGGTTTTTCGAGGAGCCCA  
TTCAAGAATTAAGTACTCGAAGTATTACTCAACAGAGAATAAGAGCTTTGGTTTTCATCTGATC  
GAGATCGAGATAGAAAAAGAGAGATTTTCGCCGTTTGTGGATTATTCCGATAAATGCA  
GTAATTCGCGAGAAT---ATATTATCTTATAGTTACAGCAAATTTATACACAATATTTACAAG  
AAACAGTTGCTTCTTAATCGTAAATACTTTCACAAATAGCTATATTTAATAGGAATTGT  
CTTTATATGATTGCCAATGAAATC-----ATAATAAATCAAGCATA  
CGTTTTCGGTGACAATATACGTATGTCTGCGAATAAAGCGCGAAGAATAATTGATCAAA  
TTCGTGGGCGTTCCTATGAAGAAACACTTATGATACTAGAACTCATGCCTTATCGAGGG  
TGTTATCCAATTTTTCAATTAGTTTATTCTGCAGCAGCAAATGCTAGTCATAATCAGGGT  
TTAGAGAAAAAAATTTAGTAATTACTCAAGCTGAAGTAAACGAAAGTACTACGGCAA  
AAAAATTCAAACCTAGAGCCCGAGGGCGCAGTTATTCAATAAAAAGACGAACTTGTA  
TATAACTATTGTATTAACAGATGTATCTTTA-----ATAGATGGAATCAAATAT  
TCAGTAGTTACAGACAAAGGTATTTCGGTTATTGTTGAAAAAT---CAATATACTTTAATGT  
CGAATCAGGATCAACTAGGACAGAAATCAAGCATTGGGTCGAACTCTTCTTTGGTGTC  
AAGGTAATCGCTGTGAATAGTCATCGACTCCCGGGAAAGAGTAGAAGAATGGGACCTA  
TTATGGGACATACAATGCATTACAAACGTATGATCGTTACGCTTCCACCGGGTTATTATAT  
TCCACCTCTTAGAAGAAAAGAACTGATGGCAGTTCCAAAGAAGCGTACTTCTATATCA  
AAAAACGTATTCGTAAGAATATTTGGAAAAAAAAGGGATATTGGACAGCATTGAAAT  
CTTTTTATTAGCTAAATCGCTTTTTAGCGGAAATTCAAAAAGTTTCTTTGTACAACAGA  
TAAAGATAATGGCCAAGGGTAAAGATATCCGTATAACGATAATTTTGGAAATGTAAGT  
GT---GCTCGAAAA-----ATTGATAAAAA-----GGTATTTCCAGATATATTA  
TACTCAAAGAA  
TCGACACAATACGCCAAATCGATTGGAATTGAAAAAGTTTGTTCGTATGTTTCAAAT  
ATACGATTCACAAGGAGATCCAAAAAATGAAAATAAGAGCTTCTGTTTCGTAAAATTTGT

GAAAAATGTCGACTGATCCGTAGAAGAGGACGAATTATAGTAATTTGTTCCAACCCAA  
AACATAAGCAAAGACAAGGAATGGTTCGAGAGAAAATAGAAGTATCTACTCGGACACT  
CCAATGGAAGTGTGTGGAATCAAGAGCAGACAGTAAGCGTCTTTATTATGGGCGCTTT  
CTTCTTTCACCACTGAAGAAAGGTCAAGCTGATACAATAGGCATTGCAATGCGACGAG  
TTTTGCTTGGAGAAATAGAAGGAACAAGTATAACAAGTGCAAATCTGAG-----AACAT  
ACCACATGAATATTCTAGCATAGTAGGTGTTGAAGAATCAGTACATGAAATTTTAATGAA  
TTTAAAAGAAATTGTATTGAGAAGTCATCTTTATGGAATTTGCGACGCGTCTATTTGTGT  
CAAAGTCTCGGATGTGTAACGGCCCAAGACATCATTTTACCATCTTATGTGGAAATCG  
TTGATAACACACAACATATAGCGAACTTAACAGAACCCATTGATTTTTGTATTAGATTAC  
AAATAGAAAGGAATCGGGGATATCGTATAAAAACGCCAAATCAATTTCAAGAGGGAAT  
TTAT-----CCTATAGATGCTGTATTTCATGCCTGTTAGAAATGCAAACCATAGTATTCATTCT  
TATGGTAATGGTAGTGAAACACAAGAGATACTCTTTCTTGAAATATGGACAAATGGAAG  
TTAACTCCTAAAGAAGCACTTCATGAAGCCTCCCGCAATTTGATTGATTTATTTATTCC  
CTTCTACATGCGGAAGAAGAA-----AACTTACATTTAGAAAACAATCAA---ACAAGTA  
TACTTTACCCCTTTTTCTTTTCATGATCAATTCAAT---CAAATAAAAAAAAAATCAAAA-  
--GAAATAGAATTCAAATCTATTTTTATTGACCAATTAGAATTGACTCCAAAGATATATAAT  
TGTCTCAAAGGTCTAATATACATACATTATTTGATCTTTTGAATAATCGTAAAGAAGAC  
CTGATGAGAATTGAACATTTTCGCATAGAAGACATAAATCATATATTTACATTTTAGAA  
AAGAATTCGCAACTACAATTAATTTACCGAAAAAGAAAATGCTCATGGATGAAAAT---  
GAAGTAATGTCTACAATACCTGGATTGAATCAGATACAATTTGAAGGATTTTGTAATTC  
ATTGATAGGGGTTTAATAGAAGAACTTTATAAATTTCAAAAATTGAAGATGCAGATCA  
AGAAATTGAATTTCAATTATTTGTAGAACTTATAAATTGGTAGAACCTTCAATAACAGA  
ACGAGATGCTATATATCAATCACTCACATATTCTTCTGAATTACATGTATCTGCAGGATTA  
ATTTGGAAAATGTTAGAGGTATGCAAGAACAACCATTTTTATTGGAAACATTCCCTT  
AATGAATTCTCTGGGGACTTTTATAGTCAATGGAATATACAGAATTGTCATCAATCAAAT  
ATTACAAAGCCCTGGTATATATTATCGATCAGAATTGGATCATAATGGAATTCCTGCTAT  
ATTGGCACGATAATATCAGATTGGGGAGGAAGATTAGAATTAGAGATTGATAGAAAAGC  
AAGGATATGGGCTCGTGTAAAGTAGAAAGCAAAAATATCTATTTTAGTTTTATCATCAGC  
TATGGGTTTGAATCTCAGAGAAATTCTGGAAAATGTTTGTACCCTGAAATGTTCTTGT  
CTTCTTGAATGATAAGGAGAAAAAAAATTGGGTCAAAGAAAATGCCATTTTGGGA  
GTTTTATCAACAGTTTGCTTCAGTAGGTGGAGATCCGGTCTTTTCTGAATCCTTATGTAA  
AGAATTACAAAAGAAATTCTTTCAACAGAGGTGTGAATTAGGAAAGATTGGTCGACGA  
AATATGAATCTAAGATTCAATCTCGATATACCTCAGAACAATACATTTTTATTACCTCGAG  
ATATATTGGCAGCTACTGATCATTGATTGGAATTAATTTGGAATCGGCACGCTTGACG  
AT-----ATGAATCATTTGAAAATAAACGTATTCGATCTGTATCAGATCTTTTACAAGATC  
AATTGGGATTGGCTCTAGTTCGTCTAGAAAATGTGATTAAGGAACCTATATCCGGAGCC  
ATTCGG---CATAAATTAATA---CCGACTCCTCAAATTTAGTAACTTCAACTCCA-----  
TTAACTACTATGAATCTTTTTTCGGATTACACCCATTATCTCAAGTTTTTGTATCGA  
ACGAATCCATTGACACAAATAGTTCATGGTAGAAAATTAAGTTATTTGGGTCCCGGAGG  
ATTGACAGCACGAAGTCTAATTTTCGGATACGAGATATTCATCCTAGTCACTATGGGCG  
CATTTGCCAATTGACACGTCGGAAGGAATCAATGTTGGGCTTATTGGATCCTTAGCAA  
TTCATGCGAGAATTGGTCATTGGGGA---TCTCTAGAAAGCCCGTTCTAT-----GAAATT  
TCTGAACAGTCAAAA-----AAAGTACGGATCCTTTCTTTATCACCAAATCGAGATGAATA  
TTATATGATAGCAGCAGGAAATCTTTGGCACTCAATCGGGATATTCAGGAAGAGCAGG

TTGTTCCAGCCCGATACCGTCAAGAATTTTTAACTATTGCATGGGAACGGATTTCATCTTC  
GAAGTATTTTTCCCTTTCCAATATTTCTCGATTGGAGCTTCCCTAATTCCTTTTATCGAGCA  
TAATGATGCGAATCGAGCTTTAATGAGTTTCGAATATGCAGCGTCAAGCAGTTCCACTTT  
CTCAATCTGAAAAATGCATTGTTGGAAGTGGGTTAGAACGCCAAGCAGCTCTAGATTC  
CGGGTTCCCTGTGATATCCGAACAGGAGGGAAAGATAATTTATAGCGATACTAAAAAG  
GTCGTTTTATCGACCAATGGAAATACTTTAAACATTCCACTAATTATGTACCAACGTTCC  
AATAAAAATACTTGCATTCATCAAAAAGCTCGGGTTCAATATGGTAAATGGATTAAAAA  
GGGACAACCTTTTAGCGGATGGTGCTTCTACAGTTGGTGGGGAACCTTGCTTTGGGGAAA  
AATATATAGTGGCTTATATGCCATGGGAAGGTTACAATTTTGAAGATGCAGTACTTATT  
AGCGAACGTCTAGTATATGAAAATATTTATACTTCTTTTTCACATAAGGAAATATGAAATT  
CAGACTCATGTGACAAGTCAAGGC---CCTGAAAAGATCACCAAAGAAATACCACATCT  
AGAGGCTCATTACTTCGTAATTTAGACAAAAATGGAATTGTGATGTTGGGATCTTGGG  
TAGAGACAGGTGATGTTTTAGTAGGTAATAACACCTCAGATGACGAAAGAA---TCCT  
CGTATGCTCCGGAAGATAGATTATTACGCGCCATACTCGGCATCCAAGTATCCACTTCAA  
AGGAACTTGTCTAAAATTACCTATAGGTGGTAGGGGTCGAGTTATTGATGTGAGATGG  
ATCCAAAAAAAAGGG---GGTCTAGTTATAATCCAGAAATCATTTCGTGTCTATATTTTAC  
AGAAACGTGAAATCAAAGTAGGTGATAAAGTAGCTGGAAGACATGGAAATAAGGGTAT  
CATTTCAAAAATTTTGACTAGACAGGATATGCCTTATTTACAAGATGGAAGATGTGTTGA  
TATGGTCTTCAACCCATTAGGAGTACCCTCACGAATGAATGTAGGACAGATATTTGAAT  
GTTCACTCGGGTTAGCCGGAAGTCTCCTAGATAGACATTATCGAATAGCACCTTTTGAT  
GAGAGATATGAAAAAGAGGCTTCCAGAAAAGTAGTGTTCGGAATTATATGAAGCCA  
GTAAGCAAACAGCAAATCCATGGGTATTTGAACCAGAGTATCCAGGAAAAAGCAAAT  
ATTTGACGGAAGAACAGGAGATCCTTTTTGAACAACCTGTTCTAATAGGAAAGCCTTATA  
TCTTGAAATTAATTCATCAAGTGGATGATAAATAACATGGACGCTCCAGTGGACATTATG  
CACTTGTTACACAACAACCCCTTAGAGGAAGAGCCAAGCAAGGGGGGCAGCGGGTAG  
GAGAAATGGAGGTTTGGGCTCTAGAAGGATTTGGTGTGCTCATATTTTACAAGAAATG  
CTTACTTATAAATCTGATCATATCAAAGCTCGTCAAGAAGTACTTGGTACTACAATAATT  
GGAGGAACAATACCGAAACCCAGGATGCTCCAGAATCGTTTCGATTGCTCGTTCGAG  
AACTACGATCTTTGGCTCTAGAACTGAATCATTTCCTTGTATCTGAGAAGAATTTGAAG  
ATGACTAGGAAGGAAGCTATGAATAATTATTTTCTTCTATGATCGATCAATATAAACATC  
AACAACTCCGAATTGGATCAGTTTCTCCTCAACAAATAAGTGCTTGGGCTACTAAAATC  
CTACCTAATGGAGAAATAGTTGGAGAAGTAACAAAGCCTTATACTTTTCATTACAAAAC  
CAATAAACCTGAAAAAGATGGATTATTTTGTGAAAGAATTTTGGGCCTATAAAAAGTG  
GAATTTGTGCTTGTGGAATTATCGAGTAATCGGAGATGAAAAAGAAAA---AAATTTT  
GTGAACAATGCGGAGTCGAATTTGTAGATTCTCGGGTACGAAGATATCAAATGGGCTAC  
ATTCAACTGGCATGCCAGTAACGCATGTGTGGTATTTGAAACGTCTTCCCTAGTTATATC  
GCGAATATTTAGATAAACCTCTTAAAGAATTAGAAGGCCTAGTATACTGCGATTTT-----  
TCTTTTGCTAGGCCT---GTAATTAATAAACCAACTTTTTTACGATTACGAGGTTTATTCG  
AATATGAAATCCAATCTTGGAAATACAGCATCCCACTTTTTTTTACTACCAAGGTTTCG  
ATACATTTGAAATCGAGAAATTTTCGAGTGGAGCGGGTTCGATTTCGAGAACAGTTATCT  
GATCTGGATTTGCGAAGTATTATAAATTTCTTATTAGTAGAATGGAAAGAATTGGTAGAA  
GAA---GGTCCCACAGGTAATGAGTGGGAGGATAGAAAAATTGGACGAAGAAAAGATTT  
TTTGGTTAGACGAATGGAATTAGCTAAGCATTTTCTTCGAACAAACATAGAACCAGAAT  
GGATGGTTTTATGTCTATTACCGGTTCTTCCCCCGAGTTGAGACCTATCATTAGATTG



ATGGGGGGAAGCTAATGAGCTCAGATATTAATGAACTCTATAGAAGAGTTATCTATCGA  
ACAATACTCTTAAGGATCTATTGATAACAAGTAGATCTACACCAGGAGAATTAGTAAT  
GTGTCAAGAGAAATTGGTACAAGAAGCCGTAGATACACTTCTTGACAATGGAATTCGA  
GGACAACCTATGAGGGATAGTCATAATAAGGTTTATAAGTCATTTTCAGATGTCATTGAA  
GGCAAAGAGGGAAGATTTTCGTGAGACTTTACTTGGCAAACGAGTCGATTATTCAGGAC  
GTTCTGTCAATTGTTGAGGTCCCTCACTTTCATTACATCAATGTGGATTGCCTGGCGAAA  
TAGCAATAGAACTTTTCCAGACATTTGTAATTCGGGGTCTAATTCGAAAGAATCTTGCT  
TCTAACATAGGAGTGGCTAAGAGTCAAATTCGGGAGCAAGAACCCATTATATGGGAAAT  
ACTTCAGGAAGTTATGCGGGGTCATCCTGTATTGCTGAATAGAGCACCCACTCTGCATA  
GATTAGGAATACAAGCATTCCAGCCTATTTTAGTGGAAGGACGTGCTATTTGTTTACATC  
CATTAGTTTGTAAAGGATTCAATGCGGACTTTGATGGTGATCAAATGGCTGTTTCATGTAC  
CTTTATCTTTGGAGGCTCAAGCAGAGGCTCGTTTACTTATGTTTTCTCATATGAATCTCTT  
ATCTCCAGCTATTGGAGATCCGATTTCTGTACCAACCCAAGATATGCTTATGGGTCTTTA  
TGTATTAACAAGTGGGAATCGTCGAGGTATTTGTGCAAATAGGTATAATCCATGTAATCG  
T-----AAAATTATAAAAATGAAAAATTCTAAATAAGAATTGTGAGTACACGAAAGA  
A--GAACCTTTTTTTGTTAATTCCTACGATGCAATTGGGGCTTATCAGCAAAAAAGAATT  
TATTTAGATAGTCCTTTGTGGCTTAGGTGGAACCTAGATCAACGT--GTTATTGCTTCA--  
---AGAGAACTCCAATAGAAGTTCAGTATGAATCTCTGGGTATCTATCATGAGATTTATG  
GAACTATATAATAGTCAGAGGCATTAAGAAAGAAATTCTTTGGATATATATTCGAACTA  
CTGTTGGTCATATTTTTCTTTATCGAGAAATAGAAGAAGCTATACAAGGGTTTTCTCGGG  
CTGGTTTTATGGTACC-----ATGGAGGTACTTATGGCAGAACGGGCCAAT  
CTGATCTATCACAATAAAGCGATAGACGGAAGTCCATTAAACGACTAATTAGCAGATT  
CATAGATCATTTCCGAATGGCGTATACATCACACATCCTGGATCAAATAAAGACTCTGG  
GTTTCCAGCAAGCTACTTCTGCATCCATTTTCATTAGGAATTGATGATCTTTAACAATAC  
CTTCTAAAGGATGGCTCGTCCAAGATGCTGAACAACAAAGTTTCATTTTTGAAAAACA  
CCATAATTATGGGAATGTACATGCGGTAGAAAAATTACGCCAATCTATTGAGATATGGTA  
TGCTACAAGTGAATATTTGCGACATGAAATGAATCCTAATTTTAGGATTACTGACCCTTT  
GAATCCAGTCCATATAATGTCTTTTTTCGGGAGCTAGGGGAAATGTATCTCAAGTACATCA  
ATTAGTAGGTATGAGAGGCTTAATGTCAGATCCTCAAGGCCAAATGATTGATTTACCCAT  
TCAAAGCAATTTACGCGAAGGATTGTCTTTAACAGAATATATTATATCTTGTTATGGAGC  
TCGCAAAGGAGTTGTAGATACTGCTGTAAGAACATCAGACGCTGGATATCTGACTCGC  
AGGCTTGTGTAAGTAGTTCAACACATTGTTGTACGTAGAACAGATTGTGGCACTATACG  
AGGAATTTCTGTGAGTCCTAACAAAGGTATGATGCCA--GAAAGAATTTTTATTCAAAC  
ATTAATTGGTCGTGTATTAGCAGATGATATATATATAGGTTTCACGATGCATTGCCATTGCA  
AATCAAGATATTGGGATTGGACTTGTCAATCGATTCAACT-----TTTCGAAAA  
CAATCAATATTGATTCGAACTCCCTTTACTTGTAGAAGTACATCTTGGATCTGTGATTAT  
GTTATGGTCGGAGTCCACTCACGGTGACCTGGTTCGAATTGGGGGAAGCTGTAGGTATT  
ATTGCAGGTCAATCTATTGGGGAACCGGGCACTCAACTAACATTAAGAAGTTTTTCATAC  
TGCGGAGTATTCACAGGAGGTACTGCAGAACATGTAAGAGCCCCTTCTAATGGAAAA  
ATACAATCAATGAAGATTTGGTTCATCCACACGTACACGTCACGGACATCCTGCTTTT  
ATATGTGATATAGATTTGTATGTAAGTATTGAAAGTGAAGATATTCTACATAACGTAAC  
TTCCATCAAAAAGTTTTCTTTTAGTTAAAAATAATCAATATGTACAATCAGAACAGGTGA  
TTGCTGAGATTCGTGCAAGAACAGATAATTTG---ATTGTGAAAGAGAGAGTTAGAAAA  
CATATTTATTCTGACTCAGAGGGAGAA---ATGCACTGGAGTACTGATGTATACCATGCAC

CTGAATGGACATATAGTAATGTCCATCTCTTACCAAAAACAAGCCATTTATGGATATTAT  
CAGGAGGTTTCGTGTAAA-----TCCAGCGTATTACCCCTTTCCTCCATAAGGATCAAGAT  
CAATTGTTGAGTTCG-----GGTAAAAAAAATACTATTCTTCCCTTATTCTTCAGTGTTT-----  
AATCCAAGTCGATAT--ATGGGT-----  
-----CATTATGATTTCCCTGCT--ATTCTTCACGAGAATTATGAT-----TTATTAG  
GAAAAAGGCGAAGAAATAGATTTCTCATTCCATTCCAATTGATGGCAGAACAATATAAC  
GAAGAAATGCTGATGCCGCGTCTCTGGATTCAAATACCCCA-----AAAGGTATTTTCTA  
TAGAAATAGTATTCTTGCTTATTTTGATGATCCTCAATACAGAAGAAAGAGTTCAGGAAT  
TATTAATATGGGACTATAGGGACACATTCAATTGCCAAAAAAGAGGAT-----TTGATCG  
AGCATAAA---GGAGTGAAAGAATTTACGCCAAAATACATGAAAGTAGATCAATTTTTTT  
TCATTCCCGAAGAAGTGCATATTTTACCTGAGTCTTCTTCCATAATGGTACGCGACAATA  
GTCTTATTGGAGTCGATACACAAATCACTCTCAATACAAGAAGCCGAGTGGGCGGATT  
GGTTCGAGTGGAGAAAAAAAAGGATTGAACTTAAAATCTTTTCTGGAGATATC  
CATTTTCTAGCGATACAGATAAGATATCCCGACACAGTGGGATCCTGATCCCGCA---G  
GAATGATAAAAACAATTTGAAA---GAATCAACAAAA-----TTGAAAAATTGGATCTATG  
TCCAACGT-----ATCATACTTACAAAAACAAAA-----TATTTTGTTTTGGTTTCGACCTGTAA  
TGCCGTATGAAATAACGGATGGTGTCAATTTAGGAGCACTTTTCTGCAAGATTTGTTC  
CAAGAAAAGGATAATCTAAAATTAAGTTGTTAATTATATCCTTTATGAAAATGGGAA  
A-----CCAATTTCTGACACAAGTATTCAATTAGTTCGGACTTGTTAATGTTGAGTGTG  
GGTCAAGACAAA-----AAAATTCTTCTATTGAAGAAGCCTACACTTCTTTTATTGGA  
GTAATCAATGGTTTATTGATTTCGAGATTTCTTAAAAGTTGACTTAATGAAA---CATATTC  
ATATATCAGAAAAAGGAAAGATACTTCAGGTTCAAGATTCATTTCTCATAATAATGCATC  
AGATAGTATTAATTAACCCATTTTCTATTTCAGTCTAATTATAAGGAT-----AAGGAACAA  
ATTCAAAATTTATTGATTCAAATAACAATACTATTTCGTTGTACATTATCGAATCAAATC  
AAAATAAGGAATGCCGATCTTTGATAATTTTGTACCATCGAATTGTTTTCGTTTTCAA  
TAAAACCTTTCAACAATTTAAAATATCAAAAT-----GTGATAAAAAGAATCAGAAAAAG  
ATTCTCTCAATTTCAATTCGTTGGGTCTTTTGGAAACA-----TCCATTCCAATTGCGAATT  
TTTATTCA-----TTTGATTATTTTATACT-----TATAATCCAATCTCG---ATCATTAATATTT  
GCAAGTTGACAAT-----TTAAAATGGACTTTTCAAATACTT-----CAA---TCGTATTTAAT  
TGATGAAAGAGAACAA-----ATTTATAATCCTGACTCGTGTAGTAACATTGTTTTGAATG  
CCTTTCAATTTGAATTGGTATTTTCTTATTATCAA-----AAATCCACAATAATTAGC---  
CTTGGAGAGTTTATTTGTGAAAATGTATCTATAGCTAAAAATGGACCG-----CCTCTAA  
AATCGGGTCAAGTTCTAATTGTTCAA---GTTGACTCTGTAATAATTAGATCAGCTAAGCC  
TTATTTAGCAACTCCAGGAGCAACTGTTTCATGGACATTATGGAAAGATAATTGATGAAG  
GAGATACATTAGTAACATTTTTATATGAAAAGTCGAGATCTGGTGATATAACTCAAGGTC  
TTCCAAAAGTAGAACAAAGTGTAGAAAGTTCGTTCAATTGATTCAATATCAATGAATCTA  
GAAAAAGAATTGAGAGTTGGAACAAAGGTATAGCAAGAGTTCTTGGAAATCCTTGG  
AGATTCTTGATTGGTGCTGAGTTAACGATAGCCCAAAGTCGTCTATCTTTAGTTAATAAG  
ATACAAAAGGTTTATCGATCACAGGGAGTACAGATTCATAATAGACATATCGAAATTATT  
GTACGTCAAATAACATCAAAGTGTGGTTTCAGAA-----GATGGAATATCGAATGTT  
TTTTTACCCGGAGAGCTAATTGGATTGTTGCGAGCTGAACGAACAGGACGTGCTTTAG  
AAGAAACGATATGTTATCGAGCTATTTTATTGGGAATAACGAAAGCCTCTCTGAATACTC  
AAAGTTTTCTATCCGAGGCTAGTTTTCAAGAAACTGCTCGAGTTTTAGCAAAATCTGCT  
CTCCGCGTTCGATCGATTGGCTAAAGGGGTTAAAAGAAAACGTTGTTCTAGGGGGAA

TGATACCTGTTGGTACTGGATTCAAAGGGTTAGTGTACTGTTCA-----AGGAAACATAAT  
AAAATGATT-----TGGGAAACAAAAAAAATCATTATTGAGCAAGAA---GTG---AGAG  
ATATTTTTTCCACCATAGAAAATTACTGAATTCT-----  
-----ATGACAAAACGATATTGGAACATAAATCTAGAAGAGATGATGGAA  
GCAGGAGTTCATTTGGTCATGGTACTCGAAAATGGAATCCTAAAATGGGTCCTTATATT  
TCTGCAAAGCGTAAAGGTATTCATATTTAAATATTACCCGAACGGCTCGTTTTTATCA  
GAAGCTTGTGATTTGGTTTTGATGCAGCATCGAAAGGAAAACAATTCTTAATTGTTGG  
TACTAAACTAAAGCAGCTGATTTAGTAGCACGTGCTGCAATAAAGAGTCGCTCTCATT  
ATGTTAATAAAAAATGGCCCGGGGTATGTTAACAATTGGTCCACTACAGAAACAAG  
ACTTCATAAGTTCAGAGACTTGAGAATGAAACAAAAGATGGGGAGACTCAATCGTCTT  
CCAAAAGAGATGCAGCTATGTTAAAGAGAAAATTATCCCACTTGCAAACCTATTTGGG  
CGGGATTCAATATATGAAGGGATTACCTGATATTGTAATAATCGTTGATCAGCAAGAAGA  
ATATACGGCTCTTCGAGAATGTATCACTTTAGGAATTCCAACAATTTGTTAATCGATAC  
AAATTGTGACCCCGATCTTGCAGATATTTGATTCCAGCCAATGATGATGCTATCGCTTC  
AATCCGATTCATTCTTAACAATTAGTATTCGCAATTTGTGAGGGTCGTTCT---AGCTATA  
TACGAAATTTGATGGGGCAAAAATCAATCCACTCGGTTTTAGACTTGGTATAACTCAA  
AGCCATCATTCTATTTGGTTTTGCACAACCAAAAATTTATCCGAAGGTCTACAAGAAGA  
TAAAAAATACGAGACTGTATACAAAATTATATACAAAAAATATGAAAATATCTTCT---  
GGTGTGAAGGAATTGCATGTATAGAGATTCAAAGAGAATCGATCTGATTCAAATCAT  
AATTTATATGGGATTTCCAAAATTATTAATAAAAGGTAGGTCTCAA-----AAAATCGA  
AGAATTACAAACGAATATAAAAAAAGAAATTCATTGTGTGAATCGAAAAATTAACATTG  
CTATTAAGAATTTCAAATCCTTATGGACACCCTAAGATTCTTGCAGAATTTATAGCCG  
GACAACTCAAGAATAGAGTCTCCTTTGAAAAGCAATGAAAAAGCTATTGAATTAAG  
TGAACAGACAGATACAAAAGGAATTAAGTACAAATTGCAGGCCGTCTCGATGGAAA  
AGAAATTGCACGTGTCGAATGGATCCGAGAAGGTAGGGTTCCTTTACAACTATTTCGA  
GCTCCAATTGATTATTGTTCTTATACAGTTTCGAACTATCTATGGGGTATTGGGAATAAAA  
ATTTGGATATTATA-----ATGTCGCGTTACCGAGGGCCTCGTTTCAAAAAAATACGCC  
GTCTGGGGGCTTTACCGGGACTTACTAATAAAAGGCCTAAAGCCAAAACCATTACTAG  
AAATCAATCGCGCTCTGGTAAA---AAATCTCAATATCGTATTCGTTTAGAAGAAAAACA  
AAAATTGCGTTTTTCATTATGGTCTTACAGAGCGACAATTACTTAAATATGTACGTATCGC  
CAGAAAAACCAAGGGATCCACAGGTCAGGTTTTACTACAATTAATTGAAATGCGTTTG  
GATAATATCCTGTTTCGATTAGGTATGGCTTCGACTATACCTCAAGCCCGCCAATTTGTT  
AACCATAGACACATTTTAGTTAATGATCATATAGTCAATATACCAAGTTATCGCTGCAAA  
CCCCGAGATATTATTACAGTGCGTGATAACCAAAAATCTAGAACTCTGGTCCAAAATTA  
TCTTGATTCG---CCTAAC---CAGGAATTGGCAAACATTTGACTCTTCAGCCATTCCAA--  
---TATAAAGGATTAGTCAATCAAATAATAGATAGTAAGTGGGTCCGTTTAAGAATAAATG  
AATTACTGGTTGTAGAATATTATTCTCGTCAGACTATGTCACGTGCGAGGGACTGCAGAA  
AAAAAACTGCAAAATCCGATCCAATTTATCGTAATCGATTAGTTAACATGTTGGTTAA  
CCGTATTCTGAAACACGGAAAGAAATCATTGGCTTATCAAATCTCTATCGAGCCATGA  
AAAATATTCAACAAAAGACAGAAAAAATCCACTATCTGTTTTGCGTCAAGCAATACG  
TGGAGTAACTCCCGATATAGCAGTCAAAGCAAGACGTGTAAGCGGATCGACTCATCAA  
GTCCCATGAAATAGGATCTACACAAGGAAAAGCACTTGCCATTCGTTGGTTATTAGC  
GGCATCCCGAAAACGTCCGGGTCGAAATATGGCTTTCAAATTAAGTTCCGAATTAGTGG  
ATGCTGCAAAAGGGAGTGGCGATGCTATACGCAAAAAGGAAGAGACTCATAGAATGG

CAGAGGCAAATAGAGCTTTTGCACATTTTGGTATGAGTAAGGACACTATTGCTGACATA  
ATAACCTCTATACGAAACGCTGACATGAATAGAAAGGGAACAGTTCGAATAACATATAC  
TAATATAACTGAAAATTTTGTGAAAATACTTTTACGAGAAGGTTTTATCAAAAACGTCA  
GAAAACATCAAGAAAGGGGCAAATATTTTTTGGTTTTAACTTTACGCTATAAAAGG-----  
AATACAAAAGGATCCCATAAAACG---ATG-----TTGAATTTAAAACGAATTAGTCGGCCT  
GGCTTAAGAATATATTCTAATTATCAAAAAATTCCTAAAAATTTTAGGCGGGATGGGTATT  
TTAATCTTTTCGACTTCACGAGGTATAATGACAGACCGAGAGGCTAGACTAGAAAAAAT  
CGGCGGAGAAATTTTGTGTTGTATATGGATGGCAAACCGATAAAAAGAATTGGTTCAC  
GTAGAAATGTACGTATTACTTCACGTAAGAATACGCGCAAATACCAAAGGAATTATT  
CATGTTCAAGCAAGTTTCAACAATACCATTGTAAGTGTACAGATGTGCGAGGTAGGGT  
GATTTCTTGGTCTCTGCTGGTACTTGTGGATTCAAGGGCACAAGAAGAGGAACACCC  
TTTGCTGCTCAAACCGCAGCAGGAAATGCTATTCGAACAGTAGTAGATCAAGGTATGC  
AAAGAGCAGAAGTCATGATAAAAGGTCCAGGTCTTGAAGAGATGCTGCATTAAGAG  
CTATTTCGTAGAAGTGGTCTATTATTAAGTTTTGTGCGGGATGTAACCTCTATGCCACATA  
ATGGATGTAGACCTCCTAAAAAAGACGTGTGATGCCAACTATTAAACAACCTATTAGA  
AACGCAAGACAGCCGATTAGAAATGTGACGAAATCCCCCGCTCTTCGGGGATGTCTC  
AACGTCGAGGAACATGTACTAGGGTGTATACTATCACCCCAAAAAACCAAACCTCTGC  
CTTACGTAAGTTGCCAGAGTACGATTAACCTCTGGATTTGAAATCACTGCTTATATACC  
TGGTATTGGCCATAATTTACAAGAACATTCTGTAGTCTTAGTCAGAGGAGGGAGGGTGA  
AGGATTTACCCGGTGTGAGATATCACATTGTTTCGAGGAACCCTAGATGCTGTCCGGAGTA  
AAGGATCGTCAACAAGGGCGTTCTAAATATGGGGTCAAAAAGCCAAAAATGGCAAAG  
AAAAGTTTGATTCAGAGGGAGAAGAAGAGGCAAAAATTGGAACAAAAATATCATTG  
ACTCGTCGATTTTTAAAAAACGAAAGAAACAAA-----GTATCATTGAGTGATAAAGAGA  
AATGGGAAATTAAGGGAAAGTTACAATCCCTACCACGTAATAGTGCTCCTACGCGTCTT  
CATCGACGCTGTTTTTTGACCGGAAGACCAAGAGGTAATTATCGAGACTTTGGTTTATC  
CCGACATATACTTCGTGAAATGTTTCATGCATGTTTGTGTTGCCAGGGGCAACAAGATCGA  
GTTGGATGGTAAAAAATTCATTATCTCAGCTATTTCAACAACAAGAAAAAGAAGAAA  
CAA-----GGATCTGTTGAATTTCAAATCTTAAGTTTCACAAACAGGATACAAAACTTA  
CTTCACATTTAGAATTACACAAAAAGGATTATTCATCTCAAAGAGGTCTACGAAAAATT  
CTGGGAAAACGTCAACGACTGCTTTATTATTTGTCAAGGAAAAATCCAATAAGTTATAA  
GGAGTTAATTAATCAGCTGGGGATTCGTGAGTTAAAAAAAATGGT--  
-????????????????????????????????????????????????????????????  
????????????????????????????????????????????????????????????  
????????????????????????????????????????????????????????????  
ATGGATAAATCCAAACGACTTTTTCTTAAATCCAAACGATCTTTTCGTAGGCGTTTGCCC  
CCGATACAGTCGGGGGATCGAATTGATTATAGAAATCTGAGTTTACTCAATCGATTTCTC  
AGTGAACAAGGAAAAATCTTATCTAGACGGGTAAATAGATTGACTTTAAAACAACAAC  
GATTAGTTACTATTGCTATAAAACAGGCTCGTATTTTATCTTTGTTACCTTTTATGAATAAT  
GAAACA-----CATTTTGAAAGAAGGAAATCGACTGCTAGAACTCCTGGGTTTAGAACCA  
AAAAGAAAATGACACGT--AAAAAATAAATCCTTTTGTAGCACATCCTTTATTAATAA  
AAATAAAGAGACTTAACACAAAATCGGAAAAAGAAATAATAGTAACTTGGTCCCGGGC  
ATCCACCATTATACCATAATGATTGGACATACTATTGCTATACATAATGGAAAGGAACA  
CATACCTATTTATATTGAGGATCGTATGGTAGGCCATAAATTGGGAGAATTTGTCTCGAC  
TCTCAATTTTAGAGGACATGCGAAAAATGACAGTAGATCTCGTCG

T





AAAAGAGGCATTTACTTATTATAGAGATGGG-----ATGTCGGCTCAGTCCGAAGGAAATT  
ATGCGGAAGCTTTACAAAATTATTATGAAGCTATGCGACTAGAAATTGACCCCTATGATC  
GAAGTTATACTCTATAACATAGGCCCTTATCCACACAAGTAATGGAGAACATACAAAA  
GCTTTGGAATATTATTTTCGGGCACTCGAACGAAACCCGTTCTTACCACAAGCTTTTAAT  
AATATGGCCGTGATCTGTCATTAC---CGGGGAGAACAGGCCATCCGACAAGGAGATTCC  
GAGATTGCAGAAGCTTGGTTTCGATCAAGCCGCTGAGTATTGGAAACAAGCTATAGCGC  
TACTCCTGGTAATTATATTGAAGCGCAGAATTGGTTAAAGATCACGAGACGTTTCGAA-  
----ATGAGTTTGCGATCAGAATTGATATGGATAGAAGTTATAGGGGGGTCTCGAAAAAC  
AAGTAATTTTTTTTGGGCTTTTATCCTTTTTTTTGGTTCATTAGGATTCTTATTGGTTGGA  
ATTTCCAGCTATCTTGGTAGGAATTTGATATCTTCATTTCCGTCTCAACAAATCCTTTTTT  
TTCCACAAGGGATCGTGATGTCTTTCTATGGGATTGCAGGTCTATTTATTAGTTCTTATTT  
GTGGTTTACAATTTGGTGGAATGTAGGTAGTGGTTATGATCGATTTCGATAAAAAACAAG  
GATTAGTTTGTATTTTCGTTGGGGATTTCCTGGAAAAAATCGTCGTATCTTCCTCAGAT  
TTCTTATAAAAGACATTCAATCCATCAGAATAGAAGTGAAAGAGGGTGTATTATGCTCGT  
CGTGTACTTTATATGGAAATAAGGGGTCAGGGAGCCATTCCTTTGACACATAGTGATGA  
TAAT--TGGACTCCACGAGAAATTGAACAAAAAGCTGCCGAATTAGCCTATTTTTTTGCG  
TGTACCAATGGAAGTCTTT

>Cornus

ATGGAAGTGGTGGTTCAATTCGATGCTGTTTCTGAGTAAATCAACGGGTAGTCTTGG  
TCCTATTGAAAATACCAGCGAAAGTGAAGATCCAGATAGAAAT-----AAAACATTCA  
TAGTAATAGTAATGTTGATCATTATTTCAGTGTCAAGGACATTCGGAATTCATTTCTGAT  
GACACTTTTTTAGTTAGGGATAATAATGGGGACAGTTATTCCATATATTTTGATATTGAAA  
ATCAGATTTTTGAGATTGACAATGATCAT-----TCTTTTCTAAGTGAAGTAGAAAGTTCTT  
TTTATAGTTATCGGAAT-----AAGGGATCTAAGAGTAACGATCCCTACTATGATCGT  
TACATGTATGATACTCAATATAGTTGGAATAATCACATTAATAGTTGCATTGACAGTTATC  
TTCAT-----TCTCAAATCTGTATTGATACTTACATTTTAAAGTGATAGTGACAATTACAGTGA  
TAGTTACATTTATAGTTCCATTTGTGGTAGCGATAGTTCCGGTATAAAAACCAGCATGAA  
TGGTAGTGATTTAACTATAAGAGAAAGTTCTAATGATCTCGATGTAAGTCAAAAATACA  
AGCATTGTGGGTTCAATGCGAAAATTGTTATGGATTAATTATAAGAAATTTTTGAAGT  
CAAAAATGAATATTTGTGAACAATGTGGATATCATTGAAAATGAGTAGTTCAGATAGA  
ATCGAACTTTTCGATTGATCCGGGCACTTGGGATCCTCTGGATGAAGACATGGTCTCTCT  
GGATCCCATTGAATTCATTCGGATGAGGAGCCTTATAAAGATCGTATCGATTCTTATCA  
AATAAAAACAGGGTTAACTGAGGCTGTTCAAACAGGCATCGGCCAACTAAACGGTATT  
CCCATAGCAATTGGGGTTATGGATTTTCAGTTTATGGGGGGTAGTATGGGATCCGTAGTT  
GGGGAGAAAATTACCCGTTTGGTTCGAGTATGCTACCAATAAATTTCTACCTCTTATTATA  
GTATGTGCTTCGGGAGGGGCACGCATGCAAGAAGGAAGTTTGAGCTTGATGCAAATGG  
CTAAAATTTCTTCTGCTTTATATGATTATCAATCAAATAAAAAGTTATTTTATGTATCAATC  
CTTACATCGCCTACTACTGGTGGGGTGACAGCCAGTTTTGGTATGTTGGGGGATATCATT  
ATTGCCGAACCCAATGCCTACATTGCATTTGCGGGTAAAAGAGTAATTGAACAAACATT  
GCATAAACAGTACCCGAAGGTTCAACAAGCGGCCGAATATTTATTCCAGAAGGGCTTAT  
TCGATTTAATCGTACCGCGTAATCCTTTAAAGGGCGTTCTGAGTGAATTATTTAGCTCC  
ACGCTTTCTTCTTTAAATCAAATTCAAGCAAGATGGTAACCATTTCGAGCCGACGAA  
ATTAGTAATATTATCCGTGAACGTATTGAGCAATATAATAGAGAAGTAAAGATTGTAAAT  
ACCGGTACTGTACTTCAAGTAGGCGATGGCATTGCTCGTATTCATGGTCTTGATGAAGT



AATGGCAGGTGAATTAGTAGAATTTGAAGAGGGGACAATAGGCATTGCTTTGAATTTG  
GAATCAAACAATGTTGGTGTGTATTAATGGGTGACGGTTTGATGATACAAGAAGGAA  
GTTCTGTAAAAGCAACAGGAAGAATTGCTCAGATACCGGTGAGTGAGGCCTATTTGGG  
TCGTGTTATAAATGCCCTGGCTAAACCTATTGATGGTAGAGGTGAAATTTAGCTTCCG  
AATCTCGGTAAATTGAATCCCCCGCTCCGGGTATTATTTGCGACGTTCCGTATATGAGC  
CTCTTCAAACGGGGCTTATTGCTATTGATTGATGATCCCTATAGGACGTGGTCAGCGA  
GAATTAATTATTGGGGACAGGCAGACTGGTAAAACAGCAGTAGCCACAGATACGATTC  
TCAATCAACAGGGGCAAATGTAATATGTGTTTATGTAGCTATTGGTCAAAAAGCATCT  
TCGGTGGCTCAGGTAGTACTAATCCAGGAAAGGGGGGCGATGGAATACACTATTG  
TAGTAGCCGAAACAGCGGATTCCCCTGCTACATTACAATATCTCGCTCCTTATACAGGA  
GCGGCTCTGGCTGAATATTTTATGTATCGTGAACGACACACTTCAATCATTTATGATGAT  
CTCTCAAAAACAAGCGCAAGCTTATCGCCAAATGTCGCTTCTATTACGAAGACCGCCCG  
GTCGCGAAGCTTATCCAGGGGATGTTTTTTATTTGCATTCACGCCTTTTGAAAGAGCC  
GCTAAATTAAGTTCTCGTTTAGGTGAAGGAAGTATGACCGCTTACCAATAGTTGAGAC  
TCAATCAGGAGATGTTTCGGCTTATATCCTACTAATGTAATTTCCATTACTGATGGACA  
AATATTTTTATCCTCCGATCTATTTAATGCCGGAATCAGGCCTGCTATTAATGTGGGTATC  
TCCGTTTCCAGAGTAGGATCTGCGGCTCAAATTAAGCCATGAAACAAGTAGCCGGCA  
AATTAATAATTGGAACCTGGCGCAATTTCGAGAATTAGAAGCCTTTGCACAATTCGCTTCT  
GATCTTGATAAAGCCACTCAGAATCAATTGGCAAGAGGTCAACGATTACGTGAATTGCT  
CAAACAATCCCAATCAGCCCCTCTCGCGGTGGAAGAGCAGATAATGACTATTTATACCG  
GAACAAATGGTTATCTTGATTCATTAGAAATTGGACAGGTAAGGAAATTTCTTGTTGAG  
TTACGTACTTACTTAAAACTAATAAACCTCAGTTCCAAGAAATCATATCTTCTACCAAG  
ACATTCACCGAGGAAGCAGAAGCTCTTTTGAAAGAAGCTATTCGGGAACAGATGGAA  
CGTTTTATACTTCAGGAACAAGCAATGAGAATAAATCCTACTACTTCTGGTCCTGGAAT  
TTCCACGCTTGAAAAAAAACCTGGGGCGTATCGCTCAAATCATTGGTCCGGTACTA  
GATGTAGCTTTTCTCCGGGCAAGATGCCTAATTTATAACGCTTTGGTAGTTAAAGGT  
CGAGATACTGCCGGTCAACCAATTAATGTGACTTGTGAGGTACAACAATTATTAGGGAA  
CAATCGAGTTAGAGCTGTAGCTATGAGTGCTACGGAGGGTCTAACGAGAGGAATGGAA  
GTGGTTGATACGGGAGCTCCTCTAAGTGTTCCGGTTGGTGGGGCGACTCTCGGACGAA  
TTTTCAATGTGCTTGAGAGCCCGTTGATAATTTAGGTCCTGTAGATACTCGCATAACAT  
CTCCTATTCATAGATCTGCGCCCGCCTTTATACAGTTAGATACAAAATTATCTATTTTTGA  
AACAGGAATTAAGTAGTAGATCTTTTAGCCCTTATCGACGTGGAGGAAAAATTGGA  
CTGTTCCGAGGAGCTGGAGTGGGTAAAACAGTACTCATTATGGAATTGATTAACAATAT  
TGCCAAAGCTCATGGGGGTGTATCCGTATTTGGCGGAGTAGGTGAACGTACTCGCGAA  
GGAAATGATCTTTACATGGAAATGAAAGAATCCGGAGTGATTAATGAACAAAATATTGC  
GGAATCAAAGTAGCTCTAGTTTACGGTCAGATGAATGAACCGCCGGGAGCTCGTATG  
AGAGTTGGTTTGACTGCCCTAACTATGGCGGAATATTTCCGAGATGTTAATGAACAAGA  
CGTACTTCTATTTATTGACAATATCTTCCGTTTCGTCCAAGCAGGATCCGAAGTATCCGC  
CTTATTGGGTAGAATGCCTTCCGCTGTGGGGTATCAACCCACCCTTAGTACTGAAATGG  
GTTCTTTACAAGAAAGAATTACTTCTACTAAAGAAGGGTCCATAACTTCTATTCAAGCA  
GTTTATGTACCTGCAGACGATTTGACCGACCCGGCTCCCGCTACGACATTTGCACATTT  
AGATGCCACTACCGTACTATCAAGAGGATTAGCTGCCAAAGGCATCTATCCAGCAGTAG  
ATCCTTTAGATTCAACGTCAACTATGCTTCAGCCTCGGATCGTTGGTGAGGAGCATTAT  
GAAACTGCGCAAAGAGTTAAGCAAACCTTTACAACGTTACAAAGAAGCTTCAGGACATTA

TAGCTATCCTTGGGTTGGACGAATTATCCGAAGAGGATCGTTTAACCGTAGCAAGAGCA  
CGAAAAATTGAGCGTTTCTTATCACAACCTTTTTTCGTAGCAGAAGTATTTACGGGTTC  
TCCAGGGAAATATGTTGGTTTAGCAGAAACAATTAGAGGGTTTCAATTGATCCTTTCCG  
GAGAATTAGATGGTCTTCCCGAACAGGCCTTTTATTTGGTAGGTAACATCGACGAAGCT  
ACCGCGAAGGCTATGAACTTAGAAATGGAGAGTAATTTGAAGAAAATGACCTTAAATC  
TTTGTGTA CTGACCCCTAATCGAATTGTTGGGATTCAGAAGTGAAAGAAAATCATTTTAT  
CTACTAATAGTGGTCAAATTGGCGTATTACCAAATCACGCCCTATTGCCACAGCTGTAG  
ATATAGGTATTTTGAGAATACGCCTTAACGACCAATGGTTAACGATGGCTCTGATGGGC  
GGTTTTGCTAGAATAGGCAATAATGAGATCACTGTTTTAGTAAATGATGCGGAGAGGGG  
TAGTGACATTGATCCCCAAGAAGCTCAGCAAACCTTTGAAATAGCGGAAGCTAATTTG  
AGGAAAGCCGAGGGCAAGAGACAAACAATTGAGGCAAATTTAGCTCTCAGACGAGCT  
AGGACACGAGTAGAGGCTATCAATGTAATTTCAATGAAAAATGTAACCGATTCTTTCGT  
TTCCTTGGGCCACTGGCCGTTCCGCCGGGAGTTTCGGGTTAATACCGATATTTTAGCAA  
CAAATCCAATAAATCTAAGCGTAGTGCTTGGTGTATTGATCTTTTTTGGAAAGGGAGTG  
TTAAGTGATTTATTAGATAATCGAAAACAGAGGATCTTGAATACTATTGAAAATTCAGAA  
GAACTACGCGGAGGAGCCATTGAACAGCTGGAAAAAGCCCGGGCTCGCTTGCGGAAA  
GTGGAAATGGAAGCAGATCAGTTTCGCGTGAATGGATACTCTGAGATAGAGCGAGAAA  
AATTGAATTTGATTAATCAACTTATAAGACTTTGGAACAATTAGAAAATTACAAAAATG  
AAACCATTAATTTTGAACAACAAAGGGCAATTAATCAAGTCCGACAACGGGTTTTCCA  
ACAAGCCCTGCAAGGGGCTCTAGGAACTCTGAATAGTTGTTTGAATAACGAGTTACAT  
TTACGTACCATCAGTGCCAATATTGGCATCTTTGGGGCGATGAAAGAAATAACCGATAT  
GAATCCACTGATTTCTGCCGCTTCCGTTATTGCTGCTGGATTGGCTGTAGGGCTTGCTTC  
TATTGGACCTGGAGTTGGTCAAGGTACTGCTGCGGGCCAAGCTGTAGAAGGTATCGCG  
AGACAGCCCGAGGCGGAGGGGAAAATAAGAGGTACTCTATTGCTTAGTCTGGCTTTTA  
TGGAAGCTTTAACAATTTATGGACTAGTTGTAGCATTAGCACTTTTATTTGCAAATCCTT  
TTGTTATGAATGTTCTATCATGTTCTATCAACACACTAAAAGGTTTATACGATATATCCGG  
TGTGGAAGTAGGCCAACATTTCTATTGGAATAAGGGGGTTTCCAAGTTCATGGCCAA  
GTA CTTATTACTTCTTGGGTTGTAATGGCTATCTTATTAGGTTTCAGCCACCATAGCTGTTC  
GGAACCCACAAACCATTCCGACTGGTGGTCAGAATTTCTTCGAATATGTCCTTGAATTC  
ATTCGAGATGTGAGCAAACTCAAATTGGAGAAGAATATGGTCCTTGGGTTCCCTTTAT  
TGGA ACTATGTTTCTATTTATTTTTGTTTCTAATTGGTCGGGGGCTCTTTTACCTTGAAA  
ATAATACAATTACCCCATGGGGAGTTAGCCGCACCCACGAATGATATAAATACTACTGTT  
GCTTTGGCTTTACTCACGTCAGTGGCATATTTCTATGCAGGCTTACCAAAAAAGGATT  
AGGTTATTTCCGGGAAATATATTCAACCAACTCCAATCCTTTTACCATTAAACATCTTAGA  
AGATTTACAAAACCGTTATCACTTAGTTTTTCGACTTTTTCGGGAATATATTAGCTGATGA  
ATTAGTAGTTGTTGTTCTTGTCTTTAGTACCTTCAGTGGTTCCTATACTGTATGTTTC  
CTTGGATTATTTACAAGTGGTATTCAAGCTCTTATTTTTGCAACTTTAGCCGCGGCTTATA  
TAGGTGAATCCATGGAGGGTCATCATATGATATTTTCAACTTTAGAGCATATATTA ACTCA  
TATCTCCTTTTCGATCGTTTCAATCGTAATTACAATTCATTTGATAACCTTATTAGTCGAT  
GAAATCGTAAGACTATATGATTCGTCAGAAAAGGGCATGATAGCTGCCCTTTTCTGTATA  
ACAGGATTATTAGTCACTCGGTGGATTTATTCGGGGCATTTCCCGTTAAGTGATTTATAT  
GAATCATTAAATTTTTCTTTCATGGAGTTTCTCTATTATTACATAGTTCGGTAT-----AAAA  
AGAAAAATCATTTAAGCGCAATAACCGCACCGAGTGCTATTTTTACC CAAGGCTTTGCT  
ACTTCAGGCCTTTTAACTGAAATACATCAATCCACAATATTAGTACCCGCTCTCCAATCC

GAGTGGTTAATAATGCACGTAAGTATGATGGTATTGGGCTATGCAGCTCTTTTATGCGGA  
TCATTATTATCAGTAGCGCTTCTAGTCATTACATTTTCGAAAAGACATAAAGATTTTTTGT--  
---AAAGAAATCCAATACATAAATAAAAAAAGCAATGTTTTGGGAAATACTTCT-----G  
CTGGGAATTATTACAGGTCCCAATTGATTCAACAATTGGATCATTGGAGTTATCGTGTTA  
TTAGTCTAGGGTTTATTTTTTAAACCATAGGGATTCTTTCGGGAGCAGTATGGGCTAATG  
AGGCATGGGGATCATATTGGAATTGGGACCCAAAGGAAACTTGGGCATTTATTACTTGG  
ACCATATTCGCGATTTATTTACATACTCGAACAAATAAAAAATTTGCAGGGTGCAAATTC  
GCAATTGTGGCTTCTATAGGCTTTCTTATAATTTGGATATGCTATTTTGGAGTCAATCTAT  
TAGGAATAGGGCTGCATAGTTATGGTTCATTTACATTAACGATGAAAAAAAAAATAAAA  
CATTCA---CTCCTCTTCTTTGTATCTATAGTATTTTTGCCCTGGTGGATTCTCTCTCATT  
AATAAAAGTCTGGAATCTTGGGTACAAATTGGTGGAATACTAGGCAATCTGAAATTTT  
TTGAATGATATTCAAGAAAAGAGTATTCTAGAAAAATTCATAGAATTAGAAGACCTCC  
TCCCTTTGGAGGAAATGATAAAGGGATACTCGAAGATACATCTACAAAAGCTTCATATA  
GGAATCCACAAAGAAACGATCCAATTAATCAAGATACACAATGAGGATCGTATCCATAC  
GATTTTGCACCTTCTCGACAAATATAATCTGTTTCATTATTCTAAGTGGTACTCTATTCTG  
GGTAATGAAGAACTTGTATTCTTAACTCTTGGACTCAGGAATTCCTATATAACTTAAAGC  
GACACAATAAAAGCTTTTTCTATTCTTTTATTAAGTATTATGTATAGGATTCATTTCG  
CCCATGGTTGGGAACATAATGATTGGCTCTGTCTACAAAGATTTTGGATTTGTTTATAACG  
ATCAAATTATATCTGGTCTTGTCTTACTTTTCCAGTCATTCTAGACACAATTTTTAAATA  
TTGGATTTTCCGTTATTTAAATCGTGTATCTCCGTCACCTGTAGTGATTTATCATTCAATG  
AATGACATGCCTATTGGTGTCCAAAAGTACCTTTTCGAAGTCCTGGAGAGGAAGACG  
CATCTTGGGTTGACGTATAACAACGACTTTATCGAGAAAGATTACTTTTTTTAGGCCAA  
GAGGTTGATAGCGAGATCTCGAATCAACTTATTGGTCTTATGGTATATCTCAGTATCGAG  
GATGATACCAAAGATCTGTATTTGTTTATAAACTCTCCTGGCGGATGGGTAATACCCGGA  
ATAGCTATTTTTGATACTATGCAATTTGTGCAACCAGATGTACATACAATATGCATGGGAA  
TGGCTGCTTCAATGGGATCTTTTATCCTGGTTCGGGGGAGAAATTACCAAACGTCTAGCA  
TTCCCTCACGCCAGGGTAATGATCCATCAACCTGCGAGTGCTTATTATGAGGCACAAAC  
GGGAGAATTTATCCTGGAAGCGGAAGAACTGCTGAAACTGCGCGAAACCCTCACAAG  
GGTTTATGTACAAAGAACGGGCAAACCCTTATGGGTTGTATCTGAAGACATGGAGAGG  
GATGTTTTTATGTACAGCAACAGAAGCCCAAGCTTATGGAATCGTTGATCTTGTAGCGGT  
TGAAATGAAAGAACAAAAATGGATTCATGAAGTTTAAATTACCGAATCGCTTCCCAATG  
GTATGTTCCGGGTTTCGTTTAAATAATGAGGATCTGAGTCTAGGTTATGTTTCGGGCAAGA  
TCCGACGTAGTTTTATACGGATACTGCCCAGGGATAGAGTCAAATTTGAAGTAAGTCGT  
TATGATTCAACCAGGGGGCGTATAATTTATCGACTCCGCAACAAGGATTCGAAGGATAT  
GGAGGAATTCCAAAGATATTTAGAA--GCTAAATCTCGGCAACACGATTTCCCTATATCCA  
CTTATCTTTCAGGAGTATATTTATACACTTGCTCATGATCGT-----GCAGATTATGACAATA  
AATCCAGCTTACTAATTGTAACCGTTTAAATTACTCGAATGTATCAACAGAATCATTTCG  
TTATTTCCGCTAATGATTCGAACCAAATCCATTTTGGGGGAAGAATTTGTATTTTCAA  
TGATATCGGAGGGATTTGCAGTCATTGTCGAAATTCATTTTCTCTACGATTAATATCTTC  
CCTCATAGTAAAATCTCAGAATTTACGATCAATTCATTCAATATTTCCTTTTTTAGAGGAC  
ACATTTTTACATTTAAATTTATGTGTTAGATATACGAATACCCTATCCCGTCCATCTGGAAA  
TCTTGGTTCAAATCTTCGTTACTGGGTAAAAGATGCCTCTTCTTTGCATTTATTACGGT  
TCTTTCTACACGAGTATCGTAATCGTAATTTGGAATAATTTGAAACTCAGTTCCTCTTTTT  
CAAACGAAGATTATTCTTGTTCCTATATAATTCATGTATGTGAATACGAATCCATTTT

TCTCTTTTTCCGTAACCAATCTTCTCACTTACGATCAACATCTTTTTGGAGCCCTTCTTGA  
ACGAATATATTTCTATGGAAAAATAGAACATGTAGAA--GTCTTTGCTAAGGATTTTATCC  
TATGGTTGTTCAAGGATCCTTTTCATACATTATGTTAGGTATCAAGGAAAATCAATTCTGG  
CTGCAAAGGGGACGCCTCTTTTGATGAATAAATGGAAATATTACTTTGTCAATTTCTGG  
AAATGTCATTTTTACGTGTGGTATCAACCAGTAACAATCTATATAAACCAATTATCCAATT  
ATCCCTCGACTTTCTGGGATATCTTTCAAACGTGCGCCCAAACCCCGCAATGGTACGG  
AGTCAAATGCTAGAAAATTCGTTTCTAATAGATAATGCGATT-----AAAAAGTTCGATAC  
CATAGTTCCCATATTCTCTGATTGGATCATTAGCTAAAGCGAAATTTTGTAAATGTCTTA  
GGCACCCAATTAGTAAGCCGGTATGGGCCGATTTATCAGATTCTGATATTATGACCGA  
TTTGGTCATATATGCAGAAATCTTTCTCATTATTATAGCGGATCCTCAAAAAAAAAAGAGT  
TTGTATCGAATAAAGTATATACTTCGACTTTCTTGTGCTAGAACTTTAGCTCGTAAACAC  
AAAAGTACTGTACGCGCTTTTTTGAAAAGATTAGGCTCGGAATTATTGGAAGAATTCCT  
TATGGAGGAGGAACAAGTTCTTTCTTTGACCTTCCCAAGACGGATTTGGTATTTGGATA  
TTATTTGTATCAATGATCTGGCCAACCACGAAATGATAATTGAT---ACAACAGAAGTACA  
A---GCTATCAATCTTTTTCCAGATTGGAATCG---TTAAAAGAGGTCTATGAGATCATATG  
GATGCTTGCCCTATTTTGACTCTTGTATTAGGAATCACAAATAGGTGTACTAGTAATTGTT  
TGGTTAGAAAGAGAAATATCAGCAGGAATACAACAACGTATTGGACCTGAATACGCCG  
GCCCTTTGGGAATCTTCAAGCTCTAGCAGATGGGACAAAATTACTTTTCAAAGAGAA  
CCTTCTTCCATCTAGAGGAGATCCTCGTTTATTCAGTATCGGACCATCCATAGCAGTTAT  
ATCAATTTTACTAAGTTATTTAGTAATTCCTTTTGGCTATCGCCTTGTTCTAGCCGATCTC  
AGTATTGGTGTTTTTTTATGGATTGCTATTTCAAGTATTGCTCCTGTTGGGCTTCTTATGT  
CAGGATATGGATCAAATAATAAATATTCTTTTTAGGTGGTCTGCGAGCTGCTGCTCAAT  
CAATTAGTTATGAAATACCATTA ACTCTATGTGTGTTATCAATATCTCTACTATCTAACAG  
TTCAAGTACAGTTGATATAGTTGAAGCACAGTCAAATATGGGTTTTGGGGATGGAATT  
TGTGGCGTCAACCTATAGGGTTTATCATTTTTCTAATTTCTTCCCTAGCGGAATGTGAAA  
GATTACCTTTTGATTTACCAGAAGCGGAAGAGGAGTTAGTAGCGGGTTATCAAACCGA  
ATACTCAGGTATCAAATTTGGTTTGTTTTACGTTGCTTCCTATCTAAATCTACTAGTTTCT  
TCATTATTTGTAACAGTTCTTTACTTGGGCGGTTGGAATCTTTCTATTCCGTACATACTCG  
TTCCTGAGCTTTTTGAAATAAATAAAGCGGGTATAGTCTTTGGAACAATAATTAGCATCT  
TTATTACATTAGCTAAA ACTTATTTGTTCTTGTTCATTTCTATCACAACAAGATGGACTTT  
ACCGAGGCTGAGAATGGACCAACTATTAATCTTGGATGGAAATTTCTTTTACCTATTTCT  
TCTAGGTAATCTATTATTAACA ACTTCTTCCCACTTATGTCACTGATGATCTGGCATGTA  
CAGAATGAAA ACTTCAATCTCGATTCTACGAGAATTTTTATGAAAGCCTTTCATTTGCTT  
CTCTTCGATGGAAGTTTTATTTTCCAGAATGTATCCTAATTTTTGGCCTAATTTCTTCTC  
TGATGATCGATTCAACCTCTGATCAAAAAGATATATCTTGGTTATATTTCACTCTTCAAC  
AAGTTTAGTAATGAGCATAACGGCCCTATTGTTCCGATGGAGAGAAGAACCTATGATTA  
GCTTTTCGGGAAATTTCAAACGAACAATTTCAACGAAATCTTTCAATTTCTTATTTTAC  
TATGTTCAACTCTATGTATTCCTCTATCCGTAGAGTACATTGAATGTACAGAAATGGCTAT  
AACAGAGTTTCTTATTTCGTATTAACAGCTACTCTAGGAGGAATGTTTTTATGCGGTGC  
TAACGATTTAATAACTATCTTTGTAGCCCCAGAATGTTTCAGTTTATGCTCCTACCTATTA  
TCTGGATATACCAAGAAAGATGTACGGTCTAATGAGGCTACTATGAAATATTTACTCATG  
GGTGGGGCAAGCTCTTCTATTCTGGTTCATGGGTTCTCTTGGCTATATGGTTCATCCGGG  
GGAGAGATCGAGCTTCAAGAAATAGTGAATGGTCTTATCAATACACAAATGTATAACTC  
CCCAGGAATTTCAATTGCGCTCATATTCATCACTGTAGGAATTGGGTTCAAGCTTTCCT

AGCCCCTTCTCATCAATGGACTCCTGACGTATACGAAGGATCTCCCACTCCAGTCGTTG  
CTTTTCTTTCTGTTACTTCGAAAGTAGCTGCTTCAGCTTCAGCCACTCGAATTTTCGATA  
TTCCTTTTTATTTCTCATCAAACGAATGGCATCTTCTTCTGGAAATCCTAGCTATTCTTAG  
CATGATATTAGGGAATCTCATTGCTATTACTCAAACAAGCATGAAACGTATGCTTGCATA  
TTCGTCCATAGGTCAAATCGGATATGTAATTATTGGAATAATTGTTGGAGACTCAAATGA  
TGGATATGCAAGCATGATAACTTATATGCTGTTCTATATCTCCATGAATCTAGGAACTTTT  
GCTTGCATTGTATTATTTGGTCTACGTACCGGAACTGATAACATTTCGAGATTATGCAGGA  
TTATACACGAAAGATCCTTTTTTGGCTCTCTCTTTAGCCCTATGTCTCTTATCCCTAGGA  
GGTCTTCTCCACTAGCAGGTTTTTTTCGGAAAACCTCTATTTATTCTGGTGTGGATGGCA  
GGCAGGCCTATATTTCTTGGTTTCAATAGGACTCCTTACAAGCGTTGTTTCTATCTACTAT  
TATCTAAAAATAATCAAGTTATTAATGACTGGGCGAAACCAAGAAATAACCCCTCACGT  
GCGAAATTATAGAAGATCTCCTTTAAGATCAAACAATTCCATCGAATTGAGTATGATTGT  
ATGTGTGATAGCATCTACTATAACCAGGAATATCAATGAACCCGATTATTGCAATTGCTCA  
GGATAACCTTTTTATGTTTCTGCTTTACGAATATGATATTTTTTGGGCATTTCTAATAATAT  
CAAGTATTATCCTATCTTGGCATTTTTCATTTCCGGAGTTTTAGCTCCGATTAGCAAAG  
GACCAGAGAAACTTTCTAGTTATGAATCGGGTATAGAACCAATGGGCGACGCTTGGTTA  
CAATTTAGAATCCGTTATTATATGTTTGCGTTAGTTTTTGTGTTTTTGTGTTTTGATGTTGAAACGG  
TTTTTCTTTATCCATGGGCAATGAGTTTCGATGTATTGGGTGTATCCGATTATTATAGAAGC  
TTTAATTTTTGTGCTTATCTTAATTGTTGGTTCAATTTATGCATGGCGAAAGGGGGCATT  
GGAATGGTCTACGAATGATTTTCCTTGGTTAACAATAATTGTAGTTTTGCCAATAGCCGC  
GGGTTCTTTAATTTTTCTTTCTTCCCATAGAGGAAATAGGGTAATTAAGTGGTATACTATT  
TGTATATGTATATTAGAGCTCCTTCTAACAACCTATGCATTCTGTTATCATTTCGAATCAG  
ACGATCCATTAATCCAACCTAGTGGAGGATTATAAATGGATCGATTTTTTTGATTTCCACT  
GGCGATTGGGAATAGATGGACTTTCTATAGGACCCATTTTACTGACAGGATTCATTA  
CTTTAGCTACTTTAGCGGCTTGGCCAGTTACTCGGATTCTCGATTATTCCATTTCTGA  
TGTTAGCAATGTACAGCGGTCAAATAGGATCATTTTCTTCTCGGGACCTTTTGCTTTTTT  
TTATCATGTGGGAGTTAGAATTAATCCCGTTTATCTACTTTTATCCATGTGGGGAGGAA  
AAAAGCGTCTCTATTAGCTACAAAATTTATTTTTGTACACTGCGGGGGGTTCCATTTTTT  
TCTTAATGGGAGTTCTGGGTGTGCGTTTTATATGGTTCTAATGAACCAACATTAAATTTG  
AAACATCGGCTAATCAATCGTATCCTGTGGTATTGGAAATAATATTCTATATTGGGTTTTT  
TATTGCGTTTTGCTGTCAAATCACCGATTATACCCCTACATACATGGTTACCAGATACCCAT  
GGAGAAGCACATTACAGTACCTGTATGCTTCTAGCTGGAATCTTATTAATAAATGGGAGC  
ATATGGATTGGTTCGGATCAATATGGAATTATTACCGCACGCTCATTTCTATATTTCTCCT  
TGGTTTATCATAGTAGGTACAACGCAAATAATCTACGCAGCTTCAACATCCCTTGGCCA  
ACGTAATTTAAAAAAGAATAGCCTATTCTTCTGTATCTCATATGGGTTTCATAATTATA  
GGAATAGGCTCTATAACCGATACGGGACTCAATGGAGCCATTTTACAAATAATCTCTCAT  
GGATTTATTGGTGC CGCTTTTTTTCTTGGCAGGAACGAGTTATGATAGAATACGTCTT  
GCTTATCTCGACGAAATGGGCGGAATAGCTATCCTAATGCCAAAAATATTCACAATGTT  
AGTAGCTTTTCGATGGCTTCTCTTGCATTACCGGGCATGAGTGGTTTTGTTGCAGAATT  
GATAGTATTTTTTGGAAATAATTACCAGCCAAAAGTATCTTTTAATGACAAAAATACTAAT  
TACTTTTGTAATGGCAATTGGGATGATATTAACCTCTATTTATTATTATCTATGTCACGTC  
AGATGTTCTATGGATAACAAGCTATTTAATGCTCCAACTCTTATTTTTTTGATTCTGGACC  
GCGAGAGTTATTTGTTTCGATCTCTATCTTTTTTACCTGTTCATAGGTATTGGTATTTACCC  
GATTTTGTCTTTCACTATCAGTTGACAAGGTCGAACCTTATTCTATCTAATTATTTTTCTA

GAATGATGCTCGAACATGTCCTTATTTTGAGTGCCTATTTATTTTCTATCGGTATCTATGG  
ATTGATTACAAGTCGAAATATGGTTAGAGCCCTTATGTGTCTTGAACCTATATTGAATGC  
AGTTAATATAAATTTTGTAACATTTTCTGATTTTTTTGATAGTCGTCAATTAAGGAAC  
CATTTTTGCAATTTTTGTTATAGCTATTGCAGCCGCTGAAGCAGCTATTGGACTGGCTAT  
TGTTTCGTCAATTTATCGTAATCGAAAATCAACTCGTATCAACCAATCGAATTTGTTGAA  
TAAGATGGAACATACATATCAATATGCGTGGATCATACTTTGATTCCACTTCCAGTTCC  
TATGTTAATAGGAGTGGGGCTTCTTCTTTTTCCGACGGCAACAAAAAATCTCCGTCGTA  
TATGGGCTTTTCCTAGTGTTCTATTGTTAAGTATAGTCATGATTTTTTCGATCGATCTGTC  
TATTCAGCAAATGAATAGCAGTTCTATCTATCAATATGTATGGTCTTGGATCATCAATAAT  
GATTTTTCTTTAGAATTGGGCTACGTAATCGATCCACTTACTTCTATTATGTCAATATTA  
TTACTAGTGTGGAAATTATGGTCTTATTTATAGTGATAATTATATGTCTCATGATCAAGG  
ATATTTGAGATTTTTTGCTTATATGAGTTTTTTCAGTACTTCCATGTTGGGATTAGTTACT  
AGTTCAAATTTGATACAAATTTATATTTTTGGGAATTGGTTGGAATGTGTTCCATTAT  
TAATAGGATTTTGGTTCACACGACCGTTGCGGCAAATGCTTGTCAAAAAGCGTTTGT  
ACTAATCGTGTAGGGGATTTTGGTTTATTATTAGGAATTTTAGGTTTTTATTGGATAACAG  
GTAGTTTTGAATTTCCGGGATTTATTCGAAATAGTAAATAACAATGAGGTCAATTTATCAT  
TTATTACTGTGTGTGCCGTTCTAGTATTTGCCGGTGCAGTTGCTAAATCTGCACAATCC  
CCCTTCATGTATGGTTACCTGATGCCATGGAAGGGCCTACTCCTATTTCCGGCTCTTATAC  
ACGCTGCTACTATGGTAGCGGCAGGAGTTTTTATTGTAGCTCGGCTTCTTCTCTTTTCA  
CAGTCATACCTTACATACTGAATCTAATATCTTTGATAGGTATAATAACAGTATTATTAGG  
CGCTACTTTAGCTCTTGCTCAAAAAGACATTAAGAGAAGTTTAGCCTACTCTACAATGT  
CTCAGTTGGGTTATATGATGTTAGCTCTAGGTATGGGGTCTTATCGAACTGCTTTATTCA  
TTTGATTACCCATGCATATTCGAAAGCATTATTGTTTTTAGGATCCGGATCTGTTATTCAT  
TCAATGGAAACTATTGTTGGATATTCTCCGATAAAAAGTCAGAATATGGTTCTTATGGGG  
GGTTTAACAAAACATGTACCAATCACAAAATTTCTTTTTTATTAGGTACTTTCTCTT  
TGTGGTATTCCACCTCTTGCTTGTTTTTGGTCCAAAGATGAAATCTTAATGATAGTTGG  
TTGTATTACCAATTTTTGCAATAATAGCTTGCTCTACAGCAGGATTAACCGCATTTTATA  
TGTTTCGGATCTATTTACTTACTTTTGAGGGTCATTTAAACGTTCAATTTCAAATTATAG  
CGGCAAAAAAATAACCCGTTCTATTCAATATCTCTATGGGGTAAAGTAGGCTCGAAAA  
CAATTAACAAA---TTATTAACCTTTATTAACAATGAATTTTTTTTTCATTTGCAATAAGAAC  
ACTTATTCATATCCTTATGAGTCGGACAATACTATGTTATTTCTCTGCTTGTATTAGCCCT  
ATTCATTTGTTTCGTTGGATCCATAGGAATTCCTTTCGATTTGGATATATTATCCAATGG  
TAAATCCGGCTATAAACCTTTTACATCAAATTCGAAT---TTGATGGATTGGTATGAATT  
TGTGAAAGATGCAATTTTTTCAGTTAGTATAGCTTATTTTGGAAATTTTATAGCATCTTTT  
TTATATAAACCCGTTTATTCATCTTCGCAAAATTTGAACTTAATTAATTCATTTGTTACTC  
TTAGGGACAAAATAATAAATGGGATATATGATTGGTTCATATAATCGTGGTTACATAGATG  
CTTTTTATGCAGCATTTTAACTGGAGGTATAAGAGGATTGGCTAAATTAATTCATTTTTT  
TGATAGACGGATAATTGATGGAATTACGAATGGGGTTGGTATTATGAGTTTCTTTGTAGG  
AGAAGGCATCAAATATATAGGAGGGGG---CGCATTTCTTCTTATCTCTTCTTGTATTCAT  
CTTATGTATCAATCTTTTTAGTAATTTAC---ATGGATTTACCTGGACCAATACATGATTTTC  
TTTTAGTTTTTCTGGGATTGGGTATTATATTGGGAGGTCTGGGAGTAGTATTACTTAACA  
ATACAATTTTTTCCGCCTTTTCATTGGGATTGGTTCTTGTTTGTATCTCCCTATTCTATATT  
CTATCTAATTTCCATTTTGTAGCCGCTGCGCAACTTCTTATTTACGTAGGAGCTATAAATA  
TTTTAATCATATTTGCTGTGATGTTTCATGAATGGTTCAGAATATCACAAAGATTTTTATCT

TTGGACCGTTGGGGATGGGGTACTTCGATGGTTTGTACAAGTATTTTTGTTTCACTAAT  
TACTACTATTCTAGATACGTCATGGTACGGGATTATTTGGACTACAAGATCAAACCAGAT  
TCTAGAACAAGATTTGATAAATAATAGTCAACAAATTGGGATTCATTTATCAACAGATTT  
TTTTCTTCCATTTGAACTCATTTCATAAATTCCTTTTAGTTGCTTTAATAGGCGCAATTGCT  
GTAGCCCGTCAAATGACTGCAACAGCTACAAGAAAAGACCTCATGATAGTCAATATGG  
GCCCTCAACACCCATCAATGCATGGTGTCTTCGACTCATCGTTACTCTAGATGGTGAA  
GATGTTATTGACTGTGAACCAATATTGGGTTATTTACACAGAGGGATGGAAAAGATTGC  
GGAAAACCGAACAATTATACAATATTTGCCTTATGTAACACGTTGGGATTATTTAGCTAC  
TATGTTACAGAAGCAATAACCGTAAATGCACCAGAGCAGTTAGGAAATATTCAAGTAC  
CCAAAAGGGCTAGCTATATCAGAGTAATTATGTTGGAATTAAGTCGTATAGCTTCTCATT  
TGTTATGGCTTGGCCCCTTATGGCCGATATTGGTGCGCAGACCCCCTTCTTCTATATTTT  
TCGAGAAAGAGAATTAATATATGACCTATTCGAAGCTGCTACCGGTATGCGAATGATGC  
ATAATTATTTTCGTATCGGAGGAGTAGCTGCTGATCTACCTCATGGTTGGATAGATAAAT  
GTTTGGATTTTTGCGATTATTTTTTAACAGGGGGTGGCATTATTGGAGGCGAAGAGGC  
GGAATCCTATTTTTTTAGAACGAGTTGAGGGGGTGGCATTATTGGAGGCGAAGAGGC  
AATAAATTGGGGTTTATCAGGACCAATGCTGCGAGCTTCTGGAATACAATGGGATCTTC  
GTAAAGTTGATCATTATGAGTGTTACGATGAATTTGACTGGGAAGTCCAATGGCAAAAA  
GAGGGGGATTCAATAGCTCGTTATTTAGTACGAATCGGTGAAATGAAAGAATCCATAAA  
AATTATTCAACAGGCTCTAGAAGGAATCCGGGGGGGCCCTATGAGAATTTAGAAATCC  
GACGCTTTGATAAAGTAAGGAATCCCGAATGGAATGATTTTGAATATCGATTTATTAGTA  
AAAAACCTTCTCCAACTTTTGAATTGTGCAACCAAGAACTTTATGTAAGAGTCGAAGC  
CCAAAAGGGGAATTGGGAATTTTTCTCATAGGAGATCAGAGTGTTTTTCTTGGAGAT  
GGAAAATTCGCCACCAGGTTTATCAATTTGCAAATTCCTCCTCAGTTAGTTAAAAAA  
ATGAAATTGGCCGATATTATGACGATCCTAGGTAGCATAGATATCATTATGGGAGAAGTT  
GATCGTATGTTCCCTATGGTAACTGGGTTTCATGAATTATGGTCAACAAACAATACGGGCT  
GCAAGATACATTGGTCAAAGTTTCATGATTACCTTATCCCATGCGAATCGTTTACCCGTA  
ACTATTCAATACCCCTATGAAAAATTAATCACATCGGAGCGTTTCCGCGGCCGAATCCA  
CTTTGAATTTGATAAATGCATTGCTTGTGAAGTATGTGTTTCGCGTATGTCCTATAGATCTA  
CCTGTTGTTGATTGGAAATTGGAAACGGATATTCGAAAGAAACGATTGCTTAATTACAG  
TATTGATTTCCGAATCTGTATATTTTGTGGTAATTGCGTTGAGTATTGTCCAACAAATTGT  
TTATCGATGACTGAAGAATATGAACTTTCTACGTATGATCGTCACGAATTGAATTATAAT  
CAAATTGCTTTGGGTGCTTTACCAATATCGGTAATTGACGATTCCACGGTTCGAACAATT  
TGGAATTCG-----ATGCAGGGTTCGTTTGTCTGCTTGGCT  
AGTCAAGCATGGGCTAATTCATAGATCTTTAGGCTTTGATTACCGAGGAATAGAGACTT  
TACAAATAAAGCCCGAGGATTGGCATTCCATTGCTGTCATTTTATATGTATATGGTTACAA  
TTATCTACGCTCCCAATGTGCATATGATGTAGCACCAGGCGGGCTGTTAGCTAGTGTGTA  
TCATCTTACGAGAATAGAGTATGGTGTGGATCAACCGGAAGAGGTATGCATAAAAGTAT  
TTGCCCAAGGAGGAATCCTAGAATTCGCTCTGTTTTCTGGGTTTGGAAAAGTGTGGAT  
TTCAAGAACGGGAATCTTATGATATGTTGGGAATCTCTTATGATAATCATCCACGCTTG  
AAACGTATCTTAATGCCGGAAGTTGGATAGGGTGGCCCTTACGTAAGGATTATATTTCC  
CCCAATTTTTATGAAATACAAGATGCTCAT-----  
-----ATGGCGAAAGGGGGCATTGGAATGGTCTTAGCTCCTGAATATTC  
AGACAATAAAAAGAAAAA-----AATACGATTGAGATGGTTATGAATTCATTGACTT  
TCCCTTACTTGATCGAACAACCCCAAATTCGTATTATTTCAACTACATCCAATGATCTTTC

AAATTGGTCAAGACTCTCTAGTTTATGGCCGCTTCTCTATGGTACCAGTTGTTGCTTCAT  
TGAATTTGCTTCACTAATAGGCTCACGATTCGACTTTGATCGTTACGGACTGGTACCAA  
GATCGAGTCCTAGACAAGCGGACCTGATTTTAACAGCCGGAACAGTAACAATGAAAAT  
GGCTCCTTCTTTAGTGAGATTATATGAGCAAATGCCGGAACCAAATATGTTATTGCTAT  
GGGAGCATGTACAATTACAGGGGGAATGTTTCAGTACCGATTCTTATAGTACTGTTTCGTG  
GAGTCGATAAGCTAATTCCTGTGGATGTCTATTTACCGGGCTGTCCACCAAACCGGAA  
GCAGTTATAGATGCTATAACAAAACCTTCGTAAGAAAATATCTCAAGAAATCTATGAAGA  
TAGAATTAGGTCTCACCAGGAGAATCGGTGTTTTACTACCAATCACAAAGTTTCATGTTG  
GACGCAGTATTCATACTGGAAATTATAATCAAGGATTACTTTATCAACCGCCATCTACTT  
CAGAGATCCTTCTGAAACATTTTTCAAATACAAAAGTTCAGTATCTTCCCACGAATTA  
GTGAATATGCAAACCTAGAAATACTTTTTCTTGGATAAAGGAACAGGTTACTCGATCCAT  
TTCCGTATCGCTCATGATATATATCATAACTCGGGCATCCATTTCAAGCGCATATCCCATT  
TTTGACACAGCAGGGTTATGAAAATCCACGAGAAGCGACGGGGCGTATTGTATGTGCCA  
ATTGCCATTTAGCTAATAAGCCCGTGGATATTGAAGTTCACAAGCGGTACTTCCGGAT  
ACTGTATTTGAAGCAGTTGTTTCGAATTCCTTATGATATGCAACTGAAGCAAGTTCTTGCT  
AATGGTAAAAGGGGGGCTTTGAATGTGGGGGCTGTTCTAATTTTACCTGAGGGGTTTG  
AACTAGCGCCTCCCAGATCGTATTTCTCCCGAGATGAAAGAAAAGATAGGCAATCTATCT  
TTTCAGAGCTATCGCCCCAATAAAAAAATATTCTTGTGATAGGCCCGTTCCCTGGTCA  
GAAATATAGTGAAATCACCTTTCCTATTCTTTCCCAGACCCCGCTACGAAGAAAGATG  
TTCACTTCTTAAAATATCCTATATACGTAGGCGGAAACAGGGGAAGGGGTCAGATTTAT  
CCCGACGGGAGCAAGAGTAACAATACAGTTTATAATGCTACAGCAGCGGGTATAGTAA  
GCAAATCGTACGAAAAGGAAAGGGGGGGTATGAAATAACCATAGCAGATGCGTTCGG  
ATGGACGTCAAGTAGTTGATAGTATCCCTCCAGGGCCCGAACTTCTTGTTCAGAGGGC  
GAATCTATCAAATTTGATCAACCATTAACAAGTAATCCGAATGTGGGCGGATTTGGTCA  
GGGAGATGCAGAAATAGTACTTCAAGATCCATTACGTGTCCAAGGTCTTTTGTTCCTCT  
TGGCATCTGTTATTTTGGCACAAATATTTTGGTTCTTAAAAAGAAACAGTTCGAGAAG  
GTTCAATTGTCCGAAATGAATTTTCATGAGTAAAGTCTATGATTGGTTCGAAGAGCGCCT  
CGAGATTCAGGCGATTGCAGATGATATAACTAGTAAATACGTTCCCTCCCCATGTCAACAT  
ATTTTATTGTTTAGGAGGAATTACGCTTACTTGTTTTTTAGTACAAGTAGCTACGGGGTT  
TGCTATGACTTTTTACTATCGTCCGACCGTTACTGAAGCTTTTGCCTCGGTTCAATACAT  
AATGACTGAAGCTAATTTTGGTTGGTTAATCCGATCAGTTCATCGATGGTTCGGCAAGTA  
TGATGGTCCTAATGATGATCCTGCATGTATTTTCGTGTGTATCTCACCGGTGGATTTAAA  
AACCTCGCGAATTGACTTGGGTTACGGGCGTGGTTCTGGCCGATTGACTGCATCTTTT  
GGCGTAACTGGTTATTCTTACCTTGGGACCAAATGGTTATTGGGCAGTAAAAATTGT  
AACGGGTGTGCCTGAAGCGATTCCCTGTAATAGGATCGCCTTTGGTAGAATTATTGCGGG  
GAAGTGCTAGTGTGGGACAATCCACCTTGACTCGTTTTTATAGTTTACACACTTTTGTAT  
TGCCCTTCTTACTGCCGATTTATGTTAATGCACTTCCCTAATGATACGTAAACAGGGTAT  
TTCTGGTCCTTAATGGGAGTAACAAAAAACCTGACTTGAATGATCCTGTATTAAGAG  
CTAAATTGGCTAAAGGGATGGGTCATAATTATTACGGAGAGCCCGCATGGCCCAATGAT  
CTTTTATATATTTTTCCAGTAGTAATTCTAGGTACTATTGCATGTAACGTGGGCTTAGCGG  
TTCTAGAACCATCAATGATTGGTGAACCAGCAGATCCATTTGCAACCCCTTGGAAATA  
TTACCCGAATGGTATTTCTTTCCCGTATTTCAAATACTTCGTACAGTACCCAATAAATTGT  
TGGGTGTTCTTTAATGGTTTCAGTACCTGCGGGATTATTAACAGTACCTTTTTTTAGAGA  
ATGTTAATAAATCCAAAATCCATTTTCGTCTCGGTAGCGACAACCGTCTTTTTGATTG



GTACCGCAGTGGCCCTTTGGTTGGGTATTGGTGCAACATTACCTATTGATAAATCCTTAA  
CTTTAGGTCTTTTTATGATTGAAGTTTTTCTATTTGGAATCGTGTTAGGTCTAATTCCTAT  
TACTTTGGCTGGATTATTTGTAAGTGCATATTTACAATACAGACGTGGTGATCAGTTGGA  
TCTTATGCCTACTATAACTAGTTATTTTCGGTTTTCTACTAGCGGCTTTAACTATAACCTCG  
GCTCTATTTATTGGTCTGAGCAAGATACGACTTATTATGGATATAGTAAGTCTCGCTTGG  
GCTGCTTTAATGGTAGTCTTTACATTTCCCTTTCCTACTCGTAGTATGGGGAAGAAGTGG  
ACTCATGATTATTCGTTTCGCCGGAACCAGAAGTAAAAATTTGGTAGATAGGGATCACA  
TAAAAACTTCTTTTCGAGGAATGGGCCAGACCAGGTCATTTCTCAAGAACACTAGCGAA  
AGGCCCTGATACTACCACTTGGATCTGGAACCTACATGCTGATGCTCACGATTTTCGATA  
GCCATAACCAGCGATTTGGAGGAGATCTCTCGAAAAGTATTTAGTGCCCATTTTCGGTCAA  
CTCTCCATCATCTTTCTTTGGCTGAGTGGTATGTATTTCCACGGTGCTCGTTTTTCCAATT  
ATGAAGCATGGCTAAGCGATCCTACTCACATTGGCCCTAGTGCCAGGTGGTTTGGCCA  
ATAGTGGGCCAAGAAATATTGAATGGTGATGTGGGCGGGGGTTCCGAGGAATACAAA  
TAACCTCCGTTTTTTTTTCAGATTTGGCGAGCATCTGGAATAACTAGTGAATTACAACCTCT  
ATTGTACCGCAATTGGTGCATTGGTCTTTGCAGCGTTAATGCTTTTTGCTGGTTGGTTCC  
ATTATCATAAAGCTGCTCCAAAATTGGCTTGGTTTCAAGATGTAGAATCTATGTTGAATC  
ACCATTTAGCGGGGCTACTTGGACTTGGGTCTCTTTCTTGGGCGGGGCATCAAGTACAC  
GTATCTTTGCCGATTAACCAATTTCTAAACGCCGGTGTAGATCCTAAAGAGATACCACTT  
CCTCATGAATTTATCTTGAATCGGGATCTTTTGGCTCAACTTTATCCCAGTTTTGCCGAG  
GGAGCAACCCCGTTTTTCACCTTGAATTGGTCAAAAATATGCGGAATTTCTTACTTTTTCG  
TGGAGGATTAGATCCAGTTACTGGGGGTCTATGGCTGACCGATATTGCACACCATCATT  
AGCTATTGCAATCTTTTCCTGATAGCAGGTCACATGTATAAGACCAATTGGGGCATTGG  
TCATGGCCTAAAAGATATTTTAGAAGCTCATAAAGGTCCATTTACAGGCCAGGGCCATA  
AAGGCCTATATGAGATCCTAACAACGTCATGGCATGCTCAATTATCTCTAACCTAGCTA  
TGTTAGGCTCTTTAACCAATTGTTGTAGCTCATCATATGTATTCCATGCCCCCTTATCCATAT  
CTAGCTACTGACTATGGTACACAACCTGTCATTGTTACACATCACATGTGGATTGGCGG  
ATTTCTCATAGTTGGTGCTGCTGCGCATGCAGCCATTTTTATGGTAAGAGACTATGATCC  
AACTACTCGATAACAACGATCTATTAGATCGTGTCCCTTAGGCATCGCGATGCAATCATATC  
ACATCTCAACTGGGCATGTATATTTCTAGGCTTTCACAGTTTTGGGTTGTATATTCATAAT  
GATACCATGAGCGCTTTAGGGCGCCCCCAAGATATGTTTTTCAGATACCGCTATAACAATTA  
CAACCCGTCTTTGCTCAATGGATACAAAACACCCATGCTTTAGCACCTGGTTCAACAGC  
TCCTGGTGCAACAGCAAGCACCAGTTTAACTTGGGGGGGTGGTGATTTAGTAGCAGTG  
GGCGCAAAGTGGC'TTTGTTACCTATTCCATTAGGAACTGCAGATTTTTTGGTACATCA  
CATTCATGCATTTACGATTCATGTGACGGTATTGATACTCCTGAAAGGTGTTCTATTTGC  
TCGTAGCTCCCGTTTGATAACCGATAAAGCAAATCTTGGTTTTTCGTTTTCTTGTGATGG  
ACCTGGAAGAGGGGGGACATGTCAAGTATCGGCTTGGGATCATGTCTTCTTAGGACTAT  
TCTGGATGTACAATGCAATTCGGTAGTAATATCCATTTTCAGCTGGAAAATGCAGTCA  
GATGTTTTGGGGCAGTATAAGTGATCAAGGGGTAGTAACTCATATTACGGGAGGAACTT  
TGCGCAGAGTTCATTACTATTAATGGGTGGCTCCGCGATTTCTTATGGGCGCAGGCAT  
CTCAGGTAATTCAGTCTTATGGTTCTTCATTATCTGCATATGGCCTTTTTTTCTTAGGTGC  
TCATTTTGTATGGGCTTTCAGTTTAATGTTTCTATTTCAGTGGACGTGGTTATTGGCAAGA  
ACTTATTGAATCCATCGTTTGGGCTCATAATAAATTAAGTTGCTCCTGCTACTCAGCC  
TAGAGCCTTGAGCATTGTACAAGGACGCGCTGTAGGAGTAACCCATTACCTTCTGGGT  
GGAATTGCCACAACATGGGCGTTCTTCTTAGCAAGAATTATTGCAGTAGGAATGGCATT

AAGATTTCCAAGGTTTAGCCAAGGCTTAGCTCAGGACCCCACTACTCGTCGTATTTGGT  
TTGGTATTGCTACCGCACATGACTTCGAGAGTCATGATGATATTACTGAGGAACGTCTTT  
ATCAGAATATTTTTGCTTCTCACTTCGGTCAATTAGCAATAATTTTTCTGTGGACTTCCG  
GAAATCTGTTTCATGTAGCTTGGCAAGGAAATTTGAGTCATGGGTACAGGACCCTTTA  
CATGTAAGACCTATTGCTCATGCAATTTGGGATCCTCATTTTGGTCAACCAGCTGTGGA  
AGCTTTTACTCGAGGGGGTGTCTTGGTCCAGTGAATATCGCTTATTCTGGTGTTTATCA  
GTGGTGGTATAACAATCGGTTTACGCACTAATGAAGATCTTTATACTGGAGCTCTTTTTCT  
ATTATTTCTTTCTGCCATATCCTTAATAGCAGGTTGGTTACACCTACAACCGAAATGGAA  
ACCGAGTGTTCGTGGTTCAAAAATGCGGAATCTCGTCTCAACCATCATTGTGACAGGAC  
TCTTCGGAGTAAGTTCTTTGGCTTGGACAGGGCATTAGTTCATGTGCTATTCTGCAT  
CCAGAGGGGAGTACGTTGATGGAATAATTTCTTAGATGTATTACCGCATCCCCAAGGG  
TTAGAACCACTTTTTACAGGTCAGTGGAATCTTTATGCGCAAAACCCCGATTCAAGTAG  
TCATTTATTTGGTACCTCCCAAGGAGCGGGAAGTCCATTCTAACCCCTTCTCGGGGGAT  
TCCATCCACAAACGCAAAGTTTATGGCTGACTGATATGGCGCATCATCATTAGCTATTG  
CATTATTTTTCTCATTGCTGGTCATATGTATAGAATACTTCGGGATTGGGCACAGTAT  
GAAAGATCTTTAGATGCACATATTCCTCCGGGGGGGCGACTGGGACGTGGGCATAAG  
GGTCTTTATGACACAATCAATAATTCGATTCATTTTCAATTAGGCCTTGCTCTAGCTTCTT  
TAGGGGTTGTTACTTCCTTGGTAGCTCAACACATGACTCTTTACCCCTTATGCATTCA  
TAGCCCAAGATTTTACTACTCAGGCTGCGTTATATACTCATCACCATAACATCGCAGGAT  
TCATCATGACAGGGGCTTTTGCTCATGGAGCTATATTTTTTCATTAGAGATTACAATCCGG  
AACAAAATGAGGATAATGTATTGGCAAGAATGTTAGACCATAAAGAAGCTATCATATCC  
CATTTAAGTTGGGCCAGCCTCTTTCTGGGGTTCATACCTTGGGACTTTATGTTTATAAT  
GATGTCATGCTTGCTTTTGGTACTCCGGAGAAACAAATCCTGATCGAACCTATATTTGCT  
CAATGGATAACAATCTGCCATGGTAAACTTCATATGGGTTTCGATGTCTTTTATCTTCA  
ACGAATGGCCCGGCATTCAATGCGGGTCGAAGCATATGGTTGCCCGGTTGGTTAAATGC  
TGTTAATGAG-----AATAGTAATTCATATTTCTTAACAATAGGTCCCGGAGACTTTTTGGT  
TCATCATGCTATTGCTCTAGGTTTACATACAACTACATTGATTTTAGTAAAAGGTGCTTTA  
GACGCACGTGGTTCCAAGTTAATGCCAGATAAAAAGGATTTTCGGTTATAGTTTTCTTG  
CGACGGTCCGGGACGAGGCGGTACTTGTGATATTTCCGCTTGGGACGCATTTTATTTAG  
CAGTTTTCTGGATGTTAAATACCATTGGATGGGTTACTTTTTATTGGCATTGGAAACACA  
TCACATTATGGCAGGGTAAACGTTTCGCAGTTTAAATGAATCTTCCACTTATTTGATGGGAT  
GGTTAAGAGATTATTTATGGTTAAACTCTTCCCAACTTATCAATGGATATAACCCCTTTG  
GTATGAATAGTTTATCGGTCTGGGCGTGGATGTTCTTATTTGGGCATCTTGTTTGGGCTA  
CTGGATTTATGTTCTTAATTTTCATGGCGTGGATATTGGCAGGAATTGATTGAAACTTTAG  
CATGGGCTCATGAACGGACACCTTTGGCCAATTTGATTCGATGGAGAGATAAACCAGT  
GGCCCTTTCCATTGTGCAAGCAAGATTGGTTGGATTAGCCCACTTTTCTGTAGGTTATAT  
ATTTACGTATGCAGCTTTCTTGATTGCCTCGACATCGGGTAAATTTGGTATGTCACATTC  
AGTAAAGATTTATGATACATGTATCGGGTGTACTCAATGTGTCCGAGCTTGCCCCACAG  
ATGTATTAGAAATGATACCTTGGGACGGATGTAAAGCGAAGCAAATTGCTTCTGCTCCA  
AGAACAGAAGACTGTGTGCGGTTGTAAGAGATGTGAATCCGCTTGTCCAACGGATTTCT  
TGAGTGTTCGAGTTTATTTATGGCATGAAACAACCTCGCAGCATGGGTCTAGCTTATATGG  
CAACTTTTGACTTTTCTCTATTTTGGTACCTGTAGTAGGCATAGTATTTCCGGCAATTG  
CAATGGCTTCTTTATCTCTTCATGTTCAAAAACAACAAGATTGTTATGCGAGATCTAAAA  
ACATATCTCTCCGTGGCGCCGGTATTAAGTACTCTATGGTTTGGGGCTTTAGCAGGCCTA

TTGATAGAGATTAATCGTTTTTTCCCGGATGCGTTGACATTCCCCTTTTTTTCATTCATGA  
CTGCAATTTTAGAGAGACGCGAAAGCGAAAGCCTATGGGGTCGCTTCTGTA ACTGGAT  
AACCAGCACTGAAAACCGTCTTTACATTGGATGGTTTGGTGTGTGATGATCCCTACCT  
TATTGACCGCAACTTCTGTATTTATTATCGCCTTCATTGCTGCTCCTCCAGTAGATATTGA  
TGGTATTTCGTGAACCTGTTTCTGGATCTCTACTTTATGGAAACAATATTATCTCAGGTGC  
CATTATTCCTACTTCTGCAGCTATAGGTTTGCACCTTTACCCGATCTGGGAAGCGGCATC  
CGTTGATGAATGGTTATACAATGGTGGTCCCTTATGAGCTAATTGTTCTACACTTCTTACT  
TGGTGTAGCTTGTACATGGGTTCGTGAGTGGGAACCTTAGTTTCCGCTCTGGGTATGCGCC  
CGTGGATTGCTGTTGCATATTCAGCTCCTGTTGCAGCTGCTACTGCTGTTTTCTTGATCT  
ACCAATTGGTCAAGGAAGTTTTCTGATGGTATGCCTTTAGGAATCTCTGGGACTTTC  
AACTTCATGATTGTATTCCAGGCTGAGCACAACATCCTTATGCACCCATTCACATGTTA  
GGCGTAGCTGGTGTATTTCGGCGGCTCCCTATTCAGCGCTATGCATGGTTCCTTGGA  
TCTAGTTTGATCAGGGAAACCACAGAAAACGAATCTGCTAATGAAGGGTACAGATTCG  
GTCAAGAGGAAGAACTTATAATATCGTAGCTGCTCATGGTTATTTTGGCCGATTAATCT  
TCCAATATGCTAGTTTCAACA ACTCTCGTTCTTTACATTTCTTCTAGCTGCTTGGCCTG  
TAGTAGGTATCTGGTTCACCGCTTTAGGTATCAGCACTATGGCTTTCAACCTAAATGGTT  
TCAATTTCAACCAATCTGTAGTTGATAGTCAAGGCCGTGTAATTAATACTTGGGCTGATA  
TCATTAACCGCGCTAACCTTGGTATGGAAGTTATGCACGAACGTAATGCTCATAACTTC  
CCTCTAGACCTAGCTGCTATTGAAGCTCCATCTACAAATGGAATGGGTTACCTTGGTAT  
CGTGTTCAACCGTGTATTGAATGATCCCGGCCGGTTGCTTTCTGTTCAATAATGCATA  
CAGCTCTGGTTGCTGGTTGGGCCGGTTCGATGGCTCTGTATGAATTAGCAGTTTTTGT  
CCCTCTGACCCTGTTCTTGATCCAATGTGGAGACAGGGTATGTTTCGTTATACCCTTCATG  
ACTCGTTTAGGAATAACTAATTCATGGGGCGGTTGGAATATTACA---GGAGGGACTATAA  
CCAATCCGGGTATTTGGAGTTATGAAGGTGTGGCCGGGGCACATATTGTGTTTTCTGGT  
TTATGCTTCTTGGCAGCTATCTGGCATTGGGTGTATTGGGATCTAGAAATATTTGCGAT  
GAGCGTACAGGAAAACCTCTTTGGATTGCCCCAAGATCTTTGGAATTCATTTATTTCTT  
TCAGGGGTGGCTTGGTTTTGGTGCATTTTCATGTGACAGGCTTGTACGGTCTCTGG  
AATATGGGTATCCGATCCTTATGGACTAACGGGAAAAGTACAACCTGTAAATCCAGCGT  
GGGGCGTGGAAGGTTTTGATCCTTTTGTCCGGGAGGAATCGCCTCTCATCATATTGCA  
GCGGGGACATTGGGCATATTAGCGGGTCTATTCCATCTTAGCGTCCGCCCGCCTCAACG  
TCTATACAAAGGATTGCGTATGGGCAATATTGAAACCGTCCTTTCCAGTAGTATCGCTGC  
TGTCTTTTTTGCAGCTTTTGTGTTGCCGGA ACTATGTGGTATGGTTCAGCAACTACCCC  
CATCGAATTATTTGGGCCACTCGTTATCAATGGGATCAGGGGTACTTCCAGCAAGAGA  
TATATCGAAGAGTTAGTGCCGGGCTAGCCGAAAATCAAAGTTTATCAGAAGCTTGGTCT  
AAAATTCCCGAAAAATTGGCTTTTTATGATTACATCGGCAATAATCCAGCAAAGGGGGG  
ATTATCCGGGCAGGCTCAATGGATAACGGGGATGGAATAGCAGTTGGATGGTTAGGAC  
ACCCCGTCTTTAGAGATAAAGAAGGACGTGAACTTTTTGTACGCCGTATGCCTACCTTT  
TTTTGAAACATTTCCAGTCGTTTTGGTAGACGGAGACGGAATTGTTAGAGCCGATGTTCC  
TTTTAGAAGGGCAGAATCGAAGTATAGTGTGCAACAAGTAGGCGTAACTGTTGAGTTC  
TATGGTGGCGAACTCAATGGAGTCAGTTATAGTGATCCTGCTACTGTGAAAAAATATGC  
TAGACGCGCTCAATTAGGTGAAATTTTTGAATTAGATCGTGCTACTTTGAAATCCGATG  
GTGTTTTTCGTAGCAGTCCAAGGGGTGGTTTACTTTTTGGGCATGCTTCATTTGCTCTG  
CTCTTCTTTCGGCCACATTTGGCATGGTGCTCGAACCTTGTTACAGGGATGTTTTTGGCT  
GGTATTGATCCAGATTTGGATGCTCAAGTGGAAATTTGGAGCATTCCAAAAACTTGGAGA

TCCA ACTACACGAAGACAAGTAGTC-----GTGGAAACGCTCTTT  
AATGGAAC TTTAGCTTTATCCGGTCGTGACCAAGAAACCACCGTTTCGCTTGGTGGG  
CCGGAAATGCCCGACTTATCAATTTATCCGGTAAACTATTAGGGGCTCATGTAGCCCATG  
CCGGATTAATCGTATTCTGGGCCGGAGCAATGAACCTATTTGAGGTGGCTCATTTTCGTA  
CCAGAGAAGCCTATGTATGAACAAGGATTAATTTACTTCCCCACCTAGCTACTCTAGG  
TTGGGGGGTAGGTCCTGGTGGGGAAGTTATAGACACCTTTCCATACTTTGTATCCGGAG  
TACTTCACTTAATTTCTCTGCAGTATTGGGCTTTGGCGGTATTTATCATGCACTTCTGG  
GACCCGAGACTCTTGAAGAATCTTTTCCATTCTTCGGTTATGTATGGAAAGATAGAAAT  
AAAATGACTACAATTTTAGGTATTAATTTTGTAGGTATAGGTGCTTTTCTTCTAG  
TATTAAGGCTCTTTATTTTGGGGGCATATATGATACCTGGGCTCCCGGGGGGGGAGAT  
GTAAGAAAATTACCAACTTGACCCTTAGCCCAAGTATTATATTTGGTTATTTACTAAAA  
TCGCCTTTTGGGGGAGAAGGGTGGATTGTTAGTGTGGACGATTTGGAAGATATAATCGG  
GGGACATGTATGGTTAGGTTCCATTTGTATACTTGGTGGAAATTTGGCATATCTTAACCAA  
ACCCTTCGCATGGGCTCGACGCGCACTTGTCTGGTCCGGAGAGGCTTACTTATCTTATA  
GTTTAGGTGCTTTAGCTGTTTTTGGTTTTTTCATTGCTTGTGCTTTGTCTGGTTCAATAATAC  
CGCTTATCCTAGTGAGTTTTACGGACCCACTGGACCAGAAGCTTCTCAAGCTCAAGCAT  
TTACTTTTCTAGTTAGAGACCAACGTCTTGGGGCTAACGTGGGATCCGCTCAAGGACCT  
ACTGGTTTAGGTAAATATCTAATGCGTTCCCGACTGGAGAAGTCATTTTGGAGGAGA  
AACCATGCGTTTTTGGGATCTGCGTGCCCCCTGGTTAGAACCTTTAAGGGGTCCAAATG  
GGTTGGACTTAAGTAGGCTGAAAAAAGACATACAGCCTTGGCAAGAACGGCGTTCCG  
CAGAATATATGACCCATGCTCCTTTAGGCTCTTTAAATCCGTGGGTGGCGTAGCTACCG  
AGATCAATGCAGTCAATTATGTCTCTCCTAGAAGTTGGTTAGCTACCTCTCATTTTGT  
TGGGATTCCTTCTTCGTAGGTCATTTGTGGCACGCAGGAAGGGCTCGTGCAGCTGC  
AGCAGGATTTGAAAAAGGAATTGATCGCGATTTTGAACCCGTTCTTTCCATGACCCCTC  
TTAATATGACTATAGCCCTTGGTAAATTTACCAAAGACGAAAAT---TTATTTGATATTATG  
GATGACTGGTTGCGGAGGGACCGTTTCGTTTTTGTAGGTTGGTCCGGTCTATTACTCTT  
TCCTTGTGCCTATTTTCGCTTTAGGGGGTTGGTTCACTGGTACAACCTTTGTAACCTCATG  
GTATACCCATGGATTGGCCAGTTCCTATTTGGAAGGCTGCAATTTCTTAACCTGCCGAG  
TTTCTACTCCTGCTAATAGTTTAGCACATTTCTTTGTTGTTACTATGGGGTCCTGAAGCAC  
AAGGAGATTTTACTCGTTGGTGTCAATTAGGGGGTCTGTGGACTTTTGTGCTCTCCAT  
GGCGTTTTCGGACTAATAGGTTTCAATGTTACGTCAATTCGAACCTGCTCGATCTGTTCAA  
TTGCGACCTTATAATGCAATCGCATTCTCTGCTCCAATTGCTGTTTTTGTCTGTATTTCT  
TGATTTATCCACTAGGCCAATCTGGTTGGTTTTTTGCGCCCAGTTTTGGCGTAGCGGCTA  
TATTTTCGCTTCATCCTTTTTTTTCAAGGGTTTCATAATTGGACGTTGAACCCATTTATAT  
GATGGGAGTTGCCGGTGTATTGGGCGCTGCTTTGCTATGCGCTATTCATGGTGCTACCGT  
AGAAAATACTTTATTTGAAGATGGTGTGGTGC AAATACATTCCGCGCTTTTAACCCAA  
CTCAAGCTGAAGAACTTATTCAATGGTCACCGCTAACCGCTTTTGGTCCCAAATCTTT  
GGGGTTGCTTTTTTCCAATAAACGTTGGTTACATTTCTTTATGTTATTTGTACCAGTAACC  
GGTTTATGGATGAGTGCTCTTGGAGTAGTCGGCCTGGCCCTGAACCTACGTGCCTATGA  
CTTCGTTTTCTCAGGAAATCCGCGCAGCGGAAGATCCTGAATTTGAGACTTTCTACACCA  
AAAATATTTCTTTTAAACGAAGGTATTCGTGCTTGGATGGCCGCTCAAGATCAGCCTCAT  
GAAAACCTTATATTCCTGAGGAGGTTCTACCCCGTGGAACGCTCTTATGTCTGGAAG  
TACAGGAGAACGCTCTTTTGTGATATTATTACCAGTATTCGATACTGGGTCATTCATAG  
CATTACTATACCTTCCTTATTCATTGCGGGTTGGTTATTCGTCAGCACGGGTTTAGCTTAC

GATGTGTTTGGAAAGCCCTCGGCCAAACGAATATTTACAGAGAGCCGACAAGGAATTC  
CATTAATAACTGGCCGTTTTGATCCTTTGGAACAACCTCGATGAATTTAATAGATCCTTTA  
TGACCATAGATCGAACCTATCCAATTTTTACAGTGCATGTTGGCTGTTACGGACTA  
GCTGTACCTACCGTTTCTTTTTTGGGGTCAATATCAGCAATGCAGTTCATCCAACGAATG  
GCTACACAAACTGTTGAGGGTAGTTCTAGATCTGGT---CCAAGACGAACTACTGTGGGG  
AGTTTATTGAAACCATTGAATTCGGAATATGGTAAAGTAGCTCCTGGATGGGGAACGAC  
TCCTTTGATGGGTGTTGCAATGGCTCTATTTGCGGTATTTCTATCTATTATTTTGGAGATT  
TATAATTCTTCCGTTTTATTGGATGGAATTTCAATGAATATGCTTACTCTTAAACTCTTTG  
TTTACACAGTAGTGATATTCTTTGTTTCTCTTTTCATCTTTGGATTCCCTATCTAATGATCC  
GGGACGTAATCCTGGACGTGAAGAAATGGCCGATACTACTGGAAGGATTCCCTTTTGG  
CTAATAGGTACTGTAACCTGGTATTCTTGAATCGGTTAATAGGTATTTTCTTTTATGGTT  
CATATCCGGATTGGGTTCATCCCTGATGCTTAATATCTTTAGTTTGATCTGTATCTGTCTT  
AATTCTGCCCTTAT---AGTAGTTTTTCATCGCCAAATTGCCGAGTCCCTATGCTTTTTT  
GAATCCAATCGTGAATGTTATGCCAGTCATACCTGTGCTCTTCTTTCTTTAGCCTTTGT  
TTGGCAAGCTGCTGTAAGTTTTCGAATGACACAATCAAACCCGAACGAACAAAATGTC  
GAATTGAATCGTACCAGTCTCTACTGGGGTTATTACTCATTTTTGTACTTGTGTTTTAT  
TTTCCAATTATTTCTTCAATATGGAAGTAAATATTCTCGCATTATTGCTACTGCACTGTT  
CATTCTAGTTCCTACTGCTTTTCTACTTATCATTTATGTAAAAACAATCAGTCAAAATGAT  
ATGGAACAGCAACCCTAGTCGCCATCTTTATATCTGGTTTACTTGTAAGTTTTACTGGG  
TACGCCTTATATACCGCTTTTGGGCAGCCTTCTCAACAATAAGAGATCCATTTCGAGGA  
A C A T G G G A  
C????????????????????????????????????????????????????????????????  
?????????????????ATGACTATTGCTTTCCAATTGGCTGTTTTTGCAATTAATTGCTACTTCCCT  
CAATCTTATTGATTGGCGTACCCCTTGTATTTGCTTCTCCTGATGGTTGGTCAAGCAACA  
AAAATGTTGTATTTTCCGGTACATCATTATGGATTGGATTAGTCTTTCTGGTGGGTATCCT  
TAATTCTCTCATCTCT-----ATGTCACCACAAACAGAGACTAAAGCAAGTGT  
TGGATTCAAAGCTGGTGTAAAGAGTACAAATTGACTTATTATACTCCTACCTATGAAAC  
CAAAGATACTGATATCTTGGCAGCATTCCGGGTAACCTCAACCTGGAGTTCACCTG  
AAGAAGCGGGGGCCGCGGTAGCTGCCGAATCTTCTACTGGTACATGGACAACCTGTGTG  
GACCGATGGACTTACTAGCCTTGATCGTTACAAAGGGCGATGCTACCACATCGAGCCC  
GTTGCTGGAGAAGAAAGTCAATTTATTGCTTATGTAGCTTACCCCTTAGACCTTTTTGA  
AGAAGTTCGTACTAATATGTTTACTTCCATTGTGGGTAATGTATTTGGGTTCAAAGC  
CCTGCGTGCTCTACGTCTGGAAGATCTGCGAATTCCTGTTGCTTATGTTAAAACCTTCC  
AAGGCCCGCCTCATGGCATCCAAGTTGAGAGAGATAAATTGAACAAGTACGGTTCGTC  
CCTGTTGGGATGTACTATTAACCTAAATTGGGGTTATCCGCTAAAAACTACGGTAGAG  
CGGTTTATGAATGTCTACGCGGTGGACTTGATTTTACCAAAGATGATGAGAACGTGAAC  
TCCAACCATTTATGCGTTGGAGAGACCGTTTCTTATTTTGTGCAGAAGCACTTTATAA  
AGCACAGGCTGAAACAGGCGAAATCAAAGGGCATTACTTGAATGCTACTGCAGGTACA  
TGCGAAGAAATGATGAAAAGGGCTATATTTGCCAGAGAGTTGGGGTTCCTATCGTAAT  
GCATGACTACTTAACAGGGGGATTCACTGCAAATACTAGTTTGGCTCATTATTGCCGGG  
ATAATGGTCTACTTCTTACATCCACCGTGCAATGCATGCAGTTATTGATAGACAGAAG  
AATCATGGTATCCATTTTCGTGTACTAGCTAAAGCGTTACGTATGTCTGGTGGAGACCAT  
ATTCCTCTGGTACCGTAGTAGGTAACCTTGAAGGGGAAAGAGAGATCACTTTGGGCT  
TTGTTGATTTACTGCGTGATGATTTTGTGAAAAGACCGAAGTCGTGGTATTTATTCA

CTCAAGATTGGGTCTCCCTGCCGGGTGTTCTGCCCCTGGCTTCGGGGGGTATTACAGTT  
TGGCATATGCCTGCTCTGACCGAGATCTTTGGGGATGATTCTGTACTACAGTTCGGTGG  
AGGAACTTTAGGACACCCTTGGGGAAATGCACCGGGTGCCGTAGCTAATCGAGTAGCT  
CTAGAAGCATGTGTACAAGCTCGTAATGAGGGGCGTGATCTTGCTCGTGAGGGTAATG  
AAATTATCCGCGAGGCTAGTAAATGGAGTCCTGAACTAGCTGCTGCTTGTGAGGTATGG  
AAGGAGATTAATTTGAATTCGAAGCAATGGATACTTTG-----ATGGCGATACATTTATAC  
AAAACCTTCTACCCCGAGCACACGCAATGGAGCCGTAGACAGTCAAGTGAAATCCAATC  
CACGAAAGAATTTGATCTATGGACAGCATCGTTGTGGTAAAGGTCGTAATGCCAGAGG  
AATCATTACCGCAGGGCATAAGAGGGGGAGGTCATAAGCGTCTATACCGTAAAATCGATT  
TTCGACGGAATGAAAAGACATATATGGTAGAATCGTAACCATAGAATACGACCCTAAT  
CGAAATGCATACATTTGTCTCATACACTATGGGGATGGTGAGAAGAGATATATTTTACAT  
CCCAGAGGGGCTATAATTGGAGATACCATTGTTTCTGGTACAGAAGTTCCTATAAAAAT  
GGGAAATGCCCTACCTTTGACCGATATGCCCTTAGGCACGGCCATAACATAGAAA  
TCACACTTGAAAGGGTGGACAATTAGCTAGAGCAGCGGGTGTGTAGCGAAACTGAT  
TGCAAAGAGGGGAAATCGGCCACATTAATAATTACCTTCTGGGGAGGTCCGTTTGATA  
TCCAAAACCTGCTCAGCAACAGTCGGACAAGTGGGAAATGTTGGGGTGAACCAGAAA  
AGTTTGGGTAGAGCCGGATCTAAACGTTGGCTAGGTAAGCGTCCTGTAGTAAGAGGAG  
TAGTTATGAACCCTGTAGACCATCCCATGGGGGTGGTGAAGGGAGGGCCCCAATTGG  
TAGAAAAAACCACAACCCCTTGGGGTTATCCTGCACTTGGAAGAAGAAGTAGAAA  
AAGGAATAAATATAGTGATAATTTGATTCTTCGTCGCCGTAGTAAAATGATTCAACCCCA  
GACCCATTTGAATGTAGCGGATAACAGCGGGGCTCGAGAATTGATGTGTATTCAAATCA  
TAGGAACTAGC---AATCGTCGATACGCTCATATTGGTGACGTTATTGTTGCTGTGATCAA  
AGAAGCAGTACCAAACATGCCCTAGAAAGATCAGAAGTAGTCAGAGCTGTAATTGTG  
CGTACCTGTAAAGAACTCAAACGTGACAACGGTATGATAATACGATATGATGACAATGC  
TGCAGTTGTCATTGATCAAGAAGGAAATCCAAAAGGAACTCGAGTTTTTGGTGCATC  
GCCCGGGAATTGAGACAGCTAAATTTACTAAAATAGTTTCATTAGCTCCCGAGGTATT  
AATGCTTAGTCCCAAAGAACCAGATTCGGTAAACAACATAGAGGAAGAATGAAGGG  
AATATCTTATCGAGGTAATCATATTTGTTTTGGTAAATATGCTCTTCAGGCCTTGAACCC  
GCTTGGATCACATCTAGACAAATAGAAGCCGGACGACGAGCAATGACACGAAATGCAC  
GTCGTGGTGGAAAAATATGGGTACGTATTTTCCCGACAAACCGGTTACAGTAAGACCT  
ACAGAAACCGCTATGGGTTCCGGGAAAGGATCCCCTGAATTTTGGGTAGCTGTTGTTA  
AACCGGGTCAATACTTTATGAAATGAGCGGAGTAACAGAACTATAGCCAGAAAGGC  
TATTTCAATAGCGGCGTCAAAAATGCCTATACGAACTCAATTCATTATTTCCGGGAATGAC  
CAGAATTAAGCGAGGATATATAGCTCGGAGACGTAGAACA AAAAATTCGTTTATTTGCAT  
CAAGCTTTCGGGGGGCTCATTCAAGACTTACTCGAACTTACTCAACAGAAAATAAA  
AGCTTTGGTTTCGGCTAATAGGGATAGAGATAGGCAAAAGAGAAATTTTCGTCGTTTGT  
GGATCACTCGGATAAACGCAGGAATTCGTGAA---GGGGGGTCTCTTATAGTTATAGTA  
GATTAATACACGATCTGTACAAGAGACAGTTGCTTCTTAATCGTAAAATACTTGCACAA  
GTCGCTATATTAATAGGAATTGTCTTTATATGATTTCCAATGAGATCATAAAA-----  
-----ATGCTAAGGAAAGTATACGCTTTTAGTCGATATATATCTATGTCTGCTCAC  
AAAGCGCGAAGAGTAATTGATCAAATTCGCGGACGTTTCATATGAAGAAACACTTATGAT  
ACTAGAACTCATGCCTTATCGAGCATGTTATCCCATTTTAAATTGGTTTATTCTGCAGC  
AGCAAATGCCAGTTACAGTCTGGGTTCCGATGAAACAAATTTAATCATTAGTAAAGCTG  
AAGTCAACGAGGGCACTACCATTAAGAAATTA AACCTAGAGCTAGAGGACGTAGTTA

TCCAATAAAAAGACCTACTTGTCATATAACTATTGTAATAACAGATATATCCATAGAG-----  
-----ATGGATGGAATCAAATATGCAGTAGTTACAGACAAAAGTATTCAGTTATTG  
GGGAAAAAT--CAATATACTTCTAATGTGCAATCAGGATCAACTAGGACAGAAATAAAG  
CATTGGGTGCAACTCTTCTTTGGTGTCAAGGTAATAGCTATGAATAGTCATCGACTTCC  
GGGAAAGGGTAGAAGAATGGGACCTATTATGGGACATACAATGCATTACAGACGTATGA  
TCATTACGCTTCAACCGGGTATTCTATTCCACCTCTTAGAAAGAAAACAACATATGGCA  
GTTCCAAAAAACGTACTTCTATATCAAAAAAGCGTATTCGAAAAAATATGTGGAAAA  
AGAAGGGATATTGGGCAGCGCTAAAAGCCTTTTCGTTAGCGAAATCCCTTTCTACCGG  
AAATTCAAAAAGTTTTTTTGTGCGACAAACAAATAAAATGGCCAAGGGTAAAGATGTC  
CGAGTAACGGTAATTTTGGAAATGTACCAGTTGTGTCCGAAACGGCGTTAATGTTAATAA  
GGCATCAACGGGCATTTCCAGATATATTACTCAAAAGAATCGACACAATACGCCTAATC  
GATTGGAATTGCGAAAATTCTGTCCCTATTGTCACAAACATACGATTCATGGGGAGATA  
AAGAAAATGAAAATAAGGGCTTCTGTTCGTAATAATTTGTGAAAAATGTGCGACTAATCC  
GCAGGCGGGGACGAATTATAGTAATTTGTTCCAACCCGAGACACAAACAAAGACAAG  
GAATGGTTCGAGAGAAAGTAACAGTATCTACTCGGACACTACAGTGGAAGTGTGTTGA  
ATCAAGAGCAGACAGTAAGCGTCTTTATTATGGACGCTTTATTCTGTCTCCACTTATGAA  
AGGCAAGCCGACACAATAGGCATTGCGATGCGAAGAGCTTTGCTTGGAGAAATAGA  
AGGAACGTGTATCACACGCGCAAAATCTGAG-----AAAATACAACACGAATATTCTACC  
ATAGTAGGTATTCAAGAATCAGTACATGAAATTTAATGAATTTGAAAGAAATTGTATTG  
AGAAGTACTTTATATGGAACCTTGTGACGCGTCTATTTGTGTCAAGGGTCCCGGATATGT  
AACTGCTCAAGATATCATCTCACCGCCTTATGTGGAAATCGTTGATAATACCCAGTATAT  
AGCTAGCTTGACGGAACCCATTGATTTGTGTATTGGATTACAAATCGAAAGGAATCGCG  
GATATCGTATAAAACCGCCAAAT--AACTTTGACGGAATTAC-----CCGATAGATGCTGT  
ATTCATGCCTGTTGAAATGCGAATCATAGTATTCAATCTTATGGGAATGGGAATGAAAA  
GCAAGAGATACTTTTTCTTGAATATGGACAAATGGAAGTTTAACTCCTAAAGAAGCA  
CTTCATGAAGCCTCCCGGAATTTGATTGATTTATTTATTCCTTTTTTACATACGGAAGAA  
GAA-----AACTTACATTTAGAGGACAATCAA--CACAAGGTTACTTTACCCACTTTTACC  
TTTCATGATAAATTAGCT--AAACTAAGGAAAAACAAAAA---AAAATAGCATTCAAATA  
TATTTTTATTGACCAATCAGAATTATCTCCCAGAATCTATAATTGCCTCAAAGGTCCAAT  
ATATATACATTATTGGACCTTTTGAATAACAGTCAAGAAGATCTTATGAAAATGAAAGAT  
TTTCGCATAGAAGATGTAAGAGATATTGGACATTCTAGAAAAGCGG-----TTCGCAA  
CCGATTTACTGAAAAATAGGATGCTTCGGGATGGA---AATGAGGGAATGTCTACAATAC  
CTGAGTTTAATCAGATACAATTTGAAGGATTTTGTAGGTTTCATTGATCGGGGCTTGACG  
GAAGAACTTTATAAGTTTCCAAAAATTGAAGATACAGATCAAGAAATTGAATTTCAATT  
ATTTGTGGAAACATATCAATTGGTGAACCGTTGATAAAAGAAAGAGATGCTGTGTATG  
AATCACTCACATATCTTCTGAATTATATGTATCCGCGGGATTAATTTGGAAAACCGGTA  
GGGATATGCAAGAACAACCAATTTTTATTGGAACATTCTCTAATGAATTCCTGGGA  
ACTTCTATAGTAAATGGAATATAACAGAGTTGTAATCAATCAATATTGCAAAGCCCCGGT  
ATTTATTACCGGTCAGAATTGGACCATAATGGAATTTCCGGTCTATACCGGCACCATAATA  
TCAGATTGGGGGGGAAGATCAGAATTAGAGATTGATAGAAAAGCAAGGATATGGGCTC  
GTGTGAGTAGGAAACAAAAAATATCTATTCTAGTTCTATCATCAGCTATGGGTTCGAATC  
TAAGAGAAATTTAGAGAATGTTTGCTATCCTGAAATTTTTTTGTCTTTTCTGAATGATA  
AGGAGAAAAAAAATTGGGTCAAAAGAAAATGCCATTTTAGAGTTTTATCAACAATT  
TGCTTGTGTAGGCGGGGATCCGGTATTTCCGACTCCTTATGTAAGGAATTACAAAAAA

AATTCTTTCAACAAAGATGTGAATTAGGGAGGATTGGTCGACGAAATATGAACCGGAG  
ACTGAACCTTGATATACCTCAGAACAATACATTTTTGTTACCGCGAGACATATTGGCAG  
CCGCGGATCATTGATTGGAATGAAATTTGGAATGGGTACACTTGACGAT-----ATGAAT  
CATTTGAAAAATAAACGCATTCGTTCTGTAGCGGATCTTTTACAAGATCAATTTCGGATTG  
GCTCTGGTTCGTTTAGAAAATGTGGTTCGAGGAACCTATATGTGGAGCAATTAGG---CATA  
AATTG---ATACCGACTCCTCAAAAATTTGGTAACTTCAACTCCA-----TTAACAACTAC  
TTATGAATCTTTTTTCGGCTTACACCCATTATCTCAAGTTTTGGATCGAACTAATCCATTG  
ACACAAATAGTTCATGGGAGAAAATTGAGTTATTTGGGCCCCCGGGGATTGACAGGGC  
GAACCGCGAGTTTTTCGGATACGAGATATCCATCCTAGTCACTATGGGCGTATTTGCCAA  
TTGATACATCTGAAGGAATCAATGTTGGACTTATTGGATCCTTAGCAATTCATGCGAGGA  
TTGGTCAATTTGGGG---TCTCTCGAAAGCCCGTTTTAT-----GAAATTTCTGAAAGACCA  
AAAAAG-----GTACGGGTGCTTTATTTATCACCAGGTAGAGATGAATACTATATGGTAGC  
GGCAGGAAATCTTTGGCGTTGAATCAGGGTATTCAGGAAGAACAGGTTGTTCCAGCT  
CGATATCGTCAAGAATTCCTGACTATTGCATGGGAACAGGTTTCATCTTCGAAGTATTTTT  
CCCTTCCAATATTTTTCTATTGGAGCTTCCCTCATTCTTTTATCGAGCATAATGATGCAA  
ATCGGGCTTTAATGAGTTCTAATATGCAACGTCAAGCAGTTCCGCTTTCTCAGTCCGAG  
AAGTGCATTGTTGGAACCTGGGTGGAACGCCAAGCGGCTCTAGATTCAGGGGCTCTGG  
CTATAGCCGAACACGAGGGAAAGATCGTTTATAACCGATACTGACAAGATAGTTTTATCA  
GGTAATGGAAATACTATAAGCATTCCATTAGTTATGTATCAACGTTCCAACAAAAATACT  
TGTATGCATCAAAAACCCGGGTTTCAGGGGGGTAATGCATTAAAAGGGGACAAATTT  
TAGCGGACGGTGCCGCTACAGTTGGTGGCGAACTCGCTTTGGGGAAAAATATATTAGT  
AGCTTATATGCCATGGGAAGGTTACAATTCTGAAGATGCAGTACTCATTAGCGAGCGCT  
TGGTATATGAAGATGTTTATACTTCTTTTCACATACGGAAATATGAAGTTCAGACTCATG  
TGACAAGCCAAGGT--CCCGAAAGGGTCACTAGCGAAATACCGCATTTAGAAGCCCAT  
TACTCCGCAATTTAGACAAAAATGGAATTGTGATGCTGGGATCTTGGGTAGAGACGG  
GGGATATTTTAGTAGGTAATTAACGCCCCAGATGGTCAAAGAA---TCATCGTATGCCCC  
GGAAGATAGATTATTGCGGGCCATACTTGGCATTTCAGGTATCTACTTCAAAGGAACTT  
GTTTAAACTACCTATAGGGGGTAGGGGTCGAGTTATTGATGTGAGATGGATCCAGAAA  
AGGGGG---GGTTCTAGTTATAATCCAGAAACGATTCGTGTATATATTTACAGAAACGTG  
AAATCAAAGTAGGCGATAAAGTAGCCGGAAGACATGGAAATAAAGGTATCATTTCAAA  
AATTTTGCCTAGACAAGATATGCCTTATTTGCAAGATGGAAGGCCTGTTGATATGGTCTT  
CAACCCATTAGGAGTACCTTCAAGAATGAATGTAGGGCAGATATTTGAATGTTCACTCG  
GGTTAGCGGGGGGCTGCTAGACAGACATTATCGAATAGCACCTTTTGATGAGAGATAT  
GAACAAGAAGCTTCAAGAAAAGTGTGTTTTCTGAATTATATGAAGCCAGTAAGCAAA  
CAGCGAATCCATGGGTATTTGAACCCGAGTATCCAGGAAAAAGCAGAATATTTGATGG  
AAGAACGGGGGATCCTTTTGAACAACCTGTTCTAATAGGAAAGCCTTATATCTTCAAAT  
TAATTCATCAAGTTGATGATAAAATCCATGGACGTTCCAGTGGCCATTATGCACTTGTTA  
CACAACAACCCCTTCGAGGAAGGGCCAAGCAAGGGGGACAGCGGGTAGGAGAAATG  
GAGGTTTGGGCTCTAGAGGGATTTGGTGTGCTCATATTTTACAAGAGATGCTTACTTAT  
AAATCTGATCATATTAGAGCTCGCCAAGAAGTACTTGGGACTACGATCGTTGGAGGAA  
CAATACCTAATCCTGAGGATGCTCCAGAATCTTTTCGATTGCTCGTTGAGAACTACGA  
TCTTTGGCTCTGGAACCTGAATCATTTCCTTGTATCTGAGAAGAACTTACAGATTAATAG  
GAAGGAAGCTATGAATCAGAATTTTTCTTCTATGATCGATCGGTATAAACATCAACAAC  
TCCGAATTGGATTAGTTTCTCCTCAACAAATAAGCGCTTGGGCCAAAAAAATCCTACCT



AATGGAGAGATAGTTGGAGAGGTAACAAAACCTACACTTTTCATTACAAAACCAATA  
AACCGGAAAAAGATGGATTATTTTGTGAAAGAATTTTGGGCCTATAAAAAGCGGAATT  
TGCGCTTGCGGAAATTATCGAGTAATCGGAGATGAAAAGGAAGACCCGAAATTTTGTG  
AACAAATGCGGAGTCGAATTTGTTGATTCTCGGATACGCAGATATCAAATGGGCTACATC  
AAACTGGCATGCCAGTAACCCATGTGTGGTATTTGAAACGTCTTCTAGTTATATTGCG  
AATCTTTTAGATAAACCTCTTAAAGAATTAGAAGGCCTAGTATACTGCGAT-----TTTTCT  
TTTGCTAGGCC--ATAGCTAAAAACCCACTTTCTTACGATTACGAGGTTTCATTTCGAAT  
ATGAAATCCAATCTTGAAATACAGCATCCCGCTTTTTTTTACTACCCAAGGCTTCGATA  
CATTTCGAAATCGAGAGATCTCTACTGGAGCAGGTGCTATCCGAGAACAATTATCCGAT  
CTAGATTTACGAATTATTATAGATTATTCTTGGTAGAATGGAAAGAATTAGGGGAAGAA  
---GGGCTCACAGGGAATGAATGGGAAGATCGAAAAATTGGAAGAAGAAAGGATTTTTT  
GGTTAGACGCATGGAATTAGCTAAGCATTTTATTTCGAACAAATATAGAACCAGAATGGA  
TGGTCTTGTGTCTATTACCAGTCTTCCCTCCCGAGTTGAGACCGATCATTTCAGATAGATG  
GGGGTAAACTAATGAGCTCGGATATTAATGAACTCTACCGAAGAGTTATCTATCGGAAC  
AATACTCTTACCGATCTATTAACAACCAGTAGATCTACGCCAGGAGAATTAGTAATGTGT  
CAGGAGAAATTGGTACAAGAAGCCGTGGATACACTTCTTGATAACGGAATTCGCGGAC  
AACCAATGAGGGACGGTCATAATAAAGTTTACAAGTCATTTTCAGATGTAATTGAAGGC  
AAAGAGGGAAGATTCGCGAGACTCTGCTGGTAAACGGGTTCGATTATTCGGGGCGTT  
CCGTCATTGTCGTAGGCCCTTCACTTTTCATTACATCGATGTGGATTGCCTCGCGAAATAG  
CAATAGAGCTTTTCCAGACATTTGTAATTCGTGGTCTAATTAACAACATCTTGCTTCGA  
ACATAGGGGTTGCTAAGAGTAAAATTCGGGAAAAAGAACCGATTGTATGGGAAATACT  
TCAGGAAGTTATGCAGGGGCATCCTGTATTGCTGAATAGAGCACCTACTCTGCATAGAT  
TAGGCATACAGGCATTCCAGCCTATTTGGTAGAAGGGCGCGCTATTTGTTTACATCCAT  
TAGTTCGTAAGGGATTCAATGCCGACTTTGATGGGGATCAAATGGCTGTTTCATGTACCC  
TTATCTTTGGAGGCTCAAGCGGAGGCCCGTTTACTTATGTTTTCTCATATGAATCTTTTAT  
CTCCCGCTATTGGGGATCCCATTTCCGTACCAACCCAAGATATGCTTATTGGACTCTATG  
TATTAACGAGCGGGAATCGTCGAGGTATTTGTGTAATAGGTATAATCCATGTAATCGC--  
-----AGAGACTATCAAATGAAAATATT-----TATAAGTATACGAAA-----GAACCCTT  
TTTTTGCAATTCCTATGATGCAATTGGAGCTTATCGGCAGAAAAGAATCCATTTAGATAG  
TCCTTTGTGGCTCCGATGGCGACTAGATCAACGC---GTTATTGCTTCA-----AGAGAAGC  
TCCATCGAAGTTCATGATGAATCTTTGGGTACCTATTATGAGATTTATGAGCACTATCTA  
ATAATAAGAAGTATAAAAAAAGAAATTATTTGATATACATTCGAACCACTGTTGGTCAT  
ATTTCTCTTTATCGAGAAATCGAAGAAGCCATACAAGGGTTTTGTGCGGGCCTGTTTATA  
TGGTACC-----ATGGAGGTAATGATGGCAGAACGGGCAATCTGGTCTATC  
ACAATAAAGCGATAGACGGAAGTCCATGAAACGACTTATTAGTAGATTAATAGATCAC  
TTCGGAATGGCATATACATCACACATCCTAGATCAAGTAAAGACTCTGGGTTTTTCAGCA  
AGCCACCGCTACATCCATTTTCATTAGGAATTGATGATCTTTTAAACAATACCTTCTAAGGG  
ATGGCTAGTTCAAGATGCTGAACAACAAGTTTTGATTTTGGAAAAACACCATCATTATG  
GGAATGTACACGCGGTAGAAAAATTACGTCAATCCATTGAGATATGGTATGCTACAAGT  
GAATATTTGAGACAAGAAATGAATCCCAATTTTAGGATGACTGACCCTTTTAAATCCAGT  
CCATATAATGTCTTTTTTCGGGAGCTAGAGGAAATGCATCTCAGGTACATCAATTAGTAGG  
TATGAGGGGATTAATGTTCGGATCCCCAAGGACAAATGATTGATTTACCTATTCAAAGTAA  
TTTACGTGAAGGACTCTCTTTAACAGAATATATCATTCTTGCTACGGAGCCCGCAAAG  
GAGTTGTGGATACTGCTGTACGAACATCAGATGCTGGATATCTCACGCGCAGGCTTGTT

GAGGTAGTTCAACACATTGTTGTACGTCTGAACAGATTGTGGCACCGTTCGAGGTATTTTC  
TGTGAGTCCTCAAAATGGGATGATACCG--GAAAGAATTTTTATCCAAACATTGATTGGT  
CGTGTATTAGCGGACGATATATATATGGGGTCCACGATGCATTGCCACTAGAAATCAAGAT  
ATTGGAATTGGACTTATCAATAGATTGATAACC-----TTTCGAGCACAACCAATA  
TCTATTCGAACTCCCTTCACTTGTAGGAGTACATCTTGGATCTGTTCGATTATGTTATGGC  
CGGAGTCCTACTCACGGCGACCTGGTCTGAATTGGGGGAAGCTGTAGGTATTATTGCGG  
GTCAATCTATTGGAGAACCGGGTACTCAATTAACATTAAGAACTTTTCATACTGGCGGA  
GTATTCACAGGGGGTACTGCAGAACATGTACGAGCCCTTCTAATGGAAAAATAAAATT  
CAATGAGGATTTGGTTCATCCGACACGTACACGTCACGGACATCCGGCTTTTCTATGTT  
CTATAGACTTGTATGTAAC TATTGAGAGTGAAGATATTATACATAATGTGAATATTCCACC  
CCAAAGTTTTCTTTTAGTTCAAAATGATCAATATGTAGAATCAGAACAAGTGATTGCTG  
AGATTCGCGCAGGAACATCCACT--TTGAATTTTAAAGAGAGGGTTCGAAAACATATTT  
ATTCTGACTCAGAGGGGAGAA---ATGCACTGGAGTACCGATGTGTATCATGCACCTGAAT  
TTACATATGGTAATGTTTACGCTCTTACCAAAAACAAGTCATTTATGGATATTATCTGGGA  
GGCCATGCAGG-----TCCAGTCTAGCCTCCCTTTCGCTCCACAAGGATCAAGATAAAAT  
GAACGCCCAT-----TCTCTTTCTGTCAAGCGAAGATATATTTCTAACCTCTCA-----GTGAC  
TAATGATCAA---GCGAGACACAAATCTTTAGTTCGGATTTTTCTGGTAAA---CAAGATA  
GAATTCCTGATTAT---TCAGAACGTAATCGAATCATATGTAATGTAATCTCACA  
TATCCT--GCCATTTCCACGAGAATTCG-----GATTTATTGGCAAAGAGGCGAAGAAATA  
GATTCATCATTCCACTCCAATCGATTTCAGGAACGCAAGAAAAACGAATACCCCGTTC  
AGGTATCTCGATTGAAATACCC-----ATAAATGGCATTTCCTCGTAGAAATAGTATTCTTGC  
TTATTTTCGATGATCCTCGATACAGAAGAAAAAGTTCGGGAATTACTAAATATGGGACTAT  
AGAAGCGCATTCAATCGTCAAAAAAGAAGAT-----TTGATTGAGTATCGGGGA---GTCAA  
GGAATTTAGGCCAAAATACATGAAAGTAGATCGATTTTTTTTTTTCATTCCCGAGGAAGTGC  
ATATCTTACCCGGATCTTCTTCCATAATGGTACGAAACAATAGTCTCATTGGGGTAGATA  
CACAAATCGTTTTCAATACAAGAAGCCGAGTAGGCGGGTTGGTGCAGGTGGAGAGAA  
AAAAAAAAAGAATTGAACTTAAATCTTTTCTGGAGATATCCATTTTCCGGGAGAGAC  
AGATAAGATATCCCGACACAGCGGCATCTTGATACCA---CCAGGA---ACGGGAAAAAAA  
AATTCACGGAATCAAAAAA-----TTGAAAAATTGGATCTATGTCCAACGG-----ATCA  
CACCTACCAAG-----AAAAATATTTTTGTTTTGGTTCGACCTGTAGTCGCATATGAAATA  
ACGGACGGTATAAATTTAGCAACACTTTTCCCCCGGATCTGTTGCAGGAAAGGGATAA  
TGTGCAACTTCGAGTTGTCAATTATATCCTTTATGGAAATGGCAAACCAATTCGGGGAA  
TTCTTGACACAAGTATTCAATTAGTTCGGACTTGTTTAGTGTGAATTGGGGCCAAGAC  
AAAAA-----AGTTCTTATATCGACGAGGCCCATGCTTCTTTGTTGAAATAAGGACA  
AATGGTTTGATTCAAGATTTCCCTAAGAATCGACTTAGTGAAGTCCCTATTTTCGTATACC  
AGCAAAAGGAATGATCCATCAGGTTTCAGGATTGATCTCTGAA---AATGGATCGGATCGC  
ACCAATATCAATCCGTTTTCTTCCATTTAT-----TCCAAGGCAAAGATTCAACAAT  
CCCTTAACCAAAATCAAGGAATATCCATACGTTGTTGAATAGA-----AATAAGAAT  
GCCAATCTTTGATAATTTGTATCATCAATGTTCTCAAATGGGTCCA-----TTCAACG  
ATGTAATAATCACAATGTG-----ATAAAGAATCA---CCTCTAATTCGAATTAGGAATT  
TGTTGGGTCCTTTAGGAACA-----GCTCTTCAAATTTATAATTTTGATTCA-----TTTTACC  
ATTTAAATTTAATAACTCATAATCAACTCTTG---GTAAC TAACTATTTGCAACTTGACAAT-  
-----TTAAAACAGGCTTTTCAAGTACTTAAA-----TATTATTTAATGGATGAAAAT-----  
GGGAAAATTTATAATCCCGATCCCTGCAGTAATATCTTTTTGAATCCATTAATTTGAATT

GGTATTTTCTCCATCACAATTATTGTGAAGAGACATCT---ACAATAATTAGTCTTGGACA  
GTTTATTTGCGAAAATGTATGTATAGCCAAAAACGGACCACAC---CTAAAA-----TCGGG  
TCAAGTTCTAATTGTTCAA---ATTGACTCTTTAGTAATACGATCAGCTAAGCCTTATTTGG  
CTACCCAGGAGCAACTGTTTCATGGCCATTATGGTGAAACCCTTTACGAAGGAGATAC  
ACTAGTTACATTTATATATGAAAAATCGAGATCTGGTGATATAACGCAGGGTCTTCCAAA  
AGTAGAACAGGTGTTAGAAGTACGTTTCGATTGATTCAATATCGATGAATCTAGAAAAGA  
GGGTTGAGGGTTGGAACGAATGTATAACAAGAATTCTTGGAATTCCTTGGGGATTCTTG  
ATTGGTGCTGAGCTAACTATAGCGCAAAGTCGTATCTCTTTGGTTAATAAGATCCAAAG  
GGTTTATCGATCCCAGGGGGTGCAGATCCATAATAGGCATATAGAAATTATTGTACGTCA  
AATAACATCAAAGTCTTGTTTTAGAA-----GATGGAATGTCTAATGTTTTTTCACCC  
GGAGAACTAATTGGATTGTTGCGAGCGGAACGTATGGGGCGTGCTTTGGAAGAAGCGA  
TCTGTTACCGAGCCATCTTGTGGAATAACAAGAGCATCTCTGAATACTCAAAGTTTC  
ATATCTGAAGCAAGTTTTCAAGAACTGCTCGAGTTTTAGCAAAAAGCCGCTCTACGGG  
GTCGTATCGATTGGTTGAAAGGCCTGAAAGAAAACGTTGTTCTGGGGGGGAGGATACC  
CGTAGGTACCGGATTCAAAGGATTA-----GCGCACCCCTCAAGGCAACATAACAACATT  
CCC-----TTGGAAACAAAAAAGAAGAGTCTATTCGAGGGGAAAATGAGA-----GATATTT  
TGTTCCACCACCGAAAATTATTTGATTCTTGCCTTTCAAAGAATTTCCATGATACATCAG  
ACAATCATTATAGGA-----TTAATGATTCCATGACAAGAAGATATTGGAACA  
TCAATTTGGAAGAGATGATGGAGTCGGGAGTTCATTTGGCCATGGTACTAGAAAATG  
GAATCCTAGAATGGCACCTTATATCTCTGCCAAGCGTAAAGGTATTCATATTACAAATCT  
TACTAGAACTGCTCGTTTTTTATCAGAAGCTTGTGATTTGGTTTTTATGATGCAGCAAGTA  
AGGGAAAACAATTCTTAATTGTTGGTACCAAACTAAAGCAGCTGATTCAGTAGCACG  
GGCTGCGCTAAAGGCTCGGTGTCATTATGTTAATAAAAAATGGCTCGGTGGTATGTTAA  
CAAATTGGGCCACTACAGAAACGAGACTTCATAAGTTCAGGGACTTGAGAACGGAAC  
AAAAACGGGGAACTCAACCGTCTTCCGAAAAGGGATGCCGCTATGTTGAAAAGAC  
AATTATCTCACTTGCAAACGTATCTGGGCGGGATTAATATATGACGGGGGTACCCGATA  
TTGTAATCATTGTTGATCAGCACGAAGAATATACGGCCCTTCGAGAATGTATCACTTTGG  
GAATTTCAACAATTTGTTAATCGATACAAATTGTGACCCGGATCTCGCGGATATTTCGA  
TTCCAGCTAACGACGATGCTATAGCTTCAATCCGATTAATTCTTAACAAATTAGTATTCG  
CAATTTGTGAGGGGCGTTCT---AGCTATATAAGGAATTCTATGGGACAAAAATAAATCC  
ACTTGGTTTCAGACTTGGTATAACCAAGGTCATCATTCCCTTTGGTTTTGCACAACCAA  
AAAATTATTCTGAGGGTCTCCAAGAAGATCAAAAAATACGGGATTGTGTTAAGAATTAT  
GTACAAAAAATATGCGAATATCCTCCGGT---GTTGAGGGAATTGCACGTATCGAGATTC  
AAAAAGAATCGATCTGATCCAGGTCATAATCTATATGGGATTCCCAAAGTTATTAATAG  
AAAGCCGGCCGCGA-----GGAATCGAAGAATTGCAGGTGAATCTACAAAAGAAT  
TTAATTGTGTGAACAGAAACTTAACATTGCTATCACAAGAATTGCAAAACCTTATGGA  
AACCTAACATTCTTGCAGGAAATTATAGCCGACAATTAAGAATAGAGTTTCATTTTCG  
CAAAGCAATGAAAAAGGCTATTGAATTAAGTAAACAAGAAGATACAAAAGGAATTCA  
AGTACAAATTGCAGGGCGTATCGACGAAAAGAAATTGCGCGTGTGCAATGGGTCAG  
AGAAGGTAGGGTTCCGCTACAAACCTTCGAGCGAAAATCGATTATTGTTCTTATACAG  
CTCGAACTATCTATGGGGTATTGGGCATCAAATTTGGATATTTATAGACGAGGAAATGT  
CGCGTTACCGAGGACCTCGTTTTCAAAAAAATACGCCGCTGGGGGCTTTACCGGGACT  
AACTAATAAAAGGCCTAGAGCCGGAAGCGATCTTAGAAACCAATCGCGTTCCGGTAAA  
---AGATCTCAATATCGTATTTCGTCTAGAAGAAAACAAAAATTACGTTTTTCATTATGGTC

TTACAGAACGACAATTACTTAAATACGTTTCGTATCGCCGGAAAAGCCAAGGGGTCAAC  
AGGCCAGGTTTTACTACAATTACTTGAAATGCGTTTGGATAACATCCTTTTTTCGATTGGG  
CATGGCTTCGACTATTCGGGAGCCCCGCAATTAGTTAACCATAGACATATTTTAGTTAA  
TGGTCGTATAGTAGATATACCAAGTTATCGCTGTAAACCCCAAGATATTATTACGGCGAG  
GGATGAACAAAAATCCAGAGCTCTGATTCAAATTTCTCTCGAGTCATCCCCTCAT---GA  
GGAATTGCCGAAACATTTGACTGTTACCCATTCCAA-----TATAAAGGATTAGTCAATC  
AAATAATAGATAGTAAATGGGTCGGTTTAAAAATAAATGAATTGCTAGTCGTAGAATATT  
ATTCCCCTCAGACTATGTCACGTCGAGGTAAGTGCAGAAGAAAAAACTGCAAAATCTGA  
TCCAATTTATCGTAATCGATTAGTTAACATGTTGGTTAACCGTATTCTGAAACACGGAAA  
AAAATCATTGGCTTATCAAATTTCTATCGAGCCGTGAAAAAGATTCAACAAAAGACA  
GAAACAAATCCACTATCTGTTTTACGTCAAGCAATACGTGGAGTAACTCCCGATATAGC  
AGTAAAAGCAAGACGTGTAGGTGGGTCGACTCATCAAGTTCCCATTGAAATAGGATCC  
ACACAAGGAAAAGCACTTGCTATTCGTTGGTTATTAGCGGCATCCCGAAAACGTCCGG  
GTCGAAATATGGCTTTCAAATTAAGTTCCGAATTAGTGGATGCTGCCAAAGGGAGTGGC  
GATGCCATACGCAAAAAGGAAGAGACTCATAGAATGGCAGAGGCAAATAGAGCTTTTG  
CACATTTTCGTATGGGTAGGGACACTATTGCTGACGTAATAACCTCTATACGAAATGCCG  
ACATGGATAGAAAAGAGTGGTTTCGAGTACCATCTACTACTATTACCGAAAACATTGTT  
AAAATACTTTTACGAGAAGGTTTTATCGAAAACGTAAGGAAACATTGGGAAAGCAACA  
AATATTTTTTGGTTTTCAACCCTGCGACATAGAAGG-----AATAGGAGAAGGCCTTATAGA  
-----AATCTTTTAAATTTAAAACGGATCAGTCGACCCGGTTTACGAATCTATTCTAACT  
ATCAACGAATTCCTAGAATTTTAGGTGGAATGGGAATTGTAATCTTTCTACTTCTCGAG  
GGATAATGACAGACCGAGAGGCTCGCCAAGAAGGAATCGGCCGAGAAATTTTGTGTTA  
TATATGGATGGCAAAAGCTATACCAAGAATTGGTTCACGTAGAAATGCACGTATTGGTT  
CACGTAAGAATGTGCGTAGAATACCAAGGGGGTTATTTCATGTTCAAGCAAGTTTCAAT  
AATACCATTGTGACTGTTACAGATGTACGGGGTCGGGTAGTTTCTTGGTCCTCTGCCGG  
TAGTTGTGGGTTTAGGGGTACAAGACGGGGGACACCTTTTGTGCTCAAACCTGCAGCA  
GGAAATGCTATTCGTACAGTCGTGGATCAAGGTATGCAACGAGCGGAAGTCATGATAA  
AGGGTCCCGGTCTCGGAAGAGACGCAGCATTACGAGCTATTTCGTAGAAGTGGTATACT  
ATTAACTTTCGTACGGGATGTAACCCCTATGCCACATAATGGCTGCAGGCCTCCTAAAA  
AAAGACGCGTGATGCCAACCATTAAACAACCTTATTAGAAATACAAGACAGCCAATCAG  
AAATGTCACAAAATCCCCGCTCTTCGGGGATGCCCTCAGCGTCGAGGAACATGTACT  
AGGGTGTATACTATCACCCCAAAAAACCAAACCTCTGCCTTACGTAAAGTTGCCAGAG  
TACGATTAACCTCTGGATTTGAAATCACTGCTTATATACCTGGTATTGGCCATAATTCACA  
AGAACATTCTGTAGTCTTAGTAAGAGGGGGAAGGGTTAAGGATTTACCCGGTGTGAGA  
TATCACATTGTTTCGAGGAACCCTAGATGCTGTTCGGAGTAAAGGATCGTCAACAAGGGC  
GTTCTAAATATGGGGTAAAAAAGCCAAAAATGGCAAGGAAAAGTTTGATTTCAGAGGG  
AGAAGAAGAGGCCAAAAATTGGAACAGAAATATCATTGATTTCGTGATCCTCAAAAAA  
AGAAATAAGC-----AAAGTTCCGTGCTTGAGTGACAAATGGGAAATTCATGGAAAGT  
TACAATCCCCCCCACGGAATAGTGCACCTACACGCCTTCATCGACGTTGTTTTTTGACC  
GGAAGACCGAGAGCTAACTACCGGGACTTTGGACTATCCGGACACATACTTCGCGAAA  
TGGTTCATGCATGTTTGTGCCAGGGGCAACAAGATCAAGTTGGATGGTAAAAAATCC  
ATTCATCTCGGTATTTCCCAAGAA-----AAAGAAGAAAAGAGGGGGTCCGTTGAATT  
TCAAGTATTCGTGTTACCAATAAGATACAGAGACTTACTTCCCATTTGGAATTGCACA  
AAAAAGACTATTTATCTCAGAGGGGTCTGCGGAAAATTCTGGGAAAACGTCAACGGCT

ATTGGCTTATTTGTCAAAAAAAAAATAGAGTACGTTATAAAGAATTAATTAGTCAGTTGG  
GTATTCGAGAGACAAAACTCGT-----ATGGTAAACTTCGTTTGAACGATGTGGTAG  
AAAGCAACGAGCCGTCTATCGAATCGTTGCAATTGATGTTTCGATCCCGAAGAGAGGGA  
AGAGATCTTCGGAAAGTGGGTTTTTATGATCCGATAAAGAATCAAACCTATTTAAATGT  
TCCTGCTATTCTATACTTCCTTGAAAAAGGCGCTCAACCTACAGGAACTGTTTCATGATAT  
TTTAAAGAAGGCGGAGGTTTTTAAGGAACTTCGTTCTAAT-----ATGGATAAAT  
CCAAGCGACCTTTTCTTAAATCCAAGCGATCTTTTCGTAGGCGTTTGCCCCGATCCAA  
TCGGGGGATCGAATTGATTATAGAAACATGAGTTTAAATTAGTCGATTTATTAGTGAACAA  
GGAAAAATATTATCTAGACGAGTGAATAGATTAACCTTGAAACAACAACGATTAATTAC  
TATTGCTATAAAACAAGCTCGTATTTTATCTTCGTTACCTTTTCTTAATAATGAGAAA-----  
CAATTTGAAAGAACCGAGTCGACCGCTAGAACTACCGGTCTTAAAACCAGAAATAAAG  
TGACACGTTCACTAAAAAAAAACCCTTTTGTAGCAAATCATTATTAATAAAAAAATTGAT  
AAGCTTAACACAAAAGCGGAAAAAGAAATAATAGTAACTTGGTCCCGGGCATCTACCA  
TTATACCTACAATGATCGGACATACTATTGCTATACATAATGGCAAGGAACATTTGCCTAT  
TTATATAACGGATCGTATGGTTGGACACAAATTAGGAGAATTTGCACCTACTTTAAATTT  
CCGAGGACATGCAAAAAGCGATAATAGATCTCGTCGTATGATTTTTAAATCTTTTCTACT  
AGGTAATCTAGTATCCTTATGCATGAAGATAATCAATTCGGTCGTTGTGGTTCGGACTCTA  
TTATGGATTTCTGACCACATTCTCCATAGGGCCCTCTTATCTCTTCTTCTACGAGCTCA  
GGCTATGGAAGAAGGAGAAGAAGGAACCGAGAAGAAGGTATCAGCAACAACCTGGTTT  
TATTACGGGACAGCTCATGATGTTTCATATCGATCTATTATGCGCCTCTGCATCTAGCATTG  
GGTAGACCTCATACAATAACTGTCCTAGCTCTACCGTATCTTTTGTTCATTTCTTCTGG  
ACAATCACAAACACTTTTTTGTATTATGGATCGACTACCAGAAATTCAATGCGTAATCT  
CAGCATTCAATGTGTATTCTGAATAATCTCATTTTTCAATTATTCAACCATTTCAATTTA  
CCAAGTTCAATGTTAGCCAGATTAGTCAACATTTATATGTTTCGATGCAACAACAAGAT  
GTTATTTGTAACAAGTAGTTTTGTTGGTTGGTTAATTGGTCACATTTTATTTCATGAAATG  
GGTTGGATTGGTATTAGTCTGGATACGGCAAAATCATTCTATTAGATCGCTTATTAGATC  
GAATAAGTACCTTGTGTCAGAATTGAGAAATTCTATGGCTCGGATCTTTAGTATTCTTTT  
ATTTATTACCTGTGTCTACTATTTGGGCAGAATACCGTCACCCATTCTTACTAAGAACT  
GAAAGAAACCGAAGAAGATAAATCGCTTGTGATTCTTCTTTTTCGACTATAACCGATGGA  
ATCGACCATTGCGATATATAAAAAACCAACACTTTGAAAAGGCTGTAAGAAATGAAAT  
GTCACAATATTTTTTTTATACATGCCAAAGTGATGGAAAACAAAAAATATCTTTTACGTA  
TCCACCCAGTTTATCAACCTTTTGGGAAATGATACAAAAAAGATGTCCTTGTACACAA  
TAGAAAACCCCCCTCTGACGAACTATACAATAATTGGATTTATAACCAACGAAGAAAA  
AGTAAG--TTAAGCAACGAATTTATAAACCGAATCGAGGCTCTAGACGGAGGATCCCTT  
TCTTTGAATCTACTTGAAAAAAAAACTAGATTGTGTAATGATGAAACCAGGCAAGAATA  
TTTGCCTAAAATGTATGATCCTTTCTTGAACGGATCGTCTCGTGGAACAATCAAAAAAG  
GGTTTTACCTATAGAAAAAATTTGGATAAATAAGATTCACGGTATCCTTTATCGAGAAT  
TTGAACAAAAAGATCCTAATGATCAATCTATTGAAATACAAGAAATCATTAAAAAAGTT  
CCTCGGTGGTCATACAAATTAATCGATTTGGAACAACAACAGGAAAGACAGATTCGCT  
CAAGAAAAGCGAAACGTGTAGTGATTTTACTAATGCTTTAATACGTTATTACACAACAA  
TCGGATTTTCGTTCGAAACATAATCAAAGGTTCTATGCGCGCTCAAAGACGTAATAAGT  
TATTGAGGAACTGTTTCAAGCAAATGTGCATTCCCCCTTTTTTTGGACAGAATAGACA  
AATCCCTCCTTTTTTCTTTTGATATC-----TCCAGACTAATGAAACTCATTTTGAAAAATC  
GAAAGGAGAAAACGCGGATAGAAATAGCAGAAGCCTGGGATACCATTCCGCTTGCTCA

AGTAATAAGAGGTTCCATGTTAGTAACTCAATCGATTTTTAGAAAATATATTATATTACCT  
TCATTGATAATAGCTAAAAATATTGGCCGTATTTTATTATTGCAATTTCCCGAGTGGTCTG  
AGGATTTAAAAGAATGGGCTGGCGAAATGCATGTTAAATGCACCTATAACGGTGTTCAA  
TTATCAGAAACAGAATTTCCGAAAAATTGGTTACTAGATGGTATTCAGATAAAAATCTTA  
TTTCCTTTCTGTCTGAAACCTTGGCACAAACCAAAGAAAGTAAAAAAAGCCGATTTTT  
GTTTTTAAACAGTTTGGGGAATGGAAACCGACCTTCCTTTTGGTTCTCCTCGAAAACGG  
CCTTCTTTTTTTGAACCCATTTTTAAGGAACTCGAAAATCAAATTTGGTCAATTGAAAAA  
TAAGTCTTTTTATAGTT--CTAAGAGTTTTTAAAAGAAAGAATCGAATTCCTTTCTAAGGGTG  
TTAAACGAAACAAAAAATGGGTTATCAAAGCATTCTA-----TTTATAAAAAGAATACT  
AAAAGAACTTTCAAAGTAAATGATTCTACAATCAACGATCAGAAAATTCATGAATCGT  
TTAGTCAAATTCGATCTACGAATTGGACAAATTATTCACTGACAGAAAAAAAATGAA  
AGATCTAACTGATAGAACAAGCACATAAGAAATCAAATAGAAAGAATTACAAAAGAG  
AAAAAAACAAGTCCTAACAAAACAAGTTATAATGTTAAAAGATTAGAATCACCAAAAA  
CTATTTGGCAAATGTTAAAAGAAGAAACGTTTCGATTACTCCGTAAATTACATTATTTTA  
TAAAATTTTTCATTGAAAAGATATCCATGGATATCTTTCTATATATCATTAAATTTCCGAG  
ATCAATACACAACCTTTTT--CACTTCATTTCTGTGACTTACCCTCCTTGTCACAAGCATA  
TGTATTTTACAAATTATCCCAAACCCAAGTTATTAACCTTGATAAATTAAGATCTGTTCTT  
CAATATACATCTTTTTTTCTTAAGAATACAATAAAGGATTATTTTACACAAGGTATATTT  
ATTTTCGAATTAAGCCATAAGAACTTCGGAATTCTGGAATGAATCAATGGAAAAATTGG  
TTAAAAGGTCATTATCAATACGATTTCTCTCGGATTAATGGTCTAGATTAATACCACAA  
AATGGCGAAATAGAGTCAATCAACGTCGTACAGCTCAAACCTAAAAACAAACGGGATT  
CATATGAAAAAGACCAA-----CTAATTCATTACAAAAACAA---AATTTTCAAAAAA  
ATAGATATGATCTTTTATCATATAAATCTATTAATGGTGATATTGGGTATCCGGATAGAAA  
TATTTTGATTGGAAAATTATAAATTTTTGTCTTAGATTTTTAGATTGGATGGGAATGAATG  
AAGAAATACTAAATCGTTGGTTCTTCCCAGAATTTTTGTTACTTTATAATATATATAAAAT  
AAAACCATGGGTTATACCAAGCAAATTGCTTCTTTTAAACTACAAGAATAACACGGAA  
GCAGAACTCCATTTCTTCTTGAACAAGTATTTGCTTTTTCAATTGAGATGGAATGAGAC  
TTTGAATCAAAGAATGATCAATAATATCAAAGTATATTGTCTCCTGCTTAGACTGAGAAA  
TCCAAAAGAAATTGCTATATTCTCGATTCAAAGAAGAGAAATAAGTCTGGATATAATGC  
TGATTCAAAGAATTTAACTCTTACAGAATTGATGAAA---GGAATATTGATTATCGAACC  
CGTTCGTCTGTTTTTAAAAACGACGGACAATTTATTATGTATCAAACCTCGGTATTT  
ATTGGTTCATAAGAGTAAGCACAAATCATTATGATTTGCTTATTCCTGAAAATATTTTATCA  
TCTAGACGTTGTAGAGAGTTGAGAATTCTAATTTGTTTCAGATTCCTTTGGCCCAATTAT  
CGATTAGAAGATTTAGCTTGTATGAATCGTTATTGGTTTGTATACCAATAATGGAAGTCGT  
TTCAGTATGTTAAGGATACATATGTATCCAATGAAAGGACATCAATTCAAATCCTGGATT  
TTCGAATTGAGAGAGATATTGAGAGAGATCAAGAATTCTCACTATTTCTTAGATTCATG  
GACCCAATTCAATTCAGTGGGATCTTTCATTCACATTTTTTTTTACCAAGAACGTTTTAT  
AAAACCTTTTGACCCCGAATTTGGAGTATCCTACTTTCA---CGCAATTCA-----CAGGG  
TTCAACAAGCAATCGATATTTACG-----ATCAAGGGT--GTAATACTCTTTGTAGTAGC  
GGTCTTCTATATCGT-----ATTAACAATCAAATATGGTTCGAAAGAAAAAATCTCTA  
TTTGATAGGGCTTCTTCCT-----ATACCTATGAATTCCATTGGACCCAGAAATGATA  
CGTTGGAAGAATCCTTT--TGGTCTTCCAATATCAACAGGTTGATTGTTTCG---CTCCTGT  
ATCTTCCAAAAGGAAAAAAGATCTCTGAGAGTTGTTTCCTGGATCCGAAAGAGAGTAC  
TTGGGTTCTCCAAGTACT-----AAAAAGTGATCATGCCTGAATCTAACTGGGGTT

CGCGGTGGTGGAGGAGCTGGATCGGAAAAAAGAGG-----GATTCTAGTTGGAAGATAT  
CTAAT-----GAAACCGTCGCTGGAATTGAGATCTTATTTAAAGAGAAAGATATCAAA---  
TATCTGGAGTTTTGTTTTGTATATTATATGGAT-----GATCCGATCCGCAAGGACCATGATT  
GGGAATTGTTTGATCGTCTTTCTCTGAGGAAGAGGCGAAATATAATCAACTTG-----AAT  
TCGGGACCGCTATTCGAAATCTTAGTGAAACACTGGATTTGTTATCTCATGTCTGCTTTT  
CGTGAAAAAATACCAATTGAAGTGGAGGGT--TTCTTCAAACAACAAGGG--GCTGGGT  
CAACTATTCAATCAAATGATATTGAGCATGTTTCCCAT-----CTCTTCTCGAGAAACAAGT  
GGGCTATTTCTTTGCAAAATTGTGCTCAATTTTCATATGTGGCAATTCCGCCAAGATCTCC  
TCGTT-----AGTTGGGGGAAG---AATCCGCACGAATCGGATTTTTTGAGGAAC---GTAT  
CGAGAGAGAATTGGATTTGGTTAGACAATGTGTGGTTGGTAAACAAGGGTCGG-----  
TTTTTTAGC-----AAGGTACGGAATGTATCGTCAAATATTCAATATGATTCC-----ACAA  
GA-----TCTAGTTTCGTTCAAGTAACGGATTCTAGCCAATTGAAAGGATCTTCT--GATCA  
ATCCAGAGATCATTTGGATTCCATTAGT-----AATGAGGATTCGGAA-----  
-----TATTACACATTGATCAATCAAAGAGAGATTCAACAATAAAAGAAAGATC  
GATTCTT--TGGGAT-----CCTTCCTTTCTTCAAACGGAACGAACAGAGATAGAATCAGA  
C-----CGATCCCGAAA-----TGCTTTTCTGGATATTCC-----TCAATGTCCCGGCTATTAC  
G--GAACGTGAGAAGCAGATGATTAATCATCTGCTTCCGGAAGAAATCGAAGAATTTCT  
T-----GGGAATCCTACAAGATCCATTGTTCTTTTTTCTCTGACAGATGG-----TCAGAAC  
TTCAT--CTGGGTTCGAATCCTACTGAGAGGTCCACTAGAGATCAG-----AAATTGTT  
GAAGAAACAACAAGATCTTCT--TTTGTCCCTTCCAGGCGATCGGAA-----AATAA  
AGAAATGGTTAATATATTCAAGATAATTACGTATTTACAAAAT-----ACCGTTTCAATTCAT  
CCTATTTTCATCAGATCCGGGATGTGATATGGTTCCG---AAGGATGAACCGGAT--ATGGA  
CAGTTCCAATAAGATTTCAATCTTGAACAAAAATCCATTTTTTGATTTA-----TTTCATCTA  
TTCCATGACCGGAACAGGGGAGGATACACGTTA-----CACCACGATTTTGAATCAGAA---  
---GAGAGATTTCAAGAAATGGCAGATCTATTCCTATCAATAACCGAGCCG---GATCT  
GGTGTATCATAAGGGATTTGCCTTTTCTATTGATTCCCTACGGATTGGATCAAAAACA---  
--TTCTTGAATGAGGTATTCAACTCCAGGGATGAATCGAAAAAGAAATCT-----TTATTG  
GTTCTACCTCCTATTTTTTAT-----GAAGAGAATGAATCTTTTTATCGAAGGATCAGAAAA  
AAATGGGTCCGG---ATCTCCTGCAGGAATGATTTGGAAGATCCAAAACCAAAAATAGTG  
GTATTTGCTAGCAACAACATAATGGAGGCAGTCAAGCAATATAGATTGATCCGAAATCT  
GATTCAAATCCAATATAGCATCTATGGG-----TACATAAGAAATGTATTGAATCGATTCTTT  
TTAATGAAT-----AGATCCGATCGCAACTTCGAATATGGA-----ATTCAAAGGGATCA  
AATAAGAAAGGATACTCTGAATCATAGACCTATAATGAAATATACGATCAACCAACATTT  
ATCAAATTTGAAAAAG---AGTCAGAAGAAATGGTTCGATCCTCTT-----ATTTTTATTCT  
CGAACCGAGAGATCCATGAATCGGGATCCTAATGCATATAGATACAAATGGTCCAATGG  
GAGCAAGAATTTCCAGGAACATTTGGAACATTTGTTTCGGAGCAGAAGAGCCGT-----  
---TTTCAAGTAGTGTTCGATCGATTACGTATTAATCAATATTCGATTGATTGGTCTGAGGT  
TATCGACAAAAAAGATTTGTCTAAGCCACTTCGTTTCTTTTTGTCCAAG-----  
-----TCACTTCTTTTTTTGTCC-----AAGTTGCTTTTCTTTTTGTCTAAC--TCA  
CTTCCTTTTTTCTTTGTGAGTTTCGGGAATATCCCATTCATAGGTCCGAG---ATCTACGT  
CTAT--GAATTGAAAGGTCCGAATGATCAACTCTGCAATCAGTTGTTAGAATCAATAGGT  
CTTCAAATCGTTCATTTGAAAAAATGGAAACCCTTC-----TTATTGGAT-----GATCATG  
ATACTTCC---CAAAAATCGAAATTTGATCAATGGAGGAAGAATATCACCATTTTTGTT  
CAATAAGATACCA---AAGTGG---ATGATTGACTCATTCCATACTAGA-----AATAATCGCA

GGAAATCCTTTGATAACATGGATTCCCTATTTCTCAATGATATCCCACGATCAAGACAATT  
GGCTGAATCCCGTGAAACCATTTTCATAGAAGTTTATTGATATCTTCTTTTTATAAAGCAA  
ATCGACTTCGATTCTTGAATAATCCACATCACTTCTGCTTCTAT-----TGTAACAAAAGAT  
TCCCTTTTTATGTG-----GAAAAGGCCCGTATCAAT-----AATTATGATTTTACGTATG  
GA---CAATTCCTCAATATCTTGTTTCATTCGCAACAAA---ATATTTTCGTTGTGCGTCCGTA  
AA-----AAAAACATGCTTTTTGGGGG---AGAGATACTATTTACCAATCGAGTCACCGG  
TTTCTAACATATTCATACCTAATGATTTTCCACAAAGTGGT---GACGAAACGTATAACTTG  
TACAAATCT-----TTCCATTGCCAAGTCGATCCGATCCATTCTGTTTCGT-----AGAGCTAT  
TTACTCGATCGCAGACATTTCTGGAACACCTCTAACAGAGGGACAAATAGTCAATTTTG  
AAAGAACTTATTGTCAACCTCTTTCAGATATGAATCTATCTGATTCAGAAGGGAAGAAC  
TTGCATCAGTATCTCAAT-----TTCAATTCAAACATGGGTTTGATTCACACTCCATGTTCT  
GAGAAATATTTACCATCCGAAAG-----AGGAAAAA-----CGGAGTCTTT  
GGCTAAAG-----AAATGCGTTGAGAAAGGACAGATGTATAGAACCTTTCAACGAGATAG  
TGCTTTTTCAACTCTCTCAAAATGGAATTTATTCCAAACATATATGCCATGGTTCCTTACT  
TCGACAGGGTACAAATATCTAAATTTTATATTTTATAGATACTTTTTTCGGACCTATTG-----C  
CGATACTAAGTAGC---AGTCAAAAATTTGTATCCATTTTTTCATGATATTATGCATGGATCA  
GATATATCATGGCGAATTCTTCAGAAAAAATTG-----TGTCTTCCACAATGGAA  
TTGG---ATAAGTGAGATTTTCGAGTAAGTGTTTACATAAT-----CTTCTTCTGTCCGAAGAA  
ATGATTCATCGAAAT-----AATGAGTCACCATTGATATCGACACATCTGAGATCGCCAAAT  
GTTCCGGGAGTTC---CTCTATTCAATCCTTTTCCCTTCTTCTGTTGCTGGATAT--CTCGTTC  
GTACACATCTTCTCTTTGTTTCCCGG-----GCCTCTAGTGAGTTACAGACAGAGTTCGAA  
AAGGTCAAATCTTTGATGATTCCATCATCTATGATTGAGTTGCGAAAACCTTCTGGATAG  
GTATCCTACATCTGAACCGAATCTTTCTGGTTAAAGAATCTTTTCTAGTTGCTCTGGA  
ACAATTAGGAGATTCTCTAGAAGAAATACGGGGTCTGCTTCTGGCGGCAACATGCTAT  
TGGGTGGTGGTCCCGCT-----TATGGG---GTCAAATCAATACGTTCTAAGAAGAAA  
TATTTGAATATCAATCTCATCGATCTCATAAGTATCATA-----CCAAATCCCATCAATC  
GAATCACTTTTTTCGAGAAATACGAGACATCTAAGTCATACAAGTAAAGAGATCTATTCA  
TTGATAAGAAAAAGAAAAACGTGAACGGGGATTGGATTGATGATAAAATAGAATCCT  
GGGTCGCGAACAGTGATTTCGATTGATGATGAAGAAAGAGAATTCTTGGTTCAGTTCTC  
C-----ACCTTAACGACA-----GAAAAAGGATTGATCAAATTCTATTGAGTCTGACT--CAT  
AGTGATCATTTATCA-----ATATCAAAGAATGACTCTGGTTATCAAATGATTGAACAAC  
CGGGAGCAATTTACTTACGATACTTAGTTGACATTCAT-----AAAAAGTATCTAATGAATT  
ATGAGTTCAATACATCCTGTTTAGCAGAAAGACGGATATTCCTTGCTCATTATCAGACAA  
TCACTTAT-----TCACAAACCTCGTGTGGGCTAATAGTTTTTCATTTCCCGTCTCATGGA--  
-----AAACCCTTTTCGCTCCGCTTAGCCTTATCCCCCTCT--AGGGGTATTTTAGTGATAG  
GTTCTATAGGAACTGGACGATCCTATTTGGTCAAATCCCTAGCGACAACTCCTATGTTT  
CTTTCATTACGGTATTTCTGAACAAGTTCCTGGATAACAAGCCTAAAGGTTTTCTTATTG  
AT-----GATATCAAT--ATTGAGGATAGTGACGATATTGATGATAGTGACGATATTGA  
TGCTAGTGACGATATTGAC-----GATATCGATCATGACCTT  
GATACGGAGCTG---GAGCTGCTAACTATGATGAATGCGCTAACTATGGATATGATGCCGG  
AA-----ATAGACCGATTTTATATCATCCTTCAATTCGAATTAGCAAAAGCAATGTCTCC  
TTGCATAATATGGATTCCAACATTCATGATCTGGATGTGAATGAGTCGAATTACTIONTATC  
CCTCGGTCTATTAGTGAACCATCTCTCCAGG-----GATTGTGAAAGATGTTCC---ACTA  
GAAATATTCTTGTATTGCTTCGACTCATATCCCCAAAAAGTGGATCCCGCTCTAATAG



CTCCGAATAAATTAATACGTGCATTAAGATACGAAGGCTTCTTATTCCACAACAACGA  
AAGCACTTTTTCACTCTTTCATATACTAGGGGATTTCACTTGGAAAAGAAAATGTTTCAT  
ACT-----AATGGATTTCGGGTCATAACCATGGGTTCGAATGCACTAGATCTTGTAGCACTT  
ACCAATGAGGCTCTATCGATTAGTATTACACAGAAGAAATCAATTATAGACACTAATACA  
ATTAGATCCGTTCTTCATAGACAAACTTGGGATTTGCGA-----TCCCAGGTAAGATCGG  
TTCAGGATCATGGGATCCTTTTCTATCAGATAGGAAGGGCTGTTGCACAAAATGTATTTT  
TAAGTAATTGCCCCATAGATCCTATATCTATCTATATGAAGAAGAAA-----TCATGTAACG  
AAGGGGATTCTTATTTGTACAAATGGTACTTTCGAACTTGGAACGAGCATGAAGAAATTA  
ACGATACTTCTTTATCTTTTGTAGTTGTTCTGCCGGATCGGTTCGCTCAAGATCTTTGGTCT  
CTACCC-----GGACCCGATGAAAAA---AATGGGATCACTTCTTATGGACTCGTTGAGAAT  
GATTCT--GATTTAGTTCATGGCCTATTAGAAGTCGAAGGCGCTCTGGCGGGA-----TCCT  
CACGGACAGAAAAATATTGCAGTCAGTTTGATAATGAT-----CGAGTGACGTTGCTTCTT  
CGGCCCGAATCAAGGAAT--CCCTTAGATATGATGAAAAATGGATCTTGTCTATCCTTG  
ATCAGAGATTTCTCTATGAAAAAGAC-----GAATCGGAGTTTGAAGAA--GGGGAGGGA  
GAAGGAGCCCTCGACCCGCAACAG-----ATAGAGGAGGAT-----TTATTCAATC  
AC-----ATAGTTTGGGCTCCT-----AGAATATGGCGCCCT-----TGGGGCTTTCTATTTGA  
TTGTATCGAAAGGCCCAATGAATTGGGATTTCCC--TATTGGTCCAGGTCATTTTCGGGGC  
AAG-----CGGATCATTATGATGAAGAGGATGAGCTTCAAGAGAATGATTCGGAGTTC  
TTGCAGAGTGGAACCATGCAGTACCAGACACGAGATAGATCTTCCAAAGAACAAGGC  
CTTTTTCGAATAAGCCAATTCATTTGGGACCCTGCGGATCCACTCTTTTTTCTATTTAAA-  
--GATCGGCCCTTTGTCTCTGTGTTTTTCACATCGAGAATTATTTGCAGATGAAGAGATGT  
CAAAGGGGCTTCTTACTTCCCAAACAGATCCTCCTACATCTATATATAAACGCTGGTTTA  
TC-----AAGAATACGCAAGAAAAGCACTTTCGAATTGTTGATTAATCGCCAGAGATGGCTT  
AGA-----ACCAATAGTTCATTATCT-----AATGGATCTTTCCGTTCTAAT-----ACTCTATC  
CGAGAGTTATCAGTATTTATCAAATCTGTTTCTATCTAAC---GGAACGCTATTGGATCAA  
TGACAAAGACATTGTTGAGAAAAAGATGGCTTTTCCCGGATGAAATGAAAATTGGATT  
C-----ATG-----ATGCCTAGATCGCGA---ATAAATGGAAATTTTATTGATAA  
GACCTTTTCAATTGTAGCCAATATCTTATTACGAATAATTCCGACAACCTCAGGAGAAA  
AAGAGGCATTTACTTATTACAGAGATGGG-----ATGTCAGCACAATCCGAAGGAAATTAT  
GCGGAAGCTTTACAGAATTATTATGAAGCTATGCGACTAGAAATTGATCCCTATGATCGA  
AGTTATATACTCTATAACATAGGCCTTATCCACACAAGTAATGGAGAACATACGAAAGC  
GTTGGAATATTATTTTCGAGCACTAGAACGAAATCCATTCTTACCACAAGCTTTTAATAA  
TATGGCCGTGATCTGTCATTAC--CGGGGAGAAACAAGCCATTCGACAGGGGAGATTCTGA  
AATTGCGGAGGCTTGGTTCGATCAAGCCGCTGAGTATTGGAAACAAGCTATAGCGCTT  
ACTCCTGGTAATTATATTGAAGCACATAATTGGTTGAAGATCACGAGGCGTTTCGAA-----  
-ATGAGTTGGCGATCAGAACGTATATGGATAGAACTTATAACGGGGTCTCGAAAAACAG  
GTAATTTCTGCTGGGCCTTTATCCTTTTTTTAGGTTTATTAGGATCTTATTGGTTGGAAT  
TTCCAGTTATCTTGGTAGAAATTTGATATCTTTATTTCCGTCTCAGCAAATCATTTTTTTT  
CCACAAGGGCTCGTGATGTCTTTTTATGGGATTGCGGGTCTCTTTATTAGCTCCTATTTG  
TGGTCCACAATTCGTTGGAATGTAGGTAGTGGTTATGATCGATTTGATATAAAAGAAGG  
AATAGTATGATTTTTCGTTGGGGATTTCTGGAAAAAATCGCCGCATCTTCTCCGATT  
CCTTATAAAAGATATTCAGTCCGTCAGAATAGAAGTTAAAGAGGGTATTTATGCTCGTC  
GTGTCCTTTATATGGAAATCAGAGGTCAGGGGGCTATTCCCTTGACTCGTACTGATGAG  
AAT--TTGACTCCACGAGAAATTGAACAAAAAGCTGCTGAATTGGCTTATTTCTGCGT

GTACCGATTGAAGTCTTT

>Dillenia

ATGGAAAACGGTGGTTCAATTCTATGTTGTCTATAAGTAAATCAATGCACAGCCTTGG  
TCCTATTGAAAATACTAGTGGAAGTAAAGACTCGATTATAAATGATACAGATAAAAACA  
TTCATAGTTACAGTAATATTGATTATTTATTCAGCCTCAGGGATATTCGGAATTCATCTC  
TGATGACATTTTTGTAATTAAGGATAGTAATGGGGGCAGTTATTCCATCTATTTTCGATATT  
GAAAATCAGATTTTTGAGATTGACAATGATCAT-----TCTTTTCTGAATGAACGAGAAAG  
TTCTTTTATAGTTATCAGAATTCTAGTTATTTGAATAATGGATCTAAGAGGGATGATTCC  
TACTATGATCGTTATATATATGATACTCAATCTAGTTGGAATAATCACATTAATAGTTGTAT  
TGACAGTTATCTTCAT-----TCTCAAATCCGTATTGATAGTTACATTTAAGTGGTAGTCAC  
AATTACAGTGACAGTTACATTTATAGTTACATTTGGAGT-----AGTCCAATATAAGA  
AATACGAATGATAGTGATTTAACTATAAAAGAAAGTTCGAATGATCTCGATGTA  
AACTCAAAAATATAAGCATTGTGGGTTCAATGCGAAAATTGTTATGGATTA  
AATTATAAGAAATTGTAAGTCAAAAATGAATATTTGCGAACAAATGTGGATATC  
ATTTGAAAATGAGTAGTTCAGATCGAATCGAACTTTTCGATTGATCCAGGTA  
CTTGGGATCCTATGGATGAGGATATGGTTCTCTGGATCCCATTGAATTTCA  
TTTCGGAAGAGGAACCTTATAAAGATCGTATCCATCTTTATCAAAAAA  
AGACAGGATTAAGCGAGGCTGTTCAAACAGGCACAGGTCAATTA  
AACGGTATTCCCATAGCAATTGGGGTTATGGATTTTCAGTTTATGGGGGGT  
AGTATGGGATCCGTAGTAGGCGAGAAAATCACACGTTTGATCGAGTATGCT  
ACCAATAAATTTCTACCTTATTATAGTGTGTGCTTCTGGAGGAGCACGC  
ATGCAAGAAGGAAGTTTGAGCTTGATGCAAATGGCTAAAATATCTTCCG  
CTTTATATGATTATCAATCAAATAAAAAGTTATTTTATGTATCAATTT  
CTCACATCTCCTACTACTGGTGGGGTAACAGCCAGTTTTGGTATGTTAG  
GGGATATTATTATTGCCGAACCCAACGCCCTACATTGCATTTGCGGGTAA  
AAGAGTAATTGAGCAAACATTGAATAAGACAGTACCTGAAGGTTCA  
ACAAGCAGCTGAATATTTATTCCATAAAGGCTTATTTGATTCAATCGT  
ACCACGGAATCTTTTAAAAGGTGTTCTGAGTGAGTTATTTCAGCTCC  
ACGCTTTCTTTTCTTTGAATCAAATCAATCAAGATGGTAACCATT  
CGAGCCGACGAAATAAGTAATATTATCCGTGAACGTATTGAACA  
ATATAATAGGGAAGTAAAGATTGTAAATACCGGTACTGTACTTCA  
AGTAGGCGACGGCATTGCTCGTATTCACGGTCTGATGAAGTAATGG  
CAGGCGAATTAGTAGAATTTGAAGAGGGTACAATAGGCATTGCT  
CTGAATTTGGAATCAAATAATGTTGGTGTGTTGATTAATGGGTGAC  
GGTTAATGATCCAAAGAGGAAGTTCTGTAAAAGCAACAGGAAAA  
ATTGCTCAAATACCTGTGAGTGAGGCTATTTGGGTCGTGTTATA  
AATGCTTTGGCTAAACCTATTGATGGTAGAGGTGAAATTT  
CAGCTTCTGAATCTCGGTTAATTGAATCTCCCGCTCCAGGGATT  
ATTTTCGAGACGTTCTGTATATGAGCCTCTTCAAACGGGGCTT  
ATTGCTATTGATTTCGATGATTCCCTATAGGACGTGGTCAGCGA  
AATTAATTATTGGGGACAGACAGACCGGTAAAACCGCAGTAGCT  
ACAGATACGATTCTCAATCAACAAGGGCAAATGTAATATGTGTTT  
ATGTAGCTATTGGGCAAAGGCATCTTCTGTGGCTCAAGTAGT  
GACTACTTTCCAGGAAAGGGGAGCGATGGAATACACATATTG  
TGGTAGCCGAAACGGCGGATTCCCCGGCTACATTACAATACCT  
CGCTCCTTATACAGGAGCAGCTCTGGCTGAATATTTTATGTAT  
CGTGAACAACACACTTCAATTATTTATGACGATCTCTCCAA  
ACAAGCGCAAGCTTATCGCCAAATGTCTCTGCTATTACGAAG  
ACCACCTGGGCGCGAAGCTTATCCAGGAGATGTTTTTTATTT  
GCATTCACGTCTTTTAGAAAGGCCGCTAAATCAAGTTCTCT  
TTTAGGTGAAGGAAGTATGACTGCTTTACCAATAGTGGA  
AACTCAATCAGGAGATGTTTCAGCTTATATTTCCACTAAT  
GTAATTTCCATTACAGATGACAAATATTCTTATCCGCCGAT  
CTATTCAATGCTGGAATCAGACCTGCTATTAATGTAGGT

ATTTCCGTCTCCAGAGTAGGATCCGCAGCTCAAATTAAGCCATGAAACAAGTAGCTG  
GTAAATCAAATTTGGAGCTGGCTCAATTCGCAGAATTAGAAGCCTTTGCACAATTCGC  
GTCTGATCTCGATAAAGCTACTCAGAATCAATTTGGCAAGAGGTCAACGATTACGTGAAT  
TGCTCAAACAATCTCAATCGGCCCTCTTACGGTGGAAGAACAGATAATGACTATTTAT  
ACCGGAACAAACGGTTATCTTGATTCCTTAGAAATTGGACAGGTAAGGAAATTTCTCGT  
TGAGTTACGTACTTACTTAAAAACGAATAAACCTCAGTTCCAAGAAATAATATCTTCTA  
CTAAGACATTTACCGAGGAAGCAGAAGCTCTTTTGAAAGATGCTATTCAGGAACAGAT  
GAAACGCTTTTACTTTCAGGAACAAGCAATGAGAATAAATCCTACTACTTCTGGTCTCG  
GGTTTCCACACTTGAAAAAAAAAGCCTGGGGCGTATCGCTCAAATCATTGGTCCAGT  
GCTGGATGTAGCCTTTCCACCGGGAAGATGCCTAATATTTACAACGCTCTTTTAGTTA  
AGGGTCGAGATACTGCCGGTCAACAAATTAATGTGACTTGTGAAGTACAACAATTATTA  
GGAAATAATCGAGTTAGAGCTGTAGCTATGAGTGCTACGGATGGTCTAATGAGAGGAAT  
GGAAGTGATTGACACAGAAGCTCCTCTAAGTGTCCAGTCGGTGGAGCGACTCTCGGA  
CGAATTTTCAACGTCCTTGGGGAACCTATTGATAATTTAGGTCCTGTAGATACTCGCACA  
ACTTCTCCTATTCATAGATCCGCGCCTGCCTTTATACAGTTAGATACAAAATTATCTATTT  
TTGAAACAGGAATTAAGTAGTAGATCTTTTAGCCCCTTATCGTCGTGGAGGAAAAATA  
GGTCTATTCGGAGGAGCTGGAGTGGGTAACAGTACTCATTATGGAAGTATCAACA  
ACATTGCCAAAGCTCATGGGGGTGTATCTGTATTTGGCGGAGTAGGTGAACGTACTCGT  
GAAGGAAATGATCTTTACATGGAAATGAAAGAATCTGGAGTGATTAATGAACAAAATAT  
TGCAGAATCAAAGTGGCTCTAGTCTACGGTCAGATGAATGAACCGCCAGGAGCTCGT  
ATGAGGGTTGGTTTAACTGCCCTAACTATGGCGGAATATTTTCGAGATGTTAATGAACA  
AGACGTACTTCTATTTATCGACAATATCTTCCGTTTCGTCCAAGCAGGATCCGAAGTATC  
TGCCTTATTGGGGCGAATGCCTTCCGCTGTGGGTATCAACCCACTCTTAGTACCGAAA  
TGGGTTCTTTACAAGAAAGAATTACTTCTACCAAAGAGGGTCCATAACTTCTATTCAA  
GCAGTTTATGTACCTGCGGACGATTTGACCGATCCTGCTCCTGCCACGACATTTGCACA  
TTTAGATGCTACTACCGTACTATCAAGAGGATTAGCTGCCAAAGGTATCTATCCCGCAGT  
AGATCCTTTAGATTCAACGTCAACTATGCTCCAACCTCGGATCGTTGGTGAGGAACATT  
ATGAAACTGCGCAAAAAGTTAAGCAAACCTTTACAACGTTACAAAGAAGTTCAGGACAT  
TATAGCTATTCTTGGGCTGGACGAATTATCCGAAGAGGATCGTTTAAACCGTAGCAAGAG  
CACGAAAAATTGAGCGTTTCTTATCACAACCCCTTTTTTGTAGCAGAAGTATTCAGTGGT  
TCCCCAGGGAAATATGTTGGTCTAGCAGAAACAATTAGAGGGTTTCAATTGATCCTTTC  
CGGAGAATTAGATGGTCTACCTGAACAAGCCTTTTATTTAGTAGGTAACATCGACGAAG  
CTACCGGAAGGCTATGAACTTAGAAATGGAGAGTAATTTGAAGAAAATGACCTTAAA  
TCTTTGTGTAAGTACCCCTAATAGAATTGTTTTGGATTGAGGGGTGAAAGAAATCATTTT  
ATCTACTAATAGTGGCCAAATTGGCATATTACCAAACCACGCCCTATTGCCACAGCTGT  
AGATATAGGTATTTTGAGAATACGCCTTAAACGACCAATGGTTAACAATGGCTCTGATGG  
GTGGTTTTGCTAGAATAAGCAATAATGAGATCACTATTTTAGTAAATGATGCGGAGAAA  
GGTAGTGACATTGATCCACAAGAAGCTCAGCAAACCTTGAATAGCGGAAGCTAATT  
TGAGGAAGGCTGAAGGCAAGAGACAAACAATTGAGGCTAATCTAGCTCTCAGACGAG  
CTAGGACACGAGTGGAGGCTATTAATGTAATTTGATGAAAAATGTAACCGATTCTTTC  
GTTTCT--GGTCACTGGCCATACGCTGGGAGTTTCGGGTTTAAATACCGATATTTTAGCAA  
CAAATCCAATAAATCTAAGTGTAGTGATTGGTGTCTTAATCTTTTTTGGAAAGGGAGTG  
TTAAGTGATTATTAGATAATCGAAAACAGAAGATATTGAATAGTATTCGAAATTCAGAA  
GAACTGCGCGGGGGGGCTATTGATCAGCTGGAAAAAGCTCGGGCCCGTTTACGGAAA

GTGGAAATGGAAGCGGATCAATTTTCGAGTGAATGGATACTCTGAAATAGAACGAGAAA  
AGTTGAATTTGATTAATTCAACTTATAAGACTTTAGAACAATTAGAAAATTACAAAAAT  
GAAACCATTTCAGTTTGAACAACAAAGAGCGCTTAATCAAGTCCGACAACGGGTTTTCC  
AACAAAGCCTTACAAGGAGCTCTAGGAACGTTGAATAGTTGTTTGAATAACGAGTTACA  
TTTACGTACCATCAATGTTAATATTGGTATGTTTGGGGCGATAAAAGAAATAACTGATAT  
GAATCCACTGATTTCTGCCGCTTCCGTTATTGCCGCTGGATTGGCTGTAGGGCTTGCTTC  
TATTGGGCCTGGAGTTGGTCAAGGTACTGCCGCAGGACAAGCTGTAGAAGGTATCGCG  
AGACAGCCCCGAGGCGGAGGGAAAATAACGAGGTACTTTATTGCTTAGTTTACTTTTTAT  
GGAAGCTTTAACAATTTATGGATTGGTTGTAGCATTAGCGCTTTTATTTGCAAATCCTTT  
TGTTATGAATGTTCTATCATGTTCCATCAACACACTAAAAGTGTATACGATATATCCGGT  
GTGGAAGTAGGCCAACATTTCTATTGGCAAATAGGGGGTTTTCCAAGTCCATGCCCAAGT  
ACTTATTACTTCGTGGGTTGTAATTGCTATCTTATTAGGTTTCGGCCATTATAGCTGTTTCGG  
AATCCACAAACCATTCCGACTGATGGTCAGAATTTCTTTGAATATGTCTTGAATTCATT  
CGAGACGTGAGCAAAAACCCAAATAGGAGAAGAATATGGCCCTTGGGTCCCCTTTATTG  
GAACTATGTTTCTATTTATTTTGTCTAATTGGTCAGGGGCTCTTTTACCTTGAAAAT  
CATACAGTTACCTCATGGGGAATTAGCCGCACCCACGAATGATATAAATACTACCGTTGC  
TTTAGCTTTACTCACGTCAGTGGCATATTTCTATGCGGGTCTTAGTAAAAAAGGATTAGG  
TTATTTTCGGTAAATACATTCAACCAACTCCAATCCTTTTACCTATTAATATCTTAGAAGAT  
TTCACAAAACCTTTATCGCTCAGTTTTCGACTTTTCGGGAATATATTGGCTGATGAATTA  
GTAGTTGTTGTTCTTGTCTTTAGTACCTTTGGTAGTTCCTATACCTGTCATGTTCCCTTG  
GATTATTTACAAGTGGTATTCAAGCTCTTATTTTGTCAACTTTAGCTGCCGCTTATATAGG  
CGAATCCATGGAAGGTCATCATATGATATTTTTGACTTTAGAACATATATTAATCATATC  
TCTTTTTCAATCATTTCATTTCAATTCAATTAACAATTCATTTTATAACCCATTATCCGATGAAAC  
GGTAGGACTATCTAATTCGAAAAAAGAGGGCATGATAGTGACTTTTTTCATGTATAACAG  
GATTATTAATTAATCTCGTTGGATTATTACACAGCATTTCCTAATAAGTGATTTATATGAATC  
AGTAATCTTCCTTTTCATGGGCTTTCTCTATTATTCATATGATTCGGTATTTT---ATGCATAA  
AAACTATTTAAGCGCAATAACCGCGCCAAGTGCTATTTTTTACCCAAGGCTTTGCTACTT  
CAGGTTTTTTAACTGAAATACATCAATCAAAAATATTAGTACCCGCTCTACAATCCCAGT  
GGTTAATGATGCACGTAAGTATGATGGTATTGGGCTATGCAGCTCTTTTATGTGGATCATT  
ATTATCAGTAGCTCTTTTGGTTATTACATTTTCGAAAAGACATA-----AGTAAAAGCAAT  
CAAATCCAACGCATGAATGAAAGATAACAATTTTTACAAAATCCTTCTCTATTTCTGCG  
AGGAATTATTACAGGTCCCAATTGATTCAACAGTTGGATTATTGGAGTTATCGTGTTATT  
AGTCTAGGGTTTTCTTTTTAACCATAGGCATTCTTTTCGGGGGCAGTATGGGCTAATGA  
GGCATGGGGGTCATATTGGAATTGGGACCCAAAAGAAATTTGGGCATTTATTACTTGGA  
CCATATTGCAATTTATTTACATACTCGAACAAACACAAATTTGAAAGGTGCAAATTC  
GCAATTGTGTCTTTATGGGCTTTCTTATAAATTTGGATATGCTATTTTGGTATCAATCTATT  
AGGAATAGGTCTACACAGTTATGGGTCATTACCTTAATAATGGAACAAAAGAAGCTAT  
TCACTCCCCTTTTTATATCTTTTATCTATAGTATTCTTGCCCTGGGGGATCTCTCTCATT  
AATAAAAGTATGGAATCTTGGGTTATTAATTGGTGGAACTAGCAAATCTGAACTTTT  
TTGAATGATATTCAAGAAAAGAGTATTCTAGAAAATTCATAAAGTTAGAGGAACTTTT  
TCTCTTGGACGAAATGATAAAGGAATACCCGAAACACATTTACAAAAGCTTTGTATAG  
AAATCTACAAAGAAACGATCCAATTGATCAAGGTATAACAATGAAGATCGTATCCATGCA  
ATTTTACACTTCTCGACAAATATCATTCTTTTATTATTCTAAGTGGTATTCTATTCTGGG  
TAATGAAGAACTTGTTATTCTTAACTCTTGGGTTTCAGGAATTCCTATATAACTTAAAGCGA

CACAATCAAAGTCTTTTCTATTCTTTTATTTACCGATTTATGTATCGGATTTTCATTCCCC  
CATGGTTGGGAGCTAATGATTGGTTCTGTTTACAAAGATTTTGGATTTGTTTCATAACGAT  
CAAATTATATCTGGTCTTGTCTTACGTTCCCGGTCATTTTAGATACAATTTTCAAATATT  
GGATCTTCCGTTATTTAAATCGTGTATCTCCGTCACCTGTAGTGATTTATCATTCAATGAA  
TGACATGCCTATTGGTGTTCCTAAAAGTACCTTTTCGAAGTCCTGGGGAAGAAGATGCTT  
CTTGGGTCGACGTATAACAACCGACTTTATCGAGAAAGATTACTTTTTTTAGGCCAAGAG  
GTTGATAACGAGATTTTGAATCAACTTATTGGTCTTATGGTATATCTCAGTATAGAGGAT  
GATACTAAAGATCTTTATTTGTTTATAAACTCTCCTGGTGGATGGGTAATACCTGGAGTA  
GCTATTTATGACTATAACAATTTGTACAACCAGATGTACATAACAATATGCATGGGATTAG  
CCGCCTCAATGGGATCTTTTATCTTGGTAGGAGGAGAAATTACCAAACGTCTAGCATTCC  
CCTCACGCCAGGGTAATGATCCATCAACCTGCTAGTTCTTTTTATGAGGCACAAACAGG  
AGAGTTTATCCTGGAAGCGGAAGA ACTACTGAAACTGCGCGAAACCATCACAAGAGT  
TTATGTACAAAGAACGGGCAAACCTTTATGGCTTGTATCCGAAGACATGGAAAGAGAT  
GTTTTTATGTCAGCAAGAGAAGCCCAAGCTTATGGAATTATTGATCTTGTAGCGGTTGA  
AATGAAAGAAACAAAATGGATTCATGAAGGTTTAATTACCGAATCACTTCCCAATGGTA  
TGTTCCGGGTTTCGTTTAGATAACGAAGATATGATTCTAGGTTATGTTTCCGGAAGGATCC  
GACGTAGTTTTATACGGATATTACCAGGGGATAGAGTAAAAATTGAAATAAGTCGTTAT  
GATTCAACCAGAGGGCGTATAATTTATAGACTCCGCAACAAAGATTTCGAACGATATGGA  
GGAATTCCAAGTATATTTAGAACGAGATATATCTCGGCAACATGACTTTCTATATCCACTT  
ATCTTCAAGAGTATATTTATGCACTTGCTCATGATCATGGA---GTGGGTTATGACAATAA  
ATCCAGTTTTCTAATTGTGAAACGTTTAATTACTCGAATGTATCAATGGAATCATTGAAAT  
ATTTCCCTTAATGATTCTAACAAAAAGAAATTTGTTGTGAACAATTTAGATTTTCAAATG  
ATATTAGAAGGATTTTCAGTCATTGCGGAAATTCATTTTCGCTCCAATTATTATCTTTCC  
TAATAGAAAAATTCATAATTTACGATCAATTCATTTCGATATTTCTTTTTTAGAGGACAA  
ATTCTCACATTTAAATTATGTGTCAGATATACTAATACCCACCCGTTTCATCTGGAAATC  
TTGATTCAAACTCTGCGCTACTGGGTTAAAGATGCCTCTTCTTGCATTTTTTACGATTT  
TTTCTTCATGAGTATCGTAATTGGACTAGTTTTTATTACTAAATCCATTTTCTTTTTTTCAA  
AACCACGATTTTTTTTCTTCTATATAATTCTCATGTATATGAATACGAATCCATTTTTGGT  
TTTCTCTGTAACCAATCTTCCATTTACAATCAACATCTTATGGAGCCCTTCTTGGTTCGA  
ATTTTTTCTATGAAAAAAGAAAGCATCTTGTAGAACTCTTGCTAATGATTTTAACTTA  
TGGTTGTGCAAAGATCCTTTCATGCATTATGTTAGGCATCAAGAAAAAATTATTCTGGCT  
TCAAAGGGGACGGCTCTTCTGATGAATAAATGGAATATTACTTTGTCAATCTTTGGCA  
ATGTAATTTTGATGTGTGGGCTCAACCAGGAAGGATCCATATAAAACAATTATCCAATAA  
TTGCTTACATTTTCTAGGCTATCTTCAAGTGTGCGGCTAAATCCTTCAATGGTATGGAG  
TCAAATACTAGAAAATGCATTTCTAATAGATAATACTATT-----AAAAAGCTCGATGCCCT  
AGTTCCAATTTTTCCGCTGATTGAATCATTGGCTAAGGCCGGGTTTTGTAAACGGATTAG  
GCCATCCCATTAGTAAGCCGGTATGGGCCGATTCATCAGATTCTGATATTATCGACCGAT  
TCGGGCGTATATGTAGAAATCTTCTCATTATCATAGTGGGTCCTCAAAAAAAAAAGAGT  
TTGTATCAAATAAAGTATATACTTCGAATTTCTTGTGCTAGGACTTTGGCTCGTAAACAC  
AAAAGTACTATACGTGCTTTTTTGAAGAGATTAGGTTTCGGAATTATTGGAAGAATTCCTT  
ACAGAGGATGAACAAATTATTTCTTTGATCTTACCAGGACAGATTTGGTATTTGGATATT  
ATCTATATCGCTGATTTGGCCGATCATTCAATGATAATTAATACAACA---GAAGTACAA---  
AATATCCATTTTTTTTCCAGATTGGAATTC---TAAAAGAGATCTATGAGATCATATGGAT  
GCTTGTCTTCTTTTAACTCTTGTATTGGGACTCACAATAAGTGTACTAGTAATTGTGTG

GTTAGAAAGAGAGATATCCGCAGGGATAACAACGTATTGGGCCCGAGTATGCCGGG  
CCTTTGGGAATTCTTCAAGCTCTAGCAGATGGGATAAACTACTTTTCAAAGAGAGCCT  
TCTCCATCTAGAGGGGATACTCGTTTATTCAGCATTGGACCATCTATATCAGTCATATCA  
ATTCTACTAAGTTATTCAGTAATTCCTTTTGGCTATGGCCTTGTTCTAGCCGATCTTAGTA  
TTGGTGTTTTTTATGGATTTCTTTTCAAGTATTGCTCCTATTGGGCTTCTTATGTCAGG  
ATACGGATCAAATAATAAATATTCCTTTTTAGGTGGTCTACGCGCTGCTGCTCAATCGAT  
TAGTTATGAAATACCATTAGCCCTATGTGTGTTATCAATATCTCTACTATCTAACAGTTCA  
AGTACAGTTGATATAGTTGAGGCACAGGCCAAAATATGGTTTGTGGGGGTGGAATTTTTG  
GCGTCAACCTATAGGAGTTCTCGTTTTTCTAATTTCTTCCCTAGCAGAATGTGAGAGATT  
GCCTTTTGATTTACCAGAAGCAGAAGAAGAAATTAGTAGCAGGTTATCAAACCTGAATATT  
CAGGTATAAAATTTGCATTATTTTTATGTTGCTTCTTATCTAAATCTATTAGTTTCCCTCATTA  
TTTTGTAACAGTTCTTTACTTTGGGGGTGGGATCTCTCTATTCCGTACATATTCGTTCCCTG  
AACTTTTTGAAATAATAAAACGGGGCGGGTCTTTCAAACCACAATTGGTATCTTTATT  
ACATTAATTTAAACTTATTTGTTTTTGTTCATTTCTATCACAACAAGATGGACTTTACCG  
AGGCTAAGAATAGACCAACTCTTAAATCTTGGATGGAAATTTCTTTTACCTATTTCTCTA  
GGTAATTTATTTAACAACCTTCTTTCCAACCTTTTCACTGATGATCTGGCATGTACAG  
AATGAAAACCTTATTCTCGATTCTACGAGAATTTTTATGAAAGCCTTTCATTTGCTTCTC  
TTCGATGGAAGTTTGATTTTCCAGAATGTATCCTAATTTTTGGCCTAATCTTCTTCTGA  
TGATCGATTTAACCTCTGATCAAAAAGATATACCTTGGTTATATTTTCATCTCTTCAACAA  
GTTTAGTAATGAGTATAACGGCCCTATTGTTCCGATGGAGAGAAGAGCCTATGATTAGC  
TTTTCGGGAAATTTCCAAACAAACAATTTCAACGAAATCTTTCAATTTCTTATTTTACTA  
TGTTCAACTCTATGTATTCCTCTATCTGTAGAGTACATTGAATGTACAGAAATGGCTATA  
ACAGAGTTTCTGTTATTCGTATTAACAGCTACTCTAGGAGGAATGTTTTTATGCGGTGCT  
AACGATTTAATAACTATCTTTGTAGCTCCAGAATGCTTCAGTTTATGCTCCTACCTATTAT  
CTGGATATACCAAGAAAGATGTACGGTCTAATGAGGCTACTACGAAATATTTACTCATG  
GGTGGGGCAAGCTCTTCTATTCTGGTTCATGGTTTCTCTTGGCTATATGGTTCATCCGGG  
GGAGAGATCGAGCTTCAAGAAATAGTGAATGGTCTTATCAATACACAAATGTATAACTC  
CCCAGGAATTTCAATTGCGCTTATATTCATCACTGTAGGAATTGGGTTCAAGCTTTCCCC  
AGCCCCTTCTCATCAATGGACTCCTGACGTATACGAAGGATCTCCCACTCCAGTCGTTG  
CTTTTCTTTCTGTTACTTTCGAAAGTAGCTGCTTCAGCTTCAGCCACTCGAATTTTGGATA  
TTCTTTTTTATTTCTCATCAAACGAATGGCATCTTCTTCTGGAAATCCTAGCTATTCTTAG  
CATGATATTGGGGAATCTCATTGCTATTACTCAAACAAGCATGAAACGTATGCTTGCATA  
TTCGTCTATAGGTCAAATCGGATATGTAATTATTGGAATAATTGTTGGAGACTCAAATGA  
TGGATATGCAAGCATGATAACTTATATGCTGTTCTATATCTCCATGAATCTAGGAACTTTT  
GCTTGCATTGTATTATTTGGTCTACGTACCGGGACTGATAACATTTCGAGATTACGCAGGA  
TTATACACGAAAGATCCTTTTTTGGCTCTCTCTTTAGCCCTATGTCTCTTATCCCTAGGA  
GGTCTTCCCTCACTAGCAGGTTTTTTTCGGAAAACCTCCATTTATTCTGGTGTGGATGGCA  
GGCAGGCCTATATTTCTTGGTTTCAATAGGACTCCTTACGAGCGTTCTTTCTATCTACTAT  
TATCTAAAATAATCAAGTTATTAATGACTGGACGAAACCAAGAAATAACCCCTCACGT  
GCGAAATTATAGAAGATCGCCTTTAAGATCAAACAATTCATCGAATTGAGTATGATTGT  
ATGTGTGATAGCATCTACTATAACCAGGAATATCAATGAACCCGATTATTGCAATTGCTCA  
GGATAACCTTTTTATGTTTCTGCTTTACGAATATGATATTTTCTGGACATTTCTAATAATAT  
CAAGTTTTATTCCTATTTTAGCATTTATCATTTCGGAGTTTTAGCTCCGATTAGAAAAG  
GACCAGAAAAACTTTCTAGTTATGAATCGGGTATAGAACCAATGGGCGATGCTTGGTTA

CAATTCGAATACGTTATTATATGTTTGCTTTAGTTTTTGTGTGTTTTGATGTTGAAACTG  
TTTTCTTTATCCATGGGCAATGAGTTTTGATCTATTGGGTGTATCTGTATTTATAGAAGC  
TTAATTTTCGTGCTTATCCTAATTGTTGGTTCAGTTTATGCATGGCGAAAAGGGGCATT  
GGAATGGTCTACGAATTTTTTTCCTTGGTTAAACAATAATTGTAGTTTTGCCGATATTCG  
GGTTCTTTAATTTTCTTCTCCCTCATAGAGGAAATAAGATCTTTAGGTGGTATACTCTA  
TGTATATGTTTTTAGAACTTCTTCTAACGACCTATGTGTTTTGTTATCATTCCAATTGA  
ATGACCCATTAATTCAATTGGCGGAGGATTATAACTGGATCAATTTTATTAATTTTCATTG  
GAGATTAGGAATAGATGGACTTTCTATAGGACCTATTTTACTAACGGGATTATCACTAC  
TTTAGCTACTTTAGCGGCCTGGCCAGTTACTCGGGATTACGATTATTTCAATTCCTTAT  
GTTAGCAATGTACAGTGGTCAAATAGGATCATTCTTCTCGCGATCTTTTACTTTTTTT  
CATCATGTGGGAATTCGAATTAATTCCTGTTTATTTACTTCTATCCATGTGGGGAGGAAA  
GAAACGTCTATATTCAGCTACAAAGTTTATTTGTACACTGCAGGAGGTTCTGTTTTTCT  
CTAATGGGGGTTCTTGGTATTAGTTTATATGGTTTTAATGAACCAATATTTTATTTTGAA  
ACATCAGCTAATCAATCGTATCCTCTGGCATTGGAAATACTATTCTATATTGGATTTCTTA  
TCGCTTTTGCTGTCAAATTACCCATTATACCCTTACATACATGGTTACCAGATACTCATGG  
CGAAGCACATTACAGTACTTGTATGCTTCTAGCTGGAATCTTATTAATAAATGGGAGCATA  
TGGATTGGTGCAGATAAATATGGAATTATTATCTCACGCCATTATATCTTTTCTCCCTGG  
TTGGTGATAGTAGGTACAATAACAATAATCTATGCAGCTTCAACATCTCCTGGTCAGCG  
GAATTTAAAAAAAAGAATAGCCTATTCTTCCGTATCTCATATGGGTTTCATAATTATCGG  
AATCGGTTCAATAACTGATACGGGACTCAATGGAGCCCTTTTACAAATAATATCTCATGG  
TTTTATTGGTGCTGCGCTTTTTTTCTTGGCAGGAACAAGTTATGATAGACTACGTCTTGT  
TTATCTTGACGAAATGGGTGGAATAGCTATTTCAATGCCAAAAATTTTCACGATGTTCA  
GTAGCTTCTCGATGGCCTCCCTTGCATTACCGAGTATGAGTGGTTTTGTTGCAGAATTA  
TAGTCTTTTTTGAATAATTACCAGCCAAAAATTTTTTTAATGCCAAAAATTTTAATTA  
CTTTTATAATGGCAATTGGAATGATATTAACTCCCATTTATTTCATTATCTATGTTACGCCAA  
ATGTTCTATGGGTACAACTATTTAATGTCCCAATTCCTATTTTTTTGATTCTGGACCGC  
GAGAGTTATTTGTTTTGATCTCTATCTTTCTCCCTGTAATAGGTATTGGTATTTACCCAGA  
TTTTGTTCTTTCACTATCAGTTGACAAGGTTGAGTATATTTTATCTAATTATTTTTATAGAA  
TGATACTCGAACATGTGCTTGTGTTTTGAGTTCCTATTTGTTTTCTATCGGTATCTATGGATT  
GATTACGAGCCGAAATATGGTTAGAGCCCTTATATGTCTTGAACCTATACTAAATGCAGT  
TAATATAAATTTACATAACATTTTCCGATTTTTTTGATAGTCGCCAGTTGAAAGGAGACAT  
TTTTTCAATTTTGTATAGCCATTGCAGCCGCTGAAGCAGCTATTGGACCTGCTATTGT  
TTCGTCAATTTATCGTAACAGAAAATCAACTCGTATCAATCAATCAAATTTGTTGAATAA  
GATGGAACATACATATCGATATGCGTGGATTGTCCCTTTCATTCCACTTACAGTTCCCAT  
GTTAATAGGGCTGGGACTTCTCTTTTTTCCAACGGGAACAAAAAATCTTCGTCTGATAT  
GGGCTTTTCCAAGTGTTTTATTGTTAAGTATAGCTATGATTTTTTTCGACTGATTTATCTAT  
TCAACAAATAAATGATAGTTATAGCTATCAATATGTATGGTCTTGGACCATCAATAATGAT  
TTTTCTTTAGAGTTTGGGCACTTGATTGACCCACTTACTTCTATTATGTCAATATTAATCA  
CTACCGTTGGAATTACGGTCTTATTTATAGTGACAATTATATGTCTCATGATCAAGGATA  
TTTGAGATTTTTGCTTATATGAGTTTTTCCAATTCTGCCATGTTGGGATTAGTTACTAGT  
TCAAATTTAGTACAAATTTATATTTTTTGGGAATTAGTTGGAATGTGTTTCGATTTATTAAT  
AGTTTTTTGGTTCACGCGACCTATTGCAGCAAATGCTTGTCAAAAAGCGTTTATAACTA  
ATCGTGTAGGGGATTTTGGTTTTATTATTAGGAATTTAGGTCTTTATTGGGTAACGGGTA  
GTTTTGAATTCAGGATTTGTTTCGAAATATTCAATAACCGTGAGGTCCATTATTTATTTGT

TAC TTT GTG TGC CTT CTT ATT ATTT CTT GGC GCAG TTG CTA AAT CCG CACA ATTT CCC CTT  
CAT GTAT GGT TAC CTG ATG CTAT GGA AGG ACCT ACT CCT ATTT CCG CTT TATA CAC GCC  
GCC ACT ATG GTAG CAG CCG GAAT TTTT CTT GTAG CCC GCCT TTT CCC TCT TTTT ATAG CC  
TTAC CTT ACATA ATGA ATCTA ATAT CTTT GATAG GGATA AATA ACAG TACT CTTAG GAG CTA  
CTTTAG CTCTTG CTCAAAA AGATATTA AGAAA ACTTTAG CCTATTCTACA ATGTCTCAAT  
TGG GTTATA CGATG TTAG CTCTAG GTATGG GGTCTTATCG AGCCG CTTTATTTCA TTTGAT  
TACTCAT GCTTATTCG AAA GCATTATTG TTTTTAG GATCTGG ATCCATTATTCA TTTCAATG  
GAAG CTATTG TTGG GTATTCCC CAGAAAAA AGTCAGA ATATGG CTCTTATGG GTGG TTT  
AGCAAAA CATATTTCCA ATTACAAAA ACTGCCTTTTTATTAG GTACACTTTCC CTTTGTGG  
CATTCC ACCTCTTG CTGTTTTTGG TCAAAA AGATGAA ATTTCTTA ATGATAG TTGG TTGTA  
TTCAACA ATTTTCG CAATCATGG CCTGCTCTACAG CGGGATTACC GCATTTTATATG TT  
TCGG ATTTATTTACT TACTTTTGA AGGGTATTTTAA CATTCATTTTCAA AATTATAG TGGA  
AAAAAAA ACAGCTTGG TCTATTCA ATATCTCTATGG GGTAAAGA AGGGACAAA ACCTA  
TTAAAAA AACCTATTA ACTTTATTA ACATTA AATTTTTTTT CATTTGAAA ATAAAA CA  
CGTTT---TGTCCGCATGAATCG AAAAATACTATGATATTTCC TATACTTCTATTGG TTCTAT  
TTACTTTG TTTGTTGG GTTCATAG GAATCCCTTTCC ATTTTGATATATTG TCGAAA TTAAT  
AAATCC ATCTATA AACCTTTTACATCAA AATTTGAATA ATTTGGA AGATTGG TATGAATTT  
ATAACA AATTCAATTCG TTCAGTCAGTATAG CTTATTTAG GGATATTTATAG CGGCTTTTT  
TCTATA AGCCCG TTTTCGTCATCTCTCAA AATTTGG ACTTAATTA ATTTATTTGCTA ATTT  
GTGGAACAAAATAAAAA ATGTAATATATGATTGG TCAATAATCG TGTTATATAG ATGC  
TTTTTATG TAGTTTCTTTAACTAAGGG CATAAAAGG ATTGGCTGAACTA ACTCATTTTTT  
TGATAAACAGGTAATTGATGGA ATTATAAATGG TGTGGTATTCTGA ATTTCTTTGTAGG  
AGAAGTTATCAATATATAGGAGGAGGC---CGCATTTCTTTTTATCTATTTTTTTATTATC  
TTCTGTATTTATTTGTTATTA ATTTATTACATGGG TTTACCTGG ACTAATACACGATTTTC  
TTTTAGTCTTTCTGGGATTAGGTCTTATATTAGGAGGGCTAGGGGTGGTATTACTTACCA  
ATCCAATTTTTTCTGCC TTTTCGTTGGGATTGGTTC TTGTTGTATATCCTTATTTCTATATT  
TCAGCGA ACTCCC ATTTTGTAGCTGCC GCACAGCTCCTTATTTATGTGGGAGCTATAAAT  
GTTTTAATCATATTTGCTGTGATG TTCATGAATGG TTCAGA ATATTACAAAGATTTTCATC  
TTTGG ACCATCGGAGATGGGATTAG TTCGCTGG TTTGTACAAGTATTTTTG TTTCACTAA  
TTACTACTATTCCAGATACGTCATGGTACGGTATTATTTGG ACTACAAGATCAA ACCAGA  
TTATAGAACAAGATTTGATAAGTAATGGTCAACAAATGGGATTCA TTTATCAACAGATT  
TTGTTCTTCCATTTGAACTTATTTGATAATTTCTTTAGTTGCTTTAATAGGTGCAATTGC  
TGCGGCTCGTCAAATGACTGTATCAGCTACAAAAAAGACTTCATGATAGTCAATATGG  
GCCCTCACCACCCG TCAATGCACGGTGTCTTCGACTTATTGTTACTCTAGATGGTGAA  
GATGTTATTGACTGTGAACCAATATTGGGTTATTTACACAGAGGGATGGAAAAAATTGC  
GGAAAACCGAACAATTATACAATATTTGCC TTATGTAACACGTTGGGATTATTTAGCTAC  
TATGTTTACAGAAGCAATAACCGTAAATGCACCAGAGCGTTTAGGAAATATTCAAGTAC  
CTAAAAGAGCCAGCTATATCAGAGTTATTATGTTGGAGTTGAGTCGTATAGCTTCTCATT  
TGTTATGGCTTGGCC TTTTTTTGGCAGATATTGGTGCGCAGACTCCCTTTTTCTATATTTT  
CAGAGAAAGAGAATTCGTATATGATTTATTTGAAGCCGCCACCGGTATGAGAATGATGC  
ATAATTTTTTTTCGTATTGGAGGAGTAGCTGCTGATCTACCTCATGGTTGGATAGATAAAT  
GTTTAGATTTCTGCGATTATTTTTTAAACGGGGGTTCCGAATATCAAAGCTTATTACAC  
GAAATCCTATTTTTTTTAGAACGGGTTGAAGGAGTAGGAATTTAATGAGGAGGAAGCA  
AAAAATTGGGGCTTATCAGGACCAATGTTACGCGCTTCCGGAATACAATGGGATCTTCG



TAAAGTTGATCATTATGAATGTTACGACGAATTTGACTGGGAAGCAAATGGCAAAAA  
GAAGGAGATTCATTAGCTCGTTATTTAGTACGAATCAGTGAAATGATGGAATCCATAAA  
AATTATTCAACAGGCTCTGGAAGGAATTCGGGGGGACCCTATGAAAATTTAGAAATCC  
GACGCTTTGATAGAGTAATAAATCCGAATGGAATGATTTTGAATATCGATTTATTAGTA  
AAAAGCCATCCCCTACTTTTGAATTGTCAAACAAGAACTTTATGTAAGAGTAGAAGC  
CCCAAAGGGGAATGGGAATTTTTTAAATAGGAGATCAGAGTGTTTTTTCCTGGAGAT  
GGAAAATTCGCCC GCCGGGTTTATCAATTTGCAAATTCCTCCTCAGTTAGTTAAAAGA  
ATGAAATTTGGCTGATATTATGACGATATTAGGTAGCATAGATATCATTATGGGAGAGGTT  
GATCGTATGTTTCTATAGTAACCGGGTTCATGAGTTATGGTCAACAAACAATACGAGC  
TGCAAGGTACATTGGTCAAAGTTTCATGATTACCTTATCTCACGCCAATCGTTTACCCGT  
AACTATTCAATACCTTATGAAAAATCGATCACATCGGAGCGTTTCCGCGGTGCAATCC  
ACTTTGAATTTGATAAATGCATTGCTTGTGAAGTATGTGTTTCGTGTATGTCCTATAGATCT  
ACCTGTTGTTGATTGGAAATTTGAAACTGATATTGCAAAGAAACGGTGTGTTAATTACA  
GTATTGATTTTGAATCTGTATATTTGTGGTAATTGCGTTGAGTATTGTCCAACAAATTG  
TTTATCGATGACTGAAGAATATGAACTTTCTACTTATGATCGTCACGAATTGAATTATAAT  
CAAATTGCTTTGGGTGCTTTACCAATGTCAATAATGAACGATTACACAATTCGAACAAT  
TTTAAATTCG-----CAAATAAAAAACAGA-----ATGCAAGGCCGTTTGTCT  
TGCTTGGTTAGTGAAGCATGAACTAGTTCATAGATCTTTGGGTTTCGATTACCAAGGAG  
TAGAGACTTTACAAATAAAGCCTGAGGATTGGCATTCCATTGCTGTCATTTTCTATGTAT  
ATGGTTACAATTATCTACGTTCCCAATGTGGCTATGATGTAGCACCAGGCGGGCTATTAG  
CTAGTGTGTATCATCTTACAAGAATAGAGTATGGTGTAGATCAACCGGAAGAGGTATGC  
ATAAAAGTATTTACTTCAAGGGGGAATCCTAGAATCCGTCTGTTTTCTGGGTTTGGAA  
AAGTGCAGATTTTCAAGAACGGGAATCTTATGATATGTTGGGAATCTTTTATGATAATCA  
TCCGCGCTTGAAGCGTATCTTAATGCCTGAAAGTTGGATAGGATGGCCCTTGCCTAAGG  
ATTATATTGCCCCAATTTTTATGAAATACAAGATGCTCAT-----  
-----ATGGTCTTAGTTCCTGACTATTC  
AGTCAATAAAAAGAAAAAAGGAAAAAAAATTTGAGACAATTATGAATTCCATTGA  
GTTTCCCTTACTTGATCGAACAACCCAAAATTCAGTTATTTCAACTACATCAAATGATCT  
TTCAAATTGGTCAAGGCTCTCTAGTCTATGGCCACTTCTTTATGGTACCAGTTGTTGCTT  
CATTGAATTTGCTTCATTAATAGGCTCACGATTTCGACTTTGATCGTTATGGACTGGTACC  
GAGATCGAGTCTTAGACAAGCAGACCTAATTTTAAACAGCTGGCACAGTAACAATGAAA  
ATGGCGCCTTCTTTAGTGAGATTATATGAGCAAATGGCTGAACCAAATATGTTATTGCT  
ATGGGAGCCTGTACAATTACAGGGGGGATGTTTCAGTACCGATTCTTATAGTACTGTTTCG  
GGGAGTCGATAAGCTAATTCCTGTGGATGTCTATTTGCCGGGCTGTCCGCCTAAACCGG  
AGGCAGTTATAGATGCTATAACAAAACCTTCGTAAAAAATATCTCGAGAAATATATGAA  
GATAGAATTCAGTCT-----GAGAATCGGTGTTTTACTACCAATCATAAGTTTCATGTTGGG  
CGCAGTATTCATACTGAAATTATAATAAAGAATTACTCTATCAATCCCATCTATTTCAA  
AGACCCCTCCTGAAACATTTGTCAAATAACAAGAGTTCGGGACTTTCTCACGAATTAGT  
GAATATGCAAATTATAAATACCTTTTCTTGGATAAAGGAACAGATTACTCGATTCAATTC  
TGTATCGCTCATGATATATATAATCACTCGGACATCCATTTCAAATGCATATCCCATTTTC  
GCACAGCAGGGTTATGAAAATCCACGAGAAGCGACTGGGCGTATTGTATGTGCTAATT  
GCCATTTAGCTAATAAGCCCGTGGATATTGAAGTTCCACAAGCGGTACTTCCTGATACT  
GTATTTGAAGCAGTTGTTTGAATTCCTTATGATATGCAACTGAAACAAGTTCTTGCTAAT  
GGGAAAAAAGGGCCTTGAATGTAGGGGCTGTTCTTATTTTACCTGAAGGGTTTGAATT

AGCCCCCTCCTGATCGTATTTCTCCTGAGATGAAAGAAAAAATAGGCAATCTGTCTTTTC  
AGAGCTATCGCCCGACTAAAAAAATATTCTTGTAATAGGGCCTGTTCCCGGTCAGAAA  
TATAGTGAAATTATCTTTCCCTATTCTTTCTCCGGACCCCGCTACTAAGAAAGATGTTAC  
TTCTTAAAATATCCCATATACGTAGGTGGAAACAGGGGAAGGGGTCAGATTTATCCTGA  
TGGGAGCAAGAGCAACAATACTGTTTATAATGCTACAGCAGCAGGTATAGTAAGCAA  
ATTATACGAAAAGAAAAGGGCGGATACGAAATAACCATAGCGGATGCATCGGATGGCC  
ATCAAGTGGTTGATATTATCCCTCCAGGACCAGAACTTCTTGTTTTAGAGGGTGAATCT  
ATCAAACCTTGATCAACCATTAACGAGCAATCCTAATGTGGGTGGATTGGTCAGGGAGA  
TGCAGAAATAGTACTTCAAGATCCATTACGTATCCAAGGCCTTTTGTTCTTTTTAGCATC  
TATTATTTTGGCACAATCTTTTTGGTTCTTAAAAAGAAACAGTTTGAAAAGGTTCAAT  
TATCCGAAATGAATTTTATGAGTAAAGTCTATGATTGGTTTCGAGGAACGTCTTGAGATC  
AGGCGATTGCAGATGATATACTAGTAAATATGTTCCCTCCCATGTCAACATATTTTATTG  
TCTAGGGGGAATTACGCTTACTTGTTTTTTAGTACAAGTAGCTACGGGGTTTGCTATGAC  
TTTTTACTATCGTCCGACCGTTACTGAGGCTTTTTGCTTCTGTTCAATACATAATGACTGA  
AGCTAATTTGGTTGGTTAATTCGATCAGTTCATCGATGGTCGGCAAGTATGATGGTTCT  
AATGATGATTCTGCACGTATTTCTGTGTATCTCACCGGTGGATTTAAAAACCCCGTG  
AGTTGACTTGGGTTACGGGTGTGGTTCTGGCTGTATTGACCGCCTCTTTTGGTGTAAC  
GGGTATTCTTTACCTTGGGACCAAATTGGTTATTGGGCAGTAAAAATTGTAACAGGTGT  
CCCTGAAGCTATTCCTGTAATAGGATCACCTTTGGTAGAATTATTACGCGGAAGTGCTAG  
TGTGGGACAATCTACTTTGACTCGTTTTTATAGTTTACATACTTTTGTATTACCTCTTCT  
ACGGCCGTATTTATGTTAATGCATTTCCCAATGATACGAAAACAAGGGATTTCTGGTCCT  
TTAATGGGAGTAACAAAAAACCTGACTTGAATGATCCTGTATTAAGAGCTAAATTAGC  
TAAAGGAATGGGTCATAATTATTACGGAGAACCCGCATGGCCCAATGATCTTTTATATAT  
TTTTCCAGTAGTAATTCTAGGTACTATTGCATGTAATGTGGGCTTAGCAATTCTCGAACC  
ATCAATGATTGGTGAACCGGCAGATCCATTTGCAACTCCTTTGGAAATATTACCTGAAT  
GGTACTTTTTTCCCGTATTTCAAATACTTCGTACAGTGCCAAATAAGTTATTGGGTGTT  
TTTTAATGGTTTCAGTCCCGCGGGATTATTAACAGTCCCTTTTTTGGAGAATGTTAATA  
AATCCAAAATCCATTTCCGGCGTCCAGTAGCGACAACCATCTTTTTGATTGGCACTGTG  
GTGGCCCTTTGGTTGGGTATTGGAGCAACATTACCTATTGATAAATCCTTAACCTTAGGT  
CTTTTTATGATTGAAGTTTTTCTTTTTGGAATCGTGTTAGGTCTAATTCCTATTACTTTAG  
CTGGGTATTTCGTGACTGCATATTTACAATATAGACGTGGTGACCAATTGGACCTTATGC  
CTACTATAACTAGTTATTTCCGGTTTTCTACTAGCAGCTTTAACTATAACCTCAGCTCTATT  
TATTGGTCTGAGCAAGATACGACTTATTATGGATATAGTAAAGTCTTGCTTGGGCTGCTTT  
AATGGTAGTCTTTACATTTTCCCTTTCACTCGTAGTATGGGGAAGAAGTGGACTCATGA  
TTATTCGTTACCCGGAACCAGAAGTAAAAATTTTGGTAGATAGGGATCCATAAAAACT  
TCTTTTGAGGAATGGGCCAGACCCGGTCATTTCTCAAGAACAATAGCTAAGGGCCCTG  
ATACTACTACTTGGATCTGGAACCTTCATGCTGATGCTCACGATTCGATAGCCATACCA  
GTGATTTGGAGGAGATTTCCCGAAAAGTATTTAGTGCCCATTTCCGGTCAACTCTCCATC  
ATCTTTCTTTGGCTGAGTGGCATGTATTTCCACGGTGCTCGTTTTTCCAATTATGAAGCA  
TGGCTAAGCGATCCTACTCACATTGGACCTAGCGCTCAGGTGGTTTTGGCCAATAGTGGG  
CCAAGAAATATTGAATGGTGATGTGGGCGGGGTTTCCGAGGAATACAAATAACCTCT  
GGTTTTTTTTCAGATTTGGCGAGCATCTGGAATAACTAGTGAATTACAACCTTTATTGACT  
GCAATTGGTGCAATTGATCTTTGCAGCCTTAATGCTTTTTGCTGGTTGGTTTCATTATCAC  
AAAGCCGCTCCAAAATTGACTTGGTTCCAAGATGTAGAATCTATGTTGAATCACCATTT

AGCGGGGCTACTGGGACTTGGGTCTCTTTCTTGGGCAGGGCATCAAATACATGTATCTT  
TACCGATTAACCAATTTTTAAACGCTGGGGTAGATCCTAAAGAGATCCCCTTCTCAT  
GAATTTATCTTGAATCGGGATCTTTTGGCTCAACTTTATCCCAGTTTTGCCGAGGGAGC  
AACCCCTTTTTTACCTTGAATTGGTCAAATATGCAGAATTTCTTACTTTTCGTGGAGG  
ATTAGACCCAGTAACTGGCGGCCTATGGCTGACCGACATTGCACACCACATTTAGCTA  
TTGCAATTTCTTTTCTGATAGCGGGTCACATGTATAGGACCAATTGGGGCATTGGTCATG  
GTCTAAAAGATATTTTAGAGGCTCATAAAGGTCCATTTACGGGCCAAGGCCATAAAGGC  
TTATATGAGATCCTAACAAACATCATGGCATGCTCAATTATCTCTTAAACCTAGCTATGTTAG  
GCTCTTTAACCATTGTTGTAGCTCACCATATGTATTCCATGCCCCCTTATCCATATCTAGC  
TACTGACTATGGTACACAACCTGTCATTGTTTACACATCATATGTGGATTGGTGGATTTCT  
TATAGTGGGTGCTGCTGCGCATGCAGCCATTTTTATGGTAAGAGATTATGATCCAACCTAC  
TCGGTATAACGACCTATTAGATCGTGTCTTAGGCATCGCGATGCAATCATATCCCATCT  
CAACTGGGCATGTATATTTCTAGGCTTTCACAGTTTTGGTTTGTATATTCATAATGATACC  
ATGAGCGCTTTAGGGCGTCCCCAAGATATGTTTTAGATAACCGCTATAACAATTACAACCT  
GTTTTTGTCAATGGATACAAAACACCCACGCTTTAGCACCTGGTGCTACGGCTCCTGG  
TGCAATAACAAGTACCAGTTTGAATTTGGGGGGGTGGTGATTTAGTAGCAGTGGGTGGT  
AAAGTAGCTTTGTTACCTATTCATTAGGAACCGCAGATTTTTTGGTACATCACATTCAT  
GCATTTACGATTCACGTGACGGTATTGATACTCTGAAAGGTGTTCTATTTGCTCGCAGC  
TCCCGTTTTGATACCGGATAAAGCAAATCTTGGTTTTTCGTTTTCCCTTGTGATGGACCTGG  
AAGAGGGGGTACTTGTCAAGTATCCGCTTGGGATCATGTCTTCTTAGGGCTATTCTGGA  
TGTAACAATGCAATTTCCGTAGTAATATTCATTTTAGCTGGAAAATGCAGTCAGATGTTT  
GGGGTAGTATAAGCGATCAAGGGGTGGTAACTCATATTACGGGAGGGAATTTTGCGCA  
GAGTTCTATTACTATTAATGGGTGGCTCCGCGATTTCTTATGGGCACAGGCATCCCAAGT  
AATTCAGTCTTATGGTTCTTCATTATCTGCCTATGGCTCTTTTTCTTAGGTGCTCATTTT  
GTATGGGCTTTTAGTTAATGTTTCTATTTAGCGGTCGTGGTTATTGGCAAGAACTTATT  
GAATCCATTGTTTGGGCTCATAATAAATTAAGTTGCTCCTGCTACTCAGCCTAGAGC  
CTTGAGCATTGTACAAGGGCGCGCTGTAGGAGTAACCCATTACCTTCTGGGTGGAATTG  
CCACAACATGGGCATTCTTCTTAGCAAGAATTATTGCAGTAGGAATGGCATTAAAGATTT  
CCAAGTTTTAGCCAAGGCTTAGCTCAGGACCCCACTACTCGTCGTATTTGGTTTGGTAT  
TGCTACCGCACATGACTTCGAGAGTCATGATGATATTACTGAGGAACGTCTTTATCAGA  
ATATTTTTGCTTCTCACTTCGGGCAATTAGCAATAATTTTTCTGTGGACGTCCGAAATC  
TGTTTCATGTAGCTTGGCAAGGAAATTTGAGTCATGGGTACAGGATCCTTTACATGTA  
AGACCTATTGCTCATGCAATTTGGGATCCTCATTTTGGTCAACCGGCTGTGGAAGCTTT  
TACTCGGGGGGTGCCCTTGGTCCAGTGAATATAGCTTATTCTGGTGTATCAGTGGT  
GGTATAACAATCGGTTTACGCACTAATGAAGATCTTTATACTGGAGCTCTTTTTTTGTTATT  
TCTTTCTGCCATATCTTTAACAGCGGGTGGTTACACCTACAACCAAAATGGAAACCGA  
GCGTTTTCGTGGTTCAAAAATGCCGAATCTCGTCTCAATCATCATTTGTGACAGGACTATTC  
GGGGTAAGTTCTTGGCTTGGACGGGACATTTAGTCCATGTCGCTATTCCTGGATCCAG  
GGGGGAGTACATTCGATGGAATAATTTCTTAGATGTATTACCGCATCCCCAAGGGTTAG  
GTCCACTTTTTACAGGTGAGTGAATCTTTATGCTCAAAACCCCGATTCAAGTAGTCAT  
TTATTTGGTACCTCTCAAGGAGCGGGAACCTGCCATTCTAACCTTCTCGGAGGATTCCA  
TCCACAAACGCAAAGTTTATGGCTGACTGATATTGCTCATCATCATTTAGCTATTGCATT  
TATTTTTCTCGTTGCTGGTTCATATGTATAGAATAATTTTCGGGATTGGGCACAGTATGAA  
AGATCTTTTAGAAGCGCATATTCCTCCGGGGGGACGCTTGGGACGTGGGCATAAGGGT

CTTTATGACACAATTAATAATTTCGATTCATTTTTCAATTAGGCCTTGCTCTAGCCTCTTTAG  
GGTTATTACTTCCTTGGTAGCCCAACATATGACTCTTTACCCGCTTATGCGTTCATAGC  
ACAAGACTTTACTACCCAAGCTGCATTATATACTCATCACCAATATATTGCAGGATTCATT  
ATGACAGGGGCTTTTGCTCATGGAGCTATATTTTTTCATTAGAGATTACAATCCGGAACA  
GAATGAGGATAATGTATTGGCAAGAATGTTAGACCATAAAGAAGCGATAATATCCCATTT  
AAGTTGGGCCAGCCTCTTTCTGGGGTTTCATACCCTGGGACTTTATGTTTATAATGATGT  
CATGCTTGCTTTTTGGTACTCCGGAGAAACAATATTGATCGAACCTATATTTGCCCAATG  
GATACAATCTGCTCATGGTAAAACCTTCATATGGGTTTCGATGTACTTTTATCTTCAACAAC  
TGGCCCAGCATTCAATGCGGGTCGAAGTATATGGTTGCCTGGCTGGTTAAATGCAGTTA  
ATGAG-----AATAGTAATTCATTATTCTTAACAATAGGACCCGGAGACTTCTTGGTTCATC  
ATGCTATTGCTCTAGGTTTACATACAACTACATTGATCTTAGTCAAAGGTTCCCTTAGATG  
CGCGTGGTTCCAAGTTAATGCCAGATAAAAAGGATTTTCGGTTATAGTTTTCTTGGCAT  
GGTCCGGGACGGGGTGGTACTTGTGATATTTCCGGCTTGGGACGCATTTTATTTGGCAGT  
TTTCTGGATGTTAAATACCATTGGATGGGTTACTTTTTATTGGCATTGGAAGCACATCAC  
ATTATGGCAGGGTAACGTTTCACAGTTTAATGAATCTTCCACTTATTTGATGGGATGGTT  
AAGAGATTATCTATGGTTAAACTCTTCACAACCTTATCAACGGATATAACCCTTTTGGTAT  
GAATAGTTTATCGGTCTGGGCGTGGATGTTCTTATTTGGACATCTTGTGTTGGGCTACTGG  
ATTTATGTTCTTAATTTCTGGCGTGGATATTGGCAGGAATTGATTGAAACTTTAGCATG  
GGCTCATGAACGTACACCTTTGGCCAATTTGATTTCGATGGAGGGATAAACCTGTGGCTC  
TTCCATTGTGCAAGCAAGATTGGTTGGATTAGTTCACTTTTCTGTAGGTTACATATTCA  
CTTATGCAGCTTTCTTGATTGCCTCTACATCGGGCAAATTTGGTATGTCACATTCAGTAA  
AGATTTACGATACATGTATAGGGTGTACTCAATGTGTCCGAGCCTGCCCCACAGATGTAT  
TAGAAATGATACCTTGGGACGGATGTAAAGCTAAGCAAATTGCTTCTGCTCCAAGAAC  
AGAGGATTGTGTTGGTTGTAAGAGATGTGAATCCGCATGCCAACGGATTTCTTGAGTG  
TTCGAGTTTATTTATGGCATGAAACAACCTCGTAGCATGGGTCTAGCTTATATGACAACTT  
TCAATTTCCCCTCTATTTTTGTGCCTTTAGTGGGTCTAGTATTTCCAACAATTGCAATGG  
CTTCTTTATTTCTTCATGTTCAAAAAACAAGATTGTTATGCGAGATCTAAAAACATATC  
TCTCCGTGGCACCGGTACTAAGTACTCTATGGTTCGGGTCTTTAGCAGGTCTATTGATAG  
AGATCAATCGTCTATTCCCAGGATGCGTTGACATTCCCTTTTTTTTCATTCATGACTGCAA  
TTTTAGAGAGACGCGAAAGCGAAAGCCTATGGGGTCGCTTCTGTAACCTGGATAACCAG  
CACTGAAAACCGTCTTTACATTGGATGGTTTGGTGTGTTTGGATGATCCCTACCTTATTGAC  
CGCAACTTCTGTATTTATTATTGCCTTCATTGCTGCTCCTCCAGTAGATATTGATGGTATT  
CGTGAACCTGTTTCTGGATCTTTACTTTATGGAAACAACATATTTCTGGTGGCATTATT  
CCTACTTCTGCAGCTATTGGTTTGCATTTTACCCGATATGGGAAGCGGCATCCGTTGAT  
GAATGGTTATACAATGGTGGTCCCTTATGAGTTAATTGTTCTACACTTCTTGCTTGGTGTA  
GCTTGTTACATGGGTCGTGAGTGGGAACCTTAGTTTCCGTTTGGGTATGCGCCCTTGGAT  
TGCTGTTGCATATTCAGCTCCTGTTGCAGCTGCTGCTGCTGTTTTCTTGATCTATCCAAT  
TGGTCAAGGAAGCTTTTCTGATGGTATGCCTCTAGGAATTTCTGGTACTTTCAACTTCAT  
GATTGTATTCCAGGCTGAGCACAACATCCTTATGCACCCATTTACATGTTAGGCGTAG  
CTGGTGTATTCGGCGGTTCCCTATTCAAGTGCATGGTTCCTTGGTAACTTCTAGTT  
TGATCAGGGAAACTACAGAAAATGAATCTGCTAACGCAGGTTACAGATTTGGTCAAGA  
GGAAGAACTTATAATATCGTAGCCGCTCATGGTTATTTTGGCCGATTAATCTTCCAATAT  
GCTAGTTTCAACAATTCTCGTTCTTTACATTTCTTCCCTAGCTGCTTGGCCTGTAGTAGGT  
ATTTGGTTCACTGCTTTAGGTATCAGTACCATGGCTTTCAACTTAAATGGTTTCAATTTT

AACCAATCTGTAGTCGATAGCCAAGGTCGTGTAATTAATACCTGGGCTGATATCATTAAC  
CGTGCTAACCTTGGTATGGAAGTTATGCATGAACGTAATGCTCATAACTTCCCTCTAGAC  
CTAGCTGCTGTTGAAGCTCCATCAATAAATGGAATGGGTTTGCCTTGGTATCGTGTTCAT  
ACCGTCGTCTTAAATGATCCTGGTTCGTTGCTTTCTGTCCATATAATGCATACAGCTCTG  
GTTGCTGGTTGGGCCGGTTCGATGGCTCTATATGAATTAGCAGTTTTTGTATCCTTCTGAC  
CCCGTTCTTGATCCAATGTGGAGACAGGGTATGTTTCGTTATAACCCTTCATGACTCGTTTA  
GGAATAACCAATTCGTGGGGCGGTTGGAGTATCACA--GGGGGAACTATAACGAATCCG  
GGTATTTGGAGTTACGAAGGTGTAGCCGGCGCACATATTGTGTTTTCTGGCTTGTGCTT  
CTTGGCAGCTATCTGGCATTGGGTGTATTGGGATCTAGAAATTTTTTGTGATGAACGTAC  
AGGAAAACCTTCTTTGGATTTACCCAAGATCTTTGGAATTCATTTATTTCTCTCCGGGGT  
GGCTTGCTTTGGTTTTGGCGCATTTTCATGTAACAGGCTTGTATGGTCCTGGGATATGGGT  
GTCCGATCCTTATGGACTAACTGGAAAAGTACAATCTGTAAATCCAGCGTGGGGCGTG  
GAAGGGTTTGATCCTTTTGTCCGGGAGGAATAGCTTCTCATCATATTGCAGCAGGAAC  
ATTGGGTATATTAGCGGGGCTATTCCATCTTAGTGTACGGCCCCCAACGTCTATACAA  
AGGATTACGTATGGGAAATATTGAAACCGTACTCTCTAGTAGTATCGCGGCTGTCTTTTT  
TGCAGCTTTTGTGTTGCTGGAACCTATGTGGTATGGTTCAGCAACTACCCCGATCGAAT  
TATTTGGACCCACTCGTTATCAATGGGATCAGGGATACTTCCAGCAAGAAATATATCGA  
AGAGTTGGCGCAGGCCTAGCCGAAAATCAAAGTTTATCAGAAGCTTGGTCTAAAATTC  
CTGAAAATTAGCTTTTTATGATTACATCGGAAATAATCCGGCAAAGGGGGATTATTC  
AGAGCGGGCTCAATGGACAACGGGGATGGCATAGCTGTTGGATGGTTAGGGCACCCTA  
TCTTTAGAGATAAAGGGGGACGTGAACTTTTTGTACGTCGTATGCCGACTTTTTTTGAA  
ACATTTCCAGTCGTTTTGGTAGACGGAGATGGAATTGTTAGAGCGGATGTTCCTTTTAG  
AAGGGCAGAATCGAAGTATAGTGTGCAACAAGTAGGCGTAACTGTTGAGTTCTATGGT  
GGCGAACTCAATGGAGTTAGTTATAGTATGATCCCGTACTGTAAAAAATATGCTAGACG  
TGCTCAATTGGGCGAAATTTTTGAATTAGATCGTGCTACTTTGAAATCCGATGGTGTTTT  
TCGTAGCAGCCCAAGGGGCTGGTTTACTTTTGGACATGCTTCATTTGCTCTGCTCTTCT  
TCTTCGGACACATTTGGCATGGTTCTAGAACCCTTGTTTAGAGATGTTTTTGTGTTATTG  
ATCCAGATTTGGATGCTCAAGTGGAGTTTGGAGCATTCCAAAAAGTTGGGGATCCAAC  
TACAAAAGGCAAGTAGTC-----GTGGAAACGCTCTTTAATGGA  
ACTTTAGCTTTAGCTGGTCGTGACCAAGAAACCACCGTTTTGCTTGGTGGGCCGGGA  
ATGCCCGACTTATCAATTTATCCGGTAAATTACTCGGGGCTCATGTAGCCCATGCTGGAC  
TAATCGTATTCTGGGCCGGAGCAATGAACCTATTTGAGGTGGCTCATTTTCGTACCAGAA  
AAGCCCATGTATGAACAAGGATTAATTTTACTTCCCTCACCTTGCTACTCTAGGTTGGGG  
AGTAGGCCCTGGTGGGGAAGTTATAGACACCTTTCCGTACTTTGTATCTGGAGTACTTC  
ACTTAATTTCCCTCTGCAGTATTAGGCTTTGGCGGTATTTATCATGCACTTCTGGGACCTG  
AGACTCTTGAAGAATCTTTTCCATTCTTCGGTTATGTATGGAAAGATAGAAATAAAATG  
ACCACAATTTTGGGTATTCATTAATCTTGTAGGTCTAGGCGTTTTTCTTCTAGTATTC  
AAGGCTCTTTATTTTGGAGGTGTATATGATACCTGGGCTCCCGGGGGGGGAGATGTAAG  
AAAAATTACCAACTTGACCCTTAGTCCCAGTGTTATATTTGGTTATTTACTAAAATCCCC  
CTTTGGAGGGGAGGGGTGGATTGTTAGTGTGGACGATTTGGAAGATATAATTGGGGGA  
CATGTATGGTTAGGTTCCATTTGTATACTTGGTGGAAATCTGGCATATCTTAACCAACCC  
TTTGCATGGGCCCGCCGTGCACTTGTATGGTCTGGAGAAGCTTATTTGTCTTATAGTTTA  
GGTGCTTTATCCGTCTGTGGTTTTATTGCTTGTGTTTTGTCTGGTTCAATAATACCGCTT  
ATCCTAGTGAGTTTTATGGTCCTACTGGGCCAGAAGCTTCTCAAGCTCAAGCATTTACT

TTTCTAGTCAGAGACCAACGCCTTGGGGCTAACGTGGGATCCGCTCAAGGGCCTACTG  
GTTTAGGTAAATATTTAATGCGTTCTCCGACCGGAGAAGTCATTTTTGGAGGAGAACT  
ATGCGTTTTTGGGATCTGCGTGCTCCTTGGTTAGAACCTCTAAGGGGTCCCAATGGTTT  
GGACTTGAGTAGACTGAAAAAAGACATAACAACCTTGGCAAGAACGGCGTTCCGCAGA  
ATATATGACTCATGCTCCTTTGGGCTCTTTAAATTCCGTGGGTGGCGTAGCTACCGAAAT  
CAATGCCGTCAATTATGTCTCCCCTAGAAGTTGGTTAGCCACTTCGCATTTTGTCTAGG  
ATTCTTCCATTCGTAGGCCATTTGTGGCACGCGGGAAGGGCTCGCGCTGCTGCAGCA  
GGATTTGAAAAAGGAATTGATCGGGATTTTGAACCTGTTCTTTCCATGACCCCTCTTAA  
CATGACTATAGCCCTTGGTAAATTTACCAAAGACGAAAATGATTTATTTGATATTATGGA  
TGACTIONTACGTAGGGACCGTTTCGTTTTTGTAGGTTGGTCCGGTCTATTGCTCTTTCC  
TTGTGCTTATTTTCGTTTTAGGAGGTTGGTTTACAGGTACAACCTTTGTAACCTCGTGGA  
TACCCATGGATTGGCCAGTTCCTATTTGGAAGGCTGCAATTTCTTAAACGGCCGCGGTTT  
CGACTCCTGCTAATAGTTTAGCACATTCTTTGTTGTTACTATGGGGACCTGAAGCACAA  
GGAGATTTTACTCGTTGGTGTCAATTAGGTGGTCTGTGGACTTTTATTGCTCTCCATGGT  
GCTTTCGCCCTAATAGGTTTTATGTTACGTCAATTCGAACTTGCTCGATCTGTTCAATTA  
CGACCTTATAATGCAATCGCATTCGCGGTCCAATTGCAGTTTTTGTCTGTATTTTTGA  
TTTATCCACTAGGTCAGTCTGGTTGGTCTTTTGCACCTAGTTTTTGGTGTAGCAGCTATAT  
TTCGATTCATACTTTTTTCCAAGGGTTTCATAATTGGACGTTGAACCCATTCATATGAT  
GGGAGTTGCCGGTGTATTGGGCGCTGCTCTGCTATGCGCTATTCATGGTGCTACCGTGG  
AAAATACTTTATTTGAAGATGGTGTGCAATAACATTCGCTGCTTTTAAACCCAACCTC  
AAGCTGAAGAACTTATTCAATGGTTACCGCTAACCGCTTTTGGTCCCAAATCTTTGGG  
GTTGCTTTTTTCCAATAAACGTTGGTTACATTTCTTTATGTTATTTGTACCAGTAACCGGTT  
TATGGATGAGTGCTCTTGGAGTAGTCGGTCTGGCTCTGAATCTGCGTGCCATGACTTC  
GTTTCCAGGAAATCCGTGCAGCGGAAGATCCTGAATTTGAACTTTCTACACTAAAA  
ATATTCTCTTAAACGAAGGTATTCGTGCTTGGATGGCGGCTCAAGATCAGCCTCATGAA  
AACCTTATATCCCTGAGGAGGTTCTACCCCGTGGAAACGCTCTTATGTCTGGAAGCAC  
AGGAGAACGTTCTTTTGTCTGATATTATTACCAGTATTCGATACTGGGTCATTCATAGCATT  
ACTATACCTTCCCTATTTATTGCGGGTTGGTTATTCGTCAGCACAGGTTTAGCTTACGAT  
GTGTTTGGAAAGCCCTCGGCCAAACGAGTATTTTACAGAGAGCCGACAAGGAATCCCAT  
TAATAACTGGCCGTTTTGATCCTTTGGAACAACCTCGATGAATTTAGTAGATCTTTTATGA  
CTATAGATCGAACCTATCCAATTTTTACAGTGCATGGTTAGCTGTTACGGACTAGCTG  
TACCTACCGTTTCTTTTTTGGGGTCAATATCAGCAATGCAGTTCATCCAACGAATGGCTA  
CACAAAGCGTTGAGGATAGTTCTAGATCTGGT--CCAAGACGAACTATTATAGGAGATTT  
ATTGAAACCATTGAATTCGGAATATGGTAAAGTAGCTCCCGGATGGGGAACCTACTCCTT  
TGATGGGTGTCGCAATGGCTTTATTTGCAGTATTTCTATCTATTATTTTGGAGATTTATAAT  
TCTTCTGTTTTATTGGACGGAATTTCAATGAATATGCTTACTCTCAAACCTTTTGTTTAC  
ACAGTAGTGATATTTTTGTTTTCTCTTTTATCTTTGGATTCCTATCTAATGATCCAGGGC  
GTAATCCTGGGCGTGAAGAAATGGCCGATACTACTGGAAGGATTCCTCTTTGGCTAATA  
GGTACTGTAACCTGGCATTCTTGTGATCGGTTAATAGGTATTTTCTTTTATGGTTCATATT  
CCGGGTTGGGTTTCATCCCTGATGTTAACATCTTTAGTTTGACCTGTATCTGTCTTAATT  
CTGTCTTTTATTCGAGTAATTTTTTCTCTCCAAATTGCCCGAGGCCTATGCTTTTTTTGAA  
TCCAATCGTAGATGTTATGCCCGTCATACCTCTGCTTTTTTTTTCTTTTAGCCTTTGTTTGG  
CAAGCCGCTGTAAGTTTTTCGAACGACACAATCAAACCCGAACGAACAAAATGTTGAAT  
TGAATCGTACCAGTCTCTACTGGGGTTATTACTCATTTTTTGTACTTGCTGTTTTATTTTC

AAATTATTTCTTCAATATGGAAGTAAATATTCTCGCATTATTGCTACTGCACTGTTTCATT  
CTAGTCCCTACAGCTTTTTTACTTATCATATACGTAAAAACAGTTAGTCAAATGATATG  
GAAACAGCAACTCTAGTCGCTATCTTTATATCTGGTTTACTTGTAAGTTTTACTGGGTAC  
GCCTTATATACCGCTTTTGGGCAACCCTCTCAACAACTAAGAGATCCATTCGAGGAACA  
CGGGGACATGGAAGCATTGGTTTATACATTCTCTTAGTCTCAACTCTAGGAATAATTTT  
TTTTGCTATTTTCTTTTCGGGAACCACCTAAAGTTCCAACATAAAAAGATAAAAATGACTA  
TTGCTTTCCAATTGGCTGTTTTTGCATTAATTGCTACTTTCATCGATCTTATTGATTAGCGT  
ACCCGTTGTATTTTCTTCTCCTGATGGTTGGTCAAGTAACAAAAATGTTGTATTTTCCGG  
TACATCATTATGGATTGGATTAGTCTTTTTGGTGGGTATCCTTAATTCTCTCATCTCT-----  
-----ATGTCACCACAAACAGAGACTAAAGCAAGTGTGGATTCAAAGCTGGTGTT  
AAAGATTACAAATTGACTTATTATACTCCTGACTATGAAACCAAAGATACTGATATCTTG  
GCAGCATTTTCGAGTAACTCCTCAACCTGGAGTTCCGCCTGAAGAAGCAGGGGCCGCG  
GTAGCTGCCGAATCTTCTACTGGTACATGGACAACCTGTGTGGACCGATGGACTTACTAG  
TCTTGACCGTTACAAAGGACGATGCTACCACATCGAGCCCGTTCTGGAGAAGAAAGT  
CAATTTATTGCTTATGTAGCTTACCCCTTAGACCTTTTTGAAGAAGGTTCTGTTACTAAC  
ATGTTTACTTCCATTGTGGGTAATGTATTTGGGTTCAAAGCCCTTCGCGCTCTACGTCTG  
GAGGATCTTCGAATCCCTCCTGCTTATACGAAAACCTTCTGGGGCCCGCTCATGGCAT  
CCAAGTTGAGAGAGATAAATTGAACAAGTATGGGCGTCTCTATTGGGATGTACTATTA  
AACCTAAATTGGGGTTATCCGCTAAGAACTATGGTAGAGCAGTTTATGAATGTCTCCGC  
GGTGGACTTGATTTTACCAAAGATGATGAGAACGTGAACTCCCAACCATTATGCGTTG  
GAGAGACCGTTTCTATTTTGTGCCGAAGCAATTTTTAAAGCGCAGGCTGAAACAGGC  
GAAATCAAAGGACATTACTTGAATGCTACTGCAGGTACATGTGAAGAAATGATGAAAA  
GGGCTGTATTTGCCAGAGAGTTGGGAGTTCCATCATAATGCATGACTACTTAAACAGGG  
GGATTCCTGCAAATACTAGCTTGGCTCATTATTGCCGAGATAATGGCCTACTTCTTCAC  
ATCCATCGTGCAATGCATGCAGTTATTGATAGACAGAAGAATCATGGTATGCATTTTCGT  
GTACTAGCTAAAGCGTTACGTATGTCTGGTGGAGATCATATTCACGCTGGTACCGTAGT  
AGGTAAACTTGAAGGGGAAAGAGACATCACTTTGGGCTTTGTTGATTTACTACGTGAT  
GATTTTGTGAAAAAGACCGAAGTCGGGGTATTTTTTTTCACTCAAGATTGGGTCTCCCT  
AGCAGGCGTTCTGCCCGTGGCTTCGGGGGGTATTCACGTTTGGCATATGCCGGCTCTGA  
CCGAGATCTTTGGAGATGATTCGGTACTACAGTTCCGTGGAGGAACTTTAGGGCACCCCT  
TGGGGAAATGCACCGGGTGCTGTAGCTAATCGAGTAGCTGTAGAAGCATGTGTACAAG  
CTCGTAATGAGGGGCGTGATCTTGCTCGTGAGGGTAATGAAATTATCGAGGAGGCTAG  
CAAATGGAGTCCGTAAGTACTGCTGCTGTGCGATATGGAAGAAAATCAAATTTGAAT  
TCGAACAGTGGATACTATT-----ATGGCGATACATTTATACAAAACCTTCTACCCCGAGCA  
CACGCAATGGAGCCGTAGACAGTCAAGTGAATAACAATCCACGAAATAATTTGATCTAT  
GGACAGCATCGTTGTGGTAAAGGTCGTAATGCCAGAGGAATCATTACCGCAGGGGCATA  
GAGGGGGAGGTCATAAGCGTCTATACCGTAAATCGATTTTCGACGGAATGAAAAAGA  
CATATATGGTAGAATCGTAACCATAGAATACGACCCTAATCGAAATGCATACATTTGTCT  
CATACACTATGGGGATGGTGAGAAGAGATATATTTTACATCCAGAGGGGCTAGAATTG  
GAGATACCATTGTTTCTGGTACAGAAGTTCCTATAAAAATGGGAAATGCCCTACCTTTG  
ACCGATATGCCCTTAGGCACGGCCATACATAACATAGAAATCACACTTGGAAGGGTGG  
ACAATTAGCTAGAGCAGCGGGTGCTGTAGCGAAACTGATTGCAAAAGAGGGGAAATC  
GGCCACATTAATAATTACCTTCTGGGGAGGTCCGTTTGATATCCAAAAACTGCTCAGCAA  
CAGTCGGACAAGTGGGGAATGTTGGGGTGAACCAGAAAAGTTTGGGTAGAGCCGGAT

CTAAGTGTGGCTAGGTAAGCGCCCTGTAGTAAGAGGAGTAGTTATGAACCCTGTAGA  
CCATCCCCATGGGGGTGGTGAAGGGAGGGCCCCAATTGGTAGAAAAAACCCACAAC  
CCCTGGGGCTATCCTGCACTTGGGAAGAAGAAGTAGAAAAAGGAATAAATATAGTGAT  
AAGTTGATTCTTCGTCGCCGTAGTAAATGATTCAACCTCAGACCCATTTAAATGTAGC  
GGACAACAGCGGGGCTCGAGAATTGATGTGTATTCTGAATCATAGGAGCTAGT---AACCG  
CCGATATGCTCATATTGGTGACGTTATTGTTGCTGTGATCAAAGAAGCAGTACCAAATAT  
GCCTCTAGAAAGATCAGAAGTAATCAGAGCTGTAATTGTACGTACCTGTAAAGAACTC  
AAACGCGACAACGGTATGATAATACGATATGATGACAATGCTGCAGTTGTCATTGATCA  
AGAGGGAAACCCAAAAGGAACCCGAATTTTTGGTGCGATAGCCCGGAATTAAGGCA  
ATTAAATTTTACTAAAATAGTTTCATTAGCGCCTGAAGTGTTAATGCTTAGTCCAAAAG  
AACAAAATTCGTAACAACATAGAGGAAGACTGAAAGGAATATCTTATCGAGGTAAT  
CATATTTGTTTCGGTAGATATGCTCTTCAAACACTTGAACCCGCTTGGATCACTTCTAGA  
CAAATAGAAGCAGGGCGACGAGCAATGGCACGAAGTGCGCGCCGTGGAGGAAAAATA  
TGGGTACGTATATTTCCAGACAAACCAATTACATTAAGACCTACGGAAACACGTATGGG  
TTCGGGTAAAGGATCTCCCGAATATTGGGTAGCTGTGTTAAACCAGGACGAATACTTT  
ATGAAATGGGCGGAGTGCCAGAAAATACAGCCAGAAAAGCTATTTCAATAGCGGCGTC  
AAAAATGCCTATACGAACTCAATTCATTATTTTCGGGAATGACTAGAAATTAGACGAGGAT  
ATATAGCGGTAGACGTAGAACAATAATTCGTTTATTACATCAAGTTTTTCGAGGAGCC  
CATTCAAGACTTACTCGAACTATTACTCAACAGAAAATAAGAGCTTTGGTTTTCGGCTCA  
TCAGGATAGAAGTAGGCAAAAAGAGATTTTCGTGCTTGTGGATTACTCGAATAAATG  
CAGCAATTCGAGGGAGC-----GTATCCTATAGTTATAGTAAATTTATACATGATCTATACA  
AGAGTCAATTGCTTCTTAATCGTAAAATACTTGCACAAATAGCTATATCAAATAAGAATT  
GTCCTTATATGATTTCCAATGAAATTATCAA-----ATGATAAAGGA  
AGTATACGCTTTAGGTCATTATATCCGTATGTGCGCTCACAAAGCGGAAGAGTAATTGA  
TCAGATTCGTGGACGTTCCCTATGAGGAAACGCTTATGATACTCGAACTCATGCCTTATC  
GAGCATGTTATCCATTTTAAATTGATTTATTCTGCAGCAGCAAATGCTAGTCACAATA  
TGGGCATCAATGAAGCAGATTTAATCATTAGTAAAGCCGAAGTCAATGAAAGCACTACT  
ATGAAAAAATTAACCTCAGGCTAGAGGCCGAGTTACCTAATAAAAAGACCTACAT  
GTCATATAACCATTGTATTGCAAGATATATCCTTATAT-----ATGGATGGAATCA  
AATATGCAGTATTTACAGACAAAAGTATTCCGTTATTGGGGAAAAAT--CAATATACTTCT  
AATGTGCAATCAGGATCAACTAGGACAGAAATAAAGCATTGGGTGCAACTCTTCTTTG  
GTGTCAAGGTAATAGCTATGAATAGTCATCGACTCCCGGGAAAGGATAGAAGAATGGG  
ACCATATGGGACATACAATGCATTACAGACGTATGATCATTACGCTTCAACCGGGTTA  
TTCTATTCCACCTCTTAGAAAAGAAAAGAAATATGGCAGTTCCAAAAAACGTACTTCTA  
TGTCAAAAAAGCATATTCGAAAAAATATTTGGAAAAGGAAGGGTTGTTGGTCAGCATT  
AAAAGCCTTTTCTTTAGCGAAATCTCTTTCTACTGGAAATTCAAAAAGTTTTTTTTGTCC  
GACAAAACAAA---ATGGCCAAAGGGAAAGATGCCCGAGTAACGGTTATTTTGGAAATGT  
ACTAGTTGC---GTTTCGAAAC-----GTTAATAAGGAATCAACGGGGATTTTCAGATATATTA  
CTCAAAGAATCGACATAATACGCCTGGTCGATTGGAATTGAGAAAATTCTGTCCCTAT  
TGTTACAAACATACAATTCATGGAGAGATAAAGAAAATGAAAATACGTGCCTCTGTTCG  
TAAAATTTGTGAAAAATGTCGCCTGATCCGTAGGCGGGGACGAATTATAGTAATTTGTT  
CCAACCCGAGACATAAACAAAGACAAGGAATGGTTCGAGAACAATAAGAGTATCTAT  
TCGGACACTGCAGTGAAGTGTGTTGAATCAAGAATAGACAGTAAGCGTCTTTATTATG  
GACGCTTTATTCTATCTCCACTTATGAAAGGGCAAGCCGACACAATCGGCATTGCGATG



CGAAGAGCTTTGCTTGGAGAAATAGAAGGAACATGTATCACGCGTGCAAATCTGAA--  
---AAAATACCACACGAATATTCTACTATGCGAGGTATTCAAGAATCAGTACATGAAATTT  
TAATGAATTTAAAAGAAATTGTATTGAGAAGTAATCTGTACGGAACCTCGAAACGCGTCC  
ATTTGTGCTAGGGGCCCGGATATGTAAGTCTCAAGATATCATCTTACCCCTTCTGTA  
GAAATCATTGATAATACACAGCATATAGCTAGCCTAACAGAACCAATAAATTTATATATT  
GAATTACAAATTGAGAGAAATCGCGGATATCATATAAAAACACCAAATAACTTTCAAGA  
CGAAAGTTAT-----CCTATAGATGCTGTATTTCATGCCTGTTTCGAAATGCGAATCATAGTATT  
CATCTTATGGAAATGGGAATGAAAAACAAGAAATCCTTTTTTCTCGAAATATGGACAAA  
CGGAAGTTTAACTCCTAAAGAAGCGCTTCATGAAGCCTCCCGGAATTTTATTGATTTAT  
TTATTCCTTTTATACATGTGGAAAAAGAAAAC-----TTGTATTTAGGGGACAATCAA---GA  
CAAGGATACTTTTCCCCTTTTACCTTTTCATGATGAATTGGCT---AAACTAAGAAAAAAC  
AAAAAA---GAAATAGCATTGAAATATCTTTTTATTGACCAATTAGAATTGCCTCCCAGGA  
TCTATAATTGCCTCAAAGGTCCAATATACACACATTATTGGACCTTTTAAATAACAGTC  
AAGAAGATCTTATGAAAATTGAGTATTTTCGCAGAGAAGATGTAAAACAGATATTTGGC  
ATTCTAGAAAAGCAT-----TTAAATTTTTTTTTAACGAAGAATAAGATGCTCGGGGATGG  
AAAT---GAGGTAATGTCTACAATACCTGGGTTTAAATCAGATACAATTTGAAGGATTTTGT  
AGATTCATTGATCAAGGCTTGGCAGAAGAAGTCTTCTAAGTTTCCAAAAATTGAAGATAC  
AGATCAAGAAATTGAATTTCAATTATTTGTGGAAACATATCAATTGGTAGAACCGTTGAT  
AAAAGAAAGAGATGCTGTATATGAATCACTTACATATTCTTCTGAATTATATGTATCCGC  
GGGATTAATTTGGAAAACAAATCGAGATATGCAAGAACAAACAATTTTTATTGGAAACA  
TTCTCTAATGAATTTCTTTGGGAAGTCTATAATAAATGGCATATACAGAATTGTAATCAA  
TCAAATATTACAAAGTCCCGGTATTTATTATCGATCAGAATTGGACCATAAGGGAATTC  
GGTCTATACTGGCGCCATAATATCAGATTGGGGGGGAAGATCAGAATTAGAGATTGATA  
GAAAAGCAAGGATATGGGCTCGCGTAAGTAGGAAGCAGAAAATATCTATTCTAGTTTTTA  
TCATCAGCTATGGGTGCGAATCTAAAAGCAATTCTAGAGAATGTTTACTACCCTGAGAT  
TTTTCTGTCTTTCTGAATGATAAGGAGAAAAAAAATTGGGTCAAAGAAAATGCC  
ATTTTGGAGTTTTATCAACAATTTGCTTGTGTAGGTGGGGATCCGGTATTTTCTGAATCC  
TTATGTAAGGAATTACAAAAGAAATCTTTTCAACAAAGATGTGAATTAGGAAGGATTGG  
TCGACGAAATATAAACCGGAGACTGAATCTTGATATACCTCAGAATAATACATTTTTATT  
ACCCCGAGATATATTAGCAGCTGCGGATCATTGATTGGACTGAAATTTGGAATGGGTA  
CACTTGACGAT-----ATGAATCATTGAAAAATAAACGTATTTCGTTCTGTAGCGGATCTCT  
TACAAGATCAATTCGGATTGGCTCTGGTTCGTTTAGAAAATTGGTTCGAGGAACTATA  
TGTGGAGCAATTAGG---CATAAATTGCTA---CCGACTCCTCAGAATTTGGTAACTTCAAC  
TCCA-----TTAACAACCACTTATGAATCTTTTTTTGGCTTACACCCATTATCTCAAGT  
TTTGGATCGAACTAATCCATTGACACAAATAGTTCACGGGAGAAAATCGAGTTATTTGG  
GCCCTGGAGGGTTGACGGGGCGAAGTCTAGTTTTTCGTATACGAGATATTCATCCTAGT  
CACTATGGGCGTATTTGCCCAATTGATACGTCCGAAGGAATCAATGTTGGGCTTATTGGA  
TCCTTAGCAATTCATACGAGGATTGGTCATTGGGGG---TCTCTAGAAAGCCCCTTTTATG  
ATTAT--GAGATTTCTGAGAAATCAAAAAA-----GTACGGATGCTTTATTTATCACCAG  
TGGAGATGAGTACTATATGGTAGCGGCGGAAATCTTTGGCATTAAATCATGGTATTCA  
GGAAGAACAGGTTGCTCCAGCTCGATACCGTCAAGAATTCCTGACTATTGCGTGGGAA  
CAGGTTTCATCTTCGAAGTATTTTTCCCTTCCAATATTTTTCTATTGGGGCTTCCCTCATT  
CTTTTATCGAGCATAATGATGCGAATCGGGCTTTAATGAGTTCTAATATGCAACGTCAAG  
CAGTTCCGCTTTCTCGGTCTGAGAAGTGCATTGTTGGAAGTGGGTTGGAACGCCAAGT

GACTCTAGATTCAGGGGTTCTCACTATAGCCGAACATGAGGGAAATATAATTTATAACCGA  
TACTGCCAAGATCCTTTTTATCAGGTAATGGAGATATTCGAAGCATTCCATTAGTTATGTAT  
CAACGTTCCAACAAAATACTTGTATGCATCAAAAACCTCAGGTTTCAAGTGGGGTAAAT  
ACATTAATAAAAGGACAAATCTTAGCGGATGGTGCCGCTACAGTTGGTGGTGAAGTTCG  
TTTGGGGAAAACGTATTAGTAGCTTATATGCCATGGGAAGGTTACAATTCTGAAGATG  
CAGTACTTATTAGCGAGCGTATGGTATATGGAGATGTTTATACTTCTTTTACATACCGA  
AATATGAAATTCAGACTCATGTGACAAGCCAAGGC---CCCGAAAGGATCACTAACGAA  
ATACCGCATTTAGAAGCCATTTACTCCGCAATTTAGACAAAATGGAATTGTGATGCT  
AGGATCTTGGGTAGAGACTGGTGATATTTTAGTAGGTAAATTAACCCCTCAGATGGCAA  
AAGAA---TCATCGTATGCCCGGAAGATAGATTATTACGAGCCATACTTGGCATTCAAGT  
ATCCACTTCAAAGGAACTTGTCTAAACTACCTATCGGTGGCAGGGGTCGAGTTATTG  
ATGTGAGATGGATCCGGAAAAAAGG---GGGTATAGTTATAATCCCGAAACGATTCTGTG  
TATATATTTACAGAAACGTGAAATCAAAGTAGGTGATAAAGTTGCTGGAAGACATGGA  
AATAAAGGTATCGTTTCAAAAATTTGCCTAGGCAAGATATGCCTTATTTTCAAGATGGA  
AGCCCCGTCGATATGGTCTTCAACCCATTAGGAGTACCTTACGAATGAATGTAGGGCA  
GATATTTGAATGCTCACTCGGGTTAGCGGGGGCCTGCTAAACAGACATTATCGAATAT  
TACCTTTTGTATGAGAGATATGAACAAGAGGCTTCAAGAAAACCTCGTGTTTTCTGAATTA  
TATAAAGCCAGTAAGCAAACAGCGAATCCATGGATATTTGAACCCGAGTATCCGGGAA  
AAAGCAGAATATTTGATGGAAGAAGTGGGGATCCTTTTGAACAACCTGTTATAATAGGA  
AAGCCTTATATCTTGAAATTAATTCATCAAGTTGATGATAAAATCCATGGACGTTCCAGT  
GGGCATTATGCACTTGTACACAACAACCTCTTAGAGGAAGGGCCAAGCAAGGGGGA  
CAACGGGTAGGAGAAATGGAGGTTTGGGCGCTAGAAGGATTTGGGGTTGCTCATATTT  
TACAAGAGATGCTTACCTATAAATCTGATCATATTAGAGCTCGCCAGGAAGTGCTTGGT  
ACTACGATCATTGGAGGAACAATACCTAATCCCGAGGATGCTCCAGAATCTTTTCGATT  
GCTCGTTTCGAGAACTACGATCTTTGGCTCTGGAATTGAATCATTTCCTTGTATCTGAGA  
AGAACTCCGGATTAATAGGAAGGAAGCTATGAATCAGAATTTTCTTCTATGATCGATC  
GGTATAAACATCAACAACCTCCGAATTGGATCAGTTTCTCCTCAACAAATAAGTGCTTGG  
GCCAATAAAACCCTACCTAATGGAGAGATAGTTGGAGAGGTGACAAAACCCTATACTT  
TTCATTACAAAACCAATAAACC GGAAAAAGATGGATTATTTTGTGAAAGAATTTTGGG  
CCTATAAAAAGTGGAATTTGTGCTTGTGGAATTTATCGAGTAATCGGGGATGAAAAAG  
AAGACCCGAAATTTTGTGAACAATGCGGAGTTCGAATTTGTTGATTCTCGGATACGAAG  
ATATCAAATGGGCTATATCAAACCTGGCATGCCAGTAACCCACGTGTGGTATTTGAAAC  
GCCTTCCTAGTTATATCGCGAATCTTTTAGATAAACCTCTTAAAGAATTAGAAGGCCTAG  
TATACTGCGAT-----TTTTCTTTTGGCTAGGCC---ATAGCTAAAAAACCTACTTTCTTACGA  
TTACGAGGTTTCAATTCGAATATGAAATCCAATCCTGGAAATACAGCATCCCCTTTTTTTT  
ACTACCTCAGGCTTTGAGACATTTTCGAAGTTCGAGAAATCTCTACTGGAGCAGGGGCTA  
TCCGAGAACAATTATCCGATCTGGATTTGCGAATTATTATAAATTATTCATTGGTAGAGT  
GGAAAGAATTAGGGGAGGAA---GGGCCACAGGTAATGAATGGGAAGATCGAAAAAT  
TGGAAGAAGAAAGGATTTTTTGGTTAGACGCATGGAATTGGCTAAGCATTTTATTCGAA  
CAAATGTAGAACCAGAATGGATGGTTTTGTGTCTATTACCAGTTCTTCCTCCCGAGTTG  
AGACCGATCATTAGATAGATGGGGGAAAACCTAATGAGCTCGGATATTAATGAACTCTA  
TAGAAGAGTTATCTATCGGAACAATACTCTTACCGATCTATTAACAACAATAGATCTAC  
GCCAGGTGAATTAGTAATGTGTCAGGAGAAATTGGTACAAGAAGCCGTGGATACCCCT  
CTTGATAATGGAATCCGCGGACAACCAATGAGGGACAGTCATAATAAGGTTTACAAATC

ATTTTCAGATGTAATTGAAGGCAAAGAGGGGAAGATTTTCGTGAGACTCTGCTTGGAAAA  
CGGGTCGATTATTCGGGTCGTTCTGTCAATTGTCGTAGGGCCCTCACTTTCATTACATCGA  
TGCGGATTGCCTCGCGAAATAGCAATAGAACTTTTCCAGACATTTGTAATTCGTGATCT  
AATTAGACAACATCTTGCTTCAAACATAGGAGTTGCTAAGAGTAAAATTCGGGAAAAA  
GAACCGATTGTATGGGAAATACTTCAGGAAGTTATGCAGGGGCATCCCGTATTGCTGAA  
TAGAGCACCTACTCTGCATAGATTAGGCATACAAGCATTCCAACCAATTTTAGTGAGG  
GACGCGCTATTTGTTTACATCCATTAGTTTGTAAAGGGATTCAACGCAGACTTTGATGGG  
GATCAAATGGCCGTTTCATGTACCTTTATCTTTGGAGGCTCAAGCGGAAGCTCGTTTACT  
TATGTTTTCTCATATGAATCTCTTGTCTCCAGCTATTGGGGATCCCATTTCCATACCAACG  
CAAGATATGCTTATTGGACTCTATGTATTAACGAGCGGGAATCGTCGAGGTATTTGTGCA  
ACTAGGTATAATCCATGTAATTGCAAAAAC-----TATCAAAATGAAAGAATTGACGATA  
TTACCTATAAGTATACGAAA-----GAACCCCTTTTTTCGAATTCCTACGATGCAATTGGAG  
CTTTTCGTCAGAAAAGAATCAATTTAGATAGTCCTTTGTGGCTTCGTTGGCGACTAGAT  
CAACGC--ATTATTGCTTCA-----AGAGAAGCTCCCATCGAAGTTCACTATGAATCTTTGG  
GTACCTATCATGAGATTTATGGGCATTATTTAATAGTAAGAAGTGTAAGAAAAGAAATTC  
TTTGTATATACATTCGAACCACTGTTGGTCATATTTCTCTTTATCGAGAAATCGAAGAAG  
CTATACAAGGGTTTTGTGCGAGCCTGTTTCATATGGTACC-----ATG  
GCAGAAATGCGCCAATTTGGTCTTTCACAATAAAGTGATAGATGGAAGTCCCATGAAAC  
GTCTTATTAGAAGATTAATAGATCACTTCGGAATGGCATATACATCACATATCCTGGATCA  
AATAAAGACTCTGGGGTCCAGCAAGCCACTGCTACATCCATTTTCATTAGGAATTGATG  
ATCTTTTAAACAACACCCTCTAAGGGATGGCTAGTCCAAGATACTGAACAACAAAGTTT  
GATTTTGGAAAAACACCATCATTATGGGAATGTACACGCGGTAGAAAAATTACGGCAAT  
CCATTGAGATATGGTATGCTACAAGTGAATATTTGCGACAAGAAATGAATCCTAATTTCA  
GGATGACTGACCCCTTTAATCCAGTCCATATAATGTCTTTTTTCGGGAGCTAGAGGAAAT  
GTATCTCAGGTACACCAATTAGTAGGTATGAGAGGATTAATGTCGGATCCCCAAGGACA  
AATGATTGATTTGCCATTCAAAGCAATTTACGCGAGGGACTCTCTTTAACAGAATATAT  
AATTTCTTGCTATGGAGCCCGAAAAGGAGTTGTGGATACTGCTGTACGAACATCAGATG  
CTGGATATCTCACGCGAAGACTTGTGTAAGTAGTTCAACACATTGTTGTACGTAACA  
GATTGTGCCACCACTCGAGGTATTTCTGTAAGTCCCTCGAAATGGAATGATGCCG---GAA  
AGGATTTTTATTCAAACACTAATTGGTTCGTGTATTAGCAGACGATATATATATGGGTCCA  
CGGTGCATTGCCACTCGAAATCAAGATATTGGGATTGGACTTATCAAGCGATTCATAAA  
C-----CTTCGAGCACAATCAATATATATTAGAACTCCCTTTACTTGTAAGAGTAT  
ATCTTGATCTGTCAATTATGTTATGGTTCGGAGTCTACTCATGGTGATCTGGTTCGAATT  
GGGAGAAGCTGTCGGTATTATTGCGGGTCAATCTATTGGAGAACCAGGTACTCAACTAA  
CATTAGAACTTTTCATACCGGCGGAGTATTTACAGGGGGTACTGCAGAACATGTACGA  
GCCCCCTCTAATGGAAAAATTAAATTCATGAGGATTTGGTTCATCCACACGTACACG  
TCATGGACATCCTGCTTTTCTATGTTATATAGACTTGTATGTAACCATTGAGAGTGAGGAT  
ATTATACATAACGTGAATATTCCGCCAAAAAGTTTTATTTTAGTTCAAATGATCAATATG  
TGGAATCAGAACACGTGATTGCTGAGATTCGCACGGGAACGTCTACT--TTAAATTTA  
AAGAGAGGGTTCGAAAACATATTTATTCTGATTCAGAGGGGGAA---ATGCACTGGAGTA  
CTGATGTGTATCATGCACCTGAATTTATATATGGTAATGTTTCATCGTTACCAAAAACAA  
GCCATTTATGGATATTATCAGGGGGCCCGTGCAGA-----TCTAGTGTAGTCCCTTTTTCT  
TACATAAGGATCAAGATCAAATGAATATTCAT-----TCTCTTTCTGTTGAACAAAAATATA  
TTTCTAACTCTTCA-----TTGACTAACGATAAAA---GTGAGACACAAAATCGGTAATTCAG

GGTTTTCTGATAAAAAAGAAGGAGGGATCCCTGATTAT---TCAGAAATTAATCGAATCA  
GATGCACTAGTCATTCTAATCTCATATATCCC---GCTATTCTTTATGGGAATTCT-----AATT  
TATTGGCAAAGAGGGCGAAGGAATGGATTCATCATCCCATTCCAATCGATTCAAAAACGA  
GAGAAAGAATAATACCCCCTTCAGGCATCTCGATTGAAATACCC-----ATAAATAGTAT  
TTTCTGTATAAATAGTATTTATGCTTATTTTCGACGATCCTCGATACAGAAGAAGGAGTTC  
GGGAATTAATAATATGGGACTGTAGAAGTGCATTCAATTGTCAAAAAAGAAGAT-----T  
TGATTGAGTATCGAGGA---GTCAAAGAATTTAGGCCAAAATACAGGAAAGGAGATCGA  
TTTTTTTTTCATTCCCAGGAAGTACATATCTTACCTGGATCCTCTTTTATAATGGTACGGA  
ACAATAGTATCATTGGAGTAGATACACGAATCACTTTAAATACAAGAAGCCGAGTAGGT  
GGGTTGGTCCGAGTTGAGAGAAAAAAGTATTGAACTTCAAATATTTTCTGGGG  
ATATCCATTTTCTGGAGAAACAGATAAGATATCCCGACACAGTGGCATCTTGATACCA  
CCAGGAACG-----CGAAAAACAAATTCTAAGGAATCTAAAAA-----TTGAGAAATTGG  
ATCTATGTCCAACGG-----ATCGCACTTACCAAG-----AAAAGTATTTTGTTTTGATTTCG  
GCCTGTAGTCACATATGAAATAGCGGACGGTATAAATTTAGCAACACTTTTTCCCAAG  
ATCCTTCGCGGGAAAGAGATAATGTGAACTTCGAGTTGTCAATTATATCCTTTATGGA  
AATGGAAAACCAATTCGGGGAATTTTGGACACAAGTATTCAATTAGTTTCGGACTTGT  
AATATTGAATTGGGATCAAGACAAAAA-----AGTTCTTCTATCGGGGAGGCCCATGC  
TTCTTTTGTGAAAGTAACGACAAATTGGCTAATTAGAGATTTCTAAGAATTGATTTAGC  
GAAATCCCCCATTTTCGTATACCGGAAAAAGGAATGATCCATCAGGTTTCAGGATTGATCT  
TTGAT---AATGAATCAGATCGC-----ATCAATCCGTTTATTCATTTATTCTAAGGCAAGG  
---ATTCAAAAATCACTTAAACAA-----AATCAAGGAATTCGTATATTATTGAATA  
GA-----ATAAGGAATGCCAATCTTTGATAATTTGTCATCATCCAATTGTTCTCGAAT  
GGGTCTA-----TTCAACAATGTAAATATTACAATGGG-----ATAAAGAATCAGATCCC  
CTAATTCCAATTAGGAATTTTTTGGTCTTTAGGAACA-----GCCCTCAAATTGCGAAT  
TTTTATTTCG-----TTTTACCATTTA-----ATAACTCATAATCAGATCTTG---GTAATTAATAT  
TACCAACTTGACAAT-----TTAAACAGGCTTTTCAACTACTTAAA-----TATTCCTTA  
ATGGATGAAAAT-----GGTAGAATTTGAATCCTGATCCATGCAGTAACATCATTTTGAAT  
GCATTCAATTTGAATTGGTATTTTTTCCATCACAATCCTTGTGATGCCACATCT---ACAAT  
AATTAGTCTTGGACAGTTTATTTGTCAAATGGATATATAGCCAAAAACAGATCACAC---  
CTAAA-----TCGGGTCAAGTTCTAATTGTTCAA---GTGGACTCTTTAGTAATAAGATCAG  
CTAAACCTTATTTAGCCACTTCAGGAGCAACTGTTTCATGGCCATTATGGGGAAATATTTT  
ATGAAGGAGATACATTAATTACATTTATATATGAAAAATCAAGATCTGGTGATATAACGC  
AGGGTCTTCCAAAAGTGGAACAAGTTTTAGAAGTGC GTTCAATTGATTCAATATCTATG  
AACCTAGAAAAAAGGATTGAGAGTTGGAACGAACGTATAACAAGAATTCTTGGAATTC  
CTGGGGATTCTTGATTGGTGCTGAACTAATACTATAGCACAAAGTCGTATCTCGTTGGTT  
AATAAGATCCAAAAGGTTTATCGATCCCAAGGGTGCAAATTCATAATAGACATATAGA  
AATTATTGTACGTCAAATAACATCAAAGGTGTTGGTTCCGAA-----GATGGAATGTCT  
AATGTTTTTTCACCTGGAGAATTAATTGGATTGTTGCGAGCGGAACGAACGGGTCGTG  
CTTTGGAAGAAGCGATCTGTTATCGAGCCGTCTTATTGGGAATCACGAAAGCATCTCTG  
AATACTCAAAGTTTATATCCGAAGCGAGTTTTCAAGAACTGCTCGAGTTTTAGCAA  
AGCTGCTCTCCGGGGCCGTATTGATTGGTTGAAAGGCCTGAAAGAGAACGTTGTTCTG  
GGGGGATGATACCCGTTGGTACCGGATTCAAGGGATTA-----GTGCACCCTTCAAGGC  
AACATAACAATATTCCT-----TTGGAAACCAAAAAGAAGAATCTATTCGAGGGGGAAAT  
GAGA-----GATATTTTATTCCACCACAAAGTCTTGCAT-----TTAAAGAATTT

TCA-----ATGACAAGAAGATATTGGAACATCAATTTAGA  
AGAGATGATGGAAGCAGGAGTTCATTTTGGTCATGGAAC TAAGAAATGGAATCCAAGA  
ATGGCACCTTATATCTCTGCAAAGCGTAAAGGTATTCATATTACAAATCTTACCAAAACT  
GCTCGTTTTTTTATCAGAAGCTTGTGATTTAGTTTTTAATGCAGCAAGTAGGGGAAAACA  
ATTCTTAATTGTTGGTACCAAAAATAAAGCAGCTGATTCAGTAGCATGGGCTGCAATAA  
GAGCCCGGTGTCATTATGTTAATAAAAAATGGCTCGGTGGTATGTTAACGAATTGGTCC  
ACTACAGAAACGAGACTTCATAAGTTCAGGGACTTGAGAACGGAACAAAAGACGGGA  
AGACTCAACCGTCTTCCGAAGCGGGATGCGGCTATGTTGAAGAGACAATTGTCTCACT  
TGCAAACATATCTGGGTGGGATTAATATATGACGGGTTTACCCGATATTGTGATCATCG  
TTGATCAGCAAGAAGAATATACGGCTCTTCGAGAATGCATTACTTTTGAATTCCAACA  
ATTTGTTTAATTGATACAAATTGTGACCCCGATCTTGCAGATATTTGATTCCAGCGAAT  
GATGACGCTATTGCTTCAATTCGATTAATTCTTAACAAATTAGTCTTCGCAATTTGCGAG  
GGGCGTCT--AGCTATATAAGAAATCCTATGGGACAAAAATAAATCCACTTGGTTTCA  
GACTTGGTACAACCCAAGGTCATCTTCTATTTGGTTTACACAACCAAAAAATTATTCT  
GAAGATCTACAAGAAGATCAAAAAATACGGAATTGTATCAAAAATTATGTACAAAAA  
ATATGAGAATATCCTCCGGC---GTAGAGGGAATTGCACATATAGAAATAAAAAAAAAA  
TCGATCTGATCCAGATCATAATCTATATGGGATTTCCAAAATTATTAATAGAAGGTAGAC  
CACGA-----GGAATCGAAGAATTAGAAATGAATGTACAAAAGAATTGAATTGTAT  
AAATAAAAACTCAACATTGCAGTTGCAAGAATTACAAAACCTTATGGGCACCCTAATA  
TTCTTGCAGAATTTATAGCCGGTCAATTA AAAAATAGAGTTTCATTTGCAAGGCAATG  
AAAAAGCTATTGAATTA ACTAAACAAGCAGATATAAAAGGAATTCAAATACAAATTGC  
AGGGCGTATCGATGGAAAAGAAATTGCACGTGTTGAATGGATCAGAGAAGGTAGGGTT  
CCTCTACAAACCATTAGAGCTAAAATTGATTATTGTCCCTATACAGTTCGAACTATTTAC  
GGTGTATTAGGCATAAAAATTTGGATATTTGTAGGCAAGGACATGTGCGGTTACCGAGG  
GCCTCGTTTCAAAAAATACGCCGTCTGGGATCTTTGCCAGGATTA ACTAGTAAAAGG  
CCTAAAACCCGAAGTGATCTTAGAAACCAATCGCGTTCTGGGAAA---AGATCTCAATAT  
CGTATTCGTCTAGAAGAAAAACAAAAATTGCGTTTTTCATTATGGTCTTACAGAACGACA  
ATTACTTAAATACGTTTCGTATCGCCGAAAAGCAAAAGGGTCAACAGGTCAGGTTTTA  
CTACAATTACTTGAAATGCGTTTGGATAACATACTTTTTCGATTGGGCATGACTTCTACT  
ATTCCTGGAGCCCGCCAATTAGTTAACCATAGACATATTTTAGTTAATGATCGTATAGTA  
GATATACCAAGTTATCGCTGCAAACCTCGAGATATTCTTACTGTGAAGGATGAACACAA  
ATCCAGAGCTCTGATTCAAATTATCTTGATTCATCCCCCAC---GAGGAATTGCCAAA  
CATTTGACTCTTCATCCATCCAATAT-----AAAGGATTAGTCAATCAAATAATAGATAGTA  
AATGTGTCGTTTTGAAAATAAATGAATTGCTAGTCGTAGAATATTATTCCCGTCAGACTA  
TGTCACGTCGAGGTACTACAGAAGAAAAAACTGCAAATCCGATCCAATTTATCGTAAT  
CGATTAGTTAACATGTTGGTTAACCGTATTCTGAAACACGGAAAAAAATCATTGGCTTA  
TCAAATTATCTATCGAGCCGTGAAAAAGATTCAACAAAAGACAGAAACAAATCCACTA  
TCTGTTTTACGTCAAGCAATACGTGGAGTAACTCCCGATATAGCAGTAAAAGCAAGAC  
GTGTAGGCGGATCGACTCATCAAGTTCCCATTGAAATAGGATCCACACAAGGAAAAGC  
ACTTGCCATTGCTTGGTTATTAGGGGCATCCCGAAAACGTCCGGGTCGAAATATGGCTT  
TCAAATTAAGTTCCGAATTGGTGGATGCTGCCAAAGGGAGTGGCGATGCCATACGCAA  
AAAGGAAGAGACTCATAGAATGGCAGAGGCAAATAGAGCTTTTGCACATTTTCGTATG  
GGTAGAGACACCATTGCTGACATAATAACCTCTCTACGAAATGCTGACATGAATAGAAA  
AGGAACAGTTCGAATACCATCAACTAACCTTACAGAAAACATTGTTAAATACTTTTAC

GAGAGGGTTTTATCGAAAACGTGAGAAAACATCAGGAAAACAAGAAATCTTTTTTGGT  
TTAACCTTACGACATAAAAGA-----AATAGGAAAGGCACATATAGAACT---ATTTTC-----  
AATTTAAAACGTATCAGTCGACCCGGTCTACGAATCTATTCTAACTATAAACGAATTCCT  
AGGATTTTAGGGGGAATGGGGATTTTAAATCTTTCTACTTCGCGAGGTATAATGACAGA  
CCGGGAGGCTCGGCTAGAAGGAATCGGTGGAGAAATTTGTGCTATATATGGATGGCA  
AACTTATACCAAGAATTGGTTCACGTAAAAATGAACGTATTAGTTCGCGTAAGAATGC  
ACGTAGAATACCAAAAGGGGTTATTCATGTTCAAGCAAGTTTCAACAACACCATTGTA  
ACTGTTACAGACGTACGTGGTTCGGGTAGTTTCTTGGTCTCCGCCGGTACTTGTGGGTT  
CAAAGGTACAAGACGAGGGACACCGTTTGTGCCCCAAACCGCAGTAGGAAATGCGAT  
TCGTACAGTAGTGGATCAAGGTATGCAACGAGCAGAAGTCATGATAAAAGGCCCTGGT  
CTCGGAAGAGATGCAGCATTACGGGCTATTCGTAGAAGTGGTATACTATTAAATTTCTGA  
CGGGATGTAACCCCTATGCCGCATAATGGCTGTAGACCCCCTAAAAAAGACGTGTGAT  
GCCAACTATTAAACAACCTATTAGAAACACAAGACAGCCAATCAGAAATGTCACGAAA  
TCCCCCGTCTTTCGGGGATGCCCTCAGCGCCGAGGAACATGTACTAGGGTGTATACTAT  
CACCCCCAAAAACCAAACTCTGCCTTACGTAAAGTTGCCAGAGTACGATTAACCTCT  
GGATTTGAAATCACTGCTTATATACCTGGTATTGGCCATAATTCACAAGAACATTCTGTA  
GTCTTAGTAAGAGGGGGAAGGGTTAAGGATTTACCCGGTGTGAGATATCACATTGTTTCG  
AGGAACCCTAGATGCTGTTCGGAGTAAAGGATCGTCAACAAGGGCGTTCTAAATATGGG  
GTCAAAAAGCCAAAAATGGCAAGGAAAAGTTTGATTCAGAGGGAGAAGAAGAGGCA  
AAAATTAGAACAAAAATATCATTGATTCGTGATCCTCAAAAAAAGAAATAAGC-----  
-AAAGTTCCGTTGTTGAGTGACAAATGGGAAATTCATGGAAAGTTACAATCCTCACCAC  
GTAATAGTGCACCCACACGTCTTCATCGACGTTGTTTTTCGACCGGAAGACCGAGAGC  
TAACTATCGAGACTTTGGACTATCCGGACACATACTTCGTGAAAAGGTTTCATGCGTGTT  
TGTTGCCAGGGGCAACAAGATCAAGTTGGATGGTAAAAAACTCCTTCATTTAGTTAA  
TTCACACGAA-----GAAAAAGAAGAAAAAAAGGGTCCGTTGAATTTCAAGTATTCAG  
TTTCACTAATAAAATACGAAGACTTACTTCACATTTGGAATTGCACAGAAAAGACTATT  
TATCTCATAGAGGTTTACGGAAAATTTTGGGAAAGCGCCAACGCTTGTGGCTTATTTG  
TCAAAGAAAAATAAAGTACGTTATAAAAAATTAATTAGTCAGTTAGGTATTTCGGGAAAC  
AAAACTCCT-----ATGGTAAAACCTTCGTTTGAACGATGTGGTAGAAAGCAACGGGCT  
GTCTATCGAATCGTTGCAATTGATGTTTCGATCCCGAAGAGAGGGAAGAGATCTTCGAA  
AAGTGGGCTTCTATGATCCGATAAAGAATAAACTTATTTAAATGTTCTGCTATTCTCT  
ATTTCTTGACAAGGGCGCTCAACCTACAGGAACTGTTTATGATATTTCAAAAAAGGTA  
GAAGTTTTTAAGGAGCTTCGCCTTAATGAAACAAAATTC AATTC AATGGATAAATCCAA  
GCGACCTTTTCTTAAATCCAAGCGATCTTTTCGTAGGCGTTTGCCCCGATCCAATCGG  
GGGACCAAAATTGATTATAGAAATATGAGTTTAAATTAGTCGATTTATTAGTGAACAAGGAA  
AAATATTATCTAGACGAGTAAATAGATTGACTTTGAAACAACAACGATTTATTACTATTG  
CTATAAAACAAGCTCGTATTTTATCTTCGTTACCTTTTCTGAATAATGAAAAA-----CAAT  
TTGAAAGAACCGAGTCAACCACTAGAACTACTGGTCTTAGAACCCGAAATAAAGTGAC  
ACGT---CTAAAAAAAATCCTTTTGTAGCGAATCATTATTAAAAAAATTAATAAACTT  
AACACAAAAGCAGAAAAAGAAGTAATAATAAGTTGGTCACGGGCATCTACCATTATAC  
CGACAATGATTGGGCATACAATTGCTATTCATAATGGAAAAGAGCATTTACCTATTTATAT  
AACGGATCGCATGGTAGGCCATAAATTGGGAGAATTTGTACCTACTCTAAATTTACAGGG  
GACATGCGAAAAATGATACTAGATCTCGTCGTATGGTTTTTAAATCTTTTATACTAGGTA  
AT-----TGCATGAAGATAATCAATTCGGTTCGTTGTGGTTCGGACTCTATTATGGGTTTC

TGACCACATTCTCTATAGGGCCCTCTTATCTCTTCCCTTCTCCGAGCTCAGGTTATGGAAG  
AAGGAGAAGAAGGAACCGAGAAGAAGATATCAGCAACAACCTGGTTTTATTACGGGAC  
AGCTCATGATGTTTCATATCGATCTATTATGCGCCTCTGCATCTAGCATTGGGTAGACCTCA  
TACAATAACTATCTTAGCTCTACCGTATCTTTTGTTCATTTCTTCTGGAACAATCACAA  
ACACTTTTTTGATTATGGATCTACTACCAGAAATCAATGCGTAATCTCAGCATTCAATG  
TGTATTCCTGAATAATCTCATTTTTCAATTATTCAACCATTTCATTTTACCAAGTTCAATG  
TTAGCCAGATTAGTCAACATTTATATGTTTCGATGCAACAACAAAATGTTATTTGTAACA  
AGTAGTTTTGTTGGTTGGTTAATTGGTCCACATTTTATTCAATGAAATGGGTTGGATTAGTA  
TTAGTCTGGATACGGCAAATCATTCTATTAGATCTCTTATTTCGATCTAATAAGTACCTTG  
TGTCAGAATTGAGAAATCTATGGCTCGAATCTTTAGTATTCTCTTATTTATTACCTGTGT  
CTACTATTTAGGAAGAATACCGTCACCCATTCTTACT-----CTGAAAGAAAAAGAAGATC  
CTAAACCTATAGTAACTATTCTTTTCGATTATAAACGATGGAATCGCCATTTTCGATATAT  
AAAAATAATAAATTTGATAAGGCTGTAATAAATAAAATGTCACAATATTTTTTTTATAACA  
TGTCAAAGTGATGGAAAACAAAGAATATCTTTTACCTATTTACTCAGTTTAGCAACTTT  
TTTTGAAATGATACAAAAAAAATTAGTTTGTCCACAACAGAAAAGGGTTTAAAT---TT  
TTTATATAATCATTGGGTTTTTATCAACGAAAAAACAAAGAACAATTTAAGTAAAGAGT  
TTCTAAATAGAATAAAAAGTTTAAACAAAGGATCC-----TTAAATGGATTTGAAAAAAG  
AACTAGATTGTGTAATGATGAAACTAAAAATGAGTATTTAACTCAATATATGATCTTCT  
CATAAACGGTCCTTATCGCGGAACAAAAAAAACCTTACAA-----TTTGATACAATTTGGA  
TAAATAAGATTCATAGTATTCTT---CGAAAATTTGAACAAAAAGATTCTAATGATCAA---A  
TTGGAATAAACGAAATCAGTAAAAAAGTCCCTCAACATTCATATAAATTAATTGATTTG  
GAACAACAGGAGGGACAACAAATTCGTTCAAGAAAATTTAAACGTGTAGTAATTTTA  
CCGATGCTTTGATACGTTATTCACAACAATCGGATTTTCGTCGAGGCATAATCAAAGGTT  
CCATGCGTGTCAAAGACGTAAAACAATTACTTTGGAAATTTCTTTCAAGCAAATGTGCAT  
TCCCCACTTTTTTTGGACAGAATAGACAAATCCATTTTTTTGTCTTTTGAAATT-----TCC  
GGACTGATAAACAAATTTTTATAAATAGGGAGGAGAAAGCTCGGATAAAAATAGCGG  
AAGCCTGGGATACCATTTTATTGCTCAAGTAATAAGAGGCTCTATGTTAGTAATACAAT  
CAATTCTTAGAAAATCTATTGTATTACCCTCATTGATAATAGCGAAAAATATCAGCCGGA  
TCTTATTATTTCAATTTCCAGAGTGGTCCGAAGATTTAAAGGAGTGGAATAGAGAAATG  
CATGTTAAATGCACCTTATAATGGGGTTCAATTATCAGAAACAGAATTTCCCAAAAACCTG  
GTTAACAGACGGTATTCAAATAAAAATCCTATTTCTTTCTGCCTGAAACCTTGGCACA  
AATCTAAGAGAGAAAAACCAAT--TTTTGTTTTTTAACAGTTTGGGGAATGGAAGCAG  
AACTACCTTTGGCTCACCCCGAAAAAGGCCCTTCTTTTTTTGAACCCATTTTTTAAAGAA  
CTCAAAAATAAAATTCGAAAATTTGAAAAAGGAATGTTTTTTTTGTT--TTTACAATTTTAA  
AAGAAAGAACTAAACAAAAATTTTCATTTTCAAACGAAACAAAAAAATGGTTTATCAA  
AAATGCTCTA-----TTTATAAAACAAATAATAAAAGAACTCTCAAAAATAAATGGTTTGA  
TAATAAATAATCAAATGATTCAGGAACCATCTATTTCAATTCAATCTATGGATTTGCAAA  
ATTATTCACTGACAGAAAAAAGATAAAGGATCTAACAGATAAAACACGCATAATTAG  
AAATCAAATAGAACAAATTACAAAAGACAAGAAAAAAATACTAAGACTAAGCAAAA  
AAATTCTAATATTAAGAACCACAAAAAATACTTTGGCAAATAAGAAAAAGAAAAAAT  
GCTCAATTAATTCGCAAATTTTATTATTTTATACAATTTTTTCATTGAACGAATATATATGGA  
TACCCTTCTATGTATCATTAAATTAAT---ATTACAACACAACCTTTTTTATTCACTTTATTCA  
---GACTTGTCTTCTTTGTCCCAAGCATATGATTTTACAAATTAGTACAAACACAACCTTA  
GTAACCTTGATAGTTTAAAACCTATTCTACTATATCTTAAATTTAAACTTAAAAATGAAAT

AAAAGATTATTTTCATACAAGGAATAATTCATTCCGAATTAACAGAAACAGAACAAATTTTCGAA  
ATTGTGAAATGACTCAATGGAAAACTGGTTAACAGGT--TATCAATATAATTTATATCA  
GATTAATTTGTCTAAATTAGTACCACAAAAATGGAGAAATAAAATTCATCAATCCTTTAT  
GTTTCAAATAAAAAGCAGATGCTATTTATATGAAAAAGACCAA-----TTAATTGATTACG  
AAAAAGAA-----TTTAAAAAACACTATTTGTATGATCTTTTATCATATAAATATATTA---  
-----ACCCCG---AAATATTTTGATTGGGGAATTCGCCATTTTTTTTTTATTATTTTTGAT  
TGGATGGGAATGAATGAAGAAATACTAAATCGTTGGTCTTTCCAGAATTTGTATTCCTT  
TATAACACATATAAGATTAAACAATGGGGTATAACCAATAAAATTACTTCTTTTTAATTACA  
AAAGCCACACGGAAGCAGAAGCTTGATTTATTCCTCAAAAAGTATTTACTTTTTCAATTG  
AGATGGGACGATTCATTGAATCAAAGAATGATCAATAATGTAAAGGTATATTGTTTCCTG  
CTTAGATTAAGAAATTCAAAAGAAATTGCTATATCCTCTATTAATAAAGGAGGAAATGAG  
TTTGGATATAATGCTAATTCAGAAAAATGTAAAGTTTACAGAATTGATGCAAAAGGGAA  
TATTAATTATCGAACCGATTCGTCTATCTAAACAATAAGACAATTTATTATGTATCA  
AACCATACGTATCCATTGGTTCATAAGAGTAAATACTATGATTTTGATTTGTTTGTCTT  
GAAAATATTTTATCCTCTAGACATCGCAGAGAATTAAGAATTAGAATTTATTTTCATATTC  
TTTGGCCTAATTATAGATTAGAGGATTTAGCTTGTATGAATCGCTATTGGTTTGATACCAA  
TAATGGCAGTCGTTTTAGCACGTTAAGGGTACATATGTACCCGATGAAAGGACATCAAT  
TCAAATCCTGGATTTTTGAATTGAGAGAGATATTGAGAGAGATCAAGAATTCCTACTAT  
TTCTTAGATTCATGGACCCAATTCATTCAGTGGGATCTTTCATTCACATTTTTTTCCAC  
CAAGAACGTTTTATAAACTCTTTGACCCCGAATTTGGAGTATCCTACTTTCA---CGCA  
ATTCA-----CAGGGTTCAACAAGCAATCGATATTTT-----ACGATCAAGGGTGTAGTAC  
TATTTGTAGTAGCG--GTCCTTATATATCGT-----ATTAACAATCGAAATATGGTCGAA  
AGAAAAAATCTCTATTTGATAGGGCTTCTTCT-----ATACTTATGAATTCATTGG  
ACCCAGAAATGATACATTGGAAGAATCTTTT--GGGTCTTCCAATATTAATAGGTTGATT  
CTTTCG---CTCCTGTATCTTCCAAAAGGAAAAAAGATCTCTGAGAGTTGTTTCCTGGAT  
CCGAAAGAGAGTACTTGGGTTCTCCCAAGAACT-----AAAAGTGTATCGTGCCTG  
AATCTAACTGGAGTTCGCGGTGGTGGAGGAACTGGATCGGAAAAAAGAGG-----GATT  
CTAGTTGTAAGATATCTAAT-----GAAACCGTCGCTGGAATTGAGATCTCATTCAAAGA  
GAAAGATATCAA---TATCTGGAGTTTCTTTTTGTATATTATATGGAT-----GATCCGATCC  
GCAAGGACCATGATTGGGAATTGTTTGTATCGTCTTCTCCGAGGAAGAGGCGAAACAT  
AATCAACTTGAATTTGAATTCGGGACAGCTATTCGAAATCCTAGTGAAACACTGGATTT  
GTTATCTCATGTCTGCTTTTCGTGAAAAAATAACCAATTGAAGTAGAGGGT--TTCTTCAA  
ACAACAAGGA--GCTGGGTCAACTATTCAATCAATGATATTGAGCATCTTCCCT-----  
CTCTTCTCGAGAAACAAGTGGGCTATTTCTTTGCAAAATTGTGCTCAATTTTCATATGTG  
GCAATTCCGCCAAAACCCTTTCGTT-----AGTTGGGGGAAG---AATCCGCACGAATCG  
GATTTTTTGAGGAAG---GTATCGAGAGAGAATTGGATTTGGTTAGACAATGTGTGGTTG  
GTAAACAAGGATCGG-----GTTTTAGC-----AAGGTACGGAATGTATCGTCAAATATTC  
AATATGATTC-----ACAAGA-----TCTAGTTTCGTTCAAGTAACGGATTCTAGCCAATT  
GAAAGGATCCTCT--GATCAATCCAGAGATCATTCCGATTCCATTAGT-----AATGAG  
GATTCGGAA-----TATCACACATTGCTCAATCAAAGAGAGATT  
CAACAATAAAAAGAAAGATCGATTCTT--TGGGAT-----CCTTCCTTTCTTCAAACGGAA  
CGAACAGAGATAGAATCAGAC-----CGATTCCCGAAA-----CGCCTTCTGGATATTCC---  
--TCAATGTCCCGGCTATTCGCG---GAACGTGAGAAGCAGATGAATCATCATCTGCTTCC  
GGAAGAAATCGAAGAATTT-----CTTGGGAATCCTACAAGATCCATTCGTTCTTTTTTCT



CTGACAGATGG-----TCAGAACTTCAT--CTGGGCTCGAATCCTACTGAGAGGTCTACTA  
GA-----AAATTGTTGAAGAAACAACAAGGTCTTTAT--TTTGTCCCTTCCAGGC  
GATCGGAA-----AATAAAGAAATGGTTAATATATTCAAGATAATTACGTATTTACAAA  
AT-----ACCGTCTCAATTCATCTATTTTCATCAGATCCGGGATGTGATATGGTTCCG---AAG  
GATGAACCGGAT--ATGGACAGTTCCAATAAGATTTTCATTCTTGAACAAAAATCCATTTT  
TTGATTTT-----TTTCATCTATTCCATGACCAGAACAGGGGGGATAACACGTTA-----CAC  
CACGATTTTGAATCAGAA-----GAGAGATTTCAAGAAATGGCAGATCTATTACTCTATC  
AATAACCGAGCCG---GATCTGGTGTATCATAAGGGATTTGCCTTTTCTATTGATTCCTACG  
GATTGGATCAAAAACAA-----TTCTTGAATGAGGTATTCAACTCCAGGGATGAATCGAA  
AAAGAAATTTT-----TTGGTTCTACCTCCTATTTTTTAT-----GAAGAGAATGAATCTT  
TTTATCGAAGGATCAGAAAAAATGGGTCCG---ATCTCTTGCGGGAATGATTTGGAAG  
ATCCAAAACCAAAAAAAGTGGTATTTGCTAGCAACAACATAATGGAGGCAGTCAATCC  
ATATAGATTGATCCGAAATCTGATTCAAATCCAATATAGCACCTATGGCTATGGGTACATA  
AGAAATGGATTGAATCGATTCTTTTTAATGAAT-----AGATCCGATCGCAACTTCGAAT  
ATGGAATTCAA-----AAAGATCAAATAGGAAATGATACTCTGAATCATAGAACTATAAT  
GAAATATATGATCAACCAACATTTATCGAATTTGAAAAAG---AGTCAGAAGAAATGGTT  
TGATCCT-----CTTATTTTTCTTTCTCGAACCGAGAGATCCATGAATCGGGATCCTGATGC  
ATATAGATACAAATGGTCCAATGAGAACAAGAATTTCCAGGAACATTTGGAACATTTGG  
TTTCGGAGCAGAAAAGTCGT-----TTTCAAGTAGTCTTCGATCGATTACGTATTAATCA  
ATATTCGATTGATTGGTCTGAGGTATCGACAAAAAAGATTTGTCTAAGTCACTTCGTTT  
CTTTTTGTCCAAGTCACTTCTT-----TTTTGTCC-----AAGTT  
GCTTCTCTTTTTGTCTAACTCACTCCCT--TTTTCTTTGTGAGTTTCGAGAATATCCCCA  
TTCATAGGTCCGAG---ATCCACATCTAT--GAATTGAAAGGTCCGAATGATCAACTCTGC  
AATCAGTTGTTAGAATCAATAGGTCTTCAAATCGTTCATTTGAAAAAATGGAAAGCCTT  
C-----TTATTGGAT-----GATCATGATACTTCC---CAAAAATCGAAATTCTTGATCAATGG  
AGGAACAATATCACCATTTTTGTTCAATAAGATACCA---AAGTGG---ATGATTGACTCATT  
CCATACTAGA-----ATAATCGCGGAAATCCTTTGATAACACGGATTCCCTATTTCTCAAT  
GATATCCCACGATCAAGACAGTTGGCTGAATCCCGTGAAACCATTTCATAGAAGTTCAT  
TGATATCTTCTTTTTATAAAGCAAATCGACTTCGGTCTTGAATAATCCACACCACTTCT  
TCTTCTAT-----TGTAACAAAAGATTCCCTTTT-----TAT--GTGGAAAAGGGCCGTATTG  
AGAATTATGAT-----TTTACGTATGGA---CAATTCCTCAATATCTTGTTTCATTCGCAACAAA  
---ATATTTCTTTGTGCGTCGGTAAA-----AAAAACATGCTTTTTTTGGAG---AGAGATAC  
TATTTACCAATCGAGTCACAGGTATCTAACATATTCATACCTAACGATTTTCCACAAAAG  
TGGTGACGAAAGG---TATAACTTGTACAAATCT-----TTCTATTTTCCAATTCGATCCGA  
TCCATTCGTTTCGT-----AGAGCTATTTTCTCGATCGCAGACATTTTTTGAACACCTCTAAC  
AGAGGGACAAATAGTCAATTTGAAAGAACTTATTGTCAACCTCTTTCAGATATGAATC  
TATCTGATTGAGAAGGGAAAAAATTGCATCAGTATCTCAAT-----TTCAATTCAAACATG  
GGTTTGATTCACACTCCATGTTCTGAGAAATATTTACCATCCGAAAAG-----AGGAAAAA  
A-----CGGAGTCTTTGTCTAAAG-----AAATGCGTTGAGAAAGGGCAGATG  
TATAGAACCTTTCAACGAGATAGTGCTTTTTCAACTCTCTCAAATGGAATCTATTCCAA  
ACATATATGCCATGGTTCCTTACTTTGACAGGGTACAAATATCTAAATTTTATATTTTAG  
ATACTTTTTTCAGAC---CTATTGCCGATACTAAATAGCAGT-----CAAAAATTTTTATCTATT  
TTTCATGATATTATGCATGGAGCAGATATATCATGGCGAATTCTTCAGAAAAAATG-----  
-----TGTCTTCCACAATGGAAT--CTGATAAGTGAGATTTTCGAGTAAGTGTTTACATAA

T-----CTTCTTCTGTCCGAAGAAATGATTCATCAAAAAGAATGAGTCA-----CCATTGATATC  
GACACATCTGAGATCGCCAAATGTTCCGGGAGTTC--CTCTATTCAATCCTTTTTCTTCTT  
CTTGTTGCTGGATAT--CTCGTTCGTACACATCTTCTCTTTTTTTCCCGA-----GCCTCTAG  
TGAGTTACAGACAGAGTTCGAAAAGGTCAAATCTTTAATGATTCCATCATAACATGATTG  
AGTTGCGAAAACCTTCTGGATAGGTATCCTACATCTGAACTGAATTCTTTCTGGTTAAAG  
AATCTCTTTCTAGTTGCTCTGGAACAATTAGGAGATTCTCTAGAAGAAATACGGGGTTC  
TGCTTCTGGCGGCAACATGCTATTGGGTGGTGGTCCC-----GCTTATGGG--GTCA  
AATCAATACGTTCTAAGAAGAAATATTTGAATATCAATCTCATCAATATTATCGATCTCAT  
A--AGTATCATAACCAAATCCCATCAATCGAATCACTTTTTCGAAAAATACGAGACATATA  
AGTCATAACAAGTAAAGAGATCTATTGATAAGAAAAAGAAAAACGTGAACGGTG  
ATTGGATTGATGATAAATAGAATCCTGGGTGCGAACAGTGATTGATTGATGATGAA  
GAAAGAGAATTCTTGATTCAGTTCTCC-----ACCTTAACGACA-----GAAAAAAGGATTG  
ATCAAATTCTATTGAGTCTGACT--CATAGTGATCATTATCA-----AAGAATGACT  
CTGGTTATCAAATGATTGAACAACCGGGAGCAATTTACTTACGATACTTAGTTGACATTC  
AT-----AAAAGTATCTAATGAATTATGAGTTCAATACATCCTGTTTAGCAGAAAGACGG  
ATATTCCTTGCTCATTATCAAACAATCACTTAT-----TCACAAACCTTGTGTGGGGCTAAT  
AGTTTTCAATTCATCTCATGGA-----AAACCCTTTTCGCTCCGCTTAGCCCTATCCC  
CCTCT--AGTGGTATTTAGTGATAGGTTGATAGGAACTGGGCGATCCTATTTGGTCAA  
ATACCTAGCGACAACTCCTATGTTCTTTTATTACGGTATTTCTGAACAAGTTCCTGGA  
TAACAAGCCTAAAGGTTTTCTTATTGAT-----GATATCGATGATATTGATGATAGTG  
ACGATATTGATGATAGTGACGATATTGATGATAGT-----G  
ACGATATCGATCGTGACCTTGATACGGAGCTGGAGCTGCTAACTATGATGAATGCGCTA-  
-----ACTATGGATATGATGCCG-----GAAATAGACCGATTTTATATCACTCTTCAATTCG  
AATTAGCAAAAGCAATGTCTCCTTGATAAATATGGATTCCAAACATTCATGATCTGGATG  
TGAATGAGTCGAATTACTTATCCCTCGGTCTATTAGTGAACCATCTCTCC-----AGGGA  
TTGTGAAAGATGTTCC--ACTAGAAATATCTTGTTATTGCTTCGACTCATATFCCCAAAA  
AAGTTGATCCCGCTCTAATAACTCCAAATAAGTTAAATACATGCATTAAGATACGAAGG  
CTTCTTATTCCACAACAACGAAAGCACTTTTTTCACTCTTTTATATACTAGGGGATTTAC  
TTGAAAAGAAAATGTTCCATACT-----AATGGATTTGGATCCATAACCATGGGTTCCAA  
TGCACGAGATCTTGTAGCACTTACCAATGAGGCCCTATCGATTAGTATTACACAAAAGA  
AATCAATTCTAGACACTAATAAATTAGATCCGCTTTCATAGACAACTTGGGATTTGC  
GA-----TCCAGGTAAGATCGGTTTCAGGATCATGGGATCCTTTTCTATCAGATAGGAA  
GGGCTGTTGCACAAAATGTACTTCTAAGTAATTGCCCATAGATCCTATATCTATCTATAT  
GAAGAAGAAA-----TCATGTAACGAAGGGGATTCTTATTTGTACAAATGGTACTTCGAA  
CTTGGAACGAGCATGAAGAAATTAACGATACTTCTTTATCTTTTGAGTTGTTCTGCCGG  
ATCGGTCGCTCAAGATCTTTGGTCTCTACCC-----GGACCCGATGAAAAA--AATGGAAT  
CACTTCTTATGGACTCGTTGAGAATGATTCT--GATCTAGTTCATGGGCTATTAGAAGTA  
GAAGGCGCTCTGGTGGGA-----TCCTCACGGACAGAAAAAGATTGCAGTCAGTTTGATA  
ATGAT-----CGAGTGACATTGCTTCTTCGGCCCGAACCAAGAAT--CCCTTAGATATGAT  
GCAAAACGGATCTTGTTCTATCGTTGATCAGAGATTTCTCTATGAAAAA-----TACGAAT  
CGGAGTTTGAAGAA--GGGGAAGGAGAAGGAGCCCTCGACCCGCAA-----CAGAT  
AGAGGAGGAT-----TTATTCAATCAC-----ATAGTTTGGGCTCCT-----AGAATATGGC  
GCCCT-----TGGGGCTTTCTATTTGATTGTATCGAAAGGCCCAATGAATTGGGATTTCC  
C--TATTGGGCCAGGTCATTTCCGGGGCGAG-----CGGATCATTATGATGAAGAGGATG

AGCTTCAAGAGAATGATTCGGAGTTCTTGCAGAGTGGAAGCATGCAGTACCAGACACG  
AGATAGATCTTCCAAAGAACAAGGCTTTTTTCGAATAAGCCAATTCATTTGGGACCCTG  
CGGATCCGCTCTTTTTCTATTCAA---GATCAGCCCTTTGTCTCTGTGTTTTACATCG  
AGAATCTTTGCAGATGAAGAGATGTCAAAGGGGCTTCTTACTTCCCAAACAGATCCT  
CCTACATCTATATATAAACGCTGGTTTATC-----AAGAATACGCAAGAAAAGCACTTCGA  
ATTGTTGATTCATCGCCAGAGATGGCTTAGA-----ACCAATAGTTCATTATCT-----AATG  
GATCTTTCCGTTCTAAT-----ACTCTATCCGAGAGTTATCAGTATTTATCAAACCTCTTCCT  
ATCTAAC---GGAAGGCTATTGGATCAAATGACAAAGACATTGTTGAGAAAAAGATGGCT  
TTTCCCGGATGAAATGCAAATT-----ATGCCTAGATCGCGA---  
ATAAATGGAAATTTTATTGATAAGACCTTTTCAATTGTAGCCAATATCTTATTACGAATAA  
TTCCGACAACCTCAGGAGAAAAAGAGGCATTTACCTATTACAGAGATGGA-----ATGTT  
AGCTCAATCCGAAGGAAATTATGCGGAAGCTTTACAGAATTATTATGAAGCTATGCGAC  
TAGAAATTGATCCCTATGATCGAAGTTATATACTCTATAACATAGGCCCTTATCCACACAA  
GTAACGGAGAACATACGAAAGCTTTGGAATATTATTTTCGGGCACTAGAACGAAATCCA  
TTCTTACCACAAGCTTTAAATAATATGGCCGTGATCTGTCATTAC---CGAGGAGAACAGG  
CCATTTCGACAGGGAGATTCGGAAATTGCGGAGGCTTGGTTTCGATCAAGCCGCTGAGTA  
TTGGAACAAGCTATAGCGCTTACTCCTGGAAATTATATTGAAGCACATAATTGGTTGA  
AGATCACAAAGCGTTTTGAA-----ATGAGTTGGCGATCAGAACGTATATGGATAGAACTT  
ATAGCGGGTCTCGAAAAAGAAGTAATTTCTGCTGGGCCTTTATCCTATTTTTAGGTTCA  
TTAGGATTCTTATTGGTTGGAACCTCCAGTTACCTTGGTAGGAATTTGATATCTTTATTTTC  
CGTCTCAGCAAATAGTTTTTGTTCACAAGGGATCGTGATGTCGTTCTATGGGATCGCG  
GGTCTCTTTATTAGCTCCTATTTGTGGTGCACAATTCATGGAATGTAGGTAGTGGTTAT  
GATCGATTTGATAGAAAAGAAGGAATAGTGTGATTTTTCGTTGGGGATTTCTTGAAA  
AAACCGTCGAATCTTCTCCGATCTTTATGAAAGATATTCAGTCCATCAGAATAGAAG  
TTAAAGAGGGTATTTATGCTCGTGTCTTTTATATGGAAATCCGAGGCCAGGGAGCC  
GTTCTTTGACTCGTACTGATGAGAAT---TTGACTCCACGAGAAATTGAACAAAAAGCT  
GCGGAATTGGCTTATTTCTTGCGTGTACCAATTGAAATATTT

>Ehretia

ATGGAAAGATGGTGGTTTAATTCGATGTTGTTTCTAAATAAATCAATGGACAGTCCTGG  
TCCTATTGAAAATACCAGTGAGAGTGAAGATCCGAATCTAAAAGATAGGGCTAAAAAC  
ATTCATAGTTACAGTAATCTTGATTCTTTATTCGGCGTCAAAGACATTCGGAATTTTCATC  
TCTGATGACACTTTTTTAGTTAGGGATAGTAATGGAGACAGTTATTCCATATATTTTGATA  
TTGAAAATCAGATTTTTGAAATTGACAACGATCAT-----TCTTTTCTGAGTGAAC TAGAA  
AGTTCTTTTTATAGTTATCGGAATTCTAGTTATCTGAATAATAGACATACGAGTGAAGAT  
CCGTA CTATAATCGTTACATGTATGATACTCAATATAAGTTGGAATAATCACATTAATAGTT  
GCATTGACAGTTATCTTCAG-----TCTCAAATCTGCATTGAGACTTCCATTATAAGTGGTA  
GTGATAATTACAGT-----TACATTTCTAGGTCCATTTGGGGTAGCGAGGGTTCCAGTATAC  
GAACCCGCACGAAGGGTAGTGATTTAACTATAAGAGAAAGCTCTAATGATCTCGATGTA  
ACTCAAAAATACAGACATTTGTGGGTTCAATGCGAAAATTGTTATGGATTAAATTATAA  
AAAAATTTGAAATCAAAAATGAATATTTGTGAACAATGTGGATATCATTGAAAATGA  
GTAGTTCAGATAGAATCGAACTTTCGATCGATCCAGGTACTTGGGATCCTATGGATGAA  
GACATGGTCTCTTTGGATCCATTGAATTTCAATTCGGAGGAGGAGCCTTATAAAGATCG  
TATTGATTCTTATCAAAGAAAGACAGGATTA ACTGAGGCTGTTCAAACGGGCATAGGCC  
GACTAAACGGTATCCCCTAGCAATTGGGGTTATGGATTTTCAGTTTATGGGGGGTAGTA

TGGGATCCGTAGTAGGGGAGAAAATAACTCGTTTGATTGAGTACGCTACCAATAAATTT  
CTACCTCTTATTATAGTGTGTGCTTCCGGGGGGGCACGTATGCAAGAAGGAAGTTTGAG  
CTTGATGCAAATGGCTAAAATATCGTCTGCTTTATATGATTATCAATCAAATAAAAAGTTA  
TTTTATGTATCAATCCTTACATCTCCTACTACTGGTGGGGTGACAGCTAGTTTTGGTATGT  
TGGGGGATATCATTATTGCCGAACCCAATGCCTACATTGCATTTGCGGGTAAAAGAGTA  
ATTGAGCAAACATTAATAAAAACAGTACCGGAAGGTTTACAAGCGGCTGAATATTTATT  
CCAGAAGGGCTTATTTGACCTAATCGTACCACGTAATCCTTTAAAAAGCGTTCTTAGTG  
AACTATTGAAGCTTCACGCTTTCTTTCCTTTGGATCAAATTCAATCAAGATGGTAACC  
ATTCGAGCCGACGAAATTAGTAATATTATCCGTGAACGTATTGAACAATATAATAGAGAA  
GTAAAGATTGTAAATACCGGTACCGTACTTCAAGTAGGCGATGGCATTGCTCGTATTCAT  
GGTCTTGATGAAGTAATGGCGGGTGAATTAGTAGAATTTGAAGAGGGTACAATAGGCAT  
TGCTCTGAATTTGGAATCAAATAATGTTGGTGTGTATTAATGGGCGATGGTTTGATGAT  
ACAGGAGGGAAGTTCTGTAAAAGCAACAGGAAGAATTGCTCAGATAACCAGTGAGTGA  
GGCCTATTTGGGTCGTGTTATAAATGCTCTGGCTAAACCTATTGATGGTAGAGGTGAAAT  
TTCAGCTTCTGAATCTCGATTAATTGAATCTCCTGCTCCAGGTATTATTTGCGGGCGTTC  
CGTATATGAACCTCTTCAAACCGGGCTTATTGCTATTGATTGATCGATGATCCCTATAGGACG  
TGGTCAGCGAGAATTAATTATTGGGGACAGGCAGACCGGTAAAACAGCAGTAGCCACA  
GATACGATTCTTAATCAACAAGGTCAAATGTAATATGCGTTTATGTAGCTATTGGTCAA  
AAAGCATCTTCTGTGGCCAGGTAGTAAATACTTTACAGGAAAGGGGGGCGATGGAAT  
ACACTATTGTGGTAGCCGAAACGGCGGATTCCCCTGCTACATTACAATATCTCGCTCCTT  
ATACAGGAGCAGCTCTGGCTGAATATTTTATGTACCGTGAACGACACACTTCAATCATT  
ATGATGATCCCTCCAAACAAGCACAAAGCTTATCGCCAAATGTCTCTTCTATTACGAAGA  
CCCCCTGGCCGCGAAGCTTATCCAGGGGATGTTTTTTATTTGCATTCACGCCTTTTGGA  
AAGAGCCGCTAAATCAAGTTCTAGTTTAGGTGAAGGAAGTATGACCGCCTTACCAATA  
GTTGAAACTCAATCGGGAGATGTTTCGGCTTATATTCCTACAAATGTAATTTCCATTACT  
GATGGACAAATATCTTATCTGCCGATCTATTCAATGCTGGAATCAGACCCGCTATTAAT  
GTGGGTATCTCCGTTTCCAGAGTGGGGTCTGCAGCTCAAATTAAGCCATGAAACAAG  
TAGCTGGTAAATTAATAATTGGAACTGGCGCAATTTGCAGAATTAGAAGCCTTTGCACAA  
TTTGCTTCTGATCTCGATAAAGCTACTCAGAATCAATTGGCAAGAGGTCAACGATTACG  
TGAATTGCTTAAACAATCCCAAGCAGCTCCTCTCGCGGTGGAAGAACAGATAATGACT  
ATTTATAACCGGAACAACGGTTATCTTGATTCAATAGAAATTGGACAGGTAAGGAAATT  
TCTTGTTGAGTTACGTACTTACGTAAAAACGAATAAGCCTCAGTTCCAAGAAATCATAT  
CTTCTACCAAGACATTTACTGAGGAAGCAGAAGCCCTTTTGAAAGAAGCTATTCAAGA  
ACAAATGGACCGTTTTTCTACTTCAAGAACAAGCAATGAGAATCAATCCTACAGCTTCT  
GGTTCTGGGGTTTCCACGCTTGAAAAAACCCTGGGGCGTATCGTCCAAATCATCG  
GTCCGGTACTAGATGTCGCCTTTCCGCCGGCAAGATGCCTAATATTTATAACGCTCTGG  
TAGTTAAAGGTCGAGATACTGTTGGTCAACCAATTAATGTGACTTGTGAGGTACAGCAA  
TTATTAGGAAATAATCGAGTTAGAGCTGTAGCTATGAGTGCTACAGATGGTCTAACGAG  
GGGAATGGAAGTGGTTGACACAGGAGCTCCTCTAAGTGTTCGGTTGGTGGAGCGAC  
TCTGGGACGAATTTCAACGTGCTTGAGAGCCTGTTGATAATTTAGGTCCTGTAGATA  
CTCGTACAACATCTCCTATTCATAGACCTGCACCCGCTTTTATAACAGTTAGATACAAAAT  
TATCTATTTTTGAAACAGGAATTAAGTAGTAGATCTTTTAGCCCTTATCGCCGTGGAG  
GAAAAATCGGACTATTCGGGGGAGCTGGAGTGGGTAAAACAGTACTCATTATGGAATT  
GATTAACAATATTGCCAAAGCTCATGGGGGTGTATCCGTATTTGGCGGAGTGGGTGAAC

GTACTCGCGAAGGAAATGATCTTTACATGGAAATGAAAGAATCTGGAGTTATTAATGAA  
GAAAATATTGCAGAATCCAAAGTAGCTCTAGTTTACGGCCAGATGAATGAACCGCCAG  
GAGCTCGTATGAGAGTTGGTTTGACTGCCCTAACTATGGCGGAATATTTCCGAGATGTT  
AATGAACAAGACGTACTTCTATTTATCGACAATATCTCCGTTTCGTTCAAGCAGGATCC  
GAAGTATCGGCCTTATTGGGTAGAATGCCTTCCGCTGTGGGTATCAACCCACCCTGAG  
TACCGAAATGGGTTCTTTACAAGAGAGAATTACTTCTACCAAAGCGGGGTCCATAACTT  
CTATTCAAGCAGTTTATGTACCCGCAGATGATTTGACCGACCCTGCTCCTGCTACGACA  
TTTGACATTTAGATGCTACTACCGTACTATCAAGAGGATTAGCTGCCAAAGGGATCTAT  
CCAGCAGTAGATCCTTTAGATTCAACGTCAACCATGCTTCAACCTCGGATCGTTGGTGA  
GGAACATTATGAAACTGCGCAAAGAGTGAAGCAAACCTTTACAACGTTATAAAGAACTT  
CAGGACATTATAGCTATCCTTGGGTTGGACGAATTATCTGAAGAGGATCGTTTAAACCGT  
AGCAAGAGCGCGAAAAATTGAGCGTTTCTTATCACAACCCTTTTTTCGTAGCAGAAGTA  
TTTACCGGTTCTCCAGGGAAATATGTTGGTCTAGCAGAAACAATTAGAGGGTTTCAATT  
GATCCTTTCCGGAGAATTAGATGGTCTTCCCTGAACAGGCCTTTTATTTGGTAGGTAATAT  
CGATGAAGCTACCGCGAAGGCTATGAACTTAGAAATGGAGAGCAATTTGAAGAAAATG  
ACCTTAAATCTTTGTGTACTGACCCCTAATCGAATTGTTTGGGATTCAGAAGTGAAAGA  
AATCATTTTATCTACTAATAGTGGTCAAATTGGCGTATTACCAAATCACGCCCTATTGCC  
ACAGCTGTAGATATAGGTATTTGAGAATACGCCTTAAACGACCAATGGGTAACGATGGC  
TCTGATGGGTGGTTTTGCTAGAATAGGTAATAATGAGATCACTGTTTTAGTAAATGATGC  
GGAGAAAGCTAGTGACATTGATCCACAAGAAGCTCAGAAAACCTTTGAAATAGCGGA  
AGCTAATTTGAGAAAAGCTGAAGGAAAGAGACAAACAATTGAGGCAAATCTAGCTCT  
CCGACGAGCTAGGACACGAGTAGAGGCTATCAATGCGATGATTATGAAAAATGTAACC  
GATCCTTTTCGTTTCT--GGCCACTGGCCATCTGCCGGGAGTTTCGGGTTTAATACCGATA  
TTTTAGCAACAAATCCAATAAATCTAAGTGTAGTGATTGGTGTATTGATCTTTTTTGGAA  
AGGGAGTGTTAAGTGATTTATTAGATAATCGAAAACAGAGGATTTGAATACTATTTCGA  
AATCCGAAGAACTGCGTGGGGGGGCCATTGAACAGCTGGAAAAAGCCCGGTCTCGC  
TTACGGAAAGTGGAATGGAAGCCGAGCAGTTTCGAGTGAATGGATACTCTGAGATAG  
AGCGAGAAAAATTGAATTTGATTAATTCAACTTATAAGACTTTGGAACAATTAGAAAAT  
TACAAAAATGAACTATTCAGTTTGAACAGCAAAGGGCGATTAATCAAGTACGACAAC  
GGTTTTTCAACAAGCCTTACAAGGAGCTCTAGGAACTTTGAATAGTTGTTTGAACAA  
CGAGTTACATTTACGCACCATTAGTGCCAATATTGGCATGTTGGGGGCGATGAAAGAAA  
TAACTGATATGAATCCACTGATTTCTGCCGCTTCCGTTATTGCTGCTGGATTGGCCGTAG  
GGCTTGCTTCTATTGGACCTGGAGTTGGTCAAGGGACTGCTGCGGGTCAAGCTGTAGA  
GGGTATCGCGAGACAGCCCGAGGCTGAGGGAAAAATACGAGGTACTCTATTGCTTAGT  
CTAGCTTTTATGGAAGCTTTAACAATTTATGGACTGGTTGTAGCATTAGCACTTTTATTT  
GCGAATCCTTTTGTATGAATGTTCTATCATGTTCCATCAACACACTTAAAGGGTTATAC  
GATATATCCGGTGTGGAAGTAGGCCAACATTTCTATTGGCAAATAGGGGGTTTCCAAGT  
CCATGGTCAAGTACTTATTACTTCTTGGGTTGTAATTGCTATCTTATTAGGTTTCAGCCGCT  
ATAGCTGTTTCGGAACCCACAAACCATTCCGACTGGGGGTCAGAATTTCTTCGAATATGT  
TCTTGAATTCATTCGAGATGTGAGTAAACTCAAATTGGAGAAGAATATGGTCCTTGGG  
TTCTTTTATTGGAACTATGTTTTTATTTATTTTGTCTAATTGGTCAGGAGCTCTTTTA  
CCTTGGAAAATCATACAATTACCTCATGGAGAGTTAGCCGCACCCACGAATGATATAAA  
TACTACTGTTGCTTTGGCTTTACTCACGTCAGTGGCATATTTCTATGCGGGTCTTAGTAA  
AAAGGGATTAGGTTATTTCCGGAAATATATTCAACCAACTCCAATCCTTTTACCCATCAA

CATCTTAGAAGATTTACAAAAGCCTTTATCGCTTAGTTTTCGACTTTTCGGGAATATCTT  
AGCTGATGAATTAGTAGTTGTTGTTCTTGTTTCTTTAGTACCTTCAGTCGTTCTATACCT  
GTCATGTTCTTGGATTATTTACAAGTGGTATTCAAGCTCTATTTTTTGCAACTTTAGCC  
GCGGCGTATATAGGTGAATCCATGGAGGGCCATCATATGATATTTTTCAACCTTAGAGCAT  
ATATTAACTCATATTTCTTTTTCGATCGTTTCAATTGTAATTACAATTCATTTGATAACCTT  
TTTAGTTGATAAACTGTAAAATATATGATTCATCAGAAAAGGGCATGATAGTTACTTT  
TTTCTGTATAACAGGATTATTAGTTACTCGTTGGATTTATTCAGGGCATTTCCTTAAGT  
GATTTATATGAATCATTAATTTTCCTTTCATGGAGTTTCTCTCTTATTCATATAGTTCCGTA  
T-----AAAAATAAAAATGATTTAAGCACAATAACTGGCCCGAGTGCTATTTTTACTCAAG  
GCTTTGCTACTTCAGGTCTTTAACTGAAATACATCAATCTGAAATATTAGTACCTGCC  
TTCAATCCGAATGGTTAATAATGCACGTAAGTATGATGATATTGGGCTATGCAGCCCTTT  
TATGTGGATCATTATTATCAGTAGCACTTCTAGTCATTACATTTCGAAAAAGAAGAAAGA  
TTTTTTGT-----AAAGAAATCGAATACATGAATGAAAGAAGCAATGTTTTACAAAATACG  
TCT-----GCTAAGAATTATTACAGATCCCAATTAATTCACCAATTGGATTATTGGAGTTA  
TCGGATTATTAGTCTAGGATTTATCTTTTTAACCGTAGGAATCTTTTCGGGAGCAGTATG  
GGCTAACGAAGCATGGGGATCCTATTGGAATTGGGACCCAAAGGAACTTGGGCATTC  
ATTACTTGGATCGTATTCGCGATTTATTTACATACTCGAACAATATAAATTTGCAGGGG  
GCAAATTCGCAATTGTGGCGTCTATAGGCTTTCTTATAATTTGGATATGCTATTTTGGGG  
TCAATCTATTAGGAATAGGGCTACATAGTTATGGTTCATTTGCATTAACAATGGCAAAAA  
AGAAAGTATTCACTCCCCTTTTCTATCTTGCATCTATAGTATTTTTGCCCTGGTGGATTTC  
TCTCTCATTTAATAAAAGTCTGGAATCCTGGGTACTAATTGGTGAATACTGGGCAATC  
CGAAATTTTTTTGAATGATATTCAAGAAAAGAGTATTCTAGAAAATTCATAGAATTAG  
AGAACTCCTCTTCTTGGACGAAATGATCAAAGAATACTCGGAGACACATCTCCAAAA  
ACTTCGTATA--ATCCACAAAGAAACGATCCAATTAATTAAGATACACAATGAGGATCGT  
ATCCATACAATTTTGCCTTCTCGACAAATCTAATCTGTTTTGTTATTCTAAGCGGTTATT  
CTATTTTGGGTAATGAAGAATGTTATTCTTAACTCTTGGACTCAGGAATTCCTATATA  
ACTTAAGCGACACAGTCAAAGCTTTTTCTATTCTTTTTATTAATGATTTATGTATCGGATT  
CCATTCACCACACGGCTGGGAATAATGATTGGCTCTGTCTACAAAGATTTTGGATTG  
TTCATAATGATCAAATTATATCTGGTCTTGTTTCCACTTTTCCAGTCATTCTCGATACAAT  
TTTTAAATATTGGATTTTCCGTTATTTAAATCGCCTATCTCCGTCACTTGTAGTTATTTATC  
ATTCAATGAATGACATGCCTATTGGTGTTCAAAAGTACCTTTCCGGAGTCCTGGAGAG  
GAAGATGCATCTTGGGTTGACGTATAACAACCGACTTTATCGAGAAAGATTACTTTTTTTA  
GGTCAAGAGGTTGATAGCGAGATCTCGAATCAACTTATTGGTCTTATGGTATATCTTAGT  
ATTGAGGATGATACCAAGGATCTATATTTGTTTATAAACTCTCCCGGGGGATGGGTAATA  
CCTGGAGTAGCTATTTATGATACTATGCAATTTGTGCGACCAGATGTCCATAACAATATGC  
ATGGGATTAGCCGCTTCAATGGGATCTTTTATCCTGGTTCGGAGGAGAAATTACCAAACG  
TCTAGCATTCCCTCACGCCAGGGTAATGATCCATCAACCTGCTAGTTCTTTTTATGAGGC  
ACAAACGGGAGAATTTATCCTGGAAGCGGAAGAAGTCTGAAACTGCGTGAAACCCT  
CACAAGGGTTTATGTACAAAGAACAGGCAAACCATTATGGGTTGTATCCGAAGATATGG  
AAAGAGATGTTTTTATGTCAGCAACGGAAGCCCAAGCTTATGGAATTGTTGATCTTGTA  
GCGGTTGAAATGAAAGAACAAAATGGATTCATGAAGGTTAATACTGAATCGCTTC  
CCAACGGTATGTTCCGGGTTCTGTTTAGATAATGAAGATCTGATTCTAGGTTATGTTTCAG  
GAAAGATCCGACGTAGTTTTATACGGATACTGCCAGGAGATAGAGTCAAATTTGAAGT  
AAGTCGTTATGATTCCACCAGAGGACGTATAATATATCGACTCCGCAACAAGGATTTCGA

AAGATATGGAGGAAATTCAAAGATATTTACAG---GATAGATCTCAACAACACGACTGCC  
TATATCCACTTATCTTTTCAGGAGTATATTTATGCACTTGCTCATGATCATGGTTTACCAGG  
TTATGACAATAAATCCAGTTTACTAATTGTGAAACGTTTAATTACTCGAATGTATCAACA  
AAATCATTTTTTTTATTTCTGTTAATGATTCGAACCAAAATCAATTTTTTGGGAAGAATTT  
GTATTCTCAAATGATATCAGAGGGATTTGCATTTATTGTGCGAAATGCCGTTTTCTCTACG  
ATTAATATCTTCTCTAATATTCAAATCTCATAATTTACGGTCAATTCATTCATATTTCCCT  
TTTTAGAGGACAACCTTTTCACATTTAAATTGTGTGTTAGATATACTAATACCCACCCCG  
TTCATCCGGAAATCTTGGTTCAAACCTTTCGCTTTTGGGTAAAAGACGCCTCTTCTTTG  
CATTTATTACGATCTTTCTCCACGAGTATTGGAATAAT-----CTTATTACCCCCAGC---TCT  
TCTTTTTCAAACAAAGATTATTCTTCTTCTTATATAATTCTCATGTATGTGAATACGAAT  
CCATTTTCGTCTTTCTCCGCAATCAATCTTCTCATTTACGATCAACATCTTTTGGAGCCC  
TTCTTGAACGAATATATTTCTATGGAAAAATAGAACGTCTTGTAGAAGTCTTTGCT---GA  
TTTTACCCTATGGTTGTTCAAGGATCCGTTACACATTATGTTAGGTATCAAGGAAAATT  
AATTTTGGCTTCAAAGGGGACGCCTCTTTTGATGAATAAATGGAAATATTACCTTGTCA  
ATTTTGGCAATGTTATTTTACCTGTGGTCGCGCCCAGGAAGAATCTATATAAACCAAT  
TATCCAATCATCCCTTGACTTTATGGGCTATCTTTCAAGTGTGCGACTAAACCCTTCAA  
TGGTACGGAGTCAAATGCTAGAAAATGCATTTCTAGTTAATAATGTTATT-----AGAAGT  
TTGATACTCTTCTTCCAATTATTCCTCTGATTGGATCATTGGCTAAAGCGAAATTTTGTA  
ACATATTAGGGAATCCCATTAGTAAGCCGGTTCGGGCTGATTTATCAGATTCTGATATTAT  
TGATCGATTTGGGCGTATATGCAGAAATCTTCTCATTATCATAGCGGATCTTCGAAAAA  
AAAGAGTTTGTATCGAATAAAGTATATACTTCGACTTTCTTGTGCTAAAACCTTTGGCTCG  
GAAACACAAAAGTAGTGTACGTGCTTTTTTTGAAAAGATTCGGCTCGGAATTATTGGAA  
GAATTTCTTACATCGGAAGAACAAGTTCTTTCTTTGACCTTCCCAAGAAGGATTTGGTA  
TTTGGATATTATTTGTATCAATGATCTGGCTAATCATCAAATGATAATTGAT---ACAACAG  
AAATAGAA---GCTATCAATTCTTTTTCCAGATTGGAATCT---TAAAAGAAATCTATGGGA  
TCATATGGACTTGTCCCTATTTTGATTCTTGTATTAGGAATCACAATCGGCGTTCTAGT  
AATTGTTTTGGTTAGAAAGAGAAATTTCTGCAGGGATACAACAACGTATTGGCCCCGAAT  
ATGCCGGTCCCTTGGGAATTCTTCAAGCCCTAGCAGATGGTACAAAACCTACTTTTCAA  
GAGAATCTTCTTCCATCTAGAGGAGATGCTCGTTTATTCAATATCGGACCGTCCATAGCA  
GTCATATCAATTTACTAAGTTATTCAGTAATTCCTTTTGGCTATCACCTTGTCTAGCTG  
ATCTTAGTATTGGCGTTTTTTTTATGGATCGCCATTTCAAGTATTGCTCCGGTTGGACTTCT  
TATGTCAGGATATGGGTCAAACAATAAATATTCCTTTTTAGGTGGTTTACGGGCTGCTGC  
TCAATCAATTAGTTATGAAATACCATTAACTCTATGTGTGTTATCAATATCTCTACTATCTA  
ACAGTTCAAGTACAGTTGATATAGTTGAAGCGCAGTCAAATATGGTTTTTTGGGGGTGG  
AATTTGTGGCGTCAACCTATAGGGTTTATCATTTTTCTAATTTCTTCTCTAGCCGAGTGT  
GAGAGATTACCTTTTGATTTACCAGAAGCAGAAGAAGAAATTAGTAGCAGGTTATCAAA  
CCGAATATTCCGGTATCAAATTTGGTTTATTTACGTTGCTTCGTATTTGAATCTACTAGT  
TTCTTCATTAATTTGTAACAGTTCTTTACTTGGGGGGTTGGAATTTTTCTATTCCGTATATAT  
TAGTTCCTGAACTTTTTGACATAAATAAAGCGGGTAAAGTCTTTGGAACAATAATCGGT  
ATCTTATTACATTATCTAAAACCTTATTTGTTCTTGTTCATTCTATTGCAACAAGATGGA  
CTTTACCGAGGCTGAGAATGGACCAACTATTAATCTTGGATGGAAATTTCTTTTACCTA  
TTCTTTAGGTAATCTATTATTAACAACCTTCGTCCCAACTTCTTTCACTGATGATCTGGCA  
TGACAGAATGAAAACCTTCATTCTCGATTCTACGAGAATTTTTATGAAAGCCTTTCATTT  
GCTTCTCTTCGATGGAAGTTTGATTTTCCAGAATGTATCCTAATTTTTGGCCTAATTTCTT

CTTCTGATGATCGATTCAACCTCTGATCAAAAAGATATACCTTGGTTATATTTTCATCTCTT  
CAACAAGTTTAGTAATGAGCATAACGGCCCTATTGTTCCGATGGAGAGAAGAACCTATG  
ATTAGCTTTTCGGGAAATTTCCAAACGAACAATTTCAACGAAATCTTTC AATTTCTTATT  
TTACTATGTTCAACTCTATGTATTCTCTATCCGTAGAGTACATTGAATGTACAGAAATG  
GCTATAACAGAGTTTCTCTTATTTCGTATTAACAGCTACTCTAGGAGGAATGTTTTTATGC  
GGTGCTAACGATTTAATAACTATCTTTGTAGCTCCAGAATGTTTCAGTTTATGCTCCTAC  
CTATTATCTGGATATACCAAGAAAGATGTACGGTCTAATGAGGCTACTATGAAATATTTA  
CTCATGGGTGGGGCAAGCTCTTCTATTCTGGTTCATGGTTTCTCTTGGCTATATGGTTCA  
TCCGGGGGAGAGATCGAGCTTCAAGAAATAGTGAATGGTCTTATCAATACACAAATGTA  
TAACTCCCCAGGAATTTCAATTGCGCTCATATTCATCACTGTAGGAATTGGGTTCAAGCT  
TTCCCCAGCCCCTTCTCATCAATGGACTCCTGACGTATACGAAGGATCTCCCACTCCAG  
TCGTTGCTTTTCTTTCTGTTACTTCGAAAGTAGCTGCTTCAGCTTCAGCCACTCGAATTT  
TCGATATTCTTTTATTCTCATCAACGAATGGCATCTTCTTCTGGAAATCCTAGCTAT  
TCTTAGCATGATATTGGGAAATCTCATTGCTATTA CTCAAACAAGCATGAAACGTATGCT  
TGCATATTCGTCCATAGGTCAAATCGGATATGTAATTATTGGAATAATTGTTGGAGACTC  
AAATGATGGATATGCAAGCATGATAACTTATATGCTGTTCTATATCTCCATGAATCTAGGA  
ACTTTTGCTTGCATTGTATTATTTGGTCTACGTACCGGAACTGATAACATTCGAGATTAT  
GCAGGATTATACAGAAAGATCCTTTTTTGGCTCTCTCTTTAGCCCTATGTCTCTTATCC  
CTAGGAGGTCTTCCTCCACTAGCAGGTTTTTTTCGGAAA ACTCTATTTATTCTGGTGTGG  
ATGGCAGGCAGGCCTATATTTCTTGGTTTTAATAGGACTCCTTACAAGCGTTGTTTCTAT  
CTACTATTATCTAAAATAATCAAGTTATTAATGACTGGGCGAAACCAAGAAATAACCC  
CTCACGTGCGAAATTATAGAAGATCCCCTTTAAGATCAAACAATTCCATCGAATTGAGT  
ATGATTGTATGTGTGATAGCATCTACTATAACCAGGAATATCAATGAACCCGATTATTGCAA  
TTGCTCAGGATACCCTTTTTATGTTTCTGCTCTACGAATATGATATTTTTTGGGCATTTTT  
AATAATATCAAGTCTTATTCCTATTTTGGCATTTTTGATTTCCGGAGTTTTAGCCCCGACT  
AGCAAAGGACCAGAGAAACTTTCTAGTTACGAATCGGGTATAGAACCAATGGGTGACG  
CTTGTTACAATTTCGAATCCGTTATTATATGTTTGCTCTAGTTTTTGTGTTTTTGTATTT  
GAAACGGTTTTTCTTTATCCATGGGCAATGAGTTTCGATGTATTGGGTGTATCTGTATTTA  
TAGAAGCTTTAATTTTCGTGCTTATCTTAATTGTTGGTTTAGTTTATGCATGGCGAAAGG  
GGGCATTGGAATGGTCTACGAATGATTTTCCCTTGGTTAACAACAATTGTAGTTTTGCCA  
ATATTTGCGGGTTCCCTAATTTTCTTTCTTCCCATAGAGGGAATAGGGTAATTAGATGG  
TATACAATATGTATATGTATTTTGGAACTCCTTCTAACGACCTATGCATTCTGTTATCATT  
CCAATCGGACGATCCATTAATCCA ACTAGTAGAGGATTTTAAATGGATCAAATTTTTTGA  
TTTCCATTGGAGATTAGGAATAGATGGGCTTTCTATAGGACCCATTTTACTGACGGGATT  
CATCACTACTTTAGCTACTTTAGCGGCTCGGCCAATTACTCGGGATTCTCGATTATTCCA  
TTTCTGATGTTAGCAATGTACAGCGGTCAAATAGGATCATTCTTCTCGGGACCTTTT  
ACTTTTTTTCATCATGTGGGAGTTAGAATTAATTCCTGTTTATTACTTCTATCCATGTGG  
GGAGGAAAGAAACGTCTGTACTCAGCTACAAAATTTATTTTGTACACAGCAGGAGGTT  
CCGTTTTTCTCTTAATGGGGTTCTGGGTATCAGTTTATATGGTTCTAATGAGCCAACAT  
TAAATTTTGAACGTCAGTTAATCAGTCGTATCCTGTGGCTTTAGAAATAATATTTCTATAT  
TGGATTTTTTATGCTTTTGTGTCAAATCGCCGATTATACCCCTACATACATGGTTACCA  
GATACCCATGGAGAAGCACATTACAGTACTTGTATGCTTCTAGCGGGAATCTTATTTAAA  
AATGGGAGCGTATGGGTTAGTTCGTATCAATATGGA ACTATTACCTCACGCCATTCTAT  
ATTTTCTCCTTGGTTGGTAATAGTAGGTACCATGCAAATAATCTATGCAGCTTCAACATC



TCTTGGCCAACGCAATTTAAAAAAGAATAGCCTATTCCCTCTGTATCCCATATGGGTTT  
CATAATTATAGGAATTGGTTCTATAACAGATACAGGGCTGAATGGAGCCCTTTTACAAAT  
AATCTCTCATGGATTTATTGGTGTCTGCACTTTTTTCTTGGCAGGAACAACGTATGATAG  
AATACGTCTTGTTTATCTTGACGAAATGGGCGGAATAGCTATCCCCCTGCCAAAAATATT  
CACGATGTTCACTAGCTTTTCGATGGCTTCCCTTGCATTACCAGGTATGAGTGGTTTTGT  
TGCCGAATTGATAGTATTTTTTGAATAATTACCAGCCAAAAATATCTTTTAATGCCAAA  
AATACTAATTACTTTTTGTAATGGCAATTGGAATGATATTAACCTCTATTTATTATTATCTA  
TGTTACGCCAGATGTTCTATGGATACAAGCTTTTTAATGCCCAAACCTCTATTTTTTTGA  
TTCTGGACCGCGAGAGTTATTTCTTTCGATCTGTATCTTTTTACCCGTAATAGCAATTGG  
TATGTACCCGGATTCGTTCTTTCACTATCGGTTGACAAGGTCGAAGTTATTCTATCTAA  
TTCTTTTTATAGAATGATACTCGAACATGTACTTGTTTTGAGTGCCTATTTATTTCTATC  
GGAATCTATGGATTGATCACAAGTCGAAATATGGTTAGAGCCCTTATGTGCCTTGAACCT  
ATATTGAATGCAGTTAATATCAATTTTGTAACATTTTCTGATTTTTTTGATAATCGTCAATT  
AAAAGGAGACATTTTCTCAATTTTGTATAGCTATTGCAGCCGCTGAAGCAGCTATTG  
GACCCGGCTATTGTTTCATCAATTTATCGTAATAGAAAATCAACTCGTATCAATCAATCAA  
ATTTGTTGAATAAAATGGAACAGACATATCAATATGCGTGGATCATACTTTGCTTCCGC  
TTACAGTTCCTATGTTAATAGGAGTGGGACTTCTTCTTTTTCCGACAGCAACAAAAAAT  
CTTCGTCGTATGTGGGCTTTTCAGAGTATTTTATTGTTAAGTATAGTCATGATTTTTTCAA  
TCAATTTGTCTATTCAGCAAATAAATAGCAGTTCTATCTATCAAAATGTATGGTCTTGGAT  
CATTATAATGATTTTTCTTTAGAATTCGGCTACTTGATCGATCCACTTACTTCTATTATGT  
CAATATTAATCACTACTGTTGGAATTATGGTCTTATTTATAGTGATAATTATATGTCTCAT  
GATCAAGGATATTTGAGATTTTTTGCTTATATGAGTTTTTTCAGTACTTCCATGTTGGGAT  
TAGTTACTAGTTCTAATTTGATCCAAATTTATATTTTTTGGGAATTGGTTGGAATGTGTTT  
CTATCTATAATAGGGTTTTGGTTCGCACGACCTGTTGCGGCAAATGCTTGTCAAAAAG  
CGTTTGTAACATAATCGTGTAGGGGATTTGGTTTATTATTAGGAATTTAGGTTTTTATTG  
GATAACTGGTAGTTTCGAATTTCCGGATTTATTCGAAGTATTCAATAATAATGAGGTCAA  
TTTATCTTTGCTACTTTATGTGCCATTCTATTATTTGCCGGTGCAGTTGCTAAATCTGCA  
CAATTTCCACTTCATGTATGGTTACCGGATGCCATGGAGGGACCTACTCCTATTTCCGGCT  
CTTATCCATGCTGCTACTATGGTAGCAGCGGAATTTTTCTTGTAGCTCGCCTTCTTCCT  
CTTTTCATAGTTATACCTTATATAATGAATTTTATCGCATTGATAGGAATAATAACAGTATT  
CTTAGGAGCTACTTTAGCTCTTGCTCAAAAAGACATTAAGGGGTTTAGCCTATTCCA  
CAATGTCTCAGTTGGGTTATATGATGTTAGCTCTAGGTATGGGGTCTTATCGAAATGCTT  
TATTTCAATTTGATTAATCATGCTTATTCCAAAGCATTATTATTTTAGGATCCGGATCCGTT  
ATTCATTCAATGGAAACTGTTGTTGGCTATTCTCCAGATAAAAGTCAGAATATGGTCTT  
ATGGGAGGTTTAACAAAACATGTACCAATTACCAAAACTGCTTTTTTATTAGGTACTACT  
TTCTCTTTGTGGTATTCCACCTCTTGCTTGTTTTTGGTCTAAAGATGAAATTCTTAATGAT  
AGTTGGTTGTATTACCGATTGTCGCAATAATAGCTTGGGCCACAGCGGGATTTACCGC  
ATTTTATATGTTTCGGATCTATTTACTTACTTTTGAGGGGCATTTAAATGTTCAATTTCAA  
AATTACAGTGGCAAACAAAATACCCCTTCTATTATTATCTCTGTGGGGTAAAAGGGG  
TTCGAAAGGAATTAACAAA---TAGTAACA-----ATCAATTTTTTTTCATTTAAGAATAA  
AAAGCCTTATTCCATCCTTCGGAATCGGATAATACTATGTTATTTCCCCTACTTATATTG  
GGCCTATTTACTTTGTTTCGTTGGATCTCTAGGAATTCCTTTC---GTGGATATATTATCAA  
ATGGTTAGCTCCGTCTATAAACCTTTTGCATCAAAAATCGAAT---TCAATGGATTGGTATG  
AATTTTTGAAAGATGCTGTTTTTTTTCAGTCAGTATAGCTTATTTCCGGAATATTGATAGCGT

CCTTTTTATATAAACCTATTTATTCTTCTTTACAAAATTTGACTTAATTAATTCATTTGTT  
ATTGTTTGGGACAAAATTCTAAATGGCATATACGATTGGTCATATAATCGTGCTTACATA  
GATGCTTTTTATAGAACATCCTTAACGGGAGGGATAAGAGGATTGGCTGAATTAECTCA  
TCTTTTTGATCGACGAGTAATTGATGGAATTACGAATGGAGTTGGTGTATGAGTTTCTT  
TGTAGGAGAAGGTATCAAATATGTAGGGGGCGGG---CGTATCTCTTCGTATCTTTTCTTG  
TATTTATTTTCTGTATCAATCTTTTTATTAATTTATTACATGGATTTACCTGGACCAATACA  
TGATTTTCTTTTAGTCTTTCTGGGATCGGGTCTTATATTAGGAGGTCTAGGAGTAGTATTA  
CTTCCCAATCCAATTTATTCTGCCTTCTCGTTGGGGTTGGTTCTTGTCTGTATATCCTTAT  
TCTATATTCTATCGAACTCCTATTTTGTAGCTGCCGCACAGCTCCTTATTTACGTCCGGAGC  
TATAAATGTTTAAATCATTTTTGCTGTGATGTTTCATGAATGGTTCAGAATATTACAAAGAT  
TTTCATCTTTGGACCGTTGGGGATGGAGTTACTTCGATGGTTTGTACAAGTCTTTTTTATT  
TCACTAATTACTACTATTCTAGATACGTCATGGTACGGGATTATTTGGACTACAAAATCA  
AACCAGATTATAGAGCAAGATTTGATAAGTAATAGTCAACAAATTGGAATTCATTTATCA  
ACAGATTTTTTTCTTCCATTTGAATTCATTTCAATAATCTTTTAGTTGCTTTAATAGGTG  
CAATTGCTGTAGCTCGTCAAATGACTGCACCAGTTACAAGAAAAGACCTCATGATAGT  
AAATATGGGTCCCTCATCACCCATCAATGCATGGTGTCTTCGACTCATCGTTACTCTAGA  
TGGTGAAGATGTTATTGACTGTGAACCAATATTGGGTATTACACAGAGGGGATGGAGA  
AAATTGCGGAAAACCGAACAAATTATACAATATTTGCCTTATGTAACACGTTGGGATTATT  
TAGCTACTATGTTACAGAAAGCAATAACCGTAAATGGACCCGAACAGTTAGGAAATATT  
CAAGTACCTAAAAGGGCTAGCTATATTAGAGTCATTATGTTGGAGTTGAGTTCGTATAGCT  
TCCATTTGTTATGGCTAGGCCCTTTTATGGCAGATATTGGGGCACAGACCCCTTCTTC  
TATATTTTTCGAGAAAGAGAACTGATATATGACCTATTCGAAGCTGCCACTGGTATGCGA  
ATGATGCATAATTATTTTCGTATTGGAGGAGTAGCTGCTGATCTACCTTATGGCTGGATA  
GATAAATGTTTGGATTTTTGCGATTATTTTTTAACAGGGGTTGCTGAATATCAAAGCTT  
ATTACACGGAATCCTATTTTTTTAGAACGAGTTGAAGGCGTAGGCATTATTGGCGGAGA  
AGAAGCAAAAATTGGGGTTTATCAGGACCAATGCTACGAGCTTCCGGAATACAATGG  
GATCTTCGTAAAGTTGATCATTATGAGTGTTACGACGAATTTGATTGGGAGGTTCAAGTG  
GCAAAAAGAGGGGGATTATTAGCTCGTTATTTAGTACGAATCAGTGAAATGACAGAA  
TCCATAAAAATTATTCAGCAGGCTCTGGAAGGAATCCCAGGGGGCCCTATGAGAATTT  
AGAAATCCGACGCTTTGATAAAGTAAAGATCCCGAATGGAATGATTTTGAATATCGAT  
TTATTAGTAAAAACCTTCTCCGACTTTTGAATTGTGCAAGCAAGAACTTTATGTGAGA  
GTCGAAGCCCCAAAAGGAGAATTGGGAATTTTTTTGATAGGAGATCAGAGTGTTTTTC  
CTTGGAGATGGAAAATTCGCCACCGGGTTTTATCAATTTGCAAATTTCTTCCCTCACTTA  
GTTAAAAGAATGAAATTGGCTGATATTATGACAATACTAGGTAGCATAGATATCATTATG  
GGAGAAGTTGATCGTATGTTCCCTATGGTAACTGAGTTCATGAATTATGGTCAACAAAC  
AATACGAGCAGCCAGGTACATTGGTCAAGGTTTCATGATTACCTTGTCACGCGAATC  
GTTTACCAGTAACTATTCAATACCCTATGAAAAATTGATCGCATCGGAACGTTTCCGA  
GGCCGAATCCACTTTGAATTTGATAAATGCATTGCTTGCGAAGTATGTGTTTCGTGTATGT  
CCTATAGATCTACCCGTTGTTGATTGGAAATTGGAACTGATATTCGAAAGAAACAATT  
GCTTAATTACAGTATTGATTTTGGGGTCTGTATATTTTGTGGTAATTGTGTTGAGTATTGT  
CCAACAAATTGTTTATCAATGACTGAAGAATATGAACTTTCTACTTATGATCGTCACGAA  
TTGAATTATAATCAAATTGCCTTGGGTTCGGTTACCGATGTCAGTAATTGACGATTACACA  
ATTCGAACAATTCGAATTCA-----ATGCAGGGTTCGTTT  
GTCTGCTTGGCTAGTCAAGCATGGACTAATTCATAGATCTTTGGGCTTTGATTACCAAG

GAATAGAGACTTTACAAATAAAGCCCCGAGGATTGGCATTCCATTGCTGTCATTTTGTAT  
GTATATGGTTACAACCTATCTACGCTCCCAATGTGCCTATGATGTAGCACCCGGCGGACTG  
TTAGCTAGTGTCTATCATCTTACGAGAATAGAGTATGGTGTGGATCAACCAGAAGAGGT  
ATGCATAAAAAGTATTTGCCTCAAGGAGGAATCCGAGAATTCCGTCCGTTTTCTGGGTTT  
GGAAAAGTGTGGATTTTCAAGAACGAGAATCTTATGATATGTTGGGAATCTCTTATGAT  
AATCATCCACGCTTGAAACGTATCTTAATGCCTGAAAAGTTGGATAGGATGGCCCCCTACG  
TAAGGATTATATTGCCCCCAATTTTTATGAAATACAAGATGCTCATATGGGCAATGAGTT  
TCGATGTATTGGGTGTATCTGTATTTATAGAAGCTTTAATTTTCGTGCTTATCTTAATTGTT  
GGTTTAGTTTATGCATGGCGAAAGGGGGCATTGGAATGGTCTTAGCTCCTGAATGTTCA  
GACAATAAAAAGAAAAAAGGAAAAAAAAGATTGAGACA---GTTATGAATTCCATTGA  
GTTTCCTTTACTTGATCGAACAACCCCAATTCAGTTATTTCAACTACATTAATGATCT  
TTCAAATTGGTCAAGACTCTCTAGTTTATGGCCGCTTCTCTACGGTACCAGTTGTTGCTT  
CATTGAATTTGCTTCACTAATAGGCTCGCGATTTCGACTTTGATCGTTATGGACTAGTACC  
AAGATCGAGTCCTAGACAAGCGGATCTAATTTTAAACAGCCGGAACAGTAACAATGAAA  
ATGGCCCCCTCTTTAGTGAGATTATATGAACAAATGCCGGAACCAAAATATGTTATTGCT  
ATGGGAGCGTGTACAATTACAGGGGGGATGTTTCAGTACCGATTCTTATAGTACTGTTTCG  
GGGGGTGCATAAGCTAATTCCTGTAGATGTCTATTTGCCTGGCTGTCCACCTAAACCGG  
AAGCAGTTATAGATGCTATAACAAAACCTTCGTAAGAAAATATCTCGAGAAATCTATGAA  
GATAGAATTAGGTCTCAACGAGCGAATCGGTGTTTTACTACCACTCACAAGTTTCATGT  
TGGACGCAGTATTCATACTGGAATTATGATCAAAGATTCCTTTATCAACCGTCATCTAC  
TTCAGAGATCCCTACTGAAACTTTTTTCAAATACAAAAGTTCAGCATCTTCCCACGAAT  
TAGTGAATATGCAAACCTAGAAATACTTTTTCTTGGATAAAGGAACAGTACTCGATCTA  
TTTCCGTATCGCTCATGATATATATCATAACTCGGACATACATTTCAAATGCATATCCCATT  
TTTGACAGCAGGGTTATGAAAATCCACGAGAAGCGACTGGGCGTATTGTATGTGCCA  
ATTGTCATTTAGCTAATAAGCCCGTGGAGATTGAGGTTCCACAAGCGGTAATTCCTGAT  
ACTGTATTTGAAGCAGTTGTTTCGAATTCCTTATGATATGCAACTGAAACAAGTTCTTGCT  
AATGGTAAAAAAGGGGGTTTGAATGTAGGGGCTGTTCTTATTTTACCGGAAGGGTTTG  
AATTAGCTCCTCCCGATCGTATTTCTCCCGAGCTGAAAGAAAAGATAGGCAATTTATCT  
TTTCAGAGCTATCGCCCCAATAAAAAAATATTCTTGTGATAGGCCCCGTCCCTGGTCA  
GAAATATAGTGAAATCACCTTTCCTATTCTTCCCGGATCCTGCTACTAAGAAGGATGT  
TCACTTCTAAAATATCCTATATACGTAGGCGGGAACAGGGGAAGGGGTCAGATTTATC  
CCGACGGGAGCAAGAGTAACAATACAGTTTATAATGCTACAGCAACGGGTATAGTAAG  
TAAAATCATACGAAAAGAGAAGGGGGGATATGAAATAACCATAACAGATGCGTCCGGAT  
GGACGTCAAAGTGGTTGATATTATCCCTCCAGGACCAGAACTTCTTGTTCAGAGGGCG  
AATCTATCAAATTTGATCAACCATTAACAAGTAATCCTAATGTGGGCGGATTTGGTCAG  
GGAGATGCAGAAATAGTACTTCAAGATCCATTACGTGTTCAAGGCCTTTTGTCTTCTT  
GGCATCTGTTATTTTGGCACAAATCTTTTTGGTTCTTAAAAAGAAACAGTTCGAGAAGG  
TTCAATTAGCAGAAATGAATTTTCATGAGTAAAGTCTATGATTGGTTTCGAAGAACGTCTT  
GAGATTCAGGCGATTGCGGATGATATAACTAGTAAATACGTTCCCTCCTCACGTCAATATA  
TTTTATTGTTTAGGGGGGATTACGCTTACTTGTTTTTTAGTACAAGTAGCTACAGGGTTT  
GCTATGACCTTTTACTATCGTCCGACCGTTACTGAGGCTTTTGTCTTGTTCATAACATA  
ATGACTGAAGCTAACTTTGGTTGGTTAATCCGATCAGTTCATCGATGGTCCGCAAGTAT  
GATGGTCTTAATGATGATCCTGCATGTGTTTCGTGTGTATCTCACCGGTGGGTTAAAAA  
ACCTCGCAATTGACTTGGGTTACAGGTGTGGTTTTGGCTGTATTGACCGCATCTTTTG

GCGTAACCGGTTATTCCTTACCTCGGGACCAAATTGGTTATTGGGCAGTTAAAATTGTA  
ACAGGTGTACCTGAAGCTATTCCCTGTAATAGGATCACCTTTGGTAGAATTATTGCGCGG  
AAGTGCTAGTGTGGGACAATCCACTTTGACTCGTTTTTATAGTTTACACACTTTTGTATT  
GCCGCTTCTGACTGCCGATTTATGTTAATGCACTTTCTAATGATACGTAAACAAGGTAT  
TTCTGGTCCTTTAATGGGAGTAACAAAAAACCAGACTTGAATGATCCTGTATTAAGAG  
CTAAATTAGCTAAAGGGATGGGTCATAATTATTACGGAGAGCCCGCATGGCCCAATGAT  
CTTTTATATATTTTTCCAGTAGTAATTTTAGGTACTATTGCATGTAACGTAGGCTTAGCGG  
TTCTAGAACCATCAATGATTGGTGAACCGGCAGATCCATTTGCAACCCCTTGGAATA  
TTACCTGAATGGTATTTCTTTCCCGTATTTCAAATACTTCGTACAGTGCCCAATAAATTAT  
TGGGTGTTCTTTAATGGTTTCAGTACCCGCGGGATTATTAACAGTACCTTTTTTAGAGA  
ATGTTAATAAATCCAAAATCCATTTCCGGCGTCCAGTAGCGACAACCGTTTTTTTTGATCG  
GTACCGCAGTTGCCCTTTGGTTGGGGATTGGTGCAACATTACCTATTGATAAATCCCTAA  
CTTTAGGCTTTTTTCATGATTGAAGTTTTTCTATTTGGAATCGTGTAGGCCTAATTCCTAT  
TACTTTGGCTGGATTATTCGTAACCTGCATATTTACAATACAGGCGTGGTGATCAATTGGA  
CCTTATGCTTACTATAACTAGTTATTTTGGTTTTCTACTAGCGGCTTTAACTATAACCTCA  
GCTCTATTTATTGGTCTGAGCAAGATACGACTTATTATGGATATAGTAAGTCTCGCTTGG  
GCTGCTTTAATGGTAGTCTTTACATTTTCCCTTTCACTCGTAGTGTGGGGAAGAAGTGG  
ACTCATGATTATTCGTTCCCGGAACCAGAAGTAAAAATTTGGTAGATAGGGATCCCG  
TAAAACTTCTTTTCGAGGAATGGGCCAGACCGGGTCATTTCTCAAGAACAATAGCTAA  
AGGGCCTGATACTACCACATGGATCTGGAACCTACATGCTGATGCTCACGATTTTCGATA  
GCCATAACCAGTGATTGGAGGAGATCTCTCGAAAAGTATTTAGTGCCCATTTTCGGTCAA  
CTCTCCATCATCTTTCTTTGGCTGAGCGGCATGTATTTCCACGGTGCTCGTTTTTCCAAT  
TATGAGGCGTGGCTAAGTGATCCAACCTCACATTGGACCTAGCGCCCAGGTGGTTTTGGC  
CAATAGTGGGCCAAGAAATATTGAATGGTGATGTAGGCGGGGTTTTCCGAGGAATACA  
AATAACCTCTGGTTTTTTTTTCAGATTTGGCGAGCATCTGGAATAACTAGTGAATTACAAC  
TCTATTGTACCGCAATTGGTGCATTGGTCTTTGCAGCGTTAATGCTTTTTGCTGGTTGGT  
TTCATTATCATAAAGCGGCTCCAAAATTGGCTTGGTTTTCAAGATGTAGAATCTATGTTGA  
ATCACCATTTAGCGGGGCTACTAGGACTTGGGTCTCTCTTTGGGCGGGGCATCAAGTT  
CATGTATCTTTACCGATTAACCAATTTCTAAACGCTGGAGTAGATCCTAAAGAGATACCA  
CTTCCTCATGAATTTATCTTGAATCGGGATCTTTTGGCTCAACTTTATCCCAGTTTTGCT  
GAGGGAGCAACCCCACTTTTCACCTTGAATTGGTCAAATATGCGGAATTTCTTACTTT  
TCGTGGAGGATTAGATCCAGTAACTGGGGGTCTATGGCTGACTGATATTGCTCATCATCA  
TTTAGCTATTGCAATTTTTCCTGATAGCGGGTCACATGTATAGGACCAACTGGGGCAT  
TGGTCATGGTATAAAAAGATATTTTAGAAGCTCATAAAGGTCCATTTACAGGTCAGGGCC  
ATAAAGGCCTATATGAGATCCTAACAACGTCATGGCATGCTCAATTATCTCTTAACCTAG  
CTATGTTAGGCTCTTTAACCATTGTTGTAGCTCACACATGTATTCCATGCCTCCTTATCC  
ATATCTAGCTACTGACTATGGTACACAACCTGTCATTGTTACACATCACATGTGGATTGG  
TGGATTTCTCATAGTTGGTGCTGCTGCTCATGCAGCCATTTTTATGGTAAGAGACTATGA  
TCCAACCTACTCGATAACGATCTATTAGATCGTGTCTTAGACATCGTGATGCAATCAT  
CTCACATCTCAACTGGGCATGTATATTTCTAGGCTTTCACAGTTTTGGTTTTGTATATTCAT  
AATGATACCATGAGCGCTTTAGGGCGTCTCAAGATATGTTTTTCAGATACCGCTATACAA  
TTACAACCCGTTTTTGTCTCAATGGATACAAAACACCCATGCTTTAGCACCTGGTGCAAC  
GGCTCCTGGTGCAACAGCAAGCACCAGTTAACTTGGGGGGGTGGTGATTTAGTAGCA  
GTGGGTGGCAAAGTGGCTTTGTTACCTATTCCATTAGGAACCGCAGATTTTTTGGTGCA

TCACATTCATGCATTTACGATTCATGTGACGGTATTGATACTCCTGAAAGGTGTTCTATT  
TGCTCGTAGCTCCCGTTTGATAACCGGATAAAGCAAATCTTGGTTTTCGTTTTCTTGTGA  
TGGACCTGGAAGAGGGGGTACATGTCAAGTATCGGCTTGGGATCATGTCTTCTTAGGA  
CTATTCTGGATGTACAATGCAATTCGGTAGTAATATCCATTTTCAGTTGGAAAATGCAG  
TCAGATGTTTGGGGCAGTATAAGCGATCAAGGGGTAGTAACTCATATCACGGGAGGAA  
ACTTTGCGCAAAGTTCTATTACTATTAATGGGTGGCTCCGCGATTTCTTATGGGCACAGG  
CATCTCAGGTAATTCAGTCTTATGGTTCTTCATTATCTGCATATGGTCTTTTTTTCTAGG  
TGCTCATTGTTGATGGGCTTTTAGTTTAATGTTTCTATTTCAGTGGACGTGGTTATTGGCA  
AGAACTTATTGAATCCATCGTTTGGGCTCATAATAAATAAAAGTTGCTCCTGCTACTCA  
GCCGAGAGCCTTGAGCATTGTACAAGGACGTGCTGTAGGAGTAACCCATTACCTTCTG  
GGTGGAAATTGCCACAACATGGGCGTTCTTCTTAGCAAGAATTATTGCAGTAGGAATGGC  
ATTAAGATTTCCAAGGTTTAGCCAAGGCTTAGCTCAGGACCCCACTACTCGTCGTATTT  
GGTTTGGTATTGCTACCGCACATGACTTCGAGAGTCATGATGATTAATCTGAGGAACGT  
CTTTATCAGAATATTTTTGCTTCTCACTTCGGTCAATTAGCAATAATTTTTCTGTGGACTT  
CCGGAATCTGTTTCATGTAGCTTGGCAAGGAAATTTGAGTCATGGGTACAGGACCCT  
TTACATGTAAGACCTATTGCTCATGCAATTTGGGATCCTCATTTTGGTCAACCGGCTGTG  
GAAGCTTATACTCGAGGGGGTGTCTTTGGCCAGTGAATATCGTTATTCTGGTGTATTAT  
CAGTGGTGGTATAACAATTGGTTTACGCACTAATGAAGATCTTTATACTGGAGCTCTTTTT  
CTATTATTTCTTTCTGCCCTATTCTTAATAGCAGGTTGGTTACATCTACAGCCGAAATGGA  
AACCGAGCGTTTCGTGGTTCAAAAATGCTGAATCTCGTCTGAATCATCATTTATCAGGA  
CTCTTCGGAGTAAGTTCCTTGGCTTGGACAGGACATTTAGTCCATGTGCTATTCTCTGG  
ATCCAGAGGGGAGTACGTTTCGATGGAATAATTTCTTAGATGTATTACCGCATCCCAAG  
GGTTAGGCCCCCTTTTTACAGGTCAGTGGAAATCTTTATGCTCAAAACCCCGATTTCGAGT  
AGTCATTTATTTGGGACCTCCCAAGGAGCAGGAACTGCCATTCTAACTCTTCTCGGGGG  
ATTCCATCCACAAACACAAAGTTTATGGCTGACTGATATTGCTCATCATCATTTAGCTAT  
TGCATTTATTTTTCTCGTTGCTGGTCATATGTATAGAATAATTTTGGGATTGGGCACAGT  
ATAAAAGATCTTTTAGATGCACACATTCCTCCGGGGGGACGATTGGGACGTGGGCATAA  
GGGTCTTTATGACACAATCAATAATTCGCTTCATTTTCAATTAGGCCTTGCTCTAGCTTC  
TTAGGGGTTATTACTTCCTTGGTAGCTCAACACATGTAATCTTTACCCGCTTATGCATTC  
ATAGCACAAGATTTTACTACTCAAGCTGCATTATATACTCATCACCAATATATCGCAGGAT  
TCATCATGACAGGAGCTTTTGCTCATGGAGCTATATTTTTTCATTAGAGATTATAATCCGG  
AGCAAATGAAGATAATGTATTGGCAAGAATGTTAGAGCATAAAGAAGCTATCATATCT  
CATTTAAGTTGGGCCAGTCTCTTCTGGGATTCCATACCTTGGGACTTTATGTTTCATAAT  
GATGTCATGCTTGCCTTTGGTACTCCAGAGAAGCAAATCTTGATCGAACCTATATTTGCT  
CAATGGATCCAATCTGCTCACGGTAAACTTCATATGGGTTTGATGTACTTTTATCTTCA  
ACGAGCGGCCCGGCATTCAATGCGGGTCGAAGCATCTGGTTGCCCGGTTGGTTAAATG  
CTGTTAATGAA-----AATAGTAATTCATTATTCTTAACAATAGGTCCTGGAGACTTTTTGG  
TTCATCATGCTATTGCTCTGGGTTTACATACAACTACATTGATCTTAGTAAAAGGTGCTTT  
AGATGCACGTGGTTCCAAGTTAATGCCAGATAAAAAAGATTTTCGGTTATAGTTTTCCGT  
GCGATGGTCCGGGGCCGAGGCGGTAATTTGTGATATTTCCGGCATGGGACGCATTTTATTG  
GCAGTTTTTTGGATGTTAAATACTATTGGATGGGTTACTTTTTATTGGCATTGGAAGCAC  
ATCACATTATGGCAAGGAAACGTTTCACAGTTTAATGAATCATCCACTTATTTGATGGGC  
TGGTTAAGAGATTATTTATGGTTAAACTCTTCACAACCTTATCAATGGATATAACCCTTTTG  
GTATGAATAGTTTATCGGTCTGGGCATGGATGTTCTTATTTGGACATCTTGTTTGGGCTA

CTGGATTTATGTTCTTAATTCCTGGCGTGGATATTGGCAGGAATTGATTGAAACTTTAG  
CGTGGGCTCATGAACGCACACCTTTGGCCAATTTGATTGCTGGAGAGATAAACCGGT  
GGCCCTTCCATTGTGCAAGCAAGATTGGTTGGATTGGCCACTTTTCTGTAGGTTATAT  
ATCACTTATGCAGCTTTCTTGATTGCCTCTACATCGGGCAAATTTGGTATGTCACATTC  
AGTAAAGATTTATGATACATGTATAGGATGTAATGTGTCCGGGCCTGCCCTACCGA  
TGATTAGAAATGATACCTTGGGACGGATGTAAAGCGAAGCAAATGCTTCTGCTCCAA  
GAACGGAGGACTGTGTTGGTTGTAAGAGATGTGAATCTGCCTGTCCAACGGATTTCTT  
GAGTGTTCGAGTTTATTTATGGCATGAAACAACCTCGCAGTATGGGTCTAGCTTATATGAC  
AACATTCAACTTTCCCTCTATTTTTGTGCCTTTAGTAGGCCTAGTATTTCCGGCAATTGC  
AATGGCTTCTTTATTTCTTTATGTTCAAAAAACAAGATTGTTATGCGAGATCTAAAAAC  
ATATCTCTCCGTGGCACCAGTACTAAGTACGCTATGGTTCGGGGCTTTAGCAGGTCTATT  
GATAGAGATTAATCGTTTTTTCCAGATGCGTTGACATTCCCCTTTTTTTCATTCATGACT  
GCAATTTTAGAGAGACGCGAAAGCGAAAGCCTATGGGGTCGCTTCTGTAACCTGGATAA  
CCAGCACTGAAAACCGTCTTTACATTGGATGGTTTGGTGTTTTGATGATCCCTACCTTAT  
TGACCGCAACTTCTGTATTTATTATCGCCTTCATTGCTGCTCCTCCAGTAGATATTGATGG  
TATTCGTGAACCTGTTTCTGGATCTCTACTTTACGGAAACAATATTATTTTCAGGTGCCAT  
TATTCCTACTTCTGCAGCTATAGGTTTGCACTTTTACCCAATATGGGAAGCGGCATCCGT  
TGATGAATGGTTATAACAACGGTGGTCCTTATGAACTTATTGTTCTACACTTCTTACTTGG  
TGTAGCTTGTTACATGGGTCGTGAGTGGGAACTTAGTTTCCGTCTGGGTATGCGACCTT  
GGATTGCTGTTGCATATTCAGCTCCTGTTGCAGCTGCTACCGCTGTTTTCTTGATTTACC  
CAATTGGTCAAGGAAGTTTTTCTGACGGTATGCCTCTAGGAATCTCTGGTACTTTCAAC  
TTTATGATTGTATTCCAGGCTGAGCACAACATCCTTATGCACCCATTTACATGTTAGGC  
GTAGCTGGGGTATTCGGCGGCTCCCTATTTAGTGCTATGCATGGTTCCTTGGTAACTTCT  
AGTTTGATCAGGGAAACCACAGAAAACGAATCTGCTAATGCAGGTTACAGATTCCGGTC  
AAGAGGAAGAACTTATAATATTGTAGCTGCTCATGGTTATTTTGGCCGATTGATCTTCC  
AATATGCTAGTTTCAACAACCTCTCGTTCGTTACACTTCTTCTTAGCAGCTTGGCCTGTAG  
TAGGTATCTGGTTCACTGCTTTAGGTATCAGCACTATGGCTTTCAACCTAAATGGTTTCA  
ATTTCAACCAATCCGTAGTTGATAGTCAAGGCCGTGTAATTAATACTTGGGCTGATATCA  
TTAACCGTGCTAACCTTGGTATGGAAGTTATGCATGAACGTAATGCTCATAACTTCCCTC  
TAGACTTAGCGGCTATCGAAGCTCCATCTACAAATGGAATGGGTTTGCCTTGGTATCGT  
GTTACATACCGTTGTATTGAATGATCCCGGTCGGTTGCTTTCTGTTTATATAATGCATACAG  
CTCTGGTTGCTGGTTGGGCCGGTCTATGGCTCTGTATGAATTAGCAGTTTTTGTATCCTT  
CTGACCTGTTCTTGATCCAATGTGGAGACAGGGCATGTTTCGTTATAACCTTCATGACT  
CGTTTAGGAATAACAAATTCATGGGGCGGTTGGAGTATCACA---GGAGGAACTGTAACG  
AATCCGGGTATTTGGAGTTACGAAGGTGTAGCTGGGGCACATATTGTGTTTTCCGGCTT  
ATGCTTTTTGGCAGCTATCTGGCATTGGGTGTATTGGGATCTAGAAATATTTTGCAGTGA  
ACGTACAGGAAAACCTTCTTTGGATTTGCCCAAGATCTTTGGAATTCATTTATTTCTTTC  
AGGGGTGGCTTGCTTTGGTTTTGGTGCATTTTCATGTAACAGGCTTGTATGGTCTGGAA  
TATGGGTGTCCGACCCTTATGGACTAACCGGAAAAGTACAACCCGTAAATCCAGCGTG  
GGCGTGGAAAGGCTTTGATCCTTTTGTTCGGGAGGAATAGCCTCTCATCATATTGCAG  
CAGGGACATTGGGCATATTAGCGGGTCTATTCATCTTAGCGTCCGCCCACCACAACGT  
CTATACAAAGGGTTGCGTATGGGAAATATTGAAACCGTCCTTTCCAGCAGTATCGCTGC  
CGTCTTTTTTGCAGCTTTTGTGTTGCGGAACTATGTGGTATGGCTCAGCAACTACCC  
CCATCGAATTATTTGGGCCCACTCGTTATCAATGGGATCAGGGGTACTTCCAACAAGAG

ATATATCGAAGAGTGAGTGCTGGGCTAGCAGAAAATCAAAGTTTATCAGAAGCCTGGT  
CTAAAATTCCTGAAAAATTAGCTTTTTATGATTACATCGGCAATAATCCGGCAAAAGGA  
GGATTATTCAGGGCCGGCTCAATGGATAATGGGGATGGAATAGCGGTCCGGATGGTTAGG  
ACACCCTATCTTTAGAGATAAAGAAGGGCGTGAACCTTTTTGTACGTCGTATGCCTACTT  
TTTTTGAACATTCCCAGTCGTTTTGGTAGACGGCGACGGAATTGTTAGAGCCGATGTT  
CCTTTTAGAAGGGCAGAATCAAAGTATAGTGTTGAACAAGTAGGTGTAACGTGTTGAATT  
CTACGGCGGCGAACTCAACGGAGTCAGTTATAGTGATCCTGCTACTGTGAAAAAATATG  
CTAGACGTGCTCAATTGGGTGAAATTTTTGAATTAGATCGTGCTACTTTGAAATCCGAT  
GGTGTTTTTTCGTAGCAGTCCAAGGGGTTGGTTTACTTTTGGACATGCTTCATTTGCTTT  
GCTCTTCTTCTTCGGACACATTTGGCATGGTGCTAGAACCCTTGTTTCAGAGATGTTTTG  
CTGGTATTGACCCAGATTTGGATGCTCAAGTAGAATTTGGAGCATTCCAGAAACTTGGA  
GATCCAATAACAAGAAGACAGGTAGTC-----GTGGAAACGCTCT  
TTAATGGAACCTTAGCTTTAGCTGGCCGTGACCAAGAAACCACCGGTTTCGCTTGGTG  
GGCCGGGAATGCCCCACTTATCAATTTATCCGGTAAACTACTAGGGGCTCATGTAGCCC  
ATGCTGGATTAATCGTATTCTGGGCCGGAGCAATGAACCTATTTGAAGTGGCTCATTTC  
GTACCAGAGAAGCCTATGTATGAACAAGGATTAATTTTACTTCCCCACCTAGCTACTCTA  
GGTTGGGGGGTGGGTCCTGGGGGGGAAGTTATAGACACTTTTCCATACTTTGTATCTGG  
AGTACTTCATTTAATTTCCCTCCGCAGTATTGGGCTTTGGCGGTATTTATCATGCACTTCTG  
GGACCTGAGACGCTTGAAGAATCTTTTCCATTCTTTGGTTATGTATGGAAAGATAGAAA  
TAAAATGACCACAATTTTAGGTATTCACTTAATCTTGTAGGTCTAGGTGCTTTTTCTTCT  
AGTATTCAAGGCTCTTTATTTTGGGGGCGTATATGATACCTGGGCTCCGGGAGGGGGGAG  
ATGTAAGAAAATTACCAACTTGACCCTTAGCCCAAATATTATATTTGGTTATTTACTAA  
AATCGCCCTTTGGAGGGGAAGGGTGGATTGTTAGTGTGGACGATTTAGAAGATATAATC  
GGAGGACATGTATGGTTAGGTTCCATTTGTATACTTGGTGGAAATCTGGCATAATTTAACC  
AAACCTTTCGCGTGGGCTCGACGCGCATTTGTATGGTCTGGAGAGGCTTACTTATCTTA  
TAGTTTAGGGGCTTTAGCCGTGTTTGGTTTCATTGCTTGCTGTTTTGTCTGGTTCAATAA  
TACCGCTTATCCTAGTGAGTTTTACGGACCCACTGGACCAGAAGCTTCTCAAGCTCAA  
GCATTTACTTTTTCTAGTTAGAGACCAACGCCTTGGGGCTAACGTGGGATCCGCTCAAGG  
ACCTACTGGTTTAGGTAAATATCTAATGCGTTCCCCGACCGGAGAAGTCATTTTTGGAG  
GAGAACTATGCGTTTTTGGGATCTGCGTGCTCCTTGGTTAGAACCCTCTAAGGGGTCCA  
AATGGGTTGGACTTGAGTAGGTTGAAAAAAGATATAACAACCTTGGCAAGAACGGCGTT  
CCGCAGAATATATGACTCATGCTCCTTTAGGTTCTTTAAATTCGTTGGGTGGCGTAGCTA  
CCGAGATCAATGCAGTTAATTATGTCTCTCCTAGAAGTTGGTTAGCTACCTCTCATTTTG  
TTCTAGGATTCTTCTTCTTCGTAGGTCACCTGTGGCATGCGGGAAGAGCTCGTGCAGCT  
GCAGCGGGGTTTGA AAAAAGGAATTGATCGTGATTTTGAACCTGTTCTTTCCATGACCCC  
TCTTAATATGACTATAGCCCTTGGTAAATTTACCAAAGACGAAAAT--TTATTTGATATTAT  
GGATGACTGGTTACGGAGGGACCGTTTCGTTTTTGTAGGCTGGTCCGGTCTATTGCTCT  
TTCTTGTGCCTATTTTCGCTTTAGGGGGTTGGTTCACAGGTACAACCTTTGTAACCTTCAT  
GGTATAACCCACGGATTGGCTAGTTCCTATCTGGAAGGCTGCAATTTCTTAACTGCCGCA  
GTTTCTACTCCTGCTAATAGTTTAGCACATTCTTTGTTGTTACTATGGGGTCCCTGAAGCA  
CAAGGAGATTTTACTCGTTGGTGTCAATTAGGCGGTCTGTGGACTTTTGTGCTCTCCA  
TGGCGCTTTCGACTAATAGGTTTCATGTTACGTCAATTCGAGCTTGCTCGATCTGTTCA  
ATTGCGACCTTATAATGCAATTGCATTCTCTGCTCCAATTGCTGTTTTTGTCTGTATTCT  
CTGATTTATCCACTAGGTCAGTCTGGTTGGTTTTTTCGCGCTAGTTTTGGTGTAGCAGCT

ATATTTTCGATTCATCCTCTTTTTTTCAAGGGTTTCATAATTGGACGTTGAACCCATTTTCATA  
TGATGGGAGTTGCCGGTGTATTGGGAGCTGCTTTGCTATGCGCTATTCATGGTGCTACC  
GTAGAAAATACTTTATTTGAAGATGGTGATGGTGCAAATACATTCCGTGCTTTTAAACCA  
ACTCAAGCTGAAGAACTTATTCAATGGTCACCGCTAACCGCTTTTGGTCCCAAATCTT  
TGGGGTTGCTTTTTTCCAATAAACGTTGGTTACATTTCTTTATGTTATTTGTACCAGTAAC  
CGTTTATGGATGAGTGCTCTTGGAGTAGTCGGTCTGGCCCTGAACCTACGTGCCTATG  
ACTTCGTTTCTCAGGAAATTCGCGCAGCGGAAGATCCTGAATTTGAGACTTTCTACACC  
AAAAATATCTTTTTAAACGAAGGTATTTCGCGCTTGGATGGCGGCTCAAGATCAGCCTCA  
TGAAAATCTTATATTCCCTGAGGAGGTTCTACCACGTGGAAACGCTCTTATGTCTGGAA  
GCACAGGAGAACGTTCTTTTGGCTGATATTATTACCAGTATTTCGATACTGGGTCAATCATA  
GCATTACTATACTTCCCTATTCATTGCGGGTTGGTTATTCGTCAGCACCGGTTTAGCTTA  
CGATGTATTTGGAAGCCCTCGGCCAAACGAGTATTTACAGAGAGCCGACAAGGTATT  
CCATTAATAACTGGCCGTTTTGATCCTTTGGAGCAACTCGATGAATTTAGTAGATCGTTT  
ATGACTATAGATCGAACCTATCCAATTTTTACCCTACGATGGTTGGCTGTTACGGCCTA  
GCTGTACCTACCGTCTTTTTTTGGGGTCAATCTCAGCAATGCAGTTCATCCAACGAAT  
GGCTACACAACTGTTGAGAAGAGTTCTAGATCTGGT---CCAAGACGAACTACTGTAG  
GGAGTTTATTAACCGTTGAATTCGGAGTATGGTAAAGTAGCTCCTGGGTGGGGAAC  
GACTCCATTGATGGGGGTTGCAATGGCTCTATTTGCGATATTTCTATCTATTATTTGGAG  
ATTTATAATTCTTCCGTTTTATTGGATGGAATTTCAATGAACATGCTTACTCTCAAACCTT  
TCGTTTACACAGTAGTGATATTTTTTGTCTCTCTCATCTTTGGATTCCTATCTAATGAT  
CCAGGGCGTAATCCTGGACGTGAAGAAATGGCCGATACTACTGGAAGGATTCCTCTTT  
GGATCATAGGTACTGTAACCTGGTATTCTTGTGATTGGTTTAATAGGTATTTCTTTTATGG  
TTCATATTCTGGATTGGGTTCAATCCTGATGCTTAATATCTTTAGTTG-----ATCTGTCTT  
AATTCTGCCCTTCAT---AGTAGTTTTTCTTTCGGCAAATTGCCCGAGGCCTATGCTTTTTT  
GAATCCAATCGTAGATGTTATGCCAGTCATACCTGTGCTTTTTTTTTCTCTTAGCCTTTGTT  
TGGCAAGCTGCTGTAAGTTTTTCGAATGACACAATCAAACCAAACGAACAAAGTGTTG  
AATTGAATCGTACCAGTCTCTACTGGGGGTTATTACTCATTTTTGTACTTGCTGTTTTATT  
TTCCAATTATTTCTTCAATATGGAAGTAAATATTCTTGCATTTATTGCTACTGCACTATTCA  
TTCTAGTTCCCTACCGCTTTTCTACTTATTATTACGTAAAAACAGTCAGTCAAATGATAT  
GGAAACAGCAACCTAGTTGCCATCTTTATATCTGGTTTACTTGTAAAGTTTTACTGGGTA  
CGCCTTATATAACCGCTTTTGGGCAACCTTCTCAACAATAAGAGATCCATTTCGAGGAAC  
ATGGGGACATGGAAGCATTGGTTTATACATTCCTCTTAGTCTCGACTCTAGGGATAATTT  
TTTTTCGCTATCTTTTTTCGAGAACCGCCTAAAGTTCCAATAAAAAGATGAAAATGACT  
CTTGCTTTCCAATTGGCTGTTTTTGCATTAATTGCTACTTCATCAATCTTATTGATTAGCG  
TACCTGTTGTATTTGCTTCTCCTGATGGTTGGTCAAGTAACAAAAATGTTGTATTTCTG  
GTACATCATATGATGGATTGGGTTAGTCTTTCTAGTGGGTATTCTTAATTCTCTTATCTCT----  
-----ATGTCACCACAAACAGAGACTAAAGCAAGTGTGGATTCAAAGCTGGTGT  
TAAAGAGTACAAATTGACTTATTATACTCCTCAATACCAAACCAAAGATACTGATATCTT  
GGCAGCATTCCGAGTAACTCCTCAACCCGGAGTTCCCCCTGAAGAAGCAGGGGCCGC  
AGTAGCTGCCGAATCTTCTACTGGTACATGGACAACCTGTGTGGACCGATGGACTTACCA  
GCCTTGATCGTTACAAAGGGCGATGCTACTACATCGAGCCCGTTCCCTGGAGAAAAAGA  
GCAATTTATTGCTTATGTAGCTTATCCTTTAGACCTTTTTGAAGAAGGTTCTGTTACTAA  
CATGTTTACTTCCATTGTAGGTAATGTATTTGGGTTCAAAGCCCTACGCGCTCTACGTCT  
GGAAGATCTGCGAATCCCTCCTGCTTATATTAACCTTTCCAGGGCCCGCCTCATGGGA



TCCAAGTTGAGAGAGATAAATTGAACAAGTATGGTCGTCCTCTGTTGGGATGTACTATT  
AACCTAAATTGGGATTATCTGCTAAAACTACGGTAGAGCTGTTTATGAATGTCTTCG  
CGGTGGACTTGATTTTACCAAAGATGATGAAAACGTGAACTCCCAACCATTATGCGTT  
GGAGAGATCGTTTCTTATTTTGTGCCGAAGCACTTTATAAAGCACAGGCTGAAACAGG  
TGAAATCAAAGGGCATTACTTGAATGCTACTGCAGGTAAGTGCGAAGAAATGATGAAA  
AGGGCTGTATTTGCTAGAGAATTGGCAGTTCCTATCGTCATGCACGACTACTTAACAGG  
GGGATTCACTGCAAATACTACCTTGGCTAGTTATTGCCGAGATAATGGTCTACTTCTTCA  
CATCCACCGTGCAATGCATGCAGTTATTGATAGACAGAAGAATCATGGTATACACTTCC  
GTGTACTAGCTAAAGCGTTACGTATGTCTGGTGGAGATCATATTCCTCTGGTACCGTAG  
TAGGTAACCTTGAAGGGGAAAGAAACATCACTTTGGGCTTTGTTGATTTACTGCGTGAT  
GATTATATTGAAAAAGACCGAAGTCGCGGTATCTTTTTCACTCAAGATTGGGTCTCTCT  
ACCGGGTGTCTGCCTGTGGCTTCAGGAGGTATTCACGTTTGGCATATGCCGGCTTTGG  
TCGAAATCTTTGGGGATGATCCGTACTACAGTTCGGTGGAGGAACTTTAGGACATCCT  
TGGGGTAATGCGCCAGGTGCCGTAGCTAACCGAGTCTCTCTAGAAGCATGTGTACAAG  
CTCGTAATGAAGGGCGTAATCTTGCTACTGAGGGTAATGAAATTGTTCTGTGAGGCTAGC  
AAATGGAGTCTGAACTAGCTGCTGCTTGTGAGGTATGGAAGGAGATCAAATTTGAGT  
TTGAAGACGTGGATACATTGGATAAGATGGCGATACATTTATACAAAACCTTCTACCCCG  
AGCACACGCAATGGAACCGTAGACAGTCAAGTGAAATCCAATCCACGAAATAATTTGA  
TCTATGGACAGCATCGTTGTGGTAAAGGTCGTAATGCCAGAGGAATCATTACCGCAAG  
GCATAGAGGGGGAGGTCATAAGCGTCTATACCGTAAAATCGATTTTCGACCGGAATGAA  
AAAGACATATATGGTAGAATCGTAACCATAGAATACGACCCTAATCGAAATGCATACATT  
TGTCTCATACTATGGGGATGGTGAGAAGAGATATATTTTACATCCCAGAGGGGCTATA  
ATTGGAGATACCATTGTTTCTGGTACAGAAGTTCCTATAAAAATGGGAAATGCCCTACC  
TTTGACCGATATGCCCTTAGGCACGGCCATACATAACATAGAAATCACACTTGGAAAGG  
GTGGACAATTAGCTAGAGCAGCGGGTGTGTAGCGAAACTGATTGCAAAGAGGGGA  
AATCGGCCACATTAATAATTACCTTCTGGAGAGGTCCGTTTGATATCCAAAACTGCTCA  
GCAACAGTCGGGCAAGTGGGGAATGTTGGGGTGAACCAGAAAAGTTTGGGTAGAGCC  
GGATCTAAGCGTTGGCTAGGTAAGCGTCTGTAGTAAGAGGAGTAGTTATGAACCCTGT  
AGACCATCCCATGGGGGTGGTGAAGGGAGAGCCCCAATTGGTAGAAAAAACCCAC  
AACCCCTTGGGGTTATCCTGCACTTGGGAAGAAGAAGTAGAAAAAGGAAGAAATATAGT  
GATAATTTGATTCTTCGTCGTCGTAGTAAAATGATTCAACCTCAGACCCATTTAAATGTA  
GCGGATAACAGCGGGGCTCGAGAATTGATGTGTATTCTGAATCATAGGAGCTAGC---AAT  
CGTCGATATGCTCATATTGGTGACGTTATTGTTGCTGTGATCAAAGAAGCAGTACCAAAT  
ATGCCCTAGAAAGATCAGAAGTAGTGAGAGCTGTAATTGTGCGTACCTGTAAAGAAC  
TCAAACGTGACAACGGTATGATAATACGATATGATGACAATGCTGCAGTTGTTATTGATC  
AAGAAGGAAATCCAAAAGGAACTCGAATTTTTGGTGCATCGCTCGGGAATTGAGAC  
AATTAATTTTACTAAAATAGTTTCATTGGCTCCCGAGGTATTAATGCTTAGTCCCAAAA  
GAACCAGATTCCGTAAACAACATAGAGGAAGAATGAAGGGAATATCTTATCGAGGTAA  
TCATATTTGTTTCGGTAAATATGCTCTTCAGGCACTTGAACCCGCTTGGATCACATCTAG  
GCAAATAGAAGCGGGTTCGACGAGCAATGACACGAAATGCACGTCGTGGCGGAAAAAT  
ATGGGTACGTATTTTTCCAGACAAACCAGTTACACTAAGACCCGCAGAAACCCGTATG  
GGTTCGGGGAAAGGATCTCCTGAATATTGGGTAGCTGTTGTTAAACCAGGTCTGAATACT  
TTATGAAATGAGTGGAGTAACAGAAAATATAGCTAGAAGGGCTATTTCAATAGCAGCAT  
CCAAAATGCCTATACAAACCTCAATTCATTATTTTCGGGAATGACCAGAATTAACGGGGA

TACGTAGCTCGGAGACGTAGAACAAAAATTCGTTTATTTGCATCAAGCTTTTCGAGGGG  
CTCATTCAAGACTTACTCGAACTATTACTCAACAGAAAATAAGAGCTTTGGTTTCGGCT  
CATCGGGATAGGGATAGGCAAAAGAGAAATTTTCGTTCGATTGTGGATCACTCGAATAA  
ACGCAGTAATTCGCGAA---AGGGGAGTATCCTATAGTTATAGTAGATTAATACACGATCT  
GTACAAGAAACAGTTGCTTCTTAATCGTAAAATACTTGCACAAATAGCTATATCCAATAG  
GAATTGTCTTTATATGATTTCCAACGAGATCAGAAAAGAAGTAGATTGGAAAGAATCCA  
CCGGAATAATTATGCTAAAGGAAGTATATGCTTTAGGTCAACATATATCCATGTCTGCTG  
ACAAAGCACGAAGAGTAATTGATCAAATTCGTGGACGTTCTTACGAGGAAACACTTAT  
GATACTAGAGCTCATGCCCTATCGAGCGTGTTATCCAATTTTTAAATTAGTTTATTCAGC  
AGCCGCAAATGCTAGTTACAATATGGGTTCCAACGAAGCCAATTTAGTCCATTAGTCAAG  
CCGAAGTCAACGAGGGTAGCACCGTAAAGAAATTCAAACCTCGAGCTAAAGGGCGTA  
GTTATCCGATAAAAAGACCTACCTGTCATATAACTATTGTAATGAAAGATATATCTTTAGA  
TGGGGGAATATGGGACAAAAAATGGATGGAATCAAATATGCAGTATTTACAGACAAA  
AGTATTCGGTTATTGGGGAAAAAT---CAATATACTTCTAATGTCTGAATCAGGATCAACTA  
GGACAGAAATAAAGCATTGGGTTCGAACTCTTCTTTGGTGTCAAGGTAATAGCTATGAAT  
AGTCATCGACTTCCGGGAAAGGGTAGAAGAATGGGACCTATTATGGGACATACAATGC  
ATTACAGACGTATGATCATTACGCTTCAACCGGGTTATTCTATTCCACCTCTTAGAAAGA  
AAAGAACTATGGCAGTTCCAAAAAACGTACTTCTATATCAAAAAAGCGTATTCGTAA  
AAATATTTGGAAAAGGAAGGGATATTGGACAGCGTTAAAAGCTTTTTTCGTTAGGTAAAT  
CTCTTTCTACAGGGAAAGTCAAAAAGTTTTTGTGTACGACAAACAAATAAGATGGCCAA  
GCGTAAAGATGTCCGAGTAACGGTGATTTTGGAAATGTACCAGTTGTGTCCGAAACGGT  
GCT-----ATAAGATATCAACGGGCATTTCCAGATATATTACTCAAAAGAACCGGCAGAA  
TACGCCTAATCGATTAGAATTGAGAAAATTCTGTTCGCTATTGTTACAAACATACCATTCA  
TGGGGAGATAAAGAAAATGAAAATAAGAGCTTCTGTTCGTAATAATTTGTGAAAAATGT  
CGACTAATCCGTAGGCGGGGACGAATTATAGTAATTTGTTCCAACCCGAGACATAAACA  
AAGACAAGGAATGGTTCGAGAGAAAGTAATAGTATCTACTCGGACACTACAGTGGAAAG  
TGTGTTGAATCAAGAACAGATAGTAAACGTCTTTATTATGGACGCTTTATTCTATCTCCA  
CTTATGAAAGGTCAAGCCGATACAATAGGCATTGCGATGCGAAGAGCTTTGCTTGGAG  
AAATAGAAGGAACATCTATCACACGTGTAATCTGAATCTGAGAAAGTCCCACATGA  
ATATTCTACCATATCGGGTATTCAAGAATCGGTACATGAAATTTAATGAATTTGAAAGA  
AATTGTATTGAGAAGTAATCTATATGGAACCTTGTGACGCGTCTATTTGTGTTAGGGGTCC  
TGGATATGTAAGTCTCAAGACATCATCTTACCGCCTTATGTGGAAATTGTTGATAATAC  
ACAACATATAGCTAGCTTGACGGAACCAATTGATTTGTGTATTGGATTACAAATCGAGA  
GAAATCGAGGATATCTTATAAAAACGCCACAT---AACTTTGATGGAAGTTAT-----CCTAT  
AGATGCTGTATTTCATGCCTGTTTCGAAATGCGAATCATAGTATTCATTCTTATGGGAATGG  
AAATGAAAAACAAGAGATACTTTTTCTCGAAATATGGACAAATGGAAGTTTAACTCCG  
AAAGAAGCACTTCATGAAGCCTCTCGGAATTTGATTGATTTATTTATCCTTTTTTACATA  
TGGAAGAAGAA-----AACGTACATTTAGAGGACAATCAA---CACACGGTTCCTTTATCCC  
CTTTTATCTTTTCATGATAAATTGGCC--AACTCAGAAAAAAGAAAAA---AAAATAGCA  
TTGAAATCGATTTTTATTGACCAATCAGAATTGCCTCCAAGGATCTATAATTGTCTCAA  
AGGTCCAATATATACATATTGGACCTTTTGAATAACAGTCAAGAAGATCTTATGAAA  
ATTGAGCATTTTCGCATAGAAGATGTAAAACAGATATTGGGCATTCTAGAAAAACAT----  
-TTCGCAATTGATTTATCAAAAAGTAAGATGCTCGGGGATGGA---AATGAGGGAATGTCT  
ACAATACCTGGATTTAATCAGATACAATTTGAAGGATTTTGTAGGTTTCATTGATCAGGGT

TTGACAGAAGAACTTTATAAGTTTCCAAAAATTGAAGATACAGATCAAGAAATCGAATT  
TCAATTATTTGTGGAAACATATCAATTGGTAGAACCGTTGATAAAGGAAAGAGATGCTG  
TGTATGAATCACTCACATATTCTTCTGAATTATATGTATCCGCGGGATTAATTTGGAAAAC  
CAGCCGGGATATGCAAGAACAACCATTTTTATTGGAAATATTCCTCTAATGAATTCCT  
GGAACTTCTATAGTAAATGGAATATATAGAATTGTGATCAATCAAATATTGCAAAGCCC  
CGGTATTTATTACCGGTCAGAATTGGACCATAACGGAATTTCCGGTCTATACCGGCACCAT  
AATATCAGATTGGGGAGGAAGACCAGAATTAGAGATTGATAGAAAAGCAAGGATATGG  
GCTCGTGTGAGTAGGAAACAAAAATATCTATTCTAGTTCTATCATCAGCTATGGGTTCCG  
AATCTAAGAGAAATTCTAGAGAATGTTTGTCTATCCTGAAATTTTTTTGTCTTTTCTGAAT  
GATAAGGAGAGAAAAAAATTGGGTCAAAGAAAATGCCATTTTGGAGTTTTATCAAC  
AATTTGCTTGTGTAGGCGGGGATCCGGTATTTTCTGAATCCTTATGTAAGGAATTACAAA  
AGAAATTCTTTCAACAAAGATGTGAATTAGGAAGGATTGGTCGACGAAATATGAACCG  
AAGACTAAATCTTGATATACCCAGAACAATACATTTTTGTACCACGAGATATATTGAC  
AGCCGCCGATCATTTGATTGGACTGAAATTTGGAATGGGTACACTTGACGAT-----ATGA  
ATCATTTGAAAAATAAACGTATTCGTTCTGTAGCCGATCTTTTACAAGATCAATTCGGAT  
TGGCTCTGGTTCGTTTAGAAAATGTGGTTCGAGGAECTATATGTGGAGCAATTCGG---C  
ATAAATTG---ATACCGACTCCTCAGAATTTGGTAACTTCAACTCCA-----TTAACAAC  
TACTTATGAATCCTTTTTCGGGTTACACCCATTATCTCAAGTTTTGGATCGAACTAATCCA  
TTGACACAAATAGTTCATGGAAGAAAATTGAGTTATTTGGGACCTGGAGGACTGACAG  
GGCGAACTGCTAGTTTTCGTATACGAGATATCCATCCTAGTCACTACGGGCGTATTTGCC  
CAATTGACACATCTGAAGGAATCAATGTTGGACTTATTGGATCCTTAGCAATTCATGCG  
AGGATTGGTCATTGGGGA---TCTCTAGAAAGCCCGTTTTAT-----GAAATTTCTGAGAG  
ATCAACAGGG-----GTACGGATGCTTTATTTATCACCAGGTAGAGATGAATACTATATGGT  
AGCGGCAGGAAATCTTTGGCCTTGAATCAGGATATTCAGGAAGAACAGGTTGTTCCA  
GCTCGATACCGTCAAGAATTCCTGACTATTGCATGGGAACAGGTTTCATCTTCGAAGTAT  
TTTTCCCTTTCAATATTTTTCTATTGGAGCTTCCCTCATTCCTTTTATCGAACACAATGAT  
GCGAATCGAGCTTTAATGAGTTCTAATATGCAACGTCAAGCAGTTCCTCTTTCTCGGTC  
CGAGAAATGCATTGTTGGAAGTGGGTTAGAACGACAAGCAGCTCTAGATTCCGGGGGCT  
CTTGCTATAGCCGAAGGCGAGGGAAAGATCATTCTACTGATACTGACAAGATCCTTTT  
ATCAGGTAATGGAAATACTCTAAGTATTCATTAGTTATGTATCAACGTTCCAACAAAA  
TACTTGTATGCATCAAAAACCCAGGTTCCGCGGGGTAATGCATTAATAAAGGACAA  
ATTTTAGCGGATGGTGTCTACGGTTGGCGGCGAACTTGCTTTGGGGAAAAATGTATT  
AGTAGCTTATATGCCGTGGGAAGGTTACAATTTGAAGATGCAGTACTCATTAGCGAGC  
GTTTGGTATATGAAGATATTTATACTTCTTTTTCATATACGGAAATATGAAATTCAGACTCA  
TGTGACAAGCCAAGGC---CCTGAAAGGGTCACTAACGAAATACCGCATTTAGAAGCCC  
ATTTACTACGCAATTTAGACAAAATGGAATTGTGATGCTGGGATCTTGGGTAGAGACG  
GGTGATATTTAGTAGGTAATTAACGCCCCAGATGGTGAAAGAA---TCGTCGTATGCC  
CGGAAGATAGATTGTTACGAGCCATACTTGGCATTTCAGGTATCTACTTCAAAGAAACT  
TGTCTAAAACCTATAGGTGGTTCGGGGTCGGGTTATTGATGTGAGGTGGATCCAGAA  
AAAAGGG---GGTCTAGTTATAATCCAGAAACGATTCGTGTATATATTTACAGAAACGT  
GAAATCAAAGTAGGCGATAAAGTAGCTGGAAGACACGGAATAAAGGGGATTATTTCCA  
AAATTTGCCTAGACAAGATATGCCTTATTTGCAAGATGGAAGACCCGTTGATATGGTC  
TTCAACCCATTAGGAGTCCCTTACGAATGAATGTAGGACAGATATTTGAATGTTCACT  
CGGGTTAGCAGGGAGTCTGCTAGACAGACATTATCGAATAGCACCTTTTGATGAGAGGT

ATGAACAAGAAGCTTCAAGAAAAGTAGTGTCTTCTGAATTATATGAAGCCAGTAAGCA  
AACAGCGAATCCATGGGTATTTGAACCCGAGTATCCAGGAAAAAGCAGAATATTTGAT  
GGAAGAACAGGGAATCCTTTTGAACAACCCGTTATAATAGGAAAGCCTTATATCTTGAA  
ATTAATTCATCAAGTTGATGATAAAATCCATGGACGTTCCAGTGGGCATTATGCCCTTGT  
TACACAACAACCTCTTAGAGGAAGGGCCAAACAAGGGGGACAACGGGTAGGAGAAAT  
GGAGTTTGGGCTCTAGAAGGATTTGGTGTGCTCATATTTTACAAGAGATGCTTACTTA  
TAAATCTGATCATATTAGAGCTCGCCAGGAAGTACTTGGTACTACGATCATTGGAGGAA  
CAATACCTAATCCTGAGGATGCTCCAGAATCTTTTCGATTGCTCGTTCGAGAACTACGA  
TCTTTAGCTCTGGAAGTGAATCATTTCCTTGTATCTGAGAAGAAGTCCAGATTAATAGG  
AAGGAAGCTATGAATCAGAATTTTCTTCTATGATCGATCGGTATAAACATCAACAGCTC  
CGAATTGGATTAGTTTCTCCTCAACAAATAAGTGCTTGGGCCACTAAAATCCTGCCTAA  
TGGAGAGATAGTTGGAGAGGTGACAAAACCTATACTTTTCATTACAAAACCAATAAA  
CCGGAAAAAGATGGATTATTTTGTGAAAGAATTTTGGACCTATAAAAAGTGGAATTTG  
TGCTTGTGAAATTATCGAGTAATCGGAGATGAAAAAGAAGACCCGAAATTTTGTGAA  
CAATGCGGAGTCGAATTTGTTGATTCTCGGATACGAAGATATCAAATGGGCTACATCAA  
ACTCGCATGCCCGTAACCCATGTGTGGTATTTAAAACGTCTTCCTAGTTATATTGCGAA  
TCTTTTAGATAAACCTCTTAAAGAATTAGAAGGCTTAGTATACTGCGAT-----TTTTCTTT  
TGCTAGGCC---ATAACTAAAAACCCACTTTCTTACGATTACGAGGTTTATTTCGAATAT  
GAAATCCAATCTTGAAATACAGCATCCCACTTTTTTTTACTACCCAGGGCTTCGATACA  
TTTCGCAATCGAGAAATCTCTACTGGTGCAGGTGCTATCCGAGAACAATTAGCCGACCT  
AGATTTACAAATTATTATAGATAAATCGTTGGTAGAATGGAAAGAATTAGGGGAAGGA---  
GGGCCACAGGGAATGAATGGGAAGATCGAAAAGTTGGAAGAAGAAAAGATTTTTTG  
GTTAGACGCATGGAATTGGCTAAGCATTTTATTCGAACAAATATAGAACCCGGAATGGAT  
GGTTTTGTGTCTATTACCAGTTCTTCCTCCTGAATTGAGACCGATCATTTCAGATAGATGG  
GGTAAACTAATGAGCTCGGATATTAATGAACTCTATAGAAGAGTTATCTATCGAAACA  
ATACTCTTACCGATCTATTAACAACAAGTAGATCTACGCCAGGAGAATTAGTAATGTGTC  
AGGAGAAATTAGTACAAGAAGCCGTGGATACACTTCTTGATAATGGAATCCGCGGACA  
ACCAATGAGGGACGGTCATAATAAAGTTTACAAGTCATTTTCAGATGTAATTGAAGGCA  
AAGAGGGAAGATTTCTGTGAGACTCTGCTTGGCAAACGGGTTGATTATTCAGGACGTTT  
CGTCATTGTCGTGGGTCTTCACTTTTATTACATCGATGTGGATTGCCTCGCGAAATAGC  
AATAGAGCTTTTCCAGACATTTGTAATTCGGGGTCTAATTAGACAACATCTTGCTTCGA  
ACATAGGAGTTGCTAAGAGTAAAATTCGGGAAAAAGAACCATTGTATGGGAAATACT  
TCAGGAAGTTATGCAGGGGCATCCTGTATTGCTGAATAGAGCACCCACTCTGCATAGAT  
TAGGTATACAGGCATTCAGCCCGTTTATGTTAGTGGAGGGCGTGCTATTTGTTTACATCCAT  
TAGTTTGTAAAGGATTCAATGCAGATTTTGTATGGGGATCAAATGGCTGTTTCATGTACCTT  
TATCTTTGGAGGCTCAAGCGGAGGCCGTTTACTTATGTTTTCTCATATGAATCTTTTGT  
CTCCAGCTATTGGGGATCCATTTCCATACCAACTCAAGATATGCTTATTGGACTCTATG  
TATTAACGAGCGGAAATCGCCGAGGTATTTGTGTAATAGGTATAATCCATGTAATCGC--  
-----AGAACTATCAAATCAAAGAAGTGACAATAATACTATAAGTATACG-----GAG  
CCTTTTTTTTGTAAATTCCTATGATGCAATTGGAGCTTATCGGCAGAAACGAATCAATTA  
GATAGTCTTTTGTGGCTCCGGTGGCGACTAGATCAACGC---GTTATTGCTTTA-----AGA  
GAAACTCCCATCGAAGTTCATTATGAATCTTTAGGTACTTATTATGAGATTTATGGACAC  
TATCTAATTGTAAGAAGTATAAAAAAAGAAATCTTTTTATATACATTCGAACCACTGTT  
GGTCATATTTCTCTTTATCGAGAAATCGAAGAAGCCATACAGGGGTTTTCTCAGGCCTG

TTCATATGGTACC-----ATGGAGGTACTTATGGCAGAACGGGCCAATCTGG  
TCTTTCACAATAAAGTGATAGACGGAAGTCCATGAAACGACTTATTAGTAGATTAATA  
GACCACTTCGGAATGGCATATACATCACACATCTTGGATCAAGTAAAACTCTGGGTTT  
TCAACAAGCTACTGCTACATCCATTTATTAGGAATTGATGATCTTTTAAACAATACCTTC  
TAAGGGATGGCTAGTACAAGATGCTGAACAACAAAGTTTGTATTTGGAAAAACACCAT  
CATTATGGGAATGTACACGCGGTAGAAAAATTACGTCAATCCATTGAAATATGGTATGCT  
ACAAGTGAATATTTGCGACAAGAAATGAATCCTAATTTTAGGATGACTGACCCTTTTAA  
TCCAGTTCATATGATGTCTTTTTCGGGAGCTAGAGGAAACGCATCTCAGGTACATCAAT  
TAGTAGGTATGAGAGGATTAATGTCCGATCCTCAAGGACAAATGATTGATTTACCCATTC  
AAAGCAATTTACGTGAAGGGCTCTCTTTAACAGAATATATCATTCTTGCTACGGAGCC  
CGTAAAGGGTTCGTGGATACTGCTGTACGAACATCAGATGCTGGATATCTCACGCGCA  
GACTTGTTGAAGTAGTTCAACATATTGTTGTACGTCGAACAGATTGTGGCAGTACCCGG  
GGGATTTCTGTGAGTCCCTCGGAATGGAATGATGCCG---GAAAGGATTTTATCCAAACA  
TTAATTGGTTCGTGTATTAGCAGATGATATATATATGGGCCCGCAATGTATTGCCACTCGCA  
ATCAAGACATTGGGATTGGACTTGTAATCGATTTCTAACT-----TTTCGAGCA  
CAACCAATATCTATTCGAACTCCCTTTACTTGTAGGAGTACATCTTGGATCTGTGATTA  
TGTTATGGCCGGAGTCCACTCATGGCGATCTGGTTGAATTGGGAGAAGCTGTAGGTAT  
TATTGCGGGTCAATCGATTGGAGAACCGGGTACTCAATTAACATTAAGAAGCTTTTCATA  
CCGGTGGAGTATTCACAGGGGGTACTGCAGAACATGTGCGAGCCCCTTCTAATGGAAA  
AATCAAATTTAATGAGGATTTGGTTCATCCGACACGTACACGTCATGGACATCCAGCTT  
TTCTATGTTCTATAGACTTGTATGTAATATTGAGAGTGAAGATATTATACATAATGTGAA  
TATTCCACCCAAAAGTTTTCTTTTAGTTCAAATGATCAATATGTAGAATCCGAACAAGT  
GATTGCCGAGATTCGCGCGGGAACATCCACT---TTGAATTTTAAAGAGAAGGTTTCGAAA  
ACATATTTATTCTGACTCAGACGGCGAA---ATCCACTGGAGTACCGATGTGTATCATGCA  
CCTGAATTTACATATGGTAATGTTTCATCTATTACCAAAAACAAGTCATTTATGGATATTAT  
TAGGAGGGCCGTACAGA-----TCCAGTCTAGTCTTCTCTCACTCCACAAGGATCAAGA  
TCAAATGAACGCGCAT-----TCTCTTTCTGTCAAGGGGGGAGATACTTCTAATCGCTCA---  
---GTAACATAATGATCAG---GTGAGACACAAATTCTTTAGTTTCGGATTTTCTGGTAAA---G  
AAGATAAGATTCCCTGATTAT---TCAGACCTTAATCGAATCATATGACTGGTTCCTTGTAAT  
CTCATATATCCG---GCCATTCTCCACGATAATTCT-----GATTTATTGTCAAAGAGGCGAAG  
AAATAGATTCATCATTCCACTCCAATGGATTCAAGAATGCGAGAACGAACATAATGTCCT  
GTTTAGGTATCTCTATTGAAATCCCC-----ACAAATGGTATTTTCCGTAGAAATAGTATTCT  
TGCTTATTTTCGATGATCCTCGATACAGAAGAAAGAGTTTCGGGAATTAATAATACGGGA  
CTATAGAAATGCATTCAATCCTCAAAAAAGAGGAT-----TTGATTGAATATCGAGGA---GT  
CAAGGAATTTAGGCCAAAATACATGAAAGTAGATCGGTTTTTTTTTTCATTCCCAGGAAG  
TACATATCTTACCCGGATCTTCTTCCATAATGGTACGGAACAATAGTCTCATTGGGGTAG  
ATACCCCAATCACTTTAAATATAAGAAGCCGAGTAGGCGGGTGGTCCGGGTGGAGAA  
AAAAAAAAAAAAAGAATTGAACTTAAAATCTTTTCTGGAGATATCCATTTTCTGGCGAG  
ACAGATAAGATATCCCGACATAGCGGCGTTTTGATACCA-----CCAGGAACGGGAAAAA  
CAAATTCGAAGGAATCAAAAAA-----TTGAAAAATTGGATCTATGTCCAACGG-----AT  
CACACCTAGCAAG-----AAAAAGTATTTTGTGTTTGGTTCGACCTGTCGTCACATATGAAA  
TAACGGATGGTATAAATTTATCAACACTTTTCCCTCCGGATCTGTTGCAGGAAAGGGAT  
AATGTGCAACTTCGAGTTGTCAATTATATCCTTTATGGAAATGGCAAACCAATTCGAGG  
AATTTCTGACACAAGTATTCAATTAGTTCGGACTTGTTTAGTATTGAGTTGGGACCAAG

AAACAAAA-----AGTTCTTCTATCGAAGAAGCCCGCGCTTCCTTTGTTGAAATAAGGA  
CAAATGGTTTGATTGACATTTCTTAAGAATTGACTTAGTGAAATCTCCTATTTTCGTATAT  
CGAAAAAAGGAATGATCCATTGGATTACGATTGCTCTCTGAT---AATGGATCAGATTGC  
ACCAATATCAATCCGTTTTCTTCCATTTATTCCTAT-----TCCAAAGGAAGAATTCAACA  
ATCCCTTAACCAAATCAAGGAACATTTCATACGTTGTTGAATAGA-----ATAAGGAA  
TGCCAATCGTTGATAATTTTGCATCATCCAATTGTTTTCGAATGGGGCCA-----TTCAAT  
GATGTAATAATATCACAGTGTG-----ATAAAAGAATCAGATTCCCGAATTCCAATTAGGA  
ATTCGTTGGGCCCTTAGGAACA-----GCCCTTCAAATTGCGAATTTTTATTCA-----TTTT  
ATCATTTA-----ATAACTCATAATCAGATCTTG--GTAACACTACTATTTGCAACTTGAC-----  
AAT---TTAAAACACACCTTTCAAGTAATTA---TATTATTTAATGGATGAAAAT-----  
GGGAAAATTTATAATCCCGACCCAGGCAGTAATATTTTGAATCCATTCCATTTGAAT  
TGGTATTTTCTCCATCACAATTGTTGTGAAGAGACATTT--ACAATAATTAGTCTTGGAC  
AGTTTATTTGTGAAAATGTATGTATAGCCAAAACAGACCCAC---CTAAA-----TCGG  
GTCAAGTTATACTTGTCAA--GTTGACTCTATAGTAATACGATCCGCTAAGCCTTATTTG  
GCCACCCAGGAGCAACTGTTTCATGGACATTATGGGGAAATCCTTTACGAAGGAGATA  
CATAGTTACATTTATATATGAAAATCGAGATCTGGTGATATAACGCAGGGTCTTCCAA  
AAGTGAACAGGTGTTAGAAGTGCCTTCGATCGATTCAATATCGATGAATCTAGAAAA  
GAGGGTTGAGTTTGAACGAATGTATAACAAGAATTCTTGGAATTCCGTGGGGATTC  
TTGATTGGTGCTGAGCTGACTATAAGTCAAAGTCGTATCTCTTTGGTTAATAAGATCCAA  
AAGGTTTATCGATCTCAGGGGGTGCAGATTCATAATAGGCATATAGAAATTATTGTACGT  
CAAATAACATCAAAGGTTTTGGTTTCAGAA-----GATGGAATGTCTAATGTTTTTTCAC  
CCGGAGAGCTGATTGGATTGTTGCGAGCGGAACGAATGGGGCGCGCTTTGGAAGAAG  
CGATCTGTTACCGAGCCATCTTATTGGGAATAACAAGAGCATCAATACTCAAAGT  
TTCATATCTGAAGCGAGTTTTCAAGAACTGCTCGGGTTTTAGCAAAGCAGCTCTCC  
GGGGTCGTATCGATTGGTTAAAAGGCCTGAAAGAGAACGTTGTTTTGGGGGGGATGAT  
ACCTGTTGGTACCGGATTCAAAGGATTA-----GTGCACCTTTCAAACAACATAACAAG  
ATTCCT-----TTGGAACAAAAAAAAGAATCTATTTCGAGGGGGAAATGAGG-----GATA  
TTTTGTTCCACCACAGGAAATTATTGATTCTTCCCTTTCAAAGAATTTCCATGATACAT  
CAGAA-----ATGACAAGAAGATATTGGAACATCAATTTGG  
AAGAGATGATGGAGGCGGGAGTTCATTTTGCCATGGTACTAGGAAATGGAATCCTAA  
AATGGCACCTTATATTTCTGCAAAGCGTAAAGGTATTCATATTATAAATCTTACTAGAAC  
TGCTCGTTTTTATCAGAAGCTTGTGATTTGGTTTTTGTGCGGCAAGGAGGGGAAAAC  
AATCTTAATTGTTGGTACCAAAAATAAAGCAGCTGATTAGTAGCATGGGCTGCAATA  
AGGGCCCGGTGTCATTATGTTAATAAAAAATGGCTCGGCGGTATGTTAACGAATTGGTC  
CACTACAGAAACGAGACTTCATAAGTTCAGGGACTTGAGAATGGAACAAAAAACGGG  
GAGACTCAACCGCTTCCGAAAAGAGATGCAGCTATGCTGAAAAGACAATTATTTTCG  
TTGCAAACATATCTGGGGGAATCAATATATGACAGGGTTACCCGATATTGTAATCATC  
GTTGATCAGCACGAAGAATATACGGCCCTGCGAGAGTGTATCACTTTGGGAATTCCAAC  
AATTTGTTAATCGATACAAATTGTGACCCCGATCTCGCAGATATTTGATTCCAGCGAA  
TGATGACGCTATATCTTCAATCCGATTGATTCTTAACAAATTAGTATTCGCAATTTGTGAG  
GGGCGTTCT---AGCTATATAAGAAATCCTATGGGACAAAAAATAAATCCACTTGGTTTCA  
GACTTGGTACAACCCAGGGTCATCATTCCCTTTGGTTTGCCAACCAAAAAATTATTCT  
GAGGGTCTACAAGAAGATCAAAAAATAAGAGATTGTATCAAGAATTATGTACAAAAAA  
ATATGAGAATATCCTCTGGG---GTCGAGGGAATTGCACGTATAGAGATTCAAAAAAGAA

TCGATCTGATCCAGGTCATAATCTTTATGGGATTTCCAAAGCTATTAATAGAAAGTCGAC  
CGCGA-----GGAATCGAAGAATTACAGACGAATTTACAAAAAGAATTTAATTGTGT  
GAGCCGAAAACCTTAATATTGCTATCACAAGAATTGCAAAACCTTATGGAAACCTAATA  
TTCTTGCAGAATTTATAGCCGGACAATTAAGAATAGAGTTTCATTTAGAAAAGCAATG  
AAAAAGCTATTGAATTAAGCAAGCAGATACAAAAGGAATTCAGTACAAATTG  
CAGGGCGTATTGACGGAAAAGAAATTGCACGTGTCGAATGGATCAGAGAAGGTAGGG  
TTCCCCTACAAACCATTTCGAGCTAAAATTGATTATTGTTCTATACAGTTCGAACTATCTA  
TGGGGTATTAGGTATCAAAATTTGGATATTTATAGACGAGGAAATGTCACGTTACCGAG  
GACCTCGTTTCAAAAAATACGCCGGCTGGGGGCTTTACCAGGACTAACTAATAAAAG  
GCCTAGAGCCGGAAGTGATCTTAGAAACCAATCGCGTTCCGGGAAA---AAATCTCAATA  
TCGTATTGCCTAGAAGAAAAACAAAAATTGCGTTTTTCATTATGGTCTTACAGAACGAC  
AATTACTTAAATATGTTTCGTATCGCCAGAAAAGCCAAGGGATCAACAGGTCAAGTTTTA  
CTACAATTACTTGAAATGCGTTTGGATAACATCCTTTTTTCGATTGGGTATGGCTTTGACT  
ATTCCCGCAGCCCGTCAATTAGTTAACCATAGACATATTTTAGTTAATGGGCGTATAGTA  
GATATACCAAGTTATCGCTGCAAACCCCGAGATATTATTACAGCGAAGGATGAACAAAA  
ATCCAGAACTCTGATTCAAAATTCTCTCGATTTCATCCCTCAT---GAGGGATTACCAAAC  
CATTTGACCCTTACCCATTCCAA-----TATAAAGGATTAGTCAATCAATAATAGATAGT  
AAATGGGTTCGGTTTGAAAATAAATGAATTGCTAGTCGTAGAATATTATTCTCGTCAGACT  
ATGTCACGTCGAGGTAAGTGCAGAAAAAAAACAGCAAAATCCGATCCAATTTATCGTA  
ATCGATTAGTTAACATGTTGGTTAACCGTATTATGAAACACGGAATAAATCATTGGCTT  
ATCAAATTATCTATCGAGCCGTGAAAAGATTCAACAAAAGACAGAAACAAATCCACT  
ATCTGTTTTACGTCAAGCAATACGTGGAGTAACTCCCGATATAACAGTAAAAGCAAGAC  
GTGTAGGTGGATCGACTCATCAAGTTCCCATTTGAAATAGGATCCACACAAGGAAAAGC  
ACTTGCCATTTCGTTGGTTATTAGCGGCATCCCGAAAACGTCCGGGGCGAAATATGGCTT  
TCAAATTAAGTTCCGAATTAGTGGATGCTGCCAAAGGGAGTGGCGATGCCATACGCAA  
AAAGGAAGAGACTCATAGAATGGCAGAGGCAAATAGAGCTTTTGCACATTTTCGTATG  
AGTAGGGACACTATTGCTGAGATAATAACCTCTATACGAAATGCTGATATGGATAGAAA  
AAGAGTAGTTTCGAATAGCATCTACTAATATTACCGAAAGTATTGTTAAAATACTTTTACG  
AGAAGGGTTTATCGAAAACGTGAGAAAACATCAAGAAAACAACAATCTTTTTTGGTT  
TTAACCTGCGACATAGAAGG-----AATAGGAAAAGACCCTAT-----AGAAATATTTTA  
ATTTAAAACGGATCAGTCGACCTGGTCTACGAATCTATTCTAACTATCAACGAATTCCTA  
GAATTTTAGGTGGGATGGGGATTGTAATTCTTTCTACTTCTCGAGGTATAATGACAGACC  
GAGAGGCTCGAGAACAAGAATCGGCGGAGAAATCTTGTGTTATATATGGATGGCAAA  
AGCTATGCCGAGAATTGGTTCACGTAGGAATGGACGTATTGGTTCGCGCAAGAGTACG  
CGTAGAATACCAAAGGGGGTTATTCATGTTCAAGCAAGTTTCAATAATACCATTGTCAC  
TGTTACAGATGTACGGGGTCGGGTGGTTTCTTGGGCCTCTGCCGGTACTTGTGGATTCA  
AAGGTAAGTAAAGGGGACGCCATTTGCTGCTCAAACCGCAGCAGGAAATGCTATTTCG  
TACAGTAGTAGATCAAGGTATGCAACGAGCAGAAGTCATGATAAAAGGTCCCGGTCTC  
GGAAGAGACGCAGCATTACGAGCTATTCGTAGAAGTGGTATACTATTAACTTTCGTACG  
GGATGTAACCCCATGCCACACAATGGCTGTAGACCTCCGAAAAAAGACGTGTGATG  
CCAATATTAACAACCTTATTAGAAATACAAGACAGCCAATGAGAAATGTCACGAAATC  
CCCCGCTCTTCGGGGATGCCCTCAGCGCCGAGGAACATGTAAGGGTGTATACTATCA  
CCCCAAAAAACCAACTCTGCCTTACGTAAAGTTGCCAGAGTACGATTAACCTCTGG  
ATTTGAAATCACTGCTTATATACCCGGTATTGGCCATAATTTACAAGAACATTCTGTAGT

CTTAGTAAGAGGGGGAAGGGTTAAGGATTTACCCGGTGTGAGATATCACATTGTTTCGA  
GGAACCCTAGATGCTGTCTGGAGTAAAGGATCGTCAACAAGGGCGTTCTAAATATGGGG  
TAAAAAAGCCAAAATGGCAAGGAAAAGTTTGATTCAGAGGGAGAAGAAGAGGCAA  
AAATTGGAACAGAAATATCATTTGATTCGTCGATCCTCAAAAAAAGAAATAAGC-----  
AAAGTTCCTCGTTGAGTGACAAATGGGAAATTTATGGAAAGTTACAATCCCCACCAC  
GGAATAGTGCACCGACACGCCTTCATCGACGTTGTTTTTCGACCGGAAGACCGAGGGC  
TAATTATCGAGACTTTGGACTATCCGGACACATACTTCGTGAAATGGTTCATGCATGTTT  
GTTGCCGGGAGCAACAAGATCAAGTTGGATGGTAAAAAATTCATTCATTTTCAGTTATTT  
CTCAA-----GAAGAAAACAAAGAAAACAGAGGGTCTGTTGAATTTCAAGTATTCAGTTT  
TACCAATAAGATACGAAGACTTACTTACATTTAGAAATTGCACAAAAAAGACTATTTAT  
CTCAGAGAGGTTTTCGAAAAATTTTGGGAAAACGTCAACGACTGCTGGCTTATTTGTC  
AAAAAAAATAGAGTACGTTATAAAGAATTAATCGGTCAGTTGGATATTCGAGAGACA  
AAAACCTCGT-----ATGGTAAAACCTTCGTTTGAACGATGTGGTAGAAAGCAACGAGCCG  
TCTATCGAATCGTTGCAATTGATGTTTCGATCCCGAAGAGAGGGGAAAAGATCTTCGGAA  
AGTGGGTTTTTATGATCCGATAAAGAATCAAACCTTATTTAAACGTTCTGCTATTCTATAT  
TTCCTTGAAAAGGGCGCTCAACCTACAGGAACTGTTTCAGGATATTTTAAAGAAGGCGG  
AGTTTTTTAAGGAACGTCGCCCTAATCAAACGGAATTCAT--ATGGATAAATCCAAGC  
GACCTTTTCTTAAATCCAAGCGATCTTTTCGTAAGCGTTTGCCTCCGATTCAATCGGGG  
GATCGAATTGATTATAGAAACATGAGTTAATTAGTCGATTTATTAGTGAACAGGGAAA  
AATATTATCTAGACGGGTAAATAGATTGACCTTGAAACAACAACGATTAATTACTATTGC  
TATAAACAAGCCCGTATTTTATCTTTGTTACCTTTTCTCAATAATGAGAAA-----CAATT  
TGAAAGAACCGAGTCGGCCGCTAGAACTACAGGTATTAGAACCAGCAATAACGTGACA  
CGTTCACTAAAAAAAATCCTTTTGTAGCCAATCATTTATTAAAAAAATTGATAAGCTT  
AACACAAAAGCAGAAAAAGAAATAATAGTAACTTGGTCCCAGGCATCTACCATTATAC  
CCACAATGATCGGCCATACTATTGCTATCCATAATGGGAAGGAGCATTGCTGTTTATAT  
AACAGATCGTATGGTAGGCCACAAATTGGGAGAATTCGCACCTACTTTAAATTTCCGAG  
GACATGCCAAAACCGATAATAGATCTCGTCGATGATTTTTCAATCTTTTCTACTAGGTA  
ATCTAGTATCCTTATGCATGAAGATAATCAATTCGGTCGTTGTGGTTCGGACTCTATTATG  
GATTTCTGACCACATTCTCCATAGGGCCCTCTTATCTCTTCCTTCTCCGAGCTCAGGTTA  
TGGAAGAAGGA-----ACCGAGAAGAAGGTATCAGCAACCACTGGTTTTTATTACGGGA  
CAGCTCATGATGTTTCATATCGATCTATTATGCGCCTCTGCATCTAGCATTGGGTAGACCTC  
ATACAATAACTGTCCTAGCTCTACCATATCTTTTGTTCATTTCTTCTGGAACAATCACA  
AACACTTT-----GGATCTACTACCAGAAATTCATGCGTAATCTCAGCATTCAATGTGT  
ATTCCTGAATAATCTCATTTTTCAATTATTCAACCATTTTCATTTTACCAAGTTCAATGTTA  
GCCAGATTAGTCAACATTTATATGTTTCGATGCAACAACAAGATGTTATTTGTAACAAGT  
AGTTTTCTTGGTTGGTTAATTGGTACATTTTATTCATGAAATGGCTTGGATTGGTATTA  
GTCTGGATACGGCAAATCATTCTATTAGATCGCTTATTCGATCTAATAAGTACCTTGTGT  
CAGAATTGAGAAATTCTATGGCTCGGATCTTTAGTATTCTCTTATTTATTACCTGTGTCTA  
CTATTTAGGCAGAATACCGTCACCCATTCTTACTAAGAACTGAAACAACCGAAGAA  
GATAAACCTCTTGGAACTCTTCTTTTCGATTATAACCGATGGAATCGCCATTTTCGCTAC  
ATAAAAAATAATCGATTTGAAAAGGCTGTAAGAAACGAAATGTCACAATACTTTTTTGA  
CACATGCCGAAGTGATGGAAAACAAGAATATCTTTTACATACCACCAAGTTTGTCAA  
CTTTTTTGAAAATGATAAAAAAAGGATATTCCTGTCAACACTAGAAAAAACCCCTCT  
GATGAACTAGACAACCGTTGGGTTTATACCAACAAGAAAAAAGTAAT--CTAACCAAC



GAGTTTCTAAATAGAATTGAAGTTCTAGACAGGGAACCCCTTTCTCTAGATATAATTGA  
ACAAGGACTAGACTGTGTAATGACAATACTAAAAAGAATATTTGCCTAAAATGTATG  
ATCCTTTCTTGAACGGACCATATCGTGGAACAATCAAAAAATGGTTTTACCTAAAAAG  
AGAGTTGGGATAAATCGGATTCATAGTATCCTTTACCAAGAATTAGTAAATTCAGATCCT  
AATGGTCAATCTATTGGAATAAAAGAAATCAGTAAAAAAGCCCCTCGCAGGTCATACA  
AATTAATCGATTTGGAACAACAATCA---GGACAAATTCGCTCAAGAAAAGCCAAACGT  
GTGGTGATTTTTACTATTGCTTTGATACGCTATTCAACAACATCAGATTTTCGACGAGGC  
ATAATCAAAGGTTCTATGCGTGCTCAAAGGCGTAAACAGTTATTTGGGAGCTGTTTCA  
AGCAAATGCGCATTCCCCCTTTTTTTGGACAGAATAAAAAAATCCCCGCTTTTTTCGT  
TTGATATC-----TCCCGACTAATCAACCCAATTTTTAGAAATAGAAAGGAGAAAGCACGG  
ATACAGGTAGCAGAAGCCTGGGATACCATTCCATTTGCACAAGGAATAAGAGGTTCCAT  
GTTAATAACTCAATCAATTCTTAGAAAATATATTCTATTACCTTCCTTGATAATAGCCAAA  
AATATTGGCCGTATGTTATTATTCAACTTCCTGAATGGTCTGAGGATTTACAGGAATGG  
AATAGAGAAATGCATGTTAAATGTACCTATAACGGTGTCAATTATCAGAAACAGAATT  
TCCGAAAAATTGGTTCACAGACGGGATTCAGATAAAAATCCTATTTCCCTTTCCGTCTGA  
AACCTTGGCACAGACCTAAAAAAAACAAAAAGATGATTTTTGTTTTTAAACAGTTTC  
AGGAATGGAAGCTGAACTTCCTTTTGGTTCCTCTCGAAAACGACCTTCCTTTTTTGAGC  
CCATTATTAGGAACTCAAAAAAAAATGCAAAATTAAAAAAGAAGTATTTTTTAGCT  
--CTAAGGGTTTTAAAAGGAAAAACAAAATTACTTCTAAAAGTTTCAAAGAAACAAA  
AAAATGGGTTATGAAAAACATTCTA-----TTAGAAAAATAATAAGAAACGAACTCTCA  
AAAGTTAATGATTCTATAATCAGCAATCAGATAATTCATGAATCATTAATCAAATTCAT  
CTCCAGATTGGACAAATTCCTCACTGACAGAAAAAAAATGAAAGATCTGACTGATAG  
ATAAAGTATCATTAGAAATCAAATAGAAAGAATTACAAAAGAGAAAAAAAAGTCTT  
ACCAAAGAAGTTATAATGCTAAAAGATTAGAGTTGCCAAAAAATATTTGGCAAATAGT  
AAAAAGAAGAAATCCTCGATTAACCTATAAATTACATTATTTTCTAAAATTTTTCAATTGA  
AAGAATGTACATAGATATTTTTTATCTATCATTAATATCCCAGAATCAATACACAACTT  
TTT--CGCTTTATTTCAAGTGATTTATCTTACTTGTACACAAGCATATGTATTTTACAAGTTA  
TCACAAACCCAAGTTAGAAATTTGTATAAATTAAGATCTGTTCTTCAATATACATCGTTT  
TTTCTTAAGACTGAAATAAAGGATTCTTTTACTAAGAATATTTCAACCTGAATTAAGG  
CATAAGAACTTAAGAATTATGGAATGAATCATTGGAAAACTGGTTAAGAGGGCATT  
TCAATACGATTTATCTCAGATTAGATGGTCTAGATTAATACCACAAAAATGGCGAAATAG  
AATTAATCAATGTCGTATGACTCAAAAAAAAACAAATGGGATTCATATGAAAAAGAC  
CAA-----TTAATTCATTACAAAAACAA---AATTTTTCAAATACTATAAATATGATCTTTT  
ATCATATAAATCTCTTAATGACGATTTTTTATATTTTCGATAGAAAATATTTGGATTGGAAA  
ATCATCAATTTTTATCTTAGACTTTTTGATTGGATGGAAATGAATGAAGAAATACTAAAT  
CGTTGGTCTTCCCAGAATTTGTGCGACTTTATAATGCATATAAAATGAAACCGTGGGTT  
ATACCAAGCAAATTACTTCTTTTAAATTACAAAAGTAACACGGAAGCAGAAGTACTAGATAT  
CTTCCTGAAACGTTATTTGCTTTTTCAATTGAGATGGGACGATTCTTTGAATCAAAGAAT  
GATCAATAATATCAAGGTATATTGTCTCCTGCTTAGACTGATAAATCCAAGAAAAATTAC  
TATATCCTCGATTCAACGGAGAGAAATAAGTTTGGATATAATGCTGATTGAAAAGAATTT  
AACTCTTACAGAATTGATGAAA--GGCGTATTGATTATCGAACCCCTTCGTCTGTCTGTA  
AAAAATGATGGACAATTTATTATGTATCAAACCATAGGTATTTCTTGGTTCATAAAAGT  
AAGCACAATCATTTAATTTGCTTGTTCCTGAAAATATTTTTTCATCTAGACATCGTAGA  
GAGTTGAGAATCTAATTTGTTTCAGATTTCTTTGGCCTAATTATCGATTAGAAGATTA

GCTTGTATGAATCGTTATTGGTTTTGATACCAATAATGGTAGTTGTTTTAGTATGTTAAGGA  
TACATATGTATCCAATGAAAGGACATCAATTCAAATCCTGGATTTTCGAATTGAGAGAG  
ATATTGAGAGAGATCAAGAATTCTCACTATTTCTTAGATTTCATGGACCCAATTCAATTCA  
GTGGGATCTTTCATTCACATTTTTTTCCACCAAGAACGTTTTATAAACTCTTTGACCCC  
CGAATTTGGAGTATCTTACTTTCA---CGCAATTCA-----CAGGGTTCAACAAGCAATCGAT  
ATTTACG-----ATCAAGGGT---TTAATACTCTTTGTAGTAGCGGTCCTTATATATCGT---  
-----ATTAACAATCGAAATATGGTCGAAAGAAAAAATCTCTATTTGATAGGGCTTCTTC  
CT-----ATACCTATGAATTCCATTGGACCCAGAAATGATACATTGGAAGAATCCGT  
T--GGGTCTTCCAATATCAATAGGTTGATTGTTTCG---CTCCTGTATCTTCCAAAAGGAAA  
AAAGATCTCTGAGAGTTGTTTCTGAATCCGAAAGAGAGTACTTGGGAGAACCCAAGT  
ACT-----AAAAAGTGTAGCATGCCTGAATCTAACTGGGGTTCGCGGTGGTGGAGGA  
ACTGGATCGGAAAAGGAGG-----GATTCTAATTGTAAGATATCTAAT-----GAAACCG  
TCGCTGGAATTGAGATCTTATTCAAAGAGAAAGATATCAA---TATCTGGAGTTTCTTTT  
TGTATATTATATGGAT-----GATCCGATCCGCAAGGACCATGATTGGGAATTGTTTGATCG  
TCTTTCTCTGAGGAAGAGGGCGAAATATAATCAACTTG-----AATTCGGGACCGCTATTTCG  
AAATCTTAGTGAAACACTGGATTTCTTATCTCATGTCTGCTTTTCGTGAAAAAATACCAA  
TTGAAGTGGAGGGT--TTCTTCAAACAACAAGGG---GCTGGGTCAACTATTCAATCAA  
TGATATTGAGCATGTTTCCCAT-----CTCTTCTCGAGAAACAAGTGGGCTTTTTCTTTGCA  
AAATTGTGCTCAATTTCATATGTGGCAATCCGCCAAGATCTCTTCGTT-----AGTTGG  
GGGAAG---AATCCGCACGAATCGGATTTTTTGAAGAAC---GTATCGAGAGAGAATTTGA  
TTTGTTAGACAATGTGTGGTTGGTAAATAAGGATCGG-----TTTTTTAGC-----AAGGT  
ACGGAATGTATCGTCAAATATTCAATATGATTCC-----ACAAGA-----TCTAGTTTCGTT  
CAAGTAACGGATTCTAGCCAAGTAAAGGATCTTCT--GATCAATCCAGAGATCATTG  
GATTCATTAGT-----AATGAGGATTCGGAA-----TATCACA  
CATTGATCAATCAAAGAGAGATTCAACAATAAAAGAAAGATCGATTCTT--TGGGAT---  
---CCTTCCTTTCTTCAAACGGAACGAACAGAGATAGAATCAGAC-----CGATTCCCGAAA  
-----TGCCTTTCTGGATATTCC-----TCAATGTCCCGGCTATTACG---GAACGTGAGAAGC  
AGATGATTAATCATCTGCTTCCGGAAGAAATCGAAGAATTTCTT-----GGGAATCCTACA  
AGATCCGTTTCGTTCTTTTTTCTCTGATAGATGG-----TCAGAACTTCAT--CTGGGTTTCGA  
ATCCTACTGAGAGGTCCACTAGAGATCAG-----AAATTGCTGAAGAAACAACAAGA  
TCTTTCT--TTTGTCCCTTCCAGGCGATCGGAA-----AATAAAGAAATGGTTAATATA  
TTCAAGATAATTACGTATTTACAAAAT-----ACCGTATCAATTCATCCTATTTTCATCAGATC  
CGGGGTGTGATATGGTTCCG---AAGGATGAACCGGAT--ATGGACAGTTCCAATAAGATT  
TCATTCTTGAACAAAAATCCATTTTTGGATTTA-----TTTCATCTATTCCATGACCGGAAC  
AGGGGAGGATACACCTTA-----CACCACGATTTTGAATCAGAA-----GAGAGATTTCAAG  
AAATGGCAGATCTATTCACTCTATCAATAACCGAGCCG---GATCTGGTGTATCATAAGGG  
ATTTGCCTTTTCTATTGATTCCTACGGATTGGATCAAAAACAA-----TTCTTGAATGAGGT  
ATTCAACTCCAGGGATGAATCGAAAAAGAAATCT-----TTATTGGTTCTACCTCCTAGT  
TTTTAT-----GAAGAGAATGAATCTTTTTCTCGAAGGATCAGAAAAAATGGGTCCGG---  
ATCTCCTGCGGGAATGATTTGGAAGATCCAAAACCAGAAATAGTGGTATTTGCTAGCAA  
CAACATAATGGAGGCAGTCAATCAATATAGATTGATCCGAAATCTGATTCAAATCCAATA  
TAGTACCTATGGG-----TACATAAGAAATGTATTGAATCGATTCTTTTTAATGAAT-----A  
GATCCGATCGCAACTTCGAATATGGA-----ATTCAAAGGGATCAAATAGGAAAGGATA  
CTCTGAATCATAGAATAATGAAATATACGATCAACCAACATTTCTCGAATTTGAAAA

AG---AGTCAGAAGAAATGGTTCGATCCTCTT-----ATTTTGATTTCTCGAACCGAGAGAT  
CCATGAATTGGGATCCTGATGCATATAGATACAAATGGTCCAATGGGAGCAAGAATTC  
CAGGAACATTTGGAACATTTTGTCTGAGCAGAAGAGCCGT-----TTTCAAGTAGTG  
TTCGATCGATTACGTATTAATCAATATTCGATTGATTGGTCTGAGGTTATCGACAAAAA  
GATTTGTCTAAGCCACTTCGTTTCTTTTTGTCCAAG-----TCACTTCTTT  
TTTTGTCC-----AAGTTGCTTTTCTTTTTGTCTAAC---TCACTTCTTTTTTCT  
GTGTGAGTTTCGGGAATATCCCATTCATAGGTCCGAG---ATCTACATCTAT--GAATTGA  
AAGGTCCGAATGATCAACTCTCCAATCAGTTGTTAGAATCAATAGGTCTTCAAATTGTT  
CATTGAAAAAATTGAAACCCTTC-----TTATTGGAT-----GATCATGATACTTCC--CAA  
AAATCGAAATTCTTGATCAATGGAGGAACAATATCACCATTTTTGTTCATAAAGATACCA  
--AAGTGG--ATGATTGACTCATTCCATACTAGA-----AATAATCGCAGGAAATCCTTTGAT  
AACACGGATTCCATTTCTCAATGATATTCCACGATCAAGACAATTGGCTGAATCCCTTG  
AAACCATTTCATAGAAGTTCATTGATATCTTCTTTTTATAAAGCAAATCGACTTCGATT  
TTGAATAATCCACATTACTTCTGCTTCTAT-----TGTAACACAAGATTCCCCTTTTCTGTG--  
-----GAAAAGGCCCGTATCAAT-----AATTATGATTTTACGTATGGA---CAATTCCTCAAT  
ATCTTGTTCAATCGCAACAAA---ATATTTCTTTGTGCGTCGGTAAA-----AAAAACATG  
CTTTTGGGGGG--AGAGATACTATTTACCAATCGAGTCACAGGTATCTAACATATTCAT  
ACCTAACGATTTTCCACAAAGTGGT--GACGAAGCGTATAACTTGTACAAATCT-----T  
TCCATTTTCCAAGTCGATCCGATCCATTCGTTCTG-----AGAGCTATTTACTCGATCGCAG  
ACATTTCTGGAACACCTCTAACAGAGGGACAAATAGTCAATTTTGAAAGAACTTATTGT  
CAACCTCTTTCAGATATGAATCTATCTGATTGAGAAGGGAAGAACTTGCATCAGTATCT  
CAAT-----TTCAATTCAAACATGGGTTTGATTGAGACTCCATATTCTGAGAAATATTTACC  
ATCCGAAAAG-----AGAAAAAA-----CGGAGTCTTTGTCTAAAG-----AAA  
TGC GTTGAGAAAGGGCAGATGTATAGAACCTTTCAACGAGATAGTGCTTTTTCAACTCT  
CTCAAATGGAATCTATTCCAAACATATATGCCATGGTTCCTTACTTTCGACAGGGTACAA  
ATATCTAAATTTGCTATTTTATAGATACTTTTTCAGACCTATTG-----CCGATACTAAGTAGC-  
--AGTCAAAAATTTGTATCCATTTTTCATGATATTATGCATGGATCAGGTATATCATGGCGA  
ATTCTTCAGAAAAAATTG-----TGTTCTCCACAATGGAATCTG---ATAAGTGAG  
ATTTTCGAGTAAGTGTTTACATAAT-----CTTCTTCTGTCCGAAGAAATGATTCATCGAAAT-  
-----AATGAGTCACCATTGATATCGACACATCTGAGATCGCCAAAGGTTTCGGGAGTTC---C  
TCTATTCATCCTTTTCTTCTTCTTGTGCTGGATAT--CTCGTTCGTACACATCTTCTCT  
TTGTTTCCCGG-----GCCTCTAGTGAGTTACAGACAGAGTTCGAAAAGGTCAAATCTTT  
GATGATTCCATCATCTATGATTGAGTTGCGAAAACCTTCTGGATAGGTATCCTACATCTGA  
ACCGAATTCTTTCTGGTTAAAGAATCTCTTTCTAGTTGCTCTGGAACAATTAGGATATTC  
TCTAGAAGAAATACGGGATTCTGCTTCTGGCGGCAACATGCTTGGT-----CCCGCT----  
-----TATGGG--GTCAAATCAATACGTTCTAAGAAGAAATATTTGAATATCAAT-----C  
TCATCGATCTCATA-----CCAAATCCCATTAATCGAATCACTTTTTTCGAGAAATACGA  
GACATCTAAGTCATACAAGTAAAGAGATCTATTGATAAAGAAAAAGAAAAACGT  
GAACGGGGATTGGATTGATGATAAAATAGAATCCTGGGTCGCGAACAGTGATTTCGATTG  
ATGATGAAGAAAGAGAATTCTTGGTTCAGTTCTCC-----ACCTTAACGACA-----GAAAA  
AAGGATTGATCAAATCTATTGAGTCTGACT--CATAGTGATCATTTA-----TCAAA  
GAATGACTCTGGTTATCAAATGATTGAACAACCGGGAGCAATTTACTTACGATACTTAG  
TTGACATTCAT-----AAAACGTATCTAATGAATTATGAGTTCAATACATCCTGTTTAGCAG  
AAAGACGGATATTCCTTGCTCATTATCAGACAATCACTTAT-----TCACAAACTTCGTGTG

GGGCTAATAGTTTTTCATTTCCCATCTCATGGA-----AAACCCTTTTCGCTCCGCTTAGC  
CTTATCCCCCTCT--AGGGGTATTTTAGTGATAGGTTCTATAGGAACTGGACGATCCTATT  
TGGTCAAATACCTAGCGACAAACTCCTATGTTCCCTTTCATTACGGTATTTCTGAACAAGT  
TCCTGGATAACAAGCCTAAAGGTTTTCTTATTGAT-----GATATCGAT--ATTGATGA  
TAGTGACGATATTGATGCTAGTGACGATATCGATGCTAGTGAC-----  
-----GATATCGATCGTGACCTTGATACGGAGCTGCTGGAAGTCTAACTAGGA  
TGAATGCGCTAACTATGGATATGATGCCGGAA-----ATAGACCGATTTTATATCACCTT  
CAATTGCAATTAGCAAAAGCAACGTCTCCTTGCATAATATGGATTCCAAACATTCATGAT  
CTGGATGTGAATGAGTCGAATTACTTATCCCTCGGTCTAGTAGTGAACCATCTATCCAGG  
-----GATTGTGAAAGATGTTCC---ACTAGAAATATTCTTGTATTGCTTCGACTCATATT  
CCACAAAAGTGGATCCCGCTCTAATAGCTCCGAATAAATTAATACGTGCATTAAGAT  
ACGAAGGCTTCTTATCCACAACAACGAAAGCACTTTTTCACTCTTTCATATACTAGGG  
GATTTCACTTGGAAAAGAAAATGTTCCATACT-----AACGGATTCGGGTCCATAACCATG  
GGTTCCAATGCACGAGATCTTGTAGCACTTACCAATGAGGCCCTATCGATTAGTATTACA  
CAGAAGAAATCAATTATAGACACTAATACAATTAGATCCGCTATTCATAGACAAACTTG  
GGATTTGCGA-----TCCCAGGTAAGATCGGTTTCAGGATCATGGGATCCTTTTCTATCAG  
ATAGGAAGGGCTGTAGCACAAAATGTACTTCTAAGTAATTGCCCATAGATCCTATATCT  
ATCTATATGAAGAAGAAA-----TCATGTAAACGAAGGGGATTCTTATTTGTACAAATGGTA  
CTTCGAACTTGGAAACGAGCATGAAGAAATTAACGATACTTCTTTATCTTTTGAGTTGTT  
CTGCCGGATCGGTGCTCAAGATCTTTGGTCTCTACCC-----GGACCCGATGAAAA---A  
ATGGGATCACTTCTTATGGACTCGTTGAGAATGATTCT--GATCTAGTTCATGGCCTATTA  
GAAGTAGAAGGCGCTCTGGTGGGA-----TCTTACGGACAGAAAAAGATTGCAGTCAG  
TTTGATAATGAT-----CGAGTGACATTGCTTCTTCGGCCCGAACCGAGGAAT--CCCTTAG  
ATATGATGCAAAACGGATCTTGTCTATCCTTGATCAGAGATTTCTCTATGAAAAATAC---  
---GAATCGGAGTTTGAAGAA---GGGGAGGGAGAAGGAGCCCTTGACCCGCAACAG-----  
-----ATAGAGGAGTAT-----TTATTCAATCAC-----ATAGTTTGGGCTCCT-----AGAATA  
TGCGCCCT-----TGGGGCTTTCTATTTGATTGTATCGAAAGGCCAATGAATTGGGAT  
TTCCC---TATTGGTCCAGGTCATTTTCGAGGCAAG-----CGGATCATTATGATGAAGAG  
GATGAGCTTCAAGAGAATGATTCGGAGTTCTTGCAGAGTGGAACCGTGCAGTACCAGA  
CACGAGATAGATCTTCCAAAGAACAAGGCTTTTTTTCGAATAAGCCAATTCATTTGGGAC  
CCTGCAGATCCACTCTTTTTCCTATTCAA---GATCAGCCCCCTGGCTCTGTGTTTTTAC  
ATCGAGAATTATTTGCAGATGAAGAGATGTCAAAGGGGCTTCTTACTTCCCAAACGGAT  
CCTCCTACATCTATATATAAACGCTGGTTTATC-----AAGAATACGCAAGAAAAGCACTT  
GAATTGTTGATTAATCGTCAGAGATGGCTTAGA-----ACCAATAGTTCATTATCT-----A  
ATGGATCTTCCGTTCTAAT-----ACTCTATCCGAGAGTTATCAGTATTTATCAAATCTCTT  
CCTATCTAAC--GGAACGCTATTGGATCAAATGACAAAGACATTGTTGAGAAAGAGATG  
GCTTTTCCCGGATGAAATGAAAATTGGATTC-----ATG-----ATGCCTAGA  
TCGCGG---ATAAATGGAAATTTTATTGATAAGACCTTTTCAATTGTAGCCAATATCTTATT  
ACGAATAATTCCGACAACCTCAGGAGAAAAAGAGGCATTTACCTATTACAGAGATGGG-  
-----ATGTCAGCTCAATCCGAAGGAAATTATGCGGAAGCTTTACAGAATTATTATGAAGCT  
ATGCGACTAGAAATTGATCCTTATGATCGAAGTTATATACTCTATAATATAGGTCTTATCC  
ACACAAGTAATGGAGAACATACGAAAGCTTTGGAATATTATTTTCGAGCACTAGAACG  
AAACCCATTCTTACCGCAAGCTTTTAATAATATGGCCGTGATCTGTCATTAC---CGAGGA  
GAACAGGCCATTCGACAGGGAGATTCTGAAATTGCGGAGGCTTGGTTCGATCAAGCCG

CTGAGTATTGGAAACAGGCTATAGCGCTTACTCCCGGGAATTATATTGAAGCACATAATT  
GGTTGAAGATCACGAGGCGTTTCGAA-----ATGAGTTGGCGATCAGAACATATATGGATA  
GAACTTATAAGGGGGTCTCGAAAAATAAGTAATTTCTGCTGGGCCCTTATCCTTTTTTTTA  
GGTTCATTAGGATTCTTATTGGTTGGAATTTCCAGTTATCTTGGTAGAAAATTTGATATCTT  
TTTTCCGTCTCAGCAAATCGTTTTTTTTCCACAAGGGATCGTGATGTCTTTCTACGGGA  
TCGCGGGTCTCTTTATTAGCTCCTATTTGTGGTGCGCAATTCCTGGAATGTAGGTAGTG  
GTTATGATCGATTGATAGAAAAGGAAGGAATAGTGTGTATTTTTCGTTGGGGATTTCTTG  
GAAAAATCGTCGTATATTCCTCCGATTCCTTATAAAAGATATTCAGTCCGTTAGAATAG  
AAGTTAAAGAGGGTATTTCTGCTCGTCGTGCCTTTATATGGACATAAGAGGACGGGGG  
GCCATTCCCTTGACTCGTACTGATGAGAAT---TTGACTCCACGAGAAATTGAACAAAA  
GCTGCCGAATTGGCCTATTTCTTGCCTGTACCAATTGAAGTATTT

>Euonymus

ATGGAAAACGGTGGTTCAATTCGATGTTATCTTTAAGTAAATCAATGGATAGTCTTGG  
TCCTATTGAAAATGTTAGTGGACGTGAAGATCCTATTGAAAATGATAGGGATAAAAAAA  
TGCATCCTTACAGTAATCTTGATCATTTAGCAGGCGGCAGGGGCTTTCGTAATTTCAATTT  
CTGATGGAACCTTTTTTATTAAGGATAATAATAGGAACGCTTATTCCGTCCATTTTGATAT  
TGAAAATCAAACCTTTTGAGATTGACAATGAGCAT-----TCGTTTATAAGTGAACCTGGAAA  
GTTCTTTTTATAGTTATCGAATTTGAGTTATCTGAATAATGAATCCGATAGTGAAGATAG  
TGATCCCCCTCGGTGGTATATAATACTAAACATAGTTGGAATAATCACATTAATAGTTG  
CATTGACACTTATCTTCGTTTTCGTTCTCCAATCGGTAGTGATAGTTATATTTTACGTGGT  
GGTGGCAATTACAGTGAAAGTTACATTTATAATTCCATTTGTAGGAACGAGAGTTCTAG  
TCTAAGACCTATCACGAATGATATTGATTTAACTCTAAGAGAAAGTTCTAATGATCTCGA  
TGAACTCAAAAATACAGGCATCTCTGGGTTCAGTGCGAAAATTGTTATGGATTAAATT  
ATAAGAAATTTTTTAAGTCAAAAATGAATATTTGTGAACAATGTGGATCTCATTGAAAA  
TGAGTAGTTCAGATAGAATTGAACTTTCGATTGATCCGGGCACTTGGAATCCTATGGAT  
GAAGACATGGTTTCTGTAGATCCCATTGAATTTCAATTCAGAGGAGGAACCTTATAAGA  
TCGTATTGACTCTTATCAAAGAAAGACAGGATTAACCGAGGCTGTTCAAACAGGTACA  
GGTCAACTAAATGGTATTCCCGTAGCAATTGGAGTTATGGATTTTATGTTTATGGGGGGG  
AGTATGGGATCCGTGGTAGGAGAGAAAATTACCCGTTTGATCGAGTATGCTACCAATCA  
ATTTTACCTCTTATTCTAGTGTGTGCTTCTGGAGGAGCACGCATGCAAGAAGGAAGTT  
TGAGCTTGATGCAAATGGCTAAAATATCTTCCGCTTTATTTGATTATCAATCAAATAAAA  
AGTTATTTTATGTATCAATCCTTACATCTCCTACTACTGGCGGAGTGACAGCAAGTTTTG  
GGATGTTGGGAGATATCATTATTGCCGAACCAAATGCCTACATTGCATTTGCCGGGTA  
AGAGTAATTGAGCAAACATTGAATAAGACAGTCCCTGAAGGTTCAACAAGCGGCTGAAT  
ATTTATTCCATAAGGGCTTATTCGATCAAATCATACCACGTAATCTTTTAAAGGGCGTTC  
TGAGTGAGTTATTTCAAGTTCCATGCTTTCTTTCCCTTTGAATCAAATCAATCAAGATGG  
TAACCATTGAGCCGACGAAATTAGTAATATTATCCGTGAACGTATTGAACAATATAATA  
GAGAAATAAAGATTGTAAATATCGGTACCGTACTTCAAGTAGGCGACGGCATCGCTCGT  
ATTTACGGTCTTGATGAAGTAATGGCGGGTGAATTAGTAGAATTTGAAGAGGGTACAAT  
CGGCATTGCTCTTAATTTGGAATCAAATAATGTTGGTGTGTATTAAATGGGTGGTGGTTT  
AATGATAGAAGAGGGAAGCTCTGTAAAAGCAACAGGAAGAATTGCTCAGATACCAGT  
GAGTGAGGCTTATTTGGGTCGTGTTATAAATGCCCTGGCTAAACCTATTGATGGTTCGAG  
GCGAAATTCAGCTTCTGAATCTCGGTTAATTGAATCTCCTGCTCCAGGGATTATTTCA  
GGCGCTCCGTATATGAGTCTCTTCAAACAGGCCTTATTGCTATTGATTGATGATCCCGA

TAGGACGTGGTCAACGAGAATTAATTATTGGGGACAGACAGACCGGTAAAACCGCGGT  
AGCCACAGATACGATTCTCAATCAACAAGGGGAAAATGTAATATGTGTTTATGTAGCTA  
TTGGTCAAAAAGCATCCTCTGTGGCTCAGGTGGTACTACTTTACAGGAAAGAGGAGC  
AATGGAATATACTATTGTGGTAGCTGAAATGGCGGATTCTCCAGCTACATTACAGTACCT  
CGCCCCTTATACTGGAGCGGCTCTAGCTGAATATTTTATGTACCGTGAACAACACTTT  
AATCATTTATGATGATCTCTCCAAACAAGCACAGGCTTATCGCCAAATGTCTCTTCTATT  
ACGAAGACCACCCGGTTCGTGAAGCTTATCCAGGAGATGTTTTTTATTTGCATTACAGTC  
TTTTAGAAAGAGCCGCTAAATCAAGTTCTAGTTTAGGTGAAGGAAGTATGACTGCTTTA  
CCAATAGTTGAGACCCAATCGGGAGATGTTTCAGCTTATATTCCTACTAATGTAATTTCC  
ATTACAGATGGACAAATCTTCTTATCCGCCGATCTGTTTAAATGCCGGAATCAGGCCTGCT  
ATTAATGTGGGTATTTCCGTCTCGAGAGTAGGATCCGCGGCTCAAATTAAGCGATGAA  
ACAAGTCGCGGGCAAATTAATAATTGGAATTGGCTCAATTCGCAGAATTAGAAGCCTTC  
GCGCAATTCGCTTCTGATCTCGATAAAGTTACTCAGAATCAATTGGCGAGAGGTCAACG  
ATTACGCGAGTTGCTCAAACAATCCCAATCTGCTCCTCTCGCGGTGGAGGACCAGATAA  
TACTATTTTATACCGGAACGAATGGCTATCTTGATTGTTAGAAATTGGACAAGTAAGA  
AAATTTCTTGTGAGTTACGTACTIONTAAAAACAAATAAACCTCAGTTCCAAGAAAT  
CATATCTTTTACCAAGGTATTCACCGAAGAGGCAGAAGCCCTTTTGAAAGAAGCTATTC  
AGGAACAGATGAAACGTTTTATACTTCCGGAACAGTTAATGAAAAAAATCCTACTACT  
TCTGGCATGGAGGTTTCCGCCCTTGAAAAAAAACCTCGGACGTATTGCTCAAATCA  
TTGGTCCAGTACTGGATGTAGCTTTTTCCCGGGCAAGATGCCTAATATTTACAACGCTC  
TAGTGGTTAAGGGTCGAGATACGTCGGTCCACACAATTAATGTGATTTGCGAAGTACAG  
CAATTATTAGGAAATAACCAAGTTCGTGCTGTAGCTATGAGTGCCACAGATGGTCTAAT  
GAGAGGGATGGACGTGATTGACACGGGAGCTCCTCTAAGTGTCCAGTCCGGCGTAGCG  
ACTCTCGGACGAATTTTCAACGTACTCGGTGAGCCTGTTGATAATTTAGGTCTGTAGA  
TACTCGTACAACATCTTATTTCATAAATCAGCGCCCGCCTTTATACAGTTAGAAACAAA  
ATTTGTCTATTTTTGAAACAGGAATTAAGTAGTAGACCTTTTAGCTCCTTATCGCCGTGG  
AGGAAAAATCGGACTATTCCGGGGGGGCTGGAGTGGGTAAAACGGTCCCTAATTATGGAA  
TTGATCAACAACATTGCCAAAGCTCATGGAGGTGTATCCGTCTTTGGCGGAGTGGGTG  
AACGTACGCGGAAGGAAATGATCTTTACATGGAAATGAAAGAATCTGGAGTAATTAA  
TGAACAAAATATTGCAGAATCAAAAGTGGCTTTAGTTTATGGCCAGATGAATGAACCGC  
CAGGAGCTCGTATGAGAGTTGGTTTAAACCGCTCTAACTATGGCGGAATATTTCCGAGAT  
GTTAATGAACAAGACGTACTIONTCTATTTATCGACAATATCTTCCGTTTCGTCCAAGCTGGA  
TCCGAAGTATCCGCCTTATTGGGGAGAATGCCCTCCGCTGTGGGTATCAACCCACCCT  
TAGTACTGAAATGGGTTCTTTACAAGAAAGAATTACTTCTACCAAAAAAGGGTCCATAA  
CTTCTATTCAAGCTGTTTATGTACCGGCGGACGATTTGACTGACCCTGCTCCGGCCACG  
ACCTTTGCACACTTAGATGCTACTACTGTACTATCACGAGGACTAGCTGCCAAGGGTAT  
CTACCCGGCAGTAGATCCTTTAGATTCAACGTCAACTATGCTACAACCTCGAATTGTTG  
GTGAGGAGCATTATGAAACTGCGCAAAGAGTGAAGCAAACCTTTACAACGTTACAAAG  
AGCTTCAGGACATTATAGCTATCCTGGGGTTGGACGAATTGTCCGAAGAGGACCGCTTA  
AACGTAGCAAGAGCACGAAAAATAGAGCGTTTCTTATCACAACCCTTTTTTCGTGCGCAG  
AAGTTTTTACTGGCTCTCCGGGGAAATATGTCGGTCTAGCAGAAACAATTAGAGGGTTT  
AAATTGATCCTTTCCGGAGAATTAGATGGTTTTCTGAGCAGGCCTTTTATTTGGTAGGT  
AACATCGATGAAGCTACTACTAAGGCTACGAATTTAGAAATGGAGAACAAATTGAAGA  
AAATGACCTTAAATCTTTGTGTACTGACCCCGAATCGAATTTTGGGATTCAGAAGTG

AAAGAAATCATTTTATCTACTAATAGTGGACAAATTGGCGTATTACCAAATCATGCGCCT  
ATTGCCACAGCCATAGATATAGGTATTTTGAGAATACGCCTTAATGACCAATGGTTAACG  
ATGGCTTTGATGGGCGGTTTTGCTAGAATAGGAAATAATGAGATCACTGTTTTAGTGAA  
TGATGCGGAAAAGAGTATTGACATTGATCCACAAGAAGCTCGTAAAACCTTTGAAATG  
GCGGAAGATAACTTGAAGAAAGCCGAAGGTAAGAGGCAAACAATTGAGGCAAATCTC  
GCTCTCAGACGAGCTAGGACACGGGTGGAGGCTATCAATGGGATGGCGATGAAAAATG  
TAACCGATTCTTTCCTTTTCTGTTGGTCACTGGCCATACGCCGGGAGTTTCGGGTTAAT  
ACCGATATTTAGCAACAAATCCAATAAATCTAAGCGTAGTCCTTGGTGTATTGATTTTT  
TTTGAAAAGGGGGTGTAAAGTGATTTATTAGATAATCGAAAACAGAGGATCTTGAATAC  
TATTCGAAATTCAGAAGAACTCCGCGAGGGAGCTATTGAACAGCTGGAAAAGCCTG  
GGACCGTTTAAGGAAAGCTGAACTGGAAGCAGATCAGTTTCGAGCGGATGGATATTCT  
GAGATAGAACGAGAAAAATTCAATTTGATTAATCAACTTCAAAGATTTTAGAACAAATT  
AGAAAATTACAAAAACGAAACCATTCAATTTGAACAAGAAAGAGCAATTAATCAAGTT  
CGACAACGGGTTTTCCAACAAGCCCTACAAGAAGCTCTAGGAACTCTGAATAGTTCTT  
TGACCGACGAGTTACATTTACGTACTATCAACGCTAATATTGGCATCTTTGGGACGATGA  
AAGAAATAACTAATATGAATCCACTGATTTCTGCCGCTTCTGTGATTGCTGCTGGGTTG  
GCCGTCGGTCTTGCTTCTATTGGACCTGGGGTTGGTCAAGGGACTGCTGCGGGTCAAG  
CTGTAGAAGGCATTGCGAGACAGCCCGAGGCAGAGGGAAAAATACGAGGGACTTTAT  
TGCTTAGTCTGGCTTTTTATGGAAGCTTTAACAATTTATGGATTAGTTGTAGCATTAGCGC  
TTTTATTTGCGAATCCTTTTGTTATGAATGTTCTATTATGCTCCATCAGTACACTCAAAGG  
ATTATACGATCTATCTGGTGTGGAAGTAGGTCAACATTTCTATTGGGAAATAGGAGGTTT  
CAAATCCATGGCCAAGTACTTATTACGTCTTGGGTTGTAATTGCTATCTTAGTAGGTTT  
AGCCATTGTAGCTGTTTCGGAATCCACAAACCATTCCGACTGCCAGTCAGAATTTCTTCG  
AGTACGTCCTTGAATTCATTCGAGACGTGAGCAAACTCAGATTGGAGAAGAATATGG  
TCCATGGGTTCCCTTTATTGGAACCATGTTTCTATTTATTTTGTTCGAATTGGTCGGGG  
GCACTTTTACCTTGAAACTCATAACAGTTACCTCAGGGGGAGTTATCCGCACCTACGAA  
TGATATAAATACTACTGTTGCTTTAGCTTTGCTTACATCAGTAGCATATTTCTATGCGGGT  
CTTACCAAAAAAGGATTAGGTTATTTTCAAGTAAATACATTCAACCAACTCCAATCCTTTTG  
CCCATTAACGTTTTAGAAAGATTTACAAAACCTTTATCGCTCAGTTTTCGACTTTTTGGA  
AATACTAGCGGATGAATTAGTGGTTGTTGTTCTTGTTCCTTAGTACCTTTAGTAGTTC  
CTATACCTGTCATGTTCCCTTGGATTATTTACAAGTGGTATTCAAGCTCTTATTTTTGCAAC  
TTTAGCCGCGGCTTATATAGGTGAATCCATGGAGGGTCATCATATGATATTTCTACTTTA  
GAGCATATATTAACATATATCCGTTTCGGTGTTCATTGTAATTAACAATTCATTTGAT  
AACTATATTACTCGATGAAATCGTCGGACTATATGATTTCGTCAGAAAAGGGAACGATAG  
CCACTTTTTTCTGTATAACTGGATTATTAGTTACTCGTTGTATTTATTTGGGACATTTACC  
GTAAAGTAATTTATATGAATCATTAGTCTTTCTTTTCATGGAGCTTATTCATTATTCATATAA  
TTCCGATTTTTAAAAACATCAAAAAAATTTAGCCTAATAACCGCGCCAAGTGCATTT  
TTTACCCAAGGCTTTGCTACTTCCGGTTTTTTAACTGAAATGCATCGGTCTGCATTATTA  
GTACCGGCTCTACAATCCAGTGGTTAGTAATGCACGTAAGTATGATGGTATTGGCCTAT  
GCGGCCCTTTTATGTGGATCATTATTTATCAGTGGCTCTTCTAGTCATTACATTTGAAAAA  
TCATAAGGATTCCTTTTTCTTTTTAAAGAGATTCAATACATGAACGGAAGTGGCAGTGTT  
TTACGA---ACTTCTTTTCTTTCTTCTAAAAATTATTACAGGTCTCAGTTGATTCACCAATT  
AGATTGTTGGAGTTATCATATTATTAGTATAGGATTTATCCTTTTAACTATAGGATTTCTTT  
CGGGAGCAGTCTGGGCTAATGAGGCATGGGGATCATATTGGAGTTGGGACCCAAAGGA

AACTTGGGCATTTATTACTTGGGCAATATTCGCAATTTATTTACATACTAGAACACATAA  
AAAATGGGAAGGTGTAAATTCGCAATTGTGGCTTTTATAGGCTTTCTTCTAATTTGGAT  
ATGTTATTTAGGGGTTAATCTATTAGGAATAGGGCTGCACAGTTATGGTTCATTTACATTA  
ATAATGGCAAAAAAGAAAGCGTTCCTCCCTTCTATATCTTGCATCTATAGTATTTTTG  
CCCTGGTGCGTCTCTCTCCTTTCAAAAAAGTCTAGAATCTTGGATTACTAATTGGTG  
GAATACTAGAGAATCCGAACTTTTTTGAATGATATTAAGAAAAAACTATTCTCGAAA  
AATTCATAGAATTAGACGAACTCTTCTCTTGGAAAGAAATGATAAAGGAATACCCGGAA  
ACACATTTACAAAAGCTTCGTATCGGAATCCACAAAGAAATGATCAAATTGATCAAGAT  
GTACAATGAGGATGGTATCCATACGATTTTCCAATTCTCGACAAATATAATCTATTTCTT  
ATTTAAAGCGGTTATTCTATTCTAGGTAATCAAGAACTTCGTTTTCTTAATTCTTGGGTTT  
AAGAATTCCTATATACTTAAGCGACACAATAAAAGCCTTTTCTATTCTTTTATTAAGT  
ATTTATGTATAGGATTTCAATCACCCACGGTTGGGAACTAATGATTGGTCTATCTACA  
AAGATTTTGGATTTACTCATAATGATCAGATTATATCTGGTCTTGTTTCCACTTTTCCAGT  
CATATTAGATAACAATTTTTAAATATTGGATCTTCCGCTATTTAAATCGTCTATCTCCCTCAC  
TTGTAGTGATTTATCATTCAATGAATGACATGCCTATTGGTGTTCGAAGAATACCCTTT  
GAAATCCTGGGGAAAACGCTTCATCCTGGGTTGACATATAACAACCGACTTTATCGAGAA  
AGATTGCTTTTTTTAGGCCAAATAATTAATACCCATCTAGCGAATCAACTTATTGCTCTTA  
TATTATATCTAACTATGGAGAGTGATACCAAAGATCTTTATTTGTTTATCAACTCTCCAGG  
CGGATGGGTAATACCTGGAATAGCTCTTTATGATACTATGCAATTTGTGCGACCAGATGT  
ACAGACAATATGCCTGGGATTGGCCGCTTCAATGGGATCTTTTATCCTGGTCCGAGGAA  
AAATTACCAAACGTTTAGCATTCCCTCACGCCAGGGTAATGATTCATCAGCCTTTTAGT  
GCTTTTTTTATGGCCCAAGTAGGAGAATTTGTCCTGGAAGCGGAAGAAGTCTGAAGC  
TGCGCGAAACCATCACAAAGGTTTATGTACAAAGAACGGGCAAAACCTTATGGATGGT  
ATCCGAAGACATGGAAAGGGATGCTTTTATGTACAGCAACAGAAGCCCAAGCTCATGGA  
ATTGTTGATCGTGTAGCGGTTGAAATGAAAGAACAATAATGGATTCATGAAGGTTTAAAT  
TACTGAATCACTTCCAAATGGTATGTTTCGGGTTTCGTTTAGATAATGAAGATTTCACTT  
AGGTTATATTTCCGGAAGGATCCGGCGCAGTTTTATACGTATACTACCGGGGGATAGAGT  
AAAAATTGAAGTAAGTCGTTATGATTCCACTAGAGGACGTATAATTTATAGACTCCGCA  
ACAAAGAT-----AAAGAAAAATTCCAAAGATATTTAGAAGTATGATCCATCTAGGCAGC  
ATGACTTCCCTATACCCACTTATCTTTAGGGAGTATAGTTATGTGCTTTCCCATGATTATGG  
TTTAGTCAGTTATGAAAATAAATCTAGTTACTAATTGTAAAACGTTTAAATTATTCGAATG  
GATCAACAAAATCATTGATTATTTCTACTCATTATTCTAACCAAAATATATTTTTTAAA  
AGAATTTATATTATCAAATGATATCAGAGGGTTTCTCAGTCATTGTGGAAATTCATTTT  
CCTACGATTCGCACCTTCTTTAATAGTAAAATCTCATAATTTACGATCAATTCATTCAATA  
TTTCTTTTTTAGAGGACAAATTTTACATTTAACTTATGTATTAGATGTACTAATAACCT  
ATCCGATCCATCTGGAAATCCTGGTTCAAATCCTTCGCTGCTGGGTGAAAGATGTTTCT  
TCTTTCGATTTATTACGATTTGTTCTCCATGAGTATTGGAATTGGAATAGTCTTCTTACTA  
AATCCATTTACATTTTTTCAACAACCAAGATTTTTCTTGTTCCTATATAATTCCTATGTGTC  
GGAATACGAATCTATCTTTCTTTTCTACGTAAACAAGATTCTCATTATGGTCAACATC  
CTCTCGGGTCTTCTTGAGCGAATCCATTTCTATGGAAAAATAGAACATCTTGCAGAAG  
TCTTTCCTAGTCAGGTTATCCTTTGGTTGTTGAAGGATCCTTGCACACATTATGTTAGAT  
ATCAAGGAAAATGCATTCTGGCTTCAAAGATATGCCATTTCTGATGAATAAATGGAAA  
TTTTACCTTGTTAATTTATTTCAATGTCATTTTTTTGCGGGGTCTCAACCGGAAAGGATC  
TATATAACCAATTATCCAAGCATTCTCTCGACTTTTTAGGCTATCTTTCAAGTGTGCAA



CTAAATTCTTCAGTAGTGCGGAGTCAAATGGTGGACAATGCGTTTCTAATAGATAAC-----  
-GCTATGAAGAACTCGATACAAGAGTTCCACTTATTTCTTTGATTTCGATTATTGGCAAA  
AGCGAGATTTTGTAAACGTATTAGGACATCCATTAGTAAAACGACCCGGGCTGATTCAT  
CGGATTCGGATATTATCGACCGATTTGTGCGTATATGTATAAATCTTTCTCATTATTACAG  
TGGATCCTCAAAAAAAAAAGAGTTTGTATCGAATAAATATGTACTIONCGACTTTCTTGTG  
TTAAAACCTTTGGCTCGTAAACACAAAAGTACTGTACGCGCTTTTTTTGAAAAGATTAGGT  
TCGGAATTATTGGAAGAATTTTTTACAGAGGACGAAGAGATTCTTTCTTTGAGCTTCCC  
AAGACGGATTTGGTATTTTGTATATTATTGTATCAACGACCTGGCCCCAGTTCTGATGAT  
ACTTGATACACCA---GAAATACAAGATATTCAT---TCTTTTTCCGGATTAGAATCC---TTAA  
AAGAGATATATAACATTATATGGATGCTTGCTCCTATTTTAACTCTTGTATTGGGAATAAC  
AATAGGGGTACTAGTAATTGTGTGGTTAGAAAGAGAAATAGCCGCAGGAGTACAACAA  
CGTATTGGGCCCGAATATGCTGGTCCTTTAGGAGTTCTTCAAGCTCTAGCAGACGGGAT  
AAACTACTTTTTAAAGAGAATCTTCTTCCATCTCGGGGAGATACTCGTTTATTCAGCG  
TTGGCCCATCCATAGCAGTCATATCAATTCTACTAAGCTATTCAGTAATTCCTTTTGGCTA  
TCACCTAGTTTTAGCTGATCTAAAGATTGGTGTTTTTTTATGGATTGCCATTTCAAGTATT  
GCTCCCATCGGACTTCTTATGTCAGGATATGGATCAAATAATAAATATTCTTTTTTAGGTG  
GTCTACGAGCCGCTGCTCAATCAATTAGTTATGAAATACCATTAECTCTATGTGTGTTAT  
CAATATCTCTACTATCTAATAGTTTAAAGTACAGTTGATATAGTTGAGGCACAGTCAAAT  
ATGGTCTTTGGGGGTGGAATTTGTGGCGGCAACCTATAGGGTTTATTGTTTTTCTAATTT  
CTTCTCTAGCAGAATGCGAGAGATTGCCCTTTGATTTACCAGAAGCGGAAGAAGAATT  
AGTAGCCGGTTATCAAACCGAATATTCGGGTATCAAATTTGGTTTATTTTATGTTGCTTC  
CTATCTAAACCTATTAGTTTCGTCATTATTTGTAACAGTTCTTTACTTGGGCGGTTGGAAT  
ATTTCTATTCCGCACTTTTTTGTTCCTAAGCTTTTTGAACTAAATAAAGTGAGTGGGGTT  
TTTGAAACAACAACGGGTATCTTTATTATATTGGCTAAAACCTATTTGTTCTTGTTCAATTT  
CTATCACAACAAGATGGACTTTACCTAGACTAAGAATGGATCAACTATTAATCTTGGC  
TGGAAATTTCTTTTACCTATTTCTCTTGGCAATCTATTATTAACAACCTCTTCAACTCC  
TTTCATTGATGATCTGGCATGTACAGAATGAAAACCTCATTCTCGATTCTACGAGAATTT  
TTATGAAAGCCTTTCATTTGCTTCTCTTCGATGGAAGTTTGATTTTCCCAGAATGTATCC  
TAATTTTTGGCCTAATCTTCTTCTGATGATCGATTCAACCTCTGATCAAAAAGATATAC  
CTTGGTTATATTTTCATCTCTTCAACAAGTTTAGTAATGAGCATAACAGCCCTATTGTTCC  
GATGGAGAGAAGAACCTATGATTAGCTTTTTCGGGAAATTTCCAAACGAACAATTTCAA  
CGAAATCTTCAATTTCTTATTTTACTATGTTCAACTCTATGTATTCCTCTATCCGTAGAGT  
ACATTGAATGTACAGAAATGGCTATAACAGAGTTTCTGTTATTTCGTATTAACAGCTACTC  
TAGGAGGAATGTTTTTATGCGGTGCTAACGATTTAATAACTATCTTTGTAGCTCCAGAAT  
GTTTCAGTTTATGCTCCTACCTATTATCTGGATATACCAAGAAAGATGTACGGTCTAATG  
AGGCTACTATGAAATATTTACTCATGGGTGGGGCAAGCTCTTCTATTCTGGTTCATGGTT  
TCTCTTGGCTCTATGGTTCATCCGGGGGAGAGATCGAGCTTCAAGAAATAGTGAATGGT  
CTTATCAATACACAAATGTATAACTCCCCAGGAATTTCAATTGCGCTTATATTCATCACTG  
TAGGAATTGGGTTCAAGCTTTCCCTAGTCCCTTCTCATCAATGGACTCCTGACGTATAC  
GAAGGATCTCCCACTCCAGTCGTTGCTTTTCTTTCTGTTACTTTCGAAAGTCGCTGCTTC  
AGCTTCAGCCACTCGAATTTTCGATATTCCTTTTTATTTCTCATCAAACGAATGGCATCT  
TCTTCTGGAAATCCTAGCTATTCTTAGCATGATATTGGGGAATCTCATTGCTATTACTCAA  
ACAAGCATGAAACGTATGCTTGCATATTCGTCCATAGGTCAAATCGGATATGTAATTAAT  
GGAATAATTGTTGGAGACTCAAATGGTGGATATGCAAGCATGATAACTTATATGCTGTTT

TATATCTCCATGAATCTAGGAACTTTTGCTTGCATTGTATCATTGGTCTACGTACCGGA  
ACTGATAACATTTCGAGATTATGCAGGATTATACACGAAAGATCCTTTTTTTGGCTCTCTCT  
TTAGCCCTAIGTCTCTTATCCCTAGGAGGCTTTCCTCCACTAGCAGGTTTTTTTCGGAAAA  
CTCCATTTATTCTGGTGTGGATGGCAGGCAGGCCTATATTTCTTGGTTTCAATAGGACTC  
CTTACGAGCGTGGTTTCTATATACTATTATCTAAAAATAATCAAGTTATTAATGACTGGAC  
GAAACCAAGAAATAACCCCTCACGTGCGAAATTATAGAAGATCCCTTTAAGATCAAA  
CAATTCCATCGAATTGAGTATGATTGTATGTGTGATAGCATCTACTATAACCAGGAATATCA  
ATGAACCCGATTATGGAAATTGCTCAGGATACCCTTTTTATGGTTCTGCTTTACGAATAC  
GATCTTTTCTGGGCATTTCTAATAATCTCAAGTGTTATCCCTGTTTTGGCATTCTAATTT  
CCGGCGTTTTGGCCCCCTTAACAAAAGGCCAGAGAAGCTTTCGAGTTATGAGTCGGG  
TATAGAACCAATGGGCGATGCTTGGTTACAATTTAGAATCCGTTATTACATGTTTGCTCT  
CGTTTTTGTATTTTTGATGTTGAAACGGTTTTTCTTTATCCGTGGGCAATGAGTTTTGA  
TG TAGTAGGAGTATCCGTATTTATAGAAGCTTTCATTTTTGTGCTTATCCTAATTGCCGGT  
TTAGTTTATGCATGGCGCAAAGGAGCATTAGAATGGTCTACGAATTTTTTTCCTTGGTTA  
ACAATCTTTGTAGTCTTTCCGATATCCGCAGGTTCTTAATTTCTTTCTGCCTCAGGGA  
GGAAATAAAGTAATTAGGTGGTATGCTATATGTATATGTGTATTAGAACTTCTTTAATGA  
CCTACGTATTCTGCTATCGTTTCCAATCGGACGATCTATTAATTCAATTGGCGGAGAATTA  
TAAGTGGGTCGATTTTTTTGGTTTTTACTGGAGATTGGGAATAGATGGACTTTCTATAGG  
ACCCATTTACTGACAGGATTTATCACTACTTTAGCTACTTTAGCGGCTTGGCCGGTTAC  
TCGAGATTCCAGACTATTCCATTTCTTGATGTTAGCCATGTATAGCGGTCAAATAGGATT  
ATTTTCTTCTCGAGATCTTTTACTTTTTTTCATCATGTGGGAGTTAGAATTAATCCCGTT  
TATCTACTTATATTTATGTGGGGGGAAAGCAACGTTTGTATTCAGCTACAAAGTTTATT  
TTATACACCGCAGGGGGTTCTTTTTTTTATTAATAGGAATTTCTAGGTATCTGTTTATAG  
GTTCCAACGAGCCAACATTAATTTTTGAAACATCAGCCAATCAACCCTATCCTTTAGCG  
CTGGAATAATATTCTATATTGGATTTCTTATTGCTTTTGCTGTCAAATTACCGATTATACC  
TTTACATACATGGTTACCAGATACTCACGGAGAGGCACATTACAGCACTTGTATGCTTCT  
AGCCGGAATCTTATTAATAAATGGGAGCATATGGGTTGGTTCGGATCAATATGGAATTATT  
ACCCCATGCTCACTCTCTAGTTTCTCCCTGGTTGATAATAATAGGCACAATTCAAATAAT  
TTATGCAGCTTCAACATCTCCTAGTCAACGTAATTTAAAAAAGAATAGCCTATTCTC  
GGTATCTCATATGGGTTTTATAATTATAGGAATTTGCTCTCTAAGCGATACGGGACTTAAC  
GGAGCTCTTTTACAAATAATATCTCATGGATTTATTGGTGTGCTGCACTTTTTTTCTGGCA  
GGAACGAGTTATGATAGAATACGTCTTCTTTATCTCGATAAAATGGGAGGAATGGCTATC  
TCGGTTCCAAAAATATTCACGATGTTTCAGTATCTCATCAATGGCTTCTCTTGCATTACCG  
GGCATGAGCGGTTTTTTTTGCAGAATTGATAATTTTTTTGGAATAATTACTAGCCAAAAA  
TTTCTTTTACTGGCAAAAATACTAATTATTTTTGTGCATGGCAATTGGAACGATATTAATC  
CTGTTTATTTATTGTCTATGTTACACCAGATGTTCTATGGATACAAGCTATTTAATGCCTC  
AAACTCTTCTTTTTTGGATTTTGGACCGCGAGAGTTGTTTATTTCATCTCTATCCTTCT  
ACCTGTAATAGGTATGGCATTATCCGGACTTCGTTTTTCTCATTATCAGGTGACAAGGT  
CGAGGCTATTTGTATAATTAT-----ATGATGCTAGAACATATACTTGTTTTGAGTGCCTA  
TTATTTTGTATAGGTATTTATGGATTGATCACGAGCCAAAATATGGTTAGAGCCCTTATG  
TGCTTTGAACTTCTAATGAATGCAATTAATAAATTTTCGTCACATTTTCTGATTTTTTTG  
ATAGTCGCAATTAAGGAACTATTTGCTCAATATTTGTTATAGCTATTGCAGCGGCTG  
AAGCAGCTATTGGACCGGCTATTGTTTCTCAATTTATCGTAACAGAAAATCAACGCGT  
ATCAATCAATCTAATTTGTTGAATAAGATGGAACATATATATCAATATCCGGGATCATCC

CTTTTATTACACTTCCAGTTCCTATGGTAATAATGGGGGGGCTTCTACTTTTTCCGACAG  
TAACAAAAAAATTCGCCGTATGTTGTCTTTTTCTAGTGTTGTTTTGTTAAGTATAGTCA  
TGCTTTTTTCACTAAATCTTCTTCTCAGCAAATCTATAGCAGTTCATCTATAAATCAGT  
GTGGTCTTGGACTIONTCAATAATGATTTTTCTTTAGAGTTCGGCTATTTGATCGACCCGCT  
GACTTCTATTATGTTAATATTGATCACTACTGTTGGAATCATGGTGCTTATTTATAGCGAC  
AATTATATGTCTCATGATCAAGGATATTTGAGATTTTTGCTTCTATGAGTTTTTTCAATA  
CTTCAATGTTGGGTTTAGTCTCGAGTTGTAATTAATAACAAATTTACATTTTTTTGGGAATT  
GGTTGGGATGTGTTCTTATCTATTAATAGGTTTTTTGGTTTACGCGACCTCTTGTTGGGTAC  
TGCGTGTCAAAGGGCGTTTATAACTAATCGTGTCTGGGGATTTGGTTTATTATTAGGAAT  
TTAGGTTTTTATTGGATAACGGGTAGTTTCGAATTTCCGGATTTGTTTCGAAATATTCAA  
CAAC---GAGATTGATTTGTTATTTGTTACTTTGTGTTCCCTTGCTATTATTTCCGGTGCAG  
TTGCTAAATCCGCGCAGTTTCCCCTTCATGTGTGGTTACCAGATGCCATGGAAGGGCCT  
ACTCCTATTTCCGGCTCTCATACATGCTGCTACTATGGTAGCAGCAGGCATTTTTCTTGTA  
GCTCGCCTTCTTCTCTTTTTCTTAGTCATACCTTACGTTATGAATTAATAGCCTTAATAG  
GTATATTAACAGTACTATTAGGAGCTACTTTAGCTCTTGCTCAAAAAGATATTAAGAGAG  
GTTTAGCTTATTCTACAATGTCTCAATTGGGCTATATCATGTTAGCTTTAGGTCTGGGCTC  
TTCTCGAGCCGCTTTATTTCAATTTGATTACTCACGCTTATTCAAAGCTTTGTTGTTTTTA  
GGATCTGGATCAATTATTCAATTCAATGGAGGCTATTGTTGGATATTCTCCCGATAAAAGT  
CAGAATATGGTTCATTATGGGCGGTTTAAACAAAACATGTTCCAATTACAAAATTTCTTTT  
TACTAGGTACACTTCTCTTTGTGGTATTCCTCCCTTTGCATGTTTTTTGGTTCGAAAGAT  
GAAATACTTAATGATAGTTGGTTATATTCACCGATTTTTTCAATAATCGCTTGTTCGCGG  
CTGGATTAACCGCATTTTATATGTTTCGGATCTATTTACTTACTTTTTGAAGGTCATTTGAA  
TCCTCATTTTCAAGATTACAGTGGAAAAAAGGTAGCTCTTTCTATTCAATATCTTTATG  
GGTAAAGAGGGGCCAAGTCCGATNAAAAAA---TATTATCTTTATTNAAAAATAAATCT  
TTTTTGCAATACTTTAAAT-----CCTTATCCTCATGAATCGAACAATACTATGCTAGCTC  
CTATACTTATATTGGCCTTATTTACCTTGTTTAGTGGGGTCATAGGAAAT-----GGATTGGA  
TATATTATCCAAATTGTTAACTCCACCGATAAACCTGTTAGATCAAATTTCAAAA---TCC  
AAGGATTGG---CAATTTTTGACAAATGCAACTTTTCCAGTCAGTATAGCTTTTTGGGGGA  
ATTTTGTTTCGCATCCTTTTTTATAACAAGCCTGTTTATTATCTTTACAAAATTTGAACTTCC  
TAAATTTAGTTGTCATTCTTAGGGACAAACTAATATATTTAATATATCGTTTGTTCATATAAT  
CGTGGTTATATAGATGCTTTTTTATGCAAATTTATAACTAGGGGTCTAAGAAGATTGGCA  
GAACTAACTCATTTTTTTGATAGACAAATAATCGATAGAATTACAAATGTAATGGGTCTT  
ACAAGTTTTTTTTCTTGGAGAGGTTATAAAATATGTAGGAGGCGGT---CGCATCTCTTCGT  
ATCTCTTATTGTATTTGTTTCGCTGTATTCATTTTTTTAGTAATAAAATTGATGGATTTACCT  
GGATCAATACATGATTTTCTTTTAGTATTTCTGGGATTGGGCCTTATATTATTAGGTTTAG  
GGGTGGTATTGCTTACCAACCCAATTTATTCCGCCTTTTCGTTGGGATTGGTTCTTATTT  
GTATAGCCTTATCTATATTTTATCAAATTCCTATTTTGTAGCTGCCGCACAACCTCCTTATT  
TACGTAGGAGCCATAAATGTTTTAATCATATTTGCTGTGATGTTTCATGAATGGTTCAGAA  
TACCACAACGCTTTTTATCTTTGGAACGCTGGAGGCGGGGTTACTTCACTGGTTTGTAC  
AAGTATTTTTCTTTTACTAATTACTACTATTCCAGATACGTCATGGTATGGGATTATTTGG  
ACTACAAGATCAAACCAGATTATAGAGAAAGATTTGATAACTAATAGTCAACAAATTGG  
AATTCGTTTATCAACAGATTTTTTTCTTCCATTTGAACTCATTCAATAATTCTTTTAGTT  
GCGTTAATAGGCGCGATTGCTGCGGCTCGTCAGATGAATGTATCATCTCCAAGACAAGA  
CCTCATGATAGTCAATATGGGCCACACCATCCATCAATGCATGGTGTCTTCGACTCAT

CGTTACTCTAGATGGTGAAGATGTTATTGACTGTGAACCAATATTAGGTTATTTACACAG  
AGGGATGGAAAAAATTGCGGAAAACCGAACAATTATACAATATCTGCCCTATGTAACAC  
GTTGGGATTATTTAGCTACGATGTTACAGAAGCAATAACGGTAAATGGACCAGAACG  
GCTGGGAAATATTCAAATACCTAAAAGAGCTAGCCATATCAGAGTAATTATGTTGGAGT  
TGAGTCGTATAGCTTCTCATCTGTTATGGCTTGGCCCTTTTATGGCAGATATTGGTGCGC  
AAACCCCTTTCTTCTATATTTTCAGAGAAAGGGAATTAGTATATGATCTATTCGAAGCTG  
CCACTGGGATGAGAATGATGCATAATTTTTTTTCGTATCGGAGGAGTAGTGGCCGATCTA  
CCTCATGGCTGGATAGATAAATGCTTGGATTTCTGCGATTATTTTTTAAACAAGGGCTGCT  
GAATATCAAAACCTTATTACGCGAAATCCTATTTTTTTAGAACGAGTTGAAGGCGTAGG  
TATTATTAGTGCAGAGGAAGCAATAAATTGGGGTTTATCAGGACCAATGCTACGAGCTT  
CTGGAATACAGTGGGATCTTCGCAAAGTTGATCATTATGAATGTTACAACGAATTTGATT  
GGGAAGCTCCGTGGCAAAAAGAAGGCGATTCATTAGCTCGTTATTTAGTCCGAATCAG  
TGAAATGAAGGAATCCATAAAAATTATTCAACAGGCTCTGGAAAGAATCCGGGGGGG  
CCCTATGAGAATTTAGAAACCCGATGTTTTGATAGAGAGAGGGATCAAAACTGGAATG  
ATTTTGAATATCGATTCATTAGTAAAAAACCTCTCCTACTTTTGAATTGCCGAAACAAG  
AACTTTATGTGAGAGTCGAAGCACCAAAGGGAGAATTGGGAATTTTTCTGATAGGGGA  
CCAGAGTGGTTTTCTTGGAGATGGAAAATTCGTCCACCGGGGTTTATTAATTTGCAAA  
TTCTTCCTCAGTTAGTTAAAAGAATGAAATTGGCTGATATTATGACGATACTAGGTAGCA  
TCGATATCATTATGGGGGAAGTTGATCGTATGCTCCCTATGGTAACTGGGTTTCAGAAATT  
ATGGTCAACAAACAATAAGGGCTGTAAGGTACATTGGTCAAAGTTTTATGATTACCTTA  
TCCCACGCAAATCGTTTACCCGTAACCTATTCAATACCCTTATGAAAAATTAATTACATCG  
GAGCGTTTCCGCGGTGCAATCCATTTTGAATTTGATAAATGTATTGCTTGTGAGGTATGT  
GTTTCGTGTATGTCTATAGATTTACCCGTTGTTGATTGGCAATTCGAAACGAATATTCGA  
AAGAAACGATTGCTTAATTATAGTATTGATTTTGGAAATCTGTATATTTTGTGGTAACTGCG  
TTGAGTATTGTCCAACAAATTGTTTATCAATGACTGAAGAATATGAGCTTTCTACTTATG  
ATCGTCACGAATTGAATTATAATCAAATTGCTTTGGGTCGTTTACCAATATCAGTAATTG  
ACGATTATACAATTCGAACGATTTGACTTTGGAC-----AT  
GCAAGGTTCTTTGTCTGCTCGGCTAGTCAAACACGGGCTAGTTCATAGATCTTTGGGCT  
TCGATTACCAAGGAATAGAACTTTACAAATAAAGCCCGCGGATTGGCATTCCATTGCT  
GTCATTTTATATGTATATGGTTACAATTATCTACGTTCCCAATGTGCCTACGATGTAGCAC  
CAGGCGGACTGTTAGCTAGTGTGTATCATCTTACGAGAGTGGCGTATAGTATAGATCAA  
CCGGAAGAGGTATGCATAAAAGTATTTGCCCAAGGAGGAATCCTAGAATTCTGTCTGT  
TTTTCTGGGTTTGGAAAAGCGCGGATTTTCAAGAAAGGGAGTCTTATGATATGTTCCGAA  
TTTCGTATGAGAATCATCCGCGCTTGAAACGCATCTTAATGCCCGAAAGTTGGATAGGG  
TGGCCTTTACGTAAGGATTATATTGCCCCGATTTTTTATGAAATACAAGATGCTCAT-----

-----ATGAATTCCATTGCGTTTCCCTTACTTGATCGA  
ACAACCCAA---TCTGTTATTTCAACTACATCAAATGATCTTTCAAATTGGTCAAGACTCT  
CCAGTTTATGGCCCTTCTCTACGGTACGAGTTGTTGCTTCATTGAATTTGCTTCATTAAT  
AGGTTACGCTTCGACTTTGATCGTTATGGACTAGTACCACGATCTAGTCCTAGACAAG  
CAGATCTAATTTTAAACAGCCGGCACTGTAACAATGAAGATGGCACCCCTCTTTAGTGAGA  
CTCTATGAACAAATGCCTGAACCTAAATATGTAATTGCCATGGGAGCCTGTACAATTAC  
AGGTGGGATGTTTCAGTACCGAGTCTTATAGTACTGTTCCGGGAGTTCGATAAGCTAATTC  
CCGTAGATGTTTATTTGCCTGGTTGCCACCTAAACCAGAGGCGGTTATAGATGCCATA

ACAAAACCTTCGTAAGAAAATATCTCGAGAAATATCTGAAGATCGAATTAGGGCTCAAC  
AAGAAAATCGTTGTTTTACTACCAATCACCAGTTTCGCCTTGGGCGCAGTACTCATACT  
GGAAATTATGATCAAGGATTACTCTATCAACCACTATCTACGTCAGAGATCCCTACTGAA  
ACATTTTTTAAATACACAGCGGGGTATCTTCCCACGACTTAGTAAATATGCAAACCTAG  
AAATACCTTTTCTTGGATAAAGGAAGAGATTACTCGATCTTTTTCCGTATCGCTCATTATA  
TCTATAATGACTTGGGCATCCATTTCAAATGCATATCCCATTTTTGACACAGCAGGGTTAT  
GAAAATCCACGAGAAGCAACTGGACGTATTGTATGCGCCAATTGCCATTTAGCTAACA  
AGCCCGTGGATATTGAGGTTCCCCAGGCAGTACTTCCCGATACTGTATTTGAAGCAGTT  
ATTCGAATTCCTTATGATAAGCAACTGAAACAAGTTCTTGCTAATGGCAAAAAAGGCGC  
CTTGAATGTTGGGGCTGTTCTTATTTTACCTGAGGGATTTGAATTAGCCCCCCCCGATCG  
TATTTCTCCTGAGATGAAGGAAAAGATGGGAAATCTGTCTTTTCAGAGCTATCGACCTA  
CTAAAAAAATATTCTTGTGATAGGGCCTGTTCTTGGTCAGAAATATAGTGAAATCACC  
TTTCCTATTCTTTCCCCGACCCCACTACTAAGAAGGACGTTCACTTCTAAAATATCCC  
ATATACGTAGGCGGGAACAGGGGAAGGGGTCAGATTTATCCTGATGGGAGCAAGAGTA  
ACAATACAGTTTATAATGCTACAGCAGCGGGTATAGTAAGCAAATTATACGAAAAGAA  
AAGGGGGGGTACGAAATAACCGATGCATCGGATGGACGCCAAGTAATTGATAT  
TATACCTCCAGGACCAGAACTTCTTGTTCAGAGGGTGAATCTATCAAATTGGATCAGC  
CATTTACGAGTAATCCTAACGTGGGTGGATTTGGTCAGGGGGATGCGGAAATAGTACTT  
CAAGACCCAGCACGGGTCCAAAGTCTTTTGTCTTCTTCGCGTCGGTTATTTTGGCACA  
AATCTTTTTGGTTCTTAAAAGAAACAGTTTGAGAAGGTTCAACTGTCCGAAATGAAT  
TTCATGAGTAAAGTCTATGATTGGTTTGAAGAACGTCTTGAGATTCAGGCGATTGCAGA  
TGATATAACTAGTAAATACGTTCTCCTCATGTCAACATATTTTATTGTTTAGGAGGAATA  
ACGCTTACTTGTTTTTAGTACAAGTGGCTACGGGGTTTGCTATGACTTTTTACTATAGG  
CCAACCGTTACTGAGGCTTTTTGCTTCTGTTCAATACATAATGACTGAAGCCAACTTTGG  
TTGGTTAATCCGATCAGTTCATCGATGGTCGGCAAGTATGATGGTCCTAATGATGATTCT  
GCACGTATTCGCGTGTGTATCTCACCGGTGGCTTTAAAAAACCCCGTGAATTGACTTGG  
TTACAGGTGTGGTTCTTGCTGTCTTGACCGCTCTTTTGGCGTAACCGGTTATTCCTTAC  
CTTGGGACCAAATTGGCTATTGGGCAGTCAAATAGTAACGGGTGTACCGGAAGCTATT  
CCTGTAATAGGATCCCCTTTGGTAGAGTTATTGCGCGGAAGTGCTAGTGTGGGCCAATC  
CACTTTGACTCGTTTTTATAGTTTACACACTTTTGTATTACCTCTTCTTACTGCCGTATTT  
ATGTTAATGCATTTCTTAATGATCCGTAAGCAAGGTATTTCCGGTCTTTAATGGGAGTA  
ACAAAAAACCTGACTTGAATGATCCTGTATTGCGAGCTAAATTGGCTAAAGGGATGG  
GTCATAATTATTACGGAGAACCCGCATGGCCTAATGATCTTTTATATATTTTTCCAGTAGT  
CATTCTAGGTACTATTGCATGTAATGTGGGCTTAGCAGTTCTAGAACCCTCAATGGTTGG  
GGAACCTGCAGAGCCATTTGCAACTCCTTTGGAAATATTGCCTGAATGGTATTTCTTTC  
CCGTATTTCAAATACTTCGTACAGTACCCAATAAGTTATTAGGCGTTCTTTAATGGTTTC  
AGTACCTGCGGGATTATTAACAGTACCTTTTTTGGAGAGTGTTAATAAATTTCAAATCC  
CTTTCGTCGTCCAGTAGCGACAACCTGTCTTTTTAATTGGTACTGTAGTGGCCCTTTGGTT  
GGGTATTGGAGCAACATTACCTATTGATAAATCCTTAACTTTAGGGCTTTTTATGATTGA  
AGTTTTTCTATTGGAATCGTCTTAGGTCTAATTCCTATTACTTTGGCTGGGTTATTCGTA  
ACTGCATATTTACAATATAGACGTGGTGATCAGCTGGGCCTTATGCCTACGATAACTAGT  
TATTTCCGGTTTCTACTAGCGGCTTTAACTATAACCTCCGTTCTATTTATTGGTCTGAGTA  
AGATACGACTTATTATGGATATAGTAAGTCTCGCTTGGGCTGCTTTAATGGTAGTCTTTA  
CATTTCCCTTTCCTCGTAGTATGGGGAAGAAGTGGACTCATGATTATTCGTTCCCGG

GAACCAGAAGTAAAAATTTTGGTAGATAGGGATCCCATAAAAACTTCGTTTCGAGGAAT  
GGGCCAGACCCGGCCATTTCTCAAGAACAATAGCCAAGGGACCTGATACTACCACTTG  
GATCTGGAACCTACATGCCGATGCTCACGATTTTCGATAGCCATACCTCCGATTTGGAGG  
AGATCTCTCGAAAAGTATTTAGTGCTCATTTTGGTCAACTCTCCATAATCTTTCTTTGGT  
TGAGTGGTATGTATTTCCACGGTGTCTGTTTTTCCAATTATGAAGCATGGCTGAGCGATC  
CTACTCACATGGTCCCAGTGCACAGGTAGTTTGGCCAATAGTGGGCCAAGAAATATTG  
AATGGTGTATGTGGGCGGGGGTTTTTCGAGGAATACAAATAACCTCTGGTTTTTTTTTCAGAT  
TTGGCGAGCATCTGGAATAACTAGTGAATTACAACCTCTATTGTACCGCAATTGGTGCCT  
TGGTCTTTGCAGCCTTAATGCTTTTTGCTGGTTGGTTCCATTATCACAAAGCTGCTCCAA  
AATTGGCTTGGTTCCAAGATGTGCAATCTATGTTGAATCACCATTTAGCGGGGCTATTAG  
GACTTGGGTCTCTTTCTTGGGCGGGGCATCAAGTACATGTGTCTGTTACCGATTAACCAA  
TTTCTAAATGCTGGAGTAGATCCTAAAGAGATCCCCCTTCTCATGAATTTATCTTGAAT  
CGGGATCTTTTGGCTCAACTTTATCCTAGTTTTGCTGAAGGAGCAACTCCTTTTTTTCAC  
CTTGAATTGGTCAAAATATGCAGAAATTTCTTACTTTTCGCGGAGGATTAGATCCAATAAC  
TGGGGGTCTTTGGCTGACCGATATTGCACACCATCACTTAGCTATTGCAATCTTTTTCCT  
GATAGCGGGTCACATGTATAGAATAACTGGGGCATTGGTTCATGATATAAAAGATATTTT  
AGAGGCTCATAAGGGTCCATTTACAGGCCAAGGTCTATAAAGGTCTATATGAGATCCTAA  
CAACGTCATGGCATGCTCAATTATCTTTAACCTAGCTATGTTAGGCTCTTTAACCATTG  
TTGTAGCTCACCATATGTATTCATGCCCCCTTATCCATATCTAGCTACTGACTATGGTAC  
ACAGCTGTCATTGTTACACATCACATGTGGATCGGTGGGTTTTCTCATAGTTGGTGTCTG  
CGGCCCATGCAGCCATTTTTATGGTAAGAGACTATGATCCAATACTCGATACAACGAT  
CTATTAGATCGTGTCTTAGGCATCGCGATGCAATCATATCACATCTCAACTGGGTATGT  
ATATTTTAGGCTTTACAGTTTTGGTTTTATATATTCACAATGATACCATGAGCGCTTTAG  
GACGCCACAAGATATGTTTTAGATAACCGCCATAACAATTACAACCTGTCTTTGCTCAAT  
GGATACAAACACCCATGCTTTAGCACCTGGTGCAACGGCCCCAGGTGCAACAACAA  
GCACCAGTTTGACTTGGGGAGGTAGTGATTTAGTAGAAGTGGGGGGGAAGGTTGCTTT  
GTTACCTATTCCATTAGGTACCGCAGATTTTTTGGTACATCACATTCATGCATTTACGATT  
CATGTGACAGTATTGATCCTCCTGAAAGGTGTTTTATTGCTCGTAGCTCTCGTTTTGATA  
CCGGATAAAGCAAATCTTGGTTTTTCGTTTTCTTGTGATGGGCCTGGAAGAGGGGGGA  
CATGTCAAGTATCTGCTTGGGATCATGTCTTCTTAGGATTATTCTGGATGTACAATGCAA  
TTTTCGGTAGTAATATTCCATTTAGTTGGAAAATGCAGTCAGATGTTTGGGGTAGTATAA  
GTAATCAAGGGTGGTAACTCATATCACGGGAGGAACTTTGCCCAAAGTTCCATTACT  
ATTAATGGGTGGCTGCGCGATTTCTTATGGGCACAGGCATCCCAGGTAATTCAGTCTTAT  
GGTCTGCATTATCTGCATATGGCCTTTTTTCTTAGGTGCTCATTTTGTATGGGCTTTTA  
GTTAATGTTTCTATTACAGCGGACGTGGTTATTGGCAAGAACTTATTGAATCCATCGTTT  
GGGCTCATAATAAATTAAGTTGCTCCTGCTACCCAGCCTAGAGCCTTGAGCATTGTA  
CAAGGACGTGCTGTAGGCGTAACTCATTACCTTCTGGGTGGAATTGCCACAACATGGG  
CGTTCTTCTTAGCAAGAATTATTGCAGTAGGAATGGCATTAAAGATTTCCAAGGTTTAGC  
CAAGGATTAGCTCAGGACCCCACTACTCGTCGTATTTGGTTTGGTATTGCTACCGCACA  
TGAATTCGAGAGTCATGATGATATTACCGAGGAACGTCTTTATCAGAATATTTTTGTTTC  
TCACTTCGGACAATTAGCAATAATTTTTTTGTGGACTTCGGAAATCTGTTTCATGTAGC  
TTGGCAAGGAAATTTTGAAGCATGGGTACAGGACCCTTACATGTAAGACCTATTGCTC  
ATGCAATTTGGGATCCCCATTTTGGTCAACCGGCTGTGGAAGCTTTTACTCGAGGAGGT  
GCTCTTGGCCCAGTCAATATCGCGTATTCGGGTGTTTATCAGTGGTGGTATAACACAGGT

ATACGTACTAATGGGGATCTTTATATTGGAGCTCTTTTTCTATTATTTCTTTCTGCGCTATC  
CCTAATAGCGGGTTGGTTCCACCTACAACCGAAATGGAAACCGAGTGTTTCGTGGTTC  
AAAAATGCCGAATCTCGTCTCAATCATCATTTGTCAGGACTATTCCGGAGTAAGTTCCTT  
GGCTTGGACAGGACATTTAGTCCATGTGCTATTCCGGGATCCAGGGGGCAATACGTTCC  
GATGGAACAATTTCTTAGATGTAGCACCCGCACCCCAAGGATTAGGCCCCCTTTTTACA  
GGCAGTGGAATCTTTATGCTCAAAACCCCGATTCAAGTAGTCATTTATTTGGTACTTCC  
CAAGGAGCTGGAACCTGCAATTCTAACCTTCTCGGGGGTTTCCATCCGCAAACGCAA  
GTTTATGGCTGACCGATATTGCACACCATCACTTAGCTATTGCAATCTTTTCCTGATAG  
CGGGTCACATGTATAGAACTAACTTCGGGATTGGGCACAGTATAAAAGATCTTTTAGAA  
GCACATGTTCCGCCGGGAGGTCGATTGGGACGCGGACATAAGGGTCTTTATGACACAA  
TCAACAATTCATTTCAATTTCAATTAGGCCTTGCTCTAGCTTCTTTAGGGGTTATTACTTC  
CTTGGTAGCTCAACACATGTACTCTTTACCTGCGTATGCGTTTATAGCGCAAGACTTTAC  
TACTCAAGCTGCATTATATACTCATCACCATAACATCGCAGGATTCATCATGACAGGAGC  
TTTTGCTCATGGAGCTATCTTTTTTATTAGAGATTACAATCCGGAGCAGAATGAGGATAA  
TGTATTGGCAAGAATGTTAGACCATAAAGAAGCTATCATATCCCATTTAAGTTGGGCCA  
GCCTCTTTCTGGGATCCATACCTTGGGCCTTTATGTTTATAATGATGTCATGCTTGCTTT  
TGGTACTCCGGAGAAACAAATCTTGATTGAACCCATATTTGCCCAATGGATACAATCTG  
CACATGGTAAAACCTCATATGGGTTGATGTAATCTTATCTTCAACGAATAGCCCCGCCT  
TCAATGCCGGTCGAAACATATGGTTGCCCGGTTGGTTAAATGCTATTAATGAG-----AAT  
AGTAATTCACTCTTCTTAACAATAGGGCCTGGAGACTTCTTGGTTCATCATGCTATTGCT  
CTAGGTTTACATACAACTACATTGATCTTAGTAAAAGGCGCTTTAGATGCACGTGGTTCT  
AAGTTAATGCCAGATAAAAAGGATTTTGGTTATAGTTTCCGTGCGATGGTCCGGGACG  
CGGCGTACTTGTGATATTTCCGGCTTGGGACGCGTTTTATTTGGCAGTTTTTTGGATGTT  
AAATACCATTGGATGGGTTACTTTTTATTGGCATTGGAAACACATCACATTATGGCAAGG  
GAACGTTTACAGTTTAAACGAATCTTCCACTTATTTGATGGGATGGTTAAGAGATTATCT  
ATGGTTAAACTCTTCAACTTATCAATGGATATAATCCTTTTGGTATGAATAGTTTATCG  
GTCTGGGCGTGGATGTTCTTATTTGGACATCTTGTTTGGGCTACCGGATTTATGTTCTTA  
ATTTCTGGCGTGGATATTGGCAAGAATTGATTGAAACTTTAGCATGGGCTCATGAACG  
CACACCTTTGGCTAATTTGATTTCGATGGAGAGATAAACCAGTGGCTCTTTCCATTGTGC  
AAGCAAGATTGGTTGGATTAGCCACTTTTCTGTAGGTTATATATTCATTTATGCGGCTT  
TCTTGATTGCCTCTACATCAGGGAAATTTGGTATGTGCAATTCAGTAAAGATTTATGATA  
CATGTATAGGGTGTACCCAATGCGTCCGAGCCTGCCCCACAGATGTATTAGAAATGATA  
CCTTGGGACGGGTGTAAGCTAAGCAAATGCTTCTGCTCCAAGAACAGAGGACTGC  
GTCGGCTGTAAGAGATGTGAATCGGCCTGTCCAACGGATTTTTTTGAGTGTTTCGAGTTTA  
TTTGTGGCATGAAACAACCTCGAAGCATGGGTCTAGCTTATATGACAACCTTTCAACGTAC  
CCTCTATTTTTGTGCCTTTGGTAGGCCTAGTTGTTCCGGCAATTGCAATGGCTTCTTTAT  
CTCTTCATGTTCAAAGAAATAAGATTGTTATGCGAGATCTAAAACATATCTCTCCGCG  
GCACCGTACTAAGTACTTTATGGTTTGGGCTTTTAGCAGGTCTATTGATAGAGATTAAT  
CGTTTTTTCCAGATGCGTTGACATTCCTTTTTTTTTTCATTCATGACTGCAATTTTAGAG  
AGACGCGAAAGCGAAAGCCTATGGGGTCGCTTCTGTAATTGGATAACCAGCACCGAAA  
ACCGTCTTTACATTGGGTGGTTTGGTGTTTTGGTATGATCCCTACTTTATGACCGCAACTT  
CTGTATTTATTATCGCTTTTATTGCTGCCCTCCAGTAGATATTGATGGTATTCGTGAACC  
TGTTTCTGGATCTTACTTTATGGAAACAATATTATTTCTGGTGCCATTTCTACTTCT  
GCAGCGATCGGTTTGCACTTTTACCAATCTGGGAAGCGGCATCCGTTGATGAATGGTT

ATACAATGGCGGTCCTTATGAGCTAATTGTTTTACACTTCTTACTTGGTGTAGCTTGTTA  
CATGGGTCGTGAGTGGAACTTAGTTTTCCGTTTGGGTATGCGGCCTTGGATTGCTGTTG  
CATATTCAGCTCCTGTTGCAGCTGCTACTGCTGTTTTCTTGATCTATCCAATAGGCCAAG  
GAAGTTTTTCTGATGGTATGCCTTTAGGAATCTCTGGTACTTTCAACTTTATGATTGTATT  
CCAAGCTGAACACAATATCCTTATGCATCCATTCACATGTTAGGCGTAGCTGGTGTATT  
CGGCGGTTCCCTATTCAGTGCTATGCATGGTTCCTTGGTAACTTCTAGTTTTGATTAGGGA  
AACCACCGAAAATGAATCTGCTAATGCAGGTTACAGATTCGGTCAAGAAGAAGAACT  
TATAATATCGTAGCTGCTCATGGTTATTTTGGCCGATTGATCTTCCAATATGCTAGTTTCA  
ACAATTCTCGTTCTTTACATTTCTTCCCTAGCCGCTTGGCCTGTAGTAGGTATCTGGTTCA  
CCGCTTTAGGTATTAGCACTATGGCTTTCAACCTAAATGGTTTCAATTTCAACCAATCTG  
TAGTTGATAGTCAAGGCCGTGTAATTAATACTTGGGCTGATATTATTAATCGCGCTAACC  
TTGGTATGGAAGTTATGCATGAACGTAATGCTCATAACTTCCCTCTAGACCTAGCTACTG  
TCGAAGCTCCATCCACAAATGTAATGGGTTTGCCTTGGTATCGTGTTCATACCGTCGTAT  
TGAATGATCCCGGTCGTTTGTGGCTGTCCATATAATGCATACGGCTCTGGTTGCTGGTT  
GGGCTGGTTGATGGCTCTATATGAATTAGCAGTTTTTGTATCCCTCTGACCCTGTTCTCG  
ACCAATGTGGAGACAAGGTATGTTTCGTTATAACCCTTTATGACTCGTTTAGGAATAACC  
GATTCATGGGGCGGTTGGACTATCACA--GGCGGGACTATAACGAATCCGGGTATTTGG  
AGTTACGAAGGTGTGGCCGGGGCACATATTGTGTTTTCTGGATTGTGCTTCTTGGCAGC  
TATCTGGCATTGGGTGTATTGGGATCTAGAAATATTTACTGATGAACGTACAGGAAAAC  
CTTCTTTGGATTTGCCCAAGATCTTCGGAATTCATTTATTTCTCTCAGGAGTGGCTTGCT  
TTGGGTTTGGCGCATTCCATGTAACAGGATTGTACGGTCCTGGAATCTGGGTGTCCGAT  
CCTTATGGACTAACCGGAAAGGTCCAATCTGTAAATCCAGCGTGGGGTGTGGAAGGTT  
TTGATCCTTTTGTCCGGGAGGAATAGCCTCTCATCATATTGCAGCAGGGACATTGGGC  
ATATTAGCAGGACTATTTTCATCTTAGTGTCCGTCCGCCACAACGTCTATACAAAGGATTG  
CGTATGGGAAATATTGAAACCGTCCTTTCCAGTAGTATTGCTGCTGTCTTTTTTGGCGCT  
TTTGTGTTGCTGGAACCTATGTGGTATGGTTCAGCAACTACTCCGATTGAATTATTTGGT  
CCCCTCGTTATCAATGGGATCAGGGATATTTCCAGCAAGAAATATATCGAAGAGTTGT  
TGCTGGGCTAGCCGAGAATCAAAGTTTATCCGAAGCTTGGTCTAAAATTCCTGAAAAAT  
TAGCTTTTTATGATTACATTGGGAATAATCCGGCAAAAGGGGGTGTTCAGAGCGGGT  
TCGATGGATAACGGGGATGGAATCGCTGTTGGGTGGTTAGGGCATCCTGTCTTTAGAGA  
TAAAGAAGGCCGTGAACCTTTTTGTGCGTCGTATGCCTACTTTTTTTGAAACATTTCCAG  
TTGTTTTGGTAGACGGTGACGGAATTGTTAGAGCCGATGTTCTTTTTCGAAGGGCGGA  
ATCGAAGTATAGTGTTCGAGCAAGTAGGTGTAACCTGTTGAGTTCTATGGCGGCGAACTC  
AATGGCGTCAGTTATAGTGATCCCGCTACTGTTAAAAAATATGCTAGACGTGCTCAATT  
GGGTGAAATCTTTGAATTAGATCGTGCTACTTTGAAATCCGATGGTGTTTTTTCGTAGTAG  
TCCAAGGGGTGGTTTACTTTTGGACATGCTTCATTTGCTCTGCTCTTCTTTGGGCA  
CATTTGGCATGGCGCTAGAACCCTGTTCCAGAGATGTTTTTGTGGTATTGATCCAGATTT  
GGACGCTCAAGTAGAATTTGGAGCATTCCAAAACTAGGGGATCCAACTACAAAAAG  
ACAAGTAGTT-----GTGGAAACGCTCTTTAATGGAACCTTAGCTT  
TAGCTGGTTCGTGACCAAGAAAGCACCGGGTTCGCTTGGTGGGCGGGAATGCCCGAC  
TTATCAATTTATCTGGTAAACTGCTGGGGGCTCATGTAGCACATGCCGATTAATCGTAT  
TCTGGGCGGCGCAATGAACTTATTTGAAGTGGCTCATTTTCGTACCGGAGAAACCAAT  
GTATGAACAAGGATTAATTTACTTCCCCACCTAGCTACTCTAGGTTGGGGGGTAGGTC  
CTGGGGGAGAAGTTATAGATACCTTTCCATACTTTGTATCTGGAGTGCTTCACTTAATTT



CCTCCGCAGTATTAGGCTTTGGCGGTATTTATCATGCACTTCTGGGACCTGAGACCCTT  
GAAGAATCTTTTCCATTCTTTGGTTATGTATGGAAAGATAGAAATAAAATGACAACAAT  
TTTGGGTATTCACTTAATCCTTGTTAGGTCTAGGTGCCTTTCTGTTAGTATTTAAAGCTCTT  
TATTTTGGGGGCGTATATGATACCTGGGCCCGGGGGGGGAGATGTAAGAAAAATTAC  
CAACTTGACTCTTAGTCCAAGTGTTATATTTGGGTATTTACTAAAATCCCCCTTTGGGGG  
AGAAGGATGGATTGTTAGTGTGGACGATTTTCAAGATATAATTGGAGGACATGTATGGA  
TAGGTTCCATTTGTATACTTGGTGGAATCTGGCATATCTTAACCAAACCTTTTGCATGGG  
CTCGCCGTGCGCTTGTATGGTCTGGAGAGGCTTACTTGTCTTATAGTTTAGCTGCTTTAT  
CTGTTTTTGGTTTCATTGCTTGTGCTTTGTCTGGTTCAATAATACCGCTTATCCTAGTGA  
GTTTTACGGGCCTACCGGCCAGAAAGCTTCTCAAGCCCAAGCATTACTTTTCTAGTTA  
GAGACCAACGTCTTGGGGCTAACGTGGGATCTGCTCAAGGACCTACCGGTTTAGGTAA  
ATATCTAATGCGTTCCCCGACCGGAGAAGTTATTTTTGGAGGTGAAACTATGCGTTTTT  
GGGATTTGCGTGCTCCCTGGTTAGAACCTCTAAGGGGTCCCAATGGTTTGGACTTGAGT  
AGGCTGAAAAAAGACATAACAACCTGGCAAGAACGACGTTCCGCGGAATATATGACCC  
ATGCCCCGTTGGGCTCTTTAAATTCTGTGGGTGGCGTAGCTACCGAGATCAATGCGGTC  
AATTATGTTTTCTCCTAGAAGTTGGTTAGCTACCTCTCATTTTGTCTAGGATTCTTCCTTT  
TCGTAGGTCATTTATGGCACGCGGAAGGGCTCGAGCGGCTGCTGCGGGATTTGAAAA  
AGGAATTGATCGCGATTTTGGAGCCTGTTCTTTCCATGACTCCTCTTAACATGACTATAGC  
CCTTGGTAAATTTACCAAAGAAGAAAAGGATTTATTTGATATTATGGATGACTGGTTAA  
GGAGGGACCGTTTTCGTTTTTGTAGGTTGGTCCGGTCTATTGCTCTTTCCTTGTGCCTATT  
TCGCCTTAGGAGGTTGGTTCACAGGTACAACCTTTGTAACCTTCATGGTATACCCATGGA  
TTAGCCAGTTCCTATTTGGAAGGCTGCAACTTCTTAACCGCTGCAGTTTCTACTCCTGCT  
AATAGTTTAGCGCATTCTTTGTTGTTACTATGGGGTCCCGAAGCACAAGGGGATTTTAC  
CCGCTGGTGTCAATTGGGTGGTCTGTGGACTTTTGTGCTCTCCACGGCGCTTTTGGAC  
TAATCGGTTTCATGTTACGTCAATTTGAACTTGCTCGATCTGTTCAATTGCGACCTTATA  
ATGCAATTTCACTCTGCTCCAATCGCTGTTTTTGTTCGGTATTCTTGATTTATCCACT  
AGGTCAGTCTGGTTGGTTTTTGCACCTAGTTTTGGTGTAGCAGCTATATTCGATTCAT  
CCTCTTTTTCCAAGGATTTCATAATTGGACATTGAACCCATTTTCATATGATGGGGGTTGC  
TGGTGTATTGGGCGCTGCTCTGCTATGTGCTATTCATGGGGCTACCGTCGAAAATACTTT  
ATTTGAAGATGGTGATGGTGCAAATACATTCCGCGCTTTTAACCCAACCTCAAGCTGAAG  
AAACTTATTCATGGTACTGCCAACCGCTTTTGGTCTCAAATCTTTGGGGTTGCTTTTT  
CCAATAAACGTTGGTTACATTTCTTTATGTTATTTGTACCAGTAACCGGTTTATGGATGA  
GCGCTCTTGGAGTAGTTGGTCTAGCTCTGAACCTACGTGCCTATGACTTCGTTTCTCAG  
GAAATCCGTGCAGCGGAAGATCCCGAATTTGAGACTTTTTTACACCAAAAATATCTTTT  
AAACGAAGGTATTCGTGCTTGGATGGCGGCTCAAGATCAGCCTCATGAAAACCTTATAT  
TCCCTGAGGAGGTTCTACCCCGTGAAACGCTCTTATGTCTGGAAGCACAGGAGAACG  
TTCTTTTGTGATATTATTACCAGTATTCGATACTGGGTCATTCATAGCATTACTATACTT  
CCCTATTCATTGCGGGTTGGTTATTCGTCAGCACGGGATTAGCTTACGATGTATTTGGAA  
GCCCCGTCCAACGAGTATTTTACAGAAAGCCGACAAGGAATTCCATTAATAACTGG  
CCGTTTTGATCCTTTGGAACAACCTTGATAAATTAAGTAGATCTTTTATGACCATAGATCG  
AACCTATCCAATTTTTACAGTGCGATGGTTGGCTGTTACGGACTAGCTGTACCAACAG  
TTTTTTTCTTGGGGTCAATATCAGCAATGCAGTTTATCCAACGAATGGTTACACAAAGC  
GTTGAGGGTAGTTCTAGA---TCTCGTCCAAAACGAACTGGTGTAGGGGGGTTATTGAA  
ACCATTGAATTCGGAATATGGTAAAGTAGCTCCTGGATGGGGAACCTACTCCATTGATGG

GAGTCACAATGGCCTTATTTGCAATATTTCTATCTATTATTTTAGAGATTATAATTCTTCC  
GTTTTACTAGACGGAATTTCAATGAATATGCTTACTCTCAAACCTTTTTGTTTACACGGTA  
GTGATATTCTTTGTTTCTCTCTTCATCTTCGGATTCCCTATCTAATGATCCAGGACGAAATC  
CCGGACGCGAAGAAATGGCCGATACTACTGGAAGGATTCCCTCTTTGGATAATAGGTACT  
GTA ACTGGTATTCTTGTGATTGGTTAATAGGTATTTCTTTTATGGTTCATATTCTGGATT  
GGGCTCATCCCTGATGCTTAATATCTTTAGTTTGATCTGGATCTGTTTTAATTCTCTCCTT  
TATTCAAGCAGTTTTCTCTTCGCTAAATTGCCTGAGGCCTACGCTTTTTTTGAAGCCAATC  
ATAGATGTTATGCCAGTCATCCCTGTGCTCTTTCTTCTCTTAGCCTTTGTTTGGCAAGCT  
GCTGTCAGTTTTCGAACGACACAATCAAACCCGAACGAACAAAATGTTGAATTGAATC  
GTACCAGTCTCTACTGGGGTTATTACTCATTTTTGTACTTGCTGTTTTATTTTCCAATTA  
TTTTTTCAATATGGAAGTCAATATCTCGCATTTATTGCTACTGCACTGTTCATTCTAGTT  
CCTACTGCCTTTTTGCTTATAATATACGTAAAAACGATCAGTCAAAGTGATATGGAAATA  
GCAACCCTAGTTGCCATCTTTATATCTGGTTTACTTGTAAGTTTTACTGGGTATGCCTTAT  
ATACTGCTTTTTGGGCAACCTTCTCAACAATAAGAGATCCATTCGAGGAACACGGGGA  
CATGGAAGCATTGGTTTATACATTCCTCTTAGTCTCGACTCTAGGGATCATTTTTTTTCGCT  
ATCTTTTTTCGAGAACCACCTAAAGTTCCAATAAAAAGATGAAAATGACTATTGCTTT  
CCAATTGGCTGTTTTTGCATTAATTGCTACGTCATTAATCTTACTGATTAGTGTACCCGTT  
GTATTTGCTTCTCCTGAGGGTTGGTCGAGTAACAAAATGTTGTATTTTCGGGGACATC  
TTTATGGATTGGATTAGTCTTTCTGGTAGGTATCCTTAACTCTCTCATCTCT-----  
---ATGTCACCACAAACCGAGACTAAAGCGAGTGTTGGATTCAAGGCTGGCGTTAAAGA  
TTATAAATTGACTTATTATACTCCTGACTATGAAACCAAAGATACTGATATCTTGGCAGC  
ATTCCGAGTAACTCCTCAACCTGGAGTTCCGCCTGAAGAAGCGGGGGCGGCGGTAGCT  
GCTGAATCTTCTACTGGTACATGGACA ACTGTGTGGACCGATGGGCTTACCAATCTTGA  
TCGTTACAAAGGACGATGCTACCACATCGAGCCC GTTGTGGAGAAGAAAGTCAATTT  
ATTGCTTATGTAGCTTATCCTTTAGACCTTTTCGAAGAAGGTTCTGTTACTAACATGTTT  
ACTTCCATTGTAGGTAATGTCTTTGGTTTCAAAGCCCTGCGCGCTCTACGTCTGGAGGA  
TTTGCGAATCCCACTGCTTATTCTAAA ACTTTCCAAGGCCCGCCGCATGGTATCCAAG  
TTGAGAGAGATAAATTGAACAAGTATGGACGCCCTCTATTGGGATGTA CTATTAAACCT  
AAATTGGGATTATCCGCCAAGAATTATGGTAGAGCAGTTTATGAATGTCTCCGCGGTGG  
ACTTGATTTTACCAAAGATGATGAGAACGTAAACTCCCAACCATTATGCGTTGGAGAG  
ACCGTTTCTTATTTTGTGCCGAAGCGCTTTATAAAGCACAGGCTGAAACAGGTGAAATC  
AAAGGGCATTACTTGAATGCTACTGCCGGTACATGCGAAGAAATGATGAAAAGGGCTG  
TATGTGCTAGAGAACTGGGTGTCCCTATCGTAATGCATGACTACTTAACGGGGGGATT  
ACTGCAAATACTACCTTGGCTCATTATTGCCGAGATAATGGTCTACTTCTTCACATCCAC  
CGTGCAATGCATGCAGTTATTGATAGACAGAAAAATCATGGTATACACTTTCGTGTACTA  
GCGAAGGCCCTACGTATGTCTGGTGGAGACCATATTCATGCTGGTACCGTAGTAGGTAA  
ACTTGAGGGTGAAAGAGATATCACTTTAGGCTTTGTTGATTACTACGTGATGATTTTAT  
TGAAAAGACCGAAGCCGCGGTATTTATTTCACTCAAGATTGGGTCTCTCTACCGGGTG  
TTCTGCCTGTGGCTTCCGGGGGTATTCACGTTTGGCATATGCCTGCTCTGACCGAGATC  
TTTGGTGATGATTCCGTACTACAATTCGGTGGAGGAACTTTAGGGCATCCTTGGGGAAA  
CGCACCTGGTGTGTAGCTAATCGAGTAGCTCTAGAAGCATGTGTACAAGCTCGTAATG  
AGGGACGTGATCTTGCTCGTGAAGGTAATGAAATTATCCGCGAGGCTAGCAAATGGAG  
TCCGAACTAGCTGCTGCTTGTGAAGTATGGAAGGAGATCAAATTTGAATTCCAAGCA  
ATGGATACTTTG-----ATGGCGATACATTTATACAAACTTCTACCCCGAGCACACGCAAT

GGAGCCGTAGACAGTCAAGTGAAATCCAATAAACGAAATAATTTGATCTATGGACAGC  
ATCGTTGTGGTAAAGGTCGTAATGCCAGAGGAATCATTACCGCAGGGCATAGAGGGGG  
AGGTCATAAGCGTCTATACCGTCAAATCGATTTTCGACGGAAGGAAAAAGACATATAG  
GTAGAATCGTAACCATAGAATACGACCCTAATCGAAATGCATACATTTGTCTCATACT  
ATGGGGATGGTGAGAAGAGATATATTTTACATCCCAGAGGGGGCTATAATTGGAGATACC  
ATTGTTTCTGGTACAGAAGTTCTATAAAAAATGGGAAATGACCTACCTTTGACCGATAT  
GCCCTTAGGCACGGCCATACATAACATAGAAATCACACTTGGAAAGGGTGGACAATTA  
GCTAGAGCAGCAGGTGCTGTAGCGAAACTGATTGCAAAAGAGGGGAAATCGGCCACA  
TTAAAATTACCTTCTGGGGAGGTCCGTTTGATATCCAAAACTGCTCAGCAACAGTCGG  
ACAAGTAGGGAATGTTGGAGTGAACCAGAAAAGTTTGGGTAAAGCCGGATCTAAATGT  
TGGCTGGGTAAGCGTCTATAGTAAGAGGAGTAGTTATGAACCCTGTAGACCATCCCCA  
TGGGGGTGGTGAAGGGAGGGCCCCAATTGGTAGAAAAAAACCCGTAACCCCATGGGG  
TTATCCTGCACTTGGAAAGAAGAAGTAGAAAAAGGAATAAATATAGCGATAATTTGATTC  
TTCGTCGCCGTAGTAAATGATTCAACCTCAGACTCATTGGAATGTGGCGGATAACAGC  
GGGGCCCGAGAATTGATGTGTATTTCGAATCATAGGAACTAGT---AATCGACGATATGCTG  
AAATTGGTGACGTTATTGTTGCTGTGATCAAGGAAGCATTACCAAATACATCCCTAGAA  
AAATCAGAAGTGATCAGAGCTGTAATTGTGCGTACTTGTAAGAATTCAAACGCGACA  
ATGGCATGATAATACGATATGATGACAATGCTGCAGTTGTCATTGATCAAGAAGGAAAT  
CCGAAAGGAACTCGAATTTTTGGTGCATCACCCGGGAATTGAGACAGTTAAATTTCA  
CTAAAATAGTTTCACTAGCACCCGAGGTATTAATGCTTAGTCCCAAAGAACCAGATTC  
CGTAAACAACATAGAGGAAGAATGAAAGGAATATCTTATCGAGGTAATCATATTTCTTT  
CGGTAGATATGCTCTTCAGGCACTTGAACCCGCGTGGATTACATCTAGACAAATAGAAG  
CGGGTCGGCGGGCAATGACACGAAATGTCCGCCGCGGTGGAAAAATATGGGTACGTTT  
ATTTCCAGACAAACCGGTTACGGTAAGACCTACAGAAACACGTATGGGTTTCGGGGAAA  
GGATCTCCTGAATATTGGGTAGTTGTGCTGAAACCAGGTAGAATACTTTATGAAATGGA  
CGGAGTAGGAGAAAATATAGCTCAAAAAGCTATTTCAATAGCGGCTTCAAAAATGCCTA  
TACGAACTCAATTCATTATTTTCGGTAATGACCAGAATTAGACGAGGATATATAGCTCGGA  
ACCGTAGAACAAAATGCGTTTATTTGCCTCAAGCTTTCGGGGGGCTCGTTCAAGACTT  
ACTCGAACTATTACTCAACAGAAAATACGAGCTTTGGTTTCGGCTCATCGGGATAGAGA  
TAGGCAAAAGAGAGATTTTCGTCGTTTGTGGATCACGCGAATAAATGCAGTAATTCGCG  
AGAGG---CGGGTATCCTATAGTTATAGTATATTAATGCACAGTTTGTACAAGAGGCAGTT  
GCTTCTTAATCGTAAATACTTGCGCAAATGGCTATATTAATAAAAAAAGTCTTTATAT  
GATTTCCAATGAAATAATAAAA-----ATGATAAAAAAAGTATACGCA  
ATAGGTCAGCATATGTCTATGTCTGCTCACAAAGCAAAAATAGTAATTGATCAGATTCGT  
GGACGTTTTTACGAGGAAACACTTAGGATACTCGAACTCATGCCTTTTTGAAAGATGTTA  
TCCCGTTTTTAAATTGGTTTATTCTGCAGCAGCAAACGCGAGTCACAATATTGAGTCCA  
ACAAATCAAACCTAATCATTAGTAAAGCCGAAGTCAACGAAGGTGGAACCTCTGAAAAA  
ATTTAAACCTAGAGCTCGAGGACGAAGTTATCCGATAAAACGACGCACTTGTTCATATAA  
CTATTGTATTGAAAGATATATCTTTAGGT-----ATGGATGGAATCAAATATGCA  
GTATTTACAGACAAAAGTATTCGGTTATTGGGGAAAAAT--CAATATACTTCTAATGTGCG  
AATCAGGATCAACTAGGACAGAAATAAAGCATTGGGTGCAACTCTTCTTTGGTGTAA  
GGTAATAGCTATGAATAGCCATCGACCCCGGGAAAGGGTAGAAGAATGGGACCTATT  
GTAGGACATACAATGCATTACAGACGTATGATCATTACGCTTCAACCCGGTTATTCTATT  
CCACCTCTTAGAAAAGAAAAGAAGACTATGGCAGTTCCAAAAAAGCGCACTTCTATATCAA

AAAAGCGTATTCGTAAAAATAGTTGGAAAAGAAAGGGATATTGGGCAGCGTTGAAAGC  
CTTTTCATTAGCGAAATCCCTTGCTACGGGGAATTCAAAAAGTTTTTTTTGTGCGA-----C  
AAATAATGGCCAGGGGTAAAGATACCCGAGTTAAAGTTATTTTGGAAATGCACCGGGTGT  
--GTTCGAACGGGTGTTGTTAATAAGAAA-----GGCATTCCAGATATATTACTIONCAAAA  
AATCGACACAATACACCCGGTCGATTGGAATTGAGAAAATTCTGTCCCTATTGTTACAA  
ACATAGGATTCATGGGGAGATAAAGAAAATGAAAATAAGAGCCTCTGTTTCGTAAAATTT  
GTGAAAATGTGCGACTGATCCGTAGACGAGGACGAATTATGGTAATTTGTTCCAACCCT  
AGACATAAACAAAGACAGGGAATGGTTCGAGAGAAAGTCAAAGTATCTACTCGAACA  
CTACAGTGGAAGTGTGTTGAATCGAGAACAGACAGTAAGCGTCTTTTTTATGGACGCT  
TTATTCTGTCTCCACTTATGAAAGGTCAAGCCGACACAATAGGGATTGCAATGCGAAGA  
GCTTTGCTTGGAGAAATAGAAGGAACATCTATCACACGTGCAAATCTGAA-----AAAA  
TACCACACGAATATTCTACCGTAGTGGGTATTCAAGAAACGGTACATGAACTTTTAATG  
AATTTGAAAGAAATTGTATTGAGAGGAAATTTGTATGGAATTCAAAACGGGTTCGATTG  
TATCAAGGGTCCGGGATATGTAAGTCTCAAGACCTCGTCTTACCCCCTTCTGTGCGAAA  
TCGTTGATAATACACAACATATAGCTATACTAACAGAACCAATTTATTTTTGTATTGAATT  
ACAAATCGAGAGACATCGAGGATATCATATAAAAACACCCAATAACTTTCAAGAAGGA  
AGTTTT-----CCTATCGATGCTGTATTGATGCCTGTTGAAATACAAATTATAGTATTCAGT  
CTTATAGAAATGGGAGTGAAAAAGAAGAGATACTTTTTCTCGAAATATGGACAAATGG  
AAGTTTAACTCCTAAAGAAGCACTTCATGAAGCCTCTCGGAATTTGATTGATTATTCAT  
TCCTTTTCTACATGCGGAAGAAGAA-----AACTTACATTTAGAAAACGACTGG---TACAA  
GGTACTTTTACCCCTTTTTACCTTTCATGATAGATTGACT---AACTAAAGAAAATCAA  
AAA---GAAATGGCATTGAAATATATTTTTATTGATCAATTAGAATTGACTTCTAGGACCTA  
TAATTGCCTCAAAGGTCTAATATACATACATTATTTGACCTTTTAAATAAGAGTACGA  
ATACCTTATGAAAATGGAACATTTTACATTGAAGACGTGAAACATATATTGAACATTCT  
AGAAAAAATAAAA---TTCGCAACTGATTTACCAAAGAATAAAATGCTGGGGGATGGAA  
AT--GAGGGAACGTCTACAATACCTGGGTTAATCAGATACAATTTGAAGGGTTTTGTAG  
GTTTATTGATCATGGCTTAACCGAAGAACTTTATAAGTTTCCAAAATTTGAAGATACAG  
AGCAAGAAATTGAATTCCAATTATTTGCGGAAACATATCAATTAGTGGAACCATTGATA  
AAAGAAAGAGATGCTGTATATGAAGCAATCACATATTCTTCTGAATTATATGTATCTGCG  
AGATTAATTTGAAAACAGTAGGGATATACAAAACAAACCCTTTTTTTTTGGAAACAT  
TCCTCTAATGAATTCCTGGGAACCTCTATAGTAAATGGAATATACAGAACTGCGATCAA  
TCAAATCTTGCAAAGCCCCGGTATCTATTATCGGTCCGAAGCGGACCATAACGGAATTT  
CGGTCTATACCGGCAGCATAATATCAGATTGGGGAGGAAGATTCGAATTAGAGATTGAT  
AGAAAAGCAAGGATATGGGCTCGTGTAAAGTAGGAAACAGAAAATCTCTATTCTAGTTC  
TATCATCAGCTATGGGTTTGAATCTAAGGGAATTTTAGAAAATGTTTGCTACCCTGAGA  
TTTTCTTGTCTTTCCTAAATGAGAAGGAGAAAAAATAAGGGTCAAAGGAAACTGC  
TATTTTGGAGTTTTATCAACAATTTACGTGTGTAGGCGGAGATCCAGTATTTTCTGAATC  
TCTATGTAAGGAATTACAAAAAATTTCTTTCAACAAAGATGTGAATTAGGAAGGATTG  
GTCGACGAAATATGAACCAGAGATTGAATCTTGATCTACCTCCGACTAATACATTTTTGT  
TACCGAGAGATATATTGGCGGCTGCGGATTATTTGATTGGAATGAAATTTGGAATGGGC  
ACGCTTGATGAT-----ATGAATCATTTAAAAAATAAGCGTATTCGTTTCGGTTGCGGATCTC  
TTACAAGATCAATTTGGATTGGCTTTGGTTCGTTTAGAAAATATGGTTCGAGGCACTATA  
TGTGGAGCAATTAGA---CATAAATTGATA---CCGACTCCTCAGAGTTTGGTACCTTCAAC  
TCCA-----TTAACAACACTTATGAATCTTTTTTTCGGGTTACACCCATTATCTCAAGT

TTTAGATCGAACTAATCCATTGACACAAACAGTTCATGGGAGAAAGTTGAGTTATTTGG  
GACCTGGAGGATTGACAGGGCGAACTGCTAATTTTCGGATACGAGATATCCATCCTAGT  
CACTATGGACGCATTTGTCCAATTGACACGCTCTGAAGGAATCAACGTTGGGCTTATTGG  
ATCCTTAGCAATTCATGCGAAAATTGGTCATTGTGGC---TCTCTAGAAAGTCCGTTTTAT-  
-----GAAATCTTTGAAGAATCAAATCAAAAAAAAAACCGGATGTTTTATTATCACCAA  
ATAGAGATGAATACTGTATGATAGCAGCAGGAAATCTTTGGCACTGAGTCGAGGTATT  
CAGGAAGAACAGGTTGTTCCAGCTCGATACCGTCAAGAATTCCTGACTATTGCATGGG  
AACAGGTTTCATCTTCGCAGTATTTTTCCCTTCCAATATTTTTCTATTGGAGCTTCCCTTAT  
TCCTTTTATCGAGCATAATGACGCGAATCGAGCTTTAATGAGTTCTAATATGCAACGTCA  
AGCAGTTCGGCTTCTCAGTCCGAGAAATGCATTGTTGGAAGTGGAGCGGAACGACAG  
GTGGCTCTAGATTCAGGAGTTTCTGTTATAGCCGAACACGAGGGAAGGATCATTTATAC  
CGATACTGACAAAATTTTTTTATTAGGCAATGAGGATATTTTCAATATTCCATTAGTTGTG  
TATCAACGTTCTAACAAAATACTTGTATGCATCAAAAAGGTCGGGTTTCAGCGGGATAA  
GTGCATTA AAAAGGGACAAATTTTAGGAGATGGTGCCGCTACAGTCGGTGGCGAACTC  
ACTTTGGGTAAAACATATTAGTAGCTTATATGCCGTGGGAGGGTTACAATTCTGAAGA  
TGCGGTACTCATTAGCGAGCGTATGATATATGGAGATATTTATACTTCTTTTCACATACGG  
AAATATGAAATTCAGGCTCATGTGACAAGTCAAGGT---TCCGAAAGGATCACTAACGAA  
ATACCGCATCTAGAAGCCATTTACTCCGAAATTTAGACAAAATGGAATTGTGGCGCT  
GGGATCGTGGGTAGAGACGGGCGATATTTAGTAGGTAAATTAACGCCTCAGATGGCA  
AAAGAG---TCATCGTATGCCCTGAAGATAGGTTATTACGAGCCATACTTGGCATTCAAG  
TGCCAGTTCAAAGGAACTTGTCTAAAACCTCCCTACAGGTGGTAGGGGCCGAGTTAT  
TGATGTTAGATGGGTCCAGAAAAGGGG---GGTTCGGATTCTAATCCAGAAACCATTCG  
TGTATATATTTTACAGAAACGTGAAATCAAAGTAGGCGATAAAGTAGCTGGAAGACATG  
GAAATAAAGGTATCGTTTTCCAAAATTTGCTAGACAAGATATGCCTTATTTGCAAGATG  
GAGGAACTGTTGATATGGTCTTCAACCCATTAGGAGTACCTTCCCGAATGAATGTAGGA  
CAGATATTTGAATGTTTCGCTGGGGTTAGCGGGAGATCTTCTAGATAGACATTATCGAATA  
GCGCCTTTTGATGAGAGATATGAACAAGAGGCTTCGAGAAAATTAGTGTTTTCTGAATT  
ATATGAAGCCAGCAAGCAAACAGCCAATCCATGGGTCTTTGAACCTGAGTATCCCGGA  
AAAAGCAGAATATTTGATGGAAGAACAGGAAATCCCTTTGAACAGCCTGTTATAATAG  
GAAAGCCTTATATCTTGAAATTAATTCATCAGGTTGATGATAAATAACATGGACGCTCCA  
GTGGGCATTATGCACTTGTACACAACAACCCCTTAGAGGAAGGGCCAAGCAAGGAG  
GACAACGTATAGGAGAAATGGAGGTTTGGGCTCTAGAGGGCTTTGGTGTCTCATATT  
CTACAAGAGATGCTTACTTATAAATCTGATCATATTAAGCTCGTCAAGAAGTACTTGGT  
ACTACGATCGTTGGAGGAACAATACCTAAACCCGAGGATGCTCCAGAATCTTTTCGATT  
GCTCGTTCGAGAACTACGATCTTTAGCTTTGGAACCTGAATCATTCTTTGTGTCTGAGA  
AGA ACTTCCAGATTAATAGGAAGGAAGCT-----ATGATCGATCGGTATAAAC  
ATCAACA ACTACGAATTGGATCAGTTTCTCCTCAACAATAAGTGCTTGGGCCAATAAAA  
ATCCTACCTAACGGAGAGCTTGTGGAGAGGTGACAAAACCTATACTTTTCATTACAA  
GACCAATAAACCTGAAAAAGAGGGATTATTCTGTGAAAGGATTTTGGTCCTATAAAA  
AGTGGAATTTGTGCTTGTGGAAATTATCGAGGAATCGGAGATGAAAAAGAAGACCTAA  
ATTTTTGTGAACAATGCGGAGTCGAATTTGTTAATTCGCGATACGCAGATATCAAATGG  
GCTACATCAAATTGGCATGCCAGTAACCCATGTGTGGTATTTGAAACGTCTTCCTAGT  
TTTATCGCCAATCTTTTAGATAAATCTATTAAGAATTGGAAGGCCTAGTATACTGCGAT--  
---TTTTCTTTGCTAGGCC---ATAGCAAAAAACCTACTTTCTTACGATTACGGGGTTC

ATTCGAATATGAAATCCAATCCTGGAAATACAGCATCCCACCTTTTTTTTTACTACCCAAGG  
TTTCGATACATTTTCGAAATCGAGAAATTTCTACTGGAGCAGGTGTTATCCGAGACCAAT  
TAGCCGATCTGGATTGCGAATTATTATAGAGTATTCGTTGGTTCGAATGGAACGAATTAG  
GGGAAGAA---AGACCCATGGATAATGAATGGGAAGATCGAAAGGTTGTTTCGAAGAAAG  
GATTTTTTGGTTAGACGTATGGAATTAGCTAAGCATTTCCTTCGAACAAATATAGAACCA  
GAATGGATGGTTTTATGTCTATTACCGGTTCTTCCCCCGAGTTGAGACCGATCATTAG  
ATAGATGGGGGTAAATTAATGAGCTCAGATATTAATGAGCTCTATAGAAGAGTTATCTAT  
CGAAACAATACTCTTGCCGATCTATTAACAACAAGTCGATCTACGCCAGGGGAATTAGT  
AATGTGTCAAGAGAAATTGGTACAAGAAGCTGTGCATACACTTCTTGATAATGGCATCC  
GCGGCCAACCAATGAGAGATGGTCATAATAAGGTTTACAAGTCGTTTTTCAGATGTAATT  
GAAGGCAAAGAAGGAAGATTTTCGTGAGACTCTGCTTGGCAAACGGGTTGATTATTCGG  
GACGTTCTGTCAATTGTCTAGGCCCTCACTGCCATTACATCGATGTGGGTTGCCCGG  
GAAATAGCAATAGAGCTTTTCCAACATTTGTAATTCGTGGTCTAATTAGACAACATCTT  
GCTTCGAACATAGGAGTTGCTAAGAGTAAATTAGGGAAAAAGAACCGATTGTATGGG  
AAATACTTCAGGAAGTTATGCAGGGGCATCCTGTATTGCTGAATAGAGCTCCTACTCTG  
CATAGATTAGGCGTACAGGCATTCCAACCAATTTTAGTGGAAGGACGTGCTATTTGTTT  
ACACCCATTAGTTTGTAAAGGATTCAATGCAGACTTTGATGGGGATCAGATGGCTGTTC  
ATGTGCCTTTATCATTAGAGGCTCAAGCGGAGGCTCGTTTACTTATGTTTTCTCATAACGA  
ATCTCCTGTCTCCGGCTATCGTCGATCCCATTGCCTTACCGACCCAAGATATGCTTATTG  
GGCTCTATGTATTAACGAATGGGGATCGACGAGGTATTTGTGCAAATAGGTATAATCCAT  
GCAATCGTAGAAAT-----TTTCAAATGAAAGAATCCCTATAATAACTATAGGGATAC  
GAAAAAAAAGTTATTTTTTTTTGTAATTCCTATCATGCAATTGGAGCTTATCGGCAGAA  
AAGAATCGATTTAGATAGTTCTTTGTGGCTCCGATGGCAATTAGATCAACGC---GTTATT  
GCTTCA-----AGAGAAGCTCCGATCGAAGTTCACTATGAATCTTTGGGTACCTATCATGA  
GATTTATGGACACTATCTAATAGTACGAAGTATCAAAAGAGAAATTCTTTGTATATACCT  
TCGGACCACCGTTGGTCATATTTCTCTTTATCGAGAAATCGAAGAGGCTATACAAGGGT  
TTTGTGCGGCCTTCTCGTATGGTATC-----ACGGAGGTACTTATGGCCGAA  
GGGGCCAATCTGGTCTATCACAATAAAGCGATAGATGGAAGTGCATTAACCGCTTAT  
TAGCAGATTAATAGATCACTTCGGAATGGCGTATACATCACATATCCTGGATCAAGTAAA  
GACTCTAGGTTTCCACCAAGCCACCGCTACATCCATTTATTAGGAGTTGATGATCTTTT  
AACAAATACCTTCTAAGGGATGGCTAGTCCAAGACGCTGAACAACAAAGTTTTCTTTTG  
GAAAAACAGCATCATTATGGGAATGTACACGCGGTAGAAAAATTACGTCAATCTATTGA  
GATATGGTATGCTACAAGCGAATATTTGCGCCAAGAAATGAATCCTAATTTTGAATGAC  
TGAACCTGGTAATCCAGTCCATATAATGTCTTTTTTCGGGAGCTAGAGGAAATGCATCTC  
AAGTACACCAATTAGTAGGTATGAGAGGATTAATGTCGGATCCACAAGGACAAATGATT  
GATTTACCCATTCAAAGCAATTTACGCGAAGGACTTTCTTTAACAGAATATATAATTTCT  
TGCTATGGAGCCCGCAAAGGAGTTGTGGATACTGCTGTACGAACATCGGATGCTGGATA  
TCTTACGCGCAGACTTGTGGAAGTAGTTCAACACATTGTTGTACGTAGAACAGATTGTG  
GCACCAGCCGAGGAATCTCTGTGAGTCCTCAAATGAAATAATGTCG---GAAAGACTTT  
TTATACAAACATTAATTGGTTCGTGATTAGCAGATGATATCTATATGGGTTCCCGATGCAT  
TGCCGTTAGAAATCAAGATATTGGGGTTTGGCTTGTCAATCGATTTCATAACC-----  
---TTTCAAACGCAATTCATATCCCTTCGAACCCCTTTACTTGTAGGAGTATGTCTTGGA  
TCTGTGCTTATGTTATGGCCGAAGTCCTACTCATGGCGACCTGGTTGAATTAGGAGAA  
GCTGTAGGTATTATTGCGGGTCAATCTATTGGAGAGCCGGTACTCAACTAACATTACG

AACTTTTCATACCGGCGGAGTATTCACAGGGGGTACTGCAGAACATGTACGAGCCCCT  
TCTAACGGGAAAATCAAATTTAATGAGGATTTGGTTCATCCCACACGTACACGCCATGG  
GCATCCTGCTTTTCTAIGTTATATGGACTTGTATGTA ACTATTGAAAGTGAAGATATTCTA  
TATAACGTGACTATTCCACAAAAAAGTTTTCTTTTAGTTCAAATGATCAATATGTAGAA  
TCAGAACAAGTGATTGCCGAGATTCGCGCGGGAACATACACTTTG---AATTTTAAAGAA  
AGGGTCCGAAAGCATATCTATTCCGACTCCGAAGGAGAA---ATCCACTGGAGTACTGAT  
GTGTACCATACACTGAATTTGCATATAGTAATGTCCACCTCTTACCAAGAACAAGCCAT  
TTATGGATATTA AAAAGGAAGTTCGTGCAGA-----TACCGTGTAGTCTCTTTTTCAATACAT  
AAGGATCAAGATCAAGTTCATTCTCTT-----TCTGTTTCTGCCGAAGGA---AGATATATTT  
CGAGCTTT---TCAGGAAATAATGATCAA---GTTAGATCCAGATTCCTTTAGTTCGGATCTTT  
CCGGTAAA---CAAAGTAAGATTACTGAATAT---TCAGAGCATAATCGAATCATATGTACTG  
GTCATTGTAATCTCATATATCCCCA---ATTCTACATGAGAGTTATGAT-----TTATTGGCAA  
AGAGGCGAAGAAATAGATTCATCATTCCATTCCAATCGATTCCAGAACGGGAGAAAGA  
ACTAATGTCCCCTGCCGATATCTCGATTGAAATACCCATAAAT-----GGTATTTTCCGTCG  
AAAAAGTATTTTTGCTTATTTTCGATGATCTTCAATACAGAAGAAACAGTTCAGGAATTA  
CTAAATATGGGACTATAGGAGTGCATTCAATCCTCAAAAAAGAGGAT-----TTGATTGAA  
TATCGA---GGAGTCAAAGAATTTAAGCCAAAATACATGAAAATAGATAGATTTTTTTTCA  
TTCCCGAGGAAGTACATATTTTACCTGAATCTTCTTCCATAATGGTACGGAACAATAGTA  
TCATTAGAGTGGATACACGAATTGCTTTAAATACAAGAAGCCGAGTAGGCGGCTTGGTC  
CGAGTGGAGAAAAAAGAGATTGAACTTAAAATATTTTCTGGAGATATCCATT  
TTCTGGAGAGACAGATAAGATCTCCCGACACAGCGGGATCTTGATACCACCAGGAAC  
GATAAAAAA-----AATTCGAAGGAATCAAAAAAT-----TTGCAAATTGGATCTATGTCC  
AACGG-----ATTACACCTACTAAGAAAAAG-----TATTTTATTTTTGTTCGGCCCCGTAATCA  
TATATGAAATAGCAGACGGTCTAAATTTATCAACACTTTTCCCTCAAGATCTGTTGCAGG  
AAAGGAAAACCTGCAACTTCGAGTTGTTAATTATATCCTTTATGGATATGGTAAACCT  
GTTTTGGGAATTTCTGACCCAAGTATTCAATTAATTTCGTACTTGTTTATCGCTGGATTGG  
GATCAAGAAAAA-----AAAAGTCTTCTATTGAGGAGGCTCATGCTTCTTTTATTGAA  
GTAAGTACAAGAGGTCTGATTGATATTTCTTACGAATTGACTTAGTGAAATCCCATAGT  
TTGTATAGCCGAAAAGGAAGGATTTCTCAAGTTCTGGATTCCTCTAT--GATAATGCGT  
CAGAGCGTGCCAATATCAATCCATTTTAT-----CTCAAGGCAAGA-----ATTCAA  
CAATCACTTAGACAAAATCAAGGAAC TATTAGTACGTTGTTGAATAGA-----AATAAG  
GAATACCAATCTTTGATAATTTTATCATCACCTAATTGTTTTCGAATGGGTCCA-----TTCA  
ACAATGTA AATATCACAAT-----GTGATAAAAGAAAGA---CCTATAATTTAATTAGGA  
ATTACTTGGGCCCTTTAGGA-----ACAGCTCTTCAAATTGCGAATTATTCTTCATATTCAT  
TTTACCATTTTATA-----ACTCATAATCAGATCTCG---GTA ACTAAATATTTGCAACTTGAG  
CTTGACAAT--TTAAAAAAGAACGTTCAAGTAATTCAAATTTAAA---TATTATTTAATGAAT  
GAAAATGGGAGA-----GTTTCTAAGCCC GATCCATGCAGTAACATCATTTTGAATCAATT  
CAATTTGAATTGGCATTCTCTATCATGATTATTGTGAAGAAAGATCCCCAATAATTAG  
C--TTGGGGCAGCTGATTTGTGAAAATCTATGTATAGCCAAAATGGACCA-----CACC  
TAAAATCGGGTCAAGTTATAATTGTTCAA---GTCGACTCGGTAGTAATAAGATCAGCTAA  
GCCTTATTTGACCACCCAGGAGCAACTCTTCATGGCCATTATGGAGAAATCCTTTCCG  
AAGGCGATACGTTAGTTACATTTATATATGAAAAATCAAGATCTGGT GATATAACGCAGG  
GTCTGCCAAAAGTGGAACAAGTGTTAGAAAGTGCGCTCTATTGATTCAATATCGAGCAA  
CCTAGAAAAGAGAGTTGAAGGTTGGAACGCGTGTATAACACGAATTCTGGGGATTCTT

TGGACATTCTTGATTGGTGGTGAGCTAACTATAGTGCAAAGTCGTATCTCTTTGGTTAAT  
AAGATCCAAAAGGTTTATCGATCCCAGGGGGTGCAGATCCATAACAGACATATAGAAAT  
TATTGTACGTCAAATAACATCAAAGTGTGGTTTCCGAA-----GAGGGAATGTCTAA  
TGTTTTTTTACCTGGAGAACTGATTGGATTGTTGCGAGCGGAACGAACAGGACGTGCT  
TTGGAAGAAGCGCTCTGTTACCGAGCCATATTATTGGGAATAACGAGAGCATCTCTTAA  
TACTCAAAGTTTCATATCTGAAGCGAGTTTTCAAGAAACTGCTCGAGTTTTAGCAAAA  
GCTGCTCTCAAGAGTCGTATCGATTGGTTGAAAGGTTTGAAGAGAACGTTGTTCTAG  
GGGGTATGATACCTGTTGGTACCGGATTCAAAGGATTTGTGCGTTTTTCG-----CAGCAA  
CATAATAACATTTCTTTGAAAATAAAAAGACGAAT-----TTATTCAAGGGTGAAGTGAG  
A-----GATATTTTGTCTACCACAGAGAATTTTTTTGATTTCGTGCATTTCAAAGAATTTTCA  
TGATCCAGCGGAACAACCTTTTATAGGATTTAATCATTCC-----ATGACAAGAA  
GATATTGGAACATAAATTTGAAAGAGATGGTGGAAAGCCGGAGTTCATTTGGTCATGGT  
ACTAGGAAATGGAATCCGAGAATGGCACCTTATATCTCTGAAAAGCGTAAAGGTATTCA  
TATTACAAATCTTACTAAAACCTGCTCGGTTTTTATCAGAAGCTTGTGATTTAGTTTTTGA  
TGCAGCAAGTAAGGGAAAACAATTCTTAATTGTTGGTACCAAACTAAAGCAGCTGAT  
TCAGTAGCACGAGCTGCAATACGGGCTCGGTGTCATTATGTTAATAAAAAATGGCTCGG  
TGGTATTTTAAACAAATTTGGTCCACTACAGAAACGAGACTTCATAAGTTCCGAGACTTTA  
GAATGGAACAAAAGACGGGGGGATTCAACCGTCTTCCGAAAAGAGATGCGGCTGTGT  
TGAAGAGACAGTTATCCCACTTGCAAACATATTTGGGCGGGATTAAATATATGATGGGG  
TTACCCGATATTGTAATAATCGTTGATCAGCAAAAAGAATATACAGCTCTTCGAGAATGT  
ATCATTTTGGGAATTCCAACGATTTGTTTAATTGATACAAATTGTGACCCGGATCTCGCA  
GATATTTTCGATTCCAACAAACGATGACGCTATAGCTTCAATCCGATTAATTCTTAACAAA  
TTAGTATTTGCAATTTGTGAGGGACGTTCT--AGCTATATACGAAATCCTATGGGACAAA  
AAATAAATCCACTTGGTTTCAGACTTGGCACAAACCAAAGTCATCATTCTCTTTGGTTT  
GTGCAACCAACAAATTATTCAGAAGGTCTGCAAGAAGATCAAAAATAACGAAACTTTA  
TCAAAAACCTATGTACAACAAAACATAAAAATATCTTCCGGT--GTTGAGGGAATTGCAC  
GTATAGAGATTCAAAAAGAATTGATCTGATTTCAGGTCCTAATATATATAGGATTCCCGA  
AGTTATTACTGGAGAGTAGG-----ACTCGAAGAATCGAAGAATTACAGAGGAAGTT  
ACAAAAGAATTAATTTGTATGAACCGAAAACCTAAACATTGCTATTACAAGGATTGCAA  
ATCCTTATGGACATCCTACTATTCTTGCAGAATTTCTAGCCGGACAATTA AAAAGCCGA  
GTTTCATGTCGTAAAGCAATGAAAAAAGCTATTGAATTAGCTGAACAGGCGAATACAA  
AAGGAATTCAAGTACAAATTGCAGGGCGTATCAACGGAAAAGAAATTGCACGTGTTGA  
ATGGATCCGAGAAGGTAGGGTTCCTCTACAAACAATTTCGAGCTAAAATCGATTTTTGTT  
CCTATACTGCTCAAACGCTTTATGGGGTATTGGGAATCAAATTTGGATATTTGGAGACG  
AGGAAATGTCACGTTACCGAGGGCCTCGTTTCAAAAAAATACGCCGGCTGGGGGTTTT  
ACCGGGACTAAGTAAAAGGCCCGAGTCGGAAACGATCTTAGAAATCAATCGCGC  
TCCGGTAAA---AAATCTCAATATCGTATTCGTTTAGAAGAAAAGCAAAAATTGCGTTTTC  
ATTATGGTCTTACAGAACGACAATTACTTAAATACGTTTCGTATCGCCGGAAAAGCAAAA  
GGTTCAACAGGTCAAATTTTACTACAATTACTTGAATGCGTTTGGATAACATCCTTTTT  
CGATTGGGTATGGCTTCGACCGTTCGCAAGCCCGCCAATTAGTTAACCATAGACATAT  
TTTAGTTAATGGTCGTATAGTGGATATACCAAGTTATCGCTGCAAACCGCGCGATATTATT  
ACAGCAAAGGATGAACAAAATCTAGAGCTCTGATTCAAATTTATCTTGATTCAATCCC  
CCAT--GAGGAAGTGCCAAAACATTTGACTCTTCACCCAATCCAA-----TATAAAGGATT  
AGTTAATCAAATAATCGATAGTAAATCGATCGGTTTTAAAAATAAATGAATTGCTAATCGT



AGAATATTATTCTCGTCAGGCTATGTCACGTCGAGGTACTGCAGAAGAAAAAACTGCA  
AAATCCGATCCAATTTATCGTAATCGATTAGTTAATATGTTGGTTAACCGTATTCTGAAAC  
ACGGAAAAAATCATTGGCTTATCAAATTTCTCTATCGAGCCATGAAAAAGATTCAACAA  
AAGACAGAAACAAATCCACTATCTGTTTTACGTCAAGCAATACGTGGAGTAACTCCCG  
ATATAGCAGTAAAAGCAAGACGTGTAGGCGGATCGACTCATCAAGTTCCCATGAAATA  
GGATCCACACAAGGAAAAGCACTTGCCATTCGTTGGTTATTAGGGGCATCCCGAAAAAC  
GTCCGGGTGCAAATATGGCTTTCAAATTAAGTTCTGAATTAGTAGATGCTGCCAAAGGG  
AGTGGCGATGCCATACGCAAAAAGGAAGAGACTCATAGAATGGCAGAGGCCAAATAGA  
GCTTTTGCACATTTTCGTATGGGTAGGGATACTCTTGCTGACATAATAAACTCTCTACGA  
AATGCTGCTATGAATAGAAAAGGAACGATTTCGAATACCGTTTACTAATATCACCAAAAA  
CATTATTAATACTTTTTACGAGAAGGTTTTATTGAAAACGCCAGGAAACATCGCGAAA  
GCGACAAATATTTTTGGTTTTAACCTACGACATAGA-----AAAGGGAGAACTA  
GT-----TTAAATTTAAAAAGAATAAGTCGACCGGGTCTACGAATCTATTCTAACTA  
TCAACAAATTCCTAGAATTTTAGGCGGAATGGGGATTGTAATACTGTCTACTTCTCGAG  
GTATAATGACAGACCGAGAGGCTCGACTAGAAGGAATCGGAGGAGAAATTTTGTGTTA  
TATATGGATGGCCAAAACCTATAACAAAAACCAGTTCTCGTAGGAATGTACGTATTGGCT  
CACGTAAGAATACACGTAGAATACAAAAGGAGTTATTCATGTTCAAGCAAGTTTCAA  
CAATACCATTGTGACTGTGACGGATGTACGGGGTCGGGTATTTCTTGGTCTCCGCCG  
GCACTTGTGGATTCAAGGGTACACGAAGAGGGACGCCGTTTGCTGCCAAACCGCAG  
CAGGAACCGCTATTCGTGCAGTAGTGGATCAAGGGATGCAACGAGCAGAAGTCATGAT  
AAAGGGTCTCGCCTCGGACGAGATGCAGCATTAAGAGCTATTCGTAGAAGTGGTATA  
CTGTTAAGTTTCGTACGAGATGTAACCTCTATGCCACATAATGGCTGCAGGCCACCTAA  
AAAAAGACGCGTCATGCCAACTCTTAAACAACCTATTAGGAATACAAGGCAGCCAATA  
AAAAATGTCACGAAATCCCCGCTCTTAGGGGATGTCCTCAGCGCCGAGGAACATGTA  
TTCGGGTGTATACTATCACCCCCAAAAACCAAACCTCTGCCTTACGTAAAGTTGCCAGA  
GTACGATTAACCTCTGGATTTGAAATCACTGCTTATATACCTGGCATTGGCCATAATTCA  
CAAGAACATTCTGTAGTCTTAGTAAGAGGGGGAAGGGTTAAGGATTTACCCGGTGTGA  
GATATCATATTGTTTCGAGGAACCCTGGATGCTGTGCGAGTAAAGGATCGTCAACAAGG  
GCGTTCTAAATATGGGGTCAAAAAGCCAAAAATGGCAAGGAAAGGTTTGATTCAAAG  
GGAAAAGACGAGGCAAAAATTGGAACAAAAATATCATTTGATTTCGTAGATCCTCAAGA  
AAAGAAATAAGC-----AAAGTTCTGTCAATTGAGTGATCAATGGGAAATTCATGGAAAG  
TTGCAGTCCCACCGCGGAATAGTGCAGCGACACGTCTTCATCGACGTTGTTTTTCGAC  
TGGAAGACCAAGAGCTAACTATCGAGACTTTGGGTTATCCGGACACATACTTCGTGAA  
ATGGTTCATGCAGGTTTGTGTCAGGGGCAACAAGATCAAGTTGGATGGTCAAAAATG  
CATTCATCTCAGTTATTTCAAAAACGAAAAAGAAAAAACAACAAAGGGATCCGT  
TGAATTGCAAGTATTCGTTTTTACTAATAAGATCCGAAGAATTACTTCACATTTGGAATT  
GCATAGAAAAGACTATTTATCTCAGAGAGGCCTCCGGAAAATTATAGGAAAACGCCAA  
CGGCTGCTGTCTTATTTGTCAAAGAAAAATGAAGTACGTTATAAACAATTAATTAGTCA  
GTTGGATATTCGGGAACCAAAAACACGT-----ATGCTCAAACCTTCGTTTGAGACGGTGT  
GGTCGAAAGCAACGAACTATTTATAGAATCGTTGCAATTGATGTTTCGATCGCGAAGAGA  
AGGAAAACCTCTTCGTAAGGTTGGTTTTTATGATCCAATAAATAATCATACTATTTAAA  
TTTTCTGACATTCTATATTTCTTGAAAAGGGTGCTCAACCTACAGAAACAGTTCAGG  
ACATTTCAAAGAAATCGGGGGTTTTTACACAATTCTGCCTTAATCAA---AGCAAATTC  
ACATGCATAAATTCAAGCGACTTTTTTCATAAATCCAAGCGTCTTTGCGTAGGCGTTTG

CCCCCGATCAAATCGGGGGATCGAATTGCTTATAGAAACATGAGTTTAATTAGTCGATTT  
ATTAGTGAACAAGGAAAAATATTATCTAAACGGGTAAATCGATTGACCTTAAAACAACA  
ACGATTAATTACTATTGCTATCAAACAAGCTCGTATTTTATCTTTGTTACCTTTTCTTAAT  
AATGAAAAA-----CAATTTGAAAAGGGCGAGTCGACTGCTAGAAGTCTGGTCTTAGA  
ACCCGAAATCAAGTGGCACGT---CTAAAAAAAATCCTTTTGTAGCGAATCATTATTG  
GGAAAAATAAATAAGCTTAACACAAAGGCGGAAAAAGAAATAATAGTAACTTGGTCCC  
GGGCATCCACCATTATAACCCACAATGATCGGACATACCATTGCTATCCACAATGGAAAG  
GAACATTTGCCTCTTTATATAACAGATCGGATGGTAGGACATAAATTGGGAGAATTTGC  
ACCTACTCTCAATTTCCGGGGACATGCAAAAAATGATAATAGATCTCGTCGTATGATTTT  
CAAATCTTTTATACTAGGTAATCTAGTATCCTTATCCCTGAAGATAATCAATTCGGTCGTT  
GTGGTTCGGACTCTACTATGGATTTCTGACCACATTTTCCATAGGACCCTCTTATCTCTTC  
CTTCTCCGAGCTCGGGTTATGGAAGAAGGAGAAGAAGGAACCGAGAAGAAGGTATCA  
GCAACAACAGGGTTTATTACGGGACAGCTCATGATGTTTCATATCGATCTATTATGCGCCT  
CTGTATCTAGCATTGGTAGACCTCATAACAATAACTGTCCTAGCCCTACCGTATCTTTTGT  
TTCATTTCTTCTGGAACAATCACAACACTTTTTTGGATTATGGATCTACTACCACAAATT  
CAATGCGTAATCTTAGCATTCAATGTGTATTCCCTGAATAATCTCATTTTTTCAATTATTCAA  
CCATTTCAATTTACCAAGTTCAATGTTAGTCAGATTAGTCAACATTTATATGTTTCGATGC  
AAACAACAAGATGTTATTTGTAACAAGTAGTTTTTGGTTGGTTAATTGGTCACATTTTA  
TTCATGAAATGGGTTGGGTTTCGTATTAGTCTGGATACAGCAAAAAAATTCTATTAGATCT  
---ATTCGATCTAATAAGTACCTTGTGTGAGAATTGAGAAATTCTATGGCTCGAATCTTGA  
GTATTCTCTTATTATTACCTGTGTCTACTATTTAGGCAGAATACCGTCACCCCTTTTTTAC  
TAAGAACTGAAAGAAACCGAAGAAGATAAAACTCTTGTAAGTACTAGACTTTTTGACTAT  
AAACGGTGGAAATCGCCATTTTCGATATATAAAAAACAACGGGAAGAGAAAAGGCTGTAA  
GAAATGAAATGTCACAATTTTTTTTTTATACATGCCTAAGTGATGGAAAAGAAAAAATT  
CCTTTTACATACCTGCCGAGTTTGTCCATTTTTTTCGACCTAATAGAAAGAAAGATGCC  
ATATTCACAACAGAAAAAATGACCTCTCCAAAATTATATAATCGTTGGAGTTATATGAAT  
GACCAAAAAAAGAATAAACTAAATAATGAATTTCTAAATAGAGTAGAACTCTAGATTT  
ACATTTTTTAGCTTTTACTTTACTCGAAAAAAGAAGTACTAGATTGTGTAAG-----AATACAA  
AGAATACTTACCTAAAATCTATGATCCTTTATTGAATGGTCCCTCACGCAGAAAGATCA  
AAAAGTTGTTTTTATTCCCACCCTGGATAACGATAAATAGAATTCACGGTCTCCTT-----  
-TTTGACCAAAAACGGGGAGAGGATAGAAAAATTGGAATAAATGAAATAAGTAAAAAA  
GTTCCCTCGCTGGTCATACAAATTAATCGAGTTAGAACAACAAGAAAGAGAAGAAATTC  
GTTCAAGAAAATCCAAACGTGTAATAATTTTTTACAGAGGCTTTAATACGTTATTACAA  
CAAGCAGACTTTCGCCGTGACATAATAAAAGGCTCCATGCGTCCTCAAAGACGTAAAA  
CAATTAATTGGGAAGTCTTTCAACCAATATACATTCCCCCTTTTTTTGGACCGACTAG  
ACAAACCCCTTTTGTCTTTTGTATC-----TCGCAGATGATGAAGATAATGTTTATCA  
ATAGGGAGGAAAAAGCACGGGTAGAAATAGCAGAAGCCTGGGATAACATTCTATTTGC  
TCACTTAATAAGAGGCTCGTTGCTAGTAATCCAATCCATTCTTAGAAAATATATTTTCTTA  
CCTTTATTGATAATAGCTAAAAATACCATCCGTACACTATTATTTCAATTTCCAGAATGGT  
CTGAGGATTTAAAAGATTGGAATAAAGAAATGCATGTTAAATGCACCTATAATGGAGTT  
CAATTATCCGAAAAAGAATTTCCGAAAAACTGGTTAACAGAGGGTATTTCAGATAAAAA  
TCCTATTCCCTTTTCGCCTGAAACCTTGGCACAGAGTTAAGAAAGGGAAAAAAAAGAA  
TTTTTGCTTTTTAACAGTTTTTGGAAATGGAACTGAATTTCCTTTTGGTTCTACCAAAAG  
AAGACTTTTTGATTTTAAACCCATTTGTAAAAAATCTCGAAGAAAAGGTTAGAAAGTTT

ACAAAAAGAGTTTTCTATTT---ATAAGGATTTTAAAAAAAAGACCAAAGTTAAATTC  
ACAAAATCAAAAAAAGTAAAAAAGAGTTATCAAAAAAGTCCATTTTTTTTTTTTA  
AAGAACAAATAAAAGAACTAATC-----ATAACTAATAAAAAGACGATTCATGAAT  
CCTCGATTCAAATTATACCTATGGATTGGACAAATTCTTCACTGGCCGAAGCAAGAATG  
CAAGATTTGACTAATAAAAAAAGGACAATCATAAAT-----CAAATAAAAAA  
AGAGAAGAGTCCTAACAAAATAACTTATGGTACGAAAAGATTTCGGATCATTA  
-----ATACTAAAAAGAAGAAATGCTCGAGTAGTCCGCAAATTCATTTTTT  
AAAAATATTGAGAAAATATACATAGATATCTTTCTATCTATCATTCAAATTCTC  
ATGCAGAACTTTTT-----ATTAAC--GACTTATCTTCTTTGTCACAAGCATAT  
CAAATTATCACAAACCAAAAAGCTTAACTTATATAAGTTAAGATCAGCTCTTCA  
AACTATTTTTCTTAAAAATAAAATAAAGGGTTATTTTGTACAGGGAATATTTCA  
ATTAAGACATAAAAAACCGATT--TCCACCATGAATCAATGGAAAACTGGTTAA  
CGTTATCAATACGATTTATCTCAGATAAGATGGTCTAGATTAGTACCACAAAAT  
AACTATTGTTAATCAAGGATGTATAGCTGAAAATAAAGCGATTCATATGAAAAT  
TGAAAAGACCGATTAATTCCGTACGAAAAAAA---AATTTTAAAAA  
TGATCTTTTAGCATATAAATTTATTAATGATGAGATTGTGGATCCGGCTAGAAA  
GATTGGAGAATTCTCCGTTTTTGTATTAGACTTTTTGATTGGATGGAAATGAAT  
AATATTAAGTCATTGGTTCTTCCCAGAAATTTTGATACTTTACAATGCATATA  
CCCCGTATCCATACCAATCAAATTACTTCTTTTTGATTACAAAAGTTCTACGG  
GCTTGATTTCCCTCCTAAAAGGTATTTCTGTTTTCAATTACGATGGAATGCTTCT  
TCAAAGAGTACTCAATAATATAAAGTATTTTGTCTCCTGCTTAGACTGATAAAT  
CGAAATTGCTATATCCTCTATTCAAAGGAGAGAACTGAGTCTCGATATTTACTA  
GAACAATTTGAGTCTTACAGAATTTTGA AAAAAGGAATATTGATTATCGAACCA  
GTCTGGCTGTA AAAAATGTCGGACAGTTTCTTATGTACCAAACCATAAATTTCA  
GTCATAAGAGTAAGCACAATCTTGATGATTTGTTTGTTCCTGAAAATATCTTTT  
AACGTCGTAGAGAATTCGGAATCTAATTTCTTTACAGGTTTTTTGGACCAATT  
TAGAAGATTTAGCTTGTATGAATCGTTGTTGGTTGATACCAATAATGGAAGTC  
ATATGGTAAGAATACATATGTATCCAATGAAAGGACATCAATTCCAATCCTGGAT  
AATTGAGAGAGATATTGAGAGAGATCAAGAATTCTCACTATTTCTTAGATTCAT  
CAATTCAATTCAGTGGGATCTTTCATTCACATTTTTTTCCATCAAGAACGTTTATA  
CTCTTGGACTCCCGAATTTTGTAGTATCCTACTTTCA---CGCAATTCA-----  
CAGGCAATCGATATTC-----ACGATCAAGGGTGTAGTCTTATTTGTAGTAGCG---  
TTATATATCGT-----ATTAACAATAGAAAGATGGTCGAAAGAAAAATCTTTATTT  
CAGGGCTTCTTCCA-----ATACCTATGAATTCCATTGGACCCAGAAATGAGAAAT  
GGAAGAATCTTTT---GGGTCTTCCAATATCAATAGGTTGATTCTTTTCG---CTCCT  
TCCAAAAGGAAAAAAGATCTCTGAGAGCGGTTTCTGATCCGAAAGAGAGTACTTG  
GGTCTCCCAATAACT-----AAAAAGTGTATCATGCCTGAATCTAACTGGAGTT  
GGTGGTGGAGGAACTGGATCGGAAAAAAGAGG-----GATTCTAGTTGTAAGATAT  
T-----GAAACCGTCGCTGGAATTGAGATCTCATTCAAAGAGAAAGATCTCAA---  
TATCTGGAGTTTCTTTTTGTATATTATATGGAT-----GATCCGATCCGCAAGGACC  
AAGATTGGG  
AATTGTTTGTATCTTTCTCCGAGGAAGAGGGCGAAACATAATCAACTTG-----  
AATTCGGACGGCTATTCGAAATTTAGTGAAAGACTGGATTTGTTATCTGATGTTGCT  
TTTCGTGAAAAATACCAATTGAAGTGGAGGGT---TTCTTCAAACAACAAGGA---  
GCTGGGTCACTATTCAATCAAATGAGATTGAGCATGTTCCCAT-----CTCTTCTCGA  
GAAAGAAGT

GGCTATTTCTTTGAAAAATTGTGCTCAATTTTCATATGTGGCAATTCCGCCAAGATCTCTT  
CGTT-----AGTTGGGGAAAG---AATCCGCACGAATCGGATTTTTTGAGGAAC---ATATC  
GAGAGAGAATTGGATTGGTTATAACAATGTGTGGTTGGTAAACAAGGATCGG-----TT  
TTTTAGC-----AAGGTACGGAATGTATCGTCAAATATTCAATATGATTCC-----ACAAGA-  
----TCTAGTTTCCTTCAAGTAAGGGATTCTAGCCAATTGAAAGGATCTTCT--GATCAATC  
CAGAGATCATTTCGATTCCATTAGT-----AATGAGGATTTCGGAA-----  
-----TATCACACATTGATCAATCAAAGAGAGATTCAACAACATAAAAGAAAGATCGA  
TTCTT--TGGGAT-----CCTTCTTTCTTCAAACGGAACATAACAGAGATAGAATCAGAC---  
--CGATTCCCTAAA-----TGCCTTTCTGGATATTCC-----TCAATGTCCCGGCTATTTCGCG---  
GAACGTGAGAAGGAGATGAATAATCATCTGCTTCCGGAAGAAATCGAAGAATTT-----C  
TTGGGAATCCTACAAGATCCATTCTGTTCTTTTTTCTCTGACAGATGG-----TCAGAACTT  
CAT--CTGGGTTCGAATCCTACTGAGAGGTCCACCAGAGATCGG-----AAATTGTTG  
AAGAAAGAACAAGATGTTTCT--TTTGTCCCTTCCAGGCGATCGGAA-----AATAAA  
GAAATAGTTAATATATTCAAGATCATTACGTATTTACAAAAT-----ACCGTCTCAATTCATC  
CTATTTTATCAGATCCGGGATGTGATAGGGTTCCG---AAGGATGAACTGGAT--ATGGAC  
AGTTCCAATAAGATTTCAATCTTGAACAAAAATCCATTTTTTGGATTTA-----TTTCATCTAT  
TCCATGACCGGAACAGGGGGGATAACCTTA-----CACCACGATTTTGAATCAGAA-----  
-GAGAGATTTCAAGAAATGGCGGATCTATTCACTCTATCAATAACCGAGCCG---GATCTG  
GTGTATCATAAGGATTTACCTTTTCTATTGATTCCTACGGATTGGATCAAAAACAA-----  
TTCTTGAATGAGGTATTGGAT-----GAATCGAAAAAGAAATCTTTA-----TTGGTTCT  
ACCTCTATTTTTTAT-----GAAGAGAATGAATCTTTTTATCGAAGGATCAGAAAAAATG  
GGTTCGG---ATCTCCTGCGGGAATGATTTGGAAGATCCAAAAGCAAAAAGAGTGGTATT  
TGCTAGCAACAACATAATGGAGGCAGTTAATCAATATAGATTGATCCGAAATCTGATTC  
AAATCCAATATAGCACCTATGGG-----TACATAAGAAATGTATTGAATCGATTCTTTTTAAT  
GAAT-----AGACCCGATCGCAACTTCGAATATGTAATTCAA-----AGGGATCAAATAG  
GAAATGATACTCTGAATCATAGAATAATGAAATATACGATCAACCAACATTTATCGA  
ATTTGAAAAAG---AGTCAGAAGAAATGGTTTCGACCCT-----CTTATTTGGATTCTCGAA  
CCGAGAGATCCATGAATCGGGATCCTAATGCATATAGATACAAATGGTCCAATGGGAAC  
AAGAATTTCCAGGAACATTTGGAACATTTCAATTTCTGAGCCGAAGAGCCATTTT--CATT  
TTCAAGTAGTCTTCGATCGATTACGTATTAATCAATATTCGATTGATTGGTCTGAGGTTAT  
CGACAAAAAAGATTTGTCTAAGTCACTTCGTTTCTTTTTGTCCAAGTTACTTCTT-----  
-----TTTTGTCC-----AAGTTTCTTCTTTTTGTCTAACTCACTTCC  
T--TTTTCTTTGTGAGTTTCGGGAATATCCCATTCATAGGTCCGAG---ATCCACATCTAT  
--GAATTGAAAGGTCCGAATAATCAACTCTGCAATCAGTTGTTAGAATCAATAGGTCTTC  
AAATCGTTCATTTGAAAAAATGGAAACCCTTC-----TTATTGGAT-----GATCATGATAC  
TTCC---CAAAAATCGAAATTCCTTGATCAATGGAGGAACAATATCACCATTTTTGTTCAAT  
AAGATACCA---AAGTGG---ATGATTGACTCATTCCATACTAGA-----ATAATCGCGGGAA  
ATCTTTTGATAAGACGGATTCCATTTCTCAATGATATCCCACGATCAAGACAATTGGCC  
GAATCCCGTGAAACCATTTCAATATAAGTTCATTGATATCTTCTTTTTATAAAGCAAATCG  
ACTTCGATTCGTGAAGAATCCACATCACTTCTACTTCTAT-----TGTAACAAAAGATTCCC  
TTTT-----TAT--GTGGAAAAGGCCCGTATCAATAATTATGAT-----TTACGTATGGA---C  
AATCCTCAATATCTTGTTCATTTCGCAACAAA---ATATTTCTTTGTACGCCGGTAAA-----  
AAAAAACATGCTTTTTTGGAG---AGAGATACTATTTACCAATCGAGTCACAGGTATCT  
AACATATTCATACCTAACGATTTTTTCAGAAAGTGGTGACGAAAGG---TATAACTTGTACA

AATCT-----TTCCATTTTCCAATTCGATCCGATCCATTCGTTTCGT-----AGAGCTATTTAC  
TCGATCGCAGACATTTCTGGAACGCCTCTCACAGAGGAACAAATAGTCAATTTTGAAA  
AAACTTATTGTCAACCTCTTTCAGATATGAATCTATCTGATTCAGAAAGGAAGAACTTG  
CATCAGTATCTCAAT-----TTCAATCAAACATGGGTTTGATTCACACTCCATGTTCTGAG  
AAATATTTACCATCCGAAAAG-----AGGAAAAAA-----CGGAGTCTTTGTC  
TAAAG-----AAATGCGTTGAGAAAGGGCAGATGTATAGAACCCTTCAACGAGATAGTGC  
TTTTTCAACTCTCTCAAATGGAATCTATTCAAACATATATGCCATGGTTCCTTACTTC  
GACAGGTTACAAATATCTAAATTGGAGATTTTTAGATACTTTTTTCAGAC---CTATTGCCGA  
TACTAAGTAGCAGTAGC---CAAAAATTTGTATCCATTTTTCGGGATATTATGCATGGATCA  
GATATATCATGGCGAATTCCTTCAGAAAAAATGG-----GGTCTTCCACAATGGAA  
T---CTGATAAGTGATATTCGAGTAAGTGTTACATAAT-----CTTCTTTTGTCCGAAGAAA  
TGGTTCATCGAAATAATGAGTCA-----CCATTGATATCGACACATCTGAGATCGCCAAAT  
GTTCCGGGAGTTG---CTCTATTCAATCCTTTTCCTTCTTCTTGTGCTGGATAT---CTTGTT  
GTACACATCTTCTCGTTGTTTCCCGA-----GCCTATAGTGAGTTACAGACAGAGTTCGAA  
AAGGTCAAATCTTTGATGATTCCATCATAATGATTGAGTTGCGAAAACCTTCTGGATAG  
GTAT-----GAACTGAATCTTTCTGGTTAAAGAATCTCTTTCTAGTTGCTCTGGAACAA  
TTAGGAGATTCTCTAGAAGAAATACGGGGTTCTGCTTCTGGCGCAACATGCTATGGGG  
TGGTGGTCCC-----GCTTATGGG---GTCAAATCAATACGTTCTAAGAAGAAATATT  
TGAATATCAAT-----CTCATCGATCTCATA---AGTATCATACCAAATCCCATCAATCGAAT  
CACTTTTTTCGAGAAATACGAGACATCTAAGTCATACAAGTAAAGAGATCTATTCATTGAT  
AAGAAAAAGAAAAACGTGAACGGTGATTGGATTGATGATAAAATCGAATCCTTGGTC  
GCGAACAGCGATTTCGATTGATGATAAAGAAAGAGAATTCTTGGTTCAGTTCTCC-----A  
CCTTAACGACA-----GAAAAAAGGATTGATCAAATTCATTGAGTCTGACT---CATAGTG  
ATCATTATCA-----AAGAATGACTCTGGTTATCAAATGATTGAACAACCAGGAG  
CAATTTACTTACGATACTTAGTTGACATTCAT-----AAAAAGTATCTAATGCATTATGAATT  
CAATACGTCTGTTTAGCAGAAAGACGGCTATTCCCTTGCTCATTATCAGACAATCACTTA  
T-----TCACAAATCTCGTGTGGGGCTAATAGTTTTCAATTCATCTCATGGA-----AAA  
CCCTTTTCGCTCCGCTTAGCCCTATCCCCCCT---AGGGCTATTTTAGTGATAGGTTCTAT  
AGGAACTGGACGATCCTATTTGGTCAAATACCTAGCGGAAAACCTCCTATGTTCTTTCA  
TTACAGTATTTCTGAACAAGTTCCTGGATAACAAGCCTAAGGGTTTTCTTATTGAT-----  
-----GATAGTGACGATATTGATCTGAGTGACGATATTGACCGT-----  
-----GACCTTGATACGGAGCTGGAGCTTCTAACTAGGA  
TGAATGCGCTA-----ACTATGGATATGATGCTT-----GAAATAGACCGATTTTATATCA  
CCCTTCAATTCGAATTAGCAAAAGCAATGTCTCCTTGATAATATGGATTCCAAACATTC  
ATGATCTGAACGTGAATGAGTCGAATTAATCCCTCGGTCTATTAGTGAACATCTCT  
CC-----AGGGATTGTGAAAGATGTTCC---ACTAGAGATATTCTTGTTATTGCTTCGACTC  
ATATTCCCAAAAAGTGGATCCCGCTCTAATAGCTCCGAATAAATTAATACATGCATTA  
AGATACGAAGGCTTCTTATTCCACAACAACGAAAGCACTTTTTTCACTCTTTCCTATACT  
CGGGGATTTCACTTGAAAAGAAAATGTTCCATACT-----AATGGATTCCGGTCCATAAC  
TATGGGTTCCAAGGTACGAGATCTTGTAGCACTTACCAATGAGGCCCTATCGATTAGTAT  
TACACAGAAGAAATCAATTATAGACACTAATATAATTAGATCTGCTCTTCATAGACAAAC  
TTGGGATTTGCGA-----TCCCAGGTAAGATCGGTTTCAGGATCATGGGATCCTTTTTTAT  
CAGATAGGAAGGGCTGTTGCACAAAACGTACTTCTAAGTAATTGTACCATGGATCCTAT  
ATCTATCTATATGAAGAAGAAA-----TCATGTAACGAAGGGGATTCCTATTTGTACAAATG

GTACTTCGAACTTGGAACGAGCATGAAGAAATTAACGATACTTCTTTATCTTTTGAGTT  
GTTCTGCCGGATCGGTCTGCTCAAGACCTTTGGTCTCTACCC-----GGACCCGATGAAAA  
A---AATGGGATCACTTATTATGGACTCGTTGAGAATGATTCT--GATCTAGTTCATGGCCT  
ATTAGAAGTAGAAGGCGCTCTGGTGGGA-----TCCTCACGGACAGAAAAAGATTGCAG  
TCAATTTGATAATGAT-----CGAGTGACATTGCTTCTTCGGCCCGAACCAAGGAAT---CCC  
TTAGATATGATGCAAAATGGATCTTGTTCTATCGTTGATCAGAGATTTCTCTATGAAAAA-  
----TACGAATCGGAGTTTGAAGAA--GTGGAAGGAGAAGGAGTCCTCGACCCGCAA----  
-----CAGAGAGAGGAGGAT-----TTATTCAATCAC-----ATAGTTTGGGCTCCT-----A  
GAATATGGCGCTAT-----TGGGGCTTTCTATTTGCTTGTATCGAAAGGCCCAATGAATT  
GGGATTTCCC---TATTGGGCCAGGTCATTTCCGGGGTAAG-----CGGATCATTTATGATG  
AAGAGGATGAGCTTCAAGAGAATGATTCGGAGTTCTTGCAGAGTGAACCATGCAGTA  
CCAGATACGAGATAGATCTTCTAAGGAACAAGGCTTTTTTTCGAATAAGCCAATTCATTT  
GGGACCCTGCCGATCCACTCTTTTTCCCTATTCAA---GATCAGCCCTTTGTCTCTGTGTT  
TTCACATCGAGAATTCTTTGCAGATGAAGAGATGTCAAAGGGGCTTCTTACTTCCCAGG  
GGGATCCCCCACATCTATATATAAACGCTGGTTTATC-----AAGAATACGCAAGAAAAG  
CACTTCGAATTGTTGATTCATCGCCAGAGATGGCTTAGA-----ACCAATAGTTCATTAT  
CT-----AATGGATTTTTCCGTTCTAAT-----ACTCTATCCGAGAGTTATCAGTATTTATCAA  
TCTGTTCCATCTAAC---GGAACGCTATTGGATCAAATGACAAAGACAGTGTGAGAAA  
AAGATGGCTTTTTCCCGGATGAAATGAAAATTGGATTC-----ATG-----ATG  
CCGAGATCTCGG---ATAAATGGAAATTTTATTGATAAGACCTTTTCAATTGTAGCCAATAT  
CTTATTACGAATAATTCCGACAACCTCAGGAGAAAAAGAGGCATTTACCTATTACAGAG  
ATGGG-----ATGTCGGCTCAATCCGAAGGAAATTATGCGGAAGCTTTACAGAATTATTAT  
GAAGCTATGCGACTAGAAATTGATCCCTATGATCGAAGTTATATACTCTATAACATAGGA  
CTTATTACACAAGTAACGGGAGAACATACGAAAGCTTTGGAATATTATTTTCGAGCACT  
AGAACGAAACCCGTTTTTACCGCAAGCTTTTAATAATATGGCCGTGATCTGTCATTAC---  
CGTGGAGAACAGGCCATTCGGCAGGGAGATTCTGAAATTGCGGAGGCTTGGTTTCGATC  
AAGCCGCCGAATATTGGAAACAAGCTATAGCGCTTACTCCTGGAAATTATATTGAAGCA  
CAGAATTGGTTGAAAATCACAAGACGTTTTGAA-----ATGAGTTGTCGGTCAGAACGTA  
TATGGATAGAATTTATAGCAGGGTCTCGAAAAACAAGTAATTTATGCTGGGCCTTTGTC  
CTTTTTTAGGTTCAATTAGGGTTCTTATTGGTTGGAACCTCTAGTTATCTTGGCCAGAATT  
TGATATCTTTATCCCCTCTCAGCAAATAATTTTTTTTCCACAAGGGATCGTGATGCTTTT  
CTATGGGATTGCAGGTCTCTTTATTGGCTCCTATTTGTGGTGCACAATTTTCGTGGAATGT  
GGGTAGTGGTTACGATCTATTCGATAAAAAGGAAGGAATAGTGTGATTTTTTCGCTGGG  
GATTTCCCTGGAAAAAATCGTCGTATCTTCTCCGATTCTTTATGAAAGATATTCAATCCC  
TCAGAATAGAAGTGAAAGAGGGTATTTATGCTCGTCTGTCCTTTATATGGAAATCAGA  
GGTCAGGGGGCTATTCCCTTGACTCGTACTGATGAGAAT--TTGACTCCACGAGAAATT  
GAGCAAAAAGCGGGTGAATTGGCCTATTTCTTGCCTGTACCCATTGAAGTCTTT

>Gunnera

ATGGAAAAATGTTGGTTCAATTCATGTTGTCTCTAAGTAAATCAATGGACAGTCTTGG  
TCCTATTGAAAATACTAGTGGAAAGTGAAGACCCGACTATAAATGATACAGATAAAAACA  
TTCATAATTCCAGTAATGTTGATCTTTTATTCAAGTGTGAGGGACATTAATAATTAATATC  
TGATGACACTTTTTTAGTTAGGGATAGTAATGGGGACAGTTATTCCATATATTTTGATATG  
GAAAATCATATTTTGGAGTTGACAATGATCAT-----TCTTTTCTGAGTGAAGTAGAAAAG  
TTCTTCCTATAGTTATAGGAATTCTAGTTATCTGACTAATGGATCTCAGAGTGACGATCC

CTACTATGATCGTTATATGTATGATACTAAATATAGTTGGAATAATCACATTATTAGTTGCA  
TTGACGTTTATCTTCGT-----TCTCAAATACGTATTGATAGTTTCGACTTTAAGTGGTAGTG  
ACAATTACAGTTACATTTACATTTATAGTTATATTTGTGGGAGTGAGAGTTCAAGTATAA  
GAACTAGCACGAATGGTAGTGATTTAATTATAAGAGAAAAGTTCTAATGATCTTGATGTA  
ACTCAAAAATACAGGCATTTGTGGATTCAATGCGAAAATTGTTATGGATTAAATTATAAG  
AAATTTTTTAAGTCAAAAATGAATATTTGTGAACAATGTGGATATCATTGAAAATGAGT  
AGTTCAGAGAGAATCGAACTTTCGATTGATCCAGGTACTTGGGATCCTATGGATGAAGA  
CATGGTCTCTCTGGATCCTATTGAATTTCAATCAGAAGAGGAACCTTATAAAGATCGTAT  
CGATTCTTATCAAATAACGACAGGATTAAGTGGGCTGTTCAAACAGGCATAGGTCAAC  
TAAACGGTATTCCCATAGCAATTGGGGTTATGGATTTTCAGTTTATGGGAGGTAGTATGG  
GATCCGTAGTAGGCGAGAAAATAACCCGTTTTGATCGAATATGCTACCAAAGATTTCTA  
CCTCTTATTATAGTATGTGCTTCTGGAGGAGCACGCATGCAAGAAGGAAGTTTGAGCTT  
GATGCAAATGGCTAAAATATCTTCCGCTTATATGATTATCAATTAATAAAAAGTTATTC  
TATATAGCAATCCTTACATCTCCTACTACTGGTGGGGTGACAGCTAGTTTTGGCATGTTG  
GGGGATATCATTATTGCCGAACCCAATGCCTACATTGCATTTGCGGGTAAAAGAGTAATT  
GAACAAACATTGAATAAGACAGTACCTGAAGGTTACAAGCGGCTGAATATTTATTCCA  
TAAGGGCTTATTTCGATCCAATCGTACCACGTAATCCTTTAAAAGGCGTTCTGAGTGAGT  
TATTTCAACTCCACGCTTTCTTTCCTTTGAATCAAATTCATCAAGATGGTAACCCCTC  
AAGCCGACGAAATTAGTAATATTATCCGTGAACGTATTGAGCAATATACTATAGAAGTAA  
AGATTGTAAATACCGGTACCGTACTTCAAGTAGGCGATGGCATTGCTCGTATTATGGTC  
TTGATGAAGTAATGGCAGGTGAATTAGTAGAATTTGAAGAGGGTACAATAGGCATTGCT  
CTGAATTTGGAATCAAATAATGTTGGTGTGTATTAATGGGTGACGGTTTGATGATACAA  
GAGGGAAGTTCTGTAAAGGCAACAGGAAGAATTGCTCAGATACCAGTGAGTGAGGCC  
TATTTGGGTCTGTGTTATAAATGCCCTGGCTAAACCTATTGATGGTAGAGGTGAAATTTCA  
GCTTCTGAATCTCGTTTAATTGAATCTCCGGCCCCAGGTATTATTTGAGACGATCCGTA  
TATGAGCCCCTTCAAACGGGTCTTATTGCTATTGATTCAATGATTCCTATAGGACGCGGT  
CAGCGAGAATTAATTATTGGGGACAGACAGACTGGTAAAACAGCAGTAGCCACAGAC  
ACGATTCTCAATCAGCAAGGACAAAATGTAATATGTGTTTATGTAGCTATTGGTCAAAA  
AGCATCTTCTGTGGCTCAGGTAGTGACTACTTTCCAGGAAAGGGGAGCGATGGACTAC  
ACTATTGTGGTAGCCGAAATGGCGGATTCCCCTGCTACATTACAATATCTTGCTCCTTAT  
ACAGGAGCAGCTTTGGCTGAATATTTTATGTATCGTGAACGACATACTTCAATCATTAT  
GATGATCCCTCTAAACAAGCACAAGCTTATCGTCAAATGTCTCTTCTATTAAGAAGACC  
GCCTGGTCGCGAAGCTTATCCGGGAGATGTTTTTTATTTGCATTACGTCTTTTGAAA  
GAGCCGCTAAATCAAGTTCTCGTTTAGGTGAAGGAAGTATGACCGCTTTACCAATAGTT  
GAGACTCAATCGGGAGATGTTTCGGCTTATATTCCTACTAATGTGATTTCCATTACAGAT  
GGCCAAATATTCTTATCCGGGATCTATTCATGCTGGCATCAGACCTGCTATTAATGTG  
GGTATTTCCGTCTCCAGAGTCGGATCTGCAGCTCAAATTAAGCCATGAAAAAAGTAG  
CTGGCAAATTAATAATTGGAACCTGGCGCAATTCGCAGAATTAGAAGCTTTTGACAATTC  
GCTTCTGATCTCGATAAAGCTACTCAGAATCAATTGGCAAGAGGTCAACGATTACGTGA  
ATTGCTCAAACAATCCAATCATCCCCTCTCACGGTGAAGAACAGATAATGACTATTT  
ATACTGGAACAAATGGCTATCTTGATTCATTAGAAATGGGCAGGTAAGTAAATTTCTC  
GTTGAGTTACGTACTIONTAAAAACCAATAAACCTCAGTTCCAAGAAATCATATCTTCT  
ACCAAGATATTAACCGAAGAAGCAGAAGACCTTTTGAAAGAAGCTATTCAGGAACAGA  
TGGAACGCTTTCTACTTCAG-----ATGAGAATTAATCCTACTACTTCTGGTCTGGGGT

TTCCACACTTGAAAAAAAAAACCTGGGGCGTATCGCTCAAATCATTGGTCCGGTACTG  
GATGTAGCTTTTCCCCGGGCAAGATGCCTAATATTTACAACGCTCTCGTAGTTAAGGGT  
AGAGATACTGTTGGTCAACAAATTAATGTGACTTGTGAGGTACAGCAATTATTAGGAAA  
TAATAGAGTTAGGGCTGTAGCTATGAGTGTACAGACGGTCTAACGAGAGGAATGGAA  
GTGATTGACACGGGAGCTCCTCTAAGTGTCCAGTCGGTGGAGCGACTCTCGGACGAA  
TTTTCAACGTACTTGGAGAACCTGTTGATAATTTAGGTCCTGTAGAGACTCGCACAACC  
TCTCCTATTATAGATCTGCGCCCGCTTTATACAGTTAGATACAAAATTATCTATTTTTG  
AAACAGGAATTAAGTAGTAGATCTTTTAGCCCCTTATCGCCGTGGAGGAAAAATCGG  
GCTATTCGGGGGAGCTGGAGTGGGTAAAACAGTACTCATTATGGAACATAATCAACAAC  
ATTGCCAAAGCTCATGGGGGTGTATCCGTATTTGGCGGAGTAGGTGAACGTA CTCTGTA  
AGGAAATGATCTTTACATGGAAATGAAAGAATCCGGAGTGATTAATGAACAAAATATTG  
CAGAATCAAAGTAGCTCTAGTCTACGGTCAGATGAATGAACCGCCGGGAGCTCGTAT  
GAGAGTTGGTTGACTGCCCTTACTATGGCGGAATATTTCCGAGATGTTAATGAACAAG  
ACGTACTTCTATTTATCGACAATATCTTCCGTTTCGTCCAAGCAGGATCCGAAGTATCCG  
CCTTATTGGGCAGAATGCCTTCCGCTGTGGGTATCAACCCACCCTTAGTACCGAAATG  
GGTTCTTTACAAGAAAGAATTACTTCTACCAAAGAAGGGTCCATAACTTCTATTCAAGC  
AGTTTATGTACCTGCGGACGATTTGACCGACCCCGCTCCTGCCACAACATTTGCACATT  
TAGATGCTACTACTGTATTATCAAGAGGATTAGCTGCCAAAGGTATCTATCCAGCAGTAG  
ATCCCTTAGATTCAACGTCAACTATGCTCCAACCTCGGATCGTTGGTGAGGAACATTAT  
GAAATCGCGCAAAGAGTTAAGCAAACCTTACAACGTTACAAAGA ACTTCAGGACATTA  
TAGCTATCCTTGGGTTGGACGAATTATCCGAAGAGGATCGTTTAACCGTAGCAAGAGCA  
CGAAAAATTGAGCGTTTCTTATCACAACCCTTTTTCGTAGCAGAAGTATTTACGGGTTC  
TCCAGGGAAATATGTTGGTCTAACAGAAACAATTAGAGGGTTTCAATTGATCCTTTCCG  
GAGAATTAGATAGTCTTCTGAACAAGCCTTTTTATTTGGTAGGTAATATCGATGAAGCTA  
CCGCGAAGGCTATAAACTTAGAATTAGAAATGGAGGAGAGCAAATGACCTTAAATCT  
TTGTGTACTGACTCCTAATAAAATTGTTTGGGATTCAGAAGTGAAAGAAATTATTTATC  
TACTAATAGTGGTCAAATTGGCGTATTACCAAACCACGCCCTATTGCCACAGCTGTAG  
ATATAGGTATTTAAGAATACGTCTTAATGACCAATGGTTAACGATGGCTCTGATGGGTG  
GTTTTGCTAGAATAGGCAATAATGAAATCACTGTTTTAGTAAATGATGCGGAGAAGGGT  
AGTGACATTGATCCACAAGAAGCTCAGCAAACCTTGAATAGCGGAAGCTAACTTGA  
GGAAAGCCGAAGGCAAGAGACAAACAATTGAGGCGAATCTAGCTCTCAGACGAGCTA  
GGACACGAGTAGAGGCTCTCAATGTAATTTGATGAAAAATGTAACCGATTCTTTTCGTT  
TCTTTGGGTCACTGGCCATCCGCCGGGAGTTTCGGGTTAATACCGATATTTTAGCAAC  
AAATCCAATAAATCTAAGTGTAGTGCTTGGTGTGTTTGGATCTTTTTTGGAAAGGGAGTGT  
TAAGTGATTTATTAGATAATCGAAAACAGAGGATCTTGAATACTATTGAAATTCAGAA  
GAACTACGTGGGGGAGCCATTGAACAGCTGGAAAAAGCCCAGGCCCGTTTACGTAAA  
GTGGAAATAGAAGCAGACCAGTTTCGAGTGAATGGATACTCTGAGATAGAACGAGAA  
AAGTTGAATTTGATTAATTCAACTTATAAGACTTTGGAACAATTAGAAAATTACAAAA  
CGAAACCATTCATTTTGAACAACAAAGAGCGATTAATCAAGTCCGACAACGGGTTTTTC  
CAACAAGCCTTACAAGGCGCTCTAGGAACTCTAAATAGTCGTTTGAACAACGAGTTAC  
ATTTACGTACCATCAGTGCTAATATTGGCGTGTGTTGGGGCGATGAAAGAGATAACTGATA  
TGAATCCACTGATTTCTGCCGCTTCCGTTATTGCTGCTGGATTGGCCGTAGGGCTTGCTT  
CTATTGGACCTGGAGTTGGCCAAGGTACTGCTGCGGGCCAAGCTGTAGAAGGTATCGC  
GAGACAACCCGAGGCGGAGGGAAAAATACGAGGTACTTTATTGCTTAGTCTGGCTTTT



ATGGAAGCTTTAACAATTTATGGATTGGTTGTAGCATTAGCGCTTTTATTTGCAAATCCC  
TTTGTTATGAATGTTCTATCATGTTCCATCAACACACTAAATGTGTTATACGATATATCCG  
GTGTAGAAGTAGGCCAACATTTCTATTGGCAAATAGGAGGTTTTCAAGTCCATGCCCAA  
GTACTIONTACTTCTTGGGTTGTAATTGCTATCTTATTAGGTTGAGTACTATAGCTGTTC  
GAAATCCTCAAACACTATTCCAACACTGACGGTCAGAATTTCTTCGAATATGTTCTTGAATTCA  
TTCGAGACGTGAGCAAAACTCAGATTGGAGAAGAATATGGTCCTTGGGTTCCCTTTATT  
GGAACACTATGTTTCTATTTATTTTTGTTTTCTAATTGGTCAGGGGCTCTTTTACCTTGGAAAA  
TCATACAGTTACCTCATGGGGAGTTAGCCGCACCCACTAATGATATAAAATACTACTGTTG  
CTTTAGCTTTACTCACGTCAGTAGCATATTTCTATGCGGGTCTTACAAAAAAGGATTAG  
GTTATTTCCGGTAAATACATTCAACCAACTCCAATCCTTTTACCCATTAACATCTTAGAAG  
ATTTTACAAAGCCTTTATCACTTAGTTTTGACTTTTTCGGGAATATATTAGCTGATGAATT  
AGTAGTTATTGTTCTTGTCTTTAGTACCTTCAGTGGTTCCTATACCTGTCATGTTCCCTT  
GGATTATTTACAAGTGGTATTCAAGCTCTTATTTTTGCAACTTTAGCCGCGGCTTATATAG  
GCGAATCCATGGAGGGTCATCATATGATATTTTTGACTTTAGAGCATATATTAACATCATAT  
ATCCTTTTCGATCGTTTCAATTGTAATTACTATTTATTTAATAACCTTATTAGTCAATGGAA  
TCGTAGAACTATATGATTCATCAGAAAAAGGCATGATAGCTACTTTTTTTTTGTATAACAG  
GGTTATTAGTAACCCGTTGGATTTTTTCGGGACATTTCCCATTAAGTGATTTATATGAATC  
ATTAATCTTCCCTTTCCTGGAGTTTCTCCATTATTAATATGGTTCCTGAT-----AAATATCAA  
AAAACCTTTAAGCACAATAACAGCACCAAGTGCTATTTTTACTCAAGGCTTTGCTACTTC  
AGGTCTTTTAACTGAAATGCATCAATCCACAATATTAGTACCTGCTCTACAATCCCAATG  
GTTAATGATGCACGTAAGTATGATGGTATTGAGCTATGCAGCTCTTTTATGTGGATCATT  
TTATCAGTAGCTCTTCTAGTCATTACATTTGAAAAGACATAATGATTTTTTGT-----AAA  
GAGACCCAATACATGAATGAAGGAAACAATATTTTACGAAACACTTCT-----GCTAGA  
AATTATTACAGGTCCCAATTAATTCAACAATTGGATCATTGGAGTTATCGTGTATTAGTA  
TAGGGTTTATCTTTTTAACCATAGGTATTCTTTCAGGAGCAGTATGGGCTAATGAAGCGT  
GGGGATCATATTGGAATTGGGACCCAAAGGAAACTTGGGCATTTATTACTTGGACCATC  
TTTGCATTTATTTACATACTCGAACAAATAAAAAGTTTTCAAGGTCCAAATCCGCAATT  
GTGGCTTCTATGGGCTTTCTTATAATTTGGATATGCTATTTTGGGGTCAATCTGTTAGGAA  
TAGGGCTACATAGTTATGGTTCATTTATATTAACAATGGCAAAAAAGAAAGCATTCACTC  
CCCTTCTATATCTTGCATCTATAGTATTTTTGCCCTGGTGGATTCTCTCTCATTAGTAAA  
AGTCTGGAATCTTGGGTTACTAATTGGTGAATACGAGTAAATCCGAATTTTTTTTTGAAT  
GATATTCAAGAAAAGAGCATTCTAGAAAAATTTATAGAAATAGAGGAACTCTTCCCTCTT  
GGACGAAATGATAAAGGAATACCCGGAGACACATCTACAAAAGCTTCATATA---ATACA  
TAAAGAAACGATCCAATTGATCAAAATGCACAATGAGGATCGTATCCATACGATTTTGC  
ATTTCTCGACCAATATAATCTGTTTCGTTATTCTAAGCGGTTATTCTATTCTGGTTAATGA  
CGAACTTGTATTCTTAACTCTTGGGTTTCAGGAATTCCTATATAACTTAAAGTGACACAAT  
AAAAGCTTTTTCTATTCTTTTCTTAACTGATTTTTGTATTGGATTCCATTCACCCCCTGGT  
TGGGAACTAATAATTGGCTCTGTCTCCAAAGATTTTGGATTTTATCATAATGATCAAATC  
ATATCTGGTCTTGTGTTGCACTTTTCCAGTCATTCTAGATACAATTTTTAAATATTTGATCT  
TCGATTATTTAAGTCGTGTATCTCCATCACTTGTAGTGATTATCATTCAATGAATGACAT  
GCCTATTGGTGTTCACGAGTACCCATCGAATTCCTGGAGAGGAAGATGCATATTGGG  
TTGACATATAACAACCGACTTTATAGAAACAGAATAATGTTTTTAGGCCAAGAGGTTAGT  
AGCGAGATCTCGAATCAACTTATTTCTCTTTTGGTATATCTCACTATAGAAGAAGATCGC  
AAAGATGTTTTTCTGTTTATAAACTCTCCTGGCGGGTGGGTAGTACCCGGAGTAGCTCT

TTATGATACTATGCGATTTGTGCAACCAGAAATACATACAATATGCATGGGAATGGCCGC  
TTCAATGGGATCTTTTCTCCTGGCCGGAGGAGAAATTACCAAACGTATAGCATTCCCTC  
ACGCCAGGGTAATGATCCATCAACCTGCTAGTTCTTTTTATGAGACACGAACGGGAGAA  
TTTATCCTGGAATCGGAAGAAGTGTGAAACTGCGCGAAATCATCACAAAGGTTTATGT  
ACAAAGAACGGGCAAACCCTTCTGGGTTATATCTGAAGACATGGAAAGGGATGTTTTT  
ATGTCAGCAACCGAAGCCCAAGCTTATGGACTTATTGATATTATACTGATTCAAATGAAA  
GAACAAAAATGGATTCATGAAGGTTTAATTACTGAATCACTTCCCAATGGTATGTTCCG  
GGTTCGTTTAGATAATGAAGATCTGATTCTAGGTTATGTTTCAGGAAGGATCCGACGTA  
GTTTTATACGGATACTACCAGGAGATAGAGTCAAAATTGAAGTAAGTCGTTATGATTCA  
ACCAGAGGGCGTATAATTTATAGACTACGTAACAAAGATTCGGGTGATATGGAGGAATT  
CAAAATATATTTAGAA---GATAGATTTTCGGCAACATTACTTCCTATATCCACTTATTTTTCA  
AGAGTATATTTATGCACTTGCTCATGATCATGGTTTATTTGGTTATGACAATAAATACAGT  
TCACTAATTGTAAAACGTTTAATTACTCGAATGTATCACCAGAAGTATTTGATTAGTTCG  
GCTAATGATTCTAACCAAAATCCATTTTTTGGGAATAATTTGTATTCTCAACTGATATCAG  
AGGGATTAGCGGTTATTGTGGAAATTCCATTTTCGCTAAGATTAATATCTTATCGAATAG  
CCAAATATCATAATTTACGATCAATTCATTCAATATTTCTTTTTTAGAGGACAAATTC  
ACATTTAAATTATGTGTCAGATATACTAATACCCACCCCATCCATCTGGAAATCTTGTT  
CAAACCCTTCGCTACTGGGTGAAAGATGCTCCTTCTTGCATTTAGTACGATTTTTTCTA  
CACGAGTTTCGTAATTGGAATAGTCTTATTACTAATAAATCCATTTACTTTTTTTCACAAA  
GATTATTCTTATTACTATATAATTCTCATGTATGTGAATACGAATACATGTTCATTTTTCTC  
CGTAATCAATCTTATCATTTACGATCAACATCTTCTGAGGTCCTTCTTGAGCGAATATATT  
TTTATGGAAAATAGAACAGCTTGTAGGAGTCTTTATTAATGATTTTATCTTATGTATGTT  
CAAGGATCCCTTCATGCATTATGTTAGGTATCAAGGAAAATCCATTTTGGCTTCAAAGG  
GAACGATCCTTATGATGAATAAATGGAATATTACTTTATAAATTTCTGGCAATGTCATTT  
TTACGTGTGGTCTCAACCGGGAAGGATCTATATAAACCAATTATACAATCATCCCCTAGA  
CTTGCTGGGCTATCTTTCAAGTGTGCGACTAAGTCCCTTCAGTGTTACGGAGTCAAATGT  
TAGAAAATTCATTTATAATAGATACTGCTATT-----AAGAAGTTTGATACTATAATTCCAAT  
TATTACTTTAATTGGATCATTGGCTAAAGCTAAATTTTGTAAATGTATTAGGGCATCCCATT  
AGTAAGCCAGCTTGGGCCGATTCATCAGATTCTGATATTATCGACCGATTTGGGCGGATA  
TGCAGAAATCTTCTCATTATCACAGTGGATCCTCAAAAAAAAAATAATTTGTATCGAATA  
AAGTATATACTTCGCCTTTCTTGTGCTAAAACCTTTAGCTCGTAAACATAAAAGTACTGTA  
CGTGCTTTTTTAAAAGATTAGGTTTCGGAATTATTGGAAGAATTCTTTACGGAGGAAGA  
ACACGTTCTTTCTTTGATCTTACCAAGACGTATTTGGTATTTGGATATTATTTGTATCAAT  
GATCTGGTCATTCATGAAATGATAATTGATACAACA---GAAGTACAA---GCTATCAATTCT  
TTTTCCAGATTGGAAAAC---TTAATAGAGCTTTATGGAATCATATGGATGCTTGTCCCTAT  
TTTTACTCCTGTATTGGGAATCACAATAGGTGTACTAGTAATTGTGTGGTTAGAAAGAG  
AAATATCCGCAGGATAACAACAACGTATTGGACCTGAATACGCCGGTCTTTGGGAATT  
CTTCAAGCTATAGCAGATGGAACAAAACCTTTTCAAAGAGGATCTTCTCCATCTAG  
AGGAGATACTCGCTTATTCAGTATTGGACCATCTATAGCAGTTATATCAATTCTACTAAGT  
TATTCAGTAATTCCTTTTAGCTATCACCTTGTCTAGCCGATCTCAGTATTGGTGTTTTTT  
TATGGATAGCCATTTCCAGTATTGCTCCCATTGGACTTCTTATATCAGGATATGGATCGAA  
TAATAAATATTCTTTTTAGGTGGTCTACGAGCTGCTGCTCAATCCATTAGTTATGAAATA  
CCATTAACCTATGTGTGTTATCAATATCTCTACTATCTAACAGTTCAAGTACAGTTGATA  
TAGTTGAGGCGCAGTCAAATATGGGTTTTGGGGATGGAATTTGTGGCGTCAACCTATA

GGATTTATCGTTTTTATAATTTCTTCACTAGCAGAATGTGAGAGATTACCTTTTGATTTAC  
CAGAAGCAGAGGAAGAATTAGTAGCAGGTTATCAAACCGAATATTCAGGTATAAAATTT  
GGTTTGTTTTACGTTGCTTCCTATCTAAATCTATTAGTTTTCTTCATTATTTGTAACAGTTCT  
TTATTTGGGCGGTTGGAATCTCTCTATTCCATACATATGGATTTCTGAGTTTTTTGAAATA  
AATAAAGTGGGTGGAGTCTTTATAACGACAATTGGTATCTTTATTACATTAGCTAAAAC  
TATTTGTTCTTGTTCAATTTCTATCACAACAAGATGGACTTTACCTAGGCTGAGAATGGAT  
CAACTATTAATCTTGGGTGGAATTTCTTTTACCGATTTCACTAGGTAATCTATTATTA  
CAACTTCTTTCCAATTTCTTTCACTGATGATCTGGCATGTACAGAATGAAAACCTTCATTC  
TCGATTCTACGAGAATTTTTATGAAAGCGTTTCATTTGCTTCTCTTCGATGGAAGTTTTA  
TTTTCCCAGAATGTATCCTAATTTTTGGCCTAATTTCTTCTCTGATGATCGATTCAACCTC  
TGATCAAAAAGATATACCTTGTTTATAATTTTCATCTCTTCAACAAGTTTAGTAATGAGCAT  
AACTGCCCTATTGTTCCGATGGAGAGAAGAACCCTATGATTAGCTTTTCGGGAAATTTCC  
AAACGAACAATTTCAACGAAATCTTTCAATTTCTTATTTACTATGTTCAACTCTATGTAT  
TCCTCTATCCGTAGAGTACATTGAATGTACAGAAATGGCTATAACAGAGTTTCTGTTATT  
CGTATTAACAGCTACTCTAGGAGGAATGTTTTTATGCGGTGCTAACGATTTAATAACTAT  
CTTTGTAGCTCCAGAATGTTTCAGTTTATGCTCCTACCTATTATCTGGATATACCAAGAA  
AGATGTACGGTCTAATGAGGCTACTACGAAATATTTACTCATGGGTGGGGCAAGCTCTT  
CTATTCTGGTTCATGGTTTCTCTTGGCTATATGGTTCATCCGGGGGAGAGATCGAGCTTC  
AAGAAATAGTGAATGGTCTTATCAATACACAAATGTATAACTCCCCAGGAATTTCAATT  
GCGCTTATATTCATCACTGTAGGAATTGGGTTCAAGCTTTCCCCAGCCCCTTCTCATCAA  
TGGACTCCTGACGTATACGAAGGATCTCCCACTCCAGTCGTTGCTTTTCTTTCTGTTACT  
TCGAAAGTAGCTGCTTCAGCTTCAGCCACTCGAATTTTCGATATTCTTTTTATTTCTCA  
TCAAACGAATGGCATCTTCTTCTGGAAATCCTAGCTATTCTTAGCATGATATTGGGGAAT  
CTAATTGCTATTACTCAAACAAGCATGAAACGTATGCTTGCATATTCGTCCATAGGTCAA  
ATCGGATATGTAATTATTGGAATAATTGTTGGAGACTCAAATGATGGATATGCAAGCATG  
ATAACTTATATGCTGTTCTATATCTCCATGAATCTAGGAACTTTTGCTTGCATTGTATCATT  
TGGTCTACGTACCGGAACTGATAACATTCGAGATTATGCAGGATTATACACGAAAGATC  
CTTTTTTGGCTCTCTCTTTAGCCCTATGTCTCTTATCCCTAGGAGGTCTTCTCCACTAGC  
AGGTTTTTTTCGGAAAACCTCCATTTATTCTGGTGTGGATGGCAGGCAGGCCTATATTTCTT  
GGTTTCAATAGGACTCCTTACGAGCGTTGTTTCTATCTACTATTATCTAAAAATAATCAA  
GTTATTAATGACTGGACGAAACCAAGAAATAACCCCTCACGTGCGAAATTATAGAAGAT  
CCCCTTTAAGATCAAACAATTCCATCGAATTGAGTATGATTGTATGTGTGATAGCATCTA  
CTATACCAGGAATATCAATGAACCCGATTATTGCAATTGCTCAGGATACCCTTTTTATGTT  
TCTGCTTTATGAATATGATATTTTCTGGGCATTTCTAATAATATCAAGTATTATTCCTATTT  
TGGCATTCTAATTTCCGGAGTTTTAGCTCCGATTAGCAAAGGGCCAGAAAAACTTTCT  
AGTTATGAATCAGGTATAGAACCAATGGGTGATGCTTGGTTACAATTTCGAATCCGTTAT  
TATATGTTTGCTCTAGTTTTTGTGTTTTTGTATGTTGAAACGGTTTTTCTTTATCCATGGG  
CAATGAGTTTAGATGTATTGGGTGTATCAGTATTTATAGAAGCCTTCATTTTTGTGCTTAT  
CCTAATTGTTGGTTCAGTTTATGCATGGCGAAAAGGAGCGTTGGAATGGTCTACGAATC  
ATTTTCCTTGGTTAACAATAATTGTAGTTTTTCCCATATCTGCGGGTTCCTTAATTTATTT  
CTTCCTCAGAGAGGAAATAAAGTAATAAGATGGTATACTTTATGTATTTGTATACTAGAA  
CTACTTCTAACTACCTATGCATTCTGTTATCATTCCAATTGGACGATCCATTAATGCAAC  
TGTCAGAGGACTATAAATGGATAAATTTTTTGGATTTTCACTGGAGATTAGGAATCGATG  
GACTTTCTATAGGACCCATTTTACTGACGGGATTCATCACTACTTTAGCTACTTTGTGCG

CTTGGCCAGTTACTCGAGATCCCCGATTATTCTATTTCCCTGATGTTAGCAATGTACAGCG  
GTCAAATAGGATCATTTTCTTCTCAAGACCTTTTACTTTTTTTCATCATGTGGGAGTTAG  
AATTAATCCCGTTTATCTACTTCTATCCATGTGGGGAGGAAAGAAACGCCTATACTCAG  
CTACAAAGTTTATTTTGTACACTGCAGGAGGTTCCATTTTTCTATTAATGGGAGTTCTGG  
GGATTGGTTTATATGGTTCCAATAAACCAACATTAAATTTTGAACATCAGCTAATCAAT  
CGTATCCTGTGGCATTGGAAATAATATTCTATATTGGATTTCTTATTGCTTTTTGCTGTAAA  
ATTACCTATTATACCCCTACATACATGGTTACCGGACACACATGGAGAAGCACATTACAG  
TACTTGTATGCTTCTAGCCGGAATCTTATTAATAAATGGGGGCATATGGATTGGTTCCGGAT  
CAATATGGAATTATTACCCCATGCTCATTCTATATTTTCTCCCTGGTTGATGATAGTAGGC  
ACAGTGCAAATAATCTATGCAGCTTCAACATCTCCGGGTCAACGTAATTTAAAAAAG  
AATAGCCTATTCCTCTGTATCTCATATGGGTTTTCTAATTATAGGAATTGGATCTCTAACC  
GACACGGGACTCAATGGAGCCATTTTACAAATAATCTCTCATGGATTTATTGGTGCTGC  
ACTTTTTTCTTATCAGGAACGAGTTATGATAGAATACGTCTTGTTTATCTTGACGAAAT  
GGGCGGAATAGCTATCGAAATGCCAAAATATTCACGATGTTTCAGTAGCTTCTCGATGG  
CTTCCCTTGCATTACCGGGCATGAGTGGTTTTGTTGCAGAATTGATAGTATTTTTTGGAA  
TAATTACCAGCCAAAATATCTTTTAATTCCAAAATACTAATTACTTTTTGTAATGGCAAT  
TGGAATGATATTAATCCTATTTATTTCATTATCTATGTCACGACAGATGTTCTATGGATAC  
AAGCTATTTAATGCTCCAAATCTTATTTTTTTGATTTTGGACCACGAGAGTTATTTGTTT  
CGATCTTTATCTTTCTACCCGTAATAGGTATTGGTATTTACCCGGATTTTCGTTCTCTCACT  
ATCGGTTGACAAGGTTGAAGCTATTCTATCTAATTATTTTTATAGAATGATGCTCGAACA  
TGTAATTGTTTTGAGTGCCTATTTATTTTCTATCGGTATTTATGGATTGATCACAAGCCGA  
AATATGGTTAGAGCTCTTATGTGTCTTGAACCTATACTGAATGCAGTTAATATAAATTTGG  
TAACATTTTCTGATTTTTTTGATAGTCGCCAATTAAGGAGATATTTTTTCCATTTTTGT  
TATAGCTATTGCAGCCGCTGAAGCAGCTATTGGACCAGCTATTGTTTCGTC AATTTATCG  
TAACAGAAAATCAATTCGTATCAATCAATCGAATTTGTTGAATAAAATGGAACATACATA  
TCAATATGCATGGATCATAACCTTCATTCCACTCCCAGTTCCTATGTTAATAGGAGTGGG  
GCTTCTACTTTTTCCGACGTCAACAAAAAATCTTCGACGTATGTGGGCTTTTACTAGTG  
TTTTATTGTTAAGTATAGTTTTTGATTTTTTTCGATCGATCTGTCTATTCAGCAAATAAATAG  
TAGTTCCATCAATCAATATGTATGGTCTTGGACTATTAATAATGATTTTTCTTTAGAGTTC  
GGGCATTTTCATCGATCCACTTACTTCTATTATGTTACTATTAATCACTACTGTTGGAATTA  
TGGTTCTTATTTATAGTGATAATTATATGTCTCATGATCAAGGATATTTGAGATTTTTTGT  
TATATGAGTTTTTCCAATACTTCCATGTTGGGATTAGTTACTAGTTCTAATTTGATACAAA  
TTTATATTTTTTGGGAAGTAGTTGGAATGTGTTCCCTACCTATTAATAGGTTTTTGGTTTAC  
ACGACCTATTGCAGCAAATGCTTGTCAAAAAGCGTTTTGTAACATAATCGTGTAGGAGATT  
TTGGTTTATTATTAGGAATTTTAGGTATTTATTGTATAACGGGTAGTTTTGAATTTTCGAGA  
TTTTTCAAATTTTTAATAACAATGAGGTCAATTTTTTATTTACTTTTTGTGCCTCC  
CTATTATTTGCCGGTGCAGTTGCTAAATCCGCACAATCCCCCTCATGTCTGGTTACCT  
GATGCCATGGAGGGACCTACTCCTATTTCCGGCTCTTATACATGCTGCTACTATGGTAGCA  
GCGGGAATTTTTCTGTAGCTCGGCTTCTTCTCTTTTACACTTATACTTACATAATGA  
ATCTAATATCTTTAATAGGTATAATAACACTACTATTAGGAGCTACTTTAGCTCTTGCTCA  
AAAAGACATTAAGGGGTTTAGCCTATTCGACAATGTCTCAATTGGGTTATACGATGT  
TAGCTCTAGGTATGGGGTCTTATCAAGCTGCTTTATTTCAATTTGATTACTCATGCTTATTC  
GAAAGCATTATTGTTTTTAGGATCCGGGTCAATTAATCAATGGAAGCTATTGTTGG  
ATATTCTCCAGATAAAAGTCAGAATATGGTTCTTATGGGTGGTTTAAACAAAACATGTGCC

AATTACAAAATTGCTTTTTTATTAGGTACACTTTCTCTTTGTGGTATTCCACCTCTTGCT  
TGTTTTTGGTCAAAAGATGAAATCTTAATGATAGTTGGTTGTATTCACCTAGTTTTGCA  
CTAATAGCTTATTCCACAGCAGGATTA ACTGCATTTTATAIGTTTTCCGATATATTTACTTA  
CTTTTGAAGGACATTTTAATGTAAATTTAAAAAATTACAGTGGAAAAAAAATAACTCG  
TTATATTCAATTTCTATATGGGGTAAAGAAGGGTCTAAAACAATTCAAAAAAATTATTA  
ACTTTATTAACACGGAATTTTTTTTCGTTTGGCAATAGGGGCACTTACTTGTATCCACAT  
GAATCGGACAATAACAATGCTATTTCCCTCTGCTTTTATTGGTCTTATTTACTTTGTTCATTG  
GATTCATAGGAATTCCTTTCTATAATAATATATTATTGAAATGGTTAACTCCGTCTATAAG  
CCTTTTACATAAAAATTTGGAG---TCCTCCGATTGGTATGAATTTGTGACCAATTCAATTT  
TTTCGGTAAGTATAGCTTATTTAGGAATATTTATAGCATCCCTTTTATATAGGCCTGTTTAT  
TCATCTTTAAAAAATTTGAACTTAATAAATTCATTTGCTATTTTTTGGGACAAAATAATA  
AATGGGGTATATAATTGGTCATATAATCGTGGTTATATAGATGCTTTTTTATACAACATATTT  
AATAGGGGGTATAAGAGGATTAGCTGAACTAACAAATTTTTTTGATAGAAGAATAATTG  
ATGGAATTACTAATGGAGTTGGTATTACAAGTTTCTTTGTAGGAGAGGGGATCAAATATA  
TAGGGGGTGGG---CGTATCTCTTCTTATCTCTTCTTGTATTTATCTTATGTATCAATATTTTT  
ATTAATT---TACATGGATTTACCCGGACCAATACATGATTTTCTTTTAGTCTTTCTGGGAT  
CAGGTCTTATATTAGGAGGTCTAGGAGTGGTATTATTTACCAATCCAATTTATTCTGCCTT  
TTCATTGGGGTTGGTTCTTGTTTGTATATCCTTATTATATATTCCATCGAACTCACATTTTG  
TAGCTGCTGCACAACCTTCTATTTACGTAGGAGCTATAAATGTTTTAATCATATTTGCTGT  
GATGTTTCATGAATGGTTCAGAATATTACAAAGATTTTCATTTTTGGACCGTTGGAGATGG  
GGTACTTCACTGGTTTGTACAAGTATTTTTGTTTCACTAATTACTACTATTTTCAGATACA  
TCGTGGTACGGAATTTTGGACGACAAGATCAAACCAGATTATAGAACAAGATTTAAT  
AAGTAATATTCAACAAATTGGGATTCATTTATTAACAGATTTTTTTCTTCCATTTGAACTC  
ATTTCAATAATTCTTTTAGTTGCTTTGATAGGTGCAATTTCTGTGGCTCGTCAGATGACT  
GTACCAGCTACAAGAAAAGACCTCATGATAATCAATATGGGCCCTCAACACCCATCAAT  
GCACGGTGTTCTTCGACTCATCGTTACTCTAGATGGTGAAGATGTTATTGACTGCGAAC  
CAATATTGGGTTATTTACACAGAGGTATGGAAAAAATTGCGGAAAACCGAACAATTATA  
CAATATCTGCCTTATGTAACACGTTGGGATTATTTAGCTACTATGTTTCACAGAAGCAATA  
ACTGTAAATGCACCAGAGCAGTTGGGAAATATTCAAGTACCTAAAAGAGCCAGCTATAT  
CAGAGTAATTATGTTGGAGTTGAGTTCGTATAGCCTCTCATTGTTATGGCTTGGCCCTTT  
TATGGCAGATATTGGTGCACAGACTCCTTTCTTCTATATTTTCAGAGAAAGAGAATTGAT  
ATATGATCTATTCGAAGCTGCCACCGGTATGAGAATGATGCATAATTATTTCCGTATCGG  
AGGAGTAGCTGCTGATCTACCTCATGGCTGGATAGATAAATGTTTGGATTTCTGTGATTA  
TTTTTTAACAGGGGTTGCTGAATATCAAAGCTTATTACGCGGAATCCCATTTTTTTTAGA  
ACGAGTTGAAGGAGTAGGCATTATTGGTGGAGAGGAAGCAATAAATTGGGGTTTATCA  
GGACCAATGTTACGAGCTTCTGGAATCCAATGGGATCTTCGTAAAGTTGATCATTATGA  
GTCTTATGACGAATTTGACTGGGAAGTACAATGGCAAAAAGAAGGAGATTCATTAGCT  
CGTTATTTGGTACGAATTTGGTGAAATGAAAGAATCCATAAAAATTATTCAACAGGCTCT  
GGAAGGAATTCGGGAGGGCCCTATGAGAATTTAGAAATCCGGCGCTTTGATAGAGCA  
AGGGATTCAGAATGGAATGAGTTTGAATATCGATTCATTAGTAAAAAGCCTTCTCCTAC  
TTTTGAATTGTCGAAACAAGAACTTTATGTGAGAGTCGAAGCCCCAAAAGGTGAATTG  
GGAATTTTTATGATAGGGGATCAAAGTGTTTTTCTTGGAGATGGAAAATTCGCCACC  
AGGTTTTATAAATTTGCAAATTTCTCCCCAGTTAGTTAAAAGAATGAAATTTGGCCGATAT  
TATGACAATACTAGGTAGCATAGATATCATTATGGGAGAAGTTGATCGTATGTTCCCTAT

GGTAACTGGGTTTCATGAATTATGGTCAACAAACAGTACGAGCTGCAAGGTACATTGGT  
CAAAGTTTCATGATTACCCTATCCCACGCGAATCGTTTACCTGTAACTATTCAATATCCTT  
ATGAAAAATTGATTACATCGGAACGTTTCCGTGGTTCGAATCCACTTTGAATTTGATAAA  
TGCATTGCTTGTGAAGTGTGTGTTTCGTGTATGTCCTATCGATCTACCCGTTGTTGATTGG  
AAATTGGAACTAATATTCGAAAGAAACAATTGCTTAATTACAGTATTGATTTTGGAAATC  
TGTATATTTTGTGGTAATTGCGTTGAGTATTGTCCAACAAATTGTTTATCAATGACTGAA  
GAATATGAACTTTCTACTTATGATCGTCCACGAATTGAATTATAATCAAATTGCTTTAGGTC  
GTTTACCAATATCAGTAATTGACGATTACACAATTCGAACAATTTAAATTCG---ATCAA  
AAATGGA-----ATGCAGGGTCGTTTGTCTGCTTGGCTAGTCAAGCA  
TGGGCTAGTTCATAGATCTTTGGGCTTCGATTACCAAGGAATAGAGACTTTACAAATAA  
AGCCCGAGGATTGGCATTCCGTTGCTGTAATTTTATATGTATATGGTTACAATTATCTACG  
TTCCAATGTGCTTATGATGTAGCACCAGGCGGACTGTTAGCTAGTGTGTATCATATTAC  
TAGAATACAGTATGGTGCAGTCAACCAGAAGAGGTATGTATAAAGTATTTGCCCCAA  
GGAGGAATCCTAGAATTCCGTCTGTTTTCTGGATTTGGAAAAGTGCAGGATTTTCAAGAA  
CGTGAATCCTATGATATGTTGGGAATCTCTTATGATAATCATCCACGCCTGAAACGTATC  
TTAATGCCTGAAAGTTGGATAGGATGGCCCTTACGTAAGGATTATATTGCCCCGAATTTT  
TATGAAATACAAGATGCTCATATGGGCAATGAGTTTAGATGTATTGGGTGTATCAGTATT  
TATAGAAGCCTTCATTTTTGTGCTTATCCTAATTGTTGGTTCAGT-----TTATGCATGGCGA  
AAAGGAGCGTTGGAATGGTCTTAGCTCCTGAATATTCAGACAATAAAAAAGTAAAAAA  
AAATAACATTGAGACAGTTATGAATTCATTGAGTTTCCGTTACTTGATCGAACCAACCC  
AAAATTCCGTTATTTCAACTACATCAAATGATCTTTCAAATTTGGTCAAGACTCTCCAGTT  
TATGGCCGCTTCTCTATGGTACTAGTTGTTGCTTCATTGAATTTGCTTCATTAATAGGCTC  
ACGGTTCGACTTTGATCGTTATGGGCTGGTACCAAGATCTAGTCCTAGGCAAGCGGACC  
TAATTTTAAACAGCTGGCACAGTAACAATGAAAATGGCTCCTTCTTTAGTGAGATTATATG  
AGCAAATGCCTGAACCAAAATATGTTATTGCTATGGGAGCATGTACGATTACAGGTGGG  
ATGTTACAGTACCGATTCTTATAGTACTGTTCCGGGGGGTAGATAAGCTAATTCCAGTGGAT  
GTATATTTGCCAGGCTGTCCACCTAAACCGGAAGCAGTTATAGATGCTATAACAAAACCT  
TCGTAAAAAAATATCTCGAGAAATATATGAAGATAGAATTAGGTCTCAACAGGATAATC  
GATGTTTTACTACTAACCACAAGTTTCATGTTGAACGCAGTACTCATACTGGAAATTATG  
ATCAAGGATTACTCTATCAATCACCATCTACTTCAGAAATCACTTCTGAAACATTTTAA  
AATATAAAAGCTCAGTATCTTCACACGAATTAGTGAATATGCAAACATAAAATACCTTTT  
CTTGGATAAAGGAACAGATTACTAGATCCATTTCCGTTATTGTTTATGATATATATAATAAC  
TCGGACATCCATTTCAAATGCATATCCCATTTTTGACACAGCAGGGTTATGAAAATCCAC  
GAGAAGCGACTGGACGATTGTATGTGCAAATTGCCATTTAGCTAATAAACCCCGTGGAT  
ATTGAGGTCCCACAAGCGGTAATCTCTGATACTGTATTTGAAGCAGTTGTTTCGAATTCC  
TTATGATATGCAACTTAAACAGGTTCTTGCTAATGGTAAAAGAGGGGCTTTGAATGTGG  
GGGCTGTTCTTATTTTACCTGAGGGGTTTGAATTAGCTCCGCCCAGTATTCTCCCG  
AGATGAAAGAAAAGATCGGCAAGCTGTCTTTTCAGAGCTATCGCCCCACTAAAAAAA  
TATTCTTGTGATAGGTCTGTTCTGGTCAGAAATATAGTGAAATTACCTTTCTATTCTT  
TCCCCAGACCCCGCTACTAAGAAGGATGTTAACTTTTTAAATATCCCATATATGTAGGC  
GGAAACAGGGGAAGGGGACAGATTTATCCCACGGGAGCAAGAGTAACAATACAGTT  
TATAATGCTACAGCAGCAGGTATAGTAAGCAAAATCACACGAAAAGAAAAGGGGGAT  
ACGAAATAACCATAGCGGATGCGTCGGATGGGCGTCAAGTGGTTGATATTATACCTCCA  
GGACCAGAACTTCTTGTTCAGAAGGTGAATCTATCAAACCTTGATCAACCATTAACGA

GTAATCCTAATGTGGGTGGATTTGGTCAGGGAGATGCAGAAATAGTACTTCAGGATCCA  
TTACGAGTCCAAGGCCTTTTGTCTTCTTGGCATCTGTTATTTTGGCACAAATCTTTTGTG  
GTTCTTAAAAGAAACAGTTTGAGAAGGTTCAATTGTCCGAAATGAATTTTCATGAGTA  
AAGTCTATGATTGGTTCGAAGAACGCCTCGAGATTCAGGCGATTGCAGATGATATAACT  
AGTAAATATGTTCCCTCCGCATGTCAACATATTTTATTGTTTAGGAGGAATTACGCTTACTT  
GTTTTTTAGTACAAGTAGCTACGGGGTTTGCTATGACTTTTTACTATCGTCCGACCGTTA  
CTGAGGCTTTTGTCTTCTGTTCAATACATAATGACTGAAGCTAATTTTGGTTGGTTAATCC  
GATCAGTTCATCGATGGTCGGCAAGTATGATGGTCCTAATGATGATACTACACGTATTTT  
GTGTGTATCTCACCGGTGGATTTAAAAACCTCGCGAATTGACTTGGGTTACAGGTGTG  
GTTCTAGCTGTATTGACTGCATCTTTTGGTGTAACTGGTTATTCCTTACCTTGGGACCAA  
ATTGGATATTGGGCAGTCAAATTTGTAACAGGCGTACCTGAAGCTATTCGGTAATAGG  
ATCACCTGTGGTAGAGTTATTACGTGGAAGTGCTAGTGTGGGACAATCCACTTTGACTC  
GTTTTTATAGTTTACACACTTTTGTATTACCTTCTTACTGCCGTATTTATGTTAATGCAC  
TTCTCAATGATACGTAAGCAAGGTATTTCTGGTCCTTTAATGGGAGTAACAAAAAACCC  
TGACTTGAATGATCCTGTATTAAGGGCAAATTTGGCTAAAGGGATGGGTCATAATTATTA  
CGGAGAACCCGCATGGCCCAATGATCTTTTATATATTTTTCCAGTAGTAATTTTAGGTACT  
ATTGCATGTAATGTAGGTTTAGCGGTTCTAGAACCATCAATGATTGGTGAACCAGCAGA  
TCCGTTTGCAACTCCTTTGGAAATATTACCCGAATGGTATTTCTTTCTGTATTTCAAATA  
CTTCGTACAGTACCTAATAAGTTATTGGGTGTTCTTTTAATGGTTTCAGTACCTGCGGGA  
TTATTAACAGTACCTTTTTTAGAGAATGTTAATAAATTCCAAAATCCATTTTCGTCTCCA  
GTAGCTACAACCGTCTTTTTGATTGGTACCGCAGCGGCTCTTTGGTTGGGTATTGGAGC  
AACATTACCTATTGATAAATCCCTAACTTTAGGTCTTTTTATGATTGAAGTTTTTCTATTT  
GGAATCGTGTTAGGTCTAATTCCTATTACTTTGGCTGGATTATTTGTAACGCATATTTAC  
AATATAGACGTGGTGATCAGTTGGACCTTATGCCTACTATACTAGTTATTTCCGTTTTCT  
ACTAGCGGCTTCAACTATAACCTCAGCTCTATTTATTGGTCTAAGCAAGATACGACTTAT  
TATGGATATAGTAAGTCTCGCTTGGGCTGCTTTAATGGTAGTCTTTACATTTCCCTTTCA  
CTCGTAGTGTGGGGAAGAAGTGGACTTATGATTATTCGTTTCGCCGGAACCAGAAGTAA  
AAATTTTGGTGGATAGGGATCCCGTAAAAACTTCTTTTCGAGGAATGGGCCAGACCCGG  
TCATTTCTCAAGAACAATAGCTAAGGGCCCTGATACTACCACTTGGATCTGGAACCTAC  
ATGCTGATGCTCACGATTTTCGATAGCCATACCAGTGATTGGAGGAGATCTCCCGAAAA  
GTATTTAGTGCTCATTTTCGGTCAACTCTCCATCATCTTTCTTTGGCTGAGTGGCATGTATT  
TCCACGGTGCTCGTTTTTCCAATTATGAAGCATGGCTAAGTGATCCTACTCACATTGGA  
CCTAGTGCCAGGTGGTTTTGGCCAATAGTGGGCCAAGAAATATTGAATGGTGATGTAG  
GCGGGGGTTTTCCGAGGAATACAAATAACCTCTGGTTTTTTTTTCAGATTTGGCGAGCATCT  
GGAATAACTAGTGAATTACAACCTTTATTGTACCGCAATTGGTGCATTGGTCTTTGCAGCC  
TTAATGCTTTTTGCTGGTTGGTTCCATTATCACAAAGCTGCTCCAAAATTGGCTTGGTTT  
CAAGATGTGGAATCTATGTTGAATCACCATTTAGCGGGGTTACTTGGACTTGGTTCTCTT  
TCTTGGGCGGGACATCAAGTACATGTATCTTTACCGATTAACCAATTTCTAAATGCTGGA  
GTAGATCCTAAAGAGATCCCACTTCCTCATGAATTTATCTTGAATCGGGATCTTTTGGCT  
CAACTTTATCCAGTTTTTGGCGAGGGAGCAACCCCATTTTTTCACCTTGAATTGGTCAA  
ATATGCAGAATTTCTGACTTTTCGTGGAGGATTAGATCCAGTAACTGGGGGTCTATGGC  
TGACCGATATTGCACATCATCATTAGCTATTGCAATTTCTTTCTGATAGCGGGTCACAT  
GTATAGGACCAACTGGGGCATTGGTCATGGTCTAAAAGATATTTTAGAGGGCTCATAAAG  
GTCCATTTACAGGTACAGGCCATAAAGGTTTATATGAGATCCTAACAACATCATGGCAC

GCTCAATTATCTCTTAACCTAGCTATGTTAGGTTCCCTTAACCAATTGTTGTAGCTCACCATA  
TGATTCCATGCCCCCTTATCCATATTTAGCTACTGACTATGGTACACAACCTGTCATTGTT  
TACACATCACATGTGGATTGGTGGATTTCTTATAGTTGGTGCTGCTGCGCATGCAGCTAT  
TTTTATGGTAAGAGACTATGATCCAACCTACTAGATAACAACGATCTATTAGATCGTGTCT  
TAGGCATCGTGATGCAATCATATCACATCTCAACTGGGCATGTATATTTCTAGGCTTTCA  
CAGTTTTGGTTTGTATATTCATAATGATACCATGAGCGCTTTAGGGCGTCCCCAAGATAT  
GTTTTCAGATACCGCTATAACAATTACAACCCGCTTTTGCTCAATGGATACAAAACACCCA  
TGCTTTAGCACCCGGTGC AACAGCTCCTGGTGC AACACAAGCACCAGCTTGACTTGG  
GGGGTGGTGATTTAATAGCAGTAGGTGGCAAAGTAGCTTTATTACCTATTCCATTAGG  
AACCGCAGATTTTTTGGTACATCACATTCATGCATTTACGATTCATGTGACGGTATTGAT  
ACTTCTGAAAGGTGTTCTATTTGCCCGTAGCTCCCGTTTGATACCGGATAAAGCAAATC  
TTGGTTTTCGTTTTCTTGTGACGGGCCTGGAAGAGGGGGACATGTCAAGTATCCGC  
TTGGGATCATGTATTCTTAGGGCTATTCTGGATGTACAATGCAATTTCCGGTAGTAATATT  
CATTTCAGTTGGAAAATGCAGTCAGATGTTTGGGGTAGTATAAGTGATCAAGGGATAGT  
AACTCATATCACGGGAGGAACTTTGCACAGAGTTCATTACTATTAATGGGTGGCTCC  
GCGATTTCTTATGGGCACAGGCATCCCAGGTAATTCAGTCTTATGGTTCTTCATTATCTG  
CGTATGGTCTTTTTTTCTAGGTGCTCATTTTGTATGGGCTTTCAGTTAATGTTTCTATT  
CAGCGGGCGTGGTTATTGGCAAGAACTTATTGAATCCATCGTTTGGGCTCATAATAAATT  
AAAAGTTGCTCCTGCTACTCAGCCTAGAGCCTTGAGCATTGTACAAGGACGTGCTGTA  
GGAGTAACTCATTACCTTCTGGGTGGAATTGCCACAACATGGGCATTCTTCTTAGCAAG  
AATTATTGCAGTAGGAATGGCATTAAAGATTTCCAAGGTTTAGCCAAGGCTTAGCTCAGG  
ACCCCACTACTCGTCGTATTTGGTTTGGTATTGCTACTGCACATGACTTCGAGAGTCATG  
ATGATATTACTGAGGAACGTCTTTATCAGAATATTTTTGCTTCTCACTTCGGGCAATTAG  
CAATAATTTTTCTGTGGACTTCCGGAAATCTGTTTCATGTAGCTTGGCAAGGAAATTTT  
GAGTCATGGGTACAGGACCCTTTACATGTAAGACCTATTGCTCATGCAATTTGGGATCC  
TCATTTTGGTCAACCAGCTGTGGAAGCTTTTACTCGAGGGGGTGCTCTTGGCCAGTG  
AATATCGCTTATTCTGGTGTATCAGTGGTGGTATAACAATCGGCTTACGCAATAATGAA  
GATCTTTATACTGGAGCTCTTTTTCTGTTATTTCTTTCTGCCATATCCTTAATAGGGGGTT  
GGTTACACCTACAACCGAAATGGAAACCGAGTGTTTCGTGGTTCAAAAATGCCGAATC  
TCGTCTCAATCATCATTTGTGACAGGACTCTTCGGAGTAAGTTCCTTGGCTTGGACAGGAC  
ATTTAGTCCATGTCGCTATTCCTGCATCCAGGGGAGAATATGTTGATGGAATAATTTCT  
TAAATGTATTACCGCATCCCCAAGGGTTAGGACCACTTTTTACAGGTCAAGTGAATCTT  
TATGCTCAAAACCCCGATTCAGGTAGTCATTTATTTAGTACCTCCCAAGGAGCAGGAAC  
TGCCATTCTAACCTTCTCGGGGGATTCCATCCACAAACGCAAAGTTTATGGCTGACTG  
ATATTGCTCATCATCATTTAGCTATTGCATTTATTTTTCTCGTTGCTGGTCATATGTATAGA  
ACTAATTTCGGGATTGGGCACAGTATGAAAGATCTTTTAGAAGCACATATTCCTCCTGG  
GGGGCGATTGGGACGTGGGCATAAGGGTCTTTATGACACAATCAATAATTCAATTCATT  
TTCAATTAGGCCTTGCTCTAGCCTCTTTAGGGGTTATTA CTTCGTTGGTAGCTCAACATA  
TGTA CTCTTACCTGCTTATGCGTTCATAGCACAAGACTTTACTACTCAAGCTGCGTTAT  
ATACTCATACCAATACATCGCAGGATTCATCATGACCGGAGCTTTTGCTCATGGAGCTA  
TATTTTTCATTAGAGATTACAATCCGGAACAGAATGAGGATAATGTATTGGCAAGAATGT  
TAGACCATAAAGAAGCTATCAAATCACATTTAAGTTGGGCCAGCCTATTTCTGGGGTTC  
CATACTTGGGACTTTATGTTTATAATGATGTCATGCTTGCTTTTGGTACTCCGGAGAAA  
CAAATCTTAATCGAACCTATATTTGCCCAATGGATACAATCTGCTCACGGTAAAACCTCA



TATGGGTTTCGATGTA CTTTTATCTTCAACGAATGGCCCGGCATTCAATGCGGGTTCGAAG  
TATATGGTTGCCTGGCTGGTTAAATGCCATTAATGAG-----AATAGTAATTC ACTATTCTTA  
ACAATAGGTCCTGGAGACTTCTTGGTTTCATCATGCTATTGCGCTAGGTTTACATACT  
ACATTGATCTTAGTAAAAGGCGCTTTAGATGCGCGTGGTTCCAAGTTAATGCCAGATAA  
AAAGGATTTTGGTTATAAGTTTTCTTGGCATGGTCCGGGACGAGGTGGTACTTGTGATA  
TTTCGGCTTGGGACGCATTTTATTTGGCAGTTTTTTGGATGTTAAATACCATTGGATGGG  
TTACTTTTTATTGGCATTGGAAACACATTACATTATGGCAAGGTAACGTTTTACAGTTTA  
ATGAATCTTCAACTTATTTGATGGGATGGTTAAGAGATTATCTATGGTTAAACTCTTAC  
AACTTATCAATGGATATAACCTTTTTGGTATGAATAGTTTATCGGTCTGGGCGTGGATGT  
TCTTATTTGGACATCTTGTGGGCTACTGGATTTATGTTCTTAATTTCTGGCGTGGATA  
TTGGCAAGAATTGATTGAAACTTTAGCATGGGCTCATGAACGCACACCTTTGGCCAATT  
TGATTTCGATGGAGAGATAAACCAGTGGCTCTTCCATTGTGCAAGCAAGATTGGTTGGA  
TTAGCCCACTTTTCTGTAGGTTATATATTCACTTATGCGGCTTTCTTGATTGCCTCTACAT  
CGGGCAAATTTGGTATGTCACATTCAGTAAAGATTTATGATACATGTATAGGGTGTACTC  
AATGTGTCCGAGCCTGCCCCACAGATGTATTAGAAATGATACCTTGGGACGGATGCAAA  
GCTAAGCAAATTGCTTCTGCTCCAAGAACAGAGGACTGTGTTGGTTGTAAGATGTG  
AATCTGCCTGTCCAACAGATTTCTTGAGTGTTTCGAGTTTATTTATGGCATGAAACA  
CGTAGCATGGGCTAGCTTATATGATATTTCTCAACTACCCTCTATTTTTGTGCCTTTAG  
TGGGCCTAGTATTTCCGGCAATTGCAATGGCTTCTTTATCTATTCATATTCAAAAAACA  
AGATTGTTATGCAAGATCTAAAAACATATCTCTCCGTGGCACCGGTAAGTACTCTAT  
GGTTCGGGTCTTTAGCGGGTCTATTGATAGAGATCAATCGTTTATTCCCGGATGCGTTGA  
CATCCCTTTTTTTTCATTCATGACTGCAATTTTAGAGAGACGCGAAAGCGAAAGCCTA  
TGGGGTCGCTTCTGTAATTGGATAACCAGCACTGAAAACCGTCTTACATTGGATGGTT  
TGGTGTGTTGATGATCCCTACCTTATTGACCGCAACTTCTGTATTTATTATCGCCTTCATT  
GCTGCTCCTCCAGTAGATATTGATGGTATTCGTGAACCTGTTTCTGGATCTCTACTTTAT  
GGAAACAATATTATTTCTGGTGCTATTATTCCTACTTCTGCAGCTATAGGTTTGCATTTT  
ACCCGATATGGGAAGCGGCATCCGTTGATGAATGGTTATAAATGGTGGTCTTATGAA  
CTAATTGTTCTACACTTCTTACTTGGTGTAGCTTGTACATGGGTTCGTGAGTGGGA  
AGTTTCCGTCTGGGTATGCGCCCTTGGATTGCTGTTGCATATTCAGCTCCTGTTGCAGCT  
GCTACTGCTGTTTTCTTGTATCTACCCAATTGGTCAAGGAAGCTTTTCTGATGGTATGCCT  
CTAGGAATCTCTGGTACTTTCAACTTCATGATTGTATTCCAGGCTGAGCACAAATCCTT  
ATGCACCCATTTACATGTTAGGCGTAGCTGGTGTATTTCGGCGGCTCCCTATTCAGTGCT  
ATGCATGGTTCCTTGGTAACCTCTAGTTTGTATCAGGGAACCACAGAAAATGAATCTGC  
TAATGAAGGTTACAGATTCGGTCAAGAGGAAGAACTTATAATATCGTAGCTGCTCATG  
GTTATTTTGGCCGATTGATCTTCCAATATGCTAGTTTCAATAATTCTCGTTCTTTACATTT  
CTTCTTAGCTGCTTGGCCTGTAGTAGGTATCTGGTTTACCGCTTTAGGTATCAGTACCAT  
GGCTTTCAACCTAAATGGTTTCAATTTCAACCAATCTGTAGTTGATAGTCAAGGTCGTG  
TAATTAATACCTGGGCTGATATCATAACCGTGCTAACCTTGGTATGGAAGTTATGCATG  
AACGTAATGCTCATAACTCCCTCTAGACCTAGCTGCTGTGCAAGCTCCATCCACAAAT  
GGA---GGTTTGCCTTGGTATCGTGTTTCATACCGTCGTATTGAATGATCCCGGTTCGGTTGC  
TTTTCTGTCCATATAATGCATACAGCTCTGGTTGCTGGTTGGGCCGGCTCGATGACTCTAT  
ATGAATTAGCAGTTTTTGTATCCCTCTGACCCCGTTCTTGATCCAATGTGGAGACAGGGT  
ATGTTTGTATCCCCTTCATGACTCGTTTAGGAATAACCAATTCATGGGGAGGTTGGAGT  
ATCACA---GGAGGGGCTATAACGAATCCGGGTATTTGGAGTTATGAAGGCGTGGCCGGG

GCACATATTATGTTTTCTGGTTTGTGCTTTTTTGGCAGCTATCTGGCATTGGGTGTATTGG  
GATCTAGAAATATTTTCTGATGAACGTACAGGAAAACCTTCTTTGGATTTGCCAAAGAT  
CTTTGGAATTCATTTATTTCTCTCCGGGGTGGCTTGTTTTGGTTTTGGCGCATTTTCATGT  
AACAGGCTTGTATGGTCCCGGAATATGGGTGTCCGATCCTTATGGACTAACTGGAAAAG  
TACAACCTGTAAATCCAGCGTGGGGCGTGGAAAGTTTTGATCCCTTTGTTCCGGGAGG  
AATAGCCTCTCATCATATTGCAGCAGGTACATTGGGCATATTAGCAGGCCTATTTTCATCTT  
AGTGTCCGTCCGCCCAACGTCTATACAAAGGATTACGTATGGGCAATATTGAAACCGT  
CCTTTCCAGTAGTATCGCTGCTGTCTTTTTTTCAGCTTTTTGTAGTTGCGGGAACCTATGTG  
GTATGGTTCAGCAACTACCCCGATCGAATTATTTGGTCCCCTCGTTATCAATGGGATCA  
GGGATACTTCCAGCAAGAAATATATCGAAGAATTGGTGCTGGGCTAGCCGAAAATCAA  
AGTTTATCAGAAGTTTGGTCTAAAATTCCCGAAAAATTAGCTTTTTATGATTACATCGGC  
AATAATCCGGCAAAAAGGGGGATTATTTAGAGCGGGCTCAATGGACAACGGGGATGGAA  
TAGCTATTGGATGGTTAGGACACCCCTATCTTAGAGATAAAGAAGGGCGTGAACCTTTTT  
GTACGTCGTATGCCTACTTTTTTTGAAACATTTCCAGTCGTTTTTGGTAGACGGAGACGG  
AATTGTTAGAGCCGATGTTCCTTTTAGAAGGGCAGAATCGAAGTATAGTGTGGAACAA  
GTAGGTGTAACGTGTGAGTTCTATGGTGGTGAACCTCAATGGAGTCAGTTATAGTGATCC  
TGCTACTGTGAAAAAATATGCTAGGCGTGTCAATTGGGTGAAATTTTTGAATTAGATC  
GTGCTACTTTGAAATCCGATGGTGTTTTTTCGTAGCAGTCCGAGGGGTTGGTTTACTTTT  
GGGCATGCTTCGTTTGCTCTGCTCTTCTTCTTCGGACACATTTGGCATGGTGCTAGAAC  
CTTGTTCCAGAGATGTTTTTGGTGGTATTGATCCAGATTTGGATACTCAAGTGAATTTGG  
AGCATTCCAAAACTTGGAGATCCAATAAAGACAAGTAGTC-----  
-----GTGGAAACGCTCTTTAATGGAACCTTAGCTTTAGCTGGTCGTGACCAAGAAA  
CCACCGGTTTCGTTGGTGGGCCGGGAATGCCCGACTTATCAATTTATCCGGTAAATTA  
CTCGGGGCTCATGTAGCCCATGCCGATTAATCGTATTCTGGGCCGGAGCAATGAACCT  
ATTTGAAGTGGCTCATTTTCGTACCAGAGAAACCCATGTATGAACAAGGATTAATTTTAC  
TTCCCATCTAGCTACTCTAGGTTGGGGGGTAGGTCTTGGTGGGGAAGTTATAGACACC  
TTCCATACTTTGTGTCTGGAGTACTTCACTTAATTTCTCTGCAGTATTGGGCTTTGGC  
GGTATTTATCATGCACTTCTAGGACCTGAGACTCTTGAAGAATCTTTTCCATTCTTCGGT  
TATGTATGGAAAGATAGAAATAAAATGACCACAATTTTGGGGATTCACTTAATCTTGTTA  
GGTATCGGTGCTTTTCTTTTAGTATTTAAGGCTCTTTTTTTTTGGGGGCGTATATGATACCT  
GGGCTCCTGGAGGGGGAGATGTAAGAAAAATTACTAACTTGACCCTTAGCCCAAGTGT  
TATATTTGGTTATTTACTAAAATCTCCCTTTGGAGGAGAAGGATGGATTGTTAGTGTGGA  
CGATTTGGAAAGATATAATTGGAGGACATGTATGGTTAGGTTCCATTTGTATACTTGGTGG  
AATCTGGCATATCTTAACCAAACCTTTGCATGGGCTCGCCGCGCACTTGTATGGTCTG  
GAGAGGCTTACTTGTCTTATAGTTTAGGTGCTTTATCTGTCTTTGGTTTTCAATGCTTGTG  
CTTTGTATGGTTCAACAATACCGCTTATCCTAGTGAGTTTTATGGGCCGACTGGACCAG  
AAGCTTCTCAAGCTCAAGCATTTACTTTTTCTAGTTAGAGACCAACGTCTTGGGGCTAAC  
GTGGGGTCCGCTCAAGGACCTACTGGTTTAGGTAAATATCTAATGCGTTCCCGACTGG  
AGAAGTCATTTTTGGAGGAGAACTATGCGTTTTTGGGATCTGCGTGCTCCTTGGTTAG  
AACCTCTAAGGGGTCCCAATGGTTTGGACTTGAGTAGGCTGAAAAAAGACATACAACC  
TTGGCAAGAACGTCGTTCCGCGGAATATGACTCATGCTCCTTTGGGTTCTTTAAATTC  
CGTGGGTGGCGTAGCTACCGAGATCAATGCAGTCAATTATGTTTCTCCTAGAAGTTGGT  
TAGCTACCTCTCATTTTGTCTAGGATTTCTCCTATTCGTAGGCCATTTGTGGCATGCGG  
GAAGGGCTCGTGCAGCTGCAGCAGGATTTGAAAAAGGAATTGATCGTGATTTTGAACC

TGTTCTTTCCATGACCCCTCTTAACATGACTATAGCCCTTGGTAGATTTACCAAAGACGA  
AAAAGATTTATTTGATACTATGGATGACTGGTTACGAAGGGACCGTTTTCGTTTTTGTAG  
GTTGGTCCGGCCTATTACTCTTTCCTTGTGCCTATTTTGTCTTAGGAGGTTGGTTCACAG  
GTACAACCTTTGTAACCTCGTGGTATAACCCATGGATTGGCTAGTTCCTATTTGGAAGGAT  
GCAATTTCTTAACCGCCGCAGTTTCTACTCCTGCTAATAGTTTAGCACATTCTTTGTTGC  
TACTATGGGGTCTGAAGCACAAAGGAGATTTTACTCGTTGGTGTCAATTAGGTGGTCTG  
TGGACGTTTGTGCTCTCCATGGGGCTTTCGGACTAATAGGTTTCATGTTACGTCAATTT  
GAACTTGCTCGATCTGTTCAATTGCGACCTTATAATGCAATCGCATTCTCTGGTCCAATT  
GCTGTTTTTGTCTGTATTCCTGATTTATCCACTAGGTCAGTCTGGTTGGTCTTTGCA  
CCTAGTTTTGGTGTAGCAGCTATATTTGATTCATCCTCTTTTTCCAAGGGTTTCATAATT  
GGACGTTGAACCCATTTTCATATGATGGGAGTTGCCGGTGTATTGGGCGCTGCTCTGCTA  
TGCCTATTCACGGTGTACCGTAGAAAATACTTTATTTGAGGATGGTGTATGGTGCAAA  
TACATCCGTGCTTTTAACCCAACCTCAAGCTGAAGAACTTATTCAATGGTCACCGCTA  
ACCGCTTTTGGTCCCAAATCTTTGGGGTTGCTTTTTCCAATAAACGTTGGTTACATTTCT  
TTATGTTATTTGTACCAGTAACTGGTTTATGGATGAGTGCTCTTGGAGTAGTCGGTCTGG  
CTCTGAACCTACGTGCCTATGACTTCGTTTCCAAGAAATCCGTGCAGCGGAAGATCCT  
GAATTTGAGACTTTCTACACCAAAAATATTCTCTTAAACGAAGGTATTCGTGCTTGGAT  
GGCGGCTCAGGATCAGCCTCATGAAAACCTTATATTCCCTGAGGAGGTTTACCCCGTG  
GAAACGCTCTTATGTCTGGAACACAGGAGAACGTTCTTTTGCTGATATTATTACCAGT  
ATTCGATACTGGGTCATTATAGCATTACTATACCTTCCCTATTTATTGCGGGTTGGTTAT  
TCGTCAGCACGGGTTTAGCTTATGATGTATTTGGAAGCCCTCGGCCAAACGAATATTTT  
ACAGAGAACCGACAAGGAATTCATTAATAACCGGCCGTTTTGATCCTTTGGAACAAC  
TCGATGAATTTAGTAGATCCTTTATGACCATAGATAGAACCTTTCCAATTTTACAGTGC  
GATGGTTGGCTGTTACGGACTAGCTGTACCTACCGTTTCTTTTTTGGGGTCAATATCA  
G C A A T G C A G T T C A T C C A A C G  
A????????????????????????????????????????????????????????????????  
????????????????????????????????????????????????????????????????  
????????????????????????????????????????????????????????????????  
????????????????????????????????????????????????????????????????  
ATGCTTACTCTCAAACCTTTCGTTTACAC  
AGTAGTTATATCTTTGTTTCTCTCTTCATCTTCGGATTCTTATCTAATGACCCGGGGCGT  
AATCCTGGACGGGAAGAAATGGCCGACACTACTGGAAGGATTCTCTTTGGCTAATAG  
GTAAGTAACTGGTATTCCTGTGATTGGTTTAAATAGGATTTTCTTTTATGGTTCATATTC  
CGGATTGGGTTTCATCCCTGATGCTTAATATCTTAAGTTTGTATCTGTATCTGTCTTAATTCT  
ACCCTTTATTCGAGTAGTTTTTTCTTAGGCAAATGCCCCGAGGCCTACGCTTTTTTTGAAT  
CCAATCGTAGATTTTATGCCAGTTATCCCTCTGCTCTTTTTTTCTTTAGCCTTTGTTTGGC  
AAGCTGCTGTAAGTTTTTCGAACGACACAATCAAACCCGAACGAACAAAGTGTGAATT  
GAATCGTACCAGTCTCTACTGGGGGTTATTAATAATTTTGTACTTGTGTTTTATTTTCC  
AATTATTTCTTCAATATGGAAGTAAATATTCTCGCATTATTGCTACTGCACTGTTTCATTC  
TAGTTCCTACTGCTTTTTTACTTATCATATATGTAAAACAGTCAGTCAAATGATATGG  
AAACAGCAACCCTAGTCGCCATCTCTATATCTGGTTTACTTGTAAGTTTTACTGGGTACG  
CCTTATATACTGCTTTTTGGGCAACCCTCTCAACAACCTAAGAGATCCATTTGAGGAACAC  
GGGGACATGGAAGCATTGGTTTATACATTCTTTTTGGTCTCGACTCTAGGGATAATTTTT  
TTCGCTATCTTTTTTCGAGAACCACCTAAAGTTCCAACCTAAAAGATAAAAATGACTAT  
TGCTTTTCAATTGGCTGTTTTTGCATTAATTGCTACTTCATTAATCTTACTGATTAGTGTA  
CCCGTTGTATTTGCTTCTCCTGATGGTTGGTCAAGTAACAAAATGTTGTATTTCCGGT

ACATCATTATGGATTGGATTAGTCTTTCTAGTGGGTATCCTTAATTCTCTCATTCT-----  
-----ATGTCACCACAAACAGAGACTAAAGCAGGTGTTGGATTCAAAGCTGGTGTTA  
AAGATTACAAATTGACTTATTATACTCCTGACTATGAAACCAAAGATACTGATATCTTGG  
CAGCATTCCGAATGACTCCTCAACCCGGAGTTCCACCTGAGGAAGCAGGGGCCGCGGT  
AGCTGCCGAATCTTCTACTGGTACATGGACAACCTGTGTGGACTGATGGACTTACCAGCC  
TTGATCGTTACAAAGGACGATGCTACGGCATCGAGCCCGTTGCTGGAGAAGAAAATCA  
ATATATTGCTTATGTAGCTTACCCTTTAGACCTTTTTGAAGAAGGTTCTGTTACTAACATG  
TTTACTTCCATTGTGGGGAATGTATTTGGGTTCAAAGCCCTACGCGCTCTTCGTCTGGA  
GGATCTGCGAATCCCTCCTGCTTATGTTAAAACCTTCCAAGGCCACCTCATGGCATCC  
AAGTTGAGAGAGATAAATTGAACAAGTATGGTCGTCCCCTATTGGGATGTACTATTA  
CCTAAATTGGGTTTATCTGCTAAGAACTACGGCAGAGCAGTTTATGAATGTCTTCGCGG  
TGGACTTGATTTTACCAAAGATGATGAGAACGTGAACTCCCAACCATTATGCGTTGGA  
GAGACCGTTTCTATTTTGTGCCGAAGCAATTTATAAAGCACAGGCTGAAACAGGTGA  
AATCAAAGGACATTACTTGAATGCTACTGCAGGTACATGTGAAGAAATGATCAAAAGG  
GCGGTATTTGCCAGAGAATTGGGGGTTCCCTATCGTAATGCATGACTACTTAACAGGGG  
ATTCACCGCAAATACTAGCTTGGCTTTTTATTGCCGAGATAATGGCCTACTTCTCACAT  
CCACCGTGCAATGCATGCAGTTATTGATAGACAGAAGAATCATGGTATACTTTTCGTG  
TACTAGCTAAAGCGTTACGTATGTCCGGTGGAGATCATATCACTCTGGTACCGTAGTAG  
GTAACTTGAAGGGGAAAGAGAAATCACTTTGGGTTTTGTTGATTTACTACGTGATGAT  
TTTATTGAAAAGACCGAAGTCGGGGTATTTATTTCACTCAAGATTGGGTCTCTTTACC  
AGGTGTTTTACCCGTGGCTTCGGGGGTATTCACGTTTGGCATATGCCCGCTCTGACCG  
AGATCTTTGGGGATGATTCTGTACTACAGTTCGGTGGAGGAACTTTAGGACACCCTTGG  
GAAATGCACCGGGTGCCGTAGCTAATCGAGTAGCTCTAGAAGCATGTGTACAAGCTC  
GTAATGAGGGGCGTGATCTTGCTCGTGAGGGTAATGAAATTATCCGTGAGGCTTCCAAA  
TGGAGTCCTGAACTAGCTGCTGCTTGTGAGGTATGGAAGGAGATCAAATTTGAATTCG  
AAGCAATGGATACTTTG-----ATGGCGATACATTTATACAAAACCTTCTACCCCAAGCACA  
CGCAATGGAGCCGTAGACAGTCAAGTCAAATCCACGAAATAATTTGATCTATGG  
ACAGAATCGTTGTGGTAAAGGTCGTAATGCCAGAGGAATCATTACCGCAAGGCATAGA  
GGGGGAGGTCATAAGCGTCTATACCGTAAAATCGATTTTCGACGGAATGCAAAAGACAT  
ATATGGTAGGATCGTAACCATAGAATACGACCCTAATCGAAATGCATACATTTGTCTCAT  
ACACTATGGGGATGGTGAGAAGAGATATATTTTACATCCCAGAGGGGCTATAATTGGAG  
ATACCATTGTTTCTGGTACAGAAGTTCCTATAAAAATGGGAAATGCCCTACCTTTGACC  
GATATGCCCTTAGGCACGGCCATACATAACATAGAAATCACACTTGGAAAGGGTGGAC  
AATTAGCTAGAGCAGCGGGTGTGTAGCGAAACTGATTGCAAAAGAGGGGAAATCGG  
CCAAATTAATAATTACCTTCTGGGGAGGTACGTTTGTATCCAAAAACTGCTCAGCAACA  
GTCGGACAGGTGGGGAATGTTGGGGTGAACCAGAAAAATTTGGGTAGAGCCGGATCT  
AAGTGTGGCTAGGTAAGCGTCCTGTAGTAAGAGGAGTAGTTATGAACCCTGTAGACC  
ATCCCATGGAGGTGGTGAAGGGAGGGCCCCGATTGGTTCGAAAAAACCACAACCC  
CTTGGGGTTATCCTGCACTTGAAGAAGAAGTAGAAAAAGGAATAAATATAGTGATAAT  
TTGATTGTTTCATCGCCGTAGTAAAATGATTC AACCTCAGACCCATTTGAATGTAGCGGA  
CAACAGCGGAGCTCGAGAATTGATGTGTATTGCAATCATAGGAGCTAGT---AATCGGCG  
ATATGCTCATATTGGTGACGTTATTGTTGCTGTGATCAAAGAAGCAATACCAAATATGCC  
TTTACAAAGATCAGAAGTGATCAGAGCTGTAATTGTACGTACCTGTAAAGAACTCAA  
CGTGACAACGGTATGATAATACGATATGATGACAATGCTGCAGTTGTCATTGATCAAGA

AGGAAATCCAAAAGGAACTCGAGTTTTTTGGTGCATCGCTCGGGAATTGAGACAGTTA  
AATTTTACTAAAATAGTTTCATTAGCTCCCGAGGTATTAATGCTTAGTCCCAAAGAACC  
AGATTCCGTAAACAACATAGAGGAAGAATGAAGGGAATATCTTATCGAGGTAATCGTAT  
TTGTTTCGGTAGATATGCTCTTCAGGCACCTTGAACCCACTTGGATCACATCTAGACAAA  
TTGAAGCGGGTTCGACGAGCAATTACACGACATGCACGTCGTGGTGGAAAAATATGGGT  
ACGTATATTTCCCGACAAAACCCATTACAGTAAGACCCGCGGAAACACGTATGGGTTCGG  
GTAAAGGATCTCCCGAATATTGGGTAGCTGTCTGTTAAACCAGGTTCGAATACTTTATGAA  
ATGGGCGGAGTAACAGAAAATGCAGCCAGAGAAGCTATTTCACTAGCGGGCTCCAAA  
TGCCTATACGAACTCAATTCATTATTTTCAGGAATGACCAGAATTAGACGAGGATATATAG  
CTCGGAGACGTAGAACAAAATTCGTTTATTTGTATCAAGCTTTCGAGGGGCTCATTCA  
AGACTTACTCGAACTATTACTCAACAGAAAATAAGAGCTTTGGTTTCGGCTCATCGGGA  
TAGAGATAAGCAAAAAGAGAAATTTTCGTCGTTTGTGGATCACTCGGATAAATGCAGTAA  
TTCGCGAT---AACAGGGTATCCTATAGTTATAGTAGATTAATAAACGATCTGTACAAGAG  
GCGGTTGCTTCTTAATCGTAAAATACTTGCACAAATAGCTATATCAAATAGGAATTGTCT  
TCATATGATTTCCAATGAGATCATAAAAATAAAA-----ATGATTAATGT  
ATATGCTTTAGGTCAACATATATGCATTTCTGCTAACAAAGCAAGAAGAGTAATTGATCA  
GATTCGTGGACGTTCCCTACGAGGAAACACTTATGATACTAGAACTCATGCCTTATCGAG  
CATCTTATCCATTTTTAAATTGATTTATTCTGCAGTAGCAAATGCTACTCACAATAGGG  
GTTTCAACGAAGCAAATTTATTTCATTAGTAAAATGGAAGTCAACGAAGGTACTACCGTG  
AAAAAATTAACCTCGAGCTCGAGGACGTTAGTTATCCGATAAAAAGATCCACTTGTCT  
ATATAAAAATTGTATTAACAGATATATCCTTATATGGGGGGGTATGGGACAAAAAATGG  
ATGGAATCAAATATTCAGTATTTACAGACAAAAGTATTCGGTTATTGGTGAAAAAT---CA  
ATATACTTCTAATGTCGAATCAGGATCAACTAGGACAGAAATAAAGCATTGGGTTCGAAC  
TCTTCTTTGGCGTCAAGGTAATAGCTATGAATAGTCATCGACTCCCGGAAAGGGTAGA  
AGAATGGGACCTATTATGGGACATACAATGCATTACAGACGTATGATCATTACGCTTCAA  
CCGGGTATTCTATTCCACCTGTTAGAAAGAAAAGAACTATGGCAGTTCCAAAAAAC  
GTACTTCTCTGTCAAAAAGCGTATTCGTAAAAATATTTGGAAAAAGAAGGGCTATTGG  
GCAGCGTTAAAAGCTTTTTTCGTTAGCGAAATCTCTTTCTAGCGGAAATTCTAAAAGTTT  
TTTT-----CTACGAAAAAAAATGAGT-----AAAGATGTCCGAGTAACAGTTATGTTAGAAT  
GTATCAGTTGTGTCCAAAACGGT-----GGTGATAAGGAATCAAAGGGCGTTTCCAGATAT  
ATTACTGAAAAGAATCGACACAATACACCAGGTTCGATTGGAGTTGAAAAAATTCTGTCT  
CCTTTTGTTCCAAACAGACGATTCATGTGGAGATAAAGAAAATGAAAATAAGGGCCTC  
CGTTCGTAAAATTTGTGAAAAATGTGCGACTGATCCGTAGGCGGGGACGAATTATAGTAA  
TTTGTTCCAAACCGAGACATAAACAAGACAAGGAATGGTTCGAGAGAAAATAACAGT  
ATCTACTCGGACACTACAGTGGAAAGTGTGTTGAATCAAGAACAGACAGTAAGCGTCTT  
TATTATGGACGCTTTATTATGTCTCCACTTATGAAAGGTCAAGCCGACACAATAGGCATT  
GCAATGCGAAGAGCTTTGCTCGGAGAAATAGAAGGAACATGTATCACACGTGCAAAAT  
CTGAG-----AAAATACCACATGAATATTCTACCATAGTAGGTATTCAAGAATCAGTACATG  
AAATTTAATGAATTTGAAAGAAATTATATTGAAAAGTAATATATATGAACTCGCGACG  
CGTCTATTTGCGTCAGAGGTCCTGGATATGTAAGTCTCAAGACATTATCTCACCGCCTT  
CTGTGGAAATTGTTGATAATACACAGCATATAGCTAGCCTGACGGAACCAATTGATTTG  
TGATTTCAATTACAAATTGAAAAGAATCGCGGATATCGTATAAAAACGCCAAATACCTAT  
CAAGATGGAAGTTAT-----CCTATAGATGCTGTATTCATGCCTGTTTCGAAATGCGAATCAT  
AGTATTCATTCTTATGGGAATGGGAAGGAGAAACAAGAAATACTTTTTCTCGAAATCTG

GACAAATGGAAGTTTAACTCCTAAAGAAGCACTTCATGAAGCCTCCCGGAATTTGATT  
GATTTATTTATTCTTTTCTACATGCGGAAGAAGAA-----AACTTACATTTAGAGGACAAT  
CAA---TACAAGGTTACTTTACCCCTTTTTTACCTTTCATGATAGATTGGCT--AAACTAAGG  
AAAAATAAAAAA---GAAATAGCATTGAAATCAATTTTTATAGACCAATCAGAATTGCCTT  
CCAGGACCTATAATTGCCTCAAAGTTCCAATATACATACATTATTGGACCTTTTGAATA  
ACAGTCAAGAAGATCTTATGAAAATTAAGCATTTTAGCATAGAAGATGTAAAACAGATA  
TTGGACATTCTAGAAAAGCAA-----TTTACAAT---ATGCTCCGGGATGGAAA  
T---GAGGAAATGTCTACAATACCTGGATTTAGTCAGATACAATTTGAAGGATTTGTAGA  
TTCATTGATCAGGGCTTGACGGAAGAACTTTATAAGTTTCCAAAAATTGAAGATACAGA  
TCAAGAAATTGAATTTCAATTATTTGTGGAAACATATCAATTGGTCGAACCGTTGATAA  
AAGAAAGAGATGCTGTGTATGAATCAATCACATATCTTCTGAATTATATGTATCCGCGG  
GATTAATTTGGAAAACCAGTAGGGATATGCAAGAACAAACAATTTTTCTTGGAAACATT  
CCTATAATGAATCCCTGGGAACTTCTATAGTAAATGGAATATACAGAATTGTGATCAAT  
CAAATATTGCAAAGCCCCGGTATTTATTACCGGTCAGAATTGGACCATAACGGAATTC  
GGTATATACCGGCACTATAATATCAGATTGGGGGGGAAGATTAGAATTAGAGATTGATAG  
AAAAGCAAGGATATGGGCTCGTGTGAGTAGGAAACAGAAAATATCTATTCTAGTTCTAT  
CATCAGCTATGGGGTCGAATCTAAGAGAAATTCTAGATAATGCTTGCTATCCTGAAATTT  
TCTTGTCTTTCTGAATGATAAGGAGAAAAAAAAGATTGGGTCAAAGAAAATGCCAT  
TTTGGAGTTTTATCAACAATTTTCTTGTGTAGGCGGGGATCCGGTATTTTCTGAATCCTT  
ATGTAAGGAATTACAAAAGAAATCTTTCAGCAAAGATGTGAATTAGGAAGGATTGGT  
CGACGAAATATGAACCAGAGACTAAATCTTGATATACCTCAGAACAATACATTTTTGT  
ACCGCGAGATATATTGGCAGCTGCGGATCATTGATTGGAATGAGATTTGGAATGGGTA  
CACTTGACGAT-----ATGAATCATTTAAAAATAAACGTATTCTGTAGCGGATCTCT  
TACAAGATCAACTCGGATTAGCTCTGGCTCGTTTAGAAAATGTGGTTCGCGGAACTATA  
TGTGGAGCAATTAGG---CATAAATTGATA---CCGACTCCTCAGAATTTGGTAACTTCAAC  
TCCA-----TTAACAACCCTTATGAATCTTTTTTTCGGCTTACACCCATTATCGCAAGT  
TTTGGATCGAACTAATCCATTGACACAAATAGTTCATGGGAGAAAGTTGAGTTATTTGG  
GCCCTGGAGGATTGACGGGTCGAACTGCTAGTTTTTCGGATACGAGATATCCATCCTAGT  
CACTATGGACGATTTGCCCAATTGACACGTCTGAAGGAATCAATGTTGGACTTATTGG  
ATCCTTAGCAATTCATGCGCGGATTGGTCATTGGGGG---TCTCTAGAAAGTCCATTTTAT-  
-----GAAATTTCTGAGAGATCAAAAAG-----GTACGGATGCTTTATTTATACCAAGTA  
GAGATGAATACTATATGGTAGCGGCGGAAATTCTTTGGCGTTGAATCAAGGTATTGAG  
GAAGAACAGGTTGTTCCCGCTCGATACCGTCAAGAATTCCTGACTATTGCATGGGAAC  
AGGTTTCATCTTCGAAGTATTTTTCCCTTCCAATATTTTTCTATCGGAGCTTCCCTCATTCC  
TTTTATCGAGCATAATGATGCGAATCGGGCTTTAATGAGTTCTAATATGCAGCGTCAAGC  
AGTTCCGCTTTCTCGTTCCGAGAAGTGCATTGTTGGAACGGGTTGGAACGCCAAGCG  
GCTCTAGATTCAGGGGTTCCGCTATAGCGGAACACGAGGGAAAGATCATTTATACCGA  
TACTGACAAGATCATTTTATCAGGTAATGGGGATACTCTAAGCATTCCATTAGTTATGTA  
CGAACGTTCCAACAAAAATACTTGTATGCATCAAAAACCCAGGTTGAGCGGGGTAAC  
TGCATTA AAAAGGGACAAATTTTAGCGGATGGTGCCGCTACAGTTGGCGGGCAACTTA  
CTTTGGGAAAAAACTTATTAGTAGCTTATATGCCATGGGAAGGTTACAATTCTGAAGAT  
GCGGTACTCATTAGCGAGCGTCTGGTCTATGGCGATATCTATACTTCTTTTCACATACGG  
AAATATGAAATTCAGACTCATGTTACAAGTCAAGGA---CCCGAAAGGATTAATAATGAA  
ATACCGCATTTAGAAGCCTATTTACTCCGCAATTTAGACAAAAATGGAATTGTGATGCTG

GGATCTTGGGTAGAGACGGGTGATATTTTAGTAGGTAAATTAACACCTCAGATGGCGAA  
AGAA--TCATCATATGCCCCGGAAGATAGATTATTACGAGCCATACTTGGCATTCAAGTA  
TCCACTTCAAAGGAAACTTGTCTAAACTACCTATAGGCGGTAGGGGCGGAGTTATTGA  
TGTGAGATGGATACAGAAAAAAGG---GGTTCTAGTTATAATCCAGAAATGATTTCGTGT  
ATATATTTACAGAAACGTGAAATCAAAGTAGGTGATAAAGTAGCTGGAAGACATGGA  
AATAAAGGTATCATTTCAAAAATTTGCCTAGGCAAGATATGCCTTATTTGCAAGATGGA  
AGACCTGTTGATATGGTCTTCAATCCATTAGGAGTACCTTCACGAATGAATGTCGGACA  
GATATTTGAATGCTCACTCGGGTTAGCGGGGGTCTGTTAGACAGACATTATAGAATAG  
CACCTTTTGACGAGAGATATGAACAAGAGGCTTCTAGAAAAGTAGTGTTCCTGAATTA  
TATGAAGCCAGTAAGCAAACAGCGAATCCATGGGTATTTGAACCCGAGTATCCGGGAA  
AAAGCAGAATATTTGATGGAAGAACGGGAGATCCTTTTGAACAACCTGTTATAATAGG  
AAAGTCTTATATCTTGAAATTAATTCATCAAGTTGATGATAAAATTCATGGACGTTCCAG  
TGGACATTATGCACTTGTTACACAACAACCTCTTAGAGGAAGGGCCAAGCAAGGGGGA  
CAACGGGTAGGAGAAATGGAGGTTTGGGCTTTAGAGGGATTTGGTGTGCTCATATTTT  
ACAAGAGATGCTTACTTATAAATCTGATCATATTAGAGCTCGCCAGGAAGTACTTGGTA  
CTACGATCATCGGAGGAACAATACCTAACCTGAGGATGCTCCAGAATCTTTTCGGTTG  
CTTGTTGAGAACTACGATCTTTGGCTTTGGAAGTGAATCATTTCTTGTATCTGAGAA  
GAACTTCCAGATTAATAGGAAGGAAGCT-----ATGATCGATCAATATAAACAT  
CAACAACCTCCGAATTGGATCAGTTTCTCCTCAACAATAAGTGCTTGGGCTAATAAAAT  
CCTACCTAATGGAGAGATAGTTGGAGAGGTGACAAAACCTATACTTTTCATTACAAAA  
CTAATAAGCCGGAAAAAGATGGATTATTTTGTGAAAGAATTTTCGGTCTATAAAAAGT  
GGAATTTGTGCTTGTGGAAATTATCGAGTAATCGGAGATAAAAAAGAAAACCCGAAAT  
TTTGTGAACAATGTGGAGTCGAATTTGTTGATTCTCGGATACGAAGATATCAAATGGGC  
TACATCAAATTGGCATGCCAGTAACCTCATGTGTGGTATTTGAAACGGCTTCTAGTTAT  
ATCGCGAATCTTTTAGATAAACCTCTTAAAGAATTAGAAGGCCTAGTATACTGCGAT-----  
TTTTCTTTTGTAGGCC---ATAGCTAAAAACCTACTTTCTTACGATTACGGGGTTCATT  
CGAATATGAAATCCAATCCTGGAATACAGCATCCCACTTTTTTTTACTACTCAAGGCTT  
CGATACATTTGAAATCGAGAAATCTCTACTGGAGCAGGTGCTATCCGAGAACAATTAT  
CCGATCTGGATTTGCGAATTATTATAGATTATTCATTGGTAGAATGGAAAGAATTAGGGG  
AAGAA---GGGACCACAGGTAATGAATGGGAAGATCGCAAATTTGGAAGAAGAAAGGA  
TTTTTTGGTTAGACGCATGGAATTAGCTAAGCATTTTATTCGAACAATGTAGAACCAG  
AACGGATGGTTTTGTGTCTATTACCAGTTCTTCTCCCGAGTTGAGACCGATCATTAG  
ATAGATGGAGGTAACCTAATGAGCTCGGATATTAATGAACTCTATAGACGAGTTATCTAT  
CGAATAATACTCTTACCGATCTATTAACAACAAGTAGATCTACGCCAGGGGAATTAGT  
AATGTGTCAGGAGAAATTGGTACAAGAAGCCGTGGATACACTTCTCGATAATGGAATC  
CGCGGACAACCAATGAGGGATGGTCATAATAAAGTTTACAAGTCGTTTTTCAGATGTAAT  
TGAAGGCAAAGAGGGAAGATTTCTGTGAGACTCTGCTTGGCAAACGGGTAGATTATTCG  
GGGCGTCCGTCATTGTTGTAGGCCCTTCACTTTTATTACATCGATGTGGATTGCCTCGC  
GAAATAGCAATAGAGCTTTTCCAGACATTTGTAATTCGTGGTCTAATTAGACAACACGT  
TGCTTCGAACATAGGGGTTGCTAAGAGTAAAATTCGTGAAAAAGAACCAATTGTCTGG  
GAAATACTTCAGGAAGTTATGCAGGGGCATCCTGTATTGCTGAATAGAGCACCTACTCT  
GCATAGATTAGGCATACAGGCATTCCAACCAATTTTAGTGGAAGGACGCGCTATTTGTT  
TACATCCATTAGTTTCGTAAGGGATTCAATGCAGACTTTGATGGGGATCAAATGGCTGTT  
CATGTACCTTTATCTTTGGAAGCTCAAGCGGAGGCTCGTTTACTTATGTTTTCTCATATG

AATCTCCTGTCTCCAGCTATTGGGGATCCCATTTCTGTACCAACTCAAGATATGCTTATT  
GGACTCTATGTATTAACGAGCGGGAATCGTCGAGGTATTTGTGCAAATAGGTATAATCCA  
TGTAATCGCAGAAAC-----TATAAAAATAAAAAGAATTGCCGATAATAAG-----TATACGA  
AAGAAAAGGAACCCCTTTTTTTGTAATTCCTATGATGCAATTGGAGCTTATCGGCAGAAA  
ATAATAAATTTAGATAGTCCTTTGTGGCTCCGGTGGCGACTAGATCAACGC---GTTATTG  
CTTCA-----AGAGAAGTTCCTATCGAAGTTCACTATGAATCCTTGGGTACCTACCATGAG  
ATTTATGGGCACTATCTAATAGTAAGAAGCGTAAAAAAGAAATTCCTTTGTATATACATT  
AGAACCCTGTTGGTCATATTTCTTTTATCGAGAAATCGAAGAAGCCATACAAGGGTT  
TTGTCGGGCCTGCTCATATGGTATC-----ATGGAGGTACTTATGGCAGAAC  
GGGCCAATCTGGTCTTTCACAATAAAGTGATAGATGGAAGTCCATGAAACGACTTATT  
AGCAGATTAATAGATCACTTTGGAATGGCATATACATCACACATCCTGGATCAAGTAAA  
GACTCTGGGTTTCCAGCAAGCCACTGCTACATCCATTTCATTAGGAATTGATGATCTTTT  
ACAATACCTTCTAAGGGATGGCTAGTCCAAGATGCTGAACAACAAAGTTTTATTTTGG  
AAAAAAACCATCAGTATGGAAATGTACACGCGGTAGAAAAATTACGTCAATCCATTGA  
GATATGGTATGCTACAAGTGAATATTTGCGACAAGAAATGAATCCTAATTTTAGGATGAC  
TGACCCTTTTAATCCAGTCCATATAATGTCTTTTTTCGGGAGCTAGAGGAAATGCATCTCA  
AGTACACCAATTAGTAGGTATGAGGGGATTAATGTCGGATCCCCAAGGACAAATGATTG  
ATTTACCTATTCAAAGCAATTTACGCGAAGGGCTCTCTTTAACGGAATATATCATTCTT  
GTTACGGAGCCCGCAAAGGAGTTGTGGATACTGCTGTACGAACATCAGATGCTGGTTA  
TCTCACGCGCCGACTTGTGAAGTAGTTCAACACATTGTTGTACGTAGAACAGATTGTG  
GCACCGTCCGCGGTATTTCTGTGAGTCTCGAAATGGTATGATGCCG---GAAAGAATTT  
TTATACAAACATTAATTGGTCGTGTATTAGCAGACGATATATATATAGGTCCACGATGCAT  
TGCCACTCGAAATCAAGATATTGGGATTGGACTTGTCATCGATTCAATAAC-----  
--TTTCGAACACAACCAATATCTATTTCGAACCCCTTTTACTTGTAGGAGTACATCTTGG  
TCTGTGATTATGTTATGGTTCGGAGTCTACTCATGGCGACCTCGTTCGAATTGGGAGAA  
GCTGTAGGTATTATTGCGGGTCAATCTATTGGCGAACCAGGTACTCAACTAACATTAAG  
AACTTTTCATACCGGCGGGCTATTACAGGGGGTACTGCAGAACATGTACGAGCACCTT  
ATAATGGAAAAATAAAATTCATGAGGATTTGGTTCATCCACACGTACACGTCATGGG  
CATCCTGCTTTTCTATGTTATATAGACTTGTATGTAATCTATTGAGAGTGAAGATATTATAC  
ATAACGTGAATATTCCACCAAAAAGTTTTCTTTTAGTTCAAAATGATCAATATGTAGAAT  
CAGAACAAGTGATTGCTGAGATTCGTGCGGGAACATCCACT--TTGAATTTTAAAGAGA  
GGGTTTCGAAAACATATTTATTCTGACTCAGAGGGAGAA---ATGCACTGGAGTACCGATG  
TGACCATGTACCTGAATATACATATGGTAATGTTACCTCTTACCAAAAACAAGTCATT  
TATGGATATTATCAGGGGACCGTGCAGA-----TCTAGTGTAGTCTCTTTTTTCACTCCACA  
AGGATCAAGATCAAATGAACGTTTCAT-----TCTCTTTCTGTTCGAACAAAGATATATTCTA  
ACTTCTCG-----GCGATTAATAATCAA---GTGAGACACAAATGTTTAGTTCCGATCTTTA  
TGGTAAAAAAGAAGGTAGTATTCCTGATTAT--TCAGAACTTAATCGAATCATATGCACT  
GGTCATTGTAATTTTCATATATCCT--GCCATTCCTCCACGAGAATTTT-----TATTTATTGGCA  
AAGAGACGAAGAAATAGATTCATCATTCCATTCCAATCGATTCAAGAACGAGAGAAAG  
AACTAATGCCCGTTCAGGTATCTCAATTGAAATACCC-----ATAAATGGTATTTTCCGTA  
GAAATAGTATTCTTGCTTATTTTCGATGATTTTAGATACAGAAGAACTGGTTCGGGAATTA  
CTAAATATGGGACTATAGAGATGCATTCAATCATCAAAAAGAGGAT-----TTGATTGAG  
TATCGAGGG---GTCAAAGAATTTAGGCCAAAATACATCAAAGTAGATCGGTTTTTTTTCA  
TTCCCGAGGAAGTACATATCTTACCCGGATCTTCTTACGTAATGGTACGGAACAATAGTA



TCATTGGAGTAGATACACAAATCACTTTTAATACAAGAAGCCGAGTAGGCGGATTGGTC  
CGAGTGGAGAAAAAAAAAAAAAGTATTGAACTTAAAATATTTCTGGAAATATCCATTT  
TCCTGGCGAGACAGATAAGATATCCCACACAGTGGGATCTTGATCCCACCAGGAACG-  
----GGAAAAACAAATTCCAAGGAATCCAAAGAA-----TTGAAAAATTGGATCTATGTCC  
AACGG-----ATTACACCTACCAAG-----AAAAAATATTTTGTTTTGGTTCGACCTGTAATC  
ACATATGAAATAACAGACGGTATAAATTTAGCAACACTTTTCCCCCAGGATCTGTTGCA  
GGAAAGGGATAATGTGCAATTTTCGAGTTGTCAATTATATCCTTTATGGAAATGGCAACC  
AAATTCGGGGAATTTCTGACACAAGTATTCAATTAGTTCGGACTTGTTTAGTATTGAATT  
GGGACCAAGACAAAAAG-----AACTCTTCTATCGAAGAGGCTCCTGCTTCTTTTGTG  
AAGTAAGGACAAATGGTCTGATTTCGAGATTTCTAAGAATAGACTTAGTGAAATCCCCT  
ATTTTCGTATACCGGAAAAAGGAATGATCCGGCAGGTTTCAGGGTTGATCTCTGAT---AAT  
GGATCAGATCGCACCAATATCAATCCCTTTTATTCCATTTATTCCAAGGGAAGG---ATTC  
ACAATCACTTAGCCAA-----AATAAAAATCAAGGAATTCGTACGTTGTTGAATAGA  
-----AATAAGGAATGCCAATTTTTTCTAATTTTGTGCATCATCCAATTGCTCCCGAATGG  
GTCCA-----TTAACGGTGTAATAATAAGAATGTG-----ATAAAGAATCAGATCCCCT  
AATCCAATTAGGGATTTCGTTGGGTCCTTTAGGAACA-----GCCCTTAAAATTGCGAATT  
TTTATTCA-----TTTTACCATTTA-----ATAACCATAATCACATCTTG---GTAACGAAATATT  
TACAACCTTGACAAT-----TAAAACAAACTTTTCAAGTACTTACA-----TATTATTAA  
TGGATGAAAAT-----GGGAGGATTTATAATCCTGATCTATGCAGTAACATTATTTTGAATA  
CATTCAATTTGAATTGGTATTTTCTTCATCACAATTTTCGTGAAGAGACATCC---ACAATA  
ATTAGTCTTGGACAGTTTATTTGTGAAAATGTATGTATAGCCAAAAATGGACCACAC---C  
TAAAA-----TCGGGTCAAGTTATAATTGTTCAA---GTTGGCTCTGTAGTAATAAGATCAGC  
TAAGCCTTATTTGGCCACGCCAGGAACAACCTGTTTCATGGCCATTATGGAGAAATACTTT  
ATGAAGGAGATACATTAGTTACATTTATATATGAAAAATCGAGATCTGGTGACATAACGC  
AGGGTCTTCCAAAAGTAGAACAAGTGTTAGAAGTACGTTTCGATTGATTCAATATCGCTA  
AACCTAGAAAAAAGGATTGAGGGTTGGAACAACCGTATAACAAGAATTCCTTGGAAATC  
CGTGGGGATTCTTAATTGGTGCTGAGCTAACTATAGTGCAAAGTCGTATCTCTTTGGTTA  
ATAAGATACAAAAGGTTTATCGATCCCAAGGGGTGCAGATCCACAATAGGCATATAGAA  
ATTATTGTACGTCAAATAACATCAAAGTATTGGTTTCAGAA-----GATGGAATGTCTA  
ATGTTTTTTCACCCGGAGAATAATTGGATTGTTGCGAGCGGAACGAACGGGGCGTGC  
TTTGGAAAGAAGCGATCTGTTACCGAGCCATATTATTGGGAATAACGAGGGGCATCTCTGA  
ATACTCAAAGTTTCATATCCGAAGCTAGTTTTCAAGAACTGCTCGAGTTTTAGCAAAA  
GCTGCTCTCCGGGGTTCGTGTTCGATTGGTTGAAAGGCCTGAAAGAGAACGTTGTCTGG  
GGGGTATGATACCGGTTGGTACTGGGTTCAAAGGATTA-----GTGTAC-----TATAAC  
AACATTCCT-----TTGGAACCCAAAAAGAAGAATCTATTTGAGGGGGAAATGAGA-----G  
ATATTTTGTTCACCACAGAGAATTATTTGATTCTTTCATTTTAAAGAATTTACATGATAC  
ATCAGAACAATCATTATGGGA-----TTAATGATTGCATGACAAAAAGATATTG  
GAACATAAATTTGGAAGAGATGATGGAAGCAGGAGTTCATTTTGGTCATGGTACTAGA  
AAATGGAATCCTAGAATGGCACCTTATATCTCTGCAAAGCGTAAAGGTATTCATATTACA  
AATCTTACTAGAACTGCTCGTTTTTTATCAGAAGCTTGTGATTTAGTTTTTGTATGCAGCA  
AGTAGGGGAAAACAATTCTTAATTGTTGGTACCAAAAATAAAGCAGCTGATTCAGTAG  
CGTGGGCTGCAATAAGGGCTCGGTGTCATTATGTTAATAAAAAATGGCTCGGTGGTATG  
TCAACGAATTGGTCCACTACAGAAACGAGACTTCATAAGTTCAGGGACTTAAGAGCGG  
AACAAAAGACGGGTAGACTCAACCGTCTTCAGAAAAGAGATGCAGCTGTGTTGAAGA

GACAATTATCTCACTTAGAAACATATCTGGGTGGGATTAATATATGACGTGGTTACCTG  
ATATTGTAATCATCGTTGATCAGCAAGAAGAATATACGGCTCTTCGAGAATGTGTCACTT  
TGGGAATTCCCACGATTTGTTTAATTGATACAAATTGTGACCCGGATATCGCAGATATTT  
CGATTCCAGCGAATGATGACGCTATAGCTTCAATCCGATTAATTCTTAACAAATTAGTAT  
TCGCAATTTGTGAGGGTCGTTCTAGC---TATATAAGAAATCCTATGGGACAAAAAATAAA  
TCCACTTGGTTTTAGACTTGGTACAACCTCAAGGTCATCATTCCTTTGGTTTTGCACAAC  
CCAAAAATTATTCAGAGGGTCTACAAGAAGATCAAAAAATACGTAATTGTATCAAGAAT  
TATATTCAAAAAATATTAATAATATCCTCTGGT--GTCGAGGGAATTGCCCGTATAGAGAT  
TAAAAAAGAATCGATCTAATCCAGGTCATAATCTATATGGGATTCCCAAAATTATTAAT  
AGAAGGTAGACCACAA-----GGAGTCAAGAATTACAGATCAATGTACAAAAAGA  
ATTTAATTCTGTAAACAAAAAACTCAACATTGCTATTACAAGAATTGAAAAACCTTACG  
GAAACCCCAATATCTTGCAGAATTTATAGCCGGACAATTAATAATAGGGTTTTATTTC  
GCAAGGCAATAAAAAAAGCTATTGAATTAAGTGAACAAGCAGATACAAAAGGAATTCA  
AGTACAAATTGCAGGACGTATCGACGGAAAAGAGATTGCACGTGTGCAATGGATCAGA  
GAAGGTAGGGTTCCCTACAAACCTTCGAGCAAAAATTGATTATTGTTTCTATACAGT  
TCGAACTATCTATGGGGTATTAGGCATCAAAATTTGGATATTTGTAGACGAAGAAATGTC  
GCGTTACCGAGGGCCTCGTTTTCAAAAAAATACGCCGTCTGGGAGCTTTACCGGGACTA  
ACTAGTAAAAGGCCTAGAGCCGGAAGTGATCTTAGAAACCAATCACGTTCCGTGAAA--  
-AGATCTCAATATCGGATTCGTCTAGAAGAAAAACAAAAATTGCGTTTTTATTATGGTCT  
TACAGAACGACAATTACTTAAATATGTTTCGTATCGCCGAAAAGCCAAAGGGTCAACA  
GGTCAGGTTTTATTACAATTACTTGAAATGCGTTTTGGATAACATCCTTTTTTCGATTGGGT  
ATGGCTTCGACTATTCCTGGAGCCCGCAATTAGTTAACCATAGACATATTTTAGTGAAT  
GGTCGTATAGTGGATATACCAAGTTATCGCTGCAAACCCCGAGATATTATTACGGCGAG  
GGATGAAGAAAAATCCAGAGCTCTGATTCAAATTTTCTTGATTCATCCACACAT--GC  
GGAATTACCAAAACATTTGACTCGTCACCCATTTCAA-----TATAAAGGGTTAGTCAATC  
AAATAATAGATAGTAAATGGGTCAAGTTTGAAAATAAATGAGTTGTTAGTCGTAGAATATT  
ATTCCCCTCAGATTATGTCACGTCGAGGTAAGTGCAGAAGAAAAAACTGCAAAATCCGA  
TCCAATTTATCGTAATCGATTAGTTAACATGTTGGTTAACCGTATTCTGAAACACGGAAA  
AAAATCATTGGCTTATCAAATTATCTATCGAGCCATGAAAAAGATTCAACAAAAGACAG  
AAACAAATCCACTATCTGTTTTACGTCAAGCAATACGTGGAGTAAGTCCCGATATAGCA  
GTAAAAGCAAGACGTGTGGGCGGATCGACTCATCAAGTTCCCATTTGAAATAGGATCCA  
CACAAGGAAAAGCACTTGCCATTCGTTGGTTATTAGGGGCATCCCGAAAACGTCCGGG  
TCGAAATATGGCTTTCAAATTAAGTTCCGAATTAGTGGATGCTGCCAAAGGGAGTGGCG  
ATGCCATACGCAAAAAGGAAGAGACTCATAGAATGGCAGAGGCAAATAGAGCTTTTGC  
ACATTTTTCGTATGGGTAAGGACACTATTGCTAACATAATAACCTCTATACGAAATGCTGA  
CATGGATAGAAAAGGAACGGTTCGAATAGCATTTACTAACATCACCGAAAACCTTTGTTA  
AAATACTTTTACAAGAAGGTTTTATCGAAAACGTGAGGAAACATCAGGAAAGAAACA  
AATATTTCTTAGTTTTAACCCTGCGACATAGAAGG-----AATAGGAAAGGGCCATATAGA  
ACT--ATTTTAAAT-----TTAAAACGGATCAGCCGACCCGGTCTACGAATCTATTCTAACTA  
TCAACGAATTCCTAGAATTTTAGGTGGAATGGGAATTGTAATTCTTTCTACTTCTCGAGG  
TATAATGACAGACCGAGAGGCTCGACTAGAAAGAATCGGCGGAGAAATTTTGTGTTATA  
TATGGATGGCAAACCTATACCAAGAATTGGTTCACGTAGGAATGGACGTATTGGTTCA  
CGTAAGAATGCACGTAGAATACCAAAGGGAGTTATTCATGTTCAAGCAAGTTTTAACAA  
TACCATTGTTACTGTTACAGATATACGGGGTTCGGGTGGTTTTCTTGGTCCCTCCGCTGGTAC

TTGTGGATT CAGCGGTACAAGAAGAGGGACGCCATTTGCTGCTCAAACCGCAGCAGG  
AAATGCTATTCGTACAGTAGTGGATCAGGGTATGCAACGAGCAGAAGTCATGATAAAG  
GGTCTTGGTCTCGGAAGAGATGCAGCATTACGAGCTATTCGTAGAAGTGGTATACTATT  
AAGTTTCGTACGAGATGTAACCCCTATGCCACATAATGGCTGTAGACCTCCTAAAAAAA  
GACGTGTTATGCCAACTATTAACAACCTATTAGAAACACAAGACAGCCAATCAGAAAT  
GTTACGAAATCCCCCGCGCTTCGGGGATGTCCTCAGCGCCGAGGAACATGCACTAGGG  
TGTATACTATCACCCCCAAAAAACCAACTCTGCCTTACGTAAAGTTGCCAGAGTACGA  
TTAACCTCTGGATTTGAAATCACTGCTTATATACCTGGTATTGGCCATAATTCACAAGAA  
CATTCTGTAGTCTTAGTAAGAGGGGGAAGGGTTAAGGATTTACCCGGTGTGAGATATCA  
CATTGTTTCGAGGAACCCCTAGATGCTGTTCGGAGTAAAGGATCGTCAACAAGGGCGTTCT  
AAATATGGGGTCAAAAAGCCAAAAATGGCAAGGAAAAGTTTGATT CAGAGGGAGAAG  
AAGAGACAAAAATTGGAACAGAAATATCATTGATTTCGTCGATCCTCAAAAAAAGAAA  
TAAGC-----AAAGTTCAGTCGTTGAATGACAAATGGGAAATTCATGGAAAGTTACAAT  
CCCACCACGTAATAGTGCACCTACACGTCTTCATCGACGTTGTTTTTCAACCGGAAGA  
CCGAGAGCTAACTATCGAGATTTT GAGCTATCCGGACATATACTCCGTGAAATGGTTGA  
TGCATGTTTGTGCCAGGGGCAACAAGATCAAGTTGGATGGCAAAAAATTCATTCATCT  
CAGTTATTTTCGCAAAAAGAAAAAGAAAA-----AACACGGGGTCTATTGAATTTCAAGT  
ATTAAGTTTCACCAATAAAAATACGGAGACTTACTTCACATTTGAAATTACACAGAAAAG  
ATTATTTATCTCAGAGAGGTCTACGAAAAATTTTGGGAAAACGTCAACGGATGCTGACT  
TATTTGTCAAAGAAAAATAGAGTACGTTATAAAGAATTAATTGATCAGTTGGATATT CGA  
GATACAAAAACTCGT-----ATGGTAAAACCTCGTTT GAAACGATGTGGTAGAAAGCAAC  
GAGCCGTCTATCGAATTGTTGCAATTGATGTTTCGATCCCGAAGAGAAGGAAGAGATCTT  
CAGAAAGTGGGTTTTTATGATCCGATAAAGAATCAAACCTATTTAAATGTTCTCTGCTATT  
CTATATTTCTTGAAAAAGGTGCTCAACCTACAGGAACTGTTTATGATATTTCAAAGAA  
GGCAGAGGTTTTTAAGGAACTTCGCGTTAATCAAACGAAATGTAAT---ATGGATAAATC  
CAAGCGACCCTTTCTTAAATCCAAGCGATCTTTTCGTAGGCGTTTGCCCCGATCCAAT  
CGGGGGATCGAATTGATTATAGAAACATGAGTTTAATTAGTCGATTTATTAGTGAACAA  
GGAAAAATATTATCTAGACGGGTGAATAGGTTGACCTTGAAACAACAACGATTAATTAC  
TATTGCTATAAAACAAGCTCGTATTTTATCTTCATTACCTTTTCTTAAACAATGAAAAA-----  
CAATTTGAAAGAATCGAGTCGACTGCTAGAACTACTGGTCTTAGAACCAGAAATAAAG  
TGACACGTTCACTAAAAAAAACCCTTTTCGTAGCAAATCAGTTATTAAGAAAAATTGAT  
AAGCTTAACACAAAGGCAGAAAAAGAAATAATAGTAACTTGGTCCCGGACATCTACCA  
TTATACCCACAATGATCGGCCATACTATTGCTATCCATAATGGAAAAGAACATTTACCTAT  
TTATATAACAGATCGTATGGTAGGCCACAAATTGGGAGAATTTGCCCTACTCTAAATTT  
CCGGGGACATGCCAAAAACGATAATAAATCTCGTCGATGATTTT GAAATCTTTTCTACT  
AAGTAATCTAGTATCCTTATGCATGAAGATAATCAATTCGGTCGTTGTGGTCGGACTCTA  
TTATGGATTTCTGACCACATTCTCCATAGGGCCCTCTTATCTCTTACTTCTCCGAGCTCA  
GGTTATGGAAGAAGGA-----ACCGAGAATAAGGTATCAGCCACA ACTGGTTTTATTAC  
GGGACAGCTCATGATGTT CATATCGATCTATTATGCGCCTCTGCATCTAGCCTTGGGTAG  
ACCTCATACAATAACTGTATTAGCTCTACCGTATCTTTTGTTCATTTCTTCTCGAACAAAT  
CACAAAAACTTTTTTTTATTATGGATCTACTAGCAGAAATTC AATGCGTAATTT CAGCATT  
CAATGTGTATTCCTGAATAATCTAATTATTCAATTATTCAACCTTTTCTTTTACCAAGTT  
CAATGTTAGCCAGATTAGTCAACATTTATATGTTTCGATGCAACAACAAGATGTTATTTG  
TAATAAGTAGTTTTTGTGGTTGGTTAATTGGTCACATTTTATT CATGAAATGGGTTGGAT

TGGTATTAGTCTGGATACGGCAAATAGATCT-----ATTAGATCTAATAAGTACCTTG  
TGTCAGAATTGAGAAAT-----TCTCGAATCGTTAGTATTCTCTTATTTATTACCTGTGTCTA  
CTATTTAGGCAGAATACCGTCACCCATTTTTACTAAAAAACTGAAAGAAACCGAAGAA  
GATAAACCTCTTGTAACCTCTCTTTTTCGACTATAAAAAGGTGGAATCGTCCATTAAGATAT  
ATAAGA---TATGAGTTTGAAAATACTTTAAAAAATGAAATGTCACAATATTTTTTTTATAC  
ATGTAGAAGTAATGGAAAAGAAAGAAATATCTTTTATGTATCCACCCAGTTTGTCAAATTT  
TTTTGAAATGATACAAAAAAGATGTTTTTTGTACACAAAAGAAACATTTTTTATCTGATG  
AACGATATAATCATTGGGTTTATACCAATGAAAAAAAAGGAACAACCTTAAGCAACGA  
ATTTATAAATAGAATAAAAAGCTTTAGACAAAAGACCCATTTTTCTGGATATATTCGAAAA  
AATAACTAGA-----TTGAATAATAATAAAAAAATACTTACCTAAAACATATGACCCCTT  
CTTAGCT--CCTTATCGTGGAACAATAAACAAATTGTCTTCACCTATAGAGATAGCTTCG  
ATTAATAAGATTTATAGTATACTTTACCAAGAATTTGAACAGAAAGATATATCAAATATA--  
-----GAAATCAGTAAAAAAGTTCCTTTATGGACACACAAATTCATCGAGTTTGAAC  
AAATCGAGAGAGAAGAAATTCGTTCAAGAAAAGTCAAACATGCAGCTTATGTTAGTGA  
TAATGTGATAGATTTTGAGACAGAATCGGATTTTCGCCGGGACATAATTAAGGATCCA  
TGCGCGCTCAAAGACGTAAAACGGTTATTTTTAAACTGTTTCAATCAAATGCACATTC  
CCTCTTTTTTTGGACAGA---ACAGACCCCTTTTTTTATTTTGTAGCTTTGGACTGACGA  
AACTAATTTCT-----AGAAATAAAGAAAGCAACGAACAGAAGATAAAAATTGAAGAG  
TGGGATAACATTATCTTTGGTCACGTAATAAGGAGTTGCATATTATTAATCCAATCGATTC  
TTAGAAAATATATGATATTTCCCTTATTGATAATAATTAAAAATATCGGCCGTATATTATTA  
TTTCAAGTTGCCGAATGGGGTGAGGATTTTGCAGATTTGAAAAAAGAAATACATGTTAT  
TTCCAATAAGAGTGGCGTTGAATTATCAGAAAAAGAAGTTAGGATAACTTCTTTTTTAA  
ACGGTATTCAAATAAAAATCCTATTTCCCTTTCTGTTTGAACCTTGGCATAAATATAAGG  
ATGAAAATACAACAAAAAAGAAAAAATAAAGTCAAAAAAATGACAGCTGAACGGC  
CTTTTGGTTTTCCCAACTCGAGCCTTCATTTTTTTGGACCCATTTTTAACGAACTAAAA--  
-----AAAAAATTTTTCAATATATTTAATGGTCTCAA  
CAAATCAAAAATGGGTTATCAACGGCATTCTATTTATAAAAATAATAATAATGAAAGG  
ACTTTCACAAGTAAACCCAATTGATTCTATAATCAGTAATCAAATGATTAATTACCCG----  
-----TACATTCAAATTCTATCTACAGATCAGAAAAATTATTTACTGACAGAAAAACAAAT  
AAAGGATTCGGCTGAGATAATAAGAACAATAAAAAAT-----AAAATA  
GAAAGAAAAGACAAGAAAATAGAATCACCAAAAAATATTTGGCAGATATTA AAA-----A  
ATGTTTCGAGTAATACATAAATCACATTATTTTTTAAATTATTTCATTGAAAAGATATACAT  
AGATATCCTTATATCTATTATTAATTCTATAATAGATATTTCCAGAATTAAT-----CAT  
GACTTATCCTACTTATCGCAAGCATATGTATTTTACAAATTATCACAGAACCAAGTTTCT  
AACTTAAGC-----TTTGTCTTCAATATACATCTTTTTTTCTTAAAAATGAAATAAAGA  
TTATTTAACACACGGAATATTTCAATCCGAGTTACAGCATAATAAATTCATAATTATGAA  
ATGAATCAATGGAAAACCTGGTTAAGGTTTCAATATCAATATGATTTCTCTCTGATTAGG  
TGGTCTAGATTAGTAATACAAAAAAGGCAAATAAAGTAAACCAATGTCGTACAGTTC  
AAAATAAAAACAAATGGGATTCATATGAAAAAGATCGA-----TTAATTCATTATGAAAA  
CAA---AATTTGAAAAAACACTATATATATAATCTTTTATCATATAAATATCTTAATATAAAT  
CTGGATAGACCGGATAGAAAATATTTTGGTTTTTGGAAATCTAAATTTTTGTCTTAGA-----  
-----TTCTTACCA---GAATTTAGGCAACTTTATAATGCATATAAGAT  
TAAACCATGGGTCTACCAATCAAAGTACTTTTTTTTTGATAAGCATATAAACATAGAAAC  
AGAACCCGATTTTTTACTGAAAAAGTATTTGCTTTTTTCAATTGGCATGGTAT-----

--ATATTCAATAATGTCAAGGCATATTATATCCTGTTTAGGGCGATAGAGGCAAGAGAAAT  
TTCTATAGCCTATATTAACGACAAGTGAGTCTGGATCTAATGCGG---ATTCATGAT  
CATTAACTCTTAATGAATTGGTGAAAAGGCTATTGTTGATTGACCCGATTTCGTCTGTCT  
ATAACAATGATAGACAAATTATTATGTATCAAACCATAGGTATTGCATTGGTTCATAAA  
AATAAGCACAATAATTATGATTTTCTTGTTCCTGAAAATATTTTATCATCTAGACGTCGTA  
GAGAATTGAGA-----ATTCTAAGTGTATTTCTTTGGCCCAATTATCGATTAGAAGATTTAG  
CTTGATGAATCGTTATTGGTTTAATACCAATAATGGCAGTCGTTTCAGTATGTTAAGGAT  
ACATATGTATCCAATGAAAGGACATCAATTCAAATTCTGGATTTTCGAATTGAGAGAGAT  
ATTGAGAGAGATCAAGAATTCTCACTCTTTCTTAAATTCATGGACCCAATTCAATTCAG  
TGGGATCTTTCATTACATTTTTTCCACCAAGAACGTTTTATAAACTCTTTGACCCCC  
GAATTTGAGTATCTACTTTCA--CGCAATTC-----CAGGGTTCAACAAGCAATCGATA  
TTTCACG-----ATCAAGGGTGTACTACTATTTGTAGTAGCG--GTCCTTATATATCGT-----  
-----ATTAACAATCGAAATATGGTCGAAAGAAAAATCTCTATTTGATAGGGCTTCTTCCT  
-----ATATCTATGAATTCCATTGGACCCAGAAATGATACATTGGAAGAATCTTTT--  
GGGTCTTCCAATATCAATAGGTTGATTGTTTCG---CTCCTGTATCTTCCAAAAGTAAAAA  
ATATTTCTGAGAGTTGTTTCTGGATCCGAAAGAGAGTACTTTGGTTCTCCCAATAACT-  
-----AAAAGTGTATCATGCCTGAATCTAACTGGGGTTCGCGGTGGTGGAGGAACT  
GGATCGGAAAAAGAGG-----GATTCTAGTTGTAAGATATCTAAT-----GAAACCGTCG  
CTGGAATTGAGATCTCATTCAAAGAGAAAGATATCAA---TATCTGGAGTTTATTTTTGT  
ATATTATATGGAT-----GATCCGATCCGCAAGGACCATGATTGGGAATTGTTTATCGTCT  
TTCTCCGAGGAAGAGGGCGAAACATAATCAACTTG-----AATTCGGGAGAGTTATTCGAA  
ATCTTAGTGAAACACTGGATTTGTTATCTCATGTCTGCTTTTCGTGAAAAAATACCAATT  
GAAGTGGAGGGT--TTCTTCAAACAACAAGGA---GCTGGGTCAACTATTCAATCAAATG  
ATATTGAGCATGTTTCCCAT-----CTCTTCTCGAGAAACAAGTGGGCTATTTCTTTGCAA  
ATTGTGCTCAATTTTCATATGTGGCAATTCGCAAGATCTCTTCGTT-----AGTTGGGG  
GAAG---AATCCGCACGAATCGGATTTTTTGAGGAAC---GTATCGAGAGAGAATTGGATT  
TGTTAGACAATGCGTGGTTGGTAAACAAGGATCGG-----TTTTTTAGC-----AAGGTA  
CGGAATGTATCGTCAAATATTCAATATGATTCC-----ACAAGA-----TCTAGTTTCGTT  
AAGTAACGGATTCTAGCCAATTGAAAGGATCTTCT--GATCAATCCAGAGATCATTTCGA  
TTCCATTAGT-----AATGAGGATTTCGAA-----TATCACACA  
TTGATCAATCAAAGAGAA-----CTAAAAGAAAGATCGATTCTT--TGGGAT-----CTTTC  
CTTCTTCAAACGGAACGAACAGAGATAGAATCAGAC-----CGATTCCCGAAA-----TGC  
CTTCTGGATATTCC-----TCAAGGTCCCGGCTATTCGCG---GAACGTGAGAAGCAGATG  
AATAATCATCTGCTTCCGGAAGAAATCGAAGAATTTCTT-----GGGAATCCTACAAGATC  
CATTCGTTCTTTTTCTCTGACAGATGG-----TCAGAACTTCAT--CTGGGTTTCGAATCCT  
ACTGAGAGGTCCACTAGAGATCAG-----AAATTGTTGAAGAAACAACAAGATGTTT  
CT--TTTGTCCCTTCCAGGCGATCGGAA-----AATAAAGAAATGGTTAATATATTCAA  
GATAATTACGTATTTACAAAAT-----ACCGCTCAATTCATCCTATTTTCATCAGATCCGGGA  
TCTGGTATGGTTCCG---AAGGATGAACCGGAT--ATGGGCAGTTCCAATAAGATTTTCATT  
CTTGAACAAAAATCCATTTTTTTATTTA-----TTTCATCTATTCCATGACCGGAACAGGGG  
GGGATACACGTTA-----GACCAAGATTTTGAATCAGAA-----GAGAGATTTCAAGAAATG  
GCAGATCTATTCACTCTATCAATAACCGAGCCG---GATCTGTTGTATCATAAGGGGTTTG  
CCTTTTCTATTGATTCTTACGGATTGGATCAAAAACAA-----TTCTTGAATGAGGTATTCA  
ACTCCAGGGATGAATCGAAAAATAAATCTTTA-----TTGGTTCTACCTCCTATTTTTTAT

-----GAAGAGAATGAATCTTTTTATCGAAGGATCAGAAAAGAATGGGTCCGG---ATCTCC  
TGCAGGAATGATTTGGAAGATCCAAAACAAAAAATAGTGGTATTTGCTAGCAACAACA  
TAATGGAGGCAGTCAATCAATATAGATTGATCCGAAATCTGATTCAAATCCAATATAGCA  
CCTATGGG-----TACATAAGAAATGTATTGAATCGATTCTTTTTAATGAAT-----AGATCC  
GATCGCAACTTCGAATATGGAATTCAA-----AGGGATCAAATAGGAAATGATACTCTG  
AATCATAGAACTATAATGAAATATACGATCAACCAACATTTATCGAATTTGAAAAAG---A  
GTCAGAAGAAATGGTTCGATCCT-----CTTATTTTTATTCTCGAACCGAGAGATCCATGA  
ATCGGGATCCTGATGCATATAGATACAAATGGTCCAATGGGAGCAAGAATTTACAGGAA  
CATTTGGAACATTTTCGTTTCTGAGCAGAAGAGCCGT-----TTTCAAGTAGTGTTTCGATC  
GATTACGTATTAATCAATATTCGATTGATTGGTCTGAGGTTATCGACAAAAAAGATTTGT  
CTAAGTCACTTCGTTTCTTTTTGTCCAAGTTG-----  
-----CTTTTCTTTTGTCTAAC---TCACTTCCTTTTTCTTTGTGAGTTTCGGGAATA  
TCCCCATTCATAGGTCCGAG---ATCCATATCTAT--GAATTGAAAGGTCCGAATGATCAAC  
TCTGCAATCAGTTGTTAGAATCAATAAGTCTTCAAATCGTTCATTTGAAAAAATTGAAA  
CCCTTC-----TTATTGGAT-----GATCATGATACTTCC---CAAAAATCTAAATTCTTGATCA  
ATGGAGGAACAATATCACCATTTTGTTCATAAAGATACCA---AAGTGG---ATGATTGAC  
TCATTCCATACTAGA-----ATAATCGCAGGAAATCCTTTGATAACACGGATTCCCTATTTA  
TCAATGATATCCCACGATCAAGACAATTGGCTGAATCCCGTGAAACCATTTTCATAGAAG  
TTCATTGATATCTTCTTTTTATAAAGCAAATCGACTTCGATTCTTGAATAATCCACATCAC  
TTCGCTTCTAT-----TGTAACAAAAGATTCCCTTTTTATGTG-----GAAAAGGCCCGT  
ATCAATAATTATGAT-----TTTACGTATGGA---CAATTCCTCAATATCTTGTTTCATTCGCAAC  
AAA---ATATTTTCTTTGTGCGTCGGTAAA-----AAAAACATGCTTTTTTGGAG---AGAGA  
TACTATTTACCAATCGAGTCACAGGTATCTAGCATATTCATACCTAACGATTTTCCACA  
AAGTGGTGACGAAACG---TATAACTTGTACAAATCT-----TTCCATTTTCCAATTTCGATC  
CGATCCATTCGTTTCGT-----AGAGCTATTTACTCGATCGCAGACATTTCTGGAACACCTCT  
AACAGAGGGACAAATAGTCAATTTTGAAAGAACTTATTGTCAACCTCTTTCAGATATGA  
ATCTATCTGATTCAGAAAGGAAGAACTTGCATCAGCATTTCAT-----TTCAATTCAAAC  
ATGGGTTTGATTACACTCCATGTTCTGAGAAATATTTACCA-----TCCGAAAAGAGGGA  
AAAA-----CGGAGTCTTTGTCTAAAT-----AAATGCGTTGAGAAAGGGCAG  
ATGTATAGAACCTTTCAACGAGATAGTGCTTTTTCAACTCTCTCAAATGGAATCTATTC  
CAAACATATATGCCATGGTTCCTTACTTTCGACAGGGTACAAATATCTAAATTTGATATTTT  
TAGATACTTTTTCAGACCTATTGCCG---ATACTAAGTAGAAGTATC---AAAAAATTTGTAT  
CCATTTTTCATGATATTATGCATGGATCGGATATATTATGGCGAATTCCTTCAGGAAAAATT  
G-----TGTCTTCCAGAATGGAATCCG---ATAAGTAAGATTTTGAGTAAGTGTTTA  
CATAAGCTTAAGCTTCTTCTGCTCGAAGAAATGATTCATCGAAATAATGAGTCA-----CC  
ATTGATATCGACACATCTGAGACCGCCAAATGTTTCGGGAGTTC---CTTTATTCAATCCTT  
TTCCTTCTTCTGTTGCTGGATAT--CTCGTTTGGACACATCTTATCTTTGTTTCCATTTC  
GCAGCCTCTAGTGAGTTACAGACAGAGTTCGAAAAGGTCAAATCTTTGATGATTCCAT  
CATACATGATTGAGTTGCGAAAACCTTCTGGATAGGTATCCTACATCTGAACTGAATTCTT  
TCTGGTTAAAGAATCTCTTCTAGTTGCTCTGGAACAATTAGGAGATTCTCTAGAAGAA  
ATATGGGGTTCTGCTTTTGGCGGCAACATGCTATTGGGTGGTGGTCCCT-----ACTT  
ATGGG---GTCAAATCAATACGTTCTAAGAAGAAATATTTGAATATCAATCTCATCGATATC  
ATCGATCTCATA---AGTATCATACCAATCCCATCAATCGAATCACTTTTTTCGAGAAATAC  
GAGACATCTAAGTCATACAAGTAAAGAGCTTATTTCATTGATAAGAAAAAGAAAAAAG

GTGAAAGGTGCTTGGATTTATGATAAAATAGAATCCTGGGTCGCGAACAGTGATTTCGAT  
TGATGATGAAGAAAGAGAATTCTTGGTTCAGTTCTCC-----ACCTTAACGACA-----GAA  
AAAAGGATTGATCAAATTCATTGAGTATGACT--CAGAGTGATCATTATCA-----  
AAGAATGACTCTGGTTATCAAATGATTGAACAACCGGGAGCAATTTACTTACGATACTT  
AGTTGACATTCAT-----AAAAGTATCTAATGAATTATGAGTTCAATACATCCTGTTTAGC  
AGAAAGACGGATATTCCTTGCTCATTATCAGACAATCACTTAT-----TCACAAACCTCGT  
GTGGGGCTAATAGTTTTAATTTCCCATCTCATGGA-----AAACCCTTTTCGCTCCGCTT  
AGCCCTATCCCCCTCT--AGGGGTATTTTAGTGATAGGTTCTATAGGAACTGGACGATCC  
TATTTGGTCAAATACCTAGCGACAACTCCTATGTTCCTTTCATTACGGTATTTCTGAAC  
AAGTTCCTGAATAACAAGCTTAAAGGTTTTATTTTTGATGATAGTGATAGTGACGATATT  
GATGATATTGATGATAGTGACGATATTGATGCTAGTGACGATATTGATGCTAGTGACGATA  
TTGAT-----GATAATGACGATATCGATCGTGACCTTGATCCGGAGC  
TGGAGCTGCTAATGGATGCGCTAACTATA---ACTATGGATATGATGCCG-----GAAATAG  
ACCTATTTTATATCACCTTCAATTTCGAATTAGCAAAAGCAATGTCTCCTTGCATAATATG  
GATTCCAAACATTCATGATCTGGATGTGAATGAGTCGAATTACTTATCCCTCGGTCTATT  
AGTGAACATCTCTCC-----AGGGATTGTGAAAGATGTTCC---ACTAGAAATATTCTTG  
TTATTGCTTCGACTCATATCCCCAAAAGTGGATCCCGCTCTAATAGCTCCGAATAAAT  
TAAATACATGCATTAAGATACGAAGGCTTCTTATTCACAACAACGAAAGCACTTTTTTC  
ATTCTTTCATATACTAGGGGATTTCACTTGGAAAAGAAAATGTTCCATACT-----AATGGA  
TTCGGGTCATAACCATGGGTTCCAATGCACGATATCTTGCAGTACTTACCAATGAGGC  
CCTATCAATTAGTATTACACAGAAGAAATCAATTATAGACACTAATACAATTAGATCCGC  
TCTTCATAGACAACTTGGGATTTGCGA-----TCCCAGGTAAGATCGGCTCAGGATCA  
TGGGATCCTTTTCTATCAGATAGGAAGGGCTGTTGCACAAAATGTACTTCTAAGTAATT  
GCCTCATAGATCCTATATCTATCTATATAAAGAAGAAA-----TCATGTAACGAAGGGGATT  
CTTATTTGTACAAATGGTACTTCGAACTTGGAACGAGCATGAAGAAATTAACGATACTT  
CTTTATCTTTTGAGTTGTTCTGCCGGATCGGTCGCTCAAGATCTTTGGTCTCTACCC-----  
GGACCCGATGAAAAA---AATGGTATCACTTCTTATGGACTCGTTGAGAATGATTCT--GA  
TCTAGTTCATGGCCTATTAGAAGTAGAAGGCGCTCTGGTGGGA-----TCCTCACGGACA  
GAAAAAGATTGCAGTCAGTTTGATAATGAT-----CGAGTGACATTGGTTCTTCGGCCCGA  
ACCAAGGAAT--CCCTTAGATATGATGCAAAATGGATCTTGTTCTATCGTTGATCAGAGA  
TTTATCTATGAAAAA-----TACGAATCGGAGTTTGAAGAA--GGGGAAGGAGAAGGAGC  
CCTCGACCCGCAA-----CAGATAGAGGAGGAT-----TTATTCAATCAC-----ATAG  
TTTGGGCTCCT-----AGAATATGGCGCCCT-----TGGGGCTTCTATTTGATTGTATCGAA  
AGGCCCAATGAATTGGGATTCCCC---TATTGGGCCAGGTCATTTCCGGGGCAAG-----C  
GGATCATTTATGATGAAGAGGATGAGCTTCAAGAGAATGATTCGGAGTTCTTGCAGAGT  
GGAACCATGCAGTACCAGACACTAGATAGATCTTCCAAAGAACAAGGCTTTTTTCGAA  
TAAGCCAATTCATTTGGGACCCTGCAGATTCACTCTTTTTCTATTCAA---GATCAGCC  
CTTTGTCTCTGTGTTTTACATCGAGAATCTTTGCAGATGAAGAGATGTCAAAGGGGT  
TTCTTACTTCCCAAACAGATCCTCCTACATCTATATATAAACGCTGGTTCATC-----AAGA  
ATACGCAAGAAAAGCACTTCGAATTGTTGATTTATCGCCAGAGATGGCTTAGAACC-----  
---AATAGTTCATTATCT-----AATGGAGCTTTCCGTTCTAAT-----ACTCCATCCGAGAGTTA  
TCAGTATTTATCAAATCTGTTCCCTATCTAAC---GGAACGCTATTGGATCAAATGACAAAG  
ACATTTGTTGAGAAAAAGATGGCTTTTCCCGGATGAAATGAAAATTGGATTC-----ATG---  
-----ATGCCTAGATCGCGG---ATAAATGGAATTTTATTGATAAGACCTTTTC

AATTGTAGCCAATATCTTATTACGAATAATTCCGACAACCTTCAGGAGAAAAAGAGGCAT  
TTACCTATTACAGAGATGGG-----ATGTCAGCTCAATCCGAAGGAAATTATGCGGAAGCT  
TTACAGAATTATTATGAAGCTATGCGACTAGAAATTGATCCCTATGATCGAAGTTATATAC  
TCTATAACATAGGACTTATCCACACAAGTAACGGGAGAACATACGAAAGCTTTGGAATAT  
TATTTTCGGGCACTAGAACGAAACCCATTCTTACCGCAAGCTTTTAATAATATGGCCGTG  
ATCTGTCAATAC---CGGGGAGAACAAGCCATTTCGACAAGGAGATTCTGAAATTGCGGA  
GGCTTGGTTCGATCAAGCCGCTGAGTATTGGAAACAAGCTATAGCGCTTACTCCTGGTA  
ATTATATTGAAGCGCATAATTGGTTGAAGATCACAAGGCGTTTCGAA-----ATGAATTGG  
CGATCAGAACGTATATGGATAGAGCTTATAACGGGATCTCGAAAAATAAGTAATTTCTG  
CTGGGCCTTTATCCTTTTTTTAGGTTTATTAGGATTCTTATTGGTTGGAAGTTCCAGTTAT  
CTTGGTAGGAATTTGATATATTTATTTCCGTCTCAGCAAATACTTTTTTTTTCCACAAGGGA  
TCGTGATGTCTTTCTATGGGATCGCAGGCCTCTTCATTAGCTCCTATTTGTGGTGCACAA  
TTTCGTGGAATATAGGTAGTGGTTATGATCGATTGATAGAAAAGAAGGAATAGTATGTA  
TTTTTCGGTGGGGATTTCTGGAAAAAATCGTCGCATCTCCTTCGATTCTTATGAAA  
GATATTCAGTCTATCAGAATAGAAGTTAAAGAGGGTATCTATGCTCGTCGTGTCCTTTAT  
ATGAAAATCAGGGGCCAGGGAGCCATTCCCTTGACTCCTACTGATGAGAAT---TTTACT  
CCACGAGAAATTGAAAAAAAAGCTGCTGAATTAGCCTATTTTTTTGCGTGTACCAATTGA  
AGTTTTT

>Heuchera

ATGAAAAACGGCGGTTCAATTCGATGTTGTCTCTAAGTAAATCAATGGACAGTCTGG  
GTCCTATTGAAAATACCTGTGGTAGTGAAGATCCGATTATAACCGATACGTATAAAAAA  
TTCTTCGTTACAATAATATTGATCATTTATTTGGCGTTCGGGACATTCCGAATTTTCATCTC  
TGATGACACTTTTTTAGTTAAGGATAGTAATGGGAACAGTTATTCCATATATTTTGATATT  
GAAAATCAGATTTTTGAGATTGATAATGATCAT-----TCTTTTCTGAGTGAAGTAGAAAG  
TTCTTTTTATAGTTATCGGAATTCTAGTTATCTGAATCATGTATCTAAGGGTGACGATCCC  
CATTATGATCGTTACATGTATGATACTAAATATAGTTGGAATAATCATATTAATAGTTGCAT  
TGACAGTTATCTTCGT-----TCTCAAATCCATATTGATAGTTACATTTTAAGTAATAGTGAT  
AATTACGGT-----TACATTTATAGTTACATTTGTGGTAACAAGAATTCCAGTATAAGAACT  
AGCACGAATGGTAGTGATTTAACTAAA-----AGTTCTAATGATCTCGAGGTAAGTCAAAA  
ATACAGACATTTGTGGGTTCAATGCGAAAATTGTTATGGATTAAATTATAAGAAATTTTT  
TAAATCAAAAATGCATATTTGTGAACAATGTGGATATCATTTGAAAATGAGTAGTTCAGA  
TAGAATCGAACTTTCGATTGATCCAGGTACTTGGGATCCTCTGGATGAAGACATGGTCT  
CTCTAGATCCCAATTGAATTTCAATTCGGAGGAGGAACCTTATAAAGAGCGTATTGATTCTT  
ATCAAAGAAAGACAGGATTAAGTGGGCTGTTCAAACAGGCACAGGTCAACTAAACG  
GTATTCCTATAGCAATTGGGGTTATGGATTTTCAGTTTATGGGGGGTAGTATGGGATCTG  
TAGTAGGCGAGAAAATCACCCGTTTGGTCGAGTATGCTACCAATAAATTTCTACCTCTTA  
TTCTGGTATGTGCTTCCGGAGGAGCACGCATGCAAGAAGGAAGTTTGAGCTTGATGCA  
AATGGCTAAAATATCTTCTGCTTTATATGATTATCAATCAAATAAAAAGTTATTCTATGTA  
TCAATCCTTACATCTCCTACTACTGGTGGGGTGACAGCTAGTTTTGGTATGTTGGGGGAT  
ATCATTATTGCCGAACCCAATGCCTACATTTGCATTTGCGGGTAAAAGAGTAATTGAACA  
AACATTGAATAAGACAGTACCTGAAGGTTACAAGCGGCTGAATATTTATCCATAAGG  
GCTTATTCGATCCAATCGTACCACGTAATCTTTTAAAAGGCGTTCTGAATGAGTTATTC  
AGCTCCACGCTTTCTTTTCTTTGAAAAAAAATGCAATCAAGATGGTAACCAATTCGAGCT  
GATGAAATTAGTAATATTATCCGGGAACGTATTGAGCAATATAATAGAGAAGTAAAGATT



GTAAATACCGGTACCGTACTTCAAGTAGGGGATGGCATTGCTCGTATTTCATGGCCTTGAT  
GAAGTAATGGCAGGTGAATTAGTAGAATTTGAAGAGGGTACAATAGGCATTGCTTTGAA  
TTTGGAATCCAATAATGTTGGTGTGTATTAAATGGGTGATGGTTTGATGATACAAGAAGG  
AAGTTCTGTAAAAGCAACAGGAAGAATTGCTCAGATACCTGTCAGTGAGGCTTATTTG  
GGTCGTGTTATAAATGCTCTGGCTAAACCTATTGATGGTAGAGGTGAAATTCAGCTTC  
TGAATCTCGGTTAATTGAATCTCCTGCTCCAGGTATTATTTTCGAGACGTTCCGTATATGA  
GCCTCTTCAAACAGGGCTTATCGCTATTGATGCGATGATACCTATAGGACGTGGTCAGC  
GAGAATTAATTATTGGGGACAGACAGACCGGTAAAACAGCAGTAGCCACAGATACGAT  
TCTCAATCAACAAGGACAAAATGTAATATGTGTTTATGTAGCTATTGGTCAAAAAGGCAT  
CTTCTGTGGCTCAGGTAGTGACTAATTTCCAGGAAAGGGGAGCAATGGAATACACTATT  
GTGGTAGCCGAAACAGCGGATTCCCTGCTACATTACAATACCTCGCTCCTTATACAGG  
AGCAGCTCTGGCTGAATATTTTATGTACCGTGAACGACACACTTCAATCATTATGATGA  
TCTCTCAAACAAGCACAAAGCTTATCGCCAAATGTCTCTTCTATTACGAAGACCCCCCG  
GTCGCGAAGCTTATCCAGGAGATGTTTTTATTTGCATTACGCCTTTTGGAAAGAGCC  
GCTAAATCAAGTTCTCGTTTAGGTGAAGGAAGTATGACCGCTTTACCAATAGTTGAGAC  
CCAATCGGGAGATGTTTCGGCTTATATTCCTACTAATGTAATTTCTATTACAGATGGACA  
GATATTCTTATCCGCCGATCTATTCAATTCTGGAATCAGACCTGCTATTAATGTGGGTATT  
TCCGTCTTAGAGTAGGATCCGCAGCTCAAATTAAGCCATGAAACAGGTAGCTGGCA  
AATCAAAATTGGAAGTGGCCCAATTTGCAGAATTAGAAGCCTTTGCACAATTTGCTTCG  
GATCTTGATAAAGCTACTCAGAATCAATTGGCAAGAGGTCAACGATTACGTGAATTGCT  
TAAGCAATCCCAATCAGCCCCTCTCACAGTAGAAGAAACAATAATGACTATTTATACCG  
GAACAAATGGTTATCTTGATTCATTAGAGATTGGACAGGTAAGGAAATTTCTCGTTGAG  
TTACGTACTIONTAAAAACGAATAAACCTCAGTTTCAAGAAATCATATCTTCTACCAA  
GACATTCACCGAGGAAGCAGAAGCCCTTTTGAAGAAGCTATTCAGGAACAGATGGA  
ACGTTTTCTACTTCAGGAACAAGCAATGAGAATCAATCCTACTACTTCTGATCCTGGGG  
TTCCACGCTTGAAAAAAAACCTGGGGCGTATCGTTCAAATATTGGTCCGGTACTG  
GATGTAGCTTTTCCCCGGGCAAGATGCCTAATATTTACAACGCTCTGGTAGTTAAGGG  
TCGAGATACTGTCGGTCAAGAAATTAATGTAACCTGTGAGGTACAGCAATTATTAGGAA  
ATAATCGAGTTAGAGCTGTAGCTATGAGTGCTACAGATGGTCTAAGGAGAGGAATGGA  
CGTGATTGACACGGGAGCTGCTCTAAGTGTTCCAGTCCGGTGGAGCGACTCTCGGACGA  
ATTTTCAACGTACTIONTGGAGAACCCTGTTGATAATTTAGGTCCTGTAGATACTCGCACAAC  
ATCTCCTATTCATAGATCTGCGCCCGCCTTTATACAGTTAGATACAAAATTATCTATTTT  
GAAACAGGAATTAAGTAGTAGATCTTTTAGCCCTTATCGTTCGTGGAGGAAAAATCG  
GACTATTTGGGGGAGCTGGAGTGGGTAAAACGGTACTCATTATGGAATTGATCAACAA  
CATTGCCAAAGCTCATGGGGGTGTATCTGTATTTGGCGGAGTAGGTGAACGTACTIONTCTG  
AAGGAAATGATCTTTACATGGAAATGAAAGAATCTGGAGTGATTAATGAACAAAATATT  
GCAGAATCAAAGTAGCTCTAGTCTACGGCCAGATGAATGAACCGCCGGGAGCTCGTA  
TGAGAGTTGGTTTGACTGCCCTAACTATGGCGGAATATTTCCGAGATGTTAATGAACAA  
GACGTACTIONTCTATTTATCGACAATATCTTCCGTTTCGTCCAAGCAGGATCCGAAGTATCT  
GCCTTATTGGGTAGGATGCCTTCCGCCGTGGGTTATCAACCCACCCTCAGTACCGAAAT  
GGGTACTTTACAAGAAAGAATTACTIONTCTACCAAAGAGGGTTCCATAACTIONTCTATTCAAG  
CAGTTTATGTACCTGCGGACGATTTGACCGACCCTGCTCCTGCTACGACATTTGCACAT  
TTAGATGTACTIONTACCGTACTGTCAAGAGGATTAGCTGCCAAAGGCATCTATCCAGCAGT  
AGATCCTTTAGATTCAACGTCAACTIONTATGCTCCAACCTCGGATCGTTGGTGAGGAACATT

ATGAAATTGCACAAAGAGTTAAGCAAACCTTTACAACGTTACAAAGAACTTCAGGACAT  
TATAGCTATCCTTGGGTTGGACGAATTATCCGAAGAGGATCGTTTAACCGTAGCAAGAG  
CACGAAAAATTGAGCGTTTCTATCACAACCTTTTTTCGTAGCAGAAGTTTTACTGGT  
TCTCCGGGGAAATATGTTGGTCTAGCAGAAACAATTCGAGGGTTTCAATTAATCCTTTC  
GGGGAATTAGATAGTCTTCTGAACAAGCCTTTTATTTGGTAGGTAACATCGATGAAG  
TTACCGGAAGGCTATGAACTTAGAAATGGAGAGCAATTTGAAGAAAATGACCTTAAA  
TCTTTGTGTACTGACCCCTAATCGAATTGTTTGGGATTCAGAAGTGAAAGAAATCATT  
TATCTACCAATAGTGGACAAATTGGCGTATTACCAAATCATGCCCTATTGCCACAGCTG  
TAGATATAGGTATTTGAGAATACGCCTTAACGACCAATGGTTAACGATGGCTCTGATGG  
GTGGTTTTGCTAGAATAGGTAATAATGAGATCACTATTTTAGTAAATGATGCGGAGAAG  
GGTAGTGACATTGATCCCCAAGAAGCTCAACAACTCTTGAAATAGCGGAACTAACT  
TGAAGAAAGCTGAAGGCAAGAGACAAACAATTGAGGCAAATCTAGCTCTCAGACGAG  
CTAGGACACGAGTAGAGGCTATCAATGTGATTTCAATGAAAAATGTAACCGATTCTTTC  
GTTTCTTGGGTCCTGGCCATCCGCCGGGAGTTTCGGGTTAATACCGATATTTTACG  
AACAAATCTAATAAATCTAAGTGTAGTGCTCGGTGTATTGATCTTTTTTGGAAAGGGAG  
TGTTAAGTGATTTATTAGATAATCGAAAACAGAGGATTTTGAATACTATTGCAAATTCAG  
AAGAATTACGTGGGGGGCCATTGAACAGCTGGAAAAAGCCCGGGCCCGCTTACGGA  
AAGTCGAAATGGAAGCAGATCAGTTTCGAGTGAATGGATACTCTGAGATAGAACGCGA  
AAAATTGAATTTGATTAATTCAACTTATAAGACTTTGGAACAATTAGAAAATTACAAA  
ATGAAACCATTAATTTGAACAACAAGAGCGATTAATCAAGTCCGACAACGGGTTTT  
CCAACAAGCTTTACAAGGAGCTCTAGGGACTTTGAATAGTTGTTTGAACAACGAGTTA  
CATTTACGTACCATTAGTGCTAATATTGGTATGTTTGGGGCGATGAAAGAAATAACTGAT  
ATGAATCCATTGATTTCTGCCGCTTCCGTTATTGCTGCTGGATTGGCCGTAGGGCTTGCT  
TCTATTGGACCTGGAGTTGGTCAAGGTACTGCTGCGGGCCAAGCTGTAGAAGGTATTG  
CGAGACAGCCTGAGGCAGAAGGAAAAATACGCGGTACTTTATTACTTAGTCTAGCTTTT  
ATGGAAGCTTTAACAATTTATGGACTGGTTGTAGCATTAGCGCTTTTATTTGCAAATCCT  
TTTGTATGAATGTTCTATCATGTTCCATCACCTAAAT--GGGTTATACGATATATCCGGT  
GTGGAAGTAGGCCAACATTTCTATTGGCAAATAGGAGGTTTACAAGTCCATGCCCAAGT  
ACTTATTACCTCTTGGGTTGTAATTGCTATCTTATTAGGTTCTGCCACTATAGCTGTTTCGG  
AATCCACAAACCATTCCGACTGACGGTCAGAATTTCTTCGAATATGTTCTTGAATTCATT  
CGCGACGTGAGCAGAACTCAGATTGGAGAAGAATATGGTACTTGGGTTCCTTTATTG  
GAACGATGTTTCTATTTATCTTTGTTTCTAATTGGTCAGGGGCTCTTTTACCTTGAAAA  
TCATACAGTTACCCCATGGGGAGTTAGCCGCACCCACGAATGATATAAATACTACGGTT  
GCTTTAGCTTTACTCACGTCAAGTGGCATAATTTTTATGCGGGTCTTTCCAAAAAAGGATTA  
GGTATTTTCGGTAAATACATTCAACCAACTCCAATCCTTTTACCCATTAACATCTTAGAA  
GATTTACAAAACCTTTATCACTTAGTTTTTCGACTTTTTCGGGAATATATTAGCTGATGAA  
TTAGTAGTTGTTGTTCTTGTCTTTTAGTACCTTTAGTGGTTCCCTATACCGGTTATGTTCC  
TTGGATTATTTACAAGTGGTATTCAAGCTCTATTTTTGCAACTTTAGCTGCGGCTTATAT  
AGGAGAATCTATGGAGGGTCATCATATGATATTTTCGACTTTCGAACATATATTAACATCAT  
ATATCCTTTTCTATTGTTTTCAATTTTAATTACAATTTATTTTCATAACCTTATTAGTGGATGA  
AATCGTAGGACTAGATGATTCGTCAGAAAAGGGCATGATAGCGACCTTTTTCTGTATAA  
CAGGATTATTAATCGCGCGGTGGATTTATTCACGACATTTTCCATTAAGTGATTTATATGA  
ATCATTAAATCTTCCTTTTCATGGAGTTTCTCCATTATTCATATGGTTCCGTATTTT--AAACA  
TAAAAATCATTTAAGCGCAATAACCGCGCCAAGTGCGATTTTTTACCCAAGGCTTTGCTA

CTTCGGGTCTTTTAAACGGAAATGCATCAATCCGCAATATTAGTACCTGCTCTACAATCCC  
AATGGTTAATGATGCATGTAAGTATGATGGTATTGGGCTATGCAGCTCTTTTATGTGGAT  
CATTATTATCAGTAGCTCTTTTAGTCATTACATTTCGAAAAGACATAAGGATTTTCGGTA  
AAAGCAATGAGATCCAATACATAAATAAAAGAAGCAATGTTTTACGAACGACTTCTTTT  
CTTTCTGATAGGAATTATTACAAGTATCAATTAATTCAACAATTGGATCATTGGGGTTATC  
GTGTTATTAGTCTAGGGTTTATCTTTTTAACCATAGGTATTCTTTCAGGAGCAGTATGGG  
CTAATGAGGCATGGGGATCATATTGGAATTGGGACCCAAAAGAACTTGGGCATTTATT  
ACTTGGACCATATTTGCGATTTATTTACATACGCGAACAAATACAAATTTGCAAGGTGCA  
AATTCTGCAATTGTGGCTTCGATGGGGTTTCTTATAATTTGGATATGTTATTTTGGGGTCA  
ATCTATTAGGAATAGGGCTACATAGTTATGGTTCATTTAACATC---ATGGCAAAAAAAAA  
AGCATTCACTCCCCTTCTATATCTTGCATCTATAGTATTTTTGCCCCTGGTGGATCTCTCTC  
TTATTTAATAAAAGTCTGGAATCCTGGGTACAAATTGGTGGAACTAGGCAATCTGA  
AACTTTTTTGAATGATATTCAAGAAAAGAGTATTCTCGAAAATTCATAGAATTAGAGG  
AACTCTTCTGTTGAACGAAATGATAAAGGAATATCCAGAGACACATCTACAAAAGCTT  
AGTCTAGGA---CACAAAGAAACGATCCAATTGATCAAGATGCACAATGAGGATCGTATC  
CATACGATTTTACTTCTCGACAAATCTAATCTGTTTCGTTATTCTAAGTGGTATTCTA  
TTCTGGGTAATGAAGAACTTGTATTCTTAACTCTTGGGTTTCAGGAATTCTTATATAACT  
TAAGCGATACAATAAAAGCTTTTTCTATTCTTTTATTAACTGATTTGTGTATCGGATCCA  
TTCGCCCCATGGTTGGGAATAATGCTTGGCTCTGTCTACAAAGATTTTGGATTTGCTC  
ATAACGATCAAATTATATCCGGTCTTGTTTCCACTTTTCCAGTCATTCTAGATACAATTTT  
AAAATATTGGATCTTCCGTTATTTAAATCGTGTATCTCCGTCACTTGTAGTGATTTATCAT  
TCAATGAATGACATGCCTATTGGTGTTCAAAAGTACCTTTTTCGAAGTCCTGGAGAGGA  
AGATGCATCTTGGGTTGACGTATAACAACGACTTTATCGAGAAAGATTGCTTTTTTTAG  
GCCAAGAGGTTGATAGTGAGATCTCTAATCAACTTATTGGTCTTATGGTATATCTCAGTA  
TAGAGGATGATACCAAAGATCTGTATTTGTTTATAAACTCTCCCGGAGGATGGGTAATAC  
CCGGAGTAGCTATTTATGATACTATGCAATTTGTACGACCAGATGTACATAAATATGCAT  
GGGGTTGGCCGCTTCAATGGGATCCTTTATCCTGGTTCGGAGGAGAAATTACCAAACGT  
CTAGCATTCCCTCACGCCAGGGTAATGATCCATCAACCCGCTAGCTCTTTTTATGAGGC  
ACAAACGGGAGAATTTATCCTGGAAGCGGAAGAACTACTGAAACTACGCGAAACCAT  
CACAAGGGTTTATGTACAAAGAACGGGCAAAACCCTTATGGGTTGTATCCGAAGATATGG  
AAAGGGATGTTTTTATGTCAGCAACAGAAGCCCAAGCTCATGGAATTGTTGATCTTGTA  
GCGGTTGAAATGAAAGAACAAAATGGGTTTCATGAAGGTTTAATTACTGAATCACTTC  
CCAATGGTATGTTCCGGGTTTCGTTTATAGATAATGAAGATCTGATTCTAGGTTATGTTTCGG  
GAAGGATCCGACGTAGTTTTATACGGATACTACCAGGAGATAGAGTCAAATTTGAAGTA  
AGTCGTTATGATTCAACCCGAGGGCGTATAATTTATAGACTCCGCAACAAGGATTCGAA  
CGATATGGGGGAATTTCAAGGATATTTAGAA---GATAAATTTTCGGCAACATGACTTCCTA  
TATCCACTTATCTTTCAGGAGTATATTTATGCACTTGCTCATGATCATGTTTTATTTGGTTA  
TGACAATAAATCCAGTTCACTAATTGTGAAACGTTTAATTACTCGAATGTGTCAACAGA  
ATCATTTTATTATTTCTGCTAATGATTCGAACCAAATCAATTTTTTGGGAAGAATTTATA  
TTCTCAAATGATATCAGAGGGATTTGCAGTCATTGTGGAAATTCGGTTTTCCCTACGATT  
TGTATCTTCTTATTAGTAAAATCTCATAATTTACGATCAATTCATTCAATATTTCTTTTT  
TAGAAGACAATTTTTTACATTTAAATTATGTGTCAGATATACTAATACCCACCCCATCCA  
TCTTGAAATATTGGTTCAAACCTTTCGCTACTGGGTGAAAGATGCCTCTTCATTGCATTT  
ATTACGATTCTTCTCTATGAGTATCAGAATTGGAATAGTCTTATTACTAAGAAATCAATT

TCTATTGTTTCACAAAGATTATTCTTATTTTTATATAATTCTTATGTATGTGAATACGAATC  
TATCTTCATTTTTCTTTGTAACCAATCTTCTCATTACGATCAACATCTTCTGGAACCTTT  
TTTGAGCGAATACATTTCTATGGAAAATAAAACATGTTGTAGAAGTCTTTTCTAATGAT  
TTTATCCTATGGTTGTTCAAAGATCCGTTTCATGCATTATGTTAGGTATCAAGGAAAATCA  
ATTCTGGCATCAAAGGTACCCCCCTTCTGCTGAATAAATGGAAATATTACCTTGTCAAT  
TTATGGCAATGTAATTTTTACGTATGGTCTCAACCAGGAAGGATCCATATAAACCAATTA  
TCCAATCATTCCCTCGACTTTCTGGGCTATCTTTCGAGTGTGCAACTAAATCCTTCAGTA  
GTGCGGAGTCAAATGCTAGAAAATTCATTGATAATGGATAATGCTATT-----AAGAAGTT  
GGATATCATAGTTCCAATTATTCTTTAATTAGATCATTGGCTAAAGCTAAATTCTGTAAC  
GTAGTAGGGGATCCATTAGTAAGCCGGCCTGGGCCGATTTCATCAGATTCTGATATTATC  
GACAGATTTGTGCGCATATGCAGAAATATTTCTCATTATCACAGCGGATCCTCAAAAAA  
AAAGAGTTTGTATCGAATAAAGTATATACTTCGACTTTCTTGTGCTCGAACTTTGGCTCG  
TAAACACAAAAGTACTGTACGTGCTTTTTTGAAAAGATTAGGTTTCGGAATTATTAGAAG  
AATTCCTTACGGAGGACGAACAAGTGCTTTCTTTGATCTTTCCAAGACGGGTTTGGTAT  
TTGGATATTATTTGTATCAATGATTTGGTCAATCATGAAATGATAATTGAT---ACAACAGA  
AGTACAA---GATATCAATTCTTTTCCCGATTGGAATCC---TTAAAAGAGGTCTATGGGAT  
CATATGGATGCTTATCCCTATTTTGACTCTTGTATTAGGAATCACAAATAGGTGTACTAGTA  
ATTGTGTGGTTAGAAAGAGAAATATCAGCAGGGATACAACAACGTATTGGACCTGAAT  
ACGCCGGCCCGTTGGGAATTCTCCAAGCTTTAGCAGATGGGACAAAACACTTTTTCAA  
AGAAAATATTCTTCCATCTAGAGGAGATACTGGTTTATTCAGTATCGGACCATCCATAGC  
GGTCATATCAATTCTACTAAGTTATTAGTAATTCCTTTTTGGTTATCACCTTGTCTAGCC  
GATCTCAATATCGGTGTTTTTTTTATGGATCGCCATTTCAAGTATTGCTCCCATGGACTTC  
TTATGTCAGGATATGGATCAAATAATAAATATTCCTTTTTAGGTGGTTTACGAGCTGCTG  
CTCAATCGATTAGTTATGAAATACCGTTAACTCTATGTGTGTTATCAATATCTCTACTATCT  
AACAGTTTGAGTACAGTTGATATAGTTGAGGCACAGTCAAATATGGGTTTTGGGGGT  
GGAATTTGTGGCGTCAACCTATAGGGTTTATCGTTTTTCTAATTTCCCTCCCTAGCAGAAT  
GTGAGAGATTACCTTTTGATTTACCAGAAGCAGAGGAAGAATTAGTAGCAGGTTATCA  
AACCGAATATTCAGGTATCAAATTTGGTTTATTTTATGTTGCTTCCTATCTAAATCTACTA  
GTTTCTTCATTCTTTGTAACAGTTCTTTACTTGGGTGGGTGGAATCTCTCTATTCCGTAC  
CTATTTGTTCCCTGAACTTTTTGAAATAAATAAAGCGAGTGGAGTTTTTGGAACGACACT  
TGGTCTCTTTATTACATTAGCTAAAACATATTTGTTCTTGTTCATTCTATAACAACAAGA  
TGGACTTTACCTAGGCTAAGAATGGACCAATTATTAATCTTGGGTGGAAATTTCTTTTA  
CCTATTTCTCTAGGTAATCTATTATTAACAACCTTCTCCCAACTCCTTTCACTGATGATCT  
GGCATGTACAGAATGAAAACCTTCATTCTCGATTCTACGAGAATTTTTATGAAAGCCTTT  
CATTTGCTTCTCTTCGATGGAAGTTTTATTTCCAGAAATGTATCCTAATTTTTGGTCTAA  
TTCTTCTTCTGATGATCGATTCAACCTCTGATCAAAAAGATATACTTGGTTATATTTTCAT  
CTCTTCAACAAGTTTAGTAATGAGCATAACGGCCCTATTGTTCCGATGGAGAGAAGAAC  
CTATGATTAGTTTTTCGGGAAATTTCCAAACGAACAATTTCAACGAAATCTTTCAATTTCT  
TTATTTACTATGTTCAACTCTATGTATTCCTCTATCCGTAGAGTACATTGAATGTACAGA  
AATGGCTATAACAGAGTTTCTGTTATTCGTATTAACAGCTACTCTAGGAGGAATGTTTTT  
ATGCGGTGCTAACGATTTAATAACTATCTTTGTAGCTCCAGAATGTTTCAGTTTATGCTC  
CTACCTATTATCTGGATATACCAAGAAAGATGTACGGTCTAATGAGGCTACTACGAAATA  
TTACTCATGGGTGGGGCAAGCTTCTATTCTGGTTCATGGTTTCTTGGCTATATGG  
TTCATCCGGGGGAGAGATGGAGCTTCAAGAAATAGTGAATGGTCTTATCAATACACAAA

TGTATAACTCCCCAGGAATTTCAATTGCGCTTATATTCATCACTGTAGGAATTGGGTTCA  
AGCTTTCCCCAGCCCCTTCTCATCAATGGACTCCTGACGTATACGAAGGATCTCCCCT  
CCAGTCGTTGCTTTTCTTTCTGTTACTTTCGAAAGTAGCTGCTTCAGCTTCAGCCACTCG  
AATTTTCGATATCCCTTTTTATTTCTCATCAAACGAATGGCATCTTCTTCTGGAATCCTA  
GCTATTCTTAGCATGATATTGGGGAATCTCATTGCTATTACTCAAACAAGCATGAAACGT  
ATGCTTGCATATTCGTCCATAGGTCAAATCGGATATGTAATTATTGGAATAATTGTTGGAG  
ACTCGAATGGTGGATATGCAAGCATGATAACTTATATGCTGTTCTATATCTCCATGAATCT  
AGGAACTTTTGCTTGCATTGTATCATTGGTCTACGTACCGGAACTGATAACATTTCGAGA  
TTATGCAGGATTATACACGAAAGATCCTTTTTTTGGCTCTCTCTTTAGCCCTATGTCTCTTA  
TCCCTAGGAGGTCTTCCCTCCACTAGCAGGTTTTTTTCGGAAAACCTCATTATTTCTGGTG  
TGGATGGCAGGCAGGCCTATATTTCTTGGTTTTCAATAGGACTCCTTACGAGCGTTGTTT  
CTATCTACTATTATCTAAAAATAATCAAGTTATTAATGACTGGACGAAACCAAGAAATAA  
CCCCTCACGTGCGAAATTATAGAAGATCCCCTTTAAGATCAAACAATTCCATTGAATTG  
AGTATGATTGTATGTGTGATAGCATCTACTATACCAGGAATATCAATGAACCCGATTATTG  
CAATTGCTCAGGATACCCTTTTTATGTTTCTGCTTTACGAATATGATATTTTCTGGGCTTT  
TCTAATAATATCAAGTCTGATTCCATTTTTGGCATTCTAATTTCCGGAGTTTTAGCTCCG  
ATTAGCAAAGGACCAGAGAAACTGTCGAGTTATGAATCGGGTATCGAACCAATGGGCG  
ATGCTTGGGTACAATTTCGAATCCGTTATTATATGTTTGCTCTAGTTTTTGTGTTTTTGA  
TGTTGAAACGGTTTTTCTTTATCCATGGGCAATGAGTTTCGATGTATTGGGTGTATCCGC  
ATTTATAGAAGCTTTAATTTTCGTGCTTATCCTAATTGTTGGTTCAGTTTATGCATGGCGA  
AAGGGAGCATTGGAATGGTCTACGAATTATTTCCCTGGTTAACAATAATTGTAGTTTTG  
CCGATATTTGCGGGCTCCTTAATTTCTTTCTCCCCATAGAGGAAATAAGATAATTAGG  
TGGTATACTATATGTATATGCATCTTGGAGCTCCTTCTAACGACCTATGCATTCGGTTATC  
ATTTTCAATTGGATGATCCATTAATCCAATTTTCGGAGGATTATAAATGGATCAATTTTTT  
TGATTTTTATTGGAGATTGGGAATAGATGGACTTTCTATAGGACCTATTTTACTGACAGG  
ATTTATCACCCTTTAGCTACTTTAGCGGGTTCGGCCAGTTACTCGAGATTTCCGATTATT  
CCATTTCTTGATGTTAGCAATGTACAGTGGTCAAATAGGATCATTTTCTTCTCGAGACCT  
TTTACTTTTTTTCATCATGTGGGAGTTAGAATTAATTCCTGTTTATCTACTCCTATCTATGT  
GGGGAGGGAAGAAACGTCTGTACTCAGCTACAAAGTTTATTTTGTACACTGCAGGAGG  
TTCTATTTTTCTCTTAATGGGAGTGCTGGGTATCGGTTTATATGGTTCCAATGAACCAAC  
ATTAATTTTTGAAACATTAGCTAATCAGTCGTATCCTATAGCATTGGAAATACTATTCTAT  
CTTGATTTTCTTATTGCTTTTGCTGTCAAATCGCCGATTATACCTCTACATACATGGTTAC  
CAGACACCCATGGAGAAGCACATTACAGTACTTGTATGCTTCTAGCTGGAATCTTATTA  
AAAATGGGAGCGTATGGGTTGATTCGGATCAATATGGAATTATTACCCCGTGCTCATTCT  
ATATTTTCTCCCTGGTTGTTGATAGTAGGCACAATACAAATCATCTATGCAGCTTCAACA  
TCTTCCGGCCAACGTAATTTAAAAAAAAGAATAGCCTATTCTCTGTATCTCATATGGGT  
TTCATAATTATCGGAATTAGCTCTCTAACTGATACAGGACTCAATGGAGCCATTTTACAA  
ATAATCTCTCATGGATTTATTGGCGCTGCACTTTTTTTCTTGGCAGGAACCAGTTATGAT  
AGAATACGCCTTGTTTATCTCGACGAAATGGGTGGAATAGCTATTCCAATGCCAAAAT  
ATTCACAATGTTTCAATCTTATCGATGGCTTCCCTTGCATTACCGGGCATGAGTGGTTT  
TGTTGCAGAATTGCTAGTATTTTTTGGAAATAATTACCAGCCAAAAGTATCTTTTAATGCC  
AAAATAATAATTACTTGTGTAATGGCAATTGGAATGATATTA ACTCCTATTTATTCATTA  
TCTATGTACGCCAGATGTTCTATGGATACAAGCTATTTAATGCCCCAAAACCTTATTTTT  
TTGATTCTGGACCGGAGAGTTATTTGTTTCGATTTCTATCTTTCTACCGGTAATAGGGA

TTGGTATTTACCCGGATTTTCGTTCTTTCATTATCAGTTGACAAGGTCGAAACTATTCTATC  
TAATTTTTTTTATAGAATGATGCTCGAACATGTACTIONTTTTGAGTGCCTATTTATTTTCTA  
TCGGTATCTATGGATTGATCACGAGTCGAAATATGGTTTCGAGCCCTTATGTGTCTTGAAC  
TTATACTGAATGCAGTTAATATAAATTTTCGTAACATTTTCGGATTTTTTTGATAATCGCCA  
ACTAAGAGGAGACATTTTCTCAATTTTGTATAGCTATTGCAGCCGCTGAAGCAGCTAT  
TGGACTAGCAATTTGTTTCGTCAATTTATCGTAACAGAACTCTATTCGTATCAACCAATC  
GAATTTGTTGAATAAAATGGAACATACATATCCATATGCATGGATCATACTTTCGTTCC  
ACTTCCTGTTCCCTGTCTTAATAGGAGTGGGACTTCTCCTTTTTCCGACGGCAACCAAGA  
ATCTTCGTGCTATGTGGGCTTTTCCTAGTGTTTTATTATTAAGTATAGTTATGATTTTTTCG  
GCGGATCTGTCTATTCAGCAAATAAATAGCAATTCATATATCAATATGTATGGTCTTGG  
CTATCAATAATGATTTTTCTTTAGAGTTTCGGCCACCTGATCGACCCACTTACTTCTATTAT  
GTTAATATTAATCACTACTGTTGGAATTATGGTCTTATTTATAGTGATAATTATATGTCTC  
ATGATCAAGGATATTTAAGATTTTTTGCTTATATGAGTTTTTTCAATACTTCCATGTTGGG  
ATTAGTTACTAGTTCTAATTTGATACAAATTTATATTTTTTTGGGAATTAGTTGGAATGTGT  
TCATATCTATTAATAGGTTTTTTGGTTCACAAGACCTATTGCGGCAAATGCTTGTCAAAA  
GCTTTTGTAACTAATCGTATAGGGGATTTGGTTTATTCTTAGGAATTTTAGGTCTTTATT  
GGATAACAGGTAGTTTTGAATTTAGAGATTTGTTTCGAAATATTCAATAACAATGAGTTAA  
ATTTATATTTGTTACTTTGTGTGCTTTTCTATTATTTTCCGGTGCAGTTGCTAAATCCGC  
GCAATTTCCCCTTCATGTATGGTTACCCGATGCCATGGAGGGGCCTACTCCTATTTCCGC  
TCTTATCCATGCTGCTACCATGGTAGCAGCGGGAATTTTTCTTGTGCTCGGCTTCTTCC  
TCTTTTCATAGTTATACCTTACATAATGAATCTAATATCTTTGATAAGTATAATAACAGTAC  
TATTAGGAGCTACTTTAGCTCTTGCTCAAAAAGATATTAAGAGAAGTTTAGCCTATTCTA  
CAATGTCTCAATTTGGGTTATACGATGTTAGCTTTAGGCATGGGGTCGTATCGAGCTGCTT  
TATTTCAATTAATTACCCATGCTTATTCGAAAGCATTATTGTTTTTTAGGATCTGGATCAATT  
ATTCATTCAATGGAAGCTATTGTCGGATATTCTCCAGATAAAAGTCAGAATATGGTCTT  
ATGGGTGGTTTAAACAAAACATGTGCCAATTACAAAACAGCTTTTTTTTTTAGGTACACT  
TTCTCTTTGTGGTATTCCACCACTTGCTTGTTTTTTGGTCCAAAGATGAAATCTTAATGA  
TACTTGGTTATATTCACCAATTTTCGCAATAATAGCTTGTTCACAGCTGGGTTAACTGC  
ATTTTATATGTTTCGGATTTATTTACTTACTTTTGAAGGGCATTAAACGTTCATTTTCAA  
AATTACAGTGGAAAAAAAACGAGCTCGTTCTATTCATATCTCTATGGGGTAAAGAAGG  
TCCAAAAACGACTAAAACAAAATTTACTTTATTAACAATGAATCTTTTTTCGACTTG  
GAATAAGAAAACCTTTTTCATATCCCCATGAATCGGATAATACTATGCTATTCTCTCTGCTT  
GTATTGGTCCATTTACTTTGTTTCGTTGGAGCCATAGGAATTCCTTTCGATTTAGATATAT  
TATCTAAATGGTTAACCCCGTCTATAAACCTTTTACATAAAAATTTGACT---TCTGTGGAT  
TGGTATGCATTTGTGACAAATGCAATTTTTTCAGTCAGTATAGCGTATTTTCGGAATACTT  
ATAGCGTCCCTTTTATATAAGCCTGTTTATTCATCTTTACAAAATTTGAACTTAATTAATT  
CATTTGTTATTTTTTGGGACAAAATAATATATGTGATATATGGTTGGTCATATAATCGTGG  
TTACATAGATGCTTTTTATGCAACATCTTTCACTAAGGGTATAAGAGGGTTAGCTGAATT  
AACTCATTTTTTGATAGACGAGTAATTGATGGAATTACGAATGGCGTTGGTATTACGAG  
TTTCTTTGTAGCAGAAGGCATCAAATATGTAGGGGGTGGC---CGCATCTCTTCTTATCTT  
TTCTTGTATTTATCTTATGTATCAATTTTTTATTAAGTTACTACATGGATTTACCTGGACC  
AATACATGATTTTCTTTTAGTCTTCTGGGATCGGCTCTTATATTAGGAGGTCTAGGAGT  
GGTATTACTTACCAATCCAATTTATTCTGCATTTTCGTTGGGATTGGTTCTTGTTTGTATA  
TCTTTATTCTATATTTTCATCAAACCTCCATTTTGTAGCTGCTGCACAGCTCCTTATTTACG

TGGGAGCTATAAATGTTTTAATCATATTTGCTGTGATGTTTATGAATGGTTCAGGATCTTA  
CAAAGATTTTACTCTTTGGACCGTTGGGGATGGGGTACTTCGGTGGTTTGTACAAGTA  
TTTTTGTTCACATAATTACTATTATTCCAGATACGTCATGGTATGGTATTATTTGGACTAC  
AAGATCAAACCAGATTATAGAGCAAGATTTGATAAGTAATAGTCAACAAATTGGGATTC  
ATTTATCAACAGATTTTTTTCTTCATTTGAACTCATTCCATAATTCTTTTAGTTGCTTT  
GATAGGTGCAATTACTGTGGCTCGTCAGATGAATGTACCAGCGACAAGAAAAGACCTC  
ATGATAGTAAATATGGGTCTCACCACCCATCAATGCATGGTGTCTTCGACTCATTATT  
ACTCTAGATGGTGAAGATGTTATTGACTGTGAACCAATATTGGGTTATTACACAGAGG  
AATGGAAAAAATTGCGGAAAACCGAACAATTATACAATATCTGCCTTATGTAACACGTT  
GGGATTATTTAGCTACTATGTTACAGAAGCAATAACCGTAAATGCACCAGAGCAATTA  
GGAAATATCAAGTACCGAAAAGAGCCAGCTATATCAGAGTAATTATGTTGGAGTTGAG  
TCGTATAGCTTCTCATTGTTATGGCTTGGTCCTTTTATGGCAGATATTGGTGCACAGAC  
CCCGTTCTTCTATATTTCAAAGAAAGAGAATTAGTATATGATTTATTCGAAGCTGCCAC  
TGGTATGAGAATGATGCATAATTATTTTCGTATCGGAGGAGTGGCTGTTGATCTACCTCA  
TGGCTGGATAGATAAATGTTTGGATTTCTGTGATTATTTTTAACAGGGATTGCTGAATAT  
CAAAAATTATTACACGAAATCCTATTTTTTTAGAACGAGTTGAGGGAGTAGGCATTATT  
AGCGGAGAAGAAGCAATAAATTGGGGTTTATCAGGACCAATGCTACGAGCTTCCGGAA  
TACAATGGGATCTTCGTAAAGTTGATCATTATGAGTGTTACGACGAATTTGATTGGGAG  
GTCCAATGGCAAAAAGAAGGAGATTCAGTACTCGTTATTTAGTACGAATCAGTGAAA  
TGACGGAATCTATAAAAATTATTCAACAGGCTCTGGAAGGAATTCCAGGGGGGCCCTAT  
GAGAATTTAGAAATCCGATCCTTTGATAGAGTAAGGGATCCCGAATGGAATGATTTTGA  
ATATAGATTCATTAGTAAAAAGCCTTCGCCACTTTTGAATTATCGAAACAAGAACTTTA  
TGTGAGAGTCGAAGCACCAAAGGGAGAGTTGGGAATTTTTTTGATAGGAGATCAAAGT  
GTTTTTCCTTGGCGATGGAAAATCCGACCGCCGGGTTTTATCAATTTGCAAATCTTCCT  
CAGTTAGTTAAAAGAATGAAATTGGCTGATATTATGACGATACTAGGTAGTATAGATATC  
ATTATGGGAGAAGTTGATCGTATGTTCCCTATGGTAACCGGGTTCATGAATTATGGTCAA  
CAAACAGTACGAGCTGCAAGGTACATTGGTCAAAGTTTCATGATTACCTTATCCCACGC  
AAATCGTTTACCTGTAACCTATTCAATATCCTTATGAAAAATTGATCACATCGGAGCGTTT  
CCGCGGTGCAATCCACTTTGAATTTGATAAATGCATTGCTTGTGAAGTATGTGTTTCGTGT  
ATGTCCTATAGATTTACCTGTTGTGCGATTGGAAATTAGAACTGATATTCGAAAGAAAC  
GATTGCTTAATTACAGTATTGATTTTCGGAATCTGTATATTTTGTGGTAATTGCGTTGAGTA  
TTGTCCAACAATTGTTTATCAATGACTGAAGAATATGAACTTTCTACTTATGATCGTCA  
CGAATTGAATTATAATCAAATCGCTTTGGGTGCTTTACCAATGCCAGTAATTGATGATTA  
CACAATTCGAACAATTTTGAATTCG---ATAAAAAATGGA-----ATGC  
AGGGTCGTTTGTCTGCTTGGCTAGTAAAGCATGGGCTAGTTCATAGATCTTTAGGCTTT  
GATTACCAAGGAATAGAGACTTTACAAATAAAGCCGGAGGATTGGCATTCCATTGCTGT  
AATTTTATATGTATATGGTTACAATTATCTACGTTCCCAATGTGCCTATGATGTAGACCA  
GGTGGACTGTTAGCTAGCGTGTATCATCTTACGAGAATAGAGTATGCTGTAGATCAACC  
GGAAGAGGTATGCATAAAAGTATTTGCCCAAGGAGGAATCCTAGAATCCGTCTGTTT  
TCTGGGTTTGGAAAAGTGCGGATTTTCAAGAACGGGAATCTTATGATATGTTGGGAATC  
TCTTATGATAATCATCCACGCCTGAAACGTATCTTAATGCCTGAAAGTTGGATAGGATGG  
CCCTTGCCTAAGGATTATATTGCCCCCAATTTTTATGAAATACAAGATGCTCAT-----  
-----ATGGCGAAAGGGAGCATTGG  
AATGGTCTTAGCTCCTGAATATTCAGACAATAAAAAGAAAAAAGGAACAAAAAAGAA

GATTGAGACAGTTATGAATTCCATCGAGTTTCCCTTACTCGATCGAACAACCCAAAATT  
CAGTCATTTCAACTACATCAAATGATCTTTCAAATTGGTCAAGACTTTCCAGTTTATGGC  
CGTTTCTCTATGGTACCAGTTGTTGCTTCATTGAATTTGCTTCATTAATAGGCTCACGAT  
TCGACTTTGATCGTTATGGACTGGTACCAAGATCCAGTCCTAGACAAGCGGACCTAATT  
TTAACAGCTGGTACAGTAACAATGAAAATGGCCCCTTCTTTAGTGAGATTATACGAACA  
AATGCCTGAACCAAAATATGTTATTGCTATGGGAGCATGTACAATTACAGGGGGGATGT  
TCAGTACCGATTCTTATAGTACTGTTTCGAGGAGTCGATAAGCTAATTCCTGTGGATGTCT  
ATTTGCCAGGCTGTCCACCTAAACCGGAGGCAGTTATAGATGCTATAACAAAACCTGCGT  
AAGAAAATATCTCGAGAAATCTATGAGGATAGAATTAGGTCTCAACGAGGGGAATCGGT  
GTTTTACTACCAATCACAAGTTTCATGTTGGACGCAGTACTCATACTGGAAATTATGATC  
AAGGATTACTCTATCAATCGCCGTCTACTCCAGAGATCCCCCGGAAACATTTTTTCAA  
TACAAAAGTTCAGTATCTTCTCACGAATTAGTGAATATGCAAACCTAGAAATACCTTTTCT  
TGGACAAAGGAACAGATTACTCGATCCATTTCCGTATCGCTCATGATATATATAATCACT  
CGGACATACATTTCAAATGCATATCCATTTTTGCACAACAGGGTTATGAAAATCCACG  
AGAAGCGACTGGGCGTATTGTATGTGCCAATTGCCATTTAGCTAGTAAGCCCGTGGATA  
TTGAGGTTCCACAAACGGTACTTCCCTGATACTGTATTTGAAGCAGTTGTTCGAATTCCT  
TATGATATGCAACTGAAACAAGTTCCTTGCTAATGGTAAAAAGGGAGGTTTGAATGTGG  
GGGCTGTCCTTATTTTACCCGAGGGGTTTGAATTAGCCCCCCCCGATCGTATTTCTCCCG  
AGATGAAAGAAAAGATAGGCAATCTGTCTTTTCAGAGCTATCGCCCCACAAAAA  
TATTCTTGTGATAGGTCTGTTCTGGTCAGAAATATAGTGAAATAACCTTTCTTATTCTT  
TCTCCCGACCCGCTAGTAAGAAAGATGTTCACTTTTTTAAATATCCCATATATGTAGGC  
GGGAACAGGGGACGGGGCCAGATTTATCCCGACGGGAGTAAGAGTAACAATACAGTTT  
ATAATGCTACAGCAGCAGGTATAGTAAACAAAATTATACGAAAAGAAAAGGGGGGTA  
CGAAATAACTATCGCGGATCCATCGGATGGACGTCAAGTGGTTGATATTATCCCTCCAG  
GGCCAGAACTTCTTGTTTCAGAGGGTGAATCTATCAAACCTTGATCAACCATTAACGAGT  
AATCCTAATGTGGGTGGATTTGGTCAGGGAGATGCCGAAATAGTACTTCAAGATCCATT  
ACGTGTCCAAGGCCTTTTGTCTTCTTGGCATCTGTTATTTTGGCACAAATCTTTTTGGT  
TCTTAAAAAGAAACAGTTTGAGAAGGTTCAATTGCTGAAATGAATTTTCATGAGTAAA  
GTATATGATTGGTTCGAAGAACGCCTCGAGATTCAGGCGATTGCAGATGATATAACTAG  
TAAATACGTTCCCTCCTCATGTCAACATCTTTTATTGCTTAGGAGGAATTACGTTACTTG  
TTTTTTAGTACAAGTAGCTACGGGGTTTGTCTATGACTTTTTTACTATCGTCCGACCGTTAC  
TGAGGCTTTTGTCTCTGTTCAATACATAATGACTGAAGCTAACTTTGGTTGGTTAATCCG  
ATCAGTTCATCGATGGTTCGGCAAGTATGATGGTCCATGATGATCCTGCACGTATTTCCG  
TGTGTATCTCACCGGTGGATTTAAAAAACCTCGCGAATTGACTTGGGTTACAGGTGTGG  
TTCTGGGTGTATTGACCGCATCTTTTGGTGTAACCTGGTTATTCCTTACCTTGGGACCAA  
TTGGTTATTGGGCAGTAAAAATTGTAACAGGCGTACCTGACGCTATTCCTGTAATAGGA  
TCGCCTTTGGTAGAGTTATTACGCGGAAGTGCTAGTGTGGGACAATCCACTTTGACTCG  
TTTTTATAGTTTACATACTTTTGTATTACCCCTTCTTACTGCTGTATTTATGTTAATGCACT  
TCCAATGATACGTAAGCAAGGTATTTCTGGTCTTTAATGGGAGTAACAAAAAACCT  
GACTTAAATGATCCTGTATTAAGAGCTAAATTGGCTAAAGGTATGGGCCATAATTATTAC  
GGAGAGCCCGCATGGCCAATGATCTTTTATATATTTTTCCAGTAGTTATTTTAGGTACTA  
TTGCATGTAACGTAGGCTTAGCAGTCTAGAACCGTCAATGATTGGTGAACCAGCAGAT  
CCATTTGCAACTCCTTTGGAAATATTACCTGAATGGTATTTCTTTCCCGTATTTCAAATAC  
TTCGTACAGTACCCAATAAGTTATTGGGTGTTCTTTTAAATGGTTTCAGTACCTGCGGGAT



TATTAACAGTACCCTTTTTGGAGAATGTTAATAAATTCCAAAATCCATTTTCGGCGTCCAG  
TAGCAACAACCGTCTTTTTGATTGGTACTGCGGTGGCCCTTTGGTTGGGTATTGGAGCA  
ACATTACCTATTGATAAATCCCTAACTTTAGGTCTTTTTATGATTGAAGTTTTTCTATTTG  
GAATCGTATTAGGTTTAATTCCTATTACTTTGGCTGGATTATTCGTAAGTGCATATTTACA  
ATACAGACGTGGTGATCAGTTGGACCTTATGCCTACTATAACTAGTTATTTTCGGTTTTCT  
ACTAGCGGCTTCAACTATAACCTCAGCTTTATTTATTGGTCTAAGCAAGATACGACTTAT  
TATGGATATAGTAAGTCTCGCTTGGGCTGCTTTAATGGTAGTCTTTACATTTTCCCTTTCA  
CTCGTAGTATGGGGAAGAAGTGGACTCATGATTATTCGTTTCGCCGGAACCAGAAGTAA  
AAATTTTGGTAGATAGGGATCCATAAAAACCTCTTTTCGAGGAATGGGCCAGACCCGGT  
CATTTCTCAAGAACAATAGCTAAGGGCCCTGAGACTACCACTTGGATCTGGAACCTACA  
TGCTGATGCTCACGATTTTCGATAGCCATAACAGTGATTTGGAGGAGATTTCTCGAAAAG  
TATTTAGTGCTCATTTTCGGTCAACTCTCCATCATCTTTCTTTGGCTGAGTGGCATGTATTT  
CCACGGTGCTCGTTTTTTCCAATTATGAAGCATGGCTAAGCGATCCTACTCATATTGGACC  
TAGTGCCCAGGTGGTTTTGGCCAATAGTGGGCCAAGAAATATTGAATGGTGACGTGGGT  
GGGGTTTTCCGAGGAATACAAATAACCTCTGGTTTTTTTTCAAATTTGGCGAGCATCCGG  
AATAACTAGTGAATTACAACCTATTGTACCGCAATTGGTGCATTGGTCTTTGCAGCGTT  
AATGCTTTTTGCTGGTTGGTTCCATTATCACAAAGCTGCTCCAAAATTGGCTTGGTTCC  
AAGACGTAGAATCTATGTTGAATCACCATTTAGCGGGGTTACTAGGACTTGGGTCTCTT  
TCTTGGGCGGGGCATCAAGTACATGTATCTTTACCGATTAACCAATTTCTAAACGCTGG  
AGTAGATCCTAAAGAGATCCCACTTCCCTCATGAATTTATCTTGAATCGGGATCTTTTGGC  
TCAACTTTATCCCAGTTTTGCTGAGGGAGCAACCCCGTTTTTTCACCTTGAATTGGTCAA  
AATATGCGGAATTCCTTACTTTTCGTGGAGGATTAGATCCAGTAACTGGGGGTCTATGG  
CTGACCGATATTGCACACCACCATTTAGCTATTGCAATTCCTTTTCCCTGATAGCAGGTAC  
ATGTATAGGACCAACTGGGGCATTGGTTCATGGTCTAAAAGATATTTTAGAGGCTCATAA  
GGGTCCATTTACAGGCCAGGGCCATAAAGGACTATATGAGATCCTAACAACGTCATGGC  
ATGCTCAATTATCTCTTAACTAGCTATGTTAGGCTCTTTAACCATTGTTGTAGCTACCA  
TATGTATCCATGCCCCCTTATCCATATCTAGCTACTGACTATGGTACAGTACTGTCAATG  
TTCACGCATCACATGTGGATTGGTGGATTTCTCATAGTGGGTGCTGCTGCGCATGCAGC  
CATTTTTATGGTAAGAGACTATGATCCAACACTCGATAACAACGATCTATTAGATCGTGT  
CCTTAGACATCGCGATGCAATCATATCGCATCTCAACTGGGCATGTATATTTTAGGCTTT  
CACAGTTTTGGTTTGTATATTCATAATGATACCATGAGTGCGTTAGGGCGTCTCAAGAT  
ATGTTTTCAGATACCGCTATAACAATTGCAACCTGTCTTTGCTCAATGGATACAAAACACC  
CATGCTTTAGCGCCTGGTGCAACGGCTCCTGGTGCAACAACAAGCACCAGTTTGACTT  
GGGGGGTGGTGATTTAGTAGCAGTAGGTGGCAAAGTAGCTTTGTTACCTATTCCATTA  
GGAACCGCAGATTTTTTGGTACATCACATTCATGCATTTACTATTCAITGTGACGGTCTTG  
ATACTCCTGAAAGGTGTTCTATTTGCTCGTAGCTCGCGTTTTGATACCGGATAAAGCAAA  
TCTCGGCTTTTCGCTTCCCTTGTGATGGACCTGGAAGAGGGGGTACATGTCAAGTATCTG  
CTTGGGATCATGTCTTCTTAGGGCTATTCTGGATGTACAATGCTATTTTCGGTAGTCATATT  
CCATTTCAAGTTGGAAAATGCAGTCAGATGTTTGGGGTAGTATAAGTGATCAAGGGGTAG  
TAACTCATATTACGGGAGGAACTTTGCGCAGAGTTCCATTACTATTAATGGATGGCTCC  
GCGATTTCTTATGGGCACAAGCATCCCAAGTAATTCAGTCTTATGGTTCTTCATTATCTG  
CATATGGACTTTTTTTCCTAGGTGCTCATTTTGTATGGGCTTTTAGTTAATGTTTCTATT  
CAGCGGGCGTGGTTACTGGCAAGAACTTATTGAATCCATCGTTTGGGCTCATAATAAAT  
TAAAAGTTGCTCCTGCTACTCAGCCTAGAGCCTTGAGCATTGTACAAGGACGTGCTGTA

GGAGTAACCCATTACCTTCTGGGTGGAATTGCCACAACATGGGCGTTCTTCTTAGCAAG  
AATTATTGCAGTAGGAATGGCATTAAAGATTTCCAAGGTTTAGCCAAGGCTTAGCTCAGG  
ACCCCACTACTCGTTCGTATTTGGTTTGGTATTGCTACCGCACATGACTTCGAGAGTCAT  
GATGATATTACTGAGGAACGTCTTTATCAGAATATTTTTGCTTCCCACCTTCGGGCAATTA  
GCAATAATTTTTCTGTGGACTTCCGGAAATCTGTTTCATGTAGCTTGGCAAGGAAATTT  
TGAGTCGTGGGTACAGGATCCTTTACACGTAAGACCTATTGCTCATGCAATTTGGGATC  
CTCATTTTTGGTCAACCTGCTGTGGAAGCTTTTACTCGAGGGGGTGTCTTTGGCCCAGTG  
AATATCGCTTATTCTGGTGTTCATCAGTGGTGGTATACAATCGGTTTACGTACTAATGAA  
GATCTTTATACTGGAGCTCTTTTTCTATTATTTCTTTCTGCCGTATCCTTAATAGCGGGTT  
GGTTACACTTACAACCGAAATGGAAACCGAGCGTTTCCTGGTTCAAAAATGCTGAATC  
TCGTCTCAATCATCATTTGTCAGGACTTTTCGGAGTAAGTTCCCTGGCTTGGACAGGGC  
ATTTAGTCCATGTTGCTATTCCTGGATCTAGGGGGGAGTACGTTTCGCTGGAATAATTTCT  
TAGATGTATTACCGCATCCCCAAGGGTTAGGCCACTTTTTACAGGTCAGTGGAAATCTTT  
ATGCTCAAAACCTGATTCAAGTAGTCATTTATTTGGTACTTCTCAAGGAGCAGGAACT  
GCCATTCTAACCTTCTCGGGGGATTTTCATCCACAAACGCAAAGTTTATGGTTGACTGA  
TATGGCTCATCATCATTTAGCTATTGCATTTATTTTTCTCGTTGCTGGTCATATGTATAGAA  
CTAACTTCGGGATTGGGCATAGTATGAAAGATCTGTTAGAAGCACATGTTCCCTCCGGGG  
GGACGATTGGGGCGTGGACATAAAGGTCTTTATGATACAATCAATAATTCGATTCATTTT  
CAATTAGGTCTTGCTCTAGCCTCTTTAGGGGTTGTTACTTCTTTGGTAGCTCAACACATG  
TACTCTTTACCTGCTTATGCGTTCATAGCACAAAGACTTTACGACTCAAGCTGCGTTATAT  
ACTCATCACCAATACATCGCAGGATTCATCATGACAGGAGCTTTTGCTCATGGAGCTATA  
TTTTTCATTAGAGATTACAATCCGGAACAGAATGAGGATAATGTATTGGCAAGAATGTT  
AGACCATAAAGAAGCTATCATATCCCATTAAAGCTGGGCCAGCCTCTTTCTGGGGTTCC  
ATACCTTAGGACTTTATGTTCATAATGATGTCATGCTTGTCTTTCGGTACTCCGGAAAAAC  
AAATCTTGATCGAACCTATATTTGCCCAATGGATACAATCTGCTCATGGTAAACTTCGT  
ATGGGTTTCGATGTACTTTTATCTTCAACGAATGGCCCAGCATTCAATGCTGGTTCGAAGC  
ATATGGTTGCCTGGCTGGTTAAATGCTATTAATGAG-----AATAGTAATTCACTATTCTTAA  
CAATAGGTCCTGGCGATTTCTTGGTTCATCATGCTATTGCTCTAGGTTTACATAACAACCA  
CATTGATCTTAGTAAAGGGTGCTTTAGATGCACGTGGTTCTAAGTTAATGCCAGATAAA  
AAGGATTTCCGGTTATAGTTTTCCCTTGCATGGTCCGGGACGAGGTGGTACTTGTGATAT  
TTCGGCTTGGGACGCTTTTTATTTGGCAGTTTTCTGGATGTTAAATACCATTGGATGGGT  
TACTTTTTATTGGCATTGGAAGCACATCACATTATGGCAGGGTAACGTTTCACAATTTAA  
TGAATCTTCCACTTATCTGATGGGATGGTTAAGAGATTATCTATGGTTAAACTCTTCACA  
ACTTATCAATGGATATAACCCTTTTGGTATGAATAGTTTATCGGTCTGGGCGTGGATGTT  
CTTATTTGGACATCTTGTTTGGGCTACTGGATTTATGTTCTTAATTCCTGGCGCGGATAT  
TGGCAGGAATTGATTGAAACTTTAGCATGGGCTCATGAACGCACACCTTTGGCCAATTT  
GATTCGATGGCGAGATAAACCAGTGGCCCTTTCTATTGTGCAAGCAAGATTGGTTGGAT  
TAGCCCACTTTTCTGTAGGTTATATAATTTACTTATGCGGCTTTCTTGATTGCGTCTACATC  
GGGCAAATTTGGTATGTCACACTCAGTAAAGATTTATGATACATGTATAGGGTGTACTCA  
ATGTGTTTCGAGCCTGCCCCACAGATGTATTAGAAATGATACCTTGGGATGGATGTAAAG  
CTAAACAAATTGCTTCTGCTCCAAGAACAGAAGACTGTGTTCGGTTGTAAGAGATGTGA  
ATCCGCCTGTCCAACGGATTTCTTGAGTGTTTCGAGTTTATTTATGGCATGAAACAACCTC  
GCAGCATGGGTCTAGCTTATATGACAACCTTTCAACTTACCCTCTATTTTTGTGCCTTTAG  
TGGGCTAGTATTTCCGGCAATTGCAATGGCTTCTTTATCTCTTCATGTTCAAAGAAACA

GGATTTTTATGCGAGATCTAAAAACATATCTTTCCGTGGCACCGGTAAGTACTCTAT  
GGTTCGGGGCTTTAGCAGGTTTATTGATAGAGATCAATCGTTTATTCCCGGATGCGTTGA  
CATCCCTTTTTTTTCATTTATGACTGCAATTTAGAGAGACGCGAAAGTGAAAGCCTAT  
GGGGTCGCTTCTGTAAGTGGATAACCAGCACCGAAAACCGTCTTTACATTGGATGGTTT  
GGCGTTTTGATGATCCCTACCTTATTGACCGCAACTTCTGTATTTATTATCGCCTTCATTG  
CTGCTCCTCCAGTAGATATTGATGGTATTCGTGAACCTGTTTCTGGATCTCTACTTTACG  
GAAACAATATTATTTCTGGTGCCATTATTCTACTTCTGCAGCTATAGGTTTGCACCTTTA  
CCCAATCTGGGAAGCAGCATCCGTTGATGAATGGTTATAACAATGGTGGTCCTTATGAAC  
TAATTGTTCTACACTTCTTACTTGGTGTAGCTTGTACATGGGTCGTGAGTGGGAACCTA  
GTTCCCGTCTGGGTATGCGTCCTTGGATTGCTGTTGCATATTCAGCTCCCGTTGCAGCTG  
CGACTGCTGTTTTCTTGATCTACCCAATTGGTCAAGGAAGCTTTTTCTGATGGTATGCCTC  
TAGGAATCTCTGGTACTTTCAACTTCATGATTGTATTCCAGGCTGAGCACAACATCCTTA  
TGCACCCATTTACATGTTAGGCGTAGCTGGTGTATTCGGCGGCTCCCTATTCAGTGCTA  
TGCATGGTTCCTTGGTAACTCTAGTTTGTATCAGGGAAACCACAGAAAATGAATCTGCT  
AATGAAGGTTACAGATTCGGGCAAGAGGAAGAACTTATAATATCGTAGCTGCTCATGG  
TTATTTTGGCCGATTGATCTTCCAATATGCTAGTTTCAATAATTCTCGTCTTTACATTTCT  
TCCTAGCCGCTTGGCCTGTAGTAGGTATCTGGTTTACTGCTTTAGGTATCAGCACCATGG  
CTTTCAACCTAAATGGTTTTCAATTTCAACCAATCTGTAGTTGATAGTCAAGGTCGTGTA  
TTAATACCTGGGCTGATATTATTAACCGTGCTAACCTTGGTATGGAAGTTATGCATGAAC  
GTAACGCTCATAACTTCCCTCTAGACCTAGCTGCTGTGCAAGCTCCGTCTACAAATGGA  
ATGGGTTTTGCCTTGGTATCGTGTTTACTACTGTTGTATTGAATGATCCCGGTCGGTTGCTT  
GCTGTCCATATAATGCATACAGCTCTCGTTGCTGGTTGGGCCGTTTCGATGGCTCTATAT  
GAATTAGCAGTTTTTGTATCCTTCTGATCCCGTCTTGTATCCAATGTGGAGACAAGGTAT  
GTTTCGTTATACCCTTCATGACTCGTTTAGGAATAACCAATTCATGGGGCGGTTGGAGTAT  
CACA---GGAGGTACCATAACGAATCCAGGCATTTGGAGTTACGAAGGTGTGGCCGGAG  
CGCATATTGTGTTTTCTGGCTTGTGCTTCTTGGCAGCTATTTGGCATTGGGTGTATTGGG  
ATCTAGAAATATTTAGTGATGAACGTACAGGAAAACCTTCTTTGGATTTGCCCAAGATT  
TTTTGGAATTCATTTATTTCTTTTCAAGGGTGGCTTGCTTTGGTTTTGGCGCATTTTCATGTA  
ACAGGGTTGTATGGTCTTGGAAATATGGGTGTCCGATCCTTATGGACTAACTGGAAAAGT  
ACAATCTGTAAATCCAGCGTGGGGTGTGGAAGGTTTTGATCCTTTTGTTCGGGAGGA  
ATAGCCTCTCATCATATTGCAGCGGGGACGTTGGGCATATTAGCGGGCCTATTCCATCTT  
AGTGTTTCGTCCGCCTCAACGTCTATACAAAGGATTACGTATGGGCAATATTGAAACCGT  
ACTTTCCAGTAGTATCGCTGCTGTCTTTTTTGTGCTTTTTGTTGTTGCTGGAACTATGTG  
GTATGGTTCAGCAACTACCCCGATCGAATTATTTGGTCCCACTCGTTATCAATGGGATCA  
GGGATACTTCCAGCAAGAAATATATCGAAGAATTAGTGCTGGACTAGCCGAAAATCAA  
AGTTTATCAGAAGCTTGGTCTAAAATTCCCGAAAAACTAGCTTTTTTATGATTACATTGGC  
ATAATCCGGCAAAAGGGGGATTATTCAGAGCGGGCTCAATGGACAACGGGGATGGAA  
TAGCTGTTGGATGGTTAGGACACCCTGTCTTTAGAGATAAAGAAGGGCGTGAACTTTTT  
GTACGCCGTATGCCTACCTTTTTTGAACATTTCCAGTTGTTTTGGTAGATGGAGACGG  
AATTGTTAGAGCTGATGTTCCTTTTAGAAAGGGCAGAATCAAAGTATAGTGTGCAACAA  
GTAGGTGTAAGTGTGAGTTCTATGGCGGCGAACTTAACGGAGTTAGTTATAGTGATCC  
GGCTACTGTTAAAAAATATGCTAGACGCGCTCAATTGGGTGAAATTTTTGAATTAGATC  
GTGCTACTTTGAAATCCGATGGTGTTTTTTCGTAGCAGCCCAAGGGGTTGGTTTACTTTT  
GGACATGCTTCATTTGCTTTGCTCTTCTTCTTCGGACACATTTGGCATGGTGTAGAAC

TTGTTTCAGAGATGTTTTTGGCTGGTATTGACCCAGATTTGGATGCTCAAGTGGAATTTGG  
AGCATTCCAAAACTTGGAGATCCAACACTACAAGAAGACAAGTAGTC-----  
-----GTGGAAACGCTCTTTAATGGAACCTTTAGCTTTAGCTGGTTCGTGACCAAGAAA  
CCACCGGTTTCGCTTGGTGGGCGGGAATGCCCGACTTATCAATTTATCTGGTAAACTA  
CTTGGGGCTCATGTAGCCCATGCCGGATTAATCGTATTCTGGGCTGGAGCAATGAACCT  
ATTTGAAGTGGCTCATTTTCGTACCAGAGAAGCCCATGTATGAACAAGGATTAATTTTAC  
TCCCCACCTAGCTACGCTCGGTTGGGGGGTAGGTCCTGGTGGGGAAGTTATAGACAC  
CTTCCCTACTTTGTATCTGGAGTACTTCACTTAATTTCTCTGCAGTATTGGGCTTTGG  
CGGTATTTATCATGCACTTCTGGGACCTGAGACTCTTGAAGAATCTTTTCCATTCTTCGG  
TTATGTATGGAAAGATAGAAATAAAATGACCACAATTTTGGGTATTCACTTAATCTTGTT  
AGGTCTAGGTGCTTTTCTTCTAGTATTCAAGGCTCTTTATTTTGGAGGCATATATGATACC  
TGGGCTCCGGGGGGGGGGGATGTAAGAAAAATTACCAACTTGACCCTTAGCCCAAGTG  
TTATATTTGGTTATTTACTAAAATCTCCTTTTGGGGGAGAAGGATGGATTGTTAGTGTGG  
ATGATTTGGAAGATATAATTGGAGGACATGTATGGTTAGGTTCCATTTGTATACTTGGTG  
GAATCTGGCATATCTTAACCAAACCCTTTGCATGGGCTCGCCGTGCACTTGTATGGTCT  
GGAGAGGCTTACTTGTCTTATAGTTTAGCTGCTTTATCTATCTTTGGTTTCATTGCTTGTT  
GCTTTGTGTGGTTCAATAATACCGCTTATCCTAGTGAGTTTTACGGGCCCACTGGACCA  
GAAGCTTCTCAAGCTCAAGCATTACTTTTCTAGTTAGAGACCAACGTCTCGGGGCTAA  
TGTGGGATCGGCTCAAGGACCGACAGGTTTAGGTAATATCTAATGCGTTCCCAACTG  
GAGAAGTCATTTTTGGAGGAGAACTATGCGTTTTTGGGATCTTCGTGCTCCCTGGTTA  
GAACCTCTAAGGGGTCCCAACGGTTTGGACTTGAGTAGGCTGAAAAAAGACATACAA  
CCTTGGCAAGAACGGCGTTCCGCGGAATATATGACTCATGCTCCTTTAGGTTCTTTAAA  
TTCCGTGGGTGGCGTAGCTACAGAAATCAATGCAGTCAATTATGTCTCTCCTAGAAGTT  
GGTTATCTACCTCTCATTTTGTCTAGGATTCTTCTTATTTCGTAGGTCATTTGTGGCACGC  
AGGAAGGGCTCGTGCAGCTGCAGCAGGATTTGAAAAAGGAATTGATCGTGATTTTGAA  
CCTGTTCTTTCCATGACCCCTCTTAACATGACTATAGCCCTTGGTAAATATACCAAAGAC  
GAAAATGATTTATTTGATATTATGGATGACTGGTTACGGAGAGACCGTTTCGTTTTTGT  
GGTTGGTCCGGTCTATTGCTCTTTCCTTGTGCGTATTTTCGCTTTAGGGGGTTGGTTACA  
GGTACAACCTTTGTAACCTCATGGTATACCCATGGATTGGCCAGTTCCTATTTGGAAGGC  
TGTAATTTCTTAACCGCCGAGTTTCAACCCCTGCTAATAGTTTAGCACATTCTTTGTG  
TTACTATGGGGTCTGAAGCCCAAGGAGATTTTACTCGTTGGTGTCAATTAGGCGGTCT  
GTGGACTTTTGTGCTCTCCATGGCGCTTTCGGACTAATAGGTTTCATGTTACGTCAATT  
CGAACTTGCTCGATCTGTTCAATTGCGACCTTATAATGCAATTGCATTTTCTGGTCCAAT  
TGCTGTTTTTGTCTGTATTCTGATTTATCCACTAGGTCAGTCTGGTTGGTTCTTTGCG  
CCTAGTTTTGGTGTAGCAGCTATATTTGATTCATCCTCTTTTTTCCAAGGGTTTCATAATT  
GGACGTTGAACCCATTTTCATATGATGGGAGTTGCCGGTGTATTGGGCGCTGCTCTGCTA  
TGCCTATTTCATGGTGTACTGTAGAAAATACTTTATTTGAAGATGGTGTATGGTCAAAT  
ACATTCGTGCTTTTAACCCAACTCAAGCTGAAGAACTTATTCAATGGTCAACCGCTAA  
CCGCTTTTGGTCCCAAATCTTTGGGGTTGCTTTTTCCAATAAACGTTGGTTACATTTCTT  
TATGTTATTTGTACCAGTAACCGGTTTATGGATGAGTGCTCTTGGAGTAGTCGGTCTGGC  
TCTGAACCTACGTGCCTATGACTTCGTTTCCCAGGAAATCCGTGCAGCGGAAGATCCTG  
AATTTGAGACTTTCTATACCAAAAATATTTATTAACGAAGGTATTCGTGCTTGGATGG  
CGGCTCAAGATCAGCTCATGAAAACCTTATATTCCCTGAGGAGGTTCTACCACGTGGA  
AACGCTCTTATGTCTGGAAGCACAGGAGAACGTTCTTTTGTGATATTACTAGTATT

CGATACTGGGTCATTCATAGCATTACTATAACCCTCCCTATTCATTGCGGGTTGGTTATTTCG  
TCAGCACGGGTTTAGCTTACGATGTGTTTGGAAGCCCTCGGCCAAACGAGTATTTTACA  
GAGAGCCGACAAGGAATTCATTAATAACTGGCCGTTTTGATTCTTTGGAACAACCTCGA  
TGAATTTAGTAGATCCTTTATGACCATAGATCGAACCTATCCAATTTTACAGTACGATG  
GTTGGCTATTCACGACTAGCTGTACCTACCGTTTCTTTTTTGGGGTCAATATCAGCAAT  
GCAGTTCATCCAACGAATGGCTACACAAACCGTTGAGAGTAGTTCCAGATCTGGT--CC  
AAGACAAACTAATGTAGGGAATTTATTGAAACCATTGAATTCGGAATATGGTAAAGTAG  
CTCCTGGATGGGGAACACTCCTTTGATGGGTGTCGCAATGGCTCTATTTGCGATATTCC  
TATCTATTATTTGGAGATTTATAACTCTTCTGTTTTACTGGACGGAATTTCAATGAATAT  
GCTTACTCTCAAACCTTTCGTTTACACAGTAGTGATATTCTTTGTTTCTCTCTTCATCTTC  
GGATTCTATCTAATGATCCAGGACGTAATCCTGGACGTGAAGAAATGGCCGATACTAC  
TGGAAGGATTCTCTTTGGCTAATAGGTACTGTAGCTGGTATTCTTGTGATCGGTTAAT  
AGGTATTTCTTTTATGGTTCATATTCAGGATTGGGTTCATCCCTGATGCTTAATATTTTA  
GTTTGATCGGTATCTGTCTTAATTCTGCCCTTAT--AGTAGTTTTTTCTTTGCCAAATTAC  
CCGAGGCCTACGCTTTTTTAAATCCAATTGTAGATTTTATGCCAGTAATACCTTTGCTGT  
TTTTTCTCTTAGCCTTTGTTTGGCAAGCTGCTGTAAGTTTTCGAACGACACAATCAAAC  
CCGAACGAACAAAGTGTTGAATTGAATCGTACCAGTCTCTACTGGGGGTTATTACTCAT  
TTTTGTACTTGCTGTTTTATTTTCCAATTATTTTTTCAATATGGAAGTAAATATTCTTGCAT  
TTATTGCTACTGCACTGTTCAATCTAGTTCCTACTGCTTTTTTACTTATCATATACGTAAA  
AACAGTCAGTCAAATAATATGGAAACAGCAACCCTAGTCGCCATCTCTATATCTGGTT  
TACTTGTAAGTTTTACTGGGTACGCCTTATATACCGCTTTTGGGCAACCCTCTCAACAAC  
TAAGAGATCCATTCGAGGAACATGGGGATATGGAAGCATTGGTTTATACATTCCTCTTAG  
TCTCGACTCTAGGGATAATTTTTTTCGCTATCTTTTTTCGAGAACCGCCTAAAGTTCCAA  
CTAAAAG-----ATGACTATTGCTTTCCAATTGGCTGTTTTTGCATTAATTGCTACTTCAT  
CAATCTTATTGATTAGTGTACCCGTTGTATTTGCTTCTCCTGACGGTTGGTCAAGTAAGA  
AAAATGTTGTATTTTCTGGTACATCATTATGGATTGGATTAGTCTTTCTGGTAGGTATCCT  
TAATTCTCTCATCTCT-----ATGTCACCACAAACAGAGACTAAAGCAAGTGT  
TGGATTCAAAGCTGGTGTAAAGATTACAAATTGACTTATTATACTCCTGATTATGAAAC  
CAAAGATACTGATATCTTGGCAGCATTCCGAGTAACTCCTCAACCTGGAGTTCCACCTG  
AGGAAGCGGGGGCAGCGGTAGCTGCTGAATCTTCTACTGGTACATGGACAACCTGTGTG  
GACCGATGGACTTACCAACCTTGATCGTTACAAAGGACGATGCTATCACATCGAGCCCG  
TTGCTGGAGAAGAAAGTCAATTTATTGCTTATGTAGCTTACCCCTTAGACCTTTTTGAA  
GAAGTTCTGTTACTAACATGTTTACTTCCATTGTGGGTAATGTATTTGGGTTCAAAGCC  
CTGCGCGCTCTACGTCTAGAGGATCTGCGAATCCCTCCTGCTTATGTTAAAACCTTTTCA  
AGGCCCGCCTCATGGCATCCAAGTTGAGAGAGATAAGTTGAACAAGTATGGTCGTCCC  
CTATTGGGATGTACTATTAACCTAAATTGGGGTTATCTGCTAAGAACTACGGTAGAGC  
AGTTTATGAATGTCTCCGTGGTGGACTTGACTTTACCAAAGATGATGAAAACGTGAACT  
CCCAACCATTTATGCGTTGGAGAGACCGTTTCTTATTTTGTGCCGAAGCACTTTATAAA  
GCACAAGCTGAAACAGGTGAAATCAAAGGGCATTACTTGAATGCTACTGCAGGTACAT  
GCGAAGAAATGATCAAAGGGCAGTATTTGCCAGAGAATTGGGAGTTCCTATCGTAAT  
GCACGATTACTTAACAGGGGGATTCACTGCAATACTAGCTTATCTTTTTATTGCCGAGA  
TAATGGCCTACTTCTTACATCCATCGTGCAATGCATGCAGTTATTGATAGACAGAAGAA  
TCATGGTATACACTTTCGTGTAAGCTAAAGCGTTACGTATGTCTGGTGGAGATCATAT  
TCACTCTGGTACCGTAGTAGGTAACCTTGAAGGGGAAAGAGAGATCACTTTGGGCTTT

GTTGATTTACTACGTGATGATTTTATTGAAAAAGATCGAAGTCGCGGTATTTATTTCACT  
CAAGATTGGGTCTCTCTACCAGGTGTTCTGCCCCGTGGCTTCAGGGGGTATTCACGTTTG  
GCATATGCCTGCTCTGACCGAGATCTTTGGAGATGATTCTGTACTACAGTTCGGTGGAG  
GAACTTTAGGACACCCCTGGGGAAATGCACCGGGTCCGTAGCTAATCGAGTTGCTCT  
AGAAGCATGTGTACAAGCTCGTAATGAAGGACGTGATCTTGCTCGTGAGGGTAATGAA  
ATTATCCGTGAGGCTTGCAAATGGAGTCCTGAACTAGCTGCTGCTTGTGAAGTATGGAA  
GGAGATCAAATTTGAATTCGAGGCAATGGATACTTTG-----ATGGCGATACATTTATACA  
AAACTTCTACCCCGAGCACACGCAACGGAGCCGTAGACAGTCAAGTCAAATCCAATC  
CACGAAATAATTTGATCTATGGACAGCATCATTGTGGTAAAGGTCGTAATGCCAGAGGA  
ATCATTACCGCAGGGCATAGAGGGGGAGGTCATAAGCGTCTATACCGTAAAATCGATTT  
TCGACGGAATAAAAAGGACATATATGGTAGAATCGTAAACCATAGAATACGACCCTAATC  
GAAATGCATACATTTGTCTCATACTATGGGGATGGTGAGAAGAGATATATTTTACATC  
CCAGAGGGGGCTATAATCGGGGATACCATTGTTTCTGGTACAGAAGTTCCTATAAAAATG  
GGAAATGCCCTACCTTTGACCGATATGCCCTTAGGCACGGCCATACATAACATAGAAAT  
CACACTTGGAAGGGTGGACAATTAGCTAGAGCAGCGGGTCTGTAGCGAAACTGATT  
GCAAAAGAGGGGAAATCGGCCACATTAATAATTACCTTCTGGGGAGGTCCGTTTGATAT  
CCAAAACCTGCTCAGCAACAGTCGGACAAGTGGGGAATGTTGGGGTGAACCAGAAA  
AGTTTGGGTAGAGCCGGATCTAAGCGTTGGCTAGGTAAGCGTCCTGTAGTAAGAGGAG  
TAGTTATGAACCCTGTAGACCATCCCCATGGGGGTGGTGAAGGGAGGGCCCCAATTGG  
TAGAAAAAGACCCACAACCCCTTGGGGTTATCCTGCACCTTGAAGAAGAAGTAGAAA  
AAAGAATAAATATAGTGATAATTTGATTCTTCGTCGCCGTAGTAAAATGATTCAACCCCA  
GACCTATTTGAATGTAGCGGACAACAGCGGGGCCGAGAATTGATGTGTATTCTGAATCA  
TAGGAGCTAGT--AATCGCCGATATGCTCATATTGGTGATGTTATTGTTGCTGTGATCAAA  
GAAGCAGTACCAAATATGCCTCTCAAAAAGATCAGAAGTGATCAGAGCTGTAATTGTAC  
GTACTIONTGTAAAGAACTCAAACGTGACAATGGTATGATAATACGATATGATGACAATGCT  
GCAGTTGTCATTGATCAAGAAGGAAATCCAAAAGGAACTCGAGTTTTTGGTGCATCG  
CCCGAGAATTGAGACGGTTAAATTTTACAAAATAGTTTCATTAGCCCCTGAAGTATTA  
ATGCTTAGTCCCAAAAAGAACCAGATTCCGTAAACAACATAGAGGAAGAATGAAGGGAA  
TATCTTATCGAGGTAATCATATTTGTTTCGGTAGATATGCTCTTCAGGCACTTGAACCCG  
CTTGATCACATCTAGACAAATAGAAGCAGGGCGACGAGCAATGACACGAAATGCAC  
GCCGTGGGGGAAAAATATGGGTACGTATATTTCCAGACAAACCCGTTACAGTAAGACC  
TGCGGAAACACGTATGGGGTCGGGTAAAGGATCTCCCGAATATTGGGTAGCTGTCTGTTA  
AACCAGGTAGAATACTTTATGAAATGGGCGGAGTAACAGAAAATATAGCCAGAAAGGC  
TATTTCAATAGCAGCATCCAAAATGCCTATACGAACTCAATTCATTATTTTCG---ATGACCA  
GAATTAGACGAGGATATGTAGCTCGTAAACGTAGAACAATAATTCGTTTATTTGCATCA  
AGCTTTTCGGGGGGCTCATTCAAGACTTACTCGAACTATTACTCAACAGAAAATAAGAG  
CTTTGGTTTCTGCTCATCGGGATAGAGATAGGCAAAAGAGAGATTTTCGTCGTTTGTGG  
ATCACTCGGATAAATGCAGTAATTCGCGGGAGT---AAGGTATCCTATAGTTATAGTCGATT  
AATACACGATCTGTACAAGAGGAAATTGCTTCTTAATCGTAAATACTTGCACAAATAG  
CTATATTAATAGGAATTGTCTTTATATGATTTCCAATGAAATCATAAGAGAAGGGGATT  
GTAAGGAATCCACCGGAAAAATTATGTTGAAGGAAGTATACGCTTTAGGTCAACATATA  
TGTATGTCTGCTCACAAGCGCGAAGAGTAGTTGATCAGATTCGTGGACGTTCCCTACG  
AGGAAACACTTATGATACTAGAACTCATGCCTTATCGAGCATGTTATCCCATTTTTAAAT  
TGTTTTATTCTGCAGCAGCAAATGCTAGTCACAATATGGGTTTCAATGAAGCAGATTTA

ATCATTAGTAAAGCCGAAGTCAATGAGGGTACTACCGTGAAAAAATTAACCTCGAG  
CTAGAGGACGTGGTTATCCGATAAAAAGGTCCACCTGCCATATACTATTGTATTGAAA  
AATACATCCTTA-----ATGGATGGAATCAAATATGCAGTATTTACAGACAAA  
AGTATTCGGTTATTGAGGAAAAAT--CAATATACTTCTAATGTCTGAATCAGGATCAACTA  
GGACAGAAATAAAGCATTGGGTCTGAACCTCTTCTTTGGTGTCAAGGTAATAGCTATGAAT  
AGTCATCGACTCCCGGAAAGGGTAGAAGAATGGGACCTATTATGGGGCATAACAATGC  
ATTACAGACGTATGATCATTACGCTTCAACCGGTTATTCTATTCCACCTCTTAGAAAGA  
AAAGAACTATGGCAGTTCCAAAAAACGTACTTCTATGTCAAAAAAGCGTATTTCGTAA  
AAATTATTGGAAAAAGAAGGGATATTGGGCAGCGTTAAAAGCTTTTTTCATTATCGAAAT  
CTCTTTCAACCGGAAATTCAAAAAGTTTTTTT-----CCGACAATGGCCAAGAGTAA  
AGATGTCCGAGTAACGGTTATTTTGGAAATGTACCAGTTGTGTGCGAAATGGTGTGAAT--  
--AAAGAATCCATGGGCATTTCCAGATATATTACTCAAAAAGAATCGACACAATACGCCTA  
GTCGATTGGAATTGAGAAAATTCTGTCCCTATTGTTACAAACATACGATTCATGGGGAG  
ATAAAGAAAATGAAAATAAGGGCCTCTGTTTCGTAAAATTTGTGAAAAATGTCGACTGA  
TCCGTAGGCGGGGACGAATTATAGTAATCTGTTCCAACCCAAGACATAAACAAAGACA  
AGGAATGGTTCGAGAGAAAGTAACAGTATCTACTCGGACACTAGAGTGGAAGTGTGTT  
GAATCAAGAGCAGACAGTAAGCGTCTTTATTATGGACGCTTTATTTTGTCTCCACTTATG  
AAAGGTCAAGCCGACACAATAGGCATTGCGATGCGAAGAGCTTTGCTTGAGAAAATAG  
AAGGAACATGTATCACACGTGCAAAATCTGAG-----AAAATACCACATGAATATTCTACC  
ATAGTAGGTATTCAAGAATCAGTACATGAAATTTAATGAATTTGAAAGAAGTTGTATTG  
AGAAGTAATCTGTATGGAACCTCGCAACGCGTCTATTTGTGTCAGTGGTCTGGATATGT  
AACTGCTCAAGACATCATCTCACCGCCTTCTGTGGAAATCGTTGATAATACACAGCATA  
TAGCTAGCCTGACTGAACCAATTGACTTGTGTATTGGATTACAAATCGAAAAGAATCGC  
GGATATCGTATAAAAACGCCAAAT-----AACGACGGAAGTTAT-----CCTATAGATGCTGTA  
TTCATGCCTGTTTCGAAATGCGAATCATAGTATTCATTCTTATGGGAATGGGAATGAAAAA  
CAAGAGATACTTTTTCTCGAAATATGGACAAATGGAAAGTTTAACTCCTAAAGAAGCACT  
TCATGAAGCCTCTCGGAATTTGATTGATTTATTTATTCCCTTTCTACATGCGGAAGAAGA  
A-----AACTTACATTTAGAGGACAATCAA--CACAAGGTTACTTTACCCCTTTTTACTTTT  
CATGATAGATTGGCT--AAACTAAGGAAAAACAAAAA-----ATAGCATTAAAATATATTT  
TTATTGACCAATCAGAATTGCCTCCAGGATCTATACTTGCCTCAAAGGTCCAATATAC  
ATACATTATTGGACCTTTTGAATAACAGTCAAGAAGATCTTATGAAAATAGAACATTTTC  
GCATAGAAGATGTAAGAGATATTGGGCTTTTTAGAAAAGCAT-----TTCGAAATTGAT  
TTACCGAAGAATAAGATGCTCCGGAATGGAAAT--GAGGGAATGTCTACAATACCTGGG  
TTAATCAGATACAATTTGAAGGATTTTGTAGGTTTATTGATCAGGGCTTGACGGAAGA  
ACTTTATAAGTTTCCAAAAATTGAAGATACAGATCAAGAAATTGAATTTCAATTATTGT  
GGAAACATATCAATTGGTTGAACCGTTGATAAAAGAAAGAGATGCTGTGTATGAATCAC  
TCACATATTCTTCTGAATTATATGTATCTGCGGGATTAATTTGGAAAACCAGTAGGGATAT  
GCAAGAACAACAATTTTTATTGGCAACATTCCTCTAATGAATTCCTGGGAACTTCTAT  
AGTAAATGGAATATACAGAATTGTGATCAATCAAATATTGCAAAGCCCCGGAATTTATTA  
CCGGTCAGAATTGGACCATAACGGAATTCGGTCTATACGGGCACCATAATATCAGATT  
GGGGAGGAAGATTAGAATTAGAGATTGATAGAAAAGCACGGATATGGGCTCGTGTGAG  
TAGGAAACAGAAAATATCTATTCTAGTTCTATCATCAGCTATGGGGTCTGAATCTAAGAG  
AAATTCTAGAGAATGTTTGTACCCGGAATTTTTTTGTGCTTCCTGAATGATAAGGAG  
AAAAAAAATTGGGTCAAAAGAAAATGCCATTTTGGAGTTTATCAACAATTTGCTT

GTGTAGGCGGGGATCCAGTATTTTCTGAATCCGTCTGTAAGGAATTACAAAAGAAATTC  
TTTCAACAAAGGTGTGAATTAGGAAGGGTTGGTCGACGAAATATGAATCGGAGACTTA  
ATCTTGATATACCTCAGAACAAATACATTTTTGTTACCGCGAGATATATTGGCAGCTGCGG  
ATCATTGATTGGAATGAAATTTGGAATGGGTACACTTGACGAT-----ATGAATCATTGGA  
AAAATAAACGTATTCGTTCTGTAGCGGATCTTTACAAGATCAATTCGGATTGGCTCTG  
GTTTCGTTTAGAAAATGTGGTTCGAGGAACTATAGGCGGAGCAATTAGG---CATAAATTG  
ATA---CCGACTCCTCAGAATTTGGTAACTTCAACTCCA-----TTAACAACCACTTATG  
AATCCTTTTTTCGGCTTACACCCATTATCTCAAGTTTTGGATCGAACTAATCCATTGACAC  
AAATAGTTCATGCGAGAAAATTGAGTTATTTGGGCCCTGGAGGATTGACAGGGCGAAC  
TGCTAGTTTTTCGGATACGAGATATCCATTCTAGTCACTATGGACGCATTTGCCCAATTGA  
CACGTCTGAAGGAATCAATGTTGGACTTATTGGATCTTTAGCAATTCATGCGCGAATTG  
GTCATTGGGGA---TCTCTAGAAAGCCCTTTTTAT-----GAAATTTCTGAGTCTGAGAGA  
TCAAAAAGGTACGGATGCTTTATTTATCACCAGTAGAGATGAATACTATATGATAGCG  
GCAGGAAATTCCTTGGCGCTGAATCAGGGTATTCAGGAGGAACAGGTTGTTCCAGCTC  
GATACCGTCAAGAATTCCTGAGTATTGCATGGGAACAGGTTTCATCTTCGAAGTATTTTT  
CCCTTCCAATATTTTTCTATTGGAGCTTCCCTCATTCTTTTATCGAGCATAATGATGCGA  
ATCGGGCTTTAATGAGTTCTAATATGCAACGTCAAGCAGTTCGGCTTTCTCGGTCCGAA  
AAGTGCATTGTTGGAACGACTGGGTTGGAACGACAAGCAGCTCTAGATTCAGGAGTTCCCG  
CTATAGCCGAACACGAGGGAAAGATTATTTATACTGATACTGACAAGATCATTTTATCAG  
GTAATGGAAATACTCTAAGCATTCCATTAATTATGTATGAACGTTCCAACAAAATACTT  
GTATGCATCAAAAACCCAGGTCCATCGGGGTAATGTATTA AAAAAGGACAAATTTTA  
GCGGATGGTGCCGCTATCGTTGGCGGCGAACTCGCTTTGGGTAAAACGTATTAGTAGC  
TTATATGCCATGGGAAGGTTACAATTCTGAAGATGCAGTACTTATTAGCGAGCGTCTGGT  
ATATGGAGATATTTATACTTCTTTTACATACGGAAATATGAAATTCAGACTCATGTGAC  
AAGCCAAGGC---CCTGAAAGGATCACTAATGAAATACCGCATTTAGAAGCCCATTTACT  
CCGTAATTTAGACAAAATGGAATTGTGAGGCTTGGATCTTGGGTAGAGACGGGCGAT  
ATTTTAGTAGGTAAATTAACGCCTCAGATGGCGAAAGAA---TCATCGTATGCCCCGAA  
GATAGATTATTACGAGCCATATTGGGCATTGAGATATCCACTTCAAAGGAACTTGTCTA  
AAACTGCCTATAGGCGGTAAGGGTCGAGTTATTGATGTGAGATGGATCCAGAAAAGG  
GG---GGTTCTAGTTATAATCCAGAAACGATTTCGTGTATATATTTTACAGAAACGTGAAAT  
CAAAGTAGGTGATAAAGTAGCTGGTAGACATGGAAATAAAGGCATCATTTCCAAAATTT  
TGCCTAGACAGGATATGCCTTATTTGCAAGATGGAAGACCTGTGGATATGGTCTTCAAC  
CCATTAGGAGTACCTTACGAATGAATGTAGGACAGATATTTGAATGCTCGCTGGGGTT  
AGCGGGGAGTCTGCTAGACAGGCATTATCGAATAGCACCTTTTGTAGAGAGATATGAGC  
AAGAGGCTTCGAGAAAACCTAGTGTCTTCTGAATTATATGAAGCTAGTAAGCAAACAGC  
AAATCCATGGGTATTTGAACCCGAATATCCGGGAAAAAGTAGAATATTTGATGGAAGAA  
CGGGAGATCCTTTTGAACAACCCGTTATAATAGGAAAGCCTTATATCTTGAATTAATTC  
ATCAAGTTGATGATAAAATCCATGGACGTTCCAGTGGACATTATGCACTTGTTACACAA  
CAACCCCTGAGAGGAAGGGCCAAGCAAGGGGGACAGCGGGTAGGAGAAATGGAGGT  
TTGGGCTCTAGAGGGATTGGCGTTGCTCATATTTTGAAGAGATGCTTACTTATAAATC  
TGATCATATTAGAGCTCGTCAGGAAGTACTTGGTACTACGATCATTGGAGGAACAATAC  
CTAACCCCGAGGATGCTCCCGAATCTTTTCGATTGCTCGTTCGAGAATTACGATCTTTG  
GCTCTGGAACGTAATCATTTTCTTGTATCTGAAAAAATTTCCAGATTAATAGGAAGGA  
AGCTATGAATCAGAATTTTTCTTCTATGATCGATCGGTATAAACATCAACAACCTCCGAAT



TGGATTAGTTTCTCCTCAACAAATAAGTGCTTGGGCCAATAAAATCCTACCTAATGGAG  
AAATAGTTGGAGAGGTGACAAAACCCTATACTTTTCATTACAAAACCAATAAACCGGA  
AAAAGATGGATTATTTTGTGAAAGAATTTTGGGCCTATAAAAAGTGGAAATTTGTGCTT  
GTGGAAATTATCGAGTAATCGGAGATGAAAAAGAAGACCCGAAATTTGTGAACAATG  
CGGAGTCGAATTTGTTGATTCTCGGGTACGAAGATATCAAATGGGCTATATCAAACCTGG  
CATGTCCAGTAACCCATGTGTGGTATTTGAAACGTCTTCCTAGTTATATCGCGAATCTTT  
TAGATAAACCTCTGAAAGAATTAGAGGGCCTAGTATACTGCGATTTT-----TCTTTTGCTA  
GGCCC---GTAGCCAAAAAACCCACTTTCTTACGATTACGAGGTTTATTTCGAATATGAAAT  
CCAATCCTGGAAATACAGCATCCCACTTTTTTTTACAACCCAGGGCTTCGATACATTTTCG  
AAATAGAGAAATCTCTACCGGAGCAGGTGCTATCCGAGAACAATTAGCCGATCTGGATT  
TGCGACTTATTATAGATTCTTCATTGGTAGAATGGAAAGAATTAGGGGAAGAA---GGTC  
CCACAGGTAATGAATGGGAAGATCGAAAAATTGGAAGAAGAAAAGATTTTTTGGTTAG  
ACGCATGGAATTAGCTAAGCATTTTATTTCGAACAAATATAGAACCAGAATGGATGGTTT  
TGTGTCTATTACCAGTTCTTCTCCCGAGTTGAGACCGATCATTAGATCGATGGGGGT  
AAACTAATGAGTTCGGATATTAATGAACTCTATAGACGAGTTATCTATCGGAACAATACT  
CTTAACGATCTATTAACAACAAGTAGATCTACACCAGGGGAATTAGTAATGTGTCAGGA  
GAAATTGGTACAAGAAGCCGTGGATACGCTTCTTGATAATGGAATCCGCGGACAACCA  
ATGAGGGACGGTCATAATAAGGTTTACAAGTCGTTTTTCGGATGTAATTGAAGGCAAAG  
AGGGAAGATTTTCGTGAGACTCTGCTTGGCAAACGGGTTGATTATTTCGGGGCGTTCCGT  
CATTGTCGTAGGCCCTTCACTTTCATTACATCGATGTGGATTGCCTCGCGAAATAGCAAT  
AGAGCTTTTCCAGACATTTGTAATTCGTGGTCTAATTAGACAACATCTTGCTTCGAACAT  
AGGAGTTGCTAAGAGTAAAATCCGGGAAAAAGAACCGATTGTATGGGAAATACTTCAG  
GAAGTTATGCAGGGGCATCCTGTATTGCTCAATAGAGCACCTACTCTGCATAGATTAGG  
CATAAGGCATTCCAACAGTTTTAGTGGAAGGACGCGCTATTTGTTTACATCCATTAGT  
TCGTAAGGGATTTAATGCAGACTTTGATGGGGATCAAATGGCTGTTTCATGTACCTTTATC  
TTTGGAGGCTCAAGCGGAGGCTCGCTTACTTATGTTTTCTCATATGAATCTCTTGCTCC  
AGCTATTGGGGATCCATTTCCGTACCAACTCAAGATATGCTTATTGGACTCTATGTATTA  
ACGAGGGGGAATCGCCGAGGTATTTGTGCAAATAGGTATAATCCACGTAATTGC-----  
ATAAATTATCAAATGAAAGAATTCGACTAATAACTATAAGTATACGAAAGAA---GAAC  
CCTTTTTTTGTAATTCGTATGATGCAATTGGAGCTTATCGGCAGAAAAGAATCAATTTAG  
ATAGTCCTTTGTGGCTCCGGTGGCGACTAGATCAACGC---GTTATTGCTTCA-----AGAG  
AAGCTCCCGTCGAAGTGCATTATGAATCTTTGGGTACTTATCATGAGATTTATGGGCACT  
ATCTAATAGTAAGAAGTGTAATAAAGAAATTTTGTATATACATTCGAACCACCGTTG  
GTCATATTTCTCTTTATCGAGAAATCGAAGAAGCTATAACAAGGGTTTTGTGCGAGCCTGT  
TCATATCGTACC-----ATGGAGGTACTTATGGCAGAACGGGCCAATCTGGT  
CTTTCACAATAAAGTGATAGATGGAACCTGCCATGAAACGACTTATTAGCAGATTAATAG  
ATCACTTCGGAATGGCATATACATCACACATCCTGGATCAAGTAAAGACTCTAGGTTTC  
CAGCAAGCCACTGCTACATCTATTTCAATAGGAATTGATGATCTTTTAAACAATACCTTCT  
AAAGGATGGCTAGTCCAAGACGCTGAACAACAAGTTTGTATTTGGAAAAACACCATC  
ATTATGGGAATGTACACGCAGTAGAAAAATTACGCCAATCTATTGAGATATGGTATGCTA  
CAAGTGAATATTTGCGACAAGAAATGAATCCTAATTTTAGGATGACTGATCCCTTAAATC  
CAGTCCATATGATGTCTTTTTCGGGAGCGAGAGGAAATGCATCTCAGGTACACCAATTA  
GTAGGTATGAGAGGATTAATGTGCGATCCCCAAGGACAAATGATTGATTTACCCATCCA  
AAGCAATTTACGCGAAGGACTCTCTTAAACAGAATATATCATTCTTGCTACGGAGCCC

GCAAAGGAGTTGTGGATACTGCTGTACGAACATCAGATGCTGGATATCTCACGCGCAG  
ACTTGTGAAGTAGTTCAACACATTGTTGTACGTAGAACAGATTGTGGCACCTCCCGA  
GGTATTTCTGTGAGTCCCTCAAAATGGGATGATGCCG---GAAAGAATTTTCATCCAAACA  
TTAATTGGTCGTGATTAGCGGACGATATATACATGGGTTTCACGATGCATTGCCATTCGA  
AATCAAGATATTGGGATTGGACTTGTCAATCGATTATAACC-----TTTCGAGC  
ACAACCAATATCTATTAGAACTCCCTTTACTTGTAGGAGTACATCTTGGATCTGTGCATT  
ATGTTATGGTCGGAGTCCACTCATGGTGACCTGGTTCGAATTGGGGGAAGCTGTAGGTA  
TTATTGCGGGTCAATCTATTGGAGAACCAGGTAACAATAACATTAAGAACTTTTCAT  
ACTGGTGGAGTATTCACGGGGGTACTGCAGAACATGTACGAGCCCCTTCTAATGGAA  
AAATAAAATTCAATGAGGATTTGGTTCATCCCACACGTACACGTCATGGACATCCTGCT  
TTTCTATGTTCTATAGACTTGTATGTAACATTGAGAGTGAAGATATTATACATAATGTGA  
ATATTCCACCAAAAAGTTTTATTTTAGTTAAAAATGATCAATATGTAGAATCAGAACAAG  
TGATTGCTGAGATTCGTGCGGGAACATCTACT--TTAATTTTAAAGAGAGGGTTCGAA  
AACATATTTATTCTGATTCACAGGGAGAA---ATGCACTGGAGTACCGATGTGTACCATGC  
ACCTGAATTTACATATGGTAATGTTTCATCTTACCAAAAACCAGTCATTTATGGATATTA  
TCAGGAAGTTCTTGCAGA-----TCCAATGTAGTCCCCTTTTCGCTCCACAAAGATCAAGA  
TCAACTGAACGTTTCAT----TCTCTTTCTGTGCAACGAAAATATATTTCTAACTTCTCA----  
-GTGACTAATGATCAA---GTGAGACATAAACTCTTTAGTTTCGGATCGTTCTGGTAAA-----  
---AGGATTCCTGATTAT--TCAGAACTTAATCGAATCATATGTAAGTACTGATCATTGTAATTTCA  
TATATCCG---GCCATTCTCCACGAGAATTAT-----GATTTATTGTCAAAGAGGGCGAAAAAA  
TAGATTAATCATTCCATTCCAATCGATTCAAGAACGAGAGAAAGAACAATGCCCCATT  
CAGGTATCTCGATTGAAATACCC-----ATAAATGGCATTTCGTAATAAATAGTATTATGG  
CTTATTTTCGATGACCCCCGATACAGAAGAAACAGTTCGGGAATTACTAAATATGGTACTA  
TAGAGGTGCATTCAATCGTCAAAAAAGAGGAT-----TTGATTGAGTATCGAGGA---GGCA  
AAGAGTTTAAGCCAAGATACATGCAAGTAGATAGATTTTTTTTCATTCCCGAGGAAGTG  
CATATTTTGCCCGGATCTTCTTCCATAATGGTGCAGAACAAATAGTATCATTGGAGTATCT  
ACACGAATCACTTTAAATAAAAGAAGCCGCGTAGGCGGATTGGTCCGAATGGAGAGAA  
AAAAAAGGGGAATTGAACTTAAATCTTTTCTGGAGATATCTATTTTGCTGGAGAGACA  
GATAAATAGCCCGACACAGTGGCATCTTAATACCACCAGGAACG-----GGAAAAACAA  
ATTCCAAGGAATCAAAAAA-----TTGAAAAATTGGCTCTATGTCCAACGG-----ATCAC  
ACCTACCAAG-----AAAAAGTATTTGTTTTGGTTTCGACCTGTAGTCACATACGAAATAG  
CGGACGGTATAAATTTAGCAACACTTTTCCCCGAGGATCTGTTGCAGGAAAGGGATAAT  
ATGAAACTTCGAGTTGTCAATTATATCCTTTATGGAAACGGAAAACCAATTTCGGGGAAAT  
TTCTGACACAAGTATTCAATTAGTTCGTAATTTGTTTAGTATTGAATTGGGACCAAGACA  
AAAAA-----AGTTCTTCTGTGCGGAGAGGCCCATGCCTCCTTTGTTGAAGTAAGTACAA  
CTGGTCTGATTCGAGATTTCCCTAAGAATTGACGTAGTGAATCCCCTATTTTCGTATACCG  
GAAAAAGGAACAGTCCATCAAGTTCAGGATTGGTCTATGAT---AATGGATCAGATCGCA  
CCAATATCAATCCGTTTTAT-----TCCAAGGCAAAG---ATTCAACAATCACTTAGCCAA-  
-----AATCAAGGAACTATTCGTACCTTGTTCATAGA-----AATAAGGAATTCCAAT  
CTTTGATAATTTATCATCATCCAATTGTTCTCGAATGGGTCCA-----TTCAAC-----GAT  
CACAACGTG-----ATAAAAAGAAATCAGACTTCCTAATTCCAATTAGGAATTCGTTGGGT  
CCTTTAGGAACA-----GCCCTTCAAATTGAAAATTTTATTCA-----TTTTACGATTTA-----  
ATAACTCGTAATCAGATCTTG---GTAACATAAATTTTGCAACTTGAGAAT-----TTAAAA  
CAGATTTTTCAAGTACTTAAA-----TATTTTTTAATGGATGAAAAT-----GGGAGGATTTA

TAATCCGGATCCGTGCAGTACCATCATTGTTGAATCCATTCAATTTGAATTGGTACTTTCT  
CCATCATAATTATTGTGAAGAAACAACC---ACAAAAGTTAGTCTCGGACAGTTTATTTGC  
GAAAATGTATGTATAGCCAAAACGGACCACAC---CTAAA-----TCGGGCCAAGTTCTA  
ATTGTTCAA---GTTGACTCTATAGTAATAAGATCGGCTAAGACTTATTTGGCCACTCCAG  
GAGCAACCGTTCGCGGCCATTATGGGGAAATCCTTTACGAAGGGGATACATTAGTTACA  
TTTATATATGAAAATCGAGATCTGGTGTATAACGCAGGGTCTTCCAAAGGTGGAACA  
GGTGTTAGAAGTGCCTTCGATTGATTCAATATCGATAAACCTAGAAAAGAGAGTTGAG  
GGTTGGAATGAGCGTATAACAAGAATTCTTGGAATTCCTGGGGATTCTTGATTGGTGC  
TGAGCTAACTATAGTGCAAAGTCGTATCTCTTTGGTTAATAAAATCCAAAAGGTTTATCG  
ATCCCAGGGGGTGCAGATTATAATAGGCATATAGAAATTATTGTACGTCAAATAACATC  
AAAAGTGTGGTTTCAGAA-----GATGGAATGTCTAATGTTTTTTTACCCGGAGA  
AATTGGATTGTTGCGAGCGGAACGAACGGGTCGTGCTTTGGAAGAAGTGATCTGTTAT  
CGAGCCATTTTATTGGGAATAACTAGAGCATCTCTGAATACTCAAAGTTTCATATCCGAA  
GCGAGTTTTCAAGAAACCGCTCGAGTTTTAGCAAAGCAGCTCTCCGTGGTTCGTATCG  
ATTGGCTGAAGGGCCTGAAAGAGAACGTTGTTCTGGGAGGGATGATACCCGTTGGTAC  
CGGATTCAAAGATTA-----GTGCACCATTCAAGGCAACATAAGAACATT-----TCTTTGG  
AAACCAAAAAGAAAATTTATTCGAGGGGGAAATGAGA-----GATATTTTGTCCACCA  
CAGAGAATTATTTAATTTTTGCATTTCAAAGAATTTCCATGATACATCAGAACAATATGG  
GATT-----ATGACAAGAAGATATTGGAACATTAATTTGGAAGAGAT  
GATGGAAGCGGGAGTTCATTTTGGTCATGGTACTAGGAAGTGGAATCCTAGAAATGGCC  
CCTTATATCTCTGCAAAGCGTAAAGGTATTCATATTACAAATCTTACTAGAACTGCTCGT  
TTTTTATCAGAAGCTTGTGATTTAGTTTTTGTATGCAGCAAGTAGGGGAAAACAATTCTT  
AATTGTTGGGACAAAAATAAAGCAGCTGATTCAGTAGCACGGGCTGCAATAAAGGCT  
CGATGTCATTATGTTAATAAAAAATGGCTCGGTGGTATGTTAACAATTTGGTCCACTACA  
GAAACGAGACTTCATAAGTTCAGGGACTTGAGAACGGAACAAAAGACGGGGGGGCTC  
AATCGTCTTCCGAAAAGAGATGCAGCTATGTTGAAGAGACAATCTCACTTGCAA  
CATATCTGGGTGGGATTAATATATGACGGGAGTCCCCGATATTGTAATCATCGTTGATC  
AGCAAGAAGATATACGGCTCTTCGAGAATGTATCACTTTGGGAATTCCAACGATTTGT  
TTAATCGATACAAATTGTGACCCCGATCTCGCAGATATTTGATTCCAGCGAATGATGAC  
GCTATAGCTTCAATCCGATTAATCTTAACAACTAGTATTTGCGATTTGTGAGGGTTCGT  
TCT--AGCTATATAAGAAATCCTATGGGACAAAAATAAATCCACTTGGTTTCAGACTTG  
GTACAACCAAGGTCATCATTCCCTTTGGTTTGCACAACCAAAAATTTCTGAGGGT  
CTACAAGAAGATCAAAAATACGGGATTGTATCAAGAATTATGTACAAAAAATATGAG  
AATATCCTCTGGT--GTCGAGGGAATTGCACGAATAGAAATTCAAAAAGAATCGATCT  
GATTCAGGTCATAATTTATATGGGATTCCTCAAAGTTATTAATAGAAGGTAGACCACGA----  
-----AGAATTGAAGACTTACAGATGAATGTACAAAAAGAATTAATTTATGTGAACCGA  
AAACTCAACATTGCTATTACAAGAATTGCAAAACCTTACGGAAACCTAATATTCTTGC  
AGAATTTATAGCCGGACAATTAATAAATAGAGTTTCATTTTCGCAAGGCAATGAAAAAA  
GCTATTGAATTAACGAGGCAGATACAAAAGGAATTCAAGTACAAATTGCAGGAC  
GTATCGACGAAAAGAAATTGCACGTGTCAATGGATCAGAGAAGGGAGGGTTCCCCT  
ACAAACCATTTCGAGCTAAAATTGATTATTGTTTCTTATACAGTTTCGAACTATATATGGGGT  
ATTAGGCATCAAATTTGGATATTGTAGACGAG---ATGTCGCGTTACCGAGGGCCTCGT  
TTCAAAAATAACGCCGTCTGGGGGCTTACCAGGGACTAACTAGTAAAAGGCCTAGAG  
CCGGAAGTGATCTTAGAAACCAATCGCGTTCCGGTAAA---AGATCTCAATATCGTATTCG

TCTAGAAGAAAAACAAAAATTGCGTTTTTCATTATGGTCTTACAGAACGACAATTACTTA  
AATATGTCCGTATCGCCGAAAAGCCAAAGGTTCAACAGGTCAGGTTTTACTACAATTA  
CTTGAAATGCGTTTGGATAACATCCTTTTTTCGATTGGGTATGGCGTCGACTATTCCTGGA  
GCCCCCAATTAGTTAACCATAGACATATTTTAGTTAATGGTCGTATAGTAGATATACCA  
AGTTATCGCTGCAAACCACGAGATATTATTACAGCGAAGGATGAACAAAAATCCAGAA  
CTCTGATTCAAATATCTTGATTCATCCCCTCAT--GAGGAATTGCCAAAATATTTGACT  
CTTACCCGCTCCAATAT-----AAAGGATTAGTCAATCAAATAATAGATAATAAATGGGTC  
GGTTTGAAAATAAATGAATTGCTAGTCGTAGAATATTATTCCCGTCAAACTATGTCACGT  
CGAGGTACTGCAGAAGAAAAAACTGCAAAATCCGATCCAATTTATCGTAATCGATTAGT  
TAACATGTTGGTTAACCGTATTCTGAAACACGGAAAAAAATCATTGGCTTATCAAATTAT  
CTATCGAGCCGTGAAAAAGATTCAACAAAAGACAGAAAACAAATCCACTATCTGTTTTA  
CGTCAAGCAATACGTGGAGTAACTCCCGATATAGCAGTAAAAGCAAGACGTGTAGGCG  
GATCGACTCATCAAGTTCCCATAGGATCCACACAAGGAAAAGCACTTGCCAT  
TCGTTGGTTATTATGGGCATCCCGAAAACGTCCGGGTGCAAATATGGCTTTCAAATTA  
GTTCCGAATTAGTGGATGCTGCCAAAGGGAGTGGCGATGCCATACGCAAAAAGAAG  
AGACTCATAAATGGCAGAGGCAAATAGAGCTTTTGCACATTTTCGTATGGGTAGGGA  
CACTATTGCTGAGATAATAACCTCTATACGAAATGCTGACATGCATAGAAAAGGAACGG  
TTCGAATAGCATCTACTAACATCACTGAAAACATTGTGAAAATACTTTTACGAGAAGGT  
TTTATAGAAAACGTGAGAAAGCATCGGGAAAACAACAAAGATTTTTTGGTGTTAACCC  
TACAACATAGAAGG-----AATAGGAAAGGACCATATAAAACT---ATT-----TTAAATTTAAA  
ACGGATCAGTCGACCTGGTCTACGAATCTATTCTAACTATCAAAGAATTCCTAGAATTTT  
GGGTGGTGTGGGGATTGTAATCCTTTCTACTTCTCGAGGTATAATGACAGACCGAGAGG  
CTCGACTAGAAGGAATCGGTGGAGAAATTTGTGTTATATATGGATGGCAAAACCTATA  
CCAAGAATTGGTTCACGTAGGAATGGACGTATTGGTTCACGTAAGAGTGCACGTAGAC  
TACCAAAGGGAGTTATTCATGTTCAAGCAAGTTTCAACAATACCATTGTGACTGTTACA  
GATGTACGGGGTCGGGTGGTTTTCTTGGTCTCTGCCGGTACTTGTGGATTCAGGGGTAC  
AAGAAGAGGGACACCATTGCTGCTCAAACAGCAGCAGGAAACGCTATTTCGTACAGT  
AGTGGATCAAGGTATGCAACGAGCAGAAGTAATGATAAAAGGTCCTGGTCTCGGAAGA  
GATGCAGCATTACGGGCTATTCGCAGAAGTGGTATACTATTAAGTTTTGTACGGGACGT  
AACCCCTATGCCACATAATGGCTGTAGACCTCCTAAAAAAAGACGTGTGATGCCAACCC  
ATTAAACAACCTTATTAGAAACACAAGACAGCCAATAAGAAATGTCACGAAATCCCCCG  
CTCTTCGGGGATGTCCTCAGCGACGAGGAACATGTAAGGTTACTAGGGTGTATACTATCACCC  
AAAAAACCAACTCTGCCTTACGTAAAGTTGCCAGAGTACGATTAACCTCTGGATTTG  
AAATCACTGCTTATATACCTGGTATTGGCCATAATTCACAAGAACATTCTGTAGTCTTAG  
TAAGAGGGGGAAGGGTTAAGGATTTACCCGGTGTGAGATATCACATTGTTTCGAGGAAC  
CCTAGATGCTGTTCGGAGTAAAGGATCGTCAACAAGGGCGTTCTAAATATGGGGTCAAA  
AAGCCAAAATGGCACGGAAAAGCTTGATTCAGAGGGAAAAGAAGAGGCCAAAATT  
GGAACAGAAATATCATTTGATTCGTGATCCTCAAAAAAAGAAATAAGC-----AAAGT  
TACGTCGTTGAGTGACAAATGGGAAATTCATGGAAAGTTACAATCCCCACCACGTAATA  
GTGCGCCTACACGTCTTCATCGACGTTGTTTTTCGACCGGAAGGCCGAGAGCTAACTAT  
CGAGACTTTGGGCTATCCGGACACATACTTCGTGAAATGGTTCATGCATGTTTGTGCC  
AGGGGCAACAAGATCAAGTTGGATGGTAAAAAATTCATTCATTTTCAGTTTTTTTGCAAG  
AA---GAA---AAAGAGGAAAACCGGGGGTCTGTTGAATTTCAAGTATTCAGTTTCACCAA  
TAAGATACGAAGGCTCACTTCGCATTTGGAATTGCACAGAAAAGACTATTTATCTCAGA

GAGGTCTACGTAAAATTCTGGGAAAACGTCAACGACTACTGGCCTATTTGTCAAAAA  
AAATAGAGTACGTTATAAAGAATTAATTGGTCGGTTAGATATTCGGGAACATAAACTC  
AC-----ATGGTAAAACCTTCGTTTGAAACGATGTGGTAGAAAGCAACGAGCCGTCTATCG  
AATCGTTGCAATTGATGTTTCGATCCCGAAGAGAAGGAAGAGATCTTCAAAAAGTTGGT  
TTTTATGATCCGATAAAGAATCAAACCTTATTCAAATGTTCTGCTATTCTATATTTCTTG  
CAAAAGGCGCTCAACCTACAGGAACGTTCATGATATTTAAAGAGGGCAGAGGTTTT  
TAACGAATTTTCGCTTTAATCAAACGAAATTCAT---ATGGATAAATCCAAGCGACCTTTT  
CTTAAATCCAAGCGATCTTTTCGTAGGCGTTTGCCCCGATCCAATCGGGGGATCGAAT  
TGATTATAGAAATATGAGTTTAATTAGTCGGTTTATTAGTGAACAAGGAAAAATATTATCT  
AGACGAGTGAATAGATTGACCTTGAACAACAACGATTAATTACTATTGCTATAAAACA  
AGCTCGTATTTTATCTTTGTTACCTTTTCTTAATAACGAGAAA-----CAGTTTGAAAGAAC  
CGAGTCGACCGCTAGAACTACTGGTTTTCGAACCAGAAATAAAGTGGCACGT---CTAA  
AAAAAATCCTTTTGTAGCGAATAATTTATTAATAAAAAAATTAAGCTTAACACAAAAG  
TCGGAAAAAGAAATAATAGTAACTTGGTCCCGAGCATCCACCATTATACCCACAATGAT  
AGGACATACTATTGCTATCCATAATGGAAAAGAGCATTTCCTATTATATAACAGATCG  
TATGGTAGGCCACAAATTGGGAGAATTTGCACCTACTCTAAATTTCCGGGGACATGCGA  
AAAATGATAATAGATCTCGTCGTATGATTTTCAAATCTTTTCTACTAGGTAATCTAGTATC  
CTTATGCATGAAGATAATAAATTCGGTCGTTGTGGTTCGGACTCTATTATGGATTTCTGAC  
CACATTCTCCATAGGGCCCTCTTATCTCTTCTTCTCCGAGCTCAGGTTATGGAAGAAG  
GAGAAGAAGGAACCCAGAAGAAGGTATCAGCAACAACCTGGTTTTATTACGGGACAGC  
TCATGATGTTTCATATCGATCTATTATGCGCCTCTGCATCTAGCATTGGGTAGACCTCATA  
ATAACTGTCCTAGCTCTACCGTATCTTTGTTTTATTCTTCTGGAACAATCACAAACA  
CTTTTTTGATTATGGATCTACTACCAGAAATTCATGCGTAATCTCAGCATTCAATGTGTA  
TTCTGAATAATCTCATTTTTCAATTATTCAACTATTTTATTACCAAGTTCAATGTTAG  
CCAGATTAGTCAACATTTATATGTTTCGATGCAACAACAAGATGTTATTTCGTAACAAGTA  
GTTTTGTTGGTTGGTTAATTGGTACATTTTATTTCATGAAATGGGTTGGATTGGTATTAG  
TCTGGATACGGCAAATAATCTATTAGATCTCTTATTTCGATCTAATAAGTACCTTGTGTC  
AGAAGTGAGAAATTCTATGGCTCGAATCTTTAGTATTCTCTTATTTATTACCTGTGTCTAC  
TATTTAGGCAGAATACCGTCACCCACTGTTACTAAGAACTGAAAGAAACCGAAGAAG  
ATAAACCTCTGGTGACCCGTCTTTTCGACTATAAACGATGGACTCGTCCATTGCGGTATA  
TAAAAAATGATCGATTTGAAAATGCTGTAAGAAATGAAATGTCACAATATTTTTTTTACA  
CATGTGCAAGTGATGGAAAACAAGAATATCTTTTACGTCTCCACCTAGTTTGTCAACT  
TTTTTAGAAATGATACAAAGAAAGATGTCTTTGTACACAACGGAAAACCCTTCTCTTA  
TGAAGTGTATAATCAGTGGGTTTATACCAATGAACAAAACGAAAAC---CTAAGCAACGA  
GTTTCTAAGTAGAATAGAGGCTCTAGACAAGGGATCTCTTCTCTGGATGTACTCGAAA  
AAAAGACTAGATTATGTAATGATGAACTAAAAAGAATACTTACCTAAAAAATATGAT  
CCTTTCTTGAACGGGCCTTATCGTGGAACAATCAAATTTATTTTTCCACCTATCGGAACT  
CTTTGGCTAAATAAGATCCACGGTATCCTTGATCGAGAATTTCAACAAAAAGATACTAA  
TGATCAAGGAATAGGAATAAACGAAATCACTAAAAAATCCCTCGATGGTCATACAAAT  
TAATCGATTTAGAACAACAAGAGAGA---CAGATTCGTTCAAGAAAAGCTAAACGTGTA  
GTCATTTTTACTGATGCTTTAATACGTTATTCTCAACAATCGGATTTTCGTGAGACATAA  
TAAAAGGCTCCATGCGCGCTCAAAGACGTAAACTAGCTATTTGGGAACTGTTTCAAGC  
AAATGTACATTCACCACTTTTTTTGGACAGAATAGACAACCCCCCTTTTTTTCATTTGA  
TATC-----TCCGAAGTATGAAACTAATTTTCATACTATAGAAGAGAAAGTGCGAATAG

AAATAGCCGAAGCCTGGGATACCATTATATTTGCTCAAGTAATAAGAGGTTTAGTCTTAG  
TAACACAATCAATTCTTAGAAAATCTATTATATTACCGTCATTAATAATAGCTAAAAATAT  
TGGTCGTATGCTATTATTTCAATTTCCCGAGTGGTCCGAGGATTTAAAGGATTGGAAGA  
GGGAAATGCATGTTAAATGCACCTATAATGGTGTTCATTATCAGAAACAGAATTTCCG  
AAAACTGGTTAACAGATGGTATTCAAATAAAGATACTATTTCTTTCTGTCTGAAACC  
TTGGCACAGATCTAAGAAAGGGAAAAAAGATGATTTTTGTTTTTTAACAGTTTGGGGA  
ATGGAAGCTGAACTGCCTTTTTGGTTCTCCCCGAAAAAAGACCCTCTTTTTTTGAACCCGT  
TTTTCAAGAACTCGGAAAAAAAATTCTAAAATGGAAAAGGAATTGTTTTCTAGCT--CT  
AAGAGTTTTTAAAGAAAGAACAAATTTCTTTCTAATAGTCCCAAAGAAATAAAAAAA  
TGGATTATCAAAAAAATTCTC-----CTTATACAAAGAATAATAAAAGAACTATCAAACT  
AAATGATTCAATAATCAGCAATAGTATGATTTATGAATCGTCCAGTCAAATTCATCTATC  
GATTGGACAAATTATCACTGACAGAAAAAAAATCAAAGATCTAACTGATAGAACAA  
GCCTAATCAGAACTCAAATAGGAAAAATTACAAAAGAAAAGAAAACCAGTGCTAACA  
AGAAAAGTCATGATGCTAAAAGATTAGAATCTGCCCAATTTTTTGGCAGATGTTAAAA  
AGAATAAATATTCGATTAATCCGTAAATCATATTTTTTTATAAAATTTTTTCGTTGAAAGAA  
TATATATAGATATCTTCTTATGTATAATTAATTTCTCGGATCAATACACAACCTTTTT--CA  
CTTTATA-----AACTTATCCTCTTTGTACAAAGCATATGTATTTTACAAATTATCACAAACC  
CAAGTTATTAGCTTGGATAAGTTAAGATCTATCCTTCAATATACATCTCTTTTTCTTAAAA  
ATGAAATAAAGGATTATTTTTGCACAAGGAATATTGCATTCCGAATTAACATAAGAAA  
CTTCGGAATTCTGGAATGAATCAATGGAAAAGTTGGTTAAGGGGTCATTATCAATATAA  
TTTCTCAAAGATTAGATGGTCTAGATTAGTACCACAAAATGGCGAAATAGAGTTAATC  
AAGGTTGGAGGGCCCAAAT--AACAAATGGGATTCGTATGAAAAAGACCAA-----GTA  
ATTCATTACGAAAAA---GAAAATTTAAAAAACACTATAGGTATGATCTCTTATCATCTA  
AATCTATTAATGATGGTATTATGGATCCGGATAGAAAATATTTTGATTGGAAAATTCTCCA  
CTTTTGTCTTAAA---TTTGATTGGATGGGAATGAATGAAGAAATACTAAATCGTTGGTTC  
TTCCCGGAATTTGCGCTACTTTATAATTCATATAAAATTC AACCTGGGCCATACCCATC  
AAATTACTTCTTTTTAATTATAAAAGCAATACAGAAGCAGA ACTCGATTTATTTCTAAAA  
AAGTATTTGCTTTTTCAATTGAGATGGGATGATTCTTTAAATCAAAGAATGATCAATAAT  
ATCAAGGTATATTGTCTCCTGCTTAGACTGATAAACCCAAGAGAAATTGCTATATCCTCT  
ATTGAACGGGGAGAAATGAGTCTGGATATAATGCTGATTCAGAAAGATTTAACTCTTAC  
AGAATTGATGAAA---GGGATATTTATTATCGAACCGGTTCTGTCTGTCTGCAAAAATGAT  
GGACAATTTATTATGTATCAAACCATAAGTATTTCAATTGGTTCATAAGAGTAAAGACAAT  
CATTATGCTTTGCTCGTTCCTGAAAATATTTTATCACCTAGACGTCGTAGAGAGTTTAGA  
ATTCTAATTTGTTTCAGATTTCTTTGGCCACTTATCGATTAGAAGATTTAGCTTGTATGA  
ATCGCTATTGGTTTGATACCACTAATGGCAGTCGTTTTCGGTATGGTAAGGATACATATGT  
ATCCGATGAAAGGACATCAATTCAAATCCTGGATTTTCGAATTGAGAGAGATATTGAGA  
GAGATCAAGAATTCTCACTATTTCTTAGATTCATGGACCCAATTCAATTCAGTGGGATCT  
TTCATTCACATTTTTTTCCACCAAGAACGTTTTATAAAACTCTTTGACCCCCGAATTTGG  
AGTATCCTACTTTCA--CGCAATTCA-----CAGGGTTCAACAAGCAATCGATATTTCT-----  
-ACGATCAAGGGTGTAGTACTATTTGTAGTAGCG--GTCCTTATATATCGT-----ATTA  
ACAATCGAAATATGGTCGAAAGCAAAAATCTCTATTTGACAGGGCTTCTTCT-----  
--ATACCTATGAATTCATTGGACCCAGAAATGATACATTGGAAGAATCTTTT--GGGTCT  
TCCAATATCAATAGGTTGATTGTTTCG---CTCCTGTATCTTCCAAAAGGAAAAAAGATCT  
CTGAGAGTTGTTTCTGGATCCGAAAGAGAGTACTTGGGTTCTCCCAATAACT-----

AAAAAGTGTATCATGTCTGAATCTAACTGGGGTTGGCGGTGGTGGAGGAACTGGATCG  
GAAAAAAGAGG-----GATTCTAGTTGTAAGATATCTAAT-----GAAACCGTCGCTGGAA  
TTGAGATCTCATTCAAAGAGAAAGATATCAA---TATCTGGAGTTTCTTTTTGTATATTAT  
ATGGAT-----GATCCGATCCGCAAGGACCATGATTGGGAATTGTTTGATCGTCTTTCTCCG  
AGGAAGAGGCGAAACATAATCAACTTG-----AATTCGGGACAGCTATTCGAAATCTTAG  
TGAAACACTGGATTTGTTATCTCATGTCTGCTTTTCGTGAAAAAATACCAATTGAAGTG  
GAGGGT--TTCTTCAAACAACAAGGA---GCTGGGTCAACTATTCAATCAAATGATATTGA  
GCATGTTTCCCAT-----CTCTTCTCGAGAAACAAGTGGGCTATTTCTTTGCAAAATTGTG  
CTCAATTTTCATATGTGGCAATTCCGCCAAGATCTCTTCGTT-----AGTTGGGGGAAG---  
AATCCGCACGAATCGGATTTTTTGAGGAAC---GTATCGAGAGAGAATTGGATTTGGTTA  
GACAATGTGTGGTTGGTAAACAAGGATCGG-----TTTTTTAGC-----AAGGTACGGAAT  
GTATCGTCAAATATTCAATATGATTCC-----ACAAGA-----TCTAGTTTCGTTCAAGTAA  
CGAATTCTAGCCAATTGAAAGGATCTTCT--GATCAATCCAGAGATCATTTCGATTCCATT  
AGT-----AATGAGGATTCGGAA-----TATCACACATTGATCA  
ATCAAAGAGAGATTCAACAATAAAAGAAAGATCGATTCTT--TGGGAT-----CCTTCCT  
TTCTTCAAACGGAACGAACAGAGATAGAATCAGAC-----CGATTCCCGAAA-----TGCCT  
TTCTGGATATTCC-----TCAATGTCCCGGCTATTCACG--GAACGTGAGAAGCAGATGAAT  
AATCATCTGCTTCCGGAAGAAATCGAAGAATTT-----ATTGGGAATCCTACAAGATCCAT  
TCGTTCTTTTTTCGCTGACAGATGG-----TCAGAACTTCAT--CTGGGTTCGAATCCTACT  
GAGGGGTCCACTAGAGATCAG-----AAATTGTTGAAGAAAGAACAATATCTTTCT--  
TTTTGTCCCTTCCAGGCGATCGGAA-----AATAAAGAAATGGTTAATATATTCAAGAT  
AATTACGTATTTACAAAAT-----ACCGTCTCAATTCATCCTATTTTCATCAGATCCGGGATGT  
GATATGGTTCCG--AAGGATGAACCGGAT--ATGGACAGTTCCAATAAGATTTCAAGTCTT  
GAACAAAATCCATTTTTTGATTTA-----TTTCATCTATTCCATGACCGGAACAGGGGGG  
GATACACGTTA-----CACCACGATTTTGAATCAGAA-----GAGAGATTTCAAGAAATGGC  
AGATCTATTCATCTATCAATAACCGAGCCG--GATCTGGTGTATCATAAGGGATTTGCC  
TTTTCTATTGATTCCTACGGATTGGATCAAAAACAA-----TTCTTGAATGAGGTATTCAAC  
TCCAGGGATGAATCGAAAAAGAAATCTTTA-----TTGGTTCTACCTCCTATTTTTTTAT---  
--GAAGAGAATGAATCTTTTTATCGAAGGATCAGAAAAAATGGGTCCG--ATCTCCTG  
CGGGAATGATTTGGAAGATCCAAAACCAAAAATAGTGGTATTTGCTAGCAACAACATA  
ATGGAGGCAGTCAATCAATATAGATTGATCCAAAATCTGATTCAAATCCAATAT-----TAT  
GGG-----TACATAAGAAATGTATTGAATCGATTCTTTTTAATGAAT-----AGATCCGATCA  
CAACTTCGAATATGGAATTCAA-----AGGGATCAAATAGGAAATGATACTCTGAATCAT  
AGAACTATAATGAAATATAGGATCAACCAACATTTATCGAATTTGAAAAAG---AGTCAG  
AAGAAATGGTTCGATCCT-----CTTATTTTTATTTCTCGAACCGAGAGATCCACGAATCG  
GGATCTTAATGCATATAGATACAAATGGTCCAATGGGAGCAAGAATTTCCAGGAACATT  
TGGAACATTTTCGTTTCTGAGCAGAAGAGCCGT-----TTCAAGTAGTGTTCGATCGATT  
ACGTATTAATCAATATTCGATTGATTGGTCTGAGGTTATCGACAAAAAAGATTTGTCTAA  
GTCACTTCGTTTCTTTTTGTCCAAGTCACTTCTT-----TTTTGTCC-----  
-----AAGTTGCTTCTTTTTGTCTAACTCACTTCCT--TTTTCTTTGTGAGTTTCG  
GGAATATCCCATTCATAGGTCCGAG--ATCCACATCTAT--GAATTGAAAGGTCCGAAT  
GATCAACTCTGCAATCAGTTGTTAGAATCAATAGGTCTTCAAATCGTTCATTTGAAAAA  
ATTGAAACCCTT-----TTATTGGAT-----GATCATGATACTTCC--CAAAAATCGAAATT  
CTTGATCAATGGAGGAACAATATCACCATTTTTGTTCAATAAGATACCA---AAGTGG---A

TGATTGACTCATTCCATACTAAAATAAAAATAATCGCAGGAAATCCTTTGATAACACG  
GATTCCTATTTCTCAATGATATCCCACGATCAAGACAATTGGCTGAATCCCGTGAAACCA  
TTTCATGGAAGTTCATTGATATCTTCTTTTTATAAAGCAAATCGACTTCGATTCTTGAATA  
ATCCACATCACTTCTGCTTCTAT-----TGTAACAAAAGATTCCCTTTT-----TAT--GTGG  
AAAAGGCCCGTATCAATAATTATGAT-----TTTACGTATGGA---CAATTCCTCAATATCTTG  
TTCATTTCGCAACAAA---ATATTTTCTTTGTGCGGCAGTCAA-----AAAAAATATGCTTTTT  
GGGAG---AGAGATACTATTTACCAATCGAGTCACAGGTATCTAACATATTCATACCTAA  
CGATTTTCCACAAAGTGGTGACGAAACG---TATAACTTGTCCAAATCT-----TTCTATTT  
TCCAATTCGATCCGATCCATTCGTTCTG-----AGAGCTATTTATTCGATCGCAGACATTC  
TGGAACACCTCTAACAGAGGGACAAATAGTCAATTTTGAAAGAAGTATTGTCAACCT  
CTTTCAGATATGAATCTATCTGATTCAGAAGGGAAGAAGTTCGATCAGTATCTCAAT-----  
TTCAATTCAAACATGGGTTTGATTCACTCCATGTTCTGAGAAAGATTTACCATCCGA  
AAAG-----AGGAAAAA-----CGGAGTCTTTGTCTAAAG-----AAATGCGTT  
GAGAAAGGGCAGATGTATAGAACCTTTCAACGAGATAGTGCTTTTTCAACTCTCTCAA  
AATGGAATCTATTCCAAACATATATGCCATGGTTCCTTACTTCGACAGGGTACAAATATC  
TAAATTTGATATTTTATGATACTTTTTCAGAC---TTATTGCCGATACTAAGTAGCAGT-----  
CAAAAATTTGTATCCATTTTTCATGATATTATGTATGGATCAGATATATCATGGCGAGTTC  
TTCAGAAAAAATTG-----TGTCTTCCACAACGGAAT---CTGATAAGTGATATTC  
GAGAAAGTGTTTACATAAT-----CTTCTTCTGTCCGAAGAAATGATTCATCGAAATAATG  
AGTCA-----CCATTGATATCGACACATCTGAGATCGCCAAATGTTCCGGGAGTTC---CTCTA  
TTCAATCCTTTTCTTCTTCTTGTGCTGGATAT---CTCGTTTGTACACATCTTCTCTTTGT  
TTCCCGA-----GCCTCTAGTGAGTTACAGACAGAGTTCGAAAAGGTCAAATCTTTGATG  
ATTCCATCATACATGATTGAGTTGCGAAAACCTTCTGGATAGGTATCCTACATCTGAACTG  
AATCTTTCTGGTTAAAGAATCTCTTTCTAGTTGCTCTGGAACAATTAGGAGATTCTCTA  
GAAGAAATACGGGGTCTGCTTCTGGCGGCAACATGCTATGGGGTGGTGGTCCC-----  
-----GCTTATGGG---GTCAAATCAATACGTTCTAAGAAGAAATATTTGAATATCAAT-----  
CTCATCGATCTCATA---AGTATCATACCAAATCCCATCAATCGAATCACTTTTTTCGAGAAA  
TACGAGACATCTAAGTCATACAAGTAAAGAGATCTATTCATTGATAAGAAAAAGAAAA  
AACGTGAACGGTGATTGGATTGATGATAAAATAGAATCCTGGGTTCGCGAACACTGATTC  
GATTGATGATGAAGAAAGAGAATTCTTGGTTCAGTTCTCC-----ACCTTAACGACA-----  
GAAAAAAGGATTGATCAAATCTATTGAGTATGACT--CATAGTGATCATTATCTAGTGA  
TCATTTATCAAAGAATGACTCTGGTTATCAAATGATTGAACAACCGGGAGCAATTTACT  
TACGATACTTAGTTGACATTCAT-----AAAAAGTGTCTAATGAATTATGAGTTCAATACAT  
CCTGTTTAGCAGAAAGACGGATATTCCTTGGCTCATTATCAGACAATCACTTAT-----TCAC  
CG-----TGTGGGGCTAATAGTTTTTCATTTCCCATCTCATGGA-----AAACCCTTTTCGCT  
CCGCTTAGCCCTATCCCCCTCT--AGGGGTATTTAGTGATAGGTTCTATAGGAACTGGA  
CGATCCTATTTGGTCAAATACCTAGCGACAACTCCTATGTTCTTTTCATTACGGTATTT  
CTGAACAAGTTCCTGGATAACAAGCCTAAAGGTTTTCTTATGAT-----GATATCG  
AT-----GATATTGATGCTAGTGACGATATTGATGATAGT-----  
-----GACGATATCGATCGTGACCTTGATACGGAGCTGGAGCTGCTAACTATGATG  
AATGCACTA-----ACTATGGATATGATGCCG-----GAAATAGACCGATTTTATATCACC  
CTTCAATTCGAATTAGCAAAAGCAATGTCTCCTTGCATAATATGGATTCCAAACATTCAT  
GATCTGGATGTGAATGAGTCGAATTACTTATCCCTCGGTCTATTAGTGAAGTATCTCTCC-  
-----AGGGATTGTGAAAGATGTTCC---ACTAGAAATATTCTAGTTATTGCTTCGACTCAT



ATTCCCCAAAAGTGGATCCCGCTCTAATAGCTCCGAATAAATTAATACATGCATTAAG  
ATACGAAGGCTTCTTATCCACAACAACGAAAGCACTTTTTCACTCTTTCATATACTAGG  
GGATTTCACTTGGAAAAGAAAATGTTCCATACT-----AATAGATTCCGGGTCCATAAGCAT  
GGGTTCCAATGCACGAGATCTTGTAGCACTTACCAATGAGGCCCTATCGATTAGTATTAC  
ACAGAAGAAATCAATTATAGACACTAATACAATTAGATCCGCTCTTCATAGACAACTT  
GGGATTTGCGA-----TCCCAGGTAAGATCGGTTTCAGGATCACGGGATCCTTTTCTATC  
AGATAGGAAGGGCTGTTGCACAAAATGTACTTCTAAGTAATTGCCCATAGATCCTATAT  
CTATCTATATGAAGAAGAAA-----TCATGTAACGAAGGGGATTCTTATTTGTACAAATGGT  
ACTTCGAACTTGGAACGAGCATGAAGAAATTAACGATACTTCTTTATCTTTTGAGTTGT  
TCTGCCGGATCGGTCGCTCAAGACCTTTGGTCTCTACCC-----CGACCCGATGAAAAA---  
AATGGGATCACTTCTTATGGACTCGTTGAGAATGATTCT--GATCTAGTTCATGGCCTATT  
AGAAGTAGAAGGCGCTCTGGTGGGA-----TCCTCACGGACAGAAAAAGATTGCAGTCA  
GTTTGATAATGAT-----CGAGTGACATTGTTTCTTCGGCCCGAACCAAGGAAT--CCCTTA  
GATATGATCCAAAATGGATCTTGTCTATCGTTGATCAGAGATTTCTCTATGAAAAA-----  
TACGAATCGGAGTTTGAAGAA-----GGAGAAGGAGCCCTCGACCCGCA-----CA  
GATAGAAGAGGAT-----TTATTCAATCAC-----ATAGTTTGGGCTCCT-----AGAATAG  
GCGCCCT-----TGGGGCTTCTATTTGATTGTATCGAAAGGCCCAATGAATTGGGATTT  
CCC---TATTGGGCCAGGTCATTTTCGGGGCAAG-----CGGATCATTATGATGAAGAGGA  
TGAGCTTCAAGAGAATGATTTCGGAGTTCTTGCAGAGTGGAACCGTGCAGTACCAGACA  
CGAGAGAGATCTTCCAAAGAACAAGGCTTTTTTTCGAATAAGCCAATTCATTTGGGACC  
CTGCAGATCCACTCTTTTTTCTATTCAA---GATCAGCCCCCTGTCTCTGTGTTTTTACA  
TCGAGAATTCTTTGCAGATGAAGAGATGTCAAAGGGGCTTCTTACTTCCCAAACAGAT  
CCTCCTACATCTATATATAAACGCTGGTTTATC-----AAGAATACGCAAGAAAAGCACTTC  
GAATTGTTGATTTCATCGCCAGAGATGGCTTAGA-----ACCAATAGTTCATTATCT-----A  
ATGGATCTTCCGTTCTAAT-----ACTCTATCCGAGAGTTATCAGTATTTATCAAATCTGTT  
CCTATCTAAC---GGAACGCTATTGGATCAAATGACAAAGACATTGTTGAGAAAAAGATG  
GCTTTTCCCGGATGAAATTAATAATTGGATTC-----ATG-----ATGCCTAGA  
TCGCGG---ATAAATGGAAATTTTATTGATAAGACCTTTTTCAGTTGTAGCCAATATCTTATT  
ACAAATAATTCCGACAACCTCAGGAGAAAAAGAGGCATTTACCTATTACAGAGATGGG-  
-----ATGTCAGCTCAATCCGAAGGAAATTATGCGGAAGCTTTACAGAATTATTATGAAGCT  
ATGCGACTAGAAATTGATCCCTATGATCGAAGTTATATACTCTATAACATAGGCCTTATCC  
ACACAAGTAACGGGAGACATACGAAAGCTTTGGAATATTATTTTCGGGCACTAGAACG  
AAATCCGTTCTTACCACAAGCTTTTAATAATATGGCCGTGATCTGTCAATTAC---CGGGGA  
GAACAGGCCATTCGACAGGGAGATTTCGAAATTGCGGAGGCTTGGTTTGATCAAGCCG  
CTGAGTATTGGAAACAAGCTATAGCACTTACTCCTGGTAATTATATTGAAGCGCATAATT  
GGTTGAAGATCACGAGGCGTTTCGAA-----ATGAGTTGGCGATCAGAACATATATGGATA  
GAACTTATAACGGGGTCTCGAAAAATAAGTAATTTCTGCTGGGCCCTTATTCTTTTTTTA  
GGTTCATTAGGATTCTTATTGGTTGGAACCTCCAGTTATCTTGGTAGGAATTTGATATCTT  
TATTTCCGTCTCAGCAAATAATTTTTTTTCCACAAGGAATCGTGATGTCTTCTATGGCA  
TCGCGGGTCTCTTTATTAGCTCCTATTTGTGGTGCACAATTTTCGTGGAATGTAGGTAGTG  
GTTATGATAGATTCGATAGAAAAGAAGGAGTTGTGTGTATTTTTTCGTTGGGGATTTCTT  
GGAAAAAATCGTCGCATCTTCTTCGATTCTTATGAAAGATATTCAGTCCATCAGAATA  
GAAGTTAAAGAGGGTATTTCTGCCCGTCGTGTCTTTATATGGACATCAGAGGCCAGGG  
GGCCATTCCCTTGACTCGTACTGATGAGAAT--TTGACTCCACGAGAAATTGAACAAA

AGCTGCCGAATTGGCCTATTTCTTGCGTGTACCAATTGAAGTATTT

>Ilex

ATGGAAAGATGCCGGTTC AATTCGATGTTGTTTCTAAGTAAATCAATGGACAGTCTTGG  
GCCTATTGAAAATACCAGTGAAAGTGAAGAGCCAAATATAAATGATCCGGATAAAAAC  
ATTTATAGTTCCAGTAATGTTGATCATTATTTCAGCATCAAGGACATTCGGAATTTGATCT  
CTGATGACACTTTTTTAGTTAGGGATAGTAATGGGGACAGCTATCCATATATTTTGATAT  
TGAAAATCAGATTTTTGAAATTAACAATGATCAT-----TCTTTTCTGAGTGAAGTAGAAA  
GTTCTTTGTATAGTTATCGGAATTCTAGTTATCTGAATAATGGATCTAAGAGTGACGATC  
CCTACTATGATCGTTACATGTATGATACTCAATATAGTTGGAATAATCACATTAATAGTTG  
CATTGATAGTTATCTTCAG-----TCTCAAATCTGTATTGATACTTACATTGTAAGTGGGAG  
TGACAATTACAGT-----TACATTTATAGTTCTATTTGTGGTAACGAGGGTTCC-----AGTAC  
TAGCACGAATGGTAGTGATTTAACTATAAGAGAAAAGTTCTAATGATCTCGATGTAACCTC  
AAAAATACAGGCATTTGTGGGTTCAATGCGAAAATTGTTATGGATTA AATTATAAAAAA  
TTTTTTAAATCAAAAATGAATATTTGTGAACAATGTGGATATCATTTGAAAATGAGTAGT  
TCAGATAGAATCGAACTTTCGATTGATCCAGGTACTTGGGATCCTATGGATGAAGACAT  
GGTCTCTCTGGATCCCATTTGAATTTCAATTCGGAGGAGGAGCCTTATAAGGATCGTATTGA  
TTCTTATCAAAGAAAGACAGGATTA ACTGAGGCTGTTCAAACAGGCATAGGTCAACTA  
AACGGTATTC CCGTAGCACTTGGGGTTATGGATTTTCAGTTTATGGGGGGTAGTATGGG  
ATCCGTAGTCGGGGAGAAAATCACACGTTTGATTGAGTACGCTACTAAGAAATTTCTAC  
CTCTTATTATAGTGTGTGCTTCCGGGGGGGCACGCATGCAAGAAGGAAGTTTGAGCCTT  
GATGCAAATGGCTAAAATCTCTTCTGCTTTATATGATTATCAATCAAATAAAAAGTTATTC  
TATGTATCAATCCTTACATCTCCTACTACTGGTGGGGTGACAGCGAGTTTTGGTATGTTG  
GGGGATATCATTATTGCTGAACCCAATGCCTACATTGCATTTGCAGGTAAAAGAGTAATT  
GAACAAACATTAATAAAAACAGTACCTGAAGGTTCAACAAGCGGCTGAATATTTATTCCA  
GAAGGGCTTATTTCGATCTAATCGTACCACGTAATCTTTTAAAAGCGTTCTAAGTGAATT  
ATTTTCAGCTCCACGCTTTCTTTCCCTTTGAATCAA AATTCAATCAAGATGGTAACCATTCG  
AGCCGACGAAATTAGTAATATTATCCGTGAACGTATTGAACAATATAATAGAGAAGTAA  
AGATTGTAATACCGGTACCGTACTTCAAGTAGGTGATGGAATTGCTCGTATTCATGGTC  
TTGATGAAGTAATGGCAGGTGAATTAGTAGAATTTGAAGAGGGTACCATAGGCATTGCT  
CTGAATTTGGAATCAAATAATGTTGGTGTGTTGATTAATGGGTGATGGTTTTGATGATCCAA  
GAAGGAAGTTCTGTAAAAGCAACAGGAAAAATTGCTCAGATAACAGTGAGTGAGGCC  
TATTTGGGTCGCGTTATAAATGCCCTGGCTAAACCTATTGATGGTAGAGGTGAAATTTCA  
GCTTCTGAATCTCGGTTAATTGAATCTCCCGCTCCCGGTATTATTTTCGCGCCGTTCCGTAT  
ATGAGCCTCTTCAAACGGGGCTTATTGCTATTGATTTCGATGATCCCTATAGGACGCGGTC  
AGCGAGAATTAATTATTGGGGACCGGCAGACCGGTA AAAACAGCAGTAGCCACGGATAC  
GATTCTCAATCAACAAGGTCAA AATGTAATATGTGTTTATGTAGCTATTGGTCAAAAAG  
CATCTTCTGTGGCTCAGGTAGTGACTACTTTCCAGGAAAGGGGAGCGATGGACTACAC  
TATTGTGGTAGCCGAAACAGCGGATTCCCTGCTACATTACAATACCTCGCTCCTTATAC  
AGGAGCGTCTTTGGCTGAATATTTTATGTACCGTAAAGAACACACTTTAATCATTATGA  
TGATCCCTCCAAACAAGCACAAGCTTATCGCCAAATGTCTCTTCTATTACGAAGACCGC  
CTGGTCGCGAAGCTTATCCAGGGGATGTTTTTTATTTGCATTCACGCCTTTTGGAAGA  
GCCGCTAAATCAAGTTCTCATTAGGTGAAGGAAGTATGACCGCTTACCAATAGTTGA  
AACTCAATCGGGAGATGTTTCGGCTTATATTCCTACTAATGTAATTTCCATTA CTGATGG  
ACAAATATTCTTATCCGCCGATCTATTCAATTCTGGAATCAGACCCGCTATTAATGTGGG

TATCTCGGTTTCCAGAGTGGGGTCTGCAGCTCAAATTAAGCCATGAAACAAGTAGCT  
GGCAAATTAATGGAAGTGGCGCAATTCGCAGAATTAGAAGCCTTTCACAATTTTC  
TTCTGATCTCGATAAAGCTACTCAGAATCAATTGGCAAGAGGTCAACGATTACGTGAAT  
TGCTCAAACAATCCCAAGCAGCCCCTCTACGGTGAAGAACAGATAATGACTATTTAT  
ACCGGAACAATGGTTATCTTGATTCATTAGAAATTGGACAGGTAAGGAAATTTCTTGT  
TGAGTTACGTACTTACTTAAAAAGTAATAAACCTCAGTTCCAAGAAATCATATCTTCTAC  
TAAGACATTCACTGAGGAAGCAGAAGCCCTTTTGAAAGAAGCTATTACAGGAACAGCT  
GGAACGTTTTATGCTTCAGGAACAAGCAATGAGAAACAATCCTACTACGCTCTGGTTCT  
GGGGTTTCCACGCTTGAAAAAAAAAACCTGGGGCGTATTGCCCAAATCATTGGTCCGG  
TACTAGATGTAGCTTTTGCGCCGGGCAAGATGCCTAATATTTATAACGCTCTGGTAGTTA  
AGGGTCGAGATACTGCCGGTCAACCAATTAATGTGACTTGTGAGGTACAACAATTATTA  
GGAACAATCGAGTTAGAGCTGTAGCTATGAGTGCTACAGATGGTTAACGAGAGGAA  
TGGAAGTGATTGATACGGGAGCTCCACTAAGTGTCCGGTCGGGGGAGCAACTCTCGG  
ACGAATTTTTAACGTGCTTGGAGAACCCGTTGATAATTTAGGTCCTGTAGATACTCGCA  
CAACATCTCCTATTCATAGATCCGCGCCCGCCTTTATACAGTTAGATACAAAATTATCGAT  
TTTTGAAACCGGAATTAAGTAGTAGATCTTTAGCCCCTTATCGCCGTGGAGGAAAA  
TCGGACTATTCGGGGGGGCTGGAGTGGGTAAAACAGTACTCATTATGGAATTGATTAAC  
AATATTGCCAAAGCTCATGGGGGTGTATCCGTATTTGGCGGAGTAGGTGAACGACTCG  
TGAAGGAAATGATCTTTACATGGAAATGAAAGAATCTGGGGTTATTAATGAACAAAATA  
TTGCCGAATCAAAGTGGCTCTAGTTTACGGTCAGATGAATGAACCTCCGGGAGCTCG  
TATGAGAGTTGGTTTGACTGCCCTAACTATGGCGGAATATTTCCGAGATGTTAATGAAC  
AAGACGTACTTCTATTTATCGACAATATCTTCCGTTTCGTCCAAGCAGGATCCGAAGTAT  
CTGCCTTATTGGGTAGAATGCCTTCCGCGGTGGGTATCAACCCACCCTTAGTACCGAA  
ATGGGTACTTTACAAGAAAGAATCACTTCTACCAAAGAAGGTTCCATAACTTCTATTCA  
AGCAGTTTATGTACCTGCAGATGATTTGACCGACCCTGCCCTGCTACGACATTTGCAC  
ATTTAGATGCTACTACCGTACTATCAAGAGGATTAGCTGCCAAAGGTATCTATCCAGCAG  
TAGATCCTTTAGATTCAACGTCAACTATGCTACAACCTCGGATCGTTGGTGAGGAACAT  
TATGAAACTGCGCAAGAGGTTAAGCAAACCTTTGCAACGTTACAAAGAACTTCAGGACA  
TTATAGCTATCCTTGGGTGGACGAATTATCCGAAGAGGATCGTTTAAACCGTAGCAAGA  
GCGCGAAAAATTGAGCGTTTCTTATCACAACTTTTTTCGTAGCAGAAGTATTTACCGG  
TTCTCCAGGGAAATACGTTGGTCTAGCAGAAACAATTAGAGGGTTTCAATTGATCCTTT  
CCGGAGAATTAGATGGTCTTCTGAACAGGCCTTTTATTTGGTAGGTAACATTGATGAA  
GCTACCGCGAAGGCTATGAACTTAGAAATGGAGAGCAATTTGAAGAAAATGATCTTAA  
ATCTTTGTGTACTGACCCCTAATCGAATTGTTTGGGATTGAGAAGTAAAAGAAATCATT  
TTATCTACTAATAGTGGCCAAATTGGCGTATTACCAAACCACGCCCTATTGCAACAGCT  
GTAGATATAGGTATTTTGAGAATACGCCTTAACGACCAATGGTTAACGATGGCTCTGATG  
GGTGGTTTTGCTAGAATAGGTAATAATGAGATTACTGTTTTAGTAAATGATGCGGAGAA  
GAGCAGTGACATTGATCCACAAGAAGCTCAGCAAACCTTTGAAATAGCGGAAGCTAAT  
TTGAGAAAAGCTGAAGGAAAGCGACAAACAATTGAGGCAAATCTAGCTCTCCGACGA  
GCTAGGACACGAGTAGAGGCCATCAATGCAATTCGATGAAAAATGTAACCGATTCTTT  
CGTTTCTTTGGGCCACTGGCCATCCGCCGGGAGTTTCGGGTTTAATACCGATATTTTATC  
AACAAATCCAATAAATCTAAGTGTAGTGCTTGGTGTATTGATCTTTTTTGGAAAGGGAG  
TGTTAAGTGATTTATTAGATAATCGAAAACAGAGGATCTTGAATACTATTGCAAATTCAG  
AAGAATTACGTGGAAGAGCCATTGAACAGCTGGAAAAAGCCCGGGCTCGCTTACGGA

AAGTGGAAATGGAAGCAGAGCAGTTTCGAGTGAATGGATACTCTGAGATAGAGCGAG  
AAAAATTGAATTTGATAAATTCAACTTATAAGACTTTGGAACAATTAGAGAATTACAAA  
AATGAACTATTCATTTTGAACAACAAAGGGTGATTAATGAAGTCCGACAACGGGTTT  
TCCAACAAGCCTTACAAGGAGCTCTAGGAACCTCTGAATAGTTGTTTGAACAACGAGTT  
ACATTTACGTACCATCAGTGCCAATATTAGCATGTTGGGGGCGATGAAAGAAATAACTG  
ATATGAATCCACTGATTTCTGCCGCTTCCGTTATTGCTGCTGGATTGGCTGTAGGGCTTG  
CTTCTATTGGACCTGGAGTTGGCCAAGGTACTGCTGCGGGCCAAGCTGTAGAAGGTAT  
TGCGAGACAGCCCGAGGCGGAGGGAAAAATACGAGGTACTTTATTGCTTAGTCTAGCT  
TTTATGGAAGCTTTAACAATTTATGGACTGGTTGTAGCATTAGCACTTTTATTTGCGAAT  
CCGTTTGTATGAATGTTCTAGCATGTTCCATCAACACACTAAAAGGGTTATACGATATA  
TCCGGTGTGGAAGTAGGCCAACATTTCTATTGGAAAATAGGGGGTTTCCAAGTCCATG  
GCCAAGTACTTATTACTTCTTGGGTTGTAATTGCTATCTTATTAGGTTTCAGCTACTATAGC  
TGTTCCGGAACCCACAAACCATTCCGACCGGCGGTCAGAATTTCTTCGAGTATGTCTTG  
AATTCATTCGAGATGTAAGTAAAACCCAAATTGGAGAAGAATATGGTCCTTGGGTTCT  
TTTATTGGAACTATGTTTCTATTTATTTTGTTCCTAATTGGTCAGGAGCTCTTTTACCTT  
GGAAAATCATAAATTACCTCATGGGGAGTTAGCCGCACCCACAAATGACATAAATACT  
ACTGTTGCTTTGGCTTTACTCACGTCAGTGGCATATTTCTATGCGGGTCTTAGCAAAAA  
AGGATTAGGTTATTTGGGAAATATATTCAACCAACTCCAATCCTTTTACCCATTAACAT  
CTTAGAAGATTTACAAAGCCTTTATCACTTAGTTTTCGACTTTTCGGGAATATATTAGC  
TGATGAATTAGTAGTTGTTGTGCTTGTTCCTTAGTACCTTTAGTGATTCTTATACCTGTC  
ATGTTCTTGGATTATTTACAAGTGGTATTCAAGCTCTATTTTGTCAACTTTAGCCGCG  
GCTTATATAGGTGAATCCATGGAGGGCCATCATATGATATTTTAACTTTAGAGCATATAT  
TAACTCATATTTCTTTTTCGATGGTTTCAATTGTAATTACAATTCATTTGATAACCTTATTT  
TTCGATGAAATCGTAAACTATATGATTCATCAGAAAAAGGCATGATAACTACTTTTTTC  
TGTATCACAGGATTATTAGTCACTCGTTGGATTATTTCGGGACATTTCCCCCTAAGTAAT  
TTATATGAATCATTAATTTCTTTTCATGGAGTTTCTCCATTATTCATATAGTTCCGTAT-----  
AAAAAAAAAAACCATTTAAGCACAATAACTGCACCAAGTGCTATTTTTTACCCAAGGCT  
TTGCTACTTCAGGTATTTTAACTGAAATACATCAATCCGAAATATTGGTACCCGCTCTCC  
AATCTGAATGGTTAATAATGCACGTAAGTATGATGATATTGGGCTATGCAGCTCTTTTATG  
TGGATCATTATTATCAGTAGCACTTCTAATCATTACATTTTCGAAAGAACAGAAAAATTCT  
TTGT-----AAAAAATCCAATACATGAATGAAAGAAACGATGTTTTACAAAATACTTCT--  
-----GATAAGAATTATTACAGGTCCCAGTTGATTCAACAATTGGGTTATTGGAGTTATCGT  
GTTATTAGTCTAGGGTTTATCTTTTTAACCATCGGTATTCTTTTCGGGAGCAGTATGGGCT  
AATGAAGCATGGGGATCATATTGGAATTGGGACCCAAAGGAAACTTGGGCATTTGTTA  
CTTGGATCGTATTCGCAATTTATTTACATACTCGAACAATAAAAATTTGCAGGATACAA  
ATTCCGCAATTGTGGCGTCTATAGGCTTTCTTATAATTTGGATATGCTATTTTGGGGTCAA  
TCTATTAGGAATAGGTCTACATAGTTATGGCTCATTATGTTAACGATGGCAAAAAAGAA  
AGCATTCACTCCTCTTTTATATCTTGCATCTATAGTATGTTTGCCTGGTGGATTTCTCTC  
TCATTTAATAAAAAGTCTGGAATCTTGGGTCACTAATTGGTGAATACTGGGCAATCCGA  
AACCTTTTTGAATGATATTCAAGAAAAGAGTATTCTAGAAAAATTCATAGAATTAGAGG  
AACTCCTCCTCTTGGACGAAATGATCAAGGAATACTCAGAGACCCATCTACAAAACCT  
TCGTATA---ATCCACAAAGAAACGATCCAATTAATCAAGATACACAACGAAGATCGTATC  
CATACGATTTTGCATTTCTCGACAAATATAATCTGTTTTCGTTATTTTAAAGCGGTATTCTA  
TTTGGGGTAATGAAGAACTTGTATTCTTAACTCTTGGGCCAGGAATTCCTATATAACT

TAAGCGACACACTAAAAGCTTTTTCTATTCTTTTATTAACCGATTTATGTATCGGATTCCA  
TTCGCCCCATGGTTGGGAACATAATGATTGGATCTGTCTACAAAGATTTTGGATTTGTTCA  
TAATGATCAAATTATATCTGGTCTTGTCTACTTTTCCAGTCATTCTAGATACAATTTA  
AAATATTGGATTTTCCGTGATTTAAATCGTGTATCTCCGTCGCTTGTAGTGATTTATCATT  
CAATGAATGACATGCCTATTGGTGTTCAAAAGTACCTTTTCGAAGTCCTGGAGAGGA  
AGATGCATCTTGGGTTGACGTATAACAACCGACTTTATCGAGAAAGATTACTTTTTTTAGG  
CCAAGAGGTTGATAGTGAAATATCGAATCAGCTTATTGGTCTTATGGTATATCTCAGTAT  
CGAGGATGATACCAAAGATCTGTATTTGTTTATAAACTCTCCTGGCGGATGGGTAATACC  
CGGAGTAGCTATTTATGATACTATGCAATTTGTGCGACCAGATGTACATACAATATGCAT  
GGGATTAGCCGCTTCAATGGGATCTTTTATCCTAGTCGGAGGAGAAATTACCAAACGTC  
TAGCATTCCCTCACGCCAGGGTAATGATCCATCAACCTGCTAGTTCTTTTTATGAGGCAC  
AAACGGGAGAATTTATCCTGGAAGCGGAAGAAGTCTGAAACTGCGTGAAACCCTCA  
CAAGGGTTTATGTACAAAGAACGGGTAAACCTTTATGGGTTGTATCCGAAGACATGGA  
AAGAGATGTTTTTATGTCAGCAACAGAAGCCCAAGCTTATGGAATTGTTGATCTTGTAG  
CGTTTGCAATGAAAGAACAAAATGGATTCATGAAGGTTTAATTACTGAATCGCTTCCC  
AATGGTATGTTCCGGGTCCGTTTAGATAATGAAGATCTGATTCTCGGTTATGTTTCAGGA  
AAGATCCGACGTAGTTTTATACGGATACTGCCGGGAGATAGAGTCAAATTGAAGTAA  
GTCGTTATGATTCAACCCGAGGGCGTATAATTTATCGACTCCGCAACAAGGATTCGAAG  
GATATGGAGGAATTCCAAAGATATTTTCGAG---GATAGATCTCAACAACACGACTTTCTAT  
ATCCACTTATCTTTCAGGAGTATATTTATGCACTTGCTCATGATCATGGTTTAGCAGGTTA  
TGACAATAAATCCAGCTTACTAATTGTGAAACGTTTAATTACTCGAATGTATCAACAGAA  
TCATTTGATTCTTTCGACTAATGATTCTAACCAAAAATAAAATTTTTGGGAAGAATTTGTA  
TTCTCAAATGATATCAGAGGGATTTGCAGTCATTGTGGAAATTCATTTTCTGTACGATT  
AATATCTTCCCTAATAATAAAATCTCATAATTTACGATCAATTCATTCAATATTTCTTTTT  
TAGAGGATAAATTTTTACATTTAAATTATGTGTTAGATATACTAATACCCACCCCGTCCA  
TCTGGAAATCTTGGTTCAAACCTCTTCGTTACTGGGTAAAAGATACTTCTTCTTTCATTT  
ATTACGATTCTTCTCTACGAGGATCGTAATTGGAATAGTCTTATTACTAAACCCGGTTC  
TTCTTTTTCAAACAAGATTCTTTTTCTTCTTATATAATTCTCATGTATGTGAATACGAA  
TCTATCTTCGTTTTTCTCCGTAATCAATCTTCTCATTACGATCAACATCTTCTGGAGTTC  
TTCTTGAACGAATATATTTCTATGGAAAATAGAATATCTTGTAGAAGTCTTTGCTAAGG  
CTTTTAAACCTATGGTTGTTCAAGGATCCTTTCATACATTATGTTAGGTATCAAGAAAAT  
CAATTCTGGCTTCAAAGGGACGTCTCTTTTGATGAATAAATGGAAACATTACCTTGTC  
AATTTCTGGCAATGTTATTTTTACCTGTGGTCTCAACCAGGAAGAATCCATATAAACCAA  
TTTTCCAATTATTATCTTGACTTTATGGGCTATTTTTCAAGTGTGCGACTAAATCCTTTAA  
TGGTACGGAATCAAATGCTAGAAAATGCATTTCTAATCGATAATGCTATT-----AAGAAGT  
TCGATATCAGTGTTCCAATTATCTCTGATTGGATCGTTGGCGAAAGCGAAATTTGTA  
ACGGATTAGGGCATCTATTAGTAAGCCGGTTCGGGCCGATTTATCAGATTCTGATATTA  
TTGATCGATTTGGGCGTATATACAGAAATCTTTTTATTATCATAGCGGATCCTCAAAAA  
AAAAGAGTTTGTATCGAATAAAGTATATACTTCGATTTCTTGTATTAGAACTTTGGCTC  
GTAACACAAAAGTACTGTACGTACTTTTTTGAAGGATTAGGATCGGAATTTGGAA  
GAATTTTAAAGGCGGAAGACCAAGTCTTTCTTTGACCTTTCCAAAACGGATTTGGTA  
TTTGGATATTATTTGTATCAATGATTTGGTTAATCATGAAATGATAATTGAT---ACAACAG  
AAGTACAA---GCTATCAATCTTTTTCCAGATTGGAATCC---TTACAAGAGGTCTATGGG  
ATCATATGGATGCTTGTCTATATTTTACTACTGTATTAGGAATCACAATAGGTGTACTAG

TAATTGTTTGGTTAGAAAGAGAAATATCTGCAGGGATACAACAACGTATTGGACCTGAA  
TACGCCGGACCTTTAGGAATTCTTCAAGCTCTAGCAGATGGTACAAAATTACTTTTCAA  
AGAGAATCTTCTCCATCTAGAGGAGATAATCGTTTATTCAGTATCGGACCATCTATAGC  
AGTCATCTCAATTCTACTAAGTTATTCAGTAATTCCTTTTGGATATCATCTTGTTCTAGCT  
GATCTAAGTATTGGTGTTTTTTTATGGATTGCCATTTCCAGTATTGCTCCCGTTGGACTTC  
TTATGTCAGGATATGGATCAAATAATAAATATTCCTTTTTAGGTGGTCTCCGAGCTGCTG  
CTCAATCAATTAGTTATGAAATACCATTAACCTCTATGTGTGTTATCAATATCTCTACTATCT  
AACAGTTCAAGTACAGTTGATATAGTTGAAGCGCAATCAAATATGGTTTTTGGGGATG  
GAATTTGTGGCGTCAACCTATAGGGTTTATCATTTTTCTAATTTCTTCCCTAGCCGAGTG  
TGAAAGATTGCCCTTTGATTTGCCAGAAGCAGAAGAAGATTAGTAGCAGGTTATCAA  
ACCGAATATTCAGGTATCAAATTTGGTTATTTTTACGTTGCTTCATATCTGAATCTACTGC  
TTTCTTCATTATTTGTAACAGTTCTTTACTTGGGGGGTTGGAATCTTTCTATTCCGTACAT  
ATTTGTTCCCTGAGCTATTTGAAATAAATAAAGCAGGTAGAGTCTTTGGAACAATAATTG  
GTATCTTTATTACATTAGCTAAAACCTATTTGTTCTTGTTCAATTTCTATCACAACAAGATG  
GACTTTACCGAGACTGAGAATGGACCAACTATTAATCTTGGGTGGAAATTTCTTTTAC  
CTATTTCTTTAGGTAATCTATTATTAACAATTTCTTCCCAACTTCTTTCACTGATGATCTG  
GCATGTACAGAATGAAAACCTCATTCTCGATTCTACGAGAATTTTTATGAAAGCCTTTCA  
TTTGCTTCTCTTCGATGGAAGTTTTATTTCCCAAGATGTATCCTAATTTTTGGCCTAATT  
CTTCTTCTGATGATCGATTCAACCTCTGATCAAAAAGATATACCTTGGTTATATTTTCACT  
CTTCAACAAGTTTAGTAATGAGCATAACGGCCCTATTGTTCCGATGGAGAGAAGAACCT  
ATGATTAGCTTTTCGGGAAATTTCCAAACGAACAATTTCAACGAAATCTTTCAATTTCTT  
ATTTTACTATGTTCAACTCTATGTATTCCTCTATCCGTAGAGTACATTGAATGTACAGAAA  
TGGCTATAACAGAGTTTCTCTTATTCGTATTAACAGCGACTCTAGGAGGAATGTTTTTAT  
GTGGTGCTAACGATTTAATAACTATCTTTGTAGCTCTAGAATGTTTCAGTTTATGCTCCTA  
CCTATTATCTGGATATAACCAAGAAAGATGTACGGTCTAATGAGGCTACTATGAAATATTT  
ACTCATGGGTGGGGCAAGCTCTTCTATTCTGGTTCATGGTTTCTCTTGGCTATATGGTTC  
ATCCGGGGGAGAGATCGAGCTTCAAGAAATAGTGAACGGTCTTATCAATACACAAATG  
TATAACTCCCCAGGAATTTCAATTGCGCTCATATTCATTACTGTAGGAATTGGGTTC AAG  
CTTTCCCAGCCCCCTTCTCATCAATGGACTCCTGACGTATACGAAGGATCTCCCCTCC  
AGTCGTTGCTTTTTCTTTCTGTTACTTCGAAAGTAGCTGCTTCAGCTTCAGCCACTCGAA  
TTTTCGATATTCCTTTTTATTTCTCATCAAACGAATGGCATCTTCTTCTGGAAATCCTAGC  
TATTCTTAGCATGATATTGGGAAATCTCATTGCTATTACTCAAACAAGCATGAAACGTAT  
GCTTGCATATTCGTCCATAGGTCAAATCGGATATGTAATTATTGGAATAATTGTTGGAGA  
CTCAAATGATGGATATGCAAGCATGATAACTTATATGCTGTTCTATATCTCCATGAATCTA  
GGAACTTTTGCTTGCATTGTATTATTTGGTCTACGTACCGGAACTGATAACATTCGAGAT  
TATGCAGGATTATACACGAAAGATCCTTTTTTGGCTCTCTCTTTAGCCCTATGTCTCTTAT  
CCCTAGGAGGTCTTCTCCACTAGCAGGTTTTTTTCGGAAAACCTCTATTTATTCTGGTGT  
GGATGGCAGGCAGGCCTATATTTCTTGGTTTTAATAGGACTCCTTACAAGCGTTGTTTCT  
ATCTACTATTATCTAAAATAATCAAGTTATTAATGACTGGACGAAACCAAGAAATAACC  
CCTCACGTGCGAAATTATAGAAGATCTCCTTTAAGATCAAACAATTCCATCGAATTGAG  
TATGATTGTATGTGTGATAGCATCTACTATAACCAGGAATATCAATGAACCCGATTATTGCC  
ATTGCTCAGGATAACCCTTTTTATGTTTCTGCTTTACGAATATGATATTTTTTGGACATTTCT  
AATAATATCAAGTCTTATTCCTATTTTGGCATTTTTCAATTTCCGGAGTTTTAGCCCCAATT  
AGCAAAGGACCAGAGAAACTCTCTAGTTATGAATCGGGTATAGAACCAATGGGCGACG

CTTGGTTACAATTTTCGAATTCGTTATTATATGTTTGCTTTAGTTTTTGTGCGTTTTTGTGATGT  
GAAACGGTTTTTCTTTATCCATGGGCAATGAGTTTCGATGTATTGGGTGTATCTGTATTTA  
TAGAAGCTTTAATTTTCGTGCTTATTTTAATTGTTGGTTCAGTTTATGCATGGCGAAAGG  
GGGCATTGGAATGGTCTACGAATTATTTTCCTTGGTTAAACAATAATTGTAGTTTTGCCAA  
TATCTGCAGGTTCTTAATTTTCTTCTTCCCCATAAAGGAAATAGGGTCATTCCGGTGGT  
ATACTATAATTTATATCTAATTTAGAACTCCTTCTGACGACCTATGCATTCTGTTATCATTTC  
CAATTGGACGATCCATTAATCCAAGTAGTGGACGATTATAAATGGATCAATTTTTTTTGGAC  
TTCCATTGGAGATTAGGAATAGATGGACTTTCTATCGGGCCCATTTACTAACGGGATTC  
ATTACTACTTTAGCTACTTTAGCGGCTCGGCCAGTACTCGAGATTCTCGATTATTCATT  
TCTTGATGTTGGCAATGTACAGTGGTCAAATAGGACCATTTTCTTCTCGGGACCTTTTAC  
TTTTTTTTCATCATGTGGGAGTTAGAATTAATCCCGTTTATCTGCTTCTATCTAGGTGGGG  
AGGAAAGAAACGTCTGTACTCAGCTACAAAATTTATTTTGTACACAGCGGGAGGTTC  
ATTTTCTCTTAATGGGAGTTCTGGGTATCGGTTTATATGGTTCTAATGAACCAACATTA  
AATTTTGAACATCAGCTAATCAGTCGTATCCTGTGGCCTTGGAATAATATTTTATATTG  
GATTTTTTATTGCTTTTGTGTCAAATCACCGATTATACCCCTACATACATGGTTACCAGA  
TACCCACGGAGAAGCACATTACAGTACTTGTATGCTCCTAGCCGGAATCTTATTAATAAAA  
TGGGAGCATATGGGTTGATTCCGATCAATATGGAATTATTACCTCACGCTCATTCTATATT  
TTCTCCTTGGTTGATAATAGTAGGCACAATACAAATAATCTATGCAGCTTTAACATCTCC  
TGGCCAACGTAATTTAAAAAAAAGAATAGCCTATTCTTCTGTATCTCATATGGGTTTCAT  
CCTTATAGGAATTGGTTCTATAACCGCTACAGGCCTCAATGGGGCCATTTTACAAATAAT  
CTCTCATGGATTTATTGGTGCTGCACTTTTTTTTCTTGGCAGGAACAAGTTATGATAGAAT  
ACGTCTTGTATTCTCGACGCAATGGGCGGAATAGCTATCCCAATGCCAAAAATATTCA  
CGATGTTCCAGTAGCTTTTCGATGGCTTCCCTTGCATTACCGGGTATGAGTGGTTTTGTG  
CAGAATTGATAGTCTTTTTTGGAATAATTACCAGCCAAAAATATCTTTTAATGCCAAAA  
TACTAATTACTCTTGTAATGGCAATTGGAATGATATTAACTCCTATTTATTATTATCTATG  
TCACGCCAGATGTTCTATGGATACAAGTTATTTAATGCTCCAAACTCTTATTTTTTTGATT  
CTGGACCGCGAGAGTTATTTGTTTCGATCTCTATCTTTCTACCCGTAATAGGTATTGGTAT  
GTACCCGGATTTTCGTTCTTTCACTATCAGTTGACAAAGTCGCAGTTATTCTATCTAATTAT  
TTTTATAGAATGATACTCGAACATGTAATGTTTTGAGTGCCTATTTATTTTCTGTCCGTC  
TCTATGGATTGATCACAAGTCGAAATATGGTTAGGGCCCTTATGTGTCTTGAACCTTATAT  
TGAATGCAATTAATATGAATTTTGTAAACATTTTCCTATTTTTTTTGTAGTCCGCAATTA  
AGGAGATATTTTTTCAATTTTTGTTATAGCTATTGCAGCCGCTGAAGCAGCTATTGGACT  
GGCTATTGTTTCATCAATTTATCGTAACAGAAAATCAACTTGTATCAACCAATCGAATTT  
GTAAATAAGATGGAACAGACATATCAATATGCATGGATAATACCTTTCGTTCCACTTCC  
AGTTCCTAATGTTAATAGGGGTGGGACTTCTTCTTTTTTCCCACGGCAACAAAAAATCTTC  
GTCGTATGTGGTCCCTTTCATAGTATTTTATTGTTAAGTATAGTCATGATTTTTTTCGATTGAT  
CTGTCTATTTCAGCAAATAAATAGCAGTTCTATCTATCAATATGTATGGTCTTGGATCATCA  
CTAATGATTTTTTCTTTAGAAATTCGGCTACTTAATTGATCCACTTACTTCTATTATGTCAATA  
TTAATCACTACTGTTGGAATTATGGTTCTTATTTATAGTGATAATTATATGTCTCATGATCA  
AGGATATGTAAGATTTTTTGTATATGAGTTTTTTTCAGTACTTCCATGTTGGGATTAGTT  
ACTAGTTCTAATTTGATACAAATTTATATTTTTTGGGAATTGGTTGGAATATGTTTCGTATC  
TATTAATAGGGTTTTTGGTTCACACGACCTGTTGCGGCAAATGCTTGTCAAAAAGCCTTT  
GTAACATAATCGTGTCCGGGATTTTTGGTTTATTATTAGGAATTTTAGGTTTTTATTGGATAA  
CAGGTAGTTTTGAATTTAGGGATTTATTCGAAATATTCAATAACAATGAGGTCAATTTTT

TATTTGTTACTTTGTGTGGCGTTCTATTATTTGCCGGTGCAGTTGCTAAATCTGCACAATT  
CCCCCTTCATGTATGGTTAGCTGATGCCATGGAAGGACCTACTCCTATTTTCGGCTCTTAT  
ACATGCTGCTACTATGGTAGCAGCGGGAATTTTTCTTGTTCGCGCGGCTTTTTCCCTTTT  
CATAGTCATACCTCCCTAATGAATTTAATCTCTTTGGTAGGAATAATAACAGTATTTTAA  
GGAGCTACTTTAGCTCTTGCTCAAAAAGATATTAAGAGAGGTTTAGCCTATTCCACAAT  
GTCTCAATTAGGTTATATGATGTTAGCTCTAGGTATGGGATCTTATCAAAGTGCTTTATTT  
CATTTGATTACTCATGCTTATTCGAAAGCCTTATTGTTTTTAGGATCTGGATCCGTTATTC  
ATTCAATGGAAACTCTTGTTGGATATTCTCCAGATAAAAAGTCAGAATATGGTTCTTATGG  
GGGGTTTAAACAAAACATGTGCCAATTACCAAAAATGCTTTTTTATTAGGTACACTTTCC  
CTTTGTGGTATTCCGCCTCTTGCTTGTTTTTGGTCCAAAGATGAAATTCTTCATGATAGT  
TGGTTGTATTCACCGCTTTTCGCAATAATAGCGTGGTCCACAGCGGGATTAACCGCATT  
TTATATGTTTTCGGATCTATTTACTTACTTTTGAAGGGCATTAAACGTTTCAATTTCAAAT  
TATAGTGGAAAAAAAATACTCCATTCTATTCAATATCTCTATGGGGAAAGGGGGATTC  
GAGAGGGATTAACACA---TTATTAAGTTTATTACGAATGAATTTGAAAACATTTGGCAAT  
AAAAAGACTTATTTGTATCCTTATGAATCGGACAATACTATGTTATTCCCTCTACTTCTAT  
TGGTTCTATTTACTTTGTTTCGTTGGATTCCCTAGGAATTCCTTTTCGATTTGGATATATTATCC  
AATGGTTAACTCCTTCTATAAACCTTTTACACGAAAATTCGAAT--TCGACAAGTTGGT  
ATGAATTTGTCAAAGATGTTGGTTTTTCAGTGAGTATAGCTTATTTAGGAATATTTATAGC  
GTCCTTTTTATATAAACCTCTTTATTCATCTTTACAAAATTTGGACTTAATTAATTCATTTG  
TACTCTTTGGGACAAAATAATAAATGTCATATATAGCTGGTCATATAATCGTGGTTACAT  
AGATGCTTTTTATGCAAGATCCTTAACTGGGGGAATAAGGGGATTGGCTGAATTAATC  
ATTTTTTTGATAGACGAGTAGTTGATGGAATTACAAATGGAGTTGGTGTATGAGTTTCT  
TTGTAGGAGAAGGTATCAAATCTGTAGGGGGCGGG---CGCATCTCTTCTTATCTTTTTCTT  
GTATTTATCTTATGTATCAATCTTTTTATTCAATTTACTCTATGGATTTACCTGGACCAATAC  
ATGATTTTCTTTTAGTCTTTCTGGGATCGGGTCTTATATTAGGAGGTTTAGGAGTAGTATT  
ACTTCCAATCCAATTTATTCTGCCTTTTCATTGGGATTGGTTCTTGTTTGTATATCCTTAT  
TCTATATCTATCGAACTCCCATTTTGTAGCTGCTGCGCAGCTCCTTATTTATGTAGGAGC  
TATAAATGTTTTAATCAATTTTTGCTGTAATGTTTATGAACGGTTCAGAATATTACAAAGAT  
TTTCATCTTTGGACTGTTGGGGATGGGGTACTTCGATAGTTTGTACAAGTCTTTTTGTT  
TCACTAATGACTACTATTCAGATACGTCATGGCACGGGATTATTTGGACTACAAAATCA  
AATCAGATTATAGAGCAAGATTTGATAAGTAATAGTCAACAAATTTGGGATTCATTTATCA  
ACAGATTTTTTTCTTCCATTTGAACTCATTTCATAAATCTTTTTAGTTGCTTTAATAGGTG  
CAATTGCTGTAGCTCGTCAAATGACTGCACCAGCTACAAGAAAAGACCTCATGATAGT  
CAATATGGGTCCTCACCACCCATCAATGCATGGTGTCTTCGACTCATCGTTACTCTAGA  
TGGTGAAGATGTTATTGACTGCGAACCAATATTGGGTTATTTACACAGAGGAATGGAAA  
AAATTGCAGAAAACCGAACCAATTATAACAATTTTGCCTTATGTAACACGTTGGGATTATT  
TAGCTACTATGTTACAGAAAGCAATAACTGTAAATGCACCAGAACAGTTAGGCAATATT  
CAAGTACCTAAAAGGGCGAGCTACATCAGAGTCATTATGTTGGAGTTGAGTCGTATAGC  
TTCGCATTTGTTATGGCTTGGCCCTTTTATGGCAGATATTGGGGCACAGACCCCTTCTT  
CTATATTTTTCGAGAACGAGAATTGATATATGACCTATTCGAAGCTGCCACCGGTATGCG  
AATGATGCATAATTATTTTCGTCTCGGAGGAGTAGCTGCTGATCTACCTCATGGATGGAT  
AGATAAATGTTTAGATTTTTGCGATTATTTTTAACAGGGGTTGCTGAATATCAAAGCT  
TATTACACAGAATCCTATTTTTTTAGAACGAGTTGAAGGAGTAGGCATTATTGGCGGAG  
AAGAAGCAATAAATTGGGGTTTATCAGGACCAATGCTACGAGCTTCCGGAATACAATG



GGATCTTCGTAAAGTTGATCATTATGAGTGTACGACGAATTTGATTGGGAAGTACAAT  
GGCAAAAAGAAGGGGATTCGTTAGCTCGTTATTTAGTACGAATCAGCGAAATGACAGA  
ATCTATAAAAATTATTCAACAGGCTCTAGAAGGAATTCAGGGGGGCCCTATGAGAATT  
TAGAAATCCGACGCTTTGATAGAGTAAGGGATCCCGAATGGAATGATTTTGATTATCGA  
TTCATTAGTAAGAAACCTTCTCCGACTTTTGAATTATCACAGCAAGAACTTTATGTAAG  
AGTCGAAACCCCAAAAAGGAGAATTGGGAATTTTCTGATAGGAGATCAGAGTGTTTTT  
CCCTGGAGATGGAAAATTCGCCACCCGGTTTTATCAATTTGCAAATTTCTCCTCAGTT  
AGTTAAAAAATGAAATTGGCTGATATTATGACGATACTAGGTAGCATAGATATCATTAT  
GGGAGAAGTTGATCGTATGTTCCCTATGGTAACTGAGTTCATAAATTATGGTCAACAAA  
CAGTACGAGCTGCAAGGTACATTGGTCAAGGTTTCACGATTACCTTATCCACGCGAAT  
CGTTTACCTGTAACTATTCAATACCCCTATGAAAAATTGATAATATCAGAACGTTTCCGC  
GGCCGAATCCACTTTGAATTTGATAAATGCATTGCTTGTGAAGTATGTGTTTCGTGTATGT  
CCTATAGATCTACCCGTTGTTGATTGGAAATTGGAACTGATATTCGAAAGAAACGATT  
GCTGAATTACAGTATTGATTTCCGGAATCTGTATATTTTGTGGTAATTGCGTTGAGTATTGT  
CCAACAAATTGTTTATCAATGACTGAAGAATATGAACTTTCTACATATGATCGTCACGAA  
TTGAATTATAATCAAATTGCTTTGGGTCGATTACCAATGTCAGTAATTGACGATTACACA  
ATTCGAACAGTTTTGAATTCG-----ATGCAGGGTTCGTTT  
GTCTGCTTGGCTAGTCAAGTATGGGCTAATTCATAGATTTTTGGGCTTTGATTACCAAGG  
AATAGAGACTTTACAAATAAAACCCGAGGATTGGCCTTCCATTGCTGTCATTTTATATGT  
ATATGGTTACAATTATCTACGCTCCCAATGTGCCTATGATGTAGCACCAGGCGGACTCTT  
AGCTAGTGTGTATCATCTTACGAGAATAGGGTATGGTGTGGATCAACCAGAAGAGGTAT  
GCATAAAAGTATTTGCCCAAGGAGGAATCCTAGAATTCCGTCTGTTTTCTGGGTTTGG  
AAAAGTGTGGATTTTCAAGAACGGGAATCTTATGATATGTTGGGAATTTCTTATGATAAT  
CATCCACGCTTGAAACGTATCTTAATGCCTGAAAGTTGGATAGGATGGCCCTTACGTAA  
GGATTATATTGCCCCAATTTTTATGAAATACAAGATGCTCAT-----  
-----ATGAATTCCATTCAATTTCCCTTACTTGAGCGAACAACCCAAAATT  
CAGTTATTTCAACTACATCAAATGATCTTTCAAATTGGTCAAGACTCTCTAGTTTATGGC  
CGTTTCTCTATGGTACCAGTTGTTGCTTCATTGAATTTGCTTCACTAATAGGCTCACGAT  
TCGACTTTGATCGTTATGGACTAGTACCAAGATCGAGTCCTAGACAAGCAGACCTAATT  
TTAACAGCCGGAACAGTAACAATGAAAATGGCTCCTTCTTTAGTGAGATTATATGAGCA  
AATGCCTGAACCAAAATATGTTATTGCTATGGGAGCATGTACAATTACAGGGGGGATGT  
TCAGTACCGATTCTTATAGTACTGTTCCGGGGAGTCGATAAGCTAATTCCTGTGGATGTCT  
ATTTGCCGGGCTGTCCCCCTAAACCGGAAGCAGTTATAGATGCTATAACAAAACCTTCGT  
AAGAAAATATCTCGAGAAATCTCTGAAGATAGAATTAGGTCTCAACGGGAGAATCGTT  
GTTTTACTACCAATCACAAGTTTCATGTTGGGCGTAGTATTCATACGGGAAATTATGATC  
GAGGATTTCTTTATCAACCGCCATCTACTTCAGAGATCCCTCCGGAAACATTTTTCAAAT  
ACAAAAGTTCAGTATCTTCCCAAGAATTGGTGAATATGCAAGCTAGAAATACTTTTTCT  
TGGATAAAGGAACAGATTACTCGATCCATTTCCGTATCGCTCATGATATATATAATAACTC  
GGACATCCATTTCAAGTGCATATCCATTTTTGCACAGCAAGGTTATGAAAATCCACGA  
GAAGCGACTGGGCGTATTGTATGTGCAAATTGTCATTTAGCTAATAAGCCCGTCGATATT  
GAGGTTCCACAAGCGGTACTTCTGATACTGTATTTGAAGCAGTTGTTCGAATTCCTTA  
TGATATGCAACTGAAACAAATTTCTTGCTAATGGTAAAAAGGGGGCTTTGAATGTAGGG  
GCTGTTCTTATTTTACCGGAGGGGTTTGAATTAGCTCCTCCCGATCGTATTTCTCCCGAG

ATGAAAGAAAAGATAGGCAATCTATCTTTTCAGAGCTATCGCCCCAATAAAAAAATAT  
TCTTGTGATAGGCCCTGTTCCCTGGTCAGAAATATAGTGAAATTATCTTTCCTATTCTTTCC  
CCGGACCCCGCTACTAAGAAAGATGTTCACTTCTTAAAATATCCTATATACGTAGGCGG  
AAACAGGGGAAGGGGGCAGATTTATCCTGACGGGAGCAAGAGTAACAATACAGTTTAT  
AATGCTACAGCAGCAGGTATAGTAAGCAGAATCATACGAAAAGAAAAGGAGGGTAC  
GAAATAACCATAACGGATGCATCGGATGGACGTCAAGTGGTTGATATTATCCCTCCAGG  
ACCAGAACTTCTTGTTCAGAAGGCGAATCTATCAAATTTGATCAACCATTAACAAGTA  
ATCCTAATGTGGGGGGATTGTTGTCAGGGAGATGCAGAAATAGTACTCCAAGATCCATTA  
CGTGTCCAAGGCCTTTTGTCTTCTTGGCATCTGTTATTTTGGCACAAATCTTTTGGTT  
CTTAAAAGAAACAGTTCGAGAAGGTTCAATTGTCCGAAATGAATTCATGAGTAAAG  
TCTATGATTGGTTCGAAGAACGTCTCGAAATTCAGGCGATTGCGGATGATATAACTAGT  
AAATACGTGCCTCCTCATGTCAACATATTTTATTGTCTAGGAGGAATTACGCTTACTTGT  
TTTTTAGTTCAAGTGGCTACGGGATTTGCTATGACTTTTTACTATCGTCCAACCGTTACT  
GAGGCTTTTGTCTTGTTCATATATAATGACTGAAGCTAATTTTGGTTGGTTAATCCGA  
TCAGTTCATCGATGGTCGGCAAGTATGATGGTCCTAATGATGATCCTGCATGTATTTTCGT  
GTGTATCTCACCGGTGGATTTAAAAACCTCGCGAATTGACTTGGGTTACAGGTGTGGT  
TCTGGGTGTATTGACCGCATCTTTTGGCGTAACTGGTTATTCCTTACCTCGGGACCAAAT  
TGGTTATTGGGCAGTGAAAATTGTAACAGGTGTACCTGAAGCTATTCCTGTAATAGGAT  
CGCCTTTGGTAGAATTATTGCGCGGAAGTGCTAGTGTGGGACAATCTACTTTGACTCGT  
TTTTATAGTTTACACACTTTTGTATTACCGCTTCTTACTGCCGTATTTATGTTAATGCATTT  
CCCAATGATACGTAAACAAGGTATTTCTGGTCTTTAATGGGAGTAACAAAAAACCTG  
ACTTGAATGATCCTGTATTAAGAGCTAAATTGGCTAAAGGTATGGGTCATAATTATTACG  
GAGAACCCGCATGGCCCAACGATCTTTTATATATTTTCCAGTAGTAATTCTAGGTACTA  
TTGCATGTAACGTAGGCTTAGCGGTTCTAGAACCATCAATGATTGGTGAACCGGCAGAT  
CCATTTGCAACCCCTTTGGAAATATTACCCGAATGGTATTTTTTTCCCGTATTTCAAATAC  
TTCGTACAGTACCCAATAAATTATTGGGTGTTCTTTAATGGTTTTAGTACCCACGGGAT  
TATTAACAGTACCTTTTTTAGAGAATGTTAATAAATCCAAAATCCATTTTCGTGTCAG  
TAGCAACAACCGTCTTTTTGGTTGGTACTGTAGTAGCCCTTTGGTTGGGTATTGGTGCA  
ACATTACCTATTGATAAATCCCTAACTTTAGGTCTTTTTATGATTGAAGTTTTTCTATTTG  
GAATCGTGTTAGGTCTAATTCCTATTACTTTGGCTGGATTATTCGTAACCTGCATATTTACA  
ATACAGGCGTGGTGATCAGTTGGACCTTATGCCTACTATAACTAGTTATTTCCGGTTTTCT  
ACTAGCGGCTTTAACTATAACCTCAGCTCTATTTATTGGGTTGAGCAGGATACGACTTAT  
TATGGATATAGTAAGTCTCGCTTGGGCTGCTTTAATGGTAGTCTTTACATTTCCCTTTCA  
CTTGTAGTATGGGGAAGAAGTGGACTCATGATTATTCGTTCCCGGAACCAGAAGTAA  
AAATTTTGGTAGATAGGGATCACATAAAAACCTTTTGTAGGAATGGGCCAGACCGGG  
TCATTTCTCAAGAACAATAGCTAAAGGCCCTGATACTACCACTTGGATCTGGAACCTAC  
ATGCTGATGCTCACGATTTTCGATAGCCATAACAGTGATTGGAGGAGATCTCTCGAAAA  
GTATTTAGTGCACATTTCCGTCAACTCTCCATTATCTTTCTTTGGCTGAGTGGCATGTATT  
TCCACGGTGCTCGTTTTTCCAATTATGAAGCATGGCTAAGCGATCCGACTCACATTGGA  
CCTAGTGCCCAAGTGGTTTGGCCAATAGTGGGCCAAGAAATATTGAATGGTGATGTGG  
GCGGGGGTTTTCCGAGGAATAACAATAACCTCTGGTTTTTTTTCAGCTTTGGCGAGCATCT  
GGAATAACTAGTGAATTACAACCTTTATTGTACCGCAATTGGTGCATTGGTCTTTGCAGC  
GTTAATGCTTTTTGCTGGTTGGTTTCATATCATAAAGCTGCTCCAAAATTGGCTTGGTT  
TCAAGATGTAGAATCTATGTTGAATCACCATTTAGCGGGGCTACTAGGACTTGGGTCTC

TCTCTTGGGCGGGGCATCAAGTACATGTATCTTTACCGATTAACCAATTTCTAAACGCTG  
GAGTAGATCCTAAAGAGATAACCACTTCCTCATGAATTTATCTTGAATCGGGATCTTTTGG  
CTCAACTTTATCCCAGTTTTGCTGAGGGGAGCAACCCCGTTTTTCACCTTGAATTGGTCA  
AAATATGCAGACTTTCTTACTTTTTCGTGGAGGATTAGATCCAGTAACTGGGGGTCTATG  
GCTGACCGATATAGCACACCATCATTAGCTATTGCAATTCTTTTCTGATAGCAGGTCA  
CATGTATAGAACCAACTGGGGTATTGGTCATGGCCTAAAAGATATTTAGAAAGCTCATA  
AAGGTCCATTTACAGGTGAGGGCCATAAAGGCCTGTATGAGATCCTAACAACGTCATG  
GCATGCTCAATTATCTCTAATCTAGCTATGTTAGGCTCTTTAACCATTGTTGTAGCTCAC  
CATATGTATTCCATGCCCCCTTATCCATATCTAGCTACTGACTATGGTACCCAACTGTCAT  
TGTTACACATCACATGTGGATTGGTGGATTTCTCATAGTTGGTGCTGCTGCGCATGCA  
GCTATTTTTATGGTAAGAGACTATGATCCAACTACTCGATAACAACGATCTATTAGATCGT  
GTCCTTCGGCATCGCGATGCAATCATATCACATCTCAACTGGGCATGTATATTTCTAGGC  
TTTCACAGTTTTGGTTTTGTATATTCATAATGATACCATGAGTGCTTTAGGGCGTCCTCAA  
GATATGTTTTTCAGATACCGCTATAACAATTACAACCTGTCTTTGCTCAATGGATACAAAAC  
ACCCATGCTTTAGCACCTAGTGCAACCGCTCCTGGTGCAACAACAAGTACCAGTTTAA  
CTTGGGGGGGGTGGTGATTTAGTAGCAGTGGGCGGCAAAGTGGCTTTGTTACCTATTCCA  
TTAGGAACCGCAGATTTTTTGGTCCATCACATTCATGCATTTACGATTCATGTAACGGTA  
TTGATACTCCTAAAAGGTGTTCTATTTGCTCGCAGCTCCCGTTTGATACCGGATAAAGC  
AAATCTTGGTTTTTCGTTTTCTTGTGATGGACCTGGAAGAGGGGGGACATGTCAAGTAT  
CAGCTTGGGATCATGTCTTCTTAGGCCTATTTGGATGTACAATGCAATTCGGTAGTAA  
TATTCATTTTCAAGTTGGAAAATGCAGTCAGATGTTTGGGGCAGTATAAGTGATCAAGGG  
ATAGTAACTCATATCACGGGAGGAACTTTGCGCAGAGTTCCATTACTATTAATGGGTG  
GCTCCGTGATTTCTTATGGGCACAAGCATCCCAGGTAATTCAGTCTTATGGTTCTTCATT  
ATCTGCATATGGCCTTTTTTTCTAGGTGCTCATTTTGTCTGGGCTTTTAGTTAATGTTT  
CTATTCAGTGGACGTGGTTATTGGCAAGAAGTATTGAATCCATCGTTTTGGGCTCATAAT  
AAATTAAGGTTGCTCCTGCTACTCAGCCGAGAGCCTTGAGCATTATAACAAGGACGTG  
CTGTAGGAGTAACCCATTACCTTCTGGGTGGAATTGCCACAACATGGGCATTCTTCTTA  
GCAAGAATTATTGCAGTAGGAATGGCATTAAAGATTTCCAAGGTTTAGCCAAGGCTTAGC  
TCAGGACCCCACTACTCGTCGTATTTGGTTTGGTATTGCTACCGCACATGATTTGAAA  
GTCATGATGATATACTGAGGAACGTCTTTATCAGAATATTTTGGCTTCTCACTTTGGAC  
AATTAGCAATAATTTTTCTGTGGACTTCCGGAAATCTGTTTTCATGTAGCTTGGCAAGGA  
AATTTGAGTCATGGGTACAGGACCCTTTACATGTAAGACCTATTGCTCATGCAATTTGG  
GATCCTCATTTTGGTCAACCGGCTGTGGAAGCTTTTACTCGAGGGGGTGTCTTTGGCCC  
AGTGAATATCGCTTATTCTGGTGTATATCAGTGGTGGTATAACAATCGGTTTACGCACTAA  
TGAAGATCTTTATACTGGAGCTCTTTTTCTATTATTTCTTTCTGCCGTATCCTTAATAGCA  
GGCTGGTTACACTTACAACCAAAATGGAAACCGAGCGTTTCGTGGTTCAAAAATGCCG  
AATCTCGTCTTAATCATATTTGTACAGGACTCTTCGGCGTAAGTTCCTTGGCTTGGACA  
GGGCATTTGGTGCATGTCGCTATTCTGGATCCAGAGGGGAGTCCGTTTCGATGGAATAA  
TTTCTTAGATGTATTACCGCATCCCCAAGGGTTAGGCCCGCTTTTTACAGGTCAGTGGA  
ATCTTATGCTCAAAAATCCGGATTCAAGTAGTCATTTATTTGGTACCTCCCAAGGAGCAG  
GAACTGCCATTCTAACCCTTCTCGGGGGATTCCATCCACAAACGCAAAGTTTATGGCTG  
ACTGATATTGCTCATCATCATTAGCTATTGCATTTATTTTTCTCATTGCTGGTCATATGTA  
TAGAACTAACTTCGGGATTGGGCACAGTATGAAAGATCTTTTAGATGCGCATATTCCTC  
CGGGGGGGGATTGGGACGTGGGCATAAGGGTCTTTATGACACAATCAATAATTCGATT

CATTTTCAATTAGGCCTTGCTCTAGCTTCTTTAGGGGTTATTACTTCCTTGGTAGCTCAA  
CACATGACTCTTTACCTGCTTATGCATTATCGCACAAGACTTTACTACTCAAGCTGCG  
TTATATACTCATACCAATACATCGCGGGATTCATCATGACAGGAGCTTTTGCTCATGGA  
GCTATATTTTTTCATTAGAGATTACAATCCGGAACAAAATGAGGATAATGTATTGGCAAGA  
ATGTTAGACCATAAAGAAGCTATCATATCTCATTTAAGTTGGGCCAGCCTCTTTCTAGGG  
TTCCATACCTTGGGACTTTATGTTTATAATGATGTCATGCTTGCCTTTGGTACTCCGGAG  
AAACAAATCTTGATCGAACCTATATTTGCTCAATGGATAACAATCTGCTCATGGTAAACT  
TCATATGGGTTCGATGTACTTTTATCTTCAACGAATGGACCGGCATTCAACCGGGGTCG  
AAGCATATGGTTGCCCGGTTGGTTAAATGCTGTTAATGAG-----AATAGTAATCACTATT  
CTTAACAATAGGTCCTGGAGACTTTTTGGTTCATCATGCTATTGCTCTGGGTTTACATAC  
AACTACATTGATCTTAGTAAAAGGTGCTTTAGATGCACGTGGTTCCAAGTTAATGCCAG  
ATAAAAAGGATTTCCGGTTATAGTTTTCCGTGCGATGGCCCGGGACGAGGCGGTACTTGT  
GATATTTCCGGCTTGGGACGCATTTTATTTGGCAGTTTTTTGGATGTTAAATACCATTGGA  
TGGGTTACTTTTTATTGGCATTGGAAGCACATTACATTATGGCAGGGTAACGTTTCACAG  
TTAATGAATCTTCCACTTATTTGATGGGCTGGTTACGAGATTATTTATGGTTAAACTCTT  
CACAAC TTATCAATGGATATAACCCTTTTGGTATGAATAGTTTATCGGTCTGGGCGTGGA  
TGTTCTTATTTGGACATCTTGTTTGGGCTACTGGATTTATGTTCTTAATTTCCCTGGCGTG  
ATATTGGCAGGAATTGATTGAAACTTTAGCATGGGCTCATGAACGCACACCTTTGGCCA  
ATTTGATTCGCTGGAGAGATAAACCAGTGGCCCTTTCCATTGTTCAAGCAAGATTGGTT  
GGATTAGCTCACTTTTCTGTAGGTTATATATTCACTTATGCAGCTTTCTTGATTGCCTCTA  
CATCAGGCAAATTTGGTATGTCACATTCAGTAAAAATTTATGATACATGTATAGGGTGTA  
CTCAATGTGTCCGCGCCTGCCCCACCGATGTATTAGAAATGATACCTTGGGACGGCTGT  
AAAGCTAAACAAATTGCTTCCGCTCCAAGAACAGAGGACTGTGTGGTTGTAAGAGAT  
GTGAATCTGCCTGCCAACGGATTTCTTGAGTGTTAGAGTTTATTTAGGGAATGAAACA  
ACTCGTAGCATGGGTCTAGCTTATATGATAACTCTCAACCTTCCCTCTATTTTTGTGCCTT  
TAATAGGCCTAGTATTTCCGGCAATTGCAATGGCTTCTTTATTTCTTCATGTTCAAAAA  
ACAAGATTGTGATGCGAGATCTAAAAACATATCTCTCCGTGGCACCGGTAATAAGTACT  
CTATGGTTCGGGCTTTTAGCAGGTCTATTGATAGAGATTAATCGTTTTTTCCCGGATGCG  
TTGACATTCCCCTTTTTTTTCATTCATGACTGCAATTTTAGAGAGACGCGAAAGCGAAAG  
CCTATGGGGTTCGCTTCTGTAACCTGGATAACCAGCACTGAAAACCGTCTTTACATTGGAT  
GGTTTGGTGTTTTGATGATCCCTACCTTATTGACCGCAACTTCTGTATTTATTATCGCCTT  
CATTGCTGCTCCTCCAGTAGATATTGATGGTATTCGTGAACCTGTTTCTGGATCTCTACT  
TTATGGAAACAATATTATCTCAGGTGCCATTATTCCACTTCTGCAGCTATCGGTTTGCA  
CTTTTACCCAATCTGGGAAGCGGCATCCGTTGATGAATGGTTATAAATGGTGGTCCTTA  
TGAAC TAATTGTTCTACACTTCTTACTTGGTGTAGCTTGTTACATGGGTCGTGAGTGGG  
AACTTAGTTTCCGTCTGGGTATGCGACCTTGGATTGCTGTTGCATATTAGCTCCTGTTG  
CAGCTGCTGCTGCTGTTTTTCTTGATCTACCCAATTGGTCAAGGAAGTTTTTCTGATGGTA  
TGCCGCTAGGAATCTCTGGTACTTTCAACTTTATGATTGTATTCCAGGCTGAGCACAAC  
ATCCTTATGCACCCATTTACATGTTAGGCGTGGCTGGTGTATTCCGGCGGCTCCCTATTC  
AGTGCTATGCATGGTTCCTTGGTAACTTCTAGTTTGATCAGGGAAACCACAGAAAATGA  
ATCTGCTAATGCAGGTTACAGATTCCGGTCAAGAGGAAGAACTTATAATATCGTAGCCG  
CTCATGGTTATTTGGCCGATTGATTTCCAATATGCTAGTTTCAACAACCTCTCGTTCTTT  
ACATTTCTTCCCTAGCTGCTTGGCCTGTAGTAGGTATCTGGTTCAGTCTTTAGGTATCAG  
CACTATGGCTTTCAACCTAAATGGTTTCAATTTCAACCAATCTGTAGTTGATAGTCAAG

GCCGTGTAATTAATACTTGGGCTGATATTATTAACCGTGCTAACCTTGGTATGGAAGTTA  
TGCATGAACGTAACGCTCATAACTTCCCTCTAGATCTAGCTGCTATCGAAGCTCCATCTA  
CAAATGGAATGGGTTTGCCTTGGTATCGTGTTACATACCGTTGTATTGAATGATCCCGGTC  
GGTACTGTCCGTCCATATAATGCATACAGCTCTGGTTGCTGGTTGGGCCGGTTCGATG  
GCTCTGTATGAATTAGCAGTTTTTGTATCCCTCTGACCCTGTTCTTGATCCAATGTGGAGA  
CAGGGTATGTTTCGTTATACCTTCATGACTCGTTTAGGAATAACCAATTCATGGGGCGGT  
TGGAGTATCACA---GGAGGGACTGTAACGAATCCGGGTATTTGGAGTTACGAAGGTGT  
GGCAGGGGCACATATTGTGTTTTCTGGCTTGTGCTTCTTGGCAGCTATTTGGCATTGGG  
TGATTGGGATCTCGAAATATTTTGTGATGAACGTACAGGAAAACCTTCTTTAGATTTGC  
CCAAGATCTTTGGAATTCATTTATTTCTTGCAGGGGTAGCTTGTCTTGGTTTTGGTGCAT  
TTCATGTAACAGGCTTGTATGGTCTGGAATATGGGTGTCCGATCCTTATGGACTAACGG  
GAAAAGTACAATCTGTAAATCCAGCGTGGGGCGTGGAAGGTTTTGATCCTTTTGTTC  
GGGAGGAATAGCCTCTCATCATATTGCAGCAGGGACATTGGGCATATTAGCCGGTCTAT  
TCCATCTTAGCGTCCGCCCGCCCAACGTCTATACAAAGGATTGCGTATGGGCAATATT  
GAAACCGTCCTTTCCAGTAGTATCGCTGCTGTCTTTTTTGCAGCTTTTGTGTTGCCGG  
AACTATGTGGTATGGTTCAGCAACTACCCCAATCGAGTTATTTGGGCCTACTCGTTATCA  
ATGGGATCAGGGGTACTTCCAGCAAGAGATATATCGAAGAGTTAGTGCTGGGCTAGCC  
GAAAATCAAAGTTTATCAGAAGCTTGGTCTAAAATTCCTGAAAAATTAGCTTTTTATGA  
TTACATCGGCAATAATCCGGCAAAAAGGGGGATTATTCAGGGCAGGCTCAATGGATAAC  
GGAGATGGAATAGCGGTTGGATGGTTAGGACACCCTATCTTTAGAGATAAAGAAGGCC  
GTGAACTTTTTGTACGCCGTATGCCTACTTTTTTTGAAACATTTCCGGTTGTTTTAATAG  
ACGGCGACGGAATTGTTAGAGCCGATGTTCTTTTAGAAGGGCAGAATCGAAGTATAG  
TGTCGAACAAGTAGGTGTAACGTTGAGTTCTACGGTGGCGAACTCAATGGAGTCAGT  
TATAGTGATCCTGCTACTGTGAAAAAATATGCTAGACGTGCTCAATTGGGTGAAATTTTT  
GAATTAGATCGTGCTACTTTGAAATCCGATGGTGTTTTTTCGTAGCAGTCCAAGGGGTTG  
GTTACTTTTTGGACATGCTTCATTTGCTTTGCTCTTCTTCTTCGGACATATTTGGCATGGT  
GCTAGAACCTTGTTTCAGAGATGTTTTTGTGTTATTGACCCAGATTTGGATGCTCAAGT  
AGAATTCGGAGCATTCCA AAAA ACTTGGAGATCCA ACTACAAGAAGACAAGTAGTT-----  
-----GTGGAACGCTCTTTAATGGAACTTTAGCTTTAGCTGGTTCGTGA  
CCAAGAAACCACCGTTTTTCGCTTGGTGGGCCGGAAATGCCCGACTTATCAATTTATCCG  
GTAAACTACTAGGGGCTCATGTAGCCCATGCCGGATTAATCGTATTCTGGGCCGGAGCA  
ATGAACCTATTTGAAGTGGCTCATTTTGTACCAGAGAAGCCTATGTATGAACAAGGATT  
AATTTACTTCCCCACCTAGCTACTCTAGGTTGGGGGGTAGGTCCTGGTGGGGAAGTTA  
TAGACACCTTTCCATACTTTGTATCTGGAGTACTTCATTTAATTTCTCTGCAGTATTGGG  
CTTTGGCGGTATTTATCATGCACTTCTGGGACCTGAGACGCTTGAAGAATCTTTTCCATT  
CTTCGGTTATGTATGGAAAGATAGAAATAAAATGACCACAATTTTAGGTATTCACTTAAT  
CTTGTTAGGTATAGGTGCTTTTTCTTCTAGTATTCAAGGCCCTTATTTTGGGGGCGTATAT  
GATACCTGGGCTCCGGGAGGGGGAGATGTAAGAAAAATTACCAACTTGACCCTTAGCC  
CAAGTATTATATTTGGTTATTTACTAAAATCCCCCTTTGGAGGGGAAGGATGGATTGTTA  
GTGTAGACGATTTGGAAGATATAATCGGAGGACATGTATGGTTAGGTTCCATTTGTATAC  
TTGGTGGAAATCTGGCATATCTTAACCAAAACCCTTCGCATGGGCTCGACGCGCACTTGTA  
TGGTCTGGAGAGGCTTACTTATCTTATAGTTTAGGGGCTATATCTGTCTTTGGTTTTATTG  
CTTGTGTTTTTGTCTGGTTCAATAATACTGCTTATCCTAGTGAGTTTTACGGACCCACTG  
GACCAGAAGCTTCTCAAGCTCAAGCATTACTTTTTCTAGTTAGAGACCAACGTCTTGG

GGCTAACGTGGGATCCGCTCAAGGACCTACCGGTTTAGGTAAATATTTAATGCGTTCCC  
CCACCGGAGAAGTCATTTTTGGAGGAGAACTATGCGTTTTTGGGATCTGCGTGCTCC  
GTGGTTAGAACCTCTAAGGGGTCCAAATGGGTTGGACTTGAGTAGGTTGAAAAAGA  
CATAAACCTTGGCAAGAACGGCGTTCTGCAGAATATATGACTCATGCTCCTTTAGGTT  
CGTTAAATCCGTGGGTGGCGTAGCTACTGAGATCAATGCAGTCAATTATGTCTCTCCTA  
GAAGTTGGTTAGCTACTTCTCATTTTTGTTCTAGGATTCTTCTTCTTCGTAGGTCATTTGT  
GGCACGCGGAAGAGCTCGTGCGGCTGCAGCAGGATTTGAAAAAGGAATTGATCGTG  
ATTTGAACTGTTCTTTCCATGACTCCTCTTAATATGACTATAGCCCTTGGTAAATTTAC  
CAAAGACGAAAAT--TTATTTGATATTATGGATGACTGGTTACGGAGGGACCGTTTTCGTT  
TTTGTAGGCTGGTCCGGTCTATTGCTCTTTCCTTGTGCCTATTTTCGCTTTAGGGGGTTGG  
TTCACAGGTACAACCTTTGTAACCTCATGGTATACTCACGGATTGGCCAGTTCCTATTTG  
GAAGGCTGTAATTTCTTAACTGCCGCCGTTTCTACTCCTGCTAATAGTTTAGCACATTCT  
TTATTGTTACTATGGGGTCCCTGAAGCCCAAGGAGATTTTACTCGTTGGTGTCAATTAGG  
CGGTCTATGGACTTTTGTGCTCTCCATGGCGCTTTTGGACTAATAGGTTTTATGTTACG  
TCAATTCGAGCTTGCTCGATCTGTTCAATTGCGACCTTATAATGCAATCGCATTCTCTGC  
TCCAATTGCTGTTTTTGTCTGTATTCCTGATTTATCCACTAGGTCAGTCTGGTTGGTTC  
TTTGCGCCTAGTTTTGGTGTAGCAGCTATATTTTCGATTCATCCTCTTTTTTCAAGGATTC  
ATAATTGGACGTTAAACCCATTTCAATATGATGGGAGTTGCTGGTGTATTAGGCGCTGCTT  
TGCTATGCGCTATTCATGGTGTACCGTAGAAAATACTTTATTTGAAGATGGTGATGGTG  
CAAATACATTCCGTGCTTTTAAACCAACTCAAGCTGAAGAACTTATTCAATGGTCACC  
GCTAACCGCTTTTGGTCCCAAATCTTTGGGGTTGCTTTTTTCCAATAAACGTTGGTTACAT  
TTCTTTATGTTATTTGTACCAGTAACCGGTTTATGGATGAGTGCTCTTGGAGTAGTCGGT  
CTGGCCCTGAACCTACGTGCCTATGACTTCGTTTCTCAGGAAATTCGCGCAGCGGAAG  
ATCCTGAATTTGAGACTTTCTACACCAAAAATATTCTCTTAAACGAAGGTATCCGTGCTT  
GGATGGCGGCTCAAGATCAGCCTCATGAAAACCTTATATTCCCTGAGGAGGTTCTACCA  
CGTGGAACGCTCTTATGTCTGGAAGCACAGGAGAACGTTCTTTTGGCTGATATTATTAC  
CAGTATTCGCTACTGGGTTATTCATAGCATTACTATACTTCCCTTATTTCATTGCGGGTTGG  
TTATTCGTCAGCACCGGTTTAGCTTATGATGTGTTTGGGAAGCCCTCGGCCAAACGAGTA  
TTTACAGAGAGCCGACAAGGAATTCATTAATAACTGGGCGTTTTGATTCTTTGGAAC  
AATTGATGAATTTAGTAGATCTTTTATGACCATAGATCGAACCTATCCAATTTTACAG  
TGCGATGGTTGGCTGTTTACGGCCTAGCTGTACCTACCGTTTCTTTTTTGGGATCAATAT  
CAGCAATGCAGTTCATCCAACGAATGGCTACACAACTGTTGAGAACGCTTCTAGATC  
TGGT--CCAAGACGAACACTGTAGGGAGTTTATTGAAACCATGAAATTCGGAATATGGT  
AAAGTAGCTCCTGGATGGGGAACAACCTCTTTGATGGGTGTCGCAATGGCTTTATTTGC  
GATATTTCTATCTATTATTTTGGAGATTTATAATTCTTCCGTCTTATTGGATGGAATTTCAA  
TGCAAATGCTTACTCTCAAACCTTTCGTTTACACAGTAGTGATATTCTTTGTTTCTCTCT  
TCATCTTTGGATTCTATCTAATGATCCAGGACGTAATCCTGGACGTGAAGAAATGGCC  
GATACGACTGGAAGGATTCCTCTTTGGATAATAGGTAAGTGTAACTGGTATTCTTGTGATC  
GGTTTACTAGGTATTTCTTTTTATGGTTCATATCCGGATTGGGTTTCATCCCTGATGCTTA  
ATACTTTAGTTAATCTGTAICTGTCTTAATTCTACTCTTTATTTCGAGTAGTCCTTTCTTG  
GCCAAATGCCCGAGGCCTATGCTTTTTTGAATCCAATCGTAGATATTATGCCAGTCATA  
CCTCTACTCTTTTTTCTCTTAGCCTTTGTTTGGCAAGCTGCTGTAAGTTTTTCGAATGACA  
CAATCAAACCCGAACGAACAAAGTGTGAAATTGAATCGTACTAGCCTCTACTGGGGAT  
TATTACTCATTTTTGTACTTGCTGTTTTATTTTCCAATTATTTCTTCAATATGGAAGTAAAT

ATTCTTGCATTTATTGCTACTGCACTGTTCAATCTAGTTCCTACTGCTTTTCTACTTATCAT  
TTACGTAAAAACAGTTAGTCAAAATGATATGGAAACAGCAACTCTAGTCACCATCTTTA  
TATCTGGTTTACTTGTAAAGTTTTACTGGGTACGCCTTATATAACCGCTTTTGGGCAACCTT  
CTCAACAATAAGAGATCCGTTCGAGGAACATGGGGACATGGAAGCATTGGTTTATAC  
ATTCCTTTTAGTCTCGACTCTAGGGATAATTTTTTCGCTATCTTTTTTCGCGAACCGCCT  
AAAGTTCCAACTAAAAAGATGAAAATGACTCTTGCTTTCCAATTGGCTGTTTTTGCATT  
AATTGCTACTTCATCAATCTTATTGATTAGTGTACCCGTTGTATTTGCTTCTCCTGATGGT  
TGGTCTAGTAACAAAAATGTTGTATTTTCTGGTACATCATTATGGATTGGATTAGTCTTTC  
TGGTGGGTATCCTTAATTCTCTCATCTCT-----ATGTCACCACAAACAGAAAC  
TAAAGCAAGTGTTGGATTCAAAGCTGGTGTAAAGATTACAAATTGAATTATTATACTC  
CTGACTATGTCACCAAAGATACTGATATCTTGGCAGCATTCCGAGTATCTCCTCAACCTG  
GAGTTCCACCTGAAGAAGCAGGGGCCGCGGTAGCTGCTGAATCTTCTACTGGTACATG  
GACAACTGTGTGGACTGATGGACTTACCAGCCTTGATCGTTACAAAGGGCGATGCTAC  
CAAATCGAGCCCGTTGCTGGAGAAGAAAATCAATTTATTGCTTATGTAGCTTACCATT  
AGATCTTTTTGAAGAAGGTTCTGTACTAATATGTTTACTTCCATTGTGGGTAATGTATTT  
GGTTCAAAGCCCTGCGTGCTCTACGCTGGAAGATTTGCGAATCCCTCCTGCTTATAC  
TAAACTTTCCAAGGCCCGCCTCATGGCATCCAAGTTGAGAGAGATAAATTGAACAAG  
TATGGTCGTCCCCTGTTGGGATGTACTATTAACCGAAATTGGGATTATCTGCTAAAAAC  
TACGGTAGAGCAGTTTATGAATGTCTACGCGGTGGACTTGATTTTACCAAAGATGATGA  
GAATGTGAACTCCCAACCATTTATGCGTTGGAGAGATCGTTTCTTATTTTGTACCGAAG  
CACTTTTTAAAGCACAGGCTGAAACAGGTGAAATCAAAGGGCATTACTTGAATGCTAC  
TGCAGGTACATGCGAAGAAATGATGAAAAGGGCTGTATTTGCCAGAGAATTGGGAGTT  
CCTATCGTAATGCATGACTACTTAACAGGGGGATTACTGCAAATACTACCTTAGCTCAT  
TATTGCCGAGATAATGGCCTACTTCTTCACATCCACCGCGCAATGCATGCAGTTATTGAT  
AGACAGAAGAATCATGGGATGCACTTTCGTGTACTAGCTAAAGGGTTACGTATGTCTGG  
TGGAGATCATATTCACGCCGGTACCGTAGTAGGTAACCTTGAAGGGGAAAGGGAGATC  
ACTTTGGGATTTGTTGATTTATTGCGTGATGATTTTATTGAAAAAGATCGAAGTCGCGGT  
ATTTATTTCACTCAAGATTGGGTCTCTCTACCAGGTGTTCTGCCCGTGGCTTCGGGAGG  
TATTCACGTTTGGCATATGCCTGCTCTGACCGAGATCTTTGGGGATGATTCCGTACTACA  
GTTCCGGTGGAGGAACTTTAGGCCACCCTTGGGGAAATGCACCGGGTGCCGTAGCTAAT  
CGAGTAGCTCTAGAAGCATGTGTAAAAGCTCGTAATGAGGGGCGTGATCTTGCTCGTG  
AGGGTAATGAAATTATCCGTGAGGCTAGCAAATGGAGTCCTGAACTAGCTGCTGCTTGT  
GAGATCTGGAAGGAGATCAAATTTGAATTTGAGGCAATGGATACTTTG-----ATGGCGAT  
ACATTTATACAAAACCTTCTACCCCGAGCACACGCAATGGAGTCGTAGACAGTCAAGTG  
AAATCCAATCCACGAAATCATTTAATCTATGGACAGCATCGTTGTGGTAAAGGTCGTAA  
TGCCAGAGGAATCATTACCGCAGGGCATAAGAGGGGGAGGTCATAAGCGTCTATAACCGT  
AAAATCGATTTTCGACGGAATGAAAAGACATATATGGTAGAATCGTAACCATAGAATA  
CGACCCTAATCGAAATGCATACATTTGTCTCATACTATGGGGATGGTGAGAAGAGAT  
ATATTTACATCCCAGAGGGGCTATAATTGGAGATACCATTGTTTCTGGTACAGAAGTTC  
CTATAAAAATGGGAAATGCCCTACCTTTGACCGATATGCCCTTAGGCACGGCCATACATA  
ACATAGAAATCACACTTGGAAAGGGTGGACAATTAGCTAGAGCAGCGGGTGTGTAGC  
GAAACTGATTGCAAAAGAGGGGAAATCGGCCACATTAATAATTACCTTCTGGGGAGGTC  
CGTTTGATATCCAAAACTGCTCAGCAACAGTTCGGACAAGTGGGGAATGTTGGGGTGA  
ACCAGAAAAGTTTGGGTAGAGCCGGATCTAAGCGTTGGCTAGGTAAGCGTCCTGTAGT

AAGAGGAGTAGTTATGAACCCCTGTAGACCATCCCCATGGGGGTGGTGAAGGGAGGGC  
CCCAATTGGTAGAAAAAACCACAACCCCTTGGGGTTATCCTGCACTTGAAGAAGA  
AGTAGAAAAAGGAATAAATATAGTGATAATTTGATTCTTCGTCGCCGTAGTAAAATGATT  
CAACCTCAGACCCATTTGAATGTAGCGGATAACAGCGGGGCTCGAGAATTGATGTGTAT  
TCGAATCATAGGAGCTAGC---AATCGTCGATATGCTCATATTGGTGACATTATTGTTGCTG  
TGATCAAAGAAGCAGTGCCAAATATGCCCTTAGAAAAATCAGAAGTGGTCAGAGCTGT  
AATTGTACGTACCTGTAAAGAACTCAAACGTGACAACGGTATGATAATACGATATGATG  
ACAATGCTGCAGTTGTCATTGATCAAGAAGGAAATCCAAAAGGAACTCGAGTTTTTTGG  
TGCGATTGCACGGGAATTGAGACAGTTAAATTTACTAAAATAGTTTCATTAGCTCCCG  
AGGTATTAATGCTTAGTCCCAAAGAACCAGATTCCGCAAACAACATAGAGGAAGAAT  
GAAGGGAATATCTTATCGAGGTAATCATATTTGTTTCGGTAAATATGCTCTTCAAGCACT  
TGAACCTGCTTGGATCACATCTAGACAAATTGAAGCAGGTCGACGAGCAATGACACGA  
AATGCACGTCGTGGTGGAAAAATATGGGTACGGATATTTCCAGACAAACCAGTTACAGT  
AAGACCCACAGAAACACGTATGGGTTCCGGGAAAGGATCCCCTGAATATTGGGTAGCT  
GTTGTTAAACCAGGTGCAATACTTTATGAAATGGGTGGAGTAACAGAAAATATAGCCAG  
AAAGGCTATTTCAATAGCAGCGTCCAAAATGCCTATACGAACTCAATTCATTATTTCCGG  
AATGACCAGAATTAGACGGGGATATATAGCTCGGAGACGTAGAACAAAAATTCGTTTAT  
TTGCATCAAGCTTTCGAGGGGCTCATTCAAGACTTACTCGAACTATTACTCAACAAAA  
ATAAGAGCTTTAGTTTCGGCTCATCGGGATAGGAATAGGCAAAAAGAGAAATTTTCGTCG  
TTTGTGGATCACTCGAATAAATGCAGTAATTCGCGAA---AGAGGGGTATCCTATAGTTAT  
AGTAGATTAATCCATGATCTGTACAAGAGACAGTTGCTTCTTAATCGTAAAATACTTGCA  
CAAATAGCTATATCAAATAGGAATTGTATTTATATGATTTCCAATGAGATCATAAAAGAA  
GTAGATTGGAAGGAATCCACCGGAAGAATTATGTTAAAAGAAGTATACGCTTTAGGTCA  
ACATATATCTATGTCTGCTCACAAAGCGCGAAGAGTAATTGATCAAATTCGTGGACGTT  
CCTACGAAGAAACACTTATGATACTAGAACTCATGCCTTATCGAGCATGTTATCCCATT  
TTAAATTTGGTTTATTCTGCAGCAGCAAATGCTAGTTACAATATGGATTCCAACGAAGCA  
AATTTATTTATTAGTAAAGCCGAAGTCAACGAGGGTACTACCGTAAAGAAATTTAAACC  
TCGAGCTCGAGGGCATAGTTATCCGATAAAAAGACCTACTTGCCGTATAACTATCGTAG  
TGAAGGATATATCCTTAGATGGGGGAGTATGGGACAAAAAATGGATGGAATCAAATAT  
GCAGTATTTACAGACAAAAGTATTCGGTTATTGGGGAAAAAT---CAATATACTTCTAATG  
TCGAATCAGGATCAACTAGGACAGAAATAAAGCATTGGGTCGAACTCTTCTTTGGTGT  
CAAGGTAATAGCTATGAATAGTCATCGACTTCCGGGAAAGGGTAGAAGAATGGGACCT  
ATTATGGGACATACAATGCATTACAGACGTATGATCATTACGCTTCAACCGGGTTATTCT  
ATTCCACCTCTTAGAAAAGAAAAGAACTATGGCAGTTCCAAAAAACGTACTTCTATATC  
AAAAAAGCGTATTCGTAAAAATTTGGAAACGGAAGGGATATTGGGCAGCGTTAAAA  
GCTTTTTCGTTAGGGAAATCTTTTTGACCGGAAATTCAAAAAGTTTTTTTTGTGCGACA  
AACAAATAAGATGGCCAAGGGTAAAGATGTCCGAGTAACAGTTATTTTGGAAATGTACC  
AGTTGTGTCCGAAACAGTGTTAAT-----AAGGGATCAACGGGCATTTCCAGATATATTAC  
TCAAAGAACCAGCACAAATACGCCTAATCGATTGGAATTGAGAAAATCTGTCCCTATT  
GTTACAAACATACGATTCATGGGGAGATAAAGAAAATGAAAATAAGAGCTTCTGTTCGT  
AAAATTTGTGAAAAATGTTCGATTAATCCGTAGGCGGGGACGAATTATAGTAATTTGTTC  
CAACTCGAGACATAAACAAGACAAGGAATGGTTCGAGAGAAAGTAACAGTATCTAC  
TCGGACACTACAGTGGAAAGTGTGTTGAATCAAGAGCAGACAGTAAGCGTCTTTATTAT  
GGACGTTTTATTTTGTGCGCCACTTATGAAAGGTCAAGCTGACACAATAGGCATTGCGAT



GCGAAGAGCTTTGCTTGGAGAAATAGAAGGAACATGTATCACACGCGCAAAATTTGAG  
-----AAAATACCACACGAATATTCTACCATAGTGGGTATTCAAGAATCAGTACATGAAAT  
TTTAATGAATTTGAAAGAAATTGTATTGAGAAGTAATCTATATGGAACCTTGGCAGCGCATC  
TATTTGTGTCAGGGGTCTGGATATGTAACCACTCAAGATATCATCTTACCGCCTTATGT  
CGAAATCGTTGATAATACACAGCATATAGCTAGTTTGACGGAACCAATTGATTTGTGTAT  
TGGATTACAAATCGAGAGGAATCGTGGATATCTTATAAAAACGCCAAAT---AACTTTGAC  
GGAAGTTAT-----CCTATAGATGCTGTATTCATGCCTGTTCGAAATGCGAATCATAGTATTC  
ATTCTTATCGGAATGGGAATGAGAAACAAGAGATACTTTTTCTCGAAATATGGACAAAT  
GGAAGTTAACTCCTAAAGAAGCACTTCATGAAGCCTCCCGGAATTTGATTGATTTATT  
TATTCCCTTTTTACATATGGAAGAAGAA-----AATTACATTTAGAGGACAATCAA---CAC  
ACGATTCCCTTACCCCTTTTAACTTTTCATGATAAATTGGCT---AAACTAAGAAAAAACA  
AAAAA---AAAATAGCATTGAAATCAATTTTTATTGACCAATTAGAATTGCCTCCCAGGAT  
CTATAATTGCCTCAAAGGTCCAATATATATACATTATTGGACCTTTTGAATAATGTTCAA  
GAAGATCTTATGAAAATTGAACATTTTCGCATAGAAGATGTA AACAGATATTGGGGGT  
TCTAGAAAAGCAT-----TTCGCAATTGATTTACCAAAAATAAGATGCTCCGGGATGGA--  
-AATGAGGGAATGTCTACAATACCTGGGTTAATCAGATACAATTTGAAGGATTTTGTAG  
GTTTCATTGATCAGGGTTTGACGGAAGAACTTTATAAGTTTCCAAAATTGAAGATACCG  
ATCAAGAAATTGAATTTCAATTATTTGTGGAAACATACCAATTGGTTCGAACCATTGATAA  
AAGAAAGAGATGCTGTGTATGAATCACTCACATATTCTTCTGAATTATATGTATCCGCGG  
GATTAATTTGAAAACCAGTAGGGATATGCAAGACCAAACAATTTTTATTGAAATATT  
CCTCTAATGAATTCTCTGGGAACTTCTATAATAAATGGAATATATAGAATTGTGATCAATC  
AAATATTGCAAAGCCCGGCATTTATTACAAGTCAGAATTGGACCATAACGGAATTTTCG  
GTCATACCGGCACCATAATATCAGATTGGGGAGGAAAATCAGAATTAGAGATTGATAA  
AAAAGCAAGGATATGGGCTCGTGTGAGTAGGAAACAAAAAATATCTATTCTAGTTCTAT  
CATCAGCTATGGGGTCGAATCTAAGAGAAATTCTAGAGAATGTTTGTATCCTGAAATT  
TTTTTGTCTTTTCTGAATGATAAGGAGAAAAAAAATTGGGTCAAAGAAAATGCCA  
TTTTGGAGTTTTATCAACAATTTGCTTGTGTAGGTGGGGATCCAGTATTTTCGGAATCCT  
TATGTAAAGAATTACAAAAGAAATTCTTTCAACAAAGATGTGAATTAGGAAGGATTGGT  
CGACGAAATATGAACCGGAGACTGAATCTTGATATACCCAGAACAAATACATTTTTGTT  
ACCACGAGATATATTGGCAGCCGCGGATCATTGATTGGAATGAAATTTGGAATGGGTA  
CACTTGACGAT-----ATGAATCATTGAAAATAAACGTATTTCGTTCTGTAGCGGATCTTT  
TACAAGATCAATTCGGATTGGCTCTGGTTCGTTTAGAAAATGTAGTTCGAGGAACTATA  
TGTGGAGCAATTAGG---CATAAATTT---ATACCGACTCCTCAGAATTTGGTAAC TTCAAC  
TCCA-----TTAACAAC TACTTATGAATCTTTTTTCGGTTTACACCCATTATCTCAAGT  
TTTGGATCGAACTAATCCATTGACACAAATAGTTTCATGGGAGAAAATTGAGTTATTTGG  
GACCTGGAGGATTGACAGGGCGAAGTCTAGTTTTCGAATAAGAGATATCCATCCTAGT  
CACTATGGACGATTTGCCCAATTGACACATCTGAAGGAATTAATGTTGGACTTATTGGA  
TCCTTAGCAATTCATGCGAGGATTGGTCATTGGGGG---TCTCTAGAAAGCCCTTTTAT--  
-----GAAATTTCTGAGAGATCAAAGGG-----GTACGGGTGCTTTATTTATCACCCCATAG  
AGATGAATACTATATGGTAGCGGCAGGAAATCTTTGGCCTTGAATCAGGGTATTCCGG  
AAGAACAGGTTGTTCCAGCTCGATATCGTCAAGAATTCCTGACTATTGCATGGGAACA  
GGTTCATCTTCGAAGTATTTTTCCCTTCCAATATTTTTCTATTGGAGCTTCCCTCATTCT  
TTTATCGAGCATAATGATGCGAATCGGGCTTTAATGAGTTCTAATATGCAACGTCAAGCC  
GTTCTCTTTCTCGGTCCGAGAAGTGCATTGTTGGAAC TGGGTTGGAACGCCAAGCGG

CTCTAGATTCAGGGGCTCTTGCTATATCCGAACACGAGGGAAAGATCATTTATAACCGAT  
ACTGACAAGATCTTTTTATCGGGTAATGGAGATACTTTAAGCATTCCATTAGTTATGTATC  
AACGTTCCAACAAAATACTTGTATGCATCAAAAACCCAGGTTCCGGCGGGGTAAATG  
CATTA AAAAGGGACAAATTTTAGCGGATGGCACCGCTACAGTTGGTGGCGAACTCGCT  
TTGGGGAAAACGTATTAGTAGCTTATATGCCATGGGAAGGTTACAATTCTGAAGATGC  
AGTACTCATTAGCGAGCGCTTGGTATATGAAGATATTTATACTTCTTTTCACATACGGAA  
ATATGAAATTCAGACTCATGTGACAAGCCAAGGC---CCCGAAAAGGTCACTAATGAAAT  
ACCGCATTTAGAAGCCATTTACTCCGCAATTTAGACAAAATGGAATTGTGATGCTGG  
GATCTTGGGTAGAGACGGGTGATATTTTAGTAGGTAAATTAACGCCCAAATGGTGAAA  
GAA---TCTTCGTATGCCCCGGAACATAGATTGTTACGAGCCATACTTGGCATTACAGGTAT  
CTACTTCAAAGAACTTGTCTAAAACCTACCTATAGGTGGTAGGGGTTCGGGTTATTGAT  
GTAAGATGGATTCAGAAAAAGGG---GGTTCTAGTTATAATCCAGAAACGATTTGTGTA  
TATATTTACAGAAACGTGAAATCAAAGTAGGGGATAAAGTAGCTGGAAGACATGGAA  
ATAAAGGTATCATTTCAAAAATTTTGCCTAGACAAGATATGCCTTATTTGCAAGATGGAA  
GACCCGTTGATATGATCTTCAACCCATTAGGAGTACCTTCACGAATGAATGTAGGGCAG  
ATATTTGAATGTTCACTCGGGTTAGCGGGGGGTCTGCTCGACAGACATTATCGAATAGC  
GCCTTTTGATGAGAGATATGAACAAGAAGCTTCGAGAAAACCTAGTGTTTTCTGAATTAT  
ATGAAGCCAGTACGCAAACAGCGAATCCGTGGGTATTTGAACCCGAGTATCCAGGAAA  
AAGCAGAATATTTGATGGAAGAACGGGGGATCCTTTTGAACAACCTGTTATAATAGGA  
AAGCCTTATATCTTGAAATTAATTCATCAAGTTGATGATAAAATCCATGGACGTTCCAGT  
GGACATTATGCACTTGTTACACAACAACCCCTTAGAGGAAGAGCCAAGCAAGGGGGA  
CAACGGGTAGGAGAAATGGAGGTTTGGGCTCTAGAGGGATTTGGCGTTGCTCATATTTT  
ACAAGAGATGCTTACTTATAAATCTGATCATATTAGAGCTCGCCAGGAAGTACTTGGTA  
CTACGATCATTGGAGGAACAATACCTAATCCTGAGGATGCTCCAGAATCTTTTCGATTG  
CTTGTTCCGGAACTACGATCTTTGGCTCTGGAACCTGAATCATTTCCTTGTATCTGAGAA  
GAACTTCCAGATTACTAGGAAGGAAGCTATGAATCAGAATTTTCTTCTATGATCGATC  
GGTATAAACATCAACAACCTCCGAATTGGATCAGTTTCTCCTCAACAAATAAGTGCTTGG  
GCCACTAAAATCTTGCCTAATGGAGAGATAGTTGGAGAGGTGACAAAACCTATACTTT  
TCATTACAAAACCAATAAACCAGAAAAAGATGGATTATTTTGTGAAAGAATTTTGGCC  
CTATAAAAAGTGGAATTTGTGCTTGTGGAAATTATCGAGTAATCCGAGATGAAAAAGA  
AGACTCGAAATTTTGTGAACAATGCGGAGTCGAATTTGTTGATTCTCGGATACGAAGAT  
ATCAAATGGGCTACATCAAACCTCGCATGCCAGTAACCCATGTGTGGTATTTGAAACGT  
CTTCCTAGTTATATTGCGAATCTTTTAGATAAACCTCTTAAAGAATTAGAAGGCCTAGTA  
TACTGCGATCCCAATTTTTCTTTTGCTAGGCC---GTAGCTAAAAAACCCACTTTCTTAC  
GATTACGAGGTTTATTCGAATATGAAATCCAATCCTGGAAATACAGCATCCCACTTTTTT  
TTACTACCCAAGGCTTCGATACATTTGAAATCGGGAGATCTCTACTGGAGCCGGTGCT  
ATCCGAGAACAACCTAGCCGATCTAGATTTACGAATTATTATAGATTATTCATTAGTAGAAT  
GGAAGGAATTAGGGGAAGAA---GGGTTACAGGGAATGAATGGGAAGATCGAAAAGT  
TGGAAGAAGAAAGGATTTTTTGGTTAGACGCATGGAATTAGCTAAGCATTTTATTCGAA  
CAAATATAGAACCAGAACGGATGGTTTTGTGTCTATTACCAGTTCTTCCTCCCGAGTTG  
AGACCGATTATTCAGATAGATGGGGTAAACTAATGAGTTCAGATATTAATGAACTCTAT  
AGAAGAGTTATCTATCGGAACAATACTCTTACCGATCTATTAACAACAAGTAGATCTAC  
GCCAGGAGAATTAGTAATGTGTCAGGAGAAATTGGTACAAGAAGCCGTGGATACACTT  
CTTGATAATGGAATCCGCGGACAACCAATGAGGGACGGTCATAATAAAATTTACAAGTC

GTTTTAGATGTAATTGAAGGCAAAGAGGGGAAGATTTTCGCGAGACTCTGCTCGGCAAA  
CGGGTCGATTATTCAGGGCGTTCTGTCATTGTCGTGGGCCCTTCACTTTCATTACACCGA  
TGTGGATTACCTCGGGAAATAGCAATAGAGCTTTTCCAGACATTTGTCATTTCGTGGTCT  
AATTAGACAACATCTTGCTTTCGAATATAGGAGTTGCTAAGAGTAAAATTCGGGAAAAA  
GAACCGCTTGTATGGGAAATACTTCAAGACGTTATGCAGGGACATCCTGTATTGCTGAA  
TAGAGCACCTACTCTGCATAGATTAGGCATACAGGCATTCCAGCCCGTTTTAGTGGAAG  
GGCGCGCTATTTGTTTACATCCATTAGTTTGTAAAGGATTCAATGCAGATTTTGACGGG  
ATCAAATGGCTGTTTCATGTACCTTTATCTTTGGAGGCTCAAGCGGAGGCCCGTTTACTTA  
TGTTTTCTCATATGAATCTTGTGTCTCCAGCTATTGGGGATCCCATTTCCGTACCAACTC  
AAGATATGCTTATTGGACTTTATGTATTAACGAGCGGGAATCGTCGAGGTATTTGTGTAA  
ATAGGTATAATCCATGTAATCTT-----AGAACTATCAAATGAAAGAATTTACGATAAT  
AACTATAAGTATACAAAA-----GAACCTTTTTTTTTGTAATTCCTATGATGCAATTGGAGCT  
TATCGACAGAAACAAATTAATTTAGATAGTCCTTTGTGGCTCCGGTGGCGACTAGATCA  
ACGC---GTTATTGCTTCA-----AGAGAAGTTCCCATCGAAGTTCATTATGAATCTTTGGGT  
ACCTATTATGAGATTTATGGGCACTATCTAATAGTAAGAAGTATAAAAAAAGAAATCTT  
TTTATATACATTCGAACCACTGTTGGTCATATTTCTCTTTATCGAGAAATCGAAGAAGCC  
ATACAGGGGTTTTGTCAAGCCTGTTTCATATGGTCCC-----ATGGAGGTACT  
TATGGCAGAACGGGCCAATCTGGTCTTTCACAATAAAGTGATAGACGGAACCTGCCATG  
AAACGACTTATTAGTAGATTAATAGATCACTTCGGAATGGCATATACATCACATATCCTG  
GATCAAGTAAAGACTCTGGGTTTTCAACAAGCTACTGCTACATCCATTTTCATTAGGAAT  
TGATGATCTTTTAAACAATACCTTCTAAGGGATGGCTAGTTCAAGATGCTGAACAACAAA  
GTTTAATTTTGAAAAACACCATCATTATGGGAATGTACACGCGGTAGAAAAATTACGT  
CAATCCATTGAGATATGGTATGCTACAAGTGAATATTTGCGACAAGAAATGAATCCTAAT  
TTTAGGATGACTGACCCTTTTAATCCAGTCCATATAATGTCTTTTTTCGGGAGCTAGAGGA  
AATGCATCTCAGGTACATCAATTAGTAGGTATGAGAGGATTAATGTCCGATCCTCAGGG  
ACAAATGATTGATTTACCCATTCAAAGCAATTTACGCGAAGGACTCTCTTTAACAGAAT  
ATATTATTTCTTGCTACGGAGCCCGTAAAGGGGTTGTGGATACTGCTGTACGAACATCA  
GATGCTGGATATCTTACGCGCAGACTTGTTGAAGTAGTTCAACACATTGTTGTACGTCG  
AACAGATTGTGGCACCGTCCGAGGTATTTCTGTGAGTCCTCGAAATGGGATGATGCCG-  
--GAAAGGATTTTATCCAAACATTAATTGGGCGTGTATTAGCAGATGATATCTATATGGG  
TGCACGATGCGTTGCCACTCGAAATCAAGATATTGGGATTGGACTTGTCAATCGATTCA  
TAACC-----TTTTCGAGCACAACCAATACCTATTCGAACTCCCTTTACTTGTAGG  
AGTACATCTTGGATTTGTCGATTATGTTATGGCCGGAGTCCACTCATGCCGACCTGGTC  
GAATTGGGAGAAGCTGTAGGTATTATTGCAGGTCAATCTATTGGAGAACCGGGTACTCA  
ATTAACATTAAGAACTTTTTCATACCGGCGGAGTATTCACAGGGGGTACTGCAGAACAG  
GTGCGAGCCCCCTTCTAATGGAAAAATAAATCAATGAGGATTTGGTTCAGCCGACAC  
GTACACGTCATGGACATCCTGCCTTTCTGTGTTCTATAGACTTGTATGTAACTATTGAGA  
GTGAAGATATTCTACATAATGTGAATATTCCACCCAAAAGTTTTCTATTAGTTCAAACG  
ATCAATATGTAGAATCAGAACAAGTGATTGCTGAGATTCGCGCGGGAACATCCACT---T  
TGAATTTTAAAGAGAGGGTTTCGAAAACATATTTATTCTGACTCAGAGGGAGAA---ATGC  
ACTGGAGTACCGATGTGTATCATGCACCTGAATTTACATATGGTAATGTTTCATCTCTTAC  
CAAAAACCAGTCATTTATGGATATTATTAGGACAGCCATGCAGA-----TCTAGTCTAGTCT  
CCCCTTCGCTCCACAAGGATCAAGATCAAATGAATGCTTAT-----TCTCTTTCTGTCAAG  
CGAAGATATATTTCTAACCTCTCA-----GTAACATAATAATCAA---GTGAGACACAAATTCT

TTAGGTCGGATTTTTCTGGTAAA---GAAGATAGGATTCCTGATTAT---TCAGAACTCAATC  
GAATCATATGCACTGGTTCGTTGTAATCTCATCTATCCG---GCCATTCTTCCCGAAAATTCT  
-----GATTTATTGGCAAAGAGCCGAAGAAATCGATTCAATTATCCACTCCAATCGATTCA  
AGAACGCGAGAACGAACATAATGCCCCGTTTCAGATATCTCGATTGAAATACCC-----ATAA  
ATGGCATTTCCTGCAGAAAGAGTATTCTTGCTTATTTTCGATGATCCTCGATACAGAAGA  
AAGAGTTTGGGAATTACTAAATATGGGACTATAGAAGTGCATTCAATCGTCAAAAAAGA  
GGAT-----TTGATTGAGTATCGAGGA---GTTAAGGAAGTTAGGCCAAAATACATGAAAGT  
AGATCGATTTTTTTTTCATTCCCGAGGAAGTGCATATTTTACCCGGATCTTCTTCCATAATG  
GTACGGAACAATAGTATCATTGGGGTAGATACACAAATCACTTTAAATACAAGAAGCCG  
AGTAGGCGGATTGGTCCGAGTGGAGAGAAAAAAGAAATTGAACTGAAAATCTT  
TTCGGGGGATATCCATTTTCTGGAGAGACAGATAAGATATCCCGACATAGTGGCGTCT  
TGATCCCG---CCAGGA---ACGGGAAAAACAATTCGAAGGAATCAAAAAA-----TTGA  
AAAATTGGATCTATGTCCAACGG-----ATCACACCTATCAAG-----AAAAGTATTTTGT  
TTGGTTCGACCTGTAGTCACATATGAAATAACGGACGGTATAAATTTAGCAACACTTTT  
CCCCCTCGATCTGTTGCAGGAAAGGGATAATGTGCAACTTCGAGTTATCAATTATATCCT  
TTATGGAATGGCAAACCAATTCGGGGAAATTTCTGACACAAGTATTCAATTAGTTCGGA  
CTTGTTTAGTATTGAATTGGGACCAAGACAAAAA-----AGTTCTTCTATCGAAGAGG  
CCCGCGCTTCTTTGTTGAAATAAAGACAAAAGGTTTGATTTCGAGATTTCTAAGAATC  
GACTTAGTGAATCCTCTATTTCTGATACCAGAAAAAGGAATGATCCATCGGGGGCAGG  
ATTGATCTCTGAT---AATGGCTCAGATCGCACCAATATCAATCCGTTTTCTTTTATTATAC  
CTAT-----TCCAAGGCAAGGATTCAAGAATCCCTTAACCAAAATCAAGGAACTATTCAT  
ACGGTATTGAATAA-----ATAAGGAATGCCAATCCTTGATAATTTTGTATCATCCA  
ATTGTTCTCGAATGGGCCA-----TTCAACGATGAAAATATCACAATATG-----ATAAA  
AGAATCA---CCCCAATTCCAATTAGGAATTCGTTGGGATCTTTAGGAACA-----GCCTTT  
CAAATCGCGAATTTTATTCA-----TTTTACCATTTA-----ATAACTTATAATCCGATTTTG---  
GTAAATAACTATTTCCAACCTTGACAAT-----TTAAACAGACTTTTCAAGTACTTAA--  
-----TATTATTTAATGGATGAAAAT-----GGAAAATTTTATAATCCCGATCCACGCAGTAAT  
ATCATTTTGAATCCATTCAATTTGAATTGGTATTTTCTCCATCACAATTATTGTGAAGAGA  
CATCT---ACAATAATTAGTCTTGGACAGTTTATTTGTGAAAATGTATGTATAGCCAAAA  
CGGACCCAC---CTAAA-----TCGGGTCAAGTTCTAATTGTTCAA---GGCGACTCTGTA  
GTAATACGATCAGCTAAGCCTTATTTGGCCACCCAGGAGCAACTGTTAATGGCCATTA  
TGGGGAAATCCTTTACGAAGGAGATATATTAGTTACATTTATATATGAAAAATCGAGATC  
TGGTGATATAACACAGGGTCTTCCAAAAGTGGAAACAGGTGTTAGAGGTGCGTTTCGATT  
AATCAATAGCAATGAATCTCGAAAAGAGGGTTGAGGGTTGGAACGAATGTATAACAG  
GAATTCTTGGAATTCCTTGGGGATTCTTGATTGGTGCTGAGCTAACTATAGTGCAAAGT  
CGTATATCTTTGGTTAATAAGATCCAAAAGGTTTATCGATCTCAGGGGGTGCAGATCCAT  
AATAGGCATATAGAAATTATTGTACGTCAAATAACCTCAAAGTATTGGTTTCAGAA-----  
---GATGGAATGTCTAATGTTTTTTTACCCGGAGAACTAATTGGATTGTTACGAGCGGAA  
CGAATGGGGCGTGCTTTGGAAGAAGCGATCTGTTACCGAGCCGTCTTATTGGGAATAA  
CAAGAGCATCTCTGAATACTCAAAGTTTTATATCTGAAGCGAGTTTTCAAGAACTGCT  
CGAGTTTTAGCAAAAGCAGCTCTCGGGGGTTCGATCGATTGGTTGAAGGGCCTGAAAG  
AGAACGTTGTTCTGGGGGGGATGATACCCGTTGGTACCGGATTCAAAGGATTA-----GT  
GCACCTTCAAGGCAACATAACAACATTCCC-----CTGGAAACCAAAAAGAAGAATCTA  
TTTGAGGGGGAAATGAGA-----GATATTTGTTCCACCACAGAAAATTATTGGATTCTTG

CCTTTCAAAGAATTTCCATGATATATCAAACAATCATTTA-----AT  
GACAAGAAGATATTGGAACATCAATTTGGAAGAGATGATGGAGGCAGGAGTTCATTTT  
GGCCATGGTACTAGGAAATGGAATCCTAAAATGGCACCTTATATCTCTGCAAAGCGTAA  
AGGTATTCATATTACAAATCTTACTAGAACTGCTCGTTTTTTTATCAGAAGCTTGTGATTT  
GGTTTTTGATGCAGCAAGTATGGGAAAAAAATTCTTAATTGTTGGCACTAAAAATAAAG  
CAGCTGATTCAGTAGCATGGGCTGCAATAAGGGCTCGTTGTCATTATGTTAATAAAAAA  
TGGCTCGGCGGTATGTTAACGAATTGGTCCACTACAGAAACGAGACTTCATAAGTTTAG  
AGACTTGAGAACGGAACAAAAACAGGGAGACTCAACCGTCTTCCGAAACGAGATG  
CAGCTATGTTGAAAAGACAATTAGCTCACCTGCAAACATATCTGGGCGGAATTAATAT  
ATGACAGGTTTACCCGATATTGTAATCATCGTTGATCAGCACGAAGAATATACAGCCCTT  
CGAGAATGTATCACTTTAGGAATTCCAACAATTTGTTAATCGATACAAATTGTGACCCC  
GATCTTGCAGATATTTGATTCCAGCGAACGATGACGCTATATCTTCAATCCGATTAATT  
CTTAACAAATTAGTATTTGCAATTTGTGAGGGTCTGTTCT---AGCTATATAAGAAATACGAT  
GGGACAAAAATAAATCCACTTGGTTTCAGACTTGGTACAACCCAAGGTCATCATTCC  
CTTTGGTTTGCACCACCAAAAAATTATTCCGAAGGTCTACAAGAAGATCAAAAAATAA  
GAGATTGTATCAAGAATTATGTACAAAAAATAGCAAAATATCCTCTGGC---GTCGAGG  
GAATTGCACGTATAGAGATTCAAAAAAGAATCGATCTGATCCAGGTCATAATCTATATGG  
GATCCCAAAGTTTTTAATAGAAAGTCGACCGCGA-----GGGATCGAAGAATTACA  
GATGAATCTACAAAAAGAATTTAATGGTGTGAACCGAAAACCTAATATTGCTATCACAA  
GAATTGCAAAACCTTATGGAAACCCTAATATTCTTGCAGAATTTATAGCCGGCCAATTA  
AAAATAGAGTTTCATTTTCGCAAAGCAATGAAAAAAGCTATTGAATTAACCGAACAAGC  
AGATACAAAAGGAATTCAAGTACAAATTGCAGGGCGTATCGACGGAAAAGAAATTGCA  
CGTGTGCAATGGATCAGAGAAGGTAGGGTCCCCTACAAACCATTTCGTGCTAAAATTG  
ATTATTGTTCCATACAGTTCGAACTATCTATGGGGTCTTAGGCATCAAATTTGGATATT  
TATAGACGAAGAAATGTCACGTTACCGAGGACCTCGTTTCAAAAAATACGCCGCCTG  
GGAGCTTTACCAGGACTAACTAATAAAAGGCCTAGAGCCGGAAATGATCTTAGAAACC  
AATCGCGTTCGGGTAAA---AAATCTCAATATCGGATTCGCCTAGAAGAAAAACAAAAAT  
TGCGTTTTTATTATGGTCTTACAGAACGACAATTACTTAAATACGTTTCGTATCGCCGGAA  
AAGCCAAGGGGTCAACAGGTCAGGTTTTACTACAATTACTTGAATGCGTTTGGATAA  
CATCCTTTTTTCGATTGGGTATGGCTCCGACTATTCCCGGAGCCCGCCAATTAGTTAATCA  
TAGACATATTTTAGTTAATGGTCGTATAGTAGATATACCAAGTTATCGCTGCAAACCCCG  
AGATATTATTACGGCGAGGGATGAACAAAAATCCATAGTTCTGGTTCAAATTTCTCTCG  
ATTCATCCCCCAT---GAGGAATTGCCAAAACATTTGACTCTTACCCATTCCAA-----TA  
TAAAGGATTAGTCAATCAAATAATAGATAGTAAATGGGTTCGTTTTGAAAATAAATGAAT  
TGTTAGTCGTAGAATATTATTTCGCGTCAGACTATGTCACGTCGAGGTAAGTGCAGAAGAA  
AAAACCTGCAAAATCCGATCCAATTTATCGTAATCGATTAGTTAACATGTTGGTTAACCGT  
ATTCTGAAACACGGAAAAAAATCATTGGCTTATCAAATTGTCTATCGAGCCGTGAAAA  
AGATTCAACAAAAGACAGAAACAAATCCACTATCTGTTTTACGTCAAGCAATACGTGG  
AGTAACTCCCGATATAGCAGTAAAAGCAAGACGTGTAGGTGGATCGACTCATCAAGTT  
CCCATTGAAATAGGATCCACACAAGGAAAAGCACTTGCCATTTCGTTGGTTATTAGCAGC  
ATCCCGAAAACGTCCGGGTCGAAATATGGCTTTCAAATTAAGTTCCGAATTAGTGGATG  
CTGCCAAAGGGAGTGGCGATGCCATACGCAAAAAGGAAGAGACTCATAGAATGGCAG  
AGGCAAATAGAGCTTTTGCACATTTTCGTATGGGTAGGGACACTATTGCTGACATAATA  
ACCTCTATACGAAATGCTGATATGGATAGAAAAAGAGTGGTTCGAATAGCATCTACTAAT

ATCACTGAAAATCTGGTTAAAATACTTTTACGAGAAGGTTTTATCGAAAACGTGAGAA  
AACCTCGAGAAAAAAACAAATATTTTTTGGTTTTAACCCCTGCGACATAGAAGG-----AAT  
AGGAAAGGGCCCTAT-----AGAAATATTTTAAATTTAAAACGGATCAGTCGCCCTGGT  
CTACGAATCTATTCTAACTATCAACGAATCCTAGAATTTTAGGCGGGATAGGGATTGTA  
ATTCTGTCTACTTCTCGAGGTATAATGACAGACCGAGAAGCTCGACTAGAAAAATCG  
GCGGAGAAATTTGTGTTATATATGGATGGCAAAGCTATACCGAGAGTTGGTTCACGT  
AGGAATGGACGTATTGGTTCACGTAAGAGTGCACGTAGAATACCAAAGGGAGTTATTC  
ATGTTCAAGCAAGTTTTAATAATACCATTGTGACTGTTACAGATGTAAGAGGTCGGGTG  
GTTTCTTGGTCCTCGGCCGGTACTTGTGGATTCAAGGGTACAAGAAGAGGGACACCGT  
TTGCTGCTCAAACCGCAGCAGGAAATGCTATTCGTGCAGTAGTGGACCAAGGTATGCA  
ACGAGCAGAAGTCATGATAAAAGGCCCGGTCTCGGAAGAGACGCAGCATTACGAGC  
TATTCGTAGAAGTGGTATACTATTAAC TTTCGTACGGGATGTAACCCCTATGCCGCATAA  
TGGCTGTAGACCTCCTAAAAAAGACGCGTGATGCCAACTATTAACAACCTATTAGA  
AATACAAGACAGCCAATCCGAAATGTCACGAAATCCCCCGTCTTGGGGGATGCCCTC  
AGCGTCGAGGAACATGTACTAGGGTG TATACTATCACCCAAAAAACC AA ACTCTGC  
CTTACGTAAAGTTGCCAGAGTACGATTAACCTCTGGATTTGAAATCACTGCTTATATACC  
CGGTATTGGCCATAATCACAGAACATTCTGTAGTCTTAGTAAGAGGGGGAAAGGGTTA  
AGGATTTACCCGGTGTGAGATATCACATTGTTTCGAGGAACCCTAGATGCTGTCGGAGTA  
AAGGATCGTCAACAAGGGCGTTCTAAATATGGGGTAAAAAAGCCAAAAATGGCAAGG  
AAAAGTTTGATTCAGAGGGGAGAAAAAGAGGCAAAAATTGGAACAGAAATATCATTG  
ATTCGTGATCCTCAAAAAAAGAAATAAGC-----AAAGTTCCGTTATTGAGTGACAAA  
TGAAAGTTTATGGAAAGTTACAATCCCCACCGCGGAATAGTGCACCTACACGCCTTCA  
TCGACGTTGTTTTTCGACCGGAAGACCGCGAGCTAACTATCGAGACTTTGGGCTATCCG  
GACACATACTTCGTGAAATGGTTCATGCATGTTTGTGTCAGGGGCAACAAGATCAAG  
TTGGATGGTCAAAAATTCATTCATTTCCGTTACTTCACAA-----GAAGAAAAGAAAGAA  
AACAGGGGGTCTGTTGAATTTCAAGTAGTCAGTTTTACCAATAAGATACGGAGACTTAC  
TTCACATTTGGAATTGCACAAAAAAGACTATTTATCTCAGAGAGGTCTACGGAAAATTC  
TGGGAAAACGTCAACGGCTATTGGCTTATTTGTCAAAAAAAAATAGAGTACGTTATAAA  
GAAATAATTGGTCAGTTGGATATTCGAGAGATAAAAACTCGT-----ATGGTAAAAC TCG  
TTTGAACGATGTGGTAGAAAGCAACGAGCCGTCTATCGAATCGTTGCAATTGATGTTT  
GATCCCGAAGAGAAGGAAGAGATCTTCGAAAGTGGGTTTTTATGATCCGATAAAGAA  
TCAA ACTTATTTAAATGTTCTGCTATTCTATATTTCTTGAAAAGGGTGCTCAACCTAC  
AGGA ACTGTT CAGGATATTTAAAGAAGGCGGAGGTTTTTAAAGA ACTTCGCTCTAATC  
AAACGAAATTC AAT--ATGGATAAATCCAAGCGACCTTTTTTTTAAATCCAAGCGATCTTT  
TCGTAGGCGTTTTGCCCGGATTCAATCGGGGGATCGAATTGATTATAGAAACATGAGTT  
TAATTAGTCGATTTATTAGTGAACAAGGAAAAATATTATCTAGGCGAGTGAATAGATTGA  
CCTTGAAACAACAACGATTAATTACTACTGCTATAAAACAAGCTCGTATTTTATCTTCGT  
TACCTTTTCTTAATAATGAGAAA-----CAATTTGAAAGAACCGAGTCGACGGCTAGA ACT  
ACTGGTCTTAGAACTAGAAATAAAGTGACACGTTCACTAAAAAAAATCCTTTTGTAG  
CAAACCATTTATTAAGAAAAATTGAGAAGCTTAACACAAAAGCAGAAAAAGAAATAAT  
AGTAACTTGGTCCCGGCATCTACCATTATACCCACAATGATCGGCCATACTATTGCTAT  
CTATAATGGAAAGGAACATTTGCCTATTTATATAACAGACCGTATGGTAGGCCACAAATT  
GGGAGAATTTGCACCTACTTTACATTTCCGAGGACATGCGAAAAGCGATAATAGATCTC  
GTCGTATGATTTTTAAATCTTTTCTACTAGGTAATCTAGTACCCTTATGTATGAAGATAAT

AAATTCGGTCGTTGTGGTCGGACTCTATTATGGATTTCTGACCACATTCTCCATAGGGCC  
CTCTTATCTCTTCCTTCTCCGAGCTCAGATTATGGAAGAAGGA-----ACCGAGAAGAA  
GGTATCAGCAACAACACTGGTTTTATTACGGGACAGCTCATGATGTTTCATATCGATCTATTA  
TGCGCCTCTGCATCTAGCATTGGGTAGACCTCATAACAATAACTGTCCTAGCTCTACCGTA  
TCTTTTGTTCATTTCTTCTGGAACAATCACAAACACTTTTTTGATTATGGATCTACTACC  
AGAAATCAATGCGTAATCTCAGCGTTCAATGTGTATTCCCTGAATAATCTCATTTTTCAA  
TTATTCAACCATTTTCAATTTACCAAGTTCAATGTTAGCCAGATTAGTCAACATTTATATGT  
TTCGATGCAACAACAAGATGTTATTTGTAACAAGTAGTTTTGTTGGTTGGTTAATTGGT  
CACATTTTATTCATGAAATGGGTTGGATTGGTATTAGTCTGGATACGGCAAATCATTCT  
ATTAGATCGCTTATTCGATCTAATAAGTACCTTGTGTCTCAGAATTGAGAAATCTATGGCT  
CGGATCTTTAGTATTCTCTTATTATTACCTGTGTCTACTATTTAGGGAGAATACCGTCAC  
CCATTCTTACTAAGAACTGAAAGAACTGAAGAAGATAAACCTCTTGTGACTCTTCT  
TTTCGATTATAACCGATGGAATCGCCATTTTCGATACATAAAAAATAAGCGATTTGAAAA  
GAATGTAAGAAATGAAACATCACAATATTTTTTTTATAACATGCCAAAATGATGGAAAAC  
AAAGAATATCTTTTACATATCCACTCAGTTTGTCAACTTTTTGGGAAATGATACAAAGA  
AGGATGTCCCTGTCCACATTAGGAAAAATCGCCTCTGATGAACTGTACTCATTGGAT  
TTATACCAACAAACAACAAAATAAC---ATAACAATGAGTTTATAAATAGAATTGAGACT  
CTCGACATGGGATCTCTTTTTCTGGATATACTCGAAAAACGGACTAGATTGTGTAATGAT  
GAGACTAAAAAAGACTACTTGCCTAAAATGTATGATCCTTTCTTGAATGGGCCATATCG  
TGGAACAATCAAAAATGGTTTTACCTATAGAGACAATTGGAATAAATAAGATTCATG  
GTATTCTTTGCCGAGAATTTGAACAGAAAGACCCTAATGATCAATCTATTGGAATAAAC  
GAAATCAGTAAAAAATCCCTCGATGGTCATACAAATTAATAGATTTGGAACAACAGTC  
A---GGACAGATTCGCTCAAGAAAAGCCAAACGGGTAGTCATTTTTACTAGTGCTTTGAT  
ACGCTATTCACAACAATCGGATTTTCGTGCAATATAATCAAAGGTTTCGATGCGTAGTC  
AAATGCGGAAAATAGTTATTTGGGAACTGTTTCAAGCAAATGTGCATTCCCCCTTTTT  
TTGGACAGAATAACAAATCCCCCTTTTTTCGTTTGATATC-----TCCGGACTAATGAA  
ACTAATTTTTTAGAAATAGAAAGGAAAAAGCACGGATAGAAATAGCAGAAGCCTGGGAT  
ACCATTCATTTGCACAAGTAATAAGAGGCTCTATGTTAATAACTCAATCGATTCTTAGA  
AAATATATTATTTTACCTTTATTGATAGTAGCTAAAAATATGGGTCGTATGTTATTATTGCA  
ACTTCTGAATGGTCTAAGGATTTACAGGAATGGAATAGAGAAATGCATGTTAAATGTA  
CCTATAATGGTGTTCAATTATCAGAAACCGAATTTCCGAAAAATTGGTTAACAGACGGT  
ATTCAGATAAAAATCCTATTTCTCTGTCTGAAACCTTGGCACAGATCTAAGATAAA  
AAAAAAGATGATTTTTGTTTTTAAACGGTTTGGGGAATGGAAGCTGAACTTCCTTTTG  
GTTCTCCCCGAAAAAGACCTTCTTTTTTTGAGCCATTTTTTAAAGAACTCAAAAAAAA  
ATTAAAAAATTGAAAAAGAAATATTTTCTAGTT---TTAAGAGTTTTAAAGGGAAGAAC  
AACTTTTTTCTAACAGTCTCAAAAGAAACAAAAAATTGGGTCATCAAAAGTGTTCTA-  
----TTTATAAAAAGAATAAGAAAAGTACTTTCAAAGTAAATGATTCTATAATCAACAAT  
CAGATAATTCATGAATCGTTAATCAAAGTCGATCTACAGATTGGACAAATATTCCCTG  
ACAGAAAAAAAACGGAAGGATCTGACTGATAGAACACGCACAATTAGAAATCAAATA  
GAAAAAATTACAAACGACAAAAAATAAATTCTAACAAAACAACCTTATAATGCCAAA  
AGACTAGAATCACTAAAAAATATTTGGCAAATATTA AAAAGAAGAAATGCTCGATTAAT  
CAGTAAATTACATTATTTTATAAAAATTTTATTGAAAGAATCTACATAGATGTCTTTTGA  
TGATCATTAATATCCCAAATCAATATACAACCTTTTT--CACTTTATTTTCGTGTGACTTA  
TCCTCCTTGTCAACAGCATATGTATTTTACAATTTATCCCAAACCCACTTGGAT-----AA

ATTAAGATCTGTTCTTCAATATACATCTTTTTTTCTTAAGACTGGGATAAAGGATTCTTTT  
ACACAAGGAATAATTCATTCTGAATTAAGATATAAGAAATTCGGAGTTATGGAGCGAA  
TCAATGGAAAACTGGTTAAGGGGTCATTATCAATACGATTTATCTCAGATTAGATGGTC  
TAGATTAATCCCACAAAAATGGCGAAATAGAGTCAATCAATGTCGTACAGCTCAAAAG  
AAAAAGAAATGGAATTCATATGAAAAAACCA-----TTACTTTATTACAAAAACAA---  
AATTTTCAAAAATACTTTAAATATGATCTTTTATCATATCAATCTATTAATGGTGATATTAT  
GTATCCAGATAGAAAATATTTTGATTGGAAAATTCTCAAGTTTGTCTTAGATTTTTTGA  
TTGGATGGGAATGAATGAAGAAATACTAAATTGTTGGTCTTCCCCGAATTTGTGCTAC  
TTTATAATGCATATAAAATGAAACCGTGGATTATAACCAAGCAAATTACTTCTTTTAAATTA  
CAAGAGCAACACGGAAGCAGAATAAATTTCTTCCCTGAAACGATATTTGCTTTTTTCAAT  
TGAGATGGGACGATGCTTTGAATCAAAGAATGATCAATAATTAAGGTATATTGTCTCC  
TGCTTAGACTGAGAAACCAAGAAAAATTACTATATCCTCTATTCAAAGAAGAGAAATG  
AGTCTGAATATAATGCTGATTCAGAAGAATTTACCTCTTACAGAATTGATGAAA---GGGA  
TATTGATTATCGAATCGGTTCTGTCTGTCTGTA AAAAATGATGGACAATTTATTATGTATCA  
AACCATAGGTATTTTCATTGGTTCATAAGAGTAAACGCAATCATTCGAATTTACTTGTTC  
TGAAAATATTTTATCATCTAGACGTCGTAGAGAATTGAGAATTTAATTTGTTTCAGATT  
TCTTTGGCCGAATTATCGATTAGAAGATTTAGCTTGTATGAATCGCTATTGGTTTGATAC  
GAATAATGGCAGTCGTATCAATATGTTAAGACTACGTATGTATCCAATGAAAGGACATCA  
ATTCAAATCCTGGATTTTCGAATTGAGAGAGATATTGAGAGAGATCAAGAATTCTCACT  
ATTTCTTAGATTCATGGACCCAATTC AATTCAGTTGGATCTTTCATTACATTTTTTTCCA  
CCAAGAACGTTTTATAAACTTTTTGACCCCGCATTGGAGTATCCTACTTTTCA---CGC  
AATTCA-----CAGGGTTCAACAAGCAATCGATATTTACG-----ATCAAGGGT---GTAAT  
ACTCTTTGTATTAGCGGTCTTATATATCGT-----ATTAACAATCGAAAGATGGTTCGA  
AAGAAAAATCTCTATTTGATAGGGCTTCTTCT-----ATACCTATGAATTCCATTG  
GACCCAGAAATGATACATTGGAAGAATCCGTT---GGGTCTTCCAATATCAATAGGTTGAT  
TGTTTCG---CTCCTGTATCTTCCAAAAGGAAAAAGATCTCTGAGAGTTGTTTTCTGAA  
TCCGAAAGAGAGTACTTGGGTTCTCCAATAACT-----AAAAGTGTAGCATGCCT  
GAATCTAACTGGGGTTCGCGGTGGTGGAGAACTGGATCGGAAAAAGAGG-----GAT  
TCTAGTTGTAAGATATCTAAT-----GAAACCGTCGCTGGAATTGAGATCTTATTCAAAG  
AGAAAGATATCAA---TATCTGGAGTTCTTTTTGTATATTATATGGAT-----GATCCGATC  
CGCAAGAACCATGATTGGGAATTGTTTGATCGTCTTCTCTGAGAAAGAGGCGAAATAT  
AATCAACTTG-----AATTCGGGACCGCTATTCGAAATCTTAGTGAAACACTGGATTTGTT  
ATCTCATGTCTGCTTTTCGTGAAAAAATACCAATTGAAGTAGAGGGT---TTCTTCAAACA  
ACAAGG---GCTGGGTCAACTATTCAATCAAATGATATTGAGCATGTTTCCCAT-----CTC  
TTCTCGAGAAACAAGTGGGCTATTTCTTTGCAAAATTGTGCTCAATTTCATATGTGGCA  
ATTCCGCCAAGATCTTTCGTT-----AGTTGGGGGAAG---AATCCGCCCAATCAGATT  
TTTTGAGGAAC---GTATCGAGAGAGAATTTGATTTGGTTAGACAATGTGTGGTTGGTAA  
ACAAGGATCGG-----TTTTTTAGC-----AAGGTACAGAATGTATCGTCAAATATTCAATA  
TGATTCC-----ACAAGA-----TCTAGTTTCGTTCAAGTAACGGATTCTAGCCAATTGAA  
AGGATCTTCT---GATCAATCCAGAGATCATTGGATTCCATTAGT-----AATGAGGAT  
TCGGAC-----TATCACACATTGATCAATCAAAGAGAGATTCAA  
CAACTAAAAGAAAGATCGATTCTT---TGGGAT-----CCTTCCTTCTTCAAACGGAACGA  
ACAGAGATAGAATCAGAC-----CGATTCCCGAAA-----TGCCTTTCTGGATATTCC-----TC  
AATGTCCCGCTATTACG---GAACGTGAGAAGCAGATGATTAATCATCTGTTTCCGGA



AGAAATCGAAGAATTTCTT-----GGGAATCCTACAAGATCCGTTTCGTTCTTTTTTCTCTG  
ACAGATGG-----TCAGAACTTCAT--CTGGGTTCTGAATCCTACTGAGAGGTCCACTAGAG  
ATCAG-----AAATTGTTGAAGAAACAACAAGATCTTTCT--TTTGTCCCTTCCAGGC  
GATCGGAA-----AATAAAGAAATGGTTAATATATTCAAGATAATTACGTATTTACAAA  
AT-----ACCGTCTCAATTCATCCTATTTTCATCAGATCCGGGATGTGATATGGTTCCG---AAG  
GATGAACCGGAT--ATGGACAGTTCCAATAAGATTTTCATTTCTTGAACAAAAATCCATTTT  
TTGATTTA-----TTTCATCTATTCCATGACCGGAACAGGGGAGGATACACGTTA-----CAC  
CACGATTTTGAATCAGAA-----GAGAGATTTCAAGAAATGGCAGATTTATTCACTCTATC  
AATAACCGAGCCG---GATCTGGTGTATCATAAGGGATTTGCCTTTTCTATTGATTCCTACG  
GATTGGATCAAAAACAA-----TTCTTGAATGAGGTATTCAACTCCAGGGATGAATCGAA  
AAAGAAATCT-----TTATTGGTTCTACCTCCTATTTTTTAT-----GAAGAGAATGAATCTT  
TTTATCGAAGGATCAGAAAAAATGGGTCCG---ATTCCTGCGGGAATGATTTGGAAG  
ATTCAAAACCAAAAATAGTGGTATTTGCTAGCAACAACATAATGGAGGCAGTCAATCAA  
TATAGATTGATCCGAAATCTGATTCAAATCCAATATAGCACCTATGGG-----TACATAAGA  
AATGTATTGAATCGATTCTTTTTAATGAAT-----AGATCCGATCGCAACTTCGAATATGG  
A-----ATTCAAAGGGATCAAATAGGAAAGGATACTATGAATCATAGAACTATAATGAAA  
TATACGATCAACCAACATTTATCGAATTTGAAAAAG---AATCAGAAGAAATGGTTTCGAT  
CCTCTT-----ATTTTTATTTCTCGAACCGAGAGATCCATGAATCGGGATCCTAATGCATATA  
GATACAAATGGTCCAATGGGAGCAAGAATTTCCAGGAACATTTGGAACATTTTCGTTTCT  
GAGCAGAAGAGCCGT-----TTTCAAGTAGTGTTCGATCGATTACGTATTAATCAATATT  
CGATTGATTGGTCTGAGGTTATCGACAAAAAAGATTTGTCTAAGCCACTTCGTTTCTTT  
TTGTCCAAG-----TCACTTCTTTTTTTGTCC-----AAGTTGCTT  
TTCTTTTTGTCTAAC---TCACTTCCTTTTTTCTTTGTGAGTTTCGGGAATATCCCCATTCAT  
AGGTCCGAG---ATCTACATCTAT--GAATTGAAAGGTCCGAATGATCAACTCTGCAATCA  
GTTGTTAGAATCAATAGGTCTTCAAATCGTTCATTTGAAAAAATGGAAACCCTTC-----T  
TATTGGAT-----GATCATGATACTTCC---CAAAAATCGAAATTCTTGATCAATGGAGGAA  
CAATATCACCATTTTTGTTCAATAAGATACCA---AAGTGG---ATGATTGACTCATTCCATA  
CTAGA-----AATAATCGCAGGAAATCCTTTGATAACACGGATTCCTATTTCTCAATGATAT  
TCCACGATCAAGACAATTGGCTGAATCCCGTGAAACCATTTTCATAGAAGTTCATTGATA  
TCTTCTTTTTATAAAGCAAATCGACTTCGATTCTTGAATAATCCACATCACTTCTGCTTCT  
AT-----TGTAACAAAAGATTCCTTTTTTATGTG-----GAAAAGGCCCGTATCAAT-----  
AATTATGATTTTACGTATGGA---CAATTCCTCAATATCTTGTTTCATTTCGCAACAAA---ATAT  
TTTTTTGTGCGTCCGGTAAA-----AAAAACATGCTTTTTTGGGGG---AGAGATACTATTTT  
ACCAATCGAGTCACAGGTATCTAACATATTCATACCTAACGATTTTCCACAAAAGTGGT--  
GACGAAACGTATAACTTGTACAAATCT-----TTCCATTTTCCAAGTCGATCCGATCCAT  
TCGTTTCGT-----AGAGCTATTTACTCGATCGCAGACATTTCTGGAACACCTCTAACAGAG  
GGACAAATAGTCAATTTTGAAGAAGTATTGTCAACCTCTTTCAGATATGAATCTATCT  
GATTCAGAAGGGAAGAAGTTCATCAATATCTCAAT-----TTCAATTCAACCATGGGTTT  
GATTCACACTCCATGTTCTGAGAAATATTTACCATCCGAAAAG-----AGGAAAAA-----  
-----CGGAGTCTTTGTCTAAAG-----AAATGCGTTGAGAAAGGGCAGATGTATAG  
AACCTTTCAACGAGATAGTGCTTTTTCAACTCTCTCAAATGGAATCTATTCAAACATA  
TATGCCATGGTTCCTTACTTCGACAGGGTACAAATATCTAAATTTGATATTTTTAGATACT  
TTTTTCAGACCTATTG-----CCGATACTAAGTAGC---AGTCAAAAATTTGTATCCATTTTTCA  
TGATATTATGCATGGATCAGATACATCATGGCGAATTTCTCAGAAAAAATGG-----

--TGTCTTCCACAATGGAATCTG---ATAAGTGAGATTTTCGAGTAAGTGTTTACATAAT-----  
CTTCTTCTGTCCGAAGAAATGATTCATCGAAAT-----AATGAGTCACCATTGATATCGACA  
CATCTGAGATCTCCAAATGTTCCGGGAGTTC---CTCTATTCAATCCTTTTCCCTTCTTCTTGT  
TGCTGGATAT--CTCGTTCGTACACATCTTCTCTTTGTTTTCCCGG-----GCCTCTAGTGAGT  
TACAGACAGAGTTTCGAAAAGGTCAAATCTTTGATGATTCCATCATCTATGATTGACTTA  
CGAAAACCTTCTGGATAGGTATCCTACATCTGAACCGAATTCTTTCTGGTTAAAGAATCTA  
TTTCTAGTTGCTCTGGAACAATTAGGAGATTCTTTAGAAGAAATACGGGGTCTGCTTC  
TGGCGGCAACATGCTATTGGGTGGTGGTCCCGCT-----TATGGG---GTCAAATCAA  
TACGTTCTAAGAAGAAATATTTGAATATCAATCTCATCGATCTCATAAGTATCATA-----  
--CCAAATCCCATCAATCGAATCACTTTTTTCGAGAAATACAAGACATCTAAGTCATACAA  
GTAAAGAGATCTATTCAATTGATAAGAAAAAGAAAAACGTGAACGGGGATTGGATTGA  
TGATAAAATAGAATCCTGGGTCGCGAACAGTGATTGATTGATGATGAAGAAAGAGAA  
TTCTTGGTTCAGTTCTCC-----ACCTTAACGACA-----GAAAAAGGATTGATCAAATTCT  
ATTGAGTCTGACT--CATAGTGATCATTTA-----TCAAAGAATGACTCTGGTTATCA  
AATGATTGAACAACCGGGAGCAATTTACTTACGATACTTAGTTGACATTCAT-----AAAA  
AGTATCTAATGAATTATGAGTTCAATACATCCTGTTTAGCAGAAAGACGGATATTCCCTG  
CTCATTATCAGACAATCACTTAT-----TCACAAACCTCGCGTGGGGCTAATAGTTTTTATT  
TCCCATCTCATGGA-----AAACCCTTTTCGCTCCGCTTAGCCTTATCCCCCTCT--AGGG  
GTATTTTAGTGATAGGTTCTATAGGAACTGGACGATCCTATTTGGTCAAATACCTAGCGA  
CAAACCTCCTATGTTCCCTTTCATTACGGTATTTCTGAACAAGTTCCTGGATAACAAGCCTA  
AAGGTTTTCTTATTGAT-----GATATCGAT--ATTGATGATAGTGACGATATTGATGA  
TAGTGACGATATTGATGCTAGTGACAATATTGATGCT-----AGTGA  
CGATATCGATCGTGACCTTGATACGGAGCTG--GAACTGCTAACTATGATGAATGCGCTA  
ACTATGGATATGATGCCGGA-----ATAGACCGATTTTATATCACCTTCAATTCGAATT  
AGCAAAAGCAATGTCTCCTTGCATAAATATGGATTCCAACATTCATGATCTGGATGTGA  
ATGAGTCGAATTACTTATCCCTCGGTCTATTAGTGAACCATCTCTCCAGG-----GATTG  
TGAAAGATATTCC---ACTAGAAATATTCTTGTATTGCTTCAACTCATATTCCCCAAAAG  
TGGATCCCGCTCTAATAGCTCCGAATAAATTAATACGTGCATTAAGATACGAAGGCTTC  
TTATTCCACAACAACGAAAGCACTTTTTCACTCTTTCATATACTAGGGGATTTCACTTGG  
AAAAGAAAATGTTCCATACT-----AATGGATTCCGGTCCATAACCATGGGTTCCAATGCA  
CGAGATCTTGTAGCACTTACCAACGAGGCTCTATCGATTAGTATTACACAGAAGAAATC  
AATTATAGACACTAATACAATTAGATCCGCTCTTCATAGACAAACTTGGGATTTGCGA----  
----TCCCAGGTAAGATCGGTTTCAGGATCATGGGATCCTTTTCTATCAGATAGGAAGGGCT  
GTAGCACAAAATGTACTTCTAAGTAATTGCCCCATAGATCCTATATCTATCTATATGAAGA  
AGAAA-----TCATGTAACGAAGGAGATTCTTATTTGTACAAATGGTACTTTCGAACCTTGA  
ACGAGCATGAAGAAATTAACGAGACTTCTTTATCTTTTGAGTTGTTCTGCCGGATCGGT  
CGCTCAAGATCTTTGGTCTCTACCC-----GGACCCGATGAAAAA---AATGGGATCACTTC  
TTATGGACTTGTTGAGAATGATTCT--GATCTAGTTCATGGCCTATTAGAAGTAGAAGGC  
GCTCTGGTGGGA-----TCCTCACGGACAGAAAAAGATTGCAGTCAGTTTTATAATGAT---  
--CGAGTGACATTGCTTCTTCGGCCCCGAACCAAGGAAT--CCCTTAGATATGATGCAAAA  
TGGATCTTGTCTATCCTTGATCAGAGATTTCTCTATGAAAAATAC-----GAATCGGAGTT  
TGAAGAA---GGGAAGGAGAAGGAGCCCTCGACCCGCACCAG-----ATAGAGGAG  
GAT-----TTATTCAATCAC-----ATAGTTTGGGCTCCT-----AGAATATGGCGCCCT-----  
--TGGGGCTTTCTATTTGATTGTATCGAAAGGCCCAATGAATTGGGATTTCCC---TATTGG

TCCAGGTCATTTTCGGGGCAAG-----CGGATCATTTATGATGAAGAGGATGAGCTTCAA  
GAGAATGATTCGGAGTTCCTTGCAGAGTGAACCATGCAGTACCAGACACGAGATAGAT  
CTTCCAAAGAACAAGGCCTTTTTTCGAATAAGCCAATTCATTTGGGACCCTGCAGATCCA  
CTCTTTTTCTTATCAA---GATCAGCCCTTTGTCTCTGTGTTTTACATCGAGAATTATT  
TGCAGATGAAGAGATGTCAAAGGGGCTTCTACTTCCCAAACAGATCCTCCTACATCTA  
TATATAAACGCTGGTTTATC-----AAGAATACGCAAGAAAAGCACTTCAAATTGTTGATT  
AATCGCCAGAGATGGCTTAGA-----ACCAATAGTTCATTATCT-----AATGGATCTTTC  
GTTCTAAT-----ACTCTATCCGAGAGTTATCAGTATTTATCAAATCTGTTCCCTATCTAAC---  
GGAACGCTATTGGATCAAATGACAAAGACATTGTTGAGAAAAAGATGGCTTTTCCCGG  
ATGAAATGAAAATTGGATTC-----ATG-----ATGCCTAGATCGCGG---ATA  
AATGGAAATTTTATTGATAAGACCTTTTCAATTGTAGCCAATATCTTATTACGAATAATTC  
CGACAACCTTCAGGAGAAAAAGAGGCATTTACATATTATAGAGATGGA-----ATGTCAGC  
TCAATCGGAAGGAAATTATGCGGAAGCTTTACAGAATTATTATGAAGCTATGCGACTAG  
AAATTGATCCCTATGATCGAAGTTATATACTCTATAACATAGGCCTTATCCACACAAGTA  
ACGGAGAACATACGAAAGCTTTGGAATATTATTTTCGAGCACTAGAGCGAAACCCATTC  
TTACCACAAGCTTTTAATAATATGGCCGTGATCTGTCATTAC---CGGGGAGAACAGGCCA  
TTCGACAGGGAGATTCTGAAATTGCAGAGGCTTGGTTCGACCAAGCCGCTGAGTATTG  
GAAACAGGCTATAGCGCTTACTCCTGGGAATTATATTGAAGCGCATAATTGGTTGAAGA  
TCACAGGGCGTTTCGAA-----ATGAGTTGGCGATCAGAACATATATGGATAGAACCTATA  
ATGGGGTCTCGAAAAGCAAGTAATTTCTGGTGGGCCATTATCCTTTTTTTTAGGTTTCATTA  
GGATTCTTATTGGTTGGAACCTTCTAGTTATCTTGGTAGAAATTTGATATCTTTATTTCCGT  
CTCAGCAAATTCTTTTTTTTCCACAAGGGATCGTGATGTCTTTCTATGGGATCGCCGGTC  
TTTTTATTAGCTCCTATTTGTGGTGCACAATTTTCGTGGAATGTAGGTTAGTGGTTATGATC  
GATTCGATCGAAAAGAAGGAATAGTGTGATTTTTTCGTTGGGGATTTCTGGAAAAAAT  
CGTCGCATCTCCTCCGATTCTTATAAAAGATATTCAGTCTGTCAGAATAGAAGTTAAA  
GAGGGTATTTATGCTCGTGTCTTTTATATGGACATCAGAGGCCAGGGGGCCATCCC  
CTTGACTCGTACTGATGAGAAT--TTACTCCACGAGAAATTGAGCAAAAAGCTGCTGA  
ATTAGCATATTTCTTGCGTGTCCCAATTGAAGTATTT

>Lonicera

CTGAAAAAATTGTGGTTCCATTTGATGTTATTGGAAAGCGATCCTGAGGAGGGTAACGA  
TCCGTTCCATGACGAGGAGGGTAACGATAACCCGCATGACTCTGAAAGCGATCCTAGG  
TTACCGGCATACTCTGGTGTCTCCTGATCTTCTTGAGAAGCGCCTTCTAATATATTTCCG  
AAGGATGATCCTAACGCTACAAGAAAGAAAAATCCCAAAGGCCTTTGTTATTATTTAG  
GCATTGGGGAAGTTATCTTGATAGGGATAGGGATAGGGGGAAGAATAGGGAGAAGGAG  
AAGCATATTGCTATGGTTCGCGCTCGACTATATCTATATAAAGATAAGGGCCACACTACA  
GACGATCCCAGTTATGAGCGCTTTATAGTTGATCCTAAATATTTTCCGAAGGATAACGAT  
AGGGAGAAGATAGACAACCTTTTTTAACGAGGCTTCCCATATAGTAAAGAGCTTCTCTAT  
AGTAGAGAGATATCCGAGCTATGGAGGTGATTATGGGGGTGATTCTGACTCTGGGGACT  
ATGGAAGTGATGAAAGTGATCCGGATTATGGAAGTGATCCGTCCCTTCAAAAAAAG  
AAATAGGAAGAATTACACTCACAAATACAAGCATTGTGGCTTATGTGCGATGAGTGTT  
ATACATTAATATAGGAGATTTTTGAAAGAAAGATTGTATATTTGTGAAGGATGTGGAT  
TTCATTTGAAAATGAATAGTTCAGAGAGACTCAAACCTTTGATCGATCCGGATACTTGG  
GATCCTATGAATGAAAAGATGGCCTCTCTGGATCCCATTTGAATTTCAATTCGGAGGAGGA  
TCCTTATATAGATCGTGTCAATTTATCGAAAAAAGACAGGATTAACCTGAGGCTATTCA

AACCGGCCTATGCCAATTAATGGTATTCCCACAGCAATGGGGGTATGGAGTTTGGGT  
TTATGGGGGGTAGTATGGGATCCGTAGTCGGGGAGAAAATAACCCGTTTGGTTGAGTAT  
GCCACTAATCAAGCTCTACCTCTTATTATAGTGTGTGCTTCCGGGGGGGCACGCATGCA  
AGAAGGAAGTTTGGAGCTTGATGCAAATGGCTAAAATATCTTCTTCTTTATATGATTTTCA  
AACAAAGAAAAAGTTATTCTATGTATCAATCCTTACATCTCCTACTACCGGTGGGGTGA  
CAGCCAGTTTTGGTATGTTGGGGGATGTCATTGTTGCCGAACCCGATGCCTATATTGCAT  
TTGCGGGTAAAAGGGTAATTGAACTAACATTGAATAAAGAAGTACCTGAAGGTTTACA  
AGAGACGGAATATTTATTTCGAGAAGGGGTATTTCGATCTAGTCATACCACGTAAGAATTT  
AAAAAGTATTCTGAATAAGTTATTTGGGTCCCACGGTTTCTTTCCTTTTACTTTGAATCA  
AAATCACATGGTAACCATTTCGAGCCGACGAAATTAGTAATATTATCCGTCAACGTATTGA  
GCAATATAATAGAGAAGTAAAGATTGTAAATACCGGTACCGTACTTCAAGTAGGCGATG  
GCATTGCTCGTATTCATGGTCTTGATGAAGTAATGGCGGGTGAATTGGTAGAATTTGGA  
GAGGGTACAATAGGCATTGCTCTGAATTTGGAATCCAATAACGTTGGTGTGTTTTAAT  
GGGCGGTGGTTTGGATGATACAAGAAGGAAGTTCTGTAAAAGCAACAGGAAGAATTC  
TCAGATACCAGTGAGTGAGGCCTATTTGGGTCTGTGTTATAAATGCTCTGGCTAAACCTA  
TTGATGGTAGAGGTGAAATTGCATCTTCGGAATATCGGTTAATTGAATCTCCTGCTCCAG  
GTATTATTTTCGCGACGTTCCGTATATGAACCTCTTCAAACGGGACTTATTGCTATTGATTC  
GATGATCCCTATAGGGCGTGGTCAGCGAGAATTAATTATTGGGGACAGACAAACCGGTA  
AAACAGCAGTAGCAACAGATACGATTCTTAACCAACAAGGCCAAAATGTAATATGCGT  
TTATGTAGCTATTGGTCAAAAAGCATCTTCTGTGGCTCAAGTAGTGACCACTTTCGAG  
AAAAGAGGGCGATGGAATACACTATTGTGGTAGCAGAAACGGCGGATTCCCCTGCTAC  
ATTACAATACCTAGCTCCCTATACAGGAGCATCTCTGGCTGAATATTTTATGTATCGTGA  
ACGACACACTTCAATTATTTATGATGATCTCTCAAACAAGCACAAGCTTATCGCCAAA  
TGTCTCTTCTATTACGAAGACCACCCGGCCGGAAGCTTATCCAGGGGATGTTTTTTATT  
TACATTCACGCCTTTTGGAAAGAGCTGCTAAATTAAGTTCTCAGTTAGGTGAAGGAAGT  
ATGACTGCTTTACCAATAGTCGAAACTCAATCGGGAGATGTTTCGGCTTATATTCCGACT  
AATGTTATTTTCGATTACTGATGGACAAATATTCTTATCCGCCGACCTATTCAATGCTGGAA  
TCAGACCCGCTATTAATGTCGGTCTCTCCGTTTCCAGAGTTGGATCTGCGGCTCAAATT  
AAAGCCATGAAACAAGTAGCTGGCAAATTAATAATTAGACCTGGCGCAATTCACAGAAT  
TAGAAGTCTTTGCACAATTTTCTTCTGATCTTGAGAAAACGACTCAGAATCAATTGGCA  
AGAGGTGCGAGATTACGCGAATTGCTCAAACAATCCCAAGCAAACCTCTCGCGGTGG  
AAGAACAGATAATGACTATCTATACCGGAACAAATGGTTATCTTGATTCATTGGAAGTTG  
GACAGGTAAGGGGTTTTCTTGACAAGCTACGTGAGTACTTAAAAATAATAAACCGCA  
GTTTCAAGAAATCATATCTTCTACCAAGACTTTTACCAGAAGAAGCAGAAGCCCTTTTG  
AAAGAAGCTATTCAGGAACAGACGGAGCGTTTTTATACTTCAGGAAGAAGTAATGAGAA  
TCGATCCGACTACTTCCGGTCTGGGGTTTCCACGCTTGAAAAAAAACCTTGGGGCG  
TATCGTCAAATCATTGGTCCGGTACTAGATGTGGTTTTTCCGCCAGGCAAGATGCCTA  
ATATTTATAACGCTCTGGTAGTTAAGGGTCGAGATACTGCCGGTCAACCAATTAATGTGA  
CTTGTGAGGTACAGCAATTATTAGGAAACAATCGAGTTAGGGCTGTAGCTATGAGTGCT  
ACAGACGGTCTAACGAGAGGAATGGAAGTGATTGATACGGGAGCTCCTCTAAGTGTTT  
CGGTGCGTGGAGCGACTCTTGGACGAATTTTCAACGTGCTTGGAGAGCCTGTTGATAA  
TTAGGTCCTGTAGATACTCGCACAAACATCCCCTATTCATAGATCTGCGCCCGCCTTTAT  
AGAGTTAGATACGAAATTATCTATTTTTGAAACCGGAATTAAGTAGTAGATCTTTTAGC  
CCCCTATCGCCGTGGAGGAAAAATAGGACTATTCCGGGGGGGCTGGAGTGGGCAAAAC

GGTACTCATTATGGAATTGATTAACAATATTGCCAAAGCTCATGGGGGTGTATCTGTATT  
TGGGGGAGTAGGTGAACGTACTIONGTAAGGAAATGATCTTTACAAGGAAATGAAAGA  
ATCTGGGGTGATTAATGAACAAAATATTGCAGAATCAAAAAGTGGCTCTAGTTTACGGTC  
AGATGAATGAACACCAGGGAGCCCGTATGAGGGTTGGTTTACTGCCCTAACTATGGC  
GGAATATTTCCGAGATGTTAATAAACAAAACGTACTTCTATTTATCGACAATATCTTCCG  
TTTCGTCCAAGCAGGATCTGAAGTATCTGCTTTATTGGGTAGAATGCCTTCCGCTGTGG  
GTTATCAACCTACCCTTAGTACCGAAATGGGTACTTTACAAGAAAGAATTACTTCTACC  
AAGAAGGGGTCCATAACTTCTATTCAAGCGGTTTATGTCCCTGCAGACGATTTGACCGA  
CCCTGCTCCTGCTACGACATTTGCACATTTAGATGCTACTACCGTACTATCAAGAGGATT  
GGCCGCCAAGGGTATCTATCCAGCAGTAGATCCTTTAGATTCAACGTCAACTATGCTAC  
AACCTGGGATCGTTGGTAAGAACCATTATGAAACAGCGCAAAGGGTTAAGCAAACCTTT  
ACAACGTTACAAAGAACTTCAGGACATTATAGCTATCCTTGGGTTGGACGAATTATCCG  
AAGAGGATCGTTTAAACCGTAGCAAGAGCACGAAAAATTGAGCGTTTCTTATCACAAAC  
TTTTTTTGTAGCAGAAGTATTTACCGGTTCTCCAGGGAAATATGTTGGTCTAACAGAAA  
CAATTAGAGGGTTTCAATTGATCCTTTCCGGAGAATTAGATGTTCTTCCCGAACAGGCC  
TTTTATTGGTAGGTACCATCGATGAAGCTACCGCGAAGGCTATGAACTTAGAAATGGA  
GAGCAATTTAAAGAAAATGACCTTAAATCTTTGTGTACTGACCCCTAATCGAATTGTTT  
GGGATTCAGAAGTGAAAGAAATCATTTTATCTACTAATAGTGGCCAAATTGGCGTATTA  
CCAAATCACGCCCTATTGCCACAGCTGTGATATAGGTATTTTGAGAATACGCCTTAAC  
GACCAATGGGTAACGATGGCTCTGATGGGTGGTTTTGCTAGAATAGGTAATAATGAGAT  
CACTGTTTTAGTAAATAATGCGGAAAAGAGTAGTGACATTGATCCACACGAAGCTCAG  
CAAACCTTGAAATAGCGGAAGCTGGTTTGAAAAAGCTGAAGGAAAAAGACAAACA  
ATTGAGGCAAATCTAGCCCTCCGACGAGCTAGGACACGAGTAGAGACTATCAGGGCGA  
TTTCAATGAAAAATGTAACCGATTCTTTTCGTTTCTTTGGGTCACTGGCCATCTGCCGGG  
AGTTTCGGGTTTAAATACCGATATTTAGCAACAAATCCAATAAATCTAAGTGTAGTGCTT  
GGGGTATTGATCTTTTTTGAAAGGGAGTGTTAAGTGATTTATTAGATAATCGAAAACA  
GAGGATTCTGAATGCTATTTCGAAATTCAGAAGAACTGCGTGGGGGGGCCATTGAACGG  
CTAGAAAAAGCCCGGGCTCACTTACGGAAAGTGGAATGGAAGCAGATCAGTATCGA  
GTGAATGGATACTCTGAGATAGAACGAGAAAGGTTGATTTTGATTAATTCAACTTATAA  
GACTTTGGAACAACCTAGAAAATGACAACAACGAAACTATTCATTTGAAACAACAAAGG  
GCAATTAATCAAGTCCGACAACGGGTTTTCCAACAAGCCTTACAAGGAGCTCTAGGAA  
CTTTGAATAGTTGTTTGAACAACGAGTTGCATTTACGTATCATCAGTGCCAATATTGACA  
TATTGGGGGCGATGAACGAAATAACCGATATGAATCCACTGATTTCTGCCGCTTCCGTTA  
TTGCTGCTGGATTGGCTGTAGGGCTTGCTTCTATTGGACCTGGAGTTGGTCAAGGAACT  
GCTGCGGGCCAAGCTGTAGAAGGTATCGCGAGACAGCCCGAGGCAGAGGGAAAAATA  
CGAGGTACTTTATTGCTTAGTCTAGCCTTTATGGAAGCTTTAACTATTTATGGCTTGGTT  
GTAGCATTAGCACTTTTATTTGCGAATCCTTTTGTTATGAATGTTCTATCATGTTCCATCA  
ACACACTAAAGGGGTTATACGATATATCCGGTGTAGAAGTAGGCCAACATTTCTATTGG  
AAAATAGGTGGTTTCCAAGTCCACGGCCAAGTACTTATTACTTCTTGGGTTGTAATTGC  
TATCTTATTAGGTTACGCCACTATAGCTGTTCCGAACCCACAAACCATTCCGACCGGCA  
GTCAGAATTTCTTCGAATATGTCCTTGAATTCATTCGAGATGTGAGTAAAACTCAAATT  
GGAGAAGAATATGGTCCTTGGGTTCCCTTTATTGGAACCTATGTTTCTATTTATTTTGT  
CTAATTGGTTCAGGAGCTCTTTTGCTTGGAAAATCATACAATTACCTCACGGGGAGTTA  
GCCGCACCCACGAATGATATAAATACTACTGTTGCTTTAGCTCTACTCACGTCAGTGGC

ATATTTCTATGCGGGTCTTAGCAAAAGGGGATTGGGTATTTTTGGGAAATATATTCAACC  
AACTCCAATCCTTTTACCTATTAACATATTAGAAGATTCACAAAGCCTTTATCACTCAG  
TTTTCGACTTTTCGGAAATATATTAGCTGATGAATTGGTAGTTGTTGTTCTTGTTCCTTA  
GTACCTTCAGTGGTTCCTATACCTGTCATGTTCCCTGGATTATTTACAAGTGGTATTCAA  
GCTCTTATTTTTGCAACTTTAGCCGCGGCTTATATAGGTGAATCCATGGAGGGTCATCAT  
ATGAGATTTTTAACTTTAGAGCATATATTAACATATTCCTTTTCAACCGTTTCAATTG  
TAATTACAATTCATTTGATAACCTTATTAGCCGATAAAATTAGAAAGCTATATGATTCGTC  
CGCAAAGGGCATGATAGCGGCTTTTTTATGTATAACGGGATTATTAGTCACTCGTTGGGT  
TTATTCAGGACATTTCCATTAAGTGATTTATATGAATCATTAACTTTCCTTTTCGTGGAGT  
TTTTCAGTTTTTTCATATAGTTCCGTAT-----AAAAAGAAACAAAATTTAAGCACAATAACT  
GGGTCAAGTGTTATTTTTACCCAAGGCTTTGCTACTTCAGGTATTTTAGATGAAATACAT  
CAATCCACAATATTAGTACCTGCTCTCCAATCCGAGTGGTTAATAATGCACGTAAGTATG  
ATGATATTGGGCTATGCAGCTCTTTTATGTGGATCATTATTATCAGTAGCACTTCTAGTCA  
TTACATTTCGAAAAACAGAAAGATTTTTTGT-----AAAGAAATCCAATACATGAATGAA  
AGGGGAATGTTTTACGAAAGACTTCT-----GCTAAGAATTATTACAGGTGTCAATTGA  
TTCAACAGTTGGATTATTGGAGTTATCGTATAATTAGTCTAGGGTTTTCTCTTTTTAACCAT  
AGGTATTCTTTCAGGAGCAGTATGGGCTAATGAAGCATGGGGATCATATTGGAATTGGG  
ACCCAAAGGAACTTGGGCATTTATTACTTGGACCGTATTCGCGATTATTACATACTC  
GAACAAATAAAAAGCTACGGGGTACAAATTCTGCAATTGTGGCGTCTATAGGATTTCTT  
ATAATTTGGATATGCTATTTTTGGGGTCAATCTATTAGGAATAGGACTACATAGTTATGGTT  
CATTTAATTTAGGTATGGCAAAAAGAAAACGTTCACTCTCTTTTATATCTCGCATCTC  
TTGTCTTTTTGCCCTGGTGGATTTCTCTCTCAGTTAATAAAAAGTTTGGAACTTTGGGTTA  
CTAATTGGTGGAATACTAGGCAATCCGAAATCTTTTTGAATGATAGTCAAGAAAAGAGT  
ATTCTAGAAAATTCATAGAATTAGAGGAACTCGCCCTCTTGGACGAAATGATCAAGG  
AATACTCGGAGACACATCTACAAAACCTTCGTATA---ATCCACAAAGAAACGATCCAAT  
TAATCAAGATACACAACGAAGATCATATCCGTATGATTTTGCACCTTCTCGACAAATATAA  
TCTGTTTCATTATTCTAAGCGGTTATTCTATTTTTGGGTACTGAAGAACTTGTTATTCTTAA  
CTCTTGGGCTCAGGAATTCCTATATAACTTAAAGTGACACAATAAAAAGCTTTTTCTATTCT  
TTAGTAGTCGATTTTTGGGTCGGATTCCATTCGCCCCATGTTTGGGAACTAATGATTGG  
CTCTGTCTACAAAGATTTTTGGATTTGTTTATAATGATCAAAATCTATCTGTTCTTGTTC  
ACTATTCAGTCATTCTAGATACCCTTTTTAAATATTGGCTTTTCTTTTATTTAAATCGCGT  
ATCTCCGTCACCTTGTAGTGATTTATCATTCAATGAATGACATGCCTGTAGGTGTTCCAAA  
AATACCCTTTCAAATTTCTGGAGACGAAGAAGCGTCTTGGGTTGACGTATACAACGGA  
CTTTATCGAAGGGGATTCCTTTTTATAGTCCAAGAGATTGATACCGAACTCTCAAATCA  
AATTGTAGGTCTTATGGTATTTCTCAGTTTGGAGGGTGAGGTAAACGATCTGTATTCTT  
TATATCCTCTCTCGGCGGATCCATGGTAGATGGATTTCGCTATTTTTGATATGCTGGTATAT  
TTGCCACCAACGATGCATACATTGAGTATCGGAGAATGCGCCTCAATGGCATCTTTGAT  
CGTGGCCGGAGGAACATTTACCCAACGTATAGCATTCCCTCACAGTAGGATAATGATCC  
ATCAACCTAATACTTTTCCTTTTGGAGACCAACGGGAGAACTTTCTCGAAATAAAG  
GAATTCTGTGCGCTGCGTGCCTGGTTCGGAGAGGCTTATGCAAAAATAACGGGCCAAC  
CCCTTTGGGTTGTAGAGATAGACCTGGAAAGAGATATTTTTATGTCAGCACAAGAAGCC  
AAAGATTATGGAATTGTTGATCTTGTAGCGAGTGGCCAAAAGACCCAAAACGTATTCA  
TGAGGGTTTAATTACGGAATCACTTCCAAATGGTATGTTCCGAGTTCATTTAGATAATGG  
AGATCTGATTATAGGTTATATTTTACGAAAGATCCGACGTAGTTTTTATACGGATACTTCC

AGGCGATAAAGTCCAAGTTGAAGTAAGTCGTTATGATTCAACCAGAGGGCGTATAATTT  
ATCGGCTTCGCAACAAGGACTCGAAAGATATGGAGGAATTCAAAAGAGATTTTCGAG---  
GCTGGGTCTCAACAACACTTCTTATATCCACTTATCTTTCAGGAGTATATTTATGCAC  
TTGCTTATGATCATGGTTTAGTAGGGTATGACAATAAATCTAGCTTACTATTTGTGAAAC  
GTTTAATTACTCGAATGTATCAAAGAATCATTTGATTTTTCTGTAAAGGATTCTAACC  
AAAATGTATTTTTGGGGAAGAATTTGTATTCTCAAATGATATCAGAGGGGTTTGCAGTC  
ATTGTAGAAATTCCATTTTCTCTACGCTTTTTATCTTCCCTAAGAGTCAAATCTCAGAAT  
TTACGATCCATTCATTTCAGTATTTCTTTTTTAGAGGACAAATTTTCACATTTAAACTATG  
TATTAGATATACTAATACCTTACTCAGCCCATTTGGAAATCTGGTTCAAACTCTTCGCTA  
CTGGGTAAAAGATGCCCCCTCTTGCATTTATTACGATTCTTCTCCACGAGTATCCTAA  
TTTGACTAGTCTTATTATTAACCGGTTCTTCTTTTTCAAACAAAGATTATTTTTCTTC  
CTATATAATTCTCATGTATGTGAATACGAATTCATCTTCGTCTTCTCCGTAACCAATCTT  
CTCATTTACGATCAACATCTTCTGGAGCCCTTCTTGAACGAATATTTTTATGAAAAA  
TAGAACATCTTGTAGAAGTCTTGTCAAGGATTTAATCTATGGTTGTTCAAGGATCCTT  
TCATGCATTATGTTAGGTATCAAGGAAAGTCAATTTTCGCTTCAAAGGGACCTTCTTT  
TGATGAATAAATGGAATATTACTTTGTACGTTTCTGGCAATGTCATTTTTACCAGTGGT  
TTCAACCAGAAAGGATTTCTATAAACCAATTATCCAACATTCGCTCGACCTTCTAGGTT  
ATCTTCAAGTGTGCGGCTAAACCCCTTAATGGCGCGCAGTCAAATGCTGGAAAATGC  
ATTTCTAATCGATAATGCTGGT-----AAGAAGTTCGATACCATTGTTCCAATTAGTCCTCT  
GATTGGATCATTGGCTAAAGCGAAATTTGTAACGTATTAGGGCATCCTGTTAGTAAGG  
TGCTTTGGGCCGATTTATCAGATTCTGAGATTATTGACCGATTGGGCGGATATGCAGAA  
ATCTTCTCATTATCATAGCGGATCTTCAAAAAAAGAGTTTGGATCGAATAAAGTATA  
TACTTCGACTTTCTTGTGCTAGAACTTTGGCTCGTAAACACAAAAGTACTGTACGTGCT  
TTTTTGAAAAGATCAGGCTCGGAATTTCTAGAAGACTTCTTACGGCGGAAGAACAGG  
TTCTTTCTTGACTTTACCAAGAACGATTTGGTATTTGGATATTATTTGTATCAATGATTT  
GGCCAATCATGAAATGATAATTGAT--ACAACAGAAGTACAA---GCTATCAATTCTTTTTC  
GAGATTGGAATCC---TAAAAGAAGTCGATGGGATCATATGGATGCTTGTTCCTATTTTC  
AGTCTTGTATTAGGAATCACAATAGGTGTACTAGTAATTGTTTGGTTAGAAAGAGAAAT  
ATCTGCAGGGATACAACAACGTATTGGACCCGAATACGCCGGTCTTTTGGAAATCTTC  
AAGCTCTAGCAGATGGTACAAAATTACTTTTCAAAGAGAATCTTCTGCCATCTCGAGGA  
GATATTCGTTTATTTCAGTATCGGACCATCCATCGCAGTCATATCAATTCTACTAAGTTATT  
TAGTAATTCCTTTTGGCTATCATCTTGTCTAGCTGATCTCAGTATCGGTGTTTTTTTATG  
GATTGCAATTTCAAGTATTGCTCCATTGGACTTCTTATGTCAGGATATGGATCAAATAAT  
AAATATTCTTTTTTAGGCGGTTTACGAGCTGCTGCTCAATCAATTAGTTATGAAATCCCA  
TTAACTCTATGTGTGTTATCAATATCTCTACTATCTAACAGTTCAAGTACAGTTGATGTAG  
TTGAAGCCCAATCAAATATGGTTTTTGGGGATGGAATTTGTGGCGTCAACCTATAGGG  
TTTATCGTTTTTCTAATTTCTTCCCTAGCCGAGTGTGAGAGATTACCTTTTGATTTACCAG  
AAGCAGAAGAAGAATTGGTAGCAGGTATCAAACCGAATATTCAGGTATCAAATTTGG  
TTATTTTATGTTGCTTCGTATTTGAATCTCTTAGTTTCTTCAATTATTTGTAACAGTTCTTT  
ACTTGGGGGGTTGGAATCTTCCATTCCGTACATATTAGTTCCTCCGCTTTTTGAAATAA  
ATAAAGAGAGTCGAGTCTTTGGAACAATAATGGGTATCTTTATTACATTAGCTAAGACTT  
ATTTGTTCTTGTTCATTCCATCATAACAAGGTGGACTTTGCCGAGGTTAAGAATGGAC  
CAACTATTAATCTCGGGTGGAAATTTCTTTTACCTATTTCTCTAGGTAATCTATTATTA  
CAACCTCTCCCAACTTCTTTCACTGATGATCTGGCATATACAGAATGAAAACCTTCATTC

TCGATTCTACGAGAATTTTTATGAAAGCCTTTCATTTGCTTCTCTTCGATGGAAGTTTGA  
TTTTCCCAGAATGTATCCTAATTTTTGGCCTAATTCTTCTTCTGATGATCGATTCAACCTC  
TGATCAAAAAGATATACCTTGGTTATATTTTCATCTCTTCAACAAGTTTAGTAATGAGCAT  
AACGGCCCTCTTGTTCGGATGGCGAGAAGAACCTATGATTAGCTTTTCGGGAAATTTCC  
AAACGAACAATTTCAACGAAATCTTTCAATTTCTTATTTACTATGTTCAACTCTATGTAT  
TCCCTATCCGTAGAGTACATTGAATGTACAGAAATGGCTATAACAGAGTTTCTCTTATT  
CGTATTAACAGCTACTCTAGGAGGAATGTTTTTATGCGGTGCTAACGATTTAATAACTAT  
CTTTGTAGCTCCAGAATGTTTCAGTTTATGCTCCTACCTATTATCTGGATATACTAAGAAA  
GATGTACGGTCTAATGAGGCTACTATGAAATATTTACTCATGGGTGGGGCAAGCTTCTCT  
ATTCTGGTTCATGGTTTCTCTTGGCTATATGGTTTATCCGGGGGAGAGATCGAGCTTCAA  
GAAATAGTGAATGGTCTTATCAATACACAAATGTATAACTCCCCAGGAATTTCAATTGCG  
CTCATATTCATCACTGTAGGAATTGGGTTCAAGCTTTCCCCAGCCCCTTCTCATCAATGG  
ACTCCTGACGTATACGAAGGATCTCCCACTCCAGTCGTTGCTTTTCTTTCTGTTACTTCG  
AAAGTAGCTGCTTCAGCTTCAGCCACTCGAATTTTTGATATTCCTTTTTATTTCTCATCA  
AATGAATGGCATCTTCTTCTGGAAATCCTAGCTATTCTTAGCATGATATTGGGGAATCTC  
ATTGCTATTACTCAAACAAGCATGAAACGTATGCTTGCATATTGTCATAGGTCAAATC  
GGATATGTAATTATTGGAATAATTGTTGGAGACTCAAATGATGGATATGCAAGCATGATA  
ACTTATATGCTGTTCTATATCTCCATGAATCTAGGAACTTTTGCTTGCATTGTATTATTTGG  
TCTACGTACCGGAACTGATAACATTCGAGATTATGCAGGATTATACACGAAAGATCCTTT  
TTTGCTCTCTCTTTAGCCCTATGTCTATTATCCCTAGGAGGTCTTCCCTCCACTAGCAGG  
TTTTTTCGGAAAACCTATTTTATTCTGGTGTGGATGGCAGGCAGGCCTATATTTCTTGGT  
TTAATAGGACTCCTTACAAGCGTTGTTTCTATCTACTATTATCTAAAATAATCAAGTTA  
TTAATGACTGGACGAAACCAAGAAATAACTCCTCACGTGCGAAATTATAGAAGATCTC  
CTTTCAGATCAAAGAATTCCATCGAATTGAGTATGATTGTATGTGTGATAGCATCTACTAT  
ACCAGGAATATCAATGAACCCGATTATTGCAATTGCTCAGGATACCCTTTTTATGTTTCT  
GCTTTACGAATATGATATTTTTTGGACATTTCTAATAATCTCAAGTCTTATTCCTATTTTGG  
CATTTTTCATTTCCGGAGTTTTAGCCCCGATTAGCAAAGGGCCGGAAAACTTTCTAGT  
TATGAATCGGGTATAGAACCAATGGGTGACGCTTGGGTACAATTTAGAATCCGCTATTAT  
ATGTTTGCCCTAGTTTTTGTGTTTTTGTATGTTGAAACGGTTTTTCTTTATCCATGGGCA  
ATGAGTTTCGATGTATTGGGTGTATCTGTATTTATAGAAGCTTTCATTTTCGTGCTTATCT  
TAATTGTTGGTTCAGTTTATGCATGGCGAAAGGGGGCATTGGAATGGTCTACGAATGAT  
TTTCTTGGTTAACAATAATTGTAGTTTTGCCAATATCTGCGGGTTCCTTAATTTGCTTTC  
TTCCCATAGAGGGAATAAGGTAATTAGGTGGTATACCATATGTATATGTGTTTTAGAAC  
TTCTTCTAACAACCTTATGCATTCTGTTATCATTTCCAATCGGACGATCCATTAATCCAATT  
AGTGGAGGACTATAAATGGATCCATTTTTTTGATTTCCATTGGAGATTAGGAATAGACG  
GACTTTCTATAGGACTCATTTTACTAACGGGATTCATCACTACTTTAGCTACTTTAGCGG  
CTCGGCCAGTTACTCGAGATTCTCGATTCTTCCATTTCTGATGTTAGCAATGTACAGCG  
GTCAAATAGGATCATTTTCTGCTCGGGACCTTTTACTTTTTTTTCATCATGTGGGAGTTAG  
AACTCATTCGGTTTATCTCCTTCTATCTATGTGGGGAGGAAAGAAACGTCTGTACTCG  
GCTACAAAATTTATTTTGTACACGGCGGGGGGTTTCGGTTTTTCTCTTAATGGGAGTTCTT  
GGTGTGCGTTTATATGGTTTCGAATGAACCAACATTAATTTTGAACATCAGTTAATCA  
GCGGTATCCTGTGGCCTTGGAAATAATATTCTATATTGGATTTTTTATTGCTTTTGTGTA  
AAATCGCCGATTATACCCCTACATACATGGTTACCAGATACCCATGGAGAAGCACATTAC  
AGTACTTGTATGCTTCTAGCCGGAATCTTATTAATAAATGGGAGCGTATGGATTAGTTTCG



ATTAATATGGAATTATTACATCATGCTCATTCTATATTTTCTCCTTGGTTAGTGATAGTAGG  
CACAATACAAATAATCTATGCAGCTTCAACATCTCCCGCCAACGTAATTTAAAAAAA  
GAATAGCCTATTCCCTCTGTATCTCATATGGGTTTCATACTTATAGGAATTGGTTCTATAAC  
CGATACGGGACTCAATGGAGCCATTTTACAAATAATATCTCATGGATTTATTGGTGCTGC  
ACTTTTTTTCTTGGCAGGAACAGGTTATGATAGAATACGTCTTGTTTATCTTGACGAAAT  
GGCGGAATAGCTATTCAAATGCCAAAAATCTTCACGATGTTACAGTACCTTTTCAATGG  
CCTCCCTTGCATTACCCGGTATGAGTGGTTTTGCTGGAGAATTCATAGTCTTTTTTGGCA  
TAATTACCAGCCAAAAATATCTTTTAATGCCAAAAATACTCATTACTTTTGTAATGGGAA  
TTGGAATGATATTAACCCCATTTATTCATTAGCTATGTCACGCCAAATGTTCTATGGATA  
TAAGTTATTTAATGCTCCAAATTCTTATGTTTTTGGATTCTGGACCGCGAGAGTTATTTGTT  
TCGATTTCTATCTTTCTACCCATATTAGGTATTGGTATGTACCCCGATTTTGTCTTTTCACT  
ATCAGTTGATAAGGTCGAAGTTATTCTATCCAATTTTTTTTATAGAATGATGCTCGAACAT  
GTACTTGTTTGAGTGCCTATTTATTTCTGTCCGGTCTCTATGGATTGATCACGAGTCTGA  
AATATGGTTAGGGCCCTTATGTGTCTTGAACCTTATATTGAATGCAGTTAATATCAATTTTG  
TAATATTTTCTGATTTTTTTGATAGTCGCCAATTAAGGAGCCATTTTTTCCATTTTTGT  
TATAGCTATTGCGGCCGCTGAAGCAGCTATTGGACTAGCTATTGTTTCATCAATTTATCGT  
AATAGAAAATCAACTCGTATTAATCAATCGAATTTGTTGAATAAGATGGAACAGACATC  
TCAATATGCATGGATAATACCCCTTCTTGCCACTTCCAGTTCCTATGCTAATAGGACTGGG  
ACTTCTTCTTTTTCCGACAGCAACAAAAAATTTTCGTCGTATGTGGGCTTTTCAGAGTG  
TTTTATTATTAAGTATAGTCATGATTTTTTCGATGAATCTATCTATTCAGCAACTAAATAGC  
AGTTCTATCTATCAATATGTATGGTCTTGGATCATCAATAATGATTTTTTCTTTTGAATTAG  
GCTACTTGATTGATCCACTTACTACTATTATGTCAATATTAATCACTACTGTTGGAATTAT  
GGTTCTTGTTTATAGTGATAATTATATGTCTCATGATCAAGGATATTTAAGATTTTTTGCTT  
ATATGAGTTTTTTTCAGTAGTTCTATGTTGGGATTAGTTACTAGTTCTAATTTGATACAAAT  
TTATATTTTTTGGGAATTAGTTGGAATGTGTTCGTATCTATTGATAGGGTTTTTGGTTCACA  
CGACCTGTTGCAGCAAATGCTTGTCAAAAAGCGTTTTGTAACATAATCGTGTGGGGATTT  
TGTTTTATTATTAGGAATTTTAGGTTTTTATTGGCTAACGGGCAGTTTCGAATTTAGGGA  
TTTATTCGAAATATTCAATAACAATGAGGTCCATTTTTTATTGTTATTTGTGTGCCGTT  
CTTTTTTTGCAGGCGCAGTTGCTAAATCTGCACAATTTCCCTCCATGTATGGTTACCC  
GATGCCATGGAGGGCCCTACTCCTATTTCCGGCTCTTATACATGCTGCTACTATGGTAGCA  
GCGGGAGTTTTTCTGTAGCTCGGCTTCTTCTCTTTTTCATAATCATACTTACATAATGA  
ATTTAATCTCTTACTAGGATAATAACAGTATTATTAGGGGCTACTTTAGCTCTCGCTCA  
AAAAGATATTAAGAGGGGTTTAGCCTATTCCACAATGTCTCAATTTGGGATATATGATGTT  
AGCTCTAGGTATGGGGTCTTATCGCAGTGCTTTATTTCAATTAATTAATCACTCATGCTTTTTCG  
AAAGCATTATTGTTTTTAGGATCTGGATCCATTATTATGCAATGGAAACTATTGTTGGAT  
ATTCGCCAAATAAAAGTCAGAATATGGCTCTTATGGGAGGTTTAAACAAAACATGTGCCG  
ATTACCAAACCGCTTTTTTATTAGGTACACTTTCTCTTTGTGGTATTCCACCCCTTGCTT  
GTTTTTGGTCCAAGGATGAAATTTCTTAATGATAGTTGGTTGTATTCACCGATTTTCGCAA  
TAATAGCTTGGTCTACAGCGGCATTAACCGCATTTTATATGTTTCGGATCTATTTACTTAC  
TTTTGAAGGACACTTAAACGCTAATTTTTCAAATTACAGTGGAAAAAAAATAAACCC  
TTCGATTCAATATCTCTATGGGGTAAAGAAGGTTTCGAAAAGGATTAAAAAA---TTATTA  
CTTTATTAACAATAAATTTTTTTTTCATTGGGGAATAAGAAGTCTTATTTATATCCTTATGA  
ATCGGATAATACTATGTTATTTCCCAATACTTGTATTGGGTCTATTTACTTTGTTTCGTTGGAT  
TCCTAGGAATTCCTTTCAATTTAGATATATTATCAAATGGTTAACCCCATATATAAACCT

TTTACATCCAAATTTGAAT---TCAATGGATTGGTATGAATTTGCGAAAGATGCAGTTTTTT  
CAGTCAGTATAGCCTATTTCCGAATAGTTATAGCGTCCCTTTTATATAAACCTGTTTATTC  
ATCTTTTCAAATTTGTACTTAATTAATTCATTTGTTATTCTTTCCGGACAAAATCATAAAT  
GGTCTATATGATTGGTCATATAATCGTGGTTACATAGATGCTTTTTATGCAACATCCTTAA  
CCGGGGGTATAAGAGGATTGGCGGAATTTACTCATTTTTTTTGATAGACGAGTAATTGAT  
GGAATTACGAATGGAGTTGGTATFATGAGTTTCTTTGTAGGAGAGGGTATCAAATCTGT  
TGGGGGCGGG---CGTATCTCTTCTTATCTTTTCTTGTATTTATCGTATGTATCCATTTTTTT  
ATTAATTTACTACATGGATTTACCTGGACCAATACATGATTTTCTTTTAGTCTTTCTGGGA  
TTGGGTTTTATATTAGGAGGTCTAGGAGTGGTGTACTTCCCAATCCAATTTATTCTGCC  
TTTTCGCTGGGATTGGTTCTTGTTTGTATATCCTTATTCTATATTCTATCGAATTCCTATTT  
TGTCGCTGCTGCGCAGCTCCTTATTTACGTAGGGGCCATAAATGTTTTAATCATTTTTTGC  
TGTGATGTTTATGAAGGGTTCAGAATATTACAAGGATTTTCATCTTTTGGCCGTTGGGG  
ATGGGCTTACTGCGATGGTTTGTACAAGTCTTTTTGTTCCTACTAATTACTACTATTCCAG  
ATACGTCGTGGTACGGGATTCTTTGGACTACAAAATCAAGCCAAATTATAGAGCAAGAT  
TTGATAAGTAATAGTCAACAAATTGGGATTCATTTATCAACAGATTTTTTTTCTTCCGTTT  
GAACTCATTTCATAAATCTTTTAGTTTCGTTAATAGGTGCAATTGCTGTAGCTCGTCAA  
ATGACTACGCCAGTTACAAGAAAAGACCTCATGATAGTCAATATGGGTCCTCACCACCC  
ATCAATGCATGGTGTCTTTCGACTCATTGTTACTCTAGATGGAGAAGATGTTATTGACTG  
TGAGCCAGTATTGGGTTATTTACATAGAGGTATGGAAAAAATTGCGGAAAACCGAACA  
ATTATACAATATTTGCCTTATGTAACACGTTGGGATTATTTAGCTACTATGTTACCCGAAG  
CAATAACTGTAAATGCACCGGAGCAGTTAGGCAATATTCAAGTACCTAAAAGGGCCAG  
CTATATCAGAGTCATTATGCTGGAGTTAAGTCGTATAGCTTCGCATTTGTTATGGCTTGG  
CCTTTTATGGCAGATATTGGGGCACAGACCCCTTTCTTCTATATTTTTTCGAGAAAGAGA  
ATTGATATATGACCTATTCGAAGCTGCCACCGGTATGCGAATGATGCATAATTTTTTTTCGT  
ATCGGAGGGGTAGCTGCTGATTTACCTCATGGATGGATAGATAAATGTTTGGATTTTTGC  
GATTATTTTTTAAACAGAGGTTGCTGAATATCAAATCTTATTACACGCAATCCTATTTTTT  
TAAAACGAGTTGAAGGAGTAGGCATTATTGGCGGAAAGGAGGCAATAAATTGGGGTTT  
ATCGGGACCAATGCTACGAGCTTCCGGAATACAATGGGATCTTCGTAAAGTTGATCAGT  
ATGAGTGTTACGACGAGTTCGATTGGGAAGTCCAATGGCAAATGAGGGGGATTTCATT  
AGCTCGTTATTTAGTACGAATCAATGAAATGGCAGAATCCATAAAAATGATTCAACAGG  
CTCTAGAAGGAATCCGGGGGGGCCCTATGAGAATTTAGAAATCCGACGTTTTTGATCCA  
CTAAGAGATCCGAAATGGAATGATTTTACTATCGATTTATTAGTAAAAAACCTTCTCCG  
ACTTTTGAATTGTGCAAGCAAGAATTTATGTGAGAGTTGAAGCCCCAAAAGGAGAAT  
TGGGAATTTTTCTGATAGGGGATAAGAATGTTTTTCTTGGAGATGGAAAATCCGACCA  
CCGGGTTTTATCAATTTGCAAATTTCTTCTCAGCTAGTTAAAAGAATGAAATTGGCTGAT  
ATTATGACGATATTAGGTAGCATAGATATCATTATGGGAGAAGTTGATCGTATGTTCTCTA  
TGATAACTGAGTTAGTGAATTATGGTCAACAAACAGTACGAGCTGCCAGATACATTGGT  
CAAAGTTTCACGATTACTTTATCGCATGCGAATCGTTTACCCGTAATTTCAATACCCC  
TACGAAAAATTGATCACATCAGAGCGTTTCCGCGGCCGAATCCATTTTGAATTTGATAA  
GTGCATTGCTTGTGAAGTATGTGTTCCGCTATGTCTTATAGATCTACCCATTGTTGATTG  
GAAATTGGAAACGGATATTCGAAAGAAACGATTGCTTAATTACAGTATTGATTTTGGAA  
TCTGTATATTTTTGTGGTAATTGCATTGAGTATTGTCCAACAAATGTTTATCAATGACTGA  
AGAATATGAACTTTCTGTGTATGATCGTCACGAATTGAATTATAATCAAATTGCTTTGGG  
TCGGTTACCAATGTCAGTAATCGACGATTACACAATTCGAACAATTTTGAATTTG-----

-----ATGCAGGGTCATTTGTCTACTTGGCTAGTCAAGCATGGG  
CTAATTCATCGATCTTTGGGCTTTGATTACCAAGGAACGGAGACTTTACAAATAAAACC  
CGAGGATTGGCATTCCATTGCTGTCATTTTATATGTATATGGTTACAATTATCTACGCTCC  
CAATGTGCCTATGATGTAGCACCTGGCGGACTGTTAGCAAGTGTGTATCATCTTACGAG  
AATAGAGTATGGCGTGGATCAACCAGAAGAGGTATGCATAAAAGTATTTGCCCCGAGG  
AGGAATCCTAGAATTCCGTCGTTTTTCTGGGTTTGGAAAAGTGTAGATTTTCAAGAACG  
GGAATCTTATGATATGTTGGGAATCTCTTATGATAATCATCCACGTTTGAAACGTATCTTA  
ATGCCTGAAAATTGGATAGGATGGCCTTTACGTAAGGATTATATTGCCCCCAATTTTTAT  
GAAATACAAGATGCTCAT-----

-----ATGGTCTTAGCTCCTGAATATTCAGACAATAAACAGAAAAATG  
AAAAAATAAGATTGACACAGTTATGAATTCCATTGAGTTTCCCTTACTTGATCAAACA  
ACCCAAAATTCAGTTATTTCAACTACATTAATGATCTTTCAAATTGGTCAAGACTCTCT  
AGTTTATGGCCGCTTCTCTATGGTACCAGTTGTTGCTTCATTGAATTTGCTTCACTAATA  
GGCTCACGATTCGACTTTGATCGTTATGGACTAGTACCAAGATCAAGTCCTAGACAAGC  
GGACCTAATTTAACAGCCGGAACGGTAACAATGAAAATGGCTCCTTCTTTAGTGAGAT  
TATATGAGCAAATGCCTGAACCAAAATATGTTATTGCTATGGGGGCATGTACAATTACAG  
GGGGGATGTTTCAGTACCGATTCTTATAGTACTGTTCCGGGAGTCGATAAGCTAATTCCG  
GTGGATGTCTATTTGCCGGGCTGTCCGCCTAAACCGGAAGCGGTTATCGATGCTATAAC  
AAAATTCGTAAGAAAATATCTCGAGAAATCTATGAAGATAGAATTAGGTATCAACAGG  
AAAATCGGTGTTTTACTACCAATCACAAGTTTCAGGTTTGGCGTAGTAGTCATACTGGA  
AATTATGATCAAGGATTCCTTTATCAAGTGCCACCTACTTCAGAGATCCCT---GAAACAT  
TTTTCAAATACAAAGGTTTCAGTATCTTCCCACGAATTGGTGAATATGCAAACCAGAAAT  
ATTTTTTCTTGGATAAAGGAACAGAGTACTCGATCCATTTCCGTATTGCTCATGATATATA  
TCATAACTCGGACATCCATTTCAAGCGCATATCCCATTTTTGCACAGCAGGGTTATGAA  
AATCCACGCGAAGCGACGGGGCGTATTGTATGTGCCAATTGCCATTTAGCTAATAAGCC  
CGTGGATATTGAGGTTCCACAAGCGATACTTCCGTGATACTGTATTTGAAGCGGTTGTTT  
GAATTCCTTATGATATACA ACTGAAACAGGTTCTTGCTAATGGTAAAAGGGGGCTTTG  
AATGTGGGTGCTGTTCTTATTTTACCGGAGGGGTTTGAATTAGCCCCTCCCGATCGTATT  
TCTCCCGAGATGAAAGAAAAGATAGGCAATCTGTCTTTTCAGAGCTACCGCCCAATA  
AAAAAATATTCTTGTGATAGGCCCTGTTCCCTGGTCAGAAATATAGTGAAATCACCTTT  
CCTATCCTTTCCCGGACCCAGTTACTAAGAAAGATGTTCACTTCTTAAAATATCCTATA  
TATGTAGGCGGAAACAGGGGAAGGGGTCAGATTTATCCCGACGGGAGCAAAAGTAAC  
AATACAGTTTATAATGCTACAGCAGCGGGTATAGTAAACAAAATTATACGAAAAGAAAA  
AGGGGGGTACGAAATAACTATAGCGGATACATCGGATGGACATCAAGTGGTTGATATTA  
TCCCTCCAGGGCCAGA ACTTCTTGTTTCAGAAGGCGAATCTATCAAATTTGATCAACCG  
TTGACAAGTAATCCTAATGTGGGCGGATTTGGTCAGGGAGATGCAGAAATAGTACTTCA  
AGATCCATTACGTGTCCAAGGCCTTTTGTCTTCTTGGCATCTGTTATTTTGGCACAAAT  
CTTTTTGGTTCTTAAAAGAAACAGTTTCGAGAAGGTTCAATTGTCCGAAATGAATTTCA  
TGAGTAAAGTTTATGATTGGTTTGAAGAACGTCTCGAGATTCAGGCAATTGCGGATGAT  
ATAACTAGTAAATATGTTCCCTCCCATGTCAACATATTTTATTGTCTAGGAGGAATTACGC  
TTACTTGTTTTTTGGTACAAGTGGCTACGGGTTTGTCTATGACTTTTTTACTATCGTCCGA  
CCGTTACTGACGCTTTTGTCTTCTGTTCAATACATAATGACTGAAGCTAATTTGGTTGGT  
TAATCCGATCTGTTTCATCGATGGTCGGCAAGTATGATGGTTCTAATGATGATCTTACACG  
TATTTCCGCGTGTATCTCACCGGTGGATTTAAAAAACCTCGAGAATTGACTTGGGTTACT

GGGGTGGTTCTGGCTGTATTGACCGCATCTTTTGGCGTAACCGGTTATTCCCTTACCTTGG  
GACCAAATTGGTTATTGGGCAGTGAAAATTGTAACAGGTGTCCCTGAAGCTATTCCCTGT  
AATAGGACCTCCTTTGGTAGAATTATTGCGCGGGAGTGCTAGTGTGGGACAATCCACTT  
TGA CT CGGTTTTATAGTTTACACACTTTTTGTATTACCACTTCTTACTGCGGTATTTATGTT  
AATGCACTTTCCGATGATACGTAAACAAGGCATTTCTGGTCCTTTAATGGGAGTAACAA  
AAAAACCTGACCTGAATGATCCTGTATTAAGAGCGAAAATTGGCTAAAGGTATGGGTCAT  
AATTATTACGGAGAGCCCGCTGGCCTAATGATCTTTTATATATTTTTCTGTAGTCATTC  
TAGGTA CTATTGCATGTAACGTAGGCTTAGCGGTTCTAGA ACCATCAATGATTGGTGAA  
CCAGCAGATCCATTTGCAACCCCTTTAGAAATATTACCCGAATGGTATTTCTTTCCCGTA  
TTTCAAATACTTCGTACAGTACCCAATAAATTATTGGGTGTTCTTTAATGGTTTCAGTA  
CCCGCGGGATTATTAACAGTACCTTTTTTTAGAGAATGTTAATAAATTTCAA AATCCATTT  
CGTCGTCCAGTAGCGACAACGGTCTTTTTGATTGGTACCGCAGTGGCCCTTTGGTTGG  
GTATTGGTGCAACATTACCTATTGATAAATCCCTA ACTTTAGGTCTTTTTATGATTGAAGT  
TTTTCTATTTGGAATCGTGTTAGGTCTAATTCCTATTACTTTGGCTGGATTATTCGTA ACT  
GCATATTTACAATACAGGCGTGGCGATCAGTTGGACCTTATGCCTACTATAACTAGTTAT  
TTCGGTTTTTCTACTAGCGGCTTTAACTATAGCCTCAGTTCTTTTTATTGGTCTGAGCAAG  
ATACGACTTATTATGGATATAGTAAGTCTTGCTTGGGCTGCTTTAATGGTAGTCTTTACAT  
TTTTCCCTTTCACTCGTAGTATGGGGAAGAAGTGGGCTCATGATTATTCGTTCCCGGAA  
CCAGAAGTCAA AATTTTGGTAGATAGGGATCACATAAAA ACTTCTTTTCGAGGAATGGG  
CCAAACCCGGTCATTTCTCAAGAACAATAGCTAAAGGCCCTGATACTACCACTTGGATC  
TGGAACCTACATGCTGATGCTCACGATTTTCGATAGCCATAACCGGTGATTGGAGGAGAT  
CTCTCGAAAAGTATTTAGTGCCCATTTCCGGTCAACTCTCCATCATCTTTCTTTGGCTGAG  
TGGCATGATTTCCACGGTGCTCGTTTTTCCAATTATGAAGCATGGCTAAGTGATCCGAC  
TCACATTGGGCCGAGTGCCAGGTGGTTTTGGCCAATAGTGGGCCAAGAGATATTGAAC  
GGTGATGTGGGCGGGGGCTTCCGAGGAATACAAATAACCTCGGGTTTTCTTTCAGCTTT  
GGCGAGCATCTGGAATAACTAGCGAATTACA ACTCTATTGTACCGCAATTGGTGCAATTG  
ATCTTTGCAGCGTTAATGCTTTTTTGCTGGTTGGTTTCATTATCATAAAGCTGCTCCAAAA  
TTGGCTTGGTTTCAAGATGTAGAATCGATGTTGAATCACCATTTAGCGGGGTTACTAGG  
ACTTGGGTCTCTCTTGGGCGGGGCATCAAGTCCATGTATCTTTACCGATTAACCAATT  
TCTAAATGCTGGGGTAGATCCTAAAGAGATACCACTGCCTCATGAATTTATCTTGAATCG  
GGATCTTTTGGCTCAACTTTATCCCAGTTTTGCCGAGGGAGCAACCCCTTTTTTTCACCT  
TGAATTGGTCAA AATACGCAGACTTTCTTACTTTTCGTGGAGGATTAGATCCAGTAACT  
GGAGGTCTATGGCTGACCGATATTGCACACCATCATTTAGCTATTGCAATTCTTTTCCTG  
ATAGCAGGTCATATGTATCGGACCAACTGGGGCATTGGTCATGGCCTAAAAGATATTTTA  
GAAGCTCATAAGGGTCCATTTACAGGCCAGGGCCATAAAGGCCTATATGAAATCCTAAC  
AACGTCATGGCATGCTCAATTATCTCTTAACCTAGCGATGCTAGGCTCTTTAACCATTGT  
TG TAGCTCATCATATGTATTCCATGCCCCCTTATCCATATCTAGCTACTGACTATGGTACA  
CAACTGTCATTGTTTACACATCACATGTGGATTGGTGGATTTCTCATAGTTGGGGCTGCT  
GCGCATGCAGCCATTTTTATGGTAAGAGACTATGATCCA ACTACTCGATATAACGATCTA  
TTAGATCGTGTCCTTAGGCATCGCGATGCTATCATATCACATCTCAACTGGGCATGTATAT  
TTCTAGGTTTTTCACAGTTTTTGGTTTTGTATATTCATAATGATACTATGAGCGCTTTAGGGCG  
CCCTCAAGATATGTTTTCAGATACCGCTATTCAATTACAACCCGCTTTTGCTCAATGGAT  
CCAAAACCCCATGCTTTAGCACCCGGTGCAACGGCTCCTGGTGCAACAACAAGCAC  
CAGTTTAACTTGGGGGGGCGGTGATTAGTAGCAGTGGGTGGCAAAGTGGCTTTGTTA

CCTATTCCATTAGGAACCGCAGATTTTTTGGTACATCACATTCATGCATTTACGATTCATG  
TGACCGTATTGATACTCCTGAAAGGTGTTCTATTTGCTCGTAGTTCCCGTTTGATAACCGG  
ATAAAGCAAATCTTGGTTTTTCGTTTTCTTGTGATGGACCTGGAAGAGGAGGGACGTG  
TCAAGTATCGGCTTGGGATCATGTCTTCTTAGGACTGTTCTGGATGTACAATGCAATTC  
AGTAGTAATTTCCATTCAGTTGGAAAATGCAGTCAGATGTTTGGGGCAGTATAAGTG  
ATCAAGGGGTAGTAACTCATATCACGGGAGGAAATTTTGCGCAGAGTTCCATTACTATT  
AATGGGTGGCTTCGCGATTTCTTATGGGCACAAGCATCCCAGGTAATTCAGTCTTATGG  
TTCTTCATTATCTGCATATGGCCTTTTTTTCCTAGGTGCTCATTTTGTATGGGCTTTTAGTT  
TAATGTTTCTATTCAGTGGACGTGGTTATTTGGCAAGAACTTATCGAATCCATCGTTTGGG  
CTCATAATAAATTAAGTTGCTCCTGCTACTCAGCCAAGAGCCTTAAGCATTGTACAA  
GGACGCGCTGTAGGAGTAACCCATTACCTTCTGGGTGGAATTGCCACAACGTGGGGCGT  
TCTTCTTAGCAAGAATTATTGCAGTAGGAATGGCATTAAAGATTTCCAAGGTTTAGCCAA  
GGCTTAGCCCAGGACCCCACTACTCGTTCGATTTGGTTTGGTATTGCTACCGCACATGA  
CTTCGAGAGTCATGATGATATTACTGAGGAACGTCTTTATCAGAATATTTTTGCTTCTCA  
CTTCGGGCAATTAGCAATAATTTTTCTGTGGACTTCCGGAAATCTGTTTCATGTAGCTTG  
GCAAGGGAATTTGAGTCATGGGTACAGGACCCTTACATGTAAGACCTATTGCTCATG  
CAATTTGGGATCCTCATTTTGGTCAACCGGCTGTAGAAGCTTTTACTCGAGGAGGTGCT  
CTTGGCCCAGTGAATATCGCCTATTCCGGTGTATTATCAGTGGTGGTATAACAATAGGTTA  
CGCACTAATGAAGATCTTTATACTGGCGCCCTTTTTCTATTATTTCTTTCTGCCATATCCTT  
AATAGCAGGTTGGTTACACCTACAACCGAAATGGAACCAAGCGTTTCATGGTTCAA  
AATGCGGAATCTCGTCTCAATCATCATTTGTCAGGACTCTTCGGCGTAAGTTCCTTGGC  
TTGGACAGGACATTTAGTACATGTCGCTATTCTGGATCCAGGGGGCAGTACGTTTCGAT  
GGAATAATTTCTTAGATGTAGTACCACATCCCCAAGGCTTAGGCCCGCTTTTTACAGGT  
CAGTGAATCTTTATGCTCAAATCCCGATTCAACTAGTCATTTATTTGGTACCTCCCAA  
GGAGCAGGAAGTCTATTCTAACCCTTCTCGGGGGATTTTCATCCACAAACGCAAAGTTT  
ATGGCTGACTGATATGGCTCATCATTTAGCTATTGCATTTATTTTTCTCGTTGCAGGG  
CATATGTATAGAATAACTTCGGGATTGGGCACAGTATGAAAGATCTTTTAGATGTGCAT  
CTTCCCCCGGGGGGCGATTGGGACGTGGGCATAGGGGTCTTTATGACACAATCAATAA  
TTCGATTCATTTCAATTAGGCCTTGCCCTAGCTTCTTTAGGGGTATTACTTCCTTGGTA  
GCTCAACACATGTACTCTTTACCTGCTTATGCATTCATAGCACAAAGACTTTACTACTCAA  
GCTGCGTTATATACTCATCACCATAACATCGCAGGATTCATCATGACAGGAGCTTTTGGCT  
CATGGAGCTATATTTTTTCATTAGAGATTACAATCCGGAACAGAATGAGGATAATGTATTG  
GCAAGAATGTTAGACCATAAAGAAGCTATCATATCTCATTTAAGTTGGGCCAGCCTCTT  
TCTGGGGTTCCATACTTTGGGACTTTATGTTTATAATGATGTCATGCTTGCCTTTGGTAC  
TCCGGAGAAACAAATCTTGATCGAACCTATATTTGCTCAATGGATAACAATCTGCTCATG  
GTAAAACCTCCTATGGGTTCGATGTACTTTTATCTTCAACGAACGGCCCCGGCATTCAAT  
GCTGGTCAAGCATATGGTTGCCGGGTGGTTAAATGCTATTAATGAG-----AATAGTAA  
TTCATATTCTTAACAATAGGTCCCAGGACTTTTTGGTTCATCATGCTATTGCTCTGGG  
TTTACATACAACTACATTGATCTTAGTAAAAGGTGCTTTAGATGCACGCGGTTCCAAGTT  
AATGCCAGATAAAAAAGATTTCCGGTTATAGTTTTCCGTGCGATGGCCCCGGGGCGAGGC  
GGTACTTGTGATATTTCCGGCTTGGGACGCATTTTATTTGGCAGTTTTTTGGATGTTAAAT  
ACTATTGGATGGGTACTTTTTATTGGCATTGGAAGCATATCACATTATGGCAGGGTAAC  
GTTTCGCAGTTAATGAATCTTCCACTTATTTGATGGGCTGGTTAAGAGATTATTTATGG  
TTAAACTCTTCACAACTTATCAATGGATATAACCCCTTTGGTATGAATAGTTTATCAGTCT

GGGCGTGGATGTTCTTATTTGGACATCTTGTTTGGGCTACTGGATTTATGTTCTTAATTC  
CTGGCGCGGATATTGGCAGGAATTGATTGAAACTTTAGCATGGGCTCATGAGCGTACAC  
CTTTGGCCAATTTGATTTCGTTGGAGAGATAAACCGGTGGCCCTTTCTATTGTACAAGCA  
CGATTGGTTGGATTAGCCCACTTTTCTGTAGGTTATATATTCACCTTATGCAGCTTTCTTGA  
TTGCCTCTACATCAGGCAAATTTGGTATGTCACATTCAGTAAAAATTTATGATACATGTAT  
AGGATGTACTIONCAATGTGTCCGAGCCTGCCCCACCGATGTATTAGAAATGATACCTTGGG  
ATGGATGTAAAGCTAAACAAATTTGCTTCCGCTCCAAGAACAGAGGACTGTGTCCGGTTG  
TAAGAGATGCGAATCTGCCTGTCCAACAGATTTCTTGAGTGTTCGAGTTTATTTATGGCA  
TGAAACAACCTCGCAGCATGGGTCTAGCTTATATGACAACCTTTCAACTTTCCCTCTGTTT  
TTGTGCCTTTGGTGGGCCCTAGTATTTCCGGCAATTGCAATGGCTTCTTTATCTCTTCATG  
TTCAAAAAATAAGATTGTTATGCGAGATCTAAAAACATATCTCTCCGCAGCACCGGTA  
CTAAGTACTTTATGGTTCGGGTCTTTAGCAGGTCTATTGATAGAGATTAATCGTTTTTCC  
CGGATGCGTTGACATTTCCCTTTTTTTCATTCATGACTGCAATTTTAGAGAGACGCGAA  
AGCGAAAGCCTATGGGGTTCGCTTCTGTAACCTGGATAACTAGCACTGAAAACCGTCTTT  
ACATTGGATGGTTTGGTGTTTTGTATGATCCCTACCCTGTTGACCGCAACTTCTGTATTTA  
TTATCGCCTTCATTGCTGCTCCTCCAGTAGATATTGATGGGATTCGTGAACCTGTTTCTG  
GATCTCTACTTTATGGAAACAATATTATCTCGGGTGCCATTATTCCTACTTCTGCAGCTAT  
AGTTTTGCACCTTTTACCCAATATGGGAAGCGGCATCGGTTGATGAATGGTTATAACAATG  
GTGGTCTTATGAACAAATTGTTCTACACTTCTTACTAGGTGTAGCTTGTACATGGGTC  
GTGAGTGGGAGCTTAGTTTCCGTCTGGGTATGCGACCTTGGATTGCTGTTGCATATTCA  
GCTCCTGTTGCAGCCGCAACTGCTGTTTTCTTGATCTACCCAATTGGTCAAGGAAGTTT  
TTCTGACGGTATGCCTCTAGGAATCTCTGGTACTTTCAACTTCATGATTGTATTCCAGGC  
TGAGCACAACATTTCTATGCACCCATTTACATGTTAGGCGTAGCTGGGGTATTCCGGCG  
GCTCCCTATTCAGTGCTATGCATGGTTCCTTGGTAACCTCTAGTTTGATCAGGGAAACC  
ACAGAAAATGAATCTGCTAATGAAGGTTATAGATTCCGGTCAAGAAGAAGAACTTATAA  
TATTGTAGCCGCCCATGGTTATTTGGCCGATTGATCTTCCAATATGCTAGTTTCAACAA  
CTCTCGTTCTTTACATTTCTTCCCTAGCCGCTTGGCCTGTAGTAGGTATCTGGTTCACTGC  
TTTAGGTATCAGCACTATGGCTTTCAACCTAAATGGTTTTTAATTTCAACCAATCTGTAGT  
TGATAGTCAAGGCCGTGTAATTAATACTTGGGCTGATATCATTAAATCGTGCTAACCTTGG  
TATGGAAGTTATGCATGAACGTAATGCTCACAACTTCCCTCTAGACCTAGCCGCTCTTG  
AAGCTCCATCTACAAATGGAATGGGTTTTGCCTTGGTATCGTGTTACATACCGTTGTATTGA  
ATGATCCCGGTCGACTGCTTTCTGTCCATATAATGCATACAGCTCTGGTTGCGGGTTGGG  
CCGGTTCTATGGCTCTGTATGAATTAGCAGTTTTTGTATCCCTCTGACCCCGTTCTTGATC  
CAATGTGGAGACAGGGTATGTTTCGTTATAACCATTGACTCGTTTAGGAATAACCAATT  
CATGGGGTGGTTGGGGTATCACA---GGGGGACTATAACGAATCCAGGTATTTGGAGTT  
ACGAAGGTGTGGCCGGGGCACATATTGTGTTTTCTGGCTTGTGCTTCTTGGCAGCTATC  
TGGCATTGGGTATATTGGGATCTAGAAATATTTTGTGATGAACGTACAGGAAAACCTTCT  
TTGGATTTACCCAAAATCTTTGGAATTCATTTATTTCTCGCAGGAGTGGCGTGCTTTGGT  
TTTGGTGCATTTTCATGTAACAGGCTTGTATGGTCCTGGAATATGGGTGTCCGATCCTTAT  
GGACTGACGGGAAAAGTGCAATCTGTAAATCCAGCCTGGGGCGTGGAAGGTTTTGATC  
CTTTTGTTCGGGAGGAATAGCCTCTCATCATATTGCAGCAGGGGCATTGGGCATATTG  
GCGGGCCTATTCCATCTTAGCGTTCCGCCACCCCAACGCCTATACAAAGGATTGCGTAT  
GGGCAATATTGAAACCGTCTTTCCAGTAGTATTGCTGCTGTCTTTTTTGCAGCTTTTGT  
TGTTGCCGGAACCTATGTGGTATGGTTCAGCAACTACTCCGATCGAATTGTTTGGGCCCTA

CTCGTTATCAATGGGATCAGGGGACTTTTCAGCAAGAGATATAACCGAAGGGTTAGTGCT  
GGACTAGCCGAAAATCAAAGTTTATCAGAAGCTTGGTCTAAAATCCCGAAAAATTGG  
CTTTTATGATTACATCGGCAATAATCCGGCAAAAAGGGGGATTATTCAGGGCGGGCTCA  
ATGGATAACGGGGATGGAATAGCCGTTGGATGGTTAGGGCATCCTATCTTTAGAGATAA  
AGAAGGACGCGAACTTTTTGTACGTCGTATGCCTACTTTTTTTGAAACATTTCCGGTCG  
TTTTGGTAGACGGCGACGGAATTGTTAGAGCCGATGTTCCTTTTCGAAGGGCCGAATC  
GAAGTATAGTGTGCAACAAGTAGGTGTAAGTGTGAGTTCTACGGTGGCGAACTCAAC  
GGAGTCAGTTATAGCGATCCTGCTACTGTGAAAAAATATGCTAGACGTGCTCAATTGGG  
TGAAATTTTTGAGTTAGATCGTGCTACTTTGAAATCCGATGGTGTTTTTTCGTAGCAGTCC  
GAGAGGTTGGTTTACTTTTGGACATGCTTCATTTGCTTTGCTCTTTTTCTTCGGACACAT  
TTGGCATGGTGCTAGAACCTTGTTAGAGATGTTTTTGCTGGTATTGACCCAGATTTGG  
ATGCTCAAGTAGAATTTGGAGCATTCCAAAACTTGGAGATCCAACACTACAAGAAGACA  
GGTAGTC-----GTGGAAACGCTCTTTAATGGAACTTAGCTTTAG  
CTGGTCGTGACCAAGAAACCACTGGTTTTCGCTTGGTGGGCCGGGAATGCCCGGCTTAT  
AAATTTATCCGGTAAACTACTAGGGGCTCATGTAGCCCATGCCGGATTAATCGTATTCTG  
GGCCGGAGCAATGAACCTATTTGAAGTGGCTCATTTCGTACCAGAGAAGCCTATGTATG  
ACAAGGATTAATTTTACTCCCCACCTAGCTACTCTAGGTTGGGGGGTAGGTCCTGGC  
GGGAAGTTATAGACACTTTTCCATACTTTGTATCTGGAGTACTTCATTTAATCTCCTCT  
GCAGTATTGGGCTTTGGCGGTATTTATCATGCACTTCTAGGACCTGAGACGCTTGAAGA  
ATCTTTCCATTCTTCGGTTATGTATGGAAAGATAGAAATAAAATGACTACAATTTTAGG  
TATTCATTAATCTTGTAGGTATAGGTGCTTTTCTTTTAGTATTCAAGGCTCTTTATTTT  
GGGGCGTATATGATACCTGGGCGCCGGAGGGGGAGATGTAAGAAAAATTACCAACT  
TGACCCTTAGTCCAAGTATTATATTCAGTTATTTACTAAAATCGCCCTTTGGAGGGGAAG  
GATGGATTGTTAGTGTAGACGATTTGGAAGATATAATCGGAGGACATGTATGGGTAGGT  
TCCATTTGTATACTTGGCGGAATCTGGCATATCTTAACCAAACCCTTCGCATGGGCTCGA  
CGCGCACTTGTATGGTCCGGGGAGGCTTACTTATCTTATAGTTTAGCGGCTTTATCTGTC  
TTTGATTTATTGCTTGTGTTTTGTATGGTTCAATAATACCGCCTATCCTAGTGAGTTTT  
ACGGACCTACTGGACCCGAAGCTTCTCAAGCTCAAGCATTTACGTTTCTAGTTAGAGAT  
CAACGTCTTGGAGCTAACGTCGGATCCGCTCAAGGACCTACCGGTTTAGGTAAATATTT  
AATGCGTTCCCCGACCGGAGAAGTCATTTTTGGAGGAGAACTATGCGTTTTTGGGAT  
CTGCGCGCCCCCTGGTTAGAACCATTAAGGGGTCCAAATGGATTGGACTTGAGTAGGC  
TGAAAAAAGATATAACAACCTTGGCAAGAACGGCGTTCCGCAGAATATATGACTCATGCT  
CCTTAGGTTCTTTAAATCCGTGGGCGGCGTAGCTACCGAGATCAATGCAGTCAATTAT  
GTCTCTCCTAGAAGTTGGTTAGCTACTTCTCATTTTTGTTCTAGGATTCTTCTTGTTTGTA  
GGTCATTTGTGGCATGCGGGAAGGGCTCGTGCAGCTGCAGCAGGGTTTGAAAAAGGA  
ATTGATCGTGATTTTGAACCTGTTCTTTCCATGACCCCTCTAAATATGACTATAGCCCTT  
GGTAAATTTACCAAAGACGAAAATGATTTATTTGATATTATGGATGACTGGTTACGGAG  
AGACCGTTTCGTTTTTGTAGGCTGGTCCGGTCTATTGCTCTTTCCCTTGTGCCTATTTTCG  
TGTAGGGGGTTGGTTCACAGGTACAACCTTTGTAACCTCATGGTATAACCCACGGATTGG  
CCAGTTCCTATTTGGAAGGCTGCAATTTCTTAACTGCCGCAGTTTCGACTCCTGCTAAT  
AGTTTAGCACATTTCTTTGTTGTTACTATGGGGTCCGAAGCACAAGGAGATTTTACTCG  
TTGGTGTCAATTGGGCGGTCTGTGGACTTTTGTGCTCTCCATGGTGCTTTTCGGACTAA  
TAGGTTTCATGTTACGTCAATTCGAACTTGCTCGATCTGTTCAATTGCGACCTTATAATG  
CAATCGCATTCTCTGGCCAATTGCTGTTTTTGTCTGTATTCTGATTTATCCACTAGG

TCAGTCTGGTTGGTTCTTTGCACCTAGTTTTGGTGTAGCGGCTATATTCCGATTCATCCT  
CTTTTTCAAGGATTCATAATTGGACGTTGAACCCATTCATATGATGGGAGTTGCCGG  
TGTATTGGGCGCTGCTTTGCTATGCGCTATTCATGGTGCTACCGTAGAAAATACTTTATTT  
GAAGATGGTGTGGTGCAAATACATTCCGTGCGTTTAAACCAACCAAGCTGAAGAAA  
CTTATTCAATGGTCACCGCTAACCGCTTTTGGTCCCAAATCTTTGGGGTTGCTTTTTCCA  
ATAAACGTTGGTTACATTTCTTTATGTTATTTGTACCAGTAACCGGTTTATGGATGAGTG  
CTCTTGGAGTAGTCGGTCTGGCTCTGAACCTGCGTGCCTATGACTTCGTTTCTCAGGAA  
ATTCGTGCGGCTGAAGATCCTGAATTTGAGACTTTCTACACCAAAAATATTCTCTTAAA  
CGAAGGGATTCGTGCTTGGATGGCGGCTCAAGATCAGCCTCATGAAAACCTTATATCC  
CTGAGGAGGTTCTACCCCGTGAAACGCTCTTATGTCTGGAAGCACAGGAGAACGTTT  
TTTTGCTGATATTATTACCAGTATTCGCTACTGGGTCATTCATAGCATTACTATAACCTCC  
CTATTCATTGCGGGTTGGTTATTCGTCAGCACCGGCTTAGCTTACGATGTGTTTGGAAAG  
CCCTCGGCCAAACGAGTATTTGCGCAGAGAACCGACAAGGAATTCATTAATAACTGGC  
CGTTTTGATCCTTTGGAACAACCTCGACGAATTTAGTAGATCTTTTATGACTATCGATCGA  
ACCTATCCAATTTTTACAGTGCATGGTTGGCTGTTACGGCCTAGCTGTACCTACTGTT  
TCTTTTTTGGGGTCAATCTCAGCAATGCAGTTCATCCAACGAATGGCTACACAAACTGT  
TGAGAGTGGTTCTAGATCTGGT--CCAAGACGAACATAATGTAGGGAGTTTATTGAAACC  
ATTGAATTCGGAATACGGAAGTAGCCCTGGATGGGGAACGACTCCGTTGATGGGA  
GTTGCAATGGCTCTATTTGCGATATTTCTATCTATTATTTGGAGATTTATAATTCTTCCGT  
TTTATTGGATGGAATTTCAATGAATATGCTTACTCTTAAACTTTTTCGTTTACACAGTAGT  
GATATCTTTGTTTCTCTGTTTCTTTGGATTTCTATCTAATGATCCAGGACGTAATCCT  
GGACGTGAAGAAATGGCCAATACTACTGGAAGGATTCCTCTTTGGATAATAGGTAAGT  
AGCTGGGATTTGTGATCGGTTAATAGGATTTTCTTTTATGGTTCATATCCGGATTG  
GGTTCATCGCTGATGCTTAATATCTTTAGTTGATCTATATCTGTCTTAATTCTACCTTTA  
TTCGACTAGTCTTTTCTTCGCCAAATTGCCCGAGGCCTATGCTTTTTTTGAATCCTATCGT  
AGATGTTATGCCAGTCATACCTTTGTTCTTTTTTCTCTTAGCCTTTGTTTGGCAAGCTGC  
TGTAAGTTTTCGAACGACACAATCAAACCCAAACGAACAAAATGTTGAATTGAATCGT  
ACCAGCCTTTATTGGGGATTACTCATTTTTGTACTTGGCTGTTTTATTTTCCAATTATTT  
CTTCAATATGGAAGTAAATATTCTTGCATTTATTGCTACTGCACTGTTTATTCTAGTCCCT  
ACTGCGTTTCTACTTATCATTACGTAAAAACCATAAGTCAAATGATATGGAAGCAGC  
AACCTACTCGCCATCTTTATATCTGGTTTACTTGTAAAGTTTACTGGGTACGCCTTATAT  
ACCGCTTTTGGGCAACCTTCTCAACACCTAAGAGATCCATTCGAGGAACATGGGGACA  
TGGAAGCATTGGTTTATACATTCCTCTTAGTCTCGACTCTAGGGATCATTTTTTTCGCTAT  
CTTTTTTAGAGAACCACCCAAAGTCCCAACGAAAAA-----ATGACTCTTGCTTTCCAA  
TTGGCCGTTTTTGCATTAATTGCTACTTCATCAATCTTATTAATTAGCGTACCCGTTGTAT  
TTGCTTCTCTGATGGTTGGTCAAGTAAACAAAATGTTGTATTTTCCGGTACATCATTAT  
GGATTGGATTAGTCTTTCTGGTAGGTATCCTTAATTCTCTCATCTCT-----ATG  
TCACCACAAACAGAGACTAAAGCAAGTGTGGATTCAAAGCGGGTGTAAAGATTACA  
AATTGACTTATTATACTCCTGACTATGAAACCAAAGATACTGATATCTTGGCAGCATTCC  
GAGTAACTCCTCAACCCGGAGTTCCGCCTGAAGAAGCGGGGGCCGCGGTAGCTGCTG  
AATCTTCAACCGGTACATGGACAACGTGTGTGGACCGATGGACTTACCAGCCTTATCGT  
TACAAAGGGCGATGCTACCACATCGAGCCCGTTGCTGGAGAAGAAAATCAATTTATTG  
CTTATGTAGCTTACCCATTAGACCTTTTTGAAGAAGGTTCTGTACTAACATGTTTACTT  
CTATTGTGGGTAATGTATTTGGGTTCAAAGCCCTGCGCGCTCTACGTCTGGAAGATCTG



CGAATCCCTGTCTCTTATGTTAAAACTTTCCAAGGCCCGCCTCATGGTATCCAAGTTGA  
GAGAGATAAATTGAACAAGTACGGCCGCCCCCTGTTGGGATGTACTATTAACCTAAAT  
TGGGGTTATCTGCTAAAACTACGGTAGGGCGGTTTATGAATGTCTACGTGGTGGACTT  
GATTTTACCAAAGATGATGAGAACGTGAACTCCAACCATTATGCGTTGGAGAGATCG  
TTCTTATTTTGTGCCGAAGCCCTTTTAAAGCACAAGTTGAAACAGGTGAAATCAA  
GGCATTACTTGAATGCTACTGCAGGTACATGTGAAGAAATGATCAAAAGGGCTGTATT  
TGCCAGAGAATTGGGAGTTCCTATCGTAATGCACGACTACTTAACAGGGGGATTCACTG  
CAAATACCAGCCTGGCTCACTATTGCCGAGATAATGGCCTACTTCTTCACATCCACCGT  
GCAATGCATGCAGTTATTGATAGACAGAAGAATCATGGTATACACTTTCGTGTACTAGCT  
AAAGCGTTACGTATGTCTGGTGGAGATCATATTCACTCCGGTACCGTAGTAGGTAACT  
TGAAGGGGAAAGAGAGATCACTTTGGGCTTTGTTGATTTACTGCGCGATGATTTTATTG  
AAAAAGATCGAAGTCGCGGTATTTATTTCACTCAAGATTGGGTCTCTCTACCGGGTGTT  
CTGCCCCGTGGCTTCGGGGGGTATTCACGTTTGGCATATGCCCGCTTTGACCGAGATCTT  
TGAGATGATTCCGTCCTACAGTTCGGCGGAGGAACTTTAGGACACCCTTGGGGAAAT  
GCACCTGGTGCCGTAGCTAATCGAGTCGCTCTAGAAGCATGTGTACAAGCTCGTAATGA  
GGGGCGTGATCTTGCTCGTGACGGTAATGAAATTATCCGTAGGGCTAGCAAATGGAGTC  
CTGAACTAGCTGCTGCTTGTGAGGTATGGAAGGAGATCAAATTTGAATTTCAAGCAAT  
GGATACTTTG-----ATGGCAATACATTTATACAAAACCTTCTACCCCGAGCACACGCAATG  
GGACCGTAAACGGTCAAGTAAAACCCAACCCACGAAATAATTTGATCTATGGACAGCA  
TCGTTGTGGTAAAGGTCGTAATGCCAGAGGAATCATTACCGCAGGGGCATAGAGGGGGA  
GGTCATAAGCGTCTATACCGTAAAATTGATTTTCGACGGAATGAAAAAACATATATGG  
CAGAATCGTAACCATAGAATACGACCCTAATCGAAATGCATCCATTTGTCTCATACTA  
TGGGGATGGTGAGAAGAGATACATTTTACATCCAGAGGGGCTATAATTGGAGATACCA  
TTGTTTCTGGTACAGAAGTTCCTATAAAAATGGGAAATGCCCTACCTTTGACCAATATG  
CCCTTAGGCACGGCCATACATAACATAGAAATGACACTTGGAAAGGGTGGACAATTAG  
CTAGAGCGGCGGGTGTGTAGCAAACTGATTTCAAAGAGGGGAAATCGGCCACATT  
AAAATTACCTTCTGGGGAGGTCCGTTTGATATCCAAAACTGCTCAGCAACAGTCGGA  
CAAGTGGGGAATGTTAGGGTGAACCAGAAAAGTTTGGGTAGAGCCGGATCTAAGCGT  
TGGCTAGGTAAGCGTCCTGTAGTAAGGGGAGTAGTTATGAACCCTGTAGACCATCCCCA  
CGGGGGTGGGGAGGGGAAGGCCCAATTGGTAGAAAAAACCCACAACCCCTTGGG  
GTTATCCTGCACCTTGGAAAAAGAAGTCGAAAACGGAATAAATATAGTGATAATTTGATT  
CTTCGTGCGCGTAATAAAATGATTCAACCTCAGACCTATTTGAATGTAGCGGATAACAG  
CGGGGCTCGAGAATTGATGTGTATTGCAATCATAGGAGCTAGC---AATCGCCGATATGCT  
CATATTGGTGACGTTATTGTTGCTGTGATTAAGAAGCAGTGCCAAAGATGCCCTAGA  
AAGATCAGAAGTGGTCAGAGCTGTAATTGTACGTACTTGTAAAGAACTCAAACGTGAC  
AGCGGTATGATAATACGATATGATGACAATGCTGCAGTCCTCATTGATCAAGAAGGAAA  
TCCAAAGGGAACCTCGGGTTTTTGGTGCGATTGCCGGGGAGTTGAGACAGTTAAATTTT  
ACTAAAATAGTTTCATTAGCTCCCGAGGTATTAATGCTTAGTCCTAAAAGAACTAGATTC  
CGTAAACAACATAGAGGAAGAATGAAGGGAATATCTTATCGAGGTAATCACATTTGTTT  
CGGTAAATATGCTCTTCAGGCACTTGAACCCACTTGGATCACATCGAGACAAATAGAA  
GCAGGTGACGAGCAATGACACGAAATGCACGTCGTGGTGGAAAAATATGGGTACGTA  
TATTTCCAGACAAACCGGTTACAGTAAGATCCGCAGAAACACGTATGGGTTCCGGGAA  
AGGATCCCCGAATATTGGGTAGCTGTTGTTAAACCGGGCCGCATCCTTTATGAAATGG  
GTGGAGTAACAGAAAATATAGCCAGAAAGGCTATTTGATAGCAGCGTCCAAAATGCC

TATACGGGCTCAATTCATTATTGCGGGAATGACCAGAACTAAACGGGGATCTATAGCTC  
GGAGACGTAGAACAAAAGTGC GTTCCTTTGTATCAAGCTTTCAAGGGGCTCATTCAAG  
ACTTACTCGAACAAATGAGTCAACAGAAAATAAGAGCTTTGGATTTCAGCACATCGGGAT  
AGGGATAGGCAAAGAGAAACTTTTCGTCGTTTGTGGATTACTCGAATAAACGCAGTAA  
TGCGCGAA---AGGGGGTATCCTATAGTTATAGTAGATTAATACACGATCTGTACAAGAG  
ACAGTTGCTTCTTAATCGTAAAATACTTGCACAAATAGCTATATCAAATAGGAATTCCAT  
TTCTATTATTTCCAACGAAATCGTAAAAGAAGTCGATTGGAAAGAATCCGCAGGAATAA  
TTATGTTTCGAGGACGTATATGCTTTAGGTCAACATATAGCTATGTCTGCTCACAAAGCGC  
GAAGAGTAATTGATCAAATTCGTGGACGTTCTACGAAGAAACACTTATGATACTAGAA  
CTCATGCCTTATCGAGCATGTTATCCAATTTTTAAATTGGTTTATTCTGCAGCAGCAAAT  
GCTAGTTACATTCTGGGTTCCAATGAAGCAAATTTAATCATTAGTAAAGCTGAAGTCAA  
CGAGGGTACTGCCGTGAAGAAATTAACCTCGAGCTCGAGGACGTAGTTATCCGATA  
AAAAGACCTACCTGCCATATACTATTATAGTGAAAGATATGTCCTTACCTGGGGGAGTA  
TGGGACAAAAAATGGATGGAATCAAATATGCAGTATTTACAGACAAAAGTATTTCGGTT  
ATTGTGCAAAAAT---CAATATACTTCTAATGTTGAATCAGGATTAAGTACAGAAATA  
AAGCATTGGGGCGAACTCTTCTTTGGTGTCAAGATAATAGCTATGAATAGTCATCGACT  
TCAGGGCAAGGGTAGAAGAATGGGACCTAGTATGGGACAAACAATGCATTACAGACGT  
ATGATCATTACGCTTCAACCGGGTTATTCTATTCCACCTCTTAGAAAGAATTAATATG  
GCAGTTCCAAAAAACGTA CTTCTATATCAAAAAACGTATTCATAAAAATATTTGGAA  
GGGAAGGGATATTGGTTCGCGTTAAAAGCTTTGTCAATTGGGGAAATCTCTTTCGACCG  
GGAATTCAAAAAGTTTTTTTTGTGCGACAAACAATAAGATGGCTAAGAGTAAAGATGT  
CCGAATAACGGTTATTTTGAATGTACCAGTTGTGTTTCGAAATGGTGTTAATGTTGATAA  
GGTATCAACGGGCATTTCCAGATATATGACTCAAAGAACCAGCACAAATACGCCCAATC  
GATTGGAATTGAGAAAATTCTGTCCCTATTGTTACAAACATACGATTCATGGGGAGATA  
AAGAAAATGAAAATAAGAGCTTCTGTTTCGTAATAATTTGTGATAAATGTCGACTAATCCG  
TAGGCGGGGACGAATTATAGTAATTTGTTCCAACCCAAGACATAAACACGACAAGGA  
ATGGTTC AAGAGAAAGTAACAGTATCTACTCGGACACTAGAGTGGAAGTGC GTTGAAT  
CAAGAGCAGACAGTAAGCGTCTTTATTATGGACGCTTTATTCTGTCTCCACTTATGAAA  
GGTCAAGCTGACACAATAGGCATTGCGATGCGAAGAGCTTTGCTTGGAGAAATAGAAG  
GAACATGCATCACACGCGCAAATCTGAG-----AAAATACCACATGAATATTCTACCATA  
GTGGGTATTCAAGAATCAGTACATGAAATTTAATGAATTTGAAAGAAATTGTATTGAG  
AAGTAATCTATATGGAACCTGCGACGCGTCCATTTGTGTCAGGGGTCCCGGAAATGTAA  
CTGCTCAAGATATCATCTCACCGCCCTATGTGCAAATCATTGATAATACACAGCATATAG  
TTAGCTTGACGGAACCAATTGATTTTTGTATTGGATTACAAATCGAGAGGAATCGTGGA  
TATCTTATAAAAACGCCAAAT---CATTTTGATGGAAGTTAT-----CCCATAGATGCTGTATT  
CATGCCTGTTGCAAATGCGAATCATAGTATTCATTCTTATGGGAATGAGAATGAGAAAC  
AAGAAATACTCTTCTCGAAATATGGACAAACGGAAGTTTAACTCCTAAAGAAGCACT  
TCATGAAGCCTCTCGGAATTTGATTGATTTATTTATTCCTTTTTTACATACAGAAGAAGA  
A-----AATTTACATTTAGAGGACAATCAA--CACACGGTTCCTTTAACCCCTTTACCTTT  
CATGAGAAATTGGCT--AAACTAAGAAAAA-----  
-----  
-----ATGCTCCAGGATGGAAAT--GAGGGAATG  
TATACAATACCCGGGTTGAATCAGATACAATTTGAAGGATTTTGTAGGTTTCATTGATCAG  
GGCTTGATGGAAGAACTTTCTAAGTTTCCAAAAATAGAAGATACGGATCAAAAAGCGG

AATTTCAATTATTTATGGAAACATATCAATTTGTAGAACCATTGATAAAAGAAAGAGATG  
CTGTGTATAAATTACTCACATATTCTTCTGAATTATATGTATCCGCAGGACTAATTTGGAA  
AACCCGCAGGGATATGCAAGAACAAACAATTTTCATTGGAAACATTCTCTAATGAATT  
CTCTGGGAACTTCTATAGTAAAGGGAATATATAGAATTGTGATCAATCAAAATTTGCAAA  
GCCCCGGTATTTATTACCGGTCAGAATTGGACCATAATGGAATTGAGGCCTATACCGGC  
ACCATAATATCAGATTGGGGAGGAAGATCAGGATTAGAGATTGATAGAAAAGCAAGGA  
TATGGGCTCGCGTGAGTAGGAAACAAAAAATATCTATCCTAGTTTTATCATCAGCTATGG  
GTTTCAATCTACGAGAAATTCTGGAGAATGTTTGTCTATCCCGAAATATTTTGTCTTTTC  
TGAATGCTAAGGAGAAAAAATTGGGTCAAAAGAAAATGCTATTTTGGAGTTTTTA  
TCAACAATTTGCTTGTGTAGGCGGAGATCCGGTATTTTCTGAATCCTTATCTAAGGAATT  
ACAAAAGAAATTTCTTTCAACAAAAATGTGAATTAGGAAGGATTGGGCGGCGAAATATG  
AATCGGAGACTGAACCTTGATATACCCAGAACAAATACATTTTGTACCACGAGATATA  
TTGGCAGCCGCGGATCATTTGATTGGAATGAAATTTGGAATGGGTCCACTTGACGAT----  
--ATGAATCATTTGAAAAATAAACGTATTCGTTCTGTAGCAGATCTTTTACAAGATCAATT  
CGGATTGGCTCTGTCTCGTTTAGAAAATGTGATTGAGGAACTATATCTGGAGCACTTA  
GA---CATAAATTGATA---CCGACTCCTCAGAATTTGGTAACTTCAACTCCA-----TTA  
ACAACACTTATGAATCTTTTTTTCAGTTTACACCCATTATCTCAAGTTTTGGATCGAACT  
AATCCATTAACACAAATAGTTCATGGTAGAAAATTGAGTTATTTGGGCCCTGGAGGATT  
GACAGGGCGAACTGCTAGTTTTTCAATACGAGATATCCATCCTAGTTACTATGGACGTAT  
TTGCCCAATTGACACATCTGAAGGAATAAATGTTGGACTTATTGGATCCTTAGCAATTCA  
TGCGAGGATTGGTCGTTGGGGG---TCTCTAGAAAGCCCATTTTAT-----GAAATTTCTG  
AGAAACCGAAAGGG-----GCACGGATGCTTTATTTATCACCAGGTCGAGATGAATACTCT  
ATGGTAGCTGCAGGCAATTCTTTGGCCTTGAATCAGAGTATTCAGGAGGAACAGGTTG  
TTCCAGCTCGATACCGTCAAGAATTCCTGACTGTTGCATGGGAACAAGTTCATCTTCGA  
AGTATTTTTTTCCTTCCAATATTTTTCTATTGGAGCTTCCCTCATTCTTTTATCGAGCATAA  
TGATGCGAATCGGGCTTTAATGAGTTCTAATATGCAACGTCAAGCAGTTCCTCTTTCTC  
GGTCCGAGAAGTGCATTGTTGGAACCTGGGTTGGAACGCCAAGCAGCTCTGGATTTCGG  
GGGCTCTTGCTATAGCCAAACACGAGGGAAAGATCAGTTATATCGATACGGACAAGATA  
CTTTTATCAAGTAATAGAGATACTCTAAGCATT-----ATGGGTTCGGGGTTCCAACAAAA  
AGACTTGTATGCATCAAAAACCCAGGTTCCGGCGGGTTAAATGCATTA AAAAGGGACA  
AATTTTAGGGTATGGCGCCGCTACGGTTGGTGGTGAACCTCGCTTTGGGGAAAAACGTA  
TTAGTAGCTTATATGCCATGGGAAGGTTACAATTCTGAAGATGCAGTACTCATTAGCGA  
GCGCTTGGTATATGAAGATATTTATACTTCTTTTACATACGGAAATATGAAACTAAGATT  
TGTGTGACAAGCCAAGGC---CCCGAAAGGGTCACTAATGAAATACCGCATTTAGAAGC  
CCATTTACTCCGCAATTTAGACAAAAGGGGAATTGTAATGCTGGGATCTTGGGTAGAGG  
CGGGTGATATTTTAGTAGGTAAATTAACGCCAAAATTGTCAAAGAA---TCGTCTGTCTG  
CCCCGAAGCTAGATTGTTACGAGCCATACTCGGCATTCAGGCAGCTACTTCAAAGGA  
AACTTGTCTAAACTACCTATAGGTGGTAGGGGTCGGGTTATTGATGTGAGATGGATCC  
AGCAAAATGAGGTTTCTGGTTCTAAT--CCAGAAAGGATTTGTGTATCTATTTTACAGAA  
ACGTGAAATCAAAGTAGGCGATAAAGTAGCTGGAAGACATGGAATAAAGGGTATCATT  
TCCAAAATTTTGCCTAGACAAGATATGCCTTATTTGCAAGATGGAAGACCTGTTGATAT  
GGTCTTCAACCCATTAGGAGTCCCTTCACGAATGAATGTAGGACAGATATTTGAATGTT  
CACTCGGGTTAGCGGGGGATCTGCTAAACAGACATTATCGAATAGCGCCTTTTGTGAG  
AGATATGAACAAGAAGCTTCGAGAAAACCTTGTGTTTTCTGAATTATATGAAGCCAGTAA

GCAAACAGCAAATCCATGGGTATTTGAACCCGAGTATCCAGGAAAAAGCAGAATATTT  
GATGGACGAACGGGGGATCCTTTTTGAACAACCTGTTATAATAGGAAAGCCTTACATCTT  
GAAATTAATTCATCAAGTTGATGATAAAATCCATGGACGTTCCAGCGGACAGTATGCCG  
TTGTTACACAACAAGCCGTTAGAGGAAGGTCCAGGGGAGGGGGACAACGGGTAGGAG  
AAATGGAGGTTTGGGCTCTAGAGGGATTTGGCGTTGCTCATATTTTACAAGAGATGCTT  
ACTTATAAATCTGATCATATGAGAGCCCGACAGGGAATACTTGGTACTACACTCATCGG  
AGGAACAATACCTAATCCTGAGGGTGCTCCAGAATCTTTTCGATTGCTCGTTCGAGAAC  
TACGATCTTTGGCTCTGGAATTGAATCATTTCCTTGTATCTGAGAAGAATTTCCAGATTC  
ATAGGGAGGAAGCT-----ATGATCGATCGGTATAAACATCAACAACCTTCGAA  
TTGGATTGGTTTCTCCTCAACAAATAAGTACTTGGGCCAACAAAATCCTGCCAATGGA  
GAGATCGTTGGAGAGGTGACAAAATCCTCTACTTTTTCATTACAAAACCAAAAAACCGC  
AAAAAGGTGGATTATTTTGTGAAAGAATTTTGGGCCTATCAAAAGTGGAATTTGTGCT  
TGTGGAAATTATCGAGTAATCGGAGATGCAAAAGACGACCCGAAATTTTGTGAACAAT  
GCGGAGTCGAATTTGTTGATTCTCGGATACGAAGATATCAAATGGGCTACATCAAATC  
GCATGCCAGTAACCTCATGTGTGGTATTTGAAACGTCTTCCTAGTTATATTGCGAATCTT  
TTAGATAAACCTCTTAAAGAATTAGAAGGCCTAGTATATTGCGAT-----TTTTCTTTGCT  
AGGCC---ATAACCAAAAAACCGACTTTCTTACGATTACGAGGTTTCATTTCGAATATGAA  
ATCCAATCTTGGAAATCTATCATCCACCCTTTTTTACTAGCCAAGGCTTCGATACATTT  
CGAAATCGAGAGATCTCTACTGGCGCAGGTGCTATCCGAGAACAATTAGCCGATCTAGA  
TTTACGAATTATTGTAGATTATTCGTTGGTAGAATGGAAAGAGTTGGGGGAAGAA---GG  
GCTTACAGGGAATGAATGGGAAGATCGAAAAGTTGGAAGAAGAAAACATTTTTTGGCT  
AGACGCATGGAATTAGCTAAGCATTTTATTTCGAACAAATATAGAACCAGAATGGATGGT  
TTTGTGTCTATTACCAGTTCTTCCTCCTGAGTTGAGACCGCTTTTTTCGGACAGATAGTAG  
TAGGCTAGTGAGGTCGGATATTAATGAACTCTATAGACGAGTTATCTATCGGAACAATAC  
TCTTACTGATCTATTAACAACAAGTCGATTTGCGCCGGGAGAATTAGTAATGTGTCAGG  
AGAAATTGGTACAAGAAGCCGTGGATTCACTTCTTGATAATGGAATAGGCGGGCAACC  
AACGAAGGACGGTTCTAATCAAGTTTACAAGTCGTTTTTCAGATAGAATTGCAGGTA  
GAGGGAAGATTTCTGAGACTCTGCTTGGCAAACGAGTCGATTATTCAGGGCGTTCCG  
TTATTGTCGTGGGCCCTTCACTTTTCATTACATCGATGTGGATTGCCTCGCGAAATAGCAA  
TAGAACTTTTCCAGACATTTGTAATTCGTGGTCTAATTAGACAGCATCTTGCTTCGAACA  
TACGAGTTGCCAAGAGTCAAATTCGGGAAAAAGAACCATTGTATGGGAAATACTTCA  
GGAAGTTATGCAGGGGCATCCGGTATTGCTGAATAGAGCGCCACTCTGCATAGATTAG  
GCATACAAGCATTTTCAGCCCGTTTTAGTGGAAAGGGCGTGCTATTTGTTTACATCCGTTA  
GTTTGTAAAGGATTCAATGCAGACTTTGACGGGGATCAAATGGCTGTTTCATGTGCCTTT  
ATCTTTAGAGGCTCAAGCAGAGGCACGTTTACTTATGTTTTCTCATCTGAATCTTTTGT  
TCCAGCTATTGGGAATCCCATTTCCGTACCAACCAAGATATGCTTATTGGACTCTATGT  
CTTAACGAGGGGGAATCGTCGAGGTGTTTGTGTAAATAGGTATAATCCATGGAATTGC---  
-----AGAACTATCAAAATGAAAGAATTTTCGATAATAACTATAAGTATACGAAA-----GA  
ACCCCTTTTTTCTAATTCCTATGATGCAATTGGGGCTTATCGGCAGAAACGAATCAATTT  
AGATAGTCCTTTGTGGCTACGGTGGCGATTAGACCAACGC---GTTATTGCTACA-----AG  
AGAAGCTCCCATCGAAGTGCATGAAATCTTTGGGTACCTATTATGAGATTTATGGACA  
CTATCTAATAGTAAGAAGTATAAAAAAAGAAATTCCTTATATATATATTCGAACCACTGTT  
GGTCATATTTTTCTTTATCGAGAAATCGAAGAAGCCATACAAGGGTTTTGTGAGGCTG  
CTCA-----ATGGAGGTAATGATGGCAGAACGGGCCAATCTGGTCTT

TCACAATAAAGTGATAGACGGAAGTCCATCAAACGACTTATTAGTCGATTAATAGATC  
ATTTCCGAATGGCATATACATCACACATCCTGGATCAAGTAAAGACTCTGGGTTTTCAA  
CAAGCTACCGCTACATCCATTTTCATTAGGAATTGATGATCTTTTAACAATACCTTCTAAG  
AGATGGCTAGTTCAAGATGCTGAACAACAAAGTTTGATTTTGGAAAAACACCATCATT  
TGGGAATGTACACGCGGTAGAAAAATTACGTCAATCCATTGAGATCTGGTATGCTACAA  
GTGAATATTTGCGACAAGAAATGAATCCTAATTTTAGGATGACTGACCCTTTTAATCCA  
GTTTCATATAATGTCTTTTTTCGGGAGCTAGGGGAAATGCATCTCAGGTACATCAATTAGTA  
GGTATGAGAGGATTAATGTCGGACCCCAAGGACAAATGATTGATTACCCATTCAAAG  
CAATTTACGCGAAGGGCTCTCTTTAACAGAATATATAATTTCTTGTTACGGAGCCCGCA  
AGGGGGTTGTGGATACTGCTGTACGAACCTCGGATGCTGGATATCTCACGCGAAGACT  
TGTTGAAGTAGTTCAACACATTGTTGTACGTGCAACAGATTGTGGGACCGCCCAAGGT  
ATTTCTGTGAGTCCTCGAAATGGGACGATGGCG---GAAAGTATTTTGATCCAAACATTA  
ATAGGTCGTGTATTAGCGGATGATATATATATGGGTCCACGATGCATTGCCGCCAGAAAT  
CAAGATATTGGAATTGGGCTTGTC AACCGATT CATAACC-----TTTCGAGCACA  
ACCAATATCTATACGAACTCCCTTTACTTGTAGGAGTACATCTTGGATCTGTTCGATTATGT  
TATGGCCGGAGTCCACTCATGGTGACCTGGTTCGAGTTGGGAGAAGCTGTTCGGTATTAT  
TGCAGGCCAATCTATTGGAGAACCGGGTACTCAATTAACATTAAGAAGCTTTTCATACCG  
GTGGAGTATTCACGGGGGGTACTGCAGAATATGTACGAGCCCCCTTAATGGAAAAATC  
AAATTCATGAGGATTTGATTCATCCAACACGTACACGTACGGGTATCCTGCTTTTCTA  
TGTTTCGATAGACTTGTATGTA ACTATTGAAAGTGAAGATATTATACATAATGTGAATATTC  
CACCCAAAAGTTTTCTTTTAGTTCAAACGAGCAATATGTAGAATCAGAACAAGTGATT  
GCTGAGATTCGCGCAGGAACATCCACT--TTGAATTTAAGGAGAAGGTTTCGAAAACAT  
ATTTATTCTGACTCAGGGGGGAGAA---ATGCACTGGAATACCGATGTGTATCATGCACCCG  
AATTTACATATGGTAATGTTTCATCTCTTACCAAAAACAAGTCATTTATGGGTATTATTAGG  
ACAGCCATGCAGA-----TCTAGTCTAGTCTCCCTTTCGAGCCACAAGGATCAAGATCAA  
ATGAACGCTCAT-----TCTCTTTCTGTCAAGCGAAAATATATTTCTAACCTTCC-----GTA  
ACTAATGATCAA---GCGAGACACAAATTCTTTAGTTTCGGATTTTATGGTCAA---GAAGA  
TAGGATTCCTGATTAT---TCAGAACTTACTCGAATCATATGTATTGGTTCGTTGTAATCTCAT  
ATATCCG---GCCATTCTCCACGAGAATTCT-----GATTTATTGGCAAAAAGGCGAAGAAAT  
AGATTCATCATTCCACTCCAATCGATTCAAGAAGGCGAGAACGAACTAATGCTCTCTTC  
AGGTATCACAATTGAAATGCC-----ATAAATGGTATTTTCCGTAGAAATAGTATTCTTGC  
TTATTTTCGACGATCCTCAATACAGAAGAAAGGGTTCGGGAATTACTAAATATGGGATTC  
TAGAGGTGGATTCAATCCTCAAAAAAGAGGAT-----TTGGATGAGTATCGAGAA---GTCG  
AGGAATTTAGTCCAAAAAATATGAAAGTAGATCGATTCTTTTTCATTCCCGAGGAAGTG  
CATATCTTATCCGAATCTTCTTCCCTAATGGTACAGAACAATAGTATTATTGGGGTAGATA  
CACAAATGACTTTAACTACAAGAAGCCGAGCAGCCGGTTGGTACGAGTGGAGAGAA  
AAAAAACAGAATTGAACTTAAATCTTTTCTGGAGATATCCATTTTCTGGAGAGACA  
GATAAGATATCCCGACATAGTGGCGTCTTGATAACCACAAGGTATG-----GGAAAAAAA  
TTCCAAG-----AAATCC-----ATGAAAGATTGGATCTATGTCCAACGG-----ATCACACCTA  
CCCC-----AAGAAGTATTTGTTTTGGTTTCGACCTGTAGTCACATATGAAATAACGGAC  
GGTATAAATTTAGCA---CTTTTCCCCCAGATCTGTTGCAGGAAAGGGATAATGTGCAA  
CTTCGAATTGTCAATTATATCCTTTATGGAAATGGCAAATCAATTCGGGGAATTTCTGAC  
ACAAGTATTC AATTAGTTTCGGATTTGTTTAGTATTGAATTGGGACCAAGACAAAAAG----  
----AGTTCGTTGGTTCGAAGAGGGGCGTCTTCTTTGTTGAAATAAGGACAAATGGTTT

GATTCGAGATTTTCTAAGAATCGATTTAGCGAAATCCCCTATTTTGTATAACCGGAAAAAG  
GAATGATACATCGGGTTCAGGATTGATCTCCGAG---AATGGATCAGATCGCACCAATATC  
AATCCATTTTCTTCCATTTTTCCTAT-----TCCGGGGCAAAGATTCAAGAATCCGTTAA  
CCAAAATCAAGGAACATTCATACATTGTTGAATAGA-----ATAAGGAATGCCAATCT  
TTGATAATTTTTCATCATCCAATTGTTCTCGAATAGGTTCA-----TGCAACGATGTAAAA  
TATGACAATGTG-----ATAAAAGAATTA---CCCCTAATA-----AATTCGTTGGGCCCTT  
TAGGAACA-----GCCCTTCCAATTGAAAATTTTATTTA-----TTTTCCCATTTA-----ATAA  
CTCATAATCAGATCTTG---GTAACGAACTATTTGCAACTTGACAATTTAAAACAGATAAA  
ACAGACCTTTCAAGTACTTAAC-----TATTATTTTCATCGACGAAAAT-----GCCAAAATT  
TATAATTCTGATCCATGCAGGAACATCATTTTGAATCCATTCAAGTTAAATTGGTATTTGA  
TACCTCACAATTATTTTGAAAAAACATCT--ACAATAATGAGTCTTGGGCAGTTTATTTG  
TGAAAATGGATGTATAGCCAAAAACAGACCCAC---CTAAA-----TCGGGTCAAGTTCT  
AATTGTTCAA---GTTGACTCTGTAGTAATACGATCAGCTAAGCCGATTTAGCCATTTCC  
GGAGCAACTGTTTCATGGCCATTATGGGAGAATCCTTTATGCAGGAGATACGTTAGTTAC  
ATTTATATATGAAAATCGAGATCAGGTGATATAACGCAGGGTCTTCCAAAAGTAGAAC  
AGGTGTTTCGAAGTTCGTTTCGATTGATTCAATATCGATGAATCTCGAACAGAGGGTTGAG  
GGTTGGAACGAATGTATAACAAGAATCTTGGAAATCCTTGGGGATTCTTGATTGGTGC  
TGAGCTAACTATAGTGCAAAGTCGTATCTCTTTGGTTAATAAGATCCAAAAAGTTTATCG  
ATCCCAGGGGGTGCAGATCCATAATAGACATATAGAAATTATTGTACGTCAAATAACATC  
AAAAGTGTGGTTTCAGAA-----GATGGAATGTCAAATGTTTTTTTACCCGGAGA  
AATTGGATTGTTGCGAGCGGAACGAACGGGGCGCGCTTTGGAAGAAGCGATCTGTTAC  
CGAGCCATCTTATTGGGAATAACAAGAGCATCTCTGAATACTCAAAGTTTCATATCCGA  
AGCGAGTTTTCAAGAACTGCTCGAGTTTTAGCAAAGCAGCTCTCCGGGGTTCGTATC  
GATTGGTTGAAAGGCTTGAAGCAAACGTTGTTCTGGGCGGAATGATACCAGTTGGTA  
CGGGATTCAAAGGCTTA-----GTGCATCCTTCAAGGAAACATAACAACATTCCC-----TTG  
GAAACCAAAAAGAAGAATCTATTTCGAGGGGGAAATGAGA-----GATATTTGTTCCACC  
ACAAAATGTATTTGATTCTGCTTTTCACAAAATTTCTATGATACACCGGAGCAATCAT  
TTATAACA-----TTAATGATTCCATGACCAGAAGGTATTGGAACATCAATTTGG  
AAGAGATGATGGAGGCAGGAGTTCATTTGGCCATGGTATTAGGAAATGGAATCCTAA  
AATGGCACCTTATATTTCTGCAAAGCGTAAAGGTAATCATATTACAAATCTTACTAGAAC  
TGCTCGTTTTTATCAGAAGCTTGTAATTTAGTTTTTGTATGCAGCAAGTAGGAGAAAAC  
AATCTTAATTGTTGGCACTAAAAAAAAGCAGCTGATTCAGTAGCACGGGCTGCAAT  
AAGGGCTCGGTGTCATTATGTTAATAAAAAATGGCCTGGCGGTATGTTAACGAATTGGT  
CCACTACAGAAATGAGACTTCATAAGTTTAGAGACTTGAGAACGCAACAAAAAACAG  
GGAGACTTAACCGTCTTCCGAAAAGAGATGCGGCTATGTTGAAAAGGAGATTATCTCA  
CTTGCAAACATATTTGGGTGGGATTAATATATGACGGGGTTACCCGATATTGTAATTGT  
CGTTGATCAGCACGAAGAATATACGGCCCTTCGAGAATGTATCACTTTGGGAATTCCAA  
CAATTTGTTAATCGATACAAATTGTGACCCCGATCTCGCCGATCTTCCGATTCCAGCGA  
ACGATGACGCTATATCTTCAATCCGATTAATTCTTAACAAATTAGTATTTCGAATTTGTGA  
GGGCCGTTCT--AGCTATCTAAGAAATCCGATGGGACAAAAATAAATCCACTTGGTTT  
CAGACTTGGTACAACCTCAAAGTCATCATTCCTTTGGTTTTCGCAACCAAAAAATTATT  
CTGAAGGTCTACAAGAAGATCAAAAAATAAGAAATTCTATCAAAAATTATATACAAAA  
AATATGAGAATAGCTTCCGGC---GTCGAGGGAATTGGACGTATAGAGATTCAAAAAAGT  
ATCGATCTGATACAGGTCATAATCTATATGGGATTCTCAAAGTTATTAATAAAAAAGTCGG

ATGCGAGAAATTAGGAATTTACAAGAAGAATTACAGATGAATCTACAAAAAGAATTTCA  
TTGGGTGAACCGAAAACCTTAACATTGCTATCACAGAAATTGAAAAACCTTATGGAAAC  
CCTAATATTCTGGCAGAATTTATAGCCAACCAATTAAGAATAGAGTTTCAGTTCGCAA  
AGCAATGAAAAAGGTTATTGAATTAAGTAAAAAGAAGGTACAAAAGGAATTCAAGT  
ACAAATAGCAGGGCGTATCAATGGAAAAGATATTGCACGTGTCGTATGGATCAGAGAA  
GGTAGGGTTCCTCTACAAACCATTCGAGCTAAAATTGATTATTGCTCCTATACAGTTCGA  
ACTATCCATGGGGTATTAGGCATCAAAATTTGGATATTTATAGACGGGGAAATGTCGCGT  
TACCGAGGACCTCGTTTTAAAAAATACGCCGCCTGGGGGCTTTGCCGGGACTAACTA  
AAAAGGGGCCTATAGGT-----CAATCGCGTTCCGTGAAA---AAATCTCAATATC  
GTATTGCGCTTGAAGAAAAACAAAATTGCGTTTTATTATGGTCTTACAGAACGGCAA  
TTACTTAAATATGTTTCGTATCGCCGAAAAGCCAAGGGGTCAACAGGTCAGGTTTTACT  
ACAATTACTTGAAATGCGATTGGATAACATCCTTTTTTCGATTGGGTATGGCTCCGACTAT  
TCCCGGAGCTCGCCAATTAGTTAACCATAGACATATTTTAGTCAACGGCCGTATCGTAGA  
TATACCAAGTTATCGCTGCAAACCCCGAGATATTATTACGGCGCGGGATGAACAAAAC  
CTAGAGCTCTGATTCAAATTTCTCTCAATTCATCCCCTCATAAAAATAAATTGCCAAAAC  
ATTTGACTCTTCAGCCATTCCAA-----TATAAAGGATTAGTCAATCAAATAATAGATAGTA  
AATGGGTTCGGTTTGAATAAATGAATTGCTAGTCGTAGAATATTATTCTCGTCAGACTA  
TGTCACGTAGAGGTACTGCAGAAAAAAAACCTGCAAATACGATCCAATTTATCGTAAT  
CGATTAGTTAACATGTTGGTTAACCGTATTCTGAAACACGGAAAAAAAGCATTGGCTTA  
TAAAATTTCTATCGAGCCATAAAAAGATTCACCAAGAGACAAAAGAAATCCACTA  
TCTGTTTTACGAGAAGCAATACGTAAAGTAACTCCCAAGATAGCAGTAAAAGCAAGAC  
GTGTAAGTGGATCGACTCGTCAAGTTCCCATTGAAATAGGATCCAAAAAAGGAAAAGT  
ACTTGCCATTTCGTTGGTTATTAGCGGCATCCCGAAAACGTCCGGGTCAAGATATGGCTT  
TCAAATTAAGTTCCGAATTCATGGATGCTTCCAAAGGGAGTGGCGATGCCATACGCAA  
AAAGGAAGAGACTCGTAGAATGGCAGAAGCAAATAGAATTTTGCACATTTTCGTATG  
GGTAGGGATACTATTGCTGACATAAACCTCTATAAGAAATGCTGATATGGATAGAAAA  
AGAGTGGTTCGAATAGCATCTACCAATATCACTGAAAATATTGTTAAAATACTTTTTACGA  
GAAGTTTTATCGAAAATGCGAGAAAACATCGAGAAAACAGCAAATCTTTTTTGGTTT  
TAACCCTACAACATAGGAGG-----AATAGGCAAAAACCTTATAGA---AAGAGAAACGGT  
TTAAATTTAAAACGGATCAGTCGACCCGGTCTACGAATCTATTCTAACTATCAACGAATT  
CCTAGAATTTTAGGCGGGATGGGGGTTGTAATCTTTCTACTTCTCGAGGTATAATGACA  
GACCGAGAGGCTCGACTAGAAAAGTAACTCGGCGGAGAAATTTTGTGTTATATATGGATGG  
CAAAGCTATACCGAGAATTGGTTCACATAGGAAGGGACGTTTTGGTTCACGTAAGAG  
TACACGCCGAATACCAAAGGGAGTTATTTCATGTTCAAGCAAGTTTCCATAATACCATTG  
TACTGTTACAGATGTACGGGGTCAAGTAGTTTCTTGGTCCTCTGCCGGTACTTGTGGA  
TTCAGAGGTAGAAGAAGAGGGACACCGTTTGTGCTCAAACCATAGCAGGAAATGCG  
ATTCGTACAGTAGTAGATCAAGGTATGAAACGAGCCAACGTCATGATAAAGGGTCTCTG  
GTCTCGGAAGAGACGCAGCATTGCGAGCTATTTCGAGAAAGCGGCATACTATTAACCTTC  
ATACGTGATGTAACCCCCCTCCACATAATGGCTGTAGACCTCCGAAAAGAAGACGTG  
TGATGCCAACTATTAAACAACCTATTAGAAATACAAGACAGCCAATCAGAAATGTCACA  
AAAGCCCCCGTCTTCGGGGATGCCCTCAGCGTCGAGGAACATGTACTAGGGTGTATA  
CTATACCCCCAAAAACCAAACCTCTGCCTTACGTAAAGTTGCCAGAGTACGATTAAC  
CTCTGGATTTGAAATCACTGCTTATATACCCGGTATTGGCCATAATTCAAAGAACATTC  
TGAGTCTTAGTAAGAGGGGGAAGGGTTAAGGATTTACCCGGTGTGAGATATCACATTG

TTCGAGGAACCCTAGATGCTGACAAAGTAGAGGGTCGTCAACAAGGGCGTTCTAAATA  
TGGGGTAAAAAAGCCAAAAATGGCAAGAAAAAGTTTGATTTCAGAGGGAGAAGAAGA  
GGCAAAAATTGGAACAGAAATATCATTTCGATCGATCCTCAAAAAAAGAAATAAG  
A-----AAAGTTCCGTCGTTGAGTGACAAACGGGAAATTTATGGAAAGTTACAATCCCC  
GCCGCGGAATAGTGCACCTACACGCCTTCATCGACGTTGTTTTTTGACCGGAAGGCCG  
AGAGCTAACTATCGAGACTTTGGACTATCCGGTCACATACTTCGTGAAATGGTTCATGC  
ATGTTTGTGTCAGGGACGACAAGATCCAGTTGGATGCTAAAAGATGCATTCGTTTCAA  
TTATTTTGCAA-----GAGGAAAACAAAGAAAACAGGGGGTCCGCTGAATTTCAAGTAGT  
TAATTTACCAATAAGATACGGAAACTTACTTTACATTTGAAATTGCACAAAAAGGACT  
ATTCGTCTCAGAGAGGCCTGCTAAAATTCTGGGAAAACGTCAACGGCTGCTGGCTTA  
TTTGTCAAACAAAAACAGAATACGT-----ATGGTAA  
AACTTCGTTTCAAACGATGTGGTAGAAAGCAACGAGCTGTCTATCGAATTGTTGCAATT  
GATGTTTCGATGCCGAAGAGAGGGGAAGAGCTCTTCGGAAAGTGGGTTTTTATGATCCGA  
TAAAGAATCAAACCTATTTAAACGTTCCCTGCTATTCTCTATTTCCCTTGAAAAAGGTGCTC  
AGCCTACAGGAACTGTTGGGGATATTTTAAGGAAGGCGGAGGCTTTTAAGGAACTTCG  
CCCTAAGCAAACGCAATTAAGAAAAATGGATAAATCCAAGCGACCCTTTCTGAAATCC  
AAGCGACCCTTTCGGAAACGTTTACCCCAATCCAACCGGGGGATCAAATTGAGTATA  
GAAACATGAGTTTAATTAGTCGATTTATTAGTGACCAAGGAAAAATATTACCTCGACGG  
GTGAAAAGATTAACCTTGAAACAACAACGATTAATTACTCTTGCTATAAAAACAAGCTCG  
TATTTTATCTTCGTTACCCTTTCTTAATAATAGGAAACTG---AAGACGAAAAACAAAAAA  
AATAAGCGAAAGAAACGCCTTAAGAATAAATTTTCATCCGGTGACACATTCATTCAAAA  
AAAATCCTTTTGTAGCAAATAATTTACTAAGAAAAATGGATAAGCTTAACACAAAAGAA  
GAAAAAGAAATAATAAATACTTGGTCCCAGGCATCTACCATTATACCCACAATGGTCCG  
TCATACTATTGCTATCCATAATGGAAAGGAGCATCTGCCTATTTATATCACAGATCGTATG  
GTAGGCCACAAATTGGGAGAGTTTGCACCTACTTTAAATTTCCGAGGACACGCGAAAA  
GCGATAATAGATCGCGTCGTATGACTTTACCATTTTTTCAACTAGCGAATCTCGTATCCTT  
ATGCATGAAAATAATAAATTCGGCCGTTGTGGTCGGGCTCTATTATGGATTTCTGACCAC  
ATTCTGCGTAGGGTCTCTTATCTCTTCTTCTACGAGCTCATGTTATAGAAGAAGCAAG  
A-----GAAAAGAAGATATCAGCAACAACGGGTTTTCTTATGGGACAGCTCATAATGTT  
CATATCGATCTATTATGTACCTCTGCATCTAGCATTGGGTAGACCTCATACAATAACTGTC  
CTAGTTTGCCCGTATCTTTGGTTTACGTCCTGTTGAATAATGACAAAAAATAAATTT  
TTTTGCTTCTACTACCAGAGATTCAATGCGTAATCTCAGCACTCAAGGGCTATTCTCTAAA  
TCATCTCGTTTTTCAATCACTCAACCCTTACTTTTTTACCAAGTGCTATGTTAGCAAGACT  
AGTCAACGTTTACATGTTTCGATGCAACAACAAGATTTTATTTGTAACAAGTAGTTTTG  
TTGGTTGGTTAATTGGTTTCATTTTATTAATGAAA-----TACTGGTCTGGATAACAGC  
ACAACCGTTTTATTAGATTGTACGTTTCGATTTAATAAGTACCTTATGTCAGAATTTACGTA  
CCGTATATTGCGAACCTTTAGTATTATCTTATTTATTACCTGTGTCTACTATTTAGGCAGAA  
TGCCTTACCCCTTCTTACTAAGAAACTGGAAAAATTTGAATTTGTTAAACTTCTGTG  
ATCCTTCTTTTTGATTATAAAGATTGGAATCGACCATTACGATACATAAAAAACAGGGAT  
TTTAAAGGGGCTGTAAAAAGCGAAACGGCACAATTTTTTTTTGATACATGCCGAAGTGA  
TGAAAAACAAAGAATCTCTTTTACATATCCGCCAGTTTGTCAACTTTTTTTGGAATGA  
TACAAAGACGAATAGACGAGTTCACGCTCCCCC-----TATGATGAACTGTATAATCAT  
TGGGTTTATACAAAGACCAAAAAAAGAACAAGATAAAAAACGAATTAATAGAA  
TTAAGGCTCTAGACATGGGATTTCTTTCTCGGGATATACTTGAAAAAAGAACTAGATTG



GTAAAGGACCGGCCTAATCAAAAATTATTGTCTCAAGAGTATGATCCTTTTTTTGAACGG  
ACCATATCGTGGAACACCCCAACAGCGGTTTTTCACCT---AAGACAGTTAAAATGAATAA  
GATTCATGGTATCCTTCAGAAAGAATTTGAACAGAAAAATTTGAGGGTCCCTGGAATTG  
GAATCAAAGAAATCGATAAAAAAGTCCCTCGATGGTCATCCAAATTAATCGAAATGGA  
AGCAGAATTTCTCGACCATCTTTGCTCAAGAGCACTGAAAGAAATAGTGCTATCTAAA  
GAGATTTACCTAGATATATTGAAAAGAGCCAGATTTTGAGCGAGACCTAATCATGAGTTC  
TACACGCGCTCAAAGGCGGAAAGTTATTATTTTGAAACTGCTTCACCCAAAGCCGCAG  
TCCCCGCTTTTTTTGGGGCAGAATCAAAAGTGTCTCGGTTATTTTTTTACTCAT-----  
CCAATAAAATTTATTTTTATAAATAAGGAAGAGCTAATGCGGATACAAGTGGAGAGCGC  
ATGGGAAAACCTGCCATATGGACCGGGAATACGAAGTTCCTTATTACTAATGCAATCGT  
TTCTTAGAAAAATATAAGTCTCCCTTTACTCATAATAGCTAAAAATATTGGCCGTTTGT  
TATTTTTGCAAGTTCCTGAGTGGGCTGAGGATTTTCAGGAATTGAATAGAGAAAGGCAT  
TTCCATGCACCCATCTTGGTGTGGACTAAACGATCCAGAGGTTTTGGCCCATTGGGC  
GGAAGAAGGTTTTGACATAAAAATCCTATATCCTTTCCGCTTGAAACCTTGGCACAGAT  
CTAAGAAGGAAGTGAAGATGATTTGGTTTTTTAACCATTTTGGGAATGGAACTGA  
ATATCCTTTCCGTTCTCCCCGAAAAGAAGTTCCTTTTTTAAACCCATTTTTTAAGAACT  
AGGAAAACAA-----ATAAAAAAA  
AAGAAGGCTTTTGAAGATTTTAAAGTTCAGGG---GTTTTCAAAAAAGTAATATCAGAA  
TTCTCAAAGAGAAAT-----ACAATCAACAATCAGATAATTGAAGAATCGTTTACTCAAAT  
TCGATCTATAGATCGGGCAAATAAGAATCTAACGGAACAAGAAATGAAGAATCTAACT  
GATAGAACAAGCACAATCAAAAATAAAATACAAAGACTTACAAAAGATAAAAAAAAAA-  
-----ACAAATTCTAATGTAGAATCACAACCACTAATTTGGCAAATATTTAAAC  
GAAGAAACGCTCGATTAATCAGCCAATTCATTATTTTCTCAAAATTTTTATTGAAAAAA  
TATACATAGATATCTTTCCACGTATCATTAATATTACCAGAATCAATACACAACCTTTA----  
-----GACTTATCTTCCTTGTCGCAAAGAGATGTATTTTCAAATTATCACAACCCCA  
AGCTATTAACCTGTCTAAGTTAAGATCTGCTCTTCAATATACATCTTTTTTTCTTAAGACT  
GCAATAAAGGATCTTTTTATACAGGGAATATTTTCATTCCGAATTAAGCATAAGAAACCT  
CGA-----AGTTATGATCAATGGAAAACTGGTTAAGAGGTCAT---CAATACAACCTTATCTC  
CGATTAGATGGTCTAGATTAATACCACAAAAATGGCGAAATAGAGTCAATCAACGTTGT  
ACGGCTGAAAATAAACAAAAATGGAGTTCAGATGAAAATGAAAAAGACCTATTATTTT  
ATTACACAAATCCA---AATTTTCAAAAATACTATAGATATGGTCTTTTATCATATAAATCTC  
TTAATGCTAATATTATTGATCCAGATCGAAAATATTTTGATTGGAAAATGCAAAATTTTGC  
TCTAAACTTTTTTGATTGGATAAAAATAGATAAAGAAAGACTAAGGAACCTGGTTCTTCC  
CAGAACATGTGCTACTTTATACTGCATATAAAGTGAACCGTGGATTATACCAAATCCAC  
TTTTTCTTGGAAATGGCGAAGCTTTTAGAGGAAGAATAAGAACCCCGATTTAGTTTCAG  
TATTGGCTTTTTCAATTGAAATGGCACAATTATTTTGGGGAAACAATACCCGGACTAATG  
AAACAATTTTTCAGCCAGCTAGAGTGGCTAAATTACCAAAAATGGGTGATAACCTATCT  
GAACAATAAACTATTTCAGTATAAATCAACATCTCATTCACTATGAACTACACTAGAGAT  
GGGTGAGCTGGGGGAGGTAGTGATTCTCGAATCGAATCGTCTGTATCTAGGAACTTATA  
GCCAAATTATTATGTATCAGACCATACGCATTTTCATTGGTTGATCAAAGTAAGCAAAATC  
ATTATGATTTTCTTGTTCCTCGAAACTATTTTATCATCTAGACGTCGTAGAGAGTTGAGAA  
TTCTAATTTCTTCAAATTTCTTTGGCCCAATTATCGATTAGAAGATTTAGCTTGTATGAA  
TCGTTATTGGTTTGATACCAATAATGGGAGTTCGTTTCAGCATGTTAAGGATATATATGTAT  
CCAATGATCCGATATTCATTCCAACCTTTGATTTTTCGAATTAAGAGAGATATTGAGAGAG



--GAATTGAAAGGTCCGAATGATCAACTCTGCAATCAGTTGTTAGAATCAATAGGTCTTC  
AAATCGTTCATTTGAAAAAATGGAAACCCTTC-----TTATTGGAT-----GATCATGATAC  
TTCC---CAAAAATCGAAATTCCTTGATCAACGGAGGAACAACCTCGCCATTTTTGTTCAA  
TAAGATACCA---AAGTGG---ATGATTGACTCATTTCTACTAGTA-----AAGAATCGCAGGA  
AATCCTTTGATAACCCGGATTCCTATTTCTCAATGATATTCCACGATCAAGACAATTGGC  
TAAATCCCGTGAAACCATTTTCATAGAAGTTCATTGATATCTGCTTTTTATAAAGCAAATC  
GACTTCGATTCTTGAATAATCCACACCACTTCTGCTTCTAT-----TGTAACAAAAGATTCC  
CTTTTTATGTG-----GAAAAGGCCCGTATCAATAATTATGAT-----TTTACGTATGGA---  
CAATTCCTCAATATCTTGTTCATTCGCAACAAA--ATATTTCTTTGTGCGTCGGTAAA----  
--AAAAACATGCTTTTTGGGGG---AGAGGTAATTTTACCAATCGAGTCACAGGTATC  
TAACATATTCATACCTAATGATTTTCCACAAAGTGGTGACGAGACA---TATAACTTATAC  
AAATCT-----TTCCATTTTCCAAGTCGACCCGATCCATTCGTTTCGT-----AGAGCTATTTA  
CTCGATCGCAGACATTTCTGGAACACCTCTAACAGAGGGACAAATGGTCCATTTTGAA  
AGAACTTATTGTCAACCTCTTTCAGATATGAATCTATCTGATTCAGAAGGGAAGAACTT  
GCATCAGTAT-----TTCAATTCAAACATGGGTTTGATTACACTCCATGTTCTGAGAA  
ATATTTACCATCCGAAAAG-----AGGAAAAA-----CGGAGTCTTTGTCTA  
AAG-----AAATGCGTTAAGAAAGGGCAGATGTATAGAACCCTTCAACGAGATAGTTCTT  
TTTCAACTCTCTCCAAATGGAATCTATTCCAAACATATATGCCATGGTTCTTTACTTCGA  
CAGGGTACAAATATCTAAATTTGATATTGTTAGATATTTTTTTCAGACCTATTGCCGATACT  
AAGTAGGAGTCAA-----AAATTTGTATCCAATATTCATATTATGCGTCGATTAGGT--ATA  
TCATGGCGAATTCTTCAGAGAAAATGGGGT-----CTTCAA--TGGAATTGG--AT  
AAGTGAGATTTTCGAGTAAGTGTTTACAT-----CAGCTTCTTCTGTCCGAAGAAATGATTC  
ATCGAAATAATGAGTCA-----CCATTGATATCGACACATCTGAGATCGCCAAATGTTTCGG  
GAGTTC--CTCTATTCAATCCTTTTCTTCTTCTTGTGCTGGATAT--CTCGTTCCTACAC  
ATCTTCTCTTTGTTTCCCGG-----GCCTCTAGTGAGTTACAGACAGAGTTCGAAAAGGTC  
AAATCTTTGATGATTCCATCATCTATGATTGAGTTGCAAGAACTTCTGGAGAGTGATCCT  
CCATCTGAACCAAATGATCCTATATTCAAGCATCCCTTCAAGCTAGGCTGGAACAATT  
AGCAGATTTTCTAGTATGGAAGGTTTTTTTTTCTGTGCGGCGACATGCTATTTAATTTGTCT  
-----ATCGATCTCGTCGATATCGATATCATCGATCTC  
ATAAGTAACATA-----CCAAATCCCAACGATCAAATCACTTTTTTCGAGAAATACGAG  
ACATCTAAGTCATACAAGTAAAGAGATCTATTCATTGATAAGAAAAGTGAAGGTTGGGA  
ACGGGGATTGGGCTGATGATCAAGTAGAATCCTGGGTTCGCAAACAGTGATTACGTTGA  
TGATGAAGAAAGAGAATTCTTGGTTTCAAGTTCTCCACC---TTAACGACAGAAAAA---AGG  
ATTGAGATTGATCAAATTCTATGGAGTCTGACT--CATAGTGATCATTTCTCA-----  
AAGAATGACTCTGGTTATCAAATGATTGAACAACCGGGAGAAATTTACTTACGATACTT  
AGTTGACATTCAT-----AAAAAGTATCTAATGAATTATGAGTTCAATACATCCTGTTTACG  
GGAAAGACGGATATTCCTTGTCTATTATCAGACAATCACTTAT-----TCACAAACCCCGT  
GTGGGGCTAATAGTTTTGATTTCCCATCGCCTGGA-----AAACTCTTTTCGCTCCGCTT  
AGCCTTATCCCCCGCT--AGGGGTATTTTAGTGATAGGTTCTATAGGAACTGGACGATCC  
TATTTGGTCAAATACCTAGCGACAAACTCTTATGTTCCCTTTCATTACGGTATTGTATGAG  
GAAGAGCTTGATAATGATCCTTCTAATTTTGTGCTTATAAGGATGTTGAGATGTTTTTT  
GAGGTTATTGATGATATTGATGATAGTAAGATTGATGAGAGTGATATTGATGAGAGTCAA  
ATTGATGAG-----AGTCCGATTGATGATAGGACGATTGATAGGCA  
GATGGATCATAGGCTGGACGGGATAACCGCATGGGATGCGTTAGGTATGGAGGTGTTGT

CGTTAAGAAACCACTATTATATCAACCTTCAATTGGAATTAGCAAAAAGCAATGTCTCCTT  
GCATAATATGGATGCCAAACATTCATGATCTGCGTGTGAAGGAGTCGGATTGCTTATCCC  
TCGGTCTATTAGTGAACCATCTCTCCGGG-----GATTGTGAAAGATGTTCC---ACTAGA  
AATATTCTTGTATTGCTTCGACTCATATTCCCCAAAAGGTGGATCCCGCTGTAATAGCT  
CCGAATAAATTAACACTACGTGCATTAAGATACGAAAGCTTCTTATTCCACACCAACGAAA  
GCACTTTCTCACTCTTTCATATACTAGGGGATTCGCTTGGAAAATCAAATGTTTCATAC  
T-----AATAGATTCCGGGTACATAACCATGGGTCCAATCCACAAGATCTTGCAGCACTTA  
CCAATGAGGCCCTATCGATTAGTATTATACAGAAGAAATCAATTATAGACACTAATACAA  
TTCGATTGCTCTTCATAGACAAACTTGGGATTTGCGA-----TCCCAGGTAAGATCGG  
CTCAGGATCGGGGGATCCTTTTCTATCAGATAGGAAGGGCTGTAGCACAAAATGTACTT  
CTAAGTAATTGCCTCATAGATCCTATATCTATCTCAAGAAGAAA-----TCATGTAAC  
GAAGGGGATTCTTATTTGTACAAATGGTACTTCGAACTTGAACGAGCATGAAGAAATT  
AACGATACTTCTTTATCTTTTGAGTTGTTCTGCCGGATCGGTCGCTCAAGATCTTTGGTC  
TCTACCC-----GGACCCGATGAAAAA---ACTGGGATCGCTTATTATAGACCCGCTGAGAA  
TGATTCT--GATCTAGTTCATGGCCTATTAGAAGTAGAAGGCGCTCTGGTGGGA-----GA  
CTCACGGACAGAAAAGGATTGCAGTCAGTTTGATAATGAT-----CGAGTGACATTGCTTC  
TTCGGCCCGAACCAAGGAAT--CCCTTAGATATGATGCAAATTGGATATTTTTCTATCCTT  
GATGTGGGATTTCTCTATCAAAGA-----TCCGAATTGGAGTTTGAAGAC-----GGGGAA  
GGAGCCCTCGACCTGGAA-----CAGGAGTTC-----TTCACTAAC-----ATA  
GTTTGGGCTCCT-----AGAATATGGAGCCCT-----TGGGACTTTCTATTGGATTGTATCG  
ACATTCCAACCTGAATTGGGATTTCCCTTCTATGGGTCCGATGAAAAGTATGCTGGA---GA  
TAAGGAAGAGTATTATGATGAAGAGGAAGAGAATGATGAAGAAGAGGATGAGCTTCA  
AGAGAATGATTCGGAGTTCTTGCAGACACGAGATATATCTTACAAAAAAGAAAGCCTT  
TTTCGACTAAGCCGATTCATTTGGAACCCTGGAGATCCACTCTTTGGGCTATTTCGTA---G  
ATGAGTCCTCTGTCTCTGTGTTTTTACATCGAGAATTATTTGCAGATGAAGCACAGAGC  
CTTTTGACTTCCGTGACTTCCGAAGAACCTTCTAGATCTATGATGAAAGGCTGGTTTAT  
CGAC---AATAAGGCGCAAGAAAAGCACTTCGAATTCTTGCTGAATTGGCATAGATGGTT  
TAGAACC-----CCTAGTTCATTATCT-----AATGGATCTTCCGTTCTAAT-----ACTCTAT  
TCGAGAGTTATCAGTATTTATCAAATCTGTTCCCTATCTAAC---GAAACGCTATTGGATCAA  
ATGAGAAATACATTGCTGAGAAAAAGATGGCTTTTCCCGGATGAAAATTGGATTTCATGG  
A-----ACAGGAGAAAGATTTAAAGATATG-----ATGCCAGATCGCGG---ATAAATGGAAA  
TTTTATTGATAAGACCTTTTCGATTGTAGCCAATATCTTATTACGAATAATTCCGACAACCT  
TCAGGAGAAAAAGAGGCATTTACCTATTACAGAGATGGA-----ATGTCAGCTCAATCTG  
AAGGAAATTTTGCGGAAGCCTTACAGAATTATTATGAAGCTATGCGACTCGAAATTGAT  
CCCTACGATCGAAGTTATATACTCTATAACATAGGACTTATCCATACAAGTAACGGAGAA  
CATACGAAAGCTTTGGAATATTACTTTTCGAGCGCTAGAACGAAACCCATTCTTACCACA  
AGCTTTTAATAATATGGCCGTGATCTGTCAATTAC---CGAGGAGAACAGGCCATTTCGACA  
GGGAGATTCTGAAATTGCGGAGGCTTGGTTTCGATCAAGCCGCTGAGTATTGGAACCGG  
GCTATAGCGCTTACTCCCGGTAATTATATTGAAGCGCATAATTGGTTGAAGATCACCAGG  
CGTTTCGAA-----ATGAGTTGTGATCAGAACATATATGGATAGAACCCTATAACGGGGTCT  
TCGAAAAACAAGTAATTTCTGCTGGGCCATTATCCTTTTTTTTAGGTTTATTAGGATTCTT  
ATTGGTTGGAACCTCCAGTATTTTTGGTAGAAATTTACATCTTTATTTCGGTCTCAGCA  
AATCGTTTTTTTTCCACAAGGGCTCGTGATGTCTTTCTATGGGATCGCGGGTCTCTTTAT  
TAGTTCCTATTTGTGGTGCACAATTTTCGTGGAATGTAGGTAGTGGTTATGATCGATTCTGA

TAGAAAAGAAGGAATAGTGTGATTTTTTCGTTGGGGATTTCTGGAAAAATCGTCGCA  
TCTGCCTCCGATTCTTTATAAAGGATATTCAGTCCATCAGAATAGAAGTTAAAGAGGGT  
CTTTATGCTTGTTCGTGTCCTTTATATGGACATCAGAGGTCAGGGGGCCATTCTTTGACT  
CGTACTGATGAGAAT--TTGACTCCACGGGAAATTGAACAAAAAGCTGCTGAATTGGCC  
TATTTCTTGCGTGTGCCAATTGAAGTATTT

>Meliosma

ATGGAAAAATGGTGGTTCAATTCGATATTGTCTCTAAGTAAATCAATGGGCAGTCTTGG  
TCCTATTAGAAAGACCAATGGAAGGGAAAACCCCTTTATAAATGATACGGAGAAAAATA  
TTCTAGTTGTAGTAATGTTGATCATTATTCGGTGTGAGAACATTCGGAGTTTCATCT  
TTGATGATACTCTTTTAGTTAGGGATAGTAATGGTTATAGTTATTCGATATATTTTGATATT  
GAAAATCAGCTTTTTGAGATTGACAATGAT-----CATTCTTTTCTGAGTGAAGTGAAGAAA  
AGAACTTTCTAGTTATCTGAATTCTAATTATCTGAATACTGGGTCTAAGAGTGACAATCA  
CTACTATGATCGTTACATGTATGATACTAAATATAGTTGGAATAATCATATTAATAGTTGCA  
TTGACAGTTATCTTTGTTCTGAAATCAGT-----ATTGATAGTTACATTTCAAATGGTAGCG  
ACAATTACAGTGACAGTTACATTTATAGTTACATTTGTAGTGACAGTAGAAGTTCTATAA  
GA-----AATGACAGTGAT--AATAAAGAGGAAGATAT--GATCTCGAGATAAATAAAA  
GATACAGGACTTTGTGGGTTCAATGCGAAAATTGTTATGGATTAATTATAAGAAATTGT  
TTCGGTCAAAAATGAATATTTGTGAACAATGTGGATATCATTGAAAATGAGTAGTTCA  
GATAGAATCGAACTTTGATTGATCCGGGCACTTGGGATCCTATGGATGAAAACATGGT  
CTCTACGGACCCGATTGAATTTCAATTCGGAGGCAGACCCTTATAAGGATCGTATCGATTT  
TTATCAAAGAAAGACAGGGTAACTGAGGCTGTTCAAACAGGCATAGGTCAACTAAAT  
GGTATTCCCGTCGCAATGGGGTTATGGATTTTAAGTTCATGGGGGGTAGTATGGGATC  
CGTAGTAGGCGAGAAAATCACCCGTTGATCGAGTATGCTACTCATAGATCTCTACCTC  
TTATTATAGTGTGTGCTTCCGGAGGAGCACGTATGCAAGAAGGAAGTTTGAGCTTGATG  
CAAATGGCTAAAATATCTTCCGCTTCATATAATTATCAATCAAATAAAAAGTTATTCTATG  
TATCAATCCTTACATCTCTACAACCCGGCGGGGTGACAGCTAGTTTTGGTATGTTGGGA  
GATATCATTATTGCCGAACCCAATGCCTACATTGCATTTGCGGGTAAAAGAGTAATTGAA  
CAAACATTGAATAAGACAGTACCTGAGGGTTACAAGCGGCTGAGTATTCATTCCATAA  
GGGCTTATTCGATTCAATCGTACCCCGTAATCTTTTAAAAGGCGTTCTTAGTGAGTTATT  
TTATCTCCACGGTTTTCTTTCCCTTGAATCAAATCAATCAAGATGGTAACCCCTTCGAGC  
CGACGAAATTAGTAATATTATCCGTGAACGTATTGAGCAATATAATAGAGAAGTAAAGAT  
TGTGAATACTGGCACCGTACTTCAAGTAGGCGACGGCATTGCTCGTATTCATGGTCTTG  
ATGAAGTAATGGCAGGTGAATTAGTAGAATTTGAAGAGGGTACAATTGGCATTGCTCTG  
AATTTGGAATCAAATAATGTTGGTGTGATTAATGGGTGACGGTTTGATGATACAAGA  
AGGAAGTTCTGTAAAAGCAACAGGAAGAATTGCTCAGATACCGGTGGGCGACGCTTAT  
TTGGGTCGTGTTATAAATGCCCTGGCTAAACCTATTGATGGTAGAGGTGAAATTTTCAGC  
TTCTGAATCTCGGTTAATTGAATCGCCCGCCCCAGGTATCATTTGAGACGTTCCGTATA  
TGAGCCTCTTCAAACAGGGCTTATTGCCATTGATTGATGATCCCTATAGGACGTGGTC  
AGCGAGAATTAATTATTGGGGACAGGCAAACCGGTAAAACAGCAGTAGCCACAGATAC  
TATTCTCAATCAAAGGGCAAATGTAATATGTGTTTATGTAGCTATTGGTCAAAAAG  
CATCTTCTGTGGCTCAGGTAGTTACTACTTTCCAGGAAAGGGGGGCGATGGAATACT  
ATTGTGGTAGCCGAAACGGCAGACTCGCCCGCTACATTACAATACCTCGCTCCTTATAC  
AGGAGCGGCTCTGGCTGAATATTTTATGTATCGTGAACGACATACTTCAATCATTTATGA  
TGATCTCTCAAACAAGCACAAAGCTTATCGACAAATGTCTCTTCTATTACGAAGACCGC

CCGGTCGCGAAGCTTATCCAGGAGATGTTTTTTATTTGCATTCACGCCTTTTGGAAAGA  
GCCGCTAAATCAAGTTCGCGTTTAGGTGAAGGAAGTATGACCGCTTTACCAATAGTTGA  
GACTCAATCGGGAGACGTTTCGGCTTATATTCCTACTAATGTAATTTCCATTACAGATGG  
ACAAATATTCCTATCCGCCGATCTATTCAATGCCGGAATCCGGCCTGCTATTAATGTGGG  
TATTTCTGTCTCCAGAGTAGGATCTGCAGCTCAAATTAAGCCATGAAACAAGTAGCTG  
GCAAATCAAAATTAGAATTGGCTCAATTCGCAGAGTTAGAAGCCTTTGCACAATTTGCT  
TCTGATCTTGATAAAGCTACTCAGAATCAATTGGCAAGAGGTCAACGATTACGTGAATT  
GCTCAAACAATCCCAATCAGCCCCTCTCACGGTGGGAAGAACAGATATTGACTATTTATA  
CTGGAACGAATGGATATCTTGATTCGTTAGAAATTGGACAAGTAAAGAAATTTCTCGTT  
CAGTTACGTAACACTTAAAAACGAATAAACCTCAGTTCCAAGAAATCATATCTTCGAC  
CAAGACATTCACCGAGGAAGCAGAAACCCTTTTGAAGGAAGCTATTCGGGAACAGAT  
AGAACGCTTTCTACTTCAGGAACAAACAATGAGAATCAATCCTACTACTTCTGGTCCTG  
GAGTTCCCGCACTTGAAGAAAAAACCTGGGGCGTATCGCTCAAATCATTGGTCCGGT  
ACTGGATGTAGCTTTTCCCCGGGCAAATGCCTAATATTTACAACGCTTTGGTAGTTA  
AGGGTCGAGATACTGTCGGCCAGCAAATTAATGTGACTTGTGAGGTACAGCAATTATTA  
GAAATAATCGAGTTAGAGCTGTAGCTATGAGTGCTACAGACGGTCTGATGAGAGGAA  
TGGACGTGATTGACACGGGAGCTCCTCTAAGTGTTCCAGTCGGTGGAGCAACTCTCGG  
ACGAATTTCAACGTTCTTGGAGAGCCTGTTGATAATTTAGGTCCTGTAGATACTCGCA  
CAACATCCCCTATTCATAGATCCGCACCTGCCTTTATACAGTTAGATACCAAATTATCTAT  
TTTTGAAACAGGAATTAAGTAGTGGATCTTTTAGCTCCTTATCGCCGTGGAGGAAAAA  
TCGGACTATTCGGGGGAGCTGGAGTGGGTAAAACAGTACTCATCATGGAATTGATCAA  
CAACATTGCCAAAGCTCATGGAGGTGTATCTGTATTTGGCGGAGTAGGCGAACGTACTC  
GTGAAGGAAATGATCTTTACATGGAAATGAAAGAATCTGGAGTGATTAATGAACAAAA  
TATTCAGAAATCAAAAGTAGCTCTAGTCTATGGTCAGATGAATGAACCGCCGGGAGCTC  
GTATGAGAGTTGGTTTGACTGCCCTAACCATGGCGGAGTATTTCCGGGATGTTAATGAA  
CAAGACGTACTTTTATTTATCGACAATATCTTCGGTTTCGTCCAAGCAGGATCCGAAGTA  
TCTGCCTTATTAGGCAGAATGCCTTCCGCTGTGGGTTATCAACCTACCCTTAGTACAGA  
AATGGGCTCTTTGCAAGAAAGAATTACTTCTACCAAAGAAGGATCCATAACTTCTATT  
AAGCAGTTTATGTACCTGCGGACGATTTGACCGACCCTGCTCCTGCCACGACATTTGCA  
CATTTAGATGCTACTACCGTACTATCAAGAGGATTAGCTGCTAAAGGTATCTATCCAGCA  
GTAGATCCTTTAGATTC AACGTCAACTATGCTCCAACCTCGGATTGTTGGTGAGGAACA  
TTATGAAACTGCGCAAAGAGTTAAGCAAACCTTTACAACGTTACAAAGAACTTCAGGAC  
ATTATAGCTATCCTTGGGTTGGACGAATTATCTGAAGAGGATCGTTTAAACCGTAGCAAG  
AGCGCGAAAAATTGAGCGTTTCTTATCACAAACCCTTCTTCGTAGCAGAAGTATTTACCG  
GTTCTCCAGGGAAATATGTTGGTCTAGCAGAAACAATTAGAGGATTTCAACTGATCCTT  
TCCGGAGAATTAGATGGTCTTCTGAGCAGGCCTTTTATTTGGTAGGTAACATCGATGA  
AGCTACCGCGAAGGCTATGAACTTAGAAGTGGAGAGCAATTTGAAGAAAATGACCTTA  
AATCTTTGTGTA CTGACTCCTAATCGAATTGTTTGGGATTCAGAAGTGAAAGAAATCAT  
TTATCTACTAATAGTGGCCAAATTGGCGTATTACCAAATCACGCCCCTATTGCCACAGC  
TG TAGATATAGGTATTTT GAGAATACGCCTTAATGACCAATGGTTAACGATGGCTCTGAT  
GGGCGGCTTCGCTAGAATAGGCAATAATGAGATCACCATTTTAGTAAATGATGCGGAGA  
AGGGTAGTGACATTGATCCGCAAGAAGCTCAGCGAACTCTTGAATAGCTGAAGCTAA  
CTTGAGTAGAGCTGAAGGCAAAAGACAAACAATTGAGGCGAATCTAGCTCTCAGACG  
AGCTAGGACGCGAGTAGAGGCTATCAATGTCAATTCGATGAAAAATGTAACCGATTCTT

TCGTTTCCTTGGGTTACTGGCCATCCGCCGGGAGTTTCGGGTTTAATACCGATATTTT  
CAACAAATCCAATAAATCTAAGTGTAGTGCTTGGTGTATTGATCTTTTTTGGAAAGGGA  
GTGTTAAGCGATTTATTAGATAATCGAAAACAGAGGATCTTGAGTACTATTTCGAAGTTC  
AGAAGAACTACGTGAAGGGGCCATTCAACAGCTGGAAAAAGCCCGGGCCCGCTTGCG  
GAAAGTAGAAATGGAAGCAGATGAGTTTCGAGTGAATGGATATTCTGAGATAGAGCGA  
GAAAAATTGAATTTGATTAATTCAACTTATAAGAATTTGGAACAATTAGAAAATTACAA  
AATGAAACCATTCATTTTGAACAACAAAGAGCGATTAATCAAGTCCGACAACGAGTT  
TTTCAACAAGCCTTACAAGGAGCTCTAGGAACTCTGAATAGTTGTTTGAACAGCGAGT  
TACATTTACGCACCATCAATGCTAATATTGGCATGTTTGGGGCGATGAAAGAAATAACT  
GATATGAATCCACTGATTTCTGCCGCTCCGTTATTGCTGCTGGATTAGCCGTAGGGCTT  
GCTTCTATTGGACCTGGAGTTGGTCAAGGTAAGTACTGCTGCGGGCCAAGCCGTAGAAGGTA  
TCGCGAGACAACCAGAGGCAGAGGGTAAAATACGAGGTACTTTTATTACTTAGTCTGGC  
TTTTATGGAAGCTTTAACAATTTATGGACTGGTCGTGGCATTAGCGCTTTTATTTGCGAA  
TCCCTTTGTTATGAATGTTCTACCATGTTCCATCAACACACTAAAAGAATTCTATGATATA  
TCCGGTGTGGAAGTAGGCCAGCATTCTATTGGCAAATAGGAGGTTTCCAAGTCCATGC  
CCAAGTACTTATTACTTCTTGGTTCGTAATTGCTATCTTATTAGGTTTACGCCACTATAGCT  
GTTTCGGAATCCACAAACCATTCTACCGACGGTCAGAATTTCTTCGAATATGTCCTTGA  
ATTCATTTCGAGACTTAAGCAAACTCAGATTGGAGAAGAATATGGTCCTTGGGTTCCCT  
TTATTGGAECTATGTTCTTATTTATTTTTGTTTCTAACTGGTCAGGGGCTCTTTTACCTTG  
GAAAATCATAACAGTTACCTCATGGGGAGTTAGCCGCACCCACGAATGATATAAATACTA  
CTGTTGCTTTAGCTTTACCCACGTCAGTGGCATATTTCTATGCGGGTCTTACCAAAAAA  
GGATTAGGTTATTTTCGGTAAATACATTCAACCTACTCCAATACTTTTACCAATTAACATCC  
TAGAAGATTTACAAAACCTTTATCACTTAGTTTTTCGACTTTTTCGGGAATATATTGGCTG  
ATGAATTAGTAGTTGTTGTTCTTGTCTTTTAGTACCTTTAGTAGTTTCTATACCTGTCAT  
GTTCTTGGATTATTTACAAGTGGTATTCAAGCTCTTATTTTTGCAACTTTAGCCGCGGC  
TTATATAGGCGAATCCATGGAGGGTCATCATATGATATTTTTGACTTTAGAACATATATTA  
ACTTATATCTCTTTTTTCGATCGTTTTCAATTGTAATTACGATTCATTTGATGACCTTATTAGT  
CGATGAAATCATAGGACTATATGATTCGTCAGAAAAAGGCATGATAGTTACTTTTTTTTT  
TATAACAGGATTATTAGTTACTCGTTGGATTTATTCGGGTCAATTTCCATTAAGTGATTTA  
TATGAATCATTAATGTTCCTTTCATGGAGTTTTTCCATTATTCATATGGTTACGAAAATAC  
GGAACCATCAAAACCATTTAAGCGCAATAACCGCGCCAAGTGCTATTTTTTACCAAGG  
CTTTGTCATTTTCGGGTCTTTTAACTGGAATGCATCAATCCGCCATATTAGTACCCGCTCT  
CCAATCCCAGTGGTTAATGATGCACGTAACATGATGTTATTGAGCTATGCAGCTCTTTT  
ATGTGGATCATTATTATCAGTAGCTCTTCTAGTCATTACATTTTCGAAAAACATAGAGAT  
TGTTGGTAAAAGCAATAAGATCCAATCCATGAATGAAAGAAATACTTTTTACAAAACA  
CTTCTTTTCTTTCCTTTAGAAATTATCACAGGTATCAATTGATTCAGCAATTGGATCATTG  
GAGTTATCGTGTGATTAGTCTCGGATTTATCTTTTAAACCATAGGTATTCTTTTCAGGAGC  
AGTATGGGCTAATGAGGCATGGGGTTCGTATTGGAATTGGGACCCTAAGGAAACTTGG  
GCATTTATTACTTGGACCATATTTCGCGATTTATTTCCATATTCGAACAAATAACAATTTGC  
AAGGTGCGAATCTGCAATTGTGGCTTCTAATGGGATTTCTTATAATTTGGATATGCTATTT  
TGGAGTCAATCTATTAGGAATAGGACTACATAGTTATGGTTCATTCATATTAACAATGCC  
AAAAAGAAAGCATTCACTCCCCCCCCATATCTTGCATCTATATTATTTTTGCCCTGGTG  
GATCTCTCTTTCATTTAATAAAAGTCTGGAATCTTGGGTTACTAATTGGTGGAAATACTAG  
ACAATCTGAAACTTTTTTGAATGATATCAAGAAAAGTGCCTTCTAGAAAAATTTATAG

AATTAGAAGAACTATTCCTGTTGGACGAAATGATAAAGGAATACCCGGAGACACATATA  
CAAAAGCTTCGTATAGGAATCCACAAAGAAACGATACAATTGGTCAAGATGTACAATG  
AGGATCATATCCATGCCATTTTGGACTTCTCGACAAATATAATATGTTTCGCTATTCTAAG  
TGGTTATTCTATTCTGGGTAATGAAGAACTTGTCTAGTCTGAATTCTTGGGTTTCAGGAATT  
CCTATATAACTTAAGCGACACAATAAAAGCTTTTTCTATTCTTTTATTAAGTATTATGC  
ATCGGATTCCACTCGCCCCATGGTTGGGAACTAATGATTGGTTCTGTCTACAAAGATTT  
TGGATTTTCTCATAACGATCAAATTATATCTGGTCTTGTTCCTACTTTTCCAGTCAATTCTA  
GATACAATTTTTAAATATTGGATCTTCCGTTATTTAAATCGTGTATCTCCGTCACTTGTAG  
TGATTTATCATTCAATGAATGACATGCCTATTGGTGTTCAAAAGTACCTTTTCGGAGTC  
CTGGAGAGGAAGATGCAATTTGGGTTGACGTATAACAACCGACTTCATCGAGAAAGATT  
ACTTTTTTTAGGCCAAGGGGTTGAAAGCGAGATCTCGAATCAACTTATTGGTCTCATGG  
TATATCTCAGTATAGAGGATGATACCAGGGATCTATATTTGTTTATAAACTCTCCCGGTGG  
ATGGGTAATACCCGGAATAGCAATTTATGATACTATGCAATTTGTGCCACCAGATGTACA  
TACAATATGCATGGGATTAGCCGCTTCAATGGGCTCTTTTATCCTGGTTCGGAGGAGAAA  
TTACCAAACGTCTAGCATTCCCTCACGCCAGGGTAATGATCCACCAACCTGCTAGTTCT  
TTTTATGAGGCACAAACAGGAGAATTTATCCTAGAAGCGGAAGAACTACTGAAACTTC  
GCGAAACCCTCACAAGGGTTTATGTACAAAGAACGGGCAACCCCCTATGGGTTGTATC  
CGAAGACATGGAAAGAGATGTTTTTATGTACGAACAGAAGCCCAAGCTCATGGAATT  
GTTGATCTTGTAGCGGTTCGAAATGAAAGAACAAAATGGATTCATGAAGGTTTAATTAC  
TGAATCACTTCCCAATGGTATGTTCCGGGTTTCGTTTAGATAATGAAGATCTGATTCTAGG  
TTATGTTTCAGGAAGGATCCGACGTAGTTTTTATACGGATACTACCAGGAGATAGAGTCA  
AAATCGAAGTAAGTCGTTATGATTCAACCAGAGGGCGTATAATTTATAGACTCCGCAAC  
AAAGAAGCGAACGATATGGAGGAATTACAAGAATATTTAGAAATAGATGGCTCTTGGC  
AACAAGACTTTCTATATCCACTTCTATTTTCAGGAGTATATTTATGCACTTGTCTCATGATCA  
TGGTTTAGAAAATTTCCGT---AAATCCAGTTTACTGATTGTGAAACGTTTAATTACTCAA  
ATGTATCAACAGAATCATTGAGTATTCCGGCTAATGATTTCGAACCAAATCAATTAGTT  
GTCAAGAATTTGGATTCTCAAATGATATCAGAGGGATTTTCAGTCAATTGTGGAAATTCC  
ATTTTTGCTGCGATTAGTATCTTCCCTAATAGAAAATCTCATAATTTACGATCAATTCAT  
TCAATATTTCTTTTCTAGAGGACAAATTCTCACATTTAAATTATGTGTCACATATACTAA  
TACCCCATCCATACACTGGGAAGTCATGGTTCAAACCTTCGCTGCTGGGTACAAGAT  
GCACCTTCTTTGCATTTATTGCGATTCTTTCTCCACGAATATCATAATTCGAATAGTCTTA  
TTACTAAATCGATTTCCATTTTGAAAAACAAAGATTATTCTGTTTTCTGTATAATTCTTA  
TATATATGAATGCGAATCCATAGTCGTTTTTATCCGTAAAAAATCTTCTCATTACGATCA  
ACATCTTCTGGAGCCCTTCTTGAGCGAGCACATTTCTATGGAAAAATGGAACATCTTGT  
AGTAGTGTTCGTAATGATTTTAACCTATGGTTTTTCAAGGAGCCTTTTATCCATTATGCC  
AGATATCAAGGAAAAGCAATTTCTGGCTTCAAAGGGCACTCCGCTTCTAATGAAGAAAT  
GGAAATATCACCTTTTAAATTTATGGCAATGTCATTTTACTTATGGTCTCAACCGAGCA  
GGATCCATATAAACCGATTATCCAATCATTCCCTTCAATTTCTGGGCTATCTTTCAAGTGT  
ACGACTAAATCCTTCAGTGGTTAGGAGTCAACTGCTAGAACTTCATTTATAATAGATAT  
TGCTATT-----AAGAAATTCGATAACCATAATTCCAATTTCTCTGATCGGATCATTGGCT  
AAAGCTAAAATTTGTAACGTATCAGGACATCCTATTAGTAAGCCGGTCTGGGCCGATTC  
ATCCGATTCTGATATTATCGATCGATTTGGGTGGATATGCAGAAATCTTCTCATTATCAC  
AGTGGATCCTCAAAAAAAAAATGGTTTGTATCGAATAAAGTATATACTTCGACTTTCGTG  
TGCTAAAATTTGGCTCGTAAACACAAAAGTACTGTACGCGCTTTTTTGAACGATTAG



GTTCGGAATTATTGGAAGAATTCCTTACGAAGGAAGAACAAGTTCTTTCTTTGATCTTC  
CCAAGACGGATTTGGTATTTGGATATTATTCGTATCAATGATCTGGCTAATTATGAAATGA  
TAATTGATACGACA---GAAGTACAA---GCTATCAATCCTTTTTCCAGATCGGAA---TCCTT  
AAAAGAGGTCTATGAGCTCATATGGCTATTTGTTCCCTATTTTTACTCCTGTATTGGGAAT  
CACAATAGGGGTAAGTAATTGTATGGTTAGAAAGACAAATCTCCGCAGGGATAACAAC  
AACGTATTGGACCTGAATATGCTGGCCCTTTGGGAATCCTTCAAGCTCTAGCAGATGGG  
ACCAAATACTTTTCAAAGAGGATCTTCTCCCATCTAGAGGAGATAGTCGTTTATTTCAG  
TATTGGACCATCTATAGCGGTCATATCAATTCATTAAGTTATTTCAGTAATTCGGTTTGGC  
TATCGCCTTGTTTTAGCCGATCTCAGTATAGGTGTTTTTTTTATGGATCGCCATTTCAAGCA  
TTGCTCCTATTGGACTTCTTATGTCAGGATATGGATCGAATAATAAATATTTCCTTTTCAGG  
TGGTCTACGAGCTGCTGCTCAATCGATTAGTTATGAAATACCATTAACTCTATGTGTGTT  
ATCAATATCTCTACTATCTAACAGTTCAAGTACAGTTGATATAGTTGAGGCGCAGTCAAA  
ATATGGTTTTTTGGGGGTGGAATTTGTGGCGTCAACCTATAGGGTTTATCGTTTTTCTAAT  
TTCTTCCCTGGCGGAATGTGAGAGATTACCTTTTGATTTACCAGAAGCGGAGGAAGAA  
TTAGTAGCAGGTTATCAAACCGAATATTCAAGTATCAAATTTGGTTTATTTTACGTTGCT  
TCCATCTAAATCTACTAGTTTCTTCATTATTTGTAACAGTTCTTTATTTGGGCGGTTGGA  
ATTTCTCTATTCCGTACATATTCATTCTGAAGTGTAAAGAATAAAT-----GGAGTCTTT  
GGAACGACAATTGGTATCTTTATTACATTAGCTAAAGCTTATATGTTCCCTGTTCAATTCTA  
TCACAACAAGATGGACTTTACCTAGGATGAGAATGGACCAACTATTAATCTTGGCTGG  
AAATTTCTTTTACCTATTTCTCTAGGTAATCTATTATTGACAACCTCCTTCCAACCTTTTT  
CACTCATGATCTGGCATGTACAGAATGAAAACCTTCATTCTCGATTCTACGAGAATTTTTA  
TGAAAGCGTTTCATTTGTTTCTCTTCCATGGAAGTTTCATTTTCCCAGAATGTATCCTAA  
TTTTTGGCCTAATTTCTTCTGATGATCGATTCAACCTCTGATCAAAAAGATATACCTT  
GGTTATATTTTCATCTCTTCAACCAGTTTAGTAATGAGCATAACGGCCCTATTGTTCCGAT  
GGAGAGAAGAACCTATGATTAGCTTTTTCGGGAAATTTCCAACGAACAGTTTCAACGA  
AATCTTTCAATTTCTTATTTTACTATGTTCAACTCTATGTATTCTCTATCCGTAGAGTACA  
TTGAATGTACAGAAATGGCTATAACAGAGTTTCTGTTATTTCGTATTAACAGCTACTCTAG  
GAGGAATGTTTTTATGTGGTGCTAACGATTTAATAACTATCTTTGTAGCTCCAGAATGTT  
TCAGTTTATGCTCCTACCTATTATCTGGATATACCAAGAGAGATGTACGGTCTAATGAGG  
CTACCACGAAATATTTACTCATGGGTGGGGCAAGCTCTTCTATTCTGGTTCATGGTTTCT  
CTTGGCTATATGGTTCATCCGGGGGAGAGATCGAGCTTCAAGAAATAGTGAATGGTCTT  
ATCAATACACAAATGTATAACTCCCCAGGAATTTCAATTGCGCTTATATTCATCACTGTA  
GGAATTTGGGTTCAAGCTTTCCCCAGCCCCTTCTCATCAATGGACTCCTGACGTATACGA  
AGGATCTCCCCTCCAGTCGTTGCTTTTTCTTTCTGTTACTTCGAAAGTAGCTGCTTCAG  
CTTCAGCCACTCGAATTTTCGATATTCTTTTTATTCTCATCAAACGAATGGCATCTTCT  
TCTGGAAATCCTAGCTATTCTTAGCATGATATTGGGGAATCTCATTTGCTATTACTCAAAC  
AAGCATGAAACGTATGCTTGCATATTCGTCCATAGGTCAAATCGGATATGTAATTATTGG  
AATAATTGTTGGAGACTCAAATGATGGATATGCAAGCATGATAACTTATATGCTGTTCTAT  
ATCTCCATGAATCTAGGAACTTTTGCTCGCATTGTATCATTGGTCTACGGACCGGAACT  
GATAACATTCGAGATTATGCAGGATTATACACGAAAGATCCTTTTTTGGCTCTCTCTTA  
GCCCTATGTCTCTTATCCCTAGGAGGTCTTCTCCACTAGCAGGTTTTTTTCGGAAAAC  
CCATCTATTCTGGTGTGGATGGCAGGCAGGCCTATATTTCTTGGTTTCAATAGGACTCCT  
TACGAGCGTTGTTTCTATCTACTATTATCTAAAAATAATCAAGTTATTAATGACTGGACG  
AAACCAAGAAATAACCCCTCACGTGCGAAATTATAGAAGATCTCCTTTAAGATCAAAC

AATCCATCGAATTTAGTATGATTGTATGTGTGATAGCATCTACTATAACCAGGAATATCAA  
TGAACCCATTATTGCAATTGCTCAGGATACCCTTTTTATGTTTCTGCTTCACGAATATGA  
TATTTTCTGGGCATTTCTAATAATATCAAGTATTATTCCTATTTTGGCATTTCATAATTTCTG  
GAGTTTTGGCCCCGATTAGCGCAGGACCCGAGAACTTTCTAGTTATGAATCGGGTATA  
GAACCAATGGGCGATGCTTGGTTACAATTTCGAATCCGTTATTATCTGTTTGCTCTAGTT  
TTTGTGTTTTTTGATGTTGAAACGGTTTTTCTTTATCCATGGGCGATGAGTTTCGATGTA  
TTGGGTGTATCTGTATTTATAGAGGCTTTAATTTTTGTGCTTATCCCAATTGTTGGTTCAG  
TTTATGCATGGCGAAAAGGAGCATTGGAATGGTCTACGAATTATTTTCTTGGTTAACTA  
TAATTGTAGTTTTGCCGATATCTGCGGGTCTTTAATTTTCTTTCTCCCTTATAGAGGAAA  
TAAGGTGATTTCGATGGTATACTATTTGTATATGTTTATTAGAACTCCTTTTAAACGACCTAT  
GCATTTTGTATCATTTTCAATTGGACGATCCATTAATCCAACTCGAGGAGGAGTATAAA  
TGGATCAATTTTTTTGATTTTCACTGGAGATTAGGAATCGATGGACTTTCCATAGGACCC  
ATTTTACTGACGGGATTCATCACAACCTTTAGCCACTTTAGCGGCTTGGCCAGTTACTCG  
AGATTCCCGATTGTTCCATTTCTGATGTTAGCAATGTACAGCGGTCAAATAGGATCATT  
TTCTTCTCGAGACCTTTTACTTTTTTTCATCATGTGGGAGTTAGAATTAATCCTGTTTAC  
CTACTTCTATCCATGTGGGGAGGGAAGAAACGTCTCTACTCAGCTACAAAGTTTATTTT  
GTACACTGCAGGGGGTCTATTTTTTCTCTTAATGGGAGTTTCGGGTATGGGTTTATATGG  
TTCCAATGAACCAACATTAATTTTTGAAACATCAGCTAGTCAATCATATCCTGTGGCATT  
GGAAATAATATTCTATTTTGGATTTCTTATTGCTTATGCTGTCAAATCACCGATTATACCC  
CTACATACATGGTTACCAGATACCCATGGCGAAGCACATTACAGTACATGTATGCTTTTA  
GCCGGAATCTTATTAATAAATGGGAGCGTATGGATTGGTTCGGATCAATATGGAATTATTA  
CCCCACGCCCATTTCTATATTTTCTCCCTGGTTGATGATAATAGGCACAATTCAAATAATTT  
ATGCAGCTTCAACATCTCCCGGTCAACGCAATTTAAAAAAGAGAATAGCCTATTCTCC  
GTATCTCATATGGGTTTTACAATTATAGGAATTGGTTCATAACCGATACGGGACTCAAT  
GGAGCCATTTTACAAATAATCTCTCATGGATTTATTGGTGCTGCACTTTTTTTCTTGGCA  
GGAACGAGTTACGATCGAATACGTCTTGTTTATCTCGACGAAATGGGAGGAATAGCTAT  
CCCAATGCCAAAATATTTATGATGTTTCAGTAGCTTCTCGATGGCCTCTCTTGCAATTGCC  
GGGAATGAGTGGTTTTGTTGCAGAATTGATAGTCTTTTTTTGGAATAATTACCAGCCAAA  
AATATCTTGTACTTCCAAAATAGTAATTATTTTTGTAATGGCAGTTGGAATGATATTAAC  
CCCTATTTATTCAATTATCTATGTCACGTCAGATGTTCTATGGATAACAAGCTATTCAATGCA  
CCAAACTATTCTTTTTTTGATTCTGGACCACGAGAACTGTTTGTTCGATCTCTATCTTT  
CTACCCGTAATAGGTATTGGTATTTATCCAGATTTTCGTTCTTTCACTGTCAGTTGACAAG  
GTAGAAGCTATTTTATCTAATTACTTTTTATAGAATGATGCTCGAACATGTGCTTGTTTTGA  
GTGCCTATTTATTTTCTATCGGTATCTATGGATTGATTACGAGCCGACATATGGTTAGAGC  
GCTTATGTGCTTGAGCTTATACTGAATGCAGTTAATATCAATTCGTAACATTTTCTGAT  
TTTTTTGATAGTCGCCAATTAATAAGGAGACATTTTCTCGATTTTTGTTATAGCTATTGCC  
GCCGCTGAAGCAGCTATTGGGCCAGCTATTGTTTCGTC AATTTATCGTAACAGAAAGTC  
AACTCGTATCAATCAATCGAATTTGTTGAATAAAAATGGAGCAGACATATCAATATGCATG  
GATCATACCTTTTCGTTCCACTTCCAGTTCCTATGTTAATAGGAGTGGGACTTCTCCTTCT  
TCCGAAGGCAACAAAAAATCTTCGTCGTATATGGGCTTTTCTAGTGTTTTATTGCTAAG  
TG TAGTTATGATACTTGC GGCCGATCTGTCTATT CAGCAAATAAATGGCAGTTACATCTA  
TCAATATGTATGGTCTTGGACCATCAATAATGATTTTTCTTAGAGTTTGGCTACTTGATC  
GATCCACTTACTTCTATTATGTCAATATTAATTACTACTGTTGGAATCCTGGTCTTATTTA  
TAGTGACAATTATATGTCTCATGATCAAGGATATTTGAGATTTTTTGTCTTATATGAGTTTT

TCCAATACTTCCATGTTGGGATTAGTTACTAGTTCCAATTTGATACAAATTTATATCTTTT  
GGGAATTAGTTGGAATGTGTTTCGTATCTATTAATAGGTTTTTGGTTACACGACCAATTG  
CAGCAAATGCTTGTCAAAAAGCGTTTTGTAACATAATCGTGTAGGGGATTTTGGTTTATTAT  
TAGGAATCTTAGGCTTTTATTGGATAACGGGTAGTTTTGAATTTCCGGGATTTGTTTCGAAA  
TATTCATAACAATGAGGTCAATTCTTTATTTGTTACTTTGTGTGCCTCTCTATTATTCGT  
CGGTGCAGTTGCTAAATCTGCACAATCCCCCTTCATGTATGGTTACCTGATGCCATGGA  
GGGGCCTACTCCCATTTCCGGCTCTTATCCATGCTGCTACTATGGTAGCAGCGGGAATTTT  
TCTTGTAGCTAGGCTTCTTCTCTTTTTCACAGCCATACCTTACATAATGTATCTAATTTCT  
TTGATAGGCATAATAACAATACTTTTAGGAGCTACTTTGGCTCTTGCTCAAAAAGACATT  
AAGAGAGGTTTGGCTTATTCGACAATGTCGCAATTGGGTTATATTATGTTAGCTCTAGGT  
ATGGGGTCTTATCAAGCTGCTTTATTTCAATTTGATCACTCATGCCTATTTCGAAAGCATTAT  
TGTTTTTAGGGTCCGGATCAATTATTCATTCAATGGAAACCATTGTTGGATATTCTCCAG  
ATAAAAGTCAGAACATTGTTCTTATGGGTGGTTAACAAAATATGTGCCAATTACAAA  
ACTTCGTTTTTATTAGGTACACTTTCTCTTTGTGGTATTCCACCTCTTGCTTGTTTTTGGT  
CCAAAGACGAAATTCTTAATGATAGTTGGTTGTATTCACCCATTTTCGCGATAATAGCTT  
GGTTACAGCAGGATTAACCTGGATTTTATATGTTTCGCATGTATTTACTTACTTTTGAGG  
GGCAGTTAAACGTTTATTTTCAAATTTACAGTGGCAAAAAAACATATCGGGCTATTCA  
ATATCTATATGGGGTAAAGAAGGACCGAAACCAATTCAAAAAATC-----TTT  
CTTTTTGCGGTTGGAATAAAGAACTTCTTCGTATCCCATGAATCGGACAATACTAT  
GCTATTGCCTTTGCTTGTATTGGCCCTATTTACTTTGGTTCGTTGGATCCATAGGAATTCCT  
TTTGATTTTGATATATTATCGAAATGGTTAACTCCCTCAATAAACCTTTTACATCCAAATT  
CGAAT--TCTTTTGATTGGTATGAATTTGTGACAAATGGCATTTTTTTCAGTCAGTATCGCC  
TATTTCCGGAATAGTTATAGCGTCTCTTTTATATACGCCTGTATATTCATCTTTCCAGAATTT  
CGATGTAATCAATTCATTTGTGATTCTATGGGACAAAATAATAAATGTGATATATAATTGG  
TCATATAATCGTGGTTATATAGACGTTTTTTATGCAACAACCTTAACTAGAGGGATAAGA  
GGATTAGCTGAACCTAATTTTTTTTGATAGACGAGTAATTGATGGAATTACGAATGGA  
GTTGGTATTACAAGTTTTTTTTGTAGGAGAAGGAATCAAATATTTTGGGGGTGGG---AGA  
ATCTCTTCTTATCTCTTCTTGTATTTATCTTATGTATCCATCTTTTTATTAATTTATTACATG  
GATTTGCCTGGACCAATACATGATTTTCTTTTAGTATTTCTGGGATCAGGTCTTATATTAG  
GAGGTCTAGGAGTGGTATTACTTACCAATCCCATTTTTTCTGCCTTTTCATTGGGATTGG  
TTCTTGTTTGTATATCCTTATTCATATTCATCGAACTCCCATTTTGTAGCTGCTGCACA  
GCTCCTTATTTACGTGGGGGCTATCAATGTCTTAATCCTATTTGCTGTGATGTTTCATGAGT  
GGTTCAGAATATTACAATGATTTCCAGCTTTGGACCGTTGGCGATGGGGTACTTCACT  
GGTTTGTACAAGCATTTTTGTTTCACTAATTACTACTATCCAGATACGTTCATGGTACGG  
GATTATTTGGACTACAAGATCAAACCAGATTATAGAGCAGGACTTGATAAATAATAGTC  
AACAAATTGGGATTCATTTATCAACAGATTTTTTTCTTCCATTTGAACTCATTTTCGATAAT  
TCTTTTAGTTGCTTTGATAGGTGCAATTTCTATGGCTCGTCAGATGACTGTACCTGCTAT  
AAAAAAGACCTTATGATAGTCAATATGGGTCCCTCAGCACCCATCAATGCATGGTGTTC  
TTCGACTCGTCGTTACTCTAGATGGTGAAGATGTTATTGACTGTGAACCCATATTAGGTT  
ATTTACACAGAGGGATGGAAAAAATTGCGGAAAACCGAACAAATTATACAATATCTCCCT  
TATGTAACACGTTGGGATTATTTAGCTACTATGTTTCACAGAGGCAATAACAGTAAATGCA  
CCAGAACAGTTGGGAAATATTCAAGTTCCTAAAAGAGCCAGCTATATCAGAGTAATTAT  
GCTGGAGCTGAGTCGTATAGCTTCTCATTTGTTATGGCTTGGCCCTTTTATGGCGGATAT  
CGGTGCACAGACTCCTTTCTTCTATATTTCCGAGAGAGAGAATTGATATATGATCTATT

CGAAGCTGCCACAGGTATGCGAATGATGCATAATTATTTCCGTATCGGAGGAGTAGCTG  
CTGATTTACCTCATGGCTGGATAGATAAATGTTTGGATTTCTGCGATTATTTTTTAACAGG  
GGTACTGAATATCAAAACCTTATTCGGCGGAATCCTATTTTTTTGGAACGAGTTGAAG  
GGGTAGGCATTATTGGTAGAGAGGAAGCAATAAATTGGGGTTTATCAGGACCAATGCTA  
CGAGCTTCCGGAATCCAATGGGATCTTCGTAAAGTTGATCATTATGAGTGTTACGACGA  
ATTTGATTGGGAAGTCCAATGGCAAAAAGAAGGAGATTCATTAGCTCGTTATTTAGTAC  
GAATCAGTGAAATGACGGAATCCATCAAAATTATTCAACAGGCTCTGGAAGGAATTCC  
GGGGGGGCCCTACGAGAATTTAGAAGTCCGCCGTTTTGATAGAGCAAAGGATTCCGAA  
TGGAATGATTTTGAATATCGATTCATTAGTAAAAAGCCTTCTCCTACTTTTGAATTATCG  
AAACAAGAACTTTATGTGAGAGTGGAAGCCCCAAAGGGGGAATTGGGAATTTTTTTGA  
TAGGGGATCAGAGTGTTTTTCCCTGGAGATGCAAAATTCGTCCACCGGGTTTTATCAAT  
TTGCAAATCTTCCTCAGCTAGTTAAAAGAATGAAATTGGCTGATATTATGACGATACTA  
GGTAGTATAGATATCATTATGGGAGAAGTTGATCGTATGTTCCCTATGTTAACCGGGTTG  
ATGAATTATGGTCAACAAACAGTACGAGCTGCAAGGTACATCGGTCAAAGTTTCATGAT  
TACCTTATCCCACACGAATCGTTTACCTATAACTATTCAATATCCTTATGAAAAATTGATC  
ACATCAGAGCGTTTCCGCGGTCGAATCCATTTTGAATTTGATAAATGCATTGCTTGTGA  
AGTATGTGTTTCGTGTATGCCCTATAGATCTACCCGTTGTTGATTGGAGATTGGAACTGA  
TATTCGAAAGAAACGATTACTTAATTACAGTATTGATTTTGGAAATCTGTATATTTTGTGGT  
AACTGCGTCGAGTATTGTCCAACAAACTGTTTATCAATGACTGAAGAATATGAACTTTC  
GACTTATGATCGTCACGAATTGAATTATAATCAAATTGCTTTGGGTCCGGTTACCAATGTC  
AATAATTGGAGATTATACAATTCGAACAATTATGAATTCGAAAATAACCACAGGCAACC  
CCCTTGATTCAAAAACGATTACCAATTACATGCAGGGTCGTTTGTCTGCTTGGCTAGTC  
AAGCATGGGCTAGTTCATAGATCTTTAGGCTTCGATTACCAAGGAATAGAGACTTTACA  
AATAAAGCCCGAGGATTGGCACTCCATTGCTGTCAATTCATATGTATATGGTTACAATTAT  
CTACGTTCCCTGTGTGCCTATGATGTAGCACCAGGCGGACTGTTAGCTAGTGTGTATCAT  
CTTACGAGAATACAGTCTGGTGTGGAGCAACCAGAAGAGGTATGCATAAAAATATTTG  
CCCCAAGGAGGAATCCTAGAATTCCATCTGTTTTCTGGATTTGGAAAAGTGCAGATTTT  
CAAGAACGGGAATCTTATGATATGTTTGGAAATCTCTTATGATAATCATCCACGCCTGAAA  
CGTATCTTGATGCCTGAAAGTTGGATCGGATGGCCCTTACGTAAGGATTATATTGCCCCC  
AATTTCTATGAAATACAAGATGCTCATATGGGCGATGAGTTTCGATGTATTGGGTGTATC  
TGTATTTATAGAGGCTTTAATTTTTGTGCTTATCCCAATTGTTGGTTCAGTTTATGCATGG  
CGAAAAGGAGCATTGGAATGGTCTTAGCTCCTAAATATTCAGACAATAAAAAGCAAAA  
AGAAGAAAAAATGACATTGAGACAGTTATGAATTCATTGAGTTTCCGTTACTTGAG  
CGAACAACCCAAAATTCAGTTATTTCAACTACATCGAATGATCTTCAAATTGGTCAAG  
ACTCTCCAGTTTATGGCCCTTCTCTAATGGTACCAGTTGTTGCTTCATTGAATTTGCTTC  
ATTAATAGGCTCTCGATTGACTTTGATCGTTATGGACTGGTACCAAGATCGAGTCCTAG  
GCAAGCCGACCTCATTTAACAGCCGGCACAGTAACAATGAAAATGGCTCCTTCTTTA  
GTGAGATTATATGAGCAAATGCCTGAACCAAAATATGTCATTGCTATGGGAGCCTGTACT  
ATTACAGGAGGAATGTTCAAGTACCGATTCTTATAGTACTGTTTCGGGGAGTCGATAAGCT  
AATTCCTGTGGATGTCTATTTGCCGGGTTGCCACCTAAACCGGAGGCAGTTATAGATG  
CTATAACAAAACCTTCGTAAGAAGGTATCTCGAGAAATCTATGAAGATAGAATTGGGTCT  
CAACAGGAAAATCGATGTTTTACTACCAATCACAAGTTTCATGTTGGGCGCAGTACTCA  
TACTGGAAATTATGATCAAGAATTACTCTATCAATCGCCATCTACTTCAGAGATCCCTTC  
TGAAACATTTTTCAAATACAAAAGTGGAACATCTTCCCACGAATTAGTGAATATGCAAA

ATAGAAATACCTTTTCTTGATAAAGGAACAGATGATTTCGATCTATTTCCGTATCGATCA  
TGATAAATGTAATAACTCAGACATCCATTTCAAATGCGTATCCCATTTTTGCACAGCAGG  
GTTATGAAAATCCACGAGAAGCGACTGGTCGTATTGTATGTGCCAATTGCCATTTAGCT  
AATAAGCCCGTGGATATTGAAGTTCACAAGCAGTACTTCCTGATACTGTATTTGAAGC  
AGTTGTTAGAATCCCTTATGATATGCAACTGAAACAAGTTCTTGCTAATGGCAAAAAGG  
GGGCTTTGAATGTAGGAGCTGTTCTTATTTTACCTGAGGGATTTCGAATTAGCTCCCCA  
GATCGTATTTCTCCCAAGATGAAAGAAAAGCTGGGCAATCTATCTTTTCAGAGTTATCG  
CCCAACTAAAAAAAATATTCTTGTGATAGGTCCTGTTTCCTGGTCAGAAATATAGTGAAA  
TCACCTTTCTTATTCTTTCCCGGACCCCGCTACTAAGAAAGACGTTCACTTCTTAAAAT  
ATCCCATATACGTAGGCGGGAACAGGGGAAGGGGTCAGATTTATCCCGATGGGAGCAA  
GAGTAAACAATACCGTCTATAATGCTACAGCAGCCGGTATAGTAAGCAAAGTTGTACGTA  
AAGAAAAGGGGGATATGAAATAAACATAGCGGATGCATCGGATGGACACCAAGTGGT  
TGATATTATACCTCCAGGACCGGAACTTCTTGTTTCAGAGGGCGAATCGATCAAGCTTG  
ATCAACCATTAACGAGTAATCCCAATGTGGGTGGATTTGGTCAGGGAGATGCAGAAATA  
GTACTTCAAGATCCATTACGTGTCCAAGGTCTTTTATTTTTCTTGCGTCTGTTATTCTG  
GCACAAATTTTTTTGGTTCTTAAAAAGAAACAATTTGAGAAGGTTCAATTGTCCGAAAT  
GAATTTTCATGAGTAAAGTATATGATTGGTTCGAAGAACGTCTCGAGATTCAGGCGATTG  
CAGATGATATACTAGTAAATATGTCCTCCCATGTCAACATATTTTATTGTCTAGGAGG  
GATTACGCTTACTTGTTTTTTAGTACAAGTAGCTACGGGGTTTGCTATGACTTTTTATTAT  
CGTCCGACCGTTACCGAGGCTTTTGCCTCTGTTCAATATATAATGACTGAAGCGAACTT  
TGGTTGGTTAATCCGATCAGTTCATCGATGGTCGGCAAGTATGATGGTCCTAATGATGAT  
CCTGCACGTATTTTCGTGTGTATCTCACCGGCGGATTTAAAAACCTCGCGAATTGACTT  
GGGTTACGGGTGTGGTTCTGGCTGTATTGACCGCATCTTTTGGTGTAACGGTTATTCT  
TACCTCGGGACCAAATTGGTTATTGGGCAGTAAAAATCGTGACAGGCGTACCTGAAGC  
TATTCCTGTAATAGGATCACCTTTGGTAGAGTTATTACGTGGAAGTGCTAGTGTGGGTCA  
ATCCACTTTGACTCGTTTTTATAGTTTACACACTTTTGTATTACCTCTTCTTACTGCCGTA  
TTTATGTTAATGCACTTCCCAATGATACGTAAGCAAGGTATTTCTGGTCCTTTAATGGGA  
GTAACAAAGAAACCTGACTTGAATGATCCTGTATTAAGAGCAAATGGCTAAAGGGA  
TGGGTCATAATTATTACGGAGAACCCGCATGGCCCAATGATCTTTTATATATTTTTCCAGT  
AGTAATTCTAGGTACGATTGCATGTAACGTAGGCTTAGCGGTTCTAGAACCGTCAATGA  
TTGGTGAACCAGCAGATCCATTTGCAACTCCTTTGGAAATATTACCCGAATGGTACTTC  
TTCCCGTATTTCAAATACTCCGTACAGTACCCAATAAGTTATTGGGTGTTCTTTTAATG  
GTTTCAGTACCTGCGGGATTATTGACAGTACCCTTTTTTGGAGAATGTTAATAAATCCAA  
AACCCATTTTCGTTCAGTAGCCACAACCTGTCTTTTTGATCGGTACCGTAGTAGCTCT  
TTGGTTGGGTATTGGAGCAACATTACCTATTGAAAAATCCCTAACTTTAGGTCTTTTTAT  
GATTGAAGTTTTTCTATTTGGAATTGTGTTAGGTCTAATTCCTATTACTTTGGCTGGATTA  
TTCGTAACCTGCATATTTACAATACAGACGCGGTGATCAGTTGGACCTTATGCCTACTATA  
ACTAGTTATTTTCGGTTTTTCTACTGGCGGCTTCGACTATAACCCCGGCTCTATTTATTGGTC  
TGAGCAAGATACGACTTATTATGGATATAGTAAATCTCGCTTGGGCTGCTTTAATGGTAG  
TCTTTACATTTTCCCTTTCACTCGTAGTATGGGGAAGAAGTGGACTCATGATTATTCGTT  
CGCCGGAATCAGAAATGAAAATTTTGGTGGATAGGGATCCCGTCAAAACTTCATTGCA  
GGAATGGGCCAGACCCGGTCATTTCTCAAGAACAATAGCTAAGGGCCCTGATACTACC  
ACTTGGATCTGGAACCTACATGCCGATGCTCACGATTTTCGATAGCCATAACAGTGATTT  
GGAGGAGATCTCTCGAAAAGTATTTAGTGCCCATTTTCGGTCAACTCTCCATCATCTTTAT

TTGGCTGAGTGGCATGTATTTCCATGGTGCCCGTTTTTCCAATTATGAAGCATGGCTAAG  
CGACCCTACTCACATTGGACCCAGCGCTCAGGTGGTTTTGGCCAATAGTGGGCCAAGAA  
ATATTGAATGGTGTATGTGGGCGGGGGTTTTCCGAGGGATACAAATAACCTCTGGTTTTTT  
TCAGCTTTGGCGAGCATCTGGAATAACGAATGAATTACAACCTCTATTGTACCGCAATTG  
GTGCATTGGTCTTTGCAGCGTTAATGCTTTTTGCTGGTTGGTTCCATTATCACAAAGCA  
GCTCCGAAATTGGCCTGGTTCCAAGATGTAGAATCTATGTTGAATCACCACTTAGCGGG  
GTTACTAGGACTTGGTTCTCTTGGTTGGGCGGGACACCAAGTACATGTATCTTTACCGA  
TTAACCAATTTCTAGACGCTGGAGTAGATCCTAAAGAGATCCCACTTCCTCATGAATTA  
TCTTGAATCGGGATCTTTTGGCTCAACTTTATCCCAGTTTTGCCGAGGGAGCAACCCCA  
TTTTTCACCTTGAATTGGTCAAATATGCGGAATTTCTTACTTTTTCGTGGAGGATTAGAT  
CCAGTAACAGGGGGTCTATGGCTGACCGATATTGCACACCCATCATTTAGCTATTGCAGT  
TCTTTTTCTCGTTGCTGGTCATATGTATAGA ACTAACTGGGGCATTGGTCATGGCCTGAA  
AGATATTTTAGAGGCTCATAAGGGTCCATTTACAGGTCAGGGACATAAAGGCCTCTATG  
AGATCCTAACAACGTATGGCATGCTCAATTATCTCTTAACCTAGCTATGTTGGGCTCTT  
TAACCATTGTTGTAGCTCACCATATGTATTCCATGCCCCCTTATCCATATCTAGCTACTGA  
CTATGGTACACA ACTTTTCAATTATCACACATCACATGTGGATCGGTGGATTCTCATAGT  
TGGTGCTGCTGCACATGCAGCCATTTTTATGGTAAGAGATTATGATCCA ACTACTCGATA  
CAACGATCTATTAGACCGTGTCTTAGGCACCGCGATGCGATCATATCACATCTCAACT  
GGGCATGTATATTTCTAGGCTTTCACAGTTTTGGTTTTGTATATTCATAATGATACTATGAG  
CGTTTTAGGGCGTCCCAAGATATGTTTTCAGATACCGCTATCCAATTACAACCCGTCTT  
TGCTCAATGGGTACAAAACACCCACGCTTTAGCACCTGGTGCAACAGCTCCTGGTGCA  
ACAGCAAGTACCAGCTTGACTTGGGGGGGTGGTGATTTAGTAGCAGTAGGCGGCAAA  
GTAGCTTTGTTACCTATTCATTAGGAACCGCAGATTTTTTGGTGCATCACATTCATGCA  
TTTACGATCCATGTGACGGTATTGATACTACTGAAAGGTGTTCTATTTGCTCGTAGCTCC  
CGTTTTGATACCTGATAAAGCAAATCTTGGGTTTCGTTTCCCTTGTGACGGACCTGGAAG  
AGGGGGGACATGTCAAGTATCCGCCTGGGATCATGCTTCTTAGGTCTATTTCTGGATGT  
ACAATTCATTTCCGTTAGTAATATTCATTTTCAGTTGGAAAATGCAGTCGGATGTTTGGG  
GTAGTATAAGTGATCAAGGGGTGGTAACTCATATCACGGGAGGAACTTTGCGCAGAG  
TTCCATTACTATTAATGGGTGGCTCCGTGATTTTTTATGGGCACAGGCATCCCAGGTAAT  
TCAGTCTTATGGTTCTTCAATTATCCGCGTATGGCCTTTTTTTTTCTAGGTGCTCATTTTGT  
TGGGCTTTCAGTTAATGTTTCTATTCAGCGGCCGTGGTTATTGGCAAGA ACTTATTGAA  
TCCATCGTTTGGGCTCATAACAAATTAAGTTGCTCCTGCTACTCAGCCTAGAGCCTT  
GAGCATTGTACAAGGACGTGCTGTAGGAGTAACCCATTACCTTCTGGGTGGAATTGCC  
ACAACATGGGCGTTCTTCTTAGCAAGAATTATTGCAGTAGGAATGGCATTACGATTTCC  
AAGGTTTAGCCAAGGCTTAGCTCAGGACCCCACTACTCGTCGTATTTGGTTTGGTATTG  
CTACCGCGCATGACTTCGAGAGTCATGATGATTA TACTGAGGAACGTCTTTATCAGAATA  
TTTTTGCTTCTCACTTCGACAGTTAGCAGTAATTTTTCTGTGGACTTCCGGAAATCTGT  
TTCATGTAGCTTGGCAAGGAAATTTTGTAGTCATGGGTACAAGACCCTTTACATGTCAGA  
CCTATTGCTCATGCAATTTGGGATCCTCATTTTGGTCAACCGGCTGTGGAAGCCTTTACT  
CGAGGGGGTGCTCTCGGCCAGTGAATATCGCGTATTCTGGTGTATTATCAGTGGTGGTA  
TACAATCGGCTTACGCACTAATGAAGATCTTTATACTGGAGCTCTTTTTCTATTGTTTCTT  
TCTGCCATATCCTTAATAGCGGGTTGGTTACACCTACAACCGAAATGGAAACCCAGTGT  
CTCCTGGTTCAAAAATGCCGAATCCCGTCTCAATCACCAATTTGTCAGGACTCTTCGGAG  
TAAGTTCCTTGGCTTGGACAGGGCATTTAGTTCATGTCGCTATTCCCGGATCCAGAGGG

CAGTCTGTTTCGATGGAATAATTTCTTAGATGTATTACCGCATCCCCAAGGGTTAGGCCCG  
CTTTTTACAGGTCAATGGAATATTTATGCCAAAACCCCGATTCCGGTAGTCATTTATTT  
GGTACCTCCCAAGGAGCGGGAACCTGCCATTCTAACCCCTTCTTGGGGGATTCCATCCAC  
AAACGCAAAGTTTATGGCTGACCGATATGGCACACCATCATTTAGCTATTGCAGTCTTTT  
TTCTCGTTGCTGGTCATATGTATAGAATACTTCGGGATTGGGCACAGTATGAAAGAT  
CTTTTAGAAGCACATAATCCTCCGGGGGGCGATTGGGACGTGGACATAAAGGTCTTTA  
TGACACAATCAATAATTCGATTCATTTTCAATTAGGCCTTGCTCTAGCCTCTTTAGGGGT  
TATTACTTCCTTGGTAGCTCAACACATGTACTCTTTACCTGCTTATGCATTCATTGCACA  
GGACTTTACTACTCAAGCTGCATTATATACTCATCACCAATACATCGCAGGATTCATCAT  
GACAGGAGCCTTTGCTCATGGAGCTATATTCTTCATTAGAGATTACAATCCGGAGCAGA  
ATGAGGATAATGTATTGGCAAGAATGTTAGACCATAAAGAAGCTATCAAATCCCATTTA  
AGTTGGGCCAGCCTCTTTCTGGGTTTCCATACCTTAGGACTTTATGTTCATAACGACGTC  
ATGCTCGCTTTTGGTACTCCGGAGAAACAAATCTTGATCGAACCCATATTTGCCCAATG  
GATACAATCTGCTCATGGCAAGACTTCATATGGGTTTCGATGTACTTTTATCTTCAACGAC  
TGGCCCAGCATTCAACGCGGGTTCGAAGCATATGGTTGCCCGGTTGGTTAAATGCTGTTA  
ATGAG-----AATAGTAATTCATACTATTCTTAAACAATAGGTCCTGGAGACTTCTTGGTTCATC  
ATGCTATTGCTCTAGGTTTACATACAACTACATTGATCTTAGTAAAAGGCGCTTTAGATG  
CGCGTGGTTCCAAGTTAATGCCAGATAAAAAGGATTTTCGGTTATAGTTTTCTTGGCGAC  
GGTCCGGGACGGGGTGGTACTTGTGATATTTCCGGCTTGGGACGCATTTTATTTGGCAGT  
TTTCTGGATGTTAAATACCATTGGATGGGTTACTTTTTATTGGCATTGGAAGCACATCAC  
ATTATGGCAGGGTAACGTTTTCACAGTTTAAATGAATCCTCCACTTATTTGATGGGATGGTT  
AAGAGATTATCTATGGTTAAACTCTTCACAACTTATCAATGGATATAACCCTTTTGGTAT  
GAATAGTTTATCGGTCTGGGCGTGGATGTTCTTATTTGGACATCTTGTTTGGGCTACTGG  
ATTTATGTTCTTAAATTTCTGGCGCGGATATTGGCAGGAATTGATTGAAACTTTAGCATG  
GGCTCATGAACGAACACCTTTGGCTAATTTGATTTCGATGGAGAGATAAACCTGTGGCTC  
TTTCCATTGTACAAGCAAGATTGGTTGGGTTAGCCATTTTCTGTAGGTTATATATTCA  
CTTATGCAGCCTTCTTGATTGCCTCTACATCAGGCAAATTTGGTATGTCACACTCAGTAA  
AGATTTATGATACATGTATAGGGTGTACTCAATGTGTACGAGCCTGCCCCACAGATGTAT  
TAGAAATGATACCTTGGGACGGATGTAAAGCTAAGCAAATTGCTTCCGCTCCAAGAAC  
AGAGGACTGTGTAGGTTGTAAGAGATGTGAATCTGCCTGTCCAACAGATTTCTTGAGT  
GTCCGGGTTTATTTATGGCATGAGACAACCTCGCAGCATGGGTCTAGCTTATATGATAACT  
CTCAACTTACCCTCTATTTTTGTTCTTTAGTGGGCCTAGTATTTCCGGCAATTGCAATG  
GTTTCTTTATTTCTTCATGTTCAAAAAACAAGATTGTCATGCGAGATATAAAAAACATAT  
CTCTCTGTGGCACCTGTGCTAAGTACTCTATGGTTCGGGGCTTTAGCAGGTCTATTGATA  
GAGATCAATCGTTTATTCCCGGATGCGTTGGCATTCCCTTTTTTT-----ATGACTGCAATT  
TTAGAGAGACGCGAAAGCGAAAGCCTATGGGGTTCGCTTCTGTAACCTGGATAACCAGCA  
CTGAAAACCGTCTTTACATTGGATGGTTCGGTGTTTTGATGATCCCTACCTTATTGACCG  
CAACCTCTGTATTTATTATCGCCTTCATTGCTGCTCCTCCAGTAGATATTGATGGTATTTCG  
TGAACCTGTTTCCGGGTCTCTACTTTATGGAACAATATTATTTCCGGGTGCCATTATTCCT  
ACTTCTGCGGCTATAGGTTTGCACCTTTACCCGATATGGGAAGCGGCATCCGTTGATGA  
ATGGTTATACAATGGTGGTCTTATGAACTAATTGTTCTACACTTCTTACTTGGTGTAGC  
TTGTTACATGGGTCGTGAGTGGGAACCTAGTTTCCGTCTGGGTATGCGCCCTTGGATTG  
CTGTTGCATATTCAGCTCCTGTGAGCTGCTGCTGCTGTTTTCTTGATCTACCCAATTG  
GTCAAGGAAGCTTCTCTGATGGTATGCCCTAGGAATCTCTGGTACTTTCAACTTCATG

ATTGTATTCCAGGCTGAGCACAACATCCTTATGCACCCATTTACATGTTAGGTGTAGCT  
GGTGTATTTCGGCGGCTCCCTATTTCAGTGCTATGCATGGTTCCTTGGTAACCTCTAGTTTG  
ATCAGGGAAACCACTGAAAATGAATCTGCTAACGAAGGTTACAGATTTGGTCAAGAGG  
AAGAACTTATAATATCGTAGCTGCTCATGGTTATTTTGGCCGATTGATCTTCCAATATGC  
TAGTTTCAACAATTCTCGTTCTTTACATTTCTTTTATAGCTGCTTGGCCTGTAGTAGGTATC  
TGGTTCACTGCTTTAGGTATCAGTACCATGGCTTTCAACCTAAACGGTTTCAATTTCAA  
CCAATCCGTAGTTGACAGTCAAGGTCGTGTAATTAACACTTGGGCTGATATCATCAACC  
GTGCTAACCTTGGTATGGAAGTTATGCATGAACGTAATGCTCACAACCTCCCTCTAGAC  
CTAGCTGCTGTTGAAGCTCCATCTACAAATGGAATGGGTTTGCCTTGGTATCGTGTTTCAT  
ACCGTCGTATTGAATGATCCCGGTCGGTTGCTTTCTGTCCATATAATGCATACAGCTCTA  
GTTTCTGGTTGGGCCGGTTCGATGGCTCTATACGAATTAGCAGTTTTTGTATCCCTCTGAC  
CCCGTTCTTGATCCAATGTGGAGACAGGGTATGTTTCGTTATAACCCTTCATGACTCGTTTA  
GGAATAACCAATTCATGGGGTGGTTGGAGTATTACA---GGAGGGACTATAACGAATCCG  
GGTATTTGGAGTTACGAAGGTGTGGCCGGGGCACATATTGTGTTTTCTGGTTTGTGCTT  
CTTGGCAGCTATCTGGCATTGGGTATATTGGGATCTAGAAATTTTCTGTGATGAACGTAC  
AGGAAAACCTTCTTTGGATTTGCCAAGATCTTTGGAATTCATTTATTTCTCTCAGGGGT  
GGCTTGCTTCGGGTTTGGCGCATTTTCATGTAACAGGCTTGTATGGTCCTGGAATATGGG  
TATCCGATCCTTATGGACTAACTGGAAAAGTACAATCTGTAAATCCCGCGTGGGGCGTG  
GAAGGTTTTGATCCTTTTGTTCGGGAGGAATAGCCTCTCATCATATTGCAGCAGGGAC  
ATTAGGCATATTAGCGGGTCTATTCCATCTTAGTGTCCGCCCGCCCAACGTCTATACAA  
AGGATTACGTATGGGCAATATTGAAACTGTCTTTCCAGTAGTATCGCTGCTGTCTTTTT  
TGCAGCTTTTGTGTTGCTGGAACATATGTGGTATGGTTCAGCAACTACCCGATCGAAT  
TATTTGGTCCCACTCGTTATCAATGGGATCAAGGCTACTTCCAGCAAGAAATATATCGAC  
GAGTTGGTACTGGGCTAGCCGAAAATCAAAGTTTATCAGAAGCTTGGTCTAAAATTCC  
CGAAAATTAGCTTTTTATGATTACATCGGCAATAATCCAGCAAAGGGGGGATTATTCA  
GAGCGGGCTCAATGGACAACGGGGATGGAATAGCTGTTGGATGGTTAGGACACCCCAT  
CTTTAGAGATAAAGAGGGGCGTGAGCTTTTTGTACGTCGTATGCCTACTTTTTTTGAAA  
CATTTCCAGTAGTTTTAGTAGACGGAGACGGAATTGTGAGAGCCGATGTTCTTTTTAGA  
AGGGCAGAATCGAAATATAGTGTGCAACAAGTAGGTGTAACCTGTTGAGTTCATGGTG  
GCGAACTCAATGGAGTCAGTTATAGTGATCCTGCTACTGTGAAAAAATATGCTAGACGT  
GCTCAATTGGGTGAAATTTTTGAATTAGATCGTGCTACTTTGAAATCGGATGGTGTTTTT  
CGTAGCAGTCCAAGGGGTTGTTTTACTTTTGGACATGCCTCGTTTGCCTTGCTCTTCTT  
TTTCGGACACATTTGGCATGGTGCTAGAACCTTGTTTCAGAGATGTTTTTGTGGTATTG  
ACCCAGATTTGGATGCTCAAGTGGAATTTGGAGCATTCCAAAAACTTGGAGATCCAAC  
TACAAAGAGACAAGTAGTC-----GTGGAAACGCTCTTTAATGGA  
ACTTTAGCTTTAGCTGGTCGTGACCAAGAAACCACTGGTTTTCGCTTGGTGGGCCGGGA  
ATGCCCGACTTATCAATTTATCCGGTAAACTACTCGGAGCTCACGTAGCCCATGCCGGA  
TTAATCGTATTCTGGGCCGGAGCAATGAACCTATTTGAAGTGGCTCATTTTCGTACCAGA  
GAAGCCCATGTATGAACAAGGATTGATTTACTTCCCATCTAGCTACTCTAGGCTGGG  
GGGTAGGTCTTGGTGGGGAAGTTATAGACACCTTTCCATACTTTGTATCTGGAGTACTT  
CACTTAATTTCTCTGCAGTATTGGGCTTTGGCGGTATTTATCATGCACTTCTAGGACCT  
GAGACTCTTGAAGAATCTTTTCCATTCTTCGGTTATGTATGGAAAGATAGAAATAAAAT  
GACTACAATTTGGGTATTCACTTAATCTTGTAGGTATAGGTGCTTTTCTTCTAGTACTC  
AAGGCTCTTTATTTTGGGGGTGTATATGATACCTGGGCTCCCGGTGGGGGAGATGTAAG



AAAAATTACCAACTTGACCCTTAGCCCAAGTGTTATATTTGGTTATTTACTAAAATCGCC  
CTTTGGGGGAGAAGGGTGGATTGTTAGTGTGGACGATTTAGAAGATATAATTGGAGGA  
CATGTATGGTTAGGTTCCATTTGTATACTTGGTGGAACTCTGGCATAATCTTAACCAAACCT  
TTTGCATGGGCTCGCCGCGCACTTGTATGGTCTGGAGAGGCTTACTTGTCTTATAGTTTA  
GGTGCTTTAGCTGTCTTTGGTTTCATCGCTTGTGCTTTGTCTGGTTCAATAATACCGCT  
TATCCTAGTGAGTTTTATGGGCCACCGGGCCAGAAGCTTCTCAAGCTCAAGCATTAC  
TTTTCTAGTTAGAGACCAACGTCTTGGGGCTAACGTGGGATCCGCTCAAGGACCCACT  
GGTTTAGGTAAATATCTAATGCGTTCCTCCGACTGGAGAGGTCATTTTTGGAGGAGAAAC  
TATGCGTTTTTGGGATCTCCGTGCTCCTTGGTTGGAACCTCTAAGGGGTCCCAATGGTT  
TGGACTTAAGTAGGCTGAAAAAAGACATAACCTTGGCAAGAACGGCGTTCCGCGG  
AATATATGACTCATGCTCCTTTGGGTTCTTTAAATTCCGTGGGTGGCGTAGCTACTGAGA  
TCAATGCAGTCAATTATGTCTCTCCTAGAAGTTGGTTAGCTACCTCTCATTTTGTCTAG  
GATCTTCCCTATTCGTGGGTCATTTGTGGCATGCGGGAAGGGCCCGTGCAGCTGCAGCA  
GGATTTGAAAAAGGAATTGATCGTGATTTTGAACCTGTTCTTTCCATGACCCCTCTTAA  
CATGACTATAGCCCTTGGTAGATTTACCAAAGACGAAAATGATTTATTTGATATTATGGA  
TGACTGGTTACGGAGAGACCGTTTTGTTTTGTAGGTTGGTCCGGCCTATTGCTATTTCC  
TTGTGCCTATTTTCGCTTTAGGAGGTTGGTTCACCGGTACAACCTTTGTAACCTCATGGTA  
TACCCATGGATTGGCTAGTTCCTATTTGGAAGGCTGCAATTTCTTAACCGCCGCAGTTTC  
TACTCCTGCTAATAGTTTAGCACATTTCTTTGTTGCTACTATGGGGTCCTGAAGCACAAG  
GCGATTTTACTCGTTGGTGTGAGTTAGGCGGTCTGTGGACTTTTGTGCTCTCCACGGC  
GCTTTCGGACTAATAGGTTTCATGTTACGTCAATTCGAACTTGCTCGATCTGTTCAATTG  
CGACCTTATAATGCAATCGCATTCTCTGCTCCAATTGCTGTTTTTGTCTGTATTCTGA  
TTTATCCACTAGGTCAGTCTGGTTGGTTCTTTGCACCTAGTTTTGGTGTAGCAGCTATAT  
TTCGATTCATCCTCTTCTTCCAAGGGTTTCATAATTGGACGTTGAACCCATTTTCATATGA  
TGGGAGTTGCCGGCGTATTGGGCGCTGCTCTGCTATGCGCTATTCATGGTGCTACCGTA  
GAAAACACTTTATTCGAAGATGGTGACGGTGCAAATACATTCGGTGCTTTTAAACCCAAC  
TCAAGCCGAAGAGACTTATTCAATGGTCACCGCTAACCGTTTTGGTCCCAAATCTTTG  
GGGTTGCTTTTTTCCAATAAACGTTGGTTACATTTCTTTATGTTATTTGTACCAGTAACCG  
GTTTATGGATGAGTGCTCTTGGAGTAGTCGGTCTAGCTCTGAACCTACGGGCCTATGAC  
TTTGTTCAGGAAATCCGTGCAGCAGAAGATCCTGAATTTGAGACTTTCTACACCAA  
AAATATTCTTAAACGAAGGTATTCGTGCTTGGATGGCGGCTCAGGATCAGCCTCATG  
AAAACCTTATATCCCTGAGGAGGTTCTACCCCGTGGAACGCTCTTATGTCTGGAAGC  
ACGGGAGAACGTTCTTTTGCTGATATTATTACCAGTATTCGATACTGGGTCATTCATAGC  
ATTACGATACCTTCCCTATTCATTGCGGGTTGGTTATTCGTCAGCACGGGTTTAGCTTAC  
GATGTGTTTGAAGCCCTCGACCGAACGAGTATTTTACAGAGAGCCGACAAGGAATTC  
CATTAATAACTGGCCGTTTTGATCCTTTGGCACAACCTCGATGAATTTAGTAGATCTTTTA  
TGACCATAGATCGAACCTATCCAATTTTACAGTGCGATGGTTGGCTGTTACGGACTA  
GCTGTACCTACCGTTCTTTTTTGGGGTCAATATCAGCAATGCAGTTCATCCAACGAATG  
GCTACACAAACCGTTGAGGGTAGTTCTAGA--TCTGGTCCAAGACAAACTGGTGTAGG  
GTCTTTATTGAAACCATGAATTCGGAATATGGTAAAGTAGCCCCTGGATGGGGAACCTA  
CCCCTTTGATGGGTGTCGCAATGGCTCTATTTGCGATATCTTATCTATTATTTGGAGAT  
TTATAATTCTTCCGTTTTACTGGATGGAATTTCAATGAGTATGCTTACTCTCAAACCTCGTC  
GTTTACACAGTAGTGATATTCTTTGTTTCTCTTTCATCTTCGGATTCCCTATCTAATGATC  
CAGGGCGTAATCCTGGGCGTGAGGAAATGGCCGATACTACTGGAAGGATTCCTCTTTG

GCTAATAGGTACTGTAAGTGGTATTCCCTGTGATCGGTTTAAATAGGTATTTTCTTTTACGGT  
TCATATTCCGGATTGGGTTTCATCCCTGATGCTTAATATCTTAAGTTAATCTGGATCTGTC  
TTAATTCTGCCCTTCATTCGAGTAGTTTTTTTATTTCGCCAAATTGCCTGAGGCTTACGCCT  
TTTTCAATCCAATCGTAGATGTTATGCCAGTCATACCTGTGCTCTTTTTTCTCTTAGCCTT  
TGTTTGGCAAGCTGCTGTAAGTTTTCGAACGACACAATCAAACCCGAACGAACAAAAT  
GTTGAATTGAATCGTACCAGTCTCTACTGGGGGTTACTACTCATTTTCGTAAGTGTGTT  
TTATTTTCAAATTATTTCTTCAATATGGAAGTAAATATTCTCGCATTTATTGCTACTGCACT  
GTTCAATTCTAGTTCCTACTGCTTTTTTACTTATCATCTACGTAAAAACAGTCAGTCAAAA  
TGATATGGAAACAGCAACCCTAGTCGCCATATTTATATCTGGTTTACTTGTGAGTTTAC  
CGGGTACGCCTTATATACCGCTTTTGGGCAACCCTCTCAACAATAAGAGATCCATTCG  
AGGAACACGGGGACATGGAAGCATTGGTTTATAATTCTCTTAGTCTCGACTCTAGGG  
ATAATTTTTTTCGCTATCTTTTTTCGCGAACCACTAAAGTTCCGACTAAAAAGATGAA  
AATGACTATTGCTTTTCAATTGGCTGTTTTTGCATTAATTGCTACTTCATCAATTTTACTG  
ATTAGTGTACCCGTTGTATTTGCTTCTCCTGATGGTTGGTCAAGTAACAAAAATGTTGTA  
TTTTCTGGTACATCATTATGGATTGGATTAGTCTTTCTGGTGGGTATTCTTAATTCTCTCA  
TCTCT-----ATGTCACCACAAACAGAGACTAAAGCAAGTGTGGATTAAAG  
CTGGTGTAAAGATTACAAATTGACTTATTATACTCCTGAATATGAAACCAAGATACTG  
ATATCTTGGCAGCATTCCGAGTAACTCCTCAACCTGGAGTTCACCTGAGGAAGCAGG  
GGCCGCAGTAGCTGCCGAATCTTCTACTGGTACATGGACAACCTGTGTGGACCGATGGA  
CTTACCAGCCTTGATCGTTACAAAGGACGATGCTACCACATCGAGCCCCTTGTGGAG  
AAGAAAGTCAATTTATTGCTTATGTAGCCTACCCTTTAGACCTTTTTGAAGAAGGTTCT  
GTTACTAACATGTTTACTTCCATTGTGGGTAATGTATTTGGGTTCAAAGCCCTACGCGCT  
CTACGTCTGGAGGATCTGCGAATCCCTGTTGCTTATGTTAAACTTTCCAAGGCCCGCC  
TCATGGCATCCAAGTTGAGAGAGATAAATTGAACAAGTATGGTCGTCCCCTATTGGGAT  
GTACTATTAAACCAAAATTGGGGTTATCCGCTAAGAACTACGGTAGAGCTGTTTATGAA  
TGTCTCCGAGGTGGGCTTGATTTTACCAAGGATGATGAGAACGTGAACTCCAGCCAT  
TTATGCGTTGGAGAGACCGTTTTCTTATTTTGTGCCGAAGCACTTTTTAAAGCACAGACT  
GAAACAGGCGAAATCAAAGGACATTACTTGAATGCTACTGCAGGTACATGCGAAGAAA  
TGATGAAAAGGGCTGTATTTGCCAGAGAATTGGGAGTTCCTATCGTAATGCATGACTAC  
TTAACGGGGGGATTACTGCAAACTACTACCTTGGCTCATTATTGCCGAGATAATGGCCTA  
CTTCTGCACATCCATCGCGCAATGCATGCAGTTATTGATAGACAAAAGAATCATGGTAT  
GCACTTTTCGTGTAAGCTAAAGCGTTACGTATGTCTGGTGGAGATCATATTCATGCTGG  
TACCGTAGTAGGTAAACTTGAAGGTGAAAGAGAAATCACCTTGGGCTTTGTGGATTTA  
CTACGCGATGATTTTATTGAAAAAGACCGAAGTCGCGGTATTTATTTCACTCAGGATTG  
GGTTTCTTACCGGGTGTCTGCCCCTGGCTTACAGGGGGTATTACGTTTGGCATAATGC  
CTGCTCTGACCGAGATCTTTGGGGATGATTCCGTAAGTACAGTTCGGTGGAGGAACTTTA  
GGACATCCTTGGGGAAATGCACCGGGTCCGTAAGTACGAGTAGCCCTAGAAGCGT  
GTGTACAAGCTCGTAATGAAGGACGTGATCTTGTCTCGTGAAGGTAATGAAATTATCCGT  
GAGGCCAGCAAATGGAGCCCTGAACTAGCTGCTGCTTGTGAGGTATGGAAGGAGATC  
AAATTTCGAATTCGAAGCAATGGATACTTTG-----ACGGCGATACATTTATACAAACTTCT  
ACCCCGAGCACACGCAATGGAGCCGTAGACAGTCAAGCGAAATCCAATCCACGAAAT  
AATTTGATCTATGGACAGCATCGTTGTGGTCAAGGTCGTAATGCCAGAGGAATCATTAC  
CGCAGGGCATAGAGGGGGGGTTCATAAGCGTCTATACCGTAAAATCGATTTTCGACGG  
AATGAAAAGACATACCTGGTAGAATCGTAACCATAGAATACGACCCTAATCGAAATGC

ATACATTTGTCTCATACACTATGGGGATGGTGAGAAGAGATATATTTTACATCCCAGAGG  
GGCTATAATTGGAGATACCATTGTTTCTGGTACAGAAGTTCCTATAAAAATTGGAAATGC  
CCTACCTTTGACCGATATGCCCTTAGGCACGGCCATACATAACATAGAAATCACACTTG  
GAAAGGGTGGACAATTAGCTAGAGCAGCGGGTGTCTGTAGCGAAACTGATTGCAAAAG  
AGGGTAAATCGGCCACATTAATAATTACCTTCTGGGGAGGTCCGTTTGATATCCAAAAC  
TGCTCAGCAACAGTCGGACAAGTGGGTAATGTTGGGGTGAACCAGAAAAGTTTGGGT  
AGAGCCGGATCTAAGTGTGGCTAGGTAAGCGTCTGTAGTAAGAGGAGTAGTTATGA  
ACCCTGTAGACCATCCCCATGGGGGTGGTGAAGGGAGGGCCCCAATTGGTAGAAAA  
AACCCACAACCCCTTGGGGTTATCCTGCGCTTGAAGAAGAAGTAGAAAAAGGAATA  
AATATAGTGATAGTTTGATTCTTCGTCGCCGTAGTAAAATGATTCAACCTCAGACTCATT  
TGAATGTAGCGGACAACAGTGGGGCTCGAGAATTGATGTGTATTTCGAATCATAGGAGCT  
AGT---AATCGCCGATATGCTCATATTGGTGACGTTATTGTTGCTGTAATCAAAGAAGCAG  
TGCCCAATATGCCTCTAGAAAGATCAGAAGTGATCAGAGCTGTAATTGTACGTACGTGT  
AAAGAACTCAAACGTGACAACGGTATGATAATACGATATGATGACAATGCTGCAGTTGT  
CATTGATCAAGAAGGAAATCCAAAAGGAACTCGAGTTTTTGGTGCGGTTGCTCGGGAA  
TTGAGACAGTTGAATTTTACTAAAATAGTTTCATTAGCTCCCGAGGTATTAATGCTTAGT  
CCAAAAGAACCAGATTTTCGTAAACAACATAGAGGAAGAATGAAGGGAAAATCGTATC  
GAGGCAGTCGTATTTGTTTCGGTAGATACGCTCTTCAGGCACTTGAACCCGCTTGGATC  
ACATCTAGACAAATAGAAGCAGGGCGACGAGCAATGACACGATATGCACGTCGTGGTG  
GAAAAATATGGATACGCATATTTCCAGACAAACCCGTTACATTAAGACCTACGGAAACA  
CGTATGGGTTTCGGGAAAGGATCTCCTGAATATTGGGTATCTGTCTGTTAAACCGGGTCG  
AATACTTTATGAAATGGGCGGAGTATCAGAAATTATAGCCAGAGAAGCTATTTCAATAG  
CAGCATCAAAAATGCCTATACGAACTCAATTCGTTATTGCGGGAATGACTAGAATTAGA  
CGAGGATATATAGCTCGGAGACGTAGAACAAAATTCGTTTATTTTCATCAACCTTTCG  
CGGGGCTCATTCAAGGCTTACTCGAACTATTACTCAACAGAAAATGAGAGCTTTGGTTT  
CGGCTCATCGGGATAGGGGTAGGGCAAAAGAGAGATTTTCGTCGTTTGTGGATCACTCG  
GATAAATGCAGTAATTCGTGAGAAT-----GTATTCTATAGTTATAGTAGATTAATACATGAT  
CTGTATAAGGGCAATTGTTTCTTAATCGTAAATACTTGCACAAATAGCTATATCAAAT  
AGGAATTGTCTTTACATGATTTTTAATGAGATCATCAA-----ATGAT  
AAAGGAAGTATACGCTTTAGGTCAACATATATGTATGTCTGCTCACAAAGCACGAAGAG  
TTATTGATCAAATTCGTGGGCGCTCCTACGAAGAAACACTTATGATACTAGAGCTCATG  
CCTTATCGAGCGTGTTATTCCATTTTTAAATTGATTTATTCTGCAGCAGCAAATGCTAGTC  
ACAATATGGGTTTCAACGAAGCAGATTCAATCATTAGTAAAGTCGAAGTCAACGAGGG  
TACTACCATGAAAAGATTAACCTCGAGCTCGAGGACGTAGTTTTCCGATAAAAAGA  
CCCACCTGTATATAACTATTGTATTGAAAGACATATCCTTAGATGGGGTGATATGGGAC  
AAAAAATGGATGGAATCAAATATGCAGTATTTACAGACAAAAGTATTCGGTTATTGGT  
GGCGAACAAATCAATATACTTCTAATGTCTGAATCAGGATCAACTAGGACAGAAATAAAGC  
ATTGGGTGCAACTCTTCTTTGGTGTCAAGGTAATATCTATGAATAGTCATCGACTCCCGG  
GAAAGGGTAGAAGAATGGGACCTATTATGGGGCATAACAATGCATTACAGACGTATGATC  
ATTACGTTCAACCGGGTTATTCTATTCCACCTCTTAGAAAAGAAAAGAACTATGGCAGT  
TCCAAAGAAACGTACTTCTATCTCAAAAAGCGCATTCGTAAAAATATTTGGAAAAGA  
AAGGGATATTGGGCAGCGGTAAGCTTTTTTCGTTAGCGAAATCTCTTTCTACCGGGAA  
TTCAAACAGTTTTTTTTGTGCGG-----ATGGCCAAGGGTAAAGATGTCAGAGTCACA  
GTTATTTTGGAAATGTACCAGTTGTGTCCGAAACGGTGTTAAT-----AAGGAATCACCGGG

CATTTCCAGATATATTACTCAAAAAGAATCGACACAATACGCCTAGTCGATTGGAATTGA  
GAAAATTCTGTCCCTATTGTTACAAGCATAACAATTCATGGGGAGATAAAGAAAATGAAA  
ATAAGGGCCTCTGTTTCGTAAAATTTGTGAAAAATGTCGACTGATCCGCAGGCGGGGAC  
GAATTTTACTAATTTGTTCCAACCCGAGACATAAACAAAAGACAAGGAATGGTTCGAGA  
AGAAGTAGCAGTATCTACTCGGACACTACAGTGGAAGTGTGTTGAATCAAGAGCAGAC  
AGTAAGCGTCTTTATTATGGACGATTTATTATGTCTCCGCTTATGAAAGGTCAAGCCGAT  
ACGATAGGCATCGCGATGCGAAGGGCTTTGCTTGGAGAAATAGAGGGAACATGTATCA  
CACGCGCTAAATCTGAG-----ACGATACCGCATGAATATTCTACCATAGTAGGTATTGAA  
GAATCAGTACATGAAATTTTAATGAATTTGAAAGAAATTGTATTAAGAAGTAATCTGTAT  
GGAACTCGCGACGCATCTATTTGCGTCAGAGGTCCTGGATACGTAACCTGCTCAAGACAT  
CATCTCACCGTCTTCTGTGGAAATAGTTGATACTACACAGCATATAGCGAGCCTGACGG  
AACCAATTAATTTGTGTATTGGATTACAAATCGAGAGGAATCACGGATATCGTATGAAA  
ACACCAAAGAACTCTCAAGATGGAAGTTAT-----CCTATAGATGCTGTATTCATGCCTGTT  
CGAAATGCGAATCATAGTATTCATTCTTATGGGAATGGGAATGAGAAACAAGAGATACT  
TTTTCTCGAAATATGGACGAATGGAAGTTTAACTCCTAAAGAAGCACTTCACGAAGCC  
TCCCGGAATTTGATTGATTTATTTATTCCTTTTCTACATACGGAAGAAGAG-----GACATA  
ATTATAGAGGACAATCAA---AACAGGTTTACTGTACCTTTTTTTTACCTTTCATGATAGATT  
GGCT---AAACTACGGAAAAACAAAAA-----ATAGCATTGAAATTCATTTTTATTGACCA  
ATCAGAATTGCCTCCTAGGACCTATAATTGCCTCAAAAAGATCCAATATACATACATTATT  
GGACCTTTTGAATAAGAGTCAAGAAGATCTTATGAGAATTGAACATTTTTCGGATAGAAG  
ATGTAANAACACATATTGGGCATTCTACAAAAGCAT-----TTCGAAATTAATTTACCGAAG  
AATAAGATGTTCTGGGATGGAAT--GAGGGAATGTCTACAATACCGGGGTTTAGTCAG  
ATACAATTTGAGGGATTTTGTAAAGTTCATTGATCAGGGCTTGACGGAAGAACCTTTATAA  
GTTTCCAAAATTTGAAGATCCGGATCAAGAAATTGAATTTCAATTATTTGTGGAACAT  
ATCAATTTGGTAGAACCTTTATAAAAGAAAGAGATGCTGTGTATGAATCACTTACATATT  
CTTCTGAATTATATGTACCTGCGGGATTAATTTGGA AAAACCGGTAGGGATATGCAAGAA  
CAAACCATTTTTATTGGAACATTCCGCTAATGAATTCTCTGGGAACCTCTATAGTAAAT  
GGAATATACCGAATTTTGATCAATCAAATATTGCAAAGCCCCGGTATTTATTACCGTTCA  
GAATTGGACCATAACGGAATTTTCGGTCTATACTGGCACCATAATATCAGATTGGGGAGG  
AAGATCAGAATTAGAGATTGATAGAAAAGCAAGGATATGGGCTCGTGTGAGTAGGAAA  
CAAAAATATCGATTCTAGTCTATCATCAGCTATGGGTTTCAATCTAAAAGAAATTTCTA  
GATAATGTTTGCTACCCTGAAATTTTCTTGTCTTTCCTGAATGATAAGGAGAAAAAAA  
GATTGGGTCAAAGAAAATGCCATTTTGGAGTTTATCAACAATTTGCTTGTGTAGGCG  
GGGATCCGGTATTTTCTGAGTCCTTATGTAAAGAATTACAAAAGAAATTTTTTCAACAA  
AGATGTGAATTAGGAAGGATTGGTCGCCGCAATATGAACCGGAGACTGAATCTTGATAT  
ATCTCAGAACAATACATTTTTGTTACCGCGAGATGTATTGGCCGCTGGGGATCAGTTGA  
TCGGAATGAAATTTGGAATGGGTACACTTGACGAT-----ATGAATCACTTGAAAATAAA  
CGTATTCGTTCTGTAGCGGATCTGTTACAAGATCAATTCGGATTGGCTCTGGTTCGTTTA  
GAAAATGTGGTTCGAGGAACTATATGTGGAGCAATTAGG--CATAAATGGATA---CCGAC  
TCCTCATAATTTGGTAACCTTCAACTCCA-----TTAACAACCACTTATGAATCATTTTT  
CGGCTTACACCCCTTATCTCAAGTTTTGGATCAAATAATCCATTGACACAAATAGTTCA  
TGGGCGAAAATTGAGTTATTTGGGTCCTGGGGGTTGACAGGGAGAACGGCTAGTTTT  
CGGATCCGAGATATCCATCCTAGTCACTATGGACGATTTTGCCCAATTGACACGTCTGA  
AGGAATCAATGTTGGACTTATTGGATCCTTAGCGATTTCATGCGAGGATTGGTCATTGGG

GG---TCTTTAGAAAGCCCATTTTAT-----GAAATATCTGAGAGATCA-----AAAAAGGTA  
CGGATGGTTTATCTATCACCAAGTAGAGATGAATACTATATCGTAGCGGCAGGAAATTCT  
TTGGCGTTGAATCAGAATGTCCAGGAAGAAGAGGTTGTTCCAGCTCGATACCGTCAAG  
AATTCCTGACTATTGCATGGGAACAGGTTTCATCTTCGAAGCATTTTTCCCTTCCAATATT  
TTTCTATCGGAGCTTCCCTCATTCTTTTATCGAGCATAATGATGCGAATCGGGCTTTAAT  
GAGTTCTAATATGCAACGTCAAGCAGTTCGCTTTCTCGGTCCGAGAAGTGCATTGTTG  
GAACTGGGTTGGAACGCCAAGCGGCTCTAGATTCCGGGGTTCGCCATAGCCGAACA  
CGAGGGAAAGATCATTATACCGATATTGACAAGATTATTTTATCAGGCAATGGAGACA  
CTCTAAAGATTCCATTGGTTATGTATCAACGTTCCAACAAAAATACTTGTATGCATCAAA  
AACCCAGGTTCCGCGGGGTAAATGCATGAAAAAGGGCCAAATTTTAGCGGACGGTG  
CCGCTACAGTTGGTGGTGAACTCGCTTTGGGAAAAAACGTATTAGTAGCTTATATGCCA  
TGGGAAGGCTACAATTCTGAAGACGCGTACTCATTAGCGAGCGTCTGGTATATGGAGA  
TATTTATACTTCTTTTCACATACGGAAATATGAAATTCAGACTCATGTGACAAACCAAGG  
A---CCTGAAAGAATCACTAATGAAATACCGCATTTAGAAGTCCATTACTCCGCAACTTA  
GACAGAAATGGAATTGTGATGTTAGGATCTTGGGTAGAAACGGGTGATATTTAGTAGG  
TAAATTAACCTCAGATGGCGAAAGAA---TCATCCTATGCTCCCGAAGATAGATTATTA  
CGAGCCATACTTGGCATTTCAGGTATCTACTTCAAAGGAAACGTGTCTAAAACCTACCTAT  
AGGTGGCAGGGGTCGAGTTATTGATGTGAGATGGATCCAGAAAAAGGGG---GGTTCCA  
GTTATAATCCAGAAACAATTCGTGTATATATTTTACAGAAACGTGAAATCAAAGTAGGT  
GATAAAGTAGCTGGAAGACATGGGAATAAAGGTATCATTTCAAAATTTTGCCTAGACA  
AGATATGCCTTATTTGCAAGATGGAACACCTGTTGATATGGTCTTCAACCCATTAGGAGT  
ACCTTCACGAATGAATGTAGGACAGATATTTGAATGTTCCCTCGGGTTAGCGGGGGATC  
TGCTAGACAGACATTATCGAATAGCACCTTTGATGAGAGATATGAACAAGAGGCTTCG  
AGAAAAGTAGTGTTTTCTGAATTATATGAAGCCAGTAAGCAAACAGCGAATCCATGGGT  
ATTTGAACCCGAGTATCCGGGAAAAGGCATAATATTTGATGGAAGAACGGGAGATCCTT  
TTGAACAACCAGTTATAATAGGAAAGTCCATATCCTGAAATTAATTCATCAAGTTGATG  
ATAAAATCCACGGACGTTCCAGTGGACATTATGCGCTTGTTACCCAACAACCCCTTAGG  
GGAAGGGCTAAGCAAGGGGGACAACGGGTAGGAGAAATGGAAGTTTGGGCCCTAGA  
GGGATTTGGTGTGCTCATATTTACAAGAGATGCTCACTTATAAATCGGATCATATTAG  
AGCTCGTCAGGAAGTACTTGGTACTACAATCATTGGAGGAACAATACCTAACCCCTGCA  
GATGCTCCAGAATCTTTTCGATTGCTCGTTTCGAGAACTACGATCTTTGGCTCTGGAAC  
GAATCATTCTTGTATCTGAGAAGAAGTTCAGATTAATAGGAAGGAAGCT-----  
-----ATGATCGACCCGGTATAAACATCAACAACCTTCGAATTGGATTAGTTTCTCCTAAACA  
AATAAGTGCTTGGGCCAGTAAAACCTACCTAATGGAGAGATAGTTGGAGAGGTGACA  
AAACCCATACTTTTCATTACAAAACCAATAAACCCGAGAAAGATGGATTGTTTTGTGA  
AAGAATTTTTGGGCCTATAAAAAGTGGAAATTTGTGCTTGTGGAAATTATCGAGTAATCG  
GAGATGAAAAAGAAGACCCGAAATTTTGTGAACAATGTGGAGTCGAATTTGTTGATTC  
TCGGATACGAAGATATCAAATGGGATACATCAAATGGCATGTCTAGTAACTCATGTGTG  
GTATTTGAAACGTCTTCTAGTTATATCGCGAATCTTTTAGATAAACCTCTTAAAGAATT  
AGAAGGTTTAGTATACTGCGAT-----TTTGCTTTTGCTAGGCC---GTCGCTAAAAACCT  
ACTTTCTTACGATTACGAGGTTTCATTTCGAATATGAAATCCAATCCCGGAAATACAGCATC  
CCTCTTTTTTTACTACCCAAGGCTTCAATACATTTTCGAAATCGAGAAATCTCTACTGGA  
GCAGGTGCTATCAAAGAACAATTAGCCGATCTGGATTTGCGAATTATTACAGATTATTCA  
TTGGTAGAATGGAAGAATTAGGGGAAGAA---GGGCCACAGGTAATGAATGGGAAGA

TAGAAAAATTGGAAGAAGAAAGGATTTTTTGGTTAGACGCATGGAATTAGCTAAGCAT  
TTTATTCGAACAAATGTAGAACCAGAACGGATGGTTTTGTGCTTATTGCCAGTTCTTCC  
TCCCAGTTGAGACCGATCATTAGATAGATGGAGGTAAACTGATGAGTTCGGATATTA  
ATGAACTCTATAGAAGAGTTATCTATCGAAACAATACTCTTACCGATCTATTAACAACAA  
GTAGATCTACGCCAGGGGAATTAGTAATGTGTCAGGAGAAATTGGTACAAGAAGCAGT  
GGATACTTCTTGATAATGGGATCCGGGGACAACCAATGAGGGACGGCTATAATAAAG  
TTTACAAGTCGTTTTCAGATGTAATTGAAGGCAAAGAGGGGAAGATTTTCGCGAGACTCT  
ACTTGGTAAACGGGTCGATTATTCGGGGCGTTCCGTCATTGTTCGTGGGCCCTTCGCTTT  
CATTACATCGATGTGGATTGCCTCGCGAAATCGCAATAGAACTTTTCCAAACATTTGTAA  
TTCGTGGTCTAATCAGACAACATGTTGCGCCCAATATAGGAGTTGCTAAAAGTAAAATT  
CGGGAAAAAGAACCAATTGTATGGGAAATCCTTCAAGAAGTTATGCAGGGGCATCCTG  
TATTGCTGAATAGAGCACCCACTCTGCATAGATTAGGGATACAGGCATTCCAACCCATTT  
TAGTGAAGGACGTGCTATTTGTTTACATCCATTAGTTTGTAAGGGATTCAATGCAGAC  
TTTGATGGGGATCAAATGGCTGTTTCATGTACCCTTATCTTTGGAGGCTCAAGCGGAGGC  
TCGTTTACTTATGTTTTCTCATATGAATCTCTTGTCTCCAGCTATTGGAGATCCCATTTC  
GTACCAACTCAAGATATGCTTATTGGACTCTATGTATTAACGATCGGGAATCGTCGAGGT  
ATTTGTCAAATAGGTATAATCCATGTAATCACAGAAAC-----TATCAAATAAAAAGAA  
TTGACGATAATAACGAGAAGTATACGAAAGAAAAAGAACCCTATTTTTGTAGTTCCTAT  
GATGTACTTGGAGCTTATCAGCAGAAACGAATCACTTTAGATAGTCCTTTGTGGTTCCG  
ATGGCGACTAGATCAACGC---GTCATTGCATCA-----AGAGAAGTTCCCGTCGAAGTTCA  
ATATGAATCGTTGGGTACCTATCATGAGATTTATGGTCACTATCTAATAGTAAGAAGTGT  
AAAAAAGAAATCCTTTGTATATACATTCGAACCACCGTTGGTCATATTTCTTTTTATCG  
AGAAATAGAAGAAGCTATACAAGGGTTTTGGCGTGCCTGCTCATAACCGGTACCTAAG  
CTAAGTAATTATATGATAATGGAGGCACTTATGGCAGAACGGGCCGATCTGGTCTTTCA  
CAATAAAGTAATAGATGGAAGTCCATGAAACGACTTATTAGCAGATTAATAGATCACT  
TCGGAATGGCATATACATCACACATCTGGATCAAATAAAGACTCTGGGTTTTCCAGCAA  
GCCACTGCTACATCCATTTTATTAGGAATTGATGATCTTTTAACAATACCTTCTAAGGGA  
TGGCTAGTCCAAGATGCTGAACAACAAAGTTTTGATTTTGGAAAAACACCATCATTATG  
GGAATGTACACGCGGTAGAAAAATTACGTCAATCCATTGAGATATGGTATGCTACAAGT  
GAATATTTGCGCCAAGAAATGAATCCTAATTTTAGGATGACTGACCCTTTTAATCCAGTC  
CATATAATGTCTTTTTTCGGGAGCTCGAGGAAATGCATCTCAGGTACACCAATTGGTAGG  
TATGAGAGGCTTAATGTCCGATCCCCAAGGGCAAATGATTGATTTGCCATTCAAAGCA  
ATTTACGTGAAGGACTCTCTTTAACGGAATATATTTCTTGCTATGGAGCCCGCAAAG  
GAGTTGTGGATACTGCTGTACGAACATCAGATGCTGGATACCTCACGCGCAGACTTGT  
GAAGTAGTTCAACACATTGTTGTACGTAGAACAGATTGTGGTACCATCCGAGGGATTTC  
TGTGAGTCCTCGAAATGGGATGATGACC---GAAAGAATTTTTATCCAAACATTAATTGGT  
CGTGTATTAGCAGACGATATATATATGGGTCCACGATGCATTGCTATTCGAAATCAAGATA  
TTGGGATTGGACTTGTCAATCGATTCATAACC-----TTTCGAGCACAAACCAATA  
TCTATTCGAACCCCTTTACTTGCAGGAGTACATCTTGGATCTGTCGATTATGTTATGGT  
CGGAGTCCCCTCATGGCGATCTGGTCAATTGGGAGAAGCAGTAGGTATTATTGCGG  
GTCAATCTATTGGGAACCGGGTACTCAACTAACATTAAGAAGTCTTTCATACTGGTGG  
GTATTACAGGGGGTACTGCAGAACATGTACGAGCTCCTTCTAATGGAAAAATAAAATT  
TAATGAGGATTTGGTTCATCCCACACGTACACGTCATGGACATCCTGCTTTTCTATGTTA  
TATAGACTTGTATGTAACCTATTGAGAGTCAGGATATTATACATAATGTGAATATCCGCCA

AAAAGTTTTCTTTTAGTTCAAATGATCAATATGTAGAATCAGAACAAGTGATTGCTGA  
GATTCGCGCGGGAACATCCACTTTG---AATTTTAAAGAGAGGGTTCGAAAACATATTTA  
TTCTGACTCAGAGGGAGAA---ATGCACTGGAGTACCGATGTGTACCATGCACCTGAATA  
TACATATGGTAATGTTTCATCTCTTACCAAAAACAAGTCATTTATGGATATTATCAGGAGG  
TCCGTGCAGA-----TCTAGTATAGCCCCTTTTTTCGCTCCACAAGGATCAAGATCAAATCA  
ACCTTCAT-----TCTCTTTCTGTGCAACGAAGATCTATTTCTAAC-----CTCTCAGTACTA  
ATGATCAA--GTGAGACACAAATTGTTTAGTTTCGGATCTTTTCGGGG-----AGGGGTAGGA  
TTCTTGATTAT--TCCGGACCTGATCGAATCATATGCAATGATCATTGTAATTCAGATAC  
CCTACC---ACTCTCCACGAGAATTCTGAT-----TTATTGGCAAAGAGGGCGAAGAAATAGA  
TTCATCATTCCATTCCAATCTAATCAAGAACGAGAGAAAGAACTAATGCTCTGTTCAGG  
TATCTCGATTGAAATACCCATAAAT-----GGTCTTTTCCGTAGAAATAGTATTCTTGCTTAT  
TTCGATGATCCCCGATACAGAAGAAACAGTTCGGGAATTACTAAATATGGGACTATAGA  
AGTGCATTCAATTCTCAAAAAGAGGAT-----TTGATTGAGTATCGAAGA-----AAAGAA  
TTTAGGCCAAAATACATGAAAGTAGATCGATTCTTTTTTCATTCCTGAGGAAGTGCATATC  
TTACCCGGATCTTCTTCCATAATGGTACAGAACAATAGTATCATTGGAGTAGATACACGA  
ATAACTTTAAATACAAGAAGCCGAGTAGGTGGATTGGTCCGAGTGGAGAGAAAAAAA  
AAAAAGATTGAATTGAAAATCTTTTCTGGAGATATCCATTTTCTGGAGAGACAGATAA  
GATATCCCGGCACAGTGGCATCTTGATACCACCGGAACAAAAA-----AACTCT  
AAGGAATCAAAA-----AAATGGAAAATTGGATCTATGTCCAACGG-----ATCACACCTA  
CTAAGAAAAAG-----TATTTTGTTTTGGTTTCGACCCGTAGTCACATATGAAATAGCAGAC  
GGGATAAATTTAGCAACGCTTTTCCCCCAGGATCTGCTGCAGGAAAGGGATAATGTGC  
AACTTAGAGTTGTCAATTATATCCTTTATGGAAACGGCAAACCAATTCGAGGAATTTCT  
CACACAAGTATTCAATTAGTTTCGAACTTGTTTAGTATTGAATTGGGACCAAGACAAAA  
A-----GATTCTTCTATAGAAGAGGTTTCATGCTTCTGTGTGCAAGTAAGGGCAATTGAT  
CTGATTCGAGATTTTCATAAGAATGGACTTAGTTAAGCCCCCTATTTTCATATACCGTAAAA  
AGGAATGATCCGGCAGGTTTCAGGATTGATTCCCGAT---AATGGATCAGATCGCACCAATA  
TCAATCCTTTTAT-----TCCAAGGCAAGG-----ATTCAGCAATCACTTAGCCAA  
CATCAAGGAATCTATTCGTACGTTGTTGAATAGA-----AATAAGGAATGCCACTCTTTGA  
TAATTTTGTATCATCCAATTGTTTTCGA-----ATGGGCCTATTCAACGGTTTGAAATATCA  
TAAT-----GTGACAAAAGAATCAGATTCCTAATTCCAATTCGGAATTCGTTGGGGCCC  
TTGGGGACT-----GTCCCTAAAATTGCGAATTTTGATTTA-----TCTTATCATTTAATAACG-  
----CATAATCAGATCTTG---AGAAATAAATATTTGCTACTTGACAAT-----TTTAAAAAG  
ATTTTCCAAGTACTTAAA-----TATTATTTAATGGATGAAAATGGGGGA-----ATTAATAA  
TCCCGATCCATCCAGTAACATCATTTTGAATCCAGTCAATTTGAATTGGTATTTTCTCCAT  
CACGATTATTGTGAAGAGACACCCATAATAATTAGC---CTTGGACAATTTATTTGTGAAA  
ATGTATGTATATACAAAAGAGACCA-----CACCTAAAATCTGGTCAAGTTCTAATTGT  
CCAT---GTTGACTCTTTAGTAATAAGATCAGCTAAGCCCTATTTGGCCACTACAGGAGCA  
ACGGTTCATGGCCATTATGGGGAAATCCTGTACGAAGGAGATACATTAGTTACATTTATA  
TATGAAAATCGAGATCTGGTGATATAACGCAGGGTCTTCCAAAGGTGGAACAAGTGT  
TAGAAGTGCGTTTCGATTGATTCAATATCGATGAATCTAGAAAAGAGGGTTGAAGGTTGG  
AACGAACATATAACAAGAATTCTTGGAAATTCCTTGGGGATTCTTGATTGGTGCTGAGCT  
AACTATAGCGCAAAGTCGTATCTCTTTAGTTAATAAGATCCAACGGTTTATCGATCCCA  
GGGGGTGCAGATTCATAATAGGCATATAGAAATTATTGTACGTCAAATAACATCAAAAG  
TCTTGGTTTCAGAA-----GATGGAATGTCTAATGTTTTTTTACCCCGGAGAACTAATTGG

ATTGTTGCGAGCGGAACGAACGGGGCGTACTTTGGAAGAAGCGATCTGTTACCGAGCC  
GTCTTATTGGGAATAACGAGGGCATCTCTGAATACTCAAAGTTTCATATCCGAGGCGAG  
TTTTCAAGAACTGCTCGAGTTTTAGCAAGAGCCGCTCTACGAGGTCGTATCGATTGGT  
TGAAAGGCCTGAAAGAGAACGTTGTTCTGGGGGGGATGATACCCGTTGGTACCGGATT  
CAAAGGATTGGTGCACCTGTTCA-----AGGCAACACAAGAACATTCCT-----TTGGAAATA  
AAAACGAAGAATCTATTCGGGGGGGAAATGAGA-----GATATTTTGTTCACCACAGAG  
AATTATTTGATTCTTGCATCCAAAAAATTTCCATGATACATCAGAACAA-----  
-----ATGACAAGAAGATATTGGAACATCAATTTGGAAGAGATGATGGAAGC  
GGGAGTTCATTTTGGTCATGGTACTAGGAAATGGAATCCTAGAATGGCACCTTACATCT  
CTGCAAAGCGTAAAGGTATTTCATATTACAAATCTTACTAGAACTGCTCGTTTTTTATCAG  
AAGCTTGTGATTTAGTTTTTGTATGCAGCAAGTAGGGAAAAACAATTCCTAATAGTTGGT  
ACCAAAAATAAAGCGGCTGATTCAGTAGCATCGGCTGCAATAAGGGCTCGGTGTCATTA  
TGTTAATAAAAAATGGCTCGGTGGTATGTCAACGAATTGGTCCACTACAGAAACGAGA  
CTTCATAAGTTCAGGGACTTGAGAGTGGAACAAAAGACGGGGAGACTCAATCGTCTTC  
CGAAAAGAGATGCAGCAATGTTGAAGAGACAATTATCGCACTTGCAAACATATCTGGG  
CGGGATCAAATATATGACGGGGTTACCCGATATTGTAATCATCGTTGATCAGCAAGAAG  
AATATACGGCTCTTCGAGAATGTGTCACCTTTGGGAATCCAACGATTTGCTTAATCGATA  
CAAATTGTGACCCGGATCTCGCAGATATTTGATTCCAGCGAATGATGACGCTATAGCTT  
CAATCCGATTAATTCTTAACAAATTAAGTATCCGCAATTTGTGAGGGTCGTTCTAGC---TAT  
AGAAGAAATCGTATGGGACAAAAATAAATCCACTTGGTTTCAGACTTGGTACAACCTC  
AAGGTCATCATTCTGTTTGGTTTGCACAACCAAAAAAGTATTCTGAGGGTCTCGAGGA  
AGATCAAAAAATACGAGATTGTATCAAGAATTATGTACAAAAAATATGAGAATATCCT  
CCGGT--GTCGAGGGAATTGCACGTATAGAGATTCAAAAAAGAATCGATCTCATCCAGG  
TCATAATCTATATAGGATTCCCAAAGTTGTTAATAGAGGGTAGACCACGA-----GGA  
GTCGAAGAATTACAGATCAATGTACAAAAAAGTTTCATTCTGTGAACCGAAAACCTCA  
ACATTGCTATCACAAGAATTGCAAAACCTTATGGACAACCTAATATTCTTGCAGAATTTA  
TAGCTGGACAATTAAGAATAGAGTTTCATTTGAAAGGCGATGAAAAAGGCTATTGA  
ATTAAGTGAACAAGCAGATACAAAAGGAATTCAAGTGCAAATTGCAGGGCGTATCGAC  
GGAAAAGAAATTGCACGTGTCGAATGGATTAGAGAAGGTCGAGTCCCCTACAAACCA  
TTCGAGCTAAAATTGATTATTGTTCCCTATACAGTTTCGAACTATCTATGGGGTATTGGGCAT  
CAAAATTTGGATATTTGTAGACGAGGAAATGTCTCGTTACCGAGGACCTCGTTTTTAAAA  
AAATACGCCGTCTAGGGGCTTTACCGGGACTAACTAGTAAAAGGCCTAGAGCTGGAAG  
TGATCTTAGAAACCAATCGCGTTCCGGGAAA---AGGTCGCAATATCGTATTCTGCTAGA  
AGAAAAACAAAATTGCGTTTTTCATTATGGTCTGACAGAGCGGCAATTACTTAAATACG  
TTCGTATCGCTGGAAAAGCCAAAGGATCAACAGGTAAAGTTTTACTACAATTACTTGAA  
ATGCGTTTGGATAACATCCTTTTTCGATTGGGTATGTCTTCGACCATTCTGGAGCCCGG  
CAATTAGTTAACCATAGACATATTTTAGTTAATGGTCTGATAGTAGATATACCAAGTTATC  
GTTGCAACCCCGAGATCTTATTACGGCGAAGGATGAACAAAAATCCAGAGCTCTGAT  
TCAAAATTATCTTGATTCATCCCCCAT--GAGGAATTGCCAAAACATTTGACTCTTCAC  
TCATTCCAATAT-----AAAGGATTAGTCAATCAAATAATAGATAGTAAATGGGTTGGTTG  
AAAATAAATGAGTTGCTAGTCGTAGAATATTATCCCGTCAGACTATGTCACGTCGAGGT  
ACTGCAGAAGAAAAAACTGCAAATCCGATCCAATTTATCGTAATCGATTAGTTAACAT  
GTTGGTTAACCGTATTCTGAAACACGGAAAAAAATCATTGGCTTATCAAATCTCTATC  
GAGCCGTGAAAAAGATTCAACAAAAGACAGAAACAAATCCACTATCTGTTTTACGTCA



AGCAATACGTGGAGTAACTCCCGATATAGCAGTAAAAGCAAGACGTGTAGGCGGATCG  
ACTCATCAAGTTCCCATTGAAATAGGATCTACACAAGGAAAAGCACTTGCCATTTCGTTG  
GTTATTAGGGGCATCCCGAAAACGTCCGGGTCGAAATATGGCTTTCAAATTAAGTTCCG  
AATTAGTGGATGCTGCCAAAGGGAGTGGCGATGCCATACGCAAAAAGGAAGAGACTC  
ATAGAATGGCAGAGGCCAAATAGAGCTTTTGCACATTTTCGTATGGGTAGGGACACTATT  
TCCGACATAATAACTTCTATACGAAATGCTGACATGGAAAAAAAAGGAACGGTTCGAAT  
AGCATTTACTAATATCACCGAAAACATTGTTAAAATACTTCTACGAGAAGGTTTTATCGA  
AAACGTGAGGAAACATCGGGAAAGCAACAAATATTTCTTGGTTTCAACCCTGCGACAT  
AGAAGG-----AATAGGAAAGGACCATATAGA-----ACTATTTTA-----AAACGTATCAGC  
CGACCCGGTCTACGAATCTTTTCCAACATCAACGAATTCCTAGGATTTTAGGTGGAAT  
GGGGATTGTAATTTCTTCTACTTCTCGAGGTATAATGACAGACCGAGAGGCTCGACTAG  
AAGGAATCGGAGGAGAAATTTTGTGTTATATATGGATGGCAAAACCTATACTCAGAATT  
GGTTCACGTAGGACTGGACGTATTGGTTCACGTAAAAATGGACGTAGAATCCCAAAGG  
GAGTTATTCATGTTCAAGCAAGTTTCAACAATACCATTGTGACTGTTACAGATGTACGG  
GGTCCGGTGATTCTTGGTCCTCCGCCGGTACTTGTGGATTCAGGGGCACAAGAAGAG  
GGACACCGTTTGCTGCTCAAACCGCAGCAGGAAATGCTATTCGTACAGTAATGGAGCA  
GGGAATGCAACGGGCAGAAGTCATGATAAAGGGTCTTGGGCTCGGAAGAGATGCAGC  
ATTACGAGCCATTCGTAGAAGTGGTATACTATTAAGTTTCGTACGGGACGTAACCCCTAT  
GCCACATAATGGATGTAGACCTCCTAAAAACGACGTGTGATGCCAACTATTAACAAC  
TTATTAGAAACACAAGACAGCCAATCCGAAATGTCACGAAATCCCCCGCTCTTCGGGG  
ATGTCCTCAGCGCCGAGGAACATGTACTAGGGTGTATACTATCACCCCCAAAAACCA  
AACTCTGCCTTACGTAAAGTTGCCAGAGTACGATTAACCTCTGGATTTGAAATCACTGC  
TTATATACCTGGTATTGGCCATAATTCACAAGAACATTCTGTAGTCTTAGTAAGAGGAGG  
GAGGGTTAAGGATTTACCCGGTGTGAGATATCACATTGTTTCGAGGAACCCTAGATGCTG  
TCGGAGTAAAGGATCGTCAACAAGGGCGTTCTAAATATGGGGTCAAAAAGCCAAAAT  
GGCAAGGAAAAGTTTGATTCAGAGGGAGAAGAAGAGACAGAAATTGGAAGAGAAAT  
ATCATTTGATTCGTATCCTCAAAAAAAGAAATAAGT-----AAAGTTCCATCGTTGA  
GGGACAAATGGGAAATTCATGGAAAATTACAATCCCCACCGCGTAATAGTGCCTTAC  
ACGTCTTCATCGACGTTGTTTTTTGACCGGAAGACCGAGAGCTAACTATCGAGACTTTG  
GGTTATCCGGACACCTACTTCGTGAAATGGTTCATGCATGTTTGTGCGGGGGCAACA  
AGATCAAGTTGGATGGTCAAAAATACATTCATCTCAGTTATTTTCGCAAGAC-----GAAAA  
AGTAGCGAGCAGCGGGTCTGTTGAATTTCAAGTATTCGGTTTCACCAATAAGATACGGA  
GACTTACTTCACATTTGAAGTTGCACAGAAAAGACTATTTATCTCAGAGAGGTCTACGG  
AAAATTCTGGGAAAACGTCAACGGCTCCTGGCTTATTTTTCAAAGAAAAATAGAGTAC  
GTTATAAAGAATTAATTTTTCAATTGGATATTCGGGAGCCAAAAACTCGT-----ATGGTAA  
AACTTCGTTTGAAACGATGTGGTAGAAAGCAACGAGTCATCTATCGAATCGTTGCAATT  
GATGTTTCGATCCCGAAGAGAAGGAAGAGATCTTCGAAAGTGGGTTTTTACGATCCGA  
TAAAGAATCAAACCTTATTTAAATGTTCCCGCTATTCTATATTTCTTGAAAAGGGCGCTC  
AGCCTACAGGAACTGTTTCATGATATTTCAAAGAGGGCAGAGGTATTTAAGGAACTCCG  
TCTTAATCAAACGAAATCAAATTACATGGATAAATCAAGCGACTTTTTCTTAAATCCA  
AGCGATCTTTTCGTAGGCGTTTGCCCCCAATTGGATCGGGGGATCGAATTGACTATAGA  
AATATGAGTTTAATTAGTCGATTTATTAGTGAACAAGGAAAAATATTATCTAGACGAGTG  
AATAGATTGACCTTGAAACAACAACGATTAATTACTATTGCTATAAAAACAAGCTCGTATT  
TTATCTTCGTTACCTTTTCTTAATAATGAGAAA-----CAATTTGAGAGAAGTGTGAGT

CCCTAGAACTGCGGGTCCTAGAACAGAAAATAAAGTGACACGTTCCCTAAAAAAAAT  
CCTTTTGTAGCTAATCATTATTAGGAAAAATTGAGAAGCTCAACATGAGAGCGGAAAA  
AGAGATAATACTAATTGGTCCCCGGGCATCTACCATTATACCCACAATGATCGGCCATAC  
AATTGCTATTCATAATGGAAAAGAACATTTGCCTGTTTATATAACAGATCGTATGGTAGG  
TCACAAATTGGGAGAATTTGCACCTACTCTTAATTTCCGGGGACATGCGAGAAACGATA  
ATAGCTCTCGTCGTATGATTTTGAATCTTTTCTACTAGGCAATCTATTATCCTTATGCAT  
GAAGATAATAAATTCGGTCGTTGTGGTCCGACTCTATTATGGATTTCTGACCACATTCTT  
CATAGGGCCCTCTTATCTCTTCCCTTCTCCGAGCTCGGGTTATGGAAGAAGGA-----AC  
CGAGAAGGAGGTATCAGCAACAACCTGGTTTTATTACAGGACAGCTCATGATGTTTCATAT  
CGATCTATTATGCGCCTCTGCATCTAGCATTGGGTCGACCTCATAACAATAACTGTCCTAG  
TTCTACCGTATCTTTTGTTCATTTCTTCTGGAACAATCACAACACTTTTTTGTATTATGG  
ATCTACTACCAGAAATTCATGCGTAATCTCAGCATTCAATGTGTATTCTGAATAATCT  
CATTTTTCAATTATTCAACCATTTCATTTTACCAAGTTCAACGTTAGCCAGATTAGTAAA  
CATTTATATGTTTCGATGCAACAACAAGATGTTATTTGTAACAAGTAGTTTTTGTGGTTG  
GTTAATTGGTCACATTTTATTTCATGAAATGGGTTGGATTGGTATTATTCTGGATACGACA  
AAATCATTCTATTAGATCT-----GTACTTATTAAGTACCTTGTGTTCAGCATTGAGAAATCT  
ACGGCTCGAATCTTTAGTATTCTTATTATCACCTGTGTCTACTATTTAGGCAGAATAC  
CGTCACCTATTGTCATAAAAACTGAAAGAAACCGAAGAAGACAAACCTCTTGTGA  
CTCTTCTTTTTGACTATAAACGATGGAATCGTCCATTGCGATATATAAAAAACAATCGAT  
TTGAAAATGCTGTAAGAAATGAAATGTCACAATATTTTTTTGATACATGCCGAAGTGAT  
GGAAAACAAAGAATATCTTTTACATATCCACCCAGTTTGTCAACTTTTTGGGAAATGAT  
ACAAAGAAAGATGTCTTTGTGCACGACAGAAAACTCTCC---GAAGAACTGTATAATC  
ATTGGATTTATACCAATGAACAAAAAAGGAACAGCTTGAAGAACGAATTTTTGAATCG  
AATGAAAGCACTAAACAAGGGATTT-----CGGGATGTACTCGAAAAACGAACCTCGACTG  
TGTAATGATGAACTGAACAAAAATGCTTTCCTAAAATGTACGATCCTTTTTTTGAACGG  
A-----CGCTATCGCGTAACAACCAACTATTCACATGATTACAAGGTCTGGATAAATAAAA  
TTCATGGTATGCTTTACGACACATTTGAACAGAAAAATGTGAATGATCAA---ATTGAAAT  
AAAAGAAATTCGTA AAAAGGTCCCTCGATGGTCATACAAATTGATTGATTTGGAAATAC  
AGAAGAGAAAAGGGATTCGTTCAAGAAAAGCCAAACGTGTAGTCATTTTTACTGATGC  
TTTGATACGTTATTTCGCAACAATCGGATTTTCGTCGACATTCATCAAAGGATCGATACG  
CGCTCAAAGATGTA AACAGTTCCCTTGGAACTGTTTCAACGAAATGTGCATTCCCCG  
CTTTTTTTGGACCGAATAGACAAACCTTTTTTTTTCTCTTTTGATATC-----TCCGGAACG  
ATGAAGCTAATTTTTAGTAATAAAGATAAAAATGAGCGGATAACAATAGCAGAAACCTG  
GGATACTTTTATATTTGCTCAAGTAATAAGGGGTTCCATGTTAGTAACCAATCGATTCTT  
AGGAAATATATTATATTGCCGTCATTGATAATAGCTAAAAATATCGGCCGTATGCTATTAT  
TTCAATTCCCCGAATGGTACGAGGATTTGACGGAGTGGAGTAGAGAAATGCATGTTAA  
ATGCACCTATAATGGTGTTC AATTATCAGAAATAGAATTTCCGAAAATTTGGTTAACAG  
ACGGTATTCAGATAAAAATCCTATTTCCCTTCTGTCTGAAACCTTGGCACAAATCTAAG  
GAAAAAAAAGAAGATAATTTTTGCTTTTTAACAGTCTGGGGAATGGAAGCCGAACTAC  
CTTTTGGTTCTCCCCGCAACGGCCTTCCCTTTTTTTGAACCCATTTATAAAGAACTGGAA  
AAAAAAAATTTTAAAGTAAAA---AAAAATGTTTTGTAGTTCTAAGAGTTTTTAAAGAA  
AGAACAAAATGGTTTCTAAAGGTCTCAAAGAAAAAAAAGATGGGTAGTAAAAAA  
GTTCTA-----TTTATAAAAACAAAAACAATGAACTTGTA AAAAGGAAAT---TCTCTAGTC  
AGTAATGATATTTTTCATGAATCGTCGATTGGAATTAGATCCATAGATTGGACAAATTATT

CACTGACAGAAACAAAAATGAAGGATCTGGCTGATAGGACAAGAACAATCAGAAATC  
AAATAGAAAGAATCACAAAAGACAACAAAAAAGTCCTAATGAAACAAGTTGGGATG  
ATAAAAGATCAAATCGCCGAAAAATATTTGGCAGATATTA AAAAGAAGAAATGCCCG  
ATTAATGCGTAAATGGCATTATTTTTTGAATTTTTCTTTGAAAGGATATCTATGTATATCC  
TTCTATGTATTATTAATATTCCCAGAATCAATACAACATTTTTTCATTCACTTTATTTTCGTGT  
GACCTAGCCGCCTTATCACAAGCCTATGTATTTTACAAATTATCACAACCAAATCTT  
AACAAAGTATCACTTGAGATCTGTACTTAAATATAACATCTCTTTTTCTTAAGGATAGAATA  
AAGTATTTTTTTAGACAAGGAATATTTTCATTCCGAATCAGAGCATAAAAAACTTCGAAA  
TTCTGGAATGAATGAATGGAAAACCTGGTTAAGGGGTCATTATCAATACGATTTATCTC  
AGACTAGATGGTCTAGATTAGTACCGAAAAAATGGCGAACTAGAATCAATCAATGTCAT  
ACGGTTCAAATAAAAAACAGATTTGCTTCCTATGAAAAAGACCAA-----TTAATTCATTA  
CGAGAAACAAGAAAAATTTAAAAAACAGTACAGATATGGTCTTTTATCACATAAATATA  
TTAATGATTCTATTATTGATCCAGATAGAAAATATTTTGATTGGAGAATTCTAAATTTTTTT  
ATTAGCAATTTCAATTGGATGGGAATGAATGAAGAAATACTAAATCGTTTTGTTCTTGCC  
AGAATTTTTGCTATTTTATGATGCATATAAGATGAAACCATGGGTCATACCAACCAAATT  
ACTTTTTTTTAAATTTCAAGAACAACACAAAAGCAGAATTAATTTCTTCCTGAAAAGAT  
ATTTTCTTTTTCAATTGAGATGGGGTGATCCTTTGAATCAAAGAATAATCAATAATATAA  
AGGTATATTGTTTCTACTTAGACTGATAAATCCAAAGGAAATTGCTATATCCTCGATTC  
AAAGAGGAGAAATGGATCTGGATGTAATGCTAAGTCAGAAGGATCTATCTCTTAAAGA  
ATTACTAAAAAAGGGATATTTCTTATCGAACCAATTCGTCTGTCTATAAAATGGGATGG  
ACAGTTTATTATGTATAAAACCATAGGTATTTTCATTGGTCCATAAGAGTAAGCACAATCA  
TTATGATTTGCTTGTTCTGAAAATATTTTATCATCTAGATGTCGTAGAGAATTGAGAATT  
CTAATTTGTTTCAGATTTCTTTGGCCCAATTATCGATTAGAAGATTTAGCTTGTATGAATC  
GCTATTGGTTTGATAACCACTAATGGTAGTCGTTTTCAGTATGTCAAGGATACATATGTATCC  
AATGAAACGACATCAATTCCAATCCTGGATCTTCGAATTGAGAGAGATATTGAGAGAGA  
TCAAGAATTCTCACTATTTCTTAGATTCATGGACCCGATTCGATTCATTGGGATCTTTCA  
CTCCCATTTTCTTCCACCAAGAGCGTTTTATGAAACTCTTTGACCCCGAATTTGGAGT  
CTCCTACTTTCA---CGCGATTCA-----CGGGGGTCAAAAAGCAATCGATATTTACG-----  
--ATCAAAGGTGTAGGACTGCTTGTAGTAGCG---GTCCTTATATAT-----CGTATTAATA  
ACCGAAATAGGGTC-----AAAATCTCTATTTGACGGGGCTTCTT-----CCTATACC  
TATGAATTCCATTGGACCCAGAAATGAGACATTGGAAGAATCTTTT--GGGTCTTCCAAT  
ATCAATAGGTTGATTGTTTCG---CTCCTCTATCTTCCAAAAGGGAAAAAGATCTCTGAG  
AGTTGTTTCATGGATCCGAAAGAGAGTACTTGGGTTCTCCAATAACT-----AAAA  
GTGTATCATGCCTGAATCTAACTGGGGTTCGCGGTGGTGGAGGAACCGGATCAGAAAA  
AAGAGG-----GATTCTAGTTGTAAGATATCT-----AATGAAACCGTAGCTGGAATTGAG  
ATCTCATTCAAAGAGAAAGATAGCAA---TATCTGGAGTTTCTTTTTGTATCCTATACGG  
AT-----GATCCGATCCGCAAGGACCATGACTGGGAATTGTTTGATCGTCTTTCTCCGAGG  
AAGAAGCGAAACATAATCAACTTG-----AATTCGGGACAGCTATTCGAAATCTTAGTGA  
AACACTGGATTTGTTATCTCATGTCTGCTTTTCGTGAAAAAAGACCAATTGAAGTGGAA  
GGT---TTCTTCAAACAACAAGGA---GCTGAGTCAACTATTCAATCAAATGATATTGAGCA  
TGTTTCCCAT-----CTCTTCTCGAGAAACAAGTGGGGTATTTCTTTGCAAATTTGTGCTC  
AATTTCATATGTGGCAATTCCGCCAAGATCTCTTCGTT-----AGTTGGGGGAAG---AAT  
CCGCACGAATCAGATTTTTTTGAGGAAC--GTATCGAGAGAGAATTGGATTTGGTTAGAC  
AATGTGTGGTTGGTAAACAAGGATCGG-----TTTTTTAGC-----AAGGTGCGGAATGTA

TCGTCAAATATTCAATATGATTCC-----ACAAGA-----TCTATTTTCGTTCAAGTAACGG  
ATTCTAGCCAATTGAAAGGATCTTCT--GATCAATCCAGAGATCATTTCGATTCCATTAGT  
-----AATGAGGATTCCGGAA-----TATCACACATTGATCAATC  
AAAGAGAGATTCAACAATAAAAGAAAGATCGATTCTT--GGGGAT-----CCTTCCTTTC  
TTCAAACGGAACGAACAGAGATAGAATCAGAC-----CGATTCCCGAAA-----TGCCTTTC  
TGGATATTCC-----TCAATGTCCCGGCTATTCACG--GAACGTGAGAAGCAGATGAATAAT  
CATCTGCTTCCGGAAGAAATCGAAGAATTTATT-----GGGAATCCTACAAGATCAATTCG  
TTCTTTTTTCTCTGACAGATGG-----TCAGAACTGCAT--CTGGGTTTGAATCCTACTGAG  
AGGTCCACTAGAGATCAG-----AAGTTGTTGAAGAAACAACAAGATGTTTCT--TTT  
GTCCCTTCCAGGCGATCCGGAA-----AAGAAAGAAATGGTTGATATATTCAAGATAAT  
TACGTATTTACAAAAT-----ACCGTCTCAATTCATCTATTTCATCAGATCCGGGATGTGAT  
ATGGTTCCG--AAGGATGAACCGGAT--ATGGACACTTCCAATAAGATTTTATTCTTGAA  
CAAAAATCCATTTTTTGGAT-----TTATTTTCTATTCATGACCGGAACAGGGGGGGATA  
CACGTTA-----CACCACGATTTTGAATCAGAA-----GAGAGATTTCAAGAAATGGCAGAT  
CTATTCACTCTATCAATAACCGAGCCG--GATCTGGTGTATCATAAGGGATTTGCCTTTC  
TATTGATTCCACGGATTGGATCAAAAAAAA-----TTCTTGAATGAGGTATTCAACTCCA  
GGGATGAATCGAAAAAGAAATCTTTA-----TTGGTTCTACCTCTATTTTTTAT-----GA  
AGAGAATGAATCTTTTTTATCGAAGGATCAGAAAAAATCGGTCCGG--ATCTCCTGCGG  
GAATGATTTGGAAGATCCAAAACCAAAAATAGTGGTATTTGCTAGTAACAACATAATGG  
AGGCAGTCAATCAATCTAGATTGATCCGAAATCTGATTCAAATCCAATATAGCACCTATG  
GG-----TACATAAGAAATGTATCGAATCGATTCTTT-----TTAATGAATAGATCCGATCGC  
AACTTCGAATATGGAATTCAA-----AGGGATCAAATAGGAAATGATACTCTGAATCATA  
GAACTATAATGAAATATATGATCAACCAACATTTCTCGAATTTGAAAAAG--AGTCAGA  
AGAAATGGTTTCGATCCT-----CTTATTTCTCGAACCGAGAGATCCATGAATCGGGAT  
CCTGATGCATATAGATACAAATGGTCCAATGGGAGCAAGAATTTCCAGGAACATTTGGA  
ACATTTTCGTTTCTGAGCAGAAGAGC-----CGTTTTCAAGTAGTGTTCGATCGATTACGT  
ATTAATCAATATTCGATTGATTGGTTCGAGGTTATCGACAAACAAGATTTGTCTAAGTCA  
CTTCGTTTCTTTTTGTCCAAGTCA-----CTTCTCTTTTTGTCC-----  
----AAGTCACTTCTTTTTGTCCAAGAAGTCACTTCTTTTTTCTTTGTGAGTTTCGGG  
AATATCCCCATTCATAGGTCCGAG--ATCCACATCTAT--GAATTGAAAGGTCCGAATGAT  
CAACTCTGCAATCAGTTGTTAGAATCAATAGGTGTTCAAATCGTTCATTTGAATAAATTG  
AAACCTTCTTATTGTTATTGGAT-----GATCATGATACTTCC--CAAAAATCGAAATTC  
TGGATCAATGGAGGAACAATATCACCATTTTTGTTCAATAAGATACCA--AAGTGG--AT  
GATTGACTCATTCCATACT-----AGAAAGAATCGCAGGAAATCCTTTGATAACACGGATT  
CCTATTTCTCAATGATATCCCACGATCGAGACAATGGGCTGAATCCCGTGAAACCATTT  
ATAGAAGTTTATTGATCTCTTTTTATAAAGCAAATCGACTTCGATTCTTGAATAATC  
CACATCACTTCTGGTTCTAT-----TGTAACAAAAGATTCCCTTTTTTATGTG-----GAAA  
AGGCCCGTATCAAGAATTCGAT-----CTTACGTAT--GGACAATTCCTCAATATCTTGTT  
ATTCGCAAC-----AAAATGTGCGTCGGTAAA-----AAAAACATGCTTTTTTGGAG--  
AGAGATACTATTTACCCATCGAGTCACAGGTATCTAACATATCCATACCTAACGATTT  
CCACAAAGTGGTGACGAAACG--TATAACTTGACAAATCT-----TTCCATTTTCCAAT  
TCGATCCGATCCATTCGTTTCGT-----AGA-----GCTATCGCAGACATTTCTGGAACACCT  
CTAACAGAGGGACAAATAGTCAATTTGAAAGAACTTATTGTCAACCTCTTTCAGATAT  
GAATCTATCTGATTGAGAAGGGAAGAACTTGCATCAGTATCTCAAT-----TTCAATTCAA

ACATGGGTTTGATTACACTCCATGTTCTGAGAAATATTTACCA-----TCCGAAAAGAGG  
AAAAA-----CGGAGTCTTTGTCTAAAG-----AAATGCGTTGAGAAACGGC  
AGATGTACAGAACCTTTCAACGAGATAGTGCTTTTTTCAAATCTCTCAAATGGAATCTG  
TTCCAAACATATATGCCATGGTTCCTTACTTCGACAGGGTGCAAATATCTAAATTTACC  
CTTTAGATACTTTTTCAGGCCTATTG-----CCGATACTAAATAGCAGT--CAAAAATTTGT  
ATCCATTTTTCATGATATTATGCATGGATCAGATATATCATGGCCAATTCCTCAGAAAAA  
CGG-----GGTCTTCCACAATGGAATCTG---ATAAGTGAGATTTCGAATAAGTGT  
TTACATAAT-----CTTCTTCTGTCCGAAGAAATGATTCATCGAAATAATGAGTCACCCGTT  
CCATTGATATGGACACATCTGAGATCACCAAATGCTCGGAAGTTC--CTCTATTCAATCC  
TTTTCTTCTTCTTGTGGCTGGATAT--CTCGTTTCGTCACATCTTCTCTTTGTTTTCCGA-  
----GCCTCTAGTGAGTTACAGACAGAGTTCGAAAAGATCAAATCTTTGATGATTCCATC  
ATACATGATTGAGTTGCGAAAACCTTCTGGATAGGTATCCTACATCTGAACTGAATCTTT  
CTGGTTAAAGAATCTCTTTCTAGTTGCTCTGGAACAATTAGGAGATTCTCTAGAAGAAA  
TACGGGGTTCTGCTTCTGGCGCAACATGCTATTGGGTGGTGGTCCC-----GCTTA  
TGGG---GTCAAATCAATACGTTCTAAGAAGAAATATTTGAATATCAATCTCATCGATCTC  
ATCGATCTCATA---AGTATCATACCAAATCCCATCAATCGAATCACTTTTTCGAGAAATAC  
GAGACATCTAAGTCGTACAAGTAAAGAGATCTATTATTGATAAGAAAAAGAAAAAC  
GTGAACGGTGATTGGATTGATGATAAAATAGAATCCTGGGTCGCGAACAGTGATTGAT  
TGATGATGAAGAAAGAGAATTCTTGGTTCAGTTCTCC-----ACCTAACGACA-----GAA  
AAAAGGATTGATCAAATCTATTGAGTCTGACT--CAGAGTGATCATTATCA-----  
AAGAATGACTCTGGTTATCAAATGATTGAACAGCCGGGATCAATTTACTTACGATACTT  
AGTTGACATTCAT-----AAAAAGTATCTAATGAATTATGAGTTCAATAGATCCTGTTTAC  
AGAAAGACGGATATTCCTTGCTCATTATCAGACAATCACTTAT-----TCACAAACCTCGT  
GTGGGACTAATAGTTTTTCAATTTCCCATCTCATGGA-----AAACCCTTTTCGCTCCGCT  
AGCCCTATCCCCCTCT---AGGGGTATTTTAGTGATAGGTTCTATAGGAACTGGACGATCA  
TATTTGGTCAAATACCTAGCGACAAACTCCTATGTTTCTTTTATTACGGTATTTCCGAAC  
AAGTTCTGGATGACAAACCTAAAGGTTATCCTATTGATGAT-----ATTGATGATAGT  
ATATTGATGATCGTGACGATATTGAT-----  
--GATAGTGACGATATCGATGATGACCTTGATACGGAGCTGCTAACTATGACGAATGCGC  
TA-----ACTATGTATATGACG-----CCGAAAATAGACCGATTTGATATCACCTTCAAT  
TCGAATTAGCAAAGCAATGTCTCCTTGATAATATGGATTCCAAACATTCATGATCTGT  
ATGTGAATGAGTCGAATTACTTATCCCTCGGTCTATTAGTGAACCTATCTCTCC-----GG  
GGGTTGTGAAAGATGTTCC---ACTAGAAATATTCTTGTTATTGCTTCGACTCATATTTCCC  
AAAAAGTGGATCCCGCTCTAATAGCTCCGAATAAATTAATACATGCATTAAGATACGA  
AGGCTTCTTATTCCACAACAACGAAAGCACTTTTTTCACTCTTTCATATACTAGGGGCTTT  
CGCTTGGAAAAGAAAATGTTCCATACT-----AATGGATTTCGGGTCCATAACCATGGGTT  
CAATGCACGAGATCTTGTAGCACTTACCAATGAGGCCCTCTCAATTAGTATTACACAGA  
AGAAATCAATTATAGACACTAATAAATTAGATCCGCTCTTCATAGACAAACTTGGGATT  
TGCGA-----TCCCAGGTAAGATCGGTTGAGGATCATGGGATCCTTTTCTATCAGATAGG  
AAGGGCTGTTGCACAAAATGTACTTCTAAGTAATTGCCCATAGATCCTATATCTATCTAT  
ATGAAGAAGAAA-----TCATGTAAGGAAGGGGATTCTTATTTGTACAAATGGTACTTCGA  
ACTTGAACGAGCATGAAGAAATTAACGAGACTTCTTTATCTTTTGTGAGTTGTTCTGCCG  
GATCGGTCGCTCAAGATCTTTGGTCTTACCC-----GGACCCGATGAAAAA---AATTGGA  
TCACTTCTTATGGATTGTTGAGAATGATTCT--GATCTAGTTCATGGCCTATTAGAAGTA

GAAGGCGCTCTGGTGGGA-----TCCTCACGGACAGAAAAAGATTGCAGTCAGTTTGATA  
ATGAT-----CGAGTGACATTGCTTCTTCGGTCCGAACCAAGGAAT--CCCTTAGATATGAT  
CCAAAATGGATCTTGTTCTATCGTTGATCAGAGATTTCTATATGAAAA-----TACAAATC  
GGAGTTTGAAGAA--GGGGAA-----GGAGCCCTCGACCCGCAA-----CAGATAGAG  
GAGGAT-----TTATTCAATCAC-----ATAGTTTGGGCTCCT-----AGAATATGGCGCCCT  
-----TGTGGCAATCTATTTGATTGTATCGAAAGGCCAATGAATTGGGATTTCCC---TAT  
TGGGCCAGGTCATTTCCG-----GGCAAGCGGATCATTATCATAAAGAGGATGAGCTT  
CAAGAGAATGATTCGAAGTTCTTGCAGAGTGGAACCATGCAGTACCAGACACGAGATA  
GATCTTCCAAAGAACAAGGCTTTTTTCGAATAAGCCAATTCATTTGGGACCCTGCAGAT  
CCATTCTTTTTCTATTCAA---GATCAGCCCTTTGTCTCTGTGTTTTACGTCGAGAATT  
CTTTGCAGATGAAGAGATGTCAAAGGGGCTTCTTACTTCCCAAACAAATCCTCCTACAT  
CTATATATAACGCTGGTTCATC-----AAGAATACGCAAGAAAAGCACTTCGAATTGTTG  
ATTCATCGCCAGAGATGGCTTAGAACC-----AATAGCTCATTATCT-----AATGGATCTTT  
CCGTTCTAAT-----ACTCCATCCGAGAGTTATCAGTATTTATCAAATCTGTTCCCTATCTAAT-  
--GGAACACTATTGGATCAAATGATAAAGACATTGTTGAGAAAGAGATGGCTTTTTCCCG  
GATGAAATGAAACATTTGATT-----CATGTAACAGGAGAAAGATTTCCCATTCCTATGCCT  
AGATCGCGG---ATAAATGGAAATTTTATTGATAAGACCTCTTCAATTGTAGCCAATATCTT  
ATTACGAATAATTCCGACAAGTTCAGGAGAAAAAGAGGCATTTACCTATTACAGAGATG  
GG-----ATGTCAGCTCAATCCGAAGGAAATTATGCGGAAGCTTTACAGAATTATTATGAA  
GCTACGCGACTAGAAATTGATCCCTATGATCGAAGTTATATACTCTATAATATAGGCCTTA  
TTCACACAAGCAATGGAGAACATACGAAAGCTTTGGAATATTATTTCCGGGCACTAGA  
ACGAAATCCATTCTTACCGCAAGCTTTTAATAATATGGCCGTGATCTGTCATTAC---CGG  
GGAGAACAGGCCATTCGACAGGGAGATTCTGAAATTGCGGAGGCTTGGTCCGATCAA  
GCTGCTGAGTATTGGAAACAAGCTATAGCGCTTACCCCAGGTAATTATATTGAAGCACA  
TAATTGGTTGAAGATCACGAGGCGGTTTCGAA-----ATGAACTGGCGATCAGAACGTATAT  
GGATAGAACTTATAACGGGTCTCGCAAATAAGTAATTTCTGCTGGGCCTTTATCCTTT  
TTTTAGGTTCACTAGGATTCTTATTGGTTGGAATTTCCAGTTATCTTGGTAGGAATTTGAT  
ATCCTTATTTCCATCTCAGCAAATAATTTTTTTCCACAAGGGCTCGTGATGTCTTTCTAT  
GGGATCGCAGGTCTGTTCAATTAGCTCCTATTTGTGGTGCACAATTTCGTGGAATGTGGG  
TAGTGGTTATGATCGATTGATAGAAAAGGAGGAATAGTGTGTATTTTTCGTTGGGGATT  
TCCTGGAATAAATCGTCGCATCTTCTTCGATTCTTATGAGAGATATCCAGTCGATCAG  
AATAGAAGTTAAAGAAGGTCTTTATCCTCGTCGTGTCCTTTATATGGAAATCAGAGGAC  
AGGGAGCCATTCCTGACTCGTACTGATGAGAAT---TTGACTCCACGAGAAATTGAAC  
AAAAAGCTGCTGAATTGGCCTATTTCTTGC GCGTACCCATTGAAGTATTT

>Arabidopsis

ATGGAAAAATCGTGGTTCAATTTTATGTTTTCTCTAAGTAAAGCAATGGATAGT---TTTC  
CTGGTGAAAAGACTACTATAAGTCAAGACCGTTTTATATATGATATGGATAAAAACTTTT  
ATGTTTCCAATAATGTTGATCTTTTAGTTAGCTCCAAGGACATTCGCAATTCATATCGG  
ATGACACCTTTTTTGTAGGGATAGTAATAAGAATAGTTATTCTATATTTTTTGATAAAAA  
AAAAAAATTTTTGAGATTGACAATGAT-----TTTAGTGACCTAGAAAAATTTTTT  
TATAGTTATTGTAGTTCTAGTTATCTAAATAATAGATCTAAAGGTGACAAC---CACTATGA  
TCCTTACATTAAGGATACTAAATATAATTGTAATAATCACATTAATAGTTGCATTGATTCTT  
ATTTTCGT-----TCTTACATCTGTATTGATAATAACTTTTTAATCGATAGTAATAATTTAAT  
GAAAGTTACATTTATAATTTCAATTTGTAGTAGTAAAAATTACAAGATAAGAACTAATAGG

AATCGTAGTAATTTAATAAGT-----TCTAAG---TTCGATATAACTCAAAACTACAATCAA  
TTGTGGATTCAATGCGACAATTGTTATGGATTAATGTATAAG-----AAAGTCAAATGA  
ATGTTTGTGAACAATGTGGACATTATTTGAAAATGAGTAGTTCAGAAAGAATCGAGCTT  
TCGATTGATCCGGGTACTTGGAAATCCTATGGATGAAGACATGGTCTCTGCGGATCCATT  
AAATTTTCATTGAAGGAGGAACCTTATAAAAACCGTATTGACTCTGCGCAAAAACTA  
CAGGATTGACTGACGCTGTTCAAACAGGTACAGGTCAACTAAACGGTATTCCGGTAGC  
CCTTGGGGTTATGGATTTTCGGTTTATGGGGGGTAGTATGGGATCCGTAGTAGGCGAAA  
AAATAACTCGTTTGATCGAGTATGCTACCAATCAATGTTTACCTCTTATTTTAGTGTGTTT  
TTCCGGAGGAGCACGAATGCAAGAAGGAAGTTTAAAGTTTGATGCAAATGGCTAAAATT  
TCTTCGGTTTTATGTGATTATCAATCAAGTAAAAAGTTATTCTATATATCAATTCCTTACATC  
TCCACTACCGGTGGAGTGACAGCTAGTTTTGGTATGTTGGGGGATATCATTATTGCCGA  
ACCCTATGCCTATATTGCATTTGCGGGTAAAAGAGTAATTGAACAAACATTGAAAAAAG  
CCGTGCCTGAAGGTTCAACAAGCGGCTGAATCTTTATTACGTAAGGGGCTTATTGGATGCA  
ATTGTACCACGTAATCTTTTAAAAGGTGTTCTGAGCGAGTTATTTTCAGCTCCATGCTTTT  
TTTCCTTTGAACACAAAT-----ATGGTAACCATTAGAGCCGACGAAATTAGTAATATTA  
TCCGTGAACGTATTGAGCAATATAATAGAGAAGTAACGATTGTAAATACCGGTACCGTA  
CTTCAAGTGGGCGATGGCATCGCTCGTATTATGGTCTTGATGAAGTAATGGCAGGTGA  
ATTAGTAGAATTTGAGGAGGGTACTATAGGTATTGCCCTTAATTTAGAATCCAATAATGT  
TGGTGTGTATTAATGGGTGACGGTTTGATGATCCAAGAAGGAAGTTCAGTCAAAGCT  
ACGGGAAAATTGCTCAGATACCGGTGAGTGAGGCTTATTTGGGGCGTGTATAAACG  
CCTTGGCTAACCTATTGATGGTCGAGGTAAGATTTCCGCTTCTGAATCTCGGTTAATTG  
AATCTCCTGCCCCAGGTATTATTTTCGAGACGTTCTGTATATGAGCCTCTTCAAACAGGA  
CTTATTGCTATTGATTCCATGATCCCTATAGGACGCGGCCAGCGAGAATTAATTATTGGT  
GACAGACAGACCGGTAACACAGCAGTAGCCACAGATACAATTCTCAATCAACAAGGC  
CAAATGTAATATGTGTTTATGTAGCTATTGGTCAAAAAGCTTCTTCCGTGGCTCAGGTA  
GTGACCAGTTTACAGGAACGAGGGGCAATGGAATACACTATTGTGGTAGCTGAAACGG  
CCGATTCCCCAGCTACGTTACAATACCTCGCGCCTTATACAGGAGCAGCCTTGGCTGAA  
TATTTTATGTACCGTGAACAACACACTTTAATAATTTATGATGATCTTTCCAAACAAGCA  
CAAGCTTATCGACAAATGTCTCTTCTATTACGAAGACCGCCGGGTCGTGAAGCTTATCC  
AGGAGATGTTTTTTTATTACATTACGCTCTTTTAGAAAGAGCCGCTAAATTAAGCTCTCA  
ATTAGGTGAAGGGAGTATGACTGCCTTACCAATCGTCGAGACCCAGTCAGGAGATGTT  
TCAGCTTATATTCCTACTAATGTAATTTCCATTACAGATGGACAAATATTCTTATCCGCCG  
ATCTTTTTAATGCTGGAATCAGACCTGCTATTAATGTAGGGATTTCTGTCTCGAGAGTAG  
GATCCGCCGCTCAAATTAAGCTATGAAACAGGTAGCTGGAAAATTAATTTGGAATT  
GGCTCAATTCGCTGAATTAGAAGCCTTTTCCCAATTTTCTTCTGATCTCGATAAAGCTAC  
TCAGAATCAATTGGCAAGAGGTCAACGATTGCGTGAGTTACTGAAACAATCCCAATCA  
GCCCCCTCACAGTGAAGAACAGATAATGACCATTTATACCGGAACAAATGGTTATCT  
GGATGGATTAGAAATTGGACAAGTAAGAAAATTTCTCGTTCAATTACGCACTTACTTAA  
AAACGAATAAACCTCAGTTTCAAGAAATCATAGCCTCTACCAAGACATTAACCGCTGA  
AGCAGAAAGCTTTTTTGAAGAAGGTATTCAAGAGCAACTAGAACGTTTCCCTACTTCAG  
GAGAAAGTAATGAGAACAAATCCTACTACTTCAAATCCAGAGGTTTCGATACGTGAAA  
AAAAAACCTGGGACGTATCGCCAAATCATTGGTCCGGTACTGGATGTAGCCTTCCCC  
CCGGGCAAATGCCTAATATTTACAATGCTCTGGTGGTTAAGGGTCGAGATACTCTTGG  
TCAAGAAATTAATGTGACTTGTGAAGTACAGCAATTATTAGGAAATAATCGAGTTAGAG

CTGTAGCTATGAGTGCGACAGAGGGTTTAAAGAGAGGAATGGACGTGGTTGATATGGG  
AAATCCTCTAAGTGTTCCAGTCGGCGGAGCGACTCTAGGACGAATTTTCAACGTGCTT  
GGGGAACCCGTTGATAATTTAGGTCCTGTGATACTCGCACAAACATCTCCTATCCATAAA  
TCCGCGCCTGCTTTTATAGAATTAGATACAAAATTATCGATTTTTGAAACAGGAATTTAA  
GTAGTAGATCTTTTGGCCCTTATCGTCGTGGGGGAAAATTGGACTATTCGGTGGGGC  
TGGCGTGGGTAAAACAGTACTAATTATGGAATTGATCAACAACATTGCTAAAGCTCATG  
GTGGTGTATCCGTATTTGGTGGAGTAGGCGAACGGACTCGTGAAGGAAATGATCTTTAC  
ATGGAAATGAAAGAATCTGGAGTCATTAATGAACAAAATCTTGCGGAATCCAAAGTGG  
CCCTAGTTTATGGTCAGATGAATGAACCGCCAGGAGCTCGTATGAGAGTTGGTCTGACT  
GCCTTAACTATGGCAGAATATTTCCGAGATGTTAATGAGCAAGACGTACTTCTATTTATC  
GACAATATCTTCCGTTTCGTACAAGCAGGATCCGAGGTATCCGCTTATTGGGTAGAAT  
GCCTTCTGCTGTGGGTTATCAACCCACCCTTAGTACCGAAATGGGTACTTTACAAGAAA  
GAATTACTTCTACGAAAAAGGGGTCCATAACCTCTATTCAAGCAGTTTATGTACCTGCA  
GATGATTTGACTGACCCCGCACCTGCCACCACATTTGCACATTTAGATGCGACTACCGT  
ACTATCAAGAGGATTAGCTGCCAAAGGTATCTATCCAGCGGTAGATCCTTTAGATTCAA  
CGTCAACTATGCTACAACCTCGAATCGTTGGCGAGGAACATTATGAAACTGCGCAACA  
AGTAAAACAACTTTACAACGTTACAAGGAGCTTCAGGACATTATAGCTATCCTGGGGT  
TGGATGAATTATCCGAAGAGGATCGCTTAACCGTAGCAAGAGCACGAAAAATTGAGCG  
TTTCTTATCACAACCTTTTTTCGTAGCAGAAGTATTTACAGGTTCTCCGGGAAAATATGT  
TGGTCTAGCGGAAACAATTAGAGGGTTTAATTTGATCCTTTCCGGAGAATTTGATTCTC  
TTCCCGAACAGGCCTTTTACTTAGTGGGTAACATCGATGAAGCTACTGCGAAGGCTACG  
AACTTAGAAATGGAGAGTAAATTGAAGAAAATGACCTTAAATCTTTGTGTACTGACTCC  
GAATCGAATTGTTTGGGATTGAGAAGTAAAAGAAATCATTTTATCTACTAATAGTGGAC  
AAATTGGTGTATTAGCAAACCACGCGCCGATTGCCACAGCTGTTGATATAGGTATTTTG  
AAAATACGCCTTGCTAACCAATGGTTAACGATGGCTCTGATGGGCGGTTTTGCTAGAAT  
AGGCAATAATGAAATCACTATTTTAGTAAATGATGCAGAGAAGAATAGTGACATTGATC  
CACAAGAAGCTCAGCAAACCTTTGAAATAGCAGAAGCTAACTTGAGAAAAGCTGAAG  
GTAAGAGACAGACAATTGAGGCTAATCTAGCTCTCAGACGAGCTCGGACACGAGTCG  
AGGCTCTCAATACGATT--ATGAAAAATTTAACCGATTCTTTCGTTTACTTGGGTCACTG  
GCCATCCGCCGGGAGTTTCGGATTTAATACCGATATTTTAGCAACAAATCCAATAAATCT  
AAGTGTAGTTTTTCGGTGTATTGATCTTTTTTTGGAAAGGGAGTGTTAAATGATTTATTAGA  
TAACCGAAAGCAGAGGATATTAATACTATTCGAAATTCAGAAGAAGCTGCGTGAAGGA  
GCTATTCAACAATTAGAAAATGCCCGGGCGCGCTTGCGTAACGTAGAAAACGGAAGCGG  
ATAAGTTTCGCGTGAATGGATACTCTGAAATCGAACGAGAAAAATTGAATTTGATTAAT  
TCAACTTATAAACTTTGAAACAATTAGAAAATTACAAAATGAAACCATTCTTTTTGA  
GCAACAAAGAACAATTAATCAAGTCCGCGAACGGGTTTTCCAACAAGCTTTACAAGG  
AGCTATAGGAACCCTAAATAGTTGTTTGGAGTAATGAGTTACATTTACGTACTATTAATGC  
AAATATTGGGATGTTTGGTACGATGAAAGAAATAACTGATATGAATCCACTGGTTTCTG  
CTGCTTCGGTTATTGCTGCTGGGTTGGCTGTTGGGCTTGCTTCTATTGGACCTGGAGTC  
GGTCAAGGTACAGCTGCGGGTCAAGCTGTGCAAGGTATCGCGAGACAACCTGAGGCA  
GAAGGAAAAATACGAGGTACTTTATTGCTTAGTTTGGCTTTTATGGAAGCTTTAACAAT  
TTATGGCCTGGTTGTAGCATTAGCGCTTTTATTTGCGAATCCTTTTGTATGAATGTTTTA  
TCATGTTCCATCAACACACTAATAAAATTATATGAGATATCTGGTGTAGAAGTAGGCCAA  
CATTTCTATTGGCAAATAGGGGGTTTCCAGGTCCATGCCCAAGTTCTTATTACTTCTTGG



GTTGTAATTGCTATCTTATTAGGTTCCGCAGTTCTAGCGATTTCGCAATCCACAAACAATT  
CCAAGTACGGCCAAAATTTCTTTGAATTTGTCCTTGAATTCATTCGAGACGTGAGTAA  
AACCCAGATTGGAGAAGAATATGGTCCATGGGTTCCCTTTATTGGAACCCTGTTTTTATT  
TATTTTTGTTTCTAACTGGTCAGGAGCCCTTTTACCGTGGAAAATTATCCAGTTACCTCA  
AGGGGAGTTAGCAGCACCAACGAATGATATAAATACGACGGTTGCTTTAGCTTTACTCA  
CATCAGTAGCCTATTTTTATGCGGGGCTTAGCAAAAAGGATTAGGGTATTTTCAGTAAAT  
ACATTCAACCAACCCCAATTCTTTTACCCATTAACATCTTAGAAGATTTTACAAAACCCC  
TATCACTTAGTTTTCGACTTTTTCGGAAATATATTAGCCGATGAATTAGTCGTTGTTGTTCT  
TGTTTCTTTAGTACCTTTAGTGGTTCCTATACCTGTTATGTTTCCTTGGATTATTTACAAGC  
GGGATTCAAGCTCTCATTTTTGCCACTTTAGCTGCGGCTTATATAGGTGAGTCTATGGAA  
GGTCATCATATGATTTTTTCAATTTTAGAGCATATATTAACATCATATATCTTTTTCGGTCGT  
TTCAATTGTGCTGACAATTTATTTTTTAACTTTATTAGTTAATGAAATCATAGGATTTTTT  
GATTCATCAGATAAAGGAATCATAATTACGTTTTTTGGTATAACAGGATTATTATTAACCTC  
GTTGGATTATTTCAGGACATTTCCATTAAGTAATTTATATGAATCATTAATTTTTCTTTTCG  
TGGGCTTTTTCAATTATTCATATGGTTTTCTATTTTAATAACAACAAAATAAGTTAAAC  
ACAATAACTGCGCCAAGTGTTATTTTTATTCAGGGTTTTGCTACTTCAGGCTTTTTAAAC  
AAAATGCCTCAGTCTGCAATATTAGTACCAGCTCTCCAGTCCCAGTGGTTAATGATGCA  
CGTAAGTATGATGATATTAGGCTATGGCGCTCTGTTATGCGGATCATTATTATCAATAGCT  
CTTCTAGTGATTACATTTTCGCAAAGTCGGACCTACTTTTTGGAAAAAGAATGTACTTTA  
CTACATAAATGAAAGAAATTCTATTTTACTAAACATTAATTTTAGTTTTTCTAGAAATTAT  
TATAGGTATCAACTGATTCAACAATTAGATTTTTGGAGTTTTCGTATTATTAGTCTTGGAT  
TTATCTTTTTAACCCTCGGCATTCTTTCAGGAGCTGTCTGGGCTAATGAGACATGGGGT  
TCATATTGGAAGTGGGACCCAAAAGAACTTGGGCATTTATTACTTGGACTATATTTCG  
AATTTATTTACATATTAACAATAAGGAATGTTAGGGGTATAAATTCTGCAATTGTGGC  
TTTGATCGGTTTTATTTAATTTGGATATGCTATTTTGGCGTCAATCTTTTAGGAATAGGT  
TTACATAGTTATGGTTCATTTACATCGAATATGGCAAAAAGAAAGCATTCCCTTTT  
TTTTATTTTCTATCTATAGTCTTTTTGCCCCTGGTTGATCTCTCTCTGCTGTAATAAAAGTT  
TGAAAACTTGGATTACTAATTGGTGGAATACTAGACAATGCGAAACTTTTTTGAATGAT  
ATTCAAGAAAAAGTTTTCTAGAAAATTCATACAATTAGAGGAACTATTCCAGCTCGA  
TGAAATGATAAAGGAATACCCAGAAACCAATTTACAACAATTTTCGTCTAGGA--CACAA  
AGAAACGATCCAATTCATCAAGATACACAATGAGTATAATATCCATACAATCTTGCACCT  
CTCGACAAATCTAATATCTTTTCGTTATTCTAAGTGGTTATTCCTTTTGGGGTAAGGAAA  
GCTTTTTTATTCTGAATTCCTGGGTTCAAGAATTCCTATATAATTTAAGTGATACAATAAA  
GCTTTTTTCGATTCTTTTATTAACCTGATTTATGTATCGGATTCCATTTCGCCTCACGGTTGGG  
AACTAATGATTGGTTATATTTACAAAGATTTTGGGTTTGGCTCATTATGAGCAAATTTTATC  
TGGTCTAGTTTCTACCTTTCCAGTAATTCCTTGATACAATTTTTAAATATTGGATTTTTCGT  
TATTTAAATCGTGTATCTCCGTCACCTTGTAGTGATTTATCATGCAATAAACGACATGCCTA  
TTGGCGTTCCAAAAGTACCTTTTCGAAGTCCTGGAGAAGGAGATACATCTTGGGTTGA  
CATATACAACCGACTTTATCGAGAAAGATTATTTTTTTTAGGCCAAGAGGTTGATACCGA  
AATCTCGAATCAACTTATTAGTCTTATGATATATCTCAGTATAGAAAAGGATACCAAAGA  
TCTTTATTTGTTTATAAATCTCCTGGTGGATGGGTAATATCTGGAATGGCTATTTATGAT  
ACTATGCAATTTGTGCGACCCGATGTACAGACAATATGCATGGGATTGGCCGCTTCAAT  
AGCATCCTTTATCCTAGTCGGAGGAGCAATTACCAAACGTATAGCATTCCCTCACGCT--  
GTAATGATCCATCAACCCGCTAGTTCGTTTTATGAGGCACAAACGGGAGAATTTATCTT

GGAAGCGGAAGAATTACTTAAACTTCGCGAAACCATCACAAGGGTTTATGTACAAAGA  
ACGGGCAAACCTATATGGGTTATATCCGAAGACATGGAACGGGATGTTTTTATGTCAGC  
A A C A G A A G C C C A A G C T C A T G G A A T T G T T G A T C T T G T A G C G G T T C A  
A????????????????????????????????????????????????????????????????????????  
????????????????????????????????????????????????????????????????????????  
????????????????????????????????????????????????????????????????????????  
????????????????????????????????????????????????????????????????????????  
ATGGATAAATTTCAAGGATATTT  
AGAGTTCGATGGGGCTCGGCAACAGAGTTTTCTATATCCACTTTTTTTTTTCGGGAGTATAT  
TTATGTACTIONGCTTATGATCATGGTTTAGCGGATTATGACAAAAAATATAGTTCACATAATT  
ACGAAACGCTTAATTTTGCGAATGTATGAACAGAATCGTTTGATTATTTCCACTAAGGA  
TGTGAACCAAAATTCCTTTTTGGGGAGTCTTTTCTATTATCAAATGATATCTGTTTTATTT  
GCAGTGATTGTCGAAATTCATTTTCCCTAAGATTAGGATCCTCTTTTTTAAAAAATCT  
TATAATTTACAATCAATTCATTCAATATTTCCCTTTTTTAGAAGACAAATTAGGACATTTTA  
ATTATGTGTTAGATGTAATAACCTTACCCCATCCATCTAGAAATCTTGGTTCAAACCCT  
ACGTTACCGGGTAAAGATGCCTCTTCTTTGCATTTTTTTTTTCGGTCTGTTTATACGAGTA  
TTGT-----AATTGGAAGAATTTAAA-----TCAATTCCAAGATTTTTCTTGTCTTAT  
ATAATCTCATGTATGTGAATACGAATCCATCTTTTTTTTTCTACGCAAGCGGTCTTCGCA  
TTTACGATCGACATCTTATGAAGTCCTTTTTGAGCGAATTGTATTCTATGGAAAAATACA  
CCATTTTTTCAAAGTTTTTGTAAATCCGGCAATCCTAGGGTTGCTCAAGGATCCTTTTCAT  
ACATTATGTTAGATATCACGGAAGATGCATTCTGGCAACAAAGGATACGCCGCTTCTGA  
TGAATAAATGGAAATATTATTTTGTAAATTTATGGCAATGTTATTTTTTCGGTATGGTTTCA  
ATCGCAAAAGGTCAATATAAATCAATTATCTAAAGATAATTTAGAGTTTCTGGGTATCT  
GTCAAGTTTGCGATTAACCCTTTAGTGGTACGTAGTCAAATGCTAGAAAACCTCATTTC  
TAATAGATAAT-----GTTAGAATCAAATTGGATAGCAAAATCCAATTTCTTCTATTATTGG  
ATCGTTGGCTAAAGATAAATTTTGTAAATGTATTAGGGCATCCATTAGTAAAGCAACCTG  
GACGGATTCATCAGATTCTGATATTCTCAACCGATTTGTGCGGATATGCAGAAATATTC  
TCATTATTACAGCGGATCTTCAAAAAAAAAAGAATTTGTATCGAATAAAATATATACTTCG  
TCTTTGTTGTGTTAAACTTTGGCTCGTAAACACAAAAGTACTGTACGCACTTTTTTAA  
AAAGTTGGGCTCTGGTTTATTGGAAGAATTCCTTACGGGGGAAGACCAAGTTCTTTC  
TTAATCTTCCCAAGACGAATTTGGTATTTGGATATCTTTATCTTAATGATTTGGTCAAT  
CATGAAATGATAATTTATGCAACA---GCAGTCCAAACTATAAAT---TCTTTTGTAAATTG  
GAATCT--TTAAAAGAGGTCTATGGACTCATATGGATATTTGTCCCTATATTTTCTCTTGTA  
TTGGGAATCATAACAGGTGTACTAGTAATTGTGTGGTTAGAAAGAGAAATATCTGCAGG  
GATAACAACGATTTGGACCTGAATACGCCGGCCCGTTGGGAATCTTCAAGCTCTAG  
CCGATGGGACAAAACCTACTTTTCAAAGAAAATCTTCGTCCATCTAGAGGAAATACTCCT  
TTATTTAGTATTGGACCATCTATAGCAGTTATCTCTATTTTACTAAGTTATTCAGTAATTC  
CTTTAGCAATCACCTTGTTTTAGCGGATCTCAATATCGGTATTTTTTTTATGGATTGCCATC  
TCAAGTATTGCTCCTATTGGACTTCTTATGTCAGGATATGGATCAAATAATAAATATCTT  
TTTTAGGTGGTCTGCGAGCTGCTGCCAATCGATTAGTTATGAAATACCATTAACTCTAT  
GTGTTTTATCAATATCTCTACTATCTAACAGTTTAAAGTACAGTTGATATAGTTGAGGCAC  
AATCAAAATATGGTTTTTGGGGATGGAATTTGTGGCGTCAACCTATAGGTTTTATCATT  
TTCTAATTTCTTCCCTAGCAGAATGCGAGAGGTTACCGTTTGATTACCAGAAGCGGAA  
GAAGAATTAATAGCAGGTATCAAACCTGAATATTCAGGTATAAAATTTGGTTTATTTTAC  
GTTGCTTCTTATCTAAATCTATTAATTTCCCTCATTATTTGTAACAGTTCTATACTTAGGCG  
GTTGGAATATTTCTATTCCGTATATATCTATTCTGGAGCTATTTCAAAGG-----GATCAA

ATTTTTGGAACAACAATTGGTATCTTTATTACATTAGCTAAAACCTATTTGTTTTTGTTCG  
TTTCTATCGCAACAAGATGGACTTTACCTAGGCTAAGAATGGATCAACTATTAATCTTG  
GATGGAAATTTCTTTTACCTATTTCCCTTGGTAATCTATTATTAACCACTTCTTTCCA  
CTTTTCACTCATGATCTGGCATGTACAGAATGAAAATTTCAATTCTCGATTCTACGAGA  
TTTTATGAAAGCCTTTCATTTGCTTCTCTTCGATGGAAGTTTTATTTTCCCAGAATGTATC  
CTAATTTTTGGCCTAATCTTCTTCTGATGATCGATTCAACCTCTGATCAAAAAGATATA  
CCTTGGTTATATTTTCATCTCTTCAACAAGTTTCGTAATGAGCATAACGGCCCTATTGTTC  
CGATGGAGAGAAGAACCTATGATTAGCTTTTCAGGAAATTTCCAAACGAACAATTTCA  
ACGAAATCTTTCAATTTCTTATTTTACTATGTTCAACTCTCTGTATTCCTCTATCCGTAGA  
GTACATTGAATGTACAGAAATGGCTATAACAGAGTTTCTGTTATTCATATTAACAGCTAC  
TCTAGGAGGAATGTTTTTATGTGGTGCTAACGATTTAATAACTATCTTTGTAGCTCCAGA  
ATGTTTCAGTTTATGCTCCTACCTATTATCTGGATATACCAAGAAAGATATACGATCTAAT  
GAGGCTACTATGAAATATTTACTCATGGGTGGGGCAAGCTCTTCTATTCTGGTTCATGGT  
TTCTCTTGGCTATATGGTTCATCCGGGGGAGAGATTGAGCTTCAAGAAATAGTGAATGG  
TCTTATCAATACACAAATGTATAACTCCCCAGGAATTTCAATTGCGCTTATATTCATCACT  
GTAGGAATGGGTTCAAGCTTTCCCTAGCCCCTTCTCATCAATGGACTCCTGACGTATA  
CGAAGGATCTCCACTCCAGTCGTTGCTTTTTCTTTCTGTTACTTCGAAAGTAGCTGCTT  
CAGCTTCAGCCACTCGAATTTTCGATATTCCTTTTTATTTCTCATCAAATGAATGGCATCT  
TCTTCTGGAAATCCTAGCTATTCTTAGCATGATATTCGGGAATCTCATTGCTATTACTCAA  
ACAAGCATGAAACGTATGCTTGCATATTCGTCCATAGGTCAAATCGGATATGTAATTATT  
GGAATAATTGTTGGAGACTCAAATGGTGGATATGCGAGCATGATAACTTATATGCTGTTC  
TATATCGCCATGAATCTAGGAACTTTTGCTTGCATTATATTTTGGTCTACGTACCGGAA  
CTGATAACATTCGAGATTATGCAGGATTATACACAAAAGATCCTTTTTTGGCTCTCTCTT  
TAGCTCTATGTCTTATCCCTAGGAGGTCTTCCCTCCACTAGCAGGTTTTTTTTGGAAAAC  
TCCATTTATTCTGGTGTGGATGGCAGGCAGGCCATATTTCTTGGTTTCAATAGGACTCC  
TTACGAGCGTTCTTTCTATCTACTATATCTAAAATAATCAAGTTATTAATGACTGGACG  
AAACCAAGAAATAACCCCTCACATGCGAAATTATAGAATATCCCCTTTAAGATCAAACA  
ATTCCATCGAATTGAGTATGATTGTATGTGTGATAGCATCTACTATAACCAGGAATATCAAT  
GAACCCGATTATTGCGATTGCTCAGGATACCCTTTTTATGTTTCTGCTTTACGAATATGAT  
ATTTTCTGGGCATTTTACTAATATCAAGTGCTATTCCCTGTTTTGGCATTCTAATTTCCG  
GAGTTTTATCTCCAATTAGGAAGGGGCCGGAGAACTTTCTAGTTATGAATCAGGTATA  
GAACCGATCGGGGATGCTTGGTTACAATTTAGAATCCGTTATTATATGTTTGCTCTAGTT  
TTTGTGTTTTTGGATGTTGAAACTGTTTTTCTGTATCCGTGGGCAATGAGTTTCGATGTA  
CTGGGGGTATCTGCTTTTTATAGAAGCTTTCATTTTCGTGCTTATCCTAATTTCTGGTTTAG  
TTTATGCATGGCGAAAAGGAGCATTGGAATGGTCTACGAATGATTTTCTTGGTTAACA  
ATAATTGTTGTTTTTCCAATATCTGCTGGTTCATTAATGTTATTTCTCCCGCATAGGGGAA  
ATAAAGTCAATAAATGGTATACTATATGCATTTGCATCTTAGAACTTCTTCTAACGACCTA  
CGTTTTTTGTATAATTTTAAAATGGACGATCCATTAATTCAACTGTCCGAAGATTATAAA  
TGGATCGATTTTTTTGATTTTTACTGGAGAATGGGAATAGATGGACTTTCTATAGGAACT  
ATTTACTGACGGGATTTATTACTACTTTAGCCACTTTAGCGGCTTTTCCAGTTACTCGG  
GATCCCGATTTTTTTCATTTCTGATGTTAGCAATGTACAGCGGTCAAATAGGATCATT  
TCTTCTCGGGATCTTCTACTTTTTTTCATCATGTGGGAATTAGAATTAATCCCGTTTATC  
TACTTTTATCCATGTGGGGTGGAAAGAAACGTCTGTATTCCGGCTACAAAATTTATTTTGT  
ACACGGCAGGAAGTTCTATTTTTTTTATTAATAGGAGTTTTAGGTATAAGTTTATATGGTTC

GAACGAACCAACATTAATAATTTAGAACTCTTAGCTAATAAATCCTATCCTGTTACACTTGA  
AATACTATTTTATATTGGATTTCTTATTGCTTTTGCCGTCAAATCACCGATTATACCTTTAC  
ATACTTGGTTACCTGACACCCACGGTGAGGCACATTACAGTACCTGTATGCTTCTCGCT  
GGAATCTTATTAATAAATGGGAGCCTATGGGTTGGTTCGAATCAATATGGAATTATTACCC  
CACGCTCATTCTATGTTTTCTCCTTGGTTGTTGGTAGTCGGTACAATCCAAATAATTTATG  
CAGCTTCAACATCTCCCGGTCAACGTAATTTAAAAAAGAGAATAGCCTATTCTTCTGTGA  
TCTCATATGGGTTTTATAATTATAGGTATTAGTTCTATAACGGATCCTGGACTTAATGGAG  
CTATTTTACAAATAATTTCTCATGGATTTATTGGCGCTGCACTTTTTTTCTTGGCAGGAA  
CGAGTTATGATAGAATTAGGCTTGTTTATCTTGATGAAATGGGTGGAATGGCTATCTCCA  
TTCCAAAATATTTACAATGTTCACTATTTTATCGATGGCTTCCCTTGCATTGCCGGGCAT  
GAGTGGTTTTTATTGCAGAATTCATTGTTTTTTTTTGGGAATAATTACCAGCCAAAATATTT  
CTTAATTTCCAAAATTTTCAATTATTTTTGTAATGGCAATTGGAATGATATTAACCTCTATAT  
ATTTATTATCTATGTTACGCCAAATGTTCTATGGATACAAGTTAATTAATATCAAAAACCT  
TTCTTTTTTTGATTCTGGACCCGAGAGTTATTTCTTTCAATCTCTATTCTTTTACCATA  
ATTGGTATTGGGATTTATCCTGATTTTGTGCTCTCATTAGCAAGTGACAAGGTGCAATCC  
ATTTTATCTAATTATTTTTATGGAATGATACTCGAACATGTACTTGTTTTGAGTGCCTATTT  
ATTTTTGATTGGTCTTTATGGATTGATCACAAGTCGAAATATGGTTAGGGCTCTTATGTG  
TCTTGAACCTATACTCAATGCAGTTAATATGAATTCGTAACATTTTCTGATTTTTTTGAT  
AATCCCAACTAAAAGGGGAAATTTTCTGCATTTTTGTTATAGCAATTGCAGCCGCTGA  
AGCAGCTATTGGATTAGCTATAGTCTCGTCAATTTATCGTAACAGAAAATCAATTCGCAT  
AAACCAATCGACCTTATTAATAAGATGGAACATACATATCAATATTCATGGATCATCCC  
TTTCATTCCACTTCCAGTACCTATTTACTAGGAGTTGGACTTCTCCTTTTTCCGACAGC  
AACAAAAACCTTCGCCGCATGTGGACTTTTCTTAGTATTTTTTTGTTAAGTATAGTTAT  
GATCTTTTCAATCTATCTATCTATTCAACAAATTTTTCTAAGTTGCATTCATAAAATGTA  
TGGTCTTGGACCATAAATAATGAATTTTCTTTTGGAGTTCGGTTACTTTATCGATCCACTTA  
CTTCTATTATGTCAATATTAATTACAACGTTGGGATTTTGGTTCTGATTTATAGTGACAA  
TTATATGTCGCATGATCAAGGATACCTGAGATTTTTGCTTATATGGGTTTTTTAATACT  
TCAATGTTAGGATTAGTTACTAGTTCTAATTTGATCCAAGTTTATTTTTTTGGGAATTAG  
TTGGAATGTGTTTCGTATTTATTAATAGGTTTTTGGTTCACACGACCTATTGCAGCGAATG  
CTGTGCAAAAAGCTTTTGTAACTAATCGTGTAGGGGATTTTGGTTTATTATTAGGAATTT  
TAGGTCTTTATTGGATAACTGGCAGTTTTGAATTCAGGATTTGTTGCAAATATTCAATA  
AT--AGAGTAAATCTCTTATTCCTTACTTTGTGTGCATTTCTATTATTGTAGGTCCTATTG  
CTAAATCCGCACAATTTCCCTCTTCATGTATGGTTACCTGATGCCATGGAGGGCCCTACTC  
CCATTTCCGGCTCTTATACATGCTGCTACTATGGTAGCGGCGGGTATTTTTCTTGTAGCTC  
GTCTTCTTCCCTTTTTATCGTTATCCCTTCTATAATGTATATAATATCTTTGATAGGTATAA  
TAACAGTACTCTTAGGAGCCACTTTAGCTCTTGCTCAAAAAGACATTAAGCGGGGTTTA  
GCCTATTCTACAATGTCTCAACTCGGTTATATGATGTTAGCTCTAGGTATGGGGTCTTATC  
GATCTGCTTTATTTCAATTTGATTACTCATGCTTATTCGAAAGCTTTGTTGTTTTTAGGATC  
TGGATCCATTATTCATTCAATGGAAGCTATAGTTGGATATTCTCCCGATAAAAGTCAGAA  
TATGATTCTTATGGGTGGTTTTGACAAAACATGTCCCGATTACAAAACGGCCTTTTTAAT  
AGGAACACTCTCTCTTTGTGGTATCCCCCCTTGCTTGTTTTTTGGTCGAAAGATGAAA  
TTCTTAATGATAGTTTGTATTTTTCGCCAATTTTTGCAATAATAGCTTGTTC AACAGCGG  
GATTAACCGCATTTTATATGTTTCGGATTTATTTACTTACTTTTTGAAGGACATTTAAACAC  
TTATTTTCTAAATTACAGTGGAATAAAGTGGCTCCTTCTATTCACTCTCTTTATGGGG

TAAAGAAGAAGAAAAAACTTAATAAA---TTAGTACCATTATTAACAATGAATTTTTTT  
TGCGGACTTAATACAAGAACCTTCTATTATCCGCATGAATCAGACAATACTATTCTATTTC  
CTATGCTTATTTTGGTTTTATTACTTTGTTTATTGGAGCCATAGGA-----TTCGACTTTGA  
TATATTATCAAAATTTTTACGCCGTCATAAACCTTTTGCATAAAAATTCACAA---TTG  
TAGATTGG---GAATTTTTGAGAAATGCAACTTTTTCGGTTCAGTATAGCCTTTTTTGGAA  
ATTTATAGCATACTGTTTATATAAGCCTTTTTATTTCATCTTTATTAATTTAACCTTACTTAA  
TTCATTTCAAATTCATTGGGAAAACTAATAAATTTTGTATATAATTGGTCATATAATCGT  
GGTTACATAGATTCTTTTTTTAAAACATCTTTAATTGAAAGTATAAGAAGATTAGCAAAA  
CAAACGACTTTTTTTGATAAACGAATCATTGATGGAATTACAAATGGAGTAGGTATTAC  
AAGTTTCTTTGTAGGAGAAGTAACAAAATATATAGGTGGAAGT---CGCATCTCTTCTTAT  
CTGTTCTTATATTTGTCCTATGTATTGATTTTTTTAATGATCCTCTTTATGGATTTGCCTGG  
ACCAATACATGATTTTCTTTTAGTTTTTCTGGGATCCGGTCTTCTAGTAGGGGGTCTGGG  
AGTGGTATTACTTCCCAACCCAATATTTTCAGCCTTTTCCTTAGGATTTGTTCTTGTGTTGT  
ATATCTTTATTGTATATTCTATCAAATCCCATTTTGTAGCTGCTGCACAACCTCTTATTTA  
TGTGGGGGCCATAAATGTTTTAATCATATTTGCTGTGATGTTTCATGAATGATTCAGAATAT  
TCCACAGATTTCAATCTGTGGACCATTGGGAATGGGATTACTTCGTTGGTTTTGTACAAC  
TATCTTTTTTTTATTAATGTCTACTATTCTCGATACGTCATGGTACGGGGTTATTTGGACT  
ACAAAATTAACCAGATTCTAGAGCAAGATTTAATAAGTAATAGTCAACAAATAGGAAT  
TCATTTATCAACAGATTTTTTTCTGCCATTTGAACTCATTTCAATAATTCTTTTAGTTGCT  
TTGATAGGTGCAATTTCTGTGGCTCGTCAAATGAAGAGACCAGTTACAGGAAAAGATC  
TTATGATAGTCAATATGGGACCTCACCAACCCATCCATGCATGGTGTCTTCGCTTAATTG  
TACTCTAGATGGTGAGGATGTTGTTGACTGTGAACCCATATTAGGTTATTTACACAGAG  
GAATGGAAAAAATTGCAGAAAACCGAGCAATTATAACAATTTACCGTATGTAACGCGA  
TGGGATTATTTAGCTACTATGTTTACAGAAGCAATAACAGTAAATGGACCAGAACAATT  
GGGAAATATTCAAGTTCCTAAAAGGGCCAGCTATATCAGAGTAATTATGCTGGAATTGA  
GTCGTATAGCTTCTCATCTGTTATGGCTCGGCCCTTTTATGGCAGATATTGGTGCACAGA  
CTCCCTTTTTCTATATTTTCAGAGAACGAGAATTTGTATATGATCTATTTCGAAGCTGCCA  
CCGGTATGAGAATGATGCATAATTTTTTTCGTATTGGAGGAATAGCGGCTGATTTACCTT  
ATGGTTGGATAGATAAATGCTTGGATTTTTGTGATTATTTTTTAACAGAGGTTGTTGAATA  
TCAAAAACCTCATTACACGAAATCCTATTTTTTTTAGAACGGGTTGAAGGAGTTGGGATTA  
TTGGTGGGGAAGAAGCAATAAATTGGGGTTTATCCGGACCAATGCTACGCGCATCCGG  
AATACCATGGGATCTTCGTAAAATTGATCGTTATGAGTCTTACGATGAATTTGAATGGGA  
AATCAATGGCAAAAACAAGGAGATTCATTAGCTCGTTATTTAGTACGACTTAGCGAAA  
TGACAGAATCCATAAAAATTATTCAACAGGCTCTGGAAGGACTTCCAGGGGGTCCCTAT  
GAGAATTTAGAAAGCAGGGGCTTTGATAGAAAAAGGAATCCAGAATGGAATGATTTTG  
AATATCGATTCATTAGTAAAAACCTTCTCCTACTTTTGAATTATCAAAAACAAGAATTT  
ATGTAAGAGTTGAAGCTCCAAAAGGGGAGTTGGGAATTTTTCTCATAGGAGATCAAAG  
CGTTTTTCTTGGAGATGGAAAATACGACCACCGGGTTTTATTAATTTGCAAATTTCTCC  
TGAAGTAGTTAAAAGAATGAAATTGGCTGATATTATGACGATACTCGGTAGCATAGATAT  
AATTATGGGAGAAGTTGATCGTATGCTTCCATGATAACCGGGTTCATGAATTATGGTCA  
ACAAACCCTACGAGCTGCAAGGTATATTGGTCAAGGTTTCATGATTACCTTATCCACA  
CAAATCGTTTACCTGTAACCTATTCAATATCCCTATGAAAAATTAATAACATCGGAACGTT  
TCCGCGGTCAATCCATTTTGAATTTGATAAATGCATTGCTTGTGAAGTATGTGTTTCGAG  
TATGTCCTATAGATTTGCCTGTTGTTGATTGGAAATTGGAACTAATATTCGAAAAAAC

GATTGCTTAATTACAGTATTGATTTTGGAAATTTGTATATTTTGTGGTAATTGTGTTGAGTA  
TTGTCCAACAAATTGTTTGTCAATGACTGAAGAATATGAATTTTCCACTTATGATCGTCA  
CGAATTGAATTATAATCAAATAGCTTTGGGTCGTTTACCAATGTCAGTAATTGACGATTA  
CACTATTCGAACAATTTGGAATTCA-----GGGGTAAACCCTTTAATT-----AT  
GCAGGGCACTTTGTCCGTTTGGCTAGCCAAACGCGGGCTGGTTCATAGATCGTTGGGC  
TTCGATTATCAAGGAATAGAGACTTTACAAATAAAGCCCGAAGATTGGCATTCTATTGC  
TGTAATTTTATATGTATATGGTTACAATTATTTACGTTTCGCAATGTGCCTATGATGTGGCA  
CCAGGTGGCCTCTTAGCCAGCGTGTATCATCTTACGAGAATAGAATATGGTGTTAATCA  
AGCGGAAGAAGTCTGCATAAAAGTATTTACTCACAGGAGTAATCCTAGAAATCCATCCG  
TTTTCTGGGTTTGGAAAAGTACGGATTTTCAAGAACGGGAATCTTATGATATGTTAGGA  
ATCACTTATGATAGCCATCCACGACTGAAACGGATCCTAATGCCCGAGAGTTGGATAGG  
GTGGCCTTTACGTAAGGATTATATTGCCCCCAATTTTATGAAATACAAGATGCTTAT-----

-----ATGAATTCCATTAAGTTTCCCATACTTGATCG  
ACAACAACAAAATTCCGTTATTTCAACTACGTTAAATGATCTTTCAAATTGGTCAAGAC  
TTTCCAGCCTATGGCCGCTTCTTTATGGTACCAGTTGTTGTTTCATTGAATTTGCCTCATT  
AATAGGCTCCCGATTTGACTTTGATCGTTATGGGTTAGTACCAAGATCGAGTCCTAGAC  
AGGCGGACCTTATTTTAAACAGCAGGTACAGTAAACAATGAAAATGGCTCCTTCTTTAGTG  
CGATTATATGAACAAATGCCTGAACCGAAGTATGTTATTGCTATGGGAGCCTGTACAATT  
ACAGGGGGGATGTTTCAGTACCGATTCTTATAGTACTGTTTCGAGGAGTTGATAAGCTAAT  
TCCTGTAGATGTCTATTTGCCGGGTTGTCCACCTAAACCAGAGGCTGTTATAGACGCTAT  
AACAAAGCTTCGTAAGAAAATAGCTAGAGAAATCTATAAGGATCGAATTAGACCTCAA  
CAGGGTAATCGGTGTTTTACTACCAATCACAAGTTTTTTGTTGTACGCAGTCCGCATATT  
GGAAATTATGATCAAGAATACTCTATCCACCATCATCTACTTCAGAGATCTCT--GAAA  
CATTTTTTAAATACAAAAGTCCAGTATCGTCCCACGAATTAGTGAATATGCAAACCTAGA  
AATACCTTTTCTTGGATAAGGGAAGAGATTACTCGCTCCATATCTGTCTCACTCATAATAT  
ATATAATAACTTGGGCATCCATTTCAAGTGCATATCCGATTTTGGCCAGCAGAATTATG  
AAAATCCACGAGAGGCGACTGGGCGTATTGTATGTGCCAATTGCCATTTAGCTAATAAG  
CCCGTGGATATTGAGGTTCCACAAACGGTACTTCTGATACTGTATTTGAAGCAGTTGT  
TAAAATTCCTTATGATATGCAACTAAAACAAGTTCTAGCTAATGGTAAAAAAGGGGCTT  
TGAATGTGGGAGCTGTTCTTATTTTACCGGAGGGTTTTGAATTAGCCCCCCCCGATCGTA  
TTTCACCCGAGATGAAAGAAAAGATAGGAAATCTTCTTTTTCAGAATTATCGTCCCAAT  
AAAAAAAATATTCTTGTGATAGGTCCTGTTCCCTGGTCAAAAATATAGTGAAATAACCTT  
TCCTATTCTTGCTCCAGACCCTGCTACTAATAAAGATGTTCACTTCTTAAAATATCCTATA  
TATGTAGGTGGAAACAGGGGAAGGGGTCAGATTTATCCTGATGGTAGCAAAAAGTAACA  
ATACAGTTTATAATGCTACGGCAGGAGGGATAATAAGTAAAATTTTACGAAAAGAAAAG  
GGGGGATACGAAATAACCATAGTGGATGCATCGAATGGACGCGAAGTTATTGATATTAT  
CCCTCGAGGCCTAGAACTTCTTGTTCAGAGGGCGAATCCATTAAACTCGATCAACCAT  
TAACGAGTAATCCTAATGTGGGTGGATTTGGTCAGGGGGATGCGGAAATAGTACTTCAA  
GATCCATTACGTGTCCAAGGTCTTTTGTCTTCTTAGGATCGGTTGTTTTGGCACAAATC  
TTTTTGGTTCTTAAAAAGAAACAGTTTGAAGAAGGTTCAATTATCCGAAATGAATTTTAT  
GAGTAAAGTTTATGATTGGTTCGAAGAACGTCTTGAGATTCAGGCGATTGCAGATGATA  
TAACTAGTAAATATGTTCCCTCCGCATGTCAACATATTTTATTGTCTAGGCGGAATTACCCT  
TACTTGTTTTTTTAGTACAAGTAGCTACGGGATTTGCTATGACTTTTTTATTACCGTCCAAC

CGTTACTGAAGCTTTTGGCTTCTGTTCAATATATAATGACTGAAGCTAACTTTGGTTGGTT  
AATCCGATCAGTTCATCGATGGTCGGCAAGTATGATGGTCCTAATGATGATCCTGCACGT  
ATTTCGTGTATACCTCACCGGTGGTTTTAAAAACCTCGCGAATTAACCTTGGGTTACTG  
GTGTGGTCTGGGTGTATTGACCGCATCTTTTGGTGTAAACAGGTTATTCTTTACCTGGG  
ATCAAATTGGTTATTGGGCGGTCAAATTGTAACAGGTGTACCTGACGCTATTCCGGTA  
ATAGGATCACCTCTGTAGAATTATTACGCGGAAGTGCTAGTGTGGACAATCCACTTT  
GACTCGTTTTTATAGTTTACACACTTTTGTATTACCTCTTCTTACGGCCGTCTTTATGTTA  
ATGCATTTCCCTAATGATACGTAAGCAAGGTATTTCTGGTCCCTTAATGGGAGTAACAAA  
AAAACCAGATTTGAATGATCCTGTATTACGAGCTAAATTAGCTAAAGGTATGGGTCACA  
ATTATTACGGGAACCCGCATGGCCAACGACCTTTTATATATTTTTCCAGTAGTTATTCT  
TGGTACCATTGCCTGTAACGTAGGCTTAGCGGTTTTAGAACCATCAATGATTGGTGAAC  
CTGCGGATCCTTTTGCAACTCCTTTGGAAATATTACCTGAATGGTATTTCTTTCTGTATT  
TCAAATACTTCGTACAGTGCCTAACAAATTATTGGGTGTTCTTTAATGGTTTCAGTACC  
AGCGGGATTATTAACCGTACCCTTTTGGAAAATGTTAATAAGTTTCAAATCCATTTTCG  
TCGTCCAGTAGCGACAACCGTCTTTTTGATTGGCACCGCGGCCCTGTGGTTAGGTA  
TTGGAGCAACATTACCGATTGATAAATCTCTAACTTTAGGTCTTTTTATGATTGAAGTTT  
TTTTATTGGAATCGTCTTAGGTCTAATTCCTATTACTTTGGCTGGATTATTCGTAAGTGC  
TTATTTACAATACAGACGTGGTGATCAGTTGGACTTTATGCCTACTATAACTAGTTATTT  
GGTTTTCTACTAGCAGCTTTAACTATAACCTCAGTTCTGTTTATTGGTCTAAGCAAATA  
CGACTTATTATGGATATAGTAAGTCTCGCATGGGCTGCTTTAATGGTAGTTTTTACATTT  
CCCTCTCTCTCGTAGTGTGGGAAGAAGTGGACTCATGATTATTCGTTCCGCCGAACCA  
GAAGTCAAATTTTGGTAGATAGGATCCATAAAAACCTTCTTTTCGAGGAATGGGCTAA  
ACCCGGTCATTTCTCAAGAACAATAGCTAAGGGACCTGATACTACCCTGGATCTGGA  
ACCTACATGCTGATGCTCACGATTTTGATAGTCATACCAGTGATTTGGAGGAAATCTCT  
GAAAAGTATTTAGTGCCCATTTCCGCCAACTCTCTATCATCTTTCTTTGGCTGAGTGGCA  
TGATTTCCATGGTGTCTCGTTTTTCCAATTATGAAGCATGGCTGAGTGATCCTACTCACA  
TTGGACCTAGTGCTCAGGTGGTTTGGCCAATAGTGGCCAAGAAATCCTGAATGGAGA  
TGTGGGCGGAGGCTTCCGAGGAATACAAATAACCTCAGGCTTTTTTCAGATTTGGCGA  
GCATCCGGAATAACTAGTGAATTACAACCTTTATTGTACCGCAATTGGCGCATTGGTCTTC  
GCAGCCTTAATGCTTTTTGCTGGTTGGTTCCATTATCACAAAGCAGCTCCAAAATTGGC  
TTGGTTCCAAGATGTAGAATCTATGTTGAATCACCATTTAGCAGGGCTACTAGGACTTG  
GGTCCCTTTCTTGGGCAGGACATCAAGTACATGTATCTTTACCGATTAACCAATTTCTAA  
ACGCTGGAGTAGATCCTAAAGAAATACCGCTTCCTCATGAATTTATCTTGAATCGGGAT  
CTTTTGGCTCAACTTTATCCAAGTTTTGCTGAAGGAGCAACTCCCTTTTTTACCTTAAAT  
TGGTCAAATACTCGGAATTTCTTACTTTTCGTGGCGGATTAGATCCAGTGAAGGGGG  
TCTATGGTTAACCGATATAGCACATCATCATTTAGCTATCGCAATCTTTTTCTAATCGCG  
GGTCATATGTATAGGACCAACTGGGGTATTGGTCATGGTATAAAGATATTTTAGAGGCT  
CATAAAGGTCCATTTACAGGCCAAGGCCATAAAGGCCTATATGAAATTCTAACAAACATC  
ATGGCATGCTCAATTATCTCTTAACTAGCTATGTTAGGCTCTTTAACCATTATTGTAGCT  
CACCATATGTATCCATGCCCCCTTATCCATATCTAGCTACTGACTATGCTACACAACCTGT  
CATTGTTACACATCACATGTGGATTGGTGGATTCTCATAGTTGGTGCTGCTGCGCATG  
CAGCCATTTTATGGTAAGAGACTATGATCCAATAATCGATATAACGATTTATTAGATCG  
TGTCCTGAGGCATCGCGATGCAATCATATCACATCTCAACTGGGTATGTATTTCTAGG  
CTTCCACAGTTTTGGTTTTGTATATTCATAATGATACCATGAGTGCTTTAGGGCGTCCACA

AGATATGTTTTTCAGATACTGCTATAACAATTACAACCAGTCTTTGCTCAATGGATACAAAA  
TACCCATGCTTTAGCACCTGGTGTAAACAGCCCCTGGTGAAACAGCGAGCACCAGTTTG  
ACTTGGGGGGGCGGTGAGTTAGTAGCAGTGGGTGGCAAAGTAGCTTTGTACCTATTC  
CATTAGGAACGGCAGATTTTTTTGGTACATCATATTCATGCATTTACAATTCATGTGACGG  
TATTGATACTGTTGAAAGGTGTTCTATTTGCTCGTAGCTCGCGTTTAATACCAGATAAAG  
CAAATCTTGGTTTTTCGTTTTCCCTTGTGATGGGCCGGGAAGAGGAGGAACATGTCAAGT  
ATCTGCTTGGGATCATGTCTTCTTAGGACTATTCTGGATGTACAATGCTATTTCCGTAGTA  
ATATTCCATTTTCAGTTGGAAAATGCAGTCAGATGTTTGGGGTAGTATAAGTGATCAAGG  
GGTGGTAACTCATATTACTGGAGGAACTTTGCACAGAGTTCCATTACTATTAATGGGT  
GGCTCCGCGATTTCTTATGGGCACAAGCATCTCAGGTAATTCAGTCTTATGGTTCCTCGT  
TATCTGCATATGGTCTTTTTTTCCCTAGGTGCTCATTTTGTATGGGCTTTCAGTTTAAATGT  
TCTATTCAGCGGGCGTGGTTATTGGCAAGA ACTTATTGAATCCATTGTTTGGGCTCATAA  
TAAATTAAGTTGCTCCTGCTACTCAGCCTAGAGCCTTGAGCATTATACAAGGACGTG  
CTGTAGGAGTAACCCATTACCTTCTGGGTGGAATTGCCACAACATGGGCGTTCCTTA  
GCAAGAATTATTGCAGTAGGAATGGCATTAAAGATTTCCAAGGTTTAGCCAAGGCTTAGC  
TCAGGACCCCACTACTCGTCGTATTTGGTTTGGTATTGCTACCGCACATGACTTCGAGA  
GTCATGATGATATTACTGAAGAACGTCTTTATCAGAATATTTTTGCTTCTCATTTCCGGC  
AATTAGCAATAATTTTTCTGTGGACTTCCGGAAATTTGTTTCATGTAGCTTGGCAAGGA  
AATTTTGAGACATGGGTACAAGACCCTTACATGTAAGACCGATTGCTCATGCTATTTG  
GGATCCTCATTTTGGTCAACCGGCTGTGGAAGCGTTTACTCGAGGAGGTGCTCTTGGC  
CCGGTGAATATAGCTTATTCTGGTGTATTATCAGTGGTGGTATAACAATCGGTTTACGTACT  
AATGAAGATCTTTATACTGGAGCTCTTTTTCTATTATTTCTTTCTGCCCTATCCTTAATAG  
GGGGTTGGTTACACCTACAACCAAAATGGAACCAAGAGTTTCGTGGTTCAAAAATGC  
TGAATCTCGTCTGAATCATCATTTGTCAGGACTATTCCGGGGTAAGCTCATTGGCTTGA  
CAGGTCATTTAGTCCATGTGCTATTCTGCATCCAGGGGGGAATATGTTTCGATGGAATA  
ATTTCTTAAATGTATTACCGCATCCCCAAGGGTTAGGCCCACTTTTTACGGGTCAGTGG  
AATCTTTATGCTCAAACCCCGACTCGAGTAGTCATTTATTTGGTACCTCCAAGGATCC  
GGAAGTCCATTCTAACCTTCTTGGGGGATTCCATCCACAAACGCAAAGTTTATGGCT  
AACCGATATGGCACATCATCATTTAGCTATCGCAATCTTTTCTCATTGCGGGTCATATG  
TATAGAACGAACCTTTGGAATCGGACACAGTATAAAAGATCTTTTAGAAGCACATATTCC  
TCCGGGAGGACGATTGGGGCGTGGGCATAAGGGTCTTTATGACACAATCAATAATTCGA  
TTCATTTTCAATTAGGCCTTGCTCTAGCCTCCTTAGGAGTTATTACTTCCTTGGTAGCTC  
AACACATGACTCTTTACCTGCTTATGCGTTCATAGCGCAAGATTTTACGACTCAAGCTG  
CGTTATATACCCATCACCAATATATTGCAGGATTCATCATGACAGGAGCTTTTGCTCATG  
GAGCTATCTTTTTTATTAGAGATTACAATCCAGAACAGAATGAGGATAACGTATTAGCAA  
GAATGTTAGACCATAAAGAAGCTATCATATCCCATTAAAGTTGGGCCAGCCTCTTTCTAG  
GGTCCATACTTTGGGACTTTATGTTTATAACGACGTCATGCTTGTCTTTGGTACTCCCG  
AAAAACAAATCTTGATCGAACCTATATTTGCCCAATGGATACAATCTGCTCATGGGAAA  
ACTTCATATGGATTTGATGTACTTTTATCTTCGACAAGTGGCCCAGCATTAAATGCGGGT  
CGCAGCATATGGTTGCCTGGCTGGTTAAATGCTATTAATGAG-----AATAGTAATTCATTA  
TTCTTAAACAATAGGTCCTGGAGATTTCTTGGTTCATCATGCTATTGCTTTAGGTTTACATA  
CAACTACATTGATCTTAGTAAAAGGTGCTTTAGATGCACGTGGTTCCAAGTTAATGCCA  
GATAAAAAGGATTTCCGGGTATAGTTTTCTTGGCATGGTCCGGGACGAGGTGGTACTTG  
TGATATTTCCGGCTTGGGACGCATTTTATTTGGCAGTTTTCTGGATGTTAAATACTATTGGA



TGGGTTACTTTTTATTGGCATTGGAAACACATCACATTATGGCAGGGTAACGTTTCACA  
GTTTAATGAATCTTCCACTTATTTGATGGGATGGTTAAGAGATTATCTATGGTTAAACTCT  
TCACA ACTTATCAATGGATATAACCCGTTTGGTATGAATAGTTTATCAGTCTGGGCATGG  
ATGTTCTTATTTGGGCATCTTGTTTGGGCTACAGGATTTATGTTCTTAATTTCTGGCGTG  
GTTATTGGCAGGAATTGATTGAAACTTTAGCGTGGGCTCATGAACGCACACCTTTGGCA  
AATTTGATTGCTGGAAAGATAAACCCAGTAGCTCTTTCAATCGTGCAAGCAAGATTGGT  
TGGATTAGCTCACTTTTCTGTAGGTTATATATTCACTTATGCGGCTTTCTTGATTGCCTCC  
ACATCGGGCAAATTCGGTATGTCACATTCAGTAAAAATTTATGATACTTGTATAGGATGT  
ACTCAATGTGTCCGAGCATGCCCTACAGACGTATTAGAAATGATACCTTGGGATGGATG  
TAAAGCTAAGCAAATAGCTTCTGCTCCAAGAACCGAGGACTGTGTTGGTTGTAAGAGA  
TGGAATCCGCCTGTCCAACGGATTTTTTGGAGCGTTCGAGTTTATTTATGGCATGAAAC  
AACTCGAAGTATGGGTCTAGCTTATATGACA ACTTTCAACTTACCCTCTATTTTTGTGCC  
TTTAGTAGGCCTAGTCTTTCCGGCAAATTGCAATGGCTTCTTTATTTCTTCATATTCAAAA  
AAATAAGATTTTTATGCGAGATCTAAAAACATATCTTTCCGTAGCACCGGTACTAAGTAC  
TCTATGGTTTCGGTTTCGTTAGCAGGTTTATTAATAGAGATTAATCGTTTATTTCCAGATGCA  
TTAACATTTCCCTTTTTTTCATTCATGACTGCAATTTTAGAGAGACGCGAAAGCGAAAG  
CCTATGGGGTTCGCTTCTGTA ACTGGATACTAGCACTGAAAACCGTCTTTACATTGGAT  
GGTTTGGTGTTTTGATGATCCCTACCTTATTGACCGCAACTTCTGTTTTTATTATCGCATT  
CATTGCTGCTCCTCCAGTAGATATTGATGGTATTCGTGAACCTGTTTCTGGATCTCTTCT  
TTACGGAAACAATATTATTTCCGGTGCCATTATTCTACTTCTGCAGCTATTGGATTGCAT  
TTTTACCCAATCTGGGAAGCTGCATCCGTTGATGAATGGCTATAACAACGGCGGTCTTA  
TGA ACTAATTGTTCTACACTTTTTACTTGGTGTAGCTTGTATATGGGTCGTGAGTGGGA  
ACTTAGTTTCCGTCTGGGTATGCGTCCTTGGATTGCTGTTGCATATTCAGCTCCTGTTGC  
AGCTGCGACTGCTGTTTTCTTGATCTATCCAATTGGTCAGGGAAGTTTTCTGATGGTAT  
GCCTCTAGGAATCTCTGGTACTTTCAACTTTATGATTGTATTCCAGGCTGAGCACAACAT  
TCTTATGCACCCATTTACATGTTAGGTGTAGCTGGTGTATTCCGGCGGCTCCCTTTTTAG  
TGCTATGCATGGTTCCCTGGTAACTTCTAGTTTGATCAGGGAACCACAGAAAATGAAT  
CTGCTAATGAAGGTTACAGATTCCGGGCAAGAAGAAGAACTTACAACATTGTAGCTGC  
TCACGGTTATTTGGCCGATTGATTTTCCAATATGCTAGTTTCAACAATTCTCGTTCTTTA  
CATTTCTTCTTAGCGGCTTGGCCGGTAGTAGGTATTTGGTTTACTGCTTTAGGTATTAGT  
ACTATGGCTTTCAACCTAAATGGTTTCAATTTCAACCAATCAGTAGTTGATAGTCAAGG  
ACGTGTTATTAATACTTGGGCTGATATTATTAACCGTGCTAACCTTGGTATGGAAGTTAT  
GCATGAACGTAATGCTCACA ACTTCCCTCTAGACCTAGCTGCTGTTGAGGCTCCATCTA  
CAAATGGAATGGGTTTGCCTTGGTATCGTGTTCATACTGTTGTATTGAATGATCCCGGTC  
GTTTACTTGCTGTTTCATATAATGCATACTGCTCTAGTTGCTGGTTGGGCTGGTTCGATGG  
CTCTATATGAATTAGCAGTTTTTTGATCCCTCCGACCCCGTTCTTGATCCAATGTGGAGAC  
AAGGTATGTTTCGTTATACCTTTTCATGACTCGTTTAGGAATAACCAATTCTTGGGGCGGTT  
GGAATATTACA---GGGGGGACTATAACGAATCCGGGTCTTTGGAGTTACGAAGGGGTAG  
CCGGAGCACATATAGTGTTTTCTGGTTTGTGCTTCTTGGCAGCTATTTGGCATTGGGTAT  
ATTGGGATCTAGAAATTTTTTGTGATGAACGTACAGGAAAACCTTCTTTGGATTTGCC  
AAGATTTTTGGAATTCATTTATTTCTTTTCAGGAGTGGCTTGCTTCGGTTTTGGCGCATTT  
CATGTAACAGGATTATATGGTCCTGGAATATGGGTATCCGACCCTTATGGACTAACCGGA  
AAGGTACAACCCGTAAACCCGGCGTGGGGCGTGGAGGGTTTTGACCCTTTTGTTCGG  
GAGGAATAGCCTCTCATCATATTGCAGCAGGGACGTTGGGTATATTAGCGGGCCTATTC

CATCTTAGTGTTTCGTCCGCCTCAACGTCTATACAAAGGATTACGTATGGGCAATATTGAA  
ACCGTCCTTTCCAGTAGTATTGCTGCTGTCTTTTTTGCAGCTTTTGTGTTGCTGGA  
ACTATGTGGTATGGTTCGCAACTACTCCCATCGAATTATTTGGTCTACTCGTTATCAATGG  
GATCAGGGATACTTTCAACAAGAAATATATCGAAGAGTTAGTGCTGGACTGGCTGAAA  
ATCAAAGTTTATCAGAAGCTTGGGCGAAAATTCCTGAAAAATTAGCTTTTTATGATTATA  
TTGGTAATAATCCAGCAAAAAGGGGGTTATTCCGAGCGGGTTCAATGGACAATGGGGA  
TGGAATAGCTGTTGGATGGTTAGGCCACCCCGTCTTTAGAAATAAAGAAGGGCGTGAA  
CTTTTTGTACGCCGCATGCCTACTTTTTTTGAAACTTTTCCGGTAGTTTTGGTAGACGGA  
GACGGAATTGTTAGAGCTGACGTCCCGTTTAGAAGGGCAGAATCAAAATATAGTGTCG  
ACAAGTAGGTGTAAGTGTGAGTTTTATGGTGGTGAAGTCAATGGAGTGAGTTATAGT  
GATCCCGCAACTGTGAAAAAATATGCTAGACGGGCTCAATTGGGTGAGATTTTTGAATT  
AGATCGTGCGACTTTGAAATCTGATGGTGTTTTTCGTAGCAGCCCAAGAGGTTGGTTA  
CGTTTGGACATGCTTCGTTTGCTCTACTTTTCTTCTTTGGACACATTTGGCATGGTGCTA  
GAACCTCTTCAGAGATGTTTTTGCTGGTATTGATCCAGATTTGGATGCTCAAGTGGA  
TTCGGGGCATTCCAAAACTTGGAGATCCAACACTACAAAACGACAAGCAGTCATGAAA  
ACCTTATATTCCCTGAGGAGGTTCTACCAGTGGAACGCTCTTTAATGGAACTTTAGC  
TTTAGCTGGTCGTGACCAAGAAACCACCGTTTCGCTTGGTGGGCCGGGAATGCCCGA  
CTTATCAATTTATCTGGTAACTTTTGGGAGCTCATGTAGCCCATGCCGGATTAATCGTA  
TTCTGGGCCGGAGCAATGAACTTATTTGAAGTGGCCATTTTGTACCTGAAAAGCCCAT  
GTATGAACAAGGATTAATTTACTTCCCCACCTAGCCACTTTAGGATGGGGGGTAGGTC  
CTGGGGGAGAAGTTATAGACACCTTTCCGTACTTTGTATCTGGAGTACTTCACTTAATTT  
CTTCTGCAGTTTTGGGCTTTGGCGGTATTTATCATGCACTTCTGGGACCCGAAACTCTT  
GAAGAATCTTTCCCTTTTTCGGTTATGTATGGAAAGATAGAAATAAAATGACCACCATT  
TTGGGTATTCACTTAATTTTGTAGGTGTAGGTGCCTTTCTTCTAGTATTCAAGGCTCTCT  
ATTTTGGGGGCGTATATGATACCTGGGCTCCGGGAGGGGGGGATGTAAGAAAATTAC  
AACTTGACTCTTAGCCCAAGTGTTATATTTGGTTATTTACTAAAATCTCCCTTTGGGGG  
AGAAGGATGGATTGTTAGTGTGGACGATTTGGAAGATATAATTGGAGGACATGTATGGT  
TAGGTTCCATTTGTATATTTGGTGGAACTGGCATACTTAACCAAGCCTTTTGCATGGG  
CTCGCCGCGCACTTGTATGGTCTGGGGAGGCTTACTTGTCTTATAGTTTAGCTGCTTTAT  
CTGTTTGTGGTTTTCAATGCTTGTGTTTTGTCTGGTTAATAATACCGCTTACCCTAGTGA  
GTTTTACGGACCTACGGGGCCAGAAGCTTCTCAAGCTCAAGCATTTACTTTTCTAGTTA  
GAGACCAACGTCTTGGAGCTAACGTGGGGTCTGCTCAAGGACCTACAGGTTTAGGTAA  
ATACTTAATGCGTTCTCCGACTGGAGAAGTTATTTTTGGAGGAGAAACAATGCGTTTTT  
GGGATCTGCGTGCTCCCTGGTTAGAACCTTTAAGGGGTCTAACGGTTTTGGACTTGAGT  
AGGTTGAAAAAAGACATAACAACCTTGGCAAGAACGACGTTCCGGCAGAATATATGACTC  
ATGCTCCTTTAGGTTTCGTTAAATTTCTGTAGGGGGCGTAGCTACTGAGATCAATGCAGTC  
AATTATGTCTCTCCGAGAAGTTGGTTATCTACCTCTCATTTTGTCTAGGATTTTTCTAT  
TCGTGGGTCAATTTATGGCACGCGGGAAGGGCTCGGGCAGCGGCAGCGGGATTGAAA  
AAGGAATTGATCGTGATTTTGAACCTGTTCTTTCCATGACTCCTCTTAACATGACTATAG  
CCCTTGGTAAATTTACCAAGACGAAAAAGATTTATTTGATATTATGGATGACTGGTTAC  
GGAGGGACCGCTTCGTTTTTGTAGGTTGGTCTGGTCTATTGCTCTTTCTTGTGCCTATT  
TCGCTTTAGGGGGTTGGTTCACAGGTACAACCTTTGTAACCTCATGGTATACTCATGGAT  
TGGCCAGTTCCTATTTAGAAGGTTGCAATTTTTTAACCGCTGCAGTTTCTACTCCTGCTA  
ATAGTTTAGCGCATTCTTTGTTGTTACTGTGGGGTCTGAAGCACAAAGGAGATTTTACT

CGTTGGTGTCAATTAGGTGGTCTATGGGCTTTTGTGCTCTCCACGGCGCTTTCGCATTA  
ATAGGTTTTATGTTACGTCAATTTGAACTTGCTCGATCTGTTCAATTGCGACCTTATAATG  
CAATCGCATTCTCTGGTCCCATTGCTGTTTTTGTTCCTGTCTTCCTAATTTATCCACTAGG  
TCAATCTGGTTGGTTCTTTGCGCCTAGTTTTGGTGTAGCGGCTATATTTGATTATCCT  
CTTTTCCAAGGGTTTCATAATTGGACATTGAACCCATTTTCATATGATGGGAGTCGCCGG  
TGACTGGGCGCGGCTCTGCTATGCGCTATTCATGGTGCTACTGTAGAAAATACTTTATT  
TGAAGATGGTGATGGTGCAAATACATTCCGTGCTTTTAACCCAACTCAAGCCGAAGAA  
ACTTATTCAATGGTCACCGCTAACCGCTTTTGGTCACAAATCTTTGGGGTTGCTTTTTCC  
AATAAACGTTGGTTACATTTCTTTATGTTATTTGTACCGGTAACCTGGTTTATGGATGAGT  
GCTCTTGGAGTAGTCGGTTTAGCTTTGAACCTACGTGCCTATGACTTCGTTTTCCAGGA  
AATCCGTGCAGCGGAAGATCCAGAATTTGAGACTTTCTATACTAAAAATATTCTTTTAA  
ACGAAGGTATTCGTGCTTGGATGGCGGCTCAAGATCAGCCTCATGAAAACCTTATATTC  
CCTGAGGAGGTTCTACCACGTGGAACGCTCTTATGTCTGGAAGCACAGGAGAACGTT  
CTTTTGCTGATATTATTACCAGTATTCGATACTGGGTCAATTCATAGCATTACTATACTTCC  
CTATTCATTGCGGGCTGGTTATTCGTCAGCACCGGTTTAGCTTACGATGTGTTCCGGGAG  
CCCTCGTCCAACGAGTATTTTACAGAGAGCCGACAAGGCATTCCATTAATAACAGGC  
CGTTTTGATCCTTTGGAACAACCTCGATGAATTTAGTAGATCTTTTATGACTATAGATAGG  
ACCTATCCAATTTTACAGTGCCTGGTTGGCTGTTTCATGGACTAGCTGTACCTACCGTT  
TCTTTTTTGGGGTCAATATCAGCAATGCAGTTCATCCAACGAATGGCTACACAACTGT  
TGAAGATAGTTCTAGATCTGGT---CCAAGAAGCACTACTGTAGGGAAGTTATTGAAACC  
ATTGAATTCGAATATGGTAAAGTAGCTCCCGGATGGGGAACGACCCCTTTGATGGGGT  
TTGCAATGGCTCTATTTGCGGTATTCCTATCTATTATTTTGGAGATTTATAATTCTTCTGTT  
CTACTGGATGGAATTTCAAGTGAATATGCTTACTCTCAAACCTTTTGTATACACTGTAGTT  
ATATTCTTTGTTTCTCTCTTCATATTTGGATTCTATCTAATGATCCAGGACGTAATCCGG  
GACGTGAAGAAATGGCTGATACTACTGGAAGGATTCTCTTTGGGTAATAGGTACTGTA  
GCTGGTATTTCTGTGATCGGTTTAATAGGTATTTCTTTTATGGTTCATATTCAGGATTAG  
GTTTCATCCCTGATGCTTAATATATTTAATTTGATCTGTATTTTTTTTAAATCTACCCTTTTT  
CAAGCACTTTTTTAGTCGCCAAATTGCCAGAGGCCTACGCCTTTTTTGAATCCAATCGTA  
GATGTTATGCCCGTAATACCTCTTTTCTTCTCTTAGCCTTTGTTTGGCAAGCCGCT  
GTAAGTTTTTCGAATGACACAATCAAATCCGAACGAACAAAGTGTGAAATTAATCGTA  
CCAGTCTCTATTGGGGGTTATTACTCATTTTTGTACTTGCTGTTTTATTTTCGAATATTTCT  
TTCAATATGGAAGTAAATATTCTTGCATTTATTGCTACTGCACTCTTCATTCTCGTTCCTA  
CTGCTTTTTTGCTTATAATTTACGTAAAAACCGTTAGTCAAAATGATATGGAAACAGCA  
ACCCTAGTCGCCATCTTTATATCTGGGTACTTGTAAGTTTTACTGGGTATGCTCTATATA  
CTGCCTTTGGGCAACCCTCTCAACAATAAGAGATCCATTTCGAGGAACACGGGGACAT  
GGAAGCATTGGTTTATACATTTCTCTTAGTATCCACTTTAGGGATAATTTTTTTCGCTATT  
TTTTTTCGGGAACCACCTAAAATTTCAACTAAAAA-----ATGACTATTGCTTTCCAATT  
GGCAGTTTTTGCATTAATTATTACTTCATCAATCTTACTGATTAGTGTACCCGTTGTATTT  
GCGTCTCCTGATGGTTGGTCGAGTAACAAAAATGTTGTATTTTCTGGTACATCTTTATGG  
ATTGGATTAGTCTTCTTGGTGGGTATCCTTAATTCTCTTATCTCT-----ATGTC  
ACCACAAACAGAGACTAAAGCAAGTGTGGGTTCAAAGCTGGTGTAAAGAGTATAA  
ATTGACTTACTATACTCCTGAATATGAAACCAAGGATACTGATATCTTGGCAGCATTCCG  
AGTAACTCCTCAACCTGGAGTTCACCTGAAGAAGCAGGGGCTGCGGTAGCTGCTGA  
ATCTTCTACTGGTACATGGACAACCTGTGTGGACCGATGGGCTTACCAGCCTTGATCGTT

ACAAAGGACGATGCTACACATCGAGCCCGTTCCAGGAGAAGAACTCAATTTATTGC  
GTATGTAGCTTATCCCTTAGACCTTTTTGAAGAAGGTTTCGGTTACTAACATGTTTACCTC  
GATTGTGGGTAATGATTTGGGTTCAAAGCCCTGGCTGCTCTACGCTAGAGGATCTGC  
GAATCCCTCCTGCTTATACTAAAACCTTCCAAGGACCACCTCATGGTATCCAAGTTGAA  
AGAGATAAATTGAACAAGTATGGACGTCCCCTATTAGGATGTACTATTAACCAAATT  
GGGGTTATCCGCGAAAACTATGGTAGAGCAGTTTATGAATGTCTACGTGGTGGACTTG  
ATTTTACCAAAGATGATGAGAATGTGAACTCCCAACCATTTATGCGTTGGAGAGACCGT  
TTCTATTTTGTGCCGAAGCTATTTATAAATCACAGGCTGAAACAGGTGAAATCAAAGG  
GCATTATTTGAATGCTACTGCGGGTACATGCGAAGAAATGATCAAAAAGAGCTGTATTTG  
CCAGAGAATTGGGAGTTCCTATCGTAATGCATGACTACTTAACAGGGGGATTACCGCA  
AATACTAGTTTGTCTCATTATTGCCGAGATAATGGCCTACTTCTTACATCCACCGTGCA  
ATGCACGCTGTTATTGATAGACAGAAGAATCATGGTATGCACTTCCGTGTACTAGCTAA  
AGCTTTACGTCTATCTGGTGGAGATCATATTCACGCGGGTACAGTAGTAGGTAAACTTG  
AAGGAGACAGGGAGTCAACTTTGGGCTTTGTTGATTTACTGCGCGATGATTATGTTGAA  
AAAGATCGAAGCCGCGGTATCTTTTCACTCAAGATTGGGTCTCACTACCTGGTGTCT  
GCCTGTGGCTTCAGGGGGTATTCACGTTTGGCATATGCCTGCTTTGACCGAGATCTTTG  
GAGATGATTCTGTACTACAATTCGGTGGAGGAACCTTAGGCCACCCTTGGGGAAATGC  
ACCGGGTGCCGTAGCCAACCGAGTAGCTCTGGAAGCATGTGTACAAGCTCGTAATGAG  
GGACGTGATCTTGCAGTCGAGGGTAATGAAATTATCCGTGAAGCTTGCAAATGGAGTC  
CTGAACTAGCTGCTGCTTGTGAAGTATGGAAAGAGATCACATTTAACTTCCCAACCATC  
GATAAATTAGATGGCATGGCGATACATTTATACAAACTTCTACCCCGAGCACACGCAA  
TGGAGCCGTAGACAGTCAAGTGAAATCCAATCCACGAAATAATTTGATCTGTGGGCAG  
CATCATTGTGGTAAAGGTCGTAATGCCAGAGGAATAATTACCGCAAGGCATAGAGGGG  
GAGGTCATAAGCGTCTATACCGTAAAATAGATTTTCGACGAAATGCAAAAAGACATATAT  
GGTAGAATCGTAACCATAGAATACGACCCTAATCGAAATGCATACATTTGTCTCATAAC  
TATGGGGATGGTGAGAAGAGATATATTTTACATCCCAGAGGGGCTATAATTGGAGATAC  
CATTGTTTCTGGTACAGAAGTTCCTATAAAAATGGGAAATGCCCTACCTTTGACCGATAT  
GCCCTTAGGCACGGCCATACATAATATAGAAATCACACTTGGAAAGGGGTGGACAATTAG  
CTAGAGCAGCGGGTGCTGTAGCGAAACTGATTGCAAAAAGAGGGGAAATCGGCCACAT  
TAAAATTACCTTCTGGAGAGGTCCGTTTGTATATCCAAAACCTGCTCAGCAACAGTCCG  
ACAAGTGGGAAATGTTGGGGTAAACCAGAAAAGTTTGGGTAGAGCCGGATCGAAATG  
TTGGCTAGGTAAACGTCTGTAGTAAGAGGAGTAGTTATGAACCCTGTCGACCATCCCC  
ATGGAGGTGGTGAAGGGAGGGCTCCAATTGGTAGAAAAAACCCTGTAACCCCTGGG  
GTTATCCTGCACTTGAAGAAGAAGACTAGAAAAAGGAAAAAATATAGTGAGACTTTGAT  
TCTTCGTGCGCGTAGTAAAATGATTCAACCACAAACCTATTTGAATGTAGCAGACAACA  
GCGGGGCTAGAGAATTGATGTGTATTTCGAATAATAGGAGCTAGT--AATCGCCGATATGC  
TCATATTGGTGACGTTATTGTTGCTGTAATCAAAGAAGCAATACCAATACTCCTCTAGA  
AAGATCAGAAGTGATTAGAGCTGTAATTGTACGTACTTGTAAGAAGTCAAACGTAAC  
AATGGGACGATAATACGATATGATGACAATGCCGCAGTTGTCATTGATCAAGAAGGAAA  
TCCAAAAGGAACTCGAGTTTTTGGGGCGATCCACGGGAATTGAGACAATTAACTTT  
ACTAAAATAGTTTCATTAGCTCCTGAGGTATTAATGCTTAGTCCAAAAGAACCAGATT  
TCGTAAACAACATCGAGGAAGACTAAAAGGAATATCTTCTCGTGGGAATCGTATTTGTT  
TTGGCAGATATGCTCTTCAAACACTTGAACCCGCTTGGATCACATCTAGACAAATAGAA  
GCAGGGCGACGCGCAATGACACGAAATGTACGACGTGGTGGAAAAATTTGGGTACGTA

TATTTCCAGACAAACCAGTTACAGTAAGACCTGCGGAAACGCGTATGGGTTCTGGGAA  
AGGATCCCCTGAGTATTGGGTAGCTGTGGTTAAACCAGGTAAAATCCTTTATGAAATGG  
GTGGTGTACCCGAAAATATAGCAAGAAAAGCTATTTCAATAGCGGCATCAAAAATGCCT  
ATAAAAACCCAATTCATTATTTCTGAAATGACTAGAATTAACGCGGATATATAGCTCGG  
AGGCGTAGAACAAAACCTTCGTTTATTTGCATCAAGCTTTCGAGGGGCTCATTACGGCT  
TACACGAACTATGACTCAACAGAGAATAAGAGCTTTAGTTTCGGCTCATCGGGATAGG  
GGTAAAAGAAAAAGAGATTTTCGCCGTTTATGGATCACTCGAATAAATGCCGTAATTCA  
CGAAATG---GGGGTATTCTATAGTTATAATGAATTCATACACAATCTATACAAGAAGCAAT  
TACTTCTTAATCGGAAAATACTTGCACAAATAGCTCTATTAATAGGAGTTGTCTTTATA  
CAATTTCGAATGACATAAAAAAA-----ATGATAAAGGAAGTATATG  
CTTTAGGGCAATATATATCTATGTCTGCCATAAAGCACGGAGAGTAATTGATCAAATAC  
GTGGACGTTCTATGAAGAAGCACTTATGATATTAGAACTTATGCCTTATCGAGGATGTT  
ATCCCATTTTTAAATTGGTTTATTCTGCTGCAGCGAACGCTAGTCAACAATAAGGGTTTCA  
AAGAAACCAATTTAGTCATTAGTAAAGCTGAGGTGAACCAAGGGAATACTGTGAAAAA  
ATTAAAACCTCGTGCCCGAGGACGAAGTTACCCAATAAAACGATCCACTTGTCAATAA  
CTATCGTATTGGAAGATATATCCTTCTATGGAGGCCTATGGGACAAAAAAATGGATGGAA  
TCAAATATGCAGTATTTACAGACAAAAGTATTCGGTTATTGGGGAAAAAT---CAATATAC  
TTTTAATGTGCAATCAGGATCAACTAGGACAGAAATAAAGCATTGGGTGCAACTCTTCT  
TTGGTGTCAAGGTAATAGCTATGAATAGTCATCGACTCCCCGAAAGGTTAAAAGAATG  
GGACCTATTCTGGGACATACAATGCATTACAGACGTATGATCATTACGCTTCAACCGGG  
TTATTCTATTCCACCTCTTAGAAAGAAAAGAAGTATGGCAGTTCAAAAAAACGTACTT  
CTATCTCGAAAAGCGTATTCGTAAAAAATTTGAAAAGGAAGGGATATTGGACATC  
GTTGAAAGCTTTTTTCATTAGGGAAATCACTTTCTACAGGTAATTCAAAAAGTTTTTTTGT  
ACAGCAAAATAAA---ATGGCCAAGGGTAAAGATGTTTCGAGTAACAATTATTTTGAATG  
TACCAGTTGTGTTGAAATGATATT-----AAGAAAGAAGCCGCGGGAATTTCCAGATATA  
TTACTCAAAAGAATCGGCATAACACCCCTAGTCGATTGGAATTGAGAAAATTCTGTCCC  
TATTGTTATAAACATACAATTCACGGGGAAATCAAGAAAATGAAAATAAGGGCTTCCGT  
TCGTAAAATTTGTGAAAAGTGTGCGACTAATCCGCAGGAGGGGACGAATTATAGTAATTT  
GTTCCAACCCGAGGCATAAACAAAGACAAGGAATGGTTCGAGAGAAAGTCAAAGTAT  
CTACTCGGACACTACAGTGGAAGTGTGTTGAATCAAAAAGAGACAGTAAGCGTCTTTA  
TTATGGACGCTTTATTCTGTCTCCACTTATGAAAGGCCAAGCCGACACAATAGGCATTG  
CGATGCGAAGAGCTTTACTTGGCGAAATAGAAGGAACATGTATTACACGTGCAAAATC  
TGAG-----AACATACCACATGACTATTCTAACATAGCAGGTATTCAAGAATCAGTACATG  
AAATTTAATGAATTTGAACGAGATTGTATTAAGAAGTAATCTATATGGAACGCGCAAC  
GCGCTTATTTGTGTCCAAGGTCCTGGATATATAACTGCTCGAGACATTATTTTACCGCCC  
GCTGTGGAATCATTGATAATACACAGCATATAGCTACCTTAACAGAACCAATAGATTTG  
TGTATTGAATTAAAAATTGAGAGGAATCGCGGATATAGTCTAAAAATGTCAAATAACTT  
TGAA---GACAGA---AGTTATCCTATCGATGCTGTATTTCATGCCTGTTGAAAATGCCAATCA  
TAGTATTCATTCTTATGGGAATGGGAATGAAAAACAAGAGATTCTTTTTCTAGAAATATG  
GACAAATGGAAGTTTAACTCCTAAAGAAGCACTTCATCAAGCCTCCCGGAATTTGATTA  
ATTTATTTATTCCTTTTCTACATGTAGAAGAAGAA-----ACGTTCTATTTAGAGAACAATC  
AA---CATCAAGTTACTTTACCCTTTTTTCTTTTCATAATCGATTAGTT---AACCTAAGAA  
AAAAAAAAAAAAAAAAAGAACTAGCCTTTCAATATATTTTTATTGACCAATTAGAATTGCCT  
CCCAGAATCTACAATTGTCTCAAAAAATCCAATATACATACATTATTGGACCTTTTGAAT

AACAGTCAAGAAGACCTTATCAAAAATTGAACATTTTTCACGTAGAAGATGTAAAAAAGA  
TATTAGACATTCTAGAAAAAAA-----ATGCTTGGGGATGAAAAA--  
-GAGGGAACATCTGCAATACCCGGATTTAATCAGATACAATTTGAAGGGTTTATCGGTT  
TATTGATCAGGGTTTAATAGAAGAACTTGCTAAGTTTCCAAAAATTGAAGATATAGATC  
ACGAAATTGAATTTCAATTATTTGTGGAAACATATCAATTGGTAGAACCTCTGATAAAA  
GAACGAGATGCTGTCTATGAATCACTTACATATTCTTCTGAATTATATGTATCCGCGGGAT  
TAATTTGGAAAACCAGTAGGAATATGCAAGAACAAAGAATTTTTATTGGAAACATTCCT  
TTAATGAATTCCTTGGAACTTCTATAGTAAACGGAATTTACCGAATTGTGATCAATCAA  
ATATTGCAAAGTCCCGGTATCTATTACCAGTCAGAATTGGATCATAATGGGATTTCCGGTC  
TATACCGGCACCATAATATCAGATTGGGGAGGCAGGTTAGAATTAGAGATTGATAAAAA  
AGCAAGAATATGGGCTCGGGTGAGTAGGAAACAAAAAATATCTATTCTAGTTCTATCAT  
CAGCTATGGGTTTGAATCTACGAGAAATTCTAGAGAATGTTTGCTACCCTGAAATTTTC  
TTATCTTTCTTGACCGATAAGGAGAAAAAATAAGGATCAAAAGAAAATGCTATTTT  
GGAGTTTATCAACAATTTTCTTGTGTAGGTGGGGATCCTATATTTTCTGAATCCTTATGT  
AAGGAATTACAAAAAAATTTCTTTCACCAAAGGTGTGAATTAGGAAGGATTGGTCGCC  
GAAATATTAATTGGAGACTGAATCTTAATATACCTCAGAACAATATATTTTTGTTACCAC  
GAGATGTGTTAGCAGCTGCCGATCATTTGATTGGGATGAAATTTGGAATGGGTACACTT  
GATGAT-----ATGAATCATTTGAAAAATAACGTATTTCGCTCTGTAGCGGATCTTTTACAA  
GACCAGCTCGGGTTGGCTCTGGCTCGTTTAGAAAATGTAGTTAAGGGAACCTATCTCCG  
GAGCAATTAGG---CATAAATTGATA---CCTACTCCTCAGAATTTGGTAACTTCAACTCCG-  
-----TTAACAATACTTATGAATCCTTTTTTCGGATTACACCCATTATCTCAAGTTTTGG  
ATCGAACAAATCCATTGACACAAATCGTTCATGGGAGAAAATTGAGTTATTTGGGCCCT  
GGCGGATTAACAGGGCGAACTGCTAATTTTCGGATACGAGATATCCATCCTAGTCACTA  
TGGGCGTATTTGTCCATTGACACGTCTGAAGGAATCAATGTTGGACTTATTGGATCTTT  
ATCAATTCATGCCAGGATTGGTGATTGGGGG---TCGTTAGAAAGTCCATTTTAT-----G  
AACTCTTTGAGAAATCAAAAAAAGCACGGATACGGATGCTTTTTTTATCACCAAGTCA  
AGATGAATATTATATGATAGCGGCAGGAAATCTTTGGCTCTTAATCGGGGCATTCAAGA  
AGAACAGGCTGTTCCAGCTCGATACCGCCAAGAATTTTGGACTATCGCATGGGAAGAG  
GTTTCATCTTCGAAGCATTTCCTTTCCAATATTTTCCATTGGAGCTTCTCTAATTCCTT  
TTATCGAACATAATGATGCGAATCGAGCTTTAATGAGTTCTAATATGCAACGTCAAGCA  
GTTCCACTTTCTCGGTCCGAAAAGTGCATTGTTGAACTGGGTTGGAACGCCAAGTGG  
CTTTAGATTACAGGGGTTCCCGCTATAGCCGAACACGAGGGAAAAATCCTTTATACTGAC  
ACTGAGAAGATCGTTTTTTTCGGGCAATGGTGATACTCTAAGCATTCCATTAATTATGTAT  
CAACGCTCAAACAAAAATACTTGTATGCATCAAAAACCTCAGGTTTCGTCGGGGTAAAT  
GCATTA AAAAGGGACAAATTTTAGCGGATGGTGCTGCTACAGTTGGTGGGGAACCTCGC  
TTTGGGGAAAAATATATTAGTGGCTTATATGCCATGGGAAGGATACAATTTTGAAGATGC  
GGTACTCATTAGTGAGTGTCTAGTATATGGTGATATTTATACTTCTTTCCACATACGGAAA  
TATGAAATTCAGACGCATGTGACAACCCAAGGT---CCTGAAAGGATCACTAAAGAAATA  
CCGCATCTAGAAGGTCGTTTACTCCGAAATTTAGACAAAAATGGAATTGTGATGCTAGG  
ATCGTGGGTTGAAACAGGTGATATTTTAGTAGGTAATTAACACCTCAAGTGGCGAAA  
GAA---TCCTCCTATGCTCCGGAAGATAGGTTATTACGAGCTATACTTGGCATTACAGGTAT  
CGACTTCAAAGAACTTGTTTAAAATTGCCTATAGGTGGTAGAGGTCGAGTTATTGAT  
GTGAGGTGGGTTTCAGAAAAAGGGT---GGTTCAAGTTATAACCCAGAAATAATTCGTGTA  
TATATTTACAGAAACGTGAAATAAAAAGTAGGTGATAAAGTAGCTGGAAGACATGGAA

ATAAAGGTATCATTTCAAAAATTTTGCCTAGACAGGATATGCCTTATTTGCAAGACGGG  
AGACCCGTGGATATGGTCTTCAACCCATTAGGAGTACCCTCACGCATGAATGTAGGACA  
GATATTTGAATGCTCGCTTGGGTTAGCGGGAAGTCTGCTAGATAGACATTATCGAATAG  
CCCCTTTTGATGAGAGATATGAACAAGAGGCTTCGAGAAAACCTGGTGTTTTCAGAATTA  
TATGAAGCCAGTAAGCAAACAGCGAATCCATGGGTATTTGAACCCGAGTATCCAGGAA  
AAAGCCGCATTTTGGATGGAAGAACAGGAGATCCTTTTGAACAGCCTGTGATAATAGG  
AAAGCCCTATATCTTGAAATTAATTCATCAGGTTGATGATAAAATACACGGACGTTCTAG  
TGGACATTATGCACTTGTTACACAACAACCCCTTAGAGGCCGTTCCAAGCAGGGGGGG  
CAGCGGGTAGGCGAAATGGAGGTTTGGGCTCTGGAGGGGTTTGGTGTGCTCATATTT  
ACAAGAGATGCTTACTTATAAATCTGATCATATTAGAGCTCGCCAAGAAGTACTTGGTA  
CCACTATCATTGGAGGAACAATACCTAAACCAGAAGATGCTCCGGAATCTTTTCGATTA  
CTTGTTGAGAACTACGATCTTTGGCTCTGGAACCTGAATCATTTCCTTGTATCTGAGAA  
GAATTTCCAGATTAATAGGAAGGAAGTT-----ATGATCGATCGGTATAAACAT  
CAACAACCTCCGAATTGGCTTAGTTTCTCCTCAGCAAATAAGTGCTTGGGCCACTAAAAT  
AATACCTAATGGAGAGATAGTTGGAGAGGTGACAAAACCCCTATACTTTTCATTACAAA  
CCAATAAACCGGAAAAAGATGGATTATTTTGTGAAAGGATTTTGGACCTATAAAGAGT  
GGAATTTGCGCTTGTGGAAATTATCGAGTGATCGGAGATGAAAAAGAAGACCCAAAGT  
TTTGTGAACAATGTGGAGTTGAATTTGTTGATTCTCGGATACGAAGATATCAAATGGGA  
TACATAAACTGACATGTCCTGTAACCTCATGTATGGTATTTGAAACGTCTTCCTAGTTAT  
ATTGCGAATCTTTTAGATAAACCTCTTAAAGAATTAGAAGGCCTAGTATACTGCGAT-----  
TTTTCTTTTGGCTAGGCC---ATAACTAAAAACCTACTTTCTTACGATTACGAGGTTCAAT  
TGAATATGAAATTCAATCCTGGAAATACAGCATCCCACTTTTTTTTACTACTCAAGGTTT  
CGATATATTTGAAATCGAGAAATTTCTACTGGGGCGGGTGCTATCCGAGAACAATTAG  
CCGATTTAGATTTGCGAATTATTATAGAAAATTCGTTGGTAGAATGGAAACAATTAGGA  
GAAGAA---GGGCCTACGGGAATGAATGGGAAGATCGAAAAATTGTAAGAAGAAAAG  
ATTTTTTAGTTAGACGTATGGAATTAGCTAAGCATTTTATTTCGAACAAATATAGAACCCG  
AATGGATGGTTTTATGTCTCTTACCGGTTCTTCCCTCCCGAGTTGAGACCCATCATTGAGA  
TAGAAGGGGGTAAACTAATGAGTTCAGATATTAATGAACTCTATAGAAGAGTTATCTATC  
GGAACAATACTCTTACCGATCTATTAACAACAAGTAGATCTACACCGGGGGAATTAGTA  
ATGTGTCAGGAAAAATTGGTACAAGAAGCCGTGGATACACTTCTTGATAATGGAATCCG  
TGGACAACCCATGAGGGATGGTCATAATAAGGTTTACAAGTCATTTTCAGATGTAATTG  
AAGGCAAAGAGGGAAGATTTGCGGAGACTCTGCTTGGGAAACGGGTCGATTATTTCGG  
GGCGCTCGGTGATTGTCGTTGGACCTTCACTTTCAATTACATCGCTGTGGATTGCCTCGC  
GAAATAGCAATAGAGCTCTTCCAGACATTTGTAATTCGTGGTTTAATTAGACAACACCT  
GGCTTCGAACATAGGAGTTGCTAAGAGTCAAATTCGTGAAAAAAGCCGATTGTCTGG  
GAAATCCTTCAAGAAGTCATGCAGGGGCATCCCGTATTACTGAATAGAGCACCTACCCT  
ACATAGATTAGGCATACAGTCATTCCAACCTATTTTAGTGGAAGGACGCACTATTTGTTT  
ACATCCATTAGTTTGTAAAGGGTTCAATGCAGACTTTGATGGGGATCAAATGGCTGTTC  
ATGTGCCTTTATCTTTAGAGGCTCAAGCAGAGGCTCGTTTACTTATGTTTTCTCATATGA  
ATCTCTTATCTCCAGCTATTGGAGATCCCATTTTCGGTACCGACTCAAGATATGCTTATTG  
GACTCTATGTATTAACGAGCGGCACTCGTCGAGGATTTGTGCAAACAGATATAATCCAT  
GTAATCGAAAAAC-----TATCAAATGAAAGAATTTACGAAACAACTATAAGTATA  
CG-----AAAGAACCCTTTTTTTGAATTCCTATGATGCAATTGGAGCTTATCGACAGAAA  
AAAATCAATTTAGATAGTCTTTGTGGCTTCGGTGGCAATTAGATCAACGC--GTTATTG

CTTCA-----AGAGAAGTTCCTATCGAAGTTCACTATGAATCTTTTGGTAACTATCATGAGA  
TTTATGCACACTATCTAATAGTAAGAAGTGTAAGAAAAAGAAAATTTTGTATATATATTC  
GAACCACAGTTGGTCATATTTCTTTTATCGAGAAATCGAGGAAGCTATACAAGGTTTT  
TCTCAAGCCTGTTTCATATGATACC-----ATGGCGGAACGGGCCAA  
TCTGGTATTTTACAATAAAGTGATAGATGGAAGTCTATTAACGACTTATTAGCCGATT  
AATAGATCACTTCGGGATGGCATATACATCACACATCCTAGATCAAGTAAAGACTCTGG  
GTTTCCAGCAAGCCACTGCTACATCCATTTTCATTAGGAATTGATGATCTTTTAACGATAC  
CTTCTAAGGGCTGGCTTGTCCAAGATGCTGAACAACAAAGTTGGATTTTGGAAAAACA  
CCATCATTATGGGAATGTACATGCGGTAGAAAAATTACGCCAATCTATTGAGATATGGTA  
TGCTACAAGTGAATATTTGCGACAAGAAATGAATCCTAATTTTAGGATGACGGACCCCT  
TCAATCCAGTCCATATGATGTCTTTTTCGGGAGCTAGGGGAAATGCATCTCAAGTACAT  
CAATTAGTAGGTATGAGAGGATTAATGTCGGATCCCCAAGGACAAATGATTGATTTACC  
TATTCAAAGCAATTTACGCGAAGGACTGTCTTAAACAGAATATATTATTCTTGCTATGG  
AGCCCGTAAAGGAGTTGTAGATACTGCTGTACGCACATCAGATGCTGGATATCTTACGC  
GTCGACTTGTTGAAGTAGTTCAACATATTGTTGTACGTAGAACAGATTGTGGCACTATC  
CGAGGGATTTTCGGTGAGTCTTAAATTCGGATGATGTCA---GAAAGAATTTTATCCAA  
ACATTAATTGGTTCGTGTCTTAGCAGACGATATATATATAGGTTCCCGATGTGTCCCTTTC  
GAAATCAAGATCTTGGGATTGGACTTGTCAATCGATTAATAACC-----TTTGG  
ACACAATCAATATCCATTCGAACTCCCTTTACTTGTTCGGAGTACATCTTGGATCTGTGGA  
TTATGTTATGGTTCGGAGTCCCACTCATGGTGACCTCGTTGAATTGGGGGAAGCTGTAGG  
TATTATCGCGGGTCAATCGATCGGCGAACCAGGGACTCAACTAACATTAAGAAGCTTTTC  
ATACCGGCGGAGTATTTACAGGAGGTACTGCCGAACATGTACGAGCCCTTATAATGGA  
AAAATCAAATTCATGAGGATTTGGTTCATCCTACACGTACACGTCACGGGCATCCTGC  
CTTTCTATGTTATATAGACTTGTCTGTAATTATTGAGAGCGAAGATATTATACATAGCGTG  
ACTATTCCACCAAAAAGTTTTCTTTTAGTTCAAATGATCAATATGTGGAATCAGAACA  
AGTGATTGCTGAGATTCGCGAGGGAAACATACACTTTT---CATTTTAAAGAGAGGGTTAG  
AAAATATATTTATTCTGACTCAGAGGGCGAA---ATGCACTGGAGTACTGATGTGTCCCAT  
GCACCCGAATTTACATATAGTAATGTCCACCTCTTACCAAAAACAAGTCATTTATGGATA  
TTATCCGGAGGTTTCATGTGGA-----TCTAGTCTAATTCGTTTTTTCGATCCATAAAGATCAA  
GATCAAATGAATATACCC-----TTTCTTTCCGCCGAAAGA---AAATCTATTTCT-----CTCTC  
AGTGAATAATGATCAA---GTGAGCCAAAATTTTTTAGTTCCGATTTTGCCGATCCAAA  
A---TTAGGGATTTACGATTAT---TCAGAATTGAATGGAACTTAGGTAAGTCAATTATAA  
TTAATATATTTCTGCT---ATTTTTTCATGAGAAGTTCGGAT-----TTATTAGCAAAAAGACGAA  
GAAATAGATTTCTCATTCCATTCCAATCGATTCAAGAGCAAGAGAAAGAATTCATACCG  
CAG---GGTATCTCGGTTGAAATACCCATAAAT-----GGTATTTTCCGTAGAAATAGTATTTT  
TGCTTTTTTTGATGATCCTAGATACCGAAGAAAGAGTTCCGGAATCTTAAATATGGGA  
CTCTAAAGGCGGATTCAATCATCCAAAAGAGGAT-----ATGATTGAGTATCGA---GGAG  
TCCAAAATTAAGACAAAATACATGAAAGTAGATCGCTTTTTTTTTCATTCCTGAGGAA  
GTGCATATTTTACCCGAATCCTCTGCCATAATGGTACAGAACTATAGTATCATTGGAGTG  
GATACACGACTCACTTTAAATATAAGAAGCCAAGTTCGGCGGGTTGATCCGAGTAGAGA  
AAAAAAGGATTTGAACTCAAATATTTTTCAGGGGATATCCATTTTCCGGACAA  
GACAGATAAAATATCCCGACACAGTGGCATCTTGATACCGCCAGGAAGAGGAAAAAAA  
-----AACTCGAAGGAATCCAAAAA-----TTTAAAATTTGGATTTATGTCCAACGG-----A  
TTACACCAACCAAGAAAAAG-----TTTTTTGTTTTGGTGCAGCCCGTAGCCACCTATGA



GATAGCGGACAGTATAAATTTGGCAACACTCTTCCCACAAGATCTCTTTTCGGGAAAAG  
GATAATATTCAACTTCGAGTTTTCAACTATATCCTTTATGGAAATGGCAAACCAACTCGA  
GGAATTTCTGACACAAGTATTCAATTAGTTCGAACTTGTTTTAGTCTTGAATTGGGAC-----  
-----AAAAATCTTCTCTCGAGGAGGTCCGTGCTTTCTTTGTTGAAGTAAGTACAA  
AGGGTTTGATTCAAGATTTATAAGAATTGGCTTAGTGAAATCCCATATTTTCATATATAA  
GAAAAAGGAATAATTCGCCAGATTCGGGATTGATCTCT-----GCAGATCACATGAAT-  
----CCGTTTTATTTCGATTTCCGCCAAGTCTGGCATT-----CTTCAACAATCACTTAGA  
CAAAATCACGGAACATTTCGCATGTTCTTAAATCGA-----AATAAGGAGTCCCAATCTT  
TGTTAATTTTATCATCATCTAATTGTTTTAGAATGGGTCCA-----TTAATCATGTAAAACA  
TCACAAT-----GTGATAAACCAATCAAATACTCTAATTACAATTAATAAATTCGTCCGGC  
CCCTTAGGAACA-----GCTACCCCAATTTCAAATTTTTATTTCG-----TTTTTGCCTTTACTA  
ACT-----TATAATCAGATCTCT--TTAATTAATATTTTCAACTTGATAAC-----TTAAAAT  
ATATTTTTCAAAAAATT-----AAC---TCTTATTTAATCGATGAAAACGGAATA-----ATTTA  
AATCTCGACCCATATAGTAACGTTGTTTTGAATCCATTCAAATTGAATTGGTATTTTCTTC  
ATCAAATTTATTGTGAGGAAACGTCCACAATAATTAGT---CTTGGACAATTTTTTTGTGA  
AAATGTATGTATAGCTAAAAAAGAACCG-----CACCTAAAATCGGGTCAAGTTTTAAT  
TGTTCAA---AGGGATTCCGCAGTAATAAGATCCGCTAAGCCCTATTTGGCTACTCCGGG  
AGCAAAGTTCATGGGCATTACAGCGAAATCTTTACGAAGGGGATACATTAGTTACAT  
TTATATATGAAAAATCGAGATCCGGTGATATAACCCAAGGTCTTCCAAAAGTAGAACAA  
GTTTTAGAAGTCCGCTCGATTGATTCAATATCGTTGAACTTAGAAAAGCGGATTAAGGG  
TTGGAACAAGTGTATAACAAGAATTCTTGGAATTCCTTGGGGATTCTTGATTGGTGCTG  
AGTTAACTATAGTGCAAAGTCGTATTTCTTTGGTTAATAAGATTCAAAGGTTTATCGAT  
CCCAGGGGGTGCAGATTCATAATAGGCATATCGAAATTATTGTACGTCAAATAACATCA  
AAAGTTTTGGTTTTCCGAA-----GAGGGAATGTCTAATGTTTTTTTACCTGGAGAACTTA  
TTGGATTATTACGAGCAGAACGAACGGGGCGTGCTTTAGAAGAAGCAATCTGTTATCG  
AGCCGTTTTATTAGGAATAACTCGAGCATCTTTGAATACTCAAAGTTTTATATCCGAAGC  
AAGTTTTCAAGAACTGCTCGAGTTTTAGCAAAGCTGCTCTTCGGGGTTCGTATCGATT  
GGTTGAAAGGCCTGAAAGAAAATGTTGTTCTAGGGGGGGTGATCCCCGCCGGGACCG  
GATTCAAAGGATTGGTGCATTGTTCA-----CGGCAACATACCAACATTATTTTGGAAAAA  
AAAACAAAGAATTTAGCTTTATTTCGAGGGAGATATGAGA-----GATATTTTATTCTACCAC  
AGGGAATTTTGTGACTCTTCTATTTCCAAATCTGACTTTTTCTAGGATT-----  
-----ATGACAAAAAGATATTGGAACATCGATTTGGAAGAGATGATGAGAGC  
AGGAGTTCATTTTGGACATGGTACGAGGAAATGGAATCCTAGAATGGCACCTTATATTT  
CTGCAAAGCGTAAAGGTATTATATATAAATCTGACTAGAACTGCTCGTTTTTTTATCAG  
AAGCTTGTGATTTAGTTTTTTGATGCGGCAAGTAGGGGAAAACAATTCTTAATTGTTGGG  
ACAAAAAATAAAGCAGCTGATTTAGTGTGCGGGCTGCAATACGGGCTCGGTGTCATT  
ATGTTAATAAAAAATGGCTCGGCGCATGTTAACAATTTGGTCCACTACCGAAAAAAG  
ACTTCATAAGTTTAGGGACTTGAGAAGTGAACAAAAGACAGAGGGATTCAACCGTCTT  
CCGAAAAGGGATGCAGCTGTGTTGAAGAGACAATTATCTCGCTTGGAAACATATCTAG  
GCGGGATTAAATATATGACGGGATTGCCTGATATTGTAATCATCCTCGATCAGCAAGAAG  
AATATACGGCTCTTAGAGAATGTATCACTTTGGGAATTCCAACCATTTCTTTAATCGATA  
CAAATTGTAATCCCGATCTCGCGGATATTTCTATTCCCGCAAATGATGACGCTATAGCTT  
CAATTCGATTCATTCTTAACAAATTAGTATTCGCAATTTGTGAGGGCCGTTCTAGC---TAT  
ATACAAAATTCTATGGGACAAAAAATAAATCCACTTGGTTTCAGACTTGGTACAACCCA

AAGTCATCATTCTCTTTGGTTTGCACAACCAAAAAAGTATTCTGAAGGTTTAGAAGAA  
GATAAAAAATACGAGACTGTATTAATAATTATGTCCAAAAAATATAAGAATATCCTCT  
GGT---ATGGAGGGAATTGCACGTATTGAAATTCAAAAAGAATCGATCTCATCCAGATC  
ATAATCTATATGGGATTTCCATAAATTATTAATTGAAGATAAA-----CCCCGAAGAGTC  
GAAGAATTACAGATGAATGTTCAAAAAGAACTAAATTGTGTCAATAGAAAACCTCAACA  
TTGCTATTACCAGAATTTCCAATCCGTATGGGGATCCTAATATTCTTGCAGAATTTATCGC  
TGGACAATTAATAAATCGCGTTTTCTTTTCGAAAAGCAATGAAAAAAGCTATTGAATTA  
CTGAACAGGCGAATACAAAAGGAATTCAAGTACAAATTGCAGGACGTATCGACGGAA  
AAGAAATTGCACGTGTTGAATGGATCAGAGAAGGCAGAGTTCCTTTACAAACAATTGA  
AGCTAAAATTGATTATTGTTCTTACAGTTCGAACTATTTATGGGGTTTTAGGAATAAA  
AATTTGGATATTTCGTAGACGAAGAAATGTCACGTTACCGAGGGCCTCGTTTTAAAAAAA  
TACGCCGTCTGGGGGCTTTACCGGGACTAACTAGTAAAAGGCCTAAGGCAGGAAGCGA  
TCTTAGAAACCAATCACGCTCCGTAAA---AAATCTCAATATCGTATTCTGTTTAGAAGAA  
AAACAAAATTGCGTTTTTATTATGGTCTTACAGAACACCAATTACTTAAATATGTGCGT  
ATAGCCGGAAAAGCCAAGGGGTCAACAGGTCAAGTTTTACTACAATTACTTGAAATGC  
GTTTGGATAACATCCTTTTTTCGATTGGGTATGGCTTTGACTATTCCTCAAGCGCGCCAAT  
TAGTTAATCATGGACATATTTTAGTTAATGGTCGTATAGTTGATATACCAAGTTATCGCTG  
CAAACCCCGAGATATTATTACAGTGAAGGATGAACAAAACCTCTAGAACTTTGGTTCAA  
AATCTTCTTGATTATCTGCCCCT--GAGGAATTGCCAAACCATCTGACTCTTCACACAT  
TCCAA-----TATGAAGGGTTAGTCAATCAAATAATAGATAGGAAATGCGTCCGTTTGA  
ATAAATGAATTGCTTGTGCTAGAAATTTACTCTCGACAGACTATGTCACGCCGAGGTACT  
GCAGAAGAAAAAACTGCAAATCCGATCCAATTTATCGTAATCGATTAGTTAACATGTT  
GGTTAACCGTATTCTGAAACACGGAAAAAAATCATTGGCTTATCAAATTATCTATCGAG  
CCTTGA AAAAGATTCAACAAAAGACAGAAACAAATCCACTATCTGTTTTTACGTCAAGC  
AATACGTGGAGTAACTCCCGATATAGCAGTAAAAGCAAGACGTGTAGGCGGGTCAACT  
CATCAAGTTCCCATTTGAAATAGGATCCACGCAAGGAAAAGCACTTGCCATTCGTTGGTT  
ATTAGGGGCATCCCGAAAACGTCCGGGTGCAAATATGGCTTTCAAATTAAGTTCCGAAT  
TAGTGGATGCTGCCAAAGGGAGTGGCGATGCCATACGCAAAAAGGAAGAGACTCATA  
GAATGGCAGAGGCAAATAGAGCTTTTGCACATTTTCGTATGGGGAAAGACACCATTGC  
TGATATAATAACCTCTATACGAAATGCTGACATGAATAGAAAAGGAACGGTTCGGATAG  
GATCGACTAACATCACGGAAGTATTGTAAAATCCTTTTTACGAGAGGGTTTTATCGAA  
AACGTAAGGAAACATCGCGAAAACAACCAATATTTTTTATTGTTTTAACCTAAGACATAG  
ACGA-----AATAAGAAAGAATCCTACAAA-----ACGATTTTAAATTTAAAGAGAATAAG  
TCGACCGGGTCTACGAATCTATTCTAACTCTCAACGAATTCCACGAATTTTAGGCGGAA  
TAGGAATTGTAATCCTTTTCGACTTCTCAAGGTATAATGACAGACCGAGAAGCTCGACTA  
AAAAGAATCGGCGGAGAAATTTTGTGTTATATATGGATGGCAAAACCTATATTAAGAAT  
TGTTTCGCGTAAAATAACACGTAGTGGTTCACGTAAAATGTACGTAGAATACCAAAG  
GGAGTTATTCATGTTCAAGCAAGTTTCAACAATACCATTGTAACCGTTACAGATGTACG  
GGGTCGGGTGATTTCTTGGTCTCCGCAGGTACTTGTGGATTCCGGGGTACAAGAAGA  
GGAACACCCTTTGCTGCCAAACCCGAGCAGGAAATGCTATTCGAGCAGTAGTGGATC  
AAGGTATGCAACGAGCTGAAGTAAGGATAAAAGGCCCTGGACTCGGAAGAGATGCGG  
CATTACGAGCTATTCGTAGAAGCGGTATACTTTTAAGTTTCGTACGAGATGTAACCCCTA  
TGCCACATAATGGTTGTAGACCCCTAAAAAAGACGTGTAATGCCAACCATTAAACA  
ACTTATTAGAAATACAAGACAGCCAATCCGAAACGTCACGAAATCCCAGCGCTTCGG

GGATGCCCTCAGCGACGAGGAACATGTACTCGGGTGTATACTATCACCCCCAAAAAAC  
CAAACCTCTGCTTTACGTAAAGTTGCCAGAGTACGATTAACCTCGGGATTTGAAATCACT  
GCTTATATACCTGGTATTGGCCATAATTTACAAGAACATTCTGTAGTCTTAGTAAGAGGG  
GGAAGGGTTAAGGATTTACCCGGTGTGAGATATCACATTGTTTCGAGGAACCCTAGATGC  
TGTCGGAGTAAAGGATCGTCAACAAGGGCGTTCTAAATATGGGGTCAAAAAGCCAAA  
AATGGCAAAGAAAAGTTTGATTTATAGGGAGAAGAAGAGGCCAAAAATTGGAAAAAAA  
ATATCATTGATTCGTTCGATCCTCAAAAAAGGAAATAAGT-----AAGATTCCGTTCGCTA  
AGTGAGAAATGGAAAATTCATGGAAAATTACAATCCCCACCGCGTAATAGTGCACCTA  
CACGTCTTCATCGACGTTGCTTTTCGACCGGAAGACCGAGAGCTAACTATCGAGACTT  
TGGACTATCTGGACACATCCTTCGGGAAATGGTTCAGGCATGTTTGTTCAGGGGCA  
ACAAGATCAAGCTGGATGATAAAAAATATAGTCATTTCA-----TTTGAAGAA---CAA---A  
AAGAAGAAAGCAGGGGATCCGTTGAATTTCAAGTATTTAGTTTCACTAATAAGATACGA  
AGACTTACTTCACATTTGGAATTGCACAGAAAAGATTATTTATCTCAGCGGGGTCTACG  
AAAAATTCTGGGAAAACGTCAACGACTGCTGGCTTATTTGTCAAAAAAAAATAGAGTA  
CGTTATAAAGAATTAATTAATCAGTTGAATATTCGGGAATTAAAAACCTCGT-----ATGGTA  
AAACTTCGTTTAAAACGATGTGGTAGAAAGCAACGAGCCGTTTATCGAATCCTTGCAAT  
TGATGTTTCGATACCGAAGAGAAGGAAGAGATCTTAGTAAGGTGGGTTTTTATGATCCCA  
TAACTAATCAAACTTTTTAAACCTTTCTGCTATTCTCGATTTTCTTAAAAAAGGAGCTC  
AACCAACAAGAACAGCTCATGATATTTCAAAGAAGGCTGGGATTTTTACGGAA-----  
-----ATGAATAAATCTAAGCGACTTTTTACTAAATCCAAGCGATCTTTTCGTAG  
GCGTTTTGCCCCGATCCAATCGGGGGATCGAATTGATTATAGAAACATGAGTTTAATTA  
GTCGATTTATTAGTGAACAAGGAAAAATATTATCTAGACGGGTGAATAGAGTGACTTTA  
AAACAACAACGATTAATCACTATTGCTATAAAACAAGCTCGTATTTTATCTTTGTTACCT  
TTTCTTAATAATCAG-----AAACAATTTGAAAGAAGTGAGTCGACTCCTAGAACTACTAG  
TCTTAGAACCAGAAAAAAGTGACACGTTCACTAAAAAAAACCCTTTTGTAGCAA  
GCATTTATTAAGAAAAATAGAGAAGCTTAATACAAAGGCGGAAAAAGAAATCATAATA  
ACTTGGTCCCGGCATCCACCATTATACCCACAATGATTGGCCATACGATCGCTATTCAT  
AATGGAAGGGAACACTTACCCGTTTATATAATAGATCTTATGGTAGGACATAAATTAGGA  
GAATTTTCACCTACTATAAATTTTCGAGGACATGCCAAAAATGATAATAGATCTCGTCGT  
ATGGTTTTTCAATCTTTTATACTAGGTAATCTAGTATCCTTATGCATGAAGATAATAAATT  
CGGTCGTTGTGGTCGGACTCTATTATGGATTTCTGACCACATTTCCATAGGGCCCTCTT  
ATCTCTTCCTTCTCCGAGCTCGGGTTATGGACGAAGGAGAAGAAGGAACCGAGAAGA  
AAGTATCAGCAACAACAGGTTTTATTGCGGGACAGCTCATGATGTTTCATATCGATCTATT  
ATGCGCCTCTGCATTTAGCATTGGGTAGACCTCATAACAATAACTGTCCTAGCTCTACCGT  
ATCTTTTGTTTCATTTCTTCTGGAACAATCACAACACTTTTTTGATTATGGATCTACTAC  
CAGAAATGAAATGCGTAATCTTCGCATTCAATGTGTATTCTGAATAATCTCATTTTTCA  
ATTATCAACCATTTCAATTTACCAAGTTCAATGTTAGCCAGATTAGTCAACATTTATATG  
TTTCGATGCAACAACAAGATGTTATTTGTAACAAGTAGTTTTTGTGGTTGGTTAATTGGT  
CACATTTTATTCATGAAATGGGTTGGATTGGTATTAGTCTGGATACAGCAAATAATTCT  
ATTAGGTCT--ATTAGATCTAATAAGTTCCTTGTGTCAGAATTGAGAAATTCTATGGCTCG  
AATCTTTAGTATTCTTATTATTACCTGTGTCTACTATTTAGGCAGAATACCATCACCC  
ATTTTACTAAGAACTTAAAGGAACCGAAGAAGCTAAACCATTTGTAACCTCTCGTTTT  
CGATTATAAAGATGGAATCGACCAACCGATATATAAAAAATGATAAAATTGAAAATAT  
TGTAAGAAATGAAATGTCACAATATTTTTTTTATACATGCCAAAGTGATGGAAAAGAAC

GAATATCTTTTACATATCCCCCAACCTTTCCACCTTTTTTTGAAATGATCCAAAAAAGGA  
TACCTTCATTTACAAAAGAAAAAAAACCTTTGACCAAGTTTCTACTTATTGGAGTTTG  
ATCCATGAAGAAAAAAGGGAAAACTTAAAAAAGAATTTTTAAATAGAATTGAAGCTT  
TAGAT-----TCTGTTGAAAATATACTGGAAAAACGACTCGCTTTTGTATAACGAAGC  
TAAAAAGAATATTTACCTAAAATTTATGATCCTTTTTTGCATGGAATCTCTCGGGGAAG  
AATCAAAAATACCTCCATTCTTAGGAGGATCCTGGATAACAAGATTCATGGTCTAC  
TTTATAAAAAATTTGAGCAAACAGATAGCAACGATCAAGAT-----TTCCTGAAATCAAT  
AAAAAAGTTCCTCGATGGTCATACAAATTAATAGAGTTGGAAGAATTGGAAGGCGAAG  
GAATTCGTTCAAGAAAAGCAAACGTGTAGTGGTTTTTACTGATGCTTTGATCCGTTAT  
TCGCAACAATCTGATTTTCGTGAGAGATAATTAAGGATCCATGCGTTCCCAAAGGCG  
TAAACTGTTATTTGGGAATTTTTCAAGCAAAGTACATTCCCCCCTTTTTTTTGATAG  
AATAGATAAA-----CTTTTTTTTTTTTCGTTTGATATATGGGGGCTAAAAAAAATTAT  
TAAAAATAGAGAAGAAACAAGACGGATAGAAATTGCAGAACTTGGGATAGCTTCCTA  
TTTGCTCAAATAATAAGAGGTTCTCTTAGTAACCAATCAATTCTTAGAAAATATATTA  
TATTACCTTTATTGATAATAATTAACAGTGTCCGTATGTTATTATTCAATTTCCCGA  
GTGGTCCCAGGATTTAAAGGATTGGAAACGTGAAATGCATGTTAAATGACTTATAATG  
GGTTCAACTATCCGAAACAGAATTTCCAAGAACTGGTTAACGGATGGTATTCAGATA  
AAAATCCTATTTCTTTTTATCTTAAACCTTGGCATAAATCTAAAAAAGGAGAAAAAAA  
TGATTTTTGTTTCTTAACAGTTTGGGAATGGAAACCGAACTACCGTTTGGTTCTGCC  
AAAGAAAGCCTTCTTTTTTTGAACCTATTTCTAAAGAATTAAAAAAAGAATCAAAAA  
ATTAAAAAAAGTCTTTTGTGGTT--TAAAGATTTTCAAAGAAAGAGCACCCATTTT  
CCTAAAAGTCGCAAAAGAACTAAAACTGGATTCTCAAAACTTTATT-----TTTATAA  
AAGGA-----ATTTCAAACGAAATGATTCAATAATAAGTAATCAGATGATTCATGAA  
CTA--GTTCAAATAAATCCTTGGAGTGGACAAAT--TCACTTAGCGAAAAAAAATCA  
AAAATTTGATTGATAGAAAAAGACAATCAGAAATCAAATAGAAGAAATTTCAAAGA  
AAAACAAAACAGTTGTACCAAACCTGCGTTATGATTCTAAAATAATTGAGTCATCAAAA  
AAAATTTGGCAGACATTCAA-----AATACCCGATTAATTTCGTAAATCCATTTTTTTTT  
AAATTTGCATCGAACAAATGTCTATAGCTATTTTTCTAGGTATCATTAAATTTCCAAGAA  
TTACTACACAACCTT-----TATGACCTATGCTCTTTATCACAAGCATATGTATTTTA  
CAAATTATCACAAATT--GTTAGTAACCTTTGTAAATTAAGGCTGTTCTTGAATATACAT  
CCTTTTTTGTAAAGAATAAAATAAAGTTTTTTTTTGAACACGGAATCTTTCAT--GAATT  
GAAAAATAAACCTTTTTG---TCCGAAGTAAATCAATGGAAAACTGGTTACGAAGTC  
AGTATCAATACAATTTACCCAGATTCATGGGCTAGATTAGTAACCCAAAATTGGAAA  
AATAAAATAAATAAAGATTCTCTAGTTCTAAACCCAACCAAAGAGGATTCATATGAAAA  
AAAGAAA-----TTTGATAATTATAAAAAACAA---AATGTAAAAAAGATTCTATATATAAT  
CTTTTTTGCTATAAATCTATTCTATAATATTCGGGGTTCGGCATAGAAAATATTTGGATT  
GGAGAATTCTTAACTTTTGGTTTACATTTTTGATTGGATGGGAATGAATGAAGAAATAC  
TAAATCAGTTTTTCTTCCGGAATTTTTCTTATTTTCTAGTACATATAAAATGAAACCATG  
GGTCATACCAATCAAATTACTTCTTTTAAATAGTAAT-----ACAGAAGCGGAACTTGATTT  
ATTTCTGACAAGATATTCGCGTTTTCAATTGCGATGGAAT-----AATCAAAAATTTCTC  
AATAATGTAAAAGTATACTGTCTCTTGGTTAGACTAAACAATCCAAACGAAATAGCGGT  
ATCTTCTATTGAAAGAGGAGAGATGAGCCTAGACATTCTAATGATTGAGAAAAATTTCA  
CTTTTGCAAATTAATGAAAAAAGGAATATTGATTATTGAACCTGTGCGTTTGTCTGTAC  
AAAACGATGGACAACCTTATTATATATAGAACCATAGGTATTTCAATTGGTTCATAAAAAATA

AACACAATTATGAT--TTCTTTGTCCCTGAAAAAATTCTATCCCCTAAACGACGTAGAGA  
ATTTTCGAATTCTAATTTGTTTCACATTTCTTTGGCCCAATTTTAAATTAGAAGATTTAGCT  
TGTATGAATCGCTATTGGTTTAATACTACTAACGGAAATCATTTCAGTATGATAAGAATA  
CGCATGTATACGATGAAAGGACATCAATTCAAATCCTGGATTTTCGAATTGAGAGAAAT  
AGTGAGAGAGATCAAGAATGCTCACTATTTCTTAGATTTCATGGACCCAATTCAATTCAG  
TGGGATCTTTCATTCATAATTTTTTCCACCAAGAACGTTTTAGAAAACCTTTGGACCCCTC  
GGATTTTTAGTATCCTACTTTTTG--CGCAATTCA-----CAGGGTTCAACAAGCAATCGATA  
TTTC-----ACGATCAAGGGTGTAGTACTATTTGTAGTAGCG---GCCCTTCTATATCGT----  
-----ATTAACAATCGAAATATGGTCGAAAGCAAAAATCTCTATTTGAAAGGGCTTCTTCC  
T-----ATACCTATGAATTCATTGGACCCAGAAATGATACATCGGAAGAATCTTTT-  
--GGGTCTTGCAATATCAATAGGTTGATTGTTTTCG---CTCCTGTATCTTACAAAAGGAAAA  
AAGATCTCTGAGAGCTGTTTCCGGGATCCGAAAGAGAGTACTTGGGTTCTCCCAATAA  
CT-----CAAAGTGTATCATGCCTGAATCTAACTGGAGTTCGCGGTGGTGGAGGAA  
CTGGATCGGAAAAAAGAGG-----GTTTTTTGTTGTAAGATATCTAAT-----GAAACCGT  
CGCTGGAATTGATATCTCATTAAAGAGAAAGATATCAA---TATCTGGAGTTTCTTTTT  
GTATATTATATGGAT-----GATCCGATCCGCAAGGGCCATGATTGGGAATTGTTTGATCGT  
CTTCTCCGAGTAAGAGGCGAAACATAATCAACTTG-----AATTCGGGACAGCTATTTCGA  
AATCTTAGTGAAAGACTGGATTTGTTATCTCATGTTTGCTTTTTCGTGAAAAAATACCAAT  
TGAAGTGGAGGGT--TTCTGCAAACAACAAGGA---GCTGGGTCAACTATTCAATCAAAT  
GATATTGAGCATGTTCCCAT-----CTCTTCTCGAGAAACAAGTGGGCTATTTCTTTGCAA  
AATTGTGCTCAATTTTCATATGTGGCAATTCCACCAAGATCTCTTCGTT-----AGTTGGG  
GGAAG---AATCCGCACGAATCGGATTTTTTTAGGAAA---ATATCGAGAGAGAATTGGATT  
TGGTTAGACAATGTGTGGTTGGTAAACAAGGATAGA-----TTTTTTAGC-----AAGGTA  
CGAAACGTATCGTCAAATATTCAATATGATTCT-----ACAAGA-----TCTAGTTTCGTT  
AAGTAACGGATTCTAGCCAATTGAACGGATCTTCT---GATCAATTCATAGATCCTTTTCGA  
TTCCATTAGT-----AATGAGGATTCGGAATATCAC-----TATCAC  
ACATTGATCAATCAAAGAGAGATTCAACAATAAAGAAAGATCGATTCTT---TTGGAT-  
----CCTTCCTTTATTCAAACGGAAGGAAGAGAGATAGAATCAGAC-----CGATTCCCTAA  
A-----TACCTTTCTGGCTATTCC-----TCAATGCCCGGCTATTCACG---GAACGTGAGAA  
GCGAATGAATAATCATCTGCTTCCGGAAGAAAGCGAAGAATTT-----CTTGGGAATCCTA  
CAAGAGCCATTCGTTCTTTTTTCTCTGACAGATGG-----TCAGAACTTCAT---CTGGGTTC  
GAATCCTACTGAGAGGTCCACTAGGGATCAG-----AAATTGTTGAAGAAAGAACAA  
GATGTTTCT---TTTGTCCCTTCCAGGCGATCGGAA-----AATAAAGAAATAGTTAATA  
TATTCAAGATAATTACGTATTTACAAAAT-----ACCGTCTCAATTCATCCTATTTTCATCAGA  
TCTGGGATGTGATATGGTTCCG---AAGGATGAACTGGAT---ATGGACAGTTCCAATAAGA  
TTTCATTCTTGAACAAAATCCATTTTTTTGATTTA-----TTTCATCTATTCCATGAACGGA  
AGAGGGGGGGATAACCGTTA-----CGCCAC-----GAGTCAGAA-----GAGAGATTTCAAG  
AAATGGCAGATCTATTCACTCTATCAATAACCGAGCCG---GATCTGGTGTATCATAAGGG  
ATTTGCCTTTTCTATTGATTCCTACGGATTGGATCAAAGACAA-----TTCTTGAAGGAGG  
TTTTCAACTTCAGGGATGAATCAAAAAGAAATCTTTA-----TTGGTTCTACCTCCTAT  
TTTTTAT-----GAAGAAAATGAATCTTTTTATCGAAGGCTCAGAAAAATTTGGGTCCGG---  
ATCTCCTGCGGGAATTATTTGGAAGATCAAAA-----AGAGTGGTATTGCTAGCAACAA  
CATAATGGAGGCAGTCAATCAATATAGATTGATCCGAAATATGATTCAAATCCAATTCCA  
ATATAGTCCCTATGGGTACATAAGAAATGTATTGAATCGATTCTTTTTAATGAAG-----A

GACCTGATCGCAACTTCGAATATGGAATTCAA-----AGGGATCTAATAGGAAATGATA  
CTCTGAATCATAGA ACTATAATGAAAGATACGATCAACCAACATTTATCGAATTTGAAA  
AAG---AGTCAGAAGAAATGGTTTCGATCCT-----CTTATTTTTCTTTCTCAAACCGAGAGAT  
CCATAAATCGGGATCCTAATGCATATAGATACAAATGGTCCAATGGGAGCAAGAATTC  
CAGGAGCATTGGAACATTTCTGTTTCTGAGCGGAAGAGCCGT-----TTTCAAGTAGTG  
TTCGATCAATTATGTATTAATCAATATTCGATTGATTGGTCTGAGGTTATTGATAAAAAAG  
ATTTGTCTAAGTCACTTCGTTTCTTTTTGTCTAAGTACTTCGTTTCTTTTTGTCCAAG---  
T TACTTCTTTTTTTGTCC-----AAGTACTTCTCTTTTTGTCTAACTCACTTCC  
T--TTTTCTTTGTGAGTTTCGAGAATATCCCTATTCATAGGTCTGAG--ATCCACATCTAT-  
--GAATTGAAAGGTCCGAACGATCAACTCTGCAATCAGTTGTTAGAATCAATAGGTCTTC  
AAATCGTTCATTTGAAAAAGTTGAAACCCTTT-----TTATTGGAT-----GATCATAACT  
TCT--CAAAAATCGAAATTCCTGATCAATGGAGGAACAATATCACCATTTTTGTTCAATA  
AAATACCA---AAGTGG---ATGATTGACTCATTCCATACTAGA-----AAGAATCGCAGGAAA  
TCTTTTGATAACACGGATTTCATTTCTCAATCGTATCCACGATCAAGACAATTGGCTG  
AATCCCGTGAAACCATTTTCAGAGAAGTTCATTGATATCTTCTTTTTCTAAAGCAAATCG  
ACTTCGATTCTTGAATAATCCACATCACTTCTGTTTCTAT-----TGTAACAAAAGATTCCC  
TTTT-----TAT--GTGGAAAAGGCCCGTCTCAATAATTCTGATTTTACGTTTACGTATGG  
A---CAATTCCTCACTATCTTGTTTCATTCACAACAAA---ACATTTTCTTCGTGCGGTGGTA  
AA-----AAAAACATGCTTTTTTTGGAG---AGAGATACTATTTACCTATCGAGTCACAGG  
TATCTAACATATTCATATCTAACGATTTCCACAAAGTGGTGACGAAAGG---TATAACTT  
GTACAAATCT-----TTCCATTTTCCAATTTCGATCCGATCCATTAGTTTCGT-----AGAGCTA  
TTACTCGATTGCAGACATTTCTGGAACACCTCTAATAGAGGGACAAAGAGTCAATTTT  
GAAAGAACGTATTGTCAAACCTTTTCAGATATGAATCTATCCGATTCAGAAGAGAAGAG  
CTTGATCAGTATCTCAAT-----TTCAATTCAAACATGGGTTTGATTACACTCCATGTTT  
TGAGAAATATTTACAG-----AGGAAAAAA-----CGGAGTCTTTGCCT  
AAAA-----AAATGCGTTGACAAAGGGCAGATGGATAGAACCTTTCAACGAGATAGTGCT  
TTTTCAACTCTCTCAAATGGAATCTATTCCAAACATATATGCCATGGTTCTTTACTTCG  
ACAGGGTACAAATATCTAAATTTGATATTTTAGATACTTTTTTCAGAC---CTATTGCGGAT  
ACTAAGTAGCAGT-----CAAAAATTTGTATCCATTTTTTCATGATATTATGCATGGATTAGAT  
ATATCATGGCGAATTCTTCAGAAAAAATTG-----TGTCTTCCACAAAGGAAT--C  
TGATAAGTGAGATTTTCGAGTAAGTCTTTACATAAT-----CTTCTTCTGTCCGAAGAAATGA  
TTCATCGAAATAATGAGTCA-----TCATTGATATCGACACATCTGAGATCGCCAAATGTTT  
GTGAGGTC---CTCTATTCAATCCTTTTCTTCTTCTTGTGCTGGATAT--ATCGTTTCGTAC  
ACATCTTCTTTGTTTCCCGA-----GCCTATAGTGAGTTACAGACAGAGTTCGAAAAGA  
TCAAATCTTTGATGATTCCATCATAATGATTGAGTTGCGAAAACCTTCTGGATAGGTATC  
CTACATCTGAACTGAATCTTTCTGGTTAAAGAATCTTTTTCTAGTTGCTCTGGAACAAT  
TAGGAGATTGTCTAGAAGAAATACGGGGTTCT-----GGCGGCAACATGCTATGGGGTGG  
TGATCCC-----GCTTATGGG---GTCAAATCAATACGTTCTAAGAAGAAAGATTTGA  
AAATAAATTTTCATCGATATCATCGATCTCATA---AGTATCATACCAAATCCCATCAATCGA  
ATCACTTTTTTCGAGAAATACGAGACATCTAAGTCATACAAGTAAAGAGATCTATTCATT  
GATAAGAAAAAGAAAAACGTGAGCGGTGATTGGATTGATGATAAAATAGAATCCTGG  
GTCGCGAACAGTGATTGATTGATGATAAAGAAAGAGAATTCTTGGTTTCAGTTCTCC----  
--ACCTTAAGGGCA-----GAAAAAAGGATTGATCAAATCTATTGAGTCTGACT--CATAG  
TGATCATTTATCA-----AAGAATGACTCTGGTTATCAAATGATTGAACAACCGGGA

ACAATTTACTTACGATACTTAGTTGACATTCAT-----AAAAAGTATCTAATGAATTATGAG  
TTCAATACATCCTGTTTAGCAGAAAGACGGATATTCCTTGCTCATTATCAGACAATCACT  
TAT-----TCACAAACTTCGTGTGGGGCTAATAGTTTTTCATTTCCCGTCTCATGGA-----A  
AACCTTTTCGCTCCGCTTAGCCCTATCCCCCTCT--AGGAGTATTTTAGTGATAGGTTCT  
ATAGGAACTGGACGATCCTATTTGGTCAAATACCTAGCGACAAACTCCTATGTTCCCTTC  
ATTACAGTATTTCTGAACAAGTTCCTGGATAACAAGCCGAAAGGTTTTTTTTATTGAT-----  
-----GATATCGAT-----GATGATAGTGACGATATTGATGCTAGTAAC-----  
-----GATATTGATCGTGAACCTTGATACGGAGCTGGAGCTTCTAA  
CTATGATGAATGCGCTA-----ACTATGGATATGATGTTG-----GAAATAGACCGATTTT  
ATATCACCTTCAATTCGAATTAGCAAAAGCAATGTCTCCTTGCATAATATGGATTCCAA  
ACATTCATGATCTTGATGTGAATGAGTCGAGTACTTAGCCCTCGGTCTATTGGTGAAC  
CTCTCTCC-----AGGGATTGTGAAAGATGTTCC--ACTAGAAATATCTTGTATTGCTT  
CGACTCATATTTCCCAAAAAGTGGATCCCGCTCTAATAGCCCCGAATAAATTAATAACAT  
GCATTAATAACGAAGGCTTCTTATTCACAACAACGAAAGCACTTTTTCACTCTTTC  
TATACTAGGGGATTTCACTTGGAAAAGAAAATGTTCCATACT-----AATGGATTCGAGTC  
TATAACCATGGGTTCCAGTGCACGAGATCTTGTAGCACTTACCAATGAGGCCCTATCAA  
TTAGTATTACACAGAAGAAATCAATTATAGACACTAATACAATTAGATCTGCTCTTCATA  
GACAACTTGGGATTTGCGA-----TCCCAGGTAAGATCGGTTTCAGGATCATGGGATCC  
TTTTCTATCAGATAGGAAGGGCTGTTGCACAAAATGTACTTATAAGTAATTGCCCATAG  
ATCCTATATCTATCTATATGAAGAAGAAA-----TCATGTAACGAAGGGGATTCTTATTTGT  
ACAAATGGTACTTCGAGCTTGGAAACGAGCATGAAGAAATTCACGATACTTCTTTATCTT  
TTGAGTTGTTCTGCCGGATCGGTCGCTCAAGACCTTTGGTCTCTACCC-----GTACCCGA  
TGAAAAA---AATAGGATCACTTCTTATGGATTCGTTGAGAATGATTCG---GATCTAGTTCA  
TGGCCTATTAGAAGTGCAAGGCGCTTTGGTGGGA-----TCCTCACGGACAGAAAAAGAT  
TGCAGTCAGTTTGATAATGAT-----CGAGTGACATTGCTTTTTTCGCTCCGAACCAAGGGA  
T--CCCTTATATATGATGCAAGATGGATCTTGTTCTATCGTTGATCAGAGATTTCTCTATGA  
AAAA-----TACGAATCGGAGTTTGAAGAA--GGGAAGGAGAAGGAGTCTCTGACCCG  
CAA-----CAGATAGAGGAGGAT-----TTATTCAATCAC-----ATAGTTTGGGCTCC  
T-----AGAATATGGCGCCCT-----CGGGCTTTCTATTTGATTGTATCGAAAGGCCTAAT  
GAATTGGGATTTCCC---TATTCGGCCGGGTCATTTCCGGGGCAAG-----CGGATCATTTA  
TGATGAAAAGTATGAGCTTCAAGAGAATGATTTCGGAGTTCTTGCAGAGCGGAACCATG  
CAGTACCAGAGACGAGATAGGTCTTCCAAGAACAAGGCTTTTTTTAGAATAAGCCAAT  
TCATTTGGGACCCCGCAGATCCACTCTTTTTTCTATTCAA---GATCAACCCTTTGTCTC  
TGTGTTTTTACATCGAGAATTCTTTGCAGATGAAGAGATGTCAAAGGGGCTTCTTACTT  
CCCAAACGGATCCTCTACATCTATATATAAACGCTGGTTTTATC-----AAGAATACGCAAG  
AAAAGCACTTCGAATTGTTGATTCAGCGCCAGAGATGGCTTAGA-----ACCAATAGTT  
CATTATCT-----AATGGATTTTCCGTTCTAAT-----ACTCGATCCGAGAGTTATCAGTATTT  
ATCAAATCTGTTTCATATCTAAC---GGAACGCTATTGGATCGAATGACAAAGACATTGTTG  
AAAAAAAGATGGCTTTTCTCGGATGAAATGAAAATAGGATTC-----ATG-----  
-----ATGCCAAGATCGCGT--ATAAATGGAAATTTTATTGATAAAACCTTTACAATTGTAGC  
CGATATCTTATTACGAGTCATTCGACAACCTCCGGAGAAAAAGAGGCATTTACTTATTA  
CAGAGATGGT-----ATGTCGGCTCAATCTGAAGGAAATTATGCGGAAGCATTACAGAATT  
ATTATGAAGCTATGCGACTAGAAATTGACCCCTATGATCGAAGTTATATACTCTATAATAT  
AGGCCTTATCCATACAAGTAATGGGGAACATACCAAAGCTTTAGAATATTATTTTCGGGC

ATTAGAACGAAACCCCTTTTTACCACAAGCTTTTAATAATATGGCTGTGATCTGTCATTA  
CCGT--GGAGAACAGGCCATTCAACAAGGAGATTCTGAAATGGCGGAGGCTTGGTTCG  
CTCAAGCCGCTGAGTATTGGAAACAGGCTATAACGCTTACTCCTGGTAATTATATTGAA  
GCACAGAATTGGTTGACGATCACGAGGCGCTTCGAA-----ATGAGTTGGCGATCAGAAT  
CTATATGGATAGAATTTATAACGGGGTCTCGAAAAACAAGTAATTTCTGCTGGGCCTTTA  
TCCATTTTTAGGTTCAATTAGGATTCTTATTGGTTGGAACCTCCAGTTATCTTGGTAGAAA  
TGTTATATCGTTATTTCCGTCCCAGCAAATCATTTTTTTTCCACAAGGGATTGTGATGTCT  
TTCTATGGGATCGCAGGTCTCTTTATTAGTTGCTATTTGTGGTGCACACTATTTGTGGAATG  
TGGGTAGTGGTTATGATCTTTTCGACCGAAAAGAAGGAATAGTGCATTTTTTCGTTGG  
GGATTTCTGGAAAAGTCGTCGCATCTTTTTACGATTCTTTATGAAAGATATTCAGTCC  
ATCAGAATAGAAGTTAAAGAGGGTGTCTTCCCGGCGTGTCTTTATATGGAAATTCG  
AGGTCAAGGGGCTATTCCTTTAATTCGTACTGATGAGAAT--TTACTACACGAGAAATT  
GAGCAAAAAGCTGCTGAATTGGCTTACTTCTGCGTGTACCAATTGAAGTATTT

>Oryza

????????????????????????????????????????????????????????????????  
????????????????????????????????????????????????????????????????  
????????????????????????????????????????????????????????????????  
????????????????????????????????????????????????????????????????  
????????????????????????????????????????????????????????????????  
????????????????????????????????????????????????????????????????  
????????????????????????????????????????????????????????????????  
????????????????????????????????????????????????????????????????  
????????????????????????????????????????????????????????????????  
????????????????????????????????????????????????????????????????  
????????????????????????????????????????????????????????????????  
????????????????????????????????????????????????????????????????  
????????????????????????????????????????????????????????????????  
????????????????????????????????????????????????????????????????  
????????????????????????????????????????????????????????????????  
????????????????????????????????????????????????????????????????  
???ATGGCAACCCTTCGAGTCGACGAAATTCATAAAATTCTCCGCGAACGTATTGAACA  
ATATAATAGAAAAGTAGGGATTGAGAATATCGGTTCGCGTAGTTCAAGTGGGGGATGGGA  
TTGCTCGTATTATAGGCTTGGTGAAATAATGTCAGGCGAATTAGTCGAATTTGCAGAA  
GGGACTAGGGGTATTGCTCTGAATTTGGAATCCAAAATGTTGGGATTGTATTAATGGG  
CGATGGGTTGATGATACAAGAGGGCAGTTTTGTAAAAGCAACAGGAAGAATTGCTCAG  
ATACCCGTGAGCGAGGCTTACTTGGGTCTGTTATAAATGCTCTGGCTAAACCTATTGAT  
GGGAGAGGCGAAATTGTAGCTTCGGAATCTCGCTTAATTGAATCTCCTGCTCCGGGTAT  
AATTTCCAGGCGTTCTGTATATGAACCCCTTCAAACGGGGCTTATTGCTATCGATTGAT  
GATTCCTATTGGGCGCGGTCAGCGAGAGTTAATTATTGGGGACAGACAAACCGGCAAA  
ACAGCAGTAGCTACAGATACAATCTCAATCAAAAAGGGCAAGATGTAATATGTGTTTA  
TGTAGCTATCGGTCAAAGAGCATCCTCCGTAGCTCAAGTAGTAACTACTTTCCATGAAG  
AGGGGGCCATGGAATACACTATTGTAGTAGCTGAAATGGCGGATTCCCCTGCTACATTA  
CAATACCTCGCTCCTTATACGGGAGCAGCCCTGGCTGAGTATTTTATGTACCGCGAACG  
GCATACTTTAATAATTTATGATGATCTCCTCAAACAGGCACAAGCTTATCGCCAAATGTC



CCTTCTATTAAGAAGACCCCCGGCCGCGAAGCTTACCCAGGGGATGTTTTTTATTTGC  
ATTCACGCCTTTTAGAAAGAGCCGCTAAATTAATTTCTCTTTTAGGGGAAGGAAGTATG  
ACTGCTTTACCAATAGTTGAGACTCAATCTGGAGACGTTTCCGCTATATTCTACTAAT  
GTAATCTCCATTACAGATGGACAAATATTCTTATCCGCAGATCTATTCAATGCCGGAATT  
CGGCCTGCTATTAATGTGGGTATTTCCGTTTCCAGAGTAGGATCCGCGGCTCAAATTAA  
AGCCATGAAACAAGTAGCTGGCAAATCAAATTTGGAATTAGCTCAATTCGCGGAGTTA  
CAAGCCTTTGCACAATTCGCCTCTGCTCTCGATAAAAACAAGTCAGAATCAATTGGCAA  
GGGGCCGACGATTACGAGAATTGCTTAAACAATCCCAAGCAAATCCTCTTCCAGTGGAA  
AGAGCAGATAGCTACTATTTATATCGGAACAAGAGGATATCTTGATTCCTTAGAAATTGG  
ACAGGTAAAGAAATTTCTGGATGAGTTACGTAAACACCTAAAAGATACTAAACCTCAA  
TTCCAAGAAATTATATCTTCTAGCAAGACATTCACCGAGGAAGCGGAAATCCTTTTGAA  
GGAAGCTATTCAGGAACAACCTCGAACGGTTTTCCCTTCAGGAACAAACAATGAGAAC  
CAATCCTACTACTTCTCGTCCCAGGGTTTTCTACAATTGAAGAAAAAAGTACAGGGCGTA  
TCGATCAAATTATTGGACCCGTGCTGGATGTCACTTTTCCCGGGGCAAGTTACCTTATA  
TTTATAATGCTTTGGTAGTCAAGAGTCGAGACACTGACGGTAAGCAAATTAATGTAAC  
TGTGAGGTACAACAATTATTAGGAAATAATCGAGTTAGAGCTGTAGCTATGAGTGCTAC  
AGATGGGTTGATGAGAGGAATGGAAGTGATTGACACGGGAGCTCCTCTCAGTGTTCC  
GTCGGTGGAGCTACTCTTGGACGAATTTCAACGTTCTTGGGGAGCCTGTTGACAATTT  
GGTCCCTGTAGATACTAGTGCAACATTCCTATTATAGATCCGCGCCCCGCTTTATCGA  
GTTAGATACGAAATTATCCATCTTTGAAACTGGTATTAAGGTGGTCGATCTTTTAGCTCC  
TTATCGGCGTGGAGGAAAAATCGGACTATTTGGGGGAGCTGGAGTAGGTAACACAGTA  
CTCATCATGGAATTAATCAACAATATTGCTAAAGCTCACGGGGGCGTATCCGTATTTGGC  
GGAGTAGGGGAACGGACTCGTGAAGGAAATGATCTTTATATGGAAATGAAGGAATCTG  
GAGTAATTAATGAAAAAATCTTGAGGAATCAAAGGTAGCTCTAGTCTATGGCCAAATG  
AATGAACCGCCAGGAGCTCGTATGAGAGTTGGTTTGACTGCCCTAACTATGGCAGAATA  
TTTCCGAGATGTTAATAAGCAAGACGTGCTTCTATTATCGATAATATCTTTGTTTTGTT  
CAAGCAGGATCGGAGGTATCTGCCTTATTAGGGAGAATGCCCTCTGCAGTGGGTTATCA  
ACCTACTCTTAGTACAGAAATGGGTTCTTTGCAAGAAAGAATTACTTCTACTAAAAGG  
GATCTATAACTTCGATCCAAGCGGTTTATGTACCTGCGGACGATTTGACCGACCCTGCT  
CCTGCTACAACATTTGCACATTTGGATGCTACTACCGTACTTTCCAGAGGATTAGCTTCC  
AAAGGGATTTATCCTGCAGTAGATCCTTTAGATTCAACCTCAACTATGTTACAACCTCG  
GATCGTTGGCAACGAACATTATGAAACTGCGCAAAGAGTTAAGCAAACCTTTACAACGT  
TACAAAGAACTTCAGGACATTATCGCAATTCCTGGGTTGGATGAATTATCGGAGGAGGA  
TCGTTTTAACTGTAGCAAGAGCACGAAAAATTGAGCGCTTCTTATCACAACCGTTTTTTG  
TGGCAGAAGTTTTTACCGGTTCTCCGGGAAAGTATGTTGGTCTTGCAGAACTATTAGG  
GGATTTCAACTAATCCTTTCCGGAGAATTAGACGGCCTACCCGAACAGGCTTTTTATTT  
GGTGGGTAACATCGATGAAGCTAGCACGAAAGCTATAAACTTAGAAGAGGAGAAACAA  
ATTGAAGAAAATGAAATTAATCTTTATGTACTGACTCCTAAGCGAATTATTTGGGATTG  
TGAAGTGAAAGAAATCATTTTATCTACTAATAGTGGCCAAATTGGCGTATTACCAAACC  
ACGCCCCCATTAAACACAGCTGTAGATATGGGTCCCTTGAGAATACGCCTCAACGATCAA  
TGGTTAACGGCGGTTCTGTGGAGCGGTTTTGCCAGAATAGTTAATAATGAGATCATCAT  
TTTAGGAAATGATGCGGAACTGGGTAGTGACATTGATCCGGAAGAAGCTCAACAGGCA  
CTTGAAATAGCCGAAGCTAACGTGAGTAGAGCTGAGGGTACGAAAGAATTGGTTGAA  
CGGAAGGTAGCTCTCAGACGAGCTAGGATACGAGTCGAGGCTGTTAATTGGATTCCCA

TGAAAAATGTAACCCATTCTTTTCGTTTTTTTTAGCTCACTGGCCATCCGCTGGGAGTTTC  
GGGCTTAATACCGATATTTTAGCAACAAATCTAATAAATCTAACTGTAGTGGTTGGTGTA  
TTGATTTATTTTGGAAAGGGAGTGTTAAAGATTTATTAGATAATCGAAAACAGAGGAT  
CTTGAGTACTATTCGAAATTCGGAAGAATTGCGTAGAGGAACCATTGAGCAGCTCGAA  
AAAGCTCGAATTCGATTACAGAAAGTCGAACTAGAAGCGGATGAGTATCGAATGAATG  
GATACTCTGAGATAGAACGAGAAAAAGCAAATTTGATTAATGCCACTTCTATTAGTTTG  
GAACAATTAGAAAAGTCTAAAAACGAAACCCTTTATTTTGAAAAACAAAGGGCGATGA  
ATCAGGTCCGACAACGGGTTTTCCAACAAGCCGTACAAGGAGCTCTAGGAACTCTGAA  
TAGTTGTTTGAATACCGAGTTACATTTCCGTACGATTCGTGCTAATATTAGCATTCTCGG  
GGCCATGGAA-----ATGAATCCACTAATTGCTGCTGCTTCCGTTATTGCTGCTGGATT  
GGCCGTAGGTCTTGCTTCTATTGGGCCTGGAGTTGGTCAAGGTACTGCTGCAGGACAA  
GCTGTAGAAGGTATTGCGAGACAGCCAGAAGCAGAAGGTAAAATACGCGGTACTTTAT  
TGCTTAGTCTAGCTTTTATGGAAGCTTTAACAATTTATGGACTAGTTGTGGCACTGGCGC  
TTTTATTTGCGAACCCTTTTGTTATGAATATTATACCGTGTCCATTAACAACTCAAGG  
GGTTATACGATATATCGGGCGTAGAAGTAGGCCAACACTTCTATTGGCAAATAGGAGGT  
TTCCAAATTCATGCCCAAGTACTTATCACTTCTTGGGTCGTAATTAATCTTGTCTAGGT  
TCAGTTATCATAGCTGTTTCGCAATCCACAAACCATCCCAACCGATGGTCAGAATTTCTT  
CGAATATGTCCTTGAGTTTATTCGAGACTTAAGCAAACTCAGATTGGAGAAGAATACG  
GTCCCTGGGTTCCCTTTATTGGAACCTATGTTCCTTTTTATTTTTGTTTCGAACTGGTCGG  
GTGCTCTTTTACCTTGAAAATTATACAGTTACCCCATGGAGAATTAGCAGCGCCACG  
AATGATATAAATACTACTGTTGCTTTAGCTTTACTCACGTCAGCGGCATATTTTTATGCGG  
GTCTTAGCAAAAAAGGATTGAGTTATTTGAGAAATATATTAACCAACTCCAATCCTT  
TTACCAATTAACATATTAGAAGATTTACAAAACCATTATCGCTTAGTTTTCGACTTTTC  
GGGAATATATTGGCGGATGAATTAGTCGTTGTTGTTCTTGTTCCTTAGTCCCCTTAGTA  
GTTCCCTATACCGGTCATGTTTCTTGGATTATTTACAAGCGGTATTCAAGCTCTTATTTTTG  
CAACGTTAGCCGCAGCCTATATAGGTGAATCCATGGAGGGTCATCATATGCTATTTGCAA  
CTTTAGAACATACTAACTCATATTTCTTTCTCAACAATTTCAATTGTGATTACGATTCA  
TTTAATAACCTTATTAGTTCGTGAACCTGGGGGATTGCGTGATTGTCGAGAAAAAGGAA  
TGATAGCCACTTTTTTCTGTATAACAGGATTCTTAGTTTCTCGTTGGGCTTCTTCGGGAC  
ATTTCCATTAAGTAATTTATATGAGTCATTGATCTTCCTTTCATGGGCTCTGTATATTCTT  
CATATGATTCCTAAGATACAGAACTCTAAAAATGATTTAAGCACATAACTACGCCGAG  
TACTATTTAACGCAAGGCTTTGCCACGTCGGGTCTTTAACTGAAATGCATCAATCCA  
CAATACTAGTACCTGCTCTACAATCTCAGTGGTTAATGATGCATGTCAGTATGATGTTAC  
TAAGCTATGCGACTTTTTGTGCGGATCCTTATTATCCGCCGCTCTTCTAATGATTAGATT  
TCGAAAGAATTTAGATTTCTTTTCGAAAAAGAAGGAGATTGAATATTTCTATGCAAAAA  
GAAGTGCTTTAAAAAGCACCTTTTTTCCTTTATTTCCAAATTATTACAAATATCAATTAAT  
TGAGCGTTTGGATTCTTGGAGTTATCGTGTCATTAGTCTAGGGTTTACCCTTTTAACCAT  
AGGTATTCTTTGTGGAGCAGTATGGGCTAATGAGGCGTGGGGATCCTACTGGAATTGGG  
ATCCTAAAGAACTTGGGCATTTATTACTTGGACCATATTTGCAATTTATTTACATAGTAG  
AACAAATCCAAATTGGAAGGGTACGAAGTCAGCATTGTAGCTTCCATAGGATTTCTTA  
TAATTTGGATCTGTTATTTTGGTATCAATCTATTAGGAATAGGTTTACATAGTTATGGTTCA  
TTTACATTACCCATGAAAAAAAAGAAAGCATTGCCTTCTTTCCTATATCTTGTATTTATC  
GTAATTTTGCCTTGGGGAGTCTCTTTCTTTTTAACAAATGTCTGGAACCTTTGGATTAAG  
AATTGGTGGAATACCAGGCAATCCCAAACCTCTTAACTGCTATTCAAGAGAAAAGAG

TTCTAGAAAGATTCATGGAATTAGAAGACCTTTTTATCTTGGACGAAATGATAAAAAGAG  
AAACCGAATACACATGTACAAAACCCCCTATAGGAATACGCAAGGAAATAATACAATT  
GGCCAAAATAGATAATGAGGGTCATCTCCATATCATTTCGCAATTTCTCGACAAATATAAT  
CTGTTTGGCTATTCTAAGTGGTCTTTTTTTCTGGGTAAAGAGGAACTTGTTATTTTGAA  
TTCTTGGGTTCAAGGAATCTTCTATAACTTAAATGACTCAGTAAAAGCTTTTTTTATTCT  
TTAGTTACTGATTTTTTTGTTGGATTTCACTCCACCCGCGGTTGGGAACTACTAATTCG  
TTGGGTCTATAACGATCTTGGATGGGTTCCCTAACGAGCTAATTTTCACTATTTTTGTTGT  
AGTTTTCTGTGATTCTAGATACATGTTTGAAATTTTGGGTCTTTTTTTGTTTAAACCGC  
CTATCTCCTTCGCTTGTAGTCATTTATCATTCAATTAGTGAAATGCCCATTTGGTGTTC  
AAGTACCTTACCGGATTCCCGGAGATGAAGAAGCGACTTGGGTTGACTTATACAATGTT  
ATGTATCGAGAAAGGACACTTTTTTTAGGTCAAGAGATTCGTTGCGAGGTCACGAATCA  
TATTACAGGTCTCATGGTATATCTCAGTATAGAAGATGGAAGTAGCGATATTTTTTTGTTT  
ATAAACTCCCCCGCGGTTGGTTAATCTCAGGAATGGCGATTTTTTGATACGATGCAAAC  
GGTAACACCAAATATATATAACAACATGCCTAGGAATAGCCGCGTCCATGCCGTCCTTCAT  
TCTGCTTGGAGGAGAACCACCAAGCGTATAGCATTCCCCACGCGAGGATTATGCTTC  
ACCAACCTGCTAGTGCTTATTATCGGGCAAGAACCAGAATTTTTACTAGAAGTGGAA  
GAGTTACACAAAGTTCGCGAAATGATCACAAGGGTTTATGACTAAGAACAGGCAAGC  
CTTTTTGGGTTGTATCCGAAGACATGGAAAGGGATGTTTTTATGTCAGCAGACGAAGCC  
AAAGCTTATGGACTTGTGATATTGTAGGGGATGAACCGAGAGAAGCAAAAATTACTT  
TCGAGGGTTTAGTTATGGAAGCCCTACCCAACGGAATGTTCCGCGTTCGCTAGAGAAT  
GACACCATCATCTGGGCTATATTTAGGAAAGATCCGGTCTAGTTCTATACGAATACTG  
ATGGGGGATAGGGTCAAAATTGAAGTAAGTCGTTATGATTCAAGCAAGGGGCGTATAAT  
TTATAGACTTCCCCATAAGGATTCGAAGGATATGGAAAAATTCGAGGGTTATTCAGAAA  
AACTTAAATTTCTAGACAATATTTCTGTCTACCCACTACTCTTTTCAGGAGTACATTTATG  
TGTTTGCCCATGATTATGGATTAATTGGTTCTAATAACAAATTTAGTTCACTACTTGTGA  
AACGGTTAATGATTCGAATGTATCAGCAGAATTTTTGGATTAATTTGGTTAATCATCCTA  
ACCAAGATCGATTATTGGATTCTGAGTTTTATTCTCAGATTCTATCTGAGGGGTTTGC  
TCGTTGTAGAAATCCATTCTCGCTACGAGAACAGTCTTGTCCGATACCAAAGTTTCAG  
AATTTACGATCTATTCATTCAATATTTCTTTTTTAGAAGACAAATTTTTGCACTTACATT  
ATCTAGCACATATAGAAATACCCTATCCTATCCATTTGGATATCTTGCTTCAACTCCTTCA  
ATACCGGATCCAAGATGTTCCATCCTTGCAATTTATTGCGATTCTTTCTCAACTACTACTC  
GAATTTGGAATAGTTTTATTAATAATCCATTTTTATTTTGAATAAAAAAAGACTATTTTCG  
GTTCTATATAACTCTTATGTATCAGAATATGAATTTTTCTTGTTGTTTCTTCGTAAACAA  
TCTTCTTGCTTGCATTAACTTCTTCCGGAACCTTTCTGGAACGAATCATCTTTTCTAGG  
AAGATGGAACAT-----TTAATGTACCCTGCTCGGAAAACCATATGGTTCGTTATGGATCCC  
CTTATGCATTATGTTTCGATATCAAGGAAAGGCAATTCTTGCATCAAAAGGAACTCTTCTT  
TTGAAGAAGAAATGGAAATGTTACCTTGTCCGTTTGTGGCAATATTCTTCTTTTTTGG  
ACTCAACCGCAAAGGATCCATCTAAACCAATTAGAAAACCTTGTCTCGATTTTCTGGG  
GTACTTTTCAAGTGTACCAATAAATCTTTGTTAGTAAGGAATCAAATGCTGGAGAATT  
CATTTCTAATAGATACTCAAATG-----AAAAAATTCGATACCAAAGTCCCTGTTACTCCTC  
TCATTGGATCTTTAGCAAAAGCCCAATTTTGTACTGGATCGGGGCATCCTATTAGTAAAC  
CAATTTGGACCGATTATCGGATTGGGATATTCTTGATCGGTTTGGTCCGATATGTAGAA  
ATCTTTTTCAATTATCACAGTGGATCTTCAAAAAGAAGACTTTGTATCGACTAAAGTATA  
TACTTCGACTTTCATGCGCTAGAACTTTAGCTCGTAAACATAAAAAGCACGGTACGAGCT

TTTATGCAATGGTTGGGTTTCGGTATTTTTAGAGAATTTTTTACGGAAGAAGAGCAAGT  
TTTTTCTTTGATGTTCCGCAAACGTATTTGGTATTTGGATATTCTCCGTATCAATGATCTG  
GTGAATCCTCTTATGATAATAGACAGGGTA---CAGGTAGAA---GCTATCAATTCTTTTTCG  
AACTTGGAA---TTATTAAGAAGTCTATGGACTGATATGGATTCTA---CCATTTTGACC  
CTCTTACTGGGAATCACAATAGAAGTACTCGTAATTGTGTGGTTAGAAAGAGAAATATC  
CGCATCGATAACAACGTATTGGTCCTGAATATGCTGGCCCCCTGGGACTGCTTCAAG  
CTATAGCAGATGGAACCTAAGCTACTTTTTAAAGAGGATATCTTGCCATCCCGAGGGGAT  
ATTCCCTTATTTAGCATTGGACCGTCTATAGCAGTCATATCAATTTTATTAAGTTTTTTAG  
TTATTCCTTTGGGATATCGCTTTGTTTTAGCGGATCTTAGTATTGGTGTTTTTTTTATGGATT  
GCCATTTCAAGTATTGCTCCTATTGGTCTTCTTATGGCAGGATATAGCTCAAATAATAAAT  
ATTCTTTTTCAGGTGGTCTACGAGCTGCCGCTCAATCTATTAGTTATGAAATCCCATTA  
CTTTTTGTGTACTAGCAATATCTCTACTATCCAACAGTTCAAGTACAGTTGATATAGTTG  
AAGCACAGTCAAATATGGTTTTTTTTGGATGGAATCTTTGGCGTCAGCCTATAGGTTTT  
CTGGTTTTTCTAATTTCTTCTTTGGCGGAATGTGAAAGATTACCCTTTGATTTACCAGAA  
GCGGAGGAAGAATTAGTAGCAGGTTATCAAACCGAATATTCTGGTATCAAATATGGTTT  
ATTTTATCTTGTTTCTTACCTAAATTTATTAGTTTCTTCTTTATTTGTAACAGTTCTCTACT  
TAGGCGGGTGAATTTGTCTATTCCCTATATATCCTTTTTTGGATTTTTCCAAATGAATAA  
AATGGTTGGAATTTTAGAAATGACAATGAGTATCTTATTACATTAACCTAAAGCTTATTTA  
TTTCTCTTCATTTCTATCACAATAAGATGGACTTTACCCAGGATGAGAATGGATCAGTTA  
TTAAATCTTGGATGGAAATTTCTTTTACCTATTTCCCTGGGCAATCTCTTATTAACAACCT  
CTTCCCAACTTGTTTCACTAATGATCTGGCATGTACAGAATGAAAACCTCATTCTCGATT  
CTACGAGAATTTTTATGAAAGCGTTTCATTTGCTTCTCTTCCAGGGAAGTTTCATTTCC  
CAGAATGTATCCTAATTTTTGGCCTAATCTTCTTCTGATGATCGATTTAACCTCTGATCA  
AAAAGATAGACCTTGGTTCTATTTTCATCTCTTCAACAAGTTTAGTAATAAGCATAACGG  
CCCTATTGTTCCGATGGAGAGAAGAACCCTATAATTAGCTTTTCGGGAAATTTCCAAACG  
AACAAATTTCAACGAAATCTTTCAATTTCTTATTTTATTATGTTCAACTTTATGTATTCCTCT  
ATCCGTAGAGTACATTGAATGTACAGAAATGGCTATAACAGAGTTTCTGTTATTCTGATT  
AACAGCTACTCTAGGGGGAATGTTTTTATGTGGTGCTAACGATTTAATAACTATCTTTGT  
AGCTCCAGAATGTTTCAGTTTATGTTTCTACCTATTGTCTGGATATACCAAGAGAGATCT  
ACGGTCTAATGAGGCTACTATGAAATATTTACTCATGGGTGGGGCAAGCTCTTCTATTCT  
GGTTCATGGTTTCTTGGCTATATGGTTCATCTGGGGGGGAGATCGAGCTTCAAGAAA  
TTGTGAACGGTCTTATCAATACACAAATGTATAACTCCCCAGGAATTTCAATTGCGCTTA  
TATCCATCACTGTAGGACTTGGGTTCAAGCTTTCCCCAGCCCCCTTTTCATCAATGGACT  
CCTGACGTCTACGAAGGATCCCCACTCCAGTCGTTGCTTTTTCTTCTGTTACTTCGAA  
AGTTGCTGCTTCAGCTTCAGCCACGGAATTCTCGATATTCTTTTTATTTCTCATCAA  
CGAATGGCATCTTCTTCTGGAAATCCTAGCTATTCTTAGCATGATATTGGGGAATCTCCT  
TGCTATTACTCAAACAAGCATGAAACGTATGCTTGCATATTCTGTCATAGGGCAAATCG  
GATATGTAATTATTGGAATAATTGTTGGAGACTCAAATGATGGATATGCAAGCATGATAA  
CTTATATGCTTTTCTATATCTCCATGAATCTAGGAACTTTTGCTTGCATTGTATTATTTGGT  
CTACGTACCGGAACCTGATAACATTTCGAGATTATGCAGGATTATACACGAAAGATCCTTTT  
TTGGCTCTCTTTAGCCCTATGTCTCTTATCCCTAGGAGGCCTTCCCTCCACTAGCAGGT  
TTCTTCGGAAAACCTCTATCTATTCTGGTGTGGATGGCAAGCAGGCCTATATTTCTTGGTT  
TCAATAGGACTCCTTACGAGCGTTCTTTCTATCTACTATTATCTAAAAATAGTCAAGTTAT  
TAATGACTGGACGAAACCAAGAAATAACCCCTTATGTGCGAAATTATAGAAGATCCCCT

TTAAGATCAAACAATTCCATCGAATTGAGTATGACTGTATGTGTGATAGCATCTACTATA  
CCAGGAATATCAATGAACCCCATTTCTTGCAATTGCTCAGGATACCCTCTTTATGTTTCTG  
CTTCACGAATATGATATTTTTTGGGCATTTCTAATAATAGCAAGCCTTATTCCTATTTTAG  
CATTTTGGATTTACGACTTTTAGCTCCGGTTCGTGAAGGACCAGAGAAGCTTTCTAGT  
TATGAATCGGGTATAGAACCCATGGGGGGGGCTTGGTTACAATCCGAATACGCTATTA  
CATGTTTGCCTAGTTTTTTGTTGTTTTTGATGTGGAAACGGTCTTTCTCTACCCTTGGGC  
AATGAGTTTCGACGTATTGGGTATATCCGTTTTTATCGAAGCTTTCATTTTCGTGCTTATC  
CTAGTTGTTGGTTTAGTTTATGCATGGCGAAAAGGAGCCTTGGAAATGGTCTATGAGTTC  
TTTTCTTGGTTAACAATACTTGTGTTTTTGCCGATATTTGCGGGTTCATTAATTTCTTT  
TTACCTCATAGGGGAAACAAAATCGTTAGGTGGTATACTATGTCTATTTGTTTATTAGAA  
TTCCTTCTAATGACTTATGCATTCTGTTATCATTTCCAATTGGAGGATCCCTTAATCCAAT  
TAAAAGAGGATTCTAAATGGATAGATGTCTTCAATTTCCACTGGAGATTGGGAATCGAT  
GGACTTTCATTAGGATCTATTTTATTGACAGGATTATGACTACTTTAGCTACTTTAGCAG  
CTTGGCCGGTTACCCGGAATTCCCGATTATTTCTATTTCTGATGCTAGCAATGTATAGCG  
GTCAAATAGGATTATTTTCTTCGCGAGACCTTTTACTTTTTTTTATCATGTGGGAGTTAG  
AATTAATTCCTGTTTACTTACTTTTATCCATGTGGGGGGGAAGAGGCGTCTCTATTTCAG  
CTACAAAGTTTATTTTGTATACTGCAGGTGGTTCATTTTTTTTCTTAATCGGAGTTCTAG  
GTATGGGCTTATACGGTTCCAACGAACCAAGATTAGATTGGAAAGATTAATTAATCAAT  
CATACCCTGCAACATTGGAAATACTATTTTATTTTGGCTTCCTTATTGCTTATGCTGTCAA  
ATTGCCGATTATACCCCTACATACGTGGTTACCAGATACCATGGGGAAGCGCATTACAG  
TACATGTATGCTTTTAGCGGGAATCCTATTAAGATGGGAGCATAACGGATTGATTCCGGAT  
CAATATGGAATTGTTACCTCATGCTCATTATCTATTTTCCCCTTGGTTAGTAATAATAGGA  
GCGATGCAAATAATCTATGCAGCTTCAACTTCTCTTGGCCAACGCAATTTCAAAAAAAG  
AATAGCCTACTCCTCCGTCTCTCACATGGGTTTCATTATTATAGGAATTGGTTCATAAC  
CAACATTGGACTCAATGGAGCTATTTTACAAATATTATCCCATGGATTATTGGGGCTAC  
ACTTTTTTTCTTAGCGGGAACGGCTTGTGATAGAATGCGCCTTGTTTATCTCGAAGAAC  
TGGGAGGGGCTTCTATCCAATGCCAAAAATTTTACCATGTTTAGTAGCTTTTCAATGG  
CTTCTCTTGCCTTACCAGGAATGAGTGGTTTTGTTGCGGAATTAGTAGTATTTTTTGGAC  
TAATTAAGTCCAAAATTTCTGTTAATGCCAAAAATGCTAATTACTTTTGTAAATGGCAA  
TTGGAATGATATTAACCTCCTATTTATTTATCTATGTTACGACAGATGTTCTATGGATAC  
AAGCTATTTTCATGTTCCAAACGAAAATTTTGGAGGATTCCGGCCCGGAGAACTCTTTCT  
TTAATCTGTATCTTTTTTACCAGTAATAGGAATCGGTATTTATCCAGATTTTGTCTCTCG  
CTATCCGTTGACAGGGTAGAGGCTCTGTTATCCAATTATTATCCTAAAATGATGTTTGGAG  
CATGACTTTTTTTGAGTGTCTATTTATTTTCGATTGGTATCTATGGATTGATCACAAGCC  
GAAACATGGTTAGAGCTCTAATATGCCTTGAACCTTATACTGAATCAATTAATCTAAATC  
TCGTAACATTTTCTGATCTATTTGATAGCCGCAATTAAGGAGACATTTTCGCAATTT  
TTGTTATAGCCCTTGC GGCTGCTGAAGCAGCTATTGGATTATCCATTCTTTCTTCCATCCA  
TCGTAATAGGAAATCAACTCGTATCAATCAATTAATTTTTTTGAATAATATGGAACATA  
TATCAATATGCATGGGTAATCCCTCTTCTCCACTTCCAGTTATTATGTCAATGGGGTTTG  
GACTTTTTCTTGTTCACACAGCAACAAAAATCTTCGTCGCATATGGGCTTTTCTAGT  
GTTTTACTTTAAGTATAGCTATGGTATTCTCAGTTCACCTGTCTATTCAACAAATAAATG  
GAAGTTCTATCTATCAATATCTATGGTCTTGGACCGTCAATAATGATTTTTCTTAGAATT  
TGGATACTTAATCGACCCGCTTACTTCTATTATGTTAATACTAATTACTACTGTAGGAATC  
CTGGTTCTTATTTATAGTATGATTATATGTCTCACGATGAGGGATATTTGAGATTTTTTG

TTTATATAAGTTTTTTCAATACTTCCATGTTGGGATTGGTTACTAGTTCCAATTTGATACA  
AATTTATTTTTTTTTGGGAGCTTGTGGGAATGTGTTCCATTTATTGATAGGCTTTTGGTTT  
ACACGGCCAATTGCAGCGAGTGCTTGTCAAAAAGCTTTTGTAACTAATCGTGTAGGGG  
ATTTTGGTCTGTTATTAGGAATCTAGGTTTTTTTTGGATAACAGGTAGTTTAGAGTTTC  
GGGATTTGTTTAAAATAGCTAATAACAATGAGATTAACCTCCTTGCTTACTATTTTGTGTG  
CTTTTTTATTATTCCCTGGTGCGGTTGCGAAATCGGCACAATTCCCTCTTCACGTATGGT  
TACCCGATGCTATGGAAGGACCCACCCCATTTTCAGCTCTTATACACGCAACAACATG  
GTTGCTGCGGGGATTTTTCTTATAGCTCGACTTCTTCCTCTTTTCATATCCCTACCTTTGA  
TAATGAGTTTCATTTCTTTAATAGGTACACTAACACTTTTCTTAGGAGCCACTTTAGCTC  
TTGCTCAGAGAGATATTAAGAAGCTTAGCCTATTCTACAATGTCTCAATTGGGTTATA  
TGATGTTAGCTCTAGGTATAGGTTCTTATCAAGCTGCTTTATTCCATTTGATCACTCATGC  
TTATTCGAAAGCTTTATTATTCTTGGGATCCGGATCTGTTATTCAATGGAACCTCTT  
GTTGGATATTCACCAGATAAAAGTCAGAATATGGTTCCTTATGGGTGGTTAAGAAAATA  
CATTCCAATTACAAGAACTTGTTTTTATGGGGTACCCTTTCTCTTTGTGGTATTCCACC  
TCTTGCTTGCTTCTGGTCCAAAGATGAAATCCTTAGTAATAGTTGGTTATATTCACCCTT  
TTTTGGAATAATAGCTTCTTTTACTGCAGGATTAACCTGCGTTTTATATGTTTCGGATATAT  
TACTTACTTTTGATGGGTATTTGCGTGTTCAATTTTCAAATTACAGTAGTACTAAAGAG  
GATTCGTTGTATTCAATATCGTTATGGGGAAAAGGATATCTAAAGGAGTCAATAGA---G  
ATTCGTTTTATCAACAGCGAAGTTTTTTTCAACTAAAAAC-----ACTTTTGTCTATCCTC  
ATGAACCGGGAAATACTATGCTATTTCCCTCTTCTTATATTACTGCTTTGTACTTTGTTTATT  
GGATCTATAGGAATCCATTTTGAATTAACCATATTATCAAAGTGGCTAACTCCCTCAATC  
AACTTTTTCCAAGAAAGTTCTAATTCGTCCATAAATTCATATGAATTTATCACTAATGCA  
ATTTCTTCTGTAAGTCTAGCTATTTTTGGTCTATTCATAGGCATATATGTTTTATGGATCTG  
CTTACTCTTTTTTTCAGAATTTGATTTAATAAATTCCTTTGTATATTTTTTCCATCAACTAA  
AAAAAAGATATATAGTTGGTCATATAATCGCGGTTATATAGATATTTTCTATACTAGGAC  
CTTTACCTTGGGTATAAGAGGATTAACCGAACTAACGCAGTTTTTTCGACAAGGGTGCA  
TTGATGGAATTACCAATGGAGTAGGTCTTGCTAGTTTTTTGTATAGGAGAAGAAATTAAT  
AT--GTAGGGGGAGGTCGAATTCGTCCTATTTATTCTTTTTTTTTATGTTATGTATCTGTGT  
TCTTATTCTTTTTTCTTATGGATTTACCTGGGCCAATACATGAAATCTTGTGCTATTTGG  
GGGATTTGTTCTTCTACTAGGGGGTCTAGGGGTGGTATTACTTACCAACCCAACCTTTTC  
TGCTTTTTTCGCTAGGATTAAGTTCTTGTGTGTATATCCTTATTCTATATTTTATTGAATCCT  
ACTTTGTAGCTGTGGCACAACCTTCTTATTTATGTGGGAGCTATAAATGTCTTGATCATATT  
TGCCGTAATGTTTCGTAAATGGCTCAGAATGGTCTAAAGATAAGAATTTTTGGACTATTG  
GAGATGGGTTCACTTCACTCGTTTGTATAACTATTCCTTTTTTCACTAATGACTACTATCCC  
AGATACGTCATGGTATGGAATCTTTGGACTACAAGATCAAACCAAAATAGTAGAACAGG  
GTCTCATAAATAACGTTCAACAAATTGGGATTCATTTAGCAACCGATTTTTATCTTCCAT  
TTGAACTCATTTCATAATTCTTCTAGTTTCTTTAATAGGTGCAATTACTATGGCTCGGCA  
AATGAGTCTACCGCTTACAAGAAAAGATCTCATGATAGTCAATATGGGCCCTCAGCACC  
CATCAATGCATGGTGTCTTCGACTGATCGTTACTCTCGATGGTGAAGATGTTATTGATT  
GTGAACCCATATTAGGCTATTTACACAGAGGAATGGAAAAAATCGCGGAAAACCGAAC  
TATTATACAATACTTACCTTATGTAACACGTTGGGATTTTATAGCTACTATGTTTACAGAA  
GCAATAACGGTAAATGCACCAGAATTCTTGGAGAATATTCAAATACCCCAAAGAGCCA  
GCTATATTAGGGTAATTATGTTAGAATTGAGCCGTATAGCTTCTCACTTGTATGGCTTGG  
ACTTTTTATGGCAGATCTCGGTGCGCAGACTCCTTTTTTTTTATATTTTTTAGAGAGAGAGA

ATTAATATATGATCTATTTGAAGCTGCTACAGGTATGCGAATGATGCATAATTACTTTTCGC  
ATCGGAGGAGTTGCTGCCGATCTGCCTTATGGATGGATCGATAAATGTTTAGATTTCTGT  
GATTATTTTTTACGAGGAGTTATTGAATATCAACAACCTATTACACAGAATCCCATTTTTT  
TGGAACGAGTTGAGGGAGTTGGTTTTATTAGCGGAGAAGAAGCTGTAAATTGGGGCTT  
ATCGGGCCCCATGTTACGAGCTTCTGGAATACAATGGGATCTTCGTAAAGTTGATCTTT  
ACGAGTCTTACAATCAATTCGATTGGAAAGTCCAATGGCAAAAAGAAGGGGATTCATT  
AGCACGCTATTTAGTACGAATCGGTGAAATGAGGGAATCCATCAAAATTATTCAACAGG  
CTGTAGAAAAAATTCCTGGGGGCCCTTATGAGAATTTAGAAGTCCGACGC---AAGAAA  
GCAAAGAATTCGAATGGAATGATTTTGAATATCGATTTCTTGGTAAAAAACCTTCACC  
CAATTTTGAATTGTCAAACAAGAGCTTTATGCAAGAGTGGAAGCCCCAAAAGGTGAA  
TTAGGAATTTATCTGGTAGGAGATGATAGTCTTTTCCCCTGGAGATGGAAAATTCGTCC  
ACCCGGTTTTATTAATTTGCAAATTCCTCCTCAGCTAGTCAAAAAAATGAAATTGGCTG  
ATATCATGACGATATTAGGTAGTATAGATATCATTATGGGAGAAGTTGATCGTATGTTCCC  
TATGGTAACTGGGTTTCATG-----GGTCAACAACAATACGCGCAGCAAGGTACATTGGT  
CAAAGTTTCATAATTACCTTATCCCACACAATCGTTTACCTATAACGATTCACTACCCC  
TATGAAAAATCAATTACATCGGAGCGTTTCCGGGGGCGAATCCACTTTGAATTTGATAA  
ATGTATTGCTTGTGAAGTATGTGTTTCGCGTATGCCCTATAGATCTACCTCTTGTGGATTG  
GAGATTTGAAAAGGATATTA AAAAGGAAACAATTGCTTAATTATAGTATTGATTTCCGAG  
TTTGTATATTTTGTGGTAATTGTGTTGAGTACTGTCCGACAAACTGTTTATCAATGACTG  
AAGAATATGAACTTTCTACTTATGATCGTCATGAATTGAATTACAATCAAATTGCTTTGA  
GTCGGTTACCAATCTCCATAATGGGAGATTACACAATTCAAACAATTAGGAATTCAAAA  
ATAGACGAAGAAAAATCTTGAATTCAAGAACGATTACTGATTACCAGCAGGGTTGGT  
TATCTAATTGGCTAGTCAAACATGAGGTGGTTCATAGATCTTTGGGCTTCGATCATCGAG  
GAATAGAGACTTTGCAAATAAAAAGCAGAGGATTGGGATTCCATTGCTGTCAATTTATAT  
GTATATGGTTACAATTATTTACGTTCCCAATGTGCTTATGACGTTGCACCCGGTGGATCT  
TTAGCTAGCGTGTATCATCTTACGAGAATACAGTATGGTATAGATAACCCAGAAGAAGTA  
TGCATAAAAGTCTTTGCCCAAAGGATAATCCTAGAATCCCATCTGTCTTCTGGATTTG  
GAGAAGTTCCGATTTTCAAGAACGCGAATCTTTTGATATGGTGGGAATCTCTTATGATAA  
TCATCCACGCCTTAAACGTATCCTAATGCCTGAAAGTTGGATAGGCTGGCCCTTACGTA  
AGGACTATATAACCCCAATTTCTATGAAATACAAGATGCTCAT-----

-----ATGAGTTTGATTGAGTTTCCCCTACTTGACCAAAGAAGTTCCAA  
TTCCGTTATTTCAACTACACTAAAAGATCTTTCGAATTGGTCAAGACTCTCTAGTTTATG  
GCCCTTCTATATGGTACCAGTTGTTGTTTCATTGAATTTGCTTCATTAATAGGCTCACGA  
TTCGACTTTGATCGTTATGGATTGGTACCAAGATCAAGTCCTAGGCAAGCGGACCTAAT  
TTAACAGCCGGTACAGTAACAATGAAAATGGCTCCCTCTTTAGTGAGATTATATGAGC  
AATGCCTGAACCAAATAACGTCATTGCTATGGGAGCTTGTACTATTACTGGTGGAAATG  
TTCAGTACGGATTCTATAGTACTGTTCCGGGGAGTTGATAAGTTAATCCTGTGGACGTC  
TACTTGCCGGGTTGCCACCTAAACCAGAGGCTGTTATAGATGCCCTAACAAAACCTTCG  
TAAGAAGATATCGCGAGAAATAGTTGAGGATCGAACTCTATCTCAA---AAAATCGATG  
TTTTACTACCAGCCACAAGCTTTATGTTCCGGCGCAGTACTAATACTGGAACCTTATGAGC  
AAGAATTGCTCTATCAATCACCATCTACTTTAGACATATCTACT-----TTTTTCAAATCCAA  
AAGTCCAGTATCTTCCACAAATTAGTGAATATGGAAAATAGAAATACTTTTTCTTGGGT  
AAAGGAACAGATGACTCGATCGATTTCTGTATCGATCATGATATACGTAATAACTCGGAC

ATCTATTTCAAATGCATATCCCATTTTTGCGCAGCAAGGTTATGAAAACCCACGAGAAG  
CAACTGGACGAATTGTATGTGCCAATTGCCATTTAGCGAATAAGCCTGTGGATATTGAA  
GTTCCCAAGCAGTGCTTCCCGATACTGTATTTGAAGCAGTCTTCGAATTCCTTATGAT  
ATGCAACTGAAACAAGTTCTTGCTAATGGGAAAAAGGGAGGGTTGAATGTGGGTGCT  
GTTCTATTTTTGCCCGAGGGATTTCGAATTAGCGCCGCCGACCGTATTTCTCCTGAGTTG  
AAAGAAAAGATAGGAAATCTCTTTTTTCAGAGTTATCGTCCCAATAAAAAAATATTCT  
TGTGATAGGCCCTGTTCCCGTAAGAAATATAGTGAAATCGTCTTTCCCATTTTCCCC  
CGACCTGCTATGAAGAAAGACGTTTCATTTCTTAAAATATCCCATATATGTGGGGGGAA  
ACCGAGGAAGGGGACAGATCTATCCTGATGGTAGCAAGAGTAACAATACGGTCTATAA  
TGCAACGTCAACAGGTGTAGTAAGAAAAATACTGCGTAAAGAAAAGGGGGGATATGA  
AATATCCATAGTCGATGCATCGGATGGACGCCAAGTGATTGATCTTATACCTCCCGGTCC  
AGAACTTCTTGTTTCAGAGGGGGAATCGATCAAGCTTGATCAACCATTAACAAGTAATC  
CTAATGTGGGAGGGTTTGGTCAGGGGGATGCAGAAATAGTGCTTCAGGATCCATTACG  
CGTTCAAGGCCTTTTGTTCTTCTTCGCATCCGTTATTTTTGGCACAAGTTTTTTGGTTCT  
CAAAAAGAAACAGTTTGAAAAGGTTCAATTGTACGAAATGAATTCATGAGTAAAGTA  
TATGATTGGTTTGAGGAACGTCTTGAGATTCAGGCAATTGCAGATGATATAACTAGTAA  
ATATGTTCCCTCCTCATGTCAACATATTTTATTGTTTAGGGGAATTACACTTACTTGT  
CTAGTACAAGTTGCTACCGTTTTGCTATGACTTTTTACTATCGCCAACCGTTACAGAG  
GCTTTTTCTCGGTTCAATACATAATGACCGAGGCCAACTTTGGTTGGTTAATCCGATCA  
GTTTCATCGATGGTCAGCAAGTATGATGGTTCTAATGATGATCCTGCACGTATTCGTGTG  
TATCTCACAGGTGGGTTTTAAAAACCCCGCAATTAAGTTGGGTCAGTGGTGTGGTTTT  
AGCTGTATTAAGTGCATCGTTTGGTGTAAGTGGTTATTCTTTACCTTGGGATCAAATTGG  
TTATTGGGCAGTCAAATTTGTGACAGGTGTGCCTGACGCGATTCCGGTAATAGGATCAC  
CTTTAGTGGAGTTATTACGTGGAAGTGCTAGTGTGGGTCAATCCACTTTGACTCGTTTTT  
ATAGTTTACATACCTTTGTACTTCTCTGCTTACTGCCGTATTTATGTTAATGCACTTTCT  
AATGATACGTAAGCAAGGTATTTCCGGCCCTTAAATGGGAGTAACAAAGAAACCTGAC  
TTAAACGATCCTGTATTAAGAGCAAATTAGCTAAAGGGATGGGACATAATTATTACGG  
GGAACCCGCGTGGCCCAACGATCTTTTATATATTTTTCCAGTAGTAATTCTAGGTA  
TATGATGTAATGTAGGTTTAGCGGTTCTCGAGCCGTCAATGATTGGTGAACCGGCGGATC  
CGTTTGCAACTCCTCTGGAAATATTACCCGAGTGGTACTTCTTTCCCGTGTTCAAATAC  
TCCGTACAGTACCTAATAAGTTATTGGGCGTTCTCTTAATGGTTTCTGTGCCGACGGGCT  
TATTGACAGTACCTTTCTAGAGAATGTCAATAAATCCAAAATCCATTTCTCGTCCAG  
TAGCTACAACCGTTTTTTAATCGGTACTGCAGTAGCTCTTTGGTTAGGTATTGGAGCAA  
CATTACCCATTGAAAAATCCTTAACCTTAGGTCTTTTTATGATTGAAGTTTTCTATTTGG  
AATCGTCTTAGGCCTAATTCCTATTACTTTAGCGGGATTATTCTGTGACTGCGTATTTGCAA  
TACAGACGTGGGGATCAGTTGGATCTTATGCTTACTATAACTAGTTATTTCCGGTTTTCTAT  
TGGCTGCTTTAACTCTAACCTAGCTCTATTTATTGGCTTGAACAAGATACGTCTTATTAT  
GGATATAGTAAGTCTCGCTTGGGCTGCTTAAATGGTAGTCTTTACATTTTCTCTTTCACTA  
GTAGTATGGGGGAGGAGTGGACTCATGATGATTCGTTCCCGGAACCGAAGTAAAAA  
TTGTTGTGGATAGGGATCCTGTAAAAACATCTTTTGAGGAATGGGCCAGACCCGGCCAT  
TTCTCAAGAACTAGCTAAGGGCCCTGATACTACCACTTGGATCTGGAACCTACATGC  
TGATGCTCACGATTCGATAGTCATACAGGTGATTTGGAGGAGATCTCTCGAAAAGTCT  
TTAGTGCTCATTTCCGGTCAACTCTCCATTATCTTTCTTTGGTTGAGTGGCATGTA  
ATGGTGCCCGTTTTTCCAATTATGAAGCATGGCTAAGTGATCCTACTCACATTGGACCC



AGTGCTCAGGTAGTTTGGCCAATCGTAGGGCAAGAAATATTGAATGGTGATGTAGGCG  
GGGGTTTCCGAGGAATCCAAATATCCTCCGGCTTTTTTCAGATTTGGCGAGCATCCGGA  
ATACTAGTGAATTACA ACTCTATTGTACCGCAATCGGTGCATTGATTTTTGTCATCGTTA  
ATGCTTTTTGCTGGGTGGTTCATTATCACAAAGCCGCTCCCAAATTAGCCTGGAGTCA  
TGACGTAGAATCCATGTTGAATCATCACTTAGCAGGGTTATTAGGACTTGGGTCTCTTC  
TTGGGCGGGGCACCAAATCCATGTATCTTTACCGATTAACCAATTTCTTGACGCTGGGG  
TTGATCCTAAGGAGATAACCACTTCCTCATGAATTTATCTTGAATCGCGACCTTTTGGCTC  
AACTTTATCCTAGTTTTGCGCAACGAGCAACCCCTTTTTTCACCTTGAATTGGTCCAAAT  
ACGCAGAATTTCTTAGTTTTGCGCGAGGGCTAGATCCAATAACCGGCGGTCTATGGTTG  
AGCGATATTGCGCACCATCATTTAGCTATTGCTATTCTTTTCCTGATCGCAGGTCATATGT  
ATAGGACCAACTGGGGTATTGGTTCATGGCTGAAAGATATTTTGGAGGCTCATAAAGGC  
CCATTTACAGGACAGCGCCATAAAGGTCTCTATGAAATCCTAACAACGTCATGGCATGC  
TCAATTATCTCTTAACCTAGCTATGCTAGGCTCTACAACCATTTGTTGTAGCTCATCATAG  
TACTCTATGCCCCCTATCCATACCTAGCTACTGACTATGGTACACA ACTTTCTTGTTC  
ACACACCACATGTGGATTGGCGGATTTCTAATAGTTGGTGCTGCTGCACATGCAGCCAT  
TTTTATGGTAAGAGACTATGATCCAACGACTCGATAACAACGATCTATTAGATCGTGTCT  
TAGACACCGTGATGCAATCATATCCACCTTA ACTGGGTATGTATATTTCTAGGTTTTCA  
CAGTTTTGGTTTATAATTCATAATGATAACCATGAGTGCTTTAGGTCGTCCCAAGATAT  
GTTTTCGGATACCGCCATAACAATTACAACCGATCTTTGCTCAATGGGTACAAAATCTCCA  
TGCTGGCGCGCCTAGGCTAACAGCTCCTGGTGCAACAACAAGTACCAGCTTAACGTGG  
GGAGGTGGCGAGTTAGTAGCAGTAGGCGGCAAAGTTGCTTTGTTACCTATTCATTAGG  
AACCGCAGATTTTTTAGTCCATCACATTCACGCATTTACAATCCATGTGACTGTATTAAT  
ACTTTTGAAAGGTGTTTTATTGCTCGCAGTTCCCGTTTGATACCCGATAAAGCAAATCT  
TGGTTTTCGCTTCCCTTGCATGGGCCTGGGCGAGGGGGAACATGTCAAGTATCCGCC  
TGGGATCATGTTTTCTTAGGTCTATTCTGGATGTACAATTCCATTCGGTAGTCATTTTCC  
ATTTACAGTTGAAAAATGCAGTCGGATGTTTGGGGTACTATAAGTGATCAAGGGGTGGTA  
ACTCATATCACAGGGGAAACTTTGCACAGAGTTCCATTACGATTAATGGGTGGCTCCG  
AGATTTCTTGTGGGCACAGGCATCCCAAGTAATTCAGTCTTATGGTTCTTCATTATCCGC  
ATATGGTCTTTTTTTCTTAGGTGCTCATTTTGTCTGGGCCTTCAGTTAATGTTTTTATTC  
AGCGCCCGTGGTTATTGGCAAGA ACTGATTGAATCTATCGTTTGGGCTCATAACAAATT  
AAAAGTTGCTCCTGCTACTCAGCCTAGAGCCTTGAGCATTATAACAAGGACGTGCTGTAG  
GAGTAACCCATTACCTTCTGGGTGGAATTGCCACAACATGGGCATTCCTTCTAGCGAGA  
ATTATTGCAGTAGGAATGGAATTAAGATTTCCAGGTTTAGCCAAGGCTTAGCTCAGGA  
CCCCACTACTCGTCGTATTTGGTTTTGGTATTGCTACCGCACATGATTTCGAAAGTCATGA  
TGATATTACTGAGGAACGCTTTTATCAGAACATTTTTGCTTCTCACTTTGGGCAATTAGC  
AATAATCTTTCTATGGACGTCCGAAATCTGTTTCATGTCGCTTGGCAAGGAAATTTG  
AATCATGGATACAGGATCCTTTACACGTAAGACCTATTGCTCATGCGATTTGGGATCCTC  
ATTTTGGTCAACCCGCTGTGGAAGCCTTTACTCGAGGAGGCGCCGCGGTCCAGTGAA  
TATCGCCTATTCTGGGGTTTATCAGTGGTGGTATAACAATTGGATTACGGACCAATGAAGA  
TCTTTATACAGGAGCTCTTTTTCTATTATTTCTTTCTACCCCTATCCTTAATAGGGGGTTGG  
TTACATCTACAACCCAAATGGAAACCAAGCCTTTTCGTGGTTCAAAAACGCGGAATCTC  
GTCTCAATCATCATTTGTCAGGACTTTTCGGGGTAAGTTCTTTGGCTTGGACAGGACAT  
TTAGTTCATGTCGCTATTCAGCATCCAGGGGAGAGTACGTTTCGATGGAATAATTTCTTA  
GATGTATTACCCTATCCACAGGGGTTGGGACCCCTTCTGACGGGTGAGTGAATCTTTA

TGCCAAAACCCCGATTTCGAGTAATCATTATTTGGTACCACTCAAGGAGCGGGAACCTG  
CTATTCTAACTCTTCTTGGGGGATTCCATCCACAAACACAAAGTTTGTGGCTGACCGAT  
ATTGCTCATCATCATTAGCTATTGCATTTATTTTTCTCATTGCCGGTCATAIGTATCGAAC  
TAACTTCGGAATTGGGCACAGTATCAAAGATCTTTTAGAAGCACATACTCCTCCGGGGG  
GTCGATTAGGGCGTGGGCATAAGGGCCTTTACGACACAATCAATAATTCGATTCATTT  
CAATTAGGTCCTTGCTCTAGCTTCTTTAGGGGTTATTACTTCCTTAGTAGCTCAACATATGT  
ACTCTTTACCTTCTTATGCATTCATAGCACAAAGACTTTACTACTCAAGCAGCTTTATATAC  
TCATCACCATAACATTGCAGGGTTCATCATGACAGGGGCTTTTGCTCATGGAGCTATTTT  
TTTCATTAGAGATTACAATCCGGAACAGAATGAGGATAATGTATTGGCAAGAATGTTAG  
ACCATAAAGAAGCTATCATATCTCATTAAAGTTGGGCTAGTCTCTTCCTAGGATTCCATA  
CTTTGGGCCTTTATGTTTATAATGACGTCATGCTTGCTTTTGGTACTCCAGAAAAGCAAA  
TCTTGATCGAACCTATATTTGCTCAATGGATAACAATCGGCTCATGGTAAGACGACATATG  
GGTTCGATATACTCTTATCTTCAACGAGCGGTCCCGCTTTCAATGCGGGTTCGAACCCTAT  
GGTTACCCGGATGGTTGAATGCTGTTAACGAG-----AATAGTAATTCGCTTTTCTTAACA  
ATAGGACCTGGAGATTTCTTGGTTCATCATGCTATTGCTTTAGGTTTGCATACAACCTACA  
TTGATTTTAGTAAAGGGTGCCTTAGATGCACGCGGTTCCAAATTAATGCCGGATAAAA  
AGATTTTGGATATAGTTTCTTGGCAGCGCCCTGGTCGCGGCGGTACTTGTGATATTT  
TGCTTGGGACGCGTTTTTATTTGGCAGTTTTCTGGATGTTAAATACCATTGGATGGGTTAC  
TTTTTATTGGCATTGGAAACACATCACATTATGGCAGGGCAACGTTTCACAATTTAATGA  
ATCCTCCACTTATTTGATGGGATGGTTAAGAGATTACCTATGGTTAAACTCTTCACAACCT  
TATCAATGGATATAATCCTTTTGGGATGAATAGTTTATCGGTATGGGCGTGGATGTTCTTA  
TTTGGACATCTTGTTTGGGCGACTGGATTTATGTTCTTAATTTCTGCGTGGATATTGG  
CAGGAATTAATTGAGACTTTAGCATGGGCTCATGAACGGACACCTTTGGCTAATTTAAT  
TCGCTGGAGAGATAAGCCCGTGGCTCTTCCATTGTGCAAGCAAGATTGGTGGGATTA  
GCTCACTTTTCCGTGGGTTATATATTCACCTTATGCCGCTTCTTGATTGCCTCAACATCAG  
GCAAGTTTGGTATGTCACATCCGTAAAAATTTATGATACATGTATAGGATGCACTCAAT  
GTGTACGAGCTTGTCCAACAGATGTATTAGAAATGATACCTTGGGATGGATGTAAAGCC  
AAGCAAATTGCTTCCGCGCCAAGAACCGAAGATTGTGTGGGTTGTAAGAGATGCGAAT  
CCGCCTGCCAACAGATTTTTTAAGTGTCCGCGTTTATTTAGGACCTGAGACAACCCGC  
AGCATGGCTCTATCTTATATGATGGATTTAACTTACCCTCTATTTTCGTGCCTTTAGTAG  
GCTTAGTATTTCCGGCAATTGCAATGGCTTCTTTATTTCTTTATGTGCAGAAAAATAAGA  
T T G T

C????????????????????????????????????????????????????????????????  
????????????????????????????????????????????????????????????????  
ATGACTGCAATTTTAGAGAGACGCGAAA  
GTACAAGCCTGTGGGGTCGCTTCTGCAACTGGATAACTAGCACCGAAAACCGTCTTTA  
CATCGGATGGTTCCGGTGTTTGATGATCCCTACCTTATTGACCGCAACTTCTGTATTTATT  
ATCGCCTTCATCGCTGCCCTCCAGTAGATATTGATGGTATTCGTGAGCCTGTTTCTGGT  
TCTTTACTTTACGGAAACAATATTATCTCTGGTGCCATTATTCCTACTTCTGCGGCGATCG  
GATTGCACTTTTACCCAATTTGGGAAGCTGCATCTGTTGATGAGTGGTTATACAATGGT  
GGTCCTTATGAGCTAATTGTTCTACACTTCTTACTTGGTGTAGCTTGTATATGGGTCGT  
GAGTGGGAACCTGAGTTTCCGTCTGGGTATGCGTCCTTGGATTGCTGTTGCATATTCAGC  
TCCTGTTGCAGCTGCTACTGCTGTTTTCTTGATTACCCTATTGGTCAAGGAAGTTTCTC  
TGATGGTATGCCTTTAGGAATATCTGGTACTTTCAACTTTATGATTGTATTCAGGCAGA  
GCATAACATCCTTATGCATCCATTTACATGTTAGGTGTAGCTGGTGTATTCCGGCGGTTT

CCTATTCAGTGCTATGCATGGTTCCTTGGTAACTCTAGTTTGATCAGGGAAACCACTG  
AAAACGAATCTGCTAATGAGGGTTACAGATTTGGTCAAGAGGAAGAACTTATAATATT  
GTGGCCGCTCATGGTTATTTTGGCCGATTAATCTTCCAATATGCTAGTTTAAACAACCTCT  
CGTTCCTTACACTTCTTCTTGGCTGCTTGGCCTGTAGTAGGGATTTGGTTCCTGCTTTA  
GGTATTAGTACTATGGCTTTCAATCTAAACGGATTCAATTTCAACCAATCTGTAGTTGAT  
AGCCAAGGTCGCGTTATTAATACTTGGGCTGATATCATCAACCGTGCTAATCTTGGTATG  
GAAGTAATGCACGAACGTAATGCTCACAACCTCCCTCTAGACCTAGCTGCTCTTGAAGT  
TCCATCTCTTAATGGAATGGGTTTGCCTTGGTATCGTGTTTCACTGCTGATTGAATGAT  
CCGGGTCGATTGCTTTCCGGTGCATATAATGCACACAGCTCTAGTTTCTGGTTGGGCTGG  
CTCGATGGCTTTATACGAATTAGCGGTTTTTGGATCCCTCTGATCCTGTTCTGGATCCAAT  
GTGGAGACAAGGTATGTTTCGTCATTCTTTCATGACTCGTTTAGGAATAACCAATTCGT  
GGGGTGGTTGGAGTATTTCA--GGAGGAACTGTAACGAATCCGGGTATTTGGAGTTATG  
AAGGCGTGGCAGGGGCGCATATTGTGTTTTCTGGCTTGTGTTTTCTTGGCAGCTATCTGG  
CATTGGGTATATTGGGACCTCGAAATATTCTGTGATGAGCGGACGGGAAAACCTTCTTT  
GGATTTGCCAAGATCTTTGGAATTCATTTATTTCTTGCAGGGGTGGCTTGGCTTTGGCTT  
TGGCGCATTTTCATGTAACCTGGTTTGTATGGTCTGGGATATGGGTGTCTGATCCTTATGG  
ACTAACTGGAAGTACAAGCTGTAAATCCGGCGTGGGGTGCAGAAGGTTTTGATCCT  
TTTGTCCGGGGGAATAGCTTCTCATCATATTGCTGCGGGTACATTGGGCATATTAGCG  
GGCCTATTCCATCTTAGTGTCCGTCCACCTCAACGTCTATACAAAGGATTACGTATGGGC  
AATATTGAACTGTACTTTCCAGTAGTATCGCTGCTGTTTTTTTTGCAGCTTTCGTAGTT  
GCCGGAACCTATGTGGTATGGGTCAGCAACTACCCCAATTGAATTGTTTGGGCCTACTCG  
TTATCAGTGGGATCAGGGATACTTTCAGCAAGAAATATATCGAAGAGTTAGTGATGGGT  
TAGCCGAAAATCTCAGTTTATCAGAAGCTTGGTCTAAAATCCCGAAAAATTAGCCTTT  
TATGATTATATTGGTAATAATCCGGCAAAGGGGGGATTATTCAGAGCAGGCTCAATGGA  
CAATGGGGATGGAATAGCTGTTGGATGGTTAGGACATCCTATCTTTAGAGATAAAGAAG  
GGCGGAACTTTTTGTACGCCGATGCCTACTTTTTTTGAAACATTTCCGGTTGTTTTGG  
TAGATGAAGAGGGAATTGTGAGAGCGGACGTTCCTTTTAGAAGAGCAGAATCCAAATA  
TAGTGTGAACAAGTAGGCGTAACGGTGGAGTTCTATGGTGGCGAACTTAATGGAGTA  
AGTTATTCTGATCCTGCTACTGTAAAAAATATGCGAGGCGTTCCCAATTAGGGGAAAT  
TTTTGAATTAGATCGGGCTACTTTGAAATCAGATGGTGTTTTTTCGCAGCAGTCCAAGGG  
GTTGGTTCACTTTTGGTTCATGCTACCTTTGCTTTGCTCTTCTTTTTTCGGACACATTTGGC  
ATGGGGCTAGAACCTTGTTTCGCAGATGTTTTTGGTGGTATTGATCCAGACTTAGATGCT  
CAAGTGGAATTTGGAGCAATCCAAAACGTGGAGATCCAACCTACAGGGAGACAGCCA  
GTCATGAAAATCTTATATTCCCTGAGGAGGTTCTACCACGTGGAAACGCTCTTTAATGG  
AACTTTTGTTTTAGCTGGTCGTGACCAAGAAACCACCGGTTTTGCTTGGTGGGCGGGG  
AATGCCAGACTTATCAATTTGTCGGGTAAACTACTTGGAGCTCACGTAGCCCATGCAGG  
ATTAATCGTATTCTGGGCCGGAGCAATGAACCTATTTGAAGTGGCCATTTTCGTACCAG  
AAAAACCCATGTATGAACAAGGGTTGATTTTACTTCCGCACTTAGCTACTCTAGGTTGG  
GGAGTAGGGCCCGGGGAGAAGTTCTAGATACTTTCCGTACTTTGTATCTGGAGTACT  
TCATCTAATTTCCCTCCGCAGTCTTAGGCTTCGGTGGCATTATCACGCGCTTCTGGGACC  
GGAGACTCTTGAAGAATCTTTCCATTCTTTGGTTATGTGTGGAAAGATAGAAATAAAA  
TGACTACAATTTTGGGTATTCACCTAATTTGTTAGGTATAGGTGCTTTTCTTCTAGTACT  
CAAAGCTCTTATTTTGGCGGTATATATGATACCTGGGCTCCTGGGGGAGGAGATGTAA  
GAAAAATTACCAATTTGACCCTTAGCCCCGGTGTATATTTGGTTATTTACTAAAATCCC

CTTTTGGGGGAGAGGGTTGGATTGTTAGTGTGGATGATTTAGAAGATATAATTGGGGGA  
CATGTATGGTTGGGTTTCATTTGTGTATTTGGCGGAATTTGGCATATCTTAACCAAACCC  
TTCGCATGGGCTCGCCGTGCATTTGTATGGTCTGGAGAAGCTTACTTGTCTTATAGTTTA  
GGCGCTTTATCTGTCTTTGGTTTTATCGCTTGTGTTTTGTCTGGTTCAATAATACAGCTT  
ATCCGAGTGAGTTTTATGGACCTACTGGGCCAGAAGCTTCTCAAGCTCAAGCATTACT  
TTTCTAGTTAGAGATCAGCGTCTTGGAGCTAATGTGGGATCTGCCCAAGGACCCACAG  
GTTTAGGTAAATATCTAATGCGTTCCCAACGGGAGAGGTTATTTTTGGAGGGGAAACT  
ATGCGTTTTTTGGGACCTTCGTGCTCCATGGTTAGAACCTCTAAGGGGCCCAACGGTTT  
GGACTTGAGTAGGTTGAAAAAGACATAACAACCTTGGCAAGAACGACGTTCCGGCAGA  
ATATATGACCCATGCTCCTTTAGGCTCTTTAAATTCTGTGGGTGGCGTAGCTACCGAGAT  
CAATGCAGTTAATTATGTTTTCTCCTAGAAGTTGGTTAGCGACTTCCCATTTTGTCTAGG  
ATTCTTCTTTTTGTGGGCCATTTGTGGCATGCAGGAAGAGCCCGGGCTGCTGCAGCA  
GGATTTGAAAAGGGAATCGATCGTGATTTGGAGCCTGTTCTTTACATGACCCCTCTTAA  
CATGACTATAGCCCTTGGTAGAGTTACTAAAGAAGAAAATGATTTATTTGATATTATGGA  
CGACTGGTTACGAAGGGACCGTTTTGTTTTGTAGGATGGTCTGGCCTATTGCTTTTTC  
CTTGTGCTTATTTTCGCTTTAGGAGGTTGGTTTACAGGGACAACTTTTGTAACCTTCTGGT  
ATACCCATGGATTGGCGAGTTCCTATTTGGAAGGTTGCAATTTCTTAACCGCAGCAGTT  
TCCACCCCTGCCAATAGTTTAGCACACTCTTTGTTGCTACTATGGGGCCCGGAAGCACA  
AGGGGATTTTACTCGTTGGTGTCAATTAGGTGGTCTGTGGACTTTTGTGCTCTCCATG  
GGGCTTTTGCACATAATAGGTTTCATGTTACGTCAATTTGAACTTGCTCGGTCTGTTCAAT  
TGCGGCCTTATAATGCAATTTCAATCTCTGGCCCAATCGCTGTTTTTGTTCGGTATTCT  
GATTTATCCACTGGGGCAATCCGGTTGGTTCTTTGCGCCGAGTTTTGGCGTAGCAGCGA  
TATTTGATTCATCCTCTTCTTCCAAGGATTTTATAATTGGACGTTGAACCCATTTTATAT  
GATGGGAGTTGCCGGAGTATTAGGCGGGCTCTGCTATGCGCTATTCATGGGGCAACCG  
TGAAAACACTCTATTTGAGGACGGTGATGGTGCAAATACCTTCCGCGCTTTTAAACCA  
ACTCAAGCTGAAGAACTTATTCATGGTCAACCGCTAATCGCTTTTGGTCCCAAATCTT  
TGGTGTGCTTTTTTCCAATAAACGTTGGTTACATTTCTTTATGCTATTTGTACCGGTCACC  
GGTTTATGGATGAGTGCTATTGGCGTAGTCGGCCTGGCTCTGAACCTACGTGCCTATGA  
CTTCGTTTTCCAGGAAATCCGTGCAGCGGAAGATCCTGAATTTGAGACTTTCTACACCA  
AAAATATTCTTTTAAACGAGGGTATTCGTGCGTGGATGGCAGCTCAGGATCAGCCTCAT  
GAAAATCTTATATCCCTGAGGAGGTTCTACCACGTGGAAACGCTCTTATGTCTGGAAG  
CACGGGAGAACGTTCTTTTGTGATATTATTACCAGTATTCGATACTGGGTTATTCATAG  
CATTACTATACTTCCCTATTCATTGCGGGTTGGTTATTTGTGAGTACGGGTTTAGCTTAT  
GACGTGTTTGGAAAGTCCCTCGGCCAAACGAGTATTTACAGAAAGCCGACAAGGAATC  
CGTTAATAACCGACCGTTTTGATTCTTTAGAACAACCTCGATGAATTTAGTAGATCCTTTA  
TGACCATAGATCGAACCTATCCTATTTTACAGTGCAGTGGCTGGCTGTTTACGGACTA  
GCTGTACCTACTGTTTTTTTCTTGGGATCAATATCAGCAATGCAGTTCATCCAACGAATG  
GCTACACAAACCGTTGAAGATAGTTCTAGACCTGGA---CCAAGACAAACTCGCGTAGG  
TAATTTATTGAAACCTTGAATTCGGAATATGGGAAAGTAGCTCCGGGTTGGGGGACTA  
CTCCTTTTATGGGGGTCGCAATGGCTTTATTCGCGGTATTCCTATCTATTATTTAGAAAT  
TTATAATCTTCCGTTTTTACTGGACGGAATTTAATGAATATGCTTACTCTCAAACCTTTTT  
GTTTATACAGTAGTGATATTCTTTGTTTCCCTCTTTATCTTTGGATTCTTATCTAATGATCC  
AGGACGTAATCCTGGGCGTGACGAGATGGCCGATACTACTGGAAGAATTCCTCTTTGG  
CTGATAGGTAATGTAACCGGATTGCTGTGATTGGTTAATAGGTGTTTTCTTTTACGGT

TCATATTCTGGATTGGGTTTCATCTCTAATGCCTAATATACTTAGTTTAACTGTATTTGTTT  
TAATTCTGTTATTTATCCGACTAGTTTTTTCTTCGCCAAATTGCCCGAAGCTTATGCCATT  
TTCAATCCAATCGTGGATTTTATGCCTGTCATACCTGTACTCTTTTTTCTATTAGCCTTTG  
TTTGGCAAGCTGCTGTAAGTTTTTCGAATGACACAATCAAACCCGAATGAACAAAATGT  
TGAATTGAATCGTACCAGTCTATACTGGGGTTTATTACTCATTTTTGTACTTGCTGTTTTA  
TTTTCCAATTACTTCTTCAATATGGAAGTCAATATTCTCGCATTTATTGCTACTGCATTGT  
TCATTCTAGTTTCTACTGCCTTTTTACTTATTATTTATGTAAAAACAGTCAGCCAAAATGA  
TATGGAAACAGCAACTTTAGTCGCCATCTCCATATCTGGTTTACTTGTAAGCTTTACTGG  
GTATGCCTTATATACCGCGTTTGGGCAACCCTCTCAACAATTAAGAGATCCATTCGAAG  
AACACGGGGACATGGAAGCATTGGTTTATACGTTCCTTTTAGTTTTCGACTTTAGGGATA  
ATTTTTTTCGCTATCTTCTCCGAGAACCACCTAAGGTTCCGACTAAAAAAGTGAAAAT  
GACTATTGCTTTCCAATTAGCTGTTTTTGCATTAATTGTGACTTCCTCAGTCTTAGTCATT  
AGTGTACCCCTTGATTTGCTTCTCCTGATGGTTGGTCAAACAATAAAAACGTTGTATTT  
TCCGGTACATCATTATGGATTGGACTGGTCTTTCTGGTAGCTATTCTAAATTCTCTCATT  
CT-----ATGTCACCACAAACAGAACTAAAGCAAGTGTTGGATTTAAAGCTG  
GTGTTAAGGATTATAAATTGACTTACTACACCCCGGAGTACGAAACCAAGGACACTGAT  
ATCTTGGCAGCATTCCGAGTAACCTCAGCCGGGGTTCCGCCCGAAGAAGCAGGGG  
CTGCAGTAGCTGCCGAATCTTCTACTGGTACATGGACAACGTTTTGGACTGATGGACTT  
ACCAGTCTTGATCGTTACAAAGGCCGATGCTATCACATCGAGCCCGTTGTTGGGGAGG  
ATAATCAATATATCGCTTATGTAGCTTATCCATTAGACCTATTTGAAGAGGGTCTGTAC  
TAACATGTTTACTTCCATTGTGGGTAACGTATTTGGTTTTCAAAGCCCTACGCGCTCTACG  
TCTGGAGGATCTGCGAATTCCCCCTACTTATTCAAAAACCTTTCCAAGGTCCGCCTCATG  
GTATCCAAGTTGAAAGGGATAAGTTGAACAAATACGGTTCGTCCTTTATTGGGATGTACT  
ATTAAACCAAATTTGGGATTATCTGCAAAAAATTATGGTAGAGCATGTTATGAGTGTCTA  
CGCGGTGGACTTGATTTTACCAAAGATGATGAAAACGTAAACTCACAACCATTTATGCG  
TTGGAGGGACCGTTTTGTCTTTTGTGCCGAAGCTATTTATAAATCACAGGCCGAAACCG  
GTGAAATTAAGGGGCATTACTTGAATGCGACTGCAGGTACATGCGAAGAAATGATTAA  
AAGAGCTGTATTTGCGAGGGAATTAGGGGTTCTATTGTAATGCATGACTACTTAACCG  
GGGGTTACCGCAAATACTAGTTTGGCTCATTATTGCCGCGACAACGGCCTACTTCTT  
CACATTCACCGAGCAATGCATGCAGTTATTGATAGACAGAAAAATCATGGTATGCATTT  
CCGTGTATTAGCTAAAGCATTGCGTATGTCTGGGGGAGATCATATCCACGCTGGTACAGT  
AGTAGGTAAGTTAGAAGGGGAACGCGAAATGACTTTAGGTTTTGTTGATTTATTGCGCG  
ATGATTTTATTGAAAAAGATCGTGCTCGCGGTATCTTTTCACTCAGGACTGGGTATCCA  
TGCCAGGTGTTATACCGGTGGCTTCAGGGGGTATTCATGTTTGGCATATGCCAGCTCTG  
ACCGAAATCTTTGGAGATGATTCTGTATTGCAATTTGGTGGAGGAACCTTTAGGACATCC  
TTGGGGTAATGCACCTGGTGCAGCAGCTAATCGGGTGGCTTTAGAAGCCTGTGTACAA  
GCTCGTAACGAAGGGCGCGATCTTGCTCGTGAAGGTAATGAAATTATCCGATCAGCTTG  
CAAATGGAGTCCTGAACTAGCCGCGAGCTTGTGAAATATGGAAAGCGATCAAATTCGAG  
TTCGAGCCGGTAGATAAACTAGATAGCACGGCGAAACATTTATACAAAACACCTATCCC  
GAGCACACGCAAGGGAACCATAGATAGGCAAGTGAAATCCAATCCACGAAATAATTTG  
ATCCATGGACGGCACCGTTGTGGTAAAGGTCGTAATTCAGAGGAATCATTACCGCAA  
GGCATAGAGGGGGAGGTCATAAGCGCCTATACCGTAAAATCGATTTTCGACGGAATCA  
AAAAGACATATCTGGTAGAATCGTAACCATAGAATACGACCCTAATCGAAATGCGTACA  
TTTGTCTCATACACTATGGGGATGGTGAGAAGGGATATATTTTACATCCCAGAGGGGCTA

TAATTGGAGATACTATTGTTTCTGGTACAAAAGTTCCTATATCAATGGGAAATGCCCTAC  
CTTTGACCGATATGCCCTTAGGCACGGCCATACATAACATAGAAATCACACGTGGAAGG  
GGTGGGCAATTAGCTAGAGCAGCAGGTGCTGTAGCGAAACTGATTGCAAAAAGAAGGT  
AAATCGGCCACTTTAAGATTACCATCTGGGGAGGTCCGTTTGGTATCCCAAAACTGCTT  
AGCAACAGTCGGACAAGTGGGTAATGTTGGGGTGAACCAAAAAAGTTTGGGTAGAGC  
CGGGTCTAAGTGTGGCTAGGTAAACGCCCGTAGTAAGAGGGGTAGTTATGAACCCT  
GTGGACCACCCCATGGGGGCGGTGAAGGGAAAGCCCCATTGGTAGAAAAAAACCC  
ACAACCCTTGGGGTTATCCTGCGCTTGAAGAAGAAGTGGAAAAAGGAAAAAATATA  
GTGATAGTTTTATTCTTCGTCGCCGTAAG---ATGATTCAACCTCAGACCCTTTTAAATGTA  
GCAGATAACAGTGGAGCTCGAAAATTGATGTGTATTTCGAGTCATAGGAGCTGCTAGTAA  
TCAGCGATATGCTCGTATTGGTGATGTTATTGTTGCTGTAATCAAAGACGCAGTGCCCC  
AAATGCCTCTAGAAAGATCCGAAGTAATTCGAGCTGTAATTGTACGTACATGTAAAGAG  
TTCAAATGCGAAGACGGTATAATAACGCTATGACGACAATGCAGCGGTTATCATTGAT  
CAAAAAGGAAATCCAAAAGGAAGTTCGCGTTTTTGGCGCGATCGCCGAGGAATTGAGA  
GAATTGAATTTTACTAAAATAGTTTCATTAGCTCCTGAAGTATTAATGCTTAGTCCCAA  
AGAACCAGATTTTCGTAAACAACATAGAGGAAGAATGAAGGGAAAATCCTACCGAGGC  
AATTGTATTTGTTTTGGTAGATATGCTCTTCAAGCACTTGAACCCACTTGGATTACGGCG  
AGGCAGATAGAAGCAGGACGAAGAGCAATGACACGATATGCACGTCTGGTGGAAAA  
ATCTGGGTACGTATATTTCCCGACAAACCGGTTACAATAAGACCGACCGAAACACGTAT  
GGGTTTCGGGAAAGGGATCCCCGAATATTGGGTAGCCGTTGTTAAACCAGGTCGAATA  
CTTTATGAAATGGGCGGAGTATCCGAAACTGTAGCTAGACGAGCTATTTCCATAGCTGC  
CAGCAAAATGCCCATAACGAAGTCAATTTCTTCGGTTAGAAATGACCAGAGTTCCGCGA  
GGATATATAGCTCGGAGACGACGGGCAAAAATGCGTTCATTTGCCTCAAACCTTAGAG  
GGGCTCATTTAAGACTTAATCGAATGATTACTCAACAGGTAAGAAGAGCGTTTGTTC  
TCTCATCGAGATAGAGTCAGGCAAAAGAGGGATTTTCGGCGTTTGTGGATCAGTCGGA  
TAAACGCAGCAACGCGGATACAT-----GTATTCGATAATTATAGTAAATTAATACACAATC  
TTTACAAGAAAGAATTGATTCTTAATCGTAAAATCCTTGCACAAGTAGCTGTATTAAATT  
CAAATAATCTTTACACGATTTCCAATAAAATAAAGATTATCAAT-----AG  
GATAAAGCGGGTTTTCAAAGCACAAAACGCATCCACATGTCCGTTTTCAAAGTACAA  
AGAGTTCTGGATGAGATTCTGTTGGCGTTACTACGAAGAAACTGTTATGATATTGAACCT  
CATGCCTTATCGAGCATCTTATCCATCTTAAAGTTGGTTTTATTTCGGCAGCAGCAAATGC  
TACTCATTATAGGGATTTTCGACAAAGCAAATTTATTCACTAAAGCCGAAGTCAGTA  
GGAGTACTATTATGAATAAATTCAGACCTCGGGCTCGAGGACGTAGTTCTCCATAAAA  
AAAACCATGTGTCATATAACAATTGACTAAAT--GTAAAGAAATCG-----AT  
GGATGGAATCAAATACGCAGTATTTACAGAAAAAAGTCTTCGTTTATTGGGAAAGAAT--  
-CAATATACTTTAATGTCTGAATCGGGATTCCTAAGACAGAAATAAAGCATTGGGTCTGA  
ACTCTTCTTTGGTGTAAAGGTAGTAGCTGTGAATAGCCATCGACTACCCGAAAGGGTA  
GAAGAATGGGCCCTATTCTAGGACATAACAATGCATTACAGACGTATGATCATTACCCTTC  
AACCGGGTTATTCTATTCCACTTCTAGATAGAGAAAAAACATGGCAGTTCCAAAAAA  
ACGTACTTCGATGTCAAAAAGCGTATTCGTAAAAATCTTTGGAAGAAAAAGACTTATT  
TTTCCATAGTACAATCTTATTCTTTAGCAAAATCATTTTCTGGCGTCAAACCAAAGGGTT  
TTTCTCGGCAACAAACAATAATATGGCCAAGGGGAAAGATGTTAGAATCAGAGTTATT  
TTGCAATGTGTGAGTTGTGTTTCGAAAA-----GGG-----GAGGAGTCGGCAGGGATTCTA  
GATATAGTACTCAAAGAATCGCCACAATACCCCGACAATTAGAATTAAGAAAATTT

TGTCGTTATTGTCGTAAGCATAACGATTCATGCCGAAATAAAGAAAATGAAAATAAGAGC  
TTCTGTTTCGTAATAATTTGTACAAAATGTCGACTGATTCGTAGGCGTGGACGAATTAGAG  
TCATTTGTTCCAATCCGAAGCATAAACAAAGACAGGGGATGGTTCGAGAGGAGGTAGC  
AGGATCCACTCAAACACTACAGTGGAAGTGTGTTGAATCAAGAGTAGATAGTAAGCGT  
CTTTATTATGGTCGTTTTATTCTGTCCCCGCTTAGAAAAGGTCAAGCGGATACCGTTGGT  
ATTGCCTTGCGAAGAGCTTTACTTGGAGAAACAGAAGGAACATGTATCACACATGCAA  
AATTTGGG-----AGCGTGCCGCACGAATATTCTACAATAGCAGGTATTGAAGAATCGGTA  
CAAGAAATTTTACTAAATTTGAAAGAAATTTGATTGAGAAGTAATCTCTATGGAGTTAG  
AACCGCATCAATTTGCGTCAAAGGTCCTAGATACATAACTGCCCAAGATATTATCTTACC  
GCCTTCCGTAGAAATCGTTGATACGGCACAACCTATAGCTAACTTGACAGAACCCACG  
GATTTCCGTATTGAGTTACGGATCAAGAGAGATCGCGGATATCACACGGAAGTCAGAA  
AGAACACTCAAGATGGAAGTTAT-----CCTATAGATGCTGTATCCATGCCTGTTCGAAAT  
GTGAATTATAGTATTTTTGCTTGTGGGAATGGAAATGCAAAATATGAGATACTTTTTCTA  
GAAATATGGACCAATGGAAGTTTAACCCCTAAGGAAGCGCTTTATGAGGCTTCTCGTAA  
TTTGATTGATTATTTCTTCTTTCTTTCACACGGAGGAAGAG-----GGTACTCGTTTCCA  
AGAAAATAAA---AACAGGTTTACTTCCCCCTTTTAAGCTTTCAAAAAAGATTAAC---A  
ATCTAAAGAAAAACAAAAA---AGAATTCCATTGAATTGTATTTTTATTGATCAATTAGA  
ACTGCCTTCTAGAACGTATAATTGTCTCAAAGGGCCAATATCCATACACTATTGGACCT  
TTTGAGTAAGACGGAAGAAGATCTGATGAGAATTGACAGTTTTTCGTATGCAAGATGGA  
AAACAGATATGGGACACTCTAGAGAAGCAT-----CTCCCAATGGATTTACCTAAGAATAA  
GATGCTCCGGAATGGAAT---GAGGGAATGTCCACAATACCCGGATTTAGTCAGATCCA  
ATTCGAGGGATTTTGTAGGTTCAATTAATCAAGGCTTGGCAGAAGAACTTGAGAAGTTTC  
CAACAATTAAGATCCAGATCACGAAATTTCAATTTCAATTTTTCGAAAGGATATCAAT  
TGCTAGAACCTTCGATAAAAAGAAAGGGATGCTGTGTATGAATCACTCACCTATTCTTCC  
GAATTATACGTATCCGCGCGATTAATTTTTGGTTTC-----GATGTGCAAAGCAAACCATT  
TCTATTGGAAACATTCCTATAATGAATTCCTTAGGAACCTTTATAATAAATGGAATATACC  
GAATTGTGATCAATCAATATTGCTAAGTCCTGGTATTTACTACCGCTCGGAATTAGACC  
ATAAAGGAATTTCTATCTACACCGGGACTATAATATCAGATTGGGGAGGAAGATCGGAA  
TTAGCAATTGATAAAAAGAAAGGATATGGGCTCGCGTGAGTAGAAAACAAAAGATAT  
CTATTCTAGTTCTATCATCAGCTATGGGTTCAAATCTAAAAGAAATTCTAGATAATGTTTC  
CTACCCTGAAATTTTCTTGTCTTTCCCTAATGCTAAGGAGAAGAAGAGGATTGAGTCAA  
AAGAAAAGCTATTTTGGAGTTTATCAACAATTTGCTTGTGTAGGTGGGGACCTGGTA  
TTTTTCGGAATCCTTATGTGAGGAATTACAAAAGAAATTTTTTCAACAAAAATGTGAATT  
AGGAAGGATTGGTTCGACGAAATATGAATCGAAGACTGAATCTTGATATACCTCAGAAC  
AGCACCTTCTTGTACCGCGAGATGTATTGGCCGCTACGGATCATTTGATTGGAATGAA  
ATTTGAAACGGGTATACTTGACGATGACGATATGAATCACTTGAAAATAAACGTATTC  
GTTCCGTTGCGGATCTGTTACAAGATCAATTCGGACTGGCTCTTGGTTCGTTTACAACAT  
GCGGTTCAAAAAACTATCCGTAGAGTATTCATACGTCAATCAAAA-----CCGACTCCACA  
AACTTTGGTAACTCCAACCTCAACCTCGATTTTATTAATACTACTTACGAGACCTTCTT  
TGGTACATATCCCTTATCTCAAGTTTTTTGATCAAACCAATCCATTGACACAAACGGTTCA  
TGGGCGAAAAGTGAGTTGTTTGGGTCCTGGAGGATTGACGGGGAGAAGTCAAGTTT  
TCGGAGCCGAGATATCCATCCGAGTCACTATGGGCGTATTTGTCCAATTGACACGTCGG  
AAGGAATCAACGTTGGACTTACTGGATCTTTAGCTATTCATGCGAGAATTGATCATTGG  
TGGGGATCCGTAGAGAGTCCTTTTTATGAAATATCTGAGAAAGCAAAGAAAAAAAAG

AG-----AGACAGGTGGTTTATTTATCACCAAATAGAGATGAGTATTATATGATAGCAGCA  
GGAAATCTTTGTCCTTGAATCGGGGTATTCAGGAAGAACAGGTTGTTCCAGCTAGATA  
CCGTCAAGAATTCCTGACTATTGCATGGGAACAGATTCATGTTAGAAGTATTTTTCCCTTT  
CCAATATTTTTCTATTGGGGGTTCTCTCATTCTTTTATTGAGCATAATGATGCGAATCGA  
GCTTTAATGAGTTCTAATATGCAGCGCCAAGCAGTTCGCTTTCTCGGTCCGAGAAGTG  
CATTGTTGGAAGTGGATTGGAACGCCAAACAGCTCTAGATTCGAGGGTTTCTGTTATAG  
CCGAACGCGAGGGAAAGATCATTCTACTAATAGTCACAAGATCCTTTTATCAAGTAGT  
GGGAAGACTATAAGTATTCTTTAGTTACCCATCGGCGCTCTAACAAAAATACTTGTATG  
CACCAAAAACCTCGGGTTCCGCGGGGTAAATCCATTA AAAAAGGACAAATTTTAGCGG  
AGGGGGCTGCTACGGTTGGTGGGGAAGTTCCTTTAGGAAAAACGTATTAGTAGCTTAT  
ATGCCATGGGAAGGTTACAATTTGAAGACGCAGTATTAATTAGCGAACGTTTGGTATA  
TGAGGATATTTATACTTCTTTTCACATCCGAAAATATGAAATTCAGACGGATACAACAAG  
CCAAGGCTCCGCTGAAAAATCACTAAAGAAATACCACATCTAGAAGAACATTTACTC  
CGCAATTTGGACAGAAATGGAGTTGTGAAGTTGGGGTCTGGGTAGAAACAGGGGATA  
TTTTAGTAGGTAAATTAACGCCTCAGATAGCGAGCGAA---TCGTCCTATATCGCGGAAGC  
TGGATTATTACGGGCCATATTTGGTCTTGAGGTATCCACTTCAAAGAAACTTCTCTCA  
AACTACCGATAGGTGGAAGAGGACGCGTTATCGATGTGAAATGGATCCAGAGG-----  
-----GATCCATAATGGTTCGTGTATATATTTTACAAAAACGCGAAATCAAAGTTGGG  
GATAAAGTAGCCGGAAGACACGGGAATAAGGGGATCATTCCAAAATTTGCCTAGGC  
AAGATATGCCCTATTTGCAAGATGGAACGCCTGTTGATATGGTTTTCAATCCCTTAGGAG  
TACCCTCCCGAATGAATGTGGGACAAATATTTGAAAGCTCGCTCGGATTAGCAGGGGAT  
CTGCTAAAGAAACATTATAGAATAGCACCTTTGATGAGAGATATGAGCAAGAGGCTTC  
AAGAAAACCTTGTGTTTTTCAGAATTATATGAAGCCAGTAAACAACAAAAATCCGTGG  
GTATTTGAACCCGAGTACCCGGGAAAAAGCAGAATATTTGATGGAAGAACAGGAGACC  
CCTTCGAACAGCCTGTTCTAATAGGGAAGTCCTATATCTTAAATTAATTCATCAAGTTG  
ATGAGAAAATCCACGGACGCTCTACTGGGCCCTATTCACTTGTTACACAACAACCCGTT  
AGAGGAAGAGCCAAGCAAGGGGGACAACGAATAGGAGAAATGGAAGTTTGGGCTTT  
AGAAGGATTTGGTGTGCTCATATTTTACAAGAGATACTTACTTATAAATCTGATCATCTT  
ATAGCTCGCCAAGAAATACTTAACGCTACGATCTGGGGAAAACGAGTACCTAATCACG  
AGGATCCTCCAGAATCTTTTCGAGTGCTTGTTCGAGA ACTACGATCTTTGGCTCTAGAA  
CTGAACCATTTCTTGTATCTCAGAAGAACTTCCAGGTTAATAGGGAAGAAGTT-----  
-----ATGATTGACCAATATAAACATCAACA ACTTCAAATTGGACTCGTTTCCCCTCAA  
CAAATAAAGGCTTGGGCTAACAAAACACTACCTAATGGGGAAGTCGTTGGCGAAGTCA  
CAAGGCCCTCCACTTTTCATTATAAAACCGATAAACCAGAAAAAGATGGATTGTTTTGC  
GAAAGAATCTTTGGACCCATAAAAAGCAGAATTTGTGCTTGTGGAAATTCTCGAGCGA  
GCGGAGCTGAAAACGAAGACGAAAGATTTTGCCAAAATGCGGAGTAGAATTTGTTG  
ATTCTCGGATACGAAGATATCAAATGGGATACATCAA ACTCGCATGTCCCGTACTCAT  
GTGTGGTATTTAAAGGCTTCCCTAGTTATATCGCGAATCTTTTAGATAAACCCCTTAA  
AAATTGGAGGGCCTAGTATATGGCGAT-----TTCTCTTTTGCTAGGCC---AGTGCTAAAA  
AACCAACTTTCTTACGATTACGAGGTTTATTTCGAGGATGAAATTCATCCTGTAACCATA  
GCATTTCCCCTTTTTTTCTACCCAGGCTTTACAACATTTCGAAATCGGGAAATTGCG  
ACAGGAGCAGGTGCTATTAGAGAACAATTAGCAGATTTGGATTGCGAATTATTTAGA  
GAATTCCTCGGTGCAATGGAAGGAATTAGAAGACGAG---GGGTATAGTGGAGATGAAT  
GGGAAGATAGAAAAAGACGAATAAGAAAAGTTTTTTTATTAGACGCATGCAATTGGC



GAAACATTTTATTCAAACAAATGTAGAACCAGAATGGATGGTTTTGTGCTTATTACCAG  
TTCTTCCTCCCGAATTAAGACCCATTGTTTATAGGTCTGGGGATAAAGTAGTGACTIONTCG  
GATATTAATGAACTTTATAAGAGAGTTATCCGTCGGAACAACAATCTTGCCTATCTATTA  
AAAAGAAGTGAATTAGCGCCAGCAGATTTAGTAATGTGCCAGGAAAAATTGGTACAAG  
AAGCCGTGGATACACTTCTTGATAGTGGGTCCCGCGGGCAACCAACGAGGGATGGTCA  
CAATAAAGTATACAAATCACTTTCAGATGTAATTGAAGGTAAAGAGGGGAGGTTTTCGC  
GAAACTCTGCTTGGGAAACGGGTTCGATTACTCGGGGCGTTCTGTCATTGTTGTGGGTC  
CTTCACTTTCATTACATCAATGTGGGTTACCTCTAGAGATAGCAATAAAGCTTTTTTCAGC  
TATTTGTAATTCGCGATTTAATCACGAAACGTGCTACTTCTAATGTTAGGATTGCTAAAA  
GGAAAATTTGGGAAAAGGAACCCATTGTATGGGAAATACTTCAAGAAGTTATGAGGGG  
ACATCCTGTACTGTTGAATAGAGCACCTACCCTGCATAGATTAGGCATACAGGCTTTCC  
AACCCACTTTAGTAGAGGGGCGTACTATTTGTTTACACCCATTAGTGTGTAAAGGTTTC  
AATGCAGACTTTGATGGGGATCAAATGGCTGTTTCATCTACCTTTATCCTTGGAAAGCTCA  
GGCGGAAGCTCGTTTACTTATGTTTTCTCATATGAATCTCCTATCTCCCGCTATTGGGGAT  
CCTATTTGCGTACCAACCCAAGACATGCTTATCGGACTTTATGTATTAACGATTGGAAAC  
CGTCGAGGTATTTGTGCAAATAGATATAATAGTTGCGGAAAC-----TATCCAAACC  
AAAAAGTAAATTACAATAAT--AAGTATACGAAAGATAAAGAATCTCTTTTTTCTAGTTC  
CTATGATGCACTGGGAGCTTATAGACAGAAACAAATCTGTTTAGACAGTCCCTTGTGGC  
TCCGATGGAAACTAGATCAACGC---GTCATTGGGTTA-----AGAGAAGTTCCGATTGAAG  
TTCAATATGAATCTTTGGGGACTTATCGTGAGATTTATGCCACTATCTAGTAGTGGGAA  
ATAGAAAAAAGGAAATCCGTTCTATATACATTTCGCACCACTCTTGGTCATATTTCTTTTT  
ATAGAGAAATAGAGGAAGCCATACAAGGATTTAGTTCAGGCCTATTCATACACTATC-----  
-----ATGGCGGAACGGGCCAATCTGGTCTTTCAGAATAAAGAGATAGA  
TGGAACCTGCTATGAAACGACTTATTAGCAGATTAATAGATCATTTCGGAATGGGATATAC  
ATCCCATATACTGGATCAAATAAAAACGCTGGGCTTCCATCAAGCCACTACTACATCGAT  
TTCATTAGGAATCGAGGATCTTTTAAACAATACCCTCTAAGGGATGGTTAGTCCAAGATG  
CGAACAACAGAGTTTTCTTTTGGAAAAACACTATTATTATGGGGCTGTACACGCGGTA  
GAAAAATTACGCCAATCCGTTGAAATCTGGTATGCTACAAGTGAATATTTGAAACACGA  
AATGAATTCGAATTTTCGGATAACAGATCCTTCTAATCCAGTCTATCTAATGTCTTTTTCA  
GGAGCTAGAGGAAATGCATCGCAGGTACACCAATTAGTAGGTATGCGAGGATTAATGG  
CGGATCCTCAAGGACAAATGATTGATTTACCTATTCAAAGCAATTTACGCGAGGGACTT  
TCTTTGACAGAATATATAATTTCTGCTACGGAGCCCGCAAAGGGGTTGTAGATACTGC  
TGACGAACGGCGGATGCTGGATATCTTACACGTAGACTTGTGTAAGTAGTTCAACATA  
TTATTGTGCGTAGAAGAGATTGTGGTACTATCCAAGCTATTTCTGTGAGTCTCAAATG  
GGATGACGGAA-----AAACTTTTTGTACAAACATTAATTGGTCGTGTATTAGCAAACGAT  
ATATATATCGGTTACGGTGCATTGCCACTCGAAATCAAGATATTGGAATTGGGTTAGTC  
AATCGATTCAATAACCACCTTTCGAGCACAGCCATTTTCGAGCACAACCAATATATATTAGA  
ACCCCTTTACTTGGCGGAGCACATCTTGGATCTGTCAATTATGTTATGGTCGGAGTTCC  
ACTCATGGCGATCTGGTTCGAATTGGGGGAAGCTGTAGGTGTTATTGCGGGTCAATCTAT  
TGGGGAGCCAGGGACTCAACTAACATTAAGAACTTTTCATACTGGTGGGGTATTCAACA  
GGGGTACTGCCGACCTTGTACGATCCCCTTCAAATGGAAAAATCCAATTCAATGGGG  
ATTTGGTTCACCCACACGTACCCGTCATGGGCAGCCTGCTTTTCTATGTTATATAGACT  
TGCATATAACTATTTCAGAGTCAGGATATTCTACATAGTGTGACTATTCTTCAAAAAGCT  
TGATTCTAGTGCAAAATGATCAATATGTAGAATCCGAACAAGTAATTGCGGAGATTTCGT

GCCGGAACGTCCGCTTTG-----TTTAAAGAAAAGGTACAAAAACATATTTATTCCGAATC  
AGATGGGGAA---ATGCACTGGAGTACCGATGTTTATCATGCGCCCGAATATCAATATGGT  
AATCTTCGTCGATTACCAAAAACAAGCCATTTATGGATATTGTGAGTAAGTATGTGCAG  
A-----TCTAGTATAGCTTCTTTTTTCGCTCCACAAGGATCAAGATCAAATGAATACTTATTC  
CTTTTCTGTTGACGGAAGG-----TATATCTTTGGCCTCTCG-----ATGGCTGAT---GATGAG  
GTAAGACATAGACTGTTGGATACTTTTGGT-----GATAGGGAAATTCCTGATTATTCA  
---ACGCCGGATCGAATCATGTCCAATGGTCATTGGAATTTTGTCTATCCTTCT--ATTCTT  
CAAAATAAT-----TTTGATTTGTTAGCGAAAAAGCGAAGAAATAGGTTTCGCCATTCCATT  
ACAGTATCATCAAGAACAAGAGAAAGAACCAATATCCTGTTTTGGGATTTTCGATTGAAA  
TACCCTTTATG-----GGTGTTTTACGTAGAAATACTATAAGTTGCTTATTTTGACGACCCAC  
GATACAAAAAAGAT-----GGAATTGTAAATTTAGAAACCCGGAGGAAGATTCGGTCTTA  
AAA-----AAGGGGGTTTTGATTGAGCATCGAGGA---ACAAAAGAATTTAGTCTAAAATA  
C---GAAGTAGATCGGTTTTTTTTTCATTCTCCAAGAACTGCATATCTTGCCGAGATCCTCA  
TCCCTAAAGGTACTTGACAATAGTATTATTGGAGTGGATACACAACCTCACAAAAAATAC  
AAGAAGTCGGCTGGGTGGATTGGTTCGAGTGAAGAGAAAAAAAAGCCATACGGAACCT  
AAAAATCTTTTCTGGAGATATTCATTTTCTGAAGAGGCGGATAAGATATTAGGT-----GG  
CAGTTTGATACCACTAGAAAGAGAAAAAAA-----GATTCTGAAGGAA---TCAAAA---AA  
AAGGGAAAATTGGGTCTATGTTTCAGTGGAAAAAATTTCTCAAGAGCAAGGAAAAG-----  
-TATTTTGTTTTGGTTCGACCTGCAGTCGCGTATGAAATGAACGAAGGGAGAAATTTAG  
CAACACTTTTCCCACAGGATCTCTTCGAGGAAGAGGGTAATCTCCAACCTTCGACTTGT  
CAATTTTATTTCTCATGAAAATAGCAAGTTAACTCAAAGAATTTATCATAACGAAT---CAAT  
TCGTTTCAACTTGCTTAGTATTGAATTGGGAACAAGAAGAAAAAGAGGAGGCTCGT----  
-----GCTTCCCTTGTTGAGATAAGAGCAAATGGTCTGATTTCGCGATTTCCCTAAG  
AATTGGGTAAATCAAATCCACTATTTTCGTATACACGAAAAAGGTATGATAGCAGAAGTG  
CAGGACTGATTCTCCAT-----TTAGATCGCACCAATACCAATTCCTTTTATTCCAAGGC  
GAAGATTCAATCA-----CTTAGCCAACATCAAGAAGCTATTGGT-----ACCTT  
GTTGAATCGAAATAA-----GAATACCAATCTTTGATGGTTTTGTGCGGCATCCAACCTGT  
TCTCGAATTGGT-----TTTTTTAAGAATTCAAAAAATCCC-----AATGGGGTAAAAGAAT  
CGAATCCTAGAATTCCTATTCCAATTTTTTCGGGACTCTTAGGTACTATTGCACCT---AGT  
ATATCGAATTTTCTTCATCT---TACTATTTACTAACG-----TATAATCAGATCCTGTAA  
AA---AAGCATTGCTCCTTGAC-----AATTTGAAACAAAACCTCAAAGTACTTCAAGG  
ACTTAAACACTCTTTAATAAATGAAAATCAAAGG-----ACTTCAAATTTTCGAT-----AGTA  
ACATCATGTTGGATCCATTCCAGTTAAATTGGCACTTTCTCCCTCATGATTCTTGGGAAG  
AGACATCAGCAAAAATTCAC---CTTGACAATTTATTTGCGAAAATGTATGTCTATTTAA  
ATCGCACATA-----AAAAATCAGGTCAAATTTTCATTGTAAT---ATAGATTCCTTT  
GTTATAAGAGCAGCTAAGCCTTATTTGGCCACTACAGGAGCAACTGTTTCATGGTCATTA  
TGGAGAAATCCTTTACAAAGGGGATAGGTTAGTTACGTTTATATACGAAAAGCGAGAT  
CTAGTGACATAACGCAAGGTCTTCCAAAAGTAGAACAAATCTTCGAAGCGCGTTCAAT  
TGATTCATATCGCCGAATCTCGAAAGGAGAATTGAGGATTGGAATGAGCGTATACCAA  
GAATTCCTGGGGGTCTTGGGGATTCTTGATTGGAGCTGAGTTAACCATAGCCCAAAGT  
CGTATCTCTTTGGTTAATAAGATCCAAAAGGTTTATCGATCCCAAGGGGTACAGATCCAT  
AATAGACATATAGAGATTATTATACGCCAAGTAACATCAAAGTGCGGGTTTCCGAA-----  
---GATGGAATGTCTAATGTTTTTTTACCTGGGGAATTAATTGGACTATTGCGAGCAGAG  
CGAGCAGGGCGGGCTTTGGATGAATCGATCTATTATCGGGCAATCTTATTGGGAATAAC

AAGGGTTTCCCTGAATACCCAAAGTTTCATATCTGAAGCAAGTTTTCAAGAACTGCTC  
GAGTTTTAGCAAAAAGCTGCCTTACGAGGTCGTATTGATTGGTTGAAAGGCCTGAAAGA  
AAACGTAGTTCTGGGGGGGATTATACCTGTTGGTACCGGATTCCAAAAATTTGTGCACC  
GTTACCCA-----CAAACAAGAACCTTTAT-----TTCGAAATTCAAAAAAAAAACTATTT  
GCGTCGGAAATG-----AGAGATATTTTGTCTCCATACAGAATTAGTTTCTTCTGATTCT  
GACGTAACAAAC-----TCAGAATCACCATTACCCCATTTATA-----ATGA  
CAAGAAGATATTGGAACATCAATTTGAAAGAGATGATAGAAGCGGGAGTTCATTTTGG  
TCATGGTATTAAGAAATGGAATCCTAAAATGGCCCCTTACATCTCGGCAAAGCGTAAAG  
GTACTCATATTACAAATCTCGCTAGAACCACCCGTTTTTTATCAGAAGCTTGTGATTTAG  
TTTTTGATGCAGCAAGTCAGGGAAAAGCTTCTTAATTGTTGGTACCAAAAAAGAGC  
AGCGGATTTAGTAGCATCAGCTGCAATAAGGGCTCGTTGTCATTATGTTAATAAAAAGT  
GGTTCAGTGGTATGTTAACGAATTGGTCGATTACTAAAAGTAGACTTTCTCAATTTAGA  
GACTTAAGAGCAGAAGAAAAGATGGAAAATTCACCATCTCCAAAAAGAGATGTG  
GCAATCTTGAAGAGAAAATTATCTACCTTGCAAAGATATCTCGGCGGGATCAAATATAT  
GACGAGGTTGCCTGACATTGTGATCGTCCTCGATCAGCAAAAAGAGTATATAGCTCTTC  
GGGAATGTGCCATTTTGGGGATTCTACTATTTCTTTAGCCGATACAAATTGTGACCCAG  
ATCTCGGAATATATCGATTCCAGCCAACGATGACACTATGACTTCAATTCGATTGATTC  
TTAACAAATTAGTATTTGCAATTTGTGAGGGCCGTTCTCTC---TATATAAGAAATCATATG  
GGACAAAAATAAATCCACTTGGTTTCAGACTTGGTACAACCCAAAATCACCATTCCTT  
TTGGTTCGCACAACCAAAAAATTATTCTGAAGGTCTACAGGAAGATAAAAAAATACGG  
AATTGTATCAAGAACTATATACAAAAGAATAGGAAAAGGGCTCGAATAAAATAGAAG  
CAATTACACATATAGAAATTCAAAAGAAATCGATACAATCCACGTCATAATCCATATTG  
GATCCCCAAT---TTATTAAAGAAAAAGGA-----GCAATCGAAGAATTAGAGAA  
AGATCTACAAAAGAAGTTAATTCTGTAAACCAGAGACTTAATATTGGGATCGAAAAA  
GTGAAAGAACCTTATAGACAACCTAACATTCTTGCAGAATATATAGCTTTCCAATTTAA  
AAATAGAGTTTCATTCCGAAAGGCAATGAAAAAAGCCATTGAATTAATAAAAAACA  
GATATAAAGGGAGTAAAAGTAAAATTCAGGCCGTCTCGCGGGAAAAGAAATTGCG  
CGTGCCGAGTGCATCAAAAAGGTAGACTTCCCCTCCAAACAATTCGCGCTAAAATTG  
ATTATTGCTGCTATCCAATTCGAACTATCTATGGAGTATTAGGAGTTAAAATTTGGATATT  
CGTAGACGAAGAAATGTCCCGTTATCGAGGACCTCGTTTTAAAAAATACGCCGCTCG  
GGAGCTTTACCAGGACTCACTAGAAAAACACCTAAATCCGGAAGTAATCTGAAAAAG  
AAATTCATTCTGGGAAA---AAAGAACAATATCGTATTCGTCTTCAAGAAAAACAGAAA  
TTGCGTTTTTCATTATGGTCTGACAGAACGACAATTACTTAGATATGTACATATCGCTGGA  
AAAGCAAAAAGTTCAACAGGTCAGGTTTTACTACAATTACTTGAAATGCGTTTTGGATAA  
TATCCTTTTTCGATTAGGTATGGCTTCAACCATTCCCGAGGCCCGCAATTAGTTAACCA  
TAGACATATTTTAGTTAATGGTCGTATAGTCGATATACCAAGTTTTTCGTTGCAAACCCCG  
AGATATTACTACGAAGGATAACCAAGATCAAACGTCCTGGTTCAAATTCATTTG  
CTTCATCCGACCCGAAA-----TTGCCAAAGCATTGACGATTGACACA-----TTGCAATAT  
AAAGGACTAGTAAAAAAATCCTGGATAGGAAGTGGGTCTCAAATAAATGAGT  
TGTTAGTTGTAGAATATTACTCTCGTCAAACCTATGTCACGTCGAGGTTACTGCAGAAAAA  
AGAAGTCAAAAATCCGATCCAATTTTTCGTAATCGATTAGTTAACATGGTGGTTAACCGT  
ATTATGAAAGACGGAAAAAAATCATTGGCTTATCAAATTCCTATCGAGCCGTGAAAAA  
GATTCACAAAAGACAGAAACAAATCCACTATTGGTTTTACGTCAAGCAATACGTAGA  
GTAACCTCCAATATAGGAGTAAAAACAAGACGTAAAAAAGGATCGACGCGGAAAGTT

CCGATTGAAATAGGATCTAAACAAGGAAGAGCACTTGCCATTCGTTGGTTATTAGAAGC  
ATCCCAAAGCGTCCGGGTCGAAATATGGCTTTCAAATTAAGTTCCGAATTAGTAGATG  
CTGCCAAAGGGGGTGGGGGTGCCATACGCAAAAAGGAAGCGACTCATAGAATGGCAG  
AGGCAAATAGAGCTCTTGCACATTTTCGTATGGGCAAGGACACTATTGCTGATTTACTA  
ACCTCTATAAGAAACGCGGACATGAATAAAAAAGGAAGTTCGGGTAGTATCTACAA  
ATATTACCGAAAACATTGTTAAATACTTCTACGAGAGGGTTTTATTGAAAGTGTTCCG  
AAACATCAGGAAAGTAACAGATATTTCTTGGTTTCAACTTTGCGACATCAAAAGAGAA  
AGACTAGAAAGGGAATATATAGAAGT-----AGAACCCTTTTAAAGCGTATCAGCCGAC  
CTGGCTTACGAATTTATGCCAACTATCAAGGAATTCCTAAGGTTTTGGGCGGAATGGGA  
ATTGCTATTCTTCTACTTCTCGAGGTATAATGACAGATCGAGAAGCTCGACTAAACAG  
AATTGGGGGAGAAGTCTTATGTTATATATGGATGACAAAAGCTATAACCAAAAATTGGTT  
CACGTAGGAAAGTACGTATTGGTTTTCGTAAGAGTGCACGTAGAATAACAAAAGGAGT  
TATTCATGTTCAAGCTAGTTTCAACAATACTATTATAACTGTTACAGATCCGCAAGGTCG  
GGTGGTTTTCTGGTCCCTCCGCGGGTACTTGTGGATTCAAAAGCTCAAGAAAAGCATCA  
CCCTATGCTGGTCAAAGAACAGCTGTAGATGCTATTCGTACAGTGGGT-----TTGCAA  
CGAGCAGAAGTTATGGTAAAGGGTGTGGTAGTGGAAGAGATGCCGCATTACGAGCCA  
TTGCTAAAAGTGGTGTACGATTAAGTTGTATACGCGATGTAACACCTATGCCGCATAATG  
GGTGTGCACCTCCTAAAAAAGACGTCTGATGCCAACGGTTAAACAACCTTATTAGAAA  
CGCAAGACAGCCAATACGAAATGCTAGAAAATCGGCCGCGCTTAAGGGATGTCCTCAG  
CGTCGAGGAACATGTGCTAGGGTGTATACTATCAACCCCAAAAACCAACTCTGCCTT  
ACGTAAAGTTGCCAGAGTACGATTAACCTCTGGATTTGAAATCACTGCTTATATACCTG  
GTATTGGCCATAATTTACAAGAACATTCTGTAGTATTAGTAAGAGGAGGAAGGGTTAAG  
GATTTACCCGGTGTGAGATATCGCATTATTCGAGGAGCCCTAGATGCTGTCTCGCAGTAAA  
GAATCGTCAACAAGGGCGTTCTAAATATGGGGTCAAAAAGCCAAAATGGCAAAAAA  
AAGTTTGATTACAGAGAGAGGAAGCGGCAGAAATTAGAACAGAAATATCATTTGATT  
CGTCGATCTTCAAAAAAAGATAAGAAGCAAAGTTTACCCTTTGAGTTTGAGTGAAA  
AAACGAAAATGCGAGAAAAATTGCAATCCCTGCCACGTAATAGTGCACCGACACGCCT  
TCATCGACGTTGTTTTTTGACCGGAAGACCTAGAGCTAACTATCGAGACTTTGGGCTAT  
CCGGACACATACTTCGAGAAATGGTTTATGCATGTTTGTACCGGGTGCAACAAGATCC  
AGTTGGATGAAAAAGAGAAAAATTTTGGATTTATGGTTAAAGAAGAAAAAGAAGAA  
AAC-----TGGGGTCTGTTGAATTTCAAGTATTCAGTTTCACCAATAAGATACGGGACT  
TGCTTACATTTGGAATTACACAAAAAGATTTTTCATCGGAAAGAGGTCTCCGAAGA  
CTTTTGGGAAAACGTCAACGTTTGCTGGCTTATTTGGCAAAGAAAAATAGAGTACGTTA  
TAAGAAATTAATCAGTCAGTTGGATATTAGGGAGCGG-----ATGTTAAAACCTTCGT  
TTAAAACGATGTGGTAGAAAGCAA-----CGT-----  
-----TTTTATGATCCGATAAAGAATCAAACCTTGTTTAAATGTTCCAGCTATTCTCTATTTCC  
TTGAAAAAGGTGCTCAACCTACAAGAACCGTTTCTGATATTTTAAGGAAGGCGGAATT  
CTTTAAAGAAAAAGAAAGAACTTTGAGT-----TTTCGTAAATCCAAGCAAACTTTT  
CGTAAATTCAAACAACCTTTTCGCAAAAGGCGTCCTCGGATTGGCCCGGGGGATCGAA  
TTGATTATAGAAACATGAGTTTAATTAATCGATTTATTAGTGAACAAGGAAAAATATTAT  
CGAGACGAATAAATAGATTAACCTTGAAACAACAACGATTAATTAATCTTGTCTATAAAA  
CAGGCTCGTATTTTATCTTCTTACCATTTTCGTAACCTATGAGAATGAGAAACAATTTCAA-  
-GCCAGTCAATTTCAATAATTACAGGTCCTAGACCCAGAAAAAATGTGACACGAAAA-  
-AAAACGAATCCTTTTTGTAGCTCATCATTTATTGGCAAAAATAGAAAAGGTCAATATGA







????????????????????????????????????????????????????????????????????????????????????????  
????????????????????????????????????????????????????????????????????????????????????????  
????????????????????????????????????????????????????????????????????????????????????????  
ATGCCTAGATCCCGT--ATAAATGGAAATTTTCATTG  
ATAAGACCTTCTCAATTGTAGCCAATATTTTATTGCGAATAATTCCGACAACCTCCGGGG  
AAAAAAGGGCATTACTTATTATAGAGATGGG-----ATGTTGGCTCAATCCGAAGGAAAT  
TATGCGGAAGCTTTGCAAAATTATTATGAAGCTACGCGACTAGAAAAGTGATCCCTATGA  
TCGAAGTTATATACTCTATAACATAGGCCTTATACACACAAGCAATGGAGAGCATACAA  
AGGCTTTGGAATATTATTTCCGGGCACTAGAACGAAACCCCTTCTTACCACAAGCTTTT  
AATAATATGGCCGTGATCTGTCATTAC-----GGAGAACAGGCCATTCTACAGGGTGATTC  
AGAAATTGCAGAAGCTTGGTTTATGCAAGCTGCTGAGTATTGGAAACAAGCTATAGGC  
CTTACTCCGGGAAATTATATTGAAGCACAGAAGTGGTTGAAGATTACGAAGCGCTTTGA  
ATTTGAAATGAATTGGCGATCAGAACACATATGGATAGAAGTTCTAAAAGGTTCTCGAA  
AAAGAGGTAATTTTTCTGGGCCTGTATTCTTTTTCTAGGTTCACTAGGATTCTTAGCGG  
TTGGGGCTTCCAGTTATCTTGGTAAGAATATTATATCTGTACTTCCATCTCAACAAATTCT  
TTTTTTTCCACAGGGGGTTCGTGATGCTTTTCTACGGAATCGCAGGCCTATTCATTAGCGC  
TTACTTGTGGTGCATTTTTGTGGAATGTAGGCAGTGGTTATGACCGATTTCGATAGAA  
AAGAGGGAGTAGTGTGCATTTTTCTGTTGGGGATTCCCTGGAATAAAACGTCGCGTCTTT  
CTTCGATTCCCTATGCGGGATATCCAATCAATTAGAATTCAGGTTAAAGAAGGCTTTTTT  
CCTCGTCGTATCCTTTATATGGAAATCCGGGGCCAGGGGGCCATTCCCTTGACTCGTAC  
TGATGAGAAGTTTTTTACTCCACGAGAAATTGAACAAAAAGCTGCCGAATTGGCTTATT  
TCTTGCGCATACCAATGGAAGTATTT

>Epifagus

ATGGAAGATGGCGGTTTAGTCTGATG-----ATAAAGAAATCATTGGATAGTGTTAGTTC  
TATTGAAAATACTATCGAAAATAAAGATTCTAATATAAAAGGTAGGGCTCAAAAACATTC  
GTAGTTACAATAATATCATTATTTATTTGGCGTCGAATACAACCGAAATTTAATACCAA  
TGATACTTTTTTATTTAGGGATAATAAGGGAGATAGTTTTTAT--TCTTTTAATATAGAAA  
TCATATTTTTGAAATTGATATCAAT-----TTTTCTTGTCTGAGTGAAGTGAAGTGAATTT  
TATAGTTATCATGGTTTTGATTATTTAATAATGGATCC---ATTGAAGATTACTTATACAAT-  
----ATGTATGATACTCCGTCA-----ATAATCACATTACTAGTTGTATTGAAAGTTATCTTC  
AG-----TCTCAAATATGCGTCAATTCCATTATAAGTGATAGTAGT---AGTTAT-----ATT  
TTTGGATGCTTT--GATAGCAGGAGGTCCGGTATACGAAACCGTGCGCAGAGTAGTTAT  
TTAACTATTAGAGAAAGCTTTAATAATCTTGATTCAACTAAAAAATACAAGCATTATGG  
GTTCAATGCGAAAATTGTTATGGATTAAATTACAAAAAATTTTTGAAATCAAAAATTAAT  
CTTTGTGAACAATGTGGATATCATTTTAAAATGAGTAGTTCAGAAAGAATAGAAGTTTT  
GGTTGACCCCGATACTTGGTATCCTATGGATGAAGACATGTCTCTCTGGATCCCATTGA  
ATTTCAATTCGGAGGAGGAA--TATAAGATCGTATTTATTCTTATCAAAAAAGGACGGGA  
TTAACCGAGGCTGTTCAAACAGGTTTAGGTCAACTAAATGGTATTCCCATAGCAATTGG  
AGTTATGGATTTTCAGTTTATGGGGGGTAGTATGGGATCGGTAGTCGGTGAGAAAATAA  
CCCGTTTGATTGAGTACGCTACCAATAAAATTTTACCTCTTATTATAGTGTGTGCTTCGG  
GGGGGGCTCGCATGCAAGAAGGAAGTTTGGAGCTTAATGCAAATGGCTAAAATATCGTC  
TGCCTTATTTGATTATCAATCAATAAAAAATTTATTGTATGTATCAATCCTTACATCGCC  
ACTACCGGTGGGGTAACAGCTAGTTTTGGTATGTTGGGAGATATCATTATTGCCGAACC  
AAATTCCTACATTGCATTTGCGGGTAAAAGAGTAATTGAGCAAACATTGCATAAAATAG  
TACCCGAAGGTTCAACAAGCGGCTGAATATTTATTCCAGAAGGGCTTATTTGACCTAATA









repeated text lines







ಇವುಗಳೆಲ್ಲವನ್ನೂ ಕಟ್ಟಿಟ್ಟುಕೊಳ್ಳುವುದು ಸರ್ಕಾರದ ಜವಬ್ದಾರಿಯಲ್ಲದೆ, ಪ್ರತಿ ಹಳ್ಳಿಯಲ್ಲೂ ಸರ್ಕಾರದ ಪ್ರತಿನಿಧಿಗಳಾದ ಶಾಸಕರುಗಳಾದ್ಯಂತ ಸರಿಯಾದ ಕಾರ್ಯಕ್ರಮಗಳನ್ನು ರೂಪಿಸುವುದು ಮತ್ತು ಆಗಾಗ್ಗೆ ನಡೆಯುವುದು ಇವೆರಡೂ ಅಗತ್ಯವಾಗಿದೆ. ಜಿಲ್ಲಾ ಮತ್ತು ತಾಲ್ಲೂಕು ಸರ್ಕಾರಗಳು ಈ ಕಾರ್ಯಕ್ರಮಗಳನ್ನು ಆಗಾಗ್ಗೆ ನಡೆಸುವುದು ಮತ್ತು ಅವುಗಳಿಗೆ ಸರಿಯಾದ ಮೊತ್ತವನ್ನು ಕೊಡುವುದು ಅವಶ್ಯಕವಾಗಿದೆ. ಸರ್ಕಾರವು ಈ ಕಾರ್ಯಕ್ರಮಗಳನ್ನು ನಡೆಸುವುದಕ್ಕೆ ಸರಿಯಾದ ಮೊತ್ತವನ್ನು ಕೊಡುವುದು ಮತ್ತು ಅವುಗಳಿಗೆ ಸರಿಯಾದ ಮೊತ್ತವನ್ನು ಕೊಡುವುದು ಅವಶ್ಯಕವಾಗಿದೆ.









repeatedly repeated text block consisting of 45 lines of identical, nonsensical characters.











-----ATACCTATGAATTCCATTGGACCCAGAAATGATACATTGGAAGAATTGGTC---GG  
GTCTTACAATATAAATAGGTTTATTGTTTCG--CTCCTCTATCTTACAAAAGGGAAAAATA  
TCTCTGAGAGTTTTTTCCTGAATCTGAAAGAGAGTACTTTGGTTCTCCCAATAACT-----  
----AAAAGTGTAGCATGCCTGAATCTAACTGGGGTTCACGGTGGTGGAGGAACTGGA  
CCGGAAAAAATAGG-----GATTATAGTTGCAAGATATCTAAT-----GAAACCGTCGCTG  
GAATTGAGATCTTATTCAAAGAGAAAGATAAAAAA---TATCTTGAGTTTATTTTTTTTTAT  
TATATGGAT-----GATCCAATTCGCAAGGACCGTGATTGGGAATTGTTTGATCGTCTTTCT  
CCGAGTAAGAGGCTAAATAAAATCAACTTT-----TATTCGGGACCGCTATTCGAAATCTT  
AGTGAAACGCCGGATTTATTATCTCATGTCTGCTTTTCGTGAAAAAATACCAATTGAAG  
TAGTGAAGGGTTTCTTCAAACAACAAAAG---GTTGGGTCAACTATTCAATCAAATGATA  
TTGAGCATGTTTCTCAT-----TTCTTCTCGAGAAATAAGCGGGCTATTTCTTTGAAAAATA  
GTGCTCAATTTAATATGTGGCAATTTGCCAGGATCTCTTAGTT-----AGTTGGGGGA  
G---AATCCGCACGAATCGGATTTTTTGAGGAAC---GTTTCGAGAGCGAATTGGATTGGT  
TAAACAATGTGTGGTTGGTAAACAAGTATCGG-----TTTTGTAGA-----AAGGTACGGA  
ATGTATCGTCAAATATTAATATAAATAT--GATTCCACAAGATCAAGATCCAGTTTCGTT  
CAAGTAACGGATTCTAGCCAAGTAAAGGATCTTAT--TATAAATCTAGCGGTCATTTTTA  
TTCCGTTATTAGT-----AATGAGGATTCGGAA-----TATCACAC  
ATTGATCAATCAAAGAGAGATTAAACCACTAAAA-----TCTATTTTTTTTGAT-----CCT  
TCCTTTCTTCAAACGGAAGCAACAGAGATAGAATCAGAC-----CAATTACAGAAA-----C  
GCCCTTCTGGATATTCC-----TCAACGCTATTACAG---GAACATGAGAAGCAGATGA  
TTAATCATATGCTTCCGGAAGAAATCGAAGAATTTATTGGG-----AATCCTACAAGATTG  
GTTTATTCTTTTTTATCTGATAGATGG-----TCAGAACTTCAT--CTGGGTTTCAATCCTAC  
TGAGAGGTCCACTAGAGATCAT-----AAATTGTTGAAGAAACAACAAGATCTTTCT--  
-TTGTCCCTTCCAGGCGATCGGAA-----AATAAAGAAGTGGTTAATATATTAAGAT  
AATTACGTATTTAAAAAAT-----ACTGTTTCTATTTCATCCTATTTTCATCAGATCCGGGGTGT  
GATGGGGTTCTG--AAGGATGAACCGGAT--ATGGACAGTTCCAATAAGATTTTCACTCTT  
TAACAAAATACTTTTTATTTATTTA-----TTTCATCTATTCCATGACTGGAACAGGGTAGG  
ATACACCTTAAACCTACACCACGATTTTGAATTAGAA-----GAGAGATTTCAAGAAAAG  
GCAGATCTATTCACTCTATCAATAACCGAGCCA---GATCTGGTGTATCACAAGGGATTTT  
CCTTTTCTATTTAT-----ATGGATCAAAAACAA-----

-----AAAATGGTGGTATTTGCTAGCAACAACATAATGGAGGCAGTCAATCAATCTAG  
ATTTATACGAAATATGATCAAAAATCCAATATAGTACCTATGGA-----TACATAAGAAATGTA  
TTACACCGATTCTTTTTAATGAAT-----AGATCCGATCACAACTTAGAATATGAAATTA  
A-----AGGGATCAAATAGGAAAGGACACTCTGAATCATAGAACTATAATTAATATATG  
ATCAACCAACATTTATCGAATTTTAAAAAG---AGTCAGAATAAATGGTTCAATCCT-----A  
TTCTCTTTTTTCTCGAACCGAGAGATCCGTAAATCGGAATCCTGATGCATATAGATACA  
AAAGGTCCAACGGGAGCAATAATTTTTTGGAACATCTGGAACATTTCTGTTTCTGAGCA  
GAAGAGCCATTTT--AAATTTAAAATAGTGTGTTGATCTAATACGTTTTAATCAATATTCGA  
TTGATTGGTCTGCGTTTATCGACACAAAAGATTTGTCTAAGCCACTTCGTTTCTTTTTAT  
CCAAG-----TTGCTTTTCTTTTTGTCTAA  
C---TCACTTCCTTTTTTCTGTGTGAGTTTCGGTAATATCCCCATTCATAGGTCCGAG---AT  
CTACATCTAT--GAATTGAAAGATCCGAATGATCAACTCTGTAATCAGTTTTTAGAACCA  
ATAGATCTTAAAATTGTTCAATTTAAAAAAAAGGAAACCCCTC-----TTATTGGGT-----T

ATCATGGTACTTCC---CGCAAATTGAAATTATTGATCACTGGAGGAAGA-----CCTTTTTT  
ATTCAATAAGATACCA---AGGTGT--ATGATTGACTCATTCCATACTATA-----AATAATCG  
CAGTAAATCCTTTGATAACACGGATTCCCTATTTATCAATGATATTCCACAATAAAGACAA  
TTGGCTTAATCTCGTGAAACCATTTTCATAGAAGTTCATTGATATCTTATTTTTATAAAGCA  
AATCGACTTCAATTCCTGAATAATCCACATAACTTCTGCTTCTAT-----TGTAACACAAGA  
TTACCCTTTTACGTA-----GAAAAGGCCCATATCCATAATTATTAT-----TTTACGTATG  
GA---CAATTCCTCAATATCTTGTTTATTTCGCAACAAA---ATATTTTCTTTGTGCGTGCATA  
AA-----AAAAAACATGCTTTTTGGGGGGGGGAGAGATACTATTTCCACCAATAGAGTCACA  
GGTATCTAAAATATTCATACCTAAAAATTTCCACAAAGTGGTGATGAAACA---TATAAC  
TTGTCCCAACCT-----TTCCATTTTCCAAGCCGATATGACCCATTTCGTTTCGT-----  
--TTGATCGCAAACATTTATGGAACACCTCTAACAGAGGGACAAATAGTAAATTTAGGAA  
GAACTTATTGTCAACCTCTTTCAGATATGAATCTATCTGATTCAGAAGGGAAGAAGCTTT  
CATCAGTATCTCAATTC-----AATTCAAACATGGGTTTGATTACACCCCATGTTCTGAT  
AAATATTTACCATCTGAAAAG-----AGGAAAAAA-----CGTAGTCTTTGTAT  
AAATAAATATAAATGCGTTGAGAAAGGGCAGATGTATAGAACCCTTTC AACGAAAGGTT  
GCTTTTTCAACTCTCTCAAATGGAATCTATTCAAACATATATGCCATGGTTCCCTACT  
TCGGCAGGGTACAAATATATAAATTTGATATTTTTAGATACTTTTTTCGGAAC TATTGTCGA  
TACTAAGTAGCAGT-----AAAAAATTTGTATCCATTTTTAATAATATTATGCATGGATCA  
GGTATATCATGGCGAATTATTAATAAAAAACGG-----TGTCTTCCA-----CTG  
ATAAGTGAGATTTGAGTAAGTGTTCACATAAT-----CTTCTTCTGTCCGAAGAAACGATT  
CGTCAAATAATGAATCA-----CCATTAATATCGACACATCTCAGATCGCCAAATGTGCG  
GGAGTTC---CTCTATTCAATCCTTTTCCTTCTTCTTGTGTTGGATAT--CTCGTTCGTACA  
CATCTTCTCTTTGTTTCCCGG-----GCCTCTAGCGAGTTACAGACAGAGTTTAAAAGGGT  
CAAATCATTGATGATTCATCATCTATGATTGAGTTGCGGAAACTTCTGAATAGATATCC  
TACA---GCATCTAATTCTTCTGGTTAAAGAATCTATTTATAGTTGCTATGGAACAATTAG  
TATATTCTCTAGAAGAAATACGGGCTTCTGGCGGCAAC-----CTACTTGGTCCCGC  
T-----TATGGGGTCAAATCAATATGTTCT--AAGAATAAATATTTAATATCAAT-----  
-----CTCATC---GATCTCATACCCAATCCCATCAATAGAATCATTTTTTTCGAGAAATAT  
GAGACATCTAAGTCATACAAGTAAAGAGATCTATTCATTGATAAGAAAAAGAAAAAAC  
GTGAATGGGGATTGGATTGATGATATAATAGAATCCTGGGTGCGGAACAGTGATTCGAT  
TGATGATGAAGAAAGAGAATTCTTGGTTCAGTTCTCC-----GCCTTAACGACA-----GAA  
AAAAGGATTTATCAAATTCTATTGAGTCTGACT---CATAGTGATCATTATCA-----  
AAAAACGACTCTGGTTATAAAATGATTGAACAACCGGGAGCAATTTACTTGCGATACTT  
AGTTGACATTCAT-----AAAAAGTATCTATTGAATTATGAGTGCAATACATCCTGTTTAGT  
AGAAAGACGGGTATTCCCTTGCTCATTCTCAGACAATCACTTAT-----TCACAAACTTCTC  
GTGGGACTAATACTTTGCATTTCCCATCTCAAGGA-----AAACCCTTTTCGATCAGCTT  
AGCCTTATCCCCCTCT--AAGGGGATTTTAGTGATAGGTTCTATAGGAACTGGACGATCC  
TTTTTGGTAAATACCTAGCGACAAACTCCTATGTTCCTTTCATTACGGTATTTCTGAAC  
AAGTTCCTGGATAACAAGCCTAAAGGTTTTCTTGTGAT-----GATAATGAC---AA  
TGATTCTAGTGACGATATTTATGCTAGTGACGATATTAATAGT-----  
-----GACCTTGATACGGAGCTGGAACCTATAACTATGATGAATGCGCT  
A-----ACTATGGATATGATGTTG-----GAACTAGACCGATTTTTTACCACCCTTCAATT  
AGAATTAGCAAAGCAATGTCTCCTTGGATAATATGGATTCCAAACATTCATGATCTGGA  
TGTAATGAGTCGAATTACTTATCCTTCGGTCTATTAGTGAACCATCTCTCT-----





GAGGGGTTGATGAGAGGAATGGAAGTGATTGACACGGGAACTCCTCTCAGTGTTCCA  
GTCGGTGGAGCTACTCTCGGACGAATTTTTAACGTTCTTGGGGAGCCTATTGACAATTT  
GGGTCTGTGGATACTAGTGCAACATTTCTATTTCATAGATCTGCGCCTGCCTTTATCGA  
GTTAGATACGAAATTATCTATCTTTGAAACAGGTATTAAGGTGGTCGATCTTTTAGCTCC  
CTATCGACGTGGAGGAAAAATCGGACTGTTTGGGGGGGCAGGAGTAGGTAACAGT  
ACTCATCATGGAATTAATCAATAACATTGCTAAAGCTCATGGAGGCGTATCCGTATTTGG  
CGGAGTAGGGGAACGGACTCGTGAAGGAAATGATCTTTATATGGAAATGAAGGAATCC  
GGAGTAATTAATGAAAAAATATTGAGGAATCAAAGGTAGCTCTAGTCTATGGCCAAAT  
GAATGAACCGCCGGGAGCTCGTATGAGAGTTGGTTTAACTGCCCTAACTATGGCAGAAT  
ATTTCCGAGATGTTAATAAGCAAGACGTGCTTTTATTTCATCGATAATATCTTTCGTTTGT  
TCAAGCAGGATCGGAAGTATCCGCCTTATTAGGCAGAATGCCCTCCGCAGTGGGTTATC  
AACCTACCCTTAGTACAGAAATGGGTTCTTTGCAAGAAAGAATTACTTCTACCAAAA  
GGGATCTATAACTTCGATCCAAGCAGTTTATGTACCTGCAGACGATTTGACCGACCCTG  
CTCCTGCCACAACATTTGCACATTTGGACGCTACTACCGTACTTTCCAGAGGATTAGCT  
TCCAAGGGTATTTATCCCGCAGTGGATCCTTTAGATTCAACCTCAACTATGTTACAGCCT  
CGGATTGTTGGCAACGAACATTATGAAACTGCGCAAAGAGTTAAGGAACTTTACAAC  
GTTACAAAGAACTTCAGGACATTATCGCAATTCTTGGATTGGATGAATTATCGGAGGAG  
GATCGTTTAACTGTAGCAAGAGCACGAAAAATCGAGCGGTTCTTATCACAACCGTTCTT  
TGTGGCAGAAGTTTTTACCGGTTCTCCAGGAAAGTATGTTGGTCTTGCAGAAACAATTA  
GGGGATTTCAACTAATCCTTTCCGGAGAATTAGACGGCCTACCCGAACAGGCTTTTTAT  
TTAGTGGGGAACATCGATGAAGCTAGCACGAAAGCTATAAACTTAGAAGAGGAGAGC  
AAATTGAAGAAAATGAAATTAATCTTTATGTACTGACTCCTAAACGAATTATTTGGGAT  
TGTGAAGTGAAAGAAATCATTTTATCTACTAATAGTGGCCAAATTGGTGTATTACCAA  
CCACGCCCCCATTAACACAGCTGTAGATATGGGTCTTTGAGAATACGCCTGAACGACC  
AATGGTTAACGGCGGTTCTGTGGAGTGGTTTTGCAAGAATAGTTAATAATGAGATCATC  
ATTTTAGGAAATGATGCAGAACTGGGTAGTGACATTGATCCAGAAGAAGCTCAACAGG  
CACTTGAAATAGCCGAAGCTAACTTGAGTAAAGCTGAAGGTACGAAAGAATTGGTTGA  
AGCGAAGCTAGCTCTCAGACGAGCTAGGATACGAGTCGAGGCTGTCAATTGGATTCCC  
ATGAAAAATGTAACCCATTTCTTTGTTTTTTTAGCTCACTGGCCATTCGCTGGGAGTTTC  
GGGCTTAATACCGATATTTTAGCAACAAATCTAATAAATCTAACTGTAGTGGTTGGTGTA  
TTGATTTTTTTTGGAAAGGGAGTGTTAAAGATTTATTAGATAATCGAAAACAGAGGAT  
TTTAAGTACTATTCGAAATTCGGAAGAATTGCGTAAAGGGACCCTTGAACAACCTCGAA  
AAAGCTCGTATTCGATTACAGAAAGTCGAACTGGAAGCAGATGAGTATCGAATGAATG  
GATACTCTGAAATAGAACGAGAAAAAGAAAATTTGATTAATGCTACTTCTATTAGTTTG  
GAACAATTAGAAAAGTCTAAAAACGAAACCCTTTATTTTGAAAAACAAAGGGCGATGA  
ATCAGGTCCGACAACAGGGTTTCCAACAAGCTGTACAAGGAGCTCTAGGAACTCTGAA  
TAGTTGTTTGAATACCGAGTTACATTTCCGTACGATTCGTGCTAATATTGGCATTCTCGG  
GGCCATAGAATGGAAGAGA---ATGAATCCACTAATTGCTGCTGCTTCCGTTATTGCTGCT  
GGATTGGCCGTAGGGCTTGCTTCTATTGGGCCCGGAGTTGGTCAAGGTACTGCTGCAG  
GACAAGCTGTAGAAGGTATTGCGAGACAGCCAGAAGCAGAAGGTAAAATAAGAGGTA  
CTTTATTGCTTAGTCTAGCTTTTATGGAAGCTTTAACAATTTATGGACTGGTTGTGGCAC  
TAGCGCTTTTATTTGCGAACCCTTTTGTTATGAATATTACACCATGTTCCATTAACACT  
CAAGGGGTTATATGATATATCGGGTGTAGAAGTAGGGCAACACTTCTATTGGCAAATAG  
GAGGTTTCCAAATTCATGCCCAAGTACTCATCTTCTTGGGTTCGTAATTACTATTTTGC

TAGGTT CAGTTATCATAGCTGTTTCGGAATCCACAAACCATCCCGACCGATGGTCAGAAT  
TTCTTCGAATATGTCCTTGAGTTTATTCGAGACTTGAGCAAACTCAGATTGGAGAAGA  
ATATGGTCCCTGGGTCCCTTTATTGGA ACTATGTTCCCTTTTATTTTTGTTTCGAATTGG  
TCAGGTGCTCTTTTACCTTGAAAATTATAGAGTTACCCCATGGGGAATTAGCAGCGCC  
CACGAATGATATAAATACTACTGTTGCTTTAGCTTTACTAACATCAGCGGCATATTTTTAT  
GCGGGTCTTAGCAAAAAAGGATTGAGTTATTTGAAAAATATATTAACCAACCCCAAT  
CCTTTTACCTATTAACATCCTAGAAGATTTCACAAAACCATTATCACTTAGTTTTCGACT  
TTTCGGAAATATATTGGCGGATGAATTAGTCGTTGTTGTTCTTGTCTTTAGTCCCCTTA  
GTAGTCCCTATACCGGTCATGTTTCTTGATTATTTACAAGCGGTATTCAAGCTCTTATTT  
TTGCAACGTTAGCCGCAGCCTATATAGGTGAATCCATGGAAGGTCATCATATGCTATTTG  
CAACTTTAGAACATATACTAACTCATATCTCTTTCTCAACCATTTCAATTGTGATTACGAT  
TCATTTGATAACCTTATTAGTTCGTGAACTTAGGGGATTACGTGATTTCGTCAGAAAAAG  
GAATGATAGCTACTTTTTTCTCTATAACAGGATTTTTAGTCTCTCGTTGGGTTCTTCGG  
GACATTTTCCATTAAGTAATTTATATGAGTCATTGATCTTCCTTTCATGGACTCTGTATATT  
CTTCATACTATTCCTAAGATACAGAACTCGAAAAATGATTTAAGCACAATAACTACGCC  
AAGTACTATTTTAAACGCAAGGCTTTGCCACGTCCGGTCTTTTAACTGAAATGCATCAAT  
CCACAATACTAGTACCTGCTCTACAATCTCAGTGGTTAATGATGCATGTCAGTATGATGT  
TACTAAGCTATGCAACTCTTTTGTGTGGATCCTTATTATCCGCCGCTCTTCTAATCATTAG  
ATTTTCGAAAGAATTTTCGATTTCTTTTCA---CTAAAGGAGATTGAATATTTATATGCAAAA  
AGAAGTGCTTTAAAAACACCTCTTTTCCCGTATTTCCAAATTATTACAAATATCAATTA  
ACTGAGCGTTTGGATTCTTGGAGTTATCGTGTCAATTAGTCTAGGGTTTACTCTTTTAAACC  
GTGGGTATTCTTTGTGGAGCAGTATGGGCTAATGAGGCATGGGGATCCTATTGGAATTG  
GGATCCTAAGGAACTTGGGCATTTATTACCTGGACCATATTTGCAATATATTTACATAGT  
AGAAAAAATCCAAATTGGAAGGGTACGAATCCGC ACTTGTAGCTTCGATAGGATTTCT  
TATAATTTGGATCTGCTATTTTGGTATCAATCTGTTAGGAATAGGTTTACATAGTTACGGT  
TCATTTACATTACCAATGAAAAAAAAGAAAGCATTGCCTTCTTTCTTATATCTTGTATTTA  
TCGTACTTTTGGCCTGGGGAGTCTCTTTCTCTTTTAAACAAATGTCTGGAACCTTTGGATTA  
AGAATTGGTGAATACCAGGCAATCCGAACTTTCTTAACTGATATTCAAGAGAAAAG  
GATTCTAGAAGGATTCATAGAATTAGAGGAACTTTTTCTCTTGGACGAAATGATAAAAG  
AGAAACCGAAGACACATGTACAAAAACTTCCTATAGGAATACACAAGGAAATAATACA  
ATTTGGCCAAAATAGATAATGAGGATCATCTCCATATCATTTTGCATTTCTCAACAAATATA  
ATCTGTTTGGCTATTCTAAGTGGTCTTTTTTTTCTGGGTAAAGAAGAACTTGTCAATTTG  
AATCTTGGGTT CAGGAATTTTTCTATAACTTAAATGATTCAATAAAAGCTTTTTTTTATTC  
TTTTAGTTACTGATTTTTTTGTTGGATTTCACTCTACCCGCGGTTGGGAACTACTAATTC  
GTTGGGTCTACAACAATCTTGGATGGGCTCCTAACGAGCTAATTTTCACTATTTTTGTTT  
GTAGTTTTCTGTGATTCTAGACACGTGTTTGAAATTTTGGGTCTTTTTTTGTTTAAACC  
GTCTATCTCCTTCACTTGTAGTCATTTATCATTCAATTAGTGAAATGCCATTGGTGTTC  
AAAAGTACCTTACCGGATTCCCGGAGATGAAGAAGCGACTTGGGTTGACTTATACAAT  
GTTATGTATCGAGAAAGGACACTTTTTTTAGGTCAAGAGATTCGTTGCGAGATCACAAA  
TCATATTACAGGTCTGATGGTATATCTCAGTATAGAAGATGGAAATAGCGATATTTTTTTG  
TTTATAAATTCCTTGGCGGTTGGCTAATCTCAGGAATGGCGATTTTTGATACGATGCAA  
ACGGTGACACCTGATATATATAACAATATGCCTCGGAATAGCCGCGTCCATGGCCTCCTTC  
ATCTGCTTGGAGGAGAACCACCAAGCGTATAGCATTCCTCACGCTAGGATTATGCT  
TCACCAACCTGCTAGTGCTTATTATCGGGCAAGGACACCAGAATTTTTACTAGAAGTGG

AAGAGTTACACAAAGTTCGCGAAATGATCACAAGGGTTTATGCACTAAGAACAGGCAA  
GCCTTTTTGGGTGTATCCGAAGACATGGAAAGGGATGTTTTTATGTCAGCAGACGAA  
GCCAAAGCTTATGGACTTGTCGATATTGTAGGGGATGAACCGAGAGAAGCAAAAGTCA  
CTTTCGAAGGTTTAGTTACGGAAGCCCTACCCAACGGAATGTTCCGCGTTCGCCTAGA  
GAATGACACCATCATCCTGGGCTATATTCAGGAAAGATCCGGTCTAGTTCTATACGAAT  
ACTGATGGGGGATAGGGTCAAAATTGAAATAAGTCGTTATGATTCCAGCAAAGGTCGTA  
TAATTTATAGACTTCCCCATAAGGATTCGAAGGATATGGAAAAATTTCGAAGGGTATTCA  
GAAAAACAGAAATCTCGTCAACACTACTTCGTCTACCCACTTCTCTTTCAGGAATATAT  
TTATGCATTTGCTCATGATTATGGATTATTTGGTTGTAATAACAAATTTAGTTCACTACTT  
GTGAACCGTTTAATTATCCGAATGTATCAGCAGAATTTTTTAATTAATTCGGTTAATTATC  
CTAACCAAGATCGATTGTTGGATTCTGAGTTTTATTCTCAGATTCTATCTGAGGGGTTTG  
CGATCGTTGTAGAAATCCCACTCTCGCTAGGGCAACTATCTTGTCCGATACCAAATTTTC  
AAAATTTACAATCTATTCATTCAATATTTCCCTTTTTAGAAAGACAAATTTTTGCATTTACA  
TTATCTATCACATATAAAAATACCCTATCCTATCCATTTAGAAATCCTGGTTCAACTCCTT  
GAATACCGGAGTCAAGATGTTCCCTCTTTGCATTTATTGCGATTCTTCTCTACTATTATT  
CGAATTGGAATAGTTTTATTACTAAATCCATTTTTCTTTTGAAAAAAAAAAGACTATTTTC  
GATTCCTATATAACTCTTATGTATCAGAATATGAATTTTTCTTGTGTTTCTTCATAAACAA  
TCTTCTTGCTTACGATTAACATCTTCTGGAACCTTTCTGGAACGAATCATCTTTTCTGGG  
AAGATGGAACAT-----GTAATGTACCCGGGGCGGAAAACCATATGGTTCTTTATGGATCC  
TCTTATGCATTATGTTTCGATATCAAGGAAAGGCAATTCTTGCATCAAAGGCACTCTTCT  
TTTGAAGAAGAAATGGAAATCTTACCTTGTCAATTTCTCGCAATATTTTTTCTTTTTTG  
GACTCAACCACAAAGGATTCGTCTAAACCAATTAACAAACTCTTGCTTCGATTTTCTGG  
GGTACCTTTCAAGTGTACCAATAAATACTTTGTTAGTAAGGAATCAAATGCTGGAGAAT  
TCTTTTCTAATAGATACTCGAATG-----AAAAAATTCGATACCACAGTCCTTGCAACTCC  
CCTTGTCCGATCCTTATCAAAGCTCAATTTTGTACTGGATCGGGGCATCCTATTAGTAA  
ACCCGTTTGGACTGATTTATCAGATTGGGATATTCTTGATCGTTTTGGTCCGATATGTAG  
AAATATTTTTTATTATCATAGTGGATCTTCGAAAAACAGACTTTGTATCGACTAAAATA  
TATACTTCGACTTTCATGTGCTAGAACTTTAGCTCGTAAACATAAAAGTACGGTACGAA  
CTTTTATGCAACGATTGGGTTCGGTATTTTTAGAAAGAAATTTTTTACGGAAGAAGAGCAA  
GTTTTTTCTTTGATGTTACCAAATGTATTTGGTATTTGGATATTATCCGTATCAATGACC  
TGGTGAATCCTCTTATGATAATAGATAGGGTA---GAGGTAGAA---ACTATCAATTTCTTTTT  
CGAAATCGGAA---TTATTTAAAGAAATCTACGGACTTATATGGATTCTA---CCCATTTTTG  
CCCTCCTACTGGGAATACAATAGAAGTACTCGTAATTGTGTGGTTAGAAAGAGAAATA  
TCCGCATCGATACAACAACGTATTGGTCTGAAATATGCTGGCCCCCTGGGACTGCTTCA  
AGCTATAGCAGATGGAACATAACTACTTTTTAAAGAGGATATCCTCCCATCCCGAGGAG  
ATATTCCTTTATTTAGCATTGGTCCCTCTATAGCAGTCATATCCATTTTATTAAGTTTTTTA  
GTTATCCCTTTAGGATATCGTTTTGTTTTAGCTGATCTTAGTATTGGTGTTTTTTTTATGGAT  
TGCGATTTCAAGTATTGCTCCTATTGGTCTTCTCATGGCAGGATATAGCTCAAATAATAA  
ATATCTTTTTTCAGGCGGTCTACGAGCGGCTGCTCAATCTATTAGTTATGAAATACCATT  
AACTTTTTGTGTACTAGCAATATCTCTACTATCTAATAGTTCAAGTACAGTTGATATAGTT  
GAAGCACAGTCCAAATATGGTTTTTTTTGGATGGAATCTTTGGCGTCAGCCTATAGGTTT  
TCTAGTTTTTCTAATTTCTTCTTTGGCAGAATGTGAAAGATTACCCTTTGATTTACCAGA  
AGCAGAAGAAGAATTAGTAGCAGGTTATCAAACCGAATATTCTGGTATTAATATGGTT  
TATTTTATCTTGTTTCTTACCTAAATTTATTAGTTTCCTCTTTATTTGTAACGTCTTACT

TAGGCGGGTGAATTTCTCTATTCCCTATATATCCTTTTTTGGATTTTTCCAAATGAATAA  
ATAATTGGAATTTTGGAAATGGTAATAGGTATCTTTATTACATTAATAAGCTTATTTA  
TTTCTCTTCATTTCTATCACATAAGATGGACTTTACCCAGGATGAGAATGGATCAGTTA  
TTAAATCTTGGATGGAAATTTCTTTTACCTATTTCTCTGGGCAATCTCTTATTAACAACCT  
CTTCCCAACTAGTTTCACTAATGATCTGGCATGTACAGAATGAAAACCTCATTCTCGATT  
CTACGAGAATTTTTATGAAAGCGTTTCATTTGCTTCTCTTCCATGGAAGTTTCATTTTCC  
CAGAATGTATCCTAATTTTTGGCCTAATTCTTCTTCTGATGATCGATTTAACCTCTGATCA  
AAAAGATAGACCTTGGTTCTATTTTCATCTCTTCAACAAGTTTAGTAATAAGCATAACGG  
CCCTATTGTTCCGATGGAGAGAAGAACCTATAATTAGCTTTTCGGGAAATTTCCAAACG  
ACAATTTCAACGAAATCTTTCAATTTCTTATTTTATTATGTTCAACTTTATGTATTCTCT  
ATCCGTAGAGTACATTGAATGTACAGAAATGGCTATAACAGAGTTTCTGTTATTCTGTATT  
AACAGCTACTCTAGGGGGAATGTTTTTATGTGGTGCTAACGATTTAATAACTATCTTTGT  
AGCTCCAGAATGTTTCAGTTTATGTTCCCTACCTATTGTCTGGATATACCAAGAGAGATCT  
ACGGTCTAATGAGGCTACTATGAAATATTTACTCATGGGTGGGGCAAGCTCTTCTATTCT  
GGTTCATGGTTTCTCTTGGCTATATGGTTCATCTGGGGGGGAGATCGAGCTTCAAGAAA  
TTGTGAATGGTCTTATCAATACACAAATGTATAACTCCCCAGGAATTTCAATTGCGCTTA  
TATTCATCACTGTAGGACTTGGGTTCAAGCTTTCCCCAGCCCCTTTTCATCAATGGACTC  
CTGACGCTACGAAGGATCCCCACTCCAGTCGTTGCTTTTCTTTCTGTTACTTCGAAA  
GTAGCTGCTTCAGCTTTAGCCACGCGAATTCTCGATATTCCTTTTTATTTCTCATCAAC  
GAATGGCATCTTCTTCTGGAAATCCTAGCTATTCTTAGCATGATATTGGGGAATCTCCTT  
GCTATTACTCAAACAAGCATGAAACGTATGCTTGCATATTCGTCCATAGGGCAAATCGG  
ATATGTAATTATTGGAATAATTGTTGGAGACTCAAATGATGGATATGCAAGCATGATAAC  
TTATATGCTGTTCTATATCTCCATGAATCTAGGAACTTTTGCCTGCATTGTATTATTTGGTC  
TACGTACCGGAACTGATAACATTCGAGATTATGCAGGATTATACACGAAAGATCCTTTTT  
TGGCTCTCTTTAGCCCTATGTCTCTTATCCCTAGGAGGCCTTCTCCACTAGCAGGTT  
TCTTCGAAAACCTCTATCTATTCTGGGTGTGGATGGCAAGCAGGCCTATATTTCTTGGTTT  
CAATAGGACTCCTTACGAGCGTTCTTTCTATCTACTATTATCTAAAATAATCAAGTTATT  
AATGACTGGACGAAACCAAGAAATAACCCCTTATGTGCGAAATTATAGAAGATCCCCTT  
TAAGATCAAACAATTCCATCGAATTGAGTATGACTGTATGTGTGATAGCATCTACTATAC  
CAGGAATATCAATGAACCCCATCTTGCAATTGCTCAGGATACCCTCTTTATGTTTTCTGC  
TTCACGAATATGATATTTTTTGGACATTTCTAATAATAGCAAGCCTTATTCCTATTTTGGTA  
TTTTGGATTCAGGACTTTTAGCCCCGGTTAGTGAAGGACCAGAGAAGCTTTCTAGTTA  
TGAATCGGGTATAGAACCATGGGGGGGGCTTGGTTACAATTCCGAATACGCTATTACA  
TGTTTGCCTAGTTTTTGTGTTTTTGTGATGTGGAAACAGTCTTTCTCTACCCTTGGGCAA  
TGAGTTTCGACGTATTGGGTGTATCCGTTTTTATCGAAGCTTTCATTTTTGTGCTTATCCT  
AGTTGTTGGTTTAGTTTATGCATGGCGAAAAGGAGCCTTGGAAATGGTCTATGAGTTATT  
TTCCTTGGTTAACAATACTTGTGTTTTTGCCGATATTTGCAGGTTTCATTAATTTCTTTTT  
ACCTCATAAAGGAAATAAAATCGTTAGGTGGTATACTATAGCTATTTGTTTTATTAGAATTC  
CTTCTAATGACTTATGCATTCTGTTATCATTTCCAATTGGAGGATCCTTTAATCCAATTA  
AGGAGGATTCTAAATGGATAGATGTTTTCGATTTCCACTGGAGATTGGGAATCGATCCA  
CTTTCATTAGGATCTATTTTATTGACAGGATTTACTACTTTAGCTACTTTAGCGGCTT  
GGCCGGTACTCGGAATTCGCAATTATTCTATTTCTGATGCTAGCAATGTATAGCGGTC  
AAATAGGATATTTTCTTCACGAGACCTTTTACTTTTTTTTATCATGTGGGAGTTAGAATT  
AATCCTGTTTACTTACTTTTATCCATGTGGGGGGGAAAGAGGCGTCTGTATTACGCTAC



CAAGTTTATTTTGTATACTGCAGGCGGTTCCATTTTTTTCTTAATTGGAGTTCGGGTATG  
GGATTATATGGTTCCAATGAACCCGGATTAGATTTAGAAAAGATTGATTAATCAATCATAC  
CCTACAACATGGGAAATACTACTGTATTTTGGCTTCCTTATTGCTTATGCTGTCAAATTG  
CCGATTATACCTTTACATACGTGGTTACCATATACCCATGGGGAAGCGCATTACAGTACA  
TGTATGCTTTTAGCCGGAATTCTATTAAGATGGGAGCATACGGATTGATTGGGTCAAT  
ATGGAATTGTTACCGCATGCTCATTATCTATTTTCCCCTTGGTTGGTAATAATAGGAGCG  
GTGCAAATAATCTATGCAGCTTCAACTTCTCTTGGTCAACGAAATTTCAAAAAAGAAT  
AGCCTACTCCTCCGTATCTCACATGGGTTTCATAATTATAGGAATTGGTTCCATAACCAA  
CATTGGACTAAATGGAGCTATTTTACAAATATTATCTCATGGATTTATCGGTGCTACACTT  
TTTTTCTTGGCGGGAACGGCTTGTGATAGAATGCGTCTTGTTTATCTCGAAGAACTGGG  
GGGAATATCTATCCCAATGCCAAAAATTTTTACCATGTTTAGTAGCTTTTCAATGGCTTC  
TCTTGCCTTGCCGGGAATGAGCGGTTTTGTTGCAGAATTAGTAGTATTTTTTGGACTAAT  
TACTAGTCCATAATTTATGTTAATGCCAAAAATGCTAATTACTTTTTGTAATGGCAATAGG  
AATGATATTAATCCTATTTATTTATTATCTATGTTACGCCAGATGTTCTATGGATAACAAGC  
TATTTTATGTTCCAAACAAAAATTTTGTAGATTCTGGACCACGAGAACTCTTTCTTTTAA  
TTTGTATCTTTTTTACCAGTAATAGGAATTGGTATTTATCCAGATTTGGTTCTCTCGCTATC  
CGTTGATAGGGTAGAGGTTCTATTATCCAATTATTATACTAAAATGATGTTTGAGCGAGT  
ACTTTTTTTGAGTGTCTATTTATTTTCGATTGGTATCTATGGATTGATCAACAAGCCGAAA  
CATGGTTAGAGCTCTAATATGTCTTGAACCTTATACTGAATTCAATTAATCTAAATCTCGTA  
ACATTTTCTGATCTATTTGATAGTCGCCAATTAAGGAGACATTTTCGCAATTTTTGTT  
ATAGCCCTTGC GGCTGCTGAAGCAGCTATTGGACTATCCATTCTTTCTTCCATCCATCGT  
AACAGGAAATCAACTCGTATCAATCAATCCAATTTTTTGAATAATATGGAACATACATAT  
CAATATGCCTGGGTAATTCCTCTTCTCCCACTTCCAGTTATTATGTCAATGGGATTTGGA  
CTTTTTCTTATTCCTACAGCAACAAAAATCTTCGTCGGATATGGGCTTTTCCTAGTATT  
TACTCTTAAGTATAGCTATGGTATTCTCACTTACCTGTCTATTCAACAAATAAATGGA  
AGTTCTATCTATCAATATCTATGGTCTTGGACCATCAATAATGATTTTTCTTAGAATTTG  
GATACTTGGTTCGACCCCTTACGTCTATTATGTTAATACTAATTACTACTGTAGGAATCTT  
AGTTCTTATTTATAGTGACGATTATATGTCTCACGATGAAGGATATTTGAGATTTTTTGT  
TATATAAGTTTTTTAATACTTCCATGTTAGGATTGGTTACTAGTTCCAATTTGATACAAA  
TTATTTTTTTTTGGGAACTTGTGGGAATGTGTTCCATTTATTGATAGGTTTTTGGTTTAC  
GCGGCCAATTGCAGCGAGTGCTTGTCAAAAAGCTTTTGTAACTAATCGTGTAGGGGAT  
TTTGGTCTGTTATTAGGAATTTAGGTTTTTTTTGGATAACGGGTAGTTTGGAGTTTCGG  
GATTTGTTCAAATAGCTAATAACAATGGGATTAATTCCTTACTTACTACTTTGTGTGCTT  
TTTTATTATTCCTTGGTGCAGTTGCAAAATCTGCACAATTCCTCTTACGTATGGTTAC  
CTGATGCTATGGAAGGACCCACTCCTATTTCCGGCTCTTATACACGCAGCAACTATGGTT  
GCTGCGGGGATTTTTCTTCTAGCTAGACTTCTTCTCTTTTCATATCCCTACCCTGGATAA  
TGAGTTTCATTTCTTTAATAGGTACAATAACACTCTTCTTAGGAGCCACTTTAGCTCTTG  
CTCAGAGAGATATTAAGAAGCTTAGCCTATTCTACAATGTCTCAATTGGGTTATATGA  
TGTTAGCTCTAGGTATAGGTTCTTATCAAGCTGCTTTATTCCATTTGATCACTCATGCTTA  
TTCGAAAGCTTTATTGTTCTTAGGATCCGGATCCGTTATTCATTCAATGGAACCTCTTGT  
TGGATATTCACCAGATAAAAGTCAGAATATGGTTCTTATGGGTGGTTAAGAAAATACG  
TTCCAATTACAAGAACTACTTTTTATGTGGTACACTTTCTCTTTGTGGTATTCCACCTCT  
TGCTTGCTTCTGGTCCAAAGATGAAATCCTTAGTAATAGTTGGTTGTATTCACCCTTTTT  
TGGAATAATAGCTTCTTTTACTGCAGGATTAAGTGCATTTTATATGTTTCGGATATATTA

CTTACTTTTGGATGGGTATTTGCGTGTTCAATTTTCAAATTACAGTAGTACTAAAGAAGGT  
TCGTTGTATTCAATATCCTTATGGGGAAAAAGTATATCCAAAGGAGTCAATAGG---GATT  
TTGTTTTATCAACAATGAAGTTTTTTTCAGCTAAAAAT-----ACTTTTGTCTATCCTCATG  
AAACGGGAAATACTATGCTATTTCTCTTCTTATATTACTACTTTTTACTTTTGTTCATTGG  
ATCCATAGGAATCCATTTTGGAGTTAACCATATTATCAAAGTGGCTAACTCCTTCAATAAA  
CTTGTTCCAGGAAAATTCTAATTCTCCATAAATTCATATGAATTTCTCACTAATGCAATT  
TCTTCTGTAAGTTTAGCAATTTTTGGTCTATTCATAGCATATATCTTTTATGGATCTGCTTA  
TTCTTTTTTTCAGAATTTGAATTTTCAAATTCCCTTGTAAGCTTTTTGGATGAAGTAAA  
AAAAAGATATACAGCTGGTCATATAATCGTGGTTATATAGATTTTTTCTATACTAGGGTT  
TTTATCCTAGGTATAAGAAAGTTAGCCGAACCTAACGCATTTTTTTGATAAAGGTGTCATT  
GATGGAATTACCAATGGAGTAGGTCTTGCTGGTTTTTTGTATAGGAGAAGAAATCAAATA  
T--GTAGGGGGAGGGCGAATATCGTCTTATCTATTCTTTTTTTTTATGTTATGTATCCTTGTT  
CTTATTCTTTATTCCAATGGATTACCTGGACCAATACATGAGATTCTTGCTATTTGGG  
GGATTTGGTCTTCTACTAGGAGGTCTAGGAGTAGTATTACTTACCAACCCAATTTATTCT  
GCCTTTTCGCTGGGATTAGTCTTGTGTTGTATATCCTTATTCTATTTTTTATTAAATTCCTA  
CTTTGTAGCTGTGCACAACCTTCTTATTTATGTGGGAGCCATAAATGTCTTGATCATATTT  
GCTGTAATGTTTGTAACGGCTCAGAGTGGTCTAAAGATAAGAATTATTGGACTATTGG  
AGATGGGTTTACTTTACTCCTTTGTATAACTATTCTTTTTTCACTAATGACTACTATCCCA  
GATACGTCGTGGTATGGAATCTTTGGACTACAAGATCAAACCAATAGTAGAACAGG  
GTCTCATAAATAACGTTCAACAAATTGGGATTCATTTAGCAACCGATTTTTATCTTCCGT  
TTGAACTCATTTCCCTAATTCTTCTAGTTTCTTTAATAGGTGCAATTACTATGGCTCGACA  
AATGAGTCTATCGCTTAAAGAAAAGATCTCATGATAGTCAATATGGGCCCTCAACACC  
CATCAATGCATGGTGTTCTTCGACTGATTGTTACTCTCGATGGTGAAGATGTTATTGATT  
GCGAACCCATATTAGGGTATTTACACAGAGGAATGGAAAAAATCGCGGAAAACAGAAG  
TATTATACAATACTTGCCTTATGTAACACGATGGGATTATTTAGCTACTATGTTTACAGAA  
GCAATAACGGTAAATGCACCAGAATTCTTAGAGAATATTCAAATACCCAAAAGAGCCA  
GCTATATTAGAGTAATTATGTTAGAATTGAGCCGTATAGCTTCTCATTGTTATGGCTTGG  
ACTTTTTATGGCGGATCTCGGGGCGCAGACTCCCTTTTTTCTACATTTTTTAGAGAGAGAG  
AATTGATATATGATCTATTTGAAGCTGTACAGGTATGCGAATGATGCATAATTACTTTTCG  
CATCGGAGGAGTCGCTGCCGATCTCCCTTATGGATGGATGGATAAATGTTTAGATTTCTG  
TGATTATTTTTTACAAGGAGTTGTTGAATATCAAGAATTATTACACAGAATCCCATTTT  
TTTAGAACGAGTTGAAGGAGTCGGTTTTATTAGCGGAGAAGAAGCTGTAAATTGGGGC  
TTATCGGGACCAATGTTACGAGCTTCTGGAATACAATGGGATCTTCGTAATAATTGATCCT  
TATGAGTCTTACAATCAATTCGATTGGAAAGTCCAATGGCAAAAAGAAGGAGATTCGTT  
AGCTCGCTATTTAGTACGAGTCGGTGAATGAGGGAATCCATAAAAATTATTCAACAGG  
CTGTAGAGAAAATTCCTGGAGGACCTTATGAGAATTTAGAAGCCCGACGC---AAGAAA  
GCAAAGAATCCCGAATGGAATGATTTTGAATATCGATTTCTTGTAATAAACCTTCGCC  
CAATTTTGAATTATCAAAGCAAGAGCTTTATGTAAGAGTAGAAGCTCCAAAAGGCGAA  
TTAGGAATTTATCTGGTAGGAGATGATAGTCTTTTCCCCTGGAGATGGAAAATTCGTCC  
ACCGGGTTTTATTAATTTGCAAATCTTCCCTCAGCTAGTTAAAAAATGAAATTGGCTGA  
TATCATGACAATATTAGGTAGTATAGATATCATTATGGGGGAAGTTGATCGTATGTTCCCT  
ATGCTAACTGGGTTCATTAGTTATGGTCAACAAACAATACGCGCCGCAAGATACATTGG  
TCAAAGTTTCATAATTACCTTATCCACACAAATCGTTTACCTATAACGATTCCTACCC  
TTATGAAAAATCAATTACATCGGAGCGTTTCCGGGGGCGAATACACTTTGAATTTGATA

AATGCATTGCTTGTGAAGTATGTGTTTCGCGTATGCCCCGATAGATCTACCCCTTGTGGATT  
GGAGATTTGAAAAGGATATTA AAAAGAAAACAATTGCTTAATTATAGTATTGATTTCCGA  
GTTTGTATATTTTTCGGTA ACTGTGTTGAATACTGTCCCACAAATTGTTTATCAATGACT  
GAAGAATATGAACTTTCTACTTATGATCGTCATGAATTGAATTACAATCAAATTGCTTTG  
AGTCGGTTACCAATCTCCATAATGGGAGATTACACAATTCAAACAATTAGGAATTCGAA  
AATAGACGAAGAAAAATCTTGGAATTC AAGAACGATTACAGATTACCAGCAGGGTTGG  
TTATCTAATTGGCTAGTTAAACATGACGTGGTTCATAGGTCTTTGGGCTTCGATCATCGA  
GGAGTAGAGACTTTACAAATAAAAAGCGGGGGATTGGGATTCCATTGCTGTCATTTTATA  
TGTATATGGTTACAATTATTTACGTTCCCAATGTGCTTATGACGTAGCACCCGGTGGATC  
TTAGCTAGCGTGTATCATCTTACGAGAATACAGTATGGTATAGATAACCCAGAAGAGGT  
ATGCATAAAAGTCTTTGCCCAAAGGATAATCCTAGAATCCCGTCCGTTTTCTGGGTTT  
GGAGAAGTGCCGATTTTCAAGAACGCGAATCTTATGATATGGTGGGAATTTCTTATGAT  
AATCATCCACGTCTTAAACGTATCTTAATGCCTGAAAGTTGGATAGGCTGGCCCTTACGT  
AAGGACTATATAACCCCAATTTCTATGAAATACAAGATGCTCAT-----

-----ATGAGTTTGATTGAGTTTCCGTTACTCGACCAAACAAGTTCCA  
ATTCCGTTATTTCAACTACACCAAACGATCTTTCAAATTGGTCAAGACTCTCAAGTTTAT  
GGCCCTTCTATATGGTACCAGTTGTTGTTTCATTGAATTTGCTTCATTAATAGGCTCAC  
GATTCGACTTTGATCGTTATGGATTGGTACCCAGATCAAGTCCTAGACAAGCGGACCTA  
ATTTAACAGCTGGTACGGTAACAATGAAAATGGCTCCATCTTTAGTGCGATTATATGAG  
CAAATGCCTGAACCGAAATACGTCATTGCTATGGGAGCCTGTACTATTACAGGGGGCAT  
GTTCAGTACAGATTCCTATAGTACTGTTTCGAGGAGTTGATAAGTTAATTCCTGTGGACG  
TCTACCTGCCGGGTTGCCCGCCTAAACCAGAGGCTGTTATAGATGCCCTAACAAAATT  
CGTAAGAAGATAGCGCGAGAAATAATTGAGGATCGAACTCTATGTCAAAGTAAAAATA  
GATCTTTTACTACCCGTCACAACTTTATGTTTCGGCGCAGTACTCACACTGGAACCTTAC  
GAACAAGAATTGCTCTATCAATCACCATCTACTTTAGATATATCTACT-----TTTTCAAAT  
CCAAAAGTTCAGTATCTTCTACAAATAGTGAATATGGAAAATAGAAAAACTTTTTCT  
TGGTTAAAGGAACAGATGATTCGATCGATTTCTGTATCGATCATGATATACGTAATAACT  
CGCACATCTATTTCAAACGCATATCCATTTTTGCGCAGCAGGGTTATGAAAACCCGCG  
GGAAGCAACTGGACGAATTGTATGTGCCAATTGCCATTTAGCTAATAAGCCTGTGGATA  
TTGAAGTTCCCAAGCAGTGCTTCCTGATACTGTATTTGAAGCAGTTCTTCGAATTCCTT  
ATGATATGCAGCTGAAACAAGTTCTTGCTAATGGTAAAAGGGAGGGTTGAATGTGGG  
TGCTGTTCTTATTTTGGCCGAGGGATTGCAATTAGCGCCGCCGACCGTATTTCTCCTGA  
GTTGAAAGAAAAGATAGGAAATCTCTTTTTTCAGAGTTATCGTCCAATAAAAAAATA  
TTCTTGTGATAGGCCCTGTTCCCGGTAAGAAATATAAGTAAATTGTCTTTCCCATTTCTT  
CCCCGATCCCGCTACAAAAAAGACGTTCAATTTCTTAAAATATCCCATATATGTAGGGG  
GAAACCGAGGAAGGGGACAGATCTATCCTGACGGTAGCAAGAGTAACAATACGGTCTA  
TAATGCTACGTCAACAGGTATAGTAAAAAATACTACGTAAAGAAAAGGGGGGATAT  
GAAATATCCATAGTGGATGCATCGGATGGGCGCCAAGTGATTGATATTATACCTCCCGGG  
CCAGA ACTTCTTTTTTCAGAGGGGGAATCGATCAAGCTTGATCAACCATTAACAAGCA  
ATCCTAATGTAGGAGGGTTTGGTCAGGGGGATGCAGAAATAGTGCTTCAGGATCCATTG  
CGCGTCCAAGGCCTTTTGTTTTTCTTCGCATCTGTTATTTTGGCACAAGTTTTTTTTGGTT  
CTCAAAAAGAAACAGTTTGAAAAGGTTCAATTGTACGAAATGAATTTCTCAATAAAG  
TATATGATTGGTTTGAAGAACGTCTTGAGATTCAGGCAATTGCAGATGATATAACTAGTA

AATATGTTCCCTCCTCATGTCAACATAATTTTATTGTTTAGGGGGAATTACACTTACTTGTTT  
TCTAGTACAAGTCGCTACCGGTTTTGCTATGACTTTTTACTACCGACCGACCGTTACAG  
AGGCTTTTTTCCCTCCGTTCAATATATAATGACGGAGGCCAACTTTGGTTGGTTAATCCGAT  
CGGTTTCATCGATGGTCAGCAAGTATGATGGTTCTAATGATGATCCTGCACGTATTTCTGTG  
TGTATCTCACAGGTGGATTTAAAAACCCCGTGAATTAACCTTGGGTACAGGCGTGGTT  
TTGGCTGTATTGACTGCATCATTTGGGTGTAAGTGGTTATTTCTTTGCCTTGGGATCAAATT  
GGTTATTGGGCAGTCAAATTGTTACAGGTGTACCCGAAGCTATTCCGGTAATAGGGTC  
CCTTTAGTGGAATTATTACGTGGAAGTGTAGTGTGGGCCAATCCACTTTGACTCGTT  
TTTATAGTTTACATACCTTTGTACTACCTCTGCTTACTGCCGTATTTATGTTAATGCACTTT  
CCAATGATACGTAAGCAAGGTATTTCCGGTCCGTTAATGGGAGTAACAAAGAAACCTG  
ACTTAAATGATCCTGTATTAAGAGCAAATTAGCTAAAGGGATGGGACATAATTATTATG  
GGAAACCCGCGTGGCCCAACGATCTTTTATACATTTTCCAGTAGTAATTCTAGGTACTA  
TTGCGTGTAAATGTAGGTTTAGCGGTTCTAGAGCCGTCATGATTGGTGAACCGGCGGAT  
CCGTTTGCAACTCCTTTGGAAATATTACCCGAGTGGTACTTCTTTCCCGTATTTCAAATA  
CTCCGTACAGTACCCAATAAGTTATTGGGCGTTCTCTTAATGGTTTCTGTGCCAACGGG  
CTTATTGACAGTACCCTTTCTAGAGAATGTCAATAAATTCCAAAATCCATTTTCGTGCGCC  
AGTAGCTACGACCGTTTTTTAATCGGTACTGCAGTAGCTCTTTGGTTAGGTATTGGAGC  
AACATTACCCATTGATAAATCCTTAACCTTAGGTCTTTTTATGATTGAAGTTTTTCTATTT  
GGAATCGTCTTAGGCCTAATCCTATTACTTTAGCGGGATTATTCGTGACTGCGTATTTG  
CAATACAGGCGTGGGGATCAGTTGGATCTTATGCTTACTATAACTAGTTATTTCCGTTTT  
CTACTGGCTGCTTTAACTATAACCCAGCTCTATTTATTAGCTTGAACAAGATACGTCTT  
ATTATGGATATAGTAAGTCTCACTTGGGCTGCTTTAATGGTAGTCTTTACATTTTCTCTTT  
CGTAGTAGTATGGGGGAGGAGTGGACTCATGATTATTCGTTTCGTGCGGAACCAGAAGTT  
AAAATTGCTGTGGATAGGGATCCTATAAAAACATCTTTTGAGGAATGGGCCAGACCCG  
GGCATTCTCAAGAACAATAGCTAAGGGCCCCGATACTACCACTTGGATCTGGAACCTA  
CATGCTGATGCTCACGATTTGATAGTCATAACCGGTGATTTGGAGGAGATCTCCCGAAA  
AGTCTTTAGTGCTCATTTCGGCCAACCTCTCCATTATCTTTCTTTGGTTGAGTGGCATGTA  
CTTCCACGGTGCCCGTTTTTCCAATTATGAAGCATGGCTAAGCGATCCTACTCACATTG  
GACCCAGTGCTCAGGTAGTTTGGCCAATAGTAGGACAAGAAATTTGAATGGTGATGT  
AGGCGGGGGTTTTCCGAGGAATCCAAATAACCTCTGGTTTTTTTCAGATTTGGCGAGCAT  
CCGGAATAACTAGTGAATTACAACCTCTATTGTACCGCAATTGGTGCATTTGATTTTGCAT  
CGTTAATGCTTTTTGCCGGTTGGTTCCATTATCACAAAGCCGCTCCCAAATTGGCCTGG  
TTCCAAGATGTAGAATCCATGTTGAATCACCACTTAGCGGGATTATTAGGACTTGGGTC  
TCTTTCTTGGGCGGGACACCAAATCCATGTATCTTTACCGATTAACCAATTTCTCGACGC  
TGGGGTTGATCCTAAAGAGATAACCACTTCCTCATGAATTTATCTTGAATCGCGACCTTTT  
GGCTCAACTTTATCCTAGTTTTGCCGAAGGAGCAACCCCTTTTTTCACCTTGAATTGGT  
CCAAATATGCGGAATTTCTTAGTTTTGCGGGAGGACTAGATCCAATAACCGGTGGTCTA  
TGGTTGAGCGATTTGCACACCATCATTTAGCTATTGCTATTCTTTTCCTGATCGCTGGTC  
ATATGTATAGGACCAATTGGGGTATTGGTCATGGACTTAAAGATATTTGGAGGCTCATA  
AGGGCCCAATTTACAGGACAAGGCCATAAAGGTCTCTATGAAATCCTAACAACGTCATG  
GCATGCTCAATTATCTCTAACCTAGCTATGCTAGGCTCTACAACCTATTGTTGTAGCTCAT  
CATATGTAATCTATGCCCCCTATCCATACCTAGCTACTGACTACGGTACACAACCTTCC  
TTGTTACACACCACATGTGGATTGGCGGATTTCTAATAGTTGGTGTGCTGCACATGC  
AGCCATTTTTATGGTAAGAGACTATGATCCAACCTACTCGATACAACGATCTATTAGATCG

CGTCCTTAGACACCGCGATGCAATCATATCCCACCTTAACTGGGTATGTATATTTCTGGG  
TTTTACAGTTTTGGCTTGTACATTCATAATGATACCATGAGTGCTTTAGGCCGTCCCCA  
AGATATGTTTTTCGGATGCCGCCATAACAATTACAACCCATCTTTGCTCAATGGATACAAA  
TATCCATGCTGGCGCGCTGGCGTAACAGCTCCTGGTGCAACAACAAGTACCAGCTTA  
ACGTGGGGAGGCGGCGAGTTAGTAGCTATAAGCGGCAAAGTAGCTTTGTTACCTATTCC  
ATTAGGAACCGCAGATTTTTTAGTCCATCACATTCACGCATTTACCATCCATGTGACTGT  
ATTAATACTTTTCAAAGGTGTTTTATTTGCTCGCAGTTCCCGTCTGATACCTGATAAAGC  
AAATCTTGGCTTTTCGCTTCCCTTGCACGACCTGGGCGAGGGGGAACATGTCAAGTA  
TCCGCCTGGGATCATGTTTTCTTAGGTCTATTCTGGATGTACAATTCTATTTTCGGTAGTCA  
TTTTCCATTTTCAGTTGGAAAATGCAGTCGGATGTTTGGGGTACTATAAGTGATCAAGGG  
ATAGTAACTCATATCACAGGGGGAACTTTGCGCAGAGTTCCATTACGATTAATGGTTG  
GCTTCGAGATTTCTTGTGGGCACAGGCATCCCAAGTAATTCAGTCTTATGGTTCTTCATT  
ATCTGCATATGGTCTTTTTTTCTTAGGCGCTCATTTTGTCTGGGCTTTTCAGTTAATGTTT  
TTATTCAGCGGCCGTGGTTATTGGCAAGAACTCATTGAATCTATCGTTTGGGCTCATAAC  
AAATTAAGTTGCTCCTGCTACTCAGCCTAGAGCCTTGAGCATTATAACAAGGACGTGC  
TGTAGGAGTAACCCATTACCTTCTGGGTGGAATTGCCACAACATGGGCATTCTTCTTAG  
CGAGAATTATTGCAGTAGGAATGGAATTAAGATTTCCAGGTTTAGCCAAGGCTTAGCT  
CAGGACCCCACTACTCGTCGTATTTGGTTTGGTATTGCTACCGCACATGATTTCGAAAG  
TCATGATGATATTACTGAGGAACGTCTTTATCAGAACATTTTTGCTTCTCACTTTGGGCA  
GTTAGCAATAATCTTCTATGGACGTCCGGAAATCTGTTTCATGTAGCTTGGCAAGGAA  
ATTTTGAATCATGGATACAGGATCCTTTACACGTAAGACCTATTGCTCATGCCATTTGGG  
ATCCTCATTTTGGGCAACCCGCTGTGGAAGCCTTTACTCGAGGAGGTGCTGCCGGTCC  
AGTGAATATCGTTATTCTGGGGTTTATCAGTGGTGGTATAACAATTGGATTGCGCACCAA  
TGAAGATCTTTATACTGGAGCTCTTTTTCTATTATTTCTTTCTACGCTATCCTTAATAGGG  
GGTTGGTTACATCTACAACCCAAATGGAAGCCAAGCCTTTCGTGGTTCAAAAACGCCG  
AATCTCGTCTGAATCATCATTTGTACAGGACTTTTCGGAGTAAGTTCTTTGGCTTGGACA  
GGACATTTAGTTCATGTTGCTATTCCCGATCCAGGGGGGAGTACGTTTCGATGGAATAA  
TTTTCTTAGATGTATTACCCTATCCCAGGGGTTGGGTCCCCTTCTGACGGGTGAGTGA  
ATCTTTATGCCAAAATCCTGATTCGAGTAATCATTTATTTGGTACCACTCAAGGAGCGG  
GAACTGCCATTCTGACCCTTCTTGGGGGATTCCATCCACAAACACAAAGTTTGTGGCT  
GACCGATATTGCTCATCATTTAGCTATTGCATTTATTTTTCTCATTGCCGGTCATATGT  
ATCGAACTAACTTCGGAATTGGGCACAGTATCAAAGATCTTTTAGAAGCACATACTCCT  
CCGGGGGGTCGATTAGGACGTGGGCATAAAGGCCCTTATGATACAATCAATAATTCGAT  
TCATTTCAATTAGGCCTTGTCTAGCTTCCTTAGGGGTTATTACTTCCTTAGTAGCTCA  
ACATATGTACTCTTACCTGCTTATGCATTCATAGCACAAAGACTTTACTACTCAAGCTGC  
TTTATATACTCATACCAATACATTGCAGGGTTCATCATGACAGGGGCTTTTGTCTATGG  
AGCTATTTTTTTCATTAGGGATTACAATCCGGAACAGAATGAAGATAATGTATTGGCAAG  
AATGTTAGACCATAAGGAAGCTATCATATCTCATTTAAGTTGGGCTAGCCTCTTCCTAGG  
ATTCCATACCTTGGGCCCTTATGTTTATAACGACGTTATGCTTGCTTTTGGTACTCCAGA  
AAAGCAAATCTTGATTGAACCTATATTTGCCCAATGGATACAATCTGCTCATGGTAAGA  
CGACATATGGGTTTCGATATACTCTTATCTTCAACGAATGGCCCCACTTTCAATGCAGGTC  
GAAACATATGGTTGCCCGGATGGTTGAATGCTGTTAATGAG-----AATAGTAATTCGCTT  
TTCTTAACAATAGGACCTGGGGATTTCTTGGTTCATCATGCTATTGCTCTAGGTTTGCAT  
ACAACACTACATTGATTTTAGTAAAGGGTGTCTTAGATGCACGCGGTTCCAAATTAATGCC

GGATAAAAAGGATTTTCGGGTATAGTTTTCTTGCGACGGCCCAGGGCGCGGCGGTACT  
TGTGATATTTCTGCTTGGGACGCGTTTTATTTGGCAGTTTTCTGGATGTAAATACCATT  
GGATGGGTACTTTTTATTGGCATTGGAAACACATTACATTATGGCAGGGCAACGTTTC  
ACAATTTAATGAATCCTCCACTTATTTGATGGGATGGTTAAGAGATTACCTATGGTTAAA  
CTCTTCACAACCTATTAATGGATATAATCCTTTTGGGATGAATAGTTTATCAGTATGGGCT  
TGGATGTTCTTATTTGGACATCTTGTTTGGGCTACAGGATTTATGTTCTTAATTTCCCTGGC  
GTGGATATTGGCAGGAATTAATTGAGACTTTAGCATGGGCTCATGAACGGACACCTTTG  
GCTAATTTAATTCGCTGGAGAGATAAGCCCGTGGCTCTTTCCGTTGTGCAAGCAAGATT  
GGTCGGATTAGCCACTTTTCCGTGGGTTATATATTCATTATGCAGCTTTCTTGATTGCC  
TCAACATCAGGCAAGTTCGGTATGTCACATTCTGTAAAAATTTATGATACATGTATAGGA  
TGCACCTATTGTGTACGAGCTTGCCCAACAGATGTATTAGAAATGATACCTTGGGATGG  
ATGTAAAGCCAAGCAAATTGCTTCCGCGCCGAGAACCGAAGATTGTGTGGGTTGTAAG  
AGATGCGAATCCGCCTGTCCAACGGATTTTTTAAGTGTCCGCGTTTATTTAGGGCCTGA  
AACAAACCCGCAGCATGGCTCTATCTTATATGACAGATTTTAACTTACCCTCTATTTTCGT  
ACCTTTAGTAGGCTTAGTATTTCCGGCAATTGCAATGACTTCCTTATTTCTTTATGTGCA  
GAAAAATAAGATTGTGCATGCGGGATATAAAAACATATCTCTGTAGCACCCGTGCTAA  
GTACTCTATGGTTTGGGGCTTTAGCAGGTTTATTGATAGAAATCAATCGTTTATTCCCAG  
ATGCTTTGTCAATCCCTTTTTTTT-----ATGACTGCAATTTTAGAGAGACGCGAAAGTACA  
AGCCTGTGGGGTCGCTTCTGCAACTGGATAACTAGCACCGAAAACCGTCTTTACATTG  
GATGGTTCGGTGTTTTGTATGATCCCTACCTTATTGACCGCAACTTCCGTATTTATTATCGC  
CTTCATCGCTGCTCCTCCAGTAGATATTGATGGTATTCGTGAGCCTGTTTCTGGTTCTTT  
ACTTTATGGAAACAATATTATCTCTGGTGCTATTATTCCTACTTCTGCGGCGATAGGGTTG  
CATTTTACCCAATTTGGGAAGCTGCATCTGTTGATGAATGGTTATACAATGGCGGTCCT  
TATGAGCTAATTGTTCTACACTTCTTACTTGGTGTAGCTTGTATATGGGTCGTGAGTGG  
GAACTTAGTTTCCGTCTGGGTATGCGCCCTTGGATTGCTGTTGCATATTCAGCTCCTGTT  
GCAGCTGCTACTGCTGTTTCTTGATTTACCCTATTGGTCAAGGAAGTTTCTCTGATGGT  
ATGCCTTTAGGAATATCTGGTACTTTCAACTTTATGATTGTATTCCAGGCAGAGCACAAC  
ATCCTTATGCATCCATTTACATGTTAGGTGTAGCTGGTGTATTTCGGCGGTTCCCTATTCA  
GTGCTATGCATGGTTCCTTGTAACCTCTAGTTTGTATCAGGGAAACCACTGAAAATGAG  
TCTGCTAATGAGGGTTACAAATTTGGTCAAGGAAGAAGAGACTTATAATATTGTGGCTGC  
TCACGGTATTTTGGTTCGATTAATCTTCCAATATGCTAGTTTCAACAATTCCTCGTTCTTTA  
CACTTCTTCTGGCTGCTTGGCCTGTAGTAGGGATCTGGTTCAGTCTTTAGGTATTAGT  
ACTATGGCATTCAACCTAAATGGTTCATTTCAACCAATCTGTAGTTGATAGCCAAGG  
TCGCGTTATTAATACTTGGGCTGATATCATCAACCGTGCTAATCTTGGTATGGAGGTAAT  
GCACGAACGTAATGCTCACAACCTCCCTCTAGACCTAGCTGCTCTTGAAGTTCCTTACC  
TTAATGGAATGGGTTTGCCTTGGTATCGTGTTCACTGTCGTATTGAATGATCCGGGTC  
GATTGCTTTCGGTGCATATAATGCACACAGCTCTAGTTTCTGGTGGGCTGGTTCGATG  
GCTTTATACGAATTAGCGGTTTTTGTATCCCTCTGATCCTGTTCTGGATCCAATGTGGAGA  
CAAGGTATGTTTCGTCATCCCCTTCATGACTCGTTTAGGAATAACGAATTCGTGGGGTGG  
TTGGAGTATTTCA---GGAGGAACTGTAACGAATCCGGGTATTTGGAGTTATGAAGGTGT  
GGCAGGTGCGCATATTGTGTTTTCTGGCTTGTGTTTCTTGGCAGCTATCTGGCATTGGGT  
ATATTGGGACCTAGAAATATTCTGTGATGAGCGGACGGGAAAACCTTCTTTGGATTGTC  
CCAAGATCTTTGGAATTCATTTATTTCTTGCAGGGGTGGCTTGTFTTGGCTTTGGTGCAT  
TTCATGTAACGGGTTTATATGGCCCTGGGATATGGGTGTCCGATCCTTACGGACTCACTG

GAAAAGTACAAGCTGTAAATCCTGCGTGGGGTGCAGAAGGTTTTGATCCTTTCGTTCC  
GGGAGGAATAGCTTCGCATCATATTGCTGCGGGTACTTTGGGCATATTAGCGGGCCTATT  
CCATCTAAGTGTCCGTCCGCCTCAACGTCTATACAAAGGGTTACGTATGGGCAATATTG  
AAACTGTACTTTCCAGTAGTATCGCTGCTGTTTTTTTTGCTGCTTTCGTAGTTGCCGGAA  
CTATGTGGTATGGATCAGCAACTACCCCAATCGAATTATTTGGGCCTACTCGTTATCAGT  
GGGATCAGGGATACTTTCAGCAAGAAATATATCGAAGAGTTAGCGATGGGTTAGCCGA  
AAATCTTAGTTTATCAGAAGCTTGGTCTAAAATTCCCGAAAAATTAGCCTTTTATGATTA  
TATTGGTAATAATCCGGCAAAGGGGGGATTATTCAGAGCAGGCTCAATGGACAATGGG  
GATGGCATAGCTGTTGGATGGTTAGGACATCCCGTCTTTAGAGATAAAGAAGGACGCG  
AGCTTTTTGTACGTCGTATGCCTACTTTTTTTGAAACATTTCCGGTCGTTTTGGTAGATG  
AAGAGGGAATTGTGAGAGCGGACGTTCCTTTTAGAAAGAGCAGAATCCAAATATAGTGT  
TGAACAAGTAGGCGTAACGGTGGAGTTCTATGGTGGCGAACTTAATGGAGTAAGTTAT  
TCTGATCCTGCTACTGTAAAAAATATGCGCGGGCTGCTCAATTAGGGGAAATTTTTGA  
ATTAGATCGAGCTACTTTGAAATCAGATGGTGTTTTTTCGCAGCAGTCCAAGGGGTTGGT  
TCACTTTTGGTCATGCTACCTTTGCTTTGCTCTTCTTTTTTCGGACACATTTGGCATGGCG  
CTCGAACCTTGTTCGAGATGTTTTGCTGGTATTGATCCAGACTTGGATGCTCAAGTG  
GAATTTGGAACATTCAAAAAGTTGGAGATCCAATAAGGAGACAGGCAGCCATG  
AAAATCTTATATCCCTGAGGAGTTCTACCACGTGGAAACGCTCTTTAATGGAACCTT  
CGTTTTAGCTGGTCGTGACCAAGAAACCACCGCTTTCCTTGGTGGGCTGGGAATGCC  
AGACTTATCAATTTGTCCGGTAAACTACTTGGAGCTCATGTAGCCCATGCCGGATTAATC  
GTATTCTGGGCCGGAGCAATGAACCTATTTGAAGTGGCCCATTTTCGTACCAGAAAAGC  
CCATGTATGAACAAGGGTTGATTTACTTCCGCACTTAGCTACTCTAGGTTGGGGAGTA  
GGGTCGGGGGGGAGAAGTTCTAGATACTTTTCCTTACTTTGTATCCGGAGTACTTCACTT  
AATTTCCCTCCGAGTCTTAGGCTTCGGTGGCATTATCACGCGCTTCTGGGACCCGAGA  
CTCTTGAAGAATCTTTTCCATTCTTTGGTTATGTATGGCAAGATAGAAATAAAATGACTA  
CACTTTTGGGTATTCATTAATTTGTTAGGTCTAGGTGCTTTTCTTCTAGTACTCAAGG  
CTCTTTATTTTGGCGGCGTATATGATACCTGGGCCCCGGGGGGGGGATGTAAGAAAA  
ATTACCAATTTGACCCCTAGCCCCGGTGTATATTTGGTTATTTACTAAAATCCCCTTTTG  
GGGAGAAGGATGGATTGTTAGTGTGGATGATTTAGAAGATATAATTGGGGGACATGTA  
TGGTTGGGTTCCATTTGTGTACTTGGCGGAATTTGGCATATCTTAACCAAACCTTTGCA  
TGGGCTCGCCGTGATTTGTATGGTCTGGCGAAGCTTACTTGTCTTATAGTTTAGGTGCT  
TTATCTGTTTTTGGTTTTATCGCTTGTGTTTTGTCTGGTTCAATAATACGGCTTATCAA  
GTGAGTTTTACGGGCCACTGGACCAGAAGCTTCTCAAGCTCAAGCATTTACTTTTTCTA  
GTTAGAGACCAGCGTCTTGGAGCTAATGTAGGGTCTGCCCAAGGACCGACGGGTTTAG  
GTAATATCTAATGCGTTCCTCAACGGGAGAGGTTATTTTTGGAGGGGAACTATGCGT  
TTTTGGGACCTTCGTGCTCCGTGGTTAGAACCTCTAAGGGGCCCAACGGTTTGGACT  
TGAGTAGGTTGAAGAAAGACGGCCAACCTTGGCAAGAACGACGTTCAAGGAGAATATA  
TGACCCATGCTCCTTAGGCTCTTAAATTCCGTGGGTGGCGTAGCTACCGAGATCAAT  
GCTGTTAATTATGTCTCCCCTAGAAGTTGGTTAGCGACCTCCATTTTGTCTAGGATTC  
TTCTTTTTTGTGGGCCATTTGTGGCATGCAGGAAGAGCCCGAGCTGCTGCAGCAGGCT  
TTGAAAAGGGAATTGATCGGATTTGGAACCTGTTGTTTACATGACCCCTCTTAAACATG  
ACTATAGCCGTTGGTAGAGTTACTAAAGAAGAAAACGATCTATTCCCCCTTATCGACGA  
CTGGTTACGAAGGGACCGCTTCGTTTTTGTAGGATGGTCCGGCTTATTGCTCTTTCCTT  
GTGCTTATTTGCTTTAGGGGGTTGGTTTACAGGGACTACTTTTGTAACCTTCTTGGTATA

CCCATGGATTGGCTAGTTCCTATTTGGAAGGTTGCAATTTCTTAACCGCGGCGGTTTCC  
ACACCTGCCAATAGTTTAGCACACTCTTTGTTGCTACTATGGGGACCGGAAGCACAGG  
GAGATTTTACTCGTTGGTCTCAATTAGGTGGTCTTTGGACTTTTCTCGCTCTCCATGGAG  
CTTTTGCACTAATAGGTTTCATGCTACGTCAATTTGAACTTGCTCGGCCTGTTCAATTGC  
GGCCTTATAATGCAATTCATTCTCTGGTCCAATCGCTGTTTTTCTTCCGTATTCCCTAT  
TTATCCACTGGGACAATCTGGTTGGTCTTCTCGCCGAGTTTTGGCGTAGCAGCTATATT  
TCGCTTCATCCTTTTTCTTCCAAGGATTTCCATAATTGGACGTTGAAACCATTTCCATATGAT  
GGGAGTTGCCGGAGTATTAGGCGCAGTCTGCTATGCGCTATCCACGGGGCTACCGTAG  
AAAACACTCTATTCGAAGATGGCGATGGTGCAAATACCTTCCGTGCTTTTAACCCAACT  
CAAGCTGAAGAACTTATTCAATGGTCACTGCTAACCGCTTTTGGTCCCAAATCTTTGG  
TGTTGCTTTTTTCCAATAAACGTTGGTTACATTTCTTTATGCTATTTGTACCCGTCACCGGT  
TTATGGATGAGTGCTATTGGCGTAGTTGGTCTGGCTCTGAACCTACGTGCCTATGACTTC  
GTTTCCCAGGAAATCCGTGCAGCGGAAGATCCTGAATTTGAGACTTTCTACACCAAAA  
ATATTCTTTTAAACGAGGGTATTCGTGCGTGGATGGCAGCTCAGGATCAGCCTCATGAA  
AATCTTATATTCCCTGAGGAGTCTACCACGTGGAAACGCTCTTATGTCTGGAAGCAC  
GGGAGAACGTTCTTTTGTGATATTATTACCAGTATTCGATACTGGGTTATTTCATAGCATT  
ACTATACCTTCCCTATTTCATTGCGGGTTGGTTATTTGTCAGTACGGGTTTAGCTTATGAC  
GTGTTTGGAAAGTCTCGACCAAACGAGTATTTACGGAAAGCCGACAAGGAATTCCAT  
TAATAACCGACCGTTTTGATTCTTTAGAACAACTAGATGAATTTAGTAGATCCTTTATGA  
CCATAGATCGAACCTATCCTATTTTACAGTGCAGTGGCTGGCTGTTACCGGATTAGCTG  
TACCCACGGTTTTTTTTCTTGGGATCAATATCAGCAATGCAGTTCATCCAACGAATGGCTA  
CACAAACCGTTGAAGATAGTTCTAGACCTAAG---CCAAAACGGACTGGCGCAGGTAGT  
TTATTGAAACCCTTGAATTCGGAATATGGGAAAGTTGCTCCGGGTTGGGGGACTACTCC  
TTTTATGGGGTTCGCAATGGCTTTATTCGCGATATTCCTATCTATAATTTTAGAAATTTATA  
ATTCTTCTGTTTTACTGGACGGAATTTAACGAATATGCTTACTCTCAAACCTTTTTGTTTA  
TACAGTAGTGATATTCTTTGTTTCCCTCTTTATCTTTGGATTCTTATCTAATGACCCAGGA  
CGTAATCCTGGGCGTGAGGAGATGGCCGATACTACTGGAAGAATTCCTCTTTGGCTGAT  
AGGTACTGTAACCTGGTATTCTTGTGATTGGTTAATAGGTTTTTTCTTTTACGGTTCGTAT  
TCTGGATTGGGTTTCATCTCTAATGCCTAATACTTAGTTTAACTGTATCTGTTTTAATT  
CTGTTCTTTGTCCGACTAGCTTTTTCTTCGCCAAATTACCCGAAGCTTATGCCATTTTCA  
ACCCAATCGTGGATGTTATGCCTGTCATACCTGTACTCTTTTTTCTATTAGCGTTTGTGTTG  
GCAAGCTGCTGTAAGTTTTTCGAATGACACAATCAAACCCGAATGAACAAAATGTTGAA  
TTGAATCGTACCAGTCTATACTGGGGTTTATTACTCATTTTTTGTACTTGCTGTTTTATTTT  
CCAATTACTTCTTCAATATGGAAGTAAATATTCTCGCATTATTGCTACAGCATTGTTTCAT  
TCTAGTTCCTACTGCCTTTTTACTTATTATTTATGTAAAAACAGCCAGTCAAATGATATG  
GAAACAGCAACTTTAGTCGCCATCTCCATATCTGGTTTACTTGTAAGCTTTACTGGGTAT  
GCCTTATATAACCGGTTTGGGCAACCCTCTCAACAATTAAGAGATCCATTCGAAGAACA  
TGGGGACATGGAAGCATTGGTTTATACGTTCTTTTTAGTTTTCGACTTTAGGGATAATTTT  
TTTCGCTATCTTCTTCCGAGAACCACCTAAGGTTCCGACTAAGAAA-----ATGAATATTG  
CTTTCCAATTAGCTGTTTTTGCATTAATTGCGACTTCCTCAGTTTTAGTAATTAGAGGAC  
ACCTTGATTTGCTTCTCCTGATGGTTGGTCAAATAATAAAAACGTTGTATTTCCGGTA  
CATCATTATGGATTGGATTAGTCTTCTGGTAGCTATTCTGAATTCTCTTATTTCT-----  
-----ATGTCACCACAAACAGAACTAAAGCAAGTGTGGATTAAAGCTGGTGTAA  
GGATTATAAATTGACTTACTACACCCCGGAGTACGAAACCAAGGATACTGATATCTTGG



CAGCATTCCGAGTAACTCCTCAGCTCGGGGTTCCGCCTGAAGAAGCAGGAGCTGCAGT  
AGCTGCGGAATCTTCTACTGGTACATGGACAACTGTTTGGACTGATGGACTTACCAGTC  
TTGATCGTTACAAAGGACGATGCTATCACATCGAGCCCGTTCCCTGGGGACCCAGATCAA  
TATATCTGTTATGTAGCTTATCCATTAGACCTATTTGAAGAGGGTTCTGTTACTAACATGT  
TACTTCCATTGTGGGTAACGTATTTGGTTTCAAAGCCTTACGCGCTCTACGTTTGGAG  
GATCTACGAATTCCCCCTGCTTATTCAAAAACTTTCCAAGGTCCGCCTCACGGTATCCA  
AGTTGAAAGGGATAAGTTGAACAAGTACGGTTCGTCCTTTATTGGGATGTACTATTA AAC  
CAAAATTGGGATTATCCGCAAAAATTACGGTAGAGCGTGTTATGAGTGTCTACGCGGT  
GGACTTGATTTTACCAAAGATGATGAAAACGTAAACTCACAACCATTTATGCGCTGGAG  
AGACCGTTTCGTCCTTTGTGCCGAAGCAATTTATAAAGCACAAGCCGAAACTGGTGAA  
ATCAAGGGGCATTACTTGAATGCGACTGCAGGTACATGCGAAGAAATGATTAAGAGAG  
CTGTATTTGCAAGGGAATTAGGGGTTCTATTGTAATGCATGACTACTTAACAGGAGGA  
TTCACCGCAAATACTACTTTGTCTCATTATTGCCGCGACAACGGCCTACTTCTTCACATT  
CACCGAGCAATGCATGCAGTTATTGATAGACAGAAAAATCATGGTATGCATTTCCGTGT  
ATTAGCTAAAGCATTGCGTATGTCGGGGGAGATCATATCCACTCCGGTACAGTAGTAG  
GTAAGTTAGAAGGGGAACGCGAAATAACTTTAGGTTTTGTTGATTTATTGCGCGATGAT  
TTTATTGAAAAGATCGTTCTCGCGGTATCTTTTTCACTCAGGACTGGGTATCCATGCCA  
GGTGTATACCGGTGGCTTCTGGGGGTATTCATGTTTGGCATATGCCAGCTCTGACCGA  
AATCTTTGGAGATGATTCCGTATTACAATTTGGTGGAGGAACTTTAGGACATCCTTGGG  
GAAATGCACCTGGTGCAGCAGCTAATCGTGTGGCTTTAGAAGCCTGTGTACAAGCTCG  
TAACGAAGGGCGCGATCTTGCTCGTGAAGGTAATGAAATTATCAAAGCAGCTTGCAAA  
TGGAGTGCTGAACTAGCCGCAGCTTGTGAAATATGGAAGGAGATCAAATTTGATTTCA  
AAGCGATGGATAACCATA-----ACGGCGAAACATTTATACAAAACACCTATCCCAGACACA  
CGCAAGGGAAACCGTAGACAGGCAAGTGAATCCAATCCACGAAATAAATTGATCCATG  
GACGGCACCGTTGTGGTAAAGGTCGTAATGCCAGAGGAATCATTACCGCAAGGCATAG  
AGGGGGAGGTCATAAGCGCCTATACCGTAAAATCGATTTTCGACGGAATCAAAAAGAC  
ATATCTGGTAGAATCATAACCATAGAATACGACCCTAATCGAAATGCATACATTTGTCTC  
ATACACTATGGGGATGGTGAGAAGAGATATATTTTACATCCCAGAGGGGCTATAATTGG  
AGATACTATTGTTTCTGGTACAAAAGTTCCCTATATCAATGGGAAATGCCCTACCTTTGAC  
CGATATGCCCTTAGGCACGGCCATACATAACATAGAAATCACACGTGGAAGGGGTGGG  
CAATTAGCTAGAGCAGCAGGTGCTGTAGCGAAACTGATTGCAAAAAGAGGGTAAATTGG  
CCACTTTAAGATTACCATCTGGGGAGGTCCGTTTGGTATCCCAAACTGCTTAGCAACA  
GTCGGACAAGTGGGTAATGTTGGGGTGAACCAAAAAGTTTGGGTAGAGCCGGATCT  
AAGTGTGGCTAGGTAAACGCCCCGTAGTAAGAGGGGTAGTTATGAACCCTGTGGACC  
ACCCCATGGGGGTGGTGAAGGGAAAGCCCCATTGGTAGAAAAAACCACAACCC  
CTTGGGGTTATCCTGCGCTTGAAGAAGAACTAGGAAAAGGAAAAAATATAGTGATAG  
TTTTATTCTTCGTCGCCGTAAG---ATGATTCAACCTCAGACCCTTTTAAATGTAGCAGAT  
AACAGTGGAGCTCGAAAATTGATGTGTATTTCGAGTCATAGGAGCCGCTGGTAATCAGC  
GATATGCTCGTATTGGTGTATTTATTGCTGTAATCAAAGACGCAGTGCCCCAATGC  
CTCTAGAAAGATCCGAAGTAATTCGAGCTGTAATTGTACGTACACGTAAAGAATTCAAA  
GGCGACGACGGTATAATAATACGCTATGATGACAATGCAGCAGTTATCATTGATCAAAA  
AGGAAATCCAAAAGGAACTCGAGTTTTTGGCGCGGTTGCCGAAGAATTAAGAGAATT  
GAATTTGACTAAAATAGTTTCATTAGCTCCTGAAGTATTAATGCTTAGTCCCAAAAGAA  
CTAGATTTGTAACAACATAGAGGAAGAATGAAGGGAAAATCCTGCCGAGGCAATCA

TATTTGTTTTGGTAGATATGCTCTTCAAGTACTTGAACCCGCTTGGATCACCGCGAGAC  
AGATAGAAGCAGGACGAAGAGCAATGACACGATATGCACGTCGTGGTGGAAAAATATG  
GGTGCGTATATTTCCCGACAAACCGGTTACAATAAGACCCACAGAAACACGTATGGGC  
TCGGGAAAGGGATCCCCGAATATTGGGTAGCCGTTGTTAAACCAGGTCAATACTTTA  
TGAAATGAGCGGAGTATCCGAAACTGTAGCTAGAGCAGCTATCTCTATAGCTGCCAGTA  
AAATGCCCATACGAAGTCAATTTCTTCGATTAGAGATGACCAGAGTTCCGCGAGGATAT  
ATAGCTCGGAGACGACGAACAAAAATGCGTTCATTTGCCTCAAACCTTTAGGGGGGCTC  
ATTTAAGACTTAATCGAGTGATTACTCAACAAGTAAGAAGAGCTTTTGTTCCTTCAT  
CGAGATAGAGGCAGGCAAAAGAGGGATTTTCGTCGTTTGTGGATCACTCGGATAAACG  
CAGCAACACGGGTATAT-----GTATTCAATAGTTATAGTAAATTAATACACAATCTGTCCA  
AGAAGGAATTGATTCTTAATCGTAAAATGCTTGCACAAGTAGCTGTATCAAATCCAAAT  
AATCTTTACACGATTTCCAATAAAATAAGGATCATCAAT-----AGGATAA  
AGCGGGTTTTCAAAGCACAAAACGCATACATATGTCTGTTTTCAAAGCACAAAGAGT  
TCTAGATGAGATTCGCTGGCGTTACTACGAGGAAACCGTTATGATACTGAATCTCATGC  
CTTATCGAGCATCGTATCCCATCTTAAAGTTGGTTTATTCGGCAGCAGCAAATGCTACTC  
ATTATAGGGATTTTCGACAAAACGAATTTATTCATCACTAAAGCCGAAGTCAGTAGGAGT  
ACTATTATGAAAAAATTCAGACCTCGAGCTCGAGGACGTAGTTATTCTATAAAAAAAC  
GATGTGTAATATAACAATTGTACTAAAT--GTAAGAAATCA-----ATGGATGG  
AATCAAATACGCAGTATTTACAGAAAAGAGTCTTCGTTTATTGGGAAAGAAT--CAATAT  
ACTTTTAATGTGCAATCGGGATTCACTAAGACAGAAATAAAGCATTGGGTGCAACTCTT  
CTTTGGTGTTAAGGTAGTAGCTGTGAATAGCCATCGACTACCCGGAAAGGGTAGAAGA  
ATGGGACCTATTCTGGGACATACAATGCATTACAGACGTATGATCATTACCCTTCAACCG  
GGTATTCTATTCCACTTCTAGATAGAGAAACGAACATGGCAGTTCCAAAAAACGTAC  
TTCGATGTCAAAAAAGCGTATTTCGTAATAATCTTTGGAAAAAAAAGACTTATTTTTCCA  
TAGTACAATCTTATTCTTTAGCAAAATCATTTTCTAGGGGCAAACCAAAGGTTTTTCTG  
GGCAACAAGCAAACAAAATGGCCAAGGGCAAAGATGTTAGAATCCGAGTTATTTTGG  
AATGTATTAGTTGTGTTGCAAAG-----GGT-----AAGGAATCGACGGGGATTTCTAGATAT  
AGTACTCAAAAAGAATCGCCACAATACGCCCGGACAATTAGAATTAAGAAAATTTTGTCT  
GTTATTGTGCGCAAGCATACTACTCATAATGAAATAAAGAAAATGAAAATAAGAGCTTCC  
GTTTCGTAAAATTTGTACAAAATGTGCGACTGATTCGCAGGCGTGGGCGAATTAGAGTTAT  
TTGTTCCAATCCGAAGCATAAACAAAGACAGGGGATGGTTCGAGAAGAGATAACAGG  
ATCCACTCAAACACTAGAGTGGAAGTGTGTTGAATCAAGAGTAGATAGTAAACGTCTT  
TATTATGGTTCGTTTCATTCTGTCTCCGCTTAGAAAAGGTCAAGCGGATACTGTCCGTATT  
GCCTTGCGAAGAGCTTTACTTGGAGAAATAGAAGGAACATGTATCACACGCGCCAAAT  
TTGGG-----AACGTGCCACATGAATATTCCACAATAGTAGGTATTGAAGAATCCATACAA  
GAAATTTTACTAAATTTGAAAGAAATTGTATTGAGAAGTAATCTCTATGGAGTTAGAGA  
CGCATCAATTTGCGTCAAAGGTCTTAGATACATAACCGCTCAAGATATAATCTTACCGCC  
TTCCGTAGAAATCGTTGATACGACACAACCTATAGCTAACTTGAGAGAACCCGTTGATT  
TCTGTATTGAGTTACAGATCAAGAGAGATCGCGCATATCATAACGGAACCTCAGAAAGAA  
CTCTCAAGATGGAAGTTAT-----CCTATAGATGCTGTATTCAATGCCTGTTTCGAAATGTGAA  
TTATAGTATTTTTTCTTGTGGGAATGGAAATGAAAAACACGAGATACTTTTTTTAGAAAT  
ATGGACGAATGGAAGTTTAACTCCTAAGAAGCGCTTTATGAAGCTTCTCGTAATTTGA  
TTGATTTATTTCTTCCTTTTCTACACACAGAGGAAGAG-----GGCACTAGTTTCGAAGAA  
AATAAA---AACAGGTAACTCCACCCCTTTTAACTTTCAAAAAAGATTCACT--AATCT

AAAGAAAAACAAAAA--GGAATTCCATTGAATTGTATTTTTATTGATCAATTAGAATTG  
CCTTCTAGAACGTATAATTGTCTCAAAGGGCCAATATACATACTATTGGACCTTTTG  
AGTAAGACTGAAGAAGATCTTATGCAAATTAATAGTTTTTCGTATGGAAGATGGAAACT  
GATATGGGACACTCTAGAGAAGCAT-----CTCCCAATTGATTTACCTAAGAACAAGATGC  
TCCGGAATGGAAAT---GAGGGAATGTCCACAATACCCGGATTTAGTCAGATCCAATTCG  
AGGGATTTGTAGATTCATTAATCAAGGCTTGGCGGAAGAACTTGAGAAGTTTCCCAC  
AATTAAGATCCAGATCACGAAATTGCATTTCAATTATTTGCGAAAGGATATCAATTGCT  
AGAACCCTCGATAAAAGAAAGGAATGCTGTGTATGAATCACTCACCTATTCTTCCGAAT  
TATATGTATCCGCGAGATTAATTTTTGGTTTC-----GATGTGCAAAGGAAACCATTTCTA  
TTGGAACATTCTATAATGAATTCCTTAGGAACCTTTATAATAAATGGAATATACCGAA  
TTGTGATCAATCAAATATTGCTAAGTCTGGTATTTACTACCGCTCGGAATTAGACCATA  
AGGGAATTTCTATATATACCGGGACTATAATATCAGATTGGGGAGGAAGGTCGGAATTA  
GCAATTGATAAAAAAGAAAGGATATGGGCTCGCGTGAGTAGAAAACAAAAGATATCTA  
TTTTAGTTCTATCATCAGCTATGGGTTCGAATCTAAGAGAAATTTTAGATAATGTTTCCTA  
CCCCGAAATTTTCTTGTCTTTCCCGAATGCTAAGGAGAAGAAGAGGATTGAGTCAAAA  
GAAAAAGCTATTTGGAGTTTTATCAACAATTTGCTTGTGTAGGTGGGGACCTGGTATT  
TTCGGAGTCCTTATGCGAGGAATTACAAAAGAAATTTTTTCAACAAAATGTGAATTAG  
GAAGAGTTGGTCGACGAAATATGAATCGGAGACTGAATCTTGATATCCCTCAGAACAAT  
ACATTCTTGTACCACGAGATGTATTGGCCGCTACGGATCATTTGATTGGAATGAAATTT  
GGAACGGGTATACTTGACGATGACGATATGAATCACTTGAAAAATAAACGTATTTCGTT  
GGTTGCAGATCTGTTACAAGATCAATTCGGACTGGCTCTTGGCCGTTTACAACATGCGG  
TTCAAAAACTATCCGTAGAGTATTCATACGTCAATCGAAA-----CCGACTCCACAACT  
TTGGTAACTCCAACCTTCAACTTCGATTTTATTAATAACTACTTATGAGACCTTTTTTGGC  
ACATACCCCTTAGCTCAAGTTTTTATGATCAAACCAATCCATTGACACAAACGGTTCATGG  
GCGAAAAGTGAGTTGTTTGGGTCCAGGAGGATTGACGGGGAGAACTGCAAGTTTTCG  
GAGCCGAGATATTCATCCGAGTCACTATGGGCGTATTTGTCCAATTGACACGTCCGAAG  
GAATCAATGTTGGACTTACCGGATCGTTAGCTATTCATGCGAGAATTGATCACTGGTGG  
GGATCTATAGAGAGTCCGTTTTATGAAATATCTGAGAAAGCAAAGAAAAAAGAG--  
---AGACAGGTAGTTTATTTATCACCAAATAGAGATGAATATTATATGATAGCAGCAGGAA  
ATTCTTTGTCTTGAATCAGGGTATTCAGGAAGAACAGGTTGTTCCAGCTAGATACCGT  
CAAGAATTCCTGACTATTGCATGGGAACAGATTCATGTTAGAAGTATTTTTCTTTCCAA  
TATTTTTCTATTGGAGGTTCTCTCATTCCTTTTATTGAGCATAATGATGCGAATCGGGCTT  
TAATGAGTTCTAATATGCAGCGCCAAGCAGTTCCACTTTCTCGGTCCGAGAAGTGCATT  
GTTGGAACCTGGATTGGAACGCCAAACAGCTCTAGATTCGAGGGTTTCCGTTATAGCCC  
AACCGGAGGGAAAGATCATTCTAGTGATAGTCACAAGATCCTTTTATCAAGTAGTGGG  
AAGACCATAAGTATTCCTTTAGTTGCCATCGGCGCTCTAACAAAATACTTGTATGCA  
CCAAAACCTCGGGTCCGCGGGGTAATCCATTA AAAAAGGGCAAATTTTAGCGGAG  
GGAGCAGCTACAGTTGGCGGGGAACCTTGCTTTAGGAAAAACGTTTTAGTAGCTTATA  
TGCCCTGGGAGGGTTACAATTTGAAGACGCAGTACTAATTAGTGAACGTTTGGTATAT  
GAGGATATTTATACTTCTTTTCACATCCGAAAATATGAAATTCAGACGGATACGACAAGC  
CAAGGCTCCGCTGAAAAATCACTAAACAATAACCACATCTAGAAGAACATTTACTTC  
GCAATTTGGACAGAAATGGAGTTGTAAGGTTGGGATCCTGGGTAGAACTGGCGATAT  
TTTAGTAGGTAAATTAACGCCTCAGATAGCGAGCGAA---TCGTCTATATCGCGGAAGCT  
GGATTATTACGGGCTATTTTTGGTCTTGAGGTATCCACTTCAAAGAACTTCTCTCAA

ACTACCTATAGGTGGAAGAGGGCGCGTTATCGATGTGAAATGGATCCAGAGG-----  
-----GACCCCATATGGTTCGTGTATATATTTTACAGAAACGTGAAATCAAAGTTGGGG  
ATAAAGTAGCTGGAAGACACGGGAATAAGGGGATCATTTCAAAATTTTGCCTAGGCA  
AGATATGCCCTATTTGCAAGATGGAGCACCTGTTGATATGGTCTTCAATCCCTTAGGAGT  
ACCCTCACGAATGAATGTGGGACAAATATTTGAAAGCTCGCTCGGATTAGCAGGGGAT  
CTGCTAAAGAAACATTATAGAATAGCACCTTTGATGAGAGATATGAGCAAGAGGCTTC  
AAGAAAACCTTGTGTTTTTCGGAATTATATGAAGCCAGTAAACAAACAAAAAATCCATGG  
GTATTTGAACCCGAGTACCCGGGAAAAAGCAGAATATTTGATGGAAGAACAGGAGATC  
CCTTCGAACAGCCTGTTCTAATAGGGAAGTCCTATATCTTAAAATTAATTCATCAAGTTG  
ATGAGAAAATTCATGGACGTTCTACTGGGCCCTACTCACTTGTTACCCAACAACCCGTT  
AGAGGAAGAGCCAAGCAAGGGGGACAACGAATAGGAGAAATGGAAGTTTGGGCTTT  
AGAAGGATTTGGTGTGCTCATATTTTACAAGAGATACTTACTTATAAATCTGATCATCTT  
ATAGCTCGCCAAGAAATACTTAATGCTACGATCTGGGGAAAAAGAATGCCTAATCACGA  
GGATCCGCCAGAATCTTTTCGAGTCCTCGTTCGAGAACTACGATCTTTGGCTCTAGAAC  
TGAACCATTTCCCTGTATCTGAGAAGAACTTCCAGGTAAATAGGGAGGATGTT-----  
-----ATGATTGACCAATATAAACATAAAACAACCTTCAAATTTGGACTCGTTTCCCTCAAC  
AAATAAAGGCTTGGGCTAAAAAATCCTACCTAATGGGGAAGTCGTTGGCGAAGTCAC  
AAGGCCCTCCACTTTTCATTATAAAACCGATAAACCAGAAAAAGATGGATTGTTTTGCG  
AAAGAATCTTTGGACCCATAAAAAGCGGAATTTGTGCTTGTGGAAACTCTCGAGCGAG  
CGTACGTGAAAACGAAGACGAAAGATTTTGCCAAAATGCGGGGTAGAATTTGTTGAT  
TCTCGGATACGAAGATATCAAATGGGATACATCAACTAGCATGTCCAGTGAATCATGT  
GTGGTATTTGAAAGGTCTTCCTAGTTATATTGCGAATCTTTTAGATAAACCCCTTAAGAA  
ATTGGAGGGCCTAGTATATGGTGAT-----TTCTCTTTTGCTAGGCC---AGCGCTAAAAAA  
CCTACTTTCTTACGATTACGGGGTTTTATTGCAAGATGAAATTTATCCTGTAACACAGT  
ATTTCTCCCTTTTTTTCTACCCAGGCTTTGCAACATTTGAAATCGGGAAATTGCAAC  
AGGAGCAGGCGCTATTAGAGAACAATTAGCAGATTTAGATTTGCGAATTATTATAGAGA  
ATTTCTTTGGTTGAATGGAAGGAATTAGAAGACGAG---GGGTATAGTGGAGATGAATGGG  
AAGATAGAAAAAGACGAATAAGAAAAGTTTTTTTTGATTAGACGCATGCAATTGGCGAA  
ACATTTTATTCAAACAAATGTAGAACCAGAATGGATGGTTTTGTGCTTATTACCGGTTCT  
TCCTCCCGAATTGAGACCCATTGTTTATAGATCTGGGGATAAAGTAGTGACTTCAGATAT  
TAATGAACTTTATAAGAGAGTTATCCGTCGGAACAACAACCTTGCCTATCTATTA AAAA  
GAAGTGAATTAGCACCAGCAGATTTAGTAATGTGCCAGGAAAAATTGGTACAAGAAGC  
CGTGGATACACTTCTTGATAGTGGGTCCCGCGGGCAACCGACGAGGGATGGTCACAAT  
AAAGTATACAAATCACTTTCAGATGTAATTGAGGGTAAAGAGGGGAGGTTTTCGCGAGA  
CTCTGCTTGGGAAACGGGTCGATTACTCGGGCGTCTGTTCATTGTTGTGGGTCTTCG  
CTTTCATTACATCAATGTGGATTACCTCTAGAGATAGCAATAAAGCTTTTTTCAGCTATTT  
GTAATTCGCGATTTAATCACGAAACGTGCTACTTCTAATGTCAGGATTGCTAAAAGGAA  
AATTTGGGAAAAGGAACCCATTGTATGGGAAATACTTCAAGAAGTTATGCGGGGACAT  
CCTGTACTGTTGAACAGAGCACCTACCCTGCATAGATTAGGCATACAGGCCTTCCAACC  
CACTTTAGTAGAGGGACGTAATTTGTTTACATCCATTAGTGTGTAAGGGTTTCAATGC  
GGACTTTGATGGGGATCAAATGGCTGTTACCTACCTTTATCCTTGAAGCTCAGGCGG  
AAGCCCGTTTACTTATGTTTTCTCATATGAATCTCCTGTCTCCCGCTATTGGAGATCCTAT  
TTGCGTGCCAACCCAAGACATGCTTATCGGACTTTATGTATTAACGATTGGAAACCGTC  
TAGGTATTTGTGCAAATAGATATAATAGTTGCGGAAAC-----TCTCAAATAAAAA

AGTAACTACAATAATTATAAGTATACGAAAGATAAAGAACCCCATTTTTCTAGTTCCTA  
TGATGCACTGGGAGCTTATAGACAAAAACGAATCGGTTTAAACAGTCCCTTGTGGCTC  
CGATGGAACTAGATCAACGC---ATCGTTGGGTCA-----AGAGAAGTTCCGATTGAAGTT  
CAATATGAATCTTTTGGGACTTATCATGAGATTTATGCCACTATCTAGTAGTGGGAAAT  
AGAAAAAAGAAATCCGTTCTATATACATTCGAACCCTTGGTTCATATTTCTTTTTAT  
AGAGAAATAGAGGAAGCCATACAAGGATTTAGTTCGGGCTATTCATACACTATC-----  
-----ATGGCAGAACGGGCCAACCTGGTCTTTCATAATAAAGAGATAGAC  
GGAAGTGTATGAAACGGCTTATTAGCAGATTAATAGATCATTTTCGGAATGGGATATACA  
TCCATATACTGGATCAAATAAAGACTCTGGGCTTCCATCAAGCCACTACTACATCGATT  
TCTTTAGGAATCGAGGATCTTTTAAACAATACCCTCTAAAGGATGGTTAGTCCAAGACGC  
GGAACAACAGAGTTTTCTTTTGGAGAAACACTATTATTATGGAGCTATACACGCGGTAG  
AAAAATTACGCCAATCCGTTGAGATATGGTATGCTACAAGTGAATATTTGAAACAAGAA  
ATGAATTCGAATTTTCGAATAACGGATCCTTCTAATCCAGTCTATCTAATGTCTTTTTCAG  
GAGCCAGAGGAAATGCATCTCAGGTACACCAATTAGTAGGTATGAGAGGGTAAATGGC  
GGATCCTCAAGGACAAATGATTCATTTACCTATTCAAAGCAATTTACGCGAGGGACTTT  
CTTTGACAGAATATATAATTTCTGCTACGGAGCCCGAAAAGGGGTTGTAGATACTGCT  
GTACGAACAGCGGATGCTGGCTATCTTACACGTAGACTTGTGAAGTAGTTCAACATAT  
TATTGTGCGTAGAAGAGATTGTGGTACTATCCAAGGTATTTCTGTGAGTCTCAAATG  
GGATGACGGAA-----AACTTTTTGTCCAAACACTAATTGGTCGTGTATTAGCAGACGAT  
ATATATATTGGTTCACGATGCATTGCTTCTCGAAATCAAGATATTGGAATTGGATTAGTCA  
ATCGATTCATAACTGCCTTTCGAGCACAACCGTTTCGAGCACAACCAATATATATTAGAA  
CCCCCTTACTTGCCGGAGCACATCTTGGATCTGTCAATTATGTTATGGGCGGAGTCCC  
ACTCATGGGGATCTGGTTCGAATTGGGGGAAGCTGTAGGTATTATTGCGGGTCAATCAAT  
TGGGGAGCCGGGGACTCAATTAACATTAAGAACTTTTCATACTGGTGGAGTATTCACAG  
GGGGTACTGCCGACCTTATACGATCCCCCTCGAATGGAAAAATCCAATTCAATGAGGAT  
TTGGTTCACCCACACGTACCCGTCATGGGCAGCCTGCTTTTCTATGCTATATAGACTTG  
CATGTAATCTCAGAGTCAGGATATTCTACATAGTGTGAATATTCCGTTAAAAAGCTTG  
ATTCTAGTGCAAAATGATCAATATGTAGAATCTGAACAAGTAATTGCGGAGATTTCGTGC  
CGGAACGTCCACTTTG-----TTTAAAGAAAAGGTACAAAAGCATATTTATTCCGAATCAG  
ACGGGGAA---ATGCACTGGAGTACTGATGTTTACCATGCGCCGAATATCAATATGGTAA  
TCTTCGTGATTACCAAAAACAAGCCATTTATGGATATTGTCAGTAAGTATGTGCAGA---  
---TCCAGTATAGCATCTTTTTCGCTGCACAAGGATCAAGATCAAATGAATACTTATTCTTT  
TTCTGTTGATGGAAGA-----TATATCTTTGACTTCTCA-----ATGGCTAAT--GATCAAGTA  
AGCCATAGACTGTTGGATACTTTTGGT-----GATAGAGAAATCTTGATTATTTA---A  
CGCCAGATCGAATCGTGTTC AACGGTCATTGGAATTGTTTCTATCCTTCC---ATTCTTCA  
AGATAAT-----TCAGATTTGTTGGCGAAAAGCGAAGAAATAGGCTCGTCGTTCCATTAC  
AATATCATCAAGAACAAGAAAAAGAGCGAATATCCTGTTTGGGTATTTCAATGGAAATA  
CCCTTTATG-----GGTGTTTTACGTAGAAATACTATTTTTGCTTATTTTGACGATCCACGAT  
ACAGAAAAGAT-----GGAATTGTTAAATTTAGAAGCCCGGAGGAAGATTCTATCTTAAA  
A-----AAAGAGGGTTTTATTGAGCATCGAGGA---ACAAAAGAATTTAGTCTAAAATAC---  
GAAGTAGATCGGTTTTTTTTTTCATTCTTCAAGAACTGCATATCTTGCCGAGATCCTCATCC  
CTAAAGTACTTGACAATAGTATTATTGGAGTCGATACACAACCTCACAAAAAATACAAG  
AAGTCGACTAGGTGGATTGGTCCGAGTGAAGAGAAAAAAAAGCCATACAGAACTCAA  
AATCTTTTCCGGAGATATTCATTTTCTGAAGAGGCGGATAAGATATTAGGT-----GGCAG

TTTGATACCACCAGAAAGAGAAAAAAA-----GATTCTAAGGAA--TCAAAA---AAAAG  
GAAAAATTGGGTTTATGTTCAACGGAAAAAATTTCTCAAAAGCAAGGAAAAG-----TAT  
TTTGTTCGGTTCGACCTGCAGTCGCATATGAAATGGACGAAGGGATAAATTTAGCAAC  
ACTTTTCCCGCAGGATCTCCTGCAAGAAGAGGATAATCTCCAACCTCGACTTGTCAATT  
TTATTTCTCATGAAAATAGCAAGTTAACTCAAAGAATTTATCACACGAAT---CAATTCGT  
TCGAACTTGCTTAGTAGTGAATTGGGAACAAGAAGAAAAAGAGGGGAGCTCGT-----  
-----GCTTCTCTTGTGAGGTAAAAACAAATGATCTAATTCGCGATTTCTAAGAATT  
GAGTTAGTCAAGTCTACTATTTGTATACACGAAGAAGGTATGATAGGACAAGTGTAGG  
ATTGATTCCCAAT-----TTAGATCGCAACAATACCAATTCCTTTTATTCCAAGGCGAAG  
ATTCAATCA-----CTTAGCCAACATCAAGAAGTTATTGGC-----ACCTTGTTGA  
ATCGAAATAAA-----GAATATCCATCTTTGATGATTTTGTGGCATCCAACCTGTTCTCG  
AATTGGT-----TTATTCAAGAATTCTAAATATCCC-----AATGCGGTAAAAGAATCGAAT  
CCTAGAATTCCTATT--GATATTTTGGGCTCTTAGGCGTTATTGTACCT--AGTATATCGA  
ATTTTCTTCATCT--TACTATTTATTAACG-----CATAATCAGATCTTGTTAAAA---AAAT  
ACTTGTTCCCTTGAC-----AATTTGAAACAAACCTTACAAGTACTTCAAGGACTTAAAT  
ACTCTTTAATAGACGAAAATAAAAGG-----ATTTCGAATTTTGAC-----AGTAACATCATG  
TTGGAGCCATTCCATTTGAATTGGCACTTTCTCCATCATGACTCATGGGAAGAGACATT  
GGCAATAATTCAC--CTTGGACAATTTATTTGTGAAAATTTATGTCTATTTAAATTACACA  
TA-----AAAAATCTGGTCAAATTTTCATTGTTAAT--ATGGACTCCTTTGTTCTAAG  
AGCAGCTAAGCCTTATTTGGCCACTATAGGAGCAACTGTTTCATGGTCATTATGGAAAAA  
TCCTTTACAAAGGAGATAGGTTAGTTACGTTTATATATGAAAAATCGAGATCCAGTGATA  
TAACGCAAGGTCTTCCAAAAGTAGAACAAATCTTCGAAGCGCGTTCAATTGATTCACTA  
TCGCCGAATCTCGAAAGGAGAATTGAGGATTGGAATGAACGTATACCAAGAATTCTTG  
GGGTTCCCTGGGGATTCTTGATTGGAGCTGAGCTAACCATAGCCCAAAGTCGTATCTCT  
TTGGTTAATAAGATCCAAAAGGTTTATCGATCCCAAGGGGTACAGATCCATAATAGACAT  
ATAGAGATTATTATACGCCAAGTAACATCAAAAAGTAAGGGTTTCCGAA-----GATGGA  
ATGTCTAATGTTTTTTTACCTGGGGAATTAATAGGACTATTGCGAGCGGAACGAGCAGG  
GCGGGCTTTAGATGAATCGATCTATTATCGGGCAATCTTATTGGGAATAACAAGGGCTTC  
CCTGAATACCCAAAGTTTCATATCTGAAGCAAGTTTTCAAGAACTGCTCGAGTTTTAG  
CAAAGCTGCCCTACGAGGTCGTATTGATTGGTTGAAAGGTCTGAAAGAAAACGTAGT  
TCTGGGGGGGATTATACCTGTTGGTACCGGATTCAAAAAATTTGTGCATCGTTCCCA---  
---CAAGACAAGAACCTTTAT-----TTAGAAATTCAAAAAAAAATCTATTTCGCGTCGGAA  
ATG-----AGAGATATTTGTTTCTCCATACAGAATTAGTTTCTTCTGATTCTGACGTAACA  
AAC-----TCAGAGACCCCGTTTACCCCTATTTATACGATT-----ATGACAAGAA  
GATATTGGAACATCAATTTGAAAGAGATGATAGAAGCGGGAGTTCATTTTGGTTCATGGT  
ATTAAGAAATGGAATCCCAAATGGCCCCCTTACATCTCGGCAAAGCGTAAAGGTAATCA  
TATTACAAATCTTGCTAGAACAGCTCGTTTTTTATCAGAAGCTTGTGATTTAGTTTTTGA  
TGCAGCAAGTCAGGGAAAAAGCTTCTTAATTGTTGGTACCAAAAAAAGAGCAGCGGA  
TTTAGTAGCATCAGCTGCAATAAGGTCTCGTTGTCATTATGTTAATAAAAAGTGGTTCAG  
CGGTATGTTAACGAATTGGTTCGATTACCAAAACTAGACTTTCTCAATTTAGAGACTTAA  
GAGCAGAAGAAAAAATGGGAAAATTCACCATCTCCAAAAAAGAGATGCGGCAATCT  
TAAAGAGAAAATTATCTACCTTGCAAAGATATCTCGGCGGGATCAAATATATGACGAGG  
TTGCCTGACATTGTGATCGTCCTTGATCAGCAAAAAGAGTATATAGCTCTTCAGGAATG  
TGCCATTTTGGGGATTCTACTATTTCTTTAGTCGATACAAATTGTGACCCAGATCTTGC

GAATATATCGATTCCCTGCCAACGATGACACTATGACTTCAATTCGATTAATTCTTAACAA  
ATTAGTATTTGCAATTTCTGAGGGCCGTTCTCTC---TATATAAGAAATCGTATGGGACAA  
AAAATAAATCCACTCGGTTTCAGACTTGGTACAACCCAAAATCACCATTCCTTTTGGTT  
CGCACAACCAAAAAATTATTCTGAAGGTCTACAGGAAGATAAAAAAATACGGAATTGT  
ATCAAGAACTATATACAAAAGAATAGGAAAAAAGGCTCGAATAAAATGGAATCAATTA  
CACATATAGAAATTCAAAAAGAAATCGATACAATCCACGTCATAATCCATATTGGATTCC  
CCAAC--TTATTAAGAAAAAGGGA-----GCAATCGAAGAATTAGAGAAAGATCT  
CCAAAAGGAAGTTAATTCTGTAAACCAGAGACTTAATATTGCTATCGAAAAGGTTAAA  
GAACCTTATAGACAACCTAATATTCTTGCAGGAATATATAGCTTTCCAATTAATAAATA  
GTTTCATTCCGAAAAGCAATGAAAAAAGCTATTGAATTAATAAATAAAGCGGATATAA  
AGGGAATAAAAAATCCAAATTGCGGGTTCGTCTAGCAGGAAAAGAAATTGCACGTGCCG  
AATGCATCAAAAAGGGTAGACTACCCCTCCAAACAATTCGCGCTAAAATTGATTATTGC  
TGCTATCCAATTCGAACTATCTATGGAGTATTAGGTGTCAAATTTGGATATTCGTAGAA  
GAAGAAATGTCCCGTTATCGAGGGCCTCGTTTAAAAAATAACGCCGTCTGGGAGCTT  
TACCAGGACTCACTAGAAAAACGCCTAAATCCGGAAGTAATCAGAAAAAGAAATTCCA  
TTCTGGGAAA---AAAGAGCAATATCGTATTCGTCTTCAAGAAAAACAGAAATTGCGTTT  
TCATTATGGTCTGACAGAACGACAATTACTTAGATATGTACATATCGCTGGAAAAGCAA  
AAAGATCCACAGGTCAGGTTTTACTACAATTACTTGAAATGCGTTTGGATAATATCCTTT  
TTCGATTGGGTATGGCTTCAACCATTCTGGGGCCCGACAATTAGTTAACCATAGACATA  
TTTTAGTTAATGGTTCGTATAGTTGATATACCAAGCTTTTCGTTGCAAACCCCGAGATATTAT  
TACTACGAAGGATAACCAACGATCAAAACGTTTGGTTCAAATTTATATTGCTTCATCCG  
ATCCGAAA-----TTACCAAAGCATTGACGGTTGACACA-----TTGCAATATAAAGGACTA  
GTAAAAAATTTCTAGATAGGAAGTGGGTTCGCTCAAATAAATGAGTTGTTAGTTGT  
AGAATATTATTCTCGCCAGACTATGTCACGTCGAGGTACTGCAGAAAAAAGAACCGCA  
AAATCCGATCCAATTTTTCGTAATCGATTAGTTAACATGGTGGTTAACCGTATTATGAAA  
GACGGAAAAAATCATTGGCTTATCAAATTCTCTATCGAGCCGTGAAAAAGATTCAAC  
AAAAGACAGAAACAATCCACTATTGGTTTTACGTCAAGCAATACGTAGAGTAACTCC  
CAATATAGGAGTAAAAACAAGACGTAAAAAAGGATCGACGCGGAAAGTTCCGATTGA  
AATAGGATCTAAACAAGGAAGAGCACTTGCCATTCTGTTGGTTATTAGAAGCATCCCAA  
AAGCGTCCGGGTGCGAAATATGGCTTTCAAATTAAGTTCCGAATTAGTAGATGCTGCCAA  
AGGGAGTGGGGGTGCCATACGCAAAAAGGAAGCGACTCATAGAATGGCAGAGGCAAA  
TAGAGCTCTTGACATTTTTCGTATGGGCAAGGACACTATTGCTGATTTACTAACCTCTAT  
AAGAAACGCAGACATGAATAAAAAAGGAACTGTTTCGAGTAGTATCCACAAATATTACC  
GAAAACATTGTTAAATACTTCTACGAGAGGGTTTTATTGAAAGTGTTCGGAAACATCA  
GGAAAGTAACAGATATTTCTTGGTTTCAACTTTGCGACATCAAAGGAGAAAGACTAGA  
AAGGGAATATATAGAACT-----AGAACCTTTTTAAAGCGTATCAGCCGACCTGGCTTAC  
GAATTTATGCCAACTATCAAGGAATTCCTAAGGTTTTGGGCGGAATGGGAATTGCTATT  
CTTTCTACTTCTCGAGGTATAATGACAGATCGAGAAGCTCGACTAAACAGAATTGGGG  
GAGAAGTTTTATGTTATATATGGATGACAAAAGCTATAACCAAAAATAGGTTACGTAAG  
AAAGTGCGTATTGGTTTTCGTAAGAGTGCACGTAGAATAACAAAAGGGATTATTCATGT  
TCAAGCTAGTTTCAACAATACCATTATAACCGTTACAGACCCACAAGGTCGGGTTCGTTT  
TCTGGTCCCTCCGCAGGTAATTGTGGATTCAAAGCTCAAGAAAAGCATCACCCATGC  
TGGTCAAAGAACAGCAGTAGATGCTATTTCGTACAGTGGGT-----TTGCAACGAGCAG  
AAGTTATGGTAAAAGGTGCTGGTAGCGGAAGAGATGCCGATTACGAGCCATTGCTAA





repeated text placeholder





AAGAGGGAATAGTGTGCATTTTTTCGTTGGGGATTCCCTGGAATAAAAACGTCGCATCTTC  
CTTCAATTCCCTTGTGCGGGATATCCAATCAATTAGAATTCAGGTTAAAGAGGGTCTTTAT  
CCTCGTCGTATCCTTTATATGGAATCCGGGGCCAGGGGGTCATTCCCTTGACTCGTACT  
GATGAGAAGTTTTTTACTCCACGAGAAATTGAACAAAAAGCTGCCGAATTGGCCTATT  
TCTTGCCTGTACCAATTGAAGTATTT

>Nicotiana

ATGGAAGATGGTGGTTTAATTTCGATGTTGTTTCTAAATAAATCAATGGGCAGTCTTGG  
TCCTATTGAAAATACCAATGAA-----GATCCAAATCGAAAA-----GTGAAAACATTCATA  
GTTGCAGTAATGTTGATTATTTATTCGGCGTTAAAGACATTCGGAATTTTCATCTCTGATG  
ACACTTTTTTAGTTAGTGATAGGAATGGAGACAGTTATTCCATCTATTTTGATATTGAAA  
ATCATATTTTTGAGATTGACAACGATCAT-----TCTTTTCTGAGTGAAGTAGAAAGTTCTT  
TTTATAGTTATCGAAACTCGAATTATCGGAATAATGGATTTAGGGGCGAAGATCCCTACT  
ATAATTCTTACATGTATGATACTCAATATAGTTGGAATAATCACATTAATAGTTGCATTGAT  
AGTTATCTTCAG-----TCTCAAATCTGTATAGATACTTCCATTATAAGTGGTAGTGAGAAT  
TACGGT-----TACATTTATAGGGCCGTTTGTGGTAACGAGGGTTCCAGTAGACGAACTCG  
CACGAAGGGCAGTGATTTAACTATAAGAGAAAAGTTCTAATGATCTCGAGGTAACCTCAA  
AAATACAGGCATTTGTGGGTTCAATGCGAAAATTGTTATGGATTAAATTATAAGAAATTT  
TTGAAATCAAAAATGAATATTTGTGAACAATGTGGATATCATTGAAAATGAGTAGTTC  
AGATAGAATTGAACTTTTGATCGATCCGGGTACTTGGGATCCTATGGATGAAGACATGG  
TCTCTCTAGATCCCATGAAATTCATTCGGAGGAGGAGCCTTATAAAGATCGTATTGATT  
CTTATCAAAGAAAGACAGGATTAACCGAGGCTGTTCAAACAGGCATAGGCCAACTAAA  
CGGCATTCCCGTAGCAATTGGGGTTATGGATTTTCAGTTTATGGGGGGTAGTATGGGATC  
CGTAGTCGGAGAGAAAATCACCCGTTGATTGAATACGCTGCCAATCAAATTTTACCCC  
TTATTATAGTGTGTGCTTCTGGGGGGGCGCGCATGCAGGAAGGAAGTTTGGAGCTTGATG  
CAAATGGCTAAAATATCGTCTGCTTTATATGATTATCAATTAATAAAAAGTTATTTTATG  
TATCAATCCTTACATCTCCGACAACCTGGTGGAGTGACAGCTAGTTTTGGTATGTTGGGG  
GATATCATTATTGCCGAACCCAACGCCTACATTGCATTTGCAGGTAAGAGTAATTGA  
ACAAACATTGAATAAAACAGTACCCGAAGGTTACAAGCAGCTGAATACTTATTCCAG  
AAGGGTTTATTCGACCTAATTGTACCACGTAATCTTTTAAAAGCGTTCTGAGTGAGTT  
ATTTAAGCTCCACGCCTTTTTTCCTTTGAATCAAAGTCAAGCAAATGGTAACCATTC  
GAGCTGACGAAATTAGTAATATTATCCGTGAACGTATTGAACAATATAATAGAGAAGTA  
AAGATTGTAAATACCGGTACCGTACTTCAAGTAGGCGACGGCATTGCTCGTATTCACGG  
TCTTGATGAAGTAATGGCGGGTGAATTAGTCGAATTTGAAGAGGGTACAATAGGCATTG  
CTCTGAATTTGGAATCAAATAATGTTGGTGTGTATTAATGGGCGATGGTTTATTGATAC  
AAGAAGGAAGTTCTGTAAAAGCAACGGGAAGAATTGCTCAGATACCCGTGAGTGAGG  
CTTATTTGGGTCGTGTTATAAATGCCCTGGCTAAACCTATTGATGGTAGAGGTGAAATTT  
CAGCTTCTGAATTTGATTAATCGAATCTGCCGCCCGGGTATTATTTCCGCGCCGTTCCG  
TATATGAGCCTCTTCAAACCGGGCTTATTGCTATTGATTCGATGATCCCTATAGGACGTG  
GTCAGCGAGAATTAATTATTGGGGACAGACAGACCGGTAAAACAGCAGTAGCCACAGA  
TACGATCCTCAATCAACAAGGTCAAAATGTAATATGTGTTTATGTAGCTATTGGGCAA  
AAGCATCTTCTGTGGCCAGGTCGTAACCTTTACAGGAAAGGGGAGCGATGGAATA  
CACTATTGTGGTAGCCGAAACGGCAGATCCCCTGCTACATTACAATACCTTGCTCCTTA  
TACAGGAGCAGCTCTGGCTGAATATTTTATGTATCGTGAACGACACACTTTAATCATTTA  
TGATGATCCCTCAAACAAGCGCAAGCTTATCGCAAATGTCTCTTCTATTACGAAGAC

CGCCCGGTCGTGAAGCTTATCCAGGAGATGTTTTTTATTTGCATTCACGCCTTTTGGAA  
AGAGCCGCTAAATTAAGTTCTAGTTTAGGTGAAGGAAGTATGACCGCCTTACCAATAGT  
TGAAACCCAATCGGGAGATGTTTCGGCTTATATTCCTACTAATGTAATTTCCATTACTGA  
TGGACAAATCTTCTTATCCGCCGACCTATTCAATTCTGGAATCAGACCTGCTATTAATGT  
GGGTATCTCCGTTTCCAGAGTGGGGTCCGCAGCTCAAATAAAAGCCATGAAACAAGTA  
GCTGGTAAATTAATAATTAGAACTAGCACAAATTCGCAGAATTAGAAGCCTTTGCACAATT  
TGCTTCTGATCTCGATAAAGCTACTCAGAATCAATTGGCAAGAGGTCAACGATTACGTG  
AATTGCTTAAACAATCCCAATCAGCTCCTCTCACGGTAGAAGAGCAGATAATGACTATT  
TATACCGGAACAAACGGCTATCTTGATTCATTAGAAGTTGGACAGGTAAGGAAATTTCT  
TGTTGAGCTACGTACTTACTTAAAACTAATAAACCTCAGTTCCAAGAAATCATATCTTC  
TACCAAGACATTTACCGAGGAAGCAGAAGCCCTTTTGAAAGAAGCTATTCAGGAACAA  
ATGGACCGTTTTATACTTCAGGAACAAGCAATGAGAATCAATCCTACTACTTCTGGTTC  
TGGGGTTTTCCACGCTTGAAAAAAAACCCGGGGCGTGTCTGTCCAAATCATCGGTCCG  
GTA TAGATGTAGCCTTTCCCCGGGCAAGATGCCGAATATTTATAACGCTCTGGTAGTT  
CAAGGTCGAGATAGTGTGGTCAACCAATTAATGTGGCTTGTGAGGTACAGCAATTATT  
AGGAAATAATCGAGTTAGGGCTGTAGCTATGAGTGCTACAGAGGGTCTAACGAGAGGA  
ATGGAAGTGATTGACACAGGAGCTCCTATAAGTGTTCCGGTCCGGGGAGCGACTCTGG  
GACGAATTTTAAACGTGCTCGGAGAACCCTGTTGATAATTTAGGGCCTGTAGATACTAGT  
ACAACGTCTCCTATTCATAGATCTGCGCCCGCCTTTATACAGTTGGATACAAAATTATCT  
ATTTTTGAAACAGGAATTAAGTAGTAGATCTTTTAGCCCTTATCGCCGTGGAGGAAA  
AATCGGACTATTCGGGGGAGCTGGAGTGGGTAAAACAGTACTTATTATGGAATTGATTA  
ACAATATTGCTAAAGCTCACGGGGGCGTATCCGTATTTGGCGGAGTGGGTGAACGTACT  
CGGGAAGGAAATGATCTTTACATGGAAATGAAAGAATCTGGAGTAATTAATGAAGAAA  
ATATTGCAGAATCAAAGTAGCCCTAGTTTATGGTCAGATGAATGAACCGCCGGGAGCT  
CGTATGAGAGTTGGTTTGACTGCCCTAACTATGGCGGAATATTTCCGAGATGTTAATGA  
GCAAGACGTACTTCTTTTTATTGACAATATCTTCCGTTTTCGTCCAAGCAGGATCCGAAG  
TATCGGCCTTATTGGGTAGAATGCCTTCCGCTGTGGGTTATCAACCCACCCTGAGTACC  
GAAATGGGTTCTTTACAAGAAAGAATTACTTCTACCAAAGAAGGGTCCATAACCTCTAT  
TCAAGCAGTTTATGTACCCGCAGACGATTTGACCGACCCTGCTCCTGCTACGACATTTG  
CACATTTAGATGCTACTACCGTACTATCAAGAGGATTGGCTGCCAAAGGTATTTATCCAG  
CAGTAGATCCTTTAGATTCAACGTCAACCATGCTTCAACCTCGGATCGTTGGTGAGGAA  
CATTACGAAACCGCCCAAAGAGTTAAGCAAACCTTTACAACGTTACAAGA ACTTCAGG  
ACATTATAGCTATCCTTGATTGGACGAATTATCCGAAGAGGATCGTTTACTCGTAGCAA  
GAGCGCGAAAAATTGAGCGTTTCTTATCACAACCCTTTTTTCGTAGCAGAAGTATTTACC  
GGTTCTCCAGGGAAATATGTTGGTCTAGCAGAAACAATTCGAGGATTTCAATTGATCCT  
TTCCGGAGAATTAGATGGTCTTCCCTGAACAGGCCTTTTTATTTGGTAGGTAATATCGATGA  
AGCTACCGCGAAGGCTATGAACTTAGAAATGGAGAGCAATTTGAAGAAAATGACCTTA  
AATCTTAGTGTACTGACCCCTAATCGAATTGTTTGGGATTCAGAAGTGGAAGAAATTGT  
TTTATCTACTAATAGCGGTCAAATTGGCATATTACCAAATCACGCCCCTATTGCCACAGC  
TG TAGATATAGGGATTTTGAGAATACGTCTTAACGACCAATGGTTAACGATGGCTCTGAT  
GGGTGGTTTTGCTAGAATAGGCAATAATGAGATCACTGTTTTAGTAAATGATGCGGAGA  
AGGGTAGTGACATTGATCCACAAGAAGCTCAGCAAACCTTTGAACTAGCGGAAGCTAA  
TGTGAAAAAGGCTGAAGGAAGGAGACAAAAAATTGAGGCAAATCTAGCTCTCCGACG  
AGCTAGAACACGGGTGGAGGCTATCAATCCGATTTCAATGAAAAACGTAACCGATTCT

TTCGTTTCT--GGCCACTGGCCATCTGCCGGGAGTTTCGGGTTTAATACCGATATTTT  
CAACAAATCCAATAAATCTAAGTGTAGTGCTTGGTGTATTGATTTTTTTTGGAAAGGGA  
GTGTTAAGTGATTTATTAGATAATCGAAAACAGAGGATCTTGAATACTATTCGAAATTCA  
GAAGAAGTGCCTGGAGGGGCTATTGAACAACCTCGAAAAGCTCGTTCTCGCTTACGG  
AAAGTAGAAAGCGAAGCCGAGCAGTTTCGAGTGAATGGATACTCTGAAATAGAACGA  
GAAAAATTGAATTTGATTAATTCAACTTATAAGACTTTGGAACAATTAGAAAATTACAA  
AAACGAAACGATTCAGTTTGAACAGCAAAGGGCGATTAATCAAGTCCGACAACGGGT  
TTTCCAACAAGCCTTACGAGGAGCTCTAGGAACCTCTGAATAGTTGTTTGAACAACGAG  
TTACATTTACGTACCATTAGTGCCAATATTGGCATGTTGGGAACAATGAAAGAAATAAC  
TGATATGAATCCACTGATTTCTGCCGCTTCCGTTATTGCTGCTGGATTGGCCGTAGGGCT  
TGCTTCTATTGGACCCGGAGTTGGTCAAGGGACTGCTGCGGGTCAAGCTGTAGAGGGT  
ATCGCGAGACAGCCTGAGGCAGAGGGAAAAATACGAGGTACGCTATTGCTTAGTCTAG  
CTTTTATGGAAGCTTTAACAATTTATGGACTGGTTGTAGCATTAGCACTTTTATTTGCGA  
ATCCTTTTGTATGAATGTTCTATCATGTTCCATCAATACTCTAAAGGGGTTATACGATAT  
ATCCGGTGTGGAAGTAGGCCAACATTTCTATTGGCAAATAGGGGGTTTCCAAGTACATG  
GCCAAGTACTTATTACTTCTTGGGTTGTAATTGCTATCTTATTAGGTTTCAGCCACTATAGC  
TGTTTCGGAACCCACAAACCATTCCGACCCGGGGTTCAGAATTTCTTCGAATATGTTCTTG  
AATTTATTCGAGATGTGAGTAAACTCAAATTGGCGAAGAATATGGGCCCTGGGTTCT  
TTTATTGGCACTATGTTTTTATTTATTTTTGTTTCTAATTGGTCAGGAGCTCTTTTACCTTG  
GAAAATCATACAATTACCTCATGGGGAGTTAGCCGCACCCACGAATGATATAAATACTA  
CTGTTGCTTTGGCTTTACTCACATCAGTGGCATATTTCTATGCGGGTCTTACAAAAAA  
GGATTAGGTTATTTTCGAAAATATATTCAACCAACCCCAATCCTTTTACCCATTAACATC  
TTAGAAGATTTACAAAACCTTTATCACTTAGTTTTCGACTTTTCGGGAATATCTTAGCT  
GATGAATTAGTAGTTGTTGTTCTTGTCTTTAGTACCTTTAGTAGTTCTTATACCTGTCA  
TGCTCCTTGGATTATTTACAAGTGGTATTCAAGCTCTTATTTTTGCAACTTTAGCCGCGG  
CTTATATAGGTGAATCCATGGAGGGCCATCATATGATATTTTCAACCTTAGAGCATATATT  
AACTCACATTTCTTTTCGATCGTTTCAATTGTAATTACAATTCATTTGATAACCTTTT  
GTCGATGAAATCGTAAACTATAAGTTCATCAGAAAAGGGCATAATAGTTACTTTTTTC  
TGATAACAGGATTATTAGTTACTCGTTGGATTCTTCTGGACATTTCCCACTAAGCGAT  
TTATATGAATCATAATTTTCTTTTATGAGTTTCTCCCTTATTCATATAATTCCGTAT----  
-AAAAATGTTTTAATTTAAGTAAATAACTGGCCCTAGTGCTATTTTTACCCAAGGCTT  
TGCTACGTCAGGTATTTTAACTGAAATACACCAATCTGTAATATTAGTACCTGCTCTTCA  
ATCCGAGTGGTTAATAATGCACGTAAGTATGATGATATTGGGCTATGCAGCTCTTTTATG  
TGGATCATTATTATCAGTAGCACTTCTAGTGATTACATTTCGAAAAAACAGACAGCTTTT  
TTAT-----AAGGAAAATGTTTTACAAAATACTTCTTTT-----GCTAAAAA  
TTATTACAGGTCCCAATTGATTCAACAATTGGATTATTGGAGTTATCGGGTTATTAGTTTA  
GGATTTACTTTTTTAAACCATAGGAATCCTTTTCGGGAGCGGTATGGGCTAATGAAGCGTG  
GGGGTCGATTGGAATTGGGACCCAAAAGAACTTGGGCATTTATTACTTGGATCGTAT  
TTGCAATTTATTTACATACTCGAACAAATAGAAATTTGCGGGGTGCAAATCTGCAATTG  
TAGCGTCTATAGGCTTTCTTATAATTTGGATATGCTATTTTGGGGTCAATCTTTTAGGAAT  
AGGGTTACATAGTTATGGTTCTTTTCCATCAACAATGGCAAAAAAGAAAGCATTCACTC  
CTCTTTTCTATCTTGCATCTATAGTATTTTTGCCCTGGTGGATTCTTTCTCAGTTAATAAA  
TGCTGGAATCTTGGGTTACCAATTGGTGAATACTGGGCAATCCGAAATTTTTTTGAAT  
AATATTCAAGAAAAGAGTCTTCTAGAAAAATTCATAGAATTAGAGGAACTCCTCTTCTT

GGACGAAATGATCAAGGAATACTCGGAAACACATCTCGAAGAGTTTGGGATA---ATCCA  
TAAAGAAACGATCCAATTAATCAAGATACAAAATGAGAATCGTATCCATACGATTTTGC  
ACTTCTCGACAAATATCATCTGTTTTATTATTCTAAGCGGGTATTCAATTTTGGGTAATGA  
AAAACCTGTTATTCTTAACCTCTGGGCTCAGGAATTCCTATATAACTTAAGTGACACAGT  
AAAAGCTTTTTCTATTCTTTTATTAACCTGATTTATGTATCGGATTCCATTCACCCACGGT  
TGGGAATTAATGATTGGCTCTATCTATAAAGATTTTGGATTTGTTTCATAATGATCAAATCA  
TATCTGGTCTTGTTCACCTTCCAGTCATTCTCGATACAATTTTTAAATATTGGATTTT  
CCGTTATTTAAATCGTCTGTCTCCGTCACCTGTAGTTATTTATCATTCAATGAATGACATG  
CCTATTGGTGTTCCAAAAGTCCCTTCCGAAGTCTGGAGAGGAAGATGCATCTTGGG  
TTGACGTATACAACCGACTTTATCGAGAAAGATTACTTTTTTTAGGCCAAGAGGTTGAT  
AGCGAGATTTCGAATCAACTTATTGGTCTTATGGTATATCTCAGTATCGAGGATGAGACC  
AAAGATCTGTATTTGTTTATAAACTCTCCTGGGGGCTGGGTAATACCTGGGGTGGCTATT  
TATGATACTATGCAATTTGTGCGACCAGATGTCCATACAATATGCATGGGATTAGCCGCT  
TCAATGGGATCTTTTATCCTGGTCGGAGGAGAAATTACCAAACGTCTAGCATTCCCTCA  
CGCTAGGGTAATGATCCATCAACCTGCTAGTTCTTTTTATGAGGCACAAACAGGCGAAT  
TTGTCCTGGAAGCGGAAGAACTGCTGAAACTGCGTGAAACCCTCACAAGGGTTTATGT  
ACAAAGAACGGGGAAACCCTTATGGGTTGTATCCGAAGATATGGAAAGAGATGTTTTT  
ATGTCAGCAACAGAAGCCCAAGCTTATGGAATTGTTGATCTTGTAGCGGTTGA  
A????????????????????????????????????????????????????????????  
????????????????????????????????????????????????????????????  
????????????????????????????????????????????????????????????  
????????????????????????????????????????????????????????????  
ATGGAAGAAATCCAAAGATATT  
TACAG--GATAGATCGCAACAACAACACTTCCTATATCCACTTATCTTTCAGGAGTATATT  
TATGCACTTGCTCATGATCATGGTTTACCAGGTTATAACAATAAATTAAGTTTCCTAATTG  
TGAAACGTTTAATTACTCGAATGTATCAACAGAATCATTTTCTTATTTCTACTAATGATTC  
TAACAAAATTCATTTTTGGGGAAGAGTTTGTATTCTCAAATGATATCAGAGGGATTG  
CGTTTATTGTGGAAATTCCTTTCTCTACGATTAATATCTTCTTTAATTTTTAAATCTTAT  
AATTTACGATCAATTCATTCAACATTTCTTTTTTAGAGGACAATTTTTCACATCTAAATT  
ATGTATTAGATATACTAATACCTACCCTGTTTCATCTGGAAATCTTGGTTCAAACCTCTTCG  
CTATTGGGTAAAAGATGCCTCTTCTTTACATTTATTACGATTCTTCTCCATGAATTTGG  
AATTTGAATAGTCTTATTACTCCCGGT--TACTCCTTTTCAAACAAAGATTCTTCTTCTT  
CTTATATAATTCTTATGTATATGAATGCGAATCCACTTTCGTCTTTCTACGGAACCAATCT  
TCTCATTTACGATCAACATCTTTTGGAGCCCTTCTTGAACGAATATATTTCTATGGAAA  
ATAGAACGTCTTGTAGAAGTCTTTGCT--GATTTTACCCTATGGTTATTCAAGGATCCTTT  
CATGCATTATGTTAGGTATCAAGGAAAATCCATTCTGGCTTCAAAGGGACGTTTCTTTT  
GATGAATAAATGGAAATTTACCTTGTCAATTTTGGCAATGTCATTGTTCTCTGTGCTT  
TCACACAGGAAGGATCCATATAAACCAATTATCCAATCATTCCCGTGACTTTATGGGCTA  
TCTTTCAAGTGTGCGACTAAATCCTTCAATGGTACGTAGTCAAATGTTAGAAAATTCAT  
TTCTAATCAATAATGCAATT-----AAGAAGTTCGATACCCTTGTTCAAATTATTCCTTTGAT  
TGGATCATTAGCTAAAGCAAACCTTTGTACCGTATTAGGGCATCCATTAGTAAACCGGT  
TTGGTCCGATTTATCAGATTCTGATATTATTGACCGATTTGGGCGTATATGCAGAAATCTT  
TTTCATTATTATAGCGGATCTTCCAAAAAAAAGACTTTATATCGAATAAAGTATATACTTC  
GACTTTCTTGTGCTAGAACTTTAGCTCGGAAACACAAAAGTACTGTACGCACTTTTTTG  
AAAAGATCGGGCTCGGAATTATTGGAAGAATCTTAACGTTCGGAAGAACAAGTTCTTT  
CTTTGACCTTCCCACGACGGATTTGGTATTTGGATATTTTTTGTATCAATGATCTGGCGA

ATTATCAAATGATAATTGAT---ACAACAGAAATAGAA---ACTATCAATTCTTTTTCCAAAT  
TGGAATCC---TTAAAAGAAGTCTATGGGATCATATGGATGCTTTTCCCTATTTTGACTCTT  
GTATTAGGAATCACAATAGGTGTACTAGTAATTGTTTTGGTTAGAAAAGAGAAATATCTGC  
AGGAATACAACAACGTATCGGACCTGAATATGCTGGCCCTTTAGGAATTCTTCAAGCTC  
TAGCAGATGGGACAAAACACTACTTTTGAAAGAGAACCCTTATTCCATCTACAGGAGATACT  
CGTTTATTAGTATCGGACCATCCATAGCAGTAATATCCATCTTTCTAAGTTATTAGTAA  
TTCCTTTTGGTGATCACCTTGTCTAGCCGATCTTAGTATTGGTGTTTTTTTTCTGGATTGC  
CATTTCAAGTATTGCTCCCGTTGGACTTCTTATGTCGGGATATGGATCAAATAATAAATAT  
TCTTTTTTAGGTGGTCTACGGGCAGCTGCTCAATCAATTAGTTATGAAATACCATTAGCT  
CTATGTGTGTTATCAATATCTCTACTATCTAACAGTTTAAGTACAGTTGATATAGTGGAAAG  
CGCAGTCAAATATGGCTTTTGGGGGTGGAATTTGTGGCGTCAACCCATCGGGTTTATC  
GTTTTTCTAATTTCTTCTCTAGCCGAGTGTGAAAGATTACCTTTTGATTTACCAGAAGCA  
GAAGAAGAATTAGTAGCAGGGTATCAAACCGAATATTCAGGTATCAAATTTGGTTTATT  
TTACATTGCTTCATATCTGAATCTACTAGTTTCTTCATTATTTGTAACAGTTCTTTATTTGG  
GAGGTTGGAATCTTTCTATTCCGTACATATTTGTTCCCTGAGCTATTTGGCATAAATAAAA  
GGGGTAAAGTCTTTGGAACTAATTGGTATCTTTATCACATTAGCCAAAACCTATTTGT  
TTTTGTTCAATCCTATTGCAACAAGATGGACTTTACCGAGGCTGAGAATGGACCAACTA  
TTAAATCTTGGGTGGAAATTTCTTTTACCTATTTCTCTAGGTAATCTATTATTGACAACCT  
CGTCCCAACTTCTTTCACTGATGATCTGGCATGTACAGAATGAAAACCTCATTCTCGATT  
CTACGAGAATTTTTATGAAAGCCTTTCATTTGCTTCTCTTCGATGGAAGTTTGATTTTCC  
CAGAATGTATCCTAATTTTTGGCCTAATTCTTCTTCTGATGATCGATTCAACCTCTGATCA  
AAAAGATATACCTTGGTTATATTTCACTCTTCAACAAGTTTAGTAATGAGCATAACGGC  
CCTATTGTTCCGATGGAGAGAAGAACCTATGATTAGCTTTTTCGGGAAATTTCCAAACGA  
ACAATTTCAACGAAATCTTTCAATTTCTTATTTTACTATGTTCAACTCTATGTATTCTCT  
ATCCGTAGAGTACATTGAATGTACAGAAATGGCTATAACAGAGTTTCTCTTATTTCGTATT  
AACAGCTACTCTAGGGGGAATGTTTTTATGCGGTGCTAACGATTTAATAACTATCTTTGT  
AGCCCCAGAATGTTTCAGTTTATGCTCCTACCTATTATCTGGATATACCAAGAAAGATGT  
ACGGTCTAATGAGGCTACTATGAAATATTTACTCATGGGTGGGGCAAGCTCTTCTATTCT  
GGTTCATGGTTTCTTGGCTATATGGTTCATCCGGGGGAGAGATTGAGCTTCAAGAAA  
TAGTAAACGGTCTTATCAATACACAAATGTATAACTCCCCAGGAATTTCAATTGCGCTCA  
TATTCATTACCGTAGGAATTGGGTTCAAGCTTTCCCCAGCCCCTTCTCATCAATGGACTC  
CTGACGTATACGAAGGATCTCCCACTCCAGTCGTTGCTTTTCTTTCTGTTACTTCGAAA  
GTAGCTGCTTCAGCTTCAGCCACTCGAATTTTCGATATTCCTTTTTATTCTCATCAAAC  
GAATGGCATCTTCTTCTGGAATCCTAGCTATTCTTAGCATGATATTGGGAAATCTCATT  
GCTATTACTCAAACAAGCATGAAACGTATGCTTGCATATTCGTCCATAGGCCAAATCGG  
ATATGTAATTATTGGAATAATTGTTGGAGACTCAAATGATGGATATGCAAGCATGATAAC  
TTATATGCTGTTCTATATCTCCATGAATCTAGGAACTTTTTGCTTGCATTGTATTATTTGGTC  
TACGTACCGGAACTGATAACATTCGAGATTATGCAGGATTATACACAAAAGATCCTTTTT  
TGGCTCTCTTTTAGCCCTATGTCTCTTATCCCTAGGAGGTCTTCCCTCCACTAGCAGGTT  
TTTTCGGAAAACCTCTATTTATTCTGGTGTGGATGGCAGGCAGGCCTATATTTCTTGGTTT  
TAATAGGACTCCTTACAAGCGTTGTTTCTATCTACTATTATCTAAAAATAATAAAGTTATT  
AATGACTGGACGAAACCAAGAAATAACCCCTCACGTGCGAAATTATAGAAGATCCCCT  
TTAAGATCAAACAATTCCATCGAATTGAGTATGATTGTATGTGTGATAGCATCTACTATAC  
CAGGAATATCAATGAACCAATTATTGCAATTGCTCAGGATAGCCTTTTTATGTTTTCTGC



TTTACGAATATGATTTTTTTTTGGGCATTTCTAATAATATCTATCCTTGTTCCCTATTTTTGGCA  
TTTTTAATTTCCGGAGTGTTAGCCCCGATTAGCAAAGGGCCGGAGAACTTTCTACTTA  
TGAGTCGGGTATAGAACCAATGGGCGATGCTTGGTTACAATTTCGAATCCGTTATTATAT  
GTTTGCTCTAGTTTTTGTGTGTTTTGATGTTGAAACGGTTTTTTCTTTATCCATGGGCAAT  
GAGTTTCGACGTATTGGGTGTATCTGTATTTATAGAAGCTTTCATTTTCGTGCTTATCTTA  
ATTATTGGTTTAGTTTATGCATGGCGAAAGGGGGCATTGGAATGGTCTACGAATTATTTT  
CCTTGGTTAACAATAATTGTAGTTTTTCCAATATTTGCGGGTTCCTTAATTTTCTTTCTTC  
CCCATAAAGGAAATAGGGTAATTAGGTGGTATACGATATGTATATGTATTTTAGAACTCC  
TTCTAACGACTTATGCATTTTGTATCATTTCCAATCGGATGATCCATTAATCCAAGT  
GGAGGATTATAAATGGATCAATTTTTTTGATTTCCATTGGAGATTAGGAATAGATGGACT  
TTCTATAGGACCCATTTTATTAACAGGATTTACTACTTTAGCTACTTTAGCGGCTTGG  
CCAGTTACTCGAGATTCTCGATTATTCCATTTTCTCATGTTAGCAATGTACAGTGGTCAA  
ATTGGATCATTTTCGTCTCGGGACCTTTTACTTTTTTTCATCATGTGGGAGTTAGAATTA  
TTCTGTTTATCTACTTCTATGCATGTGGGGAGGAAAGAAACGTCTGTACTCAGCTACA  
AAATTTATTTGTACACGGCGGGGGTCTGTTTTTTCTTTAATGGGAGTTTGGGTCTT  
GCTTTATATGGTTCTAATGAACCAACATTAATTTTGAACATCAGTTAATCAGTCATAT  
CCTGTGGTTTTAGAAATAATATCTATATTGGATTTTTTATTGCTTTTGTGTCAAATCGC  
CCATTATCCCCCTACACACATGGTTACCAGATACCCATGGAGAAGCACATTACAGTACT  
TGTATGCTTCTAGCCGAATTTTATTAATAAATGGGAGCGTATGGATTAATTCGAATCAAT  
ATGGAATTATTACCTCATGCCATTCTATATTTTCTCCTTGGTTGATGATAATAGGTACAAT  
ACAAATAATCTATGCAGCTTTAACATCTCTTGGCCAACGGAATTTAAAAAAGAATAG  
CCTATTCCTCTGTCTCTCATATGGGTTTCATAATTATAGGAATTAGTTCTTAACCGACAC  
GGGACTTAATGGAGCCCTTTTACAAATAATATCTCATGGATTTATTGGTGTGCACTTTT  
TTTCTTGGCGGGAACGACTTATGATAGAATCCGCCCTTGTTTATCTTGACGAAATGGGCG  
GAATAGCTATTCCAATGCCAAAATGTTACGATGTTTCAAGTACTTTTCGATGGCTTCCC  
TTGCATTACCAGGTATGAGTGGTTTTGTTGCCGAATTGATAGTATTTTTTGGAAATAATTA  
CCGGCCAAAATATCTTTTAATTCCAAAATACTAATTACTTTTGTAAATGGCAATTGGAA  
TGATATTAACCTCTATTTATTCATTATCTATGTCACGCCAGATGTTCTATGGATAACAAGCTA  
TTAATGCCCCGAAGGATTCTTTTTTTGATTCTGGACCGCGAGAGTTATTTCTTTTCGATC  
TCCATCTTTTTTACCCGTAATAGGTATTGGTATATACCCGGATTTTCGTTCTTTTCATTAGCAG  
TTGACAAGGTGCAAGTTATTCTATCTAATTTTTTTTATAGAATGATTCTCGAACATGTACT  
TGTTTTGAGTGCCTATTTATTTTCTATCGGGATCTATGGATTGATCACAAGTCGAAATATG  
GTTAGAGCCCTTATGTGTCTTGAACCTATATTGAATGCGGTTAATATAAATTTGTAAAT  
TTTCTGATTTTTTTGATAATCGTCAATTAAGGAGACATTTTCTCAATTTTTGTTATAGC  
TATTGCAGCCGCTGAAGCAGCCATTGGACTGGCTATTGTTTCATCAATTTACCGTAACA  
GAAAATCAACTCGTATCAACCAATCAAATTTGTTGAATAATATGGAACAGACATATGAAT  
ATGCGTGGATCATACTTTTCACTTCCAGTCCCTATGTTAATAGGAGCGGGACTTT  
TTCTTTTTCCAACGGCAACAAAAGTTTTTCGCCGATGTGGGCTTTTCAGAGTGTTTTA  
TTGTTAAGCATAGTCATGGTTTTTTCAATCTACCTGTCTATTTCAGCAAATAAATAGCAGT  
TCTTTTTATCAATATGTATGGTCTTGGATCATCAATAATGATTTTTCTTTAGACTTCGGATA  
CTTGATCGACCCACTTACTTCTATTATGTCAATATTAATCACTACGGTTGGAATTATGGTT  
CTTATTTATAGTGATAATTATATGGCTCATGATCAAGGCTATTTGAGATTTTTTGTATAT  
GAGTTTTTTCAGTACTTCCATGTTGGGATTAGTTACTAGTTTCGAATTTGATACAAATTTAT  
ATTTTTTGGGAATTGGTTGGGCTGTGTTCCCTATCTATTAATAGGATTTGGTTTACACGA

CCTGTTGCGGCAAATGCTTGTCAAAAAGCGTTTGTAACTAATCGTGTAGGGGATTTTGG  
TTTATTATTAGGAATTTTAGGTTTTATTGGATAACAGGGAGTTTCGAATTTAGGGATTTA  
TTCGAAATATTCAATAACAATGAAGTCGATTTTTATTGTTACTTTATGTGCTGTTCTCT  
TATTTGCCGGTGCAGTTGCTAAATCCGCCCAATCCCCCTTCATGTATGGTTACCTGATG  
CCATGGAGGGGCCTACTCCCATTTCGGCTCTTATACATGCTGCTACTATGGTAGCGGCG  
GGAATTTTCTTGTAGCTCGGCTTCTTCTCTTTTCAGAGTTATACCTTACATAATGTATT  
TGATCTCGGTTATAGGAATAATAACAGTATTATTAGGAGCTACTTTAGCTCTTGCTCAAA  
AAGACATTAAGAGAGGTTTAGCCTATTCCACAATGTCTCAATTGGGTTATATGATGTTAG  
CTCTTGGTATGGGGTCTTATCGAAGCGCTTTATTTCAATTTGATTACTCATGCTTATTCCAA  
AGCATTATTATTTTAGGATCCGGATCCATTATTCATTCAATGGAACTATTGTTGGATAT  
TCTCCAGCTAAAAGTCAGAATATGGGTCTTATGGGAGGTTTAAGAAAACATGTACCAAT  
TAGCAAAATCACATTTTTATTAGGTACACTTTCTCTTTGTGGTATTCCACCTCTTGCTTGT  
TTTTGGTCCAAAGATGAAATCTTAATGATAGTTGGTTGTATTTCGCCAATTTTCGCAATA  
ATAGCTTGGGCCACGGCGGGATTAACCGCATTTTATATGTTTCGGATCTATTTACTTACTT  
TTGAAGGGCATTAAACGCTCATTTTCCAAATTATGGTGGGAAACAAAAACCCCTTC  
TATTCATATCTCTATGGGGTAAA-----AACGGAGTTAAGAAA---TTATTACT-----A  
TGAATTTTTTTGCATTTGAGCATAAAGCGGTTTATTCCCTATCCTTATGAATCGGACAATAC  
TATGCTATTCCCAATATTTGTATTAGGACTCTTACTTTGTTTGGTGGATCTATAGGAATTC  
CTTCAATTTGGATATATTATCGAAATGGTTAGCTCCATCTATAAATCTTTTGCATCAAAA  
GTCGAAT--TCGATGGATTGGAATGAATTTTTAAAGGATGCAGTCTTTTCAGTCAGTATA  
GCTTATTTCCGAATATTTATAGCATCCTTTTTATATAAACCCATTTATTCTTCTTTAAAAAA  
TTTTGAGTTAATTAATCTTTTTGTTATTCTGTGGGACAAAATTATAAATGGCATATATGAT  
TGGTCATATAATCGTGCTTACATAGATGCTTTTTATACAAGATTCTTAGTTGGTGGGATAA  
GAGGATTAGCTGAATTTACTCATTTTTTTGATCGACGAGTAATTGATGGGATGACTAACG  
GGGTTGGGGTTATTAGTTTCATTGTAGGAGAAGGTATCAAATATATAGGGGGCGGA---CG  
CATCTCTTCTTATCTTTTCTTGTATTTAGCTTATGTTTCAATCTTTTTATTAGTTTATTACAT  
GGATTTATCTGAACCAATACATGATTTTCTTTTAGTCTTTCTAGGGTTCGGGTCTTATATTA  
GGGGGTCTAGGAGTGGTATTACTTCCAATCCAATTTATTCTGCCTTTTCTTGGGATTG  
GTTCTTGTGTGACATCGTTATTCTATATTCTATCTAACTCCTATTTTGTAGCTGCTGCGCA  
GCTACTTATTTACGTAGGAGCTATAAATGTTTTAATCATTTTTGCTGTGATGTTTCATGAAT  
GGTTCAGAATATTACAAAGATTTTCATCTTTGGACCGTAGGAGATGGAATTACTTCGAT  
GGTTTGTATAAGTCTTTTTATTTCACTAATTACTACTATTTTCAGATACGTCATGGTACGGG  
ATTATTTGGACTACAAGATCAAACCAGATTATAGAGCAAGATTTTATAAGTAATAGTCAA  
CAAATTGGAATTCATTTATCAACAGATTTTTTTCTTCCATTTGAACTGATTTCAATAATCC  
TTTTAGTTGCTTTAATAGGTGCAATTGCTGTAGCTCGTCAAATGACTGCACCAACTACA  
AGAAAAGACCTCATGATAGTCAATATGGGGCCTCAGCACCCATCAATGCACGGTGTCT  
TCGACTCATCGTTACTCTAGATGGTGAAGATGTTGTCGACTGCGAACCAATATTGGGTT  
ATTTACATAGAGGGATGGAGAAAATTGCGGAAAACCGAACAAATTATACAATATTTGCCT  
TATGTAACACGTTGGGATTATTTAGCTACTATGTTTACAGAAGCAATAACCATAAATGGA  
CCCGAACAAATTAGGCAATATTCAAGTACCTAAAAGGGCTAGCTATATCAGAGTCATTAT  
GTTGGAGTTGAGTCGGATAGCTTCTCATTTGTTATGGCTAGGCCCTTTTATGGCGGATAT  
TGGTGCAGACCCCTTCTTCTATATTTTTCGAGAAAGAGAATTGATATATGACCTCTT  
CGAAGCTGCCACCGGTATGCGAATGATGCATAATATTTTCGTATCGGGGGAGTGGCTG  
CCGATCTACCCTATGGCTGGATAGATAAATGTTTGGATTTTTGCGATTATTTTTTAACAGG

GGTTGCTGAGTATCAAAAACCTTATTACCCGGAATCCTATTTTTTTTAGAACGAGTTGAAG  
GCGTAGGCATTATTGGGGGAGACGAAGCATTAAATTGGGGGTTATCGGGACCAATGCTA  
CGAGCTTCCGGAATAGAATGGGATCTTCGTAAAGTTGATCATTATGAGTCTTACGACGA  
ATTTGATTGGCAGGTTCAATGGCAACGAGAAGGGGATTCATTAGCTCGTTATTTAGTAC  
GAATCGGTGAAATGACAGAATCCATAAAGATTATTCAACAGGCTCTGGAAGGAATTCC  
AGGAGGGCCTTACGAAAATTTAGAAATCCGACGTTTTTGACAGATTAAGATCCTGAA  
TGGAATGATTTTGAATATCGGTTTATTAGTAAAAAACCTTCTCCAACCTTTTGAATTGTCG  
AAACAAGAACCTTTATGTGAGAGTTGAAGCCCCAAAAGGAGAATTGGGAATTTTTCTCA  
TAGGAGATCAGAGCGTTTTTCTTGGAGATGGAAAATTCGCCACCAGGTTTTATCAAT  
TTGCAAATCTTCTCAGTTAGTTAAAAGAATGAAATTGGCTGATATTATGACAATACTA  
GGTAGCATAGATATCATTATGGGAGAAGTTGATCGTATGCTCCCTATGATAACTGAATC  
ATAAATTATGGTCAACAAACAATACGAGCCGCCAGATACATCGGCCAAGGTTTCATGAT  
TACCCTGTCCCACGCAAATCGTTTACCTGTAACCTATTCAATACCCCTACGAAAATGAT  
CACATCGGAACGTTTCCGAGGCCGAATCCACTTTGAATTTGATAAATGCATTGCTTGTG  
AAGTATGTGTGCGTGTATGTCCTATAGATTTACCCGTTGTTGATTGGAAGTTGGAACTG  
ATATTCGAAAGAAACGATTGCTTAATTACAGTATTGATTTTGGAAATCTGTATATTTGTGG  
TAATTGCGTTGAGTATTGTCCAACAAATTGTTTATCAATGACCGAAGAATATGAACTTTC  
TACTTATGATCGTACGAATTGAATTATAATCAAATCGCTTTGGGTCGCTTACCAATGTC  
AGTAATTGATGATTACACAATTCGAACAATTTGAATTTA-----  
-----ATGCAGGGTTCGTTTGTCTGCTTGGCTAGTCAAGCATGGGCTAATTCATAGATCTTT  
GGGCTTTGATTACCAAGGAATAGAGACTTTACAAATAAAGCCCGAGGATTGGCATTCCA  
TTGCTGTCATTTTTTATGTATATGGGTACAACCTATCTCCGCTCTCAATGTGCCTATGATGT  
AGCGCTGGCGGGCTGTTAGCTAGTGTGTATCATCTTACGAGAATAGAGGATGGTGTGG  
ATCAACCAGAGGAGGTATGCATAAAGTATTTGCCTCCAGGAGGAATCCTAGAATTCGG  
TCTGTTTTCTGGGTTTGGAAAAGTGTGGATTTTCAAGAACGAGAATCATATGATATGTT  
GGGAATCTCTTATGATAATCATCCACGCTTGAAACGTATCTTAATGCCTGAAAGTTGGAT  
AGGATGGCCCTTACGTAAGGATTATATTGCCCCCAATTTTATGAAATACAAGATGCTCA  
T-----ATG  
GTCTTAGCTCCTGAATATTCAGACAATAAAAAGAAAAACGGAAAAATAAGATTGAGA  
CA---GTTATGAATTCATTAGTTTCTTTACTTGGATCGAACAACCCAAAATTCAGTTATT  
TCAACTACATTAATGATCTTTCAAATTTGGTCAAGACTCTCTAGTTTATGGCCGCTTCTC  
TATGGTACCAGTTGTTGCTTCATTGAATTTGCTTCACTAATAGGCTCACGCTTCGACTTT  
GATCGTTATGGACTAGTACCAAGATCGAGTCCTAGACAAGCGGATCTAATTTAACAGC  
CGAACAGTAACAATGAAAATGGCCCCCTTTTAGTGAGATTATATGAGCAAATGCCTG  
AACCAAAATATGTTATTGCTATGGGAGCCTGTACAATTACAGGCGGGATGTTCAAGTACC  
GATTCTTATAGTACTGTTTCGGGGAGTCGATAAGCTAATTCCTGTAGATGTATATTTGCCA  
GGTTGCCACCTAAACCGGAAGCGGTTATAGATGCTATAACAAAACCTTCGTAAGAAAAT  
ATCTCGAGAACTCTATGAAGATCGAATTAGGTCTCAACGAGCGAATCGGTGTTTTACTA  
CCAATCACAAGTTTCATGTTCAACACAGTATTACATACGGGAAATTATGATCAAAGAGTT  
CTTTATCAACCCCACTACTTCAGAGATCCCTACGGAAATCTTTTTCAAATACAAAAT  
TCAGTATCTTCCCCGAATTAGTGAATATGCAAACTAGAAATGCTTTTTTCTTGGCTAAAG  
AAACAGATTACTCGATCTATTTCCGTATCGCTCATGATATATATCTTAACTCGGACATCCA  
TTTCAAGTGCATATCCCATTTTTGCACAGCAGGGTTATGAAAATCCACGAGAAGCGACT  
GGGCGTATTGTATGTGCCAATTGCCATTTAGCTAATAAGCCCGTGGAGATTGAGGTTCC

ACAAGCGGTACTTCCTGATACTGTATTTGAAGCAGTTGTTTCGAATTCCTTATGATATGCA  
ACTGAAACAGGTTCTTGCTAATGGTAAAAGGGGGGGTGAACGTGGGGGCTGTTCTT  
ATTTTACCGGAGGGGTTTGAATTAGCTCCTCCCGATCGTATTTCTCCCGAGATGAAAGA  
AAAGATTGGCAATTTGTCTTTTCAGAGCTATCGCCCAATAAAAAAATATTCTTGTGAT  
AGGCCCTGTCCCTGGTCAAAAATATAGTGAAATAACCTTCCCTATTCTTTCCCGGACC  
CTGCTACTAAGAAGGATGTTCACTTCTTAAAATATCCTATATACGTAGGCGGGAACAGG  
GGAAGGGGTCAGATTTATCCCGACGGCAGCAAGAGTAACAATACTGTTTATAATGCTAC  
AGCAGCAGGTATAGTAAGCAAAATCATACGAAAAGAAAAGGGTGGGTATGAGATAACC  
ATAACGGATGCGTCGGATGGACGTCAAGTGGTTGATATTATCCCTCCCGGACCAGAACT  
TCTTGTTCGAGGGCGAATCTATCAAATTTGATCAACCATTAACGAGTAATCCTAATGT  
AGGCGGATTTGGTCAGGGAGATGCAGAAATAGTACTTCAAGATCCATTACGTGTCCAA  
GGACTTTTGTCTTCTTGGCATCTGTTATTTGGCACAAATCTTTTTGGTCTTAAAAAG  
AAACAGTTCGAGAAGGTTCAATTGGCCGAAATGAATTCATGAGTAAAGTATATGATTG  
GTTCAAGAACGTCTCGAGATTCAAGCAATTGCGGATGATATAACTAGTAAATACGTTC  
CTCCCCACGTCAATATATTTATTGTTTAGGGGGAATTACGCTTACTTGTTTTTTAGTACA  
AGTAGCTACTGGGTTTGTATGACTTTTTACTATCGTCCGACCGTACTGAGGCTTTTGC  
TTCTGTTCAATACATAATGACTGAAGCCAACCTTGGTTGGTTAATCCGATCAGTTCATCG  
ATGGTCGGCAAGTATGATGGTCCTAATGATGATCCTGCATGTATTCGTGTGTATCTCAC  
CGGCGGATTTAAAAAACCTCGCGAATTGACTTGGGTTACAGGTGTGGTTCTGGCTGTAT  
TAACCGCATCTTTTGGCGTAACTGGTTATTCCTTACCTTGGGACCAAGTCGGTTATTGGG  
CAGTGAATAAGTAACAGGTGTCCCTGACGCTATTCTGTAAATAGGATCACCTTGGTC  
GAATTATTGCGCGGAAGCGCTAGTGTGGGACAATCTACTTTGACCCGTTTTTATAGTTTA  
CACACTTTTGTATTGCCGCTTCTTACTGCCGTATTTATGTTAATGCACTTTCCAATGATAC  
GTAAACAAGGTATTTCTGGGCCTTTAATGGGAGTAACAAAAAACCTGACTTGAATGA  
TCCTGTATTAAGAGCTAAATTGGCTAAAGGTATGGGTCATAATTATTATGGAGAGCCCGC  
ATGGCCAATGATCTTTTATATATTTTCCAGTAGTAATTCTAGGTACTATTGCATGTAAT  
GTAGGCTTAGCCGTTTTAGAACCATCAATGATTGGTGAACCGGCAGATCCATTTGCAAC  
CCTTTGGAAATATTACCTGAATGGTATTTCTTTCCTGTATTTCAAATACTTCGTACAGTG  
CCAATAAATTATTGGGGTCTTTTTAATGGTTTCAGTACCTGCGGGATTATTAACAGTA  
CCTTTTTTAGAGAATGTTAATAAATTCCAAAATCCATTTGCGCGTCCAGTAGCGACGAC  
TGTCTTTTTGATTGGTACCGCAGTCGCCCTTGGTTGGGCATTGGTGCAACATTACCTAT  
TGATAAATCCCTAACTTTAGGTCTTTTTATGATTGAAGTTTTTCTATTTGGAATCGTGTTA  
GGTCTAATTCCTATTACTTTGGCTGGATTATTCGTAACCTGCATATTTACAATATAGGCGTG  
GTGATCAGTTGGACCTTATGCTTACTATAACTAGTTATTTGCGTTTTCTATTAGCGGCTTT  
AACTATAACCTCAGCTCTATTTATTGGTCTGAGCAAGATACGACTTATTATGGATATAGTA  
AGTCTTGCTTGGGCTGCTTTAATGGTAGTCTTTACTTTTTCCCTTTCCTCGTAGTGTGG  
GGAAGAAGTGGACTCATGATTATTCGTTGCGCGGAACCAGAAGTTAAAATTTGGTAG  
ATAGGGATCCCGTAAAAACTTCGTTTCGAGGAATGGGCCAGACCGGGTCAATTTCTCAAG  
ACAATAGCTAAAGGGCCTGATACTACCACTTGGATCTGGAACCTACATGCTGATGCTC  
ACGATTTTCGATAGCCATAACAGTGATTTGGAGGAGATCTCTCGAAAAGTATTTAGTGCA  
CATTTCCGTCAACTCTCCATCATCTTTCTTTGGCTGAGCGGCATGTATTTCCACGGTGCT  
CGTTTTTCTAATTATGAAGCGTGGCTAAGTGATCCAACCTCACATTGGGCCTAGTGCCCA  
GGTGGTTTGGCCAATAGTGGGCCAAGAAATATTAATGGTGACGTAGGCGGGGGTTTC  
CGAGGAATACAAATAACCTCTGGTTTTTTTTTCAGATTTGGCGAGCATCTGGAATAACTAG

TGAATTACAACCTCTATTGTACAGCAATTGGGGCATTGGTCTTTGCAGCGTTAATGCTTTT  
TGCTGGTTGGTTTCATTATCATAAAGCGGGCCAAAATTGGCTTGGTTTCAAGATGTAG  
AATCTATGCTGAATCACCATTTGGCAGGGCTACTAGGACTTGGGTCTCTCTTGGGGCG  
GGGCATCAAGTACATGTATCTTTACCGATTAACCAATTTCTAAACGCTGGAGTAGATCCT  
AAAGAGATAACCACTTCCTCATGAATTTATCTTGAATCGAGATCTTTTGGCTCAACTTTAT  
CCCAGTTTTGCCGAGGGAGCAACCCCATTTTTACCTTGAATTGGTCAAAATATGCGGA  
CTTCTTACTTTTCGTGGAGGATTAGATCCAGTAACTGGGGGTCTGTGGCTGACTGATA  
TTGCCCATCACCATTAGCTATTGCAATCTTTTCTGATAGCGGGTCACATGTATAGGA  
CCAAGTGGGGTATTGGTCATGGACTAAAAGATATTTTAGAAGCTCATAAAGGTCCATTT  
ACAGGTCAGGGCCATAAAGGCCTATATGAGATCCTAACACGTCATGGCATGCTCAATT  
ATCTCTTAACTTAGCTATGTTAGGCTCTTTAACCATTTGTTGTAGCTCACCATATGTATTCC  
ATGCCCCCTTATCCGTATCTAGCTACTGACTATGGTACACAACCTGTCATTGTTACACAT  
CACATGTGGATTGGTGGATTCTCATAGTTGGTGCTGCCGCGCATGCAGCCATTTTTATG  
GTAAGAGATTATGATCCAACACTCGGTACAACGATCTATTAGATCGTGTCTTAGACAT  
CGTGATGCAATCATATCCCATCTCAACTGGGCATGTATATTTCTAGGCTTTACAGTTTT  
GGTTTGTATATTCATAATGATAACCATGAGCGCTTTAGGGCGTCCTCAAGATATGTTTTCA  
GATACCGCTATAACAATTACAACCCGTTTTTGTCTCAATGGATACAAAACACCCATGCTTTA  
GCACCTGGTGCAACGGCTCCTGGTGCAACAGCAAGTACCAGTTTAACTGGGGGGGT  
GGTGATTTAGTGGCAGTGGGTGGCAAGGTGGCTTTGTTGCCTATTCCATTAGGAACCGC  
GGATTTCTTGGTACATCACATTCATGCATTTACGATTCATGTGACGGTATTGATACTCTTG  
AAAGGTGTTCTATTTGCTCGCAGTTCCCGTTTTGATACCGGATAAAGCAAATCTTGGTTT  
TCGTTTTCTTGTGATGGACCTGGAAGAGGGGGTACATGTCAAGTATCGGCCTGGGATC  
ATGCTTCTTAGGACTATTCTGGATGTACAATGCAATTTCCGGTAGTAATTTCCATTTAG  
TTGGAAAATGCAGTCAGATGTTTGGGGCAGTGTAAGTGATCAAGGGGTAGTAACTCAT  
ATCACGGGAGGAAACTTTGCGCAAAGTTCTATTACTATTAATGGGTGGCTCCGCGATTT  
CTTATGGGCACAGGCATCCCAGGTAATTCAGTCTTATGGTTCTTATTATCTGCATATGG  
CCTTTTTTTTCTAGGTGCTCATTTTGTCTGGGCTTTTAGTTTAAATGTTTCTATTAGTGA  
CGTGTTATTGGCAAGAACTTATTGAATCCATCGTTTTGGGCTCATAATAAATTAAGTT  
GCTCCTGCTACTCAGCCGAGAGCCTTGAGCATTATACAAGGACGTGCTGTAGGAGTAA  
CCCATTACCTTCTGGGTGGAATTGCCACAACATGGGCATTCTTCTTAGCAAGAATTATTG  
CAGTAGGAATGGCATTACGATTTCCAAGGTTTAGCCAAGGCTTAGCTCAGGACCCACT  
ACTCGTCGTATTTGGTTTGGTATTGCTACCGCACATGACTTCGAGAGTCATGATGATATT  
ACTGAGGAACGTCTTTATCAGAATATTTTTGCTTCTCACTTTGGTCAATTAGCAATAATT  
TTTCTGTGGACTTCCGGAATCTGTTTCATGTAGCTTGGCAAGGAAATTTTGGAGTCGTG  
GGTACAGGACCCTTTACATGTAAGACCTATTGCTCATGCAATTTGGGATCCTCATTTTGG  
TCAACCGGCCGTGGAAGCTTTTACTCGAGGGGGTGTCTTGGCCCAGTGAATATCGCTT  
ATTCTGGTGTATTATCAGTGGTGGTATAACAATCGGTTTACGCACTAATGAAGATCTTTATA  
CTGGTGCTCTTTTTCTATTATTTCTTTCTGCCATATCCTTAATAGCAGGTTGGTTACACCT  
ACAACCGAAATGGAAACCGAGCGTTTCTGGTTCAAAAATGCCGAATCTCGTCTGAAT  
CATATTTGTCAGGACTCTTTGGCGTAAGTTCCCTTGGCTTGGACAGGGCATTAGTTCA  
TGTTGCTATTCCTGCATCCAGAGGGGAGTACGTTCCGGTGGAAATAATTTCTTAGATGTATT  
ACCGCATCCCCAAGGGTTAGGCCCACTTTTTACAGGTCAATGGAATCTTTATGCTCAA  
ACCCGATTCAAGTAGTCATTTATTTGGTACCGCCCAAGGGGCGGGAAGTCCATTTCTA  
ACTTCTCGGGGGATTCCATCCACAAACGCAAAGTTTATGGCTGACTGATATTGCCCA

TCACCAATTAGCTATTGCATTTATTTTTCTCGTTGCTGGTCATATGTATAGAACCAATTC  
GGGATTGGGCACAGTATGAAAGACCTTTTAGATGCACATATCCCCCGGGGGACGATT  
GGGGCGTGGACATAAGGGTCTTTATGACACAATCAATAATTCGCTTCATTTTCAATTAG  
GCCTTGCTCTAGCTTCTTTAGGGGTATTACTTCTTTGGTAGCTCAACACATGTACTCTT  
TACCTGCTTATGCATTCATAGCACAAGACTTTACTACTCAAGCTGCATTATATACCCACC  
ACCAATATATCGCAGGATTCATCATGACAGGAGCTTTTGCTCATGGAGCTATATTTTTCA  
TTAGAGATTACAATCCGGAGCAAAATGAAGATAATGTATTGGCAAGAATGTTAGAGCAT  
AAAGAAGCTATCATATCTCATTTAAGTTGGGCCAGCCTCTTTCTGGGATTCCATACCCCTG  
GGACTTTATGTTTATAATGATGTCATGCTTGCTTTGGCACTCCGGAGAAGCAAATCTT  
GATTGAACCTATATTTGCTCAATGGATAACAATCCGCTCATGGTAAAACCTTCATATGGGTT  
CGATGTACTTTTATCTTCAACGAGTGGTCCAGCATTCAATGCGGGTCAAGCATCTGGT  
TGCCGGGTTGGTTAAATGCTGTTAATGAA-----AATAGTAATTCATTATTTTTAACAATAG  
GTCCTGGAGACTTTTTGGTTCATCATGCTATTGCTCTTGGTTTACATACAACACTACATTGA  
TCTTAGTAAAAGGTGCTTTAGATGCACGTGGTTCCAAGTTAATGCCAGATAAAAAGGAT  
TTCGGTTATAGTTTTCCGTGCGATGGCCCAGGACGAGGCGGTACTIONTGTGATATTCGGC  
ATGGGACGCGTTTTATTTGGCAGTTTTTTGGATGTTAAATACTATTGGATGGGTTACTTT  
TTATTGGCATTGGAAGCACATCACATTATGGCAGGGTAACGTTTCACAGTTTAATGAAT  
CTTCCACTTATTTGATGGGCTGGTTAAGGGATTATTTATGGTTAAACTCTTCACAACCTTA  
TCAACGGATATAATCCTTTTTGGTATGAATAGTTTATCGGTTTGGGCATGGATGTTCTTATT  
TGGACATCTTGTTGGGCTACTGGATTTATGTTCTTAATTTCTTGGCGTGGATATTGGCA  
GGAATTGATTGAAACTTTAGCATGGGCTCATGAACGCACACCTTTGGCCAATTTGATTC  
GCTGGAGAGATAAACCAGTGGCCCTTTCCATTGTACAAGCAAGATTGGTTGGATTAGCT  
CACTTTTCTGTAGGTTATATATTCATTTATGCGGCTTTCTTGATTGCCTCTACGTCGGGCA  
AATTTGGTATGTCACATTCAGTAAAGATTTATGATACGTGTATAGGATGTACTCAATGTG  
TCCGAGCCTGCCCCACCGATGTATTAGAAATGATACCTTGGGACGGTTGTAAGGCTAAA  
CAAATTGCTTCTGCTCCACGAACAGAGGACTGTGTTGGTTGTAAGAGATGTGAATCCG  
CCTGTCCAACAGATTTCTTGAGTGTCCGAGTTTATTTATGGCATGAAACAACCTCGCAGT  
ATGGGTCTAGCTTATATGACAAATTTGAACCTTCCATCTATTTTTGTGCCGTTAGTAGGC  
CTAGTCTTTCCGGCAATTGCAATGGCTTCTTTATTTCTTCATGTTCAAAAAATAAGATT  
GTTATGCGAGATCTAAAAACATATCTCTGTGGCACCAGTACTAAGTACGCTATGGTTC  
GGGGCTTTAGCAGGTCTATTGATAGAGATTAATCGTTTTTTCCCGGATGCGTTGACATTC  
CCTTTTTTTTTATTTCATGACTGCAATTTTAGAGAGACGCGAAAGCGAAAGCCTATGGGG  
TCGCTTCTGTAACCTGGATAACTAGCACTGAAAACCGTCTTTACATTGGATGGTTTGGTG  
TTTTGATGATCCCTACCTTATTGACGGCAACTTCTGTATTTATTATTGCCTTCATTGCTGC  
TCCTCCAGTAGACATTGATGGTATTCGTGAACCTGTTTCAGGGTCTCTACTTTACGGAA  
ACAATATTATTTCCGGTGCCATTTCTACTTCTGCAGCTATAGGTTTACATTTTTACCC  
AATCTGGGAAGCGGCATCCGTTGATGAATGGTTATACAACGGTGGTCCCTTATGAACTAA  
TTGTTCTACACTTCTTACTTGGCGTAGCTTGTTACATGGGTGCTGAGTGGGAGCTTAGT  
TTCCGTCTGGGTATGCGACCTTGGATTGCTGTTGCATATTCAGCTCCTGTTGCAGCTGCT  
ACCGCAGTTTTCTTGATCTACCCAATTGGTCAAGGAAGTTTTTCTGATGGTATGCCTCTA  
GGAATCTCTGGTACTTTCAATTTTCATGATTGTATTCCAGGCTGAGCACAACATCCTTATG  
CACCCATTCACATGTTAGGCGTAGCTGGTGTATTCCGGCGGCTCCCTATTCAGTGCTATG  
CATGGTTCCCTGGTAACTTCTAGTTTGATCAGGGAAACCACAGAAAATGAATCTGCTAA  
TGAAGGTTACAGATTCGGTCAAGAGGAAGAACTTATAACATCGTAGCCGCTCATGGTT

ATTTTGGCCGATTGATCTTCCAATATGCTAGTTTCAACAACCTCTCGTTCGTTACACTTCT  
TCCTAGCTGCTTGGCCTGTAGTAGGTATCTGGTTTACCGCTTTAGGTATCAGCACTATGG  
CTTCAACCTAAATGGTTTCAATTTCAACCAATCTGTAGTTGACAGTCAAGGCCGTGTA  
ATTAATACTTGGGCTGATATCATTAACCGTGCTAACCTTGGTATGGAAGTTATGCATGAA  
CGTAATGCTCACAACCTCCCTCTAGACCTAGCTGCTATCGAAGCTCCATCTACAAATGG  
AATGGGTTTGCCTTGGTATCGTGTTCATACCGTTGTATTGAATGATCCCGGTCGGTTGCT  
TTCTGTTTCATATAATGCATACAGCTCTGGTTGCTGGTTGGGCCGGTTCGATGGCTCTGTA  
TGAATTAGCGGTTTTTGTATCCTTCTGATCCTGTTCTTGATCCAATGTGGAGACAGGGTAT  
GTCGTTATACCCTTCATGACTCGTTTAGGAATAACCAATTCATGGGGCGGTTGGAGTAT  
CACA---GGGGGACTGTAACGAATCCGGGTATTTGGAGTTACGAAGGTGTAGCTGGAG  
CACATATTGTGTTTTCTGGCTTATGCTTTTTGGCAGCTATCTGGCATTGGGTGTATTGGG  
ATCTAGAAATATTTTGTGATGAACGTACAGGAAAACCTTCTTTGGATTTGCCAAAGATC  
TTTGGAAATTCATTTATTTCTCTCAGGGGTGGCTTGCTTTGGTTTTGGTGCATTTTCATGTA  
ACAGGCTTGTATGGTCCCGGAATATGGGTGTCCGACCCTTATGGACTAACGGGAAAAGT  
ACAACCTGTAAATCCAGCGTGGGGCGTGGAAAGTTTTGATCCTTTTGTTCAGGAGGA  
ATAGCCTCTCATCATATTGCAGCAGGAACATTGGGCATATTAGCGGGCCTATTCCATCTT  
AGCGTCCGTCCGCCACAACGTCTATACAAAGGATTGCGTATGGGAAATATTGAAACCGT  
CCTTTCCAGTAGTATCGCTGCTGTCTTTTTTGCAGCTTTTGTGTTGCCGGAACCTATGTG  
GTATGGTTCGGCAACAACCCCGATTGAATTATTTGGGCCACTCGTTACCAATGGGATC  
AGGGGTACTTCCAGCAAGAAATATATCGAAGAGTTAGTGCTGGGCTAGCAGAAAATCA  
AAGTTTATCAGAAGCCTGGTCTAAAATTCCTGAAAAATTAGCTTTTTTATGATTACATCGG  
CAATAATCCGGCAAAAGGGGGATTATTCAGAGCGGGCTCAATGGATAACGGGGATGGA  
ATAGCGGTTGGATGGTTAGGACACCCTATCTTTAGAGATAAAGAAGGCCGTGAACTTTT  
TGACGTCGTATGCCTACTTTTTTTGAAACATTTCCGGTCGTTTTGGTAGATGGCGATGG  
AATTGTTAGAGCCGATGTTCCTTTTAGAAGGGCAGAATCGAAGTATAGTGTGAACAA  
GTAGGTGTAACCTGTTGAGTTCTACGGCGGTGAACTCAACGGCGTCAGTTATAGTGATCC  
TGCTACTGTGAAAAAATATGCTAGACGTGCTCAATTGGGTGAAATTTTTGAATTAGATC  
GTGCTACTTTGAAATCCGATGGTGTTTTTTCGTAGCAGTCCAAGGGGTTGGTTTACTTTT  
GGGCATGCTTCGTTTGCTTTGCTCTTCTTCTTCGGACACATTTGGCATGGTGCTAGAAC  
CTTGTTTCAGAGATGTTTTTGGCTGGTATTGACCCAGATTTAGATGCTCAAGTCGAATTTG  
GAGCATTCCAAAAACTTGGAGATCCAACCTACAAAAAGACAGGCAGCC-----  
-----GTGGAAACGCTCTTTAATGGAACCTTAGCCTTAGCTGGTCGTGACCAAGAA  
ACCACTGGTTTCGCTTGGTGGGCCGGGAATGCCCGACTTATCAATTTATCCGGTAAACT  
ACTAGGGGCTCATGTAGCCCATGCTGGATTAATCGTATTCTGGGCCGGAGCAATGAACC  
TATTTGAAGTGGCCCATTTTCGTACCAGAGAAGCCTATGTATGAACAAGGATTAATTTTAC  
TTCCCCACCTAGCTACTCTAGGTTGGGGGGTAGGCCCTGGGGGAGAAGTTATAGACAC  
CTTCCATACTTTGTATCTGGAGTACTTCATTTAATTTCTTCTGCAGTATTGGGCTTTGGC  
GGCATTATCATGCACTTCTGGGACCTGAGACACTTGAAGAATCTTTTCCCTTCTTTGG  
TTATGTCTGGAAAGATCGAAATAAAATGACCACAATTTTAGGTATTCATTAATCTTGTT  
AGGTCTAGGTGCTTTTCTTCTAGTATTCAAGGCTCTTTATTTTGGGGGCGTATATGATAC  
CTGGGCTCCGGGAGGGGGAGATGTAAGAAAAATTACCAACTTGACCCTTAGCCCGAGT  
ATCATATTTGGTTATTTACTAAAATCCCCTTTTGGAGGGGAAGGATGGATTGTTAGTGTG  
GACGATTTAGAAGATATAATCGGAGGACATGTATGGTTAGGTTCCATTTGTATACTTGGT  
GGAATCTGGCATATCTTAACCAAACCCTTCGCATGGGCTCGACGCGCACTTGTATGGTC

TGGAGAGGCTTACTTATCTTATAGTTTAGGGGCTTTATCCGTCTTTGGTTTCATTGCTTGT  
TGTTTTGTCTGGTTCAATAATACCGCTTATCCTAGTGAATTTACGGACCTACTGGACCA  
GAAGCTTCTCAAGCTCAAGCATTACTTTTCTAGTTAGAGACCAACGTCTTGGGGCTAA  
CGTGGGATCCGCTCAAGGACCTACTGGTTTAGGTAAATATCTAATGCGTTCCCGACTG  
GAGAAGTCATTTTTGGAGGAGAACTATGCGTTTTTGGGATCTGCGTGCTCCATGGTTA  
GAGCCTCTAAGGGGTCCAAATGGGTAGACTTGAGTAGGTTGAAAAAAGACATAACAAC  
CTTGGCAGGAACGGCGTTCCGCAGAATATATGACTCATGCTCCTTTAGGTTCTTTAAATT  
CCGTGGGTGGTGTAGCTACCGAGATCAATGCAGTCAATTATGTCTCTCCTAGAAAGTTGG  
TTAGCTACCTCTCATTTTTGTTCTAGGATTCTTCTTCTTCGTAGGTCAATTTGTGGCACGCG  
GGAAGGGCTCGTGCAGCTGCAGCAGGATTTGAAAAGGAATTGATCGTGACTTTGAA  
CCTGTTCTTTCCATGACCCCTCTAATATGACTATAGCCCTTGGTAAGTTTACCAAAGAC  
GAAAATGATTTATTTGATATTATGGATGACTGGTTACGGAGGGACCGTTTCGTTTTTGT  
GGCTGGTCCGGTCTATTGCTCTTTCCTTGTGCCTATTTGCTGTAGGGGGTTGGTTCACA  
GGTACAACCTTTGTAACCTTCATGGTATACCCATGGATTGGCCAGTCTTATTTGGAAGGC  
TGCAATTTCTTAACTGCCGCGTTTCTACTCCTGCTAATAGTTTAGCACATTCGTTGTTG  
TTACTATGGGGTCTGAAGCACAAGGAGATTTTACTCGTTGGTGTCAATTGGGGGGTCT  
GTGGACTTTTGTGCTCTCCATGGAGCTTTTGGCCTAATAGGTTTCATGTTACGTCAATT  
CGAGCTTGCTCGATCTGTTCAATTGAGACCTTATAATGCAATCGCATTCTCTGGTCCAAT  
TGCTGTTTTTGTCTGTATTTCTGATTTATCCACTGGGTGAGTCTGGTTGGTCTTTTGC  
ACCTAGTTTTGGTGTAGCAGCTATATTTGATTATCCTCTTTTTTCAAGGGTTTCATAAT  
TGGACGTTGAACCCATTTCAATATGATGGGAGTTGCCGGTGTATTGGGCGCTGCTTTGCT  
ATGCGCCATTCATGGTGCTACCGTAGAAAATACTTTATTTGAAGACGGTGATGGTGCAA  
ATACATTCGTGCTTTTAAACCAACTCAAGCCGAAGAACTTATTCAATGGTCACCGCT  
AACCGCTTTTGGTCCCAAATCTTTGGGGTTGCTTTTTCCAATAAACGTTGGTTACATTC  
TTATGTTATTTGTACCAGTAACCGTTTTATGGATGAGTGCTCTTGGAGTAGTCGGTCTA  
GCCCTGAACCTACGTGCCTATGACTTCGTTTCTCAGGAAATTCGCGCAGCGGAAGATC  
CTGAATTTGAGACTTTCTACACCAAAAATATTCTCTTAAACGAAGGTATTCGCGCTTGG  
ATGGCGGCTCAAGATCAGCCTCATGAAAACCTTATATCCCTGAGGAGGTTCTACCACG  
TGGAACGCTCTTATGTCTGGAAGCACAGGAGAACGTTTCGTTTGTGATATTATTACCA  
GTATTCGATACTGGGTCATTCATAGCATTACTATACCTTCCCTATTCATTGCGGGTTGGTT  
ATTTGTCAGCACCGTTTTAGCTTACGATGTGTTTGGAAAGCCCTCGGCCAAACGAGTATT  
TTACAGAGAGCCGACAAGGAATTCATTAATAACTGGCCGTTTTGATCCTTTGGAACAA  
CTCGATGAATTTAGTAGATCGTTTATGACTATAGATCGAACCTATCCAATTTTTACAGTAC  
GATGGTTGGCTGTTACGGCCTAGCTGTACCTACCGTCTTTTTTTTTGGGATCAATATCAG  
CAATGCAGTTCATCCAACGAATGGCTACACAACTGTTGAAAACAGTTCT--AGATCTG  
GTCCAAGACGAACTGCGGTAGGAGATTTATTAACCAATTGAATTCGGAATATGGTAAA  
GTAGCTCCTGGGTGGGGAACCTACTCCTTTGATGGGTGTCGCAATGGCCTTATTTGCGGT  
ATTTCTATCTATTATTTTGGAGATTTATAATTCTTCCGTTTTATTGGATGGAATTTCAATGA  
ATATGCTTACTCTCAAACCTTTCGTTTACACAGTAGTGATATTTTTTGTCTCTCTTCAT  
CTTTGGATTCCTATCTAATGATCCCGGACGTAATCCTGGACGTGAAGAAATGGCCGATA  
CTACTGGAAGGATTCCTCTTTGGATAATAGGTAAGTACTGTAGCTGGTATTCTTGTAAATCGGTT  
TAATAGGTATTTCTTTTATGGTTCATATTCCGGATTGGGTTTCATCCCTCATGCTTAATACC  
TTTAGTTTGTATCGGTATCTGTCTTAATTCGACCCTTTTTTCGAGTAGTTTTTCTTCGGCA  
AATTGCCCGAGGCCTATGCTTTTTTGAATCCAATCGTAGATATTATGCCAGTCATACCTC



TGTTTTTTTTTCTCTTAGCCTTTGTTTGGCAAGCTGCTGTAAGTTTTTCGAACGACACAAT  
CAAACCCGAACGAACAAAATGTTGAATTGAATCGTACCAGTCTCTACTGGGGGTATTA  
CTCATTTTTGTAAGTTTACTGGGTACGCCTTATATACCGCTTTTGGGCAACCTTCTCAA  
CAACTAAGAGATCCATTTCGAGGAACATGGAGACATGGAAGCATTGGTTTATACATTCCT  
CTTAGTCTCGACTCTAGGGATAATTTTTTTCGCTATCTTTTTTTCGAGAACCGCCTAAAGT  
TCCAACATAAAAAGAAC---ATGACTCTTGCTTTCCAATTGGCTGTTTTTGCATTAATTGCT  
ACTTCATTAATCTTATTGATTAGCGTACCCGTTGTATTTGCTTCTCCTGATGGCTGGTCAA  
GTAACAAAAATGTTGTATTTTCTGGTACATCCTTATGGATTGGATTAGTCTTTCTGGTGG  
GTATCCTTAATTCTCTCATCTCT-----ATGTCACCACAAAACAGAGACTAAAGC  
AAGTGTGGATTCAAAGCTGGTGTAAAGAGTACAAATTGACTTATTATACTCCTGAGT  
ACCAAACCAAGGATACTGATATATTGGCAGCATTCCGAGTAACTCCTCAACCTGGAGTT  
CCACCTGAAGAAGCAGGGGCCGCGGTAGCTGCCGAATCTTCTACTGGTACATGGACAA  
CTGTATGGACCGATGGACTTACCAGCCTTGATCGTTACAAAGGGCGATGCTACCGCATC  
GAGCGTGTGTTGGAGAAAAAGATCAATATATTGCTTATGTAGCTTACCCTTTAGACCTT  
TTTGAAGAAGGTTCTGTTACCAACATGTTTACTTCCATTGTAGGTAACGTATTTGGGTTC  
AAAGCCCTGCGCGCTCTACGTCTGGAAGATCTGCGAATCCCTCCTGCTTATGTTAAAAC  
TTTCCAAGGTCCGCCTCATGGGATCCAAGTTGAAAGAGATAAATTGAACAAGTATGGT  
CGTCCCCTGTTGGGATGTACTATTAACCTAAATTGGGGTTATCTGCTAAAACTACGGT  
AGAGCTGTTTATGAATGTCTTCGCGGTGGACTTGATTTTACCAAAGATGATGAGAACGT  
GAACTCACAACCATTATGCGTTGGAGAGATCGTTTCTTATTTTTGTGCCGAAGCACTTTA  
TAAAGCACAGGCTGAAACAGGTGAAATCAAAGGGCATTACTTGAATGCTACTGCAGGT  
ACATGCGAAGAAATGATCAAAGAGCTGTATTTGCTAGAGAATTGGGCGTTCCGATCGT  
AATGCATGACTACTTAAACGGGGGATTACCGCAAATACTAGCTTGGCTCATTATTGCC  
GAGATAATGGTCTACTTCTTACATCCACCGTGCAATGCATGCGGTTATTGATAGACAG  
AAGAATCATGGTATCCACTTCCGGGTATTAGCAAAAAGCGTTACGTATGTCTGGTGGAGA  
TCATATCACTCTGGTACCGTAGTAGGTAACTTGAAGGTGAAAGAGACATAACTTTGG  
GCTTTGTTGATTTACTGCGTGATGATTTTGTGTTGAACAAGATCGAAGTCGCGGTATTTATT  
TCACTCAAGATTGGGTCTCTTTACCAGGTGTTCTACCCGTGGCTTCAGGAGGTATTAC  
GTTTGGCATATGCCTGCTCTGACCGAGATCTTTGGGGATGATTCCGTAACAGTTTCGG  
TGGAGGAACTTTAGGACATCCTTGGGGTAATGCGCCAGGTGCCGTAGCTAATCGAGTA  
GCTCTAGAAGCATGTGTAAGAGCTCGTAATGAAGGACGTGATCTTGCTCAGGAAGGTA  
ATGAAATTATTCGCGAGGCTTGCAAATGGAGCCCGGAACTAGCTGCTGCTTGTGAAGTA  
TGGAAGAGATCGTATTTAATTTTGCAGCAGTGGACGTTTTTGGATAAGATGGCGATACA  
TTTATACAAAACCTTCTACCCGAGCACACGCAATGGAACCGTAGACAGTCAAGTGAAA  
TCCAATCCACGAAATAATTTGATCTATGGACAGCATCATTGTGGTAAAGGTCGTAATGC  
CAGAGGAATCATTACCGCAAGGCATAGAGGGGGAGGTCATAAGCGTCTATAACCGTAAA  
ATCGATTTTCGACGGAATGAAAAAGACATATATGGTAGAATCGTAACCATAGAATACGA  
CCCTAATCGAAATGCATACATTTGTCTCATACTATGGGGATGGTGAGAAGAGATATAT  
TTTACATCCCAGAGGGGCTATAATTGGAGATACCATTGTTTCTGGTACAGAAGTTCCTAT  
AAAAATGGGAAATGCCCTACCTTTGACCGATATGCCCTTAGGCACGGCCATACATAACA  
TAGAAATCACACTTGGAAAGGGTGGACAATTAGCTAGAGCAGCGGGTGTGTAGCGA

AACTGATTGCAAAAAGAGGGGAAATCGGCCACATTA AAAATTACCTTCTGGGGAGGTCCG  
TTTGATATCCAAAACTGCTCAGCAACAGTCGGACAAGTGGGGAATGTTGGGGTGAAC  
CAGAAAAGTTTGGGTAGAGCCGGATCTAAGCGTTGGCTAGGTAAGCGTCCTGTAGTAA  
GAGGAGTAGTTATGAACCCTGTAGACCATCCCCATGGGGGTGGTGAAGGGAGAGCCCC  
AATTGGTAGAAAAAACCACAACCCCTTGGGGTTATCCTGCACTTGAAGAAGAAGT  
AGAAAAAGGAATAAATATAGTGATAATTTGATTCTTCGTCGCCGTAGTAAAATGATTCA  
ACCTCAGACCCATTTAAATGTAGCGGATAACAGCGGGGCTCGAGAATTGATGTGTATTC  
GAATCATAGGAGCTAGC---AATCGTCGATATGCTCATATTGGTGACGTTATTGTTGCTGT  
GATCAAAGAAGCCGTACCAAATATGCCCTAGAAAGATCAGAAGTAGTCAGAGCTGTA  
ATTGTGCGGACCTGTAAAGA ACTCAAACGTGACAACGGGATGATAATACGATATGATG  
ACAATGCTGCAGTTGTTATTGATCAAGAAGGAAATCCAAAAGGAACTCGAATTTTTGG  
TGCAATCGCCCGGAATTGAGAGAATTAATTTTACTAAAATAGTTTCATTAGCTCCCG  
AGGTATTAATGCTTAGTCCCAAAGAACCAGATTCGGTAAACAACATAGAGGAAGAAT  
GAAGGGAATATCTCATCGAGGTAATCATATTTCTTTCCGGTAAATATGCTCTTCAGGCACT  
TGAACCTGCTTGGATTACATCTAGACAAATAGAAGCAGGCCGACGAGCAATGACACGA  
AATGCACGTCGTGGTGGAAAAATATGGGTACGTATATTTCCAGACAAACCAGTTACT  
AAGACCCGCAGAAACACGTATGGGTT CAGGAAAAGGATCCCCTGAATATTGGGTAGCT  
GTTGTTAAACCGGGTTCGAATACTTTATGAAATGGGTGGAGTAACAGAAAATATAGCCAG  
AAGGGCTATTTCACTAGCAGCATCTAAAATGCCTATAACGAACTCAATTCATTATTTTCG---A  
TGACCAGAATTAACGGGGATATATAGCTCGGAGACGTAGAACAAAATTCGTTTATTT  
GCATCAAGCTTTTCGGGGGGCTCATTCAAGGCTTACTCGAACTATTACTCAACAGAAAAT  
AAGAGCTTTAGTTTCGGCTCATCGGGATAGGGATAGGAAAAAGAGAGATTTTCGTCGT  
TTGTGGATCACTCGGATAAACGCAGTAATTCGCGAA---AGGGGAGTATCCTATAGTTATA  
GTAGATTAATACAGATCTGTACAAGAGACAGTTGCTTCTTAACCGTAAAATACTTGCA  
CAAATAGCTATATCAAATAGGAATTGTCTTTATATGATTTCGAACGAAATCATAAAGGAA  
GTAGATTGGAAAGAATCCACCAGAATAATTATGCTAAAGGAAGTATATGCTTTAGGTGA  
ACATATATCTATGTCTGCTGACAAAGCACGAAGAGTAATTAATCAAATTCGCGGCCGTT  
CCTATGAGGAAACGCTTATGATACTAGA ACTCATGCCCTATCGAGCATGTTATCCCATT  
TGAAATTGATTTATTCTGCAGCAGCAAATGCTAGTTACAATATGGGTTCCAGCGAAGCC  
AATTTAGTCATTAGTAAAGCCGAAGTCAATGGAGGTACTACTGTGAAGAAATTGAAAC  
CTCGAGCTCGAGGACGTAGTTTTCCAATAAAAAGATCGACCTGTCATATACTATTGTA  
ATGAAAGATATATCTTTAGATGGGGATTATGGGACAAAAAATGGATGGAATCAAATA  
TGCAGTATTTACAGACAAAAGTATTCGGTTATTGGGGAAAAAT---CAATATACTTCTAAT  
GTCGAATCAGGATCAACTAGGACAGAAATAAAGCATTGGGTTCGAACTCTTCTTTGGTG  
TCAAGGTAATAGCTATGAATAGTCATCGACTTCCGGGAAAGAGTAGAAGAATGGGACC  
TATTATGGGACATACAATGCATTACAGACGTATGATCATTACGCTTCAACCGGGTTATTCT  
ATTCCACCTCTTAGAAAGAAAAGAACTATGGCAGTTCCAAAAAACGCACTTCGACAT  
CAAAAAAGCGTATTCGTAAAAATATTTGGAAAAGGAAAGGATATTCGATCGCATTAAG  
GCTTTTTTATTAGCGAAATCTCTTTCTACCGGAATTCAAAAAGTTTTTTTTGTACGCCAA  
ACAAAATAATGGCCAAGGGGAAAGATGTCCGAGTAACGGTGATTTTGGAAATGTACTA  
GTTGTGTCCGAAACAGTGTGAT-----AAGGTATCAAGAGGTATTTCCAGATATATTACTC  
AAAAGAACCGGCACAATACGCCTAATCGATTAGAATTGAAAAAATTCTGTCCCTATTGT  
TACAAACATACGATTCATGGGGAGATAAAGAAAATGAAAATAAGAGCTTCCGTTTCGTA  
AAATTTGTGAAAAATGTCGACTAATCCGTAGGCGGGGACGAATTATAGTAATTTGTTCC

AACCCGAGACATAAACAAAGACAGGGAATGGTTCGAGAGAAAAGTAACAGTATCTACT  
CGGACACTACAGTGGAAGTGTGTTGAATCAAGAACAGACAGTAAACGCCTTTATTATG  
GACGCTTTATTCTGTCTCCACTTATGAAAGGCCAAGCCGACACAATAGGCATTGCGATG  
CGAAGAGCTTTACTTGGAGAAATAGAAGGAACATGTATCACACGTGTA AAAATCTGAG---  
---AAAGTCCCACATGAATATTCTACCATAACGGGCATTCAAGAATCGGTACATGAAATTT  
TAATGAATTTGAAAGAAATTATATTAAGAAGTAATCTATATGGAAC TTCTGACGCATCTA  
TTTGTGTCAAGGGTCTGGATCTGTA ACTGCCAAGATATCATCTTGCCGCCTTATGTAG  
AAATCGTTGATAATACACAACATATAGCCAGTTTAAACGGAACCAATTGATTTTTGTATTG  
GATTACAAATAGAGAGAAATCGTGGATATCTTATAAAAACGCCACAT---AACTTTGATGG  
AAGTTAT-----CCTATAGATGCTGTATTCATGCCTGTTTCGAAACGCGAATCATAGTATTCAT  
TCTTATGGGAATGGGAATGAAAAACAAGAGATACTTTTTCTCGAAATATGGACAAACG  
GAAGTTTAACTCCGAAAGAAGCACTTCATGAAGCATCCCGAAATTTAATTGATTTATTT  
ATTCCCTTTTTACATATGGAGGAAGAC-----AACTTATATTTACAGGACAATCAA---CACA  
CGGTTCCCTTTATCCCCTTTTACCTTTTCATGATAAATTGGCT---AAACTCATAAAAAACAA  
AAAA---AAAATAGCATTGAAATCGATTTTTATTGACCAATCAGAATTGCCTTCCAGGATC  
TATAATTGCCTCAAAATGTCCAATATATATACATTGTTGGACCTTTTGAATAACAGCCAA  
GAAGATCTTATGAAAATTGAACATTTTCGTAGCGAAGATGTAAAACGGATATTGGGCAT  
TTTAGAAAAATAT-----TTCGTAATTGATTTAGCAAAAAATAAGATGCTCGGGGATGGA---  
AATGAGGGAATATCTACAATACCTGGATTTAATCAGATACAATTTGAAGGATTTTGTAGG  
TTCATTGATCAAGGTTTGACGGAAGA ACTTTATAAGTTTCCAAAATTGAAGATACAGA  
TCAAGAAATTGAATTTCAATTATTTGTGGAAACATATCAATTGGTTCGAACCCTTGATAAA  
GGAAAGAGATGCTGTGTATGAATCACTCACATATTCTTCTGAATTATATGTATCCGCGGG  
ATTAATTTGGAAAAACAGTAGGGATATGCAAGAACAACAATTTTTATCGGAAACATTC  
CTCTAATGAATTCCTGGGA ACTTCTATAGTCAATGGAATATATAGAATTGTGATCAATC  
AAATATTGCAAAGTCCCGGTATTTATTACCGATCAGAATTGGACCATAACGGAATTTCCG  
TCTATACCGGCACCATAATATCAGATTGGGGAGGAAGATCAGAATTAGAAATTGATAGA  
AAAGCAAGGATATGGGCTCGTGTAAAGTAGGAAACAAAAAATATCTATTCTAGTTCTATC  
ATCAGCTATGGGTTTGAATCTAAGAGAAATTCTAGAGAATGTTTGCTATCCTGAAATTTT  
TTTGTCTTTTCTGAGTGATAAGGAGAGAAAAAAAATTGGGTCAAAGAAAATGCCATT  
TTGGAGTTTATCAACAATTTGCTTGTGTAGGTGGCGATCCGGTATTTTCTGAATCCTTA  
TGTAAGGAATTACAAAAGAAATTCTTTCAACAAAGATGTGAATTAGGAAGGATTGGTC  
GACGAAATATGAACCGAAGACTGAACCTTGATATACCCAGAACAAATACATTTTTGTTA  
CCACGAGATATATTGGCAGCCGCCGATCATTTGATTGGGCTGAAATTTGGAATGGGTGC  
ACTTGACGAT-----ATGAATCATTTGAAAAATAAACGTATTCGTTCTGTAGCAGATCTTTT  
ACAAGATCAATTCGGATTGGCTCTGGTTCGTTTAGAAAATGTGGTTCGGGGGACTATAT  
GTGGAGCAATTCGG---CATAAATTG---ATACCGACACCTCAGAATTTGGTAACCTCAACT  
CCA-----TTAACA ACTACTTATGAATCCTTTTTTCGGTTTACACCCATTATCTCAAGTT  
TTGGATCGAACTAATCCATTGACACAAATAGTTCATGGGAGAAAATTAAGTTATTTGGG  
CCCTGGAGGACTGACAGGGCGCACTGCTAGTTTTTCGGATACGAGATATCCATCCTAGTC  
ACTATGGACGTATTTGCCCAATTGACACATCTGAAGGAATCAATGTTGGACTTATTGGAT  
CCTTAGCAATTCATGCGAGGATTGGTCATTGGGGA---TCTCTAGAAAGCCCTTTTTAT----  
----GAAATTTCTGAGAGGTCAACCGGG-----GTACGGATGCTTTATTTATCACCAGGTAGA  
GATGAATACTATATGGTAGCGGCAGGAAATTC TTAGCCTTAAATCAGGATATTCAGGAA  
GAACAGGTTGTTCCAGCTCGATACCGTCAAGAATTCTTGACTATTGCATGGGAACAGG

TTCATCTTCGAAGTATTTTTCCTTTTCAATATTTTTCTATTGGAGCTTCCCTCATTCCTTTT  
ATCGAACATAATGATGCGAATCGAGCTTTAATGAGTTCTAATATGCAACGTCAAGCAGT  
TCCTCTTTCTCGCTCCGAGAAATGCATTGTTGGAAGTGGGTTGGAACGACAAGCAGCT  
CTAGATTCCGGGGCTCTTGCTATAGCCGAACGCGAGGGAAGGGTCGTTTATACCAATAC  
TGACAAGATTCTTTTAGCAGGTAATGGAGATATTCTAAGCATTCCATTAGTTATATATCAA  
CGTTCCAATAAAAATACTTGTATGCATCAAAAACCTCCAGGTTCCCTCGGGGTAAATGCAT  
TAAAAGGGACAAATTTAGCGGATGGTGCTGCTACGGTTGGTGGCGAACTTGCTTTG  
GGGAAAACGTATTAGTAGCTTATATGCCGTGGGAGGGTTACAATTCTGAAGATGCAGT  
ACTTATTAGCGAGCGTTTGGTATATGAAGATATTTATACTTCTTTTCACATACGGAAATAT  
GAAATTCAGACTCATGTGACAAGCCAAGGC---CCTGAAAAGTAACTAATGAAATACC  
GCATTTAGAAGCCATTTACTCCGCAATTTAGATAAAAATGGAATTGTGATGCTGGGAT  
CTTGGGTAGAGACAGGTGATATTTAGTAGGTAAATTAACACCCCAGGTCGTGAAAGA  
A---TCGTGCTATGCCCCGGAAGATAGATTGTTACGAGCTATACTGGTATTACAGGTATCT  
ACTTCAAAGAACTTGTCTAAAACCTATAGGTGGCAGGGGTCGGGTTATTGATGT  
GAGGTGGATCCAGAAGAGGGGT--GGTCTAGTTATAATCCCGAAACGATTTCGTGTATAT  
ATTTTACAGAAACGTGAAATCAAAGTAGGCGATAAAGTAGCTGGAAGACACGGAAATA  
AAGGTATCATTTCAAAATTTTGCCTAGACAAGATATGCCTTATTTACAAGATGGAAGAT  
CCGTTGATATGGTCTTTAACCATTAGGAGTACCTTCACGAATGAATGTAGGACAGATAT  
TTGAATGTTCACTAGGGTTAGCAGGGAGTCTGCTAGACAGACATTATCGAATAGCACCT  
TTTGATGAGAGATATGAACAAGAAGCTTCGAGAAAACCTTGTGTTTTCTGAATTATATGA  
AGCCAGTAAGCAAACAGCGAATCCATGGGTATTTGAACCCGAATATCCAGGAAAAAGC  
AGAATATTTGATGGAAGGACGGGGAATCCTTTTGAACAACCCGTTATAATAGGAAAGC  
CTTATATCTTGAAATTAATTCATCAAGTTGATGATAAAAATCCATGGGCGCTCCAGTGGAC  
ATTATGCGCTTGTTACACAACAACCCCTTAGAGGAAGAGCCAAACAGGGGGGACAGC  
GGGTAGGAGAAATGGAGGTTTGGGCTCTAGAAGGGTTTGGGGTTGCTCATATTTTACA  
AGAGATGCTTACTTATAAATCGGATCATATTAGAGCTCGCCAGGAAGTACTTGGTACTAC  
GATCATTGGGGGAACAATACCTAATCCCGAAGATGCTCCAGAATCTTTTCGATTGCTCG  
TTCGAGAACTACGATCTTTAGCTCTGGAACCTGAATCATTTCCTTGTATCTGAGAAGAAC  
TTCCAGATTAATAGGAAGGAAGCTATGAATAATAATTTTTCTTCTATGATCGATCGATATA  
AACATCAACAGCTCCGAATTGGATCAGTTTCTCCTCAACAAATAAGTGCTTGGGCCACT  
AAAATCCTGCCTAATGGAGAGATAGTTGGAGAGGTAACAAAACCCCTATACTTTTCATTA  
CAAACTAACAAACCGGAAAAAGATGGATTATTTGTGAAAGAATTTTGGTCTTATAA  
AAAGCGGAATTTGTGCTTGTGGAAATTATCGAGTAATCGGAGATGAAAAAGAAGACCC  
GAAATTTTGTGAACAATGCGGGGTCGAATTTGTTGATTCTCGGATACGAAGGTATCAAA  
TGGGCTATATCAAACCTCGCATGCCAGTAACCCATGTGTGGTATTTAAAACGTCTTCCTA  
GTTATATTGCGAATCTTTTAGATAAACCTCTTAAAGAATTAGAAGGCCTAGTATACTGCG  
AT-----TTTTCTTTGCTAGGCC---ATAACTAAAAGCCACTTTCTTACGATTACGAGG  
TTTATTCGAATATGAAATCCAATCTTGGAATAACAGCATCCCACTTTTTTTTACTACCCA  
GGGTTTCGATACATTCGCAATCGAGAAATCTCTACTGGCGCGGGTGCTATCCGAGAAC  
AATTAGCCGATCTAGATTTACGAATTATTATAGAGAATTCGTTGGTAGAATGGGAAGAAT  
TGGGGGAAGAA---GGGCACACAGGGAATGAATGGGAAGATCGAAAAGTTGGAAGAAG  
AAAGGACTTTTTGGTTAGACGCGTGAATTTGGCTAAGCATTTTATTTCGAACAAATATAG  
AGCCAGAATGGATGGTTTTGTGTCTATTACCAGTTCTTCCTCCTGAGTTGAGACCGATC  
ATTCAGATAGATGGGGGTAAACTAATGAGCTCAGATATTAATGAACTCTATAGAAGAGT

TATCTATCGGAACAATACCCTTACCGATCTATTAACAACAAGTAGATCTACGCCAGGAG  
AATTAGTAATGTGTCAGGAGAAATTAGTACAAGAAGCCGTGGATACACTTCTTGATAAT  
GGAATCCGGGGACAACCAATGAGGGACGGTCATAATAAAGTTTACAAGTCATTTTCTG  
ATGTAATTGAAGGCAAAGAGGGAAGATTTCTGTGAGACTCTGCTTGGCAAACGAGTCGA  
TTATTCAGGACGTTCTGTCATTGTCTGGGTCCTTCACTTTTATTACATCGATGTGGATT  
GCCTCGTGAAATAGCAATAGAACTTTTCCAGACATTTGTAATTCGTGGTCTAATTAGAC  
AACATCTTGCTTCGAACATAGGAGTTGCTAAGAGTAAAATTCGAGAAAAAGAGCCGAT  
TGTTTGGGAAATCCTTCAAGAAGTTATGCAGGGACATCCTGTATTGCTGAATAGAGCAC  
CCACTTTGCATAGATTAGGCATACAGGCATTCCAGCCCGTTTTAGTGGAGGGGCGCGCT  
ATTTGTTTACATCCATTAGTTTGCAAGGGATTCAATGCTGATTTTGATGGAGATCAAATG  
GCTGTTTACATGACCTTTATCCTTGGAGGCTCAAGTAGAGGCCCGTTTACTTATGTTTTCT  
CATATGAATCTTTTGTCTCCGGCTATTGGGGATCCCATTTCCGTACCAACGCAAGATATG  
CTTATTGGACTCTATGTATTAACGAGCGGAAATCATCGAGGTATTTGTGTAAATAGATAT  
AATCCATGTAATCGC-----AGAACTATCAAATCAAAAAAGAAGTGACAATAGTTAT  
AAGTATACG-----GAACCGTTTTTTTCTAATTCCTATGATGCAATTGGGGCTTATCGGC  
AGAAACGAATCAATTTAGATAGTCCTTTGTGGCTCCGGTGGCGACTAGATCAACGC---G  
TTATTGCTTCA-----AGAGAACTCCCATCGAAGTTCCTATGAATCTTTAGGTACTTTTT  
ATGAGATTTATGGACACTATCTAATAGTAAGAAGTCTAAAAAACAAATCCTTTTTTATAT  
ACATTCGAACCACTGTTGGTCATATTGCTCTTTATCGAGAAATCGAAGAAGCTATACAG  
GGTTTTTCTCGGGCCTATTCATCTGGTACC-----ATGGCAGAACG  
GGCCAATCTGGTCTTTTACAATAAAGCGATAAACGGAAGTCCATGAAACGACTTATTA  
GTAGATTAATAGATCACTTCGGAATGGCATATACATCACATATCCTGGATCAAGTAAAAA  
CTCTGGGGTTCCAACAAGCTACTGCTACATCCATTTTATTAGGAATTGATGATCTTTTAA  
CAATACCTTCTAAGGGATGGCTAGTTCAAGATGCTGAACAACAAGTTTGGATTTTGGAA  
AAACACCATCATTATGGGAATGTACACGCGGTAGAAAAATTACGTCAATCCATTGAAAT  
ATGGTATGCTACAAGTGAATATTTGCGACAAGAAATGAATCCTAATTTTAGGATGACTG  
ACCCTTTTAAATCCAGTTCATATAATGTCTTTCTCGGGAGCTAGAGGAAATGCATCTCAGG  
TACATCAATTAGTAGGTATGAGAGGATTAATGTCAGATCCTCAAGGACAAATGATTGATT  
TACCTATTCAAAGCAATTTACGCGAAGGACTCTCTTTAACAGAATACATCATTTCTTGCT  
ACGGAGCCCGTAAAGGAGTTGTGGATACTGCTGTACGAACATCAGACGCTGGATATCT  
CACTCGCAGACTTGTTGAAGTAGTTCAACACATTGTTGTACGTCGAACGGATTGTGGC  
ACCGCCCGGGGTATTTCTGTGAGTCCTCGGAATGGGATGATGCCG---GAAAGGATTTTT  
ATCCAAACATTAATTGGTCGTATTAGCAGATGATATATACATGGGTCCGCGATGTATTG  
CCACTAGAAATCAAGACATTGGCATTGGACTTGTAATCGATTTCATAACC-----  
TTTCGGGCACAACCAATCTCTATTTCGAACTCCCTTTACTTGTAGGAGTACATCTTGGATT  
TGTCGATTATGTTATGGCCGGAGTCCACTCATGGCGACCTGGTTGAATTGGGGGAAGC  
TGTAGGTATTATTGCAGGTCAATCGATTGGAGAACCGGGTACTCAATTAACATTAAGAA  
CTTTTCATACCGGAGGAGTATTCACGGGGGGTACTGCAGAACATGTGCGAGCCCCATCT  
AATGGAAAAATCAAATTCATGAGGATTTGGTTCATCCGACACGTACACGTCATGGGCA  
TCCCGCCTTTCTATGTTCTATAGACTTGTATGTAATTTGAGAGTGAAGATATTCTACAT  
AATGTGAATATTCCACCCAAAAGTTTGTCTTTAGTTCAAACGATCAATATGTAGAATC  
AGAACAAGTAATTGCTGAGATTCGCGCAGGAATATCCACT---TTGAATTTAAAGAGAA  
GGTTCGAAAACATATTTATTCTGATTTCAGACGGAGAA---ATGCACTGGAGTACCGATGT  
CTATCATGCACCCGAATTTACATACGGTAATGTTTCATCTATTACCAAAAAACAAGCCATTT

ATGGATATTATTAGGAAGGCCGTGCAGG-----TCCAGTCTAGTCTACCTTTTCGATCCACA  
AGGATCAGGATCAAATGAATGCGCAT-----TTTCTTTCTGGCAAGCGAAGATATACTTCT  
AACCTCTCA-----GTAACCAACGATCAG---GCGAGGCAGAAATTATTTAGTTCGGATTTT  
TCTGGTAAA---GAAGATAGGATTCTCTGATTAT---TCAGACCTTAATCGAATTATATGTGCT  
GGTCAGTATAATCTCGTATATTCG---CCTATTCTCCACGAGAATTCT-----GATTTATTGTC  
AAAAAGGCGAAGAAATAAATTCATCATTCCACTACACTCGATTCAAGAACTCGAGAAT  
GAACTAATGCCCTGTTTCAGGTATCTCGATTGAAATCCCC-----GTAAATGGTATTTTCCGT  
CGAAATAGTATTCTTGCTTATTTTCGATGATCCTCGATACAGAAGAAAGAGTTCGGGCATT  
ATTAAATATGGGACTGTAGAAACGCATTTCAGTCATCAAAAAAGAGGAT-----TTGCTTGA  
GTATCGAGGA---GTCAAGGAATTTAGGCCAAAATACATGAAAGTAGATCGATTTTTTTTC  
ATTCCTGAAGAGGTGCATATCTTGCCCGGATCTTCTTCCATAATGGTACGGAACAATAGT  
ATCGTTGGGGTAGATACACAAATCACCTTAAATCTAAGAAGCCGAGTCGGTGGGTGG  
TCCGGGTGGAGAGAAAAAAAACGAATTGAACTTAAATCTTTTCTGGAGATATCCA  
TTTTCTGGAGAGACAGATAAGATATCCCGACATACCGGCGTTTTGATACCA---CCAGG  
A---ACAGGAAAAAGAAATTCCAAGGAATCCAAAAA-----GTGAAAAATTGGATCTATG  
TCCAACGG-----ATTACACCTAGCAAG-----AAAAAGTTTTTTGTTTTAGTTCGACCTGTC  
GTCACATATGAAATAACGGACGGTATAAATTTAGCAACCCTTTTTCCACCGGATCCATTG  
CAGGAAAGGGATAATGTGCAACTTCGAATTGTCAATTATATCCTTTATGGAAATGGCAA  
ACCGATTCGAGGAATTTCTGACACAAGTATTCAATTAGTTCGGACTTGTTTAGTATTTAA  
TTGGAACCAAGACAAAAA-----AGTTCTTCTTGCGAAGAAGCCCGTGCTTCTTTTG  
TTGAAATAAGGACAAATGGTTTGATTTCGACATTTCTTAAGAATCAACTTAGTGAAATCC  
CCTATTTCTGATATCGGAAAAGGAATGATCCGTCGGGGTCAGGATTGCTCTCTGAT---A  
ATGGATCAGATTGTACCAATATCAACCCCTTTTCTTCCATTTATTCCTAT-----TCCAAG  
GCAAAAATTCAACAATCTATTAACCAACCTCAAGGAATTCATACGTTGTAAATAG  
A-----ATAAGGAATGTCAGTTCGTTGATAATTTTGTGTCAGCAGCCAATTGTTCTCGAATG  
GGGCA-----TTCAAGGATGTAATAATCACAGTGTG-----ATAAAAAATCA---CCCCT  
AATCCAATTAGGAATTCATTGGGCCCTTTAGGAACA-----TCCCTTCCAATTGAGAATT  
TTTATTCA-----TCTTACCATTTA-----ATAACTCATAATCAGATCTTA---GTAACACTATT  
TGCAACTTGACAAT-----TTAAAACAGACTTTTCAAGTGATTAAATTTAAA---TATTATT  
TAATGGATGAAAAT-----GGAAAAATTTTTAATCCCGATCCGTGTCGTAACATTATTTTAA  
ATCCATTCAATTTGAATTGGTATTTTCTCCATCACAATTATTGTGAAGAGACATCT--AAA  
ATAATTAGTCTTGGACAGTTTATTTGTGAAAATGTATGTATAGCCAAAAATGGACCGCCC  
---CTCAA-----TCGGGTCAAGTTATACTTGTTCAA---GTTGATTCGATAGTGATACGATC  
AGCTAAGCCTTATTTGGCCACCCCGGAGCAACTGTTTCATGGCCATTATGGGGAAACCC  
TTTACGAAGGAGATACATTAGTTACATTTATATATGAAAAATCGAGATCTGGTGATATAA  
CACAAGGTCTTCCAAAAGTAGAACAGGTGTTAGAAGTTCGTTTCGGTTGATTCAATATC  
CATGAATCTAGAAAAGAGGATTGAGGGTTGGAACAAATGTATAACAAGAATCTTGGGA  
ATTCCTTGGGGATTCTTGATTGGTGCTGAGCTAACTATAGCGCAAAGCCGAATCTCTTT  
GGTTAATAAAATCCAACAGGTTTATCGCTCCCAGGGGGTGCAGATTCATAATAGGCATC  
TAGAAATTATTGTACGTCAAATAACATCAAAAGTGTGGTTTCAGAA-----GATGGAA  
TGCTAATGTTTTTTTACCCCGGAGAACTTATTGGATTGTTGCGAGCAGAACGAATGGGG  
CGCGCTTTGGAAGAAGCGATCTGTTACCGAGTCGTCTTATTGGGAATAACAAGAGCAT  
CTCTCAATACTCAAAGTTTCATATCTGAAGCGAGTTTTCAAGAACTGCTCGAGTTTTA  
GCAAAAGCGGCTCTCCGGGGTTCGATCGATTGGTTGAAAGGCCTGAAAGAGAACGTT

GTTTTGGGGGGGGTGATACCCGTTGGTACCGGATTCAAGGGATTA-----GTGCACCCTTC  
AAAACAACATAACAACATTCT-----TTGGAAACAAAAAAAAAGAATCTATTCGAGGGG  
GAGATGAGA-----GATATTTTGTTCACCACAAAAAATTATTTGATTCTTGTCTTTCAA  
AAATTTCCACGATATACCCGAACAATCGTTTATAGGA-----TTAATGATTCCAT  
GACAAGAAGATATTGGAACATAAATTTGGAAGAGATGATGGAGGCAGGAGTTCATTT  
GGTCATGGTACTAGGAAATGGAATCCTAAAATGGCGCCTTATATTTCTGCAAAGCGTAA  
GGGTATTCATATTACAAATCTTACTAGAACTGCTCGTTTTTTTATCAGAAGCTTGTGATTA  
GTTTTTGACGCAGCAAGTAGGGGAAAACAATTCTTAATTGTTGGTACCAAAAATAAAG  
CAGCTGATTCAGTAGAGTGGGCTGCAATAAGGGCCCGGTGTCATTATGTTAATAAAAA  
TGGCTTGGCGGTATGTTAACGAATTGGTCCACTACCGAAACAAGACTTCATAAGTTCAG  
GGACTTGAGAATGGAACAAAAACAGGGAGACTCAACCGTCTCCCGAAAAGAGATGC  
TGCTATGTTGAAAAGACAATTATCTCGCTTGCAAACATATCTGGGCGGGATTAATATAT  
GACAGGGGTACCCGATATTGTAATCATCGTTGATCAGCACGAAGAATATACGGCCCTGC  
GAGAGTGTATTACTTTAGGAATTCACAATTTGTTTAAACCGATACAAATTGTGACCCC  
GATCTCGCAGATATTTCAATTCAGCGAATGATGACGCCATATCCTCAATCCGATTAATT  
CTTAACAAATTAGTATTCGCAATTTGTGAGGGTTCGTTCT--AGCTATATAAGAAATCCTAT  
GGGACAAAAATAAATCCACTTGGTTTCAGACTGGGTACAACCCAAGGTCATCATTCC  
CTTTGGTTTTTCAACCAAAAAATTATTCTGAAGTTTACAAGAAGATCAAAAAATAA  
GAGATTGTATCAAGAATTATGTACAAAAGAATATGAGAACGTCCTCTGGC---GTCGAGG  
GAATTGCACGTATAGAGATTCAAAAAGAATCGATCTGATCCAGGTCATAATCTTTATG  
GGATTCCCAAATTATTAATAGAAAGTCGACCCGCGC-----GGAATCGAAGAATTACA  
AACGACCTTACAAAAGAATTCATTGTGTAAACCGAAAACCTGAACATTGCTGTCACA  
AGAATTGCAAACCTTATGGAAACCCTAATATTCTTGCAAGATTTATAGCTGGACAATTA  
AAGAATAGAGTTTCTTTTCGAAAAGCAATGAAAAGGCTATTGAATTAACAGAACAAG  
CAGATACAAAAGGAATTCAAATACAAATTGCGGGGCGTATCGACGGAAAAGAAATTGC  
ACGTGTCGAATGGATCAGAGAAGGTAGGGTTCCCTACAAACGATTCGAGCGAAAATT  
GATTATTGCTCTTATACAGTTCGAATCTATGAGTATTGGGCATCAAATTTGGATAT  
TTCTAGACGAGGAAATGTTCGCTTACCGAGGACCTCGTTTCAAAAAATACGCCGCT  
GGGGGCTTTACCAGGACTAACTAATAAAAAGCCTAGGAACGGAAGTGATCTTAGAAAC  
CAATCGCGTTCCGGGAAA---AAATCTCAATATCGTATTTCGTCTAGAAGAAAAACAAAA  
TTGCGTTTTTCAATTATGGTCTTACAGAACGACAATTAATACTTAAATACGTTTCGTATCGCCAGA  
AAAGCCAAGGGGTCAACAGGTCAAGTTTTACTACAATTAATACTTGAATGCGTTTGGATA  
ACATCCTTTTTTCGATTGGGTATGGCTTCAACTATTTCCCGCAGCCCGTCAATTAGTTAACC  
ATCGACATATTTTAGTTAATGGTTCGTATAGTAGATATACCGAGTTATCGCTGCAAACCCC  
GAGATATTATTACGGCAAAGGATGAACAAAAATCCAGAGCTCTGATTCAAATTTCTCTC  
GATTCATCCCCTCAT--GAGGAATTACCAAACCATTTGACCCTTACCCATTCCAA-----T  
ATAAAGGATTAGTCAATCAAATAATAGATAGTAAATGGGTCGGTTTGAAAATAAATGAA  
TTGCTAGTCGTAGAATATTATTCTCGTCAGACTATGTCACGTCGAGGTAAGTGCAGAAAA  
AAAAACAGCAAATCCGATCCAATTTATCGTAATCGATTAGTTAACATGTTGGTTAACC  
GTATTCTGAAACACGGAAAAAATCATTGGCTTATCAAATTATCTATCGAGCCGTGAAA  
AAGATTCAACAAAAGACAGAAACAATCCACTATCCGTTTTACGTCAAGCAATACGTG  
GAGTAACTCCCGATATAACAGTAAAAGCAAGACGTGTAGGTGGATCGACTCATCAAGT  
TCCATTGAAATAGGATCCACACAAGGAAAAGCACTTGCCATTCGTTGGTTATTAGCGG  
CATCCCGAAAACGTCCGGGTCGAAATATGGCTTTCAAATTAAGTCCGAATTAGTGGAT

GCTGCCAAAGGGAGTGGCGATGCCATACGCAAAAAGGAAGAGACTCATAGAATGGCA  
GAGGCAAATAGAGCTTTTGCACATTTTCGTATGGGTAGGGACACTATTGCTGAGATAAT  
AACTTCTATACGAAATGCTGATATGGATCGAAAAAGGGTGGTTCGAATAGCATCTACTA  
ATATTACCGAAAATATTGTTCAAATACTTTTACGAGAAGGTTTTATCGAAAACGTGAGA  
AAACATCGAGAAAAAACAATAATTTTTGGTTTTAACCTGCGACATAGAAGG-----A  
ATAGGAAAAGACCCTAT-----AGAAATATTTAAATTTAAAACGAATCAGTCGACCTG  
GTCTACGAATCTATTCTAATTATCAACGAATTCGCGAATTTTAGGTGGAATGGGGATTG  
TAATTCTTTCTACTTCTCGAGGTATAATGACAGACCGAGAGGCTCGACTAGAAGGAATA  
GGTGGAGAGATTTTGTGTTATATCTGGATGGCAAAAGCTATACCGAAAATTAGTTCGCG  
TAGGAATGGACGTATTGGTTCACGTAAGGGTGCACGTAGAAATACCAAAGGGAGTTATT  
CATGTTCAAGCAAGTTTCAATAATACCATTGTCACTGTTACAGATGTACGGGGTTCGAGT  
AGTTTCTTGGTCTCCGCCGGTACTTCTGGATTCAAAGGTACGAGAAGAGGAACACCG  
TTTGCTGCTCAAACCGCAGCAGCAAACGCTATCCGTACAGTAGTGGATCAAGGTATGC  
AACGAGCAGAAGTCATGATAAAAGGTCCCGGTCTCGGAAGAGATGCAGCATTACGAG  
CTATTCGTGCAAGTGGTATACTATTA ACTTTTCGTACGGGATGTA ACTCCTATGCCACATA  
ATGGCTGTAGACCTCCGAAAAAAGACGTGTGATGCCAACTATTAACA ACTTATTAG  
AAATACAAGACAGCCAATCAGAAATGTCACGAAATCCCCGCTCTTCGGGGCTGTCTT  
CAGCGTCGAGGAACATGTACTAGGGTGTATACTATCACCCAAAAAACC AA ACTCTG  
CCTTACGTAAAGTTGCCAGAGTACGATTAACCTCTGGATTTGAAATCACTGCTTATATAC  
CCGGTATTGGCCATAATTTACAAGAACATTCTGTAGTCTTAGTAAGAGGGGGAAAGGGTT  
AAGGATTTACCCGGTGTGAGATATCACATTGTTTCGAGGAACCCTAGATGCTGTCGGAGT  
AAAGGATCGTCAACAAGGGCGTTCTAAATATGGGGTAAAAAAGCCAAAAATGGCAAG  
GAAAAGTTTGATTGAGAGGGAGAAGAAGAGGCAAAAATTGGAACAGAAATATCATT  
GATTCGTGATCCTCAAAGAAAGAAATAAGC-----AAGGTTCCGTGTTGAGTGACA  
AATGGGAAATTTATGGAAAGTTACAATCCCCACCACGGAATAGTGCACCTACACGCCTT  
CATCGACGTTGTTTTTTGACCGGAAGGCCGAGAGCTAACTATCGAGACTTTGGACTATC  
CGGACACATACTTCGTGAAATGGTTCATGCATGTTTGTGTTGCCAGGAGCAACAAGATCA  
AGTTGGATGGTAAAAAATTCTGTCAATTCAGTTATTTCTCAAGAA-----GAAAAG-----  
AGAGGATCTGTTGAATTTCAAGTATTCAATTTACCAATAAGATACGGAGACTTACTTC  
ACATTTAGAATTGCACAAAAAAGACTATTTATCTCAGAGAGGTTTGAAGAAAATTTTGG  
GAAAACGTCAACGACTCCTAGCTTATTTGTCAAAAAAATAGAGTACGTTATAAAGA  
ATTAATTAATCAGTTGGACATTCGAGAGACAAAAACTCGT-----ATGGTAAACTTCGTT  
TGAAACGATGTGGTAGAAAGCAACGAGCCGTCTATCGAATCGTTGCAATTGATGTTTCG  
ATCCCGAAGAGAAGGAAAAGATCTTCGGAAAGTGGGTTTTTATGATCCGATAAAGAAT  
CAA ACTTATTTAAATGTTCTGCTATTTTATATTTCTTGAAAAAGGGGCTCAACCTACA  
GGA ACTGTT CAGGATATTTTAAAGAAGGCGGAGGTTTTTAAGGAACTTCGTCCTAATCA  
ATCC-----ATGGATAAATCCAAGCGACCTTTTCTTAAATTCAAGCGATCTTTTCGTAG  
GCGTTTGCCTCCGATTCAATCGGGGGATCGAATTGATTATAGAAACATGAGTTTAATTA  
GTCGATTTATTAGTGAACAAGGAAAAATATTATCAAGACGAGTGAATAGATTGACCTTG  
AAACAACAACGATTAATTA CTCTTGCTATAAAAACAAGCTCGTATTTTATCTTTGTTACCC  
TTTCTCAATAATGAGAAA-----CAATTTGAAAGAACCGAGTCGACCGCTAGA ACTACTG  
GTTTTAAAGCCCGAAATAAAGTGACACGTTCACTAAAAAATAATCCCTTTGTAGCCAA  
TCATTTATTA AAAAAAATTGATAAGCTTAACACAAAAGCAGAAAAAGAAATAATAGTAA  
CTTGGTCCCGGCATCTACCATTATACCCACAATGATCGGTCATACGATTGCTATCCATA



ATGGAAAAGAGCATTTCCTATTTATATAACGGATAGTATGGTAGGCCACAAATTGGGA  
GAATTTGCACCTACATTAATTTTAGAGGACATGCAAAAAGCGATAATAGATCTCGTCG  
TATGATTTTTCAATCTTTTCTACTAGGTAATCTAGTATCCTTATGCATGAAGATAATCAATT  
CGGTCGTTGTGGTCGGACTCTATTATGGATTTCTGACCACATTCTCCATAGGGCCCTCTT  
ATCTCTTCTCTCCGAGCTCTGGTTATGGAAGAAGGA-----ACCGAGAAGAAGGTAT  
CAGCAACAACCTGGTTTTATTACGGGGCAGCTCATGATGTTTCATATCGATCTATTATGCGC  
CTCTGCATCTAGCATTGGGTAGACCTCATAACAATACTGTCCTAGCTCTACCATATCTTTT  
GTTTCATTTCTTCTGGAACAATCACAAACACTTTTTTGATTATGGATCTACTACCAGAAA  
TTCAATGCGTAATCTCAGCATTCAATGTGTATTCTGAATAATCTCATTTTTCAATTATTC  
AACCATTTCATTTTACCAAGTTCAATGTTAGCCAGATTAGTCAACATTTATCTCTTTTCGA  
TGCAACAGCAAGATCTTATTTGTAACAAGTGGTTTTGTTGGTTGGTTAATTGGTCCACAT  
TTTATTCATGAAATGGCTTGGATTGGTATTAGTCTGGATACGGCAAAATCATTCTATTAGA  
TCGTACATTCGATCTAATAAGTACCTTGTGTAGAAATTGAGAAATTCTATGGCTCGGATC  
TTTAGTATTCTTATTATTACCTGTGTCTACTATTTAGGCAGAATACCCTCACCCATTC  
TTACTAAGAACTAAAAGAACTGAAGAAGATCAGCCTCTTGTGAGTCTTCTTTTCGA  
TTATAATCGATGGAATCGACCATTCGCTACATAAAGAATAATCGATTTGAACAGGCCAT  
AAGAACGGAAATGTCACAATATTTTTTAAACACATGTAAAAGTGATGGAAAACAAAGA  
ATATCTTTTACATAACCCGCCAAGTTTATCAACTTTTTGGAAAATGATAAAAAGAAGGATA  
CCCCTATTGTCACTCCAAAAAACACTCCCTAATGAACTGGACAATCAGTGGATTTCTAC  
CAACAAAGAAAAAAGTAAT--CTGAATAAGGAATTTTTAAATCGACTTGAAGTTCTAGA  
CAAGGAATCTTTTTCTCTCGATATACTTGAAACAAGGACTAGATTGTGTAATGATGATAC  
TAAAAAGAATACGTGCCTAAAATGTATGATCCTTTGTTAAATGGACCATATCGAGGAA  
CAATCAAAAAAAGTTTTACCTAAAGAGAGGGTTAGAATAAATAGGATTCATACTATC  
TTTTACCAAGAATTGGAACAAAAAGCTCCTAATGGGACATCGATTGGAATAAAAGAAA  
TCAGTAAAAAATACCTCGCTGGTCACATAAATTAATCGAATTGGAACAACAATCG---G  
GTCAAATTCGTTCAAGAAAAGCCAAACGTGTAGTGATTTTTACTGCCGCTTTAATACGC  
TATTCGCAACAACCAGATTTTCGGCGAGGTATAATCAAAGGCTCTATGCGGGCTCAAAG  
GCGCAAAACAGTTATTTGGAAACTCTTTCAAGCAAATGTGCATTCCCCCCTTTTTCTTG  
ACAGAATAACCCCCCTTTCTTTTTTCTTTTGATATC-----TCTGGACTGATTAACCAA  
TTTTTCGAAATAGAAAGGAAAAAGCACGGATAGAGATAGCAGAAGCCTGGGATACCAT  
TCCTTTTGCGCAAATAATAAGAGGTTACATGTTAATAACTCAATCAATTCTTCGAAAATA  
TATTGTATTACCTTCATTGATAATAGCCAAAAATCTCGGGCGTATGTTAGTCTTGCAACTT  
CCTGAATGGTCTGAAGATTTGCAGGAATGGAATAGAGAAATGCATATTAATGTACTTAT  
AATGGTGTTCATTTATCAGAAACAGAATTTCCAAAAAATTGGTTGAAAGATGGCATTCA  
GATCAAAATATTATTTCTTTTTGTCTGAAACCTTGGCATATATCTAAAAAAAACAAAA  
AGATGATTTTTGTTTTTTAACAGTTTGGGGAATGGAAGCTGAACTTCCCTTTGGTTCTC  
CCCGAAAACGCCCTTCTTTTTTTGAGCCATTTTTAAGGAACTCGAAAAAAAATTGG  
AAAATTCAAAAAGAAATATTTTATAACT--CTAAAAGTTTTCAAAGGAAAAATAAAATTA  
TTTCGAAGAATTTCAAAGAAACCAAAAAATGGCTTATCAAAGTAGTCTA-----TTTAT  
AAAAAAAATGAAAAAGAACTTTCAAAGTAAATGATTCTCTAATGAGTAATCAGATA  
ATTAACGAATCATTTAGTCAAATTGAATCTGGAAATTGGCCAAATTTCTCACTGATAGA  
AAGCAAAATGAAGGATTTGACTGATAGAACAAGTACAATCAAAAATCAAATAGAAAGA  
ATTACAAAAGAGAAAAAGAAAAGTCCATAAAA---ACAAATAATATTAATAAAATTCGAA  
TCGCCAAAAAAGATTTCCAAATATTAATAAAGAAGAAATACTCGATTAATATGGAAATT

CCATTATTTTCTAAAATTATTCATTCAAAGATTATACATCGATCTATTTTTATCTATCATTAA  
TATTCCCAGAATTAATACACAACCTCTTT-----TTTATTTTCGTTTGATTTATCCTACTTATCAC  
AAGCATATGTATTTTACAAATTATCACAACCCCAAGTTATTAATTTGTCTAAATTAAGATC  
TGTTCTTCAATATACGTCTTTTTTCTTAAGACTAAAATAAAGGACTATTTTACACTAGG  
AATATTTTATTCTGAATTAACATAAGAACTTCAGAGTTATAGAATCAATCAATGGAA  
AAACTGGTTAAGACGGCATTATCAATACGATTTATCTCAGATTAGATGGTCTAGATTAAT  
GCCACAAAATGGCGAAATAGGGTTAATCAAGGTTGTATGGCTCAAAATCGAAACAAA  
TGGAATTCATATGAAAAAGACCAA-----TTAATTCATTACAAAAAGAA---AATTTTCAA  
AAATGTTATAGATATGATCTTTTAGCATATAAATCGATTAATGGCAATATTCTATATCTCGA  
TAGAAAATATTTTGATTGGAAAATTATCCATTTTTCTTTAGATTTTTTGATTGGATGGGA  
ATGAATGAAAAATATTAATCGTTGGTTCTTCCAGAAATTTGTACCCTTTATAATGTAT  
ATAAAATAAAACCGTGGATTATACCAAGCAAATTACTTCTTTTAAATTACAAAAGCAAC  
ACGGAAGCAGAAGTAGATTTGTTCTTGAAACGTTATTTGCTTTTTCAATTGAGATGGAA  
CGATGCTTTGAATCAAAGAATGATCGAGAATATCAAGGTATATTGTCTCCTGCTTCGACT  
GATAAATCCAAGCAAATGCTATATCGTCAATTCAAAGGAGAGAAATGAGTTTGGATA  
TAATGCTGATTCAGAAGAATTTAACTCTTACAGAATTGATGAAG---GGGATATTAATTAT  
CGAACCTATTCCGTTGTCTGTAAAAATAATGGACAATTTATTATGTATCAAACCATAGG  
TATTTTATTGGTTCATAAAAGTAAACACAATCATTTTGATTTGCTTGTTCCCTGAAAATATT  
TTATGGTCTAGACGTCGTAGAGAATTGAGAATTCGAAGTTTGTTTAGATTTCTTTGGCCT  
AATTATCGATTAGAAGATTTAGCTTGTATGAATCGTTATTGGTTTGATACCAATAATGGTA  
GTCGTTTCAGTATCTTAAGGATACATATGTATCCAATGAGAGGACATCAATCAAATCCT  
GGATTTTCGAATTGAGAGAGATATTGAGAGAGATCAAGAATTCTCACCATTCTTAGAT  
TCATGGACCCAATCAATTCAGCGGGATCCTTCATTCACATTTTTTCCACCAAGAACG  
TTTTCTAAAACCTTTTGACCCCGAATTTGGAGTATCCTACTTTCA---CGCAATTCA-----  
CAGGGTTCAACAAGCAATCGATATTTACAG-----ATCAAGGGT---GTAATACTCTTGT  
AGTAGCGGTCCCTTATATATCGT-----ATTAACAATCGAAATATGGTTCGAAAGAAAA  
ATCTCTATTTGATAGGGCTTCTTCCT-----ATACCTATGAATTCCATTGGACCCAGA  
AATGATACATTGGAAGAATCCGTT---GGGTCTTCCAATATCAATAGGTTGATTGTTTCG---  
CTCCTGTATCTTCCCAAAGGAAAAAGATCTCTGAGAGTTGTTTCTGAATCCGAAAG  
AGAGTACTTGGGTTCTCCCAATAACT-----AAAAAGTGTAGCATGCCTGAATCTAAC  
TGGGGTTCGCGTTGGTGGAGGAACTGGATCGGAAAAAAGAGG-----GATTCTAGTTGTA  
AGATATCTAAT-----GAAACCGTCGCTGGAATTGAGATCTTATTCAAAGAGAAAGATCT  
CAA---TATCTGGAGTTCTTTTTGTATATTATATGGAT-----GATCCGATCCGCAAGGACC  
ATGATTGGGAATTGTTTGATCGTCTTCTCTGAGGAAGAGTCGAAATAGAATCAACTTG  
-----AATTCGGGACCGCTATTCGAAATCTTAGTGAAACACTGGATTTCTTATCTCATGTCT  
GCTTTTCGTGAAAAAATACCAATTGAAGTGGAGGGT---TTCTTCAAACAACAAGGG---G  
CTGGGTCAACTATTCAATCAAATGATATTGAGCATGTTTCCCAT-----CTCTTCTCGAGAA  
ACAAGTGGGCTATTTCTTTGCAAACTGTGCTCAATTTTCATATGTGGCAATTCCGCCAA  
GATCTCTTCGTT-----AGTTGGGGGAAG---AATCCGCCGAATCGGATTTTTTGAGGAA  
C---GTATCGAGAGAGAATTGGATTTGGTTAGACAATGTGTGGTTGGTAAACAAGGATCG  
G-----TTTTTTAGC-----AAGGTACAGAATGTATCGTCAAATATTCAATATGATTCC-----  
-ACAAGA-----TCTAGTTTCGTTCAAGTAACGGATTCTAGCCAACCTGAAAGGATCTTCT--  
GATCAATCCAGAGATCATTTGGATTCCATTAGT-----AATGAGGATTCGGAA-----  
-----TATCACACATTGATTAATCAAAGAGAGATTCAACAACGAAAAGA

AAGATCGATTCTT--TGGGAT-----CCTTCCTTTCTTCAAACGGAACGAAAAGAGATAGA  
ATCAGGC-----CGATTCCCGAAA-----TGCCTTTCTGGATATTCC-----TCAATGTCCCGGC  
TATTCACG--GAACGTGAGAAGCAGATGATTAATCATCTGTTTCCGGAAGAAATCGAAG  
AATTTCTT-----GGGAATCCTACAAGATCCGTTCTGTTCTTTTTTCTCTGATAGATGG-----T  
CAGAACTTCAT--CTGGGTTCTGAATCCTACTGAGAGGTCCACTAGGGATCAG-----A  
AATTGTTGAAGAAACAACAAGATCTTTCT--TTTGTCCCTTCCAAGCGATCGGAA-----  
--AATAAAGAAATGGTTAATATATTCAAGATAATTACGTATTTACAAAAT-----ACCGTCTC  
AATTCATCCTATTTTCATCAGATCCGGGATGTGATATGGTTCCG---AAGGATGAACCGGAT-  
--ATGGACAGTTCCAATAAGATTTTCATTCTTGAACAAAAATCCATTTTTTGATTTA-----TT  
TCATCTATTCCATGACCGGAACAGGGGAGGATACACGTTA-----CACTACGATTTTGAAT  
CAGAA-----GAGAGATTTCAAGAAATGGCAGATCTATTCACTCTATCAATAACCGAGCCG  
--GATCTGGTGTATCATAAGGGATTTGCCTTTTCTATTGATTCTGCGGATTGGATCAAAA  
ACAA-----TTCTTGAATGAGGCCAGGGATGAA-----TCGAAAAGAAATCT-----TTA  
TTGGTTCTACCTCCTATTTTTTAT-----GAAGAGAATGAATCTTTTTTCTCGAAGGATCAGA  
AAAAAATGGGTCCGG---ATCTCCTGCGGGAATGATTTGGAAGATCCAAAACCAAAAAT  
AGTGGTATTTGCTAGCAACAACATAATGGAGGCAGTCACTCAATATAGATTGATCCGAA  
ATCTGATTCAAATCCAATATAGTACCTATGGG-----TACATAAGAAATGTATTGAATCGATT  
CTTTTTAATGAAT-----AGATCCGATCGCAACTTCGAATATGGA-----ATTCAAAGGG  
ATCAAATAGGAAAGGATACTCTGAATCATAGAACTATAATGAAATATACGATCAACCAAT  
ATTTATCGAATTTGAAAAAG---AGTCAGAAGAAATGGTTTCGAGCCTCTT-----ATTTGAT  
TTCTCGAACCGAGAGATCCATGAATCGGGATCCTGATGCATATAGATACAAATGGTCCA  
ATGGGAGCAAGAATTTCCAGGAACATTTGGAACAGTCCGTTTCGGAGCAGAAGAGCC  
GT-----TTTCAAGTAGTGTTCGATCGATTACGTATTAATCAATATTCGATTGATTGGTCT  
GAGGTTATCGACAAAAAAGATTTGTCTAAGCCACTTCGTTTCTTTTTGTCCAAG-----  
-----TCACTTCTTTTTTTGTCC-----AAGTTGCTTTTCTTTTTGTCTAA  
C---TCACTTCTTTTTTCTGTGTGAGTTTCGGAAATATCCCATTCATAGGTCCGAG---AT  
CTACATCTAT--GAATTGAAAGGTCCGAATGATCAACTCTGCAATCAGTTGTTAGAATCA  
ATAGGTCTTCAAATTTGTTCAATTTGAAAAAATGGAAACCCTTC-----TTATTGGAC-----G  
ATCATGATACTTCC---CAAAAATCGAAATTTCTTGATCAATGGAGGAACAATATCACCATT  
TTTGTTCATAAAGATACCA---AAGTGG---ATGATTGACTCATTCCACTAGA-----AATAA  
TCGCAGGAAATCCTTTGATAACCCGGATTTCCTATTTCTCAATGATATTCCACGATCAAGA  
CAATTGGCTGAATCCCGTGAAACCATTTTCATAGAAGTTCATTGATATCTTCTTTTTATAA  
AGCAAATCGACTTCGATTCTTGAATAATCCACATCACTTCTGCTTCTAT-----TGGAACAC  
AAGATTCCCCTTTTCTGTG-----GAAAAGGCCCGTATCAAT-----AATTCTGATTTTAC  
GTATGGA---CAATTCCTCAATATCTTGTTCAATTCGCAACAAA---ATATTTTCTTTGTGCGT  
CGGTAAA-----AAAAACATGCTTTTTGGGGG---AGAGATACTATTTACCAATCGAGTC  
ACAGGTATCTAACATATTCATACCTAACGATTTTCCACAAAGTGGT---GACGAAACGTAT  
AACTTGTAACAATCT-----TTCCATTTTCCAAGTCGATCCGATCCATTCGTTCTGTT-----A  
GAGCTATTTACTCGATCGCAGACATTTCTGGAACACCTCTAACAGAGGGGCAAATAGTC  
AATTTGAAAGAACTTATTGTCAACCTCTTTCAGATATGAATCTATCTGATTCAGAAGGG  
AAGAACTTGCATCAGTATCTCAAT-----TTCAATTCAAACATGGGTTTGATTCACACTCCA  
TGTTCTGAGAAAGATTTATCATCCGAAAAG-----AGGAAAAA-----CGGA  
GTCTTTGTCTAAAG-----AAATGCGTTGAGAAAGGGCAGATGTATAGAACCTTTCAACG  
AGATAGTGCTTTTTCAACTCTCTCAAATGGAATCTATTCCAAACATATATGCCATGGTT

CCTTACTTCGACAGGGTACAAATATCTAAATTTGATATTTTTAGATACTTTTTTCAGACCTA  
TTG-----CCAATACTAAGTAGC---AGTCAAAAATTTGTACCCATTTTTTCATGATATTATGCA  
TGGATCAGGTATATCATGGCGAATTCTTCAGAAAAAATTG-----TGTCTTCCAC  
AATGGAATCTG---ATAAGTGAGATCTCGAGTAAGTGTTTACATAAT-----CTTCTTCTGTC  
CGAAGAAATGATTCATCGAAAT-----AATGAGTCACCATTGATATCGACACATCTGAGAT  
CGCCAAATGCTCGGGAGTTC---CTCTATTCAATCCTTTTTCTTCTTCTTGTGCTGGATAT  
--CTCGTTCGTACACATCTTCTCTTTGTTTCCCGG-----GCCTCTAGTGAGTTACAGACAG  
AGTTGCGAAAAGGTCAAATCTTTGATGATTCATCATCTATGATTGAGTTGCGAAAACCT  
CTGGATAGGTATCCTACATCTGAACCGAATTCTTTCTGGTTAAAGAATCTCTTTCTAGTT  
GCTCTGGAACAATTAGGAGATTCTCTAGAAGAAATACGGGGTTCTGCTTCTGGCGGCA  
ACATGCTTGGT-----CCCGCT-----TATGGG---GTCAAATCAATACGTTCTAAGAA  
GAAAGATTGGAATATCAATCTCATCGAGATCATCGATCTCATA-----CCAAATCCCAT  
CAATCGAATCACTTTTTTCGAGAAATACGAGACATCTAAGTCATACAAGTAAAGAGATCT  
ATTCATTGATAAGAAAAAGAAAAACGTGAACGGGGATTGGATTGATGATAAAATAGA  
ATCCTGGGTCGCGAACAGTGATTGATGATGAAGAAAGAGAATTCTTGGTTTCAG  
TTCTCC-----ACCTTAACGACA-----GAAAATAGGATTGATCAAATCTATTGAGTCTGAC  
T--CATAGTGATCGTTTA-----TCAAAGAATGACTCTGGTTATCAAATGATTGAACA  
ACCGGGAGCAATTTACTTACGATACTTAGTTGACATTCAT-----AAAAAGCATCTAATGA  
ATTATGAGTTCAATCCATCCTGTTTAGCAGAAAGACGGATATTCCTTGCTCATTATCAGA  
CAATCACTTAT-----TCACAACTTCGTGTGGGGAAAATAGTTTTCAATTTCCCATCTCATG  
GA-----AAACCCTTTTCGCTCCGCTTAGCCTTATCCCCCTCT--AGGGGTATTTTAGTGA  
TAGGTTCTATAGGAACTGGACGATCCTATTTGGTCAAATACCTAGCGACAAACTCCTAT  
GTTCTTTTCATTACGGTATTTCTGAACAAGTTCTGGATAACAAGCCTAAAGGTTTTCTT  
CTTGAT-----GAGATCGAT--ATTGATGATAGTGACGATATTGATGATAGTGACAAT  
CTTGATGCTAGTGAC-----GATATCGATCGTGACCT  
TGATACGGAGCTG---AAACTGCTAACTAGGATGAATGGGCTAACTATGGATATGATGCC  
GGAA-----ATAGACCGATTTTATATCACCTTCAATTGCAATTAGCAAAAGCAATGTCT  
CCTTGCATAATATGGATTCCAAACATTCATGATCTGGATGTGAATGAGTCGAATGACTTA  
GCCCTCGGTCTATTAGTGAACCATCTCTCCAGG-----GATTGTGAAAGATGTTCT--AC  
TAGAAATATTCTTGTATTGCTTCGACTCATATCCCCAAAAAGTGGATCCCCTCTAAT  
AGCTCCGAATAAATAAATACGTGCATTAAGATACGAAGGCTTCTTCTTCCACAACAAC  
GAAAGCACTTTTTCACTCTTTCATATACTAGGGGATTTCACTTGAAAAGAAAATGTTT  
CATACT-----AACGGATTCCGGGTCCATAACCATGGGTTCCAATGCACGAGATCTTGTAGC  
ACTTACCAATGAGGTCTATCGATTAGTATTACACAGAAGAAATCAATTATAGACACTAA  
TACAATTAGATCCGCTCTTCATAGACAACTTGGGATTTGCGA-----TCCCAGGTAAGA  
TCGGTTCAGGATCATGGGATCCTTTTCTATCAGATAGGAAGGGCTGTAGCACAAAATGT  
ACTTCTAAGTAATTGCCCCATAGATCCTATATCTATCTATATGAAGAAGAAA-----TCATGT  
AACGAAGGGGATTCTTATTTGTACAAATGGTACTTCGAGCTTGGAACGAGCATGAAGA  
GATTAACGATACTTCTTTATCTTTGAGTTGTTCTGCCGGATCGGTGCTCAAGATCTTT  
GGTCTTTATCC-----GGACCCGATGAAAA---AATGGGATCACTTCTTATGGACTCGTTG  
AGAATGATTCT--GATCTAGTTCATGGCCTATTAGAAGTAGAAGGCGCTCTGGTGGA---  
---TCTTACGGACAGAAAAAGATTGCAGTCAGTTTGATAATGAT-----CGAGTGACATTG  
CTTCTTCGGCCCGAACCGAGGAAT--CCCTTAGATATGATGCAAAACGGCTCTTGTCTA  
TCCTTGATCAGAGATTTCTCTATGAAAAATAT-----GAATCGGAGTTTGAAGAA---GGGG

AGGGAGAAGGAGCCCTTGACCCGCAG-----GAGGAT-----TTATTCAATC  
AC-----ATAGTTTGGGCTCCT-----AGAATATGGCGCCCT-----TGGGGCTTTCTATTTGA  
TTGTATCGAAAGGCCCAATGAATTGGGATTTCCT--TATTGGTCCAGGTCATTTCCGGGGC  
AAG-----CGGATCATTATGATGAAGAGGATGAGCTTCAAGAGAATGATTCCGGAGTTC  
TTGCAGAGTGAACCATGCAGTACCAGACACGAGATAGATCTTCCAAAGAACAAGGC  
CTTTTTCGAATAAGCCAATTCATTTGGGACCCTGCAGATCCACTCTTTTTCTATTCAAA  
--GATCAGCCCCCTGGCTCTGTGTTTTTACATCGAGAATTATTTGCAGATGAAGAGATGT  
CAAAGGGGCTTCTTACTTCCCAAACAGACCCTCCTACATCTATATATAAACGCTGGTTTA  
TC-----AAGAATACGCAAGAAAAGCACTTCGAATTGTTGATTAATCGTCAGAGATGGCTT  
AGA-----ACCAACAGTTCATTATCT-----AATGGATCTTTCCGTTCTAAT-----ACTCTATC  
CGAGAGTTATCAGTATTTATCAAATCTGTTCCCTATCTAAC--GGAACGCTATTGGATCAAA  
TGACAAAGACATTGTTGAGAAAAAGATGGCTTTTCCCGGATGAAATGAAAATTGGATT  
C-----ATG-----ATGCCTAGATCACGG---ATAAATGGAAATTTTATTGATAA  
GACCTTTTCAATTGTAGCCAATATCTTATTACGAGTAATTCCGACAACCTCAGGAGAAA  
AAGAGGCATTTACCTATTACAGAGATGGG-----ATGTCGGCTCAATCCGAAGGAAATTAC  
GCGGAAGCTTTGCAGAATTATTATGAAGCTATGCGACTAGAAATTGATCCCTATGATCG  
AAGTTATATACTCTATAATATAGGGCTTATCCACACAAGTAATGGAGAACATACGAAAGC  
TTTGGAATATTATTTTCGAGCACTAGAACGAAACCCATTCTTACCACAAGCTTTTAATAA  
TATGGCCGTGATCTGTCATTAC--CGGGGAGAACAGGCCATTCAACAGGGAGATTCTGA  
AATTGCAGAGGCTTGGTTCGATCAAGCCGCTGAGTATTGGAAACAGGCTATAGCGCTT  
ACTCCCGTAATTATATTGAAGCGCATAATTGGTTGAAGATCACGAGACGTTTCGAA-----  
-ATGACTTGCGATCAGAACATATATGGATAGAACTTATAACGGGGTCTCGAAAAATAA  
GTAATTTCTGCTGGGCCTTTATCCTTTTTTTAGGTTTATTAGGCTTCTTATTAGTTGGAAC  
TTCCAGTTATCTTGGTAGAAATTTGATATCTTTTTTTCCGCCTCAGCAAATCATTTTTTTT  
CCACAAGGACTCGTGATGTCTTTCTACGGAATTGCGGGTCTCTTTATTAGCTCTTATTG  
TGGTGCACAATTCCTGGAATGTAGGTAGTGGTTATGATCGATTCGATAGAAAGGAAGG  
AATAGTCTGTATTTTTCGTTGGGATTTCCGGGAAAAAATCGTCGCATATTCCTCCGATT  
CCTTATAAAGATATTCAGTCCGTTAGAATAGAAGTTAAAGAGGGTATTTCTGCTCGTC  
GTGTTCTTTATATGGACATCCGAGGCCAGGGGTCCATTCCCTTACTCGTACTGATGAG  
AAT--TTGACTCCACGAGAAATTGAACAAAAGGCTGCTGAATTAGCCTATTTCTTGCCT  
GTACCAATTGAAGTATTT

>Spinacia

ATGAAAAAATGGTGGTTCAATTCGATGTTGTCTTTAAGTAAATCAATGGACAGTCTTGG  
TCCTATTGAAAATACCAGTACAAAGGAAGATCCGAGTCTAAATGATCCAGAAAAACAA  
ATTCATAGTTACAGTAATGTTAATCATTAGTTCGTGGCATTGACATTCAGAATTTTCATCT  
CGGATGATACTTTTTACTTATAGATACTAAAGGGGACAGTTATTCATATATTTTGATAT  
TGAAAATCAAATTTTGGAGATTGACAACGATCATTCT-----TTTCTGAGTAAACTGCAA  
GTTCTTTTTCAAATATTGGAATTCAAGTTATCTGAACTCTAGATCTAAGAATGGCGATA  
CTTATAATGGTCATTTCGCTGTATTATACTAACGATAGTTGGAATAATCACATTAATAATTG  
CATTGACAGTTATCTTCAT-----TCTCAAATCCGTAGTGACAGTTCCATCCTAAGTGGTAA  
TGACAGTTACATTTTGAGTTACATTTTTAAT-----AATAGGAGTGAAAGTTTCAGTAA  
AAGAAGTAATGGCAGTAATTTAACTAGAAGAGAAAGTTCT--AATCTTGATGTAACTCA  
AAAATATAGACATTTGTGGGTTCAATGCGAAAGTTGTTATGCATTAATTAAGAAATT  
GCTGAAGTCAAAAATGGGTATTTGTGAACAATGTGGATATCATTTGAAAATAAGTAGTT

CAGATAGAATCGAACTTCTGATTGATCCCGGTACTTGGAATCCAATGGATGACGATATG  
GTCTCTATGGATCCTATCGGATTCATTTCGGAGGAGGAAGCTTATAAAGATCGTATTGAT  
TCTTATCAAATAAAGACGGGTTTAACTGAAGCTGTTCAAACCGGTATAGGTCAACTAAA  
CGGTATTCCTGTAGCAATTGGGGTTATGGATTTTCAGTTTATGGGAGGTAGTATGGGATC  
TGAGTAGGGGAAAAATAACCCGGTTGATTGAGTATGCTTCCAATAAATTCATACCCC  
TTATTATAGTATGTGCTTCCGGAGGGGCACGTATGCAAGAAGGAAGCTTGAGCTTAATG  
CAAATGGCAAAAATCTCGTCTGTTTTATATGATTATCAATCAAATAAAAAGTTATTTTATG  
TATCAATCCTTACATCTCCTACTACTGGTGGGGTGACAGCCAGCTTTGGTATGTTGGGG  
GATATCATTATTGCCGAACCTAACGCCTACATTGCATTTGCGGGTAAAAGAGTAATTGA  
ACAAACATTGAATAAGACAGTACCTGAAGGTTCAACAAGCAGCCGAATTTTTATTCCATA  
AGGGTTTATTTGATCCAATCGTACCGCGTAATCTTTTAAAAGGCGTTCTAAGCGAGTTAT  
TTGAGCTGCATGCTTTTTTTTCTTTGAATCAAATAAAGGCGAGATGGCAACCATTGGA  
GCAGATGAAATTAGCAAATTATCCGTGAACGTATTGAAGGATATAATCGAGAAGTAAA  
GGTTGTAAATACCGGTACAGTGCTTCAAGTGGGTGACGGCATTGCTCGTATTCACGGTC  
TTGATGAAGTAATGGCAGGTGAATTAGTAGAATTTGAAGAGGGAACAATAGGTATTGCT  
CTGAATTTGGAATCAAATAATGTTGGTGTGTATTAATGGGTGACGGGTTGATGATACA  
AGAGGGAAGTTCTGTAAAAGCAACAGGAAGAATTGCTCAGATACCCGTGAGTGAGGC  
TTATTTAGGGCGTGTATAAATGCCCTAGCTAAACCTATTGATGGTAGGGGTGAAATTAC  
AGCTTCTGAATCTCGGTTAATTGAATCTCCCGCTCCTGGTATTATGTCCAGACGTTCCGT  
GTATGAGCCTCTTCAAACCGGACTTATTGCTATTGATGCAATGATCCCTGTAGGGCGTG  
GTCAGCGAGAATTAATTATCGGGGACAGACAACTGGTAAAACAGCAGTAGCCACAGA  
TACGATTCTCAATCAACAAGGACAAAATGTAATATGTGTTTATGTAGCTATTGGACAAA  
AAGCATCTTCTGTGGCGCAGGTAGTTACTAACTTCCAGGAAAGGGGAGCAATGGAATA  
CACTATTGTGGTAGCCGAAACAGCGGATCCCCCGCTACATTACAGTATCTCGCTCCTTA  
TACCGGAGCGGCGCTGGCGGAATATTTTATGTACCGTGAGCGACACACTTTAATCATT  
ATGATGATCTTTCCAAACAAGCACAAGCTTATCGACAAATGTCTCTTCTATTACGAAGA  
CCACCTGGACGTGAAGCTTATCCGGGAGATGTCTTTTATTTGCATTACGCCTTTTGG  
AAGAGCCGCTAAATTAAGTTCTCTTTTAGGTGAAGGAAGTATGACCGCTTTACCAATAG  
TCGAGACCCAAGCAGGAGATGTTTCGGCTTATATTCCTACTAATGTAATTTCCATTACAG  
ATGGACAAATATTCTTATCCGCCGATCTATTCAATGCTGGAATCAGACCGGCTATTAATG  
TGGGTATTTCTGTTTCTCGGGTAGGATCTGCGGCTCAAATTAAGCCATGAAAAAAGTA  
GCTGGTAAATTAATAATTGGAAGTGGCGCAATTTGCAGAATTAGAAGCCTTTGCACAATT  
TGCTTCTGATCTTGATAAAGCTACTCAGAATCAATTGGCAAGAGGGCAACGATTACGCG  
AATTGCTTAAACAACCCCAATCCGCCCTCTCACGGTAGAAGAAGGTAATGACTATC  
TATACCGGAACGAATGGTTATCTTGATTCATTAGAAGTGGATCAAGTAAGAAAATATCTT  
GTTGAATTACGTAATGTAATAAACAATAAACCAGGAGTTCCAAGAAATTATATCTTCT  
ACCAAGACATTTACTGAGGAAGCAGAAGCCCTTTTAAAAGAAGCTATTCAAGAACAGA  
TGGAACGCTTTCTACTTTCAGGAACAAGCAATGAGAATCAATCCTACTACTTCTGATCCT  
GGGGTTTCCACACTTGAAAAAAAACCTGGGGCGTATCGCTCAAATTATTGGTCCGG  
TACTGGACGTAGCCTTTCTCCAGGCAAGATGCCCAATATTTACAACGCTCTAATAGTTA  
AAGGTGAGATACTGCTGGTCAACCAATGAATGTGACTTGTGAAGTACAACAATTATTA  
GGAATAATAGAGTTAGAGCTGTAGCTATGAGTGCTACAGATGGTCTAACGCGAGGAAT  
GGAAGTTATCGACACAGGAGCTCCTTTAAGCGTTCCAGTCGGTGGAGCGACTCTTGG  
CGAATTTTTAACGTGCTTGGGGAGCCTGTTGATAATTTAGGTCCAGTAGATACACGCAC

AACATCTCCTATTCATAGATCGGCGCCCGCCTTTACACAGTTAGATACAAAATTATCTAT  
TTTTGAAACAGGAATTAAGTGGTAGATCTTTTAGCCCCTTATCGCCGTGGAGGAAAAA  
TCGGACTATTTGGGGGAGCGGGAGTGGGTAAAACAGTACTCATTATGGAATTGATTAAC  
AATATTGCCAAAGCTCATGGGGGCGTATCCGTATTTGGCGGAGTAGGTGAACGTAACG  
TGAAGGAAATGATCTTTACATGGAAATGAAAGAATCCGGAGTTATCAATGAACAAAATA  
TCGCAGAATCAAAGGTGGCTTTAGTTTATGGGCAAATGAATGAACCGCCAGGAGCGCG  
TATGAGAGTTGGGTTGACTGCCCTAACTATGGCGGAATATTTCCGAGATGTTAATGAAC  
AAGACGTACTIONTCTATTTATTGACAATATCTTCCGTTTCGTCCAAGCAGGATCTGAAGTAT  
CTGCCTTATTGGGTGCAATGCCCTCCGCTGTGGGTTATCAACCTACTCTTAGTACCGAAA  
TGGGCTCGTTACAGGAAAGAATTACTTCTACAAAAGAAGGGTCCATAACTTCGATTCA  
AGCAGTTTATGTACCTGCGGACGATTTGACCGATCCCGCTCCTGCTACGACATTTGCAC  
ATTTAGATGCTACTACCGTACTATCAAGAGGATTGGCCGCCAAAGGGATCTATCCAGCA  
GTAGATCCGCTAGATTC AACGTCAACTATGCTCCAACCTAGGATCGTTGGCGAGGAACA  
TTATGAAATTGCGCAAAGAGTTAAGGAAACCTTACAACGTTACAAAGA ACTTCAGGAC  
ATTATAGCTATCCTTGGTTTGGACGAATTATCCGAAGAAGATCGTTTAACTGTAGCAAG  
AGCACGAAAAATTGAGCGTTTCTTATCACAAACCCTTTTTTCGTAGCAGAAGTATTTACAG  
GCTCTCCAGGAAAATATGTTGGTCTAGCAGAAACAATTAGAGGGTTTCAATTGATCCTT  
TCCGGAGAATTAGACAGTCTTCTGAACAGGCTTTTTTATTTGGTAGGTAACATCGACGA  
AGCTACCGCGAAAGCTATGAACTTAGAAATGGAGAGCAAATTAAGAAAATGACCTTA  
AATCTTTGTGTACTGACTCCGAATCGAAGTATTTGGAATTCAGAAGTAAAAGAAATCAT  
TTTATCTACTAATAGTGGCCAAATTGGCGTATTACCAAACCATGCCCTACTGCCACAGC  
GGTAGATATAGGAATTTAAGAATACGCCTTAACGACCAATGGTTAACATTGGCTCTGAT  
GGGCGGTTTTGCTAGAATAGGCAATAATGAGATTACTATTTTAGTAAATGATGCTGAGA  
GGGGTAGTGACATTGATCCCCAAGAAGCCCAACAAACTCTTGAAATAGCAGAAGCTAA  
CTTGAGGAAAGCGGAAGGAAAGAGACAAAAAATTGAAGCAAATTTAGCTCTCAGACG  
AGCTAGGACACGAGTCGAGGCTAGCAATACGATTTCTATGAAAAATGTAACCGATTCTT  
TCGTTTTCTTGGGTCACTGGCCATCCGCCGGGAGTTTCGGGTTTAATACCGATATTTTAG  
CAACAAATCTAATAAATCTCAGTGTAGTGCTTGGTGTATTGATCTTTTTTGGAAAGGGA  
GTGTTAAGTGATTTATTAGATAATCGAAAACAGAGGATCTTGAATACTATTCGAAATTCA  
GAAGAACTACGCGGAAAGGCCATTGAACAGCTGGAAAAAGCCCGGGCTCGCTTAAAG  
AAAGTCGAAATGGACGCGGATCAGTTTCGAGTGAATGGATATTCTGAAATAGAACGAG  
AAAAGATGAATTTGATTAATTCAACTTATAAACTTTAGAACAATTTGAAAATTACAAA  
AACGAAACCATTGATTTGAACAACAAAAAGCGATTAATCAAGTCCGACAGCGGGTTT  
TCCAACAAGCCTTACAAGGAGCTCTAGGAACTCTGAATAGTTGTTTGAACAATGAGTT  
ACATTTACGGACCATCAATGCTAATATTGGCATGTTTGGTGCATGAACGAAATAACTG  
ATATGAATCCACTGATTGCTGCCGCTTCCGTTATTGCTGCTGGATTGGCTGTAGGGCTTG  
CTTCTATTGGACCTGGAGTTGGTCAAGGTACTGCTGCGGGACAAGCTGTAGAAGGTAT  
TGCGAGACAGCCGAAGCAGAAGGAAAAATACGAGGTACTIONTATTACTTAGTTTAGCG  
TTTATGGAAGCTTTAACAATTTATGGATTGGTTGTAGCATTAGCGCTTTTATTTGCGAATC  
CTTTTGTATGAATGTTCTATCATATTCAATCAACCCGCTAAAG---TTATATGCTATATCGG  
GTGTGGAAGTAGGTCAACATTTTTATTGGCAAATAGGAGGTTTCCAAATCCATGGCCAG  
GTCCTTATAACTTCTTGGGTTGTAATTGCTATCTTATTAGGTTTCAGCTGCTATAGCTGTT  
GGAGTCCGCAAACAATCCGACTGGTGGTCAAAAATTTTTTTGAATATGTCTTGAATTC  
ATCCGAGACGTGAGCAAACTCAAATTTGGCGAAGAATATCGCCCGTGGGTTCCCTTTA

TTGGGACTATGTTTCTATTTATTTTTGTTTCTAATTGGTCAGGGGCTCTTTTACCTTGGA  
AATCATAACAGTTACCTCATGGGGAGTTAGCCGCACCCACGAACGATATAAATACTACTG  
TTGCTTTAGCTTTACTCACGTCAGTAGCCTATTTCTATGCAGGTCTTACAAAAAAGGAT  
TAGGTTATTTGGTAAATACATTCAACCAACTCCAATTCTTTTACCCATTAACATCTTAGA  
AGATTTACAAAACCGCTATCACTTAGTTTTCGACTTTTCGGAAATATATTAGCGGATGA  
ATTAGTAGTTGTTGTTCTTGTTCCTTAGTACCTTTAGTGGTTCCTATACTGTATGTTT  
CTTGGCTTATTTACAAGTGGTATTCAGGCTCTTATTTTTGCAACTTTAGCCGCAGCTTATA  
TAGGCGAATCCCTGGAAGGTCATCATATGATATTTTCTACTTTAGAGCATATTTAACTCA  
TATTTCTTTTTCAACGGTTTCCGTTGTAATTACACTCCATTTGATAACTTTATTAGTCAAT  
GAAATAGTGGGACTATATAATTCATTAGAAAAAGGCATGCTAGTTACTTTTTCTGTATA  
ACAGGATTATTAGTTACTCGTTGGGTTTATTGGAAGCATTTCCTATTAAGTGATCTATATG  
AATCATTAAATCTTCCTTTCCCTGGAGTTTCTACCTTATTCATATGATTCCATCT-----TTTTTA  
AAAAAATAAATCTTTAATAACTGCACCAAGTGCTATTTTTACCCAAGGATTTGCTAC  
ATCGGGCCTATTAAGTAAATGCATCAATCCGGAATATTAGTACCCGCCCTACAATCACA  
GTGGTTAATGATGCATGTAAGTATGATGGTATTGGGTTATGCAGCTCTTTTAGGCGGATC  
ATTATTATCTGTAACACTTCTAATTATTATTTCAAAAAGATATACAAGTTTTTGATAAA  
CGAAAAGAGATTCAATACATAAATGAAAAAGCAATATAGTACAA---GCTTCGCCCTCT  
TATGTTTCGAAATTATTACAGGTCCCAATTGATTGAACAACCTGGATCATTGGAGTTATCGG  
GTTATTAGTCTAGGATTTATCTTTTTAACCATAGGTATTCTTTCAGGGGCAGTATGGGCC  
AATGAGGCATGGGGGTCATATTGGAAGTGGGACCCAAAGGAACTTGGGCGTTTATTA  
CTTGGACCATATTTGCAATTTATTTACATATTCGAACAAATAAAAATTTGCGGGGTGCAA  
ATTCTGCAATTGTGGCTTTTATAGGCTTTCTTATAATTTGGATATGCTATTTTGGGGTTAAT  
CTATTAGGAATAGGGCTACATAGTTATGGTTCATTTACATTAACGATGGAAAAAAGAA  
AGTATTTATTCTTTTTCTATATCTTATATCTATAGTATTTTTACCCTGGTGGATCTATCTATC  
ATTTCAAAAAGTCTGGAATCTTGGGTTACTACTTGGTGGAACTACTAAGCAATCTGAAA  
CTTTTTTGAATGATATTCAAGAAAAAAGCTTCTCGAAAAATTCATCGAATTAGAGGAG  
CTCCGCTTGTGGACGAAATGATAAAGGAATATCCAGAAACACAGTTACAAAACCTCG  
GTATAGGAATCCACAATGAAACGATTCAATTGATCAAGATGCACAATGAGGATTGTATC  
CATATGATTTTGCCTTCTCGACAAATTTAATCTGTTTCCTTATTCTAGGCGGTTATTCCA  
TTCTGGGAAATAAAGAAGTATTCTTCTTAATTCTTGGGTTTCAGGAATTCCTATATAACTT  
AAGCGACACAATAAAGCTTTTTCTATTTCTTTTAGTAACCGATTTATGTATCGGATTTCA  
TTCACCCAGGGTTGGGAAGTACTAATTGAATCTATCTACAAAGATTTTGGATTTGCCG  
ATAACGATCAAATTATATCGAGTCTTGTTCCTACTTTCCAGTCATTCTAGATACAATTTT  
GAAATATTGGATATTCCGTTCTTTAAATCGTGTATCCCATCGCTTGTAGTGATTTATCAT  
TCAATGAATGACATGCCTATTGGTGTTCCTAAAAGTTCCCTTTTGAAGTCTGGAGAGGA  
AGATGCATCTTGGGTTGACGTATAACCGACTTTATCGAGAAAGATTACTTTTTTTAGG  
CCAAGAAGTTGATAGCGAGATCTCGAATCAACTTATTGGTCTTATGGTATATCTCAGTAT  
CGAAGATGATACCAAGATTTGTATTTGTTTATAAATTCTCCTGGCGGATGGGTAATACC  
AGGAGTAGCTATTTATGATACCATGCAATTTGTGCGACCAGATGTACATACAATATGCAT  
GGGGTTAGCTGCTTCAATGGGATCTTTTATCCTGGTTCGGAGGAGAAATTACCAAACGTT  
TAGCATTCCCTCACGCTAGGGTAATGATTCATCAACCCGCAAGCTCTTTCTATGAAGCC  
CAAACGGGAGAGTTTCTCCTGGAAGCGGAAGAAGCTTTTGAATTTGCGCGAAACCTC  
ACAAAGGTTTATGGACAAAGAACGGGCAAACCCTTATGGGTTGTATCCGAAGATATGG  
AAAGGGATGTTTTTATGTCAGCAACAGAAGCCCAAGCTCATGGAATTATTGATCTTGTC



GCGGTCGAAATGAAAGAACA AAAAATGGATTCATGAAGGTTTGATTACCGAATCACTTC  
CTAATGGTATGTTCTGGGTTTCGTTTAGATAATGAAGATCCGATTCTGGGTTATGTTTCAG  
GACGGATACGACGTAGTTCTATACGAATTCTACCGGGAGATAGAGTTAAGATTGAAGTA  
AGCCGTTATGATTCAACTAGAGGTCGTATAATTTATAGACTGCGCAACAAGGATTCGAA  
CGATATGGAAGAATTCCAAAGACATATAGAA---GACAGGTCTTGGCAACATAATTTTTTA  
TATCCACTTATCTTTCAGGAATATATTTATGCATTTGCATATGATCAT-----TCAGGCAACA  
GTAAA---TACAGTTTACTGCTTGTA AAAACGTTTAATTACTCGAATGTATCAACAGAATCA  
TTTGATTCTTCTGCTAATGATTTCGAATCAAAAATGTAATTTTGGGGAAGAATTTGTATTC  
ACAAATGATAACAGAAGGGTTTGCCGTCATTGTGGAAGTTCCATTTTCCCTACTATTAAT  
ATCTTCCCTAATAGTAAAATCTCATAATTTGCGATCAATTCATTCAATATTTCCCTTTTTA  
GAGGACAAATTATTACATTTAAATTATGTGTTAGATATATTAATAACTTACCCCGCCATC  
TCGAAATCTTGGTTCAA ACTCTTCGCTACTGGGTGAAAGATGCCTCTTCTTTGCATTTAT  
TACGATTTTTTCTTTATGAGTATCGTAAT-----TTGAATAGTCTTGAATTGATTTCCTTTT  
GAAAAACAAGATTATTCTTATTCCCTATATAATTTGCATGTATGTGAATACGAATCCCTT  
TTTGTTTTTCTCTGCAACCAATCCTCTTATTTACGACCAACATCTTTTGGAGCCCTTATT  
GAACGAATCTATTTCTGCGGAAAGCTAAAATATGTA AAA---GTTTTACTAAGGATTTTA  
TCCTATGGATTTTCAGAGAACCTTTCCACATTATGTTAGGTATCAAGGAAAATCAATTC  
TGGCTTCAAAGGGACATCTCTTCTGATGCATAAATGGAAATATTACCTTATCTATTTTCG  
GGCAATGTCATTTTTCTGTGTGGTCTCAACCAAAAAGACTCTATATCAATCGATTATCAA  
ACCATTCCCTAGACTTTATGGGTTTTCTTCAAGGGTGC GACTCAATTCCTCAGTAATAC  
GGAGTCAAATGTTAAAAAATTCATTTCTAATAGAGAATATTAGT-----AAGAAGTTCGAT  
ACCGTAGTTCCAATTATCCTTTGGTTGGGTCAATGGCTAAAGCGAAATTTTGTAATGTA  
TTAGGGCATCCCATTAGTAAGTCCGTCTGGACCGATTTATCAGATTCTGATATTCTTGAT  
CGATTTGGACGTATATGTAGAAATATTTCTCATTATTATAGCGGCTCTTCAAGAAAAAAA  
AGTTTGATCGAATAAAGTATATACTTCGACTTTCTTGTGCTAGAACTTTGTCTCGTAAA  
CACAAAAGTACTGTACGTGCTTTTTTGAAAAGATTAGGTTCAGAATTTTLAGAAGAATT  
CTTTACAGAGGAAGAAAAGCTCTTTCTTTGATCTTACCAAGACGTATTTGGTATTTGG  
ATATTATTTGTATTCATAATTTGGCCAATGATGAAATGATAATTGATACAACAACAACAA  
AAGTACAAGCTATCAATTCCTTTTCCAGATTGGAA---TTCTTAAAAGAGGTTTATGAGAC  
TATATGGATGCTTTTCCCTATTTTGATTCTCGTATTGGGAATTACAATAGGTGTACTAGTA  
ATTGTATGGTTAGAAAAGAGAAATATCCGCAAGTATACAACAACGTATTGGACCTGAATA  
TGCTGGTCCTTTGGGGATTCTTCAAGCTTTAGCGGACGGAACAAA ACTGCTTTTTAAA  
GAAAACCTTCTCCATCTAGGGGGGATACATATTTATTTAGTATTGGACCTTCTATAGCA  
GTCATATCGATTCTACTAGGTTACTTAATAATTCCTTTTGGGTCTCGCCTTGTTCTAGCCG  
ATCTCAGTATTGGTGTTTTTTTTATGGATCGCTGTTTCAAGCATTGCTCCGATTGGACTTC  
TTATGTACAGGATATGGATCAAATAATAAATATTCCTTTTTAGGTGGTCTACGGGCTGCTG  
CCCAATCAATTAGTTATGAAATACCATTA ACTCTATGTGTGTTATCCATATCTCTACTATCT  
AATAGTTCAAGTACAGTTGATATAGTTGAGGCGCAGTCAAATATGGTTTTTGGGGATG  
GAATTTGTGGCGCAACCTATAGGATTTATTGTTTTTATAATTTCTTCTCTAGCAGAATGC  
GAGAGATTGCCTTTTGATTTACCAGAAGCAGAAGAAGAAATTAGTAGCAGGTTATCAA  
CCGAATATTCGGTATTAATTTGGTTTATTTTATGTTGCGTCTTATTTAAATCTACTAATC  
TCTTCAATATTTGTAACCGTTCTTACTTGGGTGGTTGGAATCTCTCTATTCCATACATAT  
TCATCTCGGAGTTTTTTGAAATAAATAAATAGATGGAGTCTTTGGAACAACAATGGT  
ATTTTCATTACATTAGCTAAA ACTTTTTTGTCTTGTTCATTCCCTATCACAACAAGATGG

ACTTTACCTAGACTGAGAATGGACCAATTATTAATCTTGGATGGAAATTTCTTTTACCT  
ATTTCTTTAGGTAATCTATTATTAACAACCTTCTTCCCAACTCTTTTCATTAATGATCTGGC  
ATGTACAGAATGAAAACCTTCATTCTCGATTCTACGAGAATTTTTATGAAAGCCTTTTCATT  
TGCTTCTCTTCGATGGAAGTTTGATTTTTCCAGAATGTATCCTAATTTTTGGCCTAATTCT  
TCTTCTGATGATCGATTCAACCTCTGATCAAAAAGATATACCTTGGTTATATTTTCATCTCT  
TCAACAAGTTTAGTAATGAGCATAACAGCCCTGTTGTTCCGATGGAGAGAAGAACCTA  
TGATTAGCTTTTCAGGAAATTTCCAAACGAACAATTTCAACGAAATCTTTCAATTTCTTA  
TTTTACTATGTTCAACTCTATGTATTCTCTATCCGTAGAGTACATTGAATGTACAGAAAT  
GGCTCTAACAGAGTTTCTGTTATTCATATTAACAGCTACTCTAGGAGGAATGTTTTTATG  
CGGTGCTAACGATTAATAACTATCTTTGTAGCTCCAGAATGTTTCAGTTTATGCTCCTA  
CCTATTATCTGGATATAACCAAGAAAGATGTACGGTCTAATGAGGCTACTACGAAATATTT  
ACTCATGGGTGGGGCAAGCTCTTCTATTCTGGTTCATGGTTTCTCTTGGCTATATGGTTC  
ATCCGGTGGAGAGATCGAGCTTCAAGAAATAGTGAATGGTCTTATCAATACACAAATGT  
ATAACTCCCCGGGAATTTCAATTGCGCTTATATTCATCACTGTAGGAATTGGGTTC AAGC  
TTTCCCCAGCCCCTTCTCATCAATGGACTCCTGACGTATACGAAGGATCTCCCACTCCA  
GTCGTTGCTTTTCTTTCTGTTACTTCGAAAGTAGCTGCTTCAGCTTCAGCCACTCGAAT  
TTTCGATATTCCCTTTTATTTCTCATCAAACGAATGGCATCTTCTTCTGGAAATCCTAGCT  
ATTCTTAGCATGATATTGGGGAATCTCATTGCTATTACTCAAACAAGCATGAAACGTATG  
CTTGCAATTCGTCCATAGGTCAAATCGGATATGTAATTATTGGAATAATTGTTGGAGAC  
TCAAATGATGGATATGCAAGCATGATAACTTATATGCTGTTCTATATCTCCATGAATCTAG  
GAACTTTTGCTTGCATTGTATTATTTGGTCTACGTACCGGAACTGATAACATTTCGAGATT  
ATGCAGGATTATACACGAAAGATCCTTTTTTGGCTCTCTCTTTAGCCCTATGCCTCTTATC  
CCTGGGGGGTCTTCCCTCCACTAGCAGGTTTTTTCGGAAAAATCTATTTATTCTGGTGTG  
GATGGCAGGCAGGCCTATATTTCTTGGTTTTAATAGGACTCCTTACGAGCGTTCTTTCTA  
TCTACTATTATCTAAAAATAATCAAGTTATTAATGACTGGACGAAACCAAGAAATAACCC  
CTCACGTGCGAAATTATAGAAGATCCCCTTTAAGATCAAAGAATTCATCGAATTCAGT  
ATGATTGTATGTGTGATAGCATCTACTATAACCAGGAATATCAATGAACCCGATTATTACAA  
TTGCTCAGGATAACCCTTTTATGTTTCTACTTTATGAATATGATATTTTCTGGGCATTTT  
ATAATATCAAGTGTTATTCCTATTTTAGCATTTCTATTTTCCGGAATTTTAGCACCGATTA  
GCAAAGGACCCGAGAACTTTCTAGTTACGAATCGGGTATAGAACCTATGGGGGATGC  
TTGGTTACAATTTGCAATCCGTTATTATATGTTTGCTCTAGTTTTTGTGTTTTTGTATGTT  
GAAACGGTTTTTCTTTATCCATGGGCAATGAGTTTCGATATATTGGGTGTATCCGTATTTA  
TAGAAGCTTTAATTTTCGTGCTTATCCTAATTGTTGGTTTAGTTTATGCATGGCGAAAAG  
GAGCATTGGAATGGTCTACGAATCTTTTCCCTGGTTAACAACAATTGTAGTTTTGCCCA  
TATTTGCCGTTCTTTAATTTTCTTATTTCCCTCATAGAGGAAATAAGGTTATTAGGTGGTA  
TACTATATGTATTTCTATGATAGAGCTCCTTCTAATGACCTATGTGTTTTTTTTATCATTTT  
AACCGGATGATCCATTAATCCAACCTGGTTGAAGATTATAAATGGATCAACTTTTTTGTAT  
TCCATTGGAGATTAGGAATCGATGGACTTTTCGATAGGACCCATTTTACTAACGGGATTCA  
TCACTACTTTAGCTACTCTAGCGGCTTGGCCTGTTACTCGAAATTCGCAATTATTTTCATT  
TCTTGATGTTAGCGATGTATAGTGCTCAAATAGGATTATTTTCGTCCCGAGATCTTTTACT  
TTTTTTTCATAATGTGGGAATTAGAATTAATCCTGTTTATCTACTTTTATCCATGTGGGGG  
GGAAAGAAACGTCTCTACTCCGCTACTAAATTTATTTGTATACTGCGGGGGGTTCTATT  
TTTTCTATTAATGGGAGTTCTAGGTGTTGGTTTATATGGTTCCAATGAACCAACATTAAT  
TTAGAAACATTAGTTAATCAATCGTATCCTGTGGCATTAGAAATAATATTCTATATTGGAT

TTTTTATTGCTTTTGCTGTCAAATTACCGATTATACCCTTACATACATGGTTACCAGATAC  
CCACGGAGAAGCGCATTACAGTACTTGTATGCTGCTAGCCGGAATTTTATTAATAATGG  
GAGCATATGGATTGGTTCCGGATCAATATGGAATTATTACCTCATGCTCATTTCGATATTTTC  
TCCTTGGTTGATGATAATAGGCACAATGCAAATAATCTATGCAGCTTCAACATCTCCCGG  
GCAACGTAATTTAAAAAAGAATAGCCTATTCTCCGTATCTCACATGGGTTTCATAAT  
TATAGGAATTAGTTCTATAACCGATACGGGCCTTAATGGGGCCATTTTACAAATAATTC  
TCATGGATTTATTGGTGCTGCACTTTTTTTCTTAGCGGGAAGTACTAGTTACGATAGAATACG  
CCTTGTTTATCTCGACGAAATGGGCGGAATCGCGATTCCAATGCCAAAAATATTCACAC  
TCTTCAGTAGCTTTTCAATGGCATCTCTTGCATTACCCGGCATGAGTGGTTTCATTGCCG  
AATTAATAGTATTTTTGGACTAATTACTAGCCAAAAATATCTTTAATACCAAATACTACT  
AATTACTTTTGGAAATGGCAATTGGAATGATATTAACCTCTATTTATTTATTATCTATGTCAC  
GTCAAATGTTCTATGGATATAAATTATTTAACATTTCAAACCTCTCTTTTTTTGATTCTGG  
TCCGCGAGAGTTGTTTGTTCACCTTCTATCTTTTTACCAGTAATAGGTATTGGGGTTTA  
CCCGGATTTAGTTCTCTCACTATCAGTTGAGAAAGTGAAGCTATTTTATCCAATTATTT  
TTATAGAATGATACTCGAGCATGTAATTGTTTTGAGTGCTTTTTTATTTCTATCGGGATT  
TATGGATTAGTCACGAGTCGAAATTTAGTTCGCGCTCTTATGTGCCTTGAACCTATATTG  
AATGCAGTTAATCTAACTTTGTAACATTTTCTGATTTTTTTGATAGTCGCCAATTAAG  
GGAAACATTTTCTCCATTTTGTATAGCCATTGCAGCCGCTGAAGCAGCTATTGGACC  
GGCTATTGTTTCTTCAATTTATCGTAACAGAAAATCCATTCGTATCAATCAATCGAATTTA  
TTGAATAAAATGGAACATATATACCAATATGCATGGATCATACTTTCCTTCCACTTCCG  
GTTCCCTTGTTAATAGGAGCTGGACTTTTATTTTTTCCGACGGCAACAAAAAATCTTCG  
GCGTATATGGGCTTTTTCTAGTATTCGTTGTTAAGTATAGTTATGATTTTTTCGATGAAG  
CTGGCTATTCAACAAATAAATAGTAATCTATTTATCAATATCTATGGTCTTGGACCATTA  
ATAATGACTTTTCTTTAGAATTTGGCTACTTGATGGACCCACTTACTTCTATTATGTCAAT  
GTTAATTACTACTGTTGCAATTCTGGTTCTTATTTATAGTGATAATTATATGTCTCATGATC  
AAGGATATTTGAGATTTTTTGCATATGAGTTTTTTCAATACTTCCATGTTGGGATTAGT  
TACTAGTTCTAATTTGATACAAATTTATATTTTTTGGGAATTAGTGGGAATGTGTTCCCTAT  
CTATTAATAGGTTTTTGGTTTACACGACCTATTGCCGCAAATGCTTGTCAAAAAGCGTTT  
GTGACTAATCGTGTAGGAGATTTTGGCTTATTATTAGGAATTTAGGTCTTTATTGGATAA  
CAGGTAGTTTCGAGTTTCCGGGATTTGTTTGAAATATTCAATAAT--GAGGTCAATTCCTTA  
TTTTGTATTTTATGTGCTTTCTTGTATTTGCCGGTGCAGTTGCTAAATCAGCTCAATTC  
CCCTTCATGTATGGTTACCTGATGCTATGGAGGGGCCTACTCCTATTTTCAGCTCTCATCC  
ATGCTGCTACCATGGTAGCGGCGGGGATTTTCTAGTTGCTCGACTCCTGCCCTTTTTG  
TAGTTATACCTTACATAATGTATGTAATATCTTTTATAGGTATAATAACAGTACTATTAGGA  
GCGACCTTAGCTCTTGCTCAAAAAGACATTAAGAGGAGTTTAGCTTATTATACAATGTC  
TCAATTGGGTTATATGATGTTAGCTCTAGGTATGGGTTCTTATCGAACGGCTTTATTTTCAT  
TTAATTACTCATGCTTATTCAAAGCATTATTGTTTTTAGCATCTGGATCTCTTATTCATTC  
AATGGGAACTATTGTTGGATATTCTCCGGATAAAAGTCAGAATATGGTTCTTATGGGGG  
GGTTAACAAAACATGTACCAATTACAAAACTTCTTTTTTAATAGGTACACTTTCTCTTT  
GTGGTATTCCGCTCTTGCTTGTTTTTGGTCCAAAGATGAAATCTTAATGATAGTTGGG  
TGTATTCGCCGATTTTCGCAATAATCGCTTATTTACAGCCGGATTAACCGCATTTTATAT  
GTTTAGAATCTATTTACTTACATTTGAAGGGCATTAAACTTTTTTTGTAAAAATTACAG  
TGGAATAAAGTAGTTCTTTTTATTCAATATCTTTATGGGGCAAAAAGAATTGAAAA  
CGATTAATCAAAAATTATTAACCTATTAACAATGAATTTTTTTTTCGTTTGAAAATAAGA

ATATTTCTTTATATCCTTATGAATCGGACAATACTATGTTATTTCTCTGATTATATTGATCA  
TGTTTACTTTATTCGTTGGATTCATAGGAATCCCATTTGATTTGGATATATTAACATAAATG  
GTTAACTCCATCTATAAATCTTTTACATTCCAATTCAGAAAATTTTGTGGATTGGTATGAA  
TTTGTGATAAATGCAATTTTTTCAATTAGTATAGCTTTTTTTGGAATATTTATAGCCTTCTT  
TTTTTATAAACCTATTTATTCATCCTTAAAAAATTTGACTTAATTAATTCATTTGATATTT  
TGGGGGACAATATAATAACTATTATATACAATTGGTCTGCTAACCGTGGTTATATAGATGC  
TTTTTATTCAACATTCTTAATTAAGGGTATAAGAAGTTTGTCTGAACTAGTTTCTTTTTTT  
GATAGACGAATAATTGATGGAATTCCTAATGGTTTTGGTGTTACAAGTTTTTTTGTAGGT  
GAAGGTATCAAATATGTAGGAGGTGGC---CGAATCTCTTCGTATCTTTTTTGGTATTTATT  
ATATGTATCCATTTTTTTTATTCATTTTACTATGGATTTACCTGGACCAATACATGATTTTC  
TTTTAGTCTTTCTGGGGTCTGGGTCTTATATTAGGGGCTCTAGGAGTGGTATTATTTACCA  
ATCCTATTTTTTCTGCCTTTTCATTGGGATTGGTTCCTTGTGTGTATATCTTTATTCTATATT  
CTAGCAAACCTCCACTTTGTAGCTTCTGCACAACCTCCTTATTTATGTGGGAGCTATAAAT  
GTATTAATCATATTTTTCTGTGATGTTTCATGAGTGGTCCAGAATATGACAAAAAGTTTCAG  
CTGTGGACTGTTGGGGACGGGGTACTTCATTGGTTTTGTATAAGTCTTTTTTGTTCATTA  
ATTAGTACTATTCTAAATACATCTTGGTATGGGATTATTTGGACTACAAAATCAAACCGAT  
ATTCTCGAACAAGATTTAATAAACGCTAGTCAACAAATTGGAATTCATTTATCAACCGAT  
TTTTTTCTTCCATTTGAACTCATTCAATAATTCTTTTAGTTTCTTTAATAGGTGCAATTG  
CTGTGGCTCGTCAAATGGCTGTACCAACTACCAGAAAAGACCTCATGATAGTCAATATG  
GGCCCTCACCATCCATCAATGCACGGTGTCTCCGACTCATCGTTACTTTAGACGGTGA  
AGATGTTATTGACTGTGAACCGATAGTGGGTTATTTACACAGAGGTATGGAAAAAATTG  
CGGAAAATCGAACAATTATACAATATCTGCCTTATGTAACACGTTGGGATTATTTAGCTA  
CTATGTTTACAGAAGCAATAACTGTAAATGGACCAGAACAATTGGGAAATATTTCAAGTA  
CCTAAAAGAGCTAGCTATATCAGAGTAATTATGTTGGAGTTAAGTCGGATAGCTTCGCAT  
TTATTATGGCTCGGCCCTTTTATGGCCGATATTGGCGCGCAGACCCCTTTTTTCTATATTT  
TAAGAGAAAGGGAATTAATATATGATTTATTTCGAAGCTGCTACCGGTATGAGAATGATGC  
ATAATTATTTTCGTATTGGAGGAGTAGCTGCCGATCTTCCTTATGGATGGATAGATAAATG  
TTTAGATTTTTTGTGATTATTTTTTAATAGGGCTTACTGAATACCAAAAACCTTATTACGCGA  
AATCCTATTTTTTTAGAACGAGTTGAGAACGTCGGCATTATTGGTGGAGAAGAAGCAAT  
AAATTGGGGTTTATCAGGCCCAATGCTACGCGCTTCCGGAATACAATGGGACCTGCGTA  
AAGTTGATCATTATGAGTGTACGACGAATTTGATTGGGAAGTCCAATGGCAAAAAGA  
AGGAGATTCATTAGCTCGTTATTTAATACGAATCGGTGAAATGGCCGAATCTGTAAAAA  
TTATACAACAAGCTCTAGAAGGAATTCAGGGGGTCCCTATGAGAATTTAGAAATTCGA  
CGCTTTAATAGAATAAAATATCCTGAATGGAATGATTTTGAATATCGATTCAATTAGTAAA  
AAGCCATCTCCTGCTTTTTGAATTGTGCAACAAGAGCTTTATGTAAGAGTTCGAAGCCC  
CAAAGGGAGAATTAGGAATATTTTTGATAGGAGATCAGAGTGTTTTTCTTGGAGATGG  
AAAATTCGTCCCCGGGTTTTATCAATTTGCAAATCTTCCTCAGTTAGTTAAAAAATG  
AAATTGGCTGATATTATGACGATACTAGGTAGCATAGATATCATTATGGGAGAAGTTGAT  
CGTATGTTCCCTATGGTAACTGGGTTTCATCAATTATGGTCAACAAACAATACGCGCGGC  
AAGGTACATTGGTCAAAGTTTTATGATTACCCTATCCCATGCTAACCGCTTACCTGTAAC  
TATTC AATATCCTTATGAAAAATTAATAACATCGGAGCGTTTTTCGTGGTCAATTCACTT  
TGAATTCGATAAATGCATTGCTTGTGAAGTATGTGTTTCGTGCATGTCCTATAGATTTGCC  
CGTTGTTGATTGGAAATTGGAAACGGATATTCGAAAGAAACGGTTGCTTAATTACAGCA  
TTGATTTCCGAATTTGTATATTTTTGTGGTAATTGTGTTGAGTATTGTCCAACCAATTGTTT

ATCAATGACTGAAGAATATGAGCTTTCTACTTATGATCGTCACGAATTAATTATAATCA  
AATTGCTCTGGGTCGTTTACCAATATCAATAACCGATGATTACACAATTCGAACAATTTT  
GAATTCG-----ATGCAGGGTCGTTTGTCTGCTTGGCTAG  
TCAAACACGGGTTAGTTCATAGATCCTTGGGTTTTGATTACCAAGGAATAGAGACTTTA  
CAAATAAAGCCCGAAGATTGGCATTCCATTGCTGTTATTTTATATGTATATGGTTACAATT  
ATTTACGTTTCAATGTGCTTATGATGTAGCACCGGGCGGGCTGTTAGCTAGTGTGTATC  
ATCTTACGAGAATAGAGTACGGCGTGGATCAACCGGAAGAGGTATGCATAAAAGTATTT  
GCTCCAAGGCGGAATCCTAGAATCCATCCGTTTTCTGGGTTTGGAAAAGCGCGGATTT  
TCAAGAACGGGAATCTTATGATATGTTTGGAACTCTTATGATAATCATCCACGCCTGAA  
ACGTATTTAATGCCCGAAAGTTGGATAGGATGGCCCTTACGTAAGGATTATATTGTCCC  
GAATTTTTATGAAATACAAGATGCTTAT-----

-----A  
TGAATTCCATTGAGTTTCCACTGCTTGATCAAATAGCCCAAATCTGTTATTTCAACTA  
CATCAAACGATCTTTCAAATTGGTCAAGACTCTCAAGTTTATGGCCGCTTCTCTACGGT  
ACCAGCTGTTGCTTCATTGAATTTGCTTCATTAATAGGCTCACGATTTGACTTTGATCGT  
TATGGACTCGTACCAAGAGCGAGCCCTAGACAAGCGGACCTAATTTAACAGCCGGTA  
CCGTAACAATGAAAATGGCGCCTTCCTTATTGAGATTATATGAGCAAATGCCTGAACCA  
AAATATGTTATTGCTATGGGAGCATGTACAATTACAGGGGGGATGTTCAGTACCGATTCT  
TATAGTACTGTTTCGAGGAGTTGATAAATTAATCCCGTGGATGTCTATTTGCCGGGCTGC  
CCACCTAAACCCGAAGCAGTTATAGATGCTATAACAAAACCTTCGTAAGAAAATATCTCG  
GGAAATCTATGAAGATAGAATTAAGTCT-----AAGAATCGATGTTTTACTATCAATCACAA  
GTTTCGTGTTGGGCGGAGTATTCATACCGGAAATTATGATCAAGCATTATTATATAAATCT  
CCATCGACTTCAGAGATTCCTCCTGAAACATTTTTCAATAACAAAACGCAGCATCTTC  
CCGCGAATTAGTGAATATGCAAACATAAATACCTTTTTCTTGGATAAAAGAACAGATTAC  
TCGATCCATTTCCATATCACTTATATTATATATAATAACTCGGTCATCCATTGCGAATGCCT  
ATCCCATTTTCGCACAGCAAGGTTATGAAAATCCACGAGAGGCGACGGGACGTATTGTA  
TGTGCCAATTGCCATTTAGCTAATAAGCCCGTGGATATTGAGGTTCCACAAGCGGTCCT  
TCCAGATACTGTATTTGAAGCAGTTGTTTCAATTCTTATGATATGCAATTAACAAGT  
TTTAGCTAACGGTAAAAGGGTGGCTTGAATGTGGGGGCTGTTCTTATTTTACCTGAGG  
GATTTGAATTAGCCCCACCCGATCGTATTTCTCCAGAGATGAAAGAAAAAATGGGGAAAT  
CTTTCTTTTCAGAGCTATCGCCCCAATAACAAAATATTCTTGTGATAGGTCCTGTTCCT  
GGGCAAAAATATAGTGAAATTACCTTTCTTATTTGCCCCGGACCCTGCCACTAAAAA  
AGACGTTCACTTCTTAAAATATCCGATATATGTAGGTGGTAACAGGGGAAGGGGTCAA  
TTTATCCTGACGGAAGCAAGAGTAATAACAGTTTATAATTCCACAGCAACAGGTATA  
GTAAAGAAAATTGTACGAAAAGAAAAGGGCGGATACGAAATAAACATAGCGGATGCCT  
CGGATGGACGTGAAGTGGTTGATATTATCCCTCGAGGACCAGAGCTTCTTGTTCGAG  
GGTGAATCTATCAAACCTTGATCAACCATTAACGAGTAATCCTAATGTGGGTGGGTTTGG  
TCAGGGAGACGCAGAAGTAGTACTTCAAGACCCACTGCGCATAACAAGGTCTTTTGT  
TTCTTTGCGTCTGTTATTTTAGCACAAATCTTTTTGGTTCTTAAAAAGAAACAATTCGAG  
AAGGTTCAATTGTCCGAAATGAATTTTATGAGTAAAGTCTATGATTGGTTTCGAAGAACG  
TCTCGAGATTCAGGCGATTGCGGATGATATAACTAGTAAATATGTTCTCCTCATGTCAA  
CATATTTTATTGTCTAGGCGGAATTACGCTTACTTGTTTTTTAGTACAAGTAGCTACAGG  
GTTTGCATGACTTTTTACTATCGTCCAACCGTACTGATGCTTTTGTCTTCTGTTCAATAT  
ATAATGACTGAAGTCAACTTTGGTTGGTTAATACGATCCGTTTCATCGGTGGTTCGGCAAG

TATGATGGTTCTAATGATGATCCTGCATGTATTTTCGTGTGTATCTTACCGGTGGGTTTAAA  
AAACCTCGAGAATTGACTTGGGTTACAGGCGTGGTTCTGGGTGTATTGACCGCGTCTTT  
TGGAGTAACTGGTTATTCCTTACCTTGGGACCAAATTGGCTATTGGGCAGTAAAAATTG  
TAACAGGCGTACCGGATGCTATTCTGTAAATAGGATCGCCTTTGGTAGAGTTATTACGTG  
GAAGTGCTAGTGTGGGACAATCTACTTTGACTCGTTTTTATAGTTTACACACTTTTGTAT  
TGCCTCTTCTACTGCCGTATTTATGTTAATGCACTTTCTAATGATACGTAAACAAGGTAT  
TTCTGGTCCCTTAATGGGAGTAACAAAAAACCTGACTTGAATGATCCTGTATTAAGGG  
CTAAATTAGCGAAAGGTATGGGGCATAATTATTATGGGGAGCCCGCGTGGCCTAATGAT  
CTTTTATATATTTTTCTGTAGTAATTTAGGTACTATTGCGTGTAACGTAGGCTTAGCAG  
TTTTAGAACCATCAATGATTGGCGAGCCGGCGGATCCATTGCAACTCCTTTGGAAATA  
TTACCTGAATGGTATTTTTTTCTGTATTTCAAATACTTCGTACAGTACCAAATAAGTTAT  
TAGGCGTTCTTTAATGGCTTCAGTACCTGCGGGATTATTAACAGTTCCTTTTTTAGAAA  
ATGTTAATAAATCCAAAATCCATTTTCGTCGTCCAGTAGCTACAACGTCTTTTTGGTTG  
GTACCGTAGTGGCCCTTTGGTTAGGTATTGGAGCAACATTACCTATTGATAAATCCCTAA  
CTTTAGGCCTTTTTATGATTGAAGTTTTTCTATTTGGAATCGTCTTAGGTCTAATTCCTAT  
TACTTTGGCTGGATTATTTGTAAGTGCATATTTACAATATAGACGTGGTGATCAGTTGGAT  
CTTATGTCTACTCTAACTAGTTATTTTCGGTTTTTTACTAGCGGCTTTAACTATAACTTCGG  
CTTTATTTATAGGTCTAAACAAGATACGACTTATTATGGATATTGTAAGTCTCGCTTGGGC  
TGCTTTAATGGTAGTCTTTACATTTTCTCTTTCACTTGTAGTATGGGGAAGAAGTGGACT  
CATGATTATTCGTTTCGCCGAACCAGAAGTAAAAATTTTGGTAGATAGGGATCCCGTAA  
AAACTTCGTTTGAGGCATGGGCCAAACCTGGTCATTTTTCAAGAACAATAGCTAAGGG  
CCCTGAAACTACTACATGGATCTGGAACCTACATGCTGATGCTCACGATTTTCGATAGCC  
ATACCAGCGATTTGGAGGAGATCTCCCGAAAAATTTTAGTGCCCATTTTCGGTCAACTC  
TCCATCATCTTTCTTTGGCTGAGTGGTATGTATTTCCACGGTGCCCGTTTTTCCAATTATG  
AAGCATGGCTAAGCGATCCTACTCACATTGGACCTAGTGCCCAAGTAGTTTGGCCGATA  
GTGGGTCAAGAAATATTGAATGGTGATGTAGGGGGAGGTTTCCGAGGAATACAAATAA  
CCTCTGGGTTTTTTCAAATTTGGCGAGCATCTGGAATAACTAGTGAATTACAACCTTTATT  
GTACCGCAATTGGTGCATTGGTCTTTGCAGCATTAATGCTTTTTTGCTGGTTGGTTCCATT  
ATCACAAAGCGGCTCCAAAATTAGCTTGGTTCCAAGATGTGGAATCTATGTTGAATCAC  
CATTTAGCAGGACTACTAGGACTTGGGTCTCTTTCTTGGGCGGGTTCATCAAATCCATGT  
ATCTTTACCGATTAACCAATTTCTAAATGCTGGAGTAGATCCTAAAGAGATACCGCTTCC  
TCATGAATTAATCTTGAATCGGGATCTTTTGGCTCAACTTTATCCCAGTTTTGCCGAAGG  
AGCAACCCCGTTTTTCACTTTGAATTGGTCAAAATATGCGGACTTTCTTACTTTTCGTG  
GAGGGTTAGACCCAGTAACTGGAGGTCTGTGGCTGACCGATACTGCACACCATCATT  
AGCTATTGCAATTCTTTTCTGTAGCGGGTTCATATGTATAGAACGAACTGGGGCATTGG  
GCATGGTCTAAAAGATATTTTAGAGGCTCATAAAGGTCCATTTACGGGCCAGGGACATA  
AAGGCTTATATGAGATCTTAACAACGTCATGGCATGCTCAATTAGCTCTTAACCTAGCTA  
TGTTAGGTTCTTTAACCATCGTTGTAGCTCATCATATGTATGCGATGCCCCCTTATCCATA  
TCTAGCTACTGACTATGGTACCCAACCTTTCATTGTTTACACATCACATGTGGATTGGTGG  
ATTTCTCATAGTTGGTGCTGCTGCGCATGCGGCCATTTTTTATGGTAAGAGACTATGATCC  
AACTACTCGATAACAACGACCTATTAGATCGGGTTCTTAGACATCGCGATGCAATCATATC  
ACATCTTAACTGGGCATGTATATTTCTAGGATTTACAGTTTTTGGTTTATATATTCATAAT  
GATACCATGAGTGCTTTAGGGCGTCCCAAGATATGTTTTTCAGATACCGCTATACAATTA  
CAACCTGTCTTCGCTCAATGGATACAAAACACCCATGCTTTAGCGCCTAGTGCAACGGC

TCCGGGTGCAACAGCAAGCACCAGTTTGGACTTGGGGAGGTAGTGATTTAGTAGCAGTG  
GGTGGAAAAGTAGCCTTGTTACCCATTCCACTAGGGACCGCAGATTTTTTAGTCCACCA  
CATTCATGCTTTTACAATTCATGTGACGGTACTAATACTTCTAAAAGGCGTTCTATTTGC  
TCGTAGCTCTCGTTTGATACCGGATAAAGCAAATCTTGGGTTTCGCTTCCCTTGTGATG  
GACCTGGAAGAGGGGGAACATGCCAAGTATCCGCGTGGGATCATGTATTCTTAGGGCT  
ATTCGTGGATGTACAACCTCAATTCGGTAGTAATAATTCATTTTCAGTTGGAAAATGCAGTC  
AGATGTTTGGGGTAGTATAAGCGATCAAGGGGTGGTAACTCATATCACTGGAGGAAAC  
TTTGCGCAAAGTTCTATTACTATTAATGGGTGGCTACGTGATTTCTTATGGGCGCAAGCA  
TCCCAGGTAATTCAGTCTTACGGTTCTTCATTATCTGCATATGGTCTCTTTTTCTAGGTG  
CTCATTTTTGTATGGGCTTTTAGTTAATGTTTTATTTAGCGGGCGTGGTTATTGGCAAG  
AACTTATTGAATCCATCGTTTGGGCTCATAATAAATTAAGTTGCTCCTGCTACTCAGC  
CTAGAGCCTTGAGCATTGTACAAGGACGTGCTGTAGGAGTAACCCATTACCTTCTGGGT  
GGAATTGCCACAACATGGGCGTTCTTCTTAGCAAGAATTATTGCAGTAGGAATGGCATT  
AAGATTTCCAAGTTTAGCCAAGGCTTAGCTCAGGACCCCACTACTCGTCGTATTTGGT  
TTGGTATTGCTACCGCACATGACTTCGAGAGTCATGATGATTAATACTGAAGAACGTCTTT  
ATCAGAATATTTTTGCTTCTCACTTTGGGCAATTAGCAATCATTTTTCTGTGGACTTCCG  
GAAATCTGTTTCATGTAGCTTGGCAAGGAAATTTGAGTCATGGGTACAGGACCCTTTA  
CACGTAAGACCTATTGCTCATGCAATTTGGGATCCTCATTTTTGGTCAACCTGCTGTAGA  
AGCTTTTACTCGGGGAGGTGCTCTTGCCCCAGTGAATATCGCTTATTCTGGTGTATCA  
GTGGTGGTATACAATAGGTTTACGCACTAATGAAGATCTTTATACTGGAGCTCTTTTTCT  
ATTATTTCTTTCTGTTATATCTTTACTAGGGGGTGGTTACACCTACAACCAAAATGGAA  
ACCGAGCGTTTCGTGGTTCAAAAATGCCGAATCCCGTCTCAACCATCACTTGTGAGGA  
CTCTTTGGAGTAAGTTCCCTTGGCTTGGACAGGACATTTAGTTCATGTCGCTATTCCCGG  
ATCCAGAGGAGAGTACGTTTCGATGGAATAATTTCTTAGACGTATTACCACATCCTCAAG  
GATTAGGTCCCCTTTTTACAGGTCAGTGGAATCTTTATGCTCAAAACCCCGATTCAAGC  
AGTCATTTATTTGGTACCTCCCAAGGGGCGGGAACAGTCCATCCTAACCTTCTTGGGGG  
ATTCATCCACAACGCAAAGTTTATGGCTAACTGATATGGCTCATCATCATTTAGCTAT  
TGCATTTGTTTTCTTGTGCGGGTCATATGTATAGAACGAACTTTGGGATTGGGCACAG  
TATGAAAGATCTTTTAGAAGCGCATATCCCCAGGGGACGATTGGGACGCGGACATA  
AAGGTCTTTATGACACAATCAACAATTCGCTTCATTTTCAATTAGGACTTGCCCTAGCGT  
CTTTAGGTGTTATAACTTCCTTGGTAGCCCAACACATGTACTCTTTACCTGCTTATGCGT  
TCATAGCCCAAGATTTTACGACTCAAGCTGCGTTATATACACATCACCAATACATCGCAG  
GATTCATTATGACAGGAGCTTTTGTCTCATGGAGCTATATTTTTTCATTCGAGATTACAATC  
CGAACAGAATGAAGATAATGTATTGGCAAGAATGTTAGACCATAAAGAAGCTATTATA  
TCCCATTTAAGTTGGGCCAGTCTCTTTTTAGGGTTCATACCTTGGGCTTTTATGTTTCAT  
AATGATGTCATGCTTGCTTTTGGTACTCCAGAAAAACAAATTTTGATCGAACCCATATTT  
GCTCAATGGATAACAATCTGCTCATGGGAAAACCTTCATATGGGTTTGTATGACTTTTATCC  
TCAACAAGTGGACCGGCATTCAATGCGGGTTCGAAGTATATGGTTGCCTGGCTGGTTAAA  
TGCTGTTAATGAG-----AATAGTAATCCCTATTCTTAACAATAGGGCCTGGAGACTTTTT  
GGTTCATCATGCTATTGCTCTAGGTTTACATACAACTACATTGATCTTAGTAAAAGGTGC  
TTTAGATGCACGCGTTCAAAGTTAATGCCAGATAAAAAGGATTTTCGGTTATAGTTTTCT  
CTTGCATGGTCCAGGACGAGGCGTACTTGTGATATTTTCGGCTTGGGACGCATTTTAT  
TTGGCGGTTTTCTGGATGTTAAATACCATTTGGGTGGGTACCTTTTATGGCATTTGAAA  
CACATCACATTATGGCAGGGTAATGTTTACAATTTAATGAATCTTCCACTTATTTGATG

GGATGGTTAAGAGATTATCTATGGTTAAACTCTTCACAACCTTATCAATGGATATAATCCAT  
TTGGTATGAATAGTTTATCGGTTTGGGCCTGGATGTTCTTATTTGGACATCTTGTTTGGG  
CTACGGGATTTATGTTCTTAATTCGTGGCGTGGATATTGGCAGGAGTTGATTGAACTT  
TAGCATGGGCTCATGAACGCACACCTTTGGCCAATTTGATTTCGATGGAGAGATAAACCG  
GTAGCTCTTCCATTGTACAAGCAAGATTAGTTGGATTAGCCCACTTCTCCGTAGGTTAT  
ATATTCACATATGCGGCTTCTTGTATTGCCTCTACATCGGGCAAATTCGGTATGTCACATT  
CAGTTAAGATTTATGATACATGTATAGGATGTACTCAATGTGTTCGAGCTTGCCCCACAG  
ATGTATTAGAAATGATACCTTGGGATGGATGTAAAGCTAAACAAATAGCTTCTGCTCCA  
AGAACAGAGGATTGTGTTGGTTGTAAGAGATGTGAATCCGCTTGTCCAACGGATTTTTT  
AAGCGTTCGGGTTTATTTATGGCATGAAACAACCCGCAGTATGGGTCTAGGGTAT-----  
ATGAACTTCCCTCTATTTTTGTGCCTTTAGTAGGCCTAGTATTTCCGGCAATTGCAATG  
GCTTCTTTATTTCTTTATGTTCAAAAAATAAGATTGTTATGCGAGATTTCAAAACATATC  
TTTCTGTGGCACCGGTACTAAGCACTTATGGTTTGGGTCTTTAGCTGGTCTATTAATAG  
AAATCAATCGTTTTTTCCAGATGCGTTGACATTCCCCTTTTTTTCATTCATGACTGCAA  
TTTTAGAGAGACGCGAAAGCGAAAGCCTATGGGGTCGCTTCTGTAATTGGATAACCAG  
CACTGAAAACCGTCTTTACATTGGATGGTTTGGTGTTTTGATGATCCCTACCTTATTGAC  
TGCAACTTCTGTATTTATTATAGCCTTCATTGCTGCTCCTCCAGTAGATATTGATGGTATT  
CGTGAACCTGTTTCCGGATCTCTACTTTACGGAAATAATATTATTTCCGGGTGCCATTATC  
CTACTTCTGCAGCTATAGGGTTGCACTTTTATCCAATCTGGGAAGCGGCATCGGTTGAT  
GAGTGGTTATAACAATGGTGGTCCCTTATGAACTAATTGTTCTACACTTCTTACTTGGTGTA  
GCTTGTATATGGGTCGTGAGTGGGAACTTAGTTTCCGTCTAGGTATGCGCCCTTGGATT  
GCTGTTGCATATTCCGCTCCAGTTGCAGCGGCTACTGCTGTTTTCTTGATCTACCCAATC  
GGTCAAGGAAGCTTTTCTGATGGTATGCCTCTAGGAATCTCCGGTACTTTCAACTTTAT  
GATTGTATTCCAGGCTGAGCACAACATCCTTATGCACCCATTTACATGTTAGGTGTAGC  
TGGTGTATTCGGCGGCTCCCTATTTAGTGCTATGCATGGTTCCTTGGTAACTTCTAGTTT  
GATCAGGGAAACCACAGAAAATGAATCTGCTAATGAAGGTTACAGATTCGGTCAAGAG  
GAAGAACTTATAATATCGTAGCTGCTCATGGTTATTTTGGTTCGATTGATCTTCCAATATG  
CTAGTTTCAACAACCTCTCGTTCCTTACACTTCTTCTTAGCTGCTTGGCCTGTAGTAGGTA  
TTTGGTTTACTGCTTTAGGTATTAGTACTATGGCTTTCAACTTAAATGGTTTCAATTTCAA  
CCAATCTGTAGTTGATAGTCAAGGTCGTGTAATTAATACTTGGGCTGATATCATTAAACCG  
TGCTAACCTTGGTATGGAAGTTATGCATGAACGTAATGCTCATAACTTCCCTCTAGACCT  
AGCTGCTATTGAAGCTCCATCTACAAATGGAATGGGTTTGCCTTGGTATCGTGTTCATAAC  
TGTTGTATTGAATGATCCCGGCCGGTTGATTTCTGTCCATATCATGCATACAGCTCTGGT  
TGCTGGTTGGGCCGGTTCGATGGCTCTATATGAATTAGCTGTTTTTGTATCCCTCTGACCC  
CGTTCCTTGATCCAATGTGGAGACAGGGTATGTTTCGTTATACCTTTCATGACTCGTTTAGG  
AATAACCAATTCGTGGGGCGGTTGGAGTATTACA---GGGGTACTATAACGGATCCTGG  
CATTGGAGTTACGAAGGTGTGGCCGGAGCGCATATTATGTTTTCGGGCTTGTGCTTTT  
TGGCCGCTATTTGGCATTGGGTATATTGGGATTTAGAAATATTTTCGGATGAACGTACAG  
GAAAACCTTCTTTGGATTTGCCTAAGATTTTGGAAATCATTATTTCTTTCCGGGGTGG  
CTTGTTTTGGTTTTGGTGCATTTTCATGTAACAGGCTTGTACGGGCCCCGAATATGGGTAT  
CCGATCCTTATGGACTAACTGGAAAAGTACAACCTGTAAGTCCAGCATGGGGCGTGGA  
AGTTTTGATCCTTTTGTCCAGGAGGAATAGCCTCTCATCATATTGCAGCAGGAACATT  
AGGTATATTAGCAGGTCTATTCCATCTTAGTGTCCGTCCGCCTCAACGTCTATACAAAGG  
ATTACGTATGGGCAACATTGAAACCGTCTTTCTAGTAGTATCGCTGCTGTCTTTTTTGC



AGCTTTTGTGTTGCGGGA ACTATGTGGTATGGTTC CGCAACTACCCCGATCGAATTATT  
TGGCCCCACTCGTTATCAATGGGATCAGGGATACTTTCAGCAAGAAATATAACGACGAG  
TAAGTGCTGGGCTAGCCGAAAATCAAAGTTTCTCAGAAGCTTGGTCAAAAATTCCCGA  
GAAATTGGCTTTTTATGATTACATTGGAAATAATCCGGCGAAAGGGGGATTATTTAGAG  
CAGGCTCAATGGACAACGGCGATGGAATAGCTGTTGGATGGTTAGGACACCCTATTTTT  
AGAGATAAAGAAGGACGTGAACTCTTTGTACGACGTATGCCTACTTTTTTTGAAACCTT  
TCCGGTCGTTTTGATAGATGGGGACGGAATTGTTTCGAGCTGATGTTCCTTTTAGAAAGAG  
CAGAATCTAAGTATAGCGTTGAACAAGTAGGTGTA ACTGTTGAGTTTTACGGCGGCGA  
ACTAAACGGAGTTAGTTATAGCGATCCTGCTACTGTCAAAAAATATGCTAGACGTGCTC  
AATTAGGTGAAATTTTCGAATTAGACCGTGCTACTTTGAAATCAGATGGTGTTTTTTCGC  
AGTAGTCCGAGGGGTGGTTTTACTTTTGGACATGCTTCCTTTGCCCTACTTCTTCTTC  
GGACACATTTGGCATGGGTCTAGAACCTTGTT CAGAGATGTTTTTGCTGGGATTGACCC  
CGATTTGGATGTTCAAGTAGAATTTGGCGCATTCCA AAAAATTGGAGATCCA ACTACAA  
GAAGACAAGGAGTTATGAAAACCTTATATTCCCTGAGGAGGTTCTACCCCGTGGAAC  
GCTCTTTAATGGA ACTTTAACTTTAGCCGGCCGTGACCAAGAAACCACCGTTTTCGCTT  
GGTGGGCCGGGAATGCTCGACTTATCAATTTATCTGGTAAACTACTTGGAGCTCATGTA  
GCCCATGCCGATTAATCGTATTCTGGGCCGGAGCAATGAACTTATTTGAAGTGGCTCA  
TTTCGTACCAGAGAAGCCTATGTATGAACAAGGATTAATTTTACTTCCCCACCTAGCTAC  
TCTAGGTTGGGGGTAGGCCCTGGCGGGGAAGTTATAGACACTTTTCCATACTTTGTAT  
CGGGAGTACTTCACTTAATTTTCGTCCGGCCGTATTGGGCTTTGGTGGTATTTATCATGCAC  
TTTTGGGCCCTGAAACTCTTGAAGAATCTTTTCCATTCTTCGGTTATGTGTGGAAGAT  
AGAAATAAAATGACCACAATTTTGGGCATTC ACTTAATCTTGTTAGGTATAGGCGCTTTT  
CTTCTAGTATTC AAGGCTCTTTATTTTGGGGGCGTATATGATACATGGGCTCCCGGAGGT  
GGAGATGTAAGAAAATTACCAACGTCACCCTTAGTCCAAGTATTATATTTGGTTGTTTA  
CTAAAATCGCCTTTTGGAGGAGAAGGGTGGATTGTTAGTGTAGACGATTTGGAAGATAT  
AATAGGGGGGCATGTATGGATAGGTGTCATTTGTATACTTGGTGGAATCTGGCATATTTT  
AACAAAACCTTTTGCATGGGCTCGCCGCGCACTTGTCTGGTCTGGCGAGGCTTATTTGT  
CTTATAGTTTGGCTGCTTTATCTGTCTTTGGTTTCATTGCTTGTTGTTTTGTCTGGTTCAA  
TAATACTGCTTATCCTAGTGAGTTTTACGGGCCCACTGGACCAGAAGCTTCTCAAGCTC  
AAGCATTTACTTTTTTAGTTAGAGACCAACGTCTTGGGGCTAACGTGGGATCCGCTCAA  
GGACCTACTGGTTTAGGTAAGTATCTAATGCGTTCTCCGACTGGAGAAGTTATTTTTGG  
GGCGAAACTATGAGGTTTTGGGATTTGCGCGCTCCGTGGTTAGAACCCTAAGAGGT  
CCAAACGGTTTGGACTTGAGTGCCTGAAAAAAGATATAACAACCTTGGCAAGAACGA  
CGTTCAGCAGAATATATGACTCATGCTCCTTTAGGTTCTTTAAATTCTGTGGGTGGGGTG  
GCTACCGAGATCAATGCAGTCAATTATGTCTCTCCTAGAAAGTTGGTTATCTACTTCTCAT  
TTTGTCTAGGATTCTTCCTATTCGTAGGGCATTGTGGCATGCGGGAAGGGCTCGTGC  
AGCTGCAGCAGGATTTGAAAAGGAATTGATCGTGATTTGAACTGTTCTTTCGATGA  
CCCCTCTTAATATGACTATAGCCGTTGGTAAATTTACCAAAGACGAAAAAGATTTATTTG  
ATAGTATGGATGACTGGTTACGGAGGGACCGTTTTGTTTTGTAGGTTGGTCTGGTCTAT  
TGCTCTTCCCTGTGCTTATTTCCGCTTAGGGGGTTGGTTTACGGGTACAACCTTTGTAA  
CTTCATGGTATACCCATGGATTGGCCAGTTCTTATTTGGAAGGCTGCAATTTCTTAACCG  
CAGCAGTTTCTACTCCTGCTAATAGTTTAGCCCACTCTTATTGTTACTGTGGGGTCCCTG  
AAGCACAAGGGGATTTTACTCGTTGGTGTCAATTAGGTGGCCTGTGGGCTTTTGTGCT  
CTTCATGGTGCTTTCGCACTAATAGGTTTTATGTTACGTCAATTCGAACTTGCTCGGTCT

GTTCAATTGCGCCCTTATAATGCAATCGCATTCTCTGGTCCAATTGCTGTTTTTGTCT  
GTATTCCTGATTTATCCACTAGGTCAATCTGGTTGGTTCTTTGCGCCTAGTTTTGGTGTA  
GCAGCTATATCCGATTCATTCTTTTTTCAAGGGTTTCATAATTGGACGCTGAACCCA  
TTTCATATGATGGGAGTTGCCGGTGTATTGGGCGCCGCTCTGCTATGCGCTATTCATGGT  
GCTACCGTTGAAAATACTTTATTTGAAGATGGTGATGGGGCAAATACATTCCGGGCTTTT  
AACCCAACCAAGCTGAAGAACTTATTCAATGGTCACCGCTAACCGCTTTTGGTCCC  
AAATCTTTGGGGTTGCTTTTTCCAATAAACGTTGGTTACATTTCTTTATGTTATTTGTACC  
AGTAACCGGTTTATGGATGAGTGCTCTTGAGTAGTCGGTCTGGCTTTGAACCTACGTG  
CCTATGACTTCGTTTTCCAGGAAATCCGTGCAGCTGAAGATCCTGAATTTGAACTTTT  
TACACCAAAAATATTCTCTTAAACGAGGGTATCCGTGCTTGGATGGCGGCTCAAGATCA  
GCCTCATGAAAACCTTATATCCCTGAGGAGTTCTACCCCGTGGAACGCTCTTATGT  
CTGGAAGCACAGGAGAACGTTCTTTTGCTGATATTATTACCAGTATTCGATACTGGGTTA  
TTCATAGCATTACTATACCTTCCCTATTTCATTGCGGGTTGGTTATTCGTCAGCACAGGTT  
AGCTTACGATGTGTTTGGAAAGCCCTCGTCCAAACGAATATTTACAGAGAGCCGACAA  
GGAATTCCATTAATAACTGGCCGTTTTGACTCTTTGGAACAACCTGATGAATTTAGTAGA  
TCTTTTATGACCATAGATCGAACCTATCCAATTTTACAGTGCGCTGGCTGGCTATTCAC  
GGACTGGCTGTACCTACCGTTTCTTTTTTGGGGTCAATATCCGCAATGCAGTTCATCCA  
ACGAATGGCTACACAAACCGTTGAGAGTAGTTCTAGA---TCTCGTCCAAAACCTACTAC  
TGTAGGGGCTTTATTGAAACCGTTGAATTCGGAATATGGTAAAGTAGCTCCTGGGTGGG  
GAACTACTCCTTTGATGGGAGTTGCAATGGCTTTATTTGCAGTATTCTTATCTATTATTT  
GGAAATTTATAATTCGTCCGTTTTACTGGATGGAATTTCCATGAATATGCTTACTCTCAA  
ACTCTTTGTTTACACAGTAGTAATATTCTTTGTTTCTCTCTTCATTTTCGGATTCCCTATCT  
AATGACCCAGGACGTAATCCTGGACGCGAAGAAATGGCCGATACTACTGGAAGAATTC  
CTCTTTGGATAATAGGGACTGTAGCTGGTATTCTTGTGATCGGTTTAGTAGGATTTTCTT  
TTATGGTTCATATTCTGGATTAGGCTCATCGCTGATGCTTAATATCTTTAGTTTGATCTGT--  
---CTTAATTCTGCCCTTTATTTCGAGTAGTTTTTTCTTCGGCAAATTACCTGAGGCCTACG  
CTTTTTTGAGTCCAATCGTAGATTTTATGCCAGTCATACCTTTATTCTTTTTTCTATTAGC  
CTTTGTTTGGCAAGCTGCTGTAAGTTTTCGAACGACACAATCAAACCCGAACGAACAA  
AATGTTGAATTGAATCGTACCAGTCTTTATTGGGGGCTATTACTCATTTTTGTACTTGCT  
GTTTTATTTTCGAATTATTTTTTCAATATGGAAGTAAATATTCTCGCATTATTTGCTACTGC  
ACTATTCATTCTAGTTCCTACTGCTTTTTTACTTATTATCTATGTAACCGGTTAGCCAA  
AATGATATGGAAACAGCAACCCTAGTCGCCATCTTTATATCTGGTTTACTTGTAAGTTTT  
ACTGGGTATGCTTTATATACCGCTTTTGGGCAACCCTCTCAACAATTAAGAGATCCCTTC  
GAGGAACACGGAGACATGGAAGCATTGGTTTATACATTTCTATTAGTCTCTACTTTAGG  
GATTATTTTTTTTGGCGATCTTTTTTTCGGGAACCTCCTAAAATTTCAACTAAAAA-----AT  
GACTATAGCTTTCCAATTGGCTGTTTTTGCATTAATTGCCACTTCATCAATCTTACTGATT  
AGCGTACCCGTTGTATTTGCTTCTCCCGACGGTTGGTCAAGTAACAAAATATTGTATTT  
TCCGGTACATCATTATGGCTTGGATTAGTCTTTCTGGTGGGTATCCTTAATTCTCTCATCT  
CT-----ATGTCACCACAAACAGAGACTAAAGCAAGTGTTGGATTTAAAGCTG  
GTGTTAAAGATTACAAATTGACTTATTATACTCCTGAGTATGAAACCCTAGATACTGATA  
TCTTGGCAGCATTCCGAGTAAGTCTCAACCTGGAGTTCCACCCGAAGAAGCAGGGG  
TGCAGTAGCTGCTGAATCTTCTACTGGTACATGGACAACCTGTATGGACCGACGGACTTA  
CCAACCTTGATCGTTACAAAGGACGATGCTACCACATCGAGCCCGTTGCTGGAGAAGA  
AAATCAATATATTTGTTATGTAGCGTATCCTTTAGACCTTTTTGAAGAAGGTTCTGTACT

AACATGTTTACTTCCATTGTGGGTAACGTATTTGGGTTCAAAGCCTTGCGTGCTCTACG  
TTTGGAAGATTTGCGAATCCCTGTTGCTTATGTAAAACTTTCCAAGGCCCGCCTCACG  
GTATCCAAGTTGAGAGAGATAAATTGAACAAGTATGGTCGTCCCTATTGGGATGCACC  
ATTAAACCTAAATTAGGTTTATCCGCTAAAACTATGGTCGCGCAGTTTATGAATGTCTT  
CGCGGTGGACTTGATTTTACCAAAGATGATGAAAACGTGAACTCCCAGCCGTTTATGC  
GTTGGAGAGACCGTTTCCTATTTTGTGCCGAAGCTCTTTATAAAGCACAAGCCGAAAC  
AGGCGAAATCAAAGGGCATTACTTGAATGCTACCGCGGGTACATGCGAAGATATGATG  
AAAAGGGCTGTATTTGCCAGAGAATTGGGCGTTTCTATTGTAATGCATGACTACTTAAC  
AGGGGGATTCACTGCAAATACTACCTTGTCTCATTATTGCCGAGATAATGGTCTACTTCT  
TCACATCCACCGTGCAATGCACGCAGTTATTGATAGGCAGAAGAATCATGGTATGCACT  
TCCGTGTACTAGCGAAAGCGTTACGTCTATCTGGTGGAGATCATATCACTCTGGTACC  
GTAGTAGGTAAGCTTGAAGGAGAAAGAGATATTACTTTAGGCTTTGTTGATTTACTACG  
TGATGATTATACTGAAAAAGACCGAAGTCGCGGTATTTATTTCACTCAATCTGGGGTTT  
CACACCAGGTGTTCTGCCTGTTGCTTCAGGCGGTATTCACGTTTGGCATATGCCTGCTC  
TAACCGAGATCTTTGGGGATGATTCTGTACTACAGTTTGGTGGAGGAACTTTAGGACAC  
CCTTGGGGGAATGCACCAGGTGCTGTAGCAAACCGAGTAGCTCTAGAAGCATGTGTAC  
AAGCTCGTAATGAGGGACGTGATCTTGCTCGCGAAGGTAATACAATTATTCGCGAGGCT  
ACCAAATGGAGTCCTGAACTAGCTGCTGCTTGTGAAGTATGGAAGGAAATCAAATTTG  
AATCCCAGCAATGGATACAGTC-----ATGGCGATACATTTATACAAAACCTTCTACCTCGA  
GCACACGCAATGGAGCCGT-----CAAGTGAAATCCAATCCACGAAATAATTTGATCTCT  
GGACAGCGTCGTTGTGGTAAAGGTCGTAATGCCAGAGGAATCATTACCGCAAGGCATA  
GAGGGGGAGGTCATAAGCGTCTATACCGTAAAATAGATTTTAGACGGAATGAAAAAGA  
CATATATGGTAAAATCGTAACTATAGAATACGACCCTAATCGAAATGCATACATTTGTCT  
CATACACTATGGGGATGGCGAGAAGAGATATATTTTACATCCAGAGGGGCTATAATTG  
GAGATACCATTGTTTCTGGTACAGAAGTTCCTATAAAAATGGGAAATGCCCTACCTTTG  
ACCGATATGCCCTTAGGCACGGCCATACATAACATAGAAATCACACTTGGAAGGGGTGG  
ACAATTAGCTAGAGCAGCGGGTGTGTAGCGAACTGATTGCAAAAAGAGGGGAAATC  
GGCCACATTAATAATTACCTTCTGGGGAGGTCCGTTTGATATCCAAAAACTGCTCAGCAA  
CAGTCGGACAAGTGGGGAATGTTGGAGTGAACCAGAAAAGGTTGGGTAGAGCCGGAT  
CTAAGCGTTGGCTAGGTAAGCGTCCTGTAGTAAGAGGAGTAGTTATGAACCCTGTAGA  
CCATCCCCACGGGGGTGGTGAAGGGAGGGCCCCAATTGGTAGAAAAAGCCCTACAAC  
CCCTTGGGGTTATCCTGCACTTGAAGAAGAAGTAGAAAAAGGAATAAATATAGTGAT  
AATTTTATTATTCGTCGACGTAGTAAATGATTCAACCTCAGACCCATTTGAATGTAGCA  
GACAACAGCGGGGCTCGAGAATTGATGTGTATTTCGAATCATAGGAGCTAGC---AACCGT  
CGATATGCTCGTATTGGTGACGTTATTGTTGCTGTGATCAAAGAAGCAATCCCCAACAC  
GCCCTTAGAAAAGATCAGAAGTGATCAGAGCTGTAGTTGTACGTACTTGTAAAGAACTA  
AAACGCGACAACGGTATGATAATACGATATGATGACAATGCTGCAGTTATCATTGATCA  
AGAAGGAAATCCAAAAGGAACTCGAATTTTTGGTGCAATTGCCCGGGAATTGCGACA  
AAAA--TTTGCGAAAATAGTTTCATTAGCTCCTGAGGTATTAATGCTTAGTCCAAAAG  
AACTAGATTCGGTAAACAACATAGAGGAAGAATGAAGGGAATATCTTATCGAGGGAAT  
CGTATTTGTTTCGGAAGATATGCTCTTCAGGCACCTTGAACCTGCTTGGATCACGTCTAG  
GCAAATAGAAGCAGGGCGGCGAGCAATGACACGAAATGCGCGTCGCGGTGGAAAAT  
ATGGGTACGTATATTTCCAGACAAACCAGTTACAGTAAGACCCGCGGAAACCCGTATG  
GGTTCGGGGAAAGGATCTCCCGAATATTGGGTAGCTGTTGTCAAACCAGGTCAATAC



ATCCCTGGGTTTAATCAGATACAATTTGAAGGATTTTGGAGGTTTCATTGATCAGGGCTTA  
ACGGAAGAACTTTCTAAGTTTCCAAAAATGGAAGATACAGACCAAGAAATTGAATTC  
AATTATTTGTGGAAACATATCAATTAGCAGAACCCTTGATAAAAGAAAAGATGCTGTG  
TATGAATCACTTACATATTCTTCTGAATTATATGTGTCCGCGGGATTAATTTGGAAAACCC  
GTAGGGAGATGCAAGAACAACAATTTTGATTGGAAATATTCTCTAATGAATTCTCTA  
GGAACCTTTTATAGTAAATGGAATATACAGAATTGTGATCAATCAAATATTGCAAAGCCCG  
GGTATTTATTACCGATCCGAATTAGACCATAACGGAATTTTCGGTCTATACCGGCACCATA  
ATATCAGATTGGGGAGGAAGATCAGAATTAGAGATTGATAGAAAAGCACGGATATGGG  
CTCGGGTGAGTAGGAAACAGAAAATATCTATTTTAGTTCTATCATCAGCTATGGGTTCA  
AATCTAAGAGAAATTCTGGATAATGTTTGTACCCGGAAATTTCTTGTCTTTCCTGAAT  
GATAAGGAGAAAAAAAATTGGGTCAAAGAAAATGCCATTTTGGAGTTTTATCAAC  
AATTTGCTTGTGTGGGTGGGGATCCGGTATTTTCGGAATCCTTATGTAAGGACTTGCAA  
AAAAAATTCTTCAACAAAGATGCGAATTAGGAAGGATTGGTCGACGAAATATGAACC  
GGCGACTGAACCTTGATATACCCGAAAATAATACGTTTTTGTACC GCGGGATATATTGG  
CAGCTGCGGATCATTTGATTGGAATGAAATTTGGAATGGGTACACTTGATGAT-----ATG  
AATCATTTGAAACATAAACGTATTAGGTCTGTTCGAGATCTCTTACAAGATCAATTCGGA  
TTGGCTCTAGTTCGTTTAGAAAACGTGGTTCGAGGAACTATAAGTGGAGCAATTCGG---  
CATAAATTAATA---CCGACTCCTCAGAATTTGGTAACTTCAACTCCA-----TTAACAA  
CGACTTTTGAATCTTTTTTTGGATTACACCCATTATCTCAAGTTTTGGATCGAACTAATC  
CATTGACACAAATAGTTCATGGGAGAAAATTGAGTTATTTGGGTCCTGGGGGATTGACA  
GGGCGAACCGCTAGTTTTCGGATACGAGATATCCATCCTAGTCACTACGGGCGTATTTG  
CCCAATTGACACATCTGAAGGAATCAATGTTGGGCTTATTGGGTCCTTAGCAATTCATG  
CGAGAATTGGTCCTTGGGGG---TCTCTAGAAAGCCCTTATTAT-----GAAATTTCTGAG  
AGATCAAAA-----AGGGTACAGATGCTTTATTTATCGCCAAGTAGGGATGAATACTATATG  
TTAGCGTCCGGAAATTCTTTGGCCCTGAATCAAGGTATTCAGGAAGAACAGGTTGTTC  
CAGCTCGATATCGTCAAGAATTCCTGACTATTGCGTGGGAACAGGTTCAATTTTCGAAGT  
ATCTTTTCTTCCAATATTTTCTATTGGAGCTTCTCTCATTCTTTTATCGAGCACAAATG  
ATGCAAATCGAGCTTTAATGAGTTCTAATATGCAACGTCAAGCAGTTCCGCTTTCTCAG  
TCCGAGAAGTGCATTGTTGGAACGGGGTTGGAACGCCAAGTGGCCCTAGATTCGGGG  
GTTCTCGCTATAGCCGAACATGAGGGAAAGATCATTTATACCAACACTGACAAGATTGT  
TTTATTAGGGAATGGGAATACTGTAAGCATTCCATTAGTTATGTATCAACGTTCCAACAA  
AAATACTTGTATGCATCAAAAACCTCAGATTCCGCGGGGAAATGTGTTAAAAAGGGG  
CAAATTTTAGCAGATGGTGCCGCTACAGTTGGTGGTGAGCTAGCTTTGGGAAAAAACG  
TATTAGTAGCTTATATGCCGTGGGAAGGTTACAATTTTGAAGATGCGGTACTCATTAGTG  
AGCGTCTTGTGTATGAAGATATTTATACTTCTTTTACATACGGAAATATGAAATTCAAA  
CTTATGTGACAAGTCAAGGT---CCTGAAAAGGTCACTAGCGAAATACCACATTTAGAAG  
CTCATTTACTCCGAATTTAGACAAAAATGGAATTGTGAGGTTGGGATCATGGGTAGAA  
ACAGGTGATATTTTGGTAGGTAAATTAACGCCTCAGATGGCAAAGAA---TCTTCGTAT  
GCCCCGAAGATAGATTATTACGAGCTATACTTGGCATTGAGGTATCCACATCAAAGGA  
AACTTGTCTAAACTACCTATAGGTGGTAGGGGCCGAGTTATTGATGTGCGATGGATCC  
AGAAAAAGGGG---GGTCCAGTTATAATCCAGAAACGATTCATGTATATATTTACAAA  
AACGTGAAATCAAAGTAGGCGATAAAGTAGCTGGAAGACATGGAATAAGGGTATCAT  
TTCCAGAATTTTGCTTAGACAAGATATGCCATATTTGCAAGATGGAAGACCTGTTGATAT  
GATCTTTAACCCACTAGGAGTACCTTCACGAATGAATGTAGGACAGATATTTGAATGTT

CGCTCGGGTTAGCGGGGAGTCTGCTAGATAGACATTATCGAATAGCACCTTTTGATGAG  
AGATATGAGCAAGAGGCTTCGAGAAAACCTGGTGTCTTCTGAATTATATGAAGCCAGTA  
AGCAAACAGCGAATCCGTGGGTATTTGAACCCGAGTATCCGGGAAAGAGTCGAATATT  
TGATGGAAGAACGGGAGATCCTTTTGAACAACCCGTTATAATAGGAAATCCTTATATATT  
GAAATTAATTCATCAAGTTGATGATAAAATTCATGGACGTTCTAGTGGACATTATGCACT  
TGTTACACAACAACCCCTTCGAGGAAGAGCCAAGCAAGGAGGACAGCGGGTAGGAG  
AAATGGAGGTTTGGGCTCTAGAAGGATTTGGTGTGCTCATATTTTACAAGAGATGCTT  
ACTTATAAATCAGATCATATTAAGCTCGCCAGGAAGTACTTGGTACTACGATCATTGGG  
GGAACAATACCTAACCTGAAGATGCTCCAGAATCTTTTCGACTGCTCGTCCGAGAACT  
ACGATCTTTGGCTCTGGAACCTGAATCATTTCCTTGTATCTGAGAGGAATTTCCAGATTAA  
TAGGATGGAAGCT-----ATGATCGATCAGTATAAACATCAACAACCTCCGAATT  
GGATCAGTTTCTCCTCAACAAATAAGTGCTTGGGCCACAAAAATCCTACCTAATGGAG  
AGATAGTTGGAGAGGTGACAAAACCTTATACTTTTCATTACAAAACCAATAAACCAGA  
AAAAGATGGATTATTTTGCGAAAGAATTTTGGGCCTATAAAAAGTGGAATTTGTGCTT  
GTGGAATTATCGAGTAATCGGAGATGAAAAGAAGACCCAAAATTTGTGAACAATG  
CGGAGTCGAATTTGTTGATTCTCGAATACGAAGGTATCAAATGGGCTATATTAATTGGC  
ATGCCCGGTAACCTCACGTGTGGTATTTGAAACGTCTTCCTAGTTATATCGCGAATTTTT  
AGATAAACCTCTTAAAGAATTAGAGGGCCTAGTATACTGCGATTTT-----TCATTTGCTAG  
GCCT---ATAGCGAAAAACCTACTTTTTTTACGATTACGCGGTTTATTTCGAATATGAAATC  
CAATCCTGGAATAACAGCATCCCCCTTTTTTTTACTACCCAAGGTTTTGATACATTTCGA  
AATAGAGAAATATCTACTGGAGCAGGTGCTATTCGAGAACAATTAGCCGATTTGGATTT  
GCGTACTATTATAGATTATTCATTCGCAGAATGGAAAGAGTTAGGGGAAGAA---GGGTCT  
ACAGGAAATGAATGGGAAGACCGAAAAGTTGGAAGAAGAAAGGATTTTTTAGTTAGA  
CGCATGGAATTAGTTAAGCATTTTATTTCGAACAAATATAGAACCAGAATGGATGGTTTTG  
TGTCTATTACCTGTTCTTCCTCCCGAGTTGAGACCGATCATTTCAGATAGATGGAGGTAAA  
TTAATGAGTTCCGATATTAATGAACTTTATAGAAGAGTCATCTATCGGAACAATACTCTT  
ACTGATCTATTATCAACAAGTAGATCTACGCCGGGAGAATTAGTAATGTGTCAGGAGAA  
ATTAGTACAAGAAGCCGTAGATACACTTCTTGATAATGGAATCCGTGGCCAGCCAATGA  
GGGATGGTCATAATAAAGTTTACAAGTCATTTTCAGATGTAATTGAGGGTAAAGAGGGA  
AGATTTTCGTGAGACTTTACTTGGTAAACGGGTCGATTATTCCGGACGTTCCGTCATTGT  
CGTAGGCCCTTCACTTTTATTACACCGATGTGGATTGCCTCGTGAAATTGCAATAGAGC  
TCTTCCAGACATTTGTAATTCGTGGTCTAATTAGGCAACATCTTGCTTTCGAACATAGGA  
GTTGCTAAGCGTAAAATTCGGGAAAAGAGCCGATTGTATGGAAAATACTGCAGGAAG  
TTATGCAGGGGCATCCTGTATTATTAATAGAGCACCTACTCTTCATAGATTAGGTATACA  
GGCGTTCCAACCTATTTTAGTGGAAGGGCGCGCTATTTGTTTACATCCGTTAGTTTGTAA  
AGGATTC AACGCAGACTTTGATGGGGATCAAATGGCTGTTTCATGTACCTTTATCTTTGG  
AGGCTCAAGCAGAGGCCCGTTTACTTATGTTTTCTCATATGAATCTTTTGTCTCCAGCTA  
TTGGCGATCCATTTCCGTACCAACCCAAGATATGCTTATTGGACTCTATATATTAACGA  
GCGGGAATCGTCGAGGTATTTGTGCAAATAGATATAATCCATGGAATCAC-----AAAA  
CCTATCAAAATGAAAGAATTGATGATACTAATTATAAGTCTATGAAA-----GAACCTTTT  
TTTGTAATTTCTATGATGCAATTGGAGCTTATCGTCAGAAAAGAATTCATTTAGATAGCC  
CTTTGTGGCTCCGGTGGCAACTAGATCAACGC---ATTATTGCTTCA-----AAAGAAGCTC  
CCATTGAAGTTCACTATGAATCTTTGGGCACCTATCATGAGATTTATGCGCACTATCTAAT  
AATAAGAAGTGTAAAAAAAGAAATTATTGATATATATATTCGAACTACTGTTGGTCATAT

TTCTCTTTATCGAGAAATTGAAGAAGCTATACAAGGATTTTATCAAGCCTGCTCA-----  
-----ATGGCAGAACGGGCCAATTTGGTCTTTCACAATAAAGCGAT  
AGATGGAAGTCCATGAAACGACTTATTAGTAGATTAATAGATCATTTTGGAATGGCATA  
TACGTCACACATCCTAGATCAACTAAAGACTCTGGGTTTCCAGCAAGCCACTGCTACAT  
CCATTTTCATTAGGAATTGATGATCTTTTAACAATACCTTCTAAAGGATGGCTAGTCCAAG  
ATGCTGAACAGCAAAGTTTGATTTTGGAAAAACACCACCATTATGGGAATGTACACGC  
GGTAGAAAAATTACGTCAATCCATTGAGATATGGTATTCTACAAGTGAATATTTGCGACA  
AGAAATGAATCCCAATTTTAGGATGACTGACCCTTATAATCCAGTCCATATAATGTCTTT  
TTCGGGAGCTAGAGGAAATGTGTCTCAGGTACATCAATTAGTAGGTATGAGAGGATTAA  
TGTCGGATCCACAAGGACAAATGATTGATTTACCTATTCAAAGCAATTTACGGGAAGGA  
CTCTCTTTAACAGAATATATAATTTCTTGTTACGGAGCCCGCAAAGGGGTTGTGGATACT  
GCTGTACGAACATCCGATGCTGGATATCTCACGCGCAGGCTTGTCTGAAGTAGTTCAACA  
TATTGTTGTGCGTAGAAGAGATTGTGGCACCATTTCGAGGTATTTCTGTAAGTCCCTCAA  
ACAGTACGATGCCG---GAAAGAATTTTGATCCAAACATTAATTGGTCGTGTATTAGCAG  
ACGATATATATATGGGTTTACGATGCATTGCCACCCGAAATCAAGATATCGGGGTTGGAC  
TTGTCAATCGATTATAACG-----CTTCGAACCCAACTAATATCCATCCGAAGTCT  
CTTTTACTTGTAGGAGTGCCTTGGATCTGTCTGATTATGTTATGGCCGGAGTCTACTC  
ACGGCGGCTGGTTGAATTGGGAGAAGCTGTAGGTATTATTGCAGGTCAATCCATTGGG  
GAACCTGGTACTCAACTAACATTAAGAATTTTCATACGGGTGGAGTATTCACAGGAG  
GGACTGCAGAACATGTACGAGCCCCTTCTAATGGAAAAATCCAATTCAATGAGGATTT  
GGTTCATCCACACGTACACGTCATGGACACCCTGCCTTTCTATGTTATATCGACTTGT  
TGTCACTATTGAGAGTGACGATATTCTACATAATGTGAATATTCGCCAAAAAGTTTTCT  
TTTAGTTCAAATGATCAATATGTTGAATCTGAACAAGTGATTGCTGAAATTCGCGCAG  
GGACATCCACCTTG---AATTTTAAGGAAAGGGTTCGAAAACATATTTATTCTGATTCAGA  
AGGAGAA---ATGCACTGGAGTACTGATGTGTACCATGCACCCGAATTTACATATGGTAAT  
GTTTCATCTCTTACCAAAAACAAGTCATTTATGGGTATTATCAGGAAAGCCGTACAGA----  
-TCGAGTGTAGTCCCCTTTTCGCTCTCCAAGGATCAAGATCAAATGAACACTCAT-----TC  
TCTTTCTTTCGAACAAATATATAATTTCTAACCCTCA-----GTCACTAACGATCAA---GTAA  
AAGATAAATTATCGGACTCT--TTTAGTAAAAA---GAGGATAGGATTACGGATTAT--TC  
AGAACTTAATCGAATAGGT-----CATTGTAATCTCATCTATCCT-----GCAAAAAATT  
TGGAT-----TTATTGGCAAAGAAACGAAGAAATAGATTTATTATTCCATTTCAAGGAAGT  
CAAGAACGAAAAAAGAATTAATGTCCCTTTCCGGTATCTCGATTGAAATACCCATAAA  
T-----GGTATTTTCCGTAAAAAATAGTATTTTGCCTATTTTCGATGATCCTCGATACCGAAGA  
AAGAGTTCGGGAATTACAAAATATGGGACTATAGAGATGCATTCAATCGTTAAAAAAGA  
GGAT-----TTGATTGAATATCGA---GGAGTCAAAGAATTTCGACCAAATAACATGAAAGT  
CGATCGGTTTTTTTTTCATTCTGAAGAAGTTCATATCTTAGCCGGATCTTCGTCCATAAT  
GGTACGCAACAATAGTATCATTGGAGTAGATACGTGGATCACTTTAAATACAAGAAGCC  
GAATAGGCGGGGTGGTCCGAGTGGAGAGGAAAAAAAAAAGATTGAACTTACCATTT  
TTTCGGGAGATATCCATTTTCCGGGAGACAGATAAGATATCCCGACACAGTGGCATT  
TTGATACCACCAAGCAGGAAA-----AATCCAAGGACTCAAAAAAT-----TTAAAAA  
AATGGATCTATGTCCAACGG-----ATCACCCCTACTAAGAAAAA-----TATTTTGTTTTG  
GTTTCGGCCGGTAGTCCCATATGAAATAACGGACGGTATCAATTTAGCAACACTTTTCCC  
TCAGGATTTGTTGCAGGAAAGGGATAATGTGCAACTTCGAGTTGTCAATTATATCCTTTA  
TGAAATGGTAAAGTCACTCGAGGAATTTCTGACACAAGTATTCAATTAGTACGTACTT

GTTTAGTATTGAATTGGAATCAAGATAAA-----AAAGGTTCTTCTATCGAAGAGGCC  
CGGTTCCCTTGTGAAGTAAGAACAAATGGTATGATTCAAGATTCTTAAAGGTCAAT  
TTAGTGAAACCCGCTATTTTCATATATCAGTAAAAGAAATGATCCATCA---TCCGAAAAA  
AGGAGGGA-----TCAGATCATAACCAATATGAATCCATTTTATTCCATTTATATTTATCCA  
AAGACA-----AAACTTCAAAAATCATTTAACCAAAACCAAGGAAGTGTCCGTACGTT  
GTTGGGTATA-----AACAAAGAATGTCAATTTTTTTTAAATTTTGTGCATCATCCAATTGTT  
TTCGAATAGGTCCA-----TTCAAGGGT-----GTCAAATATCCCGATCCCCT  
AATCCAATTAGGAATTCATTTGGTCCCTTAGGAACA-----GCCCTCAAATTGCTAATTT  
TTTTTCA-----TTTTACTATTTAATAACT-----CATAATCAGATCTTG---GTAAC  
TAAATTTT  
GCAACTTGACAAT-----TTAAAACAAACCTTTCAACCATTTAAATTTCAA---TATTATTT  
AATGGATGAAAATGGAAGA-----ATTTATAATCCCGATCCATGCAGTAACATCATTTTAA  
TCCATTCAAGTTGAATTGGTATTTTCTTCATTATCATTTTGTGAAGAGACATCCACCAA  
AATTGAT--CTTGGACAATTTGTTTGTGAAAATGTATGTATAACCAAAAAAGGAACG-----  
--CACCTAAAATCGGGTCAAGTTCTAATTGTTCAA---TTTGACTCTGTAGTAATAAGATC  
GGCTAAGCCTTATTTGGCTACTCCAGGAGCAACACTTCATGGTCATTATGGAGAAATCA  
TTTATGAAGGGGATACATTAGTTACATTTATATATGAAAATCGAGGTCTGGTGACATAA  
CGCAAGGTCTTCCAAAAGTGAACAAGTCTTAGAAGTTCGTTTCGATTGATTCAATATCC  
ATCAATCTAGAAAAGAGGATTGATAGTTGGAACGAACGTATAACAAGAATTCTTGGAA  
GTCCTTGGGGATTCTTGATTGGGGCTGAGCTAACTATAGCGCAAAGTCGTATTTCTTTG  
GTTAACAAGATCCAAAAGGTTTATCGATCACAAGGGGTGCAGATCCATAATAGACATAT  
AGAAATTATTGTACGTCAAATAACATCAAAGTCTTGGTTTCAGAA-----GATGGAAT  
GTCTAATGTTTTTTTGGCCGGAGAACTAATTGGATTGTTTCGGGCGGAACGAACGGGA  
CGCGCTTTGGAAGAAGCGATATGTTACCGCGCTACCTTATTGGGAATAACGAGAGCATC  
TCTGAATACTCAAAGTTTTATCTCCGAAGCGAGTTTTCAAGAACTGCTCGAGTTTTAG  
CAAAGCAGCTCTACGGGGCCGTATTGATTGGTTGAAAGGACTAAAAGAAAACGTTGT  
TCTGGGGGGGATGATACCTGTTGGTACCGGATTCAAAGGATTTCGTACACCATTCA-----A  
GTCAACATAAG-----GACATTCCTTTGAAAACAAAAAAGCAGAATTTATTTCGAGGGGAG  
AATGGGA-----GATATTTTGTTTTACCACAGAGAATTATTTGAGTCTTGTCTTTCAAAGAA  
T-----ATGACAAGAAGATATTGGAACATCAAT  
TTGGAAGAGATGATGGAAGCGGGAGTTCATTTTGGTCCACGGTACTCGGAAATGGAATC  
CTCGAATGTCGCCCTTATATCTCTGCAAAATGTAAAGGTATTCATATTATAAATCTTACTAG  
AACTGCTCGTTTTTTATCAGAGGCTTGTGATTTAGTTTTTGTATGCATCAAGTAGAGGAA  
AACAATTTTTAATTGTTGGGACAAAAATAAAGCAGCTGATTCAGTAGCACGGGCTGC  
AATAAGGGCTCGCTGTCATTATGTTAATAAAAAGTGGCTTGGGGGTATGTTAACGAATT  
GGTCCACGACAGAAACGAGACTTCACAAATTCAGGGACTTGAGAATGGAACAAACGG  
CAGGGAGACTCGCTCGTCTTCCAAAGAGAGATGCGGCGGTGGTGAAGAGACAATTAT  
CTCACTTGCAAACATATTTGGGTGGGATCAAATATATGACAGGGTTACCGGATATTGTAA  
TCATCGTTGATCAACAGGAAGAATATACGGCCCTTCGAGAATGTATTACTTTGGGAATT  
CCAATATTTGTTAATTGATACAAATTGTAACCCGGATCTCGCAGATATTTGATTCCG  
GCAAATGATGACGCTATAGCTTCAATTCGATTAATTTCTTACCAAATTAGTATTTGCAATTT  
GTGAAGGCCGCTCT--AGCTATATAAGAAATCCTATGGGACAAAAATAAATCCACTTG  
GTTCCGACTTGGTACAACACAAAGTCATTATTCCTTTGGTTTTACAACCAAAAAAC  
TATGCAGAAGGTCTACAAGAAGATCAAATAAAGGATTGTATAAAAAATTATGTACA  
AAAAAATACAAAAACATCCTCGGGT--GTCGAAGGAATTGCACGTATTGAAATTCAAAA



AAGAATCGATCTGATACAGGTGATAATCCATATGGGATTCCCAAATTATTAATAGAAAA  
TAGACCACAA-----GGGGTCGAAGACCTAAAAATAAATGTACAAAAAGAATTGAAT  
TGCCTGAACCGAAAACCTCAACATCGCTATTACAAGAATTGCAAAACCTTACGGGGACC  
CTAATATTCTTGCAGAATTTATAGCCGGACAACCTAAAGAGTAGGGTATCATTTCGAAAA  
GCAATGAAAAAAGCTATCGAATTAACCGAACAAAGCTGATACAAAAGGAATTCAAATCC  
AAATTGCCGGCCGTATCGATGGAAAAGAAATTGCACGTATCGAATGGATAAGAGAAGG  
TAGGGTTCCCTACAAACGATTTCGCGCAAAAATCGATTATTGTGCCTATACCGTTCGAA  
CAATCTATGGCGTATTGGGGATAAAAATTTGGATATTTATGGGCGAGGAAATGTCCGCGTT  
ACCGAGGGCCTCGTTTCAAAAAAATACGCCGTCTAGGAGCTTTACCTGGACTAACTAAT  
AAAAGGCCTAGAGCCGGAAGTGATCTTAGAAACCAATCACGTTCCGGGAAA---AGATC  
TCAATATCGTATTCGTCTAGAAGAAAAACAAAAATTGCGTTTTTCATTATGGTATTACAGA  
ACGACAATTACTTAAATACGTTTCGTATCGCCAGAAAAGCCAAAGGGTCAACAGGTTCAG  
GTTTTACTACAATTACTTGAAATGCGTTTTGGATAATATCCTTTTTTCGATTGGGCATGGCTC  
CGACTATTCTGGAGCCCAGCAATTAGTTAACCATAGACATATTTTAGTTAACGGCCGCA  
TAGTAGATATACCAAGTTATCGTTGCAAACCCCAAGATACTATTATGGCGAGGGATGAA  
CAAAAATCCATAGCTCTAATTCAAAATTCTCTTGATTTATCCCCCGC---GAGGAATTAC  
CCAAACATTTGACTCTTAACCCATTCCCA-----TATAAAGGATTAGTTAATCAAATAATAG  
ATAGTAAGTGGGTCGGTTTAAAAATAAATGAATTACTAGTGGTAGAATATTATTCTCGTC  
AGACGATGTCACGTGAGGTACTGTAGAAGAAAAAACTGCAAAATCCGATCCAATTTA  
TCGTAATCGATTAGTTAACATGTTGGTTAACCGTATTCTGAAACACGGAAAAAAATCAT  
TGGCTTATCAAATTTCTATCGAGCCGTGAAAAAGATTCAACAAAAGACAGAAACAAA  
TCCACTATCTGTTTTACGTCAAGCAATACGTGGAGTAACTCCCGATATAGCAGTAAAAG  
CAAGACGTGTAGGCGGATCGACTCATCAAGTTCCCATTTGAAATAGGATCCACACAAGG  
AAAAGCGCTTGCCATTCGTTGGTTATTAGGGGCAGCCCGAAAACGTCCGGGTTCGAAAT  
ATGGCTTTCAAATTAAGTTCCGAATTAGTGGATGCTGCCAAAGGGAGTGGCGATGCCGT  
ACGCAAAAAGGAAGAGACTCATAGAATGGCAGAGGCAAATAGAGCTTTTGCACATTTT  
CGTATGGGTAAGGACACTATTGCTGATATAATAACCTGTATACGAAATGCTGACATGAAT  
AGAAAAGGAACGGTTCGAATAGTATCTACTAACATCACCGAAAACATTGTTAAAATACT  
TTTACGAGAAGGCTTTATCGAAAATGCGAGAAAACATCAAGAAAGAAACAAATATTTT  
TTGGTTTTAACTCTGCGACATAGAAGA-----AACAAAGAAAGGGCCTTATCTAAAT-----  
ACTTTCCATTTAAAAAGAGTCAGTCGACCTGGTCTACGAATCTATTCTAATTATCAACGA  
ATTCCTAGAATTTTAGGTGGAATGGGGATTGCAATTTCTTCTACCTCGAGAGGTATAATG  
ACAGATCGGGAGGCTCGACTAGAAGGAATTGGCGGAGAAATTTTATGTTATATATGGAT  
GGCAAAACCTATACCAAAAATTGGTTCACGTAGAAATGGACGTATTAGTTTCGCGTAAA  
AGTGCACGTAAAATAACCAAAGGGTGTTATTTCATGTTCAAGCAAGTTTTAATAATACCAT  
TGTAATGTTACAGATGTACGAGGTTCGAGTCGTTTTCTTGGGCTTCTGCCGGTACTTGTG  
GATTCAGGGGTACAAAAGAGGAACACCATTTGCGGCTCAAACCGCAGCGGGAAATG  
CTATTTCGTACGGTGGTGGAAACAAGGTATGCAACGAGCAGAAGTCATGATAAAAGGTCC  
TGGTCTCGGAAGGGATGCAGCATTACGGGCTATTCGTAGAAGCGGTATACTATTAAGTT  
TCGTGCGAGACGTAACCCCTATGCCGCATAATGGCTGTAGGCCTCCTAAAAAAGACG  
CGTCATGCCAACCATTAACAACCTTATTAGAAACACAAGACAGCCAATCAGAAATGTC  
ACGAAATCCCCGCGCTTCGGGGATGCCCTCAGCGCCGAGGAACATGTAAGGGTGT  
ATACTATACCCCAAAAAAACCCTCTGCCTTACGTAAAGTTGCCAGAGTACGATTA  
ACCTCTGGATTTGAAATCACTGCTTATATACCTGGTATTGGCCATAATTTACAAGAACAT

TCTGTAGTCTTAGTAAGAGGGGGAAGGGTTAAGGATTTACCCGGTGTGAGATATCACAT  
TGTTTCGAGGAACCCTAGATGCTGTCGGAGTAAAGGATCGTCAACAAGGGCGTTCTAAA  
TATGGGGTCAAAAAGCCAAAATGGCAAGGAAAAGTTTGATTCAGCGGGAGAAGAAG  
AGAAGAAATTTAGAACAAAATATCATTTGATTCGTCGATCCTCAAACAAGAAATACG  
C-----AAAGTAACATCGTTGAGTGATAAATGGGAAATTCATGGAAAGTTACAATCTCC  
ACCACGTAATAGTGCACCTGCGCGTCTTCATCGACGTTGTTTTTTGACCGGAAGACCG  
AGAGCTAACATACGAGACTTTGGGTTATCTGGACATATACTTCGTGAAATGGTTCACAC  
ATGTTTGTGGCCAGGGGCAACAAGATCAAGTTGGATGAAAAAAATTCATTCATATCCG  
TAATTTTCGGATGAA-----AAAAAGAAGAAAACAAGGGTTCTGTTGAATTTCAAGTATT  
CTGTTTTACCAATAAGATAAGAAGACTTACTTTACATTTGGAATTGCACAAAAAAGACT  
ATTCATCTCAGCGGGTCTACGAAAACTCTGGGAAAACGTCAACGACTGCTGGCTTA  
TTTGTTAAAGATAAATGGAGTACGTTATAAAGAATTAATCAGTAAATTGAACATTCGAG  
AACTAAAAACACGT-----ATGGTAAAACCTTCGTTTGAAACGATGTGGTAGAAAGCAACG  
AGCCGTCTATCGAATCGTTGCAATTGATGTTTCGGTCCCGAAGAGAGGGAAGAGATTTG  
CAGAAAGTGGGTTTTTATGATCCGATAAAAAGTCAAACCTTATTTAAATGTTCTGCTATT  
CTAGATTTTCTGAAAAGGGTGCTCAACCTACAGAACTGTCTATGATATTTTAAAGAG  
GGCAGAGGTTTTTAAAGAATTTGACTTAATCAAACGAAGTTCAAT--ATGGATAAATC  
CAAGCGACCCTTTATTAATCCAAGCGCTCTTTTCGTAGGCGTTTGCCCCGATCCAAT  
CGGGGGATCGAATTGATTATAGAAACATGAGTTTAATTAGTCGGTTTATTAGTGAACAA  
GGAAAAATTTTATCTAGGCGAGTGAATAGATTGACCTTGAAACAACAACGATTAATTAC  
TAGTGCTATAAAACAAGCTCGTATTTTATCTTTGTTACCTTTTCTTAATAATGAGAAA-----  
-CAGTTTGAAAGAACCGAGTCGACTACTAGAAGTCTAATTTTAGAAGTAAAAATAAAG  
TGACACGTTCACTAAAAAAAATCCTTTTTGTAGCGAATCATTATTAAGAAAAATCGAG  
AAGCTTAACAAAAGGGCGGAAAAAGAAATAATAGTAACTTGGTCACGGGCATCTACCA  
TTATACCCACAATGATTGGCCATACGATTGCTATCCATAATGGAAGAGAACACTTGCCCA  
TTTATATAACAGATCGTATGGTAGGTCATAAATTAGGCGAATTTGCACCAACTCTCAATT  
TCCGGGGACATGCAAAAACGATAATAAGTCTCGTCGTATGATTTTTCAATCTTTTCTAC  
TAGGTAATCTAGTATCCTTATGCATGAAGATAATCAATTCGGTCGTTGTGGTCGGACTCT  
ATTATGGATTTCTGACCACATTCTCCATAGGGCCCTCTTATCTCTTCTTCTCCGAGCTC  
AGGTTATGGAAGAAGGAGAAGAAGGAACCGAGAAGAAGGTATCAGGAACAACAGGT  
TTTATTATGGGACAGCTCATGATGTTTCATATCGATCTATTATACGCCTCTGCATCTAGCAT  
TGGGTAGACCTCATAACAATAACTGTCCTAGCTCTACCCTATCTTTTGTTCATTTCTTCTG  
GAACAATCACAACACTTTTTTTGATTATGGATCCACTAGCAGAAATTCAATGCGTAATC  
TCAGCATTCAATGTGTATTCTGAATAATCTCATTTTTTCAATTATTCAACTATTTCAATTTA  
CCAAGTTCAATGTTAGCCAGATTAGTGAACATTTATATGTTTTCGATGCAACAACAAGAT  
GTTATTTGTAACAAGTAGTTTTGTTGGTTGGTTAATTGGTCACATTTTATTCATGAAATG  
GGTTGGATTGGTATTAGTCTGGATACAGCAAATAATTCTATTAGATCTTACCTTGTGTC  
A-----GAATTGAGAAATTCTATGGCTCGAATCTTTAGTATTCTTCTTTATTACC  
TGTGTCTACTATTTAGGCAGAATGCCGTCACCTATTTTTACT-----CTGAAACAAGAAGA  
AGATCCTAAACCCCTATTTTTCTTCTTTTCGACTATAAACGTTGGAATCGTCCAATGCG  
ATATATAAAAAACAATCGGTTTGAAAATGCGGTAAGAAATGAAATGTCACAATATTTTTT  
TTATACATGTCAAATGATGGAAAACAAGAATTTCTTTTACATATCCACCTAGTTTATC  
AATTTTCTGGGAAATGATACAAAGAAAGATTTCTTTGGCTACAACAGAAAAATTTAG  
ATGATGAACTATACAATTATTGGATTATACGAATGAACAAAAAAAAC---TTAAGCAA

TGAATTTGCTAATAGAATTACAGTTCTAGACAAAGGACTT-----ATAGATGTACTTGATAA  
AAAACTAGATTATGT-----AAAAGTAAAAATGAATATTTACAAAAAGACCATGATCCTT  
TATTAATGGATCCTATCGTGGTATAAAAAAACTCTTTTACCTTTTATAGATGAAATTTT  
TATAAATAAAATTCATAGTGTCTGTACCAGGAATTTGAATATAAAGATTCCTTTACTCA  
A---ATTGGAATAAAAGAAATAAGTAAAAAGGTTCCCTCATTGGTCATACCAACTAATTGA  
ATCCGAACAAGAGGAAATGGAACAAATTCGCTCAAGGAGCGGAAAAGAAGTAGTTTT  
TTTTACGGATGTTTTGACACGTTATCCACAAGAATCTGATTTTCGTCGAGATATAATCAA  
AGGTTCCATGCGTAGTCAAAGACGTAAAATAGTTATTTGGGAATTGTTTCAAGCAAATA  
TACATCCCCACTTTTTTTAGACAGAACGAATAAATCCTCTTTTTTTTTCTATTACTTTT----  
-TCCAGATTAATTAACGAATTTTTTAAAAATAACAAGAACAATACGACTAGACATAG  
CCGAAACTTGGGATACTATTCCAGGTGCTCAAATAATAAGAAGTTTGATATTACTAACTC  
AATCAATTCTTAGAAAATACATTCTATTGCCTTTATTGATAACAGGAAAAAATATCGGTC  
GTATATTATTATTCCAACCTTCCGAGTGGTCGGACGATTTCAAGGAGTGGACTAGTGAA  
ATGCATATTAAATGTACCTATAATGGTGTCAATTATCAGAAAAAGAATTTCTAAAAAC  
TGGTTAACAGATGGTATGCAGATAAAGATATTATCTCCTTTCTGTCTAAAACCTTGGCAT  
AAATCTATGCAAAATCAAATAGATGCTTTTTGCTTTTTAACAGTTGTGGGATTAGAACT  
GACATCCCTTTTTGGTCTCCCCGAAAACGGCCTTCTTTTTTTCAACCTATTTTTAAACAA  
CTCGACAAAAAAATTGAAAAACTTATAAAAGGAACTTCCAAGTT---CGAAAAAGACT  
AAAAGAA-----AAATTTTTTCTAAAGTTACAAAATGAAACAAACAATTGGATTATTGAAA  
TCTTTCCT-----TTTTTAAAAAAATAATACGAAAAATGTCAACCGTAAATGATTCAAGAA  
TCAAAAATCATATGATTCATGAATCATCCGTTCAAATTCGATTCTTGAATCAGACAAATT  
CTTCAGTGACCGAAAAAAAATGAAAGATTTGGCTAATAGAACAAGGATAATTA AAAA  
TAAAATAGAAAAAATTTCAAACGACAAACTAAAA-----AAAACTCGTTA  
TGGTACGAAAAATTTGGGTCAGATATTAAAAAGAAGAAATGCTCGATTAATCCGTAATT  
CAAATTATATTTTGAATTTTTTAGGGAAAGGATATACGGAGATATATTTCTATATATCATT  
AATATCCCAAATTAATACACA ACTTTTTATT CAGTTTATTTCA---GATTTTTCTTTTTTG  
TCACAAGCCTATGTATTTTACAAATTATCCCAAGCCAAAATTCCTTA ACTTATATAAGTTA  
AGATTAGTCCTT CAGTATATATCTTTATTTCTTAAAAATGAAATAAAAGATTTTTTTACTC  
AAGGAATAACTAATTCCGAGTTAAAGACTAAAAA ACTTCCGAATTCGGAATGAACCA  
ATGGAAAAACTGGTTAAAATTGAAATATCAATACAATTTATCTCAGCTAAAATGGTCTC  
GATTAGTACCACAAAAATGGCGAAATAGAGTAACTGAACATTGTGAGGTTGAAAAT----  
----ACAAATTTATATCAAACGAAGAA-----TTAATTAATTCCAAAAAGCAT-----TTTCAA  
AAGAACTATAGATATGATGTTTTATCATATAAATTTTTTAAT-----GATAAAAATAAA  
TATTTGGATTTTTAAAATTCTCGATTTTTCTCTTCGACTTTTTGATTGGATGGGAATGAATG  
AAAAAATACTGAGCCGTTGGTTTTTCTCCGAATTTTTTTCATTTTATAATGCATATAAAAT  
GAAACCGTGGGTTATACCAATTAATTTGCTTTTTTCAAATCCTAAGAGTGTATAGAAGC  
AGAATTCGATTTATTCTTAAAAGATATTTGCTTTTTCAATTGAAATGGGCCGATTCTTT  
GAATGAAAAACTGATGGATAATATCCAAGTATATTGTCTCGTCTCGATTGATCAATCC  
AATAGAAATTCCTATATCCTCTATAGAAAGAAAAGAACTGAGTATGGATATAATGCTAGA  
TCGGAAAGATTTTAATTGTCCAAACTGGAAACAAAAAAGAGTATTGATTATTGAACCGA  
TTCGTCTTTCTATAAGGGGCGATGGACAATTTCTTCTGTATCAAACCATAGGTATTTTCAT  
TGGTTCATAAGAGTAAACACAACAATTTTGATTTGCTTGCTCCTGAAAATCTTTTATCGC  
CTAGGCGTCGTAGAGAATTAAGAATCTACTTTGTTTG---TTTCTTTGGCCCAATTATCGA  
TTAGAAGATTTAGCTTGTATGAACCGTTTTTTGGTTTGATACTAATAACGGAAGTCGTTTT

AGTATATTAAGAATACATATGTATCCAATGAAAGGACATCAATTCAAATCCTGGATTTTC  
GAATTGAGAGAGATATTGAGAGAGATTAAGAATTCTCACTATTTCTTAGATTCATGGAC  
CCAATTCAATTCAGTGGGATCTTTCATTCACATTTTTTTCTACCAAGAACGTTTTTTAAA  
ACTCTTTGACCCCCGAATTTGGAGTATCCTACTTTCA---CCCAATTCA-----CAGGGTTCA  
ACAAGCAATCGATATTTTC-----ACGATCAAGGGTGTAGTACTCTTTGTGGTAGTG---GT  
CCTTATATATCGT-----ATTACCAATCGAAATATGGTCGAAAGAAAAAATCTCTATTT  
GATAGGGCTTTTTCTCT-----ATACCTATGAATTCCATTGGACCCAGAAATGATACAT  
TGGAAAAATCCTTT---GGGTCTTCCAATATCAATAGGCTGATTGTTTCA---CTCCTCTATC  
TTCCAAAAGGAAAAAAGATTTCTGAGAGTTATTTCTGGATCCGAAAGAGAGTACTTG  
GTTTCTTCCAATAACT-----AAAAAGTGTATCATGCCTGAATCTAACCGAGGTTTCGC  
GGTGGTGGAGGAACTGGATCGGAAAAAGGAGG-----GATTCTAGTTGTAAGATATCTAA  
T-----GAAACCGTCGCTGGAATTGAGATCTCATTCAAAGAGAAAGATATCCAA---TATC  
TGGAGTTTCCCTTTGTATATTATATGGAC-----GATCCGATCCGCAAGGACCATGATTGGG  
AATTGTTTGATTGTCTTTCTCTT-----  
-----  
-----TTTTTGAGGAAC---GTATCGAGAGAGAATTGGATTTGGCTAGACAATGTGC  
GGTTGGTAAATAAGGATCGG-----TTTTTTAGC-----AAGGTACGGAATGTATCGTCAA  
TATTCAATATGATTTTC-----ACAAGA-----TCTAGTTTTGTTCAAGTAACGGATTCTAGC  
CAATTGAAAGAATCTTCT--GATCAATCTAGAGATCGTTCGAATTCTATTAGT-----AA  
TGCGGATTCGGAA-----TATCACACATTAATCAATAAAAGAGA  
GATTCAACAATAAAAGAAAGATCGATTCTT--CGGGAT-----CCTTCCTTTCTTCAAACG  
GAAGGAACAGAGATAGAATCAGAC-----CGATTCCCGAAA-----TGCCTTTCTGGATATT  
CC-----TCAATGCCTCGGCTATTCACG--GCACGTGAGAAGCAGATGATTATTCATCTGCT  
TCCGGAAGAAATCGAACAATT-----CTTGAGAATCCTACAAGATCTATTCGTTCTTTTT  
TCTCTGGCAGATGG-----TCAGAACTTCAT--CTGGGTCAAATCCTACTGAGAGGTCCA  
CTAGAGATCCG-----CAATTGTTGAAGAAACAACAAGATGTTTCT--TTTGCCCTT  
CCAGGCAATCGGAA-----AATAAGAAATGGTTAATATATCAAGATAATTAAGTATT  
TACAAAAT-----ACCGTCTCAATTCATCCTATTTTCATCAGATCCGGGATGTGATATGGTTC  
CG---AAGGATGAACTGGAT--ATGGACAGTTCCGATAAGATTTTCATTCTTGAACAAAAAT  
TCATTTTTTTGACTTA-----TTTCATCTATTCATGACCGAAACAGGGGGGATAACGCATTA  
-----CACCACGATTTGAATCCGAA-----GAGAAATTTCAAGAAATGGCAGATCTATTCAC  
TCTATCAATAACCGATCCG---GATCTGGTGTATCATAGGGGATTTTCTTTTCTATTGATT  
CCTGCGGATTGGATCAAAAACAA-----TTCTTGAATGAGGTATTCAACTCCAGGGATGA  
ATCAAAAAAGAAATCTTTA-----TTGGTTCTATCTCCTATTTTTTTAT-----GAAGAGAATG  
AATCTTTTTATCGAAGGATCCGAAAAAAGGGGTTCTGA--ATCTCC-----  
-----AGA  
AATGTATTGAATCGATTCTTTTTTAATAAAT-----AGATCCGATCGCAGCTTCGAATATGG  
AATTCAA-----AGGGATCAAATAGGAAACGATACTTTGAATCATAGAACTATAAGGAA  
ATATATGATCAACCAAGATTTCTCGAATTTGAAAAAG---AGTCAGAAGAAATGGTTCTGA  
TCCT-----CTTATTTTTCTTTCTCGAACCGAGAGATTCATGAATCGGGATCCTGATGCATAT  
AGATACAAATGGTTCAATGGGAGCAAGAATTTCCAGGAACATTTGGAACATTTTCGTTTC  
TGAGCAGAAGAGCCGT-----TTTCAAGTAGTGTTTCGATCAATTACGTATTAATCAATAT  
TCGATTGATTGGTCTGAGGTTATTGACAAAAAAGATTTGTCTAAGTCACTTCGTTTCTTT

TTGTCCAAGTCACTTCGT-----TTCTTTTTGTCC-----AAGTTGC  
TTCTTTTTGTCTAACTCACTTCCT--TTTTCTTTGTGAGTTTCGGGAATATCCCCATTA  
ATAGGTCCGAG---ATCCGCATTAT--GAATTGAAAGGTCCGAATGATCAACTCTACAAT  
CCGTTGGTAGAATCAATAGGTCTTCAAATCGTTCATTTGAAAAAATGGAAAGCCTTC---  
--TTATTGGAT-----GATCATGATACTTTC---CAAAAATCGAAATTCTTGATCAATGGAGG  
ACAATATCACCATTTTTGTTCAATAAGATACCA---AAGTGG---ATGATTGACTCATTCCA  
TACTAGA-----AATAATAGCGGGAAATCCTTTGATAACACGGATTCTATTTCTCAATGAT  
ATCCCACGATCAAAACAATTGGCTGAATCCCGTAAAACCAATTCATAGAAGTTCATTGA  
TATCTTCTTTTTATAAAGCAAATCAACTTCGATTCTTGAATAATCCACATCACTTCTGCTT  
CTAT-----TGTAACAAAAGATTCCCTTTT-----TAT--ATGGAAAAGGCCCGTATCAATAA  
TTCTGAT-----TTTACGTATAGA---CAATTCCTCAATATCTTGTTCAATCACAACAAA---CTA  
TTTTCTTTGTGTGTCGGTAAA-----AAAAACATGCTTTTTTTGGAG--AGAGATACTATTT  
CACCAATCGAGTCACAGGTATCTAACATATTCCTACCTAACGATTTTCCA-----  
-----ATTCGATCCGATCTATTAGTTCGT-----AGAACTATTTACT  
CGATCGCAGACATTTCTGGAACACCTCTAACAGAGGGACAACACTAGTCCATTTTGAAAG  
AACTTATTGTCAACCTCTTTCCGATATGAATCTATCTGATTCAGAAAAGAAGAAGTTCGCA  
TCAGTATCTCAAT-----TTCAATTCAAACATGGGTTTTATTACTCCATGTTCTGAGAA  
ATATTTACTATCGGAAAAG-----AGGAAAAA-----CGGAGTCTTTGTCTAA  
AG-----AAATGCGTTGAGAAAGGGCAGATGTATAGAACCTTTCAACGAGATAGTGCTTT  
TTCAACTCTCTCAAATGGAATCTATTCCAAACATATATGCCATGGTTCCTTACTTCGAC  
AGGGTACAAATATCTAAATTTTCTATTTTTAGATACTTTTTTCAGAC---TTATTGCCGATACT  
AAGTAGCAGT-----CAAAAATTTTATCTATTCTTCATGATATTATGCACGGATCAGGTATA  
TCATGGCGAATTCTTCAGAAAAAATTG-----TGCTTCCACCATGGAAT--CTGA  
TAAGTGAGATTTTCGAGTAAGTGTTTACATAAT-----CTTCTTCTGCCCGAAGAAATGATTC  
ATCGAAATAATGAGTCA-----CCATTGATATGGACACATCTGGCATCGCCAAATGTTTCGG  
GAGTTC---TTCTATCAATCCTTTTCTTCTTTTTGTTGCTGGATAT--CTCGTTCGTACCC  
ATCTTCTCTTTGTTTTCCGA-----GCCTCTAGTGAGTTACAGACAGAGTTCGAAAGGGTA  
AAATCTTTGATGATTCCATCATAATGATTGAGTTGCGAAAACCTCTGGATAGGTATCCT  
ACATCGGAACCGAATTCCTTCTGGTTAAAGAATCTCTTTTTGGTTGCTTTAGAACAATT  
AGGAGATTCCCTAGAAAGAAATAAGGGGTTCTGCTTCTGGCGACAACATGCTATTGGGT  
GGTGGTCCCGTCCC-----GCTTATGGG---TTCAAATCAATACGTTCTAAGAAAAAATA  
TTGAATATTAATCTCATCGATATCCTCGATCTCATA---AGTATCATACCAAATCCCATCAA  
TCGAATCACTTTTTTCGAGAAATACGAGACATCTAAGTCATACAAGTAAAGAGATCTATT  
CATTGATAAGAAAAAGAAAAGGGTGAACGGTGATTGGATTGATGATAAAATAGAATC  
CTGGGTCGCAAGCAGTGATTTCGATTGATGATGAAGAAAGAGAATCCTTGGTTCAGTTC  
TCC-----ACTTTAACGACA-----GAAAAAAGGATTGATCAAATCTATTGAGTCTGACT--  
CATAGTGATCATTATCA-----AAGAATGACTCTGGTTATCAACTGATTGAACAAC  
CGGGAGCAATTTACTTACGATACTTAGTTGACATTCAT-----AAAAAGTATCTAATGAATT  
ATGAGTTCAATACATCTTGTTTAGCAGAAAGACGAGTATTCCTTGCTCATTATCAGACAA  
TCACTTAT-----TCACAAACCTCGTGTGGGGCTAATAGTTTTCAATTCATCTCATGGA--  
-----AAACCTTTTTCGCTCCGCTTAGCCCTATCCCCCTCT--AGAGGTATTTAGTGATAG  
GTTCTATAGGAACTGGACGATCCTATTTGGTCAAATACCTAGCGACAAACTCCTATGTTT  
CTTTTATTACGGTATTTCTGAACAAGTTCCTGGATAACAAGCCTAAAGGTTCTCTTATTG  
AT-----GCTAGT-----GACGATATCGATCGT-----

-----GACCTTGATACGGAGCTGGAGCTGCTAACTATGATGA  
ATGCGCTA-----ACTATGGATATGATGCCG-----GAAATAGACCAATTTTCTATCACCC  
TTCAATTTCGAATTAGCAAAGCAATGTCTCCTTGCATAATATGGATTCCAAACATTCATG  
ATCTGGATGTGAATGAGTCGAATTACTTATCCCTCGGTCTATTCGTGAACTATCTCTCC---  
-----AGGGATTGTGAAAGAGGGTCT---ACTAGAAATATTCTTGTTATTGCTTCGACTCATA  
TTCTCAAAAAGTGGATCCCGCTCTAATAGCTCCGAATCAATTAATACATGCATTAAGA  
TACGAAGGCTTCGTATTCCACAACAACGAAAGCACTTTTTCACTCTTTCATATACTAGG  
GGATTTCACTTGGAAAAGAAAATGTTCCATACT-----AATGGATTTCGGGTCCATAACCAT  
GGGTTCCAATGTACGAGATCTTGTAGCATTTATCAACGAGGCCCTATCGATTAGTATTAC  
ACAGAAGAAATCCATTATAGACACTAATACAATTCGATCCGCTCTTCATAGACAACTT  
GGGATTTGCGA-----TCCCAGGTAAGATCGGTTTCAGGATCATGGGATCCTTTTCTATCA  
GATAGGAAGGGCTGTTGCACAAAATGTACTTCTAAGTAATTGCCCGATAGATCCTATATC  
TACCTATATGAAGAAGAAA-----TCATGTAACGAAGGGGATTCTTATTTGTACAAATGGT  
ACTTCGAACTTGGAACGAGCATGAAGAAATTAACGATACTTCTTTATCTTTTGAGTTGT  
TCTGCCGGATCGGTCGCTCAAGATCTTTGGTCTCTACCC-----GGACCCGATGAAAA---  
AACGGGATCACTTCTTATGGACTCGTTGAGAATGATTCT---TATCTAGTTCATGGCCTATT  
AGAAGTAGAAGGCGCTCTGGTGGGA-----TCCTCACGG-----ATAGAAAAAGCTTGCAG  
TCAGAATGAT-----CGAGTGACATTGTTTCTTCGGCCCGAACTAAGGAAT---CCCTTAGAT  
ATGATGCAAAATGGATCTTGTCTATCCTTGATCATAGATTTCTCTATGAAAA-----TAC  
GAATCGGAATTGGAAGAA-----GGGGAAGGAGCCCTCGATCCGCAA-----CAGAT  
AGAGGAGGAT-----TTATTCAATCAC-----ATAGTTTGGGCTCCT-----AGAATATGGA  
ACCC-----TGGGGCTTTCTATTTGATTGTATCGAAAGGCCTAATGAATTGGGATTTCC  
C---TATTGGGCCAGGTCATTTCCGGGGCAAG-----CGGAGCATTATGATAAAGAGGATG  
AGCTTCAAGAGAATGATTCCGAGTTCTTGCAGAGTGGAACCATGCAGTACCAGACACG  
AGATAGATCTTCCAAAGAACAGGGCTTTTTTCGAATAAGCCAATTCATTTGGGACCCTG  
CAGATCCACTCTTTTCCCTATTCAAA---GATCAGCCCTTTGTCTCTGTGTTTTCACATCG  
AGAATCTTTGCAGATGAAGAGATATCAAAGGGGCTTCTTACTTCCCAAATGAATCCTC  
CTATATCTATATTTCAACGCTGGTTTATC-----AAGAATACGCAAGAAAAGCACTTTGAAT  
TGTTGATTAATCGCCAAAGATGGCTTAGA-----ACCAACAGTTCATTATCG-----AATGG  
ATCTTCCGTTCTAAT-----ACTCTATCCGAGAGTTATCAGTATTTATCAAATCTGTTCCCTA  
TCTAAC---GGAACACTATTGGATCAAATGACAAAGACATTGTTGAGAAAAAGATGGCTT  
TTCCCGGATGAAATGAAAATTGGATTC-----ATGCAAGAGGAGAAAGATTTTCCATTCCT  
TATGTCTAGA-----AATGGGAATTTTATTGATAAGACCTTTTCAGTTGTGGCCAATAT  
CTTATTACAAATAATTCCGACAACCTCAGGAGAAAAAGAGGCATTTACTTATTACAGAG  
ATGGG-----ATGTCAGCTCAATCTGAAGGAAATTATGCGGAAGCTTTACAGAATTATTAT  
GAAGCTATGCGACTAGAAATCGATCCCTACGATCGAAGTTATATACTCTATAATATAGGC  
CTTATTCACACAAGTAATGGAGAACATACGAAAGCTTTAGAAATATTATTTTAGGGCACTA  
GAACGAAACCCATTCTTACCACAAGCTTTTAATAATATGGCAGTGATCTGTCAATTAC---C  
GGGAGAACAAAGCCATTCGACAGGGAGATTCTGAAATTGCGGAGGCTTGGTTCGATC  
AAGCCGCTGAGTATTGGAAACAGGCTCTAACGCTTACTCCTGGGAATTATATTGAAGCG  
CATAATTGGTTGAAGATCACGGGGCGTTTCGAA-----ATGAATTGGCGATCAGAACGTAT  
ATGGGTAGAATTTATAACGGGATCTCGAAAAATAAGTAATTTCTGCTGGGCCTTTATACT  
TTTTTTAGGTTTCATCAGGATTTTATTGGTTGGAATTTCCAGCTATCTTGGTAAGAATTTT  
ATATCTTTATTTCCCCCCAGCAAATCTTTTTTTTCCACAAGGGCTGGTGATGTCTTTCT

ATGGGATTGCAGGCCTCTTTATTAGCGCCTACTTGTGGTGTGCAATTTTCATGGAATGTAG  
GTAGTGGTTATGATCGATTTCGATAGAAAAGAAGGAATAGTCTGTATTTTTTCGTTGGGGA  
TTCCCTGGAAAAATCGTCGCATCTTCTTCCGATATCTTATAAAAGATATTCAGTCTATTA  
GAATAGAACTTAAAGAGGGTATTTATACTCGTCGTGCCTTTATCTGGAAATCAGAGGT  
CAAGGAGCCATTCCTTTGACTCGTACTGATGAGAAT---TTGACTCCACGAGAAATGGAA  
CAAAAAGCGGCTGAATTGGCCTATTTCTTGCCTGTACCAATTGAAGTATTT

>Oenothera

ATGAAGCCTACCAAGGGGCCTAAAAAGCCTAACATAAGGAAGACCTTGAAGGGCCT  
AAACCTAACAGTCTAACGAGGAAGCGGAAGAGCTT-----GGGGATAATAAGGAAGAC  
CTTGAAGGGAAGTCTAACGAGGAA---GCGGAAGAGCTTGGGGATAAGCAGAAGGATA  
AGAAAGATGGGATTTTCGTAATCAATTATGACGATGAGTATGAGGAAGACCTTTATGAC  
GATGAGTATGAGGAAGACCTTGAATATGACGATGAGTATGAGGAAGACCTTGAATATGA  
TGAGGAATATGACTATGAGGAAGACCTTGAAGGG---GATAATAAGCCTCATAAGGAAGG  
GGATAATAAG-----CCTCATAAGGAAGACCTTGAAGGGGATAATAAGCCTCATAAGGA  
AGACCTTGAAGGGGATAAGCAGAAGGAAGAAGAGGAGAAGCAGAAGGAAGAGGAG  
AAGCTGAAGGACTGTCCCACTGGTTTCACCAG---ATTTACCCTAAGCATTGGGGC---G  
ATCGCAAGTCGGTTCCTCGCTAAGGAGGTTCCCGCTCAGTCTACCAAGCGGGATACCGA  
TCCGGAGGCGTCTCTAAAATCGAACTATGCGCATTATGGGTTCACTGCAAACTTTGTT  
CTGGATTCAATTATAAGAAAATTTTGAAGTCCAAAAACAATGTTTGTGAACAATGTGGA  
TCTCATTTGAAAATGCATAGTTCAGATCGAATCGACCTTATGCTTGATCCAAAGACTTG  
GGCTCCTATGCATGAAGGCCTGCTTTCTCTAGATCCTATTGAATTTTCATTTCGGAGAAAG  
ACCCTTATAAAGATCGGGTTGCTTCTTATAAAGAAAGACAGGATTATCGGAAGCTATT  
CAAACGGGCAGAGGTTACCTAAAACGTATTCACCTAGGAATTGGACTTATGGATTTTCA  
GTTTATGGGGGGTAGTATGGGATCCGTAGTCGGCGAGAGAATCACCCGTTTGGTTCGAGT  
ATGCTACCAATCGAGTTTTACCTCTTATTCTAGTGTGTGCTTCCGGAGGGGCACGTATGC  
AAGAAGGGAGTTTGGAGCTTGATGCAAATGGCTAAAATATCTTCTGCTTTATCTGATTATC  
AATCAATAGAACGGTATTCTATGTAGCTCTCCTTACATCTCCCACTACGGGTGGTGTGA  
CGGCTAGCTTTGGGATGTTGGGGGATATCATTCTTGCAGAACCTAATGCCTACATCGCAT  
TCGCAGGTAAAAGAGTAATTGAACAAACATTGAATATTGAAGTACCTGAGGGTTCACA  
AACGGCTGAATATTTATTCGATAAGGGCTTATTCGATCAAATTGTACCACGCAATCCTTT  
AAAGGGTTCTTTGAGTGAGTTATTTAATTTTACGGTTTTTGTACTTTGAATTCTCAAGT  
AATTAATATGGCAACCATTAGAGCCGACGAAATTAGTAATATTATCCGTGAACGGATTGA  
GCAATATAATAGAGAAGTAAAGATTGTAAATACTGGTACCGTACTTCAAGTTGGTGACG  
GCATTGCTCGTATTTATGGTCTTGATGAAGTAATGGCAGGCGAATTAGTAGAATTTGAA  
GAGGGTACAATCGGCATTGCTCTTAATTTGGAATCAAAAAATGTTGGTGTGTTGATTAAT  
GGGTGACGGTTTACTGATACAAGAGGGAAAGTTCTGTAAAAGCAACAGGAAGAATTGC  
TCAGATACCCGTGAGTGAGGCTTATTTGGGTCGTGTTATAAATGCCCTGGCAAAACCTA  
TTGATGGTTCGAGGTGAAATTTCTTCTTCTGAGTCTCGGTAAATTGAATCTCCCGCTCCG  
GGTATTATTTTCGAGACGTTCCGTATATGAGCCTCTTCAAACAGGACTTATTGCTATTGAT  
GCAATGATCCCTATAGGACGTGGCCAGCGAGAATTAATTATTGGAGACAGACAGACTG  
GTAACACAGCAGTAGCCACGGATACGATTCTCAATCAACAAGGGAACAATGTGATATG  
TGTTTATGTAGCTATTGGTCAAAAAGCCTCTTCTGTGGCTCAGGTAGTGAATGCTCTCC  
AAGAAAGGGGAGCTATGGAATACACTATTGTGGTAGCGGAAGCGGCCGATTCCCCAGC  
TACATTACAATACCTCGCCCTTATACAGGAGCAGCTCTGGCTGAATATTTTATGTACCG

TGAACGACACACTTTAATCATTATGATGATCCCTCCAAACAAGCACAGGCTTATCGCC  
AAATGTCTCTTCTATTACGAAGACCTCCCGGTCGCGAAGCTTATCCGGGAGATGTTTT  
TATTTGCATTACGCCTTTTGGAAAGAGCCGCTAAATTAAGTTCTCGTTTAGGTGAAGG  
AAGTATGACTGCCTTACCAATAGTTGAGACTCAATCGGGAGATGTTTCGGCTTATATTC  
TACTAATGTAATTTCCATTACAGACGGACAAATCTTCTTATCGGCCGATCTATTCAATGC  
TGGAATCAGACCCGCGATTAATGTGGGCATTTCTGTCTCCAGAGTAGGATCCGCAGCTC  
AAATTAAGCCATGAAACAAGTAGCTGGAAAATTAATAATTGGAATTGGCGCAATTTCG  
AGAATTAGAAGCCTTTGCACAATTCTTCTGATCTCGATAAAGCTACCCAGAATCAAT  
TGGCAAGAGGTCAACGATTACGTGAGTTGCTTAAACAATCTCAAGCAAAACCTCTCAC  
CGTGGCAGAACAGATACTGACTATTTATACTGGGACGAATGGTTATCTTGATTCAATCGA  
AATTGCACAGGTAAGGAAATTTCTTGATGAGCTACGTGATTACGTAAAAACGAGGAAA  
CCGCAGTTCGAAGAAATCATATCTTCTACTAAGATATTCACCGAGGAAGCACAAAGCCCT  
TTTGAAGACGCTATTCAGGAACAGAAGGAACTCTTCTAGTTCAGGAA-----ATGAGA  
ATCAATCCTACTACTTCAGGTCCTGGAGTTTCCACACTTGAAAAAAAAAAATCGGGCC  
GTATCGCTCAAATCATTGGTCCAGTACTGGATGTAACCTTTCCCCCGGGGAAGATGCCT  
AATATTTATAACGCTCTGGTCGTTAAAGGTCGAGATACTGGCGGCCAAGAAATTAATGT  
CACTTGTGAAGTACAGCAATTATTAGGAAATAATCGTGTTAGAGCTGTCGCCATGAGTG  
CTACAGATGGTCTAACGAGAGGAATGGAAGTGATTGACACGGGAGCTCCTCTAAGTGT  
TCCAGTCGGCGGAGCGACTCTAGGACGAATTTTCAACGTGCTCGGAGAGCCTGTTGAT  
GAATTAGGACCCGTAGATACTCGTACAACATCTCCTATTCATAGATCCGCGCCCGCCTTT  
ATACAGTTAGATACAAAATTATCTATTTTTGAAACAGGAATTAAGTAGTCGATCTTTTA  
GCCCCTTATCGCCGTGGAGGAAAAATAGGCCTATTCGGGGGGGCTGGGGTAGGTAAAA  
CAGTCTCATTATGGAATTGATCAACAACATTGCTAAAGCTCACGGGGGTGTATCCGTA  
TTTGGCGGAGTAGGTGAACGTACTCGTGAAGGAAATGATCTTTACATGGAATGAAGG  
AATCCGGCGTCATTAACGAACAAAATATTGCAGAATCGAAGGTGGCTCTAGTCTATGGT  
CAGATGAATGAACCCCCAGGAGCTCGTATGAGAGTTGGTTTACTGCCCTAACGATGG  
CGAATATTTCCGAGATGTTAATAAACAAAATGTACTTCTATTTATCGACAACATCTTCC  
GTTTCGTCCAAGCAGGATCCGAAGTATCCGCCTTATTGGGCCGAATGCCTTCCGCTGTG  
GGTTATCAACCCACCCTTAGTACCGAAATGGGTTCTTTACAAGAAAGAATTACTTCTAC  
TAAAGCGGGATCCATAACTTCTATTCAAGCAGTTTATGTACCGGCGGACGATTTGACCG  
ACCCTGCTCCTGCCACGACCTTTGCACATTTAGATGCGACGACCGTCCTATCAAGAGGA  
TTGGCTGCCAAAGGTATCTATCCAGCAGTGGATCCTTTAGATTCAACGTCAACTATGCT  
CCAACCTCGAATCGTTGGCGACGAACATTATGAAACTGCACAAAGAGTAAAGGAAAC  
CTTACAACGTTACAAAGAACTTCAGGACATTATATCTATCCTTGGGTTGGATGAATTATC  
CGAAGAGGATCGCTTAACTGTAGCACGAGCACGAAAAATTGAGCGTTTCTTATCACAA  
CCTTTTTCGTAGCAGAAGTATTTACAGGTTCCCGGGGAAATACGTTGGTCTAGCAGA  
AACCATTAGAGGGTTTAAATTGATCCTTTCCGGAGAATTAGATGGTCTTCTGAACAAG  
CCTTTTATTTGGTCGGTACCATCGATGAAGCTACCGCGAAGGCTGCGAACTTAGAAATG  
GAGAGTGATTTGAAGAAAATGACCTTAAATCTTTGTGTATTAACCCCTAATCGAATTGT  
TTGGGATTCAGAAGTGAAAGAAATCATTATCTACTAATAGTGGACAAATTGGCGTATT  
ACCAAATCACGCACCTATTGCCACAGCTGTAGATATAGGTATTTTAAGAATACGCCAAA  
ACGGACAGTGGTTAACGATGGCTCTGATGGGGGGTTTTGCTAGAATCGGCAATAATGA  
GATCACTATTTTAGTAAATGACGCGGAAAAGGGTAGTGACATTGATCCACAAGAAGCC  
CAGGAAACTCTTGGACTAGCGGAAGCTAACTTTAGGAAAGCGGAAGGCAAGAGACAA



ACAATTGAAGCAAATCTGGCTCTCAGACGAGCTAGGACACGCGTTGAGGCTATCAATG  
TGATTTCAATGAAAAATGTAACCGATTCTTTTCGTTTCCTTGGTTCACTGGCCATCCGCCG  
GGAGTTTCGGGTTTAATACCGATATTTTAGCAACAAATCCAATAAATCTAAGCGTAGTGC  
TTGGTGTATTGATCTTTTTTGGAAAGGGAGTGTTAAGTGATTTATTAGATAATCGAAAAC  
AGAGGATCTTGAATACTATTTCGTAATTCAGAAGAATTACGCGAGGGGGCCATCGAACA  
GCTGGAAAAAGCCCCGGGCCGTTTACAGGACGTGCAAATCGAAGCGGAAGGGTATCG  
AGCGTATGGGTACTTTGGGATAGACGAGCAAAGGCACGAGTCGATTAATTCAACTTATA  
AGACCTTGGAAACAATTAGAAAATAACAAAAACGAAAGCATTTCATTTTGAACAACAAA  
GGGCGATTAATCAAGTCCGACAGCAGATTTTCCAACAAGCCTTACAAGGAGCTTTAGG  
AACTCTGAATAGTTGTTTGAACAACGAGTTACATTTACGGACCATCAGTGCTAATATTG  
GCCTGTTTGGGTTCGATGAAAGAACTCACTGATATGAATCCACTGATTTCTGCCGCTTCC  
GTTATTGCTGCTGGATTAGCTGTCGGGCTTGCTTCTATTGGACCTGGAATTGGTCAAGG  
TACTGCTGCGGGACAAGCTGTAGAAGGTATCGCGAGACAGCCCGAGGCAGAGGGAAA  
AATACGAGGTACTTTATTGCTTAGTCTGGCTTTTATGGAAGCGTTAACAATTTATGGATT  
GGTTGTAGCCTTAGCACTTTTATTTGCGAATCCCTTTGTAATGGATGTTCTATCATGTTCC  
AACAAACACACTAAAAGGGTTATACGACATATCTGGTGTGGAAGTAGGCCAACATTTCTA  
TTGGCAAATAGGAGGTTTTCAAGTCCATGGCCAAGTACTTATTACCTCTTGGGTTGTAA  
TTGCTATCTTATTAGGTTTCAGCCAGTATAGCTGTTTCGGAATCCACAAACAATTCCAAATG  
ACAGTCAGAATTTCTTCGAATATATCCTTGAATTCATTTCGAGATGTTAGTAAAACCCAGA  
TTGGAGAAGAATATGGTCCATGGGTTCCCTTTTATTGGAAGTATGTTTCTATTTATTTTGT  
TTCTAATTGGTCAGGAGCTCTTTTACCGTGGAACTCGTAGAGTTACCTCACGGGGAGT  
TAGCTGCGCCACCAATGATATAAATACTACTGTTGCTTTAGCTTTACTCACGTCAGTAG  
CCTATTTCTATGCGGGTCTTAGCAAAAAGGGGTTAGGTTATTTTACGTAATAACATAACAAC  
CAACCCCAATCCTTTTACCCATTAACATCTTAGAAGATTTACAAAACCTTTATCCCTTA  
GTTTTCGACTTTTCGGAAATATATTAGCCGATGAATTAGTAGTTGTTGTTCTTGTTCCTTT  
AGTACCTTCAGTCGTTCCATACCTGTCATGTTCCCTGGGATTATTTACGAGTGGTATTCA  
AGCTCTTATTTTGAACGTTAGCTGCGGCTTATATAGGCGAATCCATGGAGGGGTCATCA  
TATGATATTTTATACTCTAGAACATATATTAATCAATATATCCTTTTTCGCTCGTTTCAATTG  
GAATTACAATTTTTTTGATAACCTTATCAGTC---GAAATCATAGGACTATATGATTCGTCA  
GAAAAAGGCGTGATAGGAACTTTTTTATGTATAACAGGATTATTAGTCACTCGTTGGGC  
GTATTCGGGACATTTTCCATTAAGTAATTTATATGAATCATTACTTTTTCTGTCATGGAGT  
TTCGCGATTATTCATATGTTTCCATATTTTAAAAACAGAAAAGTTATGTAAGGACAATA  
ACCTCGTCAAGTACTATTTTTTACCCAGGGCCTTGTTACTTCAGGTCTTTTAAGTGAAATG  
CAGCAATCAGAAATATTAGTACCTGCGCTCCAATCCCAATGGTTAATGATGCACGTAAG  
TATGATGGTATTGGGCTATGCAGCTCTTTTGTGTGGATCATTATTATCAGTAGCTCTCTTA  
GTCATTACATTTGAAAAGCTCTAAGAATTTTTAGTAAAAAGAAAGAGATCCAATATAG  
GAATGAACCAAGCAATGTTTTACTA-----TCTTTTATTTCTTCTAAAAACTATTACAGGGC  
TCAACTGATTCAACAATTAGATCGTTGGAGTTCTCGTATTATTAGTCTAGGATTTATCTTT  
TTAACCATAGGTATTCTTTCTGGAGCAGTATGGGCTAATGAGGCGTGGGGATCCTATTG  
GAATTGGGATCCAAAAGAACTTGGGCATTTATTACTTGGACCATGTTTTCGATTTATTT  
ACATACTCGAACAATCCAAATTTTCAAAGTGTAATTCCGCAATTGTGGCTTTTCTGG  
GCTTTATTATAATTTGGATATGCTATTTTCGGGGTCAATTTATTAGGAATAGGCTTACATAG  
TTATGGTTCAATTAATTTACAT-----ATAGTCTTTTTTCCCTG  
GTGGATCTCCCTCTTATTTAATAAAGGTCTTGAATCTTGGGTTACTAATTGGTGAATAC

TACGCACTCGGAAACTTTTTTACTGATATGCAAGAAAAGAGTATTCTAGACAAATTCA  
TAGAATTAGAAGAACTCTTACTCTTAGACGAAATGATAAACGAATACCCGGAAACACAT  
CTCCAAACACTTCGTATAGGAATCCACAAAGAAATGGTCCGCTTGATTAAGATGCGCA  
ACGAGGATCATATCCATACAATTTTGCACCTATCGACAAATATAATCTGTTTCATTATTT  
CCGCGGTTATTCTATTCTGGGTAATAAAGAACTTCTCATTCTTAACTCTTGGATGCAAGA  
ATTCCTATATAACTTAAGTGACACAATAAAAGCTTTTTTCGATTCTTTTATTAAGTATTTT  
TGTATCGGATTCCACTCGCCCCATGGTTGGGAACATAATGATTGCTTATGTCTACAAAGAT  
TTTGGATTGCTCAGAACGATCAAATTATATCTGGTCTTGTTCCTACTTTCCAGTCATT  
CTAGATAACAATTTTAAATATTGGATTTTTCGTTATTTAAATCGTGTATCACCTCACTTG  
TAGTGATTTATGATTCAATGAATGACATGCCGATTGGTATGCCTAAAATCCCTTTCCTGC  
TTGACGGAGAAGACGACGCGACTTGGGTTGACCTGTATAACGTAATTTATCGAACCCAG  
ATCCATCTTTTTAGGCGACGCAATTCCTCGAGGTCGCGAATCACATTGCTGGGCTGA  
TGATATTTCTCACCATACAGGATGCGACTCAAATCTTTATTTCTTTATAAACTCTCCCG  
GCGGGCTGGCAGTAGCCGATTACTCATTATGATACTATGCAATACGTAACACCTCCTG  
TGTATACACTAGGCCTGGGGTACTCGCCTCAATGGCATCCTTTCTACTGGTCGGCGGA  
GAAACGTCCAAACGCCTAATGGGCCCTAACGGTAGGGTAATGATACATCAGCCCGAGG  
ATTATACTCACAAAGACCAATCGCTAGAGGTACAACCTGGACTCAGGGGAAGTAGAAGA  
CATTCGCAAATGGTCATAAGGGTTTATCTAGAAAGAACAAGGCTACCCCGGGAGGTT  
CTAAACGACCATTGGAAGAAATTATTTTATGACAGCAACCGAAGCCAAATATTATGG  
A A T T G T T G A T G A T A T A G G G A T T C A  
A????????????????????????????????????????????????????????????  
????????????????????????????????????????????????????????????  
????????????????????????????????????????????????????????????  
????????????????????????????????????????????????????????????  
????????????????????????????????????????????????????????????  
ATGGAGGAATTCCCGGGATATT  
TCGAACTAGATAGATCTCGACAACACGACTTCCTATACCCCTAATTTTTTCGGGAGTCTA  
TTTATGCACTTGCTCATGATCATGGTTTAGTTGATTATGACAAAAAATATAGTTTAATAAT  
TGTGAAACGTTTAATTACTCGAATGTATCAACGGAATCATTGATTATTTTCGGCTAATGG  
TTCTGTTCAAATCCATTTTGGGGCCAGAATTTGTATTCGAAAATTCTATCAGAAGGGT  
TTGCAGTCATTGTGGAATTCATTTTCGCTACGAGTTTATCTTCCTTTATAGCAAAT  
CTCCTACTTTACGATCAATTCATTCAATATTTCTTTTTTAGAGGACCAATTTTCACATTT  
AGATTATTTGTCACATGTACTAATACCCTATCCCATCCATTTGGAAATCGCGGTTCAAAC  
CCTTCGCTACTGGGTGAAGGATGCCTCTTCTTTGCATTTATTACGTATCTTTCTACACGA  
GTATTGGAAT-----AGTTTTAGTACTAAGCATATTACCCTTTTTTTAAAATCAAGATTCTTC  
TTGTTCCCTCTATAATTCTTATGTATGTGAATACGAATCTATCTTCCTTTTTATCCGCAATCA  
ATCTTCGCATTTCCAGTCAACATCTTCTGGAGTCTTTTTTGAGCGAATCCTTTTCTATGT  
AAAAATAGACCATCTTGTGGAAGTTTTTGTGGGTTTCTGATCCGATCCTTCTTCAAGG  
ATCCGAATATGCATTATGTTAGATATCAAGGAAAATCTATTCTAGCTTCAAAGGATACAC  
CTCTTTTGATGAATAAATGGAAATATTACCTTGTCATTTATGGCAATATCATTTTTCGGT  
CTGGTCTCAACCCGGAAGGATCAACATAAACCAATTAGGTAAGTATTCTCTTGACTTTT  
TGGGATATTTTCAAACGTGCAACTAAAGTCTTCAGTGGTACGAAATCAAACGCTAGA  
GAATTCATTTCTAATAAATAAT-----GCTATGAAGAAGCTCGAAACAACAGTTCCAATTTT  
GCCTCTGATTGGATCGTTGTCTCGAGCGAAATTTTGTAAATGCATTAGGACATCCCATAG  
TAAGCCGACCCGGAATGATTCATCCGATTCTGATATTATCGACCGATTTGTGCGTATATG  
CAGAAATCTTCTCATTATCACAGTGGGTCTTCAAAAAAAAAAAGAGTTTATATCGAATAA  
AGTATATACTTCGACTTCTTGTGTAAAACCTTTGGCCCGTAAACATAAAAGTAGTGTAC

GCGCTTTTTTGAAAAGATTAGGTTTCGGAATTAGGGGACGAATTCCTTACAGAGGAAGG  
AGTTGTTCTTGCTGTGATCTTCCA--CGAATTTGGTATTTGGATATTCCTTGTATCAATG  
ATCGGGTAGGCGACGCGATGATAATTGATACAACC---GCAGTACAA---GATATGAATTCT  
TTTTCCAGATTGCAATCC---TTGAAAGAGGTCTCTGGAATCATATGGATGCTTGTACCTA  
TTTTGAGTCTTGTATTGGGGATTACTCTAGGTGTAATAGTGTGGTTAGAAAAGG  
GAAATATCCGCCGGAATACAACAACGTATTGGGCCTGAATACGCAGGGCCTATGGGAAT  
TCTTCAAGCTTTAGCTGATGGAATAAACTCATTTTCAAAGAGAATCTTCTCCCGTCTC  
GAGGAGATACTCGTTTATTTCAGCATAGGACCATCCATAGCAGTTATATCCATTTACTAA  
GTTATTCAGTAATTCCTTTTAGCTCTCACCTTGTCTTATCTGATCTCAATATCGGTGTTTT  
TTTGTGGATTGCCGTTTCCAGTATTGCTCCCATCGGACTTCTTATGTCAGGATATGGATC  
AAATAATAAATATTCTTTTTTAGGTGGTCTACGAGCCGCTGCTCAATCAATTAGTTATGA  
AATACCATTAACCTTTGTCTGTTATCAATATCTCTACTATCTAACAGTTCAAGTACAGTT  
GATATAGTTGAAGCCCAATCAAAATATGGTTTGTGGGGGTGGAATCTGTGGCGCCAACC  
TATAGGGTTTTCTTGTTTTTCTAATTTCTCCCTAGCAGAATGTGAAAGATTACCCTTTGAT  
TTACCAGAAGCAGAAGAAGAATTAGTAGCAGGTATCAAACCGAATATTCAGGTATCA  
AATTTGGTTTTATTTTACGTTGCTTCCATCTAAATCTATTAGTTTCTTCGTTATTTGTAACA  
GTTCTTTACTTGGGCGTTGGAATATCTCTATCTCGTACATATTTCGTTCTGTTCTTT--  
---GAAAAGTGGGTAGAGTTTTTGGAAACGACAATTGGTATTTTTACTACATTAGCTAAA  
ACTTATTTGTTTTGTTTCAATTTCTATCACAACAAGATGGACTTTACCTAGGCTAAGAATG  
GACCAATTATTAATCTTGGATGGAAATTTCTTTTACCCATTTCTCTCGGTAATCTATTAT  
TAACAACCTTCTCCCAACTTCTTTCACTGATGATCTGGCATGTACAGAATGAAAACCTC  
ATTCTCGATTCTACGAGAATTTTTATGAAAGCCTTTCATTTGCCTCTCTTCGATGGAAGT  
TTTATTTCCCGAAGGTATCCTCATTTTTGGCCTAATTTCTTCTGATGATCGATTCAA  
CCTCTGATCAAACAGATATACCTTGGTTCTATTTTATCTCTTCAATAAGTTAGTAATGA  
GCATAACGGCCCTATTGTTCCGATGGAGAGAAGAACCTAGGATTCTTTTTCAGGAAAT  
TTCCAAACGAACAATTTCAACGAAATCTTTCAATTTCTTATTTTACTATGTTCAACTCTA  
TGCATTCTCTATCCGTAGAGTACATTGAATGTACAGAAATGGCTATAACAGAGTTTCTG  
TTATTCGTATTAACCGCGACCCTAGGAGGAATGTTTTTATGCGGTGCTAACGATTAATA  
ACTATCTTTGTAGCTCCAGAATGTTTCAGTTTATGCTCCTACCTATTATCTGGATATACCA  
AGAAAGATGTACGGTCTAATGAGGCTACTATGAAATATTTACTCATGGGGGGGGCAAGC  
TCTTCTATTCTGGTTTATGTTTCTTGGCTATATGGTTCATCCGGGGGGGAGATCGAG  
CTTCAAGAAATAGTGAATGGTCTTATCAATACACAAATGTATAACTCCCCAGGAATTC  
AATTGCGCTTATATTCATCACTGTAGGAATTGGGTTCAAGCTTTCCCCAGCCCCTTCTCA  
TCAATGGACTCCTGACGTATACGAAGGATCTCCCACTCCAGTTGTTGCTTTTTCTTCTGT  
TACTTCGAAAGTAGCTGCTTTCAGCTTCAGCCACTCGAATTTTCGATATTCCTTTTTATTT  
CTCATCAAACGAATGGCATCCTCTTCTGGAAATTCTAGCTATTCTTAGCATGATATTGGG  
GAATCTCATTGCTATTACTCAAACAAGCATGAAACGTATGCTTGCATATTCGTCCATAGG  
TCAAATCGGATATGTAATTATTGGAATAATTGTTGGAGACGCAAACGGTGGATATGCGA  
GCATGATAACTTATATGCTGTTCTATATCTCCATGAATCTAGGAACTTTTGCTTGCATTGT  
ATTATTTGGTCTACGTACCGGAACTGATAACATTCGAGATTATGCAGGATTATACACGAA  
AGATCCTTTTTTTGGCTCTCTCTTTAGCCCTATGTCTCTTATCCCTAGGAGGTCTTCTCC  
ACTAGCAGGTTTTTTTCGGAAAACCTCATTATTCTGGTGTGGGTGGCAGGCAGGCCTAT  
ACTTCTGGTTTTCAATAGGACTCTTTACGAGCGTTGTTTCTATCTACTATATCTAAAAT  
AATCAAGTTATTAATGACTGGACGAAAGCAAGAAATAACACCTCACGTGCGAAATTATA

GAAGATCCCCTTTAAGATCAAACAATTCCATCGAATTGAGTATGATTGTATGTGTAATAG  
CATCCACTATACCAGGAATATCAATGAACCCGATTATTGCAATTGCTCAGGATACCCTTT  
TTAIGTTTCTGCTTTACGAATATGATATTTTCTGGGCATTTCTAATAATATCAAGTGTTATT  
CCTATTTTGGCATTTCGAATTTCCGGACTTTTAGCCCCGACTAGCATAGGGCCAGAGAA  
ACTTTCGAGTTATGAATCGGGTATAGAACCAATGGGCGATGCTTGGTTACAATTTCGAAT  
ACGTTATTATATGTTTGCTTTAGTTTTTGTGTTTTTGTATGTTGAAACCATTTTTCTTTATC  
CATGGGCACTGAGTTTCGATATATTGGGGGTATCCGTATTTATAGAAGCTCTCATTTTTCG  
TGCTTATCTTAGTTCTTGGTTTTGGTTTTATGCATGGCGAAAAGGAGCGTTGGAATGGTCT  
ACGAATCTTTTTCTTGGTTAAACAATAATTGTAGTTTTTCCCATATTGACGGGTCTTTAA  
TTTTCTTGCTACCTCATAGAGGTAATAAGGTCATGAAATGGTATACTTTATGTATATGTAT  
TTTAGAGCTTCTTTTAAACAACCTATACATTCTGTTATCATTTCCAACCTGGACGATCCATTA  
ACCCAATAACAGAGAATTATAAATGGATCCATTTTTTTGATTTTTATTGGAGATTAGGA  
ATAGATGGGCTTTCTATAGGACCTATTTTATTGACGGGATTTATTACCACTTTAGCAACTT  
TAGCGGCCTGGCCAGTTACTCGAGATGCCCAATTGTTCCATTTTTTTGATGTTAGCAATGT  
ACAGCGGTCAAATAGGATCATTTTCCTCTAGAGACCTTTTACTTTTTTCTAATGTGGG  
AGTTCGAATTAATTTCCGTTTATCTACTTCTATCGATGTGGGGGGGAAAGAAACGTCTCT  
ATTCAGCTACAAAGTTCATTTTGTACACGGCGGGTGGGTCCATTTTTCTATTAATAGGAG  
TTCTGGGTATTGGTTTATATGGTTCCAATGAACCAACACTCAATTTTGAAACATTAGCGA  
ATCAGTCGTATCCTGTGGCACTCGAAGTAATATTCTATGTGGGATTTCTTATTGCTTTTTGC  
GGTCAAATTGCCGATTATAACCCTTCCATACATGGTTACCAGATACACATGGGGAAGCAC  
ATTATAGTACGTGTATGCTTCTAGCTGGAATCTTATTAATAAATGGGAGCTTATGGGTTGG  
TTCGAATCAATATGGAATTATTACCTCATGCTCATTGCCTATTTTTCTCCCGGGTTGATTAT  
AGTAGGTGCAATACAAATAATCTATGCAGCTTCAACATCTCCTGGTCAACTTAATTTAAA  
AAAAGAATAGCCTATTCCTCTATATCTCATATGGGTTTCATAATTATTGGAATTGGATCT  
CTAAGCGATACGGGACTTAATGGAGCCATTTTACAAATAATCTCTCATGGCTTTATTGGG  
GCGGCTCTTTTTTTCTTGGCCGGAACGAGTTATGATAGAATACGCCTTCTTTATCTCGAT  
GAAATGGGTGGAATGGCTATCCCCCTTCCAAAATTATTTACGATGCTCAGTATCTTATCG  
ATGGCTTCGCTTGCATTACCGGGCTGAGCGGTTTTGTTGCCGAATTATTAGTATTCTTT  
GGCATAATTACCAGTCAAAAAGTATCTTTTAATGCCAAAATACTAATTGCTTTTTTAATG  
GCAATTGGAATGATATTAACCTCTATTTATTTCATTATCTATGTTACGCCAAATGTTCTACG  
GATACAAGCTATTTAATGTTCCAAACTATTTCTTTGATTCTGGTCCGCGAGAGTTATT  
TGTTTCGATCTCTCTCCTTCTACCAATAATTGGGATTGGTATTTATCCGGATTTCTGTTCTG  
TCATTATCGGTTGAAAAAGTAGAAGCTATTATATCTCATTTTTTTTTTTTCGATGATACTCG  
AACATGTACTTGTTTTGAGTGCCTATTTATTTTCTATAGGTATTTATGGATTGATCACGAG  
TCGAAATATGGTTCGGGCTCTTATGTGCCTTGAACCTATACTGAATTCGGTTAATCTTAA  
TTTCGTAACATTTTTCGGATTTTTTTGATAGTCGCCAATTAAGGAGATATTTTTTCCATT  
TTTATTATAGCTATTGCAGCCGCCGAAGCCGCTATTGGGTTGGCTATTGTTTCGTCAATTT  
ATCGTAACAGAAAATCAATTCGTATCAATCAATCCAATTTATTGAATAAAATGGAATATA  
CATATCAATATTCATGGATTATACCTTTCATTCCACTACCAGTTCCTATTCTAATAGGAAT  
GGGACTTCTACTTTTTCCGACAGCAACAAAAATCATCGTTCGTGTGTGGTCTTTTTCTTA  
GCATTTTACTGTTAAGCATGGTTATGCTTCTTTCCGCTATCTCTCTATTCAACAAATAAA  
TAGAAGTTTTATCTATCAATATGTATGGTCTTGGACCATTAATAATGATTTTTCTTTAGAG  
TTCGGTCACTTAATCGATCCACTTGCTTCTATTATGTTAATATTAATTACTACTGTTGGAA  
TTTTGGTCTTTTTTTATAGTGATAATTATATGTCTCATGATCAAGGATATTTAAGATTTTTT

GCTTATCTGAGTTTTTTCAATACCTCAATGTTAGGATTAGTTACTAGTTCTAATTTGATAC  
AAATTTATATTTTTTTGGGAATTAGTTGGAATGTGTTCTTACCTATTAATAGGTTTTTTGGTT  
CACGCGACCTATTGCAGCAACTGCTTGTCAAAAAGCTTTTGTAACTAATCGTGTAGGG  
GATTTTGGTTTATTATTAGGAATTTTAGGTCTTTATTGGATAACGGGTAGTTTTGAATTA  
GGGATTTGTTTCGAAATAGTGAATAAC---CAAGTTCATTTTTTTATTGTTACTTTGTGTTCC  
TTTCTCTTATTTGCTGGTGCAGTTGCTAAATCCGCGCAATTCCCCCTTCATGTATGGTTA  
CCTGATGCCATGGAAGGGCCCCTCTATTTCCGCTCTTATCCATGCCGCTACTATGGTA  
GCCGCGGGCATTTTTTCTTGTAGCTCGGCTTCTTCTCTTTTTGTAAATCACACCTTACATA  
ATGAATTTGATATCTTTGATAGGTATAATAACAGTACTATTAGGAGCTACTTTAGCCCTTG  
CTCAAAAAGATATTAAGAAGTTTAGCTTATTCTACAATGTCTCAACTGGGTATATGA  
TGCTAGCTCTAGGTATGGGTTCTTATCGAGCTGCTTTATTTCAATTTGATTACTCATGCTTA  
TTCAAAGCATTGTTGTTTTTAGGCTCCGGATCCATTATTCATTCAATGGAATCCATTGT  
TGGCTATTCTCCAGATAAAAGCCAGAATATGGTTCTTATGGGCGGTTAAAAAAGCATG  
TACCAATCACAAAACGGCTTTTTTTGGTGGGTACGCTTCTCTTTGTGGTATCCACCT  
CTTGCTTGTTTTTGGTCCAAAGATGAAATCTTAATGATAGTTGGTTGTATTCGCCAATT  
TTCGCAATAAGCTTGTCCACAGCAGGATTCACTGCATTTTATATGTTTCGTGTTTATT  
TACTTACTTTTGATGGACATTTAAACGTTCATTTTCAAATTTATAGTGGTCAAAAAGTA  
GCTCCGCTATTCAATATCTTTATGGGGAAAACAAGTACCAAAAAGGATTCAAAT---TT  
ATTAATTTATTGACAATGAATTTTTTTTTGGCCGAATAGAAAAG---ACTTTTTCTTATCCCC  
ATGAGTCGGACAATACTATGCTATTTTCCCTCTTTGTATTAGTGCTCTTTACTTTGTTTGT  
TGCAGCCATAGGA-----TTTGATTGCGATATATTATCAAAATTGTAAATCCGTCTATAAA  
CCTTTTACATCAAATTCAAAT--TTTACGGATTGG---GAATTTGTGACCAATGCAAGTTT  
TTCCGTCAGTATAGCCCTTTTGGGGATTTTATAGCGACTTTCTTATATAAGCCTATTTATT  
CATCTTTACAAAATTTCAACTTACTTAATTCATTTTATGTTATGTGGGACAAAATCCAAA  
ATTGGATATATGATTGGTCATATAATCGTGGTTATATAGATTCTTTTTATACAATATCCTTA  
ACTGGGGGTATAAGAGGATTGGCTGAACTAAGTCATTTTTTTGATAGACGCGTAATTGA  
TGGAATTCTAAACGGATTTCGGCCTTACGAGTTTCTTTTTTAGGAGAAAGTCTCAAATATT  
TCGGGGGCGGA---CGTATCTCTTCGTATCTTATTGTATTCCATTTTTATATTCATTTTTTT  
ATTAATGGATTCTATGGATTTGCCTGGACCAATACATGATTTTCTTTTAGTTTTTCTGGGA  
TCGGGTCTTATAGTAGGAGGTCTGGGGGTGGTCTTACTTACCAATCCCATTTTTTCTGCC  
TTTTCGTTGGGATTGGTTCTTGTGTCATATCCTTATTTTTTAGTTTATCAAACCTCCTATTT  
TGTAGCGGCTGCGCAGCTACTTATTTACGTGGGAGCTATAAATGTTTTAATCCTATTTGC  
TGTGATGTTTCATGAATGGTTCAGAATATCCAAAGATTTGACTCTTTGGACTGTTGGTGA  
TGGGATTACGTCGTTGGTTTGTACAAGTATTTTTATTTCACTAATTACTACTATTCTAGAT  
ACGTCTTGGTACGGGATTATTTGGACGACAAAATCAAATCAGATTATAGAGCAAGATTT  
GATAGGTAATAGTCAACAAATTGGAATTCATTTATCAACTGATTTTTTTCTTCCATTTGA  
GCTGATTTCAATAATACTTTTAGTTTCTTTGATAGGTGCAATTGCCGTTGCTCGTCAAAT  
GAATGTAACAACGACAAGAAAAGACCTCATGATAGTCAATATGGGACCTCACCACCCA  
TCAATGCATGGTGTCTTCGGCTCATCCTTACTCTAGACGGTGAAGATGTTATTGATTGT  
GAGCCAATATTGGGTTATTTACACCGAGGGATGGAAAAAATTGCGGAAAACCGAACTG  
TTATACAATATCTGCCTTATGTAACACGGTGGGATTATTTAGCGACTATGTTACAGAAG  
CAATAACCATAAATGGACCCGAACAGTTGGGGAATATTCAAGTACCTAAAAGAGCAAG  
TTATATCAGAATAATTATGTTAGAGTTGAGTCGTATAGCTTCTCATCTCTTATGGCTTGGC  
CCTTTTATGGCGGATATTGGTGCACAGACTCCCTTTTTCTACATTTTCAGAGAAAGAGA

ATTAGTATATGATCTATTTGAAGCTGCCACCGGTATGAGAATGATGCATAATTATTTTCGT  
ATCGGAGGAGTGGCGGCCGATCTACCGTATGGATGGATAGATAAATGTTTGGATTTCTG  
TGATTATTTTTTAACAGCAGTTTCGGAATATCAAAAACCTTATTACGCGGAATCCTATTTTT  
TTAGAACGAGTTGAGGGGGTGGGCATTATTGGCGGGGAAGAAGCAATAAATGGGGTT  
TATCAGGACCAATGCTCCGAGCTTCCGGAATAGAATGGGATCTTCGTAAAGTTGATCGT  
TATGAATGTTACGGCGAGTTGGATTGGGAAATCCGGTGGCAAAAAGAAGGGGATTCAT  
TAGCTCGTTATTTAGTCCGAATGAGTGAAATGACGGAATCTATCAAAATTATTCAGCAG  
GCTCTGGAAGGAATTCCGGGGGGGCCTTATGAAAATTTGGAAATACGATGCTTTGATAG  
AGAAAAGGATCCAGAATGGGACGGTTTTGAATATCGATTCATTAGTAAAAACCTTCTC  
CCACTTTTGAATTGCCGAAGCAAGAACTTTATGTACGCGTTGAAGCTCCAAAAGGAGA  
ATTGGGAATTTTTTAATAGGAGATCAAAGTGGTTTTCCCTGGAGATGGAAAATCCGCC  
CGCCTGGTTTTATCAATTTGCAAATTCCTCAGTTAGTTAAAAGAATGAAATTGGCTG  
ATATTATGACGATACTAGGTAGCATAGATATCATTATGGGAGAAGTAGATCGTATGTTCCC  
TATGGTAACTGGGTTTCATGAATTATGGTCAACAAACAGTACGAGCTGCAAGGTACATTG  
GTCAGGGGTTTCATGATTACCTTATCCCACGCAAATCGTTTACCCGTAAC TATTCAATATC  
CTTATGAAAATTAATTACATCGGAACGTTTCCGCGGTTCGAATCCATTTTGAATTTGATA  
AATGCATTGCTTGTGAAGTATGTGTTTCGTGTATGTCCTATAGACCTGCCCGTTGTTGATT  
GGAAATTGGAAACCGGTGTTTCGAAAGAAACGATTGCTTAATTACAGTATTGATTTCCGA  
GTTTGTATATTTTGTGGTAACTGCGTTGAGTATTGTCCAACAAACTGTTTATCAATGACG  
GAAGAATATGAACTTTCTACTTATGATCGTACGAATTGAATTATAATCAAATCGCTTTG  
GGTCGTTTACCAATGTCAGTAATCGACGATTATACAATTCGGACAATTTTGAATTCA-----  
-----ATGCAGGGTCGTTTGTCTGCTTGGCTAGTCAAGCACG  
GGCTAGTTCATAGATCTTTGGGCTTCGATTACCAAGGAATAGAACTTTACAAATAAAG  
CCCGAGGAGTGGCATTCCATTGCTGTCAATTTATATGTATATGGTTACAATTATCTACGTT  
CCCAATGTGCTTATGATGTAGCACCCGGTGGACTGTTAGCTAGTGTGTATCATCTTACGA  
GAATAGAGTATGGTGTGGATCAAGCGGAGGAGGTATGCATTAAGTATTTGCTCCAAGG  
AATAATCCTAGAATTCGTCGTTTTCTGGGTTTGGAAAAGCGCGGATTTTCAAGAACG  
AGAGTCTTATGATATGTTGGGAATCCGTTATGATAATCATCCACGACTGAAACGTATCTT  
AATGCCGAAAGTTGGATAGGATGGCCCTTACGTAAGGATTATATTGCCCCCAATTTTA  
TGAAATACAAGATGCTCAT-----  
-----ATGAATTCCA  
TAGAATTTACCTTACTTGCTCGAAGAACGCAAAATTCAGTTATTTCAACTACATCAAAT  
GATCTTTCAAATTTGGTCAAGGCTCTCGAGTTTATGGCCGCTTCTTTATGGTACCAGCTGT  
TGCTTCATTGAATTTGCTTCATTAATAGGCTCACGATTTCGACTTTGATCGTTATGGACTG  
GTACCAAGATCGAGTCTTAGACAGGCGGACCTCATTTTAAACAGCTGGCACAGTAACAA  
TGAAAATGGCTCCTTCTTTAGTGAGATTATATGAACAAATGCCCGAACCAAAATATGTTA  
TTGCTATGGGAGCGTGTACAATTACCGGGGGTATGTTTCAGTACCGATTCTTATAGTACTG  
TTCGTGGAGTAGACAAGCTAATTCCTGTAGATGTCTATTTGCCAGGCTGCCCGCCTAAA  
CCGGAGGCTATTATAGATGCTATAACAAAACCTTCGTAAGAAAATATCTAGAGAAATCTAT  
GAAGATCGAATTAGGTCTCAAGAGGAGAATCGATGTTTTACTACCAATCACAAAGTTTCA  
TGTTGGACCGAGTATGCATACTGGAAATTATGATCCAGGATTACTTTATCAATTACCATCT  
ACTTCAGAGATCGCTTCTGAAACATTTTTCAAATACAAAAGTTCAGTATCTGCCACGA  
ATTAGTGAAT-----ATGAAAATACCTTTTCTTGGATAAAGAAAGAGATTACTCGATCTAT  
TTCCCTATCACTGATGATATATATCATAACTCGGACATCCATTTCAAACGCATATCCCATT

TTTGCACAACAGGGGTATGAAAATCCACGAGAAGCGACTGGACGTATTGTATGTGCCA  
ATTGCCATTTAGCTAATAAGCCCGTGGATATTGAGGTTCCCAAGCGGTACTGCCGGAT  
ACTGTATTTGAAGCAGTTGTTCTGAATTCCTTATGATAGGCAAGTAAAACAAGTTCTTGC  
TAATGGTAAAAAAGGGGGTTTGAATGTGGGCGCTGTTCTTATTTTACCCGAGGGTTTTG  
AATTAGCCCCCCCCGCTCGTATTTACCCGAGATGAAAGAAAGGATAGGCAATCCGTCT  
TTTCAGAGCTATCGCCCCACTAAAAAAATATTCTTGTTATAGGTCCCGTTCCCGGCCA  
GAAATATAGTGAAATAACCTTTCCTATTCTTTCTCCGGACCCCGCTACTAATAAAGATGT  
TCACTTCTTAAATAACCCATATATGTGCGCGGGAATAGAGGAAGGGGACAGATTTATC  
CCGACGGGAGCAAGAGTAACAATACAGTTTATAATGCGACAGCCGCTGGGATAGTAAG  
TAAAATAATACGAAAAGAAAAGGGGGGTATGAGATAACCATAACGGATGCCTCGGAT  
GGGCGTCAAGTGGTTGATATTATCCCTCAGGACCCGAACCTTCTTGTTTCAGAGGGCG  
AATCTATCAAACCTTGATCAGCCATTAACAAGTAATCCTAATGTGGGTGGTTTTGGGCAA  
GGGGATGCAGAAGTAGTACTTCAAGATCCATTACGTGTCCAAGGCCTTTTGTCTTCTT  
GGCATCTGTTATTTTGGCACAAATCTTTTTGGTTCTTAAAGAAGAAACAGTTTGAGAAGG  
TTCAATTGTCTGAAATGAATTCATGAGTAAAGTCTATGATTGGTTCGAAGAACGTCTC  
GAGATTCAGGCGATTGCGGATGATATAACTAGTAAATATGTTCCCTCCTCATGTCAACATA  
TTTTATTGTCTGGGGGAATTACGCTTACTTGTTTTTTAGTACAAGTAGCTACGGGATTT  
GCTATGACTTTTTACTACCGCCAACAGTCACTGAGGCTTTTGCTTCTGTTCAATACATA  
ATGACTGAAGCTAACTTTGGTTGGTTAATCCGCTCCGTTTCATCGCTGGTCCGCAAGTAT  
GATGGTCCCTAATGATGATCTTGCACGTATTTTCGTGTCTATCTCACAGGTGGTTTTAAAA  
ACCTCGGAATTAACCTGGGTCACAGGCGTGGTTCTAGCTGTATTGACTGCATCGTTTG  
GTGTAACCTGGGTATTCCTTACCTTGGGACCAAATTGGTTATTGGGCAGTCAAATTGTA  
ACAGGCGTGCCGGACGCTATTCCTGTAATAGGATCTCCCTTGGTAGAGTTATTACGAGG  
AAGTGCTAGTGTGGGACAATCCACTTTGACTCGTTTTTATAGTTTACACACTTTTGTATT  
ACCTCTTCTTACGGCCGTATTTATGTTAATGCATTTCCCTAATGATACGTAAGCAAGGGAT  
TTCTGGTCCTTTAAATGGGAGTAACAAAAAACCTGACTTGAATGATCCTGTATTAAGAG  
CTAAATTGGCTAAGGGGATGGGTCATAATTATTACGGCGAACCCGCATGGCCCAACGAC  
CTTTTATATATTTTTCCAGTAGTAATTCTGGGTACGATTGCGGTGTAACGTGGGCTTAGCG  
ATTCTGGAACCATCAATGCTTGGTGAACCCGCGGATCCCTTTGCAACTCCTTTGGAAAT  
ATTACCTGAATGGTATTTCTTTCCCGTATTTCAAATACTTCGTACAGTACCCAATAAGTTA  
TTGGGCGTCTTTTAAATGGTTTCAGTACCTTCCGGATTATTAACAGTACCTTTTTTGGAG  
AATGTTAATAAATTTCAAATCCATTCCGTCGTCCAGTAGCGACAACGGTCTTTTTGATT  
GGGACTGTAGTAGCCCTTTGGTTGGGTATTGGAGCAACATTACCTATCGATAAATCCCTA  
ACCTTAGGTCTTTTTATGATTGAAGTTTTTCTATTTGGAATTGTCTTAGGTCTAATTCCTA  
TTACTTTAGCTGGATTATTTGTAACCTGCATATTTACAATACAGGCGTGGCGATCAGCTGG  
ACCTTATGCTTACTATAACTAGTTTTTTCCGGTTTTCTACTAGCGGCTTTAACTATAACCTC  
AGTTTTATTTATTGGTCTGACCAAGATACGACTTATTATGGATATAGTCAGTCTTGCTTGG  
GCTGCTTTAATGGTAGTCTTTACATTTTCCCTTTCCTGTTAGTATGGGGAAGGAGTGG  
GCTCATGATTATTCGTTCCCGGAACCAGAAGTCAAATTTGGTAGATAGGGATCCCA  
TAAAACGTCGTTTCGAGGAATGGGCTAAACCGGGCCATTTCTCAAGAACAAATAGCTAA  
GGGCCCTGAGACTACCACTTGGATCTGGAACCTACATGCTGATGCTCACGATTTTCGATA  
GCCATAACCAGCGATTTGGAGGAGATCTCTCGAAAAGTATTTAGTGCCCATTTTGGGCAA  
CTTTCCATTATCTTTCTGTGGCTGAGTGGCATGTATTTCCACGGTGCTCGTTTTTCCAATT  
ATGAAGCATGGCTAAGCGACCCTACTCACATTGGACCTAGTGCTCAGGTGGTTTTGGCC

AATAGTGGGCCAAGAAATATTGAATGGCGATGTGGGCGGGGTTTCCGAGGAATACAA  
ATAACCTCTGGGTTTTTTTCAGCTTTGGAGAGCGTCTGGAATAACTAGTGAATTACAAC  
CTATTGTACCGCAATAGGCGCATTAGTCTTTGCAGCCTTAATGCTTTTTGCTGGTTGGTT  
CCATTATCACAAAGCGGCTCCAAAATTGGCCTGGTTCCAAGATGTCGAATCTATGTTGA  
ATCACCATTAGCAGGGCTACTAGGACTGGGGTCTCTTTCTTGGGCGGGGCATCAAGTA  
CATGTATCTTTACCAATTAACCAATTTCTAAACGCGGGAGTAGATCCTAAAGAGATCCC  
ACTTCTCATGAATTTATCTTGAATCGGGATCTTTTGGCTCAACTTTATCCGAGTTTTGC  
CGAGGGAGCAACTCCATTTTTTACCTTGAATTGGTCAAAATATGCGGAATTTCTGACTT  
TTCGCGGAGGATTAGATCCAGTAACTGGGGGTCTATGGCTGACTGATATTGCTCATCAT  
CATTTGGCTATTGCAATCTTTTCTTGATAGCGGGTCACATGTATAGGACCAACTGGGGC  
ATTGGTCATGGTCTAAAAGATATTTTAGAGGCTCATAAAGGTCCATTTACAGGCCAGGG  
CCATAAAGGCCTATATGAGATCCTAACAACGTCATGGCATGCTCAATTATCTCTAACCT  
CGCTATGTTAGGCTCTTTAACGATTGTTGTAGCTCACCATATGTATTCCATGCCCCCTTAT  
CCATATCTAGCTACTGACTATGGTACCCAAGTGCATTGTTACACATCACATGTGGATT  
GGTGGATTTCTCATAGTTGGTGTGCCGCGCATGCTGCTATTTTTATGGTAAGAGATTAT  
GATCCAACACTCGATACAACGATCTATTAGATCGTGTCTTAGGCATCGCGATGCAATC  
ATATCACATCTCAATTGGGTATGTATTTTTCTAGGCTTTCACAGTTTTGGTTTTGTATATC  
ATAACGATACCATGAGCGCTTTAGGACGCCCTCAAGATATGTTTTCTGATACCGCTATAC  
AATTACAACCCGTCTTTGCTCAATGGATACAAAACACCCATGCATTAGCGCCCGGTGCA  
ACGGCCCTGGTGAACAACAAGCACCAGTTTGGCTTGGGGAGGCGGTGATTTAGTA  
GCAGTGGGGGGCAAGGTTGCTTTGTTACCGATTCCCTTAGGAACCGCAGATTTTTTGGT  
CCATCACATTCATGCATTTACGATTCATGTAAGTGTATTGATACTCTTGAAGGGTGTCTA  
TTTGCTCGTAGCTCTCGTTTTGATACCGGATAAAGCAAATCTTGGCTTTCGTTTCCCTTGT  
GATGGACCGGGACGGGGAGGGACATGTCAAGTATCCGCTTGGGATCATGTCTTCTTAG  
GGCTATTCTGGATGTACAATGCAATTCGGTAGTCATATTTCAATTCAGTTGGAAAATGC  
AGTCAGACGTTTGGGGTAGTATAAGTGATCAAGGAGTGGTAACTCATATAACGGGAGG  
AACTTTGCCAGAGTTCATCACTATTAATGGTTGGCTCCGCGATTTCTTATGGGCAC  
AGGCATCCCAAGTAATTCAGTCTTATGGTTCTTCATTATCTGCATATGGCCTTTTTTCTCT  
AGGTGCTCATTTTGTATGGGCTTTTAGTTTAATGTTTCTATTACGCGGACGTGGTTATTG  
GCAAGAACTTATTGAATCCATCGTTTGGGCTCATAATAAATTAAGTTGCTCCTGCTAC  
CCAGCCTAGAGCCTTGAGCATTGTACAAGGACGTAAGTGTAGGAGTAACCCATTACCTTC  
TGGGTGGAATTGCCACAACATGGGCATTCTTCTTAGCAAGAATTATTGCAGTAGGAATG  
GCATTAAGATTTCCAAGGTTTAGCCAAGGCTTAGCTCAGGACCCCACTACTCGTCGTAT  
TTGGTTTGGTATTGCAACCGCGCATGACTTTGAGAGTCATGATGATATTACTGAGGAAC  
GTCTTTATCAGAATATTTTTGCTTCTCACTTCGGGCAATTAGCAATCATTTTTCTGTGGA  
CTTCCGGAAATCTCTTTTCATGTAGCTTGGCAAGGAAATTTGAGGCATGGGTACAGGAC  
CCTTACATGTAAGACCTATTGCTCATGCAATTTGGGATCCTCATTTTGGTCAACCGGCT  
GTGGAAGCTTTTACTCGAGGGGGTGTCTCTCGGCCAGTGAATATCGCTTATTCTGGTGT  
TTATCAGTGGTGGTATACAATTGGTTTACGTAACGAAGATCTTTATACAGGAGCGCT  
TTTTCTATTATTTCTTCTGCTATAATCCTTAATAGCGGGTTGGTTACACCTACAACCGAAA  
TGGAACCGAGCGTTTCATGGTTCAAAAATGCCGAATCTCGTCTCAACCATCATTTGTC  
GGGGCTATTCGGTGTAAGTTCTTTGGCTTGGACAGGGCATTAGTACATGTCGCTATTCC  
AGGATCCAGGGGGGAATCCGTTTCGATGGAATAATTTCTTAGATGTATTACCGCATCCCG  
AAGGGTTAGGACCCCTTTTTACAGGCCAGTGAATCTTTATGCCCAAACCCCGATTCA



AGTAGTCATTTATTTGGTACTTCCCAAGGATCGGGAAGTCCATTCTCACCCCTTCTAGGT  
GGATTCCATCCACAAACGCAAAGTTTATGGTTGACTGATATGGCTCATCATCATTTGGCT  
ATTGCATTTCTTTTTCTCATTGCTGGTCATATGTATAGAACCAACTTCGGGATTGGGCAC  
AGTATAAAAGATCTTTTGAAGCGCATACCCCTCCGGGGGGGCGATTGGGGCGTGGAC  
ATAAGGGTCTTTATGACACAATCAATAATTCGATTCATTTTCAATTAGGCCTTGCCCTCG  
CCTCTTTAGGTGTTAATTACTTCCCTGGTAGCCCAACACATGTACTCTTTGCCTGCTTATG  
CGTTCATAGCACAAGACTTTACTACTCAAGCTGCGTTATATACTCATACCAATACATTG  
CAGGATTCATCATGACGGGGGCTTTTGCGCATGGGGCTATATTTTTCATTAGAGATTACA  
ATCCGGAACAGAATGAGGATAATGTATTGGCAAGAATGTTAGACCATAAAGAAGCTATT  
ATATCCCATTTAAGTTGGGCCAGCCTCTTTTTGGGGTTCCATACTTTGGGACTTTATGTT  
CATAATGATGTCATGCTTGCTTTTTGGTACTCCGGAGAAACAAATATTGATCGAACCTATA  
TTTGCCCAATGGATACAATCTGCTCATGGTAAAACCTCGTATGGTTTTCGATGTACTTTTA  
TCTTCAACGAATAGCCCGGCATTTAATGCGGGTCGAAGCATATGGTTGCCCGGTTGGTT  
AAATGCTATTAATGAG-----AATAGTAATTCATATTCTTAACAATAGGTCCTGGAGACTT  
CTTGGTTCATCATGCGATTGCTCTAGGGTTACATACCACTACATTGATCTTAGTAAAAGG  
TGCTTTAGATGCACGCGGTTCCAAATTAATGCCAGATAAAAAGGATTTCCGTTATAGTTT  
TCCTTGCGATGGTCCGGGACGAGGTGGTACTTGTGATATTTCCGCTTGGGACGCATTTT  
ATTTGGCAGTTTTCTGGATGTTAAATACCATTGGATGGGTTACTTTTTATTGGCATTGGA  
AACACATCACATTATGGCAAGGTAACGTTTCACAGTTTAATGAATCTTCCACTTATTTAA  
TGGGATGGTTAAGAGATTATCTTTGGTTAAACTCTTCACAACCTATCAATGGATATAATC  
CTTTTGGTATGAATAGTTTATCAGTCTGGGCCTGGATGTTCTTATTGGACATCTTGTTG  
GGCTACGGGATTTATGTTCTTAATTTCCCTGGCGTGGATATTGGCAGGAATTGATTGAAAC  
TTAGCATGGGCTCACGAACGGACGCCCTTGGCTAATTTGATTCGGTGGAGAGATAAA  
CCGGTGGCTCTTTCCATTGTGCAAGCAAGATTGGTTGGATTAGCCACTTTTCTGTAGG  
TTATATATTCATTTATGCGGCTTTCTTGATTGCTTCGACATCAGGCAAATTTGGTATGTCG  
CATTCAGTAAAGATTTATGATACCTGTATAGGATGTACTCAATGTGTACGTGCCTGCCCG  
ACGGACGTATTAGAAATGATCCCTTGGGATGGGTGTAAAGCCAAGCAAATGCTTCTGC  
TCCAAGAACAGAGGACTGTGTTGGTTGTAAGAGATGTGAATCGGCCGTGCCAACGGAT  
TTTTTGAGCGTTCGAGTTTATTTATGGCATGAAACAACCTCGAAGTATGGGTCTAGCTTAT  
ATGACA-----GACTTCCCTCTATTTTTGTGCCTTTAGTGGGCCTAGTATTTCCGGCAATT  
GCAATGGCTTCTTTATCTCTTCATGTTGAAAACAACAAGATTGTTATGCGAGATCTAAA  
AACATATCTTTCCGTCGCACCGGTAATAAGTCTCTCTGGTTCGGGGCTTTAGCGGGTC  
TATTGATAGAGATCAATCGTTTCTTCCCGGATGCCTTGACATTTCCCTTTTTTTCC---ATG  
ACTGCAATTTTAGAGAGACGCGAAAGCGAAAGCCTATGGGGTCGCTTCTGTAACCTGGA  
TAACCAGCACCGAAAACCGTCTTTACATCGGATGGTTTGGTGTTTTGGATGATCCCTACC  
CTATTGACCGCAACTTCTGTATTTATTATCGCCTTCATTGCTGCTCCTCCAGTAGATATTG  
ATGGTATTCGTGAACCTGTTTCTGGATCTCTTCTTTATGGAAACAATATTATTTCCGGGTG  
CCATTATTCCTACTTCTGCAGCTATTGGTTTGCATTTTTTACCCAATATGGGAAGCAGCAT  
CTGTTGATGAATGGTTATAACAACGGTGGTCCTTATGAGCTAATTGTTCTACACTTCTTAC  
TTGGTGTAGCTTGTACATGGGCCGTGAGTGGGAACTTAGTTTTCCGTCTGGGTATGCGC  
CCTTGGATTGCTGTTGCGTATTCAGCTCCTGTTGCAGCTGCTACTGCTGTTTTCTTGATC  
TATCCAATTGGTCAAGGAAGTTTTTCTGATGGTATGCCTCTAGGAATTTCTGGTACTTTC  
AACTTCATGATTGATTCCAGGCGGAGCACAAACATCCTTATGCACCCATTCCACATGTTA  
GGCGTAGCTGGTGTATTCCGGCGGCTCCCTATTCAGTGCTATGCATGGTTCCTTGGTAACC

TCTAGTTTGATCAGGGAAACCACAGAAAATGAATCTGCTAATGAAGGTTACAGATTG  
GTCAAGAGGAAGAACTTATAATATCGTAGCTGCTCACGGTTATTTGGCCGATTGATC  
TTCCAATACGCGAGTTTCAACAACCTCTCGTTCTTTACATTTCTTCTTAGCTGCTTGGCCT  
GTAGTAGGTATCTGGTTCACTGCTTTAGGTATTAGCACCATGGCTTTC AACCTAAATGGT  
TTCAATTTCAACCAATCTGTAGTTGATAGTCAAGGTCGTGTAATTAATACCTGGGCGGAT  
ATTATTAACCGTGCTAACCTTGGTATGGAAGTTATGCACGAGCGTAACGCCATAACTTC  
CCTCTAGACCTAGCTGCTGTTGAAGCTCCATCTACAAATGGAATGGGTTTGCCTTGGTA  
TCGTGTGCATACCGTTCGTATTGAATGATCCTGGCCGTTTGCTGGCTGTCCATATAATGCA  
TACAGCTTTGGTTGCTGGTTGGGCCGGTTCGATGGCTTTATATGAATTAGCCGTTTTTGA  
TCCCTCTGACCCCGTTCTTGATCCAATGTGGAGACAAGGTATGTTGTTATACCCTTCAT  
GACTCGTTTAGGAATAACTAATTCATGGGGTGGTTGGAGTATCACA---GGGGAACTGT  
AACGAATCCGGGTATTTGGAGTTACGAAGGTGTGGCCGGCTCACATATTCTGTTTTCTG  
GCTTGTGCTTCTTGGCAGCTATCTGGCATTGGGTGTATTGGGATTTAGCAATATTTCTG  
ATGAACGCACAGGAAAACCTTCTTTAGATTTGCCAAGATCTTTGGAATTCATTTATTTCT  
TTTCAGGGCTAGCTTGCTTTGGTTTTGGCGCATTTTCATGTAACAGGGTTGTATGGTCCTG  
GAATCTGGGTGTCCGATCCTTATGGACTAACTGGAGAGGTACAACCTGTAAATCCAGCA  
TGGGGCGTAGAAGGTTTTGATCCTTTTGTCCAGGAGGAATAGCCTCTCATCATATTGC  
AGCGGGGACTTTAGGTATATTGGCGGGTCTATTTTCATCTTAGTGTCCGTCGCCCAAC  
GTCTCTACAAGGATTGCGTATGGGCAATATTGAAACCGTCCTTTCCAGTAGTATTGCT  
GCTGTCTTTTTTGCAGCTTTTGTGTTGCTGGAACCTATGTGGTATGGTTCAGCAACTACC  
CCTATTGAATTGTTTTGGTCCCACCCGTTATCAATGGGATCAGGGATACTTCCAGCAAGA  
AATATATCGAAGAGTTGGCGCGGGGCTAGCCAAAAATCAAAGCTTATCAGAAGCGTGG  
TCTAAAATTCCTGAAAAATTGGCTTTTTATGATTACATCGGGAATAATCCTGCAAAAAGG  
GGGATTATTCAGAGCGGGTTCAATGGACAGCGGGGATGGAATAGCCGTTGGGTGGTTA  
GGACATCCTATCTTTAGAGATAAAGAGGGGCGTGAACCTTTTTGTACGTCGTATGCCTAC  
TTTTTTTTGAAACATTTCCGGTTGTTTTGGTAGACGGAGACGGAATTGTTAGAGCCGACG  
TTCCTTTTAGAAGGGCAGAATCGAAGTATAGTGTGGAACAAGTAGGTGTAACCATCGA  
GTTCTATGGTGGCGAACTCAATGGAGTCAGTTATAGTGACCCTGCTACTGTAAAAAAT  
ATGCTAGACGCGCTCAATTAGGTGAAATTTTTGAATTAGATCGCGCTACTTTGAAATCG  
GATGGTGTTTTTCGTAGCAGTCCGAGAGGCTGGTTTACTTTTGGGCATGCTTCGTTTGC  
TCTGCTCTTCTTCTTCGGGCACATTTGGCACGGTGCTAGAACCCTCTTCAGAGATGTTT  
TTGCTGGTATTGACCCGGATTGGATACGCAAGTGAATTTGGAGCATTCCAAAACTT  
GGAGATCCAAC TACAAGAAGACAAGCAGTCATGAAAACCTTATATTCCCTGAGGAGGT  
TCTACCCCGTGGAACGCTCTTTAATGGAACCTTTAGCTTTAGCTGGTCGTGACCAAGAA  
ACTACCGGTTTTCGCTTGGTGGGCCGGGAATGCACGACTTATCAATTTATCCGGTAAACT  
TTTGGGGGCTCATGTAGCCCATGCCGATTAATCGTATTCTGGGCCGGAGCAATGAACC  
TATTTGAAGTGGCTCATTTTGTACCAGAGAAGCCCATGTATGAACAAGGATTAATTTTAC  
TTCCGCACTTAGCCACTCTAGGTTGGGGAGTAGGTCCTGGTGGGGAAGTTATAGACAC  
CTTCCATACTTTGTATCTGGAGTACTTCACTTAATTTCTCGGCAGTATTGGGCTTTGG  
CGGTATTTATCATGCACTTCTGGGCCCTGAGACTCTTGAAGAATCTTTTCCATTCTTTGG  
TTATGTATGGAAAGATAGAAAATAAAATGACCACAATTTTAGGTATTCATTAATCTTGT  
AGGTTTAGGTGCTTTTCTTCTAGTATTCAAGGCTCTTTATTTTGGTGGCGTATATGATACC  
TGGGCTCCGGGAGGGGGAGATGTACGAAAATACTAACTTGACCCTTAGCCCAAGTA  
TTCTATTTGGTTATTTACTAAAATCGCCCTTTGGCGGAGAAGGATGGATTGTGAGTGTG

GATGATTTGGAAGATATAATTGGAGGGCATGTATGGTTAGGTTCCATTTGTATACTTGGC  
GGAATCTGGCATATCTTAACCAAACCTTTTGCCTGGGCTCGTCGCGCACTTGTATGGTC  
TGGGGAGGCTTACCTGTCTTATAGTTTACGCTGCTTTATCCGTTTTTGGTTTCATTGCTTGT  
TGCTTTGTCTGGTTCAATAATACCGCCTATCCTAGTGAATTTTACGGACCGACTGGACCA  
GAAGCTTCTCAAGCTCAGGCATTTACTTTTTCTAGTTAGAGACCAACGCCTTGGGGCTAA  
CGTGGGATCCGCTCAAGGACCTACAGGTTTAGGTAAATATCTAATGCGTTCCCCGACTG  
GAGAAGTCATTTTTGGAGGGGAAACTATGCGTTTTTGGGATCTGCGTGCTCCCTGGTTA  
GAACCTCTAAGGGGGCCAAATGGGTTGGACTTGAGTAGGCTGAAAAAAGACATACAG  
CCTTGGCAAGAACGGCGTTCCGCAGAATATATGACTCATGCTCCTTTAGGTTCTTTAAA  
TTCGGTTGGTGGCGTTGCTACCGAGATCAATGCAGTCAATTATGTCTCTCCTAGAAGTT  
GGTTAGCTACCTCTCATTTTTGTTCTAGGATTCTTCCTATTTCGTAGGGCATTATGGCACG  
CGGAAGGGCTCGTGCAGCTGCAGCAGGATTTGAAAAAGGAATTGATCGTGATTTTGA  
ACCTGCTCTTCCATGACCCCTCTTAACATGACTATAGCCCTTGGTAAATTTACCAAAGA  
CGAAAAAGATTTATTTGATATTATGGATGACTGGTTACGTAGGGACCGTTTTGTTTTTGT  
AGGTTGGTCCGGTCTATTGCTCTTTCCTTGTGCCTATTTTCGCTTTAGGGGGTTGGTTAC  
AGGTACAACCTTTGTAACCTCATGGTATACCCATGGATTGGCCAGCTCCTATTTGGAAG  
GATGCAACTTCTTAACCGCCGAGTTTCGACCCCTGCTAATAGTTTACGCGATTCTTTGT  
TGTTACTATGGGGTCCGGAAGCGCAGGGGGATTTACTCGTTGGTGTCAATTGGGCGGT  
CTGTGGACTTTTTGTTGCTCTCCACGGCGCTTTCGCACTAATAGGTTTCATGTTACGTCAA  
TTTGAATGCTCGATCTGTTCAATTGCGACCTTATAATGCAATCGCATTCTCTGGGCCA  
ATTGCTGTTTTTGTCTGTATTCTGATTTATCCACTCGGGCAGTCTGGTTGGTTCTTTG  
CGCCTAGTTTTGGTGTAGCAGCTATATTTTCGCTTCATCCTCTTTTTCCAAGGGTTTCATAA  
TTGGACATTGAACCCGTTTCATATGATGGGAGTTGCTGGTGTATTGGGCGCTGCTCTACT  
ATGTGCTATTTCATGGTGCTACTGTAGAAAATACTTTATTTGAAGATGGTGATGGTGCAAA  
TACATTCCGTGCTTTTAACCCAACTCAAGCTGAAGAACTTATTCAATGGTCACCGCTA  
ATCGCTTTTGGTCCCAAATCTTTGGGGTTGCTTTTTCCAATAAACGTTGGTTACATTTCT  
TTATGTTATTTGTACCAGTCACCGTTTATGGATGAGTGCTCTTGGAGTCGTGCGCCTGG  
CTCTGAACCTACGCGCCTATGACTTCGTTTTCCAGGAGATCCGTGCCGCGGAAGATCCT  
GAATTTGAACTTTCTACACCAAAAATATTCTCTTAAACGAAGGTATTCGTGCTTGGAT  
GGCGGCTCAAGATCAGCCTCATGAAAACCTTATATTCCCTGAGGAGGTTCTACCCCGTG  
GAAACGCTCTTATGTCTGGAAGCACAGGAGAACGTTCTTTTGTCTGATATTATTACCAGT  
ATTCGATACTGGGTATTTCATAGCATTACTATACCCTCCCTATTCATTGCGGGTTGGTTAT  
TCGTCAGCACGGGTTTAGCTTACGATGTGTTTGGAAAGCCCTCGTCCAAACGAATATTTT  
ACAGAGAGCCGACAAGGAATTCCATTAATAACTGGCCGTTTTGACTCTTTGGAACAAC  
TCGACGAATTTAGTAGATCTTTTATGACTATAGATCGAACCTATCCAATTTTTACAGTGC  
GATGGTTGGCTGTTTCATGGACTAGCTGTACCTACCGTTTCTTTTTTGGGGTCAATATCAG  
CAATGCAGTTCATCCAACGAATGGCTACACAACTGCTGAGGAGAGTTCTAGA---GCTA  
GACCAAAAAAACAGGTTTGGGGGGTTATTGAAACCATTAAATTCAGAATATGGTAA  
AGTAGCTCCTGGGTGGGAACTACCCCTTTGATGGGTCTTGCAATGGCTCTATTTGCGG  
TATTCTTATCTATTATTTTGGAAATTTATAATTTCTCCGTTTTATTGGACGGAATTTCAATG  
AATATGCTTACTCTCAAACCTTTTGTTTACACAGTGGTGATATTCTTTGTTTCTCTCTCA  
TCTTCGGATTCCCTATCTAACGATCCAGGACGTAATCCTGGACGTGAAGAAATGGCCGAT  
ACTACTGGAAGGATTCCCTCTTTGGATAATAGGTAAGTGTAGCCGGTATTCTTGTGATCGGT  
TTAATAGGTATTTCTTTTATGGTGCATACTCCGGGTTAGGCTCATCTCTGATGCTTAATA

TCTTTAGTTTG-----ATCTGTCTTAATCCGATCTTTATTCGAGTCGTTTTTTCTTAGCCAA  
ATTACCCGAGGCCTACGCTTTTTTTGAATCCAATCGTAGATGTTATGCCAGTAATACCCCT  
TTTCTTTTTGCTCTTAGCCTTTGTTTGGCAAGCTGCTGTAAGTTTTTCGAATGACACAATC  
AAACCCGAACGAACAAGATGTTGAATTGAATCGTACCAGTCTCTACTGGGGGTATTAC  
TCATTTTTGTACTTGCTGTTTTATTTTCCAATTATTTCTTCAATATGGAAGTAAATATTCTC  
GCATTTATTGCTACTGCACTTTTTATTTCTAGTTCCTACTGCGTTTTTACTTATAATATACGT  
AAAACTGTCAGTCAAAGTGATATGGAAACAGCAACCCTAGTCGCCATCTCTATATCTG  
GTTACTTGTAAGTTTTACGGGGTATGCCTTATATACTGCTTTTTGGGCAACCCCTCTCAAC  
AATTAAGAGATCCGTTTCGAGGAACACGGGGACATGGAAGCATTGGTTTATACATTCCCTC  
TTAGTCTCCACTCTAGGGATCATTTTTTTTCGCTATCTTTTTTCGAGAACCGCCTAAAATT  
CAAATAAAAAGACGAAAATGACTATTGCTTTCCAATTGGCTGTTTTTGCATTAATTGC  
TACTTCATCACTTTTACTGATTAGTGTACCCGTTGTATTTGCTTCTCCGAGGGTTGGTC  
AAGTAACAAAATGTTGTATTTTCCGGCACATCATTGTGGATTGGATTAGTCTTTCTGGT  
GGGTATCCTTAATTCTCTCATCTCT-----ATGTCACCACAAACAGAGACTAAA  
GCAAGTGTTGGATTCAAAGCCGGCGTTAAAGATTATAAACTGACTTATTATACTCCTGA  
ATACGAAACCAAAGATACTGATATCTTGGCAGCATTTCAGAGTAACTCCTCAACCTGGAG  
TTCCGCCTGAGGAAGCAGGGGCTGCAGTAGCTGCCGAATCTTCTACTGGTACCTGGAC  
AACTGTGTGGACCGATGGGCTTACCAGCCTTGATCGTTATAAAGGAAGATGCTACCACA  
TCGAGCCTGTTGCGGGAGAAGAGAATCAATATATATGTTATGTAGCTTACCCCTTAGACC  
TTTTTGAAGAGGGTTCTGTTACTAATATGTTTACTTCCATTGTGGGTAATGTATTTGGGTT  
CAAAGCCCTGCGTGCTCTACGTCTGGAGGATCTGAGAATCCCTACTGCATATGTTAAAA  
CTTTCCAAGGCCCGCCTCACGGCATCCAAGTTGAGAGAGATAAGTTGAACAAGTATGG  
CCGTCCCTATTGGGATGTACCATTAAACCGAAATTAGGGTTATCCGCTAAGAACTACG  
GTAGAGCTGTTTATGAATGTCTTCGTGGTGGACTTGATTTTACCAAGGATGATGAAAAC  
GTAAACTCACAACCATTATGCGTTGGAGAGACCGTTTCTTATTTTGTGCCGAAGCAAT  
TTATAAATCACAGGCTGAAACTGGTGAATCAAAGGGCATTACTTGAATGCTACTGCGG  
GTACATGCGAAGAAATGATGAAAAGGGCTATATTTGCCAGAGAATTGGGAGTTCCCATC  
GTAATGCATGACTACTTAACAGGGGGATTCACTGCAAATACTAGCTTGGCTCATTATTGC  
CGAGATAACGGTCTACTTCTTCACATCCACCGTGCAATGCATGCAGTTATTGATAGACA  
GAAAAATCATGGTATACACTTTCGTGTACTAGCTAAAGCCTTACGTATGTCTGGTGGAG  
ATCATATTCACTCAGGTACCGTAGTAGGTAACCTTGAAGGAGAAAGAGATATTACTTTA  
GGCTTTGTTGATTTACTACGTGATGATTTTATTGAAAAAGACCGAAGCCGCGGTATTTAT  
TTCACTCAAGATTGGGTCTCTACCTGGTGTTTTTGCCTGTGGCTTCAGGGGGTATTCA  
CGTGTGGCATATGCCTGCTCTGACCGAAATCTTTGGAGATGATTCCGTACTACAATTCG  
GTGGTGGAACTTTAGGACACCCTTGGGGAAATGCACCGGGTGCTGTAGCGAATCGAGT  
AGCTCTAGAAGCATGCGTACAAGCCCGTAATGAGGGGCGTGATCTTGCTCGTGAGGGT  
AATGAAATTATACGGGAGGCTTGCAAATGGAGTCCGGAAGTACTGCTGCTTGTGAAG  
TATGGAAAGAGATCAAATTTGAATTCCAAGCAATGGATACTTTG-----ATGGCGATACAT  
TTATACAAAATTTCTACCCCGAGCACACGCAATGGAGCCGTAGACAGTCAAGTGAAT  
CCAATACACGAAAAAATTTGATCTATGGACAGCCTCGTTGTAGTAAAGGTCGTAATGCC  
AGAGGAATCATTACCGCAGGGCATAGAGGGGGAGGTCATAAGCGTCTATACCGTAAAA  
TCGATTTTCGACGGAATGAAAGAGACATATATGGTAGAATCGTAAGCATAGAATACGAC  
CCTAATCGAAATGCATCCATTTGTCTCATACTATGGGGATGGTGAGAAGAGATATATT  
TTACATCCAGAGGGGCCATAATTGGAGATACCATTGTTTCTGGTACAGAAGTTCCTATA

AAAATGGGAAATGCCCTACCTTTGACCAAGATGCCCTTAGGCACGGCCCTACATAACAT  
AGAAATCACACTTGGAAAGGGTGGACAATTAGCTAGAGCAGCGGGTGCTGTAGCGAA  
ACTGATTGCAAAAGAGGGGAAATCGGCCACATTAATAATTACCTTCTGGGGAGGTCCGT  
TTGATATCCAACAACCTGCTCAGCAACAGTCGGACAAGTGGGGAATGTTGGGGTGAACC  
AGAAAAGTTTGGGTAGAGCCGGATCGAAACGTTGGCTAGGTAAGCGTCTGTAGTAAG  
AGGGGTAGTTATGAACCCCGTAGACCATCCCATGGGGGTGGTGAAGGGAGGGCCCCA  
ATTGGTAGAAAAAACCCGCAACCCCTTGGGGTTATCCGGCACTTGGGAAGAAGAAGTA  
GAAAAAGGAATAAATATAGTGAGAATTTGATTCTTCGTCGCCGTAGTAAAATGATTCAA  
CCTCAAACCCGTTTGAATGTCGCGGATAACAGTGGGGCTCGAGAATTAATGTGTATTCG  
AATCATCGGAGCTAGT---AATCGTCGATATGCTCATATCGGTGACATTATTGTTGCTGTGA  
TCAAGGAAGCATTACCAAGCACCTCCCTAGAAAGATCAGAAGTGGTCAGAGCTGTAAT  
TGACGTAATTGTAAAGAACTTAAATGTGACGACGGTATCATAATACGATATGATGACAA  
TGCTGCTGTTGTCATTGATCAAGAAGGAAATCCAAAAGGAACCCGAGTTTTTGGTGCG  
ATTGCCACGAATTGAGAGAGTTAAGTTTCACTAAAATAGTTTTATTAGCACCTGAGGT  
ATTAATGCTTAGTCCCAAAGAACCAGATTTTCGTAAACAACATAGAGGAAGAATGAGA  
GGGATATCTTATCGCGGCAATCGTATTTGTTTCGGTAAATATGCTCTGCAGGCACTTGAA  
CCGGCGTGGATCACATCTAGACAAATAGAAGCAGGGCGTCGAGCAATGACGCGAAAT  
GTACGACGTGGTGGAAAAACATGGGTACGTATATTTCCAGACAAACCCGTTACGTAA  
GAGCGGCCGAAACACGTATGGGTTTCGGTAAAGGAAACCCCGAATATTGGGTAGCTGT  
CGTCAAACCCGGGTAGAATACTTTATGAAATGGGTGGAGTCGCAGAAAATATAGCCAGA  
AAGGCGATTTCTATAGCAGCCTCGAAAATGCCTATACGAACTCAATTCATTATTTAGGA  
ATGACCAGAATTAGACGGGGATATATAGCTCGTAGACGTAGAACAAAAACGCGTTTCTT  
TGCATCAAGCTGGCGGGGGGCTCGTGGAAACCTGACTCGAGCAATCATTCAACAGAG  
AATAAGAGCTTGGTTTTTCGTCTCATCGAGATAGAACTAGACAAAAGAGAGATTTTTCGTC  
GTTTGTGGATCACTCGAATAAATGCAGCAATTCGCGAGAAT-----AGATCCTCT-----AGT  
AAATTAATACACAATCTGTACAAGAGGCAGTTGTTTCTTAATCGTAAATGCTTGCCCA  
ACTAGCTATATTAATAGGAATTGTCTTTATATGATTTCCAATCAGATCCTAAAA---GAAG  
TAGATTGGCAAGAATCCGCTACAATAATGAAAAAAGAAGTCTATGCTTTAGGGCAATAT  
ATATCTATGTCTGCTCCCAAAGCGCGAAGGGTGATTGATCAGATTCGTGGGCGGTCCTA  
CGAAGAAACCCCTTATGCTACTAGCACTTATGCCTTATCGAGCGTGTGATCCATTTTAAA  
ATTAGTGAATTCTGCGGCCGCAAATGCTAGGCACAATATGCTTTTCAATGAAGCAACTT  
TAGTTATTAGTAAAGCAGAAGTCAACGAAGGCACTACTGTGAAAAAATTAACCCGCG  
AGCTCGAGGACGGAGTTATCCAATAAGAAGACCCACTTGCCATATAAGAATTGTATTGC  
AAGATACGTCTTTTCGAT-----ATGGATGGAATCAAATATGCAGTATTTACAGA  
CAAAGGTGTTTCGGTTATTGGGGAAAAAT---CAATATACTTCTAATGTCGAATCAGGATCA  
ACTAGGACAGAAATAAAGCATTGGGTGCAACTCTTCTTTGGTGTCAAGGTACAAGCTA  
TGAATAGTCATCGACTCCCGGGAAAGGGTAGAAGAATGGGACCTATTATGGGACATAC  
AATGCATTACAGACGTATGATCATTACGCTTCAACCGGGTTATTTCTATTCCACCTTTAG  
AAAGAAAAGAACTATGGCAGTTCCAAAAAACGCACTTCTATATCAAAAAACGTATT  
CGTAAACTATTTGGAAAAAAAAGGCATATTGGGCATCCTTGAAAGCTTTTTTCGTTAGC  
GAAGTCTTTTCTACTGGAAATTCTAAAAGTTTTTTCTACTCGAAATTC-----ATGGCCA  
GGGGTAAAGATGCCCGTGAACGGTTATCTTGGAAATGTACCAATTGTGTTTCGAGGGGGT  
-----GTTACTAAGGAATCAACGGGTATTTCCAGATATATTAAGTAAAAGAAATCGACACAA  
TACGCTGGTCAATTGGAATTGAAAAAATTCTGTCCCTATTGTTACAAACAGACAATTC

ACGGGGAGATAAAGAAAATGAAAATACGGGCATCCGTTTCGTAAAATTTGTACAAAATG  
TCGACTGATCCGTAGGAGAGGACGAATTATAGTAATTTGTTCCAATCCGAGACATAAAC  
AAAGACAAGGCATGGTTCGAGAGAAAGTAAGAGTATCTACTCGGACACTCCAGTGGA  
AGTGTGTTGAATCAAGAGTAGACAGTAAGCGTCTTTATTATGGACGCTTTATTCTTTCC  
CCCTTATGAAAGGGCAGGCCGATACAATAGGCATTGCGATGCGAAGAGCTTTACTTGG  
GGAAATAGAAGGGACATGTATCACCCGCGCCAAATTTGAA-----AAAATACCCCATGAA  
TATTCTACCATAGTAGGTATTCAAGAATCAGTACATGAAATTTTAATGAATTTGAAAGAA  
ATTGTATTGAGAAGTAATTTGTATGGAACCTGTAAACGCGTCTATTTGTGTCAAGGGTCCC  
GGGTGTGTAAGTCTCAAGACATCCTATTACCACCGTCTGTGGAAATCATTGATAACAC  
ACAGCATATAGCTAGCCTAATGGAACCGATTCAATTTGTGTATTGGATTACAAATTGAGAG  
GAATCGAGGATATCATATAAAATCACCAAATAACTTTCAAGACGGAAGTTAT-----CCTAT  
AGATGCTGTATTTATGCCTGTTCGAAATGCGAATCATAGTATTCAATCTTATGGGAATCA  
AAATGAAAAACAAGAGATACTTTTTCTCGAAATATGGACAAATGGAAGTTAACTCCTA  
AAGAAGCACTTCACGAAGCCTCCCGGAATTTAATTGATTTATTTCTTCCCTTTCTGCATG  
CGGAAGAAGAA-----AACTTACATTTAGGAAAGAATAAG---TACAATGTGACTTTCCCC  
TTTTTACTTTTCATAAAAAATTAGCTAAG---CTAAGGAAACCGAAAAAC---GAAATAGCA  
TTGAAATCTATTTTTATTGACCAATTAGAATTGCCCCCCAGGATCTATAATCCCTCAA  
GGGTCCAAGATCCATACATTATCGGACCTTTTGAATAAGAGTCAAGAAGACCTTATGAA  
AATGAAACATTTTCGTATAGAAGATGTAACACAGATCTTGGACATTCTAGAAATAGAAA  
AAGCATTTCATAACCGATTTAACGAAGAAAACATGCTCGGGGATGGAAT---GGGGAA  
TGTGTACAATACCTGGTTTTAATCAGATACAATTTGAAGGATTTTGTAGATTCATTGATC  
AGGGCTTAACGGAAGAACTTTCGAAATTTCCAAAAATTGAAGACACGGATCAAGAAAT  
TGAATTTCAATTTTGTGGAAACATATCACTTGGTAGAACCTTTGATAAAAGAACGAG  
ATGCTGTATATGAATTAATCACAATTTCTTCTGAATTATATATATCCGCGGGATTAATTTGG  
AAAAGCAGTAGGGATATGCAAAAACAACCATTTTTATTGGAAACATTCCTTTAATGAA  
TTCCCTGGGAACCTTCTATAGTAAATGGAATATACAGAATTGTGATCAATCAATATTACA  
AAGTCCCGGTATCTATTATCGGTCAGAATTGGACCATAACGGAATTCGGTCTATACCGG  
GACGATAATATCAGATTGGGGGGGGAGGTTAGAATTAGAGATTGATAGAAAAGCAAGG  
ATATGGGCTCGTGTGAGTAGGAAACAGAAAATATCTATTCTAGTTCTATCATCAGCTATG  
GGTTCGAATCTAAGAGAAATTCTAGAGAATGTTTGCTATCCTGAGATGTTCTTGTCTTTC  
CTGAATGAGAAAGAGAAAAACAATTGGATCAAAGAAAATGCCATTTTGGAGTTTT  
ATCAACAATTTTCTTGTGTAGGCGGGGATCCTGTATTTTCGGAATCCTTATGTAAGGAAT  
TACACACGAAATTTTCAACAAAGATGTGAATTAGGAAGGATTGGTCGACAAAATAT  
GAATCGGAGGCTTAATCTTGATATACCTCAGCACAATACATTTTTGTTACCGCGAGATAT  
ATTAGCAGCTGCGGATCATTGATTGGAATGAAATTCGGAATGGGTACTTGTGACGAT---  
---ACGAATCATTGAAAAATAAACGTATTCGTTCTGTAGCCGATCTCTTACAAGATCAAT  
TCGGATTGGCTCTGGTTTCGTTTAGAAAGTGTGGTTAGACGAACTATATGTGGAGCAATT  
AGA---CATAAATTGATA---CCGACTCCTCATAATTTGGTAACTTCAACTCCA-----TTA  
ACAACCACTTATGAATCTTTTTTCGGATTACACCCATTATCTCAAGTTTTGGATCGAACG  
AATCCATTGACACAAATAGTTTCATGGGAGAAAATTGAGTTATTTGGGCCCTGGAGGATT  
AACAGCGCGAACTGCTAGTTTTTCGGATGCGAGATATTCACCCAGTTACTATGGACGTA  
TTTGCCCAATTGACACGTCTGAAGGAATCAATGTTGGACTTATTGGATCCTTAGCAATT  
CATGCGAGAATTGGTTCGGGGTGGG---TCTCTAGAAAGCCCATTTTAT-----GAAATCTC  
TGAGAGATCA-----AACAAAGGACGAATGCTGTATTTCTACCAAGTCGAGATGAATAC

TATATGGTAGCGGGCGGAAATTCTTTGGCGCTGAATCGGGGTATTCAAGAAGAACAGG  
TTGTTCCAGCTCGATACCGTCAAGAATTCCTGACTCTTGCATGGGACCAGGTTTCATCTT  
CGAAGTATTTTTCTTTTCAATATTTTTCTATTGGAGCTTCGCTCATTCTTTTATCGAAC  
ATAATGATGCGAATCGAGCTTTAATGAGTTTGAATATGCAACGTCAAGCAGTTCCACTT  
TCTCAGTCCGAGAGGTGCATTGTTGGAAGTGGGTTGGAACGCCAAGCGTCTCTAGATT  
CCGGGGTTACCGCTATAGCCGAACGCGAGGGAAAGATCATTATACCAATAGCGATAAG  
ATCATTTTTATCGGGCAGTGGAGATACTCTAAGCATTCCATTGGTTATGTATCAACGTTCC  
AACAAAATACTTGGATGCATCAAAAACCCAGGTTCCGCGGGGTAAATGCATTAATAA  
AAGGACAAATTTAGCGGACGGTGCAGTTGGTGGCGAACTCGCTTTAGGTAA  
AAACGTCTTAGTAGCTTATATGCCGTGGGAAGGTTACAATTTGAAGATGCGGTACTCA  
TTAGCGAGCGTCTGGTATATGAAGATATTTATACTTCGTTTCACATACGGAAATATGAAA  
TGCAGACTCATGTAACAAGCCAAGGT--CCCGAAAGGATCACTAATGAAATACCGCATC  
TAGAAGCCCATTTACTCCGCAATTTAGACAAAAATGGAATTGTGATGATGGGATCTTGG  
GTGGAGGCGGGCGAGATTTTAGTAGGTAAATTAACGCCTCAGATGGCGGAAGAAGAGT  
CGTCGTATGCCCCAGAGGAGAGATTATTACGAGCCATACTTGGCATTAGATATCCACTT  
CAAAGGAGACTTGCCTAAAACCTACCGATAGGTGGTAGGGGTCGAGTTATTGATGTGAG  
ATGGATCCAGAAAAGGGGG--GTTTCTAGTTATAATCCAGAACTATTCGTGTATATATT  
TTACAGAAACGCGAAATCAAAGTAGGGGATAAGGTAGCCGGAAGACATGGAAATAAA  
GGTATCATTTCCAAAATTTTACCTAGACAAGATATGCCTTATTTGCAAGATGGAAGGCCT  
GTTGATATGGTCTTCAATCCATTAGGAGTCCCCTCCCGAATGAATGTAGGACAGATATTT  
GAATGCTCGCTCGGATTCGCGGGGGATCTGCTAGAGAGACATTATCGAATAGCACCTTT  
TGATGAGAGATATGAGCAAGAGGCCTCAAGAAAACCTCGTGTTTTCTGAATTATACGAA  
GCCAGTAAGCAAACAGCCAATCCATGGGTATTTGAACCTGAGTATCCGGGAAAAAGCA  
GACTATTTGATGGAAGAACGGGGGATCCCTTTGAACAACCTGTTATAATAGGAAAGCCT  
TATATCTTGAATTAATTCATCAAGTTGATGATAAAATACACGGACGTTCCAGTGGACAT  
TATGCACGTGTTACACAACAACCCCTTAGAGGACGGGCCAAACAGGGGGGTCAGCGG  
GTAGGAGAAATGGAGGTTTGGGCTCTCGAGGGGTTTGGTGTGCTCATCTTTTACAAG  
AGATGCTTACTTATAAATCGGATCATATTAGAGCTCGTCAAGGAGTCCTTGGTACTACGA  
TCCTTGGAGGAACAATACCTAAACCCGAGGATGCTCCAGAATCTTTTCGACTGCTCGTT  
CGAGAACTACGATCTTTGGCTCTGGAAGTGAATCATTTCCTTGTATCTGAAAAGAACTT  
CCAGATTAATAGGAAGGAAGCT-----ATGATCGATCGGTATAAACATCAACA  
ACTCCGAATTGGATCAGTTTCTCCTCAACAATAAGTACTTGGGCCAATAAAATTCTCC  
CTAATGGAGAAATAGTCGGAGAGGTGACAAAACCCCTATACTTTTCATTACAAAACCAAT  
AAACCGGAAAGGGATGGATTATTTTGTGAAAGAATTTTGGTCTATAAAAAGTGGAAAT  
TTGTGCTTGTGGAACCTTATCGAGTAATCGGAGATAAAAAAGAAGACCCGAACTTTTGT  
GAACAATGCGGAGTCGAATTTGTTGATTCTCGGATACGAAGATATCAAATGGGATACAT  
CAAACCTGGCATGCCAGCAACCCATGTGTGGTATTTGAAACGCCTTCCTAGTTATATCG  
CGAATCTTTTAGATAAACCTCTTAAAGAATTAGAAGGCCTAGTATACTGCGAT-----TTTT  
CTTTTGCCAGGCC--GTAGCTAAAAAACCAACTTTCTTACGATTACGAGGGTTATTCG  
AATATGAAATCCAATCCTGGAAATACAGCATCCCGCTTTTTTTTACTACTCAAGGCTTCG  
ATACATTTAGAAATCGAGAAATTTCTACCGGAGCGGGTGTATCCGCGAACAATTAGCC  
GGTCTCGATTTGCGAGTTATTATAGATTATTCGTTGGTAGAGTGGAAGGAATTAGGGGA  
AGAA---AGGTGACGGGTAATGAATGGGAAGATCGCAAAATTGGACGAAGAAAGCAG  
TTTTTGGTTAGACGCGTGAATTAGCTAAGCATTTTATTTCGAACAAATATAGAACCAGA

ATGGATGGTTTTATGTCTCCTACCAGTTCTTCCTCCCGAACTACGACCCATCATTTCAGAT  
GGATGGGGGTAAGCTAATGAGCTCGGATATTAATGAACTCTATCGAAGAGTTATCTATCG  
GAACAATATCCTTGCCGATCTATTAACAACAAGTAGATCTACACCAGGGGACCTTGTA  
TGGGTCAAGAGAAATTGGTACAAGAAGCCGTAGATACACTTCTTGATAATGGAATCCGT  
AGCCGCCCGGTGAGGGATGGTCAGAATAAGGTTTACAAGTCGTTTTTCAGATGTAATTG  
AAGGCAAAGAGGGAAGATTTTCGTGAGACTCTGCTTGGCAAACGGGTTCGATTATTCGGG  
TCGTTCTGTCATTGTCGTAGGACCTACGCTTCCATTACATCGCTGTGGATTGCCTCGGGA  
AATAGCAATAGAGCTTTTTCCAGACATTTTAATTCGTGGGCTCATTAGACAACATCTTGC  
TTCGGACATAGTAGGTGCTAAGAGTCAAATTAGGGAAAAAGAGCCGATTGTCTGGGAA  
ATACTGCAGCAAGTTATGCAGGGGCATCCCGTATTGCTGAATAGAGCGCCTACTCTGCA  
TAGACTAGGCATACAGGCATTTCAACCCATTTTAGTGGAAGGGCGTGTATTTGTTTAC  
ATCCATTAGTTTGTAAGGGATTCAATGCAGACTTTGATGGGGATCAAATGGCTGTTCAT  
GTACCTTTATCTTTGGAGGCTCAGACGGAGGCTCGTTTACTGATGTTTTCTCATATGAAT  
CTCTTGTCTCCTGCGATGGGGGATCCCATTTCCGTGCCAACCCAAGATATGCTTATTGGT  
CTATATATATTAACGAGTGGGAATCCCGAGGCATTTGTACAAATAGGTATAATCCCTGG  
AATCGCAGCAAC-----TACCAAATGAAAGAATTTCTGATAATAAC-----TGAAAAAA  
AAA---GAACCTTTTTTTTGTAAATCTTATGATGCAATTGGAGCTTATCGACAGAAAAGAA  
TCCATTTAGATAGTCTTTGTGGCTTCGGTGGCGACTAGATCAACGC---GTTATTGCTTC  
A-----AGAGAAGTTCCCATCGAAGTTCAGTATGAATCCTTGGGGACCTATCATGAGATTT  
ATGGGCACTATATAATAGTAAGAAGTGTA AAAACAGAAATCTTTGGATGTACATTTCGA  
ACA ACTGTTCGGTCATATTTCTTTTTTCGAGAAATGGAAGAAGCTATA CAAGGGTTTTG  
TCGAGCTCGCTGGTATCTCAGT-----ATGGACGAAGGAGTCAAC  
CTAGTCTTTCACAAGAAAGTAATAGATGGA ACTGCCATTA AAAGACTTATTAGCCGATT  
AATAGATCACTTCGGAATGGCACATACATCACACATTCTAGATCAAGTAAAGACTCTGG  
GTTTCCAGCAAGCCACTGCTACATCCATTTCATTAGGGATTGATGATCTTTTAACGATAC  
CTTCTAAGGGTTGGTTAGTACAAGATGCTGAGCAACAAAGTTTGAGTTTGGAAAAACA  
CCACCATTACGGGAATGTACACGCAGTAGAAAAGTTACGCCAATCCATTGAAGTATGGT  
ATGCTACAAGTGAATATTTGCGACAAGAAATGAATCCTAATTTTAGGATGACCGACCCC  
TTAATCCAGTCCACATAATGTCTTTTTTCGGGAGCCAGAGGAAATGCATCTCAAGTACA  
CCAATTAGTAGGTATGAGAGGATTAATGTTCGGATCCTCAAGGACAAATGATTGATTTAC  
CTATTCAAAGCAATTTACGCGAGGGACTGTCGTTAACAGAATATATCATTTCTTGCTACG  
GAGCCCGCAAAGGAGTTGTGGATACTGCTGTACGAACATCCGATGCTGGATATCTTACG  
CGCAGGCTTGTGAAGTAGTTCAACACATTGTTGTACGTAGAACAGATTGTGGAACCC  
TCCGCGGGATTTCTGTGAGTCCTCGGAGG-----ATGCCG---GAAAGAATTTTTATTCAA  
CATT AATTGGTCGTGTATTAGCAGACGATATATATATAGGCTCACGGTGTATTGCCATTAG  
AAATCAAGATATTGGAATTGGACTTGTCAATCGATT CATAACC-----TTTCGAAT  
CCAACCAATATCCATCCGAACCCCTTTACTTGTAGAAGTACATCTTGGATCTGTTCGATT  
ATGTTATGGTAGGAGTCTACCCATGGTGACCTGGTTCGAATTGGGAGAAGCTGTAGGTA  
TTATTGCGGGTCAATCTATTGGAGAACCGGGTACTCAACTAACATTAAGAACTTTTCAT  
ACTGGCGGAGTATTCACAGGTGGTACTGCAGAACATGTACGGGGCCCCCTCGAATGGAA  
AAATAAAATTC AATGAGGCTTTGGTTCATCCCGCACGTACGCGTCATGGGCATCCTGCC  
CTTCTCTGTTCTATGGACTTGGATGTA ACTATTGAGAGTGAAGATATTCTACATAACCTG  
ACTATTCCGCCAAAAAGTTTTCTTTTGGTTCAAATAATCAATATGTAGAATCAGAACA  
AGTCATTGCCGAGATTTGCGCGGGAACATCCACTTTC---CATTTTAAAGAAAGGGTTCG



AAAACATATTTATTTCGGACTCTGAGGGAGAA---ATGCACTGGAGTACCGATGTGTACCA  
TGCACCCGAATTTACATATAGCAATGTCCATCTTTTACCAAAAACAAGTCATTTATGGAT  
ATTATCAGGAGGTTTCGTGCAGA-----TCCC GCGGAGCTCCGTTTTCACTCCACAAGGAT  
CAAGATCAAATGAATCCTCGT-----TCGACAGAAAGAGAACGA---AGATATCTTTCGAGT  
CTC---TCAGCTAATAATGATCAA---ATCAGATACAAATTCTTTAGTTCTTCTTTTTCTGGTA  
AAAAAGACGATAGGAGTCTGGTTAT---TCAGAAATGAATCGAATCATATGACTCTTCA  
TTGTAATCTCATATATCCTTCG---ATTCTACGTGAGAATTCTGAT-----TTATTGGCAAAAA  
GGAGAAGAAATCGACTTGTCAATCCAGTCCAATCGAGTCAAGAACGAGAGAAAGAAC  
TAATACCCCATTCAGGTATTTTCGATTGAACTGCCATAAAT-----GGTATTTTCCGGAAAA  
AGAGTATTCTTGCTTTTTTTTGATGATCCTCGATACAGAACAAAGAGTTCGGGAATTACT  
CAATATGAGACTATGGGGATGCACTCCATCGTTAAAAAAGAGGGT-----TTGGTTGATTA  
TCGA---GGAATCAACGAATTTAAGCCAAAATACATGACAATAGATCGATTTTTTTTCATT  
CCCGAAGAAGTACATATTTTACCTGAGTCTTCTTCGATAATGGTACGGAAATAATAGTCTG  
ATTGGAGTAGATACACGAATCGCTTTAAATACAAGAAGCAGAGCGGGCGGATTAGTCC  
GAGTGGAGAGAAAAAAAAGGGGGATTGCACTTCAAATCTTTTCTGGA ACTATCCATTT  
TCTGGAGAGACAGATAAGATATCCTGGGACAGTGGCATCTTGATACCACCAGGAACA  
GGAAAAAGA-----AATTCTAAGGAATCCAAAAA-----TGGAAAAATGGGATCTATGTCC  
AAAGG-----ATCACACCTACTAAGAAAAAG-----CATTTTGTTTTATTTCGGCCTGTAGTG  
ACATATGAAATAGCGGACGGTCTCAATTTAGCAAGACTCTTCCCCCGGATCTGTGCCA  
AGAAAAGGATAATATGCAACTTCAAATTGTCAATTATATTGTTTACGGAAATGGCAAAC  
CAATTCGGGAAATTTCTGACACAAGTATTCAATTAGTTCGGACTTGGTTCATTTTGAATT  
GGGACCAAGACAAA-----AAAAGTGCTTCTGCCGAGGCGGCCACGCTTCCTTTGTC  
GAAGTAAGGGCAAAAGGTCTGATTTCGAGATTTCTTAAGAATCGACTTAGTGAAATCCC  
CTATTTTGGATCCGAGAAAAAGGAATGATCCGTCAGGCTCAGGATTGATCTCT--GATAA  
TGTCTCAGATCACACTAATATCAATCCCTTTTAT-----TCCAAGCCAAAG-----AT  
GAAACAATCGCCTAGGCAAAATCACGGAACTATTCGGACCTTGTTAAATCAA-----AA  
TAAGGAATGCCCGTCTTTGATGATTTTGTCCGCATCTAATTGTTTTCGAATGGGTCCA----  
--TTCAATGATGTAAAATCCCAGAAT-----GTGATAAAGAATCA---GCTATAATTCAAAT  
TAGGAATTCAATTGGCCCTTTAGGAACA-----GCCCTTCAAGTTGTGAACTTT-----GATT  
CATTTTACTATTTTATAACT-----CATAATCAGGTCTTG---CTAACTAAATATTTGCAAGTTG  
AAAAT-----TTAAAACAGACTTTTCAAGTACTT-----CAA---TATTATTTAATGGATGAAA  
GCGGGAGG-----ATTTATAATCCGGATCCCCGCAGTAACATCGTTTTGAATTCATTCAATT  
TGAGTTGGTATTTTCTGCCTCACAAATCTTGTGAAGAAATATCTACAATAGTTAGT---CTT  
GGACAGTTTATTTGTGAAAATGGATGTATAGCCAAAAATGGACCA-----TACCTAAGA  
TCGGGTCAAGTTTTGATTGTTCAA---CTTGACTCTGTAGTAATAAGATCTGCTAAGCCTT  
ATTTGGCCACTCCAGGAGCAACTGTTTCATGGACATTATGGAGAAATCCTTTATGACGGA  
GATACAGTAGTGACATTTCTATATGAAAAATCGAGATCCGGTGATATAACGCAGGGTCT  
TCCAAAAGTGGAACAGGTGTTAGAAGTGC GTTCAGTTGATTCAATATCGGTGAACCTA  
GAAAAAAGAGTTGAGAATTGGAACGAGCATATAACAAGAATTCTTGATTTCCTTGGG  
GATTCTTGATTGGGGCTGAGCTAACTATAGTGCAAAGTCGGATCTCTTTGGTTAATAAG  
ATCCAAAAGGTTTATCGATCCCAGGGGGTCCAAATCCATAATAGGCACATCGAAATTAT  
TGTACGCCAAATAACATCCAAAGTGTTGGTTTCAGAG-----GATGGAATGTCTAATGT  
TTTTTTACCTAGAGAACTAATTGGATTGTTGCGAGCGGAACGGACGGGGCGCGCTTTG  
GAAGAATCGATCTGTTACAAGGCCTTCTTATTGGGAATAACAAGAACATCTTTGAATAC

TCAAAGTTTCATATCCGAAGCGAGTTTTCAAGAACTGCTCGAGTTTTAGCTAAAGCG  
GCTCTCCGGGGTCGTATTGATTGGTTGAAAGGCCTAAAAGAGAACGTTGTTATAGGCG  
GGATGATACCCGTTGGGACCGGATTCAAGGGCTTAGTACACTGTTCC-----AAGCAACAT  
AAAAGCATTCCC-----AAGAATAAGCAC-----TTTTTCGAGGGGGAGATCAGA-----GAT  
ATTTTGTTCACCACAGAGAATTATTTGATTCTTGCATTTCAAAGAATTTCCACGATACA  
CCAGAACAATCATTTAGAGTATTTAATGATTCC-----ATGACAAGAAGATATTG  
GAACATCAATTTAGAAGAGATGATGGAAGCAGGAGTTCATTTTGGTCATGGTATTA  
AATGGAATCCTAGGATGGCGCCTTATATTTATGCCAATCGTAAAGGTATTCATATTACAAA  
TCTTACTAAAACCGCGCGTTTTTTAGCAGAAGCTTGTGATTTAGTTTTTGATGCAGCAA  
GCCGGGGGGGGCAGTTTTTAATTGTTGGTACCAAAAAGCAAGCAGCTGCTTTAGTAGC  
ACGGGCTGCAATAAAGGCTCGGTGTCATTATGTTAATAAAAAGTGGCTTGGTGGTATGT  
TAACGAATTGGTCCACTACAGAAACGAGACTTCATCAGTTCAGGGACTTGAGAACGGA  
ACAAAAGACAGGGAGACTTAACCGTCTTCCAAAAGAGACGCGGCTATATTGAAGAG  
ACAATTATCTCACTTGCAAACATATCTGGGTGGGATTAATATATGACCGGTTTGCCCGA  
TATTCTAATTATCCTTGATCAGCAAGAAGAATATACGGCTCTTCGAGAATGTATTACTTT  
GGGAATCCAACAATTTGTTAATCGACACCGATTGTGACCCCGATCTTGCAGATCTTC  
CGATTCCAGCAAATGATGACGCTATGGCTTCAATCCGATTAATTCTTAACAAATTAGTAT  
TCGCGATTTGTGAGGGTCGTTCT--AGCTCTATACGAAATCCTATGGCCCAAAAATAAA  
TCCACTCGGTTTCAGACTTGGTACAACCTCAAAGTCATCATTTCGATTTGGTTTGCACAAC  
CAAAAGATTATTCTGACGGTCTACAAGAAGATCAAAAATACGAGATTGTATCCAAAAT  
TATATACAAAAAATATGCAAATATCCTCGGATGGTGTGCGAGGGGATTGCCCGAATAGA  
GATTCGAAAAAGAATTGATCTGATTCAAGTCAAAATCTATATGGGATTCCCAAAGTTATT  
AATAGAAGATGGGACACGA-----AGAATCGAAGAATTACAGAGGATTGTACAAAA  
AGAAATCAATTCTGTGAACCGAAAAATCAACATTACTATTACAAAAATTACAAAACCCT  
ACGGAGACCCCAATATTCTGGCAGAATTTATAGCCGGACAATTAATAATAGAGTTTCC  
TTTCGCAAAGCAATCCAAAAGGCTATTGAATTAGCCGAACAGGCGGATACAAAAGGAA  
TTCGAGTACAAATTGGAGGGCGCATCAACGGAGGAGATAGCACGTGTCCTATGGAT  
GAAAGAAGGTCGGGTTCCCTCTACAAACCATTTCGAGCTAAAATTGATTATTGTGTCTATA  
CAGTCCGAACTATCCATGGGCTATTAGGCATCAAAATTTGGATATTTAGAGAGGAT--AT  
GTCGCGTTACCGAGGGCCTCGTTTCAAAAAATACGCCGTCTGGGGGCTTTACCCGGA  
CTAACAGTAAAAGGCCTAGAGCCGGAAGTGATCCGAGAAACCAAGAACTTTCTGGG  
AAC--AAATCTCAATATCGTATTCTGTTTAGAAGAAAAACAAAAGTTGCGTTTTTCATTATG  
GTCCTACAGAACGACAATTGCTTAAATACGTTTCGTATCGCCGGAAAAGCCAAAGGGCC  
AACAGGTCAGGTTTTACTGCAATTACTTGAAATGCGTTTGGATAACATCCTTTTTTCGATT  
GGGTATGGCTTCGACCATTCCCTCAAGCCCGCCAATTAGTTAACCATAGACATATTTTAGT  
TAATGGTTCGTATAGTGGATATACCAAGTTATCGTTGCAAACCGCGAGATATTATTACGGC  
GAAGGATGATCAAAAATCGAAAGCTATGATTCAAATTTCTCTTGAATCACCCCCCAT--  
GAGGAAGTGCCAAAACATTTGACTTTTACCCATTCCAA-----TATAAAGGATTAGTCAA  
TCAAATAATCGATAGTGAATGGGTCGGTTTGAAAATAAATGAATTGCTAGTCGTAGAAT  
ATTATTCTCGTCAGACTATGTCACGTCGAGGTAAGTGCAGAAAGAAAAACTGCAAAATC  
CGATCCAATTTATCGTAATCGATTAGTTAACATGTTGATTAACCGTATTCTGAAACACGG  
AAAAAATCATTGGCTTATCAAATCTCTATCGAGCCATGAAAAAGATTCAACAAAAG  
ACAGAAACAAATCCACTATCCGTTTTACGTCAAGCAATACGTAGAGTAACTCCCGATAT  
AGCAGTAAAAGCAAGACGTGCAAGCGGATCGACTCATCCAGTTCCATTGAAATAGGA

TCCACACAAGGAAGAGCACTTGCCATTCGTTGGTTATTAGGGGCATCCCGAAAACGTC  
CGGGTCGAAATATGGCTTTCAAATTAAGTCCGAATTGGTGGATGCTACCAAAGGGAG  
GGGCGGTGCCATACGCAAAGGGGAAGAGACTCATAGAATGGCAGAGGGCAAATAGAGC  
TTTTGCGCATTTTCGTATGGGTAGGGACTATTGCTGACATAATAACCTCTATACGAAA  
TGTTGACATGAATAGAAAAGGGACGGTTCGAATAGAATCTACTAACATGGCCGAAAAG  
ATTGTTAAAATACTTTTACGGGAGGGTTTTATCGAAAACGTGCGAAAACACCAGGAAA  
ACAAGAAATCTTTTTTGGTTTTAACCCCTACGACATAGAAGG-----AATAGGAAAGGACC  
CTCTAGAACT--TTTTTAAATTTAAATTTAAAACGGATTAGTCGACCTGGCCTCCGAGTC  
TATTCTAACTATCAAAAAATTCCTAGAATTTTAGGCGGGATGGGGATTGTAATTTCTTCT  
ACTTCTCGAGGGATAATGACAGACCGAGAGGCTAGACTAGAAGGAATCGGCCGGAGAA  
ATTTTGTGTTATATATGGATGGCAAATCTATACCAAGCGCTGGTTTACGT-----TTACGTT  
TACGTTTACGTAAGAGTACGCGTAAAATCCCAAAGGGGGTTATTTCATGTTCAAGCGAGT  
TTCCACAATACTATTGTGACTGTTACAGATGTGCGGGGGCGGGTAATTTCTTGGTCCCTC  
CGCCGGTACTTGTGGATTCAAGAGTACAAGAAAAGGGACGCCATTTGCTGCTCAAACC  
GCAGCAGGAGATGCTATTCGGCCAGTAGTGGATCAAGGTATGCAACGAGCAGAAGTCA  
GGATAAAAGGTCCCGGTCTCGGAAGAGATGCGGCATTACGAGCGATTTCGTAGAAGTGG  
TATACGATTAAGTTGTATACGTGATGTAACCCCTCTGCCACATAATGGCTGTAGGCCCCC  
GAAAAAAAGGCGTGTGATGCCAACTATTAACAACCTTATTAGAAACACAAGACAGCCA  
ATCAGAAATGTCACGAAATCGCCCGCCCTGCGGGGATGTCCTCAGCGCCGAGGAACAT  
GTACTAGGGTGTATACTATCAACCCCAAAAACCAAACCTCTGCCTTACGTAAAGTTGCC  
AGAGTACGATTAACCTCTGGATTTGAAATCACTGCTTATATACCTGGTATTGGCCATAAT  
TCACAAGAACATTCTGTAGTCTTAGTAAGAGGGGGAAGGGTTAAGGATTTACCCGGTG  
TGAGATATCACATTGTTTCGAGGAACCCTAGATGCTGTGCGGAGTAAAGGATCGTCAACA  
AGGGCGTTCTAAATATGGGGTCAAAGGCCAAAATGGCAAGAAAAGGTTTGATTCA  
GAGGGAGAAGAAGAGGGAAAAATTGGAACAAAATATCGTTTGATTGTCGATCCTCA  
AAAAAAGAAATAAGC-----ACAGCTCCGTCATTAAGTGAAAATGGAAAATTCATGG  
AAAGTTACAATCCTCACACGTAATAGTGCACCTACACGTCTTCATCGACGTTGTTTTT  
CGACCGGAAGACCGAGAGCTAACTATCGAGACTTTAGGCTTTCCGGACACATACTTCG  
TGAAATGGTTCATGCATGTTTGTGCCAGGGGCAACAAGATCAAGTTGGATGGTAAAA  
AAGGCATTCATTTCCGTTATTTCAAA-----GAAGAAAACAGGGGGTCTGTTGAA  
TTTCAAGTAGTTAGCTTACCAATAAGATACGAAGACTTACTTCCATTTGGAATTTCA  
CAGAAAAGACTTTTTATCCAGAGGGGTCTACGTAAAATCCTGGGAAAACGACAACGC  
CTGCTGCTTATTTGTCAAAGAAAGACAAAGTCCGTTATACAGAATTAATTAGTCAGCT  
AGATATCCGAGAATTAACAACCTCGT-----ATGGTAAAACCTTCGTTTGAACGATGTGGTA  
AAAAGCAACGAGCCGTTTATCGAATCGTTGCAATTGATGTGCGATCCCGCAGAGAAGG  
AAGAGATCTTTGGAAAGTGGGTTTTTATGATCCGATAAATAATAAACCTATTTAGATAT  
TCCAGGTATTCTATATTTTCTTGA AAAAGGCGCTCAACCCACAGGAACTGTTTATGATAT  
TTTTAAAGAAAGCGGGGGTTTTTACAGAATTTAGTCTTAATCAAATGGAAGTCAAT---ATG  
GATAAATCCAAGCGACTCTTTCTTAAATCTAAGCGATCTTTTCGTAGGCGTTTGCCCC  
GATCCAATCGGGGGATCGAATTGATTATAGAAACATCAGTTTAATTAGTCGATTTATTAG  
TCAACAAGGAAAAATTTTATCGAGACGGGTAAATAGATTGACTTTAAAACAACAAAGA  
TTAATTACTATTGCTATAAAACAAGCTCGTATTTTATCTTTATTACCTTTTCGTCCGAAGG  
CGCAA-----CGGTTTTAAAAGAAGCCAGTCGACCCGCCGAACCTGTTGGTCTTAGAACCA  
GAAATAAAATGAAACGTTCACTCAAAAACAACCCTTTTGTAGCGAATCCTTTATTAAGA

AAAATGGAGAAGCTAAACAGAAGGGAGGACAAAATACTTATAAGAACTTGGTCTAGG  
GCGTCTACGATTATACTTACAATGATCGGCCATACTATTGCTATTCATAATGGAAAAGAG  
CATTTGCCTATTTATATAACAGATTATATGGTAGGCCATAAATTGGGAGAATTTGCACCTA  
CTATCAATTTTCACGAACATGCGAAAAATGATAATAAATCTCGTCGT-----AT  
GGTTAATCTCGTATACGTATGCATGAAGATAAACAATTCCGTGGTTATGGTCGGACTCTA  
TTATGGATTTATTAGCGCATTTTCCATCGGGTCTCTTACCTGTTCTTCTCCGACCACG  
GTTTTTGAACGACGATCCAGACGCAATCGAAAAGAAGGCATCAGAACTGCAGGTTTT  
TTTACAGGACAACTTTTGATATTCATATCAATCCTTTATGGGCCTCTGCATCTAGCGTTAG  
GTAGACCTCATAACAATCCTTTTACTACTTGCACCGTATTTTTTCTTTCATTACTIONTATT  
CAATAGCGGTCAATGGCCGCGTTTTGCT---TTGCTCACTAAGTCAATGCGGAATCGTAG  
GTTTCAATTGGTATTCTGAATAATTGCTTTTTTCAATTATTCAGCCTTAGCTTGTGGGA  
AGGCCAATGTTAACCCGATTAAGCTACATTTATATCTTTCGATGCAACAATAAGATGTTA  
TTTGTCCCTAAGTAGCTTTGTTGGTGGTTAATTGGTCATATTTTAGTCCTGAAATGGGCT  
GGATTGGTATTTGTTGGCTACTTCAGGTTATTAGATCGAAGACAAAACAGGTTGAATC  
GTCTTCGCTAATAAGCGGCCTAAAATTAACCTTTTATCACCTCTTTAGTATTATCTTATTT  
GCTATCTTTCTTTTATATTTAGATCAAGAAAACCTATCGAACGAAACCAAGAACTTGA  
AGAAGCTCAGAAAGACATCCCTATTATCACTTCTCTTTTTGACCCGCAAAAACCACTCC  
GTCCATTACGATATATAAAAACGGCTGGCGTTGAAAAGGCTGTCAAAAATGAGATGTC  
ACAATATTTTTTTTATGCATGCCGAAGCGATGGAAAACAAAGAATATGTTTTACATATCC  
ACCCAGTTTGGCAACTTTCTGGGAAATGATACAAAGAAAATGGCTTCGAGGTTCCCA  
TATGCTAAAGCTGCTCCTGGGAGTTATAGACAGTGGATTTCTCGCAATAAAAAAAAAA  
AGAACAGCCTGAGTACAGAATTTCAAATCGAATTAACCTTTAGATAAAAAAAAAAAG  
CCTGCAAAAATGTCCTCGAAACAAGGAAAAGGTTGTGTAATAATAAACTAAAAAAGAA  
TACTTGCCTGAAATAGCCGATCCTTTTTTGACCGGAGCGCTTCGTGGAAAGTTAAAGAA  
TAATATTACAATGAGGATGAAAAACCCGGTAAATAAGCTTCACCTACTTTTTGTGAAAA  
CGTTAGTAAATAGAGAAAAGTATTCATTCATTGAACTAGAAGAAGAAATCAATAAAAA  
AGTTCCTCGATGGTCATACCAATTAATCGAGTTGGAACAACCTGGAGGGAGCCGAGATT  
CGAATACTCCCATTCAAACGTGTAGCGGTGTTTACTGAGGCGATACGTTTTTTTAGGCCA  
TATGTCCGATTTTCGTCGAGGCCTAATCAAGGGATCCGCGCGTCAGGACAGACGTAAA  
GCATACGTTTGTGCGCAACTCAAGTAAATGCACGCTCCCCGCTTTTCGCTTTGGGCTT  
GGTTAACTTAGCCGTGCAGGTGAAATCTTTTATGAAACCCGGATAAAAGGGGAAATA  
GTGGATGACGTCGAGGATGATATACGAGAGAATGTAACGGAATGTGGGAGAACATTG  
ACTATGGTCAAGTCATAAGAACTTTCATATTACTGCATATTTTTCTTAGAAAAAAGG  
TTGTATTCCCTGCATTATAATAGGGAAAAATATAGCCCGTATGTTATTATTGCAAGCTAC  
CGAGTGGAAAATAGACTTCGCCCCGTTTGAAGAGAGAAAGGTATGCTATATGCACCTATA  
ATGGTATGAAAGTCTCAGAAAAAATCTTCCCACCAGACTGGGCCGATGACGGTATTCA  
GATACTGGTCACCAACCCTTTTTACCTTAAACCTTGGTACAGATCTAAGCCGAAGAAAG  
AACCTTGGTACAGATTTAAGACCCGATTCATTAAGATCCGAAGAAAGAAAAAGGTCC  
GAAGAAAGAAAAACCTTGGTACAGACGATTCTTTTTTCAAAAAGATCCGAAGAAAGA  
CCGAGGGGTTTCGTTTTTTTTGGGATCTTAACCGGTGATCTAATAACCCCGGATTGGGGAG  
TCAATCCCATTAGAAACGAACTCAAAAAGAAAATTCGCCAATTTGAAAAGAAACATTC  
TATAATTCTAAGCAAACGTTTTTCGAAACGTCTTAAAAAATGGATAGATAATCTTAAAA  
ACGAATTTAGAATGAGTAGGAATTTGCAAGGTCCAGTTAGAGCTTTGAAAGAT---TCAT  
TACCAGAAGAAAAAGTGGCGGATCCATCGGATCTGGATAATGAACTAAGAGCAGAGAT



AAGATCCATTCTTTCTTTTTTCTCTGACGAATGG-----TCAGAACTTCAT--CTGGGCTCG  
AATCCTACTGAGAGGTCCACTGTGGATCAG-----AAATTGTTGAAGAAAGAACAAG  
AGGTTTCT--TTTGCCCCTTTCCGGCGATCGGAA-----ACTAAAGAAATAGTGAATCT  
ATTCAAGACAATGGCGTATTACAAAAG-----ACCGTCTCAATTCATCCTATTTTCATCAGA  
TCCGGGATGTGATATGGTTCCG--AAGGATGAACTGGAT--TCA-----  
-----GAAGAGAGAT  
TTCAAGAAATGGCAGATCTATTCACTCTATCAATAACCGAGCCG--GATCTGGTGTATCA  
TAAGGGATTTGCCTTTTCTATTGATTCTTCCGTATTGGATCAAAAACAA-----TTCTTGGC  
TGAGGCC-----AGGGATGAATCGAAAAAGAAATCTTTA-----TTGGTTCTACCTCCT  
GTTTTTTAC-----CAAGAGAATGAATCTTTTTATCGAAGGATCAGAAAAAGGGGG--GTC  
CAGATCTCCTGCGGGAATGATTTGGAAGATCCAAAACCAAAAATAGTGGTATTTGCTAG  
CAACAACATCGTGGAGGCAGTCAATCAATATAGA--ATCCGAAATCTGATTCAAATCCA  
ATATAGCACCCATGGG-----TACATAAGAAATGTATTGAATCGATTCTTTTTAATGAAT-----  
--CGATCCGATCGCAACTTCGAATATGGAATTCAAAAGG-----GATCAAATAGGAAATGA  
TACTCTGAATCATAGAACTTTTATGAAATATACGATCAACCAACATTTATCGAATTTGAA  
AAAG--AGTCAAAAAGAAAGGGTCCGATCCT-----CTTATTTTGATTCT-----GAGAGATC  
CGTGAATCGGGATCCTAATGCATATAGATACAAATGGTCCAAGGGGAGCAAGAATTTCC  
AGGAACATTTGGAACATTTCTGTTTCTGAGCAGAAGAGCCGT-----TTTCAAGTGGTCT  
TCGATCGATATCGAATTAACCAATATTCGAGTGATCGGTCTGAGGTTAGCGACAAAAAA  
GATTTGGCTAAGTTCGGTTCTTTCGTTTTCTCCAAG-----  
-----TTACTTCTTTTTTTGTCTAAC--TCACTTCTTTTTTCTTTGTGAGTTTC  
GGGAATCCCCCATTTCAGAGGTCCGAG--ATCCGCGTCTCT--GAATTGAAAGGTCCGA  
ATGATCGACTCTGCAATCAGTTCTTAGAATCAATAGGTCTTCAACTCGTTTATTTGAAAA  
AATTGAAACCATTC-----TTATTGGAT-----GATCATGAGACTTCC--CAAAAATCGAAA  
TTATTGTTCAAT-----AAGAAACCA--GAGGGG--ATGATTGACTCATT  
CCATACTAGA-----ATAATCGCGGAAATCTTTGGAT-----TCCTATTTCTCAATGATAT  
CCCACGATCAAGACAATTGGTTGAATCCCGTGAAACCATTTTCATAGAAGTTTCATTGATC  
TCTTCTTTTTATAAAGCAAATCGACTTCGATTCTTGAATAATCCACATGACTTCGGCTTC  
TTT-----TGTAACAAAAGATTCCCCTTTTATGTGGAT-----ATCAAGAATTTGG  
AT-----TTTACGTATGGA--CAATTCCTCAATATCTTGTTTCATTCGCAACACA---AAATTT  
CTTTGTGCGGCGACAAA-----AAAAACATGCTTTTTTGGAG--AGAGATACTATTTTCAT  
CAATCGAGTCACAGGTATCTAACCTATTCAAG-----GATTTTCCACAAAGTGGTGACGAA  
AGG--TATACTTTTACAAATAT-----TTCCACCTTGCAATGCGATCTGATCCATTAGTT  
CGT-----AGAGCTATTTACTCGATCGCAGACATTTCTGGAACACCTCTAACAGAGGGGAC  
AGAGAGTCAATTTTGAAGAAGAACTTATTGTCAACCTCTTTCAGATATGAATCTATCTGATT  
CAGAAGGGAAGAAGAACTTGTATCAGTATCTCAAT-----TTCAATTCAAACATGGGTTTGATT  
TAT-----TCTGAGAAATGTTTCTCA-----TCCGAAAAGAGGAAAAAGAAAAA-----  
---CCCGAAAAGAGGAAAGAGAAA-----AAACCCGAAAAGAGGAAAGAGAAAAAAC  
CGAA-----AAGAGGAAAGAG-----AAAAACCCGAAAAGAGGAAAGAGAA  
AAAACCCGAAAAGAGGAAAGAGAAAAAACCCGAA--AAGAGGAAAGAGAAAAAAC  
CCGAAAAGAGGAAAGAGAGCCTTACCTCGACAGGGAGTCCAAAATTTGTATCCATTTG  
TTATGCTATATCTGATCCATGCGGAATATCATGGCGAATTCTTCAGAAAAAATTGTGTCT  
TTTACAA-----TGGATAAGTGCGATTTTCGAATAAGTGTTCATAAG-----  
CTTCTTCTGTCTGAAGAAAGTATTCATCGAAATAATGAGTCACCATCGATGACAGATCT

GAGATGGCCA-----AATCTTGGGGCGTTC--CTCTATTCAATCCTTTTCCTTCTTTTTGT  
TGCTGGACAT--CTCGTTTTTTCACACCTTCTCTTTTTATCCCAA-----GACTTTAGTGAGT  
TACAGAGAGATTTTCGCAAGGGCCCAATCTTTGATGATTCCATCATACATCGTGGAGTTG  
CGAGAACTTCTGGATATGTACCCCGCACCTCGTTCT-----TTCAAGAAGCTCTTTCT  
AGCTGCTCGGGAAAAATTAGTAAAT-----TATCTACGATGGGGTGGTGGACG  
CAAA-----TCTTTTCTTATCCAT-----CTC  
TTCGAGCTCCTCAATATCACACCAAATCCCATCGATCGA---ATCGCTTTTTTGAAAAATA  
CGAGACATCTAAGTCATACAAGTAAAGAGCTCTATTCATTGATAACAGAGCTAGGGAAC  
GGTCCTTGTTGTTGATTGACGATAAAATAGAATCCTGGATCTCGAACTGTGATGCGAT  
TGAGGATAAAGAAAGAGAATTCTTGGTTCCGTTTTGCAAC-----TTCACGAGA-----GAA  
ACAAGGATTGATCAAATTCTATTGAGTTTGACT--CATAGTGATCATTTATCA-----  
ACAATGACTCTGCCTCTCAAATGAGTGAAGAACCGGGAGCATTTTACTTACGACACT  
TAGTTGACATTCAT-----AAAAAGGGTCTAATGAATTATGAGTGAATACATCCTGTTTAG  
CAGAAAGACGGATATTCCTTGCTCATTATCAGACAATCACT-----TATTCACCGTGC  
GGGGATAATCGTTCTCATTTCATCTCATGGA-----AAAACCTTTTCGCTCCGCTTAC  
CCCTACACCCCTCT--AGGGCTACTTTAGTGATAGGTTCTATAGGAAGTGGACGATCCTA  
TTTGGTCAAATCCCTAGCGACAAACTCCTATGTTCCCTCTCATTACAGTAGTTCTGAACA  
AGTTCCTGAAGAACTGGACGCCTCAAGGTTTTGATATTCAC---GAGAGTGGCGTTTATG  
AT--TATGAGGATCGTGACAGTGACGATTATGATGAGCCTGGT-----  
-----GCCAGTGACGATTATGAGGAT--CGTGATATGGAAGATTTTGTG  
ATAGCGAGATGACGGAGTGGCTAACTAAGACGAATGTGCCACTTGTGTATCAGTTGTTT  
TATATCACCCCTTCAATTCGAATTAGCAAAAGCAATGTCTCCTTGCATACTATGGATTCCA  
AACATTCATGATCTGGATGCGAAAGAGTCCGATTACTTATCCCTCGGTCTATTAGTGAA  
CCATCTCTCCAGG-----GATTGTGGAAGACGTTCCACTAAAAATGAGATTCTTGTATT  
GCTTCGACTCATATTCCCCAAAAAGTGGATCCCTCTCTAATAGGTCCGGATGGATTAAGT  
ACATGCATTAAGACACGAAGGCTTCTTGTTCACAACAACAACAGTGCCTTTTCACCC  
TTTCATATACTAGGGGATTTCACTTGGAAAATAAAATGTTCCATACTCATACTAATGAATT  
CGAGTCCACAATCTTGGGTCCAGTGTACCAGATCTTGTAGCACTTACCAACGAGGCC  
CTATCGATTAGTATTACACAGAAGAAATCAATTATAGACACTACTACAATTAGATATGCT  
CTTCATAGAAAACTTGGGATTTGGAAGCCGAC---AGAAACCTAAGCCCGGCTAAGGA  
GCATGGGACCCTTTCTATCAGGTAGGAAGGGCTTTTGCACACACTGTACTTCTAAGGA  
ATTGCCCCATAGATCCTATATCTATCTATATCAAGAAGAAC-----TTATGTGAAGCAGGGG  
ATTCTTCTTTGTACAAATGGTACTTCGAACTTGGAACGAGCATGAAGAAATTAACGATA  
CTTCTTTATCTTTTGACTTGTCTGCCGGATCGATCGCTCAAGACCTTTTGTCTCCCCC  
GGA-----CCCGATGAACAAAATTTGATCACTTCTTATGGACTCGTTGAGAACGATTCT--  
-GATCTAGTTTCATGGCCTATTAGAGTTAGAAGGCGCTCTGGTGGGATCCTCGGGAGAAG  
GGACAGAAAAAGATTCCAGTCAGTTTGATAATGAT-----CGAGTGACATTGCTTCTTCGG  
CCCAAACCAAGGAAT--CCCTTAGATATTCAGAGACTTATCTATCAACATCAAAAATAC--  
-GAATCGGAGTTGGAAGAA-----GACGACGACGACGACGAG-----GACGTCTTCGCC  
CGAAAAGATGTTG-----GAGGAT-----TTATTCAGTGAA-----CTAGTTT  
GGTCTCCT-----AGAATATGGCACCT-----TGGGACTTTATATTGGATTGTGACGAAGA  
GGATGAGCGGCTTGAAGCTCAA---CAAGAGGATGAGCTGCTTGAAGAGGAACACGAG  
GAAGAGGAAGAGGAAGAGGAAGAGGATGAGCTTCAAGAGAATGATTCGGAGTTCTTC  
CGGAGTGAAACCCAGCAGCCCCAGGCACGAGATGGATTTTCCGAAGAAGAAGGATGT

TTTCGAATAAGCCAATTCATGTGGGTCCTGGAGATCCACTCTCTTTCTATAACAAA---G  
ATACGCCCTTTGTGCGAAGTGTTGTCATATCCAGAGGAAGCTACA-----GAGATTTCAAAG  
GAGCTTCTTCGT--CTTCTTAATGCCCTAAACGCGCACGTCAACGCTGGTGGACC-----  
AAGAAGAAGCAAGACAAGCACTACGAACTCGTGCTTGATCGCCAGAGATGGCTTATAA  
CC-----AAGAGTTCATTATCTAAATCTAATGGATTTTCCGTTCTAAT-----ACTCCATCT  
GAGAGTTATCAGTATTTATCAAATCTGTTCCATCTAACAGA---AGGCTATTGGATCAAAT  
CACAAAGACATTCTTTAGAAAAAATGGCTTTTCCCGGATGAAATGAAAATCGGATTC-  
----ATGGAACAG-----ATGCCTAGATCAAGG---ATAAATGGAAATTTTATTGAT  
AAGACCTTTTCAATTGTAGCCAATATCTTATTACGAATAATCCGACAACCTTCAGGGGA  
AAAAGAGGCATTTACCTATTACAGAGATGGG-----ATGTCGGCTCAGTCAGAAGGAAAT  
TATGCGGAAGCTTTACAGAATTATTATGAAGCTATGCGACTAGAAATTGATCCTTATGAT  
CGAAGCTATATACTCTATAACATAGGCCTTATCCACACAAGTAATGGAGAACACACGAA  
AGCTTTGGAATATTATTTTCGGGCACTAGAACGAAACCCGTTCTTACCCCAAGCTTTTA  
ATAATATGGCTGTGATCTGTCATTAC---CGGGGAGAACAGGCCATTTCGACAGGGAGATT  
CTGAAATTGCGGAGGCTTGGTTCGATCAAGCCGCTGAGTATTGGAACAAGCTATAGC  
GCTTACGCCCGGAATTATATTGAAGCGCAAATTGGTTGAAGATCACGAGACGTTTCG  
AA-----ATGATTTGGCGATCAGAACATATATGGATAGAACTTATAGTGGGGTCTCGAAAA  
ATAAGTAATTTCTGCTGGGCCTTTCTCCTTTTTTTAGGTTTCATTAGGATTCGTATTGGTTG  
GAACTTCCAGTTATCTCGGTAAGAATTTGATATCTTTAGTTTCCTCTCAGCAAATCCATT  
TTTTTCCACAGGGGCTCGTGATGTCTTTCTACGGAATCGCGGGTCTCTTTATTAGTTCTT  
ATTTGTGGTGCACAATTTCTTGAATGTGGGTAGTGGCTATGATCGATTTCGATCGAAAA  
GAAGGAATAGTGTGATTTTTTCGTTGGGGATTCCCGGGAAAAAATCGTCGTATCTTCCT  
ACGATTCCGTATGAAAGATATTCAATCCATCAGAATAGAAGTTAAAGAGGGTATTTATGC  
GCGTCGTGTCCTTTATATGGAATAAAAAGGGCAGGGGGCCATTCCCTTGACGCGTAGTG  
ATGATAAT---TTGACTCTGCGAGAAATTGAGCAAAAAGCCGCCGAATTGGCCTATTTCTT  
GCGCGTACCCATTGAAGTTTTT

>Lotus

ATGGAAAAATGGTGGTTAAATTCTATGTTGCGTTTAAAGTAAATCAACGGATAGGTTTCGG  
TCCTATTGAAAATACCAGTGTAAGTGAAGACCCGATTTTAACTGATATGGATAAAAACA  
TTCATAGTTACAACAATGTTGATTATTTAGTAGGTGTGGAGAACATCCGGAATTTCCCTAT  
CTAATAAAAGTTTTTTAGTTAGGGATAGTAAGAGGAACAGTTATTCATATATTTTGCTAT  
TGAAAATCAAATTTGGAGATTGATAATGATCAT-----TTGTTTTTAAAGTGAAGTAGAAAG  
TTTTTTTTCTAGGTATACGAATTCATCTATTTGAATAACAGCTCTAAAGGGGATGGTGAT  
-----CATTACATGTATGATACTGAATCTAGTTGGAATAATAACATTAATAGTTTCATTGA  
AAATTATATTCGT-----TCTCAAATTTGTATTGATAATTACATTTTAGGTGATGGTGACAAA  
TACAATGAT---TACTTTTATAGTTATATTTGTAGTAGGGAGAGGACTAGCATAATAACTAG  
CACAAATGATAGTGATTTCACTAAAATAGAAGGTTCTAATGATCTCGATGAGACTCAA  
AATACAAACATTTGTGGATTGAATGCGAAAATTGTTATGGATTAAATTATAAGAAAATTT  
TGAAATCAAAAATGAATATTTGTGAACACTGTGGATATCATTTGAAAATGAGCAGTTCA  
GATAGAATCGAACTTTTCGATTGATCCGGGTACTTGGAAATCCTATGGATGAAGACATGAT  
TTCTGTGGATCCCATTGAATTTCAATCCGAAGAGGAACCTTATAAAGATCGTATTGATTC  
TTATCAAAAACGACAGGATTAACCGAGGCTGTTCAAACAGGTACGGGTCATTTAAAT  
GGTATTCCTGTAGCAATTTGGGATTATGGATTTTGGAGTTTATGGGAGGTAGTATGGGATCC  
GTAGTAGGTGAGAAAATCACCCGGTTGGTCAATATGCTACCAACCAACTTTTACCTCT



TATTGTAGTATGTGCATCTGGAGGAGCACGTATGCAAGAAGGAAGTTTGAGTTTGATGC  
AAATGGCTAAAATATCTTCTGCTTTATATGATTATCAACTAAATAAAAAGTTATTCTATGT  
ATCAATCCTTACATCTCCCACTACTGGTGGGGTAACAGCTAGTTTTGGCATGTTGGGGG  
ATATCATTATTGCCGAACCAAATGCTTACATTGCATTTGCGGGTAAAAGAGTAATTGAAC  
AAACCTTGAATAAGGCAGTACCCGAAGGTTACAGGCGGCAGAATATTTATTCCATAAG  
GGCTTGTGTTGATTCAATCGTACCACGTAATCCTTTAAAAGGGATTCTAAGTGAGTTATTT  
CAGCTCCACGCTTTCTTTCTTTGATTCAAAATGAAAAAGAAATGGTAACTATTTCGTGC  
AGATGAAATTAGTAAAATTATCCGTGAACGGATTGAGCAATATAATACCGAAATTTAAAT  
TGTAATAACAGGTACTGTACTTCAAGTAGGCGATGGCATTGCTCGTATTTATGGTCTTGA  
TGAAGTAATGGCTGGTGAATTGGTGAATTTGAAGAGGGTACCATAGGCATTGCTTTGA  
ATTTGGAATCCAAAACGTTGGTGTGTTGATTAATGGGCGATGGTTTGATGATACAAGAG  
GGAAGTTCGGTAAAAGCAACAGGAAGAATTGCTCAGATACCTGTAAGTGAGGGTTATT  
TGGGTGCTGTTATAAATGCTCTGGCTAAACCTATTGACGGTCGGGGAGAAATTTTCATCT  
TCAGAATCTCGGTAAATCGAATCCCCGCTCCCGGTATTATTTTCGAGACGTTCTGTATAT  
GAGCCTCTTCAAACAGGACTTATTGCTATTGATTGATGATCCCTATAGGGCGCGGCCA  
GCGAGAATTAATTATTGGGGACAGACAAAACAGGTAACAGCAGTAGCCACAGATACG  
ATTCTCAATCAACAAGGACAAAATGTAATATGTGTTTATGTAGCTGTTGGTCAAAAAGC  
ATCGTCTGTAGCTCAAGTGGTGAATACTTTACAAGAAAGAGGAGCGATGGAATACACT  
ATTGTAGTAGCTGAAACGGCAGATTCTCCAGCTACATTGCAATATCTCGCTCCTTATACA  
GGAGCAGCTCTCGCTGAATTTTTTATGTACCGTGAACGCCACACTTTAATCATTATGAT  
GATCTCTCCAAACAAGCGCAGGCTTATCGCCAAATGTCTCTTCTATTACGAAGACCACC  
CGGTCGCGAAGCTTATCCGGGAGATGTTTTTTATTTGCATTGCGCTCTTTTGGAACGAG  
CTGCTAAATTAAGTTCTCAGTTAGGTGAAGGGAGTATGACTGCTTTACCAATAGTTGAG  
ACCAATCAGGAGATGTTTCAGCTTATATTCCCTACTAATGTAATTTCCATTACGGATGGC  
CAAATATTTTTATCTGCCGATCTATTCAACGCTGGGATCAGACCCGCGATTAATGTGGGT  
ATTTCTGTTTCCAGAGTTGGATCGGCGGCTCAAATTAAGCCATGAAACAAGTAGCCG  
GTAAATTAATAATTGGAATTGGCACAATTCGCAGAATTAGAAGCTTTTGCACAATTCGCT  
TCTGATCTTGATAAAGCTACTCAAATCAATTGGCAAGAGGTCAACGATTACGCGAGTT  
GCTTAAACAATCCCAATCAGCCCCTCTCACTGTGGAAGAACAGGTAATAACTATTTATA  
CCGGAATAATGGTTATCTTGATTCAATTAGAAATTAGACAGGTACGGAAATTTCTCGTTG  
AGTTACGTGCTTACTTAAAAACGAATAAACCTCAATTCAACGAAATCATATCTTCTACC  
AAGACATTCAGTGGGGAAGCAGAAGCTCTTTTGAAAGAAGCTATTCAGGAACAGATG  
GAACTCTTTTACTCCAAGAACAAGTAATGATAATAAATCCTACCACTTCTGATCCTGA  
AGTTTCTGCTCTTGAAAAAAAATACGGGACGTATCGCCAAATAATTGGTCCGGTAC  
TAGATGTAACTTTTCCCCCAGGGAAGATGCCCAATATTTACAACGCTCTAATAGTTAAA  
GGTCGAGATACTGTTGGTCAACAAATTAACGTGACTTGTGAAGTACAGCAATTATTAGG  
AAATAATCGCGTTAGAGCTGTAGCTATGAGTGCTACGGATGGTCTAACGAGAGGAATG  
GAAGTTATTGACACAGGAGCTGCTCTAAGTGTTCGGTGGGTGGAGTAACTCTAGGAC  
GAATTTTCAACGTACTTGGCGAGCCTATTGATAATTTGGGTCCCGTAGATACTCGTACAA  
CATCTCCTATTCACAGATCCGCGCCTGCCTTTATACAATTAGATACAAAATTATCCATTTT  
TGAAACAGGAATTAAGTAGTAGATCTTTTAGCTCCTTATCGCCGTGGAGGAAAAATAG  
GACTTTTTCGGTGGAGCTGGAGTGGGTAAAACAGTACTCATTATGGAATTAATCAATAAC  
ATTGCCAAAGCTCATGGGGGTGTGTCCGTATTTGGCGGAGTAGGTGAGCGTACTCGTG  
AGGGAAACGATCTTTACATGGAAATGAAAGAATCCGGAGTAATTAATGAAAAAATAT

TGCAGAATCAAAAAGTAGCTCTAGTCTACGGTCAAATGAATGAACCGCCTGGAGCTCGT  
ATGAGAGTTGGGTAACTGCCCTAACTATGGCGGAATATTTTCGAGATGTGAATGAACA  
AGACGTACTTCTATTTATCGACAATATCTTCCGTTTCGTCCAAGCAGGATCCGAAGTATC  
CGCTTTATTAGGTCGAATGCCTTCCGCTGTGGGTATCAACCTACCCTTAGTACCGAAAT  
GGTTCCTTACAAGAAAGAATTACTTCTACCAAAGAAGGGTCCATAACTTCTATTCAAG  
CAGTTTATGTACCCGCAGACGATTTGACTGATCCCGCCCCCGCCACGACATTTGCACAT  
TTAGATGCTACTACTGTACTATCAAGAGGATTAGCTGCCAAAGGTATCTATCCAGCAGTA  
GATCCTTTAGATTCAACGTCAACTATGCTCCAACCCCGAATCGTTGGTGAAGAACATTA  
CGAAACTGCGCAAAGAGTTAAACAACTTTACAACGTTACAAAGAACTTCAGGATATT  
ATAGCTATCCTTGGGTGGATGAATTATCTGAAGAGGACCGTTTGACCGTAGCAAGAGC  
ACGAAAAATTGAGCGTTTCTTATCACAACCCTTTTTTGTAGCAGAAGTATTTACCGGTT  
CACCGGGGAAATATGTTGGTCTAGCAGAAACAATTAGAGGGTTTAAATTGATTCTTTCT  
GGTGAATTAGATAGTCTTCCCGAACAAGCCTTTTATTTGGTGGGTAATATCGATGAAGCT  
ACCGTGAAGGCTACGAATTTAGAAAAGGAGAGCAAATTGAAGAAAATGACTTTAAATC  
TTTGTGTAAGTACCCCAAATCGAATTGTTTGGGATTCCGACGTGAAGGAAATTATTTTAT  
CTACAAATAGTGGACAAGTTGGAATATTACCCAATCACGCGCCTCTGGCTATGGCTTTA  
GATATAGGTATTTTGAGAATACGCCTTAACGACCAATGGTTAACTATGGCTCTGATGGGC  
GGTTTTGCTCGAATAGGCAATAATGAAATCACTGTTTTAGTAAATGATGCGGAAAAAGG  
AAGTGACATTGATCCACAAGAAGCACAGCAAACCTTTGAAATAGCAGAAGCTAATTTA  
AAGGAGGCTAAGGGCAAGAGACAAACAATTGAGGCAAATCTAGCTCTCAGACGAGCT  
AGAACACGAGTAGAGTCTATCAATATGATTTCAATGAAAAATATAACCGATCCTTTCCCT  
TGCTTGGGTTACTGGCCATCTGCCGGAAGTTTCGGATTTAATACCGATATTTTAGCAACA  
AATCCAATAAATCTAAGTATAGTGATAGGTGATTTGATTTTTTTTTGGAAAGGGAGTGTTA  
AGTGATTTATTAGATAATCGAAAACAGAGAATCTTGAGAACTATTCGAAATTCAGAAGA  
ACTACGGGAAGGGGCGATTGAACAGCTGGAAAAAGCCCAGGCCCGCTTAAAGAAAGT  
AGAAACAGAAGCAGATCGGTTTAGAGTGAATGGCTACTCTGAGATAGAACGAGAAAA  
ATTGAATTTAATTAATTCAATTTATACAACCTTTAGAACAATTAGAAAATTACAAAAATGA  
AACCATTCATTTTGAACAACAAAGGGCGATTAATCAAGTCCGACAGCGGGTTTTACAA  
CAAGCCTTACAAGGAGCTCTAGGAACTCTGAATAGTTGCTTAAATAATGAGTTACATTT  
CCGTACCATCGCCGCTAATATTGGTATGTTTGGGGCGATGAAAGAAAAAATAATATGA  
ATCCAATAATTTCTGCCGCTTCCGTTATTGCTGCTGGGTGGCCGTTGGGCTTGCTTCTA  
TTGGACCTGGGGTTGGTCAAGGCACTGCTGCAGGTCAAGCTGTAGAAGGAATTGCGC  
GACAACCAGAGGCAGAGGGAAAAATACGAGGTACTTTATTACTTAGTCTGGCTTTTATG  
GAAGCTTTAACTATTTATGGGCTGGTTGTAGCATTAGCACTTTTATTTGCAAATCCCTTT  
GTTATGAATGTTCTACTATGTTCCATCAACACATTCAAAAGATTATACGATATTTCTGCCG  
TGGAAGTAGGTCAACATTTCTACTGGCAAATGGGAGATTTCCAAGTGCATGCCCAAGT  
ACTTATTACTTCGTGGGTTGTGATTGCTATCTTATTAGGTTCAACCATTCTAGTTGTTCGA  
AATCCACAAACCATTCCCAATTTTGGTCAAATTTCTTTGAATATGTCCTTGAATTTATT  
CGAGACGTAAGCAAACTCAAATTGGAGAAGAATATGGTCCTTGGGTTCCATTTATCG  
GAACTCTATTTCTATTTATTTTGTTCGAATTGGTCAAGGGCTCTTTTGCCTTGAAAA  
TCATACAGTTACCTCATGGGGAGTTAGCTGCACCCACAAATGATATAAATACTACTGTTG  
CATTAGCTTTACTTACGTCAGTAGCATATTTCTATGCGGGGATTTCAAAAAAGGATTAG  
CTTATTTTGGTAAATATATAACCTACTCCAATTTTACCGATTAACATCTTAGAGGA  
TTTTACAAAACCTTTATCGCTTAGTTTTTCGACTTTTTCGGAAATATATTAGCTGACGAATT

AGTAGTAGTTGTTCTTGTTTCTTTAGTACCTTTAGTGGTTCCTATACCTGTTATGTTCCCT  
GGATTATTTACAAGTGGTATTCAAGCTCTTATTTTTGCTACTTTAGCCGCAGCTTATATAG  
GTGAATCCATGGAAGGTCATCATATGATATTTCAACTTTAGAGCATATATTAACATCATAT  
ATCGTTTTTCGGTTCGTATCAATTGTAATTTCAATTCATTTGATAACCTTATTTGTCAACCAA  
ATTGTAGGATTCTATGATTCGTCCAAAAAAGGCATGATAATAACTTTTTTGTGTATAACA  
GGATTATTAATTACTCGTTGGTTTTTTTCAGGCCATTTACCATTTAGTGATTTATATGAATC  
CTTAATCTTTCTTTTCATGGGGTTTTTCGATTTTTTTATATGGTTCCGCGTTTTAAAAAACA  
AAAAACGATTTAAGTACAATAATTGCACCTAGTGTTATTTTTACCCAAGGCTTTGCTACT  
TCGGGTCTTTTAACCGAAATGCATCAATCTGTAATATTAGTACCCGCTTTACAATCCCAT  
TGGTTAATGATGCACGTAAGTATGATGATCTTAGGCTATGCAGCTCTTTTATGTGGATCA  
CTATTATCAGTAGCTATTTTAGTCATTACATTTCAAGAATTAATACCAATTTTGGGTAAAA  
GCAAAGAAATCAAATACATAAATATGAATGAAAATGTTTTACGAAAACTTCTTTTTCA  
TCTTATAGAAATTATTACAGGTATCAATTTATTCAACAATGGATCGTTGGGGTTATCGTA  
TTATTAGTCTAGGTTTTATCTTTTTAACGATCGGTATCTTTTCAGGAGCAGTATGGGCTAA  
CGAGGCATGGGGATCTTATTGGAATTGGGATCCCAAGGAACTTGGGCCTTTATTACTT  
GGACAATATTCGCGATTTATTTACATAGTAGAAAAATAAAAACTGGAAGGTTTAAAT  
TCTTCAATAGTGGCCTCTATAGGCTTTCTTATAATTTGGATATGTTATTTTGGGGTCAATC  
TATTAGGAATAGGACTACATAATTATGGTTCGTTTACATCTAATATGGCAAAAAAGAAAG  
CATCTATCCCTTTCTATCTCTCACATCTATAGTCTTTTTGCCCCTGGTGCATCTCTTTTACA  
TGTAAGAAAGGTATGGAATATTGGGTTACTAATTGGTGGAACTAAGCAATCCGAAAT  
TTTTCTTGAATATCATTCAAGAAAAGAGCATTCTAAAAAAATTCATGGAATTAGAGGAAC  
TGTTCTTCTTGGATGAACTGCTAAAGGAATATTCGGAAACACGTCTTCAAATCCTCCGT  
ACCGGA---CACAAAGAAACAATTCAATTGATCAAGACGCACAACGAAGATCGTATCTAT  
ACAATTTTGCACTTCTCGACAAATATAATCTATTTTATTATTCTAAGTGGTTATTCTATTCT  
AGGTAATCAAGAACTTATTATTCTTAACTCTTGGGTTCAAGAATTCCTATATAACTTAAAG  
TGACACAATAAAAGCTTTTTCTATTCTTTTAGTAACTGATTTATGTATAGGGTTCCATTCG  
ACTCATGGTTGGGAACTACTGATTGGGTCCGTCTATAAAGATTTTGGATTTATTCAGAAT  
GATCAAATTATATCTGGTCTTGTCTACTTTTTCCAGTGATTTTAGATACAATTTTAAAT  
ATTGGATTTTCCGTTATTTAAATCGTGTATCTCCTTCACTTGTAGTGATTTATCATTCAAT  
GAATGACATGCCATTGGTGTTCCAAAGTGCCCTTTTCGAAGTCCTGGAGAGGAAGAT  
GCATCTTGGGTTGACATATAC---CGACTTTATAGAGAAAGACTGCTTTTTTTTAGGCCAGG  
AAGTTAATAGTGAAATATCAAATCAACTTATTGGTCTTATGGTATATCTCAGTATAGAGG  
ATGATAAGAAAGATTTGTATCTGTTTATTAATTTCTCCGGGAGGATGGGTAATCCCCGGAA  
TAGCTATTTATGATACTATGCAATTTGTACAACCGGATGTACAGACAGTATGCATGGGAT  
TAGCCGCTTCAATGGGATCTTTTGTTTTGGCAGGCGGAAAAATTACCAAACGTCTAGCA  
TTCCCTCACGCT--GTAATGATCCATCAACCTGCTAGTTCTTTTTTATGAGGCACAAACGG  
GAGAATTTATCCTGGAAGCGGAAGAAGCTCCTGAAACTACGCGAAACTATACAAGGGT  
TTATGTACAAAGAACGGGCAAACCTTTATGGCTTGTATCAGAAGACATGGAAAGGGAT  
GTTTTTATGTCAGCAGCAGAAGCCCAAGCCTATGGAATTGTTGATCTTGTAGCGGTTGA  
A????????????????????????????????????????????????????????????  
????????????????????????????????????????????????????????????  
????????????????????????????????????????????????????????????  
????????????????????????????????????????????????????????????  
ATGGAGGAATATCAGTTATATTT  
GGAAGTGGATAGATCTCGTCAACAGGACTTCCCTATACCCACTTGTTTTTCACGAATATAT  
TTACGGACTCGCTTATAGTCATGATTTATTTGGTTATGATAATAAATATAGTTTACTAATTG

TAAAACGTTTAATTACTCGAATGTATCAACAGAATCATTGATTATTTCCGGCTAATGATTC  
TAACAAAAATCGATTTTTGAGGAAGAATTTTTATTCTCAAATAATATCAGAGGGTTTTGC  
CATCATCGTGGAATTCTGTTTTCTTTACAATTAAGCTCGTCCTTAATCATAAAATCTTAT  
AATCTGCGATCAATTCATTCTATTTTTCCCTTTTTTCGAGGATAAAGTTACATATTTAAATT  
ATATATCAGATATACGAGTCCCTTATCCTATCCATCTGGAAATCTTAGTCCAAATCCTTCG  
ATACTGGGTGAAAGATGCCCTTTGTTTTCAFTTATTAAGACTGTTTTCTTTATGATTATTGT  
AATTGGAATAGTATTTTTATTAATCGATTTATACTTTTTTCAAACCAAGATTTTTCTTCT  
TCCTATATAATTTTTATGTATGTGAATATGAATCTATCTTTTTTTTTTCTACGTACCAAATCT  
TTTCATTTACGATTAATAATCTTTTAGAGTTTTTTTTGAGCGAATCTTTTTCTATGCAAAA  
AAAGGACATCTTGTAGAAGTATTTGTTAAGTTTTCTACCTAACATTCTTTAAGGATCCT  
TTCATCCATTATGTTAGATATCAGGGAAAATCCATTCTGGCTTCCAAGAATTTGCCTATTT  
TAATGAATAAATGGAAATACTATTTTATCCATTTATGGCAATGTTATTTTGATGTTTGGTC  
TCAACCGCGAACAATCCGTATAAACCAATTATCCGAATATTCATTTCACTTTTTGGGCTA  
TTTTTTAAAGGTGGGGCTGAAGCATTACAGTAGTACGGGGTCAAATGCTGCAAAATGGA  
TTTCTAATCAAATT-----ATTATAAAAAGCTTGATATAATAGTTCCAATTATTCCAATAA  
TTAGATTATTGGCTAAATCGAAATTTTGTAATGTATTAGGGAATCCCTTAGTAAGCCGT  
CCTGGGCCGACTTATCCGATTTTGAGATTATTGCCCGATTTTGC GGATATGCAGAAATC  
TTTCTCATTATTACAATGGATCCTCAAAAAAAAAAAGAGTTTGTATCGAATAAAATATATAC  
TTCGGCTTTCATGTATTAACCTTTGGCCTGTAAACACAAAAGTACCGTACGCGCTTTT  
TCGAAAAGATTAGGTTTCGGAATTATTGGAAGAATTCTTTACAGAGGAAGAAGAGATTC  
TTTTTTGATCTTTCCAACACGGATTTGGTATTTGGATATTCTTTTTAGCAACGATCTAAT  
CAATCATGACATGATAATTGATAACAACA---GAAGTCCAAGATATCAAT--TCTTTTTCCAG  
ATTGGAATCT---TTAAAGAGGTCTATGGAGTTCTATGGGTACTCGCCCTATTTAATTA  
TTGTATTAGGAATCACATAAGTGTATTAGCAATTGTATGGTTAGAAAGAGAAATATCCG  
CGGGGATGCAACAACGTATTGGACCTGAATACGCCGGTCCTTTTTGGCGTTCTTCAAGCT  
CTAGCAGACGGAACAAACTACTTTTTCAAAGAGAATCTTATTCCATCTAGAGGGGATAT  
TCGTTTTATTAGTATCGGACCATCCATATCAGTTATCTCAATTCTAATAACCTATTTAGTA  
ATTCCTTTTAGCTATAATTTGTTTTATCTGATTTGAATATCGGTGTTTTTTTTATGGATTGC  
TATTTGAGTATTGCTCCCATTGGACTTCTTATGTCAGGATATGGTTCAAATAATAAATAT  
TCTTTTTTGGGTGGTCTGCGAGCTGCTGCTCAATCAATTAGTTATGAAATACCATTAACT  
TTATGTGTATTATCAATATCTCTACTATCGAACAGTTTAAAGTACAGTTGATATAGTTGATG  
CACAATCAAATATGGGTTTTGGGGATGGAATTTGTGGCGTCAACCTATGGGTTTTCGTC  
GTTTTTCTAATTTCTTCCCTAGCAGAATGTGAAAGATTACCTTTGATTTGCCAGAAGCG  
GAAGAAGAATTAGTAGCGGGTTATCAAACAGAATATTCCGGGTATAAAATTTGGTTTATTT  
TATGTTGCTTCCTATTTAAACCTGTTAATTTCTTCAATTATTGTAACAGTTCTTTACTTGG  
GTGGTTCGAATATCTCTATTCCGTACATATCCCTTTTTGAGTTTTTTGAAATAAATAAGA  
ATATGGAGTTTTTGGAACTACAATTGGTATCTTTATTACACTAGCTAAAACCTATTTGTTC  
TTATTCGTTTTCTATCATAACAAGATGGACTTTGCCTAGGCTAAGAATGGATCAATTATTA  
AATCTTGGCTGGAAGTTTCTTTTACCTATTTCTTGGTAATCTATTATTAACAACCTTCGT  
CTCAACTGTTTTCACTCATGATCTGACATGTACAGAATGAAAACCTCATTCTCGATTCTA  
CGAGAATTTTTATGAAAGCCTTTCATTGCTTCTCTTCGATGGAAGTTTTATTTCCAG  
AATGTATCCTAATTTTTGGTCTAATTTCTTCTTCTGATGATCGATTCAACCTCTGATCAAAA  
AGATATATCTTGGTTCTATTTTATCTCTTCAACAAGTTTAGTAATGAGCATGTGGTTCTA  
TTGTTCCGATGGAGAGAAGAACCTATGATTAGCTTTTTCGGGAAATTTCCAACGAACA

ATTTCAACGAAATCTTTCAATTTCTTATTTTACTATCTTCAACTCTATGTATTCTCTATCC  
GTAGAGTACATTGAATGTACAGAAATGGCTATAACAGAGTTTCTGTTATTCGTATTAACA  
GCTACTCTAGGAGGAATGTTTTTATGCAGCGCTAACGATTTAATAACTATCTTTGTAGCT  
CCAGAATGTTTTAGTTTTATGCTCCTATCTACTATCTGGATATACCAAGAAAGATGTACGG  
TCTAATGAGGCTACTATGAAATATTTACTCATGGGTGGGGCAAGCTCTTCTATTCTGGTT  
CATGGTTTTCTTTGGCTATACGGTTTCATCCGGGGGAGAGATCGAGCTTCAAGAAATAGT  
GAATGGTCTTATCAATACACAAATGTATAACTCCCCGGGAATTTCAATTGCGCTTATATT  
CATCACTGTAGGAATTGGGTTCAAGCTCTCCCTAGCCCCCTTCTCATCAATGGACTCCTG  
ACGTATACGAAGGATCTCCCACTCCAGTCGTTGCTTTTCTTTCTGTTACTTCGAAAGTA  
GCTGCTTCAGCTTTAGCCACTCGAATTTTCGATATTCCCTTTTATTTCTCATCAAACGAA  
TGGCATCTTCTTCTGGAAATCCTAGCTATTCTTAGCATGATATTAGGGAATCTCATTGCTA  
TTACCCAAACAAGCATGAAACGTATGCTTGCGTATTTCGTCCATAGGTCAAATCGGATAT  
GTAATTATTGGAATAATTGTTGGAGACTCAAATGGTGGATATGCAAGCATGATAACTTAT  
ATGCTGTTCTATATCTCCATGAATCTAGGAACTTTTGCTTGCAATTGTATCATTTGGTCTAC  
GTACCGGAACTGATAACATTCGAGATTATGCAGGATTATACACGAAAGATCCTTTTTTG  
GCTCTCTCTTTAGCACTATGTCTCTTATCCTTAGGAGGTCTTCCTCCGCTAGCAGGTTTT  
TTCGAAAACCTTTATTTATTCTGGTGTGGATGGCAGGCAGGCCTATATTTCTTGGTTTCA  
ATAGGACTTCTTATGAGCGTTGTTTTCTATCTACTATTATCTAAAAATAATCAAGTTATTA  
TGACTGGACGAAACCAAGAAATAACCCCTCACGTGCGAAATTATAAAAGGTCCCCTTT  
AAGATCAAACAATTCATCGAATTGAGTATGATTGTATGTGTGATAGCATCTACTATATC  
AGGAATATCAATGAACCCGATTATTGAAATTGCTCAGGATACCCTTTTTATGTTTTTGCT  
TTATGAATATGATATTTTTTTGGGCATTTCTAATAATATCGATCTTTATTCCGATTTTGGCAT  
TTACAATTTCTGGCTTTTTTGCCCCGATTAACAAAGGGCCAGAGAACTTTCTAGTTAT  
GAATCGGGAATAGAACCAATGGGAGATGCTTGGTTACAATTTCAAATCCGTTATTATATG  
TTTGCTCTAGTTTTTTGTTGTTTTTGATGTTGAAACGGTTTTTCTTTATCCATGGGCAATG  
AGTTTTGATGTATTGGGGATATCCGATTTATAGAAGCTTTGATCTTTGTGCTTATCCTAA  
TTGTTGGTTCAGTTTACGCGTGGCGAAAGGGGGCTTTAGAATGGTCTACGAATTATTT  
CCTTGGTTAACATTAGTTGTAATTTTGCCAATAGCCGGCGTTTCTTAATTTTCTTATTTCT  
CTCATAGAGGAAATAAGGTAATTAGGTGGTATACTGTTTGTATTTGTTTGATAGATCTCC  
TTTTAACAACTATGCGTTTTTGTTATCATTTCCAATTGGATGATCCGCTAATTCAACTGA  
CGGAGAGTTATAAATGGATCAATTTTTTTGATTTTTACTGGAGATTCGGAATAGATGGAC  
TCTCTATAGGACCCATTTTACTGACGGGATTTATCACCCTTTAGCTACTTTAGCGGCTC  
AGCCGATTACTIONGAGAATGCAAATTATTCTATTTCTGATGTTAGCAATGTATAGCGGTC  
AAATAGGACCATTTTCTTCTCGAGACATTTTACTTTTTCTTCATCATGTGGGAATTGGAAT  
TAATCCCCTTTATCTACTTTTAGCCATGTGGGGGGGAAAGAAACGTTTGTATTTCAGCTA  
CAAATTTATTTTGTATACTGCGGGAAGTTCTGTTTTTTTTATTAATGGCAACTCTAGGTAT  
CGTTTTATACGGTTCTAATGAACCAACTCAATTTTGAACATTAATAATCAATCATA  
TCCCTTGGCGTTGGAAATAATCGTATATATAGGATTTCTTATTGCGTTTGCTGTCAAATCA  
CCGATTATACCCTTACATACATGGTTACCGGATACACACGGAGAGGCCATTACAGCAC  
TTGTATGCTTTTAGCCGGAATCTTATTAATAAATGGGAGCATATGGGTTGGTTCGAATTA  
TATGGAATTATTTTCCCACGCTCATTCTATAATTTGCCCTTGGTTAATGATATTAGGTTCCA  
TTCAAATAATCTATGCCGCTTCAGCATCTCTTGGTCAACGTAATTTAAAAAAAAGAATA  
GCTTATTCCTCAGTATCTCATATGGGTTTTCTAATTATAGGAATTGGTTCTATAAGCGATA  
CGGGGCTCAACGGGGCCATTTTACAAATAATATCTCATGGATTTATTGGCGCTGCGCTTT

TTTTCTTGTCAGGAACTAGTTATGATAGACTACGTCTTCTTTATCTTGACGAAATGGGTG  
GAATGGCTCTGCCAATGCCAAAAATATTCACGGTTTTCACTATCTTATCGATGGCCTCTC  
TTGCATTGCCGGGCATGAGTGGTTTTTTTTGCAGAGTTGATAGTTTTTTGGGGAATAATTA  
CCAGCCAAAAATATTTTTTAATAATGAAAATACTAATTACTTTTGTAACAGCAATTGGAA  
TGATATTAACCTCCTATTTATTCAATTATCTATCTTACGGCAGATGTTCTATGGATAACAAGTTT  
TTAATACGCCAAACTCATATTTTTTTGATTCTGGACCGAGAGAATTATTTATTTTCGATTT  
CTATCCTTATAACCAATAATAGGTATTGGTATTTATCCAGATTTTCATTTTTCTCATTCTCGGTT  
GACAAGGTTGAAGCTGTTCTATCTCATTTTT-----ATGATGCTCGAACATGTACTTGT  
TGAGTGCTTATCTATTTTTCTATCGGTATCTATGGATTAATCACGAGTCGAAATATGGTTCG  
AGCCCTTATGTGTCTTGAACCTTATATTGAATGCAGTAAATATGAATCTCGTAACCTTTTCT  
GATTTTTTTGATAATCGCCAATTAAGGGAAATATTTTTTCAATTTTTGTTATAGCTATTG  
CAGCCGCTGAAGCAGCTATCGGACCGGCGATTGTTTCCTCAATTTTCGCGTAACAGAAA  
ATCAATTCGTATCAATCAATCGAATTTGTTGAATAAAAATGGAATATACACATCAATCTTCA  
TGGATCATACCCTTACCCCACCTCCCGTTCCTATATTAATAGGAGTAGGACTTCTACTT  
TTTCCTACGGCAACAAAAATCTTCGCCGTATGTGGGCTTTTCCTAGTATTTTTTTGTTA  
ATTATAGTTATGATTTTTCTGTAGATCTATCTATTCATCAAATCAAGAACAGTTCTATCTA  
TCAATATGTATGGTCTTGGACTATAAATACCGATCTTTCTTTAGAGTTTGGTTACTTGATC  
GATTCACTTACCTCTATTATGTCAATATTAATTACTACTGTTGGCATTCTGGTCTTATTTA  
TAGTGATAATTATATGTCTCATGATCAAGGGTATTTGAGATTTTTTGCTTATTTGAGTTTT  
TTAATACTTCAATGTTAGGATTAGTTACTAGTTTCGAATTTGATACAAGTTTACATTTTTT  
GGGAATTGGTTGGAATGTGTTCTTATCTATTAATAGGTTTTTGGTTCACACGTCCTATTG  
CGGCAAATGCTTGTCAAAAAGCGTTTGTAATAATCGTGTAGGCGATTTTGGTTTATTAT  
TAGGAATTTGGGTCTTTATTGGATTACAGGTAGTTTGGAAATTCGGGATTTATTCCAAA  
TAATCAACAAC---GAGGTTAATATTTTTTTTATTACTTTGTGTGCCCTCTTGTTATTTTGTG  
GCTCGGTTGCAAAATCTGCCCAATTCCCCCTTCATGTATGGTTACCAGATGCTATGGAA  
GGTCCCACCCCTATTTCTGCTCTTATACATGCTGCCACCATGGTAGCAGCAGGAATTTTC  
CTTGTAGCTCGACTTCTTCCCTTTTTTCATAGCCATACCTTCTATAATGAACGGAATAGCT  
TTCATAGGTATAATAACAGTAGTATTAGGGGCCACTTTAGCAATTGCTCAAAAAGATATT  
AAGAAAAATTTGGCCTATTCTACCATGTCTCAATTGGGTTATATGATGTTAGCTTTAGGT  
ATGGGCTCTTATCGAATTGCGTTATTTCAATTTGATTACTCATGCTTATTCAAAGCATTGT  
TGTTTTTAGGGTCCGGATCCATTATTCATCAATGGAAGCTATTGTTGGGTATTCTCCAA  
ATAAAAGTCAAAATATGCTTCTTATGGGTGGTTAACAACAAACATGTGCCAATTACAAAA  
ACTGCCTTTTTAATAGGTACGCTTTCTCTTTGTGGTATTCGCCTTTTCGCCTGTTTTTGGT  
CCAAGGATGAGATTCTTAATGATAGTTGGTTATACTCACCAATTTTTGCAATAATAGCTT  
GTTCAACAGCAGGATTAACCGCATTTTATATGTTTCGGATCTATTTACTTGTTTTTGAAG  
GATATTTCAATGTTCAATTTTCAAAATTTCAATGGAAAGAAAAATAGTTCATTCTATTCAA  
TATCTTTATGGGGTAAA---GAAGGAAAAAAAATTAATAAAATTTATTATCTTTATTAAC  
AATGAATTTGTTTCGCGGTAATAAAAAGTTTCCTTGTTTTTATCCTCATGAATCTGACAA  
TACTATGTTATTTCTATGCTTGTCTTAGTACTATTTACTTTCTTCGTCGGAGCCATAGGA-  
----TTTGATTTGGATATATTATCCAAATTGTTAAGTCCGTCAATAGACTTTTACACCAAA  
ATTCAAAC---TCTGTAGATTGG---GAATTTTTTACAAATGCAACTTTTTTCGGTGAGTATAG  
CTTTTTTCGGAATCTTTATAGCGTCTTTTTTCTATAAACCAGTTTATTTCGACTTTACAAAA  
TTTGAATTTATTAATTTATTCGAAATTTTAGCTGATACAATAATAAATGGCATATATGATT  
GGTCATATAATCGCGGCTATATAGATGGATTTTATGAAATATCTCTTATTGCCTCTGTAAG

AAAATTAGCGAAACTAAATTCTTTTTTTGATAGACAGGTAATTGATGGAATTCCAAATG  
CAGTTGGTATTACAAGTTTTCTTATAGGGGAGGCTTTTAAATATGTAGGAAGTGGG---CG  
AATTTCTTCGTATATCTTATTTTTTTGTATTTTTTTGTATTATTTTTTAATAATTTTTTATATG  
GATTTGCCAAAACGCTACATGATTTTCTTTTAGTATTTCTGGGATCGGGTCTTATATTAG  
GAAGTCTAGGAGTAGTATTACTTACCAACCCAATCTTTTCTGCTTTTTCGTTGGGACTAA  
CTCTTGTTTGTATATCTTATTGTATATTTATCAAACCTCCCATTTTGTAGCTGCATCACAG  
TACTTATTTACGTGGGAGCTATAAATGTTTTAATCATATTTGGTGTGATGTTTCATGAATG  
GTTCAGAATATTACCAAGATTTTCGTCTTTGGACCGTTGGCGATGGAATGACTTTGATG  
GTTTGTACAAGTATTTTTATTTCACTAATAACTACTATTCCAGATACATCATGGTACGGGA  
TTATTTGGACTACAAGATCCAATCAGATTATAGAACAAGATTTGATAAGTACTAGTCAAC  
AAATTGGAATTCATTTATCAACAGATTTTTTTTTCTTCCATTTGAACTCATTTCAATAATTCT  
TTAGCTGCTTTAATAGGTGCAATTGTCGTAGCTCGCCAGATGAATGTCCCAGCTACAA  
GAAAAGACCTCATGATAGTAAATATGGGGCCTCACCATCCATCAATGCATGGTGTCTT  
CGACTTATTGTTACTCTGGATGGTGAAGATGTTATTGATTGTGAACCAATATTGGGTTAT  
TTACACAGAGGAATGGAAAAAATTGCGGAAAATCGAACAATTATAACAATATCTGCCTTA  
TGTAACACGTTGGGATTATTTAGCCACTATGTTACACAGAAGCAATAACCGTAAATGGAC  
CGAACAGTTAGGAAATATTCAAGTGCCTAAAAGAGCCAGCTATATCCGAGTAATTATG  
TTAGAGTTGAGTCGTATAGCTTCTCACCTACTATGGTTGGGACCTTTTATGGCAGATATT  
GGTGCAAACTCCTTTCTTCTATATTTTTAGAGAAAGGGAATTCATATATGATCTATTC  
GAAGCTGCGACAGGTATGAGAATGATGCATAATTTTTTTTCGTATTGGAGGAGTAGCGGC  
CGATCTACCTCACGTTGGATAGATAAATGTTTTGATTTCTGCAATTATTTTTTACAAG  
GGTTGTTGAATATCAAAAACCTTATTACGCGCAATCCTATTTTTTTGGAAAGGGTTGAGG  
GGGTGGGTGTTGTTGGTGGAGAGGAAGTAATAAATTGGGGTTTATCAGGACCAATGCT  
TCGGGCTTCCGGAATACAATGGGATCTACGTCAAGTTGATAATTATGAGTGTATGAAG  
AATTTGATTGGGAAGTTCAATGGCAAAAAGAGGGAGATTCATTGGCTCGTTATTTAGTT  
AGAATTGGTGAAATGATGGAATCCATAAAAATTATTCAACAGGCTTTGGAGGGGATTCC  
CGGCGGCCCTATGAAAATTTAGAAATCCGATGTTTTGGTAGAGAAAAAGAACCAGAA  
TGGAATGATTTTGAATATCGATTCATTGGTAAAAAACCGTCTCCAACTTTCGAATTGCC  
AAAACAAGAACCTTATGTAAGAGTTGAGGCCCCCAAAGGAGAATTGGGGATTTTTTTA  
ATAGGAGATCAAATGGTTTTCTTGGAGATGGAAAATTCGTCCACCGGTTTTATCAA  
TTTGCAAATCTTCTCAATTAGTTAAAAGAATGAAATTGGCTGATATTATGACAATACT  
AGGTAGCATAGATATCATTATGGGAGAAGTTGATCGTATGTTCTTATGGTAACTGGGTT  
CATGAATTATAGTCAACAAACAGTTCGAGCTGCAAGATACATTGGTCAAAGTTTCATGA  
TTACCTTATCTCACGCAAATCGTTTACCGGTAACCTATTCAATACCCTTATGAAAAATTAAT  
AACATCGGAACGTTTCCGGGGTCGAATCCATTTGATAAATGCATTGCTTGTG  
AAGTATGTGTTTCGTGTATGTCCTATAGATTTACCCGTTGTGGATTGGAACTAGAACTA  
ATATTCGAAAAAACGATTGCTAAATTACAGTATTGATTCGGAATCTGTATTTTTTTGTG  
GTAACGTATTGAGTATTGTCCAACAAATTGTTTATCAATGACGGAAGAATATGAACTTT  
CGGCTTATGATCGTCATGAATTGAATTATAATCAAATTGCTTTAGGCCGTTTACCCATGTC  
AGTAATTGATGATTATACAATTCGAACAATTCAAATAAAA-----  
-----ATGCAAGGTCGTTTGTCTGCTTGGCTAGTCAAACATGGACTAGTTCATAGATCTT  
TGGGTTTCGATTACCAAGGAATAGAGACTTTACAAATAAAGCCTGAGGATTGGCATTCC  
ATTGCTGTTATTTTATATGTATATGGTTATAATTATCTACGTTCCCAATGTGCCTATGATGTA  
TCACCGGGAGGACTGTTAGCTAGTGTGTATCATCTTACGCGAATAGAGTGTGGTATATAT

CAACCAGAAGAGGTATGCATTAATAATTTGTTCCAAGGAACAATCCCCGAATTCCTTC  
TATTTTCTGGGTTTGGAAAAGTGCGGATTTTCAAGAAAGGGAATCATATGATATGTTAG  
GAATCTCGTATGATAATCATCTCGTCTGAAACGTATTTAATGCCCGAAAGCTGGATAG  
GGTGGCCTTTGCGTAAAGATTATATCACCCCAATTTTTATGAAATACAAGATGCTCAC--

-----  
-----ATGAATTCCATTGAGTTTCCCTTAATTGAT  
CGAACAACCCAAAATTCAGTTATTTCAACTACATTAATGATCTTTCAAATTGGTCAAG  
ATTATCCAGTTTATGGCCGCTTCTCTATGGTACCAGTTGTTGCTTCATTGAATTTGCTTCA  
TTAATAGGATCACGATTCGACTTTGATCGTTATGGATTGGTACCGCGATCTAGTCCCAGG  
CAAGCAGACCTAATTTAACAGCGGGCACGGTAACCATGAAAATGGCTCCTTCTTTAGT  
TCGATTATATGAACAAATGCCCGAACCAAAATATGTTATTGCTATGGGAGCCTGCACAAT  
TACAGGAGGGATGTTTCAGTACAGATTCTTATAGTACTGTTCCGGGGGTAGATAAACTAA  
TTCCTGTGGATGTTTATTTGCCGGGCTGTCCACCGAAACCGGAGTCCATTCTAGATGCT  
ATAACAAAACCTTCGTAAGAAAATATCTCGAGAAATCCATGAAGATCAACTGAGTTCTCA  
A---GAGAATAGGTGTTTTACTACCAACCACAAATTTTATGTTGAACGCAGTACTCATAACC  
GGCAATTATGATCAAGTATTATCCATCAACCACCGTCTACTTCAGAGATATCCACA-----  
TTTTTTAGATATCAAAAAGTTCAGTATCCTAACGAAATAGTGAATATGCAAACCTAGAAAT  
GCTTTTTCTTATATAAAGGAAGAGATTACTCGATCCATTTCCGTATTGCTCGTGATATATA  
TAATAATTCGAGCACCCATTTCAAATGCATATCCGATTTTTGCCCAACAGGGTTATGAAA  
ATCCGCGAGAAGCAACTGGCCGTATTGTATGTGCCAATTGCCATTTAGCCAATAAGCCC  
GTGGATATTGAGGTCCACAAACGGTACTTCCCGATACTGTATTTGAAGCAGTTGTTCCG  
AATTCCTTATGATATGCAAGTAAAACAAGTTCCTTGCTAATGGTAAAAGGGGCGCTTTAA  
ATGTAGGGGCTGTTCTTATTTTACCGGAGGGTTTTGAATTGGCCCCACCGATCGTATTT  
CGCCCGAGATTAAAGAAAAGATGGGCAATCTGTCTTTTCAAAGCTACCGTCCCACGAA  
AAAAAATATTCTTGTGGTAGGCCCTGTTCTGGTCAGAAATATAGTGAGATTACCTTCC  
GATCTTTCCCGGATCCCGCTACTAATAGAGATGTTAATTTCTTAAAATATCCTATATAC  
GTAGGCGGCAACAGGGGAAGGGGTCAGATTTATCCCGACGGGAGTAAGAGTAATAATA  
ATGTTTATAATGCTACAACGAGCGGTATAATAAACAATAATATAAGAAAAGATAAGGGG  
GGGTACGAAATAACGATAGTGGATGCATCGGATGGACGTGAAGTAATTGATATTATACC  
TCCAGGACCAGAACTTCTTGTTCAGAGGGTGAATCCATCAAACCTTGATCAACCTTTAA  
CAAGTAATCCAAATGTGGGTGGATTTGGTCAGGGAGATGCAGAAATAGTTCTTCAAGA  
TCCGTTACGTGTCCAAGGTCTTGTCTTCTTGGCATCTATTATTTTCGCACAAATCTTT  
TTGGTTCTTAAAAGAAAACAATTTGAGAAGGTTCAATTGTCCGAAATGAATTTTATGAG  
TAAAGTCTATGATTGGTTCGAAGAACGTCTTGAGATTCAGGCGATTGCCGATGATATAA  
CTAGTAAGTATGTTCCCTCCTCATGTCAACATATTTTATTGTTTAGGGGGAATTACACTTAC  
TTGTTTTTTAGTCCAAGTAGCCACGGGGTTGCTATGACTTTTTTATTATCGTCCTACAGT  
CACTGAAGCTTTTGCTTCTGTTCAATATATAATGACTGAGGCGAATTTTGGTTGGTTAAT  
CCGATCGGTTTCATCGATGGTCGGCGAGTATGATGGTCTTAATGATGATCCTGCACGTATT  
TCGCGTCTATCTTACTGGTGGTTTTAAAAACCTCGCGAATTGACTTGGGTACTGGTG  
TGGTTTTGGGTGATTTGACCGCATCTTTTGGGTGTAACCTGGTTATTCATTACCTTGGGACC  
AAATTGGTTATTGGGCAGTCAAATTTGTAACAGGCGTACCTGAAGCTATTCCTGTAATA  
GGATCGTCGGTGGTAGAGTTATTGCGTGGAAGTGCTAGTGTGGGACAATCTACCCTGA  
CTCGTTTTTATAGTTTACATACTTTTGTATTACCTCTCCTTACTGCCGTATTTATGTTAATG  
CACTTTTCAATGATACGTAAGCAAGGCATTTCTGGCCCTTTAATGGGAGTAACAAAAAA



ACCTGACTTGAATGATCCTGTATTAAGAGCTAAATTGGCTAAAGGAATGGGTCATAATTA  
TTATGGAGAACCCGCATGGCCCAACGATCTTTTATATATTTTTCCAGTAGTGATTCTGGG  
TACTATTGCATGTAACGTAGGCTTAGCAGTTCTAGAACCATCAATGATTGGGGAACCCG  
CGGATCCATTTGCAACCCCTTTGGAAATATTGCCCGAATGGTATTTCTTTCCTGTATTT  
AAATACTTCGTACAGTGCCAAATAAGTTATTGGGTGTTCTTTTAATGGTTTCAGTACCCG  
CAGGATTAGTAACAGTACCCTTTTTGGAAAATGTTAATAAATTCCAAAATCCATTTCCGC  
GTCCAGTAGCAACAACCGTTTTTTTTAATTGGTACCGCAGTGTCTCTTTGGTTGGGTATT  
GGAGCAACATTACCCATTGAGAAATCCCTTACTTTAGGTCTTTTTATGATTGAAGTTTTT  
CTATTTGGAATCGTGTTAGGTCTAATTCCTATTACTTTGGCTGGATTATTTGTAACCTGCAT  
ATTTACAATACCGACGTGGTGATCAGTTGGACCTTATGCCCACTATAACTAGTTATTTTG  
GTTTTCTACTAGCGGTTTTAACTATAACCTCTGGTCTATTTATCAGTCTGAGGAAGCTAC  
GACTTATTATGGATATAGTAAGTCTTGCCTGGGCTGCTTTAATGGTAGTTTTTACATTTTC  
CCTTTCCCTCGTAGTATGGGGAAGAAGTGGACTTATGATTATTCGTTCCGCCGAACCCAG  
AAGTCAAAATTTTGGTGGATAGGGATCCATAAAAACCTCTTTTCGAGGAATGGGCAA  
ACCCGGCCATTTCTCAAGAACAATAGCTAAGGGACCTGATACTACTACTTGGATCTGGA  
ACCTACATGCTGATGCTCATGATTTGATAGCCATACTAGTGATTTGGAGGATATTTCC  
GAAAAATATTTAGTGCCCATTTCCGGCAACTCTCCATCATCTTTCTTTGGCTGAGTGGCA  
TGATTTCCACGGTGCTCGTTTTTTCCAATTATGAAGCATGGCTAAGCGATCCTACTCACA  
TTAGACCCAGTGCTCAGGTGGTTTTGGCCAATAGTGGGCAAGAAATATTGAATGGTGAT  
GTGGGCGGGGTTTTCCGAGGAATACAAATAACCTCGGGTTTTTTTTCAGATTTGGCGCG  
CCTCTGGAATAACTAGTGAATTACAACCTTATTGTACCGCAATTGGTGGGTGGTCTTTG  
CAGCCTTAATGCTTTTTGCTGGGTGGTTTTATTATCACAAAGCTGCTCCAAAATTGGCT  
TGGTTTTCAAGATGTGGAATCCATGTTGAATCACCATTTGGCAGGTCTACTAGGACTGGG  
GTCTCTTTCTTGGGCGGGGCATCAAGTACATGTATCTTTACCGATTAACCAATTTCTAAA  
TGCTGGAGTAGATCCCAAAGAGATTCCACTTCCTCATGAATTTATCTTAAACCGGGATC  
TTTTGGCTCAACTTTATCCAAGTTTTGCCGAGGGAGCAACCCCATTTTTCACTTTGAAT  
TGGGCAAAGTACGCGGATTTTCTTACTTTTTCGCGGAGGATTGGATCCAGTAACTGGTGG  
TCTGTGGCTGACCGATATTGCACATCATATTTAGCTATTGCCATTCTTTTCTTGATAGCG  
GGTCACATGTATAGGACCAACTGGGGTATCGGTCATGGTATAAAGATATTTTAGAGGC  
TCATAAAGGTCCATTTACAGGACAGGGGCATAAAGGTCTATATGAGATTCTAACAACCT  
CATGGCATGCTCAATTATCTATTAACCTAGCTATGTTAGGCTCTTTGACCATTATTGTAGC  
TCACCATATGTATTCTATGCCCCCTTATCCATACCTAGCGACTGACTATGGTACACAATTG  
TCATTGTTACGCATCACATGTGGATTGGTGGATTTCTCATAGTTGGTGCTGCTGCACAT  
GCAGCCATTTTTATGGTAAGAGACTATGATCCAACGACTCGATAACAACGATCTATTAGAT  
CGTGTCTTAGGCATCGCGATGCAATCATATCACATCTAAACTGGGTGTGTATATTTTTA  
GGCTTTTCATAGTTTTGGTTTTGTATATTCATAATGATACCATGAGTGCGTTAGGGCGTCCC  
CAAGATATGTTTTAGATAACAGCTATAACAATTGCAACCCATTTTTGCTCAATGGATACAA  
AATACCCACGCTTTAGCACCGGGCATAACGGCCCTGGTGCAACAACAGGTACCAGTT  
TGACTTGGGGGGGTGGTGATTTAGTGGCAGTAGGCAACAAAGTCGCTTTATTACCTATT  
CCTTTAGGAACTGCGGATTTTTTGGTCCATCATATTTCATGCATTTACAATTCATGTGACG  
GTATTGATACTCCTAAAAGGTGTTCTATTTGCTCGTAGCTCAAGATTGATACCAGATAAA  
GCAAATCTTGGTTTTCGTTTTCCCTTGTGATGGACCAGGAAGAGGGGGAACATGCCAAG  
TATCCGCTTGGGATCATGTCTTCTTAGGACTATTTTGGATGTACAATGCAATTTTCAGTAG  
TAATATCCATTTTCAGTTGGAAAATGCAGTCAGATGTTTGGGGGAGTATAAGCGATCAA

GGGGTAGTAACTCATATCACAGGAGGAAACTTTGCGCAAAGTTCCATTACTATTAATGG  
GTGGCTCCGCGATTTCTTATGGGCACAGGCATCTCAGGTAATTCAGTCTTATGGTTTCGTC  
ATTATCTGCATAIGGTCTTTTTTTCTTGGGTGCCCACTTTGTATGGGCTTTTAGTTTAATG  
TTTCTATTCAGCGGGCGTGGTTATTGGCAAGAACTTATTGAATCCATCGTTTGGGCTCAT  
AATAAATTAAGTTGCTCCTGCTACTCAGCCGAGAGCCTTGAGCATTGTACAGGGCC  
GGGCTGTAGGAGTAACACATTACCTTCTGGGTGGAATTGCCACAACGTGGGCATTCTTC  
TTAGCAAGAATTATTGCAGTAGGAATGGCATTAAAGATTTCCAAGGTTTAGCCAAGGTTT  
AGCTCAGGACCCCACTACTCGTCGTATTTGGTTTGGTATTGCTACCGCACATGACTTTG  
AGAGTCATGATGATTAATGAGGAACGTCCTTATCAGAATAATTTTGTCTCTCATTTCG  
GACAATTAGCAATAATTTTCTGTGGACTTCCGGGAATCTGTTTCATGTAGCTTGGCAA  
GGAAATTTTGGAGCATGGGTACAGGATCCTTTACATGTAAGACCTATTGCTCATGCAAT  
TTGGGATCCTCATTTTGGTCAACCGGCTGTAGAAGCTTTTACTCGAGGGGGTGCTCTTG  
GTCCAGTGAATATAGCCTATTCTGGTGTATCAGTGGTGGTATACTATTGGTTTACGTAC  
TAATGGAGATCTTTATAGTGGAGCTCTTTTTCTATTATTTCTTTCTGCCATATCTTTACTAG  
CGGGCTGGTTACACCTACAACCGAAATGGAAACCTAGCGTTTCATGGTTTAAAATGC  
CGAATCCCGCCTCAATCATCATTGTGTCAGGACTCTTTGGAGTTAGTTCCTTGGCTTGG  
CAGGACATTTAGTCCATGTCGCTATTCGGGATCTAGGGGAGAATACGTTTCGATGGAAT  
AATTTTTAAGTATATTGCCTACCCCAAGGATTAGGTCCACTTTTTACAGGTCAGTGG  
AATCTTTATGCTCAAACCCCGATTCCAGTAGTCATTTATTTGGTACCTCCCAAGGGGCT  
GGAAGTCTATTTAACACTTCTCGGGGGATTCCATCCACAAACGCAAAGTTTATGGCT  
AACCGATATGGCACACCATCATTAGCTATTGCCATTCTGTTTCTACTTGCCGGTCATATG  
TATAGAACTAACTTCGGTATTGGGCACAGTATAAAGGATCTTTTAGAAGCACATATTCCT  
CCCGGGGGTAGATTAGGGCGTGGACATAAGGGTCTTTATGACACAATCAATAATCAAT  
TCATTTTCAATTAGGCCTTGCCTTAGCCTCTTTAGGGGTGATTACTTCTTTGGTAGCTCA  
ACACATGTATTCTTTACCCGCTTATGCGTTTATAGCGCAAGACTATACTACTCAAGCTGC  
GTTATATACTCATCATCAATACATCGCAGGATTCATTATGACAGGGGCTTTTGCTCACGG  
AGCTATCTTTTTTATTTCGAGATTACAATCCTGAGCAGAATGAAGATAATGTATTGGCAAG  
AATGTTAGATCACAAGGAAGCTATCATATCCCATTTAAGTTGGGCCAGTCTATTTCTGGG  
GTTCCATACTTTGGGACTTTATGTCCATAATGATGTTATGCTTGCTTTTGGTACTCCGGA  
GAAACAAATCTTGATTGAACCCATATTTGCCCAATGGATAACAATCTGCTCATGGGAAA  
CTTCATATGGGTTCGATGTACTTTTATCTTCAACGAATAGTCCGGCGTTCAATGCGGGG  
GAAGCATATGGTTGCCTGGTTGGTTAAACGCTATTAATGAG-----AATAGTAATTCTCTAT  
TCTTAACAATAGGACCCGGCGACTTCTTGGTTCATCATGCTATTGCTCTTGGTTTACATA  
CAACTACATTGATCTTAGTAAAAGGTGCTTTGGATGCGCGTGGTTCCAAATTAATGCCG  
GATAAAAAAGATTTTGGTTATAGTTTTCTTGGATGCGCGTGGTTCCAAATTAATGCCG  
TGATATTTCCGGCCTGGGACGCTTTTTATTTGGCAGTTTTCTGGATGTTAAATACGATTGG  
ATGGGTTACTTTTTTATTGGCATTGGAAGCACATTACACTGTGGCAGGGTAATGTTTAC  
AGTTAATGAATCTTCGACCTATTTAATGGGATGGTTAAGAGATTATCTATGGTTAAACT  
CTTCACAACCTTATCAATGGATATAACCTTTTTGGTATGAATAGTTTATCAGTCTGGGCGT  
GGATGTTTTTATTTGGACATCTTGTTTGGGCTACTGGATTATGTTCTTAATTTCTGGCG  
CGGATATTGGCAGGAATTAATTGAAACTTTAGCATGGGCTCATGAACGCACACCTTTGG  
CTAATTTGATTCGATGGAGAGATAAGCCAGTTGCTCTTCCATTGTGCAAGCAAGGTTG  
GTTGGATTAGCCCACTTTTCGGTAGGTTATATATTTACTTATGCGGCTTTCTTGATTGCCT  
CTACATCGGGTAAATTTGGTATGTACATTAGTAAAATTTATGATACATGTATAGGAT

GTACTCAATGTGTCCGAGCCTGTCCTACAGATGTATTAGAAATGATACCTTGGGACGGA  
TGTAAGCTAAGCAAATAGCTTCTGCCCAAGAACAGAAGACTGTGTTGGTTGTA  
GGTGCGAATCCGCTTGTCGACGGATTTCTTAAGTGTAGAGTTTATTTATGGCATGAA  
ACAACCTCGAAGTATGGGTCTAGCTTATATGACA-----AACTTACCTTCTATTTTGTGCCT  
TTAGTGGGCCTAGTATTTCCGGCAATGGCAATGGCTTCTTTATTTCTTTATCTTCAAAA  
AACAAGATTTTATGCGAGATCTAAAAACATATCTCTCCGTGGCACCAGTGGTAAGTAC  
TCTATGGTTTCGCGGCTTTAGCAGGTCTCTTGATAGAGATCAATCGTTTATTCCCGGATGC  
ACTAATATTCCCCTTTTTTTCATTTCATGACTGCAATTTTAGAGAGACGCGAGAGCGAAA  
ACCTATGGGGTCGCTTCTGTAAGTGGATAACTAGCACTGAAAACCGTCTTTACATTGGA  
TGGTTTGGTGTGTTGATGATCCCTACCTTATTGACCGCAACTTCTGTATTTATTATCGCTT  
TCATTGCTGCCCTCCGGTAGATATTGATGGTATTCGTGAACCTGTTTCTGGATCTCTAC  
TTTACGGAAACAATATCATTCTGGTGCCATTATCCTACTTCTGCGGCTATCGGTTTGC  
ACTTTTACCCGATCTGGGAAGCAGCATCTGTTGATGAATGGTTATACAATGGCGGTCCT  
TATGAACATAATTGTTCTACATTTCTTACTTGGTGTAGCTTGTACATGGGTCGTGAGTGG  
GAACTTAGTTTTCGTCTAGGTATGCGCCCTTGGATTGCTGTTGCATATTCAGCTCCTGTT  
GCAGCCGCTACTGCTGTTTTCTTGATCTATCCGATTGGTCAAGGAAGCTTTTCTGACGG  
TATGCCTCTAGGAATCTCTGGTACTTTCAACTTTATGATAGTATTTCAAGGCTGAGCATAA  
CATCCTTATGCATCCATTTACATGTTAGGTGTAGCTGGTGTATTCCGGCGGCTCCCTATTT  
AGTGCTATGCACGGTTCCTTGGTAACTTCTAGTTTGATCAGGGAAACCACAGAAAATG  
AATCTGCTAATGAAGGTTACAGATTCGGTCAAGAGGAAGAAACCTATAATATTGTAGCT  
GCTCACGGTTATTTTGGCCGATTGATCTTCCAATATGCAAGTTTCAACAACTCTCGTTCT  
TTACACTTCTTCTTAGCTGCTTGGCCTGTTGTAGGTATCTGGTTTACTGCGTTAGGTATC  
AGCACTATGGCTTTCAATTTGAATGGTTTCAATTTCAACCAATCTGTAGTTGATAGTCAA  
GGTCGTGTAATTAACACCTGGGCTGATATTATTAACCGAGCTAACCTTGGTATGGAAGTT  
ATGCATGAACGTAATGCTCATAACTTCCCTCTAGACCTAGCTGCGGTCGAGGCTCCATC  
TATAAATGGAATGGGTTTGCCTTGGTATCGTGTTTACATCCGTTGTATTAATGATCCCGG  
CCGTTTGTCTGCTGTCCATATAATGCATACAGCTCTGGTTGCTGGTTGGGCTGGTTCAAT  
GGCTCTATATGAATTAGCAGTTTTTGATCCTTCTGATCCCGTTCTTGACCCAATGTGGAG  
ACAGGGTATGTTTCGTTATAACCCTTCATGACTCGTTTAGGAATAACCAATTCGTGGGGCG  
GTTGGAATATTACA---GGGGAACTATAACGAATCCAGGTATTTGGAGTTATGAAGGTG  
TGCCCGGGGCGCATATTTGTTTTCGGGCTTGTGCTTTTTGGCCGCTATCTGGCATTGG  
GTCTATTGGGATTTAGAAATCTTTTCTGATGAACGTAAGTGGAAAACCTTCTTTAGATTG  
CCAAAATCTTTGGAATTCATTTATTTCTTGCAGGGTTGGCTTGTGTTTGGGTTTGGCGCA  
TTTCATGTAAGTGGATTGTATGGTCCCTGGAATATGGGTGTCCGATCCTTATGGACTAACC  
GGAAGGGTACAACCCGTAAATCCCGCATGGGGTGTGGAAGGTTTGTATCCCTTTGTTC  
CGGGAGGCGTAGCCTCTCATCATATTGCAGCAGGGACATTGGGTATATTAGCGGGCCTT  
TTCCATCTTAGTGTGCGCCCAACCTTCTATATAAAGGATTACGTATGGGAAATATT  
GAAACCGTCTTTCCAGTAGTATCGCTGCTGCTTTTTTGCAGCTTTTGTGTTGCTGG  
AACTATGTGGTATGGTTCAGCAACTACCCGATTGAATTATTTGGTCCCACTCGTTATCA  
ATGGGATCAGGGATACTTCCAGCAAGAAATATATCGAAGAGTTGGTGTCTGGGCTAGCT  
GAAAATCAAAGTTTCTCAGAAGCTTGGTCTAAAATTCCCGAAAAATTGGCTTTTTATGA  
TTACATCGGCAATAATCCGGCAAAAGGAGGTTTGTGTTAGAGCGGGTTCAATGGACAAT  
GGAGATGGAATAGCCGTCGGTTGGTATGACATCCTATCTTTAGGGATAAAGAGGGGC  
GTGAACTTTTTGTACGTCGTATGCCTACCTTTTTTGAACATTTCCGGTTGTTTTGGTAG

ACGGAGACGGAATTGTTAGAGCCGATGTTCCTTTTTCGAAGGGCAGAATCGAAATATAG  
TGTCGAACAAGTAGGCGTAACTGTTGAATTCTATGGTGGCGAACTCAATGGAGTCAGT  
TATAGTGATCCCGCTACTGTCAAAAAATATGCCAGACGTGCTCAATTGGGTGAAATTTT  
TGAATTAGATCGTGCTACTTTGAAATCTGATGGTGTTTTTTCGTAGCAGTCCGAGGGGTT  
GGTTTACTTTTGGACATGCTTCGTTTGCTCTGCTGTTCTTTTTTCGGGCACATTTGGCATG  
GTTCTAGAACCTTGTTTAGAGATGTTTTTGCCGGTATCGACCCAGATTTAGATTCTCAAG  
TCGAATTTGGAGCATTCCAAAACTTGGAGATCCAACCACAAGAAGACAGGTAGTCAT  
GAAAACCTTATATTCCTGAGGAGGTTCTACCACGTGGAAACGCTCTTTAATGGAACCTT  
TAGCTTTAACCGGTCGTGACCAAGAACTACCGGTTTTGCTTGGTGGGCCGGGAATGC  
CCGACTTATCAATTTATCTGGTAAACTTCTGGGGGCCATGTAGCCCATGCTGGATTAAT  
AGTATTCTGGGCCGGAGCAATGAACCTATTTGAAGTGGCTCATTTTGTACCCGAGAAGC  
CCATGTATGAACAAGGCTTAATTTTACTTCCCCATCTAGCTACTCTAGGTTGGGGGGTCG  
GTCCTGGGGGAGAGGTTATAGACACCTTCCCATACTTTGTTTCTGGAGTACTTCACTTA  
ATTTCCCTCTGCGGTATTAGGATTTGGCGGTATTTATCATGCACTTCTGGGACCTGAGACT  
CTTGAAGAATCTTTTCCATTTTTCGGTTATGTATGGAAAGATAGAAATAAAATGACTACC  
ATTTTGGGTATCACTTAATCTTGTAGGTATAGGGGCTTTTCTTCTAGTATTCAAGGCTT  
CTTATTTTGGGGGTATATATGATACTTGGGCTCCCGGGGAGGAGATGTAAGAAAATT  
ACCAATTTGACCCTAGTCCAAGTATTATAATTTGGTTATTTACTAAAATCACCTTTTGGGG  
GAGAGGGGTGGATTGTTAGTGTGGACGATTTGGAAGACATAATTGGGGGACATGTATG  
GTTGGGTTCCATTTGTATACTTGGTGGAACTCTGGCATATTTAACAACCCCTTTGCATG  
GGCTCGGCGTGCCTAGTATGGTCTGGAGAAGCTTACTTGTCTTATAGTTTAGCAGCTT  
TATCCGTTTTTGGTTTTATTGCTTGTGCTTTGTCTGGTTAATAATACCGCTTATCCTAGT  
GAGTTTTATGGACCCACTGGACCAGAAGCTTCTCAAGCTCAAGCATTACTTTTTCTAGT  
TAGAGACCAACGTCTTGGGGCTAATGTAGGATCCGCTCAAGGGCCTACCGGTTTAGGT  
AAATACCTAATGCGTCTCCGACCGGAGAAGTCATTTTTGGAGGAGAACTATGCGGTT  
TTGGGATCTTCGTGCTCCTTGGTTGGAACCTCTAAGGGGTCCAATGGTTTGGACTTGA  
GTAGACTCAAAAAGACATACAGCCTTGGCAAGAACGTCGTTCCGCGGAATATATGAC  
TCACGCTCCTTTAGGTTCCCTTAAATTCCGTGGGGGGTGTAGCTACGGAGATCAATGCAG  
TCAATTACGTTTCTCCTAGAAGTTGGTTAGCTACTTCTCACTTTGTTCTAGGATTCTTTCT  
ATTCGTGGGTCAATTTATGGCACGCTGGAAGAGCTCGCGCAGCTGCCGCGGGATTTGAA  
AAAGGAATTGATCGAGATTTTGAACCTGTTCTTTCCATGACTCCACTTAATATGACTATA  
GCTCTTGGTAAATTTACCAAAGATGAAAATGATTTATTTGATATTATGGATGACTGGTTA  
CGTCGGGACCGTTTCGTTTTTGTGGGTTGGTCCGGTCTATTGCTCTTCCCTTGTGCCTAT  
TTCGCCTTGGGGGGTGGTTTACAGGTACCACCTTTGTAACCTCATGGTATACTCATGG  
ATTGGCAAGTTCCTATTTGGAGGGCTGTAATTTCTTAACCGCTGCAGTTTCGACCCCTG  
CTAATAGTTTAGCACACTCTTTGTTGTTACTATGGGGTCCCTGAAGCACAGGGAGATTTT  
ACCCGTTGGTGTCAATTAGGAGGTCTGTGGACTTTTGTGCTCTCCACGGTGCTTTTCGG  
ATTAATAGTTTTATGTTACGTCAATTTGAACTCGCTCGATCTGTTCAATTACGGCCTTAT  
AATGCAATTGCATTTTCTGGTCCAATTGCTGTTTTTGTCTGTATTCTGATTTATCCAC  
TAGGTCAGTCTGGTTGGTCTTTTGCACCTAGTTTTTGGTGTAGCAGCTATATTTTCGATTCA  
TCTCTTTTTTCCAAGGGTTTCATAATTGGACATTTGAACCCATTTTCATATGATGGGAGTTG  
CAGGTGTATTGGGCGCTGCCCTACTATGCGCTATTCATGGTGCTACCGTGGAAAATACAT  
TATTTGAAGATGGTGATGGCGCAAATACATTCGCTGCTTTTAACCCAACCCAAGCTGAA  
GAAACTTATTTCGATGGTCACCGCTAACCGTTTTTGGTCTCAAATCTTTGGGGTTGCTTTT

TCCAATAAACGTTGGTTACATTTCTTTATGTTATTTGTACCAGTAACTGGTTTTGTGGATG  
AGTGCTCTTGGAGTAGTCGGTCTGGCCCTGAACCTACGTGCCTATGATTTTCGTTTCTCA  
AGAAATACGCGCAGCGGAAGATCCTGAATTTGAGACTTTCTACACAAAAAATATTCTCT  
TAAACGAAGGTATTCGTGCGTGGATGGCAGCTCAAGATCAGCCTCATGAAAACCTTATA  
TTCCCTGAGGAGGTTCTACCACGTGGAAACGCTCTTATGTCTGGAAGCACAGGAGAAC  
GTTCTTTTCGCTGATATTATTACCAGTATTCGATACTGGATTATTCATAGCATTACTATACCC  
TCCCTATTTCATCGCGGGTTGGTTATTTGTCAGCACGGGTTTAGCTTACGATGTATTTGGA  
AGTCCCCGTCCAAACGAGTATTTTACAGAGAGCCGACAAGGAATTCCTTTAATAACAG  
GCCGTTTTGATCCTTTGGAACAACCTCGATGAATTTAGTAGATCTTTTATGACCATAGATA  
GGACCTTTCCAATTTTACAGTACGATGGTTAGCTGTTTCACGGACTAGCGGTACCCACC  
GTTTCTTTTTTGGGATCAATATCAGCAATGCAGTTCATCCAACGAATGGCTACACAAAC  
CGTTGAGGATAGTTCTAGA---GCTCGTCCAAGACAAACTTCTGTAGGGAGTTTATTGAA  
ACCGTTGAATTCAGAATATGGTAAAGTCGCTCCGGGGTGGGGAACACTCCTTTGATGG  
GTATTGCAATGGCTCTATTTGCAATATTTCTATCTATTATTTTGGAAATTTATAATTTCTCT  
ATTTTACTAGACGGAATTTCTATGAATATGCTTACTTTAAAATTATTTGTTTACACAGTAG  
TGATATTCTTTGTTTCGCTTTTCATCTTTGGATTCTTATCTAACGACCCAGGACGTAATCC  
AGGGCGTGAAGAGATGGCCGATACTACTGGAAGGATTCCTCTTTGGATAATAGGTACTG  
TAACTGGTATTACTGTGATCGGTTTAAATTGGTATTTTTTTTTTATGGTTCGTATTCCGGATT  
GGGATCATCCCTGATGATTAATATCGTTAGCTTGGTCTGTATTTATATTA ACTCTGTCCCT  
TATTCAAGTATTTTTTTCTTGGATAAATTGCCCGAGGCCTACGCTTTTTTTGAATCCAATT  
GTAGATATTATGCCAGTAATACCCCTATTCTTTTTTCTTTTAGCTTTTGTGGCAAGCCG  
CTGTAAGTTTTTCGAACGACACAATCAAACCCAAATGAACAAAGTGTTGAATTGAATCG  
TACCAGTCTTTACTGGGGTTATTACTCATTTTTTGTGCTTGCTGTTTTATTTTCAAATTAT  
TTCTTCAATATGGAAGTAAATATTCTCGCATTATTGCTACTGCGCTCTTCATTCTAGTTC  
CTACAGCCTTTTTACTAATAATTTACGTAAAAACGGTAAGTCAAAGTGACATGGAAACA  
GCAACCCTAGTTGCCATCTCTATATCTGGTTTACTTGTAAGTTTTACC GGGTATGCCTTAT  
ATACCGCTTTTGGGCAACCCTCGCAACA ACTAAGAGATCCATTGAAGAACATGGGGA  
CATGGAAGCATTGGTTTATACATTCTCTTAGTCTCGACTTTAGGAATCATTTTTTTTCGCT  
ATCTTTTTTAGAGAACCTCCCAAAGTTCCA ACTAAAAA-----ATGACTATCGCTTTCCA  
ATTAGCTGTTTTTGCATTAATTGCTACTTCATCCATTTTATTGATTAGTGACCTGTTGTAT  
TTGCTTCTCCTGATGGTTGGTTCGAGTAATAAAAATGTTGTATTTTCTGGTACATCATTATG  
GATTGCATTAGTATTCCTAGTGGGTATTCTTAATTCTCTCATCTCC-----ATGT  
CACCACAAACAGAACTAAAGCAAGTGTTGGGTTCAAAGCTGGTGTAAAGATTATAA  
ATTGACTTATTATACTCCTGACTATGAAACCAAAGATACTGATATCTTAGCAGCATTCCG  
AGTAACTCCTCAACCTGGAGTTCCACCTGAAGAAGCAGGTGCTGCGGTAGCTGCCGAA  
TCTTCTACTGGTACATGGACAACCGTGTGGACCGATGGGCTAACCGTCTTGATCGTTA  
CAAAGGACGATGCTACCACATCGAGCCTGTTCTGGAGAAGAAAGTCAATTCATTGCT  
TATGTAGCTTATCCTTTAGACCTTTTTGAAGAAGGTTCTGTTACTAACATGTTTACTTCCA  
TTGTAGGTAATGTATTTGGGTTCAAGGCTCTTCGCGCGCTACGTCTGGAGGATTTGCGA  
ATTCCTAATGCTTATGTTAAAACGTTCCAAGGTCCTCCTCACGGAATCCAAGTGGAAG  
AGATAAATTGAACAAGTATGGTTCGTCCTCTATTGGGATGTACTATTAACCTAAATTGGG  
GTTATCCGCTAAGAATTACGGTAGAGCAGTTTATGAATGTCTTCGCGGGGGACTTGATT  
TACTAAAGATGATGAAAATGTGAACTCTCAACCATTTATGCGTTGGAGAGACCGTTTC  
TTATTTTGTGCTGAAGCGCTTTTTTAAAGCACAGGAAGAAACAGGTGAAATCAAAGGGC

ATTACTTGAATGCTACTGCCGGTACATGCGAAGAAATGATGAAAAGAGCGGTATTTGCC  
AGAGAATTGGGCGTTCCTATCGTAATGCACGATTATTTAACTGGGGGATTCACTGCAAA  
TACTACCTTGGCTCACTATTGCCGGGATAATGGTCTACTTCTTCATATCCACCGTGCAAT  
GCACGCAGTTATCGATAGACAGAAAAATCATGGTATGCACTTCCGTGTACTAGCTAAAG  
CGTTACGTATGTCTGGTGGAGATCATATCACGCCGGTACTGTAGTAGGTAAACTTGAA  
GGGAAAGGGAAATCACTTTAGGTTTTGTTGATTTACTACGTGATGATTTTGTGAAAA  
AGATCGAAGTCGCGGTATTTATTTCACTCAGGATTGGGTTTCTTTACCAGGTGTTCTACC  
TGTTGCTTCGGGAGGTATTCACGTTTGGCATATGCCTGCTCTGACCGAAATCTTTGGAG  
ATGATTCTGTACTCCAATTCGGTGGAGGAACTTTAGGACACCCTTGGGGAAATGCACCT  
GGTGCTGTTGCTAATCGAGTAGCTCTTGAAGCGTGTGTACAAGCTCGAAACGAGGGAC  
GTGATCTTGCTCGTGAGGGTAATGAAATTATCCGTGAGGCGTCCAAATGGAGTCTGAA  
TTAGCTGCTGCTTGTGAAATATGGAAGGAGATCAAATTTGAATCCAAGCAATGGATAC  
TTTG-----ATGGCGATACATTTATACAAAACCTTCTACCCCGAGCACACGCAATCGAGCCG  
TAGACAGTCAAGTGAAATCCAATCCACGAAATCGTTTGATCTATGGACTACATTGTTGT  
AGTAAAGGCCGTAATGCCAGAGGAATCATTACCGCAGGGCATAGGGGGGGGGGCATA  
AGCGTCTATACCGTAAAATCGATTTTCGACGGAATGAAAAAACATATATGGGAAAAATC  
GTAACCATAGAATACGACCCTAATCGAAATGCATACATTTGTCTCATACTATGGGGAT  
GGTGAGAAAAGATATATTTTACACCCCGAGGGGGCTATAATTGGAGATACCATTGTTTC  
TGGTACAGAAGTTCCTATAAAAATGGGAAATGCCCTACCTTTGACCGATATGCCCTTAG  
GCACGGCCATACATAACATAGAAATCACATTCGGAAAGGGTGGAAAATTAGCTAGAGC  
AGCAGGTGCTGTAGCGAAACTGATTGCAAAAAGAGGGGAAATCGGCAACATTAATA  
CCTTCTGGGGAGGTCCGTTTGATATCCAAAACTGCTCAGCAACAGTCGGACAAGTAG  
GAAATGTTGGGGTAAACCAGAAAAGTTTGGGCAGGGCCGGATCGAAATGTTGGCTAG  
GTAAGCGTCCTGTAGTAAGAGGAGTGGTTATGAACCCTGTAGACCACCCCATGGGGG  
GGGTGAAGGGAGGGCCCCATTGGTAGAAAAAACCCGTAACCTTGGGGTTATCCT  
GCACTTGAAGAAGAAGTAGAAAAAGGAAGAAATATAGTGATAATTTGATTCTTCGTC  
GCCGTAATAAATGATTCAACCTCAAACCCATTTAAATGTAGCCGATAATAGCGGAGCC  
CGCAAATTGATGTGTATTCGAATCATAGGAGCTAGT---AATCGACGATACGCTTATATTGG  
TGACATTGTTGTTGCTGTAATCAAAGAAGCAGTACCGAATACACCCTTAGAAAGATCA  
GAAGTGATCAGAGCTGTAATTGTACGTACTTGTAAAGAACTCAAACGTAGCAATGGTAT  
AATAATACAGTATGATGATAATGCTGCAGTTGTCATTGATCAAGAAGGAAATCCAAAAG  
GAACTCGAATTTTTTTCGCAATCGCCCGGAATTGAGACAGTTCAATTTCACTAAAATA  
GTTTCATTAGCGCCTGAGATATTAATGCTTAGTCCAAAAAGAACCAGATTCCGTAAACA  
ACATAGAGGAAGAATGAAAGGAATATCCCATCGAGGTAATCAAATTTGCTTTGGAAGAT  
ATGCTCTTCAGGCACCTTGAACCAGCTTGGATAACATCTAGACAAATAGAAGCGGGGCG  
GAGGGCAATGTCACGAAATGTGCGCCGAGGTGGACAAATATGGGTACGCATATTTCCG  
GATAAACCTGTTACAGTAAGACCTACCGAAACGCGTATGGGTTCCGGAAAGGGATCTC  
CCGAATATTGGGTAGCCGTAGTTAAACCCGGAAAAATAGTTTATGAAATGGGCGGAGTC  
GCAGAAAATATAGCCAGAAAAGCTATTTCAATAGCAGCATCCAAAATGCCTATACGAAC  
TCAATTCATTATTTAGGAATGACCAGAATTAACGAGGATATATAGCGCGAAAACGGA  
GGACAAAATTCGTTTATTTACATCAAGCTTTTCGCGGAGCTCATTCAAGACTTACTCGA  
ACTATTTTCGAACAAAAAATAAAAAGCTTTGGTTTCGGCTCATCGGGACAGAAATCGGA  
AAAAAAGAGAATTTTCGAGGTTTATGGATCAGTCGAATAAATGCAGGAATTTGGTGATAA  
CAAAAATATATACTATAGTTATAGTAATTTTATGTATAATCTGTACAAGAAGCAATTGCTT



TTGATAGAAAAGCAAGGATATGGGCTCGCGTGAGTAGAAAACAGAAAATATCTATTCTA  
GTTCTATCATCAGCTATGGGTTCTGAATTTAAACGAAATTCTCGAAAATGTTTGCTACCCT  
GAAATTTTCTTGTCTTTCCTGAATGATAAGGAAGAAAAGAAAATCGGGTCAAAGAAA  
GTGCCATTTTGGAGTTTTATCGACAATTTGCTTGTGTGGGCGGAGATCCAGTATTTCTG  
AATCCTTATGTAGGGAATTACAAAAAAATTTTTCAACAAAGATGTGAATTAGGCGAG  
ATTGGTCGACGAAATATGAATCGAAGACTGAATCTTGATATACCTCAGAACAATACATT  
TTTGTTACCTCGGGATATATTGACAGCTGCGGATCATTGATTGGAATGAAATTTCTGAAT  
GGGTACGCTTGATGAT-----ATGAATCATTGAAAAATAAACGTATTCGTTCCGGTAGCAG  
ATCTCTTACAAGATCAATTTGGATTGGCCCTGGTTCGTTTAGAAAATATGGTTAGAGGA  
ACCATATGTGGAGCAATTAGA---TATAAATTGATA---CCGACTCCTCAGAATTTGGTGACT  
TCAACGCCA-----TTAACAACCACTTATGAATCTTTTTTCGGCTTACATCCATTATCT  
CAAGTTTTGGATCGAACCAATCCATTGACCCAAATAGTTCATGGGAGAAAATTGAGTTA  
TTTGGGTCCTGGAGGATTGACGGGGCGAACTGCTAGTTTTCGAATACGAGATATCCATT  
CTAGTCACTATGGACGCATTTGTCCAATTGACACCTCTGAGGGAATCAATGTTGGACTT  
ATTGGATCCCTCGCAATTCATGCGAGGATTGGTCGTTGGGGG---TCCATAGAAAGTCCA  
TTTTTT-----GAAATTTCTGAGAGATCAAAAAGA-----ATACACATGCTTTATTTATCAC  
CCAGTAGAGATGAATACTATATGATAGCGACAGGAAATTATTTGGCATTGAATCAGGGC  
AATCAGGAGGAACAGATTGTTCCAGCTCGATATCGTCAAGAATTTCTGACTATTGCATG  
GGAACAGGTTTCATCTTCGAAGTATTTCTCCTTCCAATATTTTTCTATTGGTGCCTCCCTT  
ATTCCTTTTATTGAGCATAATGATGCGAATCGAGCTTTAATGAGTTCAAACATGCAACGT  
CAAGCAGTTCCACTTTCTCAGTCTGAAAAGTGCATTGTTGGAAGTGGATTGGAACGAC  
AAGTGGCCTTAGATTTCGGAACTCTCGCTATAGCCGAACACGAGGGAAAGATCATTAT  
AAAGATACAAACAAGATTGTTTTATTTGGAAGTGGAGAGACTCTAAGCGTTCCATTAGT  
TATATATCGACGTTCCAACAAAATACTTGCATGCATCAAAAATCCCAGGTTCCAGAGAG  
GTAAATGCATTAAAAGGGGACAAATTTTAGCAGATGGTGCTGCTACAGTTGGCGGTGA  
ACTCTCTCTGGGAAAAAACGTATTAGTAGCTTATATGCCATGGGAAGGATACAATTCTG  
AGGATGCTGTACTCATTAGTGATCGTCTGGTATATGAAGATATTTATACTTCGTTTCATAT  
ACGGAAATATGAAATTCAGACTCATGTGACAAGCAATGGT---CCTGAAAGAATCACTAA  
TAAGATTCCACACTTAGAAGTCCATTTACTACGAAATTTAGACAAAATGGACTTGTGA  
TCCTGGGATCTTGGGTAGAAGCTGGCGATATTTTAGTGGGTAAATTAACGCCTCAAATG  
GCGAAAGAA---TCCTCGTATGCCCGGAAGATAGATTATTACGAGCTATACTTGGGATTC  
AGGTATCTACCTCAAAGGAACTTGTCTAAAATTACCTATAGGTGGTAGGGGCCGCGTT  
ATTGATGTGAGATGGCTCCACAAAAGGGG---GGTCCGGTTATAATCCAGAAACTATT  
CATATATATATATTACAGAAACGTGAAATCAAAGTAGGTGATAAAGTGGCCGGAAGACA  
TGGAATAAAGGCATTGTTTCCAAGATTTTGGCTAGACAGGATATGCCTTATTTGCAAG  
ATGGAAGACCTGTTGATATGGTCTTCAACCCATTAGGGGTACCTTCACGAATGAATGTA  
GGACAGATATTTGAATGCTCACTCGGATTAGCGGGGGATGTGCTAGATAGACATTATCG  
AATAGCACCTTTGATGAGAGATATGAACAAGAGGCTTCTAGAAAACCTTGTGTTTTCTG  
AATTATATCAAGCCAGTAAACAAACATCGAATCCATGGATATTTGAACCCGAGTATCCC  
GGAAAAGCAGAATATTTGATGGAAGAACAGGGACTCCTTTTGAACAGCCTGTTATAA  
TTGGAATCCTTATATCTTGAATTAATCCACCAAGTTGATGATAAAATACATGGACGTT  
CCAGTGGACATTATGCACTTGTACTCAACAACCTCTTAAAGGAAGGGCCAAGCAAGG  
AGGACAGCGGGTAGGTGAAATGGAAGTTTGGGCTCTTGAGGGATTCCGGTGTGGCCAT  
ATTTTACAAGAGATGCTTACTTATAAATCTGATCATATTAAGCTCGTCAAGAAGTACTA



GGGACTACGATTATTGGAGGAACAATATCTAAACCCGTAGATGCTCCAGAATCTTTTCG  
ATTGCTCGTTAGAGAACTACGATCTTTGGCTCTGGAAGTGAATCATTTCCTTGTCTCTG  
AGAAGAACTTCCGGATTCATAGGAAGGAAGTT-----ATGATTGATCAGTATA  
AACATCAACAACCTCCGAATTGGATCAGTTTCTCCTCAACAAATAAGTGCTTGGGCAAC  
AAAGATCCTACCTAATGGAGAGATAGTTGGAGAGGTAACAAAACCTATACTTTTCATT  
ACAAAACCAATAAGCCCGAAAAAGATGGATTATTTTGTGAAAGAATTTTGGACCTATC  
AAAAGTGGGATTTGTACTTGTGGAAATTATCGAGTAATTGGAGATAAAAAAGACGAAC  
CCAAATTTTGTGAACAATGCGGGGTAGAATTTGTGGATTCTCGGATACGTAGATATCAA  
ATGGGCTATATAAACTAGCATGCCCGTAACCCATGTGTGGTATTTGAAGCGTCTTCCT  
AGTTATATCGCGAATCTTTTAGATAAACCTCTTAAAGAATTAGAAGGTCTAGTATATTGC  
GATTTT-----TCGTTTGTAGACCC---GTAGTTAAAAACCTACTTTCTTACGATTACGAG  
GTTTATTCGAATATGAAATCCAATCCTGGAAATACAGCATTCCACTCTTTTTCGCTACCC  
ACGGTTTCGATACATTTCGAAATCGCGAAATATCTAGCGGCGCGGGTGCTATCCGAGAA  
CAATTAGTCGATCTGGATTTGAGAATTGTTATTGATTCTTCATTGGTAGAGTGGAAGAA  
TTAGGGGAAGAG---AGATCCACGCACAATGAATGGGAAGACCGAAAGGTTGGAAGAA  
GAAAGAATTTTGTGGTTCGGCGCATGGAATTAGCTAAACATTTTATCCGAACAAATATA  
GAACCGGAATGGATGGTTTTATGTCTCTTACCAGTTCTTCCTCCCGAATTGAGACCTATT  
ATTCAAATAGATGGGGGTAAACTAATGAGTTCGGATATTAATGAACTCTATAGAAGAGTT  
ATTTATCGGAACAATACTCTTATCGATCTATTGACAACAAGTAGATCTACGCCGGGAGAA  
TTAGTAATGTGTCAAGAAAAATTGGTACAAGAAGCCGTCGATACACTTCTTGATAATGG  
AATCCGGGGACAGCCAATGAAGGACGGTCATAATAAGGTTTACAAATCATTTCAGATA  
TAATTGAAGGGAAAGAGGGAAAGATTTTCGCGAGACTCTGCTTGGCAAACGAGTTGATTA  
TTCGGGGCGTTCTGTCAATTGTTGTAGGTCCATCACTTTCATTACATCGATGTGGATTGCC  
CCGTGAAATAGCAATAGAGCTTTTCCAGACATTTCTAATTCGTAGTTAATTCGAAAAC  
ACTTTGCTTCGAACATAGGGGTTGCTAAGAGTAAAATTCGGGAAAAGAGCCGATTGT  
ATGGGAAATACTTCAAGAAGTTATGCGGGGACATCCTATATTGCTGAATAGAGCACCCA  
CTTTGCATAGATTAGGGATACAAGCCTTCCAACCTATTTTAGTGGAAGGACGTGCTATTT  
GTTTACATCCATTAGTGTGTAAGGGGTTCAATGCAGACTTTGATGGGGATCAAATGGCT  
ATTCATGTCCCTTTATCTTTGGAGGCTCAAGCAGAAGCTCGTTTACTTATGTTTTCTCAT  
ACGAACCTTTTGTCTCCGGCTATTGGGGATCCATTGCCGTACCAACTCAAGATATGCTT  
ATTGGACTTTACATATTAACGAGCGGAAATCGTCGAGGTATTTGTGCAAATAGGTATAAT  
CGAAGTAATTGG-----AAAATTCTAAAAATGAAAAATTCGCGATAAG-----AAATAT  
ATGAAAAA---GAACCTTTTTTTTCTAATTCCTATGATGCAATTGGAGCTTTTCGACAGA  
AAAAAATCAATTTTGATAGCCCTTTTGGCTCCGGTGGCGATTAGATAAATGC---ATTAT  
GTCGTCA-----AGAGAGGCTCCTATCGAAGTTCATATGAATCTTTGGGTACCTATCATG  
ATATTTATGAACATTATTTAGTAATAAGAAGTATAAAAAACAAATTTGTTGCATATACAT  
TCGAACACTATTGGTCATATTTCTTTTATAGAGAAATCGAAGAAGCTATAACAAGGCTT  
TTGTCGAGGCTATTCGTATGGTATC-----ATGGCAGAACGGGCCA  
ATCTAGTCTTTCATAATAAAGTAATAGGTGGAAGTCCATAAAACGAATTATTAGTAGAT  
TAATAGATCATTTCGGAATGGCGTATACATCACATATTCTGGATCAAGTAAAGACTCTTG  
GGTCCGTCAAGCTACTACGACATCTATTTTCATTAGGAATTGATGACCTTTTAAACAATAC  
CTTCTAAGGGATGGTTAGTCCAAGATGCTGAACAACAAAGTTTGATTTTGGAAAAACA  
TCATCATTATGGGAATGTACATGCGGTAGAAAAATTACGTCAATCCATTGAGATATGGTA  
TGCTACAAGTGAATATTTGCGACAAGAAATGAATCCCAATTTTAGTATGACTGACCCCT

TTAATCCAGTCCATATAATGTCTTTTTTCGGGAGCTAGGGGAAATGCATCTCAAGTGCAC  
CAATTAGTAGGTATGAGAGGATTAATGTCCGATCCCCAGGGCCAAATGATTGATTTACC  
CATTCAAAGCAATTTACGTGAAGGACTTTCTTTAACAGAATATATTATTTCTTGTTATGG  
AGCCCGCAAGGGGTTGTGGATACTGCTGTACGAACATCAGATGCTGGATATCTTACAC  
GGAGACTTGTTGAAGTGGTTCAACACATTGTTGTACGCCGAACAGATTGCGGTACCGT  
TCGAGGGATTTCTGTAAATACTCGGAATAGAATGATGTCA---GAAAGAATTTTGATACA  
AACATTAATTGGTCGTGTATTAGCAGACGATATATATATAGGGTCGCGATGCATTGTCTGTT  
AGAAATCAAGATATTGGAATTGGACTTATCAATCGATTTCATAAAC-----TTTCAA  
ACACAACCAATATTTATCCGAACCCCTTTACCTGTAGGAATACGTCTTGATCTGTCTGA  
TTATGTTACGGGCGGAGTCCATTTCATGGAAACCTGGTCTGAATTGGGAGAAGCTGTAG  
GTATTATAGCCGGCCAATCTATTGGAGAACCTGGTACTCAATTAACATTAAGAACTTTTC  
ATACTGGCGGAGTCTTACGGGTGGTACCGCCGAATATGTGCGATCCCCCTCGAATGGT  
AAAATAAAATTCATGAGAATTCGGCTTACCCTACACGTACACGTCATGGACATCCTGC  
CTTTTTATGTTATATAGACTTATATGTAACCTATTGAAAGTAACGATATTATGCATAACGTAA  
TTATTCCACCCAAAAGTTTTTTATTAGTTCAAATGATCAATATGTAAAATCTGAACAAA  
TAATTGCCGAGATCCGTGCAGGAACATATACTTTA---AATTTGAAAGAAAAGGTTTCGAA  
AACATATTTTTTCTGATTCGGAAGGAGAA---ATGCATTGGAGTACAAATATATATCACGT  
TTCTGAGTTTGCATATAGTAATGTACATATCTTACCAAAAACAAGCCATTTGTGGATATTA  
TCGGGAAATTCACACAAG-----TCTGATACAGTTTCTTTGTCACTTCTTAAGGATCAAGA  
TCAAATGAGCACTCAT-----TCCCTTCTACTGCAAAAAGAAATACTTCGAACTTTTTA---  
---GTAAGTAATAATCAA---GTACGA-----  
-----CTATGTCCGGATCATTGTCATTTTATGCATCCTACT---ATTTCCCCGATACTTCGAA  
T-----TTATTAGCAAAAAGCGAAGAAATAGATTCATTATTCCATTTCTATTCAATTCGAGA  
ACGAAACAACGAGCTAATGCC-----GATATCTCGGTTGAAATACCTATC-----GATGGTA  
TTATTCATAAAAATAGTATTCTTGCTTATTTGATGATCCTCAATACAGAACACAGAGTT  
CGGGAATTGCGAAATATAAACTATAGGAATTCATTCCATTTTTCAAAGAAAGAT-----  
TTAATTGAGTATCGA---GGAATAAGGGAATTTAAACCAAAAATACATCAAAGTAGATCGAT  
TTTTTTTTCATTCCCCAAGAAGTGCATATTTTATCCGAATCTTCTTCCATAATGGTCCGGA  
ACAATAGTATCATTGGAGTAAATACACCAATCACTTTAAATAAAAAAAGTCGAGTAGGC  
GGATTAGTTCGAGTAGAAAAAACAACAAAAAATTGAATTAATAAATCTTTTCTGGAG  
ATATCCATTTTCCGGGAGAGATAGATAAGATATCTCAACACAGTGCCATCTTGATACCAC  
CT--GAAATGGTAAAAAATAAATTCTAAGGAATCAAAAAA-----AAGACAAACTGG  
AGATATATACAATGG-----ATTACAACCTACCAAGAAAAA-----TATTTTGTTTTGGTTTCGA  
CCTGTAATTCTATATGATATAGCGGACAGTATCAATTTAGTAAAATTTTTCCCCAAGATC  
TGTTCAAGGAATGGGATAATCTCGAACTTAAAGTCTAAATTTTATCCTTTATGGAAATG  
GGAAATCAATTCGTGGAATTTTGGACACAAGTATTCAATTAGTTTCGAACTTGCTTAGTC  
TTGAATTGGAATGAAGACGAA-----AAAAGTCTTCTATTGAGGAGGCCCTCGCTTCT  
TTTGTGTAAGTAAGTACAAATGGTTTGAATTCGATATTTCTTAAGAATTGACTTAGTTAAA  
--CATATTCATATATCCGAAAAAGAAATGATCCGTCTAGTTCAGGGTTGATTCATAC--  
AATGAGTCGGATCGTATCAATATCAATCCATTT-----TTTTCTATTAC-----AAGGAA  
AATATTCAACAATCACTTAGCCAAAAGCAC---ACTATTCGTATGTTGTTGAAT-----AG  
AATAAGGAAAACCGATCTTTTATAATTTTGTATCATCTAATTGTTTT-----CAAATGGG  
ACCATTCAACAATGTAAAATATCAAT-----GGGATTAAGAAGAAAATCATAAAAT  
CCAATTAATAATTTGTTGGGCCCTTAGGAGTA-----GCCCGCAAATTGCAAATTTTTT

TTCA-----TTTTACCATTTAATAACT-----CATAATAAAAATCTCATCGATAAAGAAAAATTT  
GCAACTTAACAAA-----TTCAAGGAAACTTTTCAAGTAATT-----AAA--TATTATTTAA  
TGGACGAAAATGAGAGA-----ATTTATAAGCCCGATCTATAACAATAACATCATTTTAAAC  
CCATTCCATTTGAATTGGGATTTTATCCATCCTAAT-----ACGTTTCCAATAATTAGT--  
CTTGGGCAATTTATTTGTGAAAATGTATGTATAGTTCAAATGGACCA-----AACCTAA  
AATCGGGTCAAGTTATAACTGTTCAA---ATGGATTTTGTAGGAATAAGATTGGCTAACCC  
TTATTTGGCAACCCCGGGAGCAACTATTCATGGACATTATGGAGAAATGCTTTATGAAG  
GAGATATATTAGTTACATTTATATATGAAAAATCGAGATCTGGTGATATAACACAAGGTC  
TTCCAAAAGTAGAACAGGTATTAGAAGTACGTTTCGATTGATTCAATATCAATGAACCTA  
GAAAAGAGAATTGATGCTTGGAACGAACGTATAACAGGAATTCTGGGCATTCTTGGGA  
GATTCTTGATTGGTGCTGAGCTAACTATAGCTCAAAGTCGTATTTCTTTGGTGAATAAAA  
TCCAAAGAGTTTATCGATCCCAGGGAGTGCACATCCATAATAGACATATCGAAATTATTG  
TTCGTCAAATAACATCAAAGTCTTGGTGTCAGAA-----GATGGAATGTCGAATGTAT  
TTTACCAGGGGGAACATAATTGGATTGTTACGAGCTCAACGAACAGGGCGCGCCTTGG  
AGAATCTATTTGTTACCGAACTCTATTATTGGGAATAACAAAACATCTCTGAATACTCA  
AAGTTTCATATCCGAAGCAAGTTTCAAGAACTGCTAGAGTTTTAGCAAAAAGCCGCT  
CTCCGAGGTCGTATCGATTGGTTGAAAGGTCTAAAAGAAAACCTTGTTTTAGGGGGGA  
TAATACCCGTCGGTACCGGATTCAAAAAAATAGGGGATCGTTCAAGCGCAAGACAAGA  
TACCAAGATTACC-----TTGGAAACAATAAAA-----ATTATTCTGA  
GGTAGAAAT-----ATGAC  
AAAAAGATATTGGAACATAACTTTTGAAGAAATGATGGAAGCGGGGGTTCATTTTGGC  
CACGGTACTAGGAAATGGAATCCTAAAATGGCACCTTATATATCTATGAAGCGCAAGGG  
TATTCATATTATAAACCTTACCCGAAGTCTCGTTTTTTGTCAGAAGCTTGTGATTTAGTT  
TTTGATGCAGCAAGCAGGGGAAAACGATTCTTAATTGTTGGTACAAAAAAAAGCA  
GCCGATTTGGTAGCCCGGGCTGCAATAAGAGCCCGATGTCATTATGTTAATAAAAAATG  
GCTCGGAGGTATGTTAACGAATTGGTATACTACAGAAACGAGACTTCGTAAGTTTCAGG  
GAATTGAGAACGGAACAAAAGACGGGGAACTCAACTGTCTTCAAAAAGAGATGCC  
GCTATCTTGAAGAGACAATTATCGCACTTGGAAACATATCTGGGCGGCATTAAATATATG  
ACAGGGTTACCTGATATTGTAATAATCGTTGATCAACAAGAAGAATATACGGCTCTTCG  
CGAATGTATTACTTTAGGAATTCACGATTTGTTAATCGATACAAATTGTGACCCCGA  
TCTCGCGGATATTTGATTCCAGCTAATGACGATGCTATAGCTTCAATCCGATTAATTCTT  
AACAAATTAGTATTTGCAATTTGTGAGGGTCATTCTAGC---TATATACGAAATTTTATGGG  
ACAAAAAATAAATCCGCTTGGTTTCAGACTTGGTACAACCTCAAAGTCATGATTCTATTT  
GGTTTGCACAACCAACAAATTATTCGAGAAATTTAAAAGAAGATAAAAAAATAAGAGA  
TTGTATCAAGACTTATATACAAAAACTATAAAAATATCTTCG---GGTGTGCGAGGGAATT  
GGACGGATAAAGATTCAAAAAGAATCGATCTGATTCAAGTCATAATCTATATGGGATT  
TCCAAAGTTATTAATAGACGGTAAGCCTCGA-----AGAATCGAAGAATTACAGATAA  
ATGTGCAAAAAAATGAATTATGTGAATAGAAAATCAACATAGCTATTACAAGAATT  
GCAAATGCTTATAGAGATCCTAATATTCTTGCAGAATTCATAGCCGGACAATTAATAAAT  
AGAGTTTCGTTTCGTAAAGCAATGAAAAAGCTATTGAGTTAACTGAACAGGCGGGGA  
CAAAAGGAGTTCAAGTACAAATTGCGGGACGTATCGACGGAAAAGAAATTGCACGCG  
TAGAATGGATCCGAGAAGGTAGGGTTCCCCTACAAACCATTTCGAGCTAAAATTGATTAT  
TGTTCCATACAGTTTCGAACTATTTATGGCGTATTAGGGATCAAAGTTTGGATATTTTAA  
ACAAAGAAATGTCACGTTACCGAGGGCCTCGTTTCAAAAAGATACGCCGTCTGGGGGC

TTTACCGGGACTAACCAGTAAAAGGCCTACAGTCGGAAGCGAACTTAGAAATCAATCG  
CGCTCCACTAAA---AAATCTCAATATCGTATTCGTTTAGAAGAAAAACAAAAATTGCGC  
TTTCATTACGGTCTTACGGAACGACAATTGCTTAAATACGTTTCGTATCGCTGGAAAAGC  
AAAAGGGTCAACTGGTCAGGTTTTACTACAATTACTTGAAATGCGTTTGGATAACATAC  
TTTTTCGATTAGGTATGGCTTCAACTATTCCTCAAGCCAGACAATTAGTTAACCATAGAC  
ATGTTTTTCGTTAATGGTCATATAGTAGATATACCAAGTTATCGTTGCAAACCACAAGATA  
TTATTACAGCGAAGGATAACAAAAAATCTAAAACCTCTGATTCAAATTTCTCTTGAATCA  
GCCCCCGC---GAGGAATTGCCAACCCATTTGACTCTTCAGCCATTCCAA-----TATAAA  
GGATTAGTAAATCAAATAATAGATAGTAAATGGGTTGGTTTGAAAATTAATGAATTGCTA  
GTTGTAGAATATTATTCTCGTCAGACTATGTCACGGCGAGGTACTGCAGAAAAAAAAC  
CGAAAATCCGATCCAATTTATCGTAATCGATTGGTTAACATGTTGGTTAACCGTATTCT  
GAAACACGGAAAAAATCATTGGCTTATCAAATTATCTATCGAGCTATGAAAAAGATTC  
AACAAAAGACAGAAACAAATCCACTATCTGTTTTACGTCAAGCAATACGTGGAGTAAC  
TCCCGATATAGCAGTAAAAGCAAGACGCGTAGGCGGATCGACTCATCAAGTTCCATT  
GAAATAGGATCCACACAAGGAAAAGCACTTGCTATTCGTTGGTTATTAGGGGCATCCCG  
AAAACGTCCGGGTCCGAATATGGCTTTCAAATTAAGTTCCGAATTAGTGGATGCTGCCA  
AAGGGAGTGGCGATGCCATACGAAAAAGGAAGAGACTCATAGAATGGCAGAGGGCAA  
ATAGAGCTTTTGCACATTTTCGTATGGGTAAGGACACCATCGCTGACATAATAACCTCTA  
TACGCAATGCTGACATGAATAGAAAAAGAACTGTTCAAATACCATTTACTAACATCACC  
GAAAACACTGTAAAAATACTTTTACGAGAGGGTTTTATTGAAAACGTGAGAAAACATC  
GGGAAAGCGACAAATCTTTTTTAGTTTTAACTCTACGATATAGAAGA-----AATACGAAA  
GGATCATATAAAACT--TTT-----TTAAATTTAAAACGGATCAGTACACCCGGTCTACGAA  
TCTATTATAACTATCAAAAAATTCCTAGAATTTTAGGAGGTATGGGGATTGTAATTTCTTC  
TACTTCGAGGGGTATAATGACAGATCGAGAGGCTCGATTAGAAAAAATCGGCGGAGAA  
GTTTTATGTTATATATGGATGGCAAACCTATACCAAAGATTGGTTCACGTAAAAATGCA  
CGTAGTGGTTCT--AAGCATCTTCGTAAAATACCAAAGGGGATTATTCATGTTCAAGCTA  
GTTTTAACAAATACCATTGTAAGTGTACAGATGTACGAGGTAGGGTGATTCTTGGTCCT  
CCGCCGGTACTTGTGGATTCAAGGGTACACGAAGGGGAACACCATTTGCCGCTCAAAC  
CGCAGCAGGAAATGCTATTCGAACAGTAGCGGATCAAGGTATGCAACGAGCAGAAGTC  
ATGATAAAAGGTCCCGGTCTCGGAAGAGATGCAGCATTAAAGAGCTATTCGTAGAAGCG  
GTATATTATTAACCTTTATACGGGATGTAAGTCTTATGCCACATAATGGATGTAGGTCACC  
TAAAAAAGACGTGTAATGCCAACTATGAAACAACCTATTAGAAAGACAAGACAGCCA  
ATCCGAAATGTCACCAAATCCCCGCTCTTCGGGGATGCCCTCAGCGCCGAGGAACTT  
GTACTAGGGTGTATACTATCACCCCTAAAAAACCAACTCTGCCTTACGTAAAGTTGCC  
AGAGTACGCTTAACCTCTGGATTTGAAATCACTGCTTATATACCCGGTATTGGCCATAAT  
TTACAAGAACATTCTGTAGTCTTAGTAAGAGGGGGGAAGGGTTAAGGATTTACCCGGTG  
TGAGATATCACATTGTTTCGAGGAACCCTGGATGCTGTTCGAGTAAAAGATCGTCAACA  
AGGGCGTTCTAAATATGGGGCCAAAAAGCCAAAAATGGCAAGGAAAAGTTTGATTCA  
GAGGGAGAAAAAGAGGCAAAAATTAGAACAAAAATATCATTGATTCCCGATCCTCA  
AAAAAAGAAATAAGC-----AAAGTTCCGTCGTTAAGTGAGAAATGGAAAATTCATGG  
AAAGTTAGAATCACTACCGCGTAATAGTGCACCCACACGTCTTCATCGACGTTGTTTTT  
CAACCGGAAGACCGCGAGCTAATTATCGAGACTTTGGATTATCTGGACACACACTTCGT  
GAAATGGTTCATGAATGTTTGTGGCCCGGTGCAACAAGATCAAGTTGGATGGTAAAAA  
AATCATTTATACCGGTTATTTCAACAAGAA---AAAAAGAAGAA---AACCCCGGATCGGT

TGAATTTCAAGTATTTAATTTACCAACAAGATACGAAGACTTACTTCACATTTTGAATT  
GCACCGAAAAGATTATTTATCTCAAAGAGGATTACGTAAAATTCTCGGGAAACGGCAA  
CGATTACTTTCTTATTTGTCAAAGAAAAATAAAATACGTTATAAAAAATTAATAAATCTG  
TTGGATATTCGAGAGTCAAAAATTCGT-----ATGGTAAAACCTTCGTTTGAAACGATGTGG  
TAAAAAGCAACGAGCTGTTTATCGAATCGTTGCAATAGATGTTTCGATCTCGAAGAGAG  
GGACGAGATCTTCGAAAAGTGGGTTTTTATGATCCAATAAAAAATCAAACCTATTTAAA  
TATCCCCTTATTTCTAAATTTCTTTGAGCAAGGTGCTCAACCTACAGGAACCTGTTTCAGG  
ATATTTCAAAAAAGGCAGGTTTCTTTATGGACCTT-----ATGGATAAATC  
TAAGCGACTCTTTCTGAAATCCAAGCGATTTTTTCGTAGGCGTTTGCCCCGATCCAAT  
CGGGGATCGAATTGATTATAAAAACATGAGTTTAATTAGTCGATTTATTAGTGAACAG  
GGAAAAATTTTATCTAGACGTGTGAATAGATTGACCTTAAAACAACAACGATTAATTAC  
AATTGCTATAAAAACAAGCTCGTATTTTATCTTCGTTACCTTTTATTAATAATGAAAAAAA  
A---CAATTTGAAAAAAGCGAGACAGCCACTAGAACTACTACTGTTTTTAAAACAAAA  
AAGTGACACGT---CTAACAAAAATCCTTTTGTAGCGAATCGTTTATTAAGAAAAATAA  
ATAATCTTAACACAAAATCAGAAAAAGAAATAATAATAACTTGGTCCAGAACATCTACC  
ATTATACCCGCAATGATTGGCCATACCATTGCTATTCACAATGGAAAAGAGCATTTACCG  
ATTTATGTAACGGATCGTATGGTAGGCCATAAATTGGGAGAATTTTCTCCTACTCTAAC  
TTCCGGGGACACGCAAAAAATGATAATAGATCTCGGCGTATGATTTTTCAATCTTTTATA  
CTGGATAATCTAGTATCCTTATGCCTCAAGATAATTAATTCGGTCATTGTGGTCGGACTCT  
ATTATGGATTTATGACCACATTCTCCACAGGGCCCTTATCTATTCTTCTTCGAGCTCA  
CGTTATGGAAGAAGGG-----ACCGAGAAGAAAATATCAGCAACAACCTGGGTTTATTA  
CGGGACAGCTCGTGATGTTTCATATCGATCTATTATGCGCCTTTCATATAGCATTAGATAG  
ACCTCATAACAATAACTGTCATAACTCTACCGTATCTTTTATTATATTTCTTCGGCAATAAT  
CAAAAAAATTTTTGAATTATGTATAACAAGAATCAAATTCATAACGTCATTTTAGTATT  
CAAAGAATATTCTTTCAGAATCTTTTTTTTCAGTTATTAAACCCCTTTTTTTTACCAAGTT  
CAATCTTAATGAGATTAGCGAACATTTATATCTTTCAATCAAACAATAAAGTCTTATTTTT  
AACAAAGTAGTTTTGTTGGTTGGTTAATTGGTCATGTTTTTTTCATGAAATGGATTGGATT  
AATGTTAGTCTGGATACAGGAAAAAACAATTCTATAAAA---ATTCGATCTAATAAGGG  
GGTTCTGGCAAAATTTAGAAAGTCT-----CAAATTTTCTTATTTTTTTTTTTTATTACCTGT  
TTATATTATTTAGGAAGAATACCGCCATTTATTTTTTTAAAATGTCAGAAATTGAAGAA  
AAGCTTAAACCTCTTGTAACATTTCTTTTCGATTATAATCGATGGAATCGTCCATTGCGAT  
ATATAAAAAATGATCGATTTGAAAATGTTGTAAGAAATGAAATTCACAATTTTTTTTTTT  
TTACATGTCAAAGTGATGGAAAAGAACGAATATCTTTCACATATCCACCTAATTTGTCG  
ACTTTTCAGAAAATGATGGAAATGAAAATTTCTCTCTTCACAAGA---GATATAATCTACG  
AAGAATTGTCTAATCTTGGAGATCCACTAATGAAGAAAAAATAAATAAATAAATAAATAAATAA  
TGAATTTTTAAATAGGGTAGAAGTTTTAGATAAGGAATCT-----GTGGATATATTCGAAAA  
CCGAATTCGATTGTGTAATGATGAAAAAACAATAAATAAATAAATAAATAAATAAATAAATAA  
CTTTTTTGAATGGACCCTGTCGTGGACAAATCCAAAAATGGTTTTTCACCC-----TCTCTT  
TTATAAATAAGATTCATGGTATCCTTTATCCAAAATTTGAACAGAAAGATCTGAATGAT  
AATTGTATTGGAATAAACGAAATCGTGAAAAAATTTCCCGATGGTCATACAACCTAAT  
CGAGTTGGAACAACCTGGAGGGAAAACAATTCGTTCCAGAAAAGCTAAACGTGTAGT  
ACTTTTGACCAAAGCTTTAATACGTTATTACAGCAACCAGATTTTCGGCGAGACATAA  
TAAAAGGATCTATACGCGCTCAAAGACGTAAAACAGTTACTTGTAACCTCTTTCAAAG  
AAGTGTGGATTCCCCTCTTTTTTTGGAAAAAATGGAAAAAACCTCCTTCTTTTTGTTTTG

ATATTTTAGATTCAAGTAAAATCTTTTTTATGTTCAAAAATAAAGAGGAAAAAAGACGT  
ATAGAAATAGGAGAAGCTTGGGATAGCATTATATTTGCTCAAGTAATTAGAGGTTGTTTA  
TTAATAACCCAATCGATTCTTAGAAAATATATTCTATTACCTTCATTGATAATAACAAAA  
ATATCGTTCGTATACTATTATTTCAATTTCCCGAATGGTCAGAAGATTTTAGGGATTGGCA  
GAGAGAAATGTATATTAATGCACCTATAATGGGGTTCAATTATCCGAAACAGAATTTCC  
AAAAAATGGCTAACAGACGGTATTCAGATAAAGATCTTATTTCCCTTTCGTCTGAAAC  
CTTGGCACAGATCTAAAAAAGTAAAAAAGAACTTTTGCTTTTTAACAATTTTTGG  
AATGGAAGTTGAATTGCCCTTTTCTGGTTATCCCCGAAATTTTTCAATTTTTTGATCCCATT  
TTAAAAGAACTCAAAAAAAA-----AAAAAATTGAAAAATATTCTAAAAATTG  
TCAATGAAAGAACAAAAACTTTATAACCACCTTAAAAGAAACATCAAAACGGATCAT  
CCAAAGTATTCTTAAAAAAGTTCTATTCTAAACAAAAAATAAAAAA-----CTC-----  
-ATCACTAAGAATATAATTTATGAATCAACCATTCTAATTCAAGCTATTAATAAGACAAAT  
TGTTCAATTGACAGAAAAAATAAAGGCCATAAATGCTAAGACAAAGAAAATCATAA  
AGAAAATAGAAAGGATGACAAA---GAAAATAAGAATTCTAAGAAAACAAGTTCTAAT  
ACTAAAGGATTAGAATTAGAAAAAAGATTTTGCAAATATTACAAAGAAGAAATGTTT  
AATTAACCCATAAATTGTATTCTTTTTTAAATTTTTACTGAATTTTATGAAAACCTGATATA  
TTTCTTTGTATCGTTAGTGTTCTTAGGATCAATGTACAATTTTTT-----GC  
TTTGTCCCAGGCATATGTATTTTTTAAATATCCCAAATCCAA-----ACAAGTATAAATT  
CAAATATGTTTTTGA CTATAGATCGTTTTTTATTAAGGATGAAATAAAAGATTATTTTATA  
CAAGGAATAATTCATTCCAAATTAAGACATAAGA ACTCTCCC---TCTTTAAGAATCAAT  
GGACAAATTGGTTAAAGGTTTATTATCAATATGATTTATCTCAGAATAGATGGTCTCGAT  
TAGTACAAAAAACCTGAAAAATAGAATAAATAAACACCGTTTGGATCAAAATAAAC  
CAAATGTGATTCATATAAAAAACCCAA-----TAAATTGTTTCCAAAAACAAA---AAAAT  
AAAAAACAATCTAGATATGATCTTTTGTATATAAATTTATTAATGATGCTATTTCGTTATC  
GGGATAGAAAGTATTTTGATTGGGTGGTAATGGAT-----GTAAAATACAA  
AATAATTCTATATCGAATTCGTTTTTTTTTAAATTCCTGAGATTTTATGATGCATATAGGAA  
TAAACCGTGGATCATACCAATCAAATTCCTTTTTTTACATTACAAGAATAAGATAGAGGC  
AGAAGTTAATTTACTAAGAAAGTATTTGAATTTTCATTTGAACTGGAAGGGTTCCTT  
AAATAAAAGAGTAATAAATAATGTCAAAGTATATTGTCTACTGATTAGATTGAAAAATAT  
AAAACAAATAGCTATATCCTCTATTCAAAGGGGAGAACTAAGTCTAGACATTATGATGA  
TTCAAATGAGAAGGATTCCACTCTTACGGGATTCAGAGGAATTTTTATTATCGAACCA  
GTCCGCCTGTCTAGAAAAACAATGAACAATTTTTTATGTATGAAACCGCGCGCCTCCT  
ATTAATTCATAAGAGTAAACGCAAACATTATGCTTTAGTTGTTATTGAAAATATTTTATCG  
GCTAGACGTCGTAGAGAATTGAGAATTCTAATTTGTTTC---ATTCTTTGGCCGAATTATC  
GATTAGAAGATTTAGCTTGTATAAATCGCTATTGGTTTGATACCTATAATGGAAGCCGTT  
TCAGTATAGTAAGGATACATATGTATCCAATGAAAGGACATCAATTCAAATCCTGGATTT  
TCGAATTGAGAGAGATATTGAAAGAGATCAAGAATTCTCGCTATTTCTTATATTCATGGA  
CCCAATTC AATTCAACGGGATCTTTCATTACATTTTTTTCCATCAAGAGAGTTTTATAA  
AACTCTTGGACTCACGAATTTGGAGTATCCTACTTTCA---GGCAATTCA-----CAGGGTT  
CAACAAGCAATCGATATTTT-----ACGATCAAGGATGTAGTACTTTTTGTAGTAGCG---A  
TCCTTCTATATCGT-----ATTAACAATCGAAAAATGGTCGAAAGAAAAAATCTCTATT  
TGACGGGGCTTCTCCT-----ATACCTATGAATTCCATTGGACCCAGAAATGATAC  
ACTGGAAGAATCTTTT--GAGTCTTCCAATATCAATAGGTTGATTGTTCCG---CTCCTGTA  
TCTTCCAAAAGAAAAAAGATCTCTGAGAGCTCTTCTCCTGGATCCGAAAGAGAGTACC

CAGGTTCTCCCAATAACT-----AAAAAGTGTATCATGCCTGAATCTAACTGGGGTTC  
GCGGTGGTGGAGGGACTGGATCAGAAAAAGAGG-----GATTCTAGTTGTAAGATATCT  
AAT-----GAAACCGTCGCTGGAATTGAGATCTCATTCAAAGAGAAAGATATCAAA---TA  
TCTAGAGTTTCCTTTTGTATATTATATGGAT-----GATCCGATCCGCAAGGACCATGATTGG  
GAATTGTTTGATCGTCTTTCTCCGAGGAAGAGGGCGAAACATAATCAACTTG-----AATC  
GGGACAGCTATTGAAATCTTAGTGAAAGACTGGATTTCTTATCTCATGTTTGCTTTTCG  
TGAAAAAAAACCAATTGAAGTGGAGGGT---TTCTTCAAACAACAAGGG---GCTGGGTC  
AACTATTCAATCAATGATATTGAGCATGTTTCCCAT-----CTCTTCTTGAGGAACAAGCG  
GGCTATTTCTTTGCAAAATTGTGCTCAATTTCATATGTGGCAATTCCGCCAAGATCTCTT  
CGTT-----AGTTGGGGGAAGAAGCAGCCGCACGAATCGGATTTTTTAAGGAAC---ATA  
TCGAGAGAGAATTGGATTGGTTAGACAATGTGTGGTTGGTAAACAAGGATCGG-----  
TTTTTTAGC-----AAGATACGGAATGTATCATCAAATATTCAATATGATTCC-----ACGAG  
A-----TCTAGTTTATTCAAGTAACGGATTCTAGCCAATTGAAAGGATCTTCT---GATCAA  
TCCAGGGATCATTTCGATTCCATTAGG-----AATGAGGATTTCGAAA-----  
-----TATGACACATTGATCAATCAAAGAGAGATTCAACAATAAAAGAAAGATC  
GATTCTTTGTTGGGAT-----CCTTCCTTTCTTCAAACGGAACGAACAGACATAGAATCGG  
AGCGATTCCGATTCCCTAAA-----AGCCTTTCTGGATATTCC-----TCAATGTGCCGACTAT  
TCATG---CAACGTGAGAAGCAGATGAATAATCATCTGCTTCCGGAAGAAATCGAAGAAT  
TT-----CTTGGGAACCCTACAAGAGCCGATCGTTTTTTTTTCTCTGACAGATGG-----TCA  
GAACTTCAT---CTAGGTTTCGAATCCTACTGAGAGGTCCACTAGAGATCAG-----AAA  
TTGTTGAAGAAAGAACAAGATGTTTCT---TTTGTCTTTCCAAGCGATCGGAA-----  
AAGAAAGAAATAGTGAATATATTCAAGATAATTCTGTATTTACAAAAT-----ACCGTCTCA  
ATTCATCCTATTTTCATCAGATCCGGTATGTGATATGGTTCCG---AAGGATGAACCG-----  
GACAGTTCCAATAAGATGTCATTCTTGAACAAAAAT-----GGTTTA-----TTTCATCTAT  
TCCATGACCGGAACAGGGGGGTATACACGTTA-----CACCACGATTTTGAATCAGAA-----  
-GAGATATTTCAAGAAATGGCAGATCTATTCAATCTATCAATAACTGAGCCG---GATCTG  
GTGTATCATAAGGGATTTGCCTTTTCTATTGATTCCCTCCGATTGGATCAAAAACAA-----  
TTTTTTGAATGAGGTATTCAACTCAAGGGATGAATCGAAAAAGAAATCTTTA-----TTG  
GTTCTACCTACTCTTTTTTAT-----GAAGAGAATGAATCTTTTTTATCGAAGGATCATAAAA  
AAATGGGTCCAG---ACCTCTTGCGGGAATGATTTGGAAGATCCAAAACCAAAAATAGT  
GGTATTTACTAGCAACAACATAATGGAGGCAGTCAATCAATATAGATTGATCCGAAATCT  
TATTCCAATCCAATATATCACCTATGGGTATGGGTACATAAGAAATGTATTGAATCGATTC  
ATTCAAAAGAAT-----CGATTTCGATCGCAACTTCGAATATCGAATTCAA-----AGGTA  
TCAAATAGAGAATGATACTCTGAATCATAGAACTAGAATGAAATACACGATCAACCAAC  
ATTTCTCAAATTTAAAAAAAAGAGTCAGAAGAAATGGTTTCGATTCT-----CTTATTTTG  
ATTTCTCGAACCGAGAGATCCATGAATCGGGATCCTAATGCATATAGATACAAATGGTCC  
AATGGGAACAAGAATTTCCAGGAACATTTGGACCATTTCAATTTCTGAGCAGAATAGCC  
GT-----TTTCAAGTAGTGTTCGATCGATTACGTATTAATCAATATTCGATTGATTGGTCT  
GAGGTTATCGACAAAAAAGATTTGTCTAAGTCACTTTGTTTCTTTTTGTACAAGTTTCTT  
CTC-----TTTTTTTCC-----AAGTTTCTTCTTTTTTGTCTAAA  
TCACTTCT--TTTTTCTTTGTGAGTTTCGGGAGTATCCCATTCATAGGTCCGAG---ATC  
CACATCTAT--GAATTGAAAAGTCCGAATCATCCACTCTGTAATCAGCTGTTTCGAATCAA  
TAGGTCTTCAAATCGTTCAATTTGAAAAAATGGAAACCCTTC-----TTATTAGAT-----GA  
CCATGATACTTCC---CAAAAATCGAGATTCTTGATCAATGGAGGAACAATATCACCATTT

TTGTTCAATAAGATACCT--AAGTGG---ATGATTGACTCTTTTCGATACTATA-----AAGAAT  
CGTAGAAAATTTTTGATAACACGGATTCTATTTCTCAATGATATCCCACGATGAAGAT  
AATTGGCTGAATCCCGTGAAACCATTTTCATAGAAGTTCATTGATATCCTCTTTTTATAAA  
GCAAATCGACTTCGATTCTTGAATAATCGATATCACTTCTGCTTCTAT-----TGTAACAAA  
AGATTGCCTTTT-----TAT--GTGGAAAAGGCCTGTATCAATAATTATGAT-----TTTACGT  
ATGGA---CAATTCCTCAATATCTTGTTCATTTCGCAACAAA---AGATTTTCTTTGTGCGGCG  
GTAAA-----AAAAACATGCTTTTTTTGGAG---AGAGATACTATTTACCAATCGAGTCAC  
GGGTATTTAACATATTGATACTTAACGATTTTCCGCAAAGTGGTGACGAAGGG---TATAA  
CTTGTAACAATCT-----TTCCATTTTCCAATTCGATCCGATCCATTCGTTTCAT-----AGAG  
CTATTTACTCGATCGCAGACATTTCTGTAACACCTCTAACAGAGGGGCAAATAGTCAAT  
TTTGAAAGAACTTATTGTCAACCTCTTTTCAGATATGAATCTACCCGATTCAGAAGGGAA  
GAACTTGCATCAGTATCTCAA-----TTCAATTCAAACATGGGTTTGATTTCATATTCCATG  
TTCTGAGAAATATTTACCATCCGAAAAT-----AGGAAAAA-----GGGATTC  
CTTGTCTAAA-----AAATGCCTTGAGAAAGGGCAGATGTATAGAACCTTTCAACGAGA  
TAGTGTTTTTTCAACTCTATCAAATGGAATCTATTCCAACATATATACCTTGGTTCCTT  
ACTTCGACAGGGTACAAATATCTAAATTTTCATATTTTGTAGATACTTTTTTCAGAC---CTATT  
GCCGATACTAAGTAGCAGC-----CAAAAATTTGTATCCATTTTTCATGATATTATGCATAGA  
TCAGATATATCATGGCGAATTCTTCAGAAAAAATGG-----TGTCTTTCACAATG  
GAAT---CTGATAAGTGAGATTTTCGAGTAAGTGTTCATAAT-----CTTCTTCTGTCCGAA  
GAAATTATTCATCGAAATAATGAGTCA-----CCATTGATATCGACACATCTGAGATCGCTA  
AATGTTCCGGGAGTTC---CTCTATTCAATCCTTTTCTTCTTCTTGTGCTGGATAT---CTCG  
TTCGTACACATCTTCTCTTTGTTTCTCGA-----GTCTATAGTGAGTTACAGACAGAGTTCG  
AAAAGGTCAAATCTTTGATGATTCCATCATAATGATTGAGTTGCGAAAACCTTCTGGAT  
AGGTATCTACATCTGAACAGAATCTTTTCTGGTTAAAGAATCTCTTTCTAGTTACTCTG  
GAACAATTAGGAAATTCTCTAGAAGAAATACGAAGTTCTGCTTCTGGCGGCAACATGC  
TATGGGGTGGTGGTTCC-----GCTTATGGG---GTCAAATCAATACGTTCTAAGAAG  
AAATATTTGAATCTC-----ATCGATCTCATA---AGTATCATACCAAATCCCATCAATC  
GAATCGCTTTTTTCGAGAAATATGAGACATCTAAGTCATACAAGTAAAGCGATCTATTCAT  
TGATAAGAAAATAAAAAACGTGAATGGTGAATTGGATTGATGATAAATAGAATCCTGG  
GTCTCGAACAGTGATTTCGATTGATGATAAAGAAAGAGAATTCTTGGTTCAGTTCTCT-----  
-ACCTTAACGACA-----GAGAAAAGGATTGATCAAATCTATTGAGTCTGACT--CACAGT  
GATCATTATCA-----AAGAATAACTCTGGTTATCAAATGATTGAACAACCGGGAA  
CAATTTACTTACGATACTTAGTTGACATTCAG-----AAAAAGTATCTAATGAATTATGAGT  
TCAATACATCCTGTTTAGTAGAAAAACGGATATTCCTTGCTCATTATCAGACAATCACTT  
AT-----TCACAAACCCTGTGTGGGACTAATAGTTTTTCATTTCTCGTCTCATGGG-----AA  
ACCCTTTTCGCTCCGCTTAGCCCTATCCCCCCT--AGGGGTCTTTTAGTGATAGGTTCTA  
TAGGAACTGGACGATCCTATTTGGTCAAATACCTAGCTGCAAACCTCTATGTTCTTTCA  
TTAGAGTATTTCTGAACAAGTTCCTGGATAACAAGCCTAAGGGTTTTCTTATTGAT-----  
-----GATAGTGACGATAGTCACGATATTGACGATATTGATGATAGTAATGATAGTGACGAT  
-----ATCGACCGTGACCTTGATACGGAGCTGGAG  
TTGCTAACTATGATGAATGCGCTA-----ACTATGGATATGATGCCG-----GAAATAGAC  
CGATTTTATATCACCTTCAATTCGAATTAGCAAAAGCAATGTCTCCTTGCATAATATGG  
ATTCCAACATTCATGATCTGGATGTGAATGAGTCGAATTCCTTATCCCTCGGTCTATTA  
CGAACCATCTCTCC-----AGGGATTGTGAAAGATGTTCC---ACTAGAAATATTCTTGT



TATTGCTTCGACTCATATTCCCCAAAAAGTAGATCCCGCTCTAATAGCTCCGAATAAATT  
AAATACATGCATTAAGATACGAAGGCTTCTTATTCCACAACAACGAAAGCACTTTTTTA  
CTCTTTCATATACTAGGAGATTTCACTTCGAAAAGAAGATGTTCCATACT-----AATGGAT  
TCGGGTCCATAACTCTGGGTCCAATGTACAAGATCTTGTAGCACTTACCAATGAGGCC  
CTATCAATTAGTATTATACAAAAGAAATCCATTATAGACTAATCTAATTAGATCTGCTC  
TTCATAAACAACTTGGGATTTGCGA-----TCTCAGGTAAGATCGGTTTCAGGATCATG  
GGATCCTTTTCTATCAGATAGGAAGGGCTGTTTCACAAAATGTACTTCTAAGTAATTGCT  
CCATAGATCCTATATCTATCTATATGAAGAAGAAA-----TCATGTAATGAGGGGGATTCTT  
ATTTGTACAAATGGTATTTCGAACTTGGAACGAGCATGAAGAATTTAACGATACTTCTTT  
ATCTTTTGAGTTGTTCTGCCGAGCGGTCTCAAGACCTTTGGTCTCTACCC-----GGA  
CCTGATGAAAAA---AATGGGATCACTTCTTATGGACTCGTTGAGAATGATTCT--GATCT  
AGTTCATGGCCTATTAGAAGTAGAAGGCGCTCTGGTGGGA-----TCTTCACGGACAGAA  
AAAGATTGCAGTCAGTTTGATAATGAT-----CGGGTGACACTTCTTCGGCCCCGAACC  
AAGTAAT--CCCTAAATATGATTCAAATGGATCTTGTCTATCGTTGATCAGAGATTC  
TCTATGAAAAA-----TATGAATCGGAGTTTGAAGAA-----GGGGAAGGAGTCCTCGAC  
CTGCAA-----CAGATAGAGGAGGAT-----TTATTCAATCAC-----ATAGTTTGGGC  
TCCT-----AGAATATGGTGCCCA-----TGGGGCTTTCTATTTGATTGTATCGAAAGGCC  
AATGAATTGGGATTTCCC---TATTGGGCCAGGTCATTTCCGGGGCAAG-----CGAATCAT  
TTATGATGAAGAGGATGAGCTTCAAGAGAATGATTCGGAGTTCTTGCAGGGTGGAACC  
ATGCAGTACCAGACACAAGATAGATCTTCCAAAGAACAAGGCTTTTTTTCGAATAAGCC  
AATTCATTTGGGACCCACGGATCCACTCTTTTTTCTATTCAA---GATCAGCCTTTTGT  
CTCTGTGTTTTACATCGAGAATTCTTTGCAGATGAAGAGATATCAAGGGGACTTCTTA  
CTTTCCAAACAGATCTTCCGACATCTATATATAAACGCTGGTTTATC-----AAGAATACGC  
AAGAAAAGCATTTCGAATTGTTGATTCATCGCCAGAGATGGCTTAGA-----ACCAATA  
ATTCATTATCT-----AATGGATTTTTCCGTTCTAAT-----ACTCTATCCGAGAGTTATCAATAT  
TTATCAAATATGTTCCCTATCTAAC---GGAACACTATTGGATCAAATGACAAAGACATTGT  
TGAGAAAAAGATGGCTTTTTCCCGGATGAGATGGTTGTTGCTATC-----TGCTCCAATAAC  
GAATCATTGGTT-----ATGCCTAGATCTCGG---ATAAATGGAAATTTTATTGATAAGACCTT  
TTCAGTTGTAGCCAATATCTTATTACAAATAATACCCACAACCTCGGGAGAAAAAGAGG  
CATTCACTTATTATAGAGATGGT-----ATGTCAGCTCAATCTGAAGGAAATTATGCGGAAG  
CTTTACAGAATTATTATGAGGCTATGCGACTGGAAGTTGATCCCTATGATCGAAGTTATA  
TACTTTATAACATAGGCCTTATCCACACAAGTAACGGAGAACATACGAAAGCTCTGGAA  
TATTATTTTCGGGCACTCGAACGAAATCCGTTCTTACCTCAAGCTTTTAAACAATATGGCC  
GTGATCTGTCATTAC---CGGGGAGAACAGGCCATTAGACAGGGAGATTCTGAAATTGCC  
GAATCTTGGTTCGATCAAGCTGCTGAATATTGGAAACAAGCTATAGCCCTTACCCCGG  
TAATTATATTGAAGCACAGAATTGGTTAAAAATTACAAGGCGTTTTGAA-----ATGACTT  
GGATATCAGAAGATACGTGGGTAGATTTTGTAAACGGGGTGTGCAAACCCCGTGATTTC  
TTCTGGGCATTTATCACTCTTTTAGGTTTCTAGTGGGTTTTTATTGGTTGCAGCTTCCAGT  
TATCTTCATAAGAATTTTTTATCTTTTCAATTCGTCCGAGCTAATTCGTTTTTTGCCACAAG  
GGGCTACGATAACTGTTTATGGGACCGCGGGTCTATTTGTTAGTTTGTTTTTGTGGCTTA  
CCATTTTTTGAATGTGGGCAGTGGTTATGATCTTTTCGATAAAAAAAGAGGAATAGTG  
TGCATTTTTCGTTACGGATTTCTTGAAAAAATCGTCGTATTTTTATCCGAGTCCTTATC  
AACGATATTCAGTCCCTCATAATACAAAGTAAAGAGGGTAGGTATCTTCGCAGTGTCT  
TTATATGCAAACCAGAGAACAGGGGGCCATTCCCCTAACTGCTGTTGACGATTCT---TG



GAAGCTATTCAGGAACAGCTGGAACGGTTTTCTCTTCAG-----ATGAGAACCAATCCT  
ACTACTTCTCCTCCCGGGGCTTCCACAATTGAAGAAAAAAGTACAGGTCGTATCGATC  
AAATTATTGGACCCGTGCTGGATGTCACTTTTTCCCCCAGGCAAGTTACCTTATATTTATA  
ACGCTTTGGTAGTCCAGAGTAGAGACACTGACGATAAGCAAATTAATGTGACTTGTGA  
GGTACAACAATTATTAGGAAATAATCGAGTTAGAGCTGTAGCTATGAGTGCTACGGACG  
GGTTGATGAGAGGAATGGAAGTGATTGACACGGGAGCTCCTCTCAGTGTTCCGGTCCG  
TGGAGCTACTCTTGGACGAATTTCAACGTTCTTGGGGAGCCTGTTGACAATTTGGGTC  
CTGTAGATAGTAGTGCAACGTTCCCTATTCATAGATCTGCGCCTGCCTTTATCGAGTTAG  
ATACGAAATTATCCATCTTTGAAACAGGTATTAAGGTCGTGATCTTTTAGCTCCTTATC  
GACGTGGAGGAAAAATAGGACTATTTGGGGGGGCTGGAGTAGGTA AACAGTACTGAT  
CATGGAATTAATCAATAACATTGCTAAAGCTCATGGGGGCGTATCCGTATTCGGTGGAGT  
AGGGGAACGGACTCGTGAAGGAAATGATCTTTATATGGAAATGAAGGAATCCGGAGTA  
ATTAATGAAAAAATATTGAGGAATCAAAGGTAGCTCTAGTCTATGGCCAAATGAATGA  
ACCACCGGGAGCTCGTATGAGAGTTGGTTAACTGCCCTAACTATGGCGGAATATTTCC  
GAGATGTTAATAAGCAAGACGTGCTTTTATTTATCGATAATATCTTTCGTTTTGTTCAAG  
CAGGATCAGAGGTATCCGCTTTATTAGGGAGAATGCCCTCCGCAGTGGGTTATCAACCT  
ACTCTTAGTACAGAAATGGGTTCTTTGCAAGAAAGAATTGCTTCTACTAAAAAGGGAT  
CTATAACTTCGATTCAAGCAGTTTATGTACCTGCAGACGATTTGACCGACCTGCCCT  
GCCACAACATTTGCACATTTGGATGCTACTACCGTACTTTCCAGAGGATTAGCTTCCAA  
GGGTATTTATCCAGCAGTAGATCCTTTAGATTCAACCTCGACTATGTTACAGCCTCGGAT  
CGTTGGCAACGAACATTATGAACTGCGCAAAGAGTTAAGGAACTTTACAACGTTAC  
AAAGAACTTCAGGACATTATTGCAATTCCTGGCTTGGATGAATTATCGGAAGAGGATCG  
TTAACTGTAGCAAGAGCAAGAAAAATTGAGCGTTTCTTATCACAACCGTTCCTTTGTGG  
CAGAAGTTTTTACTGGTTCTCCAGGAAAGTATGTTGCTCTTGCGGAAACTATTAGGGGA  
TTTCAACTAATCCTTTCCGGAGAATTAGACGGCCTACCTGAACAGGCTTTTTATTTGGT  
GGGTAACATCGATGAAGCTAGCACGAAAGCTATAACCTTAGAAGAGGAGAACAATCG  
CAGAAAATGAAATTAATCTTTATGTACTGACTCCTAAGCGAATTATTTGGGATTGTGAG  
GTGAAAGAAATCATTTTATCCACTAATAGTGGCCAAATTGGCGTATTACCAAACCACGC  
CCCATTAACACAGCAGTAGATATGGGTCTTTGAGAATACGCCTCAACGACCAATGGT  
TAACAGCGGTTCTGTGGAGCGGTTTTGCGAGAATAGTTAATAATGAGATCATCATTTTA  
GGAAATGATGCGGAACTGGGTAGTGATATTGATCCGGAAGAAGCTCAAAGGCACTTG  
AAATAGCCGAAGCTAACTTGAGTAAAGCTGAGGGTACGAAAGATTTGGTTGAAGCGA  
AGCTCGCTCTCAGACGAGCTAGGATACGAATCGAGGCTGTCAATTGGATTCCCATGAA  
AAATGTAACCCATTCCTTCGTTTTTTTAGCTCACTGGCCATCCGCTGGCAGTTTCGGGCT  
TAATACCGATATTTTAGCAACAAATCTAATAAATCTAACTGTAGTGGTTGGTGTGTTGAT  
TTTTTTTGGAAAGGGAGTGTTAAAAGATTTATTAGATAATCGAAAACAGAGGATCTTGA  
GTACTATTCGAAATTCAGAAGAATTGCGTAGAGGGACCATTGAGCAACTCGAAAAGC  
TCGGATTTCGATTACAGAAAGTCGAACTAGAAGCGGATGAGTATCGAATGAATGGATACT  
CTGAGATAGAACGAGAAAAAGCAAATTTGATTAATGCTACTTCTATTAGTTTGGAACAA  
TTGGAAGAAAGTCTAAAACGAAACCCCTTTATTTTGA AAAACAAAGGGCAATGAATCAGG  
TCCGACAGCGGTTTTTCCAACAGGCCGTACAAGGAGCTCTAGGAACTCTGAATAGTTG  
TTTGAATACCGAGTTACATTTCCGTACGATTCGTGCTAATATTGGCATTCTCGGGTCCCT  
GGAATGGAAGAGA---ATGAATCCACTAATTGCTGCTGCTTCTGTTATTGCTGCTGGATTG  
GCCGTAGGGCTTGCTTCTATTGGACCTGGAGTTGGTCAAGGTA CTGCTGCAGGACAAG

CTGTAGAAGGTATTGCGAGACAGCCAGAAGCAGAAGGTAAAATACGAGGTACTTTATT  
GCTTAGTCTAGCTTTTATGGAAGCTTTAACAATTTATGGACTAGTTGTGGCACTAGCGCT  
TTTATTTGCGAACCCTTTTGTTATGAATATTATACCTTGTTCATTAAAACACTCAAGGG  
GTTATACGATATATCGGGTGTAGAAGTAGGCCAACACTTCTATTGGCAAATAGGAGGTT  
TCCAAATTCATGCCCAAGTACTCATCACTTCTTGGGTCGTAATTACTATCTTGCTAGGTT  
CAGTTGTCATAGCTGTTTCGGAATCCACAAACCATCCCGACCGACGGTCAGAATTTTTTT  
GAATATGTCCTTGAGTTTATTTCGAGACTTGAGCAAACTCAGATTGGAGAAGAATATGG  
TCCCTGGGTTCCCTTTATTGGAACTATGTTCCCTTTTTATTTTTTGTTTCGAATTGGTCGGGT  
GCTCTTTTACCTTGGAATAATATAGAGTTACCCCATGGGGAATTAGCAGCGCCACGAA  
TGATATAAATACTACTGTTGCTTTAGCTTTACTCACGTCAGCGGCATATTTTTATGCTGGT  
CTTAGCAAAAAAGGATTGAGCTATTTTCGAGAAATATATTAACCAACTCCAATCCTTTT  
ACCAATTAACATCCTAGAAGATTTACAAAACCATTATCACTTAGCTTTTCGACTTTTCGG  
GAATATATTGGCGGATGAATTAGTCGTTGTTGTTCTTGTTCCTTTAGTCCCCTTAGTAATC  
CCTATACCGGTCATGTTTCTTGGATTATTTACAAGCGGTATTCAAGCTCTTATTTTTGCAA  
CATTAGCCGCAGCCTATATAGGTGAATCCATGGAGGGTCATCATATGCTATTTGCAACTT  
TAGAACATATACTAACTCATATCTCTTTCTCAACGATTTCAATTGTGATTACGATTCATTT  
GATAACCTTATTAGTTCGTGAACTTGGAGGATTACGTGATTTCGTCAGAAAAAGGAATGA  
TAGTTACTTTTTTCTCTATAACAGGATTCTTAGTTTCTCGTTGGGCTTCCTCGGGACATTT  
TCCATTAAGTAATTTATATGAGTCATTGATCTCCCTTTCATGGGCCCTGTATATTCTTCATA  
CCATTCCATAAATACAGAACTCTAAAATGATTTAAGCACATAACTACGCCAAGTACT  
ATTTTAAACGCAAGGCTTTGCCACATCGGGTCTTTTAACTGAAATGCATCAATCCACGAT  
ACTAGTACCTGCTCTACAATCTCAGTGGTTAATGATGCATGTCAGTATGATGTTATTAAG  
CTATGCAACTCTTTTGGGCGGACCCCATATCCGCCGCTATTCTAATCATTAGATTTTCG  
AAATAATTTCCATTTCTTTTCTAAAAGAAAGATATTAATATTTTTATGCAAAAAGAAG  
TGCTTTAAAAGAACCTCTGTCCCTTCATTTCCAAATTATTACAAATATCAATTAACGGA  
GCGTTTGGATTCTTGGAGTTATCGTGCATTAGCCTAGGATTTACCCTTTTAAACCGGAGG  
GATTCTTGGTGGAGCAGTATGGGCTAATGAGGCCTGGGGAGCCTATTGGAATTGGGATC  
CCAAGGAACTTGGGCATTTATTACTTGGACCATATTCGCAATTTATTTACATAGTAGAA  
CACATCCAAATTGGAAGGGTACGAATCCGCACCTTATAGCTTCGATAGGATTTCTTATAA  
TTTGGATTTGTTATTTTGGTATAAATCTATTAGGAATAGGCTTACATAGTTATGGTTCGTTT  
ACATTAACAATGAAAAAAGAAAGCATTGCCTTCTTTACTATATCTTGTATTTATCGTA  
CTTTTGCCCTTGGGGGGTCTCTTCCCTCATTTAACAAATGTCTGGAACCTTTGGATTAAGAA  
TTGGTGGAAATACCAGGCAATCCGAAACTCTCTTAACTGATATTCAAGAGAAAAGGATTC  
TAGAAAGATTCATAGAATTAGAAGAACTTTCTCTCTTGGACGAGATGATAAAAGGGAA  
ACTAAAGACACATGTACAAAACCTCCTACAGGAATACACAAGGAAATAATACAATGG  
GTCAAATAAATAATGAGGATCATCTCCATAACATTTTGCATTTCTCGACAAATATAATCT  
GTTTGGCTATTCTAAGTGGTTCTTTTTTTCTGGGTAAAGAGGAACTTGTCAATTTGAATT  
CTTGGGTTTCAGGAATTCCTCTATAATTTAAATGACTCAATAAAAGCTTTTTTTTATCTTTT  
AGTTACTGATTTTTTTGTTGGATTTCACTCCACCCGTGGTTGGGAACTAGTAATTCGTTG  
GGTCTACAACGATTTTGGATGGGCTCCTAACGAGCTTATTTTCACTATTTTTGTTTTGTAG  
TTTTCCAGTAATTCATAGATACATGTTTGAAATTTTGGGTCTTTTTTTGTTTAAACCGTCTA  
TCTCCTTCGCTTGTAGTCATTTATCATTCAATTAGTGAAATGCCCATTTGGTGTTCAAAA  
GTACCTTACCGGATTCCTGGAGATGAAGAAGCGACTTGGGTTGACTTATACAATGTTAT  
GTATCGAGAAAGGACACTTTTTTTTAGGTCAAGAGATTTCGTTGCGAGATCACGAATCATA

TTACAGGTCTCATGGTATATCTGAGTATAGAAGATGGAATTAGTGATATTTTTTTGTTTAT  
AAACTCCCCCGGCGGGTGGCTAATCTCAGGAATGGCTATTTTTGATACGATGCAAACGG  
TGACACCAGATATATATAACAATATGCCTCGGAATAGCCGCCTCCATGGCATCCTTCATTC  
TGCTTGGAGGAGAACCACCAAGCGTATAGCATTCCCTCACGCGAGGATTATGCTTCAC  
CAACCTGCTAGTGCTTATTATCGGGCAAGGACACCAGAATTTTACTAGAAGTAGAAGA  
GTTACACAAAGTTCGCGAAATGATCACAAGGGTTTATGCAGTAAGAACAGGCAAGCCT  
TTTTGGGTTGTATCCGAAGACATGGAAAGGGATGTTTTTATGTCAGCAGACGAAGCCA  
AAGCTTATGGACTTGTGATATTGTAGGGGATGAACCGAGAGAAGCAAAAGTAACTTT  
CGAAGGTTTAGTTACGGAAGCCCTACCCAATGGAATGTTCCGCGTTCGGCTAGAGAAT  
GACACCATCATCTAGGCTATATTTAGGAAAGATACGGTCTAGTTCTATACGAATACTG  
ATGGGGGATAGGGTCAAAATTGAAGTAAGTCGTTATGATTCAAGCAAGGGACGTATAAT  
TTATAGACTTCCCCATAAGGATTCGAAGGATATGGAAAAATTCGAAGGGTATTCAGAAA  
AACATAAATCTCGTCAACAATACTTCGTCTACCCACTTCTCTTTCAGGAATATATTTATG  
CATTTGCCCTGATTATGGATTAGTTGGTTGTAATAACAAATTTAGTTCACTACTTGTGA  
AACGTTTAATTATTCGAATGTATCAGCAGAATTTTTTGGATAACTCGGTTAATCATCCTA  
ACCAAGATCGATTATTGGATTCTGAGTTTTATTCTCAGATTCTATCTGAAGGGTTTGCGA  
TCGTTGTGGAATCCCATTCTCGCTACGGGAATTATTTGTCCGATACCAAAGTTTCAG  
AATTTACGCTCTATTCAATATTTCCCTTTTTTGAAGACAAATTTTTGCATTTGGATT  
ATCTATCACATATAGAAATACCCTATCCTATCCATTTGGAAATCCTGGTTCAACTCCTTCA  
ATACCGTATCCAAGATGTTCCATCCTTGCATTTATTGCGATTTCTTCTCAACTACTATTTCG  
AATTGGAATAGTTTTATTACTAAATCCATTTTTATTTTTCAAAAAAAAAAAGACTATTTTCGA  
TTCCTATATAACTCTTATGTATCAGAATATGAATTTTTTTTTGTTGTTTCTTCGTAAACAATC  
TTCTTGCTTACCATTAGCATCTTCTGGAACTTTTCTGGAACGAATCCACTTTTCTAGGAA  
GATGGAACAT-----ATAATGTACCCTGGTCGGAAAACCCTATGGTTCCTTATGGATCCTCT  
TATGCATTATGTTTCGATATCAAGGAAAGGCAATTCCTTGCATCAAAGGCACTTTTCTTTT  
GAAGAAGAAATGGAATGCTACCTTATCAATTTATGGCAATATTATTTCTGTTTTTGGAC  
TCAGCCGCGAAGAATCCATATAAACCAATTAGCAAACCTCTTGCTTCGATTTTATGGGGT  
ACTTTTCAAGTGTACCAAAAAGTTCTTTGTTAGTAAGGAATCAAATGCTGGAGAATTCA  
TTTCTAATAGATACTCGAATG-----AAAAAATTCGATACCATAGTCCACGCTACTCTCCTC  
ATAGGATACTTATCAAAGCTCAATTTTGTACTGGATCGGGGCATCCTATTAGTAAACCC  
ATTTGGACAGATTTATCAGATTGGGATATTCTTGATCGGTTTGGTTCGGATATGTAGAAAT  
CTTTTTCATTATCACAGTGGATCTTCAAAAAGAAGACTTTGTATCGACTAAAGTATATA  
CTTCGACTTTCATGCGCTAGAACTTTAGGTCTAAACATAAAAGCACGGTACGAGCTTT  
TATGCAATGGTTGGGTTCCGGTATTTTTAGAGAATTTTTTAGGGAAGAAGAGCAAGTTT  
TTCTTTGATGTTCCGCCAAACGTATTTGGTATTTGGATATTCTCCGTATCAATGATCTGGT  
GAATCCTCTTATGATAATAGATAGGGTA---GAGGTAGAA---ACTATCAATTTCTTTTTGGAA  
ATTGGAA---TTATTAAGAAGTCTATGGACTGATATCGATTCTA---CCCATTTGACCCT  
CCTTTTGGGAATAACAATAGAGGTAAGTCTGTAATTGTGTGGTTAGAAAGAGAAATATCTG  
CGTCGATACAACAACGTATTGGTCCTGAATATGCTGGCCCCCTGGGCCTGCTTCAAGCT  
ATAGCAGATGGGACTAAGCTACTTTTTAAAGAAGATATTCTGCCATCCCGAGGAGATAT  
TTCTTTATTTAGCATTGGACCCTCTATAGCAGTCATATCAGTTTTATTAAGTTTTTTAGTTA  
TCCCTTTGGGATATCATTTTGTTTTAGCCGATCTTAGTATTGGTGTTTTTTTTATGGATTGC  
CATTTCAAGTATAGCTCCTATTGGTCTTCTTATGGCAGGGTATAGCTCAAATAATAAATAT  
TCTTTTTCAGGCGGTCTACGAGCTGCTGCTCAATCCATTAGTTATGAAATACCATTA

TTTTGTGTGCTAGCAATATCTCTACTATCTAACAGTTCAAGTACAGTTGATATAGTTGAA  
GCACAGTCAAATAACGGTTTTTTTTGGATGGAATATTTGGCGTCAGCCTATAGGTTTTCTG  
GTTTTTTAATTTCTTCTTTGGCAGAATGTGAAAGATTACCCTTTGATTTACCAGAAGCG  
GAGGAAGAATTAGTAGCAGGTTACCAAAGTGAATATTCCGGTATCAAATATGGTTTATTT  
TATCTTGTCTTACCTAAATTTATTAGTTTCTTCTTTATTTGTAACAGTTCTCTACTTGGG  
CGGGTGGAATTTATCTATTCCCTATATATCCTTTTTTGATTTTTTCCAAATGAATAAAGCA  
GTTGGAATTTTGAAATGACAATGGGTATATTTATTACATTAAGTAAAGCTTATTTATTTCT  
TCTTCATTTCTATCACAATAAGATGGACTTTACCGAGGATGAGAATGGATCAGTTATTA  
ATCTTGGATGGAAATTTCTTTTACCTATTTCCCTGGGCAATCTCTTATTAACAACCTCTTC  
TCAACTTGTTCACATAATGATCTGGCATGTACAGAATGAAAAGTTCATTCTCGATTCTAC  
GAGTATTTTTATGAAGGCGTTTCATTTGCTTCTTCAATGGAAGTTTCATTTCCCGAGA  
GTGTATCCTAATTTTTGGCCTAATCTTCTTCTGATGTTTCGATTCAACCTCTGTTCAAAA  
AGATAGACCTTGGTTCATTTTCATCTCTTCAACATGTTTAGTAATAAGCATAACGGCCCT  
ATTGTTCCGATGGAGAGAAGAACCTATAATTAGCTTTTCGGGAAATTTCCAAACGAACA  
ATTTCAACGAAATCTTTCAATTTCTCATTTTATTATGTTCAACTTTATGTATTCCTCTATCC  
GTAGAGTACATTGAATGTACAGAAATGGCTATAACAGAGTTTCTGTTATTCGTATTAACA  
GCTACTCTAGGGGGAATGTTTTTATGTGGTGCTAACGATTTAATAACTATCTTTGTAGCT  
CCAGAATGTTTCAGTTTATGTTCCCTACCTATTGTCTGGATATACCGAGAGAGATCTACGG  
TCTAATGGGGCTTCTTTGTAATATTTACTCATGGGTGGGGCAGGCTCTTCTATTCTGGTT  
CATGGTTTCTCTTGGCTATATGGTTCATCTGGGGGGGAGATCGAGCTTCAAGAAATTGT  
GAACGGTCTTATAAATACACAAATGTATAACTCCCCAGGAATTTCACTTGCCTTATATC  
CATCACTGTAGGACTTGGGTTTAAAGCTTTCCCCAGCCCCTTTTTCATCAATGGACTCCTG  
ACGTCTACGAAGGATCCCCTACTCCACTTCGTTGCTTTTTCACTTCTATTACTTCGAAAGTAG  
CTGCTTCAGCCTCAGCCACGCGAATTCTCGAATTCTCTCTTTATTTCTCATCAAACGAAT  
GGCATCTTCTTCTGGAAATCCTAGCTATTCTTAGCATGATTTTGGGAAATCTCCTTGCTA  
TTACTCAAACAAGCATGAAACGTATGCTTGCATATTCGTCCATAGGGCAAATCGGATAT  
GTAATTATTGGAATAATTGTTGGAGACTCAAATGATGGATATGCAAGCATGATAACTTAT  
ATGCTGTTCTATATCTCCATGAATCTAGGAACTTTTGCTTGCATTGTATTATTTGGTCTAC  
GTACCGGAACTGATAACATTTCGAGATTATGCAGGATTATACACGAAAGATCCTTTTTTG  
GCTCTCTCTTAGCCCTATGTCTCTTATCCCTAGGAGGCCTTCCCTCCACTAGCAGGTTTC  
TTCGAAAACCTCTATCTATTCTGGTGTGGATGGCAAGCAGGCCTATATTTCTGGTTTCA  
ATAGGACTCCTTACGAGCGTCTTTCTATCTACTATTATCTAAAATAATCAAGTTATTA  
TGACTGGACGAAACCAAGAAATAACCCCTTATGTGCGAAATTATAGAAGATCCCCTTA  
AGATCAAACAATTCCATCGAATTGAGTATGACTGTATGTGTGATAGCATCTACTATACCA  
GGAATATCAATGAACCCCATCTTGCAATTGCTCAGGATAACCCTCTTTAATGTTTCTGCTT  
CACGAATATGATATTTTTTGGACATTTCTAATAATAGCAAGCCTTATTCCTATTTTGGCAT  
TTTCGATTTTCAGGACTTTTAGCCCCGTTAGTGAAGGACCAGAGAAGCTTTCTAGTTAT  
GAATCGGGTATAGAACCCATGGGAGGGGCTTGGGTACAATTCCGAATACGCTATTATAT  
GTTTGCCTCGTTTTTGTGTTTTTGTATGTGGAACCGTCTTTCTATACCCTTGGGCAAT  
GAGTTTCGACGTATTTGGGTGTATCCGTTTTTATCGAAGCTTTGATTTTCGTGCTTATCTTA  
GTTGTTGGTTTATGTTATGCATGGCGAAAAGGAGCCTTGGAAATGGTCTATGAGTTATTTT  
CCTTGGTTAACAATACTTGTGTTTTGCCGATATTTGCAGGTTTCAATTTTCTTTTTAC  
CTCATAAGGGAAACAAAGTCGTTAGGTGGTATACTATATCTATTTGTTTATTAGAATTCC  
TTCTAATGACTTATGCGTTCTGTTATCATTTCCAAGTGGAGGATCCCTTAATCCAATTA

AGGAGGATTATAAATGGATAGATGTCTTCGATTTCCACTGGAGATTGGGAATCGATGGA  
CTTTCATTAGGATCTATTTTATTGACAGGATTATCACTACTTTAGCTACTTTAGCAGCTT  
GGCCAATTACACGGAATTCGCGATTATTCTATTTCCCTGATGCTCGCAATGTATAGTGGTC  
AAATAGGATTATTTTCTTCGCGAGACCTTTTACTTTTTTTTTATCATGTGGGAGTTAGAATT  
AATCCTGTTTACTTACTTTTATCCATGTGGGGGGGAAGAGGCGTCTATATTCAGCTAC  
AAAGTTTATTTGTATACTGCAGGCGGTTCCATTTTTTCTTAATCGGAGTTCTGGGTAT  
GGGCTTATATGGTTCCAACGAACCAGGATTAGATTTGGAAAGATTAATTAATCAATCATA  
CCCTGCAACCTTGGAAATACTTTTATATTTTGGCTTCCTTATTGCTTATGCTGTCAAATTG  
CCGATTATACCCCTACATACGTGGTTACCAGATACCCATGGGGAAGCACATTATAGTACA  
TGTATGCTTTTAGCGGGAATATTATTAAGATGGGAGCATATGGATTGATTCGGATCAAC  
ATGGAATTGTTACCTCATGCTCATTATCTATTTTCGCCCTGGTTAGTAATAATAGGAGCGA  
TCCAAATAATCTATGCAGCTTCAACTTCTCTTGGTCAACGAAATTTCAAAAAAGAATA  
GCTTATTCCTCTGTATCTCACATGGGTTTCATAATTATAGGAATTGGTTCATAACCAACA  
TTGGACTCAATGGAGCTATTTTACAAATATTATCCCATGGATTTATTGGTGCTACACTTTT  
TTTCTTGGCAGGAACCGCTTCTGATAGAATGCGTCTTGTTTATCTCGAAGAAGTGGGGG  
GAATATCTATCCCAATGCCTAAAATTTTACCATGTTTAGTAGCTTTTCAATGGCTTCTCT  
TGCCTTACCAGGAATGAGTGGTTTTGTGCGAGAATTAGTAGTATTTTTTGGACTAATTAC  
TAGTCCAAAATTTCTGTTAATGCCAAAACACTAATTACTTTTGTAAATGGCAATTGGAAT  
GATATTAACCTCTATTTATTTATTATCTATGTTACGCCAGATGTTCTATGGATAACAAGCTAT  
TTAATGTTCCAAACGCAAATTTTGTGGATTCTGGACCACGAGAAGTCTTTATTTAATCT  
GTATCTTTTTACCAGTAATAGGAATTGGTATTTATCCAGATTTTGTCTCTCCCTATCCGT  
TGACAGGGTAGAGGCTCTCTTATCCAATTATTATCCTAAAATGATGTTTGAGCATGTACT  
TTTTTTGAGTGTCTATTTATTTTCGATTGGTATCTATGGATTGATCACAAGCCGAAACATG  
GTTAGAGCTCTAATATGTCTTGAAGTATACTGAATTAATTAATCTAAATCTCGTAACAT  
TTTCTGATCTATTTGATAGTCGCCAATTAAGGAGATATTTTCGCAATTTTGTATAGC  
CCTTGCAGGCTGCTGAAGCCGCTATTGGACTATCCATTCTTTCTTCCATCCATCGTAATAG  
GAAATCCACTCGTATCAATCAATCTAATTTATTGAATAATATGGAACATACATATCAATAT  
GCATGGGTAATCCCTCTTCTCCACTTCCAGTTATTATGTCAATGGGATTTGGCCTTATTC  
TTATCCGACAGCAACAAAAATCTTCGTCGCATATGGGCTTTTCTAGTGTTTTACTCT  
TAAGTATAGCTATGGTATTCTCAGTTCAACTGTCTATTCAACAAATAAATGGAAGTTCGA  
TCTATCAATATCTATGGTCTTGGACCGTCAATAATGATTTTTCTTTAGAATTTGGATACTT  
GATTGACCCACTTACTTCTATTATGTTAATACTAATTACTACTGTAGGAATCCTGGTTCTT  
ATTTATAGTGATGGTTATATGTCTCACGATGAAGGATATTTGAGATTTTTGTTTATATAA  
GTTTTTTCAATACTTCCATGTTGGGATTGGTACTAGCTCCAATTTGATACAAATTTATTT  
TTTTTGGGAAGTCTGTTGGGAATGTGTTCTTATTATTGATAGGCTTTTGGTTTACACGACC  
AATCGCAGCGAGTGTCTGCAAAAAGCTTTTGTAACTAATCGTGTAGGGGATTTTGGTC  
TATTATTAGGAATTTAGGTTTTTTTTGGATAACAGGTAGTTTAGAGTTTAGGGATTTGTT  
CAAAATAGCTAATAACAATGGAGTAACTCTTTACTTACTACTTTGTGTGCTTTTTTATTA  
TTCCTTGGTGCAGTTGCGAAATCCGCACAATTCCCTCTTACGTATGGTTACCCGATGCT  
ATGGAAGGACCCACTCCTATTTTCCAGCTCTTATACAAGCAGCAACTATGGTTGCTGCGGG  
AATTTTTCTTCTAGCTCGACTTCTTCCCTTTTTTTCATATCTTTACCTTTGATAATGAGTTTAA  
TTTCTTTAGTAGGTACAATAACACTATTCTTAGGAGCTACTTTAGCTCTTGCTCAGAGAG  
ATATTAAGAAGCTTAGCCTATTCTACAATGTCTCAATTGGGTTATATGATGTTAGCTCT  
AGGTATAGGTTCTTATCAAGCTGCTTTATTCCATTTGATCACTCATGCTTATTCAAAGCT

TTATTGTTCTTGGGATCCGGATCCGTTATTCATTCAATGGAACCTCTTGTTGGATATTCAC  
CAGATAAAAGTCAAATATGGTTCTTATGGGCGGTTAAGAAAATACATTCCAATCACA  
AGAACTACTTTTTTATGGGGTACACTTTCTCTTTGTGGTATTCCACCTCTTGCTTGCTC  
TGGTCCAAAGATGAAATCCTTAGTAATAGTTGGTTGTATTCCGCCCTTTTTTGAATAATA  
GCCTCCTTTACTGCAGGATTAAGTGCCTTTTATATGTTTCGGATATATTTACTTACATTG  
ATGGGTATTTGCGTGTTCAATTTCAAATACAGTAGCACTAAAGAGAGTTCCCTTGATT  
CAATATCCTTATGGGGAAAAAGGATACCCAAAGGAGTGAATAGG---GATTTTCGTTTTATC  
ACAACGAAGTTTTTTTCAGCTAAAAAC-----ACTTTTGCCTATCCGCATGAAACGGGA  
AATACTATGTTATTTCTCTTCTTATATTACTACTTTTCACTTTGTTCATTGGATTCATAGG  
AATCTCTTTTGAGTTAACCATATTATCAAAGTGGTTAACTCCCTCAATAAACTTTACTCA  
GGAAAGTTCTAATCTTTTGTAATTCATATGAATTTATTACTAATGCAATTTCTTCTGTA  
ACTCTAGCTATCTTTGGTTTATTCATAGCATATATCTTCTATGGATCCGCTTATTCTTTTT  
TCAGAAATTTGGATTAATAAACTCTTTTACGAATTTTAGATCAAGTAAAAAAAATAT  
ATACAGTTGGTCATATAATCGTGGTTATATAGATATTTTCTATACTAGGGTCTTTACCTC  
GGTATAAGAGGGTTAACCGAATAACGGAGTTTTTTGATAAGGGTGTATTTATGGAAT  
TACCAATGGAGTGGGTCTTCCTAGTTTTTTGTATAGGAGAAGAAATTAATAT--GTAGGG  
GGAGGTCGAATCTCGTCTTATTTATTCTTTTTTTTATGTTATGTATCTTTGTTTTTATTCTT  
TTTTCTTATGGATTTACCTGGACCAATACATGAGATCTTATGCTATTTGGGGGATTTGTT  
CTTCTACTAGGGGGTCTAGGAGTAGTATTACTTACCAACCCCATTTATTCTGCCTTTTCG  
CTGGGATTAGTTCTTGTTTGTATATCCTTATTCTATTTTTTATTAATTCCTACTTTGTAGC  
TGTCGCACAATCTTATTTATGTGGGAGCCATAAATGTCTTGATCATATTCGCTGTAAT  
GTTTCGTAAATGGCTCAGAATGGTCTAAAGATAAGAATTATTGGACTATTGGAGATGGGT  
TCACTTCACTCGTTTGTATAACTATTGTTTTTCTACTAATGACTACTATCCCAGATACGTC  
GTGGTATGGAATCTTTGGACTACAAGATCAAACCAAATAGTAGAACAGGGTCTCATAA  
ATAATGTTCAACAAATTGGAATTCATTTAGCAACCGATTTTTTATCTTCCGTTTGAACCTCA  
TTCCATAATCTTCTAGTTTTCTTTAATAGGTGCAATTACTATGGCTCGGCAAATGAGTCT  
ACCGTTACAAGAAAAGATCTCATGATAGTCAATATGGGCCCTCAACACCCATCAATGC  
ATGGTGTCTTCGACTGATCGTTACTCTCGATGGTGAGGATGTTATTGATTGTGAACCCA  
TATTAGGCTATTTACACAGAGGAATGGAAAAATCGCGGAAAACCGAACTATTATACAA  
TACTTACCTTATGTAACAAGGTGGGATTATTTAGCTACTATGTTTACAGAAGCAATAACA  
GTAAATGCACCAGAATCTTGGAGAATTTCAAATACCACAAAGAGCCAGCTATATTAG  
GGTAATTATGTTAGAATTAAGCCGGATAGCTTCTCACTTGCTATGGCTTGGACCTTTTAT  
GGCGGATCTCGGCGCACAGACTCCTTTTTTCTATATTTTATAGAGAGAGAGAATTAATATA  
TGATCTATTTGAAGCTGCTACAGGTATGCGAATGATGCACAATTACTTTCGCATCGGAG  
GAGTAGCCGCCGATCTACCTTATGGATGGATCGAGAAATGTTTAGATTTCTGTGATTATT  
TTTTACGCGGAGTTGTTGAATATCAACAACTTATTACACAGAATCCAATTTTTTTAGAGC  
GAGTTGAAGGAGTAGGTTTTATTAGCGGAGAAGAAGCAGTAAATTGGGGCTTATCGGG  
ACCGATGTTACGAGCTTCTGGAATACAATGGGATCTTCGTAAAGTAGATCCTTATGAGT  
CTTACAACCAATTTGATTGGAAAGTCCAATGGCAAAAAGAAGGGGATTTCGTTAGCTCG  
CTATTTAGTACGAGTTGGTGAAATGAGGGAATCCATCAAATAATTCAACAAGCTGTAG  
AAAAAATTCCTGGAGGACCTTATGAGAATTTAGAAGTCCGACGC---AAGAAAGAAAAG  
AATTCTGAATGGAATGATTTTGAGTATAAATTTCTTGGTAAAAAACCTTCGCCCAATTT  
GAATTGTCAAGACAAGAGCTTTATGTAAGAGTAGAAGCCCAAAGGTGAATTAGGGA  
TTTATCTAGTAGGAGATGATAGCCTTTCCCTGGAGATGGAAAATCCGTCCACCCGGG



TTTATTAATTTGCAAATTCCTCCTCAGCTAGTTAAAAAATGAAATTGGCTGATATCATG  
ACGATATTAGGTAGTATAGATATCATTATGGGGGAAGTTGATCGTATGTTCCCTATGGTAA  
CTGGGTTTCATGAGTTATGGTCAACAAACAATACGTGCTACAAGGTACATAGGTCAAAGT  
TTCATAACTACCTTATCCACACAAATCGTTTACCTATAACGATTCCTACCCTTATGAA  
AAATCAATTACACCAGAGCGTTTCCGAGGGCGAATCCACTTTGAATTTGATAAATGTAT  
TGCTTGTGAAGTATGTGTTTCGCGTATGTCCGATAGATCTACCCGTTGTGGATTGGAGATT  
TGAAAAGGATATTTAAAAGAAAACAATTGCTTAATTATAGTATTGATTTCCGAGTTTGTAT  
ATTTTGTGGCAATTGTGTTGAGTACTGTCCAACAAGCTGTTTATCAATGACTGAAGAAT  
ATGAACTTTCTACCTATGATCGTCATGAATTGAATTACAATCAAATTGCTTTAAGTCGGT  
TACCAATCTCATAATGGGAGATTACACAATTCAAACAATTAGGAATTCGAAAATAAAC  
AAAGAAAAATCTTCGAATTCGAAGAACGATTACTGATTACCAGCAGGGTTGGTTATCTAA  
TTGGCTAGTCAAACATGAGGTGGTTCATAGATCTTTGGGCTTTGATCACCGAGGAATAG  
AGACTTTACAAATAAAAGCAGGGGATTGGGATTCCATTGCTGTCATTTTATATGTATAG  
GTTACAATTATTTACGCTCCCAATGTGCTTATGATGTAGCACCCGGTGGATCTTTAGCTA  
GCGTGTATCATCTTACGAGAATACAATATGGTATAGATAATCCAGAAGAAGTCTGCATAA  
AAGTCTTTGCCAAAAGGATAATCCTAGAATTCCGCTGTCTTCTGGATTTGGAGAAGT  
GCCGATTTTCAAGAACGCGAATCTTATGATATGGTGGGAATCTCTTATGATAATCATCCG  
CGCCTTAAACGTATCCTAATGCCTGAAAGTTGGATAGGCTGGCCCTTACGTAAGGATTAT  
ATAACCCCAATTTTTATGAAATACAAGATGCTCAT-----  
-----ATGGTCTTAACT--GAATATTTAGAC---A  
AAAAAAA--GAAGGAAAAGATTCTATTGAGACAGTTATGAATTTGATTGAGTTTCCCT  
TACTTGACCAAACAAGTTCCAATTCTGTTATTTCAACTACACCAAATGATCTTTCGAATT  
GGTCAAGACTCTCTAGTTTATGGCCCTTCTATACGGTACCAGTTGTTGTTTCATTGAAT  
TTGCTTCATTAATAGGCTCACGATTCGACTTTGATCGTTATGGATTGGTACCAAGATCAA  
GTCCTAGGCAAGCAGACCTAATTTAACAGCCGGTACGGTAACAATGAAAATGGCTCC  
CTCTTTAGTGAGATTATACGAGCAAATGCCTGAACCAAATACGTCATTGCTATGGGAG  
CCTGTACTATTACAGGGGGAATGTTACGTACGGATTCCTATAGTACTGTTCCGGGGAGTT  
GATAAGTTAATTCCTGTGGATGTCTACTTGCCGGGCTGCCACCTAAACCGGAGGCAGT  
TATAGATGCCCTAACAAAACCTCGTAAGAAGATATCGCGAGAAATAGTTGAGGATCGAA  
CTCTATCTCAA---AAAATAGATGTTTTACTACCAGTCACAAGCTTTATGTTAGGCGCAG  
TACTCATACAGGAACCTTATGAGCAAGAATTGCTCTATCAATCACCATCTACATTAGATAT  
ATCTACT-----TTTTTCAAATCCAAAAGTTCAGTACCTTCCTACAAATTAGTGAATATGGA  
AAATAGAAATACTTTTTCTTGGGTAAAGGAACAGATAACTCGATCGATTTCTGTATCGAT  
CATGATATACGTAATAACTCGGACATCTATTTCAAATGCATATCCCATTTTTGCGCAGCA  
GGGTTATGAAAACCCACGAGAAGCAACTGGACGAATTGTATGTGCCAATTGCCATTTA  
GCTAGCAAGCCCGTCGATATTGAAGTTCCCAAGCTGTGCTTCCCGATACTGTATTTGA  
AGCAGTTCTTCGAATTCCTTATGATATGCAATTGAAACAAGTTCTTGCTAATGGAAAAA  
AGGGAGGGTTGAATGTAGGTGCTGTTCTTATTTTGGCCGAGGGATTTCGAATTAGCGCCG  
CCCGATCGTATTTCCCCTGAGTTAAAAGAAAAGATAGGAAATCTTGCTTTTCAGAGTTA  
TCGTCCCGATAAAAAAACATTCTTGTGATAGGCCCTGTTCCCGGTAAGAAATATAGTG  
AAATTGCTTTCCCATCTTTCCCCTGATCTGCTACGAAGAAAGATGCTCATTTCTTAA  
AATATCCCATATATGTAGGGGGAAACCGAGGAAGAGGACAGATCTATCCTGATGGTAGC  
AAGAGTAAACAATACAGTCTATAATGCTACGTCAACAGGTATAGTAAGAAAAATACTACG  
TAAAGAAAAAGGGGGGTATGAAATATCCATAGTTGATGCATCAGATGGACGCCAAGTG

ATTGATATTATACCTCCCGGACCAGAACTTCTTGTTTCAGAGGGGGAATCCATCAAGCT  
TGATCAACCATTAACAAGCAATCCTAATGTGGGAGGTTTTGGTCAGGGGGACGCAGAA  
ATCGTGCTTCAGGATCCATTACGTGTTCAAGGCCTTTTGAACGTCCTCGAATCCGTTATT  
TTGGCACAAGTTTTTTGGTTCTCATCAACGAAACAGTTTGAAAAGGTTCAATTGTACG  
AAATGAATTCATGAGTAAAGTATATGATTGGTTTGAGGAACGTCTTGAGATTTCAGGCA  
ATTGCAGATGATATAACTAGTAAATATGTTCCCTCCCCATGTCAACATATTTTATTGTTTAG  
GGGAATTACACTTACTTGTCTTAGTACAAGTCGCTACCGGTTTTGCTATGACTTTTT  
ACTACCGACCAACCGTTACAGAGGCTTTTTCTCGGTTCAATACATAATGACCGAGGCC  
AACTTTGGTTGGTTAATCCGATCCGTTTCATCGATGGTCAGCAAGTATGATGGTTTTAATG  
ATGATCCTGCATGATTTTCGTGTGTATCTCACAGGGGATTTAAAAACCCCGTGAATTA  
ACTTGGGTACAGGTGTGGTTTTGGCTGTTTTGACTGCATCATTGGGTGTAAGTGGTTA  
TTCTTTGCCTTGGGATCAAATTGGCTATTGGGCAGTCAAATTTGTGACAGGTGTACCTG  
ACGCCATTCCGGTAATAGGATCGCCTTAGTGGAGTTATTACGCGGAAGTGCTAGTGTG  
GGCCAATCCACTTTGACTCGTTTTTATAGTTTACATACCTTTGTACTGCCTCTGCTTACT  
GCCGTATTTATGTTAATGCACTTCCAATGATACGTAAGCAAGGTATTTCCGGTCTTTA  
ATGGGAGTAACAAAGAAACCAGACTTAAATGATCCTGTATTAAGAGCTAAATTAGCTAA  
AGGGATGGGACATAATTATTACGGGGAACCCGCATGGCCCAACGATCTTTTATATATTTT  
TCCAGTAGTAATTCTAGGTAATGTCATGTAATGTAGGTTTAGCGGTTCTCGAGCCATC  
AATGATTGGTGAACCGGCAGATCCGTTTGCAACTCCTCTGGAAATATTACCCGAGTGGT  
ACTTCTTTCCCGTGTTCAAATACTCCGTACAGTACCCAATAAGTTATTGGGCGTCTCT  
TAATGGTTTTCTGTGCCAACAGGCTTATTGACAGTACCTTTTCTAGAGAATGTCAATAAT  
TTCAAATCCATTTCCGCCCCAGTAGCTACGACCGTTTTTTAATCGGTACTGTAGTAG  
CTCTTTGGTTAGGTATTGGAGCAACATTACCCATTGATAAATCATTAACTTTAGGCTTTT  
TTATGATTGAAGTTTTTCTATTTGGAATCGTCTTAGGCCTAATTCCTATTACTTTAGCGGG  
ATTATTCGTGACTGCGTATTTGCAATACAGGCGTGGGGATCAGTTGGATCTTATGCTTAC  
TTAACTAGTTATTTGGTTTTCTACTGGCTGCTTAACTATAACCCAGCTCTATTTATT  
GGCTTGAACAAGATACGCCTTATTATGGATATAGTAAGTCTCGCTTGGGCTGCTTTAATG  
GTAGTCTTTACATTTTCTTTCACTAGTAGTATGGGGAAGGAGTGGACTCATGATTATT  
CGTTCGCCGGAACCAGAAGTAAAAATTGTTGTGGATAGGGATCCTGTAAAAACATCTT  
TTGAGGAATGGGCCAGACCCGGCCATTTCTCAAGAACACTAGCTAAGGGCCCTGATAC  
TACCACTTGGATCTGGAACCTACATGCTGATGCTCACGATTTTCGATAGTCATACTGGTGA  
TTTGGAGGAGATTTCTCGAAAAGTCTTTAGTGCTCATTTCGGGCAACTTTCCATTATCTT  
TCTTTGGTTGAGTGGCATGTACTTTCATGGCGCCCGTTTTTCCAATTATGAAGCATGGCT  
AAGTGATCCTACTCACATTGGACCCAGTGCTCAGGTAGTTTGGCCTATAGTAGGGCAAG  
AAATATTGAATGGTGATGTAGGCGGGGTTTTCCGAGGAATCCAAATAACCTCTGGTTTT  
TTTCAGCTTTGGCGAGCATCTGGAATAACTAGTGAATTACAACCTCTATTGTACTGCAATT  
GGTGCATTGATTTTTGCAGCGTTAATGCTTTTTGCTGGTTGGTTCCATTATCACAAAGCC  
GCTCCCAAATTGGCCTGGTTCCAAGATGTAGAATCCATGTTGAATCACCACTTAGCGGG  
ATTATTAGGACTTGGGTCTCTTTCTTGGGCGGGGCACCAAATTCATGTATCTTTACCAAT  
TAACCAATTTCTTGACGCTGGGGTGGATCCTAAAGAGATACCACTTCCCTCATGAATTTAT  
CTTGAATCGGGACCTTTTGGCTCAACTTTATCCTAGTTTTTGCCGAAGGAGCAACCCCTT  
TTTTCACTTTAAATTGGTCCAATAACGCAGAATTTCTGACTTTTCGCGGAGGACTAGAT  
CCAGTAACCGGTGGTCTCTGGCTGACCGATATTGCGCACCATCATTTAGCTATTGCTATT  
CTTTTCCCTAATCGCAGGTCATATGTATAGGACCAATTGGGGTATTGGCCATGGACTTAAA

GATATTTTGGAGGCTCACAAGGGCCATTTACAGGACAAGGCCATAAGGGTCTTTATGA  
AATCTTAACAACGTCATGGCATGCTCAATTATCTCTTAACCTAGCTATGCTAGGCTCTAC  
AACCATTGTTGTAGCTCATCATATGTATTCTATGCCTCCCTATCCATACCTAGCTACTGAC  
TATGGTACACAACCTTTCCTTGTTCACACACCACATGTGGATTGGCGGATTTCTAATAGTC  
GGTGCTGCTGCACATGCAGCAATTTTTATGGTAAGAGACTATGATCCAACACTCGATA  
CAACGATCTATTAGATCGCGTCTTAGACACCGCGATGCAATCATATCCCACCTAACTG  
GGTATGTATATTTCTAGGTTTTTCACAGTTTTGGCTTGTACATTCATAATGATACCATGAGT  
GCTTTAGGCCGTCACAAGATATGTTTTCGGATACTGCCATAACAATTACAACCTATCTTT  
GCTCAATGGGTACAAAATATCCATGCTACTGCGCCTGGCGTAACAGCTCCTGGTGCAAC  
ACAAGTACTAGCTTAACGTGGGGAGGCGGCGAGTTAGTAGCAGTAGGTGGCAAAGT  
GGCTTTGTTACCTATTCCATTAGGAACCGCAGATTTTTTAGTCCATCACATTCATGCATTT  
ACCATACATGTGACTGTATTAATACTTTTTGAAAGGTGTTTTATTTGCTCGGAGTTCCCGT  
TTGATACCCGATAAAGCAAATCTAGGTTTTCGCTTTCCTTGCGATGGGCCTGGCCGAGG  
GGGAACATGTCAAGTATCCGCCTGGGATCATGTTTTCTTAGGTTTATTCTGGATGTACAA  
TGCAATTCGGTAGTCATTTCCATTTTCAGTTGGAAAATGCAGTCGGATGTTTGGGGTA  
CTATAAGTGATCAAGGGGTGGTAACTCATATTACAGGGGGAACTTTGCACAGAGTCC  
ATTACGATTAATGGGTGGCTTCGAGATTTCTTGTGGGCACAGGCATCGCAAGTCATTCA  
GTCTTATGGTTCCTCATTATCTGCATATGGTCTTTTTTTCTTAGGTGCTCATTTTGTCTGG  
GCCTTCAGTTTAATGTTTTTATTTCAGCGGCCGTGGTTATTGGCAAGAACTCATTGAATCT  
ATCGTTTGGGCTCATAACAAATTAAGTTGCTCCTGCTACTCAGCCTAGAGCCTTGAG  
CATTATAAAGGACGCGCTGTAGGAGTAACCCATTACCTTCTGGGTGGAATTGCCACGA  
CATGGGCATTCTTCTTAGCGAGAATTATTGCAGTAGGAATGGAATTAAGATTTCCCAGG  
TTTAGCCAAGGCTTAGCTCAGGACCCCACTACTCGTTCGATTTGGTTTGGTATTGCTACC  
GCACATGATTTCGAAAGTCATGATGATTAATACTGAAGAACGTCTTTATCAGAACATTTTT  
GCTTCTCACTTTGGGCAATTAGCAATAATCTTTCTATGGACGTCCGGAAATCTGTTTCAT  
GTAGCTTGGCAAGGAAATTTTGAATCATGGATACAGGATCCTTTACACGTAAGACCTAT  
TGCTCATGCGATTTGGGATCCTCATTTTGGTCAACCCGCTGTGGAAGCCTTTACTCGAG  
GAGGTGCTGCTGGTCCAGTGAATATTGCTTATTCTGGAGTTTATCAGTGGTGGTATACAA  
TAGGATTACGCACCAATGAGGATCTTTATACTGGAGCTCTTTTTCTATTATTTCTTTCTAC  
GCTGTCTTAATAGCGGGTGGTTACATCTACAACCCAAATGGAAACCAAGCCTTTTCGT  
GGTTCAAAAACGCGGAATCTCGTCTCAATCATCATTTGTCAGGACTTTTCGGGGTAAGT  
TCTTTGGCTTGGACAGGACATTTAGTTCATGTTGCTATTCCCAGCATCCAGGGGGGAGTA  
CGTTCGATGGAATAATTTCTTAGATGTATTACCCTATCCCCAGGGGTGGGACCCCTTTT  
GACGGGTCAATGGAATCTTTATGCCAAAACCCTGATTTCGAGTAATCATTTATTTGGTAC  
CGCTCAAGGAGCCGGAACCTGCCATTCTAACTCTTCTTGGGGGATTCCATCCACAAACA  
CAAAGTTTGTGGCTGACCGATATGGCTCACCATCATTTAGCTATTGCATTTATTTTCTCA  
TTGCCGGTACATGTATCGAACTAACTTCGGAATTGGGCACAGTATTAAGATCTTTTA  
GAAGCGCATACTCCTCCGGGGGGTTCGATTAGGGCGTGGGCATAAGGGCCTTTATGACA  
CAATCAACAATTCGATTCATTTTCAGTTAGGTCTTGTCTAGCTTCTTTAGGGGTATTA  
CTTCCTTAGTAGCTCAACATATGTACTCTTTACCTCCTTATGCATTCATAGCACAAAGACTT  
TACTACTCAAGCTGCTTTATATACTCATCACCATATATTGCAGGGTTCATCATGACAGG  
GGCTTTTGTCTCATGGAGCTATTTTTTTCATTAGGGATTACAATCCGGAACAGAATGAGG  
ATAATGTATTGGCAAGAATGTTAGACCATAAAGAAGCTATCATATCTCATTTAAGTTGGG  
CTAGCCTCTTTCTAGGATTCCATACCTTGGGCCTTTATGTTTCATAACGACGTCATGCTTG

CTTTTGGTACTCCAGAAAAGCAAATCTTGATCGAACCTATATTTGCCCAATGGATAACAAT  
CTGCTCATGGCAAGACGACATATGGGTTTCGATATACTCTTATCTTCAACGAATGGCCCC  
GCTTTCAATGCGGGTTCGAAGCCTATGGTTGCCCGGATGGTTGAATGCTGTTAATGAG----  
--AATAGTAATTCGCTTTTCTTAAACAATAGGACCTGGGGATTTCTTGGTTCATCATGCTAT  
TGCTCTAGGTTTGCATACAACACTACATTGATTTTAGTAAAGGGCGCTTTAGATGCACGCG  
GTTCCAAATTAATGCCGGATAAAAAGGATTTTGGATATAGTTTTCCTTGTGACGGCCCA  
GGGCGCGGCGGTACTTGTGATATTTCTGCTTGGGACGCATTTTATTTGGCAGTTTTCTGG  
ATGTTAAATACCATTGGGTGGGTTACTTTTTATTGGCATTGGAAACATATCACATTATGG  
CAGGGCAACGTTTCACAATTAATGAATCCTCCACTTATTTGATGGGATGGTTAAGAGA  
TTACCTATGGTTAAACTCTTCACAACCTTATCAATGGATATAATCCTTTTGGGATGAATAGT  
TTATCGGTATGGGCGTGGATGTTCTTATTTGGACATCTTGTTTGGGCTACTGGATTTATGT  
TCTTAATTTCTGGCGGGGTATTGGCAGGAATTAATTGAGACTTTAGCATGGGCTCAT  
GAACGCACACCTTTAGCTAATTTAATTCGCTGGAGAGATAAGCCCGTGGCTCTTTCCAT  
TGTGCAAGCAAGATTGGTTGGATTAGCTCACTTTTCCGTGGGTTATATATTTCACTTATGC  
AGCTTTCTTGATTGCCTCAACATCAGGCAAGTTTGGTATGTCACATTCCGTAAAAATTA  
CGATACATGTATAGGATGCACTCAATGTGTACGAGCTTGTCCAACAGATGTATTAGAAAT  
GATACCCTGGGATGGATGTAAAGCCAAGCAAATTGCTTCCGCGCCGAGAACCGAAGAT  
TGTGTGGGTTGTAAGAGATGTGAATCTGCCTGCCGACAGATTTTTTAAGTGTCCGCGT  
TTATTTAGGGCCTGAAACAACACGTAGCATGGCTCTATCTTATATGACGGATTTAAACTT  
ACCTTCTATTTTCGTGCCTTTAGTAGGCTTAGTATTTCCGGCAATTGCAATGACTTCTTTA  
TTTTCTTTATGTGCAAAAAATAAGATTGTTCATGCGGGATATAAAAAACATATCTCTCTGTA  
GCACCCGTGCTAAGTACTCTATGGTTTGGTGCTTTAGCAGGTTTATTGATAGAAATTAAT  
CGTTTATTCCAGATGCTTTGTCATTCCTTTTTTT-----ATGACTGCAATTTTAGAGAGA  
CGCGAAAGTACAAGCCTGTGGGGTTCGCTTCTGCAACTGGATAACTAGCACTGAAAATC  
GTCTTTACATCGGATGGTTTCGGTGTTTTGTGATCCCTACCTTATTGACCGCAACTTCTG  
TATTTATATCGCCTTCATCGCTGCCCTCCAGTAGATATTGATGGTATTCGTGAGCCTGT  
TTCTGGTTCTTTACTTTATGGAAACAATATTATCTCTGGTGCTATTATCCCTACTTCTGCG  
GCGATCGGATTGCACTTTTACCCAATTTGGGAAGCTGCATCTGTTGATGAGTGGTTATA  
CAATGGTGGTCCTTATGAGCTAATTGTTCTACACTTCTTACTTGGTGTAGCTTGTATATG  
GGTTCGTGAGTGGGAACCTTAGTTTCCGTCTGGGTATGCGTCCTTGGATTGCTGTTGCATA  
TTCAGCTCCTGTTGCAGCTGCCACTGCTGTTTTCTTGATTTACCCTATTGGTCAAGGAA  
GCTTTTCTGATGGTATGCCTTTAGGAATCTCTGGTACTTTCAACTTTATGATTGTATTCCA  
GGCAGAGCATAACATCCTTATGCATCCATCCACATGTTAGGTGTAGCTGGTGTATTCCG  
CGTTCCCTATTAGTGTATGCATGGTTCCCTGGTAACCTCTAGTTTGATCAGGGAAA  
CTACTGAAAATGAATCTGCTAATGAGGGTTACAAATTTGGTCAAGAGGAAGAAACTTAT  
AATATTGTGGCTGCTCATGGTTATTTGGCCGATTAATCTTCCAATATGCTAGTTTCAACA  
ACTCTCGTCTTTTACACTTCTTCTTGGCTGCTTGGCCTGTAGTAGGAATCTGGTTCCTG  
CTTTAGGTATTAGTACTATGGCTTTCAACCTAAATGGTTTCAATTTCAACCAATCTGTAG  
TTGATAGTCAAGGTCGCGTTATTAATACTTGGGCTGATATCATCAACCGTGCTAACCTTG  
GTATGGAAGTAATGCACGAACGTAATGCTCACAACCTCCCTCTAGACTTAGCTGCTGTT  
GAAGTTCATCTATTAATGGAATGGGTTTGCCTTGGTATCGTGTTCATACTGTCGATTG  
AATGATCCGGGTCGATTGCTTGCGGTGCATATAATGCACACAGCTCTAGTTTCTGGTTG  
GGCTGGCTCAATGGCTTTATACGAATTAGCAGTTTTTGTATCCCTCTGATCCTGTTCTGGA  
TCCAATGTGGAGACAAGGTATGTTTCGTAATTCCTTCATGACTCGTTTAGGAATAACGG

ATTCGTGGGGTGGTTGGAGTATTTCA---GGAGGAACTGTAACAAATCCGGGTATTTGGA  
GTTATGAAGGTGTGGCAGGTACGCATATTGTGTTTTCTGGCTTGTGTTTCTTGGCAGCG  
ATCTGGCATTGGGTATATTGGGACCTAGAAAATATTCTCTGATGAGCGGACGGGAAAACC  
CTCTTTGGATTTGCCCAAGATCTTTGGAATTCATTTATTTCTTGCAGGGGTGGCTTGCTT  
TGGCTTTGGGGCATTTCATGTAACGGGTTTGTATGGTCCTGGGATATGGGTATCCGATCC  
TTATGGACTAACTGGAAAAGTACAAGCTGTAAATCCAGCGTGGGGTGCAGAAGGTTTT  
GATCCTTTTGTTCGGGGGGAATAGCTTCTCATCATATTGCTGCGGGTACATTGGGTATA  
TTAGCGGGCTTATTCCATCTTAGTGTCCGTCCGCCTCAACGTCTATATAAAGGATTACGT  
ATGGGCAATATTGAAACTGTACTTTCCAGTAGTATCGCTGCTGTTTTTTTTGCAGCTTTC  
GTAGTTGCTGGAAGTATGTGGTATGGGTCAGCAACGACCCCAATCGAATTATTTGGGCC  
TACTCGTTATCAGTGGGATCAGGGATACTTTCAGCAAGAAATATATCGAAGAGTTAGCA  
ATGGTTTAGCCGAAAATCTTAGTTTATCAGAAGCTTGGTCTAAAATTCCCGAAAAATTA  
GCCTTTTATGATTATATTGGTAATAATCCGGGAAAAGGGGGATTATTAGAGCAGGCTCA  
ATGGACAATGGGGATGGAATAGCTGTTGGATGGTTAGGACATCCCGTCTTTAGAGATAA  
AGAAGGACGTGAGCTTTTTGTACGCCGTATGCCTACTTTTTTTGAAACATTTCCGGTTG  
TTTTGGTAGATGAGGAGGGAATTGTTAGAGCAGACGTTCCTTTTAGAAGAGCAGAATC  
CAAATATAGTGTGAACAAGTAGGCGTAACGGTGGAGTTCATGGTGGCGAACTTAATG  
GAGTAAGTTATTCTGATCCTGCTACTGTAAAAAATATGCGAGGCGTCTCAATTAGGG  
GAAATTTTTGAATTAGACCGGGCTACTTTGAAATCTGATGGTGTTTTTTCGCAGCAGTCC  
AAGGGGTTGGTTCACTTTTGGTCATGCTACCTTTGCTTTGCTCTTCTTTTTTCGGACACAT  
TTGGCATGGCGCTAGAACATTGTTCCGAGATGTTTTTGCTGGTATTGATCCAGATTTGGA  
TGCTCAAGTGAATTTGGAACATTCCAAAAGTGGGAGATCCAACACTACAAGGAAACA  
GGCAGCCATGAAAATCTTATATTCCCTGAGGAGGTTCTACCACGTGGAAACGCTCTTTA  
ATGGAACCTTTCGTTTTAGCTGGTCGTGACCAAGAAACCACCGGCTTTGCTTGGTGGGC  
TGGGAATGCCAGACTTATCAATTTGTCCGGTAAACTACTTGGAGCTCATGTAGCCCATG  
CCGGATTAATCGTATTCTGGGCCGGAGCAATGAACCTATTTGAAGTGGCCATTTCTGTA  
CCAGAAAAGCCCATGTATGGACAAGGGTTGATTTTACTTCCACACTTAGCTACTCTAGG  
TTGGGGAGTAGGGCCAGGGGGAGAAGTTCTAGATACTTCCGTACTTTGTATCTGGCG  
TACTTCACCTAATTTCCCTCCGAGTCTTAGGCTTCGGTGGCATTATCACGCGCTTCTGG  
GACCCGAGACTCTTGAGGAATCTTTTCCATTCTTTGGTTATGTCTGGAAAGATAGAAAT  
AAAATGACTACAATTTTGGGTACCCACTTAATTTTGTAGGCCTAGGTGCTTCTCTTCTA  
GTACTCAAGGCTCTTTATTTTGCCGGTGTATATGATACCTGGGCCCTGGGGGAGGAGA  
TGTAAGAAAAATTACCAATTTGACCCTTAGCCCTAGTGTATATTTGGTTATTTCCATAA  
ACCTCCTTTTGGTGGAGAAGGGTGGATTGTTAGTGTAGATGATTTAGAAGATATAATTG  
GTGGGCATGTATGGTTGGGTTTTATTTGTGTAAGTGGCGGAATTTGGCATAATTTAACCA  
AACCTTCGCATGGGCTCGCCGTGCATTTGTATGGTGTGGAGAAGCTTACTTGTCTTAT  
AGTTTAGCCGCTTATCTGTCTTTGGTTTTATCGCTTGTGTTTTGTATGGTTCAATAATA  
CAGCTTATCCGAGTGAGTTTTATGGACCCACCGGGCCAGAAGCTTCCCAAGCTCAAGC  
ATTTACTTTTCTAGTTAGAGACCAGCGTCTTGGAGCTAATGTGGGATCCGCCCAAGGAC  
CCACAGGTTTAGGTAATAATCTAATGCGTTCACCAACTGGGGAGGTTATCTTTGGAGGG  
GAAACTATGCGTTTTTGGGACCTTCGTGCTCCATGGTTAGAACCTCTAAGGGGCCCAA  
CGTTTTGGACTTGAGTAGGTTGAAAAAAGACATACAACCTTGGCAAGAACGACGCTC  
AGCAGAATATATGACCCACGCTCCTTTAGGCTCTTTAAATTCAGTGGGTGGCGTAGCTA  
CCGAGATCAATGCAGTTAATTATGTTTCTCCTAGAAAGTTGGTTAGCGTCTTCCCATTTG

TTCTAGGATTCTTCTTTTTTGTGGGCCATTTTTGGCATGCAGGAAGAGCCCCGGGCTGCT  
GCAGCAGGTTTTGAAAAGGGAATCGATCGTGATTTGGAACCTGTTCTTTACATGAACC  
CTCTAACATGACTATAGCCCTTGGTAGAATTCCTAAAGAAGAAAATGATCTATTTGATA  
CTATGGATGACTGGTTACGAAGGGACCGTTTTCGTTTTTGTAGGATGGTCTGGCCTATTG  
CTCTTTCCTTGTGCTTATTTTCGCTTTAGGGGGTGTGTTTACAGGGACAACCTTTTGTAAC  
TCTTGGTATACCCATGGAGTGGCTAGTTCCATTTGGAAGGTTGTAATTTCTTAACCGCA  
GCAGTTTCTACCCCTGCCAATAGTTTAGCACACTCTTTGTTGCTACTATGGGGGCCCCGA  
AGCACAAGGAGATTTTACTCGTTGGTGTCAATTAGGCGGTCTATGGACTTTTGTAGCTC  
TCCACGGGGCTTTTGCACATAAGGTTTCATGTTACGCCAATTTGAACTTGCTCGGTCT  
GTTCAATTGCGGCCTTATAATGCAATCTCATTCTCTGGTCCAATTGCTGTTTTTGTCTG  
TATTCCTTATTTATCCACTGGGGCAATCTGGTTGGTCTTTTGCGCCGAGTTTTGGCGTAG  
CAGCGATATTTGATTCATCCTTTTCTTTCAAGGATTTCATAATTGGACGTTGAACCCAT  
TTCATATGATGGGAGTTGCCGGAGTATTAGGTGCCGCTCTGCTATGCGCTATTCATGGAG  
CGACCGTAGAAAACACTCTATTTGAGGACGGTGATGGTGCAAATACCTCCCGTGCTTTT  
AACCCAACTCAAGCTGAAGAACTTATTCAATGGTCACTGCTAACCGCTTTTGGTCCC  
AAATCTTTGGTGTGCTTTTTTCCAATAAACGTTGGTTACATTTCTTTATGCTATTTGTACC  
CGTACCGGTTTATGGATGAGTGCTATTGGCGTAGTTGGCTTGGCTCTGAACTTACGTG  
CCTATGACTTTGTTTTCCAGGAAATCCGTGCAGCGGAAGATCCTGAATTTGAGACTTTC  
TACACCAAAAATATTCTTTTAAACGAGGGTATTCGTGCGTGGATGGCAGCTCAGGATCA  
GCCTCATGAAAATCTTATATTCCCTGAGGAGGTTCTACCACGTGGAAACGCTCTTATGT  
CTGGAAGCACGGGAGAACGTTCTTTTGTGCTGATATTATTACCAGTATTCGATACTGGGT  
TTCATAGCATTACTATAACCTTCCCTATTCATTGCGGGATGGTTATTTGTCAGTACGGGTTT  
AGCTTATGACGTGTTTGGAAAGTCTTAGGCCAAACGAGTATTTACGGAAAGCCGACAA  
GGAATTCGTTAATAACCGACCGTTTTGATTCTTTAGAACAACTCGATGAATTTAGTAGA  
TCCTTTATGACCATAGATCGAACCTATCCTATTTTACAGTGCGATGGCTGGCTATTCAC  
GGACTAGCTGTACCTACTGTTTCTTGGGATCAATATCAGCAATGCAGTTCATCCAA  
CGAATGGCTACACAAACCGTTGAAGATAGTTCTAAACCTAGG---CCAAAACAAACTGG  
TGCAGGTAGTTTACTGAAACCCCTGAATTCGGAATATGGGAAAGTCCGCCCGGGTGG  
GGGACTACTCCTTTTATGGGGGTCGCAATGGCTTTATTCGCTATATTCCTATCTATCATT  
TAGAAATTTATAATTCTTCCGTTTTACTGGACGGAATTTAACCAATATGCTTACTCTCAA  
ACTTTTTGTTTATACAGTAGTGATATCTTTGTTTCACTCTTTATCTTTGGATTCTTATCTA  
ATGACCCAGGACGGAATCCTGGACGCGAGGAGATGTCCGATACTACTGGAAGAATTCC  
TCTTTGTCTGATAGGTAAGTACTGTAGCCGGTATTGCTGTGATTGGTTTLAGTAGGTGTTTTCT  
TTATGGTTCATATCTGGATTGGGTTTCATCTCTAATGCCTAATATACTTAGTTTAACTGTA  
TTTGTTTTAAATCTGTTATTTATCCGACTAGTTTTTTCTTCGCCAAATGCCCCGAAGCTTA  
TGCCATTTTCAATCCAATCGTGGATTTTATGCCTGTCATACCTCTATCTTTTTTCTATTAG  
CCTTTGTTTGGCAAGCTGCTGTAAGTTTTTCAATGACACAATCAAACCCGAATGAACA  
AAATGTTGAATGAATCGTACCAGTCTATACTGGGGTTTATTAATCAATTTTGTACCTGC  
TGTTTTATTTGCCAATTACTTCTTCAATATGGAAGTCAATATTCTCGCATTTATTGCTACT  
GCACTGTTCAATCTAGTTCCTACTTCTTTTTTACTTATTATTTAIGTAAAAACAGTCAGCC  
AAAATAATATGGAAACAGCAACTTTAGTCGCCATCTCCATATCTGGTTTACTTGTAAGCT  
TACTGGGTATGCCTTATATACCGCGTTTTGGGCAACCCTCTCAACAATTAAGAGATCCAT  
TCGAAGAACACGGAGACATGGAAGCATTGGTTTATACGTTCCTTTTAGTTTCGACTTTA  
GGGATAATTTTTTTCGCTATCTTCTCCGAGAACCACCTAAGGTTCCAATAAAAGAAT

AAAAATGACTATTGCTTTCCAATTAGCTGTTTTTGCATTAATTGCGACTTCCTCAGTCTT  
AGTAATTAGTGTACCCCTTGTATTTGCTTCTCCTGATGGTTGGTCAAATAATAAAAATGT  
TGTATTTTCTGGTACATCATTATGGATTGGACTAGTCTTTCTCGTAGCTATTCTGAATTCT  
CTCATTTCT-----ATGTCACCACAAACAGAACTAAAGCAGGTGTTGGATTT  
AAAGCTGGTGTAAAGATTATAAATTGACTTACTACACCCCAGAGTATGAACTAAGGA  
TACTGATATCTTGGCAGCATTCCGAGTAAGTCCTCAGCCTGGGGTTCCGCCCGAAGAA  
GCAGGGGCTGCAGTAGCTGCCGAATCTTCTACTGGTACATGGACAACGTTTTGGACTG  
ATGGACTTACCAGTCTTGATCGTTACAAAGGACGATGCTATCACATCGAGCCTGTTGCT  
GGGGAAGACAGCCAATGGATCTGTTATGTAGCTTATCCATTAGACCTATTTGAAGAGGG  
TTCCGTTACTAACATGTTTACTTCCATTGTAGGTAACGTATTTGGTTTTCAAAGCCCTACG  
TGCTCTACGTTTGGAGGATCTACGAATTCCCCCTACTTATTCAAAAACCTTTCCAAGGCC  
CGCCTCATGGTATCCAAGTTGAAAGAGATAAGTTGAACAAGTATGGTCGTCCTTTATTG  
GGATGTACTATTAACCAAAAATTGGGATTATCCGCAAAAATTATGGTAGAGCGTGTTAT  
GAGTGTCTACGTGGTGGACTTGATTTTACCAAAGATGATGAAAACGTAACTCACAAC  
CATTTATGCGCTGGAGAGACCGTTTTGTCTTTTGTGCCGAAGCTATTTATAAATCACAGG  
CCGAAACCGGTGAAATCAAGGGGCATTACTTGAATGCGACTGCGGGTACATGTGAAGA  
AATGATTAAGAGAGCTGTATTTGCAAGAGAATTAGGGGTTCTTATTGTAATGCATGACT  
ACTTAACTGGGGGATTACCGCAATACTACTTTGGCTCATTATTGCCGCGACAATGGC  
CTACTTCTTACATTACCGTGCAATGCATGCAGTTATTGATAGACAGAAAAATCATGGT  
ATGCATTTCCGTGTATTAGCTAAAGCATTGCGTATGTCTGGGGGAGATCATATCCACTCC  
GGTACAGTAGTAGGTAAGTTAGAAGGGGAACGCGAAATGACTTTAGGTTTTGTTGATTT  
ATTGCGCGATGATTTTATTGAAAAGATCGTGCTCGCGGTATCTTTTTCACTCAGGACT  
GGGTATCCATGCCAGGTGTTATACCGGTAGCTTCAGGTGGTATTCATGTTTGGCATATGC  
CAGCTCTGACCGAAATCTTTGGGGACGATTCTGTATTACAATTTGGTGGAGGAACTTTA  
GGACATCCTTGGGGAAATGCACCTGGTGCAGCAGCTAATCGAGTGGCTTTAGAAGCCT  
GTGTACAAGCTCGTAACGAAGGGCGCGATCTTGCTCGCGAAGGTAATGAAATTATCCG  
AGCAGCTTGCAAATGGAGTCCTGAACTAGCCGAGCTTGTGAAGTATGGAAGGCGATC  
AAATTTCGAGTTCGAGCCGGTAGATACTATTGATAAGACGGCGAAACATTTATACAAAAC  
ACCTATCCCGAGCACACGCAAGGGAACCTTAGACAGGCAAGTGAAATCCAATCCACG  
AAATAATTTGATCCATGGACGGCACCGTTGTGGTAAAGGTCGTAATTCCAGAGGAATCA  
TTACCGCAAGCATAGAGGGGGAGGTCATAAAGCGCTATACCGTAAAATAGATTTTCGA  
CGAATCAAAAAGACATATCTGGTAGAATCGTAACCATAGAATCCGACCCTAATCGAAA  
TGCATACATTTGTCTCATACACTATGGGGATGGTGAGAAGAGATATATTTTACATCCCAG  
AGGGGCTATAATTGGAGATACTATTGTTTCTGGTACAAAAGTTCCTATATCAATGGGAAA  
TGCCCTACCTTTGACCGATATGCCCTTAGGCACGGTCATGCATAACAAAGAAAACACAC  
GAGGAAGGGGTGGGCAATTAGCTAGAGCAGCAGGTGCTGTAGCGAAACACAAAGCAA  
AAGAGGGTAAAATGGCCACTTTAAGATTACCATCCGGGGAGGGCCGTATAGTAACCCA  
AAACAGCCTAGCAACAGTCGGACAAGAGGGTAAAGTAGGGGTGAACCAAAAAAGTTT  
GGGTAGAGCCGGATCTAAGTGTGGCTAGGTAAACGCCCCGTAGTAAGAGGGGTAGTT  
ATGAACCCTGTGGACCACCCCATGGGGGCGGTGAAGGGAAAGCTCCCATTGGTAGA  
AAAAAACCACAACCCCTTGGGGTTATCCTGCGCTTGAAGAAGAAGTAAAGGAAAAGG  
AAAAAATATAGCGATAGTTTTATTCTTCGTCGCGTAAG---ATGATTCAACCTCAGACCC  
TTTTAAATGTAGCCGATAATAGTGGAGCTCGAAAATTGATGTGTATTTCGAGTCATAGGA  
GCTGCTGGTAATCAGCGATATGCTCGTATTGGTGATGTTATTGTTGCTGTAATCAAAGAC

GCATTGCCCAAATGCCTCTAGAAAGATCCGAAGTAATTCGAGCTGTAATTGTACGTAC  
ATGTAAAGAGTTCAAATGCGAAGACGGTATAATAATCCGCTATGATGACAATGCTGCGG  
TTATAATTGATCAAAAAGGCAATCCAAAAGGAACTCGAGTTTTTGGCGCGATTGCCGA  
GGAATTGAGAGGATTGAATTTTACCAAATAGTTTTATTAGCTCCTGAAGTATTAATGCT  
TAGTCCCAAAGAACCAGATTTTCGCAAACAACATAGAGGAAGAATGAAAGGAAAATC  
CTGCCGAGGCAATCGTATTTGTTTTGGTAGATATGCTCTTCAAGCACTTGAACCCGCTT  
GGATCACGGCGAGACAGATAGAAGCAGGACGAAGAGCAATAACACGATATGCACGTC  
GTGGTGGAAAATATGGGTACGTATATTTCCCGACAAACCGGTTACACTAAGACCCACA  
GAAACACGTATGGGCTCGGGAAAGGGGTCCCCGAATATTGGGTATCCGTTGTAAAC  
CTGGTTCGTATACTTTATGAAATGGGGGGAGTATCTGAAACTGTAGCTAGAGCAGCTATC  
TCCATAGCTGCCAGTAAAATGCCATACGAAGTCAATTTATTTCGATTAGAGATGACCAG  
AGTTCCGCGAGGATATATAGCCCGGAGACGACGAACAAAAATGCGTTCATTTGCCTCA  
AACTTTAGAGGGGCTCATTTAAGACTTAATCGAATGATTACCCAACAGGTAAAAAGAG  
CTTTTGTTCCTCTCATCGAGATAGAGGTAGGCAAAAGAGGGATTTTCGTCGTTTTGTGG  
ATCACTCGGATAAACGCAGCAACGCGGGTATAT-----GTATTTCGATAGTTATAGTAAATTA  
ATACACAACCTGTACAAGAAGAAATTGATTCTTAATCGTAAAATGCTTGCACAAGTAGC  
TGTATCAAATCCAAATAATCTTTACACGATTTCCAATAAAATAAAGATCATCAAT-----  
-----AGGATAAAGAGAGTTTTCAAAGCACAAAACGTATCCCTATGTCTGTTTTTC  
AAAGCACAAAGAGTTCTTGACGAGATTCGCTGGCGTTACTACGAGGAAACTGTTATGA  
TACTGAACCTCATGCCCTATCGAGCATCTTATCCCATCTTAAAGTTGGTTTTATTTCGGCAG  
CCGCAAATGCTACTCATTATAGGGATTTTCGACAAAGCGAATTTATTTATTAATAAGCCG  
AAGTCAGTAGGAGTACTATTATGAAGAAATTCAGACCTCGAGCTCGAGGACGTAGTTT  
CCCCATAAAAAAAGCATGTGTCATATAACAATTGTAATAAAT--GTAAGAAATCT-----  
-----ATGGATGGAATCAAATACGCAGTATTTACAGAAAAAAGTCTTCGTTTTATTGG  
GAAAGAAT--CAATATACTTTTAATGTCGAATCGGGATTCACTAAGACAGAAATAAAGCA  
TTGGGTGCAACTCTTCTTTGGTGTAAAGGTAGTAGCTGTGAATAGCCATCGACTACCCG  
GAAAGGGTAGAAGAATGGGCCCTATTCTAGGACATACAATGCATTACAGACGTATGATC  
ATTACCCTTCAACCGGGTTATTCTATTCCACTTCTAGATAGAGAAAAAACATGGCAGT  
TCCAAAAAACGTAATGTCAAAAAAGCGTATTCGTAAAAATATTTGGAAGAAA  
AAGACTTATTTTTCCATAGTACAATCTTATTCTTTAGTAAAATCATTTTCGAGCGGTA  
CCAAAGGGTTTTTCTGGGCAACAAACAATAATATGGCCAAGGGAAAAGATGTTAGAA  
TCAGAGTTATTTTGAATGCATCAGTTGTGTTGAAAA-----GGT-----GAGGAATCGACG  
GGGATTTCTAGATATAGTACTCAAAGAATCGCCACAATACACCCGGACAATTAGAATT  
CAAAAAATTTTGTGCTTATTGTGCGAAGCATACTCATCACGAAATAAAGAAAATGA  
AAATAAGAGCTTCCGTTTCGTAAAATTTGTACAAAATGTCGACTGATTCGTAGGCGTGGA  
CGAATTAGAGTCATTTGCTCTAATCCGAAGCATAAACAAAGACAGGGGATGGTTTCGAG  
AGGAGGTAGCAGGATCCACTCAAACACTACAGTGGAAGTGTGTTGAATCAAGAGTAG  
ATAGTAAGCGCCTTTATTATGGTCGTTTCATTCTGTCCCCGCTTAGAAAAGGTCAAGCG  
GACACCGTCCGTATTGCCTTGCGAAGAGCTTTACTTTGGAGAAATAGAAGGAACATGTA  
TCACACGTGCAAAATTTGGG-----AGCGTGCCGCACGAATATTCTACAATAGCAGGTATT  
GAAGAATCCGTACAAGAAATTTTACTAAATTTGAAAGAAATTGTATTGAGAAGTAATCT  
CTATGGAGTTAGAGACGCATCCATTTGCGTCAAAGGTCCTAGATACATAACTGCTCAAG  
ATATCATCTTACCGCCTTCCGTAGAAATCGTTGATACGGCACAACCTATAGCTAACTTGA  
CAGAGCCCATTGATTTCTGTATTGATTTACAGATCAAGAGAGATCGTGGATATCAGACA



GAACTCAGAAAGAAGAACTATCAAGATGGAAGTTAT-----CCTATAGATGCTGTATCCATGCC  
TGTTTCGAAATGTGAATTATAGTATTTTTCTTGTGGGAATGGAATGAAAAACACGAGA  
TACTTTTTCTAGAAATATGGACTAATGGAAGTCTAACCCCTAAGGAAGCACTTTATGAG  
GCTTCTCGTAATTTGATTGATTTATTTCTCCTTTTCTACACGCGGAGGAAGAG-----GGC  
GCTAGTTTCGAAGAAAATAAA---AACAGGTTTACTCCACCCCTTTTTACTTTTTCAAAA  
AGATTAAC---AATCTAAAGAAAAACAAAAA---GGAATTCATTGAATTGATTTTTAT  
TGATCAATTAGAATTGACTTCTAGAACGTATAATTGTCTAAAAAGGGCCAATATACATAC  
ACTATTGGACCTTTTGAGTAAGACTGAAGAAGATCTTCTGAGAATTGACAGTTTTTCGTA  
TGGAAGATAGAAAACATATATGGGACACTCTAGAGAAGCAT-----CTCCAATTGATTTA  
CTTAAGAATAAAATGCTCCGGAATGGAAC---GAGGGAATGTCCACAATACCCGATTT  
AGTCAGATCCAATTCGAGGGATTTTGTAGGTTCAATTAATCAAGCCTTGGCAGAAGAACT  
TGACAAGTTTCCAACAATTAAGATCCAGATCACGAAATTGCATTTCAATTATTTGCGA  
AAGGATATCAATTGCTAGAACCTCGATAAAAGAAAGAGATGCTGTGTATGAATCACTC  
ACCTATTCTCCGAATTATATGTATCTGCGAGATTAATTTTTGGTTTC-----GATGTGCAA  
AGCAAACCATTTCTATCGGAAACATTCTATAATGAATTCCTTAGGAACCTTTATTATAA  
ATGGAATATACCGAATTGTGATCAATCAAATATTGCTAAGTCCTGGTATTTACTACCGCT  
CGAATTAGATCATAAGGGAATTTCTATCTACTGGGACTATAATATCAGATTGGGGAG  
GGAGATCGGAATTAGCAATTGATAAAAAAGAAAGGATATGGGCTCGCGTGAGTAGAAA  
ACAAAAGATATCTATTCTAGTTCTATCATCAGCTATGGGTTCGAATCTAAGAGAAATTCT  
AGATAATGTTTCCCTACCCTGAAATTTTCTTGTCTTTCCCGAATGCTAAGGAGAAGAAGA  
GGATTGAGTCAAAAAGAAAAGCTATTTTGGAGTTTATCAACAATTTGCTTGTGTAGGT  
GGGGACCTGGTATTTTCGGAGTCCTTATGCGAGGAATTACAAAAGAAATTTTTTCAACA  
AAAATGTGAATTAGGAAGGATTGGTTCGACGAAATATGAATCGGAGACTTAATCTTGATA  
TACCTCAGAACAATACATTCTTGTACCACGAGATGTATTGGCCGCTACGGATCATTTGA  
TTGGAATGAAATTTGGAACGGGTATACTTGACGATGACGATATGAATCACTTGAAAAAT  
AAACGTATTCGTTTCGGTTCGGATCTGTTACAAGATCAATTCGGATTGGCTCTTGGTCG  
TTTACAACATGCAGTTCAAAAAACTATTCGTAGAGTATTCATACGTCAATCGAAA-----C  
CGACTCCCCAACTTTGGTAACTCCAACCTCAACTTCAATTTTATTAATAACTACTTATG  
AGACCTTTTTTGGCACATACCCGTTATCTCAAGTTTTTGTATCAAACGAATCCATTGACA  
CAAACCTGTTTCATGGGCGAAAAGTGAGTTGTTTAGGTCCTGGAGGGTTGACGGGGAGA  
ACCGCAAGTTTTTCGGAGCCGAGATATTCATCCGAGTCACTATGGGCGTATTTGTCCAAT  
CGACACGTCTGAAGGAATCAATGTTGGACTTACTGGATCCTTAGCAATTCATGCGAGAA  
TTGATCACTTGTGGGGATCCATAGAGAGTCCGTTTTATGAAATATCTGAGAAAGCAAAA  
GAAAAAAAGAG-----AGACAGGTGGTTTATCTATCACCAAATAGAGATGAATATTATAT  
GATAGCAGCAGGAAATTCTTTGTCCTTGAATCAAGGTATTCAGGAAGAACAGGTTGTT  
CCGGCTAGATACCGTCAAGAATTCTTGACTATTGCATGGGAACAGATTCATGTTAGAAG  
TATTTTTCTTTCCAATATTTTCTATTGGGGTTCTCTCATTCTTTTATTGAGCACAAT  
GATGCGAATCGGGCTTTAATGAGTTCTAATATGCAGCGCCAAGCAGTTCCGCTTTCTCG  
GTCCGAGAAATGCATTGTTGGAACCTGGATTGGAACGCCAAACAGCTCTAGATTCGAGG  
GTTTCCATTATAGCCGAACGCGAGGGAAAGATCATTTCTACTGATAGTCATAAGATACTT  
TTATCAAGTAGTGGGAAGACTATAAGTATTCCTTTAGTTAACCACCGTCGCTCTAACA  
AAATACTTGTATGCACCAAAAACCTCGGGTTCACGGGGTAAATCCATTAAAAAAGGA  
CAAATTTTAGCAGAAGGAGCTGCTACAGTTGGGGCGAACTTGCTTTAGGAAAAAAC  
GTATTAGTAGCTTATATGCCATGGGAAGGTTACAATTTTGAAGACGCAGTACTAATTAGC

GAACGTTTGGTATATGAAGATATTTATACCTCTTTTCACATCCGGAAATATGAAATTCAG  
ACGGATACGACAAGCCAGGGCTCCGCTGAAAAATCACTAAAGAAATACCACATCTAG  
AAGAACATTTACTCCGCAATTTGGACAGAAATGGAGTTGTTAGGTTGGGATCCTGGGT  
AGAAACTGGTGATATTTTAGTAGGTAATTAACGCCTCAGATAGCGAGCGAA---TCATC  
TTATATCGCGGAAGCTGGATTATTACGGGCCATATTTGGCCTTGAGGTTTCCACTTCAA  
AGAAACTTCTCTGAAATTACCTATAGGTGGAAGAGGGCGCGTTATCGATGTGAAATGGA  
TCCAAAGG-----GACCCGATAATGGTTCGTGTATATATTTTACAGAAACGTGA  
AATCAAAGTTGGGGATAAAGTAGCCGGAAGACATGGGAATAAAGGGATCATTTCCAA  
ATTTTGCCTAGGCAAGATATGCCCTATTTGCAAGATGGAACACCCGTTGATATGGTCTC  
AATCCCTTAGGAGTACCCTCCCGAATGAATGTGGGACAAATATTTGAAAGCTCACTCGG  
ATTAGCGGGGGATCTGCTAAAGAAACATTATAGAATAGCACCCCTTTGATGAGAGATAG  
AGCAAGAGGCTTCAAGAAAACCTTGTGTTTTCAGAATTATATGAAGCCAGTAAAGAAAC  
AAAAAATCCATGGGTATTTGAACCCGAGTACCCGGGAAAAAGCAGAATATTTGATGGA  
AGAACAGGCGACCCCTTTGAGCAACCTGTTCTAATAGGGAAGTCCTATATCTTAAAT  
AATTCATCAAGTTGATGAGAAAATTCATGGGCGTTCTACTGGGCCCTACTCACTTGTTA  
CACAACAACCGTTAGAGGAAGAGCCAAGCAAGGGGGACAACGAGTAGGAGAAATG  
GAAGTTTGGGCTTTAGAAGGATTTGGTGTTGCTCATATTTTACAAGAGATACTTACTTAT  
AAATCTGACCATCTTATAGCTCGCCAAGAAATACTTAATGCTACGATCTGGGGAAAAAG  
AATACCTAATCATGAGGATCCTCCAGAATCTTTTCGAGTGCTCGTTTCGAGAACTACGAT  
CTTTGGCTCTAGAACTGAATCATTTCCTTGATCTGAAAAGAACTTCCAGGTTAATAGG  
GAGGAAGTT-----ATGATTGACCAATATAAACATCAACAACCTTCAAATTGGA  
CTCGTTTCCCCTCAACAAATAAAGGCTTGGGCTAACAAAAACCTACCTAATGGAGAAG  
TCGTTGGCGAAGTCACAAGGCCCTCTACTTTTCATTATAAAACCGATAAACCAGAAAA  
AGATGGATTGTTTTGCGAAAGAATCTTTGGACCCATAAAAAGCGGGATTTGCGCTTGTG  
GCAATTCTCGAGCGAGCGGAGCTGAAAACGAAGACGAAAGATTTTGCCAAAAATGCG  
GGGTAGAATTTGTGGATTCTCGGATACGAAGATATCAAATGGGATACATCAAACCTCGCA  
TGTCCTGACTCATGTGTGGTATTTGAAAGGTCTTCCTAGTTATATCGCGAATCTTTTA  
GATAAACCTCTTAAAGAAGTTGGAGGGCCTAGTATACGGCGAT-----TTCTCTTTTGCTAG  
GCCC---AGCACTAAAAAACCCACTTTTTTACGATTACGAGGTTTATTTCGAAGAGGAAAT  
TGCATCCTGTAACCACAGCATTCTCCCTTTTTTCTACCCAGGCTTTGCAACATTTG  
AAATCGGGAAATTGCGACAGGAGCAGGTGCTATTAGAGAACAATTAGCAGATTTGGAT  
TTGCGAATTATTATAGAGAATTCTTTGGTCAATGGAAGGAATTAGAAGACGAG---GGG  
TATAGTGGAGATGAGTGGGAAGATAGAAAAAGACGAATAAGAAAAGTTTTTTTTGATTA  
GACGCATGCAATTGGCGAAACATTTTATTCAAACAAATGTAGAACCAGAATGGATGGTT  
TTGTGCTTATTACCGGTTCTTCCTCCCGAATTGAGACCTATTGTTTATAGGTCTGGAGAT  
AAAGTAGTGACTTCAGACATTAATGAACTTTATAAGAGAGTTATCCGTCGGAACAACAA  
TCTTGCCTATCTATTA AAAAGAAGTGAATTAGCGCCAGCAGATTTAGTAATGTGCCAGG  
AAAAATTGGTACAAGAAGCCGTGGATACACTTCTTGATAGTGGGTCCCGCGGGCAACC  
GACGAGGGATGGTCACAATAAAGTATACAAATCACTTTCAGATGTAATTGAAGGTAAA  
GAGGGAAGGTTTCGCGAGACTCTGCTTGGGAAACGGGTTCGATTACTCGGGGCGTTCTG  
TCATTGTTGTGGGTCCTTCGCTTTTATTACATCAATGTGGATTACCTCTAGAGATAGCAA  
TAAAGCTTTTTAGCTATTTGTAATTCGCGATTTAATCACGAAACGCGCCACTTCTAATG  
TAAGGATTGCTAAAAGGAAAATTTGGGAAAAAGAACCATTGTATGGGAAATACTTCA  
AGAAGTTATGCGGGGACATCCTGTACTGTAAATAGAGCACCTACCCTGCATAGATTAG

GCATACAGGCCTTTCAACCCACTTTAGTAGAGGGGCGTACTATTTCTTTACACCCATTAG  
TGTGTAAGGGTTTCAATGCGGACTTTGATGGAGATCAAATGGCTGTTCATCTACCTTTAT  
CCTTGAAGCTCAGGCAGAAGCCCGTTTACTTATGTTTTCTCATATGAATCTCTTATCTC  
CCGCTATTGGGGATCCTATTTGCGTACCAACCCAAGACATGCTTATCGGGCTTTATGTAT  
TAACGATTGAAAGCGTCGAGGTATTTGTGCAAATAGATATAATAGTTGCAGAAAC-----  
-----TATCCAAATCTAAAAGTAAATTACAATAATTCTAAATATAGGAAAGATAAAGAAC  
CCCATTTTTCTAGTTCTTATGATGCACTGGGAGCTTATAGACAAAAACTAATCAGTTTATG  
ATAGTCCCTTGTGGCTACGATGGAACCTGGATCAACGC---GTCATTGGGTCA-----AGAG  
AAGTTCCGATTGAAGTTCAATATGAATCTTTGGGGACTTATCATGAGATTTATGCCCACT  
ATCTAATAATGGGAAATAGAAAAAAGAAATTCGTTTCGATATACATTCGAACCACTCTT  
GGTCATATTTCTTTTTATAGAGAAATAGAGGAAGCCATACAAGGATTTAGTCAGGCCTAT  
TCATACACTACC-----ATGGCGGAACGGGCCAATCTGGTCTTTCA  
TAATAAAGAGATAGACGGAACCTGGTATGAAACGACTTATTAGCAGATTAATAGATCATT  
TTGGAATGGGATATACATCCCATATACTGGATCAACTAAAGACTCTGGGCTTCCATCAAG  
CCACTACTACATCGATTTTCGTTAGGAATCGAGGATCTTTTAAACAATACCCTCTAAGGGAT  
GGTTAGTCCAAGACGCGGAACAACAGAGTTTTCTTTTTGGAGAAACACTATTATTATGG  
GGCTGTACACGCGGTAGAAAAATTACGCCAATCTGTTGAGATATGGTATGCGACAAGTG  
AATATTTGAAACAAGAAATGAATTCGAATTTTCGGATAACGGATCCTTCTAATCCAGTCT  
ATCTAATGTCTTTTTTCAGGAGCCAGAGGAAATGCATCTCAAGTACACCAATTAGTAGGT  
ATGAGAGGATTAATGTCCGACCCCAAGGACAAATGATTGATTTACCTATTCAAAGCAA  
TTTACGCGAGGGACTTTCTTTGACAGAATATATAATTTCCCTGCTATGGAGCCCGCAAAG  
GGGTTGTAGATACTGCTGTGCGAACAGCAGATGCTGGATATCTTACACGTAGACTTGT  
GAAGTAGTTCAACATATTATTGTGCGTAGAAGAGATTGTGGTACTATCCGAGGTATTTCT  
GTAAGTCTCAAATGGGATGACGGAA-----AACTTTTTGTCCAAACACTAATTGGTC  
GTGTATTAGCAGACGATATATATATATCGGTTACCGATGCATTGCCGCGCAAATCAAGATA  
TTGGAATTGGATTAGTCAATCGATTCATAACTGCCTTTTCGAGCACAACCATTTTCGAGCA  
CAACCAATATATATTAGAACCCCTTTACTTGCCGAAGCACTTCTTGGATCTGTCAATTA  
TGCTATGGCCGGAGTCCACTCATAGTGATCTGGTCAATTGGGAGAAGCCGTAGGTAT  
TATTGCAGGTCAATCAATTGGGGAGCCAGGGACTCAACTAACATTAAGAACTTTTCATA  
CTGGCGGAGTATTCACAGGGGGTACTGCCGACCTTGTACGATCCCTTCGAATGGAAA  
AATAAAATTCATGAGAATTTGGTTCACCCACACGTACCCGTCATGGGCAGCCTGCTT  
TTCTATGTTATATAGACTTGCATGTAATTTTCAAGATATTCTATATAGTGTGAA  
TATTCCTCAAAGCTTGATTCTAGTGCAAATGATCAATATGTAATCCGAACAAG  
TAATTGCGGAGATTCGTGCCGGAACGTCCACTTTA-----TTTAAAGAAAGGGTACAAAA  
GCATATTTATTCTGAATCAGACGGCGAA---ATGCACTGGAGTACTGATGTTTACCATGCG  
CCCGAATATCAATATGGTAATCTTCGCCGATTACCAAAAACAAGCCATTTATGGATATG  
TCAGTAAGTATGTGCAGA-----TCCAGTATAGCGTCTTTTTCACTCCACAAGGATCAAGA  
TCAAATGAATACTTAT-----  
-----GGT-----GATAGGGAAATTCTTGATTATTCA---ACGTCCGATCGAATCATGTCC  
AATGGCCATTGGAATTTTATCTATCCTTCT--ATTTTTCAAGATAAT-----TCAGATTTGTTG  
GCGAAAAAGCGAAGAAATAGGTTTCGTCATTCATTACAATATCATCAAGAACAAGAGA  
AAGAACTAATATCCTGTTTTGGGATTTTCGATTGAAATCCCCCTTATG-----GGTGTTTTAC  
GTAGAAATACTATTTTTGCTTATTTTGACGATCCCCGATACAGAAAAGAT-----GGAATTG  
TTAAATTTAGAAGCCCAGAGGAAGATTCATCTTAAAA-----AAAGAGGGTTTGATTGA

GCATCGAGGA---ACAAAAGAATTTAGTCTAAAATAC---GAAGTAGATCGGTTTTTTTTTCA  
TTCTTCAAGAACTTCATATCTTGCCGAGATCTTCATCCCTAAAGATACTTGACAATAGTA  
TTATTGGAGTGGATACACAACCTCACAAAAATACAAGAAGTCGACTAGGCGGACTGGT  
CCGAGTGAAGAGAAAAAAAAGCCATACGGAACCTCAAATATTTTCCGGAGATATTCAT  
TTTCCTGAAGAGGCGGATAAGATATTAGGT-----GGCTGTTTGATACCGCCAGAAAGACA  
AAAAAAA-----GATTCTAAGGAA---TCAAAA---AAAAGGAAAAATTGGGTCTATGTTCA  
ACGGAAAAAAATTCTCAAGAGCAAGGAAAAG-----TATTTTGTTCGTTCCGCCCTACA  
GTGGCATATGAAATGGACGAAGGAAGAAATTTAGCAACACTTTTCCCGCAGGATCTCT  
TGCAAGAAGAAAATAATCTCCAAATTCGACTTGTCAATTTTATTTCTCATGAAAATAGC  
AAGTTAACTCAAAGAATTTATCACACAAAT--CAATTTGTTAGAAGCTTGCTTAGTAGTGA  
ATTGGGAACAAGAAGAAAAAGAAAAGGCTGGT-----GCTTCCCTTGTGAG  
GTAAGAGCAAATGATCTTATTCGCGATTTCTAAGAATTGAGTTAGTCAAGTCCACTATT  
TCGTATACACGAAAAAGGTATGATAGGACAAGTGCAGGACCGATTCCCCAT-----TTA  
GATCGCGCCAATATCAATTCTTTTTATTCCAAGGCGAAGATTGAATCA-----CTTA  
GCCAACATCCAGAAGCTATTGGC-----ACTTTGTTGAATCGAAATAAA-----GAAT  
ACCACTCTTTGATGATTTTGTGCGCATCCAAGTGTCTCGAATTGGT-----TTATTCAAGA  
ATTCAAACATCCC-----AATGCGATAAAGAATGGAATCCTAGAATTCCTATT--GAA  
ATTTTTGGGCCCTTAGGCGCTATTGTAGCT--AGTATATCGCATTTTTCTTCATCT--TACTA  
TTACTAACG-----CATAATAAAATCCTGTAAAA---AAATATTTGTTTCGTTGAC-----  
AATTTAAAACAAACCTTCCAAGTACTTCAAGAACTTAAATACTCTTTAATAGATGAAAA  
TAAAAGG-----ATTTCTAATTTTCGAT-----AGTAACATAATGTTGGATCCATTCTTTTGA  
TTGTCACTTTGTCCATCATGATTCTTGGGAAGAGACATTGGCAATAATTCAC---CTTGGA  
CAATTTATTTGTGAAAATGTATGTCTATTTAAATCGCACATA-----AAAAATCCGGT  
CAAATTTTCATTGTAAAT--ATGAATTCCTTTGTTATAAGAGCAGCTAAACCTTATTTGGC  
CACTACAGGAGCAACTGTTAATGGTCATTATGGAGAAATCCTTTACAAGGGAGATAGGT  
TAGTTACGTTTATATATGAAAAATCGAGATCTAGTGACATAACGCAAGGTCTTCCAAA  
GTGGAACAAATCTTTGAAGCGGTTCAATTGATTCAATTATCCCCGAATCTCGAAAGGAG  
AATTGAGGATTGGAATGAGCGTATACCAAGAATTCCTTGGGGTCCCTTGGGGATTCTTGA  
TTGGAGCTGAGCTAACCATAGCCCAAAGTCGTATCTCTTTGGTTAATAAAATCCAAAAG  
GTTTATCGATCCCAAGGGGTACAGATCCATAATAGACATATAGAGATTATTATACGCCAA  
GTAACATCAAAGTGCGGGTTTCCGAA-----GATGGAATGTCTAATGTTTTTTTCGCT  
GGGGAATTAATCGGACTATTGCGAGCGGAACGAGCAGGGCGAGCTTTGGATGAATCGA  
TCTATTATCGGGCAATCTTATTGGGAATAACAAGGGCTTCCCTGAATACCCAAAGTTTCA  
TATCTGAAGCAAGTTTTCAAGAACTGCTCGAGTTTTAGCAAAGCTGCCCTACGAGG  
TCGCATTGATTGGTTGAAAGGCTTGAAGAAAACGTAGTTCTGGGGGGGATTATACCT  
GTTGGTACCGGATTCCAAAATTTGTGCATCGTTCCCA-----CAAGACAAGAACCTTTA  
T-----TTCGAAATAAAAAAAAAAAAAATCTATTTCGCGTCGGAAATG-----AGAGATTTTTTGT  
TTCTCCATACAGAATTAGTTTCTTCAGATTCTGACGTAACAAAC-----  
-----ATGACAAGAAGATATTGGAACATTAATTTGAAAGAGATGATAGA  
AGCAGGAGTTCATTTTGGTCATGGTATTAAGAAATGGAATCCTAAAATGGCCCCCTTACA  
TTTCGGCAAAGCGTAAAGGTACTCATATTATAATCTCGCTAGAACGGCTCGTTTTTTTAT  
CAGAAGCTTGTGATTTAGTTTTTGTATGCAGCAAGTCAGGGAAAAAGTTTCTTAATTGTT  
GGTACCAAAAAAAGAGCAACAGATTTAGTAGCATCAGCTGCAATAAGGGCTCGTTGTC  
ATTATGTTAATAAAAAGTGGTTCAGTGGTATGTTAACGAATTGGTCGATTACGAAAAC

AGACTTTCTCAATTTAGAGACTTAAGAGCAGAAGAAAAAATGGGAAAATTCCACCATC  
TCCCAAAAAGAGATGTGGCAATCTTGAAGAGAAAATTATCTACCTTGCAAAGGTATCTC  
GGCGGGATCAAATATATGACGAGATTGCCAGACATTGTGATCGTCCTTGATCAGCAAAA  
AGAGTATATAGCTCTTCGGGAATGTGCCATTTTGGGGATTCCTACTATTTCTTTAGTCGAT  
ACAAATTGTGACCCGGATCTCGCGAATATATCGATTCCAGCCAACGATGACACTATGAC  
TTCAATTCGATTGATTCTTAACAAATTAGTATTTTCAATTTGTGAGGGCCGTTCTCTC---T  
ATATAAGAAATCGTATGGGACAAAAATAAATCCACTCGGTTTCAGACTTGGTACAACC  
CAAAAACACCATTCTTTTGGTTCGCACAACCAAAAAATTATTCGGAAGGTCTACAGG  
AAGATAAAAAATAAGGGATTGTATCAAGA ACTATATACAAAAGAATAGGAAAAAGGG  
CTCGAATAAAATAGAATCAATTACACATATAGAAATCCAAAAAGAAATCGATACGATCC  
ACGTCATAATCCATATTGGATTCCCAAAT--TTATTAAGAAAAAAGGA-----GCA  
ATCGAAGAATTAGAGAAAGATCTACAAAAGGAAATTA ACTCTGTAAACCAGAGATTTA  
ATATTTCTATCGAAAAAGTTAAAGAACCTTATAGACAGCCTAACATTCTTGCAGAATATA  
TAGCTTTCCAATTA AAAAATAGAGTTTCATTCCGAAAGGCAATGAAAAAGCCATTGAA  
TTAACTAAAAAGCAGATATAAGGGGAGTAAAAGTAAAATTGCGGGTTCGTCTCGGAG  
GAAAAGAAATTGCACGCGCCGAATCCATTA AAAAGGGTAGACTTCCCCTCAAACAAT  
TCGCGCTAAAATTGATTATTGCTGCTATCCAATTCGGACTATCTATGGAGTATTAGGTGTA  
AAAATTTGGATATTCGTAGACGAAGAAATGTCCCGTTATCGAGGACCTCGTTTAAAAAA  
AATACGCCGTCTGGGAGCTTTACCAGGACTCACTAGAAAAACACCTAAATCCGGAAGT  
AATCTTAAAAAAAATTCAATTCTGGGAAA---AAGGAGCAATATCGTATTCGTCTTCAA  
GAAAAACAGAAATTGCGTTTTTCATTATGGTCTGACAGAACGACAATTACTTAGATATGT  
ACATATCGCTGGAAAAGCAAAAAGGTCAACAGGCCAGGTTTTACTACAATTACTTGAA  
ATGCGTTTTGGATAATATCCTTTTTTCGATTGGGTATGGCTTCAACCATTCTGGGGCCCGC  
CAATTAGTCAACCATAGACATATTTTAGTTAATGGTCTGATAGTCAATATACCAAGTTTTTC  
GTTGCAAACCCAGAGATATTATTACTACGAAAGATAACCAAGATCAAAGGTCTGGTT  
CAAAATTATATTGCTTCATCGGACCCGAAA-----TTGCCAAAGCATTGGCGATTGACAC  
G-----TTGGAATATAAAGGACTAGTAAATAAAATCCTAGATAGGAAGTGGGTTCGGTCTCA  
AAATAAATGAGTTGTTAGTTGTAGAATATTACTCTCGTCAGACTATGTCACGTCGAGGTA  
CTGCAGAAAAAAGAACTGCAAAATCCGATCCAATTTTTCGTAATCGATTAGTTAACATG  
GTGGTTAACCGTATTATGAAAGACGGAAAAAATCATTGGCTTATCAAATTCTCTATCG  
AGCCGTGAAAAAGATTCAACAAAAGACAGAAACAAATCCACTATTGGTTTTACGTCAA  
GCAATACGTAGAGTAACTCCCAATATAGGAGTAAAAACAAGACGTAAAAAAGGATCGA  
CGCGGAAAGTTCCGATTGAAATAGGATCTAAACAAGGAAGAGCACTTGCCATTCCGTTG  
GTTATTAGAAGCATCCCAAAAGCGTCCGGGTGCAAATATGGCTTTCAAATTAAGTTCCG  
AATTAGTAGATGCTGCCAAAGGGGGTGGGGGTGCCATACGCAAAAAGGAAGCGACTC  
ATAGAATGGCAGAGGCAAATAGAGCTCTTGACATTTTTCGTATGGGCAAGGACTACTATT  
GCTGATTTACTAACCTCTATAAGAAATGCGGACATGAATAAAAAAGGAACAGTTTCGAGT  
AGTATCTACAATATTACGAAAACATTGTGAAAATACTTCTACGAGAGGGTTTTATTGA  
AAGTGTTTCGGAAACATCAGGAACGTAACAGATATTTCTTGGTTTTCACTTTGCGACATC  
AAAAGAGAAAGACTAGAAAAGGAATATATAGAACA-----AGAACCTTTTTAAAGCGT  
ATCAGCCGACCCGGCTTACGAATTTATACCAACTATCAAGGAATTCCTAAAGTTTTGGG  
TGGAATGGGAATTGCTATTCTTTCTACTTCTCGAGGAATAATGACAGATCGAGAAGCTC  
GACTAAACAGAATTGGGGGAGAAGTCTTATGTTATATATGGATGGCAAAAGCTATACCA  
AAAATTGGTTCACGTAAGAAAGTGCCTATTGGTTTACGTAAGAGTGCACGTAGAATAA



repeatedly repeated text block consisting of many lines of identical or similar characters.

Very faint, illegible text covering the entire page, possibly a watermark or a very low-contrast scan of a document.





ATTTGAAATGAATTGGCGATCAGAACACATATGGGTAGAACTTCTAAAAGGTTCTCGAA  
AAAGGGGTAATTTTTCTGGGCCTGTATTCTTTTTCTAGGTTCACTAGGATTCTTATCGG  
TTGGGATTTCCAGTTATCTTGGTAAGAATATTATATCTATACTTCCATCTCAAGAAATTCT  
TTTTTTTCCGCAGGGGGTCGTGATGTCTTTCTACGGAATCGCAGGCCTATTCATTAGCTC  
CTACTTGTGGTGTACTATTTTGTGGAATGTAGGTAGTGGTTATGACCGATTTCGATAGAAA  
AGAGGGAATAGTGTGCATTTTTCGTTGGGGATTCCCTGGAATAAAAACGTCGCGTCTTCC  
TTCGATTCCCTTATGCGGGATATCCAATCAATTAGAATTCAGGTTAAAGAGGGTCTTTATC  
CTCGTCGTATCTTTATATGGAAATCCGGGGCCAGGGGATCATTCCCTTGACTCGTACTG  
ATGATAAATTTTTACTCCACGAGAAAATTGAACAAAAAGCTGCCGAATTGGCCTATTTCT  
TTGCGCGTACCAATTGAAGTATTT

>Atropa

ATGGAAGATGGTGGTTTAATTCGATGTTGTTTCTAAATAAATCAATGGGCAGTCTTGG  
TCCATTGAAAATACCAGTGAA-----GATCCAAATCGAAAA-----GTGAAAAACATTCAT--  
-TGCAGTAATGTTGATTATTTATTCGGCGTTAAAGACATTCGGAATTTTCATCTCTGATGAC  
ACTTTTTTAGTTAGTGATAGGAATGGAGACAGTTATTCCATCTATTTTGATATTGAAAAT  
CAGATTTTTGAGATTGACAACGATCAT-----TCTTTTCTGAGTGAAGTAAAGTTCTTTT  
TATAGTTATCGAAACTCGAGTTATCTGAATAATGGATTTAGGGGCGAAGATCCCTACTAT  
AATCTTACATGTATGATACTCAATATAGTTGGAATAATCACATTAATAGTTGCATTGATA  
ATTATCTTCAG-----TCTCAAATCTGTATAGATACTTCTATTATAAGTGGTAGTGAGAATTA  
CGGT-----TACATTTATAGGACCATTTGTGGTAATGAGGGTCCAGTAAACGAAGTCCGCA  
CGAAGGGCAGTGATTTAACTATAAGAGAAAGTTCTAATGATCTCGAGGTAAGTCAAAA  
ATACAGGCATTTGTGGGTTCAATGCGAAAATTGTTATGGATTAAATTATAAGAAATTTTT  
GAAATCCAAAATGAATATTTGTGAACAATGTGGATATCATTGAAAATGAGTAGTTCCG  
ATAGAATTGAACTTTTGATTGATGCGGGTACTTGGGATCCTATGGATGAAGACATGGTC  
TCTCTGGATCCCATTGAATTTTCATTCGGAGGAGGAGCCTTATAAAGATCGTATTGATTCT  
TATCAAAGAAAGACAGGATTAACCGAGGCTGTTCAAACAGGCATAGGCCAACTAAAC  
GGCATTCCCGTAGCAATTGGGGTTATGGATTTTCAGTTTATGGGGGGTAGTATGGGATCC  
GTAGTCGGAGAGAAAATCACCCGTTTGATTGAACACGCTGCCAATCAAATTTTACCTCT  
TATTATAGTGTGTGCTTCCGGTGGGGCGCGCATGCAGGAAGGAAGTTTGAGCTTGATGC  
AAATGGCTAAAATATCGTCTGCTTTATATGATTATCAATTAATAAAAAATTATTTTATGTA  
TCAATCCTTACATCTCCGACAAGTGGTGGAGTGACAGCTAGTTTTGGTATGTTGGGGGA  
TATCATTATTGCCGAACCAATGCCTACATTGCATTTGCAGGTAAAAGAGTAATTGAAC  
AAACATTGAATAAAAACAGTACCCGAAGGTTCAACAAGCAGCTGAATACTTATTCCAGAA  
GGGTTTATTTCGACCAAATTGTACCACGTAATCTTTTAAAAAGCGTTCTGAGTGAATTATT  
TAAGCTCCACGCCTTTTTTCTTTGAATCAAAGTCAAGCAAATGGTAACCATTCGAG  
CTGACGAAATTAGTAATATTATCCGTGAACGTATTGAACAATATAATAGAGAAGTAAAGA  
TTGTAAATACCGGTACCGTACTTCAAGTAGGCGATGGCATTGCTCGTATTACGGTCTT  
GATGAAGTAATGGCGGGTGAATTAGTAGAATTTGAAGAGGGTACAATAGGCATTGCTCT  
GAATTTGGAATCAAATAATGTTGGTGTGTTAATGGGCGATGGTTTGTGATACAAGA  
AGGAAGTTCTGTAAAAGCAACGGGAAGAATTGCTCAGATACCGGTGAGTGAGGCTTAT  
TTGGGTCGTGTTGTAATGCCCTGGCTAAACCTATTGATGGCAGAGGTGAAATTTACAG  
TTCTGAATTCGATTAATTGAATCTGCCGCCCCAGGTATTATTTTCGCGCCGTTCCGTATAT  
GAGCCTCTTCAAACCGGGCTTATTGCTATTGATTTCGATGATCCCTATAGGGCGTGGTCA  
GCGAGAATTAATTATTGGGGACAGACAGACCGGTAAAACAGCAGTAGCCACAGATACG

ATTCTCAATCAACAAGGGCAAAAACGTAATATGTGTTTATGTAGCTATTGGGCAAAAAGC  
ATCTTCTGTGGCCAGGTAGTAACTACTTTACAGGAAAGGGGAGCGATGGAATACACTA  
TTGTGGTAGCCGAAACGGCAGATTCCCCTGCTACATTACAATACCTTGCTCCTTATACA  
GGAGCATCTCTGGCTGAATATTTTATGTATCGTGAACGACACACTTTAATCATTATGAT  
GATCTCTCCAAACAAGCGCAAGCTTATCGCCAAATGTCTCTTATTACGAAGACCGCC  
CGGTCGTGAAGCTTATCCAGGAGATGTTTTTTATTTGCATTACGCCTTTTGGAAAAGAG  
CCGCTAAATTAAGTTCTAGTTTAGGTGAAGGAAGTATGACCGCCTTACCAATAGTTGAA  
ACTCAATCGGGAGATGTTTCGGCTTATATTCTACTAATGTAATTTCCATTACTGATGGA  
CAAATCTTCTTATCCGCCGACCTATTCAATTCTGGAATCAGACCCGCTATTAATGTGGGT  
ATCTCCGTTTCCAGAGTGGGGTCCGCAGCTCAAATAAAAGCCATGAAACAAGTAGCTG  
GTAAATTAATAATTAGAACTAGCACAATTCGCAGAATTAGAAGCCTTTGCACAATTTGCT  
TCTGATCTCGATAAAGCTACTCAAATCAATTGGCAAGAGGTCAACGATTACGTGAATT  
GCTTAAACAATCCCAATCAGCTCCTCTCACGGTAGAAGAGCAGATAATGACTATTTATA  
CCGGAACAAACGGCTATCTTGATTCATTAGAAGTTGGACAGGTAAGGAAATTTCTTGTT  
GAGCTACGTACTTACTTAAAACTAATAAACCTCAGTTCCAGGAAATCATATCTTCTACC  
AAGACATTTACCGAGGAAGCAGAAGCCCTTTTGAAAGAAGCTATTCAGGAACAAATG  
AAACGTTTTATACTTCAGGAACAAGCAATGAGAATCAATCCTACTACTTCTGGTCTG  
GGTTTCCACGCTTGAAAAAAAACCTGGGGCGTGTGCTCCAAATCATCGGTCCGGTA  
CTAGATGTAGCCTTTCCCCGGGCAAGATGCCGAATATTTATAACGCTCTGGTAGTTCA  
AGGTCGAGATAGTGTGGTCAACCAATTAATGTGGCTTGTGAGGTACAGCAATTATTAG  
GAAATAATCGAGTTAGGGCTGTAGCTATGAGTGCTACAGACGGTCTAACGAGAGGAAT  
GGAAGTGATTGACAAAGGAGCTCCTATAAGTGTTCGGTCCGGGGAGCGACTCTGGG  
ACGAATTTTAAACGTGCTCGGAGAGCCTGTTGATAATTTAGGGCCTGTAGATACTAGTA  
CAATGTCTCCTATTCATAGATCTGCGCCCGCCTTTATACAGTTAGATACAAAATTATCTAT  
TTTTGAAACAGGAATTAAGTAGTAGATCTTTTAGCCCCTTATCGCCGTGGAGGAAAAA  
TCGGACTATTCGGGGGAGCTGGAGTGGGTAAAACAGTACTCATTATGGAATTGATTAAC  
AATATTGCTAAAGCTCACGGGGGCGTATCCGTATTTGGCGGAGTGGGTGAACGTACTCG  
GGAAGGAAATGATCTTTACATGGAAATGAAAGAATCTGGGGTGATTAATGAAGAAAAT  
ATTGCAGAATCAAAGTGGCCCTAGTTTACGGTCAGATGAATGAACCGCCGGGAGCTC  
GTATGAGAGTTGGTTTACTGCCCCTAACTATGGCGGAATATTTCCGAGATGTTAATGAG  
CAAGACGTACTTCTATTTATTGACAATATCTTCCGTTTCGTCCAAGCAGGATCCGAAGTA  
TCGGCCTTATTGGGTAGAATGCCTTCCGCTGTGGGTATCAACCGACCCTGAGTACCGA  
AATGGGTTCTTTACAAGAAAGAATTACTTCTACCAAAGAAGGGTCCATAACCTCTATTC  
AAGCCGTTTATGTACCCGCAGACGATTTGACCGACCCTGCTCCTGCTACGACATTTGCA  
CATTTAGATGCTACTACCGTACTATCAAGAGGATTGGCTGCCAAAGGTATTTATCCAGCA  
GTAGATCCTTTAGATTCAACGTCAACCATGCTTCAACCTCGGATCGTTGGTGAGGAACA  
TTACGAAACCGCCCAAAGAGTTAAGCAAACCTTTACAACGTTACAAAGAACTTCAGGA  
CATTATAGCTATCCTTGGATTGGACGAATTATCCGAAGAGGATCGTTTACTCGTAGCAAG  
AGCGCGAAAAATTGAGCGTTTCTTATCACAACCCTTTTTTCGTAGCAGAAGTATTTACCG  
GTTCTCCAGGGAAATATGTTGGTCTAGCAGAAACAATTCGAGGATTTCAATTGATCCTT  
TCCGGAGAATTAGATGGTCTTCCCTGAACAGGCCTTTTATTTGGTAGGTAATATCGATGAA  
GCTACCGCGAAGGCTATGAACTTAGAAATGGAGAGCAATTTGAAGAAAATGACCTTAA  
ATCTTAGTGTACTGACCCCTAATCGAATTGTTTGGGATTCAGAAGTGGAAGAAATCGTT  
TTATCTACTAATAGTGGTCAAATTGGCATATTATCAAATCACGCCCTATTGCCACAGCT

GTAGATATAGGGATTTTGTAGAATACGCCTTAACGACCAATGGTTAACGATGGCTCTGAT  
GGGTGGTTTTGCTAGAATAGGCAATAATGAAATCACTGTTTTAGTAAATGATGCGGAGA  
AGGGTAGTGACATTGATCCACAAGAAGCTCAGCAAACCTTTGAAATAGCGGAAGCTAA  
TGTGAAAAAGGCTGAAGGAAGGAGACAAAAAATTGAGGCAAATCTAGCTCTCCGACG  
AGCTAGAACACGGGTGGAGGCTATCAATCCGATTTCAATGAAAAACGTAACCGATTCT  
TTCGTTTTCT--GGCCACTGGCCATCTGCCGGGAGTTTCGGGTTTAATACCGATATTTAG  
CAACAAATCCAATAAATCTAAGTGTAGTCCTTGGTGTATTGATTTTTTTTTGGAAAGGGA  
GTGTTAAGTGATTTATTAGATAATCGAAAACAGAGGATCTTGAATACTATTCGAAATTCA  
GAAGAACTGCGTGAAGGGGCTATTGAACAACCTCGAAAAAGCTCGTTCTCGCTTACGG  
AAAGTAGAAACCGAAGCCGAGCAGTTTCGAGTGAATGGATACTCCGAGATAGAACGA  
GAAAAATTGAATTTGATTAATTCAACTTATAAGACTTTGGAAACAATTAGAAAATTACAA  
AACGAAACGATTCAGTTTGAACAACAAAGGGCGATTAATCAAGTCCGACAACGGGT  
TTTCCAACAAGCCTTACGAGGAGCTCTAGGAACCTCTGAATAGTTGTTTGAACAACGAG  
TTACATTTACGTACCATTAGTGCCAATATTGGCATGTTGGGAACAATGAAAGAAATAAC  
TGATATGAATCCACTGGTTTTTGGCCGCTCCGTTATTGCTGCTGGATTGGCCGTAGGGCT  
TGCTTCTATTGGACCTGGAGTTGGTCAAGGGACTGCTGCGGGTCAAGCTGTAGAGGGT  
ATCGCGAGACAGCCTGAGGCAGAGGGAAAAATACGAGGTACGCTATTGCTTAGTCTAG  
CTTTTATGGAAGCTTTAACAATTTATGGACTGGTTGTAGCATTAGCACTTTTATTTGCAA  
ATCCTTTTGTATGAATGTTCTATCATGTTCCATCAATACTCTAAAGGGGTTATACGATAT  
ATCCGGTGTGGAAGTAGGCCAACATTTCTATTGGCAAATAGGGGGTTTCCAAGTACATG  
GCCAAGTACTTATTACTTCTTGGGTTGTAATTGCTATCTTATTAGGTTTCAGCCACTATAGC  
TGTTTCGGAACCCACAAACCATTCCGACCGGGGGTCAGAATTTCTTCGAATATGTTCTTG  
AATTCATTCGAGATGTGAGTAAACTCAAATTGGAGAAGAATATGGGGCCCTGGGTTCT  
TTTATTGGCACTATGTTTTTATTTATTTTTGTTTCTAATTGGTCAGGAGCTCTTTTACCTTG  
GAAAATCATACAATTACCTCATGGGGAGTTAGCCGCACCCACGAATGATATAAATACTA  
CTGTTGCTTTGGCTTTACTCACATCAGTGGCATATTTCTATGCGGGTCTTACAAAAAAA  
GGATTAGGTTATTTTCGAAAATATATTCAACCAACCCCAATCCTTTTACCCATTAACATC  
TTAGAAGATTTACAAAACCTTTATCACTTAGTTTTCGACTTTTTCGGGAATATCTTAGCT  
GATGAATTAGTAGTTGTTGTTCTTGTTCCTTTAGTACCTTTAGTAGTTCCTATACCTGTCA  
TGCTCCTTGGATTATTTACAAGTGGTATTCAAGCTCTTATTTTTGCAACTTTAGCCGCGG  
CTTATATAGGTGAATCCATGGAAGGCCATCATATGATATTTCAACCTTAGAGCATATATT  
AACTCACATTTCTTTTCGATCGTTTCAATTGTAATTACAATTCATTTGATAACCTTTTAA  
GTCGATGAAATCGTAAACTATAAGATTTCGTCAGAAAAGGGCATAATAGTTACTTTTTT  
CTGTATAACAGGATTATTAGTTACTCGTTGGATTTCTTCGGGACATTTCCCACTAAGCGA  
TTTATATGAATCATTAAATTTTCTTTTCATGGAGTTTCTCCCTTATTCATATAATTCCGTAT--  
---AACAAATGTTTTAATTTTAAAGTAAAATAACTGGCCCAAGTGCTATTTTTACCCAAGGCT  
TTGCTACTTCAGGTATTTTAACTGAAATACCAATCTGGAATATTAGTACCTGCTCTTC  
AATCCGAGTGGTTAATAATGCACGTAAGTATGATGATATTGGGCTATGCAGCCCTTTTAT  
GTGGATCGTTATTATCAGTAGCACTTCTAGTGATTACATTTGAAAAAACAGAAAGCTT  
TTTTAT-----AAGGAAAATGTTTTAGAAAATACTTCT-----GCTAAAA  
ATTATTACAGGTCCCAATTGATTCAACAATTGGATTATTGGAGTTATCGGGTTATTAGTTT  
AGGATTTACTTTTTTAACCATAGGAATCCTTTTCGGGAGCGGTATGGGCTAATGAAGCGT  
GGGGTTCGATTGGAATTGGGACCCAAAAGAACTTGGGCATTTATTACTTGGATCGTA  
TTTGCAATTTATTTACATACTCGAACAAATATAAATTTACGGGGTGCAAATTTCTGCAATTA

TAGCAACTATAGGTTTTCTTATAATTTGGATATGCTATTTTGGGGTCAATCTATTAGGAAT  
AGGGTTACATAGTTATGGTTCTTTTACATCAACAATGGCAAAAAAGAAAGCATTCACTC  
CTCTTTTCTATCTTGCATCTATAGTATTTTTGCCCTGGTGGATTCTTTCTCAGTTAATAAA  
TGCTGGAATCTTGGGTTACTAATTGGTGGAACTACTGGGCAATCCGAAATTTTTTTGAAT  
AATATTCAAGAAAAGAGTCTTCTAGAAAAATTCATAGAATTAGAGGAACTCCTCCTCTT  
GGACGAAATGATCAAGGAATACTCGGAAACACATCTCGAAGAGTTTGGGATA---ATCCA  
TAAAGAAACGATCCAATTAATCAAGATACAAAATGAGAATCGTATCCATACGATTTTGC  
ACTTCTCGACAAATATAATCTGTTTTATTATTCTAAGCGGGTATTCAATTTTGGGTAATGA  
AAAACCTGTTATTCTTAACCTCTGGGCTCAGGAATTTCTATATAACTTAAGTGACACAGT  
AAAAGCTTTTTCTATTCTTTTATTAACCTGATTTATGTATTGGATTCCATTCACCCACGGT  
TGGGAATTAATGATTGGCTCTATCTATAAAGATTTTGGATTTGTTTCATAATGATCAAATTA  
TATCTGGTCTTGTTCACCTTTCCAGTCATTCTTGATACAATTTTTAAATATTGGATTTT  
CCGTTATTTAAATCGTCTGTCTCCGTCACCTGTAGTTATTTATCATTCAATGAATGACATG  
CCTATTGGTGTTCAAAAGTTCCTTTCCGAAGTCCTGGAGAGGAAGATGCATCTTGGGT  
TGACGTATACAACCGACTTTATCGAGAAAGATTACTTTTTTTAGGCCAAGGGATTAATA  
GCGAGATTTCGAATCAACTTATTGGTCTTATGGTATATCTCAGTATCGAGGATGAGACCA  
AAGAGCTGTATTTGTTTATAAACTCTCCTGGGGGCTGGGTAATACCTGGGATCGCTATTT  
ATGATACTATGCAATTTGTGCGACCAGATGTCCATACAGTATGCATGGGATTAGCCGCTT  
CAATGGGATCTTTTATCCTGGTTCGGAGGAGAAATTACCAAACGTCTAGCATTCCCTCAC  
GCTAGGGTAATGATGCATCAACCTGCTAGTGGTTATTATGAGGCACAAACAGGCGAATT  
TGTCCTGGAAGCGGAAGAAGACTGTTGAAACTGCGTGAAACCCTCACAAGGGTTTATGTA  
CAAAGAACGGGCAAACCTTATGGGTTGTATCCGAAGATATGGAAAAAGATGTTTTTAT  
GTCAGCAACAGAAGCCCAAGCTTATGGAATTGTTGATCTTGTAGCGGTTGA  
A????????????????????????????????????????????????????????????  
????????????????????????????????????????????????????????????  
????????????????????????????????????????????????????????????  
????????????????????????????????????????????????????????????  
ATGGAAGAAATCCAAAGATATT  
TACAG---GATAGCTCGCAACAACAACACTTCCTATATCCACTTATCTTTCAGGAGTATATT  
TATGCACTTGCTCATGATCATGGTTTACCAGGTTATAACAATCAATTTAGTTTACTAATTG  
TGAAACGTTTAATTACTCGAATGTATCAACAGAATCATTTTCTTATTTCTACTAATGATTC  
TAACAAAATACATTTTTGGGGAAAGAGTTTGTATTCTCAAATGATATCAGAGGGATTG  
CATTTATTGTGGAAATCCATTTTCTCTACGATTAATATCTTCTTTAATTTAAAATCTCAT  
AATTTACGATCAATTCATTCAACATTTCTTTTTTAGAGGACAATTTTTCACATCTAAATT  
ATGTATTAGATATACTAATACCCTATCCCGTTCATCTGGAAATCTTGGTTCAAACCTCTTCG  
CTATTGGGTAAGAGATGCCTCTTCTTTACATTTATTACGATTCTTCTCCACGAATATTGG  
AATTTGAATAGTCTTATTACTCCCGGT---TACTCCTTTTCAAAAAAAGATTCTTCTTTTT  
CTTATATAATTCTTATGTATATGAATGCGAATCCACTTTTCGCTTTTCTACGGAACCAATCT  
TCTCATTTACGACCAACATCTTTTGGAGCCCTTCTTGAACGAATATATTTCTATGGAAAA  
ATAGAACGTCTTGTAGAAGTCTTTGCT---GATTTGACCCTATGGTTATTCAAGGATCCTTT  
CATGCATTATGTTAGGTATCAGGGAAAATCAATTCTGGCTTCAAAGGGACGTTTCTTT  
TGATTAATAAATGGAAATTTTACCTTGTCATTTTTGGCAATGTCATTTTTCTCTGTGTTT  
TCACACAGGAAGGATCCATATAAACCAATATCCAACCATTCCCGTGACTTTATGGGCTA  
TCTTTCAAGTGTGCGACTAAATCCTTCAATGGTACGTAGTCAAATGTTAGAAAATTCAT  
TTATAATCAATAATGCAATT-----AAGAAGTTCGATACCCTTGTTCAAATTAATCCTTTGAT  
TGGATCATTAGCTAAAGAAAACCTTTTGTACCGTATTAGGGCATCCCATTAGTAAACCGG

TTTGGTCCGATTTATCAGATTCTGATATTATTGACCGATTTGGGCGTATATGCAGAAATCT  
TTTTCAATTATTATAGCGGATCTTCCAAAAAAGACTTTATATCGAATAAAGTATATACTT  
CGACTTTCTTGTGCTAGAACTTTAGCTCGGAAACACAAAAGTACTGTACGCACTTTTTT  
GAAAAGATCGGGCTCGGAATTATTGGAAGAATTCTTAACGTCGGAAGAACAAGTTCTT  
TCTTTGACCTTCCCACGACGGATTTGGTATTTGGATATTTTTTGTATCAATGATCTGGCG  
AATTATCAAAATGATAATTGAT---ACAACAGAAATAGAG---ACTATCAATTCTTTTTCCAAA  
TTGGAATCC---TTAAAAGAAGTCTATGGAATCATATGGATGCTTGTCCCTATTTTACTCT  
TGTATTAGGAATCACAATAGGTGTACTAGTAATTGTTTGGTTAGAAAGAGAAATATCTGC  
AGGAATACAACAACGTATCGGACCTGAATATGCCGGCCCTTTAGGAATTCTTCAAGCTC  
TAGCAGATGGGACAAAACACTACTTTTTAAAGAGAACCTTATTCCATCTACAGGAGATCCT  
CGTTTATTAGTATCGGACCATCCATAGCAGTAATATCTATCTTTCTAAGTTATTTCAGTAA  
TTCCTTTTTGGTGATCACCTTGTCTAGCCGATCTTAGTATTGGTGTTTTTTTATGGATTGC  
CATTTCAAGTGTGGCTCCCGTTGGACTTCTTATGTCAGGATATGGATCAAATAATAAATA  
TTCCTTTTTAGGTGGTCTACGGGCAGCTGCCAATCAATTAGTTATGAAATACCATTAGC  
TCTATGTGTGTTATCAATATCTCTACTATCTAACAGTTCAAGTACAGTTGATATAGTGGAA  
GCGCAGTCAAATATGGTTTTTTTAGGGTGAATTTGTGGCGTCAACCCATCGGGTTTTAT  
CGTTTTTCTAATTTCTTCTCTAGCCGAGTGTGAAAGATTACCTTTTGATTTACCAGAAGC  
AGAAGAAGAATTAGTAGCAGGGTATCAAACCGAATATTCAGGTATCAAATTTGGTTTTAT  
TTACATTGCTTCATATCTGAATCTACTAGTTTCTTCATTATTTGTAACAGTTCTTTACTTG  
GGAGGTTGGAATCTTTCTATTCCGTACATATTTGTTCCCTGAGTTATTTGGCATAAATAAA  
AGGGGTAAAGTCTTTGGAACATTAATTGGTATCTTTATTACATTAGCCAAAACCTTATTTG  
TTTTTGTTCAATTCCTATTGCAACAAGATGGACTTTACCGAGGCTGAGAATGGACCAACT  
ATTAAATCTTGGATGGAAATTTCTTTTACCTATTTCTCTAGGTAATCTATTATTGACAAC  
TCGTCCCAACTTCTTTCATTGATGATCTGGCATGTACAGAATGAAAACCTTCATTCTCGAT  
TCTACGAGAATTTTTATGAAAGCCTTTCATTTGCTTCTCTTCGATGGAAGTTTGATTTTC  
CCAGAATGTATCCTAATTTTTGGCCTAATTTCTTCTGATGATCGATTCAACCTCTGATC  
AAAAAGATATACCTTGGTTATATTTTCATCTCTTCAACAAGTTTAGTAATGAGCATAACGG  
CTCTATTGTTCCGATGGAGAGAAGAACCCTATGATTAGCTTTTTCGGGAAATTTCCAAACG  
ACAATTTCAACGAAATCTTTCAATTTCTTATTTTACTATGTTCAACTCTATGTATTCCTC  
TATCCGTAGAGTACATTGAATGTACAGAAATGGCTATAACAGAGTTTCTCTTATTTCGTAT  
TAACAGCTACTCTAGGGGGAATGTTTTTATGCGGTGCTAACGATTTAATAACTATCTTTG  
TAGCCCCAGAATGTTTCAGTTTATGCTCCTACCTATTATCTGGATATAACCAAGAAAGATG  
TACGGTCTAATGAGGCTACTATGAAATATTTACTCATGGGTGGGGCAAGCTCTTCTATT  
TGGTTCATGGTTTCTCTTGGCTATATGGTTCATCCGGGGGAGAGATTGAGCTTCAAGAA  
ATAGTAAACGGTCTTATCAATACACAAATGTATAACTCCCCAGGAATTTCAATTGCGCTC  
ATATTCATTACCGTAGGAATTGGGTTCAAGCTTTCCCCAGCCCCTTCTCATCAATGGACT  
CCTGACGTATACGAAGGATCTCCCACTCCAGTCGTTGCTTTTCTTCTGTTACTTTCGAA  
AGTAGCTGCTTCAGCTTCAGCCACTCGAATTTTCGATATTCTTTTTATTTCTCATCAA  
CGAATGGCATCTTCTTCTGGAAATCCTAGCTATTCTTAGCATGATATTGGGAAATCTCAT  
TGCTATTACTCAAACAAGCATGAAACGTATGCTTGCATATTTCGTCCATAGGCCAAATCG  
GATATGTAATTATTGGAATAATTGTTGGAGACTCAAATGATGGATATGCAAGCATGATAA  
CTTATATGCTGTTCTATATCTCCATGAATCTAGGAACTTTTGCTTGCATTGTATTATTTGGT  
CTACGTACCGGAACTGATAACATTCGAGATTATGCAGGATTATACACAAAAGATCCTTTT  
TTGGCTCTCTTTTAGCCCTATGTCTCTTATCCCTAGGAGGTCTTCTCCACTAGCAGGT

TTTTTCGGAAACTCTATTTATTCTGGTGTGGATGGCAGGCAGGCCTATATTTCTTGTT  
TTAATAGGACTCCTTACAAGCGTTGTTTCTATCTACTATTATCTAAAAATAATCAAGTTAT  
TAATGACTGGACGAAACCAAGAAATAACCCCTCACGTGCGAAATTATAGAAGATCCCC  
TTTAAGATCAAACAATTCCATCGAATTGAGTATGATTGTATGTGTGATAGCATCTACTATA  
CCAGGAATATCAATGAACCCGATTATTGCAATTGCTCAGGATAGCCTTTTTATGTTTCTG  
CTTTACGAATATGATTTTTTTTTGGGCATTTCTAATAATATCAATCCTTGTTCCTATTTTGGC  
ATTTTTCATTTCCGGAGTGTTAGCCCCAATTAGCAAAGGGCCGGAGAAACTTTCTACTT  
ATGAGTCGGGTATAGAACCAATGGGCGATGCTTGGTTACAATTTAGAATCCGTTATTATA  
TGTTTGCTCTAGTTTTTGTGTTTTTGATGTTGAAACGGTTTTTCTTTATCCATGGGCAAT  
GAGTTTCGACGTATTGGGTGTATCTGTATTTATAGAAGCTTTCATTTTCGTGCTGATCTTA  
ATTATTGGTTTAGTTTATGCATGGCGAAAGGGGGCATTGGAATGGTCTACGAATTATTTT  
CCTTGGTTAACAATAATTGTCGTTTTTCTATATTTGCGGGTTCCTTAATTTTCTTTCTTC  
CCCATAAAGGAAATAGGGTAATTAGGTGGTATACAATTTGTATATGTATTTTAGAACTCC  
TTCTAACGACTTATGCATTTTGTATCATTTCCAATTGGATGATCCATTAATCCAAGT  
GGAGGATTATAAATGGATCGATTTTTTTGATTTCCATTGGAGATTAGGAATAGATGGACT  
TTCTATAGGACCCATTTTATTAACAGGATTTATCACTACTTTAGCGACTTTAGCGGCTTG  
GCCAATTACTCGAGATTCTCGATTATTCCATTTTATCATGTTAGCAATGTACAGTGGTCA  
AATTGGATCATTTTCATCCCGGACCTTTTACTTTTTTTCATCATGTGGGAGTTAGAATT  
AATCCTGTTTATCTACTTCTAGCCATGTGGGGAGGAAAGAAACGTCTGTACTCAGCTA  
CAAATTTATTTTGTACACGGCAGGGGGTCTGTTTTTCTATTAATGGGAGTTTGGGTG  
TTGCTTTATATGGTTCTAATGAACCAACATTAATTTTGAACATTAGTTAATCAGTCATA  
TCCTGTGGTTTTAGAAATAATCTTCTATATTGGATTTTTTATTGCTTTTGCTGTCAAATTG  
CCCATTATCCCTCTACACACATGGTTACCAGATACCCATGGAGAAGCACATTACAGTAC  
TTGTATGCTTCTAGCCGGAATCTTATTAATAAATGGGAGCGTATGGATTAATTCGAATCAA  
TATGGAATTACTACCTCACGCCATTCTATATTTTCTCCTTGGTTGATGATAATAGGTACA  
ATACAAATAATCTATGCAGCTTCAACATCTCTTGGCCAACGGAATTTAAAAAAGAAT  
AGCCTATTCTCTGTCTCTCATATGGGTTTCATAATTATAGGAATTAGTTCTCTAACCGAT  
ACGGGACTTAATGGAGCCCTTTTACAAATAATCTCTCATGGATTTATTGGTGCTGCACTT  
TTTTTCTTGGCGGGAACGACTTATGATAGAATCCGCCTTGTTTATCTTGACGAAATGGG  
CGAATAGCTATTCCAATGCCAAAATGTTACGATGTTTCAGTAGCTTTTCGATGGCTT  
CCCTTGCAATACCAGGTATGAGTGGTTTTGTGCGAATTGATAGTATTTTTTGGAAATA  
TTACCGGCCAAAATATGTTTTAATTCCAAAATACTAATTACTTTTGTAAATGGCAATTG  
GAATGATATTAACTCCTATTTATTCAATTATCTATGTCACGCCAGATGTTCTATGGATACAA  
GTTATTTAATGCCCCGAAGGATTCCTTTTTTGTATTCTGGACCGCGAGAGTTATTTCTTTC  
GATTTCCAATTTTTTACCCGTAATAGGTATTGGTATATACCCGGATTTTCGTTCTTTCATTA  
GCAGTTGATAAGGTCGAAGTTATTCTATCTAATTTTTTTTTATAGAATGATTCTCGAACATG  
TACTTGTTTTTGAGTGCCTATTTATTTTCTATCGGTATCTACGGATTGATCACAAGTCGAAA  
TATGGTTAGAGCCCTTATGTGTCTTGAACCTATATTGAATGCGGTTAATATCAATTTTGT  
ACATTTTCTGATTTTTTTGATAATCGTCAATTAAGGAGACATTTTCTCAATTTTGTTA  
TAGCTATTGCAGCCGCTGAAGCAGCCATTGGACTGGCTATTGTTTCATCAATTTACCGTA  
ACAGAAAATCAACTCGTATCAACCAATCTAATTTGTTGAATAATATGGAACAGACATAT  
GAATATGCGTGGATCATACTTTCATTCCACTTCCAGTCCCTATGTTAATAGGAGCGGGA  
CTTATTTCTTTTCCAACGGCAACAAAAGTTTTTCGCCGTATGTGGGCTTTTCAGAGTGT  
TTTATTGTTAAGCATAGTCATGATTTTTTCAATCTACCTGTCTATTTCAGCAAATAAATAGC

AGTTCCTTTTATCAATATGTATGGTCTTGGATCATCAATAATGATTTTTCTTTAGACTTCG  
GATACTTGATCGACCCACTTACTTCTATTATGTCAATATTAATCACTACTGTTGGAATTAT  
GGTTCCTTATTTATAGTGATAATTATATGGCTCATGATCAAGGCTATTTGAGATTTTTTGCTT  
ATATGAGTTTTTTTCAGTACTTCCATGTTGGGATTAGTTACTAGTTCTAATTTGATACAAAT  
TTATATTTTTTGGGAATTGGTTGGGCTGTGTTCTATCTATTAATAGGATTTTGGTTTACA  
CGACCTGTTGCGGCAAATGCTTGTCAAAAAGCGTTTGTAACATAATCGTGTAGGGGATTT  
TGGTTTATTATTAGGAATTTTAGGTTTTTATTGGATAACAGGAAGTTTCGAATTTAGGGA  
TTTATTCGAAATATTCAATAACAATGAGGTCAATTTTTTATTTGTTACTTTAATGCGCTGTT  
CTCTTATTTGCCGGTGCAGTTGCTAAATCCGCCAATCCCCCTTCATGTATGGTTACCT  
GATGCCATGGAGGGACCTACTCCTATTTCCGGCTCTTATACATGCTGCTACTATGGTAGCG  
GCGGGAATTTTTCTTGTAAGCTCGGCTTCTTCTCTTTTCAGAGTTATACTTATATAATGT  
ATTTGATCTCGTTATAGGAATAATAACAGTATTATTAGGAGCTACTTTAGCTCTTGCTCA  
AAAAGACATTAAGAGAGGTTTAGCCTATCCACAATGTCTCAATTGGGTTATATGATGTT  
AGCTCTAGGTATGGGGTCTTATCGAAGCGCTTTATTTCAATTTGATTACTCATGCTTATTCC  
AAAGCATTATTATTTTTAGGATCCGGATCCATTATTCATTCAATGGAACTATTGTTGGAT  
ATTCTCCAGCTAAAAGCCAGAATATGGGTCTTATGGGAGGTTAAGAAAACATGTACCA  
ATTACCCAAATCACATTTTTATTAGGTACACTTTCTCTTTGTGGTATTCCACCTCTTGCTT  
GTTTTTGGTCCAAAGATGAAATTTCTTAATGATAGTTGGTTGTATTCCGCAATTTTCGCAA  
TAATAGCTTGGGCCACGGCGGGATTAACCGCATTTTATATGTTTCGGATCTATTTACTTAC  
TTTTGAAGGACATTTAAACGTTTCAATTTCAAATTTATGGTGGGAAACAAAAACCCCTT  
TCTATCAATATCTCTATGGGGTAAA-----AAGGGAGTTAAGAAA---TTATTAACA-----  
--ATGAATTTTTTTTCATTTGAGCATAAAACGGTTTATTCCTATCCTTATGAATCGGACAAT  
ACTATGCTATCCCAATATTTGTATTAGGACTCTTTACTTTGTTTGTGGATCTATAGGAA  
TTCCTTTCAATTTGGATATATTATCGAAATGGTTAGCTCCATCTATAAATCTTTTGCATCA  
AAAGTCGAAT--TCGATGGATTGGAATGAATTTTTTAAAGGATGCAGTCCTTTCCGTCAGT  
ATAGCTTATTTTCGGAATATTTTTAGCATCCTTTTTATATAAACCTATTTATTCTTCTTTAAA  
AAATTTTGGATTAATTAATTTCTTTTGTATTCTGTGGGACAAAATTATCAATGGCATATAT  
GATTGGTCATATAATCGTGCTTACATAGATGCTTTTTTATACAAGATTCTTTGTTGGTGGGA  
TAAGAGGATTAGCTGAATTTATTCATTTTTTTGATCGACGAGTAATTGATGGGATGACTA  
ACGGGGTTGGGGTTATTAGTTTCATTGTAGGAGAAGGTATCAAATATATAGGGGGCGGA  
--CGCATCTCTTCTTATCTTTTCTTATATTTAGCTTATGTTTCAGTCTTTTTTATTAGTTTATT  
ACATGGATTTATCTGAACCAATACATGATTTTCTTTTAGTCTTTCTAGGATCGGGTCTTAT  
ATTAGGGGGTCTAGGGGTGGTATTACTTCCAATCCAATTTATTCTGCCTTTTCCTTGGG  
ATTGGTTCTTGTGGTACATCGTTATTTCTATATTCTATCTAACTCCTATTTTGTAGCTGCTG  
CGCAGCTACTTATTTACGTAGGAGCTATAAATGTTTTAATCATTTTTGCTGTGATGTTTCAT  
GAATGGTTCAGAATATTACAAAGATTTTCATCTTTGGACCGTAGGAGATGGAATTACTT  
CGATGGTTTGTATAAGTCTTTTTTATTTCACTAATTACTACTATTTTCAGATACTTCATGGTA  
CGGGATTATTTGGACTACAAGATCAAACCAGATTATAGAGCAAGATTTTCTAAGTAATA  
GTCAACAAATTGGAATTCATTTATCAACAGATTTTTTTCTTCCATTTGAACTAATTTCAAT  
AATCCTTTTATAGATGCTTTAATAGGTGCAATTGCTGTAGCTCGTCAAATGACTACACCAAC  
TACAAGAAAAGACCTCATGATAGTCAATATGGGGCCTCAGCACCCATCAATGCACGGC  
GTTCTTCGACTCATCGTTACTCTAGATGGTGAAGATGTTGTCGACTGCGAACCAATATT  
GGGTTATTTACATAGAGGGATGGAGAAAATTGCGGAAAATCGAACAAATTATCCAATATT  
TGCCTTATGTAACACGTTGGGATTATTTAGCTACTATGTTTACAGAAGCAATAACCATAA



ATGGACCCGAACAATTAGGCAATATTCAAGTACCTAAAAGAGCTAGCTATATCAGAGTC  
ATTATGTTGGAGTTGAGTCGGATAGCTTCTCATTGTTATGGCTCGGTCTTTTATGGCG  
GATATTGGTGCGCAGACCCCTTCTTCTATATTTTCGAGAAAGAGAATTAATATATGAC  
CTCTTCGAAGCTGCCACCGGTATGCGAATGATGCATAATATTTTCGTATCGGAGGGGT  
GGCTGCCGATCTACCCTATGGATGGATAGATAAATGTTTGGATTTTTGCGATTATTTTTA  
ACGGGGATTGCTGAGTATCAAAACTTATTACCCGGAATCCTATTTTTTTAGAACGAGT  
TGAAGGCGTAGGCATTATTGGGGGAGACGAAGCATTAAATTGGGGTTTATCGGGACCA  
ATGCTACGAGCTTCCGGAATAGAATGGGATCTTCGTAAAGTTGATCATTATGAGTCTTAC  
GACGAATTTGATTGGCAGGTTCAATGGCAACGAGAAGGGGATTATTAGCTCGTTATTT  
AGTACGAATCGGTGAAATGACCGAATCCATAAAGATTATTCAACAGGCTCTGGAAGGA  
ATTCCAGGAGGGCCTTACGAAAATTTAGAAATACGACGTTTTGACAGATTA AAAAGATCC  
TGAATGGAATGATTTTGAATATCGGTTTATTAGTAAAAACCTTCTCCAACTTTTGAATT  
GTCGAAACAAGAACTTTATGTGAGAGTTGAAGCCCCAAAAGGAGAATTGGGAATTTTT  
CTCATAGGAGATCAGAGCGTTTTTCTTGGAGATGGAAAATTTCGCCACCAGGTTTTAT  
CAATTTGCAAATCTTCTCAGTTAGTTAAAAGAATGAAATTGGCTGATATTATGACAAT  
ACTAGGTAGCATAGATATCATTATGGGAGAAGTTGATCGTATGCTCCCTATGATAACTGA  
ATTCATAAATTATGGTCAACAAACAATACGAGCCGCCAGATATATCGGCCAAGGTTTCAT  
GATTACCCTGTCCACGCAAATCGTTTACCTGTA ACTATTCAATACCCCTACGAAAAATT  
GATCACATCGGAACGTTTCCGGGGCCGAATACACTTTGAATTTGATAAATGTATTGCTT  
GTGAAGTATGTGTGCGTGTATGTCCTATAGATTTACCCGTTGTTGATTGGAAGTTGGAA  
ACCGATATTCGAAAGAAACGGTTGCTTAATTACAGTATTGATTTTGAATCTGTATATTT  
TGTGGTAATTGCGTTGAGTATTGCCCAACA AATTGTTTATCAATGACCGAAGAATATGA  
ACTTTCTACTTATGATCGTCACGAATTGAATTATAATCAAATCGCTTTGGGTCGCTTACC  
AATGTCAGTAATTGATGATTACACAATTTCGAACAATTTTCGAATTTA-----  
-----ATGCAGGGTCGTTTGTCTGCTTGGCTAGTCAAGCATGGGCTAATTCATA  
GATCTTTGGGCTTTGATTACCAAGGAATAGAGACTTTACAAATAAAGCCCCGAGGATTGG  
CATTCCATTGCTGTCAATTTTTTATGTATATGGGTACAATTATCTCCGCTCTCAATGTGCCTA  
TGATGTAGCGCCTGGCGGGCTGTTAGCTAGTGTGTATCATCTTACGAGAATAGAGGATG  
GTGTGGATCAACCAGAAGAGGTATGCATAAAAGTATTTGCCTCCAGGAGGAATCCTAG  
AATCCGCTCTGTTTTCTGGGTTTGGAAAAGTGTGGATTTTCAAGAACGAGAATCATATG  
ATATGTTGGGAATCTCTTATGATAATCATCCACGCTTGAAACGTATCTTAATGCCTGAAA  
GTTGGATAGGATGGCCCTTACGTAAGGATTATATTGCCCCCAATTTTTATGAAATACAAG  
ATGCTCAT-----  
-----ATGGTCTTAGTCTCCTGAATATTACAGACAATAAAAAGAAAAACGGAAAAAATAAG  
ATTGAGACA---GTTATGAATTCATTACAGTTTCTTTACTTGATCGAACAGCCCAA AATT  
CAGTTATTTCAACTACATTAATGATCTTTCAAATTGGTCAAGACTCTCTAGTTTATGGC  
CGTTTCTCTATGGTACCAGTTGTTGCTTCAATTGAATTTGCTTCACTAATAGGCTCACGCT  
TCGACTTTGATCGTTATGGACTAGTACCAAGATCGAGTCCTAGACAAGCGGATCTAATT  
TTAACAGCCGGAACAGTAACAATGAAAATGGCCCCCTTTTAGTGAGATTATATGAGCA  
AATGCCTGAACCAAAATATGTGATTGCTATGGGAGCCTGTACAATTACAGGCGGGATGT  
TCAGTACCGATTCTTATAGTACTGTTTCGGGGAGTCGATAAGCTAATTCCTGTAGATGTCT  
ATTTGCCAGGTTGCCACCTAAACCGGAAGCAGTTATAGATGCTATAACAAGCTTCGT  
AAGAAAATATCTCGAGAACTCTATGAAGATCGAATTAGGTCTCAACGAGTGAATCGGT  
GTTTTACTACCAATCACAAGTTTCATGTTTCGACGCAGTATTCATACGGGAAATTATGATC

AAAGAGTTCTTTATCAACCACCATCTACTTCAGAGATCCCTACGGAAATCTTTTTCAAAT  
ACAAAAATTCAGTATCTTCCCCGAATTAGTGAATATGCAAAGTAGAAATGCTTTTTCTT  
GGCTAAAGAAACAGATTACTCGATCTATTTCCGTATCGCTCATGATATATATCTTAACTCG  
GACATCCATTTCAAGTGCATATCCCATTTTTGCACAGCAGGGTTATGAAAATCCACGAG  
AAGCGACTGGGCGTATTGTATGTGCCAATTGCCATTTAGCTAATAAGCCCGTGGAGATT  
GAGGTTCCACAAGCGGTACTTCCTGATACTGTATTTGAAGCAGTTGTTTGAATTCCTTA  
TGATATGCAACTGAAACAGGTTCTTGCTAATGGTAAAAAGGGGGGGTTGAATGTGGGG  
GCTGTTCTTATTTACCGGAGGGGTTTTGAATTAGCTCCGTCCGATCGTATTTCTCCCGAG  
ATGAAAGAAAAGATTGGCAATTTGTCTTTTCAGAGCTATCGCCCAATAAAAAAATAT  
TCTTGTGATAGGCCCTGTCCCTGGTAAAAAATATAGTGAAATAACCTTCCCTATTCTTTC  
CCCGGACCCTGCTACTAAGAAGGATGTTCACTTCTTAAAATATCCTATATACGTAGGCGG  
GAACAGGGGAAGGGGTCAGATTTATCCCGACGGCAGCAAGAGTAACAATACAGTTTAT  
AATGCTACAGCAGCAGGTATAGTAAGCAAAATCATACGAAAAGAAAAGGGGGATATG  
AGATAACCATAACGGATGCGTCGGAGGGACGGCAAGTGGTTGATATTATCCCTCCCGG  
ACCAGAACTTCTTGTTCGAGGGCGAATCTATCAAATTTGATCAACCATTAACGAGTA  
ATCCTAATGTAGGCGGATTTGGTCAGGGAGATGCAGAAATAGTACTTCAAGATCCATTA  
CGTGTCCAAGGACTTTTGTCTTCTTGGCATCTGTTATTTTGGCACAAATCTTTTTGGTT  
CTTAAAAAGAAACAGTTCGAGAAGGTTCAATTGGCCGAAATGAATTCATGAGTAAAG  
TATATGATTGGTTCGAAGAACGTCTCGAGATTCAAGCAATTGCGGATGATATAACTAGTA  
AATATGTTCCCTCCCACGTCAATATATTTTATTGTTTAGGGGGAATTACGCTTACTTGT  
TTTAGTACAAGTAGCTACTGGGTTTGCTATGACTTTTTTACTATCGTCCGACCGTTACTGA  
GGCTTTTGCTTCTGTTCAATACATAATGACTGAAGCCAACTTTGGTTGGTTAATCCGATC  
AGTTCATCGATGGTCGGCAAGTATGATGGTCCTAATGATGATCCTGCATGATTTTCGTGT  
GTATCTCACCGGCGGATTTAAAAACCTCGCGAATTGACTTGGGTTACCGGTGTGGTTC  
TGGCTGTATTAACCGCATCTTTTGGCGTAACTGGTTATTCCCTACCTTGGGACCAAATG  
GTTATTGGGCAGTGAAAATAGTAACAGGTGTCCCTGACGCTATTCCTGTAATAGGATCA  
CCTTTGGTGAATTAATGCGCGGAAGCGCTAGTGTGGGACAATCTACTTTGACTCGTTT  
TTATAGTTTACACACTTTTGTATTGCCGCTTCTTACTGCCGTATTTATGTTAATGCACTTT  
CCAATGATACGTAAACAAGGTATTTCTGGGCCTTTAATGGGAGTAACAAAAAACCTG  
ACTTGAATGATCCTGTATTAAGAGCTAAATTGGCTAAAGGTATGGGTCATAATTATTATG  
GAGAGCCCGCATGGCCTAATGATCTTTTATATATTTTCCAGTAGTAATCTAGGTACTAT  
TGCATGTAATGTAGGCTTAGCCGTTTTAGAACCATCAATGATTGGTGAACCGGCAGATC  
CGTTTGCAACCCCTTTGGAAATATTACCTGAATGGTATTTCTTTCCTGTATTTCAAATACT  
TCGTACAGTGCCCAATAAATTATTAGGGGTTCTTTTAAATGGTTTCAGTACCTGCGGGATT  
ATTAACAGTACCTTTTTTGGAGAATGTTAATAAATTCCAAAATCCATTCGCCGTCCAGT  
AGCGACGACTGTCTTTTTGATTGGTACCGCAGTCGCCCTTTGGTTGGGCATTGGTGCAA  
CATTACCTATTGATAAATCCCTAACTTTAGGTCTTTTTATGATTGAAGTTTTCTATTTGG  
AATCGTGTAGGTCTAATTCCTATTACTTTGGCTGGATTATTCGTAACCTGCATATTTACAA  
TATAGGCGTGGTGATCAGTTGGACCTTATGCTTACTATAACTAGTTATTTCCGTTTTCTAT  
TAGCGGCTTTAACTATAACCTCAGCTCTATTTATTGGTCTGAGCAAGATACGACTTATTA  
TGGATATAGTAAGTCTTGCTTGGGCTGCTTTAATGGTAGTCTTTACTTTTTCCCTTTCCT  
CGTAGTGTGGGGAAGGAGTGGACTCATGATTATTCGTTCCCGGAACCAGAAGTTAAA  
ATTTTGGTAGATAGGGATCCCGTAAAAACGTCTTTCGAGGAATGGGCCAGACCGGGTC  
ATTTCTCAAGAACAATAGCTAAAGGGCCTGATACTACCACTTGGATTGGAACCTACAT

GCTGATGCTCACGATTTTCGATAGCCATAACCAGTGATTTGGAGGAGATCTCTCGAAAAGT  
ATTTAGTGCACATTTTCGGTCAACTCTCCATCATCTTTCTTTGGCTGAGCGGCATGTATTT  
CCACGGTGCTCGTTTTTCTAATTATGAAGCGTGGCTAAGTGATCCAACCTCACATTGGGC  
CTAGTGCCAGGTGGTTTGGCCAATAGTGGGCCAAGAAATATTAATGGTGACGTACG  
CGGAGGTTTCCGAGGAATACAAATAACCTCTGGTTTTTTTCAGATTTGGCGAGCATCTG  
GAATAACTAGTGAATTACAACCTCTATTGTACAGCAATTGGGGCATTGGTCTTTGCAGCG  
TTAATGCTTTTTGCTGGTTGGTTTCATTATCATAAAGCGGCGCCAAAATTGGCTTGGTTT  
CAAGATGTAGAATCTATGCTGAATCACCATTTGGCAGGGCTACTAGGGCTTGGGTCTCT  
CTCTTGGGCGGGGCATCAAGTACATGTATCTTTACCGATTAACCAATTTCTAAACGCTG  
GAGTAGATCCTAAAGAGATAACCACTTCCCTCATGAATATATCTTGAATCGAGATCTTTTGG  
CTCAACTTTATCCCAGTTTTTGCCGAGGGAGCAACCCCATTTTTTCACCTTGAATTGGTCA  
AAATATGCGGACTTTCTTACTTTTCGTGGAGGATTAGATCCAGTAACTGGGGGTCTGTG  
GCTAACTGATATTGCCCATCACCATTTAGCTATTGCAATTCTTTTCCTGATAGCGGGTCA  
CATGTATAGGACCAACTGGGGTATTGGTCATGGACTAAAAGATATTTTAGAAGCTCATA  
AAGGTCCATTTACAGGTCAGGGCCATAAAGGCCTATATGAGATCCTAACAACGTCATGG  
CATGCTCAATTATCTCTTAACTTAGCTATGTTAGGCTCTTTAACCATTTGTTGTAGCTCATC  
ATATGTATTCCATGCCCCCTTATCCGTATCTAGCTACTGACTATGGTACACAACCTGTCATT  
GTTACACATCACATGTGGATTGGTGGATTCTCATAGTTGGTGCTGCCGCGCATGCAG  
CCATTTTTATGGTAAGAGATTATGATCCAACCTACTCGGTACAACGATCTATTAGATCGTG  
TCCTTAGGCATCGTGATGCAATCATATCCCATCTCAACTGGGCATGTATATTTCTAGGCTT  
TCACAGTTTTGGTTTGTATATTCATAATGATACCATGAGCGCTTTAGGGCGTCTCAAGA  
TATGTTTTTCAGATACCGCTATAACAATTACAACCCGTTTTTTGCTCAATGGATACAAAACAC  
CCATGCTTTAGCACCTGGTGCAACGGCTCCTGGTGCAACAGCAAGCACCAGTTTAACT  
TGGGGGGGTGGTGATTTAGTGGCAGTGGGTGGCAAGGTGGCTTTGTTGCCTATTCCATT  
AGGAACCGCCGATTTCTTGGTACATCACATTCATGCATTTACGATTCATGTGACGGTATT  
GATACTCTTGAAAGGTGTTCTATTTGCTCGCAGTTCCCGTTTGATACCGGATAAAGCAA  
ATCTTGGTTTTTCGTTTTCTTGTGATGGACCTGAAAGAGGGGGTACATGTCAAGTATCG  
GCCTGGGATCATGTCTTCTTAGGACTATTCTGGATGTACAATGCAATTTCCGGTAGTAATA  
TTCCATTTAGTTGGAAAATGCAGTCAGATGTTTGGGGCAGTGTAAGTGATCAAGGGG  
TAGTAACCTCATATCACGGGAGGAACTTTGCGCAGAGTTCTATTACTATTAATGGGTGG  
CTCCGCGATTTCTTATGGGCACAGGCATCCAGGTAATTCAGTCTTATGGTTCTTCATTA  
TCTGCATATGGCCTTTTTTTCTAGGTGCTCATTTTGTCTGGGCTTTTAGTTTAATGTTTC  
TATTCAGCGGACGTGGTTATTGGCAAGAACTTATTGAATCCATCGTTTGGGCTCATAATA  
AATTAAGTTGCTCCTGCTACTCAGCCGAGAGCCTTGAGCATTATACAAGGACGTGCT  
GTAGGAGTAACCCATTACCTTCTGGGTGGAATTGCCACAACATGGGCATTCTTCTTAGC  
AAGAATTATTACAGTAGGAATGGCATTACGATTTCCAAGGTTTAGCCAAGGCTTAGCTC  
AGGACCCCACTACTCGTCGTATTTGGTTTGGTATTGCTACCGCACATGACTTCGAGAGT  
CATGATGATATTACTGAGGAACGTCTTTATCAGAATATTTTTGCTTCTCACTTCGGTCAA  
TTAGCAATAATTTTTCTGTGGACTTCCGAAAATCTGTTTCATGTAGCTTGGCAAGGAAA  
TTTTGAGTCGTGGGTACAGGACCCTTTACATGTAAGACCTATTGCTCATGCAATTTGGG  
ATCCTCATTTTGGTCAACCGGCCGTGGAAGCTTTTACTCGAGGGGGTGCTCTTGGCCCA  
GTGAATATCGCTTATTCTGGTGTTTATCAGTGGTGGTATAACAATCGGTTTACGCACTAAC  
GAAGATCTTTATACTGGCGCTCTTTTTCTATTATTTCTTTCTGCCATATCCTTAATAGCAG  
GTTGGTTACACCTACAACCGAAATGGAAACCGAGCGTTTCTGGTTCAAAAATGCCGA

ATCTCGTCTGAATCATCATTTGTCAGGACTCTTTGGCGTAAGTTCCTTGGCTTGGACAG  
GGCATTAGTCCATGTTGCTATTCTGCATCCAGAGGTGAGTCCGTTCCGGTGAATAATT  
TCTTAGATGTATTACCGCATCCCCAAGGGTTAGGCCACTTTTTACAGGTCAATGGAATC  
TTTATGCTCAAAACCCCGATTCAAGTAGTCATTTATTTGGTACCGCCGAAGGGGCGGGA  
ACTGCCATTCTAACTCTTCTCGGGGGATTCCATCCACAAACGCAAAGTTTATGGCTGAC  
TGATATTGCCCATCACCATTAGCTATTGCATTTATTTTTCTCGTTGCTGGTCATATGTATA  
GAACCAATTTCCGGGATTGGGCACAGTATGAAAGATCTTTTAGATGCACATATCCTCCG  
GGGGACGATTGGGGCGTGGACATAAGGGTCTTTACGACACAATCAACAATTCGCTTC  
ATTTTCAATTAGGCCTTGCTCTAGCTTCTTTAGGGGTATTACTTCTTTGGTAGCTCAAC  
ACATGTACTCTTTACCTGCTTATGCATTATAGCACAAGACTTTACTACTCAAGCTGCAT  
TATATACCCACCACCAATATATCGCAGGATTCATCATGACAGGAGCTTTTGCTCATGGAG  
CTATATTGGTCATTAGAGATTACAATCCGGAGCAAAATGAAGATAATGTATTGGCAAGA  
ATGTTAGATCATAAAGAAGCTATCATATCTCATTTAAGTTGGGCCAGCCTCTTCTGGGA  
TTCCATACCCCTGGGACTTTATGTTTATAATGATGTCATGCTTGCCTTTGGCACTCCGGAG  
AAGCAAATCTTGATTGAACCTATATTTGCTCAATGGATAACAATCCGCTCATGGTAAACT  
TCATATGGGTTTCGATGTACTTTTATCTTCAACGAGTGGCCCAGCATTCAATGCGGGTCG  
AAGCATCTGGTTGCCGGGTTGGTTAAATGCTGTTAATGAA-----AATAGTAATTCATTATT  
CTTAACAATAGGTCCTGGAGACTTTTTGGTTCATCATGCTATTGCTCTTGGTTTACATAC  
AACTACATTGATCTTAGTAAAAGGTGCTTTAGATGCACGTGGTTCCAAGTTAATGCCAG  
ATAAAAAGGATTTCCGGTTATAGTTTTCCGTGCGATGGCCCAGGACGAGGCGGTACTTGT  
GATATTTCCGCATGGGACGCGTTTTATTTGGCAGTTTTTTGGATGTTAAATACTATTGGAT  
GGGTTACTTTTTATTGGCATTGGAAGCACATCACATTATGGCAGGGTAACGTTTCACAG  
TTAATGAATCTTCCACTTATTTGATGGGCTGGTTAAGGGATTATTTATGGTTAAACTCTT  
CACAACCTTATCAATGGATATAACCCTTTTGGTATGAATAGTTTATCGGTTTGGGCATGGA  
TGTTCTTATTTGGACATCTTGTGTTGGGCTACTGGATTATGTTCTTAATTTCTTGGCGTGG  
ATATTGGCAGGAATTGATTGAAACTTTAGCATGGGCTCATGAACGCACACCTTTGGCCA  
ATTTGATTCGTTGGAGAGATAAACAGTGGCCCTTCCATTGTACAAGCAAGATTGGTT  
GGATTAGCTCACTTTTCTGTAGGTTATATATTCACTTATGCGGCTTTCTTGATTGCCTCTA  
CGTCGGGCAAATTTGGTATGTCACATTCAGTAAAGATTTATGATACGTGTATAGGATGTA  
CTCAATGTGTCCGAGCCTGCCCCACCGATGTATTAGAAATGATACCTTGGGACGGTTGT  
AAGGCTAAACAATTTGCTTCCGCTCCACGAACAGAGGACTGTGTTGGTTGTAAGAGAT  
GTGAATCCGCCTGTCCAACCTGATTTCTTGAGTGTACGAGTTTATTTATGGCATGAAACA  
ACTCGCAGTATGGGTCTAGCTTATATGACAAATTTGAACCTTCCATCTATTTTTGTGCCG  
TTAGTAGGCCTAGTCTTTCCGGCAATTGCAATGGCTTCTTTATTTCTTCATGTTCAAAAA  
AACAAGATTGTTATGCGAGATCTAAAAACATATCTCTCTGTGGCACCAGTACTAAGTAC  
GCTATGGTTCGTGGCTTTAGCAGGTCTATTGATAGAGATTAATCGTTTTTTCCCGGATGC  
GTTGACATCCCCTTTTTT-----ATGACTGCAATTTTAGAGAGACGCGAAAGCGAAAGCC  
TATGGGGTCGCTTCTGTAACCTGGATAACTAGCACTGAAAACCGTCTTTACATTGGATGG  
TTTGGTGTGTTTATGATGATCCCTACCTTATTGACGGCAACTTCTGTATTTATTATGCCTTCA  
TTGCTGCTCCTCCAGTAGACATTGATGGAATTCGTGAACCTGTTTCAGGGTCTCTACTTT  
ACGGAAACAATATTTTCCGGTGCCATTATCCTACTTCTGCAGCTATAGGTTTACATTT  
TTACCAATCTGGGAAGCGGCATCCGTTGATGAATGGTTATACAACGGTGGTCCTTATG  
AACTAATTGTTCTACACTTCTTACTTGGCGTAGCTTGTACATGGGTCGTGAGTGGGAG  
CTTAGTTTTCCGTCTGGGTATGCGACCTTGGATTGCTGTTGCATATTCAGCTCCTGTTGCA

GCTGCTACCGCAGTTTTCTTGATCTACCCAATCGGTCAAGGAAGTTTTCTGATGGTAT  
GCCTCTAGGAATCTCTGGTACTTTCAATTCATGATTGTATTCCAGGCTGAGCACAACAT  
CCTTATGCACCCATTTACATGTTAGGCGTAGCTGGTGTATTCGGCGGCTCCCTATTCAG  
TGCTATGCATGGTTCCTTGGTAACCTCTAGTTTGATCAGGGAAACCACAGAAAATGAAT  
CTGCTAATGAAGGTTACAGATTTCGGTCAAGAGGAAGAACTTATAATATCGTAGCCGCT  
CATGGTTATTTTGGCCGATTGATCTTCCAATATGCTAGTTTCAACAACCTCTCGTTCGTTA  
CACTTCTTCCTAGCTGCTTGGCCTGTAGTAGGTATCTGGTTTACCGCTTTAGGTATCAGC  
ACTATGGCTTTCAACCTAAATGGTTTCAATTTCAACCAATCTGTAGTTGACAGTCAAGG  
TCGTGTAATTAACACTTGGGCTGATATCATAACCGTGCTAACCTTGGTATGGAAGTTAT  
GCATGAACGTAATGCTCATAACTTCCCTCTAGACCTAGCTGCTATCGAAGCTCCATCTAC  
AAATGGAATGGGTTTGCCTTGGTATCGTGTTCATACCGTTGTATTGAATGATCCCGGTCG  
GTTGCTTTCTGTTCAATAATGCATACAGCTCTGGTTGCTGGTTGGGCCGGTTCGATGGC  
TCTGTATGAATTAGCGGTTTTTGTATCCTTCTGATCCTGTTCTTGATCCAATGTGGAGACA  
GGGTATGTTTCGTTATAACCCTTCATGACTCGTTTAGGAATAACCAATTCATGGGGCGGTTG  
GAGTATCACA---GGGGGACTGTAACGAATCCGGGTATTTGGAGTTACGAAGGTGTAGC  
TGGAGCACATATTGTGTTTTCTGGCTTATGCTTTTTGGCAGCTATCTGGCATTGGGTGTA  
TTGGGATCTAGAAATATTTTGTGATGAACGTACAGGAAAACCCTCTTTGGATTTGCCAA  
AGATCTTTGGAATTCATTTATTTCTCTCAGGGGTGGCTTGCTTTGGTTTTGGTGCATTT  
ATGTAACAGGCTTGTATGGTCCCGGAATATGGGTGTCCGATCCTTATGGACTAACGGGA  
AAAGTACAACCTGTAAATCCAGCGTGGGGCGTGGAAAGGTTTTGATCCTTTTGTTCAG  
GAGGAATAGCCTCTCATCATATTGCAGCAGGAACATTGGGCATATTAGCGGGCCTATTC  
CATCTTAGCGTCCGTCGCCACAACGTCTATACAAAGGATTGCGTATGGGAAATATTGA  
AACCGTCCTTTCCAGTAGTATCGCTGCTGCTTTTTTGCAGCTTTTGTGTTGCCGGAA  
CTATGTGGTATGGTTCGGCAACTACCCCGATTGAATTATTTGGGCCCACTCGTTATCAAT  
GGGATCAGGGGTACTTCCAGCAAGAAATATATCGAAGAGTTAGTGCTGGGCTAGCAGA  
AAATCAAAGTTTATCAGAAGCCTGGTCTAAAATTCCTGAAAATTAGCTTTTTATGATTA  
CATCGGCAATAATCCGGCAAAGGAGGATTATTCAGAGCGGGTTCAATGGATAACGGG  
GATGGAATAGCGGTTGGATGGTTAGGACACCCTATCTTTAGAGATAAAGAAGGGCGTG  
AACTTTTTGTACGTCGTATGCCTACCTTTTTTGAACATTCCCGGTCGTTTTGGTAGACG  
GCGATGGAATTGTTAGAGCCGATGTTCCCTTTTAGAAGGGCAGAATCGAAGTATAGTGTT  
GAACAAGTAGGTGTAACCTGTTGAGTTCTACGGCGGTGAACTCAACGGCGTCAGTTATA  
GTGATCCTGCTACTGTGAAAAAATATGCTAGACGTGCTCAATTGGGTGAAATTTTTGAA  
TTAGATCGTGCTACTTTGAAATCCGATGGTGTTTTTCGTAGCAGTCCAAGGGGTTGGTT  
TACTTTTTGGGCATGCTTCGTTTGCTTTGCTCTTCTTTCGGACACATTTGGCATGGTGC  
TAGAACCTTGTTTCAGAGATGTTTTTGCTGGTATTGACCCAGATTTAGATGCTCAAGTCG  
AATTTGGAGCATTCAAAAACTTGGAGATCCAACCTACAAAAAGACAGGCAGCCATGA  
AAACCTTATATCCCTGAGGAGGTTCTACCACGTGGAAACGCTCTTTAATGGAACTTA  
GCCTTAGCTGGTCGTGACCAAGAAACCACCGTTTTCGCTTGGTGGGCCGGGAATGCC  
GACTTATCAATTTATCCGGTAACTACTAGGGGCTCATGTAGCCCATGCTGGATTAATCG  
TATTCTGGGCCGGAGCAATGAACCTATTTGAAGTGGCCATTTTCGTACCAGAGAAGCCT  
ATGTATGAACAAGGATTGATTTTACTTCCCCACCTAGCTACTCTAGGTTGGGGGGTAGG  
CCCTGGGGGAGAAGTTATAGACACCTTCCATACTTTGTATCTGGAGTACTTCATTTAAT  
TTCTTCTGCAGTATTGGGCTTTGGCGGCATTTATCATGCACTTCTGGGACCTGAGACAC  
TTGAAGAATCTTTCCCTTCTTTGGTTATGTCTGGAAAGATCGAAATAAATGACCACA

ATTTTAGGTATTCACCTTAATCTTGTTAGGTATAGGTGCTTTTCTTCTAGTATTCAAGGCTC  
TTTATTTTGGGGGTGTATATGATACCTGGGCTCCAGGAGGGGGAGATGTAAGAAAAATT  
ACCAACTTGACCCTTAGCCCGAGTATCATATTTGGTTATTTACTAAAATCCCTTTTGG  
GGGAAGGCTGGATTGTTAGTGTAGACGATTTAGAAGATATAATTGGAGGACATGTATG  
GTTAGGTTCCATTTGTATACTTGGTGGAATCTGGCATATCTTAACCAAACCTTCGCATG  
GGCTCGACGCGCACTTGTATGGTCTGGAGAGGCTTACTTATCTTATAGTTTAGGGGCTTT  
AGCCGCTTTTGGTTTCATTGCTTGTGTTTTGTCTGGTTCAATAATACCGCTTATCCTAGT  
GAATTTTACGGACCTACTGGACCAGAAGCTTCTCAAGCTCAAGCATTACTTTTCTAGT  
TAGAGACCAACGTCTTGGGGCTAACGTGGGATCCGCTCAAGGACCTACTGGTTTAGGT  
AAATATCTAATGCGTTCCTCCGACCGGAGAAGTCATTTTTGGAGGAGAACTATGCGTTT  
TTGGGATCTGCGTGCTCCATGGTTAGAGCCTCTAAGGGGTCCAAATGGGTTAGACTTGA  
GTAGGTTGAAAAAGACATAACAACCTTGGCAGGAACGGCGTTCCGCGGAATATATGAC  
TCATGCTCCTTTAGGTTCTTTAAATTCCGTGGGTGGTGTAGCTACCGAGATCAATGCAG  
TCAATTATGTCTCTCCTAGAAGTTGGTTAGCTACCTCTCATTTTGTTTTAGGATTCTTCTT  
CTTCGTAGGTCATTTGTGGCACGCGGAAGGGCTCGTGCAGCTGCAGCAGGATTTGAA  
AAAGGAATTGATCGTGACTTTGAACCTGTTCTTTCCATGACCCCTCTTAATATGACTATA  
GCCCTTGATAAGTTTACCAAAGACGAAAATGATTTATTTGATATTATGGATGACTGGTTA  
CGGAGGGACCGTTTCGTTTTTGTAGGCTGGTCCGGTCTATTGCTCTTTCCTTGTGCCTAT  
TTTGCTGTAGGGGGTTGGTTCACAGGTACAACCTTTGTAACCTCATGGTATACCCATGG  
ATTGGCCAGTTCCTATTTGGAAGGCTGCAATTTCTTAACCTGCCGAGTTTCTACTCCTGC  
TAATAGTTTAGCACATTCGTTGTTGTTACTATGGGGTCTGAAGCACAAGGAGATTTTA  
CTCGTTGGTGTCAATTGGGGGGTCTGTGGACTTTTGTGCTCTCCATGGAGCTTTTGGC  
CTAATAGGTTTCATGTTACGTCAATTTCGAGCTTGCTCGATCCGTTCAATTGAGACCTTAT  
AATGCAATCGCATTCTCTGGTCCAATTGCTGTTTTTGTCTGTATTTCTGATTTATCCAC  
TAGGTCAGTCTGGTTGGTCTTTTGCACCTAGTTTTTGGTGTAGCAGCTATATTTGATTCA  
TCCTATTTTTTCAAGGGTTTCATAATTGGACCTTGAACCCCTTTCATATGATGGGAGTTG  
CCGGTGTATTGGGCGCTGCTTTGCTATGCGCCATTCATGGTGCTACCGTAGAAAATACTT  
TATTTGAAGACGGTGATGGTGCAAATACATTCCGTGCTTTTAACCCAACTCAAGCCGAA  
GAAACTTATTCAATGGTCACCGCTAACCGCTTTTGGTCCCAAATCTTTGGGGTTGCTTT  
TTCCAATAAACGTTGGTTACATTTCTTTATGTTATTTGTACCAGTAACCGGTTTATGGATG  
AGTGCTCTTGGAGTAGTCGGTCTAGCCCTGAACCTACGTGCCTATGACTTCGTTTCTCA  
GGAAATTCGCGCAGCGGAAGATCCTGAATTTGAGACTTTCTACACCAAAAATATTCTCT  
TAAACGAAGGTATTCGCGCTTGGATGGCGGCTCAAGATCAGCCTCATGAAAACCTTATA  
TTCCCTGAGGAGGTTCTACCACGTGGAAACGCTCTTATGTCTGGAAGCACAGGAGAAC  
GTTTCGTTTGCTGATATTATTACCAGTATTCGATACTGGGTCATTCATAGCATTACTATAAC  
TTCCCTATTCATTGCGGGTTGGTTATTTGTCAGCACTGGTTTAGCTTATGATGTGTTTGG  
AAGCCCTCGGCCAAACGAGTATTTTACAGAGAGCCGACAAGGAATTCCATTAATAACT  
GGCCGTTTTGATTCTTTGGAACAACCTCGATGAATTTAGTAGATCGTTTATGACTATAGAT  
CGAACCTATCCAATTTTTACAGTACGATGGTTGGCTGTTACGGCCTAGCTGTACCTAC  
CGTCTTTTTTTTTGGGATCAATATCAGCAATGCAGTTTCATCCAACGAATGGCTACACAAA  
CTGTTGAGAACAGTTCT--AGATCTGGTCCAAGACGAACTGCAGTAGGAGATTTATTA  
AACCATTGAATTCGGAATATGGTAAAGTAGCTCCTGGATGGGGAACACTCCTTTGATG  
GGTGTGCAATGGCCTTATTTGCGGTATTTCTATCTATTTTGGAGATTTATAATTTCTC  
CGTTTTATTGGATGGAATTTCAATGAATATGCTTACTCTCAAACCTTTCGTTTACACAGT

AGTGATATTTTTGTTTCTCTCTTCATCTTTGGATTCCCTATCTAATGATCCCCGGACGTAAT  
CCTGGACGTGAAGAAATGGCCGATACTACTGGAAGGATTCCCTTTGGATAATAGGTAC  
TG TAGCTGGTATTCTTGTAATCGGTTTAATAGGTATTTTCTTTTATGGTTCATATCCGGAT  
TGGGTTTCATCCCTGATGCTTAATACCTTTAGTTTGATCGGTATCTGTCTTAATTCGACCCT  
TTATTCGAGTAGTTTTTCTTCGGCAAATTGCCCGAGGCCTATGCTTTTTTTGAATCCAAT  
CGTAGATATTATGCCAGTCATACCTCTGTTCTTTTTTCTCTTAGCCTTTGTTTGGCAAGCT  
GCTGTAAGTTTTTCGAACGACACAATCAAACCCGAACGAACAAAGTGTTGAATTGAATC  
GTACCAGTCTCTACTGGGGGTTATTACTCATTTTTGTACTTGCTGTTTTATTTCCAATTA  
TTTCTTCAATATGGAAGTAAATATCTTGCAATTTATTGCTACTGCACTATTTATTCTAGTTC  
CTACCGCTTTTCTACTTATCATTTACGTAAAAACAGTCAGTCAAACGATATGGAAACA  
GCAACCCTAGTCGCCATCTTTATATCTGGTTTACTTGTAAGTTTTACTGGGTACGCCTTAT  
ATACCGCTTTTGGGCAACCTTCTCAACAATAAGAGATCCATTCGAGGAACATGGAGA  
CATGGAAGCATTGGTTTATACATTCCTCTTAGTCTCGACTCTAGGGATAATTTTTTCGCT  
ATCTTTTTTCGAGAACCGCCTAAACTTCCAATAAAAAGAAC---ATGACTCTTGCTTTC  
CAATTGGCTGTTTTTGCATTAATTGCTACTTCATTAATCTTATTGATTAGCGTACCCGTTG  
TATTTGCTTCTCCTGATGGCTGGTCAAGTAACAAAAATGTTGTATTTTCTGGTACATCCT  
TATGGATTGGATTAGTCTTTCTGGTGGGTATCCTTAATTCTCTCATCTCT-----  
ATGTCACCACAAACAGAGACTAAAGCAAGTGTTGGATTCAAAGCTGGTGTAAAGAGT  
ACAAATTGACTTATTATACTCCTGAGTACCAAACCAAGGATACTGATATATTGGCAGCAT  
TCCGAGTAACTCCTCAACCTGGAGTTCACCTGAAGAAGCAGGGGCCGCGGTAGCTG  
CCGAATCTTCTACTGGTACATGGACAACGTATGGACCGATGGACTTACCAGCCTTGAT  
CGTTACAAAGGGCGATGCTACCGCATCGAGCGTGTTGTTGGAGAAAAAGATCAATATAT  
TGCTTATGTAGCTTACCCTTTAGACCTTTTTGAAGAAGGTTCTGTTACCAACATGTTTAC  
TTCCATTGTAGGTAATGTATTTGGGTTCAAAGCCCTGCGCGCTCTACGTCTGGAAGATC  
TGCGAATCCCTCCTGCTTATGTTAAACTTTCCAAGGTCCGCCTCATGGGATCCAAGTT  
GAAAGAGATAAATTAACAAGTATGGTCGTCCCCTGTTGGGATGTACTATTAACCTAA  
ATTGGGGTTATCTGCTAAAAACTACGGTAGAGCTGTTTATGAATGTCTTCGCGGTGGAC  
TTGATTTTACCAAAGATGATGAGAACGTGAACTCACAACCATTATGCGTTGGAGAGAT  
CGTTTCTTATTTTGTGCCGAAGCACTTTATAAAGCACAGGCTGAAACAGGTGAAATCAA  
AGGGCATTACTTGAATGCTACTGCAGGTACATGCGAAGAAATGATCAAAGAGCTGTA  
TTTGCTAGAGAATTGGGTGTTCCGATCGTAATGCATGACTACTTAACGGGGGGATTAC  
CGCAAATACTAGCTTGGCTCATTATTGCCGAGATAATGGTCTACTTCTTCACATCCACCG  
TGCAATGCATGCGGTTATTGATAGACAGAAGAATCATGGTATCCACTTCCGGGTATTAGC  
AAAAGCGTTACGTATGTCTGGTGGAGATCATATCACTCTGGTACCGTAGTAGGTA AAC  
TTGAAGGTGAAAGAGACATAACTTTGGGCTTTGTTGATTTACTGCGTGATGATTTTGT  
GAACAAGATCGAAGTCGCGGTATTTATTTCACTCAAGATTGGGTCTCTTTACCAGGTGT  
TCTACCCGTGGCTTCAGGAGGTATTCACGTTTGGCATATGCCTGCTCTAACCGAGATCT  
TTGGGGATGATTCCGTA CTACAGTTCGGTGGAGGAACCTTTAGGACACCCTTGGGGTAAT  
CCGCCAGGTGCCGTAGCTAACCGAGTAGCTCTAGAAGCATGTGTAAAAGCTCGTAATG  
AAGGACGTGATCTTGCTCAGGAAGGTAATGAGATTATTCGCGAGGCTTGCAAATGGAG  
CCCGGAACTAGCTGCTGCTTGAGGTATGGAAAGAGATCGTATTTAATTTTGCAGCTG  
TGACGTTTTTGGATAAGATGGCGATACATTTATACAAA ACTTCTACCCCGAGCACACGC  
AATGGAACCGTAGATAGTCAAGTGA AATCCAATCCACGAAATAATTTGATCTATGGACA  
CGTCTGTTGTGGTAAAGGTCGTAATGCCAGAGGAATCATTACCGCAAGGCATAGAGGG

GGAGGTCATAAGCGTCTATACCGTAAAATCGATTTTCGACGGAATGAAAAAGACATATA  
TGGTAGAATCGTAACCATAGAATACGACCCTAATCGAAATGCATACATTTGTCTCATA  
CTATGGGGATGGTGAGAAGAGATATATTTTACATCCCAGAGGGGCTATAATTGGAGATA  
CCATTGTTTCTGGTACAGAAGTTCCTATAAAAATGGGAAATGCCCTACCTTTGACCGATA  
TGCCCTTAGGCACGGCCATACATAACATAGAAATCACACTTGGAAGGGTGGACAATT  
AGCTAGAGCAGCGGGTGTGTACCGAAACTGATTGCAAAAAGAGGGGAAATCGGCCAC  
ATAAAATTACCTTCTGGGGAGGTCCGTTTGATATCCAAAACTGCTCAGCAACAGTTG  
GACAAGTGGGGAATGTTGGGGTGAACCAAAAAAGTTTGGGTAGAGCCGGATCTAAAC  
GTTGGCTAGGTAAGCGTCCTGTAGTAAGAGGAGTAGTTATGAACCCTGTAAACCATCCC  
CATGGGGGTGGTGAAGGGAGAGCCCCAATTGGTAGAAAAAACCCACAACCCCTTGG  
GGTTATCCTGCACTTGGGAAGAAGAAGTAGAAAAAGGAATAAATATAGTGATAATTTGAT  
TCTTCGTCGCCGTAGTAAAATGATTCAACCTCAGACCCATTTAAATGTAGCGGATAACA  
GCGGGGCTCGAGAATTAATGTGTATTTCGAATCATAGGAGCTAGC---AATCGTCGATATGC  
TCATATTGGTGACGTTATTGTTGCTGTGATCAAAGAAGCAGTACCAAATATGCCCTAG  
AAAGATCAGAAATAGTCAGAGCTGTAATTGTGCGTACCTGTAAAGAACTCAAACGTGA  
CAACGGGATGATAATACGATATGATGACAATGCTGCAGTTGTTATTGATCAAGAAGGAA  
ATCCAAAAGGAACTCGAATTTTTGGTGAATCGCCCGGAATTGAGAGAATTAATTTTT  
ACTAAAATAGTTTCATTAGCTCCCGAGGTATTAATGCTTAGTCCCAAAGAACCAGATT  
CCGTAAACAACATAGAGGAAGAATGAAGGGAATATCTTATCGAGGTAATCATATTTCTT  
TCGGTAAATATGCTCTTCAGGCACTTGAACCTGCTTGGATTACATCTAGACAAATAGAA  
GCAGGCCGACGAGCAATGACACGAAATGCACGTCGTGGTGGAAAAATATGGGTACGTA  
TATTTCCAGACAAACCAGTTACTACTAAGACCCGCAGAAACACGTATGGGTTACAGAAA  
AGGATCCCCTGAATATTGGGTAGCTGTTGTTAAACCGGGTCAATACTTTATGAAATGG  
GTGGAGTAACAGAAAATATAGCCAGAAGGGCTATTTCACTAGCAGCATCCAAAATGCC  
TATACGAACTCAATTCATTATTTCA---ATGACCAGAATTAACGGGGATATATAGCTCGG  
AGACGTAGAACAAAAATTCGTTTATTTGCATCAAGCTTTTCGAGGGGCTCATTCAAGGCT  
TACTCGAACTTACTCAACAGAAAATAAGAGCTTTAGTTTTCGGCTCATCGGGATAGGG  
ATAGAAAAAGAGAGATTTTCGTCGTTTGTGGATCACTCGGATAAACCGCAGTAATTCGC  
GAA---AGGGGAGTATCCTATAGTTATAGTAGATTAATACACGATCTGTACAAGAGACAGT  
TGCTTCTTAACCGTAAAATACTTGCACAAATAGCTATATCAAATAGGAATTGTCTTTATAT  
GATTTCGAACGAAATCATAAAGGAAGTAGATTGGAAAGAATCCACCAGAATAATTATGC  
TAAAGGAAGTATATGCTTTAGGTGAACATATATCTATGTCTGCTGACAAAGCACGAAGA  
GTAATTGATCAAATTCGCGGACGTTCCCTATGAGGAAACGCTTATGATACTAGAACTCAT  
GCCCTATCGAGCATGTTATCCCATTTTCAAATTTGGTTTATTCTGCAGCAGCAAATGCTAG  
TTATAATATGGGTTCCAGCGAAGCCAATTTAGTCATTAGTAAAGCCGAAGTCAATGGGG  
GTACGACTGTGAAGAAATTGAAACCTCGAGCTCGAGGACGTAGTTTTCCGATAAAAAG  
ATCGACCTGTATATAACTATTGTAATGAAAGATATATCTTTAAATGGGGGATTATGGGA  
CAAAAAAATGGATGGAATCAAATATGCAGTATTTACAGACAAAAGTATTCGGTTATTGG  
GGAAAAAT--CAATATACTTCTAATGTCGAATCAGGATCAACTAGGACAGAAATAAAGC  
ATTGGGTCGAACTCTTCTTTGGTGTCAAGGTAATAGCTATGAATAGTCATCGACTTCCG  
GGAAAGAGTAGAAGAATGGGACCTATTATGGGACATACAATGCATTACAGACGTATGAT  
CATTACGCTTCAACCGGGTATTCTATTCCACCTCTTAGAAAGAAAAGAACTATGGCAG  
TTCCAAAAAACGCACCTTCGACATCAAAAAAGCGTATCCGTAAAAATATTTGGAAAAG  
GAAGGGATATTGGGTAGCATTAAAGGCTTTTTTATTAGCGAAATCTCTTTCTACCGGGA



ATTCAAAAAGTTTTTTTTGTACGCCAAACAAAATAATGGCCAAGGGGAAAGATGTCCG  
AGTAACGGTGATTTTGGAAATGTACTAGTTGTGTCCGAAACAGTGTTGAT-----AAGGTAT  
CAAGAGGTATTTCCAGATATATTACTCAAAGAACCGGCACAATACGCCTAATCGATTA  
GAATTGAAAAAATTCTGTCCCTATTGTTACAAACATACGATTCATGGGGAAATAAAGAA  
AATGAAAATAAGAGCTTCCGTTTCGTAAAATTTGTGAAAAATGTCGACTAATCCGTAGGC  
GGGGACGAATTATAGTAATTTGTTCCAACCCGAGACATAAACAAAGACAGGGGATGGT  
TCGAGAGAAAGTAACAGTATCTACTCGGACACTACAGTGGAAGTGTGTTGAATCAAGA  
ACAGACAGTAAACGCCTTTATTATGGACGCTTTATTCTGTCTCCACTTATGAAAGGACA  
AGCCGACACAATAGGCATTGCGATGCGAAGAGCTTTACTTGGAGAAATAGAAGGAACA  
TGTATCACACGTGTAATAATTGAG-----AAAGTACCACATGAATATTCTACCATAACGGG  
CATTCAAGAATCGGTACATGAAATTATAATGAATTTGAAAGAAATTGTATTGAGAAGTA  
ATCTATATGGAACCTTCTGAGGCGTCTGTTTGTGTCAAGGGTCCTGGATATGTAAGTCTC  
AAGATATCATCTTGCCGCCTTATGTAGAAATCGTTGATAATACACAACATATAGCTAGTTT  
AACGGAACCAATTGATTTTTGTATTGGATTACAAATAGAGAGAAATCGTGGATATCTTAT  
AAAACGCCACAA---AAGTTTGTGGAAGTTAT-----CCTATAGATGCTGTATTTCATGCCT  
GTTTCGAAACGCGAATCATAGTATTCATTCTTATGGGAATGGGAATGAAAAACAAGAGAT  
ACTTTTTCTTGAATATGGACAAACGGAAGTTTAACTCCGAAAGAAGCACTTCATGAA  
GCATCCCGAAATTTAATTGATTTATTTATCCCTTTTTACATATGGAGGAAGAC-----AAC  
TTATATTTACAGGACAATCAA---CACACGGTTCCTTTATCCCTTTTTACCTTTCATGATAA  
ATTGGCT---AAACTCATAAAAAACAACAAA---AAAATAGCATTGAAATCGATTTTTTATTG  
ACCAATCAGAATTGCCTTCCAGGATCTATAATTGCCTCAAATGTCCAATATATATACATT  
ATTGGACCTTTTGAATAACAGCCAAGAAGATCTTATGAAAATTGAACATTTTCGTAGCG  
AAGATATAAAACAGATATTGGGCATTTTAGAAAAATAT-----TTCGTAATTGATTTAGCAA  
AAAATAAGATGCTCGGGGATGGA---AATGAGGGAATATCTACAATACCTGGATTTAATCA  
GATACAATTTGAAGGATTTTGTAGGTTTCATTGATCAAGGTTTGACGGAAGAACTTTATA  
AGTTTCCAAAAATTGAAGATACAGATCAAGAAATTGAATTCCAATTATTTGTGGAAACA  
TATCAATTGGTCGAACCCTTGATAAAGGAAAGAGATGCTGTGTATGAATCACTCACATA  
TTCTTCTGAATTATATGTATCCGCGGGATTAATTTGGAAAAACAGTAGGGATATGCAAGA  
ACAAACAATTTTTATCGGAAACATTCCTCTAATGAATTCCTGGGAACTTCTATAGTCAA  
TGGAATATATAGAATTGTGATCAATCAATATTGCAAAGTCCCGGTATTTATTACCGATCA  
GAATTGGACCATAACGGAATTTTCGGTCTATACCGGCACCATAATATCAGATTGGGGAGG  
AAGATCAGAATTAGAAATTGATAGAAAAGCAAGGATATGGGCTCGTGTAAGTAGGAAA  
CAAAAATATCTATTCTAGTTCTATCATCAGCTATGGGTTTGAATCTAAGAGAAATTTTA  
GAGAATGTTTGTATCCTGAAATTTTTTTGTCTTTTCTGAGTGATAAGGAGAGAAAAAA  
AATTGGGTCAAAGAAAATGCCATTTTGGAGTTTATCAACAATTTGCTTGTGTAAGCG  
GCGATCCGGTATTTTCTGAATCCTTATGTAAGGAATTACAAAAGAAATTTCTTTCAACAA  
AGATGTGAATTAGGAAGGATTGGTCGACGAAATATGAACCGAAGACTTAACCTTGATAT  
ACCCGAGAACAATACATTTTTGTTACCACGAGATATATTGGCAGCCGCCGATCATTGAT  
TGGGCTGAAATTTGGAATGGGTGCACTTGACGAT-----ATGAATCATTGAAAAATAAGC  
GTATTCGTTCTGTAGCAGATCTTTTACAAGATCAATTCGGATTGGCTCTGGTTTCGTTTAG  
AAAATGTGGTTCGGGGGACTATATGTGGAGCAATTCGG---CATAAATTG---ATACCGACA  
CCTCAGAATTTGGTAACCTCAACTCCA-----TTAACAACACTTATGAATCCTTTTTTC  
GGTTTACACCCATTATCTCAAGTTTTGGATCGAACTAATCCATTGACACAAATAGTTCAT  
GGGAGAAAATTAAGTTATTTGGGCCCTGGAGGACTGACAGGGCGCACTGCTAGTTTTTC

GGATACGAGATATCCATCCTAGTCACTATGGACGTATTTGCCCAATTGACACATCTGAAG  
GAATCAATGTTGGACTTATTGGATCCTTAGCAATTCATGCGAGGATTGGTCATTGGGGA-  
--TCTCTAGAAAGCCCCTTTTAT-----GAAATTTCTGAGAGGTCAACCGGG-----GTACG  
GATGCTTTATTTATCACCAGGTAGAGATGAATACTATATGGTAGCGGCAGGAAATCTTT  
AGCCTTAAATCGGGATATTCAGGAAGAACAGGTTGTTCCAGCTCGATACCGTCAAGAA  
TTCTTGACTATTGCATGGGAACAGGTTTCATCTTCGAAGTATTTTTCTTTTTCAATATTTTT  
CTATTGGAGCTTCCCTCATTCTTTTTATCGAACATAATGATGCGAATCGAGCTTTAATGA  
GTTCTAATATGCAACGTCAAGCAGTTCCTCTTTCTCGCTCCGAGAAATGCATTGTTGGA  
ACTGGGTTGGAACGACAAGCAGCTCTAGATTCGGGGGCTCTTGCTATAGCCGAACGCG  
AGGGAAGGGTCGTTTATACCAATACTGACAAGATTCTTTTAGCAGGTAATGGAGATATT  
CTAAGCATTCCATTAGTTATATATCAACGTTCCAATAAAAATACTTGTATGCATCAAAAA  
CTCCAGGTTCTCGGGTAAATGCATTA AAAAGGGACAAATTTTAGCGGATGGTGCTG  
CTACGGTTGGTGGCGAACCTTGCTTTGGGGAAAAACGTATTAGTAGCTTATATGCCGTGG  
GAGGGTTACAATTCTGAGGATGCAGTACTTATTAGCGAGCGTTTGGTATATGAAGATATT  
TATACTTCTTTCCACATACGGAAATATGAAATTCAGACTCATGTGACAAGCCAAGGC---C  
CTGAAAAAGTAACTAATGAAATACCGCATTTAGAAGCCATTTACTCCGCAATTTAGAC  
AAAAATGGAATTGTGATGCTGGGATCTTGGGTAGAGACGGGTGATATTTTAGTAGGTAA  
ATTAACACCCCAGGTTCGTGAAAGAA---TCGTCGTATGCCCCGGAAGATAGATTGTTACG  
AGCTATACTTGGTATTCAGGTATCTACTTCAAAGAACTTGTTTAAAATTACCTATAGG  
TGGTAGGGGTCGGGTTATTGATGTGAGGTGGATCCAGAAAAGGGGT---GGTTCTAGTTA  
TAATCCCGAAACGATTCGTGTATATATTTACAGAAACGTGAAATCAAAGTAGGCGATA  
AGGTGGCTGGAAGACACGGAATAAAGGTATCATTTCAAAATTTTGCCTAGACAAGA  
TATGCCTATTTACAAGATGGAAGATCCGTTGATATGGTCTTTAACCCATTAGGAGTACC  
TTCACGAATGAATGTAGGACAGATATTTGAATGTTCACTAGGGTTAGCAGGGAGTCTGC  
TAGACAGACATTATCGAATAGCACCTTTTGATGAGAGATATGAACAAGAAGCTTCGAG  
AAAAGTAGTGTCTTCTGAATTATATGAAGCCAGTAAGCAAACAGCAAATCCATGGGTAT  
TTGAACCCGAATATCCAGGAAAAAGCAGAATATTTGATGGAAGGACGGGGAATCCTTT  
TGAACAACCCGTTATAATAGGAAAGCCTTATATCTTGAAATTAATTCATCAAGTTGATGA  
TAAAATCCATGGGCGTTCCAGTGGACATTATGCGCTTGTTACACAACAACCCCTTAGAG  
GAAGAGCCAAACAGGGGGGACAGCGGGTAGGAGAAATGGAGGTTTGGGCTCTAGAA  
GGGTTTGGGGTTGCTCATATTTTACAAGAGATGCTTACTTATAAATCGGATCATATTAGA  
GCTCGCCAGGAAGTACTTGGTACTACGATCATTGGGGGAACAATACCTAATCCCGAAGA  
TGCTCCAGAATCTTTTCGATTGCTCGTTCGAGAACTACGATCTTTAGCTCTGGAAGTGA  
ATCATTTCCTTGATCTGAGAAGA ACTTCCAGATTAATAGGAAGGAAGCT-----  
--ATGATCGATCGATATAAACATCAACAGCTCCGAATTGGATCAGTTTCTCTCAACAAAT  
AAGTGCTTGGGCCACTAAAATCTGCCTAATGGAGAGATAGTTGGAGAGGTAACAAAA  
CCCTATACTTTTCATTACAAAATAATAAACCGGAAAAAGATGGATTATTTTGTGAAAG  
AATTTTTGGTCTATAAAAAGCGGAATTTGTGCTTGTTGGAAATTATCGAGTAATCGGAG  
ATGAAAAAGAAGACCCGAAATTTTGTGAACAATGCGGAGTCGAATTTGTTGATTCTCG  
GATACGAAGGTATCAAATGGGCTATATCAAACCTCGCATGCCAGTAACCCATGTGTGGT  
ATTTAAAACGTCTTCTAGTTATATTGCGAATCTTTTAGATAAACCTCTTAAAGAATTAG  
AAGGCCTAGTATACTGCGAT-----TTTTCTTTTGTAGGCC---ATAACTAAAAACCCAC  
TTTCTTACGATTACGAGGTTTATTTGAATATGAAATCCAATCTTGGAAATACAGCATCCC  
GCTTTTTTTTACTACCCAGGGTTTCGATACATTCGAAATCGAGAAATCTCTACTGGCGC

AGGTGCTATCCGAGAACAATTAGCCGATCTAGATTTACGAATTATTATAGAGAATTCATT  
GGTAGAATGGGAAGAATTGGGGGAAGAA---GGGCACACAGGGAATGAATGGGAAGAT  
CGAAAAGTTGGAAGAAGAAAGGACTTTTTTGGTTAGACGCGTGGAATTGGCTAAGCATT  
TTATTCGAACAAATATAGAGCCAGAATGGATGGTTTTGTGTCTATTACCAGTTCTTCCTC  
CTGAGTTGAGACCGATCATTACAGATAGATGGGGGTAACTAATGAGCTCAGATATTAAT  
GAACTCTATAGAAGAGTTATCTATCGGAACAATACCCTTACCGATCTATTAACAACAAGT  
AGATCTACGCCAGGAGAATTAGTAATGTGTCAGGAGAAATTAGTACAAGAAGCCGTGG  
ATACACTTCTTGATAATGGAATCCGGGGACAACCAATGAGGGACGGTCATAATAAAGTT  
TACAAGTCATTTTCTGATGTAATTGAAGGCAAAGAGGGAAGATTTTCGTGAGACTCTGC  
TTGGCAAACGAGTCGATTATTCAGGACGTTCTGTTCATTGTTCGTGGGTCTTCACTTTCA  
TTACATCGATGTGGATTGCCTCGTGAAATAGCAATAGAACTTTTCCAGACATTTGTAATT  
CGTGGTCTAATTAGACAACATCTTGCTTCGAACATAGGAGTTGCTAAGAGTAAAATTAG  
AGAAAAGAGCCGATTGTATGGGAAATCCTTCAAGAAGTTATGCAGGGACATCCTGTA  
TTGCTGAATAGAGCACCCACTCTGCATAGATTAGGCATACAGGCATTCCAGCCCGTTTT  
AGTGGAGGGGCGCGCTATTTGTTTACATCCATTAGTTTGCAAGGGATTCAATGCCGATT  
TTGATGGAGATCAAATGGCTGTTCATGTACCCCTTATCCTTGGAGGCTCAAGTGGAGGCC  
CGTTTACTTATGTTTTCTCATATGAATCTTTTGTCTCCGGCTATTGGGGATCCCATTTCCG  
TACCAACGCAAGATATGCTTATTGGACTCTATGTATTAACGAGCGGAAATCGTCGAGGT  
ATTTGTGTAATAGATATAATCCATGTAATCGC-----AGAACTATCAAAATCAAAAA  
GAAGTGACAATAGTTATAAGTATACG-----GAACCCTTTTTTTCGAATTCCTATGATGC  
AATTGGAGCTTATCGGCAGAAACGAATCAATTTAGATAGTCCTTTGTGGCTCCGGTGGC  
GACTAGATCAACGC---GTTATTGCTTCA-----AGAGAACTCCCATCGAAGTTCATATG  
AATCTTTAGGTACTTTTTATGAGATTTATGGACACTATCTAATAGTAAGAAGTCTAAAA  
AACAAATCCTTTTTATATACATTAGAACCACTGTTGGTCATATTGCTCTTTATCGAGAAAT  
TGAAGAAGCTATACAGGGGTTTTCTCGGGCCTATTCATATGGTACC-----  
-----ATGGCAGAACGGGCCAATCTGGTCTTTCACAATAAAGCGATAGACGGAACTGC  
CATGAAACGCCTTATTAGTAGATTAATAGAGCACTTCGGAATGGCATATACATCACATAT  
CCTGGATCAAGTAAAACTCTGGGGTTTCAACAAGCTACTGCTACATCCATTTCAATTAG  
GAATTGATGATCTTTTAAACAATACCTTCTAAGGGATGGCTAGTTCAAGATGCTGAACAA  
CAAAGTTTGATTTTGAAAAACACCATCATTATGGGAATGTACACGCGGTAGAAAAATT  
ACGTCAATCCATTGAAATATGGTATGCTACAAGTGAATATTTGCGACAAGAAATGAATC  
CTAATTTTAGGATGACTGACCCTTTAATCCAGTTCATATAATGTCTTTCTCGGGAGCTA  
GAGGAAATGCATCTCAGGTACATCAATTAGTAGGTATGAGAGGATTAATGTCGGATCCT  
CAAGGACAAATGATTGATTTACCTATTCAAAGCAATTTGCGCGAAGGACTCTCTTTAAC  
AGAATACATCATTTCTTGCTACGGAGCCCGTAAAGGAGTTGTGGATACTGCTGTACGAA  
CATCAGACGCTGGATATCTCACTCGCAGACTTGTTGAAGTAGTTCAACACATTGTTGTA  
CGTCGAACGGATTGTGGCACCGCCCGGGGTATTTCTGTGAGTCCTCGGAATGGGATGA  
TGCCG---GAAAGGATTTTGTAGCCAAACATTAATTGGTTCGTGTATTAGCAGATGATATATA  
CATGGGTCCGCGATGTATTGCCACTAGAAATCAAGACATTGGCATTGGACTTGTAATA  
GATTCATAACC-----TTTCGGGCACAACCAATCTCTATTTCGAACCTCCCTTACTT  
GTAGGAGTACATCTTGGATTTGTTCGATTATGTTATGGCCGGAGTCTACTCATGGCGACC  
TGGTTGAATTGGGGGAAGCCGTAGGTATTATTGCAGGTCAATCGATTGGAGAACCGGG  
TACTCAATTAACATTAAGAACTTTTCATACCGGAGGAGTATTCACGGGGGGTACTGCAG  
AACATGTGCGAGCCCCATCTAATGAAAAATAAAATTCAATGAGGATTTGGTTCATCCG

ACACGTACACGTCATGGGCATCCCGCCTTTCTATGTTCTATAGACTTGTATGTA ACTATT  
GAGAGTGAAGATATTCTACATAATGTGAATATTCCACCCAAAAGTTTGCTTTTAGTTCAA  
AACGATCAATATGTAGAATCAGAACAAGTAATTGCTGAGATTTCGCGCAGGAATATCCAC  
T--TTGAATTTTAAAGAGAAGGTTTCGAAAACATATTTATTCTGATTTCAGACGGAGAA---A  
TGCACTGGAGTACCGATGTCTATCATGCACCCGAATTTACATATGGTAATGTTTCATCTATT  
ACCAAAAACAAGTCATTTATGGATATTATTAGGAGGGCCGTGCAAG-----TCCAGTCTAG  
TCTACCTTTTCGATCCACAAGGATCAGGATCAAATGAATGCGCAT-----TCTCTTTCTGGC  
AAGCAAAGATATACTTCTAACCTCTCA-----GTAACCAATGATCAG---GCGAGGCAGAAA  
TTATTTAGTTTCGGGTTTTTCTGGTAAA---GAGGATAGGATTCCTGATTAT--TCAGACCTT  
AATCGAATCATATGTACTGGTCAGTATAATCTCGTATATTCG---CCTATTCTCCATGAGAAT  
TCT-----GATTTATTGTCAAAAAGGCGAAGAAATAAATTCATCATTCCACTACACTCGATT  
CAAGA ACTCGAGAATGAACTAATGCCCTGTT CAGGTATCTCGATTGAAATACCC-----GT  
AAATGGTATTTTCCGTCGAAATAGTATTCTTGCTTATTTTCGATGATCCTCGATACAGAAAG  
AAAGAGTTCGGGCATTATTAATATGGGACTATAGAAACGCATT CAGTCATCAAAAAAG  
AGGAT-----TTGATTGAGTATCGAGGA---GTCAAGGAATTTAGGCCAAAATACATGAAAG  
TAGATCGATTTTTTTTTCATTCCTGAAGAGGTGCATATCTTGCCCGGATCTTCTTCCATAAT  
GGTACGGAATAATAGTATCGTTGGAGTAGATACACAAATCACCTTAAATCTAAGAAGCC  
GAGTCGGTGGGTTGGTTCGGGTGGAGAGAAAAAAAACGAATTGAACTTAAAATCT  
TTTCTGGAGATATCCATTTTCTGGCGAGACAGATAAGATATCCAGACATAACCGGCCTTT  
TGATACCA---CCAGGA---ACAGGAAAAATAAATTCCAAGGAATCCAAAAA-----GTGA  
AAAAGTGGATCTATGTCCAACGG-----ATTACACCTAGTAAG-----AAAAGTTTTTTGTT  
TTAGTTTCGACCTGTCGTCACATATGAAATAACGGACGGTATAAATTTTGAAACCTTTTT  
CCACCGGATCCATTGCAGGAAAGGGATAATGTGCAACTTCGAATTGTC AATTATATCCT  
TTATGGAAATGGCAAACCGATTTCGAGGAATTTCTGACACAAGTATTCAATTAGTTCGGA  
CTTGTTTAGTATTGAATTGGAACCAAGACAAAAA-----AGTTCTTCTTGCGAAGAAG  
CCCGTGCTTCTTTTGTGAAATAAGGACAAATGGTTTTGATTTCGACATTTCTTAAGAATC  
AACTTAGTTAAATCCCCTATTTCTGATATCGGAAAAAGGAATGATCCGTCGGGGTCAGG  
ATTGCTCTCTGAT---AATGGATCAGATTGTACCAATATCAACCCCTTTTCTTCCATTTATTC  
CTAT-----TCCAAGGCAAAAATTCAACAATCTCTTAACCAACCTCAAGGAACTATTCAT  
ACGTTGTTGAATAGA-----ATAAGGAATGTCAGTCGTTGATAATTTTGTTCATCAGCCA  
ATTGTTCTCGAATGGGG-----ACATTAATAATATCACAGTGTG-----ATAAAAGAC  
TCA---CCCCTAATTCCAATTAGGAATTCATTGGGCCCTTTAGGAACA-----TGCCTTCCAA  
TTGAGAATTTTTATTCA-----TCTTACCGTTTA-----ATAACTCATAATCAGATCTTA---GTA  
ACTAACTATTTGCAACTTGACAAT-----TTAAAACAGACCTTTCAAGTGATTAAATTTA  
AA---TATTATTTAATGGATGAAAAT-----GGAAAAATTTTTAATCCTGATCCATGTCGTAAC  
ATTATTTTAAATCCATTCAATTTGAATTGGTATTTTCTCCATCACAATTATTGTGAAGAGA  
CATCT---AAAATAATTAGTCTTGGACAGTTTATTTGTGAAAATGTATGTATAGCCAAAAAT  
GGACCGCCC---CTCAA-----TCGGGTCAAGTTATACTTGTTCAA---GTTGACTCGATAGT  
GATACGATCAGCTAAGCCTTATTTGGCCACCCCGGAGCAACTGTTTCATGGCCATTATG  
GGGAAACCTTTACGAAGGAGATACATTAGTTACATTTATATATGAAAAATCGAGATCTG  
GTGATATAACACAGGGTCTTCCAAAAGTAGAACAGGTGTTAGAAGTGCGTTTCGATTGA  
TTCAATATCCATGAATCTAGAAAAGAGGGTTGAGGGTTGGAACAAATGTATAACAAGA  
ATTCTTGGAAATTCCTTGGGGATTCTTGATTGGTGCTGAGCTAACTATAGCGCAAAGCCG  
AATCTCTTTGGTTAATAAAATCCAACAGGTTTATCGCTCCAGGGGGTGCAGATTCATA

ATAGACATATAGAAATTATTGTACGTCAAATAACATCAAAAAGTGTTGGTTTTAGAA-----  
--GATGGAATGTCTAATGTTTTTTTACCCGGAGAACTTATTGGATTGTTGCGAGCAGAAC  
GAATGGGGCGCGCTTTGGAAGAAGCGATCTGTTACCGAGTCGTCTTATTGGGAATAAC  
AAGAGCATCTCTCAATACTCAAAGTTTCATATCTGAAGCGAGTTTTCAAGAACTGCTC  
GAGTTTTAGCAAAAAGCGGCTCTCCGGGGTCGTATCGATTGGTTGAAAGGCCTGAAAGA  
GAACGTTGTTTTGGGGGGGGTGATACCCGTTGGTACCGGATTCAAGGGATTA-----GTC  
CACCTTCAAACAACATAACAACATTCCT-----TTGGAAACAAAAAAAAGAATCTAT  
TCGAGGGGGGAGATGAGA-----GATATTTGTTCCACCACAGAAAATTATTTGATTCTTGT  
CTTTCAAAAAAATTCCACGACATACCCGAACAATCATTATAGGA-----TTTAA  
TGATTCCATGACAAGAAGATATTGGAACATAAATTTGGAAGAGATGATGGAGGCAGGA  
GTTCATTTTGGTCATGGTACTAGGAAATGGAATCCTAAAATGGCGCCTTATATCTCTGCA  
AAGCGTAAGGGTATTCAATTACAAATCTTACTAGAACTGCTCGTTTTTTATCAGAAGCT  
TGTGATTTAGTTTTTGACGCAGCAAGTAGGGGAAAACAATTCTTAATTGTTGGTACCAA  
AAATAAAGCAGCTGATTCAGTAGAGTGGGCTGCAATAAGGGCCCGGTGTCATTATGTTA  
ATAAAAAATGGCTTGGCGGTATGTTAACGAATTGGTCCACTACAGAAACAAGACTTCAT  
AAGTTCAGGGACTTGAGAATGGAACAAAAACAGGGAGACTCAACCGTCTCCCGAAA  
AGAGATGCAGCTATGTTGAAAAGACAATTATCTCGCTTACAAACATATCTGGGCGGGAT  
TAAATATATGACAGGGGTACCCGATATTGTAATCATCGTTGATCAGCACGAAGAATATAC  
GGCCCTGCGAGAATGTATTACTTTAGGAATTCACAATTTGTTTAAACCGATACAAATTG  
TGACCCCGATCTCGCAGATATTTCAATTCAGCGAATGATGACGCCATATCCTCAATCCG  
ATTAATTCTTAAACAATTAGTATTCGCAATTTGTGAGGGTTCGTTCT--AGCTATATCAGAA  
ATCCTATGGGACAAAAATAAATCCACTTGGTTTCAGACTGGGTACAACCCAAGGTCAT  
CATCCCTTTGGTTTTTACAACCAAAAAATTATTCTGAAGGTTTACAAGAAGATCAAAA  
AATAAGAGATTGTATCAAGAATTATGTACAAAAGAATATGAGAACGTCCTCTGGC---GT  
CGAGGGAATTGCACGTATAGAGATTCAAAAAGAATCGATCTGATCCAGGTCATAATCT  
TTATGGGATTCCCAAATTATTAATAGAAAGTCGACCGCGC-----GGAATCGAAGAA  
TTACAAATGACCTTACAAAAGAATTAATTGTGTAAACCGAAAACCTGAACATTGCTG  
TCACAAGAATTGCAAAACCTTACGGAAACCTAATATTCTTGCAGAATTTATAGCTGGA  
CAATTAAGAATAGAGTTTCATTTGAAAAGCAATGAAAAGGCTATTGAATTAACAG  
ACAAGCAGATACAAAAGGAATTCAAATACAAATTGCGGGGGCGTATCGACGGAAAAG  
AAATTGCACGTGTCGAATGGATCAGAGAAGGTAGGGTTCCCCTACAAACGATTTCGAGC  
TAAAATTGATTATTGCGCTTATACAGTTTCAACTATCTATGGAGTATTGGGCATCAAAAT  
TTGGATATTTCTAGACGAGGAAATGTCGCGTTACCGAGGACCTCGTTTCAAAAAAATAC  
GCCGCTGGGGGCTTTACCAGGACTAACTAATAAAAAGCCTAGGACCGGAAGTGATCT  
TAGAAACCAATCGCGTTCCGGGAAA---AAATCTCAATATCGTATTCGTCTAGAAGAAAA  
ACAAAATTGCGTTTTTCATTATGGTCTTACAGAACGACAATTACTTAAATACGTTTCGTAT  
CGCCAGAAAAGCCAAGGGGTCAACAGGTCAAGTTTTACTACAATTACTTGAATGCGT  
TTGGATAACATCCTTTTTTCGATTGGGTATGGCTTCAACTATTTCCCGCAGCCCGTCAATTA  
GTTAATCATCGACATATTTAGTTAATGGTCGTATAGTAGATATACCGAGTTATCGCTGCA  
AACCCCGAGATATTATTACGGCAAAGGATGAACAAAAATCCAGAGCTCTGATTCAAATT  
TCTCTCGATTCATCCCTCAT--GAGGAATTACCAAATCATTGACCCTTACCCATTCCA  
A-----TATAAAGGATTAGTCAATCAAATAATAGATAGTAAATGGGTTCGGTTTTGAAAATAA  
ATGAATTGCTCGTCGTAGAAATATTCTCGTCAGACTATGTCACGTCGAGGTACTGCAG  
AAAAAAAACAGCAAAATCCGATCCAATTTATCGTAATCGATTAGTTAACATGTTGGTT

AACCGTATTCTGAAACACGGAAAAAATCATTGGCTTATCAAATTATCTATCGAGCCGT  
GAAAAAGATTCAACAAAAGACAGAAACAAATCCACTATCCGTTTTACGTCAAGCAATA  
CGTGGAGTAACCTCCGATATAACAGTAAAAGCAAGACGTGTAGGTGGATCGACTCATC  
AAGTTCCATTGAAATAGGATCCACACAAGGAAAAGCACTTGCCATTCGTTGGTTATTA  
GCGGCATCCCGAAAACGTCCGGGTCGAAATATGGCTTTCAAATTAAGTTCCGAATTAGT  
GGATGCTGCCAAAGGGAGTGGCGATGCCATACGCAAAAAGGAAGAGACTCATAGAAT  
GGCAGAGGCAAATAGAGCTTTTGCACATTTTCGTATGGGTAGGGACACTATTGCTGAGA  
TAATAACTTCTATACGAAATGCCGATATGGATCGAAAAAGGGTGGTTCGAATAGCATCT  
ACTAATATTACCGAAAATATTGTTCAAATACTTTTACGAGAGGGTTTTATCGAAAACGTG  
AGAAAACATCAAGAAAACAACAAATATTTTTTGGTTTTAACCTGCGACATAGAAGG---  
---AATAAGAAAAGACCCTAT-----AGAAATATTTTAAATTTAAAACGAATCAGTCGACC  
TGGTCTACGAATCTATTCTAATTATCAACGAATTCCTCGAATTTTAGGTGGAATGGGGAT  
TGTAATCTTTCTACTTCTCGAGGTATAATGACAGACCGAGAGGCTCGACTAGAAGGAA  
TAGGTGGAGAAATTTTGTGTTATATCTGGATGGCAAAAGCTATAACCGAAAATTAGTTCG  
CGTAGGAATGGACGTATTGGTTCACGTAAGGGTGCACGTAGAATACCAAAGGGAGTTA  
TTCATGTTCAAGCAAGTTTCAATAATACCATTGTCACTGTTACAGATGTACGGGGTTCGA  
GTAGTTTCTTGGTCTCCGCTGGTACTTCTGGATTCAAAGGTACGAGAAGAGGAACAC  
CGTTTGCTGCTCAAACCGCAGCAGCAAACGCTATCCGTACAGTAGTGGATCAAGGTAT  
GCAACGAGCAGAAGTCATGATAAAAGGTCCCGTCTCGGAAGAGATGCAGCATTACG  
AGCTATTCGTGCAAGTGGTATACTATTAACCTTCGTACGGGATGTAACCTCTATGCCACA  
TAATGGCTGTAGACCTCCGAAAAAAGACGTGTGATGCCAACTATTAACCAACTTATTA  
GAAATACAAGACAGCCAATCAGAAATGTCACGAAATCCCCGCTCTTCGGGGGTGCC  
TCAGCGTCGAGGAACATGTACTAGGGTGTATACTATCACCCCAAAAACCAAACTCT  
GCCTTACGTAAAGTTGCCAGAGTACGATTAACCTCTGGATTTGAAATCACTGCTTATATA  
CCCGGTATTGGCCATAATTTACAAGAACATTCTGTAGTCTTAGTAAGAGGGGGAAGGGT  
TAAGGATTTACCCGGTGTGAGATATCACATTGTTTCGAGGAACCCTAGATGCTGTCCGAG  
TAAAGGATCGTCAACAAGGGCGTTCTAAATATGGGGTAAAAAAGCCAAAAATGGCAA  
AGAAAAGTTTGATTTCAGAGGGAGAAGAAGAGGCCAAAAATTGGAACAGAAATATCATT  
CGATTCGTGATCCTCAAAAAAAGAAATAAGC-----AAGGTTCCGTCGTTGAGTGAC  
AAATGGGAAATTTATGGAAAGTTACAATCCCTACCACGGAATAGTGCACCTACACGCCT  
TCATCGACGTTGTTTTTTGACCGGAAGGCCGAGAGCTAACTATCGAGACTTTGGACTAT  
CCGGACATATACTTCGTGAAATGGTTCATGCATGTTTGTGTCAGGAGCAACAAGATCA  
AGTTGGATGGTAAAAAATTCTGTCAATTTCAATATTTTTCAAGAA-----GAAAAG-----  
AGAGGATCTGTTGAATTTCAAGTATTCAATTTACCAATAAGATACGGAGACTTACTTC  
ACATTTAGAATTGCACAAAAAAGATTATTTATCTCAGAGAGGTTTGAAGAAAATTTTGG  
GAAAACGTCAACGGCTGCTAGCTTATTTGGCAAAAAAATAGAGTACGTTATAAAGA  
ATTAATTAATCAGTTGGACATTCGAGAGACAAAACCTCGT-----ATGGTAAACTTCGTT  
TGAAACGATGTGGTAGAAAGCAACGAGCCGCTATCGAATCGTTGCAATTGATGTTTCG  
ATCCCGAAGAGAAGGAAAAGATCTTCGTAAAGTGGGTTTTTATGATCCGATAAAGAAT  
CAAACCTATTTAAATGTTCTGCTATTTTATATTTCCCTTGAAAAAGGGGCTCAACCTACA  
GGAACGTTCAGGATATTTTAAAGAAGGCGGAGGTTTTTAAGGAACTTCGTCCTAATCA  
ACCTAAATTCAAT---ATGGATAAATCCAAGCGACCTTTTCTTAAATTCAAGCGATCTTT  
CGTAGGCGTTTGCCCCGATTCAATCGGGGGATCGAATTGATTATAGAAACATGAGTTT  
AATTAGTCGATTTATTAGTGAACAAGGAAAAATATTATCAAGACGAGTGAATAGATTGA

CCTTGAAACAACAACGATTAATTACTCTTGCTATAAAAACAAGCTCGTATTTTATCTTTGT  
TACCTTTTCTCAATAATGAGAAA-----CAATTTGAAAGAACCGAGTCGACCGCTAGAAC  
TACTGGTTTTAAAGCCCGAAATAAAGTGACACGTTCACTAAAAAAAATCCCTTTGTA  
GCCAATCATTATTAATAAAAAAATTGATAAGCTTAACACAAAAGCAGAAAAAGAAATAAT  
AGTAACTTGGTCCCAGGCATCTACCATTATACCCACAATGATCGGTCATACTATTGCTAT  
CCATAATGGAAAAGAGCATTTCCTATTTATATAACGGATAGTATGGTAGGCCACAAATT  
GGGAGAATTTGCACCTACATTAATTTTAGAGGACATGCAAAAAGCGATAATAGATCTC  
GTCGTATGATTTTTCAATCTTTTCTACTAGGTAATCTAGTATCCTTATGCATGAAGATAAT  
CAATTCGGTCGTTGTGGTCCGACTCTATTATGGATTTCTGACCACATTCTCCATAGGGCC  
CTCTTATCTCTTCCTTCTCCGAGCTCTGGTTATGGAAGAAGGA-----ACCGAGAAGAA  
GGTATCAGCAACAGCTGGTTTTATTACGGGACAGCTCATGATGTTTCATATCGATCTATTA  
TGCGCCTCTGCATCTAGCATTGGGTAGACCTCATACAATAACTGTCCTAGCTCTACCATA  
TCTTTGTTTTCAATCTTCTGGAACAATCACAAACACTTTTTTGATTATGGATCTACTACC  
AGAAATCAATGCGTAATCTCAGCATTCAATGTGTATTCTGAATAATCTCATTTTTCAAT  
TATTCAACCATTTCATTTTACCAAGTTCAATGTTAGCCAGATTAGTCAACATTTATCTCTT  
TCGATGCAACAACAAGATCTTATTTGTAACAAGTGGTTTTGTTGGTTGGTTAATTGGTC  
ACATTTTATTTCATGAAATGGCTTGGATTGGTATTAGTCTGGATACGGCAAAATCATTCTAT  
TAGACCGTACATTCGATCTAATAAGTACCTTGTGTTAGAATTGAGAAATTCTATGGCTCG  
GATCTTTAGTATTCTTATTATTACCTGTGTCTACTATTTAGGCAGAATACCCTCACCC  
ATTCTTACTAAGAACTGAAAGAACTGAAGAAGATAAACCTCTTGTGAGTCTTCTTTT  
CAATTATAATCGATGGAATCGACCATTTTCGCTACATAAAGAATAATCGATTTGAACAAGC  
CGTAAGAACTGAAATGTCACAATATTTTTTTGACACATGTAAGTATGGAAAACAA  
AGAATATCTTTTACATAACCCGCCAAGTTTATCAACTTTTTGGAAAATGATAAAGGAAG  
GCTACCCTTATTGTCACTCCAAAAACCTCCCTAATGAACTGGACAATCAGTGGGTTT  
CTACCAACAAGAAAAAAGTAAT--CTGAATAAGGAATTTTAAATCGACTAGAAGTTC  
TAGACAAGGAATCTCTTCTCTGGATATACTCGAAACAAGGACTAGATTGAGTAATGAT  
GATACTAAAAAGAATACGTGCCTAAAATGTATGATCCTTTGTTAAATGGACCATATCGA  
GGAACAATCAAAAAAGGGTTTTACCTAAAGAGAGAGTTATACTAAATAGGATTCATA  
CTATCTTTTACCAAGAATTTGAACAAAAAGATCCTAATGGGACATCGATTGGAATAAAA  
GAAATCAGTAAAAAATACCTCGCTGGTACATAAATTAATCGAATTGGAACAACAATT  
G--GGTCAAATTCGTTCAAGAAAAGCCAGACGTGTAGTGATTTTTACTACCGCTTTAAT  
AAGCTATTCGCAACAATCAGATTTTCGGCGAGGTATAATTAAGGCTCTATGCGGGCTC  
AAAGGCGCAAAACAGTTATTTGGAAACTATTTCAAGCAAATGTGCATTCCCCCTTTTTT  
CTCGACAGAATAACCCCCCCCCGTCTTTTTTCTTTTGGATATC-----TCTGAACTGATTA  
CCAATTTTTTCGAAATAAAAAGGAAAAAGCACGGATAGCTATAGCCGAAGCCTGGGATA  
GCATTTCTTTTTCGCAATAATAAGAGGTTCCATGTTAATAACTCAATCAATCTTCGAA  
AATATATTCTATTACCTTCATTGATAATAGCCAAAAATCTCGGGCGTATGTTATTCTTGCA  
ACTTCCTGAATGGTCTGAAGATTTGGAGGAATGGAATAGAGAAATGCATATTAATGTA  
CTTATAATGGTGTTCAATTATCAGAAACAGAATTTCCAAAAAATTGGTTGAGGGATGGG  
ATTCAGATCAAAATTTTATTTCTTTTTGTCTGAAACCTTGGCATATATCTAAAAAAA  
CAAAAAGATGATTTTTGTTTTTTAACAGTTTGGGGAATGGAAGCTGAACTCCCTTTGG  
TTCTCCACGAAGTCGCCCTTCTTTTTTGGAGCCATTTTTAAGGAACTCGAAAAAAA  
AATGGAAAATTAATAAAGAAATATTTATAACT--CTAAAAGTTTTAAAGGAAAAACA  
AATTTATTTAGAAGAATTTCAAAAAGAACTAAAAAATGGCTTATCAAAAAGTATTCTA-----

-TTTCTAAAAAAATAAGAAAAGAACTTTCAAAAATAAAGGATTCTCTAATTAGTAATC  
AGATAATTAACGAATCATTTAGTCAAATTGAATCTGTAAATTGGCCAAATTCCTCACTGA  
TAGAAACCAAAATGAAGGATTTGACTGATAGAACAAGTACAATAAAAAATCAAATAGA  
AAGAATTACAAAAGAGAAAAAGAAAAGTCGTAATAAA---ACAAATAATATTA AAAAAT  
TCGAATCGACAAAAAATATTTTTCAAATATTACAAAGAAGAAATACTCGATTAATATGG  
AAATTCCATTATTTTATAAAATTATTCATTCAAAGATTATACATCAATCTATTTTTATCTATC  
ATTAATATTCCCAGAATTAATACACAACCTCTTT-----TTTATTTTCGTTTGATTTATCCTACTT  
GTCACAAGCATATGTATTTTACAAATTATCACAAACCCAAGTTATTAATTTGTCTAAATTT  
AGATCTGTTCTTCAATATACGTCTTTTTTCTTAAGACTAAAATAAAGGACTATTTTACA  
CTAGGAATATTTCAATTCTGAATTA AACATAAGAACTTCAGAGTTATAGAATCAATCAA  
TGGAAAAACTGGTTAAGACGGCATTATCAATACGATTTATCTCAGATTAGATGGTCTAGA  
TTAATGCCACAAAAATGGCGAAATAGGGTTAATCAAAGTTGTATGGCTCAAATAAAA  
ACAAATGGAATTCATATGAAAACGACCAA-----TTAATTCATTACAAAAAGAA---AATT  
TTCAAAAATGTTATAGATATGATCTTTTATCATATAAATCAATTAATGGCAATATCTATAT  
CTCGATAGAAAATATTTTGATTGGAAAATTATCCATTTTTCTCTTAGATTTTTTGATTGGA  
TGGGAATGAATGAAAAAATATTTAATCGTTGGTTCTTCCCAGAATTTGTACTACTTTATA  
ATGTATATAAAATAAACCTTGGATTATACCAAGCAAATTACTTCTTTTAAATTACAAAA  
GCAACACGGAAGCAGAACTTGATTGTTCTTGAAACGTTATTTGCTTTTTCAATTGAAA  
TGGAACGATGATTTGAATCAAAGAATGATCGAGAATATCAAGGTGTATTGTCTCCTGCT  
TCGACTGATAAATCCAACCAAAATTAGTATATCGTCAGTTCAAAGGGGAGAAATGAGTT  
TGGATATAATGCTGATTCAGGGGAATTTAACTCTTACAGAATTGATGAAG---GGAATATT  
GATTATCGAACCTATTCGGTTGTCTGTAAAAATAATGGACAATTTATTATGTATCAAAC  
CATAGGTATTTCAATTGGTTCATAAAAGTAAACACAATCATTTTTGATTTACTTGTTCCTGA  
AAATATTTTATGGTCTAGACGTCGTAGAGAATTGAGAATTCGAAGTTTTTTTAGGTTTCT  
TTGGCCTAATTATCGATTAGAAGATTTAGCTTGTATGAATCGTTATTGGTTTGATAACAAT  
AATGGTAGCCGTTTCAGTATCTTAAGGATACATATGTATCCAATGAGAGGACATCAATTC  
AAATCCTGGATTTTAGAATTGAGAGAGATATTGAGAGAGATCAAGAATTCACCATTT  
CTTAGATTCATGGACCCAATTCACTTCAGTGGGATCCTTCATTCACATTTTTTTCCACCA  
AGAACGTTTTCTAAAACCTTTTGACCCCGAATTTGGAGTATCCTACTTTCA---CGCAAT  
TCA-----CAGGGTTCAACAAGCAATCGATATTTACG-----ATCAAGGGT---GTAATACT  
CTTTGTAGTAGCGGTCCTTATATATCGT-----ATTAACAATCGAAATATGGTCGAAAG  
AAAAAATCTCTATTTGATAGGGCTTCTTCCT-----ATACCTATGAATTCCATTGGAC  
CCAGAAATGATACATTGGAAGAATCCGTT---GGGTCTTCCAATATCAATAGGTTGATTGT  
TTCG---CTCCTGTATCTTCCCAAAGGAAAAAAGATCTCTGAGAGTTGTTTCTGAATCC  
GAAAGAGAGTACTTGGGTTCTCCCAATAACT-----AAAAAGTGTAGCATGCCTGAA  
TCTAACTGGGGTTCGCGTTGGTGGAGGAACTGGATCGGAAAAAAGAGG-----GATTCTA  
GTTGTAAGATATCTAAT-----GAAACCGTCGCTGGAATTGAGATCTTATTC AAAGAGAA  
AGATCTCAA---TATCTGGAGTTTCTTTTTGTATATTATATGGAT-----GATCCGATCCGCA  
AGGACCATGATTGGGAATTGTTTGATCGTCTTCTCTGAGGAAGAGTCGAAATAGAATC  
A ACTTG-----AATTCGGGACCGCTATTCGAAATCTTAGTGAAACACTGGATTTCTTATCT  
CATGTCTGCTTTTTCGTGAAAAAATACCAATTGAAGTGGAGGGT---TTCTTCAAACAACA  
AGGG---GCTGGGTCAACTATTCAATCAAATGATATTGAGCATGTTTCCCAT-----CTCTTC  
TCGAGAAACAAGTGGGCTATTTCTTTGCAAACTGTGCTCAATTTTCATATGTGGCAATT  
CCGCCAAGATCTCTTCGTT-----AGTTGGGGGAAG---AATCCGCCCGAATCGGATTTTT



TGAGGAAC---GTATCGAGAGAGAATTGGATTGGTTAGACAATGTGTGGTTGGTAAACA  
AGGATCGG-----TTTTTTAGC-----AAGGTACAGAATGTATCGTCAAATATTCAATATGA  
TTCC-----ACAAGA-----TCTAGTTTCGTTCAAGTAACGGATTCTAGCCAACTGAAAGG  
ATCTTCT--GATCAATCCAGAGATCATTGGATTCCATTAGT-----AATGAGGATTCGG  
AA-----TATCACACATTGATTAATCAAAGAGAGATTCAACAAC  
GAAAAGAAAGATCGATTCTT--TGGGAT-----CCTTCTTTCTTCAAATGGAACGAAAAG  
AGATAGAATCAGGC-----CGATTCCCGAAA-----TGCCTTTCTGGATATTCC-----TCAATG  
TCCCGGCTATTACG---GAACGTGAGAAGCAGATGATTAATCATCTGTTCCGGAAGAA  
ATCGAAGAATTTCTT-----GGGAATCCTACAAGATCCGTTTCGTTCTTTTTCTCTGATAGA  
TGG-----TCAGAACTTCAT--CTGGGTTCGAATCCTACTGAGAGGTCCACTAGAGATCAG-  
-----AAATTGTTGAAGAAACAACAAGATCTTTCT--TTTGTCCCTTCCAGGCGATCGG  
AA-----AATAAAGAAATGGTTAATATATTCAAGATAATTACGTATTTACAAAAT-----A  
CCGTCTCAATTCATCCTATTTTCATCAGATCCGGGATGTGATATGGTTCCG---AAGGATGA  
ACCGGAT--ATGGACAGTTCCAATAAGATTTTCATTCTTGAACAAAATCCATTTTTTGT  
TTA-----TTTCATCTATTCCATGACCGGAACAGGGGAGGATACACGTTA-----CACTACGA  
TTTTGAATCAGAA-----GAGAGATTTCAAGAAATGGCAGATCTATTCCTCTATCAATA  
CCGAGCCG--GATCTGGTGTATCATAAGGGATTTGCCTTTTCTATTGATTCCTGCGGATT  
GGATCAAAAACAA-----TTCTTGAATGAGGCCAGGGATGAA-----TCGAAAAAGAAAT  
CT-----TTATTGGTTCTACCTCCTATTTTTTAT-----GAAGAGAATGAATCTTTTTCTCGA  
AGGATCAGAAAAAATGGGTCCGG---ATCTCCTGCGGGAATGATTTGGAAGATCCAAA  
ACCAAAAATAGTGGTATTTGCTAGCAACAACATAATGGAGGCAGTCACTCAATATAGAT  
TGATCCGAAATCTGATTCAAATCCAATATAGTACCTATGGT-----TACATAAGAAATGTATT  
GAATCGATCTTTTTAATGAAT-----AGATCCGATCGCAACTTCGAATATGGA-----AT  
TCAAAGGGATCAAATAGGAAAGGATACTCTGAATCATAGAACTATAATGAAATATACGA  
TCAACCAATATTTATCGAATTTGAAAAG---AGTCAGAAGAAATGGTTCGAGCCTCTT---  
---ATTTTGATTTCTCGAACCGAGAGATCCATGAATCGGGATCCTGATGCATATAGATACA  
AATGGTCCAATGGGAGCAAGAATTTCCAGGAACATTTGGAACAGTCCGTTTCGGAGCA  
GAAGAGCCGT-----TTTCAAGTAGTGTTTCGATCGATTACGTATTAATCAATATTCGATTG  
ATTGGTCTGAGGTTATCGACAAAAAAGATTTGTCTAAGCCACTTCGTTTCTTTTTGTCTA  
AGCCACTTCGTTTCTTTTTGTCCAAG---TCACTTCTTTTTTTGTCC-----AAGT  
TGCTTTTCTTTTTGTCTAAC---TCACTTCTTTTTTCTGTGTGAGTTTCGGAAATATCCCC  
ATTCATAGGTCCGAG---ATCTACATCTAT--GAATTGAAAGGTCCGAATGATCAACTCTGC  
AATCAGTTGTTAGAATCAATAGGTCTTCAAATTGTTTCATTTGAAAAAATTGAAACCCCT  
C-----TTATTGGAC-----GATCATGATACTTCC---CAAAAATCTAAATTCTTGATCAATGG  
AGGAACAATATCACCATTTTTGTTCAATAAGATACCA---AAGTGG---ATGATTGACTCATT  
CCATACTAGA-----ATAATCGCAGGAAATCCTTTGATAACCCGGATTCCAATTTCTCAAT  
GATATTCCACGATCAAGACAATTGGCTGAATCCCGTGAAACCATTCATAGAAAGTTCAT  
TGATATCTTCTTTTTATAAAGCAAATCGACTTCGATTCTTGAATAATCCACATCACTTCTG  
CTTCTAT-----TGGAACACAAGATTCCCCTTTTCTGTG-----GAAAAGGCCCGTATCA  
AT-----AATTCTTATTTACGTATGGA---CAATTCCTCAATATCTTGTTCATTTCGCAACAAA-  
-ATATTTTCTTTGTGCGTCGGTAAC-----AAAAACATGCTTTTTTGGGGG---AGAGATACT  
ATTCACCAATCGAGTCACAGGTATCTAACATATTCATACCTAACGATTTTCCACAAAGT  
GGT--GACGAAACGTATAACTTGTACAAATCT-----TTCCATTTTCCAAGTCGATCCGAT  
CCATTCGTTTCGT-----AGAGCTATTTACTCGATCGCAGACATTTCTGGAACACCTCTAAC

AGAGGGGCAAATAGTCAATTTTGAAAGAACTTATTGTCAACCTCTTTCAGATATGAATC  
TATCTGATTCAGAAGGGAAGAAGCTTGCATCAGTATCTCAAT-----TTCAATTCAAACATG  
GGTTTGATTCACACTCCATGTTCTGAGAAAGATTTATCATCCGAAAAG-----AGGAAAA  
AA-----CGGAGTCTTTGTCTAAAG-----AAATGCGTTGAGAAAGGGCAGAT  
GTATAGAACCTTTCAACGAGATAGTGCTTTTTCAACTCTCTCAAATGGAATCTATTCCA  
AACATATATGCCATGGTTCCTTACTTCGACAGGGTACAAATATCTAAATTTGATATTTTA  
GATACTTTTTTCAGACCTATTG-----CCAATACTAAGTAGC---AGTCAAAAATTTGTATCCA  
TTTTTCCTGATATTATGCATGGATCAGGTATATCATGGCGAATTCTTCAGAAAAAATTG---  
-----TGTCTTCCACAATGGAATCTG---ATAAGTGAGATAAGTAGTAAGTGTTTACA  
TAAT-----CTTCTTCTGTCCGAAGAAATGATTCATCGAAAT-----AATGAGTCACCATTGAT  
ATCGACACATCTGAGATCGCCAAATGCTCGGGAGTTC---CTCTATTCAATCCTTTTCCTT  
CTTCTTGTTGCTGGATAT--CTCGTTCGTACACATCTTCTCTTTGTTTCCCGG-----GCCTC  
TAGTGAGTTACAGACAGAGTTCGAAAAGGTCAAATCTTTGATGATTCCATCATCTATGA  
TTGAGTTGCGAAAACCTTCTGGATAGGTATCCTACATCTGAACCGAATTCTTTCTGGTTA  
AAGAATCTCTTTCTAGTTGCTCTGGAACAATTAGGAGATTCTCTAGAAGAAATACGGGG  
TTCTGCTTCTGGCGGCAACATGCTTGGT-----CCCGCT-----TATGGG--GTCAA  
TCAATACGTTCTAAGAAGAAAGATTGGAATATCAATCTCATCGAGATCATCGATCTCATA  
-----CCAAATCCCATCAATCGAATCACTTTTTTCGAGAAATACGAGACATCTAAGTCA  
TACAAGTAAAGAGATCTATTCATTGATAAGAAAAAGAAAAACGTGAACGGGGATTGG  
ATTGATGATAAAATAGAATCCTGGGTCGCGAACAGTGATTTCGATTGCTGATGAAGAAAG  
AGAATTCTTGGTTCAGTTCTCC-----ACCTTAACGACA-----GAAAATAGGATTGATCAA  
TTCTATTGAGTCTGACT--CATAGTGATCATTTA-----TCAAAGAATGACTCTGGTT  
ATCAAATGATTGAACAACCGGGAGCAATTTACTTACGATACTTAGTTGACATTCAT-----A  
AAAAGCATCTAATGAATTATGAGTTCAATCCATCCTGTTTAGCAGAAAGACGGATATTC  
CTTGCTCATTATCAGACAATCACTTAT-----TCACAACTTCGTGTGGGGAAAATAGTTTT  
CATTTCCCATCTCATGGA-----AAACCCTTTTCGCTCCGCTTAGCCTTATCCCCCTCT--  
AGGGGTATTTTAGTGATAGGTTCTATAGGAACTGGACGATCCTATTTGGTCAAATACCTA  
GCGACAAACTCCTATGTTCTTTTATTACGGTATTTCTGAACAAGTTCCTGGATAACAA  
GCCTAAAGGTTTTCTTCTTGAT-----GAGATCGAT--ATTGATGATAGTGACGATAT  
TGATGATAGTGACAATCTTGATGCTAGTGAC-----G  
ATATCGGTCTGTGACCTTGATACGGAGCTG--GAACTGCTAACTAGGATGAATGGGCTAA  
CTATGGATATGATGCCGGA-----ATAGACCGATTTTATATCACCTTCAATTCTGAATTA  
GCAAAGCAATGTCTCCTTGCATAATATGGATTCCAAACATTCATGATCTGGATGTGAAT  
GAGTCGAATGACTTATCCCTCGGTCTATTAGTGAACCATCTCTCCAGG-----GATTGTG  
AAAGATGTTCT--ACTAGAAATATTCTTGTATTGCTTCGACTCATATTTCCCAAAAAGT  
GGATCCCGCTCTAATAGCTCCGAATAAATTAATACGTGCATTAAGATACGAAGGCTTCT  
TATCCACAACAACGAAAGCACTTTTTCACTCTTTCATATACTAGGGGATTTCACTTGG  
AAAAGAAAATGTTCCATACT-----AACGGATTCGGGTCCATAACCATGGGTTCCAATGCA  
CGAGATCTTGTAGCACTTACCAATGAGGTCCTATCGATTAGTATTACACAGAAGAAATC  
AATTATAGACACTAATACAATTAGATCCGCTCTTCATAGACAAACTTGGGATTTGCGA----  
----TCCCAGGTAAGATCGGTTTCAGGATCATGGATCCTTTTCTATCAGATAGGAAGGGCT  
GTAGCACAAAATGTACTTCTAAGTAATTGCCCATAGATCCTATATCTATCTATATGAAGA  
AGAAA-----TCATGTAACGAAGGGGATTCCTATTTGTACAAATGGTACTTCGAGCTTGG  
ACGAGCATGAAGAGATTAACGATACTTCTTTATCTTTTGTAGTTGTTCTGCCGGATCGGT

CGCTCAAGATCTTTGGTCTTTATCC-----GGACCCGATGAAAAA---AATGGGATCACTTC  
TTATGGACTCGTTGAGAATGATTCT--GATCTAGTTCATGGCCTATTAGAAGTAGAAGGC  
GCTCTGGTGGGA-----TCTTCACGGACAGAAAAAGATTGCAGTCAGTTTGATAATGAT--  
--CGAGTGACATTGCTTCTTCGGCCCGAACCGAGGAAT--CCCTTAGATATGATGCAAAA  
GGGCTCTTGTTCTATCCTTGATCAGAGATTTCTCTATGAAAAATAT-----GAATCGGAGTT  
TGAAGAA--GGGGAGGGAGAAGGAGCCCTTGACCCGCAG-----GAGGAT---  
-----TTATTCAATCAC-----ATAGTTTGGGCTCCT-----AGAATATGGCGCCCT-----TGG  
GGCTTTCTATTTGATTGTATCGAAAGGCCCAATGAATTGGGATTTCCC---TATTGGTCCA  
GGTCATTTGCGGGCAAG-----CGGATCATTATGATGAAGAGGATGAGCTTCAAGAGA  
ATGATTCGGGGTTCTTGCAGAGTGAACCATGCAGTACCAGACACGAGATAGATCTTC  
CAAAGAACAAGGCCTTTTTCGAATAAGCCAATTCATTTGGGACCCTGCAGATCCACTCT  
TTTTCTATTCAA--GATCAGCCCCCTGGCTCTGTGTTTTCACATCGAGAATTATTTGC  
AGATGAAGAGATGTCAAAGGGGCTTCTTACTTCCCAAACAGATCCTCCTACATCTATAT  
ATAAACGCTGGTTTATC-----AGAATACGCAAGAAAAGCACTTCGAATTGTTGATTAAT  
CGTCAGAGATGGCTTAGA-----ACCAATAGTTCATTATCT-----AATGGATCTTCCGTT  
CTAAT-----ACTCTATCCGAGAGTTATCAGTATTTATCAAATCTGTTCCCTATCTAAC--GGA  
ACGCTATTGGATCAAATGACAAAGACATTGTTGAGAAAAAGATGGCTTTTCCCGGATG  
AAATGAAAATTGGATTC-----ATG-----ATGCCTAGATCACGG---ATAAT  
GGAAATTTTATTGATCAGACCTTTTCAATTGTAGCCAATATCTTATTACGAGTAATTCCG  
ACAACCTCAGGAGAAAAAGAGGCATTTACCTATTACAGAGATGGG-----ATGTCGGCTC  
AATCCGAAGGAAATTACGCGGAAGCTTTGCAGAATTATTATGAAGCTATGCGACTAGAA  
ATTGATCCCTATGATCGAAGTTATATACTCTATAATATAGGGCTTATCCACACAAGTAATG  
GAGAACATACGAAAGCTTTGGAATATTATTTTCGAGCACTAGAACGAAACCCATTCTTA  
CCACAAGCTTTTAATAATATGGCCGTGATCTGTCATTAC---CGGGGAGAACAGGCCATTC  
AACAGGGAGATTCTGAAATTGCGGAGGCTTGGTTTGATCAAGCCGCTGAGTATTGGAA  
ACAGGCTATAGCGCTTACTCCCGGTAATTATATTGAAGCGCATAATTGGTTGAAGATCAC  
GAGACGTTTTCGAA-----ATGACTTGCGGATCAGAACATATATGGATAGAACTTATAACGG  
GGTCTCGAAAAATAAGTAATTTCTGCTGGGCCTTTATCCTTTTTTTTAGGTTCAATTAGGCT  
TCTTATTAGTTGGAACCTCCAGTTATCTTGGTAGAAATTTGATATCTTTTTTTCCGACTCA  
GCAAATCGTTTTTTTTCCACAAGGAATCGTGATGTCTTTCTACGGAATTGCGGGTCTCT  
TTATTAGCTCTTATTTGTGGTGCACAATTTCTGGAATGTAGGTAGTGGTTATGATCGATT  
CGATAGAAAGGAAGGAATAGTCTGTATTTTCGTTGGGGATTTCCGGGAAAAAATCGTC  
GCATATTCCTCCGATTCCCTATAAAAGATATTCAGTCCGTTAGAATAGAAGTTAAAGAGG  
GTATTTCTGCTCGTGTGTTCTTTATATGGACATCCGAGGCCAGGGTCCATTCCCTTGA  
CCCGTACTGATGAGAAT--TTGACTCCACGAGAAATTGAACAAAAGGCTGCTGAATTAG  
CCTATTTCTTGCGTGTACCAATTGAAGTATTT

>Calycanthus

ATGGGAAAATGGTGGTTCAAT-----TCGCTAAGTAAATCAATGGACAGTCTTGGTCTTA  
TTGGAATACCAGTGGAAGTGAAGACCCCACTCTAAATGATACGAATAAAAACATTCCT  
---TGCAATAATGTTGATCATTTTTTCAGTGTCAGGGACATTTGGAGTTTCATCTCTGATG  
GCACTTTTTTAGTTAGGGATAATAATGGTAACTGTTATTCCGTATATTTGGATATTGAAAA  
TCAGGTTTTTGAGATTGACAATGAT-----AGTTCTTTTCTGAGTGAAGTAGAAAGTTCTT  
TTTCGAGTTATATGAAT--AGTTATCTGAATAGTGGGTCTAAGAGTGACAATCGCTACTAT  
GATCGCTACCGTATGATATTAATATAGTTGGAATAATCACATTAATAGTTGCATTGATA

GTTATCTTCGTTCTGAAATAAAC-----ATTGATAGTTACATTTCAAGTGGTAGCGACAATT  
ACCGTGACAGTTACATTTATAGTTACATTTGTAGTAAGAGTGGGAGTTCTATAAGA  
GGCGGTAATAGCAGTGATTTCAATAGAAGAGGAAGATCT--GATTTCGATCTAAATAAA  
AAATACAGACATTTATGGGTTCAATGCGAAAATTGTTATGGATTGAATTATAAAAAATTT  
GTGAGTTTCAAATGCATATTTGTGAACAATGTGGATATCATTTGAAAATGAGTAGTTC  
AGAGAGAATAGAACTTTCGATTGATTCGGGTTACTTGGGATCCTATGGATGAAGACATGG  
TCTCTATGGACCCTATTCAATTTTCATTCGGAAGAGGAGCCTTATAGAGATCGTATCGATT  
CGTATCAAAGAAAGACAGGTTTAACTGAGGCTGTTCAAACGGGCATAGGTCAACTAAA  
TGGTATTCCCGTAGCAATTGGGGTTATGGATTTTCAGTTTATGGGGGGTAGTATGGGATC  
CGTAGTAGGTGAGAAAATCACCCGTTTATCGAGTATGCTACTAATAGATCTCTGCCTG  
TTATTATGGTGTGTGCTTCTGGAGGAGCGCGCATGCAAGAAGGAAGTTTGAGTTTGAT  
GCAAATGGCTAAAATATCTTCCGCTTCATATGATTATCAATTAATAAAAAGTTATTCTAT  
GTATCAATCCTTACATCTCCTACAACCGGCGGAGTAACCGCCAGTTTTGGTATGTTGGG  
AGATATCATTATTGCTGAACCCAATGCTTACATTGCGTTTGCGGGTAAAAGAGTAATTGA  
ACAAACATTGAATAAGACAGTACCCGATGGTTCACAAGCGGCTGAGTATTCATTCCATA  
AGGGCTTATTTGATCCAATCGTACCACGTAATCCTTTAAAAGGTGTTCTGAATGAGTTAT  
TTCGGCTACACGGTTTTCTTCCCTTGAATCAAATTCAGTAGAATGGTAACCATTTCGA  
GCCGACGAAATTAGTAATATTATCCGTGAACGTATTGAACAATACAATAGAGAAGTCAA  
GATTGTGAATACTGGCACAGTACTTCAAGTAGGCGACGGCATTGCTCGTATTCATGGTC  
TTGATGAAGTAATGGCAGGGGAATTGGTAGAATTTGAAGAGGGTACAATAGGCATTGC  
TCTTAATTTGGAATCAAATAATGTTGGCGTTGTATTAATGGGCGACGGTTTGACGATA  
AGAGGGAAGTTCTGTAAAAGCAACAGGAAGAATTGCTCAGATACCAGTTAGTGAGGC  
TTATTTAGGTCGTGTTATAAATGCTCTGGCTAAACCTATTGATGGTAGAGGTGAAATTC  
GGCTTCGGAATCCCGGTTAATTGAATCTCCTGCTCCAGGTATTATTTTCGAGACGTTCCGT  
ATATGAGCCTCTTCAAACGGGACTTATTGCTATTGATTTCGATGATCCCTATAGGACGCGG  
TCAGCGAGAATTAATTATTGGGGACAGACAGACCGGGAAAGCAGCAGTAGCCACAGAT  
ACTATTCTCAATCAAAGGGGCAAATGTGGTATGTGTTTATGTGGCTATTGGTCAAAA  
AGCATCTTCCGTGGCCCAAGTAGTGACCACTTTCAGGAACGAGGGGCAATGGAATAC  
ACTATTGTGGTAGCCGAAACGGCGGATTCGCCTGCTACATTACAATACCTTGCTCCTTAT  
ACAGGAGCGGCTCTGGCTGAATATTTTATGTACCGTGAACGACATACTTCAATAATTTAT  
GATGATCTCTCCAAACAAGCACAAGCTTATCGTCAAATGTCTCTTCTATTAAGAAGACC  
GCCCCGTGCGAAGCTTATCCAGGAGATGTTTTTTATTTGCATTCACGCCTTTTGAAA  
GAGCCGCTAAATTAAGTTCTCCTTTAGGTGAAGGAAGTATGACTGCTTTACCAATAGTT  
GAGACTCAATCTGGGGACGTTTCCGCTTATATTCTACTAATGTTATTTCCATTACAGAT  
GGACAAATATTCTTATCCGCCGATCTATTCAATGCCGGAATCCGTCCTGCCATTAATGTG  
GGTATTTCTGTCTCGAGAGTAGGATCCGCGGCTCAAATTAAGCCATGAAACAAGTAG  
CTGGCAAATCAAATTGGAACGGCCAAATTCGCAGAGTTAGAGGCCTTTGCACAATT  
TGCCTCCGATCTAGATAAAGCCACTCAGAATCAATTGGCAAGAGGTCAACGATTACGC  
GAGTTGCTTAAACAATCCCAAGCAGCCCCTCTACCGTGGAAGAACAGATAGTTACTA  
TTTATACCGGAGCGAATGGGTATCTTGATCCGTTAGAAATTGGCCAGGTAAAGAAATTT  
CTCGTTACGTTACGTACCTACTTAAAAACAATAAACCTCAGCTCCAAGAAATCATATC  
TTCTACCAAGACATTCACCGAGGAAGTGGAAGCCCTTTTGAAGGAAGCTATTCCAGAA  
CAGATAGAACTCTTTCTACTTCAGGAACAAACAATGAGAATCAATCCTACTACTTCTGG  
TCCTGGGGTTTTCCACACTTGAAGAAAAAACCTGGGGCGTATTGCTCAAATCATTGGT

CCAGTACTGGATGTAGCTTTTCCCCGGGCAAGATGCCTAATATTTACAACGCCTTGGT  
AGTTAAGGGTCGAGATACTGTCCGGTCAACAAATTAATGTGACTTGTGAAGTCCAACAA  
TTATTAGGAAATAATCGAGTTAGAGCTGTAGCTATGAGTGCTACAGATGGTCTGATGAG  
AGGAATGGAAGTGATTGACACAGGAGCTCCTCTAAGCGTTCCCGTCCGGTGGAGCTACG  
CTTGGACGAATTTCAACGTTCTTGGAGAGCCTGTTGATAATTTAGGTCTGTAGATAC  
TCGCACAACATCTCCTATTATAGATCTGCGCCTGCTTTTATCCAGTTAGATACCAAATTA  
TCAATCTTTGAAACAGGGATTAAGTGGTGGATCTTTTAGCTCCTTATCGTTCGTGGAGG  
AAAAATCGGACTATTCCGGAGGAGCCGGGGTGGGTAAAACAGTACTCATCATGGAATTA  
ATCAACAACATTGCCAAGGCTCATGGAGGTGTATCTGTATTTGGCGGAGTAGGCCAAC  
GTACTCGTGAAGGAAATGATCTTTACATGGAAATGAAAGAATCTGGAGTGATTAATGAA  
CAAAATATTGCAGAATCAAAAGTAGCTCTAGTCCATGGCCAGATGAATGAACCGCCGG  
GAGCTCGTATGAGAGTTGGTTTACTGCCCTAACCATGGCGGAATATTTCCGGGATGTT  
AATGAACAAGACGTACTTCTATTTATCGACAATATCTTCCGTTTCGTCCAAGCAGGATC  
AGAAGTATCCGCCTTATTAGGTAGAATGCCTTCCGCTGTGGGTATCAACCTACCCTTAG  
TACAGAAATGGGTCTTTTGAAGAAAGAATTACTTCTACCAAAGAGGGGTCTATAACTT  
CCATTCAAGCAGTTTATGTACCTGCGGACGATTTGACCGACCCTGCTCCTGCTACGACA  
TTTGACATTTAGATGCTACTACCGTACTATCAAGAGGATTAGCTGCCAAGGGTATCTAT  
CCAGCAGTAGATCCTTTAGATTCAACGTCAACTATGCTCCAACCTAGGATCGTTGGTGA  
GGAACATTATGAAATTGCGCAAAGAGTTAAGCAAACCTCACAACGTTACAAAGAACTT  
CAGGACATTATAGCTATCCTTGGGTTGGACGAATTATCCGAAGAGGATCGTTTAAACAGT  
AGCAAGAGCACGAAAAATTGAGCGTTTCTTATCACAACCGTTCTTTCGTAGCAGAAGTA  
TTTACTGGTTCCCCAGGGAAATACGTTGGTCTTGCAGAAACAATTAGGGGGTTTCAACT  
GATCCTTTCCGGGAGAATTAGATGGTCTTCCCGAACAGGCCTTTTATTTGGTGGGTAACA  
TCGATGAAGCTACCGCGAAGGCTATGAACTTAGAAGTAGAGAGCAAATTGAAGAAAAT  
GACCCTAAATCTTTGTGTACTGACTCCTAATCGAATTATTTGGGATTCAGAAGTGAAAG  
AAATCATTTTATCTACTAATAGTGGCCAAATTGGCGTATTACCCAATCACGCCCTATTG  
CCACAGCTGTAGATATAGGTATTTTGAAGAATACGCCTCAACGGCCAATGGTTAATGATG  
GCTGTAATGGGCGGTTTCGCTAGAATAGGCAATAACGAGATCACCATTTTATGTAATGA  
TGCAGAGAAGGGTAGTGACATTGATCCACAAGAAGCTCAGCGAACTCTTGAAATAGCT  
GAAGCTAACTTGAGTAAAGCTGAAGGCAAGAGACAAGTCATTGAGGCGAATCTAGCT  
CTTAGACGAGCTAGAACACGAGTAGAGGCTATCAATGTTATT--ATGAAAAATGTAACC  
GATTCTTTTCGTTTCCTTGGGTCACTGGCCATTCGCTGGGAGTTTCGGGTTTAAATACCGAT  
ATTTTAGCAACAAATCTAATAAATCTAAGTGTAGTGCTTGGTGTATTGATCTTTTTTGG  
AAGGGAGTGTAAAGTGATTTATTAGATAATCGAAAACAGAGGATCTGGAGTACTATTTCG  
AAATTCAGACGAACTACGTGAGGTAGCCATTGAGCAGCTCGAAAAAGCCCCGGGCTCG  
CTTACGGAAAGTGGAAGAGAGAAGCAGATGAGTTTCGAGTGAATGGATACTCTGAGATA  
GAACGAGAAAAATGGAATTTGATTAATGCCACTTATGAGAATTTGGAACGATTAGAAAA  
TTACAAAAATGAAACCATTCAATTTGAACAACAAAGAGCAATTAATCAGGTCCGGCAA  
CGAGTTTCCAACAAGCCTTACAAGGAGCTCTAGGAACTCTGAATAGTCGTTTCGAACA  
GCGAGTTACATTTACGCACTATCAGCGCTAATATTGGCATGCTCGGGGCCATGAAAGAA  
ATAACTGATATGAATCCACTGATTTCTGCCGCTTCCGTTATTGCTGCTGGATTGGCTGTA  
GGGCTTGCTTCTATTGGGCCTGGAGTTGGTCAAGGTACTGCTGCAGGCCAAGCCGTAG  
AAGGTATCGCAAGACAACCAGAAGCAGAGGGTAAAATACGAGGTACTTTATTGCTCAG  
TCTGGCTTTTATGGAAGCTTTAACAATTTACGGACTGGTTCGTGGCATTAGCGCTTTTATT

TGCGAATCCTTTTGTATGAATGTTCTACCCTGTTCTATCAACACACTAAAAGGGTTATA  
CGATATATCCGAAGTGGAAGTAGGTCAACATTTCTATTGGCAAATAGGGGGTTTCCAAG  
TCCATGCCCAAGTACTTATCACTTCTTGGGGTGTAAATTGCTATTTTATTAGGCTCGGCCG  
CTATAGCTGTTTCGTAATCCACAAAACCATTCCAACCGACGGTCAGAATTTCTTCGAATAT  
GTCCTTGAATTCATTCGAGACTTGACCAAACTCAGATTGGAGAAGAATATGGTCCTTG  
GGTCCCTTTATTGGAAGTATGTTCCCTATTTATTTTGTTCCTAACTGGTCGGGTGCTCTT  
TTACCCCGGAAAATCATAACAGTTACCGCATGGAGAGTTAGCCGCACCCACGAATGATAT  
AAATACTACTGTTGCTTTAGCTTTACTTACGTCAGTGGCATATTTCTATGCGGGTCTTAC  
CAAAAAAGGATTGGGTATTTTGGTAAATACATTCAACCAACTCCAATACTTTTACCAAT  
TAACATCCTAGAAGATTTACAAAACCTTTATCACTTAGTTTTCGACTTTTCGGGAATAT  
ATTAGCTGATGAATTAGTAGTTGTTGTTCTTGTTCCTTAGTACCTTTGGTGGTTCCTATA  
CCTGTCATGTTCCCTTGGATTATTCACAAGCGGGATTCAAGCTCTATTTTTGCAACTTTA  
GCCGCGGCCTATATAGGTGAATCCATGGAAGGTCATCATATGATATTTCAACTTTAGAA  
CATATCTTAACTCATATCTCTTTTTCTATCATTTCAATTGTCATTACGATTCATTTGCTGAA  
CTTATTAGTCCATGATACCGTAGGACTATGTGATTCGTCAGAAAAAGGCATGATGGCTA  
CTTTTTTCTGTATAACAGGATTATTAGTTACTCGTTGGATTATTCTAGGCATTTTCCGTT  
AAGTGATTTATACGAATCCTTGATGTTCTTTTCATGGAGTTTCTCTATTATTCATATGGTT  
CCATATTTTAGGAACCATAAAAATTCTTTAAGCGCAATAACCGCGCCAAGTGCTATTTTT  
ACCCAAGGCTTTGCCACTTCAGGTCTTTTAACTGAAATGCATCAATCTGCAATATTAGT  
ACCCGCTCTACAATCCAGTGGTTAATGATGCACGTAAGTATGATGTTATTGGGTATGC  
ATCTCTTTTATGTGGATCGTTATTATCAGTAGCTCTTTTAGTCATTACATTTCGAAAAACC  
TTAGGTATTCCTGGTAAAAACAATGAGATACGCTACTTCAATGAAAAAGAAGTGTTTT  
AAAAAAAACATCTTTTTTTTCATTTAGAAATTATCACAGGTATCAATTGACTCAGCGATT  
GGATCATTGTAGTTATCGTATCATTAGTCTAGGGTTACTTTTTCAACCATAGGTATTCTT  
TCGGGAGCAGTATGGGCTAATGAGGCATGGGGGTCTTATTGGAATTGGGACCCCAAGG  
AAACTTGGGCATTTATTACTTGGACCATATTCGCAATTTATTTACATACTAGAACAAATC  
AGAGATTTCAAGATGTAGGTCCGGCAATTGTGGCTTCTATGGGATTTCTTATAATTTGGA  
TATGCTATTTTGGGGTCAATCTATTAGGAATAGGACTACATAGTTATGGTTCATTCGCATT  
AACAGTGCCAAAAAAA--GCATTGACTCCCTTCCCATATCTTGCATCTATAGTTTTTTTG  
CCCTGGTGGATCTCTCTCTCATTACCAAAGTCTGGAACCTTGGGTACTAATTGGTG  
GAATACCGGGCAATCCAAAACTTTTTTGAATGATATCAAGAGAAGAAGTCTGGAA  
AGATTCATAGAATTAGAACAATATTCCTGTTGGACGAAATGATAAAAGAGTATCCCGA  
GACACAGATACAAAAGTTTCATATAGGAATCCACAAAAGAGACGCTCCAATTGGTCAAA  
ATGCACAATGAAGATCATATCCATATCGTTTTGCATTTCTCGACAAATATAATCTGTTTTG  
CTATTCTAAGTGGTTATTATTTTCTGGGTAATGAAGAACTTGTTATTCTTAATCTTGGGT  
TCAGGAATTCCTCTATAACTTAAAGCGACACAATAAAGGCTTTTTTCGATTCTTTTAGTAAC  
TGATTTATGTATCGGATTCCACTCACCCCGTGGTTGGGAACATAATGATTGGTTCGGTCTA  
CAAAGATTTTGGATTTGCTCATAACGATCAAATTATATCTGGTCTTGTTCCTACTTTTCC  
AGTTATTCTAGATACAATTTTGAATATTGGATCTTCCATTATTTAAATCGTGTATCCCTT  
CACTTGTAGTGAATTTATCATTCAATGAATGAAATGCCCATTTGGTGTCCAAAAGTACCTT  
TTCGGAGTCTTGGAGAGGAAGACGCGGTTTGGGTGACGTATAACCGACTTCATCG  
AGAAAGATTACTTTTTTTAGGCCAAGAAGTTGATAGCGAGATCTCGAATCAACTTGTTG  
GTCTCATGGTATATCTCACCATAGAGGATGATACCAAGGATCTTTATTTGTTTATAAACTC  
TCCTGGCGGATGGGTAATCCAGGAATAGCTATTTATGACACTATGCAATTTGTGTACC

CGATGTGCATACAATATGCATGGGATTAGCCGCTTCAATGGGATCTTTCATCCTGGTTCGG  
AGGAGAAATTACTAAACGTCTAGCATTCCCTCACGCTAGGGTTATGATCCACCAACCTG  
CTAGTTCTTTTTATGAGGCACCCACAGGAGAATTTATCCTGGAAGCGGAAGAATACTG  
AAACTCCGCGAAACCTCACAAAGGGTTTATGTACAAAGAACGGGCAATCCTTTGTGGG  
TTGTATCCGAAGACATGGAAAGGGATGTTTTTATGTCAGCAACAGAAGCCCAAGCTCA  
CGGCATTGTTGATCTTGTAGCGATCGAAATGAAAGAACAATAATTGATTCATGAAGGTT  
TAATTACTGAATCACTTCCCAACGGTATGTTCCGGGTTTCGTCTAGATAATGAGGATCTGA  
TTCTAGGTTATGTTTCGGGGAGGATCCGACGGAGTTTTATAACGGATACTACCAGGAGAT  
AGAGTCAAAATCGAAGTAAGTAGTTATGATTCAACTAGGGGCCGTATAATTTATAGACT  
TCGCAACAAAGATTCTGAATGATATGGAGGAATTACAAGGATATTTAGAAATAGATGGAT  
TTCGGCAACACCACTTCCCTATATCCGCTTCTACTTCAGGAATATATCTACGCACTTGCTC  
ATGATCATGGTTTATTGAGTCATGACAAT--TCCAGTTCACTAATTGTGAAACGCTTAATT  
ACTCGAATGCATCAACAGAATCATTTTATTATTTTCGGTTAATGATTCTAACCAAAAAGGA  
TTCGTTGGGAAGAATTTTCATTCTCAAAGATATCGGAAGGTTTTGCCGTCATTGTGGA  
AATTCCATTTTCACTGCAATTAGTATCTTCTCTAATAGCAAATTTTCAT---TCACGATCTAT  
TCATTCAATATTTCCCTTTTTTCGAGGACAAATTATCACATTTAAATCATGTGTTCAGATATA  
CTAATACCCTACCCCATCCATCTGGAAATCTTGGTTCAAACCCTTCGCTGCTGGATACA  
GGATGCCCCCTCTTTGCATTTATTGCGATTCTTCTCCATGAGTATTGGAATTCAAATAGT  
CTCATTACTAAATCCATTTCCCTTTTTTTCAAACAAAGATTATTCTTGTTCCTATATAATT  
CGCATGTATATGAATGCGAATCCGTATTCATTTTTCTCCGTAAACAATCTTCCATTTACG  
ATCTACATCTTTTGGATCTTTTCTTGAGCGAACACATTTCTATGGAAAAATAGAGCAT---  
GTAGTAGTGCTTGGGAATCCGAAG---TTATGGTTGTTCAAAGATCCTTTCGTGCATTATG  
TCAGATATCAAGGAAAATCCATTCTAGCTTCAAGGGGGACTCAGTTTCTGATAAAGAAA  
TGGAATATCACCTTGTCAACTTCTGGCAATGTCATTTTTACTTGTGGTCTCAACCAGA  
CAGGATTCATCTAAACCAACTATGCAATCATTCCCTTCTATTTTTCTGGGTTATCTTTCAAGT  
GTGCAACTAACTCTTCGGTGGTAAGGAGTCAAATGCTAGAAAATGCATTTCTAATGGA  
TACTGCTATT-----AAGAAATTCGAGACCATAGTCCCAATTATTCCTCTGATTGGATCATT  
GGCTAAAGCAAATTTTGTAAATGGATCAGGGCATCCCATAGTAAGCCGTTTTCGGACCG  
ATTTGTCGGATTCTGAGATTATCAATCGATTTGGTTCGGATATGCAAAAATCTTTCTCATT  
TCACAGCGGATCCTCAAAAAACAGAGTTTGTATCGAATAAAGTTTATACTTCGACTTT  
CGTGTGCTAGAACTTTGTCTCGTAAACATAAAAGTACGGTACGCGCTTTTTTTGAAAAGA  
TTAGGTTTCGGAATTATTGGAAGAATTCCTTACGGAGGAAGAACAAGTTCTTTCTTTGCT  
ATTCCCAAGACGGATTTGGTATTTGGATATTATCTGTATCAATGATCTAGCCAATCATGAA  
ATGATAATTGATACGACA--GAAGTGCAA--GCTATCAATTCTTTTTCCAGATCGGAA---T  
CCTTAAAGAGGTCTATGACCTCTTATGGTTGCTTGTCCCTATTTTTACTCCTGTATTGG  
GAATCACAATAGGTGTACTCGTGATTGTGTGGTTAGAAAGAGAAATATCCGCAGGGATA  
CAACAACGTATTGGGCCTGAATATGCCGGCCCCCTTGGGAATTCTTCAAGCTCTAGCAGA  
TGGAACCAAATACTTTTTCAAAGAGGATCTTCTACCATCTAGAGGAGATATTCGTTTTATT  
CAGTATTGGGCCGTCTATAGCGGTTATATCAATTCTACTAAGTTATTTCAGTAATTCCTTTT  
GGCTATCGCCTTGTCTAGCCGATCTCGGTATAGGCGTTTTTTTTATGGAATCGCTATTTCCA  
GTATTGCTCCTATTGGACTTCTTATGTCAGGATATGGGTTCGAATAATAAATATTCCTTTTC  
AGGTGGTCTACGGGCTGCTGCTCAATCTATTAGTTATGAAATACCATTAACCTCCGTGTGT  
GTTATCAATATCTCTACTATCTAACAGTTCAAGTACAGTTGATATAGTTGAGGCACAGTC  
AAAATATGGATTTTGGGGGTGGAATCTGTGGCGTCAACCTATAGGGTTTATAGTTTTTCT

AATTTCTTCCCTAGCAGAATGTGAGAGATTACCCTTTGATTTACCAGAAGCAGAGGAGG  
AATTAGTAGCAGGTTATCAAACCGAATATTCAGGTATCAAATTTGGTTTATTTTACGTTG  
CTTCTTATCTAAATCTACTAGTTTCTTCATTATTTGTAACGGTTCTTTACTTGGGTGGGTG  
GAATCTTCCCTATTCGGTACATATTCATTCCTGAACCTTTCGGAATAAATAAGACGGACGG  
AGTCTTTGGAACGACAATTGATATCCTTATTACATTAGCTAAATCCTATTTGTTCTGTTT  
GTTCTTATCATAACAAGATGGACTTTACCTAGGATGAGAATGGACCAACTATTAATCTT  
GGATGGAAATTTCTTTTACCTATTTCTCTAGGTAATCTATTATTAATAACTTCTTTCCAAC  
TCGTTTCGTTGATGATCTGGCATGTACAGAATGAAAACCTCATTCTCGATTCTACGAGA  
ATTTTATGAAAGCGTTTCATTTGCTTCTCTTCCATGGAAGTTTCATTTTCCCAGAATGTA  
TCCTCATTTTTGGCCTAATTCTTCTTCTGATGATCGATTCAACCTCTGATCAAAAAGATAT  
ACCTTGGTTATATTTTATCTCTTCAACAAGTTTAGTAATGAGCATAACGGCCCTATTGTT  
CCGATGGAGAGAAGAACCCTATGATTAGCTTTTCGGGAAATTTCCAAACGAACAATTC  
AACGAAATCTTTCAATTTCTTATTTTACTATGTTCAACTCTATGTATTCTCTATCCGTAG  
AGTACATTGAATGTACAGAAATGGCTATAACAGAGTTTCTGTTATTTCGTATTAACAGCTA  
CTCTAGGAGGAATGTTTTTATGTGGTGCTAACGATTTAATAACTATCTTTGTAGCTCCAG  
AATCTTTCAGTTTATGCTCCTACCTATTATCTGGATATACCAAGAGAGATGTACGGTCTAA  
TGAGGCTACTACGAAATATTTACTCATGGGTGGGGCAAGCTTCTTATTCTGGTTCATGG  
TTTTCTTGGCTATATGGTTCATCCGGGGGAGAGATCGAGCTTCAAGAAATAGTGAATG  
GTCTTATCAATACACAAATGTATAACTCCCCAGGAATTTCCATTGCGCTTATATCCATCAC  
TGTAGGAATTGGGTTCAAGCTTTCCCCAGCCCCCTTCTCATCAATGGACTCCTGACGTAT  
ACGAAGGATCTCCCACTCCAGTCGTTGCTTTTTCTTCTGTTACTTCGAAAGTAGCTGCT  
TCAGCTTCAGCCACTCGAATTTTCGATATTCTTTTTATTTCTCATCAAACGAATGGCAT  
CTTCTTCTGGAAATCCTAGCTATTCTTAGCATGATATTGGGGAATCTCATTGCTATTACTC  
AAACAAGCATGAAACGTATGCTTGCATATTCGTCCATAGGTCAAATCGGATATGTAATTA  
TTGGAATAATTGTTGGAGACTCAAATGATGGATATGCAAGCATGATAACTTATATGCTGT  
TCTATATCTCCATGAATCTAGGAACTTTTGCTCGCATTGTCTCATTTGGTCTACGTACCG  
GAACTGATAACATTCGAGATTATGCAGGATTATACACGAAAGATCCTTTTTTGGCTCTCT  
CTTCAGCCCTATGTCTTATCCCTAGGAGGTCTTCCCTCCACTAGCAGGTTTTTTTCGGAA  
AACTCCATCTATTCTGGTGTGGATGGCAGGCAGGCCTATATTTCTTGGTTTCAATAGGAC  
TCCTTACGAGCGTTGTTTCTATCTACTATTATCTAAAATAATCAAGTTATTAATGACTGG  
ACGAAACCAAGAAATAACCCCTCACGTGCGAAATTATAGAAGATCCCTTTTAAGATCA  
ACAATTCATCGAATTGAGTATGATTGTATGTGTGATAGCATCTACTATAACCAGGAATAT  
CAATGAATCCAATTATTGCAATTGCTCAGGATACCCTCTTATGTTTCTGCTTCACGAATA  
TGATATTTTCTGGGCATTTCTAATAATATCAAGTGTCATTCCATTTTTGGCATTTCATTTT  
CCGGAGTTTTAGCCCCGATTTCGTGAAGGACCAGAGAAGCTCTCTAGTTATGAATCAGG  
TATAGAACCAATGGGGGATGCTTGGTTACAATTCCGAATCCGCTATTACATGTTTGCTCT  
AGTTTTTGTGTTTTTGTATGTTGAAACGGTCTTTCTTTATCCATGGGCAATGAGTTTCGA  
TGACTGGGTGATCTGTATTTATAGAAGCTTTAATTTTCGTGCTTATCCAATTGTTGGT  
TCAGTTTATGCATGGCGAAAGGGAGCGTTGGAATGGTCTACGAGTTATTTTCTTGGTT  
AACAGTAATTGTTGTTTTACCGATATCCGCGGGTTCATCAATTTCTTTGTCCCTTATAGA  
GGGAATAAAGTGATTTCGATGGTATACTATTTGTATATGCTTATTAGAAATCCTTCTAACGA  
CCTACGCATTCTGTTATCATTTCGAATCGGACGATCCATTAATCCAATTGGAGGAGGCTT  
ATAAATGGATACATATTTTTGATTTTCATTGGAGACCGGGAATCGATGGACTTTCCATAG  
GACCTATTTTACTGACGGGATTCATCACTACTTTAGCCACTTTAGCGGCTCGGCCAGTTA



CTAGAGATTCGCGATTGTTCCATTTCTGATGTTAGCAATGTACAGTGGTCAAGTAGGA  
TCATTTTCTTCTAGAGACCTTTTACTTTTTTCTCATGTGGGAGTTAGAATTAATTCCTG  
TTTACCTACTTCTATCCATGTGGGGGGGGAAAAACGTATGTACTCGGCTACAAAGTTT  
ATTTTGTACACAGCGGGGGTTCATTTTTCTCTTAATGGGAGTTTCGGGCATGGGTTTA  
TATGGCTCCAATGAACCAACATTAATTTTTGAAACATTAGCTAATCAATCGTATCCTTTG  
GGATTGGAATAATATTCTATTTTTGGCTTCTTATTGCTTATGCTGTCAAATCGCCGATTA  
TACCCCTACATACATGGTTACCAGATACCCATGGAGAAGCACATTACAGTACATGTATGC  
TTCTAGCCGGAATCTTATTAATAAATGGGAGCATAACGGATTAGTTCGGATCAATATGGAAT  
TATTACCCCATGCTCATTCTATATTTTCTCCCTGGTTGGTCATAGTGGGAGCAATTCAAAT  
AATCTATGCAGCTTCAACTTCTTTCCGGTCAACGCAATTTCAAAAAGAGAATAGCCTATT  
CCTCTGTATCTCATATGGGTTTCACTTATAGGGATTGGTTCATAACTGATACGGGAC  
TTAATGGGGCCATTTTACAAATAATCTCTCATGGATTTATTGGTGCTGCACTTTTTTCTT  
GGCAGGAACAAGTTACGATAGAATACGTCTTGTTTATCTCGACGAAATGGGAGGAATA  
GCTATCCCAATGCCAAAATATTTACCATGTTCAAGTAGCTTCTCGATGGCTTCTCTTGCA  
TTGCCGGGAATGAGTGGTTTTGTTGCGGAATTGGTAGTATTTTTTGAATAATTACCAG  
CTCGAAATATCTTTAATGCCAAAATAGTAATTTCTTTTGTAAATGGCAATTGGAATGATA  
TTAACTCCTATTTATTCATTATCTATGTTACGTCCGGATTTCTATGGATATAAGCTATTCAA  
CGTCCCAGACTTTTATTTTTTGGATTCTGGACCACGAGAACTATTTGTTTCGATCTGTAT  
CTTTCTACCTGTAGTAGGGATTGGTATTTATCCCGATTTTCGTTCTCTCCCTATCAGTTGAT  
AGGGTAGAGGCTATTCTATCTAATTATTTTCATAAAATGATGACCGAGTATGTACTTATTT  
TGAGTGCCTATTTATTTTCGATCGGTATTTATGGACTGATCACAAGCCGAAACATGGTTA  
GAGCACTTATGTGTCTTGAGCTTATACTGAATGCGGTTAATATGAATCTCGTAACGTTTT  
CTGATTTATTTGATAGTCGCCAATTAAGGAGATATTTCTCGATTTTTGTTATAGCTAT  
TGCAGCCGCTGAAGCAGCTATTGGGCCGGCTATTGTTTCATCGATCCATCGTAACCGAA  
AATCAACTCGTATCAATCAATCAAATTTGTTGAATAAAATGGAACATACATATCAACATG  
CATGGATCATACTTTTCGCTCCACTTCCATTTACTATGTCAATAGGATTGGGACTTCTGC  
TTGTTCCGACCGCAACAAAATCTTCGTGATGTGGACTTTTCTTAGTGTTCATTG  
CTAAGTATAGCAATGGTTTTTTCGGTCAATCTGTCTATTCAACAGATAAATGGCAGTTCT  
ATCTATCAACATCTATGGTCTTGGACTATCAATAATGATTTTTCTTTTCGAGTTTCGGCCACT  
TGATCGACCCGCTTACTTCTATTATGTCAATACTAATCACTACTGTTGGAATCATGGTCT  
TATTTATAGTGACAATTATATGTCTCATGATCAAGGATATTTGCGATTTTTGCTTATATGA  
GTTTTTCCAATACTTCAATGTTGGGATTAGTTACTAGTTCCAATTTGATACAAATTTATAT  
TTTTTGGGAAGTGGGAATGTGTTTCGATTTATTAATAGGTTTTTGGTTACACGACC  
CACTGCAGCAAATGCTTGTCAAAAAGCGTTTGTAACTAATCGTGTAGGCGATTTCCGGT  
TATTATTAGGAATTTTGGGTTTTTATTGGATAACTGGTAGTTTTCGAATTTCCGGGATTTGTT  
CGAAATCTTTACTAACAATGGAGTCAATTTTATTGCTACTCTGTGTGCCTTCTTATTA  
TTCGTCGGTGCAGTTGCTAAATCCGCACAATTTCTCTTTCATGTATGGTTACCCGATGCC  
ATGGAGGGACCTACTCCTATTTCCGGCTTATAACATGCTGCTACTATGGTAGCAGCAGGA  
ATTTTTCTTGTGCTCGGCTTCTCCGCTTTTACAGTTATACCTTACATAATGAATCTCA  
TTTCTTTGATAGGTGTAATAACATTACTATTAGGAGCTACTTTAGCTCTTGCTCAAAGAG  
ACATTAAGAGAAGTTTAGCCTATTCTACAATGTCTCAACTGGGCTATATTATGCTAGCCC  
CAGGGATAGGTTCTTATCGAGCTGCTTTATTCCATTTGATTACTCATGCCTATTTCGAAAG  
CATTATTGTTTTTAGGATCCGGATCCATTATTCATTCAATGGAACCCATTGTTGGCTATTC  
TCCAGATAAAAGTCAGAACGTGGTTCTTATGGGTGGTTTAACAAAATATCTGCCAATTA

CAAAAACACTTTTTTATTAGGTACACTTTCTCTTTGTGGTATTCCACCTCTTGCTTGTTT  
TTGGTCTAAAGATGAAATCTTAATGATAGTTGGTTGTATTCACCAATTTTCGCGATAAT  
AGCTTGCTCTACAGCAGGGTTAACTGCATTTTATATGGTTCCGGGTGTATTTACTTACTTT  
TGATGGGCATTTACACGTTTCATTTTCAAATTACAGTGGGACTCGAAATAGCTCATTTTA  
TTCAATATCTATATGGGGGAAAGAAGGAACAAAATTCGTTAATGGA---AATTTGCCTTTA  
TCAACACTGAAAAAAATTTCCAATAAAGAA-----ACTTTTGTGTATCCCCATGAATCGGA  
CAATACAATGCTATTGCCTCTGCTTGGATTGGTCTTATTACTTTGTTTGTGGATCCGTA  
GGAATTCCTTTGCAATTTGATATATTATCGAAATGGTTAAATCCATCAATAAACCTTTTAC  
ATCCAAATTCGAACGTTTCTGTGGATTGGTATGAATTTGGAACAAATGCAATTTATTAG  
TTAGTATAGCCTGTTTCGGAATATTCATAGCATCTCTTTTCTATGGATCTATTTATTATCT  
TTTCAGAAATTTGGATTTTCATCAATTCATTTGTTATTTTCTTGGATAGAATAATAAATGTGA  
TATACAATTTGGTCATATAATCGGGGTTACATAGATGTTTTTTATAACAACATGTTTTACTAA  
AGGTATAAGAGGATTGGCCGAACACTTATCTTTTGGATAGACGACTAATTGACGGAA  
TTGCTAATGGTATTGGTATGGCAAGTTTTTTTGTAGGAGAAGGGATCAAATAT--GTGGG  
GGGGGGGCGAATATCATCTTATCTCTTCGTGTATTTATCTTATGTATCAATCTTGTTATTA  
TTTACTATATGGATTTACCTGGACCAATACATGATATTCTTTTAGTATTTCTAGGATTAGGT  
CTTATATTGGGAGGTCTGGGAGTGGTATTACTTACCAATCCAATTTATTCTGCCTTTTCGT  
TGGGATTGGTTCTTGTTTGTATATCCTTATTTTCATATCCATCTAACTCCTATTTTGTAGCT  
GCTGCACAGCTCCTTATTTATGTGGGAGCGGTAAATGTTTTAATCGTATTTGCTGTGATG  
TTCATGAATGGTTCAGAATATTCCAACGATTTCCATCTTTGGACCGTTGGAGATGGAGT  
CACCTCATTGGTTTGTACAAGTATTCTTTTTTCACTAATTACTACTATTTGGAATACGTC  
TGGTACGGGATTATTTGGACTACAAGATCAAACCAGATTATAGAGCAGGACCTAACAA  
GTAACGTTCAACAAATTGGTATTCGTTTAGCAACTGATTTTTATCTTCCATTTGAACTCA  
TTTCTATAATTTCTTTAGCTGCTTTGATAGGTGCAATTGCTATGGCTCGTCAGATGAATGT  
ACCGGCTACAAGAAAAGACCTCATGATAGTCAATATGGGTCCTCACCACCCCTCAATGC  
ATGGTGTCTTCGACTCATCGTTACTCTAGATGGTGAAGATGTTATTGACTGCGAACCT  
GTATTGGGTTATTTACACAGAGGAATGGAAAAAATTGCAGAAAACCGAACAAATTATAC  
AATATCTGCCTTATGTAACACGTTGGGATTATTTAGCCACTATGTTACAGAAAGCAATAA  
CAGTAAATGCACCAGAACAATTAGGAAATATTCAAGTACCTAAAAGAGCTAGCTATATC  
AGAGTAATCATGCTGGAGCTGAGTCGTATAGCTTCTCATTGTTATGGCTTGGACCTTTT  
ATGGCGGATATCGGTGCACAGACTCCTTTCTTCTATATTTTCAGAGAAAGGGAATTGCTA  
TATGATCTATTTGAAGCTGCCACAGGTATGCGAATGATGCATAATTATTTCCGTATCGGA  
GGAGTAGCTGCTGATCTACCTCATGGCTGGATAGATAAATGTTTAGATTTCTGCGATTAT  
TTTTTAACGGGAGTTGTTGAATATCAAAGCTTATTACGCGGAATCCCATTTTTTTGGAA  
CGAGTTGAAGGGGTGGGCATTATTGGTGGGAGGAAGCAATAAATTGGGGTTTATCGG  
GACCAATGCTACGAGCTTCCGGAATCCAATGGGATCTTCGTAAAGTGGATCATTATGAG  
TGTTACGACGAATTCGATTGGCAAGTGAATGGCAAAAAGAAGGAGACTCATTAGCTC  
GTTATTTAGTACGAATCAGTGAAATGACAGAATCTATAAAAATTCTTCAACAAGCTCTG  
GAAGGAATTCGGGAGGGCCCTATGAGAATTTAGAAGGTCGACGCTTTGATAGAGAAA  
GTGATTCCGAATGGAATGATTTTACTATCGATTCATTAGTAAAAAGCCTTCTCCCACTT  
TTGAATTGTCGAAACAAGAATTTATGTGAGAGTAGAAGCTCCAAAGGGAGAATTGGG  
AATTTTTCTGATAGGAGATAATAGTGTTTTTCCCTGGAGATGGAAAATTCGTCCGCCAG  
GTTTCATCAATTTGCAAATTCCTCCTCACCTAGTTAAAAGAATGAAATTTGGCTGATATCA  
TGACGATACTAGGTAGTATAGATATCATTATGGGGGAAGTTGATCGTATGTTCCCTATGGT

AACTGGGTTTCATGAATTATGGTCAACAAACGGTACGAGCCGCAAGGTACATTGGTCAA  
AGTTTCATGATTACTTTATCTCACGCGAATCGTTTACCTGTAAC TATTCAATATCCTTATG  
AAAAATCGATCACATCAGAGCGTTTTTCGTGGTAGAATCCACTTTGAATTTGATAAATGC  
ATTGCTTGTGAAGTATGTGTTCCGGGTATGCCCCATAGATTTACCCGTTGTTTCATTGGAGA  
TTGAAACAGATATTAGAAAGAAACGATTGCTTAATTATAAGTATTGATTTTCGGAATCTGT  
ATATTTTGTGGGAACTGTGTCGAGTATTGTCCAACAAACTGTTTATCAATGACTGAAGA  
ATATGAACTTTCTGCTTATAATCGTCCAGCAATTGAATTATAATCAAATTGCTTTGGGTCG  
GTTACCGATGTCAGTAATTGAAGATTACACAATTGCAACA ACTAGGAATTCTAAAATAG  
CCATGGATAAACCTCTTAATGCAAGAACGGTTACAAATTCATGCAGGGTCGTTTATCT  
GCTTGGCTAGTCAAGCACGGGCTAGTTCATAGATCTTTGGGCTTCGATTACCAAGGAAT  
AGAGACTTTACAAATAAAGCCCGAGGATTGGTACTCCATTGCTGTCATTTTCATATGTATA  
TGGTTATAATTATCTACGTTTCCAGTGTGCCTATGATGTAGCGCCTGGCGGATTGTTAGC  
TAGTGTGTATTATCTTACAAGAATACAGTATGGTGTGGATCAACCCGAAGAGGTCTGCA  
TAAAAGTATTTGCCCAAGGAGGAATCCTAAAATCCCGTCTGTTTTCTGGATTTGGAAA  
AGTGCGGATTTTCAAGAACGAGAATCTTATGATATGTTGGGGATCTCTTATGAAAATCAT  
CCACGCCTGAAACGTATCTTGATGCCCCGAAAGTTGGATAGGATGGCCTCTACGTAAGGA  
TTATATTGCCCCCAATTTCTATGAAATACAAGATGCTCAT-----  
-----  
-----ATGAATTCGACTGAGTTTCCATTACTTGACCGAACAACCCAAAATTCC  
GTTATTTCAACTACATTGAATGATCTTTCGAATTGGTCAAGACTTTCTAGTTTATGGCCG  
CTTCTTTATGGTACGAGTTGTTGCTTCATTGAGTTTGCTTCATTAATAGGCTCGCGATT  
GATTTTGATCGTTATGGACTAGTACCAAGATCGAGTCCTAGGCAAGCGGACCTAATTT  
AACAGCTGGCACAGTAACAATGAAAATGGCCCCTTCTTTAGTGAGATTATATGAGCAA  
TGCCTGAACCAAAATATGTCATTGCTATGGGGGCTGTACTATTACAGGAGGGATGTT  
AGTACCGATTCTTATAGTACCGTTCGAGGAGTCGATAAGCTAATCCTGTGGATGCTAT  
TTGCCGGGCTGCCACCTAAACCAGAGGCAGTTATAGATGCTATAACGAACTTCGTAA  
GAAAGTATCTCGAGAAATCTATCAAGATAGAATTGGGTCTCAACAGGAAAATAGATGTT  
TTACTACCAATCACAAGTTTCATATTGAACGCAGTACTCATACTGGAAATTACGGTCAA  
GGATTACTCTACCAATCTCCA---ACTTCAGAAATA--TCTGAAACATTTTTCAAATACAA  
AAGTTCAGTATCTTCCCACGAATTAATGAATATGCAAAATAGAAATACCTTTTCTTGGGT  
AAAGGAAGAGATGACTCGATTCAATTTCCGTATCGATCATGATATATGTAATAACTCGGAC  
ATCTATTTCAAACGCATATCCCATTTTTGCGCAGCAGGGTTATGAAAATCCACGAGAAG  
CAACTGGGCGTATTGTATGTGCCAATTGCCATTTAGCTAATAAGCCCGTGGATATTGAGG  
TTCCACAAGCCGTGCTTCTGATACTGTATTTGAAGCAGTTGTTTCGAATCCCTTATGATA  
TGCAACTGAAACAAGTTCTTGCTAATGGTAAAAAGGGGGCTTTGAATGTGGGGGCTGT  
CCTTATTTTACCCGAGGGATTTCGAATTAGCTCCCCCGATCGTATTTCTCCCGAGCTGAA  
AGAAAAGATGGGCAATCTGTCTTTTTCAGAGTTATCGCCCCAATAAAAGAAATATTCTTG  
TGGTAGGTCCTGTTCTGGTCAGAAATATAGTGAAATTGTCTTTCCCATTTCTTTCCCGG  
ACCCTGCTACTAAGAAAGACGTTCACTTCTTAAAATATCCCATATATGTAGGCGGGAAC  
AGAGGAAGGGGTCAGATTTATCCTGATGGGAGCAAGAGTAACAATACAGTCTATAATG  
CTACAGCAGCAGGTATAGTAAGCAGAATAGTACGTAAAGAAAAGGGGGGATATGAAAT  
AAGCATAGCCGATGCATCGGATGGACGCCAAGTGGTTGATATTATACCTCCAGGACCAG  
AACTTCTTGTTCAGAGGGGGAATCCATCAAGCTTGATCAGCCATTAACAAGTAATCCT  
AACGTGGGTGGATTTGGTCAGGGAGATGCAGAAATAGTACTTCAAGATCCATTACGTG

TCCAAGGTTTGTGTGTTTTCTTGGCATCTGTTATTCTAGCACAAATCTTTTTGGTTCTTA  
AAAAGAAACAGTTTGAGAAGGTTCAATTGTCCGAAATGAATTCATGAGTAAAGTATAT  
GATTGGTTCGAGGAGCGTCTCGAGATTCAGGCGATTGCAGATGATATAACTAGTAAATA  
TGTTCCCTCATGTAAACATATTTTCATTGTCTAGGAGGGATCACACTTACTTGTTTTTTA  
GTACAAGTAGCTACGGGTTTTGCTATGACTTTTTACTACCGTCCGACTGTTACAGAGGC  
TTTTGCCTCTGTTCAATACATAATGACTGAAGCCAACTTTGGTTGGTTAATCCGATCGGT  
TCATCGATGGTCAGCAAGTATGATGGTCCTAATGATGATCCTACACGTATTTTCGTGTGTA  
TCTCACAGGTGGATTTAAAAACCTCGCGAATTGACTTGGGTTACGGGTGTAGTTCTG  
GCTGTATTGACTGCATCTTTTGGTGAACTGGTTATTCCTTACCTTGGGACCAAATTGGT  
TATTGGGCGGTAAAAATCGTGACAGGTGTACCTGAAGCTATTCCTGTAATAGGATCACC  
CTTGGTAGAGTTATTACGTGGAAGTGCTAGTGTGGGCCAATCCACTTTGACCCGTTTTT  
ATAGTTTACACACTTTTGTATTACCTCTTCTTACTGCCGTATTTATGTTAATGCACTTCCC  
AATGATACGTAAGCAAGGTATTTTCAGGTCCTTTAATGGGAGTAACAAAGAAACCTGAC  
TTAAATGATCCTGTATTAAGAGCTAAATTGGCTAAAGGAATGGGGCATAATTATTACGGA  
GAACCCGCATGGCCAATGATCTTTTATATATTTCTCCAGTAGTCATTTTAGGTAATTTG  
CATGTAACGTAGGCCTAGCGGTTCTAGAGCCGTCAATGATTGGCGAACCAGCGGATCC  
ATTTGCAACTCCTTTGGAAATATTACCTGAATGGTACTTCTTTCCCGTATTTCAAATTC  
CGTACAGTACCTAATAAGTTATTGGGTGTTCTCTTAATGGTTTTAGTACCAACGGGATTA  
TTGACAGTACCATTTTTGGAGAATGTTAATAAATTCCAAAATCCATTTTCGTCTGTCAGTA  
GCTACAACCGTCTTTTTGATTGGTACCGCGGTAGCCCTTTGGTTAGGTATTGGAGCAAC  
ATTACCTATTGATAAATCTTTAACTTTAGGCCTTTTTATGATTGAAGTTTTTCTATTTGGA  
ATCGTGTTAGGCCTAATTCCTATTACTTTGGCCGGATTATTTCGTAAGTGCATATTTACAAT  
ACAGACGCGGTGATCAGTTGGACCTTATGCCTACTATAACTAGTTATTTTCGGTTTTCTAC  
TGGCTGCTTCAACTATAACCCAGCTCTATTGATTGGTCTGAACAAGATACGACTTATTA  
TGGATATAGTAAGTCTCGCTTGGGCTGCTTTAATGGTAGTTTTTACATTTTCCCTTTACT  
CGTAGTATGGGGAAGGAGTGGACTCATGATTATTCGTTTCGCCGGAATCAGAAGTGAAG  
ATTATGGTGGATAGGGATCCATAAAAACCTTCTTTCGAGGAATGGGCCAGACCCGGCCA  
TTTTCTCAAGAACAATAGCTAAGGGCCCTGATACTACTTGGATCTGGAACCTTCATG  
CTGATGCTCACGATTTTGATAGCCATAACAGTGATTTGGAGGAGATCTCTCGAAAAGTA  
TTAGTGCTCATTTCGGTCAACTCTCCATCATCTTTCTTTGGCTGAGTGGCATGTAATTC  
CATGGCGCCCGTTTTTCCAATTATGAAGCATGGCTAAGCGATCCTACTCACATTGGACCT  
AGCGCCAGGTGGTTTTGGCCAATAGTGGGTCAAGAAATATTGAATGGTGTGATGTGGGTG  
GGGTTTTCCGAGGAATACAAATAACCTCTGGTTTTTTTCAGCTTTGGCGAGCATCTGGA  
ATAACTAATGAATTACAACCTCTATTGTACCGCAATTGGTGCATTGGTCTTTGCAGCGTTA  
ATGCTTTTTGCCGGTTGGTTCCATTATCACAAAGCTGCTCCAAAATTGGCTTGGTTCCA  
AGATGTGGAATCTATGTTGAATCACCCTTAGCAGGGTTACTGGGGCTTGGGTCTCTTT  
CTTGGGCGGGACACCAAGTCCATGTATCTTACCGATTAACCAATTTCTAGACGCTGGA  
GTGGATCCTAAAGAGATACCACTTCCCTCATGAATTTATCTTGAATCGGGATCTTTTGGCT  
CAACTTTATCCCAGTTTTGCCGAGGGAGCAACCCATTTTTACCTTGAATTGGTCAAA  
ATACGCGGACTTTCTTAGTTTTCTGTTGGGGGATTAGATCCAGTAACGGGTGGCCTATGGC  
TGACCGATATTGCACACCATCTTTAGCTATTGCAATTCTTTTCCTGGTAGCTGGTCACA  
TGTATAAGACCAACTGGGGCATTGGTCATAGTCTGAAAGATATTTTAGAGGCGCATAAA  
GGCCATTTACAGGCCAGGGCCATAAAGGCCTCTATGAGATCCTAACCAACGTCATGGCA  
TGCTCAATTATCTTTAACCTAGCTATGTTAGGCTCTTCAACCATTGTTGTAGCTCACCAT

ATGTATTCCATGCCCCCTTATCCATACCTAGCTATTGACTATGGTACACAACCTTTCATTGT  
TCACACATCATATGTGGATCGGTGGATTTCTCATAGTTGGTGCTGCTGCACATGCAGCCA  
TTTTTATGGTAAGAGACTATGATCCAACACTCGATAACAACGATCTATTAGATCGTGTCC  
TTAGACACCGGGATGCAATCATATCACACCTGAACTGGGCATGTATATTTCTAGGCTTTC  
ACAGTTTTGGCTTGTATATTCATAATGATACCATGAGCGCTTTAGGGCGTCCCAAGATA  
TGTTTTAGATACCGCTATCCAATTACAACCCATCTTTGCTCAATGGGTACAAAACACC  
CATGCTTTAGCACCTAGTGCAACGGCCCCTGGTGCAACAGCAAGCACCAGTTTGACTT  
GGGGGGGTGGTGATTTAGTAGCAGTAGGCGGCAAAGTCGCTTTGTTACCTATTCCATTA  
GGAACCGCAGATTTTTTGGTACATCACATTCATGCATTTACGATCCATGTGACCGTATTG  
ATACTATTGAAAGGTGTTCTATTTGCTCGTAGCTCACGTTTGATACCTGATAAAGCAAAT  
CTTGTTTTTCGTTTTCCCTTGTGATGGACCTGGAAGAGGGGGGACATGTCAAGTATCTGC  
CTGGGATCATGTCTTCTTAGGTCTATTCTGGATGTACAATGCAATTTCTGTAGTCATATTC  
CATTCAGTTGGAAAATGCAGTCAGATGTTTGGGGTAGTATAAGTGATCAAGGAGTGGT  
AACTCATATCACAGGAGGAAATTTGCACAGAGTTCATTACTATTAATGGATGGCTTC  
GGGATTTTTTATGGGCACAGGCATCTCAGGTAATTCAGTCTTATGGTTCTTCATTATCGG  
CATATGGCCTTTTTTTCCTAGGTGCTCATTTTGTCTGGGCTTTCAGTTAATGTTTCTATT  
CAGCGGCCGTGGTTATTGGCAAGAACTCATTGAATCCATCGTTTGGGCTCATAACAAAT  
TAAAAGTTGCTCCTGCTACTCAGCCTAGAGCCTTGAGCATTGTACAAGGACGTGCTGTA  
GGAGTAACCCATTACCTTCTGGGTGGAATTGCCACAACATGGGCATTCTTCTTAGCAAG  
AATTATTGCAGTAGGAATGGCATTAAAGATTTCCAAGGTTTAGCCAAGGCTTAGCTCAGG  
ACCCCACTACTCGTCGTATTTGGTTTTGGTATTGCTACCGCACATGATTTGAGAGTCATG  
ATGATATTACTGAGGAACGTCTTTATCAGAACATTTTTGCTTCTCACTTCGGGCAGTTAG  
CAATAATCTTCTGTGGACTTCCGGAAATCTGTTTCATGTAGCTTGGCAAGGAAATTT  
GAGTCATGGGTACAGGACCCTTACATGTAAGACCTATTGCTCATGCAATTTGGGATCC  
TCATTTGGCCAACCAGCTGTAGAAGCCTTACTCGAGGAGGTGCTCTCGGCCCGGTG  
AATATCGCTTATTCGGGTGTTTATCAGTGGTGGTATAACAATCGGCTTACGCACCAATGAA  
GATCTTTATACTGGAGCTCTTTTTCTATTATTTCTTTCTGCCATATCCTTAATTGCGGGTTG  
GTTACACCTACAACCCAAATGGAAACCAAGCGTTTCGTGGTTCAAAAATGCCGAATCT  
CGTCTCAATCATCATTTGTCAGGACTCTTCGGAGTAAGTTCCTTAGCTTGGACAGGGCA  
TTAGTTCATGTCGCTATTCCCGGAGCAAGGGGGGAGTATGTCAGATGGAATAATTTCTT  
AGATGTATTACCACATCCCAAGGGTTGGCCCCACTTTTTACAGGTCAGTGGAAATCTTT  
ATGCCAAAACCCCGATTCCAGTAGTCATTTATTTGGTACCTCCCAAGGGGCAGGAACT  
GCCATTCTAACTCTTCTCGGGGGATTCCATCCACAAACGCAAAGTTTATGGCTGACCGA  
TATTGCTCATCATCATTTAGCTATTGCATTTATTTTTCTCGTTGCTGGTCATATGTATAGAA  
CTAACTTCGGGATTGGGCACAGTATGAAAGATCTTTTAGAAGCACATATTCACCCAGGG  
GGTCGATTGGGACGTGGGCATAAGGGTCTTTATGACACAATCAATAATTCGATTCACTT  
TCAATTAGGCCTTGCTCTAGCCTCTTTAGGGGTATTACTTCCTTGGTAGCTCAACACAT  
GTACTCTTTACCTGCTTATGCATTCATAGCACAAGACTTTACTACTCAAGCTGCGTTATAT  
ACCCATCACCAATACATTGCAGGGTTCATCATGACAGGAGCCTTTGCTCATGGAGCTAT  
ATTCTTCATTCGAGATTACAATCCGGAGCAGAATGAGGATAATGTATTGGCAAGAATGT  
TAGACCATAAAGAAGCTATCATATCTCATTTAAGTTGGGCCAGCCTGTTTCTGGGGTCC  
ATACCTTAGGACTCTATGTTTATAACGACGTCATGCTCGCTTTTGGTACTCCGGAGAAA  
CAAATCTTGATCGAACCCATATTTGCCCAATGGATACAATCCGCTCATGGTAAGACTTCA  
TATGGGTTTCGATGTACTTTTATCTTCAACGAATGGACCGGCATTCAATGCTGGTCAAGT

ATATGGTTACCGGGCTGGTTGAACGCCGTTAATGAG-----AATAGTAATTCATTATTCTTA  
ACAATAGGTCCTGGAGACTTCTTGGTTCATCATGCTATTGCTCTAGGTTTGCATACA  
ACATTGATCTTAGTAAAGGGTGCCTTAGATGCACGTGGTCTAAGTTAATGCCAGATAA  
AAAAGATTTTCGGTTATAGTTTTCTTGGCAGCGTCTGGACGAGGTGGTACTTGTGATA  
TTTCGGCCTGGGACGCATTTTATTTGGCCGTTTTCTGGATGTTAAATACTATTGGATGGG  
TFACTTTTTATTGGCATTGGAAGCACATCACATTATGGCAGGGTAACGTTTCACAATTA  
ACGAATCCTCCACTTATTTGATGGGATGGTTAAGAGATTATCTATGGTTAAACTCTTAC  
AACTTATCAATGGATATAACCCTTTTGGTACGAATAGTTTATCGGTCTGGGCGTGGATGT  
TCCTTTTTGGGCATCTTGTGGGCTACTGGATTTATGTTCTTAATTTCTGGCGTGGATA  
TTGGCAGGAATTGATTGAACTTTAGCATGGGCTCATGAACGCACGCCTTTGGCTAATT  
TGATTTCGATGGAGGGATAAACCAGTGGCTCTTCCATTGTGCAAGCAAGATTGGTTGGA  
TTAGCTCACTTTTCTGTAGGTTATATATTCACTTATGCAGCTTTCCTGATTGCCTCTACAT  
CAGGCAAATTTGGTATGTCACATTCAGTAAAGATTTATGATACATGTATAGGGTGTACTC  
AATGTGTACGAGCCTGCCCCACAGATGTATTGGAAATGATACCTTGGGACGGATGTA  
GCTAAGCAAATTGCTTCTGCTCCAAGAACAGAGGACTGTGTGGGTTGTAAGAGATGTG  
AATCTGCTTGTCCAACGGATTTCTTGAGTGTTCCGGGTTTATTTATGGCATGAGACAACC  
CGAAGCATGGGTCTAGCTTATATGACAGATCTCAATTTACCCTCTATTTTTGTGCCTTTA  
GTGGGCCTAATGTTCCAGCAATTGCAATGGCTTCTTATCTCTTCATATTCAAAAAAT  
AAGATTATTATGCGAGATATAAAAACATATCTCTCCACGGCACCTGTGCTAGCTACTCTA  
TGGTTCGGGTCTTTAGCAGGTCTATTGATAGAGATCAATCGTTTATTTCCAGATGCGTTG  
ACATTCCTTTTTTTTTTCATTCATGACTGCAATTTTAGAGAGACGCGAAAGCACAAAGCCT  
ATGGGGTCGCTTCTGTA  
ACTGGATAACCAGCACTGAAAACCGTCTTTATATTGGATGGT  
TCGGTGT  
TTGATGATCCCTACCTTATTGACCGCAACTTCTGTATTTATTATTGCCTTCAT  
TGCTGCTCCTCCAGTAGATATTGATGGTATTTCGTGAACCTGTTTCTGGATCTCTACTTTAT  
GGAAACAATATTATCTCTGGTGCCATTATTCCTACTTCTGCAGCTATAGGTTTGCATTTTT  
ACCCGATCTGGGAAGCAGCATCCGTTGATGAATGGTTATACAACGGTGGTCCTTATGAG  
CTAATTGTTCTACACTTTTTACTTGGTGTAGCTTGTACATGGGTTCGTGAGTGGGA  
ACTT  
AGTTTCCGCTCTGGGTATGCGTCCTTGGATTGCTGTTGCATATTCAGCTCCTGTTGCAGCA  
GCTACTGCTGTTTTCTT  
GATCTACCCTATCGGTCAAGGAAGTTTTTCTGATGGTATGCCT  
CTAGGAATATCTGGTACTTTCAACTTTATGATTGTATTCCAGGCTGAGCACAAACATCCTT  
ATGCATCCATTTACATGTTAGGCGTAGCTGGTGTATTTCGGCGGCTCCCTATTCAGTGCT  
ATGCATGGTTCCTTGGTAACCTCTAGTTTAATCAGGGAAACCACTGAAAATGAATCTGC  
TAATGCAGGTTACAGATTCGGTCAAGAGGAAGAACTTACAATATAGTAGCCGCTCATG  
GTTATTTTTGGCCGATTGATCTTCCAATATGCTAGTTTCAACA  
ACTCTCGTCTTTTACACTT  
CTTCCTAGCTGCTTGGCCTGTAGTAGGTTTGGTTCACCGCTTTAGGTATCAGCACCAT  
GGCTTTCAACCTAAATGGGTTCAATTTAAACCAATCTGTAGTTGACAGTCAAGGTCGTG  
TTATTAACACTTGGGCTGATATCATCAATCGCGCTAACCTTGGTATGGAAGTTATGCATG  
AACGTAATGCTCACA  
ACTTCCCTCTAGACCTAGCTGCTGTTGAAGTTCCGCTACAAAT  
GGAATGGGTTTGCCTTGGTATCGTGTT  
CATAACCGTCGTATTGAATGATCCTGGTTCGGTTG  
CTTCTGTCCATATAATGCATACAGCTCTAGTTTCTGGTTGGGCCGGTTCGATGGCTCTA  
TACGAATTAGCAGTTTTT  
GATCCCTCTGACCTGTTCTTGATCCAATGTGGAGACAAGG  
TATGTTTCGTTATACCCTTCATGACTCGTTT  
AGGAATAACCAATTCATGGGGTGGTTGGAG  
TATCACA---GGAGGA  
ACTATAACGAATCCGGGTATTTGGAGTTACGAAGGTGTGGCCGG  
GGCACATATTGTGTTTTCTGGCTTGTGCTTCTTAGCAGCTATCTGGCATTGGGTATATTG

GGACCTAGAAATATTCTGTGATGAACGTACAGGAAAACCCTCTTTGGATTTGCCCAAGA  
TCTTTGGAATTCATTTATTTCTCTCAGGGGTGGCTTGCTTTGGGTTTGGCGCATTTCATG  
TAACAGGTTTGTATGGTCCCGGAATATGGGTGTCCGACCCTTATGGCCTAACCGGAAAA  
GTACAACCTGTAAATCCGGCGTGGGGCGCGGAAGGTTTTGATCCTTTTGTTCGGGAG  
GAATAGCCTCTCATCATATTGCAGCAGGTACATTGGGCATATTAGCGGGTCTATTCCATC  
TTAGTGTCCGCCACCCCAACGTCTATACAAAGGATTACGTATGGGCAATATTGAAACT  
GTCCTTTCTAGTAGTATCGCTGCTGTCTTTTTTGCAGCTTTCGTTGTTGCTGGAACATG  
TGGTATGGCTCAGCAACTACCCCGATCGAATTATTTGGTCCCACTCGTTATCAGTGGGAT  
CAGGGATACTTCCAGCAAGAAATATATCGAAGAGTTGGCGCCGGACTAGCCGAAAATC  
TAAGTTTATCGGAAGCTTGGTCTAAAATTCCCGAAAAATTAGCTTTTTATGATTACATCG  
GCAATAATCCAGCGAAGGGTGGATTATTCAGAGCAGGCTCAATGGACAACGGGGATGG  
AATAGCTGTTGGATGGTTAGGACACCCCGTTTTTLAGAGATAAAGAAGGGCATGAGCTTT  
TTGTGCGTCGTATGCCTACTTTTTTGAACATTTCCGGTAGTTTTGGTAGACGGAGAC  
GGAATTGTGAGAGCCGATGTTCTTTTTCGAAGGGCGGAATCAAAGTATAGTGTGCAAC  
AAGTGGGTGTAACCTGTTGAGTTCATGGCGGCGAACTCAATGGAGTCAGCTATAGCGA  
TCTTGCTACTGTGAAAAAATATGCTAGACGTGCCCAATTGGGTGAAATTTTTGAATTAG  
ATCGTGCTACTTTGAAATCCGATGGTGTTTTTTCGGAGCAGTCCAAGGGGTTGGTTCACT  
TTTTGGACATGCTACGTTTGCTTTGCTCTTTTTTTCGGACACATTTGGCACGGCGCTAG  
AACCTTGTTCAAGAGATGTTTTTGTGTTATTGACCCAGATTTGGATGCTCAAGTGGAAT  
TTGGAGCATTCCAAAACTTGGAGATCCAACACTACAAGAAGACAAGTAGTCATGAAAA  
CCTTATATTCCCTGAGGAGGTTCTACCCCGTGGAACGCTCTTTAATGGAACTTTAGCTT  
TAGCCGGTTCGTGACCAAGAAACCACTGGGTTTCGCTTGGTGGGCCGGGAATGCCCGAC  
TTATCAATTTGTCCGGTAAACTACTCGGGGCTCACGTAGCCCATGCCGGATTAATCGTAT  
TCTGGGCCGGAGCAATGAACCTATTTGAAGTGGCTCATTTTCGTACCAGAGAAACCCAT  
GTATGAACAAGGATTGATTTACTTCCCATCTAGCTACTTTAGGTTGGGGGGTAGGTC  
CGGGTGGAGAAGTTATAGACACCTTTCCATACTTTGTATCTGGAGTACTTCACTTAATTT  
CCTCTGCAGTCTTAGGCTTTGGCGGTATTTATCATGCCCTTCTTGGACCTGAGACTCTTG  
AAGAATCCTTTCCATTCTTCGGTTATGTATGGAAAGATAGAAATAAAATGACCACAATTT  
TGGGTATTCATTAATCTTGTTAGGTATAGGTGCTTTTCTTCTAGTACTCAAGGCTCTTTA  
TTTTGGGGGTGTATATGATACCTGGGCTCCAGGGGGGGGAGATGTAAGAAAAATTACC  
AATTTGACCCTTAGCCCAGGTGTTATATTTGGTTATTTACTAAAATCTCCCTTTGGGGGA  
GAAGGATGGATTGTTAGTGTGGACGATTTGGAAGATATAATTGGAGGACATGTATGGTT  
AGGTTCCATTTGTATACTTGGTGGAACTGGCATATTTTAACCAAACCCTTTGCGTGGGC  
TCGCCGTGCATTTGTATGGTCTGGAGAGGCCTATTTGTCTTATAGTTTLAGGTGCCTTATC  
TGTCTTTGGTTTCATCGCTTGTTGTTTTGTTTGGTTCAATAATAACCGCTTATCCTAGTGAG  
TTTTATGGGCCCACTGGGCCAGAGGCTTCTCAAGCTCAAGCATTACTTTTTCTGGTTAG  
AGACCAACGTCTTGGGGCTAACGTGGGGTCCGCTCAAGGACCTACTGGTTTAGGTA  
TATCTAATGCGTTCCCGACCGGAGAGGTCATTTTTGGAGGAGAACTATGCGTTTTTG  
GGATCTCCGTGCTCCTTGGTTGGAACCTCTAAGGGTCCCAATGGTTTGGACTTGAGTA  
GGTTGAAAAAAGACATAACAACCTTGGCAAGAACGACGTTCCGCGGAATATATGACTCA  
TGCTCCTTTAGGTTCTTTAAATCCCGTGGGTGGCGTAGCTACCGAGATCAATGCGGTCA  
ATTATGTCTCTCCTAGAAGTTGGTTAGCTACCTCTCATTTTGTCTAGGATTCTTCCTATT  
CGTGGGCCATTTGTGGCATGCGGGAAGGGCTCGTGCGGCTGCAGCCGGATTTGAAAA  
AGGAATCGATCGTGATTTTGAACCTGTTCTTTCCATGACCCCTCTTAACATGACTATAGC

CCTTGGTAGATTTACCAAAGAAGAAAATGATTTATTTGATATTATGGATGACTGGTTAAG  
GAGGGACCGTTTCGTTTTTGTAGGTTGGTCCGGTTTATTGCTCTTTCCTTGTGCTTATTT  
CGCTTTAGGGGGTTGGTTCACAGGTACAACCTTTGTAACCTTCATGGTATACCCATGGAT  
TGGCCAGTTCCTATTTGGAAGGCTGCAATTTCTTAACCGCTGCAGTTTCTACTCCTGCT  
AATAGTTTAGCACATTCGTTGTTGCTACTATGGGGACCTGAAGCACAAGGAGATTTTAC  
TCGTTGGTGTCAATTAGGGGGTCTGTGGACTTTTGTGCTCTCCATGGGGCTTTCGGAC  
TAATCGGTTTCATGTTACGTCAATTTGAACTTGCTCGATCTGTTCAATTGCGACCTTACA  
ATGCAATCGCATTCTCTGCTCCAATTGCTGTTTTTGTCTGTATTCTAATTTATCCACT  
AGGTCAGTCTGGTTGGTCTTTGCGCCTAGTTTTGGTGTAGCAGCTATATTTGATTCAT  
CCTCTTCTTCCAAGGGTTTCATAATTGGACGTTGAACCCATTTTCATATGATGGGGGTTGC  
CGGAGTATTGGGCGCTGCTCTGCTATGCGCTATTCATGGTGCTACTGTAGAAAATACTTT  
ATTCGAGGATGGTGACGGTGCAAATACATTCCGTGCTTTTAACCCAACTCAAGCTGAA  
GAGACTTATTCGATGGTCACTGCTAACCGCTTTTGGTCCCAAATCTTTGGGGTTGCTTT  
TTCCAATAAACGTTGGTTACATTTCTTTATGTTATTTGTACCGGTAACCGGTTTATGGATG  
AGCGCTATTGGAGTAGTCGGTCTGGCTCTGAACCTACGTGCCTATGACTTCGTTTCCA  
GAAATCCGCGCGGCGGAAGATCCTGAATTTGAGACTTTCTACACCAAAAATATTCTCT  
TAAACGAAGGTATTCGTGCTTGGATGGCGGCTCAGGATCAGCCTCATGAAAACCTTATA  
TTCCCTGAGGAGTTTACCCCGTGGAAACGCTCTTATGTCTGGAAGCACGGGAGAAC  
GTTCTTTTGTGATATTATTACCAGTATTCGATATTGGGTTATTCATAGTATTACTATACCT  
TCCTTATTTATTGCGGGTTGGTTATTCGTGACACAGGTTTAGCTTACGATGTGTTTGGG  
AGCCCTCGGCCAAACGAGTATTTACAGAGAGCCGGCAAGGGATTCCATTAATAACTG  
GCCGTTTTGATCCTTTGGCACAACCTCGATGAATTTAGTAGATCCTTTATGACCATAGATC  
GGACCTATCCAATTTTACAGTGCATGGTTAGCTGTTACCGACTAGCTGTACCTACC  
GTTTCTTTTTTGGGGTCAATATCAGCAATGCAGTTCATCCAACGAATGGCTACACAAAC  
TGTTGAGGGTAGTTCTAGATCTGGG---CCAAGACGGACTCTTACAGGGGATTTATTGAA  
ACCATTGAATTCGGAATATGGTAAAGTGGCTCCTGGATGGGGAACCACCCCATTTATGG  
GTGTCGCAATGGCTTTATTTGCCATATTCCTATCTATTATTTTGGAGATTTATAATTCTTCC  
GTTTTGTTGGATGGAATTTCAACGAGTATGCTTACTCTCAAACCTCTTCGTTTACACAGTA  
GTGATATTCTTTGTTTCTCTTTCATCTTCGGATTCCCTATCTAATGATCCAGGACGTAACC  
CTGGGCGTGAGGAAATGGCCGATACTACTGGAAGGATTCCTCTTTGGCTTATAGGTA  
GTAACCTGGTATTCCTGTGATCGGTTCAATAGGTATTTCTTTTACGGTTCATATCCGGAT  
TGGGATCATCCCTAATGCTTAATATCTTTAGTTTGATCTGT-----CTTAATTCTGCCCTTCA  
TTCGAGTAGCTTTTTCTTTGCCAAATTGCCCGAAGCTTATGCTTTTTTCAATCCAATCGT  
AGATGTTATGCCAGTCATACCTGTGCTCTTTTTTCTTTTAGCCCTTGTTTGGCAAGCTGC  
TGTAAGTTTTTCGCACGACACAATCAAACCCGAACGAACAAAGTGTTGAATTGAATCGT  
ACCAGTCTCTACTGGGGTTTACTCATTTTTGTACTTGTGTTTTTATTTTCCAATTATT  
TCTTCAATATGGAAGTCAATATTCTCGCATTATTGCTACTGCGCTGTTTATTCTAGTCC  
TACTGCCTTTTTACTTATCATCTACGTAAAAACAGTCAGTCAAAGTGATATGGAAACAG  
CAACCTTAGTCGCCATCTCCATATCTGGTTCACTTGTAAGCTTTACGGGGTACGCCCTAT  
ATACCGCTTTTGGGCAACCCTCTCAACAACCTAAGAGATCCATTTGAGGAACACGGGGA  
CATGGAAGCATTTGGTTTATACATTCCTGTAGTCTCGACTTTAGGGATAATTTTTTCGCT  
ATCTTTTTTCGAGAACCGCCTAAGGTCCCGACTAAAAAGATGAAAATGATTATTGCTTT  
CCAATTGGCTGTTTTTGCATTAATTGCTACTTCATCAATCTTATTGATTAGTGTACCTGTT  
GTATTGCTTCTCCCGATGGTTGGTCAAATAATAAAAATGTTGTATTTTCTGGTACATCAT



TATGGATTGGATTAGTATTTCTGGTAGCTATCCTTAATTCTCTCATCTCT-----A  
TGTCACCAAAAACAGAGACTAAAGCAGGTGTTGGATTCAAAGCTGGTGTAAAGATTA  
CAAATTGACTTATTATACTCCTGACTATGAAACCAAAGATACTGATATTTTGGCAGCATT  
CCGAGTAACCTCAACCTGGAGTTCAGCGGAGGAAGCAGGGGCTGCGGTAGCTGC  
CGAATCTTCTACTGGTACATGGACAACCTGTGTGGACCGATGGACTTACCAGCCTTGATC  
GTTACAAAGGACGATGCTACCACATCGAGCCCGTTGCTGGGGAGGAAAGTCAATTTAT  
TGCCTATGTAGCTTATCCTTTAGACCTTTTTGAAGAAGGTTCTGTTACTAACATGTTTAC  
TTCTATTGTGGGTAATGTATTTGGGTTCAAAGCCCTACGAGCTCTACGTCTAGAGGATCT  
GCGAATTCCTCCTGCTTATACCAAACTTTCTAGGCCCGCCCCATGGCATCCAAGTTG  
AACGGGATAAATTGAACAAGTATGGTCGTCCCTATTGGGATGTACTATTAACCAAAA  
TTGGGGTTATCCGCCAAGAACTACGGTAGGGCGGTTTATGAATGTCTCCGCGGTGGACT  
TGATTTTACCAAGGATGATGAGAACGTGAACTCCCAACCATTATGCGTTGGAGAGAC  
CGTTTCTTATTTGTGCCGAAGCCATTTTTAAATCGCAGGCCGAAACAGGTGAAATCAA  
AGGACATTATTTGAATGCTACTGCAGGTACATGCGAAGAAATGATCAAAAAGGGCCGTG  
TTTGCTAGAGAATTGGGAGTTCCTATCGTAATGCATGACTATTTAACAGGGGGATTCACT  
GCAAATACTAGCTTGGCTCATTATTGCCGGGACAACGGCCTACTTCTTCACATCCATCG  
CGAATGCATGCAGTTATTGATAGACAGAAAATCATGGTATGCATTTTCGTGTACTAG  
CTAAAGCGTTACGTATGTCTGGTGGAGATCATATTCACGCTGGTACCGTAGTAGGTA  
CTGGAAGGGGAACGGGAGATCACTTTGGGTTTTGTTGATTTACTACGTGATGATTTTAT  
TGAAAAGACCGAAGTCGCGGCATTTATTTCACTCAAGATTGGGTCTCTATGCCAGGT  
GTTCTGCCCGTGGCTTCAGGGGTATTACGTTTGGCATATGCCTGCCCTGACCGAGAT  
CTTTGGGGATGATTCCGTACTACAGTTCGGTGGAGGAACTTTAGGACACCCTTGGGGA  
AACCGGCCTGGTGCAGTAGCTAATCGGGTGGCTTTAGAAGCGTGTGTACAAGCTCGTA  
ATGAGGGACGTAATCTTGCTCGTGAAGGTAATGAAATTATCCGTGAAGCTAGCAAATGG  
AGCCCTGAACTAGCCGCTGCTTGTGAGGTATGGAAGGAGATCAAATTCGAATTCGAGG  
CAATGGATACCTTG-----ATGGCGATACATTTATACAAACTTCTACCCCGAGCACACGC  
AATGGAGCCGTAGACGGTCAAGTGAATCCAATCCACGAAACAATTTGATCTATGGAC  
AGCATCATTGTAGTAAGGGTCGTAATGCTAGAGGAATCATTACCGCAAGGCATAGAGGG  
GGAGGTCATAAGCGTCTATACCGTAAAATCGATTTTCGACGGAATGAAAAGACATATC  
TGGTAGAATCGTAACCATAGAATACGACCCTAATCGAAATGCATACATTTGTCTCATACA  
CTATGGGGATGGTGAGAAAAGATATATTTTACATCCCAGAGGGGCTATAATTGGAGATA  
CCATTGTTTCTGGTACAGAAGTTCCTATATCAATGGGAAATGCCCTACCTTTGACCGACA  
TGCCCTTAGGCACGGCCATACATAACATAGAAATCACACTTGGAAAGGGTGGACAATT  
AGCTAGAGCCGCAGGTGCTGTAGCGAAACTGATTGCAAAAAGAGGGTAAATCGGCCAC  
ATTAAGATTACCATCTGGGGAGGTCCGTTTGTATCCAAAACTGCTCAGCAACAGTCG  
GACAAGTGGGTAATGTTGGGGTGAACCAGAAAAGTTTGGGTAGAGCCGGATCTAAGC  
GTTGGCTAGGTAAGCGTCCTGTAGTAAGAGGAGTAGTTATGAACCCTGTAGACCATCCC  
CATGGGGGTGGTGAAGGGAGAGCCCCGATTGGTAGAAAAAAACCCACAACCCCTTGG  
GGTTATCCTGCGCTTGAAGAAGAAGTAGGAAAAGGAATAAATATAGTGATAGTTTTAT  
TCTTCGTCGCCGTA---ATGATTCAACCTCAGACCCATTTGAATGTAGCGGACAACAG  
CGGGGCTCGAGAATTGATGTGCATTGCAATCATAGGGGCTAGT---AATCGCCGATATGCT  
CATATCGGTGACGTTATTGTTGCTGTAATCAAAGAAGCAGTGCCCAATATGCCTCTCGA  
AAGATCAGAAGTTATTCGAGCTGTAATTGTACGTACATGTAAAGAACTCAAACGCGAC  
AACGGTATGATAATACGATATGATGACAATGCGGCAGTTGTCATTGATCAAGAAGGAAA

TCCAAAAGGAACTCGAGTTTTTGGAGCGATTGCTCGGGAATTGAGAAAAGTTAAATTC  
ACTAAAATAGTCTCATTAGCCCCTGAAGTCTTAATGCTTAGTCCCAAAGAACCAGATT  
TCGTAAACAACATAGAGGAAGAATGAAGGGAATATCTTATCGAGGCAATCATATTTGTT  
TCGGTAGATACGCTCTTCAAGCACTTGAACCCTCTTGGATCACATCTAGACAAATAGAA  
GCAGGGCGACGAGCAATGACACGATATGCGCGCCGTGGCGGAAAAATATGGGTACGTA  
TATTTCCCGACAAACCCGTTACAGTAAGACCTACGGAAACACGTATGGGTTCGGGGAA  
AGGATCCCCGAATATTGGGTATCTGTCTGTTAAACCAGGTCAATACTTTATGAAATGG  
GCGGAGTATCCGAAACTGTAGCCAGAGCGGCTATTTCAATAGCTGCGTGCAAAATGCCT  
ATACGAACTCAATCATTATCGCGAGAATGACCAGAATTAGACGAGGATATATAGCTCG  
GCGACGTCAACAAAAATTCGTTTATTTGCATCAACCTTTTCGAGGGGCTCATTCAAGAC  
TACTCGAACTATTACTCAACAGAAAATGAGAGCTTTGGTTTTCCACTCAGCGGGATAGA  
GGCAGGCGAAAGAGAGATTTTCGTCGTTTGTGGATCACTCGCATAAATGCAGTAACTC  
GTGAGAAT-----GTATCCTATAGTTATAGTAGATTAATACATGATCTGTACAAGAAGCGGT  
TGCTTCTTAATCGTAAAATACTTGCACAAATAGCTATATCAAATAGGAATTGTCTCGACA  
CAATTTCCAATGAGATTCTCAA-----AAAATGAAGCAAGTACAAG  
CTTTAGCTCAACATATATCTATGTCTGCTCACAAAGCACGAAGAGTCGTTGATCAGATT  
CGTGGACGTTCCCTATGCGGAAACACTTATGCTACTGGAACCTCATGCCTTATCGAGCATC  
TTATCCCATTTTTAAACTGGTTTATTCTGCAGCAGCAAATGCTAGTCACAATAAGAGTTT  
TAACGAAGCTGATTCATTCATTAGTAAAGCCGAAGTCAATGGGGTACTATCGTGAAAA  
AGTTTAAACCTCGGGCTAAAGGACGTAGTTACCCGATAAAAAGACCCACCTGTCATATA  
ACTATTGTATTGAAAGATAGATCTAAAAAG-----ATGGATGGAATCAAATATG  
CAGTCTTTACAGAAAAGAGTATTCGGTTATTGGGGAACAATCAA---TATACTTCTAATGT  
CGAATCAGGATCAACTAGGACAGAAATAAAGCATTGGGTGCAACTCTTCTTTGGTGTC  
AAGGTAATAGCTATGAATAGTCATCGACTCCCGGAAAGGGTAGAAGAATGGGA-----  
---CATACAATGCATTACAGACGTATGATCATTACGCTTCAACCGGGTATTCTATTCCACC  
TCTTATAGAGAAAAGAACTATGGCGGTTCCAAAGAAACGTACTTCTGTGTCAAAAAG  
CATATTCGTAGAAATATTTGGAAGAGAAAGGGATATCGGGCCGCGTCAAAGCTTTGTC  
TTTAGCTAAATCGATTTCTACCGGACATTCAAAGAGTTTTTTTTGTGCGACAAACAAGTA  
ATATGGCCAAGGGTAAAGATGTCAGAGTCATAATTATTTTGAATGTACCGGTTGTGCC  
CGAAAT-----GGT-----AAAGAATCGAGGGGCATTTCCAGATATATACTCAAAAAAATCG  
ACACAATACCTAGTCGATTGGAATTGAAAAAATCTGTTCTTATTGTTACAAGCATA  
GATTCATGCGGAGATAAAGAAAATGAAAATAAGGGCCTCCGTTTCGTAATAATTTGTGAA  
AATGTGACTAATCCGTAGGCGGGGACGAATTATAGTAATTTGTTCCAATCCGAGACA  
TAAACAGAGACAAGGGATGGTTCGAGAGGAAGTGGCAGTATCCACTCGGACACTACA  
GTGGAAGTGTGTTGAATCAAGAACAGACAGTAATCGTCTTTATTATGGACGTTTCGTTT  
TGTCCTCCGCTTATGAAAGGTCAAGCGGATACGATAGGTATCGCGATGAGAAAGGCTTTA  
CTTGGGGAAATAGAAGGAACATGTATAACACGCGCAAATCTGAG-----AAGGTACCGC  
ATGAATATTCTACAATAGTTGGTATTGAAGAATCAGTACATGAAATTTTAATGAATTTGA  
AAGAAATTGTATTA AAAAGTAATCTGTATGGAACCTCGTGACGCATCCATTTGCGTCAGG  
GGTCTTAAATACGTA ACTGCTCAAGATATCATCTCACCGCCTTCTGTGGAAATAGTTGAT  
ACTACACAACATATAGCTAGCCTGACGGAGCCAATTAATTTGTGTATTGAATTACAAATC  
GAGAGGGATCGCGGATATCGTATGAAAGCCCCAAATAACTATCAAGATGGAAGTTAT----  
--CCTATAGATGCCGTATCCATGCCTGTTTCGAAATGCGAATCATAGTATTCATTCTTATGGG  
AGTGGGAATGAGAAACAAGAGATACTTTTTCTTGAAATATGGACAAATGGAAGTTTAA

CTCCTAAAGAAGCACTTCACGAAGCTTCTCGTAATTTGATTGATTTATTTATTCCTTTTCT  
ACACGCGGAAGAACAGGACATTCATTTGAATTTAGAGGACAATCAA---AACAGGTTTA  
CTGTATCCCTTTTACCCTTCATGATAGATTGGGTAAT---ATAAGGAAAAACAAAAA---  
GAAATTGCATTGAAATGTATTTTTATTGACCAATCAGAATTGCCACTAGGACCTATAAT  
TGTCTGAAAAGGTCCAATATACATACATTATTGGACCTTTTGAATAACAGTCAAGAAGA  
TCTTATGAGAATTGAACATTTTCGCATAGAAGATATAAAACAAATATTGGACATTCTACA  
GAAGCAT-----TTCGGAATTGATTTACCTAAGAATAAGACGTTTCGGGATGGG---AATGA  
GGGAATGCCTACAATACCAGGATTTAGTCAGATACAATTTGAGGGATTTTGTAGGTTCA  
TTGACCAGGGCTTGACGGAAGAACTTCATAAGTTTCCAAAAATTGAAGATACAGATCA  
AGAAATTGAATTTCAATTATTTGTGGAAACATATCAATTGGTAGAACCTTGATAAAAG  
AAAGAGATGCTGTGTATGAATCACTCACATATTCTTCTGAATTATATGTATCCGCGGGAT  
TAATTTGGAAAACCGGTCGAGATATGCAAGAACAACCATATTTATTGGAAACATTCCT  
CTAATGAATTCCTGGGAAACTCTATAGTAAGCGGAATATACAGAATTGTAATCAATCAA  
ATATTGCAAAGCCCCGGTATTTATTACCGTTCAGAATTGGACCATAACGGAATTTCTGTA  
TATACCGGCACCATAATATCAGATTGGGGGGGAAGACCAGAATTAGAGATTGATAGAAA  
AGCAAGGATATGGGCCCGTGTGAGTAGGAAACAAAAATATCTATTCTAGTTCCATCAT  
CAGCTATGGGTTTGAATCTAAGAGAAATTCTAGATAATGTTTGTACCCTGAAATTTTCT  
TGTCTTTCCGAATGATAAGGAGAAAAAAGATTGGTTCAAGGGAAAATGCCATTTT  
GGAGTTTATAACAATTTGCTTGTGTAGGCGGGGATCCGGTATTTTCTGAGTCCTTATG  
TAAGGAATTACAAAAGAAATTTTTTCAACAAAGATGTGAATTAGGCAGGATTGGTTCGA  
CGAAATATGAACCGGAGACTGAATATTGATATACCTCAGAACAATACATTTTTTGTGGCA  
CGAGACGTATTGGCTGTTGTGGATCATTGATCGGAATGAAATTTGGAATGGGCACTCT  
TGACGAT-----ATGAATCACTTGAAAAATAACGTATTTCGTTCTGTAGCAGATCTGTTAC  
AGGATCAATTTGGATTGGCTCTGGTTCGTTTAGAAAATGCGGTTTCGAGGAACTATATGT  
GGAGCAATCAGG---CATAAATTGATC---CCGACCCCTCATAATTTGGTAACTTCAACTCC  
A-----TTAACAACCACTTATGAATCGTTTTTCGGCTTACACCCCTTATCTCAAGTTTT  
GGATCGAACTAATCCATTGACACAAATAGTTCATGGGCGAAAATCGAGTTATTTAGGCC  
CCGGAGGATTAACGGGGCGAACTGCTAGTTTTTCGGATACGAGATATCCATCCTAGTCAC  
TATGGACGTATTTGCCAATTGACACGTCCGAGGGAATCAATGTTGGACTTATCGGATC  
CTTAGCTATTCATGCGAGGATTGGTTCATTGGGGG---TCTATAGAGAGTCCGTTTTAT-----  
--GAAATATCTGAGAAATCCAAA-----GAGATCGTTTATTTACCACCAAGTAGAGACG  
AATATTACATGGTAGCGGCAGGAAATTCTTTGGCCTTAAATCGGGGTATTCAGGAAGAA  
CAGGTTGTTCCAGCTAGATACCGTCAAGAATTCCTGACTATTGCATGGGAACAGATTCA  
TCTTCGAAGCATTTTTCCCTTCCAATATTTTTCTATTGGAGCTTCCCTCATTCTTTTATC  
GAGCATAATGATGCAAATCGGGCTTTAATGAGTTCTAATATGCAGCGTCAAGCAGTTCC  
GCTTTCTCGGTCCGAGAAGTGCATTGTTGGAAGTGGGTTGGAAGGCAAGCAGCTCTA  
GATTCGGGGGTTTCGGCTATAGCAGAACACGAGGGAAAGATCATTATAACGATACTGA  
CAAGATCGTTTTATCAGGTAATAGAGACACTATAAGCATTCCATTGGTTATGTATCAACG  
TTCTAACAAAATACTTGTATGCATCAAAAACCTCGAGTTCCGCGGGGTAAATGCATTA  
AAAAGGGGCAAATTTTAGCGGACGGAGCGGCTACAGTTGGTGGCGAACTCGCTTTGG  
GAAAAACGTATTAGTAGCTCATATGCCATGGGAAGGCTACAATTCTGAAGACGCGGT  
ACTATTAGCGAACGTCTGATATATGGGGATATTTATACTTCTTTTCACATACGGAAATAT  
GAAATTCAGACTCATGTGACAAGCCAAGGT--CCTGAAAGAATCACTAATGAAATACCA  
CATTTAGAAGCCCATTTACTCCGCAATTTAGACAAAAATGGAATTGTGATGCTGGGATC

TTGGATAGAAAGAGGTGATATTTTAGTGGGTAAATTAACGCCTCAGGCGGCGAAAGAA--  
--TCGTTCGTATGCCCCGGAAGATAGATTATTACGAGCCATACTTGGCATTTCAGGTATCCAC  
TGCAAAGGAAACTTGTCTAAAACCTACCTATAGGCGGAAGGGGTCGAGTTATTGATGTG  
AGATGGATCCAGAAAAAAGGG---GGTTCAGTTATAATCCAGAAACGATTTCGTGTATCT  
ATTTTACAGAAACGTGAAATCAAAGTGGGTGATAAAGTAGCCGGAAGACATGGGAATA  
AGGGCATCGTTTCCAAAATTTGCTAGACAAGATATGCCTTATTTGCAAGATGGAACG  
CCAGTTGATATGGTCTTCAACCCATTAGGAGTACCTTCGCGAATGAATGTGGGACAAAT  
GTTTGAATGCTCGCTCGGATTGGCGGGGTACCTGCTGGACAAACATTATAGAATAGCAC  
CCTTTGATGAGAGATATGAGCAAGAGGCTTCGAGAAAACCTAGTGTTCCTGAATTATAT  
TCAGCCAGTAAGCAAACAGTAAATCCTTGGGTATTTGAACCCGAGTATCCAGGAAAA  
GCAGAATATTTGATGGAAGAACGGGAGATCCTTTGAAACAACCTGTTATAATAGGAAA  
GTCCTATATCCTGAAATTAATTCATCAAGTTGATGATAAAATCCACGGACGTTCCAGTGG  
ACATTATGCACTTGTACACAACAACCTCTTAGAGGAAGGGCCAAGCAAGGGGGACA  
ACGAGTAGGAGAAATGGAAGTTTGGGCTCTAGAGGGATTTGGTGTGCTCATATTTAC  
AAGAAATGCTTACTTATAAATCGGATCATATTAGGGCTCGCCAGGAAGTACTTGGTGCT  
ACGATCATTGGAGGAACAATACCTAAACCTGAGGATGCTCCTGAATCTTTTCGGTTGCT  
CGTTCGAGAACTACGATCTTTGGCTCTGGAACCTGAATCATTTCCTTGTATCTGAGAAGA  
ACTTCCAGATTAATAGGAAGGAAGCT-----ATGATCGACCGGTATAAACATC  
AACAACTTCGAATTGGATCAGTTTCTCCTCAACAAATACGTGCTTGGGCCAACAAAAC  
CCTACCTAATGGAGAGATAATTGGAGAGGTGACAAAACCTATACTTTTCATTACAAAA  
CCAATAAACCGGAAAAAGATGGATTGTTTTGTGAAAGAATCTTTGGACCTATAAAAAG  
TGGAATTTGTGCTTGTGGAAATTATCGAGTGATCGGAGATGAAAAAGAAGACCCGAAA  
TTTTGTGAACAATGCGGAGTCGAGTTTGTGATTCTCGGATACGAAGATATCAAATGGG  
ATACATCAAACCTGGCATGTCCAGTGACTCATGTGTGGTATTTGAAACGTCTTCCTAGTTA  
TATCGCGAATCTTTTAGATAAACCCCTTAAGGAGTTCGAAGGCCTAGTATACTGCGAT----  
--TTTTCTTTTGCTAGGCC---ATAGCTAAAAACCTACTTTCTTGCGATTACGAGGTTCA  
TTCGAATCTGAAATCCAATCCCGGAAATACAGCATCCCACTTTTTTTTACTACCCAGGG  
CTTCGATACATTCGAAATCGAGAAATCTCTACTGGAGCAAGTGCTATCAGAGAACAAT  
TAGCTGATCCGGATTTGCGAATTATTACAGATCATTTCATTGGTAGAATGGAAAGAATTAG  
GGGAAGAAGGGTCCACT--GGGAATGAATGGGAAGATAGAAAAATTGGAAGAAGAAA  
GGATTTTTTGGTTAGACGCATAGAATTAGCTAAGCATTTTATTCGAACAAATGTAGAACC  
AGAACGGATGGTTTTGTGCCTATTACCAGTTCTTCCTCCCGAGTTGAGACCAATCATT  
AGATAGATGGGGGTAAACTAATGAGTTTCGGATATTAATGAACTCTATCGAAGAGTTATCT  
ATCGGAACAATACTCTTACCGATCCATTAACAACAAGTACATCTACGCCGGGGGAATCA  
GTAATGTGTCAGGAGAAATTGGTACAAGAAGCTGTGGATACCCCTTCTTGATAATGGGAT  
CCGTGGACAACCAATGAGGGACGGTCATAATAAAGTTTACAAGTCCTTTTCAGATGTAA  
TTGAAGGCAAAGAAGGAAGATTTTCGTGAAACTCTACTTGGTAAACGGGTTCGATTACTC  
AGGGCGTTCCGTCATTGTCGTGGGCCCTTCACTTTCATTGCATCGATGTGGATTACCTC  
GAGAAATAGCAATAGAACTTTTCCAACATTTGTAATTCGTGGTTAATCAGACAACAT  
GTTGCTTCCAACATAGGAATTGCGAAAAGTAAAATTCGGGAAAAAGAACCAATTGTAT  
GGGAAATACTTCAAGAAGTTATGCAAGGGCATCCTGTATTGCTAAATAGAGCGCCACC  
CTGCATAGATTAGGCATACAGGCGTTCCAACCCATTTTAGTAGAGGGACGTGCTATTTG  
TTTACATCCATTAGTTTCGTAAGGGATTCAATGCAGACTTTGATGGGGATCAAATGGCTG  
TTCATGTACCTTTATCTTTGGAAGCTCAAGCGGAGGCTCGTTTACTTATGTTTTCTCATAT

GAATCTCTTGTCTCCGACTATTGGAGATCCCATTTCGGTACCAACTCAAGATATGCTTAT  
TGGACTCTATGTATTAACGATCGGGAATCGTCGAGGTATTTGTGCAAATAGGTATAATCC  
ATGGAATCGC-----GGAAAC---TCTCAAATGAAAGAGTTAACGATACT--TATATGTATA  
CTAAG---AAAGAGCCCTATTTTTGTAGTTCCTCTGATGCACTCGGAGCTTATCGGCAGA  
AACGAATCAATTTAGATAGCCCTTTGTGGCTACGGTGGCGACTGGATCAACGT---GTCA  
TTGCCTCA-----AGAGAAGTTCCTATCGAAGTTCAATATGAATCTTTGGGTACCTATCATG  
AAATTTATGGGCACTATCTAATAGTAAGAAGTATAAAAAAAGAAATCCTTTGTATATACA  
TTCGAACCACTGTTCGGTCATATTTCTTTTTATCGAGAAATAGAAGAAGCCATACAGGGG  
TTTTGTTCGGGCCTACTCA-----ATGGCAGAACGGGCCGAT  
CTGGTCTTTCACAATAAGGTGATAGATGGGGCTGCCATGAAACGACTTATTAGCAGATT  
AATAGATCACTTCGGAATGGCATATACATCGCACATCCTGGATCAAGTAAAGACTCTGG  
GTTTCCAGCAAGCCACCACTACATCCATTTCAATTAGGAATTGATGATCTTTTAAACAATAC  
CTTCTAAGGGGTGGCTAGTCCAAGATGCTGAACAACAAAGTTTGATTTTAGAAAAGCA  
CCATCATTATGGGAATGTACACGCAGTAGAAAAATTACGCCAATCCATTGAGATATGGTA  
TGCTACAAGTGAATATTTGAGACAAGAAATGCATCCTAATTTTAGGATGACTGATCCTT  
CTAATCCAGTCCATATAATGTCTTTTCGGGAGCTCGAGGAAATGCATCTCAGGTACAC  
CAATTAGTAGGTATGAGAGGATTAATGTTCGGACCCCAAGGACAAATGATTGATTTACC  
CATTCAAAGCAATTTACGCGAAGGACTTTCTTTAACAGAATATATCATTTCCTGCTATGG  
AGCCCGCAAGGGAGTTGTGGATACTGCTGTACGAACATCAGATGCTGGATACCTCACG  
CGTAGACTTGTTGAAGTAGTTCAACACATTGTTGTACGTAGAACAGATTGTGGCACTAT  
CCGGGGCATTTCCTGTAGTCCCTCGAAAT-----GGGATGACGGAAAGAATTTGGATCCAA  
ACACTAATTGGTTCGTGTATTAGCATAACGATATATATATGGGTCCACGCTGCATTGCCGCC  
CGAAATCAAGATATTGGGATTGGACTTGTCATCGATTCAATAACC-----TTTCG  
AGCACAACCAATATATATTTCGAACCCCTTTCTTTGTAGGAGTACATCTTGGATATGTCG  
ATTATGTTATGGTTCGGAGTCCCGCTCACGGCGACCTAGTCGAATTGGGAGAAGCAGTA  
GGTATTATTGCGGGTCAATCAATCGGCGAACCGGGGACTCAACTAACATTAAGAACTTT  
TCATACCGGTGGAGTATTCACAGGTGGTACTGCCGAACATGTACGAGCTCCTTTTAATG  
GAAAAATTCAATTCAACGAGGATTTGGTTCACCCACACGTACACGTACATGGGCATCCT  
GCTTTTCTATGTTATACAGACCTGTATGTAACCTATTGAGAGTCACGATATTCTACATAATG  
TGAATATTCCACAAAAAAGTTTCTCTTAGTTCAAATGATCAATATGTAGAATCAGAA  
CAAGTGATTGCCGAGATTTCGCGCTGGAACATCCACTTTC---AAAGTTAAAGAAAAAGT  
TCGAAAACATATTTATTCTGACTCAGAGGGAGAA---ATGCACTGGAGTACCGATGTGTA  
CCATGCACCTGAATATACATACGGTAATGTTTCATCTCTTACCAAAAACAAGTCATTTATG  
GATATTATCAGGAGGTCTG-----TGCAGATCCAGTATAGTGCCCTTTTCGCTCCACAAGG  
ATCAAGATCAAATGAATGTTTCAT-----TCTCTTTCTGTGGAACAGAGATATATTTCTGACC  
TCTCA-----GTAACCTAACGTTTCGA---GTGAGACACAAATTGTTTAGTTTCGGATTCTTCCG  
GTAAA---GGGGGAGGGCTCCTGATTATTCA---GGACCTGATCGAATCATATCCAATGGT  
CATTGGAATTTATATATCCTGCC---ATTCTCCACGAGAATTCTGAT-----TTATTGGCTAA  
GAGGCGAAGAAATAGATTCATTATTCCATTCCAATCTGATCAAGAACGAGAGAAAGAA  
CTAATGCCCGTTCCGGTATCTCGATTGAAATACCCATAAAT-----GGTATTTTACGCAGA  
AATAGTATTCTTGCTTATTTTCGACGATCCCCGATACAGAAGAAGCAGTTTCGGGAATTACT  
AAATATGGGACTATAGGGTGGATTCAATCGTCAAAAAAGAGGAT-----TTGATTGAGTA  
TCGAAGA---GCAAAAAGAATTTAGGCCAAAATACATGAAAGTAGATCGCTTTTTTTTCAT  
TCCCGAAGAAGTGCATATCTTACCCGCATCTTCGCCCGTAATGGTACGGAATAATAGTAT

CATTGGAGTAAATACACGAATAGCTTTAAATACAAGAAGCCGAGTAGGTGGATTGGTCC  
GAGTGGAGAGAAAAAAAAAAGGATTGAACTGAAAATATTTTCTGGGGATATCCATTT  
TCCTGGAGAGACAGATAAGATATCTCGGCACAGCGGCATCTTGATACCACCAGGAACG  
GGAAAAAAAA-----AATGTAAAGGAATCCAAA-----AAATGGAAAAATTGGATTTATGTCC  
AACGG-----ATTACACCTACTAAGAAAAAG-----TATTTTGTTTTGGTTCGACCCGTAGTC  
ACATATGAAATAGCTGATGGGATCAATTTAGAAACACTTTTCCCCCAGGATCCCTTGCA  
GGAAAGGGATAATGTGCAACTACGAGTTGTCAATTATATCCTTTACGGAAATGGCAAAC  
CAATTCGAGGAATTTCTCACACAAGTCTTCAATTAGTTCGAACTTGTTTAGTATTGAATT  
GGGACCAAGACCGAAATGGT-----TCTATAGAAGAGGTTTCATGCTTCCTTTGTTGAA  
GTAAGGGCAAATGGGCTGATTCGAGATTTCTAAAATGATTTAGTGAAGTCCCCCAT  
TTTGTATAGCGGAAAAAGAAATGATACGACAAGTTCAGGATTCATCCCCAAT--AATGG  
ATCAGATCGTACCAATATCAATCCTTTTTATTTC AAGGCGAGG-----ATT  
CAATCACTTACCCAACATCAAGGAACTATTTCGTACGTTGCTGAATAGA-----AATAAG  
GAATGCCAATCTTTTCTAATTTTGTATCATCCGATTGTTCTCGAATTGGTTCA-----TTC  
AATGGTTCGAAATCTCACAAAGTGACA-----AAAGAATCAGATCCCACGATTCCCATT  
AGGAATTCGTTGGGTCCCTTAGGGACT-----GTACCCAAAATTGCGAATTTTGATTCATCT  
-----TACTATTTAATAACT-----CATAATCAGATCTTGTTAAAT--AAATATTTGTCACCTTGAC  
AAT-----TTAAAACAGACTTTCCAAGTACTTAAATATTAT-----TTAATGGATGAAAAT  
GGGAGA-----ATTTATAATCCCGATCCACGCAGTAACATCATTTTTAATCCATTTCGATTTG  
AATTGGTGCTTTCTCCCTCATGATTATTGTGAGGAGACGTCCACCATAATTAAC---CCCG  
GGCAGTTTATTTGTGAAAATGTATGTATATCCAAATACGGACCG-----CACATAAAATC  
GGGTCAAATTCTAATTGTTTCGT--GTTGACTCCTTAGTAATAAGATCAGCTAAGCCTCAT  
TTGGCCACTCCGGGAGCAACCGTTCATGGCCATTGTGGAGAAATCCTTTACGAAGGAG  
ATACATTAGTTACATTTATATATGAAAATCGAGATCGGGTGATATAACACAAGGTCTTC  
CAAAAGTGGAACAGGTGTTAGAAGCGCGTTCGATTGATTCAATATCGATGAACCTAGA  
AAAGAGGGTTGAAGGTTGGAACGAACGTATAACAAAAATTCTTGGGATTCCTTGGGGA  
TTCTTGATTGGTGCTGAGCTAACCATAGCGCAAAGTCGTATTTCTTTGGTTAATAAGATC  
CAAAAGGTTTATCGGTCCCAGGGGGTGCAGATCCATAATAGGCATATAGAGATTATTGT  
ACGTCAAATAACATCAAGAGTGTTGGTTTCAGAA-----GATGGAATGTCTAATGTTTT  
TTCACCCGGAGAACTAATCGGATTGTTGCGAGCGGAACGAACCGGGCGTGCTTTGGAA  
GAAGCGATCTGTTACCGAGCTATCTTATTGGGAATAACGAGGGCATCTTTGAATACTCA  
AAGTTTCATATCCGAAGCGAGTTTCAAGAAACCGCTCGAGTTTTAGCAAAGCCGCT  
CTACGAGGTCGTATTGATTGGTTGAAAGGCCTGAAAGAGAACGTTGTTCTGGGGGGGA  
TGATGCCTGTTGGTACCGGATTCAAAGGATTAGTGCGCCGTTCAAGG-----CAACACAA  
CAATATTCCT-----TTGGAATCAAAAAGAAAAATCTATTTCGAGGGGGAAATGAGA-----  
GATATTTTGTTCACCACAGAGAATTATTTGATTCTTGCAATCCCAAACAATTTCCCCGAT  
ACA-----ATGACAAGAAGATATTGGCACATTAATTTG  
GAAGAGATGATGGAAGCAGGAGTTCATTTTGGTTCATGGTACTAGGAAATGGAATCCTA  
GAATGGCACCTTACATCTCCGCAAAGCGTAAAGGTATTCATATTACAAATCTTACTAGA  
ACTGCTCGTTTTTTGTGAGAAGCCTGTGATTTAGTTTTTGTATGCAGCAAGTATAGGAAA  
ACACTTCTTAATAGTTGGTACCAAAAAGAAAGCAGCGGATTCAGTAGCATCAGCTGCA  
ATAAGGGCTCGGTGTCATTATGTTAATAAAAAATGGCTCGGTGGTATGTCAACGAATTG  
GTCCACTACAGAAACGAGACTTCATAAGTTCAGGGACTTGAGAGCCGAACAAAAAGC  
GGGGAAACTCAACCGTTTACCGAAAAGAGATGCGGCAATGTTGAAGAGACAATTATCT

CACTTGCAAACATATTTGGGCGGAATTAATATATGACGGGGTTACCCGATATTGTAATC  
ATCATCGATCAGCAAGAAGAATATACGGCTCTTCGAGAATGTCTCACTTTGGGGATTCC  
GACAATTTGTTTAATCGATACAAATTGTGACCCGGATCTCGCGGATATTTTCGATTCCAGC  
GAACGATGATGCTATAGCTTCAATCCGATTGATTCTTAACAAATTAGTATCCGCGATTTG  
TGAGGGCCGTTCTAGC---TATATAAGAAATTGTATGGGGCAAAAATAAATCCACTCGG  
TTTCCGACTTGGT---GAACAAAGTCATCATTCCCTTTGGTTTCGCACAACCAAAAAGTTA  
TTGCAGAGGTCTACAGGAAGATGAAAAAATACGGGATTGTATCAAGATATATGTACAAA  
AAAATATGAGAATATCCTCAGGT---TTCGAAGGAATTGCGCATATAGAGATTCAAAAAA  
AAATGGATCTGATCCAGGTCATAATCTCTATTGGATTCCCAAATTTTTTAATAGAAGGT---  
---GGAACCCGA-----GGAATCGAAGAATTACAGATGAATGTACAAAAGAGGTTTCATTCT  
GCGAACCGGAGACTTAACATTGCTATTACAAGAGTTGCAAAACCTTATGGACAACCTA  
ATATTCTTGCAGAATATATAGCTCGACAATTAAGAATAGAGTTTCCTTTCGAAAGGCAA  
TGAAAAAAGTTATTGAATTAACTGAACAAGCGGACACAAAAGGAATTCAAGTGCAAAA  
TTGCAGGGCGTATCGACGGAAAAGAAATTGCACGTGTGAATGGATCAGAGAAGGCA  
GGGTTCCCCTACAAACCATTTCGAGCTAAAATTGATCATTGTTCTTATACAGTTTCGAACC  
ATATATGGGGTATTGGGCATAAAAATTTGGATATTTGTAGACGAACAAATGTCTCGTTAC  
CGAGGGCCTCGTTTTCAAAAAAATACGCCGTCTGGGGGCTTTACCCGGGACTAAGTAGTA  
AAAGACCTAGATCCGGAAGTGATCTTAGAAACCAATCGCGTTCTGGTAAA---AAATCTC  
AATATCGTATTCGTCTAGAAGAAAAACAAAAATTGCGCTTTCATTATGGTCTGACAGAG  
CGACAATTGCTTAGATATGTTTCGTATTGCCGGAAAAGCCAAAGGGTCAACTGGTCAGG  
TTTTACTACAACACTTGTAGATGCGTTTGGATAACATCCTTTTTTCGACTGGGTATGGCTT  
CGACCATTCTGGAGCCAGGCAATTAGTTAACCATAGACATATTTTAGTTAATGGTCGTA  
TAGTAGATATCCCAAGTTATCGCTGCAAAACCCGAGATATTACTACGAGGGATGAAC  
AAAGATCCAGAGCTCTGATTCAAATTTATCTTGATTCACCCTCCCAC---GAGGAATTGC  
CAAAACATTTGACTTTTCACCCATCCCAATAT-----AAAGGATTGGTAAATCAAATAATAG  
ATAGTAAGTGGGTCGGTTTAAAAATCAATGAGTTGCTAGTCGTAGAATATTATCCCGTC  
AGACTATGTCACGTCGAGGTAAGTGCAGAAGAAAAAACTGCAAAATCCGATCCAATTTA  
TCGTAATCGATTAGTTAACATGTTGGTTAACCGTATTCTGAAACACGGAAAAAAATCAT  
TGGCTTATCAAATTGTCTATCAAGCCGTGAAAAAGATTCAACAAAAGACAGAAACAAA  
TCCACTATCTGTTTTACGTCAAGCAATATGTAGAGTAAGTCCCGATATAGCAGTAAAAGC  
AAGACGTGTAGGTGGATCGACTCATCAAGTTCCTATTGAAATAGGATCTACACAAGGA  
AAAGCACTTGCCATTTCGTTGGTTATTAGGGGCATCCCGAAAACGTCCGGGTTCGAAATAT  
GGCTTTCAAATTAAGTTCCGAATTAGTGGATGCTGCCAAAGGGAGTGGCGATGCCATAC  
GCAAAAAGGAAGAGACTCATAGAATGGCAGAGGCAAATAGAGCTTTTGCACATTTTCG  
TATGGGTAGGGACACTATTGCCGATATACTAAGTCTATAAGAAATGCTAACATGGATAA  
AAAAGGAACAGTTCGAATAGCATCTACTAATATAACCGAAAACATTGTTAAAATACTTC  
TAAGGGAAGGGTTTATTGAAAATGTTAGGAAACATCAGGAAAACAACAAATATTTCTT  
GGTTTCAACCCTGCAACATAGAAGG-----AATAGGAAAGGAAGATATAGA-----ACTAT  
TTTA-----AAGCGTATCAGTCGACCTGGTCTACGAATCTATTCCAATTATCAACGAATTCC  
TAGGATTTTAGGTGGAATGGGGATCGTAATTTCTTACTTCTCAGGGTATAATGACAGA  
TCGAGAAGCTCGACTAGAAGGAATTGGAGGAGAAATTTGTGTTATATATGGATGACA  
AAATCTATACCAAGAATTGGTTCACGAGGGGGTGGGCGTATTGCTTCACGTAAGAATGC  
ACGTAGAATACCAAAAGGAGTTATTTCATGTTCAAGCGAGTTTCAACAATACCATTGTGA  
CTGTTACAGATGTAACAGGTCCGGTGGTTTCTTGGTCTCCGCAGGTAAGTGTGGATTC

AGGGGCACAAGAAGAGGGACACCATTTGCTGCTCAAACCGCAGCAGCAAACGCTATT  
CGTACAGTAATCGATCAGGGTATGCAACGAGCAGAAGTCATGATAAAGGGCCCCGGGC  
TCGGAAGAGATGCAGCATTACGAGCCATTCGTAGAAGTGGTATACTGTAAAGTTTCGTA  
CGTGACGTAACCCCTATGCCACATAATGGATGTAGGCCTCCTAAAAAAGACGTGTGAT  
GCCAACTATTAACAACCTTATTAGAAACACAAGACAGCCAATCCGAAATGTCACGAAA  
TCCCCTGCTCTTCGAGGATGTCTCAGCGTCGAGGAACATGTAAGGGTGTATACTAT  
CACCCCAAAAAACCAAACCTCTGCCTTACGTAAAGTTGCCAGAGTACGATTAACCTCT  
GGATTTGAAATCACTGCTTATATACCTGGTATTGGCCATAATCACAAGAACATTCTGTA  
GTCTTAGTAAGAGGAGGAAGGGTTAAGGATTTACCCGGTGTGAGATATCACATTGTTTCG  
AGGAACCCTAGATGCTGTCCGAGTAAAGGATCGTCAACAAGGGCGTTCTAAATATGGG  
GTCAAAAAGCCAAAAATGGCAAGGAAAGGTTTGATTTCAGAGGGAGAGAAAGAGGCA  
AAAATTGGAACAGAAATATCATTGATTCGTCGATCCCCGAAAAAAGAAATAGGC-----  
--AAAGTTTCATCGTTGAGTGACAAGTGGAAAATTCATGGAAAATTGCAATCCCCACCA  
CGTAATAGTGCCCCTACACGTCTTCATCGACGTTGCTTTTTGACCGGAAGACCTAGAGC  
TAACTATCGAGACTTTGGACTATCCGGACACATACTTCGAGAAAAGGTTTCATGCATGTT  
TGTTGCCGGGGGCAACAAGATCAAGTTGGATGGTCAAAAATTCATTCATCTCGGTTATT  
CCGCAAGAAGAAAAAAACAAA-----GGATCTGTTGAATTTCAAGTATTCAGTTTCA  
CCAATAAGATACGGAACTTACTTCACATTTGGAATTGCACAGAAAAGACTATTCATCT  
CAGATAGGCCTGCGGAGAATTCTGGGAAAACGTCAACGGCTGCTGGCTTATTTGTCAA  
AGAAAAATAGAGTACGTTATAAGAATTAATCGATCAGTTAGGTATTCGGGAGCCAAAA  
ACTCGT-----ATGGTAAACTTCGTTTGAAACGATGTGGTAGAAAGCAACGAGCCATCT  
ATCGAATCGTTGCAATTGATGTTTCGATCCCGAAGAGAAGGAAGAGATCTTCGTAAAGT  
GGTTTTTATGATCCGATAAATAACCAAACCTATTTAAATGTTCCCTCTATTCTATATTTCC  
TTGAAAAGGGCGCTCAACCTACAGGAAGTGTATGATATTTTAAAGAAGGCAGAGGT  
ATTTAAAGAACTTCAAATTAATCAAAGAAATCAAAT---ATGGATAAATCCAAGCGACC  
TTTTTCGTAAATCCAAGAGATCTTTTCGTAGGCGTTTGCCCCCAATTGGATCGGGGGATC  
GAATTGATTATAGAAACATGAGTTTAATTAGTCAATTTATTAAGTGAACAAGGAAAAATAT  
TATCTAGACGAGTGAATAGATTGACCTTGAAACAACAACGATTAATTACTATTGCTATAA  
ACAAGCTCGTATTTTATCTTCGTTACCCTTTCTTAATAATGAGAAA-----CAGTTTGAGA  
GAACCGAATCGATCCCTAGAACTACCGGTCTTAGAACCCAGAAAA---GTGACACGTTCA  
CTAAAAAAAATCCTTTTGTAGCTAATCATTTATTGGCAAAAATTGAGAAGCTCAACAT  
GAGAGAGGAAAAAGAGACAATAGTAACTTGGTCCCGGCATCTACCATTATACCCACA  
ATGATCGGCCATACAATCGCTATTCATAATGGAAAGGAACATTTACCTATTTTTATAACA  
GATCGCATGGTGGGTCACAAATTGGGAGAATTCGCACCTACTCTTACTTTCCGGGGAC  
ACGCGAGAACCGATACTAGATCTCGCCGTATGATTTTGAAATCTTTTCTACTAGGTAATC  
TATTATCCTTATGCATGAAGATAATAAATTCGGTTCGTTGTGGTTCGGACTCTATTATGGATT  
TCTGACCACATTCTCCATAGGGCCCTCTTATCTTTTCCTTCTCCGAGCTCGGGTTATGGA  
AGAAGGA-----ACCGAGAAGGAGGTATCAGCAACAACCTGGTTTTTATTACAGGACAGC  
TCATGATCTTCATATCGATCTATTATGCGCCTCTGCATCTGGCAATGGGTAGACCTTATAC  
AATAACTGTACTAGGTCTACCATATCTTTTGTTTCATTTCTTCTGGAAGAATCACAAACA  
TTTTTTTTGATTATGGATCAACTAACCTAAATTCATGCGTAATTTACGATTCATCCATA  
TTCTTGAATAATTTCAATTTTCAATTATTGAACCATTTTCGTTTTACCAAGTTCAACGTTAA  
TCAGATTGGTCAACATTTCTATGTTTCGATGCAACAACAAAACGCTATTTGTAATAAGTA  
GTTTTGTTGGTTGGTTAATTGGTCACATTTTATTTCATGAAATGGGTTGGATTGATATTATT



CTGGATACAGCGAAATCGTTCAATTAGATCC---ATTAGGTCTAATAAGTACCTTGTGTCA  
GAATTGAGAAATTTTTGTCTCGAATGGTTAATATTTTCTTATTTATCACCTGCGTATACT  
ATTTAGGAAGAATACCTTCGCCTATCTGACTAAGAACTGAAAGAAGCCGAAGAAGA  
CAAACCTATTGTAACCTTTCTTTTCGACTATAAACGATGGGATCGTCCATTGCGATATATA  
AAAAATGATCGTTTTGCAAATGCTGTAAGAAATGAAATGTCACAATATTTTTTTCACAA  
ATGTCCAGTTGATGGAAAACAAAAATATCTTTTACATATCCACCTAGTTTGTCAATTTT  
TTTTGAAATGATAGAAAAACATCTTTCTTTGTGTACGACAGAAAACTATCCCCGGAAG  
ATCTGTATAATCATTGGGTTTATACCAATGAAAAAAGATGCAACTTGAACAATGAG  
TTCATAAATAGAATAGAAGCTCTAAAC-----AAGCTTCTATGCATGTGCTCGAAAAAG  
GACCAGATTATACAATGATAAGAATGAACAAGAATGCTTGCCTAGAATGTACGATCCTT  
TTTTGAACGGACCATACCGTGGAACAATCAAAAAAGTGTATTCACACCTAAGAGTGGT  
TTGGATAAATAAGATTGATGATATCCTTTACCAAGAATTTGAAGAGAAAGATACACCAA  
ATTATCTATTGGAATAGAAGAAATTGGTAAAAAGGTTCCCTCGATGGTCATACAAATTG  
ACCGATTTGCAACAGCAGGAAAGGGAAGCGATTTCGTTCAAGAAAATCCAAACGCGTG  
GTAATTTATACTGATGCTTTGATACGTTATTCGCAACAATCGGATTTTCGTCGGGATCTAA  
TCAAAGGATCTAGGCGTGCTCAAAGACGTAAACAGTTACTTGGGAAATATTTCAAGC  
AATGTGCATTCCCCTTTTTTTGGACAGAATAGACAAAACATTTTTTTTTTTCTTTTGA  
TATC-----TCCGGAACGATTAATCTAGCTTTTAGAAATAAAGAGGAGAATGAACGGATAG  
CAATAGCAGAACTTGGGATACTATTATATTTGCTCAAGCAATAAGAGGTATTATGTTAG  
TAACCCAATCGATTCTTAGAAAATACATCGTATTGCCTTCATTGATAATAGCTAAAAATC  
TTGTCCGTATGTTATTATTTCAATTCCCCGAGTGGTATGAGGATTTGAAGGAGTGGAAATA  
GAGAAATGCATGTTAAATGTACCTATAATGGTGTTCATTATCAGAAACAGAATTTCCA  
AAAGACTGGTTAACAGACGGTATTCAGATAAAGATCCTATTTCTTTCTGTCTGAAACC  
TTGGCACAGATCTAAGAAAGGAAAAAAGACAATTTTTGTTTTTTAACAGTCTGGGGA  
ATGGAACCCGAACTACCTTTTTGGTTCTTCCAGAAAACGACCTTCCTTTTTTTGAACCCAT  
TTTAAAGAACTCGAAAAAAAATTAGAAAAGCGAAA---AAAAATATTTTTTAGTTCT  
AAGCGTTTTA-----AAAGAATGGTTTCGAAAGGTCTCCAAGAAAAACAAGATGGA  
TTAGAAAATAGTTTTA-----TTTATAAAAAAATAATCAAAGAGTTTGCAAAAGTAAAC  
---ACCATAATCAGTAATAAGATTCTTAGTGAACCGACCATTCGAATTAGATCCATGGATT  
GGACAAATTATTCCTGACAGAAAAAAAATGAAAGATCTGGCCGACAGGACAACCA  
CAATAAGAAATCAAATAGAAAGGATCACAAAAGAAAAAGAACAAGTCCTAACGAGA  
CAAGTTGTGATGATAAAGATCTGAATCACAGAAACATATTTGGCAGATATCAAAAAGA  
AGAAGTGCCTGGTTCATACGTAAATGGCGCTATTTTATTAATAATTTTCAGTGAAAGAATA  
TACATAGATATCTTTCTATGCGCCATTAATATCCAGGGTCAATGCACAACCTTTTC---AA  
ACTAATTTCTGTGGGATCTATCTTCCTTGTCCCAAGCATATTTATTTTACAAATTATCACAA  
ACCCAAGTTATTAACAAGTATCGCTTGAAATCTGTACTTCAATAT---GATCTTTTTCTTAG  
GGATAGAATAAGGATTATTTGACACGAGGAATATTTGATTCCAAG-----TTTAAGAAAC  
TTCCGAATTCGGAATGGGTGAGTGGAAAACTGGTTAAGAGGTCATTATCAATACAAT  
TTATCTCAGACTAGATGGTCTAGATTAGTATCAAAAAAATGGCGAGATAGAGTCAATCA  
ACATCGTACGATTCAAAATAAAAA---AGGGATTCCTATGAAAA-----GACCAATTCAT  
TCATTACGAGAAACAAGAAAAATTTCAAAAAACTACAGATATGATCTTTTTTTCATATA  
AATATATTAATAAATATATTATTGATAGGGATAAAAAATATTTGGAATGGAAAATTCTCAA  
TTTTTGTCTTAGATTTTTTGGCCGGATGGGAATGAATCAAGGAATGCTATATCGTTGGTT  
CTTCTCAGAATTTGTGCCACTTTATGATGCATATAAGATTAAACCATGGATCATACCAAT

CAAATTA CTCTTTTCAATTCCAAGAGCAACAAGGGAGCAGAACTACAGTTCTTCTTG  
AAAAGATATTTGCTTTTTCAATTAAGATGGGATGATCCTTTGAATCAAAGAATGATGAAT  
AATGTCAAGGTATATTGTCTCCTGCTTAGACTTATAAATCCAAGGGAAATTGCTATATCC  
TCTATTC AAAGAGGAGAAATGCGCCTGGATGTAATGTTGATTCAGAAAGATCTAACTCT  
TACAGAATTGATAAAAAGGGGAATATTGATTATCGAACCGGTCCGTCTGTCTATAAAAT  
GGGATGGGCAATTTATTATGTATCAAACCATAGGCATTTTCATTGGTCCATAAGAATAAGC  
ACAATGATTATGATTTGCTTGTTCCTGAAAATATTCTATCTCCTAGACGTCGCAGAGAAT  
TGAGAATTCTAATCTCCTTCAGATTCCTTTGGCCTAATTATCGATTAGAAGATTTAGCTT  
GTATTAATCGCTACTGGTTTGATACCAATAATGGCAGTCGTTTCAGTATGTTAAGGATAC  
ATATGTATCCAATGAAACGACATCAATTCAAATCCTGGATCTTCGAATTG-----AGA  
GAGATCAAGAATTCTCACTATTTCTTAGATTCATGGACCAAATTCGATTCAGTGGGATCT  
TTCACTCACATTTTTTTCCACCAAGAACGTTTTATGAAACTCTTTGACCCCGAATTTG  
GAGTATCCTACTTTCA---CGTGATTCA-----CAGGGTTCAACAAGCAATCGATATTC-----  
---ACGATCAAAGGTGTAGTACTGCTTGTAGTAGTG---GTCCTTATA-----TATCGTATT  
ACAATCGAAATATGGTCGAAAGAAAAAATCTCTATTTGATGGGGCTTCTT-----C  
CTATACCTATGAATTCATTGGACCCAGAAATGATACATTGGAAGAATCTTTT---TGGTCT  
TCCAATCTCAATAGGTTGATTGTTTCG---CTCCTGTATCTTCCAAAAGGGAAAAAGATCT  
CTGAGAGTTGTTTCATGGATCCGAAAGAGAGTACTTGGGTTCTCCCAATAACT-----  
AAAAAGTGTATCATGCCTGAATCTAACTGGGGTTCGCGGTGGTGGAGGAACCGGATCG  
GAAAAAAGAGG-----GATTCTAGTTGTAAGATATCT-----AATGAAACCGTAGCTGGAA  
TTGAGATCTCATTCAAAGAGAAAGATATCAAA---TATCTGGAGTTTCTTTTTGTATCCTAT  
ACGGAT-----GATCCGATCCGCAAGGACCATGATTGGGAATTCTTTGATCGTCTTTCTCC  
GAGGAAGAAGCGAAACATAATCAACTTG-----AATTCGGGACAGCTATTCGAAATCTTA  
GTGAAACACTTGATTTGTTATCTCATGTCTGCTTTTCGTGAAAAAAGACCAATTGAAGT  
GGAGGGT---TTCTTCAAACAACAAGGA---GCTGAGGCAACTATTCAATCAAATGATATT  
GAGCATGTTTCCCAT-----CTCTTCTCGAGAAACAAGCGGGGTATTTCTTTGCAAATTG  
TGCTCAATTTCATATGTGGCAATTCCGCCAAGATCTCTTCGTT-----AGTTGGGGGAAG  
---AATCGGCACGAATTGGATTTTTTGAGGAAC---GTATCGAGAGAGAATTTGATTTGGTT  
AGACAATGTGTGGTTGGTAAACAAGGATCGG-----TTTTTTAGC-----AAGGTACGGAA  
TGTATCGTCAAATATTCAATATGATTCC-----ACAAGA-----TCTATTTTCGTTCAAGTAA  
CGGATTCTAGCCAATTGAAAGGATCTTCT---GATCAATCCAGAGATCCTTTTCGATTCCAT  
TAGT-----AATGAGGATTCGGAA-----TATCACACATTGATC  
AATCAAACAGAGATTCAGCAACTAAAAGAAAGATCGATTCTT---TGGGGT-----CCTTCC  
TTTCTTCAAACGGAACGAACAGAGATAGAATCAGAT-----CGACTCTTGAAA-----TGCC  
TTTCTGGATATTCC-----TCAATGTCCCGGCTATTCACG---GAACGTGAGAAGCAGATGA  
ATAATCATCTGCTTCCGGAAGAAATCGAAGAATTTCTT-----GGGAATCCTACAAGATCA  
ATTCGTTCTTTTTTCTCTGATAGATGG-----TCAGAACTTCAT---CTGGGTTTCGAATCCTAC  
TGAGAGGTCTACTAGAGATCAT-----AAATTGTTGAAGAAACAACAAGATGTTTCT--  
-TTTGTCCCTTCCAGGCGATCGGAA-----AATCAAGAAATAGTTGATATATTCAAGAT  
AATTACATATTTACAAAAT-----ACCGTCTCAATTCATCCTATTTTCATCAGATCCGGGATGT  
GATATGGTTCCG---AAGGATGAACCGGAT---ATGGACAGTTCCAATAAGATTTCAATCTT  
GAACAAAAATCCATTTTTGGAT-----TTATTTTCATCTATTCCATGACCGGAACAAAGGGG  
GATACAGGTTA-----CACCACGATTTTGAATCAGAA-----GAGAGATTTCAAGAAATGGC  
AGATCTATTCATCTATCAATAACCGAGCCG---GGTCTGGTGGATCATAAGGGATTTGCC

TTTTCTATCGATTCTACGGATTGGATCAAAAAAAAA-----TTCTTGAATGAGGTATTCAAC  
TCCAGGGATGAATCGAAAAAGAAATCTTTA-----TTGGTTCTACCTCCTATTTTTTAT---  
--GAAGAGAATGAATCTTTTTATCGAAGGATCAGAAAAAATCGGTCCGG---ATCTCCTG  
CGGGAATGATTTGGAAGATCCAAAACCAAAAATAGTGGTATTTGCTAACAACAACATA  
ATGGAGGCGGTCAATCAATATAGATTGATCCGAAATCTGATGCAAATCCAATATAGCAC  
CTATGGG-----TACATAAGAAATGTATCGAATCGATTCTTTTTAATG-----AATAGATCCG  
ATCGCAACTTCGAATATGGAATTCAA-----AGGGATCAAATAGGAAATGATACTCTGA  
ATCATCTAACTATAATAAAAATATACGATCAACCAACATTTATCGAATTTGAAAAAG---AGT  
CAGAAGAAATGGTTCGAT-----CCTCTTATTTCTCGAACCGAGAGATCCATGAATCG  
GGATCCTGATGCATATAGATACAAATGGTCCAATGGGAGCAAGAATTTCCAGGAACATT  
TGGAACATTTTCGTTTCGGAACAGAAGCAC-----CGGTTTCAAGTAGTGTTCGATCGAT  
TACGTATTAATCAATATTCGATTGATTGGTCCGAGGTTATCGACAAACAAGATTTGTCTA  
AGTCACTTCGTTTCTTTTTGTCCAAGTCA-----CTTCTCTTTTTGTCC-----  
-----AAGTCACTT--CTTTTTTTGTCTAAGTCACTTCCTTTTTTCTTTGTGAGTATC  
GGGAATATCCCCATTCATAGGTCCGAG---ATCCACATCTAT--GAATTGAAAGGTCCGAA  
TGATCAACTCTGCAATCAGTTGTTAGAATCAATAGGTGTTCAAATCGTTCATTTGAATAA  
ATTGAAACCC-----TTCTTATTGGAT-----GATCATGATACTTCC--CAAAGATCGAAATT  
CTTGATCAATGGAGGAACAATATCACCC-----ATAAGATACCA---AAGTGG---ATGAT  
TGACTCATTCCATACT-----AGAAATAATCGCAGGAAATCCTTTGAGAACACGGATTCCT  
ATTTCTCAATGATATCCCACGATCGAGACAATTGGCTGAATCCCGTGAAACCATTTTCATA  
GAAGTTCATTAATATCTTCTTTTTATAAAGCAAATAGACTTCGATTCTTGAATCATCCACA  
TCACTTCTGGTTCTAT-----TGTAACAAAGGATTCCCTTTTTATGTG-----GAAAAGAC  
CCGTATCAATAATTATGAT-----CTTACATAT--GGACAATTCCTCAATATCTTGTTCAATCG  
CAACAAA---ATATTTCTTTGTGCGTCCGTA---AAAAACATGTTTTTTTTGGAG---A  
GAGATACTATTTACCAATCGAGTCACAGGTATCTGACATATTCATACCTAACGATTTTC  
CACAAAGTGGTGACGAAACG---TATAACTTGTAACAATCT-----TTCCATTTTCCAATT  
CGATCCGATCCATTTCGTTTCGT-----AGAGCTATTTACTCGATCGCAGACATTTCTGGAACA  
CCTCTAACAGAGGAACAAATAGTCAATTTTGAAAGAACTTATTGTCAGCCTCTTTCAGA  
TATGAATCTATCTGATTCAGAAGGGAAAACTTGCATCAGTATCTCAGT-----TTCAATTC  
AAACATGGGTTTGATTCACACTCCATGTTCTGAGAAATATTTACCA-----TCAGGAAAGA  
GGAAAAA-----CGGAGTCTTTGTCTAAAG-----AAATGCGTTGAGAAAC  
GGCAGATGGATAGAACCTTTCAACGAGATAGTGCTTTTTCAAATCTCTCAAATGGAAT  
CTGTTCCAAACATATATGCCATGGTTCCTTACTTCGACAGGGTGCAAATATCTAAATTTG  
ACCCTTTTAGATACTTTTTTCAGACCCATTG-----CCGATACTAAGTAGCAGT--CAAAAAT  
TTGTATCCATTTTTCATGATATTATGCATGGATCAGATATATCATGGCCAATTCCTCAGAA  
AAAATTGTGG-----GCGATTCTTCCACAATGGAATCTG---ATAAGTGAGAGTTCGAG  
TAAGTGTTTACAGAAT-----CTTCTTCTGTCCGAAGAAATGATTCATCGAAATAATGAGT  
CACCCGTTCCATTGATATGGACACATCTGAGATCACCAAATGCTTGGGAGTTC---CTCTA  
TTCAATCCTTTTCCTTTTTCTTGTGCTGGATAT--CTCGTTCGTACACATCTTCTCTTTGT  
TTCCCGA-----GCCTCTAGTGAGTTACAGACAGGGTTAGAAAGGATCAAATCTTTGATGA  
TTCCATCATACTGATTGAGTTGCGAAAATCTTGGATAGGTATCCTACATCTGAACCGA  
ATTCTTTCTGGTTAAAGAATCTCTTTCTAGTTGCTCTGGAACAATTAGGAGATTCTCTGG  
AAAAAATACGGGGTTCTGCTTCTGGCGGCAACATGCTATTGGGTGGTGGTCCC-----  
---GCTTATGGG---GTCAAATCAATACGTTCTAAGAAGAAATATTTGAATATCAAT-----C

TCATCGATCTCATC---AGTATCATACCCAATCCCATCAATCGAATCACTTTTTTCGAGAAAT  
ACGAGACATCTAAGTCGTACAAGTAAAGAGATCTATTCATTGATAAGAAAAAGAAAA  
ATGTGAACGGTGATTGGATTGATGATAAAATAGAATCCTGGGTCGCGAACAGTGATTTCG  
ATTGATGATGAAGAAAGAGAATTCTTGGTTTCAGTTCTCC-----ACCTTAACGACG-----G  
AAAAAGGGATTGATCAAATTCTATTGAGTCTGACT--CATAGTGATCATTATCA-----  
---AAGAATGACTCTGGTTATCAAATGATTGAACAACCGGGATCAATTTACTTACGATAC  
TTAGTTGACATTCAT-----AAAAAGTATCTAATGAATTATGAGTTCAATAGATCCTGTTTA  
GCAGAAAGACGGATATTCCTTGCTCATTATCAGACAATCACTTAT-----TCACAAACCTC  
GTGTGGGGCTAATAGTTCTCATTTCCCATCTCATGGA-----AAACCCTTTTCGCTCCGC  
TTAGCCCTATCCCCTTCT--AGGGGTATTTAGTGATAGGTTCTATAGGAACTGGACGATC  
CTATTTGGTCAAATACCTAGCGACAAACTCCTATGTTCTTTTCATTACGGTATTTCCGAA  
CAAGTTTCTGGATGACAAGCCTAAAGGTTATCGTATTGAT-----GATATCGAT--AT  
TGATGATAGTGACGATATCGAT-----ATTGATGATAGTGACGATATT-----  
-----GATGATGACCTTGATACGGAGCTGCTAACTATGACGAATGTGCT  
A-----ACTATGTATATGACG-----CCGAAAATAGACCGATTGATATCACCTTCAATT  
CGAATTAGCAAAGCAATGTCCCCTTGCATAATATGGATTCCAAACATTCATGATCTGTA  
TGTGAATGAGTCGAATTACTTATCCCTCGGTCTATTAGTGA ACTATCTCTCC-----AGA  
GATTGTGAAAGATGTTCC---ACTAGAAATATTCTTGTTATTGCTTCGACTCATATTCCCCA  
AAAAGTGGATCCCGCTCTAATAGCTCCGAATAAATCAAATACATGCATTAAGATACGAA  
GGCTTCTTATCCACAACAACGAAAGCACTTTTTTCATTCTTTCATATACTAGGGGATTTC  
ACTTGGAAGAAAGAAATGTTCCATACT-----AACGGATTTCGGGTCCATAACCATGGGTTC  
AATGCACGAGATCTTGTAGCACTTACCAATGAGGCCCTATCAATTAGTATTACACAGAA  
GAAATCCATTATAGACACTAATACAATTAGATCAGCTCTTCATAGACAAACTTGGGATT  
GCGA-----TCCCAGGTAAGATCGGTTTCAGGATCATGGGATCCTTTTCTATCAGATAGGA  
AGGGCTGTTGCACAAAATGTA CT TCTAAGTAATTGCCCCATAGATCCTATATCTATCTATA  
TGAAGAAGAAA-----TCATGTAAGGAAGGGGATTCTTATTTGTACAAATGGTACTTCGA  
GCTTGGAACGAGCATGAAGAAATTAACGATACTTCTTTATCTTTTGAGTTGTTCTGCCG  
GATCGGTCGCTCAAGATCTTTGGTCTCCACCC-----GGACCCGATGAAAAA---AATTGGA  
TCACTTCTTATGGATTTCGTTGAGAATGATTCT--GATCTAGTTCATGGC--TTAGAAGTAG  
AAGGCGCTCTGTTGGGA-----TCCTCACGGACAGAAAAAGATTGCAGTCAGTTTGATAA  
TGAT-----CGAGTGACATTGTTTCTTCGGTCCGAACCAAGGAAT--CCGTAGATATGATG  
CAAATGGATCTTGTCTATCGTTGATCAGAGATTTCTCTATGAAAAA-----TATGAATCG  
GAGTTTGAAGAA---GGGGAAAGAGAAGGAGCCCTCGACCCGCAA-----CAGATAG  
AGGAGGAT-----TTATTCAATCAC-----ATAGTTTGGGCTCCT-----AGAATATGGCGCC  
CT-----TGTGGCAATCTATTTGATTGTATCGAAAGGACCAATGAATTGGGATTTCCT---T  
ATTGGGCCAGGTCATTTCCG-----GGCAAGCGGATCATTATCATAAAGAGGATGAGC  
TTCAAGAGAATGATTTCGGAGTTCTTGCAGAGTGGAACCATGCAGTACCAGACACGAGA  
TAGATCTTCCAAAGAACAAGGCTTTTTTCGAATAAGCCAATTCATTTGGGACCCTGCAG  
ATCCATTCTTTTCTATTCAA---GATCAGCCCTTTGTCTCTGTGTTTTACGCCGAGAA  
TTCTTTGCAGATGAAGAGATGTCAAAGGGCTTATTACTTCCCAAACAATCCTCCTAC  
ATCTATATATAACGCTGGTTCATC-----AAGAATACGCAAGAAAAGCACTTCGAATTGT  
TGATTCATCGCCAGAGATGGCTTAGAACC-----AATAGTTCATTATCT-----AATGGATC  
TTTCCGTTCTAAT-----ACTCCATCCGAGAGTTATCAGTATTTATCAAATCTGTTCCCTATCT  
AAC---GGAACGCTATTGGACCAAATAGCAAAGGCATTGTTGAGAAAGAGATGGCTTTT

CCCGGATGAAATGAAACATTTGATT-----CATGTAACAGGAGAAAGATTTCCCATTCCTA  
TGCCTAGATCTCGG--ATAAATGGAAATTTTATTGATAAGACCTCTTCAATTGTAGCCAAT  
ATCTTATTACGAATAATTCGGACAACCTTCAGGAGAAAAAGAGGCATTTACCTATTACAG  
AGATGGG-----ATGTCAGCCCAATCCGAAGGAAATTATGCGGAAGCTTTACAAAATTATT  
ATGAAGCTACGCGACTAGAAATTGATCCCTATGATCGAAGTTATATACTCTATAACATAG  
GCCTTATCCACACAAGCAACGGAGAACATACGAAGGCTTTGGAATATTATTTCCGGGCA  
ATAGAACGAAATCCATTCTTACCACAAGCTTTTAATAATATGGCCGTGATCTGTCATTAC-  
--CGGGGAGAACAGGCCATTTCGACAAGGAGATTCTGAAATTGCAGAGGCTTGGTCCGA  
TCAAGCTGCTGAATATTGGAAACAAGCTATAGCGCTTACTCCGGGTAATTATATTGAAG  
CACATAATTGGTTGAAGATCGCAAGGCGGTTTCGAA-----ATGAACTGGCGATCAGAACG  
TATATGGATAGAACTTATAACGGGGTCTCGAAAAACAAGTAATTTCTGCTGGGCCTGTA  
TCCTTTTTTTAGGTTCACTAGGATTCTTATTGGTTGGAACCTTCGAGTTATCTTGGTAGGA  
ATCTGATATCCCTATTCCCATCTCAGCAAATCATTTTTTTTCCCAAGGGATCGTGATGTC  
TTTCTATGGGATCGCGGGTCTGTTTCATTAGTTCCTATTTGTGGTGCACAATTCGTGGAA  
TGTAGGTAGTGGTTATGATCGATTTCGATAGAAAAGAAGGAATAGTGTGTATTTTTCGTT  
GGGGATTTCTTGAATAAATCGTCGCATCTTCTTCGATTTCTTATGAGAGATATCCAGT  
CCATCAGAATGGAAGTTAAAGGGGGTCTTTATTCTCGACGTGTCCTTTATATGGAAATC  
AGAGGCCAGGGTGCCATTCCCTTGACTCGTACTGATGAGAAT---TTTACTCCACGAGAA  
ATTGAACAAAAAGCTGCTGAATTAGCCTATTTTTTGC GCGTGCCAATTGAATTGAAA

>Amborella

ATGGAAAAATGTGGGTTCAATTCGATGTTGTCTCTAAGTAAATCGATGGACAGTCTTGG  
TCTTATTGGAAATACCGGTGCAGGTGGAGGCCCTTTGATCTATGATGACACTTTTAAGC  
TTAAG---TATTTTGATATTGACGAGATTGACGATGATAGTACTCTCTGAGTGATATTGA  
AAATCAGAATCAGATCTTCTTTGATATTTACAATGATAGTACTCTCTGGAAGTAGATAG  
TGAAAATAAGAAGTTTGGAGATTCACAATGAG-----AGTGACTTTATGAGTAAACTAGAA  
AGTTCTTTTTTTAGTTATCTCACTTATAGTAATCTCAATAGTGGATCTAAGAGTTACAACC  
CCTACTATGATCCTTACATGCATGACTAGATATAGTTGGAATAATAACATTAATAGTTG  
CATTGACAGTTATATTCGTTGTGAAATCGAT-----TCC-----ATTTCAAGTGGTAGCGAC  
AATTGCAGTGACAGTTATATTTATAGTTACATCTGTAGTGACAATGGGAGTTCTATAAGA  
ACTAGAAGTACTAGTGGCAGTTCTTACCATATAAGAGGAAGATCT---AATTTTCGAGAAAAAT  
AAAAAATTAATAAATATGGGTTCAATGCGAGAATTGTTATGCATTGAATTATAATAAA  
TTATTTAGGTCTAAAATGAATGTTTGTGAACAATGTGGATATCACTTGAAAATGAGTAGT  
TCAGATAGAATCGAACTCTCGATTGATCCAGGCACTTGGCATCCTATGGATGAAGATAT  
GGTCTCCACGGATCCTATTGAATTCATTTCGGAGGAGGAACCTTATAGAGATCGCATCG  
ATTCTTATCAAAGACAAGCAGGTTTAACCGATGCTGTTCAAACAGGCATAGGTCAACTA  
GAAGGTATTCGGATAGCAATTGGAGTTATGGATTTTCAGTTCATGGGAGGTAGTATGGG  
ATCCGTAGTAGGCGAGAAAATAACTCGTTTGATCGAGTATGCTATTGATAGATCTCTCCC  
AGTTGTTATTGTGTGTGCTTCTGGAGGAGCACGCATGCAAGAAGGAGGTTTGAGCTTG  
ATGCAAATGGCTAAAATATCTTCCGCTTCATATAATTATCAATCCAATAAAAAGTTATTCT  
ATGTATCAATCCTTACATCTCTACAACCGGTGGAGTACTGCGAGTTTTCGGTATGTTG  
GGAGATATCATTATTGCCGAACCAATGCCTACGTAGCATTTGCAGGCAAAGAGTAAT  
TGAAGAAACATTAATAAGAAAATACCTGATGGTTTGCAAGTAGCTGAGTATTCATTCC  
ATAAGGGCTTATTCGATTCAATCGTACCACGTAATCCTTTAAAAGGTGTTCCAAGTGAG  
TTATTTAGCTCCACGGTTTCTTTTCTTACTTTCCATCCCCTTAAAATGGTAACCATT

GAGCTGACGAAATTAGTAATATTATCCGTGAACGGATTGAGCAATATAATAGAGAAGTA  
AAGATTGTCAATACTGGCACTGTACTTCAAGTGGGCGACGGCATTGCTCGTATTCATGG  
TCTTGATGAAGTAATGGCGGGCGAATTAGTAGAATTTGAAGAGAGTACAATAGGCATTG  
CTCCAAATTTGGAATCCAATAATGTTGGTGTGTATTAATGGGTGATGGTTTAATGATAC  
AAGAGGGCAGTTCTGTAAAAGCAACAGGAAGAATTGCTCAGATACCAGTGAGTGAGG  
CTTATTTAGGTCGTGTTATAAATGCTCTGGCTAAACCTATTGATGGGAGAGGTGAAATTT  
CATCTTCCGAATCTCGGTTAATTGAATCCCCCGCACCAGGTATTATTTGAGACGTTCCG  
TATATGAACCTCTTCAAACAGGTCTTATTGCTATTGATTCCATGATTCCATAGGACGCG  
GTCAGCGAGAATTAATTATTGGGGACAGACAGACCCGGTAAAACAGCCGTAGCTACAGA  
TACTATTCTGAATCAAAGGGGGCAAATGTAATATGTGTTTATGTAGCTATTGGTCAAAA  
AGCATCTTCCGTGGCTCAGGTAGTGACTACTTTCCAGGAACAAGGAGCAATGGAATAC  
ACTATTGTGGTAGCTGAAACGGCGGATTCACCTGCTACATTACAATACCTCGCTCCTTAT  
ACAGGAGCAGCCTTGGCTGAATATTTTATGTACCGTGAACGACATACTTTAATAATTCAT  
GATGATCCCTCTAAACAAGCACAAGCTTATCGCCAATGTCTCTTCTATTAAGAAGACC  
GCCTGGTCGCGAAGCTTATCCAGGAGATGTTTTTTATTTGCATTCCCGACTTTTGAAA  
GAGCCGCTAAATCAAGTTCTCGTTTAGGCGAAGGAAGTATGACTGCTTTACCAATAGTT  
GAGACTCAATCTGGGGACGTTTCGGCTTATATTCCCACTAATGTAATTTCCATTACAGAT  
GGACAAATCTTCTTATCTGCCGATCTATTCAATGCTGGAATCCGGCCTGCTATTAATGTG  
GGTATTTCCGTTTCCAGAGTAGGATCCGCAGCTCAAATTAAGCTATGAAACAAGTAGC  
TGCAAATCAAATTGGAACCTGGCTCAATTTGCAGAGTTAGAAGCCTTTGCACAATTC  
GCTTCTGATCTCGATAAAGCTACTCAGAATCAATTGGCAAGAGGTCAACGATTGCGCG  
AGTTGCTCAAACAATCCCAAGCAGCCCCTCTCGCGGTGGAAGAACAGGTAGTTACTAT  
TTACAGGAGCGAATGGGTATCTTGATCCATTAGAAATTGGACAGGTGAAGAAATTC  
TCGTTACAGTTACGTACTTATTTAAGAACAATAAGCCTCAGTTCCAAGAAATCATATCTT  
CTACCCGGACGTTACCGAGGAAGCAGAAGCCATTCTGAAAGAAGCTATTCAGGAAC  
AGATAGAACTGTTTCTATTTTCAGGAACAAACAATGAGAATCAATCCTACTACTTCTGGT  
TCTGGTGCTTCTACACTTGCAGAAAAAAGCGTGGGACGTATCGCTCAAATCATTGGTC  
CGGTACTGGATGTAGCTTTTCCCCCGGGCAAGATGCCCAATATTTACAACCTTTTGTA  
GTTAAGGGTCGAGATACTGCCGGTCAGCAAATTAATGTGACTTGTGAGGTACAACAATT  
ATTAGGAAATAATCGAGTTAGAACGGTAGCTATGAGTGCTACAGATGGTCTAATGAGAG  
GAATGGAAGTGATTGACACGGGAGCTCCTCTAAGTGTCCGGTTGGCGAAGCTACTCT  
CGGACGAATTTCAACGTTCTTGGAGAACCAGTTGATAATTTAGGTCCTGTAGATACTC  
GCACAACATCTCCTATTCATAGATCTGCGCCTGCCCTTATACAGTTAGATACCAAATTATC  
AATCTTTGAAACAGGCATTAAGTGGTGGATCTTTTAGCTCCTTATCGTCGTGGAGGAA  
AAATCGGGCTATTCGGGGGAGCCGGAGTGGGTAAAACAGTACTCATCATGGAATTGAT  
CAATAACATTGCCAAAGCTCACGGAGGTGTATCTGTATTTGGCGGAGTAGGAGAACGT  
ACTCGTGAAGGAAATGATCTTTACATGGAAATGAAAGAATCCGGAGTGATTAATGAAC  
AAAATATTGCAGAATCAAAGTCGCTCTAGTCTATGGTCAGATGAATGAACCGCCGGG  
AGCTCGGATGAGAGTTGGTTTAACTGCCCTAACAAATGGCGGAATATTTCCGTGATGTTA  
ATGAGCAAGACGTACTTCTATTTATTGACAATATCTCTCGCTTCGTTCAAGCAGGATCAG  
AAGTCTCTGCCTTATTAGGCAGAATGCCTTCTGCCGTGGGTATCAACCTACCCTTAGTA  
CAGAAATGGGTCTTTTGAAGAAAGAATTACTTCTACTAAAGAGGGATCCATAACTTCC  
ATTCAAGCAGTTTATGTACCTGCAGACGATTTGACCGACCCCTGCTCCTGCCACGACATT  
TGCACATTTAGATGCTACTACCGTACTATCAAGAGGATTAGCCGCCAAAGGTATCTATCC

AGCAGTAGATCCTTTAGATTCAACGTCAACTATGCTCCAACCTCGGATCGTTGGCGAGG  
AACATTACGAAACTGCGCAAAGAGTTAAGCAAACCTTTACAACGTTACAAAGAACTTCA  
AGACATTATAGCTATTCTTGGACCAGATGAATTATCCGAAGAGGATCGTTTAAACCGTAG  
CAAGAGCACGAAAAATTGAGCGTTTCTTATCACAACCTTCTTCGTAGCAGAGGTATTT  
ACTGGTTCTCCAGGAAAATATGTTGGTCTCGCAGAAACAATTAGGGGGTTTCAACTGA  
TCCTTTCCGGAGAATTAGATGGTCTTCCCGAACAGGCTTTTTATCTGGTAGGTAACATC  
GATGAAGCTACCGCGAAGGCTATTAACTTAGAAGTAGAGAGCAAATTAAGAAAATGA  
CCCTAAATCTTTGTGTACTGACTCCTAATCGAATCATTTGGGATTCAGAAGTGAAAGAA  
ATTATTTTATCCACTAATAGTGGCCAAATTGGTGTATTACCAAATCACGCACCTATTGCA  
ACGGCTGTAGATATAGGTATTCTCAAATACGCCTCCAGGAGCAATGGTTAACAATGGC  
TCTGATGGGTGGTTTCGCCAGAATAGGCAATAATGAAATAACCATATTAGTAAATGATGC  
GGAGAAGGGTAGTGACATTGATCCGCAAGAAGCTCAGCAAACCTTTGAAATAGCTGA  
AGCTAACCTGAGTAGAGCTGAGGGCAAGAGACAAACAATTGAGGCGAATTTAGCTCTT  
AGACGAGCTAGGACACGAGTAGAGGCTATCAATGCTATTTTCGATGAAAAATGTAACCG  
ACTCTTTCGTTTCCTTGGGCCACTGGCCATCTGCCGGAAGTTTCGGATTTAATACCGATA  
TTTTTGCAACAAATCCAATAAATCTAAGTGTGGTGCTTGGTGTGTTGATTTTTTTCGGA  
AAGGGAGTGTTAAGTGATTTATTAGATAATCGAAAACAGAGAATCTTGAGTACGATTCG  
CAATTCAGAAGAACTACGTGGGGGAGCCATTGAGCAGCTTGAAAAAGCCCGGGCTCG  
CTTACGGAAAGTGGAATTGAAGCAGATGAGTTTCGAGTGAATGGATACTCTGAGATA  
GAACGAGAAAAAAGTAATTTGATTAATGCTGCTTATGAAAATTTAGAACGATTAGAAAA  
TTACAAAAATGAAAGCATTCATTTTGAACAACAAAGAGCGATGAATCAGGTCCGACAG  
CGAGTTTTCCAACAAGCCTTGCAAGGAGCTCTAGAAACTCTGAATAGTTATTTGAACA  
GCGAGTTACATTTACGCACCATCAGTGCTAATATTGGCATGCTCGGGACCATGAAAAAT  
ATAACTGATATGAATCCCCTGATTTCTGCTGCTTCCGTTATTGCTGCTGGATTGGCCGTA  
GGACTTGCTTCTATTGGACCCGGAGTCGGTCAAGGTACTGCTGCGGGTCAAGCCGTAG  
AGGGTATCGCGAGACAACCAGAAGCAGAGGGTAAAATACGAGGTACTTTATTGCTTAG  
CCTGGCTTTTATGGAAGCTTTAACAATTTACGGACTGGTTCGTGGCATTAGCGCTTTTATT  
TGCGAATCCCTTTGTTATGAGTGTCTACCATGTTCCATCAACACACTAAAAGGGATATA  
CGATCTATCCGGTGTGGAAGTAGGCCAACATTTCTATTGGCAAATTGGGGGTTTCCAAG  
TCCATGCCCAAGTACTTATAACTTCTTGGGTCGTAATTGCTATCTTATTAGGTTTCAGCCA  
CTATAGTTGTTCGGAATCCACAACCATTTCCGACCGACGGTCAGAATTTCTTCGAATAT  
GTGCTTGAATTCATTTCGAGACTTGACCAAACCTCAGATTGGAGAAGAATATGGTCCCT  
GGGTTCCCTTTATTGGAACTATGTTCTATTTATTTTTGTTTCTAACTGGTCCGGCGCTCT  
TTTACCTCGGAAAATCATAGAGTTACCTCAGGGGGAGTTAGCTGCACCTACAAATGATA  
TAAATACTACTGTTGCTTTAGCTTTACCCACGTCAGTGGCATATTTCTATGCAGGTATTA  
GCAAGAAAGGATTGGGTTATTTTCGGTAAATATATTCAACCAACTCCCATACTTTTACCAA  
TTAATATCTTAGAAGATTCACAAAACCTTTATCACTTAGTTTTTCGACTTTTTGGGAATAT  
ATTGGCTGATGAATTAGTAGTTGTTGTTCTTGTTCCTTAGTCCCTTCATTGGTTCCTATA  
CCTGTCATGTTCCCTCGGATTATTCACAAGCGGTATTCAAGCTTTGATTTTTGCAACTTTA  
GCCGCGGCTTATATAGGCGAATCCATGGAGGGTCAICATATGATATTCGCGACTTTAGAA  
CATATATTAACTCACATCTCTTTTTCAATAATTTCAATTGTCATTACGACTCATTTGATGA  
CCTTCGCCCGT--GAAATCGCAGGACTATCTGATTTGTCAGAAAAAGGCATGATAGCTG  
TTTTTTTTCGTATAACAGGATTATTAGTCACTCGTTGGATTTATTCAGGACATTTACCATT  
AAGTAATTTATATGAATCATAATTTTTCTTTCATGGGGTTTCTCTTATTTCATATGATTT

CTAAAATACAGAACCATAAGAATTTTTTAAGTTCAATAACCGCGCCAAGTGCTATTTTA  
ACCCAAGGCTTTGTCACTTCGGGTCTTTTAACTGAAATGCATCAATCCGCAATACTAGT  
ACCTGCTCTACAATCCCATTTGGTTAATAATGCACGTAAGTATGATGTTGTTGAGCTATGC  
AGCTCTCTTATGTGGATCCTTATTATCAATAGCTCTTCTAGTCATTACATTTAGAAAAAAG  
CTAGATATTATTTTC-----GAGATCCAATATTTGAATGAAAAAAGAAGTATTTTGCAA  
ACACTTCT--TTTTCAATTTAGAAATTACCACAAATATCAACTTACTCAGCAATTAGATCAT  
TGGAGTTATCGTGTTATTGGTATAGGATTTACCCTTTTAACTTTAGGTATTCTTTCAGGGG  
CGGTATGGGCTAATGAGGCATGGGGATCCTATTGGAATTGGGACCCCAAGGAGACTTG  
GGCTTTTATTACTTGGACTATATCTGCGATTTATTTACATACTAGAACAATAAAAACTTG  
CAAAGTGCGAATTCAGCAATTGTGGCTTCGATAGGATTTCTTATCATTGGATATGCTAT  
TTTGGGGTCAATCTATTAGGAATAGGCCTACATAGCTATGGTTCATTTCGCATTAAGGGTG  
TCCAAAAA--GCATTGACTTCCCTGCCATATCTTGCATCTATAGTTTTTCTGCCCTGGG  
GAATTTCTCTATCATTTAATAAAAGTCTGGAACCTTGGGTTACAAATTGGTGAATACCA  
GCCAATACGAAACTCTTTTGAATGAAATTCAGAAAATAACGTTCTTGAAAGATTCATA  
GAATTAGAAGAACTATTCTTGTGGACGAAATGATAAGGGATTATCCGGAGACACATAT  
ACAAAAGCTTCGTATAGGAATCCACAAAGAAACGATAGAATTGGTGAAAATGTACAAT  
CAAGATTATATCCATATAATTCGCATTTCTCGACAAATATAATGAGTTTCGCTATTCTAA  
GTGCTTATTCTATTCTGGGTAATGAAGAACTTGTCACTCTTAATTCTTGGGTTTCAGGAAT  
TCTTCTATAACTTAAGTGACACAATAAAAGCTTTTTCTATTCTTTTACTAACCGATTCATG  
TATCGGATTTTCAATTCGCCCCATGGTTGGGAACTCATGATTGGTTCGGTCTACAAAGATTT  
TGGATTTAGTCATAACGATCAAATTATATCCGGTCTCGTTTCCACTTTTCCGGTTATTCTA  
GATACTATTTTGAAATATTGGATCTTCCATCATTTAAATCGTATATCTCCTTCACTTGAGT  
TATTTATCATTCAATGAATGAAATGCCCGTTGGTGTTCAAAAGTACTTTTTCGGAGTCC  
TGGAGAGGAAGACGCAACTTGGGTTGACATATAACAACCGACTTCATCGAGAAAGATTA  
CTTTTTTTAGGCCAAGAGGTTGAAGGTGAGATATCGAATCAAATTGTTGGTCTCATGGT  
ATATCTCAGTATAGAGGATGATACCAGGGATCTTATTTGTTTATAAACTCTCCCGGCGG  
ATGGGTAATACCAGGAATAGCTATTTATGACGCTATGCAATTTGTACCGCCAGACGTACA  
TACGATATGCATGGGATTAGCCGCTTCAATGGGATCTTTCGTCTGGCCGGAGGAGAAA  
TTACCAAACGTCTAGCATTCCTCACGCTAGGGTTATGATCCACCAACCCGCTAGTTCT  
TTTTATGAGGCACCAGCAGGAGAATTTATCCTGGAAGCGGGGAGCTACTGAAACTTC  
GCGAAACCATCACAAGCGTTTATGTACAAAGAACAGGCAACCCTTTATGGGTTGTATCC  
GAAGACATGGAAAGGGATGTTTTTATGTCAGCAACAGAAGCCCAAGCTCATGGCATTG  
TTGATCTTATAGCAGTCGAAATGAAAGAACAAAATTAATTCATGAAGGTTAATTA  
GAATCACTTCCCAATGGCATGTTCCAAGTTCGCTTAGATAATGGAGACCTGGTTCTAGG  
TTATGTTTCAGGAAGGATCCGACGTAGTTTATACGGATATTACCAGGCGATAGAGTGA  
AAATTGAAGTAAGTCGTTATGATTCAACCAGGGGACGTATTATTTATAGGCTTCGCAAC  
AAAGATTCGAATGATATGGAGGAATTACGAGGATATTTAGAAATAGATAGACCCCATCA  
ACAACGCTTCCATATCCGCTTCTATTCCAGGAGTCTATCTATGCATTGCTCATAATCAT  
GGTTTATTAGGTCATGACAAG---TCCAGTTCACTAAATGTAAAACGTTTAATTATTCAA  
TGTATCAACAGAATCATTTCAATTTCAATTAATGATTCTAACCAAATAGATTTCTTGG  
GAGGAATTTCTATTTCAAATGGTATCAGAGGGTTTTGCAGTAATTGTGGAATTCATT  
CTCGATGCGATTAGTATCTTCCCTAGGATCTGAATCTCAT---TTCCAATCTATCCATTCAAT  
ATTTCCGTTTTCTAGAGGACAAACTTTCATATTTAAATTATGTGTTAGATATACTAATACCC  
CACCAATCCATCTGGAAATCTTGGTTCAAAGCCTTCGCCAATGGATACGAGACCTTCC



TTCTTTGCATTTATTGCGGTTTTTTTCTCCACGAACATCAGAATTGGAATAGTTTCATTACT  
AAATGCAGTTCTTTTTTTTCAAGACAAAGATTGTTTTTGTTCCTGTACAATTTTCATGTA  
TATCAATTTGAATCCCTTTTCGTTTTCTACGTAAACAATTTTTTTCATTTACGGTCGATAT  
CTTTTGGATCTTTTCTTGAACGAACACATTTCTATGGAAAAATAGAAAAT--GTAGTATC  
CATGCGTAATCAGAATATTTTATGGTTGTTCAAGGACCTTTTCATGCATTATGTTAGATAT  
AAAGGAAAATCAATTATGGCTTCAAGGGGTA CTCTCCTTATGAATAAATGGAAATC  
TCACCTTGTCAATTTCTGGCAATTCCGTTTTTACTTCTGGTCTCAACCGGGCAGAATCCA  
TATAAATGAATTATCCAATCATTCCCTTCTATTTCCCGGGCTATCTTTCAGGTCTACGATTA  
AATCCCTCGATGGTAAGGAGTGAAATGCTAGAGAATTCATTTATGATAGATGCTGTTATC  
-----AAGAGATTCGATACAGTAGTCCCAACTATTTTTTCTTATTGGATCCTTGGCTAAAGTA  
AAATTATGTAACGTATCAGGGCATCCTATTAGTAAGTCGGTCTGGGCCGATTCGTCAGAT  
TCTGATATTCTCGATCAATTTGGGCGGATATGCAGAAATCTCTCTCATTATCACAGTGGG  
TCTACAAAAACACAGTTTGTGTGAATAAAATATACTTCGACTTTCGTGTGCTAG  
AACTTTGGCTCGTAAACATAAAAGCACGGTACGCGCAATTTTGAAAAGATTAGGTTTCG  
GAATTCCTTGACGAATTCCTTACGGAGGAACAAGAGATTCTTTCCTTGATTTTTCCAAA  
ACGAATTTGGTATTTGGATATTATCCGTATTCATAGTCTGGCCAATCAT--ATGATAATTGA  
TACGACA--GAAGTACAA--GCTATCAATCTTTTTCCAGATTGGAA--TCGTCAAAGA  
GGTCTATGGTCTGATATGGCTATTTATCCCTATTTTTACTCCTGTATCAGGGATCACAATA  
GGGGTATTGGTTATTGTGTGGCTAGAAAGAGAAATATCTGCAGGGATAACAACGCAT  
TGGACCTGAATACGCTGGTCCTTTGGGGATTCTTCAAGCTATAGCAGATGGGACCAAAT  
TACTTTTCAAAGAGGATCTTCTCCCATCTAGAGGAGATATTCGTTTATTCAGTATCGGGC  
CTTCTGTAGTGGTCATATCAATTTACTAAGTCATTTGGTAATTCCTTTCGGTTATCGCCT  
TGTTCTCGCCGATCTAAGTATAGGTGTTTTCTCTATGGATCGCAATTTCCAGTATTGCTCCT  
ATTGGACTTCTTATGTCAGGATATGCATCAAATAATAAATATTCTTTTTCAGGTGGTCTAC  
GAGCTGCTGCTCAATCTATTAGTTATGAAATACCGTTAACTCTGTGTGTGTTATCAATATC  
TCTACTATCTAACAGTTCAAGTACGGTTGATATAGTGGAGGCACAGTATAAATATGGTTT  
TTGGGGGTGGAATCTGTGGCGTCAACCTATAGGGTTTCTAGCTTTTCTAATTTCTTCCTT  
AGCGGAATGTGAGAGGTTGCCCTTTGATTTACCAGAAGCGGAGGAAGAATTAGTAGCG  
GGTTATCAAACCGAATATTCAGGTATTAATTTGGTTTATTTTATCTTGCTTCTTACCTAA  
ATCTACTAGTTTCTTCATTATTTGTAACGGTCTTTATTTGGGTGGGTGGAATCTTCTAT  
TCCATACATAGCAATTCCTGAGCTTTTTCAGAATAAATAGAATTGGTGGAGTTTTTGGAA  
CAACAATTAGTATCTTTTTTACATTAGCTAAAGCTTATTTGTTCCCTGTTTCATTCCATCAC  
AACAAGATGGACTTTACCTAGGATGAGAATGGACCAACTATTAATCCTTGGTTGGAAAT  
TTCTTTTACCTATTGCTCTAGGTAATCTATTACTGACAACCTTCTTCCCAACTTTTTTCGCT  
GATGATCTGGCATGTACAGAATGAAAACCTCATTCTCGATTCTACGAGAATTTTTATGAA  
AGCCTTTCATTTGCTTCTTCCATGGAAGTTTCATTTTCCAGAATGTATCCTAATTTTT  
GGCCTAATCTTCTTCTAATGATCGATTCAACCTCTGATCAAAAAGATAGACCTTGGTTC  
TATTTTCATCTCTTCAACAAGTTTAGTAATGAGCATAACGGCCCTATTGTTCCGATGGAGA  
GAAGAACCTATGATTAGCTTTTTCGGGGAATTTCCAAACGAACAATTTCAACGAAATCTT  
TCAATTTCTTATTTTACTATGTTCAACTCTATGTATTCTCTATCAGTAGAGTACATTGAAT  
GTACAGAAATGGCTATAACAGAGTTTCTGTTATTTCGTATTAACAGCTACTCTAGGAGGA  
ATGTTTTTATGTGGTGCTAACGATTTAATAACTATCTTTGTAGCTCCAGAATGTTTCAGTT  
TATGCTCCTACCTATTATCTGGATATAACCAAGAGAGATGTACGGTCTAATGAGGCTACTA  
CGAAATATTTACTCATGGGTGGGGCAAGCTCTTCTATTCTGGTTCATGGTTTCTCTTGGC

TATACGGCTCATCCGGGGGAGAGATCGAGCTTCAAGAAATAGTGAATGGTCTTATCAAT  
ACACAAATGTATAACTCCCCGGGAATTTTCGATTGCGCTTCTATCCATCACTGTAGGAATT  
GGGTTCAAGCTTTCCCCAGCCCCTTTTTCATCAATGGACTCCTGACGTATACGAAGGATC  
TCCCACTCCAGTCGTTGCTTTTTCTTTCTGTTACTTTCGAAAGTAGCTGCTTCAGCTTTAGC  
CACTCGAATTTTCGATATTCCTTTCTATTTCTCATCGAACGAATGGCATCTTCTTCTTGAA  
ATCCTAGCTATTCTTAGCATGATATTGGGGAATCTCATTGCTATTACTCAAACAAGCATG  
AAACGTATGCTTGCATATTCGTCCATAGGTCAAATCGGATATGTAATTATTGGAATAATTG  
TTGGAGACTCAAATGATGGATATGCAAGCATGATAACTTATATGCTGTTCTATATCTCCAT  
GAATCTAGGAACCTTTTGCTCGCATTGTATCATTGGTCCACGTACCGGAACTGATAACAT  
TCGGGATTATGCAGGATTATACACGAAAGATCCTTTTTTTGGCTCTCTTTCAGCCCTATG  
TCTCCTATCCCTAGGAGGTATTCCTCCATTAGCAGTTTTTTTTCGGAAAACCTCCATCTATT  
CTGGTGTGGATGGCAGGCGGGCCTATATTTCTTGGTTTCGATAGGACTCCTTACGAGCG  
TTGTTTCTATCTACTATTATCTAAAAATAATCAAGTTATTAATGACTGGACGAAACAAAG  
AAATAACCCCTCACGTGCGAAATTATAGAAGATCTCCTTTAAGATCAAACAATTCCATC  
GAATTGAGTATGATTGTATGTGTAATAGCATCTACTATACCAGGAATATCAATGAACCCA  
ATTATTGCAATTGCTCAGGATACCTTCTTTATGTTTTCTGCTTCACGAATATGATATTTTCT  
GGGCATTTCTAATGATATCAAGTGTTATTCCTATTTTGGCATTTCCTAATTTCTGGAGTTTT  
AGCCCCGATTAGTCAAGGACCAGAAAAGGTCTCTAGTTATGAATCAGGTATAGAACCA  
ATGGGGGATGCTTGGATAACAATTCCGAATCCGCTATTACATGTTTGCCCTAGTTTTTGT  
GTTTTTGATGTCGAAACCGTTTTTCTTTATCCATGGGCCATGAGTTTCGATGTATTGGGC  
GTATCCGTATTTATAGAAGCTTTAATTTTCGTGCTTATCCCAATCGTTGGTTCAGTTTATG  
CATGGCGAAAAGGAGCATTGGAATGGTCTACGAATAATTTCCCTTGGCTAACAGCGATT  
CTTCTTTTGGCCATATCCGCGGGTTCTTCAATTCTGTTTATACCTCAGAGAGGAAATAAA  
GCGGTTCCGTGGTATACTATATGTATATGCTTATTAGAACTTCTCCTAATGACCTATGTAT  
TTTATTATAATTTCCAATTGGACGATCCATTAATCCAATTGGAAGAGGATTGTAACCTGGA  
TAAATCTTTTTGATTTTCACTGGAGACTAGGAATTGATGGACTTTCATAGGTCCCATTT  
TATTGACGGGATTCATCACTACTTTAGCTACTTCAGCGGCTTGGCCAGTTACTCGAAATT  
CGCGATTATTTCAATTTCTGATGTTAGCAATGTATAGCGGTCAAATAGGATCATTTTCTTC  
TCGGGACCTTTTACTTTTTTTCATCATGTGGGAGTTAGAATTAATCCTGTTTACCTACTT  
TTATCGATGTGGGGAGGAAAAAACGTCTGTATTCAGCTACAAAATTCATTTGTACAC  
CGCAGGAGGTTCCATTTTTCTCTTAATAGGAGTTCTGGGTATGGGCCTATATAGTTCCAA  
TCAACCCATGTTGAATTTTGAACATCAGCCAATCAATCGTATCCCGTGGGATTGGAAA  
TCCATTCTATTTTCGGCTTCCTTATTGCTTATGCTGCCAAACCACCGATTATACCCCTACA  
TACATGGTTACCAGATACTCATGGAGAGGCGCATTACAGTACATGTATGCTTCTGGCTG  
GAATCTTATTAATAAATGGGAGCATATGGGTTGGTTCGAATCAATATGGAATTATTACCCC  
ATGCTCATTCTCTATTTTCTCCTTGGTTGGTAATAGTGGGAACCCTTCAAATAATCTATGC  
AGCTTCAACTTCTCTTGGCCAACGCAATTTAAAAAAGAGAATAGCCTATTCTCCTCGTAT  
CTCATATGGGTTCCACAATCATAGGAATTGGTTCATGACCGATACGGCACTCAATGGA  
GCCATTTTACAAATAATTTCTCATGGATTTATTGGTGCTGCACTTTTTTTTCTTGGCAGGA  
ACAAGTTACGATAGAATACGGTTTCTTTATCTCGACGAAATGGGAGGAATAGCTATACC  
AATGCCAAAAATTTACTATGTTTCAATGATCTTTTCGATGGCTCTCTCGCATCGCCAGG  
AATGAGTGGTTTTGTTGCAGAATTTTGGTCTTTTTGGGAATAATTACCAGCCCAAATA  
TCTTTTCATCCCCAAAATACTAATTAAGTTGTAATGGCAATTGGAATGATATTAATCCC  
ATTTATTTATTATCTATGTCACGCCAGATGTTCTATGGATACAAACTATTCAATGTTCCAA

ATTCTTACTTTGTAGATTCTGGACCGCGAGAAATATTTATTTTAATCTCTATCCTTCTACC  
TGTAATGGGTATTGGTATTTATCCTGATTTTCGTTCTTTCACTATCAGTTGATAAGGTAGAA  
GCTATTTTAGCAAATTAATGGAATGATGTTTCGAGTATGCACTTGTTTAAGTAGTT  
ATTTATTTTCTATGGGTATCTATGGATTAATCACAAGTCGAAACATGGTTAGAGCACTTAT  
GTGTCTTGAGCTTATACTGAATGCTGTTAATATGAATCTCGTAACATTTTCTGATTTATT  
GATAGTCGACAATTAAGGGAGACATTTTCTCGATCTTCGTTATAGCTATTGCAGCCGCT  
GAAGCAGCTATTGGCCAGCTATTGTTTCATCAATCCATCGTAACAGAAAATCCACTCG  
TATCAATCAATCAAATTTGTTGAAGAAAATGGAACGTACATATCAATATGCATGGATCAT  
ACCCTTCCTTACGCTTGCAGTTCCTATTTTGATAGGATTGGGACTCCTGCTTGTTCCTCC  
GGCAACAAAAGTATTCGTCGGATATGGGCTTTTCCAGTGTTTTATTGTTAAGTATAGT  
TATGGTTTTTTCTACCAATTTGTCTATTCAGCAAATAAATGGTAATTCGATTTATCAATAT  
CTATGGTCCTGGACCATCAATAGTGATTCTTCCTTAGAGTTCGGCTATTTGATCGATTCA  
CTTACTTCTATTATGTCAATATTAATTGCTACTGTTGGAATGATGGTTCTTATCTATAGTGA  
TAATTATATGTCTCATGATAAGGGATATTTAAGATTTTTTGTCTTATATGAGTTTTTTCAATA  
CTTCAATGTTGGGGTTAGTTATTAGTCCCAATTTGATACAAATCTATATTTTCTGGGAACT  
TGTGGGAATGTGTTTCGATCTATCAATAGGTTTTTGGTTTACTCGACCAAGTGCAGCAA  
ATGCTTGTCAAAAAGCGTTTGTAACTAATCGTGTAGGGGATTTTGGTTTATTATTAGGAA  
TCTTAGGCTTTTATTGGATAGCGGGTAGTTTTCGAATTTTCGGGATTTGTTTGATATATTCAA  
TGATAATGTGTTGAATTCCTCTTTTGTCTATTCTGTGCGCCTCCTTATTATTCTGGGTGCA  
GTTGCTAAATCCGCACAATCCCCCTTCATGTATGGTTACCTGATGCCATGGAGGGACC  
AACTCCTATTTTCGGCTCTTATACATGCTGCTACTATGGTAGCAGCAGGAATTTTTCTTGT  
AGCTCGGCTTCTTCCTCTTTTGTACAGTTATAACCCTACATAATGAATCTTATTTCTTTGATA  
GGTGAATAACAGTACTATTAGGAGCCACTTTGGCTCTTGCTCAAAGGACATTAAGG  
AAGTTTAGCTTATTCTACGATGTCTCAACTGGGTATATTATGTTGGCTTCAGGTATAGGT  
TCTTATCGAGCCGCTTTATTCCATTCAATCACTCATGCCTATTCGAAAGCATTATTGTTTT  
TAGGATCTGGATCAATTATTCATTCTATGGAACCTATTCTTGGGTATTCTCCAGATAAAA  
GCCAGAACATGGTTTTTATGGGTGGTTTAAAGTAAATATGTGCCGATAACAAAGGCTACT  
TTTTTGTAGGTACGCTCTCCCTTTGTGGTATTCCACCCCTTGCTTGTCTTCTGGTCCAAA  
GATGAAATCTTAATAATAGTTGGTTGTATTCGCCAATTTTCGCGATAATAGCTTCTTCTA  
CAACAGGATTAAGTGCATTTTATATGTTTCGTATGTATTTACTTACTTTTGAAGGGCATT  
ACGCGTTCATTTTAAA-----GGTGATACAAATAGTTCCTTGTATTCAATATCTATATGGG  
GGAAAGAAGGACCAGAAGTTTTTAGCAGA---AATTTGATTTTATTATCAATGAATGTTTC  
TTCTAAAAAAGAA-----ACCTTTCCCTATCCCCACGAATCGGACAATACTATGTTATTCCC  
CTTACTTTTATTGGCCATATTGACTTTTGTTCGTTGGGTCCGTAGGAATTCGTTTCGACTT  
TGACGTGTTATCAAATGGTTAATTCCATCAATGGACCTTTTTTCATGAGTATTTGAATCC  
TTCGGCGGATTGGTATGAATTTGCACAAAATGCAATTTATTTCAGTCAGTATAGCCTTTTT  
TGGAATATTAATAGCCAATCTTTTATATGGGTCTGTTTCATTCATCTTTCCAGAATTTGGAC  
TTAATCAACTCAATTTGCAATCTTTTCGGACCAAGCACTAAATGTCATATACAATTTGGTCA  
TATAATCGCGGTTACATAGATCTTTATTATGCAACAATCTTAACTAGAGGTATACGAGGAT  
TAGCTGAATCCACTCATTTTTTTGATCAACGGATAATTGATGGAGTCACGAATGCAGTT  
GGTATTACAAATTTCTTTGTAGGAGAAGCGATCAAATAT--ATGGCGGGTGGAAAGAATCT  
CTTCTTACCTCTTTTTTTTCGTTATCCTCTTTATCAATAGCCCTTATTTTAGTATATATGGATT  
TACTTGGACCAATACATGATATTCTTTTGGTATCTTTGGGCTCAGGTATTATATTAGGAAG  
TTTAGGAGTAGTATTACTTACCAATCCTATTTATTCTGCCTTTTCATCGGGATTGGTTCTT

GTTCGTATATCCTTATTCCATATTCTATCAAACCTCCTATTTTTGTAGCTGCTGCACAGCTCC  
TTATTTACGTAGGAGCCATAAATGTCTTAATCATATTTGCTGTGATGTTTCATGAATGGTTC  
AGAATATTACAATAATTTCCATCTTTGGACCGTTGGAGATGGGATCTCTTCAGTAGTTTG  
TACAAGTATTCTTTTTTCACTAATTGCTACTATTCTAGATACGTCATGGTACGGGATTATT  
TGGACTACAAGATCAAATCAGATCATAGAGCAGGACCTTACAAGTAACGTACAACAAA  
TTGGGATTCATTTATCAACTGATTTTTTTCTTCCATTTGAACTCATTTCTATAATTCTTTTA  
GTTGCCTTGGTAGGGGCAATTGCTATGGCTCGTGCATGACTGTACCAGCTACAAGAA  
ACGACCTCATGATAGTCAATATGGGTCCTCACCATCCATCAATGCATGGTGTCTTCGAC  
TCATAGTTACTCTAGACGGTGAAGACGTTATTGACTGTGAACCCATATTAGGTTATTTAC  
ACAGAGGGATGGAAAAAATTGCAGAAAATCGAACAATCATAACAATATCTTCCTTATGTA  
ACACGTTGGGATTATTTAGCTACTATGTTACAGAGGCAATAACAGTGAATGCACCGGA  
AGAGTTGGGAAATATTCAAGTACCTAGAAGAGCCAGCTATATCAGAGTAATTATGTTGG  
AGCTCAGTCGTATAGCTTCTCATTGTTATGGCTTGGACCTTTTATGGCTGATATCGGTG  
CACAGACTCCTTCTTCTATATTTTCAGAGAGAGAGAATTGCTATATGATCTATTTGAAA  
CTGCCACAGGAATGCGAATGATGCATAATTTTTTCCGTATCGGAGGAGTAGCTGCTGAT  
TTACCTCATGGCTGGATAGATAAATGTTTGGATTCTGTGATTATTTCTTACCAGAAGTT  
GCTGAATATCAAAAACCTTATTACACGTAATCCATCTTTTTTGGAACGAGTTGAAGGAGT  
GGGCTTTATTGCTGAAGAGGAAGCAATAAATGGGGTTTATCAGGACCAATGTTACGA  
GCTTCCGGAATACCATGGGATCTTCGTAAAGTCGATCATTATGAGTGTTACGATGAATTT  
GATTGGGAAGTCCAATGGCAAAAAGAAGGAGACTCATTAGCTCGTTATTTAGTACGAA  
TCAGTGAAATGATAGAATCCGTCAAATTTATTCAACAGGCTCTAGAAGGAATCCGGG  
GGGGCCCTATGAAAATTTAGAAGCCCGACGCTTTGATAGAGTAAGAAATATAGAATGG  
AATGATTTTGAATATCGATTTATTAGTAAAAAACCTTCTCCCACTTTTGAATTGTGCGAAA  
CAAGAACTCTATGTGAGAGTAGAAGCTCCAAAAGGGGAATTAGGGATTTTTCTAATAG  
GAGATAATAGTGTTTTTCCCTGGAGATGGAAAATTCGTCCACCCGGTCTTATCAATTTGC  
AAATTCTTCCTCAGCTAGTTAAAAGAATGAAATTGGCTGATATCATGACGATACTAGGT  
AGTATAGATATCATTATGGGAGAAGTTGATCGTATGTTCCCTATGGTGACTGGGTTTCATG  
AATTATGGTCAACAAGCAGTGCGAGCTGCAAGATATATTGGTCAAAGTTTCATGATTAC  
CTTATCTCACGCGAATCGTTTACCTGTAACCATTCAGTATCCTTATGAAAAATCGATCAC  
ATCAGAGCGTTTCCGGGGGCGAATCCACTTTGAGTTCGATAAATGCATTGCTTGTGAAG  
TATGCGTTCGTGTATGCCCGATAGATCTCCCCGTTGTTGATTGGAGATTCGAAACAGATA  
TTAGAAAAAACGATTGCTTAATTATAGTATTGATTTTGGAAATCTGTATATTTGTGGTAA  
CTGCGTCGAGTATTGCCCCACAACTGTTTATCCATGACTGAAGAATATGAACTTTCCA  
CCTATGATCGTCACGAATTGAATTATAATCAAATTGCTTTGGGTCGGTTACCAATACCTG  
TAGTTGGAGATTACACAATTCAAACAATTATGAATTCGAAAATAGCTATGAATAAACCC  
CTTGATTCAAGAACAATTACCAATTACATGCAGGGTCGTTTATCTGCTTGGCTAGTCAA  
GCATGAGCTAGTTCATAGATCTTTGGGCTTCGATTACCAAGGAATAGAACTTTACAAA  
TTAAATCCGAAGATTGGTACTCCATTGCTGTCATTTTCATATGTATATGGTTACAATTACCT  
ACGTTCTCAGTGTGCTTATGATGTAGCACCAGGAGGATTATTAGCTAGTGTGTATCATCT  
TACGAGAATACAATATGGTGTGGATCAACCAGAAGAGGTATGTATAAAAGTATTTGCC  
AAAGGAGGAATCCTAGAATCCCGTCTGTTTTCTGGATCTGGAAAAGTTCTGATTTTCAA  
GAACGGGAATCTTATGATATGTTGGGAATCTATTATGATAACCACCCACGCCTGAAACGT  
ATCTTGATGCCTGAAAGTTGGATTGGTTGGCCCTACGCAAGGATTATATTGCCCTAAT  
TTCTATGAGATACAGGATGCTCAT-----

-----ATGAA  
TTCTATGGAGTTTCCGTTACTTGACCGAACAAACCCCAAATTCAGTTATTTCAACTACAC  
CGAATGATCTTTTCGAATTGGTCAAGACTCTCCAGTTTATGGCCGCTTCTATAATGGTACCA  
GTTGCTGCTTCATTGAATTTGCTTCATTAATTGGCTCGCGATTTCGACTTTGATCGTTATG  
GACTGGTACCAAGATCGAGTCCTAGGCAAGCCGACCTTATTTTAACAGCCGGCACAGT  
GACAATGAAAATGGCTCCTTCTTTAGTAAGATTATATGAACAAATGCCTGAACCAAAAT  
ATGTCATTGCTATGGGAGCCTGTACTATTACAGGAGGAATGTTTCAGTACCGATTCTTATA  
GTACCGTTCGAGGAGTCGATAAGTTAATTCCTGTGGATGTCTATTTGCCGGGTTGCCCA  
CCTAAACCAGAAGCAATTATAGACGCTATAACGAACTTCGTAAGAAGGTATCTCGAG  
AAATCTATGAAGATAGAATCGCGTCCCAACAGGAAGATCGATGTTTTACTACCAATCAC  
AAGTTTCGGGTTGGGCGCAGTATTCATACCGGAAATTACGATCAAGAG-----CTCTAC  
CAATCGACTTCAGAGATACTTTCTGAAACACTTTTCAAATACAAGAGTTCACTATCTTC  
TCACGAATTAGTGAATATGCAAAAATAGAAATACTTTTTCTTGGGTAAAGGAACAGATGA  
CTCGATCCATTTTTGTATCGATGATGATATATAATAACTCGGGCATCTATTTCAAATGCA  
TATCCTATTTTTGCGCAGCAGGGTTATGAAAATCCGCGAGAAGCAACTGGACGTATTGT  
ATGTGCCAATTGTCATTTAGCTAATAAGCCTGTGGATATTGAGGTTCCACAAGCTGTGCT  
TCCTGATACTGTATTTGAAGCAGTTGTTAGAATCCCCTATGATATGCAACTGAAACAAGT  
TCTTGCTAATGGTAAAAAGGGAGGTTGAATGTAGGAGCTGTTCTCATTTTACCCGATG  
GATTTGAATTAGCTCCTCCTGATCGTATTTCTCCCGCGATGAAAGAAAAGATAGGTAATT  
TATCTTTCCAGAGTTATCGCCCCACTAAAAAAATATTCTTGTGATAGGTCCCTGTTCCCTG  
GTCAGAAATATAATGAAATTCTCTTTCCAATCCTTTCCCGGATCCCGCTACTAAGAAA  
GAAGTTCACTTCTTGAATATCCCATATATGTGGGTGGGAATAGAGGAAGGGGTCAGAT  
TTATCCCGATGGGAGCAAGAGTAACAATACAGTTTATAATGCCTCAGCATCAGGGATAA  
TAAGTAGAATAATACGTAAAGAAAAGGGTGGATATGAAATAACCATAGCTAATGCATTG  
GATGGGCGTCAAGTGGTTGATATTACCTCCAGGACCGGAACTTCTTGTTCGGAAGG  
TGAATCTATCAAACCTTGATCAACCATTAACGAGTAATCCCAATGTGGGTGGATTTGGTC  
AGGGGGATGCAGAAATAGTACTTCAAGATCCATTACGTATCCAAGGTCTTTTTCTCTTTT  
TGGCATCTGTTATTCTGGCACAAATCTTTTTGGTTCCTAAAAAGAAACAGTTTGAGAAG  
GTTCAATTGGCTGAAATGAATTCATGAGTAAAGTATATGATTGGTTCGAGGAGCGTCT  
CGAGATTCAGGCGATTGCGGATGATATAACTAGTAAATATGTTCCCTCCTCATGTCAATATA  
TTTCATTGTCTAGGGGAATCACACTTACTTGTTTTTTAGTACAAGTAGCTACGGGTTTT  
GCTATGACTTTTTACTATCGTCCAACCTGTTACAGAGGCTTTTGCCTCTGTTCAATATATAA  
TGAAGTAAAGTAACTTTGGTTGGTTAATCCGATCAGTTCATCGATGGTCGGCAAGTATG  
ATGGTCTAATGATGATCCTGCACGTATTTTCGTGTTTATCTCACAGGCGGATTTAAGAAA  
CCTCGGAATTAACCTTGGGTTACGGGTGTGGTCTGGCTGTATTGACTGCATCTTTTGG  
TGTAAGTGGTATTCTTACCTCGGGACCAAAATTGGTTATTGGGCAGTCAAATCGTGA  
CCGGCGTGCCTGAGGCTATCCCTATAATAGGATCGCCCTTGGTAGAGTTATTACGTGGA  
AGTGCTAGTGTGGGCCAATCTACCTTGACCCGTTTTTATAGTTTACACACTTTTGTATTA  
CCTCTTCTTACTGCCGTATTTATGTTAATGCATTTTCCAATGATACGTAAGCAAGGTATTT  
CGGGTCCTTAATGGGAGTAACAAAGAAACCTGACTTGAATGATCCTGTATTAAGAGCT  
AAATTGGCTAAAGGGATGGGACATAATTATTACGGAGAACCCGCATGGCCTAATGATCT  
TTTATATATCTTTCCAGTAGTAATTTAGGTAATGTCATGTAACGTGGGTCTAGCTGTT  
CTAGAACCTTCAATGATTGGTGAACCAGCAGATCCATTTGCAACTCCTTTGGAAATATT  
ACCCGAATGGTACTTTTTTCCCGTATTTCAAATACTTCGTACAGTACCTAATAAGTTATT

GGGTGTCCTTTTAATGGTTTCGGTACCAACGGGATTATTGACAGTACCTTTTTTTGGAGA  
ATGTTAATAAATTCCAAAATCCATTTCCCGTCCAGTAGCTACAACAGTCTTTTTGTTCG  
GTACCGCACTAAGTCTTTGGTTAGGTATTGGAGCAACATTACCTATTGATAAATCCCTAA  
CTTTAGGTCTTTTTATGATTGAAGTTTTTCCATTTGGAATCGTGTTAGGTCTAATTCCTAT  
TACTTTGGCCGGATTATTTGTAAGTGCATATTTACAATACAGACGCGGGGATCAGTTGGA  
T C T  
T????????????????????????????????????????????????????????????  
?????ATGGATATAGTAAGTCTCGCTTGGGCTGCTTTAATGGTAGTTTTTACATTTCCCTT  
TCACTAGTAGTATGGGAAGAAGTGGACTCATGATTATTCGTTCCCGGAATCAGAAGT  
GAAGATTATGGTGGATAGGGATCCATAAAAACCTTCTTTCGAGGAATGGGCCAGACCC  
GGCCATTTCTCAAGGACAATAGCTAAAGGCCCAATACTACCCTGGATCTGGAACCT  
ACATGCTGATGCTCACGATTTTCGATAGCCATAACCAGTGATTTGGAGGAAATCTCTCGAA  
AAGTATTTAGTGCTCATTTCCGGTCAACTATCCATCATCTTTCTTTGGTTGAGTGGTATGTA  
CTTCCATGGTGCCCGTTTTTCCAATTATGAAGCATGGTTGAGCGATCCTACTCACATCGC  
ACCCAGTGCCCAGGTGGTTTTGGCCAATAGTTGGTCAAGAAATCCTGAATGGCGATGTA  
GGTGGAGGTTTTCCGAGGAATACAAATAACCTCTGGTTTTTTTTCAGATTTGGCGAGCATC  
TGGAATAACTAGTGAATTACAACCTTATTGTACCGCAATTGGTGCTTTGGTCTTTGCAGC  
GTTAATGCTTTTTGCCGGTTGGTTCCATTATCACAAGGCTGCTCCAAAATTGGCTTGGTT  
CCAAGATGTAGAATCCATGTTGAACCACCACTTAGCAGGGTTACTAGGACTTGGGTCTC  
TTTCTTGGGCGGGACACCAAGTACATGTATCTTTACCCATTAACCAATTTCTAGACGCG  
GGAGTGGATCCTAAAGAGATAACCACTTCCATGAATTTATCTTGAATCGGGATCTTTTTG  
GCTCAACTTTATCCCAGTTTTGCCGAGGGATCAACCCATTTTTTACCTTGAATTGGTCA  
AAATACGCGGAATTTCTTACTTTTCGCGGAGGATTAGATCCAGTAACAGGGGGTCTATG  
GCTGACCGATATTGCACACCATCATTTGGCTATTGCAATTATTTTCTGATAGCTGGTCA  
CATGTATAGGACCAACTGGGGAATTGGTTCATGGCCTAAAAGAGATTTTAGAGGGCTCATA  
AAGGTCCATTTACAGGCGAGGGTCATAAAGGTCTCTATGAGATCCTAACACGTCATGG  
CATGCTCAATTAGCTCTTAACCTAGCTATGTTAGGCTCTTTAACCATTGTTGTAGCTCAC  
CATATGTATTCTATGCCCCCTATCCATACCTAGCTATTGACTATGGTACACAACCTCTCGT  
TGTTACACATCACATGTGGATCGGTGGATTTCTCATAGTTGGCGCTGCTGCACATGCA  
GCTATTTTTATGGTAAGAGACTATGACCCAACCTACTCGATACAACGACCTTTTAGATCGT  
GTCCTTAGGCACCGTGATGCAATCATATCACACCTCAACTGGGCATGTATAATTTCTAGGC  
TTTCATAGTTTTGGCCTGTATATTCATAATGATACCATGAGCGCTTTGGGGCGTCCTCAA  
GATATGTTTTTCAGATACCGCTATACAATTACAACCCATCTTTGCTCAATGGATACAAAAC  
ACTCATGCTTTAGCACCTGGTGCAACAGCTCCTGGTGCAACAACAAGTACCAGTTTGA  
CTTGGGGAGGTGGTGATTTAGTAGCAGTAGGTGGAAAAGTAGCTTTGTTACCTATTCCA  
CTAGGAACCGCAGATTTTTTGGTACACCACATTCATGCATTTACGATCCATGTGACCGTA  
TTGATACTACTGAAAGGCGTTCTATTTGCTCGTAGCTCCCGTTTGATACCTGATAAAGCA  
AATCTGGGTTTTTCGTTTCCCTTGTGACGGACCCGGAAGAGGGGGAACATGTCAAGTAT  
CCGCCTGGGATCATGTCTTCTTAGGTCTATTCTGGATGTACAATGCGATTTCCGGTAGTAA  
TATTCATTTTCAGTTGGAAAATGCAGTCCGATGTTTGGGGTAGTATAAGCAATCAAGGG  
GTGGTAACTCATATCACGGGAGGAACTTTGCGCAGAGTTCCATTACTATTAACGGATG  
GCTCCGGGATTTTCTATGGGCACAGGCCTCTCAGGTGATCCAGTCTTATGGTTCTTCATT  
ATCCGCATATGGCCTGTTTTTCCTAGGTGCTCATTTTGTGGGCTTCAGTTTAAATGTTT  
CTATTCAGCGGCCGCGGTTATTGGCAAGAACTTATTGAATCCATCGTTTGGGCTCATAA

CAAATTA AAAAGTTGCTCCTGCTACTCAGCCTAGAGCCTTGAGCATTGTCCAAGGACGT  
GCTGTAGGAGTAACCCATTACCTTCTGGGTGGAATTGCCACAACATGGGCATTCTTCTT  
AGCAAGAATTATTGCAGTAGGAATGGCATTAAAGATTTC CAAGGTTTAGCCAAGGCTTAG  
CTCAGGACCCCACTACTCGTCGTATTTGGTTTGGTATTGCCACCGCACATGACTTCGAG  
AGTCATGATGATATCACTGAGGAAGGTCTTTATCAGAATATTTTTGCTTCTCACTTCGGG  
CAGTTAGCAATAATCTTCCTGTGGACTTCCGGGAATCTGTTTCATGTGGCTTGGCAAGG  
AAATTTTGAGTCATGGGTACAGGACCCTTTACATGTAAGACCTATTGCTCATGCAATTTG  
GGATCCTCATTTTGGTCAACCAGCTGTAGAAGCCTTTACTCGAGGGGGGTGCTCTCGGTC  
CGGTGAATATCGCTTATTCGGTCTCTATCAGTGGTGGTATAACAATCGGCTTGCACCA  
ATGAAGATCTTTATACTGGAGCTCTTTTTCTATTATTTCTTTCTGCGATATCTTTAATAGCG  
GGTTGGTTACATCTACAACCCAAATGGAAGCCAAGCGTTTCGTGGTTCAAAAATGCTG  
AATCTCGTCTTAATCATCATTTGTCAGGACTGTTCCGGAGTAAGTTCCTTGGCTTGGACA  
GGACATTTAGTTCATGTGCTATTCCCGGATCCAGGGGGGAATACGTCAGATGGAATAA  
TTTCCTAGACGTATTACCATCTCCTCAAGGCTTGGGGCCACTTTTTACAGGACAGTGGA  
ATCTTTATGCCAAAACCCCGATTCCAGTGGTCATTTATTCGGTACCTCCAAGGAGCG  
GAACTGCCATTCTAACCTTCTCGGGGGATTCCATCCTCAAACCTCAAAGCTTATGGCT  
GACCGATATTGCTCATCATCATTTAGCTATTGCATTTGTTTTCTCGTTGCTGGTCATATG  
TATAGAACTAACTTCGGGATCGGTCATAGTATAAAAGATCTTTTAGAAGCACATACTCCT  
CCGGGGGGTTCGATTGGGACGGGCACATAAAGGTCTTTATGACACAATCAATAATTCCAT  
TCATTTCAATTAGGTCTTGCTCTAGCCTCTTTGGGGTTATTACTTCCTTGGTAGCTCA  
ACACATGTATTCTTTACCTCCTTATGCATTCATAGCACAAAGACTTTACTACTCAAGCTGC  
GTTATATACTCATCACCAATACATCGCAGGCTTCATCATGACAGGGGCCTTTGCTCATGG  
AGCTATATTCTTCATTAGAGATTACAATCCGGAACAGAACGAGGATAATGTATTGGCAA  
GAATGTTAGACCATAAAGAAGCTATAAAATCTCATTTAAGTTGGGCCAGCTTGTTCCTG  
GGTTTCCATACTTTGGGACTCTATGTTCATAACGACGTCATGCTTGCTTTTGGTACTCCA  
GAAAAACAAATCTTGATCGAACCTATATTTGCCAATGGATACAATCCGCTCATGGTAA  
GACTTCATATGGATTTGATGTACTCTTATCTTCAACGAACGGCCCAGCATTCAATGCTGG  
TCGAAGCTTATGGTTACCTGGCTGGTTGAATGCTATTAATGAG-----AATGGTAATTCACT  
ATTCCTAACAAATAGGTCCTGGAGACTTCTTGGTTCATCATGCTATTGCTCTAGGTTTGCA  
TACAACTACATTGATCTTAGTAAAAGGTGCTTTAGATGCACGTGGTTCCAAGTTCATGC  
CAGATAAGAAAGATTTTGGTTATAGTTCCCTTGCGATGGTCCAGGACGAGGCGGTACT  
TGTGATATTTCCGGCTTGGGATGCATTTTATTTGGCGGTTTTCTGGATGTTAAATACCATTG  
GATGGGTTACTTTTTATTGGCATTGGAAGCATATCACTTTATGGCAGGGTAATCCTTAC  
AATTTAATGAATCTTCCACTTATTTGATGGGATGGTTAAGAGATTATCTATGGTTAAACTC  
TTCACA ACTTATCAATGGATATAACCTTTCGGTACAAATAGTTTATCTGTCTGGGCGTG  
GATGTTCTTATTTGGGCATCTGGTTTGGGCTACTGGATT CATGTTTTTAATTTCTGGCG  
AGGATATTGGCAGGAATTGATTGAAACTCTAGCATGGGCTCATGAACGCACACCTTTGG  
CTAATTTGATTCGATGGAGGGATAAACCTGTGGCTCTTCCATTGTTCAAGCAAGACTG  
GTTGGCTTAGCCCACTTTTCTGTAGGTTATATATTTACTTATGCAGCTTTCTTAATTGCCT  
CTACATCGGGCAAATTTGGTATGTCACATTCAGTAAAGATTTATGATACATGTATAGGGT  
GTACACAATGCGTACGAGCCTGCCCCACGGATGTATTGGAAATGATACCTTGGGACGGA  
TGTAAGCTAAACAAATAGCTTCTGCTCCAAGAACAGAGGACTGTGTAGGTTGTAAGA  
GATGTGAATCCGCCTGTCCAACGGATTTCTTGAGTGTACGTGTTTATTTATGGCATGAGA  
C C A C T C G T A G C A T G G G T C T A G C T T A

T????????????????????????????????????????????????????????????????????????????????????????  
????????????????????????????????????????????????????????????????????????????????????????  
ATGCGAGATATAAAAACATATCTCTCTGTGGCGCCCGTGTTAACT  
ACTCTATGGTTCGGGGCTTTAGCAGGTCTATTGATAGAGATTAATCGTTTCTTCCCAGAT  
GCGCTGGCATTCCCCTTTTTT-----CTGCTAGAGAGACGCGAAAGCACAAGCTTA  
TGGGGGCGCTTCTGCAACTGGATAACCAGCACCGAAAACCGTCTTTACATTGGGTGGT  
TCGGTGTTTTGATGATCCCTACCTATTGACCGCAACTTCTGTATTTATTATCGCCTTCAT  
TGCGGCTCCTCCAGTAGATATTGATGGGATCCGTGAACCTGTTTCTGGTTCCTACTTTA  
TGGAACAATATTCTTTCTGGTGCCATTATTCCAACCTCTGCAGCTATAGGTTTGCATTT  
TTACCCAATATGGGAAGCGGCATCCGTTGATGAATGGTTATACAATGGTGGTCCTTATGA  
GTTAATTGTCCTACACTTCTTACTTAGTGTAGCTTGTACATGGGTTCGTGAGTGGGAACT  
TAGTTTCCGTCTGGGTATGCGCCCTTGGATTGCTGTTGCATATTCAGCTCCTGTTGCAGC  
TGCTACTGCTGTTTTCTTGATCTACCCTATTGGTCAAGGAAGTTTCTCAGATGGTATGCC  
TCTAGGAATATCTGGTATTTCAACTTGATGATTGTATTCCAGGCGGAGCACAACATCCT  
TATGCACCCATTTACATGTTAGGCGTAGCTGGTGTATTTCGGCGGCTCCCTATTCAGTGC  
TATGCATGGTTCCTTGGTAACCTCTAGTTTGTATCAGGGAAACCACTGAAAATGAGTCTG  
CTAATGCAGGTTACAGATTCGGTCAAGAGGAAGAAACCTATAATATCGTAGCTGCTCAT  
GGTTATTTTGGTTCGATTGATCTTCCAATATGCTAGTTTCAACAATTCTCGTTCCTTACATT  
TCTTCCTAGCTGCTTGGCCCGTAGTAGGTATTTGGTTCACTGCTTTGGGTATTAGCACTA  
TGGCTTTCAACCTAAATGGTTTCAATTTCAACCAATCCGTAGTTGACAGTCAAGGTCGT  
GTCATCAACACTTGGGCTGATATAATCAACCGTGCTAACCTTGGTATGGAAGTTATGCAT  
GAACGTAATGCTCACAATTTCCCTCTAGACTTAGCTGCTGTTGAAGCTCCATCTACAAA  
TGGAATGGGTTTGCCTTGGTATCGTGTTCCATACCGTTGTCTTGAATGATCCCGGTCGGTT  
GCTTTCTGTCCATATAATGCATACAGCTCTAGTTTCTGGTTGGGCCGGTTTCGATGGCTCT  
CTATGAATTAGCTGTTTTTGTATCCCTCTGATCCATTCTTGATCCAATGTGGAGACAAGG  
TATGTTTCGTTATACCCTTCATGACCCGTTTAGGAATAACAAATTCATGGGGCGGGTGGG  
GTATCACA--GGAGGAACTGTAACGAATCCGGGTATTTGGAGTTACGAAGGTGTGGCC  
GGGGCACATATTGTGTTTTCTGGTTTGTGCTTTTTTGGCATCTATCTGGCATTGGGTGTAT  
TGGGATCTAGAAATATTCTGTGATGAACGCACAGGAAAACCTCTTTGGATTGCCCCAA  
AATCTTTGGAATTCATTTATTTCTCTCAGGGGTGGCTTGCTTTGGGTTTGGCGCATTTCA  
TGTCACAGGTTTGTATGGTCCTGGAATATGGGTGTCTGATCCTTATGGACTAACGGGAA  
AAGTGCAATCTGTAAATCCGGCATGGGGCGCTGAAGGTTTTGATCCTTTTGTCCGGGG  
GGAATAGCTTCTCATCATATCGCAGCCGGGACATTGGGTATACTAGCAGGTCTATTCCAT  
CTTAGTGTCCGCCACCCCAACGTCTCTACAAAGGATTACGTATGGGTAATATTGAAAC  
TGTTCTTTCCAGTAGTATCGCTGCTGTATTTTTTGCAGCTTTCATTGTTGCTGGAACAT  
GTGGTACGGTTCAGCAACTACTCCGATTGAATTATTTGGTCCCCTCGTTATCAGTGGG  
ATCAAGGATACTTTCAGCAAGAAATATATCGAAGAGTTGGTACCGGGCTGGCCGAAAA  
TCTAAGTTTATCGGAAGCTTGGTCCAAAATTCCTGATAAACTAGCTTTTTATGATTACAT  
CGGTAATAATCCGGCGAAAGGAGGATTATTACAGAGCAGGCTCAATGGACAACGGAGAT  
GGAATAGCTGTTGGGTGGTTAGGACACCCGATCTTTAGAGATAAGGAAGGGCATGAAC  
TCTTTGTACGTCGTATGCCTACTTTTTTTGAAACATTTCCAGTAGTTTTGGTAGATGGAG  
ACGGAATTGTGAGAGCTGATGTTCTTTTAGAAGGGCAGAATCAAAGTACAGTGTGCA  
ACAAGTAGGTGTAACCTGTTGAGTTCTATGGTGGTGAACCTAATAGAGTAAGTTATAGCG  
ATCCTGCTACTGTGAAAAAATATGCTAGACGTGCCCAATTGGGTGAGATTTTTGAATTA  
GATCGAGCTACTTTGAAATCCGATGGTGTTTTTTCGTAGCAGTCCAAGGGGTGGTTTAC



TTTTGGACATGCTTCGTTTGCTTTGCTCTTCTTTTTTCGGACACATTTGGCATGGTGCTAG  
AACCTTGTTTAGAGATGTTTTGCTGGTATCGACCCGGATTTGGATGCCCAAGTAGAAT  
TTGGAGCATTCCAAAAATAGGAGATCCAACCTACAAGGAGACAAATAGTCATGAAAAC  
CTTATATCCCTGAGGAGTTCTACCCCGTGGAAACGCTCTTTAATGGAACCTTAGCTTT  
AGCTGGTCGTGACCAAGAAACCACAGGTTTTGCTTGGTGGGCCGGGAATGCCCGACTT  
ATCAATTTGTCTGGTAAATTACTCGGGGCTCACGTGGCCCATGCCGGATTAATCGTATTC  
TGGGCGGGAGCAATGAATCTATTTGAAGTGGCTCATTTTGTACCAGAGAAACCTATGTA  
TGAACAAGGATTAATTTTACTTCCCCATCTAGCTACTCTAGGTTGGGGGGTAGGTCTG  
GGGGGAAGTTATAGACACCTTCCATACTTTGTATCTGGAGTACTTCATTTAATTTCT  
CTGCAGTCCTAGGCTTTGGTGGTATTTATCATGCACTTCTTGGACCTGAGACTCTTGAA  
GAATCCTTTCCATTCTTCGGTTATGTATGGAAAGATAGAAATAAAATGACCACTATTTG  
GGTATTCACTTAATTTTATTAGGTGTAGGCGCTTTTCTCCTAGTGTTCAAGGCTCTTTATT  
TTGGAGGCGTATATGATACCTGGGCCCCCGGTGGCGGAGATGTAAGAAAAATAACCAA  
CCTGACACTTAGCCCAAGTGTTATATTTGGTTATTTGCTAAAATCTCCTTTTGGGGGAGA  
AGGATGGATTGTTAGTGTGGATGATTTAGAAGATATAATTGGAGGACACGTATGGTTAG  
GTTTCATTTGTATACTTGGTGGAAATATGGCATATCTTAACCAAACCTTTTGGCGTGGGCTC  
GCCGCGCATTTGTATGGTCTGGAGAAGCTTACTTGTCTTATAGTTTGGGGGCTTTATCTA  
TCTTTGGTTTCATTGCTTGCTGTTTCGCTGGTTCAATAATACGGCTTATCCTAGTGAGT  
TTTACGGTCTACCGGCCCAGAAGCTTCTCAAGCTCAAGCGTTTACTTTTCTAGTTAGA  
GACCAACGTCTTGGGGCTAACGTAGGATCTGCTCAAGGACCCACCGGTTTAGGTAAAT  
ATCTAATGCGTTCTCCAACCTGGGGAGGTCATTTTTGGAGGAGAACTATGCGCTTCTGG  
GATCTCCGTGCTCCCTGGTTGGAACCACTAAGGGGTCCCAACGGTTTGGACTTGAGTA  
GGCTGAAAAAAGACATACAGCCCTGGCAAGAACGACGTTCCGGCGGAATATATGACTCA  
TGCTCCTTTAGGTTCTTTAAATTCCGTGGGCGGCGTAGCTACAGAGATCAATGCAGTCA  
ATTATGTCTCTCCAGAAAGTTGGTTAGCTACCTCTCATTTTGTCTAGGATTTTCTCCTATT  
CGTGGGTCATTTGTGGCATGCAGGAAGGGCCCGTGCAGCTGCAGCAGGATTTGAAAA  
AGGAATCGATCGTGATTTTGAACCTGTTCTTTCCATGACTCCTCTTAACATGACTATAGC  
CCTTGGTAGGTTTTCCAAAGAGGAA---GATTTATTTGATATTATGGATGACTGGCTACGG  
AGGGACCCTTCGTTTTTGTAGGTTGGTCTGGTCTATTGCTTTTTCTTGTGCCTATTTT  
GCTTTAGGAGGGTGGTTCACAGGTACAACCTTTGTAACCTCATGGTACACCCATGGATT  
AGCTAGCTCCTATTTGGAAGGATGCAATTTTTTAACCGCTGCAGTTTCTACTCCTGCTAA  
TAGTTTAGCACATTCTTTGTTGTTACTGTGGGGTCCCTGAAGCACAAGGAGATTTTACTC  
GTTGGTGTCAATTGGGGGGTCTGTGGACTTTTGTGTCTCTCCATGGTGCTTTCGGACTA  
ATAGGTTTCATGTTGCGTCAATTCGAACTTGCTCGATCTGTTCAATTGCGACCTTATAAC  
GCAATCGCATTCTCCGCTCCAATTGCTGTTTTTGTCTGTATTCCTGATTTATCCACTAG  
GTCAGTCTGGTTGGTTCTTTGCACCGAGTTTCGGTGTAGCAGCTATATTTTCGATTCATTC  
TCTTCTTCCAAGGATTTCATAATTGGACGTTGAATCCATTCATATGATGGGAGTTGCTG  
GAGTATTGGGTGCTGCTCTGCTATGCGCTATTCATGGTGCTACCGTAGAAAATACTTTAT  
TTGAAGATGGTGATGGTGCAAATACATTCCGTGCTTTTAACCCAACCTCAAGCTGAAGA  
GACTTATTCGATGGTCACTGCTAACCGCTTTTGGTCCCAAATCTTTGGGGTTGCTTTTTC  
CAATAAACGTTGGTTACATTTCTTTATGTTATTTGTACCAGTAACCGGTTTATGGATGAG  
TGCTCTTGGAGTAGTCGGTCTGGCTTTGAACCTACGTGCCTATGACTTCGTTTCCAAG  
AAATCCGTGCAGCGGAAGATCCTGAATTTGAGACTTCTATAACCAAAAATATTCTCTTA  
AACGAAGGTATTCGTGCTTGGATGGCGGCTCAGGATCAGCCCCATGAAAACCTTATATT

CCCTGAGGAGGTTCTACCCCGTGGAACGCTCTTATGTCTGGAAGTACGGGAGAACGT  
TCTTTTGCTGATATTATTACCAGTATTTCGATACTGGGTCATTCATAGCATTACTATAACCTTC  
CCTATTCATTGCAGGTTGGTTATTTCGTCAGCACAGGCTTAGCTTACGATGTGTTTGGAA  
GCCCTCGACCGAACGAGTATTTACAGAGAGCCGACAAGGGATTCCATTAATAACTGG  
CCGTTTCGATTCAATTGGAACAACCTGATGAATTTAGTAGATCCTTTATGACCATAGATAG  
AACCTATCCGATTTTTACAGTGAGATGGTTGGCTGTTACGGACTAGCTGTACCTACAG  
TTTTTTTCTTGGGGTCAATATCAGCAATGCAGTTCATCCAACGAATGGTTACACAAAGC  
GTGGAGGATAGTTCAGATCTGGT---CCAAGACGGACTATTGTAGGGGATTATTGAAA  
CCGTTGAATTCAGAATATGGTAAAGTAGCTCCTGGATGGGGAACTACCCCTTTATGGG  
GGTCGCAATGGCTCTATTTGCAATATTTCTATCAATTATTTTGGAGATTATAATTCTTCC  
GTTTTACTGGATGGAATCTCAGTGAGTATGCTTACTCTCAAACCTGTTTCGTTTACACAGTA  
GTGATATTCTTTGTTTCTCTATTCAATTTTGGATTCCTATCTAATGACCCAGGACGTAATC  
CTGGGCGTGACGAAATGGCCGATACTACCGGAAGGATTCCTCTTTGGCTGATAGGTA  
GTAACCTGGTATTCCTGTGATCGGTTCAATGGGCATTTTCTTCTATGGATCATATCCGGAT  
TGGGCTCATCCCTGATGCCTAATATCTTCAGTTTGATCTGTATCTGTCTTCATTCTGCCCT  
TCATTTCGAGTGGTTTTTTCTTCGCGAAACTGCCCCGAGGCCTATGCTGTTTTCAATCCAAT  
CGTAGATGTTATGCCGGTCATACCTTTGTTCTTTTTTCTCTTAGCCTTTGTTTGGCAAGC  
TGCTGCAAGTTTTTCGAACGACACAATCAAACCCAAACGAACAAAATGTTGAATTGAAT  
CGTACCAGTCTCTACTGGGGGTTATTACTCAATTTTGTACTTGCTGTTTCATTTTCCAATT  
A T T T C T T C A A  
T????????????????????????????????????????????????????????????  
????????????????ATGGAAACTGCAACCCTAGTTGCCATCTCCATATCTGGTTCACTTGTA  
GCTTTACTGGGTATGCCTTATATAACCGCCTTTGGGCAACCCTCTCAACAATAAGAGAT  
CCATTTCGAGGAACATGGGGACATGGAAGCACTGGTTTATACATTCTGTTGGTATCGAC  
TCTAGGGATAATTTTTTCGCTATCTTTTTTCGAGAACCGCCTAAGGTTCCGAATAAAAA  
AATAAAATGACTATTGCTTTCCAATTGGCTGTTTTTGCAATTAATTGCTACTTCATCAATC  
TACTGATTAGTGTAACCGTTGTATTTGCTTCTTCTGATGGTTGGTCAAGTAACAAAAAT  
ATTGTATTTTCGGGTACATCATTATGGATTGGATTAGTCTTTTTTGGTAGCTATCCTTAATC  
TCTCATCTCT-----ATGTCACCAAAAACAGAGACTAAAGCAAGCGCTGGATT  
CAAAGCCGGTGTTAAAGATTACAGATTGACTTATTATACTCCTGACTATGAAACCCTAG  
CTACTGATATCTTGGCAGCATTCCGAGTAACTCCTCAACCTGGAGTTCCACCTGAGGAA  
GCAGGAGCTGCAGTAGCTGCCGAATCTTCCACTGGTACATGGACAACCTGTGTGGACCG  
ATGGACTTACCAGCCTTGATCGTTACAAAGGTTCGATGCTACCACATCGAACCCGTTGCT  
GGGGAAGAAAATCAATATATTGCTTATGTAGCTTATCCTTTGGACCTTTTTGAGGAAGGT  
TCTGTTACTAACATGTTTACTTCCATCGTAGGTAATGTATTTGGGTTCAAAGCCCTACGA  
GCTCTACGCTAGAGGATCTGCGAATTCCTCCTGCTTATTCCAAAAGTTTCCAAGGCC  
ACCTCATGGCATCCAAGTCGAGAGAGATAAATTGAACAAGTATGGTCGTCCTCCTATTAG  
GATGTAATTAACCAAAAATTGGGGTTATCTGCCAAAACCTACGGTAGAGCGGTTTAT  
GAATGTCTCCGTGGTGGGCTTGATTTTACCAAGGATGATGAGAATGTGAACTCCCAACC  
ATTTATGCGTTGGAGGGACCGTTTCTATTTTGTGCCGAAGCTCTTTATAAAGCACAGG  
CAGAAACAGGTGAAATCAAAGGACATTACTTGAATGCTACTGCAGGTACATGCGAAGA  
AATGATGAAAAGGGCCGTATTTGCCAGAGAATTGGGAGTTCCTATCGTAATGCATGACT  
ACTTAACAGGAGGATTCAGTCAATACTAGTTTGGCCATTATTGCCGAGACAATGGC  
CTACTTCTTACATTCATCGCGCAATGCATGCAGTTATTGATAGACAAAGGAATCATGGT

ATACACTTTCGTGTA TAGCTAAAGCATTGCGTATGTCTGGTGGGGATCATATTCACGCT  
GGTACCGTAGTAGGTA AACTGGAAGGGGAACGGGATGTCAC TTTGGGTTTTGTTGATC  
TACTACGTGATGATTTTATTGAAAAAGACCGAAGTCGCGGTATTTATTTCACTCAAGATT  
GGGTATCTATGCCAGGTGTTCTGCCCGTGGCTTCAGGTGGTATTCACGTTTGGCATATGC  
CTGCCCTGACCGAGATCTTTGGGGATGATTCCGTATTACAGTTCGGCGGAGGAACTCTG  
GGACACCCTTGGGGAAATGCACCCGGTGCAGTAGCTAATCGGGTGGCTTTAGAAGCGT  
GCGTACAAGCTCGTAATGAGGGACGTGATCTTGCTCGTGAAGGTAATGAAGTTATCCGT  
GAAGCTAGCAGGTGGAGCCCAGA AACTAGCTGCTGCTTGTGAGGTATGGAAGGAGATC  
AAATTCGAATTCGAAGCAATGGATGTCTTG-----ACGGCGATACATTTATACAAA ACTTC  
TACCCCGAGCACACGCAATGGAGCCGTAGACAGTCAAGTGAAATCCAATCCACGAAA  
GAATTTGATCTATGGACAGCATCGTTGTGGTAAAGGTCGTAATGCCAGAGGAATCATT  
CCGCAGGGCATAGAGGGGGGGGTCATAAGCGTCTATAACCGTAAAATCGATTTTCGACG  
GAATGAAAAAGACATATCTGGTAGAATCGTAACCATAGAATACGACCCTAATCGAAATG  
CATACATTTGTCTCATACTATGGGGATGGTGAGAAGAGATATATTTTACATCCAGAG  
GGGCTATAATTGGAGATAACCATTGTTTCTGGTACAGAAGTTCCTATATCAATGGGAAATG  
CCCTACCTTTGACCGATATGCCCTTAGGCACGGCCATACATAATATAGAAATAACACTTG  
GAAAGGGTGGACAATTAGCTAGAGCAGCAGGTGCTGTAGCGAAACTGATTGCAAAAG  
AGGGTAAATCGGCCACATTAAGATTACCATCTGGGGAGGTTTCGTTTGATATCCAAAAAC  
TGCTCAGCAACAGTCGGACAAGTGGGTAATGTTGGGGTGAACCAGAAAATTTTGGGTA  
GAGCCGGATCTAAATGTTGGCTAGGTAAGCGTCCTGTAGTAAGAGGAGTAGTTATGAA  
CCCTGTAGACCATCCCCATGGGGTGGTGAAGGGAGGGCCCCAATTGGTAGAAAAAA  
ACCCACAACCCCTTGGGGTTATCCCGCGCTTGAAGAAGAAGTAGGAAAAAGAAGAA  
ATATAGTGATAGTTTCATTCTTCGTCGTCGTAAG---ATGATTCAAGCTCAAACCTATTTGA  
ATGTAGCGGACAACAGCGGGGCTCGAGAATTGATGTGTATTTCGAATCGTAGGAGCTAG  
T---AACCCCGATATGCTCATATTGGTGACGTTATTGTTGCTGTAATCAAAGAAGCAGTA  
CCCAATATGCCCTGGAAGATCAGAAGTGATCAGAGCTGTAATTGTACGTACATGTAA  
AGA ACTCAAACGTGACAACGGTATAATAATACGATATGATGACAATGCAGCAGTTGTTA  
TTGATCCAGAGGGAAATCCAAAAGGAACTCGAGTCTTTGGTTCGATCGCTGGGGAATT  
GAGACATTTGAATTTCACTAAGATAGTATCATTAGCTCCCGAGGTATTCATGCTTAGTCC  
TAAAAGAACCAGATTCCGTAAACAACATAGAGGAAGAATGAAGGGAGTATCTTCTCGG  
GGCAATCATATTTGTTTCGGTAGATACGCTCTTCAGGCACTTGAACCTGCTTGGATCACA  
TCTAGACAAATAGAAGCGGGTAGACGAGCAATGACACGATACGCTCGTCGCGGCGGA  
AAAATATGGGTACGCGTATTC CCGGACAAACCATTACAGTAAGACCCGCGGAAACAC  
GTATGGGTTTCGGGAAAGGGATCTCCTGAATATTGGGTTTCTGTAATTAACCGGGTTCGA  
ATACTTCATGAAATGGGCGGAGTGCCAGAACTGTCGCCAGAGCAGCTATGGA AATAG  
CCGCGTGCAAAATGCCTATA CGAACTCAATTCATTAGTGCGAAAATGACCAGAGTTAG  
ACGCGGATATATAGCTCGCAGACGT CGAACAAAATTCGTTTATTTGCATCGACCTTTC  
GAGGGGCCCATCAAGACTTACTCGAACTGCTACTCAACAGAAAATGAGGGCTTTGGT  
TTCCATTTATCGGGATAGAGGTAGGCAAAAGAGAGAATTCGTCGCTTGTGGATCGCTC  
GGATAAATGCAGCAACTCACGAAAAT-----GTA-----TCCTATAGTCGATTAATAAACGAT  
CTGTACAAGAGGCAGTTGCTTCTTAATCGTAAAATACCTGCACAAATAGCTAGATACAA  
TCTAAATTCCCTTTACATGATTTCCAATGAAATCATAAAAGAAAAAAGGGAT-----  
-----ATGATAAATGAAATACGAGCATTAGCTAAACATATATGTATGTCCCTCACAAAGCG  
CGAAGAGTTATTGATCAGATTCGCGGTTGCTCTTATGAACAAACACTTATGATACTAGA

ACTCATGCCGTATCGAGTATGTTATCCCGTTTTCAAATTGGTTTACTCTGCAGCGGCAAA  
TGCTAGTCACAATATGGGTTTGAACGAAGCTGATTCATTCATTAGTAAAGCGGAAGTCC  
ATGGAGGTGCCATGATGAAAAAGTTCAAACCTAAAGCTAGGGGACGCAGTTATCCGAT  
AAAAAGACCCACTTGTCATATAACTATTGTTTTAAAG-----GAAAGAAAA-----  
--ATGGATGGAATCAAATATGCAGTATTTACAGAAAAAAGTATTCGGTTATTGGGGAACA  
ATCAA---TATACTTCTAATGTCGAATCAGGATCAACTAGGGCAGAAATAAAGCATTGGAT  
CGAACTCTTCTTTGGTGTCAAGGTAATAGCTATGAATAGTCATCGACTCCCGGTCAAGG  
GTAGAAGAATGGGACCTCTTATGGGACATAGAATGCATTACAGACGTATGATCATTACG  
CTTCAACCGGGTTATTCTATTCCACCTCTTATAGAGAAAAGGACTATGGCAGTCCCAAA  
GAAACGTACTTCTATGTCAAAAAAGCATATTCGTAGAAAATTATTGGAAGAGAAAGGGAT  
ATAAAGCCGCGGTAAAAGCTTTTTCTTTAGGTAAATCTGTTTCTACCGGGCATTCAAAA  
AGTTTTTTT-----CAAACAACAACAATGGCCAAAGGTAAAGATGCTAGAGTAAGAGTTA  
TTTTGGAATGTACCAGTTGTACTCGAAAT-----GGTGTAAAGAAGGAATCACCGGGCATT  
TCCAGATATATTACTGAAAAGAATCGACACAATACACCTAGTCGATTGGAATTGAAGAA  
ATTCTGTCCTTATTGTTTGAAGCATATGATTCACGCGGAGATAAAGAAAATGAAAATAA  
GAGCCTCTGTTTCGTAAGATTTGTGAAAAATGTGCGACTGATTCGTAGGCGAGGACGAATT  
ATAGTAATTTGTTCCAATCCGAGACATAAACAGAGACAGGGGATGGTTGAAAGGAAG  
TACCAGTATCCAATCGGACACTACAGTGGAAAGTGTGTTGAATCAAAGCAGACAGTAA  
GCGTCTTTATTATGGTCGTTTCGTTCTATCTCCGCTTATGAAAGGTCAAGCTGATACGAT  
AGGTACCGCGATGCGAAGGTCTTTACTTGGAGAAATAGAAGGAACATGTATCACATGT  
GCAAAATCTGAG-----AGGGTACCACATGAATATTCTACAATAGTAGGTATTGAGGAATC  
AGTACATGAAATTTAATGAATTTGAAAGAAATTATAGTTAGAAGCGATCTGTACGGGA  
CTCGTGATGCATTTATCTGTGTTAGGGGTCCTAAATATGTAAGTCTCAAGATATAATCTC  
ACCACCTTCTGTGAAAATAGTTGATACTACACAGCATATAGCTAGTATCACCGAACCAA  
TTAATTTTTGTATTGGATTAGAAATCGAGAGAAATCGCGGATATCGTACGAGAACCACC  
AAC-----CAAGATGCAAGTTAT-----CCTATAGATGCTGTATCTATGCCTGTTTCGAAATGCG  
AATTATAGTATTCAATGTTATGGAAATGAGAATGAAAAACAAGAGATACTTTTTCTAGA  
GATATGGACAAATGGAAGTTTAACTCCTAAAGAGGCACTTTACGAAGCTTCCCGTAATT  
TGATCGATTTATTTATTCCTTTTCTACATGCGGAGGAGCGGGACCTCCAT-----TTAGATG  
ACGATCAA---AACATATTTACTGCGCCTTTTTTCCCCTTTCATGAGGGGTTGGCT---TATA  
TAGGGATAGGGGAAAGC---AGAATTGCATTGAAACGTATTTTTATTGACCAATTAGAATT  
ATCTCCAGGACCTATAACTGCCTCAAAGGTCCAATATCCATACATTATTGGACCTTTT  
GAGTAAGAGTCAAGAAGATCTTAGGAAAATTCAACATTTTTCGTGTAGAGGATGTCAAA  
CGGGTATTGGACATTCTCAAGAAACGT-----TTTGAATGAATTTATTTACC-----ATGCTA  
CGGGATGGA---AATGAGGGAATGTCTACAATACCTGGATTAGTCAGATAACAATTTGAA  
GGATTTTGTAGGTTTCGTTGATCAGGGCTTGGCAGAAGAACTTCATAAGTTTCCAAAAAT  
TGAAGATACAGATCAAGAAATTGAATTTCAATTACTTGTGGAACATATCAATTGGCGG  
AACCTTGATAAAAGAAAGAGATGCTGTGTATGAATCACTCACACATTCCTCTGAATTA  
TATGTACCCGCGGGGTTAATTTGAAAGTTGGTAGAGATATGCAAGAACAACCGTGTT  
TATTGAAACATTCTCTAATGAATTTCTCTGGGAACCTTTATAGTAAATGGAATATACAG  
AATTGTGATCAATCAAATATTGCAAAGCCCCGGTATTTATTACAGTTCAGAATTGGACCA  
TAACGGGATTTCTGTTTATACCGGCACCATAATATCAGATCGGGGAGGAAGATCAGAAT  
TAGAGATTGATAGAAAAGCAAGGATATGGGCCCGTGTGAGCAGGAAACAAAAAATTC  
TATTCTAGTTCTACCATCAGCTATGGGTTTGAATCTAAGAGAAATTCTAGACAATGTTTG

CTACCCCGAAATTTTATTGTATTTCCCGAATGAGAAAAGAGAAAAAGAAAATTGGGTCG  
AAGGAAAATGCTATTTTGGAGTTTATCAACAATTTCTTGTGTAGGCGGGGATCCGGT  
ATTTTCTGAGTCCCTCTGTAAGGAATTACAAAAGAGATTTTTTCAACAAAGATGTGAAT  
TAGGAAGGATTGGTCGACAAAATATGAACCAGAGATTGAATATTGATATACCCCAGAAC  
AATACATTTTTATTACCACGAGACGTATTGGCTGCTACAGATCATTGATCGGAATGAAA  
TTTGGAAATGGGTACTTTGACGAT-----ATGAATCACTTGAAAAATAAACGTATTTCGTTT  
TG TAGCAGATCTGTTACAGGATCAATTCGGATTGGCTCTGGTTCGTTTGGAAAATGTGG  
TTCGAGGAACTATATGTGGAGCAATCAGG---CATAAATTTATA---CCGACTCCTCAAAAC  
TTGGTAACTTCAACTCCA-----TTAACAACCCTTATGAATCGTTTTTCGGTCTACA  
CCTTTATCTCAAGTTTTTGGATCGAACTAATCCATTGACACAGATAGTTCATGGGCGAA  
AATCAAGCTATTTGGGTCCCGGAGGATTAACAGGGCGAACTGCTAGTTTTTCGCATACGA  
GATATCCATCCTAGTCACTATGGACGTATTTGCCAATTGACACGTCCGAAGGAATCAAT  
GTTGGACTTATCGGATCCTTAGCTATTCATGCAAGGATCGGCGATTGGGGA---TCTATAC  
GAAGTCCGTTTTAT-----GAAATATCTGAGAGATCAAAAAGAG-----GAACAGATGGTTT  
ATTTATCACCAAGGAGAGATGAATACTATATGGTAGCAGCAGGAAATTCTTTGGCCTTG  
AATCAGGATATTCAAGACGAACAGGTCGTTCCAGCCCGATACCGTCAAGAATTCGTGA  
CTATTGCATGGGAACATATTGATCTTCGAAGCATTATCCCTCCAATATTTTTCTATTGG  
AGCTTCCCTCATTCCGTTTATCGAACACAATGATGCGAATCGAGCTTTAATGAGTTCTAA  
TATGCAGCGTCAAGCAGTTCCGCTTCTCGGTCCGAGAAATGCATTGTTGGAACCTGGG  
TTGGAGCGCCAAGCGGCTTTAGATTCCGGGGGTTTCAGCTATAGCCCAACACGAGGGAA  
AGGTCATTTATACCGATACTGAAAAGATCCTTTTTATCAGGGAATGGAGACACTATAAGC  
ATTCCATTGCTTATGTATCAGCGTTCCAACAAAAATACTTGTATGCATCAAAAACCTCAG  
GTTTCATCGGGATAAATATGTTAAAAAGGGACAAGTCTTGGCGGATGGTGC GGCTACAG  
TTGGTGGGGAACCTCGCTTTGGGAAAAACGTATTAGTAGCTCATATGCCATGGGAAGG  
CTACAATTTTGAAGATGCAGTACTAATTAGCGAACGTCTGGTATATGGAGATATTTATAC  
TTCGTTTACATCCGGAATATGAGATTTCAGACTCATGTGACAAGCCACGGC---CCTGA  
AAAGATCACTAACGAAATACCTCATTTAGAAGCTCATTGCTCCGTAATTTAGACAGAA  
ATGGAATTGTGATGCTCGGATCTTGGGTGGAAACGGGTGATGTTTTAGTAGGTAAATTG  
ACGCCTCAGACAGCGAAAGAA---TCATCGTATGCCCCGGAAGATAGATTATTACGAGTC  
ATACTTGGAATTCAAGTATCCACTGCAAAGGAACTTGTCTAAAACCTATAGGTGG  
AAGAGGTCGAGTTATTGATGTGAGATGGATCCAGAAAAAAGGG---GCTTCCAGTTATAA  
TCCAGAAAAAATTCGTGTATATATTTACAGAAACGTGAAATCAAAGTGGGTGATAAA  
GTCGCCGGAAGACATGGCAATAAGGGTATCATTTCCAAAATTTTGCCTAGACAAGATAT  
GCCTTATTTGCAAGATGGAACACCAGTTGATATGGTCTTCAACCCATTAGGAGTACCTT  
CACGAATGAATGTGGGACAGATCTTTGAATGCTCGCTGGGGTTAGCGGGAGATCTGCT  
GGACAGACATTATAGAATAACACCCTTTGATGAGAGATATGAGCAAGAGGCTTCGAGA  
AACTAGTGTTCCTGAATTATATGAAGCCAGTAAGCGAACAGCAAATCCATGGGTATT  
TGAACCCGAGTATCCTGGAAAAAGCAGAATATTTGATGGAAGAACAGGAGATCCTTTT  
GAACAACCTGTTATAATAGGAAAGTCCTATATGCTGAAATTAATTCATCAAGTAGATGAT  
AAAATCCATGGACGTTCCAGTGGACATTATGCACTTGTTACACAACAACCCCTTAGAGG  
AAGGGCCAAGCAAGGGGGACAACGAGTAGGAGAAATGGAAGTCTGGGCTCTAGAGG  
GATTTGGTGTGCTCATATTTTACAAGAGATGCTTACTTATAAATCCGACCATATTAGAG  
CTCGTCAGGAACTACTTGGTACCACGATCGTTGGAGGAACAATACCTAAGCCTGAGGG  
TGCTCCAGAATCTTTTCGATTGCTCGTTCGAGAACTACGATCTTTGGCTCTGGAACCTGA

AGCATTTCCTTGTATCTGAGAAGAACTTCCAGATTAATAGGAAGGAAGCT-----  
---ATGATCGACCGATATAAACATCAACAACCTTCGAATTGGATTAGTTTCTCCTCAACAAA  
TAACTGCTTGGGCCAACAAAATCCTACCTAATGGAGAGATGGTTGGAGAAGTGACAAA  
ACCCTATACTTTTCATTACAAAAGCAATAAACCGGAAAAAGATGGATTGTTTTGTGAAA  
GAATCTTTGGGCCTATCAAAGTGGAATTTGTGCTTGTGGAAATTACCGAGTCATCGGG  
GATGAAAAAGAAGACCCGAAATTTTGTGAACAATGCGGAGTCGAATCTGTTGATTCTC  
GGATACGAAGATATCAAATGGGATACATCAAACCTGGCATGTCCAGTGACTCATGTGTGG  
TATTTGAAACGTCTTCCCAGTTATATCGCGAATCTTTCAGATAGACCTCTTAAAGAATTA  
GAAGGCCTGGTATACTGCGAT-----TTCTCTTTTGCTAGGCC---ATAGCTAAAAAACCA  
CTTCTTACGATTACGAGGTTTCATTTCGAATATGAAATCCAATCCCGGAAATACAGCATCC  
CACTTTTTTTTACTACCCAATGCTTCAATCTATTTAGAAATAGAGAAATATCTACTGGAG  
CAGGTGCTATCAGAGAACAATTAGCCGACCCGGATTTGCGAATTATTACAGATCGTTCA  
TTGGTAGAATGGAAGGAATTGGGGGAAGAAAGATCCGCT--GAGAATGAATGGGAAGA  
TAAAAAATCGTAAGAAGAAAGGATTTTTTGGTTAGACGCATGGAATTGGCTAAGCAT  
CTTCTTAGAACAAATGTAGAACCAGAACGGATGGTTTTGTGCCTATTACCAGTTCTTCC  
TCCCGAGTTGAGGCCAATCATTTCAGATAGATGGGGGTAAACCAATGAGTTCGGATATTA  
ATGAACCTATAGAAGAGTTATCTATCGGAATAATACTCTTATTGATCCATTAACAACAA  
GTAGATCTACGCCAGGGGAATCAGTGATGTGTCAGGAAAAATTAGTACAAGAAGCCGT  
AGATACACTTCTTGATAATGGGATCCGCGGACAACCAATGAGGGACGGTCACAATAAA  
GTTTACAAGTCTTTTTTCAGATGTAATTGAAGGCAAAGAGGGGAAGATTTTCGCGAGACTC  
TACTTGGTAAACGGGTTCGATTATTCGGGTTCGTTCTGTTCATTGTGGTGGGCCCTTCGCTTT  
CATTACATCGATGTGGATTACCCCGAGAAATAGCAATAGAGCTCTTTCAGACATTTGTAA  
TTCGTGGTCTAATCAGACAACATGTTGCTTCCAACATAGGGATTGCTAAAAGTAAAT  
CGGGAAAAAGAACCAATTGTATGGGAATACTTCAAAGGTTATGGAAGGACATCCTG  
TATTGTTGAATAGAGCACCTACTTTGCATAGATTAGGCATACAGGCGTTCCAACCTATTC  
TAGTGGAGGGACGTGCTATTTGTTTACATCCATTAGTTCGTAAGGGATTCAATGCAGAC  
TTCGATGGGGATCAGATGGCTGTTTCATGTACCTTTGTCTTTGGAAGCTCAAGCGGAAGC  
CCGTTTACTTATGTTTTCTCATATGAATCTCTTGTCTCCGGCTATTGGAGATCCTATTTCT  
GTACCAACTCAAGATATGCTTATTGGCCTCTATGTAACGATTGGGAATCGCCGAGGT  
ATTTGTACAAATAGGTATAATCCATGTAACCTACAGA-----AAC---TATCAAATGAAATAG  
TTGACGATAAT---TATAAGTATACAAAAGAGAAAGAACCTTATTTTTGTAGTTCCTACGA  
TGCCTTGGAGCTTATCGTCAGAAACGAATCGACTTATACAGTCCTTTGTGGCTCCGGT  
GGCGGCTAGATCAATGC---GTGATTGCCTCAATAAATAGAGAAGTTCCTATTGAAGTTC  
AATATGAATCTTTGGGTATCTACCATGAGATTCACGAGCACTATCGAATAGTAAAAAGC  
GTAAAAAAGAAATCGTTTTGTATATACATTCGAACCACTGTTGGTCATATTTCTTTTTAT  
CGAGAAATAGAAGAAGCTATACAAGGGTTTTGTCCGACCTAT-----  
-----ATGGCAGAACGGGCCGATCTGGTCTTTCACAATAAAGCGATAGATGGAAC  
GCCATGAAACGACTTATTAGTAGATTAATAGATCATTTTGGAAATGGCATATACATCACAC  
ATTCTGGATCAAGTAAAGACTCTGGGTTTCCGGCAAGCCACTCTGACATCAATTCATT  
AGGAATTGATGATCTTTTAAACAACGCCTTCTAAGGGATGGTTAGTACAAGATGCGGAAC  
AACAAAGTTTGATTTTGGAAAAGCACCATCATTATGGGAATGTACACGCAGTAGAAAA  
ATTACGCCAATCAATTGAGATATGGTATGCTACAAGTGAATATTTGAGACAAGAAATGA  
ATCCAAATTTAGGATGACTGATCCTTTTAAATCCAGTCTATATAATGTCCTTTTCGGGAG  
CTAGAGGAAATGCATCTCAGGTCCACCAATTAGTAGGTATGAGAGGATTAATGTCCGAT

CCCCAAGGACAAATGATTGATTTGCCCATTCAAAGCAATTTACGCGAAGGGCTTTCTTT  
AACGGAATATAACCATTTCTGTACGGAGCCCGCAAAGGAGTTGTGGATACTGCTGTAC  
GAACATCAGATGCTGGATACCTCACGCGTAGACTTGTGAAGTAGTTCAACACATTGTT  
GTACGTAGAACGGACTGTGGCACTATCCGAGGTATTTCCGTAAGTCCTCGAAATGGGGT  
TGGGGTGACGGAAAGGATTTTTATCCAAACACTAATTGGTCGCGTATTAGCGAACGATG  
TATATATGGGTCTGCGATGCATTGCGACTCGAAATCAAGATATTGGGATTGGACTTGTCA  
ATCGATT CATAACC-----TCTCGGGCACAACCAATATATATTTCGAAGCCCCTTCA  
CTTGCAAGGAGTACATCTTGGATCTGTCAATTATGTTATGGTTCGGAGTACCACTCACGGT  
AACCTGGTTCGAATTAGGAGAAGCTGTAGGTATTATTGCGGGTCAATCAATTGGAGAAC  
CGGGAAC TCACTAACATTAAGA ACTTTTCATACCGGTGGAGTATTCACAGGCGGTATC  
GCAGAACATGTACGAGCTCCTTCTAATGGAAAAATTA AATTCAATGAGGATTTAGTTCA  
TCCCACACGTACACGTCATGGACATCCCGCTTTTCTATGCCATATAGACCTGCATGTAAC  
TATTGAGAGTCAGGATATTATACATAAAGTGAATATTCACCAAAAAGTTTTCTTTTGGT  
TCAAACGATCAATATGTAGAATCAGAACAAGTGATTGCTGAGATTCGCGCTGGAACA  
TCCACT-----TTAAAGGAGAGGGTTCAAAAACATATTTATTCTGACTCAGAGGGAGAG  
---ATGCACTGGAGTACCGATGTGTACCATACACCTGAATATACGCATGGTAATGTTTCATC  
TCTTACCCAAAACAAGTCATTTATGGGTATTATCAGGAAGTCCATGCAGA-----TCCAGT  
ATAGTGCTTTTCCACTCCACAAGGATCAAGATCA AATGAATGTTCAA-----TCTCTTTAT  
GTCGAAGAGAGATATATTTCTGACCTCTCG-----ATGAATAATGATCGA---GTGAGACAC  
AAATTGTTTGGGTGGGATCAA-----AGGGGGAGGGTTTCTTATTATTCA---GGACCT  
GATCGAATCATATCCAACAGGAATTGGGATTCATATATCCTCTT---ATTCTCCACGAGAA  
TTCTGAT-----TTATTGGCGAAGAGGCGAAGAAATAGATTCATCATCCCATTC AATATGA  
TCAAGAACAGGAGAAGGAACTAAGGCCTCCTGGT---ATCGTGATTAAAATACCCATAAA  
A-----GGTATTTTACGTAGAAATAGTATTCTTGCCTATTTTCGACGATCCCCGATACAGAAG  
AAGTAGTTCAGGAATTGCCAAATATGGGACCATAGAAGTCGATTCGATAATAAAAAAA  
GAAGAT-----TTAATTGAATATCGAAAG---ACAAGAGAGTTTGGACCAAAATACATCAA  
GTAAATCGATTTTTTTTTCATTCTCCTGAAGAAGTGCATATCTTACCTAGATCTTCGTCCATAA  
TGGTACGGAATAATAGTATCATTGGAGTAGATACACGAATCACTTTGAATATAAGAAGTC  
AAGTAGGCGGCTTGGTCCGAGTGGAGAAAAAAAAAAAAAAAAAGGATTGAATTGAAAATAT  
CTTCTGGAGATATCCATTTTCTGGAGAGACGGATAATATAGCCCGGTACAGCGGCATC  
TTGATACCACCTGGAAGGGTAAAAAAC-----ACGGAATCAA AATTC-----AAAA  
TTGGATCTATGTCCAACGG-----ATCACACCTATCAAGAAAAAG-----TATTTTGTTCAG  
TCCGACCCGTAGTGACATATGAAATCGCCGATGGGATAAATCTAGCAACGTTTTTTCCC  
CAGGATCTGTTGCAGGAAAAGAATAATTTGCAACTACGAGTTGTCAATTATATCTTTAT  
GGAGATGGCAAACCCATTTCGAGGAATTTTTACACAAGCATTCAATTAGTTCGGACTTG  
CTTAGTATTGAATTGGGATCAAGACCGGGCTGGTTCTATAGAAGAA-----GAAGAGGCTT  
ATACTTCCCTCGCTGAAGTAAGGGTAAACGATCTGATTTCGAAATTTTATAAGAATTGATT  
TGGTGAAGTCTCCTATTTCTGCTACTGGAAAAGAGAATGATATGGCGGGTTCAGGATTG  
ATTCCTAAT---AATGGATCAGATCGCATCAATACCAATCCTTTTTTTTTTCCAAGGCGAAGA  
CT-----CAATCACTTAGCCAACATCAAGGAACTATTTCGTACATTGCTGAA  
TAGAAATAAG---GAAGGCCAGGGCGAATCTCTTATGGTTTTGTCATCATCCAATTGTTCT  
CGAATTGGTCCA-----TTGAATGGTTCGAAATATCACAAT-----GTGACAAAAGAATCA  
GATCCCATGATTTCAATTAGGAATTCGTTGGGTCCGTTAGGGACT-----GTACCTAACATT  
TTGAATTTTTCTCATCT-----TATCATTCAATAACT-----CATAATGAGATCTTGTTC AAT---

AAATATTTACTACCTGACAAT-----TCAAGAGAGACTTTCTAGTACCTAAA-----TCT  
TATTTTCATGGATGAAAATAGAAGG-----ATTTATAATCTTGATCCATGCAGTAACATCATT  
TACTCCATTCAATTTGAATTGGTGTCTTTCTCCATCACGATTATTGGGAAGATACATCAA  
CAATAATTAGC---CTTGGACAGTTTCTTTGTGAAAATATATGTATATCCAAAGACGGACC  
A-----TGCGTAAAATCTGGTCAAATTATAATTGTTTCAT---GTTGACTCTTTAGTAATAAG  
ATTAGCTAAGTACCATTGGCTACCCGCGGAGCAACCGTTCATGGTCATTATGGAGAAA  
TCCTTTACGAGGGAGATACATTAGTTACTTTTATATATGAAAAATCAAGATCTGGTGATAT  
AACTCAAGGTCTTCCAAAAGTTGAACAAGTGTTAGAAGTTCGTTTCGATTGATTCAATAT  
CGATGAACCTAGAAAAGAGGGTTGAAGGCTGGAACGAACGCATAACAGGATTTCTTG  
GAATTCCCTGGGAATTCTTTATTAGTGCTCAGCTAACCATAGTGCAAAGTCGTATCTCTT  
TGGTTAATAAGATCCAAAAGGTTTATCGATCCCAGGGGGTGCAGATCCATAATAGGCAT  
ATAGAACTATTGTACGACAAATAACATCAAAGTCTTGGTTTCAGAA-----GATGGA  
ATGTCCTAATGTTTTTTCACCCAGAGAACTAATCGGATTGTTGCGAGCAGAAAGAATAGG  
TCGTGCTTTGGAAGACGATATATGTTACCGAGCTATTCTATTGGGAATAACGAGGGGCATC  
TCTGAATACTCAAAGTTTCATATCAGAAGCGAGTTTTCAAGAAACCACTCGGGTTTTAG  
CGAAAGCCGCTCTCCGAAGTCGTATTGATTGGTTGAAAGGCCTGAAAGAGAATGTTGT  
TCTGGGGGGGATGATACCTGTTGGTACCGGATTCAAAGGATTTCGTTCACTACTCCAGG-  
----GAACACAACAACATTTCT-----TTGGAAATAAAAAAGAAGAATCTATTTCGATGGGAA  
GATGAGA-----GATATTTTGTCTACCACAGAGAATTTTGTGGTTCGTGCATCCCAAAGA  
ATTTTCATGATACATCAGAACAA-----ATGGCAAGAAGATAT  
TGGGACATCAATTTGGAAGAGATGATGGGAGCAGGGGTTTCAATTTGGTTCATGGTACTA  
GGAAATGGAATCCTAGAATGGCACCTTATATCTCTGGAAAGCGTAAAGGCATTACATT  
ACAAATCTTACTAGAACGGCTCGTCTTTATCAGAAGCCTGCGATTTAGTTTTTGTATGC  
AGCAAGTAGAGGAAAGCACTTCTTAATAGTAGGTACGAAAGATAAAGCAGCCGATTCA  
GTAGCATCAGCTGCAATACGGGCTCGGTGTCATTATGTCAATAAAAAATGGCTTGGTGG  
TATGTCAACGAATTGGTCCACTACAGAAACAAGACTTCATAAGTTCAGGGACTTGAGA  
GCAGAACAAAAGATGGGTTCGATTTAAGCGTCTCCCAGAAAGAGATGCGGCAATGTTG  
AAGAGACAATTATCTCACTTGCAAACATATCTGGGCGGGATCAAATATATGACGGGGTT  
ACCCGATATTGTAATCATCGTGGATCACCAAGAAGAATATACGGCTATTAGAGAATGCCT  
CACTTTGGGTATTCCGACGATTTGTTTAATCGATACAAATTGTGATCCGGATCTCGCAGA  
TATTCGATTCAGCCAACGATGACGCTATAGCTTCAATCCAATTGATTCTTAACAAATT  
AGTATTGGCAATTCGTGAGGGTCATTATAGC---TATCTAGGAAGTCATATGGGACAGAAA  
ATAAATCCACTTGGTTTTAGACTTGGCACAACCCAAAGTCATCGTTCCTTTGGTTTCGC  
ACAACCAAAGGATTATTCGAGGAATCTACAAGAAGATGAAAAAATACGGGATTGTATC  
AAGAATTATGTACAAAACACATGAGAATATCCTCAGGG---TTCCAAGGAATTGCACGT  
CTAGGGATTCAAAAAGAATCGATCTCATCCAGGTCAATCTATATTGGGTCCTCCAA  
TTTGTTAATTGAGGGC-----CCAACCCGA-----GGAATCGAAGAATTACGAACAGATGTA  
CAAAAAAAGTTAAATTCTATGAACCGGAGACTCAACATTACTATACAAGAATTGCAA  
GACCCTATGAACAACCTAATATTCTTGCAGAATATATTGCTCTGCAATTAAAAAATAGAG  
TTTCATTTGAAAAGCAATGAAAAAAGCTATTGAATTAGCTGAACAAGCAAATACAAA  
GGGGATTCGGGTACAAATTGCGGGGCGTCTGAACGGAAAAGAGATTGCCCGTGTGCA  
ATGGATCAGAGAAGGCAGGGTTCCCCTACACACTATTTCGAGCTAAAATTGATTATTGTT  
CTTATATGGTTCAAATCTACGGGGTATTAGGGATCAAATTTGGATATTTGTAGATG  
AAGAAATGTCTCGTTACCGAGGACCTCGTTTCAAAAAAATACGCCGTCTGGGGGCTTT



ACCGGGACTAACTAGTAAAAGACCTAGATCTGGAAGTGATCTTAGAAACCAATCCCGT  
TCTGGAAAA--AGATCTCAATATCGTATTCGTTTAGAAGAAAAACAGAAATTGCGTTTT  
CATTATGGTCTGACGGAGAGACAATTACTTAGATATGTTTCGTATCGCCGGAAAAAGCCAA  
AGGGTCAACAGGACAGGTTTTACTGCAACTACTCGAGATGCGTTTGGATAACATTCTTT  
TTCGATTGGGTATGGCTTCGACCATTCTGGAGCCAGACAATTAGTTAACCATAGACATA  
TTTTAGTTAATGGTTCGTCTAGTAGATATACCAAGTTATCGCTGCAAACCCGGAGATTTG  
TTACTACGAGGGAGAAAGAAAGATCCAGAGCTCTGATTCAAATCATATGAATTCATCC  
CCCAAC--GAGGAGTTGCCAAAACATTTGACTCTTTACTCGTTGCAGTAT-----AAAGGA  
TTAGTAAATCAAATAATAGATAGTAAATGGATCGGTTTGAAAATCAATGAATTGTTAGTC  
GTAGAATATTATCCCGTCAGACTATGTCACGTTCGAGGTACTGCAGAAGAAAAAACTGC  
AAAATCCGATCCAATTTATCGTAATCGATTAGTTAACATGTTGGTTAACCGTATTCTGAA  
ACACGGAAAAAAATCATTGGCTTATCAAATTATCTATCGAGCCTTGAAAAAGATTCAAC  
AAAAGACAGAAACAAATCCACTATCTGTTTTACGTCAAGCAATACGTGGAGTAACTCC  
CGATATAGCAGTAAAAGCAAGACGTGTAGGCGGATCGACTCATCAAGTTCCCATGAA  
ATAGGATCTACACAAGGAAAAGCACTTGCCATTCGTTGGTTATTAGGGGCATCCCGAAA  
ACGTCCGGGTGCAAATATGGCTTTCAAATTAAGTTCCGAATTAGTGGATGCTGCCAAAG  
GGAACGGCGATGCCATACGCAAAAAGGAAGAGACTCATAGAATGGCAGAGGCCAATA  
GAGCTTTTGCACATTTTCGTATGGGTAGGGACACTATTGCCAATATAATAACTTGTATAA  
GAAATGCCGACATGGATAAAAAAAGAATGGTTCGAATAGCATCTACCAATATAACCGAA  
AACATTGTAAAATAATTCTACAAGAAGTTTTATTGAAAACGTTAGGAAACATCGGGA  
AAACAACAAAATTTCTGGTTTTAACCTTGCAGACATAAAAGG-----AATAGGAAAGGG  
ACATATAGA-----AAGACTTTA-----AAACGTATAAGCAGATCCGGTCTACGAATCTATT  
CCAATATCAACGAATTCCTAGGATTCAGGTGGAATGGGGGTTGTAATCTTTCTACTT  
CTCGAGGTATAATGACAGATCGAGAGGCTCGACGAGAAGGAATTGGAGGAGAGATTTT  
ATGTTATATATGGATGAAAAACCTATAACCAAGAATTGGTTCGCGTAGAAATGGACGTAT  
TGGTTCACGTAAGAATGGACGTAGAATACCCAAAGGAGTTATTCATGTTCAAGCGAGT  
TTCAATAATACCATTGTGACTGTTACAGATGTACGAGGGCGGGTGGTTTTCTTGGTGCTC  
CGCGGGTACCTGTGGATTACAGAGGCACAAGAAGAGGAACACCGTTTGCTGCTCAAAC  
CGCAGCAACAAATGCTATTCGTACGGTAGTGGATCAGGGTATGCAACGAGCAGAAGTT  
ATGATAAAGGGACCTGGTCTCGGAAGAGATGCAGCATTACGAGCCATTTCGAGAAGTG  
GTGTACTATTAAGTTTCGTACGTGACGTAACTCCCATGCCACATAATGGATGTAGACCC  
CTAAAAAAGACGCGTGATGCCAACTATTAACAACCTATTAGAAACACAAGACAGCC  
AATCAGAAATGTTACGAAATCTCCCGCTCTTCGAGGATGCCCTCAGCGTAGAGGAACA  
TGTAAGGGTGTATACTATCACCCCAAAAAACCAAATCTGCCTTACGTAAAGTTGC  
CAGAGTACGATTAACCTCTGGATTTGAAATCACTGCTTATATACCTGGTATTGGCCATAA  
TTCACAAGAACATTCTGTAGTATTAGTAAGAGGAGGGAGGGTTAAGGATTTACCCGGT  
GTGAGATATCACATTGTTTCGAGGAACCTAGATGCTGTTCGGAGTAAAGGATCGTCAAC  
AAGGGCGTTCTAAATATGGGGTCAAAAAGCCAAAATGGCAAGGAAAAGTCTGATTC  
AGAGGGAGAGGAAGAGGCAGAAATTGGAACAGAAATATCATTGATTCGTCGATCCTT  
AAAAAAGAAATAAGC-----AAACTCCATCGTTGAGTGACAAATGGAAAATTCATG  
GAAAATTGCAATCCCCACCACGTAATAGTGCACCTATACGTCTTCATCGACGTTGTTTTT  
CGACCGGAAGACCTAGAGCTAACTATCGAGACTTTGGGCTATCCGGACACGTACTION  
CGAGATGGTTCATGCATGTTTGTGGCCGGGGCAACAAGATCGAGCTGGATGGTCATA  
AATTCGTTTATATCATCTATTTCAAAGAAGAAAA-----AAGGGGTCTGTTGAAT

TTCAAGTATTCTGTTTCACCGATAAGATACGGAACTTACTTCACATTTGGAACCTGCAC  
AAAAAGGACTTTTTATCCCAAAGAGGTATGCGTAAAATTCTGGGAAAACGTCAACGGA  
TGCTGGCTTATTTGTCAAATAAAAATAAAGTACGTTATAAGAAATTAATCGGTCAGTTGA  
ATATTCGGGAGCCAAAGACTCGT-----ATGGTAAAACCTCGTTTGAACGATGTGGTAG  
AAAGCAACGAGTCATTTATCGAATCGTTGCAATTGATGTTAGATCCCGAAGAGACGGA  
AGAGCTCTTCGGAAAGTGGGTTTTTACGATCCAATAAAGAATCAAACCTTATTCAAACGT  
TCCTGCTATTCTATATTTCTTGAAAAAGGAGCTCAGCCTACAGTAACTGTTTCATGATAT  
TTCAAAGAAGGCGGAGGTATTTAAA-----ATGGATAAATCCAAGCA  
ACCTTTTCGTAAATCCAAGCGATCTTTTCGTAGGCGTTTGCCCCAATTGGATCGGGGG  
ATCGAATTGATTATAGAAACATGAGTTTAATTGGTCGATTTATTAGCGAACAAGGAAAA  
ATATTATCCAGACGAGTGAATAGATTGACCTTAAAACAACAACGATTAATTACTATTGCT  
ATAAAACAAGCTCGTATTTTATCTCCGTTACCTTTTCTTAATAATGAGAAA-----CAATTT  
GAGAGAACCGAATCCCTCCCTAGAATTACTGGTACTAGAACCATAAAGAAAATGTCAC  
GTTCACTTAAAAAAAATCCTTTTGTAGCTAATAATTTATTATTAATAAATTCATAAGCTTAA  
CACGAGGGAGGAAAAAGAAATTATAGTAACTTGGTCCCGGGCATCTACCATTATAACCA  
CTATGATTGGTCATACAATTGCTATTCATAATGGAAAAGAGCATTACCTGTTTATGTAAC  
AGATCGTATGGTAGGTCACAAATTGGGAGAATTTGCACCTACTCTTACTTTCCAGGGAC  
ATGCGAGAAACGATAGTAAATTCGTCGTATGATTTTGAATCTTTTCTACTAGGTAATC  
TATTATCCTTATGCATGAAGATAAGAAATTCGGTCGTTGTGGTCGGACTCTATTATGGAT  
TTATTACCACATTCTCTATAGGGCCCTCTTATCTCTCCTTCTCCGAGCTCGGGTTATGGA  
AGAAGGA-----ACCGAGAAGGAGGTATCAGCAACAACCTGGTTTTATTATGGGACAGT  
TCATGATGCTCATATCGATCTATTATACGCCTCTGCATCTAGCATTGGGTAGACCTCATA  
ATAACTGTCCTAGTTCTACCCTATCTTTGTTTCATTTCTTCTGGAACAATCACAAACA  
CTTTTTTTCTTATAGATCTACTACCAGAAATCAATGCGTAATCTCAGCATTCAATGTGTA  
TTCCTGAATAATCTCATTTTTCAATTATTCAACCATTTCAATTTACCAAGTTCAACGTTAG  
CCAGATTAGTCAACATTTATATGTTTCGATGCAACAACAAGATGTTATTTGTAACAAGTA  
GTTTTGTTGGTTGGTTAATCGGTCACATTTTATTATCATGAAATGGGTTGGATTGGTATTATT  
CTGG-----ATACGGCAA---ATTAGATCGAATAAGTACCTTGTGTCAGAATTGAG  
AAAGTCTATGGCTCGAATCTTGAGTATTCTCTTGTATTATCACCTGTGTCTACTATTTAGG  
CAGAATACCATCGCCTATTTTCACTAAGAACTGAAAGAAACCGAAGAAGACAAACCC  
TTTATTACTTTTCTTTTCGACTATCAACGATGGAATCGACCATTTTCGATATATAGAAAATG  
ATCAATTTGCAAATACTGTAAGAAATGAAATGTCCCAATATTTTTTTAACACATGTCCAA  
GTGATGGAAAACGAGTAATCTCTTTACATATCCTCCAGTTTGTGGGTTTTTGGGGAA  
ATGATACAAAAAAAATGTCTTTATGCGGTATGAAAGAACTATATAAAGACAAAAATCT  
GTATAATTGGGTTTCTACAAATGAACAAAAAAGGGATAAGGTAAGCAAGGAGTTCATA  
AATCGAATAGAAGCTCTATAC-----GGGATTGTTCTC-----CAAAAAGGGTCAGATTA  
TGCAATGATCGGGATGAAAAGAATGCTTACCCAAAATGTCTGATCCCTTTTTAAACGG  
ATCATACCGTGGAAACAATAAAGAATTGTATTCAAATGGAGAAAAATTTTGGATAAATA  
GAATCCACAGTCTCCTT-----GAT---CTAAATGATTCTAGTGAAATTCAAGAA  
ATAAAGAAAAGATACCTCAACGGTTATACAGATTAAGTATTTGGAACAAGACGAGG  
GAGAAGAAATTCGTTCAAGAAAACTAAACATATGGTAATTTATGCTGATGATGTGATA  
CGTTACACACAGAAACCTGATTTTCGTCGGGATCTAATCAAAGGATCGATGCGCGCTCA  
ACGACGGAAAACAGTTACTTGGGAAATGCTTCAAATAAATTTGCATTCCCCCTATTTT  
TGATAGAATAGACAAAAACCCTTTTTTTTTATTTTGATATC-----TCCAGAATCATAAACC

TAATTTTTAGGGATAAAAAAGAGGATGAG-----ATAGAAGAACTTGGGAGACTATTG  
CATTTGGTCAAGTAATAAGAGGTTTTCTGTTAGTAACCCAATCTATTCTTAGAAAATACA  
TCGTATTACCTTCATTGATAATAGCTAAGAATCTCGTGCGTATGTTATTATTTCAACTCCC  
CGAGTGGTATGAGGATTTCAAGGAATGGAGTAGAGAAATGCATATTAATGCACCTATC  
ATGGTGTTCATTATCAGAAAGAAAATTTCCGAAGAATTGGTTAAAAGCCGGTATTTCAG  
ATAAAGATTCTATTTCTTTCTATTTGAAACCTTGGCGCAAATCTAAAAAAGAAAAAA  
ACAAAATTCTTGTTTTTTAACAGTCTGGGGAATGGAACTGACCTACCCTTTGGTCTTG  
CCCGAAAGGGACCTTCCTTTTTTTGAGCCTATTCATAAAGAACTTGAAAAAAGTTTAA  
AAAAGGAAAA--AAGAAATGGTTTTTATTTGTAAGAATTTTCAAAGAA-----  
-----AAAAAATATGGGTTATCAAAGAGTTCTA-----TTTATAAAGGAGTAATGAA  
AGAACTTACAAAAGCAAATAATAAGACAATTTCTGAATCACCTATTAGAAAATCACCTA  
TTAGAACTGGATCGATGGATTGGACAAATTCCTTCACTGACAGAAAGAAAAAGAAAGGA  
TCTGTCTGATAAGACAACCACAATCAGAGATCAAATAGAAAGGATCAGGATCACAAGA  
GACAAGAGTCCTAATGAGACAAGTTATAGTGATAAAAGATCGGAATCACAGAAACCTA  
TTTGCAAGTATCCAAAAGAAGAAGTACTCGATTACTCTATAAATGGCGCTATTTTATGA  
AAAGTTTCATTGAAAGAATACACAGAAATGTCTTTCTATGTATGATTAACCTCCCTAGGA  
TCAATACACAACCTTTTTATCCACTTTATCTTTTGTTCGTTGTCT-----CAAGCATATGTAT  
TTTACAAATTATCGCAAAAACCAGGTATTAAGAAGTATCGCTTGGGATCTTTATTTCAAT  
ACGCGTAT-----TCTATTAAGATAGAATAATAGAAAGAATATTTCAATCCGAATCA  
AACATAAGAAACCGGGTAATTTCCGAATGAACGAATGGAAAACTGGTTAATAGGTA  
ATTATCAATACAATTTTTCTTATACTAGATGGTCTAGATTAGACCCGCAAAAATGGCGAA  
ATAAAGTAAATGAACAGTGTATGATAAAAAATAAGAAAAAAACCGATTCATATTCATAT  
GAGAAAGACCCATTAATTAATCACGAGAGACATAAAAACTTAGCAAACGTTACAGAT  
ATGATCTTTTATCATATAGATATATCAATAGGTTTATCGTTGATACAGATAGAAAATATTTT  
GATCTGAGAATCATCAAATTTTGGTCTAGATTTTTTGGATTGGATGGGAATGAATGAAGA  
ACTACTATATCGTTGGTTTTTCCCAGAACTTGTAATACTTAATGACGCATATAAGACTAA  
ACCTTGGACCATAACCATAAGATTGCTTCTTTTTAATTCCAAGAGCAACAAGGAAGCAG  
AACTGGATTTACTCCTGAAAAGATATTTACTTTTTCAATTCAGATGGGATGATTCTTTGA  
AGAAAAAATGATCAATAACATCAAATTATATAGTCTCCTGCTTAGACTCATGGATCCAA  
AAAAAATTGTTATATCCTCTATTCAAAGAGGGAGAAATGTGGTTGGATATAATGCTAATTC  
ATAAGGATCTACCTCTTACAAAATTGAAAAAAGGGGGAGTATTTACTATGGAACCGCTT  
CGTCTATCTAGAAAATGGAATGGACAATTTCTTATGTATCAAACCCTAAGTATTTTCATTG  
GTCATAAGATTAAGCAGAAGAATTATGATTTGTTTGTTCCTGAAAATATTTTCAGCTCTG  
AGACGGCGTAGAGAATTGAGAATTCTAAGTCGTCTCATATTTCTTTGGCCCAACCATCG  
ATTAGAAGATTTAGCTTGCATGAATCGCTATTGGTTTGTATACCAATAATGGTACTCGTTT  
CAGTATGTCAAGGATACGTATGTATCCAATGAAAGGACATCAACTCAAATCCTGGATCT  
TCGAATTGAGAGAGATATTGAGAGAGATCAAGAATTCTCACTATTTCTTAGATTTCATGG  
ACAAAATTGAATTTAGTGGGATCTTTCACTCACATTTTTTTCCACCAAGAACGTTTTATG  
AACTCTTTGACCCCGAATTTGGAGTATCCTACTTTCA---TGCGATTTCG-----CAGAGTT  
CAACAAGCAATCGATATTTTC-----ACGATCAAAGGTGTAGTACTGCTTGTAGTAGCG---  
GTCCTTATA-----TATCGTATTAACAATCGAAATATGGTTCGAAAGAAAAAATCTCTAT  
TTGATGAGGCTTCTT-----CCTATACCTATGAATTCATTGGGCCCAAGAAATGATAC  
ATTGGAAGAATCTTTT---TTGTCTTCCAATATCAATAGGTTGATTGTTTCG---CTCCTGTAT  
CTTCCAAAAGGGAAAAAGATCTCTGAGAGTTGTTTCATGGATCCGAAAGAGAGTACTT

GGCTTCTCCCAATAACT-----AAAAAGTGTATCATGCCTGAATCTAACTGGGGTTCG  
CGGTGGTGGAGGAACCGGATCGGAAAAAAGAGG-----GATTCTAGTTGTAAGATATCT--  
-----AATGAAACAGTAGCTGGAATTGAGATCTCATTCAAAGAGAAAGATATCAA---TAT  
CTGGAGTTTCTTTTTGTATCCTATACGGATACGGATGATCCGATCCGCAAGGACCATGAT  
TTGGAATTGTTTGATCGTCTTTCTCCGGGGAAGAAGCAAACATAATCAACTG-----AA  
TTCGGGACAGCTATTTCGAAATCTTAGTGAAACACTTGATTGTTATCTCATGTCTGCTTT  
TCGTGAAAAAAGACCAATTGAAGTGGAGGGT--TTCTTCAAACAACAAGGA---GCTGA  
GGCAACTATTCAATCAATGATATTGAGCATGTTCCCGT-----CTCTTCTCGAAAAACA  
AGTGGGGTATTTCTTTGCAAATTGCGCTCAATTCATATGTGGCAATCCACCAGGATC  
TCTTCGTT-----AGTTGGGGGAAG---AATCAGCACGAATCGGATTTTTTGAGGAAC---G  
TATCGAGAGAGAATTTGATTGGTTAGGCAGTATGTGGTTGGTAAACAAGGATAGG-----  
--TTTTTTAGC-----AAGGTACGGAATGTATCGTCAAATATTCAATACGATTCC-----ACA  
AGA-----TCTATTTTCGTTAAAGTAACGGATTCTAGCCAATTGAAAGGATCTTCT--GATC  
AATCCAGAGATCATTTC AATTCATTAGT-----AATGAGGATTTCGGAA-----  
-----TATCACACATTGATACATCAAACAGAAATTGAGCAACTAAAAGAAAGA  
TCGATTCTT--TGGGAT-----CCTTCCTTTCTTCAAACGGAACGAACAGAGATAGAATCA  
GAT-----CGATTCCCGAAA-----TGCCTTTCTGGATATTTT-----TCAATGTCCCGGCTATT  
ACG---GAACGTGAGAAGCAGATGAATAATCATCTGTTTCCGGAAGAAATCGAAGAATTT  
ATT-----GGGAATCCTACAAGATCAATTCGTTCTTTTTTCTCTGACAGATGG-----TCAGA  
ACTTCAT--CTGGGGTTCGAATGCTACTGAGAGGTCCACTAGAGATCAG-----AAATT  
GTTGAAGAAACAACAAGATGTTTCT--TTTGTCCCTTCCAGGCGATCGGAA-----AA  
TAAAGAAATGGTTGATATATTCAAGATAATTACGTATTTACAAAAT-----ACCGTCTCAAT  
TCATCCTATTTTCATCAGATCCGGGATGTGATATGGTTCCG---AAGGATGAACCGGAT--AT  
GGACAGTTCCAATAAGATTTTCATTCTTGAACAAAAATCCATTTTGTGAT-----TTATTCCA  
CCTATTCCATGGCCGGAACAAAGGTGGATACACGTTA-----CACCACGATTTTGAATCAG  
AA-----GAGAGATTTCAAGAAAGGGCAGATCTATTCACTCTATCAATAACCGAGCCC---G  
ATCTGATGTATCATAAGGGATTTGCCTTTTCTATTGATTCCTACGGATTGGATCAAAAAA  
AA-----TTATTGAATGAGGTATTCAACTCCAGGGATGAATCGAAAAAGAAATCTTTA-----  
--TTGGTTCTACCTCATATTTTTTAT-----GAAGAGAATGAATCTTTTTATCGAAGGATCAG  
AACAAAATCGGTCCGG---ATCTCCTGCAGGAATGGTTTGGAAAGATCCA-----AAAATAGT  
GGTATTTGCTAGCAACAACATAATGGAGGCAGTCAATCAATATAGATTGATCCGAAATC  
TGATTCAAATCCAATATAGCACCTATGGG-----TACATAAGAAATGTATCGAAGAGATTCT  
TTTTAATG-----AATAGATCCGATCGCAACTTCGAATATGGAATTCAA-----AGGGAT  
CAAATAGGAAATGATACTCTGAATCATATAACTATAATGAAATATACGATCAACCAACAT  
TTATCGAATTTGAAAAAG---AGTCAGAAGAAATGGTTTCGAT-----CCTCTTATTTCTC  
GAACCGAGAGATCCATGAATCGGGATCCTAATGCATATAGATACAAATGGTCCAATGGG  
AGCAAGAATTTCCAAGAACATTTGGAACATTTTCGTTTCTGAACAGAAGAAC-----CGT  
TTTCAAGTAGTGTTTCGATCGATTACGTATTAATCAACATTCGATTGATTGGTCCGAGGTT  
ATCGACAAACAAGATTTGTCTAAGTCACTTCGTTTCTTTTTGTCCAAGTCA-----  
-----CTTCTCTTTTTGTCT-----AAGTCACTT-----CCTTTTTTC  
TTTGTGAGTATCGGGAATATCCCATTCATAGGTCCGAG---ATCCACATCTAT--GAATTG  
AAAGGTCCGAATGATCAACTCTGCAATCAGTTGTTAGAATCAATAGGTGTTCAAATCGT  
TCATTTGAACAAATTGAAACCT-----TTCTTATTAGAT-----GATCATGATACTTCC---CA  
AAGATCGAAATTATTGATCAATGGAGGAACAATAGCACGATTTTGGTTCAATAAGATAC

CA---AAGTGG---ATGATTGACTCATTCCATACT-----AGGAATAATCGCGGGAAATCCTTT  
GAGAACACGGATTTCCTATTTCTCAATGATATCCCACGATCGAGACAATTGGCTGAATCC  
CGTGAAACCCTTTCATAGGAGTTCATTGATATCTTCTTTTTATAAAGCAAATCAACTTCG  
ATTCTTGAATAATCCACATCACTTCTGGTTCTAT-----TGTAACAAAAGATTCCCTTTTTAT  
-----GCGGAAAAGACCCGTATCAATAATTATGAT-----CTTACATAT--GGACAATTCCT  
CAATATCTCGTTCATTTCGCAACAAG--ATATTTTCTTTGTGCGTCGGTAAA-----AAAAAA  
CATGTTTTTTTTGGAG--AGAGATACTATTTACCTATTGAGTCACAGGTATCTGACATATT  
CATACTAACGATTTTCCACAAAGTGGTGACGAAACG---TATAACTTGTACAAATCT-----  
--TTCCATTTTCCAACCTCGATCCGATCCATTTCGTTTCGT-----AGAGCTATTTACTCGATCGC  
AGACATTTCTGGAACACCTCTGACAGAGGAACAAAGAGTCAATTTTGAAGGAACTTAT  
TGTCAGCCTCTTTCAGATCTGAATCTATCTGATTCAGAAGGGAAGAACTTGCATCAGTA  
TCTCAGT-----TTCAATTCAAACATGGGTTTGATTACACTCCATGTTCTGAGAAATATTT  
ACCA-----TCCGGAAAGAGGAAAAAA-----CGGAATCTTTGTCTAAAT-----  
AAATGCGTTGAGAAACGGCAGATGTATAGAACCCTTCAACGAGATAGTGCTTTTTTCAA  
TATCTCAAATGGAATCTGTTCCAAACATATATGCCATGGTTCCTTACTTCGACAGGGTG  
CAAATATATAAATTTTCATCCTTTTAGATACTTTTTCAGACCCATTG-----CCGATACTAAGT  
AGCAGT--CACAAATTTGTATCCATTTTTCATGATATTATGCATGGATCG-----GCATGGTC  
AATCCTCAGAAAAAATTGCGG-----GCGATTCTTCCACAATGGAATCTG---ATAAG  
TGAGATTTTCGAGTAAATGTTTACAGAAT-----CTTCTTCTGTCCGAAGAAATGATTCATCG  
AAATAATGAGTCACCCGTTCCATTGATATGGACACATCTGAGATCACCAAATCCTCGAG  
AGTTC---TTCTATTCAAGCCTTTTCTTCTTCTTGTGCTGGATAT--CTCGTTCGTACACA  
TCTTCTCTTTGTTTCCCGA-----GTCTCTAGTGAGTTACATACAGAGTTAGAAAAGATCA  
AATCTTTGATGATTCCATCATACTGATGGAGTTGCGAAAACCTTCTGGATAGTTATCCTC  
CACCTGAACTGAATTTCTTCTGGTTAAAGAATCTCTTTCTAGTTGCTCTGGAACAATTA  
GGAGATTCTCCGGAAGAAATACGGGGTTCTGATTCTGGCGGCAACATGCTATTGGGTG  
GCGGTCCC-----GCTTATGGG---GTCAAATCAATACGTTCTAAGAAGAAAGATTTG  
AATATCAATCTCATCGATATCATCGATCTCATA---AGTATCATACCAAATCCCGTCAATCC  
AATCACTTTTTTCGATAAATACGAGACGTTTAAAGTCGTACGAGTAAAGAGATCTATTCAAT  
GATAAGAAAAAGAAAAACGTGAACAGCGATTGGATTGATGGGAAAATAGAATCCTG  
GGTCGCGAACAGTGATTTGATTGATGATGAAGAAAGAGAATTCTTGGTTCAGTTCTCC--  
---GCCTTAACGACA-----GAAAAAAGGATTGATCAAATTCTATGGAGTCTGACT--CATA  
GTGATCCTTTCTCA-----AAGAATGACTCTGGTTATCAAATGATTGAACAACCGG  
GATCAATTTACTTACGATACTTAGTTGACATTCAT-----AAAAAGTATCTAATGAATTCTG  
AGTTCAATAGATCCTGTTTAGCAGAAAGACGAATATTCCCTTGCTCATTATCAGACAATC  
ACTTAT-----TCACAAACCTCGTGTGGGGCTAATAGTTCTCATTTCATCTCATGGA-----  
---AAACCCTTTTCGCTCCGCTTAGACCTATCCCCTTCT--AGGGGTATTTTAGTGATAGGT  
TCTATAGGAACTGGACGATCCTATTTGGTCAAATACCTAGCGACAAACTCCTACCTTCC  
TTCCATTACGGTATCTCCGAACAAGTTCCTGGATGACAAGCCTAAAGGTTATCTTATTGA  
T-----GATATTGATAGTATTGATGATAGTGACGATGTCGAT-----ATTGGTGATA  
GTGATGATATCGATATT-----GATGATGACCTTGATGCGG  
AGCTGCTAACTATGACGAATGTGCTA-----ACTATGTATATGACG-----CCGAAAATG  
GACCGGTTTGATATCACCCCTCAATTAGAATTAGCAAAGCAATGTCTCCTTGCATAATA  
TGGATTCAAACATTCATGATCTGTATGTGAATGAGTCGAATTACTIONTCCCTCGGTCTA  
TTAGTGAACCATCTCTCC-----AGAGATTGTGAAAGATGTTCC---ACTAGAAATATTCT

TGTTATTGCTTCGACTCATATTCCCCAAAAAGTGGATCCCGCTCTAATAGCTCCGAATAA  
ATCAAATACATGCATTAAGATACGAAGGCTTCTTATTCCACAACAACGAAAGCACTTTT  
TCATTCTTTCATATACTAGGGGATTCCACTTGGAAAAGAAGATGTTCCATACT-----ACG  
GATTCGGGTCCATAACCATGGGTTCCAATGCACGAGATCTTGTAGCACTTACCAATGAG  
GCCCTATCAATTAGTATTACACAGAAGAAATCAATTATAGACACTAATACAATTAGATCA  
GCTCTTCATAGACAAACTTGGGATTTGCGA-----TCCCAGGTAAGATCCGTTTCAGGAT  
CATGGGATCCTTTTCTATCAGATAGGAAGGTCCTTTGCACAAAATGTACTTCTAAGTAAT  
TGCTCCATAGATCCTATATCTACCTATATGAAGAAGAAA-----TCATGTAAGGAAGGGGAT  
TCTTATTTGTACAAATGGTACTTCGAACTTGGAACGAGCATAAAGAAATTAACGCACT  
TCTTTATCTTTTGAGTTGTTCTGCCGGATCGGTTCGCTCAAGATCTTTGGTCTCCACCC----  
--GGACCCGATGAAAAA---AATTGGATCACTTCTTATGGATTTCGTTGAGAATGATTCT---G  
ATCTAGTTCATGGC-----TTAGAAGGCGCTCTGGTGGGA-----TCCTCACGGACAGAAA  
AAGATTGCAGTCAGTTTGATAATGAT-----CGAGTGACATTGCTTCTTCGGTCCGAACCA  
AGGAAT--CCGTTAGATATGATGCAAAATGGATCTTGTCTATCGTTGATCAGAGATTTCT  
ATATGAAAAA-----TACGAATCGGAGTTTGAAGAA---GGGAAGGAGAAGGAACCCCTC  
GACCCGCAA-----CAGATAGAGGAGGAT-----TTATTCAATCAC-----ATAGTTT  
GGCTCCT-----AGAATATGGCGCCCT-----TGTGGCAATCTATTTGATTGTATCGAAAGG  
CCCAATGAATCGAGATTTCCC---TATCGGTCCAGGTCATTTCCG-----GGCAAGCAGAT  
CATTTCTCATAAAGAGGATGAGCTTCAAGAGAATGATTTGGAGTTCTTGCAGAGTGGA  
ACCATGCAGTACCAGACACGAGATAGATCCTCCAAAGAACAAGGGTTTTTTCAAATAA  
GCCAATTCATTTGGGACCCCGCAGATCCATTCTTTTTCCTATTCAA---GATCAGCCCTT  
TGTCTCTGTGTTTGCACGTCGAGAATTCTTTGCAGATGAAGAGATGTCAAAGGGGCTTA  
TTACTTCCCAAACACATTCTCCTACATCTATATATGAACGCTGGTTGATC-----AAGAATA  
CGCAAGAAAAGCACTTCGAATTGTTGATTCATCGCCAGAGATGGCTTAGCACC-----A  
ATAGTTCATTATCT-----AATGGATCTTCCGTTCTAAT-----ACGCCATCCGAGAGTTATCA  
GTATTTATCAAATCTGTTCCCTATCTAAC---GGAACGCTATTGGATCAAATGGCAAAGACA  
TTGTTGAGAAAGAGATGGCTTTTCCCGGATGAAATGAAACATTTGATT-----CATGTAAC  
AGGAGAAAGATTTCCCATTCCTATGCCTAGATCTCGG---ATAAATGGCAATTTTATCGAT  
AAGACCTCTTCAATTGTAGCCAATATCTTATTACGGATCATTCCGACGACTTCAGGAGA  
AAAAGAGGCATTTACCTATTACAGAGATGGG-----ATGTCAGCTCAATCTGAAGGAAATT  
ATGCGGAAGCTTTACAGAATTATTATGAAGCTACGCGACCAGAAATTGATCCCTATGAT  
CGAAGTTATATACTCTATAATATAGGACTTATCCACACAAGCAACGGAGAACATACGAA  
GGCTTTGGAATATTATTTTCGGGCACTAGAACGAAATCCATTCTTACCACAAGCTTCTAA  
TAATATGGCCGTGATCTGTCAATAC---CGGGGAGAACAGGCCATTCGACAGGGAGATTC  
TGAAATCGCAGAGACTTGGTCCGATCAAGCAGCTGAGTATTGGAAACAAGCTATAGCG  
CTTACTCCAGGTAATTATATTGAAGCACAGAATTGGTTGAAGATCACGAGGGCGCTTCGA  
A-----ATGAACTGGCGATCAGAACGTATATGGATAGAACTTATAACAGGTTCTCGAAAAA  
CAAGTAATTTATGTTGGGCCCTGTATACTTTTTTTAGGTTCACTAGGGTTCTTATTAGTTGG  
AACTTCCAGTTATCTTGGCAGGAATCTGATATCCTTATTTCCGTCTCAGCAAATCCTTTT  
TTTTCCACAAGGGATTGTGATGTCTTTCTATGGTATCGCAGGTCGTTCATTAGCTCCTA  
TTTGTGGTGCACAATTCTGTGGAATGTAGGTAGTGGTTATGATAGATTTGATAGAAAAG  
AAGGAATAGTGTGTATTTTTCGTTGGGATTTCTGGAAGAAATCGTCGTATCTTCTTC  
GATTCCTTATGAGAGATATTCGGTCAATCAGAATGGAAGTGAAAGAAGGTATTTATCCT  
CGTCGTGCCTTTCTATTGAAATAAGAAGCCAGGGATCCATTCCCTTACTCGTACTGA

TGAAAAT--TTCACTCCACGAGAAATTGAGCAAAAAGCTGCTGAATTGGCCTATTTCTT  
GCGCGTACCAATTGAAGTATTT

>Nymphaea

ATGGAAAATGGTGGTTAAATTCAATGTTGTCTCTAAGT-----GCGAGTCTTGGCCCTA  
TTGGAAATACCAGCGGGAGTGAAGAACCATTATAAATGATAGTGAGAAAACGTTAA  
T--TGCAGTAATGTTGATAACTTGGGCGGTGTCAAGGACGTTTGGAGTCTCATCTCTGG  
TGAGACTTTTTGGGTTAGGGATAGTAATGGTGACAGTTATTCCATATATTTTCGATATTGA  
AAATAAGATTTTTGAGATTGACACTGAT-----AGTTACTTTCTGGGTGAACTAGAAAGTT  
TATTTTCTAGTTATCTG-----AATCTAAATAATGGGTCTAAGAGTTACAATCGCTATTAT  
GATCATTACGTGTATGATACTAGGCATAGTTGGAAGAGTCACATAAATAGTTGCATTGAC  
AGTTATATTCGTTCTGAAACCAAT-----ATGGATAGTTGCATTCCAAATGGTAGCAACAAT  
TCAAGTGACAATTACATTTATAGTTACATTTGTAGCGACCGTGGGAGTTCCCTAAAAAC  
TAGTGGTAGTGAT-----TTCGGAAGACAT--GATTTAGATAGAAATAAAAAGATACA  
GACATTTATGGGTTCAATGTGAAAATTGTTATGGATTAATTTATAAGAAATTTTTTAGTTC  
AAAAATGAATATTTGTGAACAATGTGGATACCACTTGAAAATGAGTAGTTCAGATAGAA  
TCGAACTTTTGATTGATCCAGGCACTTGGGACCCCTATGGATGAAAACATGGTCTCTATG  
GACCCTATTGAATTTCACTCTGAGGAGGACCCTTATAGGGATCGTATCAATCTTATCAA  
ATAGAGACGGGTTTAGCTGAGGCTGTTCAAACAGGCATAGGCAAATAAATGGTATTC  
CTATAGCAATTGGTGTATGGATTTAAGTTCATGGGGGGTAGTATGGGATCCGTAGTAG  
GCGAGAAAATCACACGTTTGATCGAGTATGCTACTGATAGATCTCTCCCAGTTATTATGG  
TGTGTGCTTCTGGAGGAGCGCGCATGCAAGAAGGAAGTTTGAGCTTGATGCAAATGGC  
TAAAATATCTTCCGCTTTATAACAATTATCAATCAAATAAAAAGTTATTCTATGTATCAATC  
CTTACATCCCCTACAACCTGGTGGAGTGACAGCCAGTTTTGGTATGTTGGGAGATATCAT  
TATTGCCGAACCAATGCTTACATTGCATTCGCGGGTAAAAGAGTAATTGAACAAACAT  
TGAAGAAGACAGTACCTGAGGGTTCGCAAGTAGCGGAGTATTTATTCAATAAGGGTTTA  
TTTGATCCAATCGTACCGCGTAATCTTTTAAAAGGTGTTCCGAGTGAGTTATTTTCAGTTC  
CATGGTTTCTTTCCCGCCCT-----ATGGTAACCATTTCGAGCCGAAGAAATTAGTA  
ATATTATCCGCGAACGGATTGAGCAATATAATAGAGAAGTAAAGATTGTGAACACTGGT  
ACCGTACTTCAAGTGGGCGACGGCATTGCTCGTATTCATGGTCTTGATGAAGTAATGGC  
AGGTGAATTAGTAGAGTTTGCAGAGGGTACGATAGGTATTGCTCTTAATTTGGAATCAA  
ATAATGTTGGCGTTGTATTAATGGGTGACGGTTTGATGATACAAGAGGGTAGTTCCGTG  
AAAGCAACAGGACGAATTGCTCAGATACCGGTGAGTGAGGCTTATTTGGGTCTGTGTTA  
TAAATGCCCTAGCTAAACCTATTGATGGGAGGGGTGAAATTTTAGCTTCCGAATATCGG  
TTAATTGAGTCTCCCGCTCCAGGTATTATTTTCGAGACGTTCCGTATATGAGCCTCTTCAA  
ACGGGGCTTATTGCTATTGATTGATGATCCCTATAGGACGCGGTCAGCGAGAATTAATT  
ATCGGGGACAGACAGACCGGTAAAACAGCAGTAGCTACAGATACTATTCTCAATCAAA  
AAGGTCAAATGTAATATGCGTTTATGTAGCTATTGGTCAAAAAGCATCTTCCGTGGCC  
CAGGTAGTGACTACTTTCCAGGAACGGGGAGCAATGGAATACACCATTGTGGTAGCGG  
AAACAGCGGATTCGCCTGCTACATTACAATACCTCGCTCCTTATACAGGAGCCGCTCTG  
GCTGAATATTTTATGTACCGTCAACGACATACCTTAATAATTTATGATGATCTCTCCAAAC  
AAGCACAAGCTTATCGCCAAATGTCCCTTCTATTAAGAAGACCACCCGGTTCGCGAAGC  
TTATCCAGGAGACGTTTTTTTATTTGCATTCCCGCCTTTTGGAAAGAGCCGCTAAACCAA  
GTTCTCGTTTAGGCGAAGGAAGTATGACTGCTTTACCAATAGTTGAGACTCAATCTGGG  
GACGTTTCGGCTTATATTTCCCACTAATGTAATTTCCATTACAGATGGGCAAATCTTCTTAT

CCGCGGATTTATTCAATGCTGGAATCCGTCCAGCTATTAATGTGGGTATTTCCGTCTCCA  
GAGTAGGATCCGCAGCTCAAATTAAGCCATGAAACAAGTAGCCGGCAAATTAATAAATT  
AGAATTGGCTCAATTTGCAGAGTTAGAAGCCTTTGCACAATTCGCTTCCGATCTAGATA  
AAGCTACTCAGAATCAATTGGCAAGAGGTCAACGATTACGGGAGTTGCTCAAACAATC  
CCAATCATCCCCTCTCGCGGTGGATGAACAGATAGTTACTATTTATACCGGAACGAATG  
GATATCTTGATCAATTAGAAATTGGACAGGTAAAGAAATTTATTGTTTCAGTTACGTACCC  
ATTTAAGAACGAATAAGCCTCAGTTCCAAGAAATCATATCTTCTACCAAGGTATTCACC  
GAGCAAGCGGAAGCCCTTTTGAAAGAGGCTATTCAGGAGCAGATGGAACTATTTCTAC  
TTCAGGAACAAACAATGAGAATAAATCCTACTACTTCTGGTCTCGGAGTTTCAACTTT  
GTGGAAAAAATCAGGGACGTATCGCTCAAATCATCGGTCCAGTACTGGATGTAGCTTT  
TCCCCCGGGGAAGATGCCTAATTTACAACCTCTTTGGTAGTTAAGGGTTCGAGATACCG  
CAGGTCAGGAAATTAATGTGACTTGTGAGGTACAGCAATTATTAGGAAATAATCGAGTT  
AGAGCTGTAGCTATGAGTGCTACAGATGGGCTGACGAGAGGAATGGAAGTGATTGACA  
CGGGAGCTCCTCTAAGTGTTCAGTCGGTGGAGCCACTCTAGGACGAATTTTCAATGT  
TCTTGGAGAACCTGTTGATAATTTAGGTCTGTAGATACTCGCACAACATCTCCTATTCA  
TAGAGCCGCACCCGCTTTTACACAATTAGATAACCAATTATCAATCTTTGAAACGGGCA  
TTAAAGTGGTGGATCTTTTAGCGCCTTATCGGCGTGGGGGAAAAATCGGACTATTCGGG  
GGAGCCGGAGTGGGGAAAAACAGTACTCATCATGGAATTAATCAACAACATTGCCAAAG  
CTCATGGGGGTGTATCCGTATTCGGCGGAGTAGGAGAACGCACTCGTGAAGGAAATGA  
TCTTTACATGGAATGAAAGAATCCGGGGTGATTAATGAAGAAAATATTGCAGAATCTA  
AAGTAGCTCTAGTATATGGACAGATGAATGAACCGCCGGGAGCTCGTATGAGAGTCGG  
TTGACTGCCCTAACCATGGCGGAATATTTCCGTGATGTTAATGAACAAGACGTACTTCT  
ATTTATTGACAATATCTTTTCGCTTCGTTCAAGCGGGGTCAGAAGTATCTGCCTTATTAGG  
TAGAATGCCTTCCGCCGTGGGTTATCAGCCTACCCTTAGTACAGAAATGGGTTCTTTGC  
AAGAAAGAATCACTTCTACTAAAGAGGGATCTATAACTTCCATTCAAGCAGTTTATGTA  
CCTGCGGACGATTTGACTGATCCTGCTCCTGCCACGACATTTGCACATTTAGATGCTACT  
ACCGTACTATCAAGAGGATTAGCTGCCAAAGGTATCTATCCAGCAGTAGATCCTTTAGA  
TTCAACGTCAACTATGCTCCAACCTCGGATTGTTGGCGAAGAACATTACGAAACTGCG  
CAAAGAGTTAAGCAAACCTTTACAACGTTACAAAGAACTTCAGGACATTATAGCTATTCT  
TGGACTGGACGAATTATCCGAAGAGGATCGTTTAACCGTAGCAAGAGCGCGAAAAATT  
GAACGTTTCTTATCACAACCCTTCTTCGTAGCAGAAGTATTTACTGGTTCTCCAGGGAA  
ATATGTTGGTCTCGCAGAAACAATTAGGGGGTTTCAACTGATCCTTTCCGGAGAATTAG  
ATAGTTTTCCCGAGCAGGCCTTTTATTGGTAGGTAATATCGATGAAGCTACCGCGAAG  
GCTATGAACTTAGAAGTAGAGAGCAAATTGAAGAAAATGACCCTAAATCTTTGTGTACT  
GACTCCTAATAGAATTATTTGGGATTCAGAAGTGAAAGAAATCATTTTATCTACTAATAG  
TGGCCAAATCGGCGTATTACCAAACCACGCCCTATTGCCACGGCCATAGATATTGGTAT  
TTAAGAATACGCCTCGACGACCAATGGTTAACGATGGCTCTGATGGGGGGGTTTGCC  
AGAATAGGCAATAATGAAATCACCATATTAGTAAATGATGCGGAGAAGGGTAGTGACAT  
TGATCCGCAAGAAGCTCAGCGAACTCTTGAAATAGCTGAGGCTAACTTGAGTAAAGCA  
GAAGGCAAGAGACAAGTAATTGAGGCGAATTTAGCTCTCAGACGAGCTAGGGCACGA  
GTAGAGGCTATCAATGCTATTTTCGATGAAAAATCTAACCGATTTCTTCGTTTTTTGGGT  
CACTGGCCATCCGCCGGGAGTTTCGGGTTAATACCGATATTTTAGCAACAAATCTAATA  
AATCTAAGTGATGCTTGGTGTATTGATCTTTTTTGGAAAGGGAGTGTTAAGTGATTTA  
TTAGATAATCGAAAGCAGAGGATTTTGGAGTACTATTTCGCAATTCAGAAGAACTATGCGG



AGGAGCCGTTGAGCAGCTTGAAAAAGCACGGGCTCGCTTACGGAAAGTGGAAGGG  
AAGCGGAAGAGTTTCGAGTGAATGGATACTCTGAGATAGAACAAGAAAAGATGAATTT  
GATTAATGCCGCTTATCAGAATTTGGAACAATTAGAAAATTACAAAACGAAACCATTC  
ATTTTCGAACAACAAAGAGCGATTAATCAGGTCCAACAACGAGTTTTCCAACAAGCCTT  
ACAAGGGGCTCTAGGAACTCTGAATAATTGTTTGAACGGCGAGTTACATTTACGCACCA  
TCGGTGCTAATATTGGCATACTTGGGGCCATGAAAGAAATAACCGATATGAATCCCCTAA  
TTTCTGCTGCTTCCGTTATTGCTGCTGGATTGGCCGTAGGACTTGCTTCTATTGGACCCG  
GAGTCGGTCAAGGTACTGCTGCGGGCCAAGCCGTAGAAGGTATTGCTAGACAACCAG  
AAGCAGAGGGTAAAATACGAGGTACTTTATTGCTTAGTCTGGCTTTTATGGAAGCTTTA  
ACAATTTACGGACTGGTCGTGGCATTAGCACTTTTATTGCTAATCCCTTTGTGATGAAT  
GTTCTACCATGTTCCATCAACACACTAAAGGGGTATACGAGATATCCGGCGTGGAAGT  
AGGCCAACATTTCTATTGGCAAATAGGGGGTTTCCAAGTGCATGCCCAAGTACTTATAA  
CTTCCTGGGTGCTAATTGCTATCTTATTAGGTTTCAGCCGCTATAGCCGTTCCGGAATCCAC  
AAACTATCCCGACCGACGGTCAGAATTTTTTTGAATATGTTCTTGAATTCATTCGAGAC  
GTGAGCAAACTCAAATTGGAGAAGAATATGGTCCTTGGGTTCCCTTTTATTGGAAGTCT  
GTTCCCTATTTATTTTTGTTTCTAACTGGTCAGGTGCTCTTTTACCTTGGAGAATCATA  
GTTACCTCATGGGGAGTTAGCTGCACCCACGAATGATATAAATACTACTGTTGCTTTAGC  
TTTACCCACGTGAGTGGCATAATTTCTATGCAGGCCTTACTAAAAGGGATTGGGTTATTT  
CGGTAAATATATTCAACCAACTCCAATACTTTTACCAATTAATGTCTTAGAAGATTTAC  
AAAACCTTTTACTACTTAGTTTTTCGACTTTTCGGGAATATATTGGCCGATGAATTAGTAGT  
TGTTGTTCTTGTTTCTTTAGTACCTTTAGTGATTCCCTATACCTGTGATGTTCCCTCGGATTA  
TTCACAAGCGGTATTCAAGCTCTCATTTTTGCAACCTTAGCCGCGGCTTATATAGGTGAA  
TCCATGGAAGGTCATCATATGATATTTGCAACTTTAGAACATATATTAATCACAATATCTT  
TTTCGATCATTTCAATTGTGATTCCACTCATCTGATGACC---TTGGTCTATGAAATTGTA  
GGACTATGTGATTCGTCAGAAAAGGCATGATAACTACTTTTTTCTGTATAACAGGATTA  
TTAGTTACTCGTTGGATTTATTCGGGACATGTACCATTAAGTGACCTATATGAATCATTAA  
TGTTCCCTTTCATGGAGTTTCTCTCTTATTTCATATAGTTCCATATTTTAGAACTATAAGAA  
TTTTTTCAGTAAAATAACCGCCCCAAGCGCTATTTTAAACCCAAGGCTTTGCCACTTCGG  
GTCTTTTAACTAAAATGCATCAATCCGCAATATTAGTACCTGCTCTCCAATCCCGTTGGT  
TAATGATGCACGTAAGTATGATGTTGTTGAGTTATGCAGCTCTTTTATGTGGATCATTATT  
ATCCATAACTCTCCTGGTCATTACGTTTAGAAGAAAGATAGATATTTTCGGTAAGACCAA  
TGAGACCCAATACGTGAAT-----TTTTCGTTTAGAAATTATCACAGA  
TATCAATTGACTCAGCGATTGGATTATTGGAGTTATCGTGTGATTGGCTTGGGTTTTACC  
CTTTTAACTATAGGTATTCTTTTCAGGAGCAGTATGGGCTAATGAGGCATGGGGATCTTAT  
TGGAATTGGGACCCCAAAGAACTTGGGCATTTATTACTTGGACCGTATTCGCGATTTA  
TTTACATACTAGAACAATAAAAGTTTGAAGGTGCAAATTCAGCAATTGTGGCTTCTA  
TGGGATTTCTTATAATTTGGATCTGCTATTTTGGGGTCAATCTATTAGGAAGAGGGCTAC  
ATAGTTATGGTTCATTCACATTAACGTGACGAAAAA---GCATTGAATCCCCTACCATA  
TCTTGCATCTATCGTATTTCTGCCTTGGGGAATTTCTCTCTCATTTAATAAAAGTATGGAA  
CCTTGGGTGACTAATTGGTGAATACCAGCCAATCCGAACTTTTTTGAATGATATTCA  
AGAAAAGAACATTCTAGAAGGATTCATAAAATTAGAAGAACTGTTCTTGTGGACGAA  
ATGATAAAGGAGTATCCGGAGACACATATACAAAAGCTTCGTATAGGAATCCACAAAG  
AAACGATACAATTGGTAAGAATGCACAATCAAGATCATATACATATTTTGCATTTCT  
CGACAAATATAACCTGTTTCGCTATTCTAAGTGCTTATTCTATTCTGGGTAATGAAGAAC

TTATCACTCTTAATTCTTGGGTTTCAGGAATTCCTCTATAACTTAAGCGACACAATAAAAAG  
CTTTTTCCATTCTCTTATTAACCGATTTATGTATTGGATTCCATTCGCCCCACGCTTGGGA  
ACTAATGATTGGTTTCGTTCTACAAAGATTTTGGATTTGTTTCAGAATGAGAAAATTATATC  
CGGTCTCGTTTCTACCTTTCCGGTCATTCTAGATAACAATTTTGAAATATTGGATCTTTCAT  
TATTTAAACCGTGTATCTCCTTCACTTGTAGTGATTTATCATTCACTGAATGAGATGCCCA  
TTGGTGTTCAAAAGTCCCTTTTCGGAGTCCTGGAGAGGAAGATGCAGTTTGGGTTGA  
CATATACAACCGACTTCATCGAGAAAGATTACTTTTTCTAGGCCAAGGCGTTGATAGCG  
AGATCTCGAATCAACTTGTGGTCTCATGGTATATCTCAGTATGGAAGATAATACCAGGG  
ATCTCTATTTGTTTATAAATTCTCCCGCGGATGGGTAATACCGGGAATAGCTATTTATGA  
TGCTATGCAAATTGTTCCACCAGACGTACATACAATATGCATGGGATTAGCCGCTTCGAT  
GGGATCTTTCATCCTGGTTCGGAGGAGAATTTACCAAACGTCTAGCATTCCCTCACGCTA  
GGTTATGATCCACCAACCTGCTAGTTCTTTTTATGAGGCACAAGCAGGAGAATTTATC  
CTGGAAGCGGAAGAAGACTGTTGAAACTTCGCGAAATACTAACAAGAGTTTATGTACAAA  
GAACGGGCAAACCTTTATGGGTTGTATCTGAAGACATGGAAAGGGATGTTTTTATGTCA  
GCAACAGAAGCCCAAGCTCATGGCATTGTTGATCTTGTAGCAGTCGAAATGAAAGAAC  
AAAAATTGATCCATGAAGGTTAATTACTGAATCACTTCCAATGGCATGTTCTGGGTT  
CGCTTAGATAACGAAGACCTGGTTCTAGGTTATGTTTCAGGGCGGATACGACGTAGTTT  
TATACGAATACTACCAGGAGATAGAGTCAAATAGAAGTCAGCCGTTATGATTCAACAA  
GGGACGTATAATTTATAGACTTCGCAATAAAGATTCAAACGATCAATACGAATTGCAA  
GGCTATTTAGAAATAGATAGATACCGGAAACAGCGCTTCTTATATCCACTTCTTTTTTCGG  
GAGTATATCTATGCACTTGCTCATGATCATGGTTTATTAGGTTATGACAAT--TCTAGTTCA  
CTAATTGTGAAACGCTTAATTACTCGACTGCATCAACAGAATCATTGACCATTTTCGGTT  
AATGATTCT-----AGGTTTCGTTGGGAGGAGTTTTTATTCTCAAACGATACCAGAGGGTT  
TTGCAGGAATTATGGAAATCCATTCTCGGTGCGATTAGTATCTTCCTTAATAGCAAAT  
ATCAT---TTACGATCTATTCATTCAATATTTCCCTTTTTAGAGGACAAATTATCACATTTAT  
ATTATGTTTCAGATATACTAATACCCTACCCAATCCATCTGGAAATCTTGCTTCAAACCTCT  
TCGCACTCGGATACGAGATGCTCCTTCTTTGCATTTATTGAGATGTTTTCTACACGAGCA  
TCATAATTGGAATAGCCTTATTACTAAATCCATTTCCATTTTTTCAAAGCAAAGATTATTC  
TTGTTCTTGTATAATTCTCATGTATATGAATGCGAATCCGTATTAGTTTTCTTCGTAAAC  
AATCCTCTCATTACGGTCAATATCTTCTCTAGCCTTTCTTGAGAGAACACATTTTTATG  
GAAAAATAAAACAT--GTAGTGACGCCTCGTAATCAAAGGCCCTCTGGTTCTTCAAGG  
AACCTTTGATGCATTATGTTAGGTATCAAGGAAAATCAATTATGGCTTCAAGGTGTACTA  
ATTTACTGATGAAGAAATGGAAATATTACCTTGTCATTTCTGGCAATGTCATTTTCACT  
TATGGTCTCAACCGGGTAGGATCCATATAAATGAATTATCCAATCATTCTTTCTATTTTCT  
GGGCTATCTTTCAGGTGTACGACTAACGCCTTGGGTGATAAGGAGTCAAATGCTAGAG  
AATTCATTTATGATCGATACTGCTATT-----AAGAGATTCGATACAATAGTCCCAATTTTTC  
CTCTGATTGGATCGTTGGTTAAAGCTAAATTCTGTAACGTATCAGGGTATCCTATTAGTA  
AGTCAGTCTGGGCCGATTCTGTCGGATTCTGATATTATTGCTCGATTCTGGGTGGATATGCA  
GAAATCTCTCTCATTATCACAGCGGATCCTCAAAAAACACAGTTTGTGTGCAATAAAG  
TATATACTTCGACTTTCGTGTGCTAGAACTCTAGCTCGTAAACATAAAAGTACGGTACG  
CGCAATCTGTAAGAGATTAGGTTCAAACCTATTGGAAGAGTTCCTTACAGAGGAACAC  
GAAATTGTTTCTTTCATCTTCCGAAGACGGATTTGGTATTTGGATATTATCCGTATCCATG  
GTCTGGTCCCCCATCAATGATAATTGAAGAAGCACAA-----GCTATCAATTTCTTTTT  
TCAGATCGGAATCC---TCAAAGAGGTCTATGGGCTCATATGGTTACTTGTACCTATTTT

GACTCTTGTTATTGGGAATCACAATAGGGGTATTAGTAATTGTGTGGCTAGAAAGAAAA  
TATCCGCAGGGATAACAACGACGAATTGGTCCTGAGTATGCCGGGCCCTTGGGCATTCTT  
CAAGCTCTAGCGGATGGGGTCAAACACTACTTTTCAAAGAAGATCTTCTTCCATCTAGAGG  
AGATATTTCGTTTATTTAGTGTTCGGCCATCCGTAGCGGTCGTATCAATTCTACTGAGTTAT  
TCAGTAATTCCTTTGGCTATCACCTTGTACTAACCGATCTCAGTATAGGTGTTTTTCTAT  
GGATCGCTATTTCAAGTATTGCCCTATCGGACTTCTTATGTCCGGATATGGATCAAATAA  
TAAATATTCTTTTTCAGGTGGTTTACGAGCTGCTGCTCAATCTATAAGTTATGAAATACC  
GTTAACTCCATGTGTGTTATCAATATCTCTACTATCTAACAGTTCAAGTACGGTTGATATA  
GTTGAGGCGCAGTCAAATATGGTTTTTGGGGGTGGAATCTTTGGCGTCAACCTATAGG  
GTTTCTAGTTTTTATAATTTCTTCACTAGCAGAATGTGAGAGATTGCCCTTGGATTTACC  
GGAAGCCGAGGAGGAATTAGTAGCAGGTTATCAAACCTGAATATTCAGGTATCAAATTTG  
GTTTATTTTATGTTGCTTCTTACCTAAATTTACTAGTTTCTTCATTATTCGTAACAGTTCTG  
TACTTGGGAGGGTGGAAATCTTCCATATACCAATTAAGTAACTTTTCGAAATA  
AATAAACTAGTGAAGTCTTTGGAACAACAATTAGTCTCCTCATTACATTAGCTAAAGC  
TTATTTGTTTCTGTTTATTCTTCAACAAGATGGACTTTACCTAGGCTGAGAATGGA  
TCAACTATTAATCTTGGGTGGAAATCTTTTTACCTATTGCTCTCGGTAATCTATTATTG  
ACAATTTCTTCCCAACTTGTTCGCTGATGATCTGGCATGTCCAGAATGAAAACCTTCAT  
TCTCGATTCTACGAGAATTTTTATGAAAGCATTTCATTTGCTTCTTCAATGGAAGTTT  
TATTTTCCCAGAATGTATCCTAATTTTTGGCCTAATTTCTTCTGATGATCGATTTAACC  
TCTGATCAAAAAGATACACCTTGGTTATATTTTCATCTTCCACAAGTTTAGTAATGAGC  
ATAACCGCCCTATTGTTCCGATGGAGAGAAGAACCTATGATTAGCTTTTCGGGAAATTT  
CCAAACGAACAATTTCAACGAAATCTTTCAATTCCTTATTTTACTATGTTCAACTCTATG  
TATTCCTCTATCCGTAGAGTACATTGAATGTACAGAAATGGCTATAACAGAGTTTCTGTT  
ATTTGTATTAACAGCTACTCTAGGAGGAATGTTTTTATGTGGTGCTAACGATTTAATAAC  
TATCTTTGTAGCTCCAGAATGTTTCAGTTTATGCTCCTACCTATTATCTGGATATACCAAG  
AGAGATGTACGGTCTAATGAGGCTACTATGAAATATTTACTCATGGGTGGGGCAAGCTC  
TTCTATTCTGGTTTATGGTTTCTTGGCTATATGGTTCATCCGGGGGAGAGATCGAGCT  
TCAAGAAATAGTGAACGGTCTTATCAATACACAAATGTATAACTCCCCAGGAATTTCTGA  
TTGCGCTTATATCCATCACTGTAGGAATTGGGTTCAAGCTTTCCCAGCCCCTTTTCATC  
AATGGACTCCTGACGTATACGAAGGATCTCCCACTCCAGTCGTTGCTTTTCTTTCTGTTA  
CTTCGAAAGTAGCTGCTTCAGCTTCAGCCACTCGAATTTTCGATATTCCTTTCTATTTCT  
CATCGAACGAATGGCATCTTCTTCTGAAATCCTAGCTATTCTTAGCATGATATTGGGGA  
ATCTCATTGCTATTACTCAAACAAGCATGAAACGTATGCTTGCATATTCGTCCATAGGTC  
AAATCGGATATGTAATTATTGGAATAATTGTTGGAGACTCAAATGATGGATATGCAAGCA  
TGATAACTTATATGCTGTTCTATATCGCCATGAATCTAGGAACTTTTGCTTGCATTGTATT  
ATTTGGTCTACGTACTGGAAGTATAACATTCGGGATTATGCAGGATTATACACGAAAG  
ATCCTTTTTTGGCTCTCTTTCAGCCCTATGTCTCCTATCCCTAGGGGGTATTCTCCTCATT  
AGCAGGTTTTTTTTGGAAAACCTCTATCTATTCTGGTGTGGATGGCAGGCAGGCCTATATTT  
CTTGGTTTCAATAGGACTCCTTACGAGCGTTGTTTCTATCTACTATTATCTAAAAATAATC  
AAGTTATTAATGACTGGACGAAACAAGAAATAACCCCTCACGTGCCGAAATTATAGAA  
GATCTCCTTTAAGATCAAACAATTCATCGAATTGAGTATGATTGTATGTGTAATAGCAT  
CTACTATACCAGGAATATCAATGAACCCAATTATTGCAATTGCTCAGGATACCCTCTTTAT  
GTTTCTGCTTTACGAATATGATATTTCTGGGCATTTCTAATGATATCAAGTGTTATTCCTA  
TTTTGGCATTCTAATTTCCGGGGTTTTAGCCCAATTAGTGAAGGACCAGAGAAGCTC

TCCAGTTATGAATCGGGTATAGAACCAATAGGGGATGCTTGGATACAATTTTGAATCCG  
CTATTACATGTTTGCTCTCGTTTTTGTGTTTTTGATGTCGAAACGGTCTTTCTTTATCCA  
TGGGCCGTGAGTTTTGATATATTGGGCGTATACGTATTTATAGAAGCTTTGATTTTCGTGC  
TTATCCCAGTTGTTGGTTCAGTTTATGCATGGCGAAAAGGAGCATTGGAATGGTCTATG  
AGTGATTTTTATTGGTTAACAATCATTGTTGTTTTGCCATATCCGCGGGTTCCTTAATTG  
CTCTTCTCCCTCATAGAGGAAATAAGGTAGTTCGATGGTATACTATCTGTATCTGCTTATT  
TGAACTCCTTCTAACGACCTACGTATTCTGTTATCATTTTTAAATTGGACGATCCATTAATC  
CAATTGGAAGAAGACTTTAACTGGATAAATCTTTTTGATTTTCACTGGAGACTCGGAAT  
CGACGGACTTTCTATAGGACCCATTTTATTGACAGGATTTATCACTACTTTAGCTACTTC  
AGCGGCTTGGCCAGTTACTCGAAATTCGCGATTGTTCCATTTCTGATGTTAGCAATGT  
ACAGTGGTCAAATAGGATCATTTTTCTTCTCGAGACCTCTTACTTTTTTTTCATCATGTGGG  
AATTAGAATTAATTCCTGTTTACCTACTTTTATCCATGTGGGGAGGAAAGAAACGTCTGT  
ACTCAGCTACAAAGTTCATTTTGTACTIONGACAGGAGGTTCCATTTTTCTCTTAATGGGA  
GTTCTAGGTATGGGTTTATATGGTTCCAATGAACCAACATTAATTTTGAACATTAGCT  
AATCAATCGTATCCCGTGGCATTGGAAATAATTTTTATTTTGGTTTCTTATTGCTTATG  
CTGTCAAATCACCGATCATACCTTTACATACATGGTTGCCAGATACCCATGGAGAGGCG  
CATTACAGTACATGTATGCTTCTAGCTGGAATCTTATTAATAAATGGGAGCATACGGGTTG  
GTTCCGGTCAATATGGAATTATTACCCACGCCATTCCATTTTTCTCCTTGGTTGATGA  
TAGTAGGGACTATTCAAATAATCTATGCAGCTTTAACTTCTCCTGGTCAACGCAATTTAA  
AAAAGAGAATAGCCTATTCTTCCGTATCTCATATGGGTTTCATAATAATAGGAATTAGTT  
CTATAACCGATGCGGGACTCAATGGAGCTATTTTACAATAATCTCTCATGGATTTATTG  
GTGCTGCACTTTTTTCTGCGAGGAACAAGTTATGATAGAATACGTCTTCGTTATCTTA  
ACGAAATGGGGGAATAGCTATACTAATGCCAAGAATCTTACGATGTTTACGTAGCTTC  
TCGATGGCTTCTCTCGCATTACCAGGAATGAGTGGTTTTGTTGCAGAATTTGTGATATTT  
TTGGGAATAATTAAGCTAGCCCAAATACCTTGTAAATGTCAAAAATACTAATTACTTTTTGTA  
ATGGCAATGGAATGATATTAAGTCTTATTTATTCATTATCTATGTCACGCCAGATGTTCT  
ATGGATACAGGTTATTCAATGTTCCAAAGTCTCACTTTGTGGATTCTGGACCACGAGAA  
ATCTTTATTTTTATGTGTATCCTTTTACCAATAATAGGTATTGGTATTATCCAGATTTTCGT  
TCTTTCACTATCAGTTGACAAGGTAGAACTATTCTATCTAATTACTTTTCATGGGATGAT  
GCTCGAGCATGACTTGTTTTAAAGTGCCTATTTATTTTCTATTGGTATCTATGGATTGATC  
ACAAGTCGAAACATGGTTAGAGCACTTATGTGTCTTGAACCTTATACTGAATGCTGTAA  
TATGAATCTCGTAACATTTTTCTGATTTATTTGATAGTCGCCAATTAAGGGAGACATTTT  
CTCGATCTTTGTTATCGCTATTGCAGCCGCCGAAGCAGCTATTGGACCAGCTATTGTTTC  
TTCAATCTATCGTAACAGAAAATCAACTCGTATCAATCAATCAAATTTATTGAATAAAAT  
GGAACGCACATATCAATATGCATGGATTATACCTTTTCGTTCCGCTTCTAGTTACTATGTTA  
ATAGGATTGGAATCCTGCTTAATCCGACAGCAACAAAAAATATTCGTCTGATATGGGC  
TTTTCCCGCTGTTTTATTGTTAAGTATAGTTATGGTCTTTTCCACCAAGCTGGCGATCCA  
GCAAATAAATGGTAGCTCAATTTATGAATATCTATGGTCTTGGAGCATCACTAGTGATTT  
TTCCTTAGAGTTCGGCTACTTGATTGATCCACTTACTTCTATTATGTCGATATTAATCACT  
ACTGTTGGAATCATGGTCTTATCTATAGTGATAATTATATGTCTCATGACCGAGGATATT  
TGAGATTTTTTGTATATGAGTTTTTTCAATACAGCGATGCTGGGATTAGTTACTAGTC  
CCAATTTGATACAAATCCATATTTTTTGGGAAGTGTGGGAATGTGTTCCCTATCTGTTAAT  
AGGTTTTTGGTTTACCCGACCAATTGCAGCAAATGCCTGCCAAAAGCGTTTGTGACC  
AATCGTGTGGGGGATTTTTGGTTTATTATTAGGAATCCTAGGTTTTTATTTAATAACAGGTA

GTTTCGAATTTTCAGGATTTATTTCGAAATATTCAATGATAATGAGATTAATTCCTCATTGCTG  
TACGCTTTGTGCTTCTTATTATTCCCTTGGTGCAGTTGCTAAATCTGCGCAATCCCCT  
TCATGTATGGTTACCTGATGCTATGGAGGGACCCACTCCTATTTCCGGCTCTTATACATGC  
GGCTACTATGGTAGCCGCAGGAATTTTTCTTGTAGCTCGGCTTCTTCTCTTTTCATAGC  
CATACCTTACATAATGAATATCATATCTTTGATAGGTGTAATAACGGTACTATTAGGAGCT  
ACCTTAGCTCTTGCTCAAAGAGATATTAAGAGAAGTTTAGCTTATTCCACGATGTCTCA  
ATTGGGCTACATGATGTTAGCTTTGGGTATAGGTTCTTATCGAGCCGCTTTATTCCATTG  
ATCACTCATGCTTATTCTAAAGCATTATTGTTTTTAGGGTCTGGATCCATCATTCAATCCA  
TGGAACCCATTGTTGGGTATTCTCCGGCTAAGAGTCAGAACATGGTTCTTATGGGCGGT  
TTAACCAAATATATGCCAATTACAAAACAACCTTTTTTTTTTAGGTACTTCTCTTTGT  
GGTATTCCACCCCTCGCTTGTTTTTGGTCCAAAGACGAAATCTTAATGATAGTTGGTTG  
TATTCACCGATTTTTGCAATAATAGCTTTCTACACAGCAGGATTAAGTGCATTTTATATGT  
TTCGTATGTATTTACTTACTTTTCGAAGGGCATTACGTAGTCATTTCAAATACAGCG  
GACACACAAATAGTTTCTTCTATTCAATATCCATATGGGGGCAAGAAGGTTCCAAACCT  
GTTAGCAGT---AATTTGCTTTTAAACAACAAGGAATTTTTCC---AATAAAGACTCTCATACT  
TTACTATACCCGCATGAATCGGACAATACCATGTTATTTCCCTGCTTATATTGGCCATAT  
TTACTTTGTTTCGTTGGATGCATAGGAATTCATTTTCGAGGTTGACATATTATCGAAATGGT  
TAACCCCATCGATGAAACTTTTCCATCAGAATCAACTGAT---GAAGATTGGTATAAATT  
TTTGACGAATGCATTTTATTAGTTAGTATAGCCTACTTCGGAATATTTCTAGCATCTGTT  
CTATATGGGTCTGTCTATTTCAGATCGACAAAATTTGTACTTAATCAATTCATTTGCTATTC  
GCTTAGAACAAATAATAAATGTCATATACAACTGGTCATACAATCGCGGATACATAGACG  
TTTATTACGAAAAGTATTCATTAAGGGTGTACGAGAATTAGCTCAACTAGCTCATTCTT  
TTGATCGACGAGTAATTGATGGAGTTACTAATGGGATTGGCGTTGCAAGTTTCTTTCTA  
GGAGAAGGTATTAATAT---ATAGGGGGAGGGCGAATTTCTTCTTATCTATTCTTATATTT  
AGCTTGTGTATCAATAGTCTACTAATTTACTATATGGATTTACCTGCGCCAATACATGAT  
ATTTCTTTTAGTATCTCTGGGATCAGGTCTTATAGTAGGAGGTCTAGGAGTGGTATTACTT  
ACCAATCCAATTTATTCTGCCTTTTCGTTGGGATTGGTTCTTGTGTTGTATATCTTTATTTTA  
TATTCATCGAACTCTTATTTTGTAGCTGCTGCGCAGCTACTTATTTACGTGGGAGCCAT  
AAATGTCTTAATCTTATTTGCTGTGATGTTTATGAATGGTTCAGAATATTACAATTTTTT  
CATTTTTGGACTGTCGGAGATGGATTCACTTCGCTAGTTTGTACAAGTATTTTTTTTTCA  
CTAATTGCTACTATCCCAAACACGTCATGGTACGGGATTATTTGGACTACAAGATCAAA  
CCAGATCATAGAACAGGACCTGACAAGTAATGTTCAACAGATTGGGATTCATTTATCAA  
CAGATTTTTATCTTCCATTTGAATCATTCTATAATCCTTTTAGTTTCTTAGTGGGCGC  
AATTGCTATGGCTCGCCGGATGACTGTACCAGACGCAAGAAAAGACCTCCTCGTGGTC  
AATATGGGTCCTCACCAACCGTCAATGCATGGTGTCTTTCGACTCATTGTTACTCTAGAT  
GGCGAAGATGTTATCGACTGTGAACCCATATTGGGTATTTACACAGAGGAATGGAAAA  
AATTGCGGAAAACCGAACAATTATACAATATCTACCTTATGTGACACGTTGGGATTATTT  
AGCTACTATGTTACGGAGGCAATAACCGTTAATGCACCTGAGGAATTGGGAAATATTC  
AAGTACCTAAAAGAGCCAGCTATATTAGGGTAATTATGCTGGAGTTGAGTCGTATAGCT  
TCGCATTTGTTATGGCTTGGACCTTTTATGGCCGATATCGGTGCACAGACTCCTTTCTTC  
TATATTTTCAGAGAGAGGGAATTGTTATATGATCTATTCGAAGCTGCCACAGGTATGCGA  
ATGATGCATAATTATTTCCGTATCGGGGGGTAGCTGCTGATTTACCTCATGGCTGGATA  
GATAAATGTTTAGATTTTTGCGATTATTTTTTAAACGGGAGTTGTTGAATATCAAAGCTT  
ATTACGCGCAATCCCATCTTTTTGGAACGAGTTGAAGGGGTGGGTTTTATTGGGGGAG

AAGAAGCCATAAATTGGGGTTTATCAGGACCAATGCTACGAGCTTCCGGAATCCAATG  
GGACCTTCGTAAAGTCGATCGGTATGAGTGTTATGATGAATTCGATTGGGAAGTCCAAT  
GGCAAAAAGAAGGAGACTCATTAGCTCGTTATTTAGTAAGAATTGGCGAAATGACGGA  
ATCCATAAAAATTATTCAACAGGCTCTAGAAGGAATCCGGGGGGACCTTATGAAAATT  
TAGAATTCGACGCTTTGCTGGAACAAAAGACTCAGAATTGAACGACTTTGAATATCG  
ATTCATTAGTAAAAAGCCTTCTCCCAGTTTTGAATTGTCAAAAACAAGAACTTTATGTAA  
GAGTGAAGCCCCAAAGGGAGAATTAGGTATTTTTCTGATAGGAGATAATAGTGTTTTT  
CCTTGGAGATGGAAAATCCGTCCACCCGGTTTCATCAATTTGCAAATCTTCCTCAGCT  
AGTTAAAAGAATGAAATTGGCTGATATTATGACAATACTAGGTAGTATAGATATCATTAT  
GGGAGAAGTTGATCGTATGTTTCTTATGGTGACTGGGTTTCATGAATTATGGTCAACAGA  
CAGTACGAGCTGCAAGATACATTGGTCAAAGTTTCATGATTACCTTATCTCACGCAAAT  
CGTTTACCTGTAACCTATTCAATATCCTTATGAAAAATCGATCACATCAGAGCGTTTCCGT  
GGGCGAATCCACTTTGAATTTGATAAATGCATTGCTTGTGAAGTATGTGTTCCGCGTATGT  
CCGATAGATCTACCTGTTGTTGATTGGCGATTAGAAACAGATATTAGAAAGAAACGATT  
GCTTAATTATAGTATTGATTTTGGAACTCTGTATATTTTGTGGTAATTGCGTGGAGTATTGC  
CCCACAACTGTTTATCAATGACTGAAGAATATGAACTTTCCACCTACGATCGTCACGA  
ATTAAATTATAATCAAATTGCTTTGGGTTCGTTACCAATGTCTGTAATTGGAGATTACAC  
AGTTCGAACAATTATGAACTCAAAAATATCTATGGATAAACCCCTTGATTCAAGAACGA  
TTACCAAT--ATGCAGGGTCGTTTCATCCGCTTGGCTAGTTAAACACGAGCTGGTTCATAG  
ATCCTTGGGCTTTGATTACCAAGGAGTAGAGACTTTACAATAAAGCCCGAGGATTGGT  
ACTCCATTGCTGTCATTTACATCGTATATGGTTACAATTATCTACGTTCCCAATGTGCCTA  
CGATGTAGCACCGGGTGGATTGCTAGCTAGTGTGTATCATCTGACGAGAATACAGTATG  
GTGTGGACCAACCAGAAGAGGTATGCATAAAAGTATTTGTCCCAAGGAGTAATCCTAG  
AATCCCGTCTGTTTTCTGGATTTGGAAAAGCGCCGATTTTCAAGAACGGGAGTCTTATG  
ATATGTTGGGAATCTCTTATGATAATCATCCACGCATGAAACGGATTTTGATGCCCGAAA  
GTTGGATTGGTTGGCCCCACGCAAGGATTATATTGCCCTAATTTCTATGAACTACAGG  
ATGCTTAT-----  
-----ATGAATTCTATGGAGTTTCCG  
CTCTTTGACCGAACAACCCCAATTCAGTTATTTCAACTACATTGAATGATCTTTCGAAT  
TGGTCAAGACTTTCAGTTTATGGCCGCTTCTCTACGGTACCAGTTGTTGCTTCATTGAA  
TTTGCCTCATTAATAGGCTCCCGATTTCGATTTTATGCGTTATGGACTGGTGCCAAGATCC  
AGTCCTAGGCAAGCCGACCTTATTTTAACAGCCGGTACAGTAACAATGAAAATGGCTC  
CTTCTTTAGTAAGACTATATGAACAAATGCCTGAACCAAATATGTAATTGCTATGGGAG  
CCTGTACTATTACAGGAGGAATGTTACGTACCGATTCTTATAGTACCGTTCGGGGAGTC  
GATAAGTTAATCCCCGTCGATGTCTATTTGCCAGGATGCCACCTAAACCAGAGGCAAT  
TATAGACGCTATAACGAACTTCGTAAGAAGGTATCTCGAGAAATCTATGAAGATAGAA  
CGGGGTCCCAACAGGAAAATCGATGTTTTACTACTAATCACAAAGTTTCATCTTGGACGC  
AGTACTCGTGCCGTAAATTACGATCAAGGA-----CTCTATCAATCGACTTCAGAGATAC  
CTTCTGAAGCATTTTTCAAATACAAGAGTTCAGTATCTTCTCACGAATTAGTGAATATGC  
AAAAAATAGAAATTTTCTTGGGTAAAGGAACAGATGACTCGATGCATTTCCGTATCG  
ATGATGATATATGTAATAACTCGGGCATCTATTTCAAATGCATATCCATTTTTGCGCAGC  
AGAGTTATGAAAATCCGCGAGAAGCAACTGGGCGTATTGTATGCGCTAATTGCCACCTG  
GCTAACAAAGCCCGTGGATATTGAGGTTCCACAAGCTGTGCTTCTGATACTGTATTTGA  
GGCAGTTGTTAGAATCCCCTACGATATGCAACTGAAACAGGTTCTTGCTAATGGTAAAA

AGGGAGGTTTGAATGTGGGGGCTGTTCTCATTTTACCCGAAGGATTTGAATTAGCTCCC  
CCCGATCGTATTTCTCCCGAGATGAAAGAAAAGATGGGTAATCTGTCTTTTCAGAGTTA  
TCGTCCTAATAAAAAAACATTCTTGTGGTGGGCCCTGTTCCCTGGTCAGAAATATAGTG  
AAATCGTCTTTCCATCCTTTCTCCAGATCCCGCTACTAAGAAAGAGGTTCACTTCTTA  
AAATATCCTATATATGTAGGTGGGAACAGGGGAAGGGGTCAGATTTATCCTGATGGGAG  
CAAGAGTAAACAATACAGTCTATAATGCTTCAGCAGCAGGGATAGTAAGTAAAATAGTAC  
GTAAAGAAAAGGGTGGATATGAAATAACCATATCTGATGCATCGAATGGACACGAAAC  
GGTTGATATTATACCTCCAGGACCAGAACTTCTTGTCTTGAAGGTGAATACATCAAGC  
TTGATCAGCCATTAACAAGTAATCCCAATGTAGGTGGTTTTGGTCAAGGCGATGCAGAA  
ATAGTACTTCAAGATCCATTGCGTATCCAAGGCCTTTTGTCTTCTTAGCATCTGTTATTC  
TGCGCAAATCTTTTTGGTTCTTAAAAAGAAACAGTTTGAGAAGGTTCAATTAGCCGA  
AATGAATTCATGAGTAAAGTATATGATTGGTTCGAGGAGCGTCTCGAGATTCAAGCGA  
TTGCAGATGATATACTAGTAAATATGTTCCCTCCTCATGTCAATATATTTCAATTGTCTAGG  
AGGGATCACACTTACTTGGCTTTTTAGTACAAGTAGCTACGGGTTTTGCTATGACTTTTTA  
CTATCGCCCGACCGTCACAGAAGCTTTTGCCTCTGTTCAATACATAATGACTGAAGCCA  
ACTTCGGTTGGTTAATCCGATCAGTTCATCGATGGTCAGCAAGTATGATGGTTCTAATGA  
TGATCCTGCACGTATTTTCGTGTTTATCTCACAGGTGGTTTTAAGAAACCACGTGAATTG  
ACTTGGGTTACGGGCGTAGTTCTGGCTGTGTTGACTGCATCCTTTGGGGTAACTGGTTA  
TTCTTTACCTTGGGACCAAATTGGGTATTGGGCAGTCAAATTGTAACAGGTGTACCTG  
AGGCTATCCCTATAGTGGGATCGCCCTTGGTAGAGTTATTACGCGGAAGTGCTAGTGTC  
GGTCAATCCACTTTGACCCGCTTTTATAGTTTACACACTTTTGTATTACCTCTTCTTACTG  
CCGTATTTATGTTAATGCACTTTTCAATGATACGTAAGCAAGGTATTTCAAGTCCTTAAT  
GGGAGTAAACAAAGAAACCCGACTTGAATGATCCTGTATTAAGAGCAAATTGGCTAAG  
GGGATGGGACATAATTATTATGGGGAACCGGCATGGCCTAATGATCTTTTATATATTTTTC  
CCGTAGTAATTCTAGGTACTATTGCATGTAACGTAGGTCTAGCGGTTCTAGAGCCATCAA  
TGATTGGTGAACCGGCAGATCCATTTGCAACTCCTTTGGAAATATTACCCGAATGGTAC  
TTCTTTCCCGTATTTCAAATACTCCGTACAGTACCCAATAAGTTATTGGGTGTTCTTTTAA  
TGGTTTTCGGTACCAGCGGGATTATTGACAGTACCCTTTTTGGAAAATGTTAATAAATTCC  
AAAATCCATTCCGTCGCCAGTAGCTACAACAGTCTTTTTGATTGGTACGGCAGTAGCC  
CTTTGGTTAGGTATTGGAGCAACATTACCTATTGATAAGTCTCTAACTTTAGGTCTTTTTA  
TGATTGAAGTTTTTTTTATTGGAATCGTGTTAGGTCTAATTCCTATTACTTTAGCCGGATT  
GTTTGTAAGTGCATATTTACAATACAGACGCGGCGATCAGTTGGACTTTATGCCTACTAT  
AGTTAGTTATTTCCGTTTTCTACTGACTGCTTCAACTATAACCCAGCTCTATTTATTGGT  
CTGAGCAAGATACGACTTATTATGGATATAGTAAGTCTCGCTTGGGCTGCTTTAATGGTA  
GTTTTTACGTTTTCCCTTTCACTCGTAGTATGGGGAAGAAGTGGACTCATGATTATTCGT  
TCGCCGGAACCAGAAGTGAAGATTTTGGTGGATAGGGATCCCGTAAAACTTCATTTG  
AGGAATGGGCCAGACCCGGCCATTTCTCAAGGACAATAGCTAAGGGCCCTGATACTAC  
CACTTGGATCTGGAACCTACATGCTGATGCTCATGATTTTCGATAGCCATAACCAATGATTT  
GGAGGAGATCTCCCGAAAAGTATTTAGTGCTCATTTCCGGTCAACTATCCATCATCTTTCT  
TTGGTTGAGTGGCATGTATTTCCATGGAGCCCGTTTTTCCAATTATGAAGCGTGGCTGA  
GCGACCCTACTCACATCGGACCCAGTGCCAGGTGGTTTTGGCCGATAGTGGGTCAAGA  
AATATTGAATGGCGATGTAGGCGGAGGTTCCGAGGAATACAAATAACCTCTGGATTTT  
TTCAGATTTGGCGAGCGTCCGGAATAACTAGTGAATTACAACCTTTATTGFACTGCAATT  
GGAGCATTGGTCTTTGCAGCGTTAATGCTTTTTGCCGGTTGGTTCCATTATCACAAAGC

TGCTCCAAAATTGGCTTGGTTCCAAGATGTAGAATCCATGTTGAACCACCACTTAGCAG  
GATTACTAGGACTTGGGTCTCTTTCTTGGGCAGGGCATCAAGTACATGTATCTTTACCTA  
TTAACCAATTTCTGAACGCTGGGGTGGATCCTAAGGAAATACCACTTCCTCATGAATTT  
ATCTTAAATCGGGATCTTTTGGCTCAACTTTATCCCAGTTTTGCAGAGGGAGCAACCCC  
GTTTTTCACCCTGAATTGGTCAAATACGCGGAATTTCTTACTTTTTCGTGGAGGATTAGA  
TCCAGTAACAGGAGGTCTATGGCTAACCGATATTGCACACCATCATTTGGCTATTGCAAT  
TCTTTTCCTGATAGCTGGTCACATGTATAAGACCAACTGGGGCATTGGTCATGACCTGA  
AAGATATTTTTGGAGGCTCATAAGGGTCCGTTTACAGGTGAGGGTCATAAGGGCCTCTAT  
GAGATCCTAACACGTCATGGCATGCTCAATTAGCTCTGAATCTAGCTATGTTGGGTCT  
TTAACCATTTGTAGTAGCCACCATATGTAATCTATGCCCCCTTATCCATACCTAGCTACTG  
ATTATGGTACACAACCTTCGTTGTTACACATCACATGTGGATCGGTGGATTTCTCATAG  
TTGGTGCTGCTGCACATGCAGCAATTTTTATGGTAAGAGACTATGATCCAACACTCGAT  
ACAACGATCTATTAGATCGTGTCCCTTAGGCACCGAGATGCAATCATATCACATCTTAACT  
GGGTGTGTATATTTCTAGGCTTTCACAGTTTTGGCTTGTATATTCATAATGATACCATGAG  
CGCTTTGGGGCGTCCCCAAGATATGTTTTAGATAACCGCTATAACAATTACAACCTATCTT  
TGCTCAATGGATACAAAACACTCATGCTTTAGCACCTAGCGCAACAGCTCCTGGTGCA  
ACAGCGGGCACCAGCTTGACTTGGGGGGGTGGTGATTTAGTAGCAGTAGGCGGCAA  
GTAGCTTTGTTACCTATCCACTGGGAACCGCAGATTTTTTGGTACATCACATTCATGCA  
TTTACGATCCATGTAACGTATTGATACTACTGAAAGGTGTTCTATTTGCCCGCAGTTCT  
CGTTTGATACCTGATAAAGCAAATCTGGGTTTTCGTTTCCCTTGTGACGGACCCGGAAG  
AGGGGGAACATGCCAAGTATCCGCCTGGGATCATGTCTTCCCTAGGTCTATTCTGGATGT  
ACAATGCGATTTCCGGTAGTAATTTCCATTTAGCTGGAAAATGCAGTCAGATGTTTGG  
GGTAGTATAAGTGATCAAGGGGTGGTAACTCATATCACGGGGGAAACTTTGCACAGA  
GTTCCATTACAATTAATGGGTGGCTACGAGATTTTTTATGGGCACAGTCCTCCCAAGTAA  
TCCAGTCTTATGGCTCTTCATTATCCGCCTATGGTCTTTTCTTCTTAGGTGCTCATTTTGT  
CTGGGCCTTCAGTTTAATGTTTCTATTTAGCGGTCTGTGGTTATTGGCAAGAACTCATTGA  
ATCCATCGTCTGGGCTCATAACAAATTAAGTTGCTCCTGCTACTCAGCCTAGAGCCT  
TGAGCATTATAAAGGACGTGCTGTAGGAGTAACCCATTACCTTCTGGGTGGAATTGCC  
ACAACATGGGCATTCTTCTTAGCAAGAATTATTTAGTAGGAATGGCATTAAAGATTTCC  
AAGGTTTAGCCAAGGCTTAGCTCAGGACCCCACTACTCGTCGTATTTGGTTTGGTATTG  
CTACCGCACATGACTTCGAGAGTCATGATGATATCACCGAGGAACGTCTTTATCAGAAT  
ATTTTTGCTTCTCACTTCGGGCAGTTAGCAATAATCTTTCTGTGGACTTCCGGCAATCTG  
TTTCATGTGGCTTGGCAAGGAAATTTGAGTCATGGGTACAGGACCCCTTACATGTAAG  
ACCCATTGCTCATACTATTTGGGATCCTCATTTTGGTCAACCGGCTGTAGAAGCTTTTAC  
TCGAGGGGGTGCTCTTGGCCCAGTGAATATTGCTTATTCGGGTGTTTATCAATGGTGGTA  
TACAATCGGCTTGGCACCAATGAAGATCTTTATACTGGAGCTCTTTTTCTATTTATT  
TCTGCCATATCTTTAGTAGGGGGTGGTTACATCTACAACCCAAATGGAAGCCAAGCGT  
TTCGTGGTTCAAAAATGCCGAATCTCGTCTCAATCATATTTGTCAGGGCTCTTCGGAG  
TAAGCTCCTTGGCTTGGGCAGGACATTTAGTTCATGTTGCTATTCCCGGATCAAGGGGT  
GAATATGTCAGATGGAATAATTTCTTAGATGTATTACCATATCCCCAAGGATTGGGGCCA  
CTTTTTACAGGTGAGTGAATCTTTATGCCAAAACCCCGATTCCAGTAGTCATTTATTC  
GGTACCTCCAAGGAGCGGGAACCTGCCATTCTAACCTTCTCGGGGGATTCCATCCGC  
AAACTCAAAGTTTATGGCTGACCGATATTGCCATCATCATTTAGCTATTGCATTTATTT  
TCTCGTTGCTGGTCATATGTATAGAATAACTTCGGGATTGGGCACAGTATAAAAGATCT



TCTAGAGGCGCATATTCCTCCGGGGGGTCGATTGGGGCGCGGGCATAAAGGCCTTTATG  
ACACAATCAATAATTCGATTCATTTTCAATTAGGTCTTGCTCTAGCCTCTTTGGGGGTTA  
TACTTCCCTTGGTAGCTCAACACATGTACTCTTTACCTGCTTATGCATTCATAGCACAAG  
ACTTTACTACTCAAGCTGCGTTATATACTCATCACCATAACATCGCAGGGTTCATCATGA  
CAGGAGCCTTTGCTCATGGAGCTATATTCTTCATTAGGGATTACAACCCGCAGCAGAAT  
GAGGATAATGTATTGGCAAGAATGTTAGACCATAAGGAAGCTATCATATCTCATTAAAGT  
TGGGCTAGCTTGTTCCTGGGGTTCACATACCTTGGGACTCTATGTTTCATAATGACGTCATG  
CTTGCTTTTGGTACTCCAGAAAAACAAATCTTGATCGAACCCATATTTGCCCAATGGAT  
ACAGTCCGCTCATGGTAAGACTTCATATGGGTTTGATGTACTCTTATCTTCAACGAATGG  
CCCAGCATTAAATGCAGGTCAAAGCTTATGGTTACCTGGCTGGTTGAATGCTATTAATGA  
A-----AATCGTAATTCACTATTCTTAAACAATAGGGCCGGGGGACTTCTTGGTACATCATGC  
TATTGCTCTAGGGTTGCATACAACTACATTGATCTTAGTAAAAGGTGCTTTAGATGCACG  
TGGTTCCAAGTTAATGCCAGATAAAAAAGATTCGGGTATAGTTTCCCCTGCGACGGTC  
CAGGACGAGGTGGTACTTGTGATATTTTCGGCTTGGGATGCATTTTATTTGGCAGTTTCT  
GGATGTTAAATAACCATTGGATGGGTTACCTTCTATTGGCATTGGAAGCATATCACATTAT  
GGCAGGGTAATGTTTCGCAATTTAATGAATCTTCCACTTATTTGATGGGATGGTTAAGAG  
ATTATCTATGGTTAAACTCTTCACAACCTTATCAACGGATATAATCCTTTTGGTATGAATAG  
TTTATCCGTCTGGGCGTGGATGTTCTTATTTGGGCATCTTGTTTGGGCTACTGGATTCAT  
GTTCTTAATTTCCCTGGCGTGGATATTGGCAGGAATTGATTGAAACTTTAGCATGGGCTCA  
TGAACGCACACCTTTGGCTAATTTGATTTCGCTGGAGGGATAAACCGGTGGCTCTTTCCA  
TTGTACAAGCAAGACTGGTTGGCTTAGCTCACTTTTCTGTAGGTTATATATTTACCTACG  
CAGCTTTCTTGATTGCTTCTACATCAGGCAAATTTGGTATGTCACACTCAGTAAAGATTT  
ATGATACATGTATAGGGTGTACCCAATGCGTACGAGCGTGTCCACAGATGTCCCTGGAA  
ATGATACCCTGGGACGGATGTAAAGCTAAGCAAATTGCTTCCGCACCAAGAACGGAGG  
ACTGTGTAGGTTGTAAGAGATGTGAATCCGCTTGTCCAACGGATTTCTTAAGTGTACGG  
GTTTATTTATGGCATGAGACAACCCGTAGCATGGGTCTAGCTTATATGACAGATCTCAAC  
TTACCCTCTATTTTGTGCCTTTAGTAGGCCTATTATTTCCGGCAATTGCAATGGTTTCTT  
TATTTTCCATGTTCAAAAAACAAGATTGTCATGCGAGATATCAAAACATACCTTTCCG  
TAGCGCCTGTGCTAACTACTCTATGGTTCGGTCTTTTAGCAGGTCTATTGATAGAGATCA  
ATCGTTTATTCCCAGATGCGTTGACATTCCCTTTTTTTTCATTCATGACTGCAATTTTAGA  
GAGACGCGAAAGCACAAGCCTATGGGGTCGCTTCTGCAACTGGGTAACCAGCACTGA  
AAATCGTCTTTACATTGGATGGTTCGGTGTTTTGTGATGATCCCTACCCTATTGACCGCTAC  
TTCTGTATTTATTATCGCCTTCATTGCGGCTCCTCCAGTAGATATTGATGGTATTCGTGAA  
CCTGTTTCTGGTTCTCTACTTTATGGAAATAATATTATTTCTGGTGCCATTGTTCTACTT  
CTGCGGCTATCGGGTTGCATTTTACCCGATATGGGAAGCATCATCCGTTGATGAATGGT  
TATACAATGGCGGTCCTTATGAACTAATTGTTCTACACTTCTTACTTGGTGTAGCTTGTT  
ACATGGGTGCTGAGTGGGAGCTTAGCTTCCGCTGGGTATGCGCCCTTGGATTGCTGTT  
GCGTATTCAGCTCCTGTTGCAGCTGCTACTGCTGTTTTTCTTGATCTACCCTATTGGTCAA  
GGAAGCTTCTCTGATGGTATGCCTCTAGGAATATCTGGTACTTTCAACTTCATGATTGTA  
TTCCAGGCTGAACACAACATCCTTATGCATCCATTCCACATGTTAGGTGTGGCTGGTGT  
ATTCGGCGGCTCTCTATTTCAGTGCTATGCATGGTTCCTTGGTAACCTCTAGTTTGTAGCAG  
GGAACACTACTGAAAATGAGTCTGCTAATGAAGGTTACAGATTCGGTCAAGAGGAAGA  
AACCTATAATATCGTAGCTGCTCATGGTATTTTGGCCGATTGATCTTCCAATATGCTAGT  
TTCAACAACCTCTCGTTCCTTACACTTCTTCCCTAGCTGCTTGGCCTGTTGTAGGTATCTGG

TTCACCGCTTTAGGTATCAGCACTATGGCATTCAACCTAAATGGATTCAATTTCAATCAA  
TCCGTAGTTGACAGTCAAGGTCGTGTTATTAACACTTGGGCTGATATCATTAAATCGTGCT  
AACCTTGGTATGGAAGTTATGCATGAACGTAATGCTCACAACCTCCCTCTAGATCTAGC  
TGCTGTGAAGCTCCATCCACAAATGGAATGGGTTTGCCTTGGTATCGTGTTCATACTG  
TCGTATTGAATGATCCTGGTCGCTTGTCTTCTGTCCATATAATGCATACAGCTCTAGTTTC  
TGGTTGGGCCGGTTCTATGGCTCTATACGAATTAGCTGTTTTTGGATCCCTCTGATCCCGT  
TCTTGATCCAATGTGGCGACAAGGTATGTTCTGTTATACCCTTCATGACTCGTTTAGGAAT  
AACCAATTCATGGGGCGGTTGGAGTATTACA---GGAGGAACTGTAACCAATCCGGGTAT  
TTGGAGTTACGAAGGTGTTGCCGGGGCACACATTGTGTTTTCTGGCTTGTGCTTCTTGG  
CAGCTATCTGGCATTGGGTGTATTGGGATCTAGAAATATTCTGTGATGAACGTACGGGA  
AAACCTCTTTGGATTTGCCCAAGATCTTTGGAATTCATTTATTTTTATCTGGGGTGGCT  
TGCTTTGGGTTTGGTGCATTCATGTAACAGGTTTGTATGGCCCTGGAATATGGGTGTCT  
GATCCTTATGGGCTAACCGGAAAAGTGCAACCTGTAAATCCTTCATGGGGCGCGGAGG  
GTTTTGATCCTTTTGTCCGGGGGGGATAGCTTCTCATCATATTGCAGCGGGCACCTTG  
GGAATATTAGCGGGTCTATTCCATCTTAGTGTCCGCCCGCCCCAACGTCTATACAAAGCA  
TTACGTATGGGCAATATTGAAACTGTGCTTTCCAGTAGTATCGCTGCTGTGTTTTTTGCA  
GCTTTCGTTGTTGCTGGAACATGTGGTATGGTTCAGCGACTACTCCGATCGAATTATTT  
GGTCTACTCGTTATCAGTGGGATCAGGGATATTTCCAGCAAGAAATATATCGAAGAGT  
TAACGCCGGGCTAGCTGAAAATCTGAGTTTATCGGAATCTTGGTCTAAAATCCCGATA  
AACTAGCTTTTTATGATTATATCGGTAATAATCCGGCGAAAGGAGGATTGTTTCAGAGCC  
GGCTCAATGGACAACGGGGATGGAATAGCTGTTGGGTGGTTAGGACACCCTGTCTTTA  
GAGATAAAGAGGGGCATGAACTTTTTGTACGTCGTATGCCTACCTTCTTTGAAACATTT  
CCGGTAGTTTTGGTAGATGGAGACGGAATTGTGAGAGCCGATGTTCCTTTTAGAAAGG  
CGGAATCAAAGTATAGTGTGCAACAAGTGGGTGTAACCTGTTGAGTTCATGGTGGTGA  
ACTCGATGGAGTCAGTTATAATGATCCTGCTACTGTGAAAAAATATGCTAGACGTGCC  
AATTGGGTGAAATTTTTGAAATGGATCGCGCTACTTTGAAATCCGATGGTGTTTTTCGTA  
GTAGTCCAAGGGGTTGGTTCACTTTTGGACATGCTTCGTTTGCTTTGCTTTTCTTTTTCG  
GCCACATCTGGCATGGTGCTAGAACCTTGTTCAGAGATGTTTTTGGTGGTATCGACCCA  
GATTTAGATGCTCAAGTGGAAATTTGGAGCCTTCCAAAACTGGGGGATCCAACTACAA  
GGAGACAAGTAGTCATGAAAACCTTATATCCCTGAGGAGGTTCTACCCCGTGGAAC  
GCTCTTTAATGGAACTTTAGCTTTAGCTGGTTCGTGACCAAGAAACCACCGTTTTGCTT  
GGTGGGCGGGGAATGCCCGACTTATCAATCTGTCCGGTAAATTAATCGGAGCTCACGT  
GGCCCATGCCGATTAATCGTATTCTGGGCTGGAGCAATGAACCTATTTGAAGTGGCTC  
ATTCGTACCAGAGAAGCCTATGTATGAACAAGGATTGATTTTACTTCCCCTAGCTA  
CTCTAGGTTGGGGGGTAGGTCCTGGTGGGGAAGTTGTAGACACCTTCCATACTTTGTA  
TCTGGAGTACTTCACTTAATTTCCCTCCGCAGTCCTAGGCTTTGGCGGTATTTATCATGCG  
CTTCTTGGACCCGAGACTCTTGAGGAATCCTTTCCATTCTTCGGTTATGTATGGAAGAT  
AGAAATAAATGACCACAATTTTGGGTATTCATTAATCTTGTTAGGTCTAGGCGCTTTT  
CTTCTAGTGTCAAGGCTCTTTATTTTTGGGGCGTATATGATACCTGGGCCCTGGCGGT  
GGAGATGTAAGAAGAATTACCAACTTGACCTTAGCCCAAGTATTATTTGGTTATTTA  
CTAAAGTCTCCCTTTGGGGGAGAAGGCTGGATTGTTAGTGTGGACGATTTAGAAGATAT  
AATTGGAGGACATGTATGGTTAGGTTCCATTTGTATACTTGGTGGAATCTGGCATACTT  
AACCAAACCTTTGCGTGGGCTCGCCGTGCATTTGTATGGTCTGGAGAAGCTTACTTGT  
CTTATAGTTTAGGGGCTTTATCCGTCTTTGGTTTCACTGCTTGTGTTTCGTCTGGTTCA

ATAATACCGCTTATCCTAGTGAGTTTTACGGGCCTACTGGGCCGGAAGCTTCTCAAGCT  
CAAGCATTACTTTTTCTAGTTAGAGACCAACGTCTTGGGGCTAACGTGGGATCCGCTCA  
AGGACCTACTGGTTTAGGTAAATATCTAATGCGTTCCTCCCGACCGGAGAGATTATTTTTG  
GGGGGAAACTATGCGTTTTTGGGATCTCCGTGCTCCCTGGTTGGAACCCCTAAGGGG  
ACCTAACGGTTTGGACTTGAGTAGGTTGAAAAAGACATACAACCTTGGCAAGAACG  
ACGTTTCGGCGGAATATATGACTCATGCTCCTTTAGGTTCTTTAAATTCCGTGGGTGGTGT  
AGCTACAGAGATCAATGCAGTCAATTATGTCTCTCCTAGAAGTTGGTTAGCTACCTCTC  
ATTTGTTCTAGGATTCTTCTTTTTTGTGGGTCATTTGTGGCATGCGGGAAGGGCCCGTG  
CAGCTGCAGCAGGTTTTGAAAAAGGGATCGATCGCGATTTTGAACCTGTTCTTTTCATG  
ACTCCTCTTAATATGACTATAGCCCTTGGTAGATTTACCAAAGAAGAA---GATTTATTTGA  
TATTATGGATGACTGGCTACGGAGAGACCGTTTCGTTTTTGTAGGTTGGTCCGGTCTATT  
GCTCTTCCCTTGTGCCTATTTTCGCTTTAGGAGGGTGGTTCACAGGTACAACCTTTGTAA  
CTTCATGGTATACCCATGGATTGGCTAGTTCCTATTTGGAAGGCTGCAATTTCCCTAACCG  
CTGCAGTTTCTACCCCTGCTAATAGTTTAGCACATTCTTTATTGCTACTATGGGGCCCGG  
AAGCACAAGGAGATTTACTCGTTGGTGCCAATTAGGCGGTCTGTGGACTTTTGTGCT  
CTCCACGGCGCTTTCGGACTAATAGGCTTCATGTTACGTCAATTCGAACTTGCTCGATC  
TGTTCAATTGAGACCTTATAACGCAATCGCATTCTCTGGTCCAATTGCTGTTTTTGTTC  
CGTATTCTGATTTATCCACTAGGTCAGTCTGGCTGGTCTTTGCGCCTAGTTTTGGTGT  
AGCAGCTATATTTCCGTTTCATCCTTTTTCTTCCAAGGGTTTCATAATTGGACATTGAACCC  
ATTTCATATGATGGGAGTTGCCGGAGTATTGGGTGCTGCTCTGCTATGCGCTATTCATGG  
TGCTACCGTAGAAAATACTTTATTTCGAGGATGGTGACGGTGCAAATACATTCCGTGCCT  
TTAACCCAACTCAAGCTGAAGAGACCTATTCTATGGTCACTGCTAACCGCTTTTGGTCA  
CAAATCTTTGGGGTTGCTTTTTTCCAATAAACGTTGGTTACATTTCTTTATGTTATTTGTAC  
CAGTCAACCGTTTATGGATGAGTGCTCTTGGGGTGGTTCGGTCTGGCTTTGAACCTACGT  
GCCTATGACTTCGTTTCCCAGGAAATCCGTGCAGCAGAAGATCCTGAATTTGAGACTTT  
CTACACCAAAAATATTCTTTTAAACGAAGGTATTTCGTGCTTGGATGGCGGCTCAGGATC  
AGCCTCATGAAAACCTTATATTCCCTGAGGAGGTTCTACCCCGTGGAACGCTCTTATG  
TCTGGAAGTACGGGAGAACGCGCTTTTGTGATATTATTACCAGTATTCGATACTGGGT  
CATTCATAGCATTACTATACCTTCCCTATTCATTGCAGGTTGGTCATTCGTCAGCACGGG  
TTTAGCTTACGACGTGTTTGGAAAGCCCTCGACCCAACGAATATTTACAGAAAGCAGA  
CAAGGGATTCCATTAATAACTGGCCGTTTCGATTCATTGGAACAACCTCGATGAATTTAG  
TCGATCCTTTATGACCATAGATAGAACCTATCCAATTTTACAGTGAGATGGTTGGCTGT  
TCACGGACTAGCTGTACCTACCGTTTTTTTTCTTGGGGTCAATATCAGCAATGCAGTTCAT  
CCAACGAATGGCTACACAAACCATTGAGGGTAGTTCC---AGATCTGGGCCAAGACGGA  
CTATTGTAGGCGATTTATTAATAAACCAATTGAATTCGGAATATGGTAAAGTAGCCCCCGGAT  
GGGGAACCTACACCCCTTATGGGTGTCGCAATGGCTCTATTTGCAGTATTCCTATCTATTA  
TTTTGGAGATTTATAATTCTTCCGTTTTACTAGATGGTATTTTATTAAGTATGCTTACTCTC  
AAACTGTTTCGTTTATACGGTGGTGATACTTTGTTTCGCTCTTCATCTTCGGATTCCCTGT  
CTAATGACCCAGGACGTAATCCTGGACGCGAAGAAATGGCCGATACTACTGGAAGGAT  
TCCTCTTTGGCTGATAGGTAAGTAACTGGTATTTCTTGTGATCGGTTTAAATCGGCGTTTT  
CTTCTACGGCTCATATTCGGGATTGGGATCATCCCTGATGCCTAATATCTTTAGTTTAAATC  
TGTATCTGTCTTAATTCTGCCCTTCAG---AGTGGTTTTTTCTTCGCAAATGCCCCGAGG  
CTTATGCTTTTTTGAACCCAATCGTGGATTTTATGCCGGTTCATACCTGTGCTCTTTTTTCT  
CTTAGCCTTTGTGTGGCAAGCTGCTGTAAGTTTTTCGAACGACACAATCAAATCCGAAC

GAACAAAACGTTGAATTGAATCGTACCAGTCTCTACTGGGGGTTATTACTCATTTTTGT  
ACTTGCTGTTTTATTTTCCAATTATTTCTTCAATATGGAAGTAAATATACTCGCATTTATTG  
CTACTGCGCTGTTCAATTCTAGTTCCTACTGCTTTTTTACTTATCATCTACGTAAAAACAGT  
CAGTCAAAATGATATGGAAACTGCAACTCTAGTCGCCATCTTCATATCTGGTTTACTTGT  
AAGCTTTACGGGGTATGCCTTATATAACGCCTTTGGGCAACCCTCTCAACAATAAGAG  
ATCCATTTGAGGAACACGGGGACATGGAAGCATTGGTTTATACATTCCTGTTGGTCTCG  
ACTCTGGGGATAATATTTTTTGGCTATCTTTTTTCGAGAACCCTAAGGTTCCGAATAAA  
AAGATGAAAATGACTATTGCTTTCCAATTGGCTGTTTTTGCATTAATTGCTACTTCATCA  
ATCTTATTGATTAGTGTACCCGTTGTATTTGCTTCTCCCGATGGTTGGTCAAGTAAGAAA  
AATGTTGTATTTCCGGTACGTCATTATGGATTGGATTAGTATTTCTGGTAGGTATTCTTA  
ATTCGCTCATCTAT-----ATGTCACCAAAAACAGAACTAAAGCAAGTGTG  
GATTCAAAGCTGGTGTAAAGATTACAGATTGACTTATTACACTCCTGAGTATGAAACC  
CTTGCTACTGATATCTTGGCAGCATTCCGAGTAACTCCTCAACCTGGAGTTCGCCTGA  
GGAAGCAGGAGCTGCGGTGGCTGCCGAATCTTCCACTGGTACATGGACAACCTGTGTGG  
ACCGATGGACTTACCAGCCTTGATCGTTACAAAGGACGATGCTACCACATCGAGCCTGT  
TGCTGGGGAGGAAAATCAATATATTGCTTATGTAGCTTACCCTTTGGACCTTTTTGAAGA  
AGGTTCTGTTACTAACATGTTTACTTCCATTGTGGGTAATGTATTTGGGTTCAAAGCCCT  
ACGAGCTCTACGTCTGGAGGATCTGAGAATTCCTCCTGCTTATTCTAAAACCTTTTCAGG  
GCCACCTCATGGAATCCAAGTTGAGAGAGATAAATTGAACAAGTATGGTCGTCCCCTA  
TTGGGATGTAATAAACCAAAATTGGGGTATCTGCAAAGAACTATGGGAGAGCGGT  
TTATGAGTGTCTCCGTGGTGGACTTGATTTTACCAAGGATGATGAAAACGTGAACTCCC  
AACCGTTTATGCGTTGGAGAGACCGTTTCTTATTTTGCGCCGAAGCTATTTATAAAGCG  
CAGGCCGAAACAGGTGAAATTAAGGACATTACTTGAATGCTACTGCGGGTACATCCG  
AAGAAATGATGAAAAGGGCGGTCTGTGCCCGAGAGTTGGGAGTTCCTATCGTAATGCA  
TGACTACTTAACAGGGGATTACCCGCAAATACTAGCTTGGCTCATTATTGCCGAGACA  
ATGGCCTACTTCTTACATCCACCGCGCAATGCATGCAGTTATTGATAGACAGAGGAAT  
CATGGTATTCATTCCGTGTACTAGCTAAAGCGTTGCGTATGTCTGGGGGGGATCATATT  
CACGCTGGTACCGTAGTAGGTAAACTGGAAGGGGAACGAGATGCACTTTGGGCTTTG  
TTGATTTACTACGTGATGATTTTATTGAAAAAGACCGGAGTCGCGGTATTTATTTCACTC  
AAGATTGGGTATCTATGCCAGGTGTTCTGCCCGTGGCTTACAGGGGGTATTCACGTTTGG  
CATATGCCTGCCCTGACCGAGATATTTGGGGATGATTCCGTGCTACAGTTCGGTGGAGG  
AACTTTGGGACACCCTTGGGGGAATGCACCTGGTGCAGTAGCTAATAGGGTAGCTTTA  
GAAGCGTGTGTACAAGCTCGTAATGAGGGACGTGATCTTGCTCGTGAAGGTAATGAAG  
TTATTCGTGAAGCTAGCAAATGGAGTCTTGAACCTGGCTGCTGCTTGTGAGGTATGGAA  
AGAGATCAAATTCGAATTCGAAGCAATGGATGTCTTG-----ATGGCCATACATTTATACA  
AACTTCTACCCCTAGCACACGCAAAGGAGCCGTAGACAGTCAAGCGAAATCCAATCC  
ACGAACAAAATTGATCTATGGACAGCATCGTTGTGGTAAAGGTCGTAATGCCAGAGGA  
ATAATTACCGCAAGGCATAGAGGGGGAGGTCATAAGCGTCTATAACCGTAAAATCGATTT  
TCGACGGAATGAAAAAGACATATCTGGTAGAATCGTAACCATAGAATACGACCCTAATC  
GAAATGCATACATTTGTCTCATACTATGGGGATGGTGAGAAGAGATATATTTTACATC  
CCAGAGGGGGCTATAATTGGAGATACCATTGTTTCTGGTACAGAAGTTCCTATATCAATGG  
GAAATGCCCTACCTTTGACCGATATGCCCTTAGGCACGGCCATACATAACATAGAAATA  
ACACTTGGAAAGGGTGGACAATTAGCTAGAGCAGCAGGTGCTGTAGCGAAACTGATT  
GCAAAAGAGGGTAAATCGGCCACATTAAGATTACCATCTGGAGAGGTTGTTTTGATATC

CAAAAAGTCTCAGCAACAGTCGGACAAGTGGGTAATGTCGGGGCGAACCAGAAAAG  
TTTGGGTAGAGCCGGATCTAAATGTTGGCTAGGTAAGCGTCCTGTAGTAAGAGGAGTA  
GTTATGAACCCTGTAGACCATCCCCATGGAGGTGGTGAAGGGAGGGCCCCGATTGGTA  
GAAAAAAACCCACAACCTCCTTGGGGTATCCCGCGCTTGGAAGAAGGAGTAGGAAAA  
GGAATAAATATAGTGATATTTTTATTCTTCGTCCCGTAAG---ATGATTCAACCTCAGACC  
CTTTTGAATGTAGCGGACAACAGCGGAGCCCGAAAACCTTATGTGTATTCTGAATCATAGG  
AGCTAGT--AATTACCGATATGCTCATATCGGTGACGTTATTGTTGCTGTAATCAAAGAA  
GCAGTGCCAAATATGCCCTGGAAAGATCAGAAGTAATCAGAGCTGTAATTGTACGTAC  
ATGTAAAGAACTCAAGCGCGACAACGGTATGATAATCCGGTATGATGACAATGCAGCA  
GTTGTCAATTGATCAAGAAGGAAATCCAAAAGGCACCCGAGTTTTTGGTTCGATTGCTC  
GTGAATTGAGACAGTTAAATTTCACTAAGATAGTCTCATTAGCTCCCGAAGTATTAATGC  
TTAGTCCCAAAGAACCAGGTTTCGTAAACAACATAGAGGAAGAATGAAAGGAGTATC  
TTATCGGGCAATCGTATTTGTTTCGGTAGATATGCGCTTCAGGCACTTGAACCCGCTTG  
GATCACATCTAGACAAATAGAAGCAGGGCGCCGGGCAATCTCACGATATGCCCGTCGT  
GGCGGAAAATATGGGTACGTATATCCCCGACAAACCCGTTACACTAAGACCCGCGG  
AAACACGTATGGGTTCCGGGAAGGGATCTCCCGAATATTGGGTATCCGTGTTAAACCG  
GATCGAATACTTTATGAAATGGGCGGAGTATCAGAAACCGTAGCCAGAGCCGCTATGG  
AAATAGCGGCGCGCAAATGCCTATACGAACAAAATTCGTTATTGCGGAAATGACAAG  
AGTTAGACGTGGATATATTGCGCGGAGGCGTCGAAGAAAATTCGTTTATTTGCATCAA  
GCTTTCGAGGAGCTCATTCAAGACTTACTCGAACTGCTACTCAACAGAAAATAAGGGC  
TTTGGTTTCCAGCCATAGGGGTAGAGGAAGGCAAAGCGAGATTTTCGTGTTTGTGG  
ATCACTCGGATAAATGCAGTAACCCGGGAGAAT-----GTACCC-----TATAGTCGATTAATA  
CACGATCTGCGCAAGAAGCAGCTCCTTCTGAATCGTAAATACTTGCACAAATAGCTAT  
ATCAAATAGGAATTGCCTTTACATGATTTCCAATGATATAATCAA-----  
----ATGATAAAGGAAATACGAGCTTTAGCTCGACATATAGGTATGTCTGCTCAAAAAGCA  
CGAAGGGTAATTGATCAAATTCGCGGTTGCTCCTATGAGCAAACACTTATGATACTGGA  
ACTCATGCCTTATCGAGCATGTTACCCATTTTCAAATTAGTTTATTCCGCAGCAGCAAA  
TGCTAGTCACAATAGGGGTTTGAAAGAAGCTGATTTATTTATTAGTAAAGCCGAAGTCA  
ACGAAGGTGTTATCGTCAAAGGTTAAAACCGCGAGCTCGGGGACGTAGTTACCCAAT  
AAAAGACCCACCTGTATATAACTATTGTATTGAGC-----GAAAGACCT-----  
-ATGGATGGAATCAAATATGCAGTATTTACAGAAAAAAGTATTCGGTTATTGGGGAACAA  
TCAA---TATACTTCTAATGTGCAATCAGGATCAACTAGGACAGAAATAAAGCATTGGATC  
GAACTCTTCTTTGGTGTCAAGGTAGTAGCTATGAATAGCCATCGACTCCCGGGAAAGG  
GTAGAAGAATGGGACCTATTATGCGACATACAATGCATTACAGACGTATGATCATTACGC  
TTCAACCGGGTTATTCTATTCCACCTCTTATAGAGAAAAGAACTATGGCGGTTCCAAA  
AAACGTACTTCTATATCAAAAAGCATATTCGTAGAAATTTTTGGAAGAGAAAGGGATA  
TTGGGCAGCGGTAAAGCTTTTTCTTTAGCTAAATCCATTTCTACCGGTTATTCAAAG  
GTTTTTTT-----CAAAAAAA---ATGCCCAAGGGTAAAATCCCAGAGTTACGGTTATTT  
TGGAATGTACCAGTTGTGTCCGAAATGGT-----AAGAAGAAGGAATCACCGGGCATTTC  
CAGATATATTACTCAAAGAATCGACACAATACGCCTGGTTCGATTGGAATTGAAGAAAT  
TCTGTCCCTATTGTTACAAACATACGATTCACGGGGAGATAAAGAAAATGAAAATAAGA  
GCTTCCGTTTCGTAAGATTTGTGAAAATGTGCGACTGATCCGTAGGCGAGGACGAATTAT  
AGTAATTTGTTCTAATCCGAAACATAAACAGAGACAGGGAAATGGTTCGAGAGGAAGTA  
CCAGTATCCACTCGGACGCTACAGTGGAAGTGTGTTGAATCAAGAGCAGACAGCAAA

CGCCTTTATTATGGTCGTTTTCGTTTTATCCCCACTTATGAAGGGTCAAGCCGATAACAATC  
GGTATCGCGATGCGAAGGGCTTACTTGGAGAAGTAGAAGGAACATGTATTACGCGCG  
CAAAATCTGAT-----AAGGTACCACATGAATATTCTACGGTAGTAGGTATTGAAGAATCA  
GTCCATGAAATTTAATGAATTTGAAAAAATGGTATTTAGAAGTGATCTGTACGGAAC  
TCTCGACGCATCTATCTGTGTCAGGGGCCCTAGACACGTAAGTCTCAAGACATCATCT  
CACCACCTTCTGTAGAAATAGTTGATACTACACAGCATATAGCTGTCTAACAGAACCG  
GTTGATTTGTGCATTGAATTAATAAATCGAGAGGGGTCGTGGATATTGTACGAGAACCCA  
AAATAACTATCAAGACGGAAGCTAT-----CCTATAGATGCTGTATCCATGCCTGTTTCGAAA  
TGCGAATCATAGTATTCATTCTTATGGGAATGGGAATGAGAAACAAGAGATACTTTTTCT  
TGAAATATGGACGAATGGAAGTTAACTCCTAAGGAAGCGCTTTATGAAGCTTCTCGTA  
ATTTGATCGATTTATTTATTCCTTTTTCTACATGCGGAGGAACAGGACATAAATAGAAATA  
TGGAGGACAATCTA---AAAAGGGCTAGTGTGCCCTTTTTTGCCTTTGATGATGGATTGG  
AT--AATATAAAAAGA-----GAAATCATATTGAAACGTATTTTTATTGATCAATTAGAA  
TTGCCTCCTAGGACTTATAACTGTCTCAAAGGTCTAATATACATACTACTGGACCTT  
TTGAGTAAAAGTCAAGAAGATCTTATGAGAATTGAGCATTTCGCGTAGAAGACGTAA  
AACAAATATTCGACATTCTACAGAAGGGT-----TTCACAATCGACTTGCTGAAAAATTCA  
ATGCTCCGGGATGGTGGAGATGAGGGAATGTTTACAATACCTGGATTTAGTCAGATCCA  
ATTTGAGGGATTTTGTAGGTTCAATTGATCAGGGCTTGATGGAAGAAGTTCATCAATTC  
CAAAAATTGAAGATACAGATCAAGAAATTGAATTTCAATTATTTGGGGAATCTTATCAAT  
TGGTGGAACTTTGATAAAAGAAAGAGATGCTGTGTATGAATCAATTACATATTCCTCT  
GAGTTATATGTACCCGCGGGGTTAATTTGGAGAACCGGTAGAAATATGCAAGAACAAA  
CCGTATTGCTTGGAACATTCCTCTAATGAATTCCTTGGGAACCTCTATAGTAAATGGAA  
TTTACAGAATTGTCATCAATCAAATATTGCAAAGTCTGGTATTTATTACAGTACAGGAT  
TGGATCATAACGGAATTTCTGTCTATACTGGCACCATAATATCAGATTGGGGAGGAAGAT  
CAGAATTAGAGATTGATAGAAAAGAAAGGATATGGGCCCGTGTAAGCAGGAAACAAA  
AAATTTCTATTCTAGTTCTATCATCAGCTATGGGTTCAAGTCTAAGAGAAATCTAGACA  
ATGTTTGCTACCCTGAAATTTCTTGTCTTTCCCAAACGAGAAGGAGAAAAAAAAGAT  
TGGTTCAAAGGAAAATGCCATTTTAGAGTTTTATCAAAAATTTGCTTGTGTAGGCGGTG  
ATCCGGTGTTTTCTGAGTCCTTATGTAAAGAATTACAAAAGAAATTTTTTCAACAAAGA  
TGTGAATTAGGAAGGATTGGCCGACGAAATATGAACCAGAGACTGAATCTTGATATACC  
CCCGAACAAATACGTTTTTGTACCACGAGATGATTGGCTGCTGCCGATCATTTGATCGG  
AATGAAATTTGGAATGGGTACACTCGACGAT-----ATGAATCACTTGAAAAATAAACGTA  
TTCGTTCTGTAGCGGATCTGTTACAGGATCAATTCGGATTGGCTTTGGTTCGCTTGGAA  
AATGTGGTTCGGGGAACCTATATGTGGAGCAATTCGG---CATAAATTGATA---CCGACTCC  
TCGTAATTTGGTAACTTCAACTCCA-----TTAACAACAACCTTATGAATCATTTTTTCGG  
CCTACACCCTTTATCTCAAGTCTTGGATCGAACTAATCCATTGACACAAATAGTTCATGG  
GCGAAAATCGAGTTATTTGGGTCTTGGGGGATTGACAGGACGAACTGCTAGTTTTTCGTA  
TACGAGATATCCATCCTAGTCACTATGGGCGTATTTGCCCAATTGATACGTCCGAAGGAA  
TCAATGTTGGACTTATTGGGTCCTTAGCTATTCATGCAAGGGTTGGTATTGGGGG---TC  
TATAGAGACCCCATTTTAT-----GAAATATCTGAGAGATCAAAGAA-----GAACAGAT  
GGTTTATTTATCGCCGAGTAGAGATGAATACTATATGGTGGCGGCGGGAAATCTTTGGC  
GTTGACTCGGGTATTTCAGGAAGAAGAAGTTGGTCCAGCTCGATACCGTCAAGAATTT  
TTGACTATTGCATGGGAACAGATTCATCTTCGAAACATTTATCCCTTCCAATTTTTCTA  
TTGGAGCTTCTCTCATTCTTTTTATCGAGCATAATGATGCGAATCGGGCTTTAATGAGTT

CTAATATGCAGCGTCAAGCAGTTCCGCTTTCTCAGTCCGAAAAGTGTATTGTTGGAACC  
GGCTTGGAACGCCAAGCGGCTCTCGATTCAGGGGGTTCGGCTATAGCCGAACGCGAG  
GAAAGATCATTATACCGATGCTGAAAAGATCGTTTTATCAGGTAATGGGGACACTAT  
AAGCATTCCGTTGGTTATGTATCAGCGTTCCAACAAAAATACTTGGATGCATCAAAAAC  
CTCAGGTTTCATCGGGGTAAATACCTTAAAAAGGGGCAAATTTTGGCGGATGGTGCGGC  
TACGGTTGGTGGCGAACTCGCTTTGGGGAAAAATGTATCAGTAGCTTATATGCCATGGG  
AAGGTTACAATTCTGAAGATGCCGTACTCATTAGCGAACGTCTAGTCTATGACGATATTT  
ATACTTCTTTTCATATCCGGAAATATGAAATTCAGACTCATGTGACAAGCCAAGGA---CC  
TGAAAGAATCACTAATGAAATACCTCATTTAGAGCCTTATTTACTCCGCAATTTAGACAG  
AATGGAATTGTGATGCTGGGATCTTGGGTAGAACTGGTGTATGTTTTAGTAGGTAAT  
TAACGCCTCAGACAGCGAAAGAA---TCATCCTATGCTCCAGAAGATAGATTATTACGAG  
CCATACTTGGCATTTCAGGTATCCACTGCAAAGAACTTGTCTAAAGTTGCCTATAGGC  
GGAAGAGGTCGAGTTATTGATGTGAGGTGGGGCCAGAAAAAGGGG---GGTTCATTTA  
TAATCCAGAAATGATTCGTGTATATATCTCACAGAAACGTAAAATCAAAGTGGGCGATA  
AAGTAGCTGGAAGACATGGGAATAAAGGTATCATTTCAAAAATTTGCCTAGACAGGAT  
ATGCCTTATTTGCAAGATGGAACACCTGTTGATATGGTATTCAATCCATTAGGAGTACCT  
TCGCGAATGAATGTGGGACAGATGTTTGAATGCTCGCTCGGGTTAGCGGGAGACCTTC  
TGGGCAGACATTATAGAATAACACCCTTTGATGAGAGATACGAGCAAGAGGCTTCGAG  
AAAAGTAGTGTCTTCTGAATTATATGAAGCCAGTAAGCAAACAGCAAATCCATGGGTAT  
TTGAACCCGAGTATCCTGGAAAGAGCAGAATATTTGATGGAAGAACAGGAGATCCTTT  
TGAACAACCTGTTATAATAGGAAAGTCCTATATGTTAAAATTAATTCATCAAGTTGATGA  
TAAAATCCACGGACGTTCCAGTGGTCATTATGCACTTGTTACACAACAACCCCTTAGGG  
GAAGGGCTAAGCAAGGTGGACAACGAGTAGGAGAAATGGAAGTTTGGGCTCTAGAGG  
GATTTGGTGTGCTCATATTTTACAAGAGATGCTCACTTATAAATCCGATCATATTAGAG  
CTCGTCAGGAAGTACTTGGTACCACGATCGTTGGGGGAACAATACCTAATCCTGAGGG  
TGCGCCAGAATCCTTTTCGATTGCTCGTTTCGCGAACTACGATCTTTATCTCTGGAAGTGA  
ATCATTTCCTTGTATCTGAGAAAACTTCCAGATTAATAGGAAGGAAGTTATGAATCAG  
AATTTTTCTTCTATGATCGATCAGTATAAACATCAACAACCTTCGAATTGGATTAGTTTCT  
CCTAAACAATAACGTGCTTGGGCCAACAAAATCCTACCGAATGGAGAGATAGTTGGAG  
AGGTGACAAAACCTATACTTTTCATTACAAAACCAATAAACCAGAAAAAGATGGGTT  
GTTTTGCGAAAGAATTTTGGACCTATAAAAAGTGGAATTTGTGCTTGTGGAATATC  
GAGTGATCGGGGGTGAAAAAGAAGAACCAGAAATTTTGCGAACAATGCGGAGTCGAAT  
CTGTTGATTCTCGGATCCGAAGATATCAAATGGGATACATCAAACCTAGCATGCCCGGTG  
ACTCATGTGTGGTATTTGAAACGTCTTCCCTAGTTATATCGCGAATCTTTTAGATAAACCT  
CTAAGGAATTAGAAGGCCTGGTATACTGCGAT-----TTTTCTTTTGGCTAGGCC---ATAG  
CTAAAAACCTACTTTCTTACGATTACGAGGTTTCATTTCGAATATGAAATCCAATCCCGG  
AATACAGCATCCACTTTTTTTTACTACCCAAGGCTTCGATACATTTAGAAATCGAGA  
AATATCTACCGGAGCTACTGCTATCAGAGAACAATTAGCCGATCTGGATTTGCGAATTAT  
TATAGATCGTTCATTGGTGGAAATGGAAGGAATTGGGAGAAGAA---GGATCAACCGGGA  
ATGACTGGGAAGATAGAAAAATTGGGAGGAGAAAAGATTTTTTGGTTAGACGCATGGA  
ATTTGGCTAAGCATTCTTTCGAACAAATGTAGAACCAGAATGGATGGTTTTGTCCCTATT  
ACCAGTTCTTCCCTCCCGAGTTGAGGCCAATCATTTCAGATTGATGGGGGTAAATCAATGA  
GTTTCAGATATTAATGAACTTTATAGAAGAGTTATCTATCGCAACAATACTCTTACCGATCT  
ATTAACAACAAGTAGATCTACGCCGGGGGAATTAGTAATGTGTCAGGAAAAATTGGTA

CAAGAAGCTGTAGATACACTTCTTGATAATGGGATCCGCGGACAACCAATGAGGGACG  
GTCACAATAAAGTTTACAAGTCGTTTTTCAGATGTAATTGAAGGCAAAGAGGGAAGATT  
TCGCGGAGACTCTACTTGGTAAACGGGTCGATTATTCGGGTCGTTCCGTCATTGTGGTAG  
GCCCTTCGCTTTCCTACTGCATCAATGTGGATTACCTCGAGAAATAGCAATAGAGCTTTTT  
CAGACATTTGTAATTCGTGGTCTAATCAGACAACATCTTGCTTCCAACATAGGACTTGC  
TAAAAGTAAAATTCGGGAAAAAGAACCATTGTATGGGAAATACTTCAAGAAGTTATG  
CAGGGGCATCCTGTATTGCTAAATAGAGCACCCTTTGCATAGATTAGGCATACAGGC  
GTTCCAACCTATTTTAGTGGAGGGACGAGCTATTTGTTTACATCCATTGGTTTTGTAAGGG  
ATTCAATGCGGACTTCGATGGAGATCAAATGGCTGTTTCATGTACCTTTATCTTTGGAAG  
CTCAAGCAGAAGCTCGCTTACTTATGTTTTCTCATACGAATCTCTTGTCTCCAGCCATTG  
GGGATCCCATTTCCGTACCCACTCAAGATATGCTTATGGGGCTCTATGTATTAACGATGG  
GGAATCGTAGAGGTATTTGTGCAAATAGGTATAATCCATGTAACCCCAGAAACCAC-----  
---CAGAATGAAAGAATGGATCATAGTAATTATGAGTATAGGAAAGGGAAAGAACCCTAT  
TTTTGTAGTTCCTACGATGCACTTGGGGCTTATCGGCAGAAAGGGATCGATTTATATAGT  
ACTTTATGGCTACGGTGGCGACTAGATCAACGT---GTCATTGCCTCAATAAATAGAGAA  
GTTCCCATCGAAGTTCAATATGAATCTTTGGGCACTTATCATGAGATTTATGATCACTATC  
GAGTAGTAAGAAGTGTAATAAAGGAATGCTTTGTATATATATTTCGAACTACTGTTGGT  
CATATTTCTTTTATCGAGAAATAGAAGAAGCCATACAGGGGTTTTGTGCGTCTTATCA  
TATGGTACC-----ATGGCAGAACGGGAT---CTGGTCTTTCACAATA  
AAGTGATAGATGGAACCTGCCATGAAACGGCTTATTAGCAGATTAATAGATCATTTCGGA  
ATAGCCTATACATCACACATTCTGGATCAAGTAAAACTCTGGGTTTTTCAGCAAGCCAC  
CGCTACATCAATTTATTAGGAATTGATGATCTTTTAACAACACCTTCTAAGAGATGGTT  
AGTCCAAGATGCTGAACAACAAAGTTTGATTTTGAAAAGCACCATCATTATGGGAAT  
GTACACGCGGTAGAAAAATTACGTCAATCAATCGAGATATGGTATGCTACAAGTGAATA  
TTTGAGACAAGAAATGAATCTTAATTTAAGATGACTGATCCTTCAAATCCAGTCCATAT  
AATGTCTTATTCTGGAGCTAGAGGAAATGCATCTCAGGTCCACCAATTAGTAGGTATGA  
GAGGATTAATGTCAGATCCCCAAGGACAAATGATTGATTTACCCATTCAAAGCAATTTA  
CGCGAAGGACTTTCTTTAACGGAATATACAATTTCTTGCTACGGAGCCCGCAAAGGAG  
TTGTGGATACTGCTGTACGAACGTCAGACGCTGGATACCTCACGCGTAGACTTGTTGA  
AGTAGTTCAGCATATTGTTGTACGTAGAACAGATTGTGGAAGTACCCGAGGTATTTCCG  
TGAGTTTTCGAAAGGGGATGACGGAA-----AGAATTTTTATCAAACGCTAATAGGTCG  
CGTATTAGCGAACGATGTATATCTAGGTCTACGATGCATTGCTACCAGAAATCAAGATAT  
TGGGATTGGGCTTGTCATCGATTGATGACC-----TCTCGGGCGCAGCCAATAT  
ATATTCGAACTCCCTTCACTTGCCGAAGTGCATCTTGGATCTGTGCGATTATGTTATGGTC  
GGAGTCCCACTCATGGTGACCTGGTTGAATTGGGAGAAGCAGTAGGTATTATTGCGGG  
TCAATCCATTGGAGAACCTGGGACTCAACTAACATTAAGAACTTTTCATACCGGTGGAG  
TATTCACAGGTGGTACTGCAGAACATGTACGAGCTCCTTCTAATGGAAAAATAAAATTC  
AATGAGGATTTGGTTCATCCACACGGACACGCCATGGACATCCTGCCTTTCTCTGCTA  
TGTAGACCTATATGTGACTATTGAGAGTCAGGATATTATACATAGTGTGAATATTCCACC  
AAAAAGTTTTCTTTTGGTTCAAATGATCAATATGTGGAATCAGAACAAGTGATTGCTG  
AGATTTCGTGCTGGAACATCCACTTTC-----TTTAAAGAGAGGGTTCGAAAACATATTTAT  
TCTGACTCAGAGGGAGAA---ATGCATTGGAGTACCGGTGTGTACCATGCACCTGAATAT  
ACACACGGTAATGTTCAATTTCTTACCCAAAACAAGTCAATTTATGGATCTTATCGGGGGG  
TCCGTGCAAA-----TCCAGTCTAGTGCCTTTTTCTACTCCACAAGGATCAAGATCAAATGA



ATGTTCAA-----TCTCTTTCTGTCCAAGAGAGATCCATTTCTGACTTCTCG-----GTGAAT  
AATAATCGA---GTGAAACACAAATTGTTTGGCTCGGATCCCCTGGCGAGA--GGGAGAA  
GGATTTCTGATTATGCA-----TCTGAGCGAGTCATATCCAATGGTGTATGGGGATTTCATAT  
ACCCCGCC---ATTCTCCGAGAAAATCTTAT-----TTATTGGCGAAGAGGGCGAAGAAATA  
GATTCATCATAACCATTCCAATATGATCCGGAATGGGAGAAGGAATTAACGCCTCATTCTA  
GTATCACGGTTGAAATACCCGCAAAT-----GGTATTTTACGTAGAAAATAGTATTCTTGCTT  
ATTTGACGATCCACGATACAGAAGAAGCAGTTCGGGAATTACCAAATATGGC-----G  
TCGATTCAATCGTCAAAAAAGAGGGT-----CTGGTTGAGTATCGAAGACCAAAA---GAA  
TCTAGACCGAAATAC-----GTAGATCGATTTTTTGTTCATTCCCGAAGAAGTCCATATCTTG  
CCCGGGTCTTCATCCATAATGGTACGGAACAATAGTATCATTGGAGTAGATACACGAATT  
ACGTTTAATACAAGAAGCCAAATAGGTGGATTGGTGCGAATAGAAAAAAAAAAAAAAAAAG-  
--ATTGAACTGAAAATCTTTTCTGGAGGTATCCATTTTCTGGAGAAACGGATAAGATAT  
CCCGACACATTGGCATCTTGATACCACCAGGAGCAAGAAAAAAAAATGGATAAGGGATC  
AAAGGGGAAAAATTGGGAAGGGAATAATTGGGTCTATGTCCAACGG-----ATCACACCT  
ATCAAGAAAAA-----TATTTTGTTCAGTACGACCCGTAGTGACATATGAAATAGCTGA  
TGGGATAAATCTAGTAACGCTTTTCCCTGGGGATATGTTACAGGAAAAGGATAATTTGC  
GACTCCAAGTTGTCAATTATATCCTTTATGGGGATGGCAAACCAATTCGAGGAATTTCC-  
----CATATTCAATTGGTTTCGTACTTGTTTAGTATTGAATTGGGACCAAGAC-----  
AAATCTATAGAAAAGGTTTCAGGCTTCTTCTGCTGAAGTAAGGGCAAATGATCTGATTTCG  
ATATTTTATAAGAATTGATTTGGTGAAGTCTCCTATTTTGTATACCGGAAAGAGGAATGA  
TAGGTCAGGTTTCAGTGATTCCTGATACT-----GGGTCATATTGCGCCAATACCAATCTTTT  
TTCTTCCAAGGTGAAAATTAATCA-----CTTAGTCAACATCAAGGAAC  
CGTTCGTACATTTCTTAATAGA-----AATAAAGAAGGCCAATCTCTTATAGTTTTTTCAT  
CATCTAATTGTTCTCGCATCAAT-----GTTTCGAAATATCACAAAT-----GTGACCA  
AAGAATCAATTCCAATTCTTAATTTGTTG-----GGTCCCTTAGGTACT-----GTACCTAA  
AATTCATAATTTTCCCATCT-----TATCATTCAATAACC-----CATAATGAGATCTTGTTA  
AAT--AAATATTTAATACTGGATAAT--AAAATCCAAAACAGACTTTCCAACTACTTAAA  
-----TATTATTTAGTGGATGAAAACGGGAGA-----ATCTCTAATGCAAATCCATGCAGTG  
ACATCATTTTAAATCTATTCGGT-----TCGTGCTTTCTCCCTCACGATTATTGTGAGGGGA  
CATCCACAACCAGAATAATTCTCGGACAGTTTATTTGTGAAAATGTATGTCTATCCAAAC  
ACGGAACA-----CGCATAAAATCTGGTCAAGTTATAATGGTTTAT--CTTGACTCTTTCA  
TAATAAGATCAGCTAAACCCTATTTGGCGACCCGAGGAGCAACCGTTCATGGTGATTAT  
GGAGAAATCTTTTACGAAGGAGATACATTAGTTACATTTATATATGAAAAATCGAGATCT  
GGTGATATAACTCACGGCCTTCCAAAGGTTGAACAAGTGTTAGAAGTTCGTTTCGATTGA  
TTCAATATCGATGAACCTAGAAAAAAGGGTTGAAGGTTGGAACGAACATATAACAGGC  
ATTCTTGGAATTCCTTGGGGATTCTGATTGGTGCTGAACTCACCATAGCGCAAAGTCG  
TGTTTCTTTGGTTAATAAGATCCAAAAGGTTTATCGATCCCAGGGGGTACAGATTCATAA  
TAAGCATATAGAGATTATTGTACGACAAATAACATCAAAAAGTGTTGGTTTCAGAA-----  
GATGGAATGTCTAATGTTTTTTCACCCGGGGAATAATCGGATTGTTGCGAGCAGAACG  
AGCAGGTCGTGCTTTGGAAGAGGGCTATTTGTTACCGAGCCGTCTTATTGGGAATAACGA  
GAGCATCTCTGAATACTCAAAGTTTCATATCAGAAGCTAGTTTTTCAGGAAACCGCTCGA  
GTTTTAGCAAAAGCCGCTCTCCGGGGTCGTATTGATTGGTTGAAAGGTCTGAAAGAGA  
ATGTTGTTCTGGGGGGGATGATACCCGTTGGTACCGGATTCAAACGATTTCGTTACCCGT  
TCAAGG-----GAATACAACAACATTCCT-----TTGGAAATACAAAAGAAGAATTTTTTCG

GGGGGAAATGAGA-----GATATTCTGTTCCACCACAGAGAATTATTTTGTTCCTTGCATC  
CCAAAGCCAAAGAGTTTCCATTCAGAACAACCATTCTATGCTATGGGATCTAATCCAAT  
CGTTCATAAGAGCATGACAAGAAGATATTGGAACATCAATTTGGAAGAGATGATGGAA  
GCGGGGGTTCATTTTGGTCATGGTACTAGGAAATGGGATCCTAGAATGGCACCTTACAT  
CTCTGCAAAGCGTAAAGGTATTCATATTACAAATCTTACGAGAACTGCTCGTTTTTTATC  
AGAAGCCTGTGATTTAGTTTTTTGACGCAGCAAGTAGAGGAAAACACTTCTTAATAGTT  
GGTACGAAAGATAAGGCAGCTGATTTCGGTAGCATCAGCTGCAATAAGGGCTCGGTGTC  
ATTATGTCAATAAAAAATGGCTCGGTGGTATGTCAACGAATTGGTCCACTACGGAAACG  
AGGCTTCAGAAGTTCAGGGACTTGAGAGTGAGAGCCGAGATGGGGCAATTCAGTCGT  
CTCCCGAAACGGGATGCAGCAATATTGAAGAGACAATTATCTCACTTTCAAACATATCT  
GGGCGGTATCAATATATGACGGGGTTACCCGATATTGTAATCATCATTGATCAGCAAGA  
AGAATATACGGCCCTTCGAGAATGCGTCACTTTGGGTATTCCAACATTTGTTTAATCGA  
TACAAATTGTGATCCAGATCTCGCAGATATCCGATTCCAGCCAACGATGACGCTATAG  
CTTCCATCCGATTGATTCTTAACAAATTAGTATCCGCAATTTGTCAGGGACGTTCT--AG  
CTATATAAGAAGTCGTATGGGACAGAAAATAAATCCACTTGGTTTCAGACTTGGTACAA  
CCCAAAGTCATCGTTTCTTTTGGTTCGCACAACCAAAAAATTATTCCAAAGGTCTCCAG  
GAAGATGAAAAAATACGGGATTGTATCAAGAATTATGTACAAAAACATATGAGAATATC  
CTCAGGT--TTTGAAGGAATTGCACGTATAGATATTAAAAAAAGAATCGATTTGATCCAA  
GTCATAATTCATATTGGATTCGCCAATATGTTAATGGAGGGT-----AGAGCCCGA-----GG  
AATCGAAGAATTACAGACTAATGTACAAAAAAGCTTTCATTCTGTGAACCGAAGACTC  
AACATTGCTATTGCAAGAGTTGCAAGACCTTACGGGCAACCTAATATTCTTGCAGAATA  
TATCGCTCTGCAATTAAGAATAGAGTTTCTTTTCGAAAGGCAATGAAAAAAGCTATTG  
AATTAGCTGAACAAGCGGATGCAAAGGGAATTCAGGTACAAATTGCAGGACGTCTCAA  
TGAAACGAAATTGCCCGCTTGAATGGATTAGAGAAGGTAGGGTTCCCCTGCAGACC  
ATTCGAGTTAAAATTGATCATTGTTCTTATCCAGTTCGAACTATCTATGGAGTATTAGGG  
ATAAAAATTTGGATATTTTGGATGAAGAGATGTCTCGTTACCGAGGACCTCGTTTTAA  
AAAAATACGCCGTCTGGGGCTTTGCCGGGACTAACTAGTAAAAAACCTAGGTCCGCA  
AGTGATCTTAGAAACCAATCCCGCTCTGGGAAA---AGATCTCAATATCGTATTCTGTTT  
AAGAAAAACAGAAATTGCGTTTTTATTATGGTCTGACAGAGCGACAACACTACTTCGATAT  
GTTCTGATCGCTGGAAAAGCAAACGGTTCGACGGGTCAAGTTTTACTGCAACTACTTG  
AGATGCGTTTGGATAACATTCCTTTTTCGATTGGGTATGGCTTCAACTATTCCTGGAGCCA  
GGCAATTAGTTAACCATGGACATATTTAGTTAATGGTCGTCTAGTAGATATACCAAGTT  
ATCGCTGCAAACCCCGAGATATTACTACGAAGGATAAACAAGGATCCAGAGCTTTG  
ATTCAAATCATATGGATTCATCCTCCAACGAA-----TTGCCAAAACATTTGACTCTGCA  
CTCA-----TTCCAATATAAAGGGGTAGTCAATCAATAATAGATAGTAAATGGGTCTGGTTT  
GAAAGTCAATGAATTGCTAATCGTAGAATATTATTTCCCGACAACTATGTCACGCCGAG  
GTAATGCAAGAGAAAAAACTGCAAATCTGATCCAATTTATCGTAATCGATTAGTTAAC  
ATGTTGGTTAACCGTATTCTGAAACACGGAAAAAAATCATTGGCTTATCAAATTATCTAT  
CGAGCCGTGAAAAAGATTCAACAAAAGACAGAAACAATCCACTATCTGTTTTACGTC  
AAGCAATACGTGGAGTAACTCCCAATATAGCAGTAAAAGCAAGACGTGTAGGCGGATC  
GACTCATCAAGTTCCCATTTGAAATAGGATCTACACAAGGAAAAGCACTTGCCATTCGTT  
GGTTATTAGGGGCATCCCGAAAACGTCCGGGTCGAAATATGGCTTTCAAATTAAGTCC  
GAATTAGTCGATGCTGCCAGGGGGAGTGGCGATGCCATACGCAAAAAGGAAGAGACT  
CATAGAATGGCAGAGGCCAATAGAGCTTTTGCACATTTTCGTATGGGTAGAGACACTAT

TGCCGATATAATAACTTATATAAGAAATGCTGACATGGATAAAAAAGGAACAGTTCGAA  
TACCATCCACTAATATTACCGAAAAACATTGTTAAAATACTTCTGCGAGAGGGTTTTATCG  
AAAATGTTAGGAAGCACCGGAAAACAACAAGGATTTCTTGGTTTTAACCTACGACA  
TAGAAGA-----AATAGGAAAAGAGCATATAGA-----AATATTTA-----AAGCGTATCAG  
CAGACCAGGTCTGCGAATCTATTCCAACCTCAACGAATTCCTAGGATTCAGGCGGGA  
TAGGGGTTGTAATCTTTCTACTTCTAGAGGTATAATGACAGATCGAGAAGCTCGACTA  
GAAAGAATTGGAGGAGAAATTTTGTATATATGGATGACAAAACCTATAACCAAAAAT  
TGGTTCACGTAGAAATAGCCGTATTAGTTCACGTAAGAGTGGGTGTAGAACACCAATAG  
GAGTTATTCATGTTCAAGCGAGTTTCAACAATACTATTGTTACTGTTACAGACCCACAA  
GGTCCGGTTCGTTTCTTGGTCTTCCGCAGGTACCTGTGGGTCAAGGGCACAAGAAGGG  
GTACCCCATTTGCTGCTCAAACCGCAGCAGGAAATGCTATTCGTGCGGTAGTGGACCA  
GGGTATGCAACGAGCAGAAGTCATGATAAAGGGGCCCGTCTCGGGAGAGATGCAGC  
ATTACGAGCGATTCGTAGAAAGTGGTATACTATTAATTTTGTACGTGACGTAACCCCTAT  
GCCGCATAATGGATGTAGACCGCCAAAAAAGGCGCGTTATGCCAATATTAACAA  
CTTATTAGAAACACAAGACAGCCAATGAGAAATGTCACGAAATCTCCTGCTCTTCGAG  
GATGTCCTCAGCGTAGAGGAACATGTACTAGGGTGTATACTATCACCCCAAAAACCA  
AACTCTGCCTTACGTAAAGTTGCCAGAGTACGATTAACCTCTGGATTTGAAATCACTGC  
TTATACCTGGTATTGGCCATAATTTACAAGAACATTCTGTAGTATTAGTAAGAGGAGG  
AAGGGTTAAGGATTTACCCGGTGTGAGATATCACATTGTTTCGAGGAACCCCTAGATGCTG  
TCGGAGTAAAGGATCGTCAACAAGGGCGTTCTAAATATGGGGTCAAAAAGCCAAAAT  
GGCAAGGAAAAGTTTGATTCAGAGGGAGAAGAAGAGGCAGAAATTAGAAGAGAAATA  
TCATTTGATTCGTCGATCCTCAAAAAAGAAATAAGC-----AAAGTTTCATCGTTGGA  
CGAGAAATGGGAAATTCATGTAAATGCAATCCCCACCACGTAATAGTGCACCTATAC  
GTCTTCATCGACGCTGTTTTTTGACCGGAAGACCTAGAGCTAACTATCGAGACTTTGGG  
CTATCCGGACACGTACTCCGCGAAATGGTTCATGCATGTTTGTGGCCGGGGCAACAA  
GATCAAGTTGGATGGTAAAGAATTCGCCATATCCGTTATTCCACAAGAAGAAAA-----  
-----AGGGGTTCCGTTGAATTCCAAGTATTTAATTTTACCAATAAGATAGAGAGACTTA  
CTTCACATTTGGAACCTGCACAGAAGAGACTATTTATCTCAGAGGGGTCTGCGGAAAAT  
TCTGGGGAAACGCCAACGACTGTTGGTTTATTTATCAAAGAAAAATCGAGTGC GTTATA  
GGGAATTAATTGGTCAATTGGGTATTTCGAGAACCAAAAACCTGGT-----ATGGTAAAACCT  
CGTTTGAAACGATGTGGTAGAAGGCAACGAGCCACCTATCGAATCATTGCAATTGATGT  
CAGATCCCGAAGAGAGGGAAGAGATCTTCGGAAAGTAGGCTTTTACGACCCGATAAA  
GAATCAAACCTATTTAAATGTTCTCTATTTCTTATTTCTTGA AAAAGGAGCTCAACC  
CACGGGAACCTGTTTCATGATATTTCAAAAAAGGCAGAGGTATTTAAGGAACTTCGAGTT  
AATCAAACAAAA-----ATGGAGAAATTCAAGCGACCCTTTCGTAAATCCAAGCGATCT  
TTTCGTAGGCGTTTGGCCCAATTGGGTTGGGGGATCGAATTGATTATAGAAACATGAG  
TTAATTAGTCGATTTATTAGTGAACAAGGAAAATATTACCTAGGCGAGTGAATAGATT  
GACCTTGAAACAACAACGATTAATTAATGCTATAAAAACAAGCTCGTATTTTATCTTT  
GTTACCTTTTCTTAATAATGAGAAA-----CAATTTGAGAGAGCCGAGTCGATTTCTAGAA  
CTACCGGCACTAGAACCAGAAAAAAGTGGCCCGT---TCTAAAAAATCCTTTTGTA  
GCTAATCACTTATTAAGTAAAATTGAGAAGCTCAACAAGGCGGAGGAAAGAAGTATAA  
TAGTAACTTGGTCCCGGCATCCACCATTATTTGCAATGGTCCGTCATACAATTGCTG  
TTCATAACGGGAAGGAGCATTTACCTATTTATATAACGGAGCGTATGGTGGGTCACAAA  
TTGGGAGAATTCGCGCCTACTCTGACTTTCCGGGGACACGCGAGAAACGATAATAGAT

CTCGGCGAATGATTTTGAAATATAGTCTACTCGGTAATCTATTATTATTATGGATTAATATA  
GTTAATTCGGTCGTTATGGTCGGACTTTATTATGGATTCTAACCACATTTTCTATAGGTC  
CCTCTTATCTCTTACTTCTAAGAACTCGGGTTATGAAAGAAGGG-----AGCGAAAAAG  
AAGTATCAGCAACAACCGCTTTTATTATGGGACAGTTCATAGTATTCATATCGACCTATTA  
TCCGCCCTTGCATCTAGCATTAAAGTAGACCCCATACACTAACTGTCCTAGTTATAACGTA  
TCTTTTGTCTCATTCTTCTGGAACAATAAGAAATCCCTTTTGGATTATAGATCTACTCAC  
GGGAATTCATTCTAACCTTAGCATTCAATATGTATTCCTGAATAATCTAATTTTTCAAT  
TATCAACCATTTGTTTTACCAAGTTCAACATTAACCAGATTAGTCGACATTTCTATGTT  
TCGATACAACAATAAGATTTTATTGTAAACAAGTAGTTTTTTTTGGCTGGTTAATTGGGCA  
CATGTTATTGATGAAATGTATTGGCTTAGTATTATCTTGGCCATGGGAAAAA-----ATGAG  
ATCT--TTTAGATCTAATAAGTATCTTATGTCAAATGGAGAAATTCTGTATCTCAAATCT  
TTAGTATTCTCTTATTATCATCTGTATCTGCTATCTAGGAAGAATGCCATCACCCATTATA  
ACTAAAAAACTGAAAGAAGTCGAAGAAGACAAATCCCTTCTGTCTCTTCTTTTCGATT  
ATCAACGATGGAATCGACCCCTGCGATATATAGAAAATGATCGATTTTCAAATGCTGTAA  
GAAATGAAATGTCTCAATCTTTTTTTTATACATGCGCAAGTGATGGAAAGCAAAGAATA  
TCTTTCACATATCCACCTAGTTTGTCTACTTTTTTTGAAATGATAAAAAAAGATGTCT  
TTTCGCACAGCAGAAAAACTACCTGAGGAC-----CTCTCTAATTGGGTTTTCGACCACTA  
AAAAACAAAGAGATAACTTAAGGAACGAATTCATAAATCGAATCGAAGCTATAGAC-----  
-AACTTATTCTCAATGTGGTCGAAAAAAGGGCCAGATTGTGCAATGATGAAGAGGAA  
CAAGAATGCTTACCTAAGTTTTATGATCCTCTTTTGAACGGACCCTATCGTGGAAACAAG  
AAAAAAGGGTATTTATATACCAAACCGCTTGGATAAATAAGATTCATGCTATCCTTGA  
ACGAGAATTTGAACACGAAGAT--CCGAATGAT--CTTCCAATTGAAGAAATTAAGAAA  
AAGGTTCCCTCGATGGTTATACAAACTGACTGATTTGGATTTTGAAGAAGAGGAGGGGA  
TTCGTTCAAGAAAAGGCAAACGTGTAGTAATTTATACTGATGCCTTGATACGTTACTCG  
CAACAATCAGATTTTCGCCGTGATCTAATCAAAGGGTCGATGCGGGCTCAAAGACGTA  
AAACAGTGACTTGGGAAATGTTTCAAACAGATGCACACTCCCCCTTTTTTTTGACAG  
AATAGACAAAACACCTTTGTTTTCTTTTGATATC-----TCAAGGATGATGAACCTAATTT  
TAGGAATAGACAGGAGGAGGAACGGATAGCAATAGCAGAACTTGGGATAATATTATAT  
TTGCTCAAGCAATAAGGGGTCCATATTAGTAACTCACTCGATTCTACGAAAATACATC  
GTGTTACCTTCATTGATAATAGTTAAAAATATTGGTCGTATGTTATTATTTCAATTCCTG  
AGTGGTATGAAGATTTTAAACGAATGGAGTAGGGAAATGCATGTCAAATGCACATATAAT  
GGTGTTC AATTATCGGAAACAGAATTTCCAAAAGATTGGTTAACAGACGGTATT CAGAT  
AAAAATCCTATTTCTTTCTCTGAAACCTTGGCATAGATCTAAGAGAAAAAACA  
AAAATTTCTGTTTTTTAACGATCTGGGGGATGGAAACAGA ACTGCCCTTTGGCTCTCC  
CGAAAAAACCTTTCTTTTTTGAACCCATTCATAAAGCATTTCGAAAAAAAATTATAAA  
AGTAAAA---AAGAAAGGTTTTTTCTTTCTAATAATTATAAAAGACAACATAAAAGGTTTT  
ATAAAGATTCTCAACGAAAAATAAGATGGATTATCAAATAGTTCTA-----TTTATAAAA  
ATCAAAGTG-----AAGGAAGATTCCAAAATAAGTAATAGGATCATCCATGAATCA  
CCCATTAGAATTGTATCCAGAGATTGGACAAATGATTC ACTGATAGAAATAAAAATTAAT  
GATCTGGCTGATAAGACAACCAAATCTGGGATCAAGTAGAAAAGATTAGAAAAGACA  
AGAAAAAAGTACTAACAAGGGAATTTGTAGTAATAAAGAACCGAATCACGGAAAC  
ATATTTGGCAAATATCTAAAAAAGAAGTGCCCGATTAATCTCTAAATGGGACTCTTTTA  
TGAAATCTTTCATTGAAAGAATATACATGAGTATCCTTCTATGTATCACTAACATTTACAG  
GATCTATGTACAATTTTTTATTCCC-----TTCTGCGACTTATCCTCTTTGTCCCAAGCCTAT

GTGTTTTACAAATTATTGCAAACCCAAGTTAGTAACAAATATAAGTCAGAATCCATATTT  
CATTACACATATCCTTTTATTAAGGATGGAATAAAAGACTATTTACACGAGGAATATTT  
GATTCTGAATCAAAACACAAGAACTGCGGAATTCTGGAATGAGTGAATGGAAAAAC  
TGGTTAAAGAGCCATTATCAATACAATTTATCCCATGACAAATGGTCTAGATTAGCACCT  
CTAAAATGGAGAAAGAAAGTCAATCAGCATCGTACGATTCAAATAACCCAAAATCGG  
GTTTCATATGAA---GAAAAAGACCAATTAATTCATTCAGGGAAAAAGAAAAAATAAAA  
AAACTACTACAGATATGATCTTTTATCATATAAATATCTTAATAAATATACAATTGATCTAGA  
TAGAAAATATTTTGAATTGAGAATCACCAATTTTGACCCCTAGATTTTTTGATTGGATGGG  
AATGAATGAACAAATGTTAGATCGTTGGTTCTTACCAGAATTTGTGCCGCTTTACGATC  
GATATACGACTAATCCGTGGATCATACCAATAAATTTGATTCTATTTGATTTCAAGAGCA  
AGAAGGAAGCGGAACTAGACTTATTTTTGAAAAAATATTTTATTTTTCAACTCCGATGG  
GATGATCCTTTCAATAAAGGAATGAACAATAATATCAAGGTATATTGTCTACTGCTTAGA  
CTTATGAATCCGAATGAAATTGCTATATCCTCTATTCAAAGTGGAGAAATGGGTCTAGAT  
GTAATGCTGATTAATAGGGGTTTCTCTCTTCCAGAATTGATAAAAAAGGGAATATTTCTT  
ATTGAACCGGTTTCGTTTGTCTATCAAACGGGATGGAATTTTCGATTATGTATCAAACCATA  
GCTATTTTCATTGACCCATAAGATTCAGCACATAAATTATGATTTGCTTGTTCCTGAACATA  
TTTTATCTCCTAGCCATCGTAGAGAATTGAGAATCTAAGCCGTTTCAAGTTTCTTTGGC  
CCACTCATCGATTAGAAGATTTAGCCTGTATGAATCGCTATTGGTTTGATACCAATAATG  
GGAGTCGTTTCAGTATGTCAAGGATCCATATGTATCAGATGAAACGGCATCAATTCAAA  
TCCTGTATTTTTGAATTGAGAGAGATATTGAGAGAGATCAAGAATTCGCTATTTCTTA  
GATTCATGGACCAATTCGATTCAGTGGTGTCTTTCACTCACATTTTTTTCCACCAAGA  
ACGTTTTGTGAAACTCCTTGGCCCCAAACTTGGAGTGTCTGCTTTCA---CGTGATTC  
A-----CAGGGTTCAACAAGCAATCGATATTT-----ACGATCAAAGGTGTAGTACTGCT  
TGTAGTAGCG---GTCCTTATA-----TATCGTATTAACAATCGAAATATGGTCGAAAGA  
AAAAATCTCTATTTGATGGGGCTTCTT-----CCTATACCTATGAATTCCATTGGACC  
CAGAAATGATACATTGGAAGAATCTTTT---TGGTCTCCCAATATCAATAGGTTGATTGTTT  
CG---CTCCTGTATCTTCCAAAAGGGAAAAAGATCTCTGAGAGTTGTTTCATGGATCCGA  
AAGAGAGTACTTGGGTCCTCCCAATAACT-----CAAAGTGTATCATGCCTGAATCT  
AACTGGGGTTCGCGGTGGTGGAGGAACTGGATCGGAAAAAAGAGG-----GATTCTAGT  
TGTAAGATATCT-----AATGAAACAGTAGCTGGAATTGAGATCTCATTCAAAGAGAAA  
GATATCAA---TATCTGGAGTTTCTTTTTGTATCCTATATGGAT-----GATCCGATCCGCAA  
GGACCATGGTTGGGAATTGTTTGATCGTGTCTTCCGAGGAAGAAGCGAAACATAATC  
AATTTG-----AATTCGGGACAGCTATTCGAAATCTTAGCGAAACACTTGATTTGTTATCTC  
ATGTCTGCTTTTCGTGAAAAAAGACCAATTGAAGTGGAGGGT---TTCCTCAAACAACA  
AGGA---GCTGAGGCAACTATTCCATCAAATGATATTGAGCATGTTTCCCAT-----CTCTTC  
TCGAGAAACAAGTGGGATATTTCTTTGCAAATTGTGCTCAATTTTCATATGTGGCAATT  
CCACCAAGATCTCTTCGTT-----AGTTGGGGGAAG---AATCAGCACGAATCGGATTTTT  
TGAGGAAC---GTATCGAGAGAGAATTTGATTTGGTTAGACAATATGTGGTTGGTAAACA  
AGGATCGG-----TTTTTTAGC-----AAGGTACGGAATGTATCGTCAAATATTCAATATGA  
TTCC-----ACAAGA-----TCTATTTTCGTTCAAGTAACGGATTCTAGCCAATTGAAAGGA  
TCTTCT---GATCAATCCAGAGAGAATTTTCGATTCCATTAGT-----AATGAGGATTCGG  
AA-----TATCACACATTGATCAATCAAACAGAGATTCAGCAAC  
TAAAAGAAAGATTGATTCTT---TGGGAT-----CCTTCCTCTTCAAACGGAAACGAACAG  
AGATAGAATCAGAT-----CGATTCCCGAAA-----TACCCTTCTGGATATTCC-----TCAATGT

CCCGGCTATTCACG---GAACGTGAAAAGCAGATGAATAATCATCTGTTTCCGGAAAAAA  
TCGAAGAATTTCTT-----GGGAATCCTACAAGATCAATTCGTTCTTTTTTCTCCGACAGAT  
GG-----TCAGAACTTCAT--CTGGTTTTCGAATGCTACTGAGAGGTTCACTAGAGATCAG--  
-----AAATTGTTGAAGAAACAACAAGATGTTTTTTCTTTTGTCCCTTCCAGGCGATCG  
GAA-----AAGAAAGAAATGGTTGATATATTCAAGATAATTACGTATTTACAAAAT-----  
ACCGTCTCAATTCATCCTATTTTCATCAGATCGGGGATGTGATATGGTTCCG---AAGGATG  
AACCGGAT--ATGGACAGTTCTAATAAGATCTCATTCTTGAACAAAAACCCATTTTGTGA  
T-----TTATTCCATCTATTCCATGACCGGAACAAAGGGAGATACACGTTG-----CACCACG  
ATTTTGAATCAGAA-----GAGAGATTTCAAGAAATGGCAGATCTATTCACTCTATCAATA  
ACCGAGCCT--GATCTGGTGTATCATAAGGGATTTGCCTTTTCTATTGATTCCACGGGTT  
GGATCAAAAAAAA-----TTCTTGAATGAGGTATTCAACTCCAGGGATGAATCGAAAAAG  
AACTCTTTA-----TTGGTTCTACCTCATATTTTTTAT-----GAAGAGAATGAATCTTTTTA  
TCGAAGGATCAGAAAAAATGGGTCCGG---ATCTCCTGCAGGAATGGTTTGGAAAGATC  
CAAAACCCAAAATAGTGGTATTTGCTAGCAACAACATAATGGAGGCAGTCAATCAATAT  
AGATTGATCCGAAATCTGATTCAAATCCAATATAGCACCTATGGG-----TACATAAGAAAT  
CTATCGAATAGATTCTTTTTAATG-----AATAGATCCGATCGCAACTTCGAATATGGAAT  
TCAA-----AGGGATCAAATAGGAAATGATACTCTGAATCATATAACTATAATGAAATATA  
TGATCAACCAACATTTATTGAATGTGAAAAAG---AGTCAGAAGAAATGGTTTCGAT-----  
--CCTCTTATTTCTCGAACCGAGAGATCCATGAATCGGGATCCTAATGCATATAGATACA  
AATGGTCCAATGGGAGCAAGAATTTCCAGGAGCATTGGGAGCATTTCGTTTCTGAACA  
GAAGAAC-----CGTTTTCAAGTGGTGTTCGATCGATTACGTATTAATCAACATTTCGATT  
GATTGGTCCAAGGTTATCGACAAACAAGATTTGTCTAAGTCACTTCATTCTTTTTGTCC  
AAGTCA-----CTTCTTTTTTGTCT-----AAGTCACTT-----  
-----ACTTTTTTCTTTGTGAGTATCGGGAATATCCCCATTTCATAGGTCCGAG---ATCC  
ACATCTAT--GAATTGAAAGGTCCGAATGATCAACTCTGCAATCAGTTGTTAGAATCAAT  
AGGTGTTCAAATCGTTCATTTGAATAAATTGAAACCC-----TTCTTATTGGAT-----GAT  
CATGATACTTCC---CAAAGATCGAAATTCCTTGATCAATGGGGGAACAATATCAGCATTTT  
TGTTCAATAAGATACCA---AAGTGG---ATGATTGACTCACTCCATACT-----AGGAATAAT  
CGCAGGAAATCTTTGATAACACCGATTCTTATTCTCAATGATATCCCACGATCGGGAC  
AATTGGCTGAATCCCGTGAAACCATTTTCATAGAAGTTCATTGATATCTTCTTTTTATAAA  
GCAAATCTACTTTCGATTCTTGAATAATCCACATCACTTCTGCTTCTAT-----TCTAACAAA  
AGATTCCCTTTTTAT-----GCGGAAAAGACCCGTATCGATAATTATGAT-----CTTACAT  
AT--GGACAATTCCTCCATATCTCGTTCATCCGCAACAAG---ATATTTCTTTGTGCGTCG  
GTAAA-----AAAAACATGTTTTTTTGGAG---AGAGATACTATTTACCAATCGAGTCAC  
AGGTATCTGACATATTCATACCTAACGATTTCCACAAAGTGGTGACGAAACG---TATAA  
CTTGTAACAAA-----TCTCAGC  
CTCTTTCA-----ACTTATTGTCAGCCTCTTTTCAGATATGAATCTATCTGAT  
TCAGAAGGGAAGAAGTTCATCAGTATCTCAGT-----TTCAATTCAAACATGGGTTTGGAT  
TCACACTCCATGTTCTGAGAAAGATTTACCA-----TCCGCAAAA-----AAA-----  
-----CGGAATCTTTGTCTAAAG-----AAATGCGTTGAGAAACGGCAGATGTATAGAGCCTT  
TCAACGAGATAGTGCTTTTTTCAAATCTCTCAAATGGAATCTGTTCCAAACGTATATGC  
CATGGTTCTTACTTCGGCAGGGTGCAAATATATAAATTTTCATCCTTTTAGATACTTTTTC  
AGACCCATTG-----CCGATACTAAGTAGCAGT--CACCAATTTGTATCCTTTTTTTATGATA  
TTATGCATGGATCAGATATATCATGGTCAATTCTTCAGATTCCATTGTGG-----GCGAT

TCTTCCACGATGGAATCTG---ATAAGTGAGATTTTCGAGTAAGTGTTTACAGAAT-----ATT  
CTTCTGCCCCGAAGAAATGATTCATCGAAATAATGAGTCACCCGTTCCATTGAAGTGGAC  
ACATCTGAGATCACCAAATGCTCGGGAGTTC---CTCTATTCAATCCTTTTCTTCTTCTT  
GTTGCTGGATAT---CTCGTTCGTACGCATCTTCTCTTTATTTCCCGA-----GTCTCTAGTGA  
GTTACAGACAGAGTTAGAAAAGATCAAATCTTTGATGATTCCATCATAACATGATTGAGT  
TGCGAAAACCTTCTGGATAGGTATCCTCCACCTGAACTGAATTCTTTCTGGTTAAAGAAT  
CTCTTTCTAGTTGCTCTGGAACAATTAGGAGATTCTCTGGAAGAAATACGGAGTTCTGC  
TTCTGGTGGCAACATGCTATTGAGTGGTGGTCCC-----ACTTATGGG---GTCAAAT  
CAATACGTTCTAAGAAGAAAGATTTGAATATCAATCTCATCGATATCATCTATCTCATA---  
AGTATCATACCAAATCCCATCAATCAATCACTTTTTTCGAGAAATACGAGACATCTAAGT  
CGTACAAGTAAAGAGATCTATTCATTGATAAGA-----AAAAACGTGAACAGTGATTGGA  
TTGATGATCAAATAGAATCCTGGGTCGCGAACAGTGATTTGATTGATGATGAAGAAAGA  
GAATTCTTAGTTCAGTTCTCC-----ACCTTAACGACA-----GAAAAAAGGATTGATCAAAT  
TCTATTGAGTCTGACT--CATAGTGATCATTATCA-----AAGAATGACTCTGGTTA  
TCAAATGATTGAACAACCGGGATCCATTACTTACGATACTTAGTTGACATTCAA-----A  
AAAGGTATCTAATGAATTATGAGTTCAATAGATCCTGTTTAGCAGAAAGACGGATATCC  
TTGCTCATTATCAGACAATTACTTAT-----TCACAAACCCCGTGTGGGGCTAATAGTTCTC  
ATTTCCCATCTCATGGA-----AAACCCTTTTCGCTCCGCTTAGCCCTACCCCTTCT--A  
GGGGTATTTTAGTGATAGGTTTTATAGGAACTGGACGATCATATTTGTCAAATACCGAG  
TGACAAACTCCTATGTTCCCTTCATTACGGTATTTCCGAACAAGTTCCTGGATGACAAT--  
-AAAGGTTATCTTATTGAT-----GATATCGAT--ATTGATGATCGTGACGATATCGAT--  
-----ATTGATGATCGTGAC-----GATGATGAC  
CTTGATACGGAGCTGCTAACTATGCCGAATGTGCTA-----ACTATGTATATGACG-----  
CCGAAAATAGACCAATTTGAGATCACCTTCCATTAGAATTAGCAAAGCAATGTCTCC  
TTGCATAATATGGATTCCAAACATTCATGATCTGTATGTGAATGAGTCGAATTACTTATCC  
CTCGGTCTATTAGTGAACCATCTCCCC-----AGGGATTGTGAAAGATGTTCC---ACTAG  
AAATATTCTTGTATTGCTTCGACTCATATTTCCCAAAGTGGATCCCCTCTAATAGC  
TCCGAATAAATCAAATACATGCATTAAGATACGAAGGCTTCTTATTCCACAACAACGAA  
AGCACTTTTTTATTCTTTTATATACTAGGGGATTCCGCTTGGAAAAGAAAATGTCCATA  
CT-----AATGGATTCCGATCCATAACCATGGGTTCCAATGCACGAGATCTTGTAGCACTT  
ACCAATGAGGTCTTATCAATTAGTATTACACAAAAGAAATCAATTATAGACACTAATACA  
ATTAGATCAGCTCTTCATAGACAACTTGGGATTTGCGA-----TCCCAGGTAAGATCC  
GTTCAGTATCATGAGATCCTTTTCTATCAGATAGGAAGGGCTGTTGCACAAAATGTACT  
TCTAAGTAATTGCTCCATAGATCCTATATCTATCTATATGAAGAAGAAA-----TCATGTAA  
GGAAGGGGATTCTTATTTGTCCAAATGGTACTTCGAACTTGGAACGAGCATGAAGAAA  
TTAACGATACTTCTTTATCTTTTGGAGTTGTTCTGCCGGATCGGTCGCTCAAGATCTTTGG  
TCTCCACCC-----GGACCCGATGAACAA---AATTGGATCACTTCTTATGGATTCTTTGAG  
AATGATTCT--GATCTAGTTCATGGC-----TTAGAAAGCGCTCTGGTGGGA-----TACTC  
ACGGACAGAA-----TGCAGTCAGTTTGATAATGAT-----CGAGTGACATTGCTTCTTCGGT  
CCGAACCAAGGAAT--CAGTTAGATATGATGCAAAATGGATCTTGTCTATCGTTGATCA  
GAGATTTCTATATGAAAAA-----TACGAATCGGGGTTTGAAGAA--GGGGAAGGAGAAG  
GAACCCTCGACCTGCAA-----CAGATAGAGGAGGATGAG-----GATTTATTCAATCA  
C-----ATAGTTTGGGCTCCT-----AGACTATGGCGCCCT-----CATGGCAATCTATTTGATT  
GTATCGAAAGGCCCAAGAAATTGGGATTTCCC---TATTGGGTCAGGTCATTTCGG-----





????????????????????????????????????????????????????????????????????????????????????  
???ATGGCAACCCTTCGAGTCGACGAAATTAATAAAATTCTCCGCGAACGTATTGAACA  
ATATAATAGGAAAGTAGGGATTGAGAATATCGGTCGCGTAGTGCAAGTGGGGGATGGG  
ATTGCTCGTATTATAGGTCTTGGTCAAATAATGTCAGGTGAATTAGTCGAATTTGCAGAA  
GGGACGAGAGGTATTGCTCTGAATTTGGAATCCAAAATGTTGGGATTGTATTAATGGG  
CGATGGGTTGATGATACAAGAGGGAAAGTTTTGTAAAAGCAACAGGAAGAATTGCTCAG  
ATACCCGTGAGCGAGGCTTACTTGGGTCGTGTTATAAATGCTCTCGCTAAACCTATTGAT  
GGGAGAGGCGAAATTGTCGCTTCAGAATCTCGCTTAATTGAATCTCCTGCTCCGGGTAT  
AATTTCTAGGCGTTCCGTATATGAACCCCTTCAAACAGGGCTTATTGCTATCGATTGAT  
GATCCCATAGGGCGCGGTTCAGCGAGAGTTAATTATTGGGGACAGACAGACTGGCAA  
ACAGCAGTAGCCACAGATACAATTCTCAATCAAAAAGGGCAAGATGTAATATGTGTTTA  
TGTAGCTATCGGTCAAAGAGCATCCTCCGTGGCTCAAGTAGTAATACTTTCCACGAAG  
AGGGGGCCATGGAATACACTATTGTAGTAGCTGAAATGGCGGATCACCCGCTACATTA  
CAATATCTCGCTCCTTATACGGGAGCAGCCCTGGCTGAGTATTTTATGTACCGCGAACG  
GCATACTTTAATAATTTATGATGATCTCTCAAACAGGCACAAGCTTATCGCCAAATGTC  
CCTTCTATTAAGAAGACCTCCCGGCCGCGAAGCTTATCCAGGGGATGTTTTTTATTTGCA  
TTCACGCCTTTTAGAAAGAGCCGCTAAATTAATTCTCTTTTAGGCGAAGGGAGTATGA  
CCGCTTTACCAATAGTGGAGACTCAATCTGGAGACGTTTCCGCCTATATTCCTACTAATG  
TAATCTCAATTACAGATGGACAAATATTCTTATCCGCGGATCTATTCAATGCCGGAATC  
GACCTGCTATTAATGTGGGTATTTAGTTCCAGAGTGGGATCCGCAGCTCAAATTA  
GCCATGAAACAAGTAGCTGGCAAATCAAATTTGGAAGTACTAGCTCAATTCGCAGAATTAC  
AAGCCTTTGCACAATTCGCCTCTGCTCTGGATAAAACAAGTCAGAATCAATTGGCAAG  
GGGTCGACGATTACGGGAATTGCTTAAACAATCCCAATCAAACCCCTCTCCCAGTGGAA  
GAGCAGGTAGCTACTATTTATACCGGAACGAGAGGATATCTTGATTGTTAGAAATTGA  
ACAGGTAAAGAAATTTCTGGATGAGTTACGTAAACACCTAAAAGATACTAAACCTCAA  
TTCCAAGAAATTATATCTTCTAGTAAGACATTCACCGAGCAAGCAGAAACCCTTTTGAA  
GGAAGCTATTACAGGAACAGCTTGAACGTTTTCCCTTCAGGAACAAACAATGAGAACC  
AATCCTACTACTTCGCGTCCCGGGGTTTTCCACAATTGAAGAAAAAAGCGTAGGGCGTA  
TTGATCAAATTATTGGACCCGTGCTGGATATCACTTTTCCCCGGGCAAGTTGCCTAATA  
TTTATAATGCTTTGATAGTCAAGAGTCGAGACACTGCCGATAAGCAAATTAATGTGACT  
TGTGAGGTACAACAATTATTAGGAAATAATCGAGTTAGAGCTGTGGCTATGAGTGCTAC  
AGACGGGTTGATGAGAGGAATGGAAGTGATTGACACGGGAACTCCTCTCAGTGTTCC  
AGTCGGTGGAGCTACTCTCGGACGAATTTTAAACGTTCTTGGGGAGCCTATTGACAATT  
TGGGTCCTGTGGATACTAGTGCAACATTCCCTATTATAGATCTGCGCCTGCCTTTATCG  
AGTTAGATACGAAATTATCTATCTTTGAAACAGGTATTAAGGTGGTTCGATCTTTAGCTC  
CCTATCGACGTGGAGGAAAAATCGGACTGTTTGGGGGGGCAGGAGTAGGTA  
TACTCATCATGGAATTAATCAATAACATTGCTAAAGCTCATGGAGGCGTATCCGTATTG  
GCGGAGTAGGGGAACGGACTCGTGAAGGAAATGATCTTTATATGGAAATGAAGGAATC  
CGGAGTAATTAATGAAAAAATATTGAGGAATCAAAGGTAGCTCTAGTCTATGGCCAAA  
TGAATGAACCGCCGGGAGCTCGTATGAGAGTTGGTTTAACTGCCCTAACTATGGCAGA  
ATATTTCCGAGATGTTAATAAGCAAGACGTGCTTTTATTCATCGATAATATCTTTGTTTT  
GTTCAAGCAGGATCGGAAGTATCCGCCTTATTAGGCAGAATGCCCTCCGCAGTGGGTTA  
TCAACCTACCCTTAGTACAGAAATGGGTTCTTTGCAAGAAAGAATTACCTCTACCAAAA  
AGGGATCTATAACTTCGATCCAAGCAGTTTATGTACCTGCAGACGATTTGACCGACCCT

GCTCCTGCCACAACATTTGCACATTTGGACGCTACTACCGTACTTTCCAGAGGATTAGC  
TTCCAAGGGTATTTATCCCGCAGTAGATCCTTTAGATTCAACCTCAACTATGTTACAGCC  
TCGGATCGTTGGCAACGAACATTATGAACTGCGCAAAGAGTTAAGGAACTTTACAA  
CGTTACAAAGAACTTCAGGACATTATCGCAATTCTTGGATTGGATGAATTATCGGAGGA  
GGATCGTTTAACTGTAGCAAGAGCACGAAAAATCGAGCGGTTCTTATCACACCCTTC  
TTTGTGGCAGAAGTTTTTACTGGTCTCCAGGAAAAGTATGTTGGTCTTGCAGAAACAAT  
TAGGGGATTTCAACTAATCCTTTCCGGAGAATTAGACGGCCTACCCGAACAGGCTTTTT  
ATTTAGTGGGGAACATCGATGAAGCTAGCACGAAAGCTATAAACTTAGAAGAGGAGAG  
CAAATTGAAGAAAATGAAATTAATCTTTATGTAAGTACTGACTCCTAAACGAATTATTTGGGA  
TTGTGAAGTGAAGAAATCATTATCTACTAATAGTGGCCAAATTGGTGTATTACCAA  
ACCACGCCCCCATTAACACAGCTGTAGATATGGGTCTTTGAGAATACGCCTCAACGAC  
CAATGGTTAACGGCGGTTCTGTGGAGTGGTTTTGCGAGAATAGTTAATAATGAGATCAT  
CATTTAGGAAATGATGCAGAACTGGGTAGTGACATTGATCCAGAAGAAGCTCAACAG  
GCACTTGAATAGCCGAAGCTAACTTGAGTAAAGCTGAGGGTACGAAAGAATTGGTTG  
AAGCGAAGCTAGCTCTCAGACGAGCTAGGATACGAGTCGAGGCTGTCAATTGGATTCC  
CATGAAAATGTAACCCATTCTTTCTGTTTTTTAGCTCACTGGCCATTCGCTGGGAGTTT  
CGGGCTTAATACCGATATTTTAGCAACAAATCTAATAAATCTAACTGTAGTGGTTGGTGT  
ATTGATTTTTTTGGAAAGGGAGTGTTAAAAGATTTATTAGATAATCGAAAACAGAGGA  
TCTTAAGTACTATTCGAAATTCGGAAGAATTGCGTAGAGGGACCCTTGAACAACCTCGA  
AAAAGCTCGTATTCGATTACAGAAAGTCGAACTAGAAGCAGATGAGTATCGAATGAAT  
GGATACTCTGAAATAGAACGAGAAAAAGAAAATTTGATTAATGCTACTTCTATTAGTTT  
GGAACAATTAGAAAAGTCTAAAAACGAAACCCTTTATTTTGA AAAACAAGGGCGATG  
AATCAGGTCCGACAACGGGTTTTCCAACAAGCTGTACAAGGAGCTCTAGGAACTCTGA  
ATAGTTGTTTGAATACCGAGTTACATTTCCGTACGATTTCGTGCTAATATTGGCATTCTCG  
GGCCATAGAATGGAAGAGA---ATGAATCCACTAATTGCTGCTGCTTCCGTTATTGCTGC  
TGGATTGGCCGTAGGGCTTGCTTCTATTGGGCCCGGAGTTGGTCAAGGTACTGCTGCA  
GGACAAGCTGTAGAAGGTATTGCGAGACAGCCAGAAGCAGAAGGTAAAATAAGAGGT  
ACTTTATTGCTTAGTCTAGCTTTTTATGGAAGCTTTAACAATTTATGGACTGGTTGTGGCA  
CTAGCGCTTTTATTTGCGAACCCCTTTTGTATGAATATTACCCATGTTCCATTA AAAACA  
CTCAAGGGGTTATATGATATATCGGGTGTAGAAGTAGGCCAACACTTCTATTGGCAAATA  
GGAGGTTTTCAAATTCATGCCCAAGTACTCATCACTTCTTGGGTGCTAATTAATTTTG  
CTAGGTTCAAGTTATCATAGCTGTTCCGAATCCACAAACCATCCCGACCGATGGTCAGAA  
TTTCTTCGAATATGTTCTTGAGTTATTTCGAGACTTGAGCAAACTCAGATTGGAGAAG  
AATATGGTCCCTGGGTTCCCTTTATTGGAAGTATGTTCCCTTTTTATTTTTGTTTTCGAATTG  
GTCAGGTGCTCTTTTACCTTGGA AAATTATAGAGTTACCCCATGGGGAATTAGCAGCGC  
CCACGAATGATATAAATACTACTGTTGCTTTAGCTTTACTAACATCAGCGGCATATTTTA  
TGCAGGTCTTAGCAAAAAGGATTGAGTTATTTGAAAATATATTA AAACCAACCCCAA  
TCCTTTTACCTATTAACATCCTAGAAGATTCACAAAACCATTAATCACTTAGTTTTTCGAC  
TTTTCGGAAATATATTGGCGGATGAATTAGTCGTTGTTGTTCTTGTCTTTAGTCCCCTT  
AGTAGTCCCTATACCGGTCATGTTTCTTGGATTATTTACAAGCGGTATTCAAGCTCTTATT  
TTTGCAACGTTAGCCGCAGCCTATATAGGTGAATCCATGGAAGGTCATCATATGCTATTT  
GCAACTTTAGAACATATACTAACTCATATCTCTTTCTCAACCATTTCAATTGTGATTACGA  
TTCATTTGATAACCTTATTAGTTCGTGAACTTAGGGGATTACGTGATTTCGTCAGAAAAA  
GGAATGATAGCTACTTTTTTCTCTATAACAGGATTTTTTAGTCTCTCGTTGGGTTTTCTTCG

GGACATTTTCCATTAAGTAATTTATATGAGTCATTGATCTTCCTTTCATGGACTCTGTATA  
TTCTTCATACTATTCCCTAAGATACAGAACTCGAAAAATGATTTAAGCACAATAACTACGC  
CAAGTACTATTTTAACGCAAGGCTTTGCCACGTCGGGTCTTTTAACTGAAATGCATCAA  
TCCACAATACTAGTACCTGCTCTACAATCTCAGTGGTTAATGATGCATGTCAGTATGATG  
TTACTAAGCTATGCAACTCTTTTGTGCGGATCCTTATTATCCGCCGCTCTTCTAATCATT  
GATTTTCGAAATTCTTTTCGATTTCTTTTCA---CTAAAGGAGATTGAATATTTATATGCAAAA  
AGAAGTGCTTTAAAAAACACCTCTTTTCCCGTATTTCCAAATTATTACAAATATCAATTA  
ACTGAGCGTTTGGATTCTTGGAGTTATCGTGTCAATTAGTCTAGGGTTTACTCTTTTAAACC  
GTGGGTATTCTTTGTGGAGCAGTATGGGCTAATGAGGCATGGGGATCCTATTGGAATTG  
GGATCCTAAGGAAACTTGGGCATTTATTACCTGGACCATATTTGCAATATATTTACATAGT  
AGAACAATCCAAATTGGAAGGGTACGAATTCGCACCTGTAGCTTCGATAGGATTTCT  
TATAATTTGGATCTGCTATTTTGGTATCAATCTGTTAGGAATAGGTTTACATAGTTACGGT  
TCATTTACATTACCAATGAAAAAAAAGAAAGCATTGCCTTCTTTCTTATATCTTGTATTTA  
TCGTACTTTTGCCTGGGGAGTCTCTTTCTCTTTTAAACAAATGTCTGGAACCTTGGATTA  
AGAATTGGTGAATACCAGGCAATCCGAACTTTCTTAACTGATATTCAAGAGAAAAG  
GATTCTAGAAGGATTCATAGAATTAGAAGAATTTTCTCTTGGACGAAATGATAAAAAG  
AGAAACCGAAGACACATGTACAAAAACTTCCTATAGGAATACACAAGGAAATAATACA  
ATTGGCCAAAATAGATAATGAGGATCATCTCCATATCATTTTGCATTTCTCAACAAATATA  
ATCTGTTTGGCTATTCTAAGTGGTTCTTTTTTTCTGGGTAAAGAAGAACTTGTCAATTTG  
AATCTTGGGTTTCCAGGAATTTTCTATAACTTAAATGATTCAATAAAAGCTTTTTTTTATTC  
TTTTAGTTACTGATTTTTTTTGTGGATTTCACTCCACCCGCGGTTGGGAACTACTAATTC  
GTTGGGTCTACAACAATCTTGGATGGGCTCCTAACGAGCTAATTTTCACTATTTTTGTTT  
GTAGTTTTCTGTGATTCTAGACACGTGTTTGAATTTTGGGTCTTTTTTTGTTTAAACC  
GTCTATCTCCTTCACTTGTAGTCATTTATCATTCAATTAGTGAAATGCCATTGGTGTTC  
AAAAGTACCTTACCGGATTCCCGGAGATGAAGAAGCGACTTGGGTTGACTTATACAAT  
GTTATGTATCGAGAAAGGACACTTTTTTTTAGGTCAAGAGATTCGTTGCGAGATCACGAA  
TCATATTACAGGTCTGATGGTATATCTCAGTATAGAAGATGGAAATAGCGATATTTTTTTG  
TTTATAAACTCCCCTGGCGGGTGGCTAATCTCAGGAATGGCGATTTTTGATACGATGCA  
AACGGTGACACCTGATATATATACAATATGCCTCGGAATAGCCGCGTCCATGGCCTCCTT  
CATTCTGCTTGGAGGAGAACCCACCAAGCGTATAGCATTCCCTCACGCTAGGATTATGC  
TTCACCAACCTGCTAGTGCTTATTATCGGGCAAGGACACCAGAATTTTTACTAGAAGTG  
GAAGAGTTACACAAAGTTCGCGAAATGATCACAAGGGTTTATGCACTAAGAACAGGCA  
AGCCTTTTTGGGTTGTATCCGAAGACATGGAAAGGGATGTTTTTATGTCAGCAGACGA  
AGCCAAAGCTTATGGACTTGTGATATTGTAGGGGATGAACCGAGAGAAGCAAAAAGTA  
ACTTTCGAAGGTTTAGTTACGGAAGCCCTACCCAACGGAATGTTCCGCGTTCGCCTAG  
AGAATGACACGATCATCTGGGCTATATTTCAAGAAAGATCCGGTCTAGCTCTATACGA  
ATACTGATGGGGGATAGGGTCAAATTAAGTAAGTCGTTATGATTCCAGCAAAGGTC  
GTATAATTTATAGACTTCCCATAAGGATTCGAAGGATATGCAAAAATTCGAAGGGTATT  
CAGAAAAACAGAAATCTCGTCAACACTACTTCGTCTACCCACTTCTCTTTCAGGAATAT  
ATTTATGCATTTGCTCATGATTATGGATTATTTGGTTGTAATAACAAATTTAGTTCAATACT  
TGTGAAACGTTTAAATTAATTCGAATGTATCAGCAGAATTTTTTTGATTAATTCGGTTAATTAT  
CCTAACCAAGATCGATTGTTTGAATCTGAGTTTTATTCTCAGATTCTATCTGAGGGGTTT  
GGGATTGTTGTAGAAATCCCCTCTCGCTAGGGCAACTATCTTGTCCAATACCAAAGTT  
TCAAAATTTACAATCTATTCAATATTTCCCTTTTTTAGAAGACAAATTTTTGCATTTA

CATTATCTATCACATATAGAAATACCCTATCCTATCCATTTAGAAATCCTGGTTCAACTCC  
TTGAATACCGGATTCAAGATGTTCCCTCTTTGCATTTATTGCGATTCTTTCTCCACTATTA  
TTCGAATTGGAATAGTCTTATTACTAAATCCATTTTTCTTTTGAAAAACAAAGACTATT  
TCGATTCCTATATAACTCTTATGTATCAGAATATGAATTTTTCTTGTGTTTCTTCGTAAAC  
AATCTTCTTGCTTACGATTAACATCTTCTGGAACCTTTCTGGAACGAATCATCTTTCTG  
GGAAGATGGAACAT-----GTAATGTACCCGGGGCGGAAAACCATATGGTTCCTTATGGAT  
CCTCTTATGCATTATGTTTCGATATCAAGGAAAGGCAATTCTTGCATCAAAGGCACTCTT  
CTTTTGAAGAAGAAATGGAAATCTTACCTTGTCAATTTCTCGCAATATTTTTCTATTTTT  
GGACTCAACCACAAAGGATTCGTCTAAACCAATTAACAAACTCTTGCTTCGATTTTCTG  
GGGTACCTTTCAAGTGTACCAATAAATACTTTGTAGTAAGGAATCAAATGCTGGAGAA  
TTCTTTTCTAATAGATACTCGAATG-----AAAAAATCAATACCACAGTCCCTGCAACTC  
CCCTCGTTGGATCCTTATCAAAGCTCAATTTTGTACTGGATCGGGGCATCCTATTAGTA  
AACCCGTTTGGACTGATTTATCAGATTGGGATATTCTTGATCGTTTTGGTCGGATATGTA  
GAAATCTTTTTATTATCATAGTGGATCTTCGAAAAACAGACTTTGTATCGACTAAAAT  
ATATACTTCGACTTTTCATGTGCTAGAACTTTAGCTCGTAAACATAAAAGTACGGTACGA  
ACTTTTATGCAACGATTGGGTTCGGTATTTTTAGAAAGATTTTTTACGGAAGAAGAGCA  
AGTTTTTTCTTTGATGTTACCAAACGTATTTGGTATTTGGATATTATCCGTATCAATGAC  
CTGGTGAATCCTCTTATGATAATAGATAGGGTA---GAGGTAGAA---ACTATCAATCTTTT  
TCGAAATCGGAA---TTATTAAGAAATCTACGGACTTATATGGATTCTA---CCCATTTTG  
GCCCTCCTACTGGGAATCACAATAGAAGTACTCGTAATTGTGTGGTTAGAAAGAGAAAT  
ATCCGCATCGATACAACAACGTATTGGTCTGAATATGCTGGCCCCCTGGGACTGCTTC  
AAGCTATAGCAGATGGAACATAACTACTTTTAAAAGAGGATATCCTCCCATCCCGAGGA  
GAGATTCCTTTATTTAGCATTGGTCCCTCTATAGCAGTCATATCCATTTATTAAGTTTTT  
AGTTATCCCTTTGGGATATCATTTTGTTTTAGCTGATCTTAGTATTGGTGTTTTTTTATGGA  
TTGCGATTCAAGTATTGCTCCTATTGGTCTTCTCATGGCAGGATATAGCTCAAATAATA  
AATATTCTTTTCAGGCGGTCTACGAGCGGCTGCTCAATCTATTAGTTATGAAATACCAT  
TAACTTTTTGTGTACTAGCAATATCTCTACTATCTAATAGTTCAAGTACAGTTGATATAGT  
TGAAGCACAGTCCAAATATGGTTTTTTTTGGATGGAATCTTTGGCGTCAGCCTATAGGTT  
TTCTAGTTTTTCTAATTTCTTTTAGCAGAATGTGAAAGATTACCCTTTGATTTACCAG  
AAGCAGAAGAAGAATTAGTAGCAGGTTATCAAACCGAATATTCTGGTATTAATATGGT  
TTATTTTATCTTGTCTTACCTAAATTTATTAGTTTCTCTTTATTTGTAAGTTCTATAC  
TTAGGCGGGTGGAATTTCTCTATTCCCTATATATCCTTTTTTGGATTTTCCAAATGAATA  
AAATAATTGGAATTTTGGAAATGGTAATAGGTATCTTTATTACATTAACATAAGCTTATTT  
ATTTCTCTTCATTTCTATCACAATAAGATGGACTTTACCCAGGATGAGAATGGATCAGTT  
ATTAAATCTTGGATGGAATTTCTTTTACCTATTTCTCTGGGCAATCTTTATTAACAAC  
TCTTCCCAACTAGTTTCACTAATGATCTGGCATGTACAGAATGAAAACCTTCAATCTCGAT  
TCTACGAGAATTTTTATGAAAGCGTTTCATTTGCTTCTCTTCAATGGAAGTTTCATTTTC  
CCAGAATGTATCCTAATTTTTGGCCTAATTTCTTCTTCTGATGATCGATTAAACCTCTGATC  
AAAAGATAGACCTTGGTTCTATTTTCATCTCTTCAACAAGTTTAGTAATAAGCATAACG  
GCCCTATTGTTCCGATGGAGAGAAGAACCTATAATTAGCTTTTTCGGGAAATTTCCAAAC  
GAACAATTTCAACGAAATCTTTCAATTTCTTATTTTATTATGTTCAACTTTATGTATTCCT  
CTATCCGTAGAGTACATTGAATGTACAGAAATGGCTATAACAGAGTTTCTGTTATTCGTA  
TTAACAGCTACTCTAGGGGGAATGTTTTTATGTGGTGCTAACGATTTAATAACTATCTTT  
GTAGCTCCAGAATGTTTCAGTTTATGTTCCCTACCTATTGTCTGGATATACCAAGAGAGAT

CTACGGTCTAATGAGGCTACTATGAAATATTTACTCATGGGTGGGGCAAGCTCTTCTATT  
CTGGTTCATGGTTTCTCTTGGCTATATGGTTCATCTGGGGGGGAGATCGAGCTTCAAGA  
AATTGTGAATGGTCTTATCAATACACAAATGTATAACTCCCCAGGAATTTCAATTGCGCT  
TATATTCATCACTGTAGGACTTGGGTTCAAGCTTTCCCCAGCCCCTTTTTCATCAATGGAC  
TCCTGACGTCTACGAAGGATCCCCACTCCAGTCGTTGCTTTTTCTTTCTGTTACTTCGA  
AAGTAGCTGCTTCAGCTTTAGCCACGCGAATTCTCGATATTCCTTTTTATTTCTCATCAA  
ACGAATGGCATCTTCTTCTGGAAATCCTAGCTATTCTTAGCATGATATTGGGGAATCTCC  
TTGCTATTACTCAAACAAGCATGAAACGTATGCTTGCATATTCGTCCATAGGGCAAATCG  
GATATGTAATTATTGGAATAATTGTTGGAGACTCAAATGATGGATATGCAAGCATGATAA  
CTTATATGCTGTTCTATATCTCCATGAATCTAGGAACTTTTGCTTGCATTGTATTATTTGGT  
CTACGTACCGGAACTGATAACATTTCGAGATTATGCAGGATTATACACGAAAGATCCTTTT  
TTGGCTCTCTCTTTAGCCCTATGTCTCTTATCCCTAGGAGGCCTTCTCCACTAGCAGGT  
TTCTTCGGAAAACCTATCTATTCTGGTGTGGATGGCAAGCAGGCCTATATTTCTTGGTT  
TCAATAGGACTCCTTACGAGCGTTCCTTTCTATCTACTATTATCTAAAAATAATCAAGTTAT  
TAATGACTGGACGAAACCAAGAAATAACCCCTTATGTGCGAAATTATAGAAGATCCCCT  
TTAAGATCAAACAATTCCATCGAATTGAGTATGACTGTATGTGTGATAGCATCTACTATA  
CCAGGAATATCAATGAACCCCATTTCTGCAATTGCTCAGGATACCCTCTTTATGTTTCTG  
CTTCACGAATATGATATTTTTTGGACATTTCTAATAATAGCAAGCCTTATTCCTATTTTGG  
TATTTTGGATTTCAAGGACTTTTAGCCCCGTTAGTGAAGGACCAGAGAAGCTTTCTAGT  
TATGAATCGGGTATAGAACCATGGGGGGGGCTTGGTTACAATCCGAATACGCTATTA  
CATGTTTGCCTAGTTTTTTGTTGTTTTTGATGTGAAACAGTCTTTCTCTACCCTTGGGC  
AATGAGTTTCGACGTATTGGGTGTATCCGTTTTTATCGAAGCTTTCATTTTTGTGCTTATC  
CTAGTTGTTGGTTTATGTTTATGCATGGCGAAAAGGAGCCTTGGAAATGGTCTATGAGTTA  
TTTTCTTGGTTAACAATACTTGTGTTTTGCCGATATTTGCAGGTTTCATTAATTTTTCTTT  
TTACCTCATAAAGGAAATAAAATCGTTAGGTGGTATACTATAGCTATTTGTTTATTAGAAT  
TCCTTATAATGACTTATGCATTCTGTTATCATTCCAATTGGAGGATCCCTTAATCCAATT  
AAAGGAGGATTCTAAATGGATAGATGTTTTTCGATTTCCACTGGAGATTGGGAATCGATG  
GACTTTCATTAGGATCTATTTTATTGACAGGATTTATCACTACTTTAGCTACTTTAGCGGC  
TTGGCCGTTACTCGGAATTCGCAATTATTCTATTTCTGATGCTAGCAATGTATAGCGG  
TCAAATAGGATTATTTTCTTCACGAGACCTTTTACTTTTTTTTATCATGTGGGAGTTAGAA  
TTAATTCCTGTTTACTTACTTTTATCCATGTGGGGGGGAAAGAGGCGTCTGTATTAGCT  
ACCAAGTTTATTTGTATACTGCAGGCGGTTCCATTTTTTTCTTAATTGGAGTTCTGGGT  
ATGGGATTATATGGTTCCAATGAACCCGGATTAGATTTAGAAAGATTGATTAATCAATCA  
TACCCTACAACATTAGAAATACTACTGTATTTTGGCTTCCTTATTGCTTATGCTGTCAAAT  
TGCCGATTATACCTTTACATACGTGGTTACCAGATACCCATGGGGAAGCGCATTACAGTA  
CATGTATGCTTTTAGCCGGAATTCATTAAGATGGGAGCATAACGATTGATTCGGGTCA  
ATATGGAATTGTTACCGCATGCTCATTATCTATTTCCCCCTGGTTGGTAATAATAGGAGC  
GGTGCAAATAATCTATGCAGCTTCAACTTCTCTTGGTCAACGAAATTTCAAAAAAAGAA  
TAGCCTACTCCTCCGTATCTCACATGGGTTTCATAATTATAGGAATTGGTTCCATAACCA  
ACATTGGACTAAATGGAGCTATTTTACAAATATTATCTCATGGATTTATTGGTGCTACACT  
TTTTTTCTTGGCGGGAACGGCTTGTGATAGAATGCGTCTTGTATTCTCGAAGAAGTAG  
GGGGAATATCTATCCAATGCCAAAATTTTTACCATGTTTAGTAGCTTTTCAATGGCTT  
CTCTTGCCCTGCGGGAATGAGCGGTTTTGTTGCAGAATTAGTAGTATTTTTTGGACTAA  
TTACTAGTCCTAAATTTATGTTAATGCCAAAATGCTAATTACTTTTTGTAATGGCAATAG

GAATGATATTAACCTCTATTTATTTATTATCTATGTTACGCCAGATGTTCTATGGATACAAG  
CTATTTTCATGTTCCAAACAAAAATTTTGTAGATTCTGGACCACGGGAACTCTTTCTTTTA  
ATCTGTATCTTTTACCAGTAATAGGAATTGGTATTTATCCAGATTTTGGTCTCTCTCTATC  
CGTTGATAGGGTAGAGGTTCTATTATCCAATTATTATACTAAAATGATGTTTGAGCATGTA  
CTTTTTTTGAGTGTCTATTTATTTTCGATTGGTATCTATGGATTGATCACAAGCCGAAACA  
TGGTTAGAGCTCTAATATGTCTTGAACCTATACTGAATTCAAATTAATCTAAATCTCGTAAC  
ATTTTCTGATCTATTTGATAGTCGCCAATTAAGGAGACATTTTCGCAATTTTGTATA  
GCCCTTGC GGCTGCTGAAGCAGCTATTGGACTATCCATTCTTTCTTCCATCCATCGTAAC  
AGGAAATCAACTCGTATCAATCAATCCAATTTTTTGAATAATATGGAACATACATATCAA  
TATGCCTGGGTAATTCCTCTTCTCCCACTTCCAGTTATTATGTCAATGGGATTTGGACTTT  
TTCTTATTTCCACAGCAACAAAAATCTTCGTCGCATATGGGCTTTTCTAGTATTTTAC  
TCTTAAGTATAGCTATGGTATTCTCACTTCACCTGTCTATTCAACAAATAAATGGAAGTT  
CTATCTATCAATATCTATGGTCTTGGACCATCAATAATGATTTTCCCTTAGAATTTGGATA  
CTTGGTCGACCCCTTACGTCTATTATGTTAATACTAATTACTACTGTAGGAATCTTAGTT  
CTTATTTATAGTGACGATTATATGTCTCACGATGAAGGATATTTGAGATTTTGTTTATAT  
AAGTTTTTTAATACTTCCATGTTGGGATTTGGTACTAGTTCCAATTTGATACAAATTTAT  
TTTTTTTGGGAACTTGTTCGGAATGTGTTCTATTTATTGATAGGCTTTTGGTTTACGCGG  
CCAATTGCAGCGAGTGCTTGTCAAAAAGCTTTTGTAACTAATCGTGTAGGGGATTTTGG  
TCTGTTATTAGGAATTTAGGTTTTTTTTTGGATAACGGGTAGTTTGGAGTTTCGGGATTT  
GTTCAAAATAGCTAATAACAATGGGATTAATTCCTTACTTACTACTTTGTGTGCTTTTTTA  
TTATTCCTTGGTGCAGTTGCAAAATCTGCACAATTTCTCTTACGTATGGTTACCTGAT  
GCTATGGAAGGACCCACTCCCATTTTCGGCTCTTATACACGCAGCAACTATGGTTGCTGC  
GGGGATTTTCTTCTAGCTAGACTTCTTCTCTTTTCATATCCCTACCCTTGCTAATGAGT  
TTCATTTCTTTAGTAGGTACAATAACACTCTTCTTAGGAGCCACTTTAGCTCTTGCTCAG  
AGAGATATTAAGAAGCTTAGCCTATTCTACAATGTCTCAATTGGGTTATATGATGTTA  
GCTCTAGGTATAGGTTCTTATCAAGCTGCTTTATTCCATTTGATCACTCATGCTTATTCGA  
AAGCTTTATTGTTCTTAGGATCCGGATCCGTTATTCAATGGAACCTCTTGTTGGAT  
ATTCACCAGATAAAGTCAGAATATGGTTCCTTATGGGTGGTTAAGAAAATACGTTCCA  
ATTACAAGAACTACTTTTTTATGTGGTACACTTTCTCTTTGTGGTATTCCACCTCTTGCTT  
GCTTCTGGTCCAAAGATGAAATACTTAGTAATAGTTGGTTGTATTCACCCTTTTTTGGAA  
TAATAGCCTCTTTTACTGCAGGATTAAGTGCATTTTATATGTTTCGGATATATTTACTTACT  
TTTGATGGGTATTTGCGTGTTCAATTTCAAATTACAGTAGTACTAAAGAAGGTTTCGTTG  
TATTC AATATCCTTATGGGGAAAAAGTATATCCAAAGGAGTCAATAGG---GATTTTGT  
ATCAACAATGAAGTTTTTTTTCAGCTAAAAA-----ACTTTTGTCTATCCTCATGAAACGG  
GAAATACTATGCTATTTCTCTTCTTATATTACTACTTTTTACTTTGTTTCAATGGATCCATA  
GGAATCCCTTTTGGAGTTAACCATATTATCAAAGTGGCTAACTCCTTCAATAAACTTGTTT  
CAGGAAAATTCAAATCTTCCATAAATTCATATGAATTTCTCACTAATGCAATTTCTTCT  
GTAAGTTTAGCAATTTTTGGTCTATTATAGCATATATCTTTTATGGATCTGCTTATTTCTT  
TTTTCAGAATTTGAATTTCAAATTCCTTGTAAGCTTTTTGGATGAAGTAAAAAAA  
AGATATACAGCTGGTCAATAATCGTGGTTATATAGATTTTTTCTATACTAGGGTTTTTATC  
CTAGGTATAAGAAGATTAGCTGAACTAACGCATTTTTTTGATAAAGGTGTCATTGATGG  
AATTATCAATGGAGTAGGCTTGCTGGTTTTTGTATAGGAGAAGAAATCAAATAT---GTA  
GGGGGAGGGCGAATATCGTCTTATCTATTTTTTTTATGTTATGTATCCTTGTCTTATT  
CTTTATTCCAATGGATTTACCTGGACCAATACATGAGATTCTTGTGCTATTTGGGGGATT

TGTTCTTCTACTAGGAGGTCTAGGAGTAGTATTACTTACCAACCCAATTTATTCTGCCTT  
TTCGCTGGGATTAGTTCTTGTGTTGTATATCCTTATTCTATTTTTTATTAATTCCTACTTTG  
TAGCTGTCGCACAACCTTCTTATTTATGTGGGAGCCATAAATGTCTTGATCATATTTGCTGT  
AATGTTTGTAACGGCTCAGAGTGGTCTAAAGATAAGAATTATTGGACGATTGGAGATG  
GGTTTACTTTACTCCTTTGTATAACTATTCTTTTTCACTAATGACTACTATCCCAGATAC  
GTCGTGGTATGGAATTCCTTGGACTACAAGATCAAACCAAATAGTAGAACAGGGTCTCA  
TAAATAACGTTCAACAAATGGGATTCATTTAGCAACCGATTTTTATCTTCCGTTTGAAC  
TCATTTCCCTAATTCTTCTAGTTTCTTTAATAGGTGCAATTACTATGGCTCGACAAATGA  
GTCTATCGCTTAAAAGAAAAGATCTCATGATAGTGAATATGGGTCCTCAACACCCATCA  
ATGCATGGTGTTCCTCGACTGATTGTTACTCTCGATGGTGAAGATGTTATTGATTGCGAA  
CCCATATTAGGGTATTTACACAGAGGAATGGAAAAAATTGCAGAAAACAGAAGTATTAT  
ACAATACTTGCCTTATGTAACACGATGGGATTATTTAGCTACTATGTTTACAGAAGCAAT  
AACGGTAAATGCACCAGAATTCTTGGAGAATATTCAAATACCCCAAAGAGCCAGCTATA  
TTAGAGTAATTATGTTAGAATTGAGCCGTATAGCTTCTCATTTGTTATGGCTTGGACCTTT  
TATGGCGGATCTCGGGGCACAGACTCCTTTTTTCTACATTTTTAGAGAGAGAGAATTGA  
TATATGATCTATTTGAAGCTGCTACAGGTATGCGAATGATGCATAATTACTTTCGCATCGG  
AGGGGTAGCTGCCGATCTCCCTTATGGATGGATGGATAAATGTTTAGATTTCTGTGATTA  
TTTTTTACAAGGAGTTGTTGAATATCAACAACCTTATTACACAGAATCCTATTTTTTTAGA  
ACGAGTTGAAGGAGTCGGTTTTATTAGCGGAGAAGAAGCTGTAAATTGGGGCTTATCG  
GGACCAATGTTACGAGCTTCTGGAATACAATGGGATCTTCGTAAAATCGATCCTTATGA  
GTCTTACAATCAATTCGATTGGAAAGTCCAATGGCAAAAAGAAGGAGATTCGTTAGCT  
CGCTATTTAGTACGAGTCGGTGAATGAGGGAATCCATAAAAATTATTCAACAGGCTGT  
AGAGAAAATTCCTGGAGGACCTTATGAGAATTTAGAAGCCCGACGC---AAGAAAGCAA  
AGAATCCCGAATGGAATGATTTTGAATATCGATTTCTTGGTAAAAAACCTTCGCCAAT  
TTGAATTATCAAAGCAAGAGCTTTATGTAAGAGTAGAAGCTCCAAAAGGCCGAATTAG  
GAATTTATCTGGTAGGAGATGATAGTCTTTTCCCCTGGAGATGGAAAATTCGTCCACCG  
GGTTTTATTAATTTGCAAATTCCTCCTCAGCTAGTTAAAAAAATGAAATTGGCTGATATC  
ATGACAATATTAGGTAGTATAGATATCATTATGGGGGAAGTTGATCGTATGTTCCCTATGC  
TAACTGGGTTCATTAGTTATGGTCAACAAACAATACGCGCCGCAAGATACATTGGTCAA  
GGTTTAATAATTACCTTATCCCACACAAATCGTTTACCTATAACGATTCACTACCCTTATG  
AAAATCAATTACATCGGAGCGTTTCCGGGGGCGAATACACTTTGAATTTGATAAATGC  
ATTGCTTGTGAAGTATGTGTTTCGCGTATGCCCGATAGATCTACCCCTTGTGGATTGGAAA  
TTTGAAAAGGATATTAAGAAAACAATTGCTTAATTATAGTATTGATTTCCGGAGTTTGT  
ATATTTTGTGGTAACTGTGTTGAATACTGTCCACAAATTGTTTATCAATGACTGAAGAA  
TATGAACTTTCTACTTATGATCGTCATGAATTGAATTACAATCAAATTGCTTTGAGTCGG  
TTACCAATCTCCATAATGGGAGATTACACAATTCAAACAATTAGGAATTCGAAAATAGA  
CGAAGAAAATCTTGAATTCAAGAACGATTACGGATTACCAGCAGGGTTGGTTATCT  
AATTGGCTAGTTAAACATGACGTGGTTCATAGGTCTTTGGGCTTCGATCATCGAGGAGT  
CGAGACTTTACAAATAAAAGCGGGGATTGGGATTCCATTGCTGTCATTTTATATGTATA  
TGGTTACAATTATTTACGTTCCCAATGTGCTTATGACGTAGCACCCGGTGGATCTTTAGC  
TAGCGTGTATCATCTTACGAGAATACAGTATGGTATAGATAACCCAGAAGAGGTATGCAT  
AAAAGTCTTTGCCAAAAGGATAATCCTAGAATCCCGTCTGTTTTCTGGGTTTGGAGAA  
GTGCCGATTTTCAAGAACGCGAATCTTATGATATGGTGGGAATTTCTTATGATAATCATC  
CACGTCTTAAACGTATCTTAATGCCTGAAAGTTGGATAGGCTGGCCCTTACGTAAGGAC

TATATAACCCCAATTTCTATGAAATACAAGATGCTCAT-----

-----ATGAGTTTGATTGAGTTTCCGTTACTCGACCAAACAAGTTCTAATTCCGT  
TATTTCAACTACACCAAACGATCTTTCGAATTGGTCAAGACTCTCAAGTTTATGGCCCC  
TTTTATATGGTACCAGTTGTTGTTTCATTGAATTTGCTTCATTAATAGGCTCACGATTCTGA  
CTTTGATCGTTATGGATTGGTACCAAGATCAAGTCTAGACAAGCGGACCTAATTTTAA  
CAGCTGGTACGGTAACAATGAAAATGGCTCCATCTTTAGTGCGATTATATGAGCAAATG  
CCTGAACCGAAATACGTCATTGCTATGGGAGCCTGTACTATTACAGGGGGCATGTTTCAG  
TACAGATTCTATAGTACTGTTTCGAGGAGTTGATAAGTTAATTCCTGTGGACGTCTACCT  
GCCGGGTTGCCCGCCTAAACCAGAGGCTGTTATAGATGCCCTAACAAAACCTTCGTAAG  
AAGATAGCGCGAGAAATAATTGAGGATCGAACTCTATGTCAAAGTAAAAATAGATCTTT  
TACTACCCGTCACAACTTTATGTTTCGGCGCAGTACTCACACTGGAACCTTACGAACAA  
GAATTGCTCTATCAATCACCATCTACTTTAGATATATCTACT-----TTTTTCAAATCCAAAA  
GTTTCAGTATCTTCTACAAATTAGTGAATATGGAAAATAGAAAAACTTTTTCTTGGTTAA  
AGGAACAGATGATTCGATCGATTTCTGTATCGATCATGATATACGTAATAACTCGCACAT  
CTATTTCAAACGCATATCCATTTTTGCGCAGCAGGGTTATGAAAACCCGCGGGAAGCA  
ACTGGACGAATTGTATGTGCCAATTGCCATTTAGCTAATAAGCCTGTAGATATTGAAGTT  
CCCCAAGCAGTGCTTCTGATACTGTATTTGAAGCAGTTCTTCGAATTCCTTATGATAG  
CAGCTGAAACAAGTTCTTGCTAATGGTAAAAAGGGAGGGTTGAATGTGGGTGCTGTTT  
TTATTTTGCCCGAGGGATTTCGAATTAGCGCCGCCCGACCGTATTTCTCCTGAGTTGAAA  
GAAAAGATAGGAAATCTCTCTTTTCAGAGTTATCGTCCCAATAAAAAAAATATTCTTGT  
GATAGGCCCAGTTCCCGGTAAGAAATATAGTGAATTGTCTTTCCCATTTCTTTCCCCGA  
TCCCGCTACAAAAAAGACGTTCAATTTCTTAAAATATCCCATATATGTAGGGGGAAACC  
GAGGAAGGGGACAGATCTATCCTGATGGTACCAAGAGTAACAATACGGTCTATAATGCT  
ACGTCAACAGGTATAGTAAAAAAATACTACGTAAAGAAAAGGGGGGATATGAAATAT  
CCATAGTGGATGCGTCGGATGGACGCCAAGTGATTGATATTATACCTCCCGGGCCAGAA  
CTTCTTGTTCAGAGGGGGAATCAATCAAGCTTGATCAACCATTAACAAGCAATCCTAA  
TGTAGGAGGGTTTGGTCAGGGGGATGCAGAAATAGTGCTTCAGGATCCATTGCGCGTC  
CAAGGCCTTTTGTCTTCTTCGCATCTGTTATTTTGGCACAAGTTTTTTTTGGTTCTCAA  
AAGAAACAGTTTAAAAGGTTCAATTGTACGAAATGAATTTTCATGAGTAAAGTATATGA  
TTGGTTTGAAGAACGTCTTGAGATTCAGGCAATTGCGGATGATATAACTAGTAAATATG  
TTCCTCCTCATGTCAACATATTTTATTGTTTAGGGGGAATTACACTTACTTGTCTTAGT  
ACAAGTCGCTACCGTTTTGCTATGACTTTTTACTACCGACCCACCGTTACAGAGGCTT  
TTTCTCCGTTCAATATATAATGACGGAGGCCAACTTTGGTTGGTTAATCCGATCGGTTT  
ATCGATGGTCAGCAAGTATGATGGTTCTAATGATGATCCTGCACGTATTTTCGTGTGTATC  
TCACAGGTGGATTTAAAAACCCCGTGAATTAACCTTGGGTACAGGCGTGGTTTTGGC  
TGTATTGACTGCATCATTGGGTGTAACCTGGTTATTCTTTGCCTTGGGATCAAATTGGTTAT  
TGGGCAGTCAAATTTGTTACAGGTGTACCCGAAGCTATTCGGTAATAGGGTCCCCTTT  
AGTGGAATTATTACGTGGAAGTGCTAGTGTGGGCAATCCACTTTGACTCGTTTTTATA  
GTTTACATACCTTTGTAACCTCTGCTTACTGCCGTATTTATGTTAATGCACTTTCCAAT  
GATACGTAAGCAAGGTATTTCCGGTCTTTAATGGGAGTAACAAAGAAACCTGACTTA  
AATGATCCTGTATTAAGAGCAAAATTAGCTAAAGGGATGGGACATAATTATTATGGGGA  
ACCCGCGTGGCCCAACGATCTTTTATACATTTTCCAGTAGTAATTCTAGGTAATTTGC  
GTGTAATGTGGGTTTAGCGGTTCTAGAGCCGTCAATGATTGGTGAACCGGCGGATCCGT



TTGCAACTCCTTTGGAAATATTACCCGAGTGGTACTTCTTTCCCGTATTTCAAATACTCC  
GTACAGTACCCAATAAGTTATTGGGCGTTCTCTTAATGGTTTCTGTGCCAACGGGCTTAT  
TGACAGTACCCCTTCTAGAGAATGTCAATAAATTCCAAAATCCATTTTCGTGCGCCAGTA  
GCTACGACCGTTTTTTTTAATCGGTACTGCAGTAGCTCTTTGGTTAGGTATTGGAGCAAC  
ATTACCCATTGATAAATCCTTAACCTTAGGTCTTTTTATGATTGAAGTTTTTCTATTTGGA  
ATCGTCTTAGGCCTAATTCCTATTACTTTAGCGGGATTATTCGTGACTGCGTATTTGCAAT  
ACAGGCGTGGGGATCAGTTGGATCTTATGCTTACTATAACTAGTTATTTTCGGTTTTCTAC  
TGGCTGCTTTAACTATAACCCCAGCTCTATTTATTGGCTTGAACAAGATACGTCTTATTAT  
GGATATAGTAAGTCTCGCTTGGGCTGCTTTAATGGTAGTCTTTACATTTTCTCTTTTCGCTA  
GTAGTATGGGGGAGGAGTGGACTCATGATTATTCGTCCGTCGGAACCGAAGTTAAAA  
TTGCTGTGGATAGGGATCCTGTAAAAACATCTTTTGAGGAATGGGCCAGACCCGGGCA  
TTTCTCAAGAACAATAGCTAAGGGCCCCGACACTACCACTTGGATCTGGAACCTACAT  
GCTGATGCTCACGATTTTCGATAGTCATACCCGGTGATTTGGAGGAGATCTCCCGAAAAGT  
CTTTAGTGCTCATTTTCGGCCAACTCTCCATTATCTTTCTTTGGTTGAGTGGCATGTACTT  
CCACGGTGCCCGTTTTTCCAATTATGAAGCATGGCTAAGCGATCCTACTCACATTGGAC  
CCAGTGCTCAGGTAGTTTGGCCAATAGTAGGACAAGAAATTTGAATGGTGATGTAGG  
CGGGGGTTTTCCGAGGAATCCAATAACCTCTGGTTTTTTTTTCAGATTTGGCGAGCATCCG  
GAATAACTAGTGAATTACAACCTCTATTGTACCGCAATTGGTGCATTGATTTTTGCATCGT  
TAATGCTTTTTGCCGGTTGGTTCCATTATCACAAGCCGCTCCCAAATTGGCCTGGTTC  
CAAGATGTAGAATCCATGTTGAATCACCACCTTAGCGGGGTATTAGGACTTGGGTCTCT  
TTCTTGGGCGGGACACCAAATCCATGTATCTTTACCGATTAACCAATTTCTCGACGCTG  
GGGTTGATCCTAAGAGATAACCACTTCCCTCATGAATTTATCTTGAATCGCGACCTTTTGG  
CTCAACTTTATCCTAGTTTTTGGCGAAGGAGCAACCCCTTTTTTCACCTTGAATTGGTCC  
AAATATGCGGAATTTCTTAGTTTTTCGCGGAGGACTAGATCCAATAACCCGGTGGTCTATG  
GTTGAGCGATATTGCACACCATCATTTAGCTATTGCTATTCTTTTCCTGATCGCTGGTCAT  
ATGTATAGGACCAATTGGGGTATTGGTCATGGACTTAAAGATATTTTGGAGGCTCATAAG  
GGCCATTTACAGGACAAGGCCATAAAGGTCTCTATGAAATCCTAACAACGTCATGGCA  
TGCTCAATTATCTCTTAACCTAGCTATGCTAGGCTCTACAACCTATTGTTGTAGCTCATCAT  
ATGTA CTCTATGCCCCCTATCCATACCTAGCTACTGACTATGGTACACAACCTTTCCTTGT  
TCACACACCACATGTGGATTGGCGGATTTCTAATAGTTGGTGCTGCTGCACATGCAGCC  
ATTTTTATGGTAAGAGACTATGATCCAACCTACTCGATAACAACGATCTATTAGATCGCGTC  
CTTAGACACCGCGATGCAATCATATCCACCTTAACTGGGTATGTATATTTCTGGGTTTT  
CACAGTTTTGGCTTGTACATTCATAATGATACCATGAGTGCTTTAGGCCGTCCCCAAGAT  
ATGTTTTTCGATACCGCCATAACAATTACAACCCATCTTTGCTCAATGGATACAAAATATC  
CATGCTGGCGCGCCTGGCGTAACAGCTCCTGGTGCAACAACAAGTACCAGCTTAACGT  
GGGGAGGCGGCGAGTTAGTAGCTGTAGGCGGCAAAGTAGCTTTGTTACCTATTCCATTA  
GGAACCGCAGATTTTTTATGTCATCACATTCACGCATTTACCATCCATGTGACTGTATTA  
ATACTTTTTGAAAGGTGTTTTATTTGCTCGCAGTTCCCGTCTGATACCTGATAAAGCAAAT  
CTTGCTTTTCGCTTCCCTTGCACGACCTGGGCGAGGGGGAACATGTCAAGTATCCG  
CCTGGGATCATGTTTTCTTAGGTCTATTCTGGATGTACAATTCTATTTTCGGTAGTCATTTT  
CCATTTTCAGTTGGAAAATGCAGTCGGATGTTTGGGGTACTATAAGTGATCAAGGGATAG  
TAACTCATATCACAGGGGGAACTTTGCGCAGAGTTCCATTACGATTAATGGTTGGCTT  
CGAGATTTCTTGTGGGCACAGGCATCCCAAAGTAATTCAGTCTTATGGTTCTTCATTATCT  
GCATATGGTCTTTTTTTCTTAGGCGCTCATTTTGTCTGGGCTTTCAGTTAATGTTTTTAT

TCAGCGGCCGTGGTTATTGGCAAGAACTCATTGAATCTATCGTTTTGGGCTCATAACAAA  
TTAAAAGTTGCTCCTGCTACTCAGCCTAGAGCCTTGAGCATTATAACAAGGACGTGCTGT  
AGGAGTAACCCATTACCTTCTGGGTGGAATTGCCACAACATGGGCATTCTTCTTAGCGA  
GAATTATTGCAGTAGGAATGGAATTAAGATTTCCCAGGTTTAGCCAAGGCTTAGCTCAG  
GACCCCACTACTCGTCGTATTTGGTTTGGTATTGCTACCGCACATGATTTCGAAAGTCAT  
GATGATATTACTGAGGAACGTCTTTATCAGAACATTTTTGCTTCTCACTTTGGGCAGTTA  
GCAATAATCTTTCTATGGACGTCCGGAATCTGTTTCATGTAGCTTGGCAAGGAAATTTT  
GAATCATGGATACAGGATCCTTTACACGTAAGACCTATTGCTCATGCCATTTGGGATCCT  
CATTTTGGGCAACCCGCCGTGGAAGCCTTTACTCGAGGAGGTGCTGCCGGTCCAGTGA  
ATATCGCTTATTCTGGGGTTTATCAGTGGTGGTATAACAATTGGATTGCGCACCAATGAAG  
ATCTTTATACTGGAGCTCTTTTTCTATTATTTCTTTCTACGCTATCCTTAATAGGGGGTTG  
GTTACATCTACAACCCAAATGGAAGCCAAGCCTTTCTGTTTCAAAAACGCCGAATCT  
CGTCTGAATCATCATTTGTCAGGACTTTTCGGAGTAAGTTCTTTGGCTTGGACAGGACA  
TTTAGTTCATGTTGCTATTCCCAGGATCCAGGGGGGAGTACGTTTCGATGGAATAATTTCTT  
AGATGTATTACCCTATCCCCAGGGGTGGGTCCCCTTCTGACGGGTGAGTGGAAATCTTT  
ATGCCCAAATCCTGATTCGAGTAATCATTTATTTGGTACCACTCAAGGAGCGGGAAT  
GCCATTCTGACCTTCTTGGGGGATTCCATCCACAAACACAAAGTTTGTGGCTGACCG  
ATATTGCTCATCATCATTTAGCTATTGCATTTATTTTTCTCATTGCCGGTCATATGTATCGA  
ACTAACTTCGGAATTGGGCACAGTATCAAAGATCTTTTAGAAGCACATACTCCTCCGGG  
GGGTGATTAGGACGTGGGCATAAAGGCCTTTATGATACAATCAATAATTCGATTCATTT  
TCAATTAGGCCTTGCTCTAGCTTCCTTAGGGGTTATTACTTCCTTAGTAGCTCAACATAT  
GTACTCTTTACCTGCTTATGCATTCATAGCACAAAGACTTTACTACTCAAGCTGCTTTATAT  
ACTCATCACCAATACATTGCAGGGTTCATCATGACAGGGGCTTTTGCTCATGGAGCTAT  
TTTTTTCATTAGGGATTACAATCCGGAACAGAATGAAGATAATGTATTGGCAAGAATGTT  
AGACCATAAGGAAGCTATCATATCTCATTAAAGTTGGGCTAGCCTCTTCCTAGGATTCCA  
TACCTTGGGCCTTTATGTTCATAACGACGTTATGCTTGCTTTTGGTACTCCAGAAAAGCA  
AATCTTGATCGAACCTATATTTGCCCAATGGATACAATCTGCTCATGGTAAGACGACATA  
TGGGTTTCGATATACTCTTATCTTCAACGAATGGCCCCGCTTTCAATGCAGGTCGAAACAT  
ATGGTTGCCCGGATGGTTGAATGCTGTTAATGAG-----AATAGTAATTCGCTTTTCTTAAC  
AATAGGACCTGGGGATTCTTGGTTCATCATGCTATTGCTCTAGGTTTGCATACAACACTAC  
ATTGATTTTAGTAAAGGGTGCTTTAGATGCACGCGGTTCCAAATTAATGCCGGATAAAA  
AGGATTTCCGGTATAGTTTTCTTGCACGGCCAGGGCGCGGCGGTACTTGTGATATT  
TCTGCTTGGGACGCGTTTTATTTGGCAGTTTTCTGGATGTTAAATACCATTGGATGGGTT  
ACTTTTTATTGGCATTGGAACACATTACATTATGGCAGGGCAACGTTTCACAATTTAAT  
GAATCCTCCACTTATTTGATGGGATGGTTAAGAGATTACCTATGGTTAAACTCTTCACAA  
CTTATTAATGGATATAATCCTTTTGGGATGAATAGTTTATCAGTATGGGCTTGGATGTTCT  
TATTTGGACATCTTGTTGGGCTACAGGATTTATGTTCTTAATTTCTGGCGTGGATATTG  
GCAGGAATTAATTGAGACTTTAGCATGGGCTCATGAACGCACACCTTTGGCTAATTTAA  
TTCGCTGGAGAGATAAGCCCGTGGCTCTTCCATTGTGCAAGCAAGATTGGTCCGATTA  
GCCACTTTTCCGTGGGTATATATTTCACTTATGCAGCTTTCTTGATTGCCTCAACATCA  
GGCAAGTTTGGTATGTCACATTCTGTAAAAATTTATGATACATGTATAGGATGCACTCAA  
TGTGTACGAGCTTGCCCAACAGATGTATTAGAAATGATACCTTGGGATGGATGTAAAGC  
CAAGCAAATTGCTTCCGCGCCGAGAACCGAAGATTGTGTGGGTTGTAAGAGATGCGAA  
TCCGCTGCCCAACGGATTTTTTAAGTGTCCGCGTTTATTTAGGGCCTGAAACAACCCG



TGACCAAGAAACCACCGGCTTTGCTTGGTGGGCTGGGAATGCCAGACTTATCAATTTG  
TCCGGTAAACTACTTGGAGCTCATGTAGCCCATGCCGGATTAATCGTATTCTGGGCCGG  
AGCAATGAACCTATTTGAAGTGGCCCATTTTCGTACCAGAAAAGCCCATGTATGAACAA  
GGGTTGATTTTACTTCCGCACTTAGCTACTCTAGGTTGGGGAGTAGGGCCGGGGGGAG  
AAGTTCTAGATACTTTTCCTTACTTTGTATCCGGAGTACTTCACTTAATTTCTCCGCAG  
TCTTAGGCTTCGGTGGCATTATCACGCGCTTCTGGGACCCGAGACTCTTGAAGAATCT  
TTTCCATTCTTTGGTTATGTATGGAAAGATAGAAATAAAAATGACTACAATTTTGGGTATT  
CACTTAATTTTGTAGGTCTAGGTGCTTTTCTTCTAGTACTCAAGGCTCTTTATTTTGGC  
GGCGTATATGATACCTGGGCCCCCGGGGGGGGGATGTAAGAAAAATTACCAATTTGA  
CCCTTAGCCCCGGTGTATATTTGGTTATTTACTAAAATCCCCTTTTGGGGGAGAAGGAT  
GGATTGTTAGTGTGGATGATTTAGAAGATATAATTGGGGGACATGTATGGTTGGGTTCCA  
TTTGTGTACTTGGCGGAATTTGGCATATCTTAACCAAACCCCTTTCATGGGCTCGCCGT  
GCATTTGTATGGTCTGGCGAAGCTTACTTGTCTTATAGTTTAGCTGCTTTATCTGTTTTG  
GTTTTATCGCTTGTGTGTTTTGTCTGGTTCAATAATACGGCTTATCCAAGTGAGTTTTACG  
GGCCCACTGGACCAGAAGCTTCTCAAGCTCAAGCATTACTTTTCTAGTTAGAGACCA  
GCGTCTTGGAGCTAATGTAGGGTCTGCCAAGGACCGACGGGTTTAGGTAAATATCTAA  
TGC GTTCCCAACGGGAGAGGTTATTTTTGGAGGGGAAACTATGCGTTTTTGGGATCTT  
CGTGCTCCGTGGTTAGAACCTCTAAGGGGCCCAACGGTTTTGGACTTGAGTAGGTTGA  
AAAAAGACATCCAACCTTGGCAAGAACGACGTTTCAGCAGAATATATGACCCATGCTCC  
TTTAGGCTCTTTAAATTCCGTGGGTGGCGTAGCTACCGAGATCAATGCAGTTAATTATGT  
CTCTCCTAGAAGTTGGTTAGCGACCTCCCATTTTTGTTCTAGGATTCTTCTTTTTTGTGGG  
CCATTTGTGGCATGCAGGAAGAGCCCGAGCTGCTGCAGCAGGCTTTGAAAAGGGAAT  
CGATCGTGAATTTGGAACCTGTTCTTTACATGACCCCTCTTAACATGACTATAGCCGTTGG  
TAGAGTTACTAAAGAAGAAAACGATCTATTTGATATTATGGACGACTGGTTACGAAGGG  
ACCGTTTCGTTTTTGTAGGATGGTCCGGCTTATTGCTCTTTCCTTGTGCTTATTTTCGCTTT  
AGGGGGTTGGTTTACAGGGACTACTTTTGTAACTTCTTGGTATACCCATGGATTGGCTA  
GTTCCATTTTGAAGGTTGCAATTTCTTAACCGCGGCGGTTTCCACACCTGCCAATAGT  
TTAGCACACTCTTTGTTGCTACTATGGGGACCGGAAGCACAGGGGGATTTTACTCGTTG  
GTGTCAATTAGGTGGTCTTTGGACTTTTGTGCTCTCCATGGAGCTTTTGC ACTAATAG  
GTTTCATGCTACGTCAATTTGAACTTGCTCGGTCTGTTCAATTGCGGCCCTATAATGCAA  
TTTCATTCTCTGGTCCAATCGCTGTTTTTGTTCGTAATTCCTTATTTATCCACTGGGACA  
ATCTGGTTGGTTCTTTGCGCCGAGTTTTGGCGTAGCAGCTATATTTCCGTTTCATCCTTTT  
CTTCCAAGGATTCATAATTGGACGTTGAACCCATTTTCATATGATGGGAGTTGCCGGAG  
TATTAGGCGCAGCTCTGCTATGCGCTATCCACGGGGCTACCGTAGAAAACACTCTATTC  
GAAGATGGCGATGGTGCAAATACCTTCCGTGCTTTTAACCCAACTCAAGCTGAAGAAA  
CTTATTCAATGGTCACTGCTAACCGCTTTTGGTCCCAAATCTTTGGTGTGCTTTTTTCCA  
ATAAACGTTGGTTACATTTCTTTATGCTATTTGTACCCGTCACCGGTTTATGGATGAGTG  
CTATTGGCGTAGTTGGTCTGGCTCTGAACCTACGTGCCTATGACTTCGTTTCCCAGGAA  
ATCCGTGCAGCGGAAGATCCTGAATTTGAGACTTTCTACACCAAAAATATTCTTTTAAA  
TGAGGGTATTCGTGCGTGGATGGCAGCTCAGGATCAGCCTCATGAAAATCTTATATTCC  
CTGAGGAGGTTCTACCACGTGGAACGCTCTTATGTCTGGAAGCACGGGAGAACGTTCT  
TTTTGCTGATATTATTACCAGTATTCGATATTGGGTTATTCATAGCATTACTATACCTCCC  
TATTCATTGCGGGTTGGTTATTTGTCAGTACGGGTTTAGCTTATGACGTGTTTGGAAAGTC  
CTCGACCAAACGAGTATTTACGGAAAGCCGACAAGGAATTCCATTAATAACCGACCG

TTTTGATTCTTTAGAACAACTAGATGAATTTAGTAGATCCTTTATGACCATAGATCGAAC  
CTATCCTATTTTTACAGTGCGATGGCTGGCTGTTACGGATTAGCTGTACCCACGGTTTT  
TTTCTTGGGATCAATATCAGCAATGCAGTTCATCCAACGAATGGCTACACAAACCGTTG  
AAGATAGTTCTAGACCTAAG---CCAAAACGGACTGGCGCAGGTAGTTTATTGAAACCCT  
TGAATTCGGAATATGGGAAAGTTGCTCCGGGTTGGGGGACTACTCCTTTTATGGGGGTC  
GCAATGGCTTTATTCGCGATATTCCTATCTATAATTTTAGAAATTTATAATCTTCTGTTTT  
ACTGGACGGAATTTAACGAATATGCTTACTCTCAAACCTTTTTGTTTTATACAGTAGTGAT  
ATTCTTTGTTTCCCTCTTTATCTTTGGATTCTTATCTAATGACCCAGGACGTAATCCTGGG  
CGTGAGGAGATGGCCGATACTACTGGAAGAATTCCTCTTTGGCTGATAGGTAAGTGTAAAC  
TGGTATTCTTGTGATTGGTTTAAATAGGTGTTTTCTTTTACGGTTCGTATTCTGGATTGGGT  
TCATCTCTAATGCCTAATACTTAGTTTAAACCTGTATCTGTTTTAATTCTGTTCTTTGTCC  
GACTAGCTTTTTCTTCGCCAAATTACCCGAAGCTTATGCCATTTTCAACCCAATCGTGGA  
TGTTATGCCTGTCATACCTGTACTCTTTTTTCTATTAGCGTTTGTTTTGGCAAGCTGCTGTA  
AGTTTTCGAATGACACAATCAAACCCGAATGAACAAAATGTTGAATTGAATCGTACCA  
GTCTATACTGGGGTTTATTACTCATTTTTGTACTTGCTGTTTTATTTTCCAATTACTTCTTC  
AATATGGAAGTCAATATTCTCGCATTATTGCTACAGCATTGTTCAATTCTAGTTCCTACTG  
CCTTTTTACTTATTATTTATGTA AAAACAGCCAGTCAAATGATATGGAAACAGCAACTT  
TAGTCGCCATCTCCATATCTGGTTTACTTGTAAGCTTACTGGGTATGCCTTATATACCGC  
GTTTGGGCAACCCTCTCAACAATTAAGAGATCCATTCGAAGAACACGGGGACATGGAA  
GCATTGGTTTATACGTTCCTTTTAGTTTCGACTTTAGGGATAATTTTTTTCGCTATCTTCT  
TCCGAGAACCACCTAAGGTTCCGACTAAGAAA-----ATGACTATTGCTTTCCAATTAGCT  
GTTTTTGCATTAATTGCGACTTCCTCAGTTTTAGTAATTAGTGTACCCCTTGATTTGCTT  
CTCCTGATGGTTGGTCAAATAATAAAAACGTTGTATTTCCGGTACATCATTATGGATTG  
GATTAGTCTTTCTGGTAGCTATTCTGAATCTCTTATTTCT-----ATGTCACCA  
CAAACAGAACTAAAGCAAGTGTGGATTTAAAGCTGGTGTAAAGGATTATAAATTGA  
CTTACTACACCCCGGAGTACGAAACCAAGGATACTGATATCTTGGCAGCATTCCGAGTA  
ACTCCTCAGCTCGGGGTTCCGCTGAAGAAGCAGGAGCTGCAGTAGCTGCGGAATCTT  
CTACTGGTACATGGACAACCTGTTTGGACTGATGGACTTACCAGTCTTGATCGTTACAAA  
GGACGATGCTATCACATCGAGCCGTTCTGGGGACCCAGATCAATATATCTGTTATGTA  
GCTTATCCATTAGACCTATTTGAAGAGGGTCTGTTACTAACATGTTTACTTCCATTGTG  
GGTAACGTAATTTGGTTTCAAAGCCTTACGCGCTCTACGTTTGGAGGATCTACGAATTCC  
CCCTGCTTATGTA AAAACTTTCCAAGGTCCGCTCACGGTATCCAAGTTGAAAGGGATA  
AGTTGAACAAGTACGGTCGTCTTTATTGGGATGTACTATTAACCAAATTTGGGATTAT  
CCGCAAAAATACGGTAGAGCGTGTATGAGTGTCTACGCGGTGGACTTGATTTTACC  
AAAGATGATGAAAACGTAAACTCACAAACCTTATGCGCTGGAGAGACCGTTTTGTCT  
TTTGTGCCGAAGCAATTTATAAAGCACAAGCCGAAACCGGTGAAATCAAGGGGCATTA  
CTTGAATGCGACTGCAGGTACATGCGAAGAAATGATTAAGAGAGCTGTATTTGCAAAG  
GAATTAGGGGTTCCATTGTAAATGCATGACTACTTAACAGGAGGATTCACCGCAAATAC  
TACTTTGTCTCATTATTGCCGCGACAACGGCCTACTTCTTACATTACCGAGCAATGCA  
TGCAGTTATTGATAGACAGAAAATCATGGTATGCATTTCCGTGTATTAGCTAAAGCATT  
GCGTATGTCGGGGGAGATCATATCCACTCCGGTACAGTAGTAGGTAAGTTAGAAGG  
GAACGCGAAATAACTTTAGGTTTTGTTGATTATTGCGCGATGATTTATTGAAAAGAT  
CGTTCTCGCGGTATCTTTTTCACTCAGGACTGGGTATCCATGCCAGGTGTATACCGGTG  
GCTTCAGGGGGTATTCATGTTTGGCATATGCCAGCTCTGACCGAAATCTTTGGAGATGA

TTCCGTATTACAATTTGGTGGAGGAACTTTAGGACATCCTTGGGGAAATGCACCTGGTG  
CAGCAGCTAATCGTGTGGCTTTAGAAGCCTGTGTACAAGCTCGTAACGAAGGGCGCGA  
TCTTGCTCGTGAAGGTAATGAAATTATCAAAGCAGCTTGCAAATGGAGTGCTGAACTA  
GCCGCAGCTTGTGAAATATGGAAGGAGATCAAATTTGATTTCAAAGCGATGGATACCTT  
A-----ACGGCGAAACATTTATACAAAACACCTATCCCAGCACACGCAAGGGAACCGTA  
GACAGGCAAGTGAAATCCAATCCACGAAATAAATTGATCCATGGACGGCACCGTTGTG  
GTAAAGGTCGTAATGCCAGAGGAATCATTACCGCAAGGCATAGAGGGGGAGGTCATAA  
GCGCCTATACCGTAAAATCGATTTTCGACGGAATCAAAAAGACATATCTGGTAGAATCG  
TAACCATAGAATACGACCCTAATCGAAATGCATACATTTGTCTCATACTATGGGGATG  
GTGAGAAGAGATATATTTTACATCCCAGAGGGGCTATAATTGGAGATACTATTGTTTCTG  
GTACAAAAGTTCCTATATCAATGGGAAATGCCCTACCTTTGACCGATATGCCCTTAGGC  
ACGGCCATACATAACATAGAAATCACACGTGGAAGGGGTGGGCAATTAGCTAGAGCAG  
CAGGTGCTGTAGCGAAACTGATTGCAAAAAGAGGGTAAATTGGCCACTTTAAGATTACC  
ATCTGGGGAGGTCCGTTTGGTATCCCAAAACTGCTTAGCAACAGTCGGACAAGTGGGT  
AATGTTGGGGTGAACCAAAAAGTTTGGGTAGAGCCGGATCTAAGTGTTGGCTAGGTA  
AACGCCCCGTAGTAAGAGGGGTAGTTATGAACCCTGTGGACCACCCCATGGGGGTGG  
TGAAGGGAAGCCCCATTGGTAGAAAAAACCACAACCCTTGGGGTTATCCTGCG  
CTTGGGAAGAAGAACTAGGAAAAGGAAAAAATATAGTGATAGTTTTATTCTTCGTCGCC  
GTAAG--ATGATTCAACCTCAGACCCTTTTAAATGTAGCAGATAACAGTGGAGCTCGAA  
AATTGATGTGTATTTCGAGTCATAGGAGCCGCTGGTAATCAGCGATATGCTCGTATTGGTG  
ATGTTATTATTGCTGTAATCAAAGACGCAGTGCCCCAAATGCCTCTAGAAAGATCCGAA  
GTAATTCGAGCTGTAATTGTACGTACACGTAAAGAATTCAAAGGCGACGACGGTATAAT  
AATACGCTATGATGACAATGCAGCAGTTATCATTGATCAAAAAGGAAATCCAAAAGGA  
ACTCGAGTTTTTTGGCGCGGTTGCCGAAGAATTAAGAGAATTGAATTATACTAAAATAGT  
TTCATTAGCTCCTGAAGTATTAATGCTTAGTCCCAAAAGAACTAGATTTTCGTAAACAAC  
ATAGAGGAAGAATGAATGGAAAATCCTGCCGAGGCAATCATATTTGTTTTGGTAGATAT  
GCTCTTCAAGTACTTGAACCCGCTTGGATCACCGCGAGACAGATAGAAGCAGGACGA  
AGAGCAATGACACGATATGCACGTCGTGGTGGAAAAATATGGGTGCGTATATTTCCCGA  
CAAACCGGTTACAATAAGACCCACAGAAACACGTATGGGCTCGGGAAAGGGATCCCC  
CGAATATTGGGTAGCCGTTGTTAAACCAGGTGCAATACTTTATGAAATGAGCGGAGTAT  
CCGAAACTGTAGCTAGAGCAGCTATCTCTATAGCTGCCAGTAAAATGCCCATAACGAAGT  
CAATTTCTTCGATTAGAGATGACCAGAGTTCCGCGAGGATATATAGCTCGGAGACGACG  
AACAAAATGCGTTCAATTTGCCTCAAACTTTAGAGGGGCTCATTTAAGACTTAATCGAA  
TGATTACTCAACAAGTAAGAAGAGCTTTTTGTTTCTTCTCATCGAGATAGAGGCAGGCA  
AAAGAGGGATTTTCGTCGTTTGTGGATCACTCGGATAAACGCAGCAACACGGGTATAT--  
---GTATTCAATAGTTATAGTAAATTAATACACAATCTGTCCAAGAAGGAATTGATTCTTA  
ATCGTAAAATGCTTGCACAAGTAGCTGTATCAAATCCAAATAATCTTTACACGATTTCCA  
ATAAAATAAGGACTATCAAT-----AGGATAAAGCGGGTTTTCAAAGCAC  
AAAACGCATACATATGTCTGTTTTCAAAGCACAAAGAGTTCTAGATGAGATTCGCTGG  
CGTTACTACGAGGAAACCGTTATGATACTGAATCTCATGCCTTATCGAGCATCGTATCCC  
ATCTTAAAGTTGGTTTTATTTCGGCAGCAGCAAATGCTACTCATTATAGGGATTTTCGACAA  
AACAAATTTATTCATCACTAAAGCCGAAGTCAGTAGGAGTACTATTATGAAAAAATTCA  
GACCTCGAGCTCGAGGACGTAGTTATTTATAAAAAAACGATGTGTAATATAACAATT  
GTACTAAAT--GTAAAGAAATCT-----ATGGATGGAATCAAATACGCAGTATTT

ACAGAAAAGAGTCTTCGTTTATTGGGAAAGAAT---CAATATACTTTTAATGTCTGAATCGG  
GATTCACTAAGACAGAAATAAAGCATTGGGTCTGAACCTTCTTTGGTGTAAAGGTAGTA  
GCTGTGAATAGCCATCGACTACCCGGAAAGGGTAGAAGAATGGGACCTATTCTGGGAC  
ATACAATGCATTACAGACGTATGATCATTACCCTTCAACCGGGTTATTCTATTCCACTTCT  
AGATAGAGAAACGAACATGGCAGTTCCAAAAAACGTACTTTCGATGTCAAAAAAGCG  
TATTCGTAAAAATCTTTGGAAAAAAAAGACTTATTTTTCCATAGTACAATCTTATCTTT  
AGCAAAATCATTTTCTAGCGGCAAACCAAAAAGGTTTTTCTGGGCAACAAGCAAAACAA  
AATGGCCAAGGGCAAAGATGTTAGAATCCGAGTTATTTTGGAAATGTATTAGTTGTGTTC  
GAAAG-----GGT-----AAGGAATCGACGGGGATTCTAGATATAGTACTCAAAGAATCG  
CCACAATACGCCCGGACAATTAGAATTAAGAAAATTTTGTCTGTTATTGTCTGAAAGCATA  
CCACTCATAATGAAATAAAGAAAATGAAAATAAGAGCTTCCGTTTCGTAAAATTTGTACA  
AAATGTCGACTGATTTCGAGGCGTGGGCGAATTAGAGTCATTTGTTCCAATCCGAAGCA  
TAAACAAAGACAGGGGATGGTTCGAGAAAGAGATAACAGGATCCACTCAAACACTAGA  
GTGGAAGTGTGTTGAATCAAGAGTAGATAGTAAACGTCTTTATTATGGTCTGTTTCATTCT  
GTCTCCGCTTAGAAAAGGGCAAGCGGATACTGTCTGTTATTGCCTTGCGAAGAGCTTTA  
CTTGAGAAATAGAAGGAACATGTATCACACGCGCAAATTTTGG-----AACGTGCCAC  
ATGAATATTCCACAATAGTAGGTATTGAAGAATCCATACAAGAAATTTTACTAAATTTGA  
AAGAAATTGTATTGAGAAGTAATCTCTATGGAGTTAGAGACGCATCAATTTGCGTCAAA  
GGTCTTAGATACATAACCGCTCAAGATATAATCTTACCGCCTTCCGTAGAAATCGTTGAT  
ACGACACAACCTATAGCTAACTTGAGAGAGCCCGTTGATTTCTGTATTGAGTTACAGAT  
CAAGAGAGATCGCGGATATCATACTGAACTCAGAAAGAACTCTCAAGATGGAAGTTAT-  
----CCTATAGATGCTGTATTCATGCCTGTTTCGAAATGTGAATTATAGTATTTTTCTTGTG  
GGAATGGAATGAAAAACACGAGATACTTTTTTTAGAAATATGGACGAATGGAAGTTT  
AACTCCTAAAGAAGCGCTTTATGAAGCTTCTCGTAATTTGATTGATTTATTTCTTCTTTT  
ATACACACAGAGGAAGAG-----GGCACTAGTTTCGAAGAAAATAAA---AACAGGTTAAC  
TCCACCCCTTTTAAACCTTTCAAAAAAGATTCACT---AATCTAAAGAAAAACAAAAA---  
GGAATTCCATTGAATTGTATTTTATTGATCAATTAGAATTGCCTTCTAGAACGTATAATT  
GTCTCAAAAGGGCCAATATACATACTATTGGACCTTTTGGAGTAAGACTGAAGAAGAT  
CTTATGCGAATTAATAGTTTTTCGTATGGAAGATGGAAAACCTGATATGGGACACTCTAGA  
GAAGCAT-----CTCCCAATTGATTTACCTAAGAACAAGATGCTCCGGAATGGAAT---GA  
GGGAATGTCCACAATACCCGGATTTAGTCAGATCCAATTCGAGGGATTTTGTAGATTCA  
TTAATCAAGGCTTGGCGGAAGAACTTGAGAAGTTTCCACAATTAAGATCCAGATCA  
CGAAATTGCATTTCAATTATTTGCGAAAGGATATCAATTGCTAGAACCTCGATAAAAG  
AAAGGAATGCTGTGTATGAATCACTCACCTATTCTTCCGAATTATATGTATCCGCGAGAT  
TAATTTTTGGTTTC-----GATGTGCAAAAGCAAACCATTTCTATTGGAAACATTCTATAA  
TGAATTCCTTAGGAACCTTTATAATAAATGGAATATACCGAATTGTGATCAATCAAATATT  
GCTAAGTCTGTTATTTACTACCGCTCGGAATTAGACCATAAGGGAATTTCTATATGCAC  
CGGTACTATAATATCAGATTGGGGAGGAAGGTCGGAATTAGCAATTGATAAAAAAGAA  
AGGATATGGGCTCGCGTGAGTAGAAAACAAAAGATATCTATTTAGTTCTATCATCAGCT  
ATGGGTTTCGAATCTAAGAGAAATTTTAGATAATGTTTCCCTACCCCGAAATTTTCTTGTCT  
TTCCCGAATGCTAAGGAGAAGAAGAGGATTGAGTCAAAAAGAAAAGCTATTTTGGAG  
TTTTATCAACAATTTGCTTGTGTAGGTGGGGACCTGGTATTTTCGGAGTCCTTATGCGAG  
GAATTACAAAAGAAATTTTTTCAACAAAATGTGAATTAGGAAGAGTTGGTCTGACGAA  
ATATGAATCGGAGACTGAATCTTGATATCCCTCAGAACAATACATTCTTGTTACCACGAG

ATGTATTGGCCGCTACGGATCATTGATTGGAATGAAATTTGGAACGGGTATACTTGAC  
GATGACGATATGAATCACTTGAAAAATAAACGTATTCGTTCCGGTTGCAGATCTGTTACA  
AGATCAATTCGGACTGGCTCTTGGCCGTTTACAACATGCGGTTCAAAAACTATCCGTA  
GAGTATTCATACGTCAATCGAAA-----CCGACTCCACAACTTTGGTAACTCCAACCTCA  
ACTTCGATTTTATTAATCACTACTTATGAGACCTTTTTTGGCACATACCCCTTAGCTCAA  
GTTTTTGATCAAACCAATCCATTGACACAAACGGTTCATGGGCGAAAAGTGAGTTGTT  
TGGGTCCTGGAGGATTGACGGGGAGAAGTCAAGTTTTTCGTAGCCGAGATATTCATCC  
GAGTCACTATGGGCGTATTTGTCCAATTGACACGTCCGAAGGAATCAATGTTGGACTTA  
CCGGATCGTTAGCTATTCATGCGAGAATTGATCACTGGTGGGGATCTATAGAGAGTCCG  
TTTTATGAAATATCTGAGAAAGCAAAGAAAAAAGAG-----AGACAGGTAGTTTATT  
TATCACCAAATAGAGATGAATATTATATGATAGCAGCAGGAAATCTTTGTCTTGAATC  
AGGGTATTCAGGAAGAACAGGTTGTTCCAGCTAGATACCGTCAAGAATCCTGACTATT  
GCATGGGAACAGATTCATGTTAGAAGTATTTTCCCTTCCAATATTTTCTATTGGAGGT  
TCTCTCATTCTTTTATTGAGCATAATGATGCGAATCGGGCTTTAATGAGTTCTAATATGC  
AGCGCCAAGCAGTTCCACTTTCTCGGTCCGAGAAGTGCATTGTTGGAAGTGGATTGGA  
ACGACAAACAGCTCTAGATTTCGAGGGTTTCCGTTATAGCCGAACGCGAGGGGAAAGATC  
ATTTCTAGTGATAGTCACAAGATCCTTTTATCAAGTAGTGGGAAGACCATAAGTATTCCT  
TTAGTTGCCCATCGACGCTCTAACAAAAATACTTGTATGCACCAAAAACCTCGGGTCC  
GCGGGGTAAATCCATTAATAAAGGGCAAATTTTAGCGGAGGGAGCAGCTACAGTTGGC  
GGGGAAGTGGCTTTAGGAAAAACGTTTTAGTAGCTTATATGCCCTGGGAGGGTTACAA  
TTTTGAAGACGCAGTACTAATTAGTGAACGTTTGGTATATGAGGATATTTATACTTCTTTT  
CACATCCGAAAATATGAAATTCAGACGGATACGACAAGCCAAGGCTCCGCTGAAAAAA  
TCACTAAACAATACCACATCTAGAAGAACATTTACTCCGCAATTTGGACAGAAATGG  
AGTTGTGAGGTTGGGATCCTGGGTAGAACTGGCGATATTTTAGTAGGTAAATTAACGC  
CTCAGATAGCGAGCGAA---TCGTCGTATATCGCGGAAGCTGGATTATTACGGGCTATTTT  
TGGTCTTGAGGTATCCACTTCAAAAAGAACTTCTCTCAAACCTATAGGTGGAAGA  
GGGCGCGTTATCGATGTGAAATGGATCCAGAGG-----GACCCCATATGGTT  
CGTGTATATATTTTACAGAAACGTGAAATCAAAGTTGGGGATAAAGTAGCCGGAAGAC  
ACGGGAATAAGGGGATCATTTCAAAATTTTGCCTAGGCAAGATATGCCCTATTTGCAA  
GATGGAACACCTGTTGATATGGTCTTCAATCCCTTAGGAGTACCCTCACGAATGAATGT  
GGGACAAATATTTGAAAGCTCGCTCGGATTAGCAGGGGATCTGCTAAAGAAACATTATA  
GAATAGCACCCCTTTGATGAGAGATATGAGCAAGAGGCTTCAAGAAAACCTGTGTTTTC  
GGAATTATATGAAGCCAGTAAACAAACAAAAATCCATGGGTATTTGAACCCGAGTAC  
CCGGGAAAAAGCAGAATATTTGATGGAAGAACAGGAGATCCCTTCGAACAGCCTGTTC  
TAATAGGGAAGTCCTATATCTTAAATTAATTCATCAAGTTGATGAGAAAATTCATGGAC  
GTTCTACTGGGCCCTACTCACTTGTACCACAACCCGTTAGAGGAAGAGCCAAGCA  
AGGGGACAACGAATAGGAGAAATGGAAGTTTGGGCTTTAGAAGGATTTGGTGTGCT  
CATATTTTACAAGAGATACTTACTTATAAATCTGATCATCTTATAGCTCGCCAAGAAATAC  
TTAATGCTACGATCTGGGGAAAAAGAGTGCCTAATCACGAGGATCCGCCAGAATCTTTT  
CGAGTGCTCGTTCGAGAACTACGATCTTTGGCTCTAGAAGTGAACCATTCCTTGTATC  
TGAGAAGAAGTTCGGGTTAATAGGGAGGATGTT-----ATGATTGACCAATAT  
AAACATAACAACCTTCAAATTGGAAGTTCCTTCCCTCAACAAATAAAGGCTTGGGCTA  
AAAAATCCTACCTAATGGGGAAAGTCGTTGGCGAAGTCAACAAGGCCCTCACTTTTCA  
TTATAAAACCGATAAACAGAAAAAGATGGATTGTTTTGCGAAAGAATCTTTGGACCCA



TAAAAAGCGGAATTTGTGCTTGTGGAAACTCTCGAGCGAGCGTAGCTGAAAACGAAG  
ACGAAAGATTTTGCCAAAATGCGGGGTAGAATTTGTTGATTCTCGGATACGAAGATAT  
CAAATGGGATACATCAAAC TAGCATGTCCAGTGACTCATGTGTGGTATTTGAAAGGTCT  
TCCTAGTTATATTGCGAATCTTTTAGATAAACCCCTTAAGAAATTGGAGGGCCTAGTATA  
TGGTGAT-----TTCTCTTTTGCTAGGCC---AGCGCTAAAAACCTACTTTCTTACGATTA  
CGGGGTTTATTTCGAAGATGAAATTCATCCTGTAACCACAGTATTTCTCCCTTTTTTTCT  
ACCCAGGCTTTGCAACATTTGAAATCGGGAAATTGCAACAGGAGCAGGTGCTATTA  
GAGAACAATTAGCGGATTTAGATTTGCGAATTATTATAGAGAATTCTTTGGTTGAATGGA  
AGGAATTAGAAGACGAG---GGGTATAGTGGAGATGAATGGGAAGATAGAAAAAGACG  
AATAAGAAAAGTTTTTTTGATTAGACGCATGCAATTGGCGAAACATTTTATTCAAACAA  
ATGTAGAACCAGAATGGATGGTTTTGTGCTTATTACCGTTCTTCCTCCCGAATTGAGA  
CCCATTGTTTATAGATCTGGGGATAAAGTAGTGACTTCAGATATTAATGAACTTTATAAG  
AGAGTTATCCGTCGGAACAACAACCTTGCCTATCTATTA AAAAGAAGTGAATTAGCACC  
AGCAGATTTAGTAATGTGCCAGGAAAAATTGGTACAAGAAGCCGTGGATACACTTCTT  
GATAGTGGGTCCCGCGGGCAACCGATGAGGGATGGTCACAATAAAGTATACAAATCAC  
TTTCAGATGTAATTGAGGGTAAAGAGGGGAGGTTTCGCGAGACTCTGCTTGGGAAACG  
GGTCGATTACTCGGGGCGTTCTGTCAATTGTTGTGGGTCCTTCGTTTTATTACATCAATG  
TGGATTACCTCTAGAGATAGCAATAAAGCTTTTTTCAGCTATTTGTAATTCGCGATTTAAT  
CACGAAACGTGCTACTTCTAATGTCAGGATTGCTAAAAGGAAAATTTGGGAAAAGGAA  
CCCATTGTATGGGAAATACTTCAAGAAGTTATGCGGGGACATCCTGTACTGTTGAACAG  
AGCACCTACCCTGCATAGATTAGGCATACAGGCTTTCCAACCCACTTTAGTAGAGGGAC  
GTACTATTTGTTTACATCCATTAGTGTGTAAGGGTTTCAATGCGGACTTTGATGGGGATC  
AAATGGCTGTTACCTACCTTTATCCTTGGAAGCTCAGGCGGAAGCCCGTTTACTTATG  
TTTTCTCATATGAATCTCCTGTCTCCCGCTATTGGAGATCCTATTTGCGTGCCAACCCAA  
GACATGCTTATCGGACTTTATGTATTAACGATTGGAAACCGTCGAGGTATTTGTGCAAAT  
AGATATAATAGTTGCGGAAAC-----TCTCAAATAAAAAATAAACTACAATAATT  
ATAAGTATACGAAAGATAAAGAACCCCATTTTTCTAGTTCCTATGATGCACTGGGAGCTT  
ATAGACAGAAACGAATCGGTTTAAACAGTCCCTTGTGGCTCCGATGGAAACTAGATCA  
ACGC---ATCGTTGGGTCA-----AGAGAAGTTCCGATTGAAGTTCAATATGAATCTTTTGG  
GACTTATCATGAGATTTATGCCACTATCTAGTAGTGGGAAATAGAAAAAAGAAATCC  
GTTCTATATACATTCGAACCACTCTTGGTCATATTTCTTTTTATAGAGAAATAGAGGAAG  
CCGTACAAGGATTTAGTCGGGCCTATTCATACACTATC-----ATGG  
CAGAACGGGCCAACCTGGTCTTTCATAATAAAGAGATAGACGGAAC TGCTATCAAACG  
GCTTATTAGCAGATTAATAGATCATTTCGGAATGGGATATACATCCCATATACTGGATCAA  
ATAAAGACTCTGGGCTTCCATCAAGCCACTACTACATCGATTTCTTTAGGAATCGAGGA  
TCTTTTAACAATACCCTCTAAAGGATGGTTAGTCCAAGACGCGGAACAACAGAGTTTT  
CTTTTGGAGAAACACTATTATTATGGAGCTGTACACGCGGTAGAAAAATTACGCCAATC  
CGTTGAGATATGGTATGCTACAAGTGAATATTTGAAACAAGAAATGAATTCGAATTTTC  
GAATAACGGATCCTTCTAATCCAGTCTATCTAATGTCTTTTTTCAGGAGCCAGAGGAAAT  
GCATCTCAGGTACACCAATTAGTAGGTATGAGAGGGTTAATGGCGGATCCTCAAGGAC  
AAATGATTGATTTACCTATTCAAAGCAATTTACGCGAGGGACTTTCTTTGACAGAATATA  
TAATTCCTGCTACGGAGCCCGAAAAGGGGTTGTAGATACTGCTGTACGAACAGCGGA  
TGCTGGCTATCTTACACGTAGACTTGTGAAGTAGTTCAACATATTATTGTGCGTAGAAG  
AGATTGTGGTACTATCCAAGGTATTTCTGTGAGTCCTCAAATGGGATGACGGAA-----A

AACTTTTTGTCCAAACACTAATTGGTCGTGTATTAGCAGACGATATATATATTGGTTCAC  
GATGCATTGCTTCTCGAAATCAAGATATTGGAATTGGATTAGTCAATCGATTCATAACTG  
CCTTTCGAGCACAACCGTTTCGAGCACAACCAATATATATTAGAACCCCTTTACTTGC  
CGGAGCACATCTTGGATCTGTCAATTATGTTATGGGCGGAGTCCCACATCGGGGATCT  
GGTCGAATTGGGGGAAGCTGTAGGTATTATTGCGGGTCAATCAATTGGGGAGCCGGGG  
ACTCAACTAACATTAAGAACTTTTCATACTGGTGGAGTATTCACAGGGGGTACTGCCGA  
CCTTATACGATCCCCCTCGAATGGAAAAATCCAATTCAATGAGGATTTGGTTCACCCCA  
CACGTACCCGTCATGGGCAGCCTGCTTTTCTATGCTATATAGACTTGCATGTAACTATTC  
AGAGTCAGGATATTCTACATAGTGTGAATATCCGTTAAAAAGCTTGATTCTAGTGCAA  
AATGATCAATATGTAGAATCTGAACAAGTAATTGCGGAGATTCGTGCCGGAATGTCCAC  
TTTG-----TTTAAAGAAAAGGTACAAAAGCATATTTATTCCGAATCAGACGGGGAA---AT  
GCACTGGAGTACTGATGTTTACCATGCGCCCGAATATCAATATGGTAATCTTCGTGCGATT  
ACCAAAAACAAGCCATTTATGGATATTGTCAGTAAGTATGTGCAGA-----TCCAGTATAG  
CATCTTTTTCACTGCACAAGGATCAAGATCAAATGAATACTTATTCTTTTTCTGTTGATG  
GAAGA-----TATATCTTTGACTTCTCA-----ATGGCTAAT--GATCAAGTAAGCCATAGACT  
GTTGGATACTTTTGGT-----GATAGGGAAATTCTTGATTATTTA---ACGCCAGATCGA  
ATCGTGTCCAACGGTCATTGGAATTGTTTCTATCCTTCT--ATTCTTCAAGATAAT-----TC  
GGATTTGTTGGCGAAAAAGCGAAGAAATAGGTTTCGTGTTCCATTACAATATCATCAAG  
AACAAGAAAAAGAGCGAATATCCTGTTTGGGTATTTCAATGGAAATACCCTTTATG-----  
GGTGTTTTACGTAGAAATACTATTTTTGCTTATTTTGACGATCCACGATACAGAAAAGAT-  
----GGAATTGTAAATTTAGAAGCCCGGAGGAAAATTCTATCTTAAAA-----AAAGAGGG  
TTTTATTGAGCATCGAGGA--ACAAAAGAATTTAGTCTAAAATAC--GAAGTAGATCGGT  
TTTTTTTCATTCTTCAAGAACTGCATATCTTGCCGAGATCCTCATCCCTAAAGGTACTIONG  
ACAATAGTATTATTGGAGTCGATACACAACCTCACAAAAATACAAGAAGTTCGACTAGG  
TGGATTGGTCCGAGTGAAGAGAAAAAAAAGCCATACAGAACTCAAATCTTTTCCGG  
AGATATTCATTTTCTGAAAGAGGCGGATAAGATATTAGGT-----GGCAGTTTGATACCACC  
AGAAAGAGAAAAAAA-----GATTCTAAGGAA---TCAAAA---AAAAGGAAAAATTGGG  
TTTATGTTCAACGGAAAAAATTCTCAAAAGCAAGGAAAAG-----TATTTTGTTCGGTT  
CGACCTGCAGTCGCATATGAAATGGACGAAGGGAGAAATTTAGCAACACTTTTCCCGC  
AGGATCTCCTGCAAGAAGAGGATAATCTCCAACCTTCGACTTGTCAATTTTATTTCTCAT  
GAAAATAGCAAGTTAACTCAAAGAATTTATCACACGAAT--CAATTCGTTCGAACTTGC  
TTAGTAGTGAATTGGGAACAAGAAGAAAAAGAGGGGGCTCGT-----GCTTC  
TCTTGTGAGGTAAGAACAACGATCTAATTCGCGATTTCCCTAAGAATTGAGTTAGTCA  
AGTCTACTATTTCTGATACACGAAGAAGGTATGATAGGACAAGTGTAGGACTGATTCCC  
AAT-----TTAGATCGCAACAATACCAATTCCTTTTATTCCAAGGCGAAGATTCAATCA---  
-----CTTAGCCAACATCAAGAAGTTATTGGT-----ACCTTGTGAAATCGAAATAA  
A-----GAATATCCATCTTTGATGATTTTGTGGCATCCAACCTGTTCTCGAATTGGT-----T  
TATTCAGAATTTCGAAATATCCC-----AATGCGGTAAAAGAATCGAATCCTAGAATTCC  
TATT--GATATTTTGGGCTCTTAGGCGTTATTGTACCT--AGTATATCGAATTTTCTTCAT  
CT--TACTATTTATTAACG-----CATAATCAGATCTTGTTAAAA---AAATACTTGTTCCTT  
GAC-----AATTTGAAACAAACCTTCCAAGTACTTCAAGGACTTAAATACTCTTAATA  
GACGAAAATAAAAAGG-----ATTTCGAATTTGAC-----AGTAACATCATGTTGGAGCCATT  
CCATTTGAATTGGCACTTTCTCCATCATGACTCATGGGAAGAGACATTGGCAATAATTC  
AC--CTTGGACAATTTATTTGTGAAAATTTATGTCTATTTAAATCACACATA-----AAA

AAATCTGGTCAAATTTTCATTGTTAAT--ATGGACTCCTTTGTTCTAAGAGCAGCTAAGC  
CTTATTTGGCCACTATAGGAGCAACTGTTTCATGGTCATTATGGAAAAATCCTTTACAAAG  
GAGATAGGTTAGTTACGTTTATATATGAAAAATCGAGATCCAGTGATATAACGCAAGGTC  
TTCCAAAAGTAGAACAAATCTTCGAAGCGCGTTCAATTGATTCACTATCGCCGAATCTC  
GAAAGGAGAATTGAGGATTGGAATGAACGTATACCAAGAATTCTTGGGGTTCCTGGG  
GATTCTTGATTGGAGCTGAGCTAACCATAGCCCAAAGTCGTATCTCTTTGGTTAATAAGA  
TCCAAAAGGTTTATCGATCCCAAGGGGTACAGATCCATAATAGACATATAGAGATTATTA  
TACGCCAAGTAACATCAAAAAGTAAGGGTTCGAA-----GATGGAATGTCTAATGTTT  
TTTTACCTGGGGAATTAATAGGACTATTGCGAGCGGAACGAGCAGGGCGGGCTTTAGA  
TGAATCGATCTATTATCGGGCAATCTTATTGGGAATAACAAGGGCTTCCCTGAATACCCA  
AAGTTTCATATCTGAAGCAAGTTTTCAAGAACTGCTCGAGTTTTAGCAAAGCTGCC  
CTACGAGGTCGTATTGATTGGTTGAAAGGCCTGAAAGAAAACGTAGTTCTGGGGGGGA  
TTATACCTGTTGGTACCGGATTCCAAAATTTGTGCATCGTTCCCA-----CAAGACAAG  
AACCTTTAT-----TTCGAAATTCAAAAAATACTATTTCGCGTCGGAAATG-----AGAGA  
TATTTGTTTCTCCATACAGAATTAGTTTCTTCTGATTCTGACGTAACAAAC-----TCAG  
AGACCCCGTTTACCCCTATTTATACGATT-----ATGACAAGAAGATATTGGAACA  
TCAATTTGAAAGAGATGATAGAAGCGGGAGTTCATTTTGGTCATGGTATTAAGAAATGG  
AATCCCAAATGGCCCCTTACATCTCGGCAAAGCGTAAAGGTAATCATATTACAAATCT  
TGCTAGAACAGCTCGTTTTTTATCAGAAGCTTGTGATTTAGTTTTTGATGCAGCAAGTC  
AGGGAAAAGCTTCTAATTGTTGGTACCAAAAAAGAGCAGCGGATTTAGTAGCATC  
AGCTGCAATAAGGTCTCGTTGTCATTATGTTAATAAAAAGTGGTTCAGCGGTATGTTAA  
CGAATTGGTCGATTACCAAACACTAGACTTTCTCAATTTAGAGACTTAAGAGCAGAAGA  
AAAAATGGGAAAATTCACCATCTCCAAAAAGAGATGCGGCAATCTTAAAGAGAAAA  
TTATCTACCTTGCAAAGATATCTCGGCGGGATCAAATATATGACGAGGTTGCCTGACATT  
GTGATCGTCCTTGATCAGCAAAAAGAGTATATAGCTCTTCGGGAATGTGCCATTTTGGG  
GATTCCTACTATTTCTTTAGTCGATACAAATGTGACCCAGATCTTGCGAATATATCGATT  
CCTGCCAACGATGACACTATGACTTCAATTCGATTAATTCTTAACAAATTAGTATTTGCA  
ATTTCTGAGGGCCGTTCTCTC---TATATAAGAAATCGTATGGGACAAAAAATAATCCAC  
TCGGTTTCAGACTTGGTACAACCCAAAATCACCATTCTTTTGGTTCGCACAACCAAAA  
AAATTATTCTGAAGGTCTACAGGAAGATAAAAAATACGGAATTGTATCAAGAACTATA  
TACAAAAGAATAGGAAAAAGGCTCGAATAAAATGGAATCAATTACACATATAGAAAT  
TCAAAAAGAAATCGATACAATCCACGTCATAATCCATATTGGATTCCCAAAT--TTATTAA  
AGAAAAAGGGA-----GCAATCGAAGAATTAGAGAAAGATCTCCAAAAGGAAGT  
TAATTCTGTAAACCAGAGACTTAATATTGCTATCGAAAAGGTTAAAGAACCTTATAGAC  
AACCTAATATTCTTTCGGAATATATAGCTTTCCAATTAATAAATAAGAGTTTCATTCCGAA  
AAGCAATGAAAAAGCTATTGAATTAATAAATAAAGCGGATATAAAGGGAATAAAAAAT  
CCAAATTGCGGGTTCGTCTAGCAGGAAAAGAAATTGCACGTGCCGAATGCATCAAAA  
GGGTAGACTACCCCTCCAAACAATTTCGCGCTAAAATTGATTATTGCTGCTATCCAATTCG  
AACTATCTATGGAGTATTAGGTGTCAAATTTGGATATTCTGTAGAAGAAGAAATGTCCC  
GTTATCGAGGGCCCTCGTTTTAAAAAATAACGCCGCTCTGGGAGCTTTACCAGGACTCACT  
AGAAAAACGCCTAAATCCGGAAGTAATCAGAAAAAGAAATTCCATTCTGGGAAA---AA  
AGAGCAATATCGTATTCGTCTTCAAGAAAAACAGAAATTGCGTTTTTCATTATGGTCTGA  
CAGAACGACAATTACTTAGATATGTACATATCGCTGGAAAAGCAAAAAGATCCACAGG  
TCAGGTTTTACTACAATTACTTGAATGCGTTTTGGATAATATCCTTTTTTCGATTGGGTATG

GCTTCAACCATTCTGGGGCCCGACAATTAGTTAACCATAGACATATTTTAGTTAATGGT  
CGTATAGTTGATATAACCAAGCTTTCGTTGCAAACCCCGAGATATTACTACGAAGGAT  
AACCAACGATCAAACGTTTGGTTCAAATTATATTGCTTCATCCGATCCGAAA-----TT  
ACCAAAGCATTGACGGTTGACACA-----TTGCAATATAAAGGACTAGTAAAAAAAATT  
CTAGATAGGAAGTGGGTCTCAAATAAATGAGTTGTTAGTTGTAGAATATTATTCT  
CGCCAGACTATGTCACGTCGAGGTAAGTGCAGAAAAAAGAACCAGCAAATCCGATCCAA  
TTTTTCGTAATCGATTAGTTAACATGGTGGTTAACCCTATTATGAAAGACGGAAAAAAA  
TCATTGGCTTATCAAATTCTCTATCGAGCCGTGAAAAAGATTCAACAAAAGACAGAAA  
CAAATCCACTATTGGTTTTACGTCAAGCAATACGTAGAGTAACTCCCAATATAGGAGTA  
AAAACAAGACGTAAAAAGGATCGACGCGGAAAGTTCCGATTGAAATAGGATCTAAA  
CAAGGAAGAGCACTTGCCATTGTTGGTTATTAGAAGCATCCCAAAGCGTCCGGGTC  
GAAATATGGCTTTCAAATTAAGTTCCGAATTAGTAGATGCTGCCAAAGGGAGTGGGGG  
TGCCATACGCAAAAAGGAAGCGACTCATAGAATGGCAGAGGCAAATAGAGCTCTTGCA  
CATTTTCGTATGGGCAAGGACACTATTGCTGATTTACTAACCTCTATAAGAAACGCAGA  
CATGAATAAAAAGGAACTGTTTCGAGTAGTATCCACAAATATTACCGAAAACATTGTTA  
AAATACTTCTACGAGAGGGTTTTATTGAAAGTGTTCGGAAACATCAGGAAAGTAACAG  
ATATTTCTTGGTTTCAACTTTGCGACATCAAAGGAGAAAGACTAGAAAGGGAATATATA  
GAACT-----AGAACCTTTTTAAAGCGTATCAGCCGACCTGGCTTACGAATTTATGCCA  
ACTATCAAGGAATCCTAAGGTTTTGGGCGGAATGGGAATTGCTATTCTTTCTACTTCTC  
GAGGTATAATGACAGATCGAGAAGCTCGACTAAACAGAATTGGGGGAGAAGTTTTATG  
TTATATATGGATGACAAAAGCTATACCAAAAATAGGTTACGTAAGAAAGTGCGTATTG  
GTTTGCCTAAGAGTGCACGTAGAATAACAAAAGGGGTTATTCATGTTCAAGCCAGTTT  
CAACAATACCATTATAACCGTTACAGACCCACAAGGTCCGGTTCGTTTTCTGGTCCCTCG  
CAGGTAATGTTGATTCAAAGCTCAAGAAAAGCATCACCTATGCTGGTCAAAGAAC  
AGCAGTAGATGCTATTCGTACAGTGGGT-----TTGCAACGAGCAGAAGTTATGGTAAA  
AGGTGCTGGTAGCGGAAGAGATGCCGCATTACGAGCCATTGCTAAAAGTGGTGTACGG  
TTAAGTTGTATACGCGATGTAACACCTATGCCGCATAATGGATGTCGACCTCCTAAAAA  
AAGACGTCTGATGCCAACGGTTAAACAACCTTATTAGAAATGCAAGACAGCCAATACGA  
AATGCTAGAAAATCGGCCGCGCTTAAGGGATGTCCTCAGCGTCGAGGAACATGTGCTA  
GGGTGTATACTATCAACCCCAAAAACCAACTCTGCCTTACGTAAAGTTGCCAGAGT  
ACGATTAACCTCTGGATTTGAAATCACTGCTTATATACCTGGTATTGGCCATAATTTACA  
AGAACATTCTGTAGTATTAGTAAGAGGAGGAAGGGTTAAGGATTTACCCGGTGTGAGAT  
ATCGCATTATTGAGGAACCCTAGATGCTGTCGAGTAAAGAATCGTCAACAAGGGCG  
TTCTAAATATGGGGCCAAAAGCCAAAATGGCAAAAAAAGTTTTGATTGAGAGGGA  
GAAAAAGCGGCATAAATTAGAACAATAATATCATTTGATTGTCGATCCTCAAAAAAA  
AAGATAAGAAGCAAAGTTTCCCCTTTGAGTTTGGAGCGAAAAAACAAAAATGCAAGAA  
AAATTGCAATCCCTACCACGTAATAGTGCACCTACACGCCTTCATCGACGTTGTTTTTTA  
ACCGGAAGACCTAGAGCTAACTATCGAGACTTTGGGCTATCCGGACACATACTTCGAG  
AAATGGTTTATGCATGTTTGTACCGGGTGCAACAAGATCCAGTTGG-----  
---ATGGTTAAGAAGAAAAACAAGAAAAC-----AGGGGTTCTGTTGAATTTCAAGTATT  
CAGTTTCACCAATAAGATACGGAGACTTGCTTACATTTAGAATTACACAAAAAAGATT  
TTTCATCGGAAAGAGGTCTACGAAGACTTTTGGGAAAACGTCAACGTTTGCTGGCTTA  
TTTGGCAAAGAAAAATAGAGTACGTTATAAGAAATTAATCAGTCAGTTGGATATTCGGG  
AGAAG-----ATGGTAAAACCTCGTTTAAAACGATGTGGTAGAAAGCAACAAGCT











G TTCAGATAGAATCGAACTTTTGATCGATCCGGGTACTTGGGATCCTATGGATGAAGAC  
ATGGTTTCTCTGGATCCCATTGAATTCATTTCGGAGGAGGAGCCTTATAAAGATCGTGT  
CGATTCTTATCAAAGAAAGACAGGATTA ACTGAGGCCGTTCAAACAGGCATAGGCCAA  
CTAAACAGTATTCCCGTAGCAATCGGGGTTATGGATTTTCAGTTTATGGGGGGTAGTATG  
GGATCCGTGGTCGGGGAGAAAATCACCCGTTTGATTGAGTACGCTACTAAAAAATTTCT  
ACCTCTTATTATAGTGTGTGCTTCCGGGGGGGCACGCATGCAAGAAGGAAGTTTGAGC  
TTGATGCAAATGGCTAAAATATCTTCTGCTTTATATGATTATCAATCAAATAAAAAGTTAT  
TCTATGTACCAATCCTTACATCTCCTACTACAGGTGGGGT GACTGCTAGTTTTGGTATGT  
TGGGGGATATCATTATTGCCGAACCCAATGCCTACATTGCATTTGCGGGTAAAAGAGTA  
ATTGAACAAACATTGAATAAACAGTACCTGAAGGTT CACAAGCGGCTGAATATTTATT  
CCAGAAGGGCTTATTTGATCTAATCGTACCACGTAATCCTTTAAAAGCGTTCTGAGTG  
AGTTATTT CAGCTCCACGCTTTCTTTCCCTTTGAATCAAAT-----ATGGTAACCATTCG  
AGCCGACGAAATTAGTAATATTATCCGTGAACGTATTGAGCAATATAATAGAGAAGTAA  
AGATTGTAATACCGGTACCGTACTGCAAGTAGGCGACGGCATTGCTCGTATTCATGGT  
CTTGATGAAGTAATGGCGGGTGAATTAGTAGAATTTGAAGAGGGTACGGTAGGGATTG  
CTCTGAATTTGGAATCAAATAATGTCGGTGTGTATTAAATGGGCGATGGTTTGCTGATAC  
AAGAAGGAAGTTCTGTAAAAGCAACAGGAAGAATTGCTCAGATACCCGTGAGTGAGG  
CCTATTTGGGTCGTGTTGTAAATGCCCTGGCTAAACCTATTGATGGTAGAGGTGAAATTT  
CAGCTTCTGAATATCGGTTAATTGAATCTCCCGCTCCAGGTATTATTTACGACGTT CAG  
TATACGAGCCTCTTCAAACGGGGCTTATTGCTATTGATTCTATGATCCCTATAGGACGTG  
GTCAGCGAGAATTAATTATTGGGGACAGACAGACCGGTAAAACAGCAGTAGCAACAG  
ATACGATTCTCAATCAACAAGGCCAAAATGTAATATGTGTTTATGTAGCTATTGGTCAA  
AAGCATCTTCTGTGGCTCAGGTAGTGACTACTTTCCAGGAAAGGGGGGCGATGGAATA  
CACTATTGTGGTAGCTGAAATGGCGGATTCCCCTGCTACATTACAATACCTCGCTCCTTA  
TACAGGAGCCGCTCTGGCGGAATATTTTATGTACCGTGAACGACACACTTCAATCATT  
ATGATGATCCCTCAAACAAGCACAAGCTTATCGACAAATGTCTCTTCTATTACGAAGA  
CCGCCCGGTGCGGAAGCTTATCCAGGGGATGTTTTTTTATTGCAATTCACGCCTTTTGGA  
AAGAGCTGCTAAATTAAGTTCTCGTTTGGGTGAAGGAAGTATGACTGCTTTGCCAATAG  
TTGAAACTCAGTCGGGAGATGTTTCGGCTTATATTCCTACTAATGTAATTCGATTACTG  
ATGGACAAATATTCTTATCTGCCGATCTATTCAATGCTGGAATCAGACCTGCTATTAATGT  
GGGTATCTCCGTTTCCAGAGTGGGATCTGCAGCTCAAATTAAGCTATGAAACAAGTC  
GCTGGCAAATTA AAATTGGA ACTGGCGCAATTCGCAGAATTAGAAGCCTTTGCACAAT  
TTGCTTCTGATCTCGATAAAGCTACTCAGAATCAATTGGCAAGAGGTCAACGATTACGT  
GAATTGCTCAAACAATCCCAATCAGCCCCTCTCACGGTGGGAAGAACAGATAATGACTA  
TTTATACCGGAACAAATGGTTATCTTGATTTATTAGAAATTGGACAGGTAAGGAAATTC  
TTGTTGAGTTACGTA CTTACCTAAAACTAATAAACCGAAGTTTCAAGAAATCATATCTT  
CTACTAAGACATTCACCGAGGAAGCAGAAGCCCTTTTGAAAGAAGCTATT CAGGAACA  
GACGGACCGTTTTATACTTCAGGAACAAGCAATGAGAATAAATCCTACTACTTCAGGTT  
CTGGGGTTTCCACGCTTGAAAAAAAAAACCTGGGGAATATCACCCAAATCATTGGTCC  
GGTACTGGATATAGCTTTTCCACCGGGCAAGATGCCTAATATTTATAATGCTCTGGTAGT  
TAAGGATCGAGATACTGTCGGTCAACAAATTAATGTTACTTGTGAGGTACAGCAATTATT  
AGGAAACAATCGAGTTAGGGCTGTAGCTATGAGTGCTACAGACGGTCTAACGAGAGGA  
ATGGAAGTGATTGATACGGGAGCTCCTCTAAGTGTTCCGGTCCGGTGGAAACGACTCTTG  
GACGAATTTTCAACGTGCTTGGAGAGCCTGTTGATAATTTAGGGCCTGTAGATACTCGC

ACAACATCTCCTATTCATAGATCTGCGCCCGCCTTTATACAGTTAGATACAAAATTATCTA  
TTTTTGAAACCGGAATTAAGTAGTAGATCTTTTAGCCCCCTACCGCCGTGGAGGAAAA  
ATCGGACTATTCGGGGGGGCTGGAGTGGGTAAAACAGTACTCATTATGGAATTGATTAA  
CAATATTGCCAAAGCTCATGGGGGTGTATCCGTATTTGGCGGAGTTGGTGAACGTACTC  
GTGGAGGAAATGATCTTTACATGGAAATGAAAGAATCTGGGGTGATTAATGAACAAAA  
TATTGCAGAATCGAAAGTGGCTCTAGTTTACGGTCAGATGAATGAACCACCGGGAGCT  
CGTATGAGAGTTGGTTTGACTGCCCTAACTATGGCTGAATATTTCCGAGATGTTAATGAA  
CAAGACGTACTTCTATTTATCGACAATATCTTCCGTTTCGTCCAAGCAGGATCTGAAGTA  
TCTGCCTTATTAGGTAGAATGCCTTCCGCTGTGGGTATCAACCCACCCTTAGTACCGA  
AATGGGTACTTTACAGGAAAGAATTACTTCGACCAAAGAAGGGTCCATAACTTCTATTC  
AAGCGGTTTATGTACCTGCAGACGATTTGACCGACCCTGCTCCTGCTACGACATTTGCA  
CATTTAGATGCTACTACTGTACTATCAAGAGGATTAGCCGCCAAAGGTATCTATCCCGCA  
GTAGATCCTTTAGATTCAACATCAACTATGCTCCAACCTCGGATTGTTGGTGAGGAACA  
TTATGAAACTGCGCAAAGGGTTAAGCAAACCTTACAACGTTACAAAGAACTTCAGGAC  
ATTATAGCTATCCTTGGGTGGACGAATTATCCGAAGAGGATCGTTTAACCGTAGCAAG  
AGCGCGAAAAATTGAGCGTTTCTTATCACAAACCCTTTTTTCGTAGCAGAAGTTTTACTG  
GTTCTCCAGGGAAATATGTTGGTTTAGCAGAAACAATTAGGGGGTTTCAATTGATCCTT  
TCCGGAGAATTAGATGGTCTTCTGAACAGGCCTTTTATTTGGTAGGTAACATCGACGA  
AGCTACCGCGAAGGCTATGAACTTAGAAATGGAGAGCAATTTGAAGAAAATGACCTTA  
AATCTTTGTGTACTGACCCCTAATCGAACTGTTTGGGATTCAAAGTGAACGAAATCAT  
TTTATCTACTAATAATGGCCAAATTGGCGTATTACCGGATCACGCCTCTATTGCCACAGC  
TGTAGATATAGGTATTTTGAGAATACGCCTTAACGACCAATGGTTAACGATGGCTCTGAT  
GGGTGGTTTTGCTAGAATAGGTAATAATGAGATCACTGTTTTAGTAAATGATGCGGAGA  
AGAGTAGTGACATCGATTCACAAGAAGCCAGCAAACGCTTGAATAGCGGAAGCTAA  
TTAAGAAAAGCTGAAGGAAAGAGACAAAAAATTGAGGCAAATTTAGCTCTCCGACG  
AGCTAGGACACGAGTAGAGACGATCAATGCGATTTTCGATGAAAAATGTAACCGATTCT  
TTCGTTTCTTTGGGCCACTGGCCGTCGCGGGGAGTTTCGGGTTTAATACCGATATTTTA  
GCAACAAATCTAATAAATCTAAGTGTAGTGCTTGGGGTATTGATCTTTTTTTGGAAAGGG  
AGTGTTAAGTGATTTATTAGATAATCGAAAACAGAGGATTTTGAATACTATTCGAAATTC  
AGAAGAACTCCGTGAAGGGGCCATTGAACAGCTGGAAAAAGCCCGGGCGCGCTTACG  
AAAAGTGGAAATGGAAGCAGATCAGTTTCGGGTGAATGGATACTCTGAGATAGAGCGA  
GAAAAGTGGAAATTTATTAATTCAACTTCTAAGACTTTGGACCAACTAGAAAATTACAA  
AAACGAAACTATTCAATTTGAACAACAAAGGGCGATTAATCAAGTCCGACAACGGGTT  
TTCCAACAAGCCTTACAAGGGGCTCTAGGAACTCTGAGTGGTTGTTTGAACAACGAGT  
TACATTTACGTACCATCAGTGCCAATATTGGCATCTTGGGGGCGATGAAAGAAATAACT  
GATATGAATCCACTGATTTCTGCCGCTTCCGTTATTGCTGCTGGATTGGCTGTAGGGCTT  
GCTTCTATTGGACCTGGAGTTGGTCAAGGTACTGCTGCGGGCCAAGCTGTAGAAGGTA  
TCGCGAGACAGCCCAGGCGGAGGGAAAAATACGAGGTACTTTATTGCTTAGTCTAGC  
TTTTATGGAAGCTTTAACAATTTATGGCCTGGTTGTAGCATTAGCACTTTTATTTGCGAA  
TCCTTTTGTATGAATGTTCTATCCTGTTCCATCAACACACTAAAAGGGTTATATGATATA  
TCCGGTGTGGAAGTAGGCCAACATTTCTATTGGAAAATAGGAGGTTTCCAAGTCCACG  
GCCAAGTACTTATTACTTCTTGGGTTGTAATTGCTATCTTATTAGGCTCAGCCACTATAGC  
TGTTCCGGAACCCACAAACCATCCCACCAGCGGTCAGAATTTCTTCCAATATGTACTTG  
AATTCATTCGAGATGTGAGTAAAACCTCAAATTGGAGAAGAATATGGTCCTTGGGTTCTT

TTTATTGGAACATATGTTTCTATTTATTTTTGTTTCTAATTGGTCAGGAGCGCTTTTACCTT  
GGAAAATCATAACAATTACCTCATGGGGAGTTAGCCGCACCCACGAATGATATAAATACT  
ACTGTTGCTTTGGCTTTACTCACGTCAGTGGCATATTTCTATGCGGGTCTTACCAAAAA  
GGGATTAGGTTATTTTCGGGAAATATATTTCAACCAACTCCAATCCTTTTACCCATTAACAT  
CTTAGAAGATTTACAAAGCCCTTATCACTTAGTTTTTCGACTTTTCGGAGATATATTAGC  
TGATGAATTAGTAGTTGTTGTTCTTGTTCCTTAGTACCTTCAGTGGTTCCTATACCTGTC  
ATGTTCCCTGGATTATTTACAAGTGGTATTCAAGCTCTTATTTTTGCAACTTTAGCCGCG  
GCTTATATAGGTGAATCCATGGAGGGCCATCATATGATATTTTTCAACTTTAGAGCATATAT  
TAACTCATATTTCTTTTCAATCGTTTCAATTGTAATTACAATTCATTTGATAACCTTATTA  
GTCGATGAAATCATAAACTATATGATTCGTCAGAAAAGGGAATGATAGCTATTTTTTTTA  
TGATAACAGGATTATTAGTCACTCGTTGGATTTATTCGAGACATTTCCCACTAAGTGAT  
TTATATGAATCATTAATCTTTCTTTCATGGAGTTTATCAGTTATTCATATAGTTCCGTAT----  
-AAAAAGAAAAAAATTTAAGCACAATAACTGCGTCAAGTGTTATTTTTTACCCAGGGCT  
TTGCTACTTCAGGTCTTTTAACTGAAATACATCAATCCGCAATATTAGTACCCGCTCTCC  
AATCCGAGTGGTTAATAATGCACGTAAGTATGATGATATTGAGCTATGCAGCTCTTCTAT  
GTGGATCATTATTATCAGTAGCACTTCTAGTCATTACATTTTCGAAAAACAGAAATATTT  
TTTGT-----AAAGAAATCCAATACATGAATGAAAGAAACAATGTTTTAAGAACTACT-----  
-----GCTAAGAATTATTACAGGTCCCAGTTGATTCAACAGTTGGATTATTGGAGTTATCGT  
GTCATTAGTCTAGGGTTTATCTTTTTAACCATAGGTATTCTTTTCGGGAGCAGTATGGGCT  
AATGAAGCATGGGGATCATATTGGAATTGGGACCCAAAGGAAACTTGGGCATTTATTAC  
TTGGATCGTATTTGCGATTTATTTACACACTCGAACCAATATAAAATTACGGGGTGCAAA  
TTCCGCAATTGTGGCGTCTATAGGCTTCTTATAATTTGGATATGCTATTTTTGGAGTCAAT  
CTATTAGGAATAGGACTACACAGTTATGGTTCATTTACGTTAACGATGGCAAAAAAGAA  
AGCATTCACTCCTCTTTTATATCTTGCATCTCTAGTATTTTTGCCCCTGGTGGATTTCTCTT  
TCATTTAATAAAAGTCTGGAATCTTGGGTACTAATTGGTGAATACTAGGCAATCCGA  
AATTTTTTTGAATGGTATTCAAGAAAAGAATATTCTAGAAAAATTCATAGAATTAGAGG  
AAATCCTTCTCTTGGAGGAAATGATCAAGGAATACTCGGAGACACATCTACAAAACCT  
TCGTATA---ATCCACAAAGAAACGATCCAATTCATCAAGATACACAATGAGGATCGTATC  
CATACGATTTTGCACCTCTCGACAAATATAATCTGTTTCGTTATTCTAAGTGGTTATTCTA  
TTTGGGGTAATGAAGAACTTGTATTCTTAACTCTTGGGCTCAGGAATTCCTATATAACT  
TAAGTGACACAATAAAAGCTTTTTCTATTCTTTTATTAACTGATTTATGTATCGGATTTCA  
TTCGCCCCATGGTTGGGAACATAATTATTGGCTCTGTCTACAAAGATTTTTGGATTTGTTCA  
TAATGATCAAATTTTATCTGGTCTTGTTCCTACTTTTCCAGTCATTCTAGATACACTTTTT  
AAATTTTGGATTTTCCGTTATTTAAATCGTGTTCCTCCGTCACCTTGTAGTGATTTATCATT  
CAATGAATGATATGCCTATTGGTGTTCCAAAGTACCCTTTCGAAGTCTGGAGAGGAA  
GATGCATATTGGGTGACATATAACCGACTTTATCGAGAACGATTACTTTTTTTAGGC  
CAACCGGTTGCTAGCGAGATCTCGAATCAACTTATTGGTCTTATGGTATATCTCAGTATC  
GAGGATGATACCAAAGATCTGTATTTGTTTATGAACTCTCCTGGGGGATGGGTACTCCC  
TGGAATAGCTATTTATGATACTATGCAATTTGTGCGACCAGATGTACATACAATATGCATG  
GGATTAGCTGCTTCAATGGGATCTTTTATCTTGGCCGGAGGAGAAATTACCAAACGTCT  
AGCATTCCCTCACGCT--GTAATGATCCATCAACCTGCTAGTTCTTTTTTATGAGGCACAA  
ACGGGAGAATTTGTCTGGAAGCGGAAGAAGTCTGAAACTGCGTGAAACCATCACA  
AGGGTTTATGTACAAAAACGGGCAAACCTTTTGGGTTGTCTCGGAAGACCTGGAAA  
GAGATGTTTTTATGTCAGCAACAGAAGCCCAAGCTTATGGAATTGTTGATCTTGTAGCG

GTTGAGATGAAAGAACA AAAATGGATTCATGAAGGTTTAATTACTGAATCGCTTCCCAA  
TGGCATGTTCCGGATTCGCTTAGATAATGAAGATATGATTCTAGGTTATGTTTCAGGAAA  
GATCCGACGTAGTTTTATACGGATACTGCCAGGCGATAGAGTAAAAATTGAAGTAAGTC  
GTTATGATTCAACCAGAGGACGTATAATTTATCGACTTCGCAATAAGAATTCGAAAGATA  
TGGAGGAATTCCAAAGATATTTAGAG---GATAGATCTCAACAACACTACTTCTTATATCC  
ACTTATCTTTCAGGAGTATAATTTATGCACTTGCTCATGATCATGGTTTAGCGGGTTATGAC  
AATAAATTCAGTTTACTAATTGTGAAACGTTTAATTGCTCGAATGTATCAACAGAATCAT  
TTGATTCTTCTACTAATGATTCTAACCAAAAATAGATTTTTGAGGAAGAATTTGTATTCTC  
AAATGATATCAGAGGGGTTTGCAGTCATTGTGGAAATTCCATTTTATCTACAATTA AAAAT  
CTTCCCTAATAGTCAAATCTCATAATTTACGATCAATTCATTCAATATTTCTTTTTT TAGA  
GGACAAAATTTACATTTAATTTATGGTTTAGAGATACTAATACCC TACCCAGTCCATCT  
GGAAATCTTGGTTCAAAC TCTTCGCTACTGGGTAAAAGATGCTTCTTCTTTGCATTTATT  
ACGATTCTTCTCCACGAGTATTGTAATTGGAAT-----ACTAAAGCCGGTTCTTCTTTTT  
CAAAACAAAGACTATTCTTCTTACTATATAATTCATCTATGTGAATACGAATCCATCTT  
CATCTTCTCCGTAACCAATCTTCTCATTACGCTCAACATCTTCTGGAACCCTTCTTGA  
ACGAATCTATTTCTATGGAAAATAAAAATATCTTGTAAAAGTCTTTGTAAAGGCTTTTAA  
TCTATTGTTGTTGAAGGATCCTTTCATGCATTATGTTAGGTATCAAGGAAAATCAATTCT  
CGTTCAAAGGGACGCCCTTTTTGATGAAAAAATGGACATATTACTTTGTAAATTTATG  
GCAATGTCATTTTTACCTGTGGTCTCAACCGGGAAGGATCTGTATAAACCAATTATACAA  
TCATTCCCTCGACATTCTGGGCTATCTATCAAGTGCGCGGCTAAACCCTTCAATGGTAC  
GCGGTCAAATGCTAGAAAATTCATTTCTAATTGATAATGCTATT-----AATAAGTTCGATG  
CTATTGTTCCAATTATTCCTCTGATTGGATCATTGGCTAAAGCGAAATTTGTAAACGTATT  
GGGCATCCTATTAGTAAGGCGGTTTGGACCGATTTATCAGATTCTGATATTATTGACCA  
ATTTGGGCGTATATGCAGAAATCTTCTCATTATCATAGTGGATCCTCACAAAAAAGA  
GTTTGTATCGAATAAAGTATATACTTCGACTTCTTGTGCTAGAACTTTGGCTCGTAAAC  
ACAAAAGTACTGTACGTGCTTTTTTGAAGATTGGGCTCGGGATTATTGGAAGAATTC  
TTTACGGCGGAAGAACAAGTTCTTTACTTGACCTTCCAAGACGGATTTGGTATTTGGA  
TATTATTTGTATCAATGATTTGGCCAATCATGAAATGATAATAGAT---ACAACAGAAGTAC  
AA---GCTATCAATTCTTTTTTTAGATTGGAATCC---TTAAAAGAGGTATATGGGATCATAT  
GGATGCTTATCCCTATTTTTACTCCTGTATTAGGAATCACAAATAGGTGTACTAGTAATTGT  
TTGGTTAGAAAGAGAAATATCTGCAGGGATAACAACGTATTGGACCTGAATACGCC  
GGGCCTTTGGGAATTCTTCAAGCTTTAGCAGATGGTACAAAATTACTTTTCAAAGAGAA  
TCTTCTCCATCGAGAGGAGATACTCGTTTATT CAGTATCGGACCATCCGTAGCAGTTAC  
ATCAATTCTACTAAGTTATTTAGTAATTCCTTTTGGCTATCACCTTGTTCTAGCCGATCTC  
AGTATCGGTGTTTTTTTTATGGATTGCCATTTCAAGTATTGCTCCC GTTGGCCTTCTTATGT  
CAGGCTATGGATCAAATAATAAATATTCCTTTTTTAGGTGGTTTACGAGCTGCTGCTCAAT  
CAATTAGTTATGAAATACCATTA ACTCTATGTGTGTTATCAATATCTCTACTATCTAACAG  
TTCAAGTACAGTTGATATAGTTGAAGCGCAGTCAAATATGGTTTTTGGGGGTGGAATT  
TGTGGCGTCAACCTATAGGTTTATCATTTTTCTAATTCGTCCCTAGCCGAGTGTGAGA  
GATTACCTTTTGATTTACCAGAAGCAGAAGAAGAATTGGTAGCAGGTTATCAAACCGA  
ATATTCAGGTATAAAAATTTGGTTTATTTTACGTTGCTTCGTATCTGAATCTACTAGTTTCT  
TCATTATTTGTAACGGTCTTTACTTGGGGGGTTGGAATCTTCTATTCCGTACATACCC  
GTTCTGATATTTTTGAAATAAATAAAGCGAGTAGAGTATTTGGAACAATAACTGGTATC  
TTTATTACATTAGCTAAA ACTTATTTGTTCTTATTCATTCTATCACAAACAAGATGGACTT

TACCAAGGCTAAGAATGGACCAACTATTAATCTTGGATGGAAATTTCTTTTACCCATTT  
CTCTCGGCAATCTATTATTAACAACCTCTTCCCAACTTCTTTC ACTGATGATCTGGCATG  
TACAGAATGAAA ACTTCATTCTCGATTCTACGAGAATTTTTATGAAAGCCTTTCATTTGC  
TTCTCTTCGATGGAAGTTTGATTTTCCAGAATGTATCCTAATTTTTGGCCTAATTTCTCT  
TCTGATGATCGATTCAACCTCTGATCAAAAAGATATAACCTTGGTTATATTT CATCTCTTCA  
ACAAGTTTAGTAATGAGCATAACGGCCCTCTTGTTCCGATGGAGAGAAGAACCTATGAT  
TAGCTTTTTCGGGAAATTTCCAAACGAACAATTTCAACGAAATCTTTC AATTTCTTATTTT  
ACTATGTTCAACTCTATGTATTCTCTATCCGTAGAGTACATTGAATGTACAGAAATGGC  
TATAACAGAGTTTCTCTTATTTCGTATTAACAGCTACTCTAGGAGGAATGTTTTTATGCGG  
TGCTAACGATTTAATAACTATCTTTGTAGCTCCAGAATGTTTCAGTTTATGCTCCTACCTA  
TTATCTGGATATAACCAAGAAAGATGTACGGTCTAATGAGGCTACTATGAAATATTTACTC  
ATGGGTGGGGCAAGCTCTTCTATTCTGGTTCATGGTTTCTCTTGGCTATATGGTTCATCC  
GGGGGAGAGATCGAGCTTCAAGAAATAGTGAATGGTCTTATCAATACACAAATGTATAA  
CTCCCCAGGAATTTCAATTGCGCTCATATTCATCACTGTAGGAATTTGGGTTCAAGCTTTC  
CCCAGCCCCTTCTCATCAATGGACTCCTGACGTATACGAAGGATCTCCC ACTCCAGTCG  
TTGCTTTTCTTTCTGTTACTTTCGAAAGTAGCTGCTTCAGCTTCAGCCACTCGAATTTTCG  
ATATTCCTTTTTATTTCTCATCAAACGAATGGCATCTTCTTCTGGAAATCCTAGCTATTCT  
TAGCATGATATTGGGGAATCTCATTGCTATTACTCAAACAAGCATGAAACGTATGCTTGC  
ATATTCGTCCATAGGTCAAATCGGATATGTAATTATTGGAATAATTGTTGGAGACTCAA  
TGATGGATATGCAAGCATGATAACTTATATGCTGTTCTATATCTCCATGAATCTAGGAACT  
TTTGCTTGCATTGTATTATTTGGTCTACGTACCGGAACTGATAACATTTCGAGATTATGCA  
GGATTATACACGAAAGATCCTTTTTTGGCTCTCTCTTTAGCCCTATGTCTCTTATCCCTAG  
GAGGTCTTCCCTCCACTAGCAGGTTTTTTCGGAAA ACTCTATTTATTCTGGTGTGGATGG  
CAGGCAGGCCTATATTTCTTGGTTTTAATAGGACTCCTTACAAGCGTTGTTTCTATCTAC  
TATTATCTAAAATAATCAAGTTATTAATGATTGGACGAAACCAAGAAATAACCCCTCAC  
GTGCGAAATTATAGAAGATCTCCTTTCAGATCAAACAATTCCATCGAATTGAGTATGATT  
GTATGTGTGATAGCATCTACTATACCAGGAATATCAATGAACCCGATTATTGCAATTGCT  
CAGGATACCCTTTTTATGTTTCTGCTTTACGAATATGATATTTTTTGGGCATTTCTAATAAT  
ATCAAGTCTTATTCCATTTTTGGCATTTTTCAATTCGGGGTTTTAGCCCCGATTAGCAA  
AGGGCCAGAGAACTCTCTAGTTATGAATCGGGTATAGAACCAATGGGCAATGCTTGG  
TTACAATTTCGAATCCGTTATTATATGTTTGCTCTAGTTTTTGTGTTTTTGGATGTTGAAA  
CAGTTTTTCTTTATCCATGGGCAATGAGTTTCGATGTATTAGGTGTATCTGTATTTATAGA  
AGCTTTAATTTTCGTGCTTATCTTAATTGTTGGTTTAGTTTATGCATGGCGAAAGGGGGC  
ATTGGAATGGTCTACGAATTTTTTCCCTTGGTTAACAATAATTGTAGTTTTGCCAATATTC  
GCGGGCTCCGTAATTTCTTTCTTCCCCATAGAGGAAATAGAGTAATTCGGTGGTATACC  
ATATGTATATGTATTTTAGA ACTCCTTCTAACGACCTATGCATTCTGTATCATTTTTCAATT  
CGACGATCCATTAATCCA ACTGGTGGAGGACTATAAATGGATCAATTTTTTGTCTTCCA  
TTGGAGATTAGGAATAGATGGACTTTCTATAGGACCCATTTTACTAACGGGATTCATCAC  
CACTTTAGCTACTTTAGCGGCTCGGCCAGTTACTCGAGATTCTCGATTATTCCATTTCT  
GATGTTAGCAATGTACAGCGGGCAAATAGGATCATTTTCTTCTCGGGACCTTTTACTTTT  
TTTCATCATGTGGGAGTTCGAATTAATTCGGTTTTATCTACTTTTATCCATATGGGGGGG  
AAAGAGACGACTTTACTCGGCTACAAATTTTATTTTATACACGGCGGGAGGTTCCATTT  
TTCTATTAATGGGAGTTCTGGGTGTGGTTTTATATGGTTCTAATGAACCAACATTA AATT  
TTGAAACATCAGTTAATCAGTCATATCCTGTGGCCTTGGAAATAATATTCTATATTGGATT

TTTTATTGCTTTTGCTGTCAAATCGCCGATTATACCCCTACATACATGGTTACCAGATACC  
CACGGAGAAGCACATTACAGTACTTGTATGCTTCTAGCCGGAATTTACTAAAAATGGG  
AGCGTATGGATTGATTCGGATTAATATGGAATTATTACCCACGCCATTCTATATTTTCT  
CCGTGGTTGGTGATAGTAGGCACAATACAAATAATCTATGCAGCTTCAACATCTCCCG  
CCAACGTAATTTAAAAAAGAATAGCCTATTCTCTGTATCTCATATGGGTTTCATACT  
TATAGGAATTGGTTCTATAACCGATACGGGACTCAATGGAGCTATTTTACAAATAATCTC  
TCATGGATTTATCGGTGCTGCGCTTTTTTCTTGGCAGGAACGAGTTATGATAGAATACG  
TCTTGTTTATCTCGACGAAATGGGCGGAATAGCTATCCCAATGCCAAAAATATTCACGAT  
GTTCACTAGCTTTTCGATGGCTTCCCTTGCATTACCGGGTATGAGTGGTTTTGTTGCAGA  
ATTGATAGTCTTTTTTGGAAATAATTACCAGCCAAAAATATCTTTTAATGCCAAAAATCTT  
AATTACTTTTGTAAATGGCAATTGGGATGATATTAATCCTATTTATTCAATTATCTATGTTAC  
GCCAGATGTTCTATGGATAACAAGCTATTTAATGCTCCAAACTCTTATGTTTTTGATTCTG  
GACCGAGAGAGTTATTTGTTTCGATCTCTATCTTTCTACCCGTAATAGGTATTGGTATGTA  
CCCGGATTTTGTCTTTTCACTATCAGTTGACAAGGTCGAAGTTATTCTATCTAATTTTTTT  
TATAGAATGATGCTCGAACATGTACTTGTTTTTGAGTGCCTATTTATTTTCTGTTGGTCTTT  
ATGGATTGATCACGAGTCGAAATATGGTTAGGGCCCTTATGTGTCTTGAACTTATTTTGA  
ATGCAGTTAATATCAATTTTGTAAACATTTTCTGATTTTTTTGATAGTCGTCAATAAAAGG  
AGCCATTTTCTCCATTTTGTATAGCTATTGCAGCCGCTGAAGCAGCTATTGGACTGGC  
TATTGTTTCATCAATTTATCGTAACAGAAAATCAATTCGTATCAATCAATCGAATTTGTTG  
AATAAGATGGAACAGACATATCAATATGCGTGGATAATACCTTTCCTTCCACTTCCAGTT  
CCTATGTTAATAGGAGTGGGACTTCTTCTTTTTCCGACGGCAACAAAAATCTTCGTCG  
TATGTGGGCTTTTCAGAGTGTATTATTGTTAAGTATAGTCATGATTTTTTCGATCAATCTG  
TCTATTCAGCAAATAAATAGCAGTTCTATCTATCAATATGTGTGGTCTTGGATCATCAATA  
ATGATTTTTCTTTAGAAATTCGGCTACTTGATCGACCCACTTACTTCTATTATGTCAATATT  
AATTACTACTGTTGGGATTGTGGTTCTTGTTTATAGTGATAATTATATGTCTCATGATCAA  
GGATATTTGAGATTTTCGCTTATATGAGTTTTTTCAGTACTTCTATGTTAGGATTAGTTA  
CTAGTTCTAATTTGATACAAATTTATATTTTTTGGGAATTAGTCGGGATGTGTTTCGTATCT  
ATTAATAGGGTTTTGGTTCACACGACCTGTTGCGGCAATGCTTGCCAAAAGGCGTTTG  
TAACTAATCGTGTGCGGGATTTTGGTTTATTATTAGGAATTTTAGGTTTTTATTGGATAAC  
AGGTAGTTTCGAATTTTCGAGATTTATTCAAATATTAGTAACAATGAAGTGAATTTTTT  
ATTTGTTACTTTGTGTGCCGTTCTATTATTTGCCGGTGCGGTTGCTAAATCTGCACAATT  
CCCCCTTCATGTATGGTTACCTGATGCCATGGAGGGGCCTACTCCTATTTCACTCTTAT  
ACATGCTGCTACTATGGTAGCAGCGGAATTTTTCTTGTAGCTCGGCTTATCCTCTTTT  
CATAGTCATCCCTCACATAATGAATTTAATCTCTTTGGTAGGGATAATAACAGTATTATTA  
GGAGCTACTTTAGCCCTTGCTCAAAAAGACATTAAGAGAGGTTTGGCCTATTCCACAAT  
GTCTCAATGGGTTATATGATGTTAGCTTTAGGTATGGGGTCTTATCGAAGTGTCTTATTT  
CATTTGATTACTCATGCTTATTCGAAAGCATTATTGTTTTTAGGATCCGGATCCGTTATTC  
ATTCATGGAAACTCTTGTGGATATTCTCCAAAGAAAAGCCAGAATATGGTTTTTTATG  
GGGGTTTTAACAAAGCATGTGCCAATTACCAAAACGTCTTTTTTATTCCGTACACTTTC  
TCTTTGTGGTATTCGGCCTCTTGCTTGTTTTTGGTCCAAGGATGAAATTATTAATGACT  
TGGTTGTAATCACCAATTTTTGCAATAATAGCTTGGTCTACAGCGGGATTAACCGCATT  
TATATGTTTCGAATCTATTTACTTACTTTTGAAGGACATTTAAACGTTCATTTTCAAAT  
AC-----AAAAATACCCCTTCTATTCAATATCTCTATGGGGTAAAGAAGGTTTCGAAAA  
GGATTAATAAA---TTATTAACTTTATTAACAATGAATTTTTTTTTCATTTGGCAATAAGAATA

TTTTTTCATATCCTTATGAATCAGATAATACTATGTTATTTCCCTATACTTGTATTGGTTCTAT  
TCACTTTGTTTCATTGGATTCCCTAGGAATTCCTTTCAATTTGGACATATTATCCAAATGGTT  
AACCCCGTCTATAAACCTTTTACATCAAATTTAAAT--TTAATAGATTGGGATGAATTTG  
CGAAAGATGCCATCTTTTCAGTTAGTATAGCTTTTTTTTGGAAATCTTTATAGCCTCCTTTTT  
ATATAAACCCGTTTATTCTCTTTGCAAATTTGGACTTAATTAACCTCGTTTGTATTTTT  
TTGGACAAAATAATAAATGGTATATATGGTTGGTCGTGTAATCGTGGTTACATAGATGCT  
TTTTATGCAACATTCTTTACTGGGGGGATAAGAGGATTGGCCGAATTGACTTCTTTTTTT  
GATAGACAAGTAATTGATGGAATTACAAATGGAGTTGGTGTTTTGGAGTTTTTTTTGTAGG  
CGAAAGTATCAAATCTGTAGGTGGGGGG---CGCATCTCTTCTTATCTTTTCTTGTATTTGT  
CTTATGTATCAATCTTTTTATTAATTTACTACATGGATTACCTGGACCAATACATGATTTT  
CTTTTAGTCTTTCTGGGATCGGGTCTTATATTAGGAGGTCTGGGAGTGGTATTACTTCCC  
AATCCAATTTATTCCGCCTTTTCATTGGGATTGGTTCTTGTGTTGTACATCTTTATTCTATAT  
TCTATCGAACTCCCATTTTGTAGCTGCTGCACAGCTCCTTATTTATGTAGGGGGCCATAAA  
TGTTTTAATTCTTTTTGCTGTGATGTTTCATGAATGGTTCCGAATATTACAAAGATTTTCAT  
CTTTGGACCATTGGAGATGGGGTTACTTCGATGGTTTGTACAAGTATTTTTGTTTCACTA  
ATTACTACTATTCCAGATACGTCATGGTACGGGATTATTTGGACTACAAAATCAAACCAG  
ATTATAGAGCAAGATTTGATAAGCAATAGTCAACAAATTGGGATTCATCTATCAACAGAT  
TTTTTTCTTCCATTTGAACTCATTCAATAATTCTATTAGTTGCGTTAATAGGTGCAATTG  
CCGTAGCTCGTCAAATGACTGCATCAGCTACACGAAATGACCTTATGATAGTCAATCTG  
GGTCCCTCAGCACCCATCAATGCACGGTGTCTTCGACTCATTGTTACTCTAGATGGTGA  
AGATGTTATTGACTGTGAACCAATATTGGGTTATTTACATAGAGGGATGGAAAAAATTG  
CGGAAAACCGAACAATTATACAGTATTTACCTTATGTAACACGTTGGGATTATTTAGCTA  
CTATGTTACAGAAGCAATAACTGTAAATGCACCAGAGCAGTTAGGCAATATTCAAGTA  
CCTAAAAGGGCCAGCTATATCAGAGTCATTATGTTGGAGTTAAGTCGTATAGCTTCGCAT  
TTGTTATGGCTTGGCCCCCTTCTGGCAGATATTGGCGCACAGACCCCTTCTTCTATATT  
TTTCGAGAAAGAGAATTGATATATGACCTATTCGAAGCTGCCACCGGTATGCGAATGAT  
GCATAATTATTTTCGGATCGGAGGAGTAGCTGCTGATTTACCTCATGGATGGATAGATAA  
ATGTTTGGATTTTTGTGATTTTTTTTTTAACAAGGGTTACTGAATATCAAAAACCTTATTAC  
ACGGAACCCTATTTTTTTAGAACGGGTTGAAGGAGTAGGCATTATTGGCGGAGCGGAG  
GCAATAAATTGGGGTTTATCAGGACCAATGCTACGAGCTTCCGGAATACAATGGGATCT  
TCGTAAAGTTGATCATTATGAGTCTTACGACGAATTTGATTGGGGGGTCCAATGGCAAA  
AAGAGGGGGATTCCCTAGCTCGTTATTTAGTACGAATCAGTGAAATGACAGAATCCATA  
AAAATAATTCAACAGGCTTTAGAAGGAATTCCGGGGGGGCCCTATGAGAATTTAGAAA  
TCCGACGTTTTGATAAAGTACGGGATCCTGAATGGAATGATTTTACTATCGATTATCA  
GTAAAAAACCTTCTCCGACTTTTGAATTATCAAAGCAAGAACTTTATGTGAGAGTCTGA  
AGCCCCAAGGGAGAATTGGGGATTTTTCTGATAGGGGATAGGGGTGTTTTCTTGG  
AGATGGAAAATCCGACCACCGGGTTTTATCAATTTGCAAATCCTTCCTCAGTTAGTTAA  
AAGAATGAAATTGGCTGATATTATGACGATACTAGGTAGCATAGATATAATTATGGGAGA  
AGTTGATCGTATGTTCTCTATGGTAACTGAGTTCATGAACTATGGTCAACAAACAGTAC  
GAGCTGCAAGGTATATTGGTCAAGGTTTCATGATTACCTTATCACACGCGAATCGTTTAC  
CTGTAACTATTCAAATACCCTACGAAAAATTGATTACATCGGAGCGTTTCCGCGGCCGA  
ATTCACTTTGAGTTTGATAAATGCATTGCTTGTGAAGTATGTGTTTCGTGTATGTCCTATA  
GATCTACCCGTTGTTGATTGGAAATTGGAAATGGATATTCGAAAGAAACGATTGCTTAA  
TTACAGTATTGATTTCCGAATCTGTATATTTTGTGGTAATTGCGTTGAGTATTGTCCAACA

AATTGTTTATCAATGACTGAAGAATATGAACTTTCTACGTATGATCGTCACGAATTGAAT  
TATAATCAAATTGCTTTGGGACGGTTACCGATGGCAGTAATTGACGATTACACAACCTCG  
AACTATTTTGAATTTG-----ATGCAGGGGTCGTTTGTCTG  
CTTGTTAGTCAAGCATGGGCTAATTCATAGATCTTTGGGGTTTGATTACCAAGGGATA  
GAGACTTTACAAATAAAACCCGAGGATTGGCATTCCATTGCTGTCATTTTATATGTATAT  
GGTTACAATTATCTACGCTCCCAATGCGCCTATGATGTAGCACCAGGTGGACTGTTAGCT  
AGTGTGTATCATCTTACGAGAATAGAGTATGGCGTGGATCAACCAGAAGAGGTATGCAT  
AAAAGTATTTGCCCCGAGGAGGAATCCTCGAATTCCGTCTGTTTTCTGGGTTTGGAAA  
AGTGTGGATTTTCAAGAACGGGAATCTTATGATATGTTGGGAATCTTTTATGCTACTCAT  
CCACGTTTCAAACGCATCTTAATGCCTGAAAGTTGGGTAGGATGGCCTTTACGTAAGGA  
TTATATTGCCCCCAATTTTATGAAATACAAGATGCTCAT-----

-----ATGAATTCCATCGAGTTTCCCTTACTTGATCGAACAACCCAAAATTCAG  
TTATTTCAACTACATCAAATGATCTTTCAAATTGGTCAAGACTCTCTAGTTTATGGCCG  
TTCTCTATGGTACTAGTTGTTGCTTCATTGAATTTGCTTCACTAATAGGCTCACGATTCG  
ACTTTGATCGTTATGGACTAGTCCCAAGATCGAGTCTTAGACAAGCGGACCTAATTTA  
ACAGCCGGAACAGTAACAATGAAAATGGCTCCTTCTTTAGTGAGATTATATGAGCAAAT  
GCCTGAACCAAAATATGTTATTGCTATGGGAGCATGTACAATTCAGGGGGGATGTTCA  
GTACTGATTCTTATAGTACTGTTCCGGGAGTCGATAAGCTAATTCCTGTCGATGTCTATT  
TGCCAGGCTGTCCACCTAAACCCGAAGCAGTTATAGATGCTATAACAAAACCTTCGTA  
AAAATATCTCGAGAAATCTATGAAGATAGAATTAAGTCTCAACGGGAGAATCGGTGTTT  
TACAACCAATCACAAGTTTCAGGTTGGGCGTAGTATTCATACTGGAAATTATGATCGAG  
GGTTCCTTTATCAACCGCCATTTACTTCAGAGATCCCTTCCGAAACATTTTTCAAATACA  
AAAGTTCAGTCTCGTCCCACGAATTAGTGAATATGCAAACCTAGAAAGACTTTTTCTTGG  
ATAAAGGAACAGATTACTCGATCCATTTCCGCATCGCTCATGATATATATCATAACTCGG  
ACATCCATTTCAAGTGCATATCCCATTTTTGCACAGCAGGGTTATGAAAATCCACGAGA  
AGCGACTGGGCGTATTGTATGTGCCAATTGCCATTTAGCTAATAAGCCCGTGGATATTGA  
AGTTCCACAAGCCGTAATTCCTGATACTGTATTTGAAGCAGTTGTTTCGAATCCCTTATGA  
TATGCAACTAAAACAAGTTCTTGCTAATGGTAAAAAGGGGGCTTTGAATGTAGGGGCT  
GTTCTTATTTTACCGGAGGGTTTTGAATTAGCTCCTGTTGATCGGATTTCTCCGAGATG  
AAAGAAAGGATAGGCAATCTTTCTTTTTCAGAGCTATCGCCCCACTAAAAAAATATTCT  
TGTGATAGGCCCTGTTCTGTTCAAAAATATAGTGAAATCACCTTTCTATTCTTTCCCC  
GGACCCCGCTACTAAGAAAGATGTTCACTTCTTAAAATATCCTATATACGTAGGCGGAA  
ACAGGGGAAGGGGTCAGATTTATCCCGACGGGAGCAAGAGTAACAATACGGTTTATAA  
TGCTACAGCAGCAGGTATAGTAGGCCAAAATAATACGAAAAGAAAAGGGGGGTTACGA  
AATAACCATAACGGATGCATCGGATGGACGTCAAGTGGTTGATATTATCCCTCCAGGGC  
CAGAACTTCTTGTTTCAGAAGGCGAATCTATCAAATTTGATCAACCATTGACGAGTAAT  
CCTAATGTGGGCGGATTTGGTCAGGGAGATGCAGAAATAGTACTTCAAGATCCATTACG  
TGTTCAAGGCCTTTTGTCTTCTTGGCATCTGTTATTTTGGCACAATCTTTTTGGTTCT  
TAAAAAGAAACAGTTCGAGAAGGTTCAATTGTCCGAAATGAATTTTCATGAGTAAAGTC  
TATGATTGGTTTGAAGAACGTCTCGAGATTCAGGCGATTGCGGATGATATAACTAGTAA  
ATACGTTCCCTCCTCATGTTAACATATTTTATTGTCTAGGAGGTATTACGCTTACTTGT  
TTAGTACAAGTGGCTACGGGGTTTGGCTATGACTTTTTTACTATCGTCCGACCGTTACTGAC  
GCTTTTGTCTCGGTTCAATATATAATGACTGAAGCTAATTTTGGTTGGTTAATCCGATCA



GTTTCATCGATGGTCGGCAAGTATGATGGTTCTAATGATGATCCTGCATGTATTTTCGTGTG  
TATCTCACCGGTGGATTTAAAAACCTCGCGAATTAACCTGGGTTACAGGTGTGGTTCT  
GGCTGTATTGACTGCATCTTTTGGGTGTAACCTGGTTATTCCTTACCTCGGGACCAAATTGG  
TTATTGGGCAGTGAAAATTGTAACAGGTGTACCCGAAGCTATTCCTGTAATAGGATCCC  
CTTTGGTAGAATTATTGCGTGGAAGTGCTAGTGTGGGACAATCCACTTTGACTCGTTTT  
TATAGTTTACACACTTTTGTATTGCCGCTTCTTACTGCCGTATTTATGTTAATGCACTTTC  
CAATGATACGTAAACAAGGTATTTCTGGTCTTTAATGGGAGTAACAAAAAACCTGAC  
TTGAATGATCCTGTATTAAGAGCTAAATTGGCTAAAGGTATGGGTCATAATTATTACGGA  
GAGCCCGCCTGGCCAATGATCTTTTATATATTTTTCCAGTAGTAATTCTAGGGACTATTG  
CATGTAACGTAGGCTTAGCGGTTCTAGAACCATCAATGATTGGTGAACCAGCAGATCCA  
TTTGCAACCCCTTTGGAAATATTACCCGAATGGTATTTCTTTCCCGTATTTCAAATACTTC  
GTACAGTACCCAATAAATTATTGGGTGTTCTTTTAATGGTTTCAGTACCCGCGGGATTAT  
TAACAGTACCCTTTTTAGAGAATGTTAATAAATTCCAAAATCCATTTTCGTGCTCCAGTAG  
CGACAACCGTCTTTTTGATTGGTACCGCAGTGGCCCTTTGGTTAGGTATTGGTGCAACA  
TTACCTATTGATAAATCCCTAACTTTAGGTCTTTTTATGATTGAAGTTTTTCTATTTGGAA  
TCGTGTTAGGTCTAATTCCTATTACTTTGGCTGGATTATTCGTAACCTGCATATTTACAATA  
CAGGCGTGGTGATCAGTTGGACCTTATGCCTACTATAACTAGTTATTTTCGTTTTTCTACT  
AGTGGCTTTAACTATAACCTCAGCTCTATTTATTGGTCTTAGCAAGATACGACTTATCAT  
GGATATAGTAAGTCTTGCTTGGGCTGCTTTAATGGTAGTCTTTACATTTTCCCTTTCACT  
CGTAGTATGGGGAAGAAGTGGACTCATGATTATTCGTTTCGCCGGAACCAGAAGTAAAA  
ATTTTTGGTAGATAGGGATCACATAAAAACCTTCTTTTCGAGGAATGGGCCAGACCGGGTCA  
TTTCTCAAGAACAACACTAGCTAAAGGCCCTGACACTACCACTTGGATCTGGAACCTACAT  
GCTGATGCTCACGATTTTCGATAGCCATAACCAGTGATTTGGAGGAGATCTCTCGAAAAGT  
CTTTAGTGCCCATTTTCGGCCAACCTCCATCATCTTTCTTTGGCTGAGTGGCATGTATTT  
CCACGGTGCTCGTTTTTTCTAATTATGAAGCATGGCTAAGCGACCCGACTCACATTGGGC  
CGAGTGCCAGGTGGTTTTGGCCAGTAGTGGGCCAAGAAATATTGAATGGTGATGTGGG  
TGGGGGCTTCCGAGGAATACAAATAACCTCCGTTTTTTTTTCAGATTTGGCGAGCATCTG  
GAATAACTAGTGAATTACAACCTCTATTGTACTGCAATTGGTGCATTGATCTTTGCAGCAT  
TAATGCTTTTTGCTGGTTGGTTTCATTATCATAAAGCTGCTCCAAAATTGGCTTGGTTTC  
AAGATGTAGAATCTATGTTGAATCACCATTTAGCGGGGCTACTAGGACTGGGGTCTCTC  
TCTTGGGCGGGACATCAAGTACATGTATCTTTACCGATTAACCAGTTTCTAAACGCTGG  
AGTAGATCCTAAAGAGATACCACTTCCTCATGAATTTATCTTGAATCGGGATCTTTTGGC  
TCAACTTTATCCCAGTTTTGCTGAGGGAGCAACCCCTTTTTTCACCTTGAATTGGTCAA  
AATATGCGGACTTTCTTACTTTTCGCGGAGGATTAGATCCAGTAACTGGGGGTCTATGG  
CTGACCGATATTGCACACCATCATTAGCTATTGCAATTCTTTTCCCTGATAGCAGGTCATA  
TGTATAAGACCAACTGGGGCATTGGTCATGGCCTAAAAGATATTTTAGAAGCTCATAAA  
GGTCCATTTACAGGTACAGGGCCATAAAGGCCTATATGAGATCCTAACAACGTCATGGCA  
TGCTCAATTATCTTAACTTAGCTATGTTAGGCTCTTTAACCATTGTTGTAGCTCACCAT  
ATGTATTCCATGCCCCCTTATCCGTATCTAGCTACTGACTATGGTACACAATTGTCGTTGT  
TCACACATCACATGTGGATTGGTGGATTTCTCATAGTTGGCGCTGCTGCGCATGCAGCC  
ATTTTTATGGTAAGAGACTATGATCCAACCTACTCGATACAACGATCTATTAGATCGTGTC  
CTTAGGCATCGCGATGCAATCATATCACATCTCAACTGGGCATGTATATTTCTAGGCTTT  
CACAGTTTTGGTTTTGTATATTCATAATGATACCATGAGCGCTTTAGGGCGTCTCAAGAT  
ATGTTTTTCAGATACCGCTATCCAATTACAACCCGCTTTTGCTCAATGGATACAAAACACC

CATGCTTTAGCACCTGGTGCAACGGCTCCTGGTGCAACAACAAGCACCAGTTTAACTT  
GGGGGGCGGTGATTTAGTAGCAGTGGGTGGCAAAGTAGCTTTGTTACCTATTCCATTA  
GGAAGTGCAGATTTTTTGGTACATCATATTCATGCATTTACGATTCATGTGACGGTATTG  
ATACTTCTGAAGGGTGTCTATTTGCTCGTAGCTCCCGTTTGATACCGGATAAAGCAAAT  
CTTGGTTTTTCGTTTTCTTGTGATGGACCTGGAAGAGGGGGAACGTGTCAAGTATCGG  
CTTGGGATCATGTCTTCTTAGGACTATTCTGGATGTACAATGCAATTCGGTAGTTATATT  
CCATTTAGTTGGAAAATGCAGTCAGATGTTTGGGGCAGTATAAGTGATCAAGGGGTA  
GTAAGTGCAGATTTTGGTACATCATATTCATGCATTTACGATTCATGTGACGGTATTG  
CCGCGATTTCTTATGGGCACAAGCATCCCAGGTAATTCAGTCTTATGGTTCTTCATTATC  
TGCATATGGACTTTTTCTTCCAGGTGCTCATTTTTGTATGGGCTTTTAGTTAATGTTTCTA  
TTCAGTGGACGTGGTTATTGGCAAGAACTTATTGAATCCATCGTTTGGGCTCATAATAAA  
TTAAAAGTTGCTCCTGCTACTCAGCCGAGAGCCTTAAGCATTGTACAAGGACGTGCTGT  
AGGAGTAACCCATTACCTTCTGGGTGGAATTGCCACAACATGGGCGTTCTTCTTAGCAA  
GAATTATTGCAGTAGGAATGGCATTAAAGATTTCCAAGGTTTAGCCAAGGCTTAGCTCAG  
GACCCCACTACTCGTCGTATTTGGTTTGGTATTGCTACCGCACATGACTTCGAGAGTCA  
TGATGATATTACTGAGGAACGTCTTTATCAGAATATTTTTGCTTCTCACTTCGGGCAATT  
AGCAATAATTTTTCTGTGGACTTCCGAAATCTGTTTCATGTAGCTTGGCAAGGAAATT  
TTGAGTCATGGGTACAGGACCCTTTACACGTAAGACCTATTGCTCATGCAATTTGGGAT  
CCTCATTTTTGGTCAACCGGCTGTAGAAGCTTTTACTCGAGGGGGTGCTCTTGGCCCAGT  
GAATATCGCTTATTCTGGTGTATTATCAATGGTGGTATAACAATCGGTTTACGCCTAATGA  
AGATCTTTATACTGGAGCTCTTTTTCTATTATTTCTTTCTACCATATCCTTAATAGCAGGTT  
GGTTACACCTACAACCGAAATGGAAACCGAGTGTTTCGTGGTTCAAAAATGCCGAATC  
TCGTCTGAATCATCATTGTGTCAGGACTTTCGGCGTAAGTTCCTTGGCTTGGACAGGGC  
ATTTAGTACATGTGGCTATTCCTGCATCCAGAGGGGAGTACGTTTCGATGGAATAATTTCT  
TAGATGTATTACCACACCCCAAGGGTTAGGCCACTTTTTACAGGTCAATGGAATCTT  
TATGCTCAAAACCCCGACTCAAGTAGTCATTTATTTGGTACCTCCCAAGGAGCAGGAAC  
TGCCATTCTAACCTTCTCGGGGGATTCCACCCACAAACGCAAAGTTTATGGTTGACTG  
ATATGGCTCATCATCATTAGCTATTGCATTTATTTTTCTCGTTGCTGGTCATATGTATAGA  
ACTAACTTCGGTATTGGGCACAGTATGAAAGATCTTTTAGATGCACATATTCCCTCCGGG  
GGGGCGATTGGGACGTGGGCATAAGGGTCTTTATGACACAATCAATAATCCCTTCATT  
TTCAATTAGGCCTTGTCTAGCTTCTTTAGGGTTATTACTTCTTGGTAGCTCAACACA  
TGTAATCTTTACCTGCTTATGCATTCATAGCACAAGACTTTACTACTCAAGCTGCGTTAT  
ATACTCATACCAATACATCGCAGGATTCATCATGACAGGAGCTTTTGTCTCATGGAGCTA  
TATTTTTATTAGAGATTACAGTCCGGAACAGAATGAAGATAATGTATTGGCAAGAATG  
TTAGACCATAAAGAAGCTATCATATCTCATTAAAGTTGGGCCAGCCTCTTTCTGGGGTTC  
CATACCTTGGGACTTTATGTTTATAATGATGTCATGCTTGCCTTTGGTACTCCGGAGAAA  
CAAATCTTGATCGAACCTATATTTGCTCAATGGATACAATCCGCACATGGTAAACTTCA  
TATGGTTTTCGATGTCTTTTATCTTCAACGAATGGCCCGGCATTTAATGCGGGTCAAGC  
ATATGGTTGCCCGGTTGGTTAAATGCTGTTAATGAG-----AATAGTAATTCATATTCTTA  
ACAATAGGTCCGGGAGACTTTTTAGTTTATCATGCTATTGCTCTGGGTTTACATACGACT  
ACATTGATCTTAGTAAAGGGTGTCTTAGATGCACGTGGTTCCAAGTTAATGCCAGATAA  
AAAGGATTTCCGGTTATAGTTTTCCGTGCGACGGCCCGGACGGGGCGGTACTTGTGATA  
TTTCGGCTTGGGACGCATTTTATTTGGCAGTTTTTTGGATGTTAAATACTATCGGATGGG  
TTACTTTTTATTGGCATTGGAAGCATATCACATTATGGCAGGGTAACGTTTTCGCAGTTA

ATGAATCTTCCACTTATTTGATGGGATGGTTAAGAGATTATTTATGGTTAAACTCTTCAC  
AACTTATCAATGGATATAATCCTTTTGGTATGAATAGTTTATCGGTCTGGGCGTGGATGTT  
CTTATTTGGACATCTTGTTTGGGCTACTGGATTTATGTTCTTAATTCCTGGCGTGGCTAT  
TGGCAAGAATTGATTGAAACTTTAGCATGGGCTCATGAACGCACACCTTTGGCCAATTT  
GATTCGTTGGAGAGATAAACCGGTGGCCCTTTCCATTGTGCAAGCACGATTGGTTGGAT  
TAGCCCACTTTTCTGTAGGTTATATATTCACCTATGCGGCTTTCTTGATTGCCTCTACATC  
AGGCAAATTTGGTATGTCACATTCAGTAAAGATTTATGATACATGTATAGGATGTACTCA  
ATGTGTCCGAGCCTGCCCCACCGATGTATTAGAAATGATACCTTGGGACGGATGTAAAG  
CTAAACAAATTGCTTCTGCTCCACGAACAGAGGACTGTGTGCGTTGTAAGAGATGTGA  
ATCCGCCTGTCCAACCGATTTCTTGAGTGTTCGAGTTTCTTTATGGCATGAAACAACCTC  
GCAGCATGGGTCTAGGTTATATGACAACCTTTGACTTTCCCTCTGTGTTGGTGCCTTTAG  
TAGGCCTAGTATTTCCGGCAATGGCAATGGCTTCTTTATCTCTTCATGTTCAAAAGAATA  
AGACTGTTATGCGAGATCTAAAACATATCTCTCCGTGGCACCGGTATTAAGTACTCTAT  
GGTTCGGGTCTTTAGCAGGTCTATTGATAGAGATTAATCGTTTTTTCCAGATGCGTTGA  
CATTCCCCTTTTTT-----ATGACTGCAATTTTAGAGAGACGCGAAAGCGAAAGCCTATGG  
GGTCGCTTCTGTAACCTGGATAACCAGCACCGAAAACCGTCTTTACATTGGATGGTTTGG  
TGTTTTGATGATCCCTACCTTATTGACCGCAACTTCTGTATTTATTATCGCCTTCATTGCT  
GCTCCTCCAGTAGATATTGATGGTATTCGTGAACCTGTTTCCGGATCTCTACTTTATGGC  
ACAATATTATCTCTGGTGCCATTATCCTACTTCTGCAGCTATAGGTTTGCACCTTTTACC  
CAATCTGGGAAGCGGCATCCGTTGACGAATGGTTATACAACGGTGGTCCTTATGAACTA  
ATCGTTCTACACTTTTTACTTGGTGTAGCTTGTTACATGGGTGCTGAGTGGGAGCTTAGT  
TTCCGTCTGGGTATGCGACCTTGGATTGCTGTTGCATATTCAGCTCCTGTTGCAGCTGCT  
GCTGCTGTTTTCTTGATCTACCCAATCGGTCAAGGAAGTTTTTCTGATGGTATGCCTCTA  
GGAATCTCTGGTACTTTCAATTTTCATGATTGTATTCCAGGCTGAACACAACATCCTTATG  
CACCCATTTACATGTTAGGCGTAGCTGGTGTATTCGGCGGCTCCCTATTCAGTGCTATG  
CATGGTTCCCTGGTAACTTCTAGTTTGATCAGGGAAACCACAGAAAATGAATCTGCTAA  
TGAAGGTTACAGATTTCGGGCAAGAGGAAGAACTTATAATATCGTAGCCGCTCATGGTT  
ATTTTGGTCGATTGATCTTCCAATATGCTAGTTTCAACAACCTCTCGTTCTTTACATTTCTT  
CCTAGCTGCTTGGCCTGTAGTAGGTATCTGGTTCACTGCTTTAGGTATTAGCACTATGGC  
TTTCAACCTAAATGGTTTCAATTTCAACCAATCTGTAGTTGATAGTCAAGGCCGTGTAAT  
TAATACTTGGGCTGATATCATTAAACCGTGCTAACCTTGGTATGGAAGTTATGCATGAACG  
TAATGCTCATAACTTCCCTCTAGACCTAGCTGCTGTGCAAGCTCCATCTACAAATGGAAT  
GGTTTTGCCTTGGTATCGTGTTCATAACCGTTGATTGAATGATCCCGGCCGGTTGCTTTC  
TGCCATATAATGCATACAGCTCTAGTTGCTGGTTGGGCGGGTTCGATGGCTCTATATGA  
ATTAGCAGTTTTTGTATCCCTCTGACCCTGTTCTTGATCCAATGTGGAGACAGGGTATGTT  
CGTTATAACCTTCATGACTCGTTTAGGAATAACCAATTCATGGGGCGGTTGGAGTGTCA  
CA---GGAGGGGCTATACCGAATCCGGGTATTTGGAGTTACGAAGGTGTGGCCGGGGCA  
CATATTGTGTTTTCTGGCTTGTGCTTCTTGGCAGCTATCTGGCATTGGGTTTATTGGGAT  
CTAGAAATTTTTTCTGATGAACGTACAGGAAAACCTTCTTTGGATTTGCCCAAGATCTT  
TGGAATTCATTTATTTCTCGCAGGGGTGGCTTGCTTTGGTTTTGGTGCATTTTCATGTAAC  
AGGCTTGTATGGTCTGGAATATGGGTGTCTGATCCTTATGGACTAACGGGAAAAGTAC  
AATCTGTAAATCCAGCGTGGGGTGTGGAAGGTTTTGATCCTTTTGTTCGGGAGGAATA  
GCCTCTCATCATATTGCAGCAGGGACATTGGGTATATTGGCCGGTCTATTCCATCTTAGT  
GTCCGCCCGCCCCAACGTCTATACAAAGGATTGCGTATGGGCAATATTGAAACCGTCT

TTCCAGTAGTATCGCTGCTGTCTTTTTTGCAGCTTTTGTGTTGCCGGAAC TATGTGGTA  
TGGTTCAGCAACTACCCCGATCGAATTATTTGGGCCTACTCGTTATCAATGGGATCAGG  
GGTACTTCCAGCAAGAGATATATCGAAGAGTTAGTGCTGGGCTAGCCGAAAATCAAAG  
TTTATCAGAAGCTTGGTCTAAAATTCCTGAAAAATTAGCTTTTTATGATTACATCGGCAA  
TAATCCGGCAAAGGGGGATTATTCAGAGCGGGTTCAATGGATAACGGGGATGGAATA  
CGGTTGGATGGTTAGGACATCCTATCTTTAGAGATAAAGAAGGGCGTGAAC TTTTTGT  
ACGTCGTATGCCTACCTTTTTTGA AACCTTTCGGTTCGTTTTTGGTAGATGGCGACGGAA  
TTGTTAGAGCCGATGTTCC TTTTTCGAAGGGCAGAATCGAAGTATAGTGTCGAACAAGT  
AGGTGTA ACTGTTGAGTTCTACGGCGGCGAACTCAACGGAGTCAGTTATAGTGATCCT  
GCTACTGTGAAAAAATATGCTAGACGTGCTCAATTGGGTGAAATTTTTGAATTAGATCG  
TGCTACTTTGAAATCCGATGGTGT TTTTCGTAGCAGTCCGAGGGGTTGGTTTACTTTTG  
GACATGCTTCTTTTGCTTTGCTCTTCTTTTTTGGACATATTTGGCATGGTGCTAGAACCT  
TGTTCA GAGATGTTTTTGTCTGGTATTGATCCAGATTTGGATGCTCAAGTAGAATTTGGA  
GCATTCCAAA AACTGGGAGATCCA ACTACAAGAAGACAAGTAGTCATGAAAACCTTAT  
ATTCCCTGAGGAGGTTCTACCCCGTGGAACGCTCTTTAATGGAAC TTTAGCTTTAGCT  
GGTCGTGACCAAGAAACCACTGGTTTCGCTTGGTGGGCCGGGAATGCCCGGCTTATCA  
ATTTATCCGGTAAACTACTCGGGGCTCATGTAGCCCATGCCGGATTAATTGTATTCTGGG  
CCGGAGGAATGAACCTATTTGAAGTGGCTCATTTCGTACCAGAGAAGCCTATGTATGAA  
CAAGGATTAATTTTACTTCCCCACCTAGCTACTCTAGGTTGGGGGGTAGGTCCTGGTGG  
GGAAGTTATAGACACTTTTCCATACTTTGTATCTGGAGTACTTCATTTAATTTCTCTGC  
AGTATTGGGCTTTGGTGGTATTTATCATGCACTTCTAGGGCCTGAGACGCTTGAAGAAT  
CTTTTCCATTCTTCGGTTATGTATGGAAAGATAGAAATAAAATGACTACAATTTTAGGTA  
TTCACTTAATCTTATTAGGTATAGGTGCTTTTCTTCTAGTATTCAAGGCTCTTTATTTTGG  
TGGCGTATATGATACCTGGGCTCCGGGGGGGGGAGATGTAAGAAAAATTACCAACTTG  
ACCCTTAGCCCAAGTATTATATTTGGTTATTTACTAAAATCGCCCTTTGGAGGGGAAGGA  
TGGATTGTTAGTGTAGATGATTTGGAAGATATAATCGGAGGACATGTATGGTTAGGTCC  
ATTTGTATACTTGGTGAATCTGGC ATATCTTAACCAAACCTTCGCATGGGCTCGACGC  
GCACTTGTGTGGTCTGGGGAGGCTTACTTATCTTATAGTTTAGGGGCTTTATCCGCTTTT  
GGTTTCATTGCTTGTGTTTTGTCTGGTTCAATAATACCGCCTATCCTAGCGAGTTTAC  
GGACCCACTGGACCAGAAGCTTCCCAAGCTCAAGCATTACTTTTCTAGTTAGAGACC  
AACGCCTTGGGGCTAACGTGGGATCCGCTCAAGGACCTACTGGTTTAGGTAAATATTTA  
ATGCGTTCCCCGACCGGAGAAGTCATTTTGGAGGAGAACTATGCGTTTTTGGGATCT  
GCGTGCCCTTGGTTAGAACCTCTAAGGGGTCCAAATGGGTTGGACTTGAGTAGGCTG  
AAAAAAGACATAACCTTGGCAAGAACGGCGTTCTGCAGAATATATGACCCATGCTC  
CTTAGGTTCTTTAAATCTGTGGGTGGCGTAGCTACCGAGATCAATGCAGTCAATTATG  
TCTCTCCTAGAAGTTGGTTAGCTACTTCTCATTTTGTCTAGGATTCTTCTTGTTCGTAG  
GTCATTTGTGGCACGCGGGAAGGGCTCGTGCAGCTGCAGCAGGTTTTGAAAAGGAA  
TTGATCGTGATTTTGAACCTGTTCTTTCCATGACCCCTCTTAATATGACTATAGCCCTTG  
GTAAATTTACCGAAGACGAAAAGGATTTATTTGATATTATGGATGACTGGTTACGGAGG  
GACCGTTTCGTTTTTGTAGGTTGGTCCGGTTTATTGCTCTTTCCTTGTGCCTATTTTCGCTT  
TAGGGGGTTGGTTCACAGGTACAACCTTTGTA ACTTCATGGTATACCCATGGATTGGCC  
AGTTCCTATTTGGAAGGCTGCAATTTCTTA ACTGCCGCAGTTTCTACTCCTGCTAATAGT  
TTAGCACATCTTTATTGTTACTATGGGGTCTGAAGCACAAGGGGATTTTACTCGTTGG  
TGTC AATTAGGCGGTCTGTGGACTTTTTGTTGCTCTCCATGGCGCTTTCGGACTAATAGG

TTTCATGTTACGTCAATTCGAACTTGCTCGATCTGTTCAATTGCGACCTTATAATGCAAT  
CGCATTCTCTGGTCCAATTGCTGTTTTTGTCTGTATTCTTGATTTATCCACTAGGTCCAG  
TCTGGTTGGTTCTTTGCCCCTAGTTTTGGTGTAGCAGCTATATTTTCGATTCATCTCTTTT  
TTCAAGGATTTATAATTGGACGTTAAACCCATTTCATATGATGGGAGTTGCCGGGGTAT  
TGGGCGCTGCTTTGCTATGCGCTATTCATGGTGCTACTGTAGAAAATCTTTATTTTGAAG  
ATGGTGATGGTGCAAATACATTCCGTGCTTTTAACCCAACTCAAGCTGAAGAAACTTAT  
TCAATGGTCACCGCTAACCGCTTTTGGTCCCAAATCTTTGGGGTTGCTTTTTCCAATAA  
ACGTTGGTTACATTTCTTTATGTTATTTGTACCAGTAACCGGTTTATGGATGAGTGCTCTT  
GGAGTAGTCGGTCTGGCCCTGAACCTACGTGCCTATGACTTCGTTTCTCAGGAAATTCG  
TGGGCGGAAGATCCTGAATTTGAGACTTTCTACACCAAAAATATTCTTTAAACGAAG  
GTATTCGTGCTTGGATGGCAGCTCAAGATCAGCCTCATGAAAACCTTATATTCCCTGAG  
GAGGTTCTACCCCGTGGAACGCTCTTATGTCTGGAAACACAGGAGAACGTTCTTTTG  
CTGATATTATTACCAGTATTCGTTACTGGGTCATTCATAGCATTACTATACTCCCTATT  
ATTGCGGGTTGGTTATTCGTCAGCACCGGTTTAGCTTACGATGTGTTTGAAGCCCTCG  
GCCAAACGAGTATTTACAGAGAACCGACAAGGAATTCCATTAATAACTGGCCGTTTT  
GATCCTTTGGAACAACTCGATGAATTTAGTAGATCTTTTATGACCATAGATCGAACCTAT  
CCAATTTTTACAGTGCATGGTTGGCTGTTACGGCCTAGCTGTACCTACCGTTTCTTTT  
TTGGGGTCAATATCAGCAATGCAGTTCATCCAACGAATGGCTACACAACTGTTGAGA  
ACGGTTCTAGA---TCTCGTCCAAAACCAACTACTGTAGGGAATTTATTGAAACCATTGA  
ATTCGGAATATGGTAAAGTAGCTCCTGGATGGGGAACGACTCCTTTGATGGGTGTCCGA  
ATGGCCCTATTTGCGATATTTCTATCTATTTTGGAGATTTATAATTCTCCGTTTTATT  
GGATGAAATTTCAATGAATATGCTTACTCTCAAACCTTTTCGTTTACACAGTAGTGATATT  
CTTTGTTTCTCTCTTTATCTTTGGATTCCATCTAATGATCCGGGGCGTAATCCTGGACGT  
GAAGAAATGGCTGATACTACTGGAAGGATTCTCTTTGGATAATAGGTACTGTAGCTGG  
TATTCTTGTGATTGGTTAATAGGTATTTTTTTTTTATGGTTCATATCCGGATTGGGTTT  
CCCTGATGCTTAATATCTTTAGTTTGATCTGTATCTGTCTTAATTCTGCCCTTATTTCGAGT  
AGTCTTTTCTTCGCCAAATTGCCGAGGCCTATGCTTTTTTGAATCCAATCGTAGATCTT  
ATGCCAGTCATACCTTTGTTCTTTTTTCTCTTAGCCTTTGTTTGGCAAGCTGCTGTAAGT  
TTTCGAATGACACAATCAAACCCGAACGAACAAAATGTTGAATTGAATCGTACCAGCC  
TCTACTGGGGTTTACTCATTTTTGTACTTGCTGTTTTATTTTCCAATTATTTCTTCAAT  
ATGGAAGTAAATATCTTGCATTTATTGCTACTGCACTGTTTATTCTAGTTTCTACTGCTT  
TTCTGCTTATCATTACGTAAAAACAGAAAGTCAAATAAAAATGGAACAGCAACCCT  
AGTCGCCATCTTATATCTGGTTTACTTGTAAGTTTTACCGGGTACGCCTTATATACCGCT  
TTTGGGCAACCTTCTCAACAATAAGAGATCCATTTCGAGGAACATGGGGACATGGAAG  
CATGGTTTATACATTCCTCTTAGTCTCGACTCTAGGTATAATTTTTTTCGCTATCTTTTTT  
AGAGAACCGCCTAAAGTTCCAACATAAAAAG-----ATGACTCTTGCTTTCCAATTAGCTG  
TTTTTGCATTAATTGCTACGTCAATCTTATTAATTGGCGTACCCGTTGTATTTGCTTC  
TCCTGATGGTTGGTCAAGTAACAAAATGTTGTATTTTCCGGTACATCATATGGATTGG  
ATTAGTCTTTCTGGTGGGTATCCTTAATTCTCTCATCTCT-----ATGTCACCAC  
AAACAGAGACTAAAGCAAGTGTGGATTCAAAGCTGGTGTAAAGATTACAAATTGAC  
TTATTATACTCTGACTATGATCCCAAAGATACTGATATCTTGGCAGCATTCCGAGTAAC  
TCCTCAACCTGGAGTTCCAGCTGAAGAAGCAGGGGCCGCGGTAGCTGCCGAATCTTCT  
ACTGGTACATGGACAACCTGTGTGGACCGATGGACTTACTAGCCTTGATCGTTACAAAG  
GGCGATGCTACAAAATAGAGCCCGTTGCTGGAGAAGAACTCAATTTATTGCTTATGTA

GCTTACCCATTAGACCTTTTTGAAGAAGGTTCTGTTACTAACATGTTTACTTCCATTGTA  
GGTAATGTATTTGGGTTCAAAGCCCTGCGTGCTCTACGTCTGGAAGATCTGCGAATCCC  
TGTTGCTTATGTTAAACTTTCCAAGGCCCGCCTCATGGCATCCAAGTTGAGAGAGATA  
AATTGAACAAGTATGGTCGTCCCCTGTTGGGATGTACTATTAACCTAAATGGGGTTAT  
CTGCTAAAACTACGGTAGAGCGGTTTATGAATGTCTCCGGGGTGGACTTGATTTTACC  
AAAGACGATGAGAACGTGAACTCACACCATTATGCGTTGGAGAGATCGTTTCTTATT  
TTGTGCCGAAGCACTTTATAAAGCACAGGCTGAAACAGGTGAAATCAAAGGGCATTAC  
TTGAATGCTACTGCGGGTACATGCGAAGACATGATGAAAAGGGCTGTATTTGCCAGAG  
AATTGGGAGTTCCTATCGTAATGCATGATTACATAACAGGGGGATTCACCGCAAATACT  
ACCTTGGCTCATTATTGCCGAGATAATGGCCTACTTCTTACATCCACCGCGCAATGCAT  
GCAGTTATTGATAGACAGAAGAATCATGGTATGCACTTTCGTGTACTAGCTAAAGCGTT  
ACGTATGTCTGGTGGAGATCATATTTACTCCGGTACCGTAGTAGGTAACCTTGAAGGGG  
AAAGAGACATCACTTTGGGCTTTGTTGATTTACTGCGTGATGATTTTCATTGAAAAAGAT  
CGAAGTCGCGGTATTTATTTACCCAAGATTGGGTCTCTTACCAGGTGTTCTGCCCGT  
GGCTTCGGGGGTATTACGTTTGGCATATGCCTGCTCTGACCGAGATCTTTGGGGATG  
ATTCCGTACTACAGTTCGGTGGAGGAACTTTAGGACACCCTTGGGGAAATGCACCCGG  
TGCCGTAGCTAATCGAGTAGCTCTAGAAGCATGTGTACAAGCTCGTAATGAGGGACGT  
GATCTTGCTCGTGAAGGTAATGAAATTATCCGCGAGGCTGCTAAATGGAGCCCTGAACT  
AGCTGCTGCTTGTGAGGTATGGAAGGAGATCAAATTTGAATTTGAAGCAGTGGATATTT  
TGGATGTTATGGCGATACATTTATACAAAACCTTCTACCCCGAGCACACGCAATCGAGCC  
GTAGACAGTCAAGTGAATCCAATCCACGAAATAATTTGATCTATGGACAGCATCATTG  
TGGTAAAGGTCGTAATGCCAGAGGAATCATTACCGCAGGGCATAGAGGGGGAGGTCAT  
AAGCGTCTATACCGTAAAATCGATTTTCGACGGAATGAAAAAGACATATATGGTAGAAT  
CGTAACCATAGAATACGACCCTAATCGAAATGCATACATTTGTCTCATACTATGGGGA  
TGGTGAGAAGAGATATATTTTACATCCCAGAGGGGCTATAATTGGAGATACCATTGTTTC  
TGGTACAGAAGTTCCTATAAAAATGGGAAATGCCCTACCTTTGACCGATATGCCCTTAG  
GCACGGCCATACATAACATAGAAATCACACGTGGAAAGGGTGGACAATTAGCTAGAGC  
AGCGGGTGTGTAGCGAACTGATTGCAAAGAGGGGAAATCGGCCACATTAATAA  
CCTTCTGGGGAGGTCCGTTTGATATCCAAAACTGCTCAGCAACGGTCGGACAAGTGG  
GGAATGTTGGGGTGAACCAGAAAAGTTTGGGTAGAGCCGGATCTAAGCGTTGGCTAG  
GTAAGCGTCCTGTAGTAAGAGGAGTAGTTATGAACCCTGTAGACCATCCCCATGGGGG  
TGGTGAAGGGAGGGCCCCAATTGGGAGAAAAAACCCACAACCCCTTGGGGTTATCC  
TGCATTGGGAGAAGAAGTAGAAAAAGGAATAAATATAGTGATAATTTGATTCTTCGTC  
GCCGTAGTAAAATGATTCAACCTCAGACCCTTTTGAATGTAGCGGATAACAGCGGGGC  
TCGAGAATTGATGTGTATTTCGAATCATAGGAGCTAGC---AATCGTCGATATGCTCATATCG  
GTGACGTTATTGTTGCTGTGATCAAAGAAGCAGTGCCAAACATGCCCTAGCAAGATC  
AGAAGTGGTCAGAGCTGTAATTGTACGTACTTGTAAAGAACTCAAACGTGATAACGGT  
ATGATAATACGATATGATGACAATGCTGCGGTTGTCATCGATCAAGAAGGAAACCCAAA  
GGAACTCGGGTTTTTGGTGCAATTGCCCGGGAATTGAGACAGTTAAATTTACTAAAA  
TAGTTTCATTAGCTCCGGAGGTATTAATGCTTAGTCCCAAAGAACCAGATTCCGTA  
CAACATAGAGGAAGAATGAAGGGAATATCTTATCGAGGTAATCATATTTCTTTCGGTAA  
ATATGCTCTTCAGGCACTTGAACCCGCCTGGATCACATCTAGACAAATAGAAGCAGGTC  
GACGAGCAATGACACGAAATGCACGACGTGGTGGAAAAATATGGGTACGTATATTTCC  
AGACAAACCGGTTACAGTAAGACCCGCAGAAACACGTATGGGTTCCGGGAAAGGATC

CCCTGAATATTGGGTAGCTGTTGTTAAACCAGGTCTGAATCCTTTATGAAATGGGTGGAG  
TAACAGAAAATATAGCCAGAAAGGCTATTTCAATAGCATCGTCTAAAATGCCTATACGA  
ACTCAATTCATTATTTTCGGCAATGACCAGAATTAGACGGGGATATATAGCTCGGAGACG  
TAGAACAAAAATTCGTTTATTTGCATCAAGCTTTTCGAGGGGCTCATTCAAGGCTTACTC  
GAACAATTACTCAACAGAAAATAAGAGCTTTGGTTTCGTCTCATCGGGATAGGGATCG  
GCAAAGAGAAAATTTTCGTCTGTTTGTGGATCACTCGAATAAACGCAGTAATTCGTGAA  
GGG---GGGTATCCTATAGTTATAGTAGATTAATACATGATCTGTATAAGAAACAGTTACT  
TCTTAATCGTAAAATACTTGCACAAATAGCTATATCAAATAAAAATTGTCTTTATATGATT  
TCCAATGAGATCATAAAGAAGTAGATTGGAAAGAATCCACCGGAATAATTATGTTAAA  
GACAGTATATGCTTTAGGTCAATATTTATCTATGTCTGCTCATAAAGCGCGAAGAGTAAT  
AGATCAAATTCGTGGACGTTCTTATGAAGAAACACTTATGATACTAGAACTCATGCCTTA  
TCGAGCATGTTATCCCATTTTTAAATTGGTTTATTCTGCAGCAGCAAATGCTAGTTACAA  
TATGGATTCCAACGAATCAAATTTAGTTATTAGTAAAGCTGAAGTCAGCGAGGGTACTA  
TCGTGAAGAAATTAACCTCGAGCTCGAGGACGTAGTTTTCCGATAAAAAGACCTAC  
CTGCCATATAAGTATTGTAGTGAAAGATATATCCTTAGATGGGGGAGTATGGGACAAA  
AAATGGATGGAATCAAATATGCAGTATTTACAGACAAAAGTATTCGGTTATTGGGGAAA  
AAT--CAATATACTTCTAATGTCTGAATCAGGATCAACTAGGACAGAAATAAAGCATTGGG  
TCGAACTCTTCTTTGGTGTCAAGGTAATAGCTATGAATAGTCATCGACTTCCGGGAAGG  
GGTAGAAGAATGGGACCTATTATGGGACAGACAATGCATTACAGACGTATGATCATTAC  
GCTTCAACCGGGTATTCTATTCCACCTCTTAGAAAGAAAAGAACTATGGCAGTTCCAA  
AAAACGTACTTCTATATCAAAAAAGCGTATTCGTAAAAATATTTGGAAAAGAAAGGG  
ATATTGGGCAGCCTTAAAAGCGTTGTCATTAGGGAAATCTCTTTCTACTGGAAATTCAA  
AAGGTTTTTTGTGCGACAAACAAATAAGATGGCCAAGGGGAAGGATGTCCGAATAAC  
CGTTATTTTGAATGTACCAGTTGTGTTCGAAACGGTGTAAAT-----AAGGTATCAACGG  
GTATTTCCAGATATATTACTCAAAGAACCAGGCACAATACGCCTAATCGATTGGAATTGA  
GAAAATTCTGTCCATATTGTTACAAACATACGATTCATGGGGAGATAAAGAAAATGAAA  
ATAAGAGCTTCTGTTTCGTAATAATTTGTGAAAAATGTCTGACTAATTCGTAGGCGGGGACG  
AATTATAGTAATTTGTTCCAACCCAAGACATAAACAAGACAGGGGATGGTTCAAGAG  
AAAGTAAGAGTATCTACTCGGACACTACAGTGGAAGTGTGTTGAAGCAAGAGCGGAC  
AGTAAGCGTCTTTATTATGGACGCTTTATTCTGTCTCCACTTATGAAAGGTCAAGCTGAT  
ACAATAGGCATTGCAATGCGAAGAGCTTTGCTTGGAGAAATAGAAGGAACATGTATCA  
CACGTGCAAAATCTGAG-----AAAATACCACACGAATATTCTACCCTAGTGGGTATTCAA  
GAATCAGTACATGAAATTTAATGAATTTGAAAGAAATTATATTGAAAAGTAATCTATAT  
GGAACCTGCGACGCGTCTATTTGTATTAGGGGTCCTGGATATGTAAGTCTCAAGATATC  
ATCTCACCGCCTTATGTAGAAATCGTTGACAATACACAGCATATAGCTAGCTTGGCGGA  
ACCAATTGATTTGTGTATTGGATTACAAATAGAGAGGAATCGCGGATATCTTATAAAAAC  
GCCAATAACAACCTTTGATGGAAGTTAT-----CCTATAGATGCTGTATTTCATGCCTGTTTCG  
AAACGCGAATCATAGTATTCATTCTTATGGGAATGGGAATGAGAAACAAGAGATACTCT  
TTCTTGAAATATGGACAAATGGAAGTTTAACTCCTAAAGAAGCACTTCATCAAGCCTCC  
CGGAATTTGATTGATTTATTTATTTCCCTTTTTACATACAGAAGAAGAA-----AACTTACAT  
TTAGCGGACAATCAA---CACACGGTTCCTTTACCCCTTTTACTTTTCATGAGAAATTGA  
CT---AAACTAAGAAAAACAACAAAAA---AAAATAGCATTGAAATCGATTTTTATTGACCA  
ATCAGAACTGCCTCCCAGGATCTATAATTGCCTTATAAGGTCCAATATATATACATTATTG  
GACCTTTTGAATAACAGTCAAGAAGACCTTATGAAAATTGAACATTTTCGCATAGAAGA

TGTAAGCGATATTGGGCATTCTAGAAAAGCAT-----TTCGCAATTGATTTACCGAAAA  
AGCTGATGCTCCGAGATGGAAAAATGAGGGAATGTCTACAATACCTGGGTTTAATCA  
GATACAATTTGAAGGATTTTGTAGGTTTCATTGATCAGGGCTTGACGGAAGAACTTTATA  
AGTTTCCAAAAATTGAAGATACCGACCAAGAAATTGAATTTCAATTATTTGTGGAAACA  
TATCAATTAGTAGAACCGTTGATAAAAGAAAGAGATGCTGTGTATGAATCACTCACATA  
TTCTTCTGAATTATATGTCTCCGCGGGACTCATTGGAAAACTGGTAGGGATATGCAAG  
AACAACTATTTTTTTTTGGAAACATTCCTCTAATGAATTCTCTGGGAACTTCTATAGTAA  
ATGGAATATATAGAATTGTGATCAATCAAGTATTGCAAAGCCCCGGTATTTATTACCGGT  
CAGAATTGGACCATAACGGAATTTCCGGTGTATACCGGCACCATAATATCAGATTGGGGA  
GGAAGATCAGAATTAGAGATTGATAGAAAAGCAAGGATATGGGCTCGTGTGAGTAGGA  
AACAAAAATATCTATTCTAGTTTTATCATCAGCTATGGGTTTGAATCTAAGAGAAATTC  
TAGAGAATGTTTGCTATCCTGAAATATTTTTGTCTTTTCTGACTGATAAGGAGAAAAAA  
AAAATCGGGTCAAAGAAAATGCCATTTTGGAGTTTTACCAACAATTTGCTTGTGTAG  
GCGGGGATCCGGTATTTTCTGAATCCTTATGTAAGGAATTACAAAAGAAATCTTTCAA  
CAAAGATGTGAATTAGGAAGGATTGGTCGACGAAATATGAATCGGAGACTGAACCTTG  
ATATATCCAGAACAATACATTTTTGTTACCGCGAGATATATTGGCAGCCGCGGATCATT  
TGATTGGAATGAAATTTGGAATGGGTACACTTGACGAT-----ATGAATCATTTGAAAAAT  
AAACGTATTCGTTCTGTAGCAGATCTTTTACAAGATCAATTCGGATTGGCTCTGGTTTCGT  
TTAGAAAATGTGGTTCGAGGAACTATATGTGGAGCACTTAGG---CATAAATTG---ATACC  
GACTCCTCAGAATTTGGTAACCTTCAACTCCA-----TTAACAACACTTATGAATCTTT  
TTTCGGTTTACACCCATTATCTCAAGTTTTGGATCGAACTAATCCATTGACACAAATAGT  
TCATGGGAGAAAATTGAGTTATTTGGGCCCTGGAGGATTGACAGGGCGAACTGCTAGT  
TTTCGAATACGAGATATCCATCCTAGTCACTATGGGCGTATTTGCCCAATTGACACGTCT  
GAAGGAATAAATGTCGGACTTATTGGATCTTTAGCAATTCATGCGAGGATTGGTTCGTTG  
GGGA---TCTCTAGAAAGCCCGTTTTAT-----GAAATTTCTGAGAGATCAAAGGG-----  
GCACGGATGCTTTATTTATCACCAGGTAAAGATGAATACTATATGGTAGCGGCGGGAAA  
TTCTTTGGCCTTGAATCAGGGTATTCAGGAAGAACAGGTTGTTCCAGCTCGATACCGTC  
AAGAATTCCTGACTATTGCGTGGGAACAGGTTTCATCTTCGAAGTATTTTTTCTTCCAAT  
ATTTTTCTATTGGAGCTTCCCTCATTCCTTTTATCGAGCATAATGATGCGAATCGGGCTTT  
AATGAGTTCGAATATGCAACGTCAAGCAGTTCCTCTTTCTCGGTCCGAGAAGTGCATTG  
TTGGAACCTGGGTTAGAACGCCAAGCGGCTATAGATTCAGGGGCTCTTGCTATAGCGGA  
ACACGAGGGAAAGATCATTTATACCGATACTGACAAGATCCTTTTATCAGGTAATGGAA  
ATACTCTAAGCATTCCATTAGTTATATATCAACGCTCCAACAAAAATACTTGTATGCATCA  
AAAACCCAGGTTTCAGCGGGTAAATGCATAAAAAGGGACAAATTTAGCCCATGGC  
GCCGCTACAGTTGGTGGCGAACTCGCTTTGGGGAAAAACGTATTAGTAGCTTATATGCC  
ATGGGAAGGTTACAATTTGAAGATGCAGTACTCATTAGCGAGCGCTTGGTATATGAAG  
ATATTTATACTTCTTTTACATACGAAAATATGAAATTAAGACTCATGTGACAAGCCAAG  
GC---CCCGAAAGGGTCACTAATGAAATACCGCATTAGAAGCCCATTTACTCCGCAATTT  
AGACAAAACGGAATTGTAATGCTGGGATCTTGGGTAGAGACGGGTGATATTTTAGTA  
GGTAAATTAACGCCCCAAATGGTGAAGAA---TCGTGATGCCCCGGAAGATAGATTG  
TTACGAGCCATACTTGGCATTTCAGGTATCTACTTCAAAGAAACTTGTCTAAAACCTACC  
TATAGGTGGTAGGGGTCGGGTTATTGATGTGAGATGGATCCAGAAAAGGGGA---GGTTC  
TAGTTATAACCCAGAAATGATTTCGTGTATATTTTACAGAAAACGCGAAATTAAGGTAG  
GCGATAAAGTAGCTGGAAGGCATGGAATAAGGGTATCATTTCAAAAATTTTGCCTAGA



CAAGATATGCCTTATTTGCAAGATGGAAGACCTGTTGATATGGTCTTCAACCCATTAGG  
AGTACCTCCACGAATGAATGTAGGGCAGATATTTGAATGTTCACTCGGGTTAGCGGGG  
GTCTGCTAGACAGACATTATCGAATAGCGCCTTTTGATGAGAGATATGAACAAGAAGCT  
TCGAGAAAAGTAGTGTCTTCTGAATTATATGAAGCCGGTAAGCAAACAGCGAATCCATG  
GGTATTTGAACCCGAGTATCCGGGAAAAAGTAGAATATTTGATGGAAGAACGGGGGAT  
CCTTTTGAACAACCTGTTATAATAGGAAAGCCTTATATCTTGAAATTAATTCATCAAGTT  
GATGATAAAAATCCATGGACGTTCCAGCGGACATTATGCACTTGTTACACAACAACCCCT  
TAGAGGAAGGGCCAAGCAAGGTGGACAACGGGTAGGAGAGATGGAGGTTTGGGCTCT  
AGAGGGATTTGGTGTGCTCATATTTGCAAGAGATGCTTACTTATAAATCGGATCATAT  
TAGAGCTCGCCAGGAAGTACTTGGTACTACGATCATTGGAGGAACAATACCTAATCCTC  
AGGATGCTCCAGAATCTTTTCGATTGCTCGTTCGAGAAGTACGATCTTTGGCTCTGGAA  
CTGAATCATTCTTTGTATCTGAGAAGAATTTCCAGATTAATAGGAAGGAAGCTATGAAT  
CAGAATTTTCTTCTATGATCGATCGGTATAAACATCAACAACCTCCGAATTGGATCAGTT  
TCTCCTCAACAAATAAGTACTTGGGCCAATAAAATCTGCCCAATGGAGAGATAGTTGG  
AGAGGTGACAAAACCTTATACTTTTCATTACAAAACCAATAAACCGGAAAAAGATGGA  
TTATTTTGTGAAAGAATTTTGGGCCTATCAAAAGCGGAATTTGTGCTTGTGGAAATTAT  
CGAGTAATCGGGAATGAAAAAGAAGACCCGAAATTTTGTGAACAATGCGGAGTCGAA  
TTTGTGATTCTCGGATACGAAGATATCAAATGGGCTACATCAAACCTCGCATGCCAGT  
AACCCATGTGTGGTATTTGAAACGTCTTCTAGTTATATTGCGAATCTTTTAGATAAACC  
TCTTAAAGAATTAGAAGGCCTAGTATACTGCGAT-----TTTTCTTTTGCAGGGCCC---ATA  
GCTAAAAAACCTACTTTCTTACGATTACGAGGTTTCGTTTGAATATGAAATCCAATCCTG  
GAAATACAGCATCCCGCTTTTTTTTACTACCCAAGGCTTCGATACATTCGAAATCGAG  
AAATTTCTACTGGAGCAGGTGCTATCCGAGAACAATTAGCCGATCTCGATTTACGGATT  
ATTATAGATTCTTCGTTGGTAGAATGGAAGAGTTGGGGGAAGAC---GGGCTACAGGG  
AATGAATGGGAAGATCGAAAGGTTGGAAGACGAAAGGATTTTTTGGTTAGACGTATGG  
AATTAGCTAAGCATTTTATTCGAACAAATATAGAACCAGAATGGATGGTTTTTGTGTCTAT  
TACCTGTTCTTCTCCTGAGTTGAGACCGATCATTAGATAGATGGGGGTAAACTAATG  
AGCTCAGATATTAATGAACTCTATAGAAGAGTTATCTATCGAAACAATACTCTTACCGAC  
CTATTAACAACAAGTAGATCAACGCCAGGAGAATTAGTAATGTGTCAGGAGAAATTGG  
TACAAGAAGCCGTGGATACACTTCTTGATAATGGAATCCGCGGACAACCGATGAGGGA  
CGGTCATAATAAAGTTTACAAGTCATTTTCAGATGTAATTGAAGGCAAAGAGGGAAGAT  
TTCGTGAGACTCTGCTTGGCAAACGGGTTCGATTATTCAGGGCGTTCCGTCATTGTCTG  
GGTCCGTCACTTTTATTACATCGATGTGGATTGCCCCGCGAAATAGCAATAGAGCTTTT  
CCAGACATTTGTAATTCGTGGTCTAATTAGACAACATCTTGCTTCGAACATAGGAGTTG  
CTAAGAGTAAAATTCGGGAAAAAGAACCGATTGTATGGGAAATACTTCAGGAAGTTAT  
GCAGGGGCATCCCGTATTGCTAAATAGAGCGCCGACTCTGCATAGATTAGGCATACAGG  
CATTCCAGCCTGTTTTAGTGGAAGGTCGTGCTATTTGTTTACATCCATTAGTTCGTAAAG  
GATCAATGCAGACTTTGACGGGGATCAAATGGCTGTTTCATGTGCCTTTATCTTTGGAG  
GCTCAAGCAGAAGCACGTTTACTTATGTTTTCTCATATGAACCTTTTGTCTCCAGCTATT  
GGGGATCCTATTTCCGTACCAACTCAAGATAIGCTTATTGGACTCTATGTCTTAACGAGC  
GGGAATCGTCGGGGTATTTGTGTAAATAGGTATAATCCATGTAATCGC-----AGAACT  
ATCAAAATGAAAGAATTTACGATAATAACTATAAGTATACGAAA-----GAACCCTTTTTTT  
GTAATTCCTATGATGCAATTGGAGCTTATCGGCAGAAACGAATCAATTTAGATAGTCCTT  
TGTGGCTTCGGTGGCGACTAGATCAACGC---GTTATTTCTGCA-----AAAGAAGCCCCC

TCGAAGTTCACATGAATCTTTGGGTACCTATTATGAAATTTATGGGCAATATCTAATAGT  
AAGAAGTATAAAAAAGAAATCTATATATCTATATTCGAACTACTGTTGGTCATATTTCT  
CTTTATCGAGAAATCGAAGAAGCTATACAGGGGTTTTGTCAGGCCTGTTTCATATGGTCC  
C-----ATGGCAGAACGGGCCAATCTGGTCTTTCACAATAAAGTG  
ATAGACGGAAGTCCATGAAACGACTTATTAGTAGATTAATAGAACACTTCGGAATGGC  
ATATACATCACACATCTGGATCAAGTAAAGACTTTGGGTTTTCAACAAGCTACTGCTA  
CCTCCATTTTATTAGGAATTGACGATCTTTTAACAATCCCTTCTAAGAGATGGCTAGTTC  
AAGATGCTGAACAACAAAGTTTAATTTTGGAAAAGCAACACCATTATGGGAATGTACA  
CGCGGTAGAAAAATTACGTCAATCCATTGAGATATGGTATGCTACAAGTGAATTTTGC  
GACAAGAAATGAAACCTAATTTTAGGATGACTGACCCCTTAAATCCAGTTCATATAATGT  
CTTTTTCGGGAGCTAGAGGAAATGCATCTCAGGTACATCAATTAGTAGGTATGAGAGGA  
TTAATGGCGGATCCCCAAGGACAAATGATTGATTTACCCATTCAAAGCAATTTACGCGA  
AGGACTCTCTTAAACAGAATATATTATTCTTGGTACGGAGCCCGTAAAGGGGTTGTGG  
ATACTGCTGTACGAACCTCAGATGCTGGATATCTCACGCGCAGACTTGTGGAAGTAGTT  
CAACACATTGTTGTACGTCGAAAAGATTGTGGCACCGTCCGAGGTATTTCTGTGAGTCC  
CCGAAATGGGATGATGCCG---GAAAGGGTTTTTATCCAAACATTAATTGGTTCGTGTATTA  
GCGGATGATATATATCTGGGTCCACGATGTATTGCCACCAGAAATCAAGATATTGGTAGT  
GGACTTGTCAATCGATTACATAACC-----TTTCGAGCACAAACCAATATATATTCGA  
ACTCCCTTTACTTGTAGGAGTACATCTTGGATCTGTGCGATTATGTTATGGCCGGAGTCCT  
ACTCACGGCGATCTGGCCGAATTGGGAGAAGCTGTGGGTATTATTGCAGGTCAATCTAT  
TGGAGAACCTGGTACTCAATTAACATTAAGAACCTTTCATACCGGCGGAGTATTCACAG  
GGGGTACTGCAGAACATGTGCGAGCCCCTTCTAATGGAAAAATAAAATTCATGAGGA  
TTTGTTTCATCCGACACGTACACGTATGGACATCCTGCTTTTCTATGTTCTATAGACTT  
GTATGTAATATTGAGAGTGAAGATATTATACATAATGTGAATATYCCACCTAAAAGTTT  
TCTTTTAGTTCAAATGATCAATATGTAGAATCAGAACAAGTGATTGCTGAGATTCGCG  
CAGGAACATCCACT---TTGAATTTTAAAGAGAAGGTTTCGAAAACATATTTATTCTGACTC  
AGAGGGAGAA---ATGCACTGGAATACCGATGTGTATCATGCACCTGCATTTACTTATGG  
GAATGTTTCATCTCTTACCAAAAACAAGTCATTTATGGATATTATTAGGAGAGCCATGCAG  
A-----TCCGATCTAGTCGCCCTCTCGATCCACAAGGATCAAGATCAAATGAACGCCCAT--  
---TCTCTTTCTGTCAAGAGAAGATATATTTCTAACCTCTCA-----GTAACATAATGATCAA--  
-GCGAGACACAAATCTTTAGTTCGGATTTTTCTGGTAAA---GAAGATAGGATTACTGAT  
TAT--TCAGAACTTAATCGA-----ATTGGTCATTGTAATCTCCCATATCTG---GCCATTCT  
CCACGCAAATTCT-----GATTTATTGGCAAAGAGACGAAGAAATAGATTCATCATTCCAC  
TCCAATCGATTCAAGAACACGAGAACGAACATAATGCCCTCTTCGGGTATCTCGATTGAA  
ATACCC-----ATACATGGTATTTTCCGTAAAAAGAGTATTATTGCTTATTTTCGATGATCCTC  
GATACAGAAGAAAGAGTTTCGGGAATTACTAAATATGGTACTATAGAAGTGCATTCAATC  
GTCAAAAAGAGGAT-----TTGATTGAGTATCGAGGA---GTCAAGGAATTTAGGCCAAA  
ATACATGAAAGTGGATCGATTCTTTTTCATTCCCAGGAAGTGCATATCTTACCCGGATC  
TTCTTCCATAATGGTACGGAACAATAGTATTATTGGGGTAGATACACAAATCACTTTAAC  
TACAAGAAGCCGAGTGGGCGGATTGGTCCGAGTGGAGAGAAAAAAGAAATG  
AACTTAAAATATTTTCTGGAGATATCCATTTTCTGGAGAGACGGATAAGATATCCCGAC  
ATAGTGGCGTCTTGATACCACCAGGAACC-----GGAAAAACAATTCGAAGGAATCAAA  
AAAA-----TGAAAAAATTGGATCTATGTCCAACGG-----ATCACACCTACCAAG-----AAA  
AAGTATTTTGTGGTTCGACCTGTAGTCACATATGAAATAACGGACGGTATAAATTA

GCA---CTTTTCTTCCCGGATCTGTTGCAGGAAAGGGATAATGTGCAACTTCGAGTTGTC  
AATTATATCCTTTATGGAAGCTGGCAAACCAATTCGGGGTTTTTATGACACAAGTATTCAA  
TTAGTTAGGACTTGTTTAGTATTAAATTGGGTCCAAGACAAAAA-----AGTTCTTCTA  
TCGAAGAGGCCCGTACTTCTTTGTTGAAATAAGGATAAATAGTTTGATTTCGAGATTTT  
CTAAAAATCGACTTAGCGAAATCCCCTATTTTGTATACCGGAAAAAGGAAAGATCCATC  
GGGTTTCAGGATTGATCTCTGAG---AATGGATCAGATCGCACCAATATCAATCCGTTTTCT  
TCCAGTTTTTTCTAT-----TCCAAGGCAAGGATTAAGAATCCCTTAATCAAAACCAAG  
GAACTATTCATACATTGTTGAATAGA-----ATAAGGAATGCCAATCTTTGATAATTTTG  
TCATCATCCAATTGTTTTCGAATGGGTCCA-----TTCAACGATGTAAAATATCACAATGTG  
-----ATAAAGAATCA---CCCCTAATTCAAATTAGGAATTCGTTGGGCCCTTTAGGAAC  
G-----GCCCTTCAAATTGCGAATTTTTATTCA-----TTTTCCATTTA-----ATAACTTACAAT  
CAGATCCTG---GTAACATACTATTTGCAACTTGACAATTTAAAA-----CAGAGTTTTCA  
AGTACTTAAA-----TATTATTTAATGGATGAAAAT-----GGGAAAATTTATAATCCCGATC  
GATGCTGTAAACATTATTTGAATCCATTCAATTTGAATTGGTTTTTTCTCCATCACAATTA  
TTGTGAAGAGACGTCT---ACAACAATGAGTCTTGGGCAGTTTATTTGTGAAAATGTATGT  
ATAGCCAAAAATGGACCACAC---CTAAAA-----CCGGTCAAGTTCTAATTGTTCAA---G  
TTGACTCTGTAGTAATACGATCCGCTAAGCCTTATTTGGCCACCCAGGAGCAACTGTT  
CATGGCCATTATGGGGAAATCCTTTACGAAGGAGATACATTAGTTACATTTATATATGAA  
AAATCGCGATCTGGTGATATAACGCAGGGTCTTCCAAAAGTCGAACAGGTGTTAGAAG  
TGC GTTCGATTGATTCAATATCGATGAATCTCGAAAAGAGGGTTGAGGGCTGGAACGA  
ATGTATAACAAGAAATCTTGGAATTCCTTGGGGATTCTTGATTGGGGCTGAGCTAACTAT  
AGTGCAAAGTCGTATTTCTTTGGTTAATAAGATCCAAAAGGTTTATCGATCCCAGGGGG  
TGCAGATCCATAATAGGCATATAGAAATTATTGTACGTCAAATAACATCAAAAAGTGTG  
TTTTAGAA-----GATGGGATGTCTAATGTTTTTTTACCCGGAGAATTTATTGGATTGTT  
GCGAGCGGAACGAATGGGTGCGCTTTGGAAGAAGCGATCTGTTACCAAGCCGTCTTA  
TTGGGAATAACAAAAGCATCTCTGAATACTCAAAGTTTCATATCCGAAGCGAGTTTTCA  
AGAAACTGCTCGAGTTTTAGCAAAGCAGCTCTCCGGGGTCGTATCGATTGGTTGAAA  
GGCCTGAAAGAGAACGTTGTTCTGGGGGAATGATACCCGTTGGTACCGGATTCAAAG  
GATTG-----GTGCCCCCTTCGAGGCAACATAAGAATATTCCC-----TTGGAAACCAAAAAT  
AAGAATCTATTCGAGGGGGAAATGAGA-----GATATTTTGTTCACCACAGAAAATTTTT  
TGATTCTTGCTTTCAAAGAATTTCCATGATACACCAGAACAATCATTTATAGGA-----  
-----TTAATGATTCCATGACAAAAAGATATTGGAACATCAATTTGGAAGAGATGATGA  
AGGCCGGAGTTCATTTTGGACATGGTACTAAGAAATGGAATCCTAAAATGGCCCCCTAT  
ATCTCTGCAAAGCGTAAAGGTATTCATATTACAAATCTTACTAGAACTGCTCGTTTTTTA  
TTAGAAGCTTGTGATTTGGTTTTTTGATGCAGCAAGTAGGGGAAAACAATTCTTAATCGT  
TGGCACTAAAATAAAGCAGCTAACTTAGTAGCATGGGCTGCAATAAAGGCTCGGTGT  
CATTATGTTAATAAAAAATGGCTCGGCGGTATGTTAACGAATTGGTCCACTACAGAAAC  
AAGACTTCATAAGTTTAGAGACTTGAGAACAGAACAAAAAACGGGGAGACTCAACCG  
TCTCCGAAAAGAGATGCGGCTATGTTGAAAAGACAATTATCCACTTGCAAACATATC  
TGGGCGGGATTAAATATATGACAGGGTTACCAGATATTGTAATCATCGTTGATCAGCAG  
AAGAATATACGGCCCTTCGAGAATGTATCACTTTGGGAATCCAACAATTTGTTAATCG  
ATACAAATTGTGACCCCGATCTTGCAGATATTTGATTCCAGCGAACGACGATGCTATAT  
CYTCAATCCGATTAATTCTTAACAAATTAGTATTCGCAATTTGTGAGGGGCGTTCT---AG  
CTATATAAGAAATCCGATGGGACAAAAATAAATCCACTCGGTTTCAGACTTGGTACAA

CCCAAGGTCATCATTCCCTTTGGTTTGCACAACCAAAAAATTATTCCGAAGGTTTACAA  
GAAGATCAAAAAATAAGAGATTTTATCAAGAATTATGTACAAAAAATATGAAAATTC  
CTCTAGC--GTTGAGGGAAATTGCACGTATAGAGATTCAAAAACGAATCGATCTGATCCA  
GGTCATAATCTATATGGGATTCCCAAAGTTATTAATAGAAAGTCGACCGCGA-----G  
GAATCGAAGAATTGCAGATGAATCTACAAAAGAATTTAAGTCTGTGAACCAAAAAC  
TAACATTGCTATCACAAGAATTGCAAAACCTTACGGAAGCCCTAATATTCTTGCGGAAT  
TTATAGCCGGCCAATTAAGAATAGAGTTTCATTTTCGAAAAGCAATGAAAAAGGCTATT  
GAATTAACCGAACCAAGCAGATACAAAAGGAATTCAGTACAAATTGCAGGGCGTATCG  
ACGGAAAAGAAATTGCGCGTGTGGAATGGATCAGAGAAGGTAGGGTCCCCTGCAAA  
CCATTTCGAGCTAAAATCGATTATTGTTCTTACTGTTTCGAACTATTTATGGAGTATTAGG  
CATCAAAATTTGGATATTTATAGACGGGGAAATGTCGCGTTACCGAGGACCTCGTTTCA  
AAAAATACGCCGCCTGGGAGCTTTACCGGGACTAACTAATAAAAAGGCCTAGAGCCGG  
AAGTGATCTTAGAAATCAATCGCGTTCGGGAAA---AAATCTCAATATCGTATTCGTCTA  
GAAGAAAAACAAAATTGCGTTTTTCATTATGGTCTTACAGAACGACAATTACTTAAATA  
CGTTCGTATCGCCGAAAAGCCAAGGGGTCAACAGGTCAGGTTTTACTCCAATTACTY  
GAAATGCGCTTGGATAACATCCTTTTTTCGATTGGGTATGGCTCCGACTATTCGGGAGC  
CCGTCAATTAGTTAACCACAGACATATTTTAGTCAATGGTCGTATAGTAGATATAGCAAG  
TTATCGCTGCAACCCCGAGATATTATTACGGCGAGGGATGAAGAAAACCTCTAGAATC  
TGATTCAAAATTCTCTCGATTTCGTCTCTCAT--GACGAATTGCCAAAACATTTGACTCT  
TCACCCATTCAA-----TATAAAGGATTAGTCAATCAAATTATAGATAGTAAATGGGTTCGG  
TTTGAAAATAAATGAATTGCTAGTCGTAGAATATTATTCGCGCCAGACTATGTCACGTCG  
AGGTACTGCAGAAGAAAAAACTGCAAAATCCGATCCAATTTATCGTAATCGATTAGTTA  
ACATGTTGGTTAACCGTATTCTGAAACACGGAAAAAAATCATTGGCTTATCAAATTATCT  
ATCGAGCCGTGAAAAAGATTCAACAAAAGACAGAAACAAATCCACTATCTGTTTTACG  
TCAAGCAATACGTGGAGTAACTCCCGATATAGCAGTAAAAGCAAGACGTGTAGGTGGA  
TCGACTCATCAAGTTCCCATTGAAATAGGATCCACACAAGGAAAAGCACTTGCCATTC  
GTTGGTTATTAGCGGCATCCCGAAAACGTCCGGGTGCAAATATGGCTTTCAAATTAAGT  
TCCGAATTAGTGGATGCTGCCAAAGGGAGTGGCGATGCCATACGCAAAAAGGAAGAG  
ACTCATAGAATGGCAGAGGCAAATAGAGCTTTTGCACATTTTCGTATGGGTAGGGATAC  
TATTGCTGACATAATAACCTCTATACGAAATGCTGATATGGATAAAAAAAGAGTGGTTCG  
AATAGCATCTACTAATATCACTGAAAATGTTGTAAAATACTTTTACGAGAAGGTTTTAT  
CGAAAACGTGAGAAAACATCAAGAAAACAAAAGGATTTTTTTGGTTTTAACCTACG  
ACATAGAAGG-----AATAGGAAAAGGCCTTAT-----AGAAATATTTTAAATTTAAAACG  
GATCAGTCGGCCTGGTCTACGAATCTATTCTAACTATCAACGAATTCCTAGAATTTTGGG  
CGGGATCGGAATTGTAATCTTTCTACTTCTCGAGGTATAATGACAGACCGAGAGGCTC  
GACTAGAAAGAATTGGCGGAGAAATTTTGTGTTATATATGGATGGCAAAAGCTATAACCG  
AGAAGTGGTTCACGTAGGAGTGGGCGTATTGGTTCACGTAAGAGTACACGTAGAATAC  
CAAAGGGGGTTATTCAATGTTCAAGCAAGTTTCAATAATACTATTGTGACTGTTACAGAT  
GTACGGGGTCGGGTGGTCTCTTGGTCTCTGCCGGTACTTGTGGATTCAAGGGTACAA  
GAAGGGGGACCCGTTTTGCTGCTCAAACCGCAGCAGGAAACGCTATTCGTACAGTAGT  
GGATCAAGGTATGCAACGAGCAGAAGTCATGATAAAAGGACCCGGTCTCGGAAGAGA  
CGCAGCATTACGAGCTATTCGCAGAAGTGGTATACTATTAACTTTCGTGCGGGATGTAA  
CCCCCATGCCACATAATGGCTGTAGACCTCCGAAAAAACGACGTGTGATGCCAACCAATT  
AAACAACCTATTAGAAATACAAGACAGCCAATCAGAAATGTCACGAAATCCCCCGCGC

TTCGGGGATGCCCCAGCGTCGAGGAACATGTACTAGGGTGTATACTATCACCCCCAAA  
AAACCAAACCTCTGCCTTACGTAAAGTTGCCAGAGTACGATTAACCTCTGGATTTGAAAT  
CACTGCTTATATACCCGGTATTGGCCATAATTCACAAGAACATTCTGTAGTCTTAGTAAG  
AGGGGGAAGGGTTAAGGATTTACCCGGTGTGAGATATCACATTGTTTCGAGGAACCCTA  
GATGCTGTTCGGAGTAAAGGATCGTCAACAAGGGCGTTCTAAATATGGAGTAAAAAAGC  
CAAAAATGGCAAGGAAAAGTTTGATTACAGAGGGAGAAGAAGAGGCAAAAATTGGAA  
CAGAAATATCATTTCGATTTCGCCGATCCTCAAAAAAAGAAATAAGC-----AAAGTTCTA  
TCGTTAAGCGACAAATGGGAAATTTATGGAAAGTTACAATCCCCACCGCGGAATAGTG  
CACCTACACGTCTTCATCGACGTTGTTTTTCGACCGGAAGGCCGAGAGCTAACTATCGA  
GACTTTGGACTATCCGGACACATACTTCGTGAAATGGTTCATGCATGTTTGTGTCAGG  
GGCGACAAGATCAAGTTGGATGATAAAAAATCCATTACAGTGAATATTTTTGAAA-----G  
AGGAAAACAAAGACAACAGGGGGTCTGCTGAATTTCAAGTAGTCAGTTTCACCAATA  
GGATACGAAGACTTACTTCACATTTGGAATTGCACAAAAAAGACTATTTATCTCAGAGA  
GGTCTGCGTAAAATTCTAGGAAAGCGTCAACGGCTACTGGCTTATTTGTCAAAAAAAA  
ATAGAGTACGTTATAAAGAATTAATTGGTTCGGTTGGATATTCGAGAAACAAAAATTCGT-  
----ATGGTAAACTTCGTTTGAAACGATGTGGTAGAAAGCAACGAGCCGTCTATCGAAT  
CGTTGCAATTGATGTTTCGATCCCGAAGAGAAGGAAGAGATCTTCGGAAAGTGGGTTTT  
TATGATCCGATAAAGAATCAAAGTTGTTTAAATGTTCCCGCTATTCTATATTTCTTGAA  
AAAGGCGCTCAGCCGACAGGAACTGTTTCGGGATATTTTAAAGAAGGCGGAGGTTTTTA  
AG-----ATGGATAAATCCAAGCGACTTTTCTTAAATCCAAGCGATC  
TTTTTCGTAGGCGTTTGCCCCGATCCAATCGGGGGATCGAATTGATTATAGAAACATGA  
GTTTAATTAGTCGATTTATTAGTGAACAAGGAAAAATATTATCTAGACGGGTGAATAGAT  
TGACCTTGAAACAACAACGATTAATTACTATTGCTATAAAACAAGCTCGTATTTTATCTT  
TGTTACCTTTTCTTAATAATGATAAA-----CAATTTGAAAGAACCAGTTCGACCGCTAGA  
ACTGCTGGTCTTAGAGCCAGAAAAAAGTGACACGTTCACTAAAAAAAATCCTTTTG  
TAGCAAATCGTTTATTAAGAAAAATTGATAAGCTTAACACAAAAGCAGAAAAAGAAAT  
AATAATAACTTGGTCCCGGCATCTACCATTATACCCACAATGATAGGCCATACTATTGC  
TATCCATAATGGAAAGGAGCATTGCTTATTATATAAACGATCGTATGGTAGGCCACAA  
ATTGGGAGAATTTGCACCTACTTTAAATTTCCGAGGACATGCGAAAAGCGATAATAGAT  
CTCGTTCGTATGATTTTGAAATCTTTTCTACTAGGTAATCTAGTATCCTTATGCATGAAGAT  
AATCAATTCGGTTCGTTGTGGTTCGGACTCTATTATGGATTTCTGACCACATTCTCCATAGG  
GCCCTCTTATCTCTTCTTCTCCGAGCTCGGGTTATGGAAGAAGGAGAAGAAGGAACC  
GAGAAGAAGGTATCAGCAACAACAGGTTTTATTACGGGACAGCTCATGATGTTTCATATC  
GATCTATTATGCGCCTCTGCATCTAGCATTGGGTAGACCTCATAACAATAACTGTACTAGC  
TCTACCGTATCTTTTGTTCATTTCTTCTGGAATAATCACAAAAACTTTTTTGATTATGGA  
TCTACTACCAGAAATCAATGCGTAATCTTAGCATTCAATGCGTATTCCTGAATAATCTC  
ATTTTTCAATTATTCAACCATTTCAATTTACCAAGTTCAATGTTAGCCAGATTAGTCAACA  
TTTATATGTTTCGATGCAACAACAAGATGTTATTTGTAACAAGCAGTTTTGTGGTTGGT  
TAATTGGTCACATTTTATTCATGAAATGGGTTGGATTGGTATTAGTCTGGATACGGCAAA  
ATCATTCTATTAGATCG---ATTCGATCTAATAAGTACCTTGTGTCAGAATTGATAAAT-----  
TCTCGAATCTTTAGTATTCTTATTATTACCTGTGTCTACTATTTAGGCAGAATACCGT  
CACCCATTATACTAAGAACTGAAAGAAACCGAAGAAGATAAACCTCTTGTGACCCT  
TCTTTTCGATTATAAACGATGGAATCGCCATTACGATACATAAAA---AATAGATTTGAA  
AGGACTGCAAGAAATGAAATGTCACAATATTTTTTTTATAACATGCCGAAGTATGGAAA

AGAAAGAATATCTTTTACGTATCCGCCTAGCTTGTCAACTTTTGGAGAAATGATACAAA  
GAAGGATGTCCTTGCCCACTAGAAAACTCTCTTCGGATGAATTGTACAATCATTGG  
ATTTATACTAACAAACAAAAAAGAACAACCTTAAACAACGAGTTTTTAAATAGAATTAA  
GGCTCTAGATATGGGATTTCTTTCTCTAGATATACTCGAAAAAAGTACTAGATTGTATAAT  
-----ACTAAAAAGATTACTTGCCTAAAATATATGATCCCATTTTGAAT---TCATATCGTGG  
ACAATCAAAAAAAATTTTCACCTATAGAGACAATGGAAATAAATAAGATTCATAATC  
TCCTTTACCAAGAGTTTAAACAGAAAATCGCTAATGGTCAC-----ATAAAGAAATAA  
GTAAAAAAGTCCCTCGATGGTCAGACAAATTTATTGAGTTGGAACAACAGACGGGCGT  
ACAGATTCGTTCAAGAAAAATTGACGATATAGTAGTTTTTACTGAT-----ATAGAATATTT  
GCAAGAATCGGATTTTCGTCGAAACATAATCAAAGGTTCTATGCGTACTCAAAGGCGTA  
AAACTATTATTTGGAAACTGTTTGAAGCAAATGCGCACTCCCCGCTTTTTTTGAACAGA  
--AGAAA---AAATCCCCCTTTTTCTTTTGATATCTCCGAAGTATGAACTTATCTTT  
AGAAATATAAAGGAAAAAGTGCGGATAGAA-----TGGGATCTCGTTCCATTTTCGA  
AAACAACAAGAAGTTTGCTATTAATAATCAATCGATGCTTAGAAAATATATTATATTAC  
CTTCATTGATAATAGTTAAAAATATTGGGCGTATCTTATTATTCCAACCCCTGAGTGGTC  
TGAGGATTTCCATGAATGGAAGAGAGAAAAGCATATTAATGTACCTATAACGGTGTTC  
AATTATCAGAAACAGAACTTCCCGCAAATGGTTAACAGAAGGTATTACAGATAAAAATA  
CTATTTCCCTTCTGTTTGAACCTTGGTACAGATCTAAGGAGCAAAAAAAGATGATTC  
TTGTTTTTTAACGGCTAGTGGAATGGAACTGACCTTCCTTTTGGTTCTCCCCGAAAAA  
GAACTTCCTTTTTTGGAGCCCATTTTTAAGGATTTTCTA-----  
-GCTCTAAGAGTTTTTAATAAGAAGACATTTTCTACAAGGTTCAAAGAAACAAAAAGG  
GGGTTTATCAAAAACGTTTTATTTCTGTTTCTAAAAAGAATAAAAAAAGAGCTCTCAA  
AGTAAATGGTTCTATAATCAGCAATCAGACAATTCATAACTCGTTTAATAAAATTCGATC  
TACAGAT-----AATTATTCACCGAGAGAAAAAAATTAATAAATTTAACTGATAGAACAA  
GCCCAATCAGAAAGAAAATAAAGAGTATTACAAAAGAAAAA-----AATAA  
AAGAAGTTATAAT-----GTAGAATCGCCAAAAGATATTTGGCAAATATTA-----AAAAATA  
CTCGATTAATCTGGAAATTACAGGTTTTTCTAAAAATTTTATTGAAAAATATACATAG  
ATATCTTTCTATATATCATTAATATTGCCAGAATGTATACACGACTTGTT-----ATTCACT  
TTGACTTATCCTCCTTGTCGCAAGCATATGTATTTACAAATTATCCCGAACCCGAGTTAT  
TAATTTATATAAGTTAAGATCTGTTCTTGAATATACTTCTTTTTTTCTTAAGACTGCAATA  
AAGGATCTTTTACACAAGGAATTTTCATTCCGAATTAGAGCATAACGAAATTTCCAAG  
TTATGGAACGAATCAATGGAAAACTGGTTAAGAGGT--TATCAATACAATTTATCTCAG  
ATTAGATGGTCTGGATTAATACCACAAAATGGCGAAATACAATCAATCAAGGCCGTAT  
AACTCAAAAAAAACAAAATGGGATTCA-----AAAGACCGA-----TACTTCATTACAAA  
AAACAA---AATTCTCAAAAATACTATAGATATGACCTTTTATCATATAAATCTATTAATGG  
TGATATTATGTATCCAGATAGAAAATATTTTGATTGGAAAATTATCAACTTTTTTTAAGA  
CTTTTGGTTGGATGGAATGAATCAAGAAATACTAAATCGCTGGTTCTTCCCAGAATT  
TGTGCTACTTTATAATGTATACAAAAAACCCTGGATTATACCAAGCAAATTAATTCT  
TTAAATAACAAAAGTAACGTGAAAGTAGAACTAAATGCCTTACTGAAACAGCATTG  
CTTTTCAATTGAGATACGACGAGGGTTA---CAAAGAATGATCAATAATCTCAAGGTA  
AGTTGTCTCTTGATTGGACTGAAAAATCCAAGAAATATTACTGTATCGTCTATTCAAAA  
CAGAGAAATAAGTCTGGATATAATGCTGATTCGGAAGAGC---TTAACTGTTAGAGAGTT  
GATGAAAGGGGTATTGATTATCGAACCCATTCGTCTGTCTGTAAAAAAGGATGGACAAT  
TTATTATGTATCAAACCATAGGTATTTCAATTAATTCATAAGAGTAAGTACAACCATTATGA

TTTTCTTGTTCCCTGAAAAGATTTTATCGTCTAGACGTCGTAGAGAATTGAGAATTTTAAT  
TCATTTTCGTGTTTCTTGGGCCTAATTATCGATTAGAAGACTTGGCTTGTATAAATCGGTAT  
TGGTTTGATACCAATAATGGAAGCAATTTTCAGTATGTTAAGGATATATCCACAATTAATG  
AAAGGACATCAATTCAAATCCTGGATTTTCGAATTGAGAGAGATATTGAGAGAGATCA  
AGAATTCTCACTATTTCTTAGATTCACGGACCCAATTCAATTCAGTGGGATCTTTCAGTC  
ACATTTTTTTCCACCAAGAACGTTTTTATAAACTTTTTGACCCCGAATTTGGAGTATCC  
TACTTTCA---CGCAATTCA-----CAGGGTTCAACAAGCAATCGATATTTTCACG-----ATC  
AAGGGT--GTAATACTCTTTGTAGTAGCGGTCCTTATATATCGT-----ATTAACAGTCG  
AAATATGGTCGAAAGAAAAAATCTCTATTTGATAGGGCTTCTTCCT-----ATACCT  
ATGAATTCCATTGGACCCAGAAATGATACATTGGAAGAATCCGTT--GGGTCTTCCAATA  
TCAATAGGTTGATTGTTTCG--CTCCTGTATCTTCCAAAAGGAAAAAAGATCTCTGAGA  
GTTGTTTCTGAATCCGAAAGAGAGTACTTGGGTTCTCCAATAACT-----AAAAA  
GTGTAGCATGCCTGAATCTAACTGGGGTTCGCGGTGGTGGAGGAACTGGATCGGAAAA  
AAGAGG----GATTCT-----

-----  
-----  
-----  
-----

AGCCAATTGAAAGGATCTTCT--GATCAATCCAGAGATCCTTTAGATTCCATTAGT-----  
--AATGAGGATTCGGAA-----TATCACACATTGATCAATCAAAG  
AGAGATTCAACAATAAAAGAAAGATCGATTCTT--TGGGAT----CCTTCCTTTCTTCAA  
ACGGAACGAACAGAGATAGAATCAGAC----CGATTCCCGAAA----TGCCTTTCTGTAT  
ATTCC----TCAATGTCCCGGCTATTACAG--GAACGTGAGAAGCAGATGATTAATCATCT  
GCTTCCGGAAGAAATCGAAGAATTTCTT-----GGGAATCCTACAAGATCCGTTTCGTTCTT  
TTTTCTCTGACAGATGG----TCAGAACTTCAT--CTGGGTTCGAATCCTACTGAGAGGTC  
CACTAGAGATCAG-----AAATTGTTGAAGAAACAACAAGATCTTTCT--TTTGTCCC  
TTCGAGGCGATCGGAA-----AAGAAAGAAATGGTTAATATATTCAAGATAATTACGT  
ATTTACAAAAT----ACCGTCTCAATTCATCCTATTTTCATCATATCCGGGATGTGATATGGT  
TCCG--AAGGATGAACCGGAT--ATGGATAGTTCCAATAAGATTTTCATTCTTGAACAAAA  
ATCCATTTTTTGATTTA-----TTTCATCTATTCATGACCGGAACAGGGGAGGATACACGT  
TA-----CACCACGATTTTGAATCAGAA-----GAGAGATTTCAAGAAATGGCAGATTTATC  
ACTCTATCAATAACCGAGCCG--GATCTGGTGTATCATAAGGGATTTGCCTTTTCTATTGA  
TTCTTACGGATTGGATCAAAAACAA-----TTCTTGAATGAGGTATTGACTCCAGGGATG  
AATCGAAAAAAAATAT-----TTATTGGCTCTACCTCCTTTTTTTTAT-----GAAGAGAAT  
GAATCTTTTTATCGAAGGATCAGAAAAAATGGGTCCGG--ATCTCCTGCGGGAATGAT  
TTGGAAGATCCAAAACCAAAAATAGTGGTATTTGCTAGCAACAACATAATGGAGGCAG  
TCAATCAATATAGATTGATCCGAAATCTGATTCAAATCCAATATAGCACCTATGGG-----T  
ACATAAGAAATGTATTGAATCGATTCTTTTTAATGAAT-----AGATCCGATCGCAACTTC  
GAATATGGA-----ATTCAAAGGGATCAAATAGGAAAGGATACTCTGAATCATAGA  
ATAATGAAATATACGATCAACCAACATTTCTCGAATTTGAAAAAG--AGTCAGAAGAGA  
TGGTTCGATCCTCTT-----ATTTTGATTTCTCGAACCGAGAGATCCATGAATCGGGATCCT  
GATGCATATAGATACAAATGGTCCAATGGGAGCAAGAATTTCCAGGAACATTTGGAACA  
TTTCGTTTCTGAGCAGAAGAGCCGT-----TTCAAGTAGTGTTTCGATCGATTACGTATT

AATCAATATTCGATTGATTGGTCTGAGGTTATCGACAAAAAAGGTTTGTCTAAGCCATTT  
CGTTTCTTTTTGTCCAAG-----TTGCTTT  
TCTTTTTGTCTAAC--TCACTTCCTTTTTCTTTGTGAGTTTCGGGAATATCCCCATTCAT  
AGGTCCGAG--ATCTACATCTAT--GAATTGAAAGGTCCGAATGATCAACTCTGCAATCA  
GTTGTTAGAATCAATAGGTCTTCAAATCGTTCATTTGAAAAAATGGAAACCCTTC-----T  
TATTGGATTATTGGATGATCATGATACTTCC--CAAAAATCGAAATCCTTGATCAATGGA  
GGAACAATATCACCATTTTTGTTCATAAAGATACCA---AAGTGG---ATGATTGACTCATT  
CATACTAGA-----AATAATCGCAGGAAATCCTTTGATAACACGGATTCTTATTCTCAACG  
ATATCCACGATCAAGACAATTGGCTGAATCCCGTGAAACCATTCATAGAAGTTCATT  
GATATCTTCTTTTTATAAAGCAAATCGACTTCGATTCTTGAATAATCCACATCACTTCTGC  
TTCTAT-----TGTAATAAAAGATTCCCTTTTTATGTG-----GAAAAGGCCCGTATCAAT-  
----AATTCTGATTTACGTATGGA--CAATTCCTCAATATCTTGTTCATTCAACAACAAA---A  
TTTTTTCTTTGTGCGTCGGTAAA-----AAAAACATGCTTTTTGGGGG---AGAGATACTAT  
TTCACCAATCGAGTCACAGGTATCTAACATATTCATACCTAACGATTTCCACAAAGTGG  
TGGTGACGAAACGTATAACTTGTACAAATCT-----TTCCATTTCCAAGTCGATCCGAC  
CCATTTCGTTCGT-----AGAGCTATTTACTCGATCGCAGACATTTCTGGAACACCTTTAAC  
AGAGGGACAAATAGTCAATTTTGAAGAAGTATTGTCAACCTCTTTCAGATATGAATC  
TATCTGATTCAGAAGGGAAGAACTCGCATCAGTATCTCAAT-----TTCAATTCAAACATG  
GGTTTGATTCACACTCCATGTTCTGAGAAATATTTACCATCCGAAAAG-----AGGAAAA  
A-----CGGAGTCTTTGTCTAAAG-----AAATGCGTTGAGAAAGGGCAGATG  
TATAGAACCTTTCAACGAGATAGTGCTTTTTCAACTCTCTCAAATGGAATCTATTCCAA  
ACATATATGCCATGGTTCCTTACTTCGACAGGGTACAAATATCTAAATTTTATATTTTAG  
ATACTTTTTCAGACCTATTG-----CCGATACTAAGTCTA---AGTCAAAAATTTGTATCCATT  
TTTCATGATATTATGCATGGATCAGATATATCATGGCGAATTCTTCAGAAAAAATTG-----  
-----TGCTTCTAAAATGGAATCTG---ATAAGTGAGATTTTCGAGTAAGTGTTCATAA  
T-----CTTCTTGTCCGAAGAAAGGATTCATCGAAAT-----AATGAGTCGCCATTGATATC  
GACACATCTGAGATCGCCAAATGTTTCGGGAGTTC---CTCTATTCAATCCTTTTTCTTCTT  
CTTGTTGCTGGATAT--CTCGTTTGTACACATCTTCTCTTTGTTTCCTGG-----GCCTCTAG  
TGAGTTACAGACAGAGTTTGAAGAGTCAAATCTTTGATGATTCCATCATCTATGATTG  
AGTTGCGAAAACCTTCTGGATAGGTATCTACATCTGAACCGAATTCTTTCTGGTTAAAG  
AATCTCTTTCTAGTTGCTCTGGAACAATTAGGAGATTCTCTAGAAGAAATACGGGGTTC  
TGCTTCTGGCGCAACATGCTATTGGGTGGTGATCCCGCT-----TATGGG---GTCA  
AATCAATACGTTCTAAGAAGAAATATTTGAATATCAATCTCATCGATATCATCGATCTCAT  
A---AGTATCATACCAAATCCCATCAATCGAATCACTTTTTTCGAGAAATACGAGACATCTA  
AGTCATAACAAGTAAAGAGATCTATTCAATTGATAAGAAAAAGAAAAAATGTGAACGGGG  
ATTGGATTGATGATAAAATAGAATCCTGGGTCGAAACAGTGATTTCGATTGATGATGAA  
GAAAGAGAATTCTTGGTTCAGTTCTCC-----ACCTTAACGACA-----GAAAAAAGGATTG  
ATCAAATTCTATTGAGTCTGACT--CATAGTGATCATTTA-----TCAAAGAATGACT  
CTGGCTATCAAATGATTGAACAACCGGGAGCAATTTACTTACGATACTTAGTTGACATT  
CAT-----AAAAGTATCTAATGAATTATGAGTTCAATACATCCTGTTTAGCAGAAAGACG  
GATATTCCTTGCTCATTATCAGACAATCACTTAT-----TCACAAACCTCGTGTGGGGCTAA  
TAGTTTGAATTTCCCATCTCATGGA-----AAACCCTTTTCGCTCCGCTTAGCCTTATCCC  
CCTCT--AGGGGTATTTAGTGATAGGTTCTATAGGAACTGGACGATCCTATTTGGTCAA  
ATACCTAGCGACAAACTCCTATGTTCTTTTATTACGGTATTTCTGAACAAGTTCCTGGA



TAACAAGCCTAAAGGTTTTCTTATTGAT-----GATATCGAT---ATTGATGCTAGTGA  
CGATATTGATGCTAGTGACGATATTGATGCTAGTGACGATATTGATGCT-----  
-----AGTGACGATATCGATCGTGACCTTCATACGGAGCTG---GAACTGCTA-----  
-----ACTATGGATATGATGCCGGAA-----ATAGACCGATTTTATATCACCTTCAATTCTGA  
ATTAGCAAAGCAATGTCTCCTTGCATAATATGGATTCCAAACATTCATGATCTGGATGT  
GAATGAGTCGAATTACTTCTCCCTCGGTCTATTAGTGAACCATCTCTCCAGG-----GAT  
TGTGAAAGATGTTCC---ACTAGAAATATTCTTGTTATTGCTTCGACTCATATTCCCCAAA  
AAGTGGATCCCGCTCTAATAGCTCCGAATAAATTAATACGTGCATTAAGATACGAAGG  
CTTCTTATTCCACAACAACGAAAGCACTTTTTACCCTTTCATATACTAGGGGATTTTCGC  
TTGAAAATAAAATGTTCCATACT-----AATGGATTCGGGTCCATAACCATGGGTTCCAAT  
GCACGAGATCTTGTAGCACTTACCAATGAGGCCCTATCGATTAGTATTACACAGAAGAA  
ATCAATTATAGACACTAATACAATTAGATCCGCTCTTCATAGACAACTTGGGATTTGCG  
A-----TCCCAGGTAAGATCGGTTTCAGGATCATGGGATCCTTTTCTATCAGATAGGAAG  
GGCTGTAGCACAAAATGTACTTCTAAGTAATTGCCCATAGATCCTATATCTATCTATATG  
AAGAAGAAA-----TCATGTAACGAAGGGGATTCTTATTTGTACAAATGGTACTTCGAACT  
TGGAACGAGCATGAAGAAATTAACGATACTTCTTTATCTTTTGAGTTGTTCTGCCGGAT  
CGGTCGCTCAAGATCTTTGGTCTCTACCC-----CGACCCGATGAAAAA---AATGGGATCA  
CTTCTTATGGACTCGTTGAGAATGATTCT--GATCTAGTTCATGGCCTATTAGAAGTAGA  
AGGCGCTCTGGTGGGA-----TCCTCGCGGACAGAAAAAGATTGCAGTCAGTTTGATAAT  
GAT-----CGAGTGACATTGCTTCTTCGGCCCGAACCAAGGAAT--CCCTTAGATATGATGC  
AAAATGGATCTTGTCTATCCTTGATCAGAGATTTCTCTATGAAAAAAC-----GAATCG  
GAGTTTGAAGAA---GGGAAGGAGAAGGAGCCCTCGACCCGCAACAG-----ATAG  
AGGAGGAT-----TTATTTAATCAC-----ATAGTTTGGGCTCCT-----AGAATATGGCGCC  
CT-----TGGGGCTTTCTATTTGATTGTATCGAAAGGCCAATGAATTGGGATTTCCC---T  
ATTGGTCCAGGTCATTTCCGGGGCAAG-----CGGATCCTTTATGATGAAGAGGATGAGC  
TTCAAGAGAATGATTCCGAGTTCTTGCAGAGTGGAACCATGCAGTACCAGACACGAGA  
TAGATCTTCCAAAGAACAAGGCCTTTTTCGAATAAGCCAATTCATTTGGGACCCTGCAG  
ATCCACTCTTTTTCTATTCAA---GATCAGCCCTTTGTCTCTGTGTTTTACATCGAGAA  
TTATTTGCAGATGAAGAGATGTCAAAGGGGCTTCTTACTTCCCAACAGATCCTCCTAC  
ATCTATATATAAACGCTGGTTTATC-----AAGAAGACGCAAGAAAAGCACTTCGAATTGT  
TGATTAATCGCCAGAGATGGTTTAGA-----ACCAATAGTTCATTATCT-----AATGGATCT  
TTCCGTTCTAAT-----ACTCTATCCGAGAGTTATCAGTATTTATCAAATCTATTCTATCTA  
AC---GGAACGCTATTGGATCAAATGACAAAGACATTGTTGAGAAAAAGATGGCTTTTCC  
CGGATGAAATGAAAATTGGATTC-----ATGGAACAGGAGAAAGATTTCCATTCTTATG  
CCTAGATCGAGG---ATAAATGGAAATTTTATTGATAAGACCTTTTCAATTGTAGCCAATAT  
CTTATTACGAATAATTCCCACAACCTCAGGAGAAAAAGAGGCATTTACCTATTACAGAG  
ATGGG-----ATGTCAGCTCAATCCGAAGGAAATTATGCGGAAGCTTTACAGAATTATTAT  
GAAGCTATGCGACTAGAAATTGATCCCTACGATCGAAGTTATATACTCTATAACATAGGA  
CTTATCCACACAAGTAACGGAGAACATACAAAAGCTCTGGAATATTATTTTCGAGCGCT  
AGAACGAAATCCGTTCTTACCACAAGCTTTTAATAATATGGCTGTGATCTGTCATTAC---  
CGGGGAGAACAGGCCATTTCGACAGGGAGATTCTGAAATAGCGGAGGCTTGGTTTCGATC  
AAGCCGCTGAGTATTGGAAACAAGCTATGGCGCTTACTCCTGGTAATTATATTGAAGCG  
CATAATTGGTTGAAGATCACGAGGCGTTTCGAA-----ATGAGTTGTGATCAGAACATAT  
ATGGATAGAACCTATAACGGGGTCTCGAAAAACAAGTAATTTCTGCTGGGCGTTATCC

TTTTTTTAGGGTCATTAGGATTCTTATTGGTTGGAACCTCCAGTTATCTTGGTAGAACT  
TGATATCTTTATTTCCGTCTCAGCAAATCCTTTTTTTTCCACAGGGGATCGTGATGTCTTT  
CTATGGAATCGCGGGTCTCTTTATTAGCTCCTATTTGTGGTGCACACTTTCGTTGAATGT  
AGGGGGTGGTTATGATCGATTTGATAGAAAAGAAGGAATGGTGTGTATTTTTCGTTGGG  
GATTTCTGGAAAAATCGTCGCATCTTCTCCGATTCCCTATAAAAGATATTCAGTCCG  
TCAGAATAGAAGCTAAAGAGGGTATTTATGCTCGTGTCTTTATATGGACATCAGA  
GGTCAGGGGGCCATCCCCTTGACTCGTACTGATGAGAAT---GTTACTCCACGGGAAATT  
GAACAAAAGCTGCCGAATTGGCCTATTTCTTGCGTGTACCGATTGAAGTCTTT

>Cucumis

ATGGAAAAAAGATGGTTAAATTCGATGTTGTCTCTAAGTAAATCAATCAATAGTCTTGG  
TCCTATTGAA-----AGTGAAGGATCAATTATAAATAATATGAATAAAAACATTCCTAG  
TTACAGTACTGTTGATGATTTAGTCGGC-----ATTCGAAATTTTCGTATCTGATGACACTT  
TTTTAGTTAGGGATAGTAATAGCAGCAGTTATTCCATATATTTGGATATTGAAAATCAAAT  
TTTTGAGATTGACAATGATCCT-----TCTTTTGTAAAGTGAAGTAGAAAAGTTCTTTTTATAG  
TTTTCGGAACTCTACTTATCAAATAATATATCTAAGAATGATGATTCCCCTATGATCGT  
TACATGTATGATACTAAATATAGTTGGAATAATCACATTAATAGTTGCATTGACAGTTATC  
TTCGG-----ACTCAAATCTGTATTGATAGTTACATTTTAAGTGGTAGTACAATTACAGTG  
ACAGTTACATTTATAGTTATATTTGTGGCAGTGAGAGTTTCAGTATAAGAAGTAGCACGC  
ATGGAAATAATTTAACTATAACAGAA--AGTTCT-----GATCGAACTACAACTACAGCGA  
TTTTTGGGTTATATGCGAAAATTGTCATAAATTCAATTATAAGAGACTTTTCAAATCAA  
AATGAATATTTGTGAAGAATGTGGATAACATTTGAAAATGAATAGTTCAGATAGAATCG  
AACTTTTGATTGATCCAGGTACTTGGGACGCTCTATGGGAATGGGATTCGGAGGTGGAT  
CCCATTCAATGGAAGTCGCAGGTGGATCCCTATAAAGATCGTATTTCTTCTTCTCAAATA  
GAGACAGGATTACCTGAGGCTATTCAAACAGGCACAGGTAAATTAATGGTATTCCCCT  
AGCAATTGGGGTTATGGAGTTTGAATTTATGGGGGGTAGTATGGGATCTGTAGTAGGCG  
AGAAAATCACCCGTTTGATCGACTATGCTAGCAATCAATTTTACCTCTTATTTTAGTGT  
GTGCTTCGGGAGGAGCACGCATGCAAGAAGGAAGTTTGAGCTTGATGCAAATGGCAA  
AAATATCTTCTGCTTTATATGATTATCAATCAAATAAAAATTATTCTATGTAGCAATCCTT  
ACATCTCCTACTACTGGTGGGGTGACAGCTAGTTTTGCTATGTTGGGGGATATCATTATT  
GCCGAACCGAATGCCTACATCGCATTTGCGGGTAAAAGAATAATTGAAGAAACATTGA  
AGATGGAAGTCCCTGAGGGTTCACAGAAGACTGAACCTTTATTCGAAAAGGGCTTATT  
AGATCTAATCGTACCACGTAATCCTTTAAAAGATGTTGTGAGTGAGTTATTTTCAGCTCCA  
CGTTTTCGTTCCCTCGAATCAAATCAATCAAGATGGAAACCAATTCGAGCAGATGAAA  
TTAGTAATATTATCCGTGAACGTATTGAGCAATATACTAGAGAAGTCAAATTTGTAATA  
CCGGTACTGTACTTCAAGTAGGCGACGGCATTGCTCGTATTTATGGTCTTGATGAAGTA  
ATGGCAGGTGAATTAGTAGAATTTGAAGAGGGTACTATAGGCATAGCTCTCAATTTAGA  
ATCAAATAATGTTGGTGTGTATTAATGGGTGATGGTTTGCTGATACAGGAGGGAAGTT  
CTGTAAAAGCAACGGGAAGAATTGTTTCAGATACCAGTAAGCGAGGCTTATTTAGGTGCG  
TGTATAAATGCCCTAGCTAAACCTATTGATGGCCGAGGTGAAATTTTCATCTTCTGACTC  
TCGGTTAATCGAATCCCCCGCTCCTGGTATTTTGTGAGACGTTCCGTATACGAGCCTCT  
TCAAACAGGACTTATTGCTATTGATTTCGATGATTCCCTATCGGACGTGGTCAACGAGAATT  
AATTATTGGGGACAGGCAGACCGGGAAAACACTGCAGTAGCCACGGATACGATTCTCAAT  
CAACAAGGGCAAATGTAATATGTGTTTATGTAGCTATTGGTCAAAAAGCATCTTCTGT  
GGCTCAAGTAGTGAGTACTTTACAGGAAAGGGGCGCAATGGAATACACTATTATAGTAG

CCGAAACGGCAGATTCTCCGGCTACATTACAATACCTTGCCCCTTATACAGGAGCAGCT  
TGGCTGAAT--ATTTTATGTACAGAAAACAGCACACTTCATATTTATGATGATCCCTCCAA  
GCAAGCACAAGCTTATCGACAAATGTCTCTTCTTTTACGAAGACCGCCGGGCCGCGAA  
GCTTATCCGGGAGATGTTTTTTATTTGCATTCACGCCTTTTGGAAAGAGCCGCTAAATTA  
AGTTCTGCTTTAGGTGAAGGAAGTATGACTGCTTTACCAATAGTTGAGACCCAATCGGG  
AGATGTTTCAGCTTATATTCCTACTAATGTAATTTCCATTACCGATGGACAGATATTCTTA  
TCTGCCGATCTATTCAATGCTGGAATCAGACCTGCTATTAATGTGGGTATTTCCGTCTCC  
AGAGTAGGATCTGCAGCTCAAATTAAGCCATGAAACAAGTAGCCGGAAAATTAATAAT  
TGGAATTGGCTCAATTTGCCGAATTAGAAGCCTTTGCGCAATTCGCTTCTGATCTCGAT  
AAAGCTACTCAGAATCAATTGGCAAGAGGTCAACGATTACGTGAGTTGCTCAAACAAT  
CCCAATCAGCACCTCTCACGGTAGATGAACAGATAATGACTGTTTATACCGGAACTAAT  
GGTTATCTTGATTCATTAGAAATTGCACAAGTAAGGAAATTTCTTGTTGAGTTACGTACT  
TACGTA AAAACGAATAAACCTCAGTTTCAAGAAATAATCTCTTCCACGAAGACATTAC  
CCCTGAAGCGGAAGTCCTTTTGAAGAAGCTATTAGGAACAGATGGAACGTTTTTCTA  
CTTCAAGATCAAGTAATGAGAATAAATCCTACGACTTCTAGTCCTGAAGTTTCCACGCT  
TGAAAAAAACAACCTGGGACGTATCGCTCAAATAATTGGTCCGGTACTAGATGTAGCTT  
TTCCCCGGGCAAATGCCTAATATTTACAACGCTTTGATAGTTAAAGGTCAAGATATTT  
CCGGTCAAGAAATTAATGTGACTTGTGAAGTACAGCAATTATTAGGAAATAATCGAGTT  
AGAGCTGTAGCTATGAGTGCTACAGATGGTCTAAGGAGAGGAATGGAAGTGGTTGACA  
CGAGAGCTCCTCTAAGTGTTCCAGTCGGCGGAGCGACTCTCGGCCGAATTTTCAACGT  
GCTTGGAGAGCCTATTGATAATTTGGGTCTGTAGATACTCGCACAACATCTCCTATTCA  
TAGATCCGCCCTGCTTTTATCCAGTTAGATACAAAATTATCTATTTTTGAAACAGGAAT  
TAAAGTAGTGGATCTGTTAGCCCCTTATCGACGTGGAGGAAAAATAGGACTATTCCGGAG  
GGGCTGGAGTGGGTAAAACAGTACTCATTATGGAATTGATCAACAACATTGCCAAAGC  
TCATGGAGGTGTATCTGTATTTGGAGGAGTAGGTGAACGTACTCGTGAAGGAAATGATC  
TTTACATGGAAATGAAAGAATCCGGAGTAATTAATGAAGAAAATTTTGCAGAATCAAA  
AGTGGCTCTAGTCTACGGTCAGATGAATGAACCGCCGGGAGCTCGTATGAGAGTTGGT  
TTAACTGCCCTAACTATGGCGGAATATTTCCGAGATGTTAATGAACAAGACGTGCTTCTA  
TTTATCGACAATATCTTTCGTTTCGTTCAAGCGGGATCCGAAGTATCCGCGTACTGGGT  
AGAATGCCTTCGGCTGTGGGTTATCAACCCACTCTTAGTACCGAAATGGGTTCCCTTACA  
AGAAAGAATTACTTCTACCAAGGAAGGGTCCATAACTTCTATTCAAGCTGTTTATGTAC  
CTGCGGACGATTTGACCGATCCTGCTCCTGCCACCACATTTGCACATTTGGATGCTACT  
ACCGTACTATCAAGAGGATTAGCTGCCAAAGGTATCTATCCAGCAGTAGATCCTTTAGA  
TTCAACCTCAACTATGCTACAACCGAGAATCGTTGGTGAAGAACATTATGAAACTGCG  
CAAAGAGTTAAACAAACCTTACAACGTTACAAGAAGTCAAGACATTATAGCTATCC  
TTGGGTTGGACGAATTATCCGAAGAGGATCGCTTAACCGTAGCACGAGCACGAAAAAT  
TGAACGTTTCTTATCACAACCTTTTTTCGTAGCAGAAGTATTTACCGGCTCCCCGGGGA  
AATACGTTGGCCTAGCAGAAACAATTAGAGGGTTTAAATTAATCCTTTCCGGAGAATTA  
GATGGTCTTCCCGAACAAGCCTTTTATTTGGTAGGTAACATCGATGAAGCTACTGCGAA  
GGCTACGAACTTAGAAATGGAGAGCAATTTGAAGAAAATGACCTTAAATCTTAGTGTC  
CTGACTCCGAATCGAATTATTTGGGATTCAGAAGTGAAGAAAATCATTTTAGTTACGAA  
TAGTGGCCAAATTGGTGTATTACCAGATCACGCACCTATTGCCACAGCTGTAGATATAG  
GTATTTTGAATAACGCCTTACTGATGGATGGTTAACGATGGCTCTGATGGGTGGTTTTG  
CTAGAATAGGCAATAATGAGGTCACTATTTTAGTAAATGATGCGGAGAAGGCTAGTGAC

ATTGATCCACAAGAAGCTCAGCAAACCTCTTGAAATAGCAGAAGCAAACCTTGAGGAAA  
GCTCAGGGCAAGAGACAAACAATCGAGGCAAATTTAGCTCTCAGACGAGCTAGGACA  
CGAGTAGAGGCTATCAATGGCGTACCTATGAAAAATGTAACCGATTCTTTCATTTCTTTG  
GGTATTGGCCATCCGCCGAGAGTTTCGGATTTAATACCGATATTTTAGCAACAAATCCA  
ATAAATCTAAGCGTAGTGCTTGGTGTATTGATTTTTTTTTGGAAAGGGAGTGTTAAGTGAT  
TTATTAGATAATCGAAAACAGAGGATCTTGAAAACAATTCAAAATTCAGAAGAACTCC  
GTGGGGGGGCCATTGAACAGCTGGAAAAAGCCCGGGCTCGCTTACGAAAAGTCGAAA  
TGGAGGCGGATCAGTTTCGAGTGAATGGATATTCTGAGATAGAACGAGAAAAATTGAA  
TTTGATTAATCAACTTCTAAAAGTTTGGAAACAATTAGAAAATTATAAAAATGAAACTAT  
TCGTTTTGAACAACAAAAGCGATTAATCAAGTACGACAACAGGTTTTCCAACAAGCC  
TTACAAGGAGCTCTAGGAACTCTGAATAGTTGTTTGGACAACGAGTTACATTTACGTAC  
CATCAGTGCTAATATTGGCATGTTTGGGACGATGAAAGAAATAACTAACATGAATCCAC  
TGATTTCTGCCGCTTCCGTTATTGCTGCTGGATTGGCCGTGGGGCTTGCTTCTATTGGAC  
CTGGGATTGGTCAAGGTACTGCTGCGGGCCAAGCTGTAGAAGGGATCGCGAGACAAC  
CCGAGGCGGAGGGAAAAATCCGAGGTACTIONTTATTGCTTAGTCTGGCTTTTATGGAAGCT  
TTAACAATTTATGGACTGGTTGTAGCATTAGCACTTTTTATTTGCGAATCCTTTTTGTTATGA  
ATATTCTATTATGTTCTATCAACACACAAAAAGGGTTATACGATATATCTGGTGTGGAAG  
TCGGCCAACATTTGTATTGGCAAATAGGAGGTTTCCAAGTACATGCCCAAGTACTTATT  
ACTTCTTGGGTTGTAATTGCTATCTTATTAGGTTTCAGCCATTATAGCTGTTTCGTAATCCAC  
AAACCATTCCACTGACGGTCAGAATTTCTTCGAATATGTCCTTGAATTCATTTCGAGAC  
GTGAGCAAAACTCAAATTTGGCGAAGAATATGGTCCATGGGTCCCTTTATTGGAAGCT  
GTTTCTATTTATTTTGTTCGAATTGGTCAGGGGCTCTTTTACCTTGGAAAATCATA  
GTTACCTCACGGAGAGTTAGCCGCACCCACAAATGATATAAATACTACTGTTGCTTTAG  
CTTACTCACATCAGTAGCATATTTTTATGCGGGTCTTAGCAAAAAAGGATTAAGTTATT  
TCGGTAAATACATTCAACCAACTCCAATCCTTTTACCCATTAACATCTTAGAAGATTTC  
CAAAACCCCTATCACTTAGTTTTTCGACTTTTTCGGAAATATATTAGCTGATGAATTAGTAG  
TTGTTGTTCTTGTTCCTTTAGTACCTTTAGTAGTTCCTATACCTGTTATGTTCCCTTGGATTA  
TTTACAAGTGGTATTCAAGCTCTTATTTTTGCAACTTTAGCTGCAGCTTATATAGGCGAA  
TCAATGGAGGGTCATCATATGATATTTCAACTTTTGGAGCATATATTAACATCATATATCTTT  
TTCGGTCATTTCAATTGTCATTACAATTCAGTTAATAACCTTATTAATC---GAAACCGTAG  
GACTCTATGTTTCGTCAGAAAAGGGCATGATAGCTACTTTTTTCTGTATAACAGGATTAT  
TAGTTACTCGTTGGATTTATTTGAGGCATTTACCATTAAGTGATTTATATGAATCATTACT  
ATTTCTTTTCATGGGCTTTCTCCATTTATCATCTATTTACGTATTTTAAAAATATAAAA---AC  
CATTAAAGTGAATAACCGCGCCAGTACTATTTTTACACAAGGTTTTGCTACTTCAGGTTT  
TTAACTGAAATGCATCCATCCCCACTATTAGTTCCCGCTCTCCAATCTCATTGGTTAAT  
GATGCACGTAAGTATGATGGTATTAGGTTATGCCGCTCTTTTATGTGGATCATTATTTTCA  
GTAGCTCTTATAGTGATTACCTTTCAAAAAGCTATAAGAATTTTTTGTA AAAACAATGAG  
ATCCAATCCATCAACGAAGGGAATAATTTTGTAAGA-----TCCTTTTTTTCTTCGAAGAA  
TTATTATAAGTCTCAACTGATTCAACAATTAGATCATTGGAGTTGTCGTATTATTAGTCTA  
GGGTTTATCTTTTTAAGCATAGGTATTCTTTTCAGGGGCAGTATGGGCTAATGAGACCTGG  
GGATCGTATTGGAATTGGGACCCAAAGGAACTTGGGCATTTATTACTTGGACGATATT  
CGCAATTTATTTACATACGCGAACAAATAAAAATTTTGAAGGTGTA AATTCCGCAATTGT  
GGCCTCTATGGGTTTTCTTATAATTTGGATATGCTATTTTGGGGTCAATCTATTAGGGATA  
GGGCTACATAGTTATGGTCCGTTTACATTAACAATGGAAAAAAGAAAGCATTCAATCC

CCTTCTATATCTTGCATCTATAGTATTTTTGCCCTGGTGGATCTCTCTTTTCATTTAATAAAA  
GCCTAGAATCTTGGGTTACTAATTGGTGGAACTACTGGTCAATCCGAAAATTTTTTGAAT  
GATATTC AAGAAAAGAGTATTATAAAAAAAGTTCTAGAATTAGAGGAACTCTTTCTCTT  
GGACGAAATGCTAAAGGAATACCCAGAAACACATCTACAAAAGCTTCGTATCGCA---TC  
CAAAGAAACGATCCAATTGATCAAGATGCACAATGAGGATCGTATCCATACGATTTTGC  
ACTTCTCGACAAATATAATCTGTTTCGTATTCTAAGTGGTTATTCTATTCTTGGTAATGA  
AGA ACTTGTATTCTTAACTCTTGGGTTCAAGAGTTCCTATATAACTTAAGCGACACAAT  
AAAAGCTTTTTCTATTCTTTTATTA ACTGATTTATGTATAGGATTCCATTCACCCCATGGT  
TGGGAACTAATGATTGGTCTGTCTACAAAGATTTTGGATTTTCTCATAACGATCAAATT  
ATATCCAGTCTTGTTCCTACTTTTCCAGTCATTCTTGACACAATTTTAAATATTGGATCT  
TCCGTTATTTAAATCGTGTATCTCCGTCACTTGGAGTGATTTATCATTCACTGAATGACAT  
GCCTGTTGGTGTTC AAAAGTACCCTTTCGACTTCCCGGAGAAGAAGATGCATCGTGG  
GTTGACCTATACAACCGACTTTATCGACAAAGATTACTTTTTTTAGGCCAAGATGTTAAT  
AATGAGATCTCGAATCAAATTATGGGTCTTATGGTATATCTCAGTATAGAGGATGGTACC  
AAAGATCAGTATTTATTTATAAACTCTCCCGGGGATCGGTAATACCCGGAGTAGGTCTT  
TTTGATACTATGCAATTTGTGTCAACCAGATGTCCATACAATATGTATGGGATTAGCCGCTT  
CAATGGGATCTTTTATTCTAGTCGGAGGAGAAATTACCAAACGTCTAGCATTCCCTCAC  
GCTAGGGTAATGATCCATCAACCTGCTAGTTCTTTTTCTAAGGGAAAAACGGGAGAATT  
TGCCTGGAATCGACCGAACTACTGAACCTGCGCGAAACCATCACAAAGGTTTATGTC  
CAAAGAACAGGCCAAACCCCTTATGGGTTATACCCGAAGATATGGAAAGAGATGTTTTTAT  
GTCAGCACCAGAAGCCCAAGCTCATGGAATTGTTGATCTTG TAGCGGTT--  
-????????????????????????????????????????????????????????????????  
????????????????????????????????????????????????????????????????  
????????????????????????????????????????????????????????????????  
????????????????????????????????????????????????????????????????  
ATGGAGGAATTTCAAGGATATTT  
AGA ACTTGAGAAATCTCGGCAACGTGACTTCTATACCCACTTATCTTTTCGGGAGTATA  
TTTACGCATTTTCTCATGATCATTTTTTATCTGGTTATGACAAAAAATCCAGTTTACTAAT  
GGTAAAACATTTAATTACTCGAATGTATCACCAGAATCATTTTTTTTTTTTTCACTAATTAT  
TATACAAAAACCCCTTTTTGGGGGAACAATTTGTATTCTCAAATGTTATCAGAAGGGTT  
TGCAGTCATTGCGGAAATTCCACTTTCCTACGATTAGTATCTTCTTAATCGCAAAATC  
TTATAATTTACGATCAAGTCATTCAATATTTCCTTTTTTAGAGGATAAATCCCACATTTA  
AATTATGTGTCAGATGTATTAATACCCTATCCGCTCCATCTGGAAATTTTAGTTCAAATCC  
TTCGCTCCTGGGTGAAAGATGCCTCTTCTTTTCATTTATTACGGTCTTTTTTTCACGAGT  
ATTGTAATTTGAATAGTCTTAGTACTAAATTGATTTCTTTTTTTTCAAACGAAGATTAGT  
CTTGTTGCTATACAATCTTATGTATGTGGATACGAATCCATTTTCCTTTTTTCTACGTAAC  
CAATCTTCTCATATACGATTA ACTTCTTATAAGGGCCTTTTTGAGCGAATATATTTCTATG  
GAAAAATCGAACATCTTGTCAAAGTGTGTAATTCGGCTATCTTACGGGTCTTCAAG  
GATCCTTTAATACATTATGTTAGATATCAAGCAAATCTATTCTGGTTTCAAAGGATACG  
CCACTTCTGATTAATAAGTGGAATATTACCTTGTCAATTTATGGCAATGTCAATTTTATG  
TGTGGTCACAACCAGAAAGGATCTATATAACCAATTATCCAAGCGTTCTCTTGACTTT  
TTGGGCTATATTTCAAGTGTGCGATTAAATCCTTCAGTGGTATGGACTCAGATGTTAGAA  
AATTCATTTCTAATAGATAAT-----GCTACGCAGAACTCGATACACTAGTTCCATTATTA  
CTCTGCTTGCATCATTGGCTAAAGCGAAATTTGTAACGTCTTAGACATCCATTAGTAA  
GCCGACCTGGATCGATTTCGTCGGATTTTGATATTATGATCGATTTTTCGCTATATCCAGA  
AATCTTCTCATTATTACAGAGGATCCTCAAAAAAAAAGAATTTGTATCGAATACAATAT

ATACTTCGCCTTTCTTGTGTTAAAACCTTTGGCTCGTAAACACAAAAGTACTGTACCGTG  
CTCTTTTTAAAAGGTAAATTCGGAATTATTGGAAGAATTCTTTACGGAGCAAGAACAG  
GTTCTTTCTTTGATCTTCCCAAGAAAATTTGGTATTTGGATATTATTTGCATGAATGATT  
TGGCCAATCATGAAATGATAATTGATACATCA-----CAGTCCCAGATATCCATTCTTTTC  
GAGATGGATTCT-----AAAGATTCTATGAATCTATGGTACTGTCCCTATGTGGACTAC  
TGTATTGGAATCACCATAGGCGTACTAGTAATTGTATGGTTAGAAAAGAGAAATATCCGC  
AGGAATACAACAACGGATTGGACCTGAATATGCTGGTCCTTTGGGAGTTCTTCAAGCTT  
TAGCAGATGGTACAAAACACTTTTTAAAGAAAATTTGCTTCCATCTAGAGGTGATACT  
CGTTTATTAGTATCGGACCATCCATAGCAGTCATATCAATTTACTAAGCTATTAGTAA  
TTCCTTTTGGTTATCGCCTTGTTTTAGCCGATCTCCCTATCGGTGTTTTTTTATGGATTGC  
CATTTCAAGTGTTGCTCCCATCGGACTTCTTATGTCAGGATATGGATCCAATAATAAATAT  
TCCTTCTTAGGTGGTCTACGAGCTGCTGCTCAATCAATTAGTTATGAAATACCATTA  
CTATGTGTATTATCAATATCTCTACTATCTAACAGTTCGAGTACCGTTGATATAGTTGAGG  
CTCAATCAAATATGGTTTTTTGGGGTTGGAATTTGTGGCGTCAACCTATAGGGTTTTGTTA  
TTTTTCTAATTTCTTCTTAGCAGAATGCGAGAGATTACCTTTTGATTTACCAGAAGCAG  
AAGAAGAATTAGTAGCGGGTTATCAAACCTGAGTATTCGGGTATAAAAATTTGGTTTATTTT  
ATGTTGCTTCTTCTAAATCTATTAGTTTCTTCGTTATTTGTAAGTGTCTTTACTTGGGT  
GGTTGGGATATCTTATTCATACATATTAGGTTATGAACTTTTTGAAATAAATAAAGTGT  
ATGAAGTCTTTGGAATGACAATTAGTATCTTTATTACATTAGCGAAAACCTATTTGTTCTT  
GTTCAATTTCTATAGCAACAAGATGGACTTTACCCCGACTAAGAATAGATCAACTATTA  
TCTCGGATGGAAATTTCTTTTACCTATATCTCTCGGTAATCTATTATTAACAACCTTCTTT  
CAACTTTTTTCACTGATGATCTGGCATGTACAGAATGAAAACCTCATTCTCGATTCTACG  
AGAATTTTTATGAAAGCCTTTCATTTGCTTCTTTCGATGGAAGTTTTATTTTCCCAGAA  
TGATCCTAATTTTTGGCCTAATTTCTTCTTCTGATGATCGATTCAACCTCTGATCAAAAA  
GATATACCTTGGTTATATTTTCTCTTCAACAAGTTTAGTAATGAGCATAACGGCCCTAT  
TGTTCCGATGGAGAGAAGAACCTATGATTAGCTTTTCGGGAAATTTCAAACGAACAA  
TTTCAACGAAATCTTCAATTTCTTATTTTACTATGTTCAACTCTATGTATTCCTCTATCCG  
TAGAGTACATTGAATGTACAGAAATGGCTATAACAGAGTTTCTATTATTCGTATTAACAG  
CTACTCTAGGAGGAATGTTTTTATGCGGTGCTAATGATTTAATAACTATCTTTGTAGCTCC  
AGAATGTTTCAGTTTATGCTCCTACCTATTATCTGGATATACCAAGAAAGATGTACGGTC  
TAATGAGGCTACTACGAAATATTTACTCATGGGTGGGGCAAGTTCTTCTATTCTGGTTCA  
TGGTTTCTCTTGGCTATATGGTTCATCCGGGGGAGAGATCGAGCTTCAAGAAATAGTAA  
ATGGTCTTCTCAATACACAAATGTATAACTCCCAGGAATTTCAATTGCGCTTATATTCAT  
CACTGTAGGAATTTGGGTTCAAGCTTTCCCAGCCCCTTCTCATCAATGGACTCCTGACG  
TATACGAAGGATCTCCCCTCCAGTCGTTGCTTTTCTTTCTGTTACTTCGAAAGTAGCTG  
CTTCAGCTTCAGCCACTCGAATTTTCGATATTCCTTTTTATTTCTCATCAAACGAATGGC  
ATCTTCTTCTGAAATCCTAGCTATTCTTAGCATGATATTGGGGAATCTCATTGCTATTAC  
TCAAACAAGCATGAAACGTATGCTTGCATTCGTCATCGGTCAAATCGGATATGTAA  
TTATTGGAATAATTGTTGGAGACTCAAATGGTGGATATGCAAGCATGATAACTTATATGC  
TCTTCTATATCGCCATGAATCTAGGAACCTTTGCTCGCATTGTATCATTGGTCTACGTAC  
CGAACTGATAACATTCGAGATTATGCAGGATTATACACAAAAGATCCTCTTTTGGCTC  
TCTCTTTAGCCCTATGTCTCTTATCCTTAGGAGGTCTTCCCTCCACTAGCAGGTTTTTTTCG  
GAAAACCTCATTATTTCTGGTGTGGATGGCAGGCAGGCCTATATTTCTTGGTTTCAATAG  
GACTACTTACGAGCGTTGTTTCTATCTACTATTATCTAAAATAATCAAGTTATTAATGAC

TGGACGAAACCAAGAAATAACCCCTCACGTGCGAAATTATAGAAGATCTCCTTTAAGA  
TCAAACAATTCCATCGAATTGAGTATGATTGTATGTGTGATAGCATCTACTATAACCAGGA  
ATATCAATGAACCCGATTATTGAAATTGCTCAGGATACCCCTTTTTATGTTTCTGCTTTACG  
AATATGATATTTTCTGGGTATTTCTAATAATATCAAGTGTTATTCCTATTTTGGCATTCTA  
ATTTCTGGAGTTTTAGCCCTCTTAGCAAAGAGCCAGAGAACTTTCGAGTTATGAATC  
GGGAATAGAACCAATGGGCGATGCTTGGGTACAATTTAGAATCCGTTATTATATGTTTGC  
TCTAGTTTTTGTGTTTTTGTATGTTGAAACAGTTTTTCTTTATCCGTGGGCAATGAGTTT  
TGATGTATTAGGGGTATCCGTCCTTATAGAAGCTTTAATTTTCGTGCTTATCCTAATTGTC  
GGTTTAGTTTATGCATGGCGAAAAGGAGCATTGGAATGGTCTACGAATTATTTTCTTG  
GTTAACAACAGTTGTAGTTTTTCCAATATTTGCGGGTTTATTACTTTTTCTTTTTCCCTCAT  
AGAGGAAATAAAGTAATGAGATGGTATACTATATGTATCTGTGTACTCGAGCTGCTTCTA  
ACAACCTATGCGTTTTGTTATCATTTCGAATTAGACGATCCATTAATCCAATTGATGGAG  
GATTATAAATGGATCCCCTTTTTTGGATTTTTACTGGGAGATTGGAATCGATGGACTTTCC  
ATAGGACCCATTTACTGACGGGGTTTATCACCACCTTAGCTACTTTAGCGGCTTGGCC  
AGTTACTCGAGATCCCGATTATTCTATTTTCTAATGTTAGCAATGTATAGCGGTCAAATA  
GGATCATTTTCTGCTCGAGACCTTACTATTTTTTATCATGTGGGAGTTCGAATTAATC  
CCGTTTATCTACTTCTATCGATGTGGGGCGAAAGAAACGGTTGTATTCAGCTACAAAG  
TTATTTTGTACACTGCGGGAGGTTCCATTTTTTTGTTAATGGGAGTTCTGGGTATCGGT  
TTATATGGTTCTAATGAACCAACTTTAAATTTTGAACATCAGCTAATCAATCGTATCCTA  
TAGCACTGGAATACTATTCTATATCGGATTTCTTATTGCTTTTGTGTCAAATCACCGAT  
TATACCCTTACATACATGGTTACCAGATACCCACGGAGAGGCACATTACAGTACTTGTAT  
GCTTCTATCCGGAATCTTATTAGAAATGGGAGCATATGGATTGGTTCGGATCAATATGGA  
ATTATTACCCACGCCCATTCTATCTTTTACCCTGGTTGATCATAGTAGGCATAATTCAA  
ATAATCTATGCAGCTTCAACATCTTCGGGTCAACGCAATTTAAAAAAAAGAATAGCTTA  
TTCCTCCGTCTCTCATATGGGTTTCATAATTATAGGAATTGGTTCTATAAGCGATACGGGA  
CTGAATGGAGCTATTTTACAAATAATCTCTCATGGATTTATTGGCGCTGCGCTTTTTTCT  
TAGCGGGAACAAGTTATGATAGAATACGTCTGGTTTATCTTGATGAAATGGGAGGACTG  
GCTATCCCAATTCCAAAAATTTACGACTTTCAATATCTTATCGATGGCTTCCCTTGCAT  
TGCCCGGTATGAGCGGTTTTGTTGCAGAATTAATAGTCTTTTTTGAATAATTACCAGCC  
AAAAATATCTTTAATGACAAAAATGGTAATTACTTTGGTAATGGCAATTGGAATTATATT  
AACTCCATTTATTTATTATCTATGTTACGCCAGATGTTCTATGGATATAAGCTTTTTAATG  
CTAAAAATTCTTATTTTTTTGATTCGGGACCACGAGAATTGTTTGTGCGATCTCTATCC  
TTATACCTGTCATAGGTATTGGTATTTATCCAGATTTTGTTTTCTCATTTATCAGTTGACAA  
GGTCGAAGCTATTTTATCTAATTATTTTGTAGAAATCATGCTCGAACATGTACTTATTATA  
AGTGCCATTTATTTTCTATCGGTATCTATGGATTGATCACGAGCCGAAATATGGTTAGGG  
CCCTTATGTGCTTTGAGCTTATACTGAATGCAGTTAATATGAATTTTCGTAACATTTTCTGA  
TTTTTTTGATAGTCGCCAATTAAGGGAATATTTTCTCAATTTTGTATAGCTATTGCA  
GCCGCTGAAGCAGCTATTGGCCCAGCTATTCTTTCGTCAACTTATCGTAACAGAAAATC  
AACTCGTATCAATCAATCGAATTTGTTGAATAAGATGGAATATACATATCAATATTCATGG  
ATCATACCGTTCATCTCACTTCCAATTCCTATCTTAATAGGAGTGGGCCTTCTACTTTTTC  
CGACGGCAACCAAAAACCTTCGACGTCTGTGGTCTGTTCCGAGTATTTTATTGTTAAGT  
ATAGTTATGATTTTTGCCGTTTATCTGTCTATTGATCAAATAAATACTAGTTATATCTATCA  
ATATGTATGGTCTTGGACTATCAATAATGATTTTTCTTTAGAGTTGGGCTACTTCATCGAT  
CCACTTACTTGTATTATGGCAATATAATCACGACTGTTGGAATTATGGTTCTTATTATA

GTGACAATTATATGTCTCATGATCAAGGATATTTGAGATTTTTTGGCGTATATGAGTTTGT  
CAATACGTCAATGTTGGGATTAGTTACTAGTTCTGAATTTGATCCAAATTTATATTTTTTGG  
GAATTGGGTGGAATGTGTTCTTATCTATTAATAGGTTTTTGGTTCACTCGACCTAGTGCG  
GCGAATGCTGGTCAAAGGCATTTGTAACATAATCGCGTAGGGGATTTTGGTTTATTATTA  
GGAATTTTAGGTCTTTATTGGACAACGGCGAGTTTTGAATTCGGGATTTATTTCAAATA  
TTCAATAAC---GAGGTAAATTTCTTATTTCTTACTTTGTGCGCCGTCCTATTATTTGCAGG  
TGCTGTTGCTAAATCTGCTCAATTTCTCTTTCATGTATGGTTACCCGATGCTATGGAGGG  
TCCTACCCCATTTTCGGCTCTTATACATGCTGCTACCATGGTAGCAGCGGAATTTTTCT  
TGTCGCCCCGCTTCTTCCGCTTTTTATAGCAATACCTTACATCATGAATCTAATAGCTTTG  
ATAGGTATAATAACAGTACTATTTGGAGCTACTTTAGCTCTTGCTCAAAAAGATATTAAG  
AGAAGTTTAGCCTATTCTACAATGTCTCAATTTGGGCTATATGATGTTAGCTTTGGGTATG  
GGGTCATAACCAGGCTGCTTTATTTCAATTTGATTACTCATGCTTATTCAAAGCATTGTTG  
TTTTTAGGATCGGGGTCCATTATTCCTCAATGGAATCGGTTGTTGGATATTTCTCCAGAT  
AAAAGTCAGAATATGGTCTTATGGGTGGTTTAAACAAAGCATGTGCCAATTACAAAAA  
TGCTTTTTTATTAGGTACCCTTTCTCTTTGTGGTGTTCACCCCTGCCTGCTTTTGGTCC  
AAAGATGAAATTTCTAATGATAGTTGGTTGTATTCACCGATTTTCGCAATAATCGCCTGT  
TCCACAGCAGGATTAACAGCATTTTATATGTTTCGCATTTACTTACTTACTTTTGATGGA  
CATTTAAACCTTTATTGTAAAACTACAGTGGAAAAACAATAACTCCCTTTATTCAATA  
TCATTATGGGGTAAAGAA---GGATCAAAAATCATTAAAAAATTTCTTCTCATTATTAACAA  
TGAATTTTTGGATGAGTACTAAAAAT---ACTTTTTACTATCCCTATGAATCAGAGAATACT  
ATGCTATTTCCGATGTTTGTGTTATCCCTATTTACTTTGTTTGTGGAGTCATAGGAACCT  
AATTCGATTTGAATATATTAGACAAATGGTAACTCCGTCTATAAACTTGTTACACGAAA  
GTTCAAAA---TCTGAAAATTGG---GAATTTGTTAAAAATGCAACTTTTTCTGTGACTATA  
GCTTTTTTTCGGAATATTTATAGCGTCTTTCTTCTATAAGCCCACTTATTCATCTTTACAAA  
ATTTGAATTTTCGTAATTCATTTGTTTTTTTTTTGAAAAATTATAAATATAATATAAT  
TGGTCATATAATCGTGGTTACATAGATACTTTTTATCGAATATCCTTAATTGGGGGTATAA  
GAATATTAGCTGAATTAACCTATTTTTTTGATCGACGGATAATTGATGGAATTACCAATGC  
GGTGGGTATTCTTAATTTTTTTGTAGCAGAGAGTATTAATATGTAGGAGGTGGT---CGA  
ATCTCGTCTTATATCTTGTGTATTTAGTTTATTTAGTTATTTTTATATTAGTAATTTACATG  
GATTTGCCTGGACCGATACATGATTTTCTTGTAGTCTTGTGGGGATCAGGTCTTATATTA  
GGAAGTATGGGAGTACTATTATTTAAACAACTCCATTTATTCTGCTTTTTTCGTTGGGACTG  
GTTCTTGTCTTATATCCTTATTCTATATTCTAGCAAACGCCAGTTTGTAGCTGCTGCGC  
AACTCCTTATTTACGTGGGAGCTATAAATGTTTTAATCATAATTTGCTGTGATGTTTCATGAA  
GGGTTTCAGAATATTTCAAAGATTTTAAATCTTTGGACCGTTGGGAATGGAGTTACTTTTCT  
GGTTTGTACAAGTATTTTTGTTTCACTAATGACTACTATTGTGGATACGTCATGGTATGGT  
ATTATTTGGACTACACGATCAAATCAGATTCTAGAGCAAGATTTAATAAGTAATAGTCAA  
CAAATTGGAATTTATTTATCAACATATTTTTTTCTTCCATTTGAACTCATTTCGATCATTCT  
TTTAGCTGCTTTGATCGGCGCAATTTGCCGTGGCTCGCCAGATGAATGGACCAGCTACAA  
GAAAAGACCTCATGATAGTCAATATGGGACCTCACCACCCCTCAATGCACGGTGTCTT  
CGACTCATCCTTACTTTGGATGGTGAAGATGTTATTGACTGTGAACCAATATTGGGTAT  
TTACACAGGGGGATGGAAAAAATTGCAGAAAACCGAACAATTATACAATATCTACCTTA  
TGTAACACGTTGGGATTATTTAGCTACTATGTTTACAGAAGCAATAACCGTAAATGGTCC  
AGAACAGTTGGGAAATATTCAAGTCCCTAAAAGAGCCAGCTATATCAGAGTAATATGT  
TGGAGTTGAGTCGTATAGCTTCTCATCTGTTATGGCTTGGCCCTTTTATGGCGGATATTG



GCGCACAGACTCCCTTCTTCTATATTTTCAGAGAACGAGAATTAGTATATGATCTATTTCG  
AAGCAGCTACCGGTATGAGAATGATGCATAATTTTTTTCGTATCGGGGGAGTCGCGGCT  
GATTTACCTCATGGATGGATAGATAAATGTTTGGATTTCTGCGATTATTTTTTGACAGCG  
GTTGCTGAATATCAAAAACCTTATTACACAAAATCCTATTTTTTTTAGAACGAGTTGAGGG  
AGTAGGTATTATTTCTGGAGAAGAGGTCATAAATTGGGGGTTATCAGGACCAATGCTGC  
GAGCTTCCGGAATACCATGGGATCTTCGTAAAGTTGATCGTTATGAGTGTTATGACGAA  
TTTGATTGGGAAGTTCAGTGGCAAAAAGAAGGCGATTTCATTAGCTCGTTATTTAGTCAG  
ACTTGCTGAGATGACGGAATCCGTAAAAATTATTCAACAAGCTTTGGAAGGAATTCCA  
GGGGGACCTTATGAAAATTTAGAAATACGATCTTTTGATCGAGCAAGGTCTCCGGAATG  
GAATGACTTTGACTATCGATTTCATTAGTAAAAACCTTCGCCAACTTTTGAATTGGCGA  
AACAAGAACTTTATGTGAGAGTCGAAGCCCCCAAAGGGGAATTGGGCATTTTTTTTGAT  
AGGGGATCAGGGTGGTTTTCTTGGAGATGGAAAATTCGCCCGCCGGGTTTTATCAATT  
TGCAAATCTTCTCAGTTAGTTAAAGAATGAAATTGGCTGATATTATGACAATACTAG  
GTAGCATAGATATCATTATGGGAGAAGTTGATCGTATGTTCCCTATGGTAACTGGGTTC  
TGAATTATGGTCAACAAACAGTACGAGCTGCAAGGTACATTGGTTCAGGGTTTTCGTGATT  
ACTTTATCCCATGCAAAATCGTTTGCCTGTAACCTATTCAATATCCTTACGAAAAATTAATAG  
CATCGGAGCGTTTCCGCGGTTCGAATCCATTTTGAATTTCGATAAATGCATTGCTTGTGAA  
GCATGTGTTTCGTGTATGTCTATAGATCTCCCCGTTGTTGATTGGAAATTGGAAACGGAT  
ATTCGAAAGAAACGATTGCTTAATTACAGTATTGATTTCCGGATCTGTATATTTGTGGT  
AACTGCGTTGAATATTGTCCAACAAATTGTTTATCAATGACTGAAGAATATGAACTTTCT  
ACTTATGATCGTCACGAATTGAATTATAATCAAATTTCTTTGGGTTCGTTTACCGATGTCA  
GTAGTTGATGATTATAACAATTAGAACAATTTTGAAT-----  
---ATGCAGGGTAATTTGTCTTCTTGGCTAGTCAAACATGGACTGGTTCATAGATCTTTGG  
GTTTCGATTACCAAGGAATAGAGACTTTACAAATAAAGCCCGAGGAATGGCATTCCATT  
GCAGTCATTTTATATGTATATGGTTACAATTATCTACGTTCCCAATGTGCTTATGATGTAG  
CACCAGGCGGACTGTTAGCTAGTGTGTATCATCTTACGAGAATCGAGTATGGTATAGAT  
CAACCGGAAGAGGTATGCATAAAAGTATTTGCCGCAAGGATAAATCCTAGAATTCCGTC  
TGTTTTCTGGGTTTGGAAAAGTGCGGATTTTCCAGAAAGGGAATCTTATGATATGTTGG  
GAATTTATTATGATAATCATCCACGTCTAAAGCGTATCTTAATGCCTGAAAGTTGGGTAG  
GATGGCCCTTACGTAAGGATTATATTGCCCCCAATTTTTATGAAATACAAGATGCTCAT--  
-----  
-----ATGAATTCCATCGAGTTTCCCTTACTTGAT  
CGAACAACTCAAACCTCAGTTATTTCAACTACATCAAATGATCTTTCAAATTGGTCAAG  
ACTTTCCAGTTTATGGCCGTTCTCTATGGTACCAGTTGTTGCTTCATTGAATTCGCTTC  
ATTAATAGGTTACGATTCGACTTTGATCGTTATGGACTGGTACCAAGATCTAGTCCTAG  
ACAGGCAGACTTAATTTTAAACAGCGGGTACGGTAACAATGAAAATGGCTCCTTCTTTAG  
TAAGATTATATGAGCAAATGCCTGAACCAAAAATATGTTATTGCTATGGGAGCCTGTACAA  
TTACAGGAGGGATGTTTCAGTACCGATTCTTATAGTACTGTTTCGAGGAGTCGATAAGTTA  
ATTCTGTGATGTGTATTTGCCGGGTTGTCCACCTAAACCCGAGGCTGTTATAGATGCT  
ATAACAAAACCTTCGTAAGAAAATATCTCGAGAAATCTATGAAGATCGAATTAAGTCT----  
-GAAAATCGGTGTTTTACTACCAATCACAATTTTCATGTTGGCCCAAGTACTCATACTGG  
AAATTACGATCAAGAATTACTCTATCAACCATCATCTTCAGAGATCATCCCTCCTGAAAC  
TTTTTTCAAATACAAAAGTGCAGTCTTTCCTACGAATTAGTAAATATGCAAACCTAGAA  
ATACTTTTTCTTCGATAAAGGAAGAGATTACTCGATCTATTTCCGTATCACTCATGATATA

TATAATAACTTGGGCACCCGTTTCAAATGCATATCCCATTTTTGCACAACAGGGGTATGA  
AAATCCACGAGAAGCAACCGGCCGTATTGTCTGCGCCAACTGCCATTTAGCTAATAAA  
CCCGTGGATATCGAGGGTCCACAAGCGGTACTTCCTGATACTGTATTTGAAGCAGGTGG  
TCGAATCCCTTATGATATGCAACTGAAACAAGTTCTTGCGAATGGGAAAAAGGGCTGG  
TTGAATGTGGGGGCCGGTCTTATTTTACCCGAAGGGTTTGAATTAGCCCCCCCCGATCG  
GATTTCTCCCGAGATTAAGAAAAAAGGGGCTCTGTGCTTTTCAGAGCCTATCGTCCC  
ACGAAAAAAAATATTCTTGTGATAGGTCTTCTGGTCAGAAATATAGTGAAATCAC  
CTTTCCTATTCTTTCCCGGACCCCTGCGACTAAGAAAGATGTTCACTTCTTAAAAATATCC  
CATATACGTAGGCGGGAACAGGGGAAGGGGTCAGATTTATCCCGACGGGAGTAAGAGT  
AATAATAATGTTTATAATGCTACAGCAGCAGGGATAGTAAGTAAATAATACGAAAAGA  
AAAAGGAGGATATGAAATAACCATAGTGGATGCCGCGAATGGGCGTCAAGTGGTTGAT  
ATTATCCCTCCAGGACCAGAACTTCTTGTTCAGAGGGCGAATCCTTCAAACCTTGATCA  
CCCATTAACGAGTAATCCTAATGTGGGAGGATTTGGTCAGGGAGATGCGGAAATCGTCC  
TTCAAGATCCATTACGTGTCCAAGGCCTTTTGTCTTTTTTGCATCTGTTATTTTGGCAC  
AAATCTTTTTAGTTCTTAAAAAGAAACAGTTTGAGAAGGTCAATTGTCCGAAA-----A  
TGAGTAAAGTGTATGATTGGTTGGAAGAACGTCTTGAAATTCAGGCGATTGCGGATGAT  
ATACTAGTAAATACGTTCTCCTCATGTCAACATATTTTATTGTCTAGGAGGAATTACG  
CTTACTTGTTTTTTAGTACAAGTAGCTACCGGGTTTGGCTATGACTTTTTACTACCGTCCG  
ACCGTTACTGAGGCTTTTGTCTTGTCAATATATAATGACGGAAGCAAATTTGGTTGG  
TTAATCCGATCAGTTCATCGATGGTCGGCAAGTATGATGGTCTTAATGATGATCCTGCAC  
GTATTTGCGGTGTATCTTACTGGTGGATTTAAAAAACCTCGTGAATTGACTTGGGTTACA  
GGTGTGGTTCTGGCTGTATTGACCGCATCCTTTGGTGTAACCTGGTTATTCTTACCTCGG  
GACCAAATTGGTTATTGGGCAGTCAAAATTGTAACAGGTGTACCGGAAGCTATTCCAGT  
AATAGGGTCGCCTTTGGTAGAGTTATTACGCGGAAGTGCTAGTGTGGGACAATCTACCT  
TGACTCGTTTTTATAGTTTACACACTTTTGTATTACCTCTTCTTACTGCCGTATTTATGTTA  
ATGCACTTCCCAATGATACGTAAGCAAGGCATTTCTGGTCTTTAATGGGAGTAACAAA  
AAAACCAGATTTGAATGATCCTGTATTAAGAGCTAAATTGGCTAAGGGTATGGGTCATA  
ATTATTACGGAGAACCCGCATGGCCCAATGATCTTTTATATAATTTTTCCAGTAGTCATTCT  
AGGTACTATTGCATGTAACGTGGGCTTAGCGGTTCTAGAACCATCAATGATTGGTGAAC  
CCGCAGATCCATTTGCAACTCCTTTGGAAATATTGCCGGAATGGTATTTCTTTCCCGTAT  
TTCAAATACTTCGTACAGTGCCAAATAAGTTATTGGGTGTTCTTTTAATGGTTTCCGTAC  
CGGCGGGATTATTAACGTACCTTTTTTGGAGAATGTCAATAAATTCCAAAATCCATTC  
GTCGTCCAGTAGCGACAACCGTCTTTTTGATTGGTACCGCAGTAGCCCTTTGGTTGGGT  
ATTGGAGCAACATTACCGATTGATAAATCCCTAACTTTAGGTCTTTTTATGATTGAAGTT  
TTTTTATTTGGAATCGTATTAGGTCTAATTCCTATTACTTTGGCTGGATTATCTGTGACCG  
CATATTTACAATACAGACGGGGGATCAGTTGGACCTTATGCTTACTATCACTAGTTATT  
TCGGTTTTCTACTAGCAGTTTAACTATAACCTCAGCTCTATTTATCGGTCTGAACAAGA  
TAAGACTTATTATGGATATGGTAAGTCTCGCTTGGGCTGCTTTAATGGTAGTCTTTACATT  
TTCTCTTTCCCTCGTAGTATGGGGAAGAAGTGGACTCATGATTATTCGTTCCCGGAAC  
CAGAAGTCAAATTTTGGTAGATAGGGATCCATAAAAACCTTCTTTCGAGGACTGGGC  
CAGACCGGGTCATTTCTCGAGAACAATAGCTAAGGGTCTGATACTACCACTTGGATCT  
GGAACCTTCATGCTGATGCTCACGATTTGATAGCCATACTAGTGATTGGAGGAGATC  
TCTCGAAAAGTCTTTAGTGCCCATTTCCGGCCAACTCTCCATCATCTTTCTTTGGCTGAGT  
GGGATGATTTCCACGGTGCTCGTTTTTCCAATTATGAAGCATGGCTAGGTGATCCTACT

CACATTGGCCCTAGTGCCCAGGTGGTTTGGCCAATAGTGGGCCAAGAAATATTGAATG  
GTGATGTAGGCGGGGGTTTTTCGAGGAATACAAATAACATCTGGGTTTTTTCAGATGTGG  
CGAGCATCTGGAATAACTAATGAATTACAACCTCTATTGTACCGCAATTGGTGCATTAGTC  
TTTGCAGCCTTAATGCTTTTTGCTGGTTGGTTTCATTATCACAAGGCTGCTCCAAAATTG  
GCTTGGTTCCAAGATGTAGAATCCATGTTGAATCACCATTTAGCGGGTCTGCTAGGACT  
TGGGTCTCTTTCTTGGGCGGGACATCAAGTCCACGTATCTTTACCGATTAACCAATTTCT  
AAATGCTGGAGTAGATCCTAAAGAGATTCCACTTCCTCATGAATTTATCTTGAATCGGG  
ATCTTTTGGCGCAACTTTATCCTAGTTTTGCTGAGGGAGCAACCCCATTTTTCACTTTGA  
ATTGGTCAAAATATGCGGAATTTCTTACTTTTTCGCGGAGGGTTAGATCCAGTAACCGGG  
GGTCTATGGTTAACCGATATTGCACACCATCATTAGCTATTGCAATTTCTTTTCTGATAG  
CGGGTCACATGTATAGGACCAACTGGGGCATTGGTTCATGGTATAAAAAGATATTTTAGAG  
GCTCATAAAGGTCCATTTACAGGCCAGGGCCATAAAGGACTATATGAGATCCTAACAAAC  
GTCATGGCATGCTCAATTATCTATTAACCTAGCTATGTTAGGCTCTTTAACCATATTGTA  
GCTCACCATATGTATGCAATGCCCCGTATCCATATCTAGCTACTGACTATGGTACACAA  
CTTTCATTGTTACACATCACATGTGGATTGGTGGATTTCTCATAGTTGGTGTCTGCTGCG  
CATGCAGCCATTTTTATGGTAAGAGACTATGATCCAATACTCGCTACAACGATCTATTA  
GATCGTGTACTTAGGCATCGTGATGCAATCATATCACATCTGAACTGGGTGTGTATATTT  
TTAGGCTTTCACAGTTTTTGGTTTTGTATATTCATAACGATACCATGAGTGCTTTAGGGCGT  
CCACAAGATATGTTTTCAGATACCGCTATAACAATTACAACCCCGTCTTTGCTCAATGGAT  
ACAAACACCCATGCTTTAGCACCTAGGATAACGGCCCCCGGTGCAACAACAGGCACCA  
GTTTGACTTGGGGGGGTGGTGATTTAGTGGCAGTGGGCGGCAAAGTTGCTTTGTTACC  
TATTCGGTTAGGAACCGCAGATTTTTTGGTACACCATATTCATGCATTTACGATTCATGTA  
ACGGTATTGATACTCCTGAAAGGTGTTCTATTTTTCTCGTAGCTCGCGTTTTGATACCGGAT  
AAAGCAAATCTTGGTTTTCTTTCCCTTGTGATGGACCGGGAAGAGGGGGTACATGTC  
AAGTATCCGCTTGGGATCATGTCTTCTTAGGGCTATTTTGGATGTACAATTCCATTTCTGT  
AGTAATATTCCATTTAGTCGGAAAATGCAGTCAGATGTCTGGGGTAGTGTAAGTGATC  
AAGGGGTACTAACTCATATTACGGGAGGAACTTTGCGCAGAGTTCTATTACTATTAAT  
GGGTGGCTTCGCGATTTCTTATGGGCACAGGCATCCCAGGTAATTCAGTCTTATGGTTC  
TTCATTATCTGCATATGGCCTGTTTTCTAGGTGCTCATTTTGTATGGGCTTTTAGTTTA  
ATGTTTCTATTACAGCGGGCGTGGTTATTGGCAAGAACTTATTGAATCCATCGTTTGGGCT  
CATAATAAATTAAGTTGCTCCTGCTACTCAGCCTAGAGCCTTGAGCATTGTCCAAGG  
ACGTGCTGTAGGAGTAACCCATTACCTTCTGGGTGGAATTGCCACAACATGGGCGTTCT  
TCTTAGCAAGAATTATTGCAGTCGGAATGGCACTAAGATTTCCAAGGTTTAGCCAAGGC  
TTAGCTCAGGACCCCACTACTCGTCGATTTGGTTTTGGTATTGCTACCGCGCATGACTTC  
GAAAGTCATGATGATATTACTGAAGAACGTCTTTATCAGAATATTTTTGCTTCTCATTTCT  
GGGCAATTAGCAATAATTTTTCTGTGGACTTCCGGAAATCTGTTTCATGTAGCTTGGCA  
AGGAAATTTGAAGCATGGGTACAGGACCCTTACATGTAAGACCTATTGCTCATGCAA  
TTTGGGATCCTCATTTTTGGTCAACCGGCCGTCGAAGCTTTTACTCGAGGTGGTGTCTTT  
GGCCCAGTGAATATCGCTTATTCTGGTGTATCAGTGGTGGTATAACAATCGGTTTACGC  
ACTAATGGGGATCTTTATACTGGAGCTCTTTTTCTATTATTTCTTTCTGCGATAICTTTAAT  
AGCGGGTTGGTTACATCTACAACCGAAATGGAAACCGAGCGTTTCTGGTTTAAAAAT  
GCCGAATCTCGTCTGAATCATCATTTGTCAGGACTATTCGGAGTAAGTTCCTTGGCTTG  
GACAGGACATTTAGTCCATGTCGCTATTCCTGCATCCAGGGGAGAATCTGTTTCGATGGA  
ATAATTTCTTAGATGTATTGCCACATCCCCAAGGATTAGGACCACTTTTTACAGGTCAGT

GGAATCTTTATGCTCAAAACCCCGATTCAAATAATCATTATTTGGTACTTCCGAAGGAG  
CAGGAACTGCCATTCTAACCCCTTCTCGGGGGATTCCATCCGCAAACCCAAAGTTTATGG  
CTGACTGATATGGCTCATCATCATTTAGCTATTGCATTTATTTTTCTTGTGCTGGTCATAT  
GTATAGAACTAACTTCGGGATTGGACACAGTATAAAAGATCTTTTAGAAGCACATATTC  
CACCGGGGGACGATTGGGGCGTGGACATAAAGGTCTTTATGACACAATTAATAATTCG  
CTTCATTTTCAATTAGGTCTTGCTTTAGCCCTTTAGGGGTTATFACTTCCTTGGTAGCTC  
AACACATGTACGCTTTACCTGCTTATGCGTTCATAGCACAAAGACTTTACTACTCAAGCT  
GCGTTATATAACCCATCACCAATACATAGCAGGATTCATTATGACAGGAGCTTTTGCTCAT  
GGAGCTATATTTTTATTAGAGATTACAATCCAGAACAGAATGAGGATAATGTATTGGCA  
AGAATGTTAGACCATAAAGAAGCTATCATATCCCATTTAAGTTGGGCCAGCCTTTTTCTG  
GGTTCCATACTTTGGGGCTTTATGTTCAATGATGTCATGCTTGCTTTTGGTACTCCG  
GAAAAACAAATCTTAATCGAACCCATATTTGCCCAATGGATTCAATCCGCTCATGGTAA  
AACTTCATATGGCTTCGATGACTTTTATCTTCAACAAGCGGCCCGCGTTCATGCGG  
GTCGAAGCATATGGTTGCCAGGTTGGTTAAATGCTGTTAATGAG-----AATAGTAATTCA  
CTATTCTTAACAATAGGGCCCGGAGACTTCTTGGTTCATCATGCTATTGCTTTAGGTTTA  
CATACAACTACATTGATCTTAGTAAAAGGTGCTTTAGATGCACGTGGTTCCAAATTAATG  
CCGATAAAAAGGATTTTGGTTATAGTTTTCTTGCACGGTCCGGGACGAGGTGGTAC  
TTGTGATATTTTCGGCTTGGGACGCCTTTTATTTGGCAGTTTTCTGGATGTTAAATACCAT  
TGGATGGGTTACTTTTTATTGGCACTGGAAGCACATCACATTATGGCAGGGTAAACGTTT  
CACAGTTTAATGAATCTTCCACTTATTTGATGGGATGGTTAAGAGATTATCTATGGTTAA  
ACTCTTCACAACCTTATCAATGGATATAATCCTTTTGGTATGAATAGTTTATCAGTCTGGGC  
GTGGATGTTCTTATTTGGACATCTTGTTTGGGCTACTGGCTTTATGTTCTTAATTTCTG  
CGCGGATATTGGCAAGAATTGATTGAAACTTTAGCATGGGCTCACGAACGTACACCTTT  
GGCTAATTTGATTGATGGAGAGATAAACCAGTGGCTCTTCCATTGTGCAAGCAAGAT  
TAGTTGGATTAGCCCACTTTTCTGTAGGTTATATATTTACTTATGCGGCTTCTTGATTGC  
CTCTACATCAGGTAAATTTGGTATGTCACATTCAGTAAAGATTTATGATACATGTATAGG  
GTGTAATCAATGTGTCCGAGCTTGCCCCACAGATGTATTAGAAATGATACCTTGGGGCG  
GATGTAAAGCTAAGCAAATAGCTTCGGCTCCACGAACGGAAGACTGTGTTGGTTGTAA  
GAGATGTGAATCTGCCTGTCCGACGGATTTCTTGAGTGTTGCGGTTTATTTATGGCATGA  
AACAACTCGAAGCATGGGTCTAGCTTATATGACAACTCTCACCTTACCCTCTATTTTTGT  
GCCTTTAGTGGCCTAGTATTTCCGGCAATTGCAATGGCTTCTTTATTTCTTCATGTTCA  
AAAAACAAGATTTTTATGCGAGATCTAAAAACATCTCTCCCGTGGCACCGGTAGTAA  
GTAATATATGGTTCGGC---TTAGCGGGTCTATTAATCGAGATCAATCGTTTATTTCCCGGA  
TGCGTGGGAATCCCAATTTTTTCCATCATGACTGCAATTTTAGAGAGACGCGAAAGCGA  
AAGCCTATGGGGTTCGTTTCTGTAACCTGGATAACCAGCACTGAAAACCGTCTTTACATTG  
GATGGTTTGGTGTGTTTATGATGATCCCTACCTTATTGACCGCAACTTCTGTATTTATTATGC  
CTTCATTGCTGCTCCTCCAGTGGATATTGATGGTATTCGTGAACCTGTTTCTGGATCTCT  
ACTTTACGGAAACAATATTATTTCTGGTGCTATTATCCCTACCTCTGCAGCTATCGGTTTG  
CACTTTTACCCAATTTGGGAAGCTGCTTCCGTTGATGAATGGTTATACAACGGTGGTCC  
TTATGAGCTAATTGTTCTACACTTCTTACTTGGTGTAGCATGTTACATGGGTTCGAGAGTG  
GGAAGTTAGTTTCCGTCTGGGTATGCGTCCCTGGATTGCTGTTGCATATTCAGCTCCTGT  
TGCAGCAGCTACTGCTGTTTTCTTGATTTACCCAATTGGTCAAGGAAGCTTTTCTGACG  
GTATGCCTCTAGGAATCTCTGGTACTTTCAACTTCATGATTGTATTCAGGCTGAGCACA  
ACATCCTTATGCACCCATTCCACATGTTAGGTGTAGCTGGTGTATTTCGGCGGCTCCCTAT

TCAGTGCTATGCATGGTTCCTTGGTAACTTCTAAGTTGATCAGGGAAACCACAGAAAAT  
GAATCTGCTAATGAAGGTTACAGATTCGGTCAAGAGGAAGAACTTATAATATCGTAGC  
TGCTCATGGTATTTTTGGCCGATTGATCTTCCAATATGCTAGTTTCAACAACCTCTCGTTC  
TTTACATTTCTTCCTAGCTGCTTGGCCTGTAGTAGGTATCTGGTCCACCGCTTTAGGTATT  
AGCACTATGGCTTTCAACTTAAATGGTTTCAATTTCAACCAATCTGTAGTTGATAGTCAA  
GGTCGTGTAATTAATACCTGGGCTGATATTATTAACCGTGCTAATCTTGGTATGGAAGTT  
ATGCATGAACGTAATGCTCACAACCTTCCCTCTAGACCTAGCTGCTGTTGAAGTTCCATC  
TATCAATGGAATGGGTTTTGCCTTGGTATCGTGTTCATAACCGTTGTATTGAATGATCCCGG  
TCGTTTGCTTTCTGTTTCATATAATGCAAACAGCTCTAGTTGCTGGTTGGGCCGGTTCAAT  
GGCCCTATACGAATTAGCAGTTTTTGTATCCCTCTGATCCTGTTCTTGATCCAATGTGGAG  
ACAAGGTATGTTTCGTTATAACCCTCCATGACTCGTTTAGGAATAACCAATTCATGGGGAG  
GTTGGAGTATCACA---GGAGGGATTATAACGAATCCGGGTATTTGGAGTTACGAAGGTG  
TGGCCGGAGCACATATTTGTTTTCTGGATTGTGCTTCTTAGCAGCTATCTGGCATTGGG  
TGTATTGGGATCTAGAAATATTTTCTGATGAACGTACAGGAAAACCTTCTTTGGATTTGC  
CGAAGATTTTTGGAATTCATTTATTTCTCTCAGGGTTGGGTTGTTTTGGTTTTGGTGCAT  
TTCATGTAACCGGATTGTACGGTCCGGGAATATGGGTATCCGATCCTTATGGATTAACCG  
GAAGGGTACAAGCCGTAAATCCTGCGTGGGGTGTCAAGGGTTTGATCCTTTTGTTC  
GGCGGAATAGCCTCGCATCATATTGCAGCAGGTACATTGGGTATATTAGCGGGCCTATT  
CCATCTTAGTGTTTCGTCCGCCCAACGTCTATACAAAGGATTACGTATGGGAAATATTGA  
AACCGTCCTTTTCGAGTAGTATCGCTGCTGTATTTTTGCAGCTTTTGTGTTGCTGGAAC  
TATGTGGTATGGTTCAGCAACTACCCCGATTGAATTATTTGGGCCACTCGTTATCAATG  
GGATCAGGGATACTTCCAGCAAGAAATATATCGAAGAGTTAGTACCGGGTTAGCCGAA  
AATCAAAGTTTATCAGAAGCTTGGTCTAAAATTCCTGAAAAATTAGCTTTTTATGATTAT  
ATCGGGAATAATCCCGCAAAGGTGGATTATTCAGAGCGGGTCCATGGACAACGGGG  
ATGGAATAGCTGTTGGTTGGTTAGGACACCCTGTTTTTAGAGATAAAGAAGGGCGCGA  
ACTTTTTGTACGCCGTATGCCGACCTTTTTTGAACATTTCCGGTTGTTTTGGTAGACGG  
AGATGGAATTGTTAGAGCCGATGTTCCTTTTCGAAGAGCAGAATCGAAGTATAGTGTTG  
AACAGGTCGGTGTAACTGTTGAGTTCTATGGCGGTGAACTCAATGGAGTCAGTTATAGT  
GATCCTGCTACTGTGAAAAATATGCTAGACGTGCTCAATTGGGTGAAATTTTTGAATT  
AGATCGTGCTACTTTGAAATCCGATGGGGTTTTTTCGTAGCAGTCCAAGGGGTTGGTTTA  
CTTTTGGGCATGCTTCCTTTGTCTTCTTCTTTCGGACACATTTGGCATGGTGCGA  
GAACGTTGTTTCAGAGATGTCTTTGCTGGGATTGACCCAGATTTGGACACTCAAGTAGA  
ATTTGGGGCATTCCAGAAAACCTTGGAGATCCAACCTACAAAAAGAGTCTAGTC-----  
-----GTGGAACGCTCTTTAATGGAACTTTAGCTTTAGCTGGTTCGTGACCA  
AGAAACCACCGGTTTCGCTTGGTGGGCCGGGAATGCCCGACTTATCAATTTATCCGGTA  
AACTACTGGGGGCTCATGTAGCCATGCCGGATTAATCGTATTCTGGGCCGGAGCAATG  
AACCTATTCGAAGTGGCTCATTTCGTACCGGAGAAGCACATGTACGAACAAGGATTAAT  
TTTACTTCCCCACCTAGCTACTTTAGGTGGGGGGTAGGTCTGGTGGGGAAAGTTATAG  
ACACCTTTCCTTACTTTGTGTCTGGAGTACTTCACTTAATTTCCCTCCGCAGTATTGGGTT  
TTGGCGGTATTTATCATGCACTTCTGGGACCCGAGACCCTTGAAGAATCTTTTCCATTCT  
TCGGTTATGTGTGGAAGATAGAAATAAAATGACTACCATTTTGGGTATTCATTAATTT  
TGTTAGGTATAGGTGCTTTTCTTCTAGTATTCAAAGCTCTTTATTTTGGGGGCGTATATGA  
TACCTGGGCTCCCGGGGGGGGAGATGTAAGAAAAATTACCAACTTGACCCTTAGCCCA  
AGTGTATATTTGGTTATTTACTAAAATCTCCTTTTGGCGGAGAAGGATGGATTGTTAGT

GTGGACGATTTGGAAGATATAGTTGGGGGACATGTATGGTTAGGTTCCATTTGTATACTT  
GGTGGAATTTGGCATATCTTAACTAAACCCTTTGCATGGGCTCGCCGCGCACTTGTATG  
GTCTGGAGAAGCTTACTTGTCTTATAGTTTLAGGTGCTTTATCTGTTTTTGGTTTTATTGCT  
TGTTGTTTTGTCTGGTTCAATAATACTGCTTATCCGAGTGAGTTTTACGGGCCGACTGG  
ACCAGAAGCTTCTCAAGCTCAAGCATTACTTTTCTAGTTAGAGACCAACGTCTTGGA  
GCTAACATGGATCCGCTCAAGGACCTACTGGTTTAGGTAAATATCTAATGCGTTCTCCG  
ACCGGAGAAGTCATTTTTGGGGGAGAGACTATGCGTTTTTGGGATCTGCGTGCTCCGT  
GGTTAGAACCCTAAGGGGTCCTAATGGTTTGGACTTGAGTAGACTGAAAAAAGACAT  
CCAAACCTTGGCAAGAACGACGTTCCGCGGAATATATGACCCTGCTCCTTTAGGTTCTT  
TAAATCCGTGGGGGGCGTAGCTACCGAAATTAATGCAGTCAATTATGTCTCTCCTAGA  
AGTTGGTTAGCTACCTCTCATTTTTGTTCTAGGATTTCTTATTTCGTAGGTCATTTATGGC  
ATGCAGGAAGGGCTCGTGCAGCTGCCGCAGGATTTGAAAAAGGAATTGATCGTGATTT  
TGAACCTGTTCTGTTTCATGACTCCTCTTAACATGACTATAGCCGTTGGTAAATTTACCAA  
AGACGAAAATGATTTATTTCGATATTATGGATGACTGGTTACGGAGGGACCGTTTTCGTTTT  
TGTAGGTTGGTCCGGTCTATTGCTCTTTCCTTGTGCCTATTTTGCCGTCGGAGGTTGGTT  
TACAGGTACAACCTTTGTAACCTTCATGGTATACCCATGGATTGGCAAGTTCCTATTTGGA  
AGGATGCAACTTCTTAACCGCCGACGTTTCGACTCCTGCTAATAGTTTAGCCACTCTT  
TGTTGTTACTATGGGGCCCTGAAGCACAAGGAGATTTTACTCGTTGGTGTCAATTAGGT  
GGTCTGTGGACTTTTTGTTGCTCTCCACGGTGCTTTCCGACTAATAGGTTTCATGTTACGT  
CAATTTGAACTTGCTCGATCTGTTCAATTGCGACCTTATAATGCAATCGCATTCTCGGGC  
CCAATTGCTGTTTTTTGTTTCTGTATTCTGATTTATCCACTAGGTCAGTCTGGTTGGTTCT  
TTGCGCCTAGTTTTGGTGTAGCAGCTATATTTGATTCATCCTATTTTTCCAAGGGTTTCA  
TAATTGGACATTGAACCCATTTTCATATGATGGGAGTTGCGGGGGTATTGGGCGCTGCTC  
TGCTATGCGCTATTTCATGGTGCTACCGTAGAAAATACCTTATTTGAGGATGGGGATGGTG  
CAAATACATTCCGTGCTTTTTAACCCAACCTCAAGCTGAAGAACTTATTCAATGGTCACT  
GCTAACCGCTTTTTGGTCCCAAATCTTTGGGGTTGCTTTTTCCAATAAACGTTGGTTACAT  
TTCTTTATGTTATTTGTACCAGTAACTGGTTTATGGATGAGTGCTCTTGGAGTAGTTGGT  
CTGGCCCTGAACCTACGTGCCTATGACTTCGTTTCTCAGGAAATCCGTGCAGCGGAAG  
ATCCGGAATTTGAGACTTTCTATACCAAAAATATTCTCTTAAACGAAGGTATTCGTGCTT  
GGATGGCGGCTCAAGATCAGCCTCATGAAAACCTTATATTCCCTGAGGAGGTTCTACCC  
CGTGGAACGCTCTTATGTCTGGAAGCACAGGAGAACGTTCTTTTTGCTGATATTATCAC  
CAGTATTCGATACTGGGTCATTCATAGCATTACTATAACCTTCTCTATTTCATTGCAGGTTGG  
TTATTCGTGACACGGGTTTAGCTTACGATGTTTTTGGAAAGCCCTCGTCCAAATGAGTA  
TTTTACAGAGAGCCGACAAGGAATTCATTAATAACTGGCCGTTTTGATTCTTTGGAAC  
AACTCGATGAATTTAGTAGATCTTTTATGACTATCGATAAACTTATCCTATTTTTACAGT  
GCGATGGTTAACTGTTACGGACTAGCTGTACCTACCGTTTCTTTTTTAGGGTCAATATC  
AGCAATGCAATTCATCCAACGAATGGCTACACAAACCGTTGACGATAGTTCTAAATCTG  
GG---CCAAGACGAACTGTTGTAGGGGATTTATTGAAACCATTGAATTCGGAATATGGTA  
AAGTGGCTCCTGGGTGGGGAACCTTAAATGGGTGTCGCGATGAGTTTATTTGCG  
ATATTCCTATGTATTATTTGGGAGATTTATAATTCTTCCATTTTACTGGACGGAATTTCAAG  
CAATATGCTTACTCTCAAACCTATTTGTTTATAACAGTAGTAATATTCTTTGTTTCTCTTCA  
TTTTCGGATTCCTATCTAATGACCCGGGACGTAATCCGGGGCGTGAAGAAATGGCCGAG  
ACTACTGGAAGGATTCCTCTTTGGCTAATCGGTAAGTACTGTAAGTGGTATTCCTGTGATCGGT  
TTAGTCGGTGTTTTTCTTTTATGGTTCATATTCCGGCTTAGGTTTCATCTCTGATGCTTAATA

TCTTAAGTTTCATCGGTATCTGTCTTAATTCTTTCCTTTATTC AAGTAGTTTTTTTCGTCGC  
CAAATTGCCCGAGGCCTACGCTTTTTTTGAATCCAATAGTAGATGTTATGCCAGTAATACC  
TCTATTCTTTTTTCTATTAGCTTTTGTGGCAAGCTGCTGTAAGCTTTCGAATGACACA  
ATCAAATCCGAACGAACAAAATGTTGAATTGAATCGTACCAGTCTTTACTGGGGTTAT  
TACTCATTGTTGTACTTGCTGTTTTATTTCCAATTATTTCTTCAATATGGAAGTAAATATT  
CTCGCATTATTGCTACTGCACTGTTCACTTAGTTCGACCGCCTTTTTACTTATAATAT  
ACGTAAAAACAATCAGTCAAAGTGATATGGAAACAGCAACCCTAGTTGCCATCTCTATA  
TCTGGTTTACTTGTAAGTTTTACTGGGTATGCCTTATATACTGCTTTTGGGCAACCCTCTC  
AACTAAGAGATCCATTCGAGGAACACGGGGACATGGAAGCATTGGTTTATACATT  
CCTCTTAGTCTCGACTCTAGGAATAATTTTTTTCGCTATCTTTTTTCGCGAACCGCCTAA  
AGTTCCAATAAAAAGGCGAAAATGACTATTGCTTTCCAATTGGCTGTTTTTGCATTAA  
TTGTTACTTCATCAATCTTACTGATTAGTGTGCCGTTGTATTTGCTTCTCCTGATGGTTG  
GTCGGGTAACAAAATGTTGTATTTCCGGTACATCGTTATGGATTGGATTAGTCTTTCT  
GGTGGGTATCCTTAATTCTTATCTCT-----ATGTCACCACAAACAGAGACT  
AAAGCAAGTGTGGATTCAAAGCTGGTGTAAAGATTATAAATTGACTTATTATACTCCT  
GAATATGAAACCAAGATACTGATATCTTGGCAGCATTCCGAGTAACTCCTCAACCGGG  
AGTTCCACCTGAGGAAGCAGGGGCCGCTGTAGCTGCTGAATCTTCTACTGGTACATGG  
ACA ACTGTGTGGACCGATGGGCTTACCAGTCTTGATCGTTACAAAGGACGATGCTATG  
GAATCGAGCCTGTTGCTGGAGAAGAAAATCAATATATTGCTTATGTAGCTTATCCTCTAG  
ACTTTTTTGAAGAAGGTTCTGTTACTAACATGTTTACTTCCATTGTGGGTAATGTATTTG  
GATCAAGGCTCTACGTGCTCTACGTCTGGAGGATTTGCGAATCCCTACTGCTTATATTA  
AACTTTCCAAGGCCCGCCTCATGGTATCCAGGTTGAAAGAGATAAATTGAACAAGTA  
TGGTCGCCCTCTATTGGGATGTACTATTAAACCAAAAATTGGGATTATCCGCTAAGAATTA  
TGGTAGAGCAGTTTATGAATGTCTACGCGGTGGACTTGATTTTACCAAAGATGATGAAA  
ACGTGAATTCCCAACCATTTATGCGTTGGAGAGACCGTTTCCTATTTTGTGCGGAAGCT  
ATTTTTAAATCACAGGCTGAAACAGGTGAAATCAA---GACATACTGAATGCTACTGCG  
GGTACATGCGAAGAAATGATGAAAAGGGCTATATTTGCCCGAGAATTGGGAGCTCCTAT  
CGTAATGCATGACTACTTAACAGGTGGATTCACTGCAAATACTAGCTTGGCTCATTATTG  
CCGAGATAATGGTCTACTTCTTACATTCACCGTGCAATGCATGCTGTTATTGATAGACA  
GAAGAATCATGGTATGCACTTCCGTGTACTAGCTAAAGCGTTACGTATGTCTGGTGGAG  
ACCATATTCACGCTGGTACCGTAGTAGGTAACTTGAAGGGGAAAGAGAAATCACTTT  
AGGCTTTGTTGATTTACTACGTGATGATTTTGTGAAAAGACCGAAGCCGCGGTATTT  
ATTTCACTCAAGATTGGGTCTCTTTACCAGGTGTTCTGCCAGTGGCTTCCGGTGGTATT  
CACGTTTGGCATATGCCTGCTCTAACCGAGATTTTTGGAGATGATTCTGTACTACAATTC  
GGCGGAGGAACCTTTGGGGCACCCCTGGGGTAATGCACCTGGTGCCGTAGCTAACCGAG  
TAGCTCTAGAAGCATGTGTACAAGCTCGTAATGAGGGACGTGATCTTGCTCGTGAGGGT  
AATGAAATTATCCGTGAGGCTAGTAAATGGAGTCTGAACTAGTCTGCGTGAGGAAGTA  
TGGTAAGGAGATCAAATTTGAATTTGAGGCAATGGATACTTTG-----ATGGCGATACATT  
TATACAAAATTCTACCCCGAGCACACGCAATGGAGCCGTAGACAGCCAAGTAAAATC  
CAATCCACGAAATAATTTGATCTATGGACAGCATCGTTGTGGTAAAGGTTCGTAATGCCA  
GAGGAATCATTACCGCAGGGCATAAGAGGGGGAGGTCATAAGCGTCTATAACCGTAAAAT  
CGATTTTCGACGGAATGAAAAGACATATATGGTAGAATCGTAACCATAGAATACGACC  
CTAATCGAAATGCATACATTTGTCTCATACACTATGGGGATGGTGAGAAAAGATATATTT  
TACATCCCAGAGGGGCTATAATTGGAGATACCATTGTTTCTGGTACAGAAGTTCCTATAA

AAATGGGAAATGCCCTACCTTTGACCGATATGCCCTTAGGCACGGCCATACATAACATA  
GAAATCACACTTGGGAAGGGGGGACAATTAGCTAGAGCAGCAGGTGCTGTAGCGAAA  
CTGATTGCAAAAAGAGGGGAAATCGGCCACATTAATAATTACCTTCTGGGGAGGTCCGTT  
TGATATCCAAAAATTGCTCAGCAACAGTCGGACAAGTGGGGAATGCTGGGGTAAACCA  
GAAAAGTTTGGGTAGAGCCGGATCTAAATGTTGGCTAGGTAAGCGTCCTGTAGTAAGA  
GGAGTAGTTATGAACCTGTAGACCATCCCCATGGGGGTGGTGAAGGGAGGGCCCCAA  
TTGGTAGAAAAAACCCGCAACCCCTTGGGGTTATCCTGCACTTGAAGAAGAAGTAG  
AAAAAGGAATAAATATAGTGATAATTTGATTCTTCGTGCGCCGTAGTAAAATGATTCAACC  
TCAAACCCTTTTGAATGTAGCAGATAACAGCGGAGCCCGAGAATTGATGTGTATTGAA  
TCATAGGGGCTAGT---AATCGACGATATGCTCATATTGGTGACGTTATTGTTGCTGTAATC  
AAGAAAGCCGTCCCAAATACACCTTTAGAAAAGATCAGAAGTGATCAGAGCTGTAATTG  
TACGTAATTGTAAGAAGTCAAACGAGAAAATGGTATGATAATACGATATGATGACAAT  
GCTGCGGTTGTTATTGATCAAGAAGGAAATCCAAAAGGAACTCGAATTTTTGGTGCGA  
TTGCCCGAGAATTGAGACAGTTAAATTTACAAAAATAATTTTCATTAGCACCTGAAGTA  
TTAATGCTTAGTCCTAAAAGAACCAGATTCCGTAAACACCATAGAGGAAGAATGAAAG  
GAATATCTTATCGAGGCAATAGTATTTGCTTCGGGAGATACGCTATTCAGGCACTTGAAC  
CCGCTTGGATCACATCTAGACAAATCGAAGCCGGACGAAGGGCAATGACACGAAATGC  
ACGACGCGGTGGAAAAATATGGGTACGTATATTTCCAGACAAACCCGTTACACTAAGA  
CCCACAGAAACACGTATGGGTTTCAGGGAAAGGATCCCCGAATATTGGGTAGCTGTTG  
TTAAACCAGGTAGAATACTTTATGAAATGAGTGGAGTAGCCGAAAATATAGCCAGAAA  
AGCTATTTCAATAGCGGCATCCAAAATGCCTATACGAACCCAATTCATTACTTCGGGAAT  
GACTAGAATTAACGAGGATATATAGCTCGGAGACGTAGAACAAAAATTCGTTTATTTG  
CATCAAGCTTTTCGAGGGGCTCATTCAAGACTTACTCGAACTATTACTCAACAGAAAATA  
AGAGCTTTGGCTTCAGCTTATCGGGATAGAGGTAGGCAAAAAAGAAATTTTCGACAGT  
TGTGGATCGCTCGAATAAATGCAGTAATTCGATCTAAT---AATGTAGACTACAGTTATAGT  
AGATTCATACACAATCTGTACAAGAGGCAGTTGCTTCTTAATCGTAAATACTTGCCCA  
AATCGCGATATTAATAGAAATTGTCTTTATATGATTTCCAATGAGATCATAAAA-----  
-----ATGATAAAGGAAGTATACGCTTTAGGTCAACATATATGTATGTCCCTC  
ACAAAGCGCGAAGAGTAATTGATCAGATTCGTGGCCGTTCTACGAAGAAACAATGAT  
GATACTCGAACTCATGCCTTATCGAGCATGTTATCCAATTTTAAAATTGGTTTATTCGGC  
AGCAGCAAATGCTAGTCACAATATGGGTTTTAAACGAAAGAGATTTAGTCATTAGTAAAG  
CAGAAGTTAATCAAGGTACTACTGTGAAAAAATTAACCTCGAGCTCAAGGGCGAA  
GTTATCCATAAAACGACCCACTTGTCTATAACTATTGTATTGAAAAATACATCTGTGA  
AT--GGATTATGGGACAAAAAAATGGATGGAATCAAATATGCAGTATTTACAGACAAAA  
GTATTCGGTTATTGGGGAAAAAT--CAATATACTTCTAATGTCGAATCAGGATCAACTAG  
GACAGAAATAAAGCATTGGGTCGAACTCTTCTTTGGTGTCAAGGTAATAGCTATGAATA  
GTCATCGACTCCCGGGAAAGGGTAGAAGAATGGGACCTATTATGGGACATACAATGCA  
TTACAGACGTATGATCATTACGCTTCAACCGGGTATTCTATTCCACCTCTTAGAAAGAA  
AAGAACTATGGCACTTCCAAAAAAGCGCACTTCTATATCAAAAAACGGATTTCGGAAA  
AATATTTGGAAAAGCAAAGGGCGTCGGGCAGCGCTGAAAGCTTTTTCCCCAGCAAAT  
CTCTTTCAACGGGTAATTCAAAAAGTTTT-----AAATCAATGGCCAAGGGTAAAG  
ATGCCCGAGTAACAGTTATTTGGAAGGACTCGTGTGT-----CGAAAC-----GTTAATAAG  
CAATCAATAGGGATTTCCAGATATATTACTCAAAAAGAAATCGACACAATACGCCTAGTCG  
ATTGGAATTGAGAAAATTCTGTCCCGGTGTTACAAACATACGATTCATGGGGAGATAA



AGAAAATGAAAATAAGGGCCTCCATTCGTAAAATTTGTGAAAAATGTCGCTTGATCCGT  
AGGCGGAGACGAATTATGGTAATTTGTTCCAATCCGAGACATAAACAAAGACAAGGAA  
TGGTTCGAGAGAAAATCAGAGTATCGACTCGGACACTAAAGTGGAAAGTGTGTTGAATC  
AAGAGCAGACAGTAAGCGTCTTTATTATGGACGCTTTATTCTGTCTCCACTTATGAAGG  
GGCAAGGGGATACTATAGGCATTGCGATGCGAAAAGCTTTGCTTGGAGAAATAGAGGG  
AACATGTATCACACGTGCAAAATCTGAA-----AAAATCCACATGAATACTCTACCATAG  
TCGGTATTCAAGAATCAGTACATGAAATTTTAATGAATTTGAAAGAAATTGTATTGAGA  
AGTAATCTGTATGGAACCTCGTGATGCGTCTATTTGTGTCAAGGGTCTGGATGCGTAAC  
TGCTCAAGACATCATCTTACCACCTTCGGTGGAAATCGTTGATAATACACAGCATATAGC  
TAACCTAATGGAACCAATTAATTTGTGTATTGAATTAAGATCGAGAGGAATCGCGGAT  
ATCATATACAAACGCCAAATAATTTCAAGACGCAAGTTAT-----CCTATGGATGCTATATT  
CATGCCTGTTTCGAAATGTTAATCATAGTATACATTCTTATGTAAATGGGAATGAAAAACA  
AGAGATACTTTTTCTCGAAATATGGACCAATGGAAGTTAACTCCTAAAGAAGCACTTC  
ATGAAGCCTCTCGGAATTTGATTGATTTATTTATTCCTTTTTTACATGCGGAAGAAGAAA  
AAGAAAATTCATTTAAAAAATAATAAA---AAAAAAGTTACTTTACCCCTTTTTACTTT  
TCATGAGAAATTGGCGAAA---CTAAGGAAAAAGAAAAAA---GAAATAGCATTAAAATAT  
ATTTTTATTGACCAATCAGAATTGCCTCCTAGGATCTATAATTGCCTCAAAGGTGCAAT  
ATACATACATTATTGACCTTTTGAATAATAGTCCAGACGAACTTATGAAAATCAAACAT  
TTTCGCATAGAAGACGTAAAACATATATTAGACATTCTCGAAATGGAAAAGAATTTTGC  
A-----ATGCTTGGGGGTGGAAAT--GAGAGAATGTCTACAATACCTGCGTTTA  
ATCAGATACAATTTGAAGGGTTTTGTAGGTTTCATTGATCATGGCTTAACAGAAGAACTT  
TCTAAGTTTCCAAAAATTGAAGATACAGATCAAGAAATTGAATTTCAATTATTTGTGGA  
AACATATAAATTGGTAGAACCAATTGATAAAAGAACGAGATGCTGTATATGAATCACTCA  
CATATTCTTCTGAATTATACGTATCCGCAGGATTAATTTGGAAAACCCGTAGGGATATGC  
AAGAACAACAATTTTTATTGGAAACATTCCTCTAATGAATTCCTGGGAACCTTCTATA  
GTAATGGACTATACCGAATTGTGATCAGTCAAATATTGCAAAGCCCCGGTATCTATTAC  
CGGTCAGAATTGGACCATAACGGAATTTGGTCTATACCGGCACCATAATATCTGATTGG  
GGAGGAAGATTAGAATTAGAGATTGATCGAAAAGCAAGGATATGGGCTCGTGTGAGTA  
GGAAACAGAAAATATCTATTCTAGTTCTATCATCAGCTATGGGTTTCAATCTAAGAGAA  
ATTCTCGAGAATGTTTGTACCCTGAAATTTTTTTGTCTTTTCTGAATGATAAGGAGAA  
AAAAAAAATTGGATCAAAGAAAATGCCATTTTGGAGTTTTATCAACAATTTTCTTGTG  
TAGGCGGAGATCCGGTATTTTCTGAATCCTTATGTAAGGAATTACAAAAGAAATTTCTTC  
AACAAAGATGTGAATTAGGAAGGATTGGTCGACGAAATCTGAACCAGAGACTTAATCT  
TGATATACCTGAGAACAATACATTTTTTGTACAGCGAGATATATTGGCAGCTGCGGATCA  
TTTGATTGGACTTAAATTTGGAATGGGTACACTTGACGAT-----ATGAATCATTGAAAAA  
TAAACGGATTTCGTTCTGTGCGGATCTCTTACAAGATCAATTCGGATTGGCTCTAGTTC  
GTTTAGAAAATATGGTTAGAGGAACTATATGTGGAGCAATTAGG---CATAAATTGATA---C  
CGACTCCTCAGAATTTGGTAACTTCAACTCCA-----TTAACAACCACATTTGAATCT  
TTTTTCGGATTACACCCATTATCTCAAGTTTTAGATCGAACTAATCCATTGACACAAATA  
GTTTCATGGGCGAAAATTGAGTTATTTGGGCCAGGAGGATTGACAGGGCGAACTGCTA  
GTTTTTCGGATACGAGATATCCATCCTAGTCATTATGGACGCATTTGCCCAATTGACACGT  
CTGAAGGAATTAATGTTGGACTTATTGGATCATTAGCAATTCATGCAAGGATTGGTCATT  
GGGA---TCTCTAGAACTCCATTTAT-----GAAATTTAGAGAGATCAAAAAA-----  
-GTGCGGATGCTTTATTTATCACCAAGTCGAGATGAATACTATATGGTAGCGACAGGAAA

TTCTTTGGCACTGAATCCAGGTATTCAGGAAGAACAGATTGTTCCAGCTCGATACCGTC  
AAGAATTCTTGACTATTGAATGGGAACAAGTTCATCTTCGAAGTATTTTTCCCTTCCAAT  
ATTTTTCTATTGGAGCTTCCCTCATTCCTTTTATCGAACATAATGATGCGAATCGTGCTTT  
AATGAGTTCTAATATGCAACGTCAAGCAGTCCCGCTTTCTCGGTCCGAAAAGTGCATTG  
TTGGAACCTGGGTTGGAACGCCAAGTGGCTCGAGATTCAGGGGTTGCCGCTATAGCCGA  
ACACGGGGGAAAGATCATTATACCGATACTGACAAGATCATTTTTTTCGGGCAATGGAT  
ATACTCGAAGAATTCATTAGTTATGTATCAACGTTCTAACAAAAATACTTGTATGCAGC  
AAAAATCCCAGGTTCAACCAGGGTAAATGCATAAAAAAAGGGCAAATTTTAGCGGACGG  
TGCTGCTACAGTTGGTGGCGAACCTTGCTTTGGGAAAAAACGTATTAGTAGCTTATATGC  
CATGGGAAGGTTACAATTTGAAGATGCGGTACTAATTAGCGAGCGTTTGATATATGAA  
GATATTTATACTTCTTTCCACATACGGAAATATGAAATTCAAACTCATGTGACAAGCCAC  
GGA---CCTGAAAGAATCACTAACGAAATACCACATCTAGAAGCCCGCTTACTCTGTAAT  
TTAGACAAAAATGGAATTGTTATGCTGGGATCGTGGGTGGAGACGGGCGATATTTTLAGT  
AGGTAAATTAACGCCTCAGATGGCGAAAGAA---TCATCGTATGCCCCGGAAGATAGATT  
ATTACGAGCCATACTTGGCATTCAAGTATCCACTTCAAAGAAACCTGTCTAAAACCTAC  
CTATCGGCGGTAGGGGTGAGTTATTGATGTGAGATGGATCCAGAAAAAAGGG---GGTT  
CGAGTTATAATCCAGAAATTATTCGTGTATATATTTTACAGAAACGTGAAATCAAAGTAG  
GCGATAAGGTAGCGGGAAGACATGGAAATAAAGGTATTGTTTCAAAAATTTTGCCCAG  
AGAAGATATGCCTTATTTGCAAAATGGAAGACCTGTTGATATGGTTTTCAATCCATTAGG  
AGTCCCCTCACGAATGAATGTAGGACAGATATTTGAGTGCTCACTCGGGTTAGCGGGG  
AGTTTGCTAGATAGACATTATCGAATAGTACCTTTTGATGAGAGATATGAACAAGAGGC  
TTCTAGAAAACCTAGTCTTTTCTGAATTATATGAAGCCAGTAAGCAAACAGCGAAGCCAT  
GGGTATTTGAACCCGAGTATCCGGGAAAAAGCAGAATATTTGATGGAAGAACGGGAAA  
TCCTTTTGAACAACCTGTTATAATAGGAAAGCCTTATATCTTGAAATTAATTCATCAAGT  
TGATGATAAAATACACGGACGTTCCAGTGGACATTATGCACTTGTACACAACAACCCC  
TTAGAGGAAGGGCCAAGCAAGGTGGACAACGGGTGGGAGAAATGGAGGTTTGGGCT  
CTAGAAGGATTTGGGGTTGCTCATATTTTACAAGAGATGCTTACTTATAAATCTGATCAT  
ATTAGAGCTCGGCAAGAAGTACTTGGTACTACGATCATTGGAGGAACAATACCTAAAC  
CCGAGGATACTCCAGAATCTTTTCGATTGCTCGTTCGAGAATTACGATCTTTGGCTTTG  
GAACTGAATCATTTCCTTGTATCTGAGAAGAAGTCCAGATTAATAGGAAGGAAGCT----  
-----ATGATCGATCGGTATAAACATCAACAACCTCCGAATTGGATTAGTTTCTCCT  
CAACAAATAAGTGCTTGGGCCAATAAACTCTACCTAATGGCGAGATAGTTGGAGAGG  
TAACAAAACCTATACTTTTCATTACAAAACCAATAAACCTGAAAAAGATGGATTATTT  
TGTGAAAGAATTTTTGGGCCTATAAAAAGCGGGATTTGTGCTTGTGGAAATTATCGAGT  
AATCGGAGATAAAAAAGAAGATTCGAAATTTGTGAACAATGCGGAGTCGAATTTGTT  
GATTCTCGGATACGAAGATATCAAATGGGCTATATTAACCTGGCATGCCAGTAACCCAT  
GTGTGGTATTTAAACGTCTTCCTAGTTATATCGCGAATCTTTTAGATAAACCTCTTAAA  
GAATTAGAAGGCTTAGTATATTGCGAT-----TTTTCTTTTGCTAGGCC---ATAGCTAAAA  
AACCTACTTTCTTACGATTACGGGGTTCATTTCGAATATGAAATCCAATCCTGGAAATACA  
GCATCCCCTTTTTTTTACTACCCAAGGCTTCGATACATTCGAAATCGAGAAATTTCTA  
CCGGAGCAGGTGCTATACGAGAACAATTAGCCGATCTGGATTTGCGACTTATTATAGATT  
ATTCGTTGGTAGAATGGAAAGAATTAGGCGAAGAA---GGACCCGCAGGTAATGAATGG  
GAAGATCGCAAAGTTGGAAGAAGAAAGGATTTTTGGTTAGACGTATGGAATTAGCTA  
AGCATTTTTATTCGAACAAATATAGAACCCGAATGGATGGTTTTATGTCTATTACCTGTTC

TTCTCCCGAGCTGAGACCGATCATTAGATAGATGGGGTAAACTAATGAGCTCGGAT  
ATTAATGAACTCTATAGAAGAGTTATATATCGGAACAATACTCTTATTGATCTATTAACAA  
CAAGTAGATCTACGCCAGGAGAATTAGTAATGTGTCAAGGAGAAATTGGTACAAGAAGC  
CGTGGATACTTCTTGATAATGGAATCCGCGGACAACCAATGAGGGATGGCCATAATA  
AGGTTTACAAGTCGTTTTCTGATGTAATTGAAGGCAAAGAGGGAAGATTTCCGGGAGAC  
TCTGCTTGGCAAACGGGTCGATTATTCAGGACGTTCTGTGATTGTTGTAGGGCCCTCAC  
TTTCATTACATCGATGTGGATTGCCTCGCGAAATCGCAATAGAGCTTTTCCAGACATTTT  
TAATTCGTGGTCTAATTCGACAACATTTTGCTTCGAACATAGGAGTTGCTAAGAGTAAA  
ATTCGGGAAAAAGAACCATTGTATGGGAAATACTTCAGGAAGTTATGCAGGGGCATC  
CCGTATTGCTAAATAGAGCGCCTACTCTGCATAGATTAGGCATCCAGGCCTTCCAACCTA  
TTTTAGTGGAAGGACGTGCTATTTGTTTACATCCATTAGTTTGTAAGGGATTCAATGCAG  
ACTTTGATGGGGATCAAATGGCTGTTTCATGTACCTTTATCTTGGGAGGCTCAAGCAGAG  
GCGCGTTTACTTATGTTTTCTCATATGAATCTCCTGTCTTCAGCTATTGGGGATCCCATT  
CTGTACCAACTCAAGATATGCTTATTGGACTCTATGTATTAACGAGCGGGAATCGCCGA  
GGTATTTGTGCAAATCGGTATAATCCATCTAATCGCAAAAAT-----CATAAAAATGAAA  
AAATTTACAATAATAACTATAAATATACG-----GAACCCTTTTTTTGTAAATTCCTATGATG  
CAATTGGAGCTTATCGCCAGAAAAGGATCAATTTAGATAGTCCTTTGTGGCTCCGATGG  
CGACTAGATCAACGC---GTTATTGCTTCA-----AGAGAAGCCCCTATCGAAGTTCACTAT  
GAATCTTTGGGTACCCATCATGAGATTTATGGGTACTATCTAATAGTCAAAAAGTATAAAA  
AAAGAAATCTTTGTATATACATTTCGAACCACTGTTGGTTCATATTTCTCTTTATCGAGAA  
ATCGAAGAGGCTATAACAAGATTTTGCCGGGCTGCTCATATGGTACC-----  
-----ATGGCGGAACGGGCCGATCTGGTCTTTCACAATAAAGTGATAGATGGAACCTG  
CCATTAACGACTTATTAGCAGATTAATAGATCACTTCGGAATGGCATATACATCACACA  
TCCTGGATCAACTAAAGACTCTGGGGTCCAGCAGGCCACTGCTACATCCATTTTCTTA  
GGAATTGATGATCTTTTAAACAATCCCTTCTAAGGGATGGCTAGTCCAAGATGCTGAACA  
ACAAAGTTTGATTTTGGAAAAACACCATCATTATGGAAACGTACACGCAGTAGAAAAA  
TTACGCCAGTCCATTGAGATATGGTATGCTACAAGTGAATATTTGCGACAAGAAATGAA  
TCCTAATTTTAGGATGACTGACCCTTTTAAATCCAGTCCATATAATGTCTTTTTTCGGGAGC  
TCGAGGAAATGCATCTCAAGTACACCAATTAGTAGGTATGAGAGGATTAATGTCAGATC  
CACAAGGACAAATGATTGATTTACCCATTCAAAGCAATTTACGTGAGGGGCTGTCTTA  
ACGGAATATATAATTTCTTGCTACGGAGCGCGGAAAGGAGTTGTGGATACTGCTGTACG  
AACATCGGATGCTGGATATCTTACACGTAGACTTGTTGAAGTAGTTCAACACATTGTTG  
TACGTAGAACCGATTGTGGAACCATCCGAGGGATTTTAGTGAGTCCTGGAAATAGGAT  
GATTCCG---GAAAGAATTTTTATCCAAACATTAATTGGTCGTGTATTAGCGGACGATATAT  
ATATGGGCCCGCGATGCATTGGCGTTCGAAATCAAGATATTGGTATTGGACTTATTAATC  
GATTCATAACC-----TTTCAAACACAACCAATATCTATTCGGACTCCCTTTACTT  
GTAGGAGTACATCTTGGATCTGCCGATTATGTTATGGACGAAGTCCTACTCACGGGGAC  
CTGGTTCGAATTGGGAGAAGCCGTAGGTATTATTGCGGGTCAATCTATTGGAGAACCGG  
GTAATCAACTAACATTAAGAACTTTTCATACCGGCGGAGTATTCACAGGGGGGACTGC  
AGAACATATACGAGCTCCTTCTAATGGCAAATAAAATTCATGAGGATTTGGTTCATC  
CCACACGTACACGCCATGGGCATCCTGCTTTTTTATGTTATATAGACTTGTATGTAATAT  
TGAGAGTGAGGATATTATACATAACGTCACTATTCCACCAAAAAGTTTACTTTTAGTTCA  
AAACGATCAATATGTAGAATCAGAACAAGTGATTGCTGAGATTCGCGCGGGAACATAC  
ACTCTT---AATTTAAAAGAGAGAGTTTCGAAAACATATTTATTCTGACTCAGAGGGAGAA

---ATGCATTGGAGTACCGACGTGTACCATGCACCCGAATTTACATATAGTAATGTCCATC  
TCTTACCAAAAACAAGTCATTTATGGATATTATCAGGAGGTTTCGTGCGGA-----TGCAGT  
CTAGTCCCTTTTTTCACTCTACAAGGATCAAGATCAAATTAACGTTTCAT-----TCTCTTTGT  
GTCGAAAGA---AGATATAATTTCTAGCCTT---TCAGTAAATAATGATAAA---GTGGGACAAA  
AATTTTATGGTCCGGATCTCTCTGGTAAA---GAAAACGGAATTCCTGATTAT---TCAGAA  
CTTAATCCAATCCTATGTACGGGTCAATCTAATCTCACATATCCTGCT---ATTTTCCATGGT  
AATTCTGAT-----TTATTGGCAAAGAGGGCGAAGAAATGGATTCATCATTCAATTTGAATC  
ACTTCAAGAACGAGAAAAAGAACTACGACCCCCTTCCGGTATTTTCGATTGAAATACCC  
ATAAAT-----GGTATTTTTTCGTAGAAATAGTATTCTTGCTTTTTTTCGATGATCCTCAATACA  
GAAGAAATAGTTTCAGGAATTACTAAATATGGGACTATAGGGGTGCATTCAATCCTCAAA  
AAAGAGGAT-----TTGATTGAGTATCGA---GGAGTCAAAGACTTTAAGCCAAAATACATG  
AAAGTGGATCGATTTTTTTTTCATTCCCGAGGAAGTGCATATTTTACCTGAATCTTCTTCC  
ATAATGGTACGGAACAATAGTATCATTGGAGTAGCTACACGACTAACTTTAAGTATAAG  
AAGCCGAGTAGGCGGATTGGTCCGAGTGGAGAAAAAAGGATTGAACTCA  
AAATATTTTCTGGAGATATACATTTTCTGGAGAGATGGATAAGATATCCCGACACAATG  
GGATCTTGATAACCACCAGAAAGAGTAAAAAA-----AATTCTAAGAAATCAAAAAA----  
--TCGAAAATTGGATTTATGTCCAGTGG-----ATCACACCTACCAAGAAAAG-----TATT  
TTGTTTTTGTTCGACCTGTAATCATATATGAACTAGCCGACGGTATAAATTTAGTCAAAC  
TTTTCCACAGGATCTATTGCAAGAAAGGGATAATCTGGAGCTTAGAGTTGCCAATTAT  
ATACTTTATGGAAATGGCAAACCAATTCCGGGAATTTCTGGCACAAGCATTCAATTAGT  
TCGGACTTGTTTATTGTTGAATTGGGACCGAGACAAA-----AAAAGCTCTTCTATCGA  
AGACGCGCGCTTCTTTGTTGAAGTAAGTACAAATGGTCTGGTTCGAAATTTCTTAC  
GAATAGACTTAGGGAAATCCGATACTGCGTATATCAGAAAAAGGAAAGATCCGTCAGG  
TTCAGGATTGATCTTT--AATAATGAGTCAGATCGTACCAATATCAATCCATTTTTTTCTAT  
TTATTCCAAGACAAGG-----GTTCCACAATCTCCGAGTCAAATCAAGGAACTAT  
TCGTACGTTGTTGAATAGA-----AATAAAGAACGCCAATCTTTGATAATTTTGTTCAGCA  
TCGAATTGTTTCAAATAGATCTA-----TTCAACGATGTAAAAGATTATAAT-----GTCAT  
AAAAGAATCA---CCTCTAATTTCAATTAGGAATTCGTTAGGACCTTTAGGGGCG-----GC  
CCCTCAAATTGTGAATTTT-----TATTCATTTTATTACTTAATAACT-----CATAATCCGATCT  
CC---CTAACTAAATATTTGCAACTTGAC-----AAT---TTAAAACAGATTTTTTCAAGTACTT--  
---AAA---TATTATTTAATGGATGAAAACGGG---GGGATTTTAAATTCC---GATCCATGCAT  
TAACATCGTTTTCAATACATTTAATTTGAATTGGCATTCTTCTGCATGATAATTATTGTGAA  
GAAACACCTACAAGAATTAGT---CTTGGACAGTTTTTTTTTTGAAAATGTATGTATAGCCA  
AAAATAGACCA-----CACTTAAAATCGGGTCAAATTATAATTGTTCAA---GTTGATTCT  
CTAGTAATAAGATCAGCTAAGCCTTATTTGGCCACTTCAGGAGCAACTGTTTCATCGCCA  
TTATGGCGAAATCCTTTACGAAGGAGATACTTTAGTTACATTTATATATGAAAAATCACG  
ATCTGGTGATATAACGCAGGGTCTTCCAAAAGTCGAACAAGTATTAGAAGTGCGTTTCGA  
TTGATTCAATATCGATGAGCCTAGAAAAGAGAATTGAGGGTTGGAACGAGCGTATAAC  
AGAATTCTTGGAATTCCTTGGGGATTTTTGATTGGTGCTGAACTAACGATAGTGCAAA  
GTCGTATCTCTTTGGTTAATAAGATCCAAAAGGTTTATCGATCCCAGGGGGTGGAGATC  
CATAATAGACATATCGAAATTATTGTACGTCAAATAACATCAAAAAGTGTTGGTTTCAGAA  
-----GATGGAATGTCTAATGTTTTTTCACCTGGAGAACTCATTGGGTTGTTACGAGCG  
GAACGAACAGGGCGTGCTTTGGAAGAAGCGATCTGTTACCGAGCCGTATTATTGGGAA  
TAACGAAAGCATCTCTAAATACTCAAAGTTTCATATCGGAAGCAAGTTTTTCAAGAACT

GCTCGAGTTTTAGCAAAAGCCGCCCTCCGAGGTCGTATCGATTGGTTGAGAGGTTTTGA  
AAGAGAACGTTGTTCTAGGAGGCATGATACCCGTTGGTACGGGATTCAGAGAATTAGC  
GCACCGTTTCG-----AGGCAACATAACAATATTCCTTTAGAAACCCCCCAAAAAA-----  
ATTTTCGAGGGGGAAATGAGA-----GATATTTTGTTCACCACAAAGAATTATTTGATTT  
TTTCATTTCAACGAATTTACATGATACATCAGAACAAGAATTTCTAGGATTTAATGATTC  
A-----ATGACAAGAAGATATTGGAACATCCATTTGGAAGAGATGATGGAAGCA  
GGAGTTCATTTTGGTCATGGTACTAGGAAATGGAATCCTAGAATGGCACCTTATATCTCT  
GCAAAACGTAAAGGTATTTCATATTATAAATCTTACTAGAACTGCTCGTTTTTTTATCAGAA  
GCTTGTGATTTAGTTTTTGATGCAGCAACTAGGGGCAAACAATCTTAATTGTTGGTAC  
CAAAAATAAAGCAGCGGATTCAGTAGCCCGGGCTGCAACAAGGACTCGGTGTCATTAT  
GTTAATAAAAAATGGCTCGGGGGGATGTTAACAATTTGGTCTACTACAGAAACGAGAC  
TTCATAAGTTCAGGGACTTGAGAACGGAACAAAAGACGGGGGGACTCAACCGTCTTC  
CGAAAAGGGATGCCGCTATGTTCAAGAGACAATTATCTCACTTGCAAACATATCTGGGC  
GGGATTAATATATGACGGGGTTACCCGATATTGTAATAATCGTTGATCAACAAGAAGAA  
TATCGGGCTCTTCAAGAATGTATCACGTTGGGAATTCCAACTATTTGTTAATTGATACA  
AATTGTGACCCCGATCTCGCCGATATTTTCGATTCCAGCGAATGATGATGCTATAGCTTCA  
ATCCGATTAATTCTTAACAAATTAGTATTTGCTATTTTCGGAGGGTTCGTTCT--AGCTCTAT  
ACGAAATTCTATGGGACAAAAATAAATCCACTCGGTTTTCGACTTGGTGCAACCCAA  
GGGCATCATTCTCTGTGGTTTGCACACCCCAAAAAATATTCTGAAGGTTTACAAGAAGA  
TCAAAAATACGAGATTGTATCCAGAATTATGTACAAAAAACATGAGAATTTTTTCTG  
GT--GTTGAAGGAATTGCACGTATCGAGATTCAAAAAAGAATTGATCTTATTCAAGTGAT  
AATCTTTATGGGATTCCCAAAGTTAGTAATAGACGAT-----GGG-----TCTCGAAAAATCG  
AAGAATTACAGATTAATGTACAAAAGAATTCAATTCTGGGAACCGAAAACCTCAACAT  
TGCTATTACAAGAATAGGAAACCCCTTATGGACACCCTAATATTCTCGCAGAATTTATAGC  
CGGACAATTAAGAATAGAGTTTCATTTTCGCAAAGCAATGAAAAAAGCTATTGAATTA  
ACTGAACAGGCGGGTACAAAGGGAATTCAGTACAAATTGCCGGACGTATAGACGGA  
AAAGAAATTGCACGTGTCGAATGGATCAGAGAAGGACGGGTTCTCTACAAACCATT  
GAGCTAAAATTGATTATTGTTGCTATCCAGTTCGAACTATCTATGGGATATTAGGCATAA  
AAATTTGGATATTTGTAGACGAGCAAATGTCGCGTTACAGAAGGCCTCGTTTCAAAAA  
AATACGCCGTCTGGGGGCTTACCGGGACTAACTAGTAAAAGGCCCAAAACCGGAAAC  
GATCTTAAAAACCAATCGCGTTCCGGTAAA---AAATCTCAATATCGTATTGTTTAGAAG  
AAAAACAAAATTGCGTTTTTCATTATGGTCTTACAGAACGACAATTACTTAAATACGTT  
CGTATCGCCGGAAAAGCCAAAGGATCAACGGGTCAAGTTTTACTACAATTACTTGA  
TGCGTTTGGATAACATCCTTTTTTCGATTGGGTATGGCTTCGACTATTCTCAAGCCCGAC  
AATTAGTTAATCATAGACATATTTTAGTTAATGGTTCTATAGTGGATATACCAAGTTATCG  
GTGCAAACCCCGAGATATTATTACAGCAAAAGATGAAAAAAAATCGGAACTGATT  
CAAAATTATCTTGATTCATCCCCCCT---CAGGAATTGCCAAAACATTTGACTCTTCAGC  
CATTGCAA-----TATAAAGGATTAGTCAATCAAATAATAGATAGTAAATGGGTCAGTTTAA  
AAATAAATGAATTGCTCGTTGTAGAATATTATTCTCGTCAGACTATGTCACGTGAGGTA  
CTGCAGAAGAAAAAATTGAAAAATCCGATCCAATTTATCGTAATCGATTAGTTAACATG  
TTGGTTAACCGTATTCTGAAACATGGAAAAAATCATTGGCTTATCAAATTATCTATCGA  
GCCATGAAAAAGATTCAACAAAAGACAGAAACAAATCCACTATCTGTTTTACGTCAAG  
CAATACGTGGAGTAACTCCCGATATAGCAGTAAAGGCAAGACGTGTAGGCGGATCAAC  
TCATCAAGTTCCCATTTGAAATAGGATCCACACAAGGAAAAGCACTTGCCATTCTGTTGGT

TATTAGGGGCATCCCGAAAACGTCCCGGTCGAAATATGGCTTTCAAATTCAGTTCCGAA  
TTAGTGGATGCTGCCAAAGGGAGTGGCGATGCCATACGTAAAAAGGAAGAGACTCATA  
GAATGGCAGAGGCAAATAGAGCTTTTGCACATTTTCGTATGGGTAAGGACACTATTGCT  
AACATAATAACCTCTATTCGCAATGCTGACATGAATAGAAAAGGAATGGTTCGAATACC  
AGCTACTAACATCACCGAAAACATTGTTAAAATACTTTTACGAGAAGGTTTTATTGAAA  
ACGTAAGGAAACATCGGGAAAAGCAACAAGGATTTTTGGGTTTTAACCTACGACATAG  
AAGA-----AATAGGAAAGGACCATATAAAACG---ATT-----TTAAATTTAAAACGGATCAG  
TCGACCCGGTCTCCGAATATATTCTAACTATCAAAAAATTCCTAGAATTTTAGGAGGAAT  
GGGCATTGTAATTCTTTCTACTTCTCGGGGTATAATGACAGACCGAGAAGCTCGACTAC  
AGGGAATCGGCGGCGAAATTTGTGTTATATATGGATGGCAAACCCATAACCAAGAATC  
GGTTCACGTAGAAATGGACGTATTAGCTCACGT--AGTACGCGTAGAATACCAAAGGGC  
GTTATTCATGTTCAAGCAAGTTTCAACAATACAATTGTGACTGTTACAGATGTACGGGG  
TCGGGTAATTTCTTGGTCTCCGCCGGTACGTGTGGATTCAAAGGTACAAGAAGAGGG  
ACACCATTGCCGCTCAAACCGCAGCAGGAAATGCTATTCGGGGAGTAGTGGATCAAG  
GGATGCAACGAGCCGAAGTTATGATAAAGGGCCCCGGTCTCGGAAGAGATGCAGCATT  
AAGAGCTATTCGGAGAAGCGGTATATTATTAAGTTTCATACGGGATGTAACCCCTATGCC  
ACATAATGGCTGTAGGCCCCCTAAAAACGACGTGTGATGCCAACTATTAAACAACCTTA  
TTAGAAACACAAGACAGCCAATCAGAAATGTCACCAAATCGCCCCGCCCTTCGGGGATG  
CCCTCAGCGTCGAGGAACATGTACTAGGGTGTATACTATCACCCCCAAAAACCAAAC  
TCTGCCTTACGTAAAGTTGCCAGAGTACGCTTAACCTCGGGATTTGAAATCACTGCTTA  
TATACCTGGTATTGGCCATAATTTACAAGAACATTCTGTAGTCTTAGTAAGAGGGGGAA  
GGGTTAAGGATTTACCCGGTGTGAGATATCACATTGTTTCGAGGAACCCTAGATGCTGTC  
GGAGTAAAGGATCGTCAACAAGGGCGTTCATAATATGGGGTCAAAAAGCCAAAAATG  
GCAAGGAAAAGTTTAATTCAGAGGGAGAAGAAGAGGCAAAAATTTGGAACAAAAATAT  
CATTTGATTCGTCAATCCTTAAAAACGAAATAAGC-----AAAGTTCATCGTTGAGT  
GAGAAATGGGAAATTCATGGAAAGTTACAATCCCCACCGCGTAATAGTGCACCCACAC  
GTCTTCATCGACGTTGTTTTTTAACCGGAAGACCGAGAGCTAACTATCGAGACTTTGGG  
CTCTCTGGACACATACTTCGTGAAATGGTTCATGCATGCTTGTTCCTGGGGCAACAAG  
ATCAAGTTGGATGGTAAAAAATTCATTCAGCTCAGTTATTTTCGCAAGAA---GAA---AAA  
AAAGAAAATGGAGGATCCGTTGAATTTCAAGTAGTCAGTTTCACCAATAAGATACGAA  
GACTTACTTCACATTTGGAATTGCACAAAAAAGACTATTTATCTCAAAGAGGTCTACGT  
AAAATTCTCGGAAAACGCCAACGATTACTTTCTTATTTATCAAAGAAAATAAAATGCG  
TTATAAAGAATTAATTAATCAATTGGATATTCGGGAGTCAAAAACCTCAG-----ATGGTAA  
AATTCGTTTTAAAACGATGTGGTAGAAAGCAACGAGCTGTTTATCGAATCATTGCAATT  
GATGTTTCGATCCCGAAGAGAAGGAAGAGATCTTCGTAAAGTGGGTTTTTATGATCCGAT  
AAAGAATCAAACCTATTTAAATGTTCTGCGATTCTATATTTCTTGAAAAGGGTGCTCA  
ACCTACAGGAACCTGTTTCATGATATTTTAAAGAAGGCAGGTGTTTTTACGGAACCTCACC  
TTAATCAA-----ATGGATAAATCCAAGCGACTCTTTCTTAAATCCAACGATCTTT  
TCGTAGGCGTTTGCCCCGATTCCATCGGGGGATCGAATTGATTATAGAAACATGAGTT  
TAATTAGTCGATTTATTAGTGAACAAGGAAAAATATTATCTAGACGGGTAATAGATTGA  
CCTTAAAACAGCAACGCTTAATTACTATTGCTATAAAAACAAGCTCGTATTTTATCTTTGT  
TACCTTTTCTTAATAATGATAAAAATAAACAATTTGAAAGAAGCGAGTCGACTCCTAGA  
ACTATTGGTCTTAGAACAGGAATAAAATGGCGCGA---TTAAAAAAAATCCTTTTGTG  
GGAAACCATTTATTAAAAAAATAAATAAGCTTAACACAAAGGGAGAAAAAGAAATAA

TAGTAACTTGGTCCCGAGCATCTACCATTATACCAACAATGATTGGGCATACTATCGCTG  
TTCATAATGGAAAGGACCATTTGCCTGTTTATATAACGGATCGCATGGTAGGTCATAAAT  
TGGGAGAATTTGCACCCACTCGCAATTTCCGGGGGCATGTGAAAAATGATAATAGATCT  
CGTCGTATGATTTTAAAATCTTTTATACTAGGTAATCTAGTATCCCTATGCATGAAGATAA  
TCAATTCGGTTCGTTGTGGTCCGACTCTATTATGGATTTCTGACCACATTCTCCATAGGGC  
CCTCTTATCTCTTCCTTCTCCGAGCTTGGCTTATGGAAGAAGGA-----ACCGAGAAGA  
AAGTATCAGCAACAACAGGTTTTATTACGGGACAGCTCATGATGTTTCATATCGATCTATT  
ATGCGCCTCTGCATCTAGCATTGGGTAGACCTTATACAATAACTGTCCTAGCTCTACCGT  
ATCTTTTGTTCATTTCTTCTGGACCAATCCCAAACACTTTTTTTATTATGGATCTACTAC  
CAGAACTCAATGCGTAATCTTAGCATTCAATGTGTATTCCCTGAATAATCTCATTTTTCA  
ATTATTCAACCATTTCATTTTACCAAGTTCAATGTTAGTCAGATTAGTCAACATTTCTATG  
TTTCGATGCAACAACAAGATGTTATTTGTAACAAGTAGTTTTGTTGGTTGGTTAATTGGT  
CACATTTTATTCATGAAATCGGTTGGATTGATATTAGTCTGGATACAGCAAATAATTCTA  
TTATATCT--ATTAGATCTAATAAGTACCTTGTGTGAGAATTGAGAAAT-----TCTCCAATC  
TTTAGTATTATCTTATTTATTACCTGGGTCTACTATTTAGGCAGAATACCGTCACCCATTC  
CACTGAAAGAAACCTCAAAAACCGAAGAAGATAAACCTCTTGGGATTATCCTTTTTCGA  
CTATAAACGATGGAATCGTCCATTTTCGATATATAAAG---GATAAATTTGAC---GCTGTTAG  
AAAAGAAATGTCACAATATTTTTTTTATACATGTCAAAGTGACGGAAAAGACCGAATAG  
TTTTTACATATCCACCTAGTGTAGCAACTTTTTTCGAACTGATAGAAAAAAGATATCTT  
TGTTTTCAACAGAAAAACTTTTTTATGATGAATTCGATAATCCTTGGAAGTCTTTGAATG  
AACAAAAAAGAATTTTAAACAAAATAGTTATAACTAGAATTCTACTTCTCGATAAG  
GGATCCCTAGTTGGAGATGTACTGCAAAAAGGACTCAATTATGTATAGATGAACTAA  
AAAAGAATATTTACCAAAAATATATGATCCGTTCTTGAGT--CCTTACCGGAGACGAATC  
AATTTACTTTTAGGATTCAGTGAGAACATTTGGACAAATAAGATTCATGCTATCATTAAC  
AACGGTTTCTTCGATGGAAAATGCAAACGCGTA-----ATTAAGAAGATTTCTACTTCT  
ACTCCTACTTCTACTCCTACTTCTACTACTTCTACTTCTACTCCTACTTCTCCTACTTCTA  
CTTCTACTTCTACTCCTGCTTCTATTCTGCTTCGGCTATTATACGCTATGCCAAGCAATG  
GGATTTTCGTCGAGAGATAATCAAAGGCTCTATGCGTGCTCAACGACGTAATAATGGGTA  
TGTATCAACTGTTTCAAGGT--GCAAATCTTATCTTTTCTTGGGCAGA---CACAAATTTT  
TTTTTCTGATTTTGTATTTATATTCCTAGACTAATGGAAAACTTGATAGACTTAACGA  
AAAAAATCAAGAATCGATAAATCTGAAGGAATGGGAGAGCATAACGATTTGGTCAACTA  
GTAAGAGGTTCTCTGTTAATAACTCAAGCATTTTTGAGAAAATATATTATCTTACCCTCA  
GTGATAATAGCTGCCAACCTTACCCGTATACTATTATTGTCACCTCCTCACTTTTTTGGAG  
GATTTTAAAATTGGAAAAAGAAATATATGTAAAGTGCACATATAATGCTATTCCATTA  
GCAGAAAACGAATTTCCCAAATTTGGTTAACAGACGGTATTCAAATAAAGATCTTATT  
TCCTTTTCGTCTGCAATCGTGGCACAGATCAAATTTGGAACGGAACTGAACAGCCT  
TTTGGGTCTGCCGAAAACCTTCATAAAAAAAAAAAAAACAACAATTAATAAATGGAGA  
ACGAAGTATTTTCGA---ATATTTTTACGTTTAAGA-----  
AAAAAGGTTTTTAGA-----AAAATTAATATTGCAAAGAAAAATGGGTCATCAAACCC  
ATTTTATTTATAAAAAAAGACTAAGAGAA---TTCTGGCAAAGAAACCCAATTAATTCA  
ATAATAAGTAATGGAATGATCCAAAGCTCGTCTGGGTCTATAGATTGATAATTTTGTC  
TTGAGAGAACGAAAGATGAAAGAGTTGACTGATAGAATAAACACCATGCTAAAAATAA  
TTGAAAAAATGAAAAAAGACAGGCAAAAAGAGTTGCTA-----AAAATGAGTTATTAT  
GATAAATATTTGAATCTCAGAAAAATATTTTAAAGATATTAATAA-----AATGTACGATTT

ATTCGTAAATCGTATAAGTTTCTAAAATTTTTGTTCAAACATATACATAGATATCTTTC  
AAGGTATCATTAAT-----ATGTCGAGGATTAAT-----TGGGACGTATCATACTTG  
TCGCAAGCATATTTATTTTACAAATTATCACAAACAAAATTATTAAGTTAA  
GACCTGTCTTTCAATATACATCTCGTTTTCTTAAGAATGAAACACAGGATTATTTTGCAC  
ACGAAATATTACATTCCGATCTAAAACAAAAGAAACAAAAGAATCTTGAAAATTCTCCA  
TGGAAAAACTGGTTACGGGGT---TATAACTTCGATTTATATCCGATTAGATGGTCAAAT  
TACTCTCCCAAAAATGGCGAAATAGAGTCAAGCAAGATCGT-----AAAAATAAAAACCA  
ATGTGATTCATATGAAAAAAAAGGA-----TTAATTGATTACAAAAACAA---AAAAAA  
AAAAAAAATATATATATGATTCTTTATCATATAAATCTATTAATGCTAATATTAGAGGTATG  
GATAGAAAATATTTTGATTGGAGAATGCTGCATTTTTCTATTAATTTTTTGATTGGATGA  
GAATGAGTGAAAAAAAATAAGTCGTTTTCTTTCCA---AAATTTTTGATACTTTATAATGC  
ATATAAGATTAAGCCATGGATGATACCAATCAAATCACTTCTTTTCGATTCCAAGAAAA  
GATCGAAGGGAAGCTTGGTGTACTCCGAACAGGCCATTTTCGTTTTCAATTGAACTGG  
CCT-----AGTAAAAGCCTTTTCATGAACCTCAACGGATTTTCTTTCATGCTTAGACGGC  
TAGATCTCAAAAAACTTAGTCTAGCCGCTATTCGCAATAACGAATTCAGTCTGGAGTTC  
CTGCTACCTCCGTCGGACGATATAACTTTTCACGAGTTACTTGAAGGAATATTTATTATC  
GAACCCGTTCTGTCTCTAAAAAATGATGGAAAATTTATTATGTCTCAAACCATAGGT  
ATTTCAATTAGTTCAGAAGAATAAGTACAATCATTATGATTTGCTTGTCCGGAAAAATATC  
TTATCCCCTAGAGGTCGGAGAGAGTTTAGA-----ATTCTAATTATCTTTCTTTGGCCCAAT  
TATCGATTAGAAAATCTAGCTTGTATGAATCGTTATTGGTTTGATACCAATAATAGCAGTC  
GTTTTAGTATGCTAAGGATCCATATGTATCCAGTGAAAGGGCAGCAATTCAAATTATGGA  
TTTTAGAATTC-----AGAGAGATCAAGAATTCTCATTATTTCTTAGATTTCATGGACCC  
AATCAATTCATTGGGATCTTTCATTACATTTTTTCCATCAAGAACGTTTTATAAACT  
CTTAGACTCCCGAATTTGGAGTATCCTACTTTCA--CGCAATTCA-----CAGGGTTCAACA  
AGCAATCGATATTTTC-----ACGATCAAGGGTGTAGTACTATTTGTAGTAGCGGTCTGCC  
TTATATATCGT-----ATTAACAATCGAAAGATGGTCGAAAGAAAAAATCTCTATTTGA  
CAGGGTTTCTTCT--ATACCTATGAATTCATTGGACCCAGAAATGATACATTG  
GAAGAATCTTTT--GGCTCTTCCAATATCAATAGGTTGATTGTTTTG--CTCCTGTATCTTC  
CA-----

-----  
-----  
-----  
-----  
-----  
-----

-----ACTA  
GTTTCGTTCAAGTAACGGATTCTAGCCAATTGAAAGGATCTTCT--GATCAATCCAGAGA  
TCATTTTCGATTCCATTAGT-----AATGAGGATTCGGAA-----  
TATCACACATTGATCAATCAAAAAGAGATTCAACAACCG-----

-----CTTCCGGAAGAAATCGAAGAATTT-----CTCGGGAATCCTACAAGATCCA  
TTCGTTCTTTTTTCTCTGACAGATGG-----TCAGAACTTCAT--ATGGGTTCAATCCTATT  
GAGAGGTCCACTAGAGATCAG-----AAATTGTTGAAGAAAGAACAAGATGTTTCT--  
-TTTGTCCCTTCCAGGCGATCGGAA-----AATAAAGAAATAGTTAATATATTCAAGAT  
AATTACGTATTTACAAAAT-----ACCGTCTCAATTCATCCTATTTTCATCAGATCCGGGATGT



GATATGGTTCCG---AAGGATGAACTGGAT--ATGGACAGTTCCAATAAGATTTCAATCTT  
GAAGAAAAATCCATTTATTTATTTA-----TTTCATCTATTCCATGACCGGAACAGGAGGG  
GATACACGTTA-----CACCACGATTTTGAATCAGAA-----GAGAGATTTCAAGAAATGGC  
AGATCTATTCACTCTATCAATAACCGAGCCG--GATCTGGTGTATCATAAGGGATTTGCC  
TTTTCTATTGATTCCTACGGATTGGATCAAAAACAA-----TTCTTGAATGAGGTATTCAAC  
TCCAGGGATGAATCGAAAAAGAAATATTTA-----TTGGTTCTACCTCCTATTTTTTTAT---  
--GAAGAGAATGACTCTTTTTATCGAAGGATCAGAAAAAAATGGGTCCGG---ACCTCCC  
CCGGGAATGATTTGGAAGATCCAAAACAAAAAATAGTGGTATTTGCTAGCAACAACAT  
AATGGAGGCAGTCAATCAATATAGATTGATCCGAAATCTGATTCAAATCCAATAT-----TA  
TAGG-----TACATAAGAAATGTATTGAATCGATTCTTTTTAATGAAT-----AGATCCGATC  
GCGACTTGGAATATGGAATTCAA-----AGGGATCAAATAGGAAATGATACTCTGAATC  
ATAGAACTATAATGAAATATACGATCAACCAACATTTATCAAATTTCAAAAAG---GGTCA  
GAAGAAATGGTTCGATCCT-----CTTATTTTGATTTCTCGAACCGAGAGATCCATGAATC  
GGGATCCTAATGCATATAGATACAAATGGTCCAATGGGAGCAAGAATTTCCAGGAACAT-  
-----TTCATTTCTGAGCAGAAGAGCCATTTT--CATTTTCAAGTAGTGTTCGATCGATTA  
CGTATTAATCAATATTCGATTGATTGGTCTGAGGTTATCGATAAAAAAGATTGGTCTAAG  
TCACTTCGTTTCTTTTTGTCCAAGTTACTTGTT-----TTTTGTCC-----  
-----AAGTTTCTTCTTTTTGTCTAACTACTTCCT--TTTTTCTTTGTGAGTTTCGG  
GAATATCCCCATTCATAGGTCCGAG--ATCCACATCTAT--GAATTGAAAGGTCCGAATGA  
TCGACTCTGCAATCAGTTGTTAGAATCAATAGGTCTTCAAATCGTTCATTTGAAAAAAT  
TGAAACCCTTC-----TTATTGGAT-----GATCATTATACTTCC---CAAAAATCGAAATTCT  
TGATCAATGGAGGAACAATATCACCATTTTTGTTCAATAAGATACCA---AAGTGG---ATG  
ATTGACTCATTGATACTAGA-----AATAATCGCAGGAAATCCTTTGATAACACGGATTCC  
TATTTCTCAATGATATCCCACGATCAAGACAATTGGCTAAATCCCGTGAAACCATTTCAT  
AGAAGTTCATTGATATCTTCTTTTTATAAAGCAACTCGACTTCGATTCTTGAATAATCCA  
CATCACTTCTGCTTCTAT-----TGTAACAAAAGATTCCCTTTTTATGTGGATTAT--GTGGA  
AAAGGCCCGTATCAATAATTATGAT-----TTTACGTATGGA---CAATTCCTCAATATCTTGT  
TCATTGCAACAAA---ATATTTTCTTTGTGCGGCGGTAAA-----AAAAACATGCTTTTTT  
GGAG---AGAGATACTATTTACCAATCGAGTCACAGGTATCTAACATATTCATACCTAAC  
GATTTTCCACAAAGTGGTGACGAAAGG---TATAACTTGTACAAATCT-----TTCCATTT  
TCCAATTCGATCCAATCCATTCGTTTCGT-----CGAGCTATTTACTCGATCGCAGACATTC  
TGTAACACCTCTAACAGAGGGACAAATAGTCAATTTGAAAGAACTTATTGTCAACCTC  
TTTCAGATATGAATCTATCTGATTCAGAGGGGAAGAACTTGCATCAGTATCTCAAT-----T  
TCAATTCAAACATGGGTTTGATTACACTCCATGTTCTGAGAAATATTTACCATCCGAA  
AAG-----AGGAAAAAA-----CAGAGTCTTTATCGAAAG-----AAATGCCTTG  
AGAAAGGGCAGATGTATAGAACCTTTCAACGAGATAGTGCTTTTTTCAACTCTCTCAAAA  
TGGAATCTATTCAAACATATATGCCATGGTTCCTTACTTCGACAGGGTACAAATATCTA  
AATTTGCTATTTTTAGATACTTTTTTCAGAC--CTATTGCCGATACTAAGTAGCAGC-----CC  
AAAATTTGTATCCATTTTTGATGATATTATGCATCGATCAGATAGATCATGGCGAATCTT  
CGAAAAAATTG-----TGTCTTCCACAATGGAAT--CTGATAAGTGAGATTCG  
ATTAAGTGTTTACCTAAT-----CTTCTTCTGTCCGAAGAAATGATTCATCGAAATAATGAG  
TCA-----CCATCGATATCGACACATCTGAGATCGCCAAATGTTCCGGGAGTTC---CTCTATT  
CAATCCTTTTCCTTCTTATTGCTGTATAT--CTCGTTCGTACACATCTTCTTTGTTT  
CTCGA-----GCCTATAGTGAGTTACAGACAGAGTTCGAAAAGGTCAAATCTTTGATGATT

CCATCATA CATGATTGAGTTGCGAAA ACTTCTGGATAGGTATCCCACATATGAACGGAA  
TTCTTTCTGGTTAAAGAATCTCTTTCTAGTTGCTCTGGAACAATTAGGAGATTCTCTAGA  
AGAAATATGGGGTTCTGCTTCTGGTGGC-----GGTCCC-----GCTTATGG  
G---GTCAAATCAATACGTTTCGAAGAAGAAAGATTGGAATATCAATCTCATCAAT-----C  
TCATA---AGTATCATACCAAATCCCATCAATCGAATCGCTTTTTTCGAGAAATACGAGACA  
TCTAAGTCATACAAGTAAAGAGATATATTCATTGATAAGA-----AAAAATGTGAACGGTG  
ATTGGATTGATGATAAAATCCAATCCTGGGTCTGGAACAGTGATTGATTGATGATAAA  
GAAAGAGAATTCTTGGTTCAGTTCTCC-----ACCTAACGACA-----GAAAAAAGGATTG  
ATCAAATTCTATTGAGTCTGACT--CATAGTGATCATTATCA-----AAGAATGACT  
CTGGTTATCAAATGATTGAACAACCGGGAGTAATTTACTTACGATACTTAGTTGACATTC  
AG-----AAAAAGTATCTAATGAATTATAAGTTCAATACATCCTGTTTAGCAGAAAGACGG  
ACATTCCTTGCTCATTATCAGACAATCACTCAT-----TCACAAACCTCGTGTGGGGCTAAT  
AGTTTTCATTTCCCATCTCATGGA-----AAACTCTTTTCGCTCCGCTTAGCCCTCTCCC  
CG-----GGTATTTTAGTGATAGGTTCTATAGGAAC TGGACGATCCTATTTGGTCAAATA  
CCTAGCGACAAACTCCTATCTTCCTTTCATTACAGTATTTCTGAACAAGTTCCGGGATAA  
CAAGCCTAAG-----TTTATTGAT-----GATAGTGACGATATTGATGATAGTGGGCGATA  
TTGATGATAGTGACGATATCGACCGT-----GAC  
CTTGATATTGATACGGAGCTGGAGCTTCTAACTATGATGAATGCGCTA-----ACTATGG  
AGATGAAGCTG-----GAAATAGACCAATTTTATATCACCTTCAATTCGAATTAATAAA  
AGCAATGTCTCCTTGCATAATATGGATTCCAACATTCATGATCTGTATGTGAATAAGTC  
GAGTCACTTATACTTTGGTCTATTAGTGA ACTATCTCTAC-----AGGGATTTTGAAAGA  
TGTTCC---ACTACAAATATTCTTGTTATTGCTTCGACCCATATTCCCCAAAAGTGGATCC  
CGCTCTAATAGCTCCGAATAAATTGAATACATGCATTAATAACGAAGGCTTCTTATTCC  
ACAACAACGAAAGCACTTTTTCACTCTTTCATATACTAGGGGATTTCACTTGAAAAGA  
AAATGTTCCATACT-----AATGGATTCCGGTTCATAACCATGGGTTCCAATGTACGAGATC  
TTGTAGCACTTACCAATGAGGCCCTATCGATTAGTATTACGCAGAGGAAATCAATTATAG  
ACACTAATATAATTAGATCTGCTCTTCATAGACAAACTTGGGATTTGCGA-----TCCCA  
GGTAAGATCAGTTCAGGATCATGGGATCCTTTTCTATCAGATAGGAAGGGCTCTTGAC  
AAAATGTACTTCTAAGTAATTGCTCCATAGATCCTATATCTATCTATATGAAGAAGAAA---  
---TCATGTAACGAAGGGGGTTCTTATTTGTACA ACTGGTACTTCGAACTTGAAACGAGC  
ATGAAGAAATTAACGATACTTCTTTATCTTTTGAATTGTTCTGCCGGATCGGTCGTTCAA  
GACCTTTGGTCTCTATCC-----GGACCCGATGAAAAA---AATGGGATCACTTCTTATGTAC  
TCGTTGAGAATGATTCT--CATCTAGTTCATGGCCTATTAGAAGTAGAAGGCGCTCTGTT  
TGGA-----TCCTCATGGACAGAAAAAGATTGCAGTCGATTTGATAATGAT-----CGAGTGA  
CATTGCTTCTTCGGCCCCGAACCCAGGAAT--CCCTTAGATATGATACAAAATGGATCTTC  
TTCTATCGTTGATCAGATATTTCTCTATCAAAAA-----TACGAATCGAAGTTTGAAGAA---  
----GGGAAGGAGTCTTCGACCCGCAA-----CAGATAGAGGAGGAT-----TTATT  
CAATCAC-----ATAGTTTGGGCTCCT-----AGAATATGGAGCCCT-----TGGGGCTTTCTA  
TTTGATTGTATCGAAAGGCCCAATGAATTGGGAGTTCCC--TATTGGGCTAGGTCATTT  
GGGGCAAG-----CGGATCATTATGATGAAGAGGATGAGCTTCAAGAGAATGATTTCG  
AGTTCTTGCAGAGTGAACCGTGCAGTACCAGACACGAGATAGCTCTTCCAAAGAAC  
AAGGCTTTTTTCTAATAAACCAATTCATTTGGGATCCTGCAGATCCACTCTTTTTCTAT  
TCCAA--GATCATCCTTTTGTCTCTGTGTTTTACATCGAGAATTCTTTGCAGATGAAGA  
GATGGCAAAGGGGCTGCTTACTTCCCAACCAGCTTTTTCTACATCTCTAGAAAAACGCT

GGTTTATCAATATCAAGAATACGCAAGAAAAGTACGTCTGAATTGTTGATTCATCGCCAG  
AGATGGCTTAGAACTAGA---ACCAATAGTTCATTATCTAAATCTAATGGATTTTTCCGTTC  
TAAT-----ACTCTATCCGAGAGTTATCAGTATTTATCAAATCTGTTCCCTATCTAAC---GGAA  
CACTATTGGATCAAATGACAAAGACATTGTTGAGAAAAAGATGGCTTTTCCCGGATGA  
AATGAAA-----ATGCCTAGATCTGGTGGGATAAATGGAAA  
TTTTATCGATAAGACCTTTTCAATTGTAGCCAATATCTTATTACGAATAATTCCGACAACCT  
TCCGGGGAAAAAGAGGCATTACCTATTACAGAGATGGG-----ATGTCGGCTCAATCCG  
AAGGAAATTATGCGGAAGCTCTACAGAATTATTATGAAGCTATGCGACTAGAAATCGAT  
CCCTATGATCGAAGTTATATACTCTATAACATAGGTCTTATCCACACAAGGAACGGAGAA  
CATACGAAAGCTTTGGAATATTATTTTCGGGCACTAGAACGAAACCCGTTCTTACCACA  
AGCTTTTAATAATATGGCTGTGATCTGTCATTAC---CGGGGAGAACAGGCCATTGACAG  
GGAGATTCTGAAATTGCGGAGGCTTGGTTCAATCAAGCCGCTGAGTATTGGAAACAAG  
CTATAGCGCTTACTCCCGGTAATTATATTGAAGCCAAAATTGGTTGAAGATCACAAAG  
CGTTTCAA-----ATGACATTGGCGATCAGAACGTATATGATAGGATTTCTAAGAGGATC  
TCGAAAATCAGCAATTTCTGCTGGGCCTTTATCCTTTTTTTAGGTTTATTAGGGTTTTT  
ATTGGTTGGAACCTCCAGTTATCTTGGTAGGGATTTGATACCTTTATTTCCGTCTCAGCA  
AATAATTTTTTTTCCACAGGGGATCGTAATGTCTTTCTATGGGATTGCCGGTCTCTTTATT  
AGCTCCTATTTGTGGGGCACAATTTGTGGAATGTAGGTAGCGGTTATGATCGATTGAT  
AGAAAAGAAGAAATAGTGTCTATTTTTCGTTGGGGTTTCTGGAAAAAATCGTCGAA  
TCTTCTACGATTCTTATGAAAGACATTACAGTCCATCAGAATAGAAGTTAAAGAGGGT  
ATTTATGCACGTGCTGTCCTTTATATGGAAATAAGAGGCCAAGGGGCCATTCCCTTGAC  
TCGTACAGATCAGAAT--CTGACCCACGAGAAATTGAGCAAAGGCTGCCGAATTGG  
CCTATTTCTTGCCTGTACCAATTGAAGTTTTT

>Acorus

????????????????????????????????????????????????????????????????  
????????????????????????????????????????????????????????????????  
????????????????????????????????????????????????????????????????  
????????????????????????????????????????????????????????????????  
????????????????????????????????????????????????????????????????  
????????????????????????????????????????????????????????????????  
????????????????????????????????????????????????????????????????  
????????????????????????????????????????????????????????????????  
????????????????????????????????????????????????????????????????  
????????????????????????????????????????????????????????????????  
????????????????????????????????????????????????????????????????  
????????????????????????????????????????????????????????????????  
????????????????????????????????????????????????????????????????  
????????????????????????????????????????????????????????????????  
????????????????????????????????????????????????????????????????  
????????????????????????????????????????????????????????????????  
????????????????????????????????????????????????????????????????  
????????????????????????????????????????????????????????????????  
????????????????????????????????????????????????????????????????  
????????????????????????????????????????????????????????????????  
????????????????????????????????????????????????????????????????  
???ATGGCAACCCTTCGAGCCGATGAAATTAGTAATATTATCCGTGAACGTATTGAACAA  
TATACTAGAGAAGTGAAGGTTGTGAATACCGGTACAGTCCTTCAAGTAGGCGACGGCA  
TTGCTCGTATTCATGGTCTTGATGAAGTAATGGCAGGTGAATTAGTCGAATTTGAAGAG  
GGTACGATAGGTATTGCTCTTAATTTGGAATCCAATAATGTTGGCGTTGTACTAATGGGT

GACGGTTTGACAATACAAGAGGGAAGTTCTGTAAAAGCAACAGGAAGAATTGCTCAG  
ATACCGGTGAGTGAGGCTTATTTGGGTCGTGTTGTAAATGCTCTGGCTAAACCTATTGAT  
GGGAGAGGTGAAATTGCAGCTTCTGAATTCGGTTAATCGAATCTCCTGCCCCAGGTAT  
TATTTTCGAGACGTTCCGTATATGAGCCCCTTCAAACAGGTCTTATCGCTATTGATTCGAT  
GATCCCTGTAGGGCGCGGTCAGCGAGAATTAATTATTGGGGACAGACAGACCGGTAAA  
ACAGCGGTAGCCACAGATACTATTCTCAACCAAAAAGGACAAAATGTAATATGCGTTTA  
TG TAGCTATTGGCCAAAAGCATCTTCCGTCGCGCAGGTAGTGACTAATTTCCAGGAGC  
GAGGGGCGATGGAATACACTATTGTGGTAGCCGAAACGGCGGATTCCCCGCTACATTA  
CAATACCTGGCTCCTTATACAGGAGCGGCTTTGGCTGAATATTTTATGTACCGTGAACG  
ACATACTTCAATAATTTATGATGATCTCTCAAACAAGCGCAAGCTTATCGCCAAATGTC  
TCTTCTATTAAGAAGACCGCCCGGACGTGAAGCTTACCCAGGAGATGTTTTTTATTTGC  
ATTCCCGCCTTTTGGAAAGAGCCGCTAAATCAAGTTCTCGTTTAGGTGAAGGAAGTATG  
ACTGCTTTACCAATAGTTGAAACTCAATCTGGGGATGTTTCGGCTTATATTCCTACTAAT  
GTAATTTCCATTACAGATGGGCAAATATTCTTATCCGCCGATTTATTCAATGCCGGAATAC  
GACCTGCTATTAATGTGGGTATTTCTGTCTCCAGAGTAGGATCCGCAGCTCAAATTTAA  
GCCATGAAACAAGTAGCTGGCAAATCAAATTTGGAAGTAGCTCAATTCGCGGAGTTAG  
AAGCTTTTGCACAATTCGCTTCTGATCTCGATAAAGCTACTCAGAATCAATTGGCAAGA  
GGTAAACGATTGCGCGAGTTACTTAAACAATCCCAATCAGAACCTCTCGCGGTGGACG  
AACAAAGTGGTACTATTTATACCGGAACGAATGGATATCTTGATACGTTAGAAATTGGGC  
AGGTAAAGGAATTTCTCGTTAAGTTACGTACCTACTTAAAAAAGAATAAACCTCAGTTT  
CAAGAAATCATATCTTCTACCAAGACCTTTACCGAGGAAGCAGAAGCTCTTTTGAAGG  
AAGCTATTCAGGAGCAGCTCGAACTCTTTCTACTTCAGGAACAAACAATGAGAATAAC  
TCTACTACTTCT---TCTGCGGTTCCCTCACTTGACGAGAAAACTTAGGGCGTATCGTC  
CAAATCATTGGCCAGTACTGGATGTCGCCTTTCCCCCGGAAAGATGCCTAATATTTA  
CAACGCTTTGGTGGTTAAGGGTCGAGATACTGCCGGTCAGCCAATTAATGTGACTTGTG  
AGGTACAGCAATTATTAGGAAATAATCGGGTTCGAGCTGTGGCTATGAGTGCTACAGAT  
GGTTTGACGAGAGGAATGGAAGTGATTGACACGGGAGCTGCTCTAAGTGTTCCAGTCG  
GTGGAGCTACTCTCGGAAGAATTTTCAACGTTCTTGGGGAGCCCGTTGATAATTTAGGC  
CCTGTAGATACTCGCACAACATCTCCTATTCATAGATCTGCGCCTGCATTTATACAGTTA  
GATACGAAATTATCAATCTTTGAAACAGGCATTAAGTGGTAGATCTTTTAGCTCCTTAT  
CGCCGGGGAGGAAAAATCGGACTATTTGGGGGAGCTGGAGTGGGTAAAACAGTACTC  
ATCATGGAATTGATCAACAACATTGCCAAAGCGCATGGAGGTGTATCCGTATTTGGCGG  
AGTAGGCGAGCGTACTCGTGAAGGAAATGATCTTTACATGGAAATGAAAGAATCCGGA  
GTAATTAATGAAGAAAAGATTGAAGAATCTAAAGTAGCTCTAGTGATGGTCAGATGAA  
TGAACCGCCGGGCGCTCGTATGAGAGTTGGTTTGACTGCCCTAACCATGGCGGAATATT  
TCCGGGATGTTAATGAACAGGATGTACTTCTATTTATCGACAATATCTTCCGGTTCGTAC  
AAGCGGGATCAGAAGTATCTGCCTTATTAGGGCGGATGCCTTCCGCCGTGGGTTATCAA  
CCTACCCTTAGTACAGAAATGGGTTCTTTGCAAGAAAGAATTACTTCTACAAAAGAGG  
GATCTATAACGTCTATTCAAGCGGTTTATGTACCTGCGGATGATTTGACTGACCCTGCTC  
CTGCCACCACATTTGCACATTTGGATGCTACTACTGTACTATCAAGAGGATTAGCTGCC  
AAAGGTATTTATCCGGCAGTAGATCCTTTAGATTCAACGTCAACTATGCTCCAACCTAG  
GATCGTTGGCGAGGAACATTATGAAACTGCGCAAAGAGTTAAGCAAACCTTTACAACGT  
TACAAAGAACTTCAGGACATTATAGCTATCCTTGGGTTGGACGAATTATCCGAAGAGGA  
TCGTTTAACCGTAGCAAGAGCACGAAAAATTGAGCGTTTCTTATCACAACCCTTCTTCG

TAGCAGAAGTATTTACTGGTTCTCCAGGTAAATATGTTGGTCTCGCGGAAACGATTAGG  
GGGTTTCAACTGATCCTTTCAGGAGAATTAGATGGTCTTCCCGAGCAGGCCTTTTATTT  
GGTGGGTAACATCGATGAAGCTACCGCGAAGGCTATGAATTTAGAAGTGAGAGCAAA  
TTGAAGAAAATGAACTTAAAGCTTTGTTTACTGACTCCTAATCGAATTATTTGGGATTC  
AGAAGTGCAAGAAATCATTCTATCTACTAATAGTGGACAAATTGGCATATTACCAAATC  
ACGCCTCTATTGCCACAGCTGTAGATATCGGTCTTTTGAGAATACGCCGCGACGACCGA  
TGGTTAGCGGTGGCTCTGATGGGGGGGTTTGCTAGAATAGGAAATAATGAGATCACCAT  
TTTAGGAAATGATGCCGAGATGGGTACTGACATTGATCCGCAAGAAGCTCAACGAGCT  
CTTGAAATAGCTGAAGCTAACTTGAGTAAAGCTGAAGGTAAGAGACAAGCAATTGAG  
GCAAATTTAGCGCTAAGACGAGCTAGGACACGGGCGGAGGCTATTAATGTTATTTCCAT  
GAAAAATATAACCGATTCTTTCGTTTCCCTTGGGCCACTGGCCATTCGCCGGGAGTTTCG  
GGTTTAATACCGATATTTTAGCAACAAATCTAATAAATCTAAGTGTAGTGCTTGGTGTAT  
TGATCTTTTTTGAAAGGGAGTGTTAAGTGATTTATTAGATAATCGAAGACAGAGGATC  
TTGAGTACTATTGCAAATTCAGAAGAACTGCGTAGAGGAGCCCTTGAGCAGCTCGAAA  
AAGCCCGGGCTCGCTTACGGAAAGTAGAAATGGAAGCAGATGAGTATCGAGTGAACG  
GATACTCCGAGATAGAACGAGAAAAGATGAATTTGATTAATGCCACTTATGAAAATTTG  
GAACGATTAGAAAATTACAAAAATGAAACCTTCATTTTGAACAACAAAGAGCAATTA  
ATCAGGTCCGGCAACGAGTTTTCCAACAAGCGTTACAAGGAGCTCTAGGAACTCTGAA  
TAATTGTTTGAATAGTGAATTACATTTCCGTACCATCAGTGCTAATATTGGCATGCTTGG  
GGCCATGAAAGAAATAACTGATATGAATCCACTGATTTCTGCCGCTTCCGTTATTGCTGC  
TGGATTAGCCGTAGGACTTGCTTCTATTGGACCTGGGGTTGGTCAAGGTAAGTACTGCTGCAG  
GCCAAGCCGTAGAAGGTATTGCGAGACAACCAGAAGCAGAAGGTAATAACGAGGTA  
CTTTATTGCTTAGTCTGGCTTTTATGGAAGCTTTAACAATTTACGGACTGGTCGTAGCAT  
TAGCACTTTTATTTGCGAATCCTTTTGTATGAATGTTATACTATGTTCCAGCAACATGCT  
CAAAGGGTTATATGATATATCTGGTGTAGAAGTGGGCCAACATTTATATTGGCAAATAGG  
AGGGTTCCAAGTCCATGCCAAGTACTAATCACTTCTTGGGTGTAATTGCTATCTTATT  
AGGTTCAAGTCACTGTCGCTGTTTCGGAATCCACAAACCATTCCGACCAACGGTCAGAAT  
TTCTTTGAGTATGTTCTTGAATTCATTCGAGACTTGAGCAAACACAGATTGGAGAAGA  
ATATGGTCCTTGGGTTCCCTTTATTGGAACAATGTTCCCTATTTATTTTGTTCGAATTGG  
TCAGGGCTCTTTTACCTTGGAACACTCATAGAGTTACCTCACGGGGAGTTAGCCGCAC  
CCACGAATGATATAAATACTACTGTTGCTTTAGCTTTACCCACATCTGTAGCATATTTCTA  
TGCGGGTCTTACCAAGAAAGGATTGGGTTATTTGCGGAAATACATTCAACCAACTCCGA  
TCCTTTTACCAATTAATATCCTAGAAAGATTCACAAAACCTTTATCACTGAGTTTTTCGAC  
TTTTCGGAAATATCTTGGCTGATGAATTAGTAGTTGTTGTTCTTGTCTTTTAGTACCTTT  
GGTAGTTCCTATACCTGTCAATGTTTCTTGGATTATTCACAAGCGGCATTCAAGCTCTTAT  
TTTTGCAACTTTAGCCGCGGCCTATATAGGCGAATCCATGGAAGGTCATCATATGATATT  
TTCAACTTTAGAACATATATTAACCTCACATATCTTTTTCGATTATTTAGTTGTGATTACA  
ATTCAGTTGATGAACTTATTAGTCCACGAACTGGTACAACACTAGGTGATGCGTCAGAAAA  
AGGCATGATAGCTACCTTTTTCTCTATCACGGGATTATTGGTACTCGTTGGATCTATTCG  
GGTCATTTCCCACTAAGTGATTTATATGAATCATTAATCTTCTTTCATGGAGTTTCTCCA  
TTATTCATATGGTCCATATTTTAGGAACCACAGAAATCATTTAGTGCAATAACTGCGC  
CAAGTGCCATTTTACCCAAGGCTTTGCTACTTCGGGTCTTTAACGGAATGCATCAA  
TCCATAATATTAGTACCCGCTCTACAATCCCAGTGGTTAATGATGCATGTAAGTATGATGT  
TATTGAGCTATGCAGCTCTTTTATGCGGGTCATTATTATCAGTTGCTCTTCTAGTTATTAC

GTTTCGAAAAACAGCGATATTTTTGATAAAAAGAAATGAGATTGAATACTTGAATGAAA  
AACGCAGTGTTTTACAAAACACTTCGTTTGATTCAATTACAAATTATCACAAATATCAAT  
TGACTIONACGATTAGATTTTTGGAGTTATCGGGTCATTAGTCTAGGGTTTATCTTTTTAA  
CCATAGGTATTCTATCGGGGGCAGTGTGGGCTAATGAGGCATGGGGATCTTATTGGAAT  
TGGGACCCAAAGGAAATTTGGGCATTTATTACCTGGGCTATATTGCAATTTATTTACAT  
ACTAGAACGAATCATAGTTTGCAAGGTGCGAATTCGGCAATTGTGGCTTCTATCGGATT  
TCTTATAATTTGGATATGTTATTTTTGGAGTCAATCTATTAGGAATAGGTTTACATAGTTATG  
GTTCAATCACATTAATAGTGCCAAAAAAGGATTTACT--CCCCTCCCATATCTTGCATCT  
ATAGTATTTTTGCCCTGGTGGGTCTCTCTCATTAAATAAGAGTCTGGAACCTTGGGTT  
ACCAATTGGTGGAAATACCAGACAATCTGAAACCTTTTTGAATGATATTCAAGAGAGGA  
ACGTTCTAGAAAGATTCATCGAATTAGAAGAACTATTCCTGTTGGACGAAATGCTAAAG  
GAGAACCCGGAGACACGTATGAAAAATCTTCGTATAGGAATCCACAACGAAACGATCC  
AATTGGTCAAAACAGACAATGAGTATCATCTCCATACCATTTTGCATTTCTCGACAAATA  
TAATCTGTTTCGCTATTCTAAGTGTATTCTATTCTGGGTAATGAAGAACTTGTCAATCT  
TAATCTTGGGTTGAGGAATTTCTTTATACTTAAGCGACACAATAAAAGCTTTTTTCGAT  
TCTTTTAGTTACTGATTTATGGATTGGATTCCATTCACCCACGGTTGGGAACATAATGAT  
TGGTTCGGTCTACAATGATTTTGGATTAGCTCATAACGAACAAATTATATCTGGGCTTGT  
TTCCACTTTTCCAGTTATTCTAGATACGATTGTGAAATATTGGATCTTCCATTATTTAAAT  
CGTGTCTCTCCTTCACTTGTAGTGATTTATCATTCAATGAATGACATGCCATTGGTGTT  
CCAAAAGTACCTTTTCCGAGTCCTGGAGAGGAAGATGCAGCTTGGGTTGACATATACA  
ACCGACTTCATCGAGAAAGATTACTTTTTTTAGGCCAAGAGCTTGATAGCGAAATCTCG  
AATCAACTTGTGGTCTCATGGTATATCTCAGTATAGAGGATAAGACCAGGGATTTTTTT  
TTGTTTATAAATCTCCCGCGGATGGGTAATCCGGGAATAGGTCTTTATGACACTATG  
CAATTTGTGCCACCCGATGTACATACAATATGCATGGGATTAGCTGCTTCAATGGGATCT  
TTCATTCTTGTGCGGAGGAGAAATTACCAAACGTCTAGCATTCCCTCACGCTAGGGTTAT  
GATCCACCAACCTGCCAGTTCTTTTTATGAGGCACAAGCAGGGGAATTTGTCTGGAA  
GCGGAAGAACTATTGAACTTCGCGAAACCCTCACAAGAGTTTACGTACAAAGAACT  
GGTAAACCATTATGGGTTGTATCCGAAGATATGGAAAGGGATGTTTTTCTGTCAGCAAC  
AGAAGCCCAAGCTCATGGTATTGTTGATCTTGTAGGGGACGAAATGAAAGAACAAAA  
TTGATTCATGAAGGTTTAATTACTIONGAATCACTTCCATAATGGTATGTTTTGGGTGCGTTA  
GATAATGAAGATCTGGTTCTAGGTTATATTTCTGGAAGGATCCGACGCAGTTCTATACGG  
ATACTIONCCGGAGATAGAGTAAAAATCGAAGTAAGTCGTTATGATTCAACCAGAGGAC  
GCATAATTTATAGACTTCGCAATAAAGATTCGAACGAGATGGAAGAATTCAAAGTCTAT  
TTCGAAAAAGATGGGTCTCGTCAACAATACTTCCATATATCCACTTCTCTTTCAGGAGTA  
CATCTACGCACTTGCTCATAATCATGTTTTATTTCGTTTATGATAAT---TTTAGTTTAATAATT  
GTAAAACGTTTAATTACTIONCAAATGTATCAACAGAATTCCTTTGAGTAATTTGGTTAATGAT  
TCTAACCGAAATCGATTAGTTCGGAAGAATTTTTATTATCAAACGATATTAGAGGGTTTT  
TCAGTCATTATGGAAATTCATTCTCCATAATTTTTTATCTTCCGTTATACCAAAAATTC  
AGAATTTACGATCTATTCATGCAACATTTCCCTTTTTAGAAAGACAAATTATCACATTTAA  
ATCATGTATCAGATATATTAATACCCTATCCCATCCATCTCGAAATCCTGGTTCAAGTTCT  
GCAAGGCTGGATACAAGATGTTCCGTCTTTACATTTATTGCGGTTCTTTCTCCATGAGTT  
TCATAATTGGAATAGTCTCATACTAAATCCATTTCTTTTTTTCAAAGCAAAGACTCTT  
CTTGTTCTTATATAATTCTTATGATTTGAGTGTGAATCCGCATTAGTCTTCTCCGTA  
CAATCCTTTTATTTACGATCAACATCTTTTGGAACCTTTGTTGAGCGAACACATTTCTAT

GGAAAATAGAGCAT-----GTAGTGCGTAGGAAGCAAAGGCCTTATCTTTGTTCAAAG  
ATCCTTTCATCCATTATATCCGATATAAAGGAAAATCAATTCTGGCTTCAAAGGGGACTC  
ATTTTCTGATGAAGAAATGGAAATATCACCTTCTAAATTTCTGGCAATGTCATTTTGACT  
TTTGGTCTCAACCGCATAGGATTCATATAAACCAATTATCAAATCATTCTTTCTATTTTAT  
GGGCTATCTGTCAAGTGTACGAATCAATTTTTCGACGGTAAGGAGTCAAATGCTAGAG  
AGTTCATTTCTAATGGATACTCCTACT-----AAAAAATTCGATACTATAGTCCCAATTATTC  
CTCTAATCGGATCATTGGCTAAAGCTAAGTTTTGTAACGTATCGGGGCATCCTGTTAGTA  
AGCCGGTCTGGGCTGATTTGTCAGATGCTGATATTATTGATCGATTTGGACGAATATGTA  
GAAATCTTTCTCATTATCACAGTGGATCCTCAAAAAACAGAGTTTGTATCGAGTAAAG  
TATATACTTCGCCTTTCGTGTGCGAGAAGTTTGGCCCGTAAACATAAAAGTACAGTGC  
CGCTTTTTTCAAACGATTAGGTTTCAAGATTCTTAGAAGAATTCTTTACGGATAAAGAAC  
AAGTTCTTTCTTTGATCTTCCCTTCCCGTATTTGGTATTTGGATATTATCCGTATCAATGA  
CCTGGTGAATAATTCAATGATAATTGCTACGACA---GAAATACAA---GCTATCAATTCTTT  
TTCTAGATCGGAATCCTCCTTAAAAGAGGTCTACGGACTCATATGGCTGCTTGTACCTAT  
TTTTACTCTTATATTGGTAATTATAATAGGGGTACTAGTGATTGTTTGGTTGGAAAGAGA  
AATATCTGCGGGGATACAACAACGTATTGGGCCTGAATATGCCGGCCATTGGGAATTC  
TTCAAGCTCTAGCGGATGGAACCAAAGTCTTTTCAAAGAAGATCTTCTCCCATCTAGA  
GGAGATATTAGTTTATTAGCCTCGGGCCGTCTATAGCGGTCATATCAACTCTACTAAGT  
TATTTAGTAATTCCTTTTGGCTATCACCTTGTTTTAGCTGATCTCAGTATCGGCGTTTTTT  
TATGGATTGCCATTTCAAGTATTGCTCCTATTGGACTTCTTATGTCAGGATATGGCTCGAA  
TAATAAATATTCTTTTTCAGGTGGTCTACGAGCTGCCGCTCAATCTATTAGTTATGAAAT  
ACCATTAAGTCTATGTGTATTATCAATATCTCTACTATCTAATAGTTCAAGTACAGTTGATA  
TAGTTGAGGCACAGTCAAATATGGTTTTTGGGGATGGAATCTGTGGCGTCAAACCTATA  
GGATTTTTAGTTTTCTTAGTTTTCTTCTCTAGCCGAATGTGAAAGATTACCCTTTGATTTA  
CCAGAAGCAGAGGAAGAATTAGTAGCAGGTTATCAAAGTGAATATTCAGGCATCAAAT  
TTGGTTTTATTTACGTTGCTTCTTACCTAAATCTACTAGTTTCTTCATTATTTCGTAACAGT  
TCTTTACTTAGGCGGGTGAATCTCTCTATTCCATACATATTTATTCTGAACCTTTTCGGA  
AAAAACAAAACAGGTGAATCTTTGGAATGACAATTGGTATCCTAATTACATTAGCTAA  
AGCTTATTTGTTCTGTTCAATTTCTATCGCAACAAGATGGACTTTACCTAGGTTAAGAAT  
AGACCAACTATTAAATCTTGGATGGAAATTTCTCTTACCTATTTCCCTCGGTAATCTATTA  
TTGACAACCTCTTCCCAACTTGTTCCTACTAATGATCTGGCATGTACAGAATGAAAACCT  
CATTCTCGATTCTACGAGAATTTTTATGAAAGCGTTTTCAATTTGCTTCTCTTCGATGGAAG  
TTTCATTTTCCAGAATGTATCCTAATTTTTGGCCTAATCTTCTTCTGATGATCGATTCA  
ACCTCTGATCAAAAAGATAGACCTTGGTTCTATTTTCATATCTTCAACAAGTTTAGTAATG  
AGCATAGCGGCCCTATTGTTCCGATGGAGAGAAGAACCCTATGATTAGCTTTTCGGGAAA  
TTCCAAACGAACAATTTCAACGAAATCTTTCAATTTCTTATTTTACTATGTTCAACTCT  
ATGTATTCCTCTATCCGTAGAGTACATTGAATGTACAGAAATGGCTATAACAGAATTTCT  
GTTATTCGTATTAACAGCTACTCTAGGAGGAATGTTTTTATGTGGTGCTAACGATTCAAT  
AACTATCTTTGTAGCTCCAGAATGTTTTAGTTTATGCTCCTACCTCTTATCTGGATATACC  
AAGAGAGATGTACGGTCTAATGAGGCTACTATGAAATATTTACTCATGGGTGGGGCAAG  
CTCTTCTATTCTGGTTCATGGTTTCTCTTGGCTATATGGTTTATCCGGGGGGGAGATCGA  
GCTTCAAGAAATAGTGAATGGTCTTATCAATACACAAATGTATAACTCCCCGGGAATTT  
CAATTGCGCTTATATTCATCACTGTAGGAATTTGGGTTCAAGCTTTCCCTAGCCCCCTTTTC  
ATCAATGGACTCCTGACGTATACGAAGGATCTCCCACTCCAGTCGTTGCTTTTTCTTTCT

GTTACTTCGAAAGTAGCTGCTTCAGCTTCAGCCACGCGAATTTTCGATATTCCTTTTTAT  
TTCTCATCAAACGAATGGCATCTTCTTCTGGAAATCCTAGCTATTCTTAGCATGATATTG  
GGAAATCTCATTGCTATTACTCAAACAAGCATGAAACGTATGCTTGCATATTCGTCTATC  
GGTCAAATCGGATATGTAATTATTGGAATAATTGTTGGAGACTCAAATGATGGATATGCG  
AGCATGATAACTTATATGCTGTTCTATATCTCCATGAATCTAGGAACTTTTGCTCGCATTG  
TATTATTTGGTCTACGTACCGGAACTGATAACATTCGAGATTATGCAGGATTATACACGA  
AAGATCCTTTTTTTGGCTCTCTCTTTAGCCCTATGTCTCTTATCCCTAGGAGGTCTTCCTC  
CACTAGCAGGTTTTTTTCGGAAAACCTCCATCTCTTCTGGTGTGGATGGCAGGCAGGCCTA  
TATTTCTTGGTTTCAATAGGACTCCTTACGAGCGTTGTTTCTATCTACTATTATCTAAAAA  
TAATCAAGTTATTAATGACTGGACGAAACCAAGAAATAACCCCTCACGTGCGAAATTAT  
AGAAGATCTCCTTTAAGATCAAACAATTCCATCGAATTGAGTATGATTGTATGTGTGATA  
GCATCTACTATAACCAGGAATATCAATGAACCCCATCTTGCAATTGCTCAGGATACCCCTC  
TTTATGTTTCTGCTTCACGAATATGATATTTCTGGGCATTTCTACTAATATCAAGTGTTAT  
TCCTATTTTAGCATTTTTAATTTCCGGAGTTTTAGCCCAACGAGGGAAGGACCCGAGA  
AGCTTTCTAGTTATGAATCGGGTATAGAACCAATAGGGGATGCTTGGGTACAATTCCGA  
ATCCGATATTATATGTTTGCTTTAGTTTTGTTGTTTTGATGTTGAAACGGTCTTTCTTTA  
TCCATGGGCAATGAGTTTCGATGTATTGGGTGTATCCGTATTTCTAGAAGCTTTGATTTT  
CGTGCTTATCCTAATTGTTGGTTCAGTTTATGCATGGCGAAAGGGGGCATTGGAATGGT  
CTACGAGTTATTTTCTTGGTTAACCATAATTGTTGTTTTTCCGATATCCGCAGGTCTTTC  
AATTTTCTTCTCCCGCATAGAGGGAATAAGGTGGTTCGGTGGTATACTATATGTATTTG  
TTTGCTAGAACTCCTTTTAATGACCTATGTGTTCTGTTATCACTTTCAATTGAACGATCC  
ATTAATCCAATTGGATGAAGATTATGAATGGATAAATATTTTGTATTTTCACTGGAGACC  
AGGAATCGATGGACTTTCCATAGGACCCATTCTACTGACGGGATTTATCACTACTTTAGC  
TACTTTAGCGGCTTGGCCGTTACTCGAGATTTCGCGATTGTTCCATTTCTGATGTTAGC  
AATGTACAGTGGTCAAATAGGATTATTTCTTCTCGAGACCTTTTACTTTTTTTTCTCATG  
TGGGAGTTAGAATTAATTCCCGTTTACCTACTTTTATCTATGTGGGGTGGGAAGAAACG  
GCTGTACTCGGCTACCAAGTTTATTTTGTACACAGCGGGGGTTCGTTTTTCTTTAAT  
GGGAGTTCCGGGTATGGGTTTATATGGTTCCAATGAACCAACATTAATTTTGAACAT  
CGGCTAATCAATCGTATCCTGTGTCATTGGAATACTATTTTATTTTGGATTCTTATTGC  
TTATGCTGTCAAATTACCGATTATACCCCTCCATACATGGTTACCAGATACCCATGGAGA  
AGCCCATACAGTACATGTATGCTTCTAGCTGGAATCTTATTAATAATGGGAGCATATGG  
ATTAGTTCCGATCAATATGGAATTATTGCCCCACGCTCATTCTATATTTTCCCCCTGGTTG  
GTA TAGCGGGAACGTTGCAAATAATCTATGCAGCTTCAACTTCTCTGGTCAAGTTAA  
TTAAAAAAGAGAATCGCCTATTCCTCCGTATCTCATATGGGTTTCAACAATTATAGGAAT  
TGTTTCTATAACCGATACAGGACTCAATGGAGCCATTTTACAGTTACTCTCTCATGGATT  
TCTTGGTGCTGCACTTTTTTTCTTAGCGGGAACAAGTTGTGATAGAATACGTCTTATTTA  
TCTCGACGAAATGGGGGAATATCCATCCCGATGCCCAAATATTACCATGTTACAGTA  
GCTTCTCAATGGCTTCTCTTGCATTGCCAGGAATGAGTGGTTTTGTTGCGGAAGCAGTA  
GTATTTTTTGAATAATTACTAGTCAAAAATTTCTTTTTTTGCCAAAATACTAATTACTT  
TTGTAATGGCAATTGGAATGATATTAACCTCCTATTTATTTATTATCCATGTTACGCCAGAT  
CTTCTATGGATACAAGCTATTTAATATGACAACTCTTATTTTATGGATTCTGGACCACGA  
GAACTATTTGTTTCGATCTGTATCTTTTTGCCCGTAATAGGTATTGGTATTTATCCGATTT  
CGTTCTATCGTTATCAGTTGACAAGGTGGAAGCTATTTTATCTAATTACTTTTATAGAATG  
ATGCTGGAGTATGACTTTTTTTGAGTGCTTATTTATTTTCCATCGGTATCTATGGATTGA



TTACAAGTCGAAACATGGTTAGAGCACTTATGTGTCTTGAACCTATACTGAATGCGGTT  
AATATCAATCTCGTAACATTTTCTGATTTATTTGATAGTCGCCAATTAAGGAGACATT  
TTTTTCGATCTTTGTTATAGCTATTGCAGCCGCTGAAGCAGCTATTGGACCAGCTATTGTT  
TCATCGATCTATCGTAACAGAAAATCCATTCGTATTAATCAATCAAATTTGTTGAATAAA  
ATGGAACATACATATCAATATGCATGGATAATACCTTTCCTTCCATTTCCAGTTACTATAT  
CAATAGGGTTGGGACTTCTGCTCGTTCCAACGGCAACGAAAAATCTTCGCCGTATTTG  
GGCTTTTTTTAGTGTTTTATTGCTAAGTATAGCTATGGTGTTCGCGCCGATCTGGCTATT  
CAGCAAATAAACGGGAGTTTTATCTATCAATATTCATGGTCTTGGACGATTAATAACACT  
TTTTCATTAGAGTTTGGATACTTAATTGATCCACTTACCTCTATTATGTTAATACTAATCA  
CTACTGTTGGAATCATGGTCTTATTTATAGTGATAATTATATGTCTCATGATCAAGGATAT  
TTAAGATTTTTTGCTTATATGAGTTTTTTCAATACTTCTATGTTAGGATTAGTTACTAGTTC  
TAATTTGATACAAATTTATATTTTTTTGGGAACTCGTAGGAATGTGCTCCTATTTATTAATA  
GGTTTTTGGTTCACACGACCAACTGCAGCAAATGCTTGTCAAAAAGCGTTTGTAACATA  
ATCGTGTAGGGGATTTTGGTTTGTATTAGGAATCTTAGGTCTTTATTGGATAACAGGTA  
GTTTCGAATTCGGGATTTGTTTCGAAATTTAAAAACAATGAAGTCAATTCTTTATTTG  
CCGCCCTGTGCGCCTCACTATTATTTGTTGGTGCGGTTGCGAAATCCGCACAATTTCCA  
CTTCATGTATGGTTACCTGATGCTATGGAGGGCCCTACCCCATTTCCGGCTCTTATACAC  
GCTGCTACTATGGTAGCGGCGGGCATTTTTCTTGTAGCTAGGCTTCTTCTCTTTTCACA  
GTCATACCTTACATAATGAATTTCAATTTCTTTGATAGGTATAATAACAGTCCTTTTAGGGG  
CTACTTTAGCTCTTGCTCAAAGAGACATTAAGAAGTTTAGCCTACTCTACAATGTCT  
CAGTTAGGTTATATTATGTTAGCTCCAGGTATAGGCTCTTATCGAGCTGCTTTATTCATT  
TGATCACTCACGCCTATTCTAAAGCATTATTGTTTTTAGGATCTGGATCAATTATTCATTC  
AATGGAACCTATTGTTGGATATTCACCAGAGAAAAGTCAGAACATGATTCTTATGGGTG  
GTTTAAGAAGATATGTTCCAATTACAAAACCCTTTTTTCTTAGGTACACTTTCTCTTT  
GTGGTATGCCCCCTCTTGCTTGTTTTTGGTCCAAAGATGAAATCTTAATGATACTTGGT  
TATATTCACCAATTTTCGCAATAATAGCTTGGTCCACAGCAGGATTAAGTGCATTTTATAT  
GTTTCGGGTATATCTCCTTACTTTTGGATGGTCATTTACAAGTTCATTTTCAAATTTTCAGT  
AGTACTAAAAATAGCTCCTTCTATTCAATATCTATATGGGGAAAAGAAGTACCGAAACC  
ACTTAACGTA---AATTTGTTTTTATCAACAATGAACAAAATGTCTAATAAGTAC-----ACT  
TCCATGTATCCCATGAATCGGACAATACTATGCTTTTTCCGATGCTTGTATTGGTCTTAT  
TTACTTTGTTTCATGGATTTATAGGAATTCCTTTCGATTTGGATATATTATCAAATGGTTA  
ACTCCATCGATAAACCTTTTACATTCCAATTCCGGCGATTCTTTGATTGGTATGAATTT  
GTGACAAATGCAATTTATTCAGTCACTATATCCTTTTTGGGGATATTTCTAGCATACATAT  
TTTATGGGTCTGTTTATTCATCTTTTCAAATTTGGACTTAATCAATTCGTTTGTATTTTTA  
TCGGATCGAATAATAAATGGGATATAACAATTGGTCAATAATCGTGGTTACATCGACGTT  
TTTTATGGAAAAGTTTTAAGTAATACTATAAGAGGACTTGCAGAATTAATTCATTTTTTT  
GATAGACGAGTTATTGATGGGATTACAAATGGGGTTGGTGTGTAAGTTTCTTTGTAGG  
AGAAGGGATAAAATCT--GTAGGGGGTGGACGAATCTCATCTTATATCTTCTTGTATGCA  
TTTTCTGTATCAATTTGTTAATAATTTATTATATGGATTTACCTGGACCAATACATGATGT  
TCTTTTAGTATTTCTGGGATCAGGTCTTATATTAGGAGGTTTAGGAGTGGTATTACTTACC  
AATCCAATTTATTCTGCCTTTTTCATTTGGGATGGTCTTGTGTTGTATATCCTTATCTATAT  
TCTATCGAACTCCTATTTGTAGCTGCTGCACAGCTCCTTATTTACGTGGGAGCCGTAAA  
TGTCTTAATCATATTTGCTGTGATGTTTCATGAATGGTTCAGACTATTCCAACGATTTCTAT  
CTTTGGACCGTTGGGGATGGAGTCACTTCACTGGTTTGTACAAGTATTCTTTTTTCACT

AATTACTACTATCCTAGATACGTCATGGTACGGAATTATTTGGAATACAGGATCGAACCA  
GATTGTAGAGCAGGACTTAACAAGTAACGTTCAACAAATTGGAATTCATTTATCAACAG  
ATTTTATCTTCCATTTGAACTCGTTTCAATAATTCTTTTAGTTGCCTTGATAGGTGCAAT  
TACTATGGCGCGTCAGATGACTGTACCAGCTACAAGACAAGACCTTATGATAGTTAATA  
TGGGTCCACACCACCATCAATGCACGGTGTTCCTCGCCTGATCGTACTCTCGACGGT  
GAAGATGTTATTGACTGTGAACCCATATTGGGTTATTTACATAGAGGGATGGAAAAAAT  
TGCAGAAAACCGAACAAATTATACAATATCTGCCTTATGTAACACGTTGGGATTATTTAGC  
TACTATGTTTACAGAAGCAATAACAGTAAATGGGCCCGAACAAATTGGGAAATATTCAA  
TACCTAAAAGAGCCAGCTACATCAGAGTAATTATGTTAGAGCTGAGTCGGATAGCTTCT  
CATTTGTTATGGCTTGGTCCATTTATGGCGGATATCGGTGCACAAACACCCTTTTTTTATA  
TTTTTCAGAGAGAGGGAATTGATATATGATCTATTCTGAAGCTGCTACAGGTATGCCAATGA  
TGCATAATTATTTCCGTATAGGAGGAGTTGCTGCTGATCTACCTTATGGCTGGATAGATA  
AATGTTTAGATTTCTGCGATTATTTTTTAACAGGAATTGTTGAATATGAAAAGCTTATTAC  
ACAGAATCCTATTTTTTTGGAACGAGTTGAAAGAGTGGGCATTATTAGTGGGGAGGAA  
GCCATAAATTGGGGTTTATCAGGACCCATGTTACGAGCTTCCGGAATAGAATGGGATCT  
TCGTAAAGTTGATAATTATGAGTGTATAATGAATTTGATTGGGAAGTCCAATGGCAA  
AAGAAGGAGATTCATTAGCTCGTTATTTAGTCCGAATTAGTGAAATGAAAGAATCCATA  
AAAATTATTCAACAGGCTCTAGAAGGAATCCCTGGGGGGCCCTATGAAAATTTAGAGG  
TTCGGCGC---GATAAAGTCAAGGATTCGGAATGGAATGATTTTGAATATAGGTTTATTAG  
TAAAAGCCTTCGCCTACTTTTTGAATTGGCGAAACAAGAACTTTATGTGAGAGTAGAA  
GCACCAAAGGGAGAATTAGGAATTTTTCTGATAGGAGATAATAGTGTTTTTCCCTGGAG  
ATGGAAAATTCGTCCACCCGGTTTCATCAATTTGCAAATTCCTCCTCAACTAGTTAAA  
GAATGAAATTGGCCGATATCATGACGATACTAGGTAGTATAGATATCATTATGGGAGAAG  
TTGATCGTATGTTCCCTATGGTACTGGGTTTCATGAATTATGGTCAACAAACAGTACGA  
GCTGCAAGGTACATTGGTCAAAGTTTCATGATCACCTTATCGCACGCGAATCGTTTACC  
TGTAACTATTCAATATCCTTATGAAAATTTGATCACATCAGAGCGTTTTTCGTGGTGAAT  
CCACTTTGAATTTGATAAATGTATCGCTTGTGAAGTATGTGTTTCGTGTATGCCCTATAGAT  
CTACCCGTTGTTGATTGGAGATTGGACACAGATGTTAGAAAAAACAATTGCTTAATTA  
TAGTATTGATTTTGGAGTCTGTATATTTTGTGGCAACTGCGTCGAGTATTGTCCAACAAA  
CTGTTTATCCATGACTGAAGAATATGAACTTTCTACTTATGATCGTCACGAATTGAATTAT  
AATCAAATTGCTTTGGGGCGGTTACCGATGTCAGTAATTGAGGATTACACAATTGCAAC  
AACTACAAATTTGAAAATAGCTAAAATAAACCCTGGGTTACGAACGATTACTAAT--  
-ATGCAGGGTCGTTTATCTGCTTGGCTAGTCAAGCATGAGCTAGTTCATAGATCTTTGGG  
CTTCGATTACCAAGGAATAGAGATTTTACAAATAAAACCCGAGGATTGGGATTCCATTG  
CTGTCATTTTATACGTATATGGTTACAATTATTTACGTTCCCAGTGTGCCTATGATGTAGC  
ACCCGGCGGATTTTTAGCCAGTGTCTATCATCTTACGAGAATACAGTATGGTGTGGATC  
AACCGGAAGAGGTATGCATAAAAGTATTTGCTCCAAGGAGGAATCCTAAAATCCCGTC  
TGTTTTCTGGATTTGGAGAAGTGCTGATTTTCAAGAACGGGAATCTTATGATATGTTGG  
GAATTTCTTATGAAAATCATCCGCGCCTTAAACGTATTTTGTATGCCTGAAAGTTGGATAG  
GCTGGCCCTTACGTAAAGATTATATTGCCCCCAATTTCTATGAAATTCAAGATGCTCAT---

-----ATGAATTCTATTGAGTTTCCGTTACTTGAC  
CGAACAAACCCCAAATTCAGTTATTTCAACTACATTGAATGATCTTTGAACTGGTCAAG  
ACTATCCAGTTTATGGCCGCTTCTCTACGGTACCAGTTGTTGCTTCATCGAATTTGCTTC

ATTAATAGGCTCGCGATTTCGACTTTGATCGTTATGGATTGGTACCAAGATCGAGTCCTAG  
GCAAGCGGACCTAATTTTAAACAGCTGGCACAGTAACAATGAAAATGGCTCCCTCTTTA  
GTGAGATTGTATGAGCAAATGCCTGAACCAAAATATGTCATTGCTATGGGAGCTTGCAC  
TATTACCGGAGGGATGTTTCAGTACCGATTCTTATAGTACCGTTCGGGGAGTCGATAAGCT  
AATTCCTGTTCGATGTCTATTTGCCGGGCTGCCCCCTAAGCCAGAGGCAGTTATAGATG  
CTATAACAAAACCTTCGTAAGAAGTTATCTCGAGAAAATCTCTGAAGATAGAATGGGGTCT  
CAA--GAAAATCGATGTTTTACGACCAATCACAAATTTTATGTTTCGACGCAGTACTCATA  
CTGGAAATTACGATCAAGGATTACTCTATCAATCGCCACCTACTGCAGAAATACCTACA  
GAACCCTTTTTCAAATACAAAAGTTCAGTATCTTCCCGCGAATTAGGGAATATGCAAAA  
TCGAAATACTTTTCTTGGGTAAAGGAACAGATGACTCGATTCAATTCAGTATCGATCAT  
GATATATGTAATAACTCGGACATCTATTGCAAATGCATATCCCATTTTTGCACAACAGGG  
TTATGAAAATCCACGAGAAGCAACTGGACGCATTGTATGTGCTAATTGCCATTTGGCGA  
ATAAGCCCGTGGATATTGAAGTTCACAAAGCCGTGCTTCCCTGATACTGTATTTGAAGCA  
GTTGTTAGAATCCCTTATGATAAGCAACTGAAACAAGTTCCTTGCTAATGGTAAAAAGGG  
GTCTTTGAATGTAGGGGCTGTTCTTATTTTACCCGAGGGATTTGAATTAGCCCCCCCCGA  
TCGTATTTCTCCAGAAATGAAAGAAAAGATGGGGAATCTGGCTTTTCAGAGTTATCGCC  
CTACTAAAAAAATATTATTGTGATAGGTCCTGTTCCGGGTCAGAAATATAGTGAATCG  
TCTTTCCTATTCTTCCCCCGACCCTGCTACAAAGAAAAGATGTTCACTTCTTAAATATC  
CCATATATGTGGGCGGGAACAGGGGAAGGGGTCAGATTTATCCCGATGGGAGCAAGAG  
TAACAATACAGTCTATAATGCTACAGCCGCTGGTGTGGTAAGCAGAATCCTACGTAAGG  
AAAAGGGGGGTTATGAAATAACCATAGCTGATGCATCGGATGGACATCAAGTGGTTGAT  
ATTATACCTCCAGGACCAGAACTTCTTGTTCGGAGGGTGAATCCATTAAGCTTGATCA  
ACCATTAACGAGTAATCCCAATGTGGGCGGATTCGGGCAGGGCGATGCAGAAATAGTA  
CTTCAAGATCCATTACGCGTCCAAGGTCTTTTGTCTTCTTGGCATCTGTTATTTTGGCA  
CAAATCTTTTTGGTTCTTAAAAAGAAACAGTTTGAAAAGGTTCAATTGTACGAAATGA  
ATTTTATGAGTAAAGTATATGATTGGTTCGAGGAACGTCTCGAGATTCAGGCGATTGCA  
GATGATATAACTAGTAAATATGTTCCCTCCTCATGTCAACATATTTTATTGTCTAGGAGGGA  
TCACACTTACTTGTTTTTTAGTACAAGTAGCTACGGGCTTTGCTATGACTTTTTACTATC  
GTCCAAGTGTACAGATGCTTTTGCATCTGTTCAATATATAATGACTGAGGTCAACTTTG  
GTTGGTTAATACGATCAGTTCATCGATGGTCAGCAAGTATGATGGTACTAATGATGATCC  
TGCACGTATTTTCGTGTGTATCTTACAGGTGGATTTAAAAAACCCCGTGAATTGACTTGG  
GTTACAGGTGTGGTTCTGGGTGTATTGACTGCATCTTTTGGTGTAAGTGGTTATTCTTTA  
CCTTGGGACCAAATCGGTTATTGGGCAGTAAAAATTGTTACAGGCGTACCTGACGCTAT  
TCCTGTAATAGGATCTCCTTTGGTAGAGTTATTACGTGGAAGTGCTAGTGTGGGTCAAT  
CCACTTTGACTCGTTTTTATAGTTTACACACTTTTGTCTTACCTCTTCTTACTGCCGTATT  
TATGTTAATGCACTTCCCAATGATACGTAAGCAAGGGATTCAGGTCCTTTAATGGGAGT  
AACAAAGAAACCTGACTTGAATGATCCTGTATTAAGAGCTAAGTTGGCTAAAGGGATG  
GGACATAATTATTATGGAGAACCCGCGTGGCCCAACGACCTTTTATATATCTTTCCAGTA  
GTAATTTTAGGTACTATTGCGTGTAATGTGGGCCTGGCGATTCTAGAACCATCAATGATT  
GGTGAACCCGCGGATCCATTTGCAACTCCTTTGGAAATATTACCCGAATGGTACTTTTTT  
CCCGTATTTCAAATACTCCGTACAGTTCCTCAATAAGTTACTGGGTGTTCTTTTAAATGGCT  
TCAGTACCGCTGGGATTATTTACAGTACCCTTTTTGGAGAATGTTAATAAATCCAAAAT  
CCTTTTCGTCGTCCAGTAGCTACAACAGTCTTTTTGATCGGTAAGTGCAGTAGCCCTTTG  
GTTAGGTATTGGAGCCACATTACCTATTGATAAATCCCTAACTTTAGGTCTTTTTTATGATT

GAAGTTTTTCTATTTGGAATCGTATTAGGTCTAATTCCTATTACTTTGGCAGGATTGTTTCG  
TAACTGCATATTTACAATACAGACGCGGTGATCAGTTGGACCTTATGCCTACTATAACTA  
GTTATTTCCGTTTTCTACTGGCTGCTTCAACTATAACCCACAGCTCTATTCATTGGTCTGA  
GCAAGATACGGCTAATTATGGATATTGTAAGTCTTGCTTGGGCTGCTTTAATGGTAGTCT  
TTACATTTTCCCTTTCCTACTCGTAGTATGGGGAAGAAGTGGACTCATGATTATTCGTTTCG  
CGGAACCAGAAGTGAAAATTGTGGTAGATAGGGATCCCATAAAAACTTCTTTTCGAGGC  
ATGGGCCAGACCCGGCCATTTTTCAAGAACAATAGCTAAAGGCCCTGATACTACCACTT  
GGATCTGGAACCTACATGCTGATGCTCACGATTTTCGATAGCCATACCAGTGATTGGAG  
GAGATTTCTCGAAAAGTATTTAGTGCTCATTTCGGTCAACTCTCCATCATCTTTCTTTGG  
CTGAGTGGCATGTACTTCCATGGCGCCCGTTTTTTCTAATTATGAAGCATGGCTGAGTGAT  
CCTACTCACATTAGACCCAGTGCCCAGGTAGTTTGGCCAATAGTGGGTCAAGAAATTTT  
GAATGGTGATGTGGGCGGGGGTTTTCCGCGGAATACAAATAACCTCTGGTTTTTTTTCAA  
TTTGGCGAGCATCTGGAATAACTAGTGAATTACAACCTTTATTGTACCGCAATTGGCGCG  
TTGGTCTTTGCAGCGTTAATGCTTTTTGCAGGTTGGTTCATTATCACAAAGCTGCTCC  
AAAATTGGCTTGGTTCCAAGATGTCGAATCTATGTTGAATCACCCTTAGCGGGGTAC  
TAGGACTGGGGTCTCTTTCTTGGGCGGGACACCAAATACATGTATCTTTGCCGATTAAC  
CAATTTCTCGACGCGGGAGTGGATCCTAAAGAGATACCACTTCCTCATGAATTTATATTG  
AATCGGGATCTTTTGGCTCAACTTTATCCAAGTTTTGCCGAAGGAGCAACTCCATTTTT  
CACCTTGAATTGGTCAAAATATGCAGAATTTCTTACTTTTCGGGGAGGATTAGATCCTAT  
AACAGGCGGCCTATGGTTGAGCGATATTGCGCACCATCATTTAGCTATTGCAATTCTTTT  
CCTGATAGCTGGTCATATGTATAGAACCAACTGGGGCATTGGTCATGGACTAAAAGATA  
TTTTGGAGGCTCATAAGGGTCCATTTACGGGCCAAGGTCATAAAGGCCTTTATGAAATC  
CTAACACGTCATGGCATGCTCAATTAGCTCTTAACCTGGCTATGTTAGGCTCTTTAACC  
ATTGTTGTAGCTACCATATGTATTCATGCCCCCTATCCATACCTAGCTACTGACTATG  
GTACACAACCTTTCGTTGTTACACATCACATGTGGATCGGTGGATTTCTCATAGTTGGT  
GCTGCTGCACATGCAGCCATTTTTATGGTAAGAGACTACGATCCAACCTACTCGATACAA  
CGATCTATTAGATCGTGTCCTTAGGCACCGTGATGCAATCATATCACATCTAAACTGGGC  
ATGTATATTTCTAGGCTTTCACAGTTTTGGTTTTGTATATTCATAATGATACCATGAGTGCC  
TTAGGGCGCCCCCAGGATATGTTTTAGATACCGCTATACAATTACAACCCATCTTTGCT  
CAATGGGTACAAAACACCCATGCTTTAGCACCTGTTGCGACAGCTCCTGGTGAACAA  
CAGGCACCAGCTTAGCTTGGGGGGGTGGTGAAGTAGTAGCAGTAGGCGGCAAAGTAG  
CTTTGTTACCTATTCCATTAGGAACTGCGGATTTCTTGGTACATCACATTCATGCATTTAC  
GATCCATGTGACTGTATTGATACTACTGAAAGGTGTTCTGTTTGCTCGGAGCTCCCGTTT  
AATACCTGATAAAGCGAATCTTGGCTTTCGTTTCCCTTGTGATGGTCCTGGAAGAGGAG  
GAACATGTCAAGTATCCGCCTGGGATCATGTCTTCTTAGGTCTATTCTGGATGTACAATT  
CAATTTCCGGTAGTCATATTCATTTCCAGTTGGAAAATGCAATCGGATGTTTGGGGTAGTA  
TAAGCGATCAAGGGGTGGTAACCTCATATCACAGGAGGAACTTTGCACAGAGTTCCAT  
TACTATTAATGGGTGGCTTCGGGATTTCTTATGGGCACAGGCATCTCAGGTAATTCAGTC  
TTATGGTTCTTCATTATCTGCATATGGTCTTTTTTTTCTAGGTGCTCATTTTGTATGGGCTT  
TCAGTTTAAATGTTTCTATTACAGCGGCCGTGGTTATTGGCAAGAACTTATTGAATCCATCG  
TTTTGGGCTCATAACAAATTTAAAGTTGCTCCTGCTACTCAGCCTAGAGCCTTGAGCATT  
GTACAAGGACGTGCTGTAGGAGTAACTCATTACCTTCTGGGTGGAATTGCCACAACAT  
GGGCATTTCTTAGCAAGAATTTATGCAGTAGGAATGGCATTAAAGATTTCCAAGGTTT  
AGCCAAGGCTTAGCTCAGGACCCCACTACTCGTCGTATTTGGTTTTGGTATTGCTACCGC

ACATGACTTCGAGAGTCATGATGATATTACTGAGGAACGTCTTTATCAGAACATTTTTGCTTCTCACTTTGGTCAGTTAGCAATAATCTTTCTGTGGACTTCCGGAAATCTGTTTCATGTAGCTTGGCAAGGAAATTTTGAGTCATGGGTACAGGACCCTTTACACGTAAGACCTATTGCTCACGCAATTTGGGATCCTCATTTTGGTCAACCGGCTGTGGAAGCCTTTACTCGAGGAGGTGCTCCTGGACCAGTGAATATCGCTTATTCCGGCGTTTATCAGTGGTGGTATAACAATCGGATTACGCACCAATGAAGATCTTTATACTGGAGCTCTTTTTCTATTTCTTTCTGCTATATCCTTAATAGGGGGTGGTTACACCTACAACCCAAATGGAAACCAAGCGTTTCTTGTTCAAAAATGCGGAATCCCGTCTGAATCATCATTTGTCAGGACTTTTCGGAGTAAGTTCCTTGGCTTGGACAGGGCATTAGTTCATGTCGCTATTCCCGCATCAAGGGGCGAGTATGTCAGATGGAATAATTTCTTAGATGTATTACCGCACCCCAAGGTTTGGGACCACTTTTTAGCGGTACAGTGGAATCTTTATGCCAAAACCCCGATTCCAGTAGTCATTTATTCGGTACTCCCAAGGAGCGGGAACCTGCCATTCTAACTCTTCTCGGGGGATTCCATCCGCAAACGCAAAGTTTATGGCTGACCGATATGGCTCATCATCATTTAGCTATTGCATTTATTTTCTGCTAGCTGGTCATATGTATAGAACCAACTTCGGGATTGGGCACAGTATAAAAGATCTTTTGAAGCACATACTCCTCCGGGGGTCGATTGGGGCGTGGGCATAAGGGTCTTTATGATACAATCAATAATTCGCTTCATTTTCAATTAGGTCTTGCTCTGGCCTGTTTAGGAGTTACTTCCTTGGTAGCTCAACACATGTACTCTTACCTGCTTACGCATTCATAGCGCAAGACTTTACTACTCAAGCTGCGTCGTATACTCATACCAATACATCGCAGGTTTCATCATGACGGGAGCCTTTGCTCACGGAGCTATATTCTTCATTAGAGATTACAACCCGGAACAGAATGAAGATAATGTATTGGCGAGAATGTTAGACCATAAAGAAGCTATCATATCTCATTTAAGTTGGGCCAGTCTGTTTTTGGGGTTCATACTTGGGACTTTATGTTTATAACGACGTCATGCTCGCTTTTGGGACTCCGGAAAAACAATCTTGATTGAACCTATATTTGCCAGTGGATACAAATCCGCTCATGGTAAGACTTTATATGGGTTGATGTACTCTTATCTTCAACGAGTGGCCAGCATTCAATGCTGGTTCGAAGCATTGGTTACCCGGTTGGTTGAGTGCTGTTAATGAG----AATAGTAATTCACTATTCTTAACAATAGGTCCTGGAGACTTCTTGGTTCATCATGCTATGCTCTAGGTTTGCATACAACTACATTGATCTTAGTAAAGGGTGCTTTAGATGCGCGTGTTCGAAGTTAATGCCAGATAAAAAAGATTTCCGGTTATAGTTTTCTTGGCAGCGCCCGGACGGGGGGTACTTGTGATTTTCTGCTTGGGATGCATTTTATTTGGCGGTTTTCTGGATGTTAAATACCATTGGATGGGTTACTTTTTATTGGCATTGGAAGCACATCACATTATGCAAGGTAATGTTTCACAATTAACGAATCCTCTACTTATTTGATGGGATGGTTAAGAGATTATCTATGGTTAAACTCTTCCCAACTTATCAACGGATACAATCCGTTTGGTATGAATAGTTATCGGTCTGGGCATGGATGTTCTTATTTGGACATCTTGTGTTGGGCTACTGGATTTATGTCTTAATTTCTGGCGTGGATATTGGCAGGGATTAATTGAACTTTAGCATGGGCTCATGAACGCACACCTTTGGCTAATTTGATTCGATGGAGAGATAAGCCAGTGGCTCTTTCCATC GTGCAAGCAAGATTGGTTGGATTAGCCCACTTTTCCGTAGGTTATATATTTCACTTATGCA GCTTTCTTGATTGCCTCTACATCAGGTAAATTTGGTATGTCACATTCAGTAAAGATTTATGATACATGTATAGGGTGTACTCAATGTGTACGAGCCTGTCCTACAGATGTATTGGAAATGATACCCTGGGACGGATGTAAAGCTAAGCAAATTGCTTCTGCGCCAAGAACAGAGGACTGTGTAGGTTGTAAGAGATGCGAATCCGCCTGTCCAACAGACTTCTTGAGTGTCCGGGT TATTTAGGGAATGAGACAACCTCGCAGCATGGGTCTACCTTATATGACAGATCTCAACTT ACCCTCTATTTTTGTGCCTTTAGTAGGCCTAGTCTTTCCGGCAATTGCAATGGCTTCTTT ATTTCTTCATGTTCAAAAAACAAGATTGTCATGCAAGATATAAAAACATATCTCTCTGTGGCACCTGTGCTAACTACTCTATGGTTTGGGTCTTTAGCAGGTTTATTGATAGAGATCAA TCGTTTTATTCCCGGATGCCTTGTCATTCCATTTTTT-----ATGACTGCAATTTTAGAGAG

ACGCGAAAGTACAAGCCTATGGGGTCGCTTCTGTAAGTGGATAACCAGCACCGAAAAC  
CGCCTTTACATTGGATGGTTCGGTGTTTTAATGATCCCTACCTTATTGACCGCAACTTCT  
GTATTTATTATCGCCTTCATCGCTGCTCCTCCAGTAGATATTGATGGTATCCGTGAACCTG  
TTCCGGGTCTTTACTTTATGGAAACAACATTATTTCTGGTGCCATTATTCCTACATCTGC  
AGCTATAGGTTTGCACCTTTACCCAATTTGGGAAGCAGCATCCGTGATGAGTGGTTAT  
ACAATGGTGGTCCCTTATGAACTAATTGTTCTACACTTCTTACTTGGTGTAGCTTGTATAT  
GGGTCGTGAGTGGGAACTTAGTTTTCCGTCTGGGTATGCGTCCTTGGATTGCTGTGCGAT  
ATTCAGCTCCTGTTGCAGCTGCTACTGCTGTTTTCTTGATCTACCCTATTGGTCAAGGAA  
GCTTCTCTGATGGTATGCCTCTAGGAATATCTGGTACTTTCAACTTTATGATTGTATTCCA  
GGCTGAACACAACATCCTTATGCATCCATTCCACATGTTAGGCGTAGCTGGTGTATTCTG  
GCGGCTCCCTATTTAGTGCTATGCATGGTTCCTTGGTAACTCTAGTTTAATCAGGGAAA  
CTACTGAAAATGAATCTGCTAATGAAGGTTACAGATTCGGTCAAGAGGAAGAACTTAT  
AATATCGTCGCTGCTCACGGTTATTTTGGCCGATTAATCTTCCAATATGCTAGTTTCAAC  
AATCCCGTTCCTACATTTCTTCTTGGCTGCTTGGCCTGTAGTAGGTATCTGGTTCACT  
GCTTTAGGTATTAGTACTATGGCTTTCAACCTAAACGGTTTCAATTTCAACCAATCCGTA  
GTTGACAGTCAAGGTCGTGTTATTAACACTTGGGCTGATATCATCAACCGTGCTAACCT  
TGGTATGGAAGTAATGCATGAACGTAATGCTCACAACCTCCCTCTAGACCTAGCTTCTG  
TTGAAGCACCTTCTACAAATGGCATGGGTTTGCCTTGGTATCGTGTTACATACCGTCGTAT  
TGAATGATCCCGGTCGGTTGCTTTCTGTCCACATAATGCATACAGCTCTAGTTGCTGGTT  
GGGCCGGGTCAATGGCTCTATACGAATTAGCGGTTTTTGGATCCCTCTGACCCCGTCTT  
GATCCAATGTGGAGACAAGGTATGTTCTGTTATACCCTTCATGACTCGTTTAGGAATAAC  
CAATTCGTGGGGTGGTTGGAGTATCACA---GGAGGAACTATAACGAATCCGGGTATTTG  
GAGTTACGAAGGTGTGGCAGGGGCACATATTGTGTTTTCTGGCTTGTGCTTTTTTAGCAG  
CTATTTGGCATTGGGTATATTGGGACTTAGAAATATTCTGTGATGAACGTACGGGAAAA  
CCCTCTTTGGATTTGCCCAAGATCTTTGGAATTCATTTATTTCTCTCAGGAGTGGCTTGC  
TTTGGCTTTGGCGCATTTTCATGTAACAGGCTTGTATGGTCCCTGGAATATGGGTGTCTGAT  
CCTTATGGACTAACCGGAAAAGTACAACCCGTAATCCAGCTTGGGGCGCGGAAGGTT  
TTGATCCTTTTTGTTCCGGGCGGAATAGCCTCTCATCATATTGCAGCGGGGACTTTGGGC  
ATACTGGCAGGCCTATTCCACCTTAGTGTCCGTCCACCCCAGCGTCTATACAAAAGGATT  
ACGTATGGGCAATATTGAAACTGTACTTTTCGAGTAGTATCGCTGCTGTGTTTTTTCGAGC  
TTTCGTAGTTGCGGGAACCTATGTGGTATGGTTCAGCAACTACCCCATCGAATTATTTGG  
TCCGACGCGTTACCAGTGGGATCAAGGATACTTCCAGCAAGAAATATATCGAAGAGTT  
GGTGTGACTAGCCGAAAATCTGAGTTTATCGGAAGCTTGGTCTAAAATTCCTGAAA  
AATTAGCTTTTTATGATTACATCGGTAATAATCCGGCAAAGGTGGATTATTTAGAGCAG  
GCTCAATGGACAACGGAGATGGAATAGCCGTTGGATGGTTAGGACACCCCGTCTTTTCG  
AGATAAGGAAGGGCGTGAACCTTTTTGTACGCCGTATGCCTACTTTTTTTGAAACATTT  
CGGTAGTTTTGGTAGATGGAGACGGAATTGTGCGAGCCGATGTTCCTTTTCGAAGGGC  
AGAATCCAAATATAGTGTGCAACAAGTAGGCGTAACTGTTGAGTTCTATGGTGGCGAA  
CTCAATGGAGTCAGTTATAGCGATCCTGCTACTGTTAAAAAATATGCTAGACGTGCCCA  
ATTAGGTGAAATTTTTGAATTAGATCGCGCTACTTTAAAATCCGATGGTGTTTTTTCGTAG  
CAGTCCGAGGGGTTGGTTCACTTTTGGACATGCTTCATTTGCTTTACTCTTTTTTCGG  
GCACATTTGGCATGGAGCTAGAACCTTGTTCAGAGATGTTTTTGTGGTATTGATCCAG  
ATTTGGATGCTCAAGTGAATTTGGGGCATTCCAAAAAATTGGAGATCCAACACTACAAG  
GCGACAAGCAGTTATGAAAACCTTATATCCCTGAGGAGGTTCTACCCCGTGGAACG

CTCTTTAATGGAAC TTTAGCTTTAGCTGGTCGTGACCAAGAAACCACTGGTTTCGCTTG  
GTGGGCCGGGAATGCCAGACTTATCAATTTGTCCGGTAAACTACTCGGGGCTCACGTA  
GCCCATGCCGGATTAATCGTATTCTGGGCAGGAGCAATGAACCTCTTTGAAGTGGCTCA  
TTTCGTACCAGAGAAGCCCATGTATGAACAAGGATTAATTTTACTTCCCCATCTAGCTAC  
TCTAGGTTGGGGGGTAGGTCCGGGTGGGGAAGTTATAGACACCTTCCATACTTTGTAT  
CTGGAGTACTTCATCTAATTTCCCTCTGCAGTCTTAGGCTTTGGCGGTATTTATCATGCGC  
TTCTTGACCTGAGACTCTAGAAGAATCCTTTCCGTTCTTCGGTTATGTATGGAAAGAT  
AGAAATAAAATGACCACAATTTTAGGTATTCATCTAATTTTGTTAGGGATAGGTGCTTTT  
CTTCTAGTATTCAAGGCTCTTTATTTTGGGGGTGTATATGACACCTGGGCTCCTGGGGGG  
GGAGATGTAAGAAAATAACCAACTAACACTTAGCCCAAGTGTATATTTGGTTATTT  
ACTAAAATCTCCCTTTGGAGGAGAAGGATGGATTGTTAGTGTGGACGATTTAGAAGATA  
TAATTGGAGGACATGTATGGTTAGGTTCCATTTGTATACTTGGTGGAACTCTGGCATATCT  
TGACCAAACCTTTGCATGGGCTCGCCGCGCATTTGTATGGTCTGGAGAGGCTTACTTG  
TCTTATAGTTTAGGTGCTTTAGCTGTCTTTGGGTTTCATCGCTTGTTGTTTCGTCTGGTTC  
AATAATACCGCCTATCCTAGTGAGTTTTATGGACCTACTGGGCCGGAGGCTTCTCAAGC  
TCAAGCATTACTTTTCTAGTTAGAGACCAACGTCTTGGGGCTAACGTGGGATCCGCTC  
AGGGACCTACTGGTTTAGGTAATATCTAATGCGGTCCCAACGGGAGAGGTCATTTTT  
GGAGGAGAAACCATGCGCTTTTGGGATCTCCGTGCTCCTTGGTTGGAACCTCTAAGGG  
GTCCCAATGGTTTGGACTTGAGTAGGCTGAAAAAAGACATAACAACCTTGGCAAGAAC  
GACGTTCCGGCGGAATATATGACTCATGCTCCTTTAGGGTCTTTAAATCCGTGGGTGGT  
GTAGCTACCGAGATCAATGCAGTCAATTATGTCTCTCCTAGAAGTTGGTTAGCTACTTCT  
CATTTTGTCTAGGATTCTTCTTTTTTGTGGGTCAATTTGTGGCACGCAGGAAGAGCCCG  
CGCAGCGGCAGCAGGATTTGAAAAGGAATCGATCGTGATTTAGAACCTGTTCTTTCC  
ATGACTCCTCTTAATATGACTATAGCCCTTGGTAGATTTACCAAAGAGGAA--GATTTATT  
CGATATTATGGACGACTGGTTACGGAGAGACCGTTTCGTTTTTGTAGGTTGGTCCGGTC  
TATTGCTCTTCCCTTGTGCTTATTTTCGCTTTAGGAGGTTGGTTCACAGGTACAACTTTTG  
TAACTTCGTGGTATAACCCACGATTGGCTAGTTCATATTTAGAAGGCTGCAATTTCTTAA  
CCGCTGCAGTTTCTACTCCTGCTAATAGTTTAGCACATTCTTTGTTGCTACTATGGGGTC  
CTGAAGCACAAGGCGATTTTACTCGTTGGTGTCAATTAGGCGGTCTGTGGACTTTTGTT  
GCTCTACACGGTGCTTTTCGGACTAATCGGTTTCATGTTACGTCAATTCGAACCTTGCTCG  
ATCTGTTCAATTGCGACCTTATAATGCAATCGCATTTTCTGGTCCAATTGCTGTTTTCGTT  
TCTGTATTCTAATTTATCCACTGGGTCAGTCTGGTTGGTTCTTTGCACCCAGTTTTGGT  
GTGGCAGCTATATTTGATTCATCCTCTTCTCCAGGGGTTTCATAATTGGACCCTAAAC  
CCATTTCATATGATGGGAGTTGCCGGAGTATTGGGTGCTGCTCTGCTATGCGCTATTCAT  
GGTGCTACCGTAGAAAATACTTTATTTGAGGACGGTGACGGCGCAAATACATTCCGTGC  
TTTTAACCCAACGCAAGCCGAAGAGACTTATTCGATGGTCACTGCTAACCGATTTTGGT  
CCCAAATCTTTGGGGTTGCTTTTTCTAATAAACGTTGGTTACATTTCTTTATGTTATTTGT  
ACCAGTAACCGGTTTATGGATGAGTGCCCTTGGAGTAGTTGGTCTGGCTCTGAACCTAC  
GTGCCTATGACTTCGTTTCCAGGAAATCCGTGCCGCGGAAGATCCTGAATTTGAGACT  
TTCTACACCAAAAATATTCTCTTAAATGAGGGTATTCGTGCTTGGATGGCAGCTCAGGA  
TCAGCCTCATGAAAACCTTATATTCCCTGAGGAGGTTCTACCCCGTGGAACGCTCTTA  
TGTCTGGAAGCACGGGAGAACGCTCTTTTGCTGATATTATTACCAGTATTCGATACTGG  
GTATTTCATAGCATTACTATACTTCCCTATTTCATTGCGGGTTGGTTATTCGTACAGTACAG  
GTTTAGCTTACGATGTGTTTTGGAAGTCCTCGTCCAAACGAGTATTTTACAGAAAGCCGG

CAAGGGATTCCATTAATAACTGGCCGTTTTGATCCTTTGGACCAACTTGATGAATTTAGT  
AGATCCTTTATGACCATAGATCGAACCTATCCAATTTTTACAGTAAGATGGTTGGCTGTT  
CATGGACTAGCTGTACCTACCGTTTTCTTTTTGGGGTCAATATCAGCAATGCAGTTCATC  
CAACGAATGGCTACACAAACCGTTGAGGGTAGTTCTAGATCTGGG---CCAAGACGAAC  
AATTGTAGGGGATTTATTGAAACCATTGAATTCAGAATATGGTAAAGTAGCCCCGGGAT  
GGGGAACACTCCTTTTTATGGGAGTCGCAATGGCCCTATTTGCGATATTCCTATGTATTAT  
TTTGGAGATTTATAATTCTTCCGTTTTACTGGATGGAGTTTCACCGAATATGCTTACTCTC  
AAACTCTTCGTTTACACAGTAGTGATATTTTTGTTTTCTCTATTTATCTTCGGATTCCAT  
CTAATGATCCAGGACGTAATCCTGGACGTGAGGAAATGGCTGATACTACTGGAAGGATT  
CCTCTTTGGCTGATAGGTACTGTAGCTGGTATTCTGTGATCGGTTCACTGGGTGTTTTCT  
TTTTACGGTTCATATTCCGGATTGGGCTCATCTCTGATGCTTAATATACTTAATTTGATCT  
GTATCTGTCTTAATTCTGCCCTTATTCGAGTAGTTTTTTCTGCGCTAAATTGCCCGAGG  
CTTATGCTGTTTTCAATCCAATTGTAGATTTTATGCCAGTCATACCTGACTCTTTTTTCT  
CTTAGCCTTTGTTTGGCAAGCCGCTGTAAGTTTTCGCATGACACAATCAAACCCAAAC  
GAACAAAATGTTGAATTGAATCGTACCAGTCTATACTGGGGGTTATTACTCATTTTTGTA  
CTTGCTGTTTTATTTTCCAATTATTTCTTCAATATGGAAGTAAATATTCTCGCATTTATTGC  
TACTGCACTGTTCACTTAGTCCGACTGCCTTTTTACTTATCATCTACGTAAAAACAGT  
CAGTCAAATGATATGGAAACAGCAACCTTAGTCGCCATCTTCATATCTGGTTTACTTGT  
AAGCTTTACTGGGTATGCCTTATATAACCGCTTTTGGGCAACCCTCTCAACAATAAGAG  
ATCCATTGAGGAACACGGAGACATGGAAGCATTGGTTTATACATTCCTGTTAGTCTCG  
ACTCTAGGGATAATTTTTTTCGCTATCTTCTTTCGAGAACCGCCAAAGGTTCTACTAAA  
AAGATGAAAATGACTATTGCTTTTCAATTGGCTATTTTTGCATTAATTGCGACTTCATCG  
ATCTTATTGATTAGTGTACCCGTTGTATTTGCTTCTCTGATGGTTGGTCAAGTAACAAA  
AATGTTGTATTTCCGGTACCTCATTATGGATTGGGTTAGTCTTTCTGGTAGGTATCCTTA  
ATTCGCTCATCTCTATGAGTTGTAGGGAGGGACTTATGTCACCACAAACAGAGACTAAA  
GCAGGTGTTGGATTCAAAGCTGGTGTAAAGATTACAAATTGACTTATTATACTCCTGA  
ATATGAAACCAAAGATACTGATATCTTGGCAGCATTTCGAGTAACTCCTCAACCCGGAG  
TTCCACCCGAGGAAGCAGGGGCTGCGGTAGCTGCCGAATCCTCTACTGGTACATGGAC  
AACTGTGTGGACCGATGGACTTACCAGCCTTGATCGTTACAAAGGCCGATGCTACCAC  
ATCGAGCCCCTGTTGGGGAGCAAATCAATATATTGCTTATGTAGCTTATCCTTTAGAC  
CTTTTTGAAGAAGGTTCTGTTACTAACATGTTTACTTCCATTGTGGGTAATGTATTTGGG  
TTCAAAGCCCTACGAGCTCTACGTTTTGGAGGATCTTCGAATCCCCCTGCTTATTCAA  
AACTTTCAAAGGCCCGCCCCATGGAATCCAGGTTGAGAGAGATAAATTGAACAAGTAT  
GGTCGTCCCCTATTGGGATGTACTATTAACCAAATTTGGGGTTATCCGCGAAGAACTA  
CGGTAGAGCAGTTTATGAATGTCTCCGTGGTGGACTTGATTTTACCAAGGATGATGAGA  
ACGTGAACTCACAGCCATTTATGCGTTGGAGAGACCGTTTCTTATTTGTGCTGAAGCA  
ATTTATAAAGCGCAAGCGGAAACAGGTGAAATCAAAGGACATTATTTGAATGCTACTG  
CGGGTACATGTGAAGAAATGATGAGAAGGGCCCAATGTGCCAGAGAATTGGGAGTCC  
TATCGTAATGCATGACTACTTAACAGGTGGATTCAGTCAAATACTAGCTTGGCTATTTA  
TTGCCGAAACAACGGCCTACTTCTTACATCCATCGTGCAATGCATGCAGTTATTGATA  
GACAGAAGAATCATGGTATGCACTTTCGTGTACTAGCTAAAGCGCTACGTATGTCTGGT  
GGAGATCACATTCACGCCGGTACAGTAGTAGGTAACCTGGAAGGGGAACGTGAAATG  
ACTTTAGGTTTTGTTGATTTACTACGTGATGATTATTTGAAAAAGACCGAAGTCGTGGT  
ATTTTTTCACTCAAGATTGGGTCTCTATGCCAGGTGTTTTGCCCGTAGCTTCCGGTGGT



ATTCACGTTTGGCATATGCCTGCCTTGACCGAGATCTTTGGGGATGATTCTGTACTACAG  
TTCGGTGGAGGAACTTTAGGACACCCCTGGGGAAATGCACCTGGTGCAGTAGCCAATC  
GGGTAGCTTTAGAAGCGTGTGTACAAGCTCGTAATGAGGGACGTGATCTTGCTCGCGA  
AAGTACTCAAATTATCCGTGAAGCTTGTAATGGAGCCCTGAGCTAGCCGCTGCTTGTG  
AAGTATGGAAGGAAATCAAATTTGAGTTCGAACCAGTAGATAAGCTAGATGTTACGGC  
GATACATTTATACAAAACCTTCTACCTCGAGCACACGCAATGGAGCCGTAGACAGTCAA  
GTGAAATCCAATCCACGAAATAATTTGATCTATGGACAGCATCATTGTGGTAAAGGTCG  
TAATGCCAGAGGAATCATTACCGCAGGGCATAGAGGGGGAGGTCATAAGCGTCTATAC  
CGTAAAATCGATTTTCGACGGAATAAAAAAGACATATCTGGTAGAATCGTAACCATAGA  
ATACGACCCTAATCGAAATGCATACATTTGTCTCATACTATGGGGATGGTGAGAAGA  
GATATATTTTACATCCCAGAGGGGCTATAATTGGAGATACCATTGTTTCTGGTACAGAAG  
TTCCTATATCAATGGGAAATGCCCTACCTTTGACCGATATGCCCTTAGGCACGGCCATAC  
ATAACATAGAAATCACACTTGGAAAGGGTGGACAATTAGCTAGAGCAGCGGGTGTGT  
AGCGAAACTGATTGCAAAAGAGGGTAAATCGGCCACATTAAGATTACCATCCGGGGAG  
GTCCGTTTGATATCCAAAACCTGCTCAGCAACAGTCCGACAAGTAGGTAATGTTGGGG  
CGAACCAACAAAGTTTGGGTAGAGCCGGATCTAAGTGTGGCTAGGTAAGCGTCCTGT  
AGTAAGAGGAGTAGTTATGAACCCTGTGGACCATCCCCACGGGGGTGGTGAAGGGAG  
AGCCCCAATTGGTAGAAAAAACCCACAACCCCTTGGGGTTACCCTGCGCTTGGAAG  
AAGAAGTAGGAAAAGGAATAAATATAGTGATCGTTTTATTCTTCGTCGCCGTAAA---ATG  
ATTCAACCTCAGACCCTTTTAAATGTAGCGGATAACAGCGGGGCTCGAGAATTGATGTG  
TATTCGAATCATAGGAGCCAGT---AATCGCCGATATGCTCATATTGGTGACGTTATTGTTG  
CTGTAATCAAAGAAGCAGTACCCAATATGTCTCTAGAAAGATCAGAAGTGGTCAGAGC  
TGTAATTGTACGTACATGTAAAGAACTCAAACGTGACAACGGTATGATAATACGATATG  
ATGACAATGCAGCAGTTGTCATTGATCAAGAAGGGAATCCAAAAGGAACTCGAGTTTT  
TGGTGCGATCGCTCGGGAATTGAGACATTTGAATTTCACTAAAATAGTTTTCCCTAGCTC  
CTGAGGTATTAATGCTTAGTCCCAAAAAGAACCAGATTCCGTAAACAACATAGAGGAAG  
AATGAAGGGAATGTCTTATCGAGGCAGTCATATTTGTTTCGGAAGATACGCTCTTCAGG  
CACTTGAACCATCTTGGATCACATCTAGACAAATAGAAGCGGGGCGAAGGGCAATGAC  
ACGATATGCACGTCGTGGTGGAAAAATCTGGGTACGTATATTTCCGGACAAACCCGTTA  
CAATAAGACCCGCGGAAACACGTATGGGTTTCGGGGAAGGGATCCCCGAATACTGGGT  
ATCCGTTGTAAACCGGGTCGAATACTTTATGAGATGGGTGGAGTATCAGAACTGTAG  
CCAGAGCCGCTATTGAAATAGCCGCGTCCAAAATGCCTATAAGAACGCAATTTATTATT  
GCGGGAATGACCAGAGTTAGGCGAGGATATATAGCTCGGAGACGTGCAACAAAATTC  
GTTTATTTGCAGCAACCTTTTCGAGGGGCTCATTCAAGACTTACTCGAGCTGCCACTCAA  
CAGAAAATGAGAGCTTTGGTTTCTGCTCATCGAGATAGAGGCAAGCAAAAAGAGAGATT  
TTCGTCGTTTGTGGATCACTCGGATAAATGCGGTAACCTCGTGAGAAT-----GTATGCTATA  
GTTATAGTCGATTAATGCACAATCTGTATAAGAGGCAGTTGCTTCTTAATCGTAAAATAC  
TTGCACAAATAGCTATATTAATAAGAATTGTCTTCACATAATTTCCAATGAGATCATCA  
AA-----ATGATAAAGCGGGCTTTA---GCTCAAATATATCT--ATGTC  
TGCTTACAAAGCGAGAAGAGTAATTGATCAGATTCGTGGGCGTTCCTATGAGGAAACA  
ATTATGATACTAGAACTGATGCCTTATCGAGCATCTTTTCCTATTTTAAAATTGGTTTACT  
CTGCAGCAGCAAATGCTATTAACAATATGGGTTTGGAGCGAAGCTGATTTATTCATTAGTA  
AAGCAGAAGTCAATGGAGGTACTTTTCGTGAAAAAGTTACGACCCCGAGCTCGGGGAC  
GTAGTTATGCGATAAAAAGGCCCACTTGTTCATATAACAATTGTATTGAAG---AAAGATAA

ATCG-----ATGGATGGAATCAAATATGCAGTATTTACCGAAAAAGTATTCGG  
TTATTGGGGAACAATCAA--TATACTTCTAATGTCTGAATCAGGATCAACTAGGACAGAAA  
TAAAGCATTGGGTCTGAACCTCTTCTTTGGCGTCAAGGTAATAGCTATGAATAGTCATCGA  
CTCCCGGGAAAGGGTAGAAGAGTGGGACCTATTAAGGGACATACAATGCATTACAGAC  
GTATGATCATTACGCTTCAACCGGGTTATTCTATTCCACCTCTTATAGAGAAAAGAATA  
TGGCGGTTCCAAAGAAACGTACTTCTATATCAAAAAACGTATTCGTAAAAATTTTTGG  
AAGAAAAAGGGATATTTTGCCGCGGTAAAAGCTTTTTCTTTAGCTAAATCAGTTTCCAC  
CGGACAGTCAAAAAGTTTTTTTTGTGCGACAAACAAGTAATATGGCCAAGGGTAAAGAT  
GCCAGATTAACAGTTATTTTGAATGTACCAGTTGTGTCCGAAATGGT-----GTCAATAA  
GGAA-----GGTATTTCCAGATATATTACTCAAAAAATCGACACAATACATCGAGTCGAT  
TAGAATTGAGAAAATATTGTCTGCTATTGTTATAAGCATAACGATTCACGGGGAAATAAAG  
AAAATGAAAATAAGAGCCTCTGTTTCGTAAAATTTGCGAAAAATGTCTGACTAATCCGTA  
GGCGGGGACGAATTATAGTTATTTGTTATAATCCGAAACATAAACAAAGACAGGGGATG  
GTTTCGAGAGGAAGTAGTAGGATCCACTCGGGCACTACAGTGGAAGTGTGTTGAATCAA  
GAGCAGACAGTAAGCGCCTTTATTATGGTCGTTTCATTCTGTCCCCACTTCTGAAAGGA  
CAAGCCGATACTATAGGTATCGCCATGCGAAGGGCTTTACTTGGAGAAATAGAAGGAA  
CATGTATCACACGTGCAAAATCTGAG-----AAGGTACCACATGAATATTCTACGATAGCG  
GGCATTGAAGAATCAGTACATGAAATTTAATGAATTTGAAAGAAATTGTATTGAGAAG  
TAATCTTTATGGAACCTCGAGACGCATCTATTTGCGTCAGAGGTCCTAGATGCGTAACTG  
CTCAAGACATCATCTCACCACCTCCCGTAGAAGTAGTTGATACTACACAACATATAGCT  
AGCCTGACGGAACCGATTGATTTGTGTATTGGATTACAAATCCAGAGGGATCGCGGATA  
TCGTATGAAAACCACAAAAACTCTCAAGATGGAAGTTAT-----CCGATAGATGCTGTAT  
CCATGCCTGTTTCGAAATGCGAATCATAGTATTCATTCTTATGGAAATGGTAATCAGAAAC  
AAGAGATACTTTTCCTCGAAATATGGACAAATGGAAGTTTAACTCCTAAAGAAGCACTT  
CACGAAGCTTCCCGTAATTTGATTGATTTATTTATTCTTTTCTACATGCAGAGGAAGAG  
-----GACATTAATTTTCGAGGAAAATCAA--AACAGGTTTACTGTACCCCTTTTACCTTTC  
CTGATAGATTGGCT--AATCTAAAGAAAAACAAAAA---GAAATTGCATTGAAATGTATT  
TTTATTGACCAATCAGAATTGCCTCCCAGGACCTATAATTGTCTCAAAGGTCCAATATA  
CATAATTATTGGACCTTTTGAGTAACAGTCAAGAAGATCTTATGAAAATTGAATATTTT  
CGAATAGAAGATGTAAAACAGATATTGGACACTCTACAGAAGCAT-----TTCGCAATTGA  
TTTACCTAAGAATAAGATGCCCGGGAT--GGAAATGAGGGAATGTTCACAATACCTGG  
ATTTAGTCAGATCCAATTTGAGGGATTTTGTAGGTTTCATTGATCAGGGCTTGATGGAAG  
AATTTCATAAGTTTCCAAAAATTGAAGATACAGACCAAGAAATTGAATTTCAATTATTT  
GTGGAAGATATCAATTGGTAGAACCTTGATAAAAGAAAGAGATGCTGTATATGAATC  
ACTCACATATTCCTCGGAATTATATGTACCCGCGGGATTAATTTGGAAAACCGGTAGAGA  
TATGCAAGAACAACCATATTTATTGGAAACATTCCTCTAATGAATTCCTGGGAACCTT  
TATAGTAAATGGAATATACAGAATTGTAATCAATCAAATATTGCAAAGCCCCGGTATTTA  
CTACCGTTCAGAATTGGACCATAACGGAATTTCTGTTTATAACCAGTACCATAATATCAGA  
TTGGGGAGGAAGATCAGAATTAGAAATCGATAGAAAATCAAGGATATGGGCCCGTGTG  
AGTAGGAAACAAAAATATCTATTCTAGTTTTATCATCAGCTATGGGTTTCGAATCTAAGA  
GAAATTCTAGATAATGTTTGCTACCCCGAAATTTTCTTGTCTTTTCTGAATGATAGGGAG  
AAAAAAAAGATTGGGTCAAAGAAAATGCCATTTTGAATTTTATCAACAATTTGCTTG  
TGTAGGTGGAGATCCGGTATTTTCTGAATCCTTATGTAAAGAATTACAAAAGAAATTTTT  
TCAACAAAGATGTGAATTAGGAAGGATTGGACGACGAAATATGAACCGGAGATTAAT

CTTGATATACCTCAGAGCAATACATTTTTGTTACCACGAGATGTATTGGCTGCCGCGGAT  
CATTTGATCGGAATGAAATTTGGAATGGGTACACTTGACGAT-----ATGAATCACTTGAA  
AAATAAACGTATTCGTTCTGTAGCAGATCTGTTACAGGATCAATTCGGCTTGGCTCTTGT  
TCGTTTAGAAAATGCAGTTCGAGGAACTATATGTGGAGCAATCAGG---CATAAATTGATA  
---CTGACTCCTCAAATTTGGTCAGTTCAACTTCA-----TTAACAACCACTTATGAAT  
CGTTTTTCGGCCTACACCCTTATCTCAAGTTTTGGATCGAACTAATCCATTGACGCAAA  
TCGTTTCATGGGCGAAAATTGAGTTATTTGGGTCTCGGAGGATTGACAGGGCGAACTGC  
TAGTTTTCGAATACGAGATATCCATCCTAGTCACTATGGACGGATTTGCCCAATTGACAC  
GTCCGAAGGAATCAATGTTGGACTTATTGGATCCTTAGCTATTCATGCCAGGATTGGTCA  
TTGGGGG---TCTATAGAGAGTCCGTTTTAT-----GAAGTATATCAGAGATCAAAGAG--  
---ACAAAGATGGTTTTTTTTATCACCAGTAGAGATGAATATTATACGGTAGCGACAGGA  
AATCCTTTGGCTTTGAATCGAGGTATTCAGGAAGAACAGATTGTTCCCGCCCGATACCG  
TCAAGAATTCCTGACTATTGCATGGGAACAGATTCATCTTCGAAGTATTTTTCCCTTCCA  
ATATTTTTCTATTGGAGCTTCCCTGATTCCGTTTTATCGAGCATAATGATGCGAATCGGGCT  
TTAATGAGTTCGAATATGCAGCGTCAAGCAGTTCGCTTTCCCGGTCCGAGAAGTGCAT  
TGTTGGGACTGGATTGGAACGACAAGCGGCTCTGGATTCCGGGGTTTCAGCTATAGCC  
GAATGCGAGGGAAAGATTATTTATACCGATACTCATAAGATCGTTTTATCAGGTCATGGA  
GACACTATAAGCATTCCATTGGTTATGTATCAACGTTCGAACAATAACTTGTATGCAT  
CAAATCCTCAGGTTCCGGCGGGGAAATGCATTAATAAAGGACAAATTTAGCGGATG  
GTGCGGCTACAGTTGGTGGCGAACTCGCTTTAGGAAAAACGTATTAGTAGCTTATATG  
CCATGGGAAGGTTACAATTTTGAGGACGCGGTACTCATTAGCGAACGTCTGGTATATGA  
AGATATTTATACTTCTTTTCACATCCGTAAATATGAAATTCAGACTCATGTGACAAGCCA  
GGGT--CCTGAAAGAATTACTCATGAAATACCGCATTTGGAAGCTCATTTACTCCGCAAT  
TTAGACAGAAATGGAATTGTGGCGCTGGGATCTTGGGTAGAAACAGGCGATATTTAGT  
AGGTAAATTAACCCCTCAGACAGCCAACGAA---TCATCGTATGCCCCGGAAGATAGATT  
ATTACGAGCCATACTTGGGATTCAGGTATCCACTGCAAAAGAACTTGTCTAAAACCTAC  
CTATAGGCGGAAGGGGTCGAGTTATTGATGTGAGATGGATCCAGAAAAAGGGA---GGT  
TCCAGCTATAATCCAGAAACGATTTCGTGTATATATTTACAGAAACGTGAAATCAAAGT  
GGGTGATAAAGTAGCTGGAAGACACGGGAATAAAGGTATCATTTCAAAATTTTATCTA  
GACAAGATATGCCTTATTTGCAAGATGGAACGCCGGTTGATATGGTTTTCAACCCATTA  
GGAGTACCTTCACGAATGAATGTGGGACAAATATTTGAATGCTCGCTCGGGTTAGCGG  
GGGACCTGCTAGACAGACATTATAGAATAGCACCTTTTGATGAGAGATATGAGCAAGA  
GGCTTCGAGAAAAC TAGTGTCTTCTGAATTATATGAAGCCAGTAAGCAAACAGCAAAT  
CCATGGGTATTTGAACCCGAATATCCCGGAAAAAGCAGAATATTTGATGGAAGAACGG  
GAGATCCTTTTGAACAGCCTGTTCTAATAGGAAAGTCCTATATCCTGAAATTAATTCATC  
AAGTTGACGATAAAATCCACGGTTCGTCCAGTGGACATTACGCACTTGTTACACAACA  
ACCTCTTAGAGGAAGGGCAAACAGGGCGGACAGCGGTAGGAGAAATGGAAGTTTG  
GGCTCTCGAAGGGTTTTGGTGTGCTCATAATTTTACAAGAGATGCTTACTTATAAATCTGA  
TCATATTAGAGCTCGTCAGGAAGTACTTGGTACTACAATCATTGGAGGAACAATACCTA  
CCCCCGAGGATGCTCCAGAATCTTTTCGATTGCTCGTTTCGCGAATTACGATCTTTGGCTT  
TGGAAGTGAATCATTTCCTTGTATCTGAGAAGAACTTCCAGATTAATAGGAAGGAAGCT  
-----ATGATCGACCGGTATAAACATCAACAACCTCAAATTGGATCAGTTTCTC  
CTCAACAAATAAGTGCTTGGGCCAACAAAATCCTACCTAATGGAGAGATAGTTGGAGA  
GGTCACAAAACCTATACTTTTCATTACAAAACCAATAAACCGGAAAAAGATGGATTAT

TTTGTGAAAGAATCTTTGGACCTATAAAAAGTGGAATTTGCGCTTGTGGAAATTATCGA  
GTAATTGGCGCTGAAAAAGAAGACCCCAAATTTTGTGAACAATGTGGAGTCGAATTTA  
TTGATTCTCGGATACGAAGATATCAAATGGGATACATCAAGCTCGCATGTCCAGTGACT  
CATGTGTGGTATTTGAAACGTCTTCCTAGTTATATCGCGAATCTTTTAGATAAAACCCCTT  
AAGGAATTAGAAGGCCTAGTATACTGC-----GATTTTTCTTTTGCTAGGCC---ATAGCTA  
AAAAACCGACTTTCTTACGATTACGAGGTTTATTGCAATATGAAATCCAATCCTGGAAAT  
ACAGCATCCCCCTTTTTTTTACTACCCAAGGCTTCGATACATTCGAAATAGAGAAATCT  
CTACCGGAGCGGGTGCTATCAGGGAACAATTAGCCGATTTGGATTTGCGAATTGTTATC  
GATAATTCATCGGTAGAATGGAAGGACTTAGGAGACGAA---GGGTCCACTGGGAATGA  
ATGGGAAGATAGAAAAATTGGACGAAGAAAGGATTTTTTTAGTTAGACGCATGGAATTA  
GCTAAACATTTTATTGCAACAAATGTAGAACCAGAGCGGATGGTTTTGTGCCTATTACC  
GGTTCTTCCTCCCGAGTTGAGACCAATTATTCAGATAGATGGGGGTAAACTAATGAGTT  
CGGATATTAATGAACTCTATAGAAGAGTTATCTATCGGAACAATACTCTTACCGATCTATT  
AAAAACAAGTAGATCTACGCCAGGGGAATTAGTAATGTGTCAGGAGAAATTGGTGCAA  
GAAGCCGTAGATACACTTCTTGATAATGGAATCCGCGGACAACCAATGAGGGATGGCC  
ATAATAAAGTGTACAAGTCATTTTCAGATGTAATTGAAGGCAAGGAGGGGAGATTTTCGT  
GAGACTTTACTTGGTAAACGGGTCGATTATTCGGGTCGTTCCGTCATTGTTCGTAGGCC  
TTCACTTTCATTACATCGATGCGGATTACCTCGAGAAATAGCAATAGAGCTTTTCCAGA  
CATTTGTAATTCGCGGTCTAATCAGACAACATCTTGCTTCTAACATAGGAATTGCTAAAA  
GCAAAATTCGGGAAAAAGAACCGATCGTATGGGAAATACTTCAAGAAGTTATGCAGGG  
ACATCCTGTATTGCTAAATAGAGCGCCACCCTGCATAGATTAGGCATACAGGCGTTCC  
AACCCGTTTTAGTGGAGGGACGTGCTATTTGTTTACATCCATTAGTTTGTAAGGGATTCA  
ATGCAGATTTTGATGGAGATCAAATGGCTGTTTCATGTACCTTTATCTTTGGAAGCTCAA  
GCAGAGGCTCGTTTACTTATGTTTTCTCATATGAATCTCTTGTACCAGCTATTGGAGAT  
CCCATTTCTGTACCAACTCAAGATATGCTTATTGGCCTCTATGTATTAACGATGGGGAAT  
CGTCGAGGTATTTTTGTAAATAGGTATAATCCATGTAATCGCAGAAATTAT-----CAAAA  
TAAAACAGTTGACAATAATAACTATAAACATACGAAAGAGAAAAAACCCCTATTTTTTTGA  
GTTCCCTATGATGCACTTGGAGCTTATCAGCAGAAACGAATCAATTTACATAGTCCTTTGT  
GGCTCCGGTGGCGACTAGATCAACGT--GTCATTGGTTCA-----AGAGAAGTTCCTATCG  
AAGTTCAATATGAATCTTTGGGTACCTATCAGGAGATTTATGGGCACTATCTAATAGTAA  
GAAGTGTAAAAAAAGAAATACTTTGTATATACATTCGAACCACTGTTGGTCATATTTCTT  
TTTATCGAGAAATAGAAGAATCCGTACAAGGGTTTTGTGCGAGCCTACTCATATGGTACC-  
-----ATGGCAGAACGGGCCGATCTGGTCTATCACAATAAAGCGAT  
AGATGGAAGTCCATGAAACGACTTATTAGCAGATTAATAGATCACTTCGGAATGGCAT  
ATACATCACACATCCTGGATCAAGTAAAGACTCTGGGTTTTTCGGCAAGCCACTGCTACA  
TCTATTTTATTAGGAATTGATGATCTTTTAAACAATACCTTCTAAAGGATGGCTAGTCCAA  
GATGCTGAACAACAAAGTTTTATTTTGGAGAAACACCATTCTTATGGAAATGTACACGC  
GGTAGAAAAATTACGTCAATCCATTGAGATATGGTATGCTACAAGTGAATATTTGAGAC  
AAGAAATGAATCCTAATTTTCGGATGACTGATCCTTCTAATCCAGTCCATATAATGTCCT  
TTTCGGGAGCTAGAGGAAATGCATCTCAGGTGCACCAATTAGTAGGTATGAGAGGACT  
AATGTCCGATCCCAGGGACAAATGATTGATTTACCCATCCAAAGCAATTTACGTGAAG  
GACTTTCTTTAACCGAATATATAATTTCTGCTACGGAGCCCGCAAAGGAGTTGTAGATA  
CTGCTGTACGAACATCAGATGCCGATACCTCACTCGTAGACTTGTGGAAGTAGTTCAA  
CACATTGTTGTACGCAGAACAGATTGTGGCACTATCCGAGGTATTTCTGTGCAACCTCG

AAACGGGATGACGGAA-----AGGATGTTTTTTCAAACACTAATCGGTTCGTGTATTAGCA  
GACGATGTATATATAGGTCTACGATGCATTGCCGCTCGAAATCAAGATATTGGGATTGGA  
CTTGTCATCGATTCAACC-----TTTCGAGCACAACCAGTATATATTCGAACT  
CCCTTTACTTGTAGGAGTACCTCTTGATCTGTCAATTATGTTATGGCCGGAGTCTACT  
CACGGCGACCTGGTCAATTGGGGGAAGCGGTAGGTATTATTGCGGGACAATCAATTG  
GGGAACCGGGGACTCAACTAACATTAAGAACCTTTCATACTGGTGGAGTATTCACAGG  
GGGTACTGCAGAACATGTACGAGCTCCTTCTAATGGAAAAATAAAATTCAATGAGGAG  
TTGGTTCATCCACACGTACACGTCACGGACATCCTGCTTTTCTATGTTCTATAGACCTG  
TATGTAAGTGTGAGGGTCGGGATATTATACATAATGTCAATATCCACCAAAAAGTTTG  
ATTTTAGTTCAAATGATCAATATGTAGAATCAGAACAAGTGATTGCCGAGATTCCGCGC  
CGGAACATCCACTTTT-----TTTAAAGAGAGGGTCCAGAAACATATTTATTCCGAATCAG  
CGGGAGAA--ATGCACTGGAGTACCGATGTCTATCATGCACCTGAATATACATATGGTAA  
TGTTTCATCTATTACCAAAAACAAGTCATTTATGGATATTATCCGGAGGGCCATACAGA----  
--TCCAGTATAGTGTCTTCGTCGCTCCACAAGGATCAAGATCAAACGAATGCTCATTCTT  
TTTCTGTTGAACGGCGA-----TATATTTCTGACCTCTCA-----ATGACTAAT--GGTCGAGT  
GAGACACAAATTATTTAGTTCGGATCTTTCT--GGT--GGGGATAGGATTCTTGATTATTC  
A--AGACCCGATCAAATCATATCCAAGGGTCATTGGAATTTTATATACCCTTCT--ATTCT  
CCACGAGAAT-----TCAGATTTCTTAGCGAAGAGGCGAAAAAATAGATTCATCATCCCGT  
TCCAATATGATCAAGAAGGGGAGAAAGAACTAATACCGCATTCTGGTATTTTCGATCGAA  
ATACCATAAAC-----GGTATGTTGCGTAGAAATAGTATTCTTGCTTATTTTGACGATACA  
CGATACAGAAGAAGC-----GGAATTACTAAATAC---ACCGTAGAGATAGATTCAATCGTT  
AAA-----AAAGAGGATTCATTGAGTATCGAGGA---ACAAAAGAATTTAGTTCGAAATAC  
-----GTAGATCGATTTTTTTTCATTCCCGAAGAAGTGCATATCTTACCTGGATCTTCGTC  
ATAATGGTCCGGAACAACAGTCTCATCGGAGTAGACACACGAATCACTTTAAATATAAG  
AAGCCGAGTGGGTGGATTGGTTCGAGTGGAGAGAAAAAAAAAAAAATATTGAACTCAA  
AATTGTTTCTGGAGATATCCATTTTCTGAGAGACAGATAAGATATCCAGGCACAGCG  
GTATCTTGATACCGCCAGGAACGGAAAAAAA-----AACTCTAAGGAATCAAAAACA---  
AAATTGAAAAATTGGATCTATGTCCAGCGG-----ATCACGCCTACTAAGAAAAAG-----TA  
TTTTGTTTTGGTCCGACCCGTAGCCACATATGAAATAGCAGATGGGATCAATTTAGCAA  
CGTTTTTCCCTCAGGATCTATTGCAGGAAAGGGATAATGTTCAACTTCGAGTTGTTAATT  
ATATCCTTTATGAAATGGCAAACCAATTTCGAGGAATTTCTCACACAAGT--CAATTAGT  
TCGTACTTGCTTAGTATTGAATTGGGACCAAGAACAATGGTTCTATAGAA-----G  
GTGTTTCGTGCTTCTTTGTTGAAGTAAGGGCAAACGATCTTATTAGAGATTCATAAGA  
ATTGAGTTATGCAAGTCCGCTATTTGTATACCGAAAGAGGAAGGATATCGCAGGTTT  
AGGATTGATCCACGAT-----GATCGCACAAATATCAATCCTGTTTATTTGAAGGATAA  
GATTCCATCA-----TTTATTCAACATCAAGGGACTGTTGGT-----ACGTTGTTG  
AATCGAAATAAG-----GAATGCCAATCTTTGATTCTTTTGTATCATCTAATTGTTTTCG  
AATTGGT-----CCATTTAATGGTTCAAATATCAC-----AATGTGCCAAAAGAATCAGAT  
CCTATAATTCCAATT--GATTCGCTGGGTCTTTTAGGTACTACTGTACCA---AAAATTGCG  
AATTTTTTTTATTTATCTTACCATGTAATAACT-----CATAATCATATCTTGTTAACT---AA  
ATATTTGCTACGTGAC-----CATTTAAAACAGGCTTTCCAAGTACTTAGA-----TATTG  
TTAATGGATGAAAATAGGAGA-----ATTTATAATCCCGATCCGTGCAGTAACATCATTTT  
TAATGCATTGATTTGAATTGGCGCTTTCTCCATCACGATTATTTCTGAAGAGACATCCAC  
AATACTTAGC---CTTGGACAATTTGTTTGTGAAAATGTATGTCTATTTAAACACGGACCA-

-----CAGATAAAATCGGGTCAAGTTATAATTGTTTCAT--GTTGACTCCTTTGTAATAAGA  
GCAGCCAAGCCGTATTTGGCCACTCCAGGAGCAACTGTTTCATGGCCATTATGGAGAAAT  
ACTTTACGGAGGAGATACATTAATTACATTTATATATGAAAAATCAAGATCTGGTGATAT  
AACGCAGGGTCTTCCAAAAGTAGAACAAGTGTTAGAAGTACGTTCAATTGATTCCATAT  
CGACGAACCTCGAAAAAGGGTTGAAGGTTGGAACGAACATATAACAAAAATTCTTG  
GAATTCCCTGGGGATTCTTGATCGGCGCCGAGTTAACCATAGCGCAAAGTCGTATCTCT  
TTGGTTAATAAGATCCAAAAAGTTTATCGATCTCAGGGGGTGCAGATTCATAATAAGCAT  
ATAGAGATTATTGTACGTCAAATAACATCAAAGGTGTTGGTTTCAGAA-----GATGGA  
ATGTCTAATGTTTTTTCACCGGGAGAACTTATCGGATTGTTGCGGGCGGAACGAACAG  
GTCGCGCTTTGGAAGAAGCGATCTGTTATCGAGCAATCTTATTGGGAATAACAAGAGC  
GTCTTTGAATACTCAAAGTTTCATATCCGAAGCGAGTTTTCAAGAACTGCTCGAGTTT  
TGGCAAAGCGGCTCTACGGGGTCGTGTTGATTGGTTGAAAGGCCTGAAAGAGAACG  
TTGTTCTAGGGGCGATGATACCCGTCGGTACGGGATTCAAAGCATTAGTACACCGGTCA  
AGA-----AAACCCAACAACATTCAT-----TTGGAAATCAAAAAGAATAATCTATTTGAGG  
GGCAAGTGGA---GATGATATTTTGTCTACCACAGAGAATTATTTGGTTCTTGCGGCC  
AAAT-----TCAGAACAGTCATTTATGAAATTCATGATTCC-----ATGACA  
AAAAGATATTGGAACATCAATTTGGAAGAGATGATGGAAGCAGGAGTGCATTTCCGTC  
ACGGTACTAGGAAATGGAATCCTAGAATGGCACCTTACATTTCTGCAAAGCGTAAAGGT  
ATTCATATTACAAATCTTACTAGAACTGCTCGTTTTTTATCAGAAGCCTGTGATTTACTTT  
TTGATGCAGCAAGTGGGGGAAAACACTTCTTAATCGTTGGTACCAAAAAGAAAGCAG  
CTGATTCAGTAGCATCGGCTGCAATAAGGGCTCGGTGTCATTATGTTAATAAAAAATGG  
CTTGGTGGTATGTCAACGAATTGGTCCACTACAGAAACGAGACTTCAAATTTTAGGG  
ACTTAAGAGCAGAACAAAAGGCTGGGAAAATCGACCGTCTCCCGAAAAGGGATGCAG  
CAATGTTGAAGAGACAATTATCTACCTTGCAAACATATCTGGGTGGGATCAAATATATGA  
CGGGTTTACCTGATATTGTAATCATCGTTGATCAGCAAGAAGACTATACGGCTCTTCGA  
GAATGTGCATTTTAGGAATCCGACTATTTGTTAATCGATACAAATCTGACCCGGAT  
CTCGCAGACATTTGATTCCCGCCAACGATGACGCTATAGCTTCAATCCGATTGATTCTT  
AACAAATTAGTATTCGCAATTTGCGAGGGTCTGTTCTAGC---TATATAAGAAATCGTATGG  
GACAAAAAATAAATCCACTTGGTTTCAGACTTGGTGCAACCCAAAGTCATCTTTCCCTT  
TGGTTTCGCACAACCAAAAAGTTATTCTATGGGTTTACAGGAAGATGAAAAAATACGGG  
AGTGTATCAAGAATTATGTACAAAAAAACCCGAGACTGTCTTCAGGA---TTCGAAGGAA  
TAGCGCGTATAGAAATTAATAAAGAATCGATCTGATCCAGGTCATAATCTATATCGGAT  
TCCCAAATTTATTCATAGAGGGT-----CGAACGCAA-----GGAATCAAAGAATTACAGATG  
AGTGTACAAAAAAGATTAAATTCTGTGAATCAGAGACTCAACATTGCTATCGCAAGAAT  
TTCAAACCTTATGGGCAACCCAATATTCTTGCTGAATATATAGCTTTACAACATAAAAA  
TAGAGTTTCGTTTCGAAAAGCAATGAAAAAAGCTATTGAATTGACTGAACAAGCAGAT  
ACAAAAGGAATTCAAATTCAAATCGCAGGACGTATCGATGGAAAAGAAATTGCACGTG  
TCGAATGGATAAGAGAAGGTAGGGTTCCCTACAAACCATTGAGCTAAAATTGATCAT  
TGTTTCATAAAGTTCAAACCTATCTATGGGGTATTAGGCATAAAAATTTGGATATTTGTA  
GACGAGGAAATGTCTCGCTACCGAGGGCCTCGTTTTAAAAAATAACGCCGCTCTGGGGG  
CTTTACCCGACTAACTAGTAAAGGAACTAGACCCGGAAGTGATCTTAGAAATCAATTT  
CGTTCTGGTAAA---AGATCCAATATCGTATTCGTCTTGAAGAAAACAGAAATTGCGT  
TTTCATTATGGTCTGACAGAGCGACAATTAAGATATGTTTCATATCGCCGGAAAAGCC  
AAAGGATCAACAGGTCAGGTTTTACTACAACCTTGAATGCGTTTTGGATAACATCCT

TTTTCGATTGGGTATGGCTCCTACGATTCTGGAGCCCGGCAATTAGTTAACCATAGACA  
TATTTTAGTTAATGGTCGTATAGTAGATATAACCAAGTTATCGTTGCAAACCCAGAGACAT  
TATTACTACGAAGGATAAGCAAAGATCGAAAGTTCTGATTCAAATAATATGGATTCATC  
GACCCGCGAA-----TTGCCAAAACATTTGACTCTTGACTCA-----TTCCAACATAAAGGA  
TTAGTAAATCAAATCATAGATAGTAAATGGGTCTGGTTTGAAAATTAATGAGTTGTTAGTT  
GTGGAATATTATCCCGCCAGACTATGTCACGTCGAGGTACTGCAGAAGAAAAAACTG  
CAAATCCGATCCAATTTATCGTAATCGATTAGTTAACATGTTGGTTAACCGTATTCTGA  
AACACGGAAAAAAATCATTGGCTTATCAAATTATCTATCGAGCCTTGAAAAAGATTCAA  
CAAAGACAGAAACAAATCCACTATCTGTTTTACGTCAAGCAATACGTGGAGTAACTC  
CCGATATAGCAGTAAATCAAGACGTGTAGGCGGATCGACTCATCAAGTTCCTATTGAA  
ATAGGATCTACACAAGGAAAAGCACTTGCCATTCGTTGGTTATTAGCGGCATCCCGAAA  
ACGTCCGGGTCGAAATATGGCTTTCAAATTAAGTTCCGAATTAGTAGATGCTGCCAAAG  
GGAGTGGCGATGCCATACGCAAAAAGGAAGAGACTCATAAAATGGCAGAGGCAAATA  
GAGCTTTTGCACATTTTCGTATGGGTAAAGGACACTATTGCCGATATAATAACTTCTATAA  
GAAATGCTCAAATGGCTAAAAAAGGGACAGTTCGAATAGCATCTACGAATCTTACCGA  
AAACGTTGTTAAAATACTTCTGCGAGAAGGTTTTATTGAAAACGTTAGAAAACATCGG  
GAAAGTAATAAAGATTTCTTGGTTTTAAACCCTGCGACATAGAAGG-----ACTAGGAAAG  
GGATATATAGA-----ACTATTTAAAGCGTATCAGCCGACCTGGTTTACGAATCTAT  
TCCAACATCAAGGAATTCCCAAGATTTTAGGCGGAATAGGAATTGTAATTGTTTCTACT  
TCTAGAGGTATAATGACAGATCGGGAGGCTCGACTACAGGGAATTGGAGGAGAAATGT  
TATGTTATATATGTATGACAAAACTATAACCAAGAATTGGTTCACGTAGGAATGGACGTA  
TTGGTTTACGTAAGACTGGACGTAGAATACCAAAAGGAATTATTCATGTTTCAGGCAAGT  
TTCAACAATACCATTGTGACTGTTACAGATGTTCCGGGGTCGAGTAGTTTCTTGGTCCCTC  
CGCCGGTACTTGTGGATTCAAAGGCACAAGAAGAGGGACGCCGTTTGC GGCTCAAAC  
CGCAGCGGGAAATGCTATTCGTACAGTAGTAGATCAGGGTATGCAACGAGCAGAAGTC  
ATGATAAAAGGTCCCTGGGCTCGGAAGAGACGCAGCATTACGAGCCATTTCGTAGAAGCG  
GCATATTATTAATTTTCGTACGTGACGTGACCCCTATGCCACATAATGGATGTAGACCTC  
CTAAAAAAGACGTGTGATGCCAACTATTAACAACCTATTAGAAACACAAGACAGCC  
AATCCGAAATGTCACAAAATCCCCGCTCTTCGAGGATGTCCTCAGCGTCGAGGAACA  
TGTACTAGGGTGTATACTATCACCCCAAAAAACCAAACCTCTGCCTTACGTAAAGTTGC  
CAGAGTACGATTAACCTCTGGATTTGAAATCACTGCTTATATACCTGGTATTGGCCATAA  
TTTACAAGAACATTCTGTAGTCTTAGTAAGAGGTGGGAGGGTTAAGGATTTACCCGGTG  
TGAGATATCACATTGTTTCGAGGAACCCTAGATGCTGTTCGGAGTAAAGGATCGTCAACA  
AGGGCGTTCTAAATATGGGGTCAAAAAGCCAAAATGGCAAGGAAAGGTTTGATTGA  
GAGGGAGAAGAAGAGGAAGAAATTGGAACAGAAATATCATTTCGATTTCGTGGATCCTCA  
AAAAAAGAAATAAGA-----AAAGTTCCATCGTTGAGTGACAAATGGGAAATTCATGG  
AAAATTGCAATCCCACCACGTAATAGTGCACCTGTACGTCTTCATCGACGTTGTTTTTT  
GACCGGAAGACCCAGAGCTAACTATAGGGATTTTGGGTTATCCGGACACGTACTTTCGA  
GAAATGGTTCAGGCATGTTTGTGTCGGGGCGCAACAAGATCAAGTTGGATGGTCAAAA  
ATTCATTTATCTCGCTTATTCCGCAAGAAGAAAAAGAAGAA-----AACCGGGGATCTGTT  
GAATTTCAAGTATTCAGTTTCACCAATAAGATACGGAGACTTACTTCACACTTGGAAAT  
ACACAGAAAAGATTATTTATCCAGAGAGGTTTACGAAAAATTCTAGGAAAACGTCAA  
CGGCTGCTGGCTTATTTGTCAAAGAAAAATAGAGTACGTTATAATAAATTAATTGGTCA  
GTTGGATATTCGGGAGCCAAAACCTCGT-----ATGGTAAACTTCGTTTAAACGATGCG

GTAGAAAGCAACGAGCCATTTATCGAATCGTTGCAATTGATGTTTCGATCCCGAAGAGA  
GGGAAGAGATCTTTGTAAAGTGGGTTTTTATGATCCGATAAAAAATCAAACCTATTAA  
ATGTTCTCTGTTATTCTAAATTTCTGGAAAAGGGGGCTCAACCTACAGAACTGTTTCAT  
GATATTTTAAAGAAGGCAGAGGTATTTAAGGAACTTCAAGGAAATCAAACGAAA-----  
-ATGGATAAATCCAAGCAACTTTTTCGTAAATCCAAGCGATCTTTTCGTAGGCGTTTGCC  
CCCAATTGGATCGGGGGATCGAATTGATTATAGAAACATGAGTTTAATTAGTCGATTTAT  
TAGTGAACAGGGAAAAATATTATCTAGACGAGTGAATAGATTGACCTTGAACAACAA  
CGATTAATTACTATTGCTATAAAAACAAGCCCGTATTTTATCTTCGTTACCTTTTCTTAATA  
ACGAGAAA-----CAATTTGAAAGAACCGAGTCAATACCTAGACCTACCGGTCTTAGAAG  
CAGAAATAAAGTGACACGTTTCATTAATAAAAAAATCCTTTTGTGGCCAATCATTATTGG  
AAAAAATTGAGAAGCTCAACATGAAAGAGGAGAAAGAAATAATAGTAACTTGGTCCC  
GGGCATCTACCATTATACCCACAATGATCGGTCATACAATTGCTATTCATAATGGAAAGG  
AACACTTACCCATTTATATAACAGATCGTATGGTTCGGTCACAAATTGGGAGAATTCGCA  
CCTACTCTTACTTTCCGGGGACACGCGAGAAACGATAATAAATCTCGTCGTATGATTTTC  
AAATCATTCTACTAGGTAATCTTGGATCCTTATACATAAAGATAATAAATTCAGTCGTTG  
TGGTCGGACTATATTATGGATTTTTGACAACATTCTCCATAGGGCCCTCTATTCTTCTCCT  
TCTCCGAGCTCGGATTATGGAAGAAGGA-----ACCGAGAGGGAGGTATCAGCAACAA  
CTGGTTTTATTACGGGACAGCTCATGATGTTTCATATCGATCTATTATGCGCCTCTGCATCT  
AGCATTGGGTAGACCTCATAACAATAACTGTCCTAGTTATACCGTATCTTTTGTTCATTTC  
TTCTCGAACAATCAAAAACAATTTTTTGATTATGGATCTACTACCAGAAATCAATGCGT  
AATCTCAGCATTCAATGTGTATTCCTAACTAATCTAATTTTTCAACTCTTCAACCATTAA  
TGTTACCAAGTTCAACGTTAGCGAGATTAGTCAACATTTATATGTTTCGATGCAACAAC  
AAGATGTTATTTGTAACAAGTAGTTTTGTTGGTTGGTTAATTGGTCACATTTTATTCATG  
AAATGGGTTGGATTGGTAGTATCCTGGATACGGCAAAATCATTCTATTTCGATCT--ATTCG  
ATCTAATAAGTACCTTGGGTTAAAATTGAAAAGTGCTATAGCTCAAATCTTGAGTATTAT  
CTTCTTTATCGCCTGTGTCAACTATTTAGCCAGACTACCGGATCCTAGTGTCACTAAGAA  
ACTGAACGAAACCGAGCAAGACAAACCTCTTGTAACCTTGTCTTTTCGACTATAAACGA  
TGGAATCGACCTTTTAGATATATAAAAAACAAACATTCGAGAATGCTATAAGAGACGA  
AATGTCACAATATTTTTTTTATACATGTCTGAATAATGGGAAAAAAAAAATATCTTTTAC  
ATATCCACCTAGTTTAGCGACTTTTTTCGAAATAATAGAAAGAAAGATGTCTTTGTACA  
CAACAAAAAACTAACT-----GATGACGACTTGTATTGGGTTTCCAACAATGAAGAGAA  
AAAGAACAACCTTAAGTAATGAGTTGATAAACCGAATAAAAGTTTTAGACAAGGGATCC-  
-----GATGTGCTCGAAAAAAGGACGAGATTGTGTGATGATGAGAATGAACAAGAATGC  
TTACCTAAAAGTATGATCCTTTTGTGAATGGATCATATCGCGGAAGAATAAAGAAATT  
AGAATCAGAACTAGAAAAAATTTGGAAAAATAAGATACACAGTCTTATT--CGAGAATT  
TGAACATCAAGACGCAAATAATCAATTTATTGAAATAGAAAAGATCGACAAAAAGATT  
CCTAGATGGGTATACAAATTGATACAACAAGAACAACAGGAAGAAGAAGGAATTCGTT  
CGAGAAAAGGCAGACGTGTAGTAATTTATACTGATGCTTTGATACGTTACGCGCAACAA  
TCAGATTTTAGTCGGGATCTGATCAATGGATCCATACGCGCTAAAAGACGTAAAATAGT  
TCTTTGGGAAATGTTACAAGCAAATGCGCATTCCCCACTTTTTTTAGATCAAGTAGCAA  
AAATGGTTTCTTTGATCTCTTTGATGATCTTCGTGAAACAATGAATCTTATTTTTAGGA  
ATAGGGAGGAAGATGAACGGATAATAATATCCGAAACTTGGGATAACGTTATGTGTGCC  
CAAGCAATAAGAGGCTGTATGCTAGTAACCCACTCATTATTAGAAAATACATTATATTG  
CCTTTATTAATAATAGCTAAAAACATTGGGCGTATATTATTATTCAGCTCTCTGAGTGGG



ATGAGGATTTTAAGGACTGGAATAGAGAAATGCATGTAAATGCACCTATAATGGTGTT  
CAATTATCAGAAACAGAATTCCTCAAACTGGTTAAAGGATGGTATTCAGATAAAGAT  
CCTATTTCTTTTTCTCTAAAACCTTGGCGCGAATCTAAGAAAAGAAAAATGACGATT  
TTTGTTTTTTAACAGTTTGGGGAATGGAAGCGGAACTCCCTTTTGGTCCCCCTCGAAAC  
CGACCTTCTTTTTTAAACCCATTTTTGAAGAACTTGACACAAACATTTCGAAAGGTGGA  
A-----AACCAAAGTTTTGTTTTCAAAGAAAAAACAAAAGAC-----TTTTAAAG  
AAAAAACGGGATGGGTTACAAAATCGTTTTA-----TTGAAAAATAAAATAAGGAACT  
TTTTTACAAAAGTAAACTCCATAATTAGT--ATAAGATTACCCACGAATCGACTGTTCA  
AATCCATCCAGCAATTGGACAAATTATTCACCGATAGAAAAAAAATGAAGGATCTGT  
CTGATAGGACAATCACACCAGGAGTCAAATAGAACGCATCACAAAAGACAAGCAAA  
AACGTTCTAATGAGACAAGTTGTAATGCTAAAAGAACGGAATTGCAGAAAGATATTTTA  
CGGATAGCAAAAAAAGAAGTATCCGATTCATCCGTAAATTACACTCTTTTGTGAAATC  
TTTCATTGAAAGAATATACCTAGATATCTTTCTATGTACCATTAACATTCCCCGAATTAAT  
CTACAACCTTTTCATTCACCTTTATTTCTTGGGATTTCTCTTTATTGTCCCAAGCATATGTATT  
ATATAAATTATCACAAACCAAGTGATTAAGGATCAATTGAAATCTGTACTTCAATA  
TGCATATCCTTTTCTGAAGGATAGAATCAAGGACCTTTTTACACCAAGAATAGTTCATG  
CCAAATCAAGGCCTAAGAACTTCCATTTTCGAGAATAAATGCATGGAAAACTGGTT  
AAGGGGTCATTATCAATACAATTTATCTCAGACTAGATGGTCTGAATTAGTACCGAAAA  
AATGGCGAGAGAAATTCAATCAACGT--ACGATTAATAAATAAAGAAAATTGAATTCAT  
CTGAAAAAGAAAAAACCAACAAGCTCATTACGCGAAAGAAGGAAAATTGAAAAAA  
GACTACAGATATGATCTTCTATCACATAAATATTAATGAATATTTTATTGGCTCGGATAG  
AAAATATTTTGATCGGAGGATTCTCCGTTTTGACCTTAGATTTTTTATTGGATGGGAAT  
GCGCGAAGAAATTTTATATCGTTGGTTTTTCCAGAATTTGTGCTACGTTACGATGCATA  
TAAGAGTAAACCACGGATCATATCAATCAAATCTCTTCTTTTAGATTTCAAGAGTAAGA  
AGGAAGCAGAATTAGACTTTTTTCTAAAAAATATCTCCTTTTTCAATTGAGATGGGAT  
GAGCTTTTGAATAAAAAAATGATGACTAATATTAAGGTATATTGTCTCCTGCTTAGACTG  
AAAAATCTAAAGGAAATCGCAATATCCTCCATTGAAAGAGGAGAGATGTGCCTGGATTT  
AATGCTAATGCAAAAAGATCTATCTCTTAGGGAATTGATAAAAAAAGGAATATTCATTAT  
CGAACCGATTGTTTTATCTAGAAAATGGGACGGAAAATTGATTATGTATCAAACCATAG  
GTATTTCAATTGGTCGCTGAGAATAAGGATAATGATTATGATTTGCTTGTTCTGAAAATAT  
TCTATCTCCTAGACGTCGTAGAGAATTGAGAATCCTAATTTGTTTTGGATTTCTTTGGCC  
CAATTATCGATTAGAAGATTTAGCTTGTATGAATCGCTATTGGTTTGATAACCACTAATGGC  
AGTCGTTTCAGTATGTTAAGGATTCATATGTATCCAATGAAACGACATCAATTCAGATTC  
TGGATTTTCGAATTGAGAGAGATATTGAGAGAGATCAAGAATTCGCCCCATTTCTTAGA  
TTCATGGACCAAATTTCGATTCAGTGAGATCTTTGATTCACATTTTTTTCCACCAAGAAC  
GTTTGATGAAACTCTTTGACCCCCGAATTTGGAGTATCCTACTGTCA---CGCGATTCA---  
--CAGGGTTCAACAAGCAATCGATATTTTCATT-----ATCAAAGGTTTAGTACTTCTTGTA  
GTAGCG---GTCCTTATATCT-----CGTATTAACAATCGAAATATGGTTCGAAAGAAAA  
ATCTCTATTTGAGGGGGCTTCTTCCT-----ATACCTATGAATTCCATTGGACCCGGA  
AATGAGACATTGGAAGAATCCTTT--TGGTCTTCCGATATCAATAGGTTGATTGTTTTG---  
CTCCTGTATCTTCCAAAAGGGAAAAAGACCTCTGAGAGTTGTTTCATGGATCCGAAAG  
AGAGTCTTTGGCTTTTCCAATAAATAAATAAAT--CAAAGTGTATCATGCCCGAATC  
TAACCGGGGTTTCGCGGTGGTGGAGGAACCGGATCGGAAAAAAGAGG-----GATTCTAG  
TTGTAAGATATCT-----ACTAAAACCGTAGCTGGAATTGAGATCTCATCAAAGAGAA

AGATCTAAAA---TATCTGGAGTTTCTTTTTTTTATCCTATACG-----GATGATCCGATCCGCA  
AG-----  
-----  
-----GATCGG-----TTTTTTAGC-  
----AAGGTACAGAATGTATCGTCAAATATTCAATATGATTCC-----ACAAGA-----TCTAT  
TTTCGTTCAAGTAACGGATTTTAGCCAATCGAAAGGATCTTCT--GATCAATCCAGAGAT  
CACTTCGATTCCATTAGT-----AAGGAGGATTCAGAA-----T  
ATCACACATTGATCGATCAAACAGAGATTCCGCAACTAAAAGGAAGATCGATTCT--G  
GGGAT-----CCTTCCTTTCTTCAAACGGAACGAACAGAGATAGAATCAGAT-----CGATTC  
CCGAAA-----TGCCTTTCTGGATCTTCC-----CCAATGTCCCCGCTATTCCCC--GAACATG  
AGAAGCAGATGATTATTCATCGGCTTCCGGAAGAAATCGACGAATTTCTT-----GGAAT  
CCTACAAGATCAATTCGTTCTTTTTTCTCTGACAGATGG-----TCAGAACTTCAT--ATGG  
GTTCAATCCTACTGACAGGTCCACTAGAGATCAG-----AAATGGTTGAAGAAACA  
ACAAGATGTTTCT--TTTGTCTCTTCCCGGCGATCAGAA-----AATAAAGAAATGGTT  
GATATATCAAGATAATTACTTATTTACAAAAT-----ACCGTCTCAATTCATCCTATTTTCATC  
AGATCCGGGATGTGATATGGTTCCG--AAGGATGAACCAGAT--ATGGACAGTTCCAATA  
AGATTTCAATCTTGAACAAAAATCCATTTTTTGAT-----TTATTTTCATCTATTCCACGATCG  
GAACAAGGGGGGGTACACATTA-----CACCACGATTTTGAATCAGAA-----GAGAGATTT  
CAAGAAATGGCAGATCTATTCCTCTATCAATAACCGAGCCG--GATCTGGTGTATCATA  
GGGGATTTGCCTTTTTCGATTGATTCTGCGGATTAGATCAAAAAAAAA-----TTAGTGAAT  
GGAAAGGAAAAACAAAGGATGAATCGAAAAAGAAATCTTTA-----TTGGTTCTACC  
TCTCTTTTTTAT-----GAAGAGAATGCCTTTTTTTATCGAAGCATCAGAAAAAACCGG  
TCTGG--ATCCACTGCGGGAATGATTTG-----TTTGCTAGCAACAACATA  
ATGGAGGCAGTCAATCAATATAGATTGATCCGAAATCTGATTCAAATCCAATATAGCGCC  
TATGGG-----TACATAAGAAATGTATTGAATCGATTCTTTTTAATG-----AATAGATCCGA  
TCGCAACTTCGAATATGGAATTCAA-----AGGGATCAAATAGGAAATGATACTCTGAA  
TCATATAACTATAATGAAATATACGATCAACCAACATTTATCGAATTTGAAAAAG--AGTC  
AGAAGAAATGGTTTGATCCT-----CTTATTTCTCGAACCGAGAGATCCATGAATCGG  
GATCCTAATGCATATAGATACAAATGGTCCAACGGGAGTAAGAATTTCCAGGAACATTT  
GGAACATTTTCGTTTCTGAACAGAAGAAC-----CGTTTTCAAGTAGTGTGTTGATCAATT  
ACGTATTAATCAATATTCGATTAATTGGTCCGAGGCTATCGACAAACAAGATTTGTCTAA  
GTCACTTCGTTTCTTTTTGTCCAAGTCA-----CTTCTCTTTTTGTCC-----  
-----AAGCCACTTCGTTTCTTTTTGTCCAAGTCACTTCTTTGTTCTTTGTGAGTAT  
CGGGAATAGCCCCATTTCATAGGTCCGAG--ATCCACATCTAT--GAATTGAAAGGTCCGA  
ATGAGCCGCTCTGCAATCAGTTGTAAAATCAATAGGTGTTCAAATCATTCAATTTGCATA  
AATTGAAACCT-----GATCATGATACTTCC---CAAAGATCGAAATTCCTTG  
ATCAATGGAGGAACAATATCACCATTTTTGTTCAATAAGATACCA---AAGTGG--ATGAT  
TGAATCATTCCATACT-----AGAAAGAATCGCAGCAAATCCTTTGCTAACACGGATTCCT  
ATTTCTCAATGATATCCCACGATCGAGACAATTGGCTGAATCCCGTGAACCATTTTCATA  
GAAGTTCATTGATATCGTCTTTTTATAAAGCAAATCAACTTCGATTCTTGAATAATCCAC  
ATCACTTCTGGTTCTAT-----TGTAACAAAAGATTCCCCTTTTATGTG-----GAAAAGA  
CCCGTATCAATAATTATGAT-----CGTACATAT--GGACAATTCCTCAATATCTTGTTTCATC  
GCAACAAA--ATATTTCTTTGTGCGTCCGGTAAA-----AAAAAACATC

TTTTACCGATTTATTACAGGTATCTGACATATTCATACCTAACGATTTTCCACAAAGTG  
GTGACGAAACG---TATAACTTGTACAAATCT-----TTCCGTTTTCCAATTCGACCCGAT  
CCATTCGTTTCGT-----AGAGCTCTTTACTCGATCGCAGACATTTCTGGAACACCTCTAAC  
AGAGGAACAAATAGTCAATTTTGAAAGAACTTATTGTCAGCCTCTTTCAGATATGAATC  
TATCCGATTCAGAAGGGAAGAACTTGCATCAGTATCTCAGT-----TTCAATTCAAACATT  
GGTTTGATTCACACTCCATGTTCTGAGAAAAATTTACCA-----TACGTAAAGAGGAAAA  
AACAGAGTCTTTATCTGAGGAAAAAACGGAGTCTTTATCTAAAG-----AAATGCGTTGA  
GAAAGGGCAGATGTATAGAACCTCTCAACAACGGGAT-----AGTGCTTTTTTCAAATGG  
AATCTGTTCCAAACATATATGCCATGGTTCCTTACTTCGACAGGGTGCAAATATCTAACT  
TCCGTCCTTTTAGATATTTTTCAGACCCGATTG-----TCGATACTAAGTAGTAGT---CCAAA  
ATTGGTATCCATTTTGAATTCTATTATGCATAGATCAGATATATCACGGCTAATTA---  
AAATGGTGG-----ACGATTCTTCCACAATGGAATCTG---ATAAGTGAGATTTTCGAGT  
AAGTGTTTACAGAAT-----CTTCTTCTGTCCGAAGAAATGATTCATCGAAATAATGAGTC  
ACCCGTTTCAATGATATTGACACATCTGAGATCAACAAATGCTCGGGAGTTC---CTCTAT  
TCAATCCTTTTCTTCTTCTTGTGCTGGATAT---CTCGTTTCGTACGCATCTTCTCTTTGTT  
TCCCGA-----GTCTCTAATGAGTTACAGACAGAGTTAGAAAAGATCAAATCTTTGATGAT  
TCCATCATACATGATTGAGTTGCAAAAACCTTCTGTATAGGTATCCTACA-----  
-----TCTACATCTAAATCTGAATCTGAATCTGAATCTGAATATGAATATGAAC  
TGAATTCTTTCTTGTAAATAATCTCTTT-----GCTCTGGAA-----  
CAATTAGATTGGAAT-----ATCGATCTCATA---AGTATCATATCAAAT-----ACCATCA  
CTTTTTCGAGAAATACGAGACATCTAAGTCGTACAAGTAAAGAGATCTATTCATTGATA  
AGAGAAAGAAAAACGTGAACAGTGATTGGATTGAAGACAGAGTAGAATCCTGGGTT  
ACGATCAATGATTTGATTGATGAGGACGAAAGAGACTTGGCGGTTTCAGTTCTCC-----A  
CCTTAACGACC-----GAAAAAAGGATTGATCAAATCTATGGAGTCTGACT--CATAGTC  
ATCCTGTATCA-----AAGAATGATCTCGATTATCAAATAATTGAACAACCGGGATT  
AATTTCTTACGATACTTAGTTGACATTCAT-----AAAAGGATCTAATGAATTATGAGTT  
CAATGGATCCTGTTTAGCAGAAAAACGGATATTCCTTGCTAATTATCGGACAATCACTTA  
T-----TCACAAACC-----CCATCTCGTGGA-----AAACCCTTTTCACTCC  
GCTTAGACCTATCCCCCTCA---AGGGGTATTTTAGTGATAGGTTCTATAGGAACTGGACG  
ATCACATTTGGTCAAATACCTAGCGACAACTCCTATGTTCCCTTTCATTACGGTATTTCC  
GGACAGGGGCCTGTCTGACAGGCCTATATATTGTTTTATGGATGAGGAT-----ACCGATC  
CTGATTATATTGATGATGATATCGATATCGAT-----  
-----AGTGATAACTTTGATACGGAGCTGGAAACTATCGCGGATGTGGT  
AACT-----ATGGATAATATGCTG-----CTGAAAGTAATCCGATTTGATATCCTCGGTCAAT  
TCGAATTAGCAAAAACAATGTCTCCTTGCATAATCTGGATTCCAAACATTCATGATCTGT  
ATTTGAATGAGTTCGAATTACTTATCCCTCGGTCTATTAACGAACCTTTCTCTCC-----AGT  
CTCTACGGGGATTGTGAAACCACTAGAAATATTCTTGTTTTTGCTTCGACTCATCTTCCC  
CAATTAGTGGATCCCGTTCTAATAGATCCGAAGAAATCAATACATGCATTAAGATACGA  
AGGCTTCTTAGTCCACAACAACGGAAGCACTTTTTCAATCTTTTATATACTAGGGGATTT  
CACTCGGAAAATAAAATGTTCCATGCT-----AACGGATTCGGGTCCATAACCATGGGTTC  
CAATGCACGAGATCTTGTAGCACTTACCAACGAGGTCCTATCAATTAGTATTACACAGA  
AGAAATCAATTCTAGAACTAATACAATTAGATTAGCTCTTCATAGACAACTTGGGAT  
TTGCCA-----TCCCATGTAAGATCGGTTCCGGATCATGGGATCCTTTTCTATCAGATAG  
GAAGGGCTGTTGCACAAAATGTACTTCTAAGTAATTGCTGCACAGATCCTATATCTATCT

ATATGAAGAAGAAA-----TCATGTAATGAAGGGTTTTCTTATTTGTACAAATGGTACTAC  
GAACTTGGAACGAGCATGAAGAAATTAACGATACTTCTTTATCTTTTGAGTTGTTCTGC  
CGGATCGGTCGCTCAAGATCTTTGGTCTCCACCC-----GGACCCGATGAAAAC---AGTTG  
GATCACTTCTGATAGATTCGTTGAGAATGATTCT--GATCTAGTTGATAGCCTATTAGAAA  
TAGAAGGCGCTCTGGTAGGA-----TCCTGGCTT  
CTTCGGTCCGAACCAAGGAAT--CCGTTAGATATGATGCAAAAAAGATCTTGTTCT-----  
-----ATCTTTAAAAAA-----GACGAATCGGAGTTTGCAGAA--GGGGAAGGAGCCCTC  
GCCCTCGACCCGCAA-----GAGATG-----CTTTTCTACAATCAA-----ATAGT  
TTGGGCTCCT-----AGACTATGGCGCCCTCCT-----TGTGGCAAACCTATTTGATTGTATCGA  
ATATTCTCAAGAG-----GATGAT  
GATGATTGGGAGTTCTGGCAGAGTGAACCAAGTATTACTGGATGCGAGAT--AGCGAG  
GGAGGACAGGGCTTTTGGGTTTCTCAAAAATTCCTTTGGAACCCTGCGGATCCATTCCT  
TTTCCTATTCAA---GATCAGCCCTTTGTCTCTGATTCTGATTTTTCATCATATCATCAAC  
CATTCTCAAATTTTTTGGTAGAGCTGATGCCTCCTTTCAAATCTTCTGTATCTCTATATAA  
AGGCTGGGTCAAC-----AAGAAGTTGCAAGAAATGTGCCTCGAATACTTGAGTGATCGC  
GAGAGATGGCTTAGAACC-----AATAGTTCAATTATCT-----CATGGATCTTTCCGTTCTAA  
T-----ACTCTATCCGAGAGTTATCAGTATTTAGCAAATCTGTTCCCTATCTAAC--GCAACGC  
TATTGGATCAAATGACAAAGACATTGTTGAGAAAGAGATGGCTTTTCCCGGATGAAAT  
GAAAGATTTGATT-----CATGGAACAGGAGGTGGAACAGAATTGACCATGCCTAGATCT  
CGA---ATAAATGCAAATTTTATTGACAAGACCTCTACAATTGTAGCCAATATCTTATTACG  
AATAATTCCGACCACTTCAGGAGAAAAAGAGGCATTTACTTATTACAGAGATGGG-----A  
TGTCAGCCCAATCCGAAGGAAATTATGCGGAAGCTTTACAGAATTATTATGAAGCTACG  
CGACCAGAAATTGATCCCTACGATCGAAGTTATATACTTTATAACATAGGCCTTATACAC  
ACAAGTAACGGAGAACATACGAAGGCTTTGGAATATTATTTCCGAGCACTAGAACGAA  
ATCCATTCTTACCGCAAGCTTTTAATAATATGGCCGTGATCTGTCATTAC---CGGGGAGA  
ACAGGCCATTTCGACAGGGCGATTCTGAAATTGCGGAGGCTTGGTCCGATCAAGCTGCT  
GAGTATTGGAACAAGCTATAGCTCTTACTCCAGGTAATTATATTGAAGCGCAGAATTG  
GTTGAAGATCACAAAGGCGGTTTCGAA-----ATGAACTGGCGATCAGAACATATATGGATA  
GAATTTATAACGGGGTCTCGAAAAACAAGTAATTTGGCTGGGCCTGTATCCTTTTTTTTA  
GGTTCAGTAGGATCTTAGTGGTTGGAGCTTCCAGTTATCTTGGTAGGAATCTGATATCT  
GTATTCCCATCTCAGCAAATAGTTTTTTTTCCACAAGGGATCGTGATGTCTTTCTATGGG  
ATTGCAGGACTGTTCAATTAGCTCCTATTTGTGGTGCACCTATTTTCGTGGAATGTAGGTAGT  
GGTTATGATCGATTTCGATAGAAAAGAAGGAATAGTGTGTATTTTTTCGTTGGGGATTTCCT  
GGAATAAATCGTCGATTTTCCCTTCGATTCTTTATAAGAGATATCCAGTCTATTAGAATAG  
AAGTTAAAGAGGGTCTTTATTCTCGTTCGTCTTTTATATGGAATCAGAGGGTCAGGGA  
GCGATTCCCTTGACTCGTACTGATGAGAAT--TTGACTCCACGAGAAATTGAACAAAAA  
GCAGCTGATTACGCCTATTTCTTGCCTGTCCCAATTGAGGTATTT

>Phalaenopsis

ATGAAAAAATATTGGTTCAATTCAATGTTGTCTCTAAGTAAATCAATGGATGGTCTTGAT  
GCTCTTGGACATAACCAGTGGAAGTGAAGAACTAAA-----GATGCGGATAAAAAGATTC  
CTAGTTTCAGTAATATTCATTCTTTATTTGATAGGAGGAATCTTTGGAGTTTGATCTCTGA  
TCATACGTTTTTAGTTAGAAATAGTAATGGTGACACTTATTCTGTATATTTTGATATTGAA  
AATCAGATTTTTGATATTGACAATGCTAGT-----TCTTTTTTTGAGTGAACATA-----  
-----AGTTATTTGAAAAGTGGGTCTAATAATAGTAATTACTCTTATTAT--TCCATGTAT

GATACTCAATCTAATTGGAATAATCACATTAATAGTTGCATTGATAGTTATCTTCGC-----T  
TTGAAATCAGTCTTAATAGTGACATTTACAGTGATATCGAC-----TACATTTCTAGT  
TTCATTTGTACGAATGGAAATTTCTAGTATCAAACTAGTAGC-----AGTTATTTCAATAGA  
ATAGAAAAATCTAATGATTTTCGATCTAAATACAAAATACAAACAGTTATGGGTTCAATGT  
GAAAATTGTTATGGATTAATTATAAAAAATTTTTTAGTTCAAAAATGAATATTTGTGAAT  
ACTGCGGATATCATTGAAAATGAGTAGTTCAGATAGAATTGAACTCTTTATAGATCCTG  
GCACTTGGGAACCTATGGATGAAGATATGGTCTCTATAGACCCCATTGAATTTCAATCAG  
AGGAGGAACCTTATATAGATCGCATTTCTTTTTATCAAACAAAACGGGTTTAACTGAA  
GCTGTTCAAACGGGCGTAGGTCAACTAAACAGTATTCCCATAGCAATTGGAGTTATGGA  
TTTTCAGTTTATGGGAGGTAGTATGGGATCCGTAGTAGGTGAGAAAATCACCCGTTTGA  
TCGAGTATGCTACTAATCGATCTCTACCTGTCATTATTGTGTGTGCTTCTGGAGGAGCAC  
GCATGCAAGAAGGGGCTTTGAGCTTAATGCAAATGGCTAAAATATCTTCTGCTTCATAT  
GATTATCAATCAAATAAAAAGTTATTTTTGTATCAATCCTTACATCTCCTACAACCTGGC  
GGAGTTACAGCAAGTTTTGGTATGTTGGGAGATATCATTATTGCTGAACCTAATGCCTAC  
ATTGCGTTTGCGGGTAAAAGAGTAATTGAACAAACATTGAAAAGACAGTACCCGACG  
GTTTACAAGTGGCTGAGTATTTATTCCATAAGGGCTTATTCGACCCAATTGTACCACGTA  
ATCCTTTAAAAGGTGTTCTGAATGAGTTATTTTCAGCTACACGGTTTCCTTCCCTGAATC  
AAGAT-----ATGGGAACCCCTTCGAGCTGACGAAATTAGTAATATTATACGAGAACGTAT  
TGAACAATATAATAGAGAAGTAAAGATTGTGAATACCGGTACCGTACTTCAAGTGGGCG  
ATGGGATTGCTCGTATTCATGGTCTTGATGAAGTAATGGCAGGTGAATTAATAGAATTTG  
AAGAGGGTACCATAGGTATTGCTCTGAATTTGGAATCAAATAATGTTGGCGTTGTATTAA  
TGGGTGATGGTTTAATGATAAAAGAGGGAAGTTCTGTAAAAGCAACAGGAAGAATTGC  
TCAGATCCCTGTGAGCGAGGCCTTTTTGGGTCGTGTTATAAATGCTCTGGCTAAACCTA  
TTGATGGGAGAGGTGAAATTTTCATCTTCTGAATCTCGGTTAATTGAATCTCCTGCCCA  
GGTATTATTTTCGAGACGTTCCGTATATGAGCCCCCTCAAACGGGACTTATTGCTATTGAT  
TCAATGATCCCTATAGGACGTGGGCAGCGAGAATTAATTATTGGAGACAGGCAGACTG  
GTA AACAGCAGTAGCCACAGATAACAATCTCAATCAAAAAGGACAAAATGTGATATG  
TGTTTATGTAGCTATTGGTCAAAAAGCATCTTCTGTGGCTCAGGTAGTGACTACTTTCCA  
GGAAGGAGGGGCAATGGAATACACTATTGTGGTAGCCGAAACAGCAGATTCACCTGCT  
ACATTACAATATCTCGCTCCTTATACGGGAGCGGCTCTGGCCGAATATTTTATGTACCGT  
GAACGACATACTTCAATAATTTATGATGATCTTTCCAAACAGGCACAAGCTTATCGTCA  
AATGTCTCTTCTATTAAGAAGACCCCTGGTCGTGAAGCTTATCCAGGAGATGTTTTTTA  
TTTTGCATTCACGACTTTTGGAAAGAGCCGCTAAATTAAGTTCCCGTTTAGGTGAAGGA  
AGTATGACTGCTTTACCAATAGTGGAGACTCAATCCGGAGACGTTTCGGCTTATATTCT  
ACTAATGTAATTTCTATTACAGATGGACAAATCTTCTTATCTGCCGATCTATTCAATGCTG  
GAATAAGGCCTGCTATTAATGTAGGTATTTCTGTTTCAAGAGTCGGATCGGCAGCTCAA  
ATTAAAGCCATGAAACAAGTAGCTGGCAAATCAAATTGGAAGTACTCAATTTGCAG  
AATTAGAAGCCTTTGCACAATTTGCTTCTGATCTAGATAAAGCTACTCAGAATCAATTG  
GCAAGAGGTCAACGATTACGTGAGTTGCTCAAACAATCCAATCAGACCCTCTCGCGG  
TAGAAGACCAGATAGCTACTATTTATACCGGAACAAATGGATATCTTGATGCGTTAGAAA  
TTGGACAGGTAAAGAAATTTCTGTTGGGTTACGTACCTACTTAACAAAGAAGAAACC  
TAAATTTCAAGAAATTCTATCTTCTACCAAGATATCACCGAAGAAGCTGAAACCCTTT  
TGAGAGAAGCTATTCAGGAACAGATTGAACTCTTTCTACTTCAGGAACAAACAATGAG  
AAACAATCCCATTTCTGATCCTGTGGTTTCTACACTTAAAGAACAAAACCAAGGGC

GTATCGCTCAAATTATTGGCCCAGTACTGGATGTCATTTTTCCATCGGGCAAGATGCCTA  
ATATTTATAATGCTTTGATAATTAAGGTCGAGATACTGTTGGTCATCAAATTAATGTAAC  
TTGTGAAGTACAACAATTATTAGGAAATAATCGAGTGAGAGCTGTAGCTATGAGTGCTA  
CAGATGGTCTGATGAGAGGAATGAAAGTGATTGACACGGGAGCTCCTCTAAGTGTTC  
AGTCGGGGGAGCTACTCTCGGACGAATTTCAACGTCCTTGGAGAGCCCGTTGATAAT  
TTAGGTCTGTGATACTCGCACAACATTTCTATTATAGATCTGCACCCGCCTTCATA  
CAGTTAGATACAAAATTATCAATCTTTGAAACAGGGATTAAGTTGTGGATCTTTTACG  
CCCCTATCGCCGTGGAGGAAAAATCGGACTATTTGGGGGAGCTGGAGTGGGTAAAACA  
GTACTCATCATGGAATTGATCAACAACATTGCCAAAGCTCACGGAGGCGTATCCGTATT  
TGCGGGAGTAGGTGAACGTACTCGTGAAGGAAATGATCTCTACATGGAAATGAAAGAA  
TCCGGGGTTATTAATGAAAAAATATTGCAGAATCCAAAGTGGCTCTAGTCTATGGTCA  
AATGAATGAACCGCCAGGAGCTCGTATGAGAGTTGGCTTACTGCCCTAACCATGGCG  
GAATATTTCCGAGATGTTAATGAGCAAGACGTACTTTTATTTCATTGACAATATATTCGTT  
TCGTTCAAGCAGGGTCCGAAGTCTCTGCCTTATTAGGTAGAATGCCTTCTGCAGTGGGT  
TATCAACCTACCCTTAGTACGGAAATGGGTCTTTTGAAGAAAGAATTACTTCTACCAA  
GGAAGGATCCATAACATCGATTCAAGCAGTTTATGTACCTGCGGATGATTTGACCGACC  
CTGCCCTGCCACGACATTTGCACATTTAGATGCTACTACCGTATTATCAAGAGGATTAG  
CTGCCAAAGGTATTTATCCAGCAGTAGATCCCTTGGATTCAACGTCAACTATGTTACAA  
CCTCGGATCGTTGGCGAGGAACATTATGAAACTGCGCAAAGGGTTAAGCAAACCTCAC  
AACGTTACAAAGAACTTCAAGACATTATAGCTATCCTTGGGTGGACGAATTATCCGAA  
GAAGATCGTTTAACTGTAGCAAGAGCACGAAAATTGAGCGTTTCTTATCACAACCCTT  
CTTTGTGGCAGAAGTCTTTACTGGTCTCCAGGGAAATATGTTGGTCTAGCAGAAACAA  
TTCGGGGGTTTCAATTCATCCTTTCCGGAGAATTAGATGGTCTTCCCAGCAGGCCTTT  
TATTTGGTGGGTAACATCGATGAAGCTACCGCGAAAGCTATGAACTTAGAAGAGGAGA  
GCAAATTGAAGAAAATGACCTTAAATCTTTGTGTACTGACTCCAAATCGAATGATTTGG  
GATCTGAAGTGAAGAGATTATTTTATCTACTAATAGTGGACAAATTGGGGTATTACCA  
AATCATGCCCCATTGCCACGGCTGTAGATATAGGTCTTTTGAGAATACGGCTAAAA--C  
GATGGTTAACGGTAGCTCTTATGGGCGGTTTTGCTAGATAAGTAATAATGAGATCACTA  
TTTTAGGAAATGGTGCAGAAATTAGTACTGACATTGATCCACAAGAAGCTCAACAAAC  
TCTTGAATAGCTGAAGCTAAGTAAAGCTGAGGGTAAGAGACAAGCAATTGAG  
GCAAATCTAGCTCTCAGACGAGCTAGGACACGAGTAGAAGCTATCAAAGTAATTTCCA  
TGAAAATATAACCGATTCTTTTGTTCCTGGGGCACTGGCCATCCGCTGGGAGTTTC  
GAGTTTAAATACCGATATTTTAGCAACAAATCCAATAAATCTAAGCGTAGTGCTGGGTGTA  
TTGATTTTCTTTGGAAAGGGAGTGTTAAATGATTTATTAGATAAGCGAAAACAGAGGAT  
CTTGAGTACTATTCGAAATTCAGAAGAATTACGTAGAGGAGCCATTGAACAGCTCGAA  
AGAGCTCGGGTTAGATTACGCAAAGTAGAAATCGAAGCAGATGAGTATCGAACGAATG  
GATACTATGAGATAGAACGAGAAAAAGGAAATTTGATTAATGCTACTTGAATAGTTTG  
GAACGATTAGAAAATTACAAAAATGAAACTCTTTTTTTTGA AAAACAAAGAGCAATTA  
ATAAGGTCCGACAAGAAGTTTTGCAACAAGCCTTACAACGAGCTCTAGGAACTTTGAA  
TAGTTGTTTGAATATCGAAGTACATTTTCGTACTATCAGTGCTAATATTGATATCTCGGG  
TCCATGGAAGAAATAACTGATATGAATCCACTTATTTCTGCTGCTTCCGTATTGCTGCT  
GGATTGGCTGTAGGGCTTGCTTCTATCGGACCTGGGGTTGGTCAAGGTAAGTACTGCTGCGG  
GCCAAGCCGTAGAAGGTATTGCGAGACAACCAGAAGCAGAGGGTAAAATACGAGGTA  
CTTTATTGCTTAGTCTGGCTTTTATGGAAGCTTTAACAATTTATGGACTGGTTCGTGGCAT

TAGCTCTTTTATTTGCAAATCCTTTTGTATGAATGTTATACCATGTTCCATTA AAAACACT  
CAAAGGGTTATACGATATATCAGGTGTAGAAGTAGGCCAACATTTATATTGGCAAATAG  
GAGGTTTACAAATTCATGCCCAAGTACTTATCACTTCTTGGGTTGTAATTGCTATCTTATT  
AGGTTTCAGTCATCATAGCTGTTCCGGAATCCGCAAACCATTCCAACCAACGGTCAGAATT  
TCTTCGAATATGTCCTTGAATTTATTCAAGACTTGAGCAAAACTCAGATTGGAGAGGAG  
TATGGTCCTTGGGTTCTTTTATAGGAACGATGTTCTATTTATTTTTGTTTTCTAACTGGT  
CAGGTGCTCTTTTACCTTGGA AAATCATAAAATTACCTCATGGGGAGTTAGCTGCGCCC  
ACGAATGATATAAATACTACTGTTGCTTTAGCTTTACCTACGTCAGTGGCATATTTCTATG  
CGGGTCTCAGGAAAAAAGGATTGGGATATTTCCGGAAATACATTCAACCAACTCCAAT  
ACTTTTACCAATTAATATTCTAGAAGATTTACAAAACCTTTATCTCTTAGTTTTCGACTT  
TTCGGTAATATATTGGCTGATGAATTAGTGGTTGTTGTTCTTGTTCCTTTAGTGCCTTCAG  
TAGTTCCTATACCTGTCATGTTTCTTGGATTATTTACAAGTGGTATTCAAGCTCTTATTTT  
TGCAACTTTGGCCGCGGCTTATATAGGTGAATCCATGGAGGGTCATCATATGATATTTGC  
GACCTTAGAGCATATATTA ACTCATATTTCTTTTCGATCATTTC AATTGTGATTATAATTC  
ATTTGATGAACTTATTAGTCTACGAAATCGAAGAATTACGTAATTCATTAGAAAAAGGA  
ATGATAGCTACTTTTTCTCTATAACAGGGTTTTTAGTTACTCGTTGGATTTCTTCGGGA  
CATTTTCTTTAAGTAATTTATACGAATCATTAATTTTCTTTTCATGGAGTTTATCCATTAT  
TCATATAATTCTGTATATTAGGAATTATAAAAATGATTTAAACGCAATAACTGCACCAAG  
TGCCATTTTTACCCAAGGTTTCGCCACGTCAGGTCTTCAACTGAAATGCATCAACCCG  
CAATATTAGTACCTGCTCTACAATCTCAGTGGTTAATGATGCATGTCAGTATGATGTTATT  
GAGCTATGCAGCTCTTTTATGCGGATCTTTATTATCAGTTGCTCTTATAGTGATTACATTT  
CAAAAAAAAACCGATTTTTTTTTGAAAAACAAGAATATGGAATATTTGAACGAAAAA---  
AGTATTTTAAAAAAGACTTCTTTACTATCATTAAAAAATTTTACAAATATCAATTAATTC  
AACATTTGGATTCTTGGAGTTATCGTGTCATTAGTTTAGGGTTTACCTTTTTAACCATAG  
GTATTCTTTCTGGAGCAGTATGGGCTAATGAAGCATGGGGTTCATATTGGAATTGGGATC  
CTAAGGAAACTTGGGCATTTATTACTTGGACCATATTTGCAATTTATTTACATACTAGAA  
AAAATTTCAA AATTGCAAGATACGAATTCGGCATTGTAGCTTCTATAGGATTTCTCCTAA  
TTTGGATATGCTATTTTGGGATCAATCTATTAGGAATTGGGTTCCATAGTTATGGCTCATT  
CCAA-----ATGAAAAAAAAGCATTGGCT---TCCCTCCCATATCTTGTGTCTATAATCTTT  
TTGCCCTGGTGGGTTTTCTCTCTCATTAAATAAATGTCTAGAAACTTGGGTTATTAATTGG  
TGGAATACTAGGCAATCCGAAATCCCTTTGAATGATATTCAAGATAAAAATGTTCTAGA  
AAAATTTATGGAATTAGAAGAACTATTCCTGTTGGACGAGATGATAAAGGAGTACTCGG  
AAACACATATGCAAAGGCTTCATATAGGAATGCACAAGGAAACAATACAATTGGTCCA  
AAGACAAAATGAATCTCATTTCATATCATTTCGATTTCTCTACAAATCTAATCTGTTTC  
GCTATTCTAAGTGGTTATTTTTTTCTGGGTAATAAAGA ACTTTTCATTTTCAATTCTTGGA  
TTCAGGAATTTCTCTATAACTTAAGTGATACAATCAAAGCTTTTTTCGATTTCTTTAGTTA  
CTGATTTATGGATCGGATTTCACTCGACCCATGGTTGGGAACTAATGATTGGTTTCGATCT  
ACAATGATTTTGGATTGGCTCAGAATGATCAGATTATATCTGGTCTTGTTC CACTTTTC  
CAGTGATTCTAGATACAATTGTGAAATATTGGATCTTCCATTTTTTAAATCGTGTATCTCC  
TTCGCTTGTAGTAATTTATCATTCAATGAATGAAATGCCCATTTGGTGTTC AAAAAGTGCC  
TTTTCGGAATCCTGGAGAGGAAGATGCAGTTTGGGTTGACGTATACAACCGACTTCATC  
GAGAAAGATTACTTTTTTTAGGCCAAGAGGTTGATAGCGAGATCTCGAATCAAATTGTT  
GGTCTCATGGTATATCTCAGCATAGAAGATGATACTAGGGATCTTTATTTGTTTATAAATT  
CTCCAGGTGGATGGGTAATACCAGGAATAGCCATTTATGATACTATGCAATTTGTGTTAC











TACTTTTGTATTACCTCTTCTTACTGCCGTATTTATGTTAATGCACTTTCCAATGATACGT  
AAGCAAGGTATTTCCGGTCCTTTAATGGGAGTAACAAAGAAACCTGATTTGAATGATCC  
TGTATTAAGAGCTAAATTAGCTAAAGGGATGGGACATAATTATTATGGAGAACCTGCAT  
GGCCAATGATCTTTTATATATTTTTCCAGTAGTAATTTTAGGCACTATTGCATGTAATGT  
GGGCTTAGCAGTTCTAGAGCCGTCAATGATCGGTGAACCGGCGGATCCGTTTGCAACT  
CCGTTGGAATATTACCCGAATGGTACTTCTTTCCCGTATTTCAAATACTTCGCACAGTA  
CCCAATAAGTTATTGGGTGTTCTTTTAATGGTTTCAGTACCACTAGGATTATTGACAGTA  
CCTTTTTTGGAGAATGTCAATAAATCCAAAATCCATTCGTCGTCCAGTAGCCACAAC  
AGTCTTTTTGATCGGTACCGCAGTAGCTCTTTGGTTAGGGATTGGAGCAACTTTACCTAT  
TGAGAAATCCTTAACCTTAGGTCTTTTTATGATTGAAGTTTTTCTATTCGGAATCGTCTTA  
GGTCTAATTCCTATTACTTTAACAGGATTATTTGTAAGTGCATATTTACAATACAGGCGCG  
GTGATCAGTTGGACCTTATGCCTATTCTAACTAGTTATTTGGTTTTTTACTGGCTGCTTC  
AACTATAACCCAGCTCTATTTATTGGTTTAAACAAGATACGACTTATTATGGATATAGTA  
AGTTTCGCTTGGGCTGCTTTAATGGTAGTGTTTACATTTTCTCTTTCCTTGTAGTATGG  
GGAAGGAGTGGGCTTATGATTATTCGTTCCCGGAACCCGAAGTGAAAATTGTTGTAG  
ACAGGAATCCTATAAAAACGTCTTTCGAGGAATGGGCCAGACCCGGCCATTTCTCAAG  
ACAATAGCTAAGGGTCTGATACTACCACTTGGATCTGGAACCTACATGCTGATGCTC  
ACGATTTTCGATAGTCATACCAGCGATTTGGAGGAGATCTCTCGAAAAGTATTTAGTGCT  
CATTTCCGCCAACTCTCTATTATCTTTCTTTGGCTGAGTGGCATGTACTTCCATGGCGCC  
CGTTTTTCCAATTATGAAGCATGGCTAAGTGATCCTACTCATATTGCACCCAGTGCTCAA  
GTAGTTTGGCCAATAGTAGGTCAAGAAATATTGAATGGAGATGTGGGTGGTGGTTTTCCG  
AGGAATACAAATAACCTCCGGTTTTTTTTCAGATTTGGCGAGCATCTGGAATCACTAGTG  
AATTACAACCTCTACTGTACCGCAATTGGTGCATTGGTCTTTGCATCGTTAATGCTTTTTG  
CTGGTTGGTTCCATTATCACAAAGCCGCTCCCAAATTGGCTTGGTTCCAAGATGTAGAA  
TCTATGTTGAATCACCCTTAGCGGGATTACTAGGGCTTGGGTCTCTTTCTTGGGCGGG  
ACACCAAATCCATGTATCTTTACCGATTAACCAATTTCTTGACGCTGGAGTTGATCCTAA  
AGAAATACCACTTCCCCATGAATTTATCTTGAATCGGGATCTTTTGGCTCAACTTTATCC  
AAGTTTTGCCGAGGGAGCAACACCCTTTTTTTACCTTGAATTGGGCAAAATATGCGGAAT  
TTCTGAGTTTTCGTGGAGGATTAGATCCAATAACAGGGGGTCTTTGGTTGAGTGATATT  
GCACACCATCATTAGCTATTGCGATTCTGTTCCCTGATCGCAGGTCATATGTATAGGACT  
AACTGGGCCATTGGTTCATGGCCTGAAAGACATTTTAGAGGCTCATAAGGGTCCATTTAC  
GGGCCAGGGCCATAAAGGTCTCTATGAAATCCTAACAACGTCATGGCATGCTCAATTAT  
CTCTGAACCTGGCTATGTTAGGTTCTTTAACCAATTGTTGTAGCTCACCATATGTATTCCAT  
GCCCCCTATCCATACCTAGCTATTGACTATGGTACACAACCTTTTCGTTGTTACACATCA  
CATGTGGATCGGGGGATTCTTATAGTTGGCGCTGCTGCACATGCAGCCATCTTTATGGT  
AAGAGATTACGATCCAACCTACTCGATACAACGATCTATTAGATCGTGTCTTAGACATCG  
TGATGCAATCATATCACATCTCAACTGGGCATGCATATTTCTAGGGTTTCACAGTTTTGG  
CTTGTATATTATAATGATACTATGAGCGCTTTAGGACGTCCCCAAGATATGTTTTCAGAT  
ACTGCTATAACAATTACAACCCATCTTTGCTCAATGGGTACAAAACACCCATGCTTTAGC  
ACCTAACGTAACAGCTCCTGGTGCAACAACAAGTACCAGCTTAATTTGGGGAGGTGGT  
GAGTTAGTAGCAGTGGGCGGCAAGGTTGCTTTGTTACCTATAACCATTAGGAACTGCAGA  
TTTTTTGGTTCATCACATTCATGCATTTACAATTCATGTGACTGTATTGATCCTACTGAAA  
GGTGTTCATTTGCTCGCAGTTCCCGTTTGATACCTGATAAAGCAAATCTTGGTTTTTCGT  
TTTCCTTGTGATGGACCTGGTAGGGGGGTACATGTCAAGTATCCGCCTGGGATCATGT

ATTCTTAGGCCTATTCTGGATGTACAATGCAATTTCCGGTAGTAATTTTCCATTTTCAGTTGG  
AAAATGCAGTCGGATGTTTGGGGTACTATAAGTGATCAAGGAGTAGTCACTCATATCAC  
AGGAGGTAACCTTTGCACAGAGTTCCATTACTATTAATGGATGGCTCCGGGATTTCTTATG  
GGCACAGGCATCTCAGGTAATTCAGTCTTATGGTTCTTCATTATCTGCATATGGTCTTTTT  
TTCTTAGGTGCTCATTTTGTCTGGGCTTTCAGTTTAATGTTTCTATTTCAGTGGCCGTGGT  
TATTGGCAAGAACTCATTGAATCCATCGTTTGGGCTCATAACAAATTAAGTTGCTCC  
TGCTACCCAGCCTAGAGCCTTGAGTATTGTACAAGGGCGTGCTGTAGGAGTAACCCATT  
ACCTTCTGGGTGGAATTGCCACAACATGGGCATTCTTCTTAGCAAGAATTATTGCAGTA  
GGAATGACATTAAGATTCCCAAGGTTTAGCCAAGGCTTAGCTCAGGACCCCACTACTC  
GTCGTATTTGGTTTGGTATTGCTACCGCACATGACTTCGAGAGTCATGATGATTAATCTG  
AAGAACGTCTTTATCAGAACATTTTTGCTTCGCACCTTTGGACAGTTAGCAATAATATTC  
TGTGGACATCCGAAATCTGTTTCATGTAGCTTGGCAAGGAAATTTGAGTCATGGATA  
CAGGACCCTTTACATGTACGACCTATTGCTCATGCAATTTGGGATCCTCATTTTGGTCAA  
CCTGCTGTAGAAGCCTTTACTAGAGGAGGCGCTATCGGTCCAGTGAATATTGCTTATTC  
TGGTGTATCAGTGGTGGTATACAATTGGATTACGCACTAATGGGGATCTTTATACTGG  
AGCTCTTTTTCTATTACTTCTTTCTGCTATATCCTTAATAGCGAGTTGGTTACACCTACAA  
CCAAAATGGAAACCAAGCGTTTCTTGGTTCAAAAATGCCGAATCTCGTCTCAATCATCA  
TTTGTACAGGGCTTTTTGGAGTAAGTTCCTTGGCTTGGACAGGACATTTAGTTCATGTCG  
CTATCCCGGATCGAGGGGAGAGTACGTCAGATGGAATAATTTCTTAGAAGTATTACCG  
TATCCCAAGGGTTGGGCCCTTTTTATGGGTCAATGGAATCTTTATGCTCAAACCCT  
GATCCAGTAATCATTTATTTGGTACCTCCCAAGGGGCAGGAACTGCCATTCTAACCT  
TCTTGGGGGATTTATCCCAACGCAAAGTTTATGGCTAACCGATATTGCTCATCATCA  
TTTAGCTATTGCATTCCTTTTTCTCGTTGCTGGTCATATGTATAGAACTAACTTCGGTATT  
GGGCACAGTATCAAAGATCTTTTAGAAGCACATATCCCCGGGGGGTTCGATTAGGAC  
GTGGACATAAAGGTCTTTATGACACAATAAATAATTCGCTTCATTTCAATTGGGCCTTG  
CTCTAGCCTCTTTAGGGGTTATTACTTCTTTAGTAGCTCAACACATGTATTCTTTACCTGC  
TTATGCATTCATAGCACAAAGACTTTACTACTCAAGCTGCATTATATACTCATACCAATAC  
ATCGCAGGGTTCATCATGACAGGAGCCTTTGCTCATGGGGCTATATTCTTCATTAGGGAT  
TACAATCCGGAACAGAATGAGGATAATGTATTGGCAAGAATGTTAGACCATAAAGAAG  
CTATAACATCTCATTTAAGTTGGGCCAGCCTTTTTCTGGGGTTCCATACTTTGGGCCTTT  
ATGTTCATAATGACGTCATGCTTGGTACTCCGGAAAAACAAATCTTAATCGAA  
CCCATATTTGCCAATGGATAACAATCTGCTCATGGCAAGACTTCGTATGGGTTCGATGTA  
CTCTTATCTTCAACGAATAGCCCGGCATTCAATGCAGGTTCGAAGCATATGGTTACCTGG  
CTGGTTGAATGCTATTAATGAG-----AATAGTAATTCACTTTTCTTAACAATAGGGCCGGG  
AGATTTCTTGGTTCATCATGCTATTGCTCTGGGTTTACATACGACTACATTGATTTTAGTA  
AAAGGTGCTTTAGATGCGCGTGGTTCCAAGTTAATGCCAGATAAAAAGGATTTTGGTTA  
TAGTTTTCTTGCACGGCCCCGGTTCGTGGTGGTACTTGTGATATTTCTGCTTGGGACG  
CATTTTATTTGGCAGTTTTCTGGATGCTAAATACCATCGGATGGGTTACTTTTTATTGGCA  
TTGAAACACATCACATTATGGCAGGGTAATGTTTCACAATTTAATGAATCCTCTACTTA  
TTTGATGGGATGGTTAAGAGATTATCTATGGTTAAACTCTTCACAACCTTATCAATGGATAT  
AACCTTTTTGGTATGAATAGTTTATCGGTCTGGGCGTGGATGTTCTTATTTGGACATCTT  
GTTTGGGCTACTGGATTTATGTTCTTAATTCCTGGCGTGGCTATTGGCAGGAATTGATT  
GAAACTTTAGCGTGGGCTCATGAACGGACACCTTTGGCTAATTTGATTCGATGGAAAG  
ATAAGCCAGTGGCTCTTCCATTGTGCAAGCAAGATTGGTTGGATTAGTCCACTTTTCC

GTAGGTTATATATTCACTTACGCAGCTTTCTTGATTGCCTCCACATCAGGAAAATTTGGT  
ATGTCACATTCAGTAAAGATTTATGATACATGTATAGGATGTACCCAATGTGTTTCGAGCT  
TGCCCCACGGATGTATTGGAAATGATACCTTGGGACGGATGTAAAGCTAAGCAAATTGC  
TTCTGCGCCAAGAACC GAAGATTGTGTAGGTTGTAAAAGATGTGAATCCGCTTGTCCA  
ACGGATTTTTTGAGTGTCCGTGTTTATTTATGGCATGAAACAACCTCGCAGCATGGGTCT  
TTCTTATATGATAGATTTGAACTTTCCCTCTATTTTTGTTCCTTTAGTGGGCCTAGTCTTT  
CCGGCAATCGCAATGGCTTCTTTATCTCTTTATGTCCAAAGAAATAAGATTGTCATGCAA  
GATATAAAAACATATCTCTCAACGGCACCTGTGTTAACCACCTTATGGTTTGGGTCTTTA  
GCAGGTCTATTGATAGAAATTAATCGTTTATTTCCAGATGCCTTGTCAATCCCCTTTTTTT  
CATCCATGACTGCAATTTTAGAGAGACGCGAAAGTACAAGCCTATGGGGTTCGCTTCTG  
CAACTGGATTACCAGTACTGAAAACCGTCTTTACATCGGATGGTTTGGTGTTTTGATGA  
TCCCTACTTTATTGACCGCAACTTCTGTTTTTATCATTGCCTTCATTGCTGCCCTCCAGT  
CGATATTGATGGTATTTCGTGAACCTGTTTCTGGGTCTCTACTTTATGGAAACAATATTATC  
TCTGGTGCCATTATTCTACTTCCGCAGCTATAGGTTTGCATTTTTACCCAATATGGGAA  
GCAGCATCTGTTGATGAGTGGTTATAACAATGGCGGTCCTTATGAACTTATTGTTCTACAC  
TTTTTACTTGGTGTAGCTTGTACATGGGTTCGTGAGTGGGAAGTATTAGTTTCCGTCTGGG  
TATGCGCCCTTGGATTGCTGTTGCATATTCAGCTCCTGTTGCGGCTGCTACAGCTGTTTT  
CTTGATCTACCCTATTGGTCAAGGAAGTTTTTCTGATGGTATGCCTTTAGGAATATCTGG  
TACTTTCAACTTCATGATTGTCTTCCAGGCAGAGCACAACATTCTTATGCATCCATTTCA  
CATGTTAGGCGTAGCTGGTGTATTTCGGCGGTTCCCTATTCAAGTGCATGCATGGTCTTTT  
GGTAACTTCTAGTTTAATCAGGGAAACCACTGAAAATGAGTCTGCTAATGAAGGTTAC  
AGATTTGGTCAAGAGGAAGAAACCTATAATATTGTAGCCGCTCATGGTTATTTTGGCCG  
ATTGATCTTCCAATATGCTAGTTTCAACAATCCCCTTCCCTTGCATTTCTTCTTGGCTGCT  
TGGCCTGTAGTGGGTATCTGGTTCAGTCTTTGGGTATTAGTACTATGGCGTTCAACTTG  
AACGGTTTTAATTTAACCAATCCGTAGTTGATAGTCAAGGTCGTGTTATTAACACTTGG  
GCTGATATCATAAATCGTGCTAATCTTGGTATGGAAGTAATGCATGAACGTAATGCACAC  
AACTTCCCTCTAGATCTAGCTTCTGTAGAAGCTCCTTCAATAAATGGAATGGGTTTGGC  
TTGGTATCGTGTTCACACTGTTGTATTGAATGATCCCGGTCGATTACTTTCTGTCCATATA  
ATGCATACAGCTCTGGTTTCTGGTTGGGCCGGTTCGATGGCTCTATACGAATTAGCGGT  
TTTTGATCCCTCTGACCCTGTTCTTGTATCCAATGTGGAGACAAGGCATGTTTCGTTATACC  
CTTCATGACTCGTTTAGGAATAACCAATTCATGGGGGGGTTGGAGTATCTCG---GGAGG  
AACTATAACGAATCCGGGCATTTGGAGTTATGAAGGCGTGGCAGGGGCACATATTTGT  
TTTTCTGGCTTGTGCTTCTTGGCAGCTATCTGGCATTGGGTGTATTGGGACCTAGAAATAT  
TCTGTGATGAACGTACGGGAAAACCTTCTTTGGATTTGCCCAAGATTTTTGGAATTCAT  
TTATTCCTCTCAGGAATCGCTTGTCTTGGCTTTGGTGCATTTTCATGTAACAGGCTTATAT  
GGTCTTGGAAATATGGGTGTCAGATCCTTATGGACTAACTGGCAAAGTACAATCTGTAAA  
TCCAGCATGGGGTTCGGAAGGTTTTGATCCTTTTGTCCGGGGGAATAGCTTCTCATC  
ATATTGCAGCAGGTACATTGGGCATATTAGCGGGTCTATTCATCTTAGTGTCCGTCCGC  
CTCAACGTCTATACAAAGGATTACGCATGGGTAATATTGAAACTGTCCTTTCCAGTAGTA  
TTGCTGCTGTTTTTTTTTGCAGCTTTCGTTGTTGCTGGAACCTATGTGGTATGGTTCAGCAA  
CTACCCAATCGAATTATTTGGCCCCACTCGTTATCAGTGGGATCAGGGGTAATCCAA  
CAAGAAATCTATCGAAGAGTTGGGGCTGGACTAGCCGAAAATCTGAGCTTATCGGAAG  
CTTGGTCTAAAATTTCCGAAAAATTAGCTTTTTATGATTACATTGGTAATAATCCGGCGA  
AAGGAGGATTATTACAGAGCAGGCTCAATGGATAACGGAGATGGAATAGCTGTTGGGTG

GTTAGGGCACCCCATATTTAGAGATAAAGAAGGGCACGAACTCTTTGTACGTCGTATGC  
CTACCTTTTTTGAACATTTCCAGTAGTTTTGGTAGATGCAGACGGAATTGTGAGGGCT  
GATGTTCCTTTTAGAAGGGCAGAATCCAAGTATAGTGTTGAACAAGTAGGGGTAAC TG  
TTGAATTTTATGGTGGCGAGCTCAATGGGGTCATTTATAGTGATCCTGCTACTGTGAAA  
AAATATGCTAGACGTGCCCAATTGGGTGAAATTTTTGAATTAGACCGGGCTACTTTGAA  
ATCCGATGGTGTTTTTTCGTAGCAGTCCAAGGGGTGGTTCACTTTTTGGGCATGCTACGT  
TCGCTTTGCTCTTCTTTTTTCGGACATATTTGGCACGGCGCCAGAACCCTTGTTCAAGAT  
GTTTTTGCCGGTATTGATCCAGATTTGGATGCTCAAGTGGAATTTGGAGCTTTTTCAAAA  
ACTTGGAGATCCAAC TACAAGGAGACAGGTAGTCATGAAAACCTTATATCCCTGAGG  
AGTTTACCCCGTGGAAACGCTCTTTAATGGAAC TTTAGCCTTAGTCGGTTCGTGACCA  
AGAAACCACCGT TTTTCGCTTGGTGGGCGGGAATGCGAGACTTATCAATTTGTCCGGT  
AAACTGCTTGGGGCTCACGTAGCTCATGCCGGATTAATTGTATTCTGGGCCGGAGCAAT  
GAACCTATTTGAAGTGGCTCATTTCGTACCAGAGAAGCCCATGTATGAACAAGGATTGA  
TTTTACTTCCACACTTAGCTACTCTAGGGTGGGAGTAGGTCCGGGGGGAGAAGTTATC  
GACACCTTTCATACTTTGTATCTGGAGTACTCCACTTAATTTCTCTGCAGTCTTAGGC  
TTTGGCGGTATTTATCATGCACTTCTAGGACCTGAAACTCTTGAAGAATCCTTTCCATC  
TTCGTTATGTATGGAAAGATAGAAATAAAATGACTACAATTTTGGGTATTCACTTAATT  
TTATTAGGTATAGGTGCTTTTCTTAGTACTTAAGGCTCTGTATTTTGGAGGCGTATATG  
ATACCTGGGCACCCGGAGGGGGAGATGTAAGAAAAATTACCAACTTGACCCTTAGCCC  
AAGCGTTATTTTTGGTTATTTACTAAAATCTCCTTTTGGGGGAGAAGGATGGATTGTTAG  
TGTGGACGATTTAGAAGATATAATTGGAGGACATGTTTGGTTAGGTTCCATTTGTATACT  
TGGTGGAAATTTGGCATATCTTAACCAAACCTTTTGCATGGGCTCGCCGTGCATTTGTATG  
GCTGGAGAAGCTTATTTGTTCGTATAGTTTAGGTGCTCTATCTGTCTTTGGTTTCATCGC  
TTGTTGTTTTGTCTGGTTCAATAATACCGCTTATCCTAGTGAGTTTTACGGACCTACTGG  
GCCGGAAGCTTCTCAAGCTCAAGCATTACTTTTCTAGTGAGAGACCAACGCCTTGGG  
GCTAACGTGGGATCCGCCAAGGACCCACTGGGTTAGGTAAATATCTAATGCGTTCTCC  
GACCCGAGAGGTTATTTTTGGGGGAGAACTATGCGTTTTTGGGATCTTCGTGCTCCCT  
GGTTAGAACCTCTAAGAGGTCCCAATGGCTTGGACTTGAGTAGGCTGAAAAAAGACAT  
ACAACCTTGGAAGAACGACGTTTCGGCAGAATATATGACTCATGCTCCTTTGGGTTCTT  
TAAATCCGTGGGTGGCGTAGCTACCGAGATCAATGCAGTCAATTATGTCTCTCCTAGA  
AGTTGGTTAGCTACCTCTCATTTTGTCTAGGATTTTTCTATTTGTGGGACATTTGTGG  
CATGCGGGAAGGGCACGTGCAGCTGCAGCGGGGTTTAAAAAGGAATCGATCGTGAT  
TTGGAACCTGTTCTTTCCATGACCCCTTAGCATGACTATAGCCTTTGGTAGATTTATC  
AAAGAAGAAAATGATTTATTTGATATTATGGATGATTGGTTACGGAGGGACCGTTTCGT  
TTTTGTAGGTTGGTCCGGCCTATTGCTCTTTCTTGTGCTTATTTTCGCTTTAGGGGGTTG  
GTTACAGGTACAAC TTTTGTAACTTCATGGTATACCCATGGATTGGCTAGTTCTTATTT  
GGAAGTTGTAATTTCTTAACGGCTGCGGTTTCTACTCCTGCAAATAGTTTAGCACATT  
CTTTGTTGCTACTATGGGGTCTGAAGCACAAGGAGATTTTACTCGCTGGTGTCAATTA  
GGCGGTCTGTGGACTTTTGTGCTCTCCACGGTGCTTTTGGTCTAATAGGTTTCATGTTA  
CGTCAATTTGAACTTGCTCGTTCTGTTCAATTGCGACCTTATAATGCAATTGCATTTTCT  
GCTCCAATGCTGTTTTTGTCTGTATTTCTGATTTATCCACTGGGTCAATCTGGTTGGT  
TTTTTGCACCCAGTTTTGGTGTAGCAGCTATATTCGATTCATTCTTTCTTCCAAGGGT  
TTCATAATTGGACGTTGAACCCATTTTCATATGATGGGAGTTGCTGGAGTCTTAGGCGCT  
GCTCTGCTATGTGCTATTCATGGCGCCACCGTAGAAAATACCTTATTCGAAGATGGCGAT

GGTGCAAATACATTCCGTGCTTTTAAACCCAACTCAAGCTGAAGAGACTTATTCAATGGT  
CACTGCTAACCGTTTTTGGTCCCAAATCTTTGGGGTTGCTTTTTCCAATAAACGTTGGTT  
ACATTTCTTTATGCTATTTGTGCCAGTAACCGTTTATGGATGAGTGCTATTGGGGTAGT  
TGGTCTCGCTCTGAACCTACGTGCCTATGACTTTGTTTCCAAGAAATTCGTGCAGCGG  
AAGATCCTGAATTTGAAACTTTCTACACCAAAAATATTCTCTTAAACGAAGGTATTTCGT  
GCTTGGATGGCGGCTCAGGATCAGCCTCATGAAAACCTTATATTCCCTGAGGAGGTTCT  
ACCCCGTGGAACGCTCTTATGTCTGGAAGCACGGGAGAACGTTCTTTTTGCTGATATTA  
TTACTAGTATTTCGATACTGGGTCATTCATAGCATTACTATACCTTCCCTATTCAATGCGGG  
TTGGTTATTTCGTACGTACGGGTTTAGCTTACGATGTTTTTGGAAAGTCCCTCGGCCAAATG  
AATATTTACAGAGAGTCGACAAGGGATTCCTTAATAACTGGCCGTTTTGATTCTTTG  
GAACAACCTCGATAAATTTAGTAACCCTTTTATGACCATAGATCGAACTTATCCAATTTTT  
ACAGTGCGATGGTTGGCTGTTACGGACTGGCTGTACCTACTGTTTCTTTTTTAGGGTC  
AATATCAGCAATGCAGTTCATCCAACGAATGGCTACAAAAACCATTGAGAGTAGTTCTA  
GATCTGGG---CCAAGACGAACTGGCGTAGGGAGTTTATTGAAACCATTGAATTCGGAAT  
ATGGAAGTAGCTCCAGGGTGGGGGACTACACCCTTATGGGAGTTGCAATGGCTCT  
ATTTGCAATATTTTTATCTATTTTTAGAAATTTATAATTCATCTGTTTTACTGGATGGAA  
TTTCAATTAATATGCTTACTCTTAAACTATTCGTTTACACAGTAGTAATATTCTTTGTTTCT  
CTATTCATCTTCGGATTCTTATCTAATGATCCGGGGCGTAATCCTGGGCGTGAAGAAATG  
ACCGATACTACTGGAAGGATTCCCTTTGGCTGATAGGTACTTTAACTGGTATTCTTGTG  
ATCGGTTTAATAGGCATTTTTTTTTACGGCTCCTATTCCGGGTTGGGTTTCATCTCTGATGC  
TTAATATCTTTTGTAAATTTGTATCTGTCTTAATTCTACCCTTTATTCGAGTAGTTTTTTC  
TTCGCCAAATTGCCCGAGGCTTATGCCTTTTTTAATCCAATCATAGACGTTATGCCAATT  
ATCCCTGACTCTTTTTTCTCTTAGCCTTTGTTGGCAAGCTGCTGTAAGTTTCCGAATG  
ACACAATCAAACCCGAATGAACAAAATGTTGAATTGAATCGTACCAGTCTATACTGGG  
GTTTATTACTCATTTTTGTACTTGCTGTTTTATTTTTCAAATTATTTTTCAATATGGAAGTC  
AATATTCTTGCGTTTATTGCTACTGCGCTGTTCATTTTAGTTCCTACTGCCTTTTTACTTAT  
CATATACGTCAAACAGTCAGCCAAAATGATATGGAAACAGCAACCCTAGTCGCCATCT  
CCATATCCGGTTTACTTGTAAGCTTTACTGGGTATGCCTTATATAACCGCTTTTGGGCAAC  
CCTCTCAAAAATTAAGAGATCCCTTCGAAGAACATGGGGACATGGAAGCATTGGTTTAT  
ACATTTCTTTTAGTTTTCGACTTTAGGGATAATTTTTTTCGCTATCTTTTTTCGAGAACCAC  
CTAAAGTTCCAATAAAAAAACAATAATGACTATTGCTTTCCAATTAGCTGTTTTTGC  
TTAATTGCAACTTCATTAATCTTACTGATTAGTGTACCCGTTGTATTTGCTTCTTCTGATG  
GTTGGTCAAGTAACAAAAATATTGTATTTTCTGGTACATCATTATGGATTGGATTAGTCT  
TTCTGGTAGCTATCCTTAATTCTCTAATCTCTATGAGTTGTAGGGAGGGACTTATGTCAC  
CACAAACAGAACTAAAGCAAGTGTTGGATTTAAAGCTGGTGTTAAAGATTACAAATT  
GACTTATTACTCCTGATTACGAAACCAAGATACTGATATCTTGGCAGCATTCCGAGT  
AACCCCTCAACCGGGAGTTCGCCTGAAGAAGCAGGGGCTGCGGTAGCTGCCGAATC  
TTCTACTGGTACATGGACAACCTGTGTGGACTGATGGACTTACCAGTCTTGATCGTTACA  
AAGGACGATGCTACCACATCGAGGTCGTTGTTGGGGAGGAAAATCAATATATTGCTTAT  
GTAGCTTATCCTTTAGACCTTTTTGAAGAAGGTTCTGTTACTAACATGTTTACTTCCATT  
GTGGGTAATGTATTTGGTTTTCAAAGCCCTGCGAGCTCTACGTCTGGAAGATCTGCGAAT  
TCCCCCTTCTTATTCCAAAACCTTCCAAGGTCCGCCTCATGGCATCCAAGTTGAAAGAG  
ATAAATTGAACAAGTATGGTCGTCCCTATTGGGATGTAATAAACCAAAAATTGGGAT  
TATCTGCAAAAAACTACGGTAGAGCGGTTTATGAATGTCTAAGGGGTGGACTTGATTTT



ACTAAGGATGATGAAAACGTAAATTCACAACCATTTATGCGTTGGAGAGATCGTTTCTT  
ATTTTGTGCCGAAGCAATTTATAAAGCGCAAGCCGAAACAGGTGAAATTAAGGACAT  
TACTTGAATGCAACTGCGGGTACCTGTGAAGAAATGATCAAAAGAGCGGTATTCCGCA  
GAGAATTGGGAGTTCCTATCGTAATGCATGACTACTTAACTGGGGGGTTCACCGCAAAT  
ACTAGCTTGGCTCATTATTGCCGCGACAATGGTCTACTTCTTCACATCCATCGCGCAATG  
CATGCAGTTATTGATAGACAGAAAAATCATGGTATGCATTTTCGTGTACTAGCTAAAGCA  
TTACGTATGTCTGGCGGAGATCATATTCACGCTGGTACAGTAGTGGGTAAACTGGAGGG  
GGAACGTGAGATGACTTTGGGTTTTGTTGATTTGTTACGTGATGATTATATTGAAAAAG  
ATCGAAGTCGTGGTATTTTTTCACTCAAGACTGGGTCTCTATGCCAGGTGTTATACCCG  
TGGCTTCAGGGGGTATTCATGTTTGGCATATGCCTGCCCTAACCGAAATCTTTGGAGAT  
GATCCGTACTIONACAGTTTGGTGGAGGAACTTTAGGGCACCCCTTGGGGAAATGCACCCG  
GTGCAGTAGCTAATCGGGTAGCTTTAGAAGCATGTGTACAAGCTCGTAATGAGGGACG  
TGATCTTGCTCGTGAAGGTAATGATATTATTCGTGAAGCTAGCAAATGGAGCCCTGAGC  
TAGCCGCTGCTTGTGAAGTCTGGAAAGAGATCACATTCGATTTTCGACCCAGTGGATAA  
GCCAGATATAACGGCAATACATTTATACAAAACCTTCTACCTCGAGCACACGCAATGGAG  
CCGTAGACAGTCAAGTGAATCCAATCCACGAAATAATTTGATCTATGGACAGCATCGT  
TGTGGTAAAGGTCGTAATGCCAGAGGGATCATTACCGCAGGGCATAGAGGGGGAGGTC  
ATAAGCGTCTATACCGTAAAATCGACTTTTCGACGGAATGAAAAAGAGATATCTGGTAGA  
ATCGTAACCATAGAATATGACCCTAATCGAAATGCATACATTTGTCTCATACTATGGG  
GATGGTGAGAAGAGATATATTTTACATCCCAGAGGGGCTATAATTGGAGATACCATTTGT  
TCTGGTACAGAAGTTCCTATATCAATGGGAAATGCCCTACCTTTGACCGATATGCCCTTA  
GGCACGGCCATACATAACATAGAAATCACACTTGGAAAAGGTGGACAATTAGCTAGAG  
CAGCAGGCGCTGTAGCGAAACTGATTGCAAAAAGAGGGTAAATCGGCCACATTAAGATT  
ACCATCTGGGGAGGTCCGTTTGTATCCAAAAACTGCTTAGCAACAGTCGGACAAGTG  
GGTAATGTTGGGGTGAACCAAAAAAGTTTTGGGTAGAGCCGGATCTAAGTGTGGCTAG  
GTAAGCGTCCTGTAGTAAGAGGAGTAGTTATGAACCCTGTAGACCATCCCCATGGGGG  
CGGTGAAGGGAGAGCCCCAATTGGTAGAAAAAACCCACAACCCCTTGGGGTTATCC  
TGCCTTGGAGAAGAAGCAGGAAAAGGAACAAATATAGTGATAGTTTGATTCTTCGT  
CGCCGTA---ATGATTCAACCTCAGACCCTTTTGAATGTAGCGGATAACAGTGGAGCT  
CAAAAATTAATGTGTATTGATCATAGGAACTGGT---AATCACCGATATGCTCATCTTG  
GCGATGTTATTGTTGCTGTAATCAAAGAAGCAGTGCCCAACATGCCTCTAGAAAGATCA  
GAAATAATTAGAGCTGTGATTGTACGCACATGTAAAGAACTCAAACGTGACAACGGCA  
TGATAATACGATATGATGACAATGCAGCGGTTATCATTGATCAAGAAGGAAATCCAAA  
GGAACCTCGAATTTTTGGTGCAATTGCTCGAGAATTGCGACAGTTGAATTTACTAAAAT  
CGTTTCATTAGCACCCGAAGTCTTAATGCTCAGTCCTAAAAGAACCAGATTTTCGTAAAC  
AACATAGAGGTAGAATGAAGGGAATATCTTGCCGAGGCAATCATATTTGTTTTGGCAGA  
TACGCTCTTCAGGCACTTGAACCTGCTTGGATCACAGCTAGACAAATAGAAGCAGGAC  
GAAGAGCAATGACACGATATGCGCGTCGTGGTGAAAGATATGGGTACGTATCTTTCC  
GACAAACCTGTTACTGTAAGACCTACAGAAACACGTATGGGTCCGGCAAAGGATCCC  
CCGAATATTGGGTATCCGTTGTTAAACCGGGCCGAATAATTTATGAAATGAGTGGAGTAT  
CTGAAGCTGTAGCCAAAGCTGCTATGGAATAGCAGCATGCAAAATGCCTATACGAAC  
TCAATTTGTTATTTAGGAATGACCAGAGTTAAACGAGGATATACAGCTCGGAGACGTC  
GAAAAAGATTGTTTTATTTGCATCAACCTTTATAGGGGCTCATCAAGACTGACTCGA  
ACGACTACTCAACAAAGAATGAGAGCTTTGATTTCTCTCATCGAGATAGGAGCAGGA

AAAAGAGAGATTTTCGTCGTTTGTGGATCACTCGAATAAATGCGGTAACCTCGTGAGGAT  
-----CTATTCTATAGTTATAGCCTCTTCATCCACAATCTGTACAAAAGACAATTGCTTCTG  
AATCGTAAATACTTGCACAAATAGCCCTATCAAATAAGAATTGTTTTGATATTATTTCA  
AATAAAATTATCAAT-----ATGATAAAGAAAGTTTTTA--GCTCAAAT  
ATATGT---ATGTCTGTTTTCAAAGCACGAAGAGTAATTGATCAGATTCGTGGACGTTCTT  
ATGAGGAAGCACTCATGATACTAGAATAATGCCTTATAGGGCATCTTATCCAATCTTAA  
AATTAGTTTATTCTGCAGCAGCAAATGCTAGTCATAATATGGGTTTGAATGAAGTTGACT  
TATTTATTAGTAAAGCTGAAGTCAATAGAGGCACCTATTATGAAAAAGTTAAAACCCCGG  
GCTCGAGGACGTAGTTATCTGATAAAAAAACCACTTGTCATATAAAGATTTTTTTAAA  
A---AAATATAAGGTT-----ATGGATGGAATCAAATATGCAGTATTTACAGAAA  
AAAGTATTCGGTTATTGGGGAACAATCAA---TATACTTCTAATGTGCAATCAGGATCAAC  
TAGGACAGAAATAAAGCATTGGGTCGAACTCTTCTTTGGTGTCAAGGTAATAGCTATGA  
ATAGTCATCGACTCCCGGGAAGGGTAGAAGGATGGGACCTATTATGGGACATACAATG  
CATTACAGACGTATGATCATTACGCTTCAACCGGGTATTCTATTCCACCTCTTATAGAG  
AAAAGA ACTATGGCAGTTCCAAAAAACGTACTTCTATGTCAAAAAAGCATATTCGTA  
GAAATCTTTGGAAAAAAAAGGATCTTTAGCGGCAGTCAAAGCTTTTTCTTTAGCTCA  
ATCTATTTCCACCGACAATCAAAAAGTTTCTTT-----CAAAAAAAGTCATGGCCAAG  
GGTAAAGATATTAGAATTATAGTGATTTTGGAAATGTACCTGTTGT---GTTCGAAAG-----G  
TCAATAAAGAA-----GGCATTCTAGATATATTACTCAAAAAGAATCGACACAATACACCC  
AATCGACTAGAATTTAGAAAATTTTGTGCGTATTGTCAAAAAGTATACGATTCATGGGGA  
AATAAAGAAAATGAAGATAAGGGCTTCTGTTGTAATAATTTGTGAAAAATGTGCGTTGA  
TTCGTAGGCAGGGGCGAATTATAGTTATTTGTTCCAATCCGAGACATAAACAGAGACAG  
GGGATGGTTCGAGAAGACGTAGTAGGATCCACTCGAACACTACAGTGGAATGTGTTG  
AATCAAGAGTAGACAGCAAGCGTCTTTATTATGGTTCGTTTCGTTCTGTCCCCGCTTATG  
AAAGGTCAAGCCGATACCATAGGTATTGCCATACGAAGGGCTTTACTTGGAGAAATAG  
AAGGAACATGTATCACACGTGCAACATCTGAA-----AATGTGCTGCATGAATATTCTACG  
ATAGCAGGTATTGAAGAATCAGTACATGAGATTTTACTCAATTTGAAAGATATTGTATTG  
AGAAGTAATCTTTATGGAGTTAGGAACGCATCCATTTGCGTCAGGGGTCCCAAATACAT  
AACAGCTCAAGATATCATCTCACACCTTCTGTAGAAATAGTTGACACGACACAGCATA  
TAGCTAACCTGACAGAACCAATTAATTTGTGTATTGAATTACAAATTAAGAGAGATCGC  
GGATATCGTATGAAATCCACAAATGACTCTCACGATGGAAGTTAT-----CCTATAGATATT  
GTATCTATGCCTGTTGAAATGCGAATCATAGTATTCATTCTTATGGGAATGGGAATGAA  
AAACAAGAGATACTCTTTATAGAAATATGGACGAATGGAAGTTAACTCCTAAAGAAG  
CACTTTATGAAGCTTCTCGTAATTTGATTGATTTATTGATTCCTTTTCTACATGCAGAGGA  
AGAG-----GACATGAATTTTAAGGAAAATGAA---AACAGGTGGAATCTACCCCCCTTTTC  
CTTTCAAGACAAATTTACT--AATTTCAAGAAAAACAAAAAA--GGAATTCATTGACAT  
GTATTTTTATTGACCAATCAGAATTGTCTTCCAGGACCTATAATTGTCTCAAAGATCCA  
ATATACATACATTATTGGACCTTTTGTAGTACAGTCAAGAAGATCTTATGAAAATGGAAT  
ATTTTCGCACAGAAGATGTAAAACAGATATTGAGCACTGTACAGAAGCAT-----TTTGCA  
ATAAATTTACTTAATAAAAAGATGCTCCAGAAT--GGAAATGAGGGAATGTCCACAATAC  
CTGGATTTAGTCAGATACAATTTGAGGGATTTTGTAGGTTCAATTAATCAGGGCTTGACG  
GAAGAATTCATAAGTTTCAAAAAATTGAAGATAGAGATCAAGAAATTGAATTTCAATT  
ATTTGTGGAAACATATCAATTTGGTAGAGCCCTTGATAACAGAAAGAGATGCTGTGTATG  
AATCACTCACATATTCTTCTGAATTATATGTACCCGCGGTCTTAATTTGGAAAACCGGTA

GAAATATGCAAGAACAAACCGTTTTTATTGGAAACATCCCTATAATGAATTCTTTTGGAA  
ACCTCTATAGTAAATGGAATATACCGAATTGTGATCAACCAAATAGTGCAAAGTCCCGG  
TATTTACTATCGTTCAGAATTGGAACATAACGGAGTTTCTGTCTATAACCAGTACTATAATA  
TCGGATTGGGGGGGAAGGTCGGAATTAGAAATTGATAGAAAAGCAAGGATATGGGCC  
GTGTAAGTAGAAAACAAAAATATCTATTCTAGTTCTATCATCAGCTATGGGTTCGAATA  
TAAGAGAAATTTTAGATAATGTTTGTACCCTGAGATTTTCTTGTCTTTCCCGAATGATA  
AAGAGAAAAAAAAGATTGGGTCAAAGAAAATGCTATTTTGGAGTTTTATCAACAATT  
TGCCTGTGTAGGGGGGGATCCAGTATTTTCTGAGTCCCTATGCAAGGAATTACAAAAGA  
AATTTTTTCAACAAAGATGTGAGTTAGGAAAGATTGGTCGACAAAATCTAAACCGGAG  
ACTTAATCTTGATATACCCCAAAACAATACATTTTTGTTACCACGAGATTTATTGGCTGC  
TGTGGATCATTGATCGGAATGAAATTGGGAATGGGTACACTTGACGAT-----ATGAGTC  
ACTTGAAAAATAAACGTATTCGTTCTGTAGCAGATCTATTACAGGATCAATTTGGATTAG  
CTCTTGTTGTTAGAAAATACGGTTCGAGGAACTATATGTGGAGCAATCAGG---CATAA  
ATTGATA---CCGACTCCTCAAATTTGGTAACCTTCAACTTCA-----TTAACAACACTACT  
TATGAATCGTTTTTTGGCTTACACCCTTATCTCAAGTTTTGGATCGAACTAATCCGTTG  
ACACAAATTGTTTCATGGGCGAAAATGGAGTTATTTGGGTCCTGGAGGATTGACGGGGC  
GAACTGCTAGTTTTCGAATACGAGATATCCACCCGAGTCACTATGGACGTATTTGTCCA  
ATTGACACGTCCGAAGGAATCAATGTTGGACTTATGGGATCATTAGCTATTCATGTGAA  
GGTTGGTTATTGGGGA---TCTATAGAGAGTCCATTTTAT-----GGATTATCTGAGAGATC  
AAAAGAG-----GCACAGATGGTTTATTTATCACCAAATAGAGATGAATATTATATGGTAGC  
AGCAGGAAATTCTTTGGCCTTGAATCGGGATATCAAGAACAACAGGTTGTTCCAGCT  
CGATATCGTCAAGAATTCCTGACTATTGCATGGGAAGAGATTCATCTTAGAAGCATTTTT  
CCCTTCCAATATTTTTCTATTGGAGCTTCCCTCATTCTTTTATTGAGCATAATGATGCGA  
ATCGAGCTTTAATGAGTTCTAATATGCAGCGCCAAGCAGTCCCCTTTCTCGGTCCGAG  
AAGTGCATTGTTGGAACCTGGGTTGGAAGGACAAACGGCTCTAGATTCGGGGGTTTCAG  
TTATAGCCGAATGCAAGGGAAAAATCATTTATACTGATACTCAAAAGATCTTTTTATCAA  
GTAATGGGGATACTCTAAGCATTCCATTGGTTATGTATCAACGTTCCAACAAAAATACTT  
GTATGAATCAAAAAACTCAGGTTTCAGCGGGGTAAATACATTAATAAAGGGACAAATTCT  
AGCGGGTGGTGC GGCTACAGCTGGTGGGGAACCTCGCTTTAGGAAAAAATGTATTAGTA  
GCTTATATGCCATGGGAAGGTTACAATTTTGAAGACGCAGTACTAATTAGCGAACGTCT  
GGTTTATAAAGATATTTATACTTCTTTTCACATCCGGAAATATGAAATTCAGACTCATGTA  
ACAAGCCAAGGT---CCTGAAAGAATCACTAAGGAGATCCCGCATTTAGAGGCTCGTTTA  
CTCCGAAATTTAGACAGAAATGGAATTGTGATGCTGGGATCTTGGATAGAAACAGGTG  
ATATCTTAGTAGGTAAATTAACACCTCAGACAGCGAGTGAA---TCCTCATATGCCCCGGA  
GGATAGATTATTACGAGCTATACTTGGCATTTCAGGTATCCACTTCAAAGAAACTTCTCT  
AAGACTACCTATAGGGGGAAGGGGTCGAGTTATTGATGTGAGATGGATCCATAGAAGA  
GGG---GTTTCCAATTCTAATCCAGAAAGGATTCGTGTATATATTTACAGAAACGTGAAA  
TCAAAGTAGGTGATAAAGTAGCTGGAAGGCATGGAAATAAGGGTATAATTTCTAAGATT  
TTGTCTAGACAAGATATGCCCTATTTGCAAGATGGAACGCCCGTTGATATGGTATTCAAC  
CCATTAGGAGTCCCCTCACGAATGAATGTGGGACAGATATTTGAATGTTCACTCGGATT  
AGCGGGGGATCTGCTAAAGAAACATTATAGAATAGGACCTTTTGTGATGAGAGATATGAGC  
AAGAGGCCTCAAGAAAACACTAGTGTTTTCCGAATTATATGAAGCCAGTAAGAAAACAAA  
AAATCCATGGGTATTTGAACCCGAATATCCGGGAAAAAGCAGAATATTTGATGGAAGA  
ACAGGAGATCTTTTTGAACAACCTGTTCTAATAGGAAAGTCCTATATCCTAAAATTAATC

CATCAAGTTGATGATAAAAATCCATGGACGTTCCAGTGGGCATTACGCACTTGTTACACA  
ACAACCCCTTAGAGGGAGGGCCAAACAAGGGGGACAAAGAGTAGGGGAAATGGAAG  
TTTGGGCTCTAGAGGGATTGGGTGTTGCTCATATCTTACAAGAGATGCTTACTTACAAAT  
CTGATCATATTAGAGCTCGTCAAGAAGTACTTGGTGCTATGATTATTGGGGCAACAGTA  
CCTAACCCAGAGAGTGCTCCAGAATCTTTTCGATTGCTCGTTCGAGAACTACGATCTTT  
GTCCCTGGAAGTGAATCATTTCCTTGTATCTGAAAAGAAGTTCAGATGGATAGGAAGG  
AAGCT-----ATGATTGACCAGTATAAACATCAACAACCTTCGAATTGGATCAGT  
TTCCCTCAACAAATCAGGGCTTGGGCAAAAAAGATTCTACCCAATGGAGAGATAGTT  
GGAGAGGTGACAAAACCCTATACTTTTCATTATAAACTAATAAACCGGAAAAAGATG  
GATTGTTTTGTGAAAGAATTTCTGGACCCATAAAAAGTGAATTTGTGCTTGTGGAAAT  
TACCGAGGAATTGGGACTGAAAAAGAAGACCCGAAATTTTGTGAAGAATGCGGGGTG  
GAATTTGTTGATTCTCGGATACGAAGGTACCAAATGGGATACATCAAACCTGACATGTCC  
AGTGACTCATGTGTGGTATTTGAAACGCTTCCTAGTTATATTGCGAATCTTTTAGATAA  
GCCCTTAGGGAATTAGAGGGCCTAGTATATTGCGAT-----TTTTCTTTGCTAGGTCC---A  
TAGCTAAAAACCTACTTTTTTACGATTACGAGGTTTCATTTCGAATATGAAATCCAATCCT  
GGCAATACAGCATCCACTCTTTTTTACTACTCAAGGTTTCGAGACATTTTCGAAACCGA  
GAAATCTCTACGGGGGCAGGTGCTATCAGAGAACAATTAGCCGATTCGGATTGCGAAT  
TATTACAGATAATTCTTTGTTAGAATGGAAGGAATTAGGAGATGAA---GAGTCCGCAGG  
AAATGAATGGGAAGAGAAAAAAATTCGAAGAAGAAAGGATTTTTTGGTTAGGCGCAT  
AGAATTAGCTAAACATTTTCTTCGAACAAACGTAGATCCAGAATGGATGGTTTTGTGCC  
TATTACCAGTTCTTCCTCCTGAGTTGAGACCAATCATTTCAGATAGATGGGGGTAAACTA  
ATGAGTTCGGATATTAATGAACTCTATAGAAGAGTTATCTATCGGAACAATACTCTTACC  
GATCTATTAGCAACAAGTAGATCTACACCAGGGGAATTAGTAATGTGTCAGGAGAAATT  
GGTACAAGAGGCCGTGGATACACTTTTTGATAATGGGATCCGCGGACAACCCATGAGA  
GATGGTCATAATAAAGTTTACAAGTCATTTTCCGATGTAATTGAAGGCAAAGAAGGAAG  
ATTTTCGTGAGACTCTGCTTGGTAAACGGGTGATTATTTCGGGACGTTCTGTCATTGTGCG  
TAGGTCTTTGCTTTTCATTACATCAATGTGGATTACCTCGAGAAATAGCAATAGAGCTCT  
TCCAAGCATTGTGTAATTCGTGGTCTAATAAGACAAGATGTTGCTTCTAACACAGGTATT  
GCTAAAAGTAAAATTCGGGAAAAAGAACCATTGTATGGGAAATCCTTCAAGAAGTGA  
TGCAGGGGCATCCTGTATTGTTGAATAGAGCGCCCACCCTGCATAGATTAGGTATACAG  
GCGTTCCAACCCATTTTAGTGGAGGGGGCGTGCTATTTGTTTACATCCCTTAGTTTGTAAG  
GGCTTCAACGCAGACTTTGATGGGGATCAAATGGCTGTTACGTACCATTATCTTTGGA  
AGCTCAAGCAGAAGCTCGTTTACTTATGTTTTCTCATATGAATCTCTTGTCTCCAGCTAT  
TGGGGATCCCGTTCCGTACCAACTCAAGATATGCTTATAGGACTCTATGTATTAACGAT  
CGGTAATCCCCGAGGTATTTGTGCAAATAGGTATAATCAATCTAATTCTAATTGCAGAAA  
C---TATAAAAAGGAAAAAGTTTACAAGAATGACTTTAAGTATACAAAA-----GAGCTTTA  
TTTTTCTAGTTCTTATGATGCACTTGGAGCTTATCGGCAGAAACGAATCCATTAGATAG  
TCCTTTGTGGCTTCGGTGGAGACTAGATCAACGC---GTCGTTGGCTCA-----AGAGAAGT  
TCCATCGAAATTCAATATGAATCTTTTGGTAATTATAATGAGATTTATAAGCACTATCAA  
ATAATAGGAAGTGTAATAAATAGAAATTTGTTGTATATACATTCGAACTACTGCTGGTCAT  
ATTTCTTTTTATCGAGAAATAGAAGAAGCCATACAGGGGTTTTGGCGGGCCTACTCA----  
-----ATGGCAGAACGGACCAATCTGGTCTTTCACAATAAGGT  
GATAGATGGAAGTCTATTAACGACTTATTAGCAGATTAATAGATCATTTCGGAATGGC  
ATATACGTCACATATCCTGGATCAAGTGAAGGCTTTGGGTTTACGGCGAGCCACTGCTA

CATCTATTTTCATTAGGAATTGATGATCTTTTAAACAATACCTTCTAAGAGATGGTTAGTTCA  
AGACGCTGAACAACAAAGTTTTCTTTTAGAGAAAAACCATCATTATGGGAATGTACATG  
TGGTAGAAAAATTACGTCAATCCATTGAGGTATGGTATGCTACAAGTGAATATTTGAGA  
CAAGAAATGAATCCTAATTTTCAGATGACTGATCCCTCTAATCCAGTTCATCTAATGTCC  
TTTTCGGGGGCTAGAGGAAATGCATCTCAAGTACATCAATTAGTAGGTATGAGAGGATT  
AATGTCCGATCCTCAAGGACAAATGATTGATTTACCGATTCAAAGCAATTTACGGGAAG  
GGCTTTCTGTGACAGAATATATAATTTCTTGCTACGGAGCCCGCAAAGGAGTTGTAGAT  
ACTGCTGTACGAACATCAGATGCTGGATACCTCACGCGTAGACTTGTGGAAGTAGTTCA  
ACATATTCTTGACGTAGAACAGATTGTGGTACTATCCGAGGTATTTCCGTGAGTCCTCA  
AAATGGGATGACGGAA-----AAGATTTTTGTCCAAACACTAATTGGTCGTGTATTAGCAG  
ACGATATATATATCGGTCTACGATGCATTGGTACTCGAAATAAAGATATTGGAATTGGAC  
TTGTTAATCGATTCATCACC-----TTTCAAGCACACCCAATATATATTAGAACTC  
CTTTACTTGCAGGAGTACATCTTGGATCTGTCAATTATGTTATGGCCGGAGTCCTACTC  
ATGGTGACCTGGTCGAGTTGGGAGAAGCCGTAGGCATTATTGCGGGTCAATCAATTGG  
GGAACCGGGGACTCAACTAACATTAAGAACTTTTCATACTGGTGGAGTATTCACGGGT  
GGTACTGCCGAACATGTACGAGCTCCTTCTAATGGAAAAATAAAATTTGATGAGGGTTT  
GGTTCATCCACACGTACCCGTCACGGGCATCCTGCTTTTCTATGTTTTATAGACTTTTA  
TGTAECTATTGAGAGTCGGGATATTAGACATAATGTAAATATTCCAACAAAAAGTTTGAT  
TTTAGTTCAAATGATCAATATGTAGAATCAGAACAAGTGATTGCCGAGATTCGTGCCG  
AAACGTCCACCTTT-----TTAAGGAGAGGGTTCAAAAACATATTTATTCTGAGTCAGAA  
GGAGAA---ATGCACTGGAGTACTGATGGCTATCATAACGCCAAATATCCATATAGTAATG  
TTCATCTATTACCAAAAACAAGTCATTTATGGATATTAGCAGGAGGTCTATGCAGATCCA  
ATTCCAATATAGTGTCTTTTTACTCCACAAGGATCAAGATCAAATGAATGCTAATTCAT  
TTTCTCTCAAAGAT-----CTCTTTGATCTCTCA-----CTGACTAAT--GATCAAGTAAG  
ACATAAATTGTTGGATACTTTTGGT-----GATAGGGAAAGTCTTGACTATTCA---AAA  
CCTTATCGAATCATATCTAAGGGTCATTGGAATCTCATAGAGCCTTCT---ACTTATATTCG  
TCAA-----GAGAATCTTTGGCGAAAAAGCGAAGAAATAGATTTGTGATTCCTTACAAT  
ATGATCAAGAACAAGAAAATAACTAATACCCTGTTTTGGTATTTTCGATTAAAATACCTA  
TAAAT-----GGTATTTTACGTAGAAATAGTATTATTGCTTATTTTGATGATCCGCGATACAG  
AAGAAGC-----GGAATTACTAAATAT--ATTGTCGAAGTAGATTCAATCGTAAAA-----AA  
AGAAGATTTGATTGAGTATCGAGGA---GCAAAAGATTTTAGTCCGAAATAC---AAAGTA  
GATCAATTTTTTTTTCATTCCCGAGGAAATACATATCTTACCCGGATCTTCGCCATAATG  
GTCCGGAACAATAGTATCATTGGAGTAGATACACGACTTGTTTTAAATACCAGAAGTCG  
AGTAGGTGGATTAGTCCGAGTGGAGAGAAAAAAGAAAAGTCTAGAACTGAAAATATT  
TTCTGGAGATATTCATTTTTATGGAGAGGTGGATAAAATATCTAGGCACAGTGGCATTTT  
GATACCACCAGGAATCGGAAAAAAA-----GATTCTAAAGGA---TCAAAA---AAATTGAA  
AAATTGGATCTATGTCCAACGC-----ATTACACCTACCAAAAAAAG-----TATTTTGT  
TGGTTCCGGCCCGTAGTACATATGAAATAGCTGATGGGATAAATTTAGCAACACTTTTCT  
CTCAGGATCTCTTGCAGGAAAAGAATAATGTCCAACCTCGAATTGTCAATTATATACTTT  
ATGAAAATGGCAAGTCAATTTCGAGGAATTTCTCACACAAGT--CAATTAGTTCGAGCTT  
GCTTAGTATTGACTTGGGACCAAGAAAAAAGAGTTCTATAGAAGAA-----AAGGTT  
CATGCTTCTTTTGTGAAATAAGGACAAATGATCTGCTTTGTTATTTTCATCCGAATTGAG  
TTAGTAAAGTCCACTCTTTCGTATACCGAAAAAAGGTATGATACGGCAGGTTCAAGGATT  
GATTTCCAAT-----TTAGATCGTATTATAGAAATCCTTTTGATTCCAAGGCGAAGATTC

AAATA-----TTTCCCAACATCAGGGAACCTTTGGT-----ACGTTGTTGAATC  
GAAATAAG-----GAATGCCAATCTTTCCTAATTTTGTGCATCATCCAATTGTTCTCGAATT  
GGT-----CCCTTCAACTTTCGAGATATAAT-----AATGCGACAAAAGAATTGGATCCCA  
TGAATCCAATT---TATTTGTTGGGTCTTTAGGTAATTTGTGCCT---AGAATAGTAAATTC  
TCGTTTCATCT---TACTATTTAAGAACT-----TATAATCAAGTCTTTTTAAAG---AAATCTT  
TTTTGCTTGAA-----AATTTTCAACAGACTTTCCAAGTGCTTCAAGTACCTCAATACTG  
TTTCCTAGATGAAAATAGTAGG-----ATTTATAATCCCGATCCTTGCAGTAACATCATTG  
GAATTCATTTCAATTTGAATTGGTGTCTTCCATCACGATTCTTGTGAAGAGGCATGGCC  
AATAATTAGC---CTTGGACAATTCCTTTGTGAAAATGTATATCTATTGAAATATGGATCA--  
----CGCATAAAAAAATCTGGTCAAATTTTCATTGTTTCAT---GTTGATTCTCTAGTTATAAGA  
TCAGCTAAGCCCTATTTGGTCACTCCAGGAGCAACTGTCCATGGTCATTATGGGGAAAC  
CTTTTATGAAGGAGATACATTAATTACATTTATATATGAAAAGTCGAGATCTGGTGACAT  
AACGCAAGGCTTCCAAAAGTAGAACAAATCTTAGAAGTTCGTTCAATTGATTCAATAT  
CGATGAACCTCGAAAGAAGAGTTGAAGGTTGGGACGAACGTATCCGAAGGATTCTTG  
GGATCCCCTGGGGATTCTTGATTGGAGCTGAACTAACCATAGCCCAAAGTCGTATCTCT  
TTGGTTAATAAGATACAAAAGGTTTATCGATCCCAGGGGGTACAGATCCATAATAGACA  
TCTAGAGATTATTGTACGTCAAGTAACATCAAGAGTTTTGGTTTTCCGAA-----GATGG  
AATGTCTAATGTTTTTTTACCTGGGGAATTTATTGGATTGTTGCGAGCAGAACGAGCAG  
GGCGCGTTTTGGCCGAATCAATCTGTTATCGGGCAATCTTATTGGGAATAACGAAGTCA  
TCTCTGAATACTCAAAGTTTCATATCCGAAGCAAGTTTTCAAGAACTGCTCGAGTTTT  
AGCAAAGCTGCTCTACGAGGTCGTATTGATTGGTTGAAAGGCCTGAAAGAAAACGTT  
GTTCTGGGGGAATTATACCGGTTGGTACCGGATTCAATAAATTAGTACATCGTTCAA  
G-----CAAGACAAAAACATTCAT-----TTGAAAATCAAAGGAAAATCTATTCGAGTTG  
GAAATG-----AGCGATATTTGCTACCCATAGAGAATTATTTTGTCTTGTGCCAAGA  
A-----CAGACCAATCTTTTACGTAATGTATCC-----ATGGGAAGACGA  
TATTGGAACATCAATTTGGAAGAAATGATGGAAGCAGGAATTCATTTTGGTCATGTTAC  
TAATAAATGGAATCCTAGAAATGGCTCCTTACATCTCGTCAAAGCGTAAAGGTATTCATAT  
TACAAATCTTACTATAACTGCTCGTTTTTTTATCAGAAGCCTGCGATTTAGTTTTTTGATGC  
AGCAAGTAGGGGAAAAGATTCTTAATCGTTGGCACCAAAAAGAAAGCAGCGGATTT  
AGTAGCATCAGCAGCAATAAAGGCTCGATGTCATTATGTTAATAAAAAATGGCTTGGTG  
GTATGTTAACGAATTGGTCTACTACAGAAACAAGACTTCAGAAGTTCAGGGACTTAAAG  
AGCAGAACAAAAGATGGGGAACTCAATCGTCTCCCTAAAGGAGATGCAGCAATGTT  
GAAGAGAAAGTTATCTACTTTGCAAGCATATCTTGGCGGGATCAAATATATGACGGGAT  
TGCCCGATATTGTAATTATCGTGGATCAGCAAGAAGAATATACGGTTCTTCGAGAATGTG  
TCATTTTGGGTATTCCGACGATTTGTTTAATCGATACAAATTGTGATCCAGATCTTGCAG  
ATATTTCTATTCCGGCCAACGATGATGCTATCGCTTCGATTTCGATTGATTCTTACCAAATT  
AGTATCTGCAATTTGTGAGGGTCAATCTAGT---TATATAAAAAAAGGTATGGGACAAAA  
ATAAATCCAATTGGTTTTAGACTTGGAACTCAAGTCAATCATTCTTTTTGGTTTCGC  
AAAACCAAAAAATTTTTCCATAGGTCTACAAGAAGATGAAAGAATACGGAATTGTATTA  
AGGACTATGTAATAAAAAATAAGAAAATATCCTCAGGT---TTCGAAGGAATTGCTTATAT  
AGGAATTCAAAAAGAATAGATTTTATTCAAGTCATAATCTATATTGGATTTCCCAATTTA  
TTAATAGAAGGA-----CGAACACGG-----GGAGTCGAAGAATTACAGATGAATGTACAAA  
AAGAGTTTCATTCTGTAAACCGGAGACTCAACATTGCTATCACAAGAATTGAAAAACC  
TTACGGACAACCTAATATTCTCGCAGAATATATAGCTTTACAATTAATAAATAGAGTCTC

ATTTGAAAGGCAATGAAAAAGCTATTGAATTAAGTGAACAAACCGGTACAAAAGGA  
ATTCAAGTGCAAATTGCAGGACGTATCGACGGAAAAGAGATTGCACGTGTGCAATGGA  
TCAGAGAAGGCAGGGTTCCCTACAAACAATTCGCGCTAAAATTGATCACTGTTCCCAT  
ACAGTTAGAACTATCTATGGAATCTTAGGTATCAAAATTTGGATATTTGTAAACCAAGAA  
ATGTCTCGTTACCGAGGACCTCGTTTCAAAAAATAACGCCGGCTGGGGGTTTACCAG  
GACTAACTAGTAAAAGACCCAGATCCAGAAGTGATCTTCAAACCCAATTGCGCTTTGG  
AAAA---AGATCACAATATCGTATTCGTTTAGAAGAGAAAACAGAAATTGCGTTTTTATTAT  
GGTCTGACAGAACGACAATTACTTAAATATGTGCATATTGCTGGAAAAGCCAAAGGGT  
CAACAGGCCAGGTTTTACTACAATACTCGAGATGCGTTTGGATAACATCCTTTTTCGA  
TTAGGAATGGCTTCGACCATTCCAGGAGCCAGACAATTAGTTAACCATAGACACATTTT  
AGTTAATGGTTCGTATAGTGGATATACCAAGTTATCGTTGCAAACCCCTAGATATTACT  
ACGAAGGATAAAGAAAGATCGAAAGCTCTGATTCAAATTTATCTTGTTCATCCCCCG  
CGAA-----TTGCCAAACCAATTTGACTATTGACTCC-----TTACAATATAAAGGATTTGTAAA  
TCAAATAATAGATAGTAAATGGATCGGTCTAAAATAAATGAGTTGTTGGTTCGTAGAATA  
TTATTCCCGTCAGACTATGTCACGTGAGGTAAGTGCAGAAAGAAAAACTGCAAATCC  
GATCCAATTTATCGTAATCGATTAGTTAACATGTTGGTTAACCGTATTCTGAAAAATGGA  
AAAAAATCATTGGCTTATCAAATTATCTATCGAGCCGTGAAAAAGATTCAACAAAAGAC  
AGAAACAAATCCACTATCTGTTTTACGTCAAGCAATACGTGGAGTAACTCCCGATATAG  
CAGTAAAAGCAAGACGTGTAGGCGGATCGACTCATCAAGTTCCTATTGAAATAGGATCT  
ACACAAGGAAAAGCGCTTGCCATTCGTTGGTTATTAGGGGCATCCCGAAAGCGTCCGG  
GTCGAAATATGGATTTCCGATTAAGTTCCGAATTAGTAGATGCTGCCAAAGGCAGTGGC  
GATGCCATACGCAAAAAGGAAGAGACTCATAGAATGGCAGAGGCAAATAGAGCTTTTG  
CGCATTTTCGTATGGGTAGGGACATTATTGCCAATATAATAACTTCTATAAGAAATGCTG  
ACATAGATCAAAGGGAAGAGTTAAAATAGTATCTACTAATATCACTAAAAACATTGTG  
AAAATACTTTTACGAGAAGGTTTTATTGAAAACGTTTCGAAAACATCAAGAAAGTCAA  
AAAATTTCTTGGTTTTCAACCTTACGACATAGAAAG-----ACTAGGAAAGGT-----  
AATAAAATAAATTTAAAGCGTATCAGCCGACCTGGTCTACGAATATATTCCAATATCAA  
CAAATTCCTAAGATTTTAGGTGGAATGGGAATTGTAATCCTTTCTACTTCTCGAGGTATA  
ATAACAGATCGAGAAGCTCGATTAGAAAAAATTGGAGGAGAAATTTTGTGTTATATATG  
GATGACAAAACCTATAGCAAAAATTAGTTTACGTAAGAATGCACGTATTGGTTCAAATA  
AGAATGAACGTAGAATACCAAAAAGGAGTTATTCATGTTCAAGCGAGTTTCAATAACT  
ATTGTAAGTGTACAGACGTACGAGGTCGGGTGGTTTCTTGGGCTTCCGCAGGTAATC  
TGGATTCAGAGGCACAAGAAAAGGAACACCCTATGCTGCTCAAGCCGCAGCATTTAAT  
GCTATTCGTACATTAGTTGATCAGGGTATGCAACGAGCAGAAGTTATGATAAAAAGGTCC  
AGGTCTCGGAAGAGATGCGGCATTACGAGCTATTCGTAGAAATGGGATACTATTAAGTT  
TCGTACGTGATGTAACCCCATGCCGCATAATGGATGTCGCCCCCTAAAAAAGACGT  
GTGATGCCAACCATTAAACAACCTTATTAGAAACGCAAGACAGCCAATAAGAAATGTCA  
CGAAATCTCCCGCTCTTCGAGGATGTCCTCAGCGTCGAGGAACATGTACTAGGGTGTAT  
ACTATCACCCCCAAAAACCAAACCTCTGCCTTACGTAAAGTTGCCAGAGTACGATTAA  
CCTCTGGATTTGAAATCACTGCTTATATACCTGGTATTGGCCATAATTCACAAGAACATT  
CTGTAGTATTAGTAAGAGGAGGAAGGGTTAAGGATTTACCCGGTGTGAGATATCACATT  
GTTTCGAGGAACCCTAGATGCTGTTCGGAGTAAAGGATCGCCAACAAGGGCGTTCTAAAT  
ATGGGGTCAAAAAGCCAAAATGGCAAGAAAAAGTTTGATTCAAAGGGAGAAGAAG  
CGCCAGAAATTGGAACAGAAATATTATTGGATTCGTCAATCCTTAAAAAAGAAATAAG







-----TATCACACATTGATCGATCAAACAGAGATTCAGCAACTAAAAGAGAGATCGATTCTT--TGGGAT-----CCTTCCTTTCTTCAAACGGAACGAACAGAGATAGAATCAGAT-----CGATTCCCGAAA-----TGCCTTTTTGGATCTTCC-----TCCATGTCCTGGCTATTCAACA---GACCTGAGAAGCGGATGAATAATCATCTGCTTCCGGAAGAAATCGAAGAATTTCTT-----GGAAATCCTACAAGATCAATTCGTTCTTTTTTCTCTGACAGATGG-----TCAGAACTTCAT--CTGGGTTCTGAATCCTACTGAGAGGTCCTACTAGAGATCAT-----AAATTGTTGAAGA AAAACAAGATGTTTCT--TTTGTCCCTTCCAGGCGAGCGGAA-----AAGAAAGAAATGGTTGATATATTCAAGATAATTACGTATTTACAAGAT-----ACCGTCTCAATTCATCCTCGGAACCATATCACATCCCGGATCTGGTTCCG---AAGGATGAACCGGAT--ATGGACAGT TCCAATAAGATTTTCAATTCTTGAACAAAATCCATTTTTTGGAT-----TTCTTTCATCTATTCCATGACCGGAACAAAGGGGGATACGCGTTA-----CGCCACGATTTTTTTGAATCA---GAAGAGAGATTCCCAGAAATGGCGGATCTATTCACTCTATCAATAACCGAGCCG---GATCTGGTGTTCATAGGGGATTTGCCTTTTATATTGATTCCCTACGGGTTGGATCAAAAAGA-----TTCTTGAATGAGGTATTCAACTCCAGAGATGAATCGAAAAAGAAA-----TTGGTTCTACCTCCTCTTTTTTAT-----GAGGAGAATGAATCTTTTTTCTCGAAGGATCAGAAAAAATCGGTCCGG---ATCTACTGCGGGAATGAGTTGGAAGATCCCAAATAAAAACAGCGGTA TTTGCTAGCAACAACATAATGGAGGCAGTCAAT-----CAATATAGATTGATCCGAAATCTCCAATATTATGGG-----TACATAAGAAATGTATCGAATCGATTCTTTTTAATG-----AATAGATCCGATCGCAACTTCGAATATGGAATTCAA-----AGGGATCAAATAGGAAATGATACTCTGAATCATATACTATAATGAAATATACGATCAACCAACATTTATCGAATTTGAAAAG---AGTCAGAAGAAATGGTTTGATCCT-----CTTATTTCTCGAACTGAGAGATCCATGAATCAGGATCCTGATGCATATAGATACAAAGGGTCCGATGGGAGCAAGAATTC CAGGAACATTTGGAACATTTTCGTTTCTGAACAGAAGAATCCTTTTCAAGTAGTGCAAGTAGTGTTTCGATCAATTACGTATTCATCAATATTCGATTGATTGGTCCGAGGTTATCGACAAGAAGATTTGTCTAAGTCACTTCGTTTCTTTTTGTCCAAGTCA-----CTTCTCTTTTTGTCC-----AAGTCACTTCGTTTCTTTTTGTCCAAGTCACTTCCC TTTTTCTTTGTGAGTATCGGGAATATCCCCATTCATAGGTCCGAG---ATCCGCATCTAT--GAATTGAAAGGTCCGAATGATCAACTCTGCAATCAGTTGTTAGAATCCATAGGTGTTCAAATCGTTCAATTTGAAGAAATTGAAACCC-----TTCTTATTGGAT-----GATCATGATACTTC C---CAAAGACCAAATTTCTTGATCAATGGAGGAACAATATTACCATTTTTGTTCAAAA GATACCA---AAGCGG---GTGATTGACTCATTCCATACT-----AGAAAGAATCGCAGGAAA TCCTTTGATAACACGGATTCTATTTCTCAATGATATCCCACGATCGAGACAATTGGCTG AATCCCGTGAAAGCATTTTCATAGAAGTTCATTGATATCTTCTTTTTATAAAGCAAATCGA CTTCGATTCTTGAATGATCCACATCACTTCTGGTTCTAT-----TGTAACAAAAGATTCCCC TTTGATGTG-----GAAAAGACCCGTATCAATAATTATGAT-----CTTACATAT--GGACA ATTCCTCAATATCTTGTCCATTCGCAACAAA---ATCTTTTCTTTGTGCGTCCGGTAAA-----AAAGGATCTCTTTTTTTGGAG---AGAGAGACTCTTTCACCAATCGAGTCAAGGTATCTGACATCTTCATACCTAACGATTTCCACAAAAGTGGTGATGAAACG---TATAACTGTACA AATTGTACAAATCTTTCCATTTTCCAATTCGATCCGATCCATTCGTTTCGT-----GGAGCTAT TTA CTGATCGCAGACATTTCTGCAACACCTCTAACAGAGGAACAAATAGTCAATTTGGAAAAACTTATTGTGAGCCTCTTTCAGATATGAATCTATCTGATTCAGAAGGGAATAAC TTACATCAGTATCTCAGT-----TTCAATTCAAACATGGGTTTGATTCACACTCCATGTTCTGAGAAGTATTTACCA-----TCCGGAAAGAGGAAAAA-----CGGAGTCTTTGTCTAAAG-----AAATGCGTTGAGAAAGGGCAGATGTATAGAACCTTTCAACGAGATAG

TGCTTTTTCAAATCTCTCAAAATGGAATCTGTTCCAAACATATATGCCATGGTTCCTTAC  
TTCGACAGGGTGCAAATATCTCAATTCACCCTTTTAGATACTCTTTCAAACCCATTG----  
--CCGATACTGAGTAGTAGT--CAAAAATTTGTATCCATTTTTTCATGATATGATGCATGGAT  
CAGATATATCATGGCCAATTCCTCAGAAG-----ATTCTTCCACAATGGACT  
CTG---ATAAGTGAGATTTTCGAGTCAATGTTTACAGAAT-----CTTCTTCTGTCCGAAGAAA  
TGATTCATCGAAATAATGAGTCACCCGTTCCATTGATATGGGCACATCTGAGATCAACA  
AATGCTCGGGAGTTC---CTCTATTCCATCTTTTTCTTCTTCTTGTGCTGGATAT--CTCG  
TTCGTATACATCTTCTCTTTGTTTCCCGA-----GCCTCTAGTGAGTTACAGACAGAGTTAG  
AAAAGATCAAATCTTTGATGATTCCATCATACTGATGGAATTCGAAAACCTTCTGGATA  
GGTATCCTACATCTGAACTGAATCCTTTCTGGTTAAAGAATCTCTTTCTAGTTGTTCTGG  
AACAATTAGGAGATTCTCTGGGAGAAATACGGGGTTCTGCTTCTGGTGGCAACATGCTA  
TTGGGTGGTGGTCCC-----GCTTATGGG--GTCAAATCAATACGTTCTAAGAAGAA  
ATATTGGAAGATCAAT-----CTCATCGATCTTGTA---AGTATCATACCAAATCCCATCAAT  
CGAATCATTTTTTCGAGAAATACGAGACATCTAAGTCGTACAAGTAAAGAGATCTATTC  
ATTGATAAGAAAAAGAAAAACGTGAACGGTGATTGGATTGATGATAAAATAGAATTC  
TGGGTGCGAACAGTGATTGATTGATGATGAAGAAAGAGAATTCTTGGTTCAGTTCT  
CC-----GCCTAACGACA-----GAAAAAAGGATTGATCAAATCTATTGAGTCTGACT--C  
ATAGTGATCATTATCA-----AAGAATGACTCTGGTTATCAAATGATTGAACAACC  
GGGATCAATTTCTTACGATACTTAGTTGACATTCAT-----CAAAGGATCTAATGAATTA  
TGAGTTCAATAGATCCTGTTTAGCAGAAAGACGGATATTCCTTGCTCATTATCATACAAT  
CACTTAT-----TCACAAACCTTGTGTGGGGCTAATATTTTTTCATTCCCCATCTCCT-----CAT  
GGAAAACCCTTTTCGCTCCGCTTAGCCCTATCCCTTCT--AGAGGTATTTTAGTGATAG  
GTTCTATAGGAACTGGACGATCCTGTTGGTCAAATATCTAGCGACAACTCCTATGTTT  
CTTTCATTACGGTATTTCCGAACAAGTTCCCTGGATGACAAGCCTAAAGGTTATCCTATTG  
ATGAT-----ATCGAT--ATTGATGATAGTGACGATATTGAT-----GATAGT-----  
-----AATGATGACCTTGATATTGATAAGGAGCTGCTA  
ACTATGACGAATGTGCTA-----ACTATGTATATGACG-----ACGAAAATAGACCGATT  
TGATATCACCCTTCAATTCGAATTAGCAAAAGCAATGTCTCCTTGATAATATGGATTCC  
AAACATTCATGATCTGCATGTGAATGAGTCGAATTACTTATCCCTCGATCTATTAGAGAA  
CTATCTCTCC-----AGGGATTGTGAAAGATGTTCC---ACTGGAAAGATTCTTGTATTG  
CTTCGACTCATATTTCCCAAAAAGTGGATCCCGCTCTAATAGCTCCAAATAAATTAATA  
CATGCATTAAGATACGAAGGCTTCTTCTTCCACAACAATAAAGCACTTTTTTCATTCTTT  
CATATACTAGAGGATTTCACTTGGAAAAGAAGATGTTCCATACT-----AACGGATTCGGG  
TCCATAACCATGGGTTCCAATGCGCGAGATCTTGTAGCACTTATCAATGAGGCCCTATC  
AATTAGTATTACACAGAAGAAATCCATTATAGAACTAATACAATTAGATCAGCTCTTCA  
TAGAAAAACTTGGGATTTTCGA-----TCCAGATAAGATCGGTTTCAGGATCATGGGAT  
CCTTTTCTATCAGATAGGAAGGGCTGTTACACAAAATGTACTTCTAAGTAATTGCCCAT  
AGATCCTATATCTATCTATATGAAGAAGAAA-----TCATGTAAGGGAGGGGATTCTTATTT  
GTACAAATGGTACTTCGAACTTGAACGAGCATGAAGAAATTAACGATACTTCTTTATC  
TTTTGAGTTGTTCTGCCGGATCGGTCGCTCAAGATCTTTGGTCTTCATCC-----AGACAC  
GATGAAAAA---AATTGGATCACTTCTTATGGATTTCGTCGAGAACGATTCT--GATCTAGT  
TCATGGCCTATTAGAAGTAGAAGGCGCTCTGGCTCTGGCGGGATCCTCACGGACAGAA  
AAAGATTGCAGTCAGTTTGATAATAAT-----CGAGTGACATTACTTCTTCGGTCCGAACC  
AAGGAAT--CAGTTAGATATGATGCAAAATGGATCTTGTCTATCGTTGATCAGAGATTT

CTATATGAAAAA-----TACGAATCGGAGTTTGAAGAA---GGGGAAGGG-----GCCCTCGA  
TCCGCAA-----CAGATAGAGGAGGAT-----TTATTCAATCAC-----ATAGTTTGGG  
CTCCT-----AGAATATGGCGA-----TTTGATTGTATCGAAAGGCCACTGAA  
TTGGGATTTCCC---TATTGGACTGGGTCATTTCGG-----GGCAAATGGATCATTATCAT  
AAAGAGGGTGAGCTTCAAGAGAATGATTCGGAGTTCTTGCAGAGTGGAACCATGCAG  
TACCAGACACGAGATAGATCTTCCAAAGAACAAGGCTTTTTTCGAACAAGCCAATTCA  
TTTGGGACCCTGCGGATCCATCTTTTCCCTATTCAA---GATCAGCCCTCTGTCTCTGT  
GTTTTACGTCGAGAATTCTTTGCAGATGAAGAGATGTCAAAGGGGCTCATTGCTTCCC  
AAACAAATCCTCCTACATCTATATATAAACGCTGGTTCATC-----AAGAATACGCAAGAA  
AAGCACTTCGAATTGTTGATTCATCGCCAGAGATGGTTTAGAACC-----AATAGTTCAT  
TATCT-----AATGGATCTTCCGTTCTAAT-----ACTCTATCCGAGAGTTATCAGTATTTATC  
AAATCTGTTCCCTATCTAAC---GGAACGCTATTGGATCAAATGACAAAGACATTGTTGAG  
AAAGAGATGGCTTTTCCCGGATGAAATGAAACATTTGATT-----CATGTAACAGGAGAA  
AGATTCCCATTCTATGCCTAGATCTCGA---ATAAATGGAAATTTTATTGATAAGACCTC  
TTCAATTGTAGCCAATATTTTATTACGAATAATTCCGACAACCTCAGGAGAAAAAAGG  
CATTTACCTATTACAGAGATGGG-----ATGTCGGCTCAATCCGAAGGAAATTATGCAGAA  
GCTTTACAGAATTATTATGAAGCTACGCGACCAGAAATTGATCCCTATGATCGAAGTTAT  
ATACTCTATAACATAGGTCCTTATACACACAAGCAACGGAGAGCATACAAAGCTTTGGA  
ATATTATTTCCGAGCACTAGAACGAAATCCATTTTTACCACAAGCTTTTAATAATATGGC  
CGTGATCTGTCATTAC---CGGGGAGAACAGGCCATTCTACAAGGCGATTCCGAAATTGC  
GGAGGCTTGGTTCGATCAAGCTGCTGAGTATTGGAAACAAGCTATAGCGCTTACTCCA  
GGGAATTATATTGAAGCACATAATTGGTTAAAAATAACGAGGCGTTTTGAA-----ATGAA  
CTGGCGATCAGAACATATATGGATAGAACTTATAACGGGGTCTCGAAAAACAAGTAATT  
TTTGCTGGGCCTGTATCCTTTTTTTAGGTTCACTAGGATTCTTAGTGGTTGGAACCTCCA  
GTTATCTTGGTAAAAATCTGATATCCGTATTTCCGTCTCAGCAAATCCTTTTTTTCCCAC  
AAGGGATCGTGATGTCTTTCTATGGGATCGCAGGTCTATTCAATTAGTTCTTATTTGTGGT  
GCACAATTCATGGAATGTAGGTAGTGGTTATGACCGATTTCGATAGAAAAGAAGGGATA  
ATGTCCTTTTTTCGTTGGGGATTCCCTGGAAGAGATCGTCGCATCTTCCCTCGTTTTTTT  
CTGAAAGATATCCAATCAATCAGAATGGAGGTGAGAGAGGGTCTTTTTCCCTCGTCGTGT  
CCTTTATATGGAATCAAGGGTCAAGGAGCCATTCCCTTGACCCGTAATGATGAGGAT---  
TTGACTCCACGAGAAATTGAACAAAAGCTGCCGAATTGGCCTATTTCTTGCGCGTAC  
CCATTGAAGTATTT

>Lactuca

ATGAAAAGATGGTGGTTC AATTCGATGTTATTTCTAAGTAAATCAATGGGCAGTCTTGG  
TCCTATTGAAAATGCCAGTGAAAGTAAAGATCCGAATAGAAATGATACGGATAAAAACA  
TTCAGGGTTACAGTAATGTTGATCTTTTTTTGGCGTCAAGGACATTCGGAATTTTTTCT  
CTGATGATACTTTTTTAGTGAAAGATAGTAATGGGGACAGTTATTCTATATATTTGATAT  
TGAAAATCATATTTTTGAGATTGCCAATGATCAT-----CCTTTTTGTAGTGAAGTAAAG  
TTCTTTTTAT-----CGGAATCTAGTGATCTGAATAATGGATCTAAGAGTAAGAATCCCGA  
CCACGATCGTTACATGGATGATACTCAGTATACTTGGGAATAATCACATTAATAGTTGCATT  
GACAGTTATCTTACAG-----TACCAAATCTGTATTGATAATTACATTGTAAGTGGTAATGAC  
AATCCAGTAACAATTACATTTCTAGTTCCATTTCTAGT-----AATAGTAGTCAAACGAG  
GATATCACAACGAGTGATCAAAC TATAACCAGAAAGTTCTACTCATATGGGTGTAAC TCA  
ACAATACCGGCATTTGTGGGTTCAATGCGAAAATTGTTATGGATTAAATTATAAGAAATT

TTTTAAATCAAAGATGCATCTTTGTGAACAATGTGGATATCATTTGAAAATGAGTAGTTC  
AGATAGAATCGAACTTTTGATCGATCCGGGCACTTGGGAGCCTATGGATGAAGACATG  
GTCTCTCTGGATCCCATTGAATTCATTTCGGAGGAGGAGCCTTATAAAAATCGTATCGAT  
TCTTATCAAAGAAATACAGGATTAACCGAGGCTGTTCAAACAGGCAGAGGGCAACTAA  
ACGGTATTACCGTAGCAATTGGGGTTATGGATTTTCAGTTTATGGGAGGTAGTATGGGAT  
CCGTAGTCGGGGAGAAAATTACCGTTTGATTGAATACGCTACTAAAGAATTTCTACCT  
CTTATTATAGTGTGTGCTTCCGGAGGGGCACGCATGCAAGAAGGAAGTGTGAGCTTGA  
TGCAAATGGCTAAAATATCTTCTGCTTTATATGATTATCAATCAAATAAAAAGTTATTCTA  
TGTACCAATTCTTACATCTCCTACTACCGGTGGGGTGACAGCTAGTTTTGGTATGTTGGG  
GGATATCATTATTGCCGAACCCAATGCCTACATTGCCTTTGCGGGTAAAAGAGTAATTG  
AACAAACATTGAATAAAACAGTACCCGAGGGTTCACAAGCGGCCGAGTATTTATTCCA  
GAAAGGCTTATTCGATCTAATCGTACCACGTAATCCTTTAAAAAGCGTTCTGAGTGAGT  
TATTTCAACTACACACTTTCTTTCCTTTGAATCAAAT-----ATGGTAACCATTCAAGC  
CGACGAAATTAGTAATATTATCCGTGAACGTATTGAGCAATATAATAGAGAAGTAAAGAT  
TGTAATAACCGGTACCGTACTTCAAGTAGGTGATGGCATTGCTCGTATTCATGGTCTTGA  
TGAAGTAATGGCGGGTGAATTAGTAGAATTTGAAGAGGGTACAATAGGCATTGCTCTTA  
ATTTGGAATCAACTAATGTTGGTGTGTATTAATGGGTGATGGTTTGCTGATACAAGAA  
GGGAGTTCTGTAAAAGCAACAGGAAGAATTGCTCAGATACCAGTGAGTGAGGCCATT  
TGGGTCGTGTTATAAACGCGCTGGCTAAACCTATTGATGGTAGAGGTGAAATTCATCT  
TCTGAATATAGGTTAATTGAATCGCCCGCTCCAGGGATTATTTCTCGACGTTCTGTATAT  
GAGCCTCTTCAAACAGGGCTTATTGCTATTGATTCAATGATTCCGATAGGACGTGGTCA  
GCGCGAATTAATTATTGGGGACAGGCAGACCGGTAAAACAGCAGTAGCAACAGATACA  
ATTCTAAATCAACAAGGCAAAAATGTAATATGCGTTTATGTAGCTATTGGTCAAAAAGC  
ATCTTCTGTGGCTCAGGTAGTGACTAATTTCCAGGAAAGGGGCGCGATGGAATATACCA  
TTGTGGTAGCCGAAACGGCGGATTCCCCTGCTACATTACAATACCTCGCTCCTTATACA  
GGAGCAGCTCTGGCTGAATATTTTATGTACCGTGAACGACACACTTCAATCATTATGAT  
GATCCCTCTAAACAAGCCCAAGCTTATCGCCAAATGTCTCTTCTATTACGAAGACCGCC  
TGGGCGCGAAGCTTATCCAGGGGATGTTTTTTATTTACATTCACGCCTTTTGGAAAGAG  
CTGCTAAATTAAGTTCTCTTTTAGGTGAAGGAAGTATGACCGCTTTACCAATAGTGGA  
ACCAATCGGGAGATGTTTCGGCTTATATTCTACTAATGTCATTTTCGATTACTGATGGA  
CAAATATTCTTATCTGCTGATCTATTCAATGCTGGAATCCGACCCGCTATTAATGTGGG  
ATCTCTGTTTCCAGAGTGGGGTCTGCAGCTCAAATTAAGCTATGAAACAAGTAGCCG  
GTAATTAATAATTGGAATGGCACAATTCGCAGAATTAGAAGCTTTTGACAATTTGCT  
TCTGATCTCGATAAAGCTACTCAGAATCAATTGGCAAGAGGTCAACGCTTACGTGAATT  
GCTTAAACAATCCAATCCGCCCTCTCGGGGTAGAAGAACAGGTACTGACTATTTATA  
CCGGAACAAATGGTTATCTTGATTCATTAGAAATTGGACAGGTAAGGAAATTTCTTGT  
GAGTTACGTACTTACTTAAAAACCAATAAACCGCAGTTTCAAGAAATAATATCTTCTAC  
CAAGACATTCACCGAGGAAGCAGAAGCCATTTTGAAAGAAGCTATTAAGGAACAGAG  
GGAACGTTTTTATACTTCAGGAACAAGCAATGAGAATGAATCCTACTACTTCTGGTTCTG  
GGGTTACCACGCTTGACAAAAGACACTGGGGCGTATCGCCCAAATCATTGGTCCGGT  
ACTAGATGTAGCCTTTCCGCCAGGCAAAATGCCTAATATTTATAACGCTCTGGTAGTTAA  
GGGTCGAGATACTGCTGGTCAACCAATTAATGTGACTTGTGAGGTACAGCAATTATTAG  
GAAACAATCGAGTTAGGGCCGTAGCTATGAGTGCTACAGATGGTCTAACGAGAGGGAT  
GGACGTAATTGATACGGGAGCTCCACTAAGTGTCCGGTCCGGTGGAGCGACTCTCGGA

CGAATTTTCAACGTGCTTGGCGAGCCTGTTGATAATTTAGGTCCTGTAGATACTAGTAC  
AACATTTTCCTATTCATAGATCTGCGCCTGCCTTTATACAGTTAGATACAAAATTATCTATT  
TTTGAACCCGGAATTAAGTAGTAGATCTTTTAGCCCCTTATCGCCGTGGAGGAAAAT  
CGGACTATTCGGGGGAGCTGGCGTGGGTAAAACAGTACTCATTATGGAATTGATTAACA  
ATATTGCCAAAGCTCACGGAGGCGTATCTGTATTTGGCGGAGTCGGTGAACGGACTCG  
TGAAGGAAATGATCTTTACATGGAAATGAAAGAATCTGGAGTAATTAATGAAAAAATA  
TTCCAGAATCAAAGTAGCTCTAGTTTACGGTCAGATGAATGAACCGCCGGGAGCTCG  
TATGAGAGTTGGTTTACTGACCCTAACTATGGCGGAATATTTCCGAGATGTTAATGAAC  
AAGATGTACTTTTATTTATGACAATATCTTCCGTTTTGTCCAAGCAGGATCTGAAGTAT  
CCGCCTTGTGGGTAGAAATGCCTTCCGCTGTGGGTATCAACCTACCCTTAGTACCGAA  
ATGGGTTCTTTACAAGAAAGAATTACTTCTACCAAAGAAGGGTCCATAACTTCTATTCA  
AGCTGTTTATGTACCTGCAGATGATTTGACCGACCCTGCTCCTGCTACGACATTTGCAC  
ATTTAGATGCTACTACCGTACTATCAAGGGGATTAGCCGCCAAAGGTATCTATCCAGCA  
GTAGATCCTTTAGATTCAACGTCAACTATGCTACAACCCCGGATCGTTGGTGAAGAACA  
TTATGACACTGCACAAGAGGTTAAGCAAACCTTTACAACGTTACAAGA ACTTCAAGAT  
ATTATAGCTATTCTTGGATTGGACGAATTATCCGAAGAGGATCGTTTAAACCGTAGCAAG  
AGCGCGAAAATTGAGCGTTTCTTATCACAACTTTTTTTGTAGCAGAAGTATTTACGG  
GTTCTCCGGGAAAATATGTTGGTTTAGCAGAAACAATTAGAGGCTTTCAATTAATCCTT  
TCCGGAGAATTAGATGGTCTTCTGAACAGGCTTTTTATTTGGTAGGTAACATCGATGA  
AGCTACGGCGAAGGCTATGAACTTAGAAATGGAGAGCAATTTGAAGAAAATGACCTTA  
AATCTTTGTGTA CTGACCCCTAATCGAATAGTTTGGGATTCAGAAGTGAAAGAAATCAT  
TTTATCTACTAATAGTGGACAAATTGGCGTATTACCAAATCACGCTCCTATTGCCACATC  
AGTAGATATAGGTATTTGAGAATACGCCTTAACGACCAATGGCTAACGATGGCTCTGAT  
GGGCGGTTTTGCTAGAATAGGTAATAATGAGATCACTGTTTTAGTAAATGATGCAGAGA  
AAAGTGGTGACATTGATCCACAAGAAGCTCAGCAAACCTTTGAAATAGCGGAAGCTG  
CTTTGAGAAAAGCTGAAGGAAAGAGACAAACAATTGAGGCAAATCTAGCTCTCCGAC  
GGGCTAGGACACGGGTAGAGGCTATCAATGCGATTTCAATGAAAATGTAACCGATTCT  
TTCGTTTTCTTTGGGCCACTGGCCATCCGCCGGGAGTTTCGGGTTTAATACCGATATTTTA  
GCAACAAATCTAATAAATCTAAGTGTAGTGCTTGGGGTCTTGATCTTTTTTGGAAAGGG  
AGTGTTAAGTGATTTATTAGATAATCGAAAACAGAGAATCTTGAATACTATTAGAAATC  
AGAAGAATTGCGCGAGGGGGCCATCGAACAGCTGGAAAAGCCCGGGCTCGCTTACG  
GAAAGTAGAAATAGAAGCAGATCAGTTTCGCGTGAATGGATACTCTGAGATAGAGCGA  
GAAAAATTGAATTTGATTGATTCAACTTATAAGACTTTGGAACA ACTAGAAAATTACAA  
AAATGAACTATAAATTTTGAACAACAAAAGCGAGTAATCAAGTCCGACAACGGGTT  
TTCCAACAAGCCTTACAAGGAGCTCTAGGAACTCTGAATAGTTGTTTAAACAGCGAGT  
TACATTTACGTA CTATCAGTGCCAATATTGGCATATTGGGGGCGATGAAAGAAATAACG  
GATATGAATCCACTGATTTCTGCCGCTTCCGTTATTGCTGCTGGATTGGCTGTAGGGCTT  
GCTTCTATTGGACCTGGAGTTGGTCAAGGTA CTGCTGCGGGTCAAGCTGTAGAAGGTA  
TCGCGAGACAGCCCGAGGCGGAGGGAAAATACGAGGTACTTTATTGCTTAGTCTAGC  
TTTTATGGAAGCTTTAACCATTTATGGCCTGGTTGTAGCATTAGCACTTTTATTGCGAAT  
CCTTTTGTATGAATGTTCTATCATGTTCCATCAACACACTAAATGGGTTATACGATATAT  
CCGGTGTGGAAGTAGGCCAACATTTTTATTGGAAAATCGGGGTTTCCAAGTCCACGG  
CCAAGTACTTATTACTTCTTGGGTTGTAATTGCTATCTTATTAGCTTCAGCCACTCTAGCC  
GTTCCGAACCCACAAACCATTCCGACCAGCGGTCAGAATTTCTTCAATATGTCCTTGA

ATTTATTTCGAGATGTGAGTAAAACCTCAAATTGGAGAAGAATATGGTCCTTGGGTTCCCTT  
TTATTGGAACCTATGTTTCTATTTATTTTTGTTTCTAATTGGTCAGGCGCCCTTTTACCTTG  
GAAAATCATACAATTACCTCATGGGGAGTTAGCCGCCCCACGAATGATATAAATACTA  
CTGTTGCTTTGGCTTTACTCACATCAGTGGCATATTTCTATGCGGGTCTTAGCAAAAAA  
GGATTAGGTTATTTTCGGTAAATATATTCAACCAACTCCAATCTTTTACCTATTAACATCT  
TAGAAGATTTACAAAAGCCCCTATCACTTAGTTTTTCGACTTTTCGGAAATATATTAGCCG  
ATGAATTAGTAGTTGTTGTTCTTGTTCCTTTAGTACCTTCAGTGGTTCCTATCCCTGTCAT  
GTTCCCTTGGATTATTTACAAGTGGTATTCAAGCTCTATTTTTTGCAACTTTAGCTGCGGC  
TTATATAGGTGAATCCATGGAGGGCCACCATATGATATTTTCAACTTTAGAGCATATATTC  
ACTCATATTTCCTTTTCAATTGTTTCAATTGTAATTATAATTCATTTGATAACCTTATTGGG  
CAATGAAATCATAAAACCATATGATTTCGTCAGAAAAGGGGATGATAGTTACTTTTTTATG  
TCTAACAGGATTATTAATCACTCGTTGGATTTATTCGGGCCATTTCCCACTAAGTGATTTA  
TATGAATCATTAATTTTTCTTTCATGGAGTTTCTCCCTTATTCATATAGTCCCTTAT-----AT  
AAGAAAAAATTATTTAACCAGAAATAACTGCCTCAAGTACTATTTTTTACCCAGGGCTTTG  
CTACTTCGGGTCTTTTAACTGAAATACGTAAACCCACAATATTAGTACCTGCTCTACAAT  
CGGAGTGGTTAATAATGCATGTAAGTATGATGATATTGAGCTATGCGGCTCTTCTTTGTG  
GATCCTTATTATCAGTAGCACTTCTAGTCAATTACATTTAGAAAAG-----ATTTTTTATAGTT  
ATAAAGAAATCCAATACAAGAATGAAAGAAACAATATTTTTAAAAAAAATTAC-----G  
CTAAGAATTATTACAAGGCCCAATTGATTCAACAATTAGATTATTGGAGTTATCGCGTGA  
TTAGCCTAGGATTTATATTTTTAACCATAGGTATTCTTTCAGGAGCAGTATGGGCTAATG  
AAGCATGGGGATCATATTGGAGTTGGGATCCAAAGGAAACTTGGGCCTTTATTACTTGG  
ATCGTATTTGCAATTTATTTGCATATTCGAACAAATAAAAATTTTCAGGGGGCAAATTCC  
GCAATTGTGGCGACTCTAGGCTTTCTTATAATTTGGATATGCTATTTTGGGGTAAATCTAT  
TAGGAATAGGGCTACATAGTTATGGTTCATTTACGTAAACCATGGAAAAAAGAAAGCA  
TTCACTCCTCTTTTATATCTTGCATCTATAATATTTTTGCCCTGGTGGATTTCTCTCTCATT  
TCAAAAAAGTATGGAATCCTGGGTACTAATTGGTGAATACTAGGCAATCCGAACCTT  
TTTTGAATGATATTGAAGAAAAGAGTATTCTAGAAAATTCATAGAATTAGAGGAACTC  
CTCTTCTTAGAGGAAATGATTAAGGAATACTCGGAGACACATCTACAAAACCTTCGTAT  
A---ATTCACAAAGAAACAATCCAATTAATCAAGATACACAACGAGGGTCGTATTCATAC  
GATTTTGCACCTTCTCGACAAATATAATCTGTTTCATTATTCTAAGTGGTATTCTCTTTTG  
GGTAATAAAGAACTTGTATTCTTAACTCTTGGGTTTCAGGAATTCCTATATACTTAAAGT  
GACACAATAAAAGCTTTTTCTCTTCTTTTATTAACTGATTTATGTATCGGATTTCAATTCGC  
CCCATGGTTGGGAACTGATGATTGGCTTTGTCTACAAGGATTTTGGATTTGTTTATAATG  
AGCAAATTATATCTGGCCTTGTTCCTTCCACTTTTCCAGTCATTCTAGATACAATTTTCAAATA  
TTGGATTTTCCGTTATTTAAATCGCGTATCTCCGTCACCTGTAGTGATTTATCATTCAATG  
AATGACATGCCTATTGGTGTTCAAAAGTACCTTTTCGAAGTCCTGGAGAGGAAGATG  
CATCTTGGGTTGACATATAACCGACTTTATCGAGAAAGATTACTTTTTTTAGGTCAAG  
AGGTTGATAGCGAGATCTCGAATCAACTTATTGGTCTTATGATATATCTCAGTATCGAGG  
ATGATACCAAAGATCTGTATTTGTTTATAAACTCTCCTGGCGGATGGGTAATACCGGGGG  
TGGCTCTTTATGATACTATGCAATTTGTGCAACCAGATGTACATACAATATGCATGGGAT  
CAGCCGCTTCAATGGGATCTTTTATCCTGGTTCGGAGGAGAAATTACCAAACGTCTAGCA  
TTCCCTCACGCTAGGGTAATGATCCATCAACCTGCTGGTCTTTTTTCTGAAGTAGCAAC  
GGGAGAATTCATCCTGGAAGTGGGAGAACTGCTGAAACTACGTGAAACCCTGACAAG  
GGTTTATGTACAAAGAACGGGCAAACCCTATGGGTTGTCTCCGAAGACATGGAAAGA

GATGTTTTTATGTCAGCAACAGAGGCCCAAGCTTATGGAATTGTTGATCTTG TAGCGGT  
TGAAATGAAAGAACAAAAATGGATTCATGAAGGTTTAATTACTGAATCGCTTCCCAAC  
GGCATGTTCCGGGTTTCGTTTAGATAATGAAGATATGATTCTAGGTTATGTTTCAGGAAAG  
ATCCGACGTAGTTTTATACGGATACTGCCAGGAGATAGAGTCAA AATTGAAGTAAGTCG  
TTATGATTCAACCAGAGGTCGTATAATTTATCGACTCCGAAACAAAGATTTCGAAAGATA  
TGGAGAAATTCCAAAGCTATTTAGGG---GATAGATCTCAACAACACCACTTCTTATATCC  
ACTTATCTTTCAGGAGTATATTTATGTACTTGCTCATGATCATGGTTTAGCAGGTTATGAC  
AATAATCCAGCTTACTAATTGTGAAACGTTTAATCAATCGAATGTATCAACAGAATCAT  
TTGATTCTTTCGGTTAATAATTCTAAACAGACTCCATTTTTGGGGAAGAATTTTTATTTCG  
CAAGTAATGTCCGAGGTCTCTTCAATCATTATGGAAATTCCATTGTCTCTGCGATTAATA  
TCTTACCTAGTAGTCAAATCCGATAATTTACGATCAATTCATTCAATATTTTCTTTTTTAG  
AGGACAACTTTTACATTTAAATTATGTATTAGATATACTAATACCTTACCCAGCCCATCT  
GGAAATCTTGGTTCAGGCTCTTCGCTATTGGATAAAAGATGCTTCCCTCTTTCGATTTATT  
AAGATTCTTCTCCATGAGTGT CATAATTGGGATAGTCTGATTACTAAAGCCAGTTCTTC  
TTTTTCAAACACAGACTATTCTTCTCCTATATACTTCTCATTATGTGAATATGAATCC  
GGCTTCCCTCTTCTCCGTAACCAATCTTCTCACTTACGATCAACATCTTCTGGAGCCCTT  
ATTGAACGAATATATTTCTATGGAAAATAGATCATCTTGCAGAAGTCTTTGCCAGGGCT  
TTAATTTATGGTTGTTCAAAGATCCTTTCATGCATTATGTTAGGTATCAAGGAAAATCCA  
TTCTTGGTTCAAAAGGGACGTTTCTTTTGATGAATAAATGGAAATATTACTTTGTCAATT  
TCTGGAAATCTTATTTTTACCTGTGGTCTCAACCAGGAAGGATTTATATAAACCAATTAT  
CCAATCATTCCCTTGACTTTCTGGGTATCGTTCAAGTGTGCGGCTAAAGCCTTCAATG  
GTACGCAGTCAAATGCTAGAAAATGCATTTATAATTGAAAATGCTATT-----AAGAAGTT  
TGAGACTATTGTTCCAATTATGCCTTTGATTGGATCATTGGCTAAATCTAAATTTTGTAAT  
GCATTGGGGCATCCTATTGGTAAGGCGATTTGGGCCGATTTCTCAGATTCTGATATTATT  
GACCGCTTTGGGCGTATATACAGAAATCTTCTCATTATCATAGTGGATCTTCAAAAAAA  
AAGAGTTTGTATCGAGTAAAGTATATACTTCGACTTTCTTGTGCTAGA ACTTTAGCTCGT  
AAGCATAAAAGCACTGTACGTGCTTTTTTTGAAAAGATTTCGGCTCGGAATTATTAGAAGA  
ATTCTTTACGGAAGAAGAACAAGTTTTTTCCCTGACCTTTCCAAGGCGGATTTGGTATT  
TGGATATTATTTGTATCAATGATTTGGCCAATCATGAAATGATAATTGAT---ACAACAGAA  
GTACAA---GCTATCAATCTTTTTCTATATTGGAATCC---TTAAAAGAGGTCTATGGGATC  
ATATGGATGCTTATTCCTATTTTTACTCTTGTATTAGGAATCACAATAGGTGTACTAGTAA  
TTGTTTGGTTAGAAAGAGAAATATCTGCGGGTATACAACAACGTATTGGTCCTGAATAC  
GCAGGACCTTTGGGAATTCTCCAAGCTCTAGCAGATGGTACCAAATTACTTTTCAAAGA  
GAATCTTCTCCATCTAGAGGAGATACTCGTTTATT CAGTATTGGACCATCTATAGCAGT  
TATATCCATTTTATTAAGTTATTTAGTAATTCCTTTTAGTTATCACCTTGTTCTAGCCGATC  
TCAGTATCGGTGTTTTTTTTATGGATTGCTATTTCAAGCATTGCTCCTGTGCGCCTTCTTAT  
GTCAGGATATGGCTCAAATAATAAATATTCTTTTTTAGGTGGTCTACGAGCTGCTGCTCA  
ATCAATTAGTTACGAAATACCATTA ACTCTATGTGTGTTATCAATATCTCTACTATCTAAC  
AGTTCAAGTACAGTTGATATAGTTGAAGCGCAGTCAA AATATGGTTTTTTGGGGATGGAA  
TTTGTGGCGTCAACCTATAGGCTTCTAGTTTTTCTAATTTCTTCCCTAGCCGAGTGTGA  
ACGATTACCCTTTGATTTACCAGAAGCAGAAGAAG AATAGTAGCAGGTATCAAACC  
GAATATTCCGGTATAAAATTTGGTTTATTTTACGTTGCTTCATATTTAAATCTACTAGTTTC  
TTCATTATTTGTAACAGTTCTTTACTTGGGGGGTTGGAATCTTTCTATTCCGTACATATTT  
GTTCCCGAGGTTTTTTGAAATTACTAAAAGGGGTAGAGTCTTTGGAACAATAATTGGTAT



CTTTATTACATTAGCTAAAACCTTATTTGTTCTTGTTTCATTCCCTATCGCAACAAGATGGACT  
TTACCGAGACTGAGAATGGACCAATTATTAATCTTGGATGGAAATTTCTTTTACCTATT  
TCTCTAGGTAATCTATTATTAACAACCTGTTCCCAACTTATTTCACTGATGATCTGGCATG  
TACAGAATGAAAACCTTCACTCTCGATTCTACGAGAATTTTTATGAAAGCCTTTCATTTGC  
TTCTCTTCGATGGAAGTTTGATTTTCCCAGAATGTATCCTAATTTTTGGCCTAATTCTTCT  
TCTGATGATCGATTCAACCTCTGATCAAAAAGATATACCTTGGTTATATTTTCATCTCTTCA  
ACAAGTTTAGTAATGAGCATAACGTCCCTATTGTTCCGATGGAGAGAGGAACCTATGAT  
TAGCTTTTCGGGAAATTTCCAAACGAACAATTTCAACGAAATCTTTCAATTTCTTATTTT  
ACTATGTTCAACTCTATGTATTCCCTCTATCCGTAGAGTACATTGAATGTACAGAAATGGC  
TATAACAGAGTTTCTCTTATTTCGTATTAACAGCTACTATAGGAGGAATGTTTTTATGTGGT  
GCTAACGATTTAATAACTATCTTTGTAGCTCCAGAATGTTTCAGTTTATGCTCCTACCTAT  
TATCTGGATATACCAAGAAAGATGTACGGTCTAATGAGGCTACTATGAAATATTTACTCA  
TGGGTGGGGCAAGCTCTTCTATTCTGGTTCATGGTTTCTCTTGGCTATATGGTTCATCCG  
GGGGAGAGATCGAGCTTCAAGAAATAGTGAATGGTCTTATCAATACACAAATGTATAAC  
TCCCCAGGAATTTCAATTGCGCTCATATTCATCACTGTAGGAATTGGGTTCAAGCTTCC  
CCAGCCCCTTCTCATCAATGGACTCCTGACGTATACGAAGGATCTCCCACTCCAGTCGT  
TGCTTTTCTTCTGTTACTTCGAAAGTAGCTGCTTCAGCTTCAGCCACTCGAATTTTCGA  
TATTCCTTTTTATTTCTCATCAAACGAATGGCATCTTCTTCTGGAAATCCTAGCTATTCTT  
AGCATGATATTGGGGAATCTCATTGCTATTACTCAAACAAGCATGAAACGTATGCTTGCA  
TATTCGTCCATAGGTCAAATCGGATATGTAATTATTGGAATAATTGTTGGAGACTCAAAT  
GATGGATATGCAAGCATGATAACTTATATGTTGTTCTATATCTCCATGAATCTAGGAACCT  
TTGCTTGCAATTGTCTTATTTGGTCTACGTACCGGAACTGAGAACATTCGAGATTATGCAG  
GATTATACACGAAAGATCCTTTTTTGGCTCTCTCTTTAGCCCTATGTCTCTTATCCCTAGG  
AGGTCTTCCCTCCACTAGCAGGTTTTTTCGGAAAACCTCTATTTATTCTGGTGTGGATGGC  
AGGCAGGCCTATATTTCTTGGTTTTAATAGGACTCCTTACAAGCGTTGTTTCTATCTACTA  
TTATCTAAAATAATCAAGTTATTAATGACTGGACGAAACCAAGAAATAACCCCTCACG  
TGCGAAATTATAGAAGATCCCCTTAAAGATCAAACAATTCCATCGAATTGAGTATGATTG  
TATGTGTGATAGCATCTACTATAACCAGGAATATCAATGAATCCGATTATTGCAATTGCTCA  
GGATACCCTTTTTATGTTTCTGCTTTATGAATATGATATTTTTTGGGCATTTCTAATCATAT  
CAAGTCTTATTCCTATTTTGGTATTTTTCATTTCCGGATTTTTAGCTCCGATTAGCAAAGG  
ACCGGAGAAACTTTCTAGTTATGAATCGGGTATAGAACCAATAGGCGACGCTTGGTTAC  
AATTTAGAATCCGCTATTATATGTTTGTCTAGTTTTTGTGTTTTTGTGTTGAAACGGT  
TTTTCTTTATCCATGGGCAATGAGTTTTGATGTATTAGGTGTATCTGTATTTGTAGAAGCT  
TTAATTTTCGTGCTTATCTTAATTGTTGGTTTAGTTTATGCATGGCGAAAGGGGGCATTG  
GAATGGTCTACGAACAAATTTCCCTGGTTAACAATAATTGTAGTTTTACCAATATTTGCG  
GGTTCCTTTATTTTATTTCTTCCACATAAAGGAAATAGGGTCATTAGGTGGTATACTATAT  
GTATATGCATGTTAGAACTTCTTCTAACAACCTATGCATTCTGTTATCATTTTCAATTGGA  
CGATCCATTAATCCAACCTAGTAGAGGATTATAAATGGATCAATTTTTTTGATTTCCGTTG  
GAAATTAGGAATAGATGGACTGTCTATAGGACCCGTTTTTATTAACAGGATTTATCACTAC  
TTAGCTACTTTAGCAGCCTGGCCTGTTACTCGGGATTCTCGATTATTCCATTTCTTGATG  
TTAGCAATGTACAGTGGTCAAATAGGATCATTTTCTTCTCGGGACCTTTTACTTTTTTTTC  
ATCATGTGGGAATTAGAATTAATCCGGTTTATCTACTTCTATCCATGTGGGGAGGAAAG  
AAACGTCTCTACTCAGCCACAAAATTTATTTTATACACGGCGGGAGGTTCCATTTTTCTC  
TTAATGGGAGTTCTGGGTGTCGGTTTATCTGGTCTAATGAACCAACATTAATTTTGAA

ACATCAGTGAATCAATCGTATCCTGTGGCTTTGGAAATAATATTCTATATTGGATTTTTTA  
TTGCTTTTGCTGTCAAATTACCGATTCTACCCCTACATACATGGTTACCAGATACCCACG  
GAGAGGCACATTACAGTACTTGTATGCTTCTAGCCGGAATTTATTAATAAATGGGAGCG  
TATGGATTGATTCCGATTAATATGGAATTATTACCACACGCTCATTCTATATTTCTCCTTG  
GTTGATGATAGTAGGTACAATACAAATAATCTATGCAGCTTCAACATCTCCCGCCAAC  
GCAATTTAAAAAAGAATAGCCTATTCCCTCCGTATCTCATATGGGTTTCATACTTATAG  
GAATTGCTTCTATAACCGATACGGGACTCAATGGAGCTATTTTACAAATAATCTCTCATG  
GGTTTATTGGTGTGCTGCACTTTTTTTCTTGGCAGGAACGAGTTATGATAGAATACGTCTTG  
TTTATCTCGACCAAATGGGCGGAGTAGCTATCCCATGCCAAAATATTTACGATGTTCA  
GTAGTTTTTCCATGGCTTCGCTTGCATTACCGGGTATGAGTGGTTTTGTTGCAGAAGTTA  
TAGTCTTTTTAGGAATAATTACCAGCCAAAATATCTTTTAATGCCTAAAATTGCCATCA  
CTTTTGTAATGGCAATTGGAATGATATTAACCTCTATTTATTCATTATCTATGTTACGCCA  
GATGTTCTATGGATATAAGTTATTTAATACTCCAAACGCTTATGTTTTTGATTCTGGACCG  
CGCGAGTTATTTGTTTCGATCTCCATTTTTCTACCTGTAATAGGTATTGGTATGTATCCGG  
ATTTTGTTCTTTCCTACTATCAGTTGACAAGGTTGAAGGTATTCTATCTAATTATTTTTATAG  
AATGATGCTCGAACATGTACTTGTTTTGAGTGCCTATTTATTTTCTGTGCGGTCTATATGGA  
TTGATTACAAGTCGAAATATGGTTAGGGCTCTTATGTGTCTTGAACCTATATTAATGCG  
GTTAATCTCAATTTTGTAACATTTTCGGATTTTTTTGATAGTCGTCAATTAAGGAGCC  
ATTTTCTCCATTTTTGTTATAGCTATTGCAGCTGCTGAAGCTGCTATTGGACTCGCTATTG  
TTTCATCAATTTATCGTAACAGAAAATCAACTCGTATAAATCAATCGAATTTGTTGAATA  
AGATGGAACAGACATATCAATATGCGTGGATAATACCTTTCCTTCCACTTCCAGTTCCTA  
TGTTAATAGGGTTGGGACTTCTTCTTTTTCCGACGGCAACAAAAGTCTTCGTGCGTATG  
TGGTCTTTTCAGAGTGTTTTATTGTTAAGTATAGTCATGATTTTTTCCATGAATCTGTCTA  
TTCAGCAAATAAATAGCAGTTATGTCTATCAATATGTATGGTCTTGGATTATCAATAATGA  
TTTTTCTTTAGAATTCGGATACTTGATCGACCCGCTTACTTCTATTATGTTAATATTAATCA  
CTACTGTTGGAATTATGGTTCCTATTTATAGTGATAATTATATGTCTCATGACCACGGATAT  
TTGAGATTTTTTGCTTATATGAGTTTTTTTCAGTACTTCCATGTTGGGATTAGTTACTAGTT  
CAAATTTGATACAAATTTATATTTTTTTGGGAATTAGTTGGAATATGTTTCGTATCTATTAATA  
GGATTTTGGTTCACACGACCTGTTGCAGCAAAGGCTTGTCAAAGGCGTTTGTAACCTA  
ATCGTGTGGCGATTTTGGTTTATTATTAGGCATTTTAGGGTTTTATTGGATAACGGGGA  
GTTTCGAATTTTCGTGATTTATTCCAAATCTTCAATAACAATGAGGTCAATTTTTTATTTGT  
TACTTTGTGTGCTATTCTATTATTTGCCGGTGCATTGCGAAATCTGCACAATTTCCCCTT  
CATGTATGGTTACCTGATGCAATGGAAGGGCCAACCTCCTATTTTCGGCCCTTATACATGCT  
GCTACAATGGTAGCAGCGGGAATTTTTCTTGTAGCTCGACTTATGCCTCTTTTCATAGTT  
ATACCCACATAATGAATTTTATCTCTTTGATAGGGATAATAACAGTTTTTTTTAGGAGCTA  
CTTTAGCTCTTGCTCAAAAAGACATTAAGAGGGGTTTAGCTTATTCCACAATGTCTCAA  
CTGGGTTATATGATGTTAGCTCTAGGTATGGGGTCTTATCGCAGTGCTTTATTTCAATTTGA  
TFACTCATGCTTATTCCAAAGCATTATTGTTTTTAGGATCGGGATCTGTTATTCATTCAAT  
GGAAACTCTTGTGATATTGTCCAAAAAAGTCAGAATATGGTGCTTATGGGAGGTT  
TAACAAAACATCTACCAATTACTAAAAATCTTTTTTATTAGGTACACTTTCTCTTTGCG  
GTATTCCACCCTTGCTTGTTTTTGGTCCAAAGATGAAATTCTTAATGATAGTTGGTTGT  
ATTCACCTATTTTTGGAATAATAGCTTGGTCTACGGCGGGATTAACCGCATTTTATATGTG  
TCGGATCTATTTACTTACTTTTTGAAGGACATTTAAACGTTCATTTTCAAATTATAGTGG  
AAAAGGAATACCCCTTCTATTCAATATCTCTATGGGGTAAAGAAGGTTCGAAAATAA

GTAACAAA---TTGGTAACTTTATTAAAAATGAAGTTTTTTTCATTTGGCAATACCAAGAC  
GTATTCGTATCCTTATGAATCGGATAATACTATGTTATCCCAATACTTATATTGATTCTATT  
TACTTTGTTTCGTTGGATTCTTAGGAATTCCTTTC---GTTGATATATTATCCAAATGGTTAA  
ACCCGTCTATAAATCTTTTACATCAAAATTCAAAT---TCGATAGATTGGTATGAATTTAGT  
AAAGATGCATTTTTTTTCAGTCAGTATAGCCTCTTTCGGAATATTTATAGCCTTTTTTTTAT  
ATAAACCTGTTTATTCACTTTTTCAAATTTGGAGTTCCTTAATACATTTGTTATTTTTTAT  
GACAAAATAAAAAATTCTATATATGATTGGTCATATAATCGGGGTTACATAGATGCCTTTT  
ATGGAAGATTCTTAACTGCGGGGATTAGAAAATTGGCCAACCTTTGCTCATTTTTTTTGATA  
GACGAATAATTGATGCAATTCCAAATGGAGTTGGTCTTATGAGTTTCTTTGGAGCAGAG  
GTTATTAATCGGTAGGGGGTGGG---CGTATTTCTTCTTATCTGTTCTTTTATTTTTCTTAT  
GTAGCAATTTTTTTTATTAATTTACTATATGGATTTACCTGGACTAATACATGATTTTCTTTT  
AGTCTTTCTGGGATTGGGTCTTATATTAGGGGGTCTGGGAGTAGTATTACTTCCCAATCC  
TATTTATCTGCCTTTTCGTTGGGATTGGTTTTTTGTTTGTATATCTTTATTCTATATTCTATC  
AAACTCCCATTTTGTAGCTGCTGCGCAGCTCCTTATTTACGTAGGAGCCATAAATGTTTT  
AATAATTTTTGCTGTGATGTTTATAAATGGTTCAGAATATCCAAAGATTTCATCTTTGG  
ACCGTTGGAGATGGAATAACTTCGGTGGTATGTACAAGTCTTTTTGTTTCACTAATTACT  
ACTATTCCAGATACGTCATGGTACGGAATTATTTGGACTACAAAAGCAAACCAGATTAT  
AGAACAAGATTGATAAGTAATAGTCAACAAATTGGGATTCATTTATCAACAGATTTTTT  
TCTCCGTTTGAATTCATTTCAATAATTCTTTTAGTTGCGTTAATCGGCGCAATTGCTGTA  
GCTCGTCAAATGACTGGACCAGCTACAAGAAAAGACCTCATGATAGTCAATATGGGAC  
CTCACCACCCATCAATGCACGGTGTCTTCGACTCATTGTTACTCTAGATGGTGAAGAT  
GTTATTGACTGTGAACCAATATTGGGTATTTACACAGAGGTATGGAAAAAATTGCAGA  
AAATCGAACAATTATACAATTTGCCTTATGTAACACGTTGGGATTATTTAGCTACTATG  
TTCACAGAAGCAATAACTGTAAATGCACCAGAGCAATTAGGCAATATTCAAGTCCCTAA  
AAGGGCCAGTTATATCAGAGTCATTATGTTGGAGTTAAGTCGTATAGCTTCGCATTTGTT  
ATGGCTTGGCCCTTTTATGGCAGATATTGGGGCGCAGACTCCTTTCTTCTATATTTTTCG  
AGAAAGAGAATTGATATATGACCTATTCGAAGCTGCCACCGGTATGCGAATGATGCACA  
ATTTTTTTCGTATTGGTGGAAATCGCTGCTGATTTACCTCATGGGTGGATAGATAAATGTT  
TGGATTTTTGCGATTATTTTTTAACAGGAATTGCTGAATATCAGAAGCTTATTACACGGA  
ATCCCATTTTTTTAGAACGAGTTGAAGGAGTAGGCATTATTGGTGGAGAGGAAGCAATA  
AATTGGGGTTTGTGCGGACCCATGCTACGAGCTTCCGGAATACAATGGGATCTTCGTAA  
AGTTGATCATTATGAGTGTTACGACGAATTTGATTGGGAAGTCCAATGGCAAAACGAA  
GGGGATTCATTAGCTCGTTATTTAGTACGAATCAGTGAATGACAGAATCCATAAAAATT  
ATTCAACAGGCCCTAGAAGGAATTCGGGAGGGCCCTATGAAAATTTAGAAATCCGCC  
GCTTTGATCGAGTAAAAGATACTGTATGGAATGAGTTTGACTATCGATTCAATTAGTAAAA  
AACCTTCTCCGACTTTTGAATTGTGCAAGCAAGAACTTTATGCGAGAGTCGAAGCACC  
AAAGGGAGAATTGGGAATTTTTCTGATAGGAGATAAGGGTGTTTTTCTTGGCGCTATA  
AAATTGCCCCACCGGGTTTATTAATTTGCAAATTTCTCCTCAGTTAGTTAAAAGAATG  
AAATTGGCTGATATTATGACGATACTAGGTAGTATAGATATCATTATGGGAGAAGTTGAT  
CGTATGTTCCCTATGGTAACTGAGTTCATGAATTATGGCCAACAAACAGTACGAGCCGC  
AAGGTATATTGGTCAAGGTTTCATGATTACCTTATCACACGCGAATCGTTTACCTGTAAC  
TATTAATAACCCCTACGAAAAATTGATCACATCCGAGCGTTTCCGCGGACGAATCCACT  
TTGAATTTGATAAATGCATTGCTTGTGAAGTATGTGTTTCGTGTATGTCTATAGATTTGCC  
CGTTGTTGATTGGAAATTGGAACTGATATTAGAAAGAAACGATTGCTTAATTACAGTA

TTGATTTCCGGAATATGTATATTTTGTGGTAATTGCGTTGAGTATTGTCCAACAAATTGTTT  
ATCAATGACTGAAGAATATGAACTTTCTACTTATGATCGTCACGAATTGAATTATAATCA  
AATTGCTTTGGGTCGTTTACCAATGTCAGTAATTGATGATTACACAATTCGAACAATTTT  
CAATTTG-----ATGCAGGGTCATTTGTCTGCTTGGCTAG  
TTAAGCATGGGCTAATTCATAGATCTTTGGGCTTTGATTACCAAGGAATAGAGACTTTAC  
AAATCAAACCGGGGATTGGCATTCCATTGCTGTCATTTTATATGTATATGGTTACAATTA  
TCTCCGCTCCCAATGTGCCTATGATGTAGCACCAGGCGGACTATTAGCTAGTGTGTATCA  
TCTTACTAGAATAGAGTATGGCGCGGATCAACCAGAAGAGGTATGCATAAAAAGTATTTG  
CCCCGAGGAGGGATCCTAGAAATCCGTCTGTTTTTTGGGTTTGGAAAAGTGTGGATTTT  
CAAGAACGGGAATCCTATGATATGTTGGGAATCTCTTATGATAATCATCCCCGTTTGGAA  
CGTATATTAATGCCTGAAAGTTGGATAGGATGGCCTTTACGTAAGGATTATATTGCTCCC  
AATTTTTATGAAATACAAGATGCTCAT-----  
-----AT  
GAATTCCATTGAGTTTCCCTTATTTGATCGAACAACCCAAAATTCAGTTATTTCAACTAC  
ATTAAATGATCTTTCAAATTGGTCAAGACTCTCTAGTTTATGGCCGCTTCTCTATGGTAC  
CAGTTGTTGCTTCATTGAATTTGCTTCACTAATAGGCTCACGATTCGACTTTGATCGTTA  
TGGACTAGTACCAAGGTCGAGTCCTAGACAAGCGGACCTTATTTAACAGCCGGAACA  
GTAACAATGAAAATGGCCCCTTCTTAGTGAGATTATACGAGCAAATGCCTGAACCAA  
AATATGTTATTGCTATGGGAGCATGTACAATTACAGGGGGGATGTTTCAAGTACCGATTCTT  
ATAGTACTGTTTCGTGGAGTCGATAAGCTAATTCCTGTGGATGTATATTTGCCGGGCTGTC  
CACCTAAACCAGAAGCAATTATAGATGCTATAACAAAACCTTCGTAAGAAAATATCTCGA  
GAAATCTATCCAGATAGAACTATGTCTCAGCGAGAGAATCGTTGTTTTACTACCAATCA  
CAAGTTTCAGGTTGGGCATAGTATTCATACTGGAAATTATGATCAAGGATTCCTTTATCA  
ACCGACATCTACTTCAGAGATTCCTCCTGAAACATTTTTCAAATACAAAAGTTCAGTAT  
CTTCCCCCGAATTAGTAAATATGCAAACCTAGAAATAATTTTTCTTGGATAAAGGAACAG  
ATTACTCGATCTATTTCCGTATCGCTCATGATATATATCATAACTCGTGCATCCATTTCAA  
TGCATATCCCATTTTTGCGCAGAAGGGCTATGAAAATCCACGAGAAGCGACTGGACGTA  
TTGTATGCGCCAATTGCCATTTAGCTAATAAACAGTGGATATTGAGGTTCCGCAAACG  
GTACTTCCCGATACTGTATTTGAAGCAGTTGTTTCGAATTCCTTATGATATGCAACTGAAA  
CAAGTTCTTGCTAATGGTAAAAAAGGGGCTTTAAATGTGGGGGCTGTTCTTATTTTACC  
AGAGGGTTTTGAATTAGCCCCTCCCGATCGTATTTCCCCGAGATAAAAGAAAAGATGG  
GCAATCTGTCTTTTCAGAGCTATCGCCCAAATCAAAAAAATATTCTTGTATAGGCCCT  
GTTCTGGTCAGAAATATAGTGAATCACGTTTCTTATTTCCCCGGACCCCGCTACT  
AAGAAAGACATTCATTTCTTAAAATATCCTATATACGTAGGCGGAAACAGGGGAAGGG  
GCCAGATTTATCCTGACGGGAGCAAGAGTAACAATACAGTTTATAATGCTACAGCATCC  
GGTATAGTAAGCAAATCCTACGAAAAGAAAAGGGGGGATACGAAATAACCATAGCGG  
ATGCATCGGATGGACGTCAAGTGGTTGATATTATCCCGCCGGGGCCAGAACTTCTTGTT  
TCAGAAGGCGAATCTATCAAATTTGAGCAACCGTTGACAAGTAATCCTAATGTGGGGC  
GATTTGGTCAGGGAGATGCAGAAATAGTACTTCAAGATCCATTACGTGTACAAGGCCTT  
TTGTTCTTCTTAGCATCTGTTATTTTGGCACAAATATTTTTGGTTCTTAAAAGAAACAG  
TTCGAGAAGGTTCAATTGTCCGAAATGAATTTTCATGAGTAAAGTCTATGATTGGTTTGA  
AGAACGTCTCGAGATTCAGGCGATTGCAGATGATATAACTAGTAAATATGTTCCCTCCTCA  
TGTAACATATTTTATTGTCTAGGGGGAATTACGCTTACTTGTTTTTTAGTCCAAGTGGC  
TACAGGATTTGCTATGACCTTTTACTATCGTCCGACCGTTACTGATGCTTTTGCTTCTGTT

CAATACATAATGACTGAAGCTAATTTTGGTTGGTTAATCCGATCAGTTCATCGATGGTCG  
GCAAGTATGATGGTCCTAATGATGATCCTACATGTATTTTCGTGTATATCTCACCGGTGGAT  
TAAAAAACCTCGCGAATTAACCTGGGTTACAGGTGTGGTTCTGGGTGATTGACTGCA  
TCTTTTGGTGTAACCTGGTTATTCCTTACCTCGGGACCAAATTGGTTATTGGGCAGTGAA  
AATTGTAACAGGTGTACCTGAAGCTATTCTGTAAATAGGATCACCTTTGGTAGAATTATT  
GCGCGGAAGTGCTAGTGTGGGACAATCCACTTTGACTCGTTTTTATAGTTTACACACTT  
TTGTATTGCCGCTTCTTACTGCCGTATTTATGTTAATGCACTTCCCAATGATACGTAAACA  
AGGTATTTCTGGTCTTTAATCCCAATAACAAAAAACCTGACTTGAATGATCCTGTATT  
AAGAGCGAAATTGGCTAAAGGTATGGGTCATAATTATTACGGGGAGCCCGCATGGCCC  
AATGATCTTTTATATATTTTTCCGGTAGTAATTCTAGGTACTATTGCATGTAACGTAGGGT  
TAGCGGTTCTAGAACCATCAATGATTGGTGAACCGGCAGATCCATTTGCAACTCCTTTG  
GAAATATTACCCGAATGGTATTTCTTTCCCGTATTTCAAATACTTCGTACAGTACCCAATA  
AATTATTGGGTGTTCTTTAATGGTTTCAGTACCTGCGGGATTATTAACAGTACCTTTTTT  
AGAGAATGTTAATAAATTCCAAAATCCATTTTCGTTCGTCCAGTAGCGACAACCGTATTTT  
TGATTGGTACCGCAGTGGCCCTTTGGTTGGGTATTGGTGCAACATTACCTATTGATAAAT  
CCCTAACTTTAGGTCTTTTTATGATTGAAGTTTTCCATTTTGGAAATCGTGTTAGGTCTAAT  
TCCTATTACTTTGGCTGGATTATTTGTAACCTGCATATTTACAATACAGGCGTGGCGATCA  
GTTGGATCTTATGCTTACCATAACTAGTTATTTCCGGTTTTCTACTGACGGCTTTAACTATA  
ACCTCAGCTCTATTTATTGGTCTGAGCAAGATACGACTGATTATGGATATAGTAAGTCTC  
GCTTGGGCTGCTTTAATGGTAGTCTTTACATTTTCCCTTTCCTCGTAGTATGGGGAAGA  
AGTGGACTTATGATTATTCGTTTCGCCGGAACCAGAAGTAAAAATTTTGGTAGATAGGGA  
TCACATAAAAACCTTCATTCGAGGAATGGGCTAGACCGGGTCATTTCTCAAGAACAATA  
GCTAAAGGCCCTGAAACTACCACTGGATCTGGAACCTACATGCTGATGCTCACGATTT  
CGATAGCCATAACCAGTGATTGGAGGAGATCTCTCGAAAAGTATTTAGTGCGCATTTTCG  
GTCAACTCTCCATCATCTTCTTTGGCTGAGTGGCATGTATTTCCACGGTGCTCGTTTTT  
CCAATTATGAAGCATGGCTAAGCGATCCGACTCACATTAGGCCTAGTGCCCAAGTGGTT  
TGCCGATAGTGGGCCAAGAAATATTGAATGGTGTATGTGGGCGGGGGCTTCCGAGGAA  
TACAAATAACCTCTGGTTTTTTTTTCAGATTTGGCGAGCATCTGGAATAACTAGCGAATTAC  
AACTCTACTGTACCGCAATTGGTGGATTGGTCTTTGCGGCGTTAATGCTTTTTTGCTGGTT  
GGTTTCATTATCATAAAGCTGCTCCAAAACCTGGCTTGGTTTCAAGATGTAGAATCTATGT  
TGAATCACCATTTAGCGGGGCTACTAGGACTTGGGTCTCTCTCTTGGGCGGGACATCAA  
GTACATGTATCTTTACCGATTAACCAATTTCTAAACGCTGGAGTAGATCCGAAAGAAAT  
ACCACTTCCTCATGAATTTATCTTGAATCGGGATCTTTTGGCTCAACTTTATCCCAGTTT  
TGCCGAGGGAGCAACCCCATTTTTTACCTTGAATTGGTCAAATATGCGGACTTTCTTA  
CTTTTCGTGGAGGATTAGACCCAGTAACTGGAGGTCTATGGCTAACTGATACGGCACAC  
CATCATTTAGCTATTGCAATTCTTTTTCTGATAGCGGGTCACATGTATAGGACCAACTGG  
GGCATTGGTCATGGTCTAAAAGATATTTTAGAAGCTCATAAAGGTCCATTTACGGGCCA  
GGGCCATAAAGGCCTATATGAGATCCTAACAACGTCATGGCATGCTCAATTATCTCTTAA  
CCTAGCTATGTTAGGCTCTTTAACCATTGTTGTAGCTCACCATATGTATGCCATGCCCCCT  
TATCCATATCTAGCTACTGACTATGGTACACAACCTGTCATTGTTTACACATCATATGTGGA  
TTGGTGGATTTCTCATAGTTGGTGCTGCTGCGCATGCAGCCATTTTTATGGTAAGAGACT  
ATGATCCAACACTCGATAACAACGATCTATTAGATCGTGTTCTTAGGCATCGCGATGCAA  
TCATATCACATCTCAACTGGGCATGTATATTTCTAGGCTTTCACAGTTTTGGTTTTGTATAT  
TCATAATGATACCATGAGCGCTTTAGGGCGTCTCAAGATATGTTTTTCAGATACCGCTAT

CCAATTACAACCCGTCTTTGCTCAATGGATACAAAACACCCACGCTTTAGCACCTGGTG  
CAACGGCTCCTGGTGCAACAGCAAGTACCAGTTTAACTTGGGGGGGCGGTGATTTAGT  
AGCAGTGGGCGGCAAGGTAGCTTTGTTACCTATTCCATTAGGAACGGCGGATTTTTTGG  
TACATCACATTCATGCATTTACGATTCATGTGACGGTATTGATACTTCTGAAAGGTGTT  
TATTTGCTCGTAGCTCCCGTTTGATAACGGATAAAGCAAATCTTGGTTTTTCGTTTTCTT  
GTGATGGGCCTGGAAGGGGGGGACATGTCAAGTATCAGCTTGGGACCATGTTTTCTT  
AGGACTATTCTGGATGTACAATTC AATTT CAGTAGTCATATTT CATTTCAGTTGGAAAAT  
GCAGTCAGATGTTTGGGGCAGTATAAGCGATCAAGGAGTAGTA ACTCATATCACGGGA  
GAAACTTTGCGCAGAGTTCTATTA CTATTAATGGGTGGCTCCGCGATTTCTTATGGGCA  
CAGGCATCCCAGGTAATTCAGTCTTATGGTTCTTCATTATCCGCATATGGCCTTTTTTCC  
TAGGTGCTCATTTTGTATGGGCTTTTAGTTTAATGTTTTTATTTCAGTGGACGTGGTTATTG  
GCAAGAACTTATTGAATCCATCGTTTGGGCTCATAATAAATTAAGTTGCTCCTGCTAC  
CCAGCCGAGAGCCTTAAGCATTGTACAAGGACGTGCTGTAGGAGTAACCCATTACCTT  
CTGGGTGGAATTGCCACAACATGGGCGTCTTCTTAGCAAGAATTATTGCAGTAGGAAT  
GGCATTAAAGATTTCCAAGGTTTAGCCAAGGCTTAGCTCAGGACCCCACTACTCGTCGTA  
TTTGGTTTTGGTATTGCTACCGCGCATGACTTCGAGAGTCATGATGATTA TACTGAGGAA  
CGTCTTTATCAGAATATTTTTGCTTCTCACTTCGGTCAATTAGCAATAATTTTTCTGTGGA  
CTTCCGAAATCTCTTTCATGTAGCTTGGCAAGGAAATTTTGAGTCATGGGTACAGGAC  
CCTTTACATGTAAGACCTATTGCTCATGCAATTTGGGATCCTCATTTTGGTCAACCGGCT  
GTAGAAGCTTTTACTCGAGGGGGTGTCTTGGCCAGTGAATATCGCCTATTCTGGTGT  
TTACCAGTGGTGGTATAACAATCGGTTTACGAACTAATGAAGATCTTTATACTGGAGCTCT  
TTTTCTATTATTAATTTCTGCCATATCTTTAATAGCGGGTTGGTTACACCTACAACCGAAA  
TGGAACCGAGTGTTCGTGGTTCAAAAATGCAGAATCTCGTCTCAATCATCATTTATC  
AGGACTCTTCGGCGTAAGTTCCTTGGCTTGGACAGGGCATTAGTCCATGTCGCTATTCT  
CTGCATCCAGAGGGGAGTACGTTTCGATGGAATAATTTCTTAGATGTATTACCACATCCCC  
AAGGATTAGGCCCACTTTTTACAGGTCAGTGGAAATCTTTATGCTCAAAATCCCGATTCA  
GGTAGTCATTTATTTGGTACCTCCCAAGGAGCAGGAACTGCCATTTTAACCTTCTCGG  
GGGATTCCATCCACAAACCCAAAGTTTATGGCTGACTGATATGGCTCATCATCATTTAGC  
TATTGCATTTCTTTTTCTTATTGCTGGGCATATGTATAGAACTAATTTTGGGATTGGGCAC  
AGTATGAAAGATCTTTTAGATGCACATATCCCTCCGGGAGGGCGATTGGGACGTGGGCA  
TAAGGGCCTTTATGACACAATTAATAATTCGCTTCATTTTCAATTAGGCCTTGCTCTAGC  
TTCTTTAGGGGTTATTACTTCTTTGGTAGCTCAACACATGTACTCTTTACCCGCTTATGCA  
TTTATAGCACAAAGACTTTACTACTCAAGCTGCATTATATACTCATCACCAATACATTGCA  
GGATTATCATGACAGGAGCTTTTGCTCATGGAGCTATATTTTTTATTAGGGATTACAAT  
CCGGAACAGAATGAGGATAATGTATTGGCACGAATGTTAGAACATAAAGAAGCTATCAT  
ATCTCATTTAAGTTGGGCCAGCCTCTTTTTGGGTTTCCATACCTTGGGACTTTATGTCA  
TAATGATGTCATGCTTGCCTTTGGTACTCCGGAGAAGCAAATCTTAATCGAACCTATATT  
TGCTCAATGGATACAATCTGCTCATGGTAAA ACTTCATATGGGTTTCGATATACTTTTTATCT  
TCAACGAATGGCCCGGCATTCAATGCGGGTCGAAGCATATGGTTGCCGGGTTGGTTAA  
ATGCTATTAATGAG-----AATAGTAATTC ACTATTCTTAACAATAGGTCCTGGGGACTTTT  
TGGTTCATCATGCTATTGCTCTGGGTTTACATACAACTACGTTGATCTTAGTAAAAGGTG  
CGTTAGATGCGCGTGGTCCAAGTTAATGCCAGATAAAAAGGATTTCCGGTTATAGTTTT  
CCGTGCGATGGCCAGGACGAGGCGGTACTTGTGATATTTCCGGCTTGGGACGCATTTTA  
TTTGGCAGTTTTTTGGATGTAAATACCATTGGATGGGTTACTTTTTATTGGCATTGGAA

GCACATTACATTATGGCAGGGTAATGTTTCGCAGTTTAATGAATCTTCCACTTATTTGAT  
GGGCTGGTTAAGAGATTATTTATGGTTAAACTCTTCACAACCTATTAATGGATATAACCC  
TTTTGGTATGAATAGTTTATCAGTCTGGGCATGGATGTTTTTATTTGGACATCTGGTTTG  
GGCTACTGGATTTATGTTTTTAATTTCTGGCGTGGATATTGGCAGGAATTGATTGAAAC  
TTTAGCATGGGCTCATGAACGCACACCTTTGGCCAATTTGATTCGTTGGAGAGATAAAC  
CGGTGGCACTTTCCATTGTACAAGCAAGATTGGTTGGATTAGCCCCTTTTCTGTAGGT  
TATATATTTACTTATGCAGCTTTCTTGATTGCCTCTACATCAGGGAAATTTGGTATGTCAC  
ATTCAGTAAAGATTTATGATACATGTATCGGGTGTACGCAATGTGTCCGAGCCTGTCCCA  
CGGATGTATTAGAAATGATACCTTGGGATGGATGTAAAGCCAAACAATAGCTTCCGCT  
CCAAGAACAGAGGATTGTGTCCGGTTGTAAGAGATGTGAATCCGCCTGCCCAACAGATT  
TCTTGAGTGTTCGAGTTTATTTATGGCATGAAACAACCCGCAGCATGGGTATAGCTTATA  
TGACAACCTTTAACTTTCCCTCTGTTTTGGTGCCTTTAGTAGGCCTAGTATTTCCGGCAA  
TCGCAATGGCTTCTTTATTTCTTCATGTTCAAAAAACAAGATTGTTATGCGAGATCTAA  
AAACATATCTTTCCGTAGCACCGGTATTAAGTACTCTATGGTTCGGTCTTTGGCAGGTT  
TATTGATAGAGATTAATCGTTTTTTCCCGGATGCGTTGACGTTCCCCTTTTTTTCATTCAT  
GACTGCAATTTTAGAGAGACGCGAAAGCGAAAGCCTATGGGGTCGCTTCTGTAACCTGG  
ATAACCAGCACCGAAAACCGTCTTTACATTGGATGGTTTGGTGTTTTGATGATCCCTAC  
CTTATTGACCGCAACTTCTGTATTTATTATCGCCTTCATTGCTGCTCCTCCAGTGGATATT  
GATGGTATTCGTGAACCTGTTTCTGGATCTCTACTTTATGGAAACAATATTTTCAGGT  
GCCATTATTCCTACTTCTGCAGCTATAGGTTTGCATTTTTACCCAATATGGGAAGCAGCA  
TCCGTTGATGAATGGTTATAACAATGGTGGTCCCTATGAACTAATTGTTCTACACTTCTTA  
CTTGGTGTAGCTTGTACATGGGTCTGAGTGGGAGCTTAGTTTTCCGTCTGGGTATGCG  
ACCTTGGATTGCTGTTGCATATTCAGCTCCTGTTGCAGCTGCGACTGCTGTTTTCTTGAT  
CTACCCAATTGGTCAAGGAAGCTTTTCTGATGGTATGCCTCTAGGAATTTCTGGTACTTT  
CAACTTCATGATTGTATTCAGGCTGAGCACAACATCCTTATGCACCCATTCACATGCT  
AGGCGTAGCTGGTGTATTCGGCGGCTCCCTATTTAGTGCTATGCATGGTTCCTTGGTAAC  
CTCTAGTTTGATCAGGGAAACCACAGAAAATGAATCTGCTAATGAAGTTACAGATTC  
GGTCAAGAAGAAGAACTTATAATATCGTAGCCGCTCATGGTTATTTGGCCGATTGAT  
CTTCCAATATGCTAGTTTCAACAACCTCTCGTTCTTTACATTTCTTCTAGCTGCTTGGCC  
TG TAGTAGGTATCTGGTTC ACTGCTTTAGGTATCAGCACTATGGCTTTCAACCTAAATGG  
TTTCAATTTCAACCAATCGGTAGTTGATAGTCAAGGCCGTGTAATTAATACTTGGGCTGA  
TATCATTAAACCGTGCTAACCTTGGTATGGAAGTTATGCATGAACGTAATGCTCATAATTT  
CCCTCTAGACTTAGCTGCTATCGAAGCTCCATCTACAAATGGAATGGGTTTGCCTTGGTA  
TCGTGTTCATACCGTTGTATTGAATGATCCCGGACGGTTGCTTTCTGTTCATATAATGCAT  
ACAGCTTTGGTTGCTGGTTGGGCCGGTTCTATGGCCCTGTATGAATTAGCAGTTTTTTGAT  
CCTTCTGACCCTGTTCTTGATCCAATGTGGAGACAGGGTATGTTTCGTTATACCCTTCATG  
ACTCGTTTAGGAATAACCAATTCATGGGGTGGTTGGAGTATCACG---GGGGGGACTATA  
ACCAATCCGGGTATTTGGAGTTACGAAGGTGTGGCCGGAGCGCATATTGTGTTTTCTGG  
GTTGTGCTTTTTGGCAGCTATCTGGCATTGGGTGTATTGGGATCTAGAAATATTTTCTGA  
TGAACGTACAGGAAAACCTTCTTTGGATTTGCCCAAGATCTTTGGAATACATTTATTTCT  
TGCAGGTGTGGCTTGCTTTGGTTTTGGTGCATTTACGTAACAGGTTTGTATGGTCTCTG  
GCATATGGGTGTCCGATCCTTATGGACTAACAGGAAAAGTACAAGCTGTAAATCCATCG  
TGGGGTGTGGAGGGTTTTGATCCTTTTGTTCGGGAGGAATAGCCTCTCATCATATTGC  
GGCAGGGACTTTGGGCATATTAGCAGGCCTATTCCATCTTAGTGTCCGCCCCGCCCAAC

GTCTATACAAAGGATTGCGTATGGGCAATATTGAAACTGTCCTTTCCAGTAGTATCGCTG  
CTGTCTTTTTTGCAGCTTTTGTGTTGCCGAACTATGTGGTATGGTTCAGCGACTACCC  
CCATCGAATTATTTGGGCCTACTCGTTATCAATGGGATCAAGGGTACTTCCAACAAGAA  
ATATATAGAAGAGTTAGTGCTGGGTTAGCCGAAAATCAAAGTTTATCAGAAGCTTGGTC  
TAAAATTCCTGAAAAATTAGCCTTTTATGATTACATCGGAAATAATCCGGCAAAGGGG  
GATTATTCAGGGCGGGCTCAATGGATAACGGGGATGGAATAGCGGTTGGATGGTTAGG  
ACATCCTATTTTTAGAGATAAAGAAGGGCGTGAACTTTTTGTACGTCGTATGCCTACCT  
TTTTGAAACATTTCCGGTCGTTTTGGTAGACGGAGATGGGATTGTTAGAGCCGATGTTT  
CTTTTCGAAGGGCAGAATCTAAGTATAGTGTCGAACAAGTAGGTGTAACCTGTTGAGTTC  
TACGGTGGTGAACCTCAATGGAGTCAGTTATAGTGATCCTGTTACTGTGAAAAAATATGC  
TAGACGCGCTCAATTGGGGGAAATTTTTGAATTAGATCGTGCTACTTTGAAATCCGATG  
GTGTTTTTCGTAGCAGTCCGAGGGGTTGGTTTACTTTTGGACATGCTTCATTTGCTTTGC  
TCTTCTTTCGGACACATTTGGCATGGTGCCCGAACCTTGTTTAGAGATGTTTTTGTCTG  
GTATTGACCCAGATTTGGATGCTCAAGTAGAATTTGGAGCATTCCAAAACTTGGAGAT  
CCAAC TACAAGAAGACAAATAGGCATGAAAACCTTATATTCCCTGAGGAGGTTCTACC  
CCGTGGAAACGCTCTTTAATGGAACCTTAGCTTTAGCTGGTTCGTGACCAAGAAACCAC  
TGGTTTTCGCTTGGTGGGCCGGGAATGCCCGCTTATCAATTTATCTGGTAAACTACTAG  
GGGCTCATGTAGCCCATGCCGGATTAATCGTATTTTTGGGCCGGAGCAATGAATCTATTTG  
AAGTGGCTCATTTTCGTACCAGAGAAGCCTATGTATGAACAAGGATTAATTTTACTTCCC  
CACCTAGCTACTCTAGGTTGGGGGGTGGGTCTTGGTGGGGAAGTTATAGACTTTTCC  
ATACTTTGTATCCGGAGTACTTCATTTAATTTCTCTGCAGTATTGGGCTTTGGCGGTATT  
TATCATGCACTTTTAGGGCCTGAGACGCTTGAAGAATCTTTTCCATTCTTCGGTTATGTA  
TGGAAAGATAGAAATAAAATGACCACAATTTTAGGTATTAATCTTGTAGGTATA  
GGTGCTTTTCTTCTAGTATTCAAGGCTCTTTATTTTGGGGCGTATATGATACTTGGGCT  
CCGGGAGGAGGAGATGTAAGAAAAATAACCAACTTGACGCTTAGCCCAAGTATCATAT  
TTGGTTATTTACTAAAATCGCCCTTTGGGGGAGAAGGATGGATTGTTAGTGTAGACGAT  
TTGGAAGATATAATCGGAGGCCATGTATGGTTAGGTTCCATTTGTATACTTGGTGGAAAT  
TGGCATATCTTAACCAAACCTTCGCATGGGCTCGACGAGCACTTGTATGGTCTGGAGA  
GGCTTACTTATCTTATAGTTTAGCGGCTATATCTGTCTTTGGTTTCATTGCTTGTGTTTT  
GTCTGGTTCATAAATACCGCTTATCCTAGTGAGTTTTACGGACCCACTGGACCAGAAGC  
TTCTCAAGCTCAAGCATTTACTTTTCTAGTTAGAGACCAACGTCTTGGAGCTAACGTTG  
GATCTGCTCAAGGTCCTACCGGTTTAGGTAAATATTTAATGCGTTCCCCGACTGGAGAA  
GTCATTTTTGGAGGAGAACTATGCGTTTTTTGGGATCTGCGTGCTCCTTGGTTAGAACC  
CCTAAGGGGTCCAAATGGGTTGGACTTAAGTCGGCTGAAAAAAGACATAACAACCTTGG  
CAAGAACGTCGTTCCGCAGAATATATGACCCATGCTCCTTTAGGTTCTTTAAATTCCGTG  
GGTGGCGTAGCTACCGAGATCAATGCAGTCAATTATGTCTCTCCTAGAAGTTGGTTAGC  
TACTTCTCATTTTGTCTAGGATTCTTCTTCTTCGTAGGGCATTGTGGCACGCAGGAAG  
AGCTCGTGCAGCTGCAGCAGGATTTGAAAAAGGAATTGATCGTGATTTTGAACCTGTT  
CTTTCCATGACCCCTCTTAATATGACTATAGCCCTTGGTAAAGTTACCAAAGACGAAAA  
TGATTTGTTTGATATTATGGATGACTGGTTACGGAGGGACCGTTTCGTTTTTGTAGGCTG  
GTCCGGCCTATTGCTCTTTCTTGTGCCTATTTGCTGTAGGGGGTTGGTTACAGGTAC  
AACCTTTGTAACCTCATGGTATACCCATGGATTGGCCAGTTCCTATTTGGAAGGCTGCAA  
TTTCTTAACTGCCGCAGTTTCTACTCTGCGAATAGTTTAGCACATTTTGTIATTACTA  
TGGGGTCTGAAGCACAAGGAGATTTTACTCGTTGGTGTCAATTAGGCGGTCTGTGGA



CTTTTGTTGCTCTCCACGGCGCTTTCGGACTAATAGGTTTCATGTTGCGTCAATTCGAA  
CTTGCGCGATCTGTTCAATTGCGACCTTATAATGCAATCGCATTCTCTGGTCCAATTGCC  
GTTTTGTTTCTGTATTCTGATTTATCCACTAGGTCAGTCTGGTTGGTTCTTTGCGCCTA  
GTTTTGGTGTAGCAGCTATATTTGATTTATCCTCTTTTTTCAAGGATTCATAACTGGAC  
ATTGAACCCATTTTCATATGATGGGAGTTGCAGGTGTATTGGGCGCTGCTTTGCTATGCGC  
TATTCATGGTGCTACCGTAGAAAATACTTTATTTGAAGATGGTGATGGGGCAAATACATT  
CCGTGCTTTTAACCCAACCTCAAGCTGAAGAACTTATTCAATGGTCACTGCTAATCGTT  
TTTGGTCCCAAATCTTTGGGGTTGCTTTTTCCAATAAACGTTGGTTACATTTCTTTATGTT  
ATTTGTACCAGTAACTGGTTTATGGATGAGTGCTCTTGGAGTAGTCGGTCTGGCCTTGA  
ACCTACGTGCCTATGACTTCGTTTCTCAGGAAATTCGCGCGGCGGAAGATCCTGAATTT  
GAAACTTTCTACACCAAAAATATTCTCTTAAACGAAGGTATTCGTGCTTGGATGGCGGC  
TCAAGATCAGCCTCATGAAAACCTTATATTCCCTGAGGAGGTTCTACCCCGTGGAAACG  
CTCTTATGTCTGGAAGCACAGGAGAACGTTCTTTTGCTGATATTATTACCAGTATTCGCT  
ACTGGGTCATTCATAGCATTACTATACCTTCCCTATTCATTGCGGGTTGGTTATTCGTGAG  
CACTGGTTTAGCTTACGATGTGTTTGAAGCCCTCGGCCAACGAGTATTTACAGAA  
AACCGACAAGGAATTCATTAATCACCGGCCGTTTTGATTCTTTGGAACAACTCGATGA  
ATTTAGTAGATCTTTTATGACCATAGATCGAACCTATCCAATTTTTACAGTGCATGGTT  
GACTGTTACCGCCTAGCTGTACCTACCGTTTCTTTTTTGGGGTCAATATCAGCAATGC  
AGTTCATAACAACGAATGGCTACACAACTGTTGAGAACGGTGCTAGATCTGGT---CCAA  
GACGAACTACTGTAGGGGATTTATTAACCATTGAATTCGGAATATGGTAAAGTAGCT  
CCTGGGTGGGGAACGACCCCTTTGATGGGTGTCGCAATGGCTCTATTTGCGGTATTTCT  
ATCTATATTTTGGAGATTTATAATTCTTCCGTTTTATTGGATGGAATTTCAATGAATATGC  
TACTCTCAAACCTTTTCGTTTACACAGTAGTAATATTCTTTGTTTCTCTTCATCTTTGG  
ATTCCTATCCAATGATCCAGGACGTAATCCTGGACGTGAAGAAATGGCCGATACTACTG  
GAAGAATTCCTCTTTGGATAATAGGTAAGTACTGTAGCTGGTATTCTTGTGATCGGTTTAGTAG  
GTGTTTTCTTTTATGGTTCATATTCCGGATTGGGTTTCATCCCTGATGCTTAATATCTTTAG  
TTTGATCTGT-----CTTAATTCTGCCCTTTATCCGAGTAGTCTTTTCTTCGCCAAATTGCC  
GAAGCCTATGCTTTTTTTGAATCCAATCGTAGATGTTATGCCAGTCATACCCCTGTTCTTT  
TTCTTTTAGCCTTTGTTTGGCAAGCTGCTGTAAGTTTTCGAACGACACAATCAAACCC  
AAACGAACAAAATGTTGAATTGAATCGTACCAGCCTCTACTGGGGGTTATTACTCATT  
TTGTAAGTGTGTTTTATTTTCCAATTAATTTCTTCAATATGGAAGTAAATATTCTTGCATTT  
ATTGCTACTGCACTGTTCAATTTAGTTCTACTGCTTTTCTACTTATCATTACGTAAAAA  
CAGTCAGTCAAATAATATGGAAACAGCAACCCTAGTCGCTATCTTTATATCTGGTTTAC  
TTGTAAGTTTTACTGGGTACGCCTTATATACCGCTTTTGGGCAACCTTCTCAACAATAA  
GAGATCCATTCGAGGAACACGGGGACATGGAAGCATTGGTTTATACATTCCTCTTAGTC  
TCGACTCTAGGGATAATTTTTTTCGCTATCTTTTTTAGAGAACCTCCAAAAGTTCCAAC  
AAAAA-----ATGACTCTTGCTTTCCAATTGGCTGTTTTTGCATTAATTGCTACTTCATCA  
ATCTTATTGATTAGCGTACCCGTTGTATTTGCTTCTCCTGATGGTTGGTCAAGTAACAAA  
AATGTTGTATTTTCAGGTACATCATTATGGATTGGATTAGTCTTTCTGGTGGGTATCCTTA  
ATTCTCTCATCTCT-----ATGTCACCACAAACAGAGACTAAAGCAAGTGTTG  
GATTCAAAGCTGGTGTAAAGATTATAAATTGACTTATTATACTCCTGAGTATGAAACCA  
AGGATACTGATATTTTGGCAGCATTTCGAGTAACTCCTCAACCTGGAGTTCCGCCTGAA  
GAAGCAGGGCCGCGAGTAGCTGCCGAATCTTCTACTGGTACATGGACAACCTGTGTGGA  
CCGATGGACTTACGAGCCTTGATCGTTACAAAGGGCGATGCTATGGAATCGAGCCTGTT

CCTGGAGAAGAAAATCAATATATTGCTTATGTAGCTTACCCATTAGACCTTTTTGAAGAA  
GGTTCTGTACTAACATGTTTACTTCCATTGTAGGTAATGTATTTGGGTTCAAAGCCCTG  
CGTGCTCTACGTCTGGAAGATTTGCGAATCCCTACTGCGTATGTTAAACTTTCCAAGG  
TCCGCCTCACGGCATCCAAGTTGAGAGAGATAAATTGAACAAGTATGGTCGTCCTG  
TTGGGATGTACTATTAACCTAAATTGGGGTTATCCGCTAAAACTACGGTAGAGCTGT  
TTATGAATGTCTTCGTGGTGGCCTTGATTTTACTAAAGATGATGAGAACGTGAACTCCC  
AACCATTTATGCGTTGGAGAGACCGTTTCTTATTTGTGCCGAAGCTATTTTTAAATCAC  
AAGCTGAAACAGGTGAAATCAAAGGGCATTACTTGAATGCTACTGCGGGTACATGCGA  
AGAAATGATGAAAAGGGCTATATTTGCCAGAGAATTGGGAGTTCCTATCGTAATGCATG  
ACTACCTAACAGGGGGATTCACTGCAAATACTAGCTTGGCTCATTATTGCCGAGATAAT  
GGTCTACTTCTCACATCCACCGCGCAATGCATGCAGTTATTGATAGACAGAAGAATCA  
TGGTATACACTTCCGTGTACTAGCTAAAGCGTTACGTATGTCTGGTGGAGATCATATTCA  
TTCCGGTACCGTAGTAGGTAACCTGAAAGGGAAAGAGAAATCACTTTGGGCTTTGTT  
GATTTACTGCGTGATGATTTTATTGAAAAAGATAGAAGTCGCGGTATTTATTTACCCAA  
GATTGGGTCTCTCTACCAGGTGTTCTGCCTGTAGCTTCGGGCGGTATTCACGTTTGGCA  
TATGCCTGCTCTGACCGAGATCTTTGGAGATGATTCCGTACTACAGTTCGGTGGAGGAA  
CTTTAGGGCACCTTTGGGAAATGCACCCGGTGCCGTAGCTAATCGAGTAGCTCTAGA  
AGCATGTGTACAGGCTCGTAATGAGGGACGCGATCTTGCTACTGAGGGTAATGAAATTA  
TCCGTGAGGCTACCAAATGGAGTCCTGAACTAGCTGCTGCTTGTGAAGTATGGAAGGA  
GATTAATTTGAGTTTCAGGCAATGGATACTTTGGATCAAATGGCGATACATTTATACAA  
AACTTCTACCCGAGCACACGCAATGGAGCCGTAGACAGTAAAGTGAAATCCAATCCA  
CGAAATAATTTGATCTATGGACAGCATCATTGTGGTAAAGGTCGTAATGCCAGAGGAAT  
CATTACCGCAGGGCATAGAGGGGGAGGTCATAAGCGTCTATAACCGTAAAATAGATTTTC  
GACGGAATGAAAAAGACATATATGGTAGAATCGTAACCATAGAATACGACCCGAATCG  
AAATGCATACATTTGTCTCATACTATAGGGATGGTGAGAAGAGATATATTTTACATCC  
CAGGGGGGCTATAATTGGAGATACCATTGTTTCTGGTACAGAAGTTCCTATAAAAATGG  
GAAATGCCCTACCTTTGACCGATATGCCCTTAGGCACGGCCATACATAACATAGAAATC  
ACACTTGAAAGGGTGGACAATTAGCTAGAGCAGCGGGTGCTGTAGCGAAACTGATT  
GCAAAGAAGGGAAATCGGCCACATTAATAATTACCTTCTGGGGAGGTCCGTTTGATAT  
CCAAAACTGCTCAGCAACAGTCGGACAAGTGGGGAATGTTGGGGTGAACCAGAAA  
AGTTTGGGTAGAGCCGGATCTAAGCGTTGGCTAGGTAAGCGCCCTGTAGTAAGAGGAG  
TAGTTATGAACCCTGTAGACCATCCACATGGGGGTGGTGAAGGGAGGGCCCCAATTGG  
TAGAAAACAACCCACAACCCCTTGGGGTTATCCTGCACCTTGAAAAAGAAGTAGAAA  
AAGGAATAAATATAGTGATAATTTGATTCTTCGTGCGCCGTAGTAAAATGATTCAACCTCA  
GACCCATTTGAATGTAGCAGATAACAGCGGGGCTCGAGAATTGATGTGTATTCGAATCA  
TAGGAGCTAGC---AATCGCCGATATGCTCATATTGGTGACGTTATTGTTGCTGTGATCAA  
AGACGCAGTTCCAAACATGCCTCTAGAAAGATCAGAAGTGGTCAGAGCTGTAATTGTC  
CGTACTTGTAAGAACTTAAACGTGACAACGGTATGATAATACGATATGATGACAATGC  
CGCAGTTGTGATTGATCAAGAAGGAAATCCAAAAGGAACGCGAGTTTTTGGTGCGATT  
GCCCCGAGAATTGAGACAGTTCAATTTTACTAAAATAGTTTCATTAGCCCCTGAGGTATT  
AATGCTTAGTCCCAAAGAACCAGATTCGTAACAACATAGAGGAAGAATGAAGGG  
AATATCTTATCGAGGTAATGCTATTTGTTTTGGTAAATACGCTCTTCAGGCACTTGAACC  
CGCTTGGATCACCTCTAGACAAATAGAAGCAGGTCGACGAGCAATGACACGAAATGCA  
CGTCGCGGTGAAAAATATGGGTCCGTATATTTCCAGATAAACCAGTTACAGTAAGACC

CGCAGAAACACGTATGGGTTTCAGGTAAAGGCTCTCCCGAATATTGGGTAGCTGTTGTTA  
AACCAGGTTCGAATACTTTATGAAATGGGTGGAGTAACAGAAAATATAGCCAGAAGGGC  
TATTTCAATAGCAGCGTCCAAAATGCCTATACGAGCTCAATTCATCATTTCGGGAATGAC  
CAGAATTAGACGGGGATATATCGCTCGGAGACGTAGAACAAAAATTCGTTTATTTGCAT  
CAAGCTTTCGGGGGGCTCATTCAAGACTTACTCGAACTATTACTCAACAAAAATAAG  
AGCTTTGGTTTCGGGCTCATCGGGATAGGGATAAGCAAAAAATCAATTTTCGTCGTTTGT  
GGATCACTCGAATAAATGCAGCAATTCGTGAA---AGGGGGTATGCTATAGTTATAGTAG  
ATTAATAAACGGTCTGTACAAGAGACAGTTGCTTCTTAATCGTAAATACTTGCACAAA  
TAGCTATATCAAATAGGAATTGTCTTTATATGATTTCCAATGAGATCATAAAAAGAAGTAG  
GTTGGAAGGAATCCACCGGT-----ATGTTAAATGAAGTATACGCTTTAGGTCAACATATAT  
CTATGTCTGCTCACAAAGCGCGAAGGGTAATTGATCAAATTCGTGGGCGTTCCTACGAA  
GAAACACTTATGATATTAGAACTCATGCCTTATCGAGCATGTTATCCAATTTTTAAATTAG  
TTTATTCTGCAGCAGCAAATGCTAGTTTCAATATGGGTTTCAATGAAGTAAATTTAGTCA  
TTAGTAAAGCTGAAGTCAATGAAGGTACTATTGTGAAGAGATTAAAACCTCGCGCTCG  
AGGGCGTAGTTTTGCGATACAAAAACCTACCTGCCATATAACTATTGTAATGAAAGATAT  
ATCCTTAGATGGGGGAACATGGGACAAAAAATGGATGGAATCAGGTATGCAGTATTTA  
CAGACAAAAGTATTTCAGTTATTGGGGAAAAAT--CAATATACTTCTAATGTGCAATCAGG  
ATCAACTAGGACAGAAATAAAGCATTGGGTCGAACTCTTCTTTGGTGTCAAGGTAATC  
GCGATGAATAGTCATCGACTTCGGGGAAAGGCTAGAAGAATGGGACCCATTATGGGAC  
AGACAATGCATTACAGACGTATGATCATTACGCTTCAACCGGGTATTCTATTCCACCTC  
TTAGAAAAGAAAAGAACTATGGCAGTTCCAAAAAACGTACTTCTATATCAAAAAAGCG  
TATTCGTAAAAATATTTGGAAAAGGAAAGGATATTGGGCGGCGTTAAAAGCTTTGTCAT  
TAGGGAAATCTCTTTCTACTGGGAATTCCAAAAGTTTTTTTTGTGCGACAAACAAATAAG  
ATGGCCAAGGGTAAAGATGTGCGAATACCGGTTCTTTTTGGAATGTACCGCTTGTGTTTCG  
AAACGGTGTTAATGTTAATAAGGCATCAACGGGCATTTCCAGATATATTACTIONCAAAAAGA  
ACCGGCACAATACGCCTAATCGATTGGAGTTGCGAAAATTCTGTCCATATTGTTACAAA  
CATACGATTCACGGGGAGGTAAAGAAAATGAAAATAAGAGCTTCTGTTTCGTAAAATTT  
GTGAAAATGTGCGATTAATCCGTCGTCGGGGACGAATTAGAGTAATTTGTTCCAACCCA  
AGACATAAACAAAGACAAGGAATGGTTCGAGAGAAAATAACAGTATCTACTCGGACA  
CTACAGTGGAAGTGTGTTGAATCAGCAGCAGACAGTAAGCGTCTTCTTTATGGGCGCT  
TTATTCTGTCTCCGCTTATGAAAGGTCAAGCAGACACAATAGGCATTGCTATGCGAAGA  
GCTTTGCTTGGAGAAATCGAAGGAACATGTATCACACGCGCAAAATCTGAG-----AAAA  
TATCACACGAATATTCTACCATAATGGGTATTCAAGAATCAGTACATGAAATTTAATGA  
ATTTAAAAGAAATCGTATTGAGAAGTAATCTCTATGGAACCTGTGAGGCGTCTATTTGT  
GTCAGGGGCCCCGGATATGTAACGCTCAAGATATCATCTTACCGCCTTATGTAGAAATC  
CTCGATAATACACAGCATATAGCTAGCTTGACGGAACCCATTGAGTTGGTTATTGGATTA  
CAGATAGAGAAGAATCGCGGATATCTTATAAAAGCGCCAAAT---ACCTTTGATGGAAGT  
TAT-----CCTATAGATCCTGTATTTCATGCCTGTTTCGAAATGCGAATCATAGTATTCATTCTTA  
TGAAAATGGTAAC-----AAAGAGATACTATTTCTCGAAATATGGACAAATGGAAGTTTAA  
CTCCTAAAGAAGCACTTTATGAAGCCTCCCGGAATTTGATTGATTTATTGATTCCCTTTT  
TACATACCAAAGAAGAA-----AATTTAAATTTAGAGGGCAATCAA---CACATGGTTCCTT  
TACCCCTTTTACCTTTTATGATAAATTGGCT---AACTAACAAAAATAAAAAA---AAA  
ATGGCGTTGAAATCGATTTTTATTGACCAATCAGAATTGCCTCCAGGATCTATAATTGC  
CTCAAAGGTCCAATATATATACATTGTTGGACCTTTTGAATAACAGTCAAGAAGATCTT

ATGAAAATGGAACATTTTCGCATAGAAGATGTCAAACAAATTTTAGGCATTCTAGAAAA  
AAAT-----TTCGTAATTGATTTACCGAAAAATAAG-----ATGTCCACAATA  
CCTGGATTTAATCAGATACAATTTGAAGGATTTTGTAGGTTTCATTGATCAGGGTTTGACA  
GAAGAACTTTCTAAGTTTCCAAAAATTGAAGATACAAATCAAGAAATTGACTTTGAATT  
ATTTTGGAAAGATATCAATTGGTAGAACCTCGATAAAGGAAAGAGATGCTGTGTATG  
AATCACTCACATATTCTTCTGAATTATATGTATCTGCGAGACTAATTTGGAAAAACCGTA  
GGTATATCCAAGAACAAACAATTTTGATAGGAAAGATCCCTCTAATGACTTCTCTGGGA  
GCTTTTATAGTAAATGGAATATATAGAATTGTGATCAATCAAATATTGCAAAGTCCCGGT  
ATTTATTACCAGTCAGAATTGAACGATAATGGAATTTCCGTCTATACCGGCACCATAATA  
TCAGATTGGGGAGGAAGATTAGAATTAGAGATTGATAGAAAAACAAGGATATGGGTTC  
GCGTGAGTAGGCAACAAAACTATCTATTCTAGTTCTATTATCAGCTATGGGGTTGAATA  
TAAGAGAAATTCTAGAGAATGTTTGTATCCTGAACTATTTTTGTCTTTTCTGAATGATA  
AA-----AAACAAATAGGGTCAAAGAAATGCTATTTTGGAGTTTATCAACAATTTGCT  
TGTGTAGAGGGAGATCCGGTATTTTCTGAATCCTTATCTAAGGATTTACAAAAAAATT  
CTTCAACAAAGATGTGAATTGGGAGGGATTGGTCGACGAAATATGAATCGGAGACTG  
AACCTTGATATACCCAGAACAATACATTTTGTACCAGGATATATTGGCAGCCGCG  
GATCGTTTGAATCGAATCAAATTTGGAATGGGTACACTTGACGAT-----ATGAATCATTG  
CAAATAAACGTATTTCGTTCTGTAGCAGATCTTTTACAAGAGCAATTTGGATTGGCCTT  
GGTTCGTTTAGAAAATATGGCTCGAGGAAACATATATGCAGCACTTAAG---CATAACTG  
GACA---CCAACCTCAGAACTTGGTAAATTCAACCCCA-----TTAACAGATACTTAT  
AAAGTTTTTTTCCGTTTACACCCATTATCTCAAGTTTTTGGATCGAACTAATCCATTGACA  
CAAATAGTTCATGGGAGAAAATTGAGTTATTTGGGCCCGGGGGATTGACTGCGCGAA  
CTGCTACTTTTCCAATACGAGATATTCATCCTAGTCACTATGGGCGTATTTGCCCAATTG  
ACACATCTGAAGGAATAAATGTTGGACTTATTGGATCCTTAGCAATTCATGCCAGGATT  
GGTCGTTGGGGG---TCTCTAGAAAGTCCGTTTTAT-----AAAATTTCTGAGAGATCAA  
AGGG-----GCGCGGATGCTTTATTTATCACCGGGCAGAGATGAATACTATATGGTAGCGG  
CAGGAAATCTTTGGCCTTGAATCAGGGTATTCAGGAAGAACAGGTTGTTCCAGCTCG  
ATATCGTCAAGAATTCCTGACTATTGCATGGGAACAGGTTTCATCTTGAAGTATTTTTTC  
CTTCCAATATTTTTCTATTGGAGCTTCCCTCATTCCTTTTATCGAGCATAATGATGCGAAT  
CGGGCTTTAATGAGTTCTAACATGCAACGCCAAGCAGTCCCTCTTCTCAGTCCGAGA  
AGTGCATTGTTGGAAGTGGATTGGAAGGCCAAGCGGCTCTAGATTGAGGGGCTCTTGC  
TATAGCCGAACACGAGGGAGAGATTATTTATAACGATACTGACAAGATCCTTTTATCAG  
GTAATGGGGATACTCTAAGGATTCCATTAGTTATGTATCAACGTTCCAACAAAAATACTT  
GTATGCATCAAAAACCCAGGTTTCAGCGGGGTAAATGCATTA AAAAGGGACAAATTTT  
AGCGTATGGTGCTGCTACAGTTGGTGGCGAACTCGCTTTGGGGAAAAACGTATTAGTA  
GCTTATATGCCATGGGAAGGTTACAATTTTGAAGATGCAGTACTCATTAGTGAGCGCTT  
AGTATATGAAGATATTTATACTTCTTTTACATAACGTAATATGAAATTCAGATTAAC-----  
--CAAGGC---TCCGAAAGGGTCACTAATGAAATACCACATTTAGAAGTCCATTTACTCCG  
AAATTTAGACAAAAATGGAATTGTAATGCTGGGATCTTGGGTGGAAACAGGTGATATTT  
TAGTAGGTAAATTAACGCCCAAATGGTGAAAGAA---TCATCGTATGCCCCGAAGATA  
GATTGTTACGAACCATACTTGGCATGCGGGTATATACTTCAAAGAAACTTGTCTAAAA  
TTACCTATAGGAGGTAGGGGTCGGGTGATTGATGTGAGATGGGTCCAGAGTTCTAAGA  
CAGATGAGACAGAGAAAACAGAAAGTATTCGTGTATATATTTTACAGAAACGTGAAAT  
AAAAGTAGGCGATAAAGTAGCTGGAAGACATGGAATAAGGGTATCATTTCAAAAATT

TTGCCTAGACAAGATATGCCTTATTTGCAAGATGGAAGACCTGTTGATATGGTCTTCAA  
CCCATTAGGAGTACCTTCCCGAATGAATGTAGGACAAATATTTGAATCTTCACTCGGGTT  
AGCTGGGGGTTTGTCTAGACAGACATTATCGAATAGCGCCTTTTGATGAGAGATATGAAC  
AAGAAGCTTCGAGAAAACCTGGTGTCTTCTGAATTATATGAAGCCAGTAAGCAAACAGT  
GAATCCATGGATATTTGAACCCGAGTCTCCAGGAAAAAGCAGAATATTTGATGGAAGA  
ACAGGGGATCCTTTTGAACAACCTGTTATAATAGGAAAGCCTTATATCTTGAAATTAATT  
CATCAAGTTGATGATAAAATCCATGGGCGTTCAGTGGGCGTTATTCACGTCTTACACA  
ACAACCCCTTAAAGGAAGGGCCAAGAAAGGGGGACAACGGGTAGGAGAAATGGAGG  
TTTGGGCTTTAGAGGGGTTTGGCGTTGCTTATATTTTACAAGAGATGCTTACTTATAAAT  
CTGATCATATTAGAGCGCGCCAGGAAGTACTTGGTACTATAATCTTTGGAGGAAGAATA  
CCGACTCCTGAAGATGCTCCAGAATCTTTTCGGTTGTTTCGTTTCGAGAACTACGATCTTT  
AGCTCTGGAAGTGAATCATTCTTGTATCTGAGAAGACTTTCCAGCTTAATAGGAAGG  
AAGCT-----ATGATCGATCGATATACACATCAACAACCTCCGAATTGGATTAGT  
TTCTCCTCAACAAATAAGTACTTGGTCCAAAAAATCCTGCCTAATGGCGAGATAGTTG  
GAGAGGTGACAAAACCTTATACCTTTCATTACAAAACCAATAAACCAGAAAAAGATGG  
ATTATTTTGTGAAAGAATTTTGGGCCTATCAAAAGTGAATTTGTGCTTGTGGAAATTA  
TCGAGTAATCGGAGATGAAAAGGAAGACCCGCAATTTTGTGAACAATGCGGAGTTCGA  
GTTTGTGATTCTCGGATACGAAGATATCAAATGGGCTACATCAAACCTCGCATAACCCGGT  
AATGCATGTGTGGTATTTGAAACGTCTTCTAGTTATATTGTGACTCTTTTAGATAAACC  
TCTTAACGAATTAGAAGACCTAGTATACTGCAAT-----TTTTATTTTGTAGGCC---ATAG  
ATAAAAAACCTACTTTTTTACGATTACGGGGTTTATTAGAATATGAAATTCAACCCTGGA  
AATACAGGATCCCCATTTTTTTTACTACCCGGAGCTTCGATACATTTCGAAATCGAGAGA  
TGTCTACCGGGGGAGGTTCTATCAGACAACAATTAGCCAATCTAGATTTACGAATTATTA  
TAGACTATTCATTGGTAGAATGGAAAGAATTGGAGGAAGAG---GAACCCACAGGGAAC  
GAATGGGAAGATCGAAAAGTTGGAAGAAGAAAAGATTTTTTGTCTTAGACGCATGGAAT  
TGGCTAAGCATTATTCGAACAAATATAGAACCAAAATGGATGGTTTTTGCCTATTAC  
CAGTTCTTCTCCTGAGTTGAGACCAATCTATCATATAGATGAGGATAAACTAGTGACCT  
CGGATATTAATGAAATCTATAGAAGAATTATCTATCGGAATAATACTCTTACAGATCTATT  
ACAACAAGTATAGCTACGCCAGAAGAATTAATAATATCTCAGGAAAAATTGCTACAAG  
AAGCCGTGGATGCACTTCTTGATAATGGAATCTGCGGACAACCAATGAGGGATGATCAT  
AATAGAGTTTACAAGTCGCTTTCAGATGTAATTGAAGGCAAAGAAGGAAGAGTTCGCG  
AGACTCTGCTTGGTAAACGAGTCGATTATTCAGGGCGGTCCGTGATTGTCTGGGCCCT  
TCACTTTCATTACATCGATGTGGATTGCCTCGCGAAATAGCAATAGAACTTTTCCAGGCA  
TTTGTAAATTCGTGACCTAATTAGAAAACATCTTGTCTCGAACATAGGAGTTGCTAAGAG  
TCAAATTCGGAAAAAAAACCGATTGTATGGGAAATACTTCAGGAAATTCTGGATGAC  
CATCCTGTATTGCTGAATAGAGCGCCTACTCTGCATAGATTAGGCATACAGGCATTCTC  
CCCGTTTTAGTGAAGGGCGCGCTATTTGTTTACATCCATTAGTTTGTAAAGGGCTTCAAT  
GCAGACTTTGACGGGGATCAAATGGCTGTTTCATGTGCCTTTATCTTTGGAGGCTCAAGC  
AGAGGCGCGTTTACTTATGTTTTCTCATATGAATCTTTTGTCTCCAACCTATTGGGGATCC  
GATTTCCGGCACCAACTCAAGATATGCTTAGTGGACTCTATGTCTTAACGAGTGGAAATC  
GTCGGGGTATTTGTGTAAATAGGTATAATCCATGTAATCGTAGAAAC-----TATCAAAA  
TGAAGAT-----AATAACTATAAGTATACAAAAAAAAGAACCCTTTTTTTGTAATCCC  
TATGATGCAATTGGAGCTTATCGGCAAAAACGAATCAATTTAGGTAGTCCTTTGTGGCT  
GCGGTGGCGACTAGATCAACGC---GTTATTGCTGCA-----AGAGAAGTTCCCATCGAAAT

TCACTATGAATCTGTGGGGACCTATTATGAGATTTATGGACACTATCTAATAGTACGAAG  
TATAAAAAAAGAAATTCCTTTATATATATATTCGAACCACTCTTGGTCATATTTCCCTTTAT  
CGAGAAATAGAAGAAGCCATACAGGGGTTTTGGCAGTGTAATTCTATGCTACCAACGG  
GAATTCGAGTCTCTCCGGGTATGGAGGTACTGATGGCAGAACGGCCACTCAGGTCTT  
TCACAATAAAGTGATAGACGGAAGTCCATGAAACGGCTTATTAGTCGATTTATTGATC  
ACTATGGAATAGGATATACATCACATATCCTGGATCAAGTAAAGACTCTGGGTTTTCCGAC  
AAGCTACCGCCGCATCCATTTTCATTAGGAATTGATGATCTTTTAAACAATACCTTCTAAAA  
GATGGCTAGTTCAAGACGCTGAACAACAAAGTTTTATTTTGGAAAAACACCATCATTAT  
GGGAATGTACACGCGGTAGAAAAATTACGTCAATCGATCGAAATATGGTATGCCACAAG  
TGAATATTTGCGACAAGAAATGAATCCTAATTTTCGGATGACCGATCCTTTTAATCCAGT  
CCATATAATGTCTTTTTTCGGGAGCCAGAGGAAATGCATCTCAGGTACATCAATTAGTAG  
GTATGAGAGGATTAATGTCGGATCCTCAAGGGCAAATGATTGATTTACCCATTCAAAGC  
AATTTACGCGAAGGACTGTCTTTAACAGAATACATTATTTCTTGTACGGAGCCCGTAA  
AGGGGTTGTGGATACCGCTATCCGAACATCAGATGCAGGATATCTCACGCGCAGACTTG  
TTGAAGTAGTTCAACACATTGTTGTACGTGCAACAGATTGTGGCACCGTTCGAGGTATT  
TCTGTAAGTCCTCGAAATGGAATGATGACG---GACAGGATTTTTATCCAAACATTAATTG  
GCCGTGTATTAGCAGATGATATATATATAGGTTTCGCGATGTATTGCTACTAGAAATCAAGA  
TATTGGGGTTGGACTTGTACAGTAGATTCATAACT-----TTTAGAGCACAACCAA  
TCTCTATTCGAACCCCTTTACTTGTAGGAGTACATCTTGGATTTGTCAATTATGTTATGG  
CCGGAGTCCAGCGCATGACGACCTGGTTCGAATTGGGAGAAGCCGTAGGTATTATTGCA  
GGTCAATCTATTGGAGAACCGGGCACTCAATTAACATTAAGAAGTTTTCATACCGGCGG  
AGTATTTACAGGGGGTACTGCAGAACATGTGCGAGCCCTTCTAATGGAAAAATAAAAT  
TCAACGAGGATTTGGTTCATCCGACACGTACACGTCATGGACATCCTGCTTTTCTATGT  
TCTAGAGACTTGTATGTAAGTATTGAGAGTGAAGATATTATACACAATGTGTGTATTCCG  
CCAAAAGTTTTCTTTTAGTTCAAACGATCAATATGTAGAATCAGAACAAGTGATTGC  
TGAGATTCGCGGAGAACCTCCACT--TTGAATTTGAAAGAGAAGGTTTCGAAAACATAT  
TTATTCTGACTCAGAAGGCGAA---ATGCACTGGAATACTGATGTGTACCATGCACCTGA  
ATTTACATATGGTAATATTCATCTCTTACCAAAAACAAGTCATTTATGGATATTATTAGGG  
GAGCCCTGGAGA-----TACAGTCTAGGCCCTTGTTCGATCCACAAGGATCAAGATCAA  
TGAACGCTTAT-----TCTCTTTCTGTCAAGCCAAGATATATTGCTAACCCCTCA-----GTAA  
CTAATAATCAA---GTGAGACACAAATTTTTTAGTTTCGATTTTTCTGGTAAAAATGGAGA  
TAGGATTCCTGATTGT---TCAGAACTGAATCGAATGACATGTACGGATCATTCTAATCTC  
AGATATCCG---GCCATTCCTCGACGGTAATTCT-----GATTTATTGGCAAAGAGGCGAAGA  
AATAGATTCATCATCCCACTCGAATCGATTCAAGAAGGCGAGAACCAACTAATACCTTC  
TTCAGGTATCTCAATGGAAATACCC-----AGAAATGGTATTCTCCGTAGAAATAGTATTCT  
TGCTTATTTTCGATGATCCTCGATATATAAGAAAGAGCTCGGGACTTACTAAATATGAGAC  
TCGAGAACTAAATCAATCGTCAACGAAGAGAAT-----TTGATTGAGTATCGAGGA---GT  
CAAGGTATTTTGGCCAAAATACAAGGAAGTAAATCCATTTTTTTTTTATTCCCGTGGAAAG  
TCCACATTTTGTCCGAATCTTCTTCCATAATGGTACGGCACAATAGTATTATTGGGGCAG  
ATACACAAATCACTTTCAATAGAAGAAGTCGGGTAGGCGGATTGGTCCGAGTGAAGAA  
AAAAGCAGAAAAAATGAAACTGATAATCTTTTCTGGAGATATCCATTTTCTGGAAG  
ACAAATAAGGCATTCCGA-----TTGATACCGCCAGGAGGG-----GGAAAACCAAATT  
CCAAAGAATACAAAAA-----TTGAAAAATTGGCTCTATATCCAACGA-----ATGAAACT  
TTCCAGGTATGAAAAAAGTATTTGTTTTGGTTCAACCTGTAGTCCCATATAAAAAA

CGGATGGTATAAATTTAGGA---CTTTTCCCGCCGGATCTCTTGCAGGAAAGTGATAATCT  
ACAACCTTCGAGTTGTCAATTATATCCTTTATTACGACCCA-----ATTCTTGAAATTTGGGA  
CACAAGTATTCAATTAGTTTCGGACTTCTTTAGTGTTGAATTGGGACCAAGACAAAAA-  
-----ATCGAAAAGGCCTGTGCTTCCCTTTGTTGAAATAAGGACAAATGGTTTGCT  
TAGATATTTTCTAAGAATCGACTTAGCTAAGTCACCTATTTCTTATACCGGAAAAAGGAA  
CGATCTGTCTGGGTTTCAGGATTGATCTCTGAG---AATGGATCAGATCGCGCTAATGTCAAT  
CCATTTTCTTCCATTTATTCCCTATTCC-----AAGTCAAGGATTAAGAATCCCTTAATCC  
AAATCAAGGAACTATCCATACGTTGTTGAATCGA-----AATAAGGAATCTCAATCTTTG  
ATAATTTTGTCAATCATCCAATTGTTTTCGAATAGGCCCA-----TTCAACGATGTAATCT  
CCCAATGTG-----ATAAAGAATCA---CCCCTAATTCCAATTAGGAATTTCGTTGGGCC  
GTTAGGAACA-----GGTTTTCCAATTTATAATTTTGATTTA-----TTTTCCATTTA-----ATA  
ACCCATAATCAGATCTTG---GTAACATACTATTTGCAACTTGACAATTTCAA-----CA  
GATTTTTCAAATACTTAAA-----TATTATTTACTGGATGAAAAT-----GGTCAAATTTATA  
ATCCCTATTCATGCAGTAACATCATTTTGAATCCATTCATTTGAATTGGTATTTTCTCCA  
TTACAATTATTGTGAAGAGACATCT---CCAATCGTTAGTCTTGGGCAGTTTCTTTGTGAA  
AATGTATGTATAGCAAAAAAAGGACCGCAT---TAAAA-----TCGGGTCAAGTTCTAATT  
GTTCAA---GTTGACTCTGTGGTAATACGATCAGCTAAGCCTTATTTGGCTACTCCAGGAG  
CAACTGTTTCATGGACATTATGGGGAAATCCTTTACGAAGGCGATACATTAGTTACATTTA  
TATATGAAAAATCAAGATCTGGTGATATAACGCAAGGTCTTCCAAAAGTGGAACAGGT  
GTTAGAAGTGCGTTCGATTGATTCAATATCGATGAATCTCGAAAAGAGGATTGAGGGTT  
GGAACAAATCTATAACAAGAATTCTTGGAAATTCCTTGGGCATTCTTGATTGGTGCTGAA  
CTAACTATAGTGCAAAGTCGTATCTCTTTGGTTAATAAGGTCCAAAAGGTTTATCGCTCC  
CAGGGGGTGCAGATACATAATAGGCATATAGAAATTATTGTACGTCAAATAACATCAA  
AGTTTTTGGTTTCAGAA-----GATGAAATGTCTAATGTTTTTTTCGCCCGGAGAATAATT  
GGATTGTTGCGAGCGGAACGAATGGGACGCGCTTTGGAAGAAGCGATCTGTTACCAA  
GCCGTCTTATTGGGAATAACAAGAGCATCTATGAATACTCAAAGTTTCATATCCGAAGCT  
AGTTTTCAAGAACTGCTAGAGTTTTAGCAAAAGCAGCTCTCCTGGGCCGTATCGATT  
GGTTGAAAGGCCTGAAAGAAAACGTTGTTCTGGGGGGGATGATACCTGTTGGTAGCG  
GCTTCAAACACCT---TCAAGCGAACCTAACAAACATTCTAACAAACATTGCC-----TTTG  
AACTCCAAAAAAGAATCTATTAGAGGGGGAAATGAAA-----GATATTTTGTCTACCA  
CAGAAAATTATTTGATTCTTGCCTTTCAAATAATTTCCATGATACACAAGAACAATCATT  
TTTT-----ATGACAAGAAGATATTGGAACATTAATTTAGAAGAGATG  
ATGGAAGCAGGAGTTCATTTTGGCCATGGTACTAGGAAATGGAATCCTAAAATGGCAC  
CTTATATCTCTGCAAAACGTAAAGGTATTATATTAACAATCTTACTAGAACTGCTCGTT  
TTTTATCAGAAGCTTGTGATTTGGTTTTTTGATGCAGCAAGCAGAGGAAAACAATTCTTA  
ATTGTTGGCACTAAAAATAAAGAAGCTGATTTCAGTAGCATGGGCTGCAATAAGGGCTC  
GGTGTCAATTATGTTAATAAAAAATGGCTCGGTGGTATGTTAACGAATTGGTCCACTACA  
GAAACAAGACTTCATAAGTTTAGAGACTTGAGAACCGAACAAAAAACAGGGGGGCTC  
GACCGTCTTCCGAAAAGAGATGCGGCTATGTTGAAAAGACAATTATCTCATTGCAAA  
CATATCTGGGTGGGATTAATATATGACAGGGTTACCCGATATTGTAATCATCGTTGATCA  
GCACGAAGAATATACGGCCCTTCAAGAATGTATCACGTTGGGAATCCAACAATTTGTT  
TAATCGATACAAATTGTGACCCCGATCTCGCAGATATTTGATTCCAGCCAATGATGACG  
CTATATCTTCAATCCGATTAATTCTTAACAATTAGTATTTGCAATTTGTGAAGGCCGTT  
T---GGCTATATAAGAAATCCGATGGGACAAAAAATAAATCCAATTGGTTTCAGACTTGGT

ACAACCCAAGGTCATCATTCCCTTTGGTTTCGCACAACCAAAAAATTATTCTGAGGGTCT  
GCAAGAAGATAAAAAATAAGAACTTATATCCAGAATTATGTACAAAAAATATGAAAA  
CATCTTCTGGC---GTCGAGGGAATTGCACGTATAGAGATTCAAAAAGAATCGACCTGA  
TCCAAATCATAATCTATATGGGATTTCCAAAAATCTTAATTGAAAGTCGACCCCGAGGA  
ATC-----GAAGAATTACAGATGAATTTACAAAAAGAATTTCAATTCTGTAAATAGAAA  
ACTTAACATTGCTATCACACGAATTGAAAAGCCTTACGGAAACCCTAATATTCTTGCAG  
AATTTATAGCGGGCCAATTAATAAATAGAGTTTCTTTTCGCAAAGCAATGAAAAAGGCT  
ATAGAATTAAGTGAACAAGCAGATACAAAAGGAATTCAGTGCAAATTGCAGGACGTA  
TCGACGGAAAAGAAATTGCGCGTGTGAATGGATCAGAGAGGGGAGGGTTCCACTAC  
AAACCATTGCGAGCTAAAATTGATTATTGTTGCTATACAGTTCGAACGATCTATGGGGTAT  
TAGGCATCAAATTTGGATATTTATAGACGGGGAAATGTCGCGTTACCGAGGTCCTCGT  
TTCAAAAAATACGCCGCCTGGGGGCTTACCAGGGCTAACTAATAAAAGGCCCAGAG  
CTGGAAGTGATCTTAGAAACCAATCGCGTTCCGGGAAA---AAATCCAATATCGAATTC  
GCCTAGAAGAAAAACAAAATTGCGTTTTTCATTATGGTCTTACAGAACGACAATTACTT  
AAATACGTTTCGTATCGCCGAAAGGCCAAAAGGGTCAACAGGTCAGGTTTTACTACAAT  
TACTTGAAATGCGCCTTGATAACATTTCTTTTCGCTTGGGTATGGCTCCGACTATTCCGG  
GAGCTCGCCAATTAGTTAACCATAGACATATTTTAGTCAATGGTCGTATAGTAGATATAC  
CAAGTTATCGCTGCAAACCCCGAGATACTATTGCGGGCAGGGATGAACAAAAATCTAA  
AGTTCTAATTCAAATTTCTCTCGATTCATCCCCCAT---GAGGAATTGCCAAACCATTG  
ACTCTTCAACCATTCCAA-----TATAAAGGATTAGTCAATCAAATAATAGATAGTAAATGG  
GTCGGTTTTGAAAATAAATGAATTGCTAGTTGTAGAATATTATTCTCGTCAGACTATGTCA  
CGTCGAGGTACTGCAGAAGAAAAAACTGCAAATCCGATCCAATTTATCGTAATCGATT  
AGTTAACATGTTGGTTAACCGTATTCTGAAACACGGAAAAAAATCATTGGCTTATCAA  
TTATCTATCGAGCCGTGAAAAAGATTCAACAAAAGACAGAAACAAATCCACTATCTGT  
TTTACGTCAAGCAATACATGGAGTAACTCCGGGTATAGCAGTAAAAGCAAGACGTGTA  
GGTGGATCGACTCAGCAAGTTCCATTGAAATAGGATCCACACAAGGAAAAGCACTTG  
CCATTGTTGGTTATTAGCGGCATCCCGAAAACGTCCGGGTCGAAATATGGCTTTCAA  
TTAAGTTCCGAATTAGTGGATGCTGCCAAAGGGAGTGGCGATGCCATACGCAAAAAGG  
AAGAGACTCATAAATGGCAGAGTCAAATAGAGCTTTTGCACATTTTCGTATGGGTAGT  
GATACTATTGCTGACATAATAACCTCTATACGAAATGCCGATATGTATAGAAAAAGCGTG  
GTTTCGAGTAGCATCTACTAATATCAGCCAAAGTATTGTTAAAATACTTTTACGAGAGGGT  
TTTATCGAAAACGTGAGAAAACATCGAGAAAACAACAATCTTTTTTGGTTTTAACCT  
ACGACATAGACGG-----AATAGGAAAAGGACTTAT-----AGAAATCTTTTAAATTTAAA  
ACGGATCAGTCGGCCGGGTCTACGAATCTATTCTAACTATCAAAGAATTCCTAGAATTTT  
AGGTGGGATGGGGATTGTAATTCTTTCTACCTCTCAGGGTATAATGACAGACCGAGAGG  
CTCGACTAGAAAAGAAATAGGCGGAGAAATTTTGTGTTATATATGGATGGCAAAAAGCTATA  
CCGAAAAAAGGTTACCGT-----GGACGTATTGGTTCACGTAAGAGTACACGTAAAATAC  
CAAAGGGGGTTATTCAATTTCAAGCAAGTTTCAATAATACCATTGTGACTGTTACAGATG  
TACGGGGGCGAGTGGTTTTCTTGGTCTCTGCCGGTACTTCTGGCTTCCGAGGTACAAA  
AAGAGGGACGCCATTTGCTGCTCAAACCGCAGCAGGACATGCTATTTCGTGCAGTAGTA  
GATCAAGGTATGCAACGAGCAGAAGTCATGATTAAAGGTCCCGGTCTCGGAAGAGAC  
GCAGCATTACGAGCTATTTCGAGAAGTGGTATACTATTAACCTTTCGTACGGGATGTAAC  
CCCTATGCCACATAATGGCTGTAGACCCCGAAAAAAGACGTGTGATGCCAACGATT  
AAACAACCTATTAGAAATACAAGACAGCCAATTAGAAATGTCACAAAATCCCCCGCGC







ATCAAATGATATTGAGCATGTTTCCCAT-----CTCTTCTCGAGAAACAAGTCGGCTATTTTC  
TTTGCAAAATTGTGCTCAATTTTCATATGTGGCAATTCCGCCAAGATCTCTTCGTT-----  
AGTTGGGGGAAG---AATCCGCCCGAATCGGATCTTTTGAGGAAC---GTATCGAGAGAGA  
ATTTGATTTGGTTAGACAATGTGTGGTTGGTAAACAAGGATCGG-----TTTTTTCGC---  
--AAGGTACGGAATGTATCGTCAAATATTCAATATGATTCC-----ACAAGA-----TCTAGT  
TTCGTTCAAGTAAGGGATTCTAGCCAATTGAAAGGATCTTCT--GATCAATCCAGAGATC  
ATTTTGATTCCATTAGT-----AATGAGGATTTCGGAA-----TA  
TCACACATTGATCAATCAAAGAGAGATTCAACAATAAAAGAAAGATCGATTCTT--TG  
GGAT-----CCTTCCTTTCTTCAAACGGAAGGAACAGAGATAGAATCAAAC-----CGATTC  
CCGAAA-----TGCCTTTCTGGATATTCC-----TCAATGTCCCGGCTATTACAG---GAACGTG  
AGAAGCAGATGATTAATCATCTGCTTCCAGAAGAAATCGAAGAATTTCTT-----GGGAAT  
CCTACAAGATCCGTTTCGTTCTTTTTTCTCTGACAGATGG-----TCAGAATTTTCAT--CTGG  
GTTTCAATCCTACTGAGAGGTTCCACTAGAGATCAG-----AAATTGTTGAAGAAACA  
ACAAGATCTTTCT--TTTCTC-----AGGCGATCGGAA-----AATAAAGAAATGGTAAAT  
CTATTCAAGATAATTACGTATTTACAAAAT-----ACCGTCTCAATTCATCCTATTTTCATCAG  
ATTCGGGATGTGATATGGTTCCG---AAGGATGAACCGGAT--ATGGACAGTTCCAACAAG  
ATTTCAATCTTGAACAAAATCCATTTTTTGTATTGA-----TTTCATCTATTCCATGACCGGA  
ACAGGGGAGGATACACGTTA-----CACCACGATTTTGAATCAGAA-----GAGAGATTTCA  
AGAACTGGCAGATTTATTCACTCTATCAATAACCGAGCCG--GATCTGGTGTATCATAAG  
AGATTTGCCTTTTCTATTGATTCCATGGATTGGATCCAAAACAA-----TTCTTGAATGGG  
GTATTCAACTCCAGGTATGAATGGAAAACGACATCTTTATTGGTTTTATTGGTTCTACTT  
CCTATTTTTTAT-----GAAGAGAATGAATCTTTTTATCGAAGGATCAGAAAAAAAGGGT  
CCGG---ATCTCCTGCGGGAATGATTTGGAAGAGCCAAAACCAAAAATAGTGGTATTTGC  
TAGCAACAACATAATGGAGGCAGCCAATCAATATAGATTGATCCGAAATCTGATTCAAA  
TCCAACATAGCACCCATAGG-----TACATAAGAAATGTATTGAATCGATTCTTTTTAATGA  
AT-----AGATCCGATCGCAACTTCAAATATGGA-----ATTCAAAGGGATCAAATAGGA  
AAGGATACTCTGAATCATAGAACTCTAATGAAATATATGATCAACCAACATTTATCGAAT  
TTGAAAAAG---AGTCAGAAGAGATGGTTGATCCTCTT-----ATTTTTTTTTCTCGAACCA  
AGAGATCCATGAATCGGGATCCTGATGCATATAGATACAAATGGTCCACTGGGAGCAAG  
AATTTCCAGGAACAT-----TTCGTTTCTGAGCAGAAGAGCCGT-----TTTCAAGTAGT  
GTTTCGATCGATTACGTATTAATCAATATTCGATTGATTGGTCTGAGGTTATCGACAAAAA  
AGATTTGTCTAAGCCACTTCGTTTCTTTTTGTCCAAG-----  
-----TTGCTTCTTTTTTTGTCTAAC--TCACTTCTTTTTTTGTTTGTTCAGTTT  
CGGGAATATCCCATTCATAGGTCCGAG---ATCTACATCTAT--GAATTGAAAGGTCCGAA  
TGAT-----CCACAGTTTTTAGAATCAATAGGTCTTCAAATCGTTCATTTGAAAAAATTG  
AAACCCTTC-----TTATTGGAT-----GATCATGAGACTTGC---CAAAAATCTAAATCTTG  
ATCAATGGAGGAACAATATACCATTTTTGTTCAATAAGATACCA---AAGTGG---ATGAT  
TGAATCATTCCATACTAGA-----AATAATCGCAGGAAATCCTTTGATAACACGGATTCTTA  
TTTCTCAATGATATTCCACGATCAATACAATTGGCTGAATCCCGTGAATCATTTCATAG  
AAGTTCATTGAGATCTTCTTTTTATAAAGCAAATCAACTTCGATTCTTGAATAATCCACA  
TCACTTCTGCTTCTAT-----TGTAACAAAAGATTCCCCTTTTATGTG-----GAAAAGGC  
CCGTATCAAT-----AATTATGATTTTACGTATGGA---CAATTCCTCAATATCTTGTTTCATTG  
CAACAAA---ATATTTTCTTTGTGCGTCCGTA---AAAAACATGCTTTTTTGGGGG---A  
GAGATACTATTTTCAGCAATCGAGTCACAGGTATCTAACATATTTCATACCTAAGGCTTTTC

CACAAAGTGGT--GACGAAACGTATAACTTGTACAAATCT-----TTCCATTTTCCAAGT  
CGATCCAATCCATTTCGTTTCGT-----AGAGCTATTTACTCGATCGCAGACATTTCTGGAACA  
CCTCTAACAGAGGGGACAAATAGTCAATTTTGAAAGAACTTATTGTCAACCTCTTTTCAGA  
TATGAATCTATCTGATTCAGAAGGGAAGAAGCTTGTATCAGTATCTCAAT-----TTCAATTC  
AAACATGGGTTTGATTCACTCCATGTTATGAGAAATATTTACCATCCGAAAAG-----A  
GGAAAAA-----CGGAGTCTTTGTCTAAAG-----AAATGCGTTGAGAAAG  
GGCAGATGTATAGAACTTTTCAACGAGATAGTGCTTATTCAACTCTCTCAAATGGAAT  
CTATTCCAAACATATATGCCATGGTTCCTTACTTCGACAGGGTACAGATATCTAAAGTTT  
TTATTTTATAGATACTTTTTCAGACCTATTG-----CCGATACTAAGTAGC---AGTCAAAAATT  
TGTATCCATTTTTCATGATATTATGCATGGATCAAATATATCATGGCGAATTCTTCAGAAA  
AAATTC-----TGTCTTCCACAAAGGAATCTG---ATAAGTGAGATTTTCGAGTAAG  
TGTTTGCATAAT-----CTTCTTCTGTCCGAAGAAATGATTCATCGAAAT-----AATGAGTCA  
CCATTGATATCGACACATCTGACA-----AATGTTCCGGGAGTTC---CTCTATGCAATCCTTT  
TCCTTCTTCTTGTGCTGCATAT--CTCGTTGTACACGTCTTCTCTTTGTTTTCGGG-----  
GCCTCTAGTGAGTTACAGACAGAGTTCGAAAAGGTCAAATCTTTGATGATTCCATCATC  
TATGATTGAGTTGCGAAAACCTTCTGGATAGGTATCCTACATCTGAACCGAATTCTTTCTG  
GTT-----CTGAAACAATTAGGAGATTCTCTA-----GGTGGCAA  
CATGCTATTGGGTGGTGGTCCCGCT-----TATAGG---GTCAAATCAATACGCTCTAA  
GAAGAAATATTTGAATATAAATCTCATCGATATCATCGATCTCATA---AGTATCATACCAA  
ATCCCATCAATCGAATCACTTTTTTCGAGAAATACGAGACATCTAAGTCATACAAGTAAA  
GAGATCTATTCATTGATAAGAAAAAGAAAAACGTGAACGGGGACTGGATTGATGATA  
AAATAGAATCCTGGGTTGCAAACAGCGATTTCGATTGATGATGAAAAAAGAGAATTCTT  
GGTTCAGTTCTCC-----ACCTTAACGACA-----GAAAAAAGGATTGATCAAATTTTATTGA  
GTCTGACT--CATAGTGATCATTTT-----TCAAAGAATGACTCTGGTTATCAAATGA  
TTGAACAACCGGGAGCAATTTACTTACGATACTTAGTTGACATTCAT-----AAAAGTAT  
CTAATGAATTATGAGTTCAATACATCCTCTTTAGCAGAAAAGACGGATATTCCTTGCTCAT  
TATCAGACAATCACTTAT-----TCACAACTTCGTGTGGGGCTAATAGTTTGCATTTCCCA  
TCTCATGGA-----AAACCTTTTCGCTCCGCTTAGCCTTATCCCTCTCT--AGGGGTACT  
TTAGTAATAGGTTCTATAGGAACTGGACGATCTTATTTGGTCAAATACCTAGCGAAAAA  
CTCCTATCTTCTTTCATTACGGTATTTCTGAACAAGTCCCTGGATAACAAGTCTCAAGG  
TTTTGATAATATT-----GATGTTGAT--AGTGACGATAGTGAT-----G  
CTAGTGACGATATTGATGCT-----AGTGACGATATC-----CTTGA  
TATGGAGCTG--GAACTGCTAACTAGCATGAATGCGCTAACTATGGATATGATGCCTGAA  
GAT-----GAAGACCTACTTTATATCACCTTCAATTTCGAATTAGCAAAAAGCAATGTCTCCT  
TGCATAATATGGATTCCAAACATTCATGATCTGGATGTGAATGAGTTCGAATTACTTGTCC  
CCAGGTCTATTAGTGAACCTTCTCTCCAGG-----GATTATGAA-----ACTAGAAATA  
TTCTTGTTATTGCTTCGACTCATATTCCCCAAAAGTGGATCCCGCTCTAATAGCTCCGA  
ATAAATTAACGTGCATTAAGATACGAAGGCTTCTTATTCACAACAACGAAAGCAC  
TTTTTCACTCTTTCATATACTAGGGGATTTCACTTGGAAAAGAAAATGTTCCATACT-----  
AATGGATTCGGGTCCATAACCATGGGTTCCAATGCACGAGATCTTGTAGCACTTACCAA  
TGAGGCCCTATCGATTAGTATTACACAGAATAAATCAATTATAGATACTAATACAATTAGA  
TCCGCTCTTCATAGACAAATTTGGGATTTGCGA-----TCCCAGGTAAGATCGGTCCAG  
GATCATGGGATCCTTTTCTATAAGATAGGAAGGGCTGTAGCACAAAATGTACTTTTAAAGT  
AATTGCCCCATAGATCCTATATCTATCTATATGAAAAAGAAA-----TCATGTAACGAAGTG

GATTATTATTTGTACAATTGGTACTTTCGAACTTGGAACGAGCATGAAGAAATTAACGAT  
ACTTCTTTATCTTTTGAGTTGTTCTGCCGGATCGGTCACTCAAGATCTTTGGTCTCTACC  
C-----GGACCCGATGAAAAA---AATGGGATCACTCCTTATGGACTCGTTGAGAATGATTC  
T--GGTCTAGTTCGTGGCCTATTAGAAGTGGAAGGCGCTCTGGTGGGA-----TCCTCACG  
G-----ACATGCAGTCAGTTTGATAAGGAT-----CGAGTGACATTGCTTCTTCGACCCGA  
ACCAAGGAAT--CCCTTAGATATGATGCAAAATGGATCTTGTCTATCCTTGATCAGAGA  
TTTCTCTATGAAAAAGAC-----GAATCGGAGTTTGAAGAG--GGGGACGAG-----C  
GGCAACAG-----ATAGAGGAGGAT-----TTATTCAATCAC-----ATAGTTTGGGCT  
CCT-----AGAATATGGCGCCCT-----TGGGGCTTCTATTTGATTGTATCGAAAGGCCA  
ATGAATTGGGATTTCCC---TATTGGTCCAGGTCATTTCGGGGCAAG-----CGGATCGTT  
TATGATGAAGAGGATGAGCTTCAAGAGAATGATTCGGAGTTCTTGCAGAATGGAACCG  
TGCAGTACCAGACACGAGATATATCTTCCAAAGAACAAGGCCTTTTTCGAATAAGCCAA  
TTCATTTGGGACCCCTGCAGATCCACTCTTTTCCCTATTCAA---GCTCAGCCCTTTGTCT  
CTGTGTTTTACATCGAGAATTATTTGCAGATGAAGAGATGTCAAAGGGGCTTCTTACT  
CCCCAAAAAATCGTCCTACATCTCTATATAAACGCTGGTTTATC-----AAGAAGACGCA  
AGAAAAGCACTTCGAATTGTTGATTAATCGCCAGAGATGGCTTAGA-----ACCAATCG  
TTCATTATCT-----AATGGATCTTCCGTTCTAAT-----ACTCTATCCGAGAGTTATCAGTAT  
TTATCAAATCTGTTCCCTATCTAAC--GGAACACTATTGGATCAAATGACAAAGGCATTGT  
TGAGAAAAAGATGGCTTTTCCCGGATGAAATGCAAATTGGATTC-----ATGGAACAGGA  
TAAGGATTTCCCATTCCTT-----  
-----ATGTCAGCTCAATCCGAAGGAAATTATGCGGA  
AGCTTTACAGAATTATTATGAAGCTATGCGACTAGAAATTGATCCCTATGACCGAAGTTA  
TATACTCTATAACATAGGACTTATCCACACAAGTAACGGAGAACATACGAAAGCTTTGG  
AATATTATTTTCGAGCGCTCGAACGAAACCCATTCTTACCACAAGCTTTTAATAATATGG  
CCGTGATCTGTCATTAC-----  
--GTGCGACTATCTCCG-----CTA-----ATGAGTTGTGCGAT  
CAGAACATATATGGATAGAACCTATAACGGGGGCTCGAAAAACAAGTAATTTCTGCTGG  
GCTGTTATCCTTTTTTTAGGTTTATTAGGATTCTTGTGTTGTTGGAACCTCGAGTTATCTT  
GGTAGAAATTTGATATCTTTATTTCCGTCTCAGGAAATAGTTTTTTTTCCACAAGGAATT  
GTGATGTCTTTCTACGGAATCGCGGGTCTTTTTATTAGCTCCTATTTATGGTGCACAATTT  
CGTGGAATGTAGGTAGTGGTTATGATCGATTTGATAGAAAAGACGGAATAGTGTGTATC  
TTTCGTTGGGGATTTCTGGAAAAAATCGTCGGGTCTTCTCCAATTTCTTATAAAAGAT  
ATTCAGTCTGTGAGAATAGAAGTGAAAGAAGGTATTTATGCTCGTGTGCTTTTATATG  
GATATCAGAGGCCAGGGAGCCATTCCATTGACTCGTACTGATGAGAAT--TTTACTCCAC  
GGGAAATGGAACAAAAAGCTGCTGAATTGGCCTATTTCTTGCGTGTACCAATTGAAGTA  
TTT

>Glycine

ATGGA AAAATGGTGGTTTAATTCTATGTTGTTTTTAAGTAAATCAATGGATAGTCTTGGT  
CCTATTGAAAATACCAGTCTAAGGGAAGACCCTATTTTAACCGATATAGAAAAAAAAT  
TCACAGG-----GATTTGGATTATTTA-----  
-----GAAATGGAAGTTTTTTTTTCT--  
-----AGCGATCTGAATACTGTTTCTAAGAATGATGATGAT-----CATTACATGTATG  
AGACTCAATTTAGTTTTAACATAATATTACTAGTTTCATTGATAGT-----TG  
CATTGAGAGTTTCAATTTAGGTGATATTGACAAATACAATGAT--TATTTTTATAGTTACAT

TTTTTTGAATTCTAGTACTAGTATAATAACTAGTACGAATGATAGTGATTCCACTATAGGA  
GAAAGTTCTAATAATCTCGATGAAAGTCAAAAATATAAGCATTGTGGCTTGAATGCGA  
AAATTGTTATGGATTA AATTATAAAAAATTTTTTAAATCAAAAATGAATATTTGTGAATAC  
TGTGGATATCATTGAAAATGGGCAGTTCAGATAGAATCGAACTTTCGATTGATTCGGG  
TACTTGGAATCCTATGGATGAAGACATGGTTTCTCTGGATCCTATTGAATTCATTCCGA  
AGAGGAACCTTATAAAGATCGTATTGATTCTTATCAAAGAAAAACGGGATTA AACTGAGG  
CTGTTCAAACAGGTACTGGTCAACTAAATGGTATTCCTGTAGCTATTGGAATTATGGATT  
TTCAGTTTATGGGGGGCAGTATGGGATCCGCAGTAGGTGAGAAAATCACCCGTTTGGT  
AGAATATGCTACTAATCAACTTTTACCTCTTATTCTGGTATGTGCGTCCGGAGGAGCGCG  
TATGCAAGAAGGAAGTTTGAGCTTGATCCAAATGGCTAAAATCTCTTCTGCTTTATATGA  
TTATCAAAAAATAAAAAGTTATTCTATGTATCCATACTTACATCTCCCACTACTGGGGG  
GGTAACTGCTAGTTTTGGCATGTTGGGGGATATCATTATTGCCGAACCAAATGCTTATAT  
TGCATTTGCTGGTAAAAGAGTAATTGAACAAACATTGAATAAGGCAGTACCTGAAGGT  
TCACAAGCAGCTGAATATTTATTCCATAAGGGCTATTTGATTCAATCGTACCGCGTAAT  
CTTTTAAAGGGCGTTCTGAGTGAGTTATTTCAATTCCATAATTTCTTTTCTTTGACTAAA  
AATGATAAGGCAATGGTAACCATTCGTGCAGATGAAATTAGTAAAATTATCCGTGAACG  
CATTGAGCAATATAATACGGAAGTAAAATGTAAATACGGGTACCGTACTTCAAGTAG  
GCGACGGTATTGCTCGTATTTATGGTCTTGATGAAGTAATGGCGGGTGAATTAGTGGA  
TTTGAAGAGGGTACTATAGGCATTGCTTTGAATTTGGAATCCAAAAATGTTGGTGTGT  
ATTAATGGGTGATGGTTTGATGATACAAGAGGGGAAGTTCAGTAAAAGCAACAGGAAGA  
ATTGCTCAGATACCTGTAAGTGAGGCTATTTGGGTGCGTGTATAAATGCCCTGGCTAAA  
CCAATTGATGGTCGAGGAGAAATTTAGCTTCGGAATCTCGATTAATCGAATCTCCTGC  
TCCCGGTATTATTTTCGAGACGTTCCGTATATGAGCCTCTCCAAACAGGACTTATTGCTAT  
TGATTTCGATGATCCCCATAGGACGTGGCCAACGAGAATTAATTATTGGAGACAGACAAA  
CGGGTAAAACAGCAGTAGCCACAGATACTATTCTCAATCAACAGGGACAAAATGTAAT  
ATGTGTTTATGTAGCTATTGGTCAAAAAGCATCTTCTGTGGCTCAAGTGGTGAATACCT  
ACAAGAAAGAGGAGCAATGGAATACACTATTGTAGTAGCTGAAACAGCGGATTCTCCA  
GCTACATTACAATACCTCGCCCCTTATACAGGAGCAGCTCTGGCTGAATATTTTATGTAC  
CGTGAACGTCACACTTTAATCATTATGACGATCTCTCCAAACAAGCACAGGCTTATCG  
CCAAATGTCTCTTCTATTACGAAGACCACCTGGTTCGCGAAGCTTATCCAGGGGATGTTT  
TTTATTTACATTCACGTCTTTTGGAAAGAGCCGCTAAATTAAGTTCTCAGTTAGGCGAA  
GGAAGTATGACTGCTTTACCAATAGTTGAAACTCAATCGGGAGATGTTTCAGCTTATATT  
CCTACTAATGTAATTTCCATTACAGATGGCCAAATATTCTTATCTGCCGATCTATTCAATG  
CTGGAATCAGACCCGCTATTAATGTAGGTATTTCCGTTTCCAGAGTTGGATCGGCGGCT  
CAAATTAAGCCATGAAACAAGTAGCTGGTAAATTA A AATGGAATTAGCACAATTTCGC  
AGAATTAGAAGCTTTTGGCCAATTCTCTTCTGATCTCGATAAAGCTACTCAAATCAATT  
AGCAAGAGGTCAACGATTGCGCGAGTTGCTTAAACAATCCCAATCAGCTCCTCTTACC  
GTGGAAGAACAGATAATAACTATTTATACTGGAACGAATGGTTATCTTGATTCATTAGAA  
ATTGGACAGGTAAGGAAATTTCTTGTTGAGTTACGTGCTTACTTAAACACGAATAAACC  
TCAATTCAAAGAAATCATATCTTCTACCAAGACATTCACTGGGGAAGCAGAAGTCCTTT  
TGAAGGAAGCTATTCAAGAACAGATGGAACTCTTTTACTACAGGAACAGGTAATGCG  
AATCAATCCTACTACTTCTGGTCCTGAGGTTTCTGCGCTTGAAAAAAAATCTGGGAC  
GTATCGCCCAATAAATTGGTCCGGTACTAGATGTAGCTTTTCCCCAGGTAAGATGCCTA  
ATATTTACAACGCTCTGATAGTTAAGGGTTCGAGATACTGTTGGTCAACAAATTAATGTG

ACTTGTGAAGTACAGCAATTATTAGGAAATAATCGAATTAGAGCTGTAGCTATGAGTGC  
GACAGAAGGTCTAATGAGAGGAATGGAAGTGATTGACACAGGAGCTGCCCTAAGTGT  
TCCAGTAGGTGGAGCAACTCTAGGACGAATTTTCAACGTGCTTGGAGAGCCCATTGAT  
AATTTAGGTCCTGTAGATACTCGCACAAACATCTCCCATTCATAGATCTGCGCCTGCCTTT  
ATACAATTAGATACAAAATTAGCCATTTTTGAAACAGGAATAAAAGTAGTAGATCTTTTA  
GCTCCTTATCGTCGTGGAGGAAAAATAGGACTTTTCGGTGGAGCTGGAGTGGGTA  
CGGTACTGATTATGGAATTGATCAATAACATTGCCAAAGCTCATGGAGGTGTATCTGTAT  
TTGGCGGAGTAGGTGAACGTACTCGTGAGGGAAATGATCTTTATATGGAAATGAAAGA  
ATCTGGAGTAATTAATGAACAAAATATTGCAGAATCAAAGTAGCTCTAGTATATGGTC  
AAATGAATGAACCGCCCGGAGCTCGTATGAGAGTTGGTTAACTGCCCTGACTATGGC  
GGAATATTTTCGAGATGTCAATGAACAAGATGTACTTCTATTTATCGACAATATCTTTTCG  
CTTCGTCCAAGCAGGATCTGAAGTATCTGCCTTATTGGGTCTGAATGCCTTCTGCTGTGG  
GTTATCAACCCACTCTTAGTACTGAAATGGGTTCTTTACAAGAAAGAATCACTTCTACC  
AAAGAGGGGTCCATAACTTCTATTCAGCAGTTTATGTACCCGCAGACGATTTAACCGA  
TCCTGCGCCTGCTACGACATTTGCACATTTAGATGCTACTACTGTACTATCAAGAGGATT  
AGCGGCCAAAGGTATCTATCCAGCAGTAGATCCTTTAGATTCAACCTCAACTATGCTCC  
AACCTCGAATCGTTGGTGAAGAACATTATGAGACTGCGCAAAGAGTTAAACAAACTTT  
ACAACGTTACAAAGAACTTCAAGACATTATAGCTATCCTTGGCTTGGACGAATTATCCG  
AAGAAGATCGCTTAACCGTAGCAAGAGCACGAAAAATTGAGCGTTTCTTATCACAACC  
TTTTTTCGTAGCAGAAGTTTTTACCGGTTTCGCCGGGAAATATGTTAGTCTAGCAGAAA  
CAATTAGAGGGTTTAAATTGATTCTTTCTGGAGAATTAGATGGTCTTCTGAACAAGCC  
TTTTATTTGGTAGGTAATATCGATGAAGCTACTGCGAAAGCTACGAACTTAGAAATGGA  
GAGCAATTTGAAGAAAATGACTTTAAATCTTTGTGTACTGACCCCAATCGAATTGTTT  
GGGATTCGGAAGTGAAGGAAATCATTTTATCTACTAATAGCGGACAAATTGGAGTATTA  
CCAAATCATGCGCCTATTGCCACAGCCGTAGATATAGGTATTTTGAGAATACGTCTTAAA  
GACCAATGGTTAACGATGGCTCTGATGGGCGGTTTTGCTAGAATAACAATAATGAGAT  
CACTGTTTTAGTAAATGATGCGGAAAAGGGTAGTGACATTGATCCACAAGAAGCACAG  
CAAACCTTTGAAATAGCAGAAGCTAATTTGAATAAGGCGGAAGGCAAGAGACAAACA  
ATTGAGGCAAATCTAGCTCTTAGACGAGCTAGGACACGAGTAGAGGCTATCAATGTGAT  
TTCAATGAAAAATATAACCGATTCTTTCCCTTTGTTTGGGCTACTGGCCATCCGCCGGAA  
GTTTCGGGTTTAAATACCGATATTTAGCAACAAATCCAATAAATCTTAGTGTAGTGTAG  
GTGTATTGGTTTTTTTTTGAAAGGGAGTGTTAAGTGATTTATTAGATAATCGAAAACAG  
AAAATCTTGAGAACTATTCGAAACTCAGAAGAATTACGGGAAGGGGCCATTGAACAGC  
TGAAAAAAGCCCAAGCCCGCTTAAGGAAAGTCGAAACGGAAGCAGATCGTTTTTCGGG  
TGAATGGCTATTCTGAGATCGAACGAGAAAAATTGAATTTAATTAATTCAATTTATACGA  
CTTTGGAACAATTAGAAAATTACAAAAACGAAGCCATTCATTTTGAACAACAAAGAGT  
GATTAATCAAGTCCGACAACGGGTTTTACAACAAGCCTTACAGGGAGCTCTAGGAACT  
CTAAAGAGTTGCTTGAACAACGAGTTACATTTACGTACTGTCAAGTCTAATATTGGCAT  
GTTTGGGACGATGAAAGAAAAATAACTATGAATCCAATTTTCTGCTGCTTCTGTTAT  
TGCTGCTGGGTTGGCCGTAGGGCTTGCTTCTATTGGACCTGGGGTTGGTCAAGGCACT  
GCTGCAGGGCAAGCTGTAGAAGGGATTGCACGACAACCGGAGGCAGAGGGAAAAAT  
ACGAGGTACTTTATTGCTTAGTTTGGCTTTTATGGAAGCTTTAACAATTTATGGACTGGT  
GTAGCATTAGCACTTTTATTTGCTAATCCTTTTGTTATGAATGTTTTTATGCTCTATCA  
ACACATTA AAAAGATTATATGATATATCTGCTGTGGAAGTAGGTCAACATTTCTATTGGC

AAATAGGGAGTTTCCAAGTACATGCCCAAGTACTTATTACTTCTTGGGTTGTAATTGCTC  
TCTTATTGGTTTCAGCCATTCTAATTATTCGAAATCTGCAAACCATTCCTCGCTTTCGGTC  
AGAATTTCTTTGAATATGTTCTTGAATTCATTCGAGACGTGAGCAAACCTCAAATTGGA  
GAAGAATATGGTCCGTGGGTTCCTTTTATTGAACTTTGTTTCTATTTATTTTTGTTTCTA  
ATTGGTCGGGGGCTCTTTTACCTTGGAATCATACAATTACCTCACGGGGAGTTAGCT  
GCACCCACAAATGATATAAATACTACCGTTGCTTTAGCTTTACTTACATCAATTGCATATT  
TCTATGCGGGTCTTTCAAAAAAAGGATTAGCTTATTTAATAAATACATCCAACCAACCC  
CAATCCTTTTACCGATTAACATCTTAGAAGATTCACAAAACCCTTATCTCTTAGTTTTTC  
GACTTTTCGGAAATATATTAGCTGATGAATTAGTAGTTGTTGTTCTTGTTCCTTTAGTACC  
TTTAGTAGTTCCTATACCTGTCATGTTCCCTGGATTATTCACAAGCGGTATTCAAGCTCT  
CATTTTTGCTACTTTAGCTGCGGCTTATATAGGTGAATCCATGGAAGGCCATCATATGGTA  
TTTGCAAGTTTAGAACATATATTAACCTCATATATCGTTTTTCGGTCGTATCTATTTAATTC  
AATTCATTTGATAACCTTATTATTTGTGCGAAATCATAGGATTATCTGATTTCGTCAAAAAA  
GGCATGATAATAACTTTTTTTTTGTATAACAGGATTGTTAGTTACTCGTTGGGTTTTTTCA  
GGCCATTTACCGTTTAGTGATTATATGAATCATTAAATTTCTTTCATGGACTTTTTCCAT  
TTTTTATATGGTTCCTTACTTCAAAAAATCTAAAAACTATTTAAATACAATAATAACACC  
AAGTGTATTTTTACCCAAGGCTTTGCTACTTCGGGGCTTTTAACGAAAATGCATGAAT  
CGTTAATATTAGTACCTGCTTTACAGTCCCATGGTTAATGATGCACGTAAGTATGATGAT  
ATTGGGTTATGCAACTCTTTTATGCGGATCATTATTATCAGTGGCTATTTTAGTCATTACA  
TTTCAAGAACTCATACAAATTATTGGTAAAAGCAAGGAAATCAAATACATGAATATGAC  
TGATAATGTTTTACAAAAAATCTTTTTTTGTCTTATAGAAATTATTATAGATCTCAATTT  
CTTCAACAATTGGATCGTTGGGGTTACCGTACTATTAGTCTAGGTTTTATCTTTTTAACG  
ATAGGTATTATTTACAGGAGCAGTATGGGCTAATGAGGCATGGGGATCATATTGGAATTGG  
GATCCAAAGGAAACTTGGGCTTTTTATTACTTGGACTATATTCGCGATTTATTTACATACTA  
GAAAAATAAAAAATTGGAAGATCTAAATTCTTCAATAGTCGCCTCCATAGGTTTTCTTA  
TAATTTGGGTATGTTATTTAGGTATAAATCTTTTAGGAATAGGACTACATAGTTATGGTTC  
ATTTACACCTAATATGACAAAAAAGAAAACATTCATTCCCCTTCTATATCTTACATCTATA  
GCTTTTTTGCCTGGTGTATCTCTTTCACATTTAAGAAAAGTCTCGAATCTTGGTTTATT  
GATTGGTGGAATACTAGGCAATCCGAAATTTCTTGAATGATATTAAGAAAAGAGTAT  
TCTAAAAAATTCATAGAATTTGAAGAAGTGTTTTTCTTAGATGACATGTTAAAGGAAT  
GTCCGGAAACACATCTACAAAACCTGCGTACTGGA---TATAAAGAAACAATCCAATTA  
TCAAACGCACAACGAAGATCGTATGAATACGATTTTGCACCTCTCGACAAATATAATT  
TGTTTCTTTATTCTAAGCGGTTATTCTATTCTTGGTAATCAAGAAGTGTCTTATTA  
CTTTGGTTCGAGAATTTATATATAATTTAAGTGACACAATAAAAAGCTTTTTCTATTCTTCT  
ATTAAGTATTTATGTATAGGATTCCATTCAACCCATGGTTGGGAACTAGTGATTGGTTT  
CGTCTATAAAGATTTTGGATTTGCTCAAAATGATCAAATTATATCTGGTCTTGTTCCTACT  
TTCCAGTCATTTTAGATACAATTTTAAAATATTGGATTTTTCGTTATTTAAATCGCGTATC  
TCCATCACTTGTAGTGATTATCATTCAATGAATGATATGCCCATGGTGTTCCAAGAGT  
ACCCTTTCGAAGCCCTGGGGAAGAAGATGCATCTTGGGTTGATATATAC---CGACTTTAT  
CGAGAAAGATTACTTTTTTTTAGGTCAAGAGGTTGATAGTGAAATATCGAATCAACTAAT  
TAGTCTTATGGTATATCTTAGTATAGAAGAAGAGAATAAAGATTTGTATCTGTTTATAAAT  
TCTCCGGGGGGGTGGGTAATACCCGGAATAGCTATTTATGATACTATGCAATTTGTACAA  
CCAGATGTACAGACAGTATGTATGGGATTAGCCGCTTCAATGGGATCCTTTCTTTTGGC  
AGGAGGAGAAATTACCAAACGTTTAGCATTCCCTCACGCT---GTAATGATCCACCAACC



CGCTAGTTCTTTTTATGAGGCACAAACGGGAGAATTTATCCTGGAAGCGGAAGAGCTA  
CTGAAAATGCGTGAAACTATCACAAGGGTTTATGTACAAAGAACGGGCAAACCTTTAT  
GGGTTATATCCGAAGACATGGAAAGGGATGTTTTTATGTCAGCAGCAGAAGCCCAAGC  
T C A C G G A A T T G T A G A T C T T G T A G C C G T T G A  
A????????????????????????????????????????????????????????????  
????????????????????????????????????????????????????????????  
????????????????????????????????????????????????????????????  
????????????????????????????????????????????????????????????  
ATGGAGGAATCTCGAGCATATTT  
AGAACTCCATAGATCTCGACACCAGGACACCCTATACCCTCTTTTTTTCCGGGAATCTAT  
TTACGGACTAGCTTGTGGTCAT-----GTCGGTTATAACAATAAATTTAGTTTACTAATTGT  
AAAACGTTTAATTACTCGAATGTATCAACAGACTCATTTCATCATTTTTACTAACGATTC  
TAACAAAATCCTTTTTATGGGTAATCATTTTTATTCTCAAATAATATTAGAAGGTTTTGTT  
GTCGTCGTGGAGATTCTATTTTCCCTACAATTTTGTATATCTTTAATCGTAAAATCTTATA  
ATTTGCGATCAATTCATTCATTTTCCCTTTTTTCGAAGATAAACTGATATAATTAATCA  
TGAGTCAGATATACGAATACCCTATCCTATCCACCTGGAAATCTTGGTTCAAATCCTTCG  
ATATTGGATAAAAGATGTCTCTTTCTTTCATTTATTAAGGTTTTTTTTTTCTTATTATA  
ATTTGGAATAGTATTTTACTAAATGGATTTCTACTTTTTTTTCCCAAGATTTTTTTGTT  
CCTATATAATTTATATGTATGGGAATATGAATCTATCTTCTTTTTTCTACGTAACAAATCCT  
CTAAGTTACGATTAATAATTTTCGCGTTTTTTTTGAGCGAATTTTTTTCTATGAAAAAT  
AGAACATCTTGTAGAAGTATCTGTAAAGTCATATACCTTATCATTCTTTAAGGATACTTTC  
ATGCATTATGTTAGATATCAAGGAAAATCCATTTTGGTTTCAAAGAATACTCCTCTTTTG  
ATAAATAAATGGAAATACTATTTTATCTATTTATGGCAATGTCATTTTGATATTTGGTCTCG  
ACCAGGAACGATCCATATAAACCAATTATCCCAACATTCATTTCACTTTTTGGGCTATTT  
TTAAGTATTCGGCCCAATCTTTCAGTGGTACGAAATCAGATGTTGCAAATTCATTTCT  
AATAAAAATG-----GTTATGAAAAGGCTTGATACAATAGTTCCAATTATTCCTCTAATTAG  
ATCATTGGCGAAAGCAAATTTTGTAAATGTATTTGGCCATCCATTAGTAAGCCGGTTTG  
GGCCAATTTATCTGATTTTGATATTATGACCGTTTTTTGCGGATATGCCGAAATTTTTCT  
CATTATTACAATGGATCCGCAAAAAAAGAGTTTGTATCAAATAAGATATATACTTCGG  
CTTCTTGTATAAAAATTTGGCTCGTAAGCACAAAAGTACTGCGCGCACTTTTTTTGAA  
AAGATTAGGGTCAAATTTATTGGAAGAATCTTTACAGAAGAAGAAGAGACTTTTTCTT  
TGATTTTTCCAAGACGGATTTGGTATTTGGATATTCTTGTACAGAAACGATTTTCGTCATC  
ATTTTCATGATAATTTATTTAACA---GAGATACAAGATATCCAT---TTTTTTTTCAGATTGGA  
ATCT---TTTAAAGAGATATATGGAATTATATGGGTATTTGCCCTATTTGATTCTTATATTG  
GGAATTACGATAAGTGTACTAGCAATTGTATGGTTAGAAAGGGAAATATCCGCAGGGAT  
ACAACAACGTATTGGACCTGAATACACAGGTCCTTTTGGAGTTCTTCAAGCTCTAGCA  
GACGGAACAAAATTACTTTTCAAAGAGAATCTTATTCATCTAGAGGAGATATTCGTTTA  
TTCAGTATAGGACCATCTATATCAGTCATATCGATTATAATAAGCTATTCAGTAATTCCTTT  
TGGCTATAACTTTGTTTTATCTGATCTGAATATTGGTGTTTTTTTATGGATTGCTATTTTCTA  
GTATTGCTCCCATTTGGACTTCTTATGTCAGGATATGGGTCAAATAATAAATATTCCTTTTT  
GGGTGGTCTACGAGCAGCTGCTCAATCGATTAGTTATGAAATACCATTAACCTCTATGTGT  
GTTATCAATATCTCTATTATCTAACAGTTTAAAGTACAGTTGATATAGTTGATGCACAATCA  
AAATATGGTTTTTTGGGGATGGAATTTGTGGCGTCAACCTATGGGTTTCATTGTTTTTCTA  
ATCTCGTCCCTAGCAGAATGTGAAAGATTACCTTTTGAATTTACCGGAAGCGGAAGAAG  
AACTAGTAGCGGGTTATCAAACCGAATACTCGGGTATCAAATTTGGTTTTATTTIATGTTG  
CTTCCTATTTAAACCTATTCATTTCTTCCTTATTTGTAACAGTTCTTTACTTTGGTGGTTC

AAATATCTCTATTCCATACATATTCGTTTCTGACTTTTTTGAATAAATCAAACATATGGA  
GTTTTTGTAAACGATAATTGGTATCTTTATTACACTAGCTAAAACCTATTTATTCTTATTCCT  
TTCTATCGCAACAAGATGGACTTTGCCTAGGCTAAGAATAGATCAATTATTAATCTTGG  
GTGGAAATTTCTTTTACCCATTTCTCTCGGCAATCTATTATTAACAACCTTCGTCTCAACT  
GTTTTCACTGATGATCTGGCATGTACAGAATGAAAACCTCATTCTCGATTCTACAAGAA  
TTTTTATGAAAGCCTTTCATTTGCCTCTCTTCGATGGAAGTTTTATTTTCCCAGAATGTAT  
CCTAATTTTTGGCCTAATTCTTCTTCTGATGATTGATTCAACCTCTGATCAAAAAGATATA  
TCTTGGTTCTATTTTATCTCTTCAACAAGTTTAGTAATGAGCATAACGGCCCTATTGTTCC  
GATGGAGAGAAGAACCTATGATTAGCTTTTCGGGAAATTTCCAAACGAACAATTTCAA  
CGAAATCTTTCAATTTCTTATTTTACTATGTTCAACTCTATGTATTCCTCTATCCGTAGAGT  
ACATTGAATGTACAGAAATGGCTATAACAGAGTTTCTGTTATTCATATTAACAGCTACTC  
TAGGAGGAATGTTTTTATGCGGCGCTAACGATTTAATAACTATCTTTGTAGCTCTAGAAT  
GTTTCAGTTTATGTTCCCTATCTACTATCTGGATATACCAAGAAAGATGTACGGTCTAATG  
AGGCTACTACGAAATATTTACTCATGGGTGGGGCAAGCTCTTCTATTCTGGTTCATGGTT  
TCTCTTGGCTATATGGTTCATCCGGGGGAGAGATCGAGCTTCAAGAAATAGTGAACGGT  
CTTATCAATACACAAATGTATAACTCCCCAGGAATTTAATTGCACTTTTATTCATCACTG  
TAGGAATTGGGTTCAGCTTTCCCCAGCCCCTTCTCATCAATGGACTCCTGACGTATAC  
GAAGGATCTCCACTCCAGTCGTTGCTTTTCTTTCTGTTACTTCGAAAGTAGCTGCTTC  
AGCTTCAGCCACTCGAATTTTCGATATCCCTTTTTATTTCTCATCAAACGAATGGCATCT  
TCTTCTGGAAATCCTAGCTATTCTTAGCATGATATTGGGGAATCTCATTGCTATTACCCAA  
ACAAGCATGAAACGTATGCTTGCATTCGTCCATAGGTCAAATCGGATATGTAATTATT  
GGAATAATTGTTGGAGACTCAAATGGTGGATATGCAAGCATGATAACTTATATGCTGTTT  
TATATCTCGATGAATCTAGGAACTTTTGCTTGCATTGTATCATTGGTCTACGTACCGGA  
ACTGATAACATTTCGAGATTATGCAGGATTATACACGAAAGATCCTTATTTGGCTCTCTCT  
TTAGCCCTATGTCTCTTATCCTTAGGAGGTCTTCCCTCCACTATCAGGTTTTTTTCGGAAAA  
CTTCATTTATTCTGGTGTGGATGGCAGGCAGGCTTATATTTCTTAGTTTCAATAGGACTC  
CTTACGAGTGTGTTTCTATCTACTATTATTTAAAAATAATCAAGTTATTAATGACTGGAC  
GAAACCAAGAAATAACTCCTCACGTGCGAAATTATCGAAGGCCCCCTTTAAGATCAAA  
CAATTCATCGAATTAAGTATGATTGTATGTGTGATAGCATCTACTATACCAGGAATATCA  
ATGAACCCTATTATTGAAATTGCTCAGGATACCCTTTTTATGTTTCTTCTTTACGAATATG  
ATATTTTTTGGGCATTTCTAATAATATCAAGTTTTATTCCATTTTGGCATTCTAATTTCT  
GGAATTTTAGCCCCGATTAGCAAGGGACCAGAGAACTTTCTAGTTATGAATCGGGAAT  
AGAACCAATAGGTGATGCTTGGTTACAATTTTCGAATCCGTTATTATATGTTTGCTCTCATT  
TTTGTGTTTTTGTATGTTGAAACGGTTTTTCTTTATCCTTGGGCAATGAGTTTCGATGTA  
TTAGGGGTATCCGTATTTATAGAAGCTTTCATATTCGTGCTTATCCTAATTGTTGGTTTCAG  
TTTATGCATGGCGAAAGGGGGCATTAGAATGGTCTACGAATTATTTTCTTGGTTAACA  
ACAGTTGTAATTTTGCCAATAGTCGGGGGTTCCTTAATTTCTTATTTCCCATAAAGGA  
AATAAGGTAATTAATGGTATACTATTTGTATATGTTTAATTGATCTCCTTATAACATCCTA  
TGATTTTTGTTATCATTTCGAACTGGATGATCCACTAATCCAATTGACAGAAAATTATAA  
ATGGATCAATTTTTTTGACTTTTACTGGAGCTTCGGAATAGATGGACTCTCTCTAGGACC  
CATTTTATTGACGGGATTTATCACTACGTTAGCTACGTTAGCGGCTCAGCCGTTACTAG  
AGAATCCAAATTATTCTATTTCTGATGTTAGCAATGTATAGTGGTCAAATAGGAACATT  
TTCTTCTCAAGACATTTTACTTTTTTTCATCATGTGGGAATTCGAATTAATTCCCCTTTAT  
CTACTTTTATCTATGTGGGGTGGAAAAAACGTTTTGTATTACAGCTACAAAGTTTATTTG

TACACTGCGGGAAGTTCTGTTTTTTTATTACTGGGAATTCTGGGTATGAGTTTCTATAGC  
TCTAATGAACCAACATTAATAATTCGAATCATTAACTAATCAATCATATCCCGTGGCACTG  
GAAATAATATTCTATATCGGGTTTCTTATTGCTTTTGCTGTCAAATCACCAATTATACCCT  
TACATACATGGTTACCAGACACCCACGGAGAGGCACATTACAGCACTTGTATGCTTTTA  
GCCGGAATATTATTAATAAATGGGAGCATATGGGTTGGTTCGAATTAATATGGAATTCTTA  
TCTCGCGCTCATTCTATATTTTCTCCCTGGTTAATACTATTAGGTTCAATTCAAATAATCTA  
TGCAGCTTCAACATCTCTTGGTCAACGCAATTTAAAAAAAAGAATAGCTTATTCTTCAG  
TATCTCATATGGGTTTCTTACTTTTAGGAATTGGTTCATAAGCGATACAGGTCTCAACG  
GGGCTATTTTACAAATAATATCTCACGGATTTATTGGCGCTGCGCTTTTTTTCTTGGCGG  
GAACGAGTTATGATAGACTACGTCTTCTTTATCTCGACGAAATGGGTGGAATGGCTATC  
CCAATGCCAAAAATATTCACGGTTTTCACTATCTTATCGATGGCTTCTCTTGCATTGCCG  
GGCATGAGCGGTTTTGTTGCAGAATTGATAGTCTTATTGGGAATAATTACTAGCCAAA  
ATATCTTTTAATCACAAAATACTAATAACTTTTGTAACAGCAATTGGAATGATATTA  
CCTATTTATTCAATTATCTATGTTACGTCAAATGTTCTATGGATACAAGCTTTTTAATACACC  
AAATTCTATTTTTTTGATTTCGGGGCCACGAGAATTATTTATTTCAATTTCTATCCTTATAC  
CCGTAATAAGTATTGGCATTATCCAGATTTATTTTTTTCATTTTCGGCTGACAAGGTTGA  
AGCTATTCTATCTAATTTTTTA-----ATGATATTCGAGCATGCACTTGTTTTGAGTGCCTAT  
TTATTTTCTATAGGTATATATGGGTTGATCACGAGCCGGAATATGGTTAGAGCCCTTATGT  
GTCTTGAACCTATACTGAATGCAGTTAATATAAATCTCGTAACCTTTTCTGATTTTTTTGA  
TAGTCGACAATTAAGGAAATATTTTTTCAATTTTTGTTATAGCTATTGCAGCTGCTGA  
AGCAGCTATCGGACCGGCTATTGTTTCTCAATTTATCGTAATAGAAAATCAACCCGTAT  
CAATCAATCAAATTTATTGAATAAATGGAATATACACATCAATATTCATGGATCATACT  
TTTATTCATTTCCAGTTCCCTATGTTAATAGGAGTGGGACTTCTACTTTTTCCGACAGCA  
ACCAAATATCTTCGCCGTATGTGGGCTTTTCTAGTATTTTATTGTTAACTATAGTTATGA  
TGTTTTCGCTTGATTTGTCTATTCATCAAATCAATAATAGTTCTTTTTATCAATATGTATGG  
TCTTGGACCATAAATAATGATCTTTCTTTAGAGTTTGGGTACTTGATCGATTCACTTACTT  
CTATTATGTCAATATTAATTACTACTGTTGGCATTCTGGTTCTTATTTATAGTGATAATTATA  
TGTCTCATGATCAAGGATATTTGAGATTTTTTGCTTATCTGACTCTTTTTAATATTTCAAT  
GTTGGGATTAGTTACTAGTTCGAATTTGATACAAATTTATGTTTTTTGGGAATTGGTTGG  
AATGTGTTCTTATTTATTAATAGGCTTTTGGTTCACACGTCCTATTGCGGCAAATGCTTGT  
CAAAAAGCATTGTAACTAATCGTGTCGGGGATTTTGGTTTATTATTGGGAATTTTAGGT  
CTTTATTGGATAACGGGTAGTTTGGAAATTCGGGATTTGTTTTCAAATAATAAATAAC---G  
AAGTTAATATTTTTTTTCTTACTTTGGTTGCCCTCTTGCTATTTTGTGGCTCAGTCGCTAA  
ATCCGCCCAATTTCTCTTCATGTATGGCTACCAGATGCTATGGAAGGGCCTACTCCAAT  
TTCCGCCCTTATACATGCTGCTACTATGGTAGCCGCGGAATTTTTCTTGTAGCTCGACT  
TCTTCCTCTTTTCATAGTTCTACCTGCAATAATGAACGGAATAGCTTTTATAGGTATAATA  
ACGGTAGTATTAGGAGCTACCTTAGCTATTGCTCAACAAGATATTAAGAAAAATTTGGC  
TTATTCACAATGTCTCAATGGGTTATATGATGTTAGCTCTCGGTATGGGATCTTATCGA  
GCCGCTTTATTTCAATTTGATTACTCATGCTTATTCAAAGCATTGTTGTTTTTAGGATCTG  
GATCCATTATTCATTCAATGGAAGCTCTTGTCGGATATTCTCCAGCTAAAAGTCAAATA  
TGGTTCTTATGGGCGGTTAACAACAAATGTACCAATTACAAAACTTCTTTTTTAGTG  
GGTACGCTTTCTCTTTGCGGTATTCCACCTTTTGCCTGTTTTTGGTCTAAGGATGAGATT  
CTTAATGATAGTTGGTTGTATTCACCAATTTTTGCAATAATAGCTTGTGTACAGCAGGA  
TTAACTGCATTTTATATGTTTCGGATCTATTTACTTGTTTTTGAAGGATATTTAAACGTTT

ATTTTTTAAATTTCAATGGAAAAAAAAAATAGTTCATTCTATTCAATATCTTTATGGGGGA  
AGAAAGAAGTAAAACAGAAATTAAAAAACTTCTTAGCTTTACTAAGAATGAAATTTTTT  
ATCGGCACTAAAAAACTGCTTGTTTATATCCAAATGAATCGGACAATACTATGCGATTT  
TCTATCCTTGTTTTAGTGCTCTTTACTTTATTTCGTTGGGACCATAGGA-----TTCGATTTTG  
ATATATTATCAAATGGTTAATTCCCTTTATAGACCTTTTACATAAAAATTCAAAA---TTT  
GTGGATTGG---GAATTTTTGACCAACGCAGCTTTTTTCGGTGATTCTTACTTTTTTTAGGAA  
TATTTATAGCGTCTTTTTTTTTACAAACCTGTTTATTTCAGATTTACAAAATTTGAATTTATTA  
AATTTATTTGAAAAAGTTGCTGATTATTTTCAAATGTCATATATGATTGGTTCGTATAATC  
GTGGTTATATAGATGTTTTTTATGATATATCTTTAATTACGAGTGTAAGAAAATTAGTACA  
ATTC AATTATTTTTTTGATAAAAAATAATTGATGCAATTCCGAATGGAATAGGTATTACA  
AGTTTTTTTTATGGGAGAGGCCATCAAATATGTAGGAGGCGGG---CGAATTTCTTCATATA  
TTTTATTGTATATATTCTATATAGTAATCTTTATACTAATTTGGTATATGGATTTGCCCGAAC  
CGCTACATGATTTTCTTTTAGTCTTTCTTGGATCGGGTCTTATATTAGGAAGTCTGGGAG  
TAGTATTATTTACGAATCCATTTTTTTCTGCTTTTTTCATTGGGCCTAGTTCCTTGTGTATA  
TCTTTATTCTATATTTTATCAAACCTCCATTTGTAGCTGCATCACAACACTACTTATTTATGT  
GGGCGCTATAAATGTTTTAATAATATTTGCTGTGATGTTTATGAATGGTTCGGAATATTAC  
CAAGATTTTCGTCTTTGGACTGTTGGGGATGGAATTACTTTGATGGTTTGTACAAGTATC  
TTTGTTTCACTAATAACTACTATTCTAGATACATCATGGCACGGGATTATTTGGACTACA  
AGACCCAATCAGATTATAGAGCAAGATTTGATAAGTACTAGTCAACAAATTGGAATTCA  
TTTATCAACAGATTTTTTTCTTCCATTTGAACTAATTTCAATAATCCTTTTTAGTTGCTTTG  
ATAGGTGCAATTGTCGTAGCTCGCCAAATGAATATCTCAACTACAAGAAAGGACTTCAT  
GATAGTCAATATGGGGCCTCACACCCATCAATGCATGGTGTCTTAGACTTATTGTTAC  
TCTAGACGGTGAGGATGTTATTGATTGTGAACCTATATTGGGTATTTACACAGAGGAAT  
GGAAAAAATAGCGGAAAACCGAACAATTATACAATATTTGCCTTATGTAACACGTTGGG  
ACTATTTAGCTACTATGTTACAGAAGCAATAACTGTAAATGGACCAGAACAGTTGGGA  
AATATTC AAGTACCTAAAAGAGCCAGTTATATCCGAGTAATAATGTTGGAGTTAAGTCGT  
ATAGCTTCTCACCTACTATGGCTAGGACCTTTTATGGCAGATATTGGTGCACAAACCCCC  
TTCTTCTATATTTTCAGAGAAAGAGAATTAATATATGATCTATTTGAAGCTGCGACGGGT  
ATGAGAATGATGCATAATTTTTTTTCGTATCGGGGGGTAGCGACTGATCTACCTTATGGT  
TGGGTAGATAAATGTTATGATTTCTGCGATTATTTTTTAACAAGAATTGTTGAATATCAA  
AACTTATTACGCGAAATCCGATTTTTTTTAGAACGGGTTGAGGGGGTAGGTGTAGTTGA  
TATAAAGGAAGTAATAAATTGGGGTTTATCAGGACCCATGCTTCGGGCTTCCGGAATAC  
AATGGGATCTCCGTAAAGTGGATAATTATGAATGTTACGAAGAATTTGATTGGGAAGTT  
CAATGGCAAAAAGAAGGAGATTCCCTTAGCTCGTTATTTAGTTTCGAATTTGGTGAAATGAT  
GGAATCCATAAAAATTATTCAACAGGCTTTGGAAGGAATTCCCGGCGGACCATATGAAA  
ATTTAGAAATTCGCTGCTTTGATAGAGAAAAAGAGCCAGAATGGAATGAGTTTGAGTAT  
CGATTTATTAGTAAAAAACCGTCTCCGACTTTTGAATTGCCAAAACAAGAACTTTATGT  
AAGAATTGAAGCCCCCAAGGGAGAATTGGGAATTTTTCTAATAGGGGATCAA AATGGT  
TTCCCTGGAGATGGAAAATTCGTCCGCCAGGTTTTATCAATTTGCAAATCTTCCTCAA  
TTAGTTAAAAGAATGAAATTTGGCCGATATTATGACAATACTAGGTAGCATAGATATTATTA  
TGGGAGAAGTTGATCGTATGTTTCTTATGGTAAGTGGATTCATAAATTATAGTCAACAAA  
CAGTCCGAGCTGCAAGGTACATTGGTCAGGGTTTCACGATTACCCTATCTCACGCAAAT  
AGGTTACCCGTAAC TATTCAATATCCTTATGAAAAATAATCTCATCAGAACGTTTTCCGC  
GGTCAATACATTTTTGAATTTGATAAATGCATTGCTTGTGAAGTATGTGTTTCGTGTATGT

CCCATCGATCTACCTGTTGTTGATTGGAACTAGAACTGATATTCGAAAGAAACAGTT  
GCTTAATTATAGTATTGATTTTCGGAATCTGTATATTTTGTGGTAACTGTATTGAATATTGTC  
CAACAAATTGTTTATCAATGACCGAAGAATATGAACTTTCAACTTATGATCGCCACGAA  
TTAAATTATAATCAAATTGCTTTGGGCCGTTTACCAGTGTTCAGTAATTGATGATTATACAA  
TTAGAACAATTCAAATAAAA-----ATGCAAGGTCGTTTG  
TCTTCTTGGCTAGTCAAACATGGACTAATTCATAGATCATTGGGTTTCGATTACCAAGGA  
ATCGAGACTTTACAAATAAAGCCCGAGGATTGGCATTCCATTGCTGTCATTTTATATGTA  
TATGGTTACAATTATCTACGTTCCCAATGTGCCTATGATGTAGCACCAGGAGGACTATTA  
GCTAGTGTATATCACCTTACGAGACTAGAGTATGGTATAGATCAACCCGAAGAGGTCTG  
CATAAAAATATTTGTCGCAAGAAAAAATCCCAGAATTCCTTCCATTTTCTGGGTTTGGGA  
AAAGTGCGGATTTTCAAGAAAAGGAATCTTATGATATGTTGGGAATCTCTTATGATAATC  
ATCCGCGTCTGAGACGTATTTAATGCCCGAAAGTTGGATAGGATGGCCTTTGCGTAAA  
GATTATATCGCCCCAAATTTTATGAAATACAAGATGCTCAC-----

-----ATGAATTCCATTGAGTTTCCCTTACTTGATCAAACAACCAAAAATT  
CAGTTATTTCAACTACATTAATGATCTTTCAAATTTGGTCAAGATTATCCAGTTTATGGC  
CGTTTCTCTATGGTACTAGTTGTTGCTTCATTGAATTTGCTTCATTAATAGGATCACGATT  
CGACTTTGATCGTTATGGACTAGTACCACGATCGAGTCCTCGGCAAGCAGACCTAATTT  
TAACTGCGGGCACAGTCACTATGAAAATGGCTCCTTCTTTAGTTTCGATTATATGAACAA  
ATGCCCGAACCTAAATATGTTATTGCTATGGGAGCATGTACAATTACAGGGGGGATGTTT  
AGTACCGATTCTTATAGTACTGTTTCGGGGCGTGGATAAACTAATCCCAGTGGATGTCTAT  
TTGCCGGGCTGTCCACCTAAACCGGAGGCTATTATAGATGCTATAACAAAACCTTCGTAA  
GAAAATATCTCGAGAAATATATGAAAATCAAATGAGTTCTCAA---GAGAATAGATGTTTT  
ACAACCAACCACAAGTTTCATATTGGATACAGTACTCATACTGGCAATTATGGTCAAGA  
ATTATCTATCAACTGCCATCTACTTCAGAGATACCAACA-----TTTTTT-----

-----ATGCAAACCTAGAAATGCTTTTTCTTGTATAAAGGAAGGGATTACTCGATCC  
ATTTCCATATCGATCATGATATATATAATAATTTCGAGCACCCATTTCAAACGCATATCCAAT  
TTTTGCACAGCAGGGTTATGAAAATCCCCGAGAAGCAACCGGTCGTATTGTCTGTGCC  
AATTGCCATTTAGCTAATAAGCCCGTGGATATTGAGGTTCCACAAGCGGTACTTCCTGAT  
ACTGTATTTGAAGCAGTTGTTTCGAATTCCTTATGATATGCAAGTGAAACAAGTTCTTGCT  
AATGGTAAAAAGGGAGCTTTGAATGTGGGGGCTGTTCTTATTTTACCGGAAGGTTTTGA  
ATTGGCACCCCCGATCGTATTTTCGCCTGAGATTAAGAGAAGATAGGCAATCTGTCTT  
TTCAAAACTATCGTCCTACAAAAAAAATATTCTTGTGGTAGGCCCTGTTCTTGGTCAA  
AAATATAAAGAAATCACCTTTCCTATTCTTTCCCCGGATCCCACTACTAAGAGAGATGTT  
CATTTCTTAAAATATCCTATATACGTAGGTGGGAACAGGGGAAGGGGTCAGATTTATCTT  
GACGGGAGCAAGAGTAATAATAATGTGTATAATGCTACAGCAGCGGGTATGGTAAAAA  
AAATCATAAGAAAAGAAAAGGGGGATACGAAATAACTATAGTGGATGCATTGGATGG  
GCGTGAAGTGATTGATATTACCTCCAGGACCAGAACTTCTTGTTCAGAAGGTGAAT  
CTATCAAACCTTGATCAGCCATTAACAAGTAATCCAAATGTGGGTGGATTTGGTCAGGGG  
GATGCGGAAATAGTACTTCAAGATCCGTTACGTGTCCAAGGTCTCTTGTCTTCTTCGC  
ATCTATATTTTACGACAAATCTTTTTAGTTCTTAAAGAAGAAACAATTTGAGAAGGTTCA  
ATTGTCCGAAATGAATTTTCATGAGTAAAGTCTATGATTGGTTCGAAGAACGTCTTGAAA  
TTCAGGCGATTGCCGATGATATAACCAGTAAATATGTTCCGCCTCATGTGAATATATTTTA  
TTGTTTAGGAGGAATTACACTTACTTGTTTTTTTAGTCCAAGTAGCAACGGGATTTGCTAT

GACTTTTTATTATCGTCCGACCGTTACTGAAGCTTTTGCTTCTGTTCAATATATAATGACT  
GAAGCTAACTTTGGTTGGTTAATCCGATCCGTTTCATCGATGGTCGGCAAGTATGATGGT  
CTAATGATGATCCTACACGTATTTTCGTGTGTATCTCACAGGCGGTTTTAAAAACCTCG  
CGAATTAACCTGGGTTACGGGTGTAGTTTTGGCTGTATTGACTGCATCTTTTGGTGTAAC  
CGTTATTCCCTTACCTTGGGATCAAATTGGTTATTGGGCAGTCAAATTGTAACAGGCG  
TACCCGACGCTATTCCGTGAATAGGATCGTCTTTGGTAGAGTTATTACGCGGAAGTTCCA  
GTGTGGGACAATCTACCTTAACTCGTTTTTATAGTTTGCATACTTTTGTATTACCTCTTCT  
TACTGCTGTATTTATGTTAATGCACTTTTCAATGATACGTAAGCAAGGCATTTCTGGTCC  
TTAATGGGAGTAACAAAAAACCTGACTTGAATGATCCTGTATTAAGAGCTAAATTGG  
CTAAGGGAATGGGTCATAATTATTATGGAGAACCTGCATGGCCCAACGATCTTTTATATA  
TTTTTCCAGTAGTAATTCTAGGTACTATTGCCTGTAACGTAGGCTTAGCGGTTCTAGAAC  
CATCCATGATTGGGGAACCCGCGGATCCATTTGCAACTCCTTTGGAAATATTACCCGAA  
TGGTATTTCTTTCCCGTATTTCAAATACTTCGTACAGTGCCCAATAAGTTATTGGGCGTT  
CTTTAATGGTTTCGGTACCTACAGGATTATTAACAGTACCCTTTTTGGAGAATGTAAAT  
AAATTCAAAACCCATTTCCGCGTCCAGTAGCAACCACCATCTTTTTGATTGGTACTGT  
AGTTGCCCTTTGGTTAGGTATTGGAGCAACATTACCTATTGAGAAATCCCTAACTTTAG  
GTCTTTTTATGATTGAAGTTTTTCTATTTGGAATCGTGTTAGGTTTAATTCCCATTACTTT  
GGCTGGATTATTTGTAAGTGCATATTTACAATACCGACGAGGTGATCAGTTGGATCTTAT  
GCTCACTATAACTAGTTATTTCCGTTTTTTACTAGTGGTTTTAATTATAACCTCATCTCTAT  
TTATTGGTCTGAGTAAAATACGACTTATTATGGATATAGTAAGTCTTGCTTGGGCTGCTTT  
AATGGTAGTTTTTTCATTTTCTTTCCCTCGTAGTATGGGGAAGAAGTGGACTAATGAT  
TATTCGTTACCCGGAACCAGAAGTGAAAATTTTGGTAGATAGAGATCCCATAAAACTT  
CTTTCGAGGAATGGGCAAACCCAGGTCAATTTCTCAAGAACAATAGCTAAGGGACCTGA  
TACTACTACTTGGATCTGGAACCTACATGCTGACGCTCATGATTTTGATAGCCATACTAA  
TGATTTAGAGGAGATTTCCCGAAAAGTTTTTAGTGCCCATTTCCGGCCAACTCTCTATCAT  
CTTCTTTGGCTGAGTGGCATGTATTTTCATGGTGCTCGTTTTTCCAATTATGAGGCATG  
GTTAAGTGATCCTACTCACATTAGGCCTAGTGCTCAGGTGGTTTGGCCAATAGTGGGCC  
AAGAAATATTGAATGGTGATGTAGGGGGAGGGTTCCGAGGAATACAATAACCTCCGG  
TTTTTTTCAGATTTGGAGAGCATCTGGAATAACTAGTGAATTACAACCTCTATTGTACCGC  
AATTGGTGCATTGGTCTTTGCAGCCTTAATGCTTTTTGCTGGTTGGTTTCATTATCACAA  
AGCTGCTCCAAAATTGGCTTGGTTCCAAGATGTAGAATCTATGTTGAATCACCATTTGA  
CAGGGCTCCTGGGGTTGGGATCTCTTTCTTGGGCAGGACATCAAATACATGTATCTTTA  
CCAATTAACCAATTTCTAAATGCTGCAGTAGATCCCAAAGAGATTCCACTTCCTCATGA  
ATTTATCTTGAATCGGGATCTTTTGGCTCAACTTTATCCGAGTTTTGCCGAGGGAGCAA  
CTCCCTTTTTACCTTGAATTGGTCAAATAACGCAGAATTTCTTACTTTTCGTGGAGGAT  
TAGATCCAGTAACTGGAGGTCTATGGCTGACCGATATTATACACCATCATTTAGCTATTG  
CAATTCTTTTCTTGATAGCGGGTCACATGTATAGGACTAACTGGGGTATTGGTACAGTA  
TAAAAGACATTTTAGAGGCACATAAAGGTCCATTTACGGGCCAGGGTCATAAAGGTCTA  
TATGAGATCCTAACAACGTCATGGCATGCTCAATTATCTATTAACCTAGCTATGTTAGGTT  
CTTTGACCATTGTTGTAGCTCACCATATGTATTCTATGCCCCCTTATCCATACCTAGCTAC  
TGACTATGGTACACAACCTGTCATTTGTTTACACATCATATGTGGATTGGTGGATTTCTCAT  
AGTCGGTGCTGCTGCGCATGCAGCTATTTTTATGGTAAGAGATTATGATCCGACTATTCG  
ATACAACGATCTATTAGATCGTGTCTTAGACATCGCGATGCAATCATATCACATCTTAA  
CTGGGTATGTATATTTTTAGGCTTTCACAGTTTTTGGTTTGTATATTCATAATGATACCATG

AGCGCTTTAGGGCGTCCTCAAGATATGTTTTTCAGATACGGCTATACAATTACAACCGGT  
CTTTGCTCAATGGATACAAAATACCCATGCTTTAGCACCAGGCACAACAGCCCCAGGT  
GCAACAACAAGTACCAGTTTGACTTGGGGGGGTGATAATTTAGTAGCAGTGGGCGGTA  
AAGTTGCTTTGTTACCTATTCCGTTAGGAACTGCGGATTTTTTGGTCCATCATATTCATG  
CATTTACAATTCATGTAACAGTATTGATACTCCTAAAGGGTGTCTATTTGCTCGTAGTTC  
ACGATTAATACCGGATAAAGCAAATCTAGGTTTTTCGTTTTCTTGTGATGGACCTGGAA  
GAGGGGGGACATGCCAAGTATCCGCTTGGGATCATGTCTTCTTAGGACTATTTTGGATG  
TACAATTCATTTCCGGTAGTAATATTCATTTTCAGTTGGAAAATGCAGTCAGATGTTTGG  
GGTAGTATAAGTGATCAAGGGATAGTAAATCATATCACAGGAGGAAATTTTGCGCAGAG  
TTCCATTACCATTAATGGGTGGCTCCGTGATTTCTTATGGGCACAGGCATCCCAGGTAAT  
TCAGTCTTATGGTTCTTCATTATCTGCATATGGTCTTTTTTTCTTGGGTGCACATTTTGT  
TGGGCTTTTAGTTAATGTTTCTATTCAGCGGGCGTGGTTATTGGCAAGAACTTATTGAA  
TCCATTGTTTGGGCTCATAATAAATAAAGTTGCTCCTGCTACTCAGCCTAGAGCCTTG  
AGCATTGTACAAGGACGTGCTGTAGGAGTAACACATTACCTTCTAGGTGGAATTGCCAC  
AACATGGGCATTCTTCTTAGCAAGAATTATTGCAGTAGGAATGGCATTAAAGATTTCCAA  
GGTTTAGTCAAGGCTTAGCTCAAGACCCCACTACTCGTCGTATTTGGTTTGGTATTGCT  
ACCGCACATGACTTCGAAAGTCATGATGATTAATGAGGAACGTCTTTATCAGAATATT  
TTTGCTTCTCATTTCGGGCAATTAGCAATAATTTTTCTGTGGACTTCCGGGAATCTGTTT  
CATGTAGCTTGGCAAGGGAATTTGAAGCATGGGTACAGGATCCTTTACATGTAAGACC  
TATAGCTCATGCAATTTGGGATCCTCATTTTGGTCAACCGGCTGTAGAAGCTTTTACTCG  
AGGAGGTGCTCTAGGCCAGTTAATATAGCCTATTCTGGTGTATCAGTGGTGGTATAC  
AATCGGTTTACGTACTAATGGGGATCTTTATACTGGAGCTCTTTTTCTATTATTTCTTTCT  
ACTATATCTTTAATAGCGGGTTGGTTACACTTGCACCAAAAATGGAAACCAAGCGTTTC  
GTGGTTTAAAATGCCGAATCCCGCCTCAATCATCATTTGTCAGGATTATTCGGAGTCA  
GTTCTTGGCTTGGACAGGGCATTAGTCCATGTGCTATTCCGGGATCCAGGGGGGAA  
TACGTTTCGATGGAATAATTTATTAAGTATATTGCCTCACCCCGAAGGATTAGGTCCATTTT  
TCACAGGTCAAGTGAATCTTTATGCTCAAAACCCCGATTCCAATAGTCATATATTTGGTA  
CCCCTCAAGGAGCAGGAACCTGCTATTCTAACACTTCTCGGGGGATTTCATCCGCAAAC  
TCAAAGTTTATGGCTGACCGATATTGCACACCATCATTTAGCTATTGCATTTCTTTTTCTA  
GTTGCTGGCCATATGTATAGAACCAACTTCCGGGATTGGTACAGTATAAAAGATCTTTTA  
GAAGCACATACTCCTCCGGGGGGTAGATTGGGGCGTGGACATAAGGGTCTTTATGACA  
CAATCAATAATTCAATTCATTTTCAATTAGGTCTTGCTCTAGCCTCTTTAGGGGTTATTAC  
TTCTTGGTAGCTCAACACATGTAATCTTTACCCGCTTATGCATTTATAGCGCAAGACTT  
TACTACTCAAGCTGCATTATATACTCATCATCAATATATAGCGGGCTTCATTATGACAGGG  
GCTTTTTGCTCATGGAGCTATATTTTTTATTAGAGATTATAATCCAGAACAGAATGAAGAT  
AATGTCTTAGCAAGAATGTTAGACCATAAAGAAGCTATCATATCCCCTTAAGTTGGGC  
TAGCCTCTTTCTGGGGTTCCATACTCTGGGACTTTATGTCCATAATGATGTCATGCTTGC  
TTTTGGTACTCCGGAGAAACAAATCTTGATTGAACCTATATTTGCCCAATGGATACAATC  
TGCTCATGGTAAAACCTTCTATGGGTTTCGATATACTTTTATCTTCAACGAACAGTCCGGC  
GTTCAATGCAGGACGAAGCATATGGTTGCCTGGTTGGTTAAACGCTGTTAATGAG-----A  
ATAGTAATTTCTATTCTTAACAATAGGGCCTGGAGACTTCTTGGTTTCATCATGCTATTG  
CTCTTGGTTTACATACAACTACATTGATCTTAGTAAAGGGTGCTTTGGATGCGCGTGGTT  
CTAAGTTAATGCCAGATAAAAAAGATTTTGGTTATAGTTTTCTTGGCATGGCCCGGGA  
CGAGGCGGTACTTGCATATTTCCGCTTGGGACGCATTTTATTTGGCAGTTTTCTGGATG

TTAAATACCATTGGGTGGGTACTTTTTATTGGCATTGGAAACACATTACACTATGGCAG  
GGTAATGTTTCACAGTTTAATGAATCTTCTACCTATTTGATGGGATGGTTAAGAGATTAT  
CTATGGTTGAACTCTTCACAACCTTATCAACGGATATAACCCTTTTGGTATGAATAGTTTAT  
CAGTCTGGGCATGGATGTTCTTGTGGACATCTTGTGGGCTACTGGATTTATGTTCT  
TAATTCCTGGCGCGGATATTGGCAGGAATTGATTGAACTTTAGCATGGGCTCATGAA  
CGCACACCTTTGGCTAATTTGATTTCGATGGAGAGATAAACCAGTGGCTCTTTCCATTGT  
GCAAGCAAGATTGGTTGGACTAGCCACTTTTCCGTAGGTTATATATTTACTTATGCAGC  
CTTCTTAATTGCCTCGACTTCGGGCAAATTTGGTATGTCACATTCAGTAAAAATTTATGA  
TACATGTATAGGATGTAATGTGTCCGAGCCTGCCAACGGATGTATTAGAAATGAT  
ACCTTGGGACGGATGTAAAGCTAAACAAATAGCTTCTGCCCAAGAAGAGAGGACTGT  
GTTGGTTGTAAGAGGTGTGAATCCGCCTGTCCGACAGATTTCTTAAGTGTAGAGTTTA  
TTTATGGCATGAAACAACCTCGAAGCATGGGTCTAGCTTATATGATA-----AACTTTCCTTC  
CATTTTTGTTCTCTAGTAGGCCTAGTATTTCCGGCAAATTGCAATGGCTTCTTTATTTCTT  
CATGTTCAAAAAACAAGATTTTTATGCGAGATCTAAAAACATATCTTCCGTGGCACC  
AGTAGTAAGTACTCTATGGTTCGGGGCTTTGGCGGGTCTCTTGATAGAGATCAATCGTT  
TTTTTCCAGATGCATTGATATCCCTTTTTTTTTCATTCATGACTGCAATTTAGAGAGACG  
CGAGAGCGAAAGCCTATGGGGTCGCTTCTGTAAGTGGATAACCAGCACCGAAAATCGT  
CTTACATTGGATGGTTGGTGTGGTGTGGTGTGGTGTGGTGTGGTGTGGTGTGGTGTGGT  
TTATTATCGCTTTTATTGCTGCCCTCCAGTAGATATTGATGGTATTCGTGAGCCTGTTTC  
TGGATCTTACTTTATGGAAACAATATCATTCTGGTGCCATTATTCCTACTTCTGCGGCT  
ATAGGTTTGCATTTTATCCTATTTGGGAAGCGGCATCTGTTGATGAATGGTTATAACAAC  
GGCGGTCCTTATGAACTAATTGTTCTACACTTCTTACTTGGTGTAGCTTGCTACATGGGG  
CGTGAGTGGGAACCTTAGTTTTCGTTGGGTATGCGTCCTTGGATTGCTGTTGCATATTCA  
GCTCCTGTTGCAGCCGCTACTGCTGTTTTCTTGATCTATCCTATTGGTCAGGGAAGCTTT  
TCAGATGGTATGCCTCTAGGAATTCAGGTACTTTCAATTTTATGATTGTATTCAGGCT  
GAGCATAATATTCTTATGCATCCATTTACATGTTAGGTGTAGCTGGTGTATTCGGCGGC  
TCCCTATTCAGTGCTATGCATGGTTCCTTGGTAACCTTAGTGGTGTAGCTGAGGAAACCAC  
AGAAAATGAATCTGCTAATGAAGGTTACAGATTTGGTCAAGAGGAAGAAACCTATAATA  
TTGTAGCTGCTCATGGTATTTTGGCCGATTGATCTTCCAATATGCAAGTTTCAACAATT  
CTCGTTCTTTACATTTCTTCTTAGCTGCTTGGCCTGTAGTAGGTATTTGGTTTACCGCTTT  
AGGTATCAGCACTATGGCTTTCAACTTAAATGGTTTCAATTTCAACCAATCCGTAGTTGA  
TAGTCAAGGTTCGTGTAATTAACCTGGGCTGATATTATTAACCGAGCTAACCTTGGTAT  
GGAAGTAATGCATGAACGTAATGCTCATAATTTCCCTCTAGATCTAGCTGCGATCGACG  
CTCCATCTATTAATGGAATGGGTTTACCTTGGTATCGTGTTCACTGTTGTATTAATGA  
TCCAGGCCGTTTGCTTTCTGTTTCATATAATGCACACAGCTCTGGTTGCTGGTTGGGCCG  
GTTTCGATGGCTCTATATGAATTAGCAGTTTTTGGATCCCTCTGACCCTGTTCTTGACCAA  
TGTGGAGACAGGGTATGTTTCGTTATACCTTTTCATGACTCGTTTAGGAATAACCAATTCGT  
GGGGCGGTTGGAATATCACA---GGAGGGACTATAACGAATCCGGGTATTTGGAGTTACG  
AAGGTGTGGCCGGAGCACATATTGTGTTTTCGGGCTTGTGCTTTTTAGCGGCTATTTGG  
CATGGGTTTATTGGGATCTAGAAATCTTTTGTGATGAACGTAAGTGGAAAACCTTCTTTG  
GATTTGCCAAAATTTTTGGAATTCATTTATTTCTTGCAGGGGTGGCTTGTGGTGGTTTT  
GGCGCATTCATGTAACAGGATTGTATGGTCTGGAATATGGGTGTCCGATCCTTATGGA  
CTAACTGGAAGGATACAATCCGTAAATCCCGCGTGGGGCGTGGAAAGGTTTTGATCCTTT  
TGTTCCGGGGGGGGTAGCTTCTCATCATATTGCAGCAGGAACGTTGGGCATATTAGCAG



GTCTTTTCCATCTTAGTGTGCGTCCACCCCAACGTCTATATAAAGGATTACGGATGGGA  
AATATTGAAACTGTCCTTTCCAGCAGTATTGCTGCTGTCTTTTTTGCAGCTTTTGTGCTT  
GCTGGA ACTATGTGGTATGGTTCAGCAACAACCCCTATTGAATTATTCGGTCTACTCGT  
TATCAATGGGATCAGGGATACTTTCAGCAAGAAATATATCGAAGAGTTGGTGCTGGACT  
AGCCGAAAATCAAAGTTTATCAGAAGCTTGGTCTAAAATTCCCGAAAAATTAGCTTTTT  
ATGATTATATCGGAAATAATCCAGCAAAAAGGGGGTTATTTAGAGCAGGTTCAATGGAC  
AATGGAGATGGAATAGCCGTCGGTTGGTTAGGACATCCTGTCTTTAGAGATAAAGAGG  
GGCATGAACTTTTTGTACGTCGTATGCCTACTTTTTTTGAAACATTTCCGGTTGTTTTGG  
TAGATGGGGATGGAATTGTTAGGGCCGATGTTCCTTTTCGAAGGGCAGAATCTAAATAT  
AGTGTGGAACAAGTAGGTGTAATTGTTGAGTTCTATGGTGGCGAGCTTAATGGAGTCA  
GTTATAGCGATCCCGCTACTGTGAAAAAATATGCTAGACGTGCTCAATTGGGTGAAATT  
TTTGAATTAGATCGTGCTACTTTGAAATCAGATGGTGTTTTTTCGTAGCAGTCCGAGGGG  
TTGGTTTACTTTTGGACATGCTTCTTTTGTCTGCTATTCTTTTTTCGGGCACATTTGGCAT  
GGTGCTAGA ACTTTTATTCCAGAGATGTTTTTGTCTGGTATCGACCCAGATTTAGACGCTCA  
AGTAGAATTTGGAGCATTCCAAAACTTGGAGATCCA ACTACAAAAAACAGGTAGTC  
ATGAAAACCTTATATTCCCTGAGGAGGTTCTACCACGTGGAAACGCTCTTTAATGGAAC  
TTTAGCTTTA ACTGGTCGTGACCAGGAACTACCGGTTTCGCTTGGTGGGCCGGGAAT  
GCCCCACTTATCAATTTATCCGGCAA ACTACTAGGAGCCCATGTAGCCCATGCTGGATT  
AATAGTATTCTGGGCCGGAGCAATGAACCTTTTTGAAGTGGCTCATTTCGTACCCGAGA  
AGCCCATGTATGAACAAGGTTAATTTTACTTCCCCATCTAGCTACTCTAGGTTGGGGG  
GTAGGTCTGGGGGGGAAGTTATAGACACCTTTCCATACTTTGTGTCTGGAGTACTTCA  
CTTAATTTCTCTGCAGTATTGGGCTTTGGCGGTATTTATCATGCACTTTTGGGACCTGA  
GACTCTTGAAGAATCTTTTCCATTCTTCGGTTATGTATGGAAAGATAGAAATAAAATGA  
CTACAATTTTGGGTATTCACTTAATCTTGTTAGGTATAGGTGCGTTTCTTCTAGTATTCAA  
GGCTCTTTATTTTGGAGGTATATATGATACGTGGGCTCCGGGGGGCGGAGATGTAAGAA  
AAATAACCAATTTGACCCTTAGTCCAAGTATTATTTGGATATTTATTA AAATCACCTTT  
TGGGGGAGAAGGGTGGATTGTTAGTGTGGACGATTTGGAAGATATAATTGGGGGGCAT  
GTATGGTTGGGTTCCATTTGTATACTTGGTGGAACTGGCATATCTTAACCAAACCTTTT  
GCATGGGCTCGGCGTGC ACTTGTATGGTCTGGAGAAGCTTACTTATCTTATAGTTTAGGT  
GCTTTATCTGTTTTTGGTTTTATTGCTTGTGCTTTGTCTGGTTTAATAATACCGCTTATCC  
TAGTGAGTTTTTACGGGCCACTGGGCCAGAAGCTTCTCAAGCTCAAGCATTTACTTTTC  
TAGTTAGAGACCAACGCTTGGGGCTAATGTAGGATCTGCTCAAGGACCTACAGGTTTA  
GGTAAATATCTAATGCGTTCCCCGACAGGAGAAGTTATTTTTGGGGGAGAACTATGCG  
TTTTTGGGATTTGCGTGCTCCTTGGTTAGAACCTCTAAGGGGTCCGAATGGTTTAGACT  
TGAGTAGACTGAAAAAAGATATACAGCCTTGGCAAGAACGCCGTTCTGCGGAATATAT  
GACTCATGCTCCTTTAGGTTCCTTAAATTTCCGTGGGTGGCGTAGCTACAGAGATTAATG  
CAGTCAATTATGTTTTCTCCTAGAAGTTGGTTAGCTACTTCTCATTTTGTTCTAGGATTCTT  
CCTATTTGTAGGCCATTTATGGCACGCGGGAAGAGCTCGCGCAGCTGCCGCAGGATTTG  
AAAAAGGAATTGATCGAGATTTTGAACCAGTTCTTTCCATGACTCCTCTTAATATGACTA  
TAGCTCTTGGTAAATTTACCAAAGATGAAAATGATTTATTTGATATTATGGATGACTGGT  
TGCGGAGGGACCGTTTCGTTTTTGTAGGTGGTCCGGTCTATTA CTCTTCCCTTGCGCCT  
ATTCGCCTTGGGGGGTTGGTTCACAGGTACGACCTTTGTA ACTTCATGGTATACTCAT  
GGATTGGCAAGTTCTTATTTGGAAGGCTGCAACTTCTTAACCGCTGCAGTCTCCACTCC  
TGCTAATAGTTTAGCACACTCTTTGTTGTTACTGTGGGGTCTGAAGCACAGGGAGATT

TTACCCGTTGGTGTCAATTAGGTGGTCTGTGGACTTTTGTGCTCTCCACGGCGCTTTC  
GCATTAATAGGTTTCATGTTACGTCAATTTGAACTTGCTCGATCTGTTCAATTGCGGCCT  
TATAATGCAATCGCATTCTCTGGTCCAATTGCTGTTTTTGTCTGTATTCTTATTTATCC  
ACTGGGTCAGTCTGGTTGGTTCTTTGCTCCTAGTTTTTGGTGTAGCAGCTATATTTTCGATT  
CATCCTCTTTTTCCAAGGGTTTCATAATTGGACATTAACCCATTTTCATATGATGGGAGT  
TGCTGGTGTATTGGGCGCGGCACTACTATGCGCTATTCATGGTGCCACCGTAGAAAATA  
CTTTATTTGAAGATGGTGTATGGCGCAAATACATTCCGTGCTTTTAACCCAACCCAAGCT  
GAAGAACTTATTCAATGGTTACTGCTAATCGCTTTTTGGTCCCAAATCTTTGGGGTTGC  
TTTTTCCAATAAACGTTGGTTACATTTCTTTATGTTATTTGTACCAGTAACTGGTTTATGG  
ATGAGTGCTCTTGGGGTAGTTCGGTTTGGCCCTGAACCTACGTGCCTATGACTTCGTTTC  
TCAAGAAATCCGCGCAGCGGAAGATCCTGAATTTGAGACTTTCTACACCAAAAATATT  
CTCTTAAACGAAGGTATTCGTGCGTGGATGGCGGCTCAAGATCAGCCTCATGAAAACC  
TTATATCCCTGAGGAGGTTCTACCACGTGGAAACGCTCTTATGTCTGGAAGCACAGGA  
GAACGTTCTTTTGGTGTATTTATTACCAGTATCCGATACTGGATTATTCATAGCATTACTAT  
ACCCTCCCTATTCATTGCAGGTTGGTTATTTGTCAGCACGGGTCTAGCTTACGATGTTTT  
TGGAAGCCCCCGCCAAACGAATATTTTACAGAGAGCCGACAAGGAATTCATTAATA  
ACTGGCCGTTTTGATCCTTTGGAACAACCTGATGAATTTAGTAGATCTTTTATGACCATA  
GATAGGACCTATCCAATTTTTACAGTACGATGGTTGGCTGTTACGGACTAGCGGTACC  
CACTGTTTCTTTTTTGGGATCAATATCAGCAATGCAGTTCATCCAACGAATGGCTACGC  
AAACCGTTGAGGATAATTCTAGATCTGGT--CCAAGACGAACTGTTGTAGGGGATTATT  
GAAACCATTAAATTCAGAATATGGTAAAGTAGCTCCGGGGTGGGGAACACTCCTTTGA  
TGGGTGTTGCAATGGCTCTATTTGCGATATTTCTATCTATTATTTGGAGATTTATAATTCG  
TCCATTTTACTCGACGGAATTTCTATGAATATGCTTACTCTAAAACATTTTGTTTACACGG  
TAGTGATATTTCTTCGTTTTCTTTTTCATCTTCGGATTCTATCTAACGATCCAGGACGTAA  
TCCAGGGCGTGAAGAAATGGCCGATACTACTGGAAGGATTCTCTTTGGATAATAGGTA  
CTGTAACCTGGTATTACTGTGATCGGTTAATTGGTATTTTCTTTTATGGTTCATATCCGG  
ATTGGGCTCATCTCTGATGCTTAATATCTTTAATTTGGTCTGTATTTGTATTCACTCCGTC  
CTTTATTCAAGTAGTTTTTTCTCGGCGAAATTGCCGAAGCCTACGCTTTCTTGAATCCA  
ATTGTGGATATTATGCCAGTAATACCCTTACTCTTTTTTCTTTTAGCTTTTGTGGCAAG  
CTGCTGTAAGTTTTTCGAACGACACAATCAAACCCAAATGAACAAAATGTTGAATTGAA  
TCGTACCAGTCTCTACTGGGGTTATTACTCATTTTTGTACTTGCTGTTTTATTTCAAAT  
TATTTCTTCAATATGGAAGTAAATATCTTGCATTTATTGCTACTGCACTGTTTATTCTAGT  
TCTACTGCTTTTTTACTTATAATTTACGTAAAAACGGTAAAGTCAAAGTGACATGGAAA  
CAGCAACCCTAATTGCCATCTCTATATCTGGTTTACTTGTAAGTTTTACTGGGTATGCCTT  
ATATATTGCCTTTGGGCAACCCCTCGCAACAACCTAAGAGATCCATTTGAAGAACATGGGG  
ACATGGAAGCATTGGTTTATACATTCCTCTTAGTCTCGACTTTAGGAATTATTTTTTTTCGC  
TATCTTTTTTAGAGAACCCCTAAAGTTCGGACGAAAAAAGGT---ATGACTATTGCTTTC  
CAATTAGCTGTTTTTGCATTAATTGCTATTTCAATTTATTTTATTGATTAGTGTACCTGTTGT  
ATTTGCTTCTCCTGAAGGTTGGTCGAATAACAAAAATGTTGTATTTTCCGGTACATCATT  
ATGGATTGGATTAGTGTCTCTCGTGGGTATTCTTAATTCCTCATTCT-----AT  
GTCACCACAAACAGAGACTAAAGCAAGTGTGGGTTCAAAGCTGGTGTAAAGATTAT  
AAATTGACTTATTATACTCCTGACTATGAAACCAAAGATACTGATATCTTGGCAGCATT  
CGAGTAACTCCTCAACCAGGAGTTCCGCTGAAGAAGCAGGTGCCGCGGTAGCCGCC  
GAATCTTCTACTGGTACATGGACAACCTGTGTGGACCGATGGGCTTACCAGTCTTGATCG

TTACAAAGGGCGATGCTACGGCCTTGAACCTGTTGCTGGGGAAGAAAATCAATATATTG  
CTTATGTAGCTTATCCCTTAGACCTTTTTGAAGAAGGTTCTGTTACTAACATGTTTACTT  
CCATTGTCGGTAATGTATTTGGGTTCAAGGCCCTGCGTGCTCTACGTCTGGAGGATTG  
CGAATCCCTACTGCTTATATTA AAACTTTCCAAGGTCCGCCTCATGGCATCCAAGTTGA  
GAGAGATAAATTGAACAAGTATGGTCGTCCCCTATTAGGATGTACTATTAACCTAAATT  
GGGGTTATCCGCTAAGAATTATGGTAGAGCTGTTTATGAATGCTTTCGTGGGGGACTTG  
ATTTTACCAAAGATGATGAAAATGTGAATTCCCAACCATTTATGCGTTGGAGAGACCGT  
TTCTTATTTTGTGCCGAAGCCATTTTAAATCACAGGCTGAAACAGGTGAAATCAAAGG  
GCATTACTTGAATGCAACTGCGGGTACATGCGAAGAAATGATGAAAAGAGCTGTATTT  
GCCAGAGAATTAGGCGTTCCCTATCGTAATGCATGATTATTTAACGGGGGGATTCACTGC  
AAATACTAGCTTGGCTCATTATTGCCGAGATAATGGTCTACTTCTTCATATACACCGTGC  
AATGCATGCAGTTATCGACAGACAAAAGAATCATGGTATGCACTTTCGTGTACTAGCTA  
AAGCATTACGTTTGTCTGGTGGAGATCATGTTACGCCGGTACCGTAGTAGGTA AACTT  
GAAGGGGAAAGAGAAATCACTTTAGGTTTTGTTGATTTACTACGTGATGATTTTGTGTA  
AAAAGATCGAAGTCGCGGTATTTATTTCACTCAGGATTGGGTTTTCTCTACCAGGTGTTT  
TGCCTGTAGCTTCGGGAGGTATTCACGTTTGGCATATGCCTGCTCTGACCGAGATCTTT  
GGGGATGATTCTGTACTCCAATTTGGCGGAGGA AACTTTAGGACACCCTTGGGGAAATG  
CACCAGGTGCTGTAGCTAATCGAGTAGCTCTTGAAGCATGTGTGCAGGCTCGAAATGA  
AGGACGCGATCTTGCTCGTGAAGGTAATGAAATTATCCGTGAGGCTAGCAAATGGAGT  
CCTGAATTAGCTGCTGCTTGTGAAGTATGGAAGGAGATCAAATTTGAATTCGAAGCAAT  
GGATACTTTG-----ATGGCGATACATTTATACAAA AACTTCTACCCCAAGCACACGCAATG  
GAGCCGTAGACAGTCAAGTAAAATCCAATCCACGAAATCATTTGATCTATGGACAGCAT  
CGTTGTGGTAAAGGCCGTAATGCCAGAGGAATCATTACCGCAGGGCATAGAGGGGGAG  
GTCATAAGCGTCTATACCGTAAAATTGATTTTCGACGGAATGAAAAAACATATATGGTA  
GAATCGTAACCATAGAATATGACCCTAATCGAAATGCATACATTTGTCTCATACTATG  
GGGATGGTGAGAAAAAATATATTTTACACCC CAGAGGGGCTATAATTGGAGATACCATT  
GTTTCTGGTACAGAAGTTCCTATAAAAATGGGAAATGCCCTACCTTTGAGTGATATGCC  
CTTAGGCACGGCAATACATAACATAGAAATCACACTCGGAAAGGGTGGACAATTAGCT  
AGAGCAGCAGGTGCTGTAGCGAAACTAATTGCAAAAAGAGGGGAAATCGGCCACATTA  
AAATTACCTTCTGGGGAGGTCCGTTTGTATCCAAAAACTGCTCGGCAACAGTCGGAC  
AAGTGGGAAATGTTGGAGTAAACCAGAAAAATTTAGGTAGAGCCGGATCTAAATGTTG  
GCTAGGTAAGCGTCCTGTAGTAAGAGGAGTAGTTATGAACCCCGTAGACCATCCGCATG  
GGGGTGGTGAAGGGAGGGCCCCAATTGGTAGAAAAAACC CGCAACTCCTTGGGGTT  
TTCTGCACTTGAAGAAGAAGTAGAAAAAGGAAGAAATATAGTGATAATTTGATTCT  
TCGTGTCGTA ACTAAAATGATTCAACCTCAA AACTCATTTGAATGTAGCTGATAATAGCG  
GAGCACGCGAACTGATGTGTATTCGAATCCTAGGAGCTAGT---AATCGACGATATGCTTA  
TATTGGTGACATTGTTGTTGCTGTAATCAAACAAGCAGTACCAAATACGAACTTAGAAA  
GATCAGAAGTGATCAGAGCTGTAATTGTACGTA CTTGTAAGA AACTCAAACGTAGCAA  
CGGTATAATAATTCAGTATGATGATAATGCTGCAGTTGTCATTGATCAAGAAGGAAATCC  
AAAAGGAACTCGAATCTTTTGTGCAATCGCCCGGGAATTGAGACAGTTAAATTTCACT  
AAAATAGTTTCATTAGCACCCGAGGTATTAATGCTTAGTCCCAAAGAACCAGATTTGCG  
TAAACAACATAGAGGAAGAATGAAAGGAATATCCTATCGAGGGAATCATATTTGCTTCG  
GAAGATATGCTCTTCAAGCACTTGAGCCAGCTTGGATAACATCTAGACAAATAGAAGC  
GGGACGGCGGGCAATGTCACGAAATGTTTCGCCGAGGTGGACAAATATGGGTACGCATA



TTGGGGATGGAAAT--GAAGGAATGTCTACACTACCTGGATTGAATCAGATACAATTTG  
AAGGGTTTTGTAGGTTTCATTGATCGGGGCTTACCAGAAGGGCTTTTTAAGTTTCCAAAA  
ATTGAGGATACAGATCAAGAAATTGAATTTCAATTATTTGTAGAAACATATCAATTATTA  
GAACCCCTGATAAACGAAAAAGATGCTGTATATGAATCGCTTACATATTCTGCTGAATTA  
TATGTATCTGCGGGATTAATTTGGAAAAGTAGTAGGGACATACAAGAACAACACTATTTT  
TGTTGGAAACATTCCTTTAATGAATTCTCTGGGAACTTCTATAGTAAATGGAATATACAG  
AATTGTAATCAATCAAATATTGCAAAGCCCTGGTATTTATTACCGTTCAGAATTGGACCC  
TAGCGGAATTTCCGGTCTATACTGGCACCATAATATCAGACTGGGGGGGTAGATTAGAATT  
AGAGATTGATAGAAAAGCAAGGATATGGGCTCGTGTGAGTAGGAAACAGAAAATATCT  
ATTCTAGTTTTATCATCAGCTATGGGTTTCGAATTTAAGCGAAATTCTAGAGAATGTTTGT  
TATCCTGAAATTTTCGTTTCTTTCCATAATGATAAGGATAAAAAAAAAAATAGGGTCAAA  
AGAAAATGCCATTTTGGAGTTTTATCGACAATTTGCTTGTGTTGGTGGAGATCCAGTAT  
TTTCTGAATCTTTATGTAAAGAATTACAAAAAAAAATTTTTTCAACAAAGATGTGAATTA  
GGAAGGATTGGTCGACGAAATATGAACCAAAAAGCTTAATCTTGATATACCTCAGAACAA  
TACATTTTTGTTACCACGAGATATATTGACAGCTGCGGATCATTGATTGGAATGAAATT  
TGGAATGGGTATACTTGACGAT-----ATAAATCATTTGAAAAATAAACGTATTCGTTCCGGT  
AGCAGATCTATTACAAGATCAATTTGGATTGGCCCTGGTTCGTTTAGAAAATATGGTTAG  
AGGAACTATATGTGGAGCAATTAGA---CATAAATTGATA---CCGACTCCTCAGAATTTGG  
TGACTTCAACTCCA-----TTAACAACACTTATGAATCTTTTTTTGGATTACATCCATT  
ATCTCAAGTTTTGGATCAAACATAATCCATTGACCCAAATAGTTCATGGGAGAAAATTGA  
GTTATTTGGGCCCTGGAGGATTGACGGGGCGAACTGCTAGTTTTTCGGATACGAGATATC  
CACCTAGTCACTATGGACGCATTTGTCCAATTGACACGTCGGAAGGAATCAATGTTGG  
ACTTATTGGATCTCTAGCAATTCATGCGAGGATTGGTAGTTGGGGG---TCCATAGAAAGT  
CCATTTTAT-----GAAATATCTGAGAGATCAAAAAGA-----ATACGCATGCTTTATTTATC  
ACCAAGTAGAGATGAATACTATATGGTAGCAACAGGAAATTCTTTGGCACTTAATCGAG  
ATATTCAGGAGGAACAGACTGTTCCAGCCCGATACCGTCAAGAATTTCTTACGATTGCA  
TGGAACAGGTTTCATCTTCGAAGTATTTTCCCTTCCAATATTTTCTATTGGAGCTTCT  
CTGATTCCTTTTATTGAACATAATGATGCCAATCGAGCTTTAATGAGTTCTAATATGCAA  
CGTCAAGCAGTTCCGCTTTCTCAGTCCGAAAAATGCATTGTTGGAACACTGGATTGGAAC  
GCCAAGTAGCTTTAGATTCAGGGGTTTCCGCTATAGCCGAACACGAGGGGAAACATCAT  
TTATACCAATACTGACAGGATATTTTTATTTGGTAATGGAGATACTCTAAGCATTCCATTA  
ACTATATATCAACGTTCCAACAAAAATACTTGTATGCATCAAAAACCCCAGGTTTCGCCG  
AGGTAAATGTATAAAAAAGGGACAAATTTTAGCGGATGGTGTCTGCTACAGTTGACGGC  
GAACTCGCTTTGGGAAAAAACGTCTTAGTAGCTTATATGCCATGGGAAGGTTACAATTC  
TGAAGATGCTGTACTCATTAAATGAGCGTCTGGTCTATGAAGATATTTATACTTCTTTTCA  
CATACGGAAATATGAAATTCAGACTCATATGACAAGCTATGGT---TCTGAAAGAATCACT  
AATAAAATCCACATCTAGAAGCCATTTACTCAGAAATTTAGACAAAATGGAATTGT  
GATCCTCGGGTCGTGGGTAGAAACGGGTGATATTTTAGTGGGTAAATTAACACCTCAAA  
TGGCAAAAGAA---TCCTCGTATTCCCCGAAGATAGATTATTACGAGCTATACTTGGCAT  
TCAGGTATCCACCTCAAAGGAAACTTGTCTAAAACACTACCTACAGGCGGTAGGGGTAGA  
GTTATTGATGTGAGATGGATCCAAAAAAGGGG---GGTTCCAGTTATAATCCAGAAACG  
ATTCGTATATATATTTTACAGAAACGTGAAATTAAGTAGGAGATAAAGTGGCTGGGAG  
ACATGGAAATAAAGGTATCGTTTTCAAAAATTTTGTCTAGACAGGATATGCCTTATTTGCA  
AGATGGAAGACCCGTTGATATGGTCTTCAATCCACTAGGGGTACCTTCACGAATGAATG

TAGGACAAATATTTGAATGCTCGCTCGGGTTAGCAGGAGGTATGCTAGAAAAGACATTAT  
CGAATAACACCTTTTGGATGAGAGATATGAACAAGAAGCTTCGAGAAAAGTAGTGTTTT  
CTGAATTATATGAAGCCAGTAAACAAACATCTAATCCATGGATATTTGAACCCGAGTATC  
CAGGAAAAGCAAAATCTTTGATGGAAGAACAGGGAAATCTTTTAAACAGCCTGCTAT  
AATGGGAAAACCTTATATTTTGAATTAATTCATCAAGTTGATGATAAAATACATGGACG  
TTCCAGTGGACATTATGCACTTGTTACACAACAACCACTTAGAGGAAGGGCCAAGCAG  
GGAGGACAACGGGTAGGCGAAATGGAGGTTTGGGCCTTGGAAGGATTTGGTGTGCT  
CATATTTTACAAGAGATGCTTACTTATAAATCTGATCATATTAATAACTCGCCAAGAAGTA  
CTCGGGACTACGATCATTGGAGGAACAATACCTAAACCTACAGATGCTCCAGAATCTTT  
TAGATTGCTAGTTCGAGAATTACGATCTTTAGCTATGGAAGTGAATCATTTCCTTGTATC  
CGAGAAGAAGTTCGGGATTCATAGGAAGGAAGCT-----ATGATTGATCAGTA  
TAAACATCAACAACCTCCGAATTGGATCAGTTTCTCCTCAACAAATAAGTGCTTGGGCA  
AAAAAATCCTACCTAATGGAGAGATAGTGGGGGAGGTAACAAAACCCCTATACTTTTC  
ATTACAAAACCAATAAACCCGAAAAAGATGGATTATTTTGTGAAAGAATTTTGGGCCT  
ATAAAAAGTGGGATTTGTGCTTGTGGAAATTATCGAGTAATCAGAGATAAAAAGGACG  
ACCCAAAATTTTGTGAACAATGCGGAGTAGAATTTATTGATTCTCGGATACGTAGATATC  
AAATGGGCTATATAAACTGGCATGCCTAGTAACTCATGTGTGGTATTTGAAACGTCTTC  
CTAGTTATATCGCAAATCTTTTAGATAAATCTCTAAAGGAATTAGAAAGTCTAGTATACT  
GCGATTTT-----TCGTTTGCTAGACCC---GTAGTTAAAAAACCCACTTTCTTACGATTACG  
AGGTTTCATTTCGAATATGAAATCCAATCTTGGAACACAGCATACCACTTTTTTTTACTAC  
CCAAGGTTTTTGATATATTTCGAAATCGAGAAATTTCAAGTGGAGCGGGTGCTATCCGAG  
ACAATTGGCCGATCTGGATTTGAGAATCTTATGGATTCTTCGTTGATAGAATGGAAA  
GAATTAGGGGAAGAG---GGATCCCCGGACAATGAATGGGAAGATCGAAAAGTTGGAA  
GAAGAAAGAATTTTTTGGTTTCGACGCATAGAATTAGCTAAGCATTCTCCGAACAAAT  
ATAGAACCAGAATGGATGGTTTTATGTCTTTTACCAGTTCTTCCTCCCGAATTGAGACC  
GATTATTCAAATCGATGGGGGTAAACTAATGAGCTCTGATATTAATGAACTATATAGAAG  
AGTTATCTATCGGAATAATACTCTTATCGATTTATTAACAACAAGTAGATCTACTCCAGG  
AGAATTAGTAATGTGTCAGGAGAAATTGGTACAAGAAGCCGTGGATACACTTCTTGATA  
ATGGAATCCGCGACAACCGATGAGGGACGGTCATAATAAGGTTTACAAATCATTTTCT  
GATATAATTGAGGGCAAAGAGGGAAAGATTTCCGCGAGACTCTACTTGGGAAACGGGTTG  
ATTATTCGGGTCGTTCTGTCAATTGTTGTAGGTCCATCACTTTCATTACATAGATGTGGATT  
GCCCCGCGAAATAGCAATAGAACTTTTCCAGACATTTCTAATTCGTGGTCTAATTCGAA  
AACATTTTGCTTCGAACATAGGAATTGCTAAGAGTAAAATTCGGGAAAAAGAACCGAT  
TGTATGGGAATACTTCAAGAAGTTATGCAGGGACATCCCGTATTGCTGAATAGAGCGC  
CGACTCTGCATAGATTAGGTATACAGGCATTCCAACCCATTTTAGTAGAGGGGCGTGCT  
ATTTGTTTGCATCCATTAGTTTGTAAAGGATTCATGCAGACTTTGATGGGGATCAAATG  
GCTGTTTCATGTGCCTTTATCTTTAGAAGCTCAAGCAGAAGCTCGTTTACTTATGTTTCT  
CATAACGAACCTCTGTCTCCGGCTATTGGGGATCCTATTTCCGTACCAACTCAAGATATG  
CTTATTGGACTTTACATATTAACGAGCGGGAATCGTCGAGGTATTTATTCAAATAGGTAT  
AATCCACGGAATTGCGGAAATTTAGAAATCTTAAAAATGAAAGAATTCGAGATAATAA  
CTATAAGTATACGAAAAA---GAACCTTTTTTTTGTAAATTCCTATGATGCAATTGGAGCTT  
ATCAACAAAAAGAATAAACTTCGATAGTCCTTTGTGGCTCCGGTGGCGACTAGATCA  
ACGC---ATTATTTTCGTCA-----AGAGAAGTTCCTATCGAAGTTCCTATGAATCTTTAGGT  
ACCTATCATGAAATTTATGAGCATTATCTAGTAGTAAGAAGTACAAAAAAGAATTCG

TTCTATATACATTTCGAACCAATGTTGGTCATATTTCTTTTTATCGAGAAATCGAAGAAGC  
TATAAAGGTTTTTGCCGGGCCTATTCATATGATATC-----ATGGC  
AGAACGGGCCAATCTAGTCTTTCACAATAAAGTGATAGGTGGAAGTCCATTAAACGA  
CTTATTAGCAGATTAATAGATCACTTTGGAATGGCATATACATCACATATCCTGGATCAAG  
TAAAGACTCTGGGATTCCGTCAAGCTACGGATACATCCATTTTCATTAGGAATTGATGAC  
CTTTTAAACAATACCTTCTAAAGGATGGCTAGTCCAAGATGCTGAACAACAAAGTTTGAT  
TTTGGAACAACATCATCATTATGGGAATGTACATGCAGTAGAAAAATTACGCCAATCCA  
TTGAGATATGGTATGCTACAAGTGAATATTTTCGACAAGAAATGAATCCTAATTTTAGGA  
TGACCGACCCCTTTAATCCAGTCCATATAATGTCCTTTTCGGGAGCTAGAGGAAATGCG  
TCTCAAGTACACCAATTAGTGGGTATGAGAGGATTAATGTCGGATCCACAAGGACAAAT  
GATTGATTTACCTATTCAAAGCAATTTGCGCGAAGGGCTTTCTTTAACAGAATATATAAT  
TTCTTGCTACGGAGCTCGTAAAGGGGTTGTAGATACTGCTGTACGAACATCAGATGCTG  
GATATCTTACACGCAGACTTGTGTAAGTGGTTCAACACATTGTTGTACGTCGAACGGAT  
TGTGGTACCATTCAAGGAATTTTCGGTGAATACCCAGAATGGAATGATGCCG--GAAAGA  
ATATGGATACAAACATTAATTGGTTCGTGTATTAGCAGACGATATATACAGAGGTTACGA  
TGCATTGCCGTTAGAAATCAAGATATTGGAATTGGACTTATCAATCGATTTAAAACC-----  
-----CTTCAAACCAACCAATATCTATCCGAACCTCCCTTTACCTGTAGGAATACATCT  
TGGATCTGTCGATTGTGTTATGGCCAAAGTCTACTCATGGTCACTTGGTGGAAATTAGG  
AGAAGCTGTAGGTATTATTGCGGGCCAATCCATTGGAGAACCGGGCACTCAACTAACA  
TTAAGAAGTTTTCTACTGGCGGAGTCTTCACTGGAGGACTGCAGAACAGGTGCGAG  
CACCTTATAATGGAAAAATTCAATTCATGAAGATTTGGTTCATCTACACGTACACGTC  
ATGGGCATCCTGCTTTTCTATGTTATATAGATTTGTATGTTACTATTGAAAGTGGTATATT  
ATACATAATGTGACTATTCACCAAAAAGTTTTCTATTAGTTCAAAAACATCAATATGTA  
AAATCAGAACAAGTAATTGCCGAGATTCGCGCAGGAACATACACTTTT--AATTTAAA  
GAAAAAGTTCGAAAACATGTCTATTCTGACTTAGAAGGAGAA---ATGCATTGGAGTACC  
GATGTGTACCATGCATCAGAATTTAGATATAGTAATGTCCATATCTTACCAAAAACAAGT  
CATTTATGGATTTTATCAGGAAAATCATAACAGG-----TCCGGTTCAGTCTCTTTTTCAATC  
CGAAAAGATCAAGATCAAATGAACATTCAT-----TATCTTTCTACTGGAGAAAGAGATTT  
TTGTAACCTTTTA-----GCAAGTAAAAA-----GTAAGACATAAATTGTTTCGTTTCAAT  
CCTTCTGATAAAAAGAAAGGATTTCAAGATTAT--TCAATATTTAATCAAATCATATC  
TATAGATCATTGTCATTTTACACATCCTACT--ATTTCCATGATACTACGGAT-----TTATT  
AGCAAAGAGGCGGAGAAATAGATTAATTATTCCATTTCAATTCATTCAAGAACGAGACA  
AAGAGCTAATGTTAGCTTCCAGTATCTCGATTGAAATACCAATC-----AATGGTATTTTT  
GTAGAAATAGCATTCTTGCTTATTTTCGATGATCCTCAATACCGAACACAGAGCTCGGGA  
ATTACTAAATATAGGACTATAGGTATAAATTCCATTTTTAAAAAAGAGGATTTT--TTAATT  
GAGTATCAA---GGAGTTAAAGAATTTAAGACAAAATACATTAAGTAGATCAATTTTTTT  
TCATTCCCGAGGAAGTGCATATTTTACCAGAATCTTCTTCCATAATGGTACGGAACAATA  
GTATCGTTGAAGTAGATACTAATCACTTTAAATATAAGAAGTCGAGTAAGGGGATTG  
GTCCGATTGGAGAAGAAAAAAAAAAGATTGAATTAATAAATATTTTCCGGGGATATCTA  
TTTTCCCGGAGAAATGGATAAGATATCCCGACACAGTGCCGTGTTGATACCACCA---AG  
AACGGTAAAAAAAAAATTCAAA-----GAAAAAAAA-----ATGAAAAATTGGATCTATGTC  
CAATGG-----ATCACAATTACGAAAAAAAAAG-----TATTTTGTTTTGGTTCGACCGGTAAT  
TTTATATGAAATAGCGGATAGGATCAATTTAGTAAAACTTTTTCCCAAGATATGTTCCA  
AGAAAGAGATAATCTGGAACCTTAAAGTTATTAATTATATTCTTTCTGGAAATGGAAAATC

CATTCGGGGAATTTCTGATACAAGTATTCAATTAGTTAGGACTTGTTTAGTCTTAAATTG  
GGATCAAGACAAA-----AAATTTTCTTCTATAGAAAATGCGCATGCTTCTTTTGTGAA  
ATAAGTATAAAAAGGTTTGGTTAGATATTTCTTAAGAATTGACTTAGTGAAA---CATATTC  
ATATATAAGAAAAAGGAATAATCCGCCCGTTCAAGATTTATCTTGGAT---AATGAGTCG  
GACCGCACCACCATCAATCCATTT-----TTTTCTATTGATTTCG-----AGGGAAAAAATTC  
ACAATCACTTAGTAAAAATCAT---ACTATTCGTATGTTGTTGAAT-----AGAAATGAAA  
AATGCCGATCTTTGATAATTTTGTATCATCGAATTGTTTT-----CAAATACGATCATTCAA  
CCATGGAAAATATTACAAT-----GGGATAAAAGAGGGAGATGCTATGATTCCAATTA  
AATTCGTTAGGTCCTTTAGGAATA-----GCCCTCAAGTTGCCATTTTGAT-----TTTTA  
CCGTTTAATAACT-----CATAATCAGATCTCG---ATAATTAATAAATGGGCAACTTGACAAA  
-----TAAAAAGAACTTTTCAAGTATTC-----CAA---TATTATTTCTGGACGAAAACGA  
GAGA-----ATTTATAAACCTGATCTGTGTAGTAACATCATTTTAAATCCATTCTATTTGAAT  
TGGCATTTTCTCCACCATAAT-----ACGTTTACAATAATGAGT---CTTGGTCAATTTAT  
TTGCGAAAATGTATGTATAGTTCAAATGCACCA-----CACCTAAAATCGGGTCAAATT  
CTAACAGTTCAA---ATGGATTCTGTAGGAATAAGATCGGCTAACCTTATTTGGCGACTC  
CTGGAGCAACGGTTCATGGCCATTATGGGGAAATACTTTCTGAAGGAGATATATTAGTT  
ACATTTATCTATGAAAAATCGAGATCGGGTGTATAACACAAGGTCTTCCAAAAGTAGA  
ACAGGTATTAGAAGTTCGTTTCGATTGATTCAATATCGATGAACCTAGAAAAGAGAGTTG  
ATACTTGAATGGGCGTATAACAAAAATTCTTGGCATTCTTGGGGATTCTTGATTGGTG  
CTGAGCTAACGATAGCGCAAAGTTCGATTTTCTTTGGTTAATAAAATTCAAAAAGTTTAT  
CGATCCCAGGGAGTTCACATTCATAATAGACATATAGAAATTATTGTGCGTCAAATAACA  
TCAAAGTCTTGGTTTCCGAA-----GATGGAATGTCTAATGTTTTTTTTGCCCGGTGAA  
CTAATTGGATTGTTGCGAGCCGAACGAGCAGGGCGTTCCTTAGAAGAGGCGATTGCT  
ATCGAGTTCTATTATTGGGGATAACAAAACATCTCTGAATACTCAAAGTTTCATATCTG  
AAGCAAGTTTTCAAGAACTGCTAGAGTTTTATCAAAGCCGCTCTCCGGGGGCGCAT  
AGATTGGTTGAAAGGTCTGAAAGAGAACGTTGTTTTAGGGGGAATGATACCTGTTGGT  
ACCGGATTCAAAGAATAATGAACCGTCAAAGCAAAGGCAATATAACAAGATGACC--  
----TCGGAAACAAAAAAAAGAATTTATTTGAGGGCGAA---ATG---AGAGATATTTGTT  
TCACCACAGAGAATTCTTTTTTTTTGTTTCAAAGAATTTATGCGATACATCGCAGCAATC  
TAGTATT-----ATGACAAAAGATATTGGAACATAATCTTGGAAAG  
AGATGATGGAAGCAGGAGTTCATTTTGCCACGGTACTAGAAAATGGAATCCTAAAAT  
GTCACCTTATATATCTGCAAAGCGTAAGGGTATTCATATTACAAATCTTATTAGAAGTCT  
CGTTTTTATCAGAAGCTTGTGATTTAGTTTTTATGATGCAGCAAGTGAGGGAAAACAATT  
CTTAATTGTTGGTACAAAAAAAAGCAGCGGATTCAGTAGCACGGGCTGCAATAAGA  
GCTCGGTGTCATTATGTTAATAAAAAGTGGCTCGGCGGTATGTTAACGAATTGGTATACT  
ACAGAAACACGACTTCAAAGTTCAGGGACTTGAGAATGCAACAAAAGACGGGGAG  
ACTCAATAGTTTTCCAAAAGAGATGCCGCTATATTGAAGAGACATTTAGCTCATTG  
AAACATATCTTGGCGGCATTAATATATGACGGGGTTACCTGATATTGTAATAATCGTCG  
ATCAACAAGAAGAATATACGGCTCTTCGAGAATGTATAACTTTGGAAATTCCAACAATT  
TGTTAATCGATACAAATTGTGACCCGGACCTCGCCGATATTTCAATTCCAGCTAATGAT  
GATGCTATAGCCTCAATTCGATTAATTCTTAACAAATTAGTATTTGCAATTTGTGAGGGC  
CGTTCTAGC---TATATACGAAATTCTATGGGACAAAAAATAAATCCGCTTGGTTTCAGAC  
TTGGTACAACCTCAAAGTCATGATTCTATTTGGTTTGTCTCAACCAACAAATTATTCCGAG  
AATATAACAAGAAGATAAAAAAATACGAGATTGTATCAAAAATTATATACAAAAAATATA



AGAATATCCTCT--GGTGTGAGGGAATTGGACAGATAAAGATTCAAAAAAGAATTGAT  
CTTATTCAAGTTATAATATATATGGGATTTCCAAAGTTATTAATAGAGGGTAAGTCTCAA--  
-----AAAATCGAAGAATTACAGACGAATATGCAAAAAAACTGAATTGTGTGAATCG  
AAAATAACATTGCTATTGTAAAAGTTGCAATGCTTATAAACACCCTAATATTATTGC  
AGAATTTATAGCTGGACAATTAAGAATAGAGTTTCGTTTCGTAAAGCAATGAAAAAA  
GCTATTGAATTAAGTGAACAGGCGGGTACAAAAGGAGTTCAAGTACAAATTGCAGGAC  
GTATCGACGGAAAAGAAATTGCACGTGTTGAATGGATCAGAGAAGGTAGAGTTTCTCT  
ACAAACCATTTCGAGCGAAAATAGATTATTGTTGCTATACAGTTTCGAACTATTTATGGGGT  
TTTAGGGATCAAAGTTTGGATATTTTCTAAA-----ATGTCACGTTACAGAGGACCTCGTT  
TCAAAAAAATACGTCGCTGGGGTCTTTACCAGGACTAAGTAAAGGCCAACAGT  
CAAAGCGAACTTAGAAATCAATCGCGCTCCAGTAAA---AAATCTCAATATCGTATTTCG  
TTTAGAAGAAAAACAAAATTGCGTTTTTATTATGGTCTTACAGAACGACAATTGCTTA  
AATACGTTTCGTATCGCCGGAAAAGCTAAAGGATCAACTGGTCAGGTTTTATTACAATA  
CTTGAATGCGCTTGGATAACATACTTTTTCGGTTGGGTATGGCTGCGACTATTCCTCAA  
GCACGCCAATTAATTAACCATAGACATGTTTTAGTTAATGGTCATATAGTGGATATACCA  
AGTTATCGTTGCAAACCTCAAGATATTATTACAGCGAAGGATGAACAAAAATCGAAAA  
CTCTGATTCAAATTTATCTTGATTACGCCCCCGT---GAGAAATTGCCAAATCATTGAC  
TCTTACCCATTCCAA-----TATAAAGGATTAATCAATCAATAATAGATAATAAATGGGT  
TGGTTTGAAAATAAATGAATTACTAGTTGTAGAATATTATTCTCGTCAGACTATGTCACG  
GCGAGGTACTGCAGAAGAAAAACCGCAAAATCCGATCCAATTTATCGTAATCGATTA  
GTTAACATGTTGGTTAACCGTATTCTGAAACACGGAAAAAAATCATTGGCTTATCAAAT  
TATCTATCGAGCTATGAAAAAGATTCAACAAAAGACAGAAACAAATCCACTATCTGTTT  
TACGTCAAGCAATACGTGGAGTAACTCCCGATATAGCAGTAAAAGCAAGACGCGTAGG  
CGGATCAACTCATCAAGTTCCCGTTGAAATAGGATCCACACAAGGAAAAGCACTTGCC  
ATTCGTTGGTTATTGGGGGCATCCCGAAAACGTCCGGGTCGAAATATGGCTTTCAAATT  
AAGTTCCGAATTAGTGGATGCTGCCAAAGGTAGTGGCGATGCCATACGCAAAAAGGAA  
GAGACTCATAGAATGGCAGAGGCAAATAGAGCTTTTGCACATTTTCGTATGGGTAAGG  
ACACCATCGCTGACATAATAACCTATATAAGAAATGCTGACATGAATAAAAAAGGAATG  
GTTCAAATACCATTTACTAACATAACAGAAAACATTGTAAAAATACTTTTACGCGAGGG  
TTTTGTTGAAAACGTCAGAAAACATAGAGAAAACGACAAATATTTTTTAGTTTTAACTC  
TACGGTATAGAAGG-----AATAGAAAAGGATCATATAAAAGT---TTT-----TTAAATTTAAA  
ACGGATCAGTACACCCGGTCTACGAATATATTCTAATTATCAACGAATCCCTCGAATTTT  
AGGGGGCATGGGGATTGTAATTCTTTCAACTTCTAGAGGTATAATGACAGATCGAGAGG  
CTCGATTAGAAAAGAATTGGCGGAGAAGTTTTATGTTATATATGGATGGCAAAACCTATAT  
CTAAAAGGGTTCGCGTAAAATGTACGTATTGGTTTCG---AAGCATACTCGTAAAATAC  
CAAAGGGAGTTATTATGTTCAAGCTAGTTTCAACAATACTATTGTAAGTGTACAGAT  
GTACGAGGTCGGGTGATTTCTTGGTCTCCGCGGTAAGTGTGCGGATTCAAAGGTACAC  
GAAGGGGGACACCTTTTGGCGCTCAAAGTGCAGCAGGAAATGCTATTTCGAACAGTATC  
GGATCAAGGCATGCAACGAGCAGAAGTCATGATAAAAGGTCCTGGTCTCGGAAGAGA  
TGCGGCATTAAGAGCTATTCGTAGAAGTGGTATACTATTAAATTTTATACGAGATGTAAC  
TCCTATGCCACATAATGGATGTAGATCTCCTAAAAAAGACGTGTGATGCCAACTATGA  
AACAACTTATTAGAAACACAAGACAGCCAATCCGAAACGTCACAAAATCCCCAGCTCT  
TCGGGGATGCCCTCAGCGCCGAGGAACGTGTACCAGGGTGTATACTATTACCCAAA  
AAACCAAACCTCTGCTTTACGTAAAGTTGCCAGAGTACGCTTAACCTCTGGATTTGAAAT

TACTGCTTATATAACCCGGTATTGGCCATAATTTACAAGAACATTCTGTAGTCTTAGTAAG  
AGGGGGGAGGGTTAAAGATTTACCCGGTGTGAGATATCACATTGTTTCGAGGAACCCTA  
GATGCTGTCGGAGTAAAGGATCGTCAACAAGGGCGTTCTAAATATGGGGCCAAAAAGC  
CAAAAATGGCAAGGAAAAGTGTGATTAGAGGGAGAAGAAGAGACAAAAATTGGAA  
CAGAAATATCATTGATTCGCCGATCCTCAAAAAAGAAATAAGC-----AAAGTTCCG  
TCGTTAAGTGATAAATGGAAAATTCATGGAAAATTAGAATCACTACCGCGTAATAGTGC  
ACCTATACGTCTTCATCGACGTTGTTTTTCGACCGGAAGACCGCGAGCTAATTATCGAG  
ACTTTGGATTATCCGGACACATACTTCGTGAAATGGTTCATGCATGTTTATTGCCCGGTG  
CAACAAGATCCAGTTGGATGGTAAAAAATTCATTATACCTGTTATTTCAACAAGAA---A  
AAAAAGAAAAA---AACCCAGGATCGGTTGAATTTCAAATATTCAAATTTACCGATAGAA  
TACGAAGACTTACTTCACATTTTGAATTGCACCGAAAAGACTATTTATCTCAAAGAGGT  
TTACGTAAAATTTTGGGAAAACGACAAAGATTGCTGTCTTATTTGTCAAAGAAAGATAG  
AATACGGTATAAAAAATTAATAAATCAGTTTGATATTCGAGAGTCACAAATTCGT-----AT  
GGTAAAACCTTCGTTTGAAACGATGTGGTAAAAAGCAACGAGCCGTTTATCGAATCGTT  
GCAATCGATGTTTCGATCTCGAAGAGAGGGAAGAGATCTTCGGAAAGTGGGTTTTTATG  
ATCCAATAAAGAATCAAACCTATTTAAATATTCCTGTTATTCTATATTTCTTGAACGAGG  
CGCTCAACCTACAGGAAGTTCAGGACATTTCAAAAAGGGCTGGTGTTTTTTATGGAA  
CTTAGCTCGAATCAACAAACGAAATTCATATGGAAAATCTAAGCGACTCTTTATGAA  
ATCCAAGCGATCTTTTCGTAGGCGTTTGCCCCGATCCAATCGGGGGACCGAATTGATT  
ATAAAAACATGGGTTTAATTAGTCGATTTATTAGTGAACAAGGAAAAATATTATCCAGAC  
GCGTAAATAGATTGACCTTAAACAACAACGATTAATAACAATTGCTATAAAACAAGCT  
CGTATTTTATCTTCGTTACCTTTTCTTAATAATGAAAAA-----CAATTTGAAAAAAGCGAG  
TCAACCGCTAGAACTACTACTTTAAGAAAAAATAATATGTGACACGT---CTAAAAA  
AATCCTTTTGTAGCGAATCATTATTAAGAAAAATAAATAAATTAACACAAAAGCGGA  
AAAAGATATAATAAATACTTGGTCCAGAGCATCTACCATTATACCTACAATGATTGGCCA  
TACCATTGCTATCCACAACGGAAAAGAGCATTACCTATTTATATAACAGATCGTATGGT  
AGGCCATAAATTAGGAGAATTTTCACCTACTCTAAATTTCCGAGGACATGCGAAAAATG  
ATAATAGATCTCGTCGTATGATTTTTCAATCTTTTATACTGGATAATCTAGTATTCTTATGC  
ATGAAGATAATTAATTCGATAGTTGTGGTTCGGACTCTATTATGGATTTCTGACCACATTT  
CCATAGGGCCCTCTTATCTCTTCCTTCTTCGAGCTAGGCTTGTGGAAGAAGGG-----A  
CCGAGAAGAAAATATCAGCAACAACCTGGGTTTATTACGGGACAGCTCATAATGTTTATA  
TCGATCTATTATGCGCCTTTGCATTTAGCATTGGGTAGACCCCATATAATAACTGTCATAG  
CTCTACCCTATCTTTTATTTTTCAGTTCTTCGGCAATAATCACAAAACCTTTTTGAATTATGG  
ATACAAGAATCCAAATTCATACGTAATTTTAGTATTCAAAGAATCTTCTTTTATAATCTT  
ATTTTTCAGTTATTAACCCCTTTTTTTTACCAAGTTCAATATTAATAAGATTAGTAAATA  
TTTATTTGTTTCGA-----TTTAAATAT-----

-----  
-----  
-----  
-----  
-----  
-----  
-----  
-----



TTTCTGGATATTCC-----TCAATGTGCCGACTATTCATG---GAACGTGAGAAGCAGATGAA  
TAATCATCTGCTTCCGCAAGAAATCGAAGAATTT-----CTTGGGAATCCTGCAAGAGCTA  
CTCGTTCTTTTTTCTCTGACAGATGG-----TCAGAACTTCAT--CTGAGTTCGAATCCTAC  
TGAGAGGTCTACTAGAGATCAG-----AAATTGTTGAAGAAAGAACAAGAAACA  
T--CTTGTCTTTCCAGGCGATCGGAA-----AATAAGAAATAGTGAATTTATTCAAG  
ATAATTATGTACTIONTACAAAAT-----ACCGTCTCAATTCATCTATTTTCATCATATCCGGGAT  
GTGATATGGTTCCA--AAGGGTGAAGT-----GACAGTTCCAATAAGATTTTCATTCTTG  
AACAAAATCCATTTTGGGGTTTA-----TTTCATCTATTCCATGACCGGAACAGTGGGAG  
ATACACGTTA-----CACCACGATTTTGAATCAGAA-----GAGATATTTCAAGAAATGGCAG  
ATCTATTACTCTATCAATAACCGAGCCG---GATCTGGTGTATCATAAGGGATTTGCTTTT  
TCTATTGATTCTCCGGATTGGGTCAAAAACAT-----TTCTTGAATGAGTTATTCAACTCC  
AGGGATGAATCGAAAAATCACTCTTTA-----TTGGTTCTACCTCCTCTTTTTTAT-----G  
AAGAGAATGAATCTTTTTATCGAAGGATCATAAAAAAATGGGTCCAG---ACCTCTTGGC  
GGAATAATTTGGAAGATCCAAAACCTAAAATAGTTGTATTTACTAGCAACAACATAATG  
GAGGCAGTCAATCAATATAGATTGATCCGAAATCTGATTCAAATCCAATATAGCACCCAT  
-----GGTTACATAAGAAATGTATTGAAT-----CGATTCAATTGCAACTTCG  
AATATGGAATTCAA-----AGGTATCAAATAGGAAATGATACTCTGAATCATCGAACTAT  
AATGAAATACACGATCAACCAACATTTATCCAATTTGAAAAAG---AGTCAGAAGAAATG  
GTTCGATCCT-----CTTATTTTTATTTCTCGAACGGAGAGATCCATGAATCGGGATCCTAA  
TGCATATAGATACAAATGGTCCAATGGGAGCAAGAATTTCCAGGAACATTTGGACTATT  
TCATTTCTGAGCAGAATAGCCGT-----TTTCAAGTAGTGTTCGATCGATTCCATATTAAT  
CAATATTGATTGATTGGTCTGAAGTTATCGACAAAAAAGATTTGTCTAAGTCACTTTGT  
TTCTTTTTGTCCAAGTTACTTCTT-----TTTTTGCCC-----AAG  
TTTCTTCTTTTTTGTCTAACTCACTTCTTCTTTTTTCTTTGTGAGTTTTGGGGGTATCC  
CCATTCATAGGTCCGAG---ATCCACATCTAT--GAATTGAAAGGTCCGAATAATCCACTCT  
GTAATCAGTTATTAGAATCAATAGGTCTTCAAATCTTTCATTTGAAAAAATGGAAACCCT  
TA-----TTATTGGAT-----GACCAAGATACTTCC---CAAAAATCGAAATTCTTGATCAATG  
GAGGAACAATATCACCATTTTTGTTCAATAAGATACCA---AAGTGG---ATGATTGACTCA  
TTCCATACTAGA-----AAGAATCGCAGGAAATCTTTTGATAACACAGATTCCTATTTCTCA  
ATGATATCCCACGATCCAGACAATTGGCTGAATCCCGTGAAACCATTTCATAGAAGTTC  
ATTGATATACTCTTTTTATAAAGCAAATCGACTTCGATTCTTGAATAATCAATATCACTTC  
TGCTTCTAT-----TGTAACAAAAGATTCCCTTTT-----TAT--GTGGAAAAGGCCTGTATC  
AATAATTATGAT-----TTTACGTATGGA---CAATTCCTCAATATCTTGTTCATTTCGCAACAA  
A--ATCTTTTCTTTTTGCGATGGTCAA-----AAAAACATGCTTTTTTGAAG---AGAGATA  
CTATTCACCAATCGAGTCACAGGTATCTAACATATTGATACCTAACGATTTTCCACAAA  
GTGGCGACGAAGGG---TATAACTGTACAAATCT-----TTCCATTTTCCAATTCGATACG  
ATCTATTGTTTCGT-----GGAGCTATTTACTCGATCGCAGACATTTCTGGAACACCTCTAA  
CAGAGGGACAAATAGTCCATTTTGAAAAAAATTATTGTCAACCTCTTTCAGATATGAAT  
ATACCTGATTCAGAAGGGAAGAACTTGCATCAGTATCTCAAT-----TTCAATTCAAACAT  
GGGTTTGATTCACTCCATGTTCTGAGAAATATTTACCATCCGAAAAA-----AGGAAAA  
AA-----CGGAGTCTTGTCTAAAA-----AAATGCCTTGAGAAAGGGCAGAT  
GTATAGAACCCTTTCAACAAGATAGTGTTTTTTCAACTCTCTCAAAATGGAATCTATTCCA  
AACATATATACCATGGTTCCTTACCTCGACAGGGTACAAATATCTAAATTTTCATATTTTA  
GATACTTTTTTCAGAC---CTATTGCCGATACTAAGTAGCAGC-----CAAAAATTTGTATCCA

TTTTTCATGATATTATGCATGGGTCAGATATATTATGGCGAATTCGTCAGATTCCATTG-----  
-----TGTCTTCCACAATGGAATCTGCTGATAAGTGAGATTCCGGGTAATTGTTTACA  
TAAT-----CTTCTTCTGTCCGAAGAAATTATTCATCGAAATAATGAGTTA-----CTATTAATA  
TCGACACATCTGAGATCGCTAAATGTTTCAGGAGTTC---TTCTATTCAATCCTTTTCTTCT  
CCTTGTTGCTGGATAT---CTCGTTCGTACACATCTTCTCTTTGTTTCTCGA-----GTCTATA  
GTGAGTTACAGACAGAGTTCGAAAAGGTAATAATCTTTGATGATTCCATCATAATGATT  
GAGTTGCGAAAACCTTCTGGATAGGTATCCTACATCTGAACTGAATCTTTTCTGGTTAAA  
GAATCTCTTTCTAGTTGCTCTGGAACAATTAGGAGATTCTCTAGAAGAAATACGGAGTT  
TTGCTTTTGGTGGCAACATGCTATGGGGTGGTGGTCCC-----ACTTATGGG---GTC  
AAATCAATACGTTCTAAGAAGAAATATTTGAATCTC-----ATCGATCTCATA---AGT  
ATTATACCAAATCCCATCAATCGAATCGCTTTTTTCGAGAAATACGAGACATCTAAGTCAT  
CCAAGTAAAACAATCTATTCCTTGATAAGAAAAATAAAAAACGTGAATGGTGATTGGAT  
TGATGATAAAATAGAATCCTGGGTCTTGAACAGTAATTCGATTGATGATAAAGAAAGAG  
AATCTTGGTTCAGTTTTCT-----ACCTTAACGACA-----GAAAAAAGGATTGATCAAATT  
CTATTGAGTCTGACT---CATAGTCATCATTTATCA-----AAGAATAACTCTGGTTAT  
CAAATGATTGAACAACCGGGAGCAATTTACTTACGATATTTAGTTGACATTCAT-----AA  
AAAGTATCTAATGATTTATGAATTCATACATCCTGTTTAGCAGAAAGACGTATATTCCTT  
GCTAATTATCAGACAATTAATTAT-----TCACAAACCTTTCGCGGGGGGCTAATAGTTTTTCAT  
TTCCCATCTCATGGA-----AAACCCTTTTCGCTCCGCTTAGCCCTACCTCCCCCTAGTA  
GGGGTATTTTAGTGATAGGTTCTATAGGAACTGGACGATCCTATTTGGTCAAATACCTAG  
CGACAAACTCCTATGTTCTTTTATTACAGTATTTCTGAACAAGTTTCTGGATAACAAG  
CCTAAGGGTTTTCTTATTGAT-----GATAGTGAC-----GATATTGATGATAG  
TTACGATAGTGACGAT-----ATCGACCGTGACCTT  
GATATGGAGCTGGAGCTTCTAACTATGATGAATACGCTA-----ACTATGGATATGATGC  
CA-----GAAATAGACCGATTTTATATCACCTTTCAATTCGAATTAGCAAAAGCAATGTC  
TCCTTGATAATATGGATTCCAAACATCCATGATCTGGATGTGAATGAGTCGAATTACTT  
ATCCCTCGGTCTTTTAGTGAACCTATCTCTCC-----AGGGATTGTGAAAGATGTTCT---AC  
TAGAAATATTCTTGTTATTGCTTCGACTCATATTCCTCCAAAAAGTAGATCCGGCTCTAAT  
AGCTCCGAATAAATTAATACATGCATTAAGATACGAAGGCTTCTTATTTCAACAACAAC  
GAAAACACTTTTTACTCTTTTCATATACTAGGGGATTTCACTTGGAAAAGAAAATGTCC  
CATACT-----AATGGATTCCGGTCCACAACGATGGGTTCAAATGTACGAGATCTTGTAGC  
ACTTACCAACGAGGCCCTATCGATTAGTATTATACAAAAAAATCCATCATAGACACTAA  
TATAATTAGATCTGTTCTTCATAGACAACTTGGGATTTCCGA-----TCTCAGGTAAGA  
TCGGTTCAGGATCATGGGATCCTTTTCTATCAGATAGGAAGGGCTGTTTCACAAAATGT  
ACTTCTAAGTAATTGCTCCATAGATCCTATATCTATCTATATGAAGAAGAAA-----TCATGT  
GACGGGGGGGATTCTTATTTGTACAAATGGTACTTCGAACTTGGAAACGAGTATGAAGA  
AATTAACGATACTTCTTACCTTTTGTAGTTGTTCTGCCGGATCGGTCGCTCAAGACCTTT  
GGTCTTACCC-----GGACCTGATGAAAAA---AATGGGATCACATCTTATGGACTCGTTG  
AGAATAATTCT--GATCTAGTTCATGGCCTATTAGAAGTAGAAGGCGCTCTGGTGGGA---  
--TCCTCACGTACAGAAAAGATTGCAGTCAGTTTGATAAGGAT-----CGAGTGACATTG  
CTTCTTCGGTCCGAACCAAGGAAT--CCCTTAAATATGATTCAAATGGATCTTATTCTAT  
CGTTGATCAGAGATTTCTCTATGAAAAA-----TATGAATCGGAGTTTGAAGAA-----GG  
GGGGGGAGTCCTCGACCCACAA-----CAGATAGAGGAGGAT-----TTTTTCAAT  
CAC-----ATCGTTTGGGCTCCT-----AGAATATGGAGCCCT-----TGGGGCTTTCTATTTTA



CGTAGTCGGAGAGAAAATCACCCGTTTGATTGAACACGCTGCCAATCAAATTTACCT  
CTTATTATAGTGTGTGCTTCTGGGGGAGCGCGCATGCAGGAAGGAAGTTTGAGCTTGAT  
GCAAATGGCTAAAATATCGTCTGCTTTATATGATTATCAATTAATAAAAAATTATTTAT  
GTATCAATCCTTACATCTCCGACAACCTGGTGGAGTGACAGCTAGTTTTGGTATGTTGGG  
GGATATCATTATTGCCGAACCCAATGCCTACATTGCATTTGCAGGTAAAAGAGTAATTGA  
ACAAACATTGAATAAAACAGTACCCGAAGGTTCAACAAGCAGCTGAATACTTATTCCAG  
AAGGGTTTATTGACCTAATTGTACCACGTAATCTTTTAAAAAGCGTTCTGAGTGAGTT  
ATTTAAGCTCCACGCCTTTTTTCCTTTGAATCAAAGTCAAGCAAATGGTAACCATTG  
GAGCTGACGAAATTAGTAATATTATCCGTGAACGTATTGAACAATATAATAGAGAAGTA  
AAGATTGTAAATACCGGTACCGTACTTCAAGTAGGCGATGGCATTGCTCGTATTCACGG  
TCTTGATGAAGTAATGGCGGGTGAATTAGTAGAATTTGAAGAGGGTACAATAGGCATTG  
CTCTGAATTTGGAATCAAATAATGTTGGTGTGTATTAATGGGCGACGGTTTGTTGATAC  
AAGAAGGAAGTTCTGTAAAAGCAACGGGAAGAATTGCTCAGATACCCGTGAGTGAGG  
CTTATTTGGGTCGTGTTGTAAATGCCCTGGCTAAACCTATTGATGGTAGAGGTGAAATTT  
CAGCTTCTGAATTTGATTAATTGAATCTGCCGCCCCGGTATTATTTGCGGCCGTTCCG  
TATATGAGCCTCTTCAAACCGGACTTATTGCTATTGATTCGATGATCCCTATAGGACGTG  
GTCAACGAGAATTAATTATTGGGGACAGACAGACCCGGTAAAACAGCAGTAGCCACAGA  
TACGATTCTCAATCAACAAGGTCAAATGTAATATGTGTTTATGTAGCTATTGGGCAAAA  
AGCGTCTTCTGTGGCCCAGGTAGTAACTACTTTACAGGAAAGGGGGGCGATGGAATAC  
ACTATTGTGGTAGCCGAAACGGCGGATTCCCCTGCTACATTACAATACCTTGCTCCTTAT  
ACAGGAGCAGCTCTGGCTGAATATTTTATGTATCGTGAACGACACACTTTAATCATTAT  
GATGATCTCTCCAAACAAGCGCAAGCTTATCGCAAATGTCTCTTCTATTACGAAGACC  
GCCCCGTCGTGAAGCTTATCCAGGAGATGTTTTTTATTTGCATTACGCCTTTTGAAA  
GAGCCGCTAAATTAAGTTCTAGTTTAGGTGAAGGAAGTATGACCGCCTTACCAATAGTT  
GAAACTCAATCCGGAGATGTTTCGGCTTATATTCTACTAATGTAATTTCCATTACTGAT  
GGACAAATCTTCTTATCCGCCGACCTATTCAATCTGGAATCAGACCTGCTATTAATGTG  
GGTATCTCCGTTTTCCAGAGTGGGGTCCGCAGCTCAAATAAAAGCCATGAAACAAGTAG  
CTGGTAAATTAATAATAGAACTAGCGCAATTCGCAGAATTAGAAGCCTTTGCACAATTT  
GCTTCTGATCTCGATAAAGCTACTCAGAATCAATTGGCAAGAGGTCAACGATTACGTGA  
ATTGCTTAAACAATCCCAATCAGCTCCTCTCACGGTAGAAGAGCAGATAATGACTATTT  
ATACCGGAACAAACGGCTATCTTGATTCATTAGAAGTTGGACAGGTAAGGAAATTTCTT  
GTTGAGCTACGTACTIONTAAACTACTAAACCTCAGTTCCAAGAAATCATATCTTCT  
ACCAAGACATTTACCGAGGAAGCAGAAGCCCTTTTGAAGGAAGCTATTCAGGAACAA  
ATGGACCGTTTTTATACTTCAGGAACAAGCAATGAGAATCAATCCTACTACTTCTGGTTC  
TGGGGTTTCCACGCTTGAAAAAAAACCCGGGGCGTGTTCGTCCAAATCATCGGTCCG  
GTACTAGATGTAGCCTTTCCCCGGCAAGATGCCAAATATTTATAACGCTCTGGTAGTT  
CAAGGTCGAGATAGTGTGGTCAACCAATTAATGTGGCTTGTGAGGTACAGCAATTATT  
AGGAAATAATCGAGTTAGGGCTGTAGCTATGAGTGCTACAGACGGTCTAACGAGAGGA  
ATGGCAGTGATTGACACAGGAGCTCCTATAAGTGTTCAGTCGGGGGAGCGACTCTGG  
GACGAATTTTAAACGTGCTCGGAGAGCCTGTTGATAATTTAGGGCCTGTAGATACTAGT  
ACAACGTCTCCTATTCATAGATCTGCGCCCGCCTTTATACAGTTGGATACAAAATTATCT  
ATTTTTGAAACAGGAATTAAGTAGTAGATCTTTTAGCCCCCTATCGCCGTGGAGGAAA  
AATCGGACTATTCGGGGGAGCTGGAGTGGGTAAAACAGTACTCATTATGGAATTGATTA  
ACAATATTGCTAAAGCTCACGGGGGCGTATCCGTATTTGGCGGAGTGGGTGAACGTACT

CGGGAAGGAAATGATCTTTACATGGAAATGAAAGAATCTGGAGTGATTAATAAAGAAA  
ATATTGCAGAATCAAAAGTGGCCCTAGTTTACGGTCAGATGAATGAACCGCCGGGAGC  
TCGTATGAGAGTTGGTTTTGACTGCCCTAACTATGGCGGAATATTTCCGAGATGTTAATGA  
GCAAGACGTACTTCTATTTATTGACAATATCTTCCGTTTCGTCCAAGCAGGATCCGAAGT  
ATCGGCCTTATTGGGTAGAATGCCTTCCGCTGTGGGTATCAACCGACCCTAAGTACCG  
AAATGGGTTCTTTACAAGAAAGAATTACTTCTACCAAAGACGGGTCCATAACCTCTATT  
CAAGCAGTTTATGTACCCGCAGACGATTTGACCGACCCTGCTCCTGCTACGACATTTGC  
ACATTTAGATGCTACTACCGTACTATCAAGAGGATTGGCTGCCAAAGGTATTTATCCAGC  
AGTAGATCCTTTAGATTCAACGTCAACCATGCTTCAACCTCGGATCGTTGGTGAGGAAC  
ATTACGAAACCGCCCAAAGAGTTAAGCAAACCTTTACAACGTTACAAAGAAGTTCAGGA  
CATTATAGCTATCCTTGGATTGGACGAATTATCCGAAGAGGATCGTTTACTCGTAGCAAG  
AGCGCGAAAAATTGAGCGTTTCTTATCACAACCCTTTTTTCGTAGCAGAAGTATTTACCG  
GTTCTCCAGGGAAATATGTTGGTCTAGCAGAAACAATTCGAGGATTTCAATTGATCCTT  
TCCGGAGAATTAGATGGTCTTCTGAACAGGCCTTTTTATTTGGTAGGTACTATCGATGA  
AGCTACCGCGAAGGCTATGAACTTAGAAATGGAGAGCAATTTGAAGAAAATGACCTTA  
AATCTTAGTGTACTGACCCCTAATCGAATTGTTTGGGATTCAGAAGTGAAGAAAATTGT  
TTTATCTACTAATAGTGGTCAAATTGGCATATTACCAAATCACGCCCTATTGCCACAGC  
TGATAGATATAGGGATTTTGAGAATACGCCTTAACGACCAATGGTTAACGATGGCTCTGA  
TGGGTGGTTTTGCTAGAATAGGAAATAATGAGATCACTGTTTTAGTAAATGATGCGGAG  
AAGGGTAGTGACATTAATCCACAAGAAGCTCAGCAAACCTTTGAAATAGCGGAAGCTA  
ATGTGAAAAAGGCTGAAGGAAGGAGACAAAAAATTGAGGCAAATCTAGCTCTCCGAC  
GAGCTAGAACACGGGTGGAGGCTAGCAATCCGATTTCAATGAAAAACGTAACCGATTC  
TTTTCGTTTTCT--GGCCACTGGCCATCTGCCGGGAGTTTCGGGTTTAATACCGATATTTA  
GCAACAAATCCAATAAATCTAAGTGTAGTGCTTGGTGTATTGATTTTTTTTTGGAAAGGG  
AGTGTTAAGTGATTTATTAGATAATCGAAAACAGAGGATCTTGAATACTATTCGAAATTC  
AGAAGAAGTGCCTGGGGGGGCTATTGAACAACCTCGAAAAAGCTCGTTCTCGTTTACG  
GAAAGTAGAAACCGAAGCCGAGCAGTTTCGAGTGAATGGATACTCCGAGATAGAACG  
AGAAAAATTGAATTTGATTAATTCAACTTATAAACTTTGGAACAATTAGAAAATTACA  
AAAACGAAACGATTCAGTTTGAACAGCAAAGGGCGATTAATCAAGTCCGACAACGGG  
TTTTCCAACAAGCCTTACGAGGAGCTCTAGGAACTCTGAATAGTTGTTTGAACAACGA  
GTTACATTTACGTACCATTAGTGCCAATATTGGCATGTTGGGAACAATGAAAGAAATAA  
CTGATATGAATCCACTGATTGCTGCCGCTTCCGTTATTGCTGCTGGATTGGCCGTAGGGC  
TTGCTTCTATTGGACCTGGAGTTGGTCAAGGGACTGCTGCGGGTCAAGCTGTAGAGGG  
TATCGCGAGACAGCCTGAGGCAGAGGGAAAAATACGAGGTACGCTATTGCTTAGTCTA  
GCTTTTATGGAAGCTTTAACAATTTATGGACTGGTTGTAGCATTAGCACTTTTATTTGCA  
AATCCTTTTGTATGAATGTTCTATCATGTTCTATCAATACTCTAAAGGGGTTATACGATA  
TATCCGGTGTGGAAGTAGGCCAACATTTCTATTGGCAAATAGGGGGTTTCCAAGTACAT  
GGCCAAGTACTTATTACTTCTTGGGTTGTAATTGCTATCTTATTAGGTTTCAGCCACTATAG  
CTGTTCCGAACCCACAAACCATTCCGACCGGGGGTCAGAATTTCTTCGAATATGTTCTT  
GAATTCATTCGAGATGTGAGTAAACTCAAATTGGAGAAGAATATGGGCCCTGGGTTT  
CTTTTATTGGCACTATGTTTTTATTTATTTTGTCTAATTGGTTCAGGAGCTCTTTTACCT  
TGAAAATCATACAATTACCTCATGGGGAGTTAGCCGCACCCACGAATGATATAAATAC  
TACTGTTGCTTTGGCTTTACTCACATCCGTGGCATATTTCTATGCGGGTCTTACAAAAAA  
GGGATTAGGTTATTTCCGAAAATATATTCAACCAACCCCAATTCTTTTACCCATTAACAT



CTTAGAAGATTTACAAAACCTTTATCACTTAGTTTTCGACTTTTCGGGAATATCTTAGC  
TGATGAATTAGTAGTTGTTGTTCTTGTCTTTAGTACCCTTAGTAGTTCCTATACCTGTC  
ATGCTCCTTGGATTATTTACAAGTGGTATTCAAGCTCTTATTTTTGCAACTTTAGCCGCG  
GCTTATATAGGTGAATCCATGGAGGGCCATCATATGATATTTTCAACCTTAGAGCATATAT  
TAACTCACATTTCTTTTCGATCGTTTCAATTGTAATTACAATTCATTTGATAACCTTTTT  
AGTTGATGAAATTGTAAAACCTATACGATTTCGTCAGAAAAGGGCATAATAGTTACTTTTT  
CTGTATAACAGGATTATTAGTTACTCGTTGGATTTCTTCAGGACATTTCCCACTAAGCGA  
TTTATAATGAATCATTAAATTTTCTTTTCATGGAGTTTCTCCCTTATTCATATAATTCCATAT---  
--AAAAATGTTTTAATTTTAAGTAAAATAACTGGACCAAGTGCTATTTTGACCCAAGGCT  
TTGCTACTTCAGGTATTTAACTGAAATACCAATCTGGAATATTAGTACCTGCTCTTC  
AATCTGAGTGGTTAATAATGCACGTAAGTATGATGATATTGGGCTATGCAGCCCTTTTAT  
GCGGATCGTTATTATCAGTAGCACTTCTAGTGATTACATTTCGAAAAACAGAAAGCTT  
TTTTAT-----AAGGAAAATGTTGTCGAAAATACTTCGTTT-----GCTAA  
AAATTATTACAGGTCCCAATTGATTCAACAATTGGATTATTGGAGTTATCGGGTTATTAG  
TTTAGGATTTACTTTTTTAACCATAGGAATCCTTTTCGGGAGCGGTATGGGCTAATGAAGC  
GTGGGGGTCTTATTGGAATTGGGATCCAAAAGAACTTGGGCATTTATTACTTGGATCG  
TATTTGCAATTTATTTACATACTCGAACAAATAGAAATTTGCGGGGTCCAAATTCTGCAA  
TTGTAGCGTCTATAGGTTTTCTTATAATTTGGATATGCTATTTTGGGGTCAATCTATTAGG  
AATAGGGTTACATAGTTATGGTTCTTTTCCATCAACAATGGCAAAAAGAAAGCATTCA  
CTCCTCTTTTCTATCTTGCATCTATAGTATTTTGCCTGGTGGATTTCTTCTCAGTTAAT  
AAATGTCTGGAATCTTGGGTTACTAATTGGTGAATACTGGGCAATCCCAAATTGTCTT  
GAATAATATTCAAGAAAAGAGTCTTCTAGAAAATTCAGAGAATTAGAGGAACTCCTC  
TTCTTGGACGAAATGATCAAGGAATACTCGGAAACACATCTCGAAGAGTTTGGGATA---  
ATCCATAAAGAAACGATCCAATTAATCACGATACAAAATGAGAATCGTATGGATACGAT  
TTTGCACTTCTCAACAAATATCATCTGGTTTGGTATTCTAAGCGGGTATTCAATTTTGGG  
TAAGGAAAACCTTGTATTCTTAACTCTTGGGCTCAGGAATTCCTATATAACTTAAGTGA  
CACAGCAAAGCTTTGTGTCTTCTTCTAGTAACTGAGTTTTTTCTCGGATATCATTACC  
CCCAGGTTGGGAATTCGCTATACGCTCTATCTATAACGAGGTTGGAGTTGTTGCGAATG  
AGCAAACCTATAACTATTCTTGTGTTGCATCCTTCCAGTAATTTTGGATACATGTTTTAAATA  
TTGGCTTTTCCGTTATTTAACTAGTCTGTCTCCGTCATTTTACTGATTTATGATTCAATA  
ACTGAAATGCCTATTGGTGTTCAAAAGTTCTATTCCGAAATCCTGGAGATCCAATTC  
ATCTTGGGTTGACGTATAACAACCGACTTTATCGAGAAAGATTACTTTTTTTAGCCAAG  
GGATTAGTACCGATCTTTCGAATCAACTTATTGGTCTTATGATGTATCTCAGTATGGAGG  
ATGAGAACAAAGAGCTGTATTTGTTTGTAAACTCTCCTGGGGGCTGGGTAATACCTGG  
GATCGCCATTTATGATACTATGCAATTTGTGCGACCAGATATCCATACAATATGCATAGGA  
TTAGCTGCTTCAATGGGATCTTTTATCCTGGCCGGAGGACAACCTTACCAAACGTATAGC  
ATTCCCTCACGCTAGGGTAATGATACATGAACCTTATAGTGCTTTTTTATATGGCACAAGT  
AGGCGAATTTGTCATGGAAGCGGTAGAACTGATGAAACTGCGTGAAACCCTCACAAG  
GGTTTATGCAGAAAGAACGGGCAAACCCTTCTGGGTTGTACACGAAGATATGGAAAGA  
GATATTTTTATGTCAGCAACAGAAGCCCAAGCTTATGGAATTGTTGATTTTGTAGCGGTT  
CAA-----  
-----ATACAGATACTGCCAGGCGATAGAGTCAAATTGAAGTAAGTCCTTATGAT  
TCAACCAAAGGGCATATAATTTATCGACTCCACAACAAGAT---AAGGATATGGAAGAA  
ATCCACAGATATTTACAG---GATAGCTCGCAACAACAACACTTCTATATCCACTTATCTT

TCAGGAGTATATTTATGCACTTGCTCAGGATCATGGTTTATCAGGTTATAACAATAAATTT  
AGTTTCCTAATTGTGAAACGGTTAATTACTCGAATGTATCAACAGAATCATTTTATTATTT  
CGACTAATGATTCTAACAAAAATCCGTTTTTGGGGAAGAGTTTGTATTCTCAAATGATAT  
CAGAGGGGTTTGCATGTATTGTGGAATTCGTTTTTCTATACGATTAATATCTTCTTTAAT  
TTCAAATCTCATAATTTACGATCAATTCATTCAACATTCCTTTTTTAGAGGACAATTTT  
TCACATCTAAATTATGTATTAGATATACTAATACCCCTACCCCGTTCATCTGGAAATCTTGG  
TTCAAATCTTCGCTATTGGGTAAAAGATGCCTCTTCTTTACATTTATTACGATTCTTTCT  
CCACGAATATTGTAATTTGAATAGTCTTATTACTCCCGGT---TACTCCTTTTCAAAAACAAA  
GATTCTTCTTCTTCTTATATAATCTTATGTATATGAATGCGAATCCACTTTCGTCTTTCTA  
CGAACCAATCTTCTCATTACGATCAACATCTTTTGGAGCCCTTCTTGAACGAATATAT  
TTCTATGGAAAAATAGAACGTCTTGTAGAAGTCTTTGCT---GATTTTACCCTATGGTTATT  
CAAGGATCCTTTCATGCATTATGTTAGGTATGAAGGAAAATCAATTCTGGCTTCAAAAG  
GGACGTTTCCTTTGATGAATAAATGGAAATTTACCTTGTCAATTTTTGGCAATGTCATT  
TTTCTATGTACTTTCACACAGGAAGGATCCATATAACCAATTATCCAACCATTCCCGTG  
ACTTTATGGGCTATCTTCAAGTGTGCGACTAAATCATTCAATGGTACGTAGTCAAATGT  
TAGAAAATTCATTTCTAATCAATAATCCAATT-----AAGAAGTTCGAGACCCTTGTTCCAA  
TTATTCCTTTGATTGGATCATTAGCTAAAGCACACTTTTGTACCGTATTAGGGCATCCCAT  
TAGTAAACCAGTTTGGTCCGATTTATCAGATTCTGATATTATTGACCGATTTGGGCGTATA  
TGCAGAAATCTTTTTTCAATTATTATAGCGGATCTTCCAAAAAAAAGACTTTATATCGAATA  
AAGTATATACTTCGACTTTCTTGTGCTAGAACTTTAGCTCGGAAACACAAAAGTACTGT  
ACGCACTTTTTTTGAAAAGATCGGGCTCGGAATTATTGGAAGAATTCTTAACGTCGGAA  
GAACAAGTTCTTTCTTTGACCTTCCCACGACGGATTTGGTATTTGGATATTTTTTGTATC  
AATGATCTGGCGAATTATCAAATGATAATTGAT---ACAACAGAAATAGAG---ACTATCAAT  
TCTTTTTCCAAATTGGAATCC---TTAAAAGAAGTCTATGGGATCATATGGATGCTTGTCC  
CTATTGTGACTCTTGTATTAGGAATCACAAATAGGTGTACTAGTAATTGTTTGGTTAGAAA  
GAGAAATATCTGCAGGAATACAACAACGTATCGGGCCTGAATATGCCGGCCCTTTAGGA  
ATTCTTCAAGCTCTAGCAGATGGGACAAAACACTTTTTGAAAGAGAACCTTATTCCATC  
TACAGGAGATACTCGTTTTATTACGATATCGGACCATCCATAGCAGTAATATCTATCTTTCTA  
AGTTATTCAGTAATTCCTTTTTGGTGATCACCTTGTCTAGCCGATCTTAGTATTGGTGTTT  
TTTTTTGGATTGCCAATTC AAGTATTGCTCCCGTTGGACTTCTTATGTCGGGGTATGGAT  
CAAATAATAAATATTCTTTTTTAGGTGGTCTACGGGCAGCTGCTCAATCAATTAGTTATG  
AAATACCATTAGCTCTATGTGTGTTATCAATATCTCTATTATCTAACAGTTCAAGTACAGT  
TGATATAGTGGAAGCGCAGTCAAATATGGTTTTTGGGGGTGGAATTTGTGGCGTCAAC  
CCATCGGGTTTATCGTTTTTCTAATTTCTTCTCTCGCCGAGTGTGAAAGATTACCTTTTG  
ATTTACCAGAAGCAGAAGAAGAATTAGTAGCAGGGTATCAAACCGAATATTCAGGTATC  
AAATTTGGTTTATTTTACATTGCTTCATATCTGAATCTACTAGTTTCTTCATTATTTGTAAC  
AGTTCTTTACTTGGGAGGTTGGAATCTTCTATTCCGTACATATTGTTTCTGAGCTATTT  
GGCATAAATAAAGGGGGTAAAGTCTTTGGAACACTAATTGGTATCTTTATCACATTAGC  
CAAACTTATTTGTTTTTGTTCATTCTTATTGCAACAAGATGGACTTTACCGAGGCTGA  
GAATGGACCAACTATTAATCTTGGGTGGAATTTCTTTTACCGATTTCTCTAGGTAATC  
TATTATTGACAACCTCGTCCCAACTTCTTTCACTGATGATCTGGCATGTACAGAATGAAA  
ACTTCATTCTCGATTCTACGAGAATTTTTATGAAAGCCTTTCATTGCTTCTCTTCGATG  
GAAGTTTGATTTTCCAGAAATGTATCCTAATTTTTGGCCTAATTTCTTCTTCTGATGATCGA  
TTCAACCTCTGATCAAAAAGATATACCTTGGTTATATTTTATCTCTTCAACAAGTTTAGT

AATGAGCATAACGGCCCTATTGTTCCGATGGAGAGAAGAACCTATGATTAGCTTTTCGG  
GAAATTTCCAAACGAACAATTTCAACGAAATCTTTCAATTTCTTATTTTACTATGTTCAA  
CTCTATGTATTCCCTCTATCCGTAGAGTACATTGAATGTACAGAAATGGCTATAACAGAGT  
TTCTCTTATTCGTATTAACAGCTACTCTAGGGGGAATGTTTTTATGCGGTGCTAACGATTT  
AATAACTATCTTTGTAGCCCCAGAATGTTTCAGTTTATGCTCCTACCTATTATCTGGATAT  
ACCAAGAAAGATGTACGGTCTAATGAGGCTACTATGAAATATTTACTCATGGGTGGGGC  
AAGCTCTTCTATTCTGGTTCATGGTTTTCTCTTGGCTATATGGTTCATCCGGGGGAGAGAT  
TGAGCTTCAAGAAATAGTAAACGGTCTTATCAATACACAAATGTATAACTCCCCAGGAA  
TTTCAATTGCGCTCATATTCATTACCGTAGGAATTGGGTTCAAGCTTTCCCCAGCCCCCTT  
CTCATCAATGGACTCCTGACGTATACGAAGGATCTCCCACTCCAGTCGTTGCTTTTCTTT  
CTGTTACTTTCGAAAGTAGCTGCTTCAGCTTCAGCCACTCGAATTTTCGATATTCCTTTTT  
ATTTCTCATCAAACGAATGGCATCTTCTTCTGGAAATCCTAGCTATTCTTAGCATGATATT  
GGGAAATCTCATTGCTATTACTCAAACAAGCATGAAACGTATGCTTGCATATTTCGTCCAT  
AGGCCAAATCGGATATGTAATTATTGGAATAATTGTTGGAGACTCAAATGATGGATATGC  
AAGCATGATAACTTATATGCTGTTCTATATCTCCATGAATCTAGGAACTTTTGCTTGCATT  
GTATTATTTGGTCTACGTACCGGAACTGATAACATTTCGAGATTATGCAGGATTATACACA  
AAAGATCCTTTTTTGGCTCTCTCTTTAGCCCTATGTCTCTTATCCCTAGGAGGTCTTCCT  
CCACTAGCAGGTTTTTTTCGGAAAACCTCTATTTATTCTGGTGTGGATGGCAGGCAGGCCT  
ATATTTCTTGGTTTTAATAGGACTCCTTACAAGCGTTGTTTCTATCTACTATTATCTAAAA  
ATAATCAAGTTATTAATGACTGGACGAAACCAAGAAATAACCCCTCACGTGCGAAATTA  
TAGAAGATCCCCTTTAAGATCAAACAATTCCATCGAATTGAGTATGATTGTATGTGTGAT  
AGCATCTACTATAACCAGGAATATCAATGAACCCGATTATTGCAATTGCTCAGGATAGCCT  
TTTTATGTTTTCTGCTTTACGAATATGATTTTTTTTTGGGCATTTCTAATAATATCCATCCTTG  
TTCTATTTTTGGCATTTTTTCAATTTCCGGAGTGTTAGCCCCGATTAGCAAAGGGCCGGAG  
AACTTTCTACTTATGAGTCGGGTATAGAACCAATGGGCGATGCTTGGTTACAATTCG  
AATCCGTTATTATATGTTTTGCTCTAGTTTTTGTGTTTTTGTATGTTGAAACGGTTTTTCTT  
TATCCATGGGCAATGAGTTTTCGACGTATTGGGTGTATCTGTATTTATAGAAGCTTTCATTT  
TCGTGCTTATCTTAATTATTGGTTTAGTTTATGCATGGCGAAAGGGGGCATTGGAATGGT  
CTACGAATTATTTTCTTGGTTAACAATAATTGTCGTTTTTCCGATATTTGCGGGTCTTT  
AATTTCTTTCTTCCCATAAAGGAAATAGGGTAATTAGGTGGTATACCATATGTATATGT  
ATTTTAGAACTCCTTCTAACAACCTTATGCATTTTGTATCATTTCCAATCGGATGATCCAT  
TAATCCAACCTAGTAGAGGATTATAAATGGATCGATTTTTTTGATTTCCATTGGAGATTAG  
GAATAGATGGACTTTCTATAGGACCCATTTTATTAACAGGATTATCACTACTTTAGCGA  
CTTTAGCGGCTTGGCCAGTTACTCGAGATTCTAGATTATTCCATTTTCTCATGTTAGCAA  
TGACAGTGGTCAAATTGGATCATTTTCGTCTCGGGACCTTTTACTTTTTTTCATCAIGT  
GGGAGTTAGAATTAATTCCTGTTTATCTACTTCTAGCCATGTGGGGAGGAAAGAAACGT  
CTGTACTCAGCTACAAAATTTATTTGTACACGGCGGGGGTCTGTTTTTCTCTTAATG  
GGAGTTTTGGGTGTTGCTTTATATGGTTCTAATGAACCAACATTAATTTTGAACATCA  
GTTAATCAGTCATATCCTGTGGTTTTAGAAATAATCTTCTATATTGGATTTTTTATTGCTTT  
TGCTGTCAAATCGCCATTATCCCCCTACACACATGGTTACCAGATACCCATGGAGAAG  
CACATTACAGTACTTGTATGCTTCTAGCCGGAATCTTATTAATAAATGGGAGCGTATGGAT  
TAATTCGAATCAATATGGAATTATTACCTCATGCCATTCTATATTTTCTCCTTGGTTGATG  
ATAATAGGTACAATAACAATAATCTATGCAGCTTCAACATCTCTTGGCCAACGGAATTA  
AAAAAAGAATAGCCTATTCCTCTGTCTCCCATATGGGTTTCATAATTATAGGAATTAGT

TCTCTAACCGATACGGGACTTAATGGAGCCCTTTTACAAATAATCTCTCATGGATTTATT  
GGTGCTGCACTTTTTTTCTTGGCGGGAACGACTTATGATAGAATCCGCCTTGTTTATCTT  
GACGAAATGGGCGGAATAGCTATTCCAATGCCAAAAATGTTACGATGTTGAGTAGCTT  
TTCGATGGCTTCTCTTGCCTTACCAGGTATGAGTGGTTTTGTTGCCGAATTGATAGTATT  
TTTTGGAATAATTACCGGCCAAAAATATCTTTTAATTCCAAAACACTACTAATTACTTTTGTA  
ATGGCAATTGGAATTATATTAACCTCTATTTATTCATATCTATGCCACGCCAGATGTTCTA  
TGGATACAAGCTATTTAACGCCCCGAAGGATTCTTTTTTTGATTCTGGACCGCGAGAGT  
TATTTCTTTTCGATCTCCATCTTTTTACCGGTAATAGGTATTGGTATATACCCCGATTTGTT  
CTTTCATTAGCAGTTGACAAGGTCGAAGTTATTCTATCTAATTTTTTTTTATAGAATGATTC  
TCGAACATGTACTTGTGTTGAGTGCCTATTTATTTTCTATCGGTATCTATGGATTGATCAC  
AAGTCGAAATATGGTTAGAGCCCTTATGTGTCTTGAACCTTATATTGAATGCGGTTAATAT  
AAATTTTGTAACATTTTCTGATTTTTTTGATAATCGTCAATTAAGGGAGACATTTTCTC  
AATTTTGTATAGCTATTGCAGCCGCTGAAGCAGCCATTGGCCTGGCTATTGTTTCCCTC  
AATTTACCGTAACAGAAAATCAACTCGTATCAACCAATCAAATTTGTTGAATAATATGG  
AACAGACATATGAATATGCGTGGATCATACTTTTCATTCCACTTCCAGTCCCTATGTTAAT  
AGGAGCGGGACTTATTTCTTTTTCCAACGGCAACAAAAAGTTTTTCGCCGTATGTGGGCT  
TTTCAGAGTGTGTTTATTGTTAAGCATAGTCATGATTTTTTCAATCTACCTGTCTATTTCAGC  
AAATAAATAGCAGTTCTGTTTATCAATATGTATGGTCTTGGATCATTAATAATGATTTTTTC  
TTTAGACTTCGGATACTTGATCGACCCACTTACTTCTATTATGTCAATATTAATCACTACT  
GTTGGAATTATGGTCTTATTTATAGTGATAATTATATGGCTCATGATCAAGGCTATTTGA  
GATTTTTTGTCTATATGAGTTTTTTCAGTACTTCCATGTTGGGATTAGTTACTAGTTTCGAA  
TTTGATACAAATTTATATTTTTTGGGAATTGGTTGGGCTGTGTTCCCTATCTATTAATAGGA  
TTTTGGTTTACACGACCTGTTGCGGCAAATGCTTGTCAAAAAGCGTTTGTAACATAATCG  
TGTAGGGGATTTTGGTTTATTATTAGGAATTTTAGGTTTTTATTGGATAACGGGGAGTTT  
CGAATTTAGAGATTTATTCGAAATATTCAATAACAATGAGGTCAATTTTTTATTGTTACG  
TTATGCGCTGTTCTTATTTGCCGGTGCAGTTTCTAAATCCGCCCAATTCCCCCTTCAT  
GTATGGTTACCTGATGCCATGGAGGGGCCTACTCCTATTTTCGGCTCTTATACATGCTGCT  
ACTATGGTAGCGGCGGGAATTTTTCTTGTAGCTCGGCTTCTTCTCTTTTCAGAGTTATA  
CCTTACATAATGTATTTGATCTCGGTTATAGGAATAATAACAGTATTATTAGGAGCTACTT  
TAGCTCTTGCTCAAAAAGACATTAAGAGAGGTTTAGCCTATTCCACAATGCTCTCAATG  
GGTTATATGATGTTAGCTCTAGGTATGGGGTCTTATCGAAGCGCTTTATTTCAATTTGATTA  
CTCATGCTTATTCCAAAGCATTATTATTTTTAGGATCCGGATCTATTATTCATTCAATGGA  
AACTATTGTTGGATATTCTCCAGCTAAAAGCCAGAATATGGGTCTTATGGGAGGTTTAA  
GAAAACATGTACCAATTACCAAAATCACATTTTTATTAGGTACACTTTCTCTTTGTGGTA  
TTCCACCTCTTGCTTGTTTTTGGTCCAAAGATGAAATTCTTAATGATAGTTGGTTGTATT  
CGCCAATTTTCGCAATAATAGCTTGGGCCACGGCGGGATTAACCGCATTTTATATGTTTC  
GGATCTATTTACTTACTTTTGAAGGGCATTAAACGTTTCATTTTCAAATTATGGTGGGA  
AACACAAAACCCCTTTCTATTCAATATCTCTATGGGGTAAA-----AACGGAGTTAAGA  
AA---TTATTAACA-----ATGAATTTTTTGTCAATTTGAGCATAAAGCGGTTTCTTCTATC  
CGTATGAATCGGACAATACTATGCTATTTCCCAATATTTGTATTAGGGCTCTTACTTTGTT  
TGTTGGAGCTATAGGAATTCCTTTCAATTTGGATATCTTATCGAAATGGTTAGCTCCATCT  
ATAAATCTTTTGCATCCAAAGTCGAAT---TCGCAGGATTGGAATGAATTTTTAAAGGATG  
CAGTTGTTTCAGTCAGTATAGCTTATTTTCGGAATATTTATAGCATCCTTTTTATATAAACC  
CGTTTATTCTTCTTTAAAAAATTTGGAGTTCATTAACCTTTTTGTTATTCTGTGGGACAA

AATTATAAATGGCATATATGATTGGTCATATAATCGTGCTTACATAGATGCTTTTTATACAA  
GATTCTTTGTTGGTGGGATAAGAGGATTAGCTGAATTTACTCATTFTTTTGTATCGACGAG  
TAATTGATGGGATGACTAATGGGGTTGGGGTTATTAGTTTCATTGTAGGAGAAGGTATC  
AAATATATAGGGGGCGGA---CGCATCTCTTCTTATCTTTTCTTGTATTTAGCTTATGTTCC  
GTCTTTTTATTAGTTTATTACATGGATTTATCTGAACCAATACATGATTTTCTTTTAGTCTT  
TCTAGGATCGGGTCTTATATTAGGGGGTCTAGGAGTGGTATTACTTCCCAATCCAATTA  
TTCGGCCTTTTCCTTGGGATTGGTTCCTTGTGTTGTACATCGTTATTCTATATTCTATCTAACT  
CCTATTTTGTAGCTGCTGCGCAGCTACTTATTTACGTAGGAGCTATAAATGTTTAAATCAT  
TTTTGCTGTGATGTTTCATGAATGGCTCAGAATATTACAAGGATTTTCATCTTTGGACCGT  
AGGAAATGGAATTACTTCGATGGTTTGTATAAGTCTTTTTATTTCATTAATTACTACTATT  
TCAGATACGTCATGGTACGGGATTATTTGGACTACAAGATCAAACCAGATTATAGAGCA  
AGATTTTCTAAGTAATAGTCAACAAATTGGAATTCATTTATCAACAGATTTTTTTCTCCC  
ATTTGAACTTATTTCCATAATCCTTTTAGTTGCTTTAATAGGTGCAATTGCTGTAGCTCGT  
CAAATGACTGCACCAACTACAAGAAAAGACCTCATGATAGTCAATATGGGGCCTCAGC  
ACCCATCAATGCACGGTGTCTTCGACTCATCGTTACTCTAGATGGTGAAGATGTTGTC  
GACTGCGAACCAATATTGGGTTATTTACATAGAGGGATGGAGAAAATTGCGGAAAACC  
GAACAATTATACAATATTTGCCTTATGTAACACGTTGGGATTATTTAGCTACTATGTTTAC  
AGAAGCAATAACCATAAATGGACCCGAACAATTAGGCAATATTCAAGTACCTAAAAGG  
GCTAGCTATATCAGAGTCATTATGTTGGAGTTGAGTCGGATAGCTTCTCATTGTTATGG  
CTCGGTCCTTTTATGGCGGATATTGGTGCACAGACCCCTTTCTTCTATATTTTTTCGAGAA  
AGAGAATTGATATATGACCTATTCGAAGCTGCCACCGGTATGCGAATGATGCATAATTTT  
TTTCGTATTGGAGGAGTGGCTGCCGATCTACCCTATGGCTGGATAGATAAATGTTTGGAT  
TTTTGCGATTATTTTTTAACAGGGGTTGCTGAGTATCAAAACTTATTACCCGGAATCCT  
ATTTTTTTAGAACGAGTTGAAGGCGTAGGCATTATTGGGAGAGACGAGGCATTA AATTG  
GGGTTTATCGGGACCAATGCTACGAGCTTCCGGAATAGAATGGGATCTTCGTAAAGTTG  
ATCATTATGAGTCTTACGACGAATTTGATTGGCAGGTTCAATGGCAACGAGAAGGGGAT  
TCATTAGCTCGTTATTTAGTACGAATCGGTGAAATGACAGAATCCATAAAGATTATTCAA  
CAGGCTCTGGAAGGAATTCCAGGAGGGCCTTACGAAAATTTAGAAATGCGACGTTTTG  
ACAGATTA AAGATCCTGAATGGAATGATTTTGAATATCGGTTTATTAGTAAAAAGCCTT  
CTCCA ACTTTTGAATTGTCGAAACAAGA ACTTTATGTGAGAGTTGAAGCCCCAAAAGG  
AGAATTGGGGATTTTTATGATAGGAGATCAGAGCGTTTTTCTTGGAGATGGAAAATTC  
GCCACCAGGTTTTATCAATTTGCAAATTCCTCCTCAGTTAGTTAAAAGAATGAAATTG  
GCTGATATTATGACAATACTAGGTAGCATAGATATCATTATGGGAGAAGTTGATCGTATG  
CTCCCTATGATAACTGAATTCATAAATTATGGTCAACAAACAATACGAGCCGCCAGATA  
CATCGGCCAAGGTTTCATGATTACCCTGTCCCACGCAAATCGTTTACCTGTA ACTATTCA  
ATACCCCTACGAAAATTGATCACATCGGAACGTTTCCGAGGCCGAATACACTTTGAAT  
TTGATAAATGCATTGCTTGTGAAGTATGTGTGCGTGTATGTCCTATAGATTTACCCGTTG  
TTGATTGGAAGTTGGAAACTGATATTCGAAAGAAACGATTGCTTAATTACAGTATTGAT  
TTTGAATCTGTATATTTTGTGGTAATTGCGTTGAGTATTGCCCAACAAATTGTTTATCAA  
TGACCGAAGAATATGAACTTTCTACTTATGATCGTACGAATTGAATTATAATCAAATCG  
CTTTGGGTCGCTTACCAATGTCAGTAATTGATGATTACACAATTCGAACAATTCGAATT  
TA-----ATGCAGGGTCGTTTGTCTGCTTGGCTAGTCAAG  
CATGGGCTAATTCATAGATCTTTGGGCTTTGATTACCAAGGAATAGAGACTTTACAAATA  
AAGCCCGAGGATTGGCATTCCATTGCTGTCATTTTTTATGTATATGGGTACA ACTATCTA

CGCTCTCAATGTGCCTATGATGTAGCGCCTGGCGGGCTGTTAGCTAGTGTGTATCATCTT  
ACGAGAATAGAGGATGGTGTGGATCAACCAGAAGAGCTATGCATAAAAGTATTTGCCT  
CCAGGAGGAATCCTAGAATTCCGTCTGTTTTCTGGGTTTGGAAAAGCGTGGATTTTCAA  
GAACGAGAATCATATGATATGTTGGGAATCTCTTACGATAATCATCCACGCTTGAAACGT  
ATCTTAATGCCTGAAAGTTGGATAGGATGGCCCTTACGTAAGGATTATATTGCCCCAAT  
TTTTATGAAATACAAGAGGCTCATATGGGCAATGAGTTTCGACGTATTGGGTGTATCTGT  
ATTTATAGAAGCTTTCATTTTCGTGCTTATCTTAATTATTGGTTTATGTTTATGCATGGCGA  
AAGGGGGCATTGGAATGGTCTTAGCTCCTGAATATTCAGACAATAAAAAGAAAAACGG  
AAAAATAAGATTGAGACA---GTTATGAATTCATTTCAGTTTCCTTTACTTGATCGAACA  
GCCCCAATTTCAGTTATTTCAACTACATTAATGATCTTTCAAATTGGTCAAGACTCTCT  
AGTTTATGGCCGCTTCTCTATGGTACCAGTTGTTGCTTCATTGAATTTGCTTCACTAATA  
GGCTCACGCTTCGACTTTGATCGTTATGGACTCGTACCAAGATCGAGTCCTAGACAATC  
GGATCTAATTTAACAGCCGGAACAGTAACAATGAAAATGGCCCCCTTTAGTGAGAT  
TATATGAGCAAATGCCCGAACCAAAATATGTTATTGCTATGGGAGCCTGTACAATTACAG  
GCGGGATGTTTCAGTACCGATTCTTATAGTACTGTTTCGGGGAGTCGATAAGCTAATTCCT  
GTAGATGTATATTTGCCAGGTTGTCCACCTAAACCGGAAGCGGTTATAGATGCTATAACA  
AACTTCGTAAGAAAATATCTCGAGAACTCTATGAAGATCGAATTAGGTCTCAACGAG  
CGAATCGGTGTTTTACTACCAACCACAAGTTTCATGTTTCGACGCAGTATTCATACGGGA  
AATTATGATCAAAGAGTTCTTTATCAACCACCATCTACTTCAGAGATCCCTACGGAAATC  
TTTTTCAAATACAAAATTTCAGTATCTTCCGCCGAATTAGTGAATATGCAAACCTAGAAAT  
GCTTTTTCTTGGCTAAAGAAACAGATTACTCGATCTATTTCCGTATCGCTCATGATATATA  
TCTTAACTCGGACGTCCATTTCAAGTGCATATCCATTTTTGCACAGCAGGGTTATGAA  
AATCCACGAGAAGCGACTGGGCGTATTGTATGTGCCAATTGCCATTTAGCTAATAAGCC  
CGTGGAATGAGGTTCCACAAGCGGTAATTCCTGATACTGTATTTGAAGCAGTTGTTC  
GAATTCCTTATGATATGCAACTGAAACAGGTTCTTGCTAATGGTAAAAAGGGGGGTTG  
AACGTCCGGGCTGTTCTTATTTTACCGGAGGGGTTTGAATTAGCTCCTCCCGATCGTATT  
TCTCCTGAGATGAAAGAAAAGATTGGCAATTTGTCTTTTCAGAGCTATCGCCCCAATAA  
AACAAATATTCTTGTGGTAGGCCCTGTCCCTGGTAAAAAATATAGTGAAATAACCTTCC  
CTATTCTTTCCCGGACCCTGCTACTAAGAAGGATGTTCACTTCTTAAAATATCCTATATA  
CGTAGGCGGGAACAGGGGAAGGGGTCAGATTTATCCCGACGGCAACAAGAGTAACAA  
TACAGTTTATAATGCTACAGCAGCAGGTATAGTAAGCAAAATCATACGAAAAGAAAA  
GGGGGTATGAGATAACCATAACGGATGCGTCGGAGGGACGTCAAGTGGTTGATATTAT  
CCCTCCCGGACCAGAACTTCTTGTTCGAGGGCGAATCTATCAAATTTGATCAACCAT  
TAACGAGTAATCCTAATGTAGGCGGATTTGGTCAGGGAGATGCAGAAATAGTACTTCAA  
GATCCATTACGTGTCCAAGGACTTTTGTCTTCTTGGCATCTGTTATTTGGCACAATC  
TTTTTGGTTCTTAAAAAGAAACAGTTTCGAGAAGGTTCAATTGGCCGAAATGAATTCAT  
GAGTAAAGTATATGATTGGTTCGAAGAACGTCTCGAGATTCAAGCAATTGCGGATGATA  
TAACTAGTAAATATGTTCCCTCCCACGTCAATATATTTTATGTTTAGGGGGAATTACGCT  
TACTTGTTTTTTAGTACAAGTAGCTACTGGGTTTGCTATGACTTTTTACTATCGTCCGAC  
CGTACTGAGGCTTTTGCTTCTGTTCAATACATAATGACTGAAGCCAACTTTGGTTGGTT  
AATCCGATCCGTTTCATCGATGGTCGGCAAGTATGATGGTCCTAATGATGATCCTGCATGT  
ATTCGTGTGTATCTCACCGCGGATTTAAAAACCTCGCGAATTGACTTGGGTTACAG  
GTGTGGTTCTGGCTGTATTAACCGCATCTTTTGGCGTAACTGGGTATTCTTACCTTGGG  
ACCAAATTGGCTATTGGGCAGTGAAAATAGTAACAGGTGTCCCTGACGCTATTCTGTGA

ATAGGATCACCTTTGGTTCGAATTATTGCGCGGAAGCGCTAGTGTGGGACAATCTACTTT  
GACTCGTTTTTATAGTTTACACACTTTTGTATTGCCGCTTCTTACTGCCGTATTTATGTTA  
ATGCACTTTCCAATGATACGTAAACAAGGTATTTCTGGGCCTTTAATGGGAATAACAAA  
AAAACCTGACTTGAATGATCCTGTATTAAGAGCTAAATTGGCTAAGGGTATGGGTCATA  
ATTATTATGGCGAGCCCGCATGGCCAATGATCTTTTATATATTTTCCAGTAGTAATTCT  
AGGTACTATTGCATGTAATGTAGGCTTAGCCGTTTTAGAACCATCAATGATTGGTGAACC  
GGCGGATCCATTTGCAACCCCTTTGGAAATCTTACCTGAATGGTATTTCTTTCCTGTATT  
TCAAATACTTCGTACAGTGCCCAATAAATTATTGGGGTTCTTTAATGGTTTCAGTACC  
TGCGGGATTATTAACAGTACCTTTTTTAGAGAATGTTAATAAATTCCAAAATCCATTTCCG  
CCGTCCAGTAGCGACGACTGTCTTTTTGATTGGTACCGCAGTCGCCCTTTGGTTGGGCA  
TTGGTGCAACATTACCTATTGATAAATCCCTAACTTTAGGTCTTTTTATGATTGAAGTTTT  
TCTATTTGGAATCGTGTTAGGTCTAATTCCTATTACTTTGGCTGGATTATTCGTAACGTCA  
TATTTACAATATAGGCGTGGTGATCAGTTGGACCCTATGCTTACTATAACTAGTTATTTCCG  
GTTTTCTATTAGCGGCTTTAACTATAACCTCAGCTCTATTTATTGGTCTGAGCAAGATAC  
GACTTATTATGGATATAGTAAGTCTTGCTTGGGCTGCTTTAATGGTAGTCTTTACTTTTTC  
CCTTTCCTCGTAGTGTGGGGAAGGAGTGGACTCATGATTATTCGTTCCGCCGAACCA  
GAAGTTAAAATTTGGTAGATAGGGATCCCGTAAAACTTCTTTCGAGGAATGGGCCA  
GACCGGGTCAATTTCTCAAGAACAATAGCTAAAGGGCCTGATACTACCACTTGGATCTGG  
AACCTACATGCTGATGCTCACGATTTTCGATAGCCATAACAGTGATTTGGAGGAGATCTC  
TCGAAAAGTATTTAGTGCACATTTCCGGTCAACTCTCCATCATCTTTCTTTGGCTGAGCG  
GCATGTATTTCCACGGTGCTCGTTTTTCTAATTATGAAGCGTGGCTAAGTGATCCAACCTC  
ACATTGGGCCTAGTGCCAGGTGGTTTGGCCAATAGTAGGCCAAGAAATATTAATGGT  
GACGTAGGCGGGGGTTTTCCGAGGAATACAAATAACCTCTGGTTTTTTTCAGCTTTGGCG  
AGCATCTGGAATAACTAGTGAATTACAACCTCTATTGTACAGCAATTGGGGCATTGGTCT  
TTGCAGCGTTAATGCTTTTTGCTGGTTGGTTTCATTATCATAAAGCGGCGCCAAAATTGG  
CTTGGTTTTCAAGATGTAGAATCTATGCTGAATCACCATTTGGCAGGGCTACTAGGACTT  
GGGTCTCTCTTTGGGCGGGGCATCAAGTACATGTCTCTTTACCGATTAACCAATTTCTA  
AACGCTGGAGTAGATCCTAAAGAGATAACCACTTCCTCATGAATTTATCTTGAATCGAGA  
TCTTTTGGCTCAACTTTATCCCAGTTTTGCCGAGGGAGCAACCCCGTTTTTTCACCTTGA  
ATTGGTCAAATATGCGGACTTTCTTACTTTTCGTGGAGGATTAGATCCAGTAACTGGG  
GGTCTGTGGCTGACTGATATTGCCATCACCATTTAGCTATTGCAATTTCTTTCCTGATA  
GCGGGTACATGTATAGGACCAACTGGGGTATTGGTCATGGACTAAAAGATATTTTAGA  
AGCCCATAAAGGTCCATTTACAGGTACGGGCCATAAAGGCCTATATGAGATCCTAACAA  
CGTCATGGCATGCTCAATTATCTTAACTTAGCTATGTTAGGCTCTTTAACCATTGTTGT  
AGCTCATCATATGTATTCCATGCCCCCTTATCCGTATCTAGCTACTGACTATGGTACACAA  
CTGTCATTGTTACACATCACATGTGGATTGGTGGATTTCTCATAGTTGGTGTGCTGCCGCG  
CATGCAGCCATTTTATGGTAAGAGATTATGATCCAACCTACTCGGTACAACGATCTATTA  
GATCGTGTCTTAGGCATCGTGATGCAATCATATCCCATCTCAACTGGGCATGTATATTT  
CTAGGCTTTCATAGTTTTGGTTTTGTATATTCATAATGATACCATGAGCGCTTTAGGGCGTC  
CTCAAGATATGTTTTAGATAACCGCTATAACAATTACAACCCGTTTTTGGCTCAATGGATAC  
AAAACACCCATGCTTTAGCACCTGGTGCAACGGCTCCTGGTGCAACAGCAAGCACCA  
GTTTAACTTGGGGGGGTGGTGATTTAGTGGCAGTGGGTGGCAAGGTGGCTTTGTTGCC  
TATTCATTAGGAACCGCTGATTTCTTGGTACATCACATTCATGCATTTACGATTCATGTG  
ACGGTATTGATACTCTTGAAAGGTGTGCTATTTGCTCGCAGTTCTCGTTTGATACCGGAT

AAAGCAAATCTTGGTTTTTCGTTTTCCCTTGTGATGGACCTGGAAGAGGGGGTACATGTC  
AAGTATCGGCCTGGGATCATGTCTTCTTAGGACTATTCTGGATGTACAATTCAATTTTCG  
TAGTAATATTCCATTTAGTTGGAAAATGCAGTCAGATGTTTGGGGCAGTGTAAGTGAT  
CAAGGGGTAGTAACTCATATCACGGGAGGAACTTTGCGCAGAGTTCTATTACTATTA  
TGGGTGGCTCCGCGATTTCTTATGGGCACAGGCATCCCAGGTAATTCAGTCTTATGGTT  
CTTCATTATCTGCATATGGCCTTTTTTTCCCTAGGTGCTCATTGTTGCTGGGCTTTT  
AATGTTTCTATTAGCGGACGTGGTTATTGGCAAGAACTTATTGAATCCATCGTTTGGGC  
TCATAATAAATAAAAGTTGCTCCTGCTACTCAGCCGAGAGCCTTGAGCATTATACAAG  
GACGTGCTGTAGGAGTAACCCATTACCTTCTGGGTGGAATTGCCACAACATGGGCATTC  
TTCTTAGCAAGAATTATTGCAGTAGGAATGGCATTACGATTTCCAAGGTTTAGCCAAGG  
CTTAGCTCAGGACCCCACTACTCGTCGATTTGGTTTTGGTATTGCTACCGCACATGACTT  
CGAGAGTCATGATGATATTACTGAGGAACGTCTTTATCAGAATATTTTTGCTTCTCACTT  
CGGTCAATTAGCAATAATTTTTCTGTGGACTTCCGGAAATCTGTTTCATGTAGCTTGGCA  
AGGAAATTTTGGTTCGTGGGTACAGGACCCTTTACATGTAAGACCTATTGCTCATGCAA  
TTTGGGATCCTCATTGTTGTTCAACCGCCGTGGAAGCTTTTACTCGAGGGGGTGTCTTT  
GGCCAGTGAATATCGCTTATTCTGGGTGTTTATCAGTGGTGGTATAACAATCGGTTTACGC  
ACTAATGAAGATCTTTATACTGGCGCTCTTTTTCTATTATTTCTTTCTGCCATATCCTTAAT  
AGCAGGTTGGTTACACCTACAACCGAAATGGAAACCGAGCGTTTCTGGTTCAAAAAT  
GCCGAATCTCGTCTGAATCACCATTGTCAGGACTCTTTGGCGTAAGTTCCTTGGCTTG  
GACAGGGCATTAGTCCATGTTGCTATTCCCTGCATCCAGAGGGGAGTACGTTCCGGTGG  
ATAATTTCTTAGATGTATTACCGCATCCCCAAGGGTTAGGCCCACTTTTTACAGGTCAAT  
GGAATCTTTATGCTCAAACCCCGATTCAAGTAGTCATTTATTTGGTACCGCCGAAGGG  
GCGGGAACGGCCATTCTAACTCTTCTCGGGGGATTCCACCCACAAACGCAAAGTTTAT  
GGCTGACTGATATTGCCATCACCATTAGCTATTGCATTTATTTTTCTTGTGCTGGTCA  
TATGTATAGAACCAATTCGGGATTGGGCACAGTATGAAAGATCTTTTAGATGCACATAT  
TCTCCGGGGGACGATTGGGGCGTGGACATAAGGGTCTTTATGACACAATCAACAAT  
TCGCTTCATTTCAATTAGGCCTTGCTCTAGCTTCTTTAGGGGTTATTACTTCTTTGGTAG  
CTCAACACATGTACTCTTTACCTGCTTATGCATTCATAGCACAAGACTTTACTACTCAAG  
CTGCATTATATACCACCAATATATCGCAGGATTCATCATGACAGGAGCTTTTGCTC  
ATGGAGCTATATTTTTATTAGAGATTACAATCCGGAGCAAATGAAGATAATGTATTGG  
CAAGAATGTTAGATCATAAAGAAGCTATCATATCTCATTTAAGTTGGGCCAGCCTCTTC  
TGGGATTCATAACCTGGGACTTTATGTTTATAATGATGTCATGCTTGCCTTTGGCACTC  
CGGAGAAGCAAATCTTGATTGAACCTATATTTGCTCAATGGATAACAATCCGCTCATGGT  
AAAATTCATATGGGTTTCGATGTACTTTTATCTTCAACGACTGGCCAGCATTCAATGCG  
GGTTCGAAGCATCTGGTTGCCGGGTTGGTTAAATGCTGTTAATGAA-----AATAGTAATTC  
ATTATCTTAACAATAGGTCCTGGAGACTTTTTGGTTCATCATGCTATTGCCCTTGGTTTA  
CATACAACTACATTGATCTTAGTAAAAGGTGCTTTAGATGCACGTGGTTCCAAGTTAAT  
GCCAGATAAAAAGGATTTTCGGTTATAGTTTTCCGTGCGATGGCCAGGGCGAGGCGGT  
ACTTGTGATATTTCCGCATGGGACGCGTTTTATTTGGCAGTTTTTTGGATGTTAAATACT  
ATTGGATGGGTTACTTTTTATTGGCATTGGAAGCACATCACATTATGGCAAGGTAACGTT  
TCACAGTTTAATGAATCTTCCACTTATTTGATGGGCTGGTTAAGGGATTATTTATGGTTA  
AACTCTTCACACTTATCAATGGATATAACCCTTTTGGTATGAATAGTTTATCGTTTTGG  
GCATGGATGTTCTTATTTGGACATCTTGTGTTGGGCTACTGGATTTATGTTCTTAATTTCTT  
GGCGTGGATATTGGCAGGAATTGATTGAAACTTTAGCATGGGCTCACGAACGCACACC



TTTGGCCAATTTGATTTCGATGGAGAGATAAACCCAGTGGCCCTTTCTATTGTACAAGCAA  
GATTGGTTGGATTAGCTCACTTTTCTGTAGGTTATATATTCACCTATGCGGCTTTCTTGAT  
TGCCTCTACGTCGGGCAAATTTGGTATGTCACATTCAGTAAAGATTTATGATACGTGTAT  
AGGATGTACTCAATGTGTCCGAGCCTGCCCCACTGATGTATTAGAAATGATACCTGGG  
ACGGTTGTAAGGCTAAACAAATTGCTTCTGCTCCACGAACAGAGGACTGTGTTGGTTG  
TAAGAGATGTGAATCCGCCTGTCCAACAGATTTCTTGAGTGTCCGAGTTTATTTATGGC  
ATGAAACAACCTCGCAGTATGGGTCTAGCTTATATGACAAATTTGAACCTTCCATCTATTT  
TTGTGCCGTTAGTAGGCCTAGTCTTTCCGGCAATTGCAATGGCTTCTTTATTTCTTCATG  
TTCAAAAAACAAGATTGTTATGCGAGATCTAAAAACATATCTCTCTGTGGCACCAGTA  
CTAAGTACGCTATGGTTCCGGGGCTTAGCAGGTCTATTGATAGAGATTAATCGTTTTTTC  
CCGGATGCGTTGACATTTCCCTTTTTTTTCATTCATGACTGCAATTTTAGAGAGACGCGA  
AAGCGAAAGCCTATGGGGTCGCTTCTGTAACCTGGATAACTAGCACTGAAAACCGTCTT  
TACATTGGATGGTTTGGTGTTTTGATGATCCCTACCTTATTGACGGCAACTTCTGTATTTA  
TTATTGCCTTCATTGCTGCTCCTCCAGTAGACATTGATGGTATTCGTGAACCTGTTTCAG  
GGTCTCTACTTTACGGAAACAACATTATTTCCGGTGCCATTATTCCTACTTCTGCAGCTA  
TAGGTTTACATTTTTACCCAATCTGGGAAGCGGCATCCGTTGATGAATGGTTATAACAAG  
GTGGTCCATTATGAACTAATTGTTCTACACTTCTTACTTGGCGTAGCTTGTACATGGGTC  
GTGAGTGGGAGCTTAGCTTCCGTCTGGGTATGCGACCTTGGATTGCTGTTGCATATTCA  
GCTCCTGTTGCAGCTGCTACCGCAGTTTTCTTGATCTACCCAATCCGGTCAAGGAAGTTT  
TTCTGATGGTATGCCTCTAGGAATCTCTGGTACTTTCAATTTTCATGATTGTATTCCAGGCT  
GAGCACAAACATCCTTATGCACCCATTTACATGTTAGGCGTAGCTGGGGTATTCCGGCGG  
CTCCCTATTCAGTGTATGCATGGTTCCTTGGTAACTTCTAGTTTGATCAGGGAAACCAC  
AGAAAATGAATCTGCTAATGAAGGTTACAGATTCGGTCAAGAGGAAGAAACTTATAATA  
TCGTAGCCGCTCATGGTTATTTGGCCGATTGATCTTCCAATATGCTAGTTTCAACAACCT  
CTCGTTTCGTTACACTTCTTCCCTAGCTGCTTGGCCTGTAGTAGGTATCTGGTTTACCGCTT  
TAGGTATCAGCACTATGGCTTTCAACCTAAATGGTTTCAATTTCAACCAATCTGTAGTTG  
ACAGTCAGGGTTCGTGTAATTAACACTTGGGCTGATATCATCAACCGTGCTAACCTTGGT  
ATGGAAGTTATGCATGAACGTAATGCTCATAACTTCCCTCTAGACCTAGCTGCTATCGAA  
GCTCCATCTACAAATGGAATGGGTTTGCCTTGGTATCGTGTTTCATACCGTTGTATTGAAT  
GATCCCGGTCCGGTTGCTTTCTGTTTCATATAATGCATACAGCTCTGGTTGCTGGTTGGGCC  
GGTTCGATGGCTCTGTATGAATTAGCGGTTTTTGATCCTTCTGATCCTGTTCTTGATCCA  
ATGTGGAGACAGGGTATGTTTCGTTATACCCTTCATGACTCGTTTLAGGAATAACCAATTCA  
TGGGGCGGTTGGAGTATCACA---GGGGGGACTGTAACGAATCCAGGTATTTGGAGTTAC  
GAAGGTGTAGCGGGAGCACATATTGTGTTTTCTGGCTTATGCTTTTTTGGCAGCTATCTG  
GCATTGGGTGTATTGGGATCTAGAAATATTTTTGTGATGAACGTACAGGAAAACCTCTT  
TGGATTTGCCAAAGATCTTTGGAATTCATTTATTTCTCTCAGGGGTGGCTTGCTTTGGTT  
TTGGTGCATTTTCATGTAACAGGCTTGTATGGTCCCAGGAATATGGGTGTCCGATCCTTATG  
GACTAACGGGAAAAGTACAACCTGTAATCCAGCGTGGGGCGTGGAAGGTTTTTGATCC  
TTTTGTTCCAGGAGGAATAGCCTCTCATCATATTGCAGCAGGAACATTGGGCATATTAG  
CGGGCCTATTCCATCTTAGCGTCCGTCGCCACAACGTCTATACAAAGGATTGCGTATG  
GGAATATTGAAACCGTCCTTTCCAGTAGTATCGCTGCTGTCTTTTTTGCAGCTTTTGT  
GTTGCCGGAACCTATGTGGTATGGTTCGGCAACTACCCCGATTGAATTATTTGGGCCAC  
TCGTTATCAATGGGATCAGGGGTACTTCCAGCAAGAAATATATCGAAGAGTTAGTGCTG  
GGCTAGCAGAAAATCAAAGTTTATCAGAAGCCTGGTCTAAAATTCCTGAAAAATTAGC

TTTTTATGATTACATCGGCAATAATCCGGCAAAGGAGGATTATTCAGAGCAGGTTCAA  
TGGATAACGGGGATGGAATAGCGGTTGGATGGTTAGGACACCCTATCTTTAGAGATAAG  
GAAGGGCGTGAACCTTTTTGTACGTCGTATGCCTACTTTTTTTGAAACATTTCCGGTTCGT  
TTTGGTAGACGGCGATGGAATTGTTAGAGCCGATGTTCCTTTTAGAAGGGCAGAATCG  
AAGTATAGTGTGAACAAGTAGGTGTAAGTGTGAGTTCTACGGCGGTGAACTCAACG  
CGTCAAGTTATAGTGATCCTGCTACTGTGAAAAAATATGCTAGACGTGCTCAATTGGGT  
GAAATTTTCGAATTAGATCGTGCTACTTTGAAATCCGATGGTGTTTTTTCGTAGCAGTCCA  
AGGGGTTGGTTACTTTTTGGGCAIGCTTCGTTTGCTTTGCTCTTCTTCTTCGGACACATT  
TGGCATGGTGCTAGAACCTTGTTTCAGAGATGTTTTGCTGGTATTGACCCAGATTTAGA  
TGCTCAAGTCGAATTTGGAGCATTCCAAAAACTTGGAGATCCAACTACAAAAGACAA  
GCAGCCATGAAAACCTTATATTCCCGGAGGAGGTTCTACCACGTGGAACGCTCTTTAA  
TGGAACTTTAGCCTTAGCTGGTTCGTGACCAAGAAACCACAGGTTTCGCTTGGTGGGCC  
GGGAATGCCGACTTATCAATCTATCCGGTAAACTACTAGGGGCTCATGTAGCCCATGC  
TGGATTAATCGTATTCTGGGCCGGAGCAATGAACCTATTTGAAGTGGCCATTTTCGTAC  
CCGAGAAGCCTATGTATGAACAAGGATTGATTTACTTCCCCACCTAGCTACTCTAGGT  
TGGGGGGTAGGTCCTGGGGGAGAAGTTATAGACACCTTTCCATACTTTGTATCTGGAGT  
ACTTCATTTAATTTCTTCTGCAGTATTGGGCTTTGGCGGCATTTATCATGCACTTCTGGG  
ACCTGAGACACTTGAAGAATCTTTTCCCTTCTTTGGTTATGTCTGGAAAGATCGAAATA  
AAATGACCACAATTTTAGGTATTCATTAATCTTGTTAGGTATAGGTGCTTTTCTTCTAGT  
ATTCAAGGCTCTTTATTTTGGGGGCGTATATGATACCTGGGCTCCGGGAGGGGGAGATG  
TAAGAAAAATTACCAACTTGACCCTTAGCCCCGAGTATCATATTTGGTTATTTACTAAAAT  
CCCCTTTTGGAGGAGAAGGGTGGATTGTTAGTGTGGACGATTTAGAAGATATAATCGGA  
GGACATGTATGGTTGGGTTCCATTTGTATACTTGGTGGAAATCTGGCATACTTAACCAAA  
CCCTTCGCATGGGCTCGACGCGCACTTGTATGGTCTGGAGAGGCTTACTTATCTTATAGT  
TTAGGGGCTTTAGCCGTCTTTGGTTTCATTGCTTGTGTTTTGTCTGGTTCAATAATACC  
GCTTATCCTAGTGAATTTTACGGGCCTACTGGACCAGAAGCTTCTCAAGCTCAAGCATT  
TACTTTTCTAGTTAGAGACCAACGTCTTGGGGCTAACGTGGGATCCGCTCAAGGACCTA  
CTGGTTTAGGTAAATATCTAATGCGTTCCCAACCGGAGAAGTCATTTTTGGAGGAGAA  
ACTATGCGTTTTTGGGATCTGCGTGCTCCATGGTTAGAGCCTCTAAGGGGTCCAAATGG  
GTTAGACTTGAGTAGGTTGAAAAAAGACATACAACCTTGGCAGGAACGGCGTTCCGC  
GGAATATATGACTCATGCTCCTTTAGGTTCTTTAAATTCGTTGGGTGGTGTAGCTACCGA  
GATCAATGCAGTCAATTATGTCTCTCCTAGAAGTTGGTTAGCTACCTCTCATTTTGTCT  
AGGATTCTTCTTCTTTGTAGGTCATTTGTGGCACGCAGGAAGGGCTCGTGCAGCTGCA  
GCAGGATTTGAAAAAGGAATTGATCGTGACTTTGAACTGTTCTTTCCATGACCCCTCT  
TAATATGACTATAGCCATTGGTAAGTTTACCAAAGACGAAAATGATTTATTTGATATTATG  
GATGACTGGTTACGGAGGGACCGTTTCGTTTTTGTAGGCTGGTCCGGTCTATTGCTCTT  
TCCTTGTGCCTATTTGCTGTAGGGGGTTGGTTCACAGGTACAACCTTTGTAACCTCAT  
GGTATACCATGGATTGGCCAGTTCTTATTTGGAAGGCTGCAATTTCTTAACTGCCGCG  
GTTTCTACTCCTGCTAATAGTTTAGCACATTCGTTGTTGTTACTATGGGGTCTGAAGCA  
CAAGGAGATTTTACTCGTTGGTGTCAATTGGGGGGTCTGTGGACTTTTGTGCTCTCCA  
TGGAGCTTTTGGCCTAATAGGTTTCATGTTACGTCAATTCGAGCTTGCTCGATCTGTTC  
ATTGAGACCTTATAATGCAATCGCATTCTCTGGTCCAATTGCTGTTTTTGTCTGTATTT  
CTGATTTATCCACTAGGTCAGTCTGGTTGGTCTTTGACACCTAGTTTTGGTGTAGCAGCT  
ATATTCGATTCATCCTATTTTTTCAAGGGTTTCATAATTGGACCTTGAACCCCTTTCATA

TGATGGGAGTTGCCGGTGTATTGGGCGCTGCTTTGCTATGCGCCATTCATGGTGCTACC  
GTAGAAAATACTTTATTTGAAGACGGTGATGGTGCAAATACATTCCGTGCTTTTAACCC  
AACTCAAGCCGAAGAACTTATTCAATGGTCACCGCTAACCGCTTTTGGTCCCAAATCT  
TTGGGGTTGCTTTTCCAATAAACGTTGGTTACATTTCTTTATGTTATTTGTACCAGTAAC  
CGTTTTATGGATGAGTGCTCTTGGAGTAGTCGGTCTAGCTCTGAACCTACGTGCCTATG  
ACTTCGTTTCTCAGGAAATTCGCGCAGCGGAAGATCCTGAATTTGAGACTTTCTACACC  
AAAAATATTCTCTTAAACGAAGGTATTTCGCGCTTGGATGGCGGCTCAAGATCAGCCTCA  
TGAAAACCTTATATTCCCGGAGGAGGTTCTACCACGTGGAAACGCTCTTATGCTCTGGAA  
GCACAGGAGAACGTTTCGTTTGCTGATATTATTACCAGTATTTCGATACTGGGTCATTCATA  
GCATTACTATACCTTCCCTATTCATTGCGGGTTGGTTATTTGTCAGCACAGGTTTAGCTTA  
CGATGTGTTTGGAAAGCCCGCGGCCAAACGAGTATTTTACAGAGAGCCGACAAGGAATT  
CCATTAATAACTGGCCGTTTTGATCCTTTGGAACAACCTCGATGAATTTAGTAGATCGTTT  
ATGACTATAGATCGAACCTATCCAATTTTTACAGTACGATGGTTGGCTGTTACGGCCTA  
GCTGTACCTACCGTCTTTTTTTTTGGGATCAATATCAGCAATGCAGTTCATCCAACGAATG  
GCTACACAAACTGTTGAGAACAGTTCT---AGATCTGGTCCAAGACGAACTGCAGTAGG  
AGATTTATTAACCATTGAATTCGGAATATGGTAAAGTAGCTCCTGGGTGGGGAAC TA  
CTCCTTTGATGGGTGTCGCAATGGCCTTATTTGCGGTATTTCTATCTATTATTTGGAGAT  
TTATAATTCTTCTGTTTTATTGGATGGGATTTCAATGAATATGCTTACTCTCAAACCTTTC  
GTTTACACAGTAGTGATATTTTTTGTCTCTCTTCATCTTTGGATTCTATCTAATGATC  
CCGGACGTAATCCTGGACGTGAAGAAATGGCCGATACTACTGGAAGGATTCCTCTTTG  
GATAATAGGTACTGTAGCTGGTATTCTTGTAATCGGTTTAAATAGGTATTTCTTTTATGGT  
TCATATTCCGGATTGGGTTTCATCCCTGATGCTTAATACCTTTAGTTTGATCGGTATCTGTC  
TTAATTCGACCCTTATTCGAGTAGTTTTTCTTCGGCAAATGCCCCGAGGCCTATGCTT  
TTTTGAATCCAATCGTAGATATTATGCCAGTCATACCTCTGTTCTTTTTTCTTTAGCCTT  
TGTTTGGCAAGCTGCTGTAAGTTTTCGAACGACACAATCAAACCCGAACGAACAAAAT  
GTTGAATTGAATCGTACCAGTCTCTACTGGGGTTATTACTCATTTTTGTACTTGGCTGTT  
TTATTTCCAATTATTTCTTCAATATGGAAGTAAATATTCTTGCATTTATTGCTACTGCACT  
ATTTATTCTAGTTCCCTACCGTTTTTCTACTTATCATTTATGTAAAAACAGTCAGTCAAAC  
GATATGGAAACAGCAACCCTAGTCGCCATCTTTATATCTGGTTTACTTGTAAGTTTTACT  
GGGTACGCCTTATATAACCGCTTTTGGGCAACCTTCTCAACAATAAGAGATCCATTTCGA  
GGAACATGGAGACATGGAAGCATTGGTTTATACATTCCTCTTAGTCTCGACTCTAGGGA  
TAATTTTTTTCGCTATCTTTTTTCGAGAACCGCCTAAAGTTCCAAC TAAAAGAAC---AT  
GACTCTTGCTTTCCAATTGGCTGTTTTGCAATTAATTGCTACTTCATTAATCTTATTGATT  
AGCGTACCCGTTGTATTTGCTTCTCCTGATGGCTGGTCAAGTAACAAAATGTTGTATTT  
TCTGGTACATCCTTATGGATTGGATTAGTCTTTCTGGTGGGTATCCTTAATTCTCTCATCT  
CT-----ATGTCACCACAAACAGAGACTAAAGCAAGTGTGGATTCAAAGCT  
GGTGTTAAAGAGTACAAATTGACTTATTATACTCCTGAGTACCAAACCAAGGATACTGA  
TATATTGGCAGCATTCCGAGTAACTCCTCAACCTGGAGTTCCACCTGAAGAAGCAGGG  
GCCGCGGTAGCTGCCGAATCTTCTACTGGTACATGGACAACCTGTATGGACCGATGGACT  
TACCAGTCTTGATCGTTACAAAGGGCGATGCTACCGCATCGAGCGTGTGTTGGAGAA  
AAAGATCAATATATTGCTTATGTAGCTTACCCTTTAGACCTTTTTGAAGAAGGTTCCGTT  
ACCAATATGTTTACTTCCATTGTAGGTAACGTATTTGGGTTCAAAGCCCTGCGCGCTCTA  
CGTCTGGAAGATCTGCGAATCCCTACTGCTTATGTTAAAAC TTTCCAAGGTCCGCCTCA  
TGGGATCCAAGTTGAAAGAGATAAATTGAACAAGTATGGTCGTCCTGTTGGGATGT

ACTATTA AACCTAAATTGGGGTTATCTGCAAAAACTACGGTAGAGCTGTTTATGAATG  
TCTTCGCGGTGGACTTGATTTTACCAAAGATGATGAGAACGTGAACTCACAACCATTTA  
TGC GTTGGAGAGATCGTTTCTTATTTTGTGCCGAAGCACTTTTTAAAGCACAGACTGAA  
ACAGGTGAAATCAAAGGGCATTACTTGAATGCTACTGCAGGTACATGCGAAGAAATGA  
TGAAAAGAGCTGTATTTGCTAGAGAATTGGGCGTTCCGATCGTAATGCATGACTACTTA  
ACGGGGGGATTACCGCAAATACTACCTTGGCTCATTATTGCCGAGATAATGGTCTACT  
TCTTCACATCCACCGTGCAATGCATGCGGTTATTGATAGACAGAAGAATCATGGTATCC  
ACTTCCGGGTATTAGCAAAAAGCGTTACGTATGTCTGGTGGAGATCATATTCACTCTGGT  
ACCGTAGTAGGTAAACTTGAAGGTGAAAGAGACATAACTTTGGGCTTTGTTGATTTACT  
GCGTGATGATTTTATTGAACAAGATAGAAGTCGCGGTATTTATTTCACTCAAGATTGGGT  
CTCTTTACCAGGTGTTCTACCTGTGGCTTCAGGAGGTATTCACGTTTGGCATATGCCTGC  
TCTGACCGAGATCTTTGGGGATGATTCCGTACTACAGTTCGGTGGAGGAACTTTAGGAC  
ATCCTTGGGGTAATGCGCCAGGTGCCGTAGCTAATCGAGTAGCTCTAGAAGCATGTGTA  
AAAGCTCGTAATGAAGGACGTGATCTTGCTCGGGAAGGTAATGAGATTATTCGCGAGG  
CTTCCAAATGGAGCCCGGAACTAGCTGCTGCTTGTGAGGTATGGAAAGAGATCGTATTT  
AATTTTGCAGCAGTGGACGTTTGGATAAGATGGCGATACATTTATACAAAACCTTCTAC  
CCCGAGCACACGCAATGGAACCGTAGACAGTCAAGTGAAATCCAATCCACGAAATAAT  
TTGATCTATGGACAGCGTCGTTGTGGTAAAGGTCGTAATGCCAGAGGAATCATTACCGC  
AAGGCATAGAGGGGGAGGTCATAAGCGTCTATAACCGTAAAATCGATTTTCGACGGAAT  
GAAAAAGACATATATGGTAGAATCGTAACCATAGAATACGACCCTAATCGAAATGCATA  
CATTTGTCTCATACTATGGGGATGGTGAGAAGAGATATATTTTACATCCAGAGGGG  
CTATAATTGGAGATAACCATGTTTCTGGTACAGAAGTTCCTATAAAAATGGGAAATGCC  
TACCTTTGACCGATATGCCCTTAGGCACGGCCATACATAACATAGAAATCACACTTGGAA  
AAGGGTGGACAATTAGCTAGAGCAGCGGGTGTGTAGCGAACTGATTGCAAAAAGAG  
GGGAAATCGGCCACATTAATAATTACCTTCTGGGGAGGTCCGTTTGATATCCAAAACTG  
CTCAGCAACAGTCGGACAAGTGGGGAATGTTGGGGTGAACCAGAAAAGTTTGGGTAG  
AGCCGGATCTAAGCGTTGGCTAGGTAAGCGTCCTGTAGTAAGAGGAGTAGTTATGAAC  
CCTGTAGACCATCCCCATGGGGGTGGTGAAGGGAGAGCCCCAATTGGTAGAAAAAAA  
CCCACAACCCCTTGGGGTTATCCTGCACTTGAAGAAGAAGTAGAAAAAGGAATAAAT  
ATAGTGATAATTTGATTCTTCGTCGCCGTAGTAAAATGATTCAACCTCAGACCCATTTAA  
ATGTAGCGGATAATAGCGGGGCTCGAGAATTGATGTGTATTGGAATCATAGGAGCTAGC-  
--AATCGTCGATATGCTCATATTGGTGACGTTATTGTTGCTGTGATCAAAGAAGCAGTACC  
AAATATGCCCTAGAAAGATCAGAAGTAGTCAGAGCTGTAATTGTGCGTACCTGTA  
GAACTCAAACGTGACAACGGGATGATAATCCGATATGATGACAATGCTGCAGTTGTTAT  
TGATCAAGAAGGAAATCCAAAAGGAACTCGAATTTTTGGTGCAATCGCCCGGGAATTG  
AGAGAATTAATTTTACTAAAATAGTTTCATTAGCTCCCGAGGTATTAATGCTTAGTCCC  
AAAAGAACCAGATTCCGTAAACAACATAGAGGCAGAATGAAGGGAATATCTTCTCGAG  
GTAATCGTATTTCTTTCGGTAAATATGCTCTTCAGGCACTTGAACCTGCTTGGATTACAT  
CTCGACAAATAGAAGCAGGCCGACGGGCAATGACACGAAATGCACGTCGTGGTGGAA  
AAATATGGGTACGTATATTTCCAGACAAACCAGTTACTACTAAGACCCGCAGAAACACGT  
ATGGGTTTCAGGAAAAGGATCCCCTGAATATTGGGTAGCTGTTGTTAAACCGGGGCGAA  
TACTTTATGAAATGGGTGGAGTAACAGAAAATATAGCCAGAAGGGCTATTTCACTAGCA  
GCATCCAAAATGCCTATACGAACTCAATTCATTTTCG---ATGACCAGAATTAACGGG  
GATATATAGCTCGGAGACGTAGAACAAAATTCGTTTATTTGCATCAAGCTTTCGAGGG

GCTCATTCAAGGCTTACTAGAACTATTACTCAACAGAAAATAAGAGCTTTAGTTTCGGC  
TCATCGGGATAGGGATAGGAAAAAGAGAGATTTTCGTCGTTTGTGGATCACTAGGATAA  
ACGCAGTAATTCGCGAA---AGGGGAGTATCCTATAGTTATAGTAGATTAATACACGATCT  
GTACAAGAGACAGTTGCTTCTTAACCGTAAAATACTTGCACAAATAGCTATATCAAATA  
GGAATTGTCTTTATATGATTTCGAACGAAATCATAAAGGAAGTAGATTGGAAAGAATCC  
ACCAGAATAATTATGCTAAAGGAAGTATATGCTTTAGGTGAACATATATCTATGTCTGCT  
GACAAAGCACGAAGAGTAATTGATCAAATTCGCGGACGTTCCCTATGAGGAAACGCTTA  
TGATACTAGAACTCATGCCCTATCGAGCATGTTATCCCATTTTGA AATTGGTTTATTCTGC  
AGCAGCAAATGCTAGTTACAATATGGGTTCCAGCGAAACCAATTTAGTCATTAGTAAAG  
CCGAAGTCAATGAAGGTACTACTGTGAAGAAATTGAAACCTCGAGCTCGAGGACGTA  
GTTTTCCGATAAAAAGATCGACCTGTCATATAACTATTGTAATGAAAGATATATCTTTAGA  
TGGGGGATTATGGGACAAAAAATGGATGGAATCAAATATGCAGTATTTACAGACAAA  
AGTATTCGGTTATTGGGGAAAAAT--CAATATACTTCTAATGTGCAATCAGGATCAACTA  
GGACAGAAATAAAGCATTGGGTCGAACTCTTCTTTGGTGTCAAGGTAATAGCTATGAAT  
AGTCATCGACTTCCGGGAAAGAGTAGAAGAATGGGACCTATTATGGGACATACAATGC  
ATTACAGACGTATGATCATTACGCTTCAACCGGGTTATTCTATTCCACCTCTTAGAAAGA  
AAAGA ACTATGGCAGTTCCAAAAAACGCACCTTCGACATCAAAAAAGCGTATTCGTAA  
AAATATTTGGAAAAGGAAGGGGTATTGGGTAGCATTAAAGGCTTTTTTCATTAGCGAAAT  
CTCTTTCTACCGGGAATTCTAAAAGTTTTTTTTGTACGCCAAACAAAAATAATGGCCAAA  
GGGAAAGATGTCCGAGTAACGGTGATTTTGAATGTACTAGTTGTGTCCGAAACAGTG  
TTGAT-----AAGGTATCAAGAGGTATTTCCAGATATATTACTCAAAAGAACCGGCACAAT  
ACGCCTAATCGATTTGAATTGAAAAAATTCTGCCCTATTGTTACAAACATACGATTCAT  
GGGGAGATAAAGAAAATGAAAATAAGAGCTTCCGTTTCGTAAAATTTGTGAAAAATGTC  
GACTAATCCGTAGGAGGGGGCGCATTATAGTAATTTGTTCCAACCCGAGACATAAACAA  
AGACAGGGCATGGTTCGAGAGAAAGTAACAGTATCTACTCGGACACTACAGTGGAAG  
TGTGTTGAATCAAGAACAGACAGTAAACGCCTTTATTATGGACGCTTTATTCTGTCTCC  
ACTTATGAAAGGCCAAGCCGATACAATAGGCATTGCGATGCGAAGAGCTTTACTTGGG  
GAAATAGAAGGAACATGTATCACACGTGTAAAATCTGAG-----AAAGTACCACATGAAT  
ATTCTACCATAACGGGCATTCAAGAATCGGTACATGAAATTTAATGAATTTGAAAGAG  
ATTGTATTGAGAAGTAATTTATATGGAACCTTCTGACGCGTCTATTTGTGTCAAGGGTCCT  
GGATATGTA ACTGCTCAAGATATCATCTTGCCACCTTATGTGGAAATCGTTGATAATACA  
CAACATATAGCTAGTTTAAACGGAACCAATTGATTTTTGTATTGGATTACAAATAGAGAGA  
AATCGTGGATATCTTATAAAAACGCCACAT--AACTTTGATGGAAGTTAT-----CCTATAGA  
TGCTGTATTCATGCCTGTTTCGAAACGCGAATCATAGTATTCATTCTTATGGGAATGGGAA  
TGAAAAACAAGAGATACTGTTTATCGAAATATGGACAAATGGAAGTTTAACTCCGAAA  
GAAGCACTTCATGACGCATCCCGAAATTTAATTGATTTATTTATCCCTTTTTACATATGG  
AGGAAGAC-----AACTTATATTTACAGGACAATCAA---CACACGGTTCCTTTATCCCCTTT  
TACCTTTCATGATAAATTGGCT--AACTTATAAAAAACAAAAA---AAAATAGCATTGA  
AATCGATTTTTATTGACCAATCAGAATTGTCTTCCAGGATCTATAATTGCCTCAAATGT  
CCAATATATATACATTATTGGACCTTTTGAATAACAGCCAAGAAGATCTTATGAAAATTG  
AACATTTTCGTAGCGAAGATATAAACAGATATTGGGCATTTTAGAAAAATAT-----TTCG  
TAATTGATTTAGCAAAAAATAAGATGCTCGGGGATGGA---AATGAGGGAATATCTACAAT  
ACCTGGATTAATCAGATACAATTTGAAGGATTTTGTAGGTTCAATTGATCAAGGTTTGAC  
GGAAGA ACTTTATAAGTTTCCAAAAATTGAAGATACAGATCAAGAAATTGAATTTCAAT

TATTTGTGGAAACATATCAATTGGTTCGAACCCCTTGATAAAGGAAAGAGATGCTGTGTAT  
GAATCACTCACATATTCTTCTGAATTATATGTATCCGCGGGATTAATTTGGAAAAACAGT  
AGGGATATGCAAGAACAAACAATTTTTATCGGAAACATTCCTCTAATGAATTCCTGGG  
AACTTCTATAGTCAATGGAATATATAGAATTGTGATCAATCAAATATTGCAAAGTCCCG  
TATTTATTACCGATCAGAATTGGACCATAACGGAATTTTCGGTCTATACCGGCACCATAAT  
ATCAGATTGGGGAGGAAGATCAGAATTAGAAATTGATAGAAAAGCAAGGATATGGGCT  
CGTGTAAGTAGGAAACAAAAATATCTATTCTAGTTCTATCATCAGCTATGGGTTTGAAT  
CTAAGAGAAATCTAGAGAATGTTTGCTATCCTGAAATTTTTTTGTCTTTTCTGAATGAT  
AAGGAGAGAAAAAAATGGGTCAAAGAAAATTCCATTTTGGAGTTTATCAACAAT  
TTGCTTGTGTAGGTGGCGATCCGGTATTTTCTGAATCCTTATGTAAGGAATTACAAAAG  
AAATTCTTCAACAAAGATGTGAATTAGGAAGGATTGGTCGACGAAATATGAACCGAA  
AACTGAACCTTGATATACCCAGAACATAACATTTTTGTTACCACGAGATATATTGGCAG  
CCGCCGATCATTTGATTGGACTGAAATTTGGAATGGGTGCACCTTGACGAT-----ATGAAT  
CATTTGAAAAATAAACGTATTCGTTCTGTAGCAGATCTTTTACAAGATCAATTCGGATTG  
GCTCTGGTTCGTTTAGAAAATGTGGTTTCGGGGGACTATATGTGGAGCAATTCGG---CAT  
AAATTG---ATACCGACACCTCAGAATTTGGTAACCTCACCTCA-----TTAACAAC  
ACTTATGAATCCTTTTTCGGTTTACACCCATTATCTCAAGTTTTGGATCGAACTAATCCAT  
TGACCCAAATAGTTCATGGGAGAAAATTAAGTTATTTGGGCCCTGGAGGACTGACAGG  
CCGCACTGCTAGTTTTTCGGATACGAGATATCCATCCTAGTCACTATGGACGTATTTGCC  
AATTGACACATCTGAAGGAATCAATGTTGGACTTATTGGATCCTTATCAATTCATGCGAG  
GATTGGTCATTGGGGA---TCTCTAGAAAGCCTTTTTAT-----GAAATTTCTGAGAGGT  
CAACCGGG-----GTACGGATGCTTTATTTATCACCAGGTAGCGATGAATACTATATGGTAG  
CGGCAGGAAATCTTTAGCCTTAAATCGGGATATTCAGGAAGAACAGGTTGTTCCAGCT  
AGATACCGTCAAGAATTTCTGACTATTGCATGGGAACAGGTTTCATCTTCGAAGTATTTTT  
CCTTTTCAATATTTTTCTATTGGAGCTTCCCTCATTCTTTTATCGAACATAATGATGCGA  
ATCGAGCTTTAATGAGTTCTAATATGCAACGTCAAGCAGTTCCTCTTTCTCGCTCCGAG  
AAATGCATTGTTGGGACTGGGTTGGAACGACAAGCAGCTCTAGATTCGGGGGCTCTTG  
CTATAGCCGAACGCGAGGGAAGGATCGTTTATACCAATACTGACAAGATTCTTTTAGCA  
GGTAATGGAGATATTCTAAGCATTCCATTAGTTATATATCAACGTTCCAATAAAAATACTT  
GTATGCATCAAAAACCTCCGGGTTCCCTCGGGTAAATGCATTA AAAAGGGACAAATTTTA  
GCGGATGGTGTGCTACGGTTGGTGGCGAACTTGCTTTGGGGAAAAACGTATTAGTAG  
CTTATATGCCGTGGGAGGGTTACAATTCTGAAGATGCAGTACTTATTAGCGAGCGTTTG  
GTATATGAAGATATTTATACTTCTTTTACATACGGAAATATGAAATTCATACTCATGTGA  
CAAGTCAAGGC---CCTGAAAAAGTAACTAATGAAATACCGCATTTAGAAGCCCATTTAC  
TCCGCAATTTAGACAAAAAGGAATTGTGATGCTGGGATCTTGGGTAGAGACGGGTGA  
TATTTTAGTAGGTAATTAACACCCCAAGTCGTGAAAGAA---TCTTCGTATGCCCCGGA  
AGATAGATTGTTACGAGCTATACTTGGTATTCAGGTATCTACTTCAAAGAACTTGTCT  
AAAATTACCTATAGGTGGCAGGGTTCGGGTTATTGATGTGAGGTGGATCCAGAAAAGG  
GGT---GGTTCTAGTTATAATCCCGAAACGATTCGTGTATATATTTACAGAAACGTGAAA  
TCAAAGTAGGCGATAAAGTAGCTGGAAGACACGGAAATAAAGGTATCATTTCCAAAAT  
TTTGCCTAGACAAGATATGCCTTATTTACAAGATGGAAGATCCGTTGATATGGTCTTTAA  
CCCATTAGGAGTACCTTCACGAATGAATGTCGGACAGATATTTGAATGTTCACTAGGGT  
TAGCAGGGAGTCTGCTAGACAGACATTATCGAATAGCACCTTTTGGATGAGAGATATGAA  
CAAGAAGCTTCGAGAAAACTAGTGTTTTCTGAATTATATGAAGCCAGTAAGCAAACAG

CGAATCCATGGGTATTTGAACCCGAATATCCAGGAAAAAGCAGAATATTTGATGGAAGG  
ACGGGGAATCCTTTTGAACAACCCGTTATAATAGGAAAGCCTTATATCTTGAAATTAATT  
CATCAAGTTGATGATAAAATCCATGGCCGTTCCAGTGGACATTATGCGCTTGTTACACA  
ACAACCCCTTAGAGGAAGAGCCAAACAGGGGGGACAGCGGGTAGGAGAAATGGAGG  
TTTGGGCTCTAGAAGGGTTTGGGGTTGCTCATATTTTACAAGAGATGCTTACTTATAAAT  
CGGATCATATTAGAGCTCGCCAGGAAGTACTTGGTACTACGATCATTGGGGGAACAATA  
CCGAATCCCGAAGATGCTCCAGAATCTTTTCGATTGCTCGTTCGAGAACTACGATCTTT  
AGCTCTGGAAGTGAATCATTTCCTTGTATCTGAGAAGAACTTCCAGATTAATAGGAAGG  
AAGCTATGAATAATAATTTTTCTTCTATGATTGATCGATATAAACATCAACAGCTCCGAAT  
TGGATCAGTTTCTCCTCAACAAATAAGTGCTTGGGCCACAAAATCCTGCCTAATGGA  
GAGATAGTTGGAGAGGTAACAAAACCTATACTTTTCATTACAAAACAAATAAACCGG  
AAAAAGATGGATTATTTTGTGAAAGAATTTTGGTCTATAAAAAGCGGAATTTGTGCT  
TGTGGAAATTATCGAGTAATCGGAGATGAAAAGAAGACCCGAAATTTTGTGAACAAT  
GCGGAGTCGAATTTGTTGATTCTCGGATACGAAGGTATCAAATGGGCTATATCAAATC  
GCATGCCAGTAACCCATGTGTGGTATTTAAAACGTCTTCCTAGTTATATTGCGAATCTT  
TTAGATAAACCTCTTAAAGAATTAGAAGGCCTAGTATACTGCGAT-----TTTTCTTTGCT  
AGGCC--ATAACTAAAAGCCCACTTTCTTACGATTACGAGGTTTATTGGAATATGAAA  
TCCAATCTTGGAAATACAGCATCCCACTTTTTTTTACTACCCAGGGTTTCGATACATTC  
GCAATCGAGAAATCTCTACTGGCGCAGGTGCTATCCGAGAACAATTAGCCGATCTAGAT  
TTACGAATTATTATAGAGAATTCGTTGGTAGAATGGGAAGAATTGGGGGAAGAA---GGG  
CACACAGGGAATGAATGGGAAGATCGAAAAGTTGGAAGAAGAAAGGACTTTTTTGTT  
AGACGCGTGGAATTGGCTAAGCATTTTATTGCAACAAATATAGAGCCAGAATGGATGGT  
TTTGTGTCTATTACCAGTTCTTCTCCTGAGTTGAGACCGATCATTGAGATAGATGGGGG  
TAAACTAATGAGCTCAGATATTAATGAACTCTATAGAAGAGTTATCTATCGGAACAATAC  
CCTTACCGATCTATTAACAACAAGTAGATCTACGCCAGGAGAATTAGTAATGTGTCAGG  
AGAAATTAGTACAAGAAGCCGTGGATACACTTCTTGATAATGGAATCCGGGGACAACC  
AATGAGGGACGGTCATAATAAAGTTTACAAGTCATTTTCTGATGTAATTGAAGGCAAAG  
AGGGAAGATTCGTGAGACTCTGCTTGGTAAACGAGTCGATTATTCAGGACGTTCTGT  
CATTGTCGTGGGTCCTTCACTTTCATTACATCGATGTGGATTGCCTCGTGAAATAGCAAT  
AGAACTTTTCCAGACATTTGTAATTCGTGGTCTAATTAGACAACATCTTGCTTCCAACAT  
AGGAGTTGCTAAGAGTAAAATTCGAGAAAAAGAGCCGATTGTATGGGAAATCCTTCAA  
GAAGTTATGCAGGGACACCCTGTATTGCTGAATAGAGCACCTACGCTGCATAGATTAGG  
CATAAGGCATTCCAGCCGTTTTAGTGGAGGGGCGCGCTATTTGTTACATCCATTAGT  
TTGCAAGGGATTCAATGCCGATTTTGATGGAGATCAAATGGCTGTTTCATGTACCTTTATC  
CTTGGAGGCTCAAGTAGAGGCCCGTTTACTTATGTTTTCTCATATGAATCTTTTGTCTCC  
GGCTATTGGGGATCCCATTTCCGTACCAACGCAAGATATGCTTATTGGACTCTATGTATT  
AACGAGCGGAAATCATCGAGGTATTTGTGTAATAGATATAATCCATGTAATCGC-----  
AGAACTATCAAAATCAAAAAGAAGTGACAATAGTTATAAGTATACG-----GAACCC  
TTTTTTTTCGAATCCTATGATGCAATTGGGGCTTATCGGCAGAAACGAATCAATTTAGAT  
AGTCCTTTGTGGCTCCGGTGGCGACTAGATCAACGC---GTTATTGCTTCA-----AGAGAA  
ACTCCCATCGAAGTTCACTATGAATCTTTAGGTACTTTTTATGAGATTTATGGACACTAT  
CTAATAGTAAGAAGTCTAAAAAATAATCCTTTTTATATACATTCGAACCACTGTTGG  
TCATATTGCTCTTTATCGAGAAATCGAAGAAGCTATACAGGGGTTTTCTCGGGCCTATTC  
ATATGCTACC-----ATGGAGGTACTTATGGCAGAACGGGCCAATCTGGTCT

TTCACAATAAAGCGATAGACGGAAGCTGCCATGAAACGACTTATTAGTAGATTAATAGAG  
CACTTCGGAATGGCATATACATCACATATCCTGGATCAAGTAAAACTCTGGGGTTCCA  
ACAAGCTACTGCTACATCCATTTTCATTAGGAATTGATGATCTTTTAACAATACCTTCTAA  
GGGATGGCTAGTTCAAGATGCTGAACAACAAAGTTTGATTTTGGAAAAACACCATCAT  
TATGGGAATGTACACGCGGTAGAAAAATTACGTCAATCCATTGAAATATGGTATGCTAC  
AAGTGAATATTTGCGCCAAGAAATGAATCCGAATTTTAGGATGACTGACCCTTTTAATC  
CAGTTCATATAATGTCTTTCTCGGGAGCTCGAGGAAATGCATCTCAGGTACATCAATTA  
GTAGGTATGAGAGGATTAATGTCCGGATCCTCAAGGACAAATGATTGATTTACCTATTCA  
AAGCAATTTACGCGAAGGACTCTCTTTAACAGAATACATCATTTCTTGCTACGGAGCCC  
GTAAAGGAGTTGTGGATACTGCTGTACGAACATCAGACGCTGGATATCTCACTCGCAG  
ACTTGTTGAAGTAGTTCAACACATTGTTGTACGTCGAACGGATTGTGGCACC GCCCGG  
GGTATTTCTGTGAGTCCTCGGAATGGGATAATGCCG--GAAAGGATTTTTAGTCAAACAT  
TAATTGGCCGTGATTAGCAGATGATATACATGGGTTACGATGTATTGCCACTAGAA  
ACCAAGCCATTGGCATTGGACTTGTAATCGATT CATAACC-----TTTCGGGCA  
CAACCAATCTCTATT CGAACTCCCTTTACTTGTAGGAGTACATCTTGGATTTGTGATTA  
TGTTATGGCCGTAGTCCTACTCATGGCGACCTGGTTGAATTGGGGGAAGCTGTAGGTAT  
TATTGCAGGTCAATCGATTGGAGAACCGGGTACTCAATTAACATTACGAACTTTTCATA  
CCGGAGGAGTATTCACGGGGGGTACTGCAGAACATGTGCGAGCCCCATCTAATGGAAA  
AATAAAATTCAATGAGGACTTGGTTCATCCGACACGTACACGT CATGGGCATCCCGCCT  
TTCTATGTTCTATAGACTTGTATGTA ACTATTGAGAGTGAAGATATTCTACATAATGTGAA  
TATTCACCCAAAAGTTTGCTTTTAGTTCAAACGATCAATATGTAGAATCAGAACAAG  
TAATTGCTGAGATTCGCGCAGGAATATCCACT--TTGAATTTTAAAGAGAAGGTT CGAA  
AACATATTTATTCTGATT CAGACGGAGAA---ATGCACTGGAGTACCGATGTCTATCATGC  
ACCCGAATTTACATATGGTAATGTT CATCTATTACCAAAAACAAGTCATTTATGGATATTA  
TTAGGAGGGCCGTGCAGG-----TCCAGTCTAGTCTACCTTTTCGATCCACAAGGATCAGG  
ATCAAATGAATGCGCAT-----TCTCTTTCTGGCAAGCCAAGATATACTTCTAACCTCTCA--  
---GTAACCAATGATCAG--GCGAGGCAGAAATTGTTTAGTTTCGGATTTTTATGGTCAA---  
GAAGATAGGATTCCTGATTAT--TCAGACCTTAATCGAATCATATG TACTGGTCAGTATAA  
TCTCGTATATTCG--CCTATTCTTACGGGAATTCT-----GATTTATTGTCAAAAAGGCGAA  
GAAATAAATTCATCATTCCACTACACTCGATTCAAGAACTCGAGAATGAACTAATGCC  
TGTTCAAGGTATCTCGATTGAAATCCCC-----GTAAATGGTATTTTCCGT CGAAATAGTATT  
CTTGCTTATTTTCGATGATCCTCGATACAGAAGAAAGAGTTCGGGCATTATTAATATGGG  
ACTATAGAAACGCATTCAGTCATCAAAAAAGAGGAT-----TTGATTGAGTATCGAGGA---  
GTCAAGGAATTTAGGCCAAAATACATGAAAGTAGATCGATTTTTTTTTCATTCTGAAGA  
GGTGCATATCTTGCCCGGATCTTCTTCCATAATGGTACGGAACAATAGTATCGTTGGGGT  
CGATACACAAATCACCTTAAATCTAAGAAGCCGAGTCGGTGGGTTGGTCCGGGTGGAG  
AGAAAAA AAAACGAATTGAACTGAAAATCTTTTCTGGAGATATCCATTTTCTGGAG  
AGACGGATAAGATATCCAGACATACCGGCGTTTTGATACCA---CCAGGA---ACAGGAAA  
AAGAAATCCAAGGAATACAAAAA-----GTAAAAATTGGATCTATGTCCAACGA-----  
ATTACACCTAGTAAG-----AAAAGGTTTTTTGTTTTAGTTTCGACCTGTGTCACATATGA  
AATAACGGACGGTATAAATTTAGGAACCTTTTTCCACCGGATCCATTGCAGGAAAGGG  
ATAATGTGCAACTTCGAATTGTCAATTATATCCTTTATGGAAATGGCAAACCGATTTCGAG  
GAATTTCTGACACAAGTATTCAATTAGTTTCGGACTTGTTTAGTATTGAATTGGAACCAA  
GACAAAAA-----AGTTCTTCTTGCGAAGAAGCCCGTGCTTCTTTTGTGAAATAAGG



ACAAATGGTTTGATTTCGACATTTCTAAGAATCAACTTAGTGAAATCCCCTATTTTCATAT  
ATCGGAAAAAGGAATGATCCGTCGGGGTCAGGATTGCTCTCTGAT--AATGGATCAGAT  
TGTACCAATATCAACCCCTTTTCTGCCATTTATTCCTAT-----TCCAAGGCCAAAAATTCA  
ACAATCTCTTAACCAACCTCAAGGAACTATTCATACGTTGTTGAATAGA-----AATAAG  
GAATGTCAGTCGTTGATAATTTTGTGTCAGCAGCCAATTGTTCTCGAATGGAGCCA-----TT  
CAAAGATGTAATAATATCACAGTGTG-----ATAAAAGAATCA---CCCCTAATTCCAATTA  
GGAATTCATTGGGCCCTTTAGGAACA-----TGCCTTCCAATTGAGAATTTTTATTCA-----T  
CTTACCATTTA-----ATAACTCATAATCAGATCTTA---GTAATAAATATTTGCAACTTGAC  
AAT-----TTAAAACAGACTTTTCAAGTGATTAATAATAAAA---TATTATTTAATGGATGAA  
AAT-----GGAAAAATTTTAAATCCCGATCCATGCCGTAACATTATTTTAAATCCATTCAATT  
TGAATTGGTCTTTTCTCCATCACAAATTATTGTGTCAGAGACATCT---AAAATAATTAGTCTT  
GGACAGTTTATTTGTGAAAATGTATGTATAGCCAAAAATGGACCGCCC---CTCAA-----  
TCGGGTCAAGTTATACTTGTTCAA---GTTGACTCGATAGTGATACGATCAGCTAAGCCTT  
ATTTGGCCACCCCGGAGCAACTGTTTCATGGCCATTATGGGGAAACCCTTTACGAAGG  
AGATACATTAGTTACATTTATATATGAAAAATCGAGATCTGGTGATATAACACAGGGTCT  
TCCAAAAGTAGAACAGGTCTTAGAAGTGCCTCGATTGATTCAATATCCATGAATCTAG  
AAAAGAGGGTTGAGAGTTGGAACAAATGTATACCAAGAATTCTTGAATTCCCTGGGG  
ATTCTTGATTGGTGTGAGCTAACTATAGCGCAAAGCCGAATCTCTTTGGTTAATAAAAT  
CCAACAGGTTTATCGCTCCAGGGGGTGCAGATTCATAATAGGCATATAGAAATTATTGT  
ACGTCAAATAACATCAAAGTGTGATTTTCAGAA-----GATGGAATGTCTAATGTTTTT  
TCACCCGGAGAACTTATTGGATTGTTGCGAGCAGAACGAATGGGGCGCGCTTTGGAAG  
AAGCGATCTGTTACCGAGTCGTCTTATTGGGAATAACAAGAGCATCTCTCAATACTCAA  
AGTTTCATATCTGAAGCAAGTTTTCAAGAACTGCTCGAGTTTTAGCAAAGCGGCTC  
TCCGGGGTTCGATCGATTGGTTGAAAGGCCTGAAAGAGAACGTTGTTTTGGGGGGGGT  
GATACCCGTTGGTACCGGATTCAAGGGATTA-----GTGCACCCTTCAAACAACATAAC  
AACATTCCT-----TTGGAACAAAAAAACGAATCTATTCGAGGGGGAGATGAGA-----G  
ATATTTTGTTCACCACAGAAAATTATTTGATTCTTGTCTTTCAAAAAAATTCCACGACA  
TACCCGAACAATCATTATAGGA-----TTAATGATTCCATGACAAGAAGATATT  
GGAACATAAATTTGGAAGAGATGATGGAGGCAGGAGTTCATTTTGGTCATGGTACTAG  
GAAATGGAATCCTAAAATGGCGCCTTATATCTCTGCAAAGCGTAAGGGTATTTCATATTAC  
AAATCTTACTAGAAGTCTCGTTTTTTTATCAGAAGCTTGTGATTTAGTTTTTGGACGCAGC  
AAGTAGGGGAAAACAATTCTTAATTGTTGGTACCAAAAATAAAGCAGCTGATTTCAGTA  
GAGTGGGCTGCAATAAGGGCCCGGTGTCATTATGTTAATAAAAAATGGCTTGGCGGTAT  
GTTAACGAATTGGTCCACTACAGAAACAAGACTTCATAAGTTCAGGGACTTGAGAATG  
GAACAAAAACAGGGGAGACTCAACCGTCTCCCGAAAAGAGATGCAGCTATGTTGAAA  
AGACAATTATCTCGCTTGCAAACATATCTGGGCGGGATTAAATATATGACAGGGGTACC  
CGATATTGTAATCATCGTTGATCAGCACGAAGAATATACGGCCCTGCGAGAGTGTATTAC  
TTTAGGAATTCCAACAATTTGTTTAAACCGATACAAATTGTGACCCCGATCTCGCAGATAT  
TTCAATTCAGCGAATGATGACGCCATATCCTCAATCCGATTAATTCTTAACAAATTAGT  
ATTCGCAATTTGTGAGGGTCTGTTCT--AGCTATATAAGAAATCCTATGGGACAAAAATA  
AATCCACTTGGTTTCAGACTGGGTACAACCAAGGTCATCATTCCCTTTGGTTTTTACA  
ACCAAAAATTATTCTGAGGGTTTACAAGAAGATAAAAAATAAGAGATTGTATCAAG  
AATTATGTACAAAAGAATATGAGAACGTCCTCTGGC---ATCGAGGGAATTGCACGTATA  
GAGATTCAAAAAAGAATCGATCTGATCCAGGTCATAATCTTTATGGGATTCCCAAATTA

TTAATAGAAAGTCGACCGCGC-----GGAATCGAAGAATTACAAATGACCTTACAAA  
AAGAATTTAATTGTGTAAACCGAAAACCTGAACATTGCTGTCACAAGAATTGCAAAACC  
TTACGGAAACCCTAATATTCTTGCAGAATTTATAGCTGGACAATTAAGAATAGAGTTTC  
ATTTTCGAAAAGCAATGAAAAAGGCTATTGAATTAACAGAACAAGCGGATACAAAAGG  
AATTCAAATACAAATTGCGGGGCGTATCGACGGAAAAGAAATTGCACGTGTCGAATGG  
ATCAGAGAAGGCAGGGTTCCCCTACAAACGATTTCGAGCTAAAATTGATTATTGCTCTTA  
TACAGTTTCGAACTATCTATGGAATATTGGGCATCAAATTTGGATATTTCTAGACGAGGA  
AATGTGCGGTTACCGAGGACCTCGTTTCAAAAAAATACGACGCCTGGGGGCTTTACCA  
GGACTAACTAATAAAAAGCCTAGGACCGGAAGTGATCTTAGAAACCAATCGCGTTCCG  
GTAAA---AAATCTCAATATCGTATTTCGTCTAGAAGAAAAACAAAATTGCGTTTTCTTA  
TGGTCTTACAGAACGACAATTACTTAAATACGTTTCGTATCGCCAGAAAAGCCAAGGGG  
TCAACAGGTCAAGTTTTACTACAATTACTTGAAATGCGTTTGGATAACATCCTTTTTCGA  
TTGGGTATGGCTTCCACTATTTCCCGCAGCCCGTCAATTAGTTAACCATCGACATATTTA  
GTTAATGGTCATATAGTAGATATACCGAGTTATCGCTGCAAACCCCGAGATATTATTACG  
GCAAAGGATGAACAAAAATCCAGAGCTCTGATTCAAATTTCTCTCGATTCATCCCCTCA  
T--GAGGAATTACCAAATCATTTGACCCTTCAGCCATTCCA-----TATAAAGGATTAGTC  
AATCAAATAATAGATAGTAAATGGGTCGGTTTGAAAATAAATGAATTGCTAGTCGTAGA  
ATATTATTCTCGTCAGACTATGTCACGTCGAGGTAAGTGCAGAAAAAAAACAGCAAAA  
TCGGATCCAATTTATCGTAATCGATTAGTTAACATGTTGGTTAACCGTATTCTGAAACAC  
GGAAAAAATCATTGGCTTATCAAATTATCTATCGAGCCGTGAAAAAGATTCAACAAAA  
GACAGAAACAAATCCACTATCCGTTTTACGTCAAGCAATACGTGGAGTAAGTCCCGATA  
TAACAGTAAAAGCAAGACGTGTAGGTGGATCGACTCATCAAGTTCCATTGAAATAGG  
ATCCACACAAGGAAAAGCACTTGCCATTTCGTTGGTTATTAGCGGCATCCCGAAAACGT  
CCGGGTGCAAATATGGCTTTCAAATTAAGTTCCGAATTAGTGGATGCTGCCAAAGGGA  
GTGGCGATGCCATACGCAAAAAGGAAGAGACTCATAGAATGGCAGAGGCAAATAGAG  
CTTTTGCACATTTTCGTATGGGCAGGGACACTATTGCTGAGATAATAACTTCTATACGAA  
ATGCTGATATGGATCGAAAAGGGTGGTTTCGAATAGCATCTACTAATATTACCGAAAATA  
TTATTCAAATACTTTTACGAGAGGGTTTTATCGAAAACGTGAGAAAACATCGAGAAAA  
CAATAAATATTTTTGGTTTTAACCTGCGACATAGAAGG-----AATAGGAAAAGACCCT  
AT-----AGAAATATTTTAAATTTAAACGAATCAGTCGACCTGGTCTACGAATCTATTCT  
AATTATCAACGAATTCGCGAATTTTAGGTGGAATGGGGATTGTAATTTCTTCTACTTCT  
CGAGGTATAATGACAGACCGAGAGGCTCGACTAGAAGGAATAGGTGGAGAAATTTGT  
GTTATATCTGGATGGCAAAGCTATACCGAAAATTAGTTTCGCGTCGGAATGGACGTATT  
AGTTCACGTAAGGGTGCACGTAGAATACCAAAGGGAGTTATTCATGTTCAAGCAAGTT  
TCAATAATACCATTGTCACTGTTACAGATGTACGGGGTCGAGTAGTTTCTTGGTCTCTCA  
GCTGGTACTTCTGGATTCAAAGGTACGAGAAGAGGAACACCGTTTGCTGCTCAAACCG  
CAGCAGCAAACGCTATCCGTACAGTAGTGGATCAAGGTATGCAACGAGCGGAAGTCAT  
GATAAAAGGTCCCGGTCTCGGAAGAGATGCAGCATTACGAGCTATTCGTTCGAGTGGT  
ATACTATTAACTTTTCGTACGGGATGTAACCTCCGATGCCACATAATGGCTGTAGACCTCCG  
AAAAAAGACGTGTGATGCCAACTATTAACAACCTATTAGAAATACAAGACAGCCAA  
TCAGAAATGTCACGAAATCCCCGCTCTTCGGGGGTGCCCTCAGCGTCGAGGAACATG  
TACTAGGGTGTATACTATCACCCAAAAAACCAACTCTGCCTTACGTAAAGTTGCCA  
GAGTACGATTAACCTCTGGATTTGAAATCACTGCTTATATACCCGGTATTGGCCATAATT  
CACAAGAACATTCTGTAGTCTTAGTAAGAGGGGGAAGGGTTAAGGATTTACCCGGTGT



TGGATATACTCGAAACAAGGACTAGATTGTGTAATGATGATACTAAAAAGAATACGTG  
CCTAAAATGTATGATCCTTTGTAAATGGACCATATCGAGGAACAATAAAAAAGGGGT  
TTCATCTGAAAAGAGAGTTAGACTAAATAGGATTCATACTATCTTTTACCAAGAATTTGA  
ACAAAAAGATCCTAATGAGCCATCGATTGGAATAAAAGAAATCAGTAAAAAAGTACCT  
CGCTGGTCCCATAAATTAATCGAATTGGACCAACAAATG---GGTCAACTTCGTTCAAGA  
AAAGCCAAACGTGTAGTTATTTTTACTGACGCTTTAATAAGCTATTTCGCAACAATCAGA  
TTTTCGGCGAGGTATAATTAAGGCTCTATGCGGGCTCAAAGGCGCAAAACATTTATTT  
CGAAACTATTTCAAGCAAATGTACATTCCCCCTTTTTGTGCGACAGAATAACCCCCCTA  
CGTCTTTTTTCTTTTGATATC-----TCTGAACTAATTAACCAATTTTTCGAAATAGAAAG  
GAACAAGCACGGATAGCGATCGAAGAAGCCTGGGATAACATTCCTTTTGCACAAATAA  
TAAGAGGTTACATGTTAATAACTCAATCAATTCCTCGAAAATATATTCTATTACCTTCATT  
GATAATAGCCAAAAATCTCGGGCGTATGTTATTCTTGCAACTTCCTGAATGGTCTGAAG  
ATTTGCAGGAATGGAATAGAGAAATGCAGATTAAATGTACTTATAATGGTGTTCAATTAT  
CAGAAACAGAATTTCCCAAAGATTGGTTGAGAGACGGGATTCAGATCAAAATTTTATTT  
CCTTTTTGTCTGAAACCTTGGCATATATCTAAAAAAAACAAAAAGATGATTTTTGTTTT  
TTAACAGTTTGGGGAATGGAAGCTGAACTTCCTTTGGTTCTCCCCGAAAGCGCCCTT  
CCTTTTTTGAGCCATTTTTAAGGAACTCGAAAAAAAATTGGAAAATCAAAAAGAA  
ATATTTTCTAACT---CTAAAAATTTTAAAAGGAAAAACAAAATTATTTAGAAAGTGTTC  
AAAGAAACCAAAAAATGGTTTATCCAAAGTATTGGA-----TTTCTAAAAAAAATAAAAA  
AAGAACTTTCAAAGTAAATGATTATCTAATTAGTAATCAAATAATTAACGAATCATTTA  
GTCAAATTGAATCTGGAAATTGGCCAAATTCTTCACTGATAGAAAAAAAATGAAGGA  
TTGACTGATAGAACAAGTACAATCAAAAATCAAATAGAAAGAATTACAAAAGAGAAA  
AAGAAAAATCCTAATAAA---ACAAATAATATTAAAAAACTCGAATCGCCAAAAAATTT  
TTCCAAATATTAAAAAGCAGAAATACTCGAGTAATATGGAAATTCCATTATTTTCTCAA  
TTATTCATTCAAAGATTATACATCGATCTATTTTTATCTATCATTAAATATTCCTAGAATTACT  
ACACAACCTCTTT--ATCTTTATTTTCGTGTGATTTATCCTACTTGTCCACAAGCATATGTATTT  
TACAAATTATCACAAACCCAAGTTATTAATTTGTCTAAATTTAGATCTGTTCTTCAATATA  
CGTCTTGTTCCTTAAGACTAAAATAAAGGACTATTTTAAACTAGGAATATTTCAATTCGG  
AATTAACATAAGAACTTCAGAGTTATAGAATCAATCAATGGAAAAACTGGTTAAGA  
TGGCATTATCAATACGATTTATCTCAGATTAGATGGTCTAGATTAATGCCAAAAAATGG  
CGAACTAGGGTTAATCAAAGTTGTATGGCTCAAATAAAAACAAATGGAATTCATATGA  
AAAAGACCAA-----TTAATTCATTACAAAAAAGAA---AATTTTAAAAAATGTTATAGATAT  
GGTCTTTTAGCATATAAATCAATTAATGTCAATATTCTAGATCTCGATAGAAAATATTTTG  
ATTGAAAATTATCCATTTTTCTCTTAGATTTTTTGATTGGATGGGAATGAATGAAAAAA  
TATTTAATCGTTGGTTCTTCCCAGAATTTGTACTACTTTATAATGTCTATAAAAATAAAACC  
GTGGATTATACCAAGCAAATTCCTTCTTTTTAATTACAAAAGCAACACGGAAGCAGAAC  
TAGATTTGTTCTTGAAACGTTATTTGCTTTTTCAATTAAGATGGAACGATGCTTTGAATC  
AAAGAATGCTCGAAAATATCAAGGTATATTGTCTCCTGCTTCGACTGATAAATCCAACC  
AAAATTACTATATCGTCAATTCAAAGGAGAGAAATGAGTTTGGATATAATGCTGATTCA  
GGCAAATTTACCTCTTACAGACTTGATGAAG---GGGGTATTAATTATCGAACCTATTTCGG  
TTGTCTGTAACATAATGGACAATTTATTATGTATCAAACCATAGGTATTTCAATTGGTTC  
ATAAAAGTAAACACACTCATTTTGATTTGCTTGTTCCTGAAAATATTTTATGGTCTAGAC  
GTCGTAGAGAATTGAGAATTCGAAGTTTTTTTTAGATTTCTTTGGCCTAATTATCGATTAG  
AAGATTTAGCTTGATGAATCGTTATTGGTTTGATACCAATAATGGTAGCCGTTTCAGTAT

CTTAAGGATACATATGTATCCAATGAGAGGACATCAATTCAAATCCTGGATTTTCGAATT  
GAGAGAGATATTGAGAGAGATCAAGAATTCTCACCATTCTTAGATTTCATGGACCCAAT  
TCAATTCAGTGGGATCCTTCATTCACATTTTTTTCCACCAAGAACGTTTTCTAAAACCTCT  
TTGACCCCCGAATTTGGAGTATCCTACTTTCA---CGCAATTCA-----CAGGGTTCAACAA  
GCAATCGATATTTACG-----ATCAAGGGT--GTAATACTCTTTGTAGTAGCGGTCCTTA  
TATATCGT-----ATTAACAATCGAAATATGGTCGAAAGAAAAAATCTCTATTTGATAG  
GGCTTCTTCCT-----ATACCTATGAATTCATTGGACCCAGAAATGATACATTGGA  
AGAATCCGTT--GGGTCTTCCAATATCAATAGGTTGATTGTTTCG---CTCCTGTATCTTCC  
CAAAGGAAAAAGATCTCTGAGAGTTGTTTCTGAATCCGAAAGAGAGTACTTGGGTT  
CTCCAATAACT-----AAAAGTGTAGCATGCCTGAATCTAACTGGGGTTTCGCGTTG  
GTGGAGGAAGTGGATCGGAAAAAGAGG-----GATTCTAGTTGTAAGATATCTAAT-----  
--GAAACCGTCGCTGGAATTGAGATCTTATTCAAAGAGAAAGATCTCAA---TATCTGGA  
GTTTCTTTTTGTATATTATATGGAT-----GATCCGATCCGCAAGGACCATGATTGGGAATTG  
TTTGATCGTCTTCTCTGAGGAAGAGTTCGAAATAGAATCAACTTG-----AATTCGGGACT  
GCTATTCGAAATCTTAGTGAAACACTGGATTTCTTATCTCATGTCTGCTTTTCGTGAAAA  
AATACCAATTGAAGTGGAGGGT--TTCTTCAAACAACAAGGG--GCTGGGTCAACTATT  
CAATCAAATGATATTGAGCATGTTTCCCAT-----CTCTTCTCGAGAAACAAGTGGGCTATT  
TCTTTGCAAAACTGTGCTCAATTTTCATATGTGGCAATTCCGCCAAGATCTCTTCGTT-----  
---AGTTGGGGGAAG---AATCCGCCCGAATCGGATTTTTTTGAGGAAC---GTATCGAGAGA  
GAATTGGATTTGGTTAGACAATGTGTGGTTGGTAAACAAGGATCGG-----TTTTTTAG  
C-----AAGGTACAGAATGTATCGTCAAATATTCAATATGATTCC-----ACAAGA-----TCT  
AGTTTCGTTCAAGTAACGGATTCTAGCCAAGTAAAGGATCTTCT--GATCAATCCAGA  
GATCATTGGATTCCATTAGT-----AATGAGGATTCGGAA-----  
---TATCACACATTGATTAATCAAAGAGAGATTCAACAACGAAAAGAAAGATCGATTCTT  
---TGGGAT-----CCTTCTTTCTTCAAACCGGAACGAAAAGAGATAGAATCAGGC-----CGA  
TTCCCGAAA-----TGCCTTTCTGGATATTCC-----TCAATGTCCCGGCTATTACG---GAAC  
GTGAGAAGCAGATGATTAATCATCTGTTTCCGGAAGAAATCGAAGAATTTCTT-----GGG  
AATCCTACAAGATCCGTTCTTTTCTCTGATAGATGG-----TCAGAACTTCAT--CT  
GGGTTCGAATCCTACTGAGAGGTCCACTAGAGATCAG-----AAATTGTTGAAGAAA  
CAACAAGATCTTCT--TTTGTCCCTTCCAGGCGATCGGAA-----AAGAAAGAAATG  
GTTAATATATTCAAGATAATTACGTATTTACAAAAT-----ACCGTCTCAATTCATCCTATTT  
CATCAGATCCGGGATGTGATATGGTTCCG---AAGGATGAACCGGAT--ATGGACAGTTCC  
AATAAGATTTCAATCTTGAACAAAAATCCATTTTTTTGATTTA-----TTTCATCTATTCCATG  
ACCGGAACAGGGGAGGATACACGTTA-----CACTACGATTTTGCATCAGAA-----GAGAG  
ATTTCAAGAAATGGCAGATCTATTCCTCTATCAATAACCGAGCCG---GATCTGGTGTAT  
CATAAGGGATTTGCCTTTTCTATTGATTCTGCGGATTGGATCAAAAACAA-----TTCTTG  
AATGAGGCCAGGGATGAA-----TCGAAAAGAAATCT-----TTATTGGTTCTACCTCC  
TATTTTTTAT-----GAAGAGAATGAATCTTTTTTCTCGAAGGATCAGAAAAAATGGGTCA  
GG---ATCTCCTGCGGGAATGATTTGGAAGATCCAAAACCAAAAATAGTGGTATTTGCTA  
GCAACAACATAATGGAGGCAGTCACTCAATATAGATTGATCCGAAATCTGATTCAAATC  
CAATATAGTACCTATGGG-----TACATAAGAAATGTATTGAATCGATTCTTTTTAATGAAT--  
-----AGATCCGATCGCAACTTCGAATATGGA-----ATTCAAAGGGATCAAATAGGAAA  
GGATACTCTGAATCATAGAACTATAATGAAATATACGATCAACCAATATTTATCGAATTTG  
AAAAAG---AGTCAGAAGAAATGGTTTCGAGCCTCTT-----ATTTTGATTCTCGAACCGAG

AGATCCATGAATCGGGATCCTGATGCATATAGATACAAATGGTCCAATGGGAGCAAGAG  
TTTCCAGGAACATTTGGAACAGTCCGTTTCGGAGCAGAAGAGCCGT-----TTTCAAGT  
AGTGTTCGATCGATTACGTATTAATCAATATTCGATTGATTGGTCTGAGGTTATCGACAA  
AAAAGATTTGTCTAAGTCACTTCGTTTCTTTTTGTCCAAG-----TCACCT  
CTTTTTTTGTCC-----AAGTTGCTTTTATTTTTGTCTAAC--TCACCTCCTTTTT  
TCTGTGTGAGTTTCGGAAATATCCCCATTCATAGGTCCGAG--ATCTACATCTATGAAGA  
ATTGAAAGGTCCGAATGATCAACTCTGCAATCAGTTGTTAGAATCAATAGGTCTTCAAA  
TTGTTCAATTTGAAAAAATTGAAACCCTTC-----TTATTGGAC-----GATCATGATACTTC  
C--CAAAAATCGAAATTTCTTGATCAATGGAGGAACAATATCACCATTTTTGTTCAATAAG  
ATACCA---AAGTGG---ATGATTGACTCATTCCATACTAGA-----ATAATCGCAGGAAATC  
CTTTGATAACCCGGATTCTTCTCAATGATATTCCACGATCAAGACAATTGGCTGAA  
TCCCGTGAAACCATTTATAGAAAGTTCATTGATATCTTCTTTTTATAAAGCAAATCGACT  
TCGATTCTTGAATAATCCACATCACTTCTGCTTCTAT-----TGGAACACAAGATTCCCCTT  
TTCTGTG-----GAAAAGGCCCGTATCAAT-----AATTCGGATTTTACGTATGGA--CAA  
TTTCTCAATATCTTGTTCATTTCGCAACAAA---ATATTTCTTTGTGCGTCGGTAAA-----AA  
AAAACATGCTTTTTGGGGG---AGAGATACTATTTACCAATCGAGTCACAGGTATCTAA  
CATATTCATACCTAACGATTTTCCACAAAGTGGT--GACGAAACGTATAACTTGTACAAA  
TCT-----TTCCATTTTCCAAGTCGATCCGATCCATTTCGTTTCGT-----AGAGCTATTTACTC  
GATCGCAGACATTTCTGGAACACCTCTAACAGAGGGGCAAATAGTCAATTTTGAAAGA  
ACTTATTGTCAACCTCTTTCAGATATGAATCTATCTGATTCAGAAGGGAAGAACTTGCAT  
CAGTATCTCAAT-----TTCAATTCAAACATGGGTTTGATTACACTCCATGTTCTGAGAAA  
GATTTATCATCCGAAAAG-----AGGAAAAA-----TGGAGTCTTTGTCTAA  
AG-----AAATGCGTTGAGAAAGGGCAGATGTATAGAACCTTTCAACGAGATAGTGCTTT  
TTCAACTCTCTCAAATGGAATCTATTCCAAACATATATGCCATGGTTCCTTACTTCGAC  
AGGGTACAAATATCTAAATTTGATATTTTTAGATACTTTTTTCAGACCTATTG-----CCAATA  
CTAAGTAGC---AGTCAAAAATTTGTATCCATTTTTCTGATATTATGCATGGATCAGGTAT  
ATCATGGCGAATTCTTCAGAAAAAATTG-----TGTCTTCCACAATGGAATCTG---  
ATAAGTGAGATCTCGAGTAAGTGTTTACATAAT-----CTTCTTCTGTCCGAAGAAATGATT  
CATCGAAAT-----AATGAGTCACCATTGATATCGACACATCTGAGATCGCCAAATGCTCG  
GGAGTTC---CTCTATTCAATCCTTTTCCTTCTTCTTGTGCTGGATAT--CTCGTTCGTACA  
CATCTTCTCTTTGTTTCCCGG-----GCCTCTAGTGAGTTACAGACAGAGTTCGAAAAGGT  
AAAATCTTTGATGATTCCATCATCTATGATTGAGTTGCGAAAACCTTCTGGATAGGTATCC  
TACATCTGAACCGAATTTCTTCTGGTTAAAGAATCTTTTCTAGTTGCTCTGGAACAATT  
AGGAGATTCTCTAGAAGAAATACGGGGTCTGCTTCTGGCGGCAACATGCTTGGT-----  
--CCCGCT-----TATGGG---GTCAAATCAATACGTTCTAAGAAGAAAGATTGGAATA  
TCAATCTCATCGAGATCATCGATCTCATA-----CCAAATCCCATCAATCGAATCACTT  
TTTCGAGAAATACGAGACATCTAAGTCATACAAGTAAAGAGATCTATTCATTGATAAGA  
AAAAGAAAAACGTGAACGGGGATTGGATTGATGAGAAAATAGAATCCTGGGTCGCG  
AACAGTGATTTCGATTGATGATGAAGAAAGAGAATTCTTGGTTCAGTTCTCC-----ACCTT  
AACGACA-----GAAAATAGGATTGATCAAATCTATTGAGTCTGACT--CATAGTGATCAT  
TTA-----TCAAAGAATGACTCTGGTTATCAAATGATTGAACAACCGGGAGCAATT  
TACTTACGATACTTAGTTGACATTCAT-----AAAAAGCATCTAATGAATTATGAGTTCAAT  
CCATCCTGTTTAGCAGAAAGACGGATATTCCTTGCTCATTATCAGACAATCACTTAT-----  
TCACAAACTTCGTGTGGGGAAAATAGTTTTTCATTTCCCATCTCCTGGA-----AAACCC

TTTTTCGCTCCGCTTAGCCTTATCCCCCTCT--AGGGGTATTTTAGTGATAGGTTCTATAGG  
AACTGGACGATCCTATTTGGTCAAATACCTAGCGACAAACTCCTATGTTCTTTTCATTAC  
GGTATTTCTGAACAAGTTCCTGGATAACAAGTCTAAAGGTTTTCTTCTTGAT-----  
GAGATCGAT--ATTGATGATAGTGACGATATTGATGATAGTGACAATCTTGATGCTAGTG  
AC-----GATATCGATCGTGACCTTGATACGGAGCTG-  
--GAACTGCTAACTAGGATGAATGGGCTAACTGTGGATATGATGCCGGAA-----ATAGA  
CCGATTTTATATCACCTTCAATTCGAATTAGCAAAAGCAATGTCTCCTTGCATAATATG  
GATTCCAAACATTCATGATCTGGATGTGAATGAGTCGAATGACTTATCCCTCGGTCTATT  
AGTGAACCATCTCTCCAGG-----GATTGTGAAAGATGTTCT--ACTAGAAATATTCTTG  
TTATTGCTTCGACTCATATCCCCAAAAGTGGATCCCGCTCTAATAGCTCCGAATAAAT  
TAAATACGTGCATTAAGATACGAAGGCTTCTTATTCCACAACAACGAAAGCACTTTTTTC  
ACTCTTTCATATACTAGGGGATTTCACTTGGAAAAGAAAATGTTCCATACT-----AACGG  
ATTCGGGTCCATAACCATGGGTTCCAATGCACGAGATCTTGTAGCACTTACCAATGAGG  
TCCTATCGATTAGTATTACACAGAAGAAATCAATTATAGACACTAATACAATTAGATCCG  
CTCTTCATAGACAACTTGGGATTTGCGA-----TCCCAGGTAAGATCGGTTCAAGGATC  
ATGGGATCCTTTTCTATCAGATAGGAAGGGCTGTAGCACAAAATGTACTTCTAAGTAAT  
TGCCCCATAGATCCTATATCTATCTATATGAAGAAGAAA-----TCATGTAACGAAGGGGAT  
TCTTATTTGTACAAATGGTACTTCGAGCTTGGAACGAGCATGAAGAGATTAACGATACT  
TCTTTATCTTTTGAGTTGTTCTGCCGGATCGGTGCTCAAGATCTTTGGTCTTTATCC----  
-GTACCCGATGAAAAA---AATGGGATCACTTCTTATGGACTCGTTGAGAATGATTCT--GA  
TCTAGTTCATGGCCTATTAGAAGTAGAGGGCGCTCTGGTGGGA-----TCTTCACGGACA  
GAAAAAGATTGCAGTCAGTTTGATAATGAT-----CGAGTGACATTGCTTCTTCGGCCCGA  
ACCGAGGAAT--CCCTTAGATATGATGCAAAAGGGCTCTTGGTCTATCCTTGATCAGAGA  
TTTCTCTATGAAAAATAT-----GAATCGGAGTTTGAAGAA--GGGAGGGAGAAGGAGC  
CCTTGACCCGCAG-----GAGGAT-----TTATTCAATCAC-----ATAGTTTGG  
GCTCCT-----AGAATATGGCGCCCT-----TGGGGCTTTCTATTTGATTGTATCGAAAGGC  
CCAATGAATTGGGATTTCCC---TATTGGTCCAGGTCATTTTCGGGGCAAG-----CGGATC  
ATTTATGATGAAGAGGATGAGCTTCAAGAGAATGATTTCGGGGTTCTTGCAGAGTGGAA  
CCATGCAGTACCAGACACGAGATAGATCT-----CAAGGCCTTTTTTCGAATAAGCCAAT  
TCATTTGGGACCCTGCAGATCCACTCTTTTTTCTATTCAA---GATCAGCCCCCTGGCTC  
TGTGTTTTTCACATCGAGAATTATTTGCAGATGAAGAGATGTCAAAGGGGCTTCTTACTT  
CCCAAACAGATCCTCCTACATCTATATATAAACGCTGGTTTATC-----AGAATACGCAAG  
AAAAGCACTTCGAATTGTTGATTAATCGTCAGAGATGGCTTAGA-----ACCAATAGTT  
CATTATCT-----AATGGATCTTTCCGTTCTAAT-----ACTCTATCCGAGAGTTATCAGTATTT  
ATCAAATCTGTTCCCTATCTAAC---GGAACGCTATTGGATCAAATGCCAAAGACATTGTTG  
AGAAAAAGATGGCTTTTCCCGGATGAAATGAAAATTGGATTC-----ATG-----  
-----ATGCCTAGATCACGG---ACAAATGGAAATTTTATTGATAAGACCTTTTCAATTGTAGC  
CAATATCTTATTACGAGTAATTCCGACAACCTTCAGGAGAAAAAGAGGCATTTACCTATT  
ACAGAGATGGG-----ATGTCGGCTCAATCCGAAGGAAATTACGCGGAAGCTTTGCAGAA  
TTATTATGAAGCTATGCGACTAGAAATTGATCCCTATGATCGAAGTTATATACTCTATAAT  
ATAGGGCTTATCCACACAAGTAATGGAGAACATACGAAAGCTTTGGAATATTATTTTCG  
AGCACTAGAACGAAACCCATTCTTACCACAAGCTTTTAATAATATGGCCGTGATCTGTC  
ATTAC---CGGGGAGAACAGGCCATTCAACAGGGAGATTCTGAAATTGCAGAGGCTTGG  
TTCGATCAAGCCGCTGAGTATTGGAACAGGCTATAGCGCTTACTCCCGGTAATTATATT

GAAGCGCATAATTGGTTGAAGATCACGAGACGTTTCGAA-----ATGACTTGGCGATCAG  
ACGATATATGGATAGAACTTATAACGGGGTCTCGAAAAATAAGTAATTTCTGCTGGGCC  
TTGATCCTTTTTTTAGGTTCAATTAGGCTTCTTATTAGTTGGAACCTCCAGTTATCTTGTA  
GAAATTTGCTATCTTTTTTTCCGCCTCAGCAAATCATTTTTTTCCACAAGGAATCGTGA  
TGTCTTTCTACGGAATTGCGGGTCTCTTTATTAGCTCTTATTTGTGGTGCACAATTCCT  
GGAATGTAGGTAGTGGTTATGATCGATTGATAGAAAAGGAAGGAATAGTCTGTATTTTT  
CGTTGGGGATTTCCGGGAAAAAATCGTCGCATATTCCTCCGATTCCTTATAAAAGATATT  
CAGTCCGTTAGAATAGAAGTTAAAGAGGGTATTTATGCTCGTCGTGTTCTTTATATGGAC  
ATCCGAGGCCAGGGTCCATTCCTTGACCCGTA CTGATGAGAAT---TTGACTCCACGA  
GAAATTGAACAAAAGGCTGCTGAATTAGCCTATTTCTTGCGTGTACCAATTGAAGTATT  
T

>Gossypium

ATGGAAAATCATGGTTCAATTTGATCCTGTCTCTAAGTAAATCAATGGATAGCCGCCTT  
CCTGTTGAAAATACTACTGTAAACGAAGACCCGACTCGAAATGATACGGATAAAAACA  
TTCATGATTACAGTAAGGTTGATCATTAGTTGACGTCAAAGACATTCGGAATTTCAATTT  
CTGATGACACCTTTTTAATTAGGGATAGTAATCAGGACCGTTATTCCATATATTTTGATAG  
TGAAAATCAAATTTTTGAGCTTAAACAATGATCAT-----TCTTTTTTGAGTGAAGTAGAAA  
GTTTTTTTTATAGTTATCATAATCTAGTTATATGAATAATGGATCGAAAATGATGAGCC  
CCATTTAACTTGTATGATAATGATACTAACTGTGGTTGGAATAATCACATTAATAGTTGT  
ATTGACTCTTATCTTCGT-----TCTCAAATCTGTATTGATAGTTCCATTTAAGTGGTAGTG  
ACAATTCCAATGATAATTATATTTCTAATTACATTTGCGGCGGCAAGAATTTTCGATATAAT  
AACTCGTGAAAATGGTAATGATTTAACTCTAAAAGAAAGTTCTAAT--CTCGATCTA-----  
---TACAAGGATTTGTGGGTTCAATGCGAAAATTGTTATGGAGTAAATTATAAGAAATCGC  
TTAATTCAAAATGAATATTTGTGAACAATGTGGATATCATTGAAAATGAGGAGTTCA  
GATAGAATCGAACTTTGATTGATCCAGGCACCTTGGGGTCCATGGATGAAGACATGAT  
CTCTCTGGATCCCATTGAATTTCACTCTGAAGAAGAGCTTTATAAAGATCGTATTGATTT  
TTATCAAAGAAAGACAGGATTA ACTGAGGCTATTCAAACAGGCACGGGTCAACTAAC  
GGTATTCCTATAGCAATCGGGGTTATGGATTTTTCAGTTTATGGGGGGGAGTATGGGATCC  
GTAGTAGGCGAGAAAATCACCCGTTTGATCGAATATGCTACCAATAATTTTTTACCTCTT  
ATTCTAGTGTGTGCTTCCGGAGGAGCACGCATGCAAGAAGGAAGTTTGAGCTTGATGC  
AAATGGCTAAAATATCTTCCGCTTTATATGATTATCAATCAAATAAAAAGTTATTTTATGT  
ATCAATTCTTACATCTCCTACTACTGGTGGAGTACTGCGAGTTTTGGTATGTTGGGGG  
ATATCATTATTGCTGAACCCAATGCCTATATTGCATTTGCGGGTAAAAGAGTAATTGAGC  
AAACATTGAATAAAAACAATACCGGAAGGTTACAGGCGGCTGAATATTTATTCCATAAG  
GGTTTATTGATCCAATCGTACCACGTAATCCTTTAAAAGGTGTTCTGAGTGAGTTAGTT  
CAGCTCCACGGTTTTTTCCCTTTGAATCAAATCAATCAAGATGGTAACTATTAGAGC  
CGACGAAATTAGTAATATTATCCGTGAACGTATTGAGCAATATAATAGAGAAGTAAAGAT  
TGAAATACTGGTACCGTCTTCAAGTGGGCGACGGCATTGCTCGTATTCATGGTCTTG  
ATGAAGTAATGGCAGGTGAATTAGTAGAATTTGAAGAGGGTACCATAGGCATTGCCCTC  
AATTTGGAATCAAATAATGTTGGTGTGTGATTAATGGGTGACGGTTTGATGATACAAGA  
GGGAAGTTCTGTAAAAGCAACAGGAAAAATTGCTCAGATACCAGTGAGTGAGGCTTAT  
TTGGGTCGTGTTATAAATGCCCTGGCTAAGCCTATTGACGGTCGGGGTGAAATTCAGC  
TTCTGAATCTCGGTTAATTGAATCTCCTGCCCCAGGTATTATTTTCGAGACGTTCCGTTTA  
TGAGCCTCTTCAAACAGGACTTATTGCTATTGATTCGATGATCCCTATAGGACGTGGTCA



GCGAGAATTAATTATTGGGGATAGACAGACCGGTAAAACAGCAGTAGCCACGGATACG  
ATTCTCAATCAGCAAGGGCAAATGTAATATGTGTTTATGTAGCTATTGGTCAAAAAGC  
ATCTTCTGTGGCTCAGGTAGTGACCACTTTCCAAGAAAGGGGAGCGATGGAGTACACC  
ATTGTGGTAGCCGAAACGGCGGATTTCCCAGCTACATTACAATACCTCGCTCCTTATAC  
AGGAGCTGCTTTGGCTGAATATTTTATGTATCGTGAACGACACACCTTAATCATTATGA  
TGATCTTTCCAAGCAAGCACAGGCTTATCGCCAAATGTCTCTTCTATTACGAAGACCGC  
CGGGTCGTGAAGCTTATCCAGGAGATGTTTTTTATTTGCATTTCGCGCCTTTTAGAAAGA  
GCCGCTAAATCAAGTTCTCAGTTAGGTGAAGGAAGTATGACTGCTTTACCAATAGTTGA  
GACCCAGTCGGGAGACGTTTCGGCGTATATTCCTACTAATGTGATTTCCATTACAGATGG  
ACAAATATTCTTATCCGCCGATCTATTCAATGCTGGAATCAGACCTGCTATTAATGTGGG  
GATTTCCGTCTCCAGAGTAGGATCGGCGGCTCAAATTAAGCTATGAAACAAGTCGCT  
GGTAAATCAAATGGAATTGGCCCAATTCGCCGAATTAGAAGCCTTTGCACAATTTGC  
TTCTGATCTCGATAAAGCTACTCAGAATCAATTGGCACGAGGTCAACGATTACGTGAGT  
TGCTTAAACAATCCCAATCAGCTCCTCTTACGGTGGCAGAACAGATAAGTACTATTTATA  
CCGGAACGAATGGTTATCTTGATTCATTAGAAATTGGACAAGTAAGGAAATTTCTCGTT  
GAGTTACGTACTTACTTAAAAACGAATAAACCTCAGTTCCAAGAAATCATATCTTCTAC  
CAAGACATTCACTGAGGAAGCGGAAACGCTTTTGAAAGACGCTATTCAGGACCAAAT  
GGAACGTTTTTCGACTTCAGGAACAATTAATGAAAATAAATCCTACTACTTCTGTTCTG  
GAGTTTCCACGCTTGAAAAAGAAAATCTGGGGCGTATTTCTCAAATCATCGGTCCAGT  
ACTGGATGTAGCCTTTCCCCGGGCAAGATGCCTAATATTTACAACGCCCTAGTAGTTA  
AGGGTCAAGATACCGCCGGTCAACAAATTAATGAACTTGTGAGGTACAGCAATTATTA  
GGAATAATCGAGTTAGAGCTGTAGCTATGAGCGCTACAGATGGTCTAACGAGAGGAA  
TGGAAGTGATTGACACGGGAGCTGCTCTAAGTGTCCAGTCGGCGGAGCGACCCTAG  
GACGAATTTTTAACGTGCTTGGGGAGCCCCTTGATAATTTAGGTCTGTAGATACTCGC  
ACAACATCCCCTATTCATAAATCCGCGCCCCTTTCATACAATTAGATACAAAATTATCTA  
TTTTTGAAACAGGAATTAAGTAGTCGATCTTTTAGCTCCTTATCGTCGTGGAGGAAA  
ATCGGACTATTTGGGGGGGCTGGGGTAGGTAACAGTACTCATTATGGAATTGATCAA  
CAACATTGCCAAAGCTCATGGGGCGTATCCGTATTTGGCGGAGTAGGTGAACGGACT  
CGTGAAGGAAATGATCTTTACATGGAAATGAAAGAATCTGGAGTAATTAATGAACAAA  
ATCTTGCGGAATCAAAGTGGCTTTAGTCTACGGTCAGATGAATGAACCGCCAGGAGC  
TCGTATGAGAGTTGGATTGACTGCCCTAACTATGGCGGAATATTTCCGAGATGTTAATGA  
ACAAGACGTACTTCTATTTATAGACAATATCTTCCGTTTTGTCCAAGCGGGATCCGAAGT  
ATCTGCCTTATTGGGTAGAATGCCTTCCGCTGTGGGTATCAACCCACCCTTAGTACCGA  
AATGGGTACTTTACAAGAAAGAATTACTTCTACCAAGGAGGGATCCATAACTTCTATTC  
AAGCAGTTTATGTACCTGCGGATGATTTGACCGACCCTGCCCTGCCACAACATTTGCG  
CATTTAGATGCTACTACCGTACTATCAAGAGGATTAGCTGCCAAAGGTATTTATCCAGCG  
GTAGATCCTTTAGACTCAACGTCCACTATGCTCCAACCTCGAATCGTTGGTGAGGAACA  
TTATGAACTGCGCAAAGGGTTAAGCAAACCTTACAGCGTTACAAAGAACTTCAGGAC  
ATTATAGCTATCCTTGGGTGGACGAATTGTCCGAAGAGGATCGCTTAACCGTAGCAAG  
AGCGGAAAAATTGAGCGTTTCTTATCACAAACCCTTTTTTCGTAGCGGAAGTATTTACCG  
GTTCCCCGGGAAATATGTTGGTCTAGCAGAAACAATTAGAGGATTTAAATTGATCCTT  
TCCGGAGAATTAGACGGTCTTCTGAACAGGCCTTTTATTTGGTAGGTAACATCGACGA  
AGTACTGCGAAGGCTACGAACTTAGAAATGGAGAGCAAATTGAAGAAAATGACCTTA  
AATCTTTGCGTACTTACCCTAATCGAATTGTTTGGGATTCAGAAGTGAAAGAAATCAT

TTTATCTACTAATAGCGGACAAATTGGCGTATTACCAAATCACGCGCCTATTGCCACAGC  
TG TAGATATAGGTATTTTGAGAATACGCCTTAACGACCAATGGTTAACGATGGCTCTGAT  
GGGTGGTTTTGCTAGAATAGGCAACAATGAAATCACTATTTTAGTAAATGATGCGGAGA  
AGGGTAGTGACATTGATCCACAAGAAGCTCAGCAAGCTCTTGAAATAGCGGAAGCTAA  
CTTGAGGAAAGCTGAAGGCAAGAGGCAAACAATTGAGGCAAATCTAGCTCTCAGACG  
GGCTAGGACACGAGTCGAGGCTATCAACGCGATTTTCGATGAAAAATGTAACCGATTCT  
TTCGTTTTCTTGGGTCCTGACCATCCGCCGGGAGTTTCGGGGTTAATACCGATATTTTA  
GCAACAAATCCAATAAATCTAAGTGTAGTCCTTGGTGTATTGATCTTTTTTTGGAAAGGG  
AGTGTAAAGTGATTTATTAGATAATCGAAAAGAGAGGATCTTGAATACTATTCGAAATTC  
AGAAGA ACTACGCGGGGGGGCTATTGAACGGCTGAAAAGGCCCGGGCCCGCTTACG  
GAAAGTAGAAATGGAGGCGGATCAGTTTCGAGTGAATGGATACTCTGAGATAGAACGA  
GAAAAATTGAATTTGATTAATTCAACTTATAAGATTTTGGAAACAATTAGAAAATTACAA  
AATGAAACCATTTATTTTGAACAACAAGAGCGATTAATCAAGTCCGACAACGGGTT  
TTCCAACAAGCTTTACAAGGAGCTCTAGGAACTCTGAATAGTTCTTTAAACAACGAGTT  
ACATTTACGCACCATTAGCGCTAATATTGGCTTGTTTGGGGTGATGAAAGAAATAACTG  
ATATGAATCCACTGATTTCTGCCGCTTCCGTTATTGCTGCTGGGTTGGCTGTCCGGGCTTG  
CTTCTATTGGACCTGGAGTTGGTCAAGGTACTGCTGCGGGCCAAGCTGTAGAAGGTAT  
CGCGAGACAACCCGAGGCGGAGGGAAAAATACGAGGTACTTTATTGCTTAGTTTGGCT  
TTTATGGAAGCTTTAACAATTTATGGGCTGGTTGTAGCATTGGCACTCTTATTTGCGAAT  
CCTTTGT-----ATGAATGGTATATCAAACGCACTAAAC---TTATACGATATCTCTGGT  
GTGGAAGTAGGCCAACATTTCTATTGGCAAATAGCAGGTTTCCAAGTCCATGCCCAAGT  
ACTTATTACCTCTTGGGTTGTAATTGCTATCTTATTAGGTTCCGCCGTTATCGCTGTTCCG  
AATCCACAAACCATTCCAACCCGGTCAAATTTCTTCGAATATGTTCTTGAATTCATT  
CGAGACGTAAGCAAACTCAGATTGGAGAAGAATATGGTCCATGGGTTCCCTTTATTG  
GAACTATGTTTCTATTTATTTTGTCTAACTGGTCGGGTGCTCTGTTACCTTGAAAA  
TCATACAATTACCTCATGGAGAGTTAGCCGCACCCACGAATGATATAAATACTACTGTTG  
CTTAGCTTTACTCAGTCAGTAGCATATTTCTATGCGGGTCTTTCAAAAAAAGGATTGG  
GGTATTTAGTAAATACATTCAACCCACTCCAATTTTACCTATTAACATTTTAGAGGA  
TTTCACAAAACCCTTATCACTTAGTTTTCGACTTTTCGGGAATATATTAGCTGATGAATT  
AGTAGTTGTTGTTCTTGTCTTTTAGTACCTTCAGTCGTCCCTATACCTGTCATGTTCCCT  
GGATTATTTACAAGTGGGATTCAAGCTCTTATTTTTGCAACTTTAGCTGCGGCTTATATA  
GGCGAATCCATGGAGGGTCATCATATGATTTTTTCAACTTTAGAGCATATATTAACTCATA  
TATCTTTTTCAGTCGTTTCAATTGTAATTACAATTCATTTTTTAACCTTATCTTATTAGAA  
GTCGTAGGACTATATGATTCATCAGAAAAGGGCATGATAGTCACCTTTTTCTGTATAACA  
GGATTATTAGTCACTCGTTGGATTATTTCAGGACATTTCCCATTAAGTGATTTATATGAAT  
CATTAATCTTTCTTTTCATGGGGTTTCTCCCTTATTCATATGGTTTCCTATTTAAAAAAGCG  
CAAAAATAATTTAAGTGAATAACCGCACCAAGTGCTATTTTTACCCAAGGCTTTGCCA  
CTTCGGGTCTTTTAAACCAAATGCATCAATCTGCAATATTAGCACCTGCTCTCCAATCCC  
AGTGGTTAATGATGCACGTAAGTATGATGGTATTAGGCTATGCAGCTCTTTTATGTGGAT  
CATTATTATCAGTAGCTCTTCTAGTCATTACATTTTCGAAAGGCCATAAAGATTATTGGTG  
AAAACAATAAAATCCAATACATGAATGAAAGAAGCAATGTTTTACTA-----TATTTTCTTT  
CTTCTAAAAATTATTACAGATATCAATTGACTCAACAATTGGATCGTTGGAGTTATCGTA  
TTATTAGTCTCGGGTTTATCTTTTTAACCATAGGAATCTTTTCGGGAGCCGATGGGCTA  
ATGAGGCGTGGGGATCATATTGGAATTGGGACCCCAAGGAACTGGGCGTTTATTACT

TGGACCGTATTCGCGATTTATTTCCATACCCGAACAAATACAAATTTGGAAGGTGTAAT  
TCCGCACTTGTGGCTTCTATGGGATTTCTTATAATTTGGATATGCTATTTTGGGGTCAATC  
TATTAGGAATAGGTTTACATAGTTATGGTTCATTTACATTAATATGGCAAAAAGAAAG  
CATCACTCCCCTTCTATATCTTGCATCTATAGTATTTTTGCCCTGGTGGATCTCTCTCTCA  
TTAATAAAAGTCTGAAATCTTGGATTACTAATTGGTGGGATACTAGGCAATCCGAAAC  
TTTTTTGAATGATATTCAAGAAAAGAGTATTCTAGAACAATTCATAGAAGTAGAGGAAC  
TCTTCTGTTGGACGAAATGATAAAAGAATACCCGGAAACACATCTACAAAAGCTTCG  
TATAGGA---CAAAAAGAAACGATCCAATTGATCAAGCTGCACAATGAGGATCATATCCA  
TACGATTTTGCATTTCTCGACCAATCTAATCTGTTTCGTTATTTCTAAGTGGTTATTTCTATT  
TTGGGGAATGAAGAACTTCTTATTCTTAACCTTTGGGTTCAAGAATTCCTATATAATTA  
AGCGACACAATAAAAGCTTTTTCTATTCTTTTATTAACAGATTTATGTATAGGATTTCAAT  
CGCCCCACGGTTGGGAACTAATGATTGGCTCTATATACAAAGATTTTGGATTTGCTCATA  
ATGATCAAATTATATCTGGTCTTGTCTTCTACTTTTCCAGTCATTCTAGATACAATTTTAA  
ATATTGGATCTTTCGTTATTTAAATCGTGTATCTCCGTCATTTGTAGTTATTTATCATTCAA  
TGAATGACATGCCTATTGGTGTTCAAAAGTTCCTTTTCGAAATCCGGGAGAGGAAGAT  
GCAGTTTGGGTTGACGTATAACAACCGACTTTATCGAGAAAGATTACTTTTTTTAGGCCA  
AGAGGTTGATAGCGAGATCTCGAATCAACTTATTGGTCTTATGGTATATCTCAGTATAGA  
GAATGATACCAAAGATCTGTATTTGTTTATAAACTCTCCTGGCGGATGGGTAATACCCGG  
AGTAGCTATTTATGATACTATGCAATTTGTGCAACCAGATGTGCATACAATATGCATGGG  
ATTGGCTGCTTCAATGGGATCTTTTCTCCTGGCCGGAGGAGAAATTACCAAACGTCTAG  
CATTCCTCACGCTAGGGTAATGATCCATCAACCTGCTAGTTCTTTTTATGAGGCACAA  
ACAGGAGAATTTATCCTGGAAGCGGAAGA ACTACTGAAACTTCGCGAAAGCCTCACA  
AGGGTTTATGTACAAAGAACGGGCAAGCCCCTATGGGTTGTATCCGAAGACATGGAAA  
GAGATGTTTTTATGTCAGCAACAGAAGCCCAAGCTCATGGAATTGTGGATCTTGTAGCG  
G T T A A  
A????????????????????????????????????????????????????????????  
????????????????????????????????????????????????????????????  
????????????????????????????????????????????????????????????  
????????????????????????????????????????????????????????????  
ATGGAGGAATTTCAAGTATATTT  
AGA ACTAAATAGATCCCGCCGACACGATTTCTATACCCACTTATTTTTCGGGAGTATAT  
TTATGCACTTGCTCATGAGCATGGTTTACAGGGTTATGGTAATAAATTCAGTTCACTAAT  
TGTGAAACGTTTAATCTTTCGAATGGATCAACAGAATCGTTTGATTAGTTCTGCTAATGA  
TTCCAACCAAATCCGGTTTTTGGGAATAATTTGTATTCTCAAATGATAGCGGTAGGATT  
TGCAGTCATTGTGGAAATTCATTTTCTTACGATTAATATCTTACTCAGTCGCAAAATC  
TCATAATTTACAATCAATTCATTCAATATTTCTTTTTTAGAGGACAAATTTCTCACATTTA  
AATTATGTGTTAGAGGCACTAATACCTCATCCATCCATCTAGAAATCTTAGTTCAAGCC  
CTTCGCTACTGGGTAAGATGCTTCTTCTTTCGATTTATTACGGTTCTCTCTCTACGAG  
TATTGT-----AATTTGAAGAGTTTTAAATCT-----ATTTCGATTCCAAGATTATTCTTGT  
CCTATATAATTTCTACATATGTAATACGAATCCATTTTCTTTTTCTCCGTAATCAATCTT  
CTCATTACGATCAACATCTTCTGGGGTCTTCTTGAACGAATTTTTTTCTATGGAAAAA  
TAAAGTATCTTGGCGAAGTCTTTTATAATCAGAACAACCTATGGTTGTTCAAAGACCCT  
TTCATACATTTTATTAGGTATCAAGGAAAGTCAATCTGGCCTCAAAGGATACGTCTCTT  
CTGATCAATAAGTGAAATATTACTTTGTTCGATTTATGGCAATATTATTTTTACCTGTGGT  
CTCAATCAGGAAGAGTCCGTATAAATCAATTATCTAAATATTCTCTCGACTTTCTGGGCT  
ATCTTCAAGTGTGCGATTAAATCCTTCAGTGGTACGGAGTCAAATGCTAGAAAATTCA

TTTCTAATAGATAAT-----GCTGTGAAGACGTTGGATACAAGAATTCCAATTATTTTCGCTC  
ATTGGATCATTGTCTAAGGCGAAATTTTGTAACACATTAGGGCATCCCATTAGTAAGCCG  
ACGTGGGCCGATTCCCCCGATTCTGATATTATTGACCGATTGTGCGGATATCCAGAAAT  
CTTTCTCATTATCACAGTGGATCTTCAAAAAAAAAAAGTTGTATCGAATAAAATATATA  
CTTCGGTTTTCTTGTGTAAACTTTGGCTCGTAAACACAAAAGTACTGTCCGTGCTTT  
TTTGAAAAAATTAGGTTTCGGAATTTTGGAAGAATCTTTACGGAAGAAGAACATGTTT  
TTCTTTGATCTTCCCAAGACGAATTTGGTATTTGGATATTATTTGTATCAATGCTCTGGT  
CAATCATTCAATGATAATTTATACGACA---GAAGTAGAAGATATCAAT---TCCTTTTACAC  
ATTGGAATCT---TTAAAAGAGGTCTATGGGATCATATGGATGTTGGTCCCTATTTTGACTC  
TTGTATTGGGAATCACAATAGGTGTACTAGTAATTGTATGGTTAGAAAGAGAAATATCTG  
CAGGAATACAACAACGTATTGGGCCTGAATATGCCGGTCCTTTGGGCATTCTTCAAGCG  
CTAGCAGATGGAACAAAACCTGCTTTTCAAAGAAAATATTCTTCCATCTAGAGGCAATAC  
TCGTTTATTTAGTATTGGACCGGTATAGCAGTCATATCAATTTTACTAAGTTTTTTCAGTA  
ATTCCTTTTAGCTCTCGCCTTATTTTAGCCGATCTCAATATCGGTATTTTTTTATGGATTGC  
CATTCAAGTATTGCTCCCGTTGGACTTCTTATGTCAGGATACGGATCAAATAATAAATA  
TTCTTTTTAGGTGGTCTGCGAGCTGCTGCTCAATCGATTAGTTATGAAATACCATTAAC  
TCTATGTGTTTTATCAATATCTCTATTATCTAACAGTTCAAGTACAGTTGATATAGTTGAG  
GCGCAATCAAATATGGTTTTTTGGGGATGGAATTTGTGGCGTCAGCCAATAGGGTTTTAT  
CGTTTTTCTAATTTCTTCTCTAGCGGAATGCGAGAGATTACCTTTTGATTTACCAGAAGC  
GGAGGAAGAATTAGTAGCAGGGTATCAAACCGAATATTCAGGTATCAAATTTGGTTTTAT  
TTTACGTTGCTTCCCTATCTAAATCTATTACTTTCTTCGTTATTTGTAACAGTTCTTTACTTG  
GGGGTTGGAATATTTCCATTCCGTACGTATTCGCCCTGAGCTATTTGAAATAAATAAA  
ATAAATGGAATCATTGGAACGACAATTGGTATCTTTATTACATTAGCTAAAACCTATTTGT  
TTTTGTTTTATTTCTATCGCAACACGATGGACTTTACCTAGGTTAAGAATGGACCAATTAT  
TAAATCTCGGGTGGAATTTCTTTTACCCATTTCTCTCGGTAATCTATTATTAACAACCTC  
TTTCCAACCTCTTTCACTGATGATCTGGCATGTACAGAATGAAAACCTCATTCTCGATT  
TACGAGAATTTTTATGAAAGCCTTTCATTTGCTTCTCTTCGATGGAAGTTTTATTTCCC  
AGAATGTATCCTAATTTTTGGCCTAATTTCTTCTCTGATGATCGATTCAACCTCTGATCAA  
AAAGATATACCTTGGTTATATTTTATCTCTTCAACAAGTTTAGTAATGAGCATAACGGCC  
CTATTGTTCCGATGGAGAGAAGAACCTATGATTAGCTTTTCAGGAAATTTCCAAACGAA  
CAATTTCAACGAAATCTTTCAATTTCTTATTTTACTATGTTCAACTCTATGTATTCTCTAT  
CCGTAGAGTACATTGAATGTACAGAAATGGCTATAGCAGAGTTTCTGTTATTTCGTATTAA  
CAGCTACTCTAGGAGGAATGTTTTTATGCGGTGCTAACGATTTAATAACTATCTTTGTAG  
CTCCAGAATGTTTCAGTTTATGCTCCTACCTATTATCTGGATATACCAAGAAAGATGTAC  
GGTCTAATGAGGCTACTACGAAATATTTACTCATGGGTGGGGCAAGCTCTTCTATTCTG  
GTTTCATGGTTTTCTTGGCTATATGGTTCATCCGGGGGAGAGATCGAGCTTCAAGAAAT  
AGTGAATGGTCTTATCAATACACAAATGTATAACTCCCAGGAATTTCAATTGCGCTTAT  
ATTCATCACTGTAGGAATTGGGTTCAAGCTTTCCCAGCCCCTTCTCATCAATGGACTC  
CTGACGTATACGAAGGATCTCCCACTCCAGTCGTTGCTTTTCTTTCTGTTACTTCGAAA  
GTAGCTGCTTCGGCTTCAGCCACTCGAATTTTCGATATTCCTTTTTATTTCTCATCAAAC  
GAATGGCATCTTCTTCTGGAATCCTAGCTATTCTTAGCATGATATTGGGGAATCTCATT  
GCTATTACTCAAACAAGCATGAAACGTATGCTTGCATATTCGTCCATAGGTCAAATCGGA  
TATGTAATTATTGGAATAATTGTTGGAGACTCAAATGGTGGATATGCGAGCATGATAACT  
TATATGCTGTTCTATATCTCCATGAATCTAGGAACTTTTGCTTGCATTGTATTATTTGGTCT

ACGTACCGAACTGATAACATTTCGAGATTATGCAGGATTATACACAAAAGATCCTTTTTT  
GGCTCTCTCTTTAGCTCTATGTCTCTTATCTCTAGGAGGTCTTCCTCCACTAGCAGGTTT  
TTTCGGAAACTCCATTTATTCTGGTGTGGATGGCAGGCAGGCCTATATTTCTTGGTTTC  
AATAGGACTCCTTACGAGCGTTGTTTCTATCTACTATTATCTAAAAATAATCAAGTTATTA  
ATGACTGGACGAAACCAAGAAATAACCCCTCACGTGCGAAATTATAGAAGATCCCCTT  
TAAGATCAAACAATTCCATCGAATTGAGTATGATTGTATGTGTGATAGCATCTACTATAC  
CAGGAATATCAATGAACCCGATTATTGCAATTGCTCAGGATACCCTTTTTATGTTTTCTGC  
TTTACGAATATGATATTTTTCTGGGCATTTCTAATAATATCAAGTGCTATTCCATTTTTGGCA  
TTTCTAATTTCTGGAGTTTTAGCCCCGATTAGAAAGGGTCCAGAAAACTTTCTAGTTA  
TGAATCGGGTATAGAACCAATGGGCGATGCTTGGTTACAATTTCGAATCCGTTATTATAT  
GTTTGCTCTAGTTTTTTGTTGTTTTGATGTTGAAACGGTTTTTTCTTTATCCATGGGCAAT  
GAGTTTTCGATGTATTGGGGGTACCCGTATTCATAGAAGCTTTCATTTTCGTGCTTATCCT  
AATTGTTGGTTCAGTTTATGCATGGCGAAAAGGAGCATTGGAATGGTCTACGAATTATT  
TTCCTTGGTTAAACAATAATTGTATTTTTACCAATATCTGCAGGTTCTTTACTTTTTCTTTCT  
TCCTCATAAAGGAAATAAGCTAATTAAGTGGTATACAATATGTATATGCATTCTCGAACT  
CCTTCTAACAACCTATGCATTTTGTATCATTTCGATTGGACGATCCATTAATCCAGCTG  
GCGGAAGATTATAAATGGATAAATTTTTTTGATTTTTACTGGAGATTGGGAATAGATGGA  
CTTCTATAGGGCCCATTTACTGACAGGATTATCACCCTTTAGCGACTTTGGCGGCT  
TGGCCAGTTACTCGAGATTCGCGATTATTTCAATTCCTGATGCTAGCAATGTACAGTGGT  
CAAATAGGATCATTTTCTTCTCGAGACCTTTTACTTTTTTTCATCATGTGGGAGTTCGAA  
TTAATCCCGTTTATCTACTTCTATCCATGTGGGGGGGAAAGAAACGTCTGTACTCGGCT  
ACAAAATTTATTTTGTACACCGCAGGGGGTTCGGTTTTTCTATTAATAGGAGTTTTGGGT  
CTCGGTTTATACGGTTCATGAACCAACATTAATTTTTGAAACATTAGCTAATCAATCA  
TATCCTGTGCGACTGGAAATAATTTCTATATTGGATTTCTTATTGCTTTTTGCTGTCAAAT  
CGCCGATTATACCCTTACATACGTGGTTACCGGATACCACGGGGAGGCCATTACAGT  
ACTTGTATGCTTCTAGCCGGAATTTTATTAATAAATGGGAGCATATGGATTAGTTCCGGATC  
AATATGGAATTATTACCCCATGCGCATTCCATATTTTCTCCCTGGTTGATAATAGTGGGTA  
CAATGCAAATAATTTATGCAGCTTCAACATCTCTGGTCAACGGAATTTAAAAAAGA  
ATAGCCTATTCCTCCGTATCTCATATGGGTTTCATAATTATAGGAATTGGTTCGATAACTG  
ATACGGGACTCAACGGAGCTATTTTACAAATAATATCTCATGGCTTTATCGGTGCTGCAC  
TTTTTTTCTTGGCAGGAACGAGTTATGATAGAATGCGTCTTGTTTATCTCGACGAAATGG  
GCGGAATGGCCGTTTCGATTCCCAAATATTTACGATGTTCAGTATCTTATCCATGGCTT  
CTCTTGCAATACCGGGCATGAGTGGTTTTGTGTCAGAATTGATAGTCTTTTTTGGGAATAA  
TTACCAGCCAAAATATTTTTTAATGCCAAAATACTAATTACTTTTCGTAATGGCAATTG  
GAATGATATTAACCTATTTATTCATTATCTATGTCACGTCAAATGTTCTATGGATACAA  
GCTATTTAATGCTCCAAGTTCTTATTTTTTTGATTCTGGACCACGAGAGTTATTTGTTTCG  
ATCTCTATCTTTCTACCAGTAATAGGTATTGGTATTTATCCGGATTTTCGTTCTCTCATTATC  
AGGTGAGAAAGTCGAAACTATTCTATATAATTATTTTTATAGAATGATGCTCGAACATAT  
ACTTGTTTTGTAGTGCCTATTTATTTTCTATCGGTATTTATGGATTGATCACGAGTCGAAAT  
ATGGTTAGGGCCCTTATGTGTCTTGAACCTATACTGAATGCGGTTAATATAAATTTTGT  
ACATTTTCTGATTTTTTTGATAGTCGGCAATTAAGGGAAATTTTTCTCAATTTTTGT  
TAGCTATTGCAGCCGCTGAAGCAGCTATTGGATCAGCTATTGTGTCCTCGATTTATCGTA  
ACAGAAAATCAACGCGTATCAATCAATCAACTTTGTTGAATAAGATGGAGCATGCAGAT  
CAATATTCATGGATCATACCTTTTTGTCCACTTCCCATTCCATTTTAAATAGGAATGGGAC

TCCTACTTTTTCCGACGGCAACAAAAAATCTTCGTCGTATGTGGGCTTTTCCCAATATTT  
TATTGTTAAGTATAGTTATGATTTTTTCGCTCGATCTGTCTATTCAGCAAATAAATGGAAG  
TTCTATCTATCAATATGTATGGTCTTGGACCATCAATAATGATTTTTCTTTTCGAGTTTGGC  
TACTTTATTGATTCACCTTACCTCTATTATGTCAATATTAATCACTACTGTTGGAATTTTTGT  
TCTTATTTATAGTGACAATTATATGTCTCATGATGAAGGATATTTGAGATTTTTTGCTTATA  
TGAGTTTGTTCAATACTTCAATGTTGGGATTAGTACTAGTTGTAATTTGATACAAATTTA  
TATTTTTTGGGAATTAGTTGGAATGTGTTCTTATCTATTAATAGGTTTTTGGTTCACACGA  
CCCGCTGCGGCAAACGCTTGTCAAAAAGCGTTTGTAACATAATCGGATAGGCGATTTTG  
GTTTATTATTAGGAATCTTAGGTTTTTATTGGATAACGGGAAGTTTCGAATTTCAAGATT  
TGTTTCGAAATATTTAATAAC---GAGGTTTCATTTTTTATTTGTTACTTTATGTGCCTCTTTAT  
TATTTGCCGGCGCAGTTGCTAAATCTGCGCAATTTCTCTTCATGTATGGTTACCTGATG  
CCATGGAGGGGCCTACTCCTATTTTCGGCTCTTATACATGCTGCCACTATGGTAGCTGCGG  
GAATTTTTCTTGTAGCCCCGCTTCCCTCTTTTTATAGTTATAACCTTACATAATGAATCT  
AATATCTTTGATAGGTATAATAACGGTATTATTAGGGGCTACTTTAGCCCTTGCTCAAAA  
CGATATTAAGAGGGGTTTAGCCTATTCTACAATGTCCCAACTGGGTTATATGATGTTAGC  
TCTAGGTATGGGGTCTTATCGAGCCGCTTATTTTCATTTGATTACTCATGCTTATTCGAAA  
GCGTTGTTGTTTTTAGCATCCGGATCGATTATTCATTCCATGGAAGCTATTGTTGGATATT  
CTCCAGAGAAAAGCCAGAATATGGTTTTTATGGGCGGTTAAGAAAGCACGTGCCCGT  
TACCCAAATTGCTTTTTTAGTAGGTACACTTTCTCTTTGCGGTATTCCACCCCTTGCTTG  
TTTTTGGTCCAAAGATGAAATTCTTAGTGACAGTTGGTTGTATTCACCGATTTTTGCAAT  
AATAGCTTGGTCCACTGCCGGATTAACAGCATTTTATATGTTTCGGATCTATTTACTTACT  
TTTGAAGGACATTTAAACGTTCATTTTCAAAAATATAGTGGCAAAAAAAGTAGCTCTTT  
CTATTCAATAAACTATGGGGTAAAGAAGAGCAAAAAATAATTAACAGA---TTATTTCT  
TTATTAACATTAACA-----GGCTACAAGAAG---GCTTTTTCTTATCCTCATGAATCAGAT  
AATACTATGCTATTTCTATGCTTATATTGCTTCTATTTACTTTATTTGTTGGAGCTATAGC  
A-----TTTCATTTGGATATATTATCAAAATTATTAACCTCCATCTATAAATCTTTTACATCAA  
ATTCAAAT---TTTGAGGATTCG---CAATTTTTTAAAATGCAACTTTTTTCAGTGAGTATAG  
CTTGTTTCGGAATATTTACAGCATTCCTTTTTATATAAACCTTTTTTATTCATCTGTACAAAA  
TTTAAACTTACTAAATTCATTTGTGATTTTATTGGATAAAATGATATATTTGATATATGATT  
GGTCATATAATCGTGGTTACATAGATATGTTTTATTCAATATCCTTAACAAAAGGTATAAG  
AGGATTGGCCGAACATACTCATTTTTTTTGATAGGCGAGTAATCGATGGAATTACAAATG  
GAGTAGGCATTACAAGTTTTTTTTGTGGGAGAAAGTGTAATAATCTAGGGGGAAGT--C  
GCATCTCGTTTTATCTATTATTGATTTAGTTTATGTATTCATTTTTTTAGTAATTTCTACA  
TGGATTTGCCTGGACCAATACACGATTTTCTTTTAGTTTTTCTGGGATCGGGTCTTATATT  
AGGAGGCCTGGGAGTGGTATTACTTACCAATCCAATTTATTCTGCCTTTTCATTGGGATT  
GGTTCTTGTTTGTATATCCTTATTTTATATTCTCTCAAATTCTCATTTTGTAGCTGCTGCC  
AGCTCCTTATTTATGTGGGAGCCATAAATGTTTTAATCCTATTTGCTGTGATGTTTCATGAA  
TGTTTCAGAATATTATAAAGATTTAATCTGTGGACCATTGGGAATGGCCTTACTTCGTT  
GGTTTGTACAAGTATTCTTGTTCGCTAATTACTACTATATTAGATACATCATGGTACGGG  
ATTATTTGGACTACAAGATCAAATCAAATTATAGAACAAGATTTGATAAGTAATAGTCAA  
CAAATTGGAATTCATTTAGCAACCGATTTTTTTCTTCCATTTGAATTCATTTCAATAATTC  
TTTTAGTTGCTTTGATAGGTGCAATTGCTGTGGCTCGTCAGATGAATCTATCAGCTACAG  
AAAAAGACCTTATGATAGTCAATATGGGGCCTCACCACCCATCAATGCATGGTGTCTT  
CGTCTCATCGTTACTCTAGATGGTGAAGATGTTGTTGACTGTGAACCAATATTAGGTTAT

TTACACAGAGGAATGGAAAAAATTGCGGAAAACCGAACAATTATAACAATATTTGCCTTA  
TGTAACGCGTTGGGATTATTTAGCCACTATGTTACGGAAGCAATAACCGTAAATGGAC  
CAGAACAGTTGGGAATATTCAAGTCCCTAAAGGGCCAGCTATATCAGAGTAATTATG  
TTGGAGTTGAGTCGTATAGCTTCTCATCTATTATGGCTTGGACCTTTTATGGCAGATATTG  
GTGCACAGACCCCCTTTTTCTATATTTTCAGAGAAAGAGAATTAAGTATATGATCTATTCG  
AAGCTGCCACCGGTATGAGAATGATGCATAATTATTTTCGTATCGGAGGAGTGGCGGCC  
GATCTACCTTACGGCTGGCTAGATAAATGTTTGGATTTCTGTGATTATTTTTTAACAGGA  
ATTGTTGAATATCAAAAACCTTATTACGCGAAATCCTATTTTTTTTAGAACGAGTTGAAGGG  
ATAGGCGTTATTGGTGGAGAAGAAGCAATAAATTGGGGTTTATCCGGCCCAATGCTACG  
AGCATCTGGAATCAAATGGGATCTTCGGAAAGTTGATCATTATGAGTGTACGACGAAT  
TTGATTGGGAAATCCAGTGGCAAAAAGAAGGAGATTCATTAGCTCGTTATTTAGTCCGA  
ATCAGTGAAATGACGGAATCTATAAAAATAATTCAACAGGCCCTGGAAGGAATCCGG  
GTGGTCCCCTATGAGAATTTAGAAATCCGATGCTTTGATCGAGAAAGGGATCCAGAATGG  
AATGATTTTGAATATCGATTCAATTAGTAAAAACCTTCTCCACATTTGAATTACCGAGA  
CAAGAACTTTATGCGAGAATGGAAGCCCCAAAGGGAGAATTAGGAATTTTCTGATAG  
GGGATCAAAGCGGTTTTCTTGGAGATGGAAAATTTCGCCCGCCGGGTTTTATCAATTTG  
CAAATCTTCTCAGTTAGTTAAAAGAATGAAATTGGCTGATATTATGACGATACTAGGT  
AGCATAGATATCATTATGGGAGAAGTGGATCGTATGTTCCCTATGGTAACTGGGTTTCATG  
AATTATGGCCACCAAACAGTCCGAGCAGCAAGGTACATTGGTCAAGGTTTCATGATTAC  
CTTATCCCACGCAAATCGTTTACCCGTAACCTATTCAATATCCTTATGAAAAATTAATCACA  
TCAGAGCGTTTTCCGCGGACGAATCCATTTTGAATTTGATAAATGCATTGCTTGTGAAGT  
ATGTGTTTCGTGTATGCCCTATAGATCTACCCGTTGTTGATTGGAAATTTGAAACGGATAT  
TCGAAAAAACGATTGCTTAATTACAGTATTGATTTTCGGAATTTGTATATTTTGTGGTAA  
CTGCGTTGAGTATTGTCCAACAAATTGTTTATCAATGACTGAAGAATATGAACTTTCTAC  
TTACGACCGTCACGAATTGAATTATAATCAAATTGCTTTGGGCCGTTTACCAATGTCAGT  
AATTGACGATTATACAATTCGAACAGTTTTTGAATTCA-----  
---ATGCAGGGTCGTTTGTCTGTTTGGCTAGTCAAACACGGGCTAGTTCATAGATCTTTGG  
GCTTCGATTACCAAGGAATAGAGACTTTACAAATAAAGCCTGAGGATTGGCATTCCATT  
GCTGTTATTTTATATGTATATGGTTACAATTATCTACGTTCCCAATGTGCCTATGATGTAGC  
ACCAGGCGGACTGTTAGCCAGTGTGTATCATCTTACGAGAATAGAGTATGGTGTAGATC  
AACCGGAAGAGGTATGTATAAAAGTATTTGCTCCAAGGAGTAACCCTAGAATCCGTCT  
GTTTTCTGGGTTTGGAAAAGTTCGGATTTTCAAGAACGAGAATCTTATGACATGTTGGG  
AATCTCTTATGAAAATCATCCACGACTGAAACGTATCTTAATGCCCCGAAAGTTGGATAG  
GGTGGCCTTTACGTAAGGATTACATTGCCCCCAATTTTTATGAAATACAAGACGCTCAT--  
-----  
-----ATGAATTCCATCGAATTTCCCTTACTTGAT  
CGAACAACCCAAAATTCAAGTATTTCAACTACATTAATGATCTTTCAAATTTGGTCAAG  
ACTCTCCAGTTTATGGCCGCTTCTTTATGGTACCAGTTGTTGCTTTATTGAATTTGCTTCA  
TTAATAGGCTCACGCTTCGACTTTGATCGTTATGGGCTGGTACCAAGATCGAGTCCTAG  
ACAGGCAGACCTAATTTAACAGCTGGAACAGTAACAATGAAAATGGCGCCCTCTTTA  
GTGAGATTATATGAACAAATGCCCGAACCTAAATATGTTATTGCTATGGGCGCGTGTACA  
ATTACAGGAGGGATGTTCAAGTACTGATTCTTATAGTACTGTTTCGGGGGGTCGATAAGCT  
AATCCCGTGGATGTCTATTTGCCGGGCTGTCCCCCTAAACCCGAGGCAGTTATAGATG  
CTATAACAAAACCTTCGTAAGAAAATATCTCGCGAAATCTATGAAGATCGAATTAGATCT

CAACAGGGGGATCGGTGTTTTACTACCAATCACAAGTTTTGTCTTGTACGCAGTACTCG  
TACTGGAAATTATAATCAAGGATTGCTCTATCAACCACCATCTACTTCAGAGATTCCT--  
GAAACATTTTTCAACTACAAGGGTTCACTATCTTCCCACGAATTAGTAAATATGCAAAC  
TAGAAATACTTTTTCTTGGATAAAGGAGGAGATTACTCGATCCATTTCCGTATCGCTCAT  
GATCTATATAATAACCGGGGCTTCCATTTCAAATGCATATCCCATTTTTGCGCAGCAGGG  
GTATGAAAATCCACGAGAAGCAACTGGGCGTATTGTATGTGCCAATTGCCATTTAGCGA  
ATAAACCCGTGGATATTGAGGTTCCACAAGCGGTACTTCCTGATACTGTATTTGAAGCG  
GTTGTTAGAATTCCTTATGATATGCAACTGAAACAAGTTCTTGCTAATGGTAAGAAAGG  
GGCTTTGAATGTGGGTGCTGTTCTTATTTTACCAGAGGGGTTTGAAGTTAGCCCCGCCTG  
ATCGTATTTCCGCCGAGATGAAAGAAAAGATAGGCAATCTGTCTTTTCAGAACTACCGC  
CCCCTAAGAAAAATATTCTTGTGATAGGTCCTGTTCCTGGTAAAAAATATAGTGAAAT  
CACCTTTCCTATTCTTTCCCAGACCCTGCTAGTAATAAGGATGCTCATTCTTAAAATAT  
CCCATATACGTAGGCGGAAACAGGGGAAGGGGCCAGATTTATCCCGACGGGAACAAA  
AGTAACAATACTGTTTATAATGCTACGGCAACAGGTATAGTAAGCAAAAATCATACGAAA  
AGAAAAAGGGGGGTACGAAATAACCATAACGGATGCCTTGGATGGACATCAAGTGGTT  
GATATTATCCCCCAGGACCAGAACTTCTTGTTCAGAGGGTGAATCTATCAAACCTCGA  
TCAACCATTAACAATTAATCCTAATGTGGGTGGATTTGGTCAGGGGGATGCAGAAATAG  
TACTTCAAGACCCACTACGCGTCCAAGGTCTTTTGTCTTCTTGGCATCTATTGTTTTTG  
CACAAATCTTTTTGGTTCTTAAAAAGAAACAGTTTGAGAAGGTTCAAGTGTCCGAAAT  
GAATTTCTCAATAAAGTCTATGATTGGTTCGAAGAGCGCCTCGAAATTCAGGCGATTG  
CAGATGATATAACTAGTAAATATGTTCCCTCCTCATGTAAACATATTTTATTGTCTAGGAGG  
AATTACGCTTACTTGTTTTTTGGTACAAGTAGCTACAGGATTTGCTATGACTTTTTACTAT  
CGTCCAACCGTACTGAGGCTTTTGCTTCTGTTCAATACATAATGACTGAAGCTAACTT  
TGGTTGGTTAATCCGATCAGTTCATCGATGGTCGGCAAGTATGATGGTCTTAATGATGAT  
CCTGCACGTATTTCGTGTCTATCTCACTGGTGGTTTTAAAAACCTCGCGAATTAACTT  
GGTTACAGGCGTGGTCTGGGTGTGTTGACCGCATCTTTTGGCGTAACAGGTTATTCC  
TTACCTCGGGACCAAATTGGTTATTGGGCAGTCAAATCGTAACAGGCGTTCGGGAAG  
CTATTCCGGTAATAGGATCGCCTTTGGTAGAGTTATTACGTGGAAGTGCTAGTGTGGGA  
CAATCCACTTTGACCCGTTTTTATAGTTTACACACTTTTGTATTACCCCTTCTACTGCTG  
TATTTATGTTAATGCATTTCCCTAATGATACGTAAGCAAGGCATTTCTGGTCCTTAATGGG  
AGTAACAAAAAACCTGACTTGAACGATCCTGTATTAAGAGCTAAATTAGCTAAAGGTA  
TGGGTCATAATTATTATGGGGAACCCGCATGGCCCAATGATCTTTTATATATTTTTCCAGT  
AGTAATTCGGTACTATTGCTTGTAACGTGGGCTTAGCGGTTCTAGAACCCTCAATGAT  
TGGTGAACCCGCGGATCCATTTGCAACTCCTTTGGAAATATTACCTGAATGGTATTTCTT  
TCCTGTATTTCAAATACTTCGTACAGTACCTAACAAGTTATTGGGTGTTCTTTAATGGT  
TTCAGTACCCGCGGGATTATTAACAGTACCGTTTTTTGGAAAATGTTAATAAATTCAAAA  
TCCATTTTCGTTCGTCCAGTAGCGACAACCGTTTTTTTATTGGTACTGCAGTAGCCCTTT  
GGTTGGGTATTGGAGCAACATTACCGATTGATAAATCCCTAACTTTAGGTCTTTTTATGA  
TTGAAGTTTTTCTATTTGGAATCGTCTTAGGTCTAATTCCTATTACTTTGGCTGGATTATT  
CGTAACCGCATATTTACAATACAGACGTGGTGATCAGTTGGACCTTATGCCTACTATAAC  
TAGTTATTTTCGGTTTTTTACTAGCGGCTTTAACTATAACCTCAGCTTTATTTATTGGTCTG  
AGTAAGATACGACTTATTATGGATATAGTAAGTCTTGCTTGGGCTGCTTTAATGGTAGTC  
TTTACATTTTCCCTTTCACTCGTAGTATGGGGAAGAAGTGGGCTCATGATTATTCGTTTCG  
CCGGAACCAGAAGTAAAAATTTTGGTAGATAGGGATCCCGTAAAAACTTCTTTCGAGG



AATGGGCTAGGCCGGGCCATTTCTCAAGAACAATAGCTAAGGGACCCGATACTACCAC  
TTGGATCTGGAACCTACATGCCGATGCTCACGATTTTCGATAGCCATAACCAGTGATTTGG  
AGGAGATCTCTCGCAAATATTTAGTGCCCATTTTCGGCCAACTCTCCATCATCTTTCTTT  
GGCTGAGCGGCATGTATTTCCACGGTGCTCGTTTTTCCAATTATGAAGCATGGCTCAGC  
GATCCTACTCACATTGGACCTAGCGCCCAGGTGGTTTTGGCCAATAGTGGGCCAAGAAA  
TCTTGAATGGCGATGTGGGTGGGGGTTTTCCGAGGAATACAAATAACCTCTGGTTTTTTTT  
CAGATTTGGCGAGCATCTGGAATAACTAGTGAATTACAACCTCTATTGTACCGCAATCGG  
TGCATTGGTCTTTGCGGCCTTAATGCTTTTTTGCCGGTTGGTTCCATTATCACAAAGCGGC  
CCAAAATTGGCTTGGTTCCAAGATGTAGAATCTATGTTGAATCACCATTTAGCAGGGC  
TACTGGGACTTGGGTCCCTTTCTTGGGCGGGGCATCAAGTACATGTATCTTTACCGATA  
AACCAATTTCTAAATGCTGGAGTAGACCCTAAAGAGATCCCACCTCCCCATGAATTTAT  
CTTGAATCGTGATCTTTTGGCTCAACTTTATCCCAGTTTTGCCGAGGGAGCAACCCCAT  
TTTTTACCTTGAATTGGTCAAATATGCGGAATTTCTTACTTTTCGCGGAGGATTAGATC  
CAGTGACTIONGGGTCTATGGTTGACTGATATTGCACACCATCATTTAGCTATTGCAATTC  
TTTTCCTAATAGCGGGTCACATGTATAAGACCAACTGGGGCATTGGGCATAGCCTAAAA  
GATATTTTAGAGGCTCATAAAGGTCCATTTACAGGCCAAGGGCATAAAGGACTATATGA  
AATCCTAACACATCATGGCATGCTCAATTATCTCTTAACCTTAGCTATGTTAGGCTCTTTA  
ACCATTGTTGTAGCTCACCATATGTATTCCATGCCCCCTTATCCATATCTAGCTACTGACT  
ATGGTACACAACACTGTCATTGTTACACATCACATGTGGATTGGTGGATTTCTGATAGTG  
GGTGCCGCTGCGCATGCAGCCATTTTTATGGTAAGAGACTATGATCCAACACTACTCGATA  
CAACGATCTATTAGATCGTGTCTTAGGCATCGTGATGCAATCATATCACATCTCAACTG  
GGTATGTATATTTCTAGGCTTTACAGTTTTGGTTTTGTATATTCATAATGATACCATGAGC  
GCTTTAGGGCGTCCACAAGATATGTTTTAGATACCGCTATACAATTACAACCCGCTTTT  
GCTCAATGGATACAAAACACCCATACTTTAGCACCCGGTGCAACGGCTCCTGGTGCAA  
CAGCGAGCACCAGTTTGACCTGGGGAGGCGGTGATTTAGTGGCAGTAGGGGGCAAAG  
TTGCTTTGTTACCTATTCCATTAGGAACCGCAGATTTTTTGGTCCATCACATTCATGCATT  
TACGATTCATGTGACGGTATTGATACTCCTGAAAGGTGTTCTATTTGCTCGCAGCTCGCG  
TTTGATACCGGATAAAGCAAATCTCGTTTTTCGTTTTCCCTTGTGACGGGCCTGGAAGAG  
GGGGGACATGTCAAGTATCCGCTTGGGATCATGTCTTCTTAGGACTATTCTGGATGTAC  
AATCAATTCGGTAGTAATATTCCATTTAGTTGGAAAATGCAGTCAGATGTTTGGGGT  
ACTATAAGTGATCAAGGGGTGGTAACTCATATCACAGGAGGAAATTTTGCAGAGTT  
CTATTACTATTAATGGGTGGCTACGCGATTTCTTATGGGCACAAGCATCCCAGGTAATTC  
AGTCTTATGGTTCTTCATTATCTGCATATGGCCTTCTTTTCTTAGGTGCTCATTTTGTATG  
GGCTTTTAGTTAATGTTTCTATTACAGCGGACGTGGTTATTGGCAAGAACTTATTGAATC  
CATCGTTTTGGGCTCATAATAAATTAAGTTGCTCCTGCTACTCAGCCTAGAGCCTTGA  
GCATTGTACAAGGACGTGCTGTAGGGGTAACCCATTACCTTCTGGGTGGAATTGCCAC  
AACATGGGCATTCTTCTTAGCAAGAATTATTGCAGTAGGAATGGCATTAAAGATTTCCAA  
GGTTTAGCCAAGGATTAGCTCAGGACCCCACTACTCGTCGTATTTGGTTTTGGTATTGCT  
ACCGCGCATGACTTCGAGAGTCATGATGATTACTIONGAGGAACGTCTTTATCAGAATATT  
TTTGCTTCTCACTTCGGGCAATTAGCAATAATTTTTCTGTGGACTTCCGGAAATCTGTTT  
CATGTAGCTTGGCAGGGAAATTTGAGGCATGGGTACAGGATCCTTTACATGTAAGGCC  
GATTGCTCATGCAATTTGGGATCCTCATTTTGGTCAACCGGCGGTGGAAGCTTTTACTA  
GAGGGGGCGCTCCTGGTCCAGTGAATATCGCTTACTCTGGTGTATTATCAGTGGTGGTAT  
ACAATCGGGTTACGTACTAATGAAGATCTTTATACTGGAGCCCTTTTTCTATTATTTCTTT

CTGCTCTATCCTTAATAGCGGGTTGGTTACACCTACAACCGAAATGGAAACCGAGCGTT  
TCGTGGTTCAAAAACGCCGAATCTCGTCTCAATCATCATTTGTCAGGACTATTCGGAGT  
AAGTTCCTTGGCTTGGACAGGGCACTTAGTCCATGTCGCTATTCCTGGATCCCGGGGGG  
AATATGTTTCGATGGAATAATTTCTTAGATGTATTACCGCATCCCAAGGGTTAGGTCCAT  
TTTTTTCAGGTCAGTGGAATCTTTATGCTCAAACCCCGATTCAAGTAGTCATTTATTTG  
GTACCTCCAAGGATCAGGAACTGCCATTCTAACCTTCTCGGGGGATTCCATCCACAA  
ACGCAAAGTTTATGGTTGACTGATATTGCACACCATCATTTAGCTATTGCAATTCCTTTTC  
CTAATAGCGGGTCACATGTATAGAATACTTTCGGAATTGGTTCACAGTATAAAAGATCT  
TTTAGAAGCACATATTCCTCCGGGAGGACGATTGGGGCGGGGGCATAAGGGTCTTTATG  
ACACAATCAATAATTCGATTCATTTCAATTAGGCCTTGCTCTAGCTTCTTTAGGGGTTAT  
TACGTCCTTGGTAGCTCAACACATGACTCTTTACCTGCTTATGCGTTCATAGCACAAAG  
CTTTACTACTCAAGCTGCGTTATATAACCCATCACCAATACATCGCAGGATTCATCATGAC  
AGGAGCTTTTGCCACGGAGCTATATTTTTTATTAGAGATTACAATCCGGAACAGAATG  
AGGATAATGTATTGGCAAGAATGCTAGACCATAAAGAAGCTATCATATCCATTTAAGTT  
GGGCCAGCCTCTTTCTGGGATTCATACTTTGGGACTTTATGTCCATAATGATGTCATGC  
TTGCTTTTGGGACTCCGGAGAAACAAATCTTGATCGAACCCATATTTGCCAATGGATC  
CAATCTGCTCATGGTAAACTTTCATACGGGTTTCGATGTGCTTTTATCTTCAACGAATGGC  
CCAGCATTCAATGCGGGTCAAGCATATGGTTGCCCTGGCTGGTTAAATGCTGTTAATGA  
A-----AATAGTAATTCACTATTCTTAACAATAGGTCCTGGAGACTTCTTGGTTCATCATGC  
TATTGCTCTAGGTTTACATACAACACTACATTGATCTTAGTAAAGGGCGCTTTAGATGCGCG  
CGGTTCCAAGTTAATGCCGATAAAAAGGATTTCCGGTTATAGTTTTCTTGGCGATGGTC  
CGGGGCGAGGGGGTACTTGTGATATTTCCGGCTGGGACGCATTTTATTTGGCGGTTTTC  
TGGATGTAAATAACATTGGATGGGTTACTTTTTATTGGCATTGGAAACACATCACATTA  
TGGCAGGGTAACGTCTCACAGTTTAAATGAATCTTCCACTTATTTGATGGGATGGTTAAG  
AGATTATCTATGGTTAAACTCTTCACAACCTTATCAATGGGTATAACCCATTTGGTATGAAT  
AGTTTATCAGTCTGGGCGTGGATGTTCTTATTTGGACATCTTGTTTGGGCTACCGGATTT  
ATGTTCTTAATTTCTTGGCGCGGATATTGGCAAGAATTGATCGAAACTTTAGCATGGGCT  
CATGAACGCACACCTTTAGCTAATTTGATTCGATGGAGAGATAAACAGTGGCTCTTTC  
TATTGTGCAGGCAAGATTGGTTGGATTAGCCCACTTTTCTGTAGGTTATATATTTACTTAT  
GCGGCTTTCTTGATTGCCTCTACATCGGGCAAATTTGGTATGTCACATTCAGTAAAAATT  
TATGATACATGTATTGGGTGTACTCAATGTGTCCGAGCCTGCCCCACCGATGTGTTAGAA  
ATGATACCTTGGGATGGATGTAAAGCTAAGCAAATTGCTTCCGCTCCAAGAACAGAAG  
ATTGTGTTGGTTGTAAGAGATGTGAATCCGCTTGTTCCAACGGATTTCTTGAGCGTTTCGA  
GTTTATTTATGGCATGAAACAACCTCGAAGTATGGGTCTAGCTTATATGACAACCTTTCAGT  
TTCCCTCTATTTTTGTGCCTTTAGTAGGCCTAGTATTTCCGGCAATTGCAATGGCTTCTT  
TATCTTTGTATGTTCAAAAACCTAAGATTTTTATGCGAGATCTAAAACATATCTTTCCGT  
AGCACCGGTACTAAGTACTCTCTGGTTCCGTTCTTTAGCGGGTTTATTGATAGAGATCA  
ATCGTTTCTTCCCGGATGCGTTAACATTCCTTTTTTT-----ATGACTGCAATTTTAGAGA  
GACGCGAAAGCGAAAGCCTATGGGGTCGCTTCTGTAACCTGGATAACCAGCACTGAAA  
ACCGTCTTTACATCGGATGGTTTGGTGTTTTGATGATCCCTACCTTATTGACCGCAACTT  
CTGTATTTATTATCGCCTTCATTGCTGCTCCTCCAGTAGATATTGATGGTATTCGTGAACC  
TGTTTCTGGATCTCTACTTTACGGAACAATATTATTTCTGGTGCCATTATCCTACTTCT  
GCAGCTATAGGTTTGCATTTTACCCGATCTGGGAAGCGGCATCTGTTGATGAATGGTT  
ATACAATGGCGGTCCTTATGAGTTAATTGTTTTACTTCTTACTTGGTGTAGCTTGTTA

CATGGGTCGTGAGTGGGAACTTAGTTTTCCGTCTGGGTATGCGCCCTTGGATCGCTGTTG  
CATATTCAGCTCCTGTTGCAGCTGCTACCGCTGTTTTCTTGATCTATCCAATTGGTCAAG  
GAAGTTTTTCTGATGGTATGCCCTAGGAATCTCTGGTACTTTCAACTTCATGATTGTAT  
TCCAGGCTGAACACAACATCCTTATGCATCCGTTTACATGTTAGGTGTAGCTGGTGTA  
TTCGGCGGCTCCCTATTAGTGCTATGCATGGTTCCTTGGTAACCTCTAGTTTGATCAGG  
GAAACCACAGAAAATGAATCTGCTAATGAAGGTTACAGATTCGGTCAAGAGGAAGAA  
ACTTATAATATCGTAGCTGCTCATGGTTATTTTTGGCCGATTGATCTTCCAATATGCTAGTT  
TCAACAATTCTCGTTCTTTACATTTCTTCTTAGCTGCTTGGCCTGTAGTAGGTATCTGGT  
TCACCGCTTTAGGTATTAGCACTATGGCTTTCAACCTAAACGGTTTCAATTTAAACCAAT  
CCGTAGTTGATAGTCAAGGTCGTGTAATTAATACCTGGGCTGATATTATTAACCGTGCTA  
ACCTTGGTATGGAAGTTATGCATGAACGTAATGCTCATAACTTCCCTCTAGACCTAGCTG  
CTATTGAAGCTCCATCTACAAATGGAATGGGTTTGCCTTGGTATCGTGTTCCATACTGTCTG  
TATTGAATGATCCCGGTGCTTGTCTTCTGTTTATATAATGCATACGGCTCTGGTTGCTG  
GTTGGGCCGGTTCAATGGCTCTATATGAATTAGCCGTTTTTGTATCCCTCCGATCCCGTTC  
TTGATCCAATGTGGAGACAAGGTATGTTTCGTTATACCCTTCATGACTCGTTTAGGAATAA  
CCAATTCATGGGGCGGTTGGAGTATTACA---GGGGGACTATAACAAATCCGGGTATTT  
GGAGTTACGAAGGTGTGGCCGGAGCACATATTGTGTTTTCTGGCTTGTGCTTCTTGGCA  
GCTATCTGGCATTGGGTATATTGGGATCTAGAAATTTTTTGTGATGAGCGCACAGGAAA  
ACCTTCTTTGGATTTGCCAAGATTTTTGGAATTCATTTATTTCTCTCAGGAGTGGCTTG  
CTTTGGCTTTGGCGCATTTCATGTAACAGGATTGTATGGTCCCTGGAATATGGGTGTCTGG  
ACCCTTATGGACTAACTGGCAAGGTCCAACCTGTAAATCCGGCGTGGGGCGTGGAAGG  
TTTTGATCCTTTTGTCCGGGAGGAATAGCCTCTCATCATATTGCAGCAGGGACATTGG  
GCATATTAGCGGGCTTATTCCATCTTAGTGTCCGCCCGCCCCAACGTTTATACAAAGGAT  
TACGTATGGGAAATATTGAAACCGTCTTTTCCAGTAGTATAGCTGCTGTCTTTTTTGCAG  
CTTTTGTGTTGTTGCCGGAACCTATGTGGTATGGTTCAGCAACTACCCCATCGAATTATTG  
GTCCTACTCGTTATCAATGGGATCAAGGATACTTCCAGCAAGAAATATATCGAAGGGTT  
AGTGCTGGGTAGCCGAAAATCAAAGTTTATCAGAAGCTTGGTCTAAAATTCCTGAAA  
AATTAGCTTTTTTATGATTACATTGGCAATAATCCGGCAAAAGGAGGATTATTCAGAGCG  
GGTTCAATGGACAACGGGGATGGAATAGCCGTTGGGTGGTTAGGGCACCCCTATCTTTA  
GAGATAAAGACGGGCGTGAACCTTTTTGTACGTCGTATGCCTACTTTTTTTGAAACATTT  
CCGGTTGTTTTGGTAGACGGAGACGGAATTGTTAGAGCGGATGTCCCTTTTAGAAGGG  
CAGAATCAAAGTATAGTGTGCAACAAGTAGGTGTAACCTGTTGAGTTCTATGGCGGCGA  
ACTCAATGGAGTGAGTTATAGTGATCCTGCTACTGTGAAAAAATATGCTAGACGTGCTC  
AATTGGGTGAAATTTTTGAATTAGATCGTGCTACTTTGAAATCCGATGGTGTTTTTCGTA  
GCAGTCCGAGGGGTTGGTTTACTTTTGGGCATGCTTCGTTTGCCTTGCTTTTCTTCTCG  
GACACATTTGGCATGGTGCTAGAACCCTGTTTCAGAGATGTTTTTGGCCGGTATTGATCCA  
GATTTGGATGCTCAAGTGGAATTTGGAGCATTCCAAAAACTTGGAGATCCAACCTACAA  
GAAGACAAGTAGTCATGAAAACCTTATATTCCCTGAGGAGGTTCTACCCCGTGGA AAC  
GCTCTTTAATGGAACTTTAGCTTTAGCCGGTTCGTGACCAAGAAACCACCGTTTTCGCTT  
GGTGGGCCGGGAATGCCCGGCTTATCAATTTATCCGGTAAACTATTGGGGGCTCATGTA  
GCCCATGCCGATTAATCGTATTCTGGGCCGGAGCAATGAACCTATTTGAAGTGGCTCA  
TTTTGTCCCAGAAAACCCATGTACGAACAAGGATTAATTTACTTCCCACCTAGCTA  
CTCTAGGCTGGGGGGTAGGTCCCTGGCGGAGAAGTTATAGACACCTTTCCATACTTTGTA  
TCTGGAGTACTTCACTTAATTTCCCTCTGCTGTATTGGGCTTTGGCGGTATTTATCATGCA

CTTCTGGGACCTGAAACTCTTGAAGAATCTTTTCCATTTTTTCGGTTATGTATGGAAAGAT  
AGAAATAAAATGACCACAATTTTGGGTATTCACTTAATTTTGGCTAGGTATAGGTGCTTTT  
CTTCTAGTATTCAAGGCTCTTTATTTTGGGGGCGTATACGATACCTGGGCTCCGGGAGG  
GGGAGATGTAAGAAAAATTACCAACTTGACTCTTAGCCCAAGTGTATATTTGGTTATTT  
ACTAAAATCGCCCTTTGGAGGCCAAGGGTGGATTGTTAGTGTGGACGATTTGGAAGAT  
ATAATTGGAGGACATGTATGGTTAGGTTCCATTTGTATATTTGGTGGAAATCTGGCATACT  
TAACCAAACCTTTTGCATGGGCTCGCCGTGCACTTGTATGGTCGGGAGAGGCTTACTTG  
TCTTATAGTTTAGGTGCTTTATCCGTTTTTGGTTTTTCATTGCTTGTGCTTTGTCTGGTTCA  
ATAATACCGCTTATCCTAGTGAGTTTTACGGGCCACTGGACCAGAAGCTTCTCAAGCT  
CAAGCATTACTTTTCTAGTTAGAGACCAACGTCTTGGGGCTAACGTGGGATCCGCTCA  
AGGGCCTACTGGGTTAGGTAAATATCTAATGCGTTCCCCGACCGGAGAAGTCATTTTTG  
GAGGGGAAACTATGCGTTTTTGGGATCTGCGTGCTCCTTGGTTAGAACCTCTAAGAGG  
TCCCAATGGTTTGGACTTGAGTAGGTTGAAAAAGACATACAACCTTGGCAAGAACGG  
CGTTCTGCGGAATATATGACGCATGCTCCTTTAGGGTCTTTAAATTCTGTAGGTGGCGTA  
GCTACCGAGATCAATGCAGTTAATTATGTCTCTCCGAGAAGTTGGTTAGCTACCTCTCAT  
TTTGTCTAGGATTCTTCCTATTCGTGGGTCAATTTATGGCACGCGGGAAGAGCTCGCGC  
AGCCGCAGCGGGATTTGAAAAAGGAATTGATCGTGATTTTGGCCTGTTCTCTCCATG  
ACTCCTCTTAACATGACTATAGCCCTTGGTAAATTTACCAAAGATGAAAATGATTTATTT  
GATATTATGGATGACTGGTTACGTAGGGACCGTTTCGTTTTTGTAGGTTGGTCCGGCCTA  
TTGCTCTTTCCCTTGTGCCTATTTTCGCTCTAGGGGGTGGTTTACAGGTACAACCTTTGTA  
ACTTCGTGGTATACTCATGGATTGGCCAGCTCCTATTTGGAAGGCTGCAATTTCTTAACC  
GCCGCAGTTTCTACCCCTGCTAATAGTTTAGCACATTCTTTGTTGTTACTATGGGGTCCT  
GAAGCACAAGGAGATTTTACTCGTTGGTGTCAATTAGGTGGTCTGTGGACATTTGTTGC  
TCTCCACGGCGCTTTCCGACTAATAGGTTTTATGTTACGTCAATTTGAACTTGC GCGATC  
TGTTCAATTGCGACCTTATAACGCAATCGCATTCTCTGGTCCAATTGCTGTTTTTTGTTTC  
TGATTCCCTGATTTATCCACTAGGTCAGTCTGGTTGGTTCTTTGCGCCTAGTTTTGGTGT  
AGCAGCTATATTTGATTTCATCCTCTTTTTTCCAAGGATTTTCATAATTGGACATTGAACCC  
ATTTTCATATGATGGGAGTTGCCGGTGTATTGGGCGCGGCTCTGCTATGCGCTATTCATGG  
TGCTACCGTAGAGAATACTTTATTTGAAGATGGTGATGGTGCAAATACATTCCGTGCTTT  
TAACCCAACTCAAGCCGAAGAACTTATTCAATGGTCAACCGCTAACCGCTTTTGGTCCC  
AAATCTTTGGGGTTGCTTTTTTCCAATAAACGTGGTTACATTTCTTTATGTTATTTGTACC  
AGTAACCGGTTTATGGATGAGTGCTCTTGGAGTAGTCGGTCTGGCTCTGAACCTACGTG  
CCTATGACTTCGTTTTCCAGGAAATCCGTGCAGCAGAAGATCCTGAATTTGAGACTTTC  
TACACCAAAAATATTCTTTTAAACGAAGGTATTCGTGCTTGGATGGCGGCTCAAGATCA  
GCCTCATGAAAACCTTATATTCCCTGAGGAGGTTCTACCCCGTGGAAACGCTCTTATGT  
CTGGAAGCACAGGAGAACGTTCTTTTGGCTGATATTATTACCAGTATTCGATACTGGGTCA  
TTCATAGTATTACTATACCTTCCCTATTCATCGCGGTTGGTTATTTCGTCAGCACAGGTTT  
AGCTTATGATGTGTTTGGAAAGCCCTCGTCCAAACGAGTATTTTACAGAGAGCCGACAA  
GGAATTCCATTAATAACTGGCCGTTTTGATTCTTTGGAACAACCTCGATGAATTTAGTAGA  
TCTTTTATGACCATAGATCGAACCTATCCAATTTTTACAGTGCGATGGTTGGCTGTTTAC  
GGACTAGCTGTACCTACCGTTTTCTTTTTTGGGGTCAATATCAGCAATGCAGTTCATCCA  
ACGAATGGCTACACAAACCGTTGAGGGTAGTTCTAGATCTGGT--CCAAGACGAACTGT  
TGTAGGGGATTTTTTGA AACCATTTGAATTCGGAATATGGTAAGGTAGCCCCTGGATGGG  
GAACGACTCCTTTGATGGGTGTCGCAATGGCTTTATTTGCGATATTCTTATCTATTTTT

GGAGATTTATAATTCTTCCGTTTTACTGGATGGAATTTCAATGAATATGCTTACTCTTAAA  
CTCTTTGTTTACACCGTAGTAATATCTTTGTTTCTCTCTTCATCTTCGGATTCTATCTAA  
TGATCCGGGACGTAATCCTGGACGCGAAGAAATGGCCGATACTACTGGAAGGATTCCCT  
CTTTGGATAATAGGTACGGTAACTGGTATTCCTGTGATCGGTTTAATAGGTATTTCTTTT  
ATGGTTCATATTCTGGATTGGGTTTCGTCCCTGATGCTTAATATCTTTAATTTGATCTGTAT  
CTGTTTTAATTCTGCCCTTTTTTCGAGTAGTTTTTTATTTCGCCAAATTGCCCGAGGCCTAT  
GCTTTTTTTGAATCCAATCGTAGATTTTATGCCAGTAATACCTGTTCTCTTTTTTCTCTTAG  
CCTTTGTTTGGCAAGCTGCTGTAAGTTTTTCGAATGACACAATCAAACCCGAACGAACA  
AAATGTTGAATTGAATCGTACCAGTCTCTACTGGGGGTTATTACTCATTTTTGTACTTGC  
TGTTTTATTTTCCAATTATTTCTTCAATATGGAAGTAAATATTCTCGCATTATTGCTACAG  
CGCTGTTCAATTCTAGTTCCTACCGCTTTTTTACTTATAATATACGTAAAAACTGTCAGTCA  
AAGTGATATGGAAACAGCAACCTTAGTCGCCATCTCTATATCTGGTTTACTTGTAAGTTT  
TACTGGGTACGCCCTATATACTGCTTTTTGGGCAACCCTCTCAACAATTAAGAGATCCATT  
CGAGGAACACGGGGACATGGAAGCATTGGTTTATAACATTCTCTTAGTATCTACTCTAG  
GGATAATTTTTTTCGCTATCTTTTTTCGAGAACC GCCTAAAATTCTAACTAAAAAATGA  
AAATGACTATTGCTTTCCAATTGGCTGTTTTTGCATTAATTGCTACTTCGTC AATCTTACT  
GATTAGTGACCTGTTGTATTTGCTTCTCCTGATGGTTGGTTGAGTAACAAAAATATTGT  
ATTTTCCGGTACATCTTTATGGATTGGATTAGTTTTTCTAGTGGGTATCCTTAATTCTCTTA  
TTTCT-----ATGTCACCACAAACAGAGACTAAAGCAAGTGTGGATTCAAAG  
CTGGTGTTAAAGAGTATAAATTGACTTATTATACTCCTGAATATGAAGTCAAAGATACTG  
ATATCTTGGCAGCCTCCGAGTAACTCCTCAACCCGGAGTCCGCCTGAGGAAGCAGG  
GGCCGCGGTAGCTGCTGAATCTTCTACTGGTACATGGACAACCGTGTGGACCGATGGG  
CTTACCAGCCTTGATCGTTACAAAGGGCGATGCTACGACATTGAGCCCGTTCCTGGAG  
AAGAAGATCAATATATATGTTATGTAGCTTACCCTTTAGACCTTTTTTGAAGAAGTTCTG  
TTACTAACATGTTTACTTCCATTGTGGGTAATGTATTTGGGTTCAAAGCCCTGCGCGCTC  
TACGTCTAGAGGATCTGCGAGTCCCTACTGCTTATATTA AAACTTTCCAAGGCCCGCCT  
CATGGCATCCAGGTTGAAAGAGATAAATTGAACAAGTATGGTCGCCCCCTATTAGGATG  
TACTATTAACCTAAATTGGGGTTATCCGCTAAGAACTACGGTAGAGCAGTTTATGAAT  
GTCTACGTGGCGGGCTTGATTTTACCAAAGATGATGAAAATGTGAACTCCCAACCATTT  
ATGCGCTGGAGAGACCGTTTTCTTATTTTGTGCCGAAGCAATTTTTAAATCACAGGCTGA  
AACAGGTGAAATCAAAGGGCATTACTTGAATGCTACTGCAGGTACATGTGAAGAAATG  
ATCAAAGGGCCATGTGTGCTAGAGAATTGGGAGTTCCTATCGTAATGCACGACTACTT  
AACAGGTGGGTTCAACGCAAATACTAGCTTGGCTCATTATTGCCGAGATAATGGTCTAC  
TTCTTACATCCATCGCGCAATGCACGCAGTTATTGATAGACAGAAGAATCATGGTATG  
CACTTTCGTGTACTAGCTAAAGCTTTACGTATGTCTGGTGGAGATCATATTCACGCTGGT  
ACAGTAGTAGGTAACTTGAAGGAGAAAGGGACATAACTTTGGGCTTTGTTGATTTAC  
TACGTGATGATTTTATTGAAAAGATCGAAGCCGTGGTATTTATTTCACTCAAGATTGGG  
TTTTCTATGCCAGGTGTTCTGCCCGTAGCTTCGGGGGGTATTCACGTTTGGCATATGCCTG  
CTTTGACCGAGATCTTTGGAGATGATTCCGTA CTACAATTCGGTGGAGGAACTTTAGGA  
CACCTTGGGGAAATGCACCGGGTGCCGTAGCTAATCGAGTAGCTTTAGAAGCATGTG  
TACAAGCTCGTAATGAGGGACGTGACCTTGCCCGGAGGGTAATGAAATTATCCGCGA  
GGCTAGCAAATGGAGTCCTGAACTAGCTGCTGCTTGTGAAGTATGGAAGGCGATCAA  
TTTGAATTCGACGCAGTGGATAAATTAGATAA AATGGCGATACATTTATACAAACTTCT  
ACCCCGGGCACACGCAATGGAGCCGTAGACAGTCAAGTGAATCCAATCCACGAAAT

AATTTGATCTATGGACAGCATCGTTGTGGTAAAGGTCGTAATGCCAGAGGAATCATTAC  
CGCAAGGCATAGAGGGGGAGGTCATAAGCGTCTATACCGTAAAATTGATTTTCGACGA  
AATGAAAAGACATATATGGTAGAATCGTAACCATAGAATACGACCCTAATCGAAATGC  
ATACATTTGTCTCATACTATGGGGATGGTGAGAAGAGATATATTTTACATCCCAGAGG  
GGCTATAATTGGAGATACCATTGTTTCTGGTACAGAAGTTCCTATAAAAATGGGAAATG  
CCCTACCTTTGACCGATATGCCCTTAGGCACGGCCATACATAACATAGAAAATCACACTT  
GGAAGGGGTGGACAATTAGCTAGAGCAGCGGGTGTCTGTTGCGAAACTGATTGCAAAG  
GAGGGGAAATCGGCCACATTAATAATTACCTTCTGGGGAGGTCCGTTTGATATCCAAAA  
ACTGCTCAGCAACAGTCGGACAGGTGGGAATGTTGGGGTGAACCAGAAAAGTTTGG  
GTAGAGCCGGATCTAAATGTTGGCTAGGTAAGCGTCCTGTAGTAAGAGGAGTAGTTATG  
AACCTGTAGACCATCCCCATGGGGGTGGTGAAGGGAGGGCTCCAATTGGTAGAAAA  
AAACCCGCAACCCCTTGGGGTTATCCTGCACTTGGAAGAAGAAGTAGAAAAAGGAAT  
AAATATAGTGATAATTTGATTCTTCGTCGACGGAGTAAAATGATTCAACCTCAGACCCAT  
TTGAATGTAGCAGATAACAGCGGGGCCCGAGAATTGATGTGTATTTCGAGTCATAGGAG  
CTAGT--AATCGCCGATATGCTCATATTGGTGACGTTATTGTTGCTGTGATCAAGGAAGC  
AGTACCAAATACACCTCTAGAAAGATCAGAAGTGATCAGAGCTGTAATTGTACGTACTC  
GTAAAGAACTCAAACGCGACAACGGGATGATAATACGATATGATGACAATGCTGCCGT  
TGTCATTGATCAAGAAGGAAATCCAAAAGGAACTCGAATTTTTGGTGCGATCGCCCGG  
GAATTGAGACAGTTAAATTTCACTAAAATAGTTTCATTAGCTCCCGAGGTATTAATGCTT  
AGTCCCAAAGAAACCGATTTTCGTAAACAACATAGAGGAAGAATGAAGGGGATATCTT  
ATCGAGGTAATCGGATTTGTTTCGGTAGATATGCTCTTCAAGCACTTGAACCCGCTTGG  
ATTACATCTAGACAAATAGAAGCGGGGCGCCGCGCAATGACACGAAATGTACGCCGTG  
GTGGAAAATATGGGTACGTATATTTCCAGACAAACCCGTTACGGTAAGACCTACAGAA  
ACACGTATGGGTTTCGGGAAAGGATCTCCCGAGTATTGGGTAGCTGTCGTTAAACCGG  
GCAGAATACTTTATGAAATGAGCGGAGTAGCCGAAAATATAGCCAGAAAGGCTATTTCA  
ATAGCGGCGTCAAAAATGCCTATAAAAATCAATTCATTATTTTCAGGAATGACCAGAAT  
TAAACGGGGATATATAGCTCGTAGACGTCGAAAAAAAATTAGTTTATTTGCATCAAGCT  
TTCGGGGGGCTCATTCAAGACTTACTCGAACTTACTCAACAAAGAATAAGAGCTTTG  
GTTTCGGCTCATCGGGATAGAGATAGGAAAAAAAGGGATTTTCGTCGTTTGTGGATCA  
CTCGAATAAATGCAGTAATTCGTGGAGTG---GGGGTATCCTATAGTTATAGTCGATTAATA  
CACAATCTGTACAAGAAACAGTTGCTTCTGAATCGTAAAATACTTGCACAAATAGCTAT  
CTCAAATAGGAATTGTCTTTATATGATTTCCAACGAGATTAGAAAA-----

- - - - -  
-????????????????????????????????????????????????????????????????????????????????????  
????????????????????????????????????????????????????????????????????????????????????  
????????????????????????????????????????????????????????????????????????????????????  
????????????????????????????????????????????????????????????????????????????????????  
????????????????ATGGATGGAATCAAATATGTAGTAGTTACAGACAAAAGTATTCGGTTATTGG  
TGAAAAT--CAATATACTTCTAATGTCGAATCAGGATCAACTAGGACAGAAATAAAGC  
ATTGGGTCGAACTCTTCTTTGGTGTCAAGGTAATAGCTATGAATAGTCATCGACTCCCC  
GGAAAGGGTAGAAGAATGGGACCTATTATGGGACATACAATGCATTACAGGCGTATGAT  
CATTACGCTTCAACCGGGTTATTCTATTCCACCTCTTAGAACGAAAAGAACTATGGCAG  
TTCCAAAAAAACGTACTTCTACATCAAAAAAGCGTATTCGAAAAAATGTTTGGAAAAA  
GAAAGGATATTGGGCGGCCTTGAAAGCTTTTTTCATTAGCCAAATCTTTTCTACGGGGA

ATTCAAAAAGTTTTTTTTGTACGCCAAATAAAT---ATGGCCAAGAGTAAAGATGTCCGAG  
TAACGATTATTTTGAATGTACCAGTTGTGTTTCGAAACGGCGTTAAT-----AAGGAATCA  
ACGGGTATTTCCAGGTATATTACTCAAAAAAATCGACACAATACGCCAGTCGATTGGA  
ATTGAAGAAATTTCTGTCTTATTGTTACAAACATACAATTCACGGGGAGATAAAGAAAA  
TGAAAATAAGGGCTTCCGTTTCGTAAAATTTGTGAAAATGTTCGCCTAATCCGTAGGAG  
GGGACGAATTATCGTAATTTGTTTTAACCCGAGACATAAACAAAGACAAGGAATGGTT  
CGAGAGAAAGTAAAAGTCTCTACTCGGACACGACAGTGAAGTGTGTTGAATCAAGA  
ACAGATAGTAAGCGCCTTTATTATGGACGCTTTATTCTGTCTCCACTTATGAAAGGCCAA  
GCCGACACAATAGGCATTGCGATGCGAAGAGCTTTGCTTGGAGAACTAGAAGGAACAT  
GCATTACACGTGCAAATCTGAG-----AAAATACCCACGAATATTCTACCATAGTAGGT  
ATTCAAGAATCAGTCCATGAAATTTTAATGAATTTGAAAGAAATTGTATTGAGAGGGAA  
TTTGTATGGAACCTCGTAACGCCTTTATTTGTGCCAAGGGTCCCGGATATGTAAGTCTCA  
AGACATCATCTTACCACCTTCTGTGGAAATCGTTGATAATACACAGCATGTAGCCAGCC  
TAACCGAACCAATTGATTTGTGTATTGGATTACAAATCGAGAGAAATAGAGGATACGGT  
ATAAAAACGCCAAAGAACTTTCAC---GACGGA---AGTTATCCTATAGATGCTGTATTCAT  
GCCTGTTTCGAAATGCGAATCATAGTATTCATTGTTATGGGAATGATAATGAAAAACAGG  
AGATACTTTTTCTAGAAATATGGACAAATGGAAGTTTAACTCCGAAAGAAGCACTTCAT  
GAAGCTTCTCGCAATTTGATTGATTTATTTATTCCTTTTCTACATACGGAAGAAGAA-----  
AACTTACATTTAGAAAACAATCAA---CACGATGTTACTTTACCTTTTTTTCCGTTTCATGA  
TAGATTAGTT---AACTAACAAAAAAGAAA---AAAGAAATAGCATTGAAATATATTTTTTA  
TTGACCAATCAGAATTGCCTCCCAGGATCTATAATTGTCTCAAAAAGTCCAATATACATA  
CATTATTGGACCTTTTGAATAACAGTCGAGAAGACCTTATGAAAATTGAACACTTTTCGC  
ATAGAAGATGTAAAACAAATATTGGGCATTCTAGAAAAGAAG-----  
ATGCTCGGGGATGAAAAT--GGGGAATGTCTACAATACCTGGGTTGAATCAGATACAA  
TTTGAAGGATTTTGTGGGTTTCATGGATCGGGGCTTAACAGAAGAACTTTATAAGTTTCC  
AAAAATTGAAGATACAGAGCAAGAAATTGAATTTCAATTATTTGTGGAAACATATCAAT  
TGGTGAACCGTTGATAAAAGAAAGGGATGCTGTATATGAATCACTCACATATTCTTCT  
GAATTATATGTATCCGCAGGATTAATTTGGAAAACCAGTAAGGATATGCAAGAACAAAC  
AATTTTTATTGGAAACATTCCTTTAATGAACTCCCTCGGAACTTCTATAGTAAATGGAAT  
ATACAGAATTGTGATCAATCAAATATTGCAAAGCCCCGGTATCTATTATCGATCAGAATT  
GGATCATAACGGAATTTTCGGTCTATACTGGTACCATAATATCAGATTGGGGAGGGAGGTT  
AGAATTAGAGATTGATAGAAAAGCAAGGATATGGGCTCGTGTAAAGTAGGAAACAGAAA  
ATATCTATTCTAGTTCTATCATCAGCTATGGGTTTCGAATCTAAGAGAAATTCTAGAGAAT  
GTTTGCTACCCTGAGATTTTCTTGTCTTTCCCTGACCGATAAGGAAAAAAAAAAAAAATTGG  
GTCAAAGAAAATGCCATTTTGGAGTTTTATCAACAATTTTCTTGTGTAGGCGGGGATC  
CGGTATTTTCTGAATCCTTGTGTAAGGAATTACAAAAGAAATTCTTTCAGCAAAGATGT  
GAATTAGGAAGGATTGGTTCGACGAAATATGAACCAGAGATTGAATCTTAATATACCTCA  
GAACAATACATTTTGTACCAGGAGATATATTGGCAGCTGCGGATCGTTTGATTGGAAT  
GAAATTTGGAATGGGTCCACTTGACGAT-----ATGAATCATTTGAAAATAAGCGTATTC  
GTTCTGTAGCGGATCTCTTACAAGATCAATTCGGATTGGCTCTGGTTCGTTTAGAAAAT  
GTAGTTAGAGGAACTATATGCGGAGCAATTAGG---CATAAATTGATA---CCGACTCCTCA  
GAATTTGGTAACTTCGACTCCA-----TTAACAACCACTTATGAATCCTTTTTTCGGATT  
ACACCCATTGTCTCAAGTTTTGGATCGAACAAATCCATTGACACAAATAGTGCATGGGA  
GAAAATTGAGTTATTTGGGCCCCCGGAGGATTGACCGGGCGAACTGCTAATTTTCGGATA

CGAGATATCCATCCTAGTCACTATGGACGCATTTGCCCAATTGACACGTCTGAAGGGAT  
CAATGTTGGACTTATCGGATCCTTAGCAATTCATGCCAGGATTGGTCATTGGGGG---TCT  
CTAGAAAGTCCATTTTAT-----AAAATCTTTGAGAGATCAAAAAAAGCA-----CAGATG  
CTTTATTTATCCCAAGTCGAGATGAATATTATATGGTAGCGGCAGGAAATCTTTGGCC  
TTGAATCAGGGTATTCAGGAAGAACAGGTTGTTCCGGCTCGATACCGCCAAGAATTCC  
TGAATTCATGGGAACAAGTTCATCTTCGAAGTATTTTTCTTTTCAATATTTTTCTAT  
TGGAGCTTCCCTCATTCCTTTTATCGAGCATAATGACGCGAATCGGGCTTTAATGAGTTC  
TAATATGCAACGCCAAGCAGTTCCGCTTTCTCGTTCGAGAAGTGCATTGTTGGAACG  
GGTTGGAACGCCAAGTGGCTCTAGATTCAGGAGTTCCCGCTATAGCCGATCACGAGGG  
AAAGATCATTTCCACCGATACTGACAAGATTATTTTATCGGGCAATGGAGATGCTCTAG  
GCATTCCATTAGTTATGTATCAACGTTCCAACAAAATACTTGTATGCATCAAACGCCC  
GGTTCCGGCGGGGTAAATGCATTA AAAAGGGTCAAATTTTAGCGGACGGTGCCGCTAC  
GGTTGGTGGCGAACTCGCTTTGGGCAAAAACGTA CTAGTAGCTTATATGCCATGGGAA  
GGTTACAATTTTGAGGATGCGGTACTCATTAGCGAGCGTCTAGTATATGAAGATATTTAT  
ACTTCTTTTCACATACGAAAATATGAAATTCAGACTCATGTGACAAGCCAAGGT---CCT  
GAAAGAATCACTAACGAAATACCGCACCTAGAAGCCCATTACTCCGCAATTTAGACA  
AAAATGGAATTGTGATGCTGGGATCTTGGGTGGAGACAGGCGATATTTTAGTAGGTA  
TTAACGCCTCAGGTGGCGAAAGAA---TCATCGTATGCTCCAGAAGATAGATTATTACGG  
GCCATACTTGGGATTCAGGTATCCACTTCAAAGGAAACCTGTCTAAAATTACCTATAGG  
TGGGAGGGGTCGAGTCATCGATGTGAGATGGGTCCAGAAAAAAGGG---GGTTCTAGTT  
ATAATCCGGAACGATTTCGTGTCTATATTTTACAGAAACGCGAAATCAAAGTAGGCGAT  
AAAGTAGCCGGAAGGCATGGAATAAAGGGATCATTTCAAAAATTTTACCTAGACAGG  
ATATGCCTTATTTGCAAGACGGAAGACCTGTTGATATGGTCTTCAACCCATTAGGAGTA  
CCTTCACGAATGAATGTAGGACAGCTATTTGAATGCTCGCTTGGGTTAGCAGGGAGTCT  
ACTAGATAGACATTATCGAATAGCACCATTTGATGAGAGATATGAACAAGAGGCTTCGA  
GAAAAC TAGTGTTTTCCGAATTATATCAAGCCAGTAAGCAAACAGCGAATCCATGGGTA  
TTTGAACCCGAATATCCAGGAAAAAGCCGAATATTTGATGGAAGAACGGGAGGCCCT  
TTGAGCAACCTGTTATAATAGGAAAACCTTATATCTTGAATTAATTCATCAAGTTGATG  
ATAAAATACATGGGCGTTCCAGTGGACATTATGCACTTGTTACACAACAACCACTTAGA  
GGAAGGTCCAAGCAAGGAGGACAACGGGTAGGAGAAATGGAGGTTTGGGCTCTAGA  
GGGATTTGGTGTGCTCATATTTTACAAGAAATGCTTACTTATAAATCTGATCATATTAGA  
GCTCGCCAAGAAGTACTTGGGACTACGATCATTGGAGGAACAATACCTAAACCCGAAG  
ATGCTCCAGAATCTTTTCGATTGCTCGTCCGAGAATTACGATCTTTGGCTCTGGAACG  
AATCATTTCCCTGTATCTGAGAAGAACTTCCAGATTAATAGGAAGGAAGCT-----  
----ATGATCGACCGATATAAACATCAACAACCTCCGAATTGGATCAGTTTCTCCCAACAA  
ATAAGTGCTTGGGCCAAGAAAATCCTACCTAATGGAGAAACCGTTGGAGAGGTGACAA  
AACCTATACTTTTCATTACAAAACCAATAAACC GGAAAAGGATGGATTATTTTGTGAA  
AGAATTTTGGACCTATAAAAAGTGGAATTTGCGCTTGTGGAAATTATCGAGTAATTGG  
AAATCAAAAAGGAGGGCCCTAAATTTTGTGAACAATGCGGAGTTGAATTTGTTGATTCTC  
GGATACGAAGATATCAAAATGGGATACATAAGGCTGGCATGTCCAGTAACCTCATGTATGG  
TATTTGAAACGTCTTCTAGTTATATCGCCAATCTTTTAGACAAACCTCTTAAAGAATTA  
GAGGGTCTAGTATACTGCGAT-----TTTTCTTTTGGCTAGGCC---ATCGCTAAAAAACCTA  
CTTTCTTACGATTACGAGGTTTCATTCGAATATGAAATTCAATCCTGGAATAACAGTATCC  
CACTTTTTTTTACTACCCAAGGTTTCGATACATTCGAAGTCGCGAAATTTCTACCGGA



GCAGGTGCTATTTCGAGAACAATTAGCCGATCTAGATTTGCGAATTCTTATCGATTATTTCG  
GTGGTAGAATGGAAAGAATTAGGAGAAGAA---GGCCTCACGGGTAATGAATGGGAAGA  
TCGAAAAATTGGAAGAAGAAAGGATTTTTTGGTTAGACGCATGGAATTGGCTAAGCAT  
TTTATTCGAACAAATATAGAACCAGAATGGATGGTTTTTATGTCTATTACCGGTTCTTCCT  
CCCGAGTTGAGACCGATCATTAGATAGATGGGGGTAACTAATGAGTTCGGATATTA  
TGAACCTATAGAAGAGTTATCTATCGAAATAATACTCTTACCGATCTATTAACAACAAG  
TAGATCTACGCCAGGGGAATTAGTAATGTGTCAGGAAAAATTGGTACAAGAAGCCGTG  
GATACACTTCTTGATAATGGAATCCGCGGACAACCAATGAGGGACGGTCATAATAAGGT  
TTACAAGTCGTTTTTCAGATGTAATTGAAGGCAAAGAGGGGAAGATTTTCGCGAGACTTTG  
CTTGCCAAACGAGTCGATTATTTCGGGACGTTCTGTTCATTGTTGTTGGCCCTCACTTTC  
ATTACATCGCTGTGGATTGCCTCGCGAAATAGCAATAGAGCTTTTCCAGACATTTGTAAT  
TCGCGGTCTAATTAGACAACATCTTGCTCCGAACATAGGAGTTGCTAAGAGTAAAATTC  
GGAAAAAAGGGCCGATTGTATGGGAAATACTGCAAGAAGTTATGCGGGGACATCCTGT  
ATTGCTGAATAGAGCGCCTACTCTGCATAGATTAGGTATACAGGCATTCCAACCTATTTT  
AGTGGAAGGACGCGCTATTTGTTTACATCCATTAGTTTGTAAAGGATTCAATGCAGACT  
TTGATGGGGATCAAATGGCAGTTCATGTACCTTTATCTTTAGAGGCGCAAGCGGAGGCT  
CGTTTACTTATGTTTTCTCATATGAATCTCTTGTCTCCAGCTATTGGGGATCCCATTTCCG  
TACCTACTCAAGATATGCTTATTGGGCTCTATGTATTAACGAGTGGGAATCGTCGAGGTA  
TTTGTGCGAATAGGTATAATCCATGGAATCGAAAAAGC-----TATCAAATGAAAGAA  
TTGACGATAATAACTATAAGTCTACA-----AGGGAGCCTTTTTTTTGTAAATCCTATGATG  
CGATTGGAGCTTATAGGCAGAAAAGAATCAATTTAGATAGTCCTTTGTGGCTCCGGTGG  
CAACTAGAGCAATGC---GTTATTGCTTCA-----AGAGAAGCTCCCATCGAAGTTCCTAT  
GAATCTTCGGGTACCTATCATGAGATTTATGGACATTATCTAATAGTAAGAAGTTTAAAA  
AAAAAAATTCTTTGTATATACATTCGAACCACTGTTGGTCATATTTCTCTTTACCGAGAA  
ATCGAAGAAGCTATAACAAGGGTTTTTTTCGGGCCTACTCATATGATACCCAATCATATGGT  
ATC-----ATGGCAGAACGGGCCAATCTGGTATTTTCAATAAAGTGATAGAT  
GGAATGCCATTAACGGCTTATTAGCAGATTAATAGATCACTTCGGAATGGCATATACA  
TCACACATCCTGGATCAAGTAAAAGCTCTGGGTTTTCCAGCAAGCCACTGCTACATCCAT  
TTCATTAGGAATTGATGATCTTTTAAACGATACCTTCTAAGGGATGGCTAGTCCAAGATGC  
TGAACAACAAAGTTTGATTTTTGAAAAACACCATCATTTTGGGAATGTACACGCGGTA  
GAAAAATTACGCCAATCAATTGAGATATGGTATGCTACAAGTGAATATTTGCGACAAGA  
AATGAATCCTAATTTTAGGATGACTGACCCGTTTAAACCCAGTCCATATAATGTCTTTTTC  
AGGAGCTAGAGGAAATGCATCTCAAGTGCACCAATTAGTAGGTATGAGAGGATTAATG  
TCGGATCCCCAAGGACAAATGATCGATTTACCCATTCAAAGCAATTTACGCGAAGGACT  
GTCTTTAACAGAATATATCATTCTTGCTACGGAGCCCGAAAAGGGGTTGTGGATACCG  
CCGTACGAACATCAGATGCTGGATATCTTACGCGCAGACTTGTGTAAGTAGTTCAACAC  
ATTGTTGTACGTAGAACAGATTGTGGCACCACCCGAGGGATTCTGTGAGTCCTCAA  
AGAGGACGCTTCCG---GAAAGAATTTTTATCCAAACATTAATTGGTCGTGTATTAGCGG  
ACGATATATATATGGGTCCGCGGTGCATTGCCATTCGAAATCAAGATATTGGGCTTGGGC  
TTGTCGATCGATTCAGAGCC-----TTTCGAACACAACCAATATCTATTTCGAACT  
CCCTTTACTTGTAGGAGTACATCTTGGATTTGTGCGATTATGTTATGGTCGGAGCCCCACT  
CATGGTGACCTGGTTGAATTGGGAGAAGCTGTAGGTATTATTGCGGGGCAATCCATTGG  
AGAACCAGGAAACGCAACTAACATTAAGAAGCTTTTCATACCGGCGGAGTATTACAGGG  
GGTACTGCAGAACATGTCCGAGCCCTTTTAATGGAAAAATAAAATTCAATGAGGATTT

GGTTCATCCTACACGCACACGTCACGGGCATCCTGCTTTTTTATGTTATCGGGACTTGTA  
TGTAATTATTGAGAGTGAAGATATTATACATAAGGTGGCTATTCCACCAAAAAGTTTTCT  
TTTAGTTCAAACGATCAATATGTAGAATCAGAACAAGTGATTGCTGAGATTCGCGCGG  
GAACATACACTTTA---AATTTGAAAGAGAGGGTTCGAAAACATATTTATTCTGACTCAG  
AGGGGGAA---ATGCACTGGAGTACCGATGTGTACCATTCCGCCGAATTTACATATAGTAA  
TGTCATCTCTTACCAAAAACAAGCCATTTGTGGATATTATCAGGGGGTTCGTACAAA---  
---TTCAGTGTAGTTCTTTTTTCGCTCCACAAGGATCAAGATCAAATAAGCATTTCAT-----T  
ATCTTTCTGCCGAACGA---AGATATATTTCT-----TTCTCAGTGAATAATGATCAA---GTGA  
GACACAACCTTATTTAGTTCCGATTTTTTCGGATAAAAAA---GAGAGGATTTACGATTAT---T  
CAGAATTGAATCGAATAATAGGTACTGGGCATTGTGATTTTCATATATTCTGCT---ATTCTC  
CACGAGAATGCTGAT-----TTATTGGCAAAGAGACGAAGAAATAGATTTATTATTCCATTT  
CAATTGATTCAAGACCAAGAGAAAGAACTAATGCTACATTCCGGTATCTCGATGGAAAT  
ACCCATAAAT-----GGTATTTCCGTAGAAAAGTATTCTTGCTTTTTTTGACGATCCTCG  
ATACAGAAGAAAGAGTTCAGGAATTACTAAATATGGGACTCTAGGGGCGCATTCAATC  
GTCAAAGGGAGGAT-----GTGATTGAGTATCGA---GGAGTCAAAAAGGTTAAGCCAAA  
ATACATGAAAGTAGATCGATTTTTTTTCATTCCCAGGAAGTGCATATTTTATCCGAATC  
TTCTTCCATAATGGTACGGAACAATAGTATCATTGGAGTAGATACCCCAATCACTTTAAA  
TACAAGAAGCCAAGTGGGCGGATTGGTCCGAGTGGAAAGAAAAAAAAAAAAAGGATTG  
AACTGAAAATTTTTTCGGGTAATATCTATTTTCCCGGAGAAAGAGATAAGATATCTCGAC  
ACAGTGGCATCTTGATAACCACCAGGAACGGGCAAAAACA-----AACTCTAAGGAATCAA  
AAAAA-----TTGAAAAATTGGATCTATGTCCAACGG-----ATCACACCTACCAAGAAAA  
G-----TATTTTGTTTTGGTTCGACCTGTAACCCCATATGAAATACCGGACGGTCTAAATTT  
AGCAACTCTTCCCCCAGGATCCATTTTCAGGAAAAGATAATATGCAACTTCGAGCT  
GTCAATTATATCCTTTATGGAAATGGCAAACCGACTCGGAGAATTTCTGACACAAGTAT  
TCAACTAGTTCGGACTTGTTTAGTGTGAGTTGGGACCAAGACAAC-----AAAAGTT  
CTTTCGCCGAAGAGGTCTGTGCTCTTTTGTGTAAGTAAGGACAAATGGTCTGATTGGA  
GATTTCCCTAAGAATCGACTTAGTGAAATCTCATATTTTTTATATCAGAAAAGAAATGAT  
CCGTCAGGTTTCAGAATTGATTTCTGAT---AATAGGTCAGATCGTACCAATAAAAATCCGT  
TTTATTCCATTTATTCCAACGCAAGG-----ATTCAACAATCGTTTAGCCAAAATCA  
CGAACTATTACATCGCTCTTGAACAGA-----ATAAGGAATCCAATCTTTGATAATT  
TTGTCAGCATCTAATTGTTTTTCGCATGGGCCCA-----TTCAACGATGTAAAATATACAAT  
-----GTGATAAAACAATCAGATCCTCTAATTCCAATTAAGAATTTATTGGGTCCTTTAG  
GAACA-----GCCCCAAAATTGCGAATTTTATTTCATCA---TTTTACCCTTTAATAACT-----  
CATAATCAGACCTCG---GTAGCGAAATATTTTGTAGCTTGACAAT-----TTAAAACAGGC  
TTTTCAAGTACTT-----AAC---TATTATTTAATAGCTGAAAATGGGAGA-----ATTTATAATT  
TCGATCCATGCCGTAACATCTTTTTGAATGCAGTCAATTTGAATTGGTATTTCCCCATC  
ATCATTATTGTGAAGAAACGTCCACAATAATTAGT---CTTGGGCAGTTTATTTGTGAAAA  
TGATGTATAGCCAAAAGCGGACCA-----CGCCTAAAATCGGGTCAAGTTTTTATTGTT  
CAA---GCTGATTCTATAGTAATAAGATCGGCTAAGCCTTATTTGGCGACTCCGGGAGCAA  
CTGTCCATGGGCATTATGGAGAAACCCTTTACGAAGGAGATACGTTAGTTACATTTATAT  
ATGAAAAATCGAGATCTGGTGATATAACGCAGGGTCTTCCAAAAGTGGAAACAAGTGT  
AGAAGTGC GTTCGATTGATTCAATATCGATGAACCTAGAAAAGAGAATTGAGGGTTGG  
AACGAATGTATAACAAGAATTCTTGGAATTCCTTGGGGATTCGTGATTGGTGCTGAGCT  
AACTATAGTGCAAAGTCGTCTCTCTTTGGTTAATAAGATCCAAAAGGTTTATCGATCTCA

GGGGGTACAGATCCATAATAGGCATATAGAAATTATTGTACGTCAAATAACATCAAAAAGT  
ATTGGTTTTAGAA-----GATGGAATGTCTAATGTTTTTTTACCCGGGGAAGTATTGGA  
TTATTGCGAGCGGAACGAACGGGGCGTGTCTTAGAAGAAGCGATTTGTTATCGAGCCG  
TTTTATTGGGAATAACGAGAGCATCTCTGAACACTCAAAGTTTTATATCTGAAGCAAGT  
TTCAAGAACTGCTCGAGTTTTAGCAAAAGCTGCTCTCCGGGGTTCGTATCGATTGGTT  
GAAAGGCCTGAAAGAAAACGTTGTGCTTGGGGGTATGATACCCGCCGGTACCGGATTC  
AAAGGATTAGTGCACCGGTCA-----CGGCAACATAACAACATTCTTTTTGGAAACAAAA  
AAAAGAAT-----TTCTTCGGGGGAGAAATGAGA-----GATATTTCTTCCACCACCGAGA  
ATTATTTGACTCTTGCAATTTCAAACAATTTACATGATACATCAGGCCGCTCTTTTATAGGT  
ATAGAATTTAATGATTCT-----ATGGCAAGAAGATATTGGAACATAAATTTGGAAGA  
GATGTTGGAAGCAGGAGTTCATTTTGGTCATGGTACTAGGAAATGGAATCCTAGAATGG  
CGCCATATATCTCTGCAAAACGTAAGGGTATTCATATTACAAATCTGACTAGAACCGCTC  
GTTTTTTATCAGAAGCTTGTGATTTAGTTTTTGTATGCAGCAAGTAAGGGAAAACAATTC  
TTAATTGTTGGTACCAAAAATAAAGCCGCTGATTCGGTGGCGCGGGCTGCAATAAGGG  
CTCGGTGTCATTATGTTAATAAAAAATGGCTCGGTGGTATGTTAACAAATTGGCCACTA  
CAGAAACGAGGCTTCATAAGTTCAGGGACTTGAGAACAGAACAAAAGACGGGGGGA  
CTCAACCGTCTTCCGAAAAGAGATGCAGCTATGTTGAAGAGACAATTATCTCGCTTGC  
AAACATATCTGGGCGGGATTAAATATATGACGAGATTGCCTGATATTGTAATCATCGTTG  
ATCAGCAAGAAGAATATACGGCTCTGCGAGAATGTATCACTTTGGGAATTCCAACAATT  
TGTTAATCGATACAAATAGCGATCCCGATCTCGCAGATATTTTCGATTCCAGCAAATGAT  
GACGCTATAGCTTCAATTCGATTAATTTCTTAACAAATTAGTAGTCGCAATTTGTGAGGGT  
CGTTCT--AGCTATATACGAAATCCTATGGGACAAAAATAAATCCACTTGGTTTCAGAC  
TTGGTACAACCCAAAGTCATCATTCTTTGGTTTGCACAACCGAAAAAGTATTCCGAG  
GGTCTACAAGAAGATAAAAAATAAGAGACTGTATCAAGAATTATGTACAAAAAATA  
CGAGACTATCTTCTGGT--GTCGAGGGAATTGCACGTATAGAGATTCAAAAAAGACTGG  
ATCTAATTCAGGTGATAATCTATATGGGATTTCCCTAAATTATTAATTGAAGATAAG-----  
--CCACGAAAACCTCGAAGAACTACAGATGAATGTGCAAAAAGAAGTAAATTGTATGAAC  
CGAAAACCTCAACATTGCTATTACAAGAATTGGAAATCCTTATGGGCACCCTAATATTCTT  
GCCGAATTTATAGCCGGACAATTAAGAATCGAGTTTCATTTCGAAAGGCAATGAAAA  
AGGCTATTGAATTAAGTGAAGCAAGCGGATACAAAAGGAATTCAAATACAAATTGCAGG  
GCGTATCGACGGAAAAGAAATCGCACGTGTCGAATGGATCCGAGAAGGTAGGGTTCTCT  
CTACAAACCATTGGAGCGAAAATTGAGTATTGCTCTTATAGAGTTCGAACTATCTATGG  
GGTATTAGGAATCAAATTTGGATATTTATAGACGAAGAAATGTCACGTTACCGAGGGC  
CTCGTTTCAAAAAAATACGCCGTCTGGGGGCTTTACCGGGACTAACTAGTAAAAAGGCC  
TAGAGCCGGAAGCGATCTTAGAAACCAATCGCGCCCCGGTAAA---AAATCTCAATACCG  
TATTCGTTTAGAAGAAAAACAAAATTCGTTTTTCATTATGGCCTTACAGAACGACAAT  
TACTTAAATACGTTTCGTATTGCCAGAAAAGCCAAAGGGTCAACAGGTCAGGTTTTACTA  
CAATTAATTGAAATGCGGTTGGATAACATCCTTTTTTCGATTGGGTATGGCTTCGACTATT  
CCTCAAGCCCGTCAATTAGTTAACCATAGACATATTTTAGTTAATGGGCGTACAGTAGAT  
ATACCAAGTTATCGCTGCAAACCCCGAGATATTATTTACAGCGAGGGATGAACAAAATC  
TAGAACTCTGATTCAAATTTATCTTGATTATCCACCAAT--GAGGAATTACCAAAACAT  
TTGACCTTTCACACATTACAA-----TATAAAGGATTAGTCAATCAAATAATAGATAGGAAA  
TGGGTTGGTTTGAATAAATGAATTGCTTGTGCTAGATAATTTCTCGTCAGACTATG  
TCACGTCGAGGTACTGCAGAAGAAAAAACTGCAAATCCGATCCAATTTATCGTAATC

GATTAGTTAACATGTTGGTTAACCGTATTCTGAAACACGGAAAAAATCATTGGCTTAT  
CAAATTATCTATCGAGCCTTGAAAAAGATTCAACAAAAGACAGAAACAAATCCACTAT  
CTGTTTTACGTCAAGCAATACGTGGAGTAACTCCCGATATAGCAGTAAAGCAAGACG  
TGTAGGCGGATCGACTCATCAAGTTCCCATTGAAATAGGATCCACACAAGGAAAAGCA  
CTTGCCATTCGTTGGTTATTAGGGGCATCCCGAAAACGTCCGGGTGCAAATATGGCTTT  
CAAATTAAGTTCCGAATTAGTGGATGCTGCCAAAGGGAGTGGCGATGCCATACGAAA  
AAGGAAGAGACTCATAGAATGGCAGAGGCAAATAGAGCTTTTGCACATTTTCGTATGG  
GTAAGGACACTATTGCTGACATAATAACCTCTATACGAAATGCTGATATGAATAGAAA  
GGAACGATTCAAATAGGATCTACTAACATCACTGAAAACATTGTAAAATACTTTTACG  
AGAAGGTTTTATCGATAACGTAAGGAAACATCGGGAACGCAACAAATATTTTTGGTTT  
TAACCCTACGACATAGACGG-----AATAGAAAAGGACCACATAGAACT---ATT-----TTAA  
ATTTACGACGGATCAGTCGACCAGGTCTACGAATCTATTCTAACTATCAACAAATTCCTA  
GGATTTTAGGCGGGATGGGGATTGTAATTCTTTCTACTTCTCGGGGTATAATGACAGACC  
GGGAGGCTCGACTAGAAGGAATCGGTGGAGAAATTTTGTGTTCTATATGGATGGCAA  
ACCTATACCAAAGTTGGTTCACGTAGGAATGGGCGCAGTAGTGCACGGAAAAGTGCA  
CGTAGAATACCAAAGGAGTTATTCATGTTCAAGCAAGTTTCAACAATACCATTGTAC  
TGTTACAGATGTACGGGGTCGGGTAATCTCTTGGTCTCCTCCGCCGCACTTGTGGATTCA  
AGGGTACAAGAAGGGGGACCCCTTTTGCTGCTCAAACCGCAGCGGGAAATGCTATTCG  
AGCAGTAGTAGACCAAGGTATGCAACGAGCGGAAGTTATGATAAAGGGTCTTGGTCTC  
GGAAGAGATGCAGCATTACGAGCTATTCGTAGAAGTGGTATACTATTAAGTTTCGTACG  
GGATGTAACCCCTATGCCACATAATGGCTGTAGACCTCTAAAAAAGACGTGTGATGC  
CAACTATTAACAACCTATTAGAAATGCAAGACAGCCAATTAGAAATGTCACGAAATCC  
CCTGCTCTTGGGGGATGTCCTCAGCGCCGAGGAACATGTACTAGGGTGTATACTATCAC  
CCCCAAAAACCAAACCTCTGCCTTACGTAAAGTTGCCAGAGTACGATTAACCTCTGGG  
TTTGAATCACTGCTTATATACCTGGTATTGGCCATAATTCACAAGAACATTCTGTAGTC  
TTAGTAAGAGGGGGAAGGGTTAAGGATTTACCCGGTGTGAGATATCACATTGTTTCGAG  
GAACCTAGATGCTGTGCGGAGTAAAGGATCGTCAACAAGGGCGTTCTAAATATGGGGT  
CAAAAAGCCAAAAATGGCAAAGAAAAGTTTGATTCATAGGGAGAAGAAGAGGCAAA  
AATTGGAACAAAATATCATTGATTCGTGATCCTCAAAAAAAGAAATAAGC-----A  
AAGTTCCGTCGTTGAGTGAGAAATGGAAAATTCATGGAAAGTTACAATCCTCACCACG  
AAATAGCGCACCCACACGTCTTCATCGACGTTGCTTTTCGACCGGAAGACCGAGAGCT  
AACTATCGAGACTTTGGACTATCCGGACACATACTTCGTGAAATGGTTCACGCATGTTT  
GTTGCCGGGGGCAACAAGATCAAGTTGGATGGTAAAAAATTCATTATCTCAGTTATTT  
TTCAAGAA---AAAAAGAAGAA---AACAGGGGGTCTGCTGAATTTCAAATAGTTAGTTT  
CACCAATAAGATACGAAGACTTACTTCACATTTGGAATTGCACAAAAAAGACTATTTAT  
CTCAGAGAGGTCTACGTAAAATCTAGGAAAACGTCAACGACTGCTATCTTATTTATCA  
AAGACAAATAAAATACGTTATAAAGAATTAATTGGTGAGTTGGATATTCGGGAATCAAA  
AAATCGT-----ATGGTAAAACCTTCGTTTGAAACGATGTGGTAGAAAGCAACGAGCCGTT  
TATCGAATCGTTGCAATTGATGTTTCGATCCCGAAGAGAGGGAAGAGATCTTCGAAAAG  
TGGGTTTTTATGATCCGATAAATAATCAAACCTATTTAAATGTTCCCGCCATTCTCTATTT  
CCTTGAAAAAGGAGCTCAACCCACAGCAACTGTTTCATGATATTTTAAAGAAGGCGGGG  
GTTTTTACAGAACTTACTCTTAATCAA---ACAAAATTCACTATGGATAAATCCAAGCGAC  
TCTTTCTTAAATCCAAGCGATCTTTTCGTAGGCGTTTGCCCCGATCCAATCGGGGGAT  
CGAATTGATTATAGAAACATGAGTTAATTAGTCGATTTATTAGTGAACAAGGAAAAATA

TTATCTAGGCGAGTAAATAGATTGACCTTAAAACAACAACGATTAATTACTATTGCTATA  
AAACAAGCTCGTATTTTATCTTCGTTACCCTTTCTTAATAATGAGAAA-----CAGTTTGAA  
AGAAGCGAGTCGACCACTAGAACTACTGCTCTTAGAACCCAGAAATAAAATGGCGCGT--  
-CTAAAAAAAATCCTTTTGTAGCAAATCATTTATTAAAAAAATCGAAAGGCTTAATAC  
AAAAGCGGAAAAAGAAATAATAAATACTTGGTCCAGAGCATCTACCATTATACCCACAA  
TGATCGGCCATACTATCGCTATCCATAATGGAAAAGAACATTTGCCCATTTATATAACGG  
ATCGTATGGTAGGACATAAATTGGGAGAATTCGCACCTACTATAAATTTTCGCGGACAC  
GCAAAAAATGATAATAAATCTCGTCGTATGATTTTAAATCTTTTATAACCAGGGAATCTA  
ATATCCTTATACATGACGATAATCAATTCGGTCGTTATGGTCGGACTCTATTATGGATTC  
TGACCACACTATCCATAGGTCCCTCTTATATCTTCCTTCTACGAGCTCGGTTTATGGAAG  
AAGGAGAAGAAGGAACCGAGAAGAGAGTATCAGCAACAACCTGGGTTTATTGCAGGCC  
AGCTCATGATGTTCAATCAATCTACTATGTACCTCTGCATTTAGCATTGGGTAAACCTCA  
TACAATACTGTCTTAGCTCTACCGTATCTTTGTTTCATTTCTTCTGGAACAATCACAA  
AGACTTTTTTGATCATAGACGTCCTACCAGAAATCAATGCGTAATCTTAGCATTCAATG  
TGTATTCCTGAATAATCTCATTATTCAATTATTCAACCATTTCATTTTACCAAGTTCAATG  
TTAGCCAGATTAGTCAACATCTATATGTTTCGATGCAACAACAATATGTTATTTGTAACA  
AGTAGTTTTGTTGGTTGGTTAATTGGTCATATTTTATTGATGAAATGGGTTGGGTTGGTA  
TTAGTCTGGATAACAACAAATAATTTAATTAGGTCT---ATTCGATCTAATAAGTATCTGT  
ATCAGAATTTAGAAATTCTATGGCTCGAATCTTTAGTATTCTGTTATTTATTACCTGTGTT  
TACTATTTAGGCAGAATACCGTCACCCATTCTAACTAAGAACTGAAAGGAACCGAAG  
AAAATAAACCTCTTGTGACACTTCTTTTTGATTCTAAACGATGGAATCGACCTTTGCGAT  
ATATAAAAATGACCGGGTTGAAAATGCTATAAAAATGAAATGTCACAATATTTTTTTT  
ATACATGTCAAAGTGATGGAAAAGAAAAATATCTTTTACGTATCCACCCAGTTTAGCA  
ACTTTTGGGGAAATGATACAAAAAAAATATATTTTTTACACCAGAAAAATGGTTTTTC  
TGATGAATTGTATACTGATTGGAGTTTTATCAATGAACTAAAAAGAAGAAATTTGAGTA  
AGGAGTTTATAAAAAGAGTCGAATCTTTAGAT-----TTTGATCTGGGCATACTTGAAAA  
AAGGACTCGATTCTCTAATAATGAACTAAACGAGAATACTTGCCTAACTATATGATCC  
TTTCTTGCATGGACCCTACCGCGGAAGAATCAAAAAATGGGGTTCCCTACGGATCCAT  
TTTGGATAAATAAGATTCATGCTCTACTTTATCACGACCTTGAACAGACAAATCCCAAC  
AATCAAGGA-----ATAAAAGAAATAAGTAAAAAAGTTCCTCGATGGTCATACAAATTAAT  
CGATTTAGAACAACAGGAGGGAGAAGAAATTCGTTCAAGAAAATCCAAGCGCGTCGT  
GATTTTTACTAATGCTTTGATACGCTATTCGCAACAATCGGATTTTCGGCGCGACATAAT  
AAAGGGTTCCATGCGTGCCTAAAGGCGTAAAACAATTACTTGGGAGCTGTTTCAAGCA  
AATGTACATTCCCCCTTTTTTTGGACAGAGTAGACAAACCA-----CTCTTTTTTTCTTTT  
GATATTTCTGGACCGCTGAAACGAATATCTCGAAATAGAGAAGAGAAAATGAGGATAG  
AAATAGCAGAAGCTTGGGATAGTCTTTTACTTGCTCAAGTAATAAGGGGCTCCGTGTTA  
ATAACCAATCAATTCTTAGAAAATATATTATATTACCTTCACTGATAATAGTTAAAAACA  
TTGCCCGTATGTTATTATTCAATTTCTGAGTGGTCTGAGGATTTAACGGATTGGAATC  
GAGAAATGCATGTTAAATGCACTTATAATGGTGTTCATTATCCGAAACCGAATTTCCA  
AAAACTGGTTAACAGACGGTATTCAGATAAAGATCCTATTTCTTTTTTGCTGAAACC  
TTGGCACAGATTTAAA---GGTCAAAAAGAATGATTTTTGCTTTTTAACAGTTTGGGGAAT  
GGAACTGAACTACCTTTCGGCTCTCCTCGAAAACGGCGTTCGTTTTTTGAGCCTATTT  
TTAAAGAACTAAAAAAAATAAAAAAATGGAAAACGAAATGTTTTATAGCT---TTAA  
CAATTTTAAAAGAAAAAACTAAATTGTTTCGAAAAGCTTCAAAGAAACAAAAAAT

GGATCACTCAAAGCATTCTA-----TTTCTAAAAGGAATAATAAAAAGAACTTTCAAAAATA  
AATGATTTCGATAATCAGTAATAAGATGATTCACAAATCA--CTTCAAATTCAATCTATGGC  
GTGGACAAAT--TCATTAACCGAAAAAAAATAAAAAGATCTGACTAAGAGAACAAACA  
CAATCAAAAATCAAATACAAAAAATTCTAATTATAAAAAGACAAGAGTTCTAACAAAATA  
AGTTATCAGGATAAAATATTAGAATCATCAAAAAAATTTTGGCAAATAGTAAAA-----AA  
TATTCGATTAATCCGGAAATTCTATTTTTTTATAAATTTTTTCATTGAAAAGATATACATGG  
ATATTCTTCTATATATCATTAAATATTCCAAGAACCAATACCCAACCTT-----TGTGA  
CTTATCCTCCCTCTCACAAGCATATGTATTTTACAAATTATCACAAACC---GTTATTAGTT  
TTTATAAATTCAAACCTATCCTTCAATATACATCTCTTTTTCTTAAAAATGAAATAAAAAGA  
TTATTTTGAACGGGAGTATCTCATTCCGGGTTAAGACAGAAAATTGTTTGG---TCTGG  
AATGAATGAATGGAAAACTGGTTAAGGAGTCGTTATCAATACGATTTAGTTCAGAATA  
GATGGCTAAAATTAGGACCAGGACAATGGCGAAATAGAGTCAATCAACACTATCTGGC  
TCAAAAATAAACAAAATGGGATTGAGATGAAAAAGAAAGA-----TTAATTCATTACGAA  
AAAAAATCTAATTTTTAAAAAACACTATGGATATGATTTTTTATCATATAAATCTATTAATG  
ATATCCTAGATGCTTCGCACAGAAAGTTTTTTAATTGGAGAATTCTTGATTTTTGTCTTA  
GACATTTTGATTGGATGGGACTGAATGAAGAAATACTAAGTCATTGGTTCTTCCAGAA  
TTTGTGCTGCTATATAATGCATATAAGGTTAAACCATGGATCATACCAATAAAATTAATCTC  
TTTTCAATAGCAAC-----ACGGAAGCAGAGCTTGATTTCTTCTTAAAAAGGTATTTGCGT  
TTTCAATTGAGATGGGAT-----AATCAAAGAATAATCAATAATATCAAAGTATATTGCCT  
CCTGCTTAGACTGATAAATCCAACGAAATTGTTATATCCTCTATTCAACGGGGAGAGA  
TGAATCTGGATATTTGATGATTCAGAAGGATTTAACTCTTAGAGAATTAATGAAAAAA  
GGAATATTGATTATCGATCCAGTTCGTCTGTCCGTAAAAAATGATGGACAATTTATTCTA  
TATCAAACATAAGTATTTTGTGGTTCATAAAAATAAACACCATTATGAT---TTGTTTGT  
TCCTGAAAATATTTTATCCCCTAACCCGCGGAGAATTGCGAATTCGAATTTCTTTCAG  
ATTTCTTTGGCCCAATTATCGATTAGAAGATTTAGCTTGTATGAATCGATATTGGTTAAT  
ACTAATAACGGCAGTCGTTTCAGTATGATAAGGATCCGTATGTATCCGATGAAAGGACA  
TCAATTCAAATCCTGGATTTTTCGAATTGAGAGAGATATTGAGAGAGATCAAGAATTCTC  
ACTATTTCTTAGATTCATGGACCCAATTCAATTCAGTGGGATCTTTCATTACATTTTTTT  
CCACCAAGAACGTTTTATAAACTCTTGGACCCCGAATTTGGAGTATCCTACTTTCA---  
CGCAATTCA-----CAGGGTTCAACAAGCAATCGATATTTT-----ACGATCAAGGGTGTA  
GTACTATTTGTAGTAGCG---GTCCTTATATATCGT-----ATTAACAATCGAAATATGGT  
CGAAAGAAAAAATCTCTATTTGACAGGGCTTCTTCTT-----ATACCTATGAATTCC  
ATTGGACCCAGAAATGATACATTGGAAGAATCTTTT---GGGTCTTCCAATATCAATAGGT  
TGATTGTTTCG---CTCCTGTATCTTCCAAAAGGAAAAAAGATCTCTGAGAGCTGTTTCC  
TGGATCCGAAAGAGAGTACTTGGGTTCTCCCAATAACT-----AAAAAGTGTATCATG  
CCTGAATCTAACCGGGGTTTCGCGGTGGTGGAGGAACTGGATCGGAAAAAAGAGG-----  
GATTCTAGTTGTAAGATATCTAAT-----GAAACCGTCGCTGGAATTGAGATCTCATTCA  
AAGAGAAAGATATCAAA---TATCTGGAGTTTCTTTTTGTATATTATATGGAT-----GATTTCG  
ATCCGCAAGGACCATGATTGGGAATTGTTTGTATCGTCTTTCTCCGAGTAAGAGGCGAA  
ACATAATCAACTTG-----AACTCGGGACAGCTATTTCGAAATCTTAGTGAAAGACTGGATT  
TGTTATCTCATGTTTGTCTTTTCGTGAAAAAATACCAATTGAAGTGGAGGGT---TTCTTCA  
ACAACAAGGA---GCTGGGTCAACTATTCAATCAAATGATATTGAGCATGTTTCCCAT----  
--CTCTTCTCGAGAGGCAAGTGGGCTATTTCTTTGCAAATTTGTGCTCAATTCATATGTG  
GCAATTCGCCAAGATCTTTCGTT-----AGTTGGGGGAAG---AATCCACACGAATCG

GATTTTTTGAGGAAC---ATATCGAGAGAGAATTGGATTTGGTTAGACAATGTATGGTTGG  
TAAACAGGGATCGA-----TTTTTTAGC-----AAGGTACGGAATGTATCGTCAAATATTCA  
ATATGATTCC-----ACAAGA-----TCTAGTTTCGTTCAAGTAACGGATTCTCGCCAATTG  
AAAGGATCTTCT--GATCAATCCAGAGATCGTTTCGATTCCATTAGT-----AATGAGG  
ATTCGGAA-----TATCACACATTGATCAATCAAAGAGAGATTC  
AACAACTAAAAGAAAGATCGATTCTT--TGGGAT-----CCTTCCTTTCTTCAAACGGAAC  
GAACGGAGATAGAATCAGAC-----CGATTCCCTAAG-----TGCCTTTCTGGATATTCC-----  
TCAATGTCCCGGCTATTACAG---GAACGTGAGAAGCGGATGAATAATCATCTGCTTCCG  
GAAGAAATCGAAGAATTT-----CTTGGGAATCCTACAAGATCCATTGTTCTTTTTTCTCT  
GATAGATGG-----TCAGAACTTCAT--CTGGGTTTCGAACCCTACTGAGAGGTCCACTAGA  
GATCAG-----AAATTGTTGAAGAAAGAACAAGATGTTTCT--TTTGTCCCTTCCAGG  
CGATCGGAA-----AATAAAGAAATAGTTAATATATTCAAGATAATTACGTATTTACAA  
AAT-----ACCGTCTCAATTCATCCTATTTTCATCAGATCCGGGATGTGATATGGTTCCG---AA  
GGAT-----GAA--CTGGGCAGTTCCAATAAGATTTTCATTCTTGAACAAAAATCCATTTTTT  
GATTTA-----TTTCATCTATTCCATGACCAGAACAGGAGGGGATACACGTTA-----CACCA  
CGATTTTGAATCAGAA-----GAGAGATTTCAAGAAATGGCAGATCTATTCACTCTATCAA  
TAACCGAGCCG--GATCTGGTGTATTATAAGGGATTTGCCTTTTCTATTGATTCCTACGGA  
TTGGATCAAAAACAA-----TTCTTGAATGAGGTATTCAACTCCAGGGATGAATCGAAAA  
AGAAATCTTTA-----TCGGCTCTACCTCCTATTTTTTAT-----GAAGAAAATGAATCTTTT  
TATCGAAGGATCAGAAAAAAATGGGTCCGG---ATCTCCTGCGGGAATGATTTGGAAGAT  
CCAAAACCAAAAATAGTGGTATTTGCTAGCAACAACATAATGGAGGCAGTCAATCAAG  
ATAGATTGATCCGAAATCTGATTCAAATCCAA-----TATAGCACCTATGGGTACATAAGAA  
ATGTATTGAATCGATTCATTA AAAAGAAT-----CGATCCGATCGCAACTTCGAATATGG  
AATTCAA-----AGGGATCAAATAGGAAATGATACTCTGAATCATAGA ACTATAATGAAA  
TATACGATCAACCAACATTTATCGAATTTGAAAAAG---AGTCAGAAGAAATGGTTTCGAT  
CCT-----CTTATTTTGATTTCTCGGACCGAGAGATCCATGAATCGGGATCCTAATGCATAT  
AGATACAAATGGTCCAATGGGAGCAAGAATTTCCAGGAGCATTGGAACATTTTCGTTTC  
TGAGCAGAAGAGCCGT-----TTTCAAGTAGTGTTTCGATCGATTACGTATTAATCAATAT  
TCGATTGATTGGTCTGAGGTTATCGACAAAAAAGATTTGTCTAAGTCACTTCGTTTCTT  
TTTGTCCAAGTTACTTCTC-----TTTTTGTCC-----AAGTTGCT  
TCTCTTTTTGTCTAACTCACTTCCT--TTTTTCTTTGTGAGTTTCGGGAATATCCCCATTC  
ATAGGTCTGAG---ATCCACATCTAT--GAATTGAAAGGTCCGAATGATCAACTTTGCAAT  
CAGTTGTTAGAATCAATAGGTCTTCAAATCGTTCATTTGAAAAAATTGAAACCTTTC-----  
-TTATTGGAT-----GATCATAATACTTCT--CAAAAACCGAAATTCTTGATCAATGGAGG  
ACAATATCACCATTTTGGTCAATAAGATACCA---AAGTGG---ATGATTGACTCATTCCA  
TACTAGA-----ATAATCGCAGGAAATCTTTTGATAACATGGATTTTC-----TCAATGATATC  
CCACGATCAAGACAATTGGCTGAATCCCGTGAAACCATTTTCATAGAAGTTCATTGATAT  
CTTCTTTTTTATAAAGCAAATCGACTTCGATTCTTGAATAATCCACATCACTTCTGCTTCTA  
T-----TGTAACAAAAGATTCCCTTTT-----TAT--GTGGAAAAGGCCCGTATCAATAATTA  
TGAT-----TTTACGTATGGA---CAATTCCTCAATATCTTGTTTCATTTCGCAACAAA---ATATTT  
TCTTTGTGCGGTGGTAAA-----AAAAACATGCTTTTTTTGGGG---AGAGATACTATTTCA  
CCTATCGAGTCGCAGGTATCTAACATATTCATATCTAATGATTTTCCACAAAGTGGTGAC  
GAAAGG---TATAACTTGTACAAATCT-----TTCCAGTTTGCAATTCGATCCGATCCATTA  
GTTTCGT-----AGAGCTATTTACTCGATTGCAGACATTTCTGGAACACCTCTAACAGAGGG

ACAAATAGTCAATTTTGAAAGAACTTATTGTCAACCTCTTTCAGATATGAATCCATCTGA  
TTCAGAAGAGAAGAACTTGCATCAGTATCTCAAT-----TTCAATTCAAACATGGGTTTGA  
TTCACACTCCATGTTCTGAGAAATATTTACCATCCGAAAAG-----CGGAAAAAA-----  
-----CGGAGTCTTTGTCTAAAG-----AAATGCGTTGAGAAAGGGTGGATGTATAGAA  
CCTTTCAACGAGATAGTGCTTTTTCAACTCTCTCAAACGGAATCTATTCCAAACATATA  
TGCCATGGTTCCTTACTTCGACAGGGTACAAATATCTAAATTTGATATTTTAGATACTTT  
TTCAGAC--CTATTGCCGATACTAAGTAGCAGT-----CAAAAATTTGTATCCATTTTTCATG  
ATATTATGCATGGATCAGATATATCATGGCGAATTCTTCAGAAAAAATTG-----T  
GTCTTCCACAATGGAAT--CTGATAAGTGAGATTTTCGAGTAAGTGTTTACATAAT-----TTT  
CTTCTGTCCGAAGAAATGATTCATCGAAATAATGAGTCA-----CCATTGATATCGACACA  
TCTGAGATCGCCAAATGTTCCAGGAGTTC--CTCTATTCAATCCTTTTCTTCTTCTTGTG  
CTGGATAT--CTCGTTCGTACACATCTTCTCTTTGTTTCCCGA-----GCCTATAGTGAGTTA  
CAGACAGAGTTCGAAAAGGTCAAATCTTTGATGATTCCATCATAATGATTGAGTTGCG  
AAAACCTTCTGGATAGGTATCCTACATCTGAACCTGAATTTCTTCTGGTTAAAGAATCTCTT  
TCTAGTTGCTCTGGAACAATTAGGAGATTCTCTAGAAGAAATACGGGGTCTGCTTTTG  
GCGGCAACATGCTATGGGGTGGTGGTCCC-----GCTTATGGG--GTCAAATCAATA  
CGTTCTAAGAAGAAATATTTGAATATCAATCTCATCGATATCATCGATCTCATA---AGTAT  
CATACCAAATCCCATCAATCGAATCATTTTTTCGAGAAATACGAGACATCTAAGTCATAC  
AAGTAAAGAGATCTATTCATTGATAAGAAAAAGAAAAACGTGAGCGGTGATTGGATT  
GATGAGAAAATAGAATCCTGGGTTCGCGAACAGTGATTTCGATTGATGATAAAGAAAGAG  
AATCTTGGTTCAGTTCTCC-----ACCTTAACGACA-----GAAAAAAGGATTGATCAAATT  
CTATTGAGTCTGACT--CATAGTGATCATTTATCA-----AAGAATGACTCTGGTTAT  
CAAATGATTGAACAACCGGGACCAATTTACTTACGATACTTAGTTGACATTCAT-----AA  
AAAGTATCTAATGAATTATGAGTTCAATACATCCTGTTTAGCAGAAAGGCGGATATTCCT  
TGCTCATTATCAGACAATCACTTAT-----TCACAAACTTCGTGTGGGGCTAATAGTTTCA  
TTTCCCGTCTCGTGGA-----AAACCTTTTTCGCTCCGCTTAGCCCTATCTCCCTCT--AG  
GGGTATTTTAGTGATAGGTTCTATAGGAACCGGACGATCCTATTTGTTCAAATACCTAGC  
GACAACTCCTATGTTCTTTCATTACAGTATTTCTGAACAAGTTCTGGATAACAAGC  
TTAAAGGTTTTCTTATTGAT-----GATATCGAT----GATGATAGTGACGATATTGAT  
GCTAGTGACGATATTGATGCTAGTGACGCTATTGAT-----GATAGTGAC  
GCTATTGATCGTGACCTTGATACGGAGCTGGAGCTTCTAACTATGATGAATGCGTTA-----  
---ACTATGGATATGATGTCG-----GAAATAGACCGATTTTATATCACCTTCAATTCGAA  
CTAGCAAAGCAATGTCTCCTTGCATAATATGGATTCCAAACATTCATGATCTGGATGTG  
AATGAGGCGAATTACTTATCCCTCGGTCTATTAGTGAACCTATCTCTCC-----AAGGATT  
GTGAAAGATGTTCC---ACTAGAAATATTCTTGTATTGCTTCGACTCATATTCCCCAAA  
AGTGATCCCCTACTAATAGCCCCGAATAAATTAATACATGTATTAAGATACGAAGGCT  
TCTTATCCACAACAACGAAAGCACTTTTCACTCTTTCATATACTAGGGGATTTCACTT  
GGAAAAGAAAATGTTCCATACT-----AATGGATTCCGGTCCATAACCGTGGGTCCAAATG  
CACGAGATCTTGTAGCACTTACCAATGAGGCCCTATCGATTAGTATTACACAGAAGAAA  
TCAATTATAGACACTAATACAATTAGATCTGCTCTTCATAGACAACTTGGGATTTGCGA  
-----TCCCAGGTAAGATCGGTTCCAGGATCATGGGATCCTTTTCTATCAGATAGGAAGG  
GCTGTTGTACAAAATGTAATTCTAAGTAATTGCCCTTAGATCCTATATCTATCTATATGA  
AGAAGAAA-----TCATGTAACGAAGGGGATTCATTATTTGTACAAATGGTACTTCGAGCTT  
GGAACGAGCATGAAGAAATTAACGATACTTCTTTATCTTTGAGTTGTTCTGCCGGATC



GGTCGCTCAAGACCTTTGGTCTCTACCC-----GGACCCGATGAAAAA---AATGGGATCAC  
TTCTTATGGGTTTCGTTGAGAATGATTCT--GATCTAGTTCATGGCCTATTAGAAGTAGAA  
GGCGCTCTGGTGGGA-----TCCTCACGGACAGAAAAAGATTGCGGTTCAGTTTGATAATG  
AT-----CGAGTGACATTGCTTCTTCGGTCCGAGCCGGGAAT--CCCTTATATATGATGCA  
AAATGGATCTTGTTCTATCGTTGATCAGAGAAATCTCTATGAAAAA-----TACGAATCGG  
AGTTTGAAGAA---GGGGAAGGAGAAGGAGTACTCGACCCGCAA-----CAGATAGA  
GGAGGAT-----TTATTCAATCAC-----ATAGTTTGGGCTCCT-----AGGATATGGCGCCC  
T-----TGGGGCTTTCTATTTGATTGTATCGAAAGGCCAAATGAATTGGGATTTCCC---TA  
TTGGGCCGGGTCAATTCGGGGCAAG-----CGGATCATTATGATGAAAAGGATGAGCT  
TCAAGAGAATGATTCGGCGTTCCTTGCAGAGTGAACCATGCAGTACCAGGCACGAGAT  
AGATCTTCCAAAGAACAAGGCTTTTTTTCGAATAAGCCAATTCATTTGGGATCCTGCGGA  
TCCACTCTTTTTCTATTCAA---GATCAGCCCTTTGTCTCTGTGTTTTACACCGAGAA  
TTCTTTGCAGATGAAGAGATGTCAAAGGGGCTTCTTACTTCCCAAACAGATCCTCCTAC  
ATCTATATATAAACGCTGGTTTATC-----AAGAATACGCAAGAAAAGCACTTCGAATTATT  
GATTCATCGCCAGAGATGGCTTAGA-----ACCAATAGTTCATTATCTAATGCTAATGGA  
TTTTTCCGTTCTAAT-----ACTCCATCCGAGAGTTATCAGTATTTATCAAATCTGTTCCCTAT  
CTAAC---GGAAGACTATTGGATCAAATGACAAAGACATTGTTGAGAAAAAGATGGCTTT  
TCCCGGATGAAATGAAAATTGGATTC-----ATG-----ATGCCTAGATCGCA  
G---ATAAATGGAAATTTTATTGATAAGACCTTTTCAATTGTAGCCAATATCTTATTACGAA  
TAATCCGACAACCTCAGGAGAAAAAGAGGCATTTACTTATTACAGAGATGGT-----ATG  
TCGGCTCAATCCGAAGGAAATTATGCGGAGGCCTTACAGAATTATTATGAAGCTATGCG  
ACTAGAAATTGATCCCTATGATCGAAGTTATATACTATATAACATAGGCCTTATCCACACA  
AGTAATGGAGAGCATACAAAAGCTTTAGAATATTATTTTCGAGCACTAGAACGAAACCC  
GTTCTTACCACAAGCTTTTAATAATATGGCTGTGATCTGTCATTAC---CGGGGAGAACAG  
GCCATTCGACAGGGGGATTCTGAAATAGCGGAGGCTTGGTTCGATCAAGCCGCTGAGT  
ATTGAAACAGGCTATAGCGCTTACTCCTGGTAATTATATTGAAGCGCAGAATTGGTTA  
AAGATCACGCGCGTTTCGAA-----ATGAGTTGGCGATCAGAATCTATATGGATAGAATT  
TATAGTGGGATCTCGAAAAACAAGCAATTTTTGCTGGGCCTTTATCCTTTTTTTTTGGTTC  
ATTAGGGTTTTTATTAGTTGGAACCTTAGTTATCTTGGTAGGAATTTGATATCTTTATTT  
CCGTCTCAGCAAATAGTTTTTTTTCCACAAGGAATCGTGATGTCTTTCTATGGGATCGC  
AGGCCTCTTTATTAGTTCCTATTTGTGGTGCACAATTTTTTGAATGTAGGCAGTGGTTA  
TGATCGATTCGATAGAAAGGAGGGAATAGTCTGTATTTTTCGTTGGGGTTTTCTGGAA  
AAAATCGTCGCATCTTTCTACGATTCTTATGAAAGATATTCAGTCCATCAGAATAGAAG  
TTAAAGAGGGTATTTATGCTCGTCGTGCTCTTATATGGAAATCAGAGGCCAGGGGGCC  
GTTCCCTTGACTCGTACTGATGAGAAT---TTGACTCCGCGCGAAATTGAACAAAAAGCT  
GCTGAATTGGCCTATTTTTTGCGTGTACCGATTGAAGTCTTT

>Vitis

ATGGAAAAATGGTGGTTCAATTCGATGTTGTCTCTAAGTAAATCAACGGACAGTCCTGA  
TCCTATTGAAAATACCAGTGGAAGTGAAGACCGGGTTATAAATAATACGGATAAAAACA  
TTAATAATTATAGTAATGTTGATCATTATTCGGCATCAGGGACATTCGGAATTTCAITCTC  
TGATGACACTTTTTTAGTTAGGGATAGGAATGGGGTCAGTTATTTTCATATATTTTGATATT  
GAAAATCAAATTTTTGAGATTGATAACGATCAG-----TCTTTTTTGAGTGAAGTAGAAAG  
TTTTTTTTATAGTTATCGGAATTCTAGTTATCTGAATAATGTATCTAAGAGTAATCATCCC  
CACTATGATCGTTACATGTATGATACTAAATATAGTTGGAATAAGCACATTAATAGTTGCA

TTAAT-----AATTACATTTTAAGTGGTAGTAACAATTACAGT-----T  
ACATTTATAGTTACATTTGTGGTCACGGGAGTTCCAGTAAACAACTAGCACGAATGGT  
AGTGATTTAAAA-----AGTTCCTAATGTTCTATATGTAGCTCAAAAATACAGGCATTTGT  
GGATTCAATGCGAAAATTGTTATGGATTAAATTATAAAAAAAATTTAAAGTCAAAAATA  
AATATTTGCGAACAAATGCGGATATCATTGAAAATGAGTAGTTCAGATAGAATCGAACT  
TTCGATTGATCCGGGTACGTGGGATCCTGTAGATGAAGACATGGTCTCTCTGGATCCTAT  
TGAATTTCAATTCGGGGGAGGAACCTTATAAAGAGCGTATTGATTTTTATCAAAGAAAGA  
CAGGATTAACTGAGGCTGTTCAAACAGGCACAGGTCAACTAAACGGTATTCCCGTAGC  
AATTGGGGTTATGGATTTTTCAGTTTATGGGGGGTAGTATGGGATCCGTAGTAGGTGAGA  
AAATTACCCGTTTGTATCGAATATGCCACCAATGAATTTCTACCTCTTATTCTAGTGTGTTT  
TTCCGGAGGAGCACGTATGCAAGAAGGAAGTTTGAGCTTGATGCAAATGGCTAAAATA  
TCTTCCGCTTTATATGATTATCAATCAAATAAAAAGTTATTTTATGTATCAATCCTTACATC  
TCTACTACTGGTGGGGTGACAGCAAGTTTGGTATGTTGGGAGATATCATTATTGCCG  
AACCCAATTCCTACATTGCATTTGCGGGTAAAAGGGTAATTGAACAAACATTGAAAAA  
GACAGTACCTGAAGGTTACAAGCGGCTGAATATTTATTCCATAAGGGCTTATTTCGATC  
CAATCGTACCACGTAATACTTTAAAGGGTGTCTGAGTGAGTTATTTTCAGCTTCACGCT  
TTCTTTCCTTTGAATCCAAAAAAATCAAGATGGTAACCATCCGAGCCGACGAAATTAG  
TAATATTATCCGTGAACGCATTGAACAATATAATAGAGAAGTAAAGATTGTAAATACTGG  
TACCGTACTTCAAGTAGGCGATGGCATTGCTCGTATTCATGGTCTTGATGAAGTAATGGC  
AGGTGAATTAGTAGAATTTGAAGAAGGTACAATAGGCATTGCTTTGAATTTGGAATCAA  
ATAATGTTGGTGTGTATTAATGGGTGACGGTTTGATGATACAAGAGGGAAGTTCTGTAA  
AAAGCAACAGGAAGAATTGCTCAGATACCTGTGAGTGAGGCTTATTTGGGTCGTGTTAT  
AAATGCCCTAGCGAAACCTATTGATGGTAGAGGTGAAATTTTCAGCTTCTGAATCTCGGT  
TAATTGAATCTCCCGCTCCAGGTATTATTTTCGAGACGTTCCGTATATGAGCCTCTTCAA  
CAGGGCTTATTGCTATTGATTTCGATGATCCCTATAGGGCGTGGTCAACGAGAATTAATTA  
TTGGGGATAGACAGACCGGTAAAACAGCAGTAGCCACAGATACTATTCTCAATCAACA  
AGGGCAAATGTAATATGTGTTTATGTAGCTATTGGTCAAAAAGCATCCTCTGTAGCTC  
AGGTAGTGACTACTTTCCAGGAAAGGGGAGCGATGGAATACACTATTGTGGTAGCTGA  
AACGGCGGACTCGCCTGCTACATTACAATACCTTGCCCCTTATACAGGAGCAGCTCTGG  
CTGAATATTTTATGTACCGTAAACGACACACTTTAATTATTTATGATGATCCCTCCAAACA  
AGCACAAGCTTATCGTCAAATGTCTCTTCTATTACGAAGACCACCTGGTTCGGAAGCTT  
ATCCAGGAGATGTTTTTTATTTGCACTCACGCCTTTTGGAAAGAGCCGCTAAATCAAGT  
TCTTCTTAGGTGAAGGAAGTATGACTGCTTTACCAATAGTTGAGACCCAATCGGGAGA  
TGTTTCGGCTTATATTCCCACGAATGTAATTTCCATTACAGATGGACAAATATTCTTATCC  
GCCGATTTATCAATGCTGGAATCAGGCCTGCTATTAATGTGGGTATTTCCGTCTCCAGA  
GTAGGATCCGCGGCTCAAATTAAGCCATGAAACAAGTAGCTGGCAAATCAAATTTGG  
AACTGGCGCAATTTCGAGAATTAGAAGCCTTTGCACAATTCTCTTCTGATCTTGATAAA  
GCTACTCAGAATCAATTGGCAAGAGGTCAACGATTACGTGAATTGCTCAAACAATCCC  
AAGCAGCCCCTCTTACGGTGGAAAGAACAGATAATGACTATTTATACTGGAACAAATGGT  
TATCTTGATTCATTAGAAATTGGACAGGTAAGGAAATTTCTTGCTGAGTTACGTAATTAC  
TTAAAACGAATAAACCTCAGTTCCAAGAAATCATATCTTCTACCAAGACATTCACCGA  
GGAAGCAGAAACCCTTTTGAAGAACTATTTCAGGAACAGATGGAACGCTTTCTACTT  
CAGGAACAAGCAATGAGAATAAATCCTACTACTTCTGGTCCCTGGGGTTTCCACGCTTG  
AAAAAAAACCTGGGGCGTATCGCTCAAATCATTGGTCCGGTCCCTGGATGTAGCTTT

TCCCCGGGCAAGATGCCTAATATTTACAATGCGCTGGTAGTTAAGGGTCGAGATACTG  
TCGGTCAACAAATTAATGTGACTTGTGAGGTACAGCAATTATTAGGAAATAATCGAGTT  
AGAGCTGTGGCTATGAGTGCTACAGATGGTCTAATGAGAGGAATGGAAGTGATTGACA  
CGGGAGCTCCTCTAAGTGTTCAGTCGGTGGAGCGACTCTCGGACGAATTTTCAACGT  
GCTTGGAGAGCCTGTTGATAATTTAGGTCTGTAGATACTCGCACAACATCTCCTATTCA  
TAGATCTGCGCCCCTTTATACAGTTAGATACAAAATTATCCATTTTTGAAACAGGAAT  
TAAAGTAGTGGATCTTTTAGCTCCTTATCGCCGTGGAGGAAAAATTGGACTATTCGGGG  
GAGCTGGAGTGGGTAAAACAGTACTCATTATGGAATTGATCAACAACATTGCCAAAGC  
TCATGGGGGTGTATCTGTATTTGGCGGAGTAGGTGAACGTAATCGTGAAGGAAATGATC  
TTTACATGGAAATGAAAGAATCTGGAGTGATTAATGAAAAAATATTTTCAAGATCAAAA  
GTGGCTCTAGTCTACGGTCAGATGAATGAACCGCCGGGAGCTCGTATGAGAGTTGGTT  
TGACTGCCCTAACTATGGCGGAATATTTCCGAGATGTTAATGAACAAGACGTACTTCTAT  
TTATCGACAATATCTTCCGTTTCGTCCAAGCAGGATCCGAAGTATCTGCCTTATTGGGCA  
GAATGCCTTCCGCTGTGGGTATCAACCTACCCTTAGTACCGAAATGGGTACTTTACAA  
GAAAGAATTACTTCTACCAAGGAGGGTCCATAACTTCTATTCAAGCAGTTTATGTACC  
TGCGGACGATTTGACCGACCCTGCCCTGCCACAACATTTGCACATTTAGATGCTACTA  
CCGTACTATCAAGAGGATTAGCTGCCAAAGGTATCTATCCAGCAGTAGATCCTTTAGATT  
CAACGTCAACTATGCTCCAACCTCGTATCGTTGGTGAGGAACATTATGAAACTGCGCAA  
AGAGTTAAGCAAACCTTTACAACGTTACAAAGAACTTCAAGACATTATAGCTATCCTTGG  
GTTGGACGAATTATCCGAAGAGGATCGTTTAAACCGTAGCAAGAGCACGAAAAATTGAG  
CGTTTCTTATCACACCCTTTTTCGTAGCAGAAGTATTTACCGGTTCTCCAGGGAAATAT  
GTTGGTCTAGCAGAAACAATTAGAGGGTTTCAATTGATCCTTTCCGGAGAATTAGATGG  
TCTTCCCGAACAGGCCTTTTATTTGGTAGGTAACATCGATGAAGCTACCGCGAAGGCTA  
TGAACTTAGAAATGGAGAGCAAATTGAAGAAAATGACCTTAAATCTTTGTGTACTGAC  
CCCTAATCGAATTGTTTGGGATTCAAAAAGTAAAAGAAATCATTTTATCTACTAATAGTGG  
ACAAATTGGCATATTACCAAATCACGCCCTATTGCCACAGCTGTAGATATAGGTATTTT  
GAGAATACGCCTTAACGACCAATGGTTAACGATGGCTCTGATGGGCGGTTTTGCTAGAA  
TAGGCAATAATGAGATCACTGTTTTAGTAAATGATGCGGAGAAGGGTAGTGACATTGAG  
CCACAAGAAGCTCAGCAAACCTTGAATAGCGGAAGCTAACTTGAGGAAAGCTGAA  
GGCAAGAGACAAATAATTGAGGCAAATCTAGCTCTTAGACGAGCTAGGACACGAGTAG  
AGGCTATCAATGTGACTTCGATGAAAAATGTAACCGATTTCTTTCGTTTCTTGGGTAC  
TGCCATCCGCCGGGGTTTTCGGGTTTAAATACCGATATTTAGCAACAAATCCAATAAAT  
CTAAGTGTAGTGCTTGGTGTATTGATCTTTTTTGGAAAGGGAGTGTTAAGTGATTTATTA  
GATAATCGAAAACAGAGGATCTTGAATACTATTCGAAATTCAGAAGAACTACGTGAGG  
GGCCATTGAACAACCTCGAAAAAGCCCGGGCCCGCTTACGAAAAGTGGAATGGAAG  
CAGATCAGTATCGAGTGAATGGATACTCTGAGATAGAACGAGAAAAATTGAATTTGATT  
AATCAACTTATAATACTTTGGAACAATTAGAAAATTACAAAATGAAACCATTCATTTT  
GAACAACAAGAGCGATTAATCAAGTCCGACAACGGGTTTTGCAACAAGCCTTACAA  
GGAGCTCTAGGAACTATCAATAGTTGTTTGAACAAGGAATTACATTTACGTACTATCAG  
TGCTAATATTGGCATGTTTGGGTTCGATGAAAGAAATAAGAAATATGAATCCACTGATTC  
TGCCGCTTCCGTTATTGCTGCTGGATTGGCCGTAGGGCTTGCTTCTATTGGACCTGGCG  
TTGGTCAAGGTACTGCTGCGGGCCAAGCTGTAGAAGGTATCGCAAGACAGCCCGAGG  
CGGAGGGAAAAATACGAGGTACTTTATTGCTTAGTCTGGCTTTTATGGAAGCTTTAACA  
ATTTATGGACTGGTTGTAGCATTAGCACTTTTATTTGCGAATCCTTTTTGTTATGAATGTTT

TATCATGTTCCATCAACACACTAAAAGGGTTATACGATATATCTGGTGTGGAAGTCGGCC  
AACATTTCTATTGGCAAATAGGGGGTTTCCAAGTCCATGCCCAAGTACTTATTACTTCGT  
GGGTTGTAATCGCTATCTTATTAGGTTTCAGTACTCTAGCTGTTTCGAAATCCACAAACCA  
TTCTACTGACGGTCAGAATTTCTTCGAATATGTCCTTGAATTCATTCGAGACGTGAGC  
AAAACCTCAGATTGGAGAAGAATATGGTTCCTTGGGTTCTTTTATTGGAACCTATGTTTCTA  
TTTATTTTTGTTTCGAATTGGTCAGGGGCTCTTTTGCCTTGGAAAATCATAACAGTTACCT  
CATGGGGAGTTAGCTGCACCCACGAATGATATAAATACTACTGTTGCTTTAGCTTTACTC  
ACATCAGTGGCCTATTTCTATGCGGGTCTTACCAAAAAGGGATTAGGTTATTTCCGGTAAA  
TACATTCAACCGACTCCAATCCTTTTACCTATTAACATCTTAGAAGATTTTACAAAACCT  
TTATCACTTAGTTTTTCGACTTTTTCGGTAATATATTAGCTGATGAATTAGTAGTTGTTGTTT  
TTGTTTCTTTAGTACCTTCAATTGTTTCTTACCTGTCATGTTCTTGGATTATTTACAAG  
TGGTATTCAAGCTCTTATTTTTGCAACTTTAGCCGCGGCTTATATAGGCGAATCCATGGA  
GGGTCATCATATGATATTTTCGACTTTAGAGCATATATTAACCTCATATCTCTTTTTCGGTC  
GTTTCAATTGTAATTACAATTCATTTGATAACCTTATTAGTCGATGAAATCGTAGGACTTT  
CTGATTCGTCAGAAAAGGGCATGATAGCTACTTTTTTCTGTATAACAGGATTATTAGTCA  
CTCGTTGGATTTATTTGGGACATTTCCCATTAAGTGATTTGTATGAATCATTAATTTTCT  
TTCATGGAGTTTCTCCATTATTCATATAGTTCCATATTTT---AAACATAAAAATCATTTAAG  
CGCACTAACCGCGCCAAGTGCTATTTTTACCCAAGGATTTGCTACTTCAGGTCTTTTAA  
CTGAAATGCATCAATCCGAAATATTAGTACCCGCTCTCCAATCCCAGTGGTAAATGATGC  
ATGTAAGTATGATGGTATTGGGTTATGCAGCTCTTTTATGTGGATCATTATTATCAGTAGC  
TCTTTTAGTCATTACATTTTCGACAAGACATAAGGATTCCTTTGTAAAAACAATGAGATCC  
AATATATGAATAAAGGAAACAATGTTTTACAAAACACTTCTTTTCTTTCTGTTAGGAATT  
ATTACAGGGCCCAATTTATTCAACAATTGGATCATTGGAGTTATCGTGTTATTAGTTTAG  
GGTTTCTTTTTTTAAACCATAGGTATTCTTTTCGGGAGCAGTGTGGGCTAATGAGGCATGG  
GGATCATATTGGAATTGGGACCCAAAAGAACTTGGGCATTTATTACTTGGACCATATT  
CGCGATTTATTTACATACTCGAACAAATAAAAATTTGCAAGTCGCAAATTCGCAATTGT  
GGCTTCTATGGGCTTTCTTATAATTTGGATATGCTATTTTGGGGTCAATCTATTAGGAATA  
GGGCTACATAGTTATGGTTCATTTACATTTTCAATGACAAAAAAGAAAGCATTCACTCC  
CCTTCTATATCTTGCATCTATAGTATTTTTGCCCTGGTGGATCTCTCTATCACTTAATAAA  
AGTCTGGAATCTTGGGTTACTAATTGGTGGAACTAGGCAATCTGAACTTTTTTTGAA  
TGATATTCAAGAAAAGAGTATTCTAGAAAATTCATAGAATTAGAGGAACTCTTCTTGT  
TGGACGAAATGATAAAGGAATGCCCGGAAACACATCTACAAAAGCTTCGTATGGGA---  
CACAAAGAAACGATCCAATTGATCAAGATGTACAATGAGGATCCTATCCATACGATTTT  
GCACTTCTCGACAAATATAATCTGTTTCGTTATTCTAAGTGGTTATTCTATTCTGGGTAAT  
GAAGAACTTCTTATTCTTAACTCTTGGATTCAGCAATTCCTATATAACTTAAGCGACACA  
ATAAAAGCTTTTTCTATTCTTTTATTAACCTGATTTATGTATCGGATTCCACTCGCCCCATG  
GTTGGGAACTGATGATTGGCTCTGTCTACAAAGATTTTGGATTTGCTCATAACGATCAA  
ATTATATCTGGTCTTGTTTCCACCTTTCCGGTCATTCTAGATACAATTTTAAATATTGGA  
TCTTCCGGTATTTAAATCGTGTATCTCCGTCACCTGTAGTGATTTATCATTCAATGAATGA  
CATGCCTATTGGTGTTCAAAAGTGCCTTTTCGAAATCCTGGAGAGGACGATATATCTT  
GGATTGACGTATAACAACCGACTTTATCGAGAAAGATTACTTTTTTTTAGGCCAAGAGGTT  
GAGAGCGAGATCTCGAATCAACTTATTGGTCTTATGATATATCTCAGTATAGAGGATGAA  
AACAAAGATCTGTATTTTTTTATAAATTCTCCTGGCGGATGGGTACTACCCGGAATAGCT  
ATTTATGATACTATGCAATTTGTGCCACCAGAGGTACATACAATATGCCTGGGATTAGCC

GCTTCAATGGGATCTTTTATCCTGGTCGGAGGAACAATTACCAAACGTCTAGCATTCCC  
TCACGCTAGGGTAATGATCCATCAACCGGCTGCCGCTTTTTATGAGGCACAAGCCGGA  
GAATTTGTCATGGAAGCGGAAGAATACTACTGAACTGCGCGAAATCATCACAAAGGTTT  
ATGTACAAAGAACGGGCAAACCCTTATGGGTTGTATCCGAAGACCTGGAAAGGGATGT  
TTTTATGTCAGCAACAGAAGCCCAAACACTCATGGAATTGTTGATCTTGTAGCGGTTCAA  
TGAAAGAACAATAATGGATTCATGAAGGTTTAATTACTGAATCACTTCCCAACGGTATG  
TTCCGGGTGCGTTTAGATAATGAAAATATGATTCTAGGTTATGTTTCAGGAAGGATCCGA  
CGTAGTTTTATACGGATACTACCAGGAGATAGAGTCAAATGAAAGTAAGTCGTTATGA  
TTCAACCAAAGGGCGTATAATTTATAGAATCCGAAACAAGGATTCGAATAATATGGAAG  
GAGTTCAAAGATATTTTAAA---GATAGGTCTCGTCAAGATGACTTCCTATATCCACTTATC  
TTTCAGGAGTATATTTATGCACTTTTCTTATGATCATGGTTTAGTGGGTTATGACAATAAAT  
CCAGTTTACTAATTGTGAAACGTTTAATTACGCGAATGTATCAACAGAATCATTGATTT  
TTTCT-----GATTCTAATCAAAATCCATTTTTTGGAAAGAATTTTTATTCTCAAATGATATC  
AGAGGGATTTGGAGTCATTGTGGAATTCATTTTCCCTACGATTAGTCTCTTCTCTAAT  
AGCAAATCTCATAATTTACGATCAATTCATTCAATATTTCCTTTTTAGAGGACAAATT  
CCCACATTTAAAGTATGTGTCAGATATACTAATACCCACCCCATCCATCTGGAAATCTT  
GGTTCAAGCCCTTCGTTACTGGGTGAAAGATGCCTCTTCTTTGCATTTATTACGATTCTT  
TCTACACGAGTATCATAATTGGAATAGTATGATTACTAAGAAATCAATTTCCATTTTTTCA  
CAAAGATTTTTCTTATTCCTATATAATTTTCATGTATGTGAATACGACTCTATCTTCATTTT  
TATCCGCAATCAATCTTATCATTACGATCAACATCTTATGGAGCCCTTCTTGGGCGAATA  
TTTTTCTATGGAAAATAGAGCATTTTGTGCAAGTCTTTGCTAATGATTTTATCTTATGGT  
TGTTCAAGAATCCTTTCATGCATTATGTTAGGTATCAAGGAAAATCCATTCTGGCTTCAA  
AAGGGGCGCCTCTTCTGATGAATAAATGGAATATTACCTTGTCAATTTCTGGCAATGT  
CATTTTTACGTGTGGTCTCAACCAGTAAGGATCCATATAAACCAATTATCCAAGCATTC  
CTCGACTTTCTGGGCTATCTTCAAGTGTGCGACTAAATCCTTCAGTGGTACGGAGTCA  
AATGCTAGAAAATGCATTTATAATAGATAATGCTATT-----AAGAAGTTCGATACTATAGTT  
CCAATTATTCCTATCATTGGATCGTTGGCTAAAGCGAGATTTTGTAATGCCTTAGGGCAT  
CCCATTAGTAAGCCGTCCTGGGCCGATTCATCAGATTATGATATTATCGACCGATTTGTG  
CGTATATGCAGAAATATTTCTCATTATCACAGTGGATCCTCAAAAAAAAAAGAATTTGTAT  
CGAATCAAATATATACTTCGACTTTCTTGTGCTCGAACTTTGGCTCGTAAACACAAAAG  
TACTGTACGTGCTTTTTTGAAGAGATTAGGGTTCGGAATTTTTGGAAGAATTCCTTACAG  
AGGAAGAACAAGCTCTTTCTTAAATCTTACCAAGACGTTTTTGGTATTTTGATATTATTT  
GTATCAATGATCTAGCCAATCATGAAATGATAATTGAT---ACACCAGAAGTACAA---GATA  
TCAATCTTTTTCCCGATTGGAATAC---TAAAAGAGGTTTATGGGATCATATGGATGCTT  
GTACCTATTTTTACTCCTGTATTGGGAATCACAATAGGTGTACTAGCAATTGTGTGGTTA  
GAAAGAGAAATATCCGCAGGGATACAACAACGTATTGGACCTGAATATGCCGGTCCTTT  
GGGAATCTTCAAGCTCTAGCAGATGGCACAATACTACTTTTCAAAGAGAATCTTCTTC  
CATCTAGAGGAGATACTCGTTTATTCAGTATCGGACCATCCATAGCAGTCATATCAATTC  
TACTAAGTTATTTAATAATTCCTTTTTGGCTCTAACCTTGTCTATCCGATCTCAATATCGG  
TGTTTTTTTTATGGATCGCCATTTCAAGTATTGCTCCCATTTGGACTTCTTATGTCAGGATAT  
GGATCAAATAATAAATATTCCTTTTTAGGTGGTCTACGAGCTGCTGCTCAATCAATTAGT  
TATGAAATACCATTAACCTCTATGCGTGTTATCAATATCTCTATTATCTAACAGTTCAAGTA  
CAGTTGATATAGTTGAGGCGCAGTCAAATATGGTTTTTGGGGGTGGAATTTGTGGCGT  
CAACCTATAGGGTTTATCGTTTTTCTAATTTCTTCCCTAGCCGAATGCGAAAGATTGCCT

TTTGATTTACCAGAAGCAGAAGAAGAATTAGTAGCAGGTTATCAAACCGAATATTCGGG  
TATCAAATTTGGTTTATTTTACGTTGCTTCTTATCTAAATCTACTAGTTTCTTCATTATTTG  
TAACAGTTCTTTACTTGGGAGGTTGGGATCTCTCTATTCCGTACATATTTGTTCCCTGAGT  
TTTTTGAAATAAATAAAGCGGGTGAAGTCTTTGGAACGACAATTGGTATCTTTATTACAT  
TAGCCAAAACCTTATTTGTTCTTGTTTCATTCCCTATCACAACAAGATGGACTTTACCTAGGC  
TGAGAATGGACCAACTATTAATCTTGGATGGAAATTTCTTTTACCTATTTCTCTAGGTA  
ATCTATTATTAACAACCTTCTTCCCAACTCCTTTCACTGATGATCTGGCATATACAGAATG  
AAAACCTTCATTCTCGATTCTACGAGAATTTTTATGAAAGCCTTTCAATTTGCTTCTCTCG  
ATGGAAGTTTTATTTTCCCAGAATGTATCCTAATTTTTGGCCTAATTTCTTCTCTGATGAT  
CGATTCAACCTCTGATCAAAAAGATATACCTTGGTTATATTTTCATCTCTTCAACAAGTTT  
AGTAATGAGCATAACGGCCCTATTGTTCCGATGGAGAGAAGAACCTATGATTAGCTTTT  
CGGGAAATTTCCAAACGAACAATTTCAACGAAATCTTTCAATTTCTTATTTTACTATGTT  
CAACTCTATGTATTCTCTATCCGTAGAGTACATTGAATGTACAGAAATGGCTATAACAG  
AGTTTCTCTTATTCGTATTAACAGCTACTCTAGGAGGAATGTTTTTATGCGGTGCTAACG  
ATTTAATAACTATCTTTGTAGCTCCAGAATGTTTCAGTTTATGCTCCTACCTATTATCTGG  
ATATACCAAGAAAGATGTACGGTCTAATGAGGCTACTACGAAATATTTACTCATGGGTG  
GGGCAAGTTCTTCTATTCTGGTTCATGGTTTCTCTTGGCTATATGGTTCATCCGGGGGAG  
AGATCGAGCTTCAAGAAATAGTGAATGGTCTTATCAATACACAAATGTATAACTCCCCA  
GGAATTTCAATTGCGCTTATATTCATCACTGTAGGAATTGGGTTCAAGCTTTCCCCAGCC  
CCTTCTCATCAATGGACTCCTGACGTATACGAAGGATCTCCCACTCCAGTCGTTGCTTT  
TCTTTCTGTTACTTCGAAAGTAGCTGCTTCAGCTTCAGCCACTCGAATTTTCGATATTCC  
TTTTTATTTCTCATCAAACGAATGGCATCTTCTTCTGGAAATCCTAGCTATTCTTAGCATG  
ATATTGGGGAATCTCATTGCTATTACTCAAACAAGCATGAAACGTATGCTTGCATATTCG  
TCCATAGGTCAAATCGGATATGTAATTATTGGAATAATTGTTGGAGACTCAAATGGTGGA  
TATGCAAGCATGATAACTTATATGCTGTTCTATATCTCCATGAATCTAGGAACTTTTGCTT  
GCATTGTATCATTGGTCTACGTACCGGAACTGATAACATTTCGAGATTATGCAGGATTAT  
ACACGAAAGATCCTTTTTTGGCTCTCTCTTTAGCCCTATGTCTCTTATCCCTAGGAGGTC  
TTCTCCACTAGCAGGTTTTTTTCGGAAAACCTCATTATTCTGGTGTGGATGGCAGGCA  
GGCCTATATTTCTTGGTTTCAATAGGACTCCTTACGAGCGTTGTTTCTATCTACTATTATC  
TAAAAATAATCAAGTTATTAATGACTGGACGAAACCAAGAAATAACCCCTCACGTGCG  
AAATTATATAAGATCTCCTTTAAGATCAAACAATTCATCGAATTGAGTATGATTGTATGT  
GTGATAGCATCTACTATACCAGGAATATCAATGAACCCGATTATTGCAATTGCTCAGGAT  
ACCCTTTTTATGTTTCTGCTTTACGAATATGATATTTCTGGGCTTTTCTAATAATATCAAG  
TGTTATTCCCATTTTGGCATTTTTTATTTCCGGAGTTTTAGCTCCGATTAGTAAAGGACC  
AGAGAAACTTTCTAGTTATGAATCGGGTATAGAACCAATGGGCGATGCTTGGTTACAAT  
TTCGAATCCGTTATTATATGTTTGTCTAGTTTTTGTCTGTTTTTGGATGTTGAAACGGTTTT  
TCTTTATCCATGGGCAATGAGTTTCGATGTATTGGGTGTATCCGTATTTATAGAAGCTTTA  
ATTTTCGTGCTTATCCTAATTGTTGGTTCAGTTTATGCATGGCGAAAAGGAGCATTGGAA  
TGGTCTACGAATTATTTTCTTGGTTAACACTAATTGTAGTTTTGCCGATATCCGCAGGT  
TCCTTAATTTTTTTCTCCCTCATAGAGGAAATAAGGTAATTAGATGGTATACTATATTTAT  
ATGTATGTTAGAACTACTTCTAACAACCTATGTATTTCTGTTATCATTTCGAATTAGATGAT  
CCATTAATCCAACCTGGTGGAGGATTATAAATGGATCAATTTTTTTGATTTTACTGGAGA  
TTAGGAATAGATGGACTGTCTATAGGACCCATTTTACTGACGGGATTTATCACCCTTTA  
GCTACTTTAGCGGCTTGGCCAGTACTCGAGATTCCCGATTATTCCATTTCTGATGTTA

GCAATGTACAGCGGTCAAATAGGATCATTTTCTTCTCGGGACCTTTTACTTTTTTTCATC  
ATGTGGGAGTTAGAATTAATCCGGTTTATCTACTTCTATCTATGTGGGGGGGAAAGAA  
ACGTCTGTACTCAGCTACAAAGTTTATTTTGTACACTGCAGGAGGTTCCATTTTTTCTCT  
ACTGGGGGTTCTGGGTATCGGCTTATATGGTCCAACGAACCAACATTAATTTTGAAA  
CATCGGCTAATCAATCGTATCCTGTGGCATTGGAAATAATATTCTATATTGGATTTTTTATT  
GCTTTTGTGTCAAATCACCGATTATCCCACTACATACATGGTTACCAGACACCCATGG  
AGAAGCACATTATAGTACTTGTATGCTTCTAGCTGGAATCTTATTAATAAATGGGAGCGTA  
TGGTTTGGTTCGGATCAATATGGAATTATTACCCACGCTCATTCTATATTTTCTCCCTGG  
TTGGTAGTAGTAGGTACAATGCAAATAATCTATGCAGCTTCAACATCTTCTGGTCAACGT  
AATTTAAAAAAGAATAGCCTATTCCTCTGTATCTCATATGGGTTTCATAATTATAGGAA  
TTGGTTCTATAACCGATACGGGACTCAACGGAGCCATTTTACAAATAATCTCTCATGGAT  
TTCTTGGTGCTGCGCTTTTTTCTTGGCAGGAACCAGTTATGATAGAATACGTCTTATTT  
ATCTCGACGAGATGGGCGGAATAGCTATCCCAATGCCAAAAATATTCACAATGTTCAGT  
ATCTTATCGATGGCTTCCCTTGCATTACCGGGCATGAGCGGTTTTGTTGCAGAATTGATA  
GTCTTTTTTGAATAATTACCAGCCAAAAATTTCTTTAATGCCAAAAATACTAATTACT  
TTTGTAAATGGCAATTGGAATGATATTAATCCTATTTATTCATTATCTATGTCACGCCAGA  
TGTTCTATGGATAACAAGCTATTTAATGCCCCAACTCTTATTTTTTTGATTCTGGACCGC  
GAGAGTTATTTGTTTTGATCTCTATCTTTCTACCCGTAATAGGTATTGGTATTTACCCGGA  
TTTCGTTCTCTCATTATCAGTTGACAAGGTTGAAGCTATTCTATCTAATTTTTTTTTATAGA  
ATGATGCTCGAACATGTACTTGTTTGAGTGCCTATTTATTTTCTATCGGTATCTATGGAT  
TGATCACGAGTCGAAATATGGTTAGAGCTTATGTGTCTTGAACCTATACTGAATGCAG  
TTAATATAAATTTCGTAACATTTTCTGATTTTTTTGATAATCGACAATTAAGGAGACAT  
TTTCTCAATTTTGTATAGCTATTGCAGCCGCTGAAGCTGCTATTGGACCAGCTATTGT  
TTCGTCAATTTATCGTAATAGAAAATCAACTCGTATTAATCAATCGAATTTGTTGAATAA  
GATGGAACATACATATCAATATGCATGGATCATACTTCCCTTCCACTTCCAATTCCTATG  
TACTAGGAGTGGGACTTCTCCTTTTTCCAACAGCAACAAAAATCTTCGGCGTATGTG  
GTCTTTTACTAGTGTTTTATTGTTAAGTATAGTTATGACTTTTTTCGGTCAATCTGTCTATT  
CATCAAATAAATAGCAGTTCTATATATCAATATGTATGGTCTTGGACCATCAATAATGATT  
TTTCTTTAGAGTTCGGCTACTTGATTGATCCACTTACTTCTATTATGTCAATATTAATCAC  
TACGGTTGGAATTATGGTTCTTATTTATAGTGACAATTATATGTCTCATGATCAAGGATAT  
TTGAGATTTTTTGCTTATATGAGTTTTTTCAATGCTTCCATGTTGGGATTAGTTACTAGTT  
CTAATTTGATACAAATTTATATTTTTTTGGGAATTAGTTGGAATGTGTTCAATTTATTAATA  
GGTTTTTGGTTCACACGGCCTATTGCGGCAAATGCTTGTCAAAGGCGTTTGTAACTAA  
TCGTGTAGGGGATTTTGGTTTATTATTAGGAATTTTGGGTCTTTATTGGATAACAGGTAG  
TTTCGAATTCGGGATTTGTTTCGAAATATTTAATAACAATGGGACAAATTTTTTATTGTT  
TCTTTGTGTGCTTTATTCTTATTGTGCGGTGCGGTTGCTAAATCGGCTCAATTTCCCTTC  
ATGTATGGTTACCCGATGCAATGGAGGGGCTACTCCTATTTTCGGCTCTTATACATGCTG  
CTACTATGGTAGCAGCGGGAATTTTCTTGTAGCTCGCCTTTTTCTCTTTTTCATAGTCAT  
ACCTTACATAATGAATCTAATATCTTTGATAGGTATAATAACAATATTATTAGGAGCTACT  
TTAGCTCTTGCTCAAAAAGATATTAAGAAAAGTTTGGCCTATTCCACAATGTCTCAATT  
GGGTTATACGATGTTAGCCCTAGGTATGGGGTCTTATCGAGCTGCTTTATTTCAATTTGATT  
ACTCATGCTTATTCGAAAGCATTATTGTTTTTAGGATCCGGATCGATTATTCATTCAATGG  
AAGCTATTGTTGGATATCTCCAGATAAAAAGTCAAATATGGTTCTTATGGGTGGTTTAA  
CAAAACATGTGCCAATTACAAAAATACCTTTTTTATTAGGTACACTCTCTTTTGTGGTA

TTCCGCCTCTTGCTTGTTTTTGGTCCAAAGATGAAATTCTTAATGATAGTTGGTTGTATT  
CACCTATTTTTGCAATAATAGCTTGTTAACGGCAGGATTAACCGCATTTTTATATGTTTCG  
GATCTATTTACTTACTTTTTGAAGGATATTTTAATGTTTCATTGTAAAAATTACAGTGGAAA  
AAAAAGTAGCTTGTTCTATTCAATATCTCTATGGGGTAAAGAAGGTCAAAAAACAATTA  
AAAAAAAATTATTA ACTCTATTAACAACGAATTTTTTTTCGTTTGACAATAAGAACA CT  
TTTTGTATCCCAGGAATCGGACAATACTATGTTATCCCTCTGTTTG CATTAGCCCTATT  
TACTTTGTTTCGTTGGAGCCATAGGAATTCCTTTTCGATTTTGATATATTATCGAAATGGTTA  
AATCCGGCTACAAACCTTTTACATAAAAATTTGAAT--TATGGGGATTGGTATGAATTTGT  
TATAAATGCAATTTTTTCAGTCAGTATATCTTATTTTGGAAATTTTTTAGCGTCTCTTTTAT  
ATAATCCTGTTTATTTCATCTTTACAAAATTTGGATTTAATTAATTCAGTTGCCATTTTTTG  
GGATAAATAATAATAAAGGTATATAATTGGTCATATAATCGTGGTTACATAGATGCTTTT  
TATGAAACATCCTTAACTAAGGGTATAAGAGGATTAGCGGAACTAACTCATTTTTTTGAT  
GGACGAGTAATTGATGGAATTACGAATGGGGTTGGTGTACGAGTTTTTTTTGTAGGAGA  
AAGTATCAAATATGTAGGGGGTGA--CGCATCTCCTCTTATCTTTTTTTGTATTTATCTT  
CTGTATCAATCTTATTATTAATTTCCCTACATGGATTTACCTGGACCAATACATGATTTCTT  
TTAGTCTTTCTGGGATCAGGTCTTATATTAGGAGGTCTAGGAGTGGTATTACTTACCAAT  
CCGATCTATTCTGCCTTTTCATTGGGATTGGTTTTTTGTTTGTATATCCTTATTCTATATTCC  
ATCAAACCTCCATTTTGTAGCTGCTGCACAGCTCCTTATTTACGTGGGAGCTATAAATGT  
TTAATCATATTTGCTGTGATGTTTCATGAATGGTTCAGAATATTACAAAGATTTTAATCTT  
TGGACCGTTGGAGATGGGGTTACTTCCGGTAGTTTGTACAAGTATTTTTGCTTCACTAATT  
ACTACTATTCTAGATACGTCATGGTACGGGATTATTTGGACTACAAGATCAAACCAAATT  
ATAGAGCAAGATTTGATAAGTAATAGTCAACAAATTGGAATTCATTTATCAACAGATTTT  
TTCTTCCATTTGAACTAATTTGATAATTTCTTTTAGTTGCTTTGATAGGTGCAATTGCTG  
TGGCCCGTCAGATGAATGTACCAGCTACAAGAGAAGACCTCATGATAGTCAATATGGGT  
CCTCATCACCCATCAATGCACGGTGTCTTCGACTCATCGTTACTTTAGATGGTGAAGAT  
GTTATTGACTGTGAACCAATACTAGGTTATTTGCACAGAGGGATGGAAAAATTGCAG  
AAAACCGAACAATTATACAATATTTGCCTTATGTAACACGTTGGGATTATTTAGCTACTA  
TGTTACAGAAAGCAATAACCGTAAATGCACCAGAGCAGTTGGGAAATATTCAAGTACC  
TAAAAGAGCCAGCTATATTAGAGTGATTATGTTGGAGTTGAGTCGTATAGCTTCTCATT  
ATTATGGCTTGGCCCTTTTATGGCAGATATTGGTGCACAGACTCCTTTCTTCTATATTTT  
AGAGAAAGAGAGTTAGTCTATGATCTATTTCGAAGCTGCCACCGGTATGAGAATGATGCA  
TAATTATTTTCGTATAGGAGGAGTAGCTGCTGATCTACCGCATGGATGGATAGATAAATG  
TTTGGATTTCTGCGATTATTTTTTAACAGGGGTTGCTGAATATCAAAA ACTTATTACGCG  
TAATCCTATTTTTTTAGAACGAGTTGAGGGAGTAGGCATTATTGGTGTAGAAGAAGCAA  
TAAATTGGGGTTTGT CAGGACCAATGCTACGAGCTTCCGGAATACAATGGGATCTTCGT  
AAAGTTGATCATTATGAGTGTTATGACGAATTTGATTGGGAAGTCCAATGGCAAAAAGA  
AGGAGATTCATTATCTCGTTATTTAGTACGAATTTGGTGAATGGTGGCATCTATAAAAAT  
TATTC AACAGGCTCTGGAAGGAATTCGGGAGGGCCGTATGAGAATTTAGAAATCCGA  
TGCTTTGATAGAGCGAGGGATCCCGAATTGAATGATTTTGAATATCGATTTATTAGTAAA  
AAGCCTTCTCCACTTTTGAATTGTCGAAACAAGA ACTTTATGTGAGAGTTCGAAGCCC  
CAAAGGGAGAGTTGGGAATTTTTCTGATAGGGGATCAGAATGTTTTCTTGGAGATG  
GAAAATTCGACCGCCGGGTTTTATCAATTTGCAAATTTCTCCTCAGTTAGTTAAAAGAA  
TGAAATTTGGCTGACATTATGACGATACTAGGTAGCATAGATATAATTATGGGAGAAGTTG  
ATCGTATGTTCCCTATGGTAACTGGGTTTCATGAATTATGGTCAACAAACAGTACGAGCT



GCAAGGTATATTGGTCAAAGTTTCATGATTACCTTGTCCCACGCAAATCGTTTACCTGTA  
ACTATTCAATATCCTTATGAAAAATTGATCACATCGGAGCGTTTCCGCGGTCTGAATCCAC  
TTTGAATTTGATAAATGCATTGCTTGTGAAGTATGTGTTTCGTGTATGTCCTATAGATCTAC  
CTGTTGTTGATTGGAAATTGGAAACTGATATCGAAAAGAAACAATTGCTTAATTACAGT  
ATTGATTTTCGGAATCTGTATATTTTGTGGTAATTGCGTTGAGTATTGTCCAACAAATTGTT  
TATCAATGACTGAAGAATATGAACTTTCCACTTATGATCGTCACGAATTGAATTATAATC  
AAATTGCTTTGGGTCGTTTACCAATGTCAGTAATTGACGATTACACAATTTCGAACAATTT  
TGAATTCA---ATAACAAGTGAA-----ATGCAGGGTTCGTTTGTCTGCT  
TGGCTAGTCAAGCATGGGCTAGTTCATAGATCTTTGGGCTTCGATTATCAAGGAATAGA  
GACTTTACAAATAAAGCCCGAGGATTGGCATTCCATTGCTGTCAATTTTATATGTATATGG  
TTATAATTATCTACGCTACAATGTGCCTATGATGTAGCACCAGGAGGACTGTTAGCTAG  
TGTGTATCATCTTACGAGAATAGAGTATGGTGTAGATCAACCGGAAGAGGTATGCATAA  
AAGTATTTGCCTCAAGGAGGAATCCTAGAATTCCGTCTGTTTTCTGGGTTTGGAAAAGT  
GCGGATTTTCAAGAACGAGAATCTTATGATATGTTGGGAATCTCTTATGATAATCATCCA  
CGCTGAAGCGTATCTTAATGCCTGAAAGTTGGATAGGATGGCCCTTACGTAAAGATTA  
TATTGCACCTAATTTTTATGAAATACAAGATGCTCAT-----

-----ATGAATTCTATTGAGTTTCCCTTACTTGATCGAACAACCCAAAATTCAGTTA  
TTTCAACTACATCAAACGATCTTTCAAATTGGTCAAGACTCTCCAGCTTATGGCCGCTT  
CTCTATGGTACCAGTTGTTGCTTCATTGAATTTGCTTCATTAATAGGATCGCGATTTCGAC  
TTTGATCGTTATGGACTGGTACCAAGGTCGAGTCCTAGACAAGCGGACCTAATTTTAAAC  
AGCTGGTACAGTAACAATGAAAATGGCTCCTTCTTTAGTGAGATTATATGAGCAAATGC  
CTGAACCAAAATATGTTATTGCTATGGGAGCATGCACAATTACAGGGGGGATGTTTCAGT  
ACAGATTCTTATAGTACTGTTTCGGGGAGTCGATAAGCTTATTCTGTGGATGTCTATTTG  
CCGGGCTGTCCACCTAAACCGGAGGCTGTTATAGATGCTATAACAAAATTCGTAAGA  
AAATATCTCGAGAAATCTATGAAGATAGAATCAGGTCT-----GAGAATCGGTGTTTTACT  
ACCAATCACAAGTTTCATGTTGGACGCAGTACTCATACTGGAATTTATGATCAAAGGTT  
ACTCTATCAATCCCA---ACTTCAGAGATCCCTCTTGAAACATTTTTCAAATACAAAAGT  
TCAGTATCTTCCCCGAATTTGTGAATATGCAAACCTAGAAATACCTTTTCTTGGATAAAG  
GAACAGATTACTCGATCCATTTCCGTATCGCTTATGATATATATAATAACTCGGACATCCA  
TTTCAAATGCATATCCATTTTTGCACAGCAGGGTTATGAAAATCCACGAGAAGCGACT  
GGACGTATTGTATGTGCCAATTGTCATTTAGCTAATAAGCCCGTGGATATTGAGGTTCCA  
CAAGCGGTACTTCTGATACTGTATTTGAAGCAGTTGTTTCGAATTCCTTATGATATGCAA  
ATGAAACAAGTTCTTGCTAATGGTAAAAGAGGGGCTTTGAATGTGGGGGCTGTTCTTAT  
TTTACCTGAGGGGTTTGAATTAGCCCCACCCGATCGTATTTCCCCGAGATGAAAGAAA  
AGATAGGCAATCTATCTTTTCAGAACTATCGCCCTACTAAAAAAATATTCTTGTGATAG  
GTCCTGTTCTGGTCAAAAATATAGTGAATCACCTTTCCTATTCTTCTCCCGACCCCG  
CTACTAAGAAAGATGTTCACTTCTTAAATATCCCATATACGTAGGCGGGAACAGGGGA  
AGGGGTCAGATTTATCCTGACGGGAGCAAGAGTAACAATACAGTTTATAATGCTACAGC  
GGCAGGTATAGTAAGCAAATCATACGAAAAGAAAAGGGGGGTACGAAATAACCATA  
GCGGATGCATCGGATGGACGTCAAGTGGTTGATATTATCCCTCCAGGACCAGAACTTCT  
TGTTCAGAGGGTGAATCTATTAACCTTGATCAACCATTAACGAGTAATCCTAATGTGG  
GTGGATTTGGTCAGGGAGATGCAGAAATAGTACTTCAAGATCCATTACGTATCCAAGGC  
CTTTTGTCTTCTTGTCTTCTGTTATTTTGGCACAATCTTTTTGGTTCCTTAAAAAGAAA

CAGTTTGAGAAGGTTCAATTGTCCGAAATGAATTTTCATGAGTAAAGTCTATGATTGGTT  
CGAAGAACGTCTCGAGATTCAGGCGATTGCAGATGATATAACTAGTAAATATGTTCCCTC  
CTCATGTCAACATATTTTATTGTCTAGGAGGAATTACGCTTACTTGTTTTTTAGTACAAGT  
AGCTACGGGGTTTGCTATGACTTTTTACTATCGTCCGACGGTACTGAGGCTTTTGCTTC  
TGTTCAATACATAATGACTGAAGCGAACTTCGGTTGGTTAATCCGATCAGTTCATCGAT  
GGTCGGCAAGTATGATGGTCCTAATGATGATCCTTCACGTATTCGTGTATATCTCACCG  
GTGGATTTAAAAACCTCGCGAATTGACTTGGGTTACAGGTGTGGTTCTGGGTGTATTG  
ACCGCATCTTTTGGTGTAACGGTATTCTTTACCTCGGGACCAAATTGGTTATTGGGCA  
GTCAAATTGTAACAGGTGTACCTGAAGCTATTCCTGTAATAGGATCACCTTTGGTAGA  
GTTATTACGCGGAAGTGCTAGTGTGGGACAATCCACTTTGACCCGTTTTTATAGTTTAC  
ACACTTTTGTATTACCTCTTCTTACGGCCGTATTTATGTTAATGCACTTCCCAATGATACG  
TAAGCAAGGTATTTCTGGTCCTTTAATGGGAGTAACAAAAAACCTGACTTGAACGAT  
CCTGTATTAAGAGCTAAATTAGCTAAAGGGATGGGTCATAATTATTACGGAGAACCCGC  
ATGGCCAATGATCTTTTATATATCTTTCCAGTAGTTATTCTAGGTACTATTGCATGTAAC  
GTAGGCTTAGCGGTTCTAGAACCATCAATGATTGGTGAACCAGCAGATCCATTTGCAAC  
TCTTTGGAAATATTACCTGAATGGTATTTCTTTCCCGTATTTCAAATACTTCGTACAGTA  
CCTAATAAGTTATTAGGTGTTCTTTAATGGTTTCAGTACCTGCGGGATTATTAACAGTA  
CCTTTTTTGGAAAATGTTAATAAATCCAAAATCCATTTTCGTTCGTCCAGTAGCGACAAC  
CGTTTTTTTGATTGGTACCGCAGTGGCCCTTTGGTTGGGTATTGGAGCAACATTACCTAT  
TGATAAATCCCTAACTTTAGGTCTTTTTATGATTGAAGTTTTTCTATTTGGAATCGTCTTA  
GGTCTAATTCCTATTACTTTGGCTGGATTATTCGTAACCTGCATATTTACAATACAGACGTG  
GTGATCAGTTGGACCTTATGCCTACTATAACTAGTTATTTTCGGTTTTCTACTAGCGGCTT  
CAACTATAACCTCAGTCTATTTATTGGTCTAAGCAAGATACGACTTATTATGGATATAGT  
AAGTCTCGCTTGGGCTGCTTTAATGGTAGTCTTTACATTTTCTCTTTCACTCGTAGTATG  
GGGAAGAAGTGGACTCATGATTATTCGTTTCGCCGGAACCAGAAGTTAAAATTTTGGTA  
GATAGGGATCCATAAAAACCTTCTTTTCGAGGAATGGGCCAGACCCGGTCATTTCTCAA  
GAACAATAGCTAAGGGCCCTGATACTACCCTTGGATCTGGAACCTACATGCTGATGCT  
CACGATTTTCGATAGCCATAACCAGTGATTTGGAGGAGATCTCTCGAAAAGTATTTAGTGC  
CCATTTTCGGGCAACTCTCCATCATCTTTCTTTGGCTGAGTGGCATGTATTTCCACGGTGC  
TCGTTTTTCCAATTATGAAGCATGGCTAAGCGATCCTACTCACATTGGACCTAGTGCCC  
AGGTGGTTTGGCCAATAGTGGGCCAAGAAATATTGAATGGTGTATGTGGGCGGGGGTTT  
CCGAGGAATACAAATAACCTCTGGTTTTTTTCAGATGTGGCGAGCATCTGGAATAACTA  
ATGAATTACAACCTTTATTGTACCGCAATTGGTGCATTGGTCTTTGCAGCCTTAATGCTTT  
TTGCTGGTTGGTTCCATTATCACAAAGCCGCTCCAAAATTGGCTTGGTTCCAAGATGTA  
GAATCTATGTTGAATCACCATTTAGCGGGGCTACTAGGACTTGGGTCTCTTTCTTGGGC  
GGGGCATCAAGTACATGTATCTTTACCGATTAACCAATTTCTAAACGCTGGAGTAGATC  
CTAAAGAGATCCCCTTCCATGAATTTATCTTGAATCGGGATCTTTTGGCTCAACTTT  
ATCCCAGTTTTGCGGAGGGAGCAACCCCATTTTTACCTTGAATTGGTCAAATATGCA  
GAATTTCTTACTTTTCGTGGAGGATTAGATCCAGTAACTGGGGGTCTATGGCTGACCGA  
TATTGCACACCATCATTTAGCTATTGCAATTTCTTTCCCTGATAGCGGGTACATGTATAGG  
ACCAACTGGGGCATTGGTTCATGGGCTAAAAGATATTTTAGAGGCTCATAAAGGTCCATT  
TACAGGTCAGGGCCATAAAGGCCTATATGAAATTTCTAACAACGTCATGGCATGCTCAAT  
TATCTCTTAACCTAGCTATGTTAGGCTCTTTAACCATTGTTGTAGCTCACCATATGTATTC  
CATGCCCTTATCCATATTTAGCTACTGACTATGGTACACAACCTGTCATTGTTACACA

TCACATGTGGATTGGTGGATTTCTCATAGTTGGTGCTGCTGCGCATGCAGCCATTTTTAT  
GGTAAGAGACTATGATCCAACACTCGATAACAACGATCTATTAGATCGTGTCCCTTAGGCA  
TCGTGATGCAATCATATCACATCTCAACTGGGCATGTATATTTCTAGGCTTTCACAGTTT  
TGGTTTGTATATCATAATGATACCATGAGCGCTTTAGGGCGTCCCCAAGATATGTTTTC  
AGATACTGCTATAACAATTACAACCCGTCTTTGCTCAATGGATACAAAACACCCATGCCCT  
AGCACCTAGTGCAACGGCTCCTGGTGCAACAACAAGCACCAGTTTGACTTGGGGGGG  
TGGTGATTTAGTAGCAGTGGGTGGCAAAGTAGCTTTGTTGCCTATTCCGTTAGGAACCG  
CAGATTTTTTGGTACATCACATTCATGCATTTACGATTCATGTGACGGTATTGATACTCCT  
GAAAGGTGTTCTATTTGCTCGTAGCTCTCGTTTGATACCGGATAAAGCAAACCTTGGTT  
TTCGTTTCCCATGTGATGGACCTGGAAGAGGGGGTACATGTCAAGTATCAGCTTGGGAT  
CACGTCTTCTTAGGGCTATTCTGGATGTATAATTCAATTTCCGGTAGTAATATCCATTTCA  
GTTGGAAAATGCAGTCAGATGTTTGGGGGAGTATAAGTGATCAAGGGGTGTTAACTCA  
TATCACGGGAGGAACTTTGCGCAAAGTTCCATTACTATTAATGGGTGGCTCCGCGATT  
TCTTATGGGCACAGGCATCCCAGGTAATTCAGTCTTATGGTTCTTCATTATCCGCATATG  
GTCTTTTTTTCCTAGGTGCTCATTGTATGGGCTTTTAGTTTAATGTTTCTATTTAGCGG  
GCGTGGTTATTGGCAAGAAGCTTATTGAATCCATCGTTTGGGCTCATAATAAATAAAAGT  
TGCTCCTGCTACCCAGCCTAGAGCCTTGAGCATTGTACAAGGACGTGCTGTAGGAGTA  
ACCCATTACCTTCTGGGTGGAATTGCCACAACATGGGCGTTCCTTCTTAGCAAGAATTAT  
TGCAGTAGGAATGGCATTAAAGATTTCCAAGGTTTAGCCAAGGCTTAGCTCAGGACCCC  
ACTACTCGTCGTATTTGGTTTGGTATTGCTACCGCACATGACTTCGAAAGTCATGATGAT  
ATTACTGAGGAACGTCTTTATCAGAATATTTTTGCTTCTCATTTTGGGCAATTAGCAATC  
ATTTTTCTGTGGACTTCCGGAAATCTGTTTCATGTAGCTTGGCAAGGAAATTTGAATCA  
TGGGTACAAGACCCTTTACATGTAAGACCTATTGCTCATGCAATTTGGGATCCTCATTTC  
GGTCAACCGGCTGTGGAAGCTTTTACTCGAGGGGGTGTCTCCTGGACCAGTGAATATCG  
CTTATTCTGGTGTTTATCAGTGGTGGTATAACAATCGGTTTACGCACTAATGAAGATCTTTA  
TACTGGAGCTCTTTTTCTATTATTTCTTTCTGCTATATCTTTAATAGCGGGTTGGTTACAC  
CTACAACCGAAATGGAAACCGAGCGTTTCGTGGTTCAAAAATGCCGAATCTCGTCTCA  
ATCATCATTTGTCAGGACTCTTCGGAGTAAGTTCATTGGCTTGGACCGGACATTTAGTC  
CATGTCGCTATTCCTGGATCCAGGGGGGAGTACGTTTCGATGGAATAATTTCTTAGATGTA  
TTACCGCACCTCAGGGGTTAGGCCACTTTTTACAGGTCAGTGGAAATCTTTATGCTCA  
AAACCTGATTCAAGTAGTCATTTATTTGGTACCTCTCAAGGAGCAGGAACTGCCATTC  
TAACCTTCTCGGGGGATTCCATCCACAAACGCAAAGTTTATGGCTGACTGATATTGCT  
CATCATCATTTAGCTATTGCATTTATTTTTCTCGTTGCTGGTCATATGTATAGAATACTT  
CGGGATTGGGCACAGTATGAAAGATCTTTTAGAAGCGCATATTCCTCCGGGAGGACGAT  
TGGGGCGTGGACATAAGGGTCTTTATGACACAATCAATAATTCGATTCATTTCAATTAG  
GCCTTGCTCTAGCCTCTTTAGGGGTTATTTACTTCCCTGGTAGCTCAACACATGTATTCTTT  
ACCGGCTTATGCGTTCATAGCACAAGACTTTACTACTCAAGCTGCGTTATATACTCATCA  
CCAATACATCGCAGGATTCATCATGACAGGAGCTTTTGCTCATGGAGCTATATTTTTTCAT  
TAGAGATTACAATCCGGAGCAGAATGAGGATAATGTATTGGCAAGAATGTTAGACCATA  
AAGAAGCTATCATATCCATTTAAGTTGGGCCAGCCTATTTTTGGGGTTCCATACCTTGG  
GACTTTATGTTTATAATGATGTATGCTTTCGTTTGGTACTCCGGAGAAACAAATCTTGA  
TTGAACCTATATTTGCTCAATGGATACAATCTGCTCACGGTAAAACCTTCATATGGGTTTG  
ATGACTTTTTATCTTCAACAACCTGGCCCGGCATTCAATGCGGGGCGAAGCATATGGTTG  
CCTGGCTGGTTAAATGCTGTAAATGAG-----AATAGTAATTCATTATTCTTAAACAATAGGT

CCTGGAGACTTCTTGGTTCATCATGCTATTGCTCTAGGTTTACATACA ACTACATTGATC  
TTAGTAAAAGGCGCTTTAGATGCACGTGGTCCAAAGTTAATGCCAGATAAAAAGGATTT  
CGGTTATAGTTTTCTTGGCAGTGGTCCCGGACGAGGCGGTACTTGTGATATTCGGCTT  
GGGACGCATTTTATTTGGCAGTTTTCTGGATGTTAAATACTATTGGATGGGTTACTTTTTA  
TTGGCATTGGAAGCACATCACATTATGGCAGGGTAACGTTTCACAGTTTAATGAATCTT  
CCACTTATTTGATGGGATGGTTAAGAGATTATCTATGGTTAAACTCTTCACA ACTTATCA  
ATGGGTATAACCCTTTTGGTATGAATAGTTTATCAGTCTGGGCGTGGATGTTCTTATTTG  
GACATCTTGTGGGCTACTGGGTTTATGTTCTTAATTTCTGGCGTGGATATTGGCAGG  
AATTGATTGAACTTTAGCATGGGCTCATGAACGCACACCTTTGGCCAATTTGATTGGA  
TGGAGAGATAAACCAGTGGCTCTTCCATTGTGCAGGCAAGATTAGTTGGATTAGCCCA  
CTTTTCTGTAGGTTATATATTCACCTATGCGGCTTTCTTGATTGCCTCCACATCGGGCAA  
TTTGGTATGTCACATTCAGTAAAGATTTATGATACATGTATAGGGTGTACTCAATGTGTC  
CGTGCCGCCCCACAGATGTATTAGAAATGATACCTTGGGACGGATGTAAAGCTAAGCA  
AATTGCTTCTGCTCCAAGGACAGAAGACTGCGTTCGGTTGTAAGAGATGTGAATCTGCC  
TGTCCAACAGATTTCTTGAGTGTTCGGGTTTATTTATGGCATGAAACA ACTCGCAGCAT  
GGGTCTAGCTTATATGATAACTCTTAACTTACCCTCTATTTTGGTGCCTTTAGTGGGCTA  
GTATTTCCGGCAATTGCAATGGCTTCATTATTTCTTCATGTTCAAAAAACAAGATTTTT  
ATGCGAGATCTAAAAACATATCTTTCCACGGCACCGGTACTAAGTACTATATGGTTCCG  
GTCCTTAGCAGGTCTATTGATAGAGATTAATCGTTTATTCCCGGATGCGTTGACATTTCC  
TTTTTTTAAAT---ATGACTGTAATTTTAGAGAGACGCGAAAGCGAAAGCCTATGGGGTCG  
CTTCTGTA ACTGGATAACCAGCACTGAAAACCGTCTTTACATTGGATGGTTTGGTGT  
TGATGATCCCGACCTTATTGACCGCAACTTCTGTATTTATTATCGCCTTCATTGCTGCCCC  
TCCAGTAGATATTGATGGTATTCGTGAACCTGTTTCTGGATCTCTACTTTATGGAAACAA  
TATTATCTCTGGTGCCATTATTCCTACTTCTGCAGCTATAGGTTTGC ACTTTTACCCAATA  
TGGGAAGCAGCATCCGTTGATGAATGGTTATAACAATGGTGGTCCTTATGAGCTAATTGT  
TCTACACTTCTTACTTGGTGTAGCTTGTTACATGGGTCGTGAGTGGGAACTTAGTTTCC  
GTCTGGGTATGCGTCCTTGGATTGCTGTTGCATATTCAGCTCCTGTTGCAGCTGCTGCTG  
CTGTTTTCTTGATCTACCCAATTGGTCAAGGAAGCTTTTTCTGATGGTATGCCTCTAGGAA  
TCTCTGGTACTTTCAACTTCATGATTGTATTCCAGGCTGAGCACAACATCCTTATGCACC  
CATTCCACATGTTAGGCGTAGCTGGTGTATTTCGGCGGTTCCCTATT CAGTGCTATGCATG  
GTTCCCTTGGTAACCTCTAGTTTGTATCAGGGAAACCACAGAAAATGAATCTGCTAATGCA  
GGTTACAGATTCGGTCAAGAGGAAGAACTTATAATATTGTGGCTGCTCATGGTTATTTT  
GGCCGATTGATCTTCCAATATGCTAGTTTCAATAATTCTCGTTCCTTACATTTCTTCCCTAG  
CTGCTTGGCCTGTAGTAGGTATCTGGTTCACTGCTTTAGGTATCAGCACTATGGCTTTCA  
ACCTAAATGGTTTTCAATTTCAACCAATCTGTAGTTGATAGCCAAGGTCGTGTAATTAATA  
CTTGGGCTGATATTATCAACCGTGCTAACCTTGGTATGGAAGTTATGCATGAACGTAATG  
CTCATAATTTCCCTCTAGATCTAGCTGCTGTTGAAGCTCCATCTATAAATGGAATGGGTT  
TGCCTTGGTATCGTGTTCACTGTCGATTGAATGATCCCGGTCGATTGATTTCTGTCCA  
TATAATGCATACAGCTCTGGTTGCTGGTTGGGCCGGTTCGATGGCTCTATATGAATTAGC  
AGTTTTTGTATCCCTCTGACCCCGTTCTTGATCCAATGTGGAGACAAGGTATGTTCTGTTAT  
ACCCTTCATGACTCGTTTAGGAATAACTAATTCATGGGGCGGTTGGAGTATCACA---GG  
CGGGACTATAACGAATCCGGGTATTTGGAGTTACGAAGGTGTGGCCGGGGCACATATTG  
TGTTTTCTGGCTTGTGCTTCTTAGCAGCTATCTGGCATTGGGTGTATTGGGATCTAGAAA  
TATTTTGTGATGAACGTACAGGAAAACCTTCTTTGGATTTGCCAAGATCTTTGGAATT

CATTTATTTCTATCAGGGTTGGCTTGCTTTGGTTTTGGCGCCTTTCATGTAACAGGCTTG  
TATGGTCTTGGAATCTGGGTGTCCGACCCTTATGGACTAACTGGAAAAGTACAATCTGT  
AAATCCAGCGTGGGGCGTGGAAGGTTTTGATCCTTTTGTTCGGGGAGGAATAGCCTCT  
CATCATATTGCAGCAGGTACATTGGGCATATTAGCAGGCCTATTCCATCTTAGTGTCCGT  
CCGCCTCAACGTCTATACAAAGGATTACGTATGGGAAATATTGAAACCGTCTGTCCAG  
TAGTATTGCTGCTGTCTTTTTTGCAGCTTTTGTGTTGCTGGAACCTATGTGGTATGGTTC  
AGCAACTACCCCGATCGAATTATTTGGTCCCCTCGTTATCAATGGGATCAGGGATACTT  
CCAACAAGAAATATATCGAAGAGTTGGTGTGCTGGGCTAGCCGAAAATCAAAGTTTATCA  
GAAGCTTGGTCTAAAATTCCTGAAAAATTAGCCTTTTATGATTACATCGGCAATAATCCG  
GCAAAGGGGGATTATTCAGAGCGGGTTCAATGGACAATGGGGATGGAATAGCTGTTG  
GATGGTTAGGACACCCTATCTTTAGAGATAAAGAAGGTCGTGAACTTTTTGTACGTCGT  
ATGCCTACCTTTTTTGAACATTTCCAGTCGTTTTGGTAGACGGAGACGGAATTGTTAG  
AGCCGATGTTCCCTTTCAGAAGGGCAGAATCGAAGTATAGTGTCGAACAAGTAGGTGTA  
ACTGTTGAGTTCTATGGCGGCGAACTCAATGGAGTCAGTTATAGTGATCCTGCTACTGT  
GAAAAAATATGCTAGACGTGCTCAATTGGGTGAAATTTTTGAATTAGATCGTGCTACTT  
TGAAATCCGATGGTGTTTTTCGTAGCAGTCCAAGGGGTGGTTTTACTTTTTGGACATGCT  
TCATTTGCTCTGCTCTTCTTCTTCGGACACATTTGGCATGGTGCTAGAACCCTTATTCAGA  
GACGTTTTTGTGCTGTTATTGACCCGGATTTGGATGCTCAAGTGGAATTTGGAACATTTCCA  
AAAACCTGGGGATCCAACCTACAAGAAGACAAGTAGTCATGAAAACCTTATATTCCCTG  
AGGAGGTTCTACCCCGTGGAACGCTCTTTAATGGAACCTTAGCTTTAGCTGGTTCGTGA  
CCAAGAAACCACCGTTTTCGCTTGGTGGGCCGGGAATGCCCAGCTTATCAATTTATCCG  
GTAAACTACTTGGGGCTCATGTAGCCCATGCCGGATTAATCGTATTCTGGGCCGGAGCA  
ATGAACCTATTTGAAGTGGCTCATTTTCGTACCAGAGAAGCCCATGTATGAACAAGGATT  
AATTTTACTTCCCCACCTAGCTACTCTAGGTTGGGGGGTAGGTCCTGGTGGGGAAGTTA  
TAGACACCTTTCCATACTTTGTATCTGGAGTACTTCACTTAATTTCCCTCCGCAGTATTGG  
GCTTTGGCGGTATTTATCATGCACTTCTGGGACCTGAGACTCTTGAAGAATCTTTTCCAT  
TTTTCGGTTATGTATGGAAAGATAGAAATAAAAATGACCACAATTTGGGTATTCACTTAA  
TCTTGTTAGGTATAGGTGCTTTTCTTCTAGTATTCAAGGCTCTTTATTTTTGGCGGCGTATA  
TGATACCTGGGCTCCCGGAGGGGGAGATGTAAGAAAAATTACCAACTTGACCCTTAGC  
CCAAGTGTATATTTGGTTATTTACTAAAATCGCCCTTTGGAGGAGAAGGATGGATTGTT  
AGTGTGGACGATTTGGAAGATATAATTGGAGGACATGTATGGTTAGGTTCCATTTGTATA  
TTTGGTGGAACTCTGGCATATCTTAACCAAACCCTTTGCGTGGGCTCGCCGTGCACTTGT  
ATGGTCTGGAGAGGCTTACTTGTCTTATAGTTTAGGTGCTTTAGCTGTCTTTGGTTTCAT  
TGCTTGTGCTTTGTCTGGTTCAATAATACCGCTTATCCTAGTGAGTTTTACGGGCCAAC  
TGGACCCGAAGCGTCTCAAGCTCAAGCATTACTTTTCTAGTTAGAGACCAGCGTCTTG  
GGGCTAACGTGGGATCCGCTCAAGGACCTACTGGTTTAGGTAAATATCTAATGCGTTC  
CCGACTGGAGAAGTCATTTTTGAGGAGAACTATGCGTTTTTGGGATCTGCGTGCTC  
CCTGGTTAGAACCCTAAGGGGTCCCAATGGTTTGGACTTGAGTAGGCTGAAAAAAGA  
CATAAACCTTGGCAAGAACGGCGTTCCGCGGAATATATGACTCACGCTCCTTTAGGTT  
CTTAAATTCGTTGGGTGGCGTAGCTACCGAGATCAATGCAGTCAATTAIGTCTCTCCTA  
GAAGTTGGTTAGCTACTTCTCATTTTTGTCTAGGATCTTCCCTATTCGTAGGTCATTTGTG  
GCACGCGGGAAGGGCTCGTGCAGCTGCAGCAGGATTTGAAAAAGGAATTGATCGTGA  
TTTTGAACCTGTTCTTTCTATGACCCCTCTAACATGACTATAGCCCTTGGTAAATTCAC  
CAAAGACGAAAGC---TTATTTGATATTATGGATGACTGGTTACGGAGGGACCGTTTTCGT

TTTTGTAGGTTGGTCCGGTCTATTGCTCTTTCCTTGTGCCTATTTTCGCTTTGGGGGGTTG  
GTTACACAGGTACAACCTTTGTAACCTTCATGGTATAACCCATGGATTGGCTAGTTCCTATTT  
GGAAGGTTGCAATTTCTTAACCGCCGCAGTTTCTACCCCTGCTAATAGTTTAGCACATT  
CTTTATTGTTACTATGGGGTCCCTGAAGCACAAGGAGATTTTACTCGTTGGTGTCAATTAG  
GTGGTCTGTGGACTTTTGTGCTCTTCATGGCGCTTTCGGACTAATAGGTTTCATGTTAC  
GTCAATTCGAACTTGCTCGATCTGTTCAATTGCGACCTTATAATGCAATCGCATTCTCTG  
CTCCAATCGCTGTTTTTGTCTGTATTCCATAATTTATCCACTAGGTCAGTCTGGTTGGTT  
CTTTGCGCCTAGTTTTGGTGTAGCAGCTATAATTCGATTCATCCTCTTTTTTCCAAGGGTT  
TCATAATTGGACGTTGAACCCATTTTCATATGATGGGAGTTGCCGGTGTATTGGGCGCTG  
CTCTGCTATGCGCTATTCATGGTGCTACCGTAGAAAATACTTTATTTGAAGATGGTGATG  
GTGCAAATACATTCCGGGCTTTTAATCCAACCTCAAGCTGAAGAACTTATTCAATGGTC  
ACCGCTAACCGCTTTTGGTCCCAAATCTTTGGGGTTGCTTTTTTCCAATAAACGTTGGTT  
ACATTTCTTTATGTTATTTGTACCAGTAACCGGTTTATGGATGAGTGCTCTTGGAGTAGT  
CGGTCTGGCTCTGAACTTACGTGCCTATGACTTCGTTTCCAGGAAATCCGTGCAGCGG  
AAGATCCTGAATTTGAGACTTTCTACACCAAAAATATTCTCTTAAACGAAGGTATTTCGT  
GCTTGGATGGCGGCTCAAGATCAGCCTCATGAAAACCTTATATTCCCTGAGGAGGTTCT  
ACCCCGTGGAAACGCTCTTATGTCTGGAAGCACAGGAGAACGTTCTTTTTGCTGATATTA  
TTACCAGTATTCGATACTGGGTCAATCATAGCATTACTATACCTTCCCTATTCATTGCGGG  
TTGGTTATTCGTCAGCACGGGTTTAGCTTACGATGTGTTTGAAGTCCTCGGCCAAACG  
AGTATTTTACAGAGAGCCGACAAGGAATTCATTAATAACCGGCCGTTTTGATCCTTTG  
GAACAACCTCGATGAATTTAGTAGATCTTTTATGACCATAGATCGAACCTATCCAATTTTT  
ACAGTGCGATGGTTGGCTGTTACGGACTAGCTGTACCTACCGTTTCTTTTTTGGGGTC  
AATATCAGCAATGCAGTTCATCCAACGAATGGCTACAAAACCGTTGAGGGTAGTTCTA  
GA---TCTCGTCCAAAACCAACTACTGTAGGGGAGTTATTAACCGTTGAATTCGGAAT  
ATGGTAAAGTAGCTCCTGGATGGGGAACACTCCTTTAATGGGTGTCGCAATGGCTCTA  
TTTGCGGTATTCCTATCTATTTTGGAGATTTATAATTCTTCTGTTTTATTGGACGGAAT  
TTCATGAATATGCTTACTCTCAAACCTTTCGTTTACACAGTAGTGATATTCTTTGTTTCT  
CTCTTCATCTTCGGATTCCCTATCTAATGATCCGGGACGTAATCCTGGGCGTGAAGAAATG  
GCCGATACTACTGGAAGGATTCTCTTTGGCTAATAGGTAAGTACTGTAACCTGGTATTCCTGTG  
ATCGGTTTAAATAGGCATTTTCTTTTATGGTTCATATTCCGGATTGGGTTTCATCCCTGATGC  
TTAATATCTTTAGTTTGGATCTGTATCTGTCTTAAATCTGCCCTTTATTTCGAGTAATTTTTTC  
TTCGCCAAATTGCCCGAAGCCTATGCTTTTTTGAATCCAATCGTAGATGTTATGCCAGTC  
ATACCTCTGTTCTTTTTTCTCTTAGCCTTTGTTTGGCAAGCCGCTGTAAGTTTTTCGAACG  
ACACAATCAAACCCGAACGAACAAAATGTTGAATTGAATCGTACCAGTCTTTACTGGG  
GGTATTACTCATTTTTTGTACTTGCTGTTTTATTTTCCAATTATTTTTTCAATATGGAAGTA  
AATATTCTCGCATTTATTGCTACTGCACTGTTCAATCTAGTTCCTACTGCTTTTTTACTTAT  
CATTTACGTAACAAACAGTTAGTCAAATAATATGGAAACAGCAACCCTAGTCGCCATCT  
CTATATCTGGTTTACTTGTAAGTTTTACTGGGTACGCCTTATATAACCGCCTTTGGGCAGC  
CCTCTCAACAATAAGAGATCCATTTGAGGAACACGGGGACATGGAAGCATTGGTTTA  
TACATTCCTCTTAGTCTCGACTCTAGGGATAATTTTTTTCGCTATCTTTTTTTCGAGAACCG  
CCTAAAGTTCCAATAAAAAGGTGAAAATGACTATTGCTTTCCAATTGGCTGTTTTTGC  
ATTAATTGCTACTTCATCAATCTTACTGATTAGTGTACCCGTTGTATTTGCTTCTCCTGAT  
GGTTGGTCAAGTAACAAAATATTGTTTTTCCGGTACATCATATGATTGGATTAGTCT  
TTTCTGGTAGGTATACTTAATTCTCTCATCTCT-----ATGTCACCACAAACAG

AGACTAAAGCAAGTGTTGGATTCAAAGCCGGTGTTAAAGATTACAAATTGACTTATTAT  
ACTCCTGAATATGAGACCAAACCTACTGATATCTTGGCAGCATTCCGAGTAACTCCTCA  
ACCTGGAGTTCCACCCGAAGAAGCAGGGGCCGCGGTAGCTGCTGAATCTTCTACTGGT  
ACATGGACAACCTGTGTGGACTGATGGACTTACCAGCCTTGATCGTTACAAAGGACGAT  
GCTACCACATCGAGCCCGTTGCTGGAGAAGAAAGTCAATTTATTGCTTATGTAGCTTAC  
CCTTTAGACCTTTTTGAAGAAGGCTCTGTACTAACATGTTTACTTCCATTGTGGGTAAT  
GTGTTTGGGTTCAAAGCTCTGCGCGCTCTACGTCTAGAGGATCTGCGAATCCCCCTGC  
TTATTCTAAAACCTTCCAAGGCCCGCCTCATGGCATCCAAGTTGAGAGAGATAAATTGA  
ACAAGTATGGTCGTCCCCTATTGGGATGTACTATTAACCTAAATTGGGGTTATCCGCTA  
AGAACTATGGTAGAGCAGTTTATGAATGTCTCCGCGGTGGACTTGATTTTACTAAAGAT  
GATGAGAACGTGAACTCCCAACCATTTATGCGTTGGAGAGACCGTTTCTTATTTTGTGC  
CGAAGCCATTTTTAAATCACAGGCTGAAACAGGTGAAATCAAAGGGCATTACTTGAAT  
GCTACTGCAGGTACATGCGAAGAAATGATCAAAGGGGCTGTATTTGCCAGAGAATTGG  
GAGTTCCTATCGTAATGCATGACTACTTAACAGGGGGATTACCCGCAAATACTAGCTTG  
GCTCATTATTGCCGAGATAATGGCCTACTTCTTACATCCATCGTGCAATGCATGCAGTT  
ATTGATAGACAGAAGAATCATGGTATGCACTTTCGTGTACTAGCTAAAGCCTTACGTCT  
GTCTGGAGGAGATCATATTCACGCCGGTACCGTAGTAGGTAAACTTGAAGGAGAAAGA  
GAGATCACTTTGGGCTTTGTTGATTTATTACGTGATGATTTTGTGAAAAAGACCGAAG  
TCGCGGTATTTATTTCACTCAAGATTGGGTCTCTCTACCAGGTGTTCTGCCAGTGGCTTC  
TGGGGGTATTCACGTTTGGCATATGCCTGCTCTGACCGAGATCTTTGGAGATGATTCCGT  
ACTACAGTTCGGTGGAGGAACTTTAGGACACCCTTGGGGAAATGCACCGGGTGCCGTA  
GCTAATCGAGTAGCTCTTGAAGCATGTGTACAAGCTCGTAATGAGGGACGTGATCTTGC  
TCGTGAGGGTAATGAAATTATCCGTGCAGCTAGCAAATGGAGTCCTGAACTAGCTGCT  
GCTTGTGAAGTATGGAAGGAAATCAAATTTGAATTCCCAGCAATGGATACTTTG-----AT  
GGCGATACATTTATACAAAACCTTCTACCCCGAGCACACGCAATAGAGCCGTAGACAGTC  
AAGTGAAATCCAATCCACGAAATAATTTGATCTATGGACAGCATCGTTGTGGTAAAGGT  
CGTAATGCCAGAGGAATCATTACCGCAGGGCATAGAGGGGGAGGTCATAAGCGTCTAT  
ACCGTAAAATCGATTTTCGACGGAATGAAAAAGACATATATGGTAGAATCGTAACCATA  
GAATACGACCCTAATCGAAATGCATACATTTGTCTCATACTATGGGGATGGTGAGAA  
GAGATATATTTTACATCCCAGAGGGGCTATAATTGGAGATACCATTGTTTCTGGTACAGA  
AGTTCCTATAAAAATGGGAAATGCCCTACCTTTGACCGATATGCCCTTAGGCACGGCCA  
TACATAACATAGAAATCACACTTGGAAAGGGTGGACAATTAGCTAGAGCAGCGGGTGC  
TG TAGCGAAACTGATTGCAAAGAGGGGAAATCGGCCACATTAATAATTACCTTCTGGG  
GAGGTCCGTTTGTATATCCAAAACTGCTCAGCAACAGTCGGACAGGTGGGAAATGTTG  
GGGTGAACCAGAAAAGTTTGGGTAGAGCCGGATCTAAGTGTTGGCTAGGTAAGCGTCC  
TG TAGTAAGAGGAGTAGTTATGAACCCTGTAGACCATCCCCATGGGGGTGGTGAGGGG  
AGAGCCCCAATTGGTAGAAAAAAACCCACAACCCCTTGGGGTTATCCTGCACTTGGAA  
GAAGAAGTAGAAAAAGGAATAAATATAGCGATAATTTGATTCTTCGCCGCCGTAGTAAG  
ATGATTCAACCCAGACCCATTTGAATGTAGCGGACAACAGCGGGGCCCGAGAATTGA  
TGTGTATTGCAATCATAGGAACTAGT--AATCGCCGATACGCTCATATTGGTGACGTTATT  
GTTGCTGTGATCAAAGAAGTAGTACCAAATATGCCTCTAGAAAGATCAGAAGTAATCA  
GAGCTGTAATTGTACGTACCTGTAAGAAGTCAAACGTGACAACGGTATGATAATACGA  
TATGATGACAATGCTGCAGTTATTATTGATCAAGAAGGAAACCCAAAAGGAACTCGAAT  
TTTTGGTGCGATCGTCCGGGAATTGAGACAGTTAAATTTTACTAAAATAGTTTTCCTTAGC

CCCTGAGGTATTAATGCTTAGTCCCAAAGAACCAGATTCCGTAAACAACATAGAGGA  
AGAATGAAGGGAATATCTTATCGAGGTAATCGTATTTGTTTCGGTAGATACGCTCTTCAA  
GCACTTGAACCTGCTTGGATCACATCTAGACAAATAGAAGCGGGGCGACGAGCAATGA  
CACGAAACGTACGCCGTGGTGGAAAAATATGGGTACGTATATTTCCAGACAAACCAGT  
TACAGTAAGACCTACGGAAACACGTATGGGTTCGGGGAAAGGATCCCCGAATATTGG  
GTAGCTGTCGTTAAACCAGGTAGAATACTTTATGAAATGGGCGGAGTAGCAGAAAATAT  
AGCTAGAAAAGCTATTTCAATAGCGGCGTCCAAAATGCCTATACGAACTCAATTCATTA  
TTTCGGGAATGACCAGAACTAGACGAGGATATATAGCTCGTAGACGTAGAACAAAAAT  
TCGTTTATTTACATCAAGCTTTTCGAGGAGCCATTCAAGACTTACTCGAACTATTACTCA  
ACAGAAAATCAGAGCTTTGGTTTCGACTCATCGGGATAGAGATCGGCAAAGAGAGAT  
TTTCGTCGTTTGTGGATCACTCGGATAAATGCAGTAATTCACGAGAAT-----GCATCCTAT  
AGTTATAGTAGATTTATACACGATCTGTACAAGAGGCAGTTACTTCTTAATCGTAAAATA  
CTTGACAAAATAGCTATATCCAATAGGAATTGTCTTTATATGATTTCCAATGAGATCATAA  
AA-----GAAGAAGTATACGCTTTAAGTCAATCTATCTCTATGTC  
TGCTCACAAAGCGCGAAGAGTACTTGATCAAATTCTTGGACGTTCTATCGGGAAACA  
CTTACGATACTTGAACCTCATGCCTTATCGAGCGTGTATCCATTTTAAATTAATTTATT  
CTGCAGCAGCAAATGCTAAGCACAAATATGGGTTTGAACGAAGAATATTTAGTCATTACT  
AAAGCCACAGTCAACGAGGGTACTACCGTGAAAAAATTGAAACCTCGAGCTCGAGGA  
CGTAGTTATGCGATAAAAAGACCCACTTGTATATAACTATTGTATTGAAAGATACAGCC  
TTATATGGGGGAGTATGGGACAAAAAATGGATGGAATCAAATATGCAGTATTTACAGA  
CAAAAGTATTCGGTTATTGGGGAAAAAT--CAATATACTTCTAATGTGCAATCAGGATCA  
ACTAGGACAGAAATAAAGCATTGGGTTCGAACTCTTCTTTGGTGTCAAGGTAATAGCTAT  
GAATAGTCATCGACTCCCGGGAAAGGGTAGAAGAATGGGACCTATTATGGGACATACA  
ATGCATTACAGACGTATGATCATTACGCTTCAACCGGGTATTCTATTCCACCTCTTAGA  
AAGAAAAGAACTATGGCAGTTCCAAAAAACGTACTTCTATGTCAAAAAAGCGTATTC  
ATAAAAATATTTGGAAAAGGAAGGGATGGCGAGCCGCATTAAAGGCTTTTGCGTTAGC  
GAAATCTCTTTCTACCGGGAATTCAAAAAGTTTTTTTTGTGCGCCAATAATAATATGG  
CCAAGAGTAAAGATGCCGAATAAGGGTCTTTTGGAAATGTACTAGTTGTGTACGAGG  
CGGT-----GTTAATAAGGAATCAACAGGCATTTCCAGATATATTTACTGAAAAAATCGAC  
ACAATACGCCCGTTCGATTGGAATTGCAAAAATTCTGTCCCTATTGTTATAAACATACGA  
TTCATGGGGAGATAAAAAAATGAAAATAAGGGCTTCTGTTCGTAAAATTTGCGAAAA  
ATGTCGACTGATCCGTAGACGGGGACGAATTATAGTAATTTGTCCCAACCCGAGACATA  
AACAAAGACAAGGAATGGTTCGAGAGAAAGTAACAGTATCTACTCGGACACTGCAGT  
GGAAGTGTGTTGAATCAAGAGTAGACAATAAGCGTCTTTGTTATGGACGCTTTATTCTG  
TCTCCACTTATTAAGGTCAAGCCGACACAATAGGCATTGCGATGCGAAGAGCTTTGCT  
TGGAGAAATAGAAGGAACATGTATCACACGTGCAAATCTGAG-----AAAATACCCCAT  
GAATATTCTACCATAGTAGGTATTCAAGAATCAGTACATGAAATTTAATGAATTTGAAA  
GAAATTGTATTGAGAAGTAATCTGTATGGAACCTCGCGGCGCGTTTATTTGTGCCAGGGG  
TCCTGGATATGTAAGTCTCAAGACATCATTTACCCGCTTCTGTGGAATCGTTGATAA  
TACACAACATATAGCTAGACTGATGGAACCGATTGATTTGTGTATTGGATTACAAATCGA  
GAGGAATCGCGGATATAGTATAAAAAGGCCAAAT-----AACGACGGAAGTTAT-----CCTA  
TAGATGCTGTATTATGCCTGTTCGAAATGCGAATCATAGTATTCATTCTTATGGGAATG  
GGAATGAAAGACAAGAGATACTTTTTCTCGAAATATGGACAAATGGGAGTTAACTCCT  
AAAGAAGCACTTCATGAAGCCTCCCGTAATTTGATTGATTTATTTATTCCTTTTCTACAT



GCGGAAGAAGAA-----ACTTTACATTTAGAGTACAATCAA---CACAAAGAGCACTTTACC  
CCCTCTTACTTTTCATGATAGATTGGCT---AAACTAAGGAAAAACAAAAA-----ATAGA  
ATTGAAATATATTTTTATTGACCAATTAGAATTGCCTCCCAGGATCTATAATTGCCTCAA  
AGGTCCAATATACATACATTATTAGACCTTTTGAATAAGAGTCAAAGGATCTTATGAAA  
ATTGAAGATTTTCGCATAGAAGATGTAAAACAGTTATTGGGCATTCTAGAAAAACAT----  
-TTCACAATTGAT-----ATGTTCCGGGGTGGAAAT--GAGGGAATGTCTACAATACC  
TGGGTTTAATCAGATCCAATTTGAAGGATTTTGTAGGTTTATTGATCAGGGCTTGACAG  
AAGAACTTTATAAGTTTCCAAAAATTGAAGATACAGATCAAGAAATTGAATTTCAATTA  
TTTGTGGAAACATATCAATTGGTGGAAACCATTGATAAAAGAAAGAGATGCCGTGTATGA  
ATCACTCACATATTCTTCTGAATTATATGTATCTGCGGGATTAATTTGGAAAACCAGCAG  
AGATATGCAAGAACAAACAATTTTTATTGGAAACATTCCTCTAATGAATTCCTTGGGAA  
CTTCTATAGTAAATGGACTATACAGAATTGTGATTAATCAAATATTGCAAAGCCCCGGCA  
TTTATTACCGGTCAGAATTGGACCATAACGGAATTTCCGGTCTATACCGGCACCATAGTCT  
CAGATTGGGGAGGAAGATTAGAATTAGAGATTGATAGAAAAGCAAGGATATGGGCTCG  
TGTGAGTAGGAAACAAAAATATCTATTCTAGTTCTATCATCAGCTATGGGTTCGAATCT  
AAGAGAAATTCTAGAGAATGTTTGCTATCTGAGATTTTTTTTGTCTTTTCTGAATGATAA  
GGAGAAAAAAAATTGGGTCAAAGAAAGTGCCATTTTGGAGTTTATCAACAATTT  
GCTTGTGTAGGTGGGGATCCGGTATTTTCTGAATCATTATGTAAGGAATTACAAAAGAA  
ATTCTTTCAACAAAGATGTGAATTAGGAAGGATTGGTCGACGAAATATAAACGGGAGA  
CTGAATCTTGATATACCTCAGAACAATACATTTTTGTTACCGCAAGATATATTGGCAGCT  
GCGGATCATTGATTGGAATGAAATTTGGAATGGGTATACTTGACGAT-----ATGAATCAT  
TTGAAAATAAACGTATTCGTTCTGTAGCGGATCTCTTACAAGATCAATTCGGACTGGC  
TCTAATTCGTTTAGAAAACGTGGTTCGAGGAACTATATGTGGAGCAATTAGG---CATAAA  
TTAATA---CCGACTCCTCAGAATTTGGTAACTTCAACTCCA-----GTAACAACTACTT  
ATGAATCTTTTTTCGGCTTACACCCATTATCTCAAGTTTTGGATCGAACTAATCCATTGA  
CACAAATAGTTCATGGGCGAAAATCGAGTTATTTGGGCCCCGGTGGATTGACAGGGCG  
AACTGCCAGTTTTTCGGATACGAGATATCCATCCTAGTCACTATGGACGCATTTGCCCAAT  
TGACACGTCTGAAGGAATCAATGTTGGACTTATTGGATCCTTAGCAATTCACGCGAGGA  
TTGGTCATTGGGGA---TCTCTAGAAAGCCATTTTAT-----GAAATTTCT-----GAGAGAT  
CAAAAAGGTACGGATGCTTTATTTATCACCAAGTAGAGATGAATACTATATGGTAGCG  
GCAGGAAATTTCTTGGCACTGAATCAGGGTATTCAGGAAGAACAGGTTGTTCCAGCTC  
GATACCGTCAAGAATTCCTGACTATTGCGTGGGAACAGGTTTCATCTTCGAAGTATTTTT  
CCTTTCCAATATTTTTCTATTGGAGCTTCCCTCATTCTTTTATCGAGCATAATGATGCGA  
ATCGGGCTTTAATGAGTTCTAATATGCAACGCCAAGCAGTTCGGCTTTCTCGGTCCGAG  
AAGTGCATTGTTGGAACACTGGGTTGGAACGTCAAGCGGCTCTAGATTCAGGGGTTCCCG  
TTATAGCCGAACACGAGGGAAAGATCGTTTATACCGATACTGACAAGATCATTTTATCA  
GGTAATGGAGATACTCTAAGTATTCCATTAGTTATGTATCAACGTTCCAACAAAAATACT  
TGTATGCATCAAAAAGCCAGGTTCCGGCGGGTAAATGCATTA AAAAGGGACAAATTT  
TAGCGGATGGGGCCGCTACAGTTGGCGGAGAACTAGCTTTGGGGAAAAACGTATTAGT  
GGCTTATATGCCATGGGAAGGTTACAATTCTGAAGATGCGGTACTCATTAGCGAGCGTC  
TGGTATATGGAGATATTTATACTTCTTTTACATACGGAAATATGAAATTCAGACCCATGT  
GACAAGCCAAGGC---CCCGAAAGGATCACTAACAAAATACCGCATTTAGAAGCACATT  
TACTCCGCAATTTAGACAAAAATGGAATGTGATACTGGGATCTTGGGTAGAGACGGG  
CGATATTTAGTAGGTAAATTAACGCCTCAGATGGCGAAAGAA---TCATCGTATGCCCCG

GAAGATAGATTATTACGAGCCATACTTGGCATTTCAGGTATCCACTTCAAAGGAAACTTG  
CCTAAAACCTACCTATAGGTGGTTCGAGGTCGAGTTATTGATGTGCGATGGATCCAGAAAA  
AGGGT--GGTTCTAGTTATAATCCAGAAACGATTCGTGTATATATTTACAGAAACGTGA  
AATCAAAGTAGGTGATAAAGTAGCTGGAAGACATGGAAATAAGGGTATCATTTCCAA  
ATTTTGCCTAGACAAGATATGCCTTATTTGCAAGATGGAAGACCTGTTGATATGGTCTTT  
AACCCATTAGGAGTACCGTCACGAATGAATGTAGGACAGATATTTGAATGCTCGCTGGG  
GTTAGCGGGGGTCTGCTAGACAGACATTATCGAATAGCACCTTTTGATGAGAAATATG  
ACAAGAGGGCTTCGAGAAAACCTAGTGTCTTCTGAATTATATGAAGCCAGTAAGCAAAC  
AGCGAATCCATGGGTATTTGAACCCGAGTATCCGGGAAAAAGCAGAATATTTGATGGA  
AGAACGGGAGATCCTTTTGAACAACCTGTTATAATAGGAAAGCCTTATATCTTGAAATT  
AATTCATCAAGTTGATGATAAAATCCATGGACGTTCCAGTGGACATTATGCACCTGTTAC  
ACAACAACCCCTTAGAGGAAGGGCCAAGCAAGGGGGACAACGGGTAGGAGAAATGG  
AGGTTTGGGCTCTAGAGGGATTGAGGTTGCTCATATTTTACAAGAGATGCTTACTTATA  
AATCTGATCATATTAGAGCTCGCCAGGAAGTACTTGGTACTACGATCATTGGAGGAACA  
ATACCTAACCCCTGAGGATGCTCCAGAATCTTTTCGATTGCTCGTTCGAGAACTACGATC  
TTTGGCTCTAGAATTGAATCATTTCCTTGATCTGAGAAGAACTTCCAGATTAATAGGAA  
GGAAGCT-----ATGATCGATCGGTATAAACATCAACAACCTCCGAATTGGATC  
AGTTTCCCCTCAACAAATAAGTGCTTGGGCCAATAAAATCCTACCTAATGGAGAGATAA  
TTGGAGAGGTTACAAAACCCCTATACTTTTCATTACAAAACCTAATAAACCGGAAAAAGAT  
GGATTATTTTGTGAAAGAATTTTGGCCCTATAAAAAGTGAATTTGTGCTTGTGGAAA  
TTATCGAGTAATCGGAGATGAAAAAGACGCCAAAATTTTGTGAACAATGCGGAGTC  
GAATTTGTTGATTCTCGGATACGAAGATATCAAATGGGCTACATCAAACCTGGCATGCC  
AGTAACGCATGTGTGGTATTTGAAACGCTTCCCTAGTTATATCGCAAATCTTTTAGATAA  
ACCTCTTAAAGAATTAGAAGGCCCTAGTATATTGCGAT-----TTTTCTTTTGGCTAGGCC---A  
TAGAGAAAAACCTACTTTCTTACGATTACGAGGTTTCATTTCGAATATGAAATTCAATCTT  
GGAAATACAGCATCCCCTTTTTTTTACTACCCAAGGTTTCGATACATTTCGAAATCGA  
GAAATCTTACCGGAGCCGGTGCTATACGAGAACAATTAGACGATCTGGATTGCGAAT  
TATTATAGATTATTCATTGGTAGAATGGAAAGAATTAGGGGAAGAA---GGGCCACAGG  
TAATGAATGGGAAGATCGAAAAATTGGAAGAAGAAAGGATTTTTTGGTTAGACGCATG  
GAATTAGCTAAGCATTTTTATTTCGAACAAATATAGAACCAGAATGGATGGTTTTGTGTCTA  
TTACCAGTTCTTCCCTCCCGAGTTGAGACCGATCATTTCAGATAGATGGGGGTAACTAAT  
GAGCTCGGATATTAATGAACTCTATAGAAGAGTTATCTATCGGAACAATACTCTTACCGA  
TCTATTAACAACAAGTAGATCTACACCAGGGGAATTAGTAATGTGTACAGGAGAAATTGG  
TACAAGAAGCCGTGGATACACTTCTTGATAATGGAATCCGCGGACAACCAATGAGGGA  
CGGTCATAATAAGGTTTACAAGTCGTTTTTCAGATGTAATTGAAGGCAAAGAAGGAAGA  
TTTCGTGAGACCCCTGCTTGGCAAACGGGTCGATTATTCGGGGCGTTCGGTCATTGTCGT  
AGGCCCTTCACTTTCATTACATCAATGTGGATTGCCTCGCGAAATAGCAATAGAATTTT  
CCAGACATTTTTAATTCGCGGTCTAATTAGACAACATCTTGCTTCGAACATAGGAGTTG  
CTAAGAGTCAAATTCGAGAAAAAGAACCGATTGTATGGGAAATACTTCAGGAAGTTAT  
GCGGGGGCATCCTGTATTGCTGAATAGGGCACCTACTCTGCATAGATTAGGCATACAGG  
CATCCAACCTATTTTGTGGAAGGACGTGCTATTTGTTTACATCCATTAGTTCGTAAGG  
GATTCAATGCAGATTTTGTGATGGGGATCAAATGGCTGTTTCATGTACCTTTATCTTTGGAGG  
CTCAATCGGAGGCTCGCTTACTTATGTTTTCTCATATGAATCTCTTGTCTCCAGCCATTG  
GGGATCCCATTTCCGTACCAACTCAAGATATGCTTATTGGACTCTATGTATTAACGAGCG

GGAATCGTCGAGGTATTTGTGCAAATAGGTATAATCCATGTAATCGAAGAAAC-----TA  
TCAAATGAAAGAATTGACGATAATACTATAGGTATACGAAAGAAAAAGAACCCTTTT  
TTTGTAAATTCCTATGATGCAATTGGAGCTTATCGGCATAAAAGAATTAATTTATATAGTCC  
TTTGTGGCTCCGGTGGCAACTAGATCAACGC---CTTATTGCTTCA-----AAAGAAGCTCC  
CATCGAAGTTCACTATGAATCTTTGGGTACCTATCATGAGATTTATGGGCACTATCTAATA  
GTAAGAAGTGTAATAAAGAGATTCTTGTATATACATTGAAACCCTGTTGGTCATAT  
TTCTCTTTATCGAGAAATCGAAGAAGCCATCCAAGGCTTTTGTGCGGGCCTGCTCATATG  
AGACC-----ATGGGGTACTTATGACAGAAAGGGCTAATCTGGTCTTTCAC  
AATAAAGTGATAGATGGAAGTCCATGAAACGACTTATTAGCAGATTAATAGATCACTT  
CGAATGGCATATACATCACACATCCTGGATCAAGTAAAGACTCTGGGTTTCCAGCAAG  
CCACTGCTACATCCATTTCAATTAGGAATTGATGATCTTTTAAACAATACCTTCTAAGGGAT  
GGCTAGTCCAAGATGCTGAACAACAAAGTTTGATTTTGGAAAAACACCATCATTATGG  
GAATGTACACGCGGTAGAAAAATTACGCCAATCCATTGAGATCTGGTATGCTACAAGTG  
AATATTTGCGACAAGAAATGAATACTAATTTTAGGATGACTGACCCCTTTAATCCAGTTC  
ATATAATGTCTTTTTCGGGAGCTAGAGGAAATGCATCTCAGGTACACCAATTAGTAGGTA  
TGAGAGGATTAATGTCAGATCCCCAAGGACAAATGATTGATTTACCCATTCAAAGCAAT  
TTACGTGAGGGGCTCTCTTTAACAGAATATATAATTTCTTGCTACGGAGCCCACAAGGG  
GGTTGTAGATACTGCTGTACGAACATCAGATGCTGGATATCTCACGCGTAGACTTGTG  
AAGTAGTTCAACACATTGTTGTACGTAGAACAGATTGTGGCACTATCCGAGGTATTTCT  
GTGAGTCCTCGAAATGGGATGATACCG---GAAAGAATTTTATTCAAACATTAATTGGTC  
GTGTATTAGCAGACGATATATATATGGGCCACGATGCATCGCCATTGAAATCAAGATA  
TTGGGATTGGGCTTGTCAATCGATTCATAACC-----TTTCAAGCACAGACAATA  
TCGATTCGAACCCCTTTACTTGTAAGAGCACATCTTGGATCTGTGACTATGTTATGGT  
CGGAGTCCTACTCATGGCGACCTGGTCAATTGGGAGAAGCTGTAGGTATTATTGCGG  
GGCAATCTATTGGAGAACCGGGTACTCAACTAACATTAAGAACTTTTCATACCGGCGGA  
GTATTCATGGGGTACTGCAGAGCATGTACGAGCCCCTTCTAATGGAAAAATAAAATT  
CAATGAAGATTGGGTTTATCCACACGTACACGTCATGGACATCCTGCTTTTCTATGTTA  
TATAGACTTGTATGTAATAATTGAGAGTGAAGGAATTATACATAACGTGAATATTCCCCC  
AAAAAGTTTTCTTCTAGTTCAAATGATCAATATGTAGAATCAGAACAAGTGATTGCTG  
AGATTTCGTGCAGGAACATACACT--TTCAATTTTAAAGGAAAGGGTTCGAAAACATATTTA  
TTCTGACTCAGAGGGAGAA---ATGCATTGGAGTACCGATGTGTACCATGCACCTGAATT  
TACATATGGTAATGTTTATCTATTACCAAAGACAAGTCATTTATGGATATTATCTGGGGT  
TCATGCAGA-----TTCAGTATAGTCCCTTTTTTCGATCCACAAGGATCAAGATCAAATGAG  
CGTTCGT-----TCTCTTTCTGTGCAACGAAGATATATTTCTAACCCTCA-----GTGACTAA  
TGATCAA---GTGATACACGAATTCCTTTAGTTCTGATCTTTCTGGTAAAAAAGAAGGTAG  
GATTCCTGCTTAT--TCAGAACTTAATCGAATCATATATACTGGTCGTTATAATCTCATAGA  
TCCT--GCCATTCTACACGAGAATTCT-----GATTTATTGGCAAAGAGGGCAAGAAATAGA  
TTCATCATTCCATTCCAATCGATTCAAGAAGGAGAGAAAGAACTAATGCCCTTCAGG  
TATCTCGATTGAAATACCT-----ATAAATGGTATTTTCCGTAGAAATAGTATTCTTGCTTAT  
TTCGACGATCCTCGATACAGAAGAAACAGCTCAGGAATTACTAAATATGGGACTATAGA  
GGCGCATTCAATCGTTAAAAAAGAGGAT-----TTGATTGAATATCGAGGA---GTCAAAGA  
ATTTAAGCCAAAATACATGAAAGTAGATCGATTTTTTTTTCATTCCCGAGGAAGTGCATAT  
TTTACCCGGATCTGCTTCCATAATGGTACGGAACAATAGTATCATTGGAGTAGATACAG  
AATCACTTTAAATACAAGAAGCCGAGTAAGTGGATTGGTCCGAGTGGAGAGAAAAAA

AAAAAGGATTGAACTTAAAATCTTTTCTGGAGATATCCAGTTTCCTGGAGAGACAAATA  
AGATATCCCGACACATCGGCATCTTGATAACCACCAGGAACG-----AGAAAAAAAAATTC  
CAAGGAATCAAAAAA-----TTGAAAAATTGGATCTATGTCCAAGGG-----ATCACACCT  
ACCAAG-----AAAAAGTATTTTGTGGTTCGACCCGTAGTCACATATGAAATAGCGGA  
CGGTATAAATTTAGCAACACTTTTCCCTCAGGATCTGTTGCAGGAAAGGGATAATATGC  
ACCTTCAAGTTGTCAATTATATCCTTTATGGAAATGGCAAACCGATTTCGGGGAATTTCTG  
ATACAAGTATTCAATTAGTTCGGACTTGTTTAGTATTGAATTGGTACCAAGAAAAAAAA-  
-----AGTTCTCCTATCGAAAAGACCCATGCTTCCTTTATGGAAGTAAGGACAAATGGTC  
TGATTTCGAGATTTCTAACAATTAAGTGTGAAATCCTATATTTTCATATACCGGAAAAA  
GGAATGATCCGTCAAGTTCAGGATTGATCGCTGAT---AATGGATCAGATCACACCAATAT  
CAATCCGTTTTATTCCATTTATCCGAAGGAAAGG---ATTCAACAATTACTTAGACAAAGA  
CAAAAAAAAAATCAAGGAATTCGTACGTTATTAATAGA-----AATAAGGAATGC  
CAATCTTTGATAATTTTGTTCATCATCCAATTGTTCTCGAATGGGTCCA-----TTCAACGAT  
GTAAATATCACAATGTG-----ATAAAGAATCAGATACCCCAATTCCAATTAGGAATT  
CGTTGGGTCCTTTAGGAACA-----GCCCTTCAAATTACGAATTTTTATTCA-----TTTTACC  
ATTTA-----ATAACTCATAATCATATCTTG---GTAACTAAATATTTCCAACTTGACAAT-----  
--TTAAACAGACTTTTCAAACACTTAAA-----TATTATTTAATGGATGAAAAT-----GGG  
ATAACTTATAATCCCGATCCATGCAGTAACATCATTTTGAATCCATTCAATTTGAATTGGT  
ATTTTCTCCATCATAATTATTGTGAAGAGACATCC---ACAATAATTAGTCTCGGACAGTTT  
ATTTGTGAAAATGTATGTATAGCCAAAAACGGACCACAC---CTAAA-----TCAGGTCAA  
GTTCTAATTGTTCAA---GTTGACTCTGTAGTAATAAGATCAGCTAAGCCTTATTTGGCTA  
CTCTGGGAGCAACTGTTTCATGGACATTATGGGGAAATCCTTTACGAAGGAGATACATTA  
GTTACATTTATATATGAAAAATCAAGATCTGGTGTATATAACGCAGGGTCTTCCAAAAGTG  
GAACAAGTGTTAGAAGTGCGTTCGATTGATTCCATATCGATGAACCTAGAAAAGAGAG  
TTGAGGGTTGGAACGAGCATATAACAAGAATCCTTGGAAATTCCTTGGGGATTCTTCATT  
GGTGCTGAGCTAACTATAGCGCAAAGTCGTATCTCTTTAGTTAATAAGATCCAAAAGGT  
TTATCGATCCAGGGGGTTCAGATCCATAATAGGCATATAGAAATTATTGTACGTCAAAT  
AACATCAAAAGTGTGGTTTCAGAA-----GATGGAATGTCTAATGTTTTTTTCGCCCGG  
AGAACTAATTGGATTGTTGCGAGCGGAACGAACGGGGCGTGCTTTCGAAGAAGCTATT  
TGTTACCGAACCATTTTATTGGGAATAACGAGAGCGTCTCTGAATACTCAAAGTTTCATA  
TCCGAGGCGAGTTTTCAAGAACTGCTCGAGTTTTAGCAAAGCTGCTCTGTGGGGTC  
GTATCGATTGGTTGAAAGGCCTAAAAGAAAACGTCGTTCTGGGGGGGATGATACCCGT  
TGGTACCGGATTTAAAGGATTA-----GTGCACCGTTCAAGGCAACATAACAACATCCCTT  
TGGAATGGAAACCAAAAAGAATAATTTATTCGAGAGGGAAATGAGA-----GATATTTT  
GTTCCACCACAGAGAATTATTTGATTCTTGCAGTTCAAAGAATTTCCATGATACATCAG  
AACATCATTATGGGA-----TTAATGATTCCATGACAAGAAGATATTGGAAC  
ATCAATTTGGAAGAGATGATGGAAGCAGGAGTTCATTTTGGTCATGGTACTAGGAAATG  
GAATCCTAGAATGGCGCCTTATATCTCGGCAAAGCGTAAAGGTATTCATATTACAAATCT  
TACTAGAACTGCTCGCTTTTTATCAGAAGCTTGTGATTTAGTTTTTGTATGCAGCAAGTAG  
GGAAAACAATCTTAATTGTTGGTACCAAAAATAAAGCAGCGGATTTCAGTAGCACGG  
GCTGCAATAAAGGCTCGGTGTCATTATGTTAATAAAAAATGGCTCGGTGGTATGTCAAC  
GAATTGGTCCACTACAGAAACGAGACTTCATAAATTCAGGGACTTGAGAACGGAACA  
AAAGACGGGGAGACTCAATCGTCTCCGAAAAGAGATGCAGCTATGTTGAAGAGACA  
ATTATCTCACTTGCAAACATATTTGGGTGGGATTAATATATGACGGGGTTACCCGATATT

GTAATAATCGTTGATCAGCAAGAAGAATATACGGCTCTTCGAGAATGTATCACTTTAGG  
AATTCCAACGATTTGTTTAATCGATACAAATTGTGACCCCGATCTCGCAGATATTTGAT  
TCCAGCAAATGATGACGCTATAGCTTCAATCCGATTAATTCCTAATAAATTAGTATTCGCT  
ATTTGTGAGGGTTCGTTCT---AGCTATATAAGAAATCCTATGGGACAAAAAATAAATCCAC  
TGGGTTTCAGACTTGGTACAACCCAAGGTCATCATTGCTTTGGTTTGCACAACCAA  
AAATTATTCCAAGGGTCTACAAGAAGATCAAAAAATACGGGATTGTATCAAGAATTATG  
TACAAAAAATATAAGAATATCCTCTGGT---GTCGAGGGAATTGCACGTATAGAGATTCA  
AAAAAGAATCGATCTGATTCAGGTCATAATCTATATGGGATTCCCAAAGTTATTAGTAGA  
AGGTAAACCACGA-----AGAATTGAAGAATTACAGATGAATGTACAAAAAGAATTG  
AATTACGTGAACCGAAAACCTAACATTGCTATTACAAGAATTACAAAACCTTACGGACA  
TCTAATATTCTTGCAGAATTTATAGCCGGACAATTAAGGAATAGAGTTTCGTTTCGCAA  
GGCAATAAAAAAAGCTATTGAATTAACCTGAACAGGCAGATACAAAAGGAATTCAAGTA  
CAAATTGCAGGGCGTATCGACGGAAAAGAAATTGCACGTGTTGAATGGATTAGAGAAG  
GAAGGGTTCCCCTACAAACCATTGAGCTAAAATTGATTATTGTTCTTATAGAGTTTCGA  
ACTATATATGGGGTATTAGGCATCAAATTTGGATATTTGTAGACGAGGAAATGTCGCGT  
TACCGAGGGCCTCGTTTCAAAAAATACGCCGTCTGGGGGCTTTACCGGGACTAACTA  
GTAAAAGGCCTAGAGCCGGAAGTGATCTTAGAAACCAATCGCGTTCGGGAAA---AGA  
TCTCAATATCGTATTCGCTCTAGAAGAAAAACAAAAATTGCGTTTTCAATTATGGTCTTACA  
GAACGCCAATTACTTAACTATGTTTCGTATCGCCGAAAAGCCAAAGGGGCAACAGGTC  
GGGTTTTACTCCAATTACTTGAATGCGTTTTGGATAACATCCTTTTTTCGATTGGGTATGG  
CTTCGACTATTCTGAGCCCGCAATTAAGTTAATCATAGACATATTTTAGTTAATGGTC  
GTATAGTAGATATACCAAGTTATCGCTGCAAACCCCGAGATATTATTACGGCGGGGAATG  
AACAAAAATCCAGAGCTCTGATTCAAATGTTTTTGTATTATCCTCCCAT---GAGGAATT  
GCCAAAACATTTGACTCTTCAACCATTCCAA-----TTAAAGGATTAGTCAATCAAATAA  
TAGATAGTAACTGGGTTCGGTTTGAAAATAAATGAATTGCTAGTCGTAGAATATTATTCCC  
GTCAGACTATGTCACGTGAGGTAAGTGCAGAAAGAAAAACTGCAAATCCGATCCAAT  
TTATCGTAATCGATTAGTTAACATGTTGGTTAACCGTATTCTGAAACACGAAAAAAAT  
CATTGGCTTATCAAATTATCTATCGATCCGTGAAAAGATTCAACAAAAGACAGAAACA  
AATCCACTATCTGTTTTACGTCAAGCAATACGTGGAGTAACTCCCGATATAGCAGTAAA  
AGCAAGACGTGTAGGCGGATCGACTCATCAAGTTCCCATTTGAAATAGGATCCACACAA  
GGAAAAGCACTTGCCATTTCGTTGGTTATTAGGGGCATCCCGAAAACGTCCGGGTCGAA  
ATATGGCTTTCAAATTAAGTTCCGAATTAGTGGATGCTGCCAAAGGGAGTGGCGATGCC  
ATACGCAAAAAGGAAGAGACTCATAGAATGGCAGAGGCAAATAGAGCTTTTGCACATT  
TTCGTATGGGCAGGGACACTATTGCTGACATAATAACCTCTATACGAAATGTCGACATG  
GATAGAAAAGTAACGGTTTCGAATAGCATCTACTAATATCACCGAAAACATTGTTAAAAT  
ACTTTTACGGGAAGGTTTTATCGAAAACGTGAGGAAACATCAGGAAAGCAACAAATAT  
TTTTTGGTTTTAACCTGCGACATAGAAGG-----AATAGGAAAGGAACATATAGAACT---  
ATTTTTAAAT-----TTAAAACGGATCAGTCGACCTGGTCTACGAATCTATTCTAACTATCAA  
CGAATTCCTAGAATTTTAGGTGGTATGGGGATTGTAATTCTTTCTACTTCTAGAGGTATA  
ATGACAGACCGAGAGGCTCGCCTAGAAAGAATTGGTGGAGAAATTTTGTGTTATATATG  
GATGGCAAAACCTATACCAAGAATTGGTTCACGTAGGAATGGACGTATTGGTTCACGTA  
AGAGTGCGCGTAGAATACCAAAGGGAGTTATTCATGTTCAAGCAAGTTTTAACAATACC  
ATTGTGACCGTTACAGATGTACGGGGTTCGGGTGGTTTTCTTGGTCTTCGGCCGGTACTTG  
TGGATTCAGGGGTACAAGAAGAGGGACGCCATTTGCTGCTCAAACCGCAGCAGGAAA

TGCTATTTCGTACAGTAGTGGATCAAGGTATGCAACGAGCAGAAGTCATGATAAAGGGT  
CCTGGTCTCGGAAGAGATGCAGCATTACGAGCTATTTCGTAGAAGTGGTATACTATTAAG  
TTTCGTACGGGATGTAACCTCTATGCCACATAACGGCTGTAGACCTCCTAAAAAAGAC  
GTGTACACCCTACATGTTCTCGGCGCTGAGGACACCCCGAAGAGCGGGGGATTTCG  
TGACATTTCTGATTGGCTGTCT--TGTGTTTCTAATAAG---TTGTTTAATAGTTGGCATACT  
ATCACCCCAAAAAACCAAACCTCTGCCTTACGTAAAGTTGCCAGAGTACGATTAACCT  
CTGGATTTGAAATCACTGCTTATATACCTGGTATTGGCCATAATCACAAGAACATTCTG  
TAGTCTTAGTAAGAGGGGGAAGGGTTAAGGATTTACCCGGTGTGAGATATCACATTGTT  
CGAGGAACTCTAGACGCTGTCCGAGTAAAGGATCGTCAACAAGGGCGTTCTAAATATG  
GGGTCAAAAAGCCAAAAATGGCAAGGAAAAGTTTGATTCAGAGGGAGAGGAAGAGA  
CAAAAATTGGAACAGAAATATCATTTGATTCGTCGATCCTCAAAAAAAGAAATAAGC---  
-----AAAGTTCCGTCGTTGAGTGACAAATGGGAAATTCATGGAAAGTTACAATCCTCAC  
CGCGTAATAGCGCACCTACCCGCTTTCATCGACGTTGTTTTTTGACCGGAAGACCGGGA  
GCTAACTATCGATACTTTGGGTTATCTGGACACATACTTCGTGAAATGGTTCATGCATGT  
TTGTTGCCAGGGGCAACAAGATCAAGTTGGATGGTAAAAACTTATTCATCTCAGTTAT  
TTCTCAA-----AAAGAAGCAAATAGGGGATCTGTTGAATTTCAAGTATTCAGTTTCA  
CCAATAAGATCCGAAGACTTACTTCACATTTGGAATTGCACAGAAAAGACTATTTATCT  
CAGAGAGGTCTACGGAAAATTCTGGGAAAACGTCAACGGTTGCTGTCTTATTTGGCAA  
AGAAAAATAGAGTACGTTATAAAGAATTAATTGGTCAGTTGGGTATTCCGGGAGACAAA  
AATTCGT-----ATGGTAAAACCTTCGTTTCAAACGATGTGGTAGAAAGCAACGAGCCGTC  
TATCGAATCGTTGCAATTGATGCTCGATCCCGAAGAGAAGGAAGAGATCTTCGGAAAG  
TGGGTTTTTATGATCCGATAAAGAATCAAACCTTATTCAAATGTTCTCTGCTATTCTATATTT  
CCTGAAAAAAGGAGCTCAACCTACAGGAACTGTTTCATGATATTTCAAAGAAAGCGGAG  
GTTTTTACGGAACCTTCGTCTTAATCAAACGAAATTCAAATTCATGGATAAATCCAAGCG  
ACTTTTTCTTAAATCCAAGCGATCTTTTCGTAGGCGTTTGCCCCGATCCAATCGGGGG  
ATCGAATTGATTATAGAAACATGAGTTAATTAGTCGATTTATTAGTGAACAAGGAAAAA  
TATTATCTAGACGAGTGAATAGATTGACTTTGAAACAACAACGATTAATTACTATTGCTA  
TAAAACAAGCTCGTATTTTATCTTCGTTACCTTTTCTTAATAATGAGAAA-----CAATTTG  
AAAGAACCGAGTCGACCGCTAGAACTACTGGTCTTAGAACCAGAAATAAAGTGACAC  
GT--CTAAAAAAAATCCTTTTATAGCAAAGCATTATTAAGAAAAATTGCTATGCTTAA  
CACAACGTGGGAAAAAAGAAATAATAGTAACTTGGTCCCGGACATCTACCATTATACCA  
CAATGATCGGCCATACTATTGCTGTACATAATGGAAAGGAGCATTTCCTATTTATATAAC  
AGATCGTATGGTAGGCCACAAATTGGGAGAATTTTCATCTACTCTAAATTTCCGGGGAC  
ACGCAAAAAACGATAATAGATCTCGTCGTATGATTTTAAAATCTTTTCTACTAGGTAATC  
TAGTATCCTTATGCATGAAGATAATCAATTCGGTCGTTGTGGTCGGACTCTATTATGGATT  
TCTGACCACATTCTCCATAGGGCCCTTATCTCTTCCCTTCTCCGAGCTCAGGTTATGGA  
AGAAGGAGAAGAAGGAACCGAGAAGAAGGTATCAGCAATAACTGGTTTTATTACGGG  
ACAGCTCATGATGTTTCATATCGATCTATTATGCGCCTCTGCATCTAGCATTGGGTAGACC  
TCATACAATAACTGTCCTAGCTCTACCGTATCTTTTGTTCATTTCTTCTGGAACAATCAC  
AAACACTTTTTTGGATTATGGATCTACTACCAGAAATTCATGCGTAATCTCAGCATTCAA  
TGTGTATTCTGAATAATCTCATTTTTCAATTATTAACCATTTTCATTTTACCAAGTTCAA  
TGTTAGCCAGATTAGTCAACATTTATATGTTTCGATGCAACAACAAGATGTTATTTGTAA  
CAAGTAGTTTTGTGGTTGGTTAATTGGTACATTTTATTTCATGAAATGGGTGGATTGG  
TATTAGTCTGGATACGGCAAAATCCTTCTATTAGATCTCTTATTTCGATCTAATAAGTACCT

TGTGTCAGAATTGAGAAATTCTATGGCTCGAATCTTTAGTATTCTCTTATTTATTACCTGT  
GTCTACTATTTAGGCAGAATACCGTCACCCATTCTACTAAGAAAATGAAAGAAACCGA  
AGAAGATAAACCCCTTGTGACTCTTCTTTTTGACTATAAACGATGGAATCGTCCATTGC  
GATATATAAAGGCTTTTCAAATTAATAAAGCTGTAAGAAATGAAATGTCACAATATTTTT  
TTTATACATGCCTCAGTGATGGAAAACAAAGAATATCTTTTACATATCCCCCAGTTTGT  
CAATTTTTTTGGAAATGATACAAAGAAAGATGTCTTTGTCCACAACAGAAAGACTCTC  
CTATGACGAACCTATATAATCATTGGATTTATACCAATGAACAAAAAGAAAAC---CTAAGA  
AAGGAGTTTATAACGAGAATCGAGGCTCTAGACAATGGATCGCTTACTCTGGATGTACT  
GGAAAAAAGAACTAGATTGTGTAATGATGCAACTAAAAAAGAATACTTGCCTAAAATAT  
ATGATCCTTTCTTGAACGGACCATATCGTGGAACAATCAAAAAAATGTTTTACCTATA  
GAGAAGTTTCGCATAAATAAGATTTACGGTATCCTT---CGAGAATTTGAACATACAGACC  
CCAAGGATCAATCTATTGGAATAAAGAAATCAGTAAAAAAGTCCCCCGATGGTCATAC  
AAATTAATGAATGAGGAG-----GAGATTCGTTCAAGAAAATCCAAACATGTAGTG  
ATTTTTACCGATGCTTTGATCCGTTATTCACAACAATCGGATTTTCGTCGAGATATAATCA  
AAGGCTCCATGCGCGCTCAAAGACGTAATAAGTTATTCGGGAACCTTTTCAAGCAAA  
TGTACATTTCCCCCTTTTTTTGGACAGAATATACAAACCCATCTTTTTTCTTTTGATATT-  
----TCTGGATTGATAAACTCATTTTTGAATAAGAGAGGAAAAAGCACGGATAAAAAT  
AGCCGAAGTCTGGGATACCGTCCTATTTGCTCAAGTAATAAGAGGTTGCTTGTATTAA  
CCCAATCAATTTTTCGAAAATATATTATATTACCTTCATTGATAATAGCTAAAAACATCGG  
TCGTATGTTATTATTCAATCTCCCGAGTGGTCCGAAGATTTAAAGGATTGGAATCGAGA  
AATGCATGTTAAATGCACCTATAATGGTGTTCATTATCAGAAACAGAATTTCCGCAAA  
ACTGGTTAAGAGACGGTATTCAAATAAAGATCCTATTTCTTTCTGTCTGAAACCTTGG  
CACAAACCTCAAAAAGTAAAAAA-----TTTTGTTTTTAAACAGTTTGGGGAATGGAAA  
CTGATCTGCCTTTTGGTTCTCCCCGAAAACGACCTTCTTTTTTAAACCCATTTTGA  
GAACTTGAAAAAAGAATTCGAAAATTTAAAAACAAGTGTTTTCTAGTT---CTAACAGTT  
TTAAAAGAACGAACAAAAATATTTTAAAGGTCTCAAAAAGAAACAAAAAATGGGTTA  
TCAAAAGTGTTCTATTTATAAATAAAAAAATAATAAAGAAGTCTTAAAAATAAATG  
ATTCGATAATCAATAATCAGATGATTCACAATCGTCTATTCAAATTCGATCTATGAATTG  
GACAAATTATTCACTGACAGAAAAAAGTGAAAGATCTGACTGATAGAACAAGCAC  
AATTAGAAAAAATAGAAAAAATTATAAAGACAAGAAAAAAGCCCTAACAAAGC  
TAGTTATAATGCTAAAAGATTAGAATCACAAAAAGCATTGGCAAATATTA  
GAAATTCTCGATTAATTCGCAAATTACATTATTTATAAATTTTTCATTGAAAGGATATA  
CATAGATATTCTTCTATGTCTCATTAATATTTCCAGAACCAATGCACAATTTTTT---CACTT  
TATTTTCGTGTGACTTATCCTCCTTGTACAAGCATATGTATTTTACAAATTATCACAAACC  
CAAGTTATTAACCTTGATAAGTTAAGATCTGTCTTCAATATACATCTTTTTTCTTAAGA  
ACGAAAGAAAAGATTATTTTGCACACGAAATATTTTATTACGAATTAAGACATAAGAAA  
CTTCGTAATTCTGGAATGAATCAATGGAAGAACTGGTTAAGAGGTCATTATCAATATAAA  
TTATCTCCGATTATATGGTCTAGATTAGTACCACAAAAGTGGCGAAATAGAGTAAATCAA  
CATTGTGTGGCTCAAATCAAAGCAAATGGGATTTATCTCAAAAAGATCAA-----TTAAT  
TCATTACAACAACAAGAAAATTTAAAAAACAATATAGATATGACCTTTTATCATATAA  
ATATATTAATGATGATATTATGTATCCGGATAGAAAATATTTTGGATTGGAAAATTCTCCATT  
TTTGCTTTAGACTTTTTGATTGGATGGGGATGAATGAAGAAATACTAAATCGTTGGTTCT  
TCCAGAAATTTGTGCTACTTTATAATACATATAAAATGAAACCCTGGGTTATACCAATCA  
AATTAATCTTTTAAATTTCAAGAATCACACGGAAGCAGAAGTTCGATTTATTCCTAAAA

AGATATTTGCTTTTTCAATTGAGATGGGATGATTCTTTAAATCAAAAAATGATCAATAAT  
ATCAAGGTATATTGTCTCCTGCTTAGACTGATAAATCCAAGAGAAATTTGTATATCTGCT  
ATTCAAAGGGGAGAAATGAGTCTGGATCTAATACCGGTTCCATAAAGATTTAACTCTTAC  
AGAATTGATGAAAATGGGTATATTTATTATCGAACCAATTCGTCTGTCTGTAAAAAATGA  
TGGACAATTTATTATGTATCAAACCTATAGGTATTTTCATTGGTTCATAAGAGTAAGTACAAT  
CATTATGATTTGCTTGTTCCTGAAAATATTTTATCGCCTAGACGTCGTAGAAAATTTAGA  
ATTCTAATTTGTTTCAGATTTCTCTGGCCCAATTATCGATTAGAAGATTTAGCTTGTATGA  
ATCGCTATTGGTTTGATACCAATAATGGTAGTTGTTTTAGTATGATAAGGATACATATGTA  
TCCAATGAAAGGACATCAATTCAAATCTTGGATTTTCGAATTGAGAGAGATATTGAGAG  
AGATCAAGAATTCTCACTATTTCTTAGATTCATGGACCCAATTCACCTCAGTGGGATCTT  
TCATTCACATTTTTTTCCACCAAGAACGTTTTATAAAACTCTTTGACCCCGAATTTGGA  
GTATCCTACTTTCA--CGCAATTCA-----CAGGGTTCAACAAGCAATCGATATTTTC-----  
ACGATCAAGGGTGTAGTACTATTTGTAGTAGCG---GTCCTTATATATCGT-----ATTAA  
CAATCGAAATATGGTTCGAAAGAAAAATCTCTATTTGACAGGGCTTCTTCCT-----  
ATACCTATGAATTCCATTGGACCCAGAAATGATACATTGGAAGAATCTTTT---GGGTCTT  
CCAATATCAATAGGTTGATTGTTTTCG---CTCCTGTATCTTCCAAAAGGAAAAAAGATCTC  
TGAGAGCTGTTTCTGGATCCGAAAGAGAGTACTTGGGTTCTCCCAATAACT-----A  
AAAAGTGTATCATGCCTGAATCTAACTGGGGTTCGCGGTGGTGGAGGAACTGGATCGG  
AAAAAAGAGG-----GATTCTAGTTGTAAGATATCTAAT-----GAAACCGTCGCTGGAAT  
TGAGATCTCATTCAAAGAAAAAGATATCAA---TATCTGGAGTTTCTTTTTGTATATTATA  
TGGAT-----GATCCGATCCACAAGGACCATGATTGGGAATTGTTTGATCGTCTTTCTCCG  
AGGAAGAGGCGAAACATAATCAACTTG-----AATTCGGGACAGCTATTCGAAATCTTAG  
TGAAACACTGGATTTGTTATCTCATGTCTGCTTTTCGTGAAAAAATACCAATTGAAGTG  
GAGGGT--TTCTTCAAACAACAAGGA---GCTGGGTCAACTATTCAATCAAATGATATTGA  
GCATGTTTCCCAT-----CTCTTCTCGAGAAACAAGTGGGCTATTTCTTTGCAAAATTGTG  
CTCAATTTCATATGTGGCAATTCGCCAAGATCTCTTCGTT-----AGTTGGGGGAAA---  
AATCCGCACGAATCGGATTTTTTTGAGGAAC---GTATCGAGAGAGAATTGGATTTGGTTA  
GACAATGTGTGGTTGGTAAACAAGGATCGG-----TTTTTTAGC-----AAGGTACGGAAT  
GTATCGTCAAATATTCAATATGATTCC-----ACAAGA-----TCTAGTTTCGTTCAAGTAA  
CGGATTCTAGCCAATTGAAAGGATCTTCT--GATCAATCCAGAGATCATTTCGATTCCATT  
AGT-----AATGAGGATTCGAAA-----TATCACACATTGATCA  
ATCAAAGAGAGATTCAACAATAAAAGAAAGATCGATTCTT--TGGGAT-----CCTTCCT  
TTCTTCAAACGGAACGAACAGAGATAGAATCAGAC-----CGATTCCCGAAA-----TGCCT  
TTCTGGATATTCCTCAATGTCAATGTCCCGGCTATTCACG---GAACGTGAAAAGCAGAT  
GATTATTCATCTGCTTCCGGAAGAAATTGAAGAATTT-----CTTGGGAATCCTACAAGAT  
CCATTCGTTCTTTTTTCTCTGACAGATGG-----TCAGAACTTCAT--CTGGGTTCAATCC  
TATTGAGAGGTCCACTAGAGATCAG-----AAATTGTTGAAGAAACAACAAGATGTT  
TCT--TTTGTCCCTTCCAGGCGATCGGAA-----AATAAAGAAATGGTTAATATATTCA  
AGATAATTACGTATTTACAAAAT-----ACCGTCTCAATTCATCCTATTTTCATCAGATCCGG  
GATGTGATATGGTTCCG---AAGGATGAACCGGAT--ATGGACAGTTCCAATAAGATTTCA  
TTCTTGAACAAAAATCCATTTTTTGATTTA-----TTTCATCTATTCCATGACCGGAACAGG  
GGGGATACACGTTA-----CACCACGATTTTGAATCAGAA-----GAGAGATTTCAAGAAA  
TGGCAGATCGATTCATCTATCAATAACCGAGCCG---GATCTGGTGTATCATAAGGGATT  
TGCCTTTTCTATTGATTCTACGGATTGGATCAAAAACAA-----TTCTTGAATGAGGTATT



TAACTCCAGGGATGAATCGAACAAGAAATCTTTA-----TTGGTTCTACCTCCTAGTTTT  
TAT-----GAAGAGAATGAATCTTTTTATCGAAGGATCAGAAAAAATGGGTCCGG---ATC  
TCCTGCGGAAATGATTTGGAAGATCCAAAACCAAAAATAGTGGTATTTGCTAGCAACA  
ACATAATGGAGGCAGTCAATCAATATATATTGATCCGAAATCTGATTCAAATCCAATATA  
GCACCTATGGG-----TACATAAGAAATGTATTGAATCGATTCTTTTTAATGAAT-----AGA  
TCCGATCGCAACTTCGAATATGGAATTCAA-----AGGGATCAAATAGGAAATGATACT  
CTGAATCATAGAACTATAATGAAATATACGATCAACCAACATTTATCGAATTTGAAAAAG  
---AGTCAGAAGAAATGGTTCGATCCT-----CTTATTTTTATTCTCGAACCGAGAGATCCA  
TGAATCGGGATCCTCATGCATATAGATACAAATGGTCCAATGGGAGCAAGAATTTCCAG  
GAACATTTGGAACATTTCTGTTTCTGAGCAGAAGAGCCGT-----TTTCAAGTAGTGTT  
GATCGATTACGTATTAATCAATATTCGATTGATTGGTCTGAGGTTATCGACAAAAAAGAT  
TTGTCTAAGTCACTTCGTTTCTTTTTGTCCAAGTCACTTCTT-----TTTT  
GTCC-----AAGTTGCTTCTTTTTGTCTAACTCACTTCT--TTTTCTTTGT  
GAGTTTCGGGAATATCCCATTTCATAGGTCCGAG---ATCCACATCTAT--GAATTGAAAG  
GTCCGAATGATCAACTCTGCAATCAGTTGTTAGAATCAATAGGTCTTCAAATCATTCAAT  
TGAAAAAATGGAACTCTTC-----TTATTGGAT-----GATCATGATACTTCC---CAAAAA  
TCGAAATTTTTGATCAATGGAGGAACAATATCACCGTTTTTGTTCATAAAGATACCA---A  
AGTGG---ATGATTGACTCATTCCATAGTAGA-----ATAATCGCAGGAAATCCTTTGATAA  
CACGGATTCCTATTTCTCAATGATATCCCACGATCAAGACAATTGGCTGAATCCCGTGA  
AACCATTTTCATAGAAGTTCATTGATATCTTCTTTTTATAAAGCAAATCGACTTCGATTCTT  
GAATAATCCGCATCGCTTCTGCTTCTAT-----TGCAACAAAAGATTCCCTTT-----TAT--  
GTGGAAAAGGCCCGTATCAATAATTCTGAT-----TTTACGTATGGA---CAATTCCTCAATAT  
TTTGTTCAATTCGCAAGAAA---ATATTTCTTTGTGCGGCGGTAAA-----AAAAACATGC  
TTTTTTGGAG---AGAGATACTATTTACCAATCGAGTCACAGGTATCTAACATATTCATAC  
CTAACGATTTTCCACAAAGTGGTGACGAAACG---TATAACTGTACAAATCT-----TTC  
CATTTTCCAATTCGATCCAATCCATTTCGTTCGT-----AGAGCTATTTACTCGATCGCAGAC  
ATTTCTGGAACACCTCTAACAGAGGGACAAATAGTCAATTTGAAAGAACTTATTGTCA  
ACCTCTTTCAGATATGAATCTATCTGATTCAGAAGGGAAGAAGTTCATCAGTATCTCAA  
T-----TTCAATTCAAACATGGGTTTGATTCACTCCATGTTCTGAGAAATATTTACCATC  
CGAAAAG-----AGGAAAAA-----CGGAGTCTTTGTATAAAG-----AAATGC  
GTTGAGAAAGGGCAGATGTATAGAACCTTTCAACGAGATAGTGCTTTTTCAACTCTCTC  
AAAATGGAATCTATTCCAAACATATATGCCATGGTTCCTTACTTCGACAGGGTACAAATA  
TCTAAATTTGATATTTTTAGATACTTTTTTCAGAC---CTATTGCCGATATTAAGTAGCAGT---  
--CCAAAATTTGTATCCATTTTTTCATGATATTATGTATGGATCAGATATATCATGGCGAATTC  
TTCAGAAAAAATTG-----TGTCTTCCACAACGGAAT--CTGATAAGTGAGATTT  
CGAGTAAGTGTTTACATAAT-----CTTCTTCTGTCCGAAGAAATGATTCATCGAAATAATG  
AGTCA-----CCATTGATATCGACACATCTGAGATCGCCAAATGTTCCGGGAGTTC---CTCTA  
TTCAATCCTTTTCTTCTTCTTGTGCTGGATAT--CTCGTTCGTACACATCTTCTCTTTGT  
TTCCCGA-----GCCTCTAGTGAGTTACAGACAGAGTTCGAAAAGGTCAAATCTTTGATG  
ATTCCATCATACATGATTGAGTTGCGAAAACCTTCTGGATAGGTATCCTACATCTGAACTG  
AATCTTTCTGGTTAAAGAATCTCTTTCTAGTTGCTCTGGAACAATTAGGAGATTCTCTA  
GAAGAAATACGGGGTTCTGCTTCTGGCGGCAACATGCTATTGGGTGGTGGTCCC-----  
-----GCTTATGGG---GTCAAATCAATACGTTCTAAGAAGAAATATTTGAATATCAATCTCA  
TCGATATCATCGATCTCATA---AGTATCATACCAAATCCCATCAATCGAATCACTTTTTTCG

AGAAATACGAGATGTCTAAGTCATAACAAGTAAAGAGATCTATTCATTGATAAGAAAAAG  
AAAAACGTGAACGGTGATTGGATTGATGATAAAATAGAATCCTGGGTCGCGAACAGT  
GATTCGATTGATGATGAAGAAAGAGAATCCTTGGTTCAGTTCCTCC-----ACCTTAACGAC  
A-----GAAAAAAGGATTGATCAAATTCTATTGAGTCTGACT--CATAGTGATCATTATCA-  
-----AAGAATGACTCTGGTTATCAAATGATTGAACAACCGGGAGCAATTTACTTAC  
GATACTTAGTTGACATTCAT-----AAAAAGTATCTAATGAATTATGAGTTCAATACATCCT  
GTTTAGCAGAAAGACGGATATTCCTTGCTCATTATCAGACAATCACTTAT-----TCACAAA  
CCTCGTGTGGGGCTAATAGTTTTTCATTTCCCATCTCATGGA-----AAACCCTTTTCGCT  
CCGCTTAGCCCTATCCCCCTCT--AGGGGTATTTAGTGATAGGTTCTATAGGAACTGGA  
CGATCCTATTTGGTCAAATACCTAGCGACAACTCCTATGTTCTTTTCATTACGGTATTT  
CTGAACAAGTTCCTGGATAACAAGCCTAAAGGTTTTCTTTTTTGAT-----GATATCG  
ATGATATTGATGCTAGTGACGATATTGATGCTAGTGACGATATTGATGCTAGT-----  
-----GACGATATCGATCGTGACCTTGATACGGAGCTGGAGCTGCTAA  
CTATGATGAATGCGCTA-----ACTATGGATATGATGCCG-----GAAATAGACCGATTTT  
ATATCACCTTCAATTCGAATTAGCAAAAGCAATGTCTCCTTGCATAATATGGATTCCAA  
ACATTCATGATCTGGATGTGAATGAGTCAATTAATCTTATCCCTCGGTCTATTAGTGA  
ACTATCTCTCC-----AGGGATTGTGAAAGATGTTCC--ACTAGAAATATTCTTGTATTGCTT  
CGACTCATATTTCCCAAAAAGTGGATCCCGCTCTAATAGCTCCGAATAAATTAATAACAT  
GTATTAAGATACGAAGGCTTCTTATTCCACAACAACGAAAGCACTTTTTCACTCTTTCAT  
ATACTAGGGGATTTCACTTGGAAAAGAAAATGTTCCATACT-----AATGGATTCTGGGTC  
ATAACCATGGGTTCCAATGCACGAGATCTTGTAGCACTTACCAATGAGGCCCTATCGATT  
AGTATTACACAGAAGAAATCAATTATAGACACTAATGCAATTAGATCCGCTCTTCATAGA  
CAAACCTGGGATTTGCGA-----TCCCAGGTAAGATCGGTTCAAGGATCATGGGATCCTT  
TTCTATCAGATAGGAAGGGCTGTTGCGCAAAATGTACTTCTAAGTAATTGCCCATAGA  
TCCTATATCTATCTATATGAAGAAGAAA-----TCATGTAACGAAGGGGATTCTTATTGTA  
CAAATGGTACTTTCGAACTTGGAACGAGCATGAAGAAATTAACGATACTTCTTTATCTTT  
TGAGTTGTTCTGCCGGATCGGTGCTCAAGACCTTTGGTCTCTACCC-----GGACCCGAT  
GAAAAA---AATGGGATCACTTCTTATGGACTCGTTGAGAATGATTCT--GATCTAGTTCA  
CGGCCTATTAGAAGTAGAAGGCGCTCTGGTGGGA-----TCCTCACGGACAGAAAAAGAT  
TGCAGTCAGTTTGATAATGAT-----CGAGTGACATTGCTTCTTCGGCCCGAACCAAGGAA  
T--CCCTTAGATATGATGCAAAATGGATCTTGTCTATCGTTGATCAGAGATTTCTCTATG  
AAAAA-----TACGAATCGGAGTTTGAAGAA---GGGGCAGGAGAAGGAGCCCTCGACCC  
GCAA-----CAGATAGAGGAGGAT-----TTATTCAATCAC-----ATAGTTTGGGCTC  
CT-----AGAATATGGCGCCCT-----TGGGGCTTTCTATTTGATTGTATCGAAAGGACCAA  
TGAATTGGGATTTCCC---TATTGGGCCAGGTCTTTTCGGGGCAAG-----CGGATCATT  
ATGATGAAGAGGATGAGCTTCAAGAGAATGATTCCGAGTTCTTGCAGAGTGGAACCAT  
GCAGTACCAGACACGAGATAGATCTTCCAAAGAACAAGGCTTTTTTCGAATAAGCCAA  
TTCATTTGGGACCCTGCAGATCCACTCTTTTCCTATTCAA---GATCAGCCCTTTGTCT  
CTGTGTTTTACATCGAGAATTCTTTGCAGATGAAGAGATGTCAAAGGGGCTTCTTACT  
TCCCAAACAGATCCTCCTACATCTATATATAAACGCTGGTTTATC-----AGAATACGCAA  
GAAAAGCACTTCGAATTGTTGATTCATCGCCAGAGATGGCTTAGA-----ACCAATAGT  
TCATTATCT-----AATGGATCTTTCCGTTCTAAT-----ACTCCATCCGAGAGTTATCAGTATT  
TATCAAATCTGTTCTATCTAAC--GCAAGGCTATTGGATCAAATGACAAAGACATTGTT  
GAGAAAAAGATGGCTTTTCCCGGATGAAATGAAAATTGGATTC-----ATG-----

-----ATGCCTAGATCGCGG---ATAAATGGAAATTTTATTGATAAGACCTTTTCAATTGTA  
GCCAATATCTTATTACGAATAATTCCAACAACCTTCAGGAGAAAAAGAGGCATTTACCTA  
TTACAGAGATGGT-----ATGTCGGGCTCAATCCGAAGGAAATTATGCGGAAGCTTTACAGA  
ATTATTATGAAGCTATGCGACTAGAAATTGATCCCTATGATCGAAGTTATATACTCTATAA  
CATAGGACTTATCCACACAAGTAATGGAGAGCATAACGAAAGCTTTGGAATATTATTTTC  
GGCATTAGAACGAAACCCGTTCTTACCACAAGCTTTTAATAATATGGCCGTGATCTGT  
CATTAC---CGGGGAGAACAAGCCATTCGCCAGGGAGATTCTGAAATTGCGGAAGCTTG  
GTTTCGATCAAGCCGCTGAGTATTGGAAACAAGCTATAGCACTTACTCCTGGTAATTATAT  
TGAAGCGCATAATTGGTTGAAGATCACGAGGCGTTTCGAA-----ATGAGTTGGCGATCA  
GAACGTATATGGATAGAACTTATAACGGGGTCTCGAAAAACAAGTAATTTCTGCTGGGC  
CTTTATCCTTTTTTTTAGGTTTCATTAGGGTTCTTATTGGTTGGAACCTCCAGTTATCTTGGT  
AGGAATTTGATATCTTTATTTCCGTCTCAGCAAATAATTTTTTTTCCACAAGGGATCGTG  
ATGCTTTTCTACGGGATTGCCGGTCTCTTATTAGCTCCTATTTGTGGTGCACAATTCG  
TGGAATGTAGGTAGTGGTTATGATCGATTTCGATAGAAAAGAAGGAATAGTGTGTATTTT  
TCGTTGGGGATTTCTGGAAAAATCGCCGGATCTTCTCCGATTACTTATGAAAGATAT  
TCAGTCCATCAGAATAGCAGTTAAAGAGGATATTTATGCCCGTCGTGTCCTTTATATGGA  
AATCAGAGGACAGGGGGCCATTCCTTTGACTCGTACTGATGAGAAT--TTGACGCCACG  
AGAAATGGAACAAAAAGCTGCTGAATTAGCCTATTTCTTGCGTGTACCGATTGAAGTAT  
TT

>Helianthus

ATGAAAAGATGGTGGTTAAATTTCGATGTTATTTCTAAGTAAATCAACGAGCAGTCTTGG  
TCCTATTGAAAATGCCAGCGAAAGTAAAGATCCGAATATAAATGATACGGATAAAAAACA  
TTCAGAGTTACAGTAATGTTGATCTTTTTTTTGGCGTCAAAGACCTTCGGAATTTAATCT  
CTGATGATACTTTTTTGTAAAGATAGTAATGGGGACATTTATTCTTTATATTTTGATATT  
GAAAATCATATTTTTGAGATTGACAATGATCAT-----CCTGAACTAGAAAGTTCTT  
TTTAT-----CGGAATTCTAGTTATCTGAATAATGGATCTAAGAGTAAGAATCCCGAACACG  
ATCCTTACATGAATGATACTCAGTATACTTGAATAATCACATTAATAGTTGCATTGACA  
GTTATCTTCAG-----TCTCAAATCTGTATTGATAGTTACATTGTAAGTGGTAGTGACAATT  
CCAGTAATAATTACATTTCTAGTTCCATTTGTGGT-----AATAGTAGTAAAAACGAGGATG  
CCAGAACGAGTGATCCAATTATACGAGAAAGTTCTACTGATCTGGATGTAACCTCAAAAA  
TACAGGCATTTGTGGGTTCAATGCGAAAATTGTTATGGATTAAATTATAAGAAATTTTTT  
AAATCAAAAATGAATCTTTGTGAACAATGTGGATATCATTGAAAATGAGTAGTTCAGA  
TAGAATCGAACTTTCGATCGATCCGGGTACTTGGGAGCCTATGGATGAAGACATGGTCT  
CTCTGGATCCCATTGAATTTCAATTCGGAGGAGGAGCCTTATAAAAATCGTATCGATTCTT  
ATCAAAGAAAGACAGGATTAACCGAGGCTGTTCAAACAGGCATAGGGCAACTAGACG  
GTATTAACGTAGCAATTGCGGTTATGGATTTTCAGTTTATGGGGGTAGTATGGGATCCG  
TCGTCGGGGAGAAAATTACCCGTTTAATTGAATACGCTACTAAAGAATTTCTACCTCTTA  
TTATAGTGTGTGCTTCCGGAGGGGCACGCATGCAAGAAGGAAGTTTGAGCTTGATGCA  
AATGGCTAAAATATCTTCTGCTTTATATGATTATCAATCAAATAAAAAGTTATTCTATGTA  
CCAATCCTTACATCTCCTACTACCGGTGGGGTGACAGCTAGTTTTTGGTATGTTGGGGGA  
TATCATTATTGCTGAACCCAATGCCTACATTGCCTTTGCGGGTAAAAGAGTAATTGAAC  
AAACACTGAATAAACAGTACCCGACGGTTCACAAGCGGCTGAGTATTTATTCCAGAA  
GGGCTTATTCGATCTAATCGTACCACGTAATCCTTTAAAAGCGTTCTGAGCGAGTTATT  
TCAACTCCACACTTTCTTTTCTTTGAATCAAAT-----ATGGTAACCATTCAAGCCGAC

GAAATTAGTAATATTATCCGTGAACGTATTGAGCAATATAATAGAGAAGTAAAGATTGTA  
AATACCGGTACCGTACTTCAAGTAGGTGATGGCATTGCTCGTATTCATGGTCTTGATGAA  
GTAATGGCGGGTGAATTAGTAGAATTTCAAGAGGGTACAATAGGCATTGCTCTTAATTT  
GGAATCAACTAATGTTGGTGTGTATTAATGGGTGATGGTTTGCTGATACAAGAAGGGA  
GTTCTGTAAAAGCAACAGGAAAAATTGCTCAGATACCAGTGAGTGAGGCCTATTTGGG  
TCGTGTTATAAACGCCCTGGCTAAACCTATTGATGGTAGAGGTGAAATTCATCTTCTGA  
ATATAGATTAATTGAATCGCCCCTCCGGGGATTATTTCTCGACGTTCTGTATATGAGCCT  
CTTCAAACAGGGCTTATTGCTATTGATTCAATGATTCCCATAGGACGTGGTCAGCGAGA  
ATTAATTATTGGGGACAGACAGACCGGTAAAACAGCAGTAGCAACAGATACAATTCTA  
AATCAACAAGGCCAAAATGTAATATGCGTTTATGTAGCTATTGGTCAAAAAGCATCTTC  
TGTGGCTCAGGTAGTGACTACTTTCCAGGAAAAGGGCGCGATGGAATATACTATTGTGG  
TAGCCGAAACGGCGGATTCCCCTGCTACATTACAATACCTCGCTCCTTATACAGGAGCA  
GCTCTGGCTGAATATTTTATGTACCGTGAACGACACACTTAAATCATTATGATGATCTCT  
CTAAACAAGCGCAAGCTTATCGCCAAATGTCTCTTCTATTACGAAGACCACCTGGGCGC  
GAGGCTTATCCAGGGGATGTTTTTTATTTACATTCACGCCTTTTGAAAGAGCTGCTAA  
ATTAAGTTCTCTTTTAGGTGAAGGAAGTATGACCGCTTACCAATAGTTGAAACCCAAT  
CGGGAGACGTTTCGGCTTATATTCTACGAATGTAATTTCAATTACTGATGGACAAATAT  
TCTTATCTGCCGATCTCTTCAATGCTGGAATCCGACCCGCTATTAATGTGGGTATCTCG  
TTTCCAGAGTGGGGTCTGCAGCTCAAATTAAGCTATGAAACAAGTAGCCGGTAAATT  
AAAACCTGGAGCTGGCACAATTCGCAGAATTAGAAGCTTTTGCACAATTTGCTTCTGATC  
TCGATAAAGCTACTCAGAATCAATTAGCAAGAGGTCAACGATTACGTGAATTGCTTAAA  
CAATCCCAATCCGCCCTCTCGCGGTAGAAGAACAGATACTTACTATTTATAACCGAAC  
AAACGGTTATCTCGATTCATTAGAAGTTGGACAGGTAAGGAAATTTCTGGTTGAGTTAC  
GTACTTACTTAAAAACCAATAAACACAGTTTCAAGAAATAATATCTTCTACCAAGATAT  
TCACCGAGGAAGCGGAAGCCATTTGAAAGAAGCTATTCAGGAACAGAGGGAACGTT  
TTACTTTCAGGAACAAGCAATGAGAATGAATCCTACTACTTCTAGTTCTGGGGTTGCC  
ACGCTTGACAAAAGAACCTGGGGCGTATCGCCCAAATCATTGGTCCGGTACTAGATG  
TAGCCTTTCCGCCAGGCAAAATGCCTAATTTATAACGCTTTGGTAGTTAAGGGTTCGA  
GATACTGTTGGTCAACCAATTAATGTGACTTGTGAGGTACAGCAATTATTAGGAAACAA  
TCGAGTTAGAGCCGTAGCTATGAGTGCTACAGACGGTCTAACGAGAGGAATGGACGTA  
ATTGATACGGGAGCTCCGCTAAGTGTTCGGTCCGGTGGAGCGACTCTCGGACGAATTT  
TCAACGTGCTTGGGGAGCCTATTGATAATTTAGGTCTGTAGATAATAGCACAACATTC  
CTATTCATAGATCCGCGCCTGCCTTTATAAGTTAGATACAAAATTATCTATTTTTGAAAC  
CGGAATTAAGTAGTAGATCTTTTAGCCCTTATCGCCGTGGAGGAAAAATCGGACTAT  
TCGGGGGAGCTGGCGTGGGTAAAACAGTACTCATTATGGAATTGATTAACAATATTGCC  
AAAGCTCACGGAGGCGTATCTGTATTTGGCGGAGTCGGTGAACGGACTCGTGAAGGA  
AATGATCTTTACATGGAATGAAAGAATCTGGAGTCATTAATGAACAAAATATTGCAGA  
ATCAAAAGTGGCTCTAGTTTACGGTCAAATGAACGAACCGCCGGGAGCTCGTATGAGA  
GTTGGTTTGACTGCCCTAACTATGGCGGAATATTTCCGAGATGTTAATGAACAAGACGT  
TCTTTTATTTGTTGACAATATCTTCCGTTTTGTCCAAGCAGGATCTGAAGTATCCGCCTT  
GTTGGGTAGAAATGCCTTCGCTGTGGGTATCAACCTACCCTTAGTACCGAAATGGGTT  
CTTACAAGAAAGAATTACTTCTACCAAGAAGGGTCCATAACTTCTATTCAAGCTGTT  
TATGTACCTGCAGATGATTTGACCGACCCTGCTCCTGCTACGACATTTGCACATTTAGAT  
GCTACGACCGTATTATCAAGAGGATTGGCTGCCAAAGGTATCTATCCAGCAGTAGATCC

TTTAGATTCAACGTCAACTATGCTACAACCCCGGATCGTTGGTGACGAACATTATGAAA  
CTGCACAACAGGTTAAGCAAACCTTTACAACGTTACAAAGAACTTCAAGATATTATAGCT  
ATTCTTGGATTAGACGAATTATCCGAAGAAGATCGTTTAACCGTAGCAAGAGCGCGAA  
AAATTGAGCGTTTCTTATCACAACCTTTTTTCGTAGCAGAAGTATTTACGGGTTCTCCG  
GGAAAATATGTTGGTTTAGCAGAAACAATTAGAGGCTTTCAATTAATCCTTTCCGGAGA  
ATTAGATGGTCTTCCCGAACAGGCCTTTTATTTGGTAGGTAACATCGATGAAGCTACGG  
CGAAGGCTATGAACTTAGAAATGGAGAGCAATTCGAAGAAAATGACCTTAAATCTTTG  
TGTACTGACCCCTAATCGAATAGTTTGGGATTCAGAAGTGAAAGAAATCATTTTATCTA  
CTAATAGTGGACAAATTGGCGTATTACCAAATCACGCTCCTATTGCCACAGCAGTAGATA  
TAGGTATTTTGAGAATACGCCTTAACGACCAATGGCTAACGATGGCTCTGATGGGCGGT  
TTTGCTAGAATAGGTAATAATGAAATCACTGTTTTAGTAAATGATGCAGAGAAAAGTAG  
TGACATTGATCCACAAGAAGCTCAGCAAACCTTTGAAATAGCAGAAGCTGCTTTGAGA  
AAAGCTGAAGGAAAGAGACAAACAATCGAGGCAAATCTAGCTCTCCGACGGGCTAGG  
ACACGAGTAGAGGCTATCAATGCCATTTCAATGAAAAATGTAACCGATTCTTTTCGTTTC  
TTTGGGCCACTGGCCATCCGCCGGGAGTTTCGGGTTTAATACCGATATTTTAGCAACAA  
ATCTAATAAATCTAAGTGTAGTACTTGGGGTCTTGATCTTTTTTGGAAAGGGAGTGTTA  
AGTGATTTATTAGATAATCGAAAACAGAGAATCTTGAATACTATTAGAAATTCAGAAGA  
ATTGCGCGAAGGGGCCATCGAACAGCTGGAAAAAGCCCGGGCTCGATTACGGAAAAT  
AGAAATAGAAGCAGATGAGTTTCGCGTGAATGGATACTCTGAGATAGAGCGAGAAAAA  
TTGAATTTGATTGATTCAACTTATAAGACTTTGGAACAACCTAGAAAATTACAAAAATGA  
AACTATAAATTTTGAACAACAAAAGGCCAGTAATCAAGTCCGACAACGGGTTTTCCAA  
CAAGCTTTACAAGGAGCTCTAGGAACTCTGAATAGTTGTTTAAACAACGAATTACATTT  
ACGTACTATCAGTGCCAATATTGGCATATTGGCGGCGATGAAACAAATAACGGACATGA  
ATCCACTGATTTCTGCCGCTTCCGTTATTGCTGCTGGATTGGCTGTAGGGCTTGCTTCTA  
TTGGACCTGGAGTTGGTCAAGGTAAGTACTGCTGCGGGCCAAGCTGTAGAAGGTATCGCGAG  
ACAGCCCGAGGCGGAGGGAAAAATACGAGGTACTTTATTGCTTAGTCTAGCTTTTATGG  
AAGCTTTAACAATTTATGGCCTGGTTGTAGCATTAGCACTTTTATTTGCTAATCCTTTTGT  
TATGAATGTTCTATCATGTTCCATCAACACACTAAATGGGTTATAACGATCTATCCGGTGT  
GGAAGTAGGCCAACATTTTTATTGGAAAATCGGGGGTTTCCAAGTCCACGGCCAAGTA  
CTTATTACTTCTTGGGTTGTAATTGCTATCTTATTAGGTTTCAGCCGCTCTAGCCGTTCCGA  
ACCCACAAACCATTCCGACCGGCGGTCAGAAATTTCTTCGAATATGTTCTTGAATTTATTC  
GAGATGTGAGTAAAACTCAAATTGGAGAAGAATATGGTCCTTGGGTTCTTTTATTGGA  
ACTATGTTTCTATTTATTTTTGTTTCTAATTGGTTCAGGCGCCCTTTTACCTTGGAAAATCA  
TACAATTACCTCATGGGGAGTTAGCCGCACCCACGAATGATATAAATACTACTGTTGCTT  
TGGCTTTACTCACGTCAAGTGGCATAATTTCTATGCAGGCTTACCACAAAAGGATTGAGT  
TATTTCCGGAAATATATTCAACCAACTCCAATTTTACCTATTAATATCTTAGAAGATT  
TCACAAAGCCCCTATCACTTAGTTTTTCGACTTTTTCGGAAATATATTAGCCGATGAATTAG  
TAGTTGTTGTTCTTGTTCCTTTAGTACCTTCAGTGGTTCCTATCCCCGTCATGTTCTTGG  
ATTATTTACAAGTGGTATTCAAGCTCTTATTTTTGCAACTTTAGCCGCGGCTTATATAGGT  
GAATCCATGGAGGGCCACCATATGATATTTCAACTTTAGAGCATATATTAATCATAATTT  
CTTTTTCTATTGTTTCAATTGTAATCACACTTCATTTGATAACCTTATTGGGCAATGAAAT  
CATAAAACCATATGATTTCGTCAGAAAAGGGGATGATAGCTACTTTTTTATGTCTAACAG  
GATTATTAACCACTCGTTGGATTATTTCAGGCCATTTCCCGCTAAGTGATTTATATGAATC  
ATTAATTTTTCTTTCATGGAGTTTCTCCCTTATTCATATAGTGCCTTAT-----ATAAGAAA

AATGATTTAACCACAATAACTGCCTCAATTAATTTTTACCCAAGGCTTTGCTACTTCG  
GGTCTTTTAAATGAAATACACAAACCCACAATATTAGTACCTGCTCTACAATCGGAGTG  
GTTAATAATGCACGTAAGTATGATGATATTGAGCTATGCGGCTCTTCTTTGTGGATCATT  
TTATCAGTAGCACTTCTAGTCATTACATTTAGAAAT-----ATTTTTTATAGTTCTAAAGA  
AATCCAATACAAGAATGAAAGAAACAATATTTTTCAAAAACTTCT-----GATAAGAA  
TTATTACAAGGCCAATTTATTCAACAATTGGATTATTGGAGTTATCGTGTGATTAGCCTA  
GGATTTATCTTTTTAACCATAGGTATTCTTTTCAGGAGCAGTATGGGCTAATGAAGCATGG  
GGATCATATTGGAGTTGGGATCCAAAAGAACTTGGGCCTTTATTACTTGGATCGTATTTC  
GCAATTTATTTGCATACTCGAACAAATAAAAATTTGCAAGGAGCAAATCCGCAATTGT  
GGCGACTCTAGGCTTTCTTATCATTGGATATGCTATTTTGGGGTCAATCTATTAGGAATA  
GGGCTACATAGTTATGGTTCATTCACGTTAACCATGGCAAAAAAGAAAGCATTCACTCC  
TCTTTTATATCTTGTATCTATCGTATTTTGGCCCTGGTGGATTTCTCTCTTATTTCAAAAA  
GTCTGGAATCGTGGGTTACTAATTGGTGGAACTAGGCAATCCGAACTTTTTTGAAT  
GATATTGAAGAAAAGAGTATTCTAGAAAAATTCATAGAATTAGAGGAACTCCTCTTCTT  
AGAGGAAATGATCAAGGAATACTCGGAGACACATCTACAAAACCTTCGTATA---ATTCA  
CAAAGAAACAATCCAATTAATCAAGATACAAAACGAGGGTTCGTATTCATACGATTTTGC  
ACTTCTCGACAAATATAATCTGTTTCATTATTCTAAGTGGTTATTCTATTTTGGGTAATAA  
AGAACTTGTTATTCTTAACTCTTGGGCCAGGAATTCCTATATAACTTAAGTGACACAAT  
AAAAGCTTTTTCTCTTCTTTTATTAAGTATTATGTATCGGATTCATTTCGCCCCATGGT  
TGGGAATTGATGATTGGCTTTGTCTACAAGGATTTGGATTTGTTTCATAATGATCAAATT  
ATATCTGGCCTTGTTCCACTTTTCCAGTCATTCTAGATACAATTTTAAAATATTGGATTT  
TCCGTTATTTAAATCGTGTATCTCCGTCACTTGTAGTGATTTATCATTCAATGAATGACAT  
GCCTATTGGTGTTCAAAAGTACCTTTTCGAAGTCCTGGAGAGGAAGATGCATCTTGG  
GTTGACATATAACAACCGACTTTATCGAGAAAGATTACTTTTTTTTAGGGCAAGAGGTTGA  
TAGTGAGATCTCAAATCAACTGATTGGTCTTATGATATATCTCAGTATCGAGGATGATAC  
CCAAGATCTGTATTTGTTTATAAACTCTCCTGGCGGATGGGTAATACCGGGAGTGGCTC  
TTTATGATACTATGCAATTTGTGCAACCAGATGTACATACAATATGCATGGGATCAGCCG  
CTTCAATGGGATCTTTTATCCTGGTTCGGAGGAGAAATTACCAAACGTCTAGCATTCCCT  
CACGCCAGGGTAATGATCCATCAACCTGCTGGTCTTTTTTCTGAAGTAGCAACGGGAG  
AATTCATCCTGGAAGTGGGAGAACTGCTGAAACTACGTGAAACCCTGACAAGGGTTTA  
TGTACAAAGAACGGGCAAACCCGTATGGGTTGTATCCGAAGACATGGAAAGAGATGTT  
TTTATGTCAGCAACAGAGGCCCAAGCTTATGGAATTGTTGATCTTGTAGCGGTTGAAAT  
GAAAGAACAAAAATGGATTCATGAAGGTTAATTACTGAATCGCTTCCAATGGCATGT  
TCCGGGTTTCGTTTAGATAATGAAGATATGATTCTAGGTTATGTTTCAGGAAAGATCCGAC  
GTAGTTTTATACGAATATTGCCAGGAGATAGAGTCAAATTTGAAGTAAGTCGTTATGATT  
CAACCAGAGGTTCGTATAATTTATCGACTCCGCAACAAAGATTTCGAAAGATATGGAGAA  
ATTCAAAGG-----GATAGATCT-----CACTACTTCTTATATCCACTTATCTTTCAGGA  
GTATATTTATGTACTTGCTCATGATCATGGTTTAGCAGGTTATGACAATAAATCCAGTTTA  
CTAATTGTGAAACGTTTAAATCATTTCGAATGTATCAACAGAATCATTGATTCTTTCTGTT  
AATGATTCTAAACAGACTGCATTTTTGGGGAAGAATTTTTATTTCGCAAGTAATGTCAGA  
GGTTTCTTCAACCATTATGGAAATTCATTGTCTCTGCGATTAATATCTTCCCTAGTAGTT  
AAATCCGATAATTTACGATCAATTCATTCCATATTTCTTTTTTAGAGGACAACCTTTTCAC  
ATTTAAATTTATGTATTAGATATACTAATACCTTACCCAGCTCATCTGGAATCTTGGTTCA  
GGCTCTTCGCTATTGGATCAAAGATGCTTCTCTTTCGATTTATTAAGATTCTTTCTCCAT

GAGTGT CATAATTGGGATAGTCTTATTACTAAAGCCAGTTCTTTTTTTTCAAACACAGA  
CTATTCTTCTTCTATATACTTCTTATGTATGTGAATATGAATCTGGCTTCCTATTTCTCCG  
TAACCAATCTTCTCACTTACGATCAACATCTTCTGGAGCCCTTATTGAACGAATATATTT  
CTATGGAAAAATAGAGCATCTTGCAGAAGTCTTTGCCAGGACTTTTAATTTATGGTTCTT  
CAAAGATTCTTTCATGCATTATGTTAGGTATCAAGGAAAATCAATTCTTGCTTCAAAG  
GGACGTTTCTTTTGATGAATAAAAGGAAAGATTACTTTTTTCAATTTCTGGAAATCTTATT  
TTTACCTGTGGTCTTATCCAGGAAGGATTTCTATAAACCAATTATCCAATCATTCCCTTG  
ACTTTCTGGGTTATCGTTCAAGTGTGCGTCTAAAGCCTTCAATGGTACGCGGTCAAATG  
CTAGAAAATACATTTTTAATTAATAATGCTATT-----AAGAAGTTTGATAGTATTGTTCCAA  
TTATGCCTCTGGTTGGATCGTTGGCTAAATCGAAATTTTGTAACGCATTGGGGCATCCTA  
TTGGTAAGGCAATTTGGGCCGATTTATCAGATTCTGATATTATTGAGCGCTTTGGCCGTA  
TATACAGAAATCTTCTCATTATCATAGTGGATCTTCAAAAAAAAAAAGTTTGTATCGAG  
TAAATATATACTTCGACTTTCTTGTGCTAGAACTTTAGCTCGTAAGCATAAAAGTACTG  
TACGTGCTTTTTTGAAAAGATTTCGGTTCGCAATTATTGGAAGAGTTCTTTACGGAAGAA  
GAACAAGTTTTTTCCTTGACCTTTCCAAGACGGATTTGGTATTTGGATATTGTTTGTATC  
AATGATTTGGCCAATCAT--ATGATAATTGAT--ACAACAGAAGTACAA--GCTATCAATT  
CTTTTTCTAGATTGGAATCC--TTAAAAGAGGTCTATGGGATCATATGGGTGCTTATCCCT  
ATTTTTACTCCTGTATTAGGAATTACAATAGGTGTA TAGTCATTGTTTGGTTAGAAAGA  
GAAATATCCGCGGGTATACAACAACGTATCGGTCTGAATACGCAGGACCTTTGGGAAT  
TCTTCAAGCTCTAGCAGATGGTACCAAATTACTTTTCAAAGAGAATCTTCTTCCATCTA  
GAGGAGATACTCGTTTATTTAGTATTGGACCATCTATAGCAGTCATATCAATTTTATTAAG  
TTATTTAGTAATTCCTTTTGGTTATCGCCTTGTCTAGCCGATCTCAGTATTGGTGTTTTT  
TTATGGATTGCTATTTCAAGTATTGCTCCTGTTGGCCTTCTTATGTCAGGATATGGCTCAA  
ATAATAAATATTCTTTTTTAGGTGGTCTACGAGCTGCTGCTCAATCAATTAGTTATGAAAT  
ACCATTA ACTCTATGTGTGTTATCAATATCTCTACTATCTAACAGTTCAAGTACAGTTGAT  
ATAGTTGAAGCGCAGTCAAATATGGTTTTTGGGGATGGAATTTGTGGCGTCAACCTAT  
AGGGTTTCTAGTTTTTCTAATTTCTTCCCTAGCCGAGTGTGAACGATTACCTTTTGATTT  
ACCAGAAGCAGAAGAAGAATTAGTAGCAGGTATCAAACCGAATATTCCGGTATCAAA  
TTTGGTTTATTTTACGTTGCTTCATATTTAAATCTACTGGTTTCTTCAATTATTGTAACAGT  
TCTTTACTTGGGGGGTTGGAATCTTCTATTCCGTACATACCTGTTCCCGAGCTTTTTGA  
TATTACTAAAAGAGGTAGAGTCTTTGGAACAATAATTGGTATCTTTATTACATTAGCTAA  
AACATATTTGTTCTTGTTCATTCCATCGCAACAAGATGGACTCTACCGCGGCTGAGAAT  
GGATCAATTATTAATCTTGGATGGAATTTCTTTTACCTATTTCTCTAGGTAATCTATTAT  
TAACA ACTTCTTCCCAACTTCTTTCACTGATGATCTGGCATGTACAGAATGAAA ACTTC  
ATTCTCGATTCTACGAGAATTTTTATGAAAGCCTTTCATTTGCTTCTCTTCGATGGAAGT  
TTGATTTTCCAGAAATGATCCTAATTTTTGGCCTAATTTCTTCTTCTGATGATCGATTCAA  
CCTCTGATCAAAAAGATATACCTTGGTTATATTTTCACTCTTCAACAAGTTAGTAATGA  
GCATAACGGCCCTATTGTTCCGATGGAGAGAGGAACCTATGATTAGCTTTTTCGGGAAAT  
TTCCAAACGAACAATTTCAACGAAATCTTTCAATTTCTTATTTTACTATGTTCAACTCTA  
TGATTCCTCTATCCGTAGAGTACATTGAATGTACAGAAATGGCTATAACAGAGTTTCTC  
TTATTCATATTAACAGCTACTATAGGAGGAATGTTTTTATGCGGTGCTAACGATTTAATAA  
CTATCTTTGTAGCTCCAGAATGTTTCAGTTTATGCTCCTACCTATTATCTGGATATACGAA  
GAAAGATGTACGGTCTAATGAGGCTACTATGAAATATTTACTCATGGGTGGGGCAAGCT  
CTTCTATTCTGGTTCATGGTTTTCTTGGCTATATGGTTCATCCGGGGGAGAGATCGAGC

TTCAAGAAATAGTGAATGGTCTTATCAATACACAAATGTATAACTCCCCAGGAATTTCAA  
TTGCGCTCATATTCATCACTGTAGGAATTGGGTTC AAGCTTTCCCCAGCCCCTTCTCATC  
AATGGACTCCTGACGTATACGAAGGATCTCCCACTCCAGTCGTTGCTTTTCTTTCTGTTA  
CTTCGAAAGTAGCTGCTTCAGCTTCAGCCACTCGAATTTTCGATATTCCTTTTTATTCT  
CATCAAACGAATGGCATCTTCTTCTGAAATCCTAGCTATTCTTAGCATGATATTGGGGA  
ATCTCATTGCTATTACTCAAACAAGCATGAAACGTATGCTTGCATATTCGTCCATAGGGC  
AAATCGGATATGTAATTATTGGAATAATTGTTGGAGACTCAAATGATGGATATGCAAGCA  
TGATAACTTATATGCTGTTCTATATCTCCATGAATCTAGGAACTTTTGCTTGCATTGTCTT  
ATTTGGTCTACGTACCGGAACTGAGAACATTCGAGATTATGCAGGATTATACACGAAAG  
ATCCTTTTTTTGGCTCTCTCTTTAGCCCTATGTCTCTTATCGCTAGGAGGTCTTCCCTCACT  
AGCAGGTTTTTTTCGAAAACTCTATTTATTCTGGTGTGGATGGCAGGCAGGCCTATATTT  
ATTGGTTTTAATAGGACTCCTTACAAGCGTTGTTTCTATCTACTATTATCTAAAAATAATC  
AAGTTATTAATGACTGGACGAAACCAAGAAATAACCCCTCACGTGCGAAATTATAGAA  
GATCCCCTTTAAGATCAAACAATTCATCGAATTGAGTATGATTGTATGTGTGATAGCAT  
CTACTATAACCAGGAATATCAATGAATCCGATTATTGCAATTGCTCAGGATACCCTTTTTAT  
GTTTCTGCTTTACGAATATGATATTTTTTTGGGCATTTCTGATAATATCAAGTCTTATTCCTA  
TTTTGGTATTTTTTCATTTTCGGGATTTTTAGCCCCGAGTAGCAAAGGACCGGAGAACTT  
TCTAGTTATGAATCAGGTATAGAACCAATAGGTGACGCTTGGTTACAATTTAGAATCCGC  
TATTATATGTTTGCTCTTGTTTTTGTGTTTTTGATGTGGAAACGGTTTTTCTTTATCCAT  
GGGCAATGAGTTTCGATGTATTAGGTGTATCTGTATTTGTAGAAGCTTTAATTTTTGTGC  
TTATCTTAATTGTTGGTTTTAGTTTATGCATGGCGAAAGGGAGCATTGGAATGGTCTACGA  
ACAAATTCCTTGGTTAACAATAATTGTAGTTTTACCAATATTTGCAGGGTCCTTAATTTT  
CTTCTTCCCCATAAAGGAAATAGGGTAATTCGGTGGTATACTATATGTATATGCATGTTA  
GAACTTCTTCTAACAACCTATGCATTCTGTTATCATTTCCAATTGGACGATCCATTAATCC  
AACTAGTAGAGGACTATAAATGGATCAATTTTTTTGATTTCCGTTGGAAATTAGGAATAG  
ATGGACTGTCTCTAGGACCCGTTTTATTAACAGGATTTATCACTACTTTAGCTACTTTAG  
CGGCCTGGCCCCGTTACTCGGGATTCTCGATTATTCCATTTCTTGATGTTAGCAATGTACA  
GTGGTCAAATAGGATCATTTTCTTCTCGGGACCTTTTACTATTTTTTCATCATGTGGGAATT  
AGAATTAATTCCAGTTTATCTACTTCTATCCATGTGGGGAGGAAAGAAACGTCTCTACT  
CAGCCACAAAATTTATTTTGTACACGGCGGGGGTTCCATTTTTCTCTTAATGGGAGTT  
CTGGGTGTGCGTTTATATGGTTCGAATGAACCAACATTAATTTTTGAAACATCAGTTAAT  
CAGTCGTATCCTGTGGCTTTGAAATCATATTCTATATTGGATTTTTAATTGCTTTTGCTG  
TCAAATTGCCGATTCTACCCCTACATACATGGTTACCAGATACCCACGGAGAGGCACAT  
TACAGTACTTGTATGCTTCTAGCCGGAATTTTATTAATAAATGGGAGCGTATGGATTGATT  
CGGATTAATATGGAATTATTACCACACGCTCATTCTATATTTTCTCCTTGGTTGATGGTAG  
TAGGCACAATACAAATAATCTATGCAGCTTCAACATCTCTCGGCCAACGTAATTTAAAA  
AAAAGAATAGCCTATTCTCCGTATCTCATATGGGTTTCATACTTATAGGAATTGCTTCGA  
TAACCGATACGGGACTCAATGGAGCTATTTTACAAATAATCTCTCATGGCTTTATTGGTG  
CTGCACTTTTTTTCTTGGCGGGAACGAGCTATGATAGAATACGTCTTGTATCTCGATG  
AAATGGGTGGAGTAGCTATCCCCATGCCAAAATCTTTACAATGTTTCAGTAGTTTTTCC  
ATGGCTTCCCTTGCAATACCGGGTATGAGTGGTTTTGTTGCAGAAGTGCTAGTATTTTTA  
GGAATAATTACCAGCCAAAATATCTTTTAATGCCAAAATTGCCATCACTTTTGTAATG  
GCAATTGGAATGATATTAACCTATTTATTTATTATCTATGTACGCCAGATATTCTATGG  
ATACAAGTTATTTAATACTCCAAACTCTTATGTTTTTTGATTCTGGACCGCGGAGTTATTT



GTTTCCATCTCCATTTTTATACCCGTAATAGGTATTGGTATGTACCCCGATTTTGTTCCTTC  
ACTATCAGTTGACAAGGTTGAAGGTATTCTATCTAATTATTTTTATAGAATGATGCTCGA  
GCATGTACTTGTTTTGAGTGCCTATTTATTTCTGTCTGGTCTATATGGATTGATTACAAGT  
CGAAATATGGTTAGGGCTCTTATGTGTCTTGAACCTTATATTAATGCAGTTAATCTCAATT  
TTGTAACATTTTCTGATTTTTTTGATAGTCGTCAATTAAGGAGCCATTTTTTCTATTTT  
TGTTATAGCTATTGCAGCTGCTGAAGCCGCTATTGGACTCGCTATTGTTTCATCAATTTAT  
CGTAACAGAAAATCAACTCGTATAAATCAATCGAATTTATTGAATAAGATGGAACAGAC  
ATATCAATATGCGTGGATAATACCTTTTCTTCCACTTCCAGTTCCTATGTTAATAGGGTTG  
GGACTTCTTCTTTTTCCGACGGCAACAAAAAGTCTTCGTCGTATGTGGGCTTTTCAGAG  
CGTTTTATTGTTAAGTATAGTCATGATTTTTTCTCTGAATCTGTCTATTTCAGCAAATAAAT  
AGCAGTCTGTCTATCAATATGTATGGTCTTGGATTATAAATAATGATTTTTTCTTTAGAAT  
TCGGATACTTGATCGATCCACTTACTTCTATTATGTCAATATTAATCACTACTGTTGGAAT  
TATGGTTCTGATTTATAGTGATAATTATATGTCTCATGATCACGGATTTTGAGATTTTTG  
CTTATATGAGTTTTTTCAGTACTTCCATGTTGGGATTAGTTACTAGTTCAAATTTGATACA  
AATTTATATTTTTTGGGAATTGGTTGGAATGTGTTTCGTATCTATTAATAGGATTTTGGTTC  
ACACGACCTGTTGCAGCAAAGGCTTGTCAAAAAGCATTGTAACTAATCGTGTGGTG  
ATTTTGGTTTATTATTAGGCATTTTAGGGTTTTATTGGATAACGGGGAGTTTCGAATTCG  
TGATTTATTTCAAATATTCAATAACAATGAGGTCAATTCTGTATTTGTTACTTTGTGCGCT  
GTTCTATTATTTGCTGGTGCGATTGCTAAATCTGCACAATTTCCCCTTCATGTATGGTTAC  
CTGATGCAATGGAAGGGCCGACCCCTATTTCCGGCCCTTATACATGCTGCTACGATGGTA  
GCAGCGGGAATTTTTCTGTAGCTCGACTTATGCCCTTTTCATAGTAATACCCACATA  
ATGAATTTTATCTCTTTTATAGGGATAATAACAGTTTTTTTTCGGAGCTACTTTAGCTCTTG  
CTCAAAAAGACATTAAGAGAGGTTTAGCCTATTCCACAATGTCTCAATTGGGTTATATG  
ATGTTAGCTCTAGGTATGGGTTCTTATCGTAGTGCTTTATTTCAATTTGATTACTCATGCTTA  
TTCCAAGGCATTATTGTTTTTAGGATCGGGATCCGTTATTCCTCAATGGAACTCTTGT  
TGGATATTGTCCAAAAAAGTCAGAATATGGTGCTTATGGGAGGTTTAAAAAACAT  
GTACCAATTAATAAAAATTCTTTTTTATTAGGTACACTTTCTCTTTGTGGTATTCCACCTC  
TTGCTTGTTTTTGGTCCAAAGATGAAATTCTGAATGATAGTTGGTTGTATTACCTATTT  
TTGCAATAATAGCTTGGTCTACGGCGGGATTCACCGCATTTTATATGTGTCCGATCTATTT  
ACTTACTTTTGAAGGACATTTAAACGTTCAATTTCAAATTAACAGTGGAAAAAGGAATA  
CCCCCTGTATTTAATATCTCTATGGGGTAAAGAAGGTTCAAAAATAAGTAACAAAAAC  
TTGGTAACTTTATTAAAAATGAATTTTTTTTCAATTTAGCAATACCAAGACTTCTTTGTATC  
CTTATGAATCGGATAATACGATGTTATTCCCAATACTTATATTAATTCTATTTACTTTGTTC  
GTTGGATTCTTAGGAATTCCTTTC---GTGGATATATTATCCAAATGGTTAACCCCGTCTAT  
AAATCTTTTACATCAAAGTTCAAAC---TCAATAGATTGGTATGAATTTGTAAAGATGCA  
GTTTTTTCAGTCAGTATAGCCTGTTTCGGAATATATATAGCATTTTTTTTTATATAACCTGT  
TTATTCATCTTTTCAAATTTGGACTTAATTAATTAGTTGTTATTTTTTCTGACAAAATA  
AAAAATGCTATATATGATTGGTCATATAATCGGGGTTACATAGATGCCTTTTATGGAACAT  
TCTTCACTGCGGGGGTGCGAAAATTGGCCGAATTTACTCATTTTTTTGATAGACGAATA  
ATTGATGGAATTCCAAATGGAGTTGGGTTTATGAGTTTCTTTGTAGCAGAGGTTATTA  
TCGGTAGGGGGTGA---CGCATTTCTTCTTATTTGTCTTTTTATTTTTCTTATGTATCAATC  
TTTTTATTAATTTATTACATGGATTTACCTGGACTAATACACGATTTTCTTTTAGTCTTTCT  
GGGATTGGGTCTTATATTAGGGGGTCTGGGAGTAGTATTACTTGCCAATCCCATTATTC  
TGCCTTTTCATTGGGATTGGTTTTTGTGGTATATCGTTATTCTATATTCTATCGAACTCCC

ATTTTGTAGCTGCCGCGCAGCTCCTTATTTACGTAGGAGCCATAAATGTTTTAATCATT  
TTGCTGTGATGTTCAATAATGGTTCAGAATATTCCAAAGATTTCCATCTTTGGACCGTGG  
GAGATGGAGTAACTTCCGTGGTCTGTACAAGTCTTTTTGTTTCTACTAATTACTACTATTC  
CAGATACGTCATGGTACGGGATTATTTGGACTACAAAAGCAAACCAGATTATAGAGCAA  
GATCTGATAAGTAATAGTCAACAAATCGGGATTCATTTATCAACAGATTTTTTTATTCCG  
TTTGAATTCATTTCAATAATTCTTTTAGTTGCGTTAATCGGGCGCAATTGCTGTAGCTCGT  
CAAATGACTGTACCATCTACAAGAAAAGACCTCATGATAGTCAATATGGGACCTCACCA  
CCCATCAATGCATGGTGTCTTCGACTCATTGTTACTCTAGATGGTGAAGATGTTATTGA  
CTGTGAACCAATATTGGGTTATTTACACAGAGGTATGGAAAAAATTGCGGAAAATCGA  
ACAATTATACAATATTTGCCTTATGTAACACGTTGGGATTATTTAGCTACTATGTTACAG  
AAGCAATAACTGTAAATGCGCCAGAGCAATTAGGCAATATTCAAGTCCCTAAAAGGGC  
CAGTTATATCAGAGTCATTATGTTGGAGTTAAGTCGTATAGCTTCGCATTTGTTATGGCTT  
GGCCCTTTTATGGCAGATATTGGGGCGCAGACTCCTTTCTTCTATATTTTTTCGAGAAAGA  
GAATTAATATATGACCTATTCGAAGCTGCCACCGGTATGCGGATGATGCACAATTTTTTT  
CGTATTGGTGGAGTCGCTGCTGATTTACCTCATGGCTGGATAGATAAATGTTTGGATTTT  
TGCGATTATTTTTTAACAGGAATTGCTGAATATCAAAGCTTATTACACGGAATCCCAT  
TTTTTAGAACGAGTTGAAGGAGTAGGCATTATTGGTGGAGAGGAAGCAATAAATTGGG  
GTTTGTGGGACCAATGCTACGAGCTTCCGGAATAGAATGGGATCTTCGTAAAGTTGAT  
CATTATGAGTGTTACGATGAATTTGATTGGGAAGTCCAATGGCAAAAAGAGGGGGATT  
CGTTAGCTCGTTATTTAGTACGAATCAGCGAAATGACAGAATCCATAAAAATTATTCAA  
CAGGCCCTAGAAGGAATTCCGGGAGGGCCCTATGAAAATTTAGAAATCCGCCGCTTTG  
ATAGAGTAAAAGATACTGTATGGAATGAGTTTACTATCGATTCATTAGTAAAAAACCTT  
CTCCGACTTTTGAATTGTGCAAGCAAGAACTTTATGCGAGAGTCGAAGCACCAAAGGG  
AGAATTGGGAATTTTTTTGATAGGAGATAAGGGTGTTTTTCTTGGCGATATAAAATTAG  
GCCGCCGGGATTTATTAATTTGCAAATCTTCCTCAGTTAGTTAAAAGAATGAAATTGG  
CTGATATTATGACGATACTAGGTAGTATAGATATCATTATGGGAGAAGTTGATCGTATGTT  
TCCTATGGTAACTGAGTTCATGAATTATGGCCAACAAACAGTACGAGCTGCAAGGTATA  
TTGGTCAAGGTTTCATGATTACCTTATCACACGCGAATCGTTTACCTGTAACCTATTCAAT  
ACCCCTACGAAAATTGATCACATCCGAGCGTTTCCGCGGTGCAATCCACTTTGAATTT  
GATAAATGCATTGCTTGTGAAGTATGTGTTGCTGTATGTCCTATAGATCTACCCGTTGTT  
GATTGGAAATTGGAACTGATATTAGAAAGAAACGATTGCTTAATTACAGTATTGATTC  
GGAATATGTATATTTTGTGGTAATTGCGTTGAGTATTGTCCAACAAATTGCTTATCAATG  
ACTGAAGAATATGAACTTTCTACTTATGATCGTCACGAATTGAATTATAATCAAATTGCT  
TTGGGTCGGTTACCAATGTCAATAATTGACGATTACACAATTCGAACAATTTTAAATTTG  
-----ATGCAGGGTAATTTGTCTGCTTGGCTAGTTAAGCA  
TGCGCTAATTCATAGATCTTTGGGCTTTGATTACCAAGGAATAGAGACTTTACAAATCA  
AACCGGGGGATTGGCATTCCATTGCTGTCATTTTATATGTATATGGTTACAATTATCTCCG  
CTCCAATGTGCCATGATGTAGCACCGGGCGGACTATTAGCTAGTGTGTATCATCTTAC  
TAGAATAGAGTATGGCGTGGATCAACCAGAAGAGGTATGCATAAAAGTATTTGCCCGA  
GGAAGGATCCTAGAATCCGTCTGTTTTCTGGGTTTGGAAAAGTGTGGATTTTCAAGA  
ACGGGAATCTTATGATATGTTGGGAATCTCTTATGATAATCATCCACGTTTGAACGTAT  
CTTAATGCCTGAAAGTTGGATAGGATGGCCTTTACGTAAGGATTATATTGCTCCCAATTT  
TTATGAAATACAAGATGCTCAT-----  
-----ATGAATT

CCATTGAGTTTCCCTTATTTTCATCGAACAACCCAAAATTCAGTTATTTCAACTACATTAA  
ATGATCTTTCAAATTGGTCAAGACTCTCTAGTTTATGGCCGCTTCTCTATGGTACCAGTT  
GTTGCTTCATTGAATTTGCTTCACTAATAGGTTTACGATTTCGACTTTGATCGTTATGGAC  
TAGTACCAAGATCGAGTCCTAGACAAGCGGACCTTATTTTAAACAGCCGGAACAGTAAC  
AATGAAAATGGCCCCTTCCTTAGTGAGATTATACGAGCAAATGCCTGAACCAAAAATATG  
TTATTGCTATGGGAGCATGTACAATTACAGGGGGGATGTTTCAGTACCGATTCTTATAGTA  
CTGTTTCGTGGAGTCGATAAGCTAATTCCTGTGGATGTCTATTTGCCGGGCTGTCCACCT  
AAACCAGAAGCAATTATAGATGCTATAACAAAACCTTCGTAAGAAAATATCTCGAGAAAT  
CTATCCAGATAGAATTATGTCTCAGCGAGAGAATCGGTGTTTTACTACCAATCACAAGT  
TTCAGGTTGGGCATAGTATTCATACTGGAAATTATGATCAAGGATTCCTTTATCAACCGC  
CATCTACCTCAGAGATTCCCTCCTGAAACATTTTTCAAATACAAAAGTTCAGTCTCTTCA  
CACGAATTAGTAAATATGCAAACCTAGAAATACTTTTTCTTGGATAAAGGAACAGATTAC  
TCGATCTATTTCCGCATCGCTCATGATATATAATAACTCGTACATCCATTTCAAATGCAT  
ATCCCATTTTTGCACAGCAGGGTTATGAAAATCCACGAGAAGCGACTGGGCGTATTGTA  
TGCGCCAATTGCCATTTAGCTAATAAACCAGTGGATATTGAGGTTCCGCAAGCGGTACT  
TCCCGATACTGTATTTGAAGCAGTTGTTTCGAATTCCTTATGATACGCAACTGAAACAAG  
TTCTTGCTAATGGTAAAAAGGGAGGTTTGAATGTGGGGGCTGTTCTTATTTTACCAGAG  
GGTTTTGAATTAGCCCCTCCCGATCGTATTTCCCCCGAGATAAAAGAAAAGATGGGTAA  
TTTGTCTTTTCAGAGCTATCGCCCCAATCAAAAAAATATTCTTGTTCATAGGCCCTGTCC  
TGGTCAGAAATATAGTGAAATCACCTTTCCTATTCTTTCCCGGACCCCGCTACTAAGA  
AAGACATTCACTTCTTAAAATATCCTATATACGTAGGTGGAAACAGGGGAAGGGGCCA  
GATTTATCCTGACGGGAGCAAAGTAACAATACAGTTTATAATGCTACAGCATCAGGTA  
TAGTAAGCAAATCCTACGAAAAGAAAAGGGGGGATACGAAATAACCATAGCGGATGC  
GTCGGATGGACGTCAAGTGGTTGATATTATCCCTCCGGGGCCAGAACTTCTTGTTCAG  
AAGGCGAATCTATCAAATTGGATCAACCGTTGACAAGTAATCCTAATGTAGGCGGATTT  
GGTCAGGGAGATGCAGAAATAGTACTTCAAGATCCATTACGTGTACAAGGCCTTTTGT  
CTTCTTCGCAGCTGTTATTTTGGCACAAATATTTTGGTTCTTAAAAAGAAACAGTTTCG  
AGAAAGTTCAATTGTCCGAAATGAATTTTCATGAGTAAAGTATATGATTGGTTTGAAGAG  
CGTCTTGAGATTCAGGCGATTGCGGATGATATAACTAGTAAATATGTTCCCTCCTCATGTA  
AACATATTTTATTGTCTAGGGGGAATTACGCTTACTTGTTTTTTAGTACAAGTGGCTACA  
GGATTTGCTATGACCTTTTACTATCGTCCGACCGTTACTGATGCTTTTTGCTTCTGTTCAAT  
ACATAATGACTGAAGCTAATTTTGGTTGGTTAATCCGATCAGTTCATCGATGGTCGGCA  
AGTATGATGGTCCTAATGATGATCCTACATGTATTTTCGTGTATATCTCACCGGTGGATTA  
AAAAACCGCGCGAATTAACCTTGGGTACAGGTGTGGTTCTGGCTGTATTGACTGCATCA  
TTTGGTGTAACCTGGTTATTCTTTACCCTGGGACCAAATTGGTTATTGGGCAGTGAAAAT  
TGTAACAGGTGTACCTGACGCTATTCCTGTAATAGGATCACCTTTGGTAGAATTATTGCG  
CGAAGTGCTAGTGTGGGACAATCCACTTTGACTCGTTTTTATAGTTTACACACTTTTGT  
ATTGCCGCTTCTTACTGCCGTATTTATGTTAATGCACTTCCAATGATACGTAAACAAGG  
GATTTCTGGTCCTTTAATGGGAGTAACAAAAAACCTGACTTGAATGATCCTGTATTAA  
GAGCTAAATTGGCTAAAGGTATGGGTCATAATTATTACGGGGAGCCCGCATGGCCCAAC  
GATCTTTTATATATTTTTCCGGTAGTAATTTCTAGGCACGATTGCATGTAACGTAGGCTTAG  
CGTTCTAGAACCATCAATGATTGGTGAACCGGCAGATCCGTTTGCAACTCCTTTGGAA  
ATATTACCCGAATGGTATTTCTTTCCCGTATTTCAAATACTTCGTACAGTACCCAATAAAT  
TATTGGGTGTTCTGTTAATGGTATCAGTACCCGCGGGATTATTAACAGTACCCTTTTTAG

AGAATGTTAATAAAATCCAAAATCCATTTTCGTCGTCAGTAGCGACAACCGTATTTTTGA  
TTGGTACCGCAGTGGCCCTTTGGTTGGGTATTGGTGCAACATTACCTATTGATAAATCCC  
TAACTTTAGGTCTTTTTATGATTGAAGTTTTCTATTTGGAATCGTGTTAGGTCTAATTC  
TATTACTTTGGCTGGATTATTTGTAAGTGCATATTTACAATACAGGCGTGGCGATCAGTT  
GGACCTTATGCCTATCATAACTAGTTATTTTCGTTTTCTACTAACGGCTTTAACTATAGCC  
TCAGCTCTATTTATTGGTCTGAGCAAGATACGACTTATTATGGATATAGTAAGTCTCGCTT  
GGGCTGCTTTAATGGTAGTCTTTACATTTTCCCTTTCACTCGTAGTATGGGGAAGAAGT  
GGACTTATGATTATTCGTTTCGCCGGAACCGAAGTAAAAATTTTGGTAGATAGGGATCA  
CATAAAAATTCATTCGAGGAATGGGCTAGACCGGGTCATTTCTCAAGAACAATAGCTA  
AAGGCCCTGAAACTACCACTTGGATCTGGAACCTACATGCTGATGCTCACGATTTTCGAT  
AGCCATAACAGTGATTTGGAGGAGATCTCTCGAAAAGTATTTAGTGCGCATTTTCGGTCA  
ACTCTCCATCATCTTCCCTTTGGCTGAGTGGCATGTATTTCCACGGTGCTCGTTTTTCCAA  
TTATGAAGCATGGCTAAGCGATCCGACTCACATTTGGGCCTAGTGCCCAGGTGGTTTTGGC  
CGATAGTGGGCCAAGAAATATTGAATGGTGATGTGGGCGGGGGCTTCCGAGGAATACA  
AATAACCTCTGGGTTTTTTCAGCTTTGGCGAGCATCTGGAATAACTAGCGAATTACAAC  
TCTATTGTACCGCAATTGGTGCATTGATCTTTGCAGCGTTAATGCTTTTTGCTGGTTGGT  
TTCATTATCATAAAGCTGCTCCAAAATTTGGCTTGGTTTTCAAGATGTAGAATCTATGTTGA  
ATCACCATTTAGCGGGGCTACTAGGACTTGGGTCTCTCTCTTGGGCGGGGCATCAAGTA  
CATGTATCTTTACCTATTAACCAATTTCTAAACGCTGGAGTAGATCCTAAAGAAATACCA  
CTTCCTCATGAATTTATCTTGAATCGGGATCTTTTGGCTCAACTTTATCCCAGTTTTGCC  
GAGGGAGCAACCCCGTTTTTTCACCTTGAATTGGTCAAATATGCTGACTTTCTTACTTT  
TCGTGGAGGATTAGACCCCGTAACTGGAGGTCTATGGCTAACCGATACTGCACACCATC  
ATTTAGCTATTGCAATTTCTTTTTCTTATAGCGGGTCACATGTATAGGACCAACTGGGGCA  
TTGGTTCATGGTCTAAAAGATATTTTAGAAGCTCATAAAGGTCCATTTACGGGCCAGGGC  
CATAAAGGCCTATATGAGATCCTAACAACGTCGTGGCATGCTCAATTATCTCTTAACCTA  
GCTATGTTAGGCTCTTTAACCATTGTTGTAGCTCACCATATGTATGCCATGCCTCCTTATC  
CATATCTAGCTACTGACTATGGTACACAACCTATCATTGTTACACATCATATGTGGATTGG  
TGGATTTCTCATAGTTGGTGCTGCTGCGCATGCAGCCATTTTTATGGTAAGAGACTACGA  
TCCAACTACTCGATAACGATCTATTAGATCGTGTTCTTAGGCATCGCGATGCAATCAT  
ATCACATCTCAACTGGGCATGTATATTTCTAGGCTTTCACAGTTTTGGTTTTGTATATTCAT  
AATGATACCATGAGCGCTTTAGGGCGTCTCAAGATATGTTTTTCAGATACCGCTATCCAA  
TTACAACCCGTCTTTGCTCAATGGATACAAAACACCCACGCTTTAGCACCTGGTGCAAC  
GGCTCCTGGTGCAACAGCAAGCACCAGTTAACTTGGGGGGGGCGGTGATTTAGTAGCA  
GTGGGCGGCAAGGTAGCTTTGTTACCTATTCCATTAGGAACCGCGGATTTTTTGGTACA  
TCACATTCATGCATTTACGATTCATGTGACGGTATTGATACTTCTGAAAGGTGTTCTATTT  
GCTCGTAGCTCCCGTTTTGATACCGGATAAAGCAAATCTTGGGTTTTCGTTTTCTTGTGAT  
GGCCTGGAAGGGGGGGGACATGTCAAGTATCAGCTTGGGACCATGTCTTCTTAGGAC  
TATTTCTGGATGTACAATTCATTTTCAGTAGTCATATTTCAATTTTCAGTTGGAAAATGCAGT  
CAGATGTTTGGGGCAGTATAAGCGATCAAGGAGTCGTAACCTCATATCACGGGAGGAAA  
CTTTGCGCAGAGTTCTATTAATAATGGGTGGCTCCGCGATTTCTTATGGGCACAGGC  
ATCCCAGGTAATTCAGTCTTATGTTTCTTATTATCCGCATATGGCCTTTTTTTCCTAGGT  
GCTCATTTTGTATGGGCTTTTAGTTAATGTTTTTATTTCAGTGGACGTGGTTATTGGCAA  
GAACTTATTGAATCCATCGTTTTGGGCTCATAATAAATTAAGTTGCTCCTGCTACCCAG  
CCGAGAGCCTTAAGCATTGTACAAGGACGTGCTGTAGGAGTAACCCATTACCTTCTGG

GTGGAATTGCCACAACATGGGCGTTCTTCTTAGCAAGAATTATTGCAGTAGGAATGGCA  
TTAAGATTTCCAAGGTTTAGCCAAGGCTTAGCTCAGGACCCCACTACTCGTCGTATTTG  
GTTTGGTATTGCTACCGCGCATGACTTTGAGAGTCATGATGATTACTGAGGAACGTC  
TTTATCAGAATAATTTTTGCTTCTCACTTCGGGCAATTAGCAATCATTTTTCTGTGGACTC  
CGAAATCTCTTTCATGTAGCTTGGCAAGGAAATTTGAGTCATGGGTACAGGACCCTT  
TACATGTAAGACCTATTGCTCATGCAATTTGGGATCCTCATTTTTGGTCAACCAGCTGTAG  
AGGCTTTTACTCGAGGGGGTGCTCCTGGGCCGGTGAATATCGCTTATTCTGGTGTAT  
CAGTGGTGGTATAACAATCGGTTTACGAACTAATGAAGATCTTTATACTGGAGCTCTTTTT  
CTATATTTATTTCTGCCATATCTTTAATAGCGGGTTGGTTACACCTACAACCGAAATGGA  
AACCGAGCGTTTCGTGGTTCAAAAATGCAGAATCTCGTCTCAATCATCATTTATCAGGA  
CTCTTTGGCGTAAGTTCCTTGGCTTGGACAGGGCATTAGTCCATGTCGCTATTCTGCA  
TCCAGAGGGGAGTCCGTTTCGATGGAATAATTTCTTAGATGTATTACCACATCCCCAAGG  
GTTAGGCCCACTTTTTACAGGTCAGTGAATCTTTATGCTCAAAATCCCGATTCAAGTA  
GTCATTTATTTGGTACCTCCCAAGGAGCAGGAACTGCCATTTAACCCTTCTCGGGGGA  
TTCCATCCACAAACCCAAAGTTTATGGCTGACTGATATGGCTCATCATCATTTAGCTATT  
GCATTTATTTTTCTCATTGCTGGGCATATGTATAGAATAATTTGGGATTGGGCACAGTA  
TGAAAGATCTTTTAGATGCACATATCCCTCCGGGAGGGCGATTGGGACGTGGGCATAAG  
GGCCTTTATGACACAATTAATAATTCGATTCATTTTCAATTAGGCCTTGCTCTAGCTTCTT  
TAGGGGTTATTACTTCTTTGGTAGCTCAACACATGTA CTCTTTACCCGCTTATGCATTTAT  
AGCACAAGACTTTACTACTCAAGCTGCGTTATATACTCATCACCAATACATCGCAGGATT  
CATCATGACAGGAGCTTTTGCTCATGGAGCTATATTTTTTATTAGGGATTACAATCCGGA  
ACAGAATGAGGATAATGTATTGGCAAGAATGTTAGAACATAAAGAAGCTATCATATCTC  
ATTTAAGTTGGGCCAGTCTCTTTTTGGGTTCCATACCTTGGGACTTTATGTTTATAATG  
ATGTCATGCTTGCTTTGGTACTCCGGAGAAGCAAATCTTAATCGAACCTATATTTGCTC  
AATGGATACAATCTGCTCATGGTAAACTTCATATGGGTTTCGATATACTTTTATCTTCAAC  
GAGTGGCCCGGCATTCAATGCGGGTCGAAGCATATGGTTGCCGGGTTGGTTAAATGCT  
GTTAATGAG-----AATAGTAATTCATATTCTTAACAATAGGTCCTGGAGACTTTTTGGTT  
CATCATGCTATTGCTCTAGGTTTACATACAACTACGTTGATCTTAGTAAAAGGTGCGTTA  
GATGCACGTGGTTCCAAGTTAATGCCAGATAAAAAGGATTTTGGTTATAGTTTTCCGTG  
CGATGGCCCAGGACGAGGCGGTACTTGTGATATTTCCGGCTTGGGACGCATTTTATTTGG  
CAGTTTTTTGGATGTAAATACCATTGGATGGGTTACTTTTTATTGGCATTGGAAGCACA  
TTACATTATGGCAGGGTAATGTTTACAGTTAATGAATCTTCCACTTATTTGATGGGCT  
GGTTAAGAGATTATTTATGGTTAAACTCTTCACA ACTTATTAATGGATATAATCCTTTTGG  
TATGAATAGTTTATCCGTCTGGGCATGGATGTTTTTATTTGGACATCTTGTTTGGGCTACT  
GGATTTATGTTTTTAATTCCTGGCGTGGATATTGGCAGGAATTGATTGAAACTTTAGCA  
TGGGCTCATGAACGCACACCTTTGGCCAATTTGATTCGTTGGAGAGATAAACCGGTGG  
CACTTTCCATTGTACAAGCAAGATTGGTTGGATTAGCCCACTTTTCTGTAGGTTATATAT  
TTACTTATGCAGCTTTCTTGATTGCCTCTACATCAGGGAAATTTGGTATGTCGCATTAG  
TAAAGATTTATGATACATGTATCGGGTGTACTCAATGTGTCCGAGCCTGTCCTACGGATG  
TATTAGAAATGATACCTTGGGACGGATGTAAAGCCAAACAAATAGCTTCTGCTCCAAGA  
ACAGAGGATTGTGTCGGTTGTAAGAGATGTGAATCCGCCTGCCAACAGATTTCTTGA  
GTGTTCCGCTTTATTTATGGCATGAAACAACCCGCAGCATGGGTATAGCTTATATGACAA  
CTCTTAACTTTCCCTCTGTTTTGGTCCCTTTAGTAGGCCTAGTATTTCCGGCAATCGCAA  
TGGCTTCTTTATTTCTTCATGTTCAAAAAACAAGATTGTTATGCGAGATCTAAAAACAT

ATCTTCCGTTGGCACCGTACTAAGTACTCTATGGTTCGGTGCTTTGGCAGGTTTATTGA  
TAGAGATTAATCGTTTTTCCCGGATGCATTGACGTTCCCCTTTTTTC-----ATGACTGCAA  
TTTTAGAGAGACGCGAAAGCGAAAGCCTATGGGGTCGCTTCTGTAACCTGGATAACTAG  
CACCGAAAACCGTCTTTACATTGGATGGTTTGGCGTTTTGATGATCCCTACCTTATTGAC  
CGCAACTTCTGTATTTATTATCGCCTTCATTGCTGCTCCTCCAGTAGATATTGATGGTATT  
CGTGAACCTGTTTCTGGATCTCTACTTTACGGAAACAATATTTATTTCCGGTGCCATTATT  
CCTACTTCTGCAGCTATCGGTTTGCACTTTTACCCAATATGGGAAGCAGCATCCGTTGAT  
GAATGGTTATACAATGGTGGTCCTTATGAACATAATTGTTCTACACTTCTTACTTGGTGTA  
GCTTGTTACATGGGTCGTGAGTGGGAGCTTAGTTTTCCGTCTGGGTATGCGACCTTGGAT  
TGCTGTTGCATATTACAGCTCCTGTTGCAGCTGCGACTGCTGTTTTCTTGATCTACCCAAT  
TGGTCAAGGAAGCTTTTTCTGATGGTATGCCTCTAGGAATTTCTGGTACTTTCAACTTCAT  
GATTGTATTCCAGGCTGAGCACAACATTCTTATGCACCCATTTACATGCTAGGCGTAG  
CTGGTGTATTCCGGCGGCTCCCTATTTAGTGCTATGCATGGTTCCTTGGTAACCTCTAGTT  
TGATCAGGGAAACCACAGAAAATGAATCTGCTAATGAAGGTTACAGATTCGGTCAAGA  
GGAAGAACTTATAATATCGTAGCCGCTCATGGTTATTTGGCCGATTGATCTTCCAATA  
TGCTAGTTTTCAACAACCTCTCGTTCTTTACATTTCTTCCTAGCTGCTTGGCCTGTAGTAGG  
TATCTGGTTCACTGCTTTAGGTATCAGTACTATGGCTTTCAACCTAAATGGTTTTCAATTT  
CAACCAATCAGTAGTTGATAGCCAAGGCCGTGTTATTAACAACCTGGGCTGATATCATT  
ACCGTGCTAACCTTGGTATGGAAGTTATGCATGAACGTAATGCTCATAATTTCCCTCTAG  
ACTTAGCTGCTATTGAAGCTCCATCTACAAATGGAATGGGTTTGCCTTGGTATCGTGTT  
ATACCGTTGTATTGAATGATCCCGGACGGTTGCTTTCTGTTTATATAATGCATACAGCTTT  
GGTTGCTGGTTGGGCCGTTTCGATGGCCCTGTATGAATTAGCAGTTTTTGTATCCTTCTG  
ACCCTGTTCTTGATCCAATGTGGAGACAGGGTATGTTTCGTTATACCCTTCATGACTCGTT  
TAGGAATAACAAATTCCTGGGGCGTTGGAGTATCACG---GGGGGACTATAACGAATC  
CGGGTATTTGGAGTTACGAAGGTGTGGCTGGAGCGCATATTGTGTTTTCTGGGTTGTGC  
TTTTTGGCAGCTATCTGGCATTGGGTATATTGGGATCTAGAAATATTTGTGATGAACGT  
ACAGGAAAACCTCTTTGGATTTGCCAAGATCTTTGGAATACATTTATTTCTTGCAGG  
TCTGGCTTGCTTTGGTTTTGGTGCATTTTCATGTAACAGGCTTGTATGGTCTGGCATATG  
GGTGTCCGATCCTTATGGGCTAACAGGGAAAGTACAATCTGTAAATCCATCGTGGGGTG  
TAGAGGGTTTTGATCCTTTTTGTTCCGGGAGGAATAGCCTCTCATCATATTGCGGCAGGG  
ACTTTGGGCATATTAGCAGGTCTATTCCATCTTAGCGTCCGCCCCGCCCAACGTCTATAC  
AAAGGATTGCGTATGGGCAATATTGAAACTGTCCTTTCCAGTAGTATCGCTGCTGTCTTT  
TTTGCAGCTTTTTGTGTTGCCGGAACCTATGTGGTATGGTTCAGCAACTACCCCATCGA  
ATTATTTGGGCCTACTCGTTATCAATGGGATCAGGGATACTTCCAACAAGAAATATATAG  
AAGAGTTAGTGCTGGGTTAGCCGAAAATCAAAGTTTATCAGAAGTTTGGTCTAAAATT  
CCTGAAAAATTAGCCTTTTATGATTACATCGGAAATAATCCGGCAAAAAGGGGGATTATT  
CAGGGCGGGCTCAATGGATAACGGGGATGGAATAGCGGTTGGATGGTTAGGACATCCT  
ATCTTTAGAGATAAAGAAGGCCGTGAACTTTTTGTACGTCGTATGCCTACCTTTTTTTGA  
AACATTTCCGGTCGTTTTGGTAGACGGAGACGGAATTGTTAGAGCCGATGTTCTTTTC  
GAAGGGCGGAATCTAAGTATAGTGTGCAACAAGTAGGTGTAACCTGTTGAGTTCTATGG  
TGGTGAACCTCAATGGAGTCAGTTATAGTGATCCTGTTACTGTCAAAAAATATGCTAGAC  
GCGCTCAATTGGGGGAAATTTTTGAATTAGATCGTGCTACTTTGAAATCTGATGGTGTT  
TTTCGTAGCAGTCCAAGGGGTTGGTTTACTTTTGGACATGCTTCATTTGCTTTGCTCTTC  
TTCTTCGGACACATTTGGCATGGTTCTCGAACCTTGTTTAGAGATGTTTTCGCTGGTATT

GACCCAGATTTGGATGCTCAAGTAGAATTTGGAGCATTCCAAAACTTGGAGATCCAA  
CTACAAGAAGACAAGCAATCATGAAAACCTTATATTCCCTGAGGAGGTTCTACCCCGT  
GGAAACGCTCTTTAATGGAACTTTAGCTTTAGCTGGTTCGTGACCAAGAAACCACCGT  
TTCGCTTGGTGGGCGGGAATGCCCGGCTTATCAATTTATCCGGTAAACTACTAGGGG  
TCATGTAGCCCATGCCGGATTAATCGTATTCTGGGCCGGAGCAATGAATCTATTTGAAGT  
GGCTCATTTTCGTACCAGAAAAGCCTATGTATGAACAAGGATTAATTTTACTTCCTCACCT  
AGCTACTCTAGGTTGGGGGGTAGGTCCTGGTGGGGAAGTTATAGATACTTTTCCATACT  
TTGTATCTGGAGTACTTCATTTAATTTCCCTCTGCAGTATTGGGCTTTGGCGGTATTTATCA  
TGCACTTTTAGGACCTGAGACGCTTGAAGAATCTTTTCCATTCTTCGGTTATGTATGGA  
AAGATAGAAATAAAATGACCACAATTTTAGGTATTCATTTAATCTTGTTAGGTCTAGGTG  
CTTTTCTTCTAGTATTCAAGGCTCTTTATTTTGGGGGCGTATATGATACTTGGGCTCCGG  
GAGGAGGAGATGTAAGAAAAATCACCAACTTGACGCTTAGCCCAAGTATCATATTTGG  
TTATTTACTAAAATCGCCCTTTGGGGGGGAAGGATGGATTGTTAGTGTAGACGATTTGG  
AAGATATAATAGGAGGCCATGTGTGGTTAGGTTCCATTTGTATACTTGGTGGAAATTTGGC  
ATATCTTAACCAAACCCTTCGCATGGGCTCGACGTGCACTTGTATGGTCTGGAGAGGCT  
TACTTATCTTATAGTTTAGCGGCTATATCTGTCTTTGGTTTCATTGCTTGTGTTTTGTCTG  
GTTCAATAATACGGCTTATCCTAGTGAGTTTTATGGACCCACTGGACCAGAAGCTTCTC  
AAGCTCAAGCATTACTTTTTCTAGTTAGAGACCAACGTCTTGGAGCTAACGTAGGATCC  
GCTCAAGGGCCTACCGGTTTAGGTAATATTTAATGCGTTCCCCGACCGGAGAAGTCAT  
TTTTGGAGGAGAACTATGCGTTTTTGGGATTTGCGCGCTCCTTGGTTAGAACCTCTAA  
GGGGTCCAAATGGGTGGACTTGAGTCGGCTGAAAAAAGACATACAACCTTGGCAAG  
AACGTCGTTCCGCAGAATATATGACTCATGCTCCTTTAGGTTCTTTAAATTCCGTGGGTG  
GAGTAGCTACCGAGATCAATGCAGTCAATTATGTGTCTCCTAGAAGTTGGTTAGCTACT  
TCTCATTTTTGTTCTAGGATTCTTCTTCTTCGTAGGACATTTGTGGCACGCAGGAAGAGC  
TCGTGCAGCTGCAGCAGGATTTGAAAAAGGAATTGATCGTGATTTTGAACCTGTTCTTT  
CCATGACCCCTCTTAATATGACTATAGCCCTTGGTAAATTTACCAAAGACGAAAATGATT  
TGTTTGATATTATGGATGACTGGTTACGTAGGGACCGTTTCGTTTTTTGTAGGCTGGTCCG  
GCCTATTGCTCTTTCCTTGTGCCTATTTTCGCCGTAGGGGGTTGGTTCACGGGTACAACC  
TTTGTAACCTCATGGTATACCCATGGATTGGCCAGTTCCTATTTGGAAGGCTGCAATTC  
TTAACTGCCGCAGTTTCTACTCCTGCTAATAGTTTAGCACATTCTTTGTTATTACTATGGG  
GTCCTGAAGCACAAGGAGATTTTACTCGTTGGTGTCAATTAGGCGGTCTGTGGACTTTT  
GTTGCTCTCCACGGCGCTTTCGGACTAATAGGTTTCATGTTACGTCAATTCGAACTTGC  
TCGATCTGTTCAATTGCGACCTTATAATGCAATCGCATTCTCTGGTCCAATTGCCGTTTT  
TGTTTCTGTATTCCTGATTTATCCACTAGGTCAGTCTGGTTGGTTCTTTGCGCCTAGTTTT  
GGTGTAGCAGCTATATTTCGATTTATCCTCTTTTTTCAAGGATTTCATAACTGGACATTGA  
ACCCATTTATATGATGGGAGTTGCCGGTGTATTGGGCGCTGCTTTGCTATGCGCTATTC  
ATGGTGCTACCGTAGAAAATACTTTATTTGAAGATGGTGTATGGCGCAAATACATTCCGT  
GCTTTTAACCAAACCTCAAGCTGAAGAACTTATTCAATGGTCACTGCTAATCGCTTTTG  
GTCCCAAATCTTTGGGGTTGCTTTTTCCAATAAACGTTGGTTACATTTCTTTATGTTATTT  
GTACCAGTAACTGGTTTATGGATGAGTGCTCTTGGAGTAGTCGGTCTGGCCTTGAACCT  
ACGTGCCTATGACTTCGTTTCTCAAGAAATTCGCGCGGCGGAAGATCCTGAATTTGAG  
ACTTTCTACACCAAAAATATTCTCTTAAACGAAGGTATTCGTGCTTGGATGGCGGCTCA  
AGATCAGCCTCATGAAAACCTTATATTCCCTGAGGAGGTTCTACCCCGTGGAAACGCTC  
TTATGTCTGGAAGCACAGGAGAACGTTCTTTTGGCTGATATTATTACCAGTATTCGCTACT

GGGTCATTCATAGCATTACTATACCTTCCCTATTCATTGCGGGTTGGTTATTCGTCAGCAC  
TGGTTTAGCTTACGATGTGTTTGGGAAGCCCTCGGCCAAACGAGTATTCACAGAGAAC  
CGACAAGGAATTCATTAATCACCGGCCGTTTTGATTCTTTGGAACAACCTCGATGAATT  
TAGTAGATCTTTTATGACCATAGATCGAACCTATCCAATTTTACAGTGCATGGTTGGC  
TGTTACGGCCTAGCTGTACCTACCGTTTCTTTTTGGGGTCAATATCAGCAATGCAGTT  
CATAACGAATGGCTACACAACTGTGAGAACGGTTCTAAATCTGGT---CCAAGACG  
AACTACTGTAGGGAATTTATTAACCCCTTGAATTCTGAATATGGTAAAGTAGCTCCGG  
GGTGGGGAACGACCCCTTTGATGGGCGTCGCAATGGCTCTATTTGCGGTATTTCTATCTA  
TTATTTAGAGATTTATAATTCTTCTGTTTTATTGGATGGAATTTCAATGAATATGCTTACT  
CTCAAACTTTTCGTTTACACAGTAGTAATATTCTTTGTTTCTCTTTCATCTTTGGATTCC  
TATCCAATGATCCAGGACGTAATCCTGGACGTGAAGAAATGGCCGATACTACTGGAAG  
AATCCTCTTTGGATAATAGGTACTGTAGCTGGTATTCTTGTGATCGGTTTAGTAGGCGT  
TTTCTTTTATGGTTCATATCCGGATTGGGTTTCATCCCTGATGCTTAATATCTTTAGTTTGA  
TCTGT-----CTTAATTCTGCCCTTTATCCGAGTAGTCTTTTCTTCGCCAAATTGCCCGAAG  
CCTATGCTTTTTTGAATCCAATCGTAGATGTTATGCCAGTCATACCCCTGTTCTTTTTTCT  
TTTAGCCTTTGTTTGGCAAGCTGCTGTAAGTTTTCGAACGACACAATCAAACCCAAAC  
GAACAAAATGTTGAATTGAATCGTACCAGCCTCTACTGGGGGTTATTACTCATTTTTGTA  
CTTGCCGTTTTATTTTCCAATTATTTCTTCAATATGGAAGTAAATATTCTTGCATTTATTGC  
TACTGCACTGTTCATTTTAGTTCCTACTGCTTTTCTACTTATAATTTACGTAAAAACAGTC  
AGTCAAAATGATATGGAAACAGCAACCCTAGTCGCCATCTTTATATCTGGTTTACTTGTA  
AGTTTTACTGGGTACGCCTTGTATACCGCTTTTGGGCAACCTTCTCAACAATAAGAGA  
TCCATTCGAGGAACACGGGGACATGGAAGCATTGGTTTATACATTCCTATTAGTCTCGA  
CTCTAGGGATAATTTTTTTCGCTATCTTTTTTAGAGAACCGCCGACAATTTCAACTAAAA  
AA-----ATGACTCTTGCTTTCCAATTGGCTGTTTTTGCATTAATTGCTACTTCATCAATCTT  
ATTGATTGGCGTACCCGTTGTATTTGCTTCTCCTGATGGTTGGTCAAGTAACAAAAATGT  
TGTATTTTCAGGTACATCATTATGGATTGGATTAGTCTTTCTGGTGGGTATCCTTAATTCT  
CTCATCTCT-----ATGTCACCACAAACAGAGACTAAAGCAAGTGTTGGATTCT  
AAAGCTGGTGTTAAAGATTATAAATTGACTTATTATACTCCTGAATATGAAACCAAGGAT  
ACTGATATCTTGGCAGCATTTTCGAGTAACTCCTCAACCTGGAGTTCCGCCTGAAGAAG  
CAGGGGCCGAGTAGCTGCCGAATCTTCTACTGGTACATGGACAACCTGTATGGACCGA  
TGGACTTACCAGCCTTGACCGTTACAAAGGCCGATGCTATGGACTTGAGCCTGTTCTGT  
GAGAAGACAATCAATTTATTGCTTATGTAGCGTACCCATTAGACCTTTTTGAAGAAGGT  
TCTGTTACTAACATGTTTACTTCCATTGTAGGTAATGTATTTGGGTTCAAAGCCCTGCGT  
GCTCTACGTCTGGAAGATTTGCGAATCCCGACTGCGTATGTTAAACCTTTGACGGTCC  
GCCTCACGGTATCCAAGTTGAAAGAGATAAATTGAACAAGTATGGTCGTCCCCTGTTG  
GGATGTACTATTAACCGAAATTGGGGTTATCCGCTAAAACTACGGTAGAGCTTGTTA  
TGAATGTCTTCGTGGTGGCCTTGATTTTACTAAAGATGATGAGAACGTGAACCTCCAAC  
CATTTATGCGTTGGAGAGACCGTTTCTTATTTGTGCCGAAGCTATTTATAAAGCACAAG  
CTGAAACAGGTGAAATCAAAGGGCATTACTTGAATGCTACTGCGGGTAATTGCGAAGA  
TATGATGAAAAGGGCTGTATTTGCTAGAGAATTGGGAGTTCCTATCGTAATGCATGACT  
ACCTAACAGGTGGATTCCTGCAATACTAGCTTGTCTCAGTATTGCCGAGATAATGGT  
CTACTTCTTACATCCACCGCGCAATGCATGCGGTTATTGATAGACAGAAGAATCATGG  
TATGCACTTCCGTGTACTAGCTAAAGCGTTACGTATGTCCGGTGGAGATCACATTCATC  
CGGTACCGTAGTAGGTAACCTTGAAGGGGAAAGAGAAATCACTTTGGGCTTTGTTGAT



TTACTGCGTGATGATTTTATTGAAAAAGATAGAAGTCGCGGTATTTATTTACCCCAAGAT  
TGGGTCTCTCTACCAGGTGTTCTGCCTGTAGCTTCGGGGGGTATTCACGTTTGGCATAT  
GCCTGCTCTAACCGAGATCTTTGGGGATGATTCCGTACTIONACAGTTCGGTGGAGGAACTT  
TAGGGCACCCCTTGGGGTAATGCACCTGGTGCCGTAGCTAACCGAGTAGCTCTAGAAGC  
ATGTGTACAAGCTCGTAATGAGGGACGCGATCTTGCTACTGAGGGTAATGAAATTATCC  
GTGAGGCTACCAAATGGAGTCCTGAACTAGCTGCTGCTTGTGAAGTATGGAAGGAGAT  
CAAATTTGAGTTCAGGCAATGGATACTTTGGATACGATGGCGATAAATTTATACAAAA  
CTTCTACCCCGAGCACACGCAATGGAACCGTAGACAGTCAAGTGAAATCCAATCCACG  
AAATAATTTGATCTATGGACAGCATCATTGTGGTAAAGGTCGTAATGCCAGAGGAATCA  
TTACCGCAGGGCATAGAGGGGGAGGTCATAAGCGTCTATACCGTAAAATAGATTTTCGA  
CGAATGAAAAAGACATATATGGTAGAATCGTAACCATAGAATACGACCCGAATCGAAA  
TGCATACATTTGTCTCATACACTATAGGGATGGTGAGAAGAGATATATTTTACATCCCAG  
GGGGCTATAATTGGAGATACCATTGTTTCTGGTACAGAAGTTCCTATAAAAATGGGAA  
ATGCCCTACCTTTGACCGATATGCCCTTAGGCACGGCCATACATAACATAGAAATCACA  
CTTGGAAGGGTGGACAATTAGCTAGAGCAGCGGGTGCTGTAGCGAAACTGATTGCA  
AAAGAAGGGAAATCGGCCACATTAATAATTACCTTCTGGGGAGGTCCGTTTGATATCCA  
AAAAGTCTCAGCAACAGTCGGACAAGTGGGAATGTTGGGGTGAACCAGAAAAATT  
TGGGTAGGGCCGGATCTAAGCGTTGGCTAGGTAAGCGCCCTGTAGTAAGGGGAGTAGT  
TATGAACCCTGTAGACCATCCACATGGGGGTGGTGAAGGGAGGGCCCAATTGGTAGA  
AAAAAACCACAACCCCTTGGGGTTATCCTGCACTTGGAAAAAGAAGTAGAAAAAGG  
AATAAATATAGTGATAATTTGATTCTTCGTCGCCGTAGTAAAATGATTCAACCTCAGACC  
CATTTGAATGTAGCAGATAACAGCGGGGCTCGAGAATTGATGTGTATTTCGAATCATAGG  
AGCTAGC---AATCGTCGATATGCTCATATTGGTGACGTTATTGTTGCTGTGATCAAAGAC  
GCAGTTCCAAACATGCCTCTAGAAAGATCAGAAGTGGTCAGAGCTGTAATTGTCCGTA  
CTTGTAAGAAGTAAACGTGACAACGGTATGATAATACGATATGATGACAATGCTGCA  
GTTGTGATTGATCAAGAAGGAAATCCAAAAGGAACTCGCGTTTTTTGGTGCATTGCC  
GAGAATTGAGACAGTTCAATTTTACTAAAATAGTTTCATTAGCTCCCAGGTTATTA  
ATAACCCCAAAAAGAACCAGATTCGGTAAACAACATAGAGGAAGAATGAAGGGAATATC  
TTATCGAGGTAATACTATTTGTTTTGGTAAATACGCTCTTCAGGCACTTGAACCCGCTTG  
GATCACATCTAGACAAATAGAAGCAGGTCGACGAGCAATGACACGAAATGCACGTCGC  
GGTGGAAAAATATGGGTCCGTATATTTCCAGATAAACCAGTTACAGTAAGGCCCGCAGA  
AACACGTATGGGTTCAAGTAAAGGCTCTCCCGAATATTGGGTAGCTGTTGTTAAACCAG  
GTCGAATCCTTTATGAAATGGGTGGAGTAACAGAAAATATAGCCCGAAGGGCTATTTCA  
ATAGCAGCGTCCAAAATGCCTATACGAGCTCAATTCATCATTTCGGGAATGACCAGAAT  
TAGACGGGGATATATCGCTCGGAGACGTAGAACAAAAATTTCGTTTATTTGCATCAAGCT  
TTCGGGGGGCTCATTCAAGACTTACTCGAACTATTACTCAACAAAAATAAGAGCTTTG  
GTTTCGGCTCATCGGGATAGGGATAGGCCAAAAAATCAATTTTCGTCGTTTTGTGGATCAC  
TCGAATAAATGCAGCAATTCGCGAA---AGGGGGTATGCTATAGTTATAGTAGATTCATA  
AATGATCTGTACAAGAGACAATTGCTTCTTAATCGTAAAATACTTGCACAAATAGCTATA  
TCAAATAGGAATTGTCTTTATATGATTTCCAATGAGATCATAAAAAGAAGTAAGTTGGAA  
GGAATCCACCGT-----ATGTTAAATGAAGTATACGCTTTAGGTCAACATATATCTATGTC  
TGCTCACAAAGCGCGAAGAGTAATTGATCAAATTCGTGGGCGTTCCTACGAAGAAACA  
CTTATGATATTAGAACTCATGCCTTATCGAGCATGTTATCCCATTTTTAAATTAGTTTATTC  
TGCAGCAGCAAATGCTAGTTCCAATATGGGTTTCGAATGAAGCAAATTTAGTGATTAGTA

AAGCCGAAGTAAATAAAGGTA CTATCATGAAGAGATTA AAAACCTCGAGCTCGAGGGCG  
TAGTTTTGCGATACAAAAACCTACCTGCCATATACTATTGTAATGAAAGATATATCCTTA  
GATGGGGGAACATGGGACAAAAAATGGATGGAATCAGGTATGCAGTATTTACAGACA  
AAAGTATTCGGTTATTGGGGAAAAAT--CAATATACTTCTAATGTCTGAATCAGGATCAAC  
TAGGACAGAAATAAAGCATTGGGTCTGA ACTCTTCTTTGGTGTCAAGGTAATCGCGATG  
AATAGTCATCGACTTCGGGGAAAGGCTAGAAGAATGGGACCCATTATGGGACAGACAA  
TGCATTACAGACGTATGATCATTACGCTTCAACCGGGTTATTCTATTCCACCTCTTAGAA  
AGAAAAGA ACTATGGCAGTTC CAAAAAACGTACTTCGATATCAAAAAAGCGTATTCG  
TAAAAATATTTGGAAAAGGAAAGGATATGGGGCGGCGTTAAAAGCTTTGTCATTAGGG  
AAATCTCTTTCTACCGGGAGTTCAAAAAGTTTTTTTTGTACGACAAACAAATAAGATGGC  
CAAGGGTAAAGATGCGCGAATACCGGTTCTTTTGGAATGTACCGCTTGTGTTTCGAAAC  
GGT-----GTTAATAAGGAATCAACGGGCATTTCCAGATATATTACTCAAAGAACC GGCA  
CAATACGCCTAATCGATTGGAGTTACTAAAATCTGTCCATATTGTTACAAACATACGAT  
TCACGGGGAGATAAAGAAAATGAAAATAAGAGCTTCTGTTTCGTAAAATTTGTGAAAAA  
TGTCGACTAATCCGTCGTCGGGGACGAATTATAGTAATTTGTTCCAACCCAAGACATAA  
ACAAAGACAAGGAATGGTTTCGAGAGAAAATAACAGTATCTACTCGGACACTACAGTG  
GAAGTGTGTTGAATCAGCAGCAGACAGTAAGCGTCTTTTGTATGGGCGCTTTATTCTGT  
CTCCGCTTATGAAAGGTCAAGCAGACACAATAGGCATTGCGATGCGAAGAGCTTTGCT  
TGGAGAAATCGAAGGAACATGTATCACACGCGCAAAATCTGAG-----AAAATCTCACAC  
GAATATGCTACCATAATGGGTATTCAAGAATCAGTACATGAAATTTAATGAATTTGAAA  
GAAATCGTATTGAGAAGTAATCTCTATGGA ACTTGTGAGGCGTCTATTTGTGTCAGGGG  
CCCTGGATATGTA ACTGCTCAAGATATCATCTTACCGCCTTATGTAGAAATCGTCGATAAT  
ACACAGCATATAGCTAGCTTGACGGAACCCATTGAGTTGGTTATTGGATTACAAATAGA  
GAAGAATCGTGGATATCTTATAAAGCGCCAAAT--ACCTTTGATGGAAGTTAT-----CCT  
ATAGATCCTGTATTTCATGCCTGTTGAAATGCGAATCATAGTATTCATTCTTATGAAAATG  
GTAAC-----AAAGAGATACTATTTCTCGAAATATGGACAAATGGAAGTTTAACTCCTAAA  
GAAGCACTTCACGAAGCCTCCCGGAATTTGATTGATTTATTGATTCCCTTTTTACATACC  
AAAGAAGAA-----AATTTAAGTTTAGAGGACAATCAA---CACATAGTTCCCTTTACCCCCT  
TTTACCTTTTATGATAAATTGGCT---AAACTAACAAAAAATAAAAAA---AAAATGGCGTT  
GAAATCGATTTTTATTGACCAATCAGAATTGCCTCCAGAACTATAATTGCCTCAAAAG  
GTCCAACATATATACATTATTGGACCTTTTGAATAACAGTCAAGAAGATCTTATGAAAAT  
GGAACATTTTCGCATAGAAGACGTCAAACAAATTTTAGGGATTCTAGAAAAAAAT-----T  
TCGTAATTGATTTACCGAAAAATAAG-----ATGTCCACAATACCTGGATT  
TAATCAGATACAGTTTGAAGGATTTGTAGGTTTCATTGATCAGGGTTTGGCAGAAGAGC  
TTTCTAAGTTTCCAAAAATTGAAGATACAAATCAAGAAATTGACTTTGAATTCTTTTTG  
GAAAGATATCAATTGGTAGAACCCCTGATAAAGGAAAGAGATGCTGTGTATGAATCACT  
CACATATTCTTCTGAATTATATGTATCCGCGAGACTCATTTGGAAAAACCGTAGGTATAT  
CCAAGAACAACAATTTTGATAGGAAAGATCCCTATAATGACTTCTCTGGGAGCTTTTA  
TAGTAAATGGAATCTATAGAATTGTGATCAATCAAATATTGCAAAGTCCCGGTATTTATT  
ACCAGTCAGAATTAACGATAATGGAATTTCCGGTCTATACCGGCACCATAATATCAGATT  
GGGGAGGAAGATTAGAATTAGAAATTGATAGAAAAGCAAGGATATGGGTTTCGTGTGAG  
TAGGCAACAAAACTATCTATTCTAGTTCTATTATCAGCAATGGGGTTGAATATAAGAGA  
AATCTAGAGAATGTTTGCTATCCTGAACTATTTTTGTCTTTTCTGAATGATAAA-----AA  
AAAAATAGGGTCAAAAGAAAATGCTATTTTGAATTTTATCAACAATTTGCTTGTGTAG

AGGGAGATCCGGTATTTTCTGAATCCTTATCTAAGGATTTACAAAAAAATTCTTTCAA  
CAAAGATGTGAATTGGGAGGGATTGGTCGACGAAATATGAATCGGAGACTAAACCTTG  
ATATACCCCGAACAATACATTTTTGTTACCGCGAGATATATTGGCAGCCGCGGATCGTT  
TGATTGCAATAAAATTTGGAATGGGTACTTGTGACGAT-----ATGAATCATTTGCAAAATA  
AACGTATTCGTTCTGTAGCAGATCTTTTACAAGAGCAATTTGGATTGGCCTTGGTTGTT  
TAGAAAATATGGCTCGAGGAAACATATATGCAGCACTTAAG---CATAACTGGACA---CCA  
ACTCCTCAGAACTTGGTAAATTCAACTCCA-----TTAACAGATACTTATAAAGTTTTT  
TTCCGTTTACACCCATTATCTCAAGTTTTGGATCGAACTAATCCACTGACACAAATAGTT  
CATGGGAGAAAATTGAGTTATTTGGGCCCGGGGGATTGACTGCGCGAACTGCTACTT  
TTCCAATACGAGATATTCATCTAGTCACTATGGGCGTATTTGCCCAATTGACACATCTG  
AAGGAATAAATGTTGGACTTATTGGATCCTTAGCAATTCATGCGAGGATTGGCCGTTGG  
GGG---TCTCTAGAAAGTCCGTTTTAT-----CAAATTTCTGAGAGATCAAAAGGG-----GC  
ACAGATGCTTATTTATCACCGGGTAGAGATGAATACTATATGGTAGCAGCAGGAAATTC  
TTTGGCCTTGAATCAGGGTATTCAGGAAGAACAGGTTGTTCCAGCTCGGTATCGTCAA  
GAATTCCTGACTATTGCATGGGAACAGGTTCACTTCGAAGTATTTTTGCCTTCCAATAT  
TTTTCTATTGGAGCTTCCCTCATTCCTTTTATCGAGCATAATGATGCGAATCGGGCTTTAA  
TGAGTTCTAATATGCAACGCCAAGCAGTCCCTCTTCTCAGTCCGAGAAGTGCATTGTT  
GGAACTGGATTGGAAGGCCAAGCGGCTCTAGATTCAGGGGCTCTTGCTATAGCCGAAC  
ACGAAGGAAAGATTTTTTATAACCGATACTGACAAGATCCTTTTATCAGGTAATGGGGAT  
ACTCTAAGGATTCCATTAGTTATGTATCAACGTTCCAACAAAAATACTTGTATGCATCAA  
AAACCCAGGTTCCGGCGGGTAAATGCATTAATAAAGGGACAAATTTTAGCGTATGGTG  
CTGCTACAGTTGGTGGCGAACTCGCTTTGGGGAAAAACGTATTAGTAGCTTATATGCCA  
TGGGAAGGTTACAATTTGAAGATGCAGTACTCATTAGCGAGCGCTTAGTATATGAAGA  
TATTTATACTTCTTTTACATACGTAAATATGAAATTCAGATTAAC-----CAAGGC---CC  
CGAAAGGGTCACTAATGAAATACCGCATTTAGAAGTCCATTACTCCGAAATTTAGACA  
AAAATGGAATTGTAATGCTGGGATCTTGGGTGGAAACAGGTGATATTTTAGTAGGTA  
TTAACGCCCAAATGGTGAAAGAA---TCATCGTATGCCCGGAAGATAGACTGTTACGA  
ACCATACTTGGCATGCGGGTATATACTTCAAAGAACTTGTCTAAAACCTATAGG  
CGGTAGGGGTCGGGTATTGATGTGAGATGGGTCCAGAGTTCTAAGACAGATGAGACA  
GAGAAAACAGAAAGTATTCGTGTATATATTTTACAGAAACGTGAAATAAAAGTAGGTGA  
TAAAGTAGCTGGAAGACATGGAATAAGGGTATCATTTCAAAAATTTTACCTAGACAAG  
ATATGCCTTATTTGCAAGATGGAAGACCTGTTGATATGGTCTTCAATCCATTAGGAGTAC  
CTTCGCGAATGAATGTAGGACAAATATTTGAATCTTCGCTCGGGTTAGCGGGGGATTG  
CTAGACAGACATTATCGAATAGCGCCTTTTGTGATGAGAGATATGAACAAGAAGCTTCGAG  
AAAACCTGGTGTCTTCTGAGTTATATGAAGCCAGTAAGCAAACAGCGAATCCATGGATAT  
TTGAACCCGAGTCTCCAGGAAAAAGCAGAATATTTGATGGAAGAACGGGGGATCCTTT  
TGAACAACCTGTTATAATAGGAAAGCCTTATATCTTGAAATTAATTCATCAAGTTGATGA  
TAAAATCCATGGGCGTTCCAGCGGGCGTTATTCACGTCTTACACAACAACCCCTTAAAG  
GAAGGGCCAAAAAAGGGGGCAGCGGGTAGGAGAAATGGAGGTTTGGGCTTTAGAA  
GGTTTTGGCGTTGCTTATATTTTACAAGAAATGCTTACTTATAAATCTGATCATATTAGAG  
CTCGCCAGGAAGTACTTGGTACTATAATCTTTGGAGGAAGAATACCGACTCCTGAGGAT  
GCTCCAGAATCTTTTCGGTTGTTTCGTTTCGAGAACTACGATCTTTAGCTCTGGAAGTAA  
TCATTTTCTTGATCTGAGAAGACTTTCCAGCTTAATAGGAAGGAAGCT-----  
ATGATCGATCGATATACACATCAACAACCTCCGAATTGGATTAGTTTCTCCTCAACAAATA

AGTACTTGGTCCAAAAAATCCTGCCTAATGGCGAGATTGTTGGAGAGGTGACAAAAC  
CTTATACCTTTCATTACAAAACCAATAAACCAGAAAAAGATGGATTATTTTGTGAAAGA  
ATTTTGGGCCTATCAAAGTGAATTTGTGCTTGTGGAAATTATCGAGTAATCGGAGA  
TGAAAAGGAAGACCCGCAATTTGTGAACAATGCGGAGTCGAGTTTGTGATTCTCGG  
ATACGAAGATATCAAATGGGCTACATCAAACCTCGCATACCCCGTAATGCATGTGTGGTAT  
TTGAAACGTCTTCTAGTTATATTGTGAATCTTTTAGATAAACCTCTTAACGAATTAGAA  
GACCTAGTATACTGCGGT-----TTTTATTTGCTAGGCC---ATAGATAAAAAACCCACTT  
TTTTACGATTACGGGGTTTATTGGAATATGAAATCAACCCTGGAAATACAGGATCCCAA  
TTTTTTTTACTACCCGGAGCTTCGATACATTTGAAATCGAGAGATGTCTACCCGGAGGA  
GGTTCTATCAGACAACAATTAGCCAATCTAGATTTACGAATGATTATAGATTATTCATTGG  
TAGAATGGAAAGAATTGGAGGAAGAG---GAATCCACAGGGAATGAATGGGAAGATCG  
AAAAGTTGGAAGAAGAAAAGATTTTTGCTTAGACGCATGGAATTGGCTAAGCATTTTA  
TTCGAACAAATATAGAACCAAAATGGATGGTTTTGCGTCTATTACCAGTTCCTCCTCTG  
AGTTGAGACCAATCTATCATATAGATGAGGATAAACTAGTGACCTCGGATATTAATGAAA  
TCTATAGAAGAATTATCTATCGGAATAATACTCTTACAGATCTATTAACAACAAGTATAGC  
TACACCAGAAGAATTAATAATATCTCAGGAAAAATTGCTACAAGAAGCCGTGGATGCA  
CTTCTTGATAATGGAATCTGCGGACAACCAATGAGGGATGATCATAATAGAATTTACAA  
GTCGCTTTCAGATGTAATTGAAGGCAAAGAAGGAAGAGTTCGCGAGACTCTGCTTGGT  
AAACGAGTCGATTATTCAGGGCGGTGAGTATTGTCGTGGGCCCTTCACTTTCATTACA  
TCGATGTGGATTGCCTCGCGAAATTGCAATAGAACTTTTCCAGGCATTTGTAATTCGTG  
ACCTAATTAGAAAACATCTTGCTTCGAACATAGGAGTTGCTAAGAGTCAAATTCGGAA  
AAAAAACCTATTGTATGGGAAATACTTCAAGAAATTCTGGATGACCATCCTGTATTGC  
TGAATAGAGCGCCTACTCTGCATAGATTAGGTATACAGGCATTCCTCCCCGTTTTAGTGG  
AAGGGCGTGCTATTTGTTACATCCATTAGTTTGTAAAGGGCTTCAATGCAGACTTTGAC  
GGGGATCAAATGGCTGTTTCATGTGCCTTTATCTTTAGAGGCGCAAGCAGAGGCACGTTT  
ACTTATGTTTTCTCATATGAATCTTTTGTCTCCAATTTGGAGATCCCATTTCTGCACCA  
ACTCAAGATATGCTTAGTGGACTCTATGTCTTAACGAGTGGAAATCGTCGGGGTATTG  
TGAAATAGGTATAATCCATGTAATCGTAGAAAC-----TATCAAATGAAGAT-----AA  
TAACTATAAGTATACAAAAAAGAACCCTTTTTTTGTAAATGCCTATGATGCAATTGG  
AGCTTATCGGCAAAAACGAATCAATTTAGGTAGTCCTTTGTGGCTGCGGTGGCGACTA  
GATCAACGT---GTTATTGCTGCA-----AGAGAAGCTCCTATCGAAATTCATGAACTT  
TGGGGACCTATTATGAGATTTATGGACACTATCTAATAGTAAGAAGTATAAAAAAAGAA  
ATCTTTATATATATATTCGAACCACTCTTGGTCATATTTCTCTTTATCGAGAAATAGAAG  
AAGCCATACAGGGGTTTTGGCAGTATAATTCTATGCTACCAGCGCGAATTCGAGTCTCA  
CCGGGTATGGAGTACTGATGGCAGAACGGCCCACTCAGGTCTTTCACAATAAAGTGA  
TAGACGGAACCTGCCATGAAACGACTTATTAGTTCGATTTATTGATCACTATGGAATAGGAT  
ATACATCACATATCCTGGATCAAGTAAAGACTCTGGGTTTCCGACAAGCGACCGCCGCA  
TCCATTTCAATTAGGAATTGATGATCTTTTAAACAATACCTTCTAAAAGATGGCTCGTTCAA  
GACGCTGAACAACAAAGTGTTCTTTTGGAAAAACACCATCATTATGGGAATGTACACG  
CGGTAGAAAAATTACGTCAATCAATCGAGATATGGTATGCCACAAGTGAATATTTGCGA  
CAAGAAATGACTCCTAATTTTCGGATGACCGATCCTTTTAAATCCAGTCCATATAATGTCT  
TTTTCGGGAGCCAGAGGAAATGCGTCTCAGGTACATCAATTAGTAGGTATGAGAGGATT  
AATGTCCGATCCCCAAGGACAAATGATTGATTTACCCATTCAAAGCAATTTACGCGAAG  
GACTCTCTTAAACAGAATATATTATTCTTGCTACGGAGCCCGTAAAGGAGTTGTGGATA

CCGCTATCCGAACATCAGATGCAGGATATCTCACGCGCAGACTTGTTGAAGTAGTGCAA  
CACATTGTTGTACGTCTGAACAGATTGTGGCACCGTTCGCGGTATTTCTGTAAGTCCTCG  
AAATGGAATGATGGCG--GACAGGATTTTATCCAAACATTAATTGGCCGTGTATTAGCA  
GATGATATATATATAGGTTTCGCGATGCATTGCTACTAGAAATCAAGATATTGGGGTTGGA  
CTTGTC AATAGATT CATAACT-----TTTAGAGCACAACCAATCTCTATT CGAACC  
CCCTTTACTTGTAGGAGTACATCTTGGATTTGTCAATTATGTTATGGCCGGAGTCCAGCT  
CATGACGACCTGGTCTGAATTGGGAGAAGCTGTAGGTATTATTGCAGGTCAATCTATTGG  
AGAACC GGGTACTCAATTAACATTAAGA ACTTTTCATACTGGCCGGAGTATTCACAGGGG  
GTACTGCAGAACATGTGCGAGCCCCTTTAATGGAAAAATAAAATTC AATGAGGATTTG  
GTTTCATCCGACACGTACACGT CATGGACATCCTGCTTTTCTATGTTCTAGAGACTTATAT  
GTA ACTATTGAGAGTGAAGATATTATACACAATGTGTGTATTCCGCCCAA AAGTTTTCTT  
TTAGTTCAAAACGATCAATATGTAGAATCAGAACAAGTCATTGCTGAGATTCGCGCGAG  
AACATCCACT--TTGAATTTGAAAGAGAAGGTT CGAAAACATATTTATTCTGACTCAGA  
GGGCGAA---ATGCACTGGAATACCGATGTGTACCATGCACCTGAATTTACATATGGTAAT  
ATTCATCTCTTACCAAAAACAAGTCATTTATGGATATTATTAGGGGAGCCCTGGAGA-----  
TCTAGTCTAGGCCCTGTTCGATCCACAAGGATCAAGATCAAATGAACGCTTAT-----TC  
TCTTTCTGTTAAGCGAAGATATATTTCTAACCCCTCA-----GTA ACTAATAATCAA---GTG  
AGACACAAATTTTTTAGTTTCGTATTTTTCTGGTAAAAATGGAGATAGGATTCCTGATTAT-  
--TCAGAACTTAATCGAATGACATG TACTGGTCGTTGTAATCTCAGATATCCG---GGCATT  
CTCGACGGGAATTCT-----GATTTATTGGCAAAGAGGCGAAGAAATAGAGTCATCATCCC  
ACTCGACTCGATTCAAGAAGGCGAGAACCAACTAATACCTTCTTCAGGTATCTCAATTG  
AAATCCCC-----AGAAATGGTATTCTCCGTAGAAATAGTATTCTTGCTTATTTTCGACGATC  
CTCGATATATAAGAAAGAGCTCGGGACTTACTAAATATGAGACTAGAGAGCTGAATTCA  
ATCGTCAACGAAGAGAAT-----TTGTTGAGTATCGAGGA---GTCAAGGTATTTTGGCCA  
AAATATAAGGAAGTCAATCCATTTTTTTTTTATTCCCGTGGAAGTCCACATTTTGGCCGAA  
TCTTCTTCCATAATGGTACGGCACAATAGTATTATTGGGGTAGATACACAAATCACTTTA  
AATAGAAGAAGTCGGGTAGGTGGATTGGTCCGAGTGAAGAAAAAAGCAGAAAAAATT  
AAACTGATAATCTTTTCTGGAGATATCCATTTTCTGGAAAGACAAATAAGGCATTCCG  
A-----TTGATACCACCGGGAGGG-----GGAAAACAAAATTCCAAAGAATACAAAAA  
A-----TTGAAAAATTGGCTCTATATCCAACGA-----ATGAAACTTTCCAGGTATGAAAAA  
AGTATTTTGT TTTGGTTCAACCCGTAGTCCCATATAAAAAAACGGATGGTATAAATTTAG  
GA---CTTTTCCAGCGGATCTCTTGCAGGAAAGTGATAATCTACA ACTTCGAGTTGTCA  
ATTATATCCTTTATTACGACCCA-----ATTC TTGAAATTTGGGACACAAGTATTCAATTAGT  
TCGGACTTGTTTAGTGTGTAATTGGGACCAAGACAAAAAG-----ATCGAAAAG  
GCCTGTGCTTCCTTTGTTGAAATAAGGACAAATGGTTTGATTAGAGATTTTCTAAGAAT  
CGACTTAGCGAAGTCACCTATTT CATATACCGGAAAAAGGAACGATCTGCCGGGTTC A  
GGATTGATCTCTGAG---AATGGATCAGATCGCGCTAATGGCAATCCGTTTTCTTCCATTT  
ATTCCTATTCC-----AAGGCAACGATTCAAGAATCCCTTAATCCAAACCAAGGA ACTAT  
TCATACATTGTTGAATCGA-----AATAAGGAATCTCAATCTTTGATAATTTTGT CATCAT  
CCAATTGTTCTCGAATAGGCCCA-----TTCAACGATGTAAAATATCCCAATGTG-----AT  
AAAAGACTCA---CCCCTAATTC AATTAGGAATTCGTTGGGCCCTTAGGAACA-----GG  
CTTCCAATTTATCATTTCGATTTA-----TTTTCCATTTA-----ATAACCCATAATCAGATCT  
TG---GTAACGAACTATTTGCAACTTGACAATTTAAAA-----CAGATTTTCAAATACTT  
AAA-----TATTATTTACTGGATGAAAAT-----GGTAAAATTTATAATCCCTATT CATGCAG

TAACATCATTTTGAATCCATTCAAATTGAATTGGTATTTTCTCCATTACAATTATTGTGAA  
GAGACATCT--ACAATCGTTAGTCTTGGGCAGTTTCTTTGTGAAAATGTATGTATAGCCA  
AAAAAGGACCGCAT--TTAAA-----TCAGGTCAAGTTCTAATTCCTCAA---GTTGACTCT  
GTGGTAATACGATCAGCTAAGCCTTATTTGGCTACTCCAGGAGCAACTGTTTCATGGACA  
TTACGGGGAAATCCTTTACGAAGGAGATACATTAGTTACATTTATATATGAAAAATCAAG  
ATCTGGTGATATAACGCAAGGTCTTCCAAAAGTGGAACAGGTGTTAGAAGTGC GTTCG  
ATTGATTCAATATCGATGAATCTTGAAGAGGATTGAGGGTTGGAACAAATGTATAAC  
AAGAATTCCTGGAATTCCTTGGGCATTCTTTATTGGTGCTAAGCTAACTATAGTGCAAAG  
TCGTATCTCTTTGGTTAATAAGGTCCAAAAGGTTTATCGATCCCAGGGGGTGCAGATAC  
ATAATAGGCATATAGAAATTATTGTACGTCAAATAACATCAAAGGTGTTGGTTTCAGAA--  
-----GATGAAATGTCTAATGTTTTTTTCGCCCGGAGAACTAATTGGATTGTTGCGAGCGG  
AACGAATGGGGCGCGCTTTGGAAGAAGCGATCTGTTACCAAGCCGTCTTATTGGGAAT  
AACAGAGCATCCATGAATACTCAAAGTTTCATATCCGAAGCGAGTTTTCAAGAAACC  
GCTCGAGTTTTAGCAAAAAGCAGCTCTCCTAGGGCGTATCGATTGGTTGAAAGGCCTAA  
AAGAAAACGTTGTTCTGGGGGGGATGATACCTGTTGGTAGCGGCTTCAAACACCT--T  
CAAGCGAACCTAACACATTCCTAACAACATTGCC-----TTTGAAC TCAAAAAAAGAA  
TCTATTAGAGGGGGAAATGAAA-----GATATTTTGTCTACCATAGAAA-----  
-----ATGACAAGAAGATATTGGAACATT  
AATTTAGAAGAGATGATGGAAGCAGGAGTTCATTTTGGCCATGGTACTAGGAAATGGA  
ATCCTAAAATGGCACCTTATATCTCTGCAAAACGTAAAGGTATTCATATTACAAATCTTA  
CTAGAAGTCTCGTTTTTTATCAGAAGCTTGTGATTTGGTTTTTTGATGCAGCAAGTAGG  
GGAAAACAATTCTTAATTGTTGGCACTAAAATAAAGAAGCTGATTCAGTAGCATGGG  
CTGCAATAAGGGCTCGGTGTCATTATGTTAATAAAAAATGGCTCGGTGGTATGTTAACG  
AATTGGTCCACTACAGAAACGAGACTTCATAAGTTTAGAGACTTGAGAAGTGAACAAA  
AAACAGGGGGGCTCAGCCGTCTTCCGAAAAGAGATGCGGCTATGTTGAAAAGACAAT  
TATCTCATTTGCAAACATATCTGGGCGGGATTAAATATATGACAGGGTTACCCGATATTGT  
AATCATCGTTGATCAGCACGAAGAATATACGGCCCTTCAAGAATGTATCACATTGGGAA  
TTCCAACAATTTGTTAATCGATACAAATTGTGACCCCGATCTCGCAGATATTTGATT  
CAGCGAATGATGACGCTATATCTTCAATCCGATTAATTCTTAACAAATTAGTATTTGCAAT  
TTGTGAGGGCCGTTCT--GGCTATATAAGAAATCCGATGGGACAAAAATAAATCCAATT  
GGTTTCAGACTTGGTACAACCAAGGTCATCATTCCCTTTGGTTTCGCACAACCAAAAA  
ATTATTCTGAGGGTCTGCAAGAAGATCAAAAAATAAGAAATTATATAAAGAATTATGTA  
CAAAAAATATGAAAACATCTTCTGGC--GTCGAGGGAATTGCACGTATAGAGATTCAA  
AAAAGAATCGACCTGATCCAAATCATAATCTATATGGGATTTCCAAAATATTAATTGAA  
AGTCGACCCCGAGGAATC-----GAAGAATTACAGATGAATTTACAAAAAGAATTTA  
ATTCTGTAAATCGGAACTTAACATTGCTATCACACGAATTGAAAAGCCTTATGGAAAC  
CCTAATATTCTTGCAGAATTTATAGCCGGACAATTAATAAATAAGAGTTTCTTTTCGCAA  
GCAATGAAAAGGCTATAGAATTAAGTGAACAAGCAGATACAAAAGGAATTCAAGTGC  
AAATTGCAGGACGTATCGACGAAAAGAAATTGCGCGTGTGAAATGGATCAGAGAGG  
GTAGGGTTCCACTACAAACCATTCGCGCTAAAATTGATTATTGTTCCCTATACAGTTTCGAA  
CAATCTATGGGGTATTAGGCATCAAATTTGGATCTTTATAGAAGGGGAAATGTCGCGTT  
ACCGAGGTCTCGTTTTCAAAAAATACGTCGCCTGGGGGCTTTACCAGGGCTAACTAA  
TAAAAGGCCAGAGCTGGAAGTGATCTTAGAAACCAATCGCGTTCCGGGAAA---AAAT  
CCAATATCGTATTTCGCTAGAAGAAAAACAAAAATTGCGTTTTTCATTATGGTCTTACA

GAACGACAATTACTTAAATACGTTTCGTATCGCCGGAAAGGCAAAGGGGTCAACAGGTC  
AGGTTTTACTACAATTACTTGAAATGCGCCTGGATAACATCCTTTTTTCGGTTGGGTATGG  
CTCCGACTATTCGGGAGCTCGCCAATTAGTTAACCATAGACATATTTTAGTCAATGGTC  
GTATAGTAGATATACCAAGTTATCGCTGCAAACCCGAGATACTATTGCGGCGAGGGAT  
GAACAAAAATCTAGAGCTCTAATTCAAAATTCTCTCGATTTCATCCCCTCCT--GAGGAAT  
TGCCAAACCATTTGACTCTTCAACCATTCCAA-----TATAAAGGATTAGTCAATCAAATA  
ATAGATAGTAAATGGGTTCGGCTTGAAAATAAATGAATTGCTAGTGGTAGAATATTATTCT  
CGTCAGACTATGTCACGTCGAGGTACTGCAGAAGAAAAAACTGCAAAAATCCGATCCAA  
TTTATCGTAATCGATTAGTTAACATGTTGGTTAACCGTATTCTGAAACACGGAAAAAAAT  
CATTGGCTTATCAAATTATCTATCGAGCCGTGAAAAAGATTCAACAAAAGACAGAAAC  
AAATCCACTATCTGTTTTACGTCAAGCAATACATGGAGTCACTCCGGGTATAGCAGTAA  
AAGCAAGACGTGTAGGTGGATCGACTCATCAAGTTCCCATTGAAATAGGATCCACACA  
AGGAAAAGCACTTGCCATTCGTTGGTTATTAGCGGCATCCCGAAAACGTCCGGGTGCGA  
AATATGGCTTTCAAATTAAGTTCCGAATTAGTGGATGCTGCCAAAGGGAGTGGCGATGC  
CATA CGCAAAGGGAAGAGACTCATAGAATGGCAGAGGCAAATAGAGCTTTTGCACAT  
TTTTCGTATGAGTAGTGATACTATTGCTGACATAATAACCTCTATACGAAATGCCGATATGT  
ATAGAAAAGCGTGGTTCGAGTAGCATCTACTAATATCAGCCAAAGTATTGTTAAAATA  
CTTTTACGAGAGGGTTTTATCGAAAACGTGAGAAAACATCGAGAAAACAACAAAGATT  
TTTTGGTTTTAACCTACGACATAGAAGG-----AATAGGAAAAGGCCTTAT-----CGAA  
ATCTTTTAAATTTAAAACGGATCAGTCGGCCGGGTCTACGAATCTATTCTAACTATCAA  
GAATTCCTAGAATTTTAGGCGGGATGGGAGTTGTAATCTTTCTACCTCTCGGGGTATAA  
TGACAGACCGGGAGGCTCGACTAGAAAGAATAGGCGGAGAAATTTTGTGTTATATATG  
GATGGCAAAGCTATACCGAAAAGGGTTCACGT-----GGACGTATTAGTTCGCGTAAG  
AGTATACGTAATAACCAAAGGGGTTATTCATATTCAAGCAAGTTTCAATAATACCATT  
GTGACTGTTACAGATGTACGAGGGCGAGTGGTTTCTTGGTCCTCTGCCGGTACTTGTGG  
CTTCCAAGGTACAAGAAGAGGGACGCCGTTTGCTGCTCAAACCGCAGCGGCAAATGC  
TATTCGTGCAGTAGTAGATCAAGGTATGCAACGAGCAGAAGTCATGATTAAGGTCCC  
GTCTTGGAAGAGACGCAGCATTACGAGCTATTCGCAGAAGTGGTATACTATTAACTTTC  
GTACGGGATGTAACCCCTATGCCACATAATGGCTGTAGACCCCGAAAAAAGACGTG  
TGCACCCTACATGTTCCCTCGACGCTGAGGGCATCCCCGAAGCGCGGGGGATTTTGTGA  
CATTTCTAATTGGCTGTCT--TGTATTTCTAATAAG---TTGTTTAATCGTTGGCATACTATC  
ACCCCAA AAAAACC AA ACTCTGCCTTACGTAAAGTTGCCAGAGTACGATTAACCTCTG  
GATTTGAAATCACTGCTTATATACCCGGTATTGGCCATAATTCACAAGAACATTCTGTAG  
TCTTAGTAAGAGGGGGGAGGGTTAAGGATTTACCCGGTGTGAGATATCACATTGTTCGA  
GGAACCCTAGATGCTGTCGGAGTAAAGGATCGTCAACAAGGGCGTTCT-----AGTGCGT  
TG-----ATGGCAAAAAAAGTTTGATTGAGAGGGAAAAGAAGAGGCCAAAAATTGGA  
ACAGAAATATCATTTGATTTCGTCGATCCTCAAAGAAGAAATAAGC-----AAAGTTCG  
ATCATTGAGTGACAAATGGGAAATTTATGGAAAGTTACAATCCCCACCGCGGAATAGT  
CACCTACGCGGCTTCATCGACGTTGTTTTTCAACTGGAAGGCCAAGAGCTAACTACCG  
AGACTTTGGACTATCCGGACACATACTTCGTGAAATGGTTCATGCATGTTTGTGCCAG  
GGGCGACAAGATCGAGTTGGATGGTAAAAAATTCATTTATTTCCATTATTTTGAAAGAA  
CAAGAAGAAAACAAAGAAAACAGAGGATCTGTTGAATTTCAAGTAGTAAGTTTCACC  
AATAAGATACGGAGACTTACTTCACATTTGGAATTGCACAAAAAAGACTATTTATCTCA  
GAGAGGTCTGCGGAAAATTCTGGGAAAACGTCAACGGTTGCTGGCTTATTTGTCAAAA

AAAAATAGAGTGC GTTATAAAGAATTAATAGGGCAGTTGGATATTCGAGAAAGAAAA  
CTCGT-----ATGGTAAAAC TTCGTTTAAAACGATGTGGTAGAAAGCAA-----CGAATC  
GTTGCAATTGATGTTTCGATCTCGAAGAGAAGGAAGAGATCTTCGGAAAGTGGGTTTTT  
ATGATCCTATCAAGAATCAAAC TTAATTTAAACGTTCCCGCGATTCTCTATTTCTTGAAA  
AGGGCGCTCAGCCTACAGGAACTGTT CAGGATATTTTAAAAAAGGCAGAGGTTTTTAA  
GAACTTGGCCCTAATCAAACGAAAT TCAAT---ATGGATAAATCCAAGCGAACTTTTCTT  
AATCCAAGCGATCTTTTCGTAAGCGTTTGCCCCGATCCAATCGGGGGATCGAATTGA  
TTATAAAAACATGAGTTTAAATTAGTCGATTTATTAGTGAACAGGGAAAAATATTATCTAG  
ACGAGTAAATAGATTGACCTTGAAACAACAACGATTAATTACTATTGCTATAAAACAAG  
CTCGTATTTTATCTTTGTTACCTTTTCTTAATAATGAGAAA-----CAATTTGAAAGAACCG  
AGTCGACCACTAGA ACTCCTAGTCTTAGAGCCAGAAAAAGAGTGACACGTTCACTCA  
AAAAAATCCTTTTGTAGCGAATCATT TATTAAAAAAAATAAATAAGCTTAACACAAAA  
GAAGAAAAAGAAATCATAATAACATGGTCCC GGGCATCTACCATTATACCCATAATGGT  
CGGCCATACTATTGCTATCCATAATGGAAAGGAACATTTACCTATTTATATAACAGATCGT  
ATGGTAGGACACAAATTGGGAGAATTGCGCCTACTTTAAATTTCCGAGGACATGCAA  
AAAGCGATAATAGATCTCGTCGTATGATTTTGAAATCTTTTCTACTAGGTAATCTAGTATC  
CTTATGCATGAAGATAATCAATTCGGTCGTTGTGGTTCGGACTCTATTATGGATTTCTGAC  
CACATTCTCCATAGGACCCCTCCTATCTCTTCTTCTCCGAGCTCACGTTATGGAAGAAG  
GAGAAGAAGGAGCCGAGAAGAAGGTATCAGCAACA ACTGGTTTTATTACGGGACAGC  
TCATAATGTT CATATCGATCTATTATGCGCCTCTGCATCTAGCACTGGGTAGACCTCATA  
AATAACTGTCCTAGCTCTACCGTATCTTTTGTTTCATTTCTTCTGCAATAGTAAGAAAA  
CTTCTTGATTATGGATCTACTACCAGAAATTCAATGCGTAATCTCAGCATTCAATGTGT  
ATTCCTGAATAATCTCATT TTTTCAATTATTGAATCATTTCATTTTACCAAGTTCAATGTTA  
GCGAGATTAGTCAACATTTTATGTTTCGATGCAACAGCAAGATGCTATTTGTAACAAGT  
AGTTTTGTTGGTTGGATAATTGGTCACATTTTATTCATGAAATGGGTTGGATTGCTATTA  
GTTTGGATACGGCAAATCGATCTATTCGG-----ATTCAAGCTAATAAATACCTTGTGTTA  
GAATTGAAAAATTCTATGTCTGGTATCTTTAGTATTTTCTTATTAGTTACCTGTGTCCACT  
ATTTAGGCAGAATACCGTCACCCATTTT TAGTACTAAACTGAACATGAATGAAGAAGAA  
AACCTATTCTGACCTTTTTTTTTCGATTATAACCGATGGAATCGTCCATTACGATACATAA  
GAAAGAAAAAATTGAAAGGCTCTGTAAAGAAAAGAGCCTCACAATATTTTTTTTATAC  
ATGCCAAAGTGATGGAAAACAAAGAATATCTTTTACATATCCTCCGAGTTTGTCAACTT  
TTGGAGAAATGATAGCAAGAAGGATATCGTTGTCTACATTAGAAAAAATCTCCCCTGAT  
GAACTATACACCGAGTGGGTTTTTACCAATAAAGAGAAAAAGAACA ACTTAAATAATG  
AATTTATAAATAGAATTGAAGCCTTAGAGACAGTATTTCTTTCTCTAAATATACTTGAAG  
CAAAGACTAGATTGTCTAATACTAAAAACA AAAACAATTGCTTAGTTAAAATGTATGAT  
CCTTTTTTGAAT---ATGTATCGCGGAAGAATGAAGAAATTGTTTTCTTCTACAGAAACAG  
CTGAACTAAATAAAATTCATGATATCCTTTCTCCAGAAAATGAACAGAAAAACCCTAAA  
CGTGAA-----ATAAACGAAATAGGTAAAAAACCCCTCGATGGTCATACAAATTAATC  
GAGTTGGAACAATATTTTAAAAAACAGCTTCGAACAAGAAAATTTAAACATATAGCTTT  
TTAACGCGTGGTTTTATAAGTTATTTGGAAGAACCGGATTTTCGTCGAGCCGTAATCA  
AAGATTCTATGCGTGTTCAAAGGCGTAAATGGTTATTTGGGGACCGTCTCAAGGAAAT  
CCCATTCCCCCTTTTTTTGGAAAAA---ATGGAA---GATTTTCCTTTTCT-----ATATC  
CGACCTAATGAAACTTTTTTTTAAAT---ATAAAAAAAAATAACCAGGAGGAC-----TG  
GGAGAACATTCCATATGCACAAAAATCAAGAAGTGT TTTGTTACTAGCTCAATCAATTT



TTAGAAGATATATTA AATTACCCTTATTGATAATAGCTAAGAATATTGGTCGTATTTTATTA  
CGACAATCTCCGGAATGGTACGAGGATTTTCAAGATTGGAATAGAGAAATTTATCTAAA  
GTGCAACTATAACGGTCTTCAATTCTCCAAAACGGAATTCCTAAAATTGGTTAATCG  
AAGGTTTTTCAGATAAAAATCCTATATCCTTTTCATTTGAAACCTTGGCACAGATCTAAGC  
ACAAGATGATTTTGATTCTTGTTTTTTAACAGTTTTGGGAATGGAAACGGAATATCCTT  
TTGGTCTCCGCGAAAAACACCTTCTTTTTTTGAACCCATTTTTAAAGATATAGAC-----  
-----TATAAAGTCGAAATCAGAAATTTTAGAATTCGAAGAG  
CTTTAAAAAAAATAAAAAAAAAGAAGCAAAGTCTTTTTCTTTGTAAAACAAATACT  
AAAAGAACTTTTTAAAAGGAAAGGATTCTATAATCAGCAATAAGATAATTCATGAATCAC  
TTAGTCAAATCGACCTAAAGGTTTGACAAATTATTCACAGACAGAAGAAGAAATGAA  
ACATAGAATTGATAGAAGAAACACAATCAGAAATCAAATAGAAATAATGAAAAAAAT  
AAAAAA-----AAAAAATAAATAAAAAGAATAATGGAGAAGCACTCCCAACAATTT  
GGAAAATATTA AAA-----AGAAATAATATTGAATTAATAGTTAAAATTTTCATTG  
AAAAAATATACATAGATATCTTTCTATGTATCATTAATATGCGCAGAATCGCTCTACA  
ACTTTTT-----TTTGAGTTATCTTACTTGTACAAAAATATGTATTTTTAAAATTATCACA  
AACCCAGGTTATTCACTTCAATAAGTTAAGATCTATTCTTCAGTACCCGCTTTTTTTTCTT  
AAGAATGAAATAAAGGATTTTTTTAGACAAGGAATCTTTGATTACGAAGTAAGACATAA  
GAAACTTCCAAATTCTGGAATGAATCCATGGAAAACTGGTTAAGAGGT---TATCAATA  
CGATTTATCTCAGATTACATGGTCTAGATTAGTCCCACAAAAATGGCGAAATGGAAAA  
ATCAATGCCAGCCGTCTCAAATAAGAATAAATGGTATTCCTATGAAAAAGACCAA-----  
TTATTTGATTACAAAAAAA---AATTTTCAAAAAA ACTATAGATATGATCGTTTATCATA  
TAAATATATTCATAGTGATATTATATATACAGATAGAAAATATTTGGGTTGGAAATTGAAT--  
-----CCTTTTGATTGGATGGGAATGAATGAAAAATTCTTAATCTTATTTTTATTCCA  
GAGTTTTTTGATACTTTATCATAAATAAAGAGAAACCTTGGTTTATTCCAAGCAACTTA  
CTTCTTTTTAAT-----CTACAAATATTAATCAAAGGAGATTTTCCTTTGCAAT  
TAAGATGGACTGGACGTTTGAATCAAAAAATGATGAATAATATCCAGATATATGGTCTCC  
TGTTAGCCTAATAAATGTAAGAAAAATTTCTATATCCTATATTCAAAGGAAAGAAATGA  
ATTTGGATATAATGAGGAGACGT-----TTAAATCTTACACAATTAACAAAAGGAATATT  
AATTATGGAACCCGCCGTCTATCTGTAAAAAATGACGGACAGTTTTTTATGTATCAAAT  
CATAGGTATTTTCGTTGGTTCATAAAAGTAAGCACAGAATTCTGATTTGCTTGTTCTCGA  
AAAAATTTTATCGTCTAGACGTCGTAGAGAATTGAGAATTCTAATTTCTTCGTGTTTTT  
TTGGCCTAATTATCGATTAGAGGATTTAGCTTGTATGAATCGCTATTGGTTTGACACCAAT  
AATGGGAGCCGCTTTAGTATGTTAAGGATATATATGTATCCCATGACAGGACATGAATTC  
AAGTCTTGATTTTAGAATTGAGAGAGATATTGAGAGAGATCAAGAATTCTCACTATTT  
CTTAGATTCCTGGACCCAATTC AATTCAGTGGGATCTTTCATTACATTTTTTTCCACCA  
AGAACGTTTTATAAACTTTTTGACTCCCGAATTTGGAGTATCCTACTTTCA---CACAAT  
TCA-----CAGGGTTCAACAAGCAATCGATATTTACG-----ATCAAGGGT---GTAATACT  
CTTTGGAGTAGCGGTCTTATATATCGT-----ATTAACAATCGAAATATGGTCGAAAG  
AAAAAATCTCTATTTGATAGGGCTTCTTCCT-----ATACCTATGAATTCCATTGGAC  
CCAGAAATGATACATTGGAAGAATCCGTT---GGGTCTTCCAATATCAATAGGTTGATTGT  
TTCG---CTCCTGTATCTTCCAAAAGGAAAAAAGATCTATGAGAGTTCTTTCTGAATCC  
GAAAGAGAGTACTTGGGTTCTCCCAATAACT-----AAAAGTGTAGCATGCCTGAA  
TCTAACTGGGGTTCGCGGTGGTGGAGGGACTGGATCGGAAAAAAGAGC-----GATTCT  
AGTTGTAAGATATCTAAT-----GAAACCGTCTGCTGGAATTGAGATATTATCAAAGAGA

AAGATCTCAA---TATCTGGAGTTTGTCTTTGTATATTATAGGGAT-----GATCCGATCCGC  
AAGGACCATGGTTGGGAATTTTTGATCGTCTTTCTCTGAGGAAGAGGCAAAATAGAA  
TCAACTTG-----AATTCGGGACCACTATTCGAAATCTTAGTGAAACACTGGATTTGTTAT  
CTAATGTCTGCTTTTCGTGAAAAAATACCAATTGAAGTGGAGGGT---TTTTTCAAACAA  
CAAGGG---GCTGGGTCAACTATTCAATCAAATGATATTGAGCATGTTTCCCAT-----CTCT  
TCTCGAGAAACAAG-----

-----TCCCGGCTATTCACG---GAACGTGAGAAGCAGATGATTAATCATATGCT  
TCCGGAAGAAATCGAAGAATTTCTT-----GGGAATCCTACAAGATCCGTTCGTTCTTTTT  
TCTCTGACAGATGG-----TCAGAACTTCAT--CTGGGTTCGAATCCTACTGAGAGGTCCA  
CTAGAGATCAG-----AAATTGTTGAAGAAACAACAAGATCTTTCT--TTTCTC-----A  
GGCGATCGGAA-----AAGAAAGAAATGGTGAATCTATTCAAGATAATTACGTATTTA  
CAAAAT-----ACCGTCTCAATTCATCCTATTTTCATTAGATTTCGGGATGTGATATGGTTCCG-  
--AAGGATGAACCGGAT--ATGGACAGTTCCAACAAGATTTTCATTCTTGAACAAAAATCC  
ATTTTTTGATTTA-----TTTCATCTATTCCATGACCGGAACAGGGGAGGATACACGTTA----  
--CACCACGATTTTGAATCAGAA-----GATAGATTTCAAGAAATGGCAGATTTATTCACCTC  
TATCAATAACCGAGCCG---GATCTGGTGTATCATAAGAGATTTGCCTTTTCTATTGATTCC  
TATGGATTGGATCCAAAACAA-----TTCTTGAATGGGGTATTCAACTCCAGGTATGAATG  
GAAAACGACATCT-----TTATTGGTTTTATTTCCTATTTTTTAT-----GAAGAGAATGAAT  
CTTTTTATCGAAGGATCAGAAAAAATAGGGTCCGG---ATCTCCTGCGGGAATGATTTGG  
AAGAGCCAAAACCAAAAATAGTGGTATTTGCTAGCAACAACATAATGGAGGCAGTCAA  
TCAATATAGATTGATCCGAAATCTGATTCAAATCCAACATAGCACCCATAGG-----TACAT  
AAGAAATGTATTGAATCGATTCTTTTTAATGAAT-----AGATCCGATCGCAACTTCGAAT  
ATGGA-----ATTCAAAGGGATCAAATAAGAAAGGATACTCTGAATCATAGAACTCTAA  
TGAAATATACGATCAACCAACATTTATCGAATTTGAAAAAG---AGTCAGAAGAGATGGT  
TCGATCCTCTT-----ATTTTTTTTTATCGAACCGAGAGATCCATGAATCGGGATCCTGATG  
CATATAGATACAAATGGTCCACTGGGAGCAATAATTTCCAGGAACATTTGGAACATTTCT  
GTTTCTGAGCAGAAGAGCCGT-----TTGCAAGTAGTGTTCGATCGATTACGTATTAATC  
CATATTCGATTGATTGGTCTGAGGTTATCGACAAAAAAGATTTGTCTAAGCCACTTCGTT  
TCTTTTTGTCCAAG-----TTGCTTCTTTT  
TTTGTCTAAC---TCACTTCTTTTTTTGTTTGTGTCAGTTTCGGGAATATCCCCATTCATAGGT  
CCGAG---ATCTACATCTAT--CAATTGAAAGGTCCGAACGAT-----CCACAGTTTTTAGA  
ATCAATAGGTCTTCAAATCGTTTCATTTGAAAAAATTGAAACCCTTC-----TTATTGGAT---  
----GATCATGAGACTTGC---CAAAAATCGAAATTCCTTGATCAATGGAGGAACAATATCAC  
CATTTTTGTTCAATAAGATACCA---AAGTGG---ATGATTGACTCATTCATACTAGA-----A  
ATAATCGCAGGAAATCCTTTGATAACACGGATTCTTCTCAATGATATTCCACGATC  
AATACAATTGGCTGAATCCCGTGAAATCATTTTCATAGAAGTTCATTGAGATCTTCTTTTT  
ATAAAGGAAATCAACTTCGATTCTTGAATAATCCACATCACTTCTGCTTCTAT-----TGTA  
ACAAAAGATTCCCCTTTTATGTG-----GAAAAGGCCCGTATCAAT-----AATTATGATT  
TTACGTATGGA---CAATTCCTCAATATCTTGTTTCATTCGCAACAAA---ATATTTCTTTGTG  
CGTCGGTAAA-----AAAAACATGCTTTTTGGGGG---AGAGATACTATTTTCAGCAATCGA

GTCACAGGTATCTAACATATTCATACCTAAGGCTTTTCCACAAAGTGGT---GACGAAAC  
GTATAACTTGTACAAATCT-----TTCCATTTTCCAAGTCGATCTAATCCATTTCGTTTCGT---  
---AGAGCTATTTACTCGATCGCAGACATTTCTGGAACACCTCTAACAGAGGGACAAATA  
GTCAATTTTGAAAGAAGTATTGTCAACCTCTTTCAGATATGAATCTATCTGATTCAGAA  
GGGAAGAACTTGTATCAGTATCTCAAT-----TTCAATTCAAACATGGGTTTGATTACAC  
TCCATGTTCTGAGAAATATTTACCATCCGAAAAG-----AGGAAAAA-----  
CGGAGTCTTTGTCTAAAG-----AAATGCGTTGAGAAAGGGCAGATGTATAGAAGTTC  
AACGAGATAGTGCTTATTCAACTCTCTCAAATGGAATCTATTCCAAACATATATGCCAT  
GGTTCCTTACTTCGACAGGGTACAGATATCTAAAGTTTTTATTTTAGATACTTTTTCAG  
ACCTATTG-----CCGATACTAAGTAGC---AGCCAAAATTTGTATCCATTTTTCATGATATT  
ATGCATGGATCAGATATATCATGGCGAATTTCTCAGAAAAAATTC-----TGTCTT  
CCACAATGGAATCTG---ATAAGTGAGATTTTCGAGTAAGTGTTCATAAT-----CTTCTTC  
TGTCGAAGAAATGATTCATCGAAAT-----AATGAGTCAACATTGATATCGACACATCTG  
ACA-----AATGTTTCGGGAGTTC--CTCTATGCAATCCTTTTCTTCTTCTTGTGCTGCATA  
T--CTCGTTTGTACACATCTTCTCTTTGTTTTCGGG-----GCCTCTAGTGAGTTACAGGCA  
GAGTTTGAAAAGGTCAAATCTTTGATGATTCCATCATCTATGATTGAGTTGCGAAAAAT  
TCTGGATAGGTATCTACATCTGAACCGAATTTCTTCTGGTTAAAGAATCTCTTTCTAGT  
TGCTTTGAAACAATTAGGAGATTCTCTA-----GGTGGCAACATGCTATTGG  
GTGGTGGTCCCGCT-----TATGGG---GTCAAATCAATACGCTCTAAGAAGAAATAT  
TTGAATATCAATCTCATCGATATCATCGATCTCATA---AGTATCATACCAAATCCCATCAAT  
CGAATCACTTTTTTCGAGAAATACGAGACATCTAAGTCATACAAGTAAAGAGATCTATTC  
ATTGATAAGAAAAAGAAAAACGTGAACGGGGACTGGATTGATGATAAAATAGAATCC  
TGGGTTGCAAACAGTGATTCGATTGATGATGAAAAAGAGAATTTGGTTTCAGTTCTC  
C-----ACCTTAACGACA-----GAAAAAAGGATTGATCAAATTTTATTGAGTCTGACT--CAT  
AGTGATCATTTA-----TCAAAGAATGACTCTGGTTATCAAATGATTGAACAACCG  
GGAGCAATTTACTTACGAGACTTAGTTGACATTCAT-----AAAAAGTATCTAATGAATTAT  
GAGTTCAATACATCCTCTTTAGCAGAAAGACGGATATTCCTTGCTCATTATCAGACAATC  
ACTTAT-----TCACAACTTCGTGTGGGGCTAATAGTTTTTCATTTCCCATCTCATGGA-----  
--AAACCCTTTTCGCTCCGCTTGGCCTTATCTCTCTCT--AGGGGTATTTTAGTGATAGGTT  
CTATAGGAACTGGACGATCTTATTTGGTCAAATACCTAGCGAAAAACTCCTATCTTCCTT  
TCATTACGGTATTTCTGAACAAGTTCTGGATAACAAGTCTCAAGGTTTTGATGATATC--  
-----GATATTGAC---CTTGATGCTAGTGACGATCTTGATGCTAGTGACGATCTTGATG  
CTAGTGACGATCTTGATGCT-----AGTGACGATATC-----CTTGA  
TATGGAGTTG---GAACTGCTAACTAGCATGAATGCGCTAACTATGAATATGATGCCTGAA  
GAT-----GAAGACCAACTTTATATCACCTTCAATTCGAATTAGCAAAAGCAATGTCTCC  
TTGCATAATATGGATTCCAAACATTCATGATCTGGATGTGAATGAGTCAAATTACTTCTC  
CCTAGGTCTATTAGTGAACCTTCTCTCCAGG-----GATTATGAA-----ACTAGAAAT  
ATTCTTGTTATTGCTTCGACTCATATCCCCAAAAAGTGGATCCCGCTCTAATAGCTCCG  
AATAAATTAATACGTGCATTAAGATACGAAGGCTTCTTATTCACAACAACGAAAGCA  
CTTTTCACTCTTTCATATACTAGGGGATTTCACTTGGAAAAGAAAATGTTCCATACT-----  
-AATGGATTTCGGGTCCATAACCATGGGTCCAATGCACGAGATCTTGTAGCACTTACCAA  
TGAGGCCCTATCGATTAGTATTACACAGAAGAAATCAATTATAGATACTAATACAATTAG  
ATCCGCTCTTCATAGACAAATTTGGGATTTGCGA-----TCCCAGGTAAGATCGGTCCA  
GGATCATGGGATCCTTTTCTATCAGATAGGAAGGGCTGTAGCACAAAATGTACTTTTAA

GTAATTGCCCATAGATCCTATATCTATCTATATGAAAAAGAAA-----TCATGTAACGAAG  
TGGATTTTTATTTGTACAATTGGTACTTCGAACTTGGAACGAGCATGAAGAAATTAACG  
ATACTTCTTTATCTTTTGTAGTTGTTCTGCCGGATCGGTCACTCAAGATCTTTGGTCTCTA  
CCC-----GGACCCGATGAAAAA---AATGGGATCACTCCTTATGGACTCGTTGAGAATGAT  
TCT--GGTCTAGTTCGTGGCCTATTAGAAGTGGAAGGCGCTCTGGTGGGA-----TCCTCA  
CGG-----ACATGCAGTCAGTTTGATAAGGAT-----CGAGTGACATTGCTTCTTCGACCC  
GAACCAAGGAAT--CCCTTAGATATGATGCAAAAAGGATCTTGTCTATCCTTGATCAGA  
GATTTCTCTATGAAAAAGAC-----GAATCGGAGTTTGAAGAG--GGGGAAGGA-----GCC  
CTCGACCGGCAACAG-----ATAGAGGAGGAT-----TTATTCAATCAC-----ATAGT  
TTGGGCTCCT-----AGAATATGGCGCCCT-----TGGGGCTTTCTATTTGATTGTATCGAA  
AGGCCCAATGAATTGGGATTTCCC--TATTGGTCCAGGTCATTTCTGGGGCAAG-----CG  
GATCATTTATGATAAAGAGGATGAGCTTCAAGAGAATGATTTCGGAGTTCTTGCAGAGTG  
GAACCGCGCAGTACCAGACACGAGATAGATCTTCCAAAGAACAAGGCCTTTTTCGAAT  
AAGCCAATTCATTTGGGACCCTGCAGATCCACTCTTTTTCTATTCAA--GCTCAGCCC  
TTTGTCTCTGTGTTTTACATCGAGAATTATTTGCAGATGAAGAGATGTCAAAGGGGCT  
TCTTACTCCCCAAACAAATCCTCCTACATCTCTATATAAACGCTGGTTTATC-----AAGAA  
GACGCAAGAAAAGCACTTCGAATTGTTGATTAATCGCCAGAGATGGCTTAGA-----AC  
CAATCGTTCATTATCT-----AATGGATCTTTCCGTTCTAAT-----ACTCTATCCGAGAGTTAT  
CAGTATTTATCAAATCTGTTCCCTATCTAAC--GGAACACTATTGGATCAAATGACAAAGG  
CATTGTTGAGAAAAAGATGGCTTTTCCCGGATGAAATGCAAATTGGATTC-----ATGGAA  
CAGGAGAAGGATTTCCATTCTTATGTCTAGATCGCGG--ATAAATGGAAATTTTATTG  
ATAAACCTTTTCAATTGTAGCCAATATCTTATTACGAATAATTCCGACAACCTCAGGAG  
AAAAAGAGGCATTTACCTATTACAGAGATGGG-----ATGTCAGCTCAATCCGAAGGAAA  
TTATGCGGAAGCTTTACAGAATTATTATGAAGCTATGCGACTAGAAATTGATCCCTATGA  
CCGAAGTTATATACTCTATAACATAGGACTTATCCACACAAGTAACGGAGAACACACGA  
AAGCTTTGGAATATTTTTTCGAGCGCTCGAACGAAACCCATTCTTACCACAAGCTTTT  
AATAATATGGCCGTGATCTGTCATTAC--CGGGGAGAACAGGCCATTCGCCAGGGGGAT  
TCTGAAATTGCAGAGGCTTGGTTCGACCAAGCCGCTGAGTATTGGAAACAGGCTATAG  
CACTTACTCCTGGTAATTATATTGAAGCTCATAATTGGTTGAAGATCACTAGACGTTTCG  
AA-----ATGAGTTGTGATCAGAACATATATGGATAGAACCTATAAAGGGGGCTCGAAAA  
ACAAGTAATTTCTGCTGGGCTATTATCCTTTTTTTTAGGTTTATTAGGATTCTTGTGGTTG  
GAACCTCGAGTTATCTTGGTAGAAATTTGATATCTTTATTTCCGTCTCAGGAAATCGTTT  
TTTTTCCACAAGGAATTGTGATGCTTTCTATGGGATCGCGGGTCTTTTTATTAGCTCCT  
ATTTGTGGTGCACAATTTCTGGAATGTAGGTAGTGGTTATGATCGATTTGATATAAAAG  
ACGGAATAGTGTGATCTTTCTGTTGGGGATTTCTTGGAAAAAATCGTCGGGTCTTTCTC  
CGATTTCTTATAAAGATATTCAATCCGTCAGAATAGAAGTTAAAGAGGGTATTTATGCT  
CGGCGTGTCTTTATATGGATATCAGAGGCCAGGGAGCCATTCCATTGACTCGTACTGA  
TGAGAAT--TTTACTCCGCGGGAAATGGAACAAAAAGCTGCTGAATTGGCCTATTTCTT  
GCGTGTACCAATTGAAGTATTT

>Eucalyptus

ATGGAAAAATGGTGGTTCAATTTCGATGTTGTATCTAAGTAAATCAATTGATAGGTTTGGT  
CCTATTGAAAAAACCAGTGTAAGTGAAGATCCGGTTAGAAACGATACGGATAAAAAGA  
TTCATAGTTACAGTAATGCTACGCATTTCTGTTGGGCGTCAGGGACGTTCTGTAATTTTATCT  
CTGATGACACCTTTTTAGTTTCGAGATAGTAATAGGAATATTTATTCCATATATTTTATGATTT

ACTAATCAAATTTTTGAGATTGACAATGATCCT-----TCTTTACTGAGTGAACGAGAAAG  
CTCTTTTTTTAGTTATCGGACTTATGCTTATCTGAAGAATGGATCTAAGAATGATGATCC  
GCCCTGTGATCGTTCCATGTATGATACTAAATACAGTTGGAATAATCACACTACTAGTTG  
CATTAACTCTTATCTTGGT-----TCTCAAATCTGTATTGAGAGTTCATTTTAAAGTAGTAGT  
GACAATCCAGTGACAGTTACATTTCTAGTTACATTTATGGTAGGGGGAGCTCCAGTATA  
AGAACTAGCAGGAATGGTATTGATTTCACTCGAAGAGAAAATTCTACT---TTCGATTTG  
ACTCAAAAATATAGGCATTTGTGGGTTCAATGCGAAAATTGTTATGGATTAAATTATAAG  
AAACTTTTTGAAGTCCAAAATGAATATTTGTGACCAATGTGGATATCATTGAAAATGAG  
TAGTTCAGATCGAATCGAACTTTGATTGATCCAGGTACTIONGGATCCTATGGATGAAG  
ACATGGTTTCTCTGGATCCTATTGAATTTCACTCGGAGGAGGAACCTTATAAAGATCGTA  
TTGATTCTTATCAAAGAAAGACAGGATTAACCGATGCTGTTCAAACAGGCACAGGTCG  
ACTAAACGGTATTCCCATAGCAATTGGAGTTATGGATTTTCAGTTTATGGGGGGTAGTAT  
GGGATCCGTAGTAGGGCAGAAAATCACCCGTTTGATCGAGTATGCTACCAATCAATTTT  
TACCTCTGATTCTAGTGTGTGCTTCCGGAGGAGCACGTATGCAAGAAGGAAGCTTGAG  
CTTGATGCAAATGGCTAAAATATCTGCTGCTTTATATGATTATCAATCCATAAAAAGTTA  
TTCTATGTATCAATCCTTACATCTCCTACTACTGGTGGGGTAACGGCTAGTTTTGGGATG  
TTGGGGGATATTATTATTGCCGAACCTAATGCTTACATTGCATTTCGAGGTAAGAGTA  
ATTGAACAAACATTGAATAAGATAGTACCTGAAGGTTTACAAGCGGCTGAATATTTATT  
CCATAAGGGCTTATTCGATCCAATCGTACCACGTAATCCTTTAAAGGGTGTCTGAGTG  
AGTTATTTAAGCTTACGCTTTTTTTTCCCTTTGAAT-----ATGGTAACCATTAGAGCC  
GACGAAATTAGTAATATTATCCGTGAACGTATTGAGCAATATAATAGAGAAGTAAAGATT  
GTAAATACCGGTACCGTACTGCAAGTAGGCGACGGCATTGCTCGTATTTATGGTCTTGAT  
GAAGTAATGGCGGGTGAATTAGTAGAATTTGAAGAGGGTACAATAGGGATTGCTCTGA  
ATTTGGAATCAAATAATGTTGGTGTGTATTAATGGGTGACGGTTTGATGATACAAGAG  
GGAAGTTCTGTAAAAGCAACAGGAAGAATTGCTCAGATACCGGTGAGTGAGGCTTATT  
TGGGTGCTGTTATAAATGCCCTGGCCAAACCTATTGATGGTTCGAGGTGAAATTTACGCT  
TCTGAATCTCGATTAATTGAATCTCCTGCTCCAGGTATTATTTTCGAGACGTTCCGTATATG  
AGCCTCTTCAAACCTGGACTTATTGCTATTGATTTCGATGATCCCTATAGGACGTGGTCAGC  
GAGAATTAATTATTGGGGACAGACAGACCGGTAAAACAGCAGTAGCCACGGATACTAT  
TCTCAATCAACAAGGTCAAATGTAATATGTGTTTATGTAGCTATTGGTCAAAAAGCATC  
TTCTGTGGCTCAGGTAGTGAATACTCTCCAGGAAAGGGGAGCTATGGAATACACTATTG  
TGGTAGCTGAAACGGCGGATTCCCCAGCTACGTTACAATACCTCGCTCCTTATACAGGA  
GCAGCTCTTGCTGAATATTTTATGTTTCGTGAACGACACACTTTAATCATTATGATGAT  
CTCTCCAAACAAGCACAGGCTTATCGCCAAATGTCTCTTCTATTACGAAGACCACCCGG  
TCGCGAAGCTTATCCAGGAGATGTTTTTTTATTGTCATTCACGCCTTTTAGAAAGAGCCG  
CTAAATTAAGTTCTCTTTTAGGTGAAGGAAGTATGACTGCCTTACCAATAGTGGAGACC  
CAGTCGGGAGATGTTTCGGCTTATATTCCTACTAATGTAATTTCCATTACAGATGGACAA  
ATATTCTTATCAGCCGATCTATTCAATGCTGGAATCAGACCTGCTATTAATGTGGGTATTT  
CTGTTTCCAGAGTAGGATCTGCAGCTCAAATTAAGCCATGAAACAAGTAGCTGGAAA  
ATTAAAATTGGAATTAGCGCAATTCGCAGAATTAGAAGCCTTTGCACAATTCGCTTCTG  
ATCTCGATAAAGCTACCCAGAATCAATTGGCAAGAGGTCAACGATTACGTGAATTGCTT  
AAACAATCCCAAGCAGCCCCTCTCACGGTGAAGAACAGATAATGACTATTTATACGG  
GAACGAATGGTTATCTTGATTCATTAGAAATTGGACAGGTAAGGAAATTTCTCGTTGAG  
TTACGTACTIONTACGTA AAAACGAATAAACCTCAATTCCAAGAAATTATATCTTCTACTAAA

ACATTTACTGAGGAAGCAGAAGCCCTTTTAAAAGAAGCTATCCAGGAACAGAAGGAA  
CGCTTTCTACTTCAGGAACAAGGAATGAGAATCAATCCTACTACTTCGGGTCCTGGAGT  
TTCCACACTTGAAAAAAAAAACCTGGGACGTATCTCTCAAATCATTGGTCCGGTACTC  
GATGTAGCCTTTCCCCGGGCAAGATGCCTAATATTTATAACGCTCTGGTAGTTAAAGGT  
CGAGATACTATCGGTCAAGAAATTAATGTGACTTGTGAGGTACAGCAATTATTAGGAAA  
TAATCGAGTTAGAGCTGTAGCTATGAGTGCTACAGATGGTCTAATGAGAGGAATGGAA  
GTGATTGACACAGGAGCTCCTCTAAGTGTTCCAGTCGGCGGAGCGACTCTCGGCCGAA  
TTTTCAACGTGCTTGGAGAACCTGTTGATGATTTAGGACCTGTAGATACTCGTACAACA  
TCTCCTATTCATAGATCTGCGCCCGCCTTTATCCAGTTAGATACAAAATTATCTATTTTTG  
AAACAGGAATTAAGTAGTAGATCTTTTAGCCCCTTATCGGCGTGGAGGAAAAATAGG  
ACTATTCGGGGGGGCTGGAGTGGGTAAAACAGTACTCATTATGGAATTGATCAACAAC  
ATTGCTAAAGCTCATGGGGGGGTATCCGTATTTGGAGGAGTAGGTGAACGTA CTCTGTA  
AGGAAATGATCTTTACATGGAAATGAAAGAATCTGGAGTAATTAATGAACAAAATATTG  
CAGAATCTAAGGTCGCTCTAGTCTACGGTCAGATGAATGAACCCCCGGAGCTCGTATG  
AGAGTTGGTTTGACTGCCCTAACTATGGCGGAATATTTCCGAGATGTTAATGAACAAGA  
CGTACTTCTATTTATCGACAATATCTTCCGTTTCGTCCAAGCAGGATCTGAGGTATCCGC  
CTTATTGGGTAGAATGCCTTCTGCTGTGGGTATCAACCTACCCTTAGTACCGAAATGG  
GTACTTTACAAGAAAGAATTACTTCTACCAAGAGGGATCCATAACTTCTATTCAAGCA  
GTTTATGTACCTGCGGACGATTTAACCGACCCTGCTCCTGCCACGACATTTGCACATTT  
AGATGCTACGACCGTACTATCAAGAGGATTAGCTGCTAAAGGTATCTATCCAGCAGTAG  
ATCCTTTAGATTCAACGTCAACTATGCTCCAACCTCGAATCGTTGGTGAGGAACATTAT  
GAAACTGCACAAAGAGTTAAGCAAACCTTTACAACGTTACAAAGAACTTCAGGACATTA  
TAGCTATCCTTGGGTTGGACGAATTATCTGAAGAGGATCGTTAACCGTAGCAAGAGCA  
CGAAAAATTGAGCGTTTCTTATCCCAACCCTTTTTCGTAGCAGAAGTATTTACCGGTT  
CCCGGGGAAATATGTTGGTCTAGCAGAAACAATTAGAGGGTTTAAATTGATCCTTTCCG  
GAGAATTAGATGGTCTTCTGAAACAAGCCTTTTATTTGGTAGGTAACATCGATGAAGCT  
ACTGCGAAGGCTACGAACTTAGAAATGGAGAGTAAATTGAAGAAAATGACCTTAAATC  
TTTGTGTAATAACCCCTAATCGAATTGTTTGGGATTCAGAAGTGAAAGAAATCATTTTAT  
CTACTAATACTGGACAAATTGGCGTATTACCAATCACGCGCCTATTGCCACAGCTGTA  
GATATAGGTATTTTGAGAATACGCCTTAACGACCAATGGTTAACAATGGCTCTGATGGG  
TGGTTTTGCTAGAATAGGCAATAATGAGATCACTATTTTAGTAAATGACGCGGAAAAGG  
GTAGTGATATTGATCCACAAGAAGCTCAGGAAACTCTTGA ACTAGCGGAAGCTAACTT  
AAGAAAAGCTGAAGGTAAGAGACAAACAATTGAGGCAAATCTAGCTCTCAGACGAGC  
TAGGACACGAGTCGAGGCTATCAATGCAATTTCAATGAAAAATGTAACCGATTCTTTTCG  
TTTCCTTGGGTCACTGGCCATCGGCCGGGAGTTTCGGATTTAATACCGATATTTTAGCAA  
CAAATCCAATAAATCTAAGTG TAGTCCTTGGTGTATTGATCTTTTTTTGGAAAGGGAGTG  
TTAAGCGATTTATTAGATAATCGAAAACAGAGGATCTTGAATACTATTGAAATTCAGA  
AGAATTACGCGCGGGGCCATTGAACAGCTGGAAAAAGCCCGGGCCCGTTTACGGAA  
AGTGGAATGGAAGCGGAGCAGTTTCGAGTGAATGGATATTCTGAGATAGAACAAGA  
AAAGTTGAATCTGATTAATTCAACTTATAAGACCTTGAACAATTAGAAAATTACAAAA  
ACGAAACTATTCATTTTGAACAGCAAAGAGCGATTAATCAAGTCCGACAACGGGTTTT  
CCAACAAGCCTTACAAGGAGCTCTAGGAACTCTGAATAGTTGTTTGAACAACGAGTTA  
CATTTACGTA CTATCAGTGCTAATATTGGCATGTTTGGGGCGATGAAAGAAATAACTGAT  
ATGAATCCACTGATTTCTGCCGCTTCCGTTATTGCTGCTGGGTAGCTGTCCGGCTTGGCT

TCTATTGGACCTGGAGTTGGTCAAGGTAAGTACTGCTGCGGGCCAAGCTGTAGAAGGTATTG  
CAAGACAGCCCGAGGCGGAGGGAAAAATACGAGGTAAGTACTTTATTGCTTAGTCTGGCTTT  
TATGGAAGCGTTAACAATTTATGGATTGGTTGTAGCCTTAGCGCTTTTATTTGCGAATCC  
CTTTGTGATGAATGTTTTATCATGTTCCACCAACACACTAAAAGGGTTATACGATATAC  
GGGTGTGGAAGTAGGCCAACATTTCTATTGGCAAATAGGAGGTTTTCAAGTCCATGGC  
CAAGTCCATTACTTCTTGGGTTGTAATTGCTATCTTATTAGGTTCCGCCAGTATAGCTG  
TTCGGAATCCACAAACCATTCCGAATGACAGTCAAAAATTTCTTCGAATATGTCCTTGAA  
TTCATTGAGACGTTAGCAAAACTCAGATTGGAGAAGAATATGGTCCATGGGTTCCCTTT  
TATTGGAAGTATGTTCCATTTATTTTTGTTTCGAATTGGTCAGGGGCTCTTTTACCATGG  
AAAATCATAGAATTACCTCATGGGAGTTAGCCGCACCCACGAATGATATAAATACTAC  
CGTTGCTTTAGCTTTACTCACGTCAGTAGCATATTTCTATGCAGGTCTTACCAAAAAAG  
GATTAAGTTATTTAGTAAATACATTCAACCAACTCCAATCCTTTTACCCATTAACATCTT  
AGAAGATTTACAAAACCTTTATCACTTAGTTTTCGACTTTTCGGAAATATATTAGCCGA  
TGAATTAGTAGTTGTTGTTCTTGTTCCTTTAGTACCTTTAGTGGTTCCTATACCTGTCATG  
TTCCTTGGATTATTTACAAGTGGTATTCAAGCTCTTATTTTTGCAACTTTAGCCGCGGCT  
TATATAGGTGAATCCATGGAGGGTCATCATATGATATTTCCACCTTAGAACATATATTA  
CTCATATATCCTTTTCGATCATTCAATAGTAATTACTATTTTTTTGATAAGCTTATCGGTC-  
--GAAATCGTAGGACTATATGATTCGTCAGAAAAAGGCATGACAGCTACTTTTTTCTGTAT  
AACAGGCTTATTAGTCACTCGTTGGATTTATTCGGGACATTTCCCGTTAAGTGATTTATA  
TGAATCATTAATTTTTCTTTCATGGAGTTTCTCCGTTATTCATATGGTTCCGTATTTTAAA  
AAACATAAAAATTATTTAAGCACATAACC GCGCCAAGTACTATTTTTACCCAAGGCTT  
TGCTACTTCGGGTCTTTTAACTGAAATGCATCAATCCGAAATAGTAGTACCTGCTCTCCA  
ATCCCAATGGTTAATGATGCATGTAAGTATGATGATATTGGGCTACGCAGCTCTTTTATGT  
GGATCATTATTATCAGTAGCTCTTTAGTCATTACATTGCGAAAAGCCATAAGGGTTTTT  
AGTAAAAAAACGAGATCCAATACATGAATGAAAGAAGCAATGTTTTACTA-----TCTTT  
TTGTTCTTCTCGAAATTATTACAGGGCTCAACTGATTCAACAAGTACTAGTACAGTGGAGTT  
ATCGTATTATTAGTCTAGGGTTTTCTTTTTTAAACCATAGGTATTCTTTTCGGGAGCAGTATG  
GGCTAATGAGGCATGGGGGTCATATTGGAATTGGGACCCAAAGGAAACTTGGGCATTT  
ATTACTTGGACCCTATTTGCGATTTATTTACATACTCGAACAAATAAAAATTGGGAAAGT  
TTAATTGCGCAATTGTGGCTTCTATAGGCTTTCTTATAATTTGGATATGCTATTTTGGGG  
TTAATTTATTAGGAATAGGATTACATAGTTATGGTTCATTTAATTTACATATGGTAAAAAA  
GAAAGCATTTCCTCTTCTATATCTTACATCTATAAGTATTTTTGCCCTGGTGGATCTCT  
CTCTCATTTAATAAAAAGTCTTGAATTTGGATTACTAATTGGTGGAAATACTAGGCAATCC  
GAAACTTTTTTACTGATATTCAAGAAAAGAGTATTCTAGAAAAATTCATCGAATTGGA  
AGAACTCTTACTCTTGGACGAAATGATAAAGAATACCCGGAAACACATCTACAAACA  
CTTCGTATAGGAATCCACAAAGAAACGATCCAATTGATCAAGATGCACAATGAGGATCA  
TATCCATATGATTTGCACTTATCGACAAATATAACCTCTTTCATTATTTTAAAGTGGTTATT  
CTATTCTGGGTAATGAAGAAGTCTTACTTAACTCTTGGGTTCAAGAATTCCTATATA  
ACTTAAGTGACACAATAAAAAGCTTTTTCTATTCTTTTATTAAGTATTATGTATCGGATT  
CCATTCCGCCCATGGTTGGGAACTAATGATTGGCTATGTCTACAAAGATTTTGGATTGTC  
TCACAACGATCAAATTATATCGGGTCTTGTTCCTACTTTTCCAGTCATTCTGGATACAAT  
TTTTAAATATTGGATCTTCCGCTATTTAAATCGTATATCTCCATCACTTGTAGTGATTTATC  
ATTCATGAATGACATGCCTATTGGTGTTCAAAAGTACCCTTTTCGAAGTCCCTGGAGAG  
GAAGATGCCTCTTGGGTTGACGTATACAACCGACTTTATCGAGAAAGATTACTTTTTTT





ACTTTGTGTGTTATCAATATCTCT---TTATCTAACAGTTCAAGTACAGTTGATATAGTTGA  
GGCCCAGTCCAAATATGGTTTTTGGGGATGGAATTTGTGGCGTCAACCTATAGGGTTTT  
TCATTTTTCTAATTTCTTCCCTAGCAGAATGTGAGAGATTACCTTTTCGATTTACCAGAAG  
CAGAGGAAGAATTAGTAGCAGGTTATCAAACCGAATATTCGGGTATCAAATTTGGGTTA  
TTTTATGTTGCTTCCCTATCTAAATCTATTAGTTTCTTCGTTATTTGTAACAGTTCTTTACTT  
AGGGGGTTGGAATATCTCTATTCCCTACATATTCGTTCCCTGAGCTATTT-----GAAAAAGT  
AGGTAGAGTCTTTGGAACGACAATTGGTATTTTTATTACATTAGCTAAAACCTTATTTCTT  
CTTGTTTTATTTCTATCACAACAAGATGGACTTTACCTAGACTAAGAATAGACCAATTATT  
AAATCTTGGATGGAAATTTCTTTTACCCATTTCTCTCGGTAATCTATTATTAACAACCTCT  
TTCCAACCTCCTTTTCATTGATGATCTGGCATGTACAGAATGAAAACCTCATTCTCGATTCT  
ACGAGAATTTTTATGAAAGCCTTTTCATTTGCTTCTCTTCGATGGAAGTTTTATTTTTCCCA  
GAATGTATCCTAATTTTTGGCCTAATTTCTTCTTCTGATGATCGATTCAACCTCTGATCAA  
AAGATATACCTTGGTTCATTTTCATCTCTTCAACAAGTTTAGTAATGAGCATAACGGCCC  
TATTGTTCCGATGGAGAGAAGAACCTATGATTATCTTTTCAGGAAATTTCCAAACGAAC  
AATTTCAACGAAATCTTTCAATTTCTTATTTTACTATGTTCAACTCTATGTATTCTCTATC  
CGTAGAGTACATTGAATGTACAGAAATGGCTATCACAGAGTTTCTCTTATTTGTATTAAC  
AGCTACTCTAGGAGGAATGTTTTTATGCGGTGCTAACGATTTAATAACTATCTTTGTAGC  
TCCAGAATGTTTCAGTTTATGCTCCTACCTATTATCTGGATATACCAAGAAGGATGTACG  
GTCTAATGAGGCTACTATGAAATATTTACTCATGGGTGGGGCAAGCTCTTCTATTCTGGT  
TCATGGTTTCTCTTGGCTATATGGTTCATCCGGGGGAGAGATCGAGCTTCAAGAAATAG  
TGAATGGTCTTATCAATACACAAATGTATAACTCCCCAGGAAATTTAATTGCGCTTCTAT  
TCATCACTGTAGGAATTGGGTTCAAGCTTTCCCTAGCCCCTTCTCATCAATGGACTCCT  
GACGTATACGAAGGATCTCCCACTCCAGTCGTTGCTTTTTCTTTCTGTTACTTCGAAAGT  
AGCTGCTTCAGCTTCAGCCACTCGAATTTTCGATATTCCTTTTTATTTCTCATCAAACGA  
ATGGCATCTTCTTCTGGAAATCCTAGCTATTCTTAGCATGATATTGGGGAATCTCATGCT  
ATTACTCAAACAAGCATGAAACGTATGCTTGCATATTCGTCCATAGGTCAAATCGGATAT  
GTAATTATTGGAATAATTGTTGGAGACTCAAATGGTGGATATGCGAGCATGATAACTTAT  
ATGCTGTTCTATATCTCCATGAATCTAGGAACTTTTGCTTGCATTGTATTATTTGGTCTAC  
GTACCGGAACTGATAACATTTCGAGATTATGCAGGATTATACACGAAAGATCCTTTTTTG  
GCTCTCTCTTATAGCCCTATGTCTCTTATCCCTAGGAGGTCTTCCCTCCACTAGCAGGTTTT  
TTCGAAAACCTCCATTTATTTCTGGTGTGGATGGCAGGCAGGCCTATACTTCTTGGTTTC  
AATAGGACTCCTTACGAGCGTTATTTCTATCTACTATTATCTAAAATAATCAAGTTATTA  
ATGACTGGACGAAACCAAGAAATAACACCTCACGTGCGAAATTATAGAAGATCCCCCT  
TAAGATCAAACAATTCCATCGAATTGAGTATGATTGTATGTGTGATAGCATCTACTATAC  
CAGGAATATCAATGAACCCGATTATTGCAATTGCTCAGGATACCCTTTTTATGTTTTCTGC  
TTTACGAATATGATATTTTCTGGGCATTTCTAATAATATCAAGTGTATTTCCTATTTTGGCA  
TTTCKAATTTCCGGAATTTTAGCCCCGATTAGCAAAGGGCCAGAGAACTTTTCGAGTTA  
TGAATCAGGTATAGAACCAATGGGCGATGCTTGGTTACAATTTCGAATCCGTTATTATAT  
GTTTGCTCTAGTTTTTGTGTTTTTGTATGTTGAAACGGTTTTTCTTTATCCATGGGCAAT  
GAGTTTCGATGTATTGGGGGTATCCGTATTTATAGAAGCTTTAATTTTCGTGCTTATCCTA  
ATTGTTGGTTTAGTTTATGCATGGCGAAAAGGAGCATTGGAATGGTCTACGAATTATTTT  
CCTTGGTTAACAATAATTGTACTTTTGCCGATATTCGCAGGTTCTTTAATTTTCTTTCTAC  
CTCATAGAGGAAATAAGGTAATAAGGTGGTATACTATATGCATATGCTCTTTAGAGCTCC  
TTTTAACTACCTATACATTCTGTTATCATTCCAATTGAACGATCCATTAACCAATTAAC

AGAGGATTATAAATGGATTAATTTTTTTGATTTTTACTGGAGATTGGGAATAGATGGACT  
TTCTATAGGACCTATTTTACTGACGGGATTTATCACCCTTTAGCTACTTTAGCGGCTCG  
GCCAGTTACTCGAGATTCCCGATTATCCATTTCTGATGTTAGCAATGTACAGCGGTCA  
AATAGGATCATTTTCTCTCGAGACCTTTTACTTTTTTTTCATCATGTGGGAGTTAGAATT  
AATCCCGTTTATCTACTTCTAGCGATGTGGGGGGGAAAGAAACGTCTGTATTCCGCTA  
CAAAATTTATTTTGTACACTGCGGGAGGTTCCATTTTTCTATTAATAGGGGTTCTGGGTA  
TTGGTTTATATGGTTCCAACGAACCAACATTAATTTGGAAACATTATCTAATCAATCGT  
ATCCGGTGGCACTGGAAATAATACTCTATATTGGATTTCTTATTGCTTTTTCTGTGAAATT  
ACCGATTATACCCTTACATACATGGTTACCAGACACCCATGGAGAGGCACATTATAGTAC  
TTGTATGCTTCTAGCCGGAATTTTATTAATAAATGGGAGCATATGGGTTGGTTCGAATCAA  
TATGGAATTATTACCTCATGCTCATTCTATATTTTCTCCCTGGTTGATTATAGTAGGCGCA  
ATCCAAATAATCTATGCAGCTTTAACATCTCCTGGTCAACGTAATTTAAAAAAAAGAAT  
AGCCTATTCTCTGTATCTCATATGGGTTTCATAATTATTGGAATTGGCTCGATAACTGAT  
ACGGGACTCAATGGAGCCATTTTACAAATAATCTCTCATGGATTTATCGGCGCTGCTCTT  
TTTTTCTTGGCAGGAACGAGTTATGATCGAATACGTCTTGTTTATCTCGACGAAATGGG  
TGGAATGGCTATCCACCTTCCAAAATATTCACAATCTTTAGTATCTTATCAATGGCTTC  
CCTTGCATTACCAGGTATGAGTGGTTTTCTTGCAGAATTGATAGTATTTTTTGGAAATAATT  
ACCAGCCACCAATATCTTTTAATGCCAAAATACTAATTACTTTTTGTAATGGCAATTGGA  
ATGATATTAACCTATTTATTTATTATCTATGTTACGCCAAATGTTCTATGGATACAAGTT  
ATTTAATGTTCCAAACTCTTATTTTTTTGGATTTTGGGCCGCGAGAGTTATTTGTTTCCATC  
TCTATTCTTCTACCAATAATAGCTATTGGTATTTATCCAGATTTTCGTTCTTTCACTATCTGT  
TGACAAAGTCGAAGCTATTATATCTAATTATTTTTTATCAAATGATACTCGAACATGTACTT  
GTTTTGAGTGCCTATTTATTTTCTATTGGTATCTATGGATTGATCACGAGTCGAAATATGG  
TTAGGGCCCTTATGTGTCTTGAACCTATCCTCAATGCGGTTAATATAAATTTTGTAAACATT  
TTCAGATTTTTTTGATAGTCGACAATTAAGGAGATATTTTCTCCATTTTTGTTATAGCT  
ATTCAGCCGCTGAAGCAGCTATTGGGTTAGCTATTGTTTCGTCAATTTATCGTAACAGA  
AAATCAACTCGTATCAATCAATCGAATTTGTTGAATAAAATGGAATATACATATCAATATT  
CATGGATTATCCCCTTCATTCCACTTCCAGTTCCTATGTTAATAGGAGTGGGACTTCTAC  
TTTTTCCAACGGCAACAAAAATCTTCGCCGTATGTGGGCTTTTCTAGTATTTTCTTGT  
TAAGTATAGTTATGATACTTTCCGTCTATCTATCTATTCAACAAATAAATAGAAGTTTTAT  
CTATCAATATGTATGGTCTTGGACCATTAATAATGATTTTTCTTTTCGAGTTCGGTCACTTA  
ATAGATCCACTTACTTCTATTATGTTAATATTAATTACTACTGTTGGAATTTGGTTCTTTT  
TTATAGTGACAATTATATGTCTCATGATCAAGGATATTTGAGATTTTTTGGCTTATATGAGT  
TTTTTCAATACTTCCATGTTGGGATTAGTTACTAGTTCGAATTTGATACAAATTTATATTT  
TTTGGGAATTAGTTGGAATGTGTTCTTATTTATTAATAGGTTTTTGGTTCACACGACCTA  
GTGCGGCGACTGCTTGTCAAAAAGCGTTTGTAAACGAATCGTGTAGGCGATTTTGGTTTA  
TTATTAGGAATTTAGGTCTTTATTGGATAACCGGTAGTTTTGAATTCGGGATTTGTCC  
AAATATTGAATAAC---GAGGTTCTTTTTTATTTCTTACTTTGTGTTACTTTCTTTTATTTG  
CAGGTGCAGTTGCGAAATCGGCACAATCCCCCTTCATGTATGGTTACCTGATGCCATG  
GAAGGCCCTACTCCCATTTCCGGCTCTTATACATGCCGCTACTATGGTAGCAGCGGGCATT  
TTTCTTGTAGCTCGACTTCTTCTCTTTTTATAATCATACCTTACATAATGAATTCATATC  
TTAATAGGTATAATAACAGTATTATTAGGAGCTACTTTAGCTCTTGCTCAAAAAGATATT  
AAAAGAGGTTTAGCTTATTCTACAATGTCTCAATTTGGGTTATATGATGTTAGCTCTAGGT  
ATGGGGTCTTATCGAGCCGCTTTATTTCAATTTGATTACTCATGCTTATTCAAAGCATTGT

TGTTTTTAGGATCCGGATCAATTATTCATTCAATGGAAGCTATTGTTGGATATTCTCCAGA  
TAAAAGTCAGAATATGGTTCCTTATGGGAGGTTTAAAAAAGCATGTACCAATTACAAAA  
CTGCTTTTTTAGTAGGTACACTTCTCTTTGTGGTATTCCCCCCTTGCTTGTTTTTGGTC  
CAAAGATGAAATTCTTAATGATAGTTGGTGTATTACCTATTTTCGCAATAATAGCTTG  
TTCCACAGCAGGATTAACCGCATTATATGTTTCGAATCTATTTACTTACTTTTGAGGG  
ACATTTCAATGTTCAATTTCAAATTACAATGGTCAAAAAAGTAGTTCCTGCTATTCAAT  
ATCTCTATGGGGAAAAGAAGTGCCAAAAACGATTA AAAAT--TTATTAAGTTTATTAACA  
ATGAATTTTTTTTCGGTCACTAAAAAT--ACTTCTCTTATCCTCATGAATCGGACAATAC  
CATGTTATTTCTATGGTTATATTAGTGCTATTTACTTTGTTTGTGGGGTCGTAGGAGCT-  
--TTTCATTTGGATATATTATCTAAATTGTTAAATCCGTCTATAAACCTTTTACATCCGAATT  
CAAAT--TCGGTGGATTGG---GAATTTGTGACAAATGCAAGTTTTTCTGTCAGTATAGCT  
TTTTTCGGAATATTTATAGCGTCTTTTTTATATAAGCCTATTTATTCATCTTTACAAAATTT  
GAACTTACTAAATTCGTTTTCTATTTTAGGGGACAGAATAAGAAATGGGATATATGATTG  
GTCATATAATCGTGGTTACATAGATGCTTTTTATAACAATATCCTTAACTCAGGGTATAAGA  
GGACTAGCTGAACTAATTCATTTTTGGATAGACGACTAATTGATGGAATTACGAATGGT  
TTCGGTCTTACAAGTTTCTTTTTTCGGAGAAGGTATCAAATATGTAGGGGGCGGT--CGCA  
TCTCTTCTTATCTCTTATTGTAT-----TATAGTATGGATTTGCCTGGACC  
AATACATGATTTTCTTTTAGTTTTCTGGGATCAGGTCTTATATTAGGAAGTCTAGGGGT  
GGTATTACTTACCAATCCAATTTATTCTGCCTTTTCCTTGGGATTGGTCTTGTGTGTATA  
TCCTTATTTTATATTCTATCAAACCTCCATTTTGTAGCGGCTGCGCAGCTCCTTATTTATGT  
AGGAGCTATAAACATTTTAATTCTATTTGCTGTGATGTTTCATGAATGGTTCAGAATATTAC  
AAAGATTTGAATCTTTGGACTGTTGGAGATGGGATTACTTCGTTGGTTTGTACAAGTAT  
TTTGGTTTCACTAATGACTACTATTTTAGATACGTCGTGGTACGGGATTATCTGGACGAC  
AAAGTCAAACCAGATTATCGAGCAAGATTTGATAGGTAATAGTCAACAAATTGGAATTC  
ATTTATCAACAGATTTTTTTCTTCCATTTGAACTCATTTCATAATTCTTTTAGTTGCTTT  
GATAGGTGCAATTGCTGTTGCTCGTCAAATGAATGTAACAACACTACAAGAAAAGACCTC  
ATGATAGTCAATATGGGACCTCACCCATCAATGCATGGTGTCTTTCGGCTCATCCTT  
ACTCTAGATGGTGAAGATGTTATTGATTGTGAACCAATATTAGGTTATTTACACAGAGGA  
ATGGAAAAAATTGCGGAAAATCGAACAGTTATAACAATATCTACCTTATGTAACACGTTG  
GGATTATTTAGCTACTATGTTACAGAAGCAATAACCGTAAATGGACCAGAACAGTTGG  
GAAATATTCAAGTACCTAAAAGAGCCAGTTATATCAGAGTAATTATGTTAGAGTTGAGT  
CGTATAGCTTCTCATCTGTTATGGCTTGGCCCCTTATGGCAGATATTGGTGCACAGACC  
CCTTTTTTCTATATTTTCAGAGAAAAGAGAATTAGTATATGATCTATTTCGAAGCTGCCACC  
GGTATGAGAATGATGCATAATTATTTTCGTATCGGAGGAGTAGCGGCCGATCTACCTTAT  
GGATGGATAGATAAATGTTTGGATTTCTGTGATTATTTTTTAACAGCGGTTTCTGAATATC  
AAAACTTATTACGCGAAATCCTATTTTTTTAGAACGAGTTGAGGGAGTAGGCATTATT  
GGTCCAGAAGAAGCAATAAATTGGGGTTTATCGGGACCAATGCTACGAGCTTCCGGAA  
TCCAATGGGATCTTCGTAAAGTTGATCATTATGAATGTTACGACGAATTGGATTGGGAA  
ATCTTTTGGCAAAAAGAAGGAGATTCATTAGCTCGCTATTTAGTCCGAATCGGTGAAAT  
GAGGGAATCTATAAAAATTATTCAACAAGCTCTGGAAGGAATTCCAGGGGGGCCCTAT  
GAGAATTTAGAAAACCCGGTGCTTTGCTAGAGAAAGGGATCCGGAATGGAATGATTTTG  
AATATCGATTCATTAGTAAAAACCTTCTCCTACTTTTGAATTGCCGAAGCAAGA ACTTT  
ATGTAAGAGTTGAAGCCCCAAAGGGAGAATTGGGAATTTTTTTAATAGGAGATCAGAG  
TGTTTTTCTTGGAGGTGGAAAATTCGTCCACCTGGTTTTTATCAATTTGCAAATTTCTCC

TCAGTTAGTTAAAAGAATGAAATTGGCCGATATTATGACAATACTAGGTAGCATAGATAT  
CATTATGGGAGAAGTTGATCGTATGTTCCCTATGGTAACTGGGTTTCATGAATTACGGTCA  
ACAAACAGTACGAGCTGCAAGGTACATTGGTCAAGGGTTCATGATTACCTTATCTCACG  
CAAATCGTTTACCTGTAACCTATTCAATATCCTTATGAAAAATTAATTACATCTGAGCGTTT  
CCGCGGCCGAATCCATTTTGAATTTGATAAATGCATTGCTTGTGAAGTATGTGTTTCGTGT  
ATGTCCTATAGATCTACCTGTTGTTGATTGGAAATTGGAACTGGTATACGAAAGAAAC  
GCTTGCTTAATTACAGTATTGATTTTCGGAATTTGTATTTTTTTGTGGTAACTGTGTTGAGTA  
TTGTCCAACAAATTGTTTATCAATGACTGAAGAATATGAACTTCTACTTATGATCGTCA  
CGAATTGAATTATAATCAAATCGCATTGGGTCGTTTACCAATGTCAGTAATTAACGATTAT  
ACAATTCGAACAATTTTGAATTCG-----ATAATAAAA-----ATGCAG  
GGTCGTTTGTCTGCTTGGCTAGTCAAGCATGGACTAGTTCATAGATCTTTGGGCTTCGA  
TTATCAAGGAATAGAGACTTTACAAATAAAGCCTGAGGATTGGCATTCCATTGCTGTCA  
TTTTATATGTATATGGTTACAATTATCTACGTTCCCAATGTGCTTATGATGTAGCACCCGG  
TGGACTGTTAGCTAGTGTGTATCATCTTACGAGAATAGAGTATGGTGTAGATCAACCCG  
AAGAGGTATGCATAAAAGTATTTGCCCGAGGAGGAATCCTCGAATTCGGTCTGTTTTC  
TGGATTTGGAAAAGTGCGGATTTTCAAGAACGGGAATCTTATGATATGTTGGGAATCTG  
TTATGATACTCATCCACGACTTAAACGTATCTTAATGCCTGAAACTTGGATAGGATGGCC  
CTTACGTAAGGATTATATTGCCCTAATTTTTATGAAATCCAAGATGCTCATATGGGCAAT  
GAGTTTCGATGTATTGGGGGTATCCGTATTTATAGAAGCTTTAATTTTCGTGCTTATCCTA  
ATTGTTGGTTTAGTTTATGCATGGCGAAAAGGAGCATTGGAATGGTCTTAGTTCCTGAA  
TATTCAGACAATAAAAAAAGTAAA---AAAAAAAATAACATTGAGACGGTTATGAATTCC  
ATAGAATTTCCCTTACTTGCTCGAACAACCCAAAATTCAGTTATTTCAACTACATTAAT  
GATCTTTCAAATTGGTCAAGGCTCTCTAGTTTATGGCCGCTTCTTTATGGTACCAGTTGT  
TGCTTCATTGAATTTGCTTCATTAATAGGCTCACGATTTCGACTTTGATCGTTATGGACTG  
GTACCAAGATCGAGTCCTAGACAGGCAGACCTCATTTTAACAGCCGGCACAGTAACAA  
TGAAAATGGCTCCTTCTTTAGTGAGATTATATGAACAAATGCCTGAACCAAAAATATGTTA  
TTGCTATGGGAGCATGTACAATTACAGGGGGGATGTTTCAGTACCGATTTCGTATAGTACT  
GTTCCGGGGAGTCGATAAGCTAATTCCTGTAGATGTCTATTTGCCAGGCTGTCCGCCTAA  
ACCAGAGGCAGTTATAGATGCTATAACAAAACCTTCGTAAGAAAATAGCTAGAGAAATCT  
ATGAAGAGCGAATTAGGTCTCAAGAAGAAAATCGGTGTTTTACTACCAATCACAAGTT  
TCATGTTGGACGCAGTATTCATACTGGAAATATGATCAAGGATTGCTCTATCAATCACC  
ATCTACTTCAGAGATACCTCCTGAAACATTTTTCAAATACAAAAGTTCAGTATCTTCCCA  
CGAATTAGTGAATATGCAAACTAAAAACACCTTTTCTTGGATAAAGAAAGAGATTATTC  
GATCTATTTCCGTATCGCTGATGATATATATCATAGCTCGGACATCCATTTCAAATGCATAT  
CCCATTTTTGCACAGCAGGGTTATGAAAATCCACGAGAAGCGACCGGACGTATTGTATG  
TGCCAATTGCCATTTAGCTAATAAGCCCGTGGATATTGAGGTTCCGCAAGCGGTACTTC  
CTGATACTGTATTTGAAGCAGTTGTTTCGAATTCCTTATGATATGCAAGTTAAACAAGTTC  
TTGCTAATGGTAAAAGGGGAGGTTTGAATGTGGGGGCTGTTCTTATTTTACCTGAGGGA  
TTTGAATTAGCGCCTCCCGATCGGATTTCCGCCGAGATGAAAGAAAAGATAGGCAATCT  
GTCTTTTCAGAGCTATCGCCCAATAAAAAAATATTCTTGTGATAGGTCTCTGTTTCTGG  
TCAGAAATATAGTGAAGTCACCTTTCCTATTCTTTCCCGGACCCCGCTACTAATAAAGA  
TGTTCACTTCTTAAAATATCCCATATATGTAGGCGGGAACAGAGGAAGGGGTCAGATTT  
ATCCCGATGGGAGCAAGAGTAACAATACAGTTTATAATGCTACAGCGGCTGGTGTAGTA  
AGTAAAATCATACGAAAAGAAAAAGGGGGGTACGAAATAACCATATCGGATGCGTCAG

ATGAACGTCAAGTGGTTGATATTATTCCACCAGGGCCAGAACTTCTTGTTTCCGAAGGC  
GAATCTATCAAACCTTGATCAGCCATTAACGAGTAATCCTAATGTGGGTGGATTTGGTCA  
AGGAGATGCGGAAATAGTACTTCAAGATCCATTCCGTGTCCAAGGCCTTTTGTTCTTCT  
TGGCATCTGTTATTTTGGCACAAATATTTTGGTTCTTAAGAAGAAACAGTTTGAGAAG  
GTTCAATTGTCCGAAATGAATTTTCATGAGTAAAGTCTATGATTGGTTTGAAGAACGTCT  
CGAGATTCAGGCGATTGCAGATGATATAACTAGTAAATATGTTCCCTCCTCATGTCAACAT  
ATTTTATTGTCTAGGAGGAATTACGCTTACTTGTTTTTTAGTACAAGTAGCTACGGGGTT  
TGCTATGACTTTTTACTACCGTCCAACCTGTTACTGAGGCTTTTGCTTCTGTTCAATACAT  
AATGACTGAAGCTAACTTTGGTTGGTTAATTCGATCAGTTCATCGATGGTCGGCAAGTA  
TGATGGTCCTAATGATGATCCTGCACGTATTTTCGTGTGTATCTCACTGGTGGTTTTAAAA  
AACCTCGCAATTAACCTTGGGTTACAGGTGTGGTTCTGGCTGTATTGACCGCATCCTTT  
GGTGTAACCTGGTTATTCGTTACCTTGGGACCAAATTGGTTATTGGGCAGTCAAAATTGT  
AACAGGTGTGCCGGAAGCTATTCCTGTAATAGGATCCCCCTTTAGTAGAGTTATTACGCG  
GAAGTGCTAGTGTGGGACAATCCACTTTGACTCGTTTTTATAGTTTACACACTTTTGTAT  
TACCTCTTCTTACTGCCGTGTTTATGTTAATGCATTTTCTAATGATACGTAAGCAAGGTAT  
TTCCGGTCCTTTAAATGGGAGTAACAAAAAACCTGACTTAAATGATCCTGTATTAAGAG  
CTAAATTGGCTAAAGGGATGGGTCATAATTATTACGGAGAACCCGCATGGCCCAACGAT  
CTTTTATATATTTTTCCAGTAGTAATTTAGGTACTATTGCGTGTAACGTAGGCTTAGCGG  
TTCTAGAACCATCAATGATTGGTGAACCCGCCGATCCATTTGCAACTCCTTTGGAAATA  
TTACCCGAATGGTATTTCTTTCCCGTATTTCAAATACTTCGGACAGTACCTAATAAGTTAT  
TGGGTGTTCTTTTAAATGGTTTCAGTACCTGCGGGATTATTAACAGTACCTTTTTTGGAGA  
ATGTTAATAAATTTCAAATCCATTTTCGTCTGTCAGTAGCGACAACCTGTCTTTTTGATTG  
GTACCGTAGTGGCCCTTTGGTTGGGTATTGGAGCAACATTACCTATTGATAAATCCCTAA  
CTTTAGGTCTTTTTATGATTGAAGTTTTTCTATTTGGAATTGTCTTAGGTCTAATTCCTATT  
ACTTTAGCTGGATTATTTGTAACCTGCATATTTACAATACAGACGTGGTGATCAGTTGGAT  
CTTATGCTTACTATAACTAGTTATTTTCGGTTTTTCTACTAGCAGCTTTAACTATAACCTCAG  
CTCTCTTTATTGGTCTGACCAAGATACGACTTATTATGGATATAGTAAGTCTTGCTTGGG  
CTGCTTTAATGGTAGTCTTTACATTTTCTTTTCACTCGTAGTATGGGGAAGAAGTGGAC  
TCATGATTATTCGTTCCCGGAACCAGAAGTCAAATTTTGGTAGATAGGGATCCATA  
AAAACCTCTTTTCGAGGAATGGGCCAAACCGGGTCATTTCTCAAGAACAATAGCTAAGG  
GCCCTGATACTACCACTTGGATCTGGAACCTACATGCTGATGCTCACGATTTTCGATAGC  
CATACCAATGATTTGGAGGAGATCTCTCGAAAAGTATTTAGTGCTCATTTTGGCCAACT  
TTCCATTATCTTTCTTTGGCTGAGTGGCATGTATTTCCATGGTGCTCGTTTTTCCAATTAT  
GAAGCATGGCTAAGTGACCCTACTCACATTGGACCTAGTGCCCAGGTGGTTTGGCCAA  
TAGTGGGCCAAGAAATATTGAATGGCGATGTGGGCGGGGGTTTCCGAGGAATACAAAT  
AACCTCTGGTTTTTTTTCAGATTTGGCGAGCATCGGGAATAACTAGTGAATTACAACCTCT  
ATTGTACCGCAATTGGTGCATTAGTCTTTGCAGCCTTAATGCTTTTTGCTGGTTGGTTCC  
ATTATCACAAGCTGCTCCAAAATTGGCCTGGTTCCAAGATGTAGAATCTATGTTGAAT  
CACCATTTAGCAGGGCTACTAGGACTTGGGTCTCTTTCTTGGGCGGGGCATCAAGTACA  
TGTATCTTTACCAATTAACCAATTTCTAAACGCTGGAGTAGATCCTAAAGAGATCCCACT  
TCCTCATGAATTTATCTTGAATCGGGATCTTTTGGCTCAACTTTATCCAGTTTTGCCGA  
GGGAGCAACCCCATTTTTTACCTTGAATTGGTCAAATATGCGGAATTTCTTACTTTTCG  
TGGCGGATTAGATCCAGTAACTGGGGGTCTATGGCTAACTGATATTGCTCATCATCATTT  
AGCTATTGCAATTTCTTTTCTTGATAGCAGGTCACATGTATAGGACCAACTGGGGCATTG

GTCATGGCATAAAAAGATATTTTAGAGGCTCATAAAGGTCCATTTACAGGCCAGGGCCAT  
AAAGGCCTATACGAGATCCTAACAACGTCATGGCATGCTCAATTATCTCTTAACCTAGCT  
ATGTTAGGCTCTTTAACCATTGTTGTAGCTCACCATATGTATTCCATGCCCCCTTATCCAT  
ATCTAGCTACTGACTATGGTACACAACACTGTCATTGTTACACATCACATGTGGATTGGC  
GGGTTTCTCATAAGTTGGTGCTGCCGCGCATGCAGCTATTTTTATGGTAAGAGATTATGAT  
CCAACTACTCGATAACAACGATCTATTAGATCGTGTCTTAGGCATCGTGATGCAATCATA  
TCACATCTCAACTGGGTATGTATATTTCTAGGCTTTCACAGTTTTGGTTTGTATATTCATA  
ATGATACCATGAGCGCTTTAGGGCGACCCCAAGATATGTTTTCTGATACCGCTATAAAT  
TACAACCCGTCTTTGCTCAATGGATACAAAACACCCATGCTTTGGCGCCTGCTGCAACC  
GCCCTGGTGAACAGCAAGCACCAGTTTGACTTGGGGAGGTGGTGATTTAGTGGCA  
GTAGGTGGCAAGGTTGCTTTATTACCTATTCCATTAGGAACCGCAGATTTTTTGGTACAT  
CACATTCATGCATTTACGATTCATGTAACAGTATTGATACTCCTGAAAGGTGTTCTATTT  
GCTCGTAGCTCTCGTTTGATACCGGATAAAGCAAATCTTGGTTTTCGTTTCCCTTGAT  
GGACCTGGAAGAGGGGGGACATGCCAAGTATCCGCTTGGGATCATGTCTTCTTAGGCC  
TATTCTGGATGTACAATGCAATCTCGGTAGTCATATTTCAATTCAGTTGGAAAATGCAGT  
CAGATGTTTGGGGTAGTATAAGTGATCAAGGAGTGGTAACTCATATCACGGGAGGAAA  
CTTGGCGCAGAGTTCCATCACTATTAATGGGTGGCTCCGCGATTTCTTATGGGCACAGG  
CATCCCAAGTAATTCAGTCTTATGGTCTTCATTATCTGCATATGGCCTTTTTTTCCTAGG  
TGCTCATTTTGTATGGGCTTTTAGTTAAATGTTTCTATTCAGCGGGCGTGGTTATTGGCA  
AGAACTTATTGAATCCATCGTTTGGGCTCATAATAAATAAAAGTTGCTCCTGCTACTCA  
GCCTAGAGCCTTGAGCATTGTACAAGGACGTGCTGTAGGAGTAACCCATTACCTTCTGG  
GTGGAATTGCCACAACATGGGCGTTCTTCTTAGCAAGAATTATTGCAGTAGGAATGGCA  
TTAAGATTTCCAAGTTTAGCCAAGGCTTAGCTCAGGACCCCACTACTCGTCGATTTG  
GTTTGGTATTGCGACCGCGCATGACTTTGAGAGTCATGATGATTAATGAGGAACGTC  
TTATCAGAATATTTTTGCTTCTCACTTCGGGCAATTAGCAATAATTTTTCTATGGACTTC  
CGAAATCTGTTTCATGTAGCTTGGCAAGGAAATTTGAGGCATGGGTACAGGACCCC  
TTACATGTAAGACCTATTGCTCATGCAATTTGGGATCCTCATTTTGGTCAACCGGCCGTG  
GAAGCTTTTACTCGAGGGGGTGCTCTTGGCCAGTGAATATCGTTATTCTGGTGTATTAT  
CAGTGGTGGTATAACAATTGGTTTACGTACTAATGAAGATCTTTATACGGGAGCCCTTTTT  
CTATTATTTCTTTCTGCCATATCCTTAATAGCAGGTTGGTTACACCTACAACCGAAATGG  
AAACCGAGCGTTTCGTGGTTCAAAAATGCCGAATCTCGTCTCAATCATCATTTGTGTCAGG  
ACTATTCGGTGTAAAGTTCTTTGGCTTGGACAGGGCATTAGTACATGTGCTATTCTG  
ATCCAGGGGGGAATACGTTTCGATGGAATAATTTTTTAGATGTATTACCGCATCCCGAAG  
GGTTAGGACCACTTTTTACAGGTCAGTGGAATCTTTATGCCAAAACCCCGATTCAAAT  
AGTCATTTATTTGGTACCTCCCAAGGATCAGGAACCTGCCATTCTAACCCTTCTAGGGGG  
ATTCCATCCACAAACGCAAAGTTTATGGTTGACTGATATTGCTCATCATCATTTGGCTAT  
TGCATTTATTTTTCTCGTTGCTGGTCATATGTATAGAATAACTTCGGGATTGGGCACAG  
TATAAAAGATCTTTTAGAAGCACATACTCCTCCGGGGGACGATTGGGGCGTGGACATA  
AAGGTCTTTATGACACAATCAATAATTCGATTCATTTCAATTAGGCCTTGCTCTAGCCT  
CTTAGGTGTTATTACTTCCCTTGGTAGCTCAACACATGTACTCTTTACCTGCTTATGCGTT  
CATAGCACAAGACTTTACTACTCAAGCTGCGTTATATACTCATCACCATAACATCGCAGG  
ATTCATCATGACAGGGGCTTTTGCTCATGGGGCTATATTTTCATTAGAGATTACAATCC  
GGAACAGAATGAGGATAATGTATTGGCAAGAATGTTAGACCATAAAGAAGCTATCATAT  
CCCATTTAAGTTGGGCCAGCCTCTTTCTGGGGTCCACACTTTGGGGCTTTATGTTTATA

ATGATGTCATGCTTGCTTTTGGTACTCCGGAGAAACAAATCTTAATCGAACCTATATTTG  
CCCAATGGATAACAATCTGCTCATGGTAAACTTCATATGGGTTCGATGTGCTTTTATCTT  
CAACGAATAGCCCAGCATTTAATGCAGGTCAAAGCATATGGTTGCCCGGCTGGTTAAAT  
GCTATTAATGAG-----AATAGTAATTCACTATTCTTAAACAATTGGTCCTGGAGACTTCTTG  
GTTTCATCATGCGATTGCTCTAGGTTTACATACAACACTACATTGATCTTAGTAAAAGGTGCT  
TTAGATGCACGTGGTTCAAAGTTAATGCCAGATAAAAAGGATTTCCGGTTATAGTTTTCC  
TTGCGATGGTCCGGGACGAGGCGGTACTTGTGATATTTCCGCTTGGGACGCATTTTATT  
TGGCAGTTTTCTGGATGTTAAATACCATTGGGTGGGTTACTTTTTATTGGCATTGGAAAC  
ACATCACATTATGGCAGGGTAAACGTTTACAGTTTAAATGAATCTTCCACTTATTTGATGG  
GATGGTTAAGAGATTATCTATGGGTAAACTCTTCACACTTATCAATGGATATAACCCCT  
TTGGTATGAATAGTTTATCAGTTTGGGCGTGGATGTTCTTATTTGGACATCTTGTGGG  
CTACTGGATTTATGTTTTTAATTTCCCTGGCGTGGATATTGGCAGGAATTGATTGAAACTT  
TAGCATGGGCTCATGAACGCACACCTTTAGCTAATTTGATTTCGATGGAGAGATAAACCA  
GTGGCTCTTTCCATTGTACAAGCAAGATTGGTTGGATTAGCCATTTTTCTGTAGGTTAT  
ATATTCACGTATGCGGCTTTCTTGATTGCCTCCACGTCAGGCAAATTTGGTATGTCACAT  
TCAGTAAAGATTTATGATACATGTATAGGATGTAATGTGTGCGAGCCTGCCAAC  
AGATGTATTAGAAATGATACCGTGGGATGGATGTAAAGCTAAGCAAATTTGCTTCTGCTC  
CAAGAACAGAGGACTGTGTCGGTTGTAAGAGATGTGAATCCGCCTGTCCAACGGATTT  
TTTGAGCGTTCGAGTTTATTTATGGCATGAAACAACCTCGAAGCATGGGTCTAGCGTATAT  
GATAATTTTTAACTTACCCTCTTTCTTTGTGCCTTTAGTGGGCCTAGTATTTCCGGCAATT  
GCAATGGCTTCTTTATCTCTTCATGTTCAAAAAACAAGATTTTTATGCGAGATCTAAAA  
ACATATCTTTCCGTGGCACCGTACTAAGTACTCTATGGTTTGGGGCTTTAGCAGGTCTT  
TTGATAGAGATCAATCGTTTATTTCCGGATGCGTTGACATTCCTTTTTTTTCATTCATGA  
CTGCRATTTTAGAGAGACGCGAAAGCGAAAGCCTATGGGGTTCGCTTCTGTAACCTGGAT  
AACCAGCACCGAAAACCGTCTTTACATTGGATGGTTTGGTGTGTTTATGATGATCCCTACCT  
TATTGACCGCAACTTCTGTATTTATTTATGCTTTCATTGCTGCTCCTCCAGTAGATATTGA  
TGGTATTCGTGAACCTGTTTCTGGATCTCTACTTTATGGAAACAATATTATCTCGGGTGC  
CATTATTCCTACTTCTGCAGCTATAGGTTTGCATTTTTACCCAATATGGGAAGCGGCATC  
TGTTGATGAATGGTTATAACAACGGCGGTCCCTTATGAGCTAATTGTTCTACACTTCTTACT  
TGGTGTAGCTTGTACATGGGTTCGTGAGTGGGAACCTTAGTTTCCGTCTGGGTATGCGCC  
CTTGGATTGCTGTTGCATATTCAGCTCCTGTTGCAGCTGCTACTGCTGTTTTCTTGATCT  
ACCCAATTGGTCAAGGAAGTTTTTCGGATGGTATGCCTCTAGGAATTTCTGGTACTTTC  
AACTTCATGATTGTATTCCAGGCTGAGCACAAACATCCTTATGCACCCATTTACATGTTA  
GGCGTAGCTGGTGTATTTCGGCGGCTCCCTATTCAGTGCTATGCATGGTTCCTTGGTAACC  
TCTAGTTTGTATCAGGGAAACCACAGAAAATGAATCTGCTAATGAAGGTTACAGATTGCG  
GTCAAGAGGAAGAAACTTATAATATCGTAGCTGCTCATGGTATTTTGGCCGATTGATCT  
TCCAATATGCTAGTTTCAACAATTCTCGTTCCTTACACTTCTTCCTAGCTGCTTGGCCTG  
TAGTAGGTATCTGGTTCACTGCTTTAGGTATCAGCACTATGGCTTTCAACCTAAATGGTT  
TCAATTTCAACCAATCCGTAGTTGATAGTCAAGGTCGTGTAATTAATACCTGGGCTGATA  
TTATTAATCGTGCTAACCTTGGTATGGAAGTTATGCATGAACGTAATGCTCATAACTTCC  
CTCTAGACCTAGCTGCTGTCGAAGTTCCATCTACAAATGGAATGGGTTTGCCTTGGTAT  
CGTGTTCAACCGTCGTATTAATGATCCCGGCCGTTTGGCTTCTGTCCATATAATGCATA  
CAGCTTTGGTTGCTGGTTGGGCCGTTTCGATGGCTCTATATGAATTAGCAGTTTTTGATC  
CCTCTGATCCCGTTCCTGATCCAATGTGGAGACAAGGTATGTTTCGTTATACCCTTCATGA

CTCGTTTAGGAATAACCAATTCATGGGGCGGCTGGAGTATTACA---GGAGGGACTATAA  
CAAATCCGGGTATTTGGAGTTACGAAGGCGTGGCCGGTGCACATATTGTGTTTTCTGGC  
TTGTGCTTCTTGGCAGCTATCTGGCATTGGGTGTATTGGGATTTAGAAATATTTTGTGAT  
GAGCGTACAGGAAAACCTTCTTTGGATTTGCCAAAAATTTTGGAAATTCATTTATTTCTT  
TCAGGAGTGGCTTGCTTTGGGTTTGGCGCATTTTCATGTAACAGGATTGTATGGTCCTGG  
AATATGGGTGTCCGATCCTTATGGACTAACTGGAAAGGTACAACCTGTAAATCCAGCGT  
GGGGTGTAGAAGGTTTTGATCCTTTTGTCCGGGAGGAATAGCCTCTCATCATATTGCA  
GCAGGTACTTTAGGCATATTAGCGGGCCTATTTTCATCTTAGTGTCCGTCCGCCCAACGT  
CTATATAAAGGATTACGTATGGGCAATATTGAAACCGTCCTTTCCAGTAGTATTGCTGCT  
GTCTTTTTTGCAGCTTTTGTGTTGCTGGAACATGTGGTATGGTTCAGCAACTACCCCT  
ATCGAATTATTTGGTCCACTCGTTATCAATGGGATCAGGGATACTTCCAGCAAGAAATA  
TATCGAAGAGTTGGTGCTGGGCTAGCCAAAAATCAAAGTTTATCAGAAGCTTGGTCTA  
AAATTCCTGAAAAATTAGCTTTTTATGATTATATCGGTAATAATCCGGCAAAGGGGGGAT  
TATTCAGAGCGGGTTCAATGGACAACGGGGATGGAATAGCTGTTGGGTGGTTAGGACA  
TCCTATCTTTTCGAGATAAAGAAGGGCGTGAACCTTTTTGTACGTCGTATGCCTACTTTTTT  
TGAAACATTTCCGGTTGTTTTGGTAGACGGAGACGGAATTGTTTCGAGCCGACGTTCT  
TTTCGAAGGGCGGAATCAAAGTATAGTGTGAACAAGTGGGTGTAACCTGTTGAGTTCT  
ATGGCGGGGAACTCAATGGAGTCAGTTATAGTGATCCTGCTACTGTGAAAAAATATGCT  
AGACGTGCCCAATTAGGTGAAATTTTTGAATTAGATCGTGCTACTTTGAAATCCGATGG  
TGTTTTTCGTAGCAGTCCAAGGGGTTGGTTTACTTTTGGACATGCTTCGTTTGCTCTGC  
TCTTCTTTCGGACACATTTGGCATGGTGCTAGAACCTTGTTTCAGAGATGTTTTTGT  
GGTATTGACCCCGATTTGGATGCTCAAGTGGAATTTGGAGCATTCCAAAACTTGGAGA  
TCCAACTACAAGAAGACAAGTAGTCATGAAAACCTTATATCCCTGAGGAGGTTCTACC  
CCGTGGAAACGCTCTTTAATGGAACCTTAGCTWTAGCTGGTTCGTGACCAAGAAACCAC  
CGTTTTCGCTTGGTGGGCCGGAATGCACGACTTATCAATTTATCCGGTAAACTGTTGG  
GGGCTCATGTAGCCCATGCCGATTAATCGTATTCTGGGCCGGAGCAATGAACCTATTT  
GAAGTGGCTCATTTTGTACCAGAAAAGCCCATGTATGAACAAGGATTAATTTTACTTCC  
CCACTTAGCTACTCTAGGTTGGGGGGTAGGTCCGGGTGGGGAAGTTATAGACACCTTT  
CCATATTTGTATCTGGAGTACTTCACTTAATTTTCGTCTGCAGTATTAGGCTTTGGCGGTA  
TTATCATGCACTTCTGGGCCCTGAGACTCTTGAAGAATCTTTTCCATTCTTTGGTTATG  
TATGGAAAGATAGAAATAAAATGACCACAATTTGGGTATTCATTAATCTTGTTAGGTA  
TAGGTGCTTTTCTTCTAGTATTCAAGGCTCTTTATTTTGGAGGCGTATATGATACCTGGG  
CTCCGGGAGGGGGAGATGTAAGAAAAATTACCAACTTGACCCTTAGCCCAAGTGTTAT  
ATTTGGTTATTTACTAAAATCTCCTTTTGGAGGAGAAGGATGGATTGTTAGTGTGGACG  
ATTTGGAAGATATAATTGGAGGGCATGTATGGTTAGGTTCCATTTGTATACTTGGCGGAA  
TCTGGCATATCTTAACCAAACCTTTTGCATGGGCTCGTCGAGCACTTGTATGGTCTGGG  
GAGGCTTACTTGTCTTATAGTTAGCTGCTTTATCTGTTTTTGGTTTCATTGCTTGTGCT  
TTGTCTGGTTCAATAATACCGCTTATCCTAGTGAATTTTACGGACCTACTGGGCCAGAA  
GCTTCTCAAGCTCAGGCATTTACTTTTCTAGTTAGAGACCAACGTCTTGGGGCTAACGT  
GGGATCCGCTCAAGGACCTACTGGTTTAGGTAATAACCTAATGCGTTCCTCCGACTGGAG  
AAGTAATTTTGGAGGGGAACTATGCGTTTTTGGGATCTGCGTGCTCCTTGGTTAGAA  
CCTCTAAGGGGTCAAATGGATTGGACTTGAGTAGGCTGAAAAAAGATATACAGCCTT  
GGCAAGAACGTGTTCCGCAGAATATGACTCATGCTCCTTTAGGTTCTTTAAATTCG  
TGGGTGGTGTGCTACCGAGATCAATGCAGTCAATTATGTCTCTCCTAGAAGTTGGTTA



GCTACTTCTCATTGTTCTAGGATTCTTTCTATTTCGTAGGTCATTTATGGCACGCGGGA  
AGGGCTCGTGCAGCTGCAGCAGGATTTGAAAAGGGAATTGATCGTGATTTTGAACCTG  
TTCTTTCCATGACCCCCCTTAATATGACTATAGCCCTTGGTAAATTTACCAAAGACGAAA  
ATGATTTATTTGATATTATGGATGACTGGTTACGTAGAGACCGTTTCGTTTTTGTAGGTTG  
GTCCGGTCTATTA CTCTTTCTTGTGCCTATTTGCCTTAGGTGGTTGGTTCACAGGTAC  
AACCTTTGTA ACTTCATGGTATA ACCCATGGATTGGCCAGTTCCTATTTGGAAGGATGCA  
ACTTCTTAACCGCCG CAGTTTCTACTCCCGCTAATAGTTTAGCACATTCTTTGTTGTTAC  
TATGGGGTCCTGAAGCACAAGGAGATTTACTCGTTGGTGTCAATTAGGCGGTCTGTGG  
ACTTTTGTGGCTCTCCACGGCGCTTTCCGACTAATAGGTTTCATGTTACGTCAATTTGA  
ACTTGCTCGATCTGTTCAATTGCGACCTTATAATGCAATCGCATTCTCTGGTCCAATTGC  
TGTTTTTGTCTGTATTCTGATTTATCCACTAGGT CAGTCTGGTTGGTTCTTTGCGCCT  
AGTTTTGGTGTAGCAGCTATATTTGCCTCATCCTTTTTTTCCAAGGGTTTCATAATTGG  
ACATTGAACCCATTT CATATGATGGGAGTTGCCGGTGTATTGGGCGCTGCTCTCCTATGC  
GCTATTCATGGTGTACCGTAGAAAATACTTTATTTGAAGATGGTGATGGTGCAAATACA  
TTCCGTGCTTTTAACCCAACTCAAGCTGAAGAACTTATTCAATGGTCACCGCTAATCG  
CTTTTGGTCCCAAATCTTTGGGGTTGCTTTTTTCCAATAAACGTTGGTTACATTTCTTTAT  
GTTATTTGTACCAGTAACCGGTTTATGGATGAGTGCTCTTGGAGTAGTCGGTCTGGCTC  
TGAACCTACGTGCCTATGACTTCGTTTCCCAGGAGATCCGTGCAGCGGAAGATCCTGA  
ATTTGAAACTTTCTACACCAAAAATATTCTCTTAAACGAAGGTATTCGTGCTTGGATGG  
CGGCTCAAGATCAGCCTCATGAAAACCTTATATTCCCTGAGGAGGTTCTACCCCGTGGA  
AACGCTCTTATGTCTGGAAGCACAGGAGAACGTTCTTTTGCTGATATTATTACCAGTATT  
CGATACTGGGTTATTCATAGTATTACTATACTTCCCTATTCATTGCGGGTTGGTTATTCG  
TCAGCACGGGTTTAGCTTATGATGTGTTTGGAAAGCCCTCGTCCAAACGAATATTTTACA  
GAGAGCCGACAAGGAATTCATTAATAACTGGCCGTTTTGACCCTTTGGAACAACCTCG  
ATGAATTTAGTAGATCTTTTATGACCATAGATCGAACCTATCCAATTTTACAGTGCGAT  
GGTTAGCTGTT CATGGACTAGCTGTACCTACCGTTTCTTTTTTAGGGTCAATATCAGCAA  
TGCAGTTCATCCAACGAATGGCTACGCAAACCGTTGAGGGTAGTTCTAGATCTGGA---C  
CAAGACGA ACTATTGTAGGGGATTTATTGAAACCATTGAATTCAGAATATGGTAAAGTA  
GCTCCTGGATGGGGA ACTACTCCTTTGATGGGTGTCGCAATGGCTCTATTTGCAGTATT  
CCTATCTATTATTTTGGAAATTTATAATTCTTCTGTTTTACTGGACGGAATTTCAATGAATA  
TGCTTACTCTCAA ACTCTTTGTTTATACAGTAGTGATATTTTTTGTCTCTCTTCATCTT  
TGGATTCTATCTAATGATCCAGGACGTAATCCTGGACGTGAAGAAATGGCCGATACTA  
CTGGAAGGATTCCTCTTTGGATAATAGGTACTGTA ACTGGTATTCTTGTGATTGGTTTAA  
TAGGTATTTCTTTTATGGTTCATACTCCGGGTTGGGTT CATCTCTGATGCTTAATATCTTT  
AGTTTGATCTGTATCTGTCTTCATTCACCCCTTATTCAAGTAGTTTTTTCTTAGCCAAAT  
TGCCTGAGGCCTACGCTTTTTTGAATCCAATCGTAGATTTTATGCCAGTAATACCCCTC  
TCTTTTTTCTCTTAGCCTTTGTTTGGCAAGCTGCTGTAAGTTTTCTG  
A????????????????????????????????????????????????????????????  
????????????????????????????????????????????????????????????  
????????????????????????????????????????????????????????????  
ATGGAAGTAAATATTCTCGCATTATTGCTACTGCACTCTTC  
ATTCTAGTTCCTACTGCTTTTTTACTTATAATATACGTAAAACAGTCAGTCAAAGTGAT  
ATGGAACAGCAACCCTAGTCGCCATCTCTATATCTGGTTTACTTGTAAGTTTTACTGGG  
TACGCCTTATACTGCTTTTGGGCAACCCTCTCAACAATTAAGAGATCCATTGGAAGA  
ACACGGGGACATGGAAGCATTGGTTTATACATTCTTCTTAGTCTCGACTCTAGGGATAA  
TTTTTTTCGCTATCTTTTTTTCGAGAACCACCTAAAGTTCCA ACTAAAAGGTGAAAATG

ACTATTGCTTTCCAATTGGCTGTTTTTGCATTAATTGCTACTTCATTAATCTTACTGATTA  
GTGTACCCGTTGTATTTGCTTCTCCTGACGGTTGGTCGAGTAACAAAAATGTTGTATTTT  
CTGGTACATCATTATGGATTGGATTAGTCTTTCTGGTGGGTATCCTTAATCTCTCAITCTC  
T-----ATGTCACCACAAACAGAGACTAAAGCAAGTGTTGGATTCAAAGCTG  
GTGTTAAAGATTATAAACTGACTTATTATACTCCTGACTATGAAACCAAAGATACTGATA  
TCTTGGCAGCATTCCGAGTAACTCCTCAACCTGGAGTTCCTCCTGAGGAAGCAGGGGC  
TGCGGTAGCTGCTGAATCTTCTACTGGTACATGGACAACCTGTGTGGACCGATGGGCTTA  
CCAGCCTTGATCGTTATAAAGGAAGATGCTACCACATCGAGCCTGTTGCTGGAGACGA  
AAATCAATATATATGTTATGTAGCTTACCCTTTAGACCTTTTTGAAGAAGGTTCTGTTACT  
AATATGTTTACTTCCATTGTGGGTAATGTATTTGGGTTCAAAGCCCTGCGCGCTCTACGT  
CTGGAGGATCTGCGAATCCCTCCTTCTATAACGAAAACCTTTCCAAGGCCCGCCTCATGG  
CATCCAAGTTGAGAGAGATAAATTGAACAAATATGGGCGTCCCCTATTGGGATGTACTA  
TTAAACCGAAATTGGGGTTATCCGCTAAGAACTACGGTAGAGCAGTTTATGAATGTCTT  
CGTGGTGGACTTGATTTTACGAAAGATGATGAGAACGTGAACTCACAACCATTTATGC  
GTTGGAGAGACCGTTTCTTATTTTGTGCCGAAGCCATTTTTAAATCACAGGCTGAAACA  
GGTGAATCAAAGGGCATTACTTGAATGCTACTGCAGGTACATGCGAAGAAATGATGA  
AAAGGGCTGTATTTGCCAGAGAATTGGGAGTTCCTATCGTAATGCATGACTACTTAACA  
GGGGGATTCACTGCAAATACTAGCTTGGCTCATTATTGCCGAGATAATGGTCTACTTCTT  
CACATCCATCGTGCAATGCATGCAGTTATTGATAGACAGAAAAATCATGGTATACACTTT  
AGGGTACTAGCTAAAGCCTTACGTATGTCTGGTGGAGATCATATTCACGCTGGTACTGT  
AGTAGGTAACCTGAAAGGAGAAAGAGACATTACTTTGGGCTTTGTTGATTTACTACGTG  
ATGATTTTATTGAAAAAGATCGAAGCCGCGGTATTTATTTCACTCAAGATTGGGTCTCTC  
TACCAGGTGTTCTGCCGTAGCTTCTGGGGGTATTACGTTTGGCATATGCCTGCTCTG  
ACCGAGATCTTTGGAGATGATTCCGTACTACAATTCGGCGGAGGAACTTTAGGACACC  
CTTGGGGAAATGCACCGGGTGCCGTAGCTAATCGAGTAGCTCTAGAAGCATGCGTACA  
AGCTCGTAATGAGGGACGTGATCTTGCTCGTGAGGGTAATGAAATTATCCGTGAGGCTA  
GCAAATGGAGTCCTGAACTAGCTGCTGCTTGTGAAGTATGGAAAGAGATCAAATTTGA  
ATTCGAAGCAATGGATACTTTG-----ATGGCGATACATTTATACAAACTTCTACCCCGAG  
CACACGCAATGGAGCCGTAGACAGTCAAGTGAAATCCAATACACGAAATAATTTGATC  
TATGGACAGCATCGTTGTAGTAAAGGTTCGTAATGCCAGAGGAATCATTACCGCAGGGCA  
TAGAGGGGGAGGTCATAAGCGTCTATACCGTAAAATCGATTTTTCGACGGAATGAAAAA  
GACATATATGGTAGAATCGTAAGCATAGAATACGACCCTAATCGAAATGCATCCATTTGT  
CTCATACACTATGGGGATGGTGAGAAGAGATATATTTTACATCCCAGAGGGGCTATAATT  
GGAGATAACCATTGTTTCTGGTACAGAAGTTCCTATAAAAATGGGAAATGCCCTACCTTT  
GACCGATATGCCCTTAGGCACGGCCATACATAACATAGAAATCACACTTGAAAGGGTG  
GACAATTAGCTAGAGCAGCGGGTGCTGTAGCGAAACTGATTGCAAAAGAGGGGAAAT  
CGCCACATTAATAATTACCTTCTGGGGAGGTCCGTTTGATATCCAAAACCTGCTCAGCA  
ACAGTCGGACAAGTGGGGAATGTTGAGGTGAACCAGAAAAAGTTGGGTAGAGCCGGA  
TCTAAATGTTGGCTAGGTAAGCGTCTGTAGTAAGAGGAGTGGTTATGAACCCTGTAGA  
CCATCCCCATGGGGGTGGTGAAGGGAGAGCCCCAATTGGTAGAAAAAAACCCGCAAC  
CCCTTGGGGTTATCCTGCACTTGGAAGAAGAAGTAGAAAAAGGAAGAAATATAGTGAT  
AATTTGATTCTTCGTCGCCGTAGTAAAATGATTCAACCTCAAAGCCATTTGAATGTAGC  
GGATAACAGCGGGGCCCGAGAATTAATGTGTATTAGAATCATAGGAGCTAGT---AATCG  
CCGATATGCTCATATCGGTGACATTATTGTTGCTGTGATCAAGGAAGCATTACCAAACAC

ACCTCTAGAAAGATCAGAGGTGATCAGAGCTGTAATTGTACGTACTTGTAAGAAGCTTA  
AACGTGACAACGGTATGATAATACGATATGATGATAATGCTGCAGTTGTGATTGATCAAG  
AAGGAAATCCAAAAGGAACCTCGAGTTTTTGGTGCATTGCCCGAGAATTGAGACAGTT  
AAATTTCACTAAAATAGTTTTATTAGCACCTGAGGTATTAATGCTTAGTCCTAAAAGAAC  
CAGATTTTCGAAAACAACATAGAGGAAGAATGAAAGGAATATCTTATCGAGGTAATCGTA  
TTTGTTTTCGGTAAATATGCTCTTCAGGCACTTGAACCCGCTTGGATCACATCTAGACAA  
ATAGAAGCAGGGCGACGAGCAATGACAAGAAATGTGCGCCGTGGTGGAAAAATATGG  
GTACGTATATTTCCAGACAAACCAGTTACGGTAAGACCTACGGAAACACGTATGGGTTC  
GGGTAAAGGATCTCCCGAATATTGGGTAGCTGTCGTTAAACCAGGTCGAATACTTTATG  
AAATGGGCGGAGTAGCAGAAAATATAGCCAGAAAGGCTATTTCAATAGCGGCGTCCAA  
AATGCCTATACGAACTCAATTTATTATTTTCGGGAATGACTAGAATTAGACGAGGATATAT  
AGCTCGGAGACGTAGAACAAAAATTCGTTTATTTGCATCAAGCTTTTCGGGGGGCTCGT  
TCAAGACTTACTCGAACAATTATTCAACAGAAAATAAGATCTTTGGTTTCGTCTCATCG  
AGATAGAGATAGGAAAAAGATAGATTTTCGTCGTTTGTGGATCACTCGGATAAATGCAG  
TAATTCGCGGGAAT---AGAGTATCCTATAGTTATAGTAGATTAATACACAATCTGTACAAG  
AGACAGTTGCTTCTAATCGTAAAATACTTGCACAAATAGCTATATTAATAGGAATTGT  
CTTTATATGATTTCTAATGAGATCAGATCA-----ATGAGAAAGGAAG  
TATATGCTTTAGGTCAACATATATCTATGTCTGCTCACAAAGCACGAAGGGTAATTGATC  
AGATTCGTGGACGTTCCCTACGAGGAAACACTTATGATACTCGAACTTATGCCTTATCGA  
GCGTGTATCCCATTTTTAAGTTGGTTTATTCTGCAGCAGCAAATGCTAGTCATAATATG  
GGTTTCAATGAAGCAAGTTTAGTTATTAGTAAAGCTGAAGTCAACGAGGGTACTACTAT  
GAAAAAATTAACCTCGAGCTCGAGGGCGAAGTTATGCAATAAAAAGACCCACTTGT  
CATATAAGGATTGTATTGAAAGATAAATCTTTCTAT---GGATTATGGGACAAAAAATGG  
ATGGAATCAAATATGCAGTATTTACAGACAAAAGTATTTCGGTTATTGGGGAAAAAT---CA  
ATATACTTTTAATGTGCAATCAGGATCAACTAGGACAGAAATAAAGCATTGGGTGCAAC  
TCTTCTTTGGTGTCAAGGTAAGCTATGAATAGTCATCGACTCCCGGGAAAGGGTAG  
AAGAATGGGACCTATTCTGGGACATACAATGCATTACAGACGTATGATCATTACGCTTC  
AACCGGGTTATTCTATTCCACCTCTTAGAAAGAAAAGAACTATGGCAGTTCCAAAAAA  
AAGTACTTCTATATCAAAAAACGTATTCGTAAAAACATTTGGAAAAAGAAGGTATATC  
GGGCAGCGTTGAAAGCTTTTTTCCTTAGCGAAGTCTCTTTCTACCGGGAATTCAAAAAG  
TTTTTTTTGTACGACAATAAA---ATGGCCAAGGGTAAAGATGTCCGAGTAACGGTTATT  
TTAGAATGTACCAACTGT---GTTAGAACC-----CTTAATAAGGAATCAAGGGGTGTTTCC  
AGATATATTACTCAAAAGAATCGACACAATACGCCTAGTCGATTGGAATTGAGAAAATT  
CTGTCCCTATTGTTACAAACATACGATTCACGGGGAGATAAAGAAAATGAAAATAAGG  
GCCTCCGTTCGTAAAATTTGTGAAAAATGTCGACTGATCCGTAGAAGAGGACGAATTAT  
AGTAATTTGTTCTAATCCGAGACATAAACAAGACAAGGAATGGTTCGAGAGAAAGTA  
AGAGTATCTACTCGGACACTACAGTGGAAAGTGTGTTGAATCAAGAGCAGACAGTAAGC  
GTCTTTATTATGGACGCTTTATTCTATCTCCCTTATGAAAGGGCAAGCCGATACAATAG  
GCATTGCGATGCGAAGAGCTTTGCTTGGTGAATAGAAGGAACATGTATCACCCGTGC  
AAAATTTGAA-----AAAATACCACATGAATATTCTACCATAGTAGGTATTCAAGAATCAGT  
ACATGAAATTTAATGAATTTGAAAGAAATTGTATTGAGAAGTAATCTATATGGAACCTCG  
CAACGCGTCTATTTGTGTCAAGGGTCTGGATGTGTAAGTCAAGACATCATCTTAC  
CAACTTCTGTGGAATCGTTGATAACACACAGTATATAGCTAATCTAACGGAAACCCATT  
AATTTGTGTATTGGATTACAAATCGAGAGGAATCGCGGATATCATATAAAAACACCAA

AAACTTTCAAGATGGAAGTTAT-----CCTATAGATGCTGTATTCATGCCTGTTTCGAAATGC  
GAATCATAGTATTCATTCTTATGGGAATGGAAATGAAAAACAAGAGATACTTTTTCTCG  
AAATATGGACAAACGGAAGTTAACTCCTAAAGAAGCACTTCATGAAGCCTCCCGGAA  
TTTAATTGATTTATTTATTCCTTTTCTACATGCAGAAGAAGAA-----AACTTACATTTAGA  
GAACAATCAG---TACAAGGTTACTTTACCCTTTTTTACTTTTTTCATGATAGGTTGGCTAAG-  
--CTAAGGAAAACGAAAAAA---GAAATAGCATTGAAATCCATTTTTATTGACCAATTTCGA  
ATTGCCTCCCAGGACCTATAATTGCCTCAAAAAGGTACAATATACATACATTATTTGACCT  
TTTGAATAAGAGTCAAGAAGACCTTATGAAAATGGAATATTTTCGCATAGAAGATGTAA  
AACAGATATTGGACAGTCTAGAAATAGAAAAAGCATTTCACAACCCATTTACCGAAGA  
A---ATGCTCGGGGATGGAAAT---GAGGGAATGTCTACAATACCTGGGTTAATCAGATAC  
AATTTGAAGGATTTTGTAGATTCATTGATCAGGGCTTAACAGAAGAAGCTTATAAAGTTT  
CCAAAAATTGAAGATACAGATCAAGAAATTGAATTTCAATTATTTGTGGAAACATATCA  
ATTGGTAGAACCTTTGATAAAAGAAAGAGATGCTGTATATGAATCACTCACATATTCCTC  
TGAATTATATGTATCCGCGGGATTAATTTGGAAAACCAGTAGGGATATGCAAGAACAAA  
CTCTTTTTATTGGAAACATTCCCTTAATGAATTCCTGGGAACTTCTATAGTAAATGGAA  
TATACAGAATTGTGATCAATCAAATATTGCAAAGTCCCGGTATCTATTACCGGTCAGAAT  
TGGACCATAACGGAATTTCCGTCTATACCGGCACCATAATATCAGATTGGGGAGGAAGA  
TTAGAATTAGAGATTGATCGAAAAGCAAGGATATGGGCTCGTGTGAGTAGGAAACAGA  
AAATATCTATTCTAGTTCTATCATCAGCTATGGGTTCGAATCTAAGAGAAATTCTAGAGA  
ATGTTTGTCTATCCTGAGATTTTCTTGTCTTTCCTGAATGATAAAGAGAAAAAAAATT  
GGGTCAAAGAAAATGCCATTTTGGAGTTTATCAACAATTTGCTTGTGTAGGCGGAGA  
TCCGGTATTTTCTGAATCCTTATGTAAGGAATTACAAAAAAATTCTTTCAACAAAGAT  
GTGAATTAGGAAGGATTGGTTCGACGAAATATGAATCGGAGACTCAATCCTTGATATACCT  
CAGAACAATACATTTTTGTTACCGCGAGATATATTGGCAGCTGCGGATCATTTGATTGGA  
ATGAAATTCGGAATGGGTACACTTGACGAT-----ATGAATCATTGAAAAATAAGCGTAT  
TCGTTCTGTAGCGGATCTCTTACAAGATCAATTCGGATTGGCTCTGGTTTCGTTTAGAAA  
ATGTGGTTAAAGGAAGTATATGTGGAGCAATTAGG---CATAAATTGATA---CCGACTCCT  
CAGAATTTGGTAACTTCAACTCCA-----TTAACAACCACTTATGAATCTTTTTTCGGA  
TTACACCCATTATCTCAAGTTTTGGATCGAACGAATCCATTGACACAAATTGTTTCATGG  
GAGAAAATTGAGTTATTTGGGCCCTGGAGGATTAACAGGGCGAACTGCTAGTTTTCGA  
ATACGAGATATCCACCCTAGTCACTATGGACGCATTTGCCAATCGACACGTCTGAAGG  
AATCAATGTTGGACTTATTGGATCTTTAGCAATTCATGCGAGAATTGGTCAGGGGGGG--  
-TCTCTAGAAAGCCATTTTAT-----GAAATCTCCGAGAGATCAAATCAAAAAAAGTA  
CGGATGCTTTATTTATCACCAAGTAGAGATGAATACTATATGATAGCGGCGGGAAATTCT  
TTAGCGCTGAATCAGCGTATTCAAGAAGAACAGGTTGTTCCAGCTCGATACCGTCAAG  
AATTCCTAACTATTGCATGGGAACAGGTTAATCTTCGAAGTATTTTTCTTTCCAATATTT  
TTCTATTGGAGCTTCTCTCATTCTTTTATCGAGCATAATGATGCGAATCGAGCTTTAATG  
AGTTCGAATATGCAACGCCAAGCAGTTCCACTTTCTCGGTCCGAGAAGTGCATTGTTG  
GAACTGGGTTGGAACGCCAAGCGGCTCTAGATTCAGGGGTTACCGCTATAGCCGAACA  
CGAGGGAAAGATCATTATACCAATACTGACAAGATCATTATTTGGGCAATGGAGATA  
CTTTAAGCATTCCATTAGTTATGTATCAACGTTCCAACAAAAATACTTGTATGCATCAAA  
AACCCCAGGTTCCGCGGGGTAAATGCATTAATAAAGGACAAATTTTAGCGGATGGTGC  
CGCTACAGTTGGTGGCGAACTCGCTTTGGGTAAAAATGTATTAGTAGCTTATCTGCCAT  
GGGAAGGTTACAATTTTGAAGATGCAGTACTCATTAGCGAGCGTCTGGTATATGAAGAT

ATTTATACTTCTTTTCACATACGGAAATATGAAATTCAGACTCATGTGACAAGCCAAGG  
A---CCCGAAAGGATCACTAACGAAATACCGCATCTAGAAGCCCATTTACTCCGCAATTT  
AGACAAAATGGAATTGTGATGTTGGGATCTTGGGTAGAGGCGGGCGATGTTTTAGTA  
GGTAAATTAACCTCCCAGACGGCGAAAGAA---TCATCGTATGCCCCAGAAGATAGATTA  
TTACGAGCCATACTTGGCATTCAAGTATCCACTTCAAAGGAAACTTGTCTAAAACCTACC  
TATAGGTGGTAGGGGTAGAGTTATTGATGTGAGATGGATCCAGAAAAAAGGG---GGTTC  
GAATTATAATCCAGAAACTATTTGTGTCTATATTTTACAGAAACGTGAAATCAAAGTGG  
GTGATAAAGTAGCTGGAAGGCATGGAATAAAGGTATCATTTCCAAATTTTACCTAGA  
CAAGATATGCCTTATTTGCAAGATGGAAGACCTGTTGATATGGTCTTCAATCCATTAGGA  
GTACCCTCACGAATGAATGTAGGACAGATATTTGAATGCTCACTCGGGTTAGCGGGGGA  
TCTGCTAGATAGACATTATCGAATAGCACCTTTGATGAGAGATATGAGCAAGAGGCTT  
CGAGAAAACCTAGTGTCTTCTGAATTATATGAAGCCAGTCAGCAAACAGCGAATCCATG  
GGTATTTGAACCCGAGTATCCGGGAAAAAGCAGAATATTTGATGGAAGAACGGGAGAT  
CCTTTTGAACAACCTGTTATAATAGGAAAGCCTTATATCTTGAAATTAATTCATCAAGTT  
GATGATAAAATACACGGACGTTCCAGTGGACATTATGCACTTGTTACACAACAACCCCT  
TAGAGGAAGGGCCAAGCAAGGGGGACAACGGGTAGGAGAAATGGAGGTTTGGGCTC  
TCGAGGGGTTTGGTGTGCTCATATTTTACAAGAGATGCTTACTTATAAATCGGATCATA  
TTCGAGCTCGTCAAGAAGTACTTGGTACTACAATCATTGGGGGAACAATACCTAAACCT  
AAAGATGCTCCAGAATCTTTTCGATTGCTCGTTCGAGAACTACGATCTTTGTCTCTGGA  
ACTGAATCATTTCCTTGTATCTGAGAAGAACTTCCAGATTAATAGGAAGGAAGCTATGA  
ATCATAATTTTCTTCTATGATCGATCGGTATAAACATCAACAACCTCCGAATTGGATCAG  
TTTCTCCTCAACAAATAAGTGCTTGGGCCAAAAAAATCCTCCCTAATGGAGAGATAGTT  
GGAGAGGTGACAAAACCCCTATACTTTTCATTACAAAACCAATAAACCGGAAAAGGATG  
GATTGTTTTGTGAAAGAATTTTTGGTCCTATAAAAAGTGGAATTTGTGCTTGTGAAAT  
TATCGAGTAATCGGAGATGAAAAAGAGGACCCGAAATTTTGTGAACAATGCGGAGTAG  
AATTTGTTGATTCTCGGATACGAAGATATCAAATGGGATACATCAAATTAGCATGTCCAG  
TAACCCATGTGTGGTATTTGAAACGTCTTCCCTAGTTATATCGCGAATATTTTAGATAAAC  
CTCTTAAAGAATTAGAAGGGCTAGTATACTGCGATTTT-----TCTTTTGCTAGGCC---AT  
AGCTAAAAACCTACTTTCTTACGATTACGAGGGTTATTCGAATATGAAATCCAATCATG  
GAAATACAGCATCCCACTTTTTTTTACTACTCAAGGCTTCGATACATTCGAAATCGAG  
AAATTTCTACTGGAGCGGGTGCTATCCGAGAACAATTAGCCGATCTCGATTTGCGAATT  
ATTATAGATTATTCATTGGTAGAATGGAAGGAATTAGGAGAAGAA---AGACCCACGGGT  
AATGAATGGGAAGATCGCAAATTTGGAAGAAGAAAGGATTTTTTGGTTAGACGCATGG  
AATTGGCTAAGCATTTTCTTCGAACAAATATAGAACCAGAATGGATGGTTTTATGTCTAC  
TACCAGTCTTCCCTCCCGAACTACGACCCATCATTAGATAGATGGAGGTAAGCTAATG  
AGCTCGGATTAATGAACTCTATAGAAGAGTTATCTATCGGAACAATACTCTTACCGAT  
CTATTAACAACAAGTAGATCTACACCAGGGGAATTAGTAATGTGTCAAGAGAAATTGGT  
ACAAGAAGCCGTGGATACACTTCTTGATAATGGAATTCGCGGACAACCAATGAGGGAT  
GGTCATAATAAGGTTTACAAGTCGTTTTCGGATGTAATTGAAGGCAAAGAGGGAAGAT  
TTCGTGAGACTCTGCTTGGCAAACGGGTGATTAATTCGGGTCTGTTCTGTCATTGTCGTA  
GGACCTCACTTCCATTACATCGATGTGGATTGCCTCGGGAAATAGCAATAGAGCTTTT  
TCAGACATTTGTAATTCGTGGGCTAATTAGACAACATCTTGCTTCGAACATAGGAGTTG  
CTAAGAGTAAAATTCGGGAAAAGGAGCCCATTGTATGGGAAATACTGCAAGAAGTTAT  
GCAGGGGCATCCCGTATTGCTGAATAGAGCGCCTACTCTGCATAGATTAGGCATACAGG

CATTTCAACCCATTTTGTAGTGGAAGGACGTGCTATTTGTTTACATCCATTAGTTCGTAAGG  
GATTCAATGCAGACTTTGATGGGGATCAAATGGCTGTTCATGTACCTTTATCTTTGGAG  
GCTCAAGCGGAGGCTCGTTTACTTATGTTTTCTCATATGAATCTCTTGTCTCCAGCTATT  
GGGGATCCCATTTCCGTACCAACCCAAGATATGCTTATTGGTCTATATGTATTAACGAGT  
GGGAATCGCCGAGGTATTTGTACAAATAGGTATAATCCATGGAATCGC-----AGAACT  
ATCAAAATGAAAGAACTTATGATAATAACTATAAGTATAGAAAAAAA---GAACCTTTTTT  
TTGTAATTCCTATGATGCAATTGGAGCTTATCGACAGAAAAGAATCAATTTAGATAGTCC  
TTTGTGGCTTCGATGGCGACTAGATCAACGC---ATTATTGCTTCA-----AGAGAAGTTCCT  
ATCGAGATTCATGAACTTTGGGTACCTATCATGAAATTTATGGGCACTATCTAATAG  
TAAGAAGTGTAAAAAAGAAATTATTTGTATATACATTTCGAACAACCTGTCCGGTCATATTT  
CTCTTTTTTCGAGAAATCGAAGAAGCTATAACAAGGGTTTTGTGCGAGCCTGCTCATTTGGT  
ACC-----ATGGAGGTACTTATGGCAGAACGAGTCAATCTAGTCTTTCACAA  
TAAAGTAATAGATGGAACCTGCCATTAAGACTTATTAGCAGATTAATAGATCACTTCG  
GAATGGCATATACATCACACATTCTGGATCAAGTAAAGACTCTGGGTTTTCCAGCAAGCC  
ACTGCTACATCCATTTATTAGGGATTGATGATCTTTTAAACAATACCTTCGAAGGGATGG  
TTAGTACAAGATGCTGAACAACAAAGTTTGATTTTGGAAAAACACCATCATTATGGGAA  
TGTACATGCAGTAGAAAAATTACGCCAATCCATTGAGGTATGGTATGCTACAAGTGAAT  
ATTTGCGACAAGAAATGAATCCTAATTTTAGGATGACAGACCCCTTAAATCCAGTCCATA  
TAATGTCTTTTTTCGGGAGCCAGAGGAAATGCATCTCAAGTACACCAATTAGTAGGTATG  
AGAGGATTAATGTCAGATCCTCAAGGACAAATGATTGATTTACCCATTCAAAGCAATTT  
ACGCGAAGGACTATCTTTAACAGAATATATCATTCTTGCTACGGAGCCCGCAAAGGAG  
TTGTGGATACTGCTGTACGAACATCAGATGCTGGATATCTTACGCGCAGACTTGTGAA  
GTAGTACAACACATTGTTGTACGCAGAACAGATTGTGGAACCATCCGAGGGGTTTTCTG  
TGAGTCCTCGAAATGGGATGATGCCG---GAAAGAATTTTTATTCAAACATTAATTGGTGC  
TGTATTAGCAGACGATATCTATATGGGCCACGATGCATTGCCATTGCAAAATCAAGATAT  
TGGAATTGGACTTGTCAATCGATTCATAACC-----TTTCGAACACAACCAATAT  
CTATTGCAACCCCTTTACTTGTAGGAGTACATCTTGGATCTGTGCGATTATGTTATGGTA  
GGAGTCCACTCATGGCGACCTGGTTCGAATTGGGAGAAGCTGTAGGTATTATTGCGGGT  
CAATCTATTGGAGAACCAGGGACTCAACTAACATTAAGAATTTTCATACCGGCGGAGT  
ATTCACAGGTGGTACTGCCGAACATGTACGAGCCCCCTCTAATGGAAAAATCAAATTCA  
ATGACGATTTGGTTCATCCCACACGTACGCGTCATGGGCATCCTGCCTTTCTATGTTCTA  
TAGACTTGTATGTAACCTATTGAGAGTGAAGATATTCTACATAACGTGACTATTCCACCAA  
AAAGTTTTCTTTTGGTTCAAATAATCAATATGTAGAATCAGAACAAGTGATTGCTGAA  
ATTCGCGCGGGAACATACACTTTC---AATTTGAAAGAGAGGGTTCGAAAACATATTTAT  
TCTGAATCAGAGGGGAGAA---ATGCACTGGAGCACCGATGTGTACCATGCACCTGAATTT  
ACATATAGTAATGTCCATCTTTTACCAAAAACAAGCCATTTATGGATATTATCAGGGGGT  
TCGTGCAGA-----TCCAGTAGAGTCCCTTTTTTCACTCTACAAGGATCAAGACCAAATGA  
ATCTTCGT-----TCGACAGAAAGAGAACGA---AGATATATTTTCGAGTCTC---TCAGTGAAT  
AATGATCAA---ATGAGATACGAATTATGTAGTTCTGATTTTTCTGGTAAAATAGAAGATA  
GGATTCCCTGATTAT--TCAGAACTTAATCGAATCATATCTATTGTTTCATTGTAATCTCAAAT  
ATCCTACT---ACTTTCGACGAGAATTCTGAT-----TTATTGGCAAAAAGGCGAAGAAATC  
GATTTCTTATTCCACTACAATCGATTCAAGAACGAAAGAAAGAACTAATGCCCCATTCA  
GGTATCTCGATTGAACTACCGATAAAT-----GGAATTTTACGTAGAAATAGTATTCTTGCT  
TATTTGACGATCCTCGATACAGAAGAAAGAGTTCGGGAATTATTAATATGGGACTCT

AGGGGTTTCATTCAGTCGTTAAAAAAGAGGAT-----TTGATTGAGTATCGA---GGAATCAA  
AGAATTTAAGCAAAAATGCATGAACTAGATCCATTTTTTTTCATTCCCGAAGAAGTGC  
ATATTTTCCCTGAATCTTCTTCGATAATGGTACGGAACAATAGTCTGATTGGAGTAGATA  
CACGAATCGCTTTAAATACAAGAAGCCGAGTGGGCGGATTAGTCCGAGTGGAGAGAA  
AAAAAAAAGGATTGAACTGAAAATCTTTTCTGGAGATATCCATTTTCTGGAGAGAC  
AGATAAGATATCCCGACACAGTGGCATCTTGATACCCCGAGGAACAGGAAAAACA-----  
AATTTTAAGGAATCCAAAAA-----TGGA AAAAATTGGATCTATGTCCAACGG-----ATCA  
CACCTACTAAGAAAAAG-----TATTTTGTTTTAGTTTCGACCCGTAGTGACATATGAAGTAT  
TGGACGGTATAAATTTAGCAACACTCTTCCCCCGGATCTGTTACAAGAAAGGGATAAT  
ATGCAACTTCGAGTTGTCAATTATATTGTTTACAGAAATGGCAAACCAATTTCGGGGAAT  
TTCTGATACAAGTATTCAATTAGTTTCGGACTTGTTTAAATTTTGAATTGGGACCAAGACA  
AA-----AAAAGTTCTTCTATCGAAGAGGCTCATACTTCCTTTGTTGAAGTAAGTACAA  
ATGGTCTGATTTCGAGATTTCCCTAAGAATTGACTTAGTGAAATTCCTATTTTCGTATCTCA  
GAAAAAGGAATGATCCCTCAGGCTCAGGATTGATCTCAGATGATAATGTGTCAGATCAC  
ACCAATAGCAATCCCTTTTAT-----TCCAAGACAAA-----ATTCAACAATTACTT  
AGCCAAAATCAAGGAATTCGCACGTTGTTAAATAAA-----AATAAGGAATGTCCA  
TCTTTGATAAATTTGTTCATCATCTAATTGTTTCCGAATGGGTCCA-----TTCAACGCTGGA  
AAATATCACAAAT-----GTGATAAAAGAATCA---CCTATAATTAATAATTAGGAATTCGATT  
GGCCCTTTAGGAACA-----GTCCTTCAATTTGTGAATTTT-----TATTCATTTTACTATTTAA  
TAACT-----CATAATCCTATTTTG---GTA ACTAAATATTTGCAACTTGAAAAT-----TTAAA  
ACAGACTTTTCAAGTAATT-----AAC---TATTATTTAATGGATGAAAATGGGAGA-----ATT  
TTGAATCCCGATTCATGCAGTAACATCGTTTTTGAATTCATTCAATTTGAATTGGTATTTTC  
TCCATCATAATTATTTTGAAGAAAGATCCACAATAATTAGT---CTTGGACAGTTTATTTGT  
GAAAATGTATGTATATCCAAAAACGGACCC-----CATCTCAAATCGGGTCAAGTTTGA  
TTGTTCAA---GTTGACTCTGTAGTAATAAGATCCGCCAAGCCTTATTTGGCCACTCCAGG  
AGCAACTGTTTCATGGTCATTATGGAGAAATCCTTTACGAAGGAGATACATTAGTTACATT  
TATATATGAAAAATCGAGATCCGGTGATATAACGCAGGGTCTTCCAAAAGTGGAACAAG  
TGTTAGAAGTGC GTTCAATTGATTCAATATCGATGAACCTAGAAAAAAGAATTGAGGGT  
TGGAACGAGCATATAAAAAAATTCTTGGAAATTCCTTGGGGATTCTTGATTGGGGCTGA  
ACTA ACTATAGTGCAAAGTCGTATATCTTTGGTTAATAAGATCCAAAAGGTTTATCGATC  
CCAGGGGGTGCAAATCCATAATAGGCACATAGAAATTATTGTACGCCAAATAACATCAA  
AGGTGTTGGTTTCAGAG-----GATGGAATGTCTAATGTTTTTTTACCTGGAGAACTAAT  
TGGATTGTTGCGAGCGGCGGAACGGGGCGCGCTTTGGAAGAATCGATCTGTTACCGC  
GCCATCCTATTGGGAATAACAAGGGCATCTTTGAATACTCAAAGTTTCATATCTGAAGC  
GAGTTTTCAAGAACTGCTCGAGTTTTAGCCAAAGCTGCTCTCCGGGGCCGTATCGAT  
TGGTTGAAAGGCCTAAAAGAGAACGTTGTTATAGGAGGGATGATACCCGTTGGTACCG  
GATTC AAAGGATTAGTGCATCGTTCA-----AGGCAACATAAGAACATTCCTTTGAAAAC  
CAAAAAGAAGAAT-----TTTTTCGAGGGGGAAATCGGA-----GATATTTTGTTCACCAC  
AGAGAATTATTTGATTCTTCCATTTCAAAGAAGTTTCATGATACATCAGAACAATCATT  
CGAGGATTTAATGATTCC-----ATGACAAGAAGGTATTGGAATATCAATTTGGA  
AGAGATGATGGAAGCGGGAGTTCATTTTGGTCATGGTACTAGGAAATGGAATCCTAGG  
ATGGCACCTTATATTTCTGCCAAGCGTAAAGGTATTCATATTACAAATCTTACTAAAAC  
GCTCGTTTTTTATCAGAAGCTTGTGATTTAGTTTTTGTATGCAGCAAGTAGGGGAAAACA  
GTTTTTAATTGTTGGTACCAAGAATAAAGCAGCTGATTCAGTAGCACGGGCTGCAATAA

GGGCTCGATGTCATTATGTTAATAAAAAAGTGGCTCGGTGGTATGTTAACGAATTGGTCC  
ACTACAGAAACGAGACTTCATAAGTTCAGGGACTTGAGAACGGAACAAAAGGCGGGG  
AGACTCAATCGTCTTCCGAAAAGAGACGCAGCTATGTTGAAGAGACAATTATCTCACT  
TGCAAACATATCTGGGCGGGATTAATATATGACGGGGTTACCTGATATTGTAATTATTG  
TTGATCAACAAGAAGAATATACGGCTCTTCGAGAATGTATCACTTTGGGAATTCCAACA  
ATTTGTTTAATCGATACAAATTGTGACCCGGATCTTGACAGATATTCGATTCCAGCAAAT  
GATGACGCTATAGCTTCAATCCGATTAATTCTTAACAAATTAGTATTTGCAATTTGTGAG  
GGTCGTTCT---AGCTATATACGAAATCCTATGGGACAAAAATAAATCCACTTGGTTTCA  
GACTTGGTACAACCCAAGGTCATCATTCTATTTGGTTTGCACAAGCCAAAAATTATTC  
GATGGTCTGCAAGAAGATCAAAAAATACGAAATTGTATCAAGAATTATTTACAAAAAAA  
TATGAGAATATCCTCT---GGTGTGGAGGGAATTGCACGCATAGAAATTCGAAAAAGAAT  
TGATCTGATTCAAGTCATAATTTATATGGGATTCCCAAAGTTATTACTAGAAGGCAAGAC  
CGA-----AGAATCGAAGAATTACAGATGAATGTACAAAAAGAACTTAATTGTGTG  
AACCGAAAACCTCAACATTGCTATTACAAGAATTACAAACCCTTATGGGCACCCTAATAT  
TCTTGCAGAATTTATAGCCGGACAGTTAAAGAATAGAGTTTCATTTTCGCAAAGCAATAA  
AAAAGGCTATTGAATTAACCGAACAGGCAGATACAAAAGGAATTCAGTACAAATTGC  
AGGTCGCCTGGACGGAAAAGAAATTGCACGTGTCGAATGGATGAGAGAAGGTAGGGT  
TCCCTACAAACCATTTCGAGCTAAAATTGATTATTGTTTCCCTATGGAGTCCGAACGGTCTA  
TGGAGTATTAGGCATCAAAATTTGGATATTTTGGGAA-----ATGTCGCGTTACCGAGGGC  
CTCGTTTCAAAAAATACGCCGTCTTGGGGCTTACCAGGACTAACTAGTAAAAGGCC  
TAGAGCCGGAAGCGATCTTAGAAACCAATCGCGCTCTGGGAAA---AAATCTCAATATCG  
TATTCGTTTAGAAGAAAAACAAAAATTGCGTTTTTCATTATGGTCTTACAGAACGACAAT  
TACTTAAATACGTTTCGTATCGCCGGAAAAGCAAAAAGGGTCAACAGGTCAGGTTTTACT  
ACAATTACTTGAAATGCGTTTGGATAACATCCTTTTTCCGATTGGGTATGGCTTCGACTAT  
TCCTCAAGCCCGCCAATTAGTTAACCATAGACATATTTTAGTTAATGGCTGTATAGTAGA  
TATACCAAGTTATCGCTGCAAACCAGAGATATTATTACGGCGAGGGATGATCAAAAAT  
CGAGAGCTATGATTCAAATTTATTTGATTCATCCCCCAT---GAGGAAGTGCCAAAACA  
TTTGACTCTTCACCCATTTCAA-----TATAAAGGATTAGTCAATCAAATAATCGATAGTAA  
ATGGATCGGTTTGAATAAATGAATTGCTAGTCGTAGAATATTATTCTCGTCAGACTAT  
GTCACGTCGAGGTAAGTGCAGAAAGAAAAACTGCAAAATCCGATCCAATTTATCGTAAT  
CGATTAGTTAACATGTTGGTTAACCGTATTCTGAAACACGGAAAAAAATCATTGGCTTA  
TCAAATTATCTATCGAGCCATGAAAAAGATTCAACAAAAGACAGAAACAAATCCACTA  
TCCGTTTTACGTCAAGCAATACGTGGAGTAACCTCCCGATATAGCAGTAAAAGCAAGAC  
GTGTAGGCGGATCGACTCATCAAGTTCCCATGAAATAGGATCCACACAAGGAAAAGC  
ACTTGCCATTTCGTTGGTTATTAGGAGCATCCCGAAAACGTCCGGGTTCGAAATATGGCTT  
TCAAATTAAGTTCCGAATTAGTGGATGCTGCCAAAGGGAGTGGCGATGCCATACGCAA  
AAAGGAAGAGACTCATAGAATGGCAGAGGCAAATAGAGCTTTTGCGCATTTTCGTATG  
GGTAGGGACACTATTGCTGACATAATAACCTCTATACGAAATGCTGACATGAATAGAAA  
AGGGACGATTCAAATAGCATCCACTAACATCACGAAAACATTGTTAAAATACTTTTAA  
GAGAAGGTTTTATCAAAAACGTGAGGAAGCATCAGGAAAACAACAAATATTTTTTGGT  
TTTAAACCCTACGACATAGAAGG-----AATAGGAAAGGACCCTATCGAACT---ATT-----TTA  
AATTTAAAACGTATCAGTAGGCCTGGCCTACGAATCTATTTCGAACTATCAACGAATTCCT  
AGAATTTTAGGCGGGATGGGGATTGTAATCTTTTCTACTTCTCGAGGTATAATGACAGA  
CCGAGAGGCTCGACTAGAAGGAATCGGCGGAGAAATTTTGTGTTATATATGGATGGCA



AAATCTATAACCAAGAAGACTGGTTCACGTAGGAATGTCCGTAGTGGTTCACGTAAAAGTAC  
ACGTAGAATACCAAAGGGAGTTATTCATGTTCAAGCAAGTTTCAACAATACCATTGTGA  
CTGTTACAGATGTACGGGGTTCGGGTAATTTCTTGGTCCTCCGCCGGTACTTGTGGATT  
AATGGTACAAGAAGGGGGACACCATTTGCTGCTCAAACCGCAGCAGGAAATGCTATTC  
GGACAGTAGTAGATCAAGGTATGCAACGAGCAGAAGTCATGATAAAAGGTCCTGGTCT  
CGGAAGAGATGCAGCATTAAAGAGCTATTCGTAGAAGTGGTATACTATTAAGTTTCGTAC  
GTGATGTAACCCCTATGCCACATAATGGCTGTAGACCTCCTAAAAAAGACGTGTGCAC  
CCTACATGTTCCCTCGACGCTGAGGACATCCCCAAGAGCGGGGGATTTCGTGACATTTC  
TGATTGGCTGTCT--TGTGTTTCTAATAAG--TTGTTTAATAGTTGGCATACTATCACCCCC  
AAAAAACCAACTCTGCCTTACGTAAAGTTGCCAGAGTACGATTAACCTCTGGATTG  
AAATCACTGCTTATATACCTGGTATTGGCCATAATTCACAAGAACATTCTGTAGTCTTAG  
TAAGAGGGGGAAGGGTTAAGGATTTACCCGGTGTGAGATATCACATTGTTTCGAGGAAC  
CCTAGATGCTGTTCGGAGTAAAGGATCGTCAACAAGGGCGTTCTCAATATGGGGTCAAA  
AAGCCAAAATGGCAAGGAAAAGTTTGATTTCAGAGGGAGAAGAAGAGGCCAAAACT  
GGAACAAAATATCATTGATTTCGTGATCCTCAAAAAAGAAATAAGC-----AAAGT  
TCCGTGCTTGAGTGAGAAATGGAAAATTCATGGAAAGTTACAATCCTCACCGCGTAATA  
GTGCGCCTACACGTCTTCATCGACGTTGTTTTTCGACCGGAAGACCGAGAGCTAACTAT  
CGAGACTTTGGGCTTTCCGGACACATACTTCGGGAAATGGTTCATGCATGTTTGTGCC  
AGGGGCAACAAGATCAAGTTGGATGGTAAAAATTCATTCATCTCAGTTATTTACAAG  
AA---GAAGAAAAGAAGAAAACAGGGGGTCCATTGAATTTCAAGTATTTGTTTCACC  
AATAAGATACGAAGACTGACTTCACATTTGGAATTGCACCGAAAAGATTATTTATCTCA  
GAGAGGTTTACGTAAAATCCTGGGAAAACGCCAACGACTGCTGTCTTATTTGTCAAAG  
AAAAATAGAATACGTTATAAAGAATTAATTAGTCAGCTGGATATTCGGGAGTCAAAAAC  
TCGT-----ATGGTAAAACCTTCGTTTGAAACGATGTGGTAGAAAGCAA---CCCGTTTATCG  
AATCGTTGCAATTGATGTCCGATCCCGAAGAGAAGGAAGAGATCTTCGGAAAGTGGGT  
TTTTATGATCCGATAAATAATCAAACGATTTAAATATTCTTGCTATTCTATTTTTTCTTGA  
AAAAGGTGCTCAACCTACAGGAACTGTTTATGATATTTTAAAGAAAGCGGGGGTTTCT--  
---TTT-----ATGGAAAATCCAAGCGACTCTTTCTTAAATCCAAGCGATC  
TTTTCGTAGGCGTTTGCCCCGATCCAATCGGGGGATCGAATTGATTATAGAAACATGA  
GTTTAATTAGTCGATTTATTAGTGAACAAGGAAAAATATTATCTAGACGGGTAAATAGAT  
TAACCTTAAAACAACAACGATTAATTACTATTGCTATAAAAACAAGCTCGTATTTTATCTT  
TGTTACCTTTTCTTAATAATGAGAAA-----CAATTTGAAAGAAGCGAGTCGACCGCCGG  
AGCTACTGGTCTTAGAACCATAAATAAAGTGACACGTTCACTAAAAAAAATCCTTTTG  
TAGCGAATCATTTATTAAGAAAAATTGAGAAGCTTAACACAAAGGCGGAAAAAAGAAAT  
AATAATAACTTGGTCTCGGGCATCTACCATTATACCTACAATGATCGGTCATACTATTGCT  
ATCCATAATGGAAGGGAACATTTACCTATTTATATAACAGATCGTATGGTAGGCCATAAA  
TTGGGAGAATTTTACCTACTATAAATTTCCGTGGACATGCGAAAATGATAATAGATCT  
CGTCGTATGATTTTGAAATCTTTTCTACTAGGGAATCCAGTATCCTTATGCATGAACATAA  
TAAATTCGGTCGTTATGGTCGGACTCTATTATGGATTTCTGACCACATTCTCCATAGGGC  
CCTCTTATCTCTTCTTCTCCGAGCTCGGGTTCTGGAAGAAGGAGAAGAAGGAACCGA  
GAAGAAGGTATCAGCAACAACGGGTTTTATTGCGGGACAGCTCATGATGTTTCATATCGA  
TCTATTATGCGCCTCTGCATCTAGCATTGGGTAGACCTCATACAATAACTGTCCTAGCTC  
TACCGTATCTTTTGTTCATTTCTTCTGGAACAATCACAAACACTTTTTTGATTATGGATC  
TACTACCAGAAATCAATGCGTAATCTTAGCATTCAATGTGTATTCTGAATAATCTCATT

TTTCAATTATTCAACCAATTCATTTTACCAAGTTCAATGTTAGCCAGATTAGTCAACATTT  
ATATGTTTCGATGCAACAACAAGATGTTATTTGTAACAAGTAGTTTTGTTGGTTGGTTAA  
TTGGTCACATTTTTTTCATGAAATGGGTTGAATTGGTATTAGTCTGGATACAGCAAAATA  
ATTCTATTCGATCG---ATTCGATCGAATAAGTACCTTGTGTCAGAATTGAGAAATCTATG  
GCTCGAATCTTTAGTATTCTTTATTATTACCTGTGTTTACTATTTAGGCAGAATACCGT  
CACCCATTGTTACTAAAAAATTCAAAGAAACCGAAGAAGATAAACCTCTTGTGACTCT  
TCTTTTCGACTATAAACGATGGAATCGACCATTACGATATATAAAAAACAATCACTTTGA  
AAATGCCGTAAGAAATGAAGTGTCAACAATTTTTTTTTATATATGTGCAAAACAATGGAA  
AAGAAAGAATATCTTTTACGTATCCCCCAGTTTGTCAACTTTCTTGAAAATGATAGAA  
AGAAAAATTTCTTTGTTGACAAAAGAAAAACTACCTCTGATGAATTGTATGATCATTG  
GATTTATACCAATGACCAAAAAAAGAACAACCTTGAGCAAAAAATTCGAAATCAAATG  
GAAACTGTAAAT-----ATTACTCTAGATGTATTCGAAAAAAGAACTAGATTGTGTAATG  
ATGAAAATAAAAAAATACTTGCCGAAAATATATGATCCCTTTTTGAATGGGCCCGGT  
CGTGGAAGGGTGAATTTTTTTTTTTCATCCATCGAGACAGGTTGGATAAATAAGATTCA  
TAGTATACTTCAGGAAAATTGGAAGAAAAGAGCCCAAGACTAAAGGA-----ATAAA  
AGAAATAAGTACAAAAGTTCCCTTCATGGTCATACAAATTAATCGATTTGGAACAACAGG  
AAGGAGAAGAGATTCGTTCCAGAAAACCAAGCATGTACTAATTTTTACTGATACTTTC  
ATACGTTATTCACAACAATCAGATTTTCGTCGAGACATAATCAAAGGCTCTATGCGTGCT  
CAAAGACGTAAAACAGTTATTTGTGAATTGTTTCAAGCAAATGTGCATTCTCCTCTTTT  
TTTGACAGAATAGGCAAACCC-----CTTTTTCTTTTGATATCTCCGGGATGATAAAA  
TTCATTTTGAAAAAAGACAAGAGAAAGCACGAATAGAAATAGCCCAAACCTGGGAT  
AGAGTTTTATTTGCTCAAGCAATAAGAGGATCCCTATTAGTAACCCAATCTTTTCTTAGA  
AAATATATTCTATTCCCTTCAGTGATAATAGCTAAAAATATAGCCCGTATATTATTATTCA  
ATTTCCCGAGTGGTCTGAGGACTTAAAAGATTGGAATAGAGAAATGCATGTTAAATGCA  
CCTATAATGGTGTTCATTATCAGAAACCGAATTTCCAAAAAATTGGTTGACAGACGGT  
ATTCAGATAAAGATCCTATTTCTTTTTACATTAACCTTGGCACAGATCTAAG-----CAA  
AAAAACGATTTTGTTTTTTAACAGTTTGGGGAATGGAACTGAAGTTCCTTTTGGTTC  
TCCAGAAAACAACGTTCATTTTTTGAACCCATTTTTAAAGAACTCAGAAAAAAAATTA  
TAAAATTACAAAAGAATCCTTTTTTAGTT---ATACAGGTTTTAAAAGAAAGAATAAATCT  
TTTTTTAAACCTTTCAAAGAAAGAAAAAAATCGGTCATGAAAACCATCTA-----TTTT  
TAAAAGGAATAATAAAGAACTTTCCAAAAGAAACAATGGGGTAATCAGTAATGGGAT  
GATTAATGAATCG---ATTCAAATTCGATTTATGGATTTGACAGAT---TCATTGACAGAAAA  
AAAAATGAAAGATCTGGATGATAGAACCAGCACAATCAGGAATCAAATAGAAAAAATT  
ACAAAAGATAATAAAAAAAGTTCTAATAAAATAAGTTATCCTACTAACTATTAGCATCA  
ATAAAAAATATTTGGCAGAAATTAAGAAATTCAATGTTTCGATTAATCCGTAAATCATAT  
TCTTTTTTCAAATTTTAATTGAAAGGATATACATAAATACTTATCTGTATCATTAATAG  
TCCGAGGATCACTACACAACCTT-----TTATCCTCCTTCTCACAAAGCATATGT  
ATTTTACCAATTATATCAAACG---TTTTGTAATTTGTATAAGTTAAGATATGTCCTTCAATA  
TACATCTTTTTTCTTAAGAATGAAATAAAGGATTATTTTACACAAGGAATTTTTTATCCT  
GAATTAACATAAAAAATTTTTG---TCGGAAATGATTCAATGGAAAACTGGTTAAGG  
GGTCATTATCAATATGATTTATCTCCGATTAGATGGTATCGATTAGTACCACACAAATGGC  
GAAATAGATTCAATCAAACACGTCTAGTGCAAATAAAAAACAAAAGACATTCAGATGA  
AAAAGATCGATTAATATTAATTAATTACAAAAAATTA---AACCTTCAAAAATACTATGGAT  
ATGACCTTTTCTCATATAAATCGATTAATGATGATATTCTCAATACAGATAGAAAATATTT

GGATTGGAGAATTTTCGATTTTTGTCTTCGACTTTTTGATTGGATGGCAATGAATGAAG  
AAATACTAAGTCGTTGGTCTTTCCAGAATTTGTGATCCTTTATAATACATATATTATGAA  
ACCGTGGATCATACCAATCCAACACTTCTTTTAAATAGCAAC-----ACGGAAGTAGAGC  
TTTATTTTTTCCTAAAAAGGTATTTACGTATTCAATTGAGATGGGAT-----AATCAAAGA  
ATGATCAATAATATCAAATATATTGTCTCCTACTTAGACTAATAAATCCAAGAGAAATT  
GCTATATCCTCTATTCAAAGGGGAGAAATGAGTTTAGATATTTTGATTACTCAAAGGAT  
TTAACTCTTACAGAATTAATGAAAAAAGGTATATTAATTATCGAACCAATTCGTTTGTCT  
ATAAAAAATGATGGACAATTGATTATGTATCAAAGTCTAAATATTTCAATTGTTTCATAAG  
AGTAAGCCCGATTATGATTTGTTGTTTGTCCCGAAAAGGTTTTATCCACTAAAAGACG  
TCGAGAATTAAGAATTCGAATTTGTTTCAAATTTCTTTGGCCTAATTATCGATTAGAAGA  
TTTATCTTGTATGAATCGATATTGGTTTGATACCAATAATGGGGGCCGCTTCACTATGATA  
AGGATACATATGTATCCAATGAAAGGACATCAATTCAAATCCTGGATTTTCGAATTGAG  
AGAGATATTGAGAGAGATCAAGAATTCTCACCATTCTTAGATTATGACCCCAATTCA  
ATTCCGTGGGATCTTTCATTCACATTTTTTCCACCAAGAACGTTTTATAAACTCTTGG  
ACCCCGAATTTGGAGTATCCTACTTTCA---CGCAATTCA-----CAGGGTTCAACAAGCA  
ATCGATATTTTC-----ACGATCAAGGGTGTAGTACTATTTGTAGTAGCG---GTCCTTCTAT  
ATCGT-----ATTAACAATCGAAATATGGTTCGAAAGAAAAAATCTCTATTTGACAGGG  
CTTCTTCTCT-----ATACCTATGAATTCCATTGGACCCAGAAATGATACATTGGAAG  
AATCTTTT--GGGTCTTCCAATATCAATAGGTTGATTGTTTCG---CTCCTCTATCTTCCAAA  
AGGAAAAAAGATCTCTGAGAGCTGTTTCTGGATCCGAAAGAGAGTACTTGGGTTCTC  
CCAATAACG-----AAAAGTGTATCATGCCTGAATCTAACTGGGGTTCGCGGTGGT  
GGAGGAACTGGATCGGAAAAAAGAGG-----GATTCTAGTTGTAAGATATCTAAT-----G  
AAACCGTCGCTGGAATTGAGATCTCATTCAAAGAGAAAGATATCAAA---TATCTGGAGT  
TTCTTTTTGTATATTATATGGAT-----GATCCGATCTGCAAGGACCATGATTGGGAATTTTT  
GGATCGTCTTTCTCCGAGTAAGAGACGAAACATAATTAAGTTG-----AATTCGCGACAGC  
TATTCGAAATCTTAGTTAAAGACTGGATTTGTTATCTCATGTTTGCTTTTCGTGAAAAAA  
TACCAATTGAAGTGGAGGGT--TTCTTCAAACAACAAGGA---GCTGGGTCAACTATTCA  
ATCAAATGATATTGAGCCTATTTCCCAT-----CTCTTCTCGAGAAAGAAGTGGGCTATTT  
TTTGCAAAATTGTGCTCAATTTTCAATATGTGGCAATTCGCAAGATCTCTTCGTT-----  
AGTTGGGGGAAG---AATCCGCCCGAATCGGATTTTTTTGAGGAAC---ATATCGAGAGAGA  
ATTGGATTTGGTTAGACAATGTGTGGTTGGTAAACAAGGATCGG-----TTTTTTAGC---  
--AAGGTACGGAATGTATCGTCAAATATTCAATATGATTCT-----ACAAGA-----TCTAGT  
TTCGTTCAAGTAACGGATTCTAGCCAATTGAAAGGATCTTCT--GATCAATCCAGAGATC  
ATTTTCGATTCCATTAGT-----AATGAGGATTCGGAA-----TATC  
TCACACATTGATCAATCAAAGAGAGATTCAACAATAAAAGAAAGATCGATTCTT--TG  
GGAT-----CCTTCTTTCTTCAAACGGAACGAACAGAGCTAGAATCAGAC-----CGATTCT  
CTAAA-----TGCCTTTCTGGATATTCC-----CGGCTATTCACG---GAACGTGAGAAG  
GAGATGAAGAATCATCTGCTTCCGGAAGAAATCGAAGAATTT-----CTTGGGAATCCTAC  
AAGATCCATTCTTTCTTTTTTCTCTGACAGATGG-----TCAGAACTTCAT--CTGGGTTCG  
AATCCTACTGAGAGGTCCACTAGAGATCAG-----AAATTGTTGAAGAAAGAACAAG  
ATGTTTCT--TTTGTCCCTTCCAGGCGATCGGAA-----AATAAAGAAATAGTTAATAT  
ATTCAAGATAATTACGTATTTACAAAAT-----ACCGTCTCAATTCATCCTATTTATCAGAT  
CCGGGATGTGATATGGTTCCG---AAGGATGAACTGGAT--ATGCACAGTTCCCATAAAGAT  
TTCATTCTTGAACAAAAATACATTTTTTTGATTTA-----TTTCATCTGTTCCATGACCGGAA

CAGGGGGGATAACACGTTA-----CACCACGATTTTGAATCAGAA-----GAGAGATTTCAA  
GAAATGGCAGATCTATTTACTCTATCAATAAGCGAGCCG---GATCTGGTGTATCATAAGG  
GATTTGCCTTTTCTATGGATTCTTACGTATTGGATCAAAAACAA-----TTCTTGAATGAGG  
TATTTCAACTCCAGGGATGAATCGAAAAAGAAATCTTTA-----TTGGTTCTACCTCCTCT  
TTTTTAT-----GAAGAGAATGAATCTTTTTATCGAAGGATCAGAAAAAATGGGTCCGG--  
-ATCTCCTGCGGGAATGATTTGGAAGATCCAAAACCAAAAATAGTGGTATTTGCTAGCA  
ACAACATAATGGAGGCAGTCAATCAATATAGATGGATCCGAAATCTGATTCAAATCCAA-  
----TATAGCACCTATGGGTACATAAGAAATGTATGGAATCGATTCTTTTTAATGAAT-----  
-AGATCCGATCGCAACTTCGAATATGGAATTCAA-----AGGGATCAAATAGGAAATGAT  
ACTTTGAATCATAGAACGATAATGAAATATACGATCAACCAACATTTATCGAATTTGAAA  
AAG---AGTCAGAAGAAATGGTTCAATCCT-----CTTATTTTTATTTCTCGAACCGAGAGAT  
CCGTGAATCGGGATCCTAATGCATATAGATACAAATGGTCCAATGGGAGCAAGAATTC  
CAGGAACATTTGGAACATTTTCGTTTCTAAGCAGAAGAGCCGT-----TTCAAGTAGTC  
TTCGATCGATTACGTATTAATCAATATTCGATTGATTGGTCTGAGGTTATCGACAAAAAA  
GATTTGTCTAAGTCACTTCGTTTCGTTTTGTCCAAGTTACTTCTC-----TT  
TTTGTCC-----AAGTTTCTTCTTTTTTTGTCTAACTCACTTCCT--TTTTCTTT  
GTGAGTTTCGGGAATACCCCATTCATAGGTCCGAG---ATCCACGTCTAT--GAATTGAA  
AGGTCCGAATGATCAACTCTGCAATCAGTTGTTAGAATCAATAGGTCTTCAAATCGTTC  
ATTTGAAAAAATGGAAACCATTA-----TTATTGGAT-----GATCATGATACTTCC--CAA  
AATCGAAATTATTGATCAATGGAGGAACAATATCACCATTTTTTTTCAATAAGATACCA--  
-AAGTGG---ATGATTGACTCATTCCATACTAGA-----ATAATCGCAGGAAATCTTTTGATA  
ACACGGATTCTTCTCAATGATATCCCACGATCAAGACAATTGGCTGAATCCCGTG  
AAACCATTTCATAGAAGTTCATTGATATCTTCTTTTTATAAAGCAAATCGACTTCGATTCT  
TTGAATAATCCACATCACTTCTGCTTCTAT-----TGTAACAAAAGATTCCTTT-----TA  
T--GTGAAAGGGCCCGTATCAATAATTCTGAT-----TTACATATGGA---CAATTCCTCAA  
TATCTTGTTTCATTCGCAACAAA---ATATTTTCTTTGTGCGGCGGTAAG-----AAAAATAC  
GCTTTTTTTGGAG---AGAGATACTATTTACCAATCGAGTCAAGGTATCTAACATATTCAT  
ACCTAACGATTTTCCACAAAGTGGTGACGAAAGG---TCTAACTTGTAACAATCT-----T  
TCCATTTTGCAATTCGATCCGATCCATTAGTTCGT-----AGAGCTATTTACTCGATCGCAG  
ACATTTCTGGAACACCTCTAACAGAGGGACAAATAGTCAATTTTGAAAGAACTTATTGT  
CAACCTCTTTCAGATATGAATCTATCTGATTCAGAAGGGAAGAAGTGTATCAGTATCTC  
AAT-----TTCAATTCAAACATGGGTTTGATTCACTCCATGTTCTGAGAAATATTTACCA  
TCCGAAAAG-----AGGAAAAA-----CGGAGTCTTTGTCTAAAG-----AAAT  
GCGTTGAGAAAGGACAGATGTATAGAACCTTTCAACGAGATAGTGCTTTTTCAACTCTC  
TCAAAATGGAATCTATTCCAAACATATATGCCATGGTTCCTTACCTCGACAGGGTACAAA  
TATCTAAATTGGATATTTTTAGATACTTTTTTCAGAC---CTATTGCCGATACTAAGTAGCAG  
T-----CAAAAATTTGTATCCATTTTTCATGATATTATGCATGGATCAGATATATCATGGCAA  
ATTCTTCAGAAAAAATTC-----TGTCTTCCACAATGGAAT--CTGATAAGTGAGA  
TTTCGAGTAAGTGTTTACATAAT-----CTTCTTCTGTCCGAAGAAATGATTCATCGAAATA  
ATGAGTCA-----CCATTGATATCGACCCATCTGAGATCTCCAAATGTTCCGGGAGTTC---CT  
CTATTCAATCCTTTTTCTTCTTCTTGTGCTACATAT---ATCGTTTCGTACACATCTTCTCTT  
TGTTTCCCGA-----GCCTATAGTGAGTTACAGACAGAGTTCGAAAAGGTCAAATCTTGG  
ATGATTCCATCATAATGATGGAGTTGCGAAAACCTTCTGGATAGGTACCCTACATCTGA  
ACTGAATTCTTTCTGGTTAAAGAATCTCTTCTAGTTGCTCTGGAAAAATTAGGAGATT

CTCTAGAAGAAATACGGGGTTCTGCTTCTGGCGGCAACATGCTATGGGGTGGTGGTCC  
C-----GCTTATGGG--TTCAAATCAATACGTTCTAAGAAGAAATATTGGAATATCAA  
T-----CTCATCGATCTCATA---AGTATCATACCAAATCCCATCCATCGAATCACTTTTCG  
AAAAAGACGAGACATCTAAGTCATACAAGTAAAGAGATCTATTCATTGATAAGAAAA  
GAAAAAATGTGAACGGTGATTGGATTGATGATAAAATAGAATCCTGGGTCGCGAACAG  
TGATTTCGATTGATGATAAAGAAAGAGAATTCTTGGTTCAGTTTTCC-----ACCTAACGA  
CA-----GAAAAAGGGATTGATCAAATTCTATTGAGTTTGACT--CATAGTGATCATTATC  
A-----AAGAATGACTCTGGTTATCAAATGATTGAACAACCGGGAGCAATTTACTT  
ACGATACTTAGTTGACATTCAT-----AAAAGTATCTAATGAATTATGAGTTCAATACATT  
CTGTTTAGCAGAAAGACGGATATTCCTTGCTCATTATCAGACAATCACTTAT-----TCACA  
AACCTCGTGTGGGACTAATAGTTTTTCATTTACATCTCATGGA-----AAACCCTTTTCG  
CTCCGCTTAGCCCTATCCCCTTCT--AGGGGTATTTTAGTGATAGGTTCTATAGGAACTGG  
ACGATCCTATTTGGTCAAATACCTAGCGACAAACTCCTATGTTCCCTTTCATTACAGTATT  
TCTGAACAAGTTCCTGGATAACAAGCCTAAAGGTTTTTCTTATTGAT-----GATATC  
GAT-----GAGGATAGTGACGATATTGAGGATAGTGAC-----  
-----AATATTGATCGTGACCTTGATACGGAGCTGGAGCTTCTAACTAGGATGA  
ATGCGCTA-----ACTATGGATATGATGCCG-----GAAATAGACCGATTTTATATTACCC  
TTCAATTTCGAATTAGCAAAGCAATGTCTCCTTGCATAATATGGATTCCAAACATTCATG  
ATCTGGATGTGAATGAGTCGAATTACTTATCCCTCGGTCTATTAGTGA ACTATCTCTCC---  
-----AGGGATTGTGAAAGATGTTCC---ACTCAAATATTCTTGTTATTGCTTCGACTCATA  
TTCCCCAAAAGTGGATCCCGCTCTAATAGCTCCGAATAAATTAATACATGCATTAAGA  
TACGAAGGCTTCTTATTCCACAACAACGAAAGCACTTTTTACCCCTTCATATACTAGG  
GGATTTCACTTGGAAAAGAAGATGTTCCATACT-----AATGGATTTCGGGTCATAACCAT  
GGGTTCCAATGTACGAGATCTTGTAGCACTTACCAATGAGGCCCTATCGATTAGTATTAC  
ACAAAAGAAATCAATTCTAGACACTAATACAATTAGATCTGCTCTTCATAGACAACTT  
GGGATTTGCCA-----TCCCAGGTAAGATCGGTTTCAGGATCATGGGATCCTTTTCTATCA  
GATAGGAAGGGCTGTTGCACAAAATGTACTTCTAAGTAATTGCCCCATAGATCCTATATC  
TATCTATATGAAGAAGAAA-----TCATGTAACGAAGGGGATTCTTATTTGTACAAATGGTA  
CTTCGAACTTGGAACGAGCATGAAGAAATTAACGATACTTCTTTATCTTTTGAGTTGTT  
CTGCCGGATCGATCGCTCAAGACCTTTGGTCTCTACCC-----GGACCCGATGAAAA---A  
ATGAGATCACTTCTTATGGACTCGTTGAGAATGATTCT--GATCTAGTTCATGGCCTATTA  
GAAGTAGAAGGCGCTCTGGTGGGA-----TCCTCGCGGACAGAAAAAGATTACAGTCAG  
TTTGATAATGAT-----CGAGTGACATTGCTTCTTCGGCCCAAACCAAGGAAT--CCCTTAG  
ATATGATGCAAAATGGATCTTGTTCTATCGTTGATCAGAGATTTCTCTATGAAAA-----T  
ACGAATCGGAGTTTGAAGAA---GGGAAGGAGAAGGAGTCCTCGACCCGCAA-----  
-CAGATAGAGGAGGAC-----TTATTCAATCAC-----ATAGTTTGGGCTCCT-----AGAAT  
ATGGCGCCCT-----TGGGGCTTTCTATTTGATTGTATCGAAAGGCCCAATTCATTGGGA  
TTTCCC---TACTGGGCCAGGTCATTTCCGGGGCAAG-----CGGATCATTTATGATGAAAA  
GGAGGAGCTTCAAGAGAATGATTTCGGAGTTCTTGCAGAGTGGAACCATGCAGTACCA  
GACACGAGATAGATCTTCCAAAGAACAAGGCTTTTTTCGAATAAGCCAATTCATTTGGG  
ACCCTGCAGATCCACTCTTTTTCTATTCAAA---GATCAGCCCTTTGTCTCTGTGTTTTC  
ACATCGAGAATTCTTTGCAGATGAAGAGATGTCAAAGGGGCTTCTTACTTCCCAAACA  
GATCCCCTACATCTATATATAAACGCTGGTTTATC-----AAGAATACGCAAGAAAAGCAC  
TTCGAATTGTTGATTCATCGCCAGAGATGGCTTAGA-----ACCAATAGTTCATTATCT---

--AATGGATTTTTCCGTTCTAAT-----ACTCCATCCGAGAGTTATCAGTATTTATCAAATCTG  
TTCCTATCGAAC---GGAAGGCTATTGGATCAAATGACAAAGACATTGTTGAGAAAAAGA  
TGGCTTTTCCCGGATGAAATGAAAATCGGATTC-----ATG-----ATGCCTA  
GATCGAGG---ATAAATGGAAATTTTATTGATAAGACCTTTTCAATTGTAGCCAATATCTTA  
TTACGAATAATTCCGACAACCTCAGGAGAAAAAGAGGCATTTACCTATTACAGAGATGG  
G-----ATGTCGGCTCAATCCGAAGGAAATTATGCGGAAGCTTTACAGAATTATTATGAAG  
CTATGCGACTAGAAATTGATCCCTATGATCGAAGCTATATACTCTATAACATAGGCCTTAT  
CCACACAAGTAACGGAGAACATACGAAAGCTTTGGAATATTATTTTCGGGCACTAGAA  
CGAAACCCGTTTTTACCACAAGCTTTTAATAATATGGCTGTGATCTGTCAATTAC---CGGG  
GAGAGCAGGCCATTCGACAGGGGGATTCTGAAATTGCGGAGGCTTGGTTTCGATCAAGC  
CGCTGAGTATTGGAAACAAGCTATAGCGCTTACTCCTGGTAATTATATTGAAGCGCAGA  
ATTGGTTGAAGATCACGAGACGTTTCGAA-----ATGAGTTGTCGATCAGAACATATATGG  
ATAGAACTTATAGTGGGGTCTCGAAAAATAAGTAATTTCTGCTGGGCCTTTATCCTTTTT  
TTAGTTCACTAGGATTCGTATTAGTTGGATCTTCCAGTTATCTCGGTAAGAATTTGATAT  
CTTTAGTTCCGTCTCAACAAATTCTTTTTTTTCCACAAGGGATCGTGATGTCTTTCTACG  
GTATCGCAGGTCTCTTTATTAGTTCCTATTTGTGGTGCACAATCTCGTGGAATGTAGGTA  
GTGGCTATGATCGATTGATAGAAAAGAAGGAATAGTGTGTATTTTTCGTTGGGGATTT  
CCTGGAAAAAATCGTCGCATCTTTCTACGATTTTCGTATGAAAGATATTCAGTCCATCCGA  
ATCGAAGTTAAAGAGGGTATTTCTGCTCGTCGTGTCCTTTATATGGAAATCAAAGGACA  
GGGGGCCGTTCCCTTGACGCGTACTGATGAGAAT---TTGACTCCACGTGAAATTGAGCA  
AAAAGCCGCCGAATTGGCCTATTTCTTGCGCGTACCGATTGAAGTATTT

>Daucus

ATGGAAAGATGGTGGTTCGATTCAATACTGTTTCTAAGTAAATCAATGGGCGGTCTTGG  
TCCTATTGAAAATACCAGTGAAAGTGAAGATCCGAATAGAAATGATATGAAAAAAAATA  
GCCATAGTTACAGCAATGTTGATTATTTATTCGGCGTCAAGGACATTTGGAATTTCACT  
CTGATGAAACTTTTTAGTTGTGGATAGGAATGGGAACAGTTATTCCATATATTTGGATA  
TTGAAAAGCATATTTTCGAGATTGATAGTGGTCAT-----TTTTTTCAGAGTGGACTAGAA  
AGTTCTTTTTATAGTTATTGGAATTTGAGTTATCTAAATAATGGATCTAAGACTGACGATC  
CTCACGATGATCATTACATGGATGATACTCAATATAGTTGGAATAATCACATTAATAGTTA  
TATTGACATTTATCTTGAG-----TCTCAAATCTTTATTGATACTTACATTGTAAGTGGTAGT  
GACAATTACAGTAACAGTTACATTTCTCGTTCCGTTTGTGGTAGTAAGGGGTCCAATATA  
AGTACCAGCACGAATGGTAGC-----ACTATAATAGAAAGTTCCAATGATCTGGATATAAC  
TCAAAAATACAGACATTTATGGGTTCAATGTGAAAATTGTTATGGATTAAATTATAAGAA  
AATTTTAAAATCAAAAATGAATCTTTGTGAACAATGTGGATATCATTGAAAATGAGTA  
GTTACAGATAGAATCGAACTTTCGATCGATCCGGATACTTGGGATGCTATGGATGAAGAC  
ATGGTTTCTTTGGATCCATTGAATTTCAATTCGGAAGAGGAGCCTTATAAAGATCGTATC  
GATTCTTATCAACGAAAGACAGGATTAACGGAAGCCGTTCAAACAGGCATAGGCCAAT  
TAAATGGTATTTCCATAGCACTTGGGGTTATGGATTTTTCAGTTTATGGGGGGTAGTATGG  
GATCCGTGGTTGGAGAGAAAATAACCCGTTTATTGAGTACGCTACTAACCAATTGCTC  
CCTCTTATTATAGTATGTGCTTCTGGGGGGGCGCGTATGCAAGAGGGAAGTTTGAGTTT  
AATGCAAATGGCTAAAATATCTTCTGCTTTATATGATTATCAATCAAATAAAAAGTTATTC  
TATGTACCAATTCTTACATCTCCTACTACAGGGGGGGTACTGCTAGTTTTGGTATGTTG  
GGAGATATCATTATTGCCGAACCCAACGCCTATATTGCATTTGCGGGTAAAAGAGTAATT  
GAACAAACATTGAATAAAACAGTACCTGAAGGTTACAGGCGGCTGAATATTTATTC

AGAAGGGCTTATTTCGATCTAATCGTACCACGTAATCTTTTAAAAAGCGTTCTGAGTGAG  
TTATTTTCAGCTCCACGCTTTCTTTCCCTTTGAATAAAAATTCAATAGAGATGGTAACAATT  
CGAGCCGACGAAATTAGTAAGATTATCCGTGAGCGTATTGAGGAATATAATAGAGAAGT  
AAAGATTGTAAATACCGGTACCGTACTGCAAGTAGGTGACGGCATTGCTCGTATTCATG  
GTCTTGATGAAGTAATGGCGGGTGAATTAGTAGAATTTCAAGAGGGTACAGTAGGCATT  
GCTCTGAATTTGGAATCAACAAATGTCGGTGTGTATTAATGGGTGATGGTTTGCTGATA  
CAAGAAGGAAGTTCTGTAAAAGCAACAGGAAGAATTGCTCAGATACCTGTGAGTGAG  
GCCTATTTGGGTGCTGTTGTAAATGCCCTGGCTAAACCTATTGATGGTAGGGGTGAAAT  
TTCAGCTTCTGAATATCGGTAAATTGAATCTCCTGCTCCGGGTATTATTTACGACGTTT  
CGTATACGAGCCTCTTCAAACGGGGCTTATTGCTATTGATTTCGATGATACCTATAGGGCG  
TGGCCAGCGAGAATTAATTATTGGGGACAGACAAACAGGTAAAACAGCAGTAGCAAC  
AGATACGATTCTGAACCAACAAGGCCAAAATGTAATATGTGTTTATGTAGCTATTGGTC  
AAAAAGCATCTTCTGTGGCTCAGGTAGTACTAATTTCCAGGAAAGGGGAGCGATGGA  
ATACACTATTGTGGTAGCTGAAACGGCGGATTCTCCTGCTACATTACAATATCTCGCTCC  
TTATACAGGCGCTGCTCTGGCGGAATTTTTTATGTACCGCAAACGACACACTTTAATAAT  
TTATGATGATCCCTCTAAACAGGCACAAGCTTATCGACAAATGTCTCTTCTATTACGAAG  
ACCGCTGGTCGCGAAGCTTATCCAGGGGATGTTTTTTATTTACATTCACGCCTTTTGA  
AAGAGCTGCTAAATTAGGTTCTCTTTTAGGTGAAGGAAGTATGACTGCTTTGCCAATAG  
TTGAAACTCAATCGGGAGATGTTTCGGCTTATATTCCTACTAATGTAATTTGATTACTG  
ATGGACAAATATTCTTATCTGCCGATCTATTCAATGCTGGAATCAGACCTGCTATTAATGT  
GGGTATCTCCGTTTCTAGAGTGGGATCTGCAGCTCAAATTAAGCTATGAAACAAGTTG  
CTGGCAAATTAATAATTGGAAGTGGCGCAATTCGCAGAATTAGAAGCCTTTGCACAATTT  
GCTTCTGATCTTGATAAAGCTACTCAGAATCAATTGGCAAGAGGTCAACGATTACGTGA  
ATTGCTTAAACAATCCCAATCCGCCCTCTTGCGGTAGAAGAACAGATAATGACTATTTA  
TACCGGAACAAATGGTTATCTTGATTCATTAGAAATTGGACAGGTAAGGAAATTTCTTG  
TTGAGTTACGTACTTACCTAAAAACAAATAAACCGCAGTTTCAAGAAATAATATCTTCT  
ACCAAGATATTCACCGAGGAAGCAGAAGCCCTTTTGAAGAAGCTATTCAGGAACAGA  
TGGAACGTTTATACTTCAGGAACAAGTAATGAAAATAAATCCTACTAATTCTAGTTCGT  
TGACTTCCACGCTTGAAAAAAAAAACCTCGGGAATATCACCCAAATCATTGGTCCGGT  
ACTAGATGTAGCTTTTCCACCGGGCAAGATGCCTAATATTTATAACGCTCTGGTAGTTAA  
GGGTGAGATACTGCTGGTCAACAAATTAATGTGACTTGTGAGGTACAGCAATTAAGT  
GAAACAATCGAGTTAGGGCTGTGGCTATGAGTGCTACAGATGGTCTAACGAGAGGAAT  
GGAAGTAATGGATACGGGAGCTCCTCTAAGTGTCCGGTCCGGTGGAACGACTCTTGA  
CGAATTTTCAACGTAATTTGGAGAGCCCGTTGATAATTTAGGGCCTGTAGATACTCGCAC  
AACATCTCCTATTCATAGATCTGCGCCCGCCTTTATACAGTTAGATAACCAAATTATCTATT  
TTTGAACCGGAATTAAGTAGTAGATCTTTTAGCCCCTTATCGTCGTGGAGGAAAAAT  
TGGACTATTCGGGGGGGCTGGAGTGGGTAAAACAGTCCTCATTATGGAATTGATTAACA  
ATATTGCCAAAGCTCATGGGGGTGTATCTGTATTTGGCGGAGTAGGTGAACGTAATCGT  
GAAGGAAATGATCTTTACATGGAATGAAAGAATCCGGGGTGATTAATGAAGAAAATA  
TTGCAGAATCAAAGTGGCTCTAGTTTACGGTCAGATGAATGAACCGCCGGGAGCTCG  
TATGAGAGTTGGTTTACTGCCCTCACTATGGCTGAATATTTTCGAGATGTTAATGAACA  
AGATGTACTTCTATTTATCGACAATATCTTCCGTTTCGTCCAAGCAGGATCGGAAGTATC  
CGCCTTATTGGGTAGAATGCCTTCCGCTGTGGGTATCAACCCACCCCTTAGTACCGAAA  
TGGGTACGTTACAAGAAAGAATTACTTCGACGAAAGAGGGGTCCATAACCTCTATTCA

AGCAGTTTATGTACCTGCAGACGATTTGACCGACCCTGCGCCCGCTACGACATTTGCAC  
ATTTGGATGCTACTACTGTACTATCAAGAGGATTAGCCGCCAAAGGTATCTATCCAGCA  
GTAGATCCTTTAGATTCAACGTCAACTATGCTCCAACCCCGGATTGTTGGTGAGGACCA  
TTATGAAACTGCCCAAAAAGTTAAGCAAACCTTTACAACGTTACAAAGAAGTTTCAGGAC  
ATTATAGCTATCCTTGGATTGGACGAATTATCCGAAGAGGATCGCTTAACCGTAGCAAG  
AGCGCGAAAAATTGAGCGTTTCTTATCACAAACCCTTTTTTCGTAGCAGAAGTTTTTACCG  
GTTCTCCAGGAAAATATGTTGGTTTATCAGAAACAATTAGAGGGTTTTCGGTTGATCCTT  
TCCGGAGAATTAGACAGTCTTCTGAACAGGCCTTTTATTTGGTAGGTAACATCGATGA  
AGCTACCGCGAAGGCTATGAACTTAGAAATGGAGAGCAATTCGAATAAAATGACCTTA  
AATCTTTGTGTACTAACCCCTAATCGAACTGTTTGGAAATTCAAAAGTGAACGAAATCAT  
TTTATCTACTAATAGTGGTCAAATTGGTGTATTACCAAATCACGCCTCTGTTGCTACAGC  
CGTCGATATAGGTATTTTGAAAATACGTCTTGACGGCCAATGGTTAACGATGGCCCTGAT  
GGGAGGTTTTGCTATAATAGGTAATAATGAGATCACTGTTTTAGTAAATGATGCGGAAA  
AAGGTAGTGACATCGATTCACAAGAAGCCAGCAAACCTTGAATAGCAGAAGCTAA  
TTTCAGAAAAGCTGAAGGAAAGAGACAAAAAATTGAGGCAAATCTAGCTCTCCGACG  
AGCTAGGACACGAGTCGAGACGATCAATGCGATTTTCGATGAAAAATGTAACCGATTCT  
TTCGTTTTCTTTGGGCCACTGGCCGTCGCCGGGAGTTTTCGGGTTTAATACCGATATTTTA  
GCAACAAATCTAATAAATCTAAGTGTAGTGCTTGGGGTATTGGTTTTTTTTTTGGAAAGGG  
AGTGTTAAGTGATTTATTAGATAATCGAAAACAGAGGATCTTGAATACTATTCGAAATTC  
AGAAGAAGTGCCTGGGGGAGCCATTGAACAGCTGGAAAAGGCCCGTACTCGCTTACG  
AAAAGTGGAAATGGAGGCAGATCAGTTTTCGAGTCAATGGATACTCTGAGATAGAGCGA  
GAAAGATTGAATTTTATTAATTCCACTTCTAAGACTTTGAAACAAGTAGAAAATTACAA  
AAACGAAACTATTAATTTTGAACAACAAAGAGCGATTAATCAAGTCCGACAAGTGGTT  
TTCCAACAAGCCTTACAAGGGGCTCTAGGAACTCTGAGTAGTTGTTTGAACAACGAGT  
TACATTTACGTACGATACGTGCCAATATTGGCATGTTGGGGGCAATAACCGAT-----AT  
GAATCCACTGATTTCTGCCGCTTCCGTTATTGCTGCTGGATTGGCTGTAGGGCTTGCTTC  
TATTGGACCTGGAGTTGGTCAAGGTACTGCTGCGGGCCAAGCTGTAGAAGGTATCGCG  
AGACAGCCCGAGGCGGAGGGAAAAATACGAGGTACTTTATTGCTTAGTCTAGCTTTTAT  
GGAAGCTTTAACAATTTATGGTCTGGTTGTAGCATTAGCACTTTTATTTGCGAATCCTTT  
TGTTATGAATGTTCTATCCTGTTCCATCAACAACTAAATGGGTTATACGATATTTCTGGT  
GTGGAAGTAGGCCAACATTTCTATTGGAAAATAGGAGGTTTCCAAGTCCACGGCCAAG  
TACTTATTACTTCTTGGGTTGTAATTGCTATCTTATTGGGTTTACGCTACTCTAGCTGTTTCG  
GAACCCACAAACCATTCCTAAGTACGCGGTCAGAATTTCTTCGAATATGTACTTGAATTC  
TTCGAGATGTGAGTAAAACCTCAAATTGGAGAAGAATATGGTCCCTGGGTTTCTTTTATT  
GGAACAATGTTTCTATTTATTTTTGTTTCTAATTGGTTCAGGAGCGCTTTTACCTTGGAAA  
ATCATACAATTACCTCATGGGGAGTTAGCCGCACCCACGAATGATATAAATACTACTGTT  
GCTTTGGCTTTACTCACGTGAGTGGCATATTTCTATGCGGGTATTAGCAAAAAAGGATT  
GGGTTATTTTCGAAAATATATTCAACCAACCCCAATCCTTTTACCCATTAACATCTTAGA  
AGATTTACAAAACCTTTATCACTCAGTTTTTCGACTTTTCGGAAATATATTAGCTGATGA  
ATTAGTAGTTGTTGTTCTTGTTCCTTAGTACCTTTAGTGGTTCCTATACCTGTATGTTT  
CTTGGATTATTTACAAGTGGTATTCAAGCTCTGATTTTTGCAACTTTAGCCGCGGCTTAT  
ATAGGGGAATCCATGGAGGGTCATCATATGATATTTCAACTTTAGAGCATATATTAACCTC  
ATATTTCCCTTTTCCATCGTTTGCATTGTAATTACAATTCATTTGATAACTTTATTAATCGAT  
GAAATCATAAACTAAACAATTCGTCAGAAAAGGGAATGATAGCTACTTTTTTATGTAT



AACCGTATTATTAGTCACTCGTTGTATTTATTTCTGGGCATTTACCACTAAGTGATTTATAT  
GAATCATTAAATCTTTCTTTTCATGGAGTTTATCATTATTTCATATAGTTCCATAT-----AAAAA  
TAAAAGCCATTTAAGCACAATAACTGCGTCAAGTGTTATTTTTACCCAAGGCTTTGCTA  
CTTCGGGTCTTTTAACTGAAATACATCAATCCGCAATATTAGTACCCGCTCTCCAATCCG  
AGTGGTTAATAATGCACGTAAGTATGATGATATTGGGCTATGCAGCTCTTTTATGTGGAT  
CATTATTATCAGTAGCACTTCTGGTCCTTACATTTTCGAAAAAACAGAAATCTTCTTTGT---  
---AAGGAAATACAATACATAAATGAAATAAATAATATTTTTGGAAATGCTTCT-----GAT  
ACAATTATTACAGGTCCCAATTGATTCAACAGTTGGATTATTGGAGTTATCGTGTGATT  
AGTCTAGGTTTTATCTTTTTAACTATAGGTATTTCTTTCAGGAGCAGTATGGGCTAATGAA  
GCATGGGGGTCATATTGGAATTGGGACCCAAAGGAACTTGGGCATTTATTACTTGGAT  
CGTATTTGCGGTTTATTTACATACTAGAACCAATACAAATTTACAGGTTGAAAATTCGCG  
AATTGTGGCATCTATGGGCTTTCTTATAATTTGGATATGCTATTTTGGGGTCAATCTATTA  
GGAATAGGGCTACATACTTATGGTTCATTTACGTTAACAATGTCAAAAAAGAAAGCATT  
CACCTCTCTTTTATATCTTGCATCTATAGTATTTTTGCCCTGGTGGATTCTCTCTCATTTA  
ATAAAAGTCTGGAATCTTGGGTTACTGATTGGTGAATACTAGGCAATCTGAAATTTTT  
TGGAATGATATTCAAGAAAAGAATATTATAAAAAATTTTCATAGAATTGGAAGAAATCCT  
TCTTTTGGAGGAAATGATCAAGGAAGACTCAGAGACACATCTACAAAACCTTCGTATA-  
--ATCCACAAGAAACGCTCCAATTAATCAAGATACACAATGAGGATCATATTCATACGA  
TTTTGCACTTCTCGACAAATATAATCTGTTTCGTTATTCTAAGCGGTTATTCTATTTTGGG  
TAATGAAGAACTTGTTATTCTTAACTCTTGGGCTCAGGAATTCATATATAACTTAAAGTGA  
CACAATAAAAGCTTTTTTGGATTCTTTTATTAACAGATTTTTTTTATCGGATTCCATTGACT  
CGTGGTTGGGAACATAATGATTGGCTTTGTCTACAAAGATTTTGGATTTGCTCATAATGAT  
CAAATCTATCTAGTCTTGTTTGTATTTTTCCAGTCACTTCTAGATACTCTATTTAAATTTG  
GGTTTTTTCGTTATTTAAATTGTGTTTCTCCGTCACTTGTAGTGATTATCATTCAATGAAT  
GAAATGCCTATTGGTGTTCCTAAAAGTGCCTTTTAGAAGTCCTGGAGAGGAAGATGCAT  
CCTGGGTTGACGTATACAACCGACTTTATCGAGAAAGATTACTTTTTTTTAGGACAAGAG  
GTTGATAGCGAGATCTCGAACCAACTTATTGGTCTTATGGTATATCTCAGTATCGAGAAT  
GATACCAAAGATCTCTATTTGTTTATAAACTCTCCCGCGGATGGGTTATCCCTGGAGTG  
GCTATTTATGATACAATGCAATTTGTGCGACCAGATGTACAGACAATATGCATGGGATTA  
GCCGCTTCAATGGGATCTTTTATCTTAGCCGGAGGAGAAATTACCAAACGTCTAGCATT  
CCCTCACGCTAGGGTAATGATTCATCAACCTGCTAGTTCTTTTTTATGAGGCACAAACGG  
GAGAATTTATCCTGGAAGCGGAAGAGCTGCTAAAACCTGCGTGAAACCCTAACAAGGG  
TTTATGTACAAAGAACGGACAAACCTTATGGGTTGTCTCGGAAGACATGGAAAGAGA  
TGTTTTTATGTCAGCAACAGAAGCCCAAGCTTATGGAATTGTTGATCTTGTAGCGGTGG  
TTATGAAAGAACAATAATGGATTCAATGAAGGTTTAATTACTGAATCCCTTCCCAACGGT  
ATGTTCCGTATTTCGCTTAGATAATCAAGATATGATTCTAGGTTATGTTTCAGGAAAGATC  
CGACGTAGTTTTTATACGGATACTACCAGGCGATAGAGTAAAATTGAAGTAAGTCGTTA  
TGATTCAACCAGAGGACGTATAATTTATCGACTTCGCAATAAGGATTCGAAAGATATGG  
AGGAATCCAAAGATATTTAAAG---AATAGATCTCAACAACACTACTTCTTATATCCACT  
TATCTTTCAGGAGTATATTTATGCACTTGCGCATGATCATGGTTTAGTGGGTTATAAT---A  
AATTCAGTTTACTAATTTGTGAAACGTGCAATTGAGCGAATGTATCAGCAGAAGCATTG  
ATTCTTTTTGATAATGATTTAACCAAAATAGATTTTTTGGAAATAATTTTTCTTTTCAA  
TGATATCAGAAGGATTTGCAGTCATTTAGAAATTCGGTTTTATCTCCGATTATTATCTTC  
GCTAATAGTGAAATCTAATAATTTACGATCAATTCATTCAATATTCCCTTTTTTLAGAGGAC

AATTTTTACATTTAATTTATGTATTAGAGATACTAATACCCTACCCAGCCCATCTGGAAA  
TATTGATTCAAACCTCTGCGCTACTGGGTAAAAGACGCTTCTTCTTTACATTTATTACGAT  
TCTTCTCCATGAGTATCGTAGTTGGAAT-----ACGAAAGCCAGTTCTTTTTTTTCAA  
ACAAAGGTTTTTCTTCGTCCTATATAATTCTCATATATGTGAATATGAATCCATCTTCGTC  
TTTCTTCGTAACCAATCTTCTCATTATGTTCAACCTCTTCTGGAACCCTTCTTGAACGA  
ATCTATTTCTATGGAAAACCTAGAACATCTTGTAAGAAGCTTTTGCTAAGGCCTTAACTA  
TGGTTGTTAAGGATCCTTTCATGCATTATGTTAGGTATCAAGGAAAATCAATTCTCGCT  
TCAAAGGGACACCCCTTTGATGAAAAAATGGACATATTACTTTGTCAATTTATGGGA  
ATGTCGTTTTTACCTATGGTCTCAGCCGGGACGGATCTGTATAAACCAATTATATAATAAT  
TCCCTATCTCTTCTGGGATATATATCAAGTGCGGGACTAAACCCTTCAATGGTCCGCAGT  
CAAATGTTAGAAAATGCATTTATAATTGATAATCCTATT-----AAAAAGTTCGATACTCT  
GTTCCAATTGTTCTCTGATTGGATCATTGGCTAAGGCGAGATTTTGTAACGTATTGGGG  
CACCTATTAGTAAGGCGGTTTGGACTGATTTATCAGATTCTGATATTATTGTCCGATTG  
GGCGTATATGCAGAAATCTTCTCATTTTTTTAGTGGATCCTCACAAAAAAGAGTTTGT  
ATCGAATAAAGTATATACTTCGGCTGTCTTGTGCTAGAACTTTGGCTCGTAAACATAAAA  
GTAAGTGTACGTGCTTTTTTGAAGATCGGGCTCGGGGTATTGGAAGAATTCTTTACG  
GCGGAAGAGCAAGTCCTTTATTTGACCTTTCCAAGACGTATTTGGTATTTGGATATTATT  
TGTATCAATGATTTGGCCAGTCATGAAATGATAATAGAT---ACAACAGAAGTACAA---GC  
TATCAATTCTTTTTTTAGATTGGAATCC---TAAAAGAGGTATATGATATCATATGGATGCT  
TGCCCTATTTTACTCTTGTATTAGGAATCACAATAGGTGTACTAGTAATTGTTTGGTTA  
GAGAGAGAAATATCTGCGGGGATACAACAACGTATTGGCCCCGAATATGCTGGACCTTT  
GGGAATTCTTCAAGCTTTAGCAGATGGTACAAAATTACTTTTCAAAGAGAATCTTCTTC  
CATCAAGAGGAGATACTCGTTTATTCAGTATCGGACCATCCATAGCAGTCACATCAATTC  
TACTAAGTTATTTAGTAATTCCTTTTGGATATCGCCTTGTCTAGCCGATGTCAGTATTGG  
TGTTTTTTTATGGATTGCCATTTCAAGTATTGCTCCCGTGGGCCTTCTTATGTCAGGTTAT  
GGATCAAATAATAAATATTCTTTTTTAGGTGGTTTACGGGCTGCTGCTCAATCAATTAGT  
TATGAAATACCATTAACCTCTATGTGTGTTATCAATATCTCTATTATCTAACAGTTCAAGTA  
CAGTTGATATAGTTGAAGCGCAGTCAAATATGGTTTTTGGGGGTGGAATTTGTGGCGT  
CAACCTATAGGGTTTATAGTTTTTCTAATTCGTCCTTAGCCGAGTGTGAAAGATTACCT  
TTTGATTTACCAGAAGCAGAAGAAGAATTGGTAGCAGGTTATCAAACCGAATATTACAG  
GTATAAAATTTGGTTTATTTTACGTTGCTTCGTATCTGAATTTACTAGTTTCTTCATTATTT  
GTAACGGTCTTTACTTAGGGGGTTGGAATCTTCTCTTCCGCACATAGCCCTTCTTTTT  
TTTTTTGAAATAAATAAAGCGGGTAGAGTCTTTGGAACAATAATTGGTATCTTTATTACA  
TTGGCTAAAACCTTATTTGTTCTTATTTCATTGCTATCACAACAAGATGGACTTTACCAAGG  
CTAAGAATGGACCAACTCTTAAATCTTGGGTGGAAATTTCTTTTACCTATACTCTCGGC  
AATCTATTATTAACAACCTTCTTCCCAACTTCTTCACTGATGATCTGGCATGTACAGAAT  
GAAAACCTTCTCGATTCTACGAGAATTTTATGAAAGCCTTTCATTTGCTTCTCTTC  
GATGGAAGTTTGATTGTCCAGAATGTATCCTAATTTTTGGCCTAATTTCTTCTGATG  
ATCGATTCAACCTCTGATCAAAAAGATATACCTTGGTTATATTTTCATCTTCAACAAGT  
TTAGTAATGAGCATAACGGCCCTCTTGTTCCGATGGAGAGAAGAACCCGTGATTAGTTT  
TTCGGGAAATTTTCAAACGAACAATTTCAACGAATCTTTCAATTTCTTATTTTACTATG  
TTCAACTCTATGTATTCCTCTATCCGTAGAGTACATTGAATGTACAGAAATGGCTATAAC  
AGAGTTTCTCTTATTCGTATTAACAGCTACTCTAGGAGGAATGTTTTTATGCGGTGCTAA  
CGATTTAATAACTATCTTTGTAGCTCCAGAATGTTTCAGTTTATGCTCCTACCTATTATCT

GGATATACGAAGAAAGATGTACGGTCTAATGAGGCTACTATGAAATATTTACTCATGGGT  
GGGGCAAGCTCTTCTATTCTGGTTCATGGTTTCTCTTGGCTATATGGTTCATCCGGGGGA  
GAGATCGAGCTTCAAGAAATAGTGAATGGTCTTATCAATACACAAATGTATAACTCCCC  
AGGAATTTCAATTGCGCTCATATTCATCACTGTAGGAATTGGATTCAAGCTTTCCCCAGC  
CCCTTCTCATCAATGGACTCCTGACGTATACGAAGGATCTCCCACTCCAGTCGTTGCTT  
TTCTTTCTGTACTTCGAAAGTAGCTGCTTCAGCTTCAGCCACTCGAATTTTCGATATTC  
CTTTTTATTTCTCATCAAATGAATGGCATCTTCTTCTGGAAACCCTAGCTATTCTTAGCAT  
GATATTGGGGAATCTTATTGCTATAACTCAAACAAGCATGAAACGTATGCTTGCATATTC  
GTCCATAGGTCAAATCGGATATGTAATTATTGGAATAATTGTTGGAGACTCAAATGATGG  
ATATGCAAGCATGATAACTTATATGCTGTTCTATATCTCCATGAATCTAGGAACTTTTGCT  
TGCATTGTATTATTTGGTCTACGTACCGGAACTGATAACATTCGAGATTATGCAGGATTAT  
ATACGAAAGATCCTTTTTTTGGCTCTCTCTTTAGCCCTATGTCTCTTATCCCTAGGAGGTC  
TTCCTCCACTAGCAGGTTTTTTTCGGAAAACCTATTTATTCTGGTGTGGATGGCAGGCA  
GGCCTATATTTCTTGGTTTTAATAGGACTCCTTACAAGCGTTGTTTCTATCTACTATTATCT  
AAAATAATCAAGTTATTAATGACTGGACGAACCCAAGAAATAACCCCTCACGTGCGA  
AATTATAGAAGATCTCCTTTCAGATCAAACAATTCCATCGAATTGAGTATGATTGTATGT  
GTGATAGCATCTACTATACCAGGAATATCAATGAACCCGATTATTGCAATTGCTCAGGAT  
ACCCTTTTTATGTTTTCTGCTTACGAATATGATATTTTTTGGGCATTTCTAATAATATCAAG  
TCTTATTCCTATTTTGGCATTTTTCGTTTTCCGGAGTTTTAGCCCCGATTAACAAGGGCC  
TGAGAAACTTTCTAGTTATGAATCGGGTATAGAACCAATGGGCAACGCTTGGTTACAAT  
TTCGAATCCGTTATTATATGTTTGCTCTAGTTTTTGTGTTTTTGTATGTTGAAACAGTTTT  
TCTTTATCCATGGGCAATGAGTTTCGATGTATTAGGTATATCTGTATTTGTAGAAGCTTTA  
ATTTTCGTGCTTATCTTAATTGTTGGTTTAGTTTATGCATGGCGAAAAGGGGCATTGGAA  
TGGTCTACGAATTTTTTTCCTTGGTTAACAATAATTGTAATTTTGCCAATATTCGAGGCT  
CCATAATTTTATTTCTTCCCCATAGAGGAAATAGAGTAATTAGGTGGTATACTATATGTAT  
ATGTATTCTAGAACTCCTTCTAACGACCTATGCATTCTGTTATCACTTTCAATTGGATGAT  
CCATAATCCAATTAGTCGAGGACTTTAAATGGATCGATTTTTTTTGGATTTCCATTGGAGA  
TTAGGAATAGATGGACTTTCTATAGGACCCATATTACTAACGGGATTCATCACTACTTTA  
GCTACCTTAGCGGCTTGGCCAGTTACTCGAGATTCTCGATTATTTCATTTTCTAATGTTA  
GCAATGTACAGCGGTCAAATAGGATTATTTGCTTCTCGAGACCTTTTACTGTTTTTTCATC  
ATGTGGGAGTTAGAATTAATCCGGTTTATCTACTTTTATCCATGTGGGGGGGAAAGAA  
ACGTCTTTACTCGGCTACAAAATTTATTTTATATACAGCGGGGGGTTCCGTTTTTCTCTT  
AATGGGAGTTTTGGGTGTCCGTTTATATGGTCTACTGAGCCGACATTAACCTTTGCAA  
CATTAGTTAATCAGTCATATCCTGTGGCGTTGGAAATAATATTATATATTGGATTTTTTATT  
GCTTTTGTGTCAAATCGCCGATTATACCTCTACATACATGGTTACCAGATACCCATGGA  
GAAGCACATTACAGTACTTGTATGCTTTTAGCCGGAATCTTATTAATAAATGGGAGCGTAT  
GGGTTGATTCCGATTAATATGGAATTATTATCCCACGCCATTCTATATTTTCTCCGTGGT  
TGGTGATAGTAGGCACAATAACAATAATATATGCAGCTTCAACATCTCTTGGCCAACGTA  
ATTTAAAAAAGAATAGCCTATTCCTCTGTATCTCATATGGGTTTCATACTTATAGGAAT  
TGGTTCTATAAACGATACGGGACTCAATGGAGCCATTTTACAAATAGTCTCTCATGGATT  
TATTGGTGTGCGCTTTTTTTCTTGGCAGGAACGAGTTATGATAGAATACGTCTTGTTTA  
TCTCGACGAAATGGGTGGAATAGCTATCCAATGCCAAAATATTCACGATGTTACAGCA  
GCTTTTCAATGGCTTCTCTTGCATTACCGGGCATGAGTGGTTTTGTTGCAGAATTTATAG  
TTTTTTTTGGAATCATTACCAGCCAAAATATCTTTAATATCAAACCTAGGAATTACTTT

TGTAATGGCAATTGGAATTATATTAACCTCCTATTTATTCATTATCTATGTTACGCCAGATGT  
TCTATGGATAACAAGCTATTTAATGCTCCAACTCATATGTTTTGATTCTGGACCACGAG  
AGTTATTTGTTTCGATCGCTATCTTTATACCCGTAATAGGTATTGGTATGTACCCTGATTTT  
GTTCTTTCCCTATCAGTTGACAAGGTCGAGGTTCTTTTATCTAATTTTGTATAGAAATGA  
TGCTCGAACATGTACTTGTGTTGAGTGCCTATTTATTTCTGTTGGTCTTTATGGATTGAT  
TACGAGTCGAAATATGGTTAGGGCCCTTATGTGTCTTGAACCTTATTTGAATGCAGTTAA  
TATCAATTTTGTAAACATTTCTGATTTTTTTGATAGTCGTCAATTAAGGATCAATTTTC  
TCTATTTTTGTTATAGCTATTGCAGCCGCTGAAGCAGCTATTGGACTAGCTATTGTTTCAT  
CAATTTATCGTAACAGAAAATCAACTCGTATCAATCAATCAAACTTGTGAATAAGATG  
GAACAGACATATCAATATGCGTGGATAATTCCTTCCCTCCACTCCAGTTCCTATGTTA  
ATAGGAGCGGGACTTCTTCTTTTCCGTCGGCAACAAAGAGTCTTCGCCGTATGTGGG  
CTTTCAAAGTGTTTTTTTGTTAAGTATAGTCATGCTTTTTTCGATCAATCTGTCTATTCA  
GCAAATAAATGGAAGTCTATCTATCAATATGTATGGTCTTGGATCATAAATAATGATTTT  
TCTTTAGAATTCGGTACTTGATCGACCCGCTTACTTCTATTATGTCAATATTGATTACTA  
CTATTGGAATTATGGTCTTATTTATAGTGATAATTATATGTCTTATGATCAAGGATATTTG  
AGATTTTTGCTTATATGAGTTTTTTCAGTACTTCTATGTTAGGATTAGTTACTAGTTTCGA  
ATTTGATACAAATTTATATTTTTGGGAATTGGTAGGAATGTGTTTCATATCTATTAATAGG  
GTTTTGGTTCACACGGCTGTTGCTGCAAATGCTTGCCAAAAGGCATTTGTAACATAATC  
GTGTTGGGGATTTGGTTTATTATTAGGAATTTAGGCTTTTATTGGATAACAGGGAGTT  
TCGAATTTAGAGATTTGTTCAAATATTAATAACAATGAAGTCAATTTTTTATTTGTTAC  
TTTCTGTGCTGTTCTATTTTGGCCGGTGCAGTTGCTAAATCTGCACAATTTCCCCTTCAT  
GTATGGTTACCGGATGCCATGGAGGGTCTACTCCTATTTCCGGCTCTTATACATGCTGCT  
ACTATGGTAGCTGCGGGCATTTTTCTGTAGCTCGGCTTATTCCTCTTTTCATAGTTATCC  
CTCATATAATGAATTTTCATCTCTTTGGTAGGAGTAATAACAATATTATTCGGAGCAACTTT  
TGCCCTTGCTCAAAAAGACATTAAGAGAGGTTTAGCCTATTCCACAATGTCTCAATTGG  
GTTATATGATGTTAGCTCTAGGTATGGGGTCTTATCGAAGTGCTTTATTTCAATTTGATTAC  
TCATGCTTATTCCAAAGCATTATTATTTTTAGGATCTGGATCCGTTATTCATTCAATGGAA  
ACTCTTGTGGCTATTCTCAAATAAAAGTCAAGATATGGTTTTTTATGGGGGGTTTAAACA  
AAGCATGTCCCAATTACCAAACCTCCTTTTTATTAGGTACACTTTCTCTTTGTGGTATT  
CCGCCGCTTGCTTGTTTTTTGGTCCAAAGATGAAATCTTAATGATACTTGGTTATATTCA  
CCAATTTTTGCAATAATAGCTTGGTTTACAGCGGGATTAACCGCATTTTATATGTTTCGA  
ATCTATTTACTTACTTTTGAAGGACATTTAAACGTTCAATTTCAAATTTATAGTGGCAA  
AAGAATACTCCCTTCTATTCAATATCTTTATGGGGTAAAGAAAATTCAAAAAGAATTAA  
CAA-----AGTTTATTAACAATGAAATTTTTTTCATTTGGAAATAAGAAGTTTTTTTTGT  
ATCCTTATGAATCGGATAATACTAIGTTATTTCCCTATACTTGTATTGGTTCTATTTACGTTG  
TTCGTTGGATCCCTAGGAATTCCTTTCCGTTTGGATATATTATCAAATGGTTAACCCCG  
TCTATAAACCTTTTACATAAAAATTTGAAT---TCTATAGGTTGGTATGAATTTTTGAAAGA  
TGCTCTTTTTTCAGTTAGTATAGCTATTTTTGGAATATTTATAGCCTTCTTTTTATATAAAC  
CTGTTTATTCATCTTTACAAAATTGGGACTTAATTAACCTTTTTGTTATTCTTTTGGACAA  
ATAATAAATGGTATATATGATTGGTCATATAATCGTGGTTATATAGATGCTTTTTATGCAA  
GATCTTTTATGGGGGAATAAGAGGATTGGCCAAGTTAACTTCTTTTTTTGATAGACGA  
GTAATTGATGGAATTAATAATGGAGTTGGTGTGTTTGGAGTTCTTTTTAGGTGAAGGTATC  
AAATCTATAGGTGGGGGG---CGCATCTCTTCTATCTTTTCTTGTATTTCTTTTTTGTAGC  
AATCCTTTTATTAATTATTAATATGGATTTACCCGGACCAATACATGATTTTCTTTTGTAGTCT

TTCTGGGATCGGGTCTTATATTAGGAGGTCTGGGAGTGGTATTACTCCCCAATCCAATTT  
ATTCTGCCTTTTCATTAGGATTGGTTCTTGTGTTGTACATCCTTATTCTATATTCTATCAAAC  
TCCCATTTTGTAGCTGCTGCGCAACTTCTTATTTACGTAGGAGCTATAAATGTTTTAATCA  
TTTTTGCTGTAATGTTTCATGAATGGTTCCGAATATTACAAAGATTTTCATCTTTGGACCG  
TTGGGGACGGAGTTACGTTCGATGGTTTGTACAAGTATTTTTGTTTCACTAATTACTACTA  
TTCCAGATACGTTCATGGTACGGGATTATTTGGACTACAAAATCAAACCAGATTGTAGAG  
CAAGATTTGATAAGTAATAGTCAACAAATTTGGGATTCATTTATCAACAGATTTTTTTCTT  
CCATTTGAACTTATTTCAATAATTCTTTTAGTTTCGTTAATAGGTGCGATTACTGTAGCTC  
GTCAAATGACTGCACCAGCTACACGAAATGACCTTATGATAGTCAATATGGGTCCTCAG  
CACCCATCAATGCACGGTGTCTTCGACTCATTGTTACTCTAGATGGTGAAGATGTTATT  
GACTGTGAACCAATATTGGGTTATTTACATAGAGGGATGGAAAAAATTGCGGAAAACC  
GAACAATTATACAATATTTACCTTATGTAACGCGTTGGGATTATTTAGCTACTATGTTTAC  
CGAAGCAATAACTGTAAATGCCCCAGAGCAGTTAGGCAATATTCAAGTGCCTAAAAGG  
GCCAGCTATATCAGAGTCATTATGTTAGAGTTAAGTCGTATAGCTTCGCATTTGTTATGG  
CTTGGCCCTTTTATGGCAGATATTGGCGCACAGACCCCTTCTTCTATATTTTTTCGAGAA  
AGAGAATTGATATATGACCTATTCGAAGCTGCTACCGGTATGCGAATGATGCATAATTTT  
TTTCGTATTGGAGGAGTCGCTGCTGATTTACCTCATGGCTGGATAGATAAATGTTTGGAT  
TTTTGTGATTATTTTTTAACAAGAGTTACTGAATATCAAAGGCTTATTACACGGAATCCT  
ATTTTTTTAGAGCGAGTTGAGGGAGTGGGCATTATTGGCGGAGAGGAGGCAATAAATT  
GGGGTTTATCGGGACCAATGCTACGAGCTTCCGGAATACAATGGGATCTTCGGAAGGTT  
GATCATTACGAGTCTTACGATGAATTTGATTGGGGAGTTCAATGGCAAAGGAAGGGG  
ATTCGTTAGCTCGTTATTTAGTACGAATCAGTGAAATGACAGAATCAGTAAAAATTATTC  
AACAGGCTTTAGAAGGAATTACGGGGGGGCCATATGAGAATTTAGAAATCCGACGCTT  
TGATAAAGTATGGGATCCCGAATGGAATGATTTTGACTATCGATTTATCAGTAAAAAACC  
TTCTCCTACTTTTGAATTGTCAAACAAGA ACTCTATGTGAGAGTCGAAGCCCCAAA  
GGAGAATTAGGCATTTTTCTGATAGGAGATAAGGGTATTTTTCTTGGAGATGGAAAAT  
ACGACCACCGGGTTTTATCAATTTGCAAATCCTTCTCAATTAGTTAAAAGAATGAAAT  
TGGCTGATATTATGACAATACTAGGTAGCATAGATATCATTATGGGAGAAGTTGATCGTA  
TGTTTTCTATGGTAACTGAGTTCATGAATTATAGTCAACAAACAGTACGAGCTGCAAGG  
TACATCGGCCAAGGTTTCATGATTACTTTATCACATGCGAGTCGTTTACCTGTA ACTATT  
CAATATCCCTACGAAAAATTGATTACATCGGAGCGTTTCCGCGGCCGAATCCACTTTGA  
ATTTGATAAATGCATTGCTTGTGAAGTATGTGTTTCGTGTATGTCCTATAGATCTACCTGTT  
GTAGATTGGAAATTGGAAAAGGATATTAGAAAGAAACGATTGCTTAATTACAGTATTGA  
TTTCGGAATCTGTATATTTTGTGGTAATTGCGTTGAGTATTGTCCAACAAATTGTTTATCA  
ATGACTGAAGAATATGAACTTTCTACATATGATCGTCACGAATTGAATTATAATCAAATT  
GCTTTAGGGCGTTTACCAATGTCAATAATTAATGATTACACGACTCGAACAATTTTGAAT  
TTG-----ATGCAGGGTCGTTTGTCTGCTTGGTTAGTCAA  
GCATGGACTAATTCATAGATCTTTGGGTTTTGATTACCAAGGAATAGAACTTTACAAAT  
AAAACCCGAGGATTGGCATTCCATTGCTGTCAATTTATATATATATGGTTACAATTATTTA  
CGCTCCAATGTGCCTATGATGTAGCACCAGGTGGACTGTTAGCTAGTGTGTATCATCTT  
ACGAGAATAGAGTATGGCGTGGATCAACCAGAAGAGGTATGCATAAAAGTATTTTCCCC  
GAGGAAAAATCCTCGAATTCCGTCTGTTTTCTGGGTTTGGAAAGGTGTGGATTTTCAA  
GAACGGGAGTCTTTTATGATGTTGGGAATATCTTATGATAATCATCCGCGTTTGAACGC  
ATCTTAATGCCTGAAAGTTGGATTGGATGGCCTTTACGTAAGGATTATATTGCCCCCAAT

TTTTATGAAATACAAGATGCTCAT-----  
-----ATGAA  
TTCCATCGAGTTTCCCTTACTTGATCGAACAACCCAAAATTCAGTTATTTCAACTACATC  
AAACGATCTTTCAAATGGTCAAGACTTTCTAGTTTATGGCCGCTTCTCTATGGTACCAG  
TTGTTGCTTCATTGAATTTGCTTCACTAATAGGCTCACGATTCGACTTTGATCGTTATGG  
ACTAGTCCCAAGATCAAGTCTAGACAAGCGGACCTTATTTAACAGCCGGAACAGTA  
ACAATGAAAATGGCTCCCTCTTTAGTGAGATTATATGAGCAAATGCCTGAACCAAATA  
TGTTATTGCTATGGGAGCATGTACAATTCAGGGGGGATGTTTCACTGATTCTTATAG  
TACTGTTCCGGGAGTCGATAAGTTAATTCCTGTAGATGTCTATTTGCCAGGTTGTCCACC  
AAAACCGGAAGCAGTTATAGATGCTATAACAAAACCTTCGTAAGAAAATATCTCGAGAA  
ATCTATGAAGATAGAATTAAGTCTCAACGAGAGAATCGGTGTTTTACAACCAATCACAA  
ATTGAAGGTCGGGCGTAGTATTCATACCGGAAATTACGATCGGGAGTTCCTTTATCAAC  
CGACATCCACTTCGGAGATCCCCCCCCGAAACATTTTTCAAATACAAAAGTTTCACTCT  
TCCCACGAATTAGTGAATATGCAAACCTAGAAAGACTTTTTCTTGGATAAAGGAACAAAT  
AAATCGATCCATTTCCGTATCGCTCATGATATATATCATAACTCGGCCATCTATTTCAATT  
GCATATCCCATTTTTGCACAACAAGGTTATGAAAATCCACGAGAAGCGACTGGTTCGTAT  
TGTATGTGCCAATTGCCATTTAGCTAATAAGCCCGTGGATATTGAAGTTCACAAACGGT  
ACTTCCAGATACTGTATTTGAAGCAGTTGTTTGAATACCTTATGATATGCAACTAAAACA  
AGTTCTTGCTAATGGTAAAAGGGGTACTTTGAATGTAGGGGCTGTTCTTATTTACCAG  
AGGGTTTTGAATTAGCTCCTGCCGATCGGATTTCCCCCGAGATGAAAGAAAAGATAGG  
CAATCTTTCTTTTCAGAGCTATCGCCCCAATAAAAAAATATTCTTGTGATAGGCCCCGT  
TCCTGGTCAGAAATATAGTGAATAACCTTTCCTATCCTTTCCCCGGACCCCGCTACTAC  
GAAAGAGGTTCACTTCTTAAAATATCCTATATACGTAGGCGGAAACAGGGGAAGGGGT  
CAGATTTATCCCGACGGGAGCAAAAAGTAACAATACAGTTTATAATGCTACCTCAGCAGG  
TATAGTAGGTAAAATAATACGAAAAGAAAAGGGGGTTACGAAATAACCATAGCGGAT  
GCATCGGATGGACGTCAAGTGGTTGATATTATCCCTCCAGGGCCAGAACTTCTTGTTTC  
AGAAGGCGAATCTATCAAATTGGATCAACCGTTGACGAGTAATCCTAATGTGGGCGGAT  
TTGGCCAGGGAGATGCAGAAATAGTACTTCAAGACCCCTTACGTGTCCAAGGCCTTTT  
GTTCTTCTTGGCATCTGTTATTTTGGCACAAATCTTTTTGGTTCTTAAAAGAAACAGTT  
CGAGAAGGTTCAATTGTCAGAAATGAATTTTCATGAGTAAAGTATATGATTGGTTTGAAG  
AACGTCTCGAGATTCAGGCGATTGCGGATGATATACTAGTAAATACGTTCCCTCCTCATG  
TCAACATATTTATTGTCTGGGAGGCATTACGCTTACTTGTTTTTTAGTACAAGTGGCTA  
CGGGGTTTGCTATGACTTTTTACTATCGTCCGACTGTTACGGACGCTTTTGCTTCGGTTC  
AATACATAATGACTGAAGCTAATTTTGGTTGGTTAATCCGATCAGTTCATCGATGGTCAG  
CAAGTATGATGGTTCTAATGATGATCTTGCATGTATTTCCGGTTTATCTCACTGGTGGATT  
TAAAAGCCTCGTGAGTTAACTTGGGTTACAGGTGTGGTTCTAGCTGTATTGACTGCAT  
CTTTTGGTGTAACCTGGTTATTCCTTACCTCGGGACCAAATTGGTTATTGGGCAGTAAA  
ATTGTAACAGGTGTACCCGAAGCTATTCCTGTAATAGGGTCGCCTTTGGTAGAATTATTG  
CGTGGAAGTGCTAGTGTGGGACAATCCACTTTGACTCGTTTTTATAGCTTACACACTTT  
TGATTGCCGCTTCTTACTGCTGTATTTATGTTAATGCACTTTCCAATGATACGTAAACAA  
GGCATTTCTGGTCTTTAATGGGAGTAACAAAAAACCTGACTTGAATGATCCTGTATT  
AAGAGCTAAATTAGCTAAAGGTATGGGTCATAATTATTACGGAGAGCCCGCTTGGCCCA  
ATGATCTTTTATATATTTTTCCAGTAGTAATTCTAGGAACTATTGCATGTAACGTAGGTTT  
AGCGGTTCTAGAACCATCAATGATTGGTGAACCAGCAGATCCATTTGCAACCCCTTTGG

AAATATTACCCGAATGGTATTTCTTTCCCGTATTTCAAATACTTCGTACAGTACCCAATAA  
ATTATTGGGTGTCCTTTTAATGGTTTCAGTACCTGTGGGATTATTAACAGTACCTTTTTTG  
GAGAATGTTAATAAATTCCAAAACCCATTTTCGTTCGTCCAGTAGCGACAACCGTCTTTTT  
GATTGGTACCGCAGTGGCCCTTTGGTTGGGTATTGGTGCAACATTACCTATTGATAAATC  
CCTAACTTTAGGTCTTTTTATGATTGAAGTTTTTCTATTTGGAATCGTGTTAGGTCTAATT  
CCTGTTACTTTGGCTGGATTATTCGTAACCTGCATATTTACAATATAGGCGTGGTGATCAAT  
CGGACCTTATGCCTACTATAACTAGTTATTTTGGTTTTTCTACTAGCGGCTTTAACGGTAA  
CCTCAGCTCTATTTATTGGTCTGAGTAAGATACGACTTATCATGGATATAGTAAGTCTCG  
CTTGGGCTGCTTTAATGGTAGTCTTTACTTTTTCCCTTTCACTCGTAGTATGGGGAAGAA  
GTGGACTCATGATTATTCGTTTCGCCGAACCAGAAGTAAAAATTTTGGTAGATAGGGAT  
CACATAAAAACCTCTTTTCGAGGAATGGGCCAGGCCGGGTCATTTCTCAAGAACACTAG  
CTAAAGGTCCTGACACTACCACTTGGATCTGGAACCTACATGCTGATGCTCACGATTC  
GATAGCCATAACAGTGATTTGGAGGAGATCTCTCGAAAAGTCTTTAGTGCCCATTTTCGG  
GCAACTCTCCATCATCTTTCTTTGGCTTAGTGGTATGTATTTCCATGGTGCTCGTTTTTCT  
AATTATGAAGCATGGCTAAGTGATCCGACTCACATTGGACCAAGTGCCAGGTGGTTT  
GGCCAATAGTGGGCCAAGAAATATTGAATGGTGATGTGGGTGGGGGCTTCCGAGGAAT  
ACAAATAACCTCTGGTTTTTTTTCAGCTTTGGCGAGCATCCGGAATAACTAGTGAATTGC  
AACTCTATTGTACCGCAATTGGTGCATTGATCTTTGCAGCGTTAATGCTTTTTTGCTGGTT  
GGTTTCATTATCATAAAGCTGCTCCAAAATTGGCTTGGTTTCAAGATGTAGAATCTATGT  
TGAATCACCATTTAGCGGGGCTACTAGGACTGGGGTCTCTCTCTTGGGCGGGGCATCA  
AGTACATGTATCTTTACCGATTAACCAATTTCTAAACGCTGGAGTAGATCCTAAAGAGAT  
ACCACTTCCTCATGAATTTATCTTGAATCGGGATCTTTTGGCTCAACTTTATCCCAGTTT  
TGCTGAGGGAGCAACTCCCTTTTTTACCCTGGATTGGTCAAATATTCAGACTTTCTTA  
CTTTTCGTGGAGGATTAGATCCAGTAACTGGGGGTCTATGGCTGACCGATATCGCACAC  
CATCATTTAGCTATTGCAATTCTTTTCTGATAGCGGGTCATATGTATAAACTAACTGGG  
GCATTTGGTCATGGCCTAAAAGATATTTAGAAAGCTCATAAAGGTCCATTTACGGGTGAG  
GGCCATAAAGGCCTATATGAAATCCTAACAACATCATGGCATGCTCAATTATCTCTTAAC  
CTAGCTATGTTAGGCTCTTTAACCATTATTGTAGCTACCATATGTATTCTATGCCGCCTT  
ATCCGTATCTAGCTACTGACTATGGTACACAACCTGTCATTGTTACACATCACATGTGGA  
TTGGTGGATTTCTCATAGTTGGCGCTGCTGCGCATGCAGCCATTTTTATGGTAAGAGACT  
ATGATCCTACTACTCGATACAATGATCTATTAGATCGTGTCTTAGGCATCGCGATGCAA  
TCATATCACATCTCAACTGGGCATGTATATTTCTAGGCTTTACAGTTTTGGTTTTGTATAT  
TCATAATGATACCATGAGCGCTTTGGGGCGTCTCAAGATATGTTTTCGGATACCGCTAT  
ACAATTACAACCTGTCTTTGCTCAATGGATACAAAACACCCATGCTTTAGCACCCAGTG  
CAACGGCTCCGGGTGCAACAACAAGCACCAGTTTAACTTGGGGAGGCGGTGATTTAGT  
AGCAGTGGGTGGTAAAGTGGCTTTGTTACCTATTCCATTAGGAACTGCAGATTTTTTGG  
TACATCACATTCATGCATTTACGATTCATGTGACGGTATTAATACTTTTGAAGGGTGTCT  
ATTTGCTCGTAGCTCCCGTTTGATACCGGATAAAGCAAATCTTGGTTTTTCGTTTTCTTG  
TGATGGACCTGGAAGAGGGGGGACGTGTCAAGTCTCGGCTTGGGATCATGTCTTCTTA  
GGGCTATTCTGGATGTATAATGCAATTTCCGGTGGTTATATTCCATTTAGTTGGAAAATG  
CAGTCAGATGTTTGGGGCAGTATAAGTGATCAAGGGGTAGTAACTCATATCACGGGAG  
GAAACTTTGCGCAGAGTTCCATTACTATTAATGGGTGGCTCCGCGATTTCTTATGGGCA  
CAGGCATCCCAAGTAATTCATCTTATGGTTCTTCATTATCGGCATATGGGCTTTTCTTCC  
TAGGTGCCCATTTTGTATGGGCCTTTAGTTAATGTTTCTATTAGTGACGTGGTTATT

GGCAAGAACTTATTGAATCCATCGTTTGGGCTCATAATAAATTTAAAAGTTGCTCCTGCTA  
CTCAGCCGAGAGCCTTAAGCATTGTACAAGGACGTGCTGTAGGAGTAACCCATTACCT  
TCTGGGTGGAATTGCCACAACATGGGCGTTCTTCTTAGCAAGAATTATTGCAGTAGGAA  
TGGCATTAAAGATTTCCAAGGTTTAGCCAAGGCTTAGCTCAGGACCCCACTACTCGTCGT  
ATTTGGTTTGGTATTGCTACCGCACATGACTTCGAGAGTCATGATGATATTACTGAGGAA  
CGTCTTTATCAGAATATTTTTGCTTCTCACTTCGGGCAATTAGCAATAATTTTTCTGTGG  
ACTTCCGAAATCTGTTTCATGTAGCTTGGCAAGGAAATTTTGAGTCATGGGTACAGGA  
CCTTTACATGTAAGACCTATTGCTCATGCAATTTGGGATCCTCATTTTGGTCAACCGGC  
TGTAAGAAGCTTTTACTCGAGGGGGTGCTCTCGGCCAGTGAATATCGCTTATTCTGGTG  
TTTATCAGTGGTGGTATACAATCGGTTTACGCACTAATGAAGATCTTTATACTGGAGCTC  
TTTTTCTATTATTTCTTTCTGCCATATCGTTAATAGCAGGTTGGTTACACCTACAACCGAA  
ATGGAACCGAGTGTTCGTGGTTCAAAAATGCCGAATCTCGTCTCAATCATCATTTGT  
CAGGACTCTTCGGCGTAAGTTCCTTGGCTTGGACAGGGCATTAGTACACGTGGCTATT  
CCTGCATCTAGAGGGGAGTACGTTTCGATGGAATAATTTATTAGATGTATTACCACACCCC  
CAAGGGTTAGGCCCGCTTTTTACAGGCCAGTGAATCTTTATGCTCAAACCCCGACTC  
AAGTAGTCATTTATTTGGTACCTCCCAAGGAGCAGGAACTGCCATTCTAACCCCTTCTCG  
GGGGATTCATCCACAAACGCAAAGTTTATGGCTGACTGATATGGCTCATCATCATTTAG  
CTATTGCATTTATTTTTCTTGTGGCGTCATATGTATAGAATAACTTCGGTATTGGACA  
CAGTATGAAAGATCTTTTAGATGCACATATTCCTCCGGGGGGCGATTGGGACGTGGGC  
ATAAGGGTCTTTATGACACAATCAATAATTCCTTCATTTTCAATTAGGCCTTGCTCTAG  
CCTCTTTAGGGGTATTACTTCCCTTGGTAGCTCAACACATGTACTCTTTACCCGCTTATG  
CATTCATAGCACAAGACTTTACTACTCAAGCTGCGTTATATACTCATCACCAATACATCG  
CAGGATTCATCATGACAGGAGCTTTTGCTCATGGAGCTATATTTTTTCATTAGAGATTACA  
GTCCGGAACAGAACGAGGATAATGTATTAGCAAGAATGTTAGACCATAAAGAAGCTAT  
CATATCTCATTTAAGTTGGGCTAGCCTCTTTCTGGGGTCCATACCTTGGGACTTTATGT  
TCATAATGATGTTATGCTTGCCTTTGGTACTCCGGAGAAAACAAATCTTGATCGAACCTAT  
ATTTGCTCAATGGATAACAATCCGCTCATGGTAAAACCTTCATATGGTTTTGATGTACTTTTA  
TCTTCAACAAATGGCCCGGCATTCAATGCGGGTCGAAGCATATGGTTGCCCGGTTGGTT  
AAATGCTGTTAATGAG-----ACTAGTAATTCACTATTCTTAACAATAGGCCCCGGAGACT  
TTTTAGTTCATCATGCTATTGCTCTGGGTTTACATACAACACTACATTGATCTTAGTAAAGG  
GTGCTTTAGATGCACGCGGTTCCAAATTAATGCCGATAAAAAAGATTTTCGGTTATAGT  
TTCCGTGCGATGGCCCGGACGGGGCGGTACTIONTGTGATATTCGGCTTGGGACGCGTT  
TTATTTGGCAGTTTTTTGGATGTAAATACTATCGGATGGGTACTTTTTATTGGCATTGG  
AAGCATATCACATTATGGCAGGGTAACGTTTCGCAGTTTAAACGAATCTTCCACTTATTTG  
ATGGGCTGGTTAAGAGATTATTTATGGTTAAACTCTTCACAACCTTATCAATGGATATAAC  
CCTTTTGGTATGAATAGTTTATCGGTCTGGGCGTGGATGTTCTTATTTGGACATCTCGTT  
TGGGCTACTGGATTTATGTTCTTAATTTCTTGGCGTGGCTATTGGCAAGAATTGATTGAA  
ACTTTAGCATGGGCTCATGAACGCACACCTTTGGCCAATTTGATTCGTTGGAGAGATAA  
ACCGGTGGCCCTTTCATTGTGCAAGCACGATTGGTTGGATTAGCCCACTTTTCCGTAG  
GTTATATATTCACTTATGCGGCTTTCTTGATTGCCTCTACATCGGGCAAATTTGGTATGTC  
ACATTCAGTAAAGATTTATGATACATGTATAGGGTGCCTCAATGTGTCCGAGCCTGCC  
CACTGACGTATTAGAAATGATACCCTGGGACGGATGTAAAGCTAAACAAATTGCTTCTG  
CTCCAAGAACAGAAGATTGTGTTGGTTGTAAGAGATGTGAATCCGCCTGTCCAACCGA  
TTTTCTGAGTGTTCCGGTTTCTTTATGGAATGAAACAACCTCGTAGTATGGGTCTAGCTTA



TATGACAAC TTTTCGACT TTTCCCTCTG TTTTTGGTGCCTTTAGTGGGCTTAATATTTCCGGC  
AATGGCAATGGCTTCTTTATTTCTTCATGTTCAAATAATAAGACTGTTATGCGAGATCT  
AAAAACATATCTTTCCGTGGCACCGGTATTAAGTACTCTATGGTTCGGGTCTTTAGCAG  
GTCTATTGATAGAGATTAATCGTTTTTTCCAGATGCGTTGACATTCCCCTTTTTT-----AT  
GACTGCTATTTTAGAGAGACGCGAAAGCGAAAGCCTATGGGGTCGCTTCTGTA ACTGG  
ATAACCAGCACCGAAAACCGTCTTTACATTGGATGGTTTGGTGT TTTGATGATCCCTAC  
TTTATTGACCGCAACTTCTGTATTTATTATCGCCTTCATTGCTGCTCCTCCAGTAGATATT  
GATGGTATTCGTGAACCTGTTTCTGGATCTCTACTTTATGGCAACAATATTATTTCCGGT  
GCCATTATTCCGACTTCTGCAGCTATAGGTTTGCAC TTTTATCCAATCTGGGAAGCGGCT  
TCTGTTGATGAATGGTTATAACAACGGTGGTCCTTATGAATTAATCGTTCTACACTTTTTA  
CTTGGTGTAGCTTGTACATGGGTGCTGAGTGGGAGCTTAGTTTCCGTCTAGGTATGCG  
ACCTTGGATTGCTGTTGCATATTCAGCTCCTGTTGCAGCTGCTACTGCTGTTTTCTTGAT  
CTACCCAATCGGTCAAGGAAGCTTTTCTGATGGTATGCCTCTAGGAATCTCTGGTACTT  
TCAACTTCATGATTGTATTCCAGGCTGAGCACAAACATCCTTATGCACCCATTTACATGT  
TAGGCGTAGCTGGTGTATTTCGGCGGTTCCCTATTTAGTGCTATGCATGGTCTTTGGTAA  
CCTCTAGTTTGATCAGGGAAACCACAGAAAATGAATCTGCTAATGAAGGTTACAGGTT  
CGGGCAAGAAGAAGAACTTATAATATCGTAGCCGCTCATGGTTATTTTGGCCGATTAA  
TCTTCCAATAGCTAGTTTCAACA ACTCTCGTTCTTTACACTTCTTCC TAGCTGCTTGGC  
CTGTAGTAGGTATCTGGTTTACTGCTTTAGGTATCAGCACTATGGCTTTCAACCTAAATG  
GTTTCAATTTCAACCAATCTGTAGTTGATAGTCAAGGCCGTGTAATTAATACTTGGGCTG  
ATATCATTAAACCGCGCTAACCTTGGTATGGAAGTTATGCACGAACGTAATGCTCATAACT  
TCCCTCTAGACTTAGCTGCTGTTGAAGCTCCATCTACAAATGGGATGGGTTTGCCTTGG  
TATCGTGTTCCATACCGTTGTCTTGAATGATCCCGGTCCGTTGCTGGCTGTCCATATAATG  
CATAAGCTCTGGTTGCTGGTTGGGCGGGTTCGATGGCTCTATATGAATTAGCAGTTTTT  
GATCCTTCTGACCCTGTTCTTGATCCAATGTGGAGACAGGGTATGTTTCGTTATACCCTTC  
ATGACCCGTTTAGGAATAACCAGTTCGTGGGGCGGTTGGAGTATCACA---GGAGGGGCT  
ACACCGAATCCGGGTATTTGGAGTTACGAGGGTGTGGCCGGGGCACATATTGTGTTTTTC  
TGGCTTGTGCTTCTTGGCAGCTATCTGGCACTGGACGTATTGGGATCTAGCAATCTTTTG  
TGATGAACGTACAGGAAAACCTTCTTTAGATTTGCCAAGATCTTTGGAATTCATTTATT  
TCTCGCGGGGTTAGCTTGGCTTTGGTTTTGGTGCATTTCAITGTAACAGGCTTGTATGGTCC  
TGGAATATGGGTGTCCGATCCTTATGGACTAACGGGAAAAGTACAATCCGTAAATCCAG  
CGTGGGGCGTGGAAGGTTTTGATCCTTTTGTTCGGGAGGAATAGCTTCTCATCATATT  
GCAGCAGGTACATTGGGCATATTGGCGGGTCTATTCCATCTTAGCGTCCGCCCGCCCCA  
ACGTCTATACAAAGGGTTACGTATGGGCAATATTGAAACTGTACTTTCCAGTAGTATTGC  
GGCTGTCTTTTTTGCAGCTTTTGTGTTGTTGCCGGA ACTATGTGGTATGGTTCAGCAACTA  
CCCCAATCGAATTATTTGGGCCTACTCGTTATCAATGGGATCAGGGGTACTTCCAGCAA  
GAGATATATCGAAGAGTTAGTGCTGGGCTAGCCGAAAATCAAAGTTTATCAGAAGCTTG  
GTCTAAAATTCTGAAAAATTAGCTTTTTTATGATTACATCGGCAATAATCCGGCAAAAAG  
GGGGATTATTCAGAGCAGGCTCAATGGATAATGGGGATGGAATAGCGGTTGGATGGTTA  
GGACATCCTATCTTTAGAGATAAAGAAGGGCGTGA ACTTTTTGTACGTCGTATGCCTAC  
CTTTTTTGA AACCTTCCCGGTCGTGTTGGTAGATGGTGACGGAATTGTTAGAGCGGATG  
TTCCTTTTCGAAGGGCAGAATCGAAGTATAGTGTCGAACAAGTAGGTGTA ACTGTTGA  
GTTCTACGGTGGCGAACTCAACGGAGTCAGTTATAGTGATCCTGCTACTGTGAAAAAAT  
ATGCTAGACGCGCTCAATTGGGTGAAATTTTTGAATTAGATCGTGCTACTTTGAAATCC

GATGGTGTTTTTTCGTAGCAGTCCAAGGGGTTGGTTTACTTTTTGGACATGCTTCTTTTGC  
TTTGCTCTTCTTCTTTGGACATATTTGGCATGGTGCTAGAACCCTGTTTCAGAGATGTTTT  
TGCTGGTATTGACCCAGATTTGGATGCTCAAGTAGAATTTGGAGCATTCCAAAACTAG  
GAGATCCTACTACAAGAAGACAGACAGTCATGAAAACCTTATATTCCCTGAGGAGGTT  
CTACCCCGTGGAAACGCTCTTTAATGGAACCTTAGCTTTAGCTGGTCGTGACCAAGAA  
ACCACCGTTTTCGCTTGGTGGGCCGGGAATGCCCGGCTTATCAATTTATCCGGTAAACT  
ACTAGGGGCTCATGTAGCCCATGCCGGATTAATCGTATTCTGGGCCGGAGGAATGAACC  
TATTTGAAGTGGCTCATTTTCGTACCAGAAAAGCCTATGTATGAACAAGGATTAATTTTAC  
TTCTCACCTAGCTACTCTAGGTTGGGGAGTAGGTCCTGGTGGGGAAGTTATAGACACT  
TTCCATATTTTGTATCTGGAGTACTTCATTTAATTTCCCTCTGCAGTATTGGGCTTTGGTG  
GTATTTATCATGCACTTCTAGGACCTGAGACGCTTGAAGAATCTTTTCCATTCTTCGGTT  
ATGTATGGAAAGATAGAAATAAAATGACCACAATTTTAGGTATTCACTTAATCTTGTTAG  
GTATAGGAGCTTTTCTTCTAGTATTC AAGGCTCTTTATTTTGGTGGTGTCTATGATACCTG  
GGCTCCGGGAGGGGGAGATGTAAGAAAAATTACCAACTTGACCCTTAACCCAAGTATT  
ATATTTGGTTATTTACTAAAATCCCCTTTTGGAGGGGAAGGGTGGATTGTTAGTGTAGAC  
GATTTGGAAGATATAATCGGAGGACATGTATGGTTAGGTTCCATTTGTATATTTGGTGGGA  
ATCTGGCATATCTTAACCAAACCTTTCGCATGGGCTCGACGCGCACTTGTATGGTCTGG  
AGAGGCTTACTTATCTTATAGTTT TAGCGGCTTTATCCGTCTTTGGTTTCATTGCTTGTGT  
TTTGTCTGGTTCAATAATACCGCCTATCCTAGCGAGTTTTACGGACCCACTGGACCAGA  
AGCTTCTCAAGCTCAAGCATTACTTTTTCTAGTTAGAGACCAACGGCTGGGGGCTAAC  
GTGGGCTCTGCTCAAGGACCTACCGTTTTAGGTAAATATTTGATGCGTTCTCCACCGG  
AGAAGTCATTTTTGGAGGAGAACTATGCGTTTTTGGGATTTACGTGCCCTTGTTAG  
AACCTCTAAGGGGTCCAAATGGGTTGGACTTGAGTAGGCTGAAAAAGACATACAAC  
CTTGGAAGAACGGCGCTCTGCAGAATATGACTCATGCCCTTTAGGTTCTTTAAAT  
TCCGTGGGTGGTGTAGCTACCGAGATCAATGCAGTCAATTATGTCTCTCCTAGAAGTTG  
GTTAGCTACTTCTCATTTTGTCTAGGATCTTCTTGTTCGTAGGTCATTTGTGGCACGC  
AGGAAGGGCTCGTGCAGCTGCAGCGGGGTTGAAAAAGGAATTGATCGTGATTTTGA  
ACCTGTTCTTTCCATGACCCCTCTTAATATGACTATAGCCCTTGGGAAATTTACCAAAGA  
CGAAAAAGATTTATTTGATATTATGGATGACTGGTTACGGAGGGACCGTTTCGTTTTTGT  
AGGATGGTCCGGTCTATTGCTCTTTCCCTGTGCCTATTTGCTGTAGGAGGCTGGTTCAC  
AGGTACAACCTTTGTAACCTCATGGTATACCCATGGATTGGCCAGTTCCTATTTGGAAG  
GCTGCAATTTCTTAACCTGCCGAGTTTCTACTCCTGCTAATAGTTTAGCACATTCTTTGT  
TGTTACTGTGGGGTCTGAAGCACAAGGGGATTTTACTCGTTGGTGTCAATTAGGTGGT  
CTGTGGACTTTTTGTTGCCCTCCATGGTGCTTTCGGACTAATAGGCTTCATGTTACGTCAA  
TTCGAACTTGCTCGATCTGTTCAATTGCGACCTTATAATGCAATCGCGTTTTCTGGTCCA  
ATFGCTGTTTTTGTCTGTATTCTGATTTATCCACTAGGACAATCTGGTTGGTTCTTTG  
CGCCAAGTTTTGGTGTAGCAGCTATATTTGATTCATCCTCTTTTTTCAAGGATTTCATAA  
TTGGACATTAACCCATTTTCATATGATGGGAGTTGCAGGGGTATTGGGCGCTGCTTTGC  
TATGCGCTATTCATGGTGCTACTGTAGAAAATACTTTATTTGAAGATGGTGATGGTGCAA  
ATACATTCGTGCTTTTAACCCAACCTCAAGCTGAAGAACTTATTCAATGGTCACCGCG  
AACCGCTTTTTGGTCCCAAATCTTTGGGGTTGCTTTTTCCAATAAACGTTGGTTACATTC  
TTTATGTTATTTGTACCAGTAACTGGTTTATGGATGAGTGCTCTTGGAGTAGTTGGTCTG  
GCCCTGAACCTGCGCGCCTATGACTTCGTTTTCTCAGGAAATTCGCGCGGCAGAAGATC  
CTGAATTTGAGACTTTCTACACAAAAAATATTCTCTTAAACGAAGGTATTCGTGCTTGG

ATGGCGGCTCAAGATCAGCCTCATGAAAACCTTATATTCCTGAGGAGGTTCTACCCCG  
TGAAACGCTCTTATGTCTGGAAGCACAGGAGAACGTTCTTTTGCTGATATTATTACCA  
GTATTCGCTACTGGGTCATTCATAGCATTACTATACCTTCCCTATTCATTGCGGGTTGGTT  
ATTCGTCAGTACCGGTTTAGCGTACGATGTATTTGGAAGCCCTCGGCCAAACGAGTATT  
TCACAGAGAACCGACAAGGAATCCATTAATAACTGGCCGTTTTGATCCTTTGGAACA  
ACTCGATGAATTTAGTAGATCTTTTATGACCATAGATCGAACCTATCCAATTTTACAGT  
GCGATGGTTGGCTGTTACGGCCTAGCTGTACCTACCGTTTTCTTTTTTGGGGTCAATATC  
AGCAATGCAGTTCATCCAACGAATGGCTACACAACTGTTGAGAACGTTTCTAGA---TC  
GCGTCCAAAACCAACTACTGTAGGGGGTTTATTGAAACCACTGAATTCGGAATATGGTA  
AAGTCGCCCTGGGTGGGGAACAGCTCCTTTGATGGGTGTCGCAATGGCCCTATTTGC  
AATCTTTCTATCTATTATTTTGGAGATTTATAATTCTTCTGTTTTATTGGATGGAATTTCAA  
TGAATATGCTTACTCTCAAACTTTTCGTTTACACAGTAGTGATATTCTTTGTTTCTCTATT  
TATTTTTGGATTCCCTATCTAATGATCCGGGGCGTAATCCTGGCCGTGAAGAAATGGCTGA  
TACTACTGGAAGGATTCTCTTTGGATAATCGGTACTGTAGCTGGTATTCTTGTGATCGG  
TTAATAGGTATTTCTTTTATGGTTCATATTCTGGATTGGGTTTCTCTGATGCTTAATA  
TCTTTAGTTTGATCTGCATCTGTCTTAATTCTGCCTTTTATTCGAGTAGTCTTTTCTTCGC  
CAAATTGCCCGAGGCCTACGCTTTTTTGAATCCAATCGTAGATCTTATGCCAGTCATACC  
TTTTGTTCTTTTTTCTTTAGCCTTCGTTTGGCAAGCTGCTGTAAGTTTTTCAATGACACA  
ATCAAACCCGAACGAACAAGATGTTGAATTGAATCGTACCAGCCTCTACTGGGGATTAT  
TACTCATTTTTGTACTTGTCTTTTTATTTTCCAATTATTTCTTCAATATGGAAGTAAATATT  
CTTGCATTTATTGCTACTGCACTGTTTATTCTAGTTCCTACTGCTTTTTCTGCTTATCATT  
TGTA AAAACAGAACTCAAATAAAATGGAAACAGCAACCCTAGTCGCCATCTTTATAT  
CTGGTTTACTTGTAAGTTTTACCGGGTACGCCCTATATACCGCTTTTGGGCAACCTTCTC  
AACTAAGAGATCCGTTTCGAGGAACATGGGGACATGGAAGCATTAGTTTATAACATTC  
CTCTTAGTCTCGACTCTAGGTATAATTTTTTTCGCTATCTTTTTTAGAGAACCACCTAAA  
GTTCCA ACTAAAAG-----ATGACTCTTGCTTTCCAATTGGCTGTTTTTGCATTAATTGCT  
ACTTCATCAATCTTATTAATTGGCGTACCTGTTGTATTTGCTTCTCCTGATGGTTGGTCAA  
GTAACAAAATGTTTTATTTTCTGGTACATCATTATGGATTGGATTAGTCTTTCTGGTGG  
GTATCCTTAATTCTCTCATCTCT-----ATGTCACCACAAACAGAGACTAAAGC  
AGGTGTTGGATTCAAAGCTGGGGTTAAAGATTACAAATTGACTTATTATACTCCTGACTA  
TGAAACCAAAGATACTGATATCTTGGCAGCATTCCGAGTAACTCCTCAACCTGGAGTTC  
CACCTGAAGAAGCGGGAGCCGCGGTAGCTGCCGAATCTTCTACTGGTACATGGACCAC  
TGTGTGGACCGATGGACTTACCAGTCTTGATCGTTACAAAGGGCGCTGCTACGGAATC  
GAGCCCGTTGCTGGAGAAGAAAATCAATTTATCGCTTATGTAGCTTACCCATTAGACCT  
TTTTGAAGAAGGTTCTGTTACTAACATGTTTACTTCTATTGTAGGTAATGTATTTGGGTT  
CAAAGCCCTGCGCGCTCTACGCTGGAAGATCTGCGAATTCCTGTTGCTTATGTTAAAA  
CTTCCAAGGACCGCCTCATGGCATCCAAGTTGAGAGAGATAAATTGAACAAGTATGG  
TCGTCCCTGTTGGGATGTAATAAACCTAAATTGGGATTATCCGCTAAAAACTACGG  
TAGAGCGGTTTATGAATGTCTCCGCGGTGGACTTGATTTTACCAAAGACGATGAGAATG  
TGA ACTCTCAACCATTTATGCGTTGGAGAGATCGTTTCTTATTTTGTGCCGAAGCAATTT  
ATAAAGCACAGGCTGAACTGGTGAAATCAAAGGGCATTACTTGAACGCTACTGCGGG  
TACATGTGAAGAAATGATGAAAAGGGCTATATTTGCCAGAGAATTGGGAGTTCCTATCG  
TAATGCATGATTACTTAACAGGGGGATTCACTGCAAACTAGCTTAGCCCATTTATGCC  
GAGATAATGGCCTACTTCTTACATCCACCGCGCAATGCATGCAGTTATTGATAGACAG

AAGAATCATGGTATACACTTTCGTGTACTAGCTAAAGCGTTACGTATGTCTGGTGGAGA  
TCATATTCCTCCGGTACCGTAGTAGGTAACCTTGAAGGGGAAAGAGACATCACTCTG  
GGCTTTGTTCGATTTACTGCGTGATGATTTTATTGAAAAAGATCGAAGTCGCGGTATTTAT  
TTCACCCAAGATTGGGTCTCTCTACCGGGTGTCTACCCGTGGCTTCGGGAGGTATTCA  
CGTTTGGCATATGCCTGCTCTGACCGAGATCTTTGGGGATGATTCCGTACTACAGTTCG  
GTGGAGGAACTTTAGGACACCCTTGGGGAAATGCACCCGGTGCCGTAGCTAATCGAGT  
AGCTCTAGAAGCATGTGTACAAGCTCGTAATGAGGGGCGTGATCTTGCTCGTGAAGGG  
AATGAGATTATCCGTGAGGCTACTAAATGGAGCCCTGAACTAGCTGCTGCTTGTGAAGT  
ATGGAAGGAGATCAAATTTGAATTTGAAGCAATGGATACCTTG-----ATGGCGATACATT  
TATACAAAACCTTCTACCCGAGCACACGCAATCGAACCGTAGACAGTCGAGTGAAATC  
CAATCCACGAAATAATTTGATCTATGGACAGCATCGTTGTGGGAAAGGTTCGTAATGCCA  
GAGGAATCATTACCGCAGGGCATAGAGGGGGAGGTCATAAGCGTCTATAACCGTAAAAT  
AGATTTTCGACGGAATGAAAAGACATATATGGTAGAATCGTAACCATAGAATACGACC  
CTAATCGAAATGCATACATCTGTCTCATACTATGGGGATGGTGAGAAGAGATATATTT  
TACATCCCAGAGGGGCTATAATTGGAGATACCATTGTTTCTGGTACAGAAGTTCCTATAA  
AAATGGGAAATGCCCTACCTTTGACCGATATGCCCTTAGGCACGGCCATACATAACATA  
GAAATCACACGTGGAAGGGGTGGACAATTAGCTAGAGCAGCGGGTGTGTAGCGAAA  
CTGATTGCAAAAAGAGGGGAAATCGGCCACATTAATAATTACCTTCTGGGGAGGTCCGTT  
TGATATCCAAAACCTGCTCAGCAACGGTCCGACAAGTGGGGAATGTTGGGGTGAACC  
AGAAAAGTTTGGGTAGAGCCGGATCTAAGCGTTGGCTAGGTAAGCGTCTGTAGTAAG  
AGGAGTCGTTATGAATCCTGTAGACCATCCACACGGGGGTGGTGAAGGTAGGGCCCCA  
ATTGGGAGAAAAAACCACAACCCTTGGGGTTATCCTGCACTTGGGAGAAGAAGT  
AGAAAAGGAATAAATATAGTGATAATTTGATTCTTCGTGCGCCGTAGTAAAATGATTCA  
ACCCAGACCCTTTTGAATGTAGCAGATAACAGCGGGGCTCGAGAATTGATGTGTATTC  
GAATCATAGGAGCTAGC---AATCGTCGATATGCTCATATCGGTGACGTTATTGTTGCTGT  
GATCAAAGAAGCAGTGCCAAATATGCCCTAGCAAGATCAGAGGTGGTCAGAGCTGTA  
ATTGTACGTACTTGTAAGAAGACTCAAACGTGATAACGGTATGATAATACGATATGATGAC  
AATGCTGCGGTTGTCATTGACCAAGAAGGAAACCCCAAAGGAAGTTCGAATTTTTGGTG  
CAATTGCCCGTGAATTGAGACAGTTAAATTTACTAAAATAGTTTCATTAGCTCCGGAG  
GTATTGATGCTTAGTCCCAAAGAACCAGATTCCGTAAACAACATAGAGGAAGAATGA  
AGGGAATATCTTATCGAGGTAATCATATTTCTTTTGGTAAATATGCTCTTCAGGCACTTG  
AACCCGCTTGGATCACGTCTAGACAAATAGAAGCAGGTAGACGGGCAATGACACGAA  
ATGCACGTCGCGGTGGAAAAATTTGGGTACGTATATTTCCAGACAAACCGGTTACAGTA  
AGACCCGCAGAAACACGTATGGGTTCGGGGAAAGGATCCCCTGAATATTGGGTAGCTG  
TTGTTAAACCAGGTTCGAATACTTTATGAAATGGGTGGAGTAACAGAAAATATAGCCAGA  
AGAGCGATTTCAATAGCATCCTCCAAAATGCCTATACGAACTCAATTTATTATTTCCGGA  
ATGACCAGAATTAGGCGGGGAAATATAGCTCGGAGACGTAGAACAATAAATTCGTTTATT  
TGCATCAAGCTTTTCGAGGGGCTCATTCAAGACTTACTCGAACAATTACTCAACAGAAA  
ATAAGAGCTCTGGTTTCGTCTCATCGGGATAGGGATAAGCAAAAAGCGAAATTTTCGCCG  
TTTGTGGATCACTCGAATAAACCGCAGTAATTCGTGAAATA---GGGGTATCCTATAGTTAT  
AGTAGATTAATACATGCCCTATATAAGAAACAGGTGCTTCTTAATCGTAAAATACTTGCA  
CAAATAGCTATATCAAATAAAAATTGTCTTTATATGATTTCCAATGAAATCATAAAAAGAA  
GTCGATTGGAAAGAATCCACCGGAATAATTATGTTAAAGGAAGTATACGCTTTAGGTCA  
ACATATATCTATGTCTGCTCACAAAGCAAGAAGAGTGGTTGATCAAATTCGTGGACGGT

CATACGAAGAAACACTTATGATACTAGAACTCATGCCTTATCGCGCATGTTATCCCATT  
TGAAATTGGTTTACTCTGCAGCAGCAAATGCTAATTACAATATGGATTCCAACGAATCC  
AATTTAGTTATTAGTAAAGCTGAAGTCAGCGAGGGTACTGCCACGAAAAAATTA AAC  
CTCGAGCTCGAGGGCGTAGTTTTACGATAAAAAGACCTACTTGCCATATAGCTATTGTA  
GTGAAAGATATATCATTAGATGGGGGATATGGGACAAAAAATGGATGGAATCAAATA  
TGCAGTATTTACAGACAAAAGTATTCGGTTATTGGGGAAAAAT---CAATATACTTCTAAT  
GTCGAATCAGGATCAACTAGGACAGAAATAAAGCATTGGGTTCGAACTCTTCTTTGGTG  
TCAAGGTAATAGCTATGAATAGTCATCGACTTCCGGGAAAGGGTAGAAGAATGGGACC  
TATTATGGGACAGACAATGCATTACAGACGTATGATCATTACGCTTCAACCGGGTATTC  
TATTCCACCTCTTAGAAAAGAAAAGAACTATGGCAGTTCCAAAAAACGTACTTCTATAT  
CAAAAAAGCGTATTCGTAAAAATATTTGGAAAGGTAAGGGATCTTGGGCAGCCTTAAA  
AGCGTTGTCATTAGGTAAATCTCTTTCTACCGGAACTCAAAAAGTTTTTTTT-----CAA  
AAAAAATGGCCAAGGGGAAAGATGTCCGAATAACGGTATTTTTGGAATGTACCGGTT  
GTGTTTCGAAACGGTGTAAAT-----AAGGTATCAACGGGTATTTCCAGATATATTACTGAAA  
AGAATCGTCACAACACGCCTAATCGATTGGAATTAAGAAAATTCTGTCCATTTTGTAC  
AAACATACGATGCATGGGGAGATAAAGAAAATGAAAATAAGAGCTTCTGTTCGTAAAA  
TTTGTGAAAATGTCGACTAATCCGTAGGCGGGGACGAATTATAGTAATTTGTTCCAAC  
CCAAGACATAAACAAAGACAAGGAATGGTTCGAGAGAAAAGTAACAGTATCTACTCGG  
ACACTACAGTGGAAGTGTGTTGAATCAAAGCAGACAATAAACGTCTTTATTATGGAC  
GCTTTATTCTGTCTCCACTTATGAAAGGTCAAGCTGACACAATAGGCATCTCGATGCGC  
AGAGCTTTGCTTGGAGAAATAGAAGGAACATGTATCACACGTGCAAAATCTGAG-----A  
AAATACCACACGAGTATTCTACCCTAGTGGGTATTCAAGAATCGGTACATGACATTTTAA  
TGAATTTGAAAGAAATTGTATTGAGAAGTAATCTATACGGAACCTTGCAGCGCGTCTATT  
TGTGTCAGGGGTCCTGGATATGTAAGTCTCAAGATATAATCTTACCGCCTTATGTAGAA  
GTCGTTGACAATACACAGCATATAGCTAGCTTGACGGAACCCATTGAATTGTGTATTGG  
ATTACAAATAGAGAGGAATCGCGGATATCTTATAAAAACGCCAAATAATAACTCTGACG  
GAAGTTAT-----CCTATAGATGCTGTATTTCATGCCTGTTTCGAAACGCGAATCATAGTATTC  
ATTCTTATGGGAATGGGAATGATAAACAAGAAATACTCTTTCTTGAAATATGGACAAAT  
GGAAGTTTAACTCCTAAAGAAGCACTTCATGAAGCCTCCCGGAATTTGATTGATTTATT  
TATTCCTTTTTTACACACGGAAGAAGAA-----AACTTACATTTAGCGAACAAATCAA---CA  
CATGGTCCCTTTACCCCTTTTACCTTTCATGATAAATTGGAT---AAACTAAGAAAAAAC  
AAAAA---AAAAGAGCATTGAAATCGATTTTTATTGACCAATCAGA ACTACCTCCCAGG  
ATCTATAATTGCCTTAAAAGGTCCAATATATATACATTATTGGACCTTTTGAATAACAGTC  
AAGAAGACCTTATGAAAATTGAACATTTTCGCATAAAGGATGTA AACAGATATTGGGC  
ATTCTAGAAAAGAAT-----TTCTCAATTAATTTAGGGAAAAAGCCGATGCTCCGAGATGG  
A---AATGAGGGAATGTCTACAATACCTGGCTTTAATCAGATACAATTTGAAGGATTTTGT  
AGGTTTCATGGATCAGGGCTTGACGGAAGA ACTTTATAAGTTTCCAAAAATTGAAGATA  
CCGATCAAGAAATTGAATTTCAATTAATTTGTGGAAACATATCAATTAGTAGAACCGTTGA  
TAAAAGAAAGAGATGCTGTGTATGAATCACTCACATATTCTTCTGAATTCTATATATCCG  
CGGGACTCATTTGGAAAACAGTAGGGATATGCAAGAACAACTATTTTTCTTGGAAA  
CATTCCTCTAATGAATTCTCTGGGA ACTTCTATAGTAAATGGAATATATAGAATTGTGATC  
AATCAAATATTGCAAAGTCCCGGTATTTATTACCGGTCAGAATTGGATCATAATGGAATT  
TCGGTATATACCGGCACCATAATATCGGATTGGGGAGGAAGATTAGAATTAGAGATTGAT  
AAAAAAGCAAGGATATGGGCTCGTGTGAGTAGGAAACAAAAAATATCTATTCTAGTTCT

ATCATCGGCTATGGGTTCTGAATCTAAGAGAAATTCTAGAGAATGTTTGTCTATCCTGAAAT  
ATTTTTATCTTTTCTAACTGATAAGGAAAAAAAAAAAAATAGGGTCAAAGAAAATGCCA  
TTTTGGAGTTTTACCAACAATTTGCTTGTGTAGGCGGGGATCCGGTATTTTCTGAATCCT  
TATGTAAGGAATTACAAAAGAAATCTTTCAACAAAATGTGAATTAGGAAAGATTGGT  
CGACGAAATATGAATCGGAGATTGCGCCTTGATATATCCCAGAACAATACATTTTTGTTA  
CCGCGAGATATATTGGCAGCCGCGGATCATTTGATTGGAATGAAATTTGGAATGGGTAC  
ACTTGACGAT-----ATGAATCATTTGAAAAATAAACGCATTTCGTTCTGTAGCAGATCTTAT  
ACAAGATCAATTAGGATTGGCTCTGGTTCGTTTAGAAAATATGATTTCGAGGAACTATAG  
GTGGAGCACTTAGG---CATAAATTG---ATACCGTCTCCTCAGAATTTGGTAACTTCAACT  
CCA-----TTAACAAGTACTTATGAATCTTTTTTCGGTTTACACCCATTATCTCAAGTT  
TTAGATCGAACTAATCCATTGACACAAATAGTTCATGGGAGAAAATTGAGTTATTTGGG  
CCCTGGAGGATTGACAGGGCGAACTGCTAGTTTTTCGAATACGAGATATCCATCCTAGTC  
ATTATGGGCGTATTTGCCCAATTGACACGTCTGAAGGAATAAATGTCCGACTTATTGGAT  
CTTTAGCAATTCATGCGAAGATTGGTCGTGGAGGA---TCTCTAGAGAGTCCATTTTAT---  
----GAGATTTCTCAGAGATCAAAGGG-----GCACGGATGCTTTATTTATCACCAGGTAA  
AGATGAATACTATATGGTAGCGGCGGAAATCCTTTGGCTTTGAATCAGGGTCTTCAGG  
AAGAACAGGTTGTTCCAGCTAGATATCGTCAAGAATTCCTGACTATTGCATGGGAACAG  
GTTTCATCTTCGAAGTATTTTTTCCCTTCCAATACTTTTCTATTGGAGCTTCCCTCATTCTT  
TTATCGAGCATAATGATGCGAATCGGGCTTTAATGAGTTCGAATATGCAACGTCAAGCA  
GTTCTCTTTCTCGATCCGAGAAGTGTATTGTTGGAACGAGGTTGGAAACGCCAGGCGG  
CTCTAGATTCAGGGGTTCTTGCTATCGCCGAACATGAAGGAAAGGTCATTTATAACCGAT  
ACTGACAAGATCCTTTTATCGGGTAATGGAGATACTCTAACATTCCATTAGTTATGTAT  
CAACGTTCCAACAAAATACTTGTATGCATCAAAAACCCAGGTTTCAGAGGGGTAAAT  
ACATTAAGAAAGGACAAATCTTAGCCTATGGCGCCGCTACAATTGGTGGCGAACTCGC  
TTTGGGGAAAAACGTATTAGTAGCTTATATGCCGTGGGAAGGTTACAATTTTGAAGATG  
CAGTGCTCATTAGCGAGCGTTTGGTTTATGAAGATTTATACTTCTTTTACATACGAA  
AATATGAAATTCAAACTCATGTGACAAGCCAAGGC---CCCGAAAGGGTCACTAGGGAA  
ATACCGCATTTAGAAGCTCATTTACTACGCAATTTAGACAAAACGGAATTGTAATGCT  
GGGATCTTGGGTAGAAACGGGTGAGATTTTAGTAGGTAAATTAACGCCCCAAATGGTG  
AAAGAA---TCGTCTGATGCCCGGAGGATAGATTGTTACGAGCCATACTTGGCATTAG  
GTATCTACTTCAAAGAAACTTGTCTAAAACCTTATAGGCGGTAGGGGTCGAGTTAT  
TGATGTGAGATGGATCCAGAAAAGGTA---GGTCTAGTTATAATCCAGAAACGATTTCG  
TGATATATTTTACAGAAACGTGAAATTAAGGTAGGCGATAAAGTAGCTGGAAGACATG  
GAAATAAGGGTATAATTTCAAAAATTTGCCTAGACAAGATATGCCTTATTTGCAAGATG  
GAAGACCTGTTGATATGGTCTTCAACCCATTAGGAGTACCTTCCCGAATGAATGTAGGA  
CAGATATTTGAATGTTCACTCGGGTTAGCTGGGGGTCTACTAGACAGACATTATCGAAT  
AGCCCCTTTTGATGAAAGATATGAACAAGAAGCTTCGAGAAAACCTAGTGTTTTCTGAA  
TTATATCAAGCCAGTAAGCAAACGGCGACTCCATGGGTATTTGAACCCGAGTATCCGGG  
AAAAAGCAGAATATTTGATGGAAGAACGGGGGATCCTTTTGAACAACCTGTTATAATA  
GGAAAGCCTTATATCTTGAATTAATTCATCAAGTTGATGATAAAATCCATGGACGGTCC  
AGCGGACATTATGCACTTGTACACAACAACCCTCAGAGGAAGGGCTAAGCAAGGTG  
GGCAGCGGGTAGGAGAGATGGAGGTTTGGGCTCTAGAAGGATTTGGTGTGCTTATAT  
TTTACAAGAGATGCTTACTTATAAATCGGATCATATTAGAGCTCGCCAGGAAGTACTTGG  
TACTACTATCATTGGAGGAGCAATACCTAATCCTGAGGATGCTCCAGAATCCTTTTCGATT

ACTCGTTCGAGAACTACGATCTTTGGCTCTGGAAGTGAATCATTCTTTGTATCTGAGA  
AACTTTCAAGATTAAGGAAGGAAGCTATGAATCCCAACTTTTCTTCTATGATTGAT  
CAGTATAAACATCAACAACCTCCGAATTGGATCAGTTTCTCCTCAACAAATAAGTACTTG  
GGCGAATAAAATCCTCCCTAATGGAGAGAGAGTTGGAGAGGTGACAAAACCTTATACT  
TTTCATTACAAAACCAATAAACCCGAAAAAGATGGATTATTTTGTGAACGCATTTTGG  
GCCTATCAAAAAGTGGAAATTTGTGCTTGTGGAAATTATCGAGTAATCGGAGATAAAAAA  
AAGACCGGAAATCTTGTGAACAATGCGGGGTCGAGTTTGTGATTCTCGGATACGAAG  
ATATCAAATGGGCTACATCAAACCTCGCATGCCAGTAACCCACGTGTGGTATTTGAAAC  
GTCTTCTAGTTATATTGCGAATCTTTAGATAAACCTCTTAAAGAATTAGAAGGCCTAG  
TATACTGCGAT-----TTTTCTTTTGTAGGCC---ATAGCTAAAAAACCCACTTTTTTACGA  
TTACGAGGTTTGTTCGAATATGAAATCCAATCCTGGAAATATAGCATCCCGCTTTTTTTTT  
ACTACCCAAGGCTTTGATACATTTGAAATCGAGAGATCTCTACTGGAGCAGGTGCTAT  
CCGAGAACAATTAGCCGATCTCGATTTACGGATTATTATAGATTCTTCATTGGTAGAATG  
GAAAGAGTTGGGGGAAGAC---GGTCCCACAGGGAATGAGTGGGAAGATCGAAAAGTT  
GGAAGACGAAAGGATTTTTTGGTCAGACGTATGGAATTAGCGAAGCATTTTATTCGAAC  
AAATATAGACCCAAAATGGATGGTTTTGTGCTATTACCTGTTCTTCTCCTGAGTTAAG  
ACCGATCGTTCAGATAGACGGGGTAAACTAATGAGCTCGGATATTAATGAACTCTATA  
GAAGAGTTATATATCGGAACAATACTTTACCGACCTATTAACAACAAGTAGATCTACG  
CCAGGAGAGTTAATAATGTGTCAGGAGAAATTGGTACAAGAAGCCGTGGATACACTTC  
TTGATAATGGAATCCGTGGACAACCGATGAGGGACGGCCATAATAAAGTTTACAAATCA  
TTTTCGGATGTAATTGAAGGCAAAGAGGGAAGATTTGCGGAGACTTTGCTTGGCAAAC  
GAGTCGATTATTCAGGGCGTTCGTCATTGTCGTGGGCCCTCACTTTCATTATATCAAT  
GCGGATTGCCCCGCGAAATAGCAATAGAGCTTTTCCAGACATTTGTAATTCGTAGTCTA  
ATTAGACAACAGCTTGCTTCGAATATAGGAGTTGCTAAGAGTAAAATTCGGGAAAAAA  
AACCGATTGTATGGGAAATACTTCGGGAAGTTATGCGGGGGCATCCTGTATTGTTAAAT  
AGAGCACCTACTCTGCATAGATTAGGTATACAGGCATTCCAGCCTGTTTTAGTGGAGGG  
TCGTGCTATTTGTTTACATCCATTAGTTCGTAAAGGATTCAATGCAGACTTTGACGGGGA  
TCAAATGGCTGTTTCATGTGCCTTTATCTTTTGGAGCTCAAGCGGAAGCACGTTTACTTAT  
GTTTTCTCATATTAACCTTTTATCTCCGGCGATTGGGGATCCTATTTCCGTACCAACTCAA  
GATATGCTTATTGGACTCTATGTCTTAACGAGCGGGAATCGTCGAGGTATTTGTGTAAT  
AGGTATAATCCATCTAATCAC-----AGAAAT---CAAATAAAAAGAATTTATGAGAATAA  
CTATAAGTATACGAAA-----GAACCTTTTTTTTTGTAATTCTTATGATGCAATTGGAGCTTAT  
CGGCAGAAACGAATCAATTTAGATAGTCCTTTGTGGCTCCGGTGGCGGCTAGATCAAC  
GC---GTTATTGCTGCA-----AGAGAAGCTCCTCTCGAAGTTCACTATGAATCTTTGGGTA  
CCTATTATGATATTTATGGGCAATATCTAATAGTAAGAAGTATAAAAAAAGAAATTCCTTC  
TATATATATTCGAACTACTGTTGGTCATATTTTCGATTTATCGAGAAATCGAAGAAGCTATA  
CAGGGGTTTTGTCAGGCCTGT-----ATGGAGGTACTTATGGCAGA  
ACGGGCCAATCTGGTCTTTCACAATAAAGTGATAGACGGAACTGCCATGAAACGACTT  
ATTAGTAGATTAATAGATCACTTCGGAATGGCATATACGTCACACATCCTGGATCAAGTA  
AAGACTTTGGGTTTTCAACAAGCTACTGCTACATCCATTTTCATTAGGAATTGATGATCTT  
TTAACAATCCCATCTAAGAGATGGCTAGTTCAAGATGCTGAGGAACAAAGTTTCATTTT  
GGAAAAACACCACCATTCTGGGAATGTACATGCAGTAGAAAAATTACGCCAATCCATT  
GAGATATGGTATGCTACAAGTGAATTTTTGCGACAAGAAATGAATCCTAATTTTAGGAT  
GACTGACCCTTTAATCCAGTACATATAATGTCTTTTTTCAGGAGCTAGAGGAAATGCGT

CTCAGGTACATCAATTAGTAGGTATGAGAGGATTAATGTCGGATCCCCAAGGGCAAATG  
ATTGATTTACCCATTCAAAGCAATTTACGCGAAGGACTCTCTTTAACAGAATATATTATT  
TCTTGCTACGGAGCCCGGAAGGGAGTTGTGGATACTGCTGTACGAACTTCAGATGCTG  
GATATCTCACGCGCAGACTTGTTGAGGTAGTTCAACACATTGTTGTACGTCGAAAAGAT  
TGTGGCACCCGCCGAGGTATTTCTGTGAGTCTTGAAACGGGATGATGTCG---GAAAAT  
ATTTTTATCCAAACATTAATTGGTCGTGTATTAGCGGATGATATATATATGGGTACACGAT  
GTATTGCCACTAGAAATCAAGATATTGGTAGTGGACTTGTCAATCAATTCATAACC-----  
-----TTTCGAGCACAACCCATATATATTGAACTCCCTTTACTTGTAGGAGTACATCTT  
GGATCTGTCAATTATGTTATGGCCGGAGTCCTACTCATGGTGACCTGGTTCGAATTGGGA  
GAAGCTGTGGGTATTATTGCGGGTCAATCTATTGGAGAGCCCGGCACTCAATTAACATT  
AAGAACCTTTCATACCGGCGGAGTATTTACAGGGGGTATTGCAGAACATGTACGAGCC  
CCCTCTAATGGAAAATAAAATTCAATGAGGATTTAGTTCATCCGACACGTACACGTCA  
TGGGCATCCTGCTTTTGTGTGTTCTATAGATTTGTACGTAACCTATTGAAAGTGAGGATAT  
TCTACATAATGTGAATATTCCACCCAAAAGTTTTCTTTTAGTTCAAATGATCAATATGT  
AGAATCAGAACAAGTGATTGCTGAGATTTCGCGCAGGAACATCCACT---TTGAATTTAA  
AGAGAAGGTTTCGAAAACATATTTATTCTGATTTCAGAGGGAGAA---ATGCATTGGAATAC  
CGACGTGTATCATGCACCTGAATTTACATATGGAAATGTTTCATCTCTTACCAAAAACAA  
GTCATTTATGGATATTATTAGGAGAGCCGCGCAGA-----TCTGATCTAATCTCCCTTTCGA  
TCCACAAGGATCAAGATCAAATGAACGCTCGT-----TCTTTTTCTGTCAAGAAAAGATCT  
ATTTTCGAACCTCTCG-----GTAACATAATGATCAA---GTGAGACACAAATTCCTTAGTTTCGG  
ATTTTTTTGGTAAA---GAAGAAGAACCCTGATTAT---TCAGAACTTAATCGA-----AT  
TGTTTCGTTGTAATCTCAGATATCCG---ACCATTCCATACGCCGATTAT-----GATTTATTGG  
CAAAGAGACGAAGAAAAAGATTCATTATTCCACTCCAATCGATTCAAGAACGTGAGAA  
CGAACTAATGCCTCCTTCGGGAATCTCGATCGAAATACCC-----ATAAATGGTATTTTTTCG  
TATAAATAGTATTCTTGCTTTTTTCGATGATCCTCGATACAGAAGAAAGAGTTCGGGAAT  
TACTAAATATGGCACTATAGAAGTTCGATCCAATCGCCAAAAAAGAGGAT-----TTAATTG  
AGTATCGAGGA---GTCAAGGAGTTTAAGCCAAAATACATAAAAGTGGATCGGTTCTTTT  
TCATTCCCGAGGAAATGCATATCTTACCTGGATCTTCTTCCATAATGGTACGAAACAATA  
GTATTATTGGGATAGATACACAAATAGCTTTAACTACAAGAAGCCGAGTCGGCGGATTA  
GTTTCGAGTGGAGATAAAAAAAAAAAGAATTGAACTAAAAATATTTTCTGGAGATATCC  
ATTTTCCTGGAGAGACAGATAAGATATCTCGACATAGTGGTGTCTTGATACCACCAGGA  
ACG-----GGAAAGACAAATTCGAAAGAATCCAAAAA-----GGGAAAACTGGATCTAT  
GTCCAACGG-----ATCACACCTACCAAT-----AAAAAGTATTTTGTTTTGGTTTCGACCTGT  
AGTCACATATGAAATAACAGACGGTATAAATTTAGTA---CTTTTTCCCCCGGATCTGTTG  
CAGGAAATGGATAATGTGCAACTTCGAGTTGTCAATTATATCCTTTATGGAAACGGCAA  
ACCAATTCGGGAAATTTATAACACAAGTATTCATTTAGTTAGGACTTGTTTAGTATTTAA  
TTGTACCCAAGACAAAAA-----AGTTCTTATATCGAAGAGACCCGTACTTCCTTTGT  
TGAAATAGGGATAAATGGTTTGTGAGTCGAGATTTTATAAAAATAGACTTAGTGAAATCCC  
CTATTTTCGTATACCGCAAAAAGGAATGATCCTTCGCGTTCAGGATTGATCTATGAG---AA  
TGGATCAGATTGCACCAATATCAATCCGTTTTCTTCCCGTTTTTCTACTAT-----TCCAAC  
GCAAGGATTAAGAATCCCTTAATCAAACCAAGGCACTATTCATACATTGTTCAATAG  
A-----ATAAGGAATACCAATCTTTGATAATTTTGTTCATCCTCTAATTGTTTTCGAATGG  
GCCA-----TTCAACAATGTAAAATATCACAATGTG-----ATAAAGAATCA---CCCCA  
ATTCCAATTAGGAATTTGTTGGGCCCTTTAGGAACA-----GCCCTTAAACTGCGAATTT



TTATCCA-----TTTTCCCATTTA-----ATAACTTATAATCAGATCTTG--GTAATTAACTATTT  
GCAACTTGACAACCTTAAAA-----CAGACCTTTCAAGTAATTA---TATTTTTTAA  
TGGATGAAATT-----GGTAAAATTTATAATTATGATTTGTGCAGTAACATTATTTTGAATCC  
ATTCAATTTAAATTGGTATTTTCTTCAGCACAATTATTGTGAAGGGATGTCT--ACAATAA  
TGAGTCTTGGGCAGTTTATTTGTGAAAATGTATGTATAGCCAAAAATGGACCACAT--CT  
CAAA-----TCGGGTCAAGTTCTAATTGTTAAA---ATGGATTCTGTAGTAATACGATCCGCT  
AAGCCTTATTTAGCCACCCCAGGAGCAACGGTTCATGGCCATTATGGGGAAATCCTTTA  
CGAAGGAGATACATTAGTTACATTTATATATGAAAAATCGCGATCTGGTGATATAACGCA  
GGGCCTTCCAAAAGTGGAACAGGTATTAGAAGTGC GTTCGATTGATTCAATATCGATGA  
ATCTCGAAAAGAGGGTTGAGGGTTGGCATGAATGTATAACAAGAACTCTTGGAATTCC  
TTGGGGGTTCTTGATTGGTGCTGAGCTAACTATAGTGCAAAGTCGTATCGCTTTGGTTA  
ATAAGATCCAAAAGGTTTATCGATCCCAGGGGGTGCAGATCCATAATAGACATATAGAA  
ATTATTGTACGTCAAATAACATCAAAGTGTGGTTTCAGAA-----GATGGGATGTCTA  
ATGTTTTCTTACCCGGAGAATTAATTGGATTGTTACGGGCGGAACGAATGGGGCGTGCT  
TTGGAAGAAGCAATCTGTTACCGAGCCGTCTTATTGGGAATAACAAAAGCATCTCTGAA  
TACTCAAAGTTTCATATCCGAAGCGAGTTTTCAAGAACTGCTCGAGTTTTAGCAAAA  
GCTGCTCTACGGGGTTCGTATTGATTGGTTAAAAGGCCTGAAAGAGAACGTTGTTCTGG  
GGGGGATGATACCCGTTGGTACCGGATTCGAGGGATTG-----GTGCACTCTTCGAGACA  
ACATACCAACCTTTCC-----TTGGAAACCAAAAATAATAATATATTTGAGGGGGAGATGA  
GA-----GATATTTTGTCCACCACAGAAAATTTTTGATTCTTGCTTTTCAAAGAATTTCC  
ATGATACATCAGAACAATCATTATAGGTATA-----GGATTTAATGATTCCATGACAA  
AAAGATATTGGAACATCGATTTGGAAGAGATGATGAAGGCCGGAGTTCATTTTGGACAT  
GGTACTAGGAAATGGAATCCTAAAATGGCCCCTTATATTTCTGCAAAGCGTAAAGGTAT  
TCATATTATAAATCTTACTAGAACCGCTCGTTTTTTTATCAGAAGCTTGTGATTTGGTTTTT  
GATGCAGCAAGTAGGGGAAAACAATTCTTAATCGTTGGCACGAAAATAAAGCAGCTG  
ACCTAGTAGCATGGGCTGCAATAAGGGCTCGGTGTCAATTATGTTAATAAAAAATGGCTC  
GGCGGTATGTTAACGAATTGGTCCACTACAGAAACGAGACTTCATAAGTTTAGAGACTT  
GAGAACAGAACAAAAAACAGGGAGACTTCGTCTGTTCCGAAAAGAGATGCGGCCGT  
GTTGAAAAGACAATTATCTCACTTGCAAACATATCTGGGCGGGATTAATATATGACGG  
GGTTACCAGATATTGTAATCATCATGATCAACACGAAGAATATACGGCACTTCAAGAAT  
GTATCACTTTGGGAATTCCAACAATTTCTTTAATCGATACAAATTGTGACCCCGATCTTG  
CAGATATTTGATTCCAGCCAATGATGACGCTATATCTTCAATCCGATTAATCTTAACAA  
ATTAGTATTCGAATTCGTGAAGGGCGTTCT--AGCTATATAAGAAATCCGATGGGACAA  
AAAATAAATCCACTTGGTTTCAGACTTGGTACAACCCAAAGTCATCATTCCCTTTGGTT  
TACACAACCAAAAAATTATTCCGAAGGTCTACAAGAAGATCAAAAAATAAGAGATTTT  
ATTAAGAATTATGTACAAAAAATCTGAAAATTTCCCTCTGGC---GTCGAGGGAATTGCA  
CGTATAGAAATTCACAAACGAATCGATCTGATCCAGGTCATTATCTATATGGGATTCCCA  
AAGTTATTAATAGAAAATCGACCGGGA-----GGAATCGAAAAATTGCAGATGAATTT  
ACAAAAGAATTTAATTGTGTCAACCGAAAACCTTAACATTACTATCACAAGAATTGCAA  
AACCTTACGGAAGCCCTAATATTCTTGCAGAATTTATAGCCGGCCAATTAAGAATAGA  
GTTTCTTTTCGAAAAGCAATGAAAAGGCTATTGAATTAAGTGAACAAGCAGATACAA  
AAGGAATTCAAGTACAAATTTAGGACGTATCGACGGAAAAGAAATTGCGCGTGTGCA  
ATGGATCAGAGAGGGCAGGGTTCCCTTCAAACCATTCGAGCTAAAATAGATTATTGTT  
CTTATACAGTTCGAACTATATATGGAGTTTTAGGCATTAATAATTTGGATATTTTTAGACGG

GGAAATGTCGCGTTACCGGGGACCTCGTTTCAAAAAAATACGCCGCTGGGAGCTTTA  
CCGGGACTAACTAATAAAAGGCCTAGAGCCGGAAGTGATCTTAGAAACCAATCACGTT  
CCGGTAAA---AAATCTCAATATCGTATTTCGTCTAGAAGAAAAACAAAAGTTGCGTTTTT  
ATTATGGTCTTACAGAACGACAATTACTTAAATACGTTTCGTATCGCCGGTAAAGCCAAG  
GGGTCAACAGGTCAGGTTTTACTCCAATTACTTGAAATGCGCTTGGATAACATCCTTTT  
TCGATTGGGTATGGCTACGACTATTCTGGAGCCCGTCAATTAGTTAACCATAGACATAT  
TTTAGTCAATGGTCGTATAGTAGATATACCAAGTTATCGCTGCAAACCCCGAGATATTATT  
ACGGCGAGGGATGAACAAAACCTCTAGAGCTCTGATTCAAATTCCTTTCAATTCACCCT  
CTCAG---GACGAAATGCCAAAACATTTGACTCTTCAACCATTCCAA-----TATAAAGGAT  
TAGTCAATCAAATAATAGATAGTAAATGGGTCGGTTTGAAAATAAATGAATTGCTAGTC  
GTAGAATATTATTCGCGCCAGACCATGTCACGTCGAGGTAAGTGCAGAAGAAAAAACTG  
CAAATCCGATCCAATTTATCGTAATCGATTAGTTAACATGTTGGTTAACCGTATTCTGA  
AACACGGAAAAAAATCATTGGCTTATCAAATTATCTATCGAGCCGTGAAAAAGATTCAA  
CAAAGACAGAAACAAATCCACTATCTGTTTTACGTCAAGCAATACGTGGAGTAACTC  
CCGATATAGCAGTAAAAGCAAGACGTGTAGGTGGATCGACTCATCAAGTTCCATTGA  
AATAGGATCCACACAAGGAAAAGCACTTGCCATTCGTTGGTTATTAGCGGCATCCCGA  
AAACGTCCGGGTCGAAATATGGCTTTCAAATTAAGTTCCGAATTAGTGGATGCTGCCAA  
AGGGAGTGGCGATGCCATACGCAAAAAGGAAGAGACTCATAGAATGGCAGAGGCAAA  
TAGAGCTTTTGCACATTTTCGTATGGGTAGGGATATTATTGCTGACATAAACTTCTATA  
CGAAATGCTGATATGGATCGAAAAAGGGCGGTTTCGAATAGCATCTACTAATATCACTGA  
AAATATTGTTAAAATACTTTTACGAGAAGGTTTTATTGAAAACGTGAGAAAACATAAAG  
AAACCAAAAAAGATTTTTTGGTTTTAACCTACGACATAGAAGG-----AATAGGAAAAG  
ATCTTAT-----AGAAATTTTTTAAATTTAAAACGGATCAGTCGGCCTGGTCTACGAATC  
TATTCGAACTACCAACGAATTCCTAGAATTTTAGGTGGGATGGGAATTGTAATTATTTCT  
ACTTCCCGAGGTATAATGACAGACCGAGAAGCTCGACTAGAACGAATTGGCGGAGAA  
GTTTTGTGTTATATATGGATGGCAAAAACCTATACCGAGAATTGGTTCACGTAAGAATGG  
ACGTATTGGTTCACGTAAGAATACACGGAGAATACCAAAGGGGGTATTTCATGTTCAAG  
CAAGTTTCAATAATACTATTGTGACTGTTACAGATGTACGGGGTTCGAGTGGTTTTCTGG  
TCCTCCGCCGGTACTTGTGGATTCAAGGGTACACGAAGGGGTACGCCCTTTGCTGCTC  
AAACCGCAGCAGGAAACGCTATTCGTACAGTAGTGGATCAAGGTATGCAACGAGCGG  
AAGTCATGATAAAAGGACCGGGTCTCGGAAGAGACGCGGCATTACGCGCTATTTCGAG  
AAGTGGTATACTATTAACCTTTTGTGCGTGATGTAACCCCTATGCCACATAATGGCTGTAG  
ACCTCCAAAAAAGCGACGTGTGATGCCAACTATTAACAACCTATTAGAAATACAAGA  
CAGCCAATCAGAAATGTCACAAAATCCCCCGCACTTCGGGGATGCCCTCAGCGTCGAG  
GAACATGTACTAGGGTGTATACTATCACCCCCAAAAAACCAAACCTCTGCCCTACGTAAA  
GTTGCCAGAGTACGATTAACCTCTGGATTTGAAATCACTGCTTATATACCCGGTATTGGC  
CATAATTCACAAGAACATTCTGTAGTCTTAGTAAGAGGGGGAAGGGTTAAGGATTTACC  
CGGTGTGAGATATCACATTGTTTCGAGGAACCCTAGATGCTGTCGGAGTAAAGGATCGTC  
ACAAGGGCGTTCTAAATATGGAGTAAAAAAGCCAAAAATGGCAAGAAAAGGTTTGA  
TTCAGAGGGGAGAATAAGAGGCAAAAATTGGAACAAAATATCATTCGATTTCGTGATC  
CTCAAAAAAAGAAATAAGG-----CAAGTTCTGTCCTTAAGCGACAAATGGGAAATTTA  
TGAAAGTTACAATCTCCGCCGCGGAATAGTGCACCTACACGCCTTCATCGACGTTGTT  
TTTCGACCGGAAGGCCGAGAGCTAACTATCGAGACTTTGGACTATCTGGACAGATACT  
TCGTGAAATGGTTCACGCATGTTTATTGCCAGGGGCGACAAGATCCAGTTGGATGATAA

AAAATTCATTCAGTGCAATTTTTTTTAAA-----GAGGAAAACGAAGACAACAAGGGGTC  
TGTTGAATTTCAAGTAGTGAGTTTCACCAATAGGATACGTAAACTTACTTCACATTTGG  
AATTGCACAAAAAAGACTATTTATCTCAGAGAGGTCTGCGTAAAATTCTAGGAAAACG  
TCAACGGCTGCTCGCTATTTGTCAAAAAAAAATAGAGTACGTTATAAAGAATTAATCG  
GCCAGTTGGAGATTCGAGAAACAAAAAAAAT-----ATGGTAAACTTCGTTTGAAACG  
CTGTGGTAGAAAGCAACGAGCCGTCTATCGAATCGTTGCAATTGATGTTTCGATCCCGAA  
GAGAAGGAAGAGATCTTCGGAACGTAGGTTTTTATGATCCGATAAAGAATCAAAGTTAT  
TTAAACGTTCCCTGCTATTCTATATTTCCCTTGAAAAGGGCGCTCAGCCACAGGAAGTGT  
TCGGGATCTTTTAAAAAAGGCGGAAGTTTTTAAG-----ATGGATAA  
ATCCAAGCGACCTTTTCTTAAATCCAAGCGATCTTTTCGTAGGCGTTTGCCCCGATTC  
AATCGGGGGATCGAATTGATTATAGAAACATGAGTTTAAATTAGTCGATTTATTAGCGAAC  
AAGGAAAAATATTATCTAGACGGGTGAATAGATTGACCTTGAAACAACAACGATTAATT  
ACTATTGCTATAAAGCAGGCTCGTATTTTATCTTTGTTACCTTTTCTTAAATAATGAGAAA--  
---CAATTTGAAAGAACCGAGTCGACCACCAGAACTGCGGGTCTTCGAGCCAGAAATA  
AAGTGACACGTTCACTAAAAAAAACCCTTTTGTAGCAAATCGTTTATTAAGAAAAAT  
TGATAACCTTAACACAAAAGCAGAAAAAGAAATAATAATAACTTGGTCTCGGGCATCT  
ACCATTATACCCACAATGATCGGCCATACCATTGCTATCCATAATGGAAAGGAACATTTA  
CCTATTTATATAACCGATCGTATGGTAGGCCACAAATTGGGAGAATTTGCACCTACTTTA  
AATTTCCGAGGACACGCAAAAAGCGATAATAGATCTCGTCGTATGATTTTGAAATCTTT  
TCTACTAGGTAATCTAGTATCCTTATGCATGAAGATAATCAATTCGGTCGTTGTGGTTCGG  
ACTCTATTATGGATTTCTGACCACATTCTCCATAGGGCCCTCTTATCTCTTCTTCTCCGA  
GCTCAGGTTATGGAAGAAGGAGAAGAAGGAACCGAGAAGAAGGTATCAGCAACAAC  
AGGTTTTATTACGGGACAGCTCATGATGTTCAATATCGATCTATTATGCGCCTCTGCATCTA  
GCATTGGGTAGACCTCATAACAATAACTGTACTAGCTCTACCGTATCTTTTGTTCATTTCT  
TCTGGAAAAATCACAAAACCTTTTTTGATTATGGATCTACTACCAGAAATTCATGCGT  
AATCTCAGCATTCAATGCGTATTCCTGAATAATCTCATTTTTCAATTATTCAACCATTTCA  
TTTTACCAAGTTCAATGCTAGCCAGATTAGTCAACATTTATATGTTTCGATGCAACAACA  
AGATGTTATTTGTAACAAGCAGTTTTGTTGGTTGGTTAATTGGTCACATTTTATTCATGA  
AATGGGTTGGATTGGTATTAGTCTGGATACGGCAAAAATAATTCTATTAGATCG---ATTCGA  
TCTAATAAG-----TCAGAATTGATAAAT-----TATCGAATATTTAGTATTCTCTTATTATT  
ACCTGTGTCTACTATTTAGGCAGAATACCGTCACCCATTTTTACTAAGAACTGAAT---A  
CCGAAGAAGATAAACCTCTTCTGACCTTTCTTTTCGATTATAAACGATGGAATCGCCCA  
TTACGATACATAAAA---AATAGATTTGAAAGGACTACAAGAAAAGAAATGTCACAATAT  
TTTTTTTATACATGCCGAAGTGATGGAAAAGAAAGAATCTCTTTTACGTATCCGCCTAGC  
TTGTCAACTTTTGGAGAAATGATACAAAGAAGGATGTCCCTGCCACACTAGAAAAAC  
TCTCTTCGGCTGAACTGTACAATCATTGGGTTTATACTAACCAACACAAAAATAACAAC  
TTAAACAACGAGTTTTTTAAATAGAATTGAGGCTCTAGATACGGGATTTTTTTCTCTAGAT  
ATACTCGAAAAAAGTACTAGATTGTGTAAT-----ACTAGAAAATATTACTTGCCATAAATG  
TATGATCCCATTTTGAAT--TTATATCGGGGAACAATCCAAAAAAAATTTACCTATAG  
AGACATTGGAAATTAATAAGATTCATAGTCTCCTTTACCAAGAATTTGAACAGAAAAGC  
CCTAATGATCAA-----ATAAAAGAAATCAGTAAAAAAGTCCCTAGATGGTCATACAAA  
CTTATTGAATTGGAATTCCTATCGGGCACACAGATACGTTCAAGAAAAAGGGATGGTAT  
AATAATTTATAGGCCT-----AGAGACTATTCAGAAGAATCAGATTTTCGTGAGAAATTCAT  
CAAAGGTTCTATGCGTGTTCAAAGGCGTAAAACCTGTTATTTGGAAATTGTTTCAAGCAA

ATGCGCATTCCCCTCTTTTTTTGGACAGA---ATAAAA---AAATACCCACTTTTTTCTTTTA  
ATATCCCTGAACGGATGAAATCTTTTTTTAGAAATATAAAGGAAAAAGCGTCGATAAAA  
-----TGGGATTTCATTCCATATCCACAAGCAACAAGAAGTTTAATTTTAATAATTCAA  
TCAATTTTTAGAAAATATATTTTATTACCTTCATTGATAATAGTTAAAAATATTGGGCGTAT  
TTTATTATCTCAACCCCCGAATGGACTGAGGACTTCGATGAGTGGAATAGAGAAAAG  
CATATTATATGTACCTATAATGGTGTTCAAGTATCAGAATTCGAACTTCCCAAAAATTGG  
TTTAAAGATGGTATTCAGATAAAAATAGTATTTCCTTTTTTATTTGAAACCTTGGCACAGA  
TCCAAAAAAGAAGAACAACCAAAATTTTATTTTTTAACGGCTTGGGGAGCGCAAACCTA  
CCCTTAACCTTGGTCTATCCCTCCAAAACCTTCCTTTTTTAAGCCTATTTTAAAAGAAC  
TTAAAAAATA-----ATGCAAAAACGTTAAAAGTTCTAAGAGTTTTAAAA  
GAAAGAGATTTTCTACAAGATTCAAAAAGAACCAAAAAGAGGTGATTATTAACGTTT  
TATTTCTGTTTATAAAAAGAATAAAAAAAGAACTCTTCAAAATACATGATTATATAATTA  
GGAATCAGCAAATTCACGACTCGTTTATAAAAATTAATCTACAGATAATAAAAATGATT  
CACTGAGAGATAAAAAAATTAAAAATCTGACTGATAGAACAAGCACGATAAGAACGA  
AAACAAAGGGTCTTATGAAAGAAAAAACAGT-----AACAAAACAAGTTTTAATAGA  
AAAAAAAATCACCAAATATCTTTTTAAAATCTTAAAAATAAAAAGCACTCGATTAAT  
CTATAAATTCTATTTGTTTATAACAATTTTCATTAAGAATATACATCGATATCTTTGTAT  
GTATTATTCATATTGCCAGAATTTCTACACAACCTCCT---AAAGAAATTAATTTTGACTTA  
TCCTCTTTATCACAAGCATATGTATTTTACAAATTATCACAAACCCCAATTATTCATTTTA  
TAAGTTAAGAGATATTTTTGAGTATACTCCTTTTTTTCTTAAGACTGCAATGAAAATTA  
TTTTACACAAGGAATATTTTCATTCCGAATTAAGACATACTAACTTTCAAGTTATGAAAC  
GAATCAATGGAAAAGCTGGTTAAGAGGT---TATCAATACAATTTATCTCAGATTAGGTGG  
TCTGGATTAATACCAAAAAAATGGCGAACTACAATAAATGAAGGTGGTATGACCCCAA  
TAAAACAAATGCAATTCGTATGAAAAGACCGA-----TTACTTTATCACAAAAACAA-  
--AATTTTCTAAAATACTATATATATGATCTTTTTTCATATAAATCTATTAATGGTGATATTAT  
GTATCCGGACAGAAAATATTTTGATTGGACAATTTTAAATTTTTTTATAAGATTTTTTGAT  
TGGATGGAATGAATGAAGAAATCCTAAACCCAACGTTCTTCCCAGAATTTGTGCCAC  
TTTACAATGTATACAAAACAAAACCATGGATTATACCAAGCAAATTACTTCTTTTAAATA  
TCCGGAATAAGATGAGACGAGAAATAATTTTCTTACGGAAACACTATTTGCTTTTTCAA  
TGGATAATAGACGATGGTTTAACTGAAAGAATGATCAATAATATCAAGATATATTGTTAC  
TTGCTTGGACTGAGAAATCCAAGAGATACTACTATATCGTCTATTCAAAGGAAAGAATT  
AAATCTGGATATAATGGTGATTTCGACAAAAA---TTGACTCCTATAGAATTGAATAAAGGG  
ATATTTTTTCTAGATCCCACCCGTTTGTTCAGTAAAAACGACGGATACTTTATTATATATC  
AAACCGTAGGTATATCGTTGGTTCATAAGAGTAAATACAAACATTATGATTTTGTTCGTT  
CTGAAAATATTTTATCGTCTAGACGTCGTAGAGAATTGAGAATTCTACTTCTTTTCGTGT  
TTCTTTGGCCTAATTATCGATTAGAAGACTTAGCTTGTATGAATAGATATTGGTTTAAATAC  
CAATAATGGAAGCCGTTTLAGTATATTAAGAATATATCCACAATTCATGAAAGGACATCA  
ATTCAAATTCGGATTTTCGAATTAAGAGAGATATTGAGAGAGATCAAGAATTCTCACT  
ATTTCTTAGATTCATGGACCAATTCAATTCAGTGGGATCTTTCATTCACATTTTTTTCCA  
CCAAGAACATTTTATAAACTTTTTGACCCCGAATTTGGAGTATCCTACTTTCA---CGC  
AATTCG-----CAGGGTTCAACAAGCAATCGATATTTACG-----ATCAAGGGTGTAGTA  
ATACTCTTTGTAGTAGCGGTCTTATATATCGT-----ATTAACAGTCGAAATATGGTTCG  
AAAGAAAAAATTTATATTTGATAGGACTTCTTCCT-----ATACCTATGAATTCATT  
GGACCCAGAAATGATACATTGGAAGAATCCGTC---GGGTCTTCCAATATCAATAGGTTG

ATTGTTTCC--CTCCTGTATCTTCCAAAAGGAAAAAAGATCTCTGAGAGTTGTTTCCTG  
AATCCGAAAGAGAGTACTTGGGTTCTCCCAATAACT-----AAAAAGTGTAGCATGC  
CTGAATCTAACTGGGGTTCGCGGTGGTGAGGAACTGGATCGGAAAAAAGAGG-----G  
ATTCT-----  
-----  
-----  
-----  
-----AGCCAATTGA  
AAGGATCTTCT--GATCAATCCAGAGATCCTTTGGATTCCATTAGT-----AATGAGGA  
TTCGGAA-----TATCACACATTGATCAATCAAAGAAAGATTCA  
ACAATAAAAGAAAGATCGATTCTT--TGGGAT----CCTTCCTTTCTTCAAACGGAACG  
AACAGAGATAGAATCAGAC-----CGATTCCTCGAAA-----AGCCTTTCTGGATATTCC-----T  
CAATGTCCCGGCTATTACAG--GAACGTGAGAAGCAGGTGATTAATCATCTGCTTCCGG  
AAGAAATCGAAGAATTTCTT-----GGGAATCCTACAAGATCCGTTCTGTTCTTTTTTCTCT  
GACAGATGG-----TCAGAACTTCAT--CTGGGTTCTGAATCCTACTGAGAGGTCCACTAGA  
GATCAT-----AAATTGTTGAAGAAACAACAAGATCTTTCT--TTTGTCCCTTCGAGGC  
GGTTCGGAA-----AAGAAAGAAATGGTTAATATATTCAAGATAATTACATATTTACAA  
AAT-----ACCGTCTCAATTCATCCTATTTTCATCATATCCGGGATGTGATATGGTTCCG--AA  
GGATGAACCGGAT--ATGGACAGTTCCAATAAGATTTTCATTCTTGAACAAAAATCCATTT  
CTTGATTTA-----TTTCATCTATTTTCATGACCGGAACATGGGAGGATACACGTTA-----CAC  
CATGATTTTGAATCAGAA-----GAGAGATTTCAAGAAATGGCAGATTTATTCACTCTATC  
AATAACCGAGCCG--GATCTGGTGTATCATAAGGGATTTGCCTTTTCTATTGATTCCCTACG  
GATTGGATCAAAAACAA-----TTCTTGAATGAGGTATTCAACTCTAGGGATGAATCGAA  
AAAAAAATCT-----TTATTGGCTCTACCTCCTTTTTTTTAT-----GAAGAGAATGAATCTT  
TTTATCGAAGGATCATAAAAAAATGGGTCCGG--ATCTCCTGCGGAAATGATTTGGAAG  
ATCCAAAACCAAAAAAATGGTATTTGCTAGCAACAAC-----  
-----CTAAATGTATTGAATCGATTCTTTTTTAATGAAT-----AGA  
TCCGATCGCAACTTCGAATATGGA-----ATTCAAAGGGATCAAATAGGAAAGGATACT  
CTGAATCATAGAATAAGAAATATATGATCAACCAACATTTATCGAATTTGAAAAA  
G--AGTCAGAAGAGATGGTTTCGATCCTCTT-----ATTTTGATTTCTCGAACCGAGAGATC  
CACGAATCGGGATCCTGATGCATATAGATACAAATGGTCCAATGGGAGCAATAATTTCC  
AGGAACATTTGGACCATTTTCGTTTCTGAGCGGAAGAGCCGT-----TTTCGAGTAGTGT  
TCGATCGATTACGTATTAATCAATATTCGATTGATTGGTCTGAGGTTATCGACAAAAAAG  
GTTTGTCTAAGCCATTTTCGTTTCTTTTTGTCCAAGTCACTTCTTTTTTTGTCCAAG-----T  
CACTTCTTTTTTTGTCC-----AAGTTTCTTTTCTTTTTGTCTAAC---TCACTTC  
CTTTTTCTTTGTGAGTTTCGGGAATATCCCATTTCATAGGTCCGAG--ATCTACATCTAT-  
--GAATTGAAAGGTCCGAATGATCAACTCTGCAATCAGTTGTTAGAATCAATAGGTCTTC  
AAATCGTTCATTTGAAAAAATTGAAACCCTTC-----TTATTGGAT-----GATCATGATAC  
TTCC--CAAAAATCGAAATTCCTTGATCAATGGAGGAACAATATCACCGTTTTTTGTTCAAT  
AAGATACCA--AAGTGG--ATGATTTACTCATTCCATACTAGA-----ATAATCGTAGGAA  
ATCCTTTGCTAACACGGATTCCTATTTCTCAACGATATTTACGATCAAGACTATTGGCT  
GAATCCCGTGAAACCATTTTCATAGAAGTTTCATTGATATCTTCTTTTTTATAAAGCAAATCA  
ACTTCGATCTTGAATAATCCACATCACTTCTGCTTCTAT-----TGTAATAAAAGATTCCCT

TTTTATGTG-----GAAAAGGCCCGTATCAAT-----AATTCTGATTTTACGTATGGA---C  
AATCCTCAATATCTTGTTCATTACACAACAAA--ATTTTTCTTTGTGCGTCGGTAAA----  
-AAAAACATGCTTTTTGGGGG--AGAGATACTATTTACCAATCGAGTCACGGGTATCT  
AACATATTCATACCTAACGATTTTCCACAAGGTGGTGGTGACGAAACGTATAACTTGT  
CAAATCT-----TCCCATTTCCAAGTCGATCCGATCCATTCGTTTCGT-----AGAGCTATTT  
ACTCGATCGCAGACATTTCTGGAACACCTCTAACAGAGGGACAGATAGTCAATTTTGA  
AAGAACTTATTGTCAACCTCTTTTCAGATCTGAATCTATCTGATTCAGAAGGGAAGA  
CGCATCAGTATCTCAAT-----TTCAATTCAAACATGGGTTTGATTCACACTCCATGTTCTG  
AGAAATATTTACCATCCGAAAAG-----AGGAAAAAC-----CGGAGTCTTTT  
TCTAAAG-----AAATACGTTGAGAAAGGGCAGATGTATAGAACCTTTCAACGAGATAGT  
GCTTTTTCAACTCTCTCAAATGGAATCTATTCCAAACATATATACCATGGTTCCTTACTT  
CGACAGGGCACAAATATCTAAATTGGATATTTTTAGATACTTTTTTCAGGCCTATTG-----C  
CGATACACCTATTGCCGAGTCAAAAATTTGTATCCATTTTTCATGATATTATGCATGTATT  
AGATATATCCTGGCGAATTCTTCAGAAAAAGTTG-----GGTCTTCCACAACGGA  
ATCCG---ATACGTAAGATTTTCGAGTAAGTGTTTACATAAT-----CTTCTTCTGTCCGAAGA  
AATGATTCATCGAAAT-----AATGAGTCGCCGTTGATATCGACACACCTGAGATCGCCAA  
ATGTTCCGGGAGTTC---CTCTATTCAATCCTTTTCTTCTTCTTGTGGATAT--CTCGT  
TCGTACACATCTTATCTTTGTTCCCGG-----GCCTCTAGTGAGTTACAGATAGAGTTTGA  
AAAGGTCAAATCTTTGATGATTTTCATCATATATGATTGAGTTGCGAAAACCTTCTGGATAG  
GTATCCTACATCTGAACCGAATTCTTTCTGGTTAAAGAATCTCTTTCTAGTTGCTCTGGA  
ACAATTAGGAGATTCTCTAGAAGAAATATGGGGTTTTGCTTCTGGCGGCAACATGCTAT  
TGGGTGGTGATTCCGCT-----TATGGG---GTCAAATCAATACGTTCTAAGAAGAAA  
TATTTGAATATCAAT-----CTCATCGATCTCATA---AGTATCATACCAAATCCCATCAGTC  
GAATCACTTTTTTCGAAAAATACGAGACATCTAAGTCATACAAGTAAAGAGATCTATTCA  
TTGATAAGAAAAAGAAAAATGTGAACGGGGATTGGATTGATGATAAAATCGAATCCT  
GGGTCGCAAACAGTGATTTCGATTGATGATGAAGAAAGAGAATTCTTGGTTTCAGCTCTC  
C-----ACCTTAACGACA-----GAAAAAAGGATTGATCAAATTCTATTGAGTCTGACT--CAT  
AGTGATCATTTA-----TCAAAGAATGACTCTGGCTATCAAATGATTGAACAACGG  
GGAGCAATTTACTTACGATACTTAGTTGACATTCAT-----AAAAAGTATCTAATGAATTAT  
GAGTTCAATACATCCTGTTTAGCAGAAAGACGGATATTCCTTGCTCATTATCAGACAATC  
ACTTAT-----TCACAAACCTCGTGTGGGGCTAATAGTTTTTCATTTGCCATCTCATGGA-----  
---AAACCCTTTTCGCTCCGCTTAGCCTTATCCCCCTCT---AGGGGTATTTTAGTGATAGGT  
TCTATAGGAACTGGACGATCCTATTTGGTCAAATACCTAGCGACAAACTCCTATGTTCT  
TTCATTACGGTATTTCTGAACAAGTTCCTGGATAAT-----CTTA  
GTGAG---ATTGATGCTAGTGAGGATATTGATGCTAGTGAGGATATTGATGCTAGTGAGGA  
TATTGATGCT-----AGTGACGATATCGATCGTGACCTTCATACGGA  
GCTG---GAATTGCTA-----ACTATGGATATGATGTGCGAA-----AAAGATCGAT  
TTTATATCACCTTCAATTCGAATTAGCAAAGCAATGTCTCCTTGATAATATGGATTCC  
AAACATTCATGATCTGGATGTGAATGAGTCAAATTACTTCTCCCTCGGTCTATTAGTGAA  
CCATCTCTCCAGG-----GATTGTGAAAGGTGTTCC---ACTAGAAATATTCTTGTTATTGC  
TTCGACTCATATTTCCCAAAAAGTGGATCCCGCTCTAATAGCTCCGAATAAATTAATAAC  
GTGCATTAAGATACGAAGGCTTCTTATTCCACAACAACGAAAGCACTTTTTACCCCTTT  
CATATACTAGGGGATTTGCTTGGAAAAGAAAATGTTCCATACT-----AATGGATTCGGG  
TCCATAACCATGGGTTCCAATGCACGAGATCTTGTAGCACTTACCAATGAGGCCCTGTC

GATTAGTATTACACAGAAGAAATCAATTATAGACACTAATACAATTAGATCCGCTTTTCA  
TAGACAAACTTGGGATTTGCGA-----TCCCAGGTAAGATCGGTTTCAGGATCATGGGAT  
CCTTTTCTATCAGATCGGAAGGGCTGTAGCACAAAATGTACTTCTAAGTAATTGCCCCAT  
AGATCCTATATCTATCTATATTAAGAAGAAA-----TCATGTAACGAAGGGGATTCTATTT  
GTACAAATGGTACTTTCGAACTTGGAAGTAGCATGAAGAAATTAACGATACTTCTTTATC  
TTTTGAGTTGTTCCGCCGGATCGGTCGCTCAAGATCTTTGGTCTCTACCC-----GGACCC  
GATGAAAGA---AATGGGATCACTTCTTATGGACTCGTTGAGAATGATTCT---GATCTAGT  
TCATGGCCTATTACAAGTAGAAGGCGCTCTGGTGGGA-----TCCTCGCGGACAGAAAAA  
GATTGCAGTCAGTTTGATAATGAT-----CGAGTGACATTGCTTCTTCGGCCCGAACCAAG  
GAAT---CCCTTAGATATGATGCAAAACGGATCTTGTCTATCCTTGATCAGAGATTTCTCT  
ATGAAAAAAC-----GAATCGGAGTTTGAAGAA---GGGGAAGGG-----GCTCTCGACCC  
GCAACAG-----ATAGAGGAGGAT-----TTATTTAATCAC-----ATAGTTTGGGCTC  
CT-----AGAATATGGCACCCCT-----TGGGGCATTCTATTTGATTGTATCGAAAGGCCAA  
TGAATTGGGATTTCCC---TATTGGTCCAGGTCATTTCCGGGGCAAG-----CGGATCCTTT  
ATGATGAAGAGGATGAGCTTCAAGAGAATGATTCCGAGTTCTTGCAGAGTGGAACCAT  
GCAGTACCAGACACGAGATAGATCTTCCAAAGAACAAGGCTTTTTTCGAATAAGCCAA  
TTCATTTGGGACCCTGCAGATCCACTCTTTGTCCTATTCAA---GATCAGTCCTCTGTCT  
CTGTGTTTTACATCGAGAATTATTTGCAGATGAAGAGATGTCAAAGGGGCTTCTTACT  
TCCCAAACAGATCCTCCTACATCTATATATAAACGCTGGTTTATC-----AAGAAGACGCA  
AGAAAAGCACTTTGAATTGTTGATTAATCGCCAGAGATGGTTTAGA-----ACCACTAG  
TTCATTATCT-----AATGGATCTTCCGTTCTAAT-----ACTCTATCCGAGAGTTATCAGTAT  
TTATCAAATCTATTCCTATCTAAC---GGAACCTATTGGATCAAATGACAAAGACATTATT  
GAGAAAAAGATGGCTTTTCCCGGATGAAATGAAAATTGGATTC-----ATGGAACAGGAG  
AAAGATTTCCCATTCCTTATGCCTAGATCGCGG---ATAAATGGAAATTTTATTGATAAGAC  
CTTTTCAATTATAGCCAATATCTTATTACGAATAATTCCGACAACCTTCAGGAGAAAAAGA  
GGCATTTACCTATTACAGAGATGGT-----ATGTCGGCTCAATCCGAAGGAAATTATGCGG  
AAGCTTTACAGAATTATTATGAAGCTATGCGACTAGAAATTGATCCCTATGATCGAAGTT  
ATATACTCTATAACATAGGACTTATCCACACAAGTAACGGAGAACATACGAAAGCTCTG  
GAATATTATTTCCGAGCGCTAGAACGAAATCCGTTCTTACCACAAGCTTTTAATAATATG  
GCTGTGATCTGTCATTAC---CGGGGAGAACAGCCATTCGACAGGGAGATTCTGAAATT  
GCGGAGGCTTGGTTGATCAAGCCGCTGAGTATTGGAACAAGCTATAGCGCTTACTC  
CTGGTAATTATATTGAAGCGCATAATTGGTTGAAGATCACTAGGCGTTTCGAA-----ATG  
AGTTGTCGATCAGAACATATATGGATACAACCTATAACGGGATCGCGAAAAACAAGTAA  
TTTATGCTGGGCCATTATCCTTTTTTTTAGGTTTCATTAGGATTCTTATTGGTTGGAACCTCC  
AGTTATCTTGGGAGAACTTGATATCTTTATTTCCGTCTCAGCAAATCCTTTTTTTTTCCA  
CAAGGGATTGTGATGTCTTTCTATGGGATCGCGGGTCTCTTTATTAGCTCCTATTTGTGG  
TGCACAATTCGTGGAATGTAGGGGGTGGTTATGATCGATTGATAGAAAAGAAGGAAT  
GGTGTGTCTTTTTCGTTGGGGATTCCCTGGAAAAAATCGTCGCATCTTCTACGATTCC  
TTATAAAGGATATTCAGTCCGTCAGAATAGAAGTTAAAGAGGGTATTTATGCTCGCCGT  
GTCCTTTATATGGATATCAGAGGCCAGGGGGCCATTCCCTTGACTCGTACTGATGAGAAT  
---GTTACTCCACGGGAAATCGAACAAAAAGCTGCTGAATTGGCCTATTTCTTGCGTGTA  
CCAATTGAAGTATTT

>Liriodendron

ATGGAAAAATGGTGGTTCAATTCGATGTTGTCTCTAAGTAAATCAATGGACAGTCTTGG

CCCTATTGGAATAACCAGTGGAAGTGAAGACCCATTATAAATGATACGGATAAAAACA  
TTCAT--TGCAGTAATGTTGATCATTTTTTAGGTGTCAGGGACATTTGGAGTTTCATCTCT  
GATGAACTTTTTTAGTTAGGGATAGTAATGGTAACAGTTATTCCGTATATTTTGATATTG  
AAAATCATATTTTTGAGATTGACAATGAT-----AGTTCTTTTCTGAGTGAAGTGAAGTT  
CTTTTTCT-----AGTTATCTGAATAATGGGTGCAAGAGTGACAATCGCTACTATGA  
TTGTGACATGTATGATACTAAATATAGTTGGAATAATCACATTAATAGTTGCATTGATAGT  
TATCTTCGTTCTGAAATCAGT-----ATTGATAGTTACATTTCAAGTGGTAGCGACAATTGC  
AGTGACAGTTACATTTATAGTTATATTTGTAGTGATAGTGGGAGTTCTATAAGAACTGAC  
GGTAATGGCAGT-----GATATAAGAGGAAGATCG--GATTTTCGATATAAATCAAAAATACA  
GACATTTATGGGTTCAATGCGAAAATTGTTATGGATTAAATTATAAGAAATTTTTTAAGT  
CAAAAATGAATATTTGTGAACAATGTGGATATCATTTGAAAATGAGTAGTTCAGATAGA  
ATCGAACTTTCGATTGATCCGGGCACTTGGGATCCTATGGATGAAGACATGGTCTCTAT  
CGACCCCATTAATTTCACTCGGAAGAGGAGCCTTATAGAGATCGTATCGATTTCGTATC  
AAAGAAAGACAGGTTTAACTGAGGCTGTTCAAACAGGCATAGGTCAACTAAATGGTAT  
TCCCATAGCAATTGGGGTTATGGATTTTGAGTTCATGGGAGGTAGTATGGGATCCGTAGT  
AGGCGAGAAAATCACCCGTTTGATCGAGTATGCTACTAATAGATCTTTACCTGTTATTAT  
GGTGTGTGCTTCTGGAGGAGCACGCATGCAAGAAGGAAGTTTGAGCTTGATGCAAAT  
GGCTAAAATATCTTCGCTTTATATGATTATCAATCAAATAAAAAGTTATTCTATGTATCA  
ATCCTTACATCTCCTACAACCTGGTGGAGTGACAGCCAGTTTTGGTATGTTGGGAGATAT  
CATTATTGCTGAACCCAATGCCTACATTGCATTTGCGGGTAAAAGAGTAATTGAACAAA  
CATTGAATAAGACAGTACCCGACGGTTCACAAGCGGCTGAGTATTCATTCCATAAGGGC  
TTATTTGATCCAATCGTACCACGTAATCTTTTAAAAGGTGTTCTGAGTGAGTTATTTAG  
CTACACGGTTTCTTTCCCTTGACTCAAAAT-----ATGGTAACCATTCGAGCCGACGAAA  
TTAGTAATATTATCCGTGAACGTATTGAACAATATAATAGAGAAGTCACGATTGTGAATA  
CCGGCACTGTACTTCAAGTAGGCGATGGTATTGCTCGTATTCATGGTCTTGATGAAGTAA  
TGGCAGGGGAATTAGTAGAATTTGAAGAGGGTACAATAGGCATTGCTCTGAATTTGGA  
ATCAAACAATGTTGGCGTTGTATTAATGGGTGACGGTTTGCTGATACAAGAGGGAAGTT  
CTGTAAAAGCAACAGGAAGAATTGCTCAGATACCAGTGAGTGAGGCTTATTTGGGTCG  
TGTTATAAATGCTCTGGCTAAACCTATTGATGGGAGAGGCGAAATTTAGCTTCTGAAT  
CTCGGTTAATTGAATCTCCCGCTCCAGGTATTATTTCTAGACGTTCCGTATATGAGCCTC  
TTCAAACGGGGCTTATTGCTATTGATTCGATGATCCCTATAGGGCGCGGTCAGCGAGAA  
TTAATTATTGGGACAGACAGACCGGAAAACAGCAGTAGCCACAGATACTATTCTCA  
ATCAAAAAGGCCAAAATGTAATATGTGTTTATGTAGCTATTGGGCAAAAAGCATCTTCC  
GTGGCCAGGTAGTGACTACTTTCCAGGAACAGGGGGCGATGGAATACACTATTGTGG  
TAGCCGAAACGGCGGATTCACCTGCTACATTACAATACCTCGCTCCTTATACAGGAGCG  
GCTCTAGCTGAATATTTATGTACCGTGAACGACATACTTCAATAATTTATGATGATCCCT  
CCAAACAAGCACAGCTTATCGCAAATGTCTCTTCTATTAAGAAGACCACCCGGTCG  
TGAAGCTTATCCAGGAGATGTTTTTTATTTGCATTCACGCCTTTTGGAAGAGCTGCTA  
AATCAAGTTCTCGTTTAGGTGAAGGAAGTATGACTGCTTTACCAATAGTTGAGACTCAA  
TCTGGGGACGTTTCGGCTTATATTCTACTAATGTGATTTCCATTACAGATGGACAAATA  
TTCTTATCTGCCGATCTATTCATGCTGGAATCCGTCTGCTATTAATGTGGGTATTTCCG  
TCTCCAGAGTAGGATCTGCCGCTCAAATTAAGCCATGAAACAAGTAGCTGGCAAATC  
AAAATTGGAAGTGGCTCAATTCGCGGAGTTAGAAGCCTTTGCCCAATTTGCTTCTGACC  
TCGATAAAGCCACTCAGAATCAATTGGCAAGAGGTCAACGATTACGCGAGTTGCTCAA



ACAATCCCAATCAACTCCTCTCACGGTGGAAGACCAGATAGTTACTATTTATAACCGGAG  
CGAATGGGTATCTTGATCCGTTAGAAATTGGGCAGGTAAGAAATTTCTCGTTCAGTTA  
CGTACCTACTTAAAAACAAATAAACCTCAGTTACAAGAAATCATACTTTCTACCAAGAC  
ATTCACCGAGCAAGCAGAAGCCCTTTTGAAGGAAGCTATTCCGGAACAGATAGAACTG  
TTTCTACTTCAGGAACAAACAATGAGAATCAATCCTACTACTTCTAGTCCTGGGGTTTC  
CACACTTGAAGAAAAAACCTGGGGCGTATTGTTCAAATCATTGGTCCGGTACTGGAT  
GTAGCTTTTCCCCGGGCAAGATGCCTAATATTTACAACGCTTTGGTAGTTAAGGGTCG  
AGATACTGTCGGTCAGCAAATTAATGTGACTTGTGAGGTACAGCAATTATTAGGAAATA  
ATCGAGTTAGAGCTGTAGCTATGAGTGCTACAGATGGTCTGATGAGAGGAATGGAAGT  
GATTGACACGGGAGCTCCTCTAAGTGTTCAGTCGGTGGAGCTACTCTCGGACGAATT  
TTCAACGTTCTTGAGAGCCTGTTGATAATTTAGGGCCTGTAGATACTCGCACAACATC  
TCCTATTCATAGATCTGCGCCTGCTTTTATCCAGTTAGATACCAAATTATCAATCTTTGAA  
ACAGGGATTAAGTGGTGGATCTTTTAGCTCCTTATCGCCGTGGAGGAAAAATCGGACT  
ATTCGGGGGAGCTGGAGTGGGTAAAACAGTACTCATCATGGAATTGATCAACAACATT  
GCCAAAGCTCATGGAGGTGTATCTGTATTTGGCGGAGTAGGGCGAACGTACTIONTGAAG  
GAAATGATCTTTACATGGAAATGAAAGAATCTGGAGTGATTAATGAACAAAATATTGCA  
GAATCCAAAGTAGCTCTAGTCTATGGTCAGATGAATGAACCGCCGGGAGCTCGTATGA  
GAGTTGGTTTGACTGCCCTAACTATGGCGGAATATTTCCGGGATGTTAATGAACAAGAC  
GTACTTCTATTTATAGACAATATCTTCCGTTTCGTCCAAGCAGGATCAGAAGTATCCGCC  
TTATTAGGTAGAATGCCTTCTGCTGTGGGTATCAACCTACCCTTAGTACAGAAATGGGT  
TCTTTGCAAGAAAGAATTACTTCTACCAAAGAGGGATCTATAACTTCCATTCAAGCAGT  
TTATGTACCTGCGGACGATTTGACCGACCCCGCTCCTGCTACGACATTTGCACATTTAG  
ATGCTACTACCGTACTCTCAAGAGGATTAGCTGCTAAAGGTATCTATCCAGCAGTAGAT  
CCTTTAGATTCAACGTCCACTATGCTCCAACCTAGGATCGTTGGCGAGGAACATTATGA  
AACTGCACAAAGAGTTAAGCAAACCTTCAACAACGTTACAAAGAACTTCAGGATATTATA  
GCTATCCTTGGGTTGGACGAATTATCTGAAGAGGATCGTTTAAACCGTAGCAAGAGCAC  
GAAAAATTGAGCGTTTCTTATCACAAACCCTTCTTCGTAGCAGAAGTATTTACTGGTTCT  
CCAGGAAAATATGTTGGTCTCGCAGAAACCATTAGGGGGTTTCAACTGATCCTTTCCGG  
AGAATTAGATGGTCTTCCCGAGCAGGCCTTTTATTTGGTAGGTAACATCGATGAAGCTA  
CCGCGAAGGCTATGAACTTAGAAGTGGAGAGCAAATTGAAGAAAATGACTTTAAATCT  
TTGTGTACTGACCCCTAATCGAATTATTTGGGATTCAGAAGTGAAGAAATATTTTATC  
TACTAATAGTGGCCAAATTGGCGTATTACCAAATCACGCCCTATTGCCACAGCCGTAG  
ATATAGGTATTTGAGAGTACGCCTCAACGACCAATGGTTAACGATGGCTCTGATGGGT  
GGTTTCGCTAGAATAGGTAATAATGAGATCACCATTTTAGTAAATGATGCGGAGAAGGG  
TAGTGACATTGATCCACAAGAAGCTCAGCGAACTCTTGAATAGCTGAAGCTAACTTG  
AGTAGAGCTGAAGGCAAGAGACAAGCAATTGAGGCGAATCTAGCTCTCAGACGAGCT  
AGGACACGAGTAGAGGCTATCAATGTTATTTGATGAAAATGTAACCGATTCTTTTCGT  
TTCTTGGGTTACTGGCCATCCGCCGGGAGTTTCGGGTTTAAATACCGATATTTTAGCAAC  
AAATCTAATAAATCTAAGTGTAGTACTTGGTGTATTGATCTTTTTTTGGAAAGGGAGTGTT  
AAGTGATTTATTAGATAATCGAAAACAGAGGATCCTGAGTACTATTTCGAAATTCAGAAG  
AACTACGTGAAGGAGCTATTGAGCAGCTCGAAAAAGCCCGGGCTCGCTTACGGAAAG  
TGAAATGGAAGCGGATGAGTTTCGAGTGAATGGATACTCTGAGATAGAACGAGAAA  
AACAGAATTTGATTAATGCCACTTATGAGAATTTGGAACGATTAGAAAATTACAAAAT  
GAAACCATTCATTTTGAAGAACAAAGAGCAATTAATCAGGTCCGACAGCGAGTTTTCC

AACAAGCCTTACAGGGAGCTCTAGGAACTCTGAATAGTTGTTTCGAACAGCGAGTTACA  
TTTACGCACCATCAGTGCTAATATTGGCGTGCTCGGGGCCATGAAAGAAATAACTGATA  
TGAATCCACTGATTTCTGCCGCTTCCGTTATTGCTGCTGGATTGGCCGTAGGGCTTGCTT  
CTATTGGACCTGGAGTTGGTCAAGGTACTGCTGCGGGCCAAGCCGTAGAAGGTATCGC  
GAGACAACCAGAAGCAGAGGGTAAAATACGAGGTACTTTATTGCTTAGTCTGGCTTTTA  
TGGAAGCTTTAACAATTTACGGACTGGTCGTGGCATTAGCGCTTTTATTTGCGAATCCTT  
TTGTTATGAATGTTCTACCATGTTCCATCAACACACTAAAGGGGTTATACGATATATCCG  
GTGTGGAAGTAGGCCAACATTTCTATTGGCAAATAGGGGGTTTCCAAGTCCATGCCCA  
AGTACTTATCACTTCTTGGGTCGTAATTGCTATCTTATTAGGTTTCAGCCACTATAGCTGTT  
CGAATCCACAAACCATTCCAACCGACGGTCAGAATTTCTTCGAATATGTCCTTGAATT  
CATTCGAGACTTGAGCAAAACCCAGATTGGAGAAGAATATGGCCCTTGGGTTCCCTTTA  
TTGGA ACTATGTTCCATTTATTTTGTCTAACTGGTCAGGTGCTCTTTTACCTCGGA  
AAATCATA CAGTTACCTCATGGGGAGTTAGCTGCACCGACGAATGATATAAATACTACT  
GTTGCTTTAGCTTTACCCACGTC AATGGCATATTTCTATGCGGGTTTTACCAAAAAGGA  
TTGAGTTATTTCCGGTAAATACATTCAACCAACCCCAATACTTTTACCAATTAACATCCTA  
GAAGATTTTACAAAACCTTTATCACTTAGTTTTTCGACTTTTTCGGGAATATATTGGCTGAT  
GAATTAGTAGTTGTTGTTCTTGTCTTTAGTACCTTCAGTAGTCCCTATACCTGTCATGT  
TCTTGGATTATTCACAAGCGGGATTCAAGCTCTATTTTTGCAACTTAGCCGCGGCTT  
ATATAGGTGAATCTATGGAGGGTCATCATATGATATTTGCGACTTTAGAACATATATTAAC  
TCACATCTCTTTTTCGATCATTCAATTGTCATTACGATTCATTTGGTGACTTTATTAGTC  
CATGAAATCGTAGGACTATGTGATCCGTCCGAAAAAGGCATGATAGCCGCTTTTTTCTG  
TATAACAGGATTATTAGTTACTCGTTGGATTATTTCGAGACATTTCCCGTTAAGTGATTTA  
TATGAATCATTAATGTTCCTTTCATGGAGTTTCTCCATTATTCATATGGTTCCTAAAATAG  
GAATCATAAAAATGATTTAAGCGCAATAACCGCGCCAAGCGCTATTTTTACCCAAGGCT  
TTGCCACTTCGGGTCTTTCAACTGAAATGCATCAATCCGCAATATTAGTGCCTGCTCTAC  
AATCCCAGTGGTTAATGATGCATGTAAGTATGATGTTATTGAGCTATGCAGCTCTTTTAT  
GTGGATCGTTATTATCAGTAGCTCTTTTAGTCAATTTCGAAAAACATAGGTATTG  
TTGGCAAAAGCAATGAGATCCACTACTTGAATGAAAAAAGAAATGTTTTACAAAACAC  
TTCTTTTCTTTCAATTTAGAAATTATCACAGGTATCAATTGACTCAGCGATTGGATTATTGG  
AGTTATCGTGTCATTAGTCTAGGGTTTACCTTTTTAACCATAGGTATTCTTTCGGGAGCA  
GTATGGGCTAATGAGGCATGGGGATCTTATTGGAATTGGGACCCCAAGGAACTTGGG  
CATTTACTTGGACCATATTTGCGATTTATTTACATACTAGAACAAATCGGAGTTTGCA  
AGGTGTGAACTCGGCAATTGTGGCTTCCATGGGATTTCTTATAATTTGGATATGCTATTT  
TGGGGTCAATCTATTAGGAATAGGACTACATAGTTATGGTTCATTACATTAACAGTGCC  
AAAAAA--GCATTGACTCCCCTCCCATATCTTGCATCTATAGTCTTTTTTGCCCTGGTGG  
ATCTCTATCTCATTTAATAAAAAGTCTGGAACCTTGGGTTACTAATTGGTGGAATACCAGG  
CAATCCGAAACTTTTTTGAATGATATTCAAGAGAAGAACGTTCTAGAAAGATTCATAGA  
ATTAGAACA ACTATTCTGTTGGACGAAATGATAAAGGAGTACCCGGGGACACAGATA  
CAAAAGCTTCGTATAGGAATCCACAAAGAAACAATACAATTGGTCAAAATGCACAATG  
AAGATCATATCCATATCATTTTGCATTTCTCGACAAATATAATCTGTTTTGCTATTCTAAG  
TGTTATTCTATTCTGGGTAATGAAGAACTTGTCATTCTTAATTCTTGGGTTTCAGGAATT  
CCTCTATAACTTAAGCGACACAATAAAAGCTTTTTCTATTCTTTTATTA ACTGATTTATGT  
ATCGGATTCCACTCGCCCCATGGTTGGGA ACTAATGATTGGTTCGGTCTACAAAGATTT  
TGGATTTGCTCATAACGATCAAATTATATCTGGTCTTGTTCCTACTTTTCCAGTCATTCTA

GATACAATTTTGAAATATTGGATCTTCCATTATTTAAATCGTGTATCTCCTTCACTTGTAG  
TGGTTTATCATTCAATGAATGAAATGCCATTGGTGTTCAAAAGTACCTTTTCGGAGT  
CCTGGAGAGGAAGATGCAATTTGGGTTGACGTATTCAACCGACTTTATCGAGAAAGATT  
ACTTTTTTTAGGCCAAGAGGTTGATAGCGAGATCTCGAATCAACTGTTGGTCTCATGG  
TATATCTCAGCATAGAGGATGATACCAGGGATCTTTATTTGTTTATAAACTCTCCCGGCG  
GCTGGGTAATACCAGGAATATCTATTTATGATACTATGCAATTTGTGCCACCAGATGTGC  
ATACAATATGCATGGGATTAGCCGCTTCAATGGGATCTTTCATCCTGGTTCGGAGGAGAA  
ATTACCAAACGTCTAGCATTCCCTCACGCTAGGGTTATGATCCACCAACCTGCTAGTTCT  
TTTTATGAGGCACCCACAGGAGAATTTATCCTGGAAGCGGAAGAATACTGAAACTCC  
GCGAAACCCTCACAAGGGTTTATGTACAAAGAACGGGCAATCCTTTATGGGTTGTATCC  
GAAGACATGGAAAGAGATGTTTTTATGTCAGCAGCAGAAGCCCAAGCTCATGGCATTG  
TTGATCTTGTAGCGGTCGAAATGAAAGAACAAAAATTGATTCATGAAGGTTTAATTACT  
GAATCACTTCCCAATGGTATGTTCCGGGTTTCGTTTAGATAATGAAGATCTGATTCTAGGT  
TATGTTTCGGGGAGGATCCGACGAAGTTTTATACGGATACTACCAGGAGATAGAGTAAA  
AATCGAAGTAAGTCGTTATGATTCAACCAGGGGACGTATAATTTATAGACTTCGCAACA  
AAGATTCGAACGATATGGAGGAATTACAAGGATATTTAGAAATAGATAGATCTAGGCAA  
CAACTTTCCTATATCCGCTTCTATTTTCAGGAGTATATCTACGCACTTGCCCATGATCATG  
GTTTATTAGGTTATGACAAT---TCCAGTTCACTAATTGTGAAACGTTTAATTACTCGAATG  
CATCAACAGAATCATTGATTATTTTCGGTTAATGATTCCAACGAAAATGGATTCGTTGGG  
AAGAGTTTTTATTCTCAAATGGTATCAGAGGGTTTTGCAGTCATTATGGAAATTCCATTC  
TCGCTGCGATTAGTATCTTCCCTAATAGCAAATCTCAT---TTACGATCTATTCAATCAATA  
TTCCCTTTTTTCGAGGACAAATTATCACATTTAAATCATGTGTCAGATATACTAATACCTC  
ATCCCATCCATCTGGAAATCTTGGTTCAAACCCTTCACTGCTGGATACAAGATGCCCCC  
TCTTTGCATTTATTGCGATTCTTTCTCCACGAGTATCGTAATTCGAATAGTCTCATTACTA  
AATCCATTTCTCTTTTTTCAAACAAAGATTCTTCTTGTTCCTATATAATTCTCATGTATAT  
GAATGTGAATCCGTATTAGTGTCTCCGTAACAATCTTCTCATTTACGATCAACATCC  
TCTGGAACTTTTCTTGAGCGAACACATTTCTATGGAAAAATAGAACAT--GTAGTAGTGC  
TTCGTAATCAGAAG---CTATGGTTGTTCAAGGACCCTTTCATGCATTATGTCAGATATCA  
AGGAAAATACATTCTAGCTTCAAAGGGGACTCATCTTCTGATGAAGAAATGGAAATCT  
CACCTTGTCAATTTTTGGCAATGTCATTTTACTTGTGGTCTCGACCGGACAGGATCCAT  
ATAAACCAATTATACAATCATTCTTCTATTTTTCTGGGCTATCTTTCAAGTGTACGACTAA  
ACACTTCGGCGGTAAGGATTCAAATGCTAGAGAATTCATTTCTAATAGATACTTCTATT---  
---AATAAATTCGAGACCCTAGTCCCAATTATTTCTCTGATTGGATCAGTGGCTAAAGCGA  
AATTTTGTAAACGTATCAGGGCATCCATTAGTAAGTCGGTCCGGGCCGATTTCGTGAGAT  
TCTGATATTATAAATCGATTTGGGCGGATATACAGAAATCTTTCTCATTATCACAGTGGAT  
CCTCAAAAAACAGACTTTGTATCGAATAAAGTATATACTTCGACTTTCGTGTGCTAGA  
ACTTTGGCTCGTAAACATAAAAGTACGGTACGCGCTTTTTTGAACGATTAGGTTCCGA  
ATTCTTGGAGGAATTCCTTACAGAGGAAGAACAAGTTCTTTCTTTGATTTTCCAAGAC  
GGATTTGGTATTTGGATATTATCCGTATCAATGACCTGGCCAATCATTCAATGATAATTGA  
TACGACA---GAAGTACAA---GCTATCAATTCTTTTTCCAGATCGGAA---TCCTTAAAAGA  
GGTCTATGGCCTCGTATGGTTGCTTGTCCCTATTTTTACTCCTGTATTGGGAATCACAATA  
GGTGTACTCGTGATTGTGTGGTTAGAAAGAGAAATATCCGCAGGGATACAACAACGTAT  
TGGGCCCGAATATGCCGGTCCCTTGGGAATCTTCAAGCTCTAGCAGATGGGACCAA  
CTACTTTTTCAAAGAGGATCTTCTACCATCTAGAGGAGATATTCGTTTATTCAAGTATCGGA

CCATCTATAGCGGTCATATCAATTCTACTAAGTTATTCAGTAATTCCTTTTGGCTATCGTC  
TTGTTCTAGCCGATCTCAGTATCGGTGTTTTTTTTATGGATCGCTATTTCCAGTATTGCTCC  
TATTGGACTTCTTATGTCAGGATATGGATCGAATAATAAATATTCCTTTTCCAGGTGGTCTA  
CGAGCTGCTGCTCAATCTATTAGTTATGAAATACCATTAACCTCCATGTGTGTTATCAATAT  
CTCTACTATCTAACAGTTCAAGTACAGTTGATATAGTTGAGGCACAGTCAAATATGGG  
TTTGGGGGATGGAATCTGTGGCGTCAACCTATAGGGTTTATAGTTTTTCTAATTTCTTCC  
CTAGCGGAATGTGAGAGATTACCCTTTGATTTACCAGAAGCAGAGGAGGAATTAGTAG  
CAGGTTATCAAACCGAATATTCAGGTATCAAATCTGGTTTATTTTACGTTGCTTCTTACCT  
AAATCTACTAGTTTTCTTCATTATTTGTAACAGTTCTTTACTTGGGCGGATGGAATCTTTCT  
ATTCCGTACATATTCATTCCTGAACCTTTTCGGAATAAATAAACAGGTGGAGTCTTTGG  
AACGACAATTGGTATCTTTATTACATTAGCTAAAGCTTATTTGTTTCTGTTCCATTCTATC  
ACAACAAGATGGACTTTACCTAGGATGAGAATGGACCAACTATTAATCTTGGATGGA  
AATTTCTTTTACCTATTTCTCTAGGTAATCTATTATTGACAACCTTCTTCCCAACTCCTTTC  
ACTGATGATCTGGCATGTACAGAATGAAAACCTTCACTCTCGATTCTACGAGAATTTTTAT  
GAAAGCGTTTCATTTGCTTCTCTTCCATGGAAGTTTCATTTTCCAGAATGTATCCTAAT  
TTTTGGCCTAATTTCTTCTGATGATCGATTCAACCTCTGATCAAAAAGATATACCTTG  
GTTATATTTTCACTCTTCAACAAGTTTAGTAATGAGCATAACGGCCCTATTGTTCCGATG  
GAGAGAAGAACCTATGATTAGCTTTTCGGGAAATTTCCAAACGAACAATTTCAACGAA  
ATCTTTCAATTTCTTATTTTACTATGTTCAACTCTATGTATTCTCTATCCGTAGAGTACAT  
TGAATGTACAGAAATGGCTATAACAGAGTTTCTGTTATTTCGTATTAACAGCTACTCTAGG  
AGGAATGTTTTTATGTGGTGCTAACGATTCAATAACTATCTTTGTAGCTCCAGAATGTTT  
CAGTTTATGCTCCTACCTATTATCTGGATATACCAAGAGAGATGTACGGTCTAATGAGGC  
TACTACGAAATATTTACTCATGGGTGGGGCAAGCTCTTCTATTCTGGTTCATGGTTTCTC  
TTGGCTATATGGTTCATCCGGGGGAGAGATCGAGCTTCAAGAAATAGTGAATGGTCTTA  
TCAAGACACAAATGTATAACTCCCCAGGAATTTCAATTGCGCTTATATTCATCACTGTAG  
GAATTTGGGTTCAAGCTTTCCCCAGCCCCTTCTCATCAATGGACTCCTGACGTATACGAA  
GGATCTCCCACTCCAGTCGTTGCTTTTTCTTCTGTTACTTTCGAAAGTAGCTGCTTCAGC  
TTCAGCCACTCGAATTTTCGATATTCCTTTTTTATTTCTCATCAAACGAATGGCATCTTCTT  
CTGGAAATCCTAGCTATTCTTAGCATGATATTGGGGAATCTCATTGCTATTACTCAAACA  
AGCATGAAACGTATGCTTGCATATTCGTCCATAGGTCAAATCGGATATGTAATTATTGGA  
ATAATTGTTGGAGACTCAAATGATGGATATGCAAGCATGATAACTTATATGCTGTTCTATA  
TCTCCATGAATCTAGGAACTTTTGCTCGCATTGTCTCATTGTTGTTCTACGTACCGGAACTG  
ATAACATTCGAGATTATGCAGGATTATACACGAAAGATCCTTTTTTTGGCTCTCTCTCAG  
CCCTATGTCTCTTATCCCTAGGAGGTCTTCCCTCCACTAGCAGGTTTTTTTCGGAAAACCTCC  
ATCTATTCTGGTGTGGATGGCAGGCAGGCCTATATTTCTTGGTTTTCAATAGGACTCCTTA  
CGAGCGTTGTTTCTATCTACTATTATCTAAAAATAATCAAGTTATTAATGACTGGACGAA  
ACCAAGAAATAACCCCTCACGTGCGAAATTATAGAAGATCTCCTTTAAGATCAAACAAT  
TCCATCGAATTGAGTATGATTGTATGTGTGATAGCATCTACTATAACCAGGAATATCAATGA  
ACCAATTATTGCAATTGCTCAGGATACCCTCTTTATGTTTCTGCTTCACGAATATGATAT  
CTTCTGGGCATTTCTAATAATATCAAGTGTTATTCCATTTTTGGCATTCTAATTTCCGGA  
GTTTTAGCCCCGATTAGTGAAGGACCAGAGAAGCTCTCTAGTTATGAATCGGGTATAGA  
ACCCATGGGGGATGCTTGGTTACAATTCCGAATCCGTTATTATATGTTTGCTCTAGTTTTT  
GTTGTTTTTGGATGTTGAAACGGTCTTTCTTTATCCATGGGCAATGAGTTTCGATGTATTG  
GGTGTATCTGTATTTATAGAAGCTTTAATTTTCGTGCTTATCCCAATTGTTGGTTCAGTTT

ATGCATGGCGAAAAGGAGCATTGGAATGGTCTACGAGTTATTTTCCTTGGTTAAACAATA  
ATTGTGGTTTTGCCGATATTTGCGGGTTCGTCAATTTTCTTTTTCCCTCATAGAGGAAAT  
AAGGTGGTTCGGTGGTATACTATTTGTATCTGCTTATTAGAACTCCTTCTAACGACCTAT  
GCATTCTGTTATCATTTCGAATTGGACGATCCATTAATTCAATTGGAGGAGGATTATAAA  
TGGATAAATATTTTGATTTTCACTGGAGACTGGGAATCGATGGACTTTCATAGGACCC  
ATTTTACTGACGGGATTCATCACTACTTTAGCTACTTTAGCGGCTCGGCCAGTTACTCGG  
GATTCGCGATTGTTCCATTTCCCTAATGTTAGCAATGTACAGTGGTCAAATAGGATCATT  
TCTTCTCGAGACCTTTTACTTTTTTTCATCATGTGGGAGTTAGAATTAATTCCTGTTTACT  
TACTTCTATCCATGTGGGGGGTAAGAAACGTCTGTACTCAGCTACAAAGTTTATTTTGT  
ACACTGCGGGGGTTCATCTTTCTCTTAATGGGAGTTCCAGGTATGGGTTTATATGGTT  
CCAATGAACCAATATTAATTTTGAAACATCAGCTAATCAATCGTATCCCCTGGCATTGG  
AAATAATATTCTATTTTGGTTTCCTTATTGCTTATGCTGTCAAATCGCCGATTATACCCCTA  
CATAATGGTTACCAGATACCCATGGAGAAGCACATTACAGTACATGTATGCTTCTAGCT  
GGAATCTTATTAATAAATGGGAGCATATGGATTGGTTCCGATCAATATGGAATTATTACC  
CATGCCCATCTATATTTTCTCCCTGGTTGATGATAGTAGGAACGATTCAAATAATCTATG  
CAGCTTCAACTTCTTCCGGTCAAAGCAATTTAAAAAAGAGAATAGCCTATTCCTCCGTA  
TCTCATATGGGTTTCAACAATTATAGGAATTGGTTCCATAACCGATACGGGACTCAATGGA  
GCAATTTTACAAATAATCTCTCATGGATTATTGGTGCTGCACTTTTTTTCTTGGCAGGA  
ACGAGTTACGATAGAATACGTCTTGTATCTTGACGAAATGGGAGGAATAGCTATCCC  
AATGCCAAAAATTTACCATGTTCCAGTAGCTTCTCGATGGCTTCTCTTGCATTGCCAGG  
AATGAGTGGTTTTGTTGCAGAATCGGTAGTTTTTTGGGGAATAATTACCAGCCCGAAAT  
ATCTTTAATGCCAAAAATACTAATTACTTTTGTAAATGGCAATTGGAATGATATTAACTCC  
TATTTATTCATTATCTATGTCACGCCAGATGTTCTATGGATACAACTGTTTAAATGTTCCA  
AACTCTTATTTTTTGGATTCTGGACCACGAGAACTATTTGTTTCGATCTGTATCTTTCTAC  
CCGTAATAGGTATCGGTATTTATCCTGATTTCTGTTCTCTCGCTATCAGTTGACAAGGTAG  
AAGCTATTCTAGCTAATTACTTTTACAAAATGATGACCGAGCATGTACTTATTTTGAGTG  
CCTATTTATTTTCTATCGGTATTTATGGATTGATCACAAAGCCGAAACATGGTTAGAGCAC  
TTATGTGTCTTGAGCTTATACTGAATGCGGTTAATCTAAATCTCGTAACATTTTCTGATTT  
ATTTGATAGTCGCCAATTAAGGAGACATTTTCTCGATCTTTGTTATAGCTATTGCAGC  
CGCTGAAGCAGCTATTGGGCCAGCTATTGTTTCGTCGATCTATCGTAACAGAAAATCAA  
CTCGTATCAATCAATCGAATTTGTTGAATAAAATGGAACATACATATCAATATGCATGGA  
TCATACCTTTCGTTCCACTTCCAGTTACTATGTCAATAGGATTGGGACTTCTGCTTGTTTC  
CGACTGCAACAAAAAATCTTCGTCGATGTGGGCTTTTCCTAGTGTTTCATTGCTAAGT  
ATAGTTATGGTTTTTTTCGGCCGATCTGTCTATTCAGCAAATCAATGGCAGTTCTATCTATC  
AATATCTATGTTCTTGGACCATCAATAATGATTTTTCTTTAGAGTTCCGGCCACTTGATCG  
ACCCACTTACTTCTATATGTCAATACTAATCACTACTGTTGGAATCATGGTTCTTATTTA  
TAGTGACAATTATATGTCTCATGATCAAGGATATTTGAGATTTTTGCTTATATGAGTTTT  
TCCAATACTTCTATGTTGGGATTAGTTACTAGTTCCAATTTGATACAAATTCATATTTTTT  
GGGAACTGGTGGGAATGTGTTTCGATCTATTAATAGGTTTTTTGGTTCACACGACCAATT  
GCAGCCAATGCTTGTCAAAAGCGTTTGTAACTAATCGTGTAGGGGATTTTGGTTTATT  
ATTAGGAATCTTAGGTTTTTATTGGATAACAGGCAGTTTGGAAATTCGGGATTTGTTTCGA  
AATCTTCAATAACAATGGGGTAAATCTTTATTTGCTACTCTGTGTGCCTTCTATATTT  
GTCGGTGCAGTTGCTAAATCCGCGCAATTTCCCCTTCATGTATGGTTACCTGATGCCATG  
GAGGGGCCACTCTATTTCCGGCTTTATACATGCTGCTACTATGGTGGCAGCGGGAAT

TTTTCTTGTCGCTCGGCTTCTTCCCATTTTCACAGTCATACCTTACATAATGAATCTCATT  
TCTTTGCTAGGTATAATAACGGTACTATTAGGAGCTACTTTAGCTCTTGCTCAAAAAGAC  
ATTAAGAGAAGTTTAGCCTATTCTACAATGTCTCAATTGGGTTATACTATGTTAGCCCCA  
GGGATAGGTTCTTATCGAGCTGCTTTATTCCATTTAATCACTCATGCCTATTTCGAAAGCA  
TTATTGTTTTTAGGATCCGGATCGATTATTCAATCAATGGAACCCATTGTTGGATATTCTC  
CAGATAAAAGTCAGAACATGGTTCTTATGGGTGGTTTAAACCAAATATGTGCCAATTACA  
AAAACGACTTTTTTATTAGGTACTTTCTCTTTGTGGTATTCCACCTCTTGCTTGTTTTT  
GGTCCAAAGATGAAATCTTAATGATAGTTGGTTGTATTACCGATTTTCGCGATAATAG  
CTTGTTCCACAGCAGGATTAAGTGCATTTTATATGTTTCGGATGTATTTACTTACTTTTGA  
GGGGCATTACACATTCGGTTTCAAATTACAGTGGCACTAAAATAGCTCGTTCTGTT  
CAATATCTATATGGGGGAAAGAAGGACCGGAACCGGTTAAAAAA---AAATTACTTTTAT  
CAGTAATGAATAAGGTTTCCAATAAAGAC-----ACTTCCATGTATCCCTGTGAATCGGAC  
AATACCATGCTATTTCCCTACTTGTATTGGTACTATTTACTTTGTTTGTGGGTCCATAG  
GAATTCCTTTTCGATTTTGATATATTATCGAAATGGTTAACCCCATCAATAAACCTTTTACA  
TCAAATTCGAACTATTCTGTGGATTGGTATGAGTTTGTGACAAATGCAATTTATTCAGT  
CAGTATATCCTATTTTCGGAATATTCATAGCATCTCTTTTATATGGGTCTGTTTATTCATCTT  
TTCAGAATTTAGACTTAATTAATTCATTTGTTCTTTTCTTGGACCGAATAATAAATGTAAT  
ATACAATTGGTCATATAATCGTGGTTACATAGATGTTTTTTATGCAACATTCTTAACTAAG  
GGTATAAGAGGATTAGCCGAACTAACTAATTTTTTTGATAGACGAGTAATTGATGGAATT  
ACGAATGGTGTGGTATTGCAAGTTTCTTTGTAGGAGAAGGTATCAAAATAT---GTGGGG  
GGCGGACGAATCTCTTCTTATCTTTTCGTGTATTTATCTTATGTATCAACCTTTTTTATTAAT  
TACTATATGGATTTACCTGGACCAATACATGATATTCTTTTAGTATTTCTAGGGTCAGGT  
CTTATATTAGGAGGCCTAGGGGTGGTATTACTTACCAATCCAATTTATTCTGCCTTTTCAT  
TGGGATTGGTTCTTGTTTGTATATCCTTATTCCATATCCATCTAACTCCTATTTTGTAGCT  
GCTGCACAGCTCCTTATTTACGTGGGAGCCGTAATGTCTTAATCGTATTTGCTGTGATG  
TTCATGAATGGTTCAGAATATTCCAAAGATTTATATCTTTGGACAGTTGGAGATGGAGTT  
ACTTCACTGGTTTGTACAAGTATTCTTTTTTCTACTAATTACTACTATCTCAGATACGTCAT  
GGTACGGGATTATTTGGACTACAAGATCAAACCAGATTATAGAGCAGGACCTGACAAG  
TAACGTTCAACAAATTGGAATTCATTTATCAACAGATTTTATCTTCCATTTGAACTCATT  
TCTATAATTCTTTTAGTTGCCCTGATAGGTGCAATTTCTATGGCTCGTCAGATGACTGTAC  
CGGATATAAGAAAAGACTTCATGATAGTCAATATGGGTCCCTACCACCCATCAATGCAT  
GGTGTCTTTCGACTCATCGTTACTCTAGATGGTGAAGATGTTATTGACTGTGAACCCGTA  
TTGGGTTATTTACACAGAGGGATGGAAAAAATTGCGGAAAACCGAACAATTATACAGT  
ATCTACCTTACGTAACACGTTGGGATTATTTAGCTACTATGTTTACAGAGGCAATAACCG  
TAAATGCACCAGAACAATTGGGAAATATTCAAGTACCTAAAAGAGCCAGCTATATCAGA  
GTCATTATGCTGGAGTTGAGTCGTATAGCTTCTCATTTGTTATGGCTTGGTCCTTTTATGG  
CGGATATCGGTGCACAGACTCCTTTCTTCTATATTTTTCAGAGAGAGGGAATTGCTATATG  
ATCTATTTCGAAGCTGCCACAGGTATGCGAATGATGCATAATTATTTCCGTATCGGGGGAG  
TAGCTGCCGATCTACCTCATGGATGGATAGATAAATGTTTGGATTTCTGCGATTATTCTTT  
AACAGGAGTTGTTGAATATCAAAGCTTATTACGCGGAATCCCATTTTTTTTGGAACGAG  
TTGAAGGAGTGGGCATTATTGGTGGAGAGGAAGCAATAAATGGGGTTTATCAGGACC  
AATGCTACGAGCTTCCGGAATACAATGGGATCTTCGTAAAATTGATCATTATGAGTGTTA  
CGATGAATTCGATTGGGAAGTCCAATGGCAAAAAGAAGGAGACTCATTAGCTCGTTAT  
TTAGTACGAATCAGTGAAATGGCGGAATCCATAAAAATTATTCAACAGGTTCTGGAAGG

AATCCGGGGGGCCCTATGAGAATTTAGAAGTCCGTCGCTTTGATAAAGCAAGGGAT  
TCCGAATGGAATGATTTTGAATATCGATTCATTAGTAAAAAGCCTTCTCCCACCTTTGAA  
TTGTCCAAACAAGAACTTTATGTGAGAGTAGAAGCCCCAAAAGGAGAATTGGGAATTT  
TTCTGATAGGAGATAATAGTGTTTTTCCCTGGAGATGGAAAATTCGTCCACCCGGTTTC  
ATCAATTTGCAAATTCTCCCTCAGCTAGTTAAAAGAATGAAATTGGCTGATATCATGAC  
GATACTAGGTAGTATAGATATCATTATGGGAGAAGTTGATCGTATGTTCCCTATGATGAC  
CGGGTTCATGAATTATGGTCAACAAACAGTACGAGCTGCAAGGTACATTGGTCAAAGT  
TTCATGATTACCTTATCCCACGGAATCGTTTACCTGTAACCTATTCAATATCCTTATGAAA  
AATCGATCACATCAGAGCGTTTCCGCGGTCTGAATCCACTTTGAATTTGATAAATGCATT  
GCTTGTGAAGTATGTGTTTCGTGTATGCCCATAGATCTACCCGTTGTTGATTGGAGATTG  
GAAACAGATATTAGAAAGAAACGATTACTTAATTATAGTATTGATTTCCGGAATCTGTATA  
TTTTGTGGTAACTGCGTCGAGTATTGTCCAACAACTGTTTATCAATGACTGAAGAATA  
TGAACCTTCTACTTATGATCGTCACGAATTGAATTATAATCAAATTGCTTTGGGTCCGTT  
ACCAATGTCAGTAATTGGCGATTACACAATTCGAACAATTATGAATTCGAAAATAGCCA  
CGGATAACCCCTTGATTCAAGAACGATTACCAATTACATGCAGGGTTCGTTTATCTGCT  
TGGCTAGTCAAGCATGAGCTAGTTCATAGATCTTTGGGCTTCGATTACCAAGGAATAGA  
GACTTTACAAATAAAGCCCGAGGATTGGTACTCCATTGCTGTCATTTTATATGTATATGG  
TTACAATTATCTACGTTCCAGTGTGCCTATGATGTAGCGCCGGGCGGATTGTTAGCTAG  
TGTGTATCATCTTACGAAAATAGAGTATGGTGTGGATCAACCCGAAGAGGTATGCATAA  
AAGTATTTGCCCAAGAAGGAATCCTAGAATCCCGTCTGTTTTCTGGATTTGGAAAAGT  
GCCGATTTTCAAGAACGGGAATCTTATGATATGTTGGGAATTTCTTATGAGAATCATCCA  
CGCCTAAAACGTATCTTGATGCCTGAAAGTTGGATAGGCTGGCCCCCTACGTAAGGATTA  
TATTGCCCCCAATTTCTATGAAATACAAGATGCTTAT-----

-----ATGAATTCTATTGAGTTTCCGTTACTTGACCGAACAACCCAAAATTCAGTTA  
TTTCAACTACATCGAACGATCTTTCGAATTGGTCAAGACTCTCAAGTTTATGGCCGCTT  
CTCTATGGTACCAGTTGTTGCTTCATTGAATTTGCTTCATTAATAGGCTCGCGATTCGAC  
TTTGATCGTTATGGACTGGTACCAAGATCGAGCCCTAGGCAAGCAGACCTAATTTTAAAC  
AGCCGGCACAGTAACAATGAAAATGGCCCTTCTTTAGTGAGATTATATGAGCAAATGC  
CGGAACCAAAATATGTCATTGCTATGGGAGCTTGTACTATTACAGGAGGGATGTTTCAAGT  
ACCGATTTCTATAGTACCGTTCCGGGAGTGCATAAGCTAATTCCTGTGGATGTCTATTTG  
CCGGGTTGCCACCTAAACCAGAGGCAGTTATAGATGCTATAACGAACTTCGTAAGA  
AAGTATCTCGAGAAATCTCTGAAGATAGAATTGGGTCTCAACAGGAAAATCGATGTTTT  
ACTACCAATCACAAGTTTCATGTTGGACGCAGTACTCATACTGGAAATTACGATCAAGG  
ATTACTCTATCAATCCCCCTTACTTTCAGAGATATCTTCTGAAACATTTTTCAAATACAA  
AAGTTCAGTATCTTCCCACGAATTAGTGAATATGCAAAATAGAAATACCTTTTCTTGGGT  
AAAGGAACAGATGACTCGATTCATTTCCGTATCGATCATGATATATGTCATAACTCGGAC  
ATCTATTTCAAATGCATATCCCATTTTTGCGCAGCAGGGTTATGAAAATCCACGAGAAG  
CAACTGGGCGTATTGTATGCGCCAATTGCCATTTAGCTAATAAGCCCGTGGATATTGAGG  
TTCCACAAGCTGTGCTTCCCTGATACTGTATTTGAAGCAGTTGTTTCAATCCCTTATGATA  
TGCAACTGAAACAAGTTCTTGCTAATGGTAAAAAGGGGGCTTTGAATGTAGGGGCTGT  
TCTTATTTTACCCGAGGGATTTCGAATTAGCTCCCCCGATCGTATTTCTCCCGAGATGAA  
AGAAAAGATAGGCAATCTTTCTTTTTCAGAGTTATCGCCCCACTAAAAGAAATATTCTTG  
TGGTAGGTCCTGTTCCCTGGTCAGAAATATAGTGAATCGTCTTTCCCATTTCTTCCCGG

ACCCTGCTACTAAGAAAGACGTTCACTTCTTAAAATATCCCATATATGTAGGTGGGAAC  
AGGGGAAGAGGTCAGATTTATCCCGATGGGAACAAGAGTAACAATACAGTCTATAATG  
CTACAGCAGCAGGTATAGTAAACAGAATAGTACGTAAAGAAAAAGGGGGCTATGAAAT  
AACCATAGCTGATGCATCGGATGGACACCAAGTGGTTGATATTATACCTCCAGGACCAG  
AATTCTTGTTCAGAGGGTGAATCTATCAAGCTTGATCAACCATTAACGAGTAATCCC  
AATGTGGGTGGATTTGGTCAGGGAGATGCAGAAATAGTACTTCAAGATCCATTACGTGT  
CCAAGGTTTGTGTTCTTCTTGGCATCTGTTATTCTGGCACAAATCTTTTTGGTTCTAAA  
AAAGAAACAGTTTGAGAAGGTTCAATTGTCCGAAATGAATTCATGAGTAAAGTATATG  
ATTGGTTTCGAGGAGCGTCTCGAGATTCAGGCGATTGCAGATGATATAACTAGTAAATAT  
GTTCCCTCCTCATGTCAACATATTTTATTGTCTAGGAGGGATCACACTTACTTGTTTTTTAG  
TACAAGTAGCTACCGGTTTTGCTATGACTTTTTACTATCGTCCGACCGTTACAGAGGCTT  
TTGCCTCTGTTCAATACATAATGACTGAAGCCAACCTTTGGTTGGTTAATCCGATCAGTTC  
ATCGATGGTCAGCAAGTATGATGGTGCTAATGATGATCCTACACGTATTTTCGTGTGTATC  
TCACAGGTGGATTTAAAAAACCTCGCGAATTGACTTGGGTTACGGGTGTGATTTTGGCT  
GTATTGACTGCATCTTTTGGTGTAAGTGGTTATTCCTTACCTCGGGACCAAATTGGTTAT  
TGGGCAGTAAAAATCGTGACAGGTGTACCTGAAGCTATTCCTGTAATAGGATCGCCTTT  
GGTAGAGTTATTACGTGGAAGTGCTAGTGTCCGTCATCCACTTTGACTCGTTTTTATA  
GTTTACACACTTTTGTATTACCTCTTCTTACTGCCGTATTTATGTTAATGCACTTTCCAAT  
GATACGTAAGCAAGGTATTTCAAGGTCCTTTA-----ATAACAAAGAAACCTGACTTGAATG  
ATCCTGTATTAAGAGCTAAATTGGCTAAAGGGATGGGGCATAATTATTACGGGAGAACCC  
GCGTGGCCCAATGATCTTTTTATATATTTCTCCAGTAGTCATTCTAGGTACTATTGCATGTA  
ACGTAGGCCTAGCGGTTCTAGAACCGTCAATGATTGGTGAACCAAGCGGATCCATTTGC  
AACTCCTTTGGAAATATTACCCGAATGGTACTTCTTTCCCGTATTTCAAATTCCTCCGTAC  
AGTACCCAATAAGTTATTGGGTGTTCTTTTAAATGGTTTCAGTACCAACGGGATTATTAAC  
AGTACCCTTTTTGGAGAACGTTAATAAATTCCAAAATCCATTCGTCGTCCAGTAGCTA  
CAACAGTCTTTTTGATCGGTACTGTTATAGCTCTTTGGTTAGGTATTGGAGCAACATTAC  
CTATTGATAAATCTCTAACTTTAGGTCTTTTTATGATTGAAGTTTTTCTATTTGGAATCGT  
CTTAGGTCTAATTCCTATTACTTTGGCTGGATTATTCGTAAGTGCATATTTACAATACAGA  
CGCGGTGATCAGTTGGACCTTATGTCTACTATAACTAGTTATTTCCGTTTTCTACTGGCT  
GCTTCAACTATAACCCAGCTCTATTGATTGGTCTGAGCAAGATACGACTTATTATGGAT  
ATAGTAAGTCTCGCTTGGGCTGCTTTAATGGTAGTCTTTACATTTTCCCTTTCACTCGTA  
GTATGGGGAAGAAGTGGACTCATGATTATTCGTTCCGCGAACCAGAAGTAAAGATTG  
TGGTGGATAGGGATCCATAAAAACCTTCTTTGAGGAATGGGCCAGACCCGGCCATTT  
CTCAAGAACAATAGCTAAGGGCCCTGATACTACCACTTGGATCTGGAACCTACATGCTG  
ATGCTCACGATTTTCGATAGCCATAACAGTGATTTGGAGGAGATCTCTCGAAAAGTATTT  
AGTGCTCATTTCCGGTCAACTCTCCATCATCTTTCTTTGGTTGAGTGGCATGTACTTCCAT  
GGCGCCCGTTTTTCCAATTATGAAGCATGGCTAAGCGATCCTACTCACATTGGACCCAG  
CGCCAGGTGGTTTTGGCCAATAGTGGGTCAAGAAATATTGAATGGTGTGATGTGGGCGGG  
GGTTTTCCGAGGAATACAAATAACCTCTGGTTTTTTTTTCAGATTTGGCGAGCATCCGGAAT  
AACTAGTGAATTACAACCTCTATTGTACCGCAATTGGTGCATTGGTTTTTGCAGCGTTAAT  
GCTTTTTGCTGGTTGGTTCCATTATCACAAAGCTGCTCCAAAATTGGCTTGGTTCCAAG  
ATGTAGAATCTATGTTGAATCACCACTTAGCGGGGTTACTAGGACTTGGGTCTCTTTCTT  
GGGCGGGACACCAAGTACATGTATCTTTACCGATTAACCAATTTCTAGACGCTGGAGTG  
GATCCTAAAGAGATAACCACTTCTCATGAATTTATCTTGAATCGGGATCTTTTTGGCCCAA



CTTTATCCCAGTTTTGCCGAGGGAGCAACTCCATTTTTACCTTGAATTGGTCAAATA  
CGCGGAATTTCTTAGTTTTCGTGGAGGGTTAAATCCAGTAACAGGGGGTCTATGGCTGA  
CCGATATTGCACACCATCATTTAGCTATCGCAATTTCTTTCCCTGATAGCTGGTCACATGTA  
TAGGACCAACTGGGGCATTGGTCACGGTCTGAAAGATATTTTAGAGGCCATAAGGGT  
CCATTTACAGGCCAGGGTCATAAAGGCCTCTATGAGATCCTAACACGTCATGGCACGC  
TCAATTATCTCTAACCTAGCTATGTTAGGCTCTTCAACCATTGTTGTAGCTACCATATG  
TATTCATGCCCCCTATCCATACCTAGCTATTGACTATGGTACACAACCTTCGTTGTTCA  
CACATCACATGTGGATTGGTGGATTTCTCATAGTTGGTGCTGCTGCACATGCAGCCATTT  
TTATGGTAAGAGACTATGATCCAACACTCGATAACGATCTATTAGATCGTGTCTTA  
GGCACCGGGATGCAATCATATCACATCTCAACTGGGCATGTATATTTCTAGGCTTTACA  
GTTTTGGCTTGTATATTCATAATGATACCATGAGCGCTTTAGGGCGTCCCAAGATATGT  
TTTCAGATACCGCTATAACAATTACAACCCATCTTTGCTCAATGGGTACAAAACACCCATG  
CTTTAGCACCTGGTGCAACAGCTCCTGGTGCAACAACAAGCACCAGCTTGACTTGGGG  
GGGTAGTGATTTAGTAGCAGTAGGCGGCAAAGTCGCTTTGTTACCTATTCCATTAGGAA  
CCGCAGATTTTTTGGTACATCACATTCATGCATTTACGATCCATGTGACCGTATTGATACT  
ACTTAAAGGTGTTCTATTTGCTCGTAGCTCACGCTTGATACCTGATAAAGCAAATCTTG  
GTTTTCGTTTCCCTTGTGACGGACCTGGAAGAGGGAGGGACATGTCAAGTATCTGCCTG  
GGATCATGTCTTCTTAGGTCTATTCTGGATGTACAATGCAATTCGGTAGTAATATCCAT  
TTCAGTTGGAAAATGCAGTCAGATGTTTGGGGTAGTATAAGTGATCAAGGGGTGGTAA  
CTCATATCACGGGAGGAAACTTTGCACAGAGTTCCATTACTATTAATGGGTGGCTCCGG  
GATTTTTTATGGGCACAGGCATCTCAGGTAATTCAGTCTTATGGTTCTTCATTATCTGCAT  
ATGGCCTTTTTTCCCTGGGTGCTCATTTTGTCTGGGCTTTCAGTTTAATGTTTCTATTAG  
CGGCCGTGGTTATTGGCAAGAACTCATTGAATCCATCGTTTGGGCTCATAACAAATTA  
AAGTTGCTCCTGCTACTCAGCCAAGAGCCTTGAGCATTGTACAAGGACGTGCTGTAGG  
AGTAACCCATTACCTTCTGGGTGGAATTGCCACAACATGGGCATTCTTCTTAGCAAGAA  
TTATTGCAGTAGGAATGGCATTAAAGATTTCCAAGGTTTAGCCAAGGCTTAGCTCAGGAC  
CCCACTACTCGTCGTATTTGGTTTGGTATTGCTACCGCACATGATTTTCGAGAGTCATGAT  
GATATTACTGAGGAACGTCTTTATCAGAACATTTTTGCTTCTCACTTCGGGCAGTTAGC  
AATAATCTTCTGTGGACTTCCGGAAATCTGTTTCATGTAGCTTGGCAAGGAAATTTG  
AGTCATGGGTACAGGACCCTTTACATGTAAGACCTATTGCTCATGCAATTTGGGATCCT  
CATTTTGGTCAACCAGCTGTAGAAGCCTTTACTCGAGGAGGTGCTCTCGGCCAGTGA  
ATATCGCTTATTCCGGTGTATCAGTGGTGGTATAACAATCGGCTTACGCACTAATGAAG  
ATCTTTATACTGGAGCTCTTTTTCTATFATTTCTTTCTGCCATATCCTTAATTGCGGGTTG  
TTACACCTACAACCCAAATGGAAACCAAGCGTTTTCGTGGTTCAAAAATGCCGAATCTC  
GTCTCAATCATCATTTGTCAAGACTCTTTGGAGTAAGTTCGTTGGCTTGGACAGGACAT  
TTAGTTCATGTCGCTATCCCAGGATCAAGGGGGGAGTACGTCAGATGGAACAATTTCTT  
AGATGTATTACCGTATCCCAAGGGTTGGGCCACTTTTTACAGGTCAGTGGAAATCTTA  
TGCCCAAAACCCGATTCCAGTAGTCATTTATTTGGTACCTCCCAAGGAGCGGGAACCTG  
CCATTCTAACCCCTTCTCGGGGATTCCATCCACAACGCAAAGTTTATGGCTGACCGAT  
ATTGCTCATCATCATTTAGCTATTGCATTTATTTTTCTCGTTGCTGGTCATAIGTATAGAAC  
TAACTTCGGGATTGGGCACAGTATGAAAGATCTTTTAGAAGCACATACTCCTCCGGGGG  
GTCGATTGGGACGTGGTCATAAGGGTCTTTATGACACAATCAATAATTCGATTCATTTTC  
AATTAGGTCTTGCTCTAGCCTCTTAGGGGTATTACTTCTTGGTAGCTCAACACATGT  
ACTCTTTACCTGCTTATGCATTCATAGCACAAAGACTTTACTACTCAAGCTGCGTTATATA

CTCATCACCAATACATCGCAGGATTCATCATGACAGGAGCCTTTGCTCATGGAGCTATAT  
TCTTCATTCGAGATTACAATCCGGAACAGAATGAGGATAATGTATTGGCAAGAATGTTA  
GACCATAAAGAAGCTATCAAATCTCATTTAAGTTGGGTCAGCCTGTTTCTGGGGTTCCA  
TACCTTAGGACTCTATGTTTATAACGACGTTATGCTTGTCTTTGGGACTCCGGAGAAAC  
AAATCTTGATCGAACCTATATTTGCCCAATGGATACAATCCGCTCATGGTAAGACTTCAT  
ATGGGTTTCGATGTACTCTTATCTTCAACGAGTGGCCCAGCATTCAATGCTGGTTCGAAGC  
ATATGGTTACCCGGCTGGTTGAATGCTGTTAATGAG-----AATAGTAATTCACTATTCTTA  
ACAATAGGTCCTGGAGATTTCTTGGTTCATCATGCTATTGCTCTAGGTTTGCATACAAC  
ACATTGATCTTAGTAAAAGGTGCTTTAGATGCACGTGGTTCCAAGTTAATGCCAGATAA  
AAAGGATTTTCGGTTATAGTTTTCCTTGGCAGCGTCTGGACGAGGCGGTACTTGTGATA  
TTTCGGCTTGGGACGCATTTTATTTGGCAGTTTCTGGATGTTAAATACTATTGGATGGG  
TTACTTTTTATTGGCATTGGAAGCACATCACATTATGGCAGGGTAACGTTTCACAATTTA  
ATGAATCCTCCACTTATTTGATGGGATGGTTAAGAGATTATCTATGGTTAAACTCTTCAC  
AACTTATCAATGGATATAACCCTTTTGGTACGAATAGTTTATCAGTCTGGGCATGGATGT  
TCCTATTTGGGCATCTTGTGGGCTACTGGATTTATGTTCTTAATTCCTGGCGTGGATA  
TTGGCAGGAATTGATTGAAACTTTAGCATGGGCTCATGAACGCACGCCTTTGGCTAATT  
TGATTTCGATGGAGGATAAACCAGTGGCTCTTCCATTGTGCAAGCAAGATTGGTTGGA  
TTAGCCCACTTTTCTGTAGGTTATATATTCATTTATGCAGCTTTCTTGATTGCCTCTACAT  
CAGGCAAATTTGGTATGTCACATTCAGTAAAGATTTATGATACATGTATAGGGTGTACTC  
AATGTGTACGAGCCTGCCCCACAGATGTATTGGAAATGATACCTTGGGACGGATGTAAA  
GCTAAGCAAATTGCTCCTGCTCCAAGAACAGAGGACTGTGTAGGTTGTAAGAGATGTG  
AATCCGCTTGTCCAACGGATTTCTTGAGTGTCCGGGTTTATTTATGGCATGAGACAAC  
CGCAGCATGGGCTAGCTTATATGACAGATTTCAATTTACCCTCTATTTTTGTGCCTTTAG  
TGGGCTAGTATTTCCGGCAATTGCAATGGCTTCTTTATCCCTTCATGTTCAAAAAACA  
AGATTGTTATGCGAGATATAAAAACATATCTCTCCGTGGCACCTGTGCTAACTACTCTAT  
GGTTTGGGTCTTTAGCAGGTCTATTGATAGAGATCAATCGTTTATTTCCAGATGCGTTGG  
TATTTCCCTTTTTTTTCATTCATGACTGCAATTTAGAGAGACGCGAAAGCACAAAGCCTAT  
GGGGTCGCTTCTGTAACCTGGATAACCAGCACTGAAAACCGTCTTTATATTGGATGGTTC  
GGTGTGTTTGTATGATCCCTACCTTATTGACCGCAACTTCTGTATTTATTATCGCCTTCATTG  
CTGCTCCTCCAGTGGATATTGATGGTATTTCGTGAACCTGTTTCTGGGTCTCTACTTTATG  
GAAACAATATTATCTCTGGTGCCATTATTCCTACTTCTGCAGCTATAGGTTTGCATTTTTA  
CCCAATATGGGAAGCAGCATCCGTTGATGAATGGTTATACAATGGTGGTCCTTATGAGCT  
AATTGTTCTACACTTCTTACTTGGTGTAGCTTGTACATGGGTCGTGAGTGGGAACCTA  
GTTTCCGTCTGGGTATGCGCCCTTGGATTGCTGTTGCATATTCAGCTCCTGTTGCAGCTG  
CTACTGCTGTTTTCTTGATTTACCCTATTGGTCAAGGAAGCTTCTCTGATGGTATGCCTC  
TAGGAATCTCTGGTACTTTCAACTTCATGATTGTATTCCAGGCTGAGCACAACATCCTTA  
TGCATCCATTCATATGTTAGGCGTAGCTGGTGTATTCCGGCGGCTCCCTATTCAGTGCTA  
TGCATGGTTCCTTGGTAACTCTAGTTTATGATCAGGGAAACCACTGAAAACGAGTCTGCT  
AATGAAGGTTACAGATTCGGTCAAGAGGAAGAACTTATAATATCGTAGCTGCTCATGG  
TTATTTTGGCCGATTGATCTTCCAATATGCTAGTTTCAACAATTCCTCGTCTTTACATTT  
TTCTAGCTGCTTGGCCTGTAGTAGGTATCTGGTTCAGTCTTTAGGTATCAGCACCATG  
GCTTTCAACCTAAATGGTTTCAATTTCAACCAATCCGTAGTTGACAGTCAAGGTCGTGT  
TATTAACACTTGGGCTGATATCATCAATCGTGCTAACCTTGGTATGGAAGTTATGCATGA  
ACGTAATGCTCACAACCTCCCTCTAGACCTAGCTGCTGTTGAAGCTCCATCTACAAATG

GAATGGGTTTACCTTGGTATCGTGTTTCATACCGTCGTATTGAATGATCCCGGTCGGTTGC  
TTTCTGTCCATATAATGCATACAGCTCTAGTTTCTGGTTGGGCCGTTTCGATGGCTTTAT  
ACGAATTAGCAGTTTTTTGATCCCTCTGACCCCGTTCTTGATCCAATGTGGAGACAAGGT  
ATGTTTCGTTATCCCTTTTCATGACTCGTTTAGGAATAAACAATTCATGGGGTGGTTGGAGT  
ATCACA---GGAGGAACTATAACGAATCCGGGTATTTGGAGTTACGAGGGTGTGGCCGG  
GGCACATATTGTGTTTTCTGGCTTGTGCTTCTTAGCAGCTATCTGGCATTGGGTGTATTG  
GGACCTAGAAATATTCTGTGATGAACGTACGGGAAAACCCTCTTTGGATTTGCCCAAGA  
TCTTTGGAATTCATTTATTTCTCTCAGGGGTGGCTTGTCTTTGGGTTTGGCGCATTTCATG  
TAACAGGCTTGTATGGTCCTGGAATATGGGTGTCCGATCCTTATGGCCTAACTGGAAAA  
GTACAATCTGTAAATCCAGCGTGGGGCGCGGAAGGTTTTGATCCCTTTGTTCCGGGAG  
GAATAGCCTCTCATCATATTGCAGCGGGGACATTGGGCATATTAGCGGGTCTATTCCATC  
TTAGTGTCCGCCCGCCCCAACGTCTATACAAAGGATTACGTATGGGCAATATTGAACT  
GTCCTTTCCAGTAGTATCGCTGCTGTCTTTTTTGCAGCTTTCGTTGTTGCTGGAACATG  
TGGTATGGTTCAGCAACTACCCCGATCGAATTATTTGGTCCCACTCGTTATCAGTGGGAT  
CAGGGATACTTTCAGCAAGAAATATATCGAAGGGTGGTGGCGGGCTAGCCGAAAATC  
TTAGTTTGTGCGAAGCTTGGTCTAAAATTCCCGAAAAATTAGCTTTTTATGATTACATCG  
GTAATAATCCGGCGAAAGGGGGATTATTCAGAGCAGGCTCAATGGATAACGGGGATGG  
AATAGCTGTTGGATGGTTAGGACACCCCATTTTTAGAGATAAAGAAGGGCATGAGCTTT  
TTGTACGTCGTATGCCTACTTTTTTTGAAACATTTCCAGTAGTTTTGGTAGACGGAGAC  
GGAATTGTGAGAGCCGATGTTCTTTTTAGAAGGGCAGAATCAAAGTATAGTGTGCAAC  
AGGTAGGTGTAACGTGTTGAGTTCTACGGTGGCGAACTCAATGGAGTCAGTTATAGTGAT  
CCTGCTACTGTGAAAAAATATGCTAGACGTGCCCAATTGGGTGAAATTTTTGAATTAGA  
TCGTGCTACTTTGAAATCCGATGGTGTTTTTTCGTAGCAGTCCAAGGGGTTGGTTCACTT  
TTGGACATGCTACGTTTGCTTTGCTTCTTTTTTCGGACACATTTGGCATGGCGCTAGA  
ACCTTGTTTCAGAGATGTTTTGCTGGTATTGACCCAGATTTGGATGCTCAAGTGGAAAT  
TGGGGCATTCCAAAACTTGGAGATCCAATAAGGAGACAAGTAGTCATGAAAAC  
CTTATATCCCTGAGGAGTTCTACCCCGTGGAAACGCTCTTTAATGGAACCTTATCTTT  
AGCTGGTCGTGACCAAGAAACCACGGGTTTCGCTTGGTGGGCTGGGAATGCCCGACTT  
ATCAATTTGTCCGGTAAACTACTCGGCGCTCACGTAGCCCATGCCGGATTAATCGTATTC  
TGGGCCGAGCAATGAACCTATTTGAAGTGGCTCATTTTCGTACCAGAGAAACCCATGTA  
TGAACAAGGATTAATTTTACTTCCCCATCTAGCTACTCTAGGTTGGGGGGTAGGTCCGG  
GTGGGGAAGTTGTAGACACCTTTCCATATTTGTATCTGGAGTACTTCACTTAATTTCT  
CTGCAGTTTTAGGCTTTGGCGGTATTTATCATGCACTTCTCGGACCTGAGACTCTTGAA  
GAATCCTTTCCATTCTTCGGTTATGTATGGAAAGATAGAAATAAAATGACCACAATTTTG  
GGTATTCACTTAATCTTGTAGGTATAGGCGCTTTTCTTCTAGTACTCAAAGCTCTTTATT  
TTGGGGGCGTATATGATACCTGGGCTCCCGGGGGGGGAGATGTAAGAAAAATTACCAA  
CTTGACCTTAGCCCAAGTGTATATTTGGTTATTTACTAAAATCGCCCTTTGGGGGAGA  
AGGATGGATTGTTAGTGTGGACGATTTAGAAGATATAATTGGAGGACATGTATGGTTAG  
GTTCCATTTGTATACTTGGTGGAACTCTGGCATATCTTAACCAAACCTTTGCGTGGGCTC  
GCCGCGCATTGTATGGTCTGGAGAGGCTTACTTGTCTTATAGTTTAGGTGCTTTATCTG  
TCTTTGGTTTCATCGCTTGTGTTTTGTTTGGTTCAATAATACCGCTTATCCTAGTGAGTT  
TTACGGGCCACCGGGCCAGAAGCTTCTCAAGCTCAAGCATTACTTTTTCTAGTTAGAG  
ACCAACGTCTTGGGGCTAACGTGGGATCCGCTCAAGGACCTACTGGTTTAGGTAAATAT  
CTAATGCGTTCCCGGACCGGAGAGGTCATTTTCGGAGGAGAAACTATGCGTTTTTTGGG

ATCTCCGCGCTCCCTGGTTGGAACCTCTAAGGGGTCCCAATGGTTTGGATTTGAGTAGG  
CTGAAAAAAGACATAACAACCTTGGCAAGAACGACGTTTCGGCGGAATATATGACTCATG  
CTCCTTTAGGTTCTTTAAATTCCGTGGGTGGCGTAGCTACCGAGATCAATGCAGTTAATT  
ATGTCTCTCTAGAAAGTTGGTTAGCTACCTCTCATTTTGTCTAGGATTTCTCCTATTCGT  
GGGTCATCTGTGGCATGCGGGAAGGGCCCGTGCAGCTGCAGCAGGATTTGAAAAAGG  
AATCGATCGTGATTTTGAACCCGTTCTTTCCATGACCCCTCTTAACATGACTATAGCCCT  
TGGTAGATTTACCAAAGAAGAAAATGATTTATTTGATATTATGGATGACTGGTTACGGAG  
GGACCGTTTCGTTTTTGTAGGTTGGTCCGGTCTATTGCTCTTTCCTTGTGCTTATTTTCG  
TTTAGGAGGTTGGTTCACAGGTACAACCTTTGTAACCTTCATGGTATACCCATGGATTGG  
CCAGTTCCTATTTGGAAGGCTGCAATTTCTTAACCGCTGCAGTTTCTACTCCTGCTAATA  
GTTTAGCACATTCTTTGTTGCTACTATGGGGCCCTGAAGCACAAGGAGATTTTACTCGT  
TGGTGTCAATTAGGCGGTCTGTGGACTTTTGTGCTCTCCATGGCGCTTTCGGACTAAT  
AGGTTTCATGTTACGTCAATTCGAACTTGCTCGATCTGTTCAATTGCGACCTTATAATGC  
AATCGCATTCTCTGCTCCAATTGCTGTTTTTGTCTGTATTCTGATTTATCCCCTAGGT  
CAGTCTGGTTGGTCTTTTGCGCCAGTTTTGGTGTAGCAGCTATATTTGATTCATCCTC  
TTCTTCCAAGGATTCATAATTGGACGTTGAACCCATTTTCATATGATGGGAGTTGCCGG  
AGTATTGGGCGCTGCTCTGCTATGCGCTATTCATGGTGTACCGTAGAAAATACTTTATT  
CGAAGATGGTGATGGTGCAATACATTCCGTGCTTTTAACCCAACTCAAGCTGAAGAG  
ACTTATTCGATGGTCACTGCTAACCGCTTTTGGTCCCAAATCTTTGGGGTTGCTTTTTCC  
AATAACGTTGGTTACATTTCTTTATGTTATTTGTACCAGTAACCGGTTTATGGATGAGT  
GCTATTGGAGTAGTCGGTCTGGCTCTGAACCTACGTGCCTATGACTTCGTTTTCCAGGA  
AATCCGTGCAGCGGAAGATCCTGAATTTGAGACTTTCTACACCAAAAATATTCTCTTAA  
ACGAAGGTATTCGTGCTTGGATGGCGGCTCAGGATCAGCCTCATGAAAACCTTATATTC  
CCTGAGGAGGTTCTACCCCGTGGAAACGCTCTTATGTCTGGAAGCACGGGAGAACGTT  
CTTTTGCTGATATTATTACCAGTATTCGATACTGGGTCATTCATAGTATTACTATACTTCC  
CTATTCATTGCGGGTTGGTTATTCGTTAGCACGGGTTTAGCTTACGATGTGTTTGGAAAGC  
CCTCGGCCAAACGAGTATTTACAGAGAGCCGGCAAGGGATTCCATTAATAACTGGCC  
GTTTTGATCCTTTGGCACAACCTTGATGAATTTAGTAGATCCTTTATGACCATAGATCGAA  
CCTATCCAATTTTTACAGTGCATGGTTGGCTGTTACGGACTAGCTGTACCTACCGTTT  
CTTTTTGGGGTCAATATCAGCAATGCAGTTCATCCAACGAATGGCTACACAAACCGTT  
GAGGGTAGTTCTAGATCTGGG---CCAAGACGAACTATTACAGGGGATTTATTGAAACCA  
TTGAATTCGGAATATGGTAAAGTGGCTCCTGGATGGGGAACCTACCCCTTCATGGGTGT  
CGCAATGGCTCTATTTGCGATATTCCTATCTATTTTGGAGATTIATAATTCTTCCGTTT  
TACTGGATGGAATTTCAATGAGTATGCTTACTCTCAAACCTTTCGTTTACACAGTAGTGA  
TATTCCTTGTCTCTCTTTCATCTTCGGATTCCATCTAATGATCCAGGACGTAATCCTGG  
ACGCGAGGAAATGGCCGATACTACTGGAAGGATTCCCTCTTTGGCTGATAGGTACTGTAA  
CTGGTATTCCTGTGATCGGTTCAATGGGTATTTTCTTTTACGGTTCATATTCTGGATTGGG  
ATCATCCCTAATGCTTAATATCTTTAGTTTGATCTGTATCTGTATTAATTCTGCCCTTCATT  
CGAGTAGCTTTTTCTTCGCCAAATTACCCGAGGCTTATGCTTTTTTCAATCCAATCGTAG  
ATGTTATGCCAGTCATACCTGTGCTCTTTTTTCTCTTAGCCCTTGTTTTGGCAAGCTGCTG  
TAAGTTTTCGAACGACACAATCAAACCCGAACGAACAAAATGTTGAATTGAATCGTAC  
CAGTCTCTACTGGGGGTTATTACTCATTTTTGTACTTGTGTTTTATTTTCCAATTATTC  
TTCAATATGGAAGTCAATATTCTCGCATTTAATTGCTACTGCGCTGTTCAATCTAGTTCCTA  
CTGCTTTTTTACTTATCATCTACGTA AAAACAGTCAGTCAAATGATATGGAAACAGCA

ACCCTAGTCGCCATCTCCATATCTGGTTCACCTTGTAAGCTTTACTGGGTACGCCTTATAT  
ACCGCTTTTGGGCAACCCTCTCAACAATAAGAGATCCATTCGAGGAACACGGGGACA  
TGGAAGCATTGGTTTATACATTCCTGTTAGTCTCGACTTTAGGGATAATTTTTTCGCTAT  
CTTTTTTCGAGAACCACCTAAGGTTCCGACTAAAAAGATGAAAATGACTATTGCTTTCC  
AATTGGCTGTTTTTGCATTAATTGCTACTTCATCAATCTTACTGATTAGTGTACCCGTTGT  
ATTTGCTTCTTCTGATGGTTGGTCAAGTAACAAAAATGTTGTATTTTCTGGTACATCATT  
ATGGATTGGATTAGTCTTTCTGGTAGCTATCCTTAATTCTCTCATCTCT-----AT  
GTCACCACAAACAGAGACTAAAGCAAGTGTGGATTCAAAGCTGGTGTTAAAGAGTA  
CAAATTGACTTATTATACTCCTGAATATGAAACCAAAGATACTGATATCTTGGCAGCATT  
CCGAGTAACTCCTCAACTCGGAGTTCGCCTGAGGAAGCAGGGGGCTGCGGTAGCTGC  
CGAATCTTCTACTGGTACATGGACAACCTGTGTGGACCGATGGACTTACCAGCCTTGATC  
GTTACAAAGGACGATGCTACCACATCGAACCCGTTGCTGGGGAGACCGATCAATATATT  
GTTTATGTAGCTTACCCTTTAGACCTTTTTGAAGAAGGTTCTGTTACTAACATGTTTACT  
TCCATTGTGGGTAATGTATTTGGGTTCAAAGCCCTACGAGCTCTACGTCTGGAAGATCT  
GCGAATTCCTCCTGCTTATATCAAACCTTCCAAGGCCCGCCCATGGCATCCAAGTTG  
AGAGAGATAAATTGAACAAGTATGGTCGTCCCTATTGGGATGTACTATTAACCAAAA  
TTGGGGTTATCCGCCAAGAATACTACGGTAGGGCGGTTTATGAATGTCTCCGTGGTGGACT  
TGATTTTACCAAGGATGATGAGAACGTGAACCTCCAACCATTATGCGTTGGAGAGAC  
CGTTTCTTATTTGTGCCGAAGCACTTTATAAAGCGCAGTCCGAAACAGGTGAAATCAA  
AGGACATTACTTGAATGCTACTGCAGGTACATGCGAAGAAATGATGAAAAGGGCCGTA  
TTTGCCAGGGAATTGGGAGTTCCTATCGTAATGCATGACTACTTAACGGGAGGATTAC  
TGCAAATACTAGCTTGGCTCATTATTGCCGAGACAACGGTCTACTTCTTCACATCCATCG  
CGAATGCATGCAGTTATTGATAGACAGAAGAATCATGGTATACACTTTCGTGTACTAG  
CTAAAGCATTACGTATGTCTGGTGGAGATCATATTCCTCTGGTACCGTAGTAGGTA AAC  
TGGAAGGGGAACGGGACATCACTTTGGGTTTTGTTGATTTACTACGTGATGATTTTATT  
GAAAAAGACCGAAGCCGCGGTATTTATTTCTCTCAAGATTGGGTCTTTTGCCAGGTGT  
TCTGCCCGTGGCTTCAGGCGGTATTCACGTTTGGCATATGCCTGCCCTGACCGAGATCT  
TTGGGGATGATTCCGTACTACAGTTCGGTGGAGGAACCTTAGGACACCCTTGGGGAAA  
TGCACCTGGTGCAGTAGCTAATCGGGTGGCGTTAGAAGCGTGTGTACAAGCTCGTAAT  
GAGGGACGTGATCTTGCTAGTCAAGGTAATGAAATTATCCGTGAAGCTAGCAAATGGA  
GCCCTGAACTAGCTGCTGCTTGTGAGGTATGGAAGGAGATCAAATTCGACTTCAAAGC  
AATGGATACCTTG-----GCGATACATTTATACAAAACCTTCTACCCCGAGCACACGCAAT  
GGAGCCGTAGACAGTCAAGTGAAATCCAATCCACGAAATAATTTGATCCATGGACAGC  
ATCATTGTGGTAAAGGTCGTAATGCCAGAGGAATCATTACCGCAGGGCATAGGGGGGG  
AGGTCATAAGCGTCTATACCGTAAAATCGATTTTCGACGGAATGAAAAGACACATCTG  
GTAGAATCGTAACCATAGAAATACGACCCTAATCGAAATGCATACATTTGTCTCATACT  
ATGGGGATGGTGAGAAGAGATATATTTTACACCCCGAGGGGGCTATAATTGGAGATACC  
ATTTGTTTCTGGTACAGAAGTTCCTATATCAATGGGAAATGCCCTACCTTTGACCGATATG  
CCCTTAGGCACGGCCATACATAACATAGAAATCACACTTGGAAAGGGTGGACAATTAG  
CTAGAGCAGCAGGTGCTGTAGCGAAACTGATTGCAAAAAGAGGGTAAATCGGCCACATT  
AAGATTACCATCTGGGGAGGTCCGTTTGATATCCAAAAACTGCTCAGCAACAGTCGGA  
CAAGTGGGTAATGTTGGGGTGAACCAGAAAAGTTTGGGTAGAGCCGGATCTAAGTGTT  
GGCTAGGTAAGCGTCTGTAGTAAGAGGAGTAGTTATGAACCCTGTAGACCATCCCAT  
GGGGGTGGTGAAGGGAGGGCCCCGATTGGTAGAAAAAACCCACAACCCCTTGGGGT



ATATCATCCCACCGCCTTCTGTGGAAATAGTTGATACTACACAGCATATAGCTAGCCTGA  
CGGAACCAATTGATTTGTGTATTGAATTACAAATCGAGAGGGATCGTGGATATCGTATG  
AAAACACCAAATAATTATCAAGATGGAAGTTAT-----CCTATAGATGCTGTATCCATGCCT  
GTTTCGAAATGCGAATCATAGTATTCACTTCTTATGGGAATCGGAATGAAAAACAAGAGAT  
ACTTTTTCTCGAAATATGGACGAATGGAAGTTTAACTCCTAAAGAAGCACTTCACGAA  
GCTTCCCGTAATTTGATTGATTTATTTATTCCTTTTCTACATGCGGAGGAACAGGACATC  
GTTTTA-----GAGGACAATCCA---AACCGCTTACTGTACCCCTTTTTTACCTTTCATGATA  
GATTGGCGAAT--ATAAGGAAAAACAAAAA---GGAATTGCATTGAAATGTATTTTTATT  
GACCAATCAGAATTGCCTCCCAGGACCTATAATTGTCTCAAAAGGTCCAATATACATAC  
ATTATTGGACCTTTTGAGTAACAGTCAAGAAGATCTTATGAGAATTGAACATTTTCGCAT  
AGAAGATGTAAAACAAATATTGGACATTCTACAGAAGCAT-----TTCACAATTGATTTAC  
CTAAGAATAAGATGCTCCGGGATGGA---AATGAGGGAATGTCTACAATACCCGGATTTA  
GTCAGATACAATTTGAGGGATTTTGTAGGTTTCATTGATCAGGGCTTGACGGAAGAACTT  
CATAAGTTTCCAAAATTGAAGATACAGATCAAGAAATTGAATTTCAATTATTTGTGGA  
AACATATCAATTGGTAGAACCTTGATAAAAGAAAGAGATGCTGTGTATGAATCACTCA  
CATATTCTTCTGAATTATATGTACCCGCGGGGTTAATTTGGAAAACCGGTAGAGATATGC  
AAGAACAACCGTATTTATTGGAAACATTCCTCTAATGAATTCCTGGGAACCTTCTATA  
GTAAATGGAATATACAGAATTGTGATCAATCAAATATTGCAAAGTCCCGGTATTTATTAC  
CGTTCAGAATTGGACCATAACGGAATTTCTGTCTATACTGGCACCATAATATCAGATTGG  
GGAGGAAGATCAGAATTAGAGATTGATAGAAAAGCAAGGATATGGGCCCGTGTGAGTA  
GGAAACAAAAATATCTATTCTAGTTCTATCATCAGCTATGGGTTTCGAATCTAAGAGAA  
ATTCTAGATAATGTTTGCTACCCTGAAATTTCTTGTCTTTCCCGAATGATAAGGAAAA  
AAAAAGATTGGGTCAAGGGAAAATGCCATTTTGGAGTTTTATCAACAATTTGCTTGTGT  
AGGCGGGGATCCGGTATTTTCTGAATCCTTATGTAAGGAATTACAAAAGAAATTTTTTC  
AACAAAGATGTGAATTAGGAAGAATTGGTCGACGAAATATGAACCGGAGACTGAATCT  
TGATATACCTCAGAACAATACATTTTTGTACCACGAGATGATTGGCTGCTGCGGATCA  
TTTGATCGGAATGAAATTTGGAATGGGCACACTTGACGAT-----ATGAATCACTTGAAAA  
ATAAACGTATTCGTTCTGTAGCAGATCTGTTACAGGATCAATTCGGATTGGCTCTGGTTC  
GTTTAGAAAATGCGGTTTCGAGGAACTATATGTGGAGCAATCCGG---CATAAATTGATA---  
CCGACTCCTCAGAATTTGGTAACTTCAACTCCA-----TTAACAACCACTTATGAATC  
GTTTTTCGGCCTACACCCTTTATCTCAAGTTTTGGATCGAACTAATCCATTGACACAAAT  
AGTTCATGGGCGAAAATCGAGTTATTTGGGTCTGGAGGATTAACAGGGCGAACTGCT  
AGTTTTTCGGATACGAGATATTCATCCTAGTCACTATGGACGATTTTGCCCAATTGACACG  
TCCGAAGGAATCAATGTTGGACTTATTGGATCCTTAGCTATTCATGCGAGGATTGGTCAT  
TGGGGG---TCGATAGAGAGTCCGTTTTAT-----GAAATATCTGAGAGATCCAAAGAA----  
--GTACAGATGGTTTATTTATCACCAAGTAGAGATGAATACTATATGGTAGCGGCAGGAA  
ATTCTTTAGCGTTGAATTGGGGTATTACAGGAAGAACAGGTTGTTCCAGCTCGATACCGT  
CAAGAATTCCTGACTATTGCATGGGAACAGATTCATCTTCGAAGCATTTTTCCCTTCCAA  
TATTTTTCTATTGGAGCTTCCCTCATTCCTTTTATCGAGCATAATGATGCGAATCGGGCTT  
TAATGAGTTCTAATATGCAGCGCCAAGCAGTTCCGCTTTCTCGGTCCGAGAAGTGATT  
GTTGGAACCTGGGTTGGAATGCCAAGCGGCTCTAGATTCGGGGGTTTCAGCTATAGCCG  
AACACGAGGGAAAGATCGTTTATACCGATACTGATAAGATCGTTTTATCAGGTAATGGA  
GACACTATAAGCATTCCATTGGTTATGTATCAACGTTCCAACAAAAATACTTGTATGCAT  
CAAAAACCTCAGGTTTCGGCGGGGTAAATGCATTA AAAAGGGACAAATTTTAGCGGACG

GTGCGGCTACAGTTGGTGGTGAAC TTGCTTTGGGAAAAACGTATTAGTAGCTTATATG  
CCATGGGAAGGCTACAATTCTGAAGACGCGGTACTCATTAGCGAACGTCTAGTATATGG  
AGATATTTATACTTCTTTTCACATCCGGAAATATGAAATTCAGACTCATGTGACAAGCCA  
AGGC---CCTGAAAGAATCACTAACGAAATACCGCATTTAGAAGCTCATTTACTCCGCAA  
TTTAGACAAAAATGGAATTGTGATGCTGGGATCTTGGATAGAAACAGGTGATATTTTAG  
TAGGTAAATTAACGCCTCAGACAGCGAAAGAA---TCATCGTATGCTCCGGAAGATAGAT  
TATTACGGGCCATACTTGGCATTTCAGGTATCCACTGCAAAGGAAACTTGTCTAAAACTA  
CCTATAGGGGGGAAGGGGTTCGAGTTATTGATGTCAGATGGATCCAGAAAAAGGGG---GG  
TTCCAGTTATAATCCAGAAATGATTCGTGTATATATTTACAGAAACGTGAAATCAAAGT  
AGGTGATAAAGTAGCTGGAAGACATGGGAATAAAGGTATCATTTCAAAAATTTTGCCTA  
GACAAGATATGCCCTATTTGCAAGATGGAACACCAGTTGATATGGTCTTCAACCCATTA  
GGAGTACCTTCGCGAATGAATGTGGGACAGATATTTGAATGCTCGCTCGGGTTAGCGG  
GGGACCTGCTGGACAGACATTATAGAATAGCACCTTTGATGAGAGATATGAGCAAGA  
GGCTTCGAGAAAACTAGTGTTTTCTGAATTATATTCAGCCAGTAAGCAAACAGCAAATC  
CATGGGTATTTGAACCCGAGTGTCCGGGAAAAAGCAGAATATTTGATGGAAGAACAGG  
AGATCCTTTTGAACAACCTGTTATAATAGGAAAGTCCTATATCCTGAAATTAATTCATCA  
AGTTGATGATAAAATCCATGGACGTTCCAGTGGACATTATGCACTTGTTACACAACAAC  
CCCTTAGAGGAAGGGCCAAGCAAGGGGGACAACGAGTAGGAGAAATGGAAGTTTGG  
GCTCTAGAGGGATTCCGGTGTGCTCATATTTCAAGAGATGCTTACTTATAAATCTGAT  
CATATTAGAGCTCGTCAGGAAGTACTTGGTACTACGATCATTGGAGGAACAATACCTAA  
TCCTGAGGATGCTCCAGAATCTTTTCGATTGCTCGTTCGAGAACTACGATCTTTGGCTC  
TGGAAGTGAATCATTTCCTTGTATCTGAGAAGAACTTCCAGATTAATAGGAAAGAAGCT  
-----ATGATCGATCGGTATAAACATCAACAACCTCGAATTGGATCAGTTTCTC  
CTCAACAAATAAGTGCTTGGGCCAACAAAATCCTACCTAATGGAGAGATAGTTGGAGA  
AGTGACAAAACCCTATACTTTTCATTACAAAACCAATAAACCGGAAAAAGATGGATTG  
TTTTGTGAAAGAATCTTTGGACCTATAAAAAGTGGAAATTTGTGCTTGTGGAAATTATCG  
AGTGATCGGAAATGAAAAAGAAGACCCGAAATTTTGTGAACAATGCGGAGTTCGAATTT  
GTCGATTCTCGAATACGAAGATATCAAATGGGATACATCAAACCTGGCATGTCCGGTGAC  
TCATGTGTGGTATTTGAAACGTCTTCCTAGTTATATCGCGAGTCTTTTAGATAAACCCCT  
TAAGGAATTAGAAGGCCTAGTATACTGCGAT-----TTTTCTTTTGCTAGGCC---ATAGCT  
AAAAACCTACTTTCTTACGATTACGAGGTTCAATTCGAATCTGAAATCCAATCCCGGAA  
ATACAGCATCCCACTTTTTTTTACTACCCAGGACTTCGATACATTTGAAATAGAGAAAT  
CTCTACTGGAGCAGGTGCTATCAAAGAACAATTAGCCGATCCGGATTTGCGAATTATTA  
CAGATCATTCATTGGTAGAATGGAAGGAATTAGGGGAAGAAGGGTCCGCTGATGGGAA  
TGAATGGGAAGATAGAAAAATTGGAAGAAGAAAGGATTTTTTGGTTAGACGCATGGAA  
TTAGCTAAGCATTTTATTCGAACAAATGTAGAACCAGAACGGATGGTTTTGTGCCTATT  
ACCAGTCTTCCCTCCCGAGTTGAGACCAATCATTAGATAGATGGGGGTAAACCAATG  
AGTTCGGATATTAATGAACTCTATCGAAGAGTTATCTATCGGAACAATACTCTTACCGAT  
CCATTAACAACAAGTAGATCTACGCCAGGGGAATCAGTAATGTGTCAGGAGAAATTGG  
TACAAGAAGCCGTGGATACACTTCTTGATAATGGGATCCGCGGACAACCAATGAGGGA  
CGGTCATAATAAAGTTTACAAGTCGTTTTTCAGATGTAATTGAAGGCAAAGAGGGGAAGA  
TTTCGTGAGACTCTACTTGGTAAACGGGTCGATTATTCGGGGCGTTCCGTTATTGTCGT  
GGGCCCTTCGCTTTCATTACATCGATGTGGATTACCTAGAGAAATAGCAATAGAGCTTTT  
CCAGACATTTGTCATTTCGTGGTCTAATCAGACAACATGTTGCTTCTAACATAGGGATTG



CTAAAAGTAAAATTAGGGAAAAAGAACCAATTGTATGGGAAATACTTCAAGAAGTTAT  
GCAGGGGCATCCTGTATTGCTGAATAGAGCACCCACCCTGCATAGATTAGGCATACAGG  
CGTTCCAACCCATTTTAGTGGAGGGACGCGCTATTTGTTTACATCCATTAGTTCGTAAGG  
GATTC AATGCAGACTTTGATGGGGATCAAATGGCTGTTTCATGTACCCTTATCTTTGGAA  
GCTCAAGCGGAGGCTCGTTACTTATGTTTTCTCATATGAATCTCTTGTCTCCAGCTATT  
GGAGATCCCATTTCGTACCAACTCAAGATATGCTTATTGGACTCTATATATTAACGATC  
GGGAATCGTCGAGGTATTTGTTCAAATAGGTATAATCCATGTAATCGAAGA-----AAC---T  
ATCAAAATGAAACGGTTGACTATAAT-----AAGTATACGAAAGAGAAAGAACCTTATTTT  
TG TAGTTCCATGATGCACTTGGAGCTTATCGGCAGAAACGAATCAATTTAGATAGTCCT  
TTGTGGCTCCGGTGGCGACTCGATCAACGT---GTTATTGCCTCA-----AGAGAAGTTCCC  
ATCGAAGTTCAATATGAATCTTTGGGTACCTATCATGAGATTTATGGGCACTATCTAATAG  
TAAGAAGTGTA AAAAAAGAAATCCTTTGTATATACATTCGAACAACCTGTTGGTCATATT  
TCTTTTTATCGAGAAATAGAAGAAGCCATACAAGGGTTTTGTCTGGGCCTACTTATACGAT  
ACC-----ATGGAGGTACTTATGGCAGAACGGGCCGATCTGGTCTTTCACAA  
TAAAGTGATAGATGCAACTGCCATGAAACGACTTATTAGCAGATTAATAGATCACTTCG  
GAATGGCATATACATCGCACATCCTGGATCAAGTAAAGACTCTGGGTTTCCAGCAAGCC  
ACTGCTACATCCATTTCAATTAGGAATTGATGATCTTTTAAACAATACCTTCTAAGGGGTGG  
CTAGTCCAAGATGCTGAACAACAAAGTTTGATTTTAGAAAAGCACCATCATTATGGGAA  
TGTACACGCGGTAGAAAAATTGCGTCAATCCATTGAGATATGGTATGCTACAAGTGAAT  
ATTTGAGACAAGAAATGCATCCTAATTTTAGGATGACTGATCCTTCTAATCCAGTCCATA  
TAATGTCTTTTTCGGGAGCTAGAGGAAATGCATCTCAGGTACACCAATTAGTAGGTATG  
AGAGGATTAATGTCGGACCCCAAGGACAAATGATTGATTTACCCATTCAAAGCAATTT  
ACGCGAAGGACTTTCTTTAACGGAATATATAATTTCCCTGCTACGGAGCCCGCAAAGGAG  
TTGTGGATACTGCTGTACGAACATCAGATGCTGGATACCTCACGCGTAGACTTGTGAA  
GTAGTTCAACACATTGTTGTGCGTAGAACAGATTGTGGCACTATCCGAGGTATTTCCGT  
GAGTCTCGAAAT-----GGGATGACGGAAAAAATTTTGATCCAAACACTAATTGGTTCGT  
GTATTAGCAGACGATATATATATGGGTCTACGATGCATTGCCACTCGAAATCAAGATATT  
GGGATTGGACTTGTCAATCGATT CATAACC-----TTTCGAGCACAATCAATATAT  
ATTCGAACCCCTTTATTTGTAGGAGTACATCTTGGATCTGTAGATTATGTTATGGTTCGG  
AGTCCCCTCATGGCGATCTGGTCTGAATTGGGAGAAGCAGTAGGTATTATTGCGGGTCA  
ATCAATTGGGGAACAGGGACTCAACTAACATTAAGA ACTTTTCATACTGGTGGAGTAT  
TTACAGGTGGTACTGCAGAACATGTACGAGCTCCTTCTAATGGAAAATAAAATTCAAT  
GAGTGTGTTGGTTCATCCCACACGTACACGTATGGACATCCTGCTTTTCTATGTTATATA  
GACCTGTATGTA ACTATTGAGAGTCAGGATATTATACATAATGTGAATATTCCACCAAAA  
AGTTTTCTTTTAGTTCAAATGATCAATATGTAGAATCAGAACAAGTGATTGCTGAGATT  
CGCGCTGGAACATCCACTTTC-----TTTAAAGAGAGGGTTCGAAAACATATTTATTCTGA  
CTCAGAGGGAGAA---ATGCACTGGAGTACCGATGTGTACCATGCGCCTGAATATAGATA  
CGGTAATGTTTCATCTCTTACCAAAAACAAGTCATTTATGGATATTATCAGGAGGTCCG----  
--TGCAGATCCAGTATAGTCCCTTTTTTCGCTCCACAAGGATCAAGATCAAATGAATGTTT  
AT-----TCTCTTTCTGTGCAACGGAGATATATTTCTGACCTCTCA-----GTGACTAATGATC  
GA---GTGAGACACAAATTGTTTAGTTTCGGATCCTTCCGGTAAA---AAGGAGAGGATTCT  
TGATTATTCA---GGACCTGATCGAATCGTATCTAATGGTTCATTGGAATTCCTATATCCTG  
CC---ATTCTCCACGAGAATTCTGAT-----TTATTGGCGAAGAGGGCGAAGAAATAGATTCAT  
CATCCCATTCCAATATGATCAAGAACGGGAGAAAGAACTAATGCCCCGTTCTGGTATCT

CGATTGAAATACCCATAAAT-----GGTATTTTACGTAGAGATACTATTCTTGCTTATTTTCGA  
CGATCCCCGATACAGAAGAAGCAGTTCAGGAATTACTAAATATGGGACCATAGAGGTG  
GATTC AATCGTCAAAAAAGAGGAT-----TTGATTGAGTATCGAGGG---GCAAAAAGAATTT  
AGGCCGAAATACATGAAAGTAGATCGATTTTTTTTTCATTCCCGAAGAAGTGCATATCTT  
ACCCGGATCTTCGCCATAATGGTACGGAACAATAGTATCATTGGAGTAGATACACGAA  
TCGCTTTAAATACAAGAAGCCGAGTAGGTGGATTGGTCCGAGTGGAGAGAAAAAAAAA  
AAAAGATTGAACTGAAAATCTTTTCTGGAGATATCCATTTTCTGGAGAGACAGATAAG  
ATATCCCGGCACAGCGGCATCTTGATACCACAGGAACGGGAAAAAAAA-----AATTCTA  
AGGAATCAAAA-----AAATGGAAAAATTGGATCTATGTCCAACGG-----ATCACACCTAC  
CAAGAAAAAG-----TATTTTGTCTCGGTTTCGACCCGTAGTCACATATGAAATAGCTGATG  
GGATCAATTTAGGAACGCTTTTCCCCCAGGATCTGTTGCAGGAAAGGGATAATGTGCA  
ACTACGAGTTGTCAATTATATCCTTTATGGAAATGGCAAACCAATTCGAGGAATTTATCA  
CACAAGTATTCAATTAGTTTCGGACTTGTTTAGTATTGAATTGGGACCAAGACCGAAATG  
GT-----TCTATAGAAGAAGTTCATGCTTCCTTTGTTGAAGTAGGGACAAATGATCTG  
ATTCGAGATTTTATCAGAATTGATTTGGTGAAGTCCCCTATTTTCGTATATCGGAAAAAGG  
GATGATACGACAGGTTTCAGGATTGATCCCCGAT---AATGAATCAGATCGCACCAATATCA  
ATACTTTTTTATTCCAAGACGAGG-----ATTCAATCACTTACCCAACATCA  
AGGAACTATTTCGTACGTTTCTGAATAGA-----ATAAGGAATGCCAATCTTTTCTAATT  
TTGTCATCATCTGATTGTTCTCGAATTGGTCCA-----TTCAATGGTTCGAAATCTCACAAG  
GTGACA-----AAAGAATCAGATCCCATGATTCCCATTAGGAATTCGTTGGGTCCCTTA  
GGGACT-----GTACCTAAAATTGCGAATTTTTATTTCATCT-----TACTATTTAATAACT-----C  
ATAATCAGATTTTGTAAAT---AAATATTTGCTACTTGACAAT-----TTAAAACAGACTT  
TCCAAGTACTTAAATACTAT-----TTAATGGATGAAAATGGGAGA-----ATTTATAATCCC  
AATCTGCACAGTAACATCATTTTTAAATCCATTTCGATTTGAATTGGTGCTTTTCTCCGTCAC  
GATTATTGTGAGGAGACATCCACAATAATTAGC---CTTGGACAGTTTATTTGTGAAAATG  
TATGTATATCCAAATATGGACCA-----CACATAAAATCTGGTCAAGTTCTAATTGTTTCAT-  
--GTTGACTCCTTAGTAATAAGATCAGCTAAGCCTCATTGTTGGCCACTCCAGGAGCAACCG  
TCCATGGCCATTATGGAGAAATCCTTTCCGAAGGAGATACATTAGTTACATTTATATATG  
AAAAATCGAGATCGGGTGATATAACGCAAGGTCTTCCAAAAGTGGAACAAGTCTTAGA  
AGTGCGTTTCGATTGATTCAATATCGATGAACCTAGAAAAGAGGATTGAAGGTTGGAAC  
GAACATATAACAAGAATTCCTTGGAAATTCCTTGGGGATTCTTGATTGGCGCTGAGCTAAC  
CATAGCGCAAAGTCGTATCTCTTTGGTTAATAAGATCCAAAAGGTTTATCGATCCCAGG  
GGGTGCAGATCCATAATAGGCATATAGAGATTATTGTACGTCAAATAACATCCAAAGTGT  
TGGTTTTCGGAA-----GATGGAATGTCTAATGTTTTTTTACCCGGAGAACTAATCGGATT  
GTTGCGAGCGGAACGAACAGGGCGTGCTTTGGAAGAAGGGATCTGTTACCGAGCCAT  
CTTATTGGGAATAACGAGGGCATCTCTGAATACTCAAAGTTTCATATCCGAAGCGAGTT  
TTCAAGAAACCGCTCGAGTTTGTAGCAAAGCCGCTCTACGAGGTCGTATTGATTGGTT  
GAAAGGCCTGAAAGAGAACGTTGTTCTGGGGGGGATGATACCTGTTGGTACCGGATT  
AAAGGATTAGTGCACCGTTCAAGG-----CAACACAACAACATTCCCT-----TTGGAATCA  
AAAAGAAGAATCTATTCGAGGGGGAAATGAGA-----GATATTTTGTTCACCACAGAGA  
ATTATTGAGTTCTTGCATCCCAAAAAATTTCCATGATACATCATTACGGGATTTAATGAT  
TCC-----ATGACAAGAAGATATTGGAACATCCATTTGGAAGAGATGATG  
GAGGCAGGAGTTCAATTTGGTTCATGGTACTAGGAAATGGAATCCTAGAATGGCACCTTA  
CATCTCTGCAAAGCGTAAAGGTATTTCATATTACAAATCTTACTAGAACTGCTCGTTTTTT



GGTGGAATGGGGATTGTCATTCTTTCTACTTCTAGAGGTATAATGACAGATCGGGAAGC  
TCGACTAGAAGGAATTGGAGGAGAAGTTTTGTGTTATATATGGATGACAAAACCTATAC  
CAAGAATTGGTTCACGTAGGAATGGGCGTATTGGTTCACGTAAGAGTGGGCGTAGAAT  
ACCAAAAGGAGTTATTCATGTTCAAGCGAGTTTCAACAATACCATTGTGACTGTTACAG  
ATGTACTAGGTCAGGTGGTTTCTTGGTCCTCCGCTGGTACTTGTGGATTTAGAGGCACA  
AGAAGAGGGACACCATTTGCTGCTCAAACCGCAGCAGGAAACGCTATTTCGTACAGTAG  
TGGATCAGGGTATGCAACGAGCAGAAGTCATGATAAAGGGTCCTGGTCTCGGAAGAGA  
TGCAGCACTACGAGCTATTCGTAGAAGTGGTATACTATTAAGTTTCGTACGTGACGTAA  
CCCCTATGCCACATAATGGATGTAGACCTCCTAAAAAAGACGTGTGATGCCAACTATT  
AAACAACCTATTAGAAACACAAGACAGCCAATCAGAAATGTCACGAAATCCCCAGCTC  
TTCGAGGATGTCCCTCAGCGTCGAGGAACATGTACTAGGGTGTAT---ATCACCCCCAAA  
AACCAAACTCTGCCTTACGTAAAGTTGCCAGAGTACGATTAACCTCTGGATTTGAAATC  
ACTGCTTATATACCTGGTATTGGCCATAATTCACAAGAACATTCTGTAGTCTTAGTAAGA  
GGAGGAAGGGTTAAGGATTTACCCGGTGTGAGATATCACATTGTTTCGAGGAACCCTAG  
ATGCTGTTCGGAGTAAAGGATCGTCAACAAGGGCGTTCT---AGTGCGTTG-----ATGG  
CAAGAAAAAGTTTGATTTCAGAGGGAGAGAAAAAGGCAGAAATTGGAACAGAAATATC  
ATTTGATTCGTTCGATCCTCAAAAAAAGAAATAAGC-----AAAGTTTCATCGTTGAGTG  
ACAAATGGGAAATTCATGGAAAATTGCAATCCCCACCACGTAATAGTGCACCTACACGT  
CTTCATCGACGTTGTTTTTCGACCGGAAGGCCTAGAGCTAACTATCGAGACTTTGGGCT  
ATCCGGACACATACTTCGCGAAAGGGTTCATGCATGTTTGTGCGGGGGCAACAAGA  
TCAAGTTGGATGGTAAAAAATTCATTCATCTCAGTTATCCCGCAAGAAGAAAAAGAAA  
AA-----AACAAAGGGTCTGTTGAATTTCAAGTATTCAGTTTCACCAATAAGATACGGAG  
ACTTACTTCACATTTGGAATTGCACAGAAAAGACTATTTATCTCAGAGAGGTCTGCGGA  
AAATTCTGGGAAAACGCCAACGTCTACTGGCTTATTTGTCAAAGAAAATAGAGTACG  
TTATAAAGAATTAATTGGTTCGGTTGGATATTCGGGAACCAAAAACCTCGT-----ATGGTAA  
AACTTCGTTTGAACGATGTGGTAGAAAGCAACGTGCCATCTATCGAATCGTTGCAATT  
GATGTTTCGATCCCGAAGAGAAGGAAGAGATCTTCGTAAAGTGGGTTTTTACGATCCGAT  
AAAGAACCAAACTTATTCAAATGTTCCCTGCTATTCTATATTTCTTGAAAAAGGTGCTC  
AACCTACAGGAACTGTTTCATGATATTTCAAAGAAGGCGGAAGTATTTAAGGAACTTCG  
AATTAATCAAACGAAA-----ATGGATAAATCCAAGCGACTCTTTCGTAAATCCAAGCG  
ATCTTTTCGTAGGCGTTTGCCCCAATTGGATCGGGGGATCGAATTGATTATAGAAACAT  
GAGTTTAATTAGTCAATTTATTAGTGAACAGGGAAAAATATTATCTAGACGAGTGAATA  
GATTGACCTTGAAACAACAACGATTAATTAATGCTATAAAACAAGCTCGTATTTTAT  
CTTCGTTACCTTTTCTTAATAATGAGAAA-----CAATTTGAGAAAACCGAGTCGATCCCT  
AGAACTACTGGTCCTAGAACCAGAAATAAAGTGACGCGTTCCTCAAAAAAATCCTT  
TTGTAGCTAATAATTTCTTGGGAAAAATTGAGAAGCTCAACATGAGGGGAGGAAAAAGA  
GATAATAATAACTTGGTTCGCGGGCATCTACCATTATACCCACAATGATCGGCCATACAAT  
TGCTATTCATAATGGAAAGGATCATTTACCTATTTATATAACAGATCGTATGGTTCGGTAC  
AAATTGGGAGAATTCGCACCTACTCTGACTTTCAAGGGACACGCGAGAAACGATAATA  
GATCTCGTCGTATGATTTTGAATCTTTTCTACTAGGTAATCTATTATCCTTATGCATGAA  
GATAATAAATTCGGTTCGTTGGGGTTCGACTCTATTATGGATTTCTGACCACATTCTCCAT  
AGGGCCCTCTTATCTCTTCTTCTCCGAGCTCGGGTTATGGAAGAAGGA-----ACCGA  
GAAGGAGGTATCAGCAACAACCTGGTTTTATTACGGGACAGCTCATGATGTTTCATATCGA  
TCTATTATGCGCCTCTGCATCTAGCATTGGATAGACCTCATACAATAACTGTCCTAGTTCT

ACCGTATCTTTTGTTCATTTCTTCTGGAACAATCACAAACACTTTTTTGATTATGGATCT  
ACTACCAGAAATTCAATGCGTAATCTCAGCATTCAATGTGTATTCCTGAATAATCTCATT  
TTTCAATTATTCAACCATTTCAATTTTACCAAGTTCAACGTTAGCCAGATTAGTCAACATT  
TATATGTTTCGATGCAACAACAAGATGTTATTTGTAACAAGTAGTTTTGTTGGTTGGTTA  
ATTGGTCACATTTTCTTCATGAAATGGGTTGGATTGGTATTATTCTGGATACGGCAAAT  
CATCTATTAGATCT---ATTTCGATCTAATAAGTACCTTGTGTCAGAATTGAGAAATTCTAT  
GGCTCGAATCTTTAGTATTCTCTTATTTATCACCTGTGTCTACTATTTAGGCAGAATACCG  
TCGCCTATTGTCACTAAGAACTGAAAGAAACCGAAGAAGACAAACCTCTTGTGACTC  
TTCTTTTCGACTATAAACGATGGAATCGTCCATTGCGATATATAAAAAACGATCGCTTTG  
AAAAACAGTAAGAAATGAAATGTCACAATATTTTTTTTACACATGTCCAAGTGATGG  
AAAAAACGAATATCTTTTACATATCCCCCAGTTTGTGCGACTTTTGGGGAAATAATAC  
AAAGAAAGATGTCTTTGTATACGACAGATAAACTATTACCAGAGGATCCGTATAATCATT  
GGGTCTATACCAATGAACAAAAAAGGCACAACCTTGAGCAATGAGTTCATAAATCGAAT  
AGAAGCCCTAGAC-----AGGCTTACTCTGGATGTGCTCGAAAAAAGCACCAGATTGTGC  
AATAATGAGAATGAACAAGAATTCTTTCCTAAAATATATGATCCTTTTTTTGAACGGACCA  
TATCGTGGAACAACCAAAAAGGTATATTCACGTATAGAAATGGTTTGGATAAATAAGAT  
TCATGATATCTTTTACCGAGAATTTGAACAAAAAGAT--CCAAATGATTATATTGGAATAG  
AAGAAATCGGTAAAAAGGTTCCCTCGATGGTCATACAAATTGACCCATTTGGAAGAACA  
AGAGAAAGAAGGGATTTCGTTCAAGAAAAGCCAAACGCGTGGTAATTTATACTGATGCA  
TTGATACGTTACTCGCAACAATCGGATTTTCGTCGGGATCTAATCAAAGGATCCATGCG  
CGCTCAAAGACGTAAAACAGTTACTTGGGAAATGTTTCAAGCAAACGTGCATTCCCCA  
CTTTTTTTGGACAGAATAGACAAAACCTTTTTTTTTTTCTTTTGATATC-----TCCGGAATG  
ATGAACCTCATTTTTAGGAATAAAGAGGAGAATGAACGGATAGCAATAGCAGAACTT  
GGGATACTATTATATTTGCTCAAGCAATAAGAGGTTCTATGTTAGTAACACAATCGATTCT  
TTAGAAAATACATCGTATTGCCTTCATTGATAATAGCTAAAAATCTCGGCCGTATGTTATT  
ATTTCAATTTCCCGAGTGGTACGAGGATTGGAAGGAGTGGAAATAGAGAAATGCATGTT  
AAATGCACCTATAATGGTGTTCATTATCAGAAACAGAATTTCCGAAAGACTGGCTAAC  
AGACGGTATTCAAATAAAGATCCTATTTCCCTTCTGTCTGAAACCTTGGCACAGATCTA  
AGAAAGGAAAAAAGAAAATTTTTGTTTTTAAACAGTCTGGGGAATGGAACTGAACT  
ACTTTTTGGTTCCTCCCGAAAACGACCTTCCTTTTTTTGAACCCATTTGTAAAGAACTCG  
AAAAAAAATTCGAAAAGTGAAA---AAGAAATGCTTTCTAGTTCTAAGAGCTTTAGGG  
GAAAGAACAAAATGGTTTCTAAGGGTCTTAAAAGAAAAACAAGATGGATTCTCAA  
ACAGTTCTA-----TTTATAAAAAGAATAATAAAAAGAATTTGCAAAAGTAAAT--TCTATAA  
CTAATAATAAGATTAACCATGAATCGATCATTGCAATTAGATCTGTGGATTGGACAAATT  
ATTCACTGACAGAAAAAAAATGAAGGATCTGGCTGATAGGACAACCACAATCCGAAA  
TAAAATAGAAAGGATTACAAAAGACAAGAGAAAAAGTCTAACGAGACAGGTTGTGA  
TGATAAAGATCGGAATCACAGAAACATATTTGGCAGATATCAAAAAGAAGAAGTGCC  
CGATTAATACGTAAATGGCACTATTTTATGAAATCTTTCATTGAAAGAATATACATGGATA  
TCTTTCTATGTACCATTAATATTTCCAGAAGAAATGCACACCTTTTCATTCACTTTATTT  
GTGTGACTTATCTTCCCTTGTCCCAAGCATATGTATTTTACAATTTATTACAAATCCAAGTT  
ATTAATAAATATTACTTGAGATTTGTACTTCAATATGCATATCTTTTTCTTAAAGATAGAAT  
AAAGGACCATTTTACACGAGGAATATTGGATGCCAAATCAAGGCCTAAGAAACCTCCG  
AATCTGGAATGAATGAATGGAAAAATTGGTTAAGGGGTCATTATCAATACAATTTATCT  
CAGACTAGATGGTCTAGATTAGTACCGCAAAAATGGCGAAATAGAGTCAATCAACGTC

GTACGATTCAAATAAAAAA---AAAGATTCATATGAAAAA-----GACCAATTCATTCATT  
ACGAGAAACAAGAAAAATTTAAAAAACACTACAGATATGATCTTTTATCACATAAATAT  
ATTCATGAGTCTATTATTGATCCGGATAGAAAATATTTGGAGTGGAGAATTCTCAATTTT  
TTTCTTAGATTTTTTGGATTGGATGGGAATGAATGAAGAAATGCTATATCGTTGGTTCTTT  
TCAGAATTTGTGCTACTTTATGATGCATATAAGATTAAACCGTGGATCATAACCAATCAA  
TTACTTATTTTCAATTCCAAGAGCAATAAAGAAGCAGAACTAAATTTCTTCCTGAAAAG  
GTATTTGCTTTTTCAATTGAGATGGGATGATCCTTTGAATCAAAGAATGATCAATAATAT  
CAAGGTATATTGTCTACTGCTTAGGCTGATAAATCCAAAGGAAATTGCTATATCCTCTAT  
TCAAAGAGGAGAAATGCGCCTGGATGTAATGCTGATTCAGAAGGATCTAACTCTTACA  
GAATTGATAAAAAGGGGAATATTGATTATCGAACCGGTTTCGTCTGTCTATAAAATGGGA  
TGGACAATGGATTATGTATCAAACCATAGGTATTTTCGTTGGTCCATAAGAATAAGTACAA  
TAATTATGCTTTGCTTGTTCCTGAAAATATTCCATCTCCTAGACGTCGTAGAGAATTGAG  
AATCTAATTTGTTTGGAGATTTCTTTGCCCAATTATCGATTAGAAGATTTAGCTTGTATG  
AATCGCTACTGGTTTGATACCAATAATGGCAGTCGTTTCAGTATGTCAAGGATACATATG  
TATCCAATGAAACGACATCAATTCAAATCCTGGATCTTCGAATTG-----AGAGAGAT  
CAAGAATTCTCACTATTTCTTAGATTCATGGACCAAATTCGATTCAGTGGGATCTTTCAC  
TCACATTTTTTCCACCAAGAACGTTTTATGAAACTCTTTGACCCCGAATTTGGAGTAT  
CCTACTTTCA---CGTGATTCA-----CAGGGTTCAACAAGCAATCGATATTTT-----ACGA  
TCAAAGGTGTAGTACTGCTTGTAGTAGCG---GTCCTTATA-----TATCGTATTAACAAT  
CGAAATATGGTCGAAAGAAAAAATCTCTATTTGATGGGGCTTCTTCCTATACCTATTCTT  
CCTATACCTATGAATTCCATTGGACCCAGAAATGATACATTGGAAGAATCTTTT---TGGTC  
TTCCAATATCAATAGGTTGATTGTTTCG---CTCCTGTATCTTCCAAAAGGGAAAAAGATC  
TCTGAGAGTTGTTTCATGGATCCGAAAGAGAGTACTTGGGTTCTCCCAATAACT-----  
--AAAAAGTGTATCATGCCTGAATCTAACTGGGGTTCGCGGTGGTGGAGGAACCGGATC  
GGAAAAAGAGG-----GATTCTAGTTGTAAGATATCT-----AATGAAACCGTAGCTGGA  
ATTGAGATCTCATTCAAAGAGAAAGATATCAA---TATCTGGAGTTTCTTTTTGTATCCTA  
TACGGAT-----GATCCGATCCGCAAGGACCTTGATTGGGAATTCCTTGATCGTCTTTCTCC  
GAGGAAGAAGCGAAACATAATCAACTTG-----AATTCGGGACAGCTATTCGAAATCTTA  
GTGAAACACTTGATTTGTTATCTCATGTCTGCTTTTCGTGAAAAAAGACCAATTGAAGT  
GGAGGGT---TTCTTCAAACAACAAGGA---GCTGAGGCAACTATTCAATCAAATGATATT  
GAGCATGTTTCCCAT-----CTCTTCTCGAGAAACAAGTGGGGTATTTCTTTGCAAATTG  
TGCTCAATTCATATGTGGCAATCCGCCAAGATCTCTTCGTT-----AGTTGGGGGAAG  
---AATCAGCACGAATCGGATTTTTTGGAGAAC---GTATCGAGAGAGAATTGGATTTGGTT  
AGACAATGTGTGGTTGGTAAACAAGGATTGG-----TTTTTTAGC-----AAGGTACGGAA  
TGTATCGTCAAATATTCAATATGATTCC-----ACAAGA-----TCTATTTTCGTTCAAGTAA  
CGGATTCTAGCCAATTGAAAGGATCTTCT---GATCAATCCAGAGATCCTTTTCGATTCCAT  
TAGT-----AATGAGGATTCGGAA-----TATCACACATTGATC  
AATCAAACAGAGATTCAGCAACTAAAAGAAAGATCGATTCTT---TGGGAT-----CCTTCC  
TTTCTTCAAACGGAACGAACAGAGATAGAATCAGAT-----CGATTCCCGAAA-----TGCC  
TTTCTGGATATTC-----TCAATGTCCCGGCTATTCACG---GAACGTGAGAAGCAGATGA  
ATAATCATCTGCTTCCGGAAGAAATCGAAGAATTTCTT-----GGGAATCCTACAAGATCA  
ATTCGTTCTTTTTTCTCTGACAGATGG-----TCAGAACTTCAT---CTGGGTTCGAATCCTA  
CTGAGAGGTCCACTAGAGATCAG-----AAATTGTTGAAGAAACAACAAGATGTTTC  
T---TTTGTCCCTTCCAGGCGATCGGAA-----AATAAAGAAATGGTTGATATATTCAAG

ATAATTACGTATTTACAAAAT-----ACCGTCTCAATTCATCCTATTTTCATCAGATCCGGGAT  
GTGATATGGTTCCG--AAGGATGAACCGGAT--ATGGGCAGTTCCAATAAGATTTTCATTC  
TTGAACAAAATCCATTTTTGGAT-----TTATTTTCATCTATTCATGACCGGAACAAAGG  
GGATACACGTTA-----CACCACGATTTTGAATCAGAA-----GAGAGATTTCAAGAAATGG  
CAGATCTATTCATCTATCAATAACCGAGCCG---GATCTGGTGTATCATAAGGGATTTGC  
CTTTTCTATTGATTCCTACGGATTGGATCAAAAAA-----TTCTTGAATGAGGTATTCAA  
CTCCAGGGATGAATCGAAAAAGAAATCTTTA-----TGGGTTCTACCTCCTATTTTTGAT-  
----GAAGAGAATGAATCTTTTTATCGAAGGATCAGAAAAAATCGGTCCGG---ATTTCCT  
GCGGGAATGATTTGGAAGATCCAAAACCAAAAATAGTGGTATTTGCTAGCAACAACAT  
AATGGAGGCGGTCAATCAATATAGATTGATCCGAAATCTGATTCAAATCCAATATAGCAC  
CTATGGG-----TACATAAGAAATGTATCGAATCGATTCTTTTTAATG-----AATAGATCCG  
ATCGCAACTTCGAATATGGAATTCAA-----AGGGATCAAATCGGAAATGATACTCTGA  
ATCATCTAACTAGAATAAAATATACGATCAACCAACATTTATCGAATTTGAAAAAG---AG  
TCAGAAGAAATGGTTCGAT-----CCTCTTATTTCTCGAACCGAGAGATCCATGAATC  
GGGATCCTGATGCATATAGATACAAATGGTCCAATGGGAGCAAGAATTTCCAGGAACAT  
TTGGAACATTTCTGTTTCTGAACAGAAGCAC-----CGTTTTCAAGTAGTGTTCGATCGA  
TTACGTATTAATCAATATTCGATTGATTGGTCCGAGGTTATCGACAAACAAGATTTGTCT  
AAGTCACTTCGTTTCTTTTTGTCCAAGTCA-----CTTCTCTTTTTGTCC---  
-----AAGTCACTT--CTCTTTTTGTCTAAGTCACTTCCTTTTTTCTTTGTGAGTAT  
CGGGAATATCCCATTTCATAGGTCCGAG---ATCCACATCTAT--GAATTGAAAGTCCCGA  
ATGATCAACTCTGCAATCAGTTGTTAGAATCAATAGGTGTTCAAATCGTTCATTTGAATA  
AATTGAAACCC-----TTCTTATTGGAT-----GATCATGATACTTCC---CAAAGATCGAAAT  
TCTTGATCAATGGAGGAACAATATCACCATTTTTGTTCAATAAGATACCA---AAGTGG---  
ATGATTGACTCATTCCATACT-----AGAAATAATCGCAGGAAATCCTTTGATAACACTGAT  
TCCTATTTCTCAATGATATCCCGCGATCGAGACAATTGGCTGAATCCCGTGAAACCATTT  
CATAGAAGTTCATTGATATCTTCTTTTTATAAAGCAAATCGACTTCGATTCTTGAATAATC  
CACATCACTTCTGGTTCTAT-----TGTAACAAAAGATTCCCTTTTTTATGTG-----GAAA  
AGACCCGTATCAATAATTATGAT-----CTTACATAT--GGACAATTCCTCAATATCTTGTTC  
TTCGCAACAAA--ATATTTCTTTGTGCGTCGGTAAA-----AAAAACATGTTTTTTTGG  
G---AGAGATACCATTTACCAATCGAGTACAGGTATCTGACATATTCATACCTAACGAT  
TTTCCACAAAGTGGTGGCGAAACG---TATAACTTGTACAAATCT-----TTCCATTTTCC  
AATTCGATCCGATCCATTCGTTTCGT-----AGAGCTATTTACTCGATCGCAGACATTTCTGG  
AACACCTCTAACAGAGGAACAATAGTCAATTTGAAAGAACTTATTGTCAGCCTCTTT  
CAGATATGAATCTATCTGATTGAGAAGGGAAAAAATGTCATCAGTATCTCAGT-----TTC  
AATCAAACATGGGTTTGAATTCACACTCCATGTTCTGAGAAAGATTTACCA-----TCAGG  
AAAGAGGAAAAA-----CGGAGTCTTTGTCTAAAG-----AAATGCGTTGA  
GAAACGGCAGATGTATAGAACCTTTCAACGAGATAGTGCTTTTTTCAAATCTCTCAAAT  
GGAATCTGTTCCAAACATATATGCCATGGTTTCTTACTTCGACAGGGTGCAAATATCTAA  
ATTTACCCTTTTAGATACTTTTTTCAGACCCATTG-----CCGATACTAAGTAGCAGT--CA  
AAAATTTGTATCCATTTTTCATGATATTATGCATGGATCAGATATATCATGGCCAATTCCTC  
AGAAAAAATTTGTGG-----GCGATTCTTCCACAATGGAATCTG---ATAAGTGAGATTT  
CGAGTAAGTGTTTACAGAAT-----CTTCTTCTGTCCGAAGAAATGATTCATCGAAATAAT  
GAGTCACCCGTTCCATTGATATGGACACATCTGAGATCACCAAATGCTCGGGAGTTC---  
CTCTATTCAATCCTTTTTCTTCTTCTTGTGCTGGATAT--CTCGTTCGTACACATCTTCTC

TTTGTTTCCCGA-----GCCTCTAGTGAGTTACAGACAGAGTTAGAAAAGATCAAATCTTT  
GATGATTCCATCATAACATGATTGAGTTGCGAAAACCTTCTGGATAGGTATCCTACATCTGA  
ACTGAATCTTTCTGGTTAAAGAATCTCTTTCTAGTTGCTCTGGAACAATTAGGAGATTC  
TCTGGAAGAAATACGGGGTTCTGCTTCTGGCGGCAACATGCTATTGGGTGGTGGTCCC-  
-----GCTTATGGG---GTCAAATCAATACGTTCTAAGAAGAAATATTTGAATATCAAT-  
-----CTCATCGATCTCATC---AGTATCATACCAAATCCCATCAATCGAATCACTTTTTTCGA  
GAAATACGAGACATCTAAGTCGTACAAGTAAAGAGATCTATTCAATTGATAAGAAAAAG  
AAAAAACGTGAACGGTGATTGGATTGATGATAAAATAGAATCCTGGGTGCGGAACAGT  
GATTCGATTGATGATGAAGAAAGAGAATTCTTGGTTCAGTTCTCC-----ACCTAACGAC  
A-----GAAAAAAGGATTGATCAAATTCTATTGAGTCTGACT---CATAGTGATCATTATCA-  
-----AAGAATGACTCTGGTTATCAAATGATTGAACAACCGGGATCAATTTACTTAC  
GATACTTAGTTGACATTCAT-----AAAAAATATCTAATGAATTATGAGTTCAATAGATCCT  
GTTTAGCAGAAAAGACGGATATTCCTTGCTCATTATCAGACAATCACTTAT-----TCACAAA  
CCTCGTGTGGGGCTAATAGTTCTCATTCCCATCTCATGGA-----AAACCCTTTTCGCT  
CCGCTTAGCCCTATCCCCTTCT---AGGGGTATTTAGTGATAGGTTCTATAGGAATTGGAC  
GATCATATTTGGTCAAATACCTAGCGCAAACTCCTATGTTCTTTTCATTACGGTATTTCC  
GAACAAGTTCCTGGATGACAAGCCTAAAGGTTATCTTATTGAC-----GATATCGAT  
---ATTGATGATAGTGACGATATCGAT-----ATTGATGATAGTGACGATATT-----  
-----GATGATGACCTTGATACGGAGCTGCTAACTATGACGAATGT  
GCTA-----ACTATGTATATGACG-----CCGAAAATAGACCGATTTGATATCACCCCTCA  
ATTAGAATTAGCAAAAGCAATGTCCCCTTGATAATATGGATTCCAAACATTCATGATCT  
GTATGTGAATGAGTCGAATTACTTATCCCTCGGTCTATTAGTGAACATCTCTCC-----A  
GAGATTGTGAAAGATGTTCC---ACTAGAAATATTCTTGTTATTGCTTCGACTCATATCCC  
AAAAAAGTGGATCCCGCTCTAATAGCTCCGAATAAATTAATACATGCATTAAGATACG  
AAGGCTTCTTATTCCACAACAACGAAAGCACTTTTTTCATTCTTTCATATACTAGGGGATT  
TCACTTGGAAAAGAAAATGTTCCATACT-----AACGGATTTCGGGTCCATGACCATGGGTT  
CCAATGCACGAGATCTTGTAGCACTTACCAATGAGGCCCTATCAATTAGTATTACACAG  
AAGAAATCAATTATAGACACTAATAACAATTAGATCCGCTCTTCATAGACAACTTGGGA  
TTTGCGA-----TCCCAGGTAAGATCGGTTCAAGATCATGGGATCCTTTTCTATCAGATA  
GGAAGGGCTGTTGCACAAAATGTAATCTAAGTAATTGCCCATAGATCCTATATCTATC  
TATATGAAGAAGAAA-----TCATGTAAGGAAGGGGATTCTTATTTGTACAAATGGTACTT  
CGAACTTGGAACGAGCATGAAGAAATTAACGATACTTCTTTATCTTTTGAGTTGTTCTG  
CCGGATCGGTGCTCAAGATCTTTGGTCTCCACCC-----GGACCCGATGAAAAA---AATG  
GGATCACTTCTTATGGATTTCGTTGAGAATGATTCT--GATCTAGTTCATGGC---TTAGAAG  
TAGAAGGCGCTCTGGTGGGA-----TCCTCACGGACAGAAAAAGATTGCAGTCAGTTTGA  
TAATGAT-----CGAGTGACATTGCTTCTTCGGTCCGAACCAAGGAAT---CAGTTAGATAG  
ATGCAAAATGGATCTTGTCTATCGTTGATCAGAGATTTCTATATGAAAAA-----TACGAA  
TCGGAGTTTGAAGGA---GGGGAAGGAGAAGGAGCCCTCGACCCGCAA-----CAGA  
TAGAGGAGGAT-----TTATTCAATCAC-----ATAGTTTGGGCTCCT-----AGAATATGGC  
GCCCT-----TGTGGCAATCTATTTGATTGTATCGAAAGGACCAATGAATTGGGATTTC  
C---TATTGGGCCAGGTCATTTCCG-----GGCAAGCGGATCATTTATCATAAAGAGGATG  
AGCTTCAAGAGAATGATTCGGAGTTCTTGCAGAGTGGAACCATGCAGTACCAGACACG  
AGATAGATCTTCAAAGAACAAGGCTTTTTTCGAATAAGCCAATTCGTTTGGGACCCCTG  
CAGATCCATTCTTTTTTCTATTCAAA---GATCAGCCCTTTGTCTCTGTGTTTTTCACGTCGA



GAATTCTTTGCAGATGAAGAGATGTCAAAGGGGCTTATTACTTCCCAAACAAATCCTCC  
CACATCTATATATAAACGCTGGTTCATC-----AAGAATACGCAAGAAAAGCACTTCGAAT  
TGTTGATTCATCGCCAGAGATGGCTTAGAACC-----AATAGTTCATTATCT-----AATGG  
ATCTTTCCGTTCTAAT-----ACTCCATCCGAGAGTTATCAGTATTTATCAAATCTGTTCTTA  
TCTAAC---GGAACGCTATTGGATCAAATGACAAAGGCATTGTTGAGAAAGAGATGGCTT  
TTCCCGGATGAAATGAAACATTTGATT-----CATGTAAGA-----TTTCCCATTCCTATGC  
CTAGATCTCGG---ATAAATGGAAATTTTATTGATAAGACCTCTTCAATTGTAGCCAATATC  
TTATTACGAATAATTCCGACAACCTTCAGGAGAAAAGGAGGCATTACCTATTACAGAGA  
TGGT-----ATGTCGGCTCAATCCGAAGGAAATTATGCGGAAGCTTTACAAAATTATTATG  
AAGCTACGCGACCAGAAATTGATCCCTATGATCGAAGTTATATACTCTATAACATAGGCC  
TTATCCACACAAGCAACGGAGAACATACGAAGGCTTTTGAATATTATTTCCGGGCACTC  
GAACGAAACCCATTCTTACCACAAGCTTTTAATAATATGGCTGTGATCTGTCATTAC---C  
GGGGAGAACAGGCCATTCGACAAGGAGATTCTGAAATTGCGGAGGCTTGGTCCGATC  
AAGCTGCTGAATATTGGAAACAAGCTATAGCGCTTACTCCAGGTAATTATATTGAAGCA  
CATAATTGGTTGAAGATCACAAGGCGGTTTCGAA-----ATGAACTGGCAATCAGAACGTA  
TATGGATAGAACTTATAACGGGGTCTCGAAAAACAAGTAATTTCTGCTGGGCCTGTATC  
CTTTTTTTAGGTTCACTAGGATTCTTATTGGTTGGAACCTCCAGTTATCTTGGTAGGAAT  
CTGATATCCTTATTTCCCTCTCAGCAAATCCTTTTTTTTTCCCAAGGAATCGTGATGTCTT  
TCTATGGGATCGCTGGTCTGTTTCATTAGTTCCTATTTGTGGTGCACAATTCATGGAATG  
TAGGTAGTGGTTATGATCTTTTCGATAGAAAAGAAGGAATAGTGTGTATTTTTTCGTTGG  
GGATTTCTGGAATAAATCGTCGCATCTTCCTTCGATTCTTATGAGAGATATCCAGTCG  
ATCAGAATGGAAGTTAAAGAGGGTCTTTATCCTCGTCGTGTCCTTTATATGGAAATCAG  
AGGCCAGGGAGCCATTCCTTGACTCGTACCGATGAGAAT---TTTACTCCACGAGAAAT  
TGAACAAAAAGCTGCTGAATCGGCCTATTTCTTGCGCGTACCAATTGAAGTATTT

>Citrus

ATGAAAAAATGGTGGTTCAATTCGATGTTATCTTTAAGTAAATCAATGGAGAGCCCTGG  
TCCTATTA AAAATCCCAGTGTAAGCGAGGAACTGATTAGAAATGATAAGAATAAAAAACA  
TTCATAGTTACAGC-----AAATTAGCTGGTGTGAGGGACATTCATAATTCATCTCGGA  
TGACACTTTTTTTGTAAAGGATAGTAATAGAGATAGTTATTCCATCTATTTTGATATTGAA  
AATCAAATTTTGGAACTAGACAATGCTCAT-----TCTTTTCTGAGTGAAGTAAAGTTC  
TTTTTATAGCTTTTCGTAATTATAGTTTCGAGGAATAATGGATCTAAAAGCGCTGATCCTGA  
TTCCGATCGTTACATGTATGATACTAAATCGAGTTGGAATAATCACATTCATAATTGCCTT  
GACTCTTATCTT-----CATTCTCAAATCTGTATTGATAGTACAGTTTTAAGTAGTAGTGAC  
AATTATAGTGCCAGTTACATTTATAATTCATTTGT--AGTGAGAGTTCCAATATACAAAG  
TAGCACGAATGGTAGTGATTTAACTATAAGCGAAAGTTCTAATGAAAGCGATGTAACCTC  
AAAAATACAGGCATTTATGGGTTCAATGCGAAAATTGTTATGGATTAAATTATAAGAAAT  
TTCTTAAATCAAAAATGTATCTTTGTGAACAATGCGGATATCATTTGAAAATGATTAGCT  
CAGATAGAATCGACCTTTTGGTTGATCCAGGTAAGTTGGGATCCGATGGATGACGACATG  
GTCTCTATAGATCCCATTGAATTTGATTCAGAAGAGGAACCTTATAAAAATCGTATTGAT  
TCTTATCAAAGCAAGACAGGATTAACAGAGGCTGTTCAAACAGGTACAGGGCAACTAA  
ACGGGATTCCCATCGCAATTGGGGTTATGGATTTTCAGTTTATGGGGGGTAGTATGGGAT  
CCGTAGTAGGCGAGAAAATAACCCGTTTGTATCGAGTATGCTGCCAATAAATTTTTACCT  
CTTCTTCTAGTGTGTGCTTCTGGGGGAGCACGCATGCAAGAAGGAAGTTTGGAGTTTGA  
TGCAATGGCTAAAATATCTTCTGCTTTATATGATTATCAATCAAATAAAAAGTTATTCTA

TGTATCAATTCTTACATCCCCTACTACGGGTGGAGTGACAGCTAGTTTTGGTATGTTGGG  
GGATATCATTATTGCTGAACCTAATGCCTATATTGCATTTGCAGGTAAAAGAGTAATTGA  
ACAAACATTGAATAAGACAGTACCTGAAGGTTCAACAAGAGGCTGAATATTTATTTCGATA  
AGGGCTTATTTCGATCCAATCGTACCACGTAATCCTTTAAAAGGTGTTCTGAGCGAGTTA  
TTTCTGTTCCACGGCCGTTTTTCCTTTGAATCAAAAT-----ATGACAACAATTAAGCCG  
ACGAAATTAGTAATATTATCCGCGAACGTATTGAGCAATATAATAGAGAAGTAAAGATTG  
TAAATATTGGGACCGTACTTCAAGTAGGCGACGGCATCGCCCGTATTTATGGTCTTGATG  
AAGTAATGGCAGGTGAATTAGTAGAATTTGAAGAGGGTACAATAGGCATTGCTCTGAAT  
TTGGAATCAACTAATGTTGGTGTGTTTTAATGGGTGACGGTTAATGATACAAGAAGG  
AAGTTCTGTAAAAGCAACCGGAAAAATTGCTCAGATACCAGTAAGCGAGGCTTATTTA  
GGTCGTGTTATAAATGCCCTGGCTAAACCTATTGATGGTTCGAGGTGAAATTTTCAGCTTC  
TGAATCTCGATTAATTGAATCCCCTGCTCCGGGTATTATTTTCGAGACGTTCCGTATATGA  
GCCTCTTCAAACAGGACTTATTGCTATTGATTTCGATGATCCCTATCGGACGCGGTTCAGC  
GAGAATTAATTATTGGGGACAGACAGACCGGTAACCGGCAGTAGCCACGGATACGAT  
TCTCAACCAACAAGGGCAAATGTAATATGTGTTTATGTAGCTATTGGTCAAAAAGCAT  
CTTCTGTGGCTCAGGTAGTGAATACTTTCCAGGAGAGGGGGGCAATGGACTACACTAT  
TGTGGTAGCCGAAACGGCGGATTCCCCCGCTACGTTACAATACCTCGCTCCTTATACGG  
GCGCAGCTCTAGCTGAATATTTTATGTACCGTGAACGACACACTTTAATCATTATGATG  
ATCCCTCAAACAAGCACAGGCTTATCGACAAATGTCTCTTCTATTACGAAGACCACCG  
GGTCGCGAAGCTTATCCCGGAGATGTTTTTTATTTGCATTCACGACTTTTGGAAGAGC  
CGCGAAATTAGGTTTCGAGTTAGGCGAAGGAAGTATGACCGCTTTACCAATAGTTGAG  
ACCCAGTCGGGAGATGTTTCGGCTTATATTCCCTACTAATGTAATTTCCATTACAGACGGG  
CAAATATTCTTATCCGCGGATTTATTCAATGCTGGAATCAGACCCGCTATTAATGTGGGT  
ATTTCCGTCTCTCGAGTAGGATCCGCAGCTCAAATTAAGCTATGAAACAAGTAGCCGG  
CAAATTAATAATTGGAATTGGCACAATTTCGCAGAATTAGAAGCCTTTGCACAATTTGCTT  
CTGATCTCGATAAAGCTACTCAGAACCAATTGGCAAGGGGTCAACGCTTACGTGAGTT  
GCTCAAACAGGCCCAAGCAGCCCCTCTCACGGTGAAGAACAGATAATGACTATTTAT  
ACAGGAACGAATGGTTATCTTGATTCAATAGAAATTGGTCAAGTAAGAAAATTTCTCGT  
TGAGTTACGTACTIONTAAAAACGAATAAACCTCAGTTCCAAGAAATAATATCTTCTA  
CCAAGATATTCACCGAAGAAGCAGAAGCCCTTTTGCAAGAAGCTATTCAGGAACAAA  
AGGAACGTTTTCTACTTCAGGAACAATTCATGAGAATAAATCCTACTACTTCCGGTCT  
GGGGTTCCGCGTTTTGCAAACAAAACCTAGGACATATCGCTCAAATCATTGGTCCGGT  
ACTGGATGTAGCTTTCCCCCGCAAGATGCCTAATATTTACAATGCTCTGGTAGTTAA  
GGGTCGAGATACTGTTCGATCAACCAATTAATGTGACTTTCGAGGTACAGCAATTATTAG  
GGAATAATCGAGTTAGAGCTGTAGCCATGAGTGCTACAGATGGTCTAACGAGGGGTAT  
GGAAGTAATTGACACGGGAGCTCCTCTAAGTGTTCAGTCGGCGGAGTGACTCTAGGA  
CGAATTTTCAACGTGCTTGGAGAGCCGTTGATAATTTAGGTCCTGTAGATACTCGCAC  
AACATCCCCTATTCATAAATCCGCGCTGCTTTTATAAGTTAGATAACAAGATTATCTATT  
TTTGAACAGGAATTAAGTAGTAGATCTTTTAGCTCCTTATCGTCGGGGAGGAAAAAT  
CGGACTATTTGGGGGAGCTGGGGTGGGTAAAACAGTACTCATTATGGAATTGATCAAC  
AACATTGCCAAAGCCCATGGGGGTGTATCCGTATTTGGCGGAGTCGGTGAACGTACTC  
GTGAAGGAAATGATCTTTACATGGAAATGAAAGAGTCTGGAGTAATTAATGACCAAAA  
TCTTTCCGAATCAAAAGTGGCTCTAGTCTACGGTCAGATGAATGAACCACCAGGAGCT  
CGTATGAGAGTTGGTTTGACGGCCCTAACTATGGCGGAATATTTCCGAGATGTTAATGA

ACAAGACGTA CTTCTATTTATCGACAATATCTTCCGTTTCGTCCAAGCGGGATCCGAGGT  
ATCCGCCTTATTGGGTAGAAATGCCTTCCGCTGTGGGTTATCAACCTACCCTTAGTACCGA  
AATGGGTTCTTTACAAGAAAGAATTACTTCTACCAAAGAGGGGTCCATAACTTCTATTC  
AAGCAGTTTATGTACCCGCGGATGATTTGACTGATCCCGCTCCTGCCACGACATTTGCC  
CATTTAGATGCTACTACCGTACTATCAAGAGGATTAGCTGCTAAAGGTATCTATCCAGCA  
GTTGATCCTTTAGACTCAACGTCAACTATGCTGCAACCTCGGATCGTTGGCGAGGAACA  
TTATGAAACGGCGCAAAGAGTTAAGCAAACCTTTACAACGTTACAAAGA ACTTCAGGAC  
ATTATAGCTATCCTTGGGTTGGACGAACTGTCCGAAGAGGATCGTTTAACTGTAGCAAG  
GGCGCGAAAAATTGAGCGTTTCTTATCACAACCCTTTTTTCGTAGCCGAAGTATTTACCG  
GTTCCCCGGGGAAATATGTTGGTCTAGCCGAAACTATTAGAGGGTTTAAATTGATCCTG  
TCCGGAGAATTAGATGGTCTTCTGAGCAGGCCTTTTATTTGGTAGGTAACATAGATGA  
AGTTACTGCGAAGGCTACAACTTAGAAATGGAGAGTAATTTGAAGAAAATGACCTTA  
AATCTTTGTGTA CTGACCCCTAATCGAATTGTTTGGGATTCAGAAGTGAAAGAAATCAT  
TTTATCTACTAATAGTGGACAAATCGGCGTATTACCAAATCACGCGCCTATTGCCACAGC  
TG TAGATATAGGTATTTAAGAATCCGCTTTAACGACCAATGGTTAACGATGGCTCTGAT  
GGGTGGTTTTGCTAGAATAGGGAATAATGAGATCACTATTTTAGTAAATGATGCGGAGA  
AGAGTAGTGACATTGATCCCCAAGAAGCCAGCAA ACTCTTGAAATAGCAGAAGCTAA  
TTTGAGGAAAGCTGAAAGCAAGAGACAAACAATTGAGGCAAATCTAGCTCTCAGACG  
AGCTAGGACACGAGTAGAGGTTATCAATGCGATTTCAATGAAAAATGTAACCGATTCTT  
TCGTTTCTTTGGTTAACTGGCCATTCGCCGGGAGTTTCGGGCTTAATACCGATATTTTAG  
CAACAAATCCAATAAATCTAAGTGTAGTGCTTGGTGTATTGATCTTTTTTTGGAAAGGGA  
GTGTTAAGTGATTTATTAGATAATCGCAA ACTGAGGATTTGAATAGTATTCGAAATTCA  
GAAGA ACTGCAGAGAGGGGCCATTGAACGGCTGGAAAAAGCCCGGGCCCGTTACG  
AAAAATAGAAATAGAAGCAGATCAGTTTCGAGTGAATGGATACTCTGAGATAGAACGA  
GAAAAATTCAATTTGATTAATTCAACTTATAAGACTTTGGATCAATTAGAAAATTACAAA  
AATGAAACCATTCATTTTGAACAACAAAGAGCAATTAATCAAGTCCGACAACGGGTTT  
TCCAACAAGCTTTACAAGGAGCGCTCGGAACTCTGAATAGTTGTTTGAACAAGGAGTT  
ACATTTACGTACCATTAGTGCCAATATTGGCATGTTTGGAGCGATGAAAGAAATAACTG  
ATATGAATCCACTGATTTCTGCCGCTTCCGTTATTGCTGCTGGGTTGGCTGTTGGGCTTG  
CTTCTATTGGACCTGGAGTTGGTCAAGGTA CTGCTGCGGGCCAGGCAGTAGAAGGGAT  
CGCGAGACAGCCCGAGGCAGAGGGAAAAATACGAGGTA CTTTATTGCTTAGTCTGGCT  
TTTATGGAAGCTTTAACAATTTATGGGCTGGTTGTAGCATTAGCACTTTTATTTGCGAAT  
CCTTTTGTATGAATGTTCTATCATGTTCCATGAATACACTAAGG---TTATACGATATATCC  
GGTGTGGAAGTAGGCCAACATTTCTATTGGCAAATAGGTGGGTTCCAGGTCCATGCC  
AAGTACTTATTACTTCTTGGGTTGTAATTGCTATCTTATTAGGTT CAGCCTTTATAGCCGT  
TCGGAATCCACAAACCGTTCCGACTGCCACTCAA AATTTCTTCGAATATGTCCTTGAAT  
TCATTGAGACGTGAGCAA AACTCAGATTGGAGAAGAATATGGCCCATGGGTTCCCTT  
TATTGGA ACTCTGTTTCTTTTTATTTTTGTTTCTAATTGGTCAGGTGCTCTTTTACCTTGG  
AAAATCATAGAGTTACCTCATGGGGAGTTAGCCGCACCCACGAATGATATAAATACTAC  
CGTTGCTTTAGCTTTGCTCACGTCAATAGCATACTTCTATGCGGGTCTTTCCAAAAAGG  
GATTAGGCTATTT CAGTAAATACATTCAACCGACTCCAATTCTTTTACCCATTAACATTTT  
AGAAGATTTCAAAAACCTCTATCACTTAGTTTTCGACTTTTTTGGGAATATATTAGCCGA  
TGAATTAGTAGTTGTTGTTCTTGTCTTTAGTACCTTTAGTGGTTCC TATAACCCGTCATG  
TTCCTTGGATTATTTACAAGCGGTATTCAAGCTCTATTTTTTGCAACTTTAGCTGCGGCT

TATATAGGCGAATCTATGGAGGGACATCATATGATATTTTCAACTTTGGAGCGTATATTA  
CGCATATATCCTTTTCGGTTCGTTTCAATTGGAATTACAATTTATTTAATAACCTTCTTAGT  
CGATGAAATCAGAGGGCTATATGCTTCATCAGAAAGGGGGATGACAGCTACCGCTTCT  
GTCTAACAGGATTATTAATCACCCGTTGGGTTACTCGAGACATTTCCCATTAAGTGATT  
TATATGAATCATTAAATCTTTCTTTCATGGAGTTTATCTATTATTCATAAGATTTTTGATTTA  
AAAATAATCAAAATCATTAAAGCGCTATAACGGCACCAAGTGCTTTTTTTTACCCAAGGC  
TTTGCGACTTCGGGTTTTTTAACCAAAATGCATCAATCCAGAATATTAGTACCGCTCTC  
CAAGTCCAGTGGTTAATGATGCACGTAAGTATGATGGTATTGGGCTATGCAGCTCTTTTA  
TGTGGATCATTATTATCCACGGCTCTTCTAGTCATTACATTTGAAAAGTGATAAGGCTT  
TTTTTAAAAGAAAAGAAATCCAATACATGAACGAAAAAAGAATGTTTTTCTA---AGT  
-----CTTTCGCTAGAAATTATTACAGGTATCAAGTGATTCAACAATTGGATCGTTGGAG  
TTATCGTATTATTAGTTTAGGATTTATCTTTTTAACCACAGGTATTCTTTCGGGAGCAGTA  
TGGGCTAATGAGGCGTGGGGGTCTTATTGGAATTGGGATCCAAAAGAAACTTGGGCAT  
TTATTACTTGGACGATATTCGGGATTTATTTACATACTCGAACAAATACAAAATGGGAAG  
GTGTAAATCCGCAATTGTGGCTTCTATGGGCTTCTTATAATTGGATATGCTATTTTCGG  
AGTCAATCTATTAGGAATAGGGTTACATAGTTATGGTTCATTTAAT-----ATGACAAAAA  
GAACGCATCCATTCCCCTTAGATATCTTTCATCTGTAGTATTTTTGCCCTGGTGGATCCCT  
CTCTCATTAAATAAAAGTCTGGAATCTGGGTTACTAATTGGTGGAACTAGTCAATCC  
GAAACCTTTTTGAATGATATTCAAGAAAAGGCTATTCTAGAAAAATTCATAGAATTAGA  
GGAATTATTTCTCTTGGACGAAATGATAAAGGAATTTCCGGAAAGACGTCTAGAAAAG  
CTTCGTATA---CTCCAGAAAGAAACAATCCAATTAATCAAGATGCACGATGAGGATCATA  
TCCATACGATTTTTCACTTTTCGACAAATACAATCTGCTTCGTTATTCTAAGTGGTTATTC  
TATTTTGTGTAATGAAGAACTTTTTATTCTTAACTCTTGGGTTCAAGAATTCCTATATAAT  
TTAAGCGACACAATAAAAGCCTTTTCGATTCTTTTCGTAAGTATTATGTATCGGATTC  
CATTCACCCCGCGGTTGGGAACTACTGATTGGCTATGTCTACAACGACTTTGGGCTTGC  
TCATAATGATATTATTCTATCTGTTCTTGTTCCTTTCCACTTTTCCAGTCGTTCTAGATACATTTT  
TTAAATATTGGCTTTTTTCTTATTAAATCGTGTATCTCCGTCCTTGTAGTGATTTATCAT  
TCAATGACTGAGATGCCTATTGGTGTTCAAAAGTACCTTATCGAAGTCCCGGGGACAA  
GCATCCATCTTGGGTTGACATATAACCGACTTTATCGAGAAAGATTACTTTTTTTTAGG  
TCAAATGGTTGAGAGCGATATCTCGAATCAACTTATTGGTATTATGGTATATCTCAGTATA  
GAGAACGAGACCAAGGATTTGTATTTATTTATCAACTCTCCTGGCGGATGGGTAATACC  
CGGGATAGCAATTTATGATACTATGCAATTTGTGCGACCCGATGTACAGACAATATGCAT  
GGGATTGGCCGCCTCCATGGGGTCTTTTCTCCTGGCCGCCGGAGCAAGTACCAAACGT  
CTAGCATTCCCTCACGCTAGGGTCAATGATCCATCAACCTATTGGCGCTTTTTATGGGGCA  
CAAACGGGAGAATTTATCCTGGATACGGAAGAACTACTGAGACTGCGCGAAATCCTTA  
CAATGGTTTATGTACAAAGATCGGGCAAGCCCTTATGGGTTGTATCCGAAGACATGGAA  
AGGGATACTTTTATGTCAGCAACAGAAGCCCAAGCTCATGGACTTGTTGATCTTGTAGC  
G G T T G G  
A????????????????????????????????????????????????????????????????  
????????????????????????????????????????????????????????????????  
????????????????????????????????????????????????????????????????  
????????????????????????????????????????????????????????????????  
ATGGAGGAATTTCAAGTATATTT  
AGA ACTAGATAGATCTCAACAACACGACTTCTATACCCACTTCTTTTTCGGGAGTATAT  
TTATGTA CTGTCATGATCATGGTTTAGGGTTTTATGACAATAAATCTAGTTC ACTAAGT  
GTGAAACGGTTAATTACTAGAATGTATCAACGGATTAATTTGAGTATTGCTGCTAATGAT

TCGAATCAAATCCGATTTTTGGGAATAAGTTATATTCTCAAATTATATCAGAGGTATTTG  
CTGCTGTGGTGGAAATCCATTTCCCTACGGTTGGTGGCTTTTTTAATTGAAAAATCG  
CCTAATTTCCAATCAATTCATTCAATATTTCCCTTTTTTCGAGGATAAATTGTCCCATTAA  
ATTATGTGTTAGATGTACGAATACCCTACCCATTTGTCCCGAAATCTTGGTTCAAACCC  
TTCGCGAATGGGTAAAGGATGCCTCTTCTTTACATTTATTACGGTTCTTTCTCCACGAGT  
ATTTAATTCGAACAGTCTTATTAATACTCTATTTCTGTTTTTTTTAAAACCAAGATTGTT  
ATTGTTTCTATATAATTCTCATGTATATGAATATGAATCCATCCTCTTTTTTCTCTGTAACC  
AATCGTCTCATTTACAATCAACATCCTTTCAAGTCCTCGTTGAGCGAACGTATTTCTATG  
GAAAAGTCGAACATCTTGTCTGAAGTCTTTGCTAAATTTAGATCTTAGGGTTGGTCAAG  
GATCCTTTTCATGCATTATGTTAGATATCAAGGAAAATCCATTTTGGCTTCAAAGGATACG  
CCTCTTCTGATGAATAAATGGAAATATTACCTTGTCTGGTTTATGGCAATGGCATTTCAC  
GCGTCTTCTCAACCAGGAAGGGTTCAGCTAACTACTTAGGCAAGTACGCTATTAACCT  
TCTGGGCTATCTTTCCGGTGTGCGACTAAATCTTTGTTGGTACGGAGTCAAATGCTAG  
AAAATTCATTTCTAATAGATAAT-----TCTATGAAGAAGGTCGATACGACCGTTCCAATTA  
TTCATCTGATTGGATCATTGACTAAGGCGCGGTTTTGTAACGCATTAGGGCATCCTATCA  
GTAAGTCGACTTGGTCCGATTTCTCTGATTTCTCATCTTATCGACCGATTTGTGCGTATAT  
GTAGAAATCTTCTCATTATTACAGCGGATCTTCAAAAAAAAAAAGTTTGTATCGAGTA  
AAATATACTTCGGCTTTCTTGTGTTAAAGTTTGGTTCGTAAACATAAAAGTACTGTA  
CGCGCTTTTTTAAAAGATTAGGTTTCGGAATTATTGGAAGAATTCCTTATGGAGGAAGA  
ACACGTTCTTGCTTTACTCTTTCCAAGACGGATTTGGTATTTGGATATTTTTTGTATCAA  
CGATCTGGTTAATTATCAAATGATAATTGCTACACCC---GAAGTACAAGATATCAAT---TC  
TTTTTCCCGATTGGAATCC---CTACAAGAGGTCTATGGGATCCTATGGGTGCTTGCCCCT  
ATTTTCGATTTATGTATTGGCAATCACAAATCGGTGTCCTAGTAATTGTGTGGTTAGAAAGA  
GAAATATCTGCAGGAATACAACAGCGTATTGGGCCCTGAATACGCCAGCCCTTTGGGAAT  
TCTTCAAGCTTTAGCCGATGGGACAAAACCTTTTCAAAGAAAACCTTCTTCCATCTA  
GAGGAAATAGTAGTTTATTCAGTATTGGTCCATCTATAGCAGTCATAGCAATTCTACTAA  
GTTATTCAGTAATTCCTTTTAGTTATAACCTTGTTTTAGCTGACCTCAATATCGGTATTTT  
TTTATGGATTGCCATTTCAAGTATTGCCCTATTGGACTTCTTATGTCAGGATATGGATCA  
AATAATAAATATTCCTTTTTAGGTGGTCTGCGAGCTGCTGCTCAATCGATTAGTTATGAA  
ATACCATTAACCTTTATGTGTTTTATCAATATCTCTATTATCTAACAGTTTAAAGTACAGTTGA  
TATAGTTGGGGCGCAATCAAATATGTTTTTGGGGGTGGAATTTGTGGCGTCAACCTA  
TAGGGTTTATCGTTTTTCTAATTTCTTCCCTAGCGGAATGCGAGAGATTACCTTTGATTT  
ACCAGAAGCGGAAGAAGAATTAGTAGCCGGTTATCAAACCGAATATTCAGGAATAAAA  
TTTGGTTTTATTTACGTTGCTTCCCTATCTAAATCTACTAGTTTCCTCATTATTTGTAACAGT  
TCTTTACTTGGGAGGTTTCGAATCTTTCCATTCCATACATATTTGTTCCCTGGGCTGGTTGA  
AATAAATAAAGCGGATGGAATCTTTGGAACGACAATTGGTATCTTTATTACATTAGCTAA  
AATTTATTTGTTCTTGTTCATTCTATTGCAACAAGGTGGACTTTACCGAGACTAAGAAT  
GGACCAACTATTAATCTTGGCTGGAAATTTCTTTTACCTATTTCTCTCGGTAATCTATTA  
TTAACAACCTTCTTCCCAACTCCTTTTCGCTAATGATCTGGCATGTACAGAATGAAAACCT  
CATCTCGATTCTACGAGAATTTTTATGAAAGCCTTTCATTTGCTTCTCTTCGATGGAAG  
TTTTATTTTCCCAGAATGTATCCTAATTTTTGGCCTAATCTTCTTCTGATGATCGATTCA  
ACCTCTGATCAAAAAGATATACTTGGTTATATTTTCATCTCTTCAACAAGTTTAGTAATG  
AGCATAACGGCCCTATTGTTCCGCTGGAGAGAAGAACCTATGATTAGCTTTTCGGGAAA  
TTTCCAACGAACAATTTCAACGAAATCTTTCAATTTCTTATTTTACTATGTTCAACTCT

ATGTATTCTCTATCCGTGGAGTACATTGAATGTACAGAAATGGCTATAACAGAGTTTCT  
GTTATTTCGTATTAACAGCTACTCTAGGAGGAATGTTTTTATGCGGTGCTAACGATTTAAT  
AACTATCTTTGTAGCTCCAGAATGTTTCAGTTTATGCTCCTACCTATTATCTGGATATACC  
AAGAAAGACGTACGGTCTAATGAGGCTACTATGAAATATTTACTCATGGGTGGGGCAA  
GCTCTTCTATTCTGGTTCATGGTTTCTCTTGGCTATATGGTTCATCCGGGGGCGAGATCG  
AGCTTCAAGAAATAGTGAATGGTCTTATCAATACACAAATGTATAACTCCCCGGGAATT  
TCAATTGCGCTTATATTCATCACTGTAGGAATTGGGTTCAAGCTTTCCTAGCCCCTTCT  
CATCAATGGACTCCTGACGTATACGAAGGATCTCCCACTCCAGTCGTTGCTTTTTCTTTCT  
GTTACTTCGAAAGTAGCTGCTTCAGCTTCAGCCACTCGAATTTTCGATATTCCTTTTTAT  
TTCTCATCAAACGAATGGCATCTTCTTCTGGAATCCTAGCTATTCTTAGCATGATATTG  
GGGAATCTCATTGCTATTACTCAAACAAGCATGAAACGTATGCTTGCATATTCGTCCATA  
GGTCAAATCGGATATGTAATTATTGGAATAATTGTTGGAGACTCAAATGGTGGATATGCG  
AGCATGATAACTTATATGCTGTTCTATATCTCCATGAATCTAGGAACTTTTGCTTGCATTG  
TATTATTTGGTCTACGTACCGGAACTGATAACATTCGAGATTATGCAGGATTATACACAA  
AAGATCCTTTTTTTGGCTCTCTCTTTAGCTCTATGTCTTATCCCTAGGAGGTCTTCCTCC  
ACTAGCAGGTTTTTTTCGGAAAACCTCATTTATTCTGGTGTGGATGGCAGGCAGGCCTAT  
ATTTCTTGGTTTCAATAGGACTCCTTACGAGCGTTGTTTCTATCTACTATTATCTAAAAT  
AATCAAGTTATTAATGACTGGACGAAAGCAAGAAATAACCCCTCACGTGCGAAATTATA  
GAGGATCCCCTTTAAGATCAAACAATTCCATCGAATTGAGTATGATTGTATGTGTGATAG  
CATCTACTATACTAGGAATATCAATGAACCCGATTATTGCAATTGCTCAGGATACCCTTTT  
TATGTTTCTGCTTTACAAATATGATATTTTTCTGGGCATTTCTAATAATATCAAGCGTTATTC  
CTATTTTGGCATTCTAATTTCCGCAGTTTTAGCCCCGATTAACAAAGGGCCAGAGAAA  
CTTCTAGTTATGAATCGGGTATCGAACCAATGGGCGATGCTTGGTTACAATTTCGAATC  
CGGTATTATATGTTTGTCTAGTTTTTGTGTTTTTGTATGTTGAAACCGTTTTTCTTTATC  
CATGGGCAATGAGTTTTGATGTATTGGGGGTACCCGTATTTATAGAAGCTTTCATTTTCA  
TGCTTATCCTAATTGTTGGTTTAGTTTATGCGTGGCGAAAAGGAGCATTAGAGTGGTCT  
ACGAATTATTTTCTTGGTTAACACTAATTGTAGTTTTTCCGATAGCCGCGGGTCTTTA  
ATTTTTTTTTCTCCCTCATAGAGGAATAAGGTGACTAGAGGATATACAATATATATATGTG  
TCTTAGAACTCCTTCTAACGACCTATGCATTCTGTTATAATTTCCAATTGGACGATCCATT  
AATCCAGCTGGCAGAGGATTATAAATGGATCACTTTTTTTGAGTTTGACTGGCGATTGG  
GAATAGATGGACTTTCCATAGGACCCATTTTACTGACGGGATTTATCACCCTTTAGCTA  
CTTTAGCGGCTCGGCCAGTTACTCTGAATTCCCGACTATTCCACTTCCTGATGTTAGCGA  
TGACAGCGGTCAAATAGGATCATTTTCTTCTCGGGACCTTTTACTTTTTTTCATCATGT  
GGGAATTAGAATTAATTCCCGTTTATCTACTTCTGTCCGTGTGGGGTGGAAAGAAACGC  
CTTTATTCAGCCACAAAATTTATTTGTACACGGCAGGAGGCTCCGTTTTTCTTTTAATA  
GGAGTTTTGGGTATCGGTTTATATGGTTCCAATGAACCAACATTAATTTGGAAACATTA  
GTTAATCGGTTCGTATCCTGTGGCACTGGAAATAATATTCTATATTGGATTTTTTATTGCTT  
TTGCTGTCAAATTGCCAATTATACCCTTTCATACGTGGTTACCAGACACCCACGGAGAG  
GCACATTACAGTACTTGTATGCTTCTAGCCGGAATCTTATTAATAAATGGGAGCATATGGG  
TTGATTCGAATCAATATGGAACATTAACCGCACGCTCATTCTATATTTCCCCCTGGTTCA  
TGATAGTAGGTACCGTGCAAATAATTTATGCAGCTTCAACATCTCCCGGCCAACGGAAT  
TTAAAAAAGAATAGCCTATTCCTCTGTATCTCATATGGGTTTCATAATTCTAGGAATA  
GGCTCGATAACCGATACAGGTCTCAATGGAGCCGTTTTACAAATAATTTCTCATGGGTT  
GATTAGTGTGCACTTTTTTTCTTGGCAGGAACGAGTTATGATAGAATACGTTTTTGCTTA

TCTAGACGAAATGGGCGGACTAGCTATAACCAATTCCAAAGATCTTCACGCTATTCAGTA  
TCTTATCGATGGCCTCCCTTGCATTACCCGGCATGAGTGGTTTTGTTGCAGAATTGATAG  
TATTTTTTGAATAATTACCAGCCAAAAATTTTTTTAATGCCAAAAATAGTAATCACTT  
TTGTAATGGCAATTGGAATGATATTAACCTCTATTTATTCATTATCTATGTTACGGCAAAT  
GTTCTATGGGTACAAGCTATTTAATGCCCAAACCTTATTTTTTTGATTCTGGACCACG  
GGAGTTATTTGTTTTGATCTCGATTCTTCTACCCGTAATAGGTATTGGTATTTATCCCGAT  
TTCGTTCTCTACTATCAGCGGACAAGGCCGAAGCTATTATATCGAATTTTTTTTTG---AT  
GATGCTCGAGCAIGTACTTGTGTTTGTAGTGCCTATTTATTTTCGATTGGCATCTATGGCTTG  
ATTACGAGCCGAAATATGGTTCGGGCCTTGATGTGCCTTGAACCTATACTAAATGCAGTT  
AATATCAATTTGTAAACATTCTCTGATTTTTTTGATAGTCGACAATTAAGGAGATATTT  
TTTCAATTTTTGTTATAGCTATTGCAGCCGCTGAAGCAGCTATCGGATCAGCTATTGTTT  
CGTCAATTTATCGTAACAGAAAATCGACGCGTATCAATCAATCGACTTTGTTGAATAAG  
ATGGAACATACATATCAATATTCCTGGATCATACTTTAGTTCCACTTCCAGTCCCTATGT  
TAATAGGGGTGGGACTTCTATTTTTTCCGACCGCAACAAAAATCTTCGCCGTATGTGG  
GCTTTTATTAGTATTTTATTGTTAAGTATAGTTATGATTTTTTCGATCGATCTATCTATTGA  
GCAAATAGATAGAACTTCGATCTATCAATCCCTAAGGACTTGGACCATCACTAGTGATTT  
GTCTTTTCGAGTTCGGATACTTTATTGATCCACTTACTTCTATTATGTCAATATTAATCACT  
ACAGTTGGAATTCGGTCTTATTTATAGTGACAATTATATGTCTCATGATCAAGGATATT  
TGAGATTTTTGCTTATATGAGTTTTTTCAATGCTTCAATGTTAGGATTAGTTACAAGTTC  
GAATTTCATACAAATTTATATTTTTTGGGAATTGGTTGGAATGTGCTCTTATCTATTAATC  
GGTTTTTGGTTCACACGACCTATTGCGGCAGGCGCCTGTCAAAAAGCATTGTAACTAA  
TCGTGTAGGGGATTTTGGATTATTATTAGGGATCTTAGGTCTTTATTGGCTAACAGGCAG  
TTTTCGAATTTCCGGATTTGTTCGAAATATTGAAAAAC---GAGGTAAACCTTTTATTTGTT  
ACTTTGTGTGCATTTCTATTATTTGCCGGCCCGTTGCTAAATCCGCGCAATTCCTCTT  
CATGTATGGTTACCCGATGCCATGGAAGGGCCTACTCCTATTTCCGGCTCTTATCCATGCT  
GCTACTATGGTAGCGGCGGGAATTTTTCTTGTAGCTCGGCTTCTTCCACTTTTTCATAGTC  
ATACCATACGCAATGAATCTAATATCTTTGATAGGGATAATAACAGTATTTTTTAGGAGCTA  
CTTTAGCTCTTGCTCAACAAGATATTAAGAGAGGTTTAGCTTATTCTACAATGTCTCAAT  
TGGGTTATATGATGTTAGCTCTAGGTATGGGGTCTTATCGAGCCGCTTTATTTCAATTTGAT  
TACTCATGCCTATTCCAAAGCCTTGTGTTTTTAGGATCCGGATCAATTAATCATTCAATG  
GAAGCTATTGTTGGATATTTCCAGATAAAAGCCAGAATATGGTTCCTATGGGTGGGTTA  
AGAAAGCATGTGCCGATTACAAAACCGCTTTTTTAGTAGGTACTCTTCTCTTTGTGG  
TATTCACCTCTCGCCTGTTTTTGGTCCAAGGATGAAATCTTAATGATACTTGGTTGTA  
TTCGCCGATTTTCGCAACAATAGCTTTTTTTCACAGCCGGATTAACCGCATTTTATATGTT  
TCGAATTTATTTACTTACTTTTGTAGGGGCCTTTCAACTTTTGCTTGCAAAATTACAGTGG  
CAAAAAAGAAATTCCTTATATTCAATATCTCTATGGGGTAAAGAAGAACCAAAACCGA  
TTAAAAAC---TTAGTTGCTTTATTAACAATGAATTTTTTTGCGGGCGCTGCCAAG---ACT  
TTTTGTTATCCTCACGAATCAGACAATACTATATTATTTGTTATGCTTGTATTAGTCCCTATT  
TCCTTTGTTTGTGGAGCGATAGGA-----TTGGAGTCGGATATTTTATCAAAATTGTTAAC  
TCCATCTATAAATCTGTTACAACAAAATCAACT--TTTGTGATTGG---GAAGTTGTA  
AAATCCAACCTTTCCGTCAGTATAACGTATTTTGGAAATACTTCTAGCCTACTTTTTATAT  
AAACCTTTTATTCATCTTTACACAATTGGAACATATTGAATTTTTTTGCTATTCTTTGGG  
ACAAAATACTCAATTTTCTATATGATTGGTCATATAATCGTGCTTATATAGATGCTTTTTAC  
ACAAGATCCTTAACAGAAGGGATAAGAGGATTAGCGGAACTAACTCATTTGTTTCGACA

GACGAGTAATTGATGGAATTACGAATGGGGTTGGTATTACAAGTTTTTTTTGTAGGGGAA  
GGTATAAAATATTTAGGGGGAAGT--CGCATCTCTTTTTATCTCTTATTATATTTATTTTCG  
TTATTATTCCTTTTAATATTTCTCTTCATGGATTGCTGGACCAATACACGATTTTATTTT  
AGTTTTTCTGGGATCGGGTCTTATATTAGGAGGTCTGGGAGTGGTATTATTTACCAACCC  
AATTTATTCTGCCTTTTCCTTGGGATTGGTTCTTGTGTTGTATATCATTATTCTATATTCTATC  
AAATTCCCATTTTGTAGCTGCCGCGCAACTCCTATTTACGTGGGAGCTGTAAATGTTTT  
AATCATATTTGCTGTAATGTTTCATGAACGGCTCAGACTATTCCAAAGATTTTAATCTTTG  
GACTATTGGCGATGGTCTTACTTCTCTGGTTTTGTACAAGTATTTTTTTTTTCGCTAATCACT  
ACTATTCTCGATACATCGTGGTACGGGATTATTTGGACTACACGAGCCAACCAGATTATT  
GAACAAGATTTGATAAGTAATAGTCAACAAATTGGAATTCATTTATCAACAGACTTTTTT  
CTTCCATTTGAACTCGTTTTCAATAATTCTTTTAGTTGCTTTAATAGGTGCAATTGCCGTG  
GCGCGTCAAATGAGTATACTAGCTACAGAAAAAGAATTTATGATAGTCAATATGGGACC  
TCACCACCCGTCAATGCATGGGGTTCTTCGTCTCATCGTTACTCTAGACGGTGAAGATG  
TTATTGACTGTGAACCAATATTGGGTTATTTACACAGAGGGATGGAAAAAATTGCGGAA  
AACCGAACAATTATACAATATCTGCCTTATGTAACCCGTTGGGATTATTTAGCTACTATGT  
TCACAGAAGCAATAACTGTAAATGGACCAGAACAGTTGGGAAATATTCGCGTACCTAA  
AAGGGCCAGCTATATCAGAGTAATTATGTTGGAGTTGAGTCGTATAGCTTCCCATCTGTT  
ATGGCTTGGCCCTTTTATGGCAGATATTGGTGCACAGACTCCTTTCTTCTATATTTTCAG  
AGAAAGAGAATTAGTATATGATCTGTTTGAAGCTGCCACCGGTATGAGAATGATGCATA  
ATTATTTTCGTATCGGAGGAGTAGCAGCTGATTTACCCTATGGTTGGATAGATAAATGTT  
TGGATTTCTGCGATTATTTTTTAACAGGGGTTGCTGAATATCAAAAACCTTATTACGCGAA  
ACCCCATTTTTTTAGAACGAGTTGAAGGAGTAGGCATTATTGGTGGAGAAGAAGCAAT  
AAATTGGGGTTTATCAGGACCAATGCTACGAGCGTCTGGAATAGAATGGGATCTTCGTA  
AAGTTGATCATTATGAGTGTATGACGAATTTGATTGGGAAGTCCAGTGGCAAAAAGA  
AGGGGATTCCTTAGCTCGTTATTTAGTCCGAATCGGTGAAATGACGGAATCTGTCAAAA  
TTATTCAACAGGCTTTAGAAAGGAATTCGGGAGGCCCTATGAAAATTTAGAAATCCGC  
TGCTTTGATAGAGAAAGCGATCCAGAACGGAATGATTTTAAAATAGATTATTAGTAA  
AAAGCCTTCTCCTACCTTTGAATTGACAAAACAAGAACTTTATGCGAGAGTAGAAGCC  
CCAAAAGGAGAATTGGGAATTTTTCTGATAGGGGATCAAAGTGGGTTTCCTTGGAGAT  
GGAAAATTCGCCACCGGGTTTTATCAATTTGCAAATTCCTCCTCAGTTAGTTAAAAGA  
ATGAAATTTGGCTGATATTATGACGATATTAGGTAGTATAGATATCATTATGGGGGAAGTTG  
ATCGTATGTTCCCTATGGTAACCGGTTTCATGAATTATGGTCAACAAACAATACGAGCTG  
CAAGGTACATTGGTCAAAGTTTCATGATTACTTTATCCCAAGCAAATCGTTTACCTGTAA  
CTATTCAATATCCTTATGAAAATTAATCCCATCAGAGCGTTTTTCGTGGTTCGAATCCATT  
TTGAATTTGATAAATGTATTGCTTGTGAAGTATGCGTTTCGGGTATGTCCTATAGATCTGC  
CTGTTGTTGATTGGAAATTTGAAACAGATATTCGAAAGAAACGATTGCTTAATTACAGT  
ATTGATTTTGGAAATTTGTATTTTTTGTGGTAACTGCGTTGAGTATTGTCCAACAAATTGT  
TTATCAATGACTGAAGAATATGAACTTGGGACTTACGACCGTCACGAATTGAATTATAAT  
CAAATTGCTTTAGGTCGTTTACCAATGTCAGTAATTGACGATTTTACAATTCGAACAGTC  
TTGAATTCG-----ATGCAGGGTTCGTTTGTCTGCTTGGCT  
GGTCAAGCATGGGCTAGTTCATAGATCTTTGGGCTTTGATTACCAAGGAATAGAACTT  
TACAAATAAAGCCCGAGGATTGGCACTCCGTTGCTGTCATTTTGTATATATATGGCTACA  
ATTATCTACGGTCCCAATGTGCCTATGATGTAGCACCGGGCGGACTGTTAGCCAGTGTG  
TATCATCTTACGCGAATAGAGTATGGTGTAGATCAACCAGAAGAGGTATGCATAAAAGT



ATTTGCTCCAAGGAGTAATCCTAAAATTCCATCGGTTTTCTGGGTTTGGAAAAGTGCGA  
ATTTTCAAGAACGGGAATCTTATGATATGCTGGGAATCCTTTATGATAATCATCCACGAC  
TGAAACGTATCTTAATGCCTGAAAGTTGGATAGGGTGGCCCTTACGTAAGGATTATATTG  
CCCCAATTTTTATGAAATACAAGATGCTTAT-----

-----ATGAATTCTATTGAATTTTCCTTACTTGATCGAACAACCCCAAATTCATTTATTTCAA  
CTACATCAAACGATCTTTCAAATTGGTCAAGACTCTCCAGCTTATGGCCGCTTCTTTATG  
GTACCAGTTGTTGTTTCATTGAATTTGCTTCATTAATCGGCTCGCGGTTTCGATTTTGACC  
GTTATGGGCTGGTACCAAGATCGAGCCCTAGACAGGCGGACCTAATTTAACAGCTGGT  
ACAGTAACAATGAAAATGGCTCCTTCTTTAGTGAGATTATATGAACAAATGCCTGAACC  
AAAATATGTTATGCTATGGGAGCATGTACAATTACAGGGGGGATGTTTCAGTACCGATT  
GTATAGTACTGTTTCGAGGAGTTGATAAGCTAATTCCCGTGGATGTTTATTTGCCGGGTTG  
CCCGCCTAAACCAGAGGCCGTTATAGATGCCATAACAAAACCTTCGTAAGAAAATATCTC  
GAGAAATCTATGAAGATCGAATTCGATTG-----GAGAATCGCACTTTTACTACCAATCAC  
AAGTTTCGTGTTGTATGCAGTACTAATACTGGAAATTATGATCAAGGATTACTTTATCAA  
CCACCA---ACGTCAGAAATCCCGCCTGAAACCTTTTTCAAATACAAAAGTTTCAGTATCT  
TCCCCCGAATTCATTAATATGCAAATTAGAAATACCTTTTTCTTCGTTAAAGGGAGAGATT  
ACTCGATTCATTTCCGTATCCCTCATGATATATATAATAACTCGGGCATCAATTTCAAATG  
CATATCCCATTTTTGCGCAGCAGGGTTTTGAAAATCCACGAGAAGCAACTGGTCGTATT  
GTATGCGCCAATTGCCATTTAGCTAATAAGCCCGTGGATATTGAGGTTCCACAGGCGGT  
ACTCCCCGATACTGTATTTGAAGCAGTTGTTAGAATTCCTTATGATATGCAACTAAAACA  
AGTTCTTGCTAATGGTAAAAAGGGGGCTTTGAATGTGGGGGCCGTTCTTATTTACCAG  
AGGGGTTTGAATTAGCCCCCCCCGATCGTATTTCCGCCGAGATGAAAGAAAAGATAGG  
CAAGCTGTCTTTTCAGACCTACCGACCCACTAAAAAAAACATTCTTGTGATAGGGCCA  
GTTCCCTGGTCAGAAATATAGTGAATAACTTTTCCTATTCTTTCCCCGAACCCCGCGACT  
AATAAAGATGCTTACTTCTTAAAATATCCAATATACGTAGGTGGGAACAGGGGAAGGGG  
TCAGATTTATCCCGACGGGAACAAAAGTAACAATACGGTTTATAATGCTACATCTGCGG  
GTATAGTAAGCAAATCATAAGAAAAGAAAAGGGGGATAAGAAAATAACCATAACGGA  
TGCATCGAATGGACGTGAAGTGGTTGATATTATCCCCCAGGACCAGAACTTCGTGTTT  
CAGAGGGCCAATCTATCAAACCTTGATCAACCATTAACAAGTAATCCTAATGTAGGCGGG  
TTTGGTCAGGCAGATGCAGAAATAGTACTTCAAGATCCATTACGTGTCCAAGGCCTTTT  
GTTCTTTTTGGCATCTGTTGTTTTGGCACAAATATTTTTGGTTCTTAAAAAGAAACAGTT  
TGAGAAGGTTCAATTGTCCGAAATGAATTTCCCTCAATAAAGTCTACGATTGGTTCAAG  
AACGTCTCGAGATTCAGGCGATTGCAGATGATATAACTAGTAAATACGTTCCCTCCTCATG  
TCAACATATTTTATTGTCTGGGAGGAATTACGCTCACTTGTTTTTTAGTACAAGTAGCTA  
CAGGGTTTGCTATGACTTTTTACTACCGCCCGACCGTTACTGAGGCTTTTGCCTCTGTTC  
AATACATAATGACGGAAGTTAACTTCGGGTGGTTAATTCGATCGGTTTCATCGATGGTCG  
GCAAGTATGATGGTCCCTAATGACAATCCTGCACGTATTTTCGCGTGTATCTACCGGGGG  
TTTTAAAAAACCTCGCGAATTGACTTGGGTTACAGGTGTGGTTCTGGCTGTATTGACCG  
CATCTTTTTGGTGTAACAGGTTATTCTTTACCTTGGGACCAAATTGGATATTGGGCAGTAA  
AAATTGTAACAGGCGTGCCCGAAGCAATTCGGTAATAGGATCGCCTTTGGTAGAGTTA  
TTACGCGGAAGTGCTAGTGTGGGACAGTCCACTTTGACTCGTTTTTATAAGTTTACACAC  
TTTTGTATTACCTCTTCTTACTGCCGTATTTATGTTAATGCATTTCCCTAATGATACGTAAAC  
AAGGTATTTCTGGCCCTTTAATGGGAGTAACAAAAAACCTGACTTGAATGATCCTGTA

TTAAGGGCTAAGTTGGCTAAGGGTATGGGTCATAATTATTATGGAGAACCCGCATGGCC  
CAACGATCTTTTATATATTTTTCCAGTAGTAATTCTAGGTACTATTGCATGTACCGTAGGC  
TTAGCGGTTCTAGAACCATCAATGATTGGTGAACCCGCGGATCCATTTGCAACTCCTTT  
GGAAATCTTACCCGAATGGTATTTCTTTCCCGTATTTCAAATACTTCGTACAGTACCCAA  
TAAGCTGTTGGGTGTTCTTTTAATGGTTTCAGTACCTACGGGATTATTAACAGTACCTTT  
TTTGAAAATGTTAATAAATCCAAAATCCATTTCCCGTCCCGTAGCGACAACCGTCT  
TTTTGATTGGGACCGCAGTGGCCTTGTGCTTGGGTATTGGAGCAACATTACCTATTGAA  
AATCCCTAACTTTAGGTCTTTTTATGATTGAAGTCTTTCTATTTGGAATCGTCTTAGGTC  
TAATTCCTATTACTTTGGCTGGATTATTCGTAACCGCCTATTTACAATACAGACGTGGTGA  
TCAGTTGGACCTTATGCCTACTATACTAGTTATTTTGGTTTTCTACTAGCGGCTTTAACT  
ATAACCTCGGCTCTATTTATGGTCTGAGTAAGATAGGACTTATTATGGATATAGTAAGTC  
TCGCTTGGGCTGCTTTAATGGTAGTCTTTACATTTTCCCTTTCGCTCGTAGTATGGGGAA  
GAAGTGGACTCATGATTATTCGTTCCCGGAACCAGAAGTAAAAATTTTGGTAGATAGG  
GATCCCGTAAAACTTCTTTTCGAGGAATGGGCCAAACCGGGGCATTTCTCAAGAACCA  
TAGCTAAGGGACCTGAGACTACCACTTGGATCTGGAACCTACATGCTGATGCTCACGA  
CTTCGATAGCCATAACAGTGATTTGGAGGAGATCTCTCGAAAAGTATTTAGTGCCCAT  
TCGGACAACCTCCATCATTTTTCTTTGGCTGAGCGGAATGTATTTCCACGGTGCTCGTT  
TTTCCAATTATGAAGCCTGGCTAAGCGATCCTACTCACATTGGACCTAGCGCACAGGTG  
GTTTGGCCAATAGTGGGCCAAGAAATATTGAACGGTGATGTGGGCGGGGGTTCCGAG  
GAATACAAATAACCTCCGGGTTTTTTTCAGCTTTGGCGAGCATCTGGAATAACTAGTGAA  
TTACAACCTCTATTGTACCGCAATTGGCGCATTGATTTTTGCAGCCTTAATGCTTTTTGCT  
GGTTGGTCCATTATCACAAAGCTGCTCCAAAATTGGCTTGGTTTCAGGATGTAGAATC  
TATGTTGAACCACCATTTAGCGGGGCTGCTAGGGCTCGGGTCCCTTTCTTGGGCCGGGC  
ATCAAGTACATGTATCTTTACCGATTAACCAATTTCTAAACGCTGGAGTAGATCCTAAAG  
AGATCCCCTTCCCTCATGAATTTATCTTGAATCGGGATCTTTTGGCTCAACTTTATCCCA  
GTTTTTCCGAAGGAGCAACCCCATTTTTTACCTTGAATTGGTCAAATATGCGGAATTT  
CTTACTTTTCGTGGCGGATTAGATCCAGTAACTGGGGGTCTATGGCTGACCGATATTGC  
ACACCATCATTTAGCTATTGCAATCTTTTCCCTGATCGCGGGGCACATGTATAGGACCAA  
CTGGGGGATTGGTCATGGTCTAAAAGATATTTTAGAGGCTCATAAAGGTCCATTTACAG  
GTCAAGGCCATAAAGGATTATATGAGATCCTAACAACATCATGGCATGCTCAATTATCGC  
TTAACCTAGCTATGTTAGGATCTTTAACCATTTATTGTAGCTCATCATATGTATTCCATGCC  
CCCTTATCCATATCTAGCTACTGACTATGGTACACAACCTGTCATTGTTACACACCACAT  
GTGGATTGGTGGATTTCTCATTTGTTGGCGCTGCTGCGCATGCAGCCATTTTTATGGTAAAG  
AGACTATGATCCAACCTACTCGATAACAACGATCTCTTAGATCGTGTCTTCCGGCATCGCGA  
TGCAATCATATCACATCTCAACTGGGTATGTATATTTCTAGGATTTACAGTTTTGGTTTG  
TATATTCATAATGATACCATGAGTGCTTTAGGGCGTCCACAAGATATGTTTTAGATACC  
GCGATAACAATTACAACCTGTCTTTGCTCAATGGATACAAACACCCACGCCTTAGCACC  
CGGCGGAACGGCCCCTGGTGCAACAGCAAGCACCAGTTTGACTTGGGGGGGTGTTGA  
TTAGTGGCAGTGGGCGGAAAAGTTGCTTTGTTACCTATTCCATTAGGAACCGCGGATT  
TTTTGGTACATCACATTCATGCATTTACGATTCATGTGACGGTATTGATACTCCTGAAAG  
GAGTTCTTTTGTCTGCTAGCTCGGTTTTGATACCGGATAAAGCAAATCTTGGGTTTTGCT  
TTCCCTTGTGATGGTCTTGAAGAGGGGGGACATGTCAAGTATCCGCTTGGGATCATGT  
CTTCTTAGGACTATTCTGGATGTACAATGCAATTTCCGGTAGTAATATCCATTTAGTTG  
GAAAATGCAGTCAGATGTTTGGGGTAGTATAAGTGATCAGGGGGTGGTAACTCATATTA

CAGGAGGAAACTTTGCGCAGAGTTCCATTACGATTAATGGGTGGCTCCGCGATTTTTTA  
TGGGCACAGGCATCCCAGGTAATTCAGTCTTATGGTTCCTCATTATCTGCATATGGCCTT  
TTTTTCCTAGGTGCTCATTGTATGGGCTTTTAGTTTAAATGTTTCTATTTCAGCGGGCGTG  
GTTATTGGCAAGAAGTTATTGAATCCATCGTTTGGGCTCATAATAAATTAAGTTGCTC  
CTGCTACTCAGCCTAGAGCCTTGAGCATTGTACAAGGACGCGCTGTAGGAGTAACCCA  
TTACCTTCTAGGTGGAATTGCCACAACATGGGCGTTCCTTCTTAGCAAGAATTATTGCAG  
TAGGAATGGCATTAAAGATTTCCAAGGTTTAGCCAAGGCTTAGCTCAGGACCCACTACT  
CGTCGTATTTGGTTTTGGTATTGCTACCGCACATGACTTCGAGAGTCATGATGATATTACT  
GAGGAACGTCTTTATCAGAATATTTTTGCTTCGCACTTCGGGCAATTAGCAATAATTTTT  
CTGTGGACTTCCGGAATCTCTTTCATGTAGCTTGGCAAGGAAATTTGAGGCATGGGT  
ACAGGACCCTTTACATGTAAGACCTATTGCTCATGCAATTTGGGATCCTCATTTTGGTCA  
ACCGGCCGTGGAAGCTTTTTCTCGGGAGGTGCTCTTGGCCCGGTGAATATCGCTTATT  
CTGGTGTATTATCAGTGGTGGTATAACAATCGGTTTACGCACTAATGAGGATCTTTACTG  
GAGCTCTTTTTCTATTATTTCTTTCCGCCATATCTTTAATAGCGGGTTGGTTACACCTACA  
ACCGAAGTGGAAACCGAGCGTTTCGTGGTTCAAAATGCCGAATCTCGTCTGAATCAT  
CATTTGTCAGGACTGTTTCGGAGTAAGTTCCTTGGCTTGGACAGGGCATTTAGTACATGT  
CGTATTCTGGATCCAGGGGGGAGTATGTTTCGATGGAATAATTTCTTAGATGTATTGCC  
GCATCCCCAAGGGTTAGGCCCACTTTTTACGGGTCAGTGAATCTTTATGCGCAAACC  
CCGATTCAAGTAGTCATTTATTTGGTACCTCCCAAGGATCAGGAACTGCCATTCTAACC  
CTTCTCGGGGGATTCCATCCACAAACGCAAAGCTTATGGCTGACCGATATTGCTCATCA  
TCATTTAGCTATTGCATTTATTTTTCTCGTTGCTGGTTCATATGTATAGAACGAATTCGGG  
ATTGGGCACAGTATAAAAGATCTTTTAGAAGCACATATTCCTCCGGGAGGACGCTTGGG  
GCGCGGGCATAAGGGTCTTTATGACACAATCAATAATTCGCTTCATTTTCAATTAGGCCT  
TGCTCTAGCCTCTTTAGGGGTTATTACTTCCTTGGTAGCTCAACACATGTACTCTTTACC  
TGCTTATGCATTCATAGCGCAAGATTTTACTACTCAAGCTGCGTTATATACTCATCACCAA  
TACATCGCGGGATTCATCATGACAGGAGCTTTTGTACAGGAGCTATCTTTTTTATTAGA  
GATTACAATCCGGAACAGAATGAGGATAATGTATTGGCAAGAATGTTAGACCATAAGGA  
AGCTATTATATCCCATTTAAGTTGGGCCAGCTTGTCTGGGGTTCCATACTTTGGGACT  
TTATGTTTATAATGATGTCATGCTTGCTTTTGGTACTCCGGAGAAACAAATCTTGATCGA  
ACCGATATTTGCCCAATGGATACAATCTGCTCATGGTAAACTTCATATGGATTCGATGT  
ACTTTTATCTTCAACGGATGGCCCTGCATTCAATGCGGGTCGAAGCATATGGTTGCCCTG  
GCTGGTTAAGTGCTGTTAATGAG-----AATAGTAATTCTCTATTCTTAACAATAGGCCCTG  
GAGACTTTTTGGTTCATCATGCTATTGCTCTAGGTTTACATACAACTACATTGATCTTGGT  
AAAGGGGGCTTTAGATGCACGGGGTTCTAAGTTAATGCCAGATAAAAAGGATTTCCGT  
TATAGTTTTCTTGGCAGGTTCCGGGACGAGGCGGTACTTGTGATATTTCCGGCTTGGGA  
CGCATTTTATTTGGCAGTTTTCTGGATGTTAAATACCATTGGGTGGGTTACTTTTTATTGG  
CATTGGAATCACATCACGTTATGGCAGGGTAACGTTTACAGTTAATGAATCTTCCAC  
TTATTTGATGGGATGGTTAAGAGATTATCTATGGTTAAACTCTTCCCAACTTATCAATGG  
GTATAACCCGTTTGGTATGAATAGTTTATCAGTCTGGGCGTGGATGTTCTTATTTGGACA  
TCTTGTGGGCTACTGGATTTATGTTTTTAAATTTCTTGGCGCGGGTATTGGCAAGAATT  
GATTGAAACTTTAGCGTGGGCTCACGAACGCACACCCTTAGCTAATTTGATTCGATGGA  
GAGATAAACCAGTGGCCCTTTCCATTGTGCAAGCACGATTGGTTGGATTAGCCCACTTC  
TCTGTAGGTTATATATTCACTTATGCGGCTTTCTTGATTGCCCTTACATCGGGCAAATTTG  
GTATGTCACATTCAGTAAAGATTTATGATACATGTATAGGGTGTACTCAATGTGTACGAG

CTTGCCCCACGGATGTATTAGAAATGATACCTTGGGACGGATGTAAAGCAAAGCAAATT  
GCTTCTGCTCCAAGAACAGAGGACTGTGTTGGTTGTAAGCGATGTGAATCCGCCTGTC  
CAACGGATTTCTTGAGTGTTTCGAGTTTATTTATGGCATGAAACAACCCGAAGCATGGGT  
CTAGCTTATATGACAATTCACAGCTTTCCCTCTATTTTTGTGCCTTTAGTGGGCCTAGTAT  
TTCCGGCAATGGCAATGGCTTCGTTATTTCTTTATCTTGAAAAATAAGATTTTGATGC  
GAGATCTAAAAACATATCTTTCCGTGGCACCGGTAAGTACTCTATGGTTCGGGTCT  
TTAGCAGGGTTATTGATAGAAATCAACCGTTTATTCCTCCGACGCATTGACATTTCTTTT  
TTTTCAATTCATGACTGCAATTTAGAGAGACGCGAAAGCGAACGCCTATGGGGTTCGCTT  
CTGTAACCTGGATAACTAGCACTGAAAACCGCCTTTACATTGGTTGGTTTGGTGTTTTGA  
TGATCCCTACTTTATTGACCGCAACTTCTGTATTTATTATCGCCTTCATTGCTGCTCCTCC  
AGTAGATATTGACGGTATTCGTGAACCTGTTTCTGGATCTCTACTTTATGGAAACAATAT  
TATTTCTGGTGCGATTATTCCTACTTCTGCAGCTATAGGTTTGCATTTTTACCCGATATGG  
GAAGCGGCATCCGTTGATGAATGGTTATACAATGGCGGTCTTATGAGCTAATTGTTCTA  
CACTTCTTACTTGGTGTAGCTTGTACATGGGTCGTGAGTGGGAACTTAGTTTCCGTCT  
GGGTATGCGTCCTTGGATTGCTGTTGCATATTCAGCTCCTGTTGCAGCAGCGACTGCTG  
TTTTCTTGATCTACCCAATCGGTCAAGGAAGTTTTTCTGATGGTATGCCTCTAGGAATCT  
CTGGTACTTTCAATTCATGATTGTATTCCAGGCTGAGCACAAACATCCTTATGCACCCAT  
TCCACATGTTAGGCGTAGCTGGTGTATTCGGCGGCTCCCTATTCAGTGCTATGCATGGTT  
CCTTGGTAACCTCTAGTTTGATCAGGGAAACCACAGAAAATGAATCTGCTAATGCAGG  
TTACAGATTCGGTCAAGAGGAAGAACTTATAATATCGTAGCTGCTCACGGTTATTTTG  
GCCGATTGATCTTCCAATATGCTAGTTTCAACAATTCCTCGTTCTTTACATTTCTTCCCTGGC  
TGCTTGGCCTGTAGTAGGTATCTGGTTCCTGCTTTAGGTATTAGCACTATGGCTTTCAA  
CTAAATGGTTTCAATTTCAACCAATCTGTAGTTGATAGTCAAGGTGCTGTAATTAATAC  
CTGGGCTGATATTATTAATCGTGCTAACCTTGGTATGGAAGTTATGCATGAACGTAATGC  
TCATAACTTCCCTCTAGACCTAGCTGCTATTGAAGCCCCATCTACAAATGGGATGGGTTT  
GCCTTGGTATCGTGTTCCATACCGTTCGATTTGAATGATCCCGGTGCTTTGATTGCTGTCCA  
TATAATGCATACAGCCCTGGTTGCGGGTTGGGCCGGTTCAATGGCTCTATATGAATTAGC  
TGTTTTTGATCCCTCCGATCCAGTTCTTGATCCAATGTGGAGACAAGGCATGTTGTTAT  
ACCCTTCATGACTCGTTTAGGAATAACCGATTCATGGGGTGGTTGGAGTATTACA---GG  
GGGGACAGTAACGAATCCGGGTATTTGGAGTTACGAAGGTGTAGCGGGGGCACATATT  
GTGTTTTCCGGATTGTGCTTCTTGGCAGCTATCTGGCATTGGGTGTATTGGGATCTAGCA  
ATATTTGTTGATGACCGTACAGGAAAACGTTCTTTGGATTTGCCTAAAATCTTTGGAATT  
CATTTATTTCTCTCAGGAGTGGCTTGCTTTGGTTTTGGGACATTTTCATGTAACAGGATTG  
TATGGTCTGGAATATGGGTGTCTGATCCGTATGGACTAACTGGAAAGGTACAATCTGT  
AAATCCAGCATGGGGTGTGGAAGGTTTTGATCCTTTTGTTCAGGAGGAATAGCCTCTC  
ATCATATTGCGGCAGGGACATTGGGCATATTAGCAGGCTTATTCCATCTCAGTGTCCGCC  
CGCCACAACGCTTATACAAAGGATTACGTATGGGCAATATTGAAACCGTTCTTTCCAGC  
AGCATCGCTGCTGTCTTTTTTGCAGCGTTTGTGTTGCTGGAACCTATGTGGTATGGGTC  
AGCAACTACCCCATCGAATTATTTGGTCCCACCCGTTATCAATGGGATCAGGGATACTT  
TCAGCAAGAAATATATCGAAGAGTCAGTGCTGGACTAGCCGAAAATCAAAGTTTATCA  
GAAGCTTGGTCTAAAATTCCTGAAAAATTAGCTTTTTTATGATTACATCGGAAATAATCCT  
GCGAAAGGGGGATTATTCAGAGCGGGTTCAATGGATAACGGGGATGGAATAGCTGTCCG  
GGTGGTTAGGACACCCATATTTAGAGATAAAGAAGGGCGTGAACTTTTTGTACGTCGT  
ATGCCTACTTTTTTTGAAACATTTCCAGTTGTTTTGGTAGACGGAGATGGAATTGTTAG

AGCCGACGTTCCCTTTTCGAAGGGCAGAATCGAAGTATAGTGTCGAACAAGTAGGTGTA  
ACCGTTGAGTTCTATGGTGGCGAGCTGAATGGCGTGAGTTATAGTGATCCTGCTACTGT  
GAAAAAATATGCTAGACGTGCTCAATTGGGTGAAATTTTGAATTAGATCGTGCTACTT  
TGAAATCCGATGGTGTTCGTCGACGCCAAGGGGCTGGTTTACGTTTGGACACGC  
TTCATTTGCTCTGCTTTTCTTCTTCGGACACATTTGGCATGGTGCTAGAACCTTGTTT  
AGATGTTTTGCTGGTATTGACCCGGATTTGGACGCTCAAGTGGAATTTGGAGTATTCC  
AAAACTTGGAGATCCAACCTACAAGAAGACAAGTAGTC-----GT  
GGAAACGCTCTTTAATGGAACCTTAGCTGTAGCAGGTCGTGACCAAGAAACCACCGGT  
TTCGCTTGGTGGGCCGGGAATGCCCGACTTATCAATTTATCCGGTAAACTGCTGGGCGC  
TCATGTAGCCCATGCTGGATTAATCGTATTCTGGGCCGAGCAATGAACCTATTTGAAG  
TGGCTCATTTTCGTACCAGAAAAGCCCATGTATGAACAAGGATTAATTTTACTTCCCAC  
CTAGCTACTCTAGGCTGGGGGGTAGGTCCTGGTGGGGAAGTTATAGACACCTTTCCATA  
CTTTGTATCTGGAGTACTTCACTTAATTTCTCTGCAGTATTGGGCTTTGGCGGTATTTAT  
CATGCACTTCTGGGACCTGAGACTCTTGAAGAATCTTTTCCATTCTTCGGTTATGTATGG  
AAAGATAGAAATAAAATGACCACAATTTTGGGTATTCACCTAATCTTGTTAGGTATAGGT  
GCTTTTCTTCTAGTATTCAAGGCTCTTTATTTTGGGGGCGTGTATGATACCTGGGCTCCG  
GGGGGGGGGAGTTAAGAAAATTACCAACTTGACCTTAGCCCAAGTGTTATTTTGTG  
GTTATTTACTAAAATCCTTCTTTGGAGGAGAGGGGTGGATTGTTAGTGTGGATGATTTG  
GAAGATATAATTGGAGGTCATGTATGGTTAGGTTCCATTTGTATATTTGGTGGAACTCTGG  
CATATCTTAACCAAGCCTTTTGCATGGGCTCGCCGTGCACTTGTATGGTCTGGGGAGGC  
TTACTTGTCTTATAGTTTAGGTGCTTTAGCTGTTTTTGGTTTCATTGCTTGTGCTTTGTC  
TGGTTCAATAATACCGCTTATCCTAGTGAGTTTTATGGTCCCCTGGGCCAGAAGCTTCT  
CAAGCTCAAGCATTACTTTTCTGGTTAGAGACCAACGCTTGGGGGCTAATGTGGGATC  
CGCTCAAGGGCCTACTGGTTTAGGTAATATCTAATGCGTTCCCCTACTGGAGAAGTCA  
TTTTTGGGGGAGAACTATGCGTTTTTGGGATCTGCGTGCTCCATGGTTAGAACCTCTA  
AGGGGTCCCAACGGTTTAGACTTGAGTAGGTTGAAAAGGACATAACCTTGGCAA  
GAACGACGTTCTGCGGAATATATGACTCATGCTCCTTTAGGTTCTTTAAATTCTGTGGGT  
GGAGTAGCTACCGAGATCAATGCAGTTAATTATGTCTCTCCGAGAACTTGGTTATCTACT  
TCTCATTTTGTCTAGGCTTCTTCTTCTTCGTAGGTCACCTTATGGCACGCGGGAAGAGCT  
CGTGCAGCTGCAGCAGGGTTTGA AAAAGGAATTGATCGTGATTTTGAACCTGTTCTTT  
CGATGACTCCTATTAACATGACTATAGCCCTTGGTAAATTTACCAAAGAGGAAAAGGAT  
TTATTTGATATTATGGATGACTGGTTACGGAGGGACCGATTGCTTTTGTAGGTTGGTCT  
GGCCTATTGCTCTTTCCTTGTGCCTATTTGCTTTAGGGGGTTGGTTACAGGCACAAC  
CTTTGTAACCTTCATGGTATACCCATGGATTAGCCAGTTCCATTTGGAAGGCTGCAACTT  
CTTAACCGCCGAGTTTCGACTCCTGCTAATAGTTTAGCGCATTCTTTGTTGTTACTATG  
GGTCCCTGAAGCACAAGGAGATTTTACTCGCTGGTGTCAATTAGGCGGTCTTTGGACT  
TTTGTGCTCTACACGGTGCCTTCGGACTAATAGGTTTCATGTTACGTCAATTTGAACTT  
GCTCGCTCTGTTCAATTGCGACCTTATAATGCAATAGCATTCTCTGCTCCAATTGCTGTT  
TTTGTCTCTGATTCCTGATTTATCCACTAGGTCAGTCTGGTTGGTTCTTTGCGCCTAGTT  
TTGGTGTAGCGGCGATATTCGATTCATCCTTTTTTTTCCAAGGGTTTCATAATTGGACAT  
TGAACCCCTTTATATGATGGGAGTTGCCGGTGTATTGGGCGCTGCTCTGCTATGTGCCA  
TTCATGGCGCTACCGTAGAAAATACTTTATTTGAAGATGGTGATGGTGCAAACACATTC  
CGTGCTTTTAAACCAACGCAAGCCGAAGAAACCTATTCGATGGTCACCGCTAACCGCT  
TTTGGTCTCAAATCTTTGGGGTTGCTTTTTTCCAATAAACGTTGGTTACATTTCTTTATGTT

ATTTGTACCAGTAACCGGTTTATGGATGAGTGCTCTTGGAGTAGTCGGCCTAGCCCTGA  
ACCTACGTGCTTATGACTTCGTTTCCCAGGAAATCCGTGCAGCGGAAGATCCTGAATTT  
GAGACTTTCTACACAAAAAATATTCTTTTAAACGAGGGTATTTCGTGCTTGGATGGCGGC  
TCAAGATCAGCCTCATGAAAACCTTATATTCCCTGAGGAGGTTCTACCCCGTGGAAACG  
CTCTTATGTCTGGAAGCACAGGAGAACGTTCTTTTGCTGATATTATTACCAGTATTCGAT  
ACTGGGTCATTCATAGCATTACTATACCTTCCCTATTTCATTGCGGGTTGGTTATTTCGTCAG  
CACGGGGTTAGCTTATGATGTGTTTGGAAAGCCCCGGCCAAACGAGTATTTTACAGAG  
AGCCGGCAAGGAATTCATTAATAACCGGCCGTTTGGATTCTTTGGAACAACCTCAATGA  
ATTTAGTAGATCTTTTATGACCATAGATCGAACCTATCCAATTTTACAGTGCATGGTT  
GGCTGTTACGGACTAGCTGTACCTACCGTTTCTTTTTGGGGTCAATATCAGCAATGC  
AGTTCATCCAACGCATGGCTACACAAACAGTTGAGGGTAGTTCTAGA---GCTCGTCCAA  
AAAGAACTTCTGCAGGGGGGTTGTTGAAACCTTGAATTCGGAATATGGTAAAGTAGC  
TCTGGATGGGGAACACTCCTTTGATGGGAGTCGCAATGGCTTATTTGCGGTATTCCT  
ATCTATATTTTGGAGATTTATAATTCGTCCGTTTACTGGACGGAATTTCACTGAATATG  
CTTACTCTCAAACCTTTGTTTACACCGTAGTGATATTCTTTGTTTCGCTCTTCATCTTCG  
GATTCCTGTCTAATGATCCAGGGCGTAATCCCGGACGCGAAGAAATGGCCGATACTACT  
GGAAGGATTCCCCTTTGGATAATAGGAACTGTAACCTGGTATTCTGTGATCGGTTTAATA  
GGCATTTCCTTTTATGGTTCATATCCGGATTAGGTTTCGTCCTTGATGCTTAATATCTTTA  
GTTTAATGTATATCTGTCTTAATTCTGCCCTTTAT---AGTAGTTTTTTATTTCGCTAAATTAC  
CCGAGGCCTACGCTTTTTTGAATCCAATTGTAGATGTTATGCCAGTAATACCTGTTCTAT  
TTTTTCTCTTAGCCTTTGTTTGGCAAGCTGCTGTAAGTTTTTCGAATGACACAATCAAAC  
CAAACGAACAAAATGTTGAATTGAACCGTACCAGTCTCTACTGGGGGTTATTGCTCAT  
TTTTGTACTTGCTGTTTTATTTTCCAATTACTTCTTCAATATGGAAGTAAATATTCTCGCA  
TTTATTGCTACTACACTGTTTCGTTCTAGTTCCCTACTGCGTTTTTGGCTTATAATACGTAA  
AAACGGTCAGTCAAAGTGATATGGAAACAGCAACCCTAGTCGCCATCTCTATATCTGGG  
TTACTTGTAAAGTTTTACTGGGTACGCCCTTATATACTGCTTTTTGGGCAACCCTCTCAACAA  
CTAAGAGATCCATTCGAGGAACACGGGGACATGGAAGCATTGGTTTATACATTCTCTCTT  
AGTCTCGACTCTAGGGATCATTTTTTTCGCTATCTTTTTTTCGAGAACCGCCTAAAGTCC  
AACTAAAAAACAAAATGACTATTGCTTTCCAATTGGCTGTTTTTGCATTAATTGCTA  
CTTCATCAATCTTACTGATTAGTGTACCCGTTGTATTTGCTTCTCCGGATGGTTGGTTCGA  
GTAACAAAAATGTCGATTTTCTGGTACATCATTTGTGGATTGGATTAGTCTTTCTGGTGG  
GTATCCTTAACTCTCTCATTCT-----ATGTCACCACAAACAGAGACTAAAGC  
GAGTGTGGATTCAAGGCCGGTGTTAAAGATTATAAATTGACTTATTATACTCCTGACTA  
TGTAACCAAAGATACTGATATCTTGGCAGCATTCCGAGTAACTCCTCAGCCCGGAGTTC  
CACCCGAGGAAGCGGGGGCTGCGGTAGCTGCGGAATCTTCTACTGGTACCTGGACAGC  
TGTGTGGACCGATGGGCTTACCAGCCTTGATCGTTACAAAGGGCGATGCTACAACATTG  
AGCCCGTTGCTGGAGAAGAGAATCAATATATATGTTATGTAGCTTACCCGTTAGACCTTT  
TTGAAGAAGGTTCTGTACTAACATGTTTACTTCCATTGTGGGTAATGTATTTGGTTTCA  
AAGCACTGCGCGCTCTACGTCTAGAGGATCTACGAATCCCTCCTGCGTATACTAAAAC  
TTCCAAGGCCCGCCTCACGGCATCCAAGTTGAGAGAGATAAATTGAACAAGTATGGCC  
GTCCCCTGTTGGGATGTAATAAACCTAAACTGGGGTTATCCGCGAAGAATTATGGT  
AGGGCGGTTTATGAATGTCTACGTGGTGGACTTGACTTTACCAAAGATGATGAGAACG  
TGAACCTCCAACCATTTATGCGTTGGAGGGACCGTTTCTTATTTTGTGCGGAAGCTCTT  
TATAAAGCGCAAGCTGAAACAGGTGAAATCAAAGGTCATTACTTGAATGCTACTGCAG

GGACATGCGAAGAAATGCTAAAAAGGGCTGTCTTTGCCAGAGAGTTGGGAGTTCCTAT  
CGTAATGCATGACTACTTAACAGGGGGATTACCCGCAAATACTACCTTGGCTCATTATTG  
CCGAGATAATGGTCTACTTCTTCACATCCACCGTGAATGCATGCAGTTATTGATAGACA  
GAAGAATCATGGTATGCACTTTCGTGTACTAGCTAAAGCTTTGCGTCTGTCTGGTGGAG  
ATCATATTCACGCCGGTACAGTAGTAGGTAAACTTGAGGGGGAAAGAGACATAACCTT  
GGGATTTGTTGATTTACTACGTGATGATTTTGTGGAAAAAGATCGAAGCCGCGGTATTTA  
TTTCACTCAAGATTGGGTCTCTATAACCAGGTGTTATACCTGTGGCTTCCGGGGGTATTCA  
CGTTTGGCATATGCCTGCGTTGACAGAGATCTTTGGAGATGATTCCGTATTACAATTTGG  
TGGAGGAACTTTAGGACACCCTTGGGGAAATGCACCCGGCGCTGTAGCTAATCGAGTA  
GCTCTAGAAGCATGTGTACAAGCTCGTAATGAAGGACGCGATCTTGCTCGTGAAGGTA  
ATGAAATTATCCGGGAGGCTAGCAAATGGAGTCCTGAACTGGCTGCTGCTTGTGAAGT  
CTGGAAGTCGATCAAATTCGAATTTGCCGCAATGGATACTTTG-----ATGGCGATACATTT  
ATACAAAACCTTCTACCCCGAGCACACGCAATGGAGCCGTAGACAGTCAAGTGAAATCC  
AATCCACGAAATAATTTGATCTATGGACAGCATCGTTGTGGTAAAGGTCGTAATGCCAG  
AGGAATCATTACCGCAGGGCATAGAGGGGGAGGTCATAAGCGTCTATAACCGTAAAATC  
GATTTTCGACGGAATGAAAAAGACATATATGGTAGAATCGTAACCATAGAATACGACCC  
TAATCGAAATGCATACATTTGTCTCATACTATGGGGATGGTGAGAAGAGATATATTTT  
ACATCCAGAGGGGGCTATAATTGGAGATACCATTGTTTCTGGTACAGAAGTTCCTATAA  
AAATGGGAAATGCCCTACCTTTGACCGATATGCCCTTAGGCACGGCCATACATAACATA  
GAAATCACACTTGGAAAGGGTGGACAATTAGCTAGAGCAGCGGGTGTGTAGCGAAA  
CTGATTGCAAAAGAGGGGAAATCGGCCACATTAATAATTACCTTCTGGGGAGGTCCGTT  
TGATATCCAAAACCTGCTCAGCAACAGTCGGACAAGTGGGGAATGTTGGGGCGAACC  
AGAAAAGTTTGGGTAGAGCCGGATCTAAATGTTGGCTAGGGAAGCGTCTGTAGTAAG  
AGGAGTAGTTATGAACCCTGTAGACCACCCCATGGGGGTGGTGAAGGAAGGGCTCC  
GATTGGTAGAAAAAGACCCGCAACCCCTTGGGGTTATCCTGCACTTGGAAAGACGAAGT  
AGAAAAGGAATAAATATAGTGATAATTTGATTCTTCGCCCGCTACTAAAATGATTCA  
ACCTCAAACCCATTTGAATGTAGCAGACAATAGCGGTGCCCGAGAATTGATGTGTATT  
GAATCATAGGAGCCAGT---AATCGTAGATATGCTCATATTGGTGACGTTATTGTTGCTGT  
GATCAAGGAAGCAGTACCCAATACGCCTCTAGAAAGATCAGAAGTGATCAGAGCTGTA  
ATTGTACGTACTTGTAAAGAACTCAGACGTGATAACGGTATGATAATACGGTACGATGA  
CAATGCTGCAGTTGTCAATGATCACGAAGGAAATCCAAAGGGAACCTCGAGTTTTTGGT  
GCGATCGCCCGGAATTGAGACAGTTGAATTTACTAAAATAGTTTCATTAGCACCTGA  
AGTATTAATGCTTAGTCCCAAAGAACAAGATTCCGTAAACAACATAGAGGAAGAATG  
AAAGGGATATCTTATCGAGGTAATCATATTTGTTTCGGCAGATATGCTCTTCAAGCACTT  
GAACCCGCTTGGATCACATCTAGACAAATCGAAGCGGGGCGCCGCGCAATGACACGA  
AATGTACGGCGCGGTGGAAAAATATGGGTACGTATCTTTCCAGACAAACCCGTTACT  
AAGACCCACGAAACCCGTATGGGGTCCGGTAAAGGATCCCCGAATATTGGGTAGCC  
GTCGTTAAACCGGGTAGAATACTTTATGAAATGAGTGGAGTAGCTGAAAATATAGCTCG  
AAAGGCTATTTCAATAGCGGCGTCCAAAATGCCTATAAGAACTCAATTCATTATTTCCG  
GAATGACCAGAATTAGACGAGGATATATAGCTCGGAGACGTAGAACAAAATGCGTTT  
ATTTGTATCAAGCTTTCGCGGGGCTCATTCACGACTTAGCCGAACAATTACTCAACAGA  
AAATAAGAGCTTTGGTTTCGGCTCATCGCGATAGAGATAGGAAAAAAAGAGATTTTCG  
TCGTTTGTGGATACCCGAATAAATGCAGTAATTCGCGGAAAT--CTGGTATCCTATAGTT  
ATAGTAGATTAATATAAATCTGTATAAGGCGCAGTTGGTTCTTAATCGTAAGATACTTG

CACAAATAGCTATATCAAATAGGAATTGTCTTTATATGATTTCCAATGAGATTATAAAA----  
-----ATGATAAGGGAAGTATCTGCTTTAGGTCAACATATATGTATGTCT  
GCTCACAAAGCCCGAAGGGTAATTGATCAGATTTCGTGGACGTTCTTACGAGGAAACCC  
TTATGATACTCGAACTCATGCCTTATCGAGCATGTTATCCCATTTTAAAATTGGTTTATTC  
TGCAGCAGCAAATGGTATTCACAATCTGGGTTTCAACGAAGGAAGTTTATTCATTATTA  
AAGCCGAA-----  
-----ATGGATGGAATCAAATATGCAGTATTTACAGACAAAAGTATT  
CGGTTATTGGGAAAAAAT--CAATATACTTCTAATGTGCAATCAGGATCAACTAGGACAG  
AAATAAAGCATTGGGTCGAACTCTTCTTTGGTGTCAAGGTAATTGCTATGAATAGTCAT  
CAACTCCCCCGAAAGGGTAGAAGAATGGGACCTATTATGGCACATACAATGCATTACAG  
ACGTATGATCATTACGCTTCAACCGGGTTATTCTATTCACCTCTTAGAAAAGAAAAGAA  
CTATGGCAGTTCCAAAAAACGTACTTCTATATTAAAAAACGTATTCGTAAAAATCTTT  
GGAAAAAGGGGGGGTACTGGGCAGCGTTGAAGGCTTTTTTCGTTAGCGAAATCCCTTGC  
TACTGGGAATTCAAAAAGTTTTTTT-----ACAACAATGGCCAAGGGTAAAGAGGTC  
CGAGTAAGGGTTATTTTGAATGTACTAGTTGTGTTTCGAAACGGTGTTAAT-----AAGGA  
ATCAAGGGGTATTTCCAGATATATTACTCAAAAAGAATCGACACAATACACCCAGTCGAT  
TGGAATTGAGAAAATTCTGTCCCTATTGTTACAAGCATACTTCATGGGGAGATAAAA  
AAAATGAAAATAAGGGCTTCAGTTCGTAAAAATTTGTGAAAAATGTGCGACTGATCCGCA  
GGAGGGGACGGATTATAGTAATTTGTTCCAACCCGAGACATAAACAAAGACAAGGAAT  
GGTTCGAGAGAAAGTAAAAGTATCTACTCGGACACTACAGTGGAAAGTGTGTTGAATCA  
AGAGCAGACAGTAAGCGTCTTTATTATGGGCGCTTTATTTTGTCTCCACTTATGAAAGG  
TCAAGCCGACACAATAGGCATTGCGATGCGAAGAGTTTTGCTTGGAGAAATAGAAGGA  
ACATGTATTACACGCGCAAATCTGAA-----AAAATTCCACACGAATATTCTACCATAGT  
GGGTATTCAAGAATCGGTACATGAAATTTAATGAATTTGAAAGATATTGTATTGAGAAG  
TAATCTTTATGGAACCTGTGACGCGCTTATTTGTGTCAAAGGCCCGGGATATGTAAGTGC  
TCAAGACATCCTCTTGCCGCTTCTGTGGAATCGTTGATAATACGCAGCACATAGCTA  
GCCTAACAGAACCAATTGATTTGTCTATTGGATTACAAATCGAGAGGAGTCGAGGATAT  
AATATAAAAACGCCAAATACCTTTCAA---GACGGAAATTGTTATCCTATCGATGCTGTAT  
TCATGCCTGTTTCGAAATGCGAATCATAGTATTCAGTCTTATGGGAATGGCAATGAAAA  
CAAGAGATCCTTTTTCTAGAAATATGGACAAACGGAAGTTTAACTCCTAAAGAAGCAC  
TTCATGAAGCCTCCCGGAGTTTGATTGATTTATTTATCCCTTTCTCCAGGCAGAAGACG  
AA-----AACTTACCTTTAGAGAACAATCAA---TACAAGGTTACTTTACCCTTTTTTACTTT  
TCATGATAGATTGGCT---AAACTAACGAAAAAGAAA---AAAGAAATCGCATTGAAATCG  
ATTTTTATTGACCAATCAGAAATGTCTCCAGGATCTATAATTGTCTCAAAAAGTCCAAT  
ATACATACATTATTTCGACCTTTTGAATACGCGTCAAGAAGACCTTATGAAAATTGAACA  
CTTTCGCATAGAGGATGTAAAGCAGATAATGAGTATTCTAGAAAAGAAA-----  
-----ATGCTCGGAGATGGAAAT--GCAGGAATGTCTACAATACCTGGGTTGAATCAG  
ATACAATTTGAAGGATTTTGTAGGTTTCATTGATCAGGGCTTAACAGAAGAGCTTTATAA  
GTTTCCAAAAATTGAAGATACAGATCAAGAAATTGAATTTCAATTATTTGTGGAACAT  
ATCAATTGGTAGAACCTTGCTAAAAGAAAGAGATGCTGTATATGAATCATTACAGTATT  
CTTCTGAATTATATGTATCCGCAGGATTAATTTGGAAAAGCCGAGGGGACATGCAGGAA  
CAAATATTTTTATTGGAAACATTCTCTAATGAATCTTTGGGAACTTCTATAGTAAAC  
GGAATATACAGAAATTGTATCAATCAAATATTGCAAAGTCCCGGTATCTATATCGGTCA  
GAATTGGGCCATAACGGAATTTTCGGTCTATACAGGCACCATAATATCTGATTGGGGGGG



AAGATTCGAATTAGAGATTGATAGAAAAGCAAGGATATGGGCTCGTGTGAGTAGGAAA  
CAGAAAGTATCTATTCTAGTTCTATCAGCAGCTATGGGTTTGAATCTACGAGAAATTCTA  
GAGAATATTTGCTACCCTGAAATTTTCTTGTCTTTTCTGACGAATAAGGAGAAAAAAA  
AATTGGATCAAAGAAAATGCCATTTTGGAGTTTATCAACAATTTGCTTGTGTAGGCG  
GAGATCCGGTATTTTCGGAATCCTTATGTAAGGAATTACAAAAGAAATTTTTTCACCAA  
AGATGTGAATTAGGAAAGATTGGTAGACGAAATATGAACCAGAGACTGAATCTGAATAT  
ACCTCAGAACAATACATTTTTGTTACCACGAGATGTATTGGCAGCTGTCGATCATTGAT  
TGGACTGAAATTTGGAATGGGTACACTTGACGAT-----ATGAATCATTGAAAAATAAAC  
GTATTCGGTCTGTCGCGAATCTTTTACAAGATCAATTCGGATTGGCCCTGGTTCGGTTAG  
AAAATGTGATTAGAGGAACTATATGTGGAGCAATTAGG---CATAAATTGATG---CCAAC  
TCTCAAATTTGGTAACTTCAACTCCC-----TTAACAACCCTTATGATTCTTTTTTC  
GGATTACATCCATTATCTCAAGTTTTGGATCGAACTAACCCATTGACACAAATAGTTCAT  
GGGAGAAAATTGAGTTATTTGGGCCCCGGAGGATTGACAGGGCGAACTGCGAGTTTTC  
GGGTACGAGATATCCATCCTAGTCACTATGGCCGCATTTGTCCAATTGACACGTCCGAA  
GGAATCAATGTTGGACTTATTGGATCCTTAGCAATTCATGCGAGAATTGGTTATTGGGG  
G---TCTCTAGAAAGCCCGTTTTAT-----GAAATCTTTGAAAAATCAAAAAAGTA-----C  
GGATGCTTTATTTATCACCAAGTAGAGATGAATACTATATGGTAGCGGCAGGAAATCTT  
TGGCACTGAATCAGGGTAGTCCGGAAGAACAGGTTGTTCCGACTCGATACCGTCAAGA  
GTTCTGACTATTGCGTGGGAACAGGTTTCATCTTCGAAGTATTTTTCCCTTCCAATATTT  
TTCTATTGGGGCTTCCCTCATTCTTTTTATCGAGCATAATGATGCGAATCGGGCTTTAAT  
GAGTTCTAATATGCAACGCCAAGCAGTTCCGCTCGTTCGGTCCGAGAAGTGCATTGTT  
GGAACCTGGGTTGGAACCTCAAGTGGCTCTAGATTCAGGGGTTCCCGCTATAGCCGAAC  
ACGAGGGAAAGATCATTATACCGATATTGACAAGATTGTTTTATCGGGAAACGGTAAT  
ACATATAGTATCCCATTAATTATGTATCAACGTTCAAACAAAAATACTTGTATGCATCAA  
AAACCCAGGTTGGGCGGGGTAAATGCATTA AAAAGGGCCAAGTTTTAGCGGATGGTG  
CCGCTACAGTTGGCGGCGAACTCGCTTTAGGGAAAAACATATTAGTAGCTTATATGCCA  
TGGAAGGCTACAATTTTGAGGATGCGGTACTTATTAGCGAACGTCTGATATATAGAGAT  
ATTTATACTTCTTTTACATACGGAAATACGAAATTCAGACTCATGTGACAAGTCAAGGT  
---CCCGAAAGGATCACTAATGAAATACCACATCTAGAAGCCCGGTTACTCCGCAATTTA  
GACAAAATGGAATTGTGATGCTGGGATCTTGGGTAGAGACCGGCGATATTTTAGTAGG  
TAAATTAACGCCTCAGGCGGCGAAAGAA---TCATCGTATGCTCCGGAAGATAGATTATT  
ACGGGCCATACTTGGCATTCAAGTATCCACTTCAAAGGAACTTGCCTAAACTACCTA  
TAGGTGGTAGGGGTCGCGTTATTGATGTGAGATGGGTCCAGAAAAAGGGG---GGTTCT  
AGTTATAATCCAGAAACGATTTGTGTATATATTTACAGAAACGTGAAATCAAAGTAGG  
TGATAAAGTAGCTGGAAGACATGGAATAAGGGTATCGTTTCAAAAATTTTGCCTAGAC  
AGGATATGCCTTATTTGCAAGATGGAAGGCCTGTTGATATGGTTTTCAACCCACTAGGA  
GTACCCTCGCGAATGAATGTAGGACAGATATTTGAATGCTCGCTCGGGTTAGCGGGGG  
GTCTGCTAAATCGACATTATCGAATAGCACCTTTTGATGAGAGATATGAACAAGAGGCT  
TCGAGAAAACCTCGTGTTTTCTGAATTATATGAAGCCAGTAAGCAAACCGCGAATCCATG  
GGTATTTGAGCCGGAATACCCGGGAAAAAGCAGAATATTTGATGGACGAACGGGAGAT  
CCTTTTGAAGAACCTGTTCTAATAGGAAAGCCTTATATCTTGAAATTAATTCATCAAGTT  
GATGATAAAGTACACGGACGTTCCAGTGGGCATTATGCACTTGTTACCCAACAACCCCT  
TAGAGGAAGGTCCAAACAAGGGGGACAACGGGTAGGAGAAATGGAGGTTTGGGCTCT  
AGAGGGCTTTGGTGTGCTCATATTTTACAAGAGATGCTTACTTATAAATCTGATCATATT

AGAGCGCGCCAAGAAGTACTTGGTACTACAATCATTGGAGAAACAATACCTAACCCGG  
AAGATGCTCCAGAATCTTTTCGATTGCTCGTTCGAGA ACTACGATCTTTGGCTTTGGAA  
CTGAATCATTGTTGTATCTGAGAAAACTTCCAGATTAATAAGAAGGAAGCT-----  
-----ATGATTGATCGATATAAACATCAACA ACTCCGAATTGGATCAGTTTCTCCTCAAC  
AAATACGCGCTTGGGCCAATAAAATCCTACCTAATGGAGAGATAATTGGAGAAGTGAC  
AAAACCCTATACTTTTCATTACAAAACCAATAAACCGGAAAAAGATGGATTATTTGTG  
AAAGAATTTTTGGGCCTATTAAGTGAATTTGTGCTTGTGGAAATTATCGAATAATC  
GGAGATGAAAAAGAAGACCCGCAATTTTGTGAACAATGTGGGGTTGAATTTGTTGATT  
CTCGGATACGAAGATATCAAATGGGATACATAAACTGGGATGCCAGTAACCCACGTG  
TGGTATTTGAAACGTCTTCTAGTTATATCGCGAATCTTTTAGATAAACCTCTTAAAGAA  
TTAGAAGGCCTAGTATATTGCGAT-----TTTTCTTTTGCTAGGCCT--ATAGCGAAAAAAC  
CGACTTTTTTACGATTACGCGGTTTCATTTCGAATATGAAATACAATCCTGGAAATACAGCA  
TCCCCTTTTTTTACTACCCAAGGTTTCGATAAATTTTCGTAACCGAGAAATTTCTACTG  
GAGCAGTTGCTATCCGGGAACAATTAGCCGATCTAGATTTGCGAATTATTCTAGATAATT  
CCTTGTTAGAATGGAAAGAATTAGGGGAAGAA---GGGCCCGCCGGTAATGACTGGGAA  
GATCGAAAAATTGGACGAAGAAGGGATTTTTTGGTTAGACGCATGGAATTAGCTAAGC  
ATTTTCTTCGAACAAATATAGAACCAGAGTGGATGGTTTTATGTCTATTACCTGTTCTTC  
CTCCCGAGTTGAGGCCTATCATTCAAATAGATGGAGGTAAACTAATGAGTTCAGATATT  
AATGAACTCTATAGAAGAGTTATCTATCGGAACAATACTCTTATCGACCTATTAACAACA  
AGTAGATCTACGCCAGGGGAATTGGTAATGTGTCAGGAGAAATTGGTACAAGAAGCCG  
TGGATACGCTTCTTGATAATGGAATCCGTGGACAGCCAATGAGGGATGGTCATAATAAG  
ATTTATAAGTCGTTTTTCAGATGTAATTGAAGGAAAAGAGGGAAGATTCGTGAGACTCT  
GCTTGGCAAACGGGTCGATTATTCGGGGCGGTCTGTCAATTGTTGTGGGCCCTCACTTT  
CATTACATCAATGTGGATTGCCTCGCGAAATCGCAATAGAGCTTTTCCAGACTTTTGTA  
TTTGTGGGCTAATTAGACAACACCTTGCTTCGAACATAGGAGTTGCTAAGAGTAAAATT  
CGGGAAAAAGGGCCGATTATCTGGGAAATACTGCAGGAAGTTATGCAGGGACATCCAG  
TATTGCTGAATAGAGCGCCTACTCTGCATAGATTGGGCGTACAGGCATTCCAGCCCATT  
TAGTGAAGGGCGCGCTATTTGTTTACATCCATTAGTTTGTAAAGGGATTCAACGCAGAC  
TTTGATGGGGATCAAATGGCTGTTTCATGTACCCTTATCTTTAGAGGCTCAAGCAGAGGC  
TCGGTTACTTATGTTTTCTCATATGAATCTCTTGTCTCCTACTATTGGAGATCCCATTTC  
ATACCGACTCAAGATATGCTTATTGGGCTCTATGTATTAACGAGCGGGAATCGTCGAGGT  
ATTTGTGCAAATAGGTATAATACATGGAATCGAAGAAAT-----TATCCAGATGAAAGAA  
TTGACGAT-----TATACGTATACGAAA-----GAACCCCTTTTTTGTAAATTCCTATGATGCAA  
TTGGAGCTTATCGGCAGAAAAGAATCAATTTAGATAGTCCGTTGTGGCTTCGGTGGCGA  
TTAGATCAACGC---CTTATTGCTTCA-----AGGGAAGCTCCCATCGAAGTTCACTATGAAT  
CTTTGGGTACCTCTCATGAGATTTATGGGCATTATCTAATAGTACGAAGTGTAATAAAG  
AAATTCTTCTATATACATTCGAACACCCTGGGCCATATTTCTCTTTATCGAGAAATCG  
AAGAAGCTATAAAGGGTTTTGCGGGCCTGCTCATATGGTACC-----  
-----ATGGCAGAACGGGTGAGTCTGGTCTTTCACAATAAAATGATAGATGGA ACTGCCA  
TTAAACGACTTATTAGCAGGTTAATAGATCACTTCCGAATGGCATATACATCCCACATCC  
TGGATCAAGTAAAGACCCTGGGGTTCCAGCAAGCCACTGCTACATCTATTTATTAGGC  
ATTGATGATCTTTTAAACGATACCTTCTAAGCGATGGCTAGTCCAAGATGCTGAACAACA  
AAGTTTTATTTGGAAAAACTATCATTATGGGAATGTACACGCGATAGAAAACTAC  
GACAATCCATTGAGATATGGTATGCTACAAGTGAATATTTGCGACAAGAAATGAATCCT

AATTTTAGGATGACTGAGCCTTTTAATCCAGTCCATATAATGTCTTTTTTCGGGGGCTAGA  
GGAAATGCATCTCAAGTACACCAATTGGTGGGTATGAGAGGATTAATGTCTGATCCCCA  
AGGGCAAATGATTGATTTACCCATTCAAAGTAATTTACGCGAAGGGCTTTCTTTAACAG  
AATATATCATTTCTTGCTATGGAGCCCGCAAGGGGGTTGTCGATACCGCTGTCCGAACA  
TCAGATGCTGGATATCTTACGCGCAGACTTGTGAAGTAGTTCAACACATTATTGTACGT  
AGAACAGATTGTGGCACTGTCCGAGGAATTTCTGTGAGTCCTCAAATAGGATGATGT  
CG---GAAAGGGTTTTTAGCCAAACATTAATTGGTTCGTGATTAGCGGACGATATATATAT  
GGGCCAGCGATCCATTGCCATTAGAAATCAAGATATTGGGATTGGACTTGTCAATCGAC  
TCATAACC-----CTTCGAACACAAGCAATATCTATTTCGAACCCCTTTACTTGTA  
GGAGTACATCGTGGATCTGTTCGATTATGTTATGGTCGGAGTCCGACTCATGGTGACCTG  
GTTGAATTGGGGGAAGCCGTAGGTATTATTGCGGGTCAATCTATTGGAGAACCAGGGA  
CTCAACTAACATTAAGAACTTTTCATACCGGCGGCGTATTTACGGGGGGCACTGCAGAA  
CATGTACGAGCCCCTTCTAATGGTAAAATCAAATTCATGAGGATTTGGTTCATCCCAC  
GCGCACACGTCACGGGCATCCGGCTTTTCTATGTTCTATAGATTTGGATGTAATTATTGA  
GGGTGAAGATATTATGCACAATGTGACTATTCCACCAAAAAGTTTTCTTTTAGTTCAA  
ATGATCAATATGTCGAATCAGAACAAGTGATTGCTGAGATTTCGGGCGGGAGCATACT  
TTG---AATTTTAAAGAGAGGGTTCGAAAACATATTTATTCTGATTCAGAGGGAGAA---AT  
GCACTGGAGTACTGATGTGTACCATGCACCCGAATTTACATATAGTAATGTCCACCTCTT  
GCCAAAACAAGCCATTTATGGATATTGTTCGGGGGGTTCACGCAGA-----TCTAGTGTA  
GTTTCTTTTTTCACTCCACAAGGATCAAGATCAAATGAATATTCAT-----TCTCTTTCTGTC  
GAACGA---AGAGAGATTTCTAGCCTCCTCTCAGTGAATAATGATCAA---ACGGGACACA  
AATTTTTTAGTTCTGATTTTTCTGCTAAAAAATCTTGAGATGTCTGATTAT---TCGGGA  
TTAATAGAATCATAAGTACTGGTCATTGTAATCTCATCCATCCTGCA---ATTCTCCACGC  
AAATTCGGAT-----TTATTGGCAAAAAGGCAAAGAAATGGATTTCTTATTCCATTCCACT  
CGATTCAAGAGCAAGAGAAAGAGCTAATGCCCAT---GGTATCTCGATTGAAATACCCG  
TAAGG-----GGTATTTCCGTAGAAATAGTATTTCTTGCTTATTTTCGACGATCCTCGATA  
GAAGAAAGAGTTCCGGAATTAATAATGGGGGACTCTGGGGGCGCATTCAATCGTTAA  
AAAAGAGGAC-----TTGATTGAGTATCGA---GGACTCAAAAAAATTAAGCCAAAATACA  
TGAAAATAGATCGCCTTTTTTTCATTCCGGAGGAAGTGCATATTTTTCCCGAATCTTCTT  
ACCTAATGGTACGGAATAATAGTATCATTGGAGTAGACACACAAATCACTTTAAATATAC  
GAAGCCGGGTGGGCGGATTGGTCCGAATGGAGAGAAAAAGGGGAGGGGGTTGAACTA  
AAAATATTTTCGGGAGATATCCATTTCCCGGAGAGATAGATAAGATATCCCGACACAGT  
GGCATCCTGATACCGCCAGAAAGTGAAAAAACAAACTTGCCACTAAGGAATCAAAA  
AAA-----TTGAAAAAGTGGATCTATGTTCAACGG-----ATCACACCTACAAAGAAAAAG--  
----TCTTTTGTTTTGGTTCGACCCGTAGTCACATATGAAATAGCGAACGGTATAAATTTAG  
CAACTCTTTCCCGAGGATCCGCTGCGGGAAAAGGATAATATGCAATTTTCGAGTTGTC  
AATTATGTCCTTTATGGGAAGGGCAAAGCCGCTGGGGGAATTTCTGATACAAGTCTTCA  
ATTAGTTCCGACGTGTTTAGTGTTGAATTGGGACCAAGACAAC-----AAAAGTTCTTC  
CGTCGAAGAGGTTTGTGCTTCTTTGTTGAAGTACGTACAAATGGTCTGATTTCGAAATT  
TCCTAAGAATCAACTTAGTGAAATCCAATATTTTCGTATCTCAGAAAAAGGGATCATCCG  
TCGGGTTTCAGGATTAATTTCTGAT--AATGGTTCAGCTCGCACCAATAGCAATCCGTTTT  
ATTCCGTGTTTGGCAAGGCAGG-----GTTGAACAATCGCTTAGACAAAATCAA  
GGAATATTCGTACGTTGTTGAATAAA-----ATAAGGAATGCCAAGTTTTGATAATTT  
TATCATCATTAATATTTTCGAATGGGTCCA-----TTGAACGATGTAAAATATACAAT---

----GTGATAAAACAATCAGATTTCGCTAACTCCAATTAAGACTTCGTTGGGACCCTTAGG  
AACA-----TTCCTTCAAATTGCGAATTTTTATTCA-----TTTTACTATTTAATAACT-----CAT  
AATCATATCTCG---GTAACATAATTTGAACTTGACAAT-----TAAAACAGCCTTTT  
CAAGTACTT-----AAA---TATTATTTAATGGACGAAACCGGGGAA-----ATTTATAATCCTG  
ATACAGATAGTAAGATCCTTTTGAATCCATTTAATTTGAATTGGTATTTTCTCCAGCCT---T  
ATTGTGAGGAAATGTCCCCGATAATTAGT---CTTGGGCAGTTTCTTTGTGAAAATGTACG  
TATAACCAAAGGGGACCA-----TACCTAAAATCCGGTCAAGTTTTAATTGTTCAA---G  
TTAACTCTGTAGTAATACGATCAGCTAAGCCTTATTTGGCTACTCCTGGAGCAACTGTTC  
ATGGGCATTATGGAGCAATCCTTTACGAAGGGGATACATTAGTTACATTTATATATGAAA  
AATCGAGATCTGGTGATATAACGCAGGGTCTTCCAAAAGTAGAACAGGTGTTAGAAGT  
GCGTTCGCTTGATTCAATATCGATGAACCTAGAAAAGAGAGTTGAGGGTTGGAACGCG  
AGTATAACAAGAATTCTTGGGATTCCCTGGGGATTCTTGATTGGTGCTGAGCTAACTATA  
GTGCAAAGTCGTATCTCTTTGGTTAATAAGATCCAAAAGGTTTATCGATCGCAGGGGGT  
GCAGATCCATAATAGGCATATAGAAATTATTGTACGTCAAATAACATCAAAGTTTTAGT  
TTCCGAA-----GATGGAATGTCTAATATTTTTTTACCCGGCGAACTGATTGGATTGTTA  
CGAGCGGAACGAATGGGGCGCGCTTTGGAAGAAGTGATCTGTTATCGAGCTATCTTATT  
GGGAATAACGAGAGCGTCTCTGAATACTCAAAGTTTTATATCCGAAGCAAGTTTTCAAG  
AAACCACGCGAGTTTTAGCAAAGCTGCTCTCCGAGGTCTGATCGATTGGTTGAAAGG  
CCTGAAAGAAAACGTTGTTCTGGGGGGGATAATACCAGTCGGTACCGGATTCAAAGGA  
TTAGTCCACTGTTCA-----AGGCAGCATAACAACATTCTTTTGGAAAGACAAAAGGGA  
AT-----TTATTCGGGGGGGAAATGAGA-----GATATTTTCTTACACCACAGAGAATTATTG  
ACTCGTGCAATTTCAACGACTTTCCATGATACATCAGAGCACAATTGCTTAGAGGGTTTA  
ATGAGTCTTAGGAGCGAATTCTTTATGGCAAGAAGGTATTGGAACATCCATTTGGAAGA  
GATGATGGAAGCAGGAATTCATTTTGGTCATGGTACTCGGAAATGGAATCCTAGAATGG  
CACCTTATATATCTGCAAACATAAAGGTATTCATATTACAAATCTGACTCGAACTGCTC  
GGTTTTTATCAGAAGCTTGTGATTTAGTTTTTGATGCAGCAAGTAGGGGAAAACAATTC  
TTAATTGTTGGTACTAAAATAAAGCAGCTGATTTAGTCGCGGAGCTGCAATAAGGGC  
TCGGTGCCATTATGTTAATCAAATGGCTCGGCGGTATGTTAACCAATTGGTCCACTAC  
AGAAACGCGACTTCACAAGTTCAGGGATTTGAGAACGGAACAAAAGGGGGGAGAC  
TCGACAGTCTTCCAAAAGGGATGCCGCTATTTTGAAGAGACAATTATCGCGTCTGCA  
AACGTATCTGGGCGGGATTAATATATGACGAGGGTACCCGATATTGTAATCGTCGTTGA  
TCAGCAAGAAGAATATACGGCTCTTCGAGAATGTATCACTTTGGGAATTCACAATTT  
GTTAATCGATACAAATTGTGACCCCGATCTCGCAGATATTTTCGATTCCAGCAAACGATG  
ACGCTATAGCCTCAATCCGATTAATTCTTAACAAATTAGTATTCGCAATTTGTGAGGGTC  
GCTCT---AGCTATATACGAAATCCTATGGGACAAAATAAATCCACTAGGTTTCCGGCT  
TGGTACAACACAAAGTCATCATTCTTTGGTTTGCAAACCAAAAAACTATTGCGAG  
GGTCTACAAGAAGATCAAATAACGAACTTTATTAAGAATTATATAAAAAAATAT  
CAGAATATCTCCGGT---GTTGAGGGAATTGCACGGATAGAGATTCAAAAAGAATTGA  
TCTAATTCAGTTATAATCTATATAGGGTTCCAAAATTATTACTAGAAAATAGA-----  
CCGCGAAGAATTGAAGAATTACAGATGAATGTACAAAAGAACTTAATTGTGTGAATC  
GAAAAATAAACATTGCTATTACACGAATTACAAATCCTTATGGACACCCCAATATTCTTG  
CCGAATTTATAGCCGGACAATTAATAAATAGAGTTTCTTTTCGAAAAGCAATGAAAAA  
AGCTATTGAATTAACGGAACAGGCCGATACAAAAGGAATTCAAGTACAAATTGCAGGG  
CGTCTTGACGGAAGAAATTGCGCGCGCCGAATGGATCAGAGAAGGTAGAGTTCT

CTACAAACCATTGGAGCTAAAATTGATTATTGTTTCCTATACGGTTCGAACTATCTACGGG  
GTATTGGGAATCAAAATTTGGATATTTGTAGACGAAAAAATGTCACGTTACCGAGGGCC  
TCGTTTCAAAAAAATACGCCGCTGGGGGCTTTGCCGGGACTAACGAGTAAAAGGCCT  
AGAGCCGGAAGCGATTTTAGAAACCAATTGCGCTCCGTAAAA---AAATCTCAATATCGA  
ATTCGTTTAGAAGAAAAACAAAATTGCGTTTTATTATGGTCTTACAGAACGACAATT  
ACTTAATATGTTTCGTATCGCCAGAAAAGCCAAAGGGTCAACCGGTCTGGTTTTACTACA  
ATTACTTGAAATGCGTTTGGATAACATTCTTTTTTC-----GATTGGG  
TATGGCTTCAACTATTCCTCAAGCCCGCCAATTGGTTAACCATCGACATATTT-----

-----ATGTCACGTCG  
AGGTACTACAGAAGAAAAAATGCAAAATCCGATCCAATTTATCGTAATCGATTAGTTA  
ACATGTTGGTTAACCGTATTCTGAAACACGGAAAAAATCATTGGCTTATCAAATTATCT  
ATCGAGCCTTGAAAAAGATTCAACAAAAGACAGAAAAAATCCACTATCTGTTTTACG  
TCAAGCAATACGTGGAGTAACTCCCGATATAGCAGTAAAAGCAAGACGTGTAGGCGGA  
TCGACTCATCAAGTTCCCATGAAATAGGATCCGCACAAGGAAAAGCACTTGCCGTTT  
GTTGGTTATTAGGGGCATCCCGAAAACGTCCGGGTGCAAATATGGCTTTCAAATTAAGT  
TCCGAATTAGTGGATGCTGCCAAAGGGAGTGGCGATGCCATACGCAAAAAGGAAGAG  
ACTCATAGAATGGCAGAGGCAAATAGAGCTTTTGCACATTTTCGTATGGGCAAGGACA  
CTATTGCTGACATAATAACTTCTATACGAAATGCTGACATGAATAGAAAGGGAACGGTT  
CGAATAGCATCTACTAACATCACCGAAAACGTTGTTAAAATCCTTTTTCGAGAGGGTTT  
TATCGAAAACGCAAGGAACTCGTGGAAAACAAAAAAGAGTTTTTGGTTTTAACCTA  
CGACATCGAAGG-----AATAGGAAAGGGCCGTATAGACCC---ATTTTAAAT-----TTAAA  
CGAATCAGTCGACCCGGTCTACGAATCTATTTAACTATCGACGAATTCCTAGAATTTA  
GATGGGATGGGGATTGTAATTCTCTACTTCTCGGGGTATAATGACAGACCGAGCGGC  
TCGACTGGAAAGAATCGGTGGAGAAATTTGTGTTATATATGGATGGCAAAATCTCCAC  
CACGAAGTGGTTCACGTAGGCCGGGACGGATCGGTTACGTAAAAGTGGACGTGCAAT  
ACCAAAGGGCGTTATTTCATGTTCAAGCAAGTTTCAACAACACCATTGTGACTGTTACA  
GATGTCCGGGGTCCGGTAATTTCTTGGTCTCGGCCGGTACTTGTGGATTCAGGGGTAC  
AAGAAGAGGTACGCCTTTTGTGCTCAAACCGCAGCAGGAAATGCTATTCGAGCAGTA  
GCGGATCAAGGTATGCAACGAGCAGAAGTCATGATAAAGGGTCCTGGTCTCGGAAGA  
GATGCGGCATTACGAGCTATTCGTAGAAGCGGTATCCTTTTAAATTCGTACGGGATGTA  
ACCCCTATGCCACACAATGGTTGCAGACCCCTAAAAAAGACGGGTGATGCCAACTA  
TTAAACAACCTATTAGAAACCCAAGACAGCCAATTAGAAATGTTACCAAATCCCCCGCT  
CTGCGGGGATGTCCTCAGCGCCGAGGAACATGTACAAGGGTGTATACTATCACCCCA  
AAAAACCAAACCTCTGCCTTACGTAAAGTTGCCAGAGTACGATTAACCTCTGGGTTTGA  
AATCACTGCTTATATACCTGGTATTGGCCATAATTCACAAGAACATTCTGTAGTCTTAGT  
AAGAGGGGGGAGGGTTAAGGATTTACCCGGTGTGAGATATCACATTGTTTCGAGGAACC  
CTAGATGCTGTCCGAGTAAAGGATCGTCAACAAGGGCGTTCTAAATATGGGGTCAAAA  
AGCCAAAAATGGCAAGGCAAAGTTTGATTTCAGAGGGAAAAGAAAAGGCACAAATTG  
GAACAAAAATATCATTTGATTCGTGATCCTCAAAAAAAGAAATAAAC-----AAAGCT  
CCATCGTTGAGCGATAAATGGAAAATTCATGGAAAGTTACAATCCTCACCGCGTAATAG  
TGCACCTACCCGTCTTCATCGACGTTGTTTTTTGACCGGAAGGCCGAGAGCTAACTATC  
GAGACTTTGGACTATCCGGACACATACTTCGTGAAATGGTTCATGCGTGTGTTGTTGCCG  
GGGGCAACAAGATCAAGTTGGATGGTAAAAAATGCATTTCATCTCAGTTAGGGTTCAAG

AA-----AAAAAAGAAAAAACAGCGGATCGGTTGAATTTCAAGTATTTTCGTTTCACCAA  
CACGATCCGGAGACTTACTTCACATTTAGAATTGCACAGAAAAGACTATTCATCTCAA  
GGGGTCTACGTAAAATTTTGGAAAAACGCCAACGTCTACTAGCTTATTTGTCAAAGAA  
AAATAGAGTACGTTATAAAGAATTAATTAGTAAGTTGAATATCCGGGAGTCAAAAAATC  
GT-----ATGGTAAAACCTTCGTTTGAAACGATGTGGTAGAAAGCAACGAGCCGTTTATCG  
AATCGTTGCAATTGATGGTCGATCCCGAAGAGAAGGAAGAGATCTTCGGAAAGTGGGT  
TTTTATGATCCGATAAATAATCAAACCCATTTAAATGTTTCCTGCTATTCTATATTTCTTGC  
CAAGGGCGCTCAACCTACAGGAACCGTTCATGATATTTACAGAAAGCGGGGGTTTTT  
ACAGAAGTTAGTCTTAATCAA---ACGAAATTCTATATGGATAAAACCAAGCGACTCTTTC  
TTAAATCCAAGCGATCTTTTCGTAGGCGTTTGCCCCGATCCAATCGGGGGATCGAATT  
GATTATAGAAACATGACTTTAATTAGTCGATTTCTTAGTGAACAAGGAAAAATATTATCT  
AGACGGGTGAATAGATTGACCTTAAAAGAACAACGATTAATTAATGCTATAAAACA  
AGCTCGTATTTTATCTTCGTTACCTTTTCTTAATAATGAGAAA-----CAATTTGAAAGAAG  
TGGGTTGACCGCTAGACCTCCCGGTCTTAGAACCAGAAAAAAAGTGACACGTTCACTA  
AAAAAAATCCTTTTGTAGCGAATCATTATTAAGAAAAATCGATAAGCTTAATACAAA  
AGCGGAAAAAGAAATAATAATAACTTGGTCCCGGCATCTACCATTATACCCACAATGG  
TCGGCCATACTATTGCTATCCATAATGGAAGGGAGCATTTCCTATTATATAACAGATCG  
TATGGTAGGACATAAATTGGGAGAATTTGCGCCACTATCAATTTCCGTGGACATGCAA  
AAAATGATAATAGATCCCGTCGTATGATTTTTCAATCTTTTATACTAGGTAATCTAGTATC  
CTTATGCATGAAGATAATCAATTCGGTTCGTTGTGGTTCGGACTCTATTATGGATTTATGAC  
CACATTCTCCATAGGGCCCTCTTATCTCTTCCCTTCCGAGCTCGGGTTATGGAAGAAG  
GAGAAGAAGGAACCGAGAAGAAGGTATCAGCAACAACCTGGTTTTATTGCGGGACAGC  
TCATGATGTTTCATATCGATCTATTATGCGCCTCTGCATCTAGCATTGGGTAGACCCGATAC  
AATAACTGTCCTAGCTCTACCGTATCTTTTGTTCATTTCTTCTGGAACAATCCCAAACA  
CTTTTTTGATTATGGATCTACTACCAGAAATCAATGCGTAATCTTAGCATTCAATGTGTA  
TTCTGATAATCTCATTTTTCAATTATCAACCATTTCCTTTTACCAAGTTCAATGTTAG  
CCAGATTAGTCAACATTTATATGTTTCGATGCAACAACAAGATGTTATTTGTAACAAGTA  
GTTTTGTTGGTTGGTTAATTGGTACATTTTATTCATGAAATGGGTTGGATTGGTATTAG  
TTTGGATGCAGCAAAGAATTCTATTAGGTCT---ATTCGATTTAATAAGTACCTTGTGTC  
AGAATTGAGAAATTCTATGGCTCGAATCTTTAGTATTCTCTTATTATTACCTGTATCTAC  
TATTTAGGCAGAATACCCTCACCCATTTTACTAAGAACTGAAAGTGGCCGAAGAAGA  
TAAACCTCTTGTGACCCTTCTTTTCGACTATAAACGTTGGACTCGGCCACTTCGATATAA  
AAAAATAATAGATTTGAAAATGCTGTACGAAACGAAATGTCACATTTTTTTTTTATGC  
ATGTCGAAGTGATGGAAAAGAAAGGATCTCTTTTACATATCCAGCTAGTTTGTCAACTT  
TTTTGGACATGATAAAAAAAATAATTATTTTTTCGCAACCGAAAAACTATCCTCTGATG  
AATTTTCTACACATTGGAATTACACTAATAACCAAAAAATTAAGA ACTTAAGCAAGGAG  
TTTAGAAATCGACTTGAGGGTTTAGAT-----CTTATTCGGGATATACTCGAAAAAAGGA  
CTCAATTGTGTAATGATAAGACTAAAAAAATACTTACCTAAAACATATGATCCTTTAT  
TAAACGGACCTTATCGTGGAAGAATCAAAAAATCTTTTACCCATAAGAACGCCTTGG  
ATAAATAAAATTCACAATCTAATTTATCACGAATTTGAACAGACAGATCCCAATGATCAA  
-----AAAGAAATTAGTAAAAGAGTTCCCCGGTGGTCATACAAATTAATCAATGTATA  
CCAAGAACTGGGAGAAGCATTTCGTTACGAAAAGCCAAACGTTTAGTGGTTGCTGTT  
GATCTTTGCCCATTTTGGAAACAATCGGATTTTCGTGCGATATATAATAAAAGGTTCCA  
TGCGCGCACAAAGACGTAAAACCGTTATTTGGAAACCAGTTCAAGCAAATGCCCATTC

CCCTCTTTTTTTGGACAGAATAGACAAAACC-----CTTTATTTGTCTTTTTGATATTTCCCA  
ACTGATGAAAGTAATTCTTCGAAATAGACAAGAAATGGTACGTATAAAACAAGCAGAA  
GGATGGGATAAGCGTTTACTTACTCGAATACTAAGAAGTTCTATGTTAGTAATCCAATCG  
ATTCTTAGAAAATATATTGTATTACCGTTATTGATAATAGCTAAAAATGTGGTTTCGCATAC  
TATTATTCCAAGATCCCGAGTGGTCCGAGGATTTTAAGGATTGGAATCGTGAAATTTATG  
TAAATGCACTTATAGTGGTGTAAATTTATCTGAAACAGAATTTCCGAAAAACTGGTTAA  
TAGAAGGTATTCAGATAAAGATCCTATTCCCCTTTCACCTGAAACCCTGGCACGGATCT  
ACG-----ACTGATGTTTGTTTTTTAACAATTTTTGGGCTGGAAACTGACATGCCGTT  
CGTTTCTCCCAAAAACGACGTTTCTTTTTGAACCCATTTTTAAAGAACTAAAAAAA  
AAAATTCGAAAATTGAAAACATAAGTCTTTTATAGTT---TTAAGGGATTTTAAAGAA-----  
-----GGCAAATAAAAAGAACTTTCAAA  
AATAACAATTCGATAATCAGTAAGCAGATGATTCACGAACCG---ATTGAAATTTTCATCT  
ATGGATTGGACGAAA---TCCCGGACTGAAAAAAAATGAAAGATCTGACTAATAGAAC  
AAGCAGAATCAGAAATCAAATATATAAAATTACAAAAGAAAAGAAAAAAGTTTCGAA  
CAAACCAACGTATTCTGTAAATATTAGACCCATCAAAAAGGATTTGGCGGATATTAA  
AA-----AACGCTCGATTAATCCGTAAATCCTATTTGTTTCTAAAATTTGGCATTGAAAAGA  
TATACAGAAATATTTTTATATCTACCCTTACTATTCCAAGAATCAATACAAAACCT-----  
-----TGTAATTTATTGTCTTTTTTACAAGCATATGTATTTTACAAATTATTACAAGTC---AT  
TTTGAACTTTTATAATTTAAGACCCGTTCTTCAATATACATCTCTATTTCTTAAGAATGAA  
ATAAAAGATTTTTTTAAACACGGAATCTTTAAT---CAATTAAGACATAAACCCCTTTGG---  
TTTGGAAAGGAATACACGAAAACACTGTTTAAAGCGGGCATTATCAATATGATTTATCTCG  
GATTAATGGGCTAGATTAGTACCACAAGAATGGCGAAATAGAGCCAATCAACACTGTA  
TGGCTCAAATAAAATTTAAAAGAGATTCGTATGAAAAAATGGA-----TTAACTCATTAC  
GAAAAACAA---AATTTTAAAAAACACTATAGATATGATCTTTTATCATATAAATCGCTTAA  
TGATGATATTATGGATTTGTATAGAAAATATTTTGATTGGAGAATTCTTAATTTTTGTCTTA  
GATTTTGTGATTGGATGGGAATGAATGAAGAAATACTAAGTTGTTGGTTCTTCCCAGAA  
TTTGTACTACTTTTTAATGCATATAGAACGAAACCCTGGATTATACCAATCAAATTACTTC  
TTTTCAATAGAGAA-----ACCGAAGTACAGCTCGATTTCTTCTTAAAAGATATTTGTGT  
TTGCAGTTGCGATGGAGGGGGGCT---AGAGAAAAATACTCAATGATATGCAAGTATAT  
TGTCACCTGGTTCGACTAATAAATCCTAGCGACGTTGCTATAGCCTCTATTCAAAGGGG  
AGAAATGAGTCTGCCTATTTGATCACTAAGAAGAAGTTTCGCTCTTAAAGAATTGACGA  
AAGGGGGAATGCTTATTATCGAACCCCGTCGTTTGTCTGTAAAAAATGATGGACAATTT  
TTTCTATATCAAATCGTAGGTATTGCATTGGTTCATAAGAATAAGCGCCATTATGAT---TT  
GCTTGTTCCTGAAACTATTTTACTCCCTAAACGTCGTAGAGAATTAAGAACCCTAATTT  
GTTTCAAATTTATTTGGGCCAATTCTCGATTAGAAGATTTAATTTGTATGAATCGGTATTG  
GTTAATACCAATAATGGGAGTCGTTTCAGTATGGTAAGGGTCCATATGTATCCAATGAA  
AGGACATCAATCAAATCCTGGATTTTCGAATTGAGAGAGATATTGAGAGAGATCAAG  
AATTCTCACTATTTCTTAGATTCATGGACCCAATTCATTCAGTGGGATCTTTCATTCAC  
ATTTTTTCCACCAAGAACGTTTTATAAACTCTTGGATCCACGAATTTGGAGTATCCTA  
CTTCA---CGCAATTCA-----CAGGGTCAACAAGCAATCGATATTTT-----ACGATCAA  
GTGTGTAGTACTGTTTGTAGTAGCG---ATCCTTATATATCGT-----ATTAACAATCGAA  
ATATGGTCGAAAGAAAAAATCTCTATTTGACAGGGCTTCTTCTCT-----ATACCTAT  
GAATTCCATTGGACCCAGAACTGATACATTTGGAAGAATCTTTT---GGGTCTTCCAATATC  
AATAGGTTGATTGTTTCG---CTCCTGTATCTTCCAAAAGGAAAAAAGATCTCTGAGAGC

TTTTTCCTGGATCCGAAAGAGAGTACTTGGGTTCTCCCAATAACT-----AAAAGGTG  
TATCATGCCTGAATCTAACTGGGGTTCGCGGTGGTGGAGGAACTGGCTCGGAAAAAAG  
AGG-----GATTCTAGTTGTAAGATATCTAAT-----GAAACCGTTCGCTGGAATTGAGATCT  
CATTCAAAGAGAAAGATCTCAA---TATCTGGAGTTTCTTTTTGTATATTATATGGAT-----  
GATCCGATCCGCAAGGACCATGATTGGGAATTGTTTGATCGTCTTTCTCCGAGTAAGAG  
GCGAAACATAATCAACTTG-----AATTCGGGACATCTATTGCAAATCTTAGTGAAAGACT  
GGATTTGTTATCTCATGTTTGCTTTTCGTGAAAAAATACCAATTGAAGTGGGGGGT--TT  
CCTCAAACAACAAGGG--GCTGGGTCAACTATTCAATCAAATGATATTGAGCGTTTTTC  
CCAT-----CTCTTCTTGAGAAACAAGTGGGCTATTTCTTTGCAAAATTGTGCTCAATTTCA  
TATGTGGCAATTCCGCCAAGATCTCTTCGTT-----AGTTGGGGGAAG---AATCCGCACG  
AATCGGATTTTTTGAGGAAC---ATAGCGAGAGAGAATTGGATTTGGTTAGACAATGTGT  
GGTTGGTAAACAAGGATCGA-----TTTTTTACC-----AAGGTACGGAATGTATCGTCAA  
ATATTCAATATGATTCC-----ACAAGA-----TCTAGTTTCGTTCAAGTAACGGATTCTAG  
CCAATTGAAAGGATCTTCT--GATCAATCCAGAGATCATTTCGATTCCATTAGT-----  
AATGAGGATTCCGAA-----TATCACACATTGATCAATCAAAGA  
GAGATTCAACAATAAAAGAAAGATCGATTCTT--TGGGAT-----CCTTCTTTTCTTCAAG  
CGAACGAAGAGAGATAGAATCAGAC-----CGATTCCCTAAA-----TGTCTTTCTGGATAT  
TCC-----TCAATGTCCCGGCTATTCACG---GAACGTGAAAGGCAGATGAATAAGCATCTG  
CTCCGGAAGAAATCGAAGAATTT-----CTGGGAATCCTGCAAGATCCATTTCGTTCTTT  
TTTCTCTGACAGATGG-----TCAGAACTTCAT--CTGGGTTCGAATCCTACTGAGAGGTC  
CACTAGAGATCAG-----AAATTGTTGAAGAAAGAAGAGGATGTTTCT--TTTGTCCC  
TTCCAGGCGATCGGAA-----AATAAAGAAATAGTTAATATATTCAAGATAATTACGTA  
TTTACAAAAT-----ACCGTCTCAATTCATCCTATTTTCATCAGATCCGGGATGTGATATGGT  
TCCG---AAGGATGAACTGGAT--ATGGACAGTTCCAATAAGATTTTCATTCTTAAACAAA  
ATCCATTTTTTGATTTA-----TTTCATCTATTCCATGACCGGAACAGGGGGGGATCCACGT  
TA-----CACCACGATTTTGAATCAGAA-----GAGAGATTTCAAGAAATGGCAGATCTATTC  
ACTCTATCAATAACCGAGCCG--GATCTGGTGTATCATAAGGGATTTGCCTTTTCTATTTT  
TTCTTACGGATTGGAGCAAAAACAA-----TTCTTGAATGAGGTATTCAACTCCAGGAAT  
GAATCGAAAAAGAAATCTTTA-----TTGGTTCTACCTCCTATTTTTTAT-----GAAGAGA  
ATGAATCTTTTTATCGAAGGATCAGAAAAAATGGGTCCGG---ATCTCCTGCGGGAATG  
ATTTGGAAGATCCAAAACCAAAAATAGTGGTATTTGCTAGCAACAACATAATGGAGGC  
AGTCAATCAATCTAGATTGATCCGAAATCGGATTCAAATCAA-----TATAGCACCTATGG  
GTACATAAGAAATGTATTGAATCGATTCTTTTTAATGAAT-----AGATCCGATCGCAACT  
TCGAATATGGAATTCAC-----AGGGATCAAATAGGAAATGATACTCTGAATCATAGAAC  
TATAATGAAATATACGATCAACCAACATTTATCGAATTTGAAAAAG---AGTCAGAAGAAA  
TGGTTTCGCTCCT-----CTGATTTTGATTTCTCGAACCGAGAGATTCATGAATCGGGATCCT  
AATGCATATAGATACAAATGGTCCAATGGGAGCAAGAATTTCCAGGAGCATTGAAACA  
TTTCGTTTCTGAGCAGAAGAGCCGT-----TTTCAAGTAGTGTTTCGATCGATTACGTATT  
AATCAATATTCGATTGATTGGTCTGAAGTTATCGACAAAAAAGATTTGTCTAAGCCACT  
TCCTTTCTTTTTGTCC-----AAGTTTCTT  
TTCTTTTTGTCTAACTCACTTCT--TTTTCTTTGTGAGTTTCGGGAATATCCCATTTCAT  
AGGTCTGAG---ATCCACATCTAT--GAATTGAAAGGTCCGAATGATCAACTCTGCAATCA  
GTTGTTAGAATCAATAGGTCTTCAAATCGTTCAATTTGAAAAAATTGAAACCCTTC-----TT  
ATTGGAT-----GATCATAATACTTCC--CAAAAATCGAAATCTTGATCAATGGAGGAA



GAATATCACCATTTTTGTTCAATAAGATACCG---AAGTGG---ATGATTGACTCATTCCATA  
CTAGA-----AAAAATCGCAGGAAATCTTTTGATAACACGGATTCTTCTCAATGATAT  
CCCACGATCAAGACAATTGGCTGAATCCTGTGAAACCATTTTCATAGAAGTTCATTGATA  
TCTTCTTTTTATAAAGCAAATCGACTTCGATTCTTGAATAATCCACATCGCTTCCGCTTCT  
AT-----TGTAACAAAAGATTCACTTTT-----TAT---GTGGAAAAGGTCCGTATCAATAATT  
ATGAT-----TTTACGTATGGA---CAATTCCTCAATATCTTGTTCATTTCGCAACAAA---ATATT  
TTCTTTGTGCGGCGTAAA-----AAAAAACATGCTTTTTTTGGAG---AGAGATACTATTTTC  
ACCAATCGAGTCACAGGTATCTAACATATTCATACCTAACGATTTTCCACAAAGCGGTG  
ACGAAAGG---TATAACTTGTACAAATTT-----TTCCCTTTTCCAATTCGATCCGATCTAT  
TAGTTCGT-----AGAGCTATTTACTCGATCGCAGCCATTTCTGGAACACCTCTAACAGAG  
GGACAAATAGTCAATTTTGAAAGAACTTATTGTCAACCTCTTTCAGATATGAATCGATCT  
GATTCAGACGAGAAGAAGCTTGCATCAGTATCTCAAT-----TTCAATTCAAACATGGGTTT  
GATTCACACTCCATGTTCTGAGAAATATTTACCATCCGAAAAGAGAAAGAGGAAAAAA  
-----CGGAGTCTTTGTCTAAAG-----AAATGCGTTGAGAAAGGGCAGATGT  
CTAGAACCTTTCAACGAGACAGTGCTTTTTCAACTCTCTCAAATGGAATCGATTCCAA  
ACATATATGCCATGGTTCCTTACTTCGACAGGGTACAAATATCTAAATTTGATATTTTATG  
ATACTTTTTTTCAGAC--CTATTGCCGGTACTAAGTAGCAGT-----CAAAAATTTGTATCCATT  
TTTCATGATATTATGCATGGATCAGATAGAGCATGGCGAATTCTTCAGAAAAAATGG-----  
-----TGTCTTCCACAATGGAAT--CTGATAAGTGAGATTTTCGAGTAAGTGTTTCCATA  
AT-----CTTCTTCTGTCCGAAGAAATGATTCATCGAAATAATGAGTCA-----CCATTGATAT  
CGACACATCTGAGATCGCCAAATGCTCGGGAGTTC--CTCTATTCAATCCTTTTCTTCT  
TCTTGTGCTGGATAT--CTCGTTCATACACATCTTCTCTTTGTTTCCCGA-----GCCTATA  
GTGAGTTAGAGACAGAGTTCGAAAGGGTCAAATCTTTGATGATTCCACCATACATGATT  
GAGTTGCGAAAACCTTCTGGATAGGTATCCACATCTGAACTGAATCTTTTCTGGTTAAA  
GAATCTCTTTCTAGTTGCTCTGGAACAATTAGGAGATTCTCTAGAAGAAATACGGGGTT  
CTGCTTTTGGCGGCAACATGCTATGGGGTGGTGGTCCC-----GCGGATGGG--GTT  
AAATCAATACGTTCTAAGACGAAAGATTTGAATATCAATCTCGTTCGATATCACCGATCTC  
ATA--AGTATCATACCAAATCCCATCAACCGAATCACTTTTTTCGAGAAATACGAGACATC  
TAAGTCATACAAGTAAAGAGATCTATTCATTGATAAGAAAAAGAAAAAGGGGAACGG  
TGATTGGATTGATGATAAAATAGAATCCTGGGTTCGCGAACAGTGATTTCGATTGATGATA  
AAGAAAGAGAATTCTTGGTTCAGTTCTCCACCTTAACCTTAACGACA-----GAAAAAAG  
GATTGATCAAATTCTATCGAGTCTGACT--CATAGTGATCATTATCA-----AAGAA  
TGACTCTGGTTATCAAATGATTGAACAACCGGGAACAATTTACTTACGATACTTAGTTG  
ACATTCAT-----AAAAAGCATTTCATGAATTATGAGTTCAATACATACTGTTTAGCAGAAA  
GACGGATATTCCTTGCTCATTATCAGACAATCACTTAT-----TCACAAACTTCGTGTGGGG  
CTAATAGTTTTTCATTTCCCATCTCATGGA-----AAACCCTTTTCGCTCCGCCTAGCCCTA  
TCCCCCTCT--AGGGGTATTTTAGTGATAGGTTCTATAGGAACCGGACGCTCCTATTTGG  
TCAAATACCTAGCGGCAAACCTCCTATGTTTCTTTCATTACAGTATTTCTGAACAAGTTCC  
TGGATAACAAGCCTAAAGGTTTTCTTATTGAT-----GATATCGAT----GATGCTAGT  
GACGATATTGATGCTAGTGAC-----GATAT  
CGATCGTGACCTTGATACGGAGCTGGAGCTTCTAACTATGATGAATGCGCTA-----ACT  
ATCGATATGATGTCG-----GAAATAGGCCGATTTTATATCACCTTCAATTCGAATTAGC  
AAAAGCAATGTCTCCTTGCATAATATGGATTCCAAACATTCATGATCTGGATGTGAATGA  
GTCGAATTACTTATCCCTCGGTCTATTAGTGAACCTATCTCTCC-----AGGGATTGTGAA

AGATGTTCC---ACTAGAAATATTCTTGTTATTGCTTCGACTCATATTCCCCAAAAAGTGG  
ATCCCGCTCTAATAGCCCCGAATAAATTAATACATGCATTAAGATACGAAGGCTTCTTA  
TCCACAACAACGAAAGCACTTTTTCACTCTTTCATATACTAGGGGATTTCACTTGGAA  
AAGAAAATGTTCCATACT-----AATGGATTTCGGGTCCATAACCATGGGTTCCAATGCACG  
AGATCTTGTAGCACTTACCAATGAGGCCCTATCGATTAGTATTACACAGAAGAAATCAA  
TTATAGACACTAATACAATTAGATCTGCTCTTCATAGACAACTTGGGATTTGCGA-----  
-TCCCAGGTAAGATCGGTTCAAGATCATGGGATCCTTTTTCTATCAGATAGGGAGGGCTGT  
TGCACAAAATGTACTTCTAAGTAATTGCCCCATAGATCCTATATCTATCTATATGAAGAA  
GAAA-----TCGTGTAACGAAGGGGATTCTTATTTGTACAAATGGTACTTCGAACTTGGAA  
CGAGCATGAAGAAATTAACGATACTTCTTTATCTTTTGAGTTGTTCTGCCGGATCGGTC  
GCTCAAGACCTTTGGTCTCTACCC-----GGACCCGATGAAAAA---AACGGGATCACTTCT  
TCTGGACTCGTTGAGAATGATTCT--GATCTAGTCCATGGCCTATTAGAAGTAGAAGGCG  
CTCTGGTGGGA-----TCCTCGCGGACAGAAAAAGATTGCAGTCCGTTTGATAATGAT----  
-CGAGTGACATTGCTTCTTCGGCCCGAACCAAGGAAT--CCCTTAGATATGATGCAAAAA  
GGATCTTGTCTATCGTTGATCAGAGATTCTCTATGAAAAA-----TACGAATCGGAGTTT  
GAAGAA---GGGGAAGGAGAAGGAGTCTCGACCCGCAA-----CAGATAGAGGAGG  
AT-----TTATTCAATCAC-----ATAGTCTGGGCTCCT-----AGAATATGGCGCCCC-----  
-TGGGGCTTTCTATTTGATTGTATCGAAAGGCCCAATGAATTGGGATTTCCC---TATCGGG  
CCGGGTCATTTCCGGGCAAG-----CGGATCATTATGATGAAAAGGATGAGCTTCAAG  
AGAATGATTCGGAGTTCTTGCAGAGTAGAACCATGCAGTACCAGACACGAGATAGATC  
TTCCAACGAACAAGGCTTTTTTTCGAATAAGCCAATTCATTTGGGAACCTGCGGATCCAC  
TCTTTTTCTATTCAA---GATCAGCCCCTTGTCTCTGTGTTTTACACCGAGAATTCTTT  
GCAGATGAAGAGATGTCAAAGGGGCTTCTTACTTCCCAACCAGATCCTCCTACATCTAT  
ATATAAACGCTGGTTTATC-----AAGAATACGCAAGAAAAGCACTTCGAATTGTTGATTC  
ATCGCCAGAGATGGCTTAGA-----ACCAATAGTTCATTATCT-----AATGGATTTTTCCG  
TTCTAAT-----ACTCCATCCGAGAGTTATCAGTATTTATCAAATCTGTTCTATCTAAC---G  
GAACGCTATTGGATCAAATGACAAAGACATTGTTGAGAAAAAGATGGCTTTTTTCCGGA  
TGAAATGAAAATTGGATTC-----ATG-----ATGCCTAGATCGCGG---ATAA  
ACGGAAATTTTATTGATAAGACCTTTTCGATTGTAGCCAATATATTATTACGAATAATTCC  
GACAACTGTAGGAGAAAAAGAGGCATTACCTATTACAGAGATGGT-----ATGTCAGCT  
CAATCTGAAGGCAATTATGCGGAAGCTTTACAGAATTATTATGAAGCTATGCGACTAGA  
AATTGATCCTTACGATCGAAGCTATATACTCTATAACATAGGCCTTATCCACACAAGTAA  
CGGAGAACATACAAAAGCTTTAGAATATTTTTTCGGGCACTAGAACGAAATCCGTTCT  
TACCACAAGCTTTTAATAATATGGCTGTGATCTGTCATTAC---CGGGGGGAACAGGCCGT  
TCGACAGGGAGATTCTGAAATTGCGGAGGCTTGGTTCAATCAAGCTGCCGAGTATTGG  
AAACAAGCTATTGCGCTTACTCCTGGTAATTATATTCAAGCGCAGAATTGGTTGAAGAT  
CACGGGACGTTTCGAA-----ATGAGTTGGCGATCAGAATATATATGGGTAGAATTTATAG  
CGGGCTCTCGCAAACCAGGCAATTTCTTCTGGGCCTTTATCCTTTTTTTTAGGCTCATTAG  
GATTCTTAGTGGTTGGAATTTCTAGTTATCTTGATAGGAATTTGCTATCTTTATTTCCGTC  
GCAGCAAATCAATTTTTTTCCACAAGGGATCGTGATGTCTTCTACGGGATCGCGGGTC  
TCTTTATTAGTTCCTATTTGTGGTGCACAATTATATGGAATGTAGGTAGCGGTTATGATCG  
ATTTGATACAAAAGAGGGAATAGTGTGTATTTTTCGTTGGGGATTTCTGGAAAAAATC  
GCCGCATCTTTCTACGATTCCTTATGAAAGATATTCAGTCCATCAGAATAGAAGTTAAAG  
AGGGTATTTATGCTCGTCTGTCCTTTATATAGAAAGCAGAGGCTTGGGGGCCATTCCC

TTGAATCGTACTGATGAGAAT--TTGACTCCGCGAGAAATTGAGCAAAAAGGCTGCGGAA  
TTGGCCTATTTCTTGCGTGTACCAATTGAAGGATTT

>Platanus

ATGGAAAAATGGTGGTTCAATTCGATGTTGTCTCTAAGTAAATCAATGGACAGTCTTGG  
TGCTATTGGAAATAGCAGTGGAAGTGAAGACCCCGTTATAAATGATACGGATAAAAACA  
TTCAT--TACAGTAATGTTGATCATTATTCGGTGTGAGGAACATTCGGAATTTTATCTCT  
GATGACACTTTTTTAGTTAGGGATAGGACTGGTGACAGTTATTCTATATATTTGGATATTG  
AAAATGAGATTTTTGAAATTGACAATGAT-----CGTTCTTTTCTGAGTGAATTAGAAAGT  
TATTTTTCTAGTTATCTGAAT-----AATAGGTCTAAGAGTGACACTCACTACTATGA  
CCGTTACATGTATGATACTAAATATACTTGGAAATAATCACATTAATAGTTGCATTGACAGT  
TATATTCGTTCTGAAATCAGT-----ATTGATAGTTACATTTCAAGTGGTAGCGACAATTAC  
AGTGACAGTTACATTTCTAGTTACATTTGTAGTGACAGCGGGAGTTATATAAGAACTAG  
C---AATGGCAGTGAT--AATATAAGAGGAAGATAT--GATCTTGATATAAATAAAAAATAC  
AGGCATTTGTGGATTCAATGCGAAAATTGTTATGGATTAAATTATAAGAAATTTTTTAGG  
TCAAAAATGAATATTTGTGAACAATGTGGATATCATTGAAAATGAGTAGTTCAGATAG  
AATCGAACTTTGATTGATCCCGGCACCTGGGATCCTATGGATGAAGACATGGTCTCTAT  
AGACCCCATGAATTCATTGAGGAGGAGCCTTATAAAGATCGTATAGATTCTTATCA  
AAGAAAGACAGGGTTAACTGAGGCTGTTCAAACAGGCATAGGTCAACTAAATGGTATT  
CCCATAGCAATTGGGGTTATGGATTTTCAGTTTATGGGGGGTAGTATGGGATCCGTAGTA  
GGCGAGAAAATCACCCGTTTGATCGAGTATGCTACTAATGGATCTCTACCTCTTATTATA  
GTGTGTGCTTCCGGAGGAGCACGCATGCAAGAAGGAAGTTTGAGCTTGATGCAAATG  
GCTAAAATATCTTCCGCTTCATATGATTATCAGTCAAATAAAAAGTTATTCTATGTATCAA  
TCCTTACATCTCCTACAACCGGTGGGGTGACAGCTAGTTTTGGTATGTTGGGAGATATC  
ATTATTGCCGAACCAATGCCTACATTGCATTTGCGGGTAAAAGAGTAATTGAACAAAC  
ATTGAATAAGACAGTACCTGAAGGTTACAAGCAGCTGAGTATTCATTCCATAAAGGCT  
TATTCGACTCAATCGTACCACGTAATCTTTTAAAAGGAGTTCTGAGTGAGTTATTTACG  
TCCACGGTTTCTTTCCCTTGAATCAAATTCAATCAAGATGGTAACCCCTTCGAGCCGAC  
GAAATAGTAATATTATTCGTGAACGTATTGAGCAATATAATAGAGAAGTAAAGGTTGTG  
AATACCGGCACCGTACTTCAAGTAGGCGACGGTATTGCTCGTATTCACGGTCTTGATGA  
AGTAATGGCAGGTGAATTAGTAGAATTTGAAGAGGGTACAATAGGCATTGCTCTTAATT  
TGGAATCAAATAATGTTGGTGTGTTATTAATGGGTGACGGTTTGATGATACAAGAGGGA  
AGTTCTGTAAAAGCAACAGGACGAATTGCTCAGATACCAGTGAGCGAGGCTTATTTGG  
GTCGTGTATAAATGCCCTGGCTAAACCTATTGATGGTAGAGGTGAAATTTTCAGCTTCT  
GAATCTCGGTAAATTGAATCTCCTGCTCCAGGTATTATTTTCGAGACGTTCCGTATATGAG  
CCTCTTCAAACGGGACTTATTGCTATTGATTGATGATCCCTATAGGACGCGGTCAGCG  
AGAATTAATTATTGGGGACAGACAGACCGGTAAAACAGCAGTAGCCACGGATACTATT  
CTCAATCAAAAAGGGCAAACGTAATATGTGTTTATGTAGCTATTGGTCAGAAAGCATC  
TTCTGTGGCTCAGGTAGTACTACTTTTCAGGAAAGAGGGGGCGATGGAATACACTATT  
GTGGTAGCCGAAACGGCAGACTCGCCTGCTACATTACAATACCTCGCTCCTTATACAGG  
AGCGGCTCTGGCCGAATATTTTATGTACCGTGAACGACATACTTCAATCATTATGATGA  
TCCTTCCAAACAAGCCCAAGCTTATCGCCAATGTCTCTTCTATTACGAAGACCACCCG  
GTCGCGAAGCTTATCCGGGAGATGTTTTTTATTTGCATTCACGCCTTTTGGAAAGAGCC  
GCTAAATCAAGTTCTTTTTGGGTGAAGGAAGTATGACCGCTTTACCAATAGTTGAGAC  
TCAATCGGGAGACGTTTCGGCTTATATTCCTACTAATGTAATTTCCATTACAGATGGACA

AATATTCTTATCCGCCGATCTATTCAATTCTGGAATCCGACCTGCTATTAATGTGGGTATT  
TCCGTCTCCAGAGTAGGATCCGCAGCTCAAATTAAGCCATGAAACAAGTAGCCGGCA  
AATTAATAATTGGAAGTGGCTCAATTTGCAGAGTTAGAAGCCTTTGCACAATTTGCTTCT  
GATCTCGATAAAGCTACTCAAATCAATTGGCAAGAGGTCAACGATTACGTGAATTGCT  
CAAACAATCCCAATCAGCCCCTTTACGGTGGGAAGAACAGATAGTTACTATTTATACCG  
GAACAAATGGGTATCTTGATTCGTTAGAAATTGGACAGGTAAAGAAATTTCTCGTTTCAG  
CTACGTACTTATTTAAAAACGAATAAACCTCAGTTCCAAGAAATCATATCTTCTAGTAAG  
ACATTCACCGAGGAAGCAGAAGCCCTTTTGAAGGAAGCTATTCAGGAACAGATGGAA  
CGCTTTCTACTTCAGGAGCAAACAATGAGAATTAATCCTACTACTTCCGGTCTGGGGT  
TTCCGCACTTGAAGAAAAAACCTGGGGCGTATCGCTCAAATCATTGGTCCGGTACTA  
GATGTAGCTTTTCCCCCGGCAAAATGCCTAATTTACAATGCTTTGGTAGTTAAGGGT  
CGAGATACTGTCCGGCAGCAAATTAATGTGACTTGTGAGGTACAGCAATTATTAGGAAA  
TAATCGAGTTAGAGCTGTAGCTATGAGTGCTACAGATGGCCTGACGAGGGGAATGGAA  
GTGATTGACACGGGAGCTCCTCTAAGTGTTCAGTCGGTGGAGCGACTCTCGGACGAA  
TTTTCAATGTTCTTGGAGAACCCTGTTGATAATTTAGGTCCTGTAGATACTCGCACAACAT  
CTCCTATTCATAGATCTGCGCCTGCTTTTATACAGTTAGATACCAAATTATCTATTTTTGA  
AACAGGAATTAAGGTAGTGGATCTTTTAGCTCCCTATCGCCGTGGAGGAAAAATCGGA  
CTATTCGGGGGAGCTGGGGTGGGTAAAACAGTACTCATCATGGAATTGATCAACAACA  
TTGCCAAAGCTCATGGCGGTGTATCTGTATTTGGCGGAGTAGGCGAACGTACTCGTGA  
AGGAAATGATCTTTACATGGAAATGAAAGAATCTGGAGTGATTAATGAACAAAATATTG  
CAGAATCAAAGTAGCTCTAGTATATGGTCAGATGAATGAACCGCCGGGAGCTCGTATG  
AGAGTTGGTTTGACTGCCCTAACTATGGCGGAGTATTTCCGGGATGTTAATGAACAAGA  
CGTACTTCTATTTATCGACAATATCTTCCGTTTCGTCCAAGCAGGATCCGAAGTATCTGC  
TTTATTAGGCAGAATGCCTTCTGCTGTGGGTTATCAACCTACCCTTAGTACAGAAATGG  
GTTCTTTGCAAGAAAGAATTACTTCTACAAAAGAAGGATCCATAACTTCTATTCAAGCA  
GTTTATGTACCCGCGGATGATTTGACCGACCCTGCTCCTGCCACGACATTTGCACATTA  
GATGCTACTACCGTACTATCAAGAGGATTAGCTGCCAAAGGTATCTATCCAGCAGTGGA  
TCCTTTAGATTCAACGTCAACTATGCTCCAACCTCGGATCGTTGGTGAGGAACATTATG  
AAACTGCGCAAAGAGTTAAGCAAACCTTTACAACGTTACAAAGAGCTTCAGGACATTAT  
AGCTATCCTTGGGTTGGACGAATTATCCGAAGAGGATCGTTTAACCGTAGCAAGGGCA  
CGAAAAATTGAGCGTTTCTTATCACAACCCTTCTTCGTAGCAGAAGTATTTACCGGTT  
TCCAGGGAAATATGTTGGTTTAGCAGAAACAATTAGGGGGTTTCAACTGATCCTTTCCG  
GAGAATTAGATGGTCTTCTGAGCAGGCCTTTTATTTGGTAGGTAACATCGATGAAGCT  
ACCGCGAAGGCTATGAACTTAGAAGTGGAGAGCAAATTGAAGAAAATGACCTTAAATC  
TTTGTGTAAGTACTCCTAATCGAATTGTTTGGGATTCAGAAGTGAAAGAAATTTTTAT  
CTACTAGTAGTGGCCAAATTGGCGTATTACCAAATCACGCCCTATTGCCACAGCTGTA  
GATATAGGTATTTGAGAATACGCCTTAACGAACAATGGTTAACGATGGCTCTGATGGG  
CGGTTTCGCTAGAATAGGCAATAATAAGATCACCATTTTAGTAAACGATGCGGAGAAGG  
GCAGTGACATTGATCCGCAAGAAGCTCAGCGAACTTTGAAATAGCTGAAGCTAACTT  
GAGTAGAGCTGAAGGCAAGAGACAAACAATTGAGGCAAATCTAGCTCTCAGACGGGC  
TAGGACGCGAGTAGAGACTATCAATGTAATTTTCGATGCAAAATTTAACCGATTCTTTTCG  
TTTCTTGGGTCACTGGCCATCCGCCGGGAGTTTCGGGTTTAATACCGATATTTTAGCA  
ACAAATCCAATAAATCTAAGTGATGCTCGGTGATTTGATCTTTTTTGGAAAGGGAGT  
GTTAAGTGATTTATTAGATAATCGAAAACAGAGGATCTTGAGTACTATTGCAAATTCAG

AAGAACTACGTGGAGGGGCCATTGAACAGCTGGAAAAAGCCCGGGCCCGCTTACGGA  
AAGTGGAAATGGAAGCAGATGAGTTTCGAGTGAATGGATACTCTGAGATAGAACGAG  
AAAAGTTGAATTTGATTAATTCGACTTATAAGAATTTGGAACGATTAGAAAATTACAAA  
AATGAAACCATTTCAGTTTGAACAACAAAGAGCGATTAATCAAGTCCGACAACGAGTTT  
TTCAACAAGCCTTACAAAGAGCTCTAGGAACTCTGAATAGTTGTTTGAACAACGAGTT  
ACATTTACGCACCATCAGTGCTAATATCGGCATGTTCCGGGACGATGAAAGAAATAACCG  
ATATGAACCCACTGATTTCTGCCGCTTCCGTTATTGCTGCTGGATTGGCCGTAGGGCTTG  
CTTCTATTGGACCTGGAGTTGGTCAAGTACTGCCGCGGGCCAAGCCGTAGAAGGTAT  
CGCGAGACAACCAGAGGCAGAGGGTAAAATACGAGGTA CTTTATTGCTTAGTCTGGCT  
TTTATGGAAGCTTTAACAATTTATGGACTGGTCGTGGCATTAGCGCTTTTATTGCGAAT  
CCCTTTGTTATGAATGTTCTACCATGTTCCATCAACACACTAAAAGGGTTATACGATATAT  
CCGGTGTGGAAGTAGGCCAACATTTCTATTGGCAAATAGGGGGTTTCCAAGTCCATGCC  
CAAGTACTTATTACTTCTTGGGTCGTAATTGCTATCTTATTAGGGTCAGCCACTGTAGCT  
GTTCCGAATCCACAAACCATTCCGACCGACGGTCAGAATTTCTTTGAATATGTCCTTGA  
ATTCATTTCGAGACTTGAGCAAACTCAGATTGGAGAAGAATATGGTCCTTGGGTTCTT  
TTATTGGCACTATGTTCCATTTATTTTTGTTTCTAACTGGTCAGGGGCTCTTTTACCTTG  
GAAAATCATAACAGTTACCTCATGGGGAGTTAGCCGCACCTACGAATGATATAAATACTA  
CTGTTGCTTTAGCTTTACCCACGTCAGTGGCATATTTCTATGCGGGTCTTACCAAAAAA  
GGATTGGGTTATTTTCGGTAAATACATTCAACCAACTCCAATCCTTTTACCAATTAACATT  
CTAGAAGATTTCAAAAACCTTTATCACTTAGTTTTTCGACTTTTTCGGGAATATATTGGCT  
GATGAATTAGTAGTTGTTGTTCTTGTCTTTAGTACCTTCGGTGGTTCCTATACCTGTTA  
TGTTCCCTTGGATTATTTACAAGTGGTATTCAAGCTCTTATTTTTGCAACTTTAGCTGCCG  
CTTATATAGGCGAATCCATGGAGGGTCATCATATGATATTTTTGACTTTAGAACATATATT  
CACTCATATCTTTTTTCGATCGTTCAATTGTGATTACGATTCATTTGATGACCCTATTA  
GTCGATGGAATCGTAGGACTATATGATTCGTCAGAAAAAGGCATGATAGCTACTTTTTTA  
TGATAACAGGATTTTTAGTTACTCGTTGGATTTATTTCGAGACATTTCCCATTAAGTGATT  
TATATGAATCATTAATATTCCTTTCATGGAGTTTCTCCATTATTCATATGGTTCCTAAAATA  
CGGAATCATAAAAATCATTTAAGCGCAATAACCGCGCCAAGCGCTATCTTTACCCAAGG  
CTTTGCCACTTCAGGTCTTTTAACTGAAATGCATCAATCCGCAATATTAGTACCTGCTCT  
CCAATCCCAGTGGTTAATGATGCACGTAAGTATGATGGTATTGAGCTATGCAGCTCTTTT  
ATGTGGATCATTATTATCAATAGCCCTTCTAGTCATTAGATTTTCGAAAAACATAGAGAT  
TTTTGGTAAAGACAATGAGAGCCAATACGTGAATGAAAGAAGCAATATTTTACGAAAC  
ACCTCTTTTCTTTCCTTTAGAAATTATTACAGATATCAATTAATTCAGCAATTGGATCATT  
GGAGTTATCGTGTCAATTAGTCTAGGATTTATCTTTTTAACTATAGGTATTCTTTTCAGGAGC  
AGTATGGGCTAATGAGGCGTGGGGGGCGTATTGGAATTGGGACCCCAAGGAAACTTGG  
GCATTTATTACTTGGACCATATTTGCGATTTATTTACATACTCGAACAAATAAAGATTTGC  
AAGGTGCGAATTCGCAATTGTGGCTTCTATAGGATTTTTGATAATTTGGATATGCTATTT  
TGGGGTCAATCTATTAGGAATAGGTTTACATAGTTATGGTTCATTCACATTAACAATGCC  
AAAAAGAAAGCATTCACTCCCCTCCCATATCTTGCATCTATAGTATTTTTGCCCTGGTG  
GATCTCTCTCATTTAATAAAAAGTCTGGAATCTTGGATTACTAATTGGTGGAACTAG  
GCAATCCGAAATTTTTTTGAATGATATCAAGAAAAAACGTTCTAGAAAAATTTATAG  
AATTAGAAGAACTATTCCTGTTGGACGAAATGATAAAGGAGTACCCGGAGACACATATA  
CAAAAGCTTCGTATAGGAATACACAAAGAAACGATAGAATTGGTCAAAATACACAATG  
AGGGTCATATCCATACTATTTTGCACCTCTCGACAAATATAACCTGTTTCGCTATTCTAAG

TGGTTATTCTATTCTGGGTAATGAAGA ACTTGTCAATTCTTAATTCTTGGCTTCAGGAATT  
CCTATATAATTTAAGCGACACAATAAAAAGCTTTTTCTATTCTTTTATTAACCGATTTATGTA  
TTGGATTCCACTCGCCCCATGGTTGGGA ACTAATGATTAGCTCTGTCTACAGAGATTTT  
GGATTTGCTCATAACGATCCAATTATATCTGGTCTTGTTCCTTTTCCAGTGATTCTAG  
ATACAATTTTTAAATATTGGATTTTTTCGTTATTTAAATCGCGTATCTCCGTCACCTTGAGT  
GATTTATCATTCAATGAATGACATGCCTATTGGTGTTCCTAAAAGTCCCTTTTCGGAGTCC  
TGGAGAGGAAGATGCGATTTGGGTTGACGTATACAACCGACTTCATCGCGAAAGATTA  
CTTTTTTTAGGCCAAGAGGTTGATAGCGAGATCTCGAATCAACTTATTGGTCTCATGGTA  
TATCTCAGTATAGAGGATGATACCAGAGATCTGTATTTGTTTATAAACTCTCCCGGCGGA  
TGGGTAATACCCGGAATAGCTATTTATGATACTATGCAATTTGTGCCACCAGATGTACAT  
ACAATATGCATGGGATTAGCAGCTTCAATGGGATCTTTTATCCTGGTCCGAGGAGAAAT  
TACCAAACGTCTAGCATTCCCTCACGCCAGGGTAATGATCCACCAACCTGCTAGTTCTT  
TTTATGAGGCACAAACAGGAGAATTTATCCTGGAAGCGGAAGAGCTACTTAAACTTCG  
CGAAACCCTCACAAGGGTTTATGTACAAAGAACGGGCAACCCCTTATGGGTTGTATCC  
GAAGACATGGAAAGGGATGTTTTTATGTCAGCAACAGAAGCCCAAGCTCATGGAATTG  
TTGATCTTGTAGCGGTCGAAATGAAAGAACAAAATGGATTCATGAAGGTTAATTACT  
GAATCGCTTCCAATGGTATGTTCCGGGTTCTGTTTAGATAATGAAGATCTGATTCTAGGT  
TATGTTTCAGGAAAGATCCGACGTAGTTTTATACGGATACTACCAGGAGATAGGGTCAA  
AATCGAAGTAAGTCGTTATGATTCAACCAGAGGACGTATCATTATAGACTCCGCAGCA  
AAGATTCGAACGATATGGAAGAATTACAAGGATATTTAGAAATAGATAGATCTCGGCAA  
CAAGACTTCCTATATCCACTTCTCTTTCAGGAGTATATTTATGCACTTGCTCATGATCATA  
GTTTAGAAAATTTAGGT---AAATCCAGTTCACTAATTGTGAAACGTTTCATTACTCGAAT  
GTATCAACAGAATCATTAAATTATTTCCGGCTAATGATTCTAATCAAATAAAATTTGTTGGG  
AAAAATTTGGATTCTCAAACAATATCAGAGGGGTTTGAATCATTGTGGAAATTCCATT  
CTCCCTGCGATTAGTATCTTCCCTAATAGTAAAATCTCGTAATTTACGATCAATTCATTCA  
ATATTTCTTTTTTAGAGGACAAATTATCACATTTAAATTATGTGTGTCAGATATACTAATAC  
CCCATCCCATCCATCCGGAATCTTAGTTCAGTCTTCGCAGTTGGGTACAAGATGCC  
CCTTCTTTCGATTTATTGCGACTCTTCTCCACGAATATCGTAATTGGACTAGTCTTATTA  
CTAAATCCATTTCCATTTTTTCAAACAAAGATTCTTTTTGTTCCCTATATAATTTTCATATA  
TGTGAATGCGAATCCATATTCGTTTTTCTCCGTAAACAATCTTCTCATTACGATCAACA  
TCTTTTAGAGCCCTTCTTGAGCGAACACATTTCTATGGAAAATGGAACATTTTGTAGT  
AGTGTTCGTAATAATTTATCCTATGGTTAGTTAAGGATCCTTTCATGCATTATGTCAGA  
TATCAAGGAAAATCCTTTTTGGCTTCAAAGGGGACTCCTCTTTTAATGAATAAATGGAA  
ATATTATCTTGTCAATTTTTGGCAATATTATTTTTATTTGTGGTCTCAACCGAGTAGGATC  
CATATAAACCAATTATCCAATCATTCCCTCGACTTCTGGGTTATCTTCAAGTGTACGA  
CTAAATCCTTCAGTGGTAAGTAGTCAAATGCTAGAAAATTTATATCTAATGGATATTGCT  
ATT-----AAGAAGTTCGATACCATAATCCCGATTATCCTCTGATTGGATCATTGGCTAAA  
GCGAAATTTGTAAACGATCAGGGCATCCCGTTAGTAAGCCGGTCCGGGCCGATTCATC  
CGATTCTGATATTATCGATCGATTTGGGCGGATATGCAAAAATCTTCTCATTATCACAGT  
GGGTCTCAAAAAAAAAGAGTTTGTATCGAATAAAGTATATACTTCGACTTTCGTGTGC  
TAGAACTTTAGCTCGTAAACATAAAAGTACTGTACGTGCTTTTTTGGAAAAGATTAGGTT  
CGGAATTATTGGAAGAATCTTTACGGAGGAGGAACAAGTTCTTCTTTGATCTTCCCA  
AGACAGATTTGGTATTTGGATATTATTCGTATCAATGATTTGGCCAATCATGAAATGATAA  
TTGATACGACA---GAAGTACAA---GCTATCAATCTTTTTCCAGATCAGAA---TCCTTAAA

AGAGGCCTATGGGCTCATATGGCTACTTGTCCCTATTTTTACTCCTGTATCGGGAATCAC  
AATAGGAGTACTAGTTATTGTGTGGTTAGAGAGAGAAATATCTGCAGGGATAACAAC  
GTATTGGGCCTGAATACGCCGGCCCTTGGGAATCTTCAAGCCCTAGCGGATGGGACC  
AAACTACTTTTCAAAGAGGATCTTCTCCATCTAGAGGAGATACTCGTTTATTAGTATC  
GGACCATCTATAGCGATCATATCAATTCTACTAAGTTATTAGTAATTCCTTTTGGCTATC  
GCCTTGTTCTAGCTGATCTCAGTATAGGTGTTTTTTTATGGATTGCCATTTCAAGTATTGC  
TCCTATTGGACTTCTTATGTCAGGATATGGATCGAATAATAAATATTCCTTTTTCGGGTGGT  
CTACGAGCTGCTGCTCAATCGATTAGTTATGAAATACCATTAACTCTATGTGTCTTATCAA  
TATCTCTACTATCTAACAGTTTAAAGTACAGTTGATATAGTTGAGGCGCAGTCCAAATATG  
GTTTTTGGGGGTGGAATTTGTGGCGGCAACCTATAGGGTTTGCCGTTTTTCTAATTTCTT  
CTCTAGCAGAATGTGAGAGATTACCTTTTGATTTACCAGAAGCAGAGGAAGAATTAGTA  
GCAGGTTATCAAACCGAATATTCAGGTATCAAATTTGGTCTATTTTACGTTGCTTCCTAC  
CTAAATCTACTAGTTTCTTCATTATTTGTAACAGTTCTTTATTTGGGCGGTTGGAATCTTT  
CTATTCCGTACATATTCATTCCTGAACTTTTCGAAATAAATAAAGTGAGTGGGGTCTTTG  
GAACGACAATTGGTATCTTTATTACACTAGCTAAAGCTTATTTGTTCTGTTTCTTCTAT  
CACAACAAGATGGACTTTACCCAGGATGAGAATGGACCAACTATTAATCTTGGATGG  
AAATTTCTTTTACCTATTTCTCTAGGCAATCTATTATTGACAACCTTCTTCCCAACTTTTTT  
CACTCATGATCTGGCATGTACAGAATGAAAACCTTCATTCTCGATTCTACGAGAATTTTTA  
TGAAAGCGTTTCATTTGCTTCTCTTCCATGGAAGTTTCATTTTCCCAGAATGTATCCTAA  
TTTTTGGCCTAATTCTTCTTCTGATGATCGATTCAACCTCTGATCAAAAAGATATACCTT  
GGTTATATTTTCACTCTTCAACAAGTTTAGTAATGAGCATAACGGCCCTATTGTTCCGAT  
GGAGAGAAGAACCTATGATTAGCTTTTTCGGGAAATTTCCAAACGAACAATTTCAACGA  
AATCTTTCAATTTCTTATTTTACTATGTTCAACTCTATGTATTCTCTATCCGTAGAGTACA  
TTGAATGTACAGAAATGGCTATAACAGAGTTTCTGTTATTTCGTATTAACAGCTACTCTAG  
GAGGAATGTTTTTATGTGGTGCTAACGATTTAATAACTATCTTTGTAGCTCCAGAATGTT  
TCAGTTTATGCTCCTACCTATTATCTGGATATACCAAGAGAGATGTACGGTCTAATGAGG  
CTACTACGAAATATTTACTCATGGGTGGGGCAAGCTCTTCTATTCTGGTTCATGGTTTCT  
CTTGGCTATATGGTTCATCCGGGGGAGAGATCGAGCTTCAAGAAATAGTGAATGGTCTT  
ATCAATACACAAATGTATAACTCCCCAGGAATTTCAATTGCACTTATATTCATCACTGTA  
GGAATTGGGTTCAAGCTTTCCCCAGCCCCTTCTCATCAATGGACTCCTGACGTATACGA  
AGGATCTCCCACTCCAGTCGTTGCTTTTTCTTTCTGTTACTTCGAAAGTAGCTGCTTCAG  
CTTCAGCCACTCGAATTTTCGATATTCCTTTTTATTTCTCATCAAACGAATGGCATCTTCT  
TCTGGAAATCCTAGCTATTCTTAGCATGATATTGGGGAATCTCATTGCTATTACTCAAAC  
AAGCATGAAACGTATGCTTGCATATTCGTCCATAGGTCAAATCGGATATGTAATTATTGG  
AATAATTGTTGGAGACTCAAATGATGGATATGCAAGCATGATAACTTATATGCTGTTCTAT  
ATCTCCATGAATCTAGGAACTTTTGCTCGCATTGTATCATTTGGTCTACGTACCGGAACT  
GATAACATTCGAGATTATGCAGGATTATACACGAAAGATCCTTTTTTGGCTCTCTCTTCA  
GCCCTATGTCTCTTATCCCTAGGAGGTCTTCTCCACTAGCAGGTTTTTTTCGGAAAAC  
CCATCTATTCTGGTGTGGATGGCAGGCAGGCCTATATTTCTTGGTTTCAATAGGACTCCT  
TACGAGCGTTGTTTCTATCTACTATTATCTAAAATAATCAAGTTATTAATGACTGGACG  
AAACCAAGAAATAACCCCTCACGTGCGAAATTATAGAAGATCTCCTTTAAGATCAAAC  
AATCCATCGAATTGAGTATGATTGTATGTGTGATAGCATCTACTATACCAGGAATATCAA  
TGAACCAATTATTGCAATTGCTCAGGATACCCTTTTTATGTTTCTGCTTACGAATATG  
ATATTTTCTGGGCATTTCTGATAATATCAAGTGTATTCTATTTTGGCATTCTAATTTCC

GGAGTTTTGGCCCCGATTAGCGAAGGACCAGAGAACTTTCTAGTTATGAATCGGGTAT  
AGAACCAATGGGCGATGCTTGGTTACAATTCCGAATCCGTTATTATATGTTTCGCTCTAGT  
TTTTGTTGTTTTGATGTTGAAACGGTTTTTTCTTTATCCATGGGCAATGAGTTTCGATGT  
GTTGGGTGTACCCGATTTTATAGAAGCTTTAATTTTTGTGCTTATCCTAATTGTTGGTTCA  
GTTTATGCATGGCGAAAAGGAGCATTGGAATGGTCTACGAATTTTTTTCCTTGGTTAAC  
AATAATTGTAGTTTTTGCCGATATCTGCGGGTCTTTAATTTTTCTTTCTCCCCATAGAGGA  
AATAAGGCGATTTCGCTGGTATACTATATGTATATGTTTATTAGAACTCCTTCTAATCACTT  
ATGTATTCTGTTATCATTTCOAATTGGACGATCCATTAATCCAACTGGAGGAGGATTATA  
AATGGATAAATTTTTGATTTTCACTGGAGATTAGGAATCGATGGACTTTCCATAGGAC  
CCATTTTATTGACGGGGTTCATCACTACTTTAGCTACTCTAGCGGCTTGGCCAATTACTC  
GAGATTCCCGATTGTTCCATTTCTGATGTTAGCAATGTACAGTGGTCAAATAGGATCAT  
TTTCTTCTAGAGACTTTTACTTTTTTTTATTATGTGGGAGTTAGAATTAATCCCGTTTA  
CCTACTTCTATCCATGTGGGGAGGGAAGAAACGTCTGTATTTCGGCTACAAAGTTTATTT  
TGACACTGCAGGAGGTTCTATTTTTCTCTTAATGGGAGTTCTGGGTATGGGTTTATATG  
GTTCCAATGAACCAACATTAATTTTTGAAACATCAGCCAACCAATCATATCCCGTGGCA  
TTGGAATAATGTTCTATTTTGGATTTCTTATTGCTTATGCTGTCAAATCACCGATTATAC  
CCCTACATACATGGTTACCAGATACCCACGGAGAAGCACATTACAGTACATGTATGCTT  
CTAGCCGGAATTTTATTAATAAATGGGAGCATATGGATTGGTTCGAATCAATATGGAATTA  
TTACCCCATGCTCATTCTATATTTTTCCCCCTGGTTGATGATAGTAGGCACAATTCAAATAA  
TCTATGCAGCTTCAACATCTCCCGGTCAACGCAATTTAAAAAAGAGAATAGCCTATTCC  
TCTGTATCTCATATGGGTTTCACAATTATAGGAATTGGTTCTATAACGGATGCGGGACTC  
AATGGAGCCGTTTTACAAATAATCTCTCATGGATTTATCGGTGCTGCACTTTTTTTTCTTG  
GCAGGAACGAGTTACGATAGAATACGTCTTGTTTATCTCGACGAAATGGGAGGAATAG  
CTATCTCAATGCCAAAATATTACGATGTTTACGATGCTTCTCGATGGCTTCTCTTGCAT  
TGCCGGAATGAGTGGTTTTGTTGCAGAATTGATAGTATTTTTTGAATAATTACCAGTC  
CAAAATATTTTTAATGCCAAAATACTAATTACTTTTTGTAATGGCAATTGGAATGATATT  
AACTCCTATTTATTCAATATCTATGTCACGCCAGATGTTCTATGGCTACAACTATTCAAT  
GCTCCAACTCTTATTTTTTTGATTCTGGACCACGAGAACTATTTGTTTCGATCTCTATC  
TTTCTACCCGTAATAGGTATTGGTATTTATCCGGATTTCTGTTCTCTCACTATCAGTTGACA  
AGGTCGAAGCTATTCTATCTAATTACTTTTATAAAATGATACTCGAACATGTACTTGT  
GAGTGTATTATTTTCTATCGGTATCTATGGATTGATCACGAGCCGAAATATGGTTAGA  
GCGCTTATGTGTCTTGAACCTTATACTGAATGCGGTAAATAAATTTTCGTAACATTCTCTG  
ATTTTTTTGATAGTCGCCAATTAAGAGGAGACATTTTCTCGATTTTTGTTATAGCTATTGC  
AGCAGCTGAAGCAGCTATTGGACCAGCTATTCTTTTCGTCAATTTTTTCGTAACAGAAAGT  
CAACTCGTATCAATCAATCGAATTTGTTGAATAAAATGGAACATACATATCAATATGCAT  
GGATCATACCTTTCTTCCACTTCCAGTTCCTATGTTAATAGGAGTGGGACTTCTCCTTG  
TTCCGAGGGCAACAAAAATCTTCGCCGATGTGGGCCTTTCTAGTGTTTTATTGCTA  
AGTATAGTTATGATTTTTTTCAGCCGATCTGTCTATTTCAGCAACTAAACGGCAGTTCGATC  
TATCAATATGTATGGTCTTGGACCATCAATAATGATTTTTCTTAGAGTTCGGTACTTGA  
TCGATCCACTTACTTCTATTATGTCAATATTAATCACTACTGTTGGAATAATGGTTCTTGT  
TTATAGTGACAATTATATGTCCCATGATCAAGGATTTTGAGATTTTTTGGCTTATATGAGT  
TTTTCCAATACTTCCATGTTGGGATTAGTTACTAGCTCCAATTTGATACAAATTTATATTT  
TTTTGGGAATTGGTTGGAATGTGTTTCGTATCTTTAATAGGTTTTTGGTTTCACACGACCAA  
TTGCGGCAAATGCTTGTCAAAAAGCGTTTTGTAATAATCGTGTAGGGGATTTTTGGTTTA



TTATTAGGAATCTTAGGGCTTTATTGGATAACGGGTAGTTTTGAATTCGGGATTTGTTC  
GAAATATTCAATAACAATAGGGTCAATCTTTATTTGTCACTTTGTGTGCCTCCCTCTTAT  
TCGTCGGTGCAGTTGCTAAATCTGCGCAATCCCCCTTCATATATGGTTACCCGATGCCA  
TGGAGGGTCTACTCCTATTTTCGGCTCTTATACATGCTGCTACTATGGTAGCAGCGGGAA  
TTTTTCTTGTAGCTCGGCTTTTTCTCTTTTTACAGTTATACCTTATATAATGAATCTAATT  
TCTTTGATAGGTATAATAACAGTACTATTAGGAGCTACTTTGGCTCTTGCTCAAAAAGAC  
ATTAAGAGAAGTTTAGCCTATTCTACAATGTCTCAATTGGGTATACTATGTTAGCTCTA  
GGTATGGGATCTTATCGAGCTGCTTTATTTCAATTTGATCACCCATGCCTATTTCGAAAGCA  
TTATTGTTTTTAGGGTCTGGATCAATTATTCATTCAATGGAAACCGTTGTTGGATATTCTC  
CAGAGAAAAGTCAGAACATGGCTCTTATGGGTGGTTTAAACAAAATATGCGCCAATTAC  
AAAACCGCTTTTTTATTAGGTACACTCTCTCTTTGTGGTATTCCACCTCTTGCTTGTTT  
TTGGTCTAAAGACGAAATTCTTAATGATAGTTGGTTGTATTACCGATTTTCGCAATAAT  
AGCTTGTTCCACAGCAGGATTAAGTGCATTTTATATGTTTCGGATGTATTTACTTACTTTT  
GAAGGACATTTAAACGTCCATTTTCAAATACAGCGGCAAAAAAATAGCTCGTTCTA  
TTCAATATCTATATGGGGTAAAAAGAAACGAAAATTAATATTAGATTATCAACTTT  
ATCAACAATGAATTTTTTTGTTTGGCAATAAAGAACTTTCCCATATCCCATGAATC  
GGATAATACTATGCTATTGCCTCTGCTTGTATTGGTCCATTTACTTTGTTTCGTCGGATTC  
ATAGGAATCCCCTTCGATTTGGATATATTATCCAAATGGTTAGCTCCGTCAATAAACCTTT  
TACATCCCAATTTGAGC---TCTGTAGATTGGTATGAGTTTATCACAATGCAATTTTTTCA  
GTCAGTATAGCCTATTTTGAATATTTATAGCGTCTCTTTTATATAGGCCTGTTTATTCATC  
TTTCCAGAATTTGGAATTAATTAATTTTTTTGTGATTCTCTGGGACCAACTACTAAATATT  
ATATACAATTGGTCATATAATCGCGTTACATAGATTTTTTTTATGCAAAAATTTTCATTA  
GGGGTATAAGAGGATTAGCTGAACTAACTCATTTTTTTGATAGACGAGTAATTGATGGA  
ATTACGAATGGGGTTGGTGTACAAGTTTCTTTGTAGGAGAAGGGATCAAATATGTAGG  
GGGCGGG---CGAATCTCTTCTTATCTCTTCTTGTATTTATCTTATGTATTAATCTTTTTATTA  
ATTTCTTATATGGATTTACCTGGACCAATACATGATTTTCTTTTAGTTTTTCTGGGATCAG  
GTCTTATATTAGGGGGTCTGGGAGTGGTATTACTTACCAATCCAATTTATTCTGCCTTTTC  
GTTGGGATTGGTTCTTGTTTGTATATCCTTATTCTATATTCCATCGAACTCCCATTTTGTA  
GCTGCTGCGCAGCTCCTTATTTACGTGGGAGCCATAAATGTCTTAATCATATTTGCTGTG  
ATGTTTCATGAATGGTTCAGAATATTACAATGATTTCCATCTTTGGACTGTTGGAGATGGA  
GTCACTTCACTGCTTTGTACAAGTATTTTTGTTTACTAATTACTACTATCCCAGACACG  
TCATGGTACGGGGTTATTTGGACTACAAGATCAAACCAGATTATAGAGCAGGACTTGAT  
AAGTAACGGTCAACAAATTGGAATTCATTTATCAACAGATTTTTTTCTTCCATTTGAACT  
CATTTCTATAATTTCTTTTAGTTGCCTTAATAGGTGCAATTGCTATGGCGCGTCAGATGACT  
GTACCAGCTACAAGAAAAGACCTCATGATAGTCAATATGGGTCCCTACCATCCATCAAT  
GCATGGTGTCTTCGACTCATCGTTACTCTAGATGGTGAAGATGTTATTGACTGTGAAC  
CCGTATTGGGTTATTTACACAGAGGGATGGAAAAAATTGCAGAAAACCGAACAATTATA  
CAATATCTGCCTTATGTAACACGTTGGGATTATTTAGCTACTATGTTTACAGAAGCAATA  
ACCGTAAATGCACCGGAACAGTTGGGAAATATTCAAGTACCTAAAAGAGCCAGCTATA  
TCAGAGCAATTATGCTGGAGCTGAGTCGTATAGCTTCTCATTTGTTATGGCTTGGTCCTT  
TTATGGCGGATATCGGTGCACAGACTCCTTTTTTCTATATTTTTAGAGAGAGAGAGTTAA  
TATATGATCTATTCGAAGCTGCCACAGGTATGCGAATGATGCATAATTATTTCCGTATCGG  
AGGAGTAGCTGCTGATTTACCTCATGGCTGGATAGATAAATGTTTGGATTTCTGCGACTA  
TTTTTTAAACAGGGATTGCTGAATATCAAAGCTTATTACGCGGAATCCCATTTTTTTTGA

GCGAGTCGAAGGGGTGGGCATTATTGGTGGAGAGGAAGCAATAAATTGGGGTTTATCA  
GGACCAATGTTACGAGCTTCCGGGATCCAATGGGATCTTCGTAAAAGTTGATCATTATGG  
GTGTTATGACGAATTTGATTGGGAAGTCCAATGGCAAAAAGAAGGAGATTCATTAGCT  
CGTTATTTAGTACGAATCAGTGAAATGACGGAATCCGTAAAAATTATTCAACAGGCTTT  
GGAAGGAATTCGGGGGGGCCCTATGAAAATTTAGAAGTCCGACGCTTTGATAGAGCA  
AGGGATTCGAATGGAATGATTTTGAATATCGATTCATTAGTAAAAAGCCTTCTCCCACT  
TTTGAATTGTCGAAACAAGAACTTTATGTGAGAGTGGAAAGCCCCAAAAGGGGAGTTG  
GGAATTTTTCTGATAGGAGATCAGAGTGTTTTTCCCTGGAGATGGAAAATTCGTCCACC  
GGGTTTTATTAATTTGCAAATTCCTCCTCAGCTAGTTAAAAGAATGAAATTGGCTGATAT  
TATGACGATACTAGGTAGTATAGATATTATTATGGGAGAAGTTGATCGTATGCTCCCTATG  
GTA ACTGGGTT CATGAATTATGGTCAACAAACAGTACGAGCTGCAAGGTACATCGGTC  
AAAGTTTCATGATTACCTTATCCCACGCGAACCGTTTACCTGTA ACTATTCAATATCCTTA  
TGAAAATTTGATCACATCGGAGCGTTTCCGTGGTCGAATACACTTTGAATTTGATAAAT  
GCATTGCTTGTGAAGTATGTGTTTCGTGTATGCCCTATAGATCTACCCGTTGTTAATTGGA  
GATTAGAAACCGATATTCGAAAGAAACGATTACTTAATTACAGTATTGATTTTGGAACT  
GTATATTTTGTGGTAACTGCGTCGAGTATTGTCCAACAAATTGTTTATCAATGACTGAAG  
AATATGAACTTTCTACTTATGATCGTCACGAATTGAATTATAATCAAATTGCTTTGGGCC  
GATTACCAATATCAGTAATTGGAGATTACACAATTCGAACAATTATGAATTCGAAAATAG  
CCACGGGGAAACCCCTTGATTCAAAAACGATTACCAATTACATGCAGGGTCGTTTGTCT  
GCTTGGCTAGTCAAGCATGGGCTAGTTCATAGATCTTTGGGCTTCGATTACCAAGGAAT  
AGAGACTTTACAAATAAAGTCCGAGGATTGGCACTCCATTGCTGTCATTTTCATATGTATA  
TGGTTACAATTATCTACGTTCCCAATGTGCCTATGATGTAGCACCAGGCGGACTATTAGC  
TAGTGTGTATCATCTTACGAGAATACAGTATGGTGTGGATCAACCGGAAGAGGTATGCA  
TAAAAGTATTTGCCGCAAGGAGGAATCCTAGAATTCCGTCTGTTTTCTGGATTTGGAAA  
AGTGCGGATTTCCAAGAACGGGAATCCTTATGATATGTTGGGAATCTCTTATGATAATCAT  
CCACGCCTGAAACGGATCTTGATGCCTGAAAGTTGGATAGGATGGCCCTTACGTAAGG  
ATTATATTGCCCCCAATTTCTATGAAATACAAGACGCTCAT-----

-----ATGAATTCCATTGAGTTTCCGTTACTTGATCGAACA ACTCAA AATTCA  
GTTATTTCAACTACACCGAATGATCTTTCAAATTGGTCAAGACTCTCCAGTTTATGGCCG  
CTTCTCTATGGTACCAGTTGTTGCTTCATTGAATTTGCTTCATTAATAGGCTCACGATTC  
GACTTTGATCGTTATGGACTGGTACCAAGATCGAGTCTTAGACAAGCGGATCTTATTTT  
AACAGCCGGCACAGTAACAATGAAAATGGCTCCTTCTTTAGTGAGATTATATGAGCAAA  
TGCCTGAACCAAAATATGTCATTGCTATGGGAGCCTGTACTATTACAGGAGGGATGTTT  
AGTACCGATTCTTATAGTACTGTTCCGGGAGTCGATAAGCTAATTCCTGTGGATGTCTAT  
TTGCCGGGTTGCCACCTAAACCGGAGGCAGTTATAGATGCTATAACGAACTTCGTAA  
GAAGGTATCTCGAGAAATCTATGAAGATAGAATTTGGCCTCAACAGGAGAGTCGATGT  
TTTACTACCAATCACAAGTTTCATGTTGGACGCAGTACTCATACTGGAAATTATGATCAA  
GGGTTACTCTATCAATCACCATCTACTTCAGAGATCCCTTCTGAAATATTTTCAAATAC  
AAAAGTTCAGTATCTTCCCATGAATTAGTAAATATGCAAAATAGAAATACCTTTTCTTGG  
ATAAAAGAACAGATGACTCGATCCATTTCCGTATCGATCATGATATATGTAATAACTCGG  
ACAGCCATTTCAAATGCATATCCCATTTTGCACAGCAGGGTTATGAAAATCCACGAGA  
AGCGACTGGTCGATTGTATGTGCTAATTGCCATTTAGCTAATAAGCCCGTGGATATTGA  
GGTCCACAAGCGGTA CTTCCTGATACTGTATTTGAAGCAGTTGTTAGAATCCCTTATGA

TATGCAAGTGAAACAAGTTCTTGCTAATGGTAAAAAGGGGGCTTTGAATGTAGGGGCT  
GTTCTTATTTTACCTGAGGGATTCTGAATTAGCTCCACCCGATCGTATTTCTCCCGAGATG  
AAAGAAAAGATAGGCAAGTTGTCTTTTCAGAGTTATCGCCCTACTAAAAAAATATTCT  
TGTGATAGGTCCTGTTCTGGTCAGAAATATAGTGAAATAACTTTTCTATTTCTTTCCCC  
GGACCCCGCTACTAAGAAAGATGTTCACTTCTTAAAATATCCCATATACGTAGGCGGGA  
ACAGAGGAAGGGGTCAAATTTATCCCGATGGGAGCAAGAGTAATAATACAGTCTATAAT  
GCTACAGCAGCGGGTATAATAAGCAAAATCGTACGTAAAGAAAAGGGGGGATATGAAA  
TATCCATAGCGGATGCATCGGATGGACACCAAGTAGTTGATATTATACCTCCAGGACCA  
GAACTTCTTGTTTCAGAGGGTGAATCCATCAAGCTTGATCAACCATTAACGAGTAATCC  
CAATGTGGGGGGGTTTGGTCAGGGAGATGCAGAAATAGTACTTCAAGATCCATTACGT  
GTCCAAGGCCTTTTGTTTTTCTTGGCATCTGTTATTTTGGCACAAATATTCTTGGTTCTTA  
AAAAGAAACAGTTTGAGAAGGTTCAATTGTCCGAAATGAATTCATGAGTAAAGTATAT  
GATTGGTTCGAAGAACGTCTCGAAATTCAGGCGATTGCAGATGATATAACTAGTAAATA  
TGTTCTCCCATGTCAACATATTTTATTGTCTAGGGGGGATTACGCTTACTTGTTTTTTA  
GTACAAGTAGCTACTGGGTTTGTATGACTTTTTATTATCGTCCGACCGTTACCGAGGCT  
TTTGCCTCTGTTCAATACATAATGACTGAAGCTAACTTTGGTTGGTTAATCCGATCAGTT  
CATCGATGGTCGGCAAGTATGATGGTCCTAATGATGATCCTGCATGTATTTCTGTGTAT  
CTTACCGGTGGATTTAAAAACCTCGCGAATTGACTTGGGTTACGGGTGTGGTTTTGGC  
CGTATTGACCGCATTTTTGGTGTAAGTGGTTATTCCTTACCTCGGGACCAAATTGGTTA  
TTGGGCAGTCAAATTGTGACAGGTGTACCTGAAGCCATTCCTGTAATAGGATCACCCCT  
TGGTAGAGTTATTACGCGGAAGTGCTAGTGTGGGTCAATCCACTTTGACTCGTTTTTTAT  
AGTTTACACACTTTTGTATTACCTCTTCTTACTGCCGTATTTATGTTAATGCACTTCCCAA  
TGATACGTAAGCAAGGTATTTCTGGTCCTTTAATGGGAGTAACAAAGAAACCTGACTTG  
AATGATCCTGTATTAAGAGCTAAATTGGCTAAAGGGATGGGTCATAATTATTACGGAGA  
ACCCGCGTGGCCCAACGATCTTTTATATATTTTCCAGTAGTAATTCTAGGTACTATTGCT  
TGTAACGTAGGTTTAGCAGTTCTAGAACCATCAACGATTGGTGAACCAGCAGATCCATT  
TGCAACTCCTTTGGAAATATTACCCGAATGGTACTTTTTTCCCGTATTTCAAATACTCCG  
TACAGTACCCAATAAATTATTAGGTGTTCTTTAATGGTTTCAGTACCTGCGGGATTATT  
GACAGTACCCTTTTTGGAGAATGTTAATAAATCCAAAATCCATTTCTGTCGTCCAGTGG  
CTACAACCGTCTTTTTGATCGGTACCGCAGTAGCTCTTTGGTTGGGTATTGGGGCAACA  
TTACCTATTGATAAATCTCTAACTTTAGGTCTTTTTATGGTTGAAGTTTTTCTATTTGGAA  
TCGTGTTAGGTCTAATTCCTATTACTTTGGCTGGATTATTGTAAGTGCATATTTGCAATA  
CAGACGCGGTGATCAGTTGGACCTTATGCCTACTATAACTAGTTATTTCCGTTTTTCTACT  
GGCAGCTTTAACTATAACCTCAGCTCTATTTATTGGTCTGAGCAAGATACGACTTATTAT  
GGATATAGTAAGTCTCGCTTGGGCTGCTTTAATGGTAGTCTTTACATTTTCTTTTCACT  
CGTAGTATGGGGAAGAAGTGGACTCATGATTATTCGTTCCCGGAATCAGAAGTAAAA  
ATTTTGGTGGATAGGGATCCCGTAAAACTTCTTTTCGAGGAATGGGCCAGACCGGGTC  
ATTTCTCAAGAACTAGCTAAAGGCCCTGAGACTACCACTTGGATCTGGAACCTACAT  
GCCGATGCTCACGATTTTCGATAGCCATACCAGTGATTTGGAGGAGATCTCTCGAAAAGT  
ATTTAGTGCCATTTCCGGTCAACTCTCCATCATCTTTCTTTGGCTGAGTGGCATGTATTT  
CCATGGTGCTCGTTTTTCCAATTATGAAGCATGGCTAAGTGATCCTACTCACATTAGACC  
CAGCGCTCAGGTGGTTTGGCCAATAGTGGGCCAAGAAATATTGAATGGTGTGTTGGGT  
GGAGTTTTCCGAGGAATACAAATAACCTCTGGTTTCTTTCAGATTTGGCGAGCTTCTGG  
AATAACTAGTGAATTACAACCTATTGTACCGCAATTGGTGCATTGGTCTTTGCAGCGTT

AATGCTTTTTGCTGGTTGGTTCCATTATCACAAAGCTGCTCCAAAATTGGCTTGGTTCC  
AAGATGTAGAATCTATGTTGAATCACCCTTAGCAGGGTACTAGGGCTTGGGTCTCTT  
TCTTGGGCGGGACACCAAGTACATGTATCTTTACCGATTAACCAATTTCTAGACGCTGG  
AGTAGATCCTAAAGAGATCCCCTCCTCATGAATTTATCTTGAATCGGGATCTTTTGGC  
TCAACTTTATCCTAGTTTTGCCGAGGGAGCAACCCCATTTTTACCTTGAATTGGTCAA  
AATATGCGGACTTTCTTACTTTTCGTGGAGGATTAGATCCAGTAACAGGGGGTCTATGG  
CTGACCGATATTGCACACCATCATTTAGCTATTGCAGTTCTTTTCCTGATAGCAGGTCAC  
ATGTATAGGACCAACTGGGCCATTGGTTCATGGTTTGAAGGATATTTTAGAGGCCATAA  
AGGTCCATTTACAGGCCAGGGACATAAAGGCCTCTATGAGATCCTAACAACGTCATGG  
CATGCTCAATTATCTCTTAACCTAGCTATGTTAGGCTCTTTAACCATGTTGTAGCTCACC  
ATATGTATTCCATGCCTCCTTATCCATATCTAGCTACTGACTATGGTACACAACCTTTCTGTT  
GTTACACATCATATGTGGATCGGTGGATTTCTCATAGTTGGTGCTGCTGCGCATGCAG  
CCATTTTTATGGTAAGAGACTATGATCCAACCTACTCGATAACAACGATCTATTAGATCGTG  
TCCTTAGGCACCGTGATGCAATCATATCACATCTCAACTGGGCATGTATATTTCTAGGCT  
TTCATAGTTTTGGTTTGTATATTCATAATGATACCATGAGCGCTTTAGGGCGTCCCAAG  
ATATGTTTTAGACACCGTATAACAATTACAACCTGTCTTTGCTCAATGGGTACAAAACA  
CCCATGCTTTAGCACCTGGTGCAACAGCTCCTGGTGCAACAACAAGCACCAGCTTGAC  
TTGGGGGGGTGGTGATTTAGTAGCAGTAGGTGGCAAAGTAGCTTTGTTACCTATTCCAT  
TAGGAACTGCAGATTTTTTGGTACATCACATTCATGCATTTACGATCCATGTGACGGTAT  
TGATACTACTGAAAGGTGTTCTATTTGCTCGTAGCTCCCGTTTGATACCTGATAAAGCAA  
ATCTTGGTTTTTCGTTTTCCCTTGTGACGGACCTGGAAGAGGGGGGACATGTCAAGTATCC  
GCCTGGGATCATGTCTTCTTAGGTCTATTCTGGATGTACAATGCAATTTCCGGTAGTAATA  
TTCCATTTAGTTGGAAAATGCAGTCGGATGTTTGGGGTAGTATAAGTGATCAAGGGGT  
GGTAACTCATATTACGGGAGGAAACTTTGCGCAGAGTTCCATTACTATTAATGGGTGGC  
TCCGTGATTTTTTATGGGCACAGGCATCCCAGGTAATTCAGTCTTATGGTTCTTCATTAT  
CTGCATATGGCCTTTTTTTCCTAGGTGCTCATTTTGTCTGGGCTTTTCAGTTAATGTTTCT  
ATTCAGCGGCCGTGGTTATTGGCAAGAACTTATTGAATCCATCGTTTGGGCTCATAACA  
AATTAAGTTGCTCCTGCTATTTCAGCCTAGAGCCTTGAGCATTGTACAAGGACGTGCT  
GTAGGAGTAACTCATTACCTTCTGGGTGGAATTGCCACAACATGGGCATTCTTCTTAGC  
AAGAATTATTGCAGTAGGAATGGCATAAGATTTCCAAGGTTTAGCCAAGGCTTAGCTC  
AGGACCCCACTACTCGTCGTATTTGGTTTGGTATTGCTACCGCACATGACTTCGAAAGT  
CATGATGATATTACTGAGGAACGTCTTTATCAGAATATTTTTGCTTCTCACTTCGGGCAG  
TTAGCAATAATTTTTCTGTGGACTTCCGGAAATCTTTTTCATGTAGCTTGGCAAGGAAAT  
TTTGAGTCATGGGTACGGGACCTTTACATGTAAGACCTATTGCTCATGCAATTTGGGAT  
CCTCATTTTTGGTCAACCGGCTGTGGAAGCCTTTACTCGAGGGGGTGGCTCTCGGTCCAG  
TGAATATCGCTTATTCTGGTGTATTATCAGTGGTGGTATACAATCGGCTTACGCACTAATG  
AAGATCTTTATACTGGAGCTCTTTTTCTATTATTTCTTTCTGCCGTATCCTTAATAGCGGG  
TTGGTTACACCTACAACCGAAATGGAAACCAAGCGTTTCATGGTTTAAAAATGCGGAA  
TCTCGTCTCAATCATCATTTGTCAGGACTCTTCGGAGTAAGTTCCTTGGCTTGGACAGG  
GCATTTAGTTCATGTCGCTATTCCCGGATCCAGGGGGGAGTACGTTTCGATGGAATAATTT  
CTTAGATGTATTACCGCATCCCCAAGGGTTAGGCCCGCTTTTTACAGGTCAGTGGAATC  
TTTATGCCAAAACCCCGATTCCAGTAGTCATTTATTTGGTACCGCCAAGGAGCGGGG  
ACTGCCATTCTAACTCTTCTCGGGGGATTTCATCCACAAACGCAAAGTTTATGGCTGAC  
CGATATTGCACATCATCATTTAGCTATTGCATTGATTTTTCTCGTTGCTGGTTCATATGTATA

GAACTAACTTCGGGATTGGGCACAGTATGAAAGATCTTTTAGAAGCACATACTCCTCCG  
GGGGACGATTGGGACGTGGACATAAGGGTCTTTATGACACAATCAATAATTCGGTTCA  
TTTTCAATTAGGTCTTGCTCTAGCTTCTTTAGGGGTTATTACTTCCTTGGTAGCTCAACA  
CATGTA CTCTTTACCTGCTTATGCATTCATAGCACAAAGACTTTACTACTCAAGCTGCCTT  
ATATACTCATCATCAATACATCGCAGGATTCATCATGACAGGAGCTTTTGCTCATGGAGC  
GATATCTTCATTAGAGATTACAATCCGGAGCAGAATAAGGATAATGTATTGGCAAGAAT  
GTTAGACCATAAAGAAGCTATCATATCCCATTTAAGTTGGGCCAGCCTCTTTCTGGGGTT  
CCATACTTTGGGACTTTATGTTTATAACGATGTCATGCTCGCTTTTGGTACTCCGGAGAA  
ACAAATCTTGATCGAACCCATCTTTGCCCAATGGATACAATCTGCTCATGGTAAGACTT  
CATATGGGTTTCGATGTACTTTTATCTTCAACGAATAGCCCAGCATTCAACGCGGGTTCGA  
AGCATATGGTTGCCTGGCTGGTTAAATGCTGTTAATGAG-----AATAGTAATTCATTATTC  
TTAACAATAGGTCCTGGAGACTTCTTGGTTCATCATGCTATTGCTCTAGGTTTACATACA  
ACTACATTGATCTTAGTAAAAGGTGCTTTAGATGCACGTGGTTCCAAGTTAATGCCAGA  
TAAAAAGGATTTTCGGCTATAGTTTTCTTGCACGGTCCGGGACGAGGTGGTACTTGTG  
ATATTTTCGGCTTGGGACGCATTTTATTTGGCAGTTTTCTGGATGTTAAATACCATTGGAT  
GGGTTACTTTTTATTGGCATTGGAAGCACATCACATTATGGCAGGGTAACGTTTTACAG  
TTAATGAATCCTCCACTTATTTGATGGGATGGTTAAGAGATTATCTATGGTTAAACTCTT  
CACAACCTATCAATGGATATAACCCTTTTGGTATGAATAGTTTATCGGCTCTGGGCGTGA  
TGTTCCATTTGGACATCTTGTTTTGGGCTACTGGATTTATGTTCTTAATTTCTGGCGTGG  
ATATTGGCAGGAATTGATTGAAACTTTAGCATGGGCTCATGAACGCACACCTTTGGCTA  
ATTTGATTCGATGGAGAGATAAACAGTGGCTCTTTCCATTGTGCAAGCAAGATTGGTC  
GGATTAGCCCACTTTTCTGTAGGGTATATATTCATTTATGCAGCTTTCTTGATTGCCTCTA  
CATCAGGCAAATTTGGTATGTCGCATTCAGTAAAGATTTATGATACATGTATAGGGTGTA  
CTCAATGTGTACGAGCCTGCCCCACAGATGTTTTAGAAATGATCCCTTGGGACGGATGT  
AAAGCTAAGCAAATTGCTTCTGCTCCAAGAACAGAGGATTGTGTAGGTTGTAAGAGAT  
GTGAATCCGCCTGTCCAACGGATTTCTTGAGTGTTCGGGTTTATTTATGGCATGAAACA  
ACTCGCAGCATGGGTCTAGCTTATATGATAGATCTCCTTTTTCCCGCTTTTTTGGTGCCT  
TTCGTGGGCATAGTATTGCCGGCAATTGCAATGGCCTCTTTATTTATTTATATTGAAAGA  
AACGAGATTGTCATGCGAGATATAAAAACATATCTCTCCGTGGCACCTGTGCTAAGTAC  
TCTATGGTTTCGGGGCTTTAGCAGGTCTATTGATAGAGATCAATCGTTTCTTTCCGGATGC  
GTTGACATTCCTTTTTTT-----ATGACTGCAATTTTAGAGAGACGCGAAAGCGAAAGCC  
TATGGGGTCGCTTCTGTA ACTGGATAACCAGCACCGAAAACCGTCTTTACATTGGATGG  
TTTGGTGTTTTGATGATCCCTACCTTATTGACCGCAACTTCTGTATTTATTCGCCTTCA  
TTGCTGCCCTCCAGTGGATATTGATGGTATTCTGTAACCTGTTTCTGGGTCTCTACTTT  
ACGGAAACAATATTATCTCTGGTGCCATTATTCCCTACTTCTGCAGCTATAGGTTTGC ACT  
TTTACCCGATATGGGAAGCGGCATCCGTTGATGAATGGTTATACAATGGTGGTCCCTTATG  
AACTGATTGTTCTACACTTCTTACTTGGTGTAGCTTGTACATGGGTCTGTGAGTGGGAA  
CTTAGTTTTCCGTCTGGGTATGCGCCCTTGGATTGCTGTTGCATATTCAGCTCCTGTTGCA  
GCTGCTACTGCTGTTTTCTTGATCTACCCAATTGGTCAAGGAAGCTTCTCTGATGGTATG  
CCTCTAGGAATCTCTGGTACTTTCAACTTCATGATTGTATTCCAAGCTGAGCACAAACATC  
CTTATGCACCCATTTACATGTTAGGTGTAGCTGGTGTATTTCGGCGGCTCCCTATTCACT  
GCTATGCATGGTTCCTTGGTAACTTCTAGTTTTGATCAGGGAACCACTGAAAATGAATC  
TGCTAATGAAGGTTACAGATTCGGTCAAGAGGAAGAACTTATAATATCGTAGCTGCTC  
ATGGTTATTTTGGCCGATTGATCTTCCAATACGCGAGTTTCAACA ACTCTCGTTCCTTAC

ATTTCTTCCCTAGCTGCTTGGCCTGTAGTAGGTATCTGGTTCACTGCTTTAGGTATCAGCA  
CCATGGCTTTCAACCTAAATGGTTTCAATTTCAACCAATCTGTAGTTGACAGTCAAGGT  
CGTGTAATTAACACTTGGGCTGATATCATCAACCGTGCTAACCTTGGTATGGAAGTTATG  
CATGAACGTAATGCTCACAACCTCCCTCTAGATCTAGCTGCTGTTGAAGCCCCATCTAC  
AAATGGAATGGGTTTGCCTTGGTATCGTGTTCCATACCGTCGTATTGAATGATCCCGGTCG  
CTTGCTTTCTGTTTCATATAATGCATACAGCTCTAGTTTCTGGTTGGGCCGGTTCGATGGC  
TCTATACGAATTAGCAGTTTTTGTATCCCTCTGATCCTGTTCTTGATCCAATGTGGAGACA  
GGGTATGTTTCGTTATAACCCTTCATGACTCGTTTAGGAATAACCAATTCATGGGGCGGTTG  
GAGTATCACA---GGAGGGACTATAACGAATCCGGGTATTTGGAGTTACGAAGGTGTGGC  
CGGGGCACATATTGTGTTTTCTGGCCTGTGCTTCTTGGCAGCTATCTGGCATTGGGTGTA  
TTGGGATCTAGAAATATTCTGTGATGAGCGTACAGGAAAACCTCTTTGGATTGCCCCA  
AGATCTTTGGAATCCATTTATTTCTCTCAGGGGTGGCTTGCTTCGGGTTTGGCGCATTTC  
ATGTAACAGGCTTGTATGGTCCTGGAATATGGGTGTCTGATCCTTATGGACTAACTGGA  
AAAGTACAACCTGTAAATCCCGCGTGGGGCGTGGAAAGGTTTTGATCCTTTTGTCCGG  
GAGGAATAGCCTCTCATCATATTGCAGCAGGGACATTGGGCATATTAGCGGGCTTATTCC  
ATCTTAGTGTCCGCCACCCCAACGTCTATACAAAGGATTACGTATGGGCAATATTGAA  
ACTGTCTTTCCAGTAGTATCGCTGCTGTCTTTTTTGCAGCTTTTGTGTTGCTGGA  
ACTATGTGGTATGGTTCAGCAACTACCCCGATCGAATTATTTGGTCCCACTCGTTATCAATGG  
GATCAGGGATACTTCCAGCAAGAAATATATCGAAGAGTTGGTACCGGGCTAGCCGAAA  
ATCAAAGTTTATCAGAAGCTTGGTCTAAAATCCCGAAAAATTAGCGTTTTATGATTACA  
TCGGCAATAATCCAGCAAAAAGGGGGATTATTCAGAGCGGGCTCAATGGACAACGGGGA  
TGGAATAGCCGTTGGATGGTTAGGACATCCCATCTTTAGAGATAAAGAAGGGCGTGAG  
CTTTTGTACGCCGATGCCTACGTTTTTTGAAACATTTCCAGTAGTTTTGGTAGACGGA  
GACGGAATTGTGAGAGCCGATGTTCCTTTTAGAAGGGCAGAATCGAAGTATAGTGTGCG  
AACAAGTAGGCGTAACTGTTGAGTTCTATGGTGGCGAACTCAATGGAGTCAGTTATAGT  
GATCCTGCTACTGTGAAAAAATATGCTAGACGTGCTCAATTGGGTGAAATTTTTGAATT  
AGATCGTGCTACTTTGAAATCCGATGGTGTTTTTTCGTAGCAGTCCAAGGGGTTGGTTTA  
CTTTTGGACATGCTTCCTTTGCTTTGCTCTTCTTTTTTCGGACACATTTGGCATGGTGCTA  
GAACCTTGTTTCAGAGATGTTTTTGTGTTATTGACCCAGATTTGGATGCTCAAGTGGAA  
TTCGGAGCATTCCAAAACCTTGGAGATCCAACCTACAAGGAGACAGGTAGTC-----  
-----GTGGAAACGCTCTTTAATGGAACCTTAGCTTTAGCTGGTTCGTGACCAA  
GAAACCACCGTTTTCGCTTGGTGGGCCGAAATGCCCGACTTATCAACTTGTCTGGTA  
AACTACTCGGGGCTCACGTAGCCCATGCCGGATTAATTGTATTCTGGGCCGGAGCAATG  
AACCTATTTGAAGTGGCTCATTTTCGTACCAGAGAAGCCCATGTATGAACAAGGATTAAT  
TTACTTCCCCATCTAGCTACTCTAGGTTGGGGGGTAGGTCCTGGTGGGGAAGTTATAG  
ACACTTTTCCATACTTTGTATCTGGAGTACTTCACTTAATTTCTCTGCAGTATTGGGCTT  
TGCGGTATTTATCATGCACTTCTCGGGCCTGAGACTCTGGAAGAATCTTTTCCATTCTT  
CGTTTATGTATGGAAGATAGAAATAAAATGACCACAATTTTGGGTATTCACTTAATCTT  
GTTAGGTATAGGTGCTTTTCTTAGTACTCAAGGCTCTTATTTTGGGGGCGTATATGAT  
ACCTGGGCTCCCGGGGGGGGAGATGTAAGAAAAATTACCAACTTGACCCTTAGCCCAA  
GTGTTATATTTGGTTATTTACTAAAATCCCTTTGGGGGAGAAGGATGGATTGTTAGTG  
TGACGATTTAGAAGATATAATTGGAGGACATGTATGGTTAGGTTCCATTTGTATACTTG  
GTGGAATCTGGCATACTTAACCAAACCTTTGCATGGGCTCGCCGCGCACTTGTATGG  
TCTGGAGAGGCTTACTTGTCTTATAGTTTAGGTGCTTTATCTGTCTTTGGTTTCATCGCTT

GTTGCTTTGTCTGGTTCAATAATACCGCTTATCCTAGTGAGTTTTATGGGCCCACTGGGC  
CAGAAGCTTCTCAAGCTCAAGCATTACTTTTTCTAGTTAGAGATCAACGTCTTGGGGCT  
AACGTGGGATCCGCTCAAGGACCTACTGGTTTAGGTAAATATCTAATGCGTTCCCCTAC  
CGGAGAGGTCATTTTTGGAGGAGAACTATGCGTTTTTGGGATCTCCGTGCTCCCTGGT  
TGGAACCTCTAAGGGGTCCCAATGGTTTGGACTTGAGTAGGCTGAAAAAAGACATACA  
ACCTTGGCAAGAACGGCGTTCGCGGAATATATGACTCATGCTCCTTAGGTTCTTTAA  
ATTCCGTGGGTGGCGTAGCTACCGAGATCAATGCAGTCAATTATGTCTCTCTAGAAGT  
TGTTAGCTACCTCTCATTGTTCTAGGATCCTTCCCTATTCGTGGGTCATTGTGGCATG  
CGGAAGGGCCCGTGCAGCTGCAGCAGGATTTGAAAAAGGAATTGATCGTGATTTTCG  
AGCCTGTTCTTTCCATGACCCCTCTAACATGACTATAGCCCTTGGTAGATTTACCAAAG  
ACGAAAATGATTTATTTGATATTATGGATGACTGGTTACGGAGGGACCGTTTCGTTTTTG  
TAGGTTGGTCCGGTCTATTGCTCTTTCCTTGTGCCTATTTTCGCTTTAGGAGGTTGGTTCA  
CAGGTACAACCTTTGTAACCTTCATGGTATACCCATGGATTGGCCAGTTCCCTATTTGGAAG  
GCTGCAATTTCTTAACCGCCGAGTTTCTACTCCTGCTAATAGTTTAGCACATTCTTTAT  
TGCTACTATGGGGTCTGAAGCACAAGGAGATTTACTCGTTGGTGTCAATTAGGCGGT  
CTGTGGACTTTTGTGCTCTTCATGGCGCTTTCGGACTAATAGGTTTCATGTTACGTCAA  
TTCGAACTTGCTCGATCTGTTCAATTGCGACCTTATAATGCAATCGCATTCTCTGCTCCA  
ATTGCTGTTTTTGTTCGTATTTCCTGATTTATCCACTTGGTCAGTCTGGTTGGTTTTTTG  
CACCTAGTTTTGGTGTAGCAGCTATATTTGATTATCCTCTTCTTCCAAGGGTTTCATAA  
TTGGACGTTGAACCCATTTTCATATGATGGGAGTTGCCGGCGTATTAGGTGCTGCTCTGC  
TATGCGCTATTCATGGTGCTACTGTAGAAAATACTTTATTCGAAGATGGTGACGGTGCA  
AATACATTCCGTGCTTTTAACCCAACCTCAAGCTGAAGAGACTTATTCAATGGTCACCGC  
TAACCGCTTTTGGTCCCAAATCTTTGGGGTTGCTTTTTCCAATAAACGTTGGTTACATTT  
CTTTATGTTATTTGTACCCGTAACCTGGTTTATGGATGAGTGCTCTTGGAGTAGTCGGTCT  
GGCTCTGAACCTACGTGCCTATGACTTCGTTTCCCAGGAAATCCGTGCAGCGGAAGAT  
CCTGAATTTGAGACTTTCTACACCAAAAACATTTCTCTTAAACGAAGGTATTCGTGCTTG  
GATGGCGGCTCAAGATCAGCCTCATGAAAACCTTATATTCCCTGAGGAGGTTCTACCCC  
GTGGAAACGCTCTTATGTCTGGAAGCACGGGAGAACGTTCTTTTGTGATATTATTACC  
AGTATTCGATACTGGGTCATTCATAGCATTACTATACTTCCCTATTCATTGCGGGTTGGT  
TATTCGTGAGCACGGGTTTAGCTTACGATGTGTTTGGAAAGCCCTCGGCCAAACGAGTAT  
TTTACAGAGAGCCGACAAGGAATTCCATTAATAACTGGCCGTTTTGATCCTTTGGCACA  
ACTCGATGAATTTAGTAGATCCTTTATGACCATAGATCGAACCTATCCAATTTTACAGT  
GCGATGGTTGGCTGTTACGGACTGGCTGTACCTACCGTTTCTTTTTTGGGGTCAATAT  
CAGCAATGCAGTTCATCCAACGAATGGCTACACAAAGCGTTGAGGGTAGTTCTAGATC  
TGGT---CCAAGACGAACTATTACAGGGGATTTATTGAAACCATTGAATTCGGAATATGGT  
AAAGTAGTCTCTGGATGGGGAACCTACCCCTTTGATGGGTGTCGCAATGGCTCTATTTGC  
GATATTCCTATCTATTATTTTGGAGATTTATAATTCTTCCGTTTTACTGGATGGAATTTCAA  
TGAGTATGCTTACTCTCAAACCTTTCGTTTACACAGTAGTGATATTCTTTGTTTCTCTCTT  
CATCTTCGGATTCCTATCTAATGATCCAGGACGTAATCCTGGACGCGAGGAAATGGCCG  
ATACTACTGGAAGGATTCCTCTTTGGCTGATAGGTAAGTACTGTAACCTGGTATTCTGTGATCG  
GTTCAATAGGATTTTCTTTTACGGTTCATATTCGGATTGGGTTTCATCCCTGATGCTTAA  
TATCTTTGGTTTGATTTGT-----CTTAATTCTGCCCTTCATTCGAGTAGTTTTTTCTTTGCC  
AAATTGCCCTGAGGCTTACGCTTTTTTCAATCCAATTGTAGATGTTATGCCAGTCATACCT  
GTGCTCTTTTTTCTCTTAGCCCTTGTTTGGCAAGCTGCTGTAAGTTTTTCGAACGACACA

ATCAAACCCGAACGAACAAAATGTTGAATTAAACCGTACCAGTCTCTACTGGGGGTTA  
TTACTCATTFFFFTACTTGCTGTTTTATTTTCCAATTATTTCTTCAATATGGAAGTAAATAT  
TCTCGCATTATTTGCTACTGCCTGTTTCTAGTTTCTACTGCCTTTTTACTTATCATCT  
ACGTAAAAACAGTCAGTCAAAATGATATGGAAACAGCAACCCTAGTCGCCATCTCTATA  
TCTGGTTCACTTGTAAGTTTTACTGGGTACGCCTTATATAACCGCTTTTGGGCAGCCCTCT  
CAACAATAAGAGATCCATTTCGAGGAACACGGGGACATGGAAGCATTGGTTTATACAT  
TCCTCTTAGTCTCGACTCTAGGGATAATTTTTTTTCGCTATCTTTTTTTTCGAGAACC GCCTA  
AAGTTCCGACTAAAAAGATGAAAATGACTATTGCTTTCCAATTGGCTGTTTTTGCATTA  
ATTGCTACTTCATCAATCTTACTGATTAGTGTACCCGTTGTATTTGCTTCTCCTGAAGGTT  
GGTCAAGTAACAAAATGTTGTATTTCCGGTACATCATTATGGATTGGATTAGTCTTTT  
TGGTGGGTATCCTTAATTCTCTCATCTCT-----ATGTCACCACAAACAGAGAC  
TAAAGCAAGTGTTGGATTCAAAGCTGGTGTAAAGATTACAAATTGACTTATTATACTC  
CTGACTATGAAACCAAAGATACTGATATCTTGGCAGCATTCCGAGTAACTCCTCAACCT  
GGAGTTCCACCTGAGGAAGCAGGGGCCGCGGTAGCTGCCGAATCTTCTACTGGTACAT  
GGACAACCTGTGTGGACCGATGGACTTACTAGCCTTGATCGTTACAAAGGACGATGCTA  
CCACATCGAGCCC GTTGTGGAGAAGAAAATCAATATATTGCTTATGTAGCTTACCCTTT  
AGACCTTTTTGAAGAAGGTTCTGTACTAACATGTTTACTTCCATTGTGGGTAATGTATT  
TGGGTTCAAAGCCCTACGTGCTCTACGTCTGGAGGATCTGCGAATCCCTCCTGCTTATT  
CTAAAACCTTCCAAGGACCACCTCATGGTATCCAAGTTGAGAGAGATAAATTGAACAA  
GTATGGTTCGTCCTCTATTGGGATGTACTATTAACCAAATTTGGGGTTATCCGCTAAGAA  
CTACGGTAGAGCGGTTTATGAATGTCTTCGCGGTGGACTTGATTTTACCAAGGATGATG  
AGAACGTGAACTCCCAACCATTTATGCGTTGGAGAGACCGTTTCTTATTTTGTGCCGAA  
GCAATTTATAAAGCACAGGCCGAAACAGGTGAAAATCAAAGGGCATTACTTGAATGCTA  
CGGCGGGTACATGTGAAGAAATGATTAAGGGCTGTATTTGCCAGAGAATTAGGAGT  
TCCTATCGTAATGCATGACTACTTAACGGGGGATTCACTGCAAATACTAGCTTGGCTCA  
TTATTGCCGAGATAATGGCCTACTTCTTCACATCCATCGCGCAATGCATGCAGTTATTGA  
TAGACAGAAGAATCATGGTATACACTTTTCGTGTACTAGCTAAAGCGTTACGTATGTCCG  
GTGGAGATCATATTCACGCTGGTACCGTAGTAGGTAAACTTGAAGGGGAAAGAGAAAT  
CACCTTGGGCTTTGTTGATTTACTACGTGATGATTTTATTGAAAAAGACCGAAGTCGCG  
GTATTTATTTCACTCAAGATTGGGTCTCTCTACCAGGTGTTCTGCCCGTGGCTTCGGGG  
GGTATTCACGTTTGGCATATGCCTGCTCTGACTGAGATCTTTGGGGATGATTCGGTACTA  
CAGTTCCGGTGGAGGAACTTTAGGACACCCTTGGGGAAATGCACCGGGTGCAGTAGCTA  
ATCGAGTAGCCCTAGAAGCGTGTGTACAAGCTCGTAATGAGGGACGTGATCTTGCTCG  
TGAAGGTAATGAAATTATCCGTGAAGCTTGCAAATGGAGCCCTGAACTAGCTGCCGCT  
TGTGAGGTATGGAAGGAGATCAAATTCGAATTCGAAGCAATGGATACTTTG-----ACGG  
CGATACATTTATACAAAACCTTCTACCCCGAGCACACGCAATGGAGCCGTCGACAGTCA  
AGTGAAATCCAATCCACGAAATAATTTGATCTATGGACAGCATCGTTGTGGTAAAGGTC  
GTAATGCCAGAGGAATCATTACCGCAGGGCATAGAGGGGGAGGTCATAAGCGTCTATA  
CCGTAATAATCGATTTTCGACGGAATAAAAAAACATAGAGGGTAGAATCGTAACCATA  
GAATACGACCCTAATCGAAATGCATACATTTGTCTCATACACTATGGGGATGGTGAGAA  
GAGATATATTTTACATCCCAGAGGGGCTATAATTGGAGATTCCATTGTTTCTGGTACAGA  
AGTTTCTATAAAAATGGGAAATGCCCTACCTTTGACCGATATGCCCTTAGGCACGGCCA  
TACATAACATAGAAATCACACTTGGAAAGGGTGGACAATTAGCTAGAGCAGCGGGTGC  
TG TAGCGAAACTGATTGCAAAGAGGGGTAATCGGCCACATTAATAATTACCCTCTGGG



GAGGTCCGTTTGGATATCCAAAACTGCTCAGCAACATTCGGACAGGTGGGTAATGTTG  
GGGTGAACCAGAAAAGTTTGGGTAGAGCCGGATCTAAGTGTGGCTAGGTAAGCGTCC  
TGTAAGAGGAGTAGTTATGAACCCTGTAGACCATCCCCATGGGGGTGGTGAAGGG  
AGGGCCCAATTGGTAGAAAAACCCCAACCCCTTGGGGTTATCCTGCGCTTGGA  
GAAGAAGTAGAAAAAGGAATAAATATAGTGATAGTTTGATTCTTCGTCGCCGTACTAAA  
ATGATTCAACCTCAGACCCATTTGAATGTAGCGGACAACAGCGGGGCTCGAGAATTGA  
TGTGTATTGCAATCATAGGAGCTAGT---AATCGCCGATATGCTCATATTGGTGACGTTATT  
GTTGCTGTAATCAAAGAAGCAGTGCCCAATATGCCTCTAGAGAGATCAGAAGTGATCA  
GAGCTGTAATTGTACGTACATGTAAAGAACTCAAACGCGACAACGGTATGATAATAAGA  
TATGATGACAATGCAGCAGTTGTCATTGATCAAGAAGGAAATCCAAAAGGAACTCGAG  
TTTTTGGTGCGATCGCTCGGGAATTGAGACAGTTGAGTTTTACTAAAATAGTTTCATTA  
GCTCCTGAGGTATTAATGCTTAGTCCCAAAGAACCAGATTCCGTAAACAACATAGAG  
GAAGAATGAAGGGAATATCATATCGAGGCAATCGTATTTCTTTTGGTAGATACGCTCTC  
GGGCACTTGAACCCGCTTGGATCACATCTAGACAAATAGAAGCAGGGCGACGAGCAAT  
GACACGATATGCACGTCGTGGTGAAAAATATGGGTACGTATATTTCCAGACAAACCCG  
TTACAGTAAGACCTACGGAAACACGTATGGGTTCCGGGAAAGGATCTCCCGAATATTG  
GGTATCTGTCGTTAAACCGGGTCAATACTTTATGAAATGGGTGGAATATCAGAAATTG  
TAGCCAGAGAAGCTATTTCAATAGCTGCGTCCAAAATGCCTATACGAACCCAATTCGTT  
ATTGCGGGAATGACCAGAATTAGACGGGGATATATAGCTCGGAGACGTAGAACAAAA  
TTCGTTTATTTGCATCAACCTTTCGAGGGGCTCATTCAAGACTTACTCGAACCACTACT  
CAACAGAAAATGAGAGCTTTGGTTTCGGCTCATCGGGATAGGGGCAGGCAAAAGAGA  
AATTTTCGTCGTTTGTGGATCACTCGGATAAATGCAGTAATTCGTGAAAAT-----GTATCC  
TATAGTTATAGTCGATTAATACACGATCTGTACAAGAGGCAGTTGCTTCTTAATCGTAAA  
ATACTTGCACAAATAGCTATATCAAATAGGAATTGTCTTTACATGATTTCCAATGAGATC  
ATCAA-----ATGATAAACGAAGTATACGCTTTAGGCCAACATATAT  
GTATGTCCGCTCACAAAGCGCGAAGGGTAATTGATCAGATTCGTGGGCGTTCCTACGA  
AGAAACACTTATGATACTCGAACTCATGCCTTATCGAGCATGTTACCCCATTTTTAAATT  
GGTTTATTCTGCAGCAGCAAATGCTAGTCACAATATGGGTTTCAACGAAGCGGATTTAA  
TCATTAGTAAAGCCGAAGTCAACGAAGGTCTTACCATGAAAAGGTTAAAACCTCGAGC  
TCGAGGACGTAGTTATCCGATAAAAAGACCCACCTGTCATATAACTATTGTATTGAAAG  
ATATATCCTTAGATGGTATAGTGGG-----ATGGATGGAATCAAATATGCAGTATTTACA  
GACAAAGGTATTCGGTTATTGGGGAACAAT---CAATATACTTCTAATGTCGAATCAGGAT  
CAACTAGGACAGAAATAAAGCATTGGGTCAACTCTTCTTTGGTGTCAAGGTAATAGCT  
ATGAATAGTCATCGACTCCCGGAAAGGGTAGAAGAATGGGACCTATTATGGGACATAC  
AATGCATTACAGACGTATGATCATTACGCTTCAACCGGGTTATTCTATTCCACCTCTTAG  
AAAGAAAAGAACTATGGCGGTTCCAAAGAAACGTACTTCTATATCAAAAAGCGTATT  
CGTAAAAATATTTGGAAAAGAAAGCGGATTGGGCATCGGTAAAAGCTTTTTTCGTTAG  
CGAAATCTCTGTCTACCGGGAATTCAAAAGTTTTTTTTGTGCGACAAATA---AACATGG  
CCAAGGGTAAAGATGTCAGAGTTAGAGTTATTTTGGAAATGTATCAATTGTGTCCGAAAC  
GGTGTTAAT-----AAGGAATCACCGGGCGTTTCCAGATATATTAATCAAAAAGAAATCGACA  
CAATACGCCTAGTCGATTGGAATTGAGAAAATTCTGTCCCTATTGTTTCAAGCATAACGAT  
TCATGGGGAGATAAAGAAAATGAAAATAAGGGCTTCGGTTCGTAAAATTTGTGAAAAA  
TGTCGACTGATCCGTAGACGGGGACGAATTATAGTAATTTGTTCCAACCCGAGACATAA  
ACAAAGACAAGGAATGGTTCGAGAGAAAGTAACAGTATCTACTCGGACACTACAGTG

GAAGTGTGTTGAATCAAGAGCAGACAGTAAGCGTCTTTATTATGGACGTTTTATTCTGT  
CTCCGCTTATAAAAGGTCAAGCTGATACGATAGGCATTGCGATGCGAAGGGCTTTGCTT  
GGAGAAATAGAAGGAACATGTATCACACGTGCAAAATCTGAG-----AAGATACCGCATG  
AATACTCTACCATAGTAGGTATTGAAGAATCAGTACATGAAATTTAATGAATTTGAAAG  
AAATTGTATTGAGAAGTAATCTGTATGGAACCTCGCAACGCATCTATTTGCATCAGGGGT  
CCTGGATACGTAACCTGCTCAAGACATCATCTCACCGCCTTCTGTGGAAACCGTTGATAA  
TACACAGCATATAGCTAATCTGACGGAACCAATTGATTTTTGTATTGAATTAGAAATCGA  
GAGGAACCGGGGATATCGTATGAAAACACCAAATAACTCTCAAGATGGAAGTTAT-----  
CCTATAGATGCTGTATTCATGCCTGTTAGAAATGCGAATCATAGTATTCATCTTATGCAA  
ATGGAATGAGAAACAAGAGATACTTTTTCTCGAAATATGGACGAATGGAAGTTAAC  
TCCTAAAGAAGCACTTCACGAAGCCTCCCGGAATTTGATTGATTTATTTATCCCTTTTCT  
ACATGCGCAAGAAGAG-----AACATCTTGTTAGAGGACAATCAA---AATGGGGTTACTTT  
ACCCTTTTTTACTTTTCATGATAGATTGGCG---AAAATAAGGAAAAACGAAAAA---GAA  
ATAGCATTGAAATATATTTTTATTGACCAATCAGAATTGCCTCCCAGAACCTATAATTGCC  
TCAAAGGTCCAATATACATACATTATTGGACCTTTTCAATAACAGTCAAGAAGATCTTA  
TGAAAATTGAAGATTTTCGCATAGAAGATGTAAAACAGATATTGGGCATTCTACAAAAG  
CAT-----TTCACAGTTGATTTACCGAAGAATAAGATGCGCCGGGATGGAAAT--GAGGGA  
ATGTCTACAATACCTGGGTTAATCAGATACAATTTGAGGGATTTTGTAGGTTTCATTGAT  
CAAGGCTTGACGGAAGAACTCTATAAGTTTCCAAAATTGAAGATACAGATCAAGAAA  
TTGAATTTCAATTATTTGTAGAAACATATCAATTGGTAGAACCTTGATAAAAGAAAGA  
GATGCTGTGTATGAATCACTCACATATTCTTCTGAAGTATATGTACCCGCGGGATTAATTT  
GGAAACCCGGTAGGGATATGCAAGAACAACCATTTTTATTGGAAACATTCCTCTAATG  
AATCCCTGGGAACCTCTATAGTAAATGGAATATACAGAATTGTGATCAATCAAATATTG  
CAAAGCCCCGGTATTTATTACCGTTCCGAATCCGACCATAACGGAATTTCCGGTCTATACC  
GGCACCATAATATCAGATTGGGGAGGAAGATCAGAATTAGAGATTGATAGAAAAGCAA  
GGATATGGGCTCGTGTGAGTAGGAAACAAAAATATCTATTCTAGTTCCATCATCAGCTA  
TGGGTTCGAATCTAAGAGAAATTCTAGATAATGTTTGCTACCCTGAAATTTTCTTGTCTT  
TCCTGAATGATAAGGAGAAAAAAAAGATTGGGTCAAAGAAAATGCCATTTTGGAGTT  
TTATCAACAATTTGCTTGTGTAGGCGGGGATCCGGTATTTTCTGAGTCCTTATGTAAGGA  
ATTACAAAAGAAATTTTTTCAACAAAGATGTGAATTAGGAAGGATTGGTTCGACGAAATA  
TGAATCGGAGACTGAATCTTGATATACCTCAGAACAATACATTTTTGTTACCGCGAGAT  
GTATTGGCAGCTGCGGATCATTTGATCGGAATGAAATTTGGAATGGGTACACTTGACGA  
T-----ATGAATCACTTGAAAATAAACGCATTCGTTCTGTAGCGGATCTTTACAAGATC  
AATTTGGATTGGCTCTGATTCGGTTAGAAAATGTGGTTCGAGGAACTATATGTGGAGCA  
ATTAAG---CATAAATTGATA---CCGACTCCTCAGAATTTGGTAACTTCAACTCCA-----  
-TTAACAACCACTTATGAATCATTTTTTCGGCCTACACCCCTTATCTCAAGTTTTGGATCG  
AACTAATCCATTGACACAAATGGTTCATGGGCGAAAATTGAGTTATTTGGGTCCTGGAG  
GATTGACGGGGCGAACTGCTAGTTTTTCGGATACGAGATATCCATTCTAGTCATTATGGAC  
GTATTTGCCAATTGACACGTCTGAAGGAATCAACGTTGGACTTATTGGATCTTTAGCG  
ATTTATGCGAGGATTGGTTCATTGGGGA---TCTCTAGAAAGCCCATTTTAT-----GAAATA  
TCTGATAGATCC-----AAAGAAGTACAAATGCTTTATTTATACCAAGTAGAGATGAATA  
CTATATGGTGGCGGCGGAAATCTTTGGCGTTGAATCAGAGTATTCCGGAAGAACAG  
GTTGTTCCAGCTCGATACCGTCAAGAATTCCTGACTATTGCATGGGAACAAGTTCATTT  
TCGAAGCATTTTTCCCTTCCAATATTTTTCTATTGGAGCTTCCCTCATTCTTTTATCGAG

CATAATGATGCGAATCGGGCTTTAATGAGTTCTAATATGCAACGTCAAGCAGTTCCGCT  
TTCTCAGTCCGAGAAGTGCATTGTTGGAACGGGTTGGAACGCCAGGCGGCTCTAGAT  
TCGGGGGTTTCTACTATAGCGGAACACGAGGGAAAGATCATTATACCGATACTGATAA  
GATCATTTTATTAGGTAATGGAGACACCCTAAGTATTCATTGGTTATGTATCAACGTTCC  
AACAAAATACTTGTATGTATCAAAAACCCAGGTTTCGGCGGGTAAATTCATTA  
GGGACAAATTGTAGCGGATGGTGCCGCTACAGTTGGTGGCGAACTCGCTTTGGGAAA  
AACGTATTAGTAGCCTATATGCCATGGGAAGGTTACAATTCTGAAGACGCAGTACTCATT  
AGCGAGCGTCTGGTATATGGAGATATTTATACTTCTTTTCACATACGGAAATATGAAATT  
CAGACTCATGTGACAAGCCAAGGC---CCTGAAAGGATCACTAATGAAATACCGCATTTA  
GAAGCCATTTACTCCGAAATTTAGACAGAAATGGAATTGTGATGCTGGGATCTTGGGT  
AGAAACGGGTGATATTTTAGTAGGTAATTAACGCCTCAGATGGCGAAAGAA---TCATC  
GTATGCCCCGGAAGATAGATTATTACGAGCCATACTTGGCATTACAGGTATCCACTTCAA  
GGAACTTGTTAAAACCTGCCTATAGGTGGCAGGGGTCGAGTTATTGATGTGAGATGGA  
TCCAGAAAAGGGG---GGTTCCAGTTATAATCCAGAAACAATTTGTGTATATATTTACA  
GAAACGTGAAATCAAAGTGGGTGATAAAGTAGCTGGAAGACATGGGAATAAAGGTATC  
ATTTCCAAAATTTGCCTAGACAAGATATGCCTTATTTGCAAGATGGAACACCTATTGAT  
ATGGTTTTCAACCCATTAGGAGTACCCTCACGAATGAATGTAGGACAGATATTTGAATG  
CTCGCTCGGGTTAGCGGGGATCTGCTAGACAGACATTATCGAATAGCACCCCTTGATG  
AGAGATATGAGCAAGAGGCTTCGAGAAAACCTAGTGTTTTCTGAATTATATAAAGCCAGT  
AAGCAAACAGCGAATCCATGGGTATTTGAACCCGAGTATCCAGGAAAAGCAGAATAT  
TTGATGGAAGAACAGGAGATCCTTTTGAACAACCCGTTCTTATAGGAAAGTCCATATC  
CTGAAATTAATTCATCAAGTTGATGATAAAATCCACGGGCGTTCCAGTGGACATTATGC  
GCTTGTTACACAACAACCCCTTAGAGGAAGGGCCAAGCAAGGGGGACAACGGGTAGG  
AGAAATGGAAGTTTGGGCTCTAGAGGGATTTGGCGTTGCTCATATTTACAAGAAATGC  
TTACTTATAAATCTGATCATATTAGAGCTCGTCAGGAAGTACTTGGTACTACGATCGTTG  
GAGGAACAATACCTAGCCCTGAGGATGCTCCAGAATCTTTTCGATTGCTCGTTCGAGA  
ACTACGATCTTTGGCTCTGGAACCTGAATCATTTCCTTGTATCTGAGAAGAACTTCCAGA  
TTAATAGGAAGGAAGCT-----ATGATCGACCGGTATAAACATCAACAACCTTC  
GAATTGGATCAGTTTCTCCTCAACAAATAAGTGCTTGGGCCAAAAAATCCTACCTAAT  
GGAGAAATAGTTGGAGAGGTGACAAAACCTATACTTTTCATTACAAAACCAATAAAC  
CGGAAAAGATGGATTGTTTTGTGAAAGAATTTTGGCCCTATCAAAAGTGAATTTGT  
GCTTGTGGGAATTATAGAGTAATCGGAGATGAAAAGAAGACCCGAAATTTTGTGAAC  
AATGCGGAGTCGAATTTGTTGATTCTCGGGTACGAAGATATCAAATGGGATACATCAA  
CTGGCATGTCCAGTAACCTCATGTGTGGTATTTGAAACGTCTTCCTAGTTATATCGCGAAT  
CTTTTAGATAAACCTCTTAGAGAATTAGAAGGCCTAGTATACTGCGAT-----TTTTCTTT  
GCTAGGCC---ATAGCTAAAAACCTACTTTCTTACGATTACGAGGTTTCATTCGAATATG  
AAATCCAATCCTGGAATAACAGCATCCCGCTTTTTTTTACTACTCAAGGCTTCGATACAT  
TTCGAAATCGAGAAATCTCTACAGGAGCAGGTGCTATCAGAGAACAATTAGCCGATCT  
GGATTTGCGAATTATTACAGCTTATTCATTGGTGGAAATGGAAGAATTAGGGGAAGAA--  
-GGGCCCACAGGTAATGAATGGGAAGATAGAAAATTGGAAGAAGAAAGGATTTTTTG  
GTTAGACGCATGGAATTAGCTAAGCATTTTATTCGAACAATGTAGAACCAGAATGGAT  
GGTTTTGTGCCTATTACCAGTTCTTCCTCCCGAGTTGAGACCGATCATTCAAATAGATGG  
GGGTAACTAATGAGTTTCGGATATTAATGAACTCTATAGAAGAGTTATCTATCGGAACAA  
TACTCTTACCGATCTATTAACAACAAGTAGATCTACGCCAGGGGAATCAGTAATGTGTC

AGGAGAAATTGGTACAAGAAGCCGTGGATACACTTCTTGATAATGGGATCCGTGGACA  
ACCAATGAGGGACGGTCATAATAAAGTTTACAAATCGTTTTTCAGATGTAATTGAAGGCA  
AAGAGGGAAGATTCGCGGAGACTCTGCTTGGTAAACGGGTCGATTATTCGGGGCGTTC  
CGTCATTGTCGTGGGCCCTTCTCTTTCATTACATCGATGCGGATTGCCCTCGTGAAATAGC  
AATAGAGCTTTTCCAGACATTTGTAATTCGTGGTCTAATCAGACAACATCTTGCTTCCA  
ACATAGGAGTTGCTAAAAGTAAAATTCGGGAAAGAGAACCAATTGTATGGGAAATACT  
TCAAAAAGTTATAACAAGGGCATCCTGTATTGCTGAATAGAGCACCCACTCTGCATAGAT  
TAGGCATACAGGCATTCCAACCCATTTTAGTGGAAGGATGTGCTATTTGTTTACATCCAT  
TAGTTCGTAAGGGATTCAATGCAGACTTTGATGGGGATCAAATGGCTGTTCATGTACCT  
TTATCTTTGGAGGCTCAAGCGGAGGCTCGTTTACTTATGTTTTCTCATATGAATCTCTTG  
TCTCCAGCTATTGGAGATCCCATTTCCGTACCAACTCAAGATATGCTTATGGGACTCTAT  
GTATTAACGATCGGGAATCGTCGAGGTATTTGTGCAAATAGGTATAATCCACGTAATCGC  
AGAAAC-----TATCAAAATGAAAGAATTGACGATAATAACTATAGGTATACGAAAGAA  
AAAGAACCCTATTTTTGTAGTTCTTATGATGCGCTTGGGGCTTATCGGCAGAAACGAAT  
CAATTTAGATAGTCCTTTGTGGCTCCGATGGCGACTAGATCAACGC---GTCATTGCATCA  
-----AGAGAAGTTCCCATCGAAGTTCAATATGAATCTTTGGGTACCTATCATGAGATTTAT  
GGGCACTATCTAATAGTAAGAAGTGTAAGAAAAGAAATCCTTTGTATATACATTCGAAC  
CACTGTTGGTCATATTTCTTTTTATCGAGAAATAGAAGAAGCCATACAAGGGTTTTGCC  
GGGCCTGCTCATATGGTACC-----ATGGAGGTACTTATGGCAGAACGGGCC  
GATCTGGTCTTTCACAATAAAGCGATAGATGGAACCTGCCATGAAACGACTTATTAGCAG  
ATTAATAGACCATTTCCGAATGGCATATACATCACACATCCTGGATCAAGTAAAGACTCT  
GGGTTTCCAGCAAGCCACTGCTACATCCATTTTCATTAGGAATTGATGATCTTTTAAACAAT  
ACCTTCTAAGGGGTGGCTAGTTCAAGATGCTGAACAACAAAGTTTGATTTTGGAAAAA  
CACCATCATTATGGGAATGTACACGCGGTAGAAAAATTACGTCAATCCATTGAGATATG  
GTATGCTACAAGTGAATATTTGCGACAAGAAATGAATCCTAATTTTAGGATGACCAACC  
CTTCTAATCCAGTCCATATAATGTCTTTTTCCGGGAGCTAGAGGAAATGCATCTCAGGTAC  
ACCAATTAGTAGGGATGAGAGGATTAATGTCCGATCCCCAAGGACAAATGATTGATTTA  
CCCATTAGAGCAATTTACGCGAAGGACTCTCTTTAACAGAATATATCATTTCCTGTTAC  
GGAGCCCGCAAAGGGGTTGTGGATACTGCTGTACGAACATCAGATGCTGGATACCTCA  
CGCGCAGACTTGTTGAAGTAGTTCAACACATTGTTGTCCGTAGAACAGATTGTGGCAC  
CCTCCAGGGTATTTCTGTGAGTCCTCGAAATGGGATGATAACG---GAAAGAATTTGAT  
CCAAACATTAATCGGTCGTGTATTAGCAGACGATATATATATGGGCCACGATGCATTGC  
CGCTCGAAATCAAGATATTGGGATTGGACTTGTCAATCGATTACATAACC-----T  
TTGGAGCACAAACCAATATCTATTTCGAACCCCTTTACTTGCAGGAGTATATCTTGGATCT  
GTCGATTATGTTATGGTCCGAGTCCCACTCATGGCGACCTGGTTCGAATTGGGAGAAGC  
AGTAGGTATTATTGCGGGTCAATCTATTGGGGAACCCGGGACTCAACTAACATTAAGAA  
CTTTTCATACCGGCGGAGTATTCACAGGAGGTACTGCAGAACATGTACGAGCTCCTTCT  
AATGGAAAAATCAAATTCATGAGGATTTGGTTCATCCACACGTACACGTCATGGACA  
TCCCGCTTTTCTATGTTATATAGACCTGTATGTAACCTATTGAGAGTCAGGATATTATACAT  
AACGTGAATATTCCACCAAAAAGTTTTCTTTTAGTTCAAATGATCAATATGTAGAATCA  
GAACAAGTCATTGCTGAGATTCGCGCGGGGACATCCACTTTG---AATTTTAAAGAGAGG  
GTTTCGAAAACATATTTATTCTGACTCAGAGGGAGAA---ATGCACTGGAGTACCAATGTG  
TACCATGCGCCTGAATATACATATAGTCATGTTTCATCTTTACCAAAAACAAGTCATTTAT  
GGATATTATCAGGAGGTTTCGTACAGA-----TCCAGTATAGTCCCTCTTTCGCTCCACAAG

GATCAAGATCAAATGAACGTTTCAT-----TCTCTTTCTGTGCGAACGAAGATATATTTCTAAC  
-----TTCTCAGTACTAATGATCAA--GTGAGACACAAATTGTTAATTCGTACCCTTCCA  
GT-----GGGGAGAGGATTCTTGATTAT--TCAGGAACGGATCGAATCATATGCAATGGTCA  
TTGTAATTTTCATATATCCTTCC---ATTCTCCACGAAAATTCTGAT-----TTATTGGCAAAGA  
GACGAAGAAATAGATTCATCATTCCATTCCAATCTAATCAAGAACGAGAGAAAGAACT  
AATGTCCCGTTCGGATATCTCGATTGAAATACCCATAAAT-----GGTATTTTTTCGTAGAAAT  
AGTATTCTTGCGTATTTTCGACGATCCCCGATACAGAAGAAATAATTCGGGAATTACTAAA  
TATGGGACTATAGAGGTGCATGCAATCGTCAAAAAAGAGGAT-----TTGATTGAGTATCG  
AAGA-----AAAGAATTTAGGCCAAAATACATGAAAGTAGATCGGTTTTTTTTTCATTCCCG  
AGGAAGTGCATATCTTACCCGGATCCTCTTCCATAATGGTACGGAACAATAGTATCATTG  
GAGTAGATACACGAATCACTTTAAATGCAAGAAGCCGAGTAGGCGGATTGGTCCGAGT  
GGAGAGAAAAAAAACGGATTGAACTGAAAATATTTTCTGGGGATATCCATTTTCT  
GGAGAAACAGATAAGATATCCCGGCACAGTGGTATCTTGATACCACCAGGAACGGGAA  
AAAAA-----AATTCTAAGAAATCAAAAAA---AAATTGCAAATTTGGATCTACGTCCAA  
CGG-----ATTACACCTATCAAGAAAAAG-----TATTTTGTTTTGTTCGACCCGTAGTCAC  
ATATGAAATAGCAGACGGGATCAATTTAGCAACGCTTTTCCCCCAAGATCTGTTGCAGG  
AAAGGGATAATGTACAACCTCGAGTTGTCAATTATATCCTTTATGCAAATGGCAAACCA  
ATTCGAGGAATTTCTCACACAACCTATTCAATTAGTTCCGACTTGTTTAGTATTGAATTGG  
GACCAAGGCAAAAAT-----GGCTCTTCCATAAAAGAGGTTTCATGCTTCTTTGTTGAA  
GTAAGGGCAAATGATCTGATTCAAGATTTTCATAAGAATGGACTTAGTGAAGTCCACTAT  
TTCGCATACCGGAAAAAGGAATGATCCGGCAGGTTTCAGGATTGATCCCCGAT---AATGG  
ATCAGATCGCACCAATATAAATCCTTTTAT-----TCCAAGGCAAGG-----ATTCA  
ACAATCACTTAGCCGACACCAAGGAACCTTCGTTTCATTGTTGAATAGA-----AATAA  
GGAATGCCAATCTTTGATAATTTGTGCATCATCAAATTGTTCT-----CAAATGGGTCCACT  
CAACACTTTGAAATATCACAAAT-----GTGACAAAAGAATCAGATCCCCCGATTCCAATT  
AGGAATTCGTTGGGTCTTTAGGGACT-----GTCCCTAAAATTACGAATTTTATTTCATCT-  
--TATTACCAGTTAATAACT-----CATAATCAGATCTTG---GTAAGTAAATATTTGCTACTTG  
CCAAT-----TTGAAACAGACTTTACAAGTATTTAAA-----TATTATTTAATGGATGAAA  
ATGGGAAA-----ATTTATAATCCCGATCCATGCAGTAACATCATTTTTAATCCATTCAATTT  
GAATTGGTATTTTCTCCATCACGATTATTGTGAAGAGACATCCACAATAATTAGC---CTG  
GGGCAGTTTTTTTTGCGAAAATGTATGTATATCCAAAAAAGGACCA-----CATCTAAAAT  
CTGGTCAAGTTCTAATTGTTTCAT---GTTGACTCTTTAGTAATAAGATCAGCTAAGCCCTAT  
TTGGCCACTCCAGGAGCAACCGTTCACGGCCATTATGGGGAAATCCTTTACAAAGGAG  
ATACGTTAGTTACATTTATATATGAAAAATCGAGATCTGGTGATATAACACAGGGTCTTC  
CAAAAGTGGAAACAAGTGTTAGAAGTGC GTTCAATTGATTCAATATCGATGACCCTGGA  
AAATAGGGTTGAGGGTTGGAACGAACGTATAACAAGAATTCTTGGAATTCCTTGGGAA  
TACTTGATTGGCGCTGAGCTAACCATAGCGCAAAGTCGTATCTCTTTGGTTAATAAGATC  
CAAAAGGTTTATCGATCCCAGGGGTTTCAGATCCATAATAGGCATATAGAAATTATTGTA  
CGTCAAATAACATCAAAGTGTTGGTTTCAGAA-----GATGGAATGTCTAATGTTTTTT  
CACCCGGAGAGCTCATTGGATTGTTCCGAGCGGAACGAACGGGACGCGCTTTGGAAG  
AAGCGATCTGTTACCGAGCCGTATTATTGGGAATAACGCGGGCATCTCTGAATACTCAA  
AGTTTCATATCCGAGGCGAGTTTTCAAGAACTGCTCGAGTTTTAGCAAAGCCGCTCT  
ACGAGGTCGTATCGATTGGTTGAAAGGCCTGAAAGAGAACGTTGTTCTGGGGGGGATG  
ATACCTGTTGGTACCGGATTCAAAGGATTGGTCCACCGTTCA-----AGGGAACATAACA

ACATTCCT-----TTGGAAATTA AAAAGAAGAATCTATTCGAGGGGGAAATGAGA-----GAT  
ACTTTGTTCCACCATAGAGAATTATTTGATTCTTGTATCCCCAAAATTTCCATGATACAT  
CAAACAATCATTACGGGATTTAATGATTTT-----ATGACAAGAAGATATTGG  
AACATCAATTTGGAAGAGATGATGGAAGCCGGGGTTCATTTTGGTCATGGTACTCGGA  
AATGGAATCCTAGAATGGCACCTTACATCTCTGCAAAGCGTAAAGGTATTCATATTATAA  
ATCTTACTAGAACTGCTCGTTTTTTATCAGAAGCTTGTGATTTAGTTTTTGTATGCAGCAA  
GAAGGGGAAAACGATTCTTAATAGTTGGCACCAAAAATAAAGTAGTTGATTTAGTAGC  
ATCGGCTGCAATAAGGGCTCGGTGTCATTATGTTAATAAAAAATGGCTCGGTGGTATGT  
CAACGAATTGGTCCACTACAGAAACGAGACTTCATAAGTTCAGGGACTTGAGAGCGG  
AACAAAAGGCGGGGAGACTCAACCATCTTCCGAAAAGAGATGCAGCAATGTTGAAAA  
GACAGTTATCTCACTTGGAAACATATTTGGGTGGAATCAAATATATGACGGGGTTACCC  
GATATTGTAATCATCGTTGATCAGCAAGAAGAATATACGGCTCTTCGAGAATGTGTCAC  
TTTGGGAATTCCAACGATTTGTTAATCGATACAAATTGTGACCCGGATCTCGCAGATAT  
TTCAATTCCAGCGAATGATGACGCTATAGCTTCAATCCGATTAAGTTCTTAACAAATTAGT  
ATCCGCAATTTGTGAGGGTCGTTCTAGC---TATATAAGAAATCATATGGGTCAAAAATA  
AATCCACTCGGTTTCAGACTTGGTACAACCCAAAATCATCATTCCGTTTGGTTTGCACA  
ACCAAAAAGTTATTCCGAGGGCCTCCAGGAAGATCAAAAATACGGGATTGTATCAAG  
AATTATGTACAAAAAATAAGAGAATACCC---TTA---GTCGAGGGAATTGCACGTATAGA  
GATTCAAAAAGAATTGATCTAATCCAGGTCATAATCTATATGGGATTCCCAAAGTTGTT  
AATAGAGGATAGACCACGA-----GGAATCGAAGAATTACAGATCAATTTACAAAA  
GAATTTAATTCCATGAACCGAAAACCTAACATTGCTATCACAAGAATTGCAAAACCTTA  
TGACAACCTAATATTCTTGCAGAATATATAGCCGGACAATTAAGAGTAGAGTTTCATT  
TCGAAAGGCAATGAAAAAGCTATTGAATTAACCTGAACAAACAGATACAAAAGGAATT  
CAAGTACAAATTGCAGGGCGTATCGACGGAAAAGAAATTGCACGTGTCGAATGGATCA  
GAGAAGGTAGGGTTCCCCTACAAACCATTTCGAGCTAAAATTGATTATTGTTCCCTATACA  
GTTCGAACTATCTATGGGGTATTGGGCATCAAATTTGGATATTTGTAGACGAGGAAAT  
GTCTCGTTACCGAGGGCCTCGTTTCAAAAATACGCCGTCTGGGGGCTTTACCGGGA  
CTAACTAGTAAAAGTCCTAAAGCCGGAAGTGATCTTAGAAACCAATTGCGTTCCGGGA  
AA---AGATCTCAATATCGTATTCGTCTAGAAGAAAAACAAAATTGCGTTTTTCATTATGG  
TCTGACAGAGCGGCAATTACTTAAATACGTTTCGTATCGCCGAAAAGCCAAAGGGTCA  
ACAGGTCAGGTTTTACTACAATTACTTGAATGCGTTTGGATAACATCTTTTTTCGATTG  
GGTATGGCTTCGACCATTCCCGGAGCCCGCAATTAGTTAACCATAGACATATTTTAGTT  
AATGGTCGTATAGTAGATATAACCAAGTTATCGTTGCAAACCCCGAGATATTATTACGACA  
AGGGATGAACAAAATCCAGAGCTCTGATTCAAATATCTTGATTATCCTCCCAC---  
GAGGAATTGCCAAAACATTTGACTCTTCACTCATTCCAATAT-----AAAGGATTAGTCAA  
TCAAATAATAGATAGTAAATGGGTTCGTTTGC AAATAAATGAGTTGCTAGTCGTAGAATA  
TTACTCCCGTCAGACTATGTCACGTCGAGGTACTGCAGAAGAAAAAACTGCAAATCC  
GATCCAATTTATCGTAATCGATTAGTTAACATGTTGGTTAACCGTATTCTGAAACACGGA  
AAAAATCATTGGCTTATCAAATTATCTATCGAGCCGTGAAAAGATTCAACAAAAGAC  
AGAAACAAATCCACTATCTGTTTTACGTCAAGCAATACGTGGAGTAACTCCCGATATAG  
CAGTAAAAGCAAGACGTGTAGGCGGATCGACTCATCAAGTTCCCATGAAATAGGATC  
TACACAAGGAAAAGCACTTGCCATTCGTTGGTTATTAGGGGCATCTCGAAAACGCCCG  
GGTCGAAATATGGCTTTCAAATTAAGTTCCGAATTAGTGGATGCTGCCAAAGGGAGTG  
GCGATGCCATACGCAAAAAGGAAGAGACTCATAGAATGGCAGAGGCAAATAGAGCTTT

TGCACATTTTCGTATGGGTAGGGACACTATTGCCGACATAATAACTTCTATACGAAATGC  
TGACATGGATAAAAAGGGAAGGGTTCGAATAGGATATACCAATATCGCCGAAAACATTA  
TTAAAATACTTCTACGAGAAGGTTTTATCGAAAACGTGAGGAAACATCGAGAAAGCAA  
CAAATATTTCTTGGTTTTCAACCCTGCGACATAGAAGG-----AATAGGAAAAGACCATATA  
AA-----ACTATTTTA-----AAACGTATCAGCCGACCCGGTCTACGAATCTATTCCAATA  
TCAACGAATTCCTAGGATTTTAGGTGGAATAGGTATTGTAATTCTTTCTACTTCTCGAGG  
TATAATGACAGATCGAGAAGCTCGACTAGAAGGAATCGGAGGAGAAATTTTGTGTTATA  
TATGGATGGCAAACCTATACAAAGAATTGGTTCACGTAGGAATGGACCTATTGGTTCA  
CGTAAGAATGGACGTAGAATACCAAAGGGAGTTATTCATGTTCAAGCAAGTTTCAACA  
ACACCATTGTGACTGTTACAGATGTAAGGGTTCGGGTGGTTTCTTGGTCTCCGCCGGT  
GCTTGTGGATTTAGGGGCACAAGAAGAGGGACACCTTTTGCTGCTCAAACCGCAGCA  
GGAATGCTATTTCGTACAGTAGTGGATCAGGGTATGCAACGAGCAGAAGTCATGATAA  
AGGGTCTGGTCTCGGAAGAGATGCAGCATTACGAGCCATTCGTAGAAGTGGTATACTA  
TTAAGTTTCGTACGGGACGTAACCTATGCCACATAATGGATGTAGACCTCCTAAAAA  
AAGACGTGTGATGCCAACTATTAACAACCTATTAGAAACACAAGACAGCCAGTCAGA  
AATGTCACGAAATCCCCTGCTCTTCGGGGATGTCCTCAGCGCCGAGGAACATGTACTA  
GGGTGTATACTATCACCCCAAAAAACCAAACCTCTGCCTTACGTAAAGTTGCCAGAGT  
ACGATTAACCTCTGGATTTGAAATCACTGCTTATATACCTGGTATTGGCCATAATTTACA  
AGAACATTCTGTAGTCTTAGTAAGAGGAGGAAGGGTTAAGGATTTACCCGGTGTGAGA  
TATCACATTGTTTCGAGGAACCCTAGATGCTGTTCGGAGTAAAGGATCGTCAACAAGGGC  
GTTCTAAATATGGGGTCAAAAAGCCAAAATGGCAAAGAAAAGTTTGATTTCAGAGGG  
AGAAGAAGAGACAGAAATTGGAACAGAAATATCATTGATTTCGTGATCCTCAAAAAA  
AGAAATAAGC-----AAAATTCCTTCGTTGAGTGGCAAATGGGAAATTCATGGAAAAC  
ACAATCCCTACCACGTAATAGTGCAGCTACACGCTTCATCGACGTTGTTTTTCGACCG  
GAAGACCGAGAGCTAACTATCGAGACTTTGGGTATCCGGACACATACTTCGTGAAAT  
GGTTCATGCATGTTTGTGGCCGGGGCAACAAGATCCAGTTGGATGGTAAAAAATGCA  
TTCATCTCGGTTATTTTCGCAAGAAGAAAAGAAGAAAACAAG-----GGGTCTGCTGAAT  
TTCAAGTATTCAATTTACCAATAAAATACGGAGGCTTACTTCACATTTGGAATTGCAC  
AGAAAAGACTATTTATCTCAGAGAGGTCTACGGAAAATTTTGGGAAAACGTCAACGGC  
TATTAGCTTATTTGTCAAAGAAAATAAAGTACGTTATAAAGAATTAATTAGTCAGTTGG  
ATATTCGGGAGCCAAAATTCGT-----ATGGTAAACTTCGTTGAAACGATGTGGTGA  
AAGCAACGAGCTATCTATCGAATTGTTGCAATTGATGTTTCGATCCCGAAGAGAAGGAA  
GAGATCTTCGGAAAGTGGGTTTTTACGATCCGATAAAGAATCAAACCTATTTAAATGTT  
CCCGTTATTCTATATTTCCCTCGAAAAGGTGCTCAACCTACAGGAACTGTTTCATGATATT  
TCAAAGAAGGCAGAAGTATTTAAGGAACTTCGCATTAATCAAACGAAATCAAAT---ATG  
GATAAACCCAAGCGACTCTTTCTGAAATCCAAGCGATCTTTTCGTAGGCGTTTGCCCC  
AATTGGATCGGGGGATCGAATTGATTATAGAAACATGAGTTTAATTAGTCGATTTATTAG  
TGAACAGGGAAAATATTATCTAGACGAGTGAATAGATTGACCTTGAAACAACAACGA  
TTAATTACTATTGCTATAAAACAAGCTCGTATTTTATCTTCGTTACCTTTTCTTAATAATGA  
GAAA-----CAATTTGAGAGAGCCGAGTCGACCCCTAGAACTCCTGGTCCCTAGAACCAG  
AAATAAAGTGACACGTTCACTAAAAAAAATCCTTTTGTAGCTAATCATTTATTAAGAA  
AAATTGAGAAGCTTAACACGAAGGCAGAAAAGAGATAATAGTAACTTGGTCCCGGG  
CATCTACCATTATACCCACAATGATCGGCCATACAATTGCTATTCATAATGGCAAGGAGC  
ATTTGCCTATTTATATAACAGATCGTATGGTAGGTACAAATTGGGAGAATTTGCGCCTA

CTATGAATTTCCGGGGACATGCGAAAAATGATAATAGATCTCGTCGTATGATTTTGAAAT  
CTTTTCTACTAGGTAATCTATTATCCTTATGCATGAAGATAATCAATTCGGTCGTTGTGGT  
CGGACTCTATTATGGATTTCTGACCACATTCCTCATAGGGCCCTCTTATCTCTTCCCTTCTC  
CGAGCTCGGGTTATGGAAGAAGGA-----ACCGAGAAGGAGGTATCAGCAACAACCTG  
GTTTTATTACGGGACAGCTCATGATGTTTCATATCGATCTATTATGCGCCTCTGCATCTAGC  
ATTGGGTAGACCTCATAACAATACTGTCCTAGTTCTACCGTATCTTTTGTTCATTTCTTC  
TGGCACAATCACAATACTTTTTAAATTATGGATCTACTATCAGAAATTCAATACGTAAT  
CTCAACATTCATGTGTATTTTTGAATAATCTCATTTTTCCATTATTCAACCATTTCATTTT  
ACCAAGTTCAACGTTAGCCAGATTAATCAACATTTATATGTTTCAATGCAACAACAAGA  
TGTTATTTGTAACAAGTAGTTTTGTTGGTTGGTTAATCGGTCACATTTTATTTCATGAAAT  
GGGTTGAATTGGTACTAATTTGGATACGGCAAAATCATTTTTTTTAGATCTTCTAATGTAC  
TTATTA AAAACCTTGTGCCAGAATTGAGAAATTCTATGGCTCGAATCTTTAGTATTCTCT  
TATTTATCACCTGTATCTACTATTTAGGCAGAATGCCGTCAACTCTTGTCACTAAGAAAA  
TGAAAGAACTGAAGAAGACAAACCCCTTGTTACTCTTCTTTTTGACTATAAACGATG  
GAATCGTCCATTGCGATATATAAAAAATAATCAATTGGAAAATGCTGTAAGAAATGAAA  
TGTCACAATATTTTTTTTATACATGCCAAAGTGATGGAAAACAAAGAATATCTTTTACAT  
ATCCACCCAGTTTGTCAACTTTTTGGGAAATGATACAAAGAAAAATGTCCTTGTACACG  
ACAGAAAACTCTCCCCTGAAGAAGTGTATAATCATTGGGTTTATACCAATGAACAAAA  
AAGGAACAACGTAAGTAAAGAGTTTATAAATCGAATCGAAGCTCTAGACAAGGGATCT  
CTTACTTTGGATGTACTCGAAAAAAGGACTAGATTGTGTAATGATAAGACTGAACAACA  
ATGCTTACCTAAAGTCTATGATCCTTTCTTGAACGGACCCTATCGTGGAACAATCAAAA  
AAGTGTCTTCATCTAAG-----CTTTGGATAAATAAGATTCATGGTATCCTTTATCGAGAAT  
TTGAGCAGAAAGATCCTAATAATCAA-----GTAATAAACGAAATCTGTAAAAAGGTCCCT  
CGATGGTCATACAAATTAATCGATTTGGAACAACAGGAGGGAGAACAGATTCGTTTAC  
GAAAAGCCAAACGCGTAGTAATTTTTACTGATGCTTTGATACGTTATTCACAACAACCG  
GATTTTCGTCGGGATATAATCAAAGGATCCATGCGCGCTCAAAGACGTAAAATTGTTAT  
TTGGGAAGTGTTCAGCAAATGTGCATTCCCCACTTTTTTTGGACAAAATAGACAAA  
ACTTTTTTTTTTTCTTTTGATATC-----TCCGAAATGACGAAGTTCATTTTTAGGAATAAA  
GAAGAAAATGAGCGAATAGCAGTAGCAGAGACCTGGGATAGTATTCTATTTGCTCAAC  
CAATAAGGGGTTTCGATGTTAGTAACCCAATCAATTCCTTAGAAAATATATTGTATTGCCTT  
TATTGATAATAGCTAAAAATAACCGCCCGTATCTTATTATTTCAATTCCCCGAGTGGTTTCA  
GGATTGGGAAGAGTGAATAGAGAAATCCACGTTAAATGCACTTATAACGGTGTTCAT  
TATCAGAAACCGAATTTCCGAGAACTGGTTAAAAGACGGTATTCAGATAAAGATTCTA  
TTTCTTTTGTGTCTGAAACCTTGGCACAGATTTAAGAAAGGAAAAAAATATAATTTTTG  
TTTTTTAACAGTCTGGGGAATGGAAACAGAACTTCTTTTTGGTTCTCCCCGAAACCAA  
CCGTCTTTTTTTGAACCCATTTTAAAAGAAGTTCGAAAAAAAATTAGAAAGGTGAAA--  
-AATCAATTTTTTTCGAATTCTAAGAGTTGTAAGAAAGAAAGAACAAAATGGTTTCTAACGG  
TCTTAAAAGAAAAAAAAGATGGGTTATCGAAATAATTCTA-----TTTATAAAAAGAATA  
ATGAAAGAAGTTCGAAAAATAAATAACTATAATTAGTAATCAGATTATTCATGAATCG  
CCCATTTCGAATTAGATCCACGGATTGGACAAATTATTCCTGACAGAAAAAAAATGA  
AGAATCTGGCTGATAGGACAAGCACAATCAGAAATCAAATAGAAAGAATCACAAAAG  
ACAAGAAAAAAGTCTAAAAAATGAGTTGTGGTGATAAAGATCAGAATCACTGA  
AAAGTTTTTGGGAGATAGTAAAAAAGAAGTATCCGTTTAAATACGTAAATGGCATT  
TTTTTGAAATTTGTCATTGAAAAGATATAC-----CTTCTATGTATCATTAAATATCCCAG



GATCAATGCACAACCTTTTCATTCACTTTATTTTCG---GACCTATCCTCCTTATCACAAGCAT  
ATGTATTTTACAAATTATCACAAACCAAAGTTATTAACAAGTATCACTTGAGATCTGTAC  
TTGAATATAGATCTCTTTTTCTTAAAGATAGAATAAAGGATTATTTTACACAAGGAATATT  
TCATTTTGAATCAAGGCATAAGAACTTCGAAATTCTGGAATGAATGACTGGAAAAAC  
TGGTTAAAGGGTCATTATCAATACGATTTATCTCAGACTAGATGGGCTAGATTAGTACCA  
CAAAAATGGCAAAATAGAGTCAATCAACGTCGTACAACCTCAAAATAAAAAAAAAAATTAG  
GTTCATATGAAAAAGACCAA-----TTAATTCATTACCAAAAACAAGAAAAATTA  
ACACTACGGATATGATCTTTTATCACATAAATATATAAATGATTATATTATTGAGCCGGATA  
GAAAATATTTTGATTGGGGAATTCTCCATTTTGTCTTAGACCTTTTGATTGGATGGGAA  
TGAATGAAGAAATACTAAATCGTTGGTTCGTCCAGAAATTTTGCTACTTTTATGATACAT  
ATAAGATGAAACCATGGGGCATAACAATAAATTACTTCTTGTAATTTCAAGAGCAAG  
GCAGAAGTGGAACTGGATTTATTGCTGAAAAATATTTGCTTTTTCAATTGAGATGGAA  
TGGTTCTTTGAATCAAAGAATATTGAATAATATCAAGATATATTGTTTCTGCTTAGATTG  
ATAAATCCAAAGGAAATTACTATATCCTCTATTCAAAAAGGAGAAATGAGTCTGGGTAT  
AATGCTGATTAAGAGGGATCTAACTTTTACAGAATTGATAAAAAGGGGGATATTTATTAT  
CGAACCGATTTCGTCTGTCTATAAAATGGGATGGACAATTTATTATGTATCAAACCATAGG  
TATTTTATTGGTCCATAAAAGTAAGCACAAATCATTATGATTTGCTTGTTCCTGAAAATATT  
TCATCGCCTAGACGTCGTAGAGAGTTGAGAATTCTAACTTGTTTCAGATTTCTTTGGCC  
CAATTATCGATTAGAAGATTTAGCTTGTATGAATCGCTATTGGTTTGATACCAATAATGGC  
AGTCGTTTCAGCATGTCAAGGATACATATGTATCCAATGAAACGACATCAATTCAAATC  
CTGGATCTTCGAATTGAGAGAGATATTGAGAGAGATCAAGAATTCTCACTATTTCTTAG  
ATTCATGGACGAAATTTGATTCAGTGGGATCTTTCACTCACATTTTTTTCCACCAAGAG  
CGTTTTATAAACTCTTTGACCCCCGAATTTGGAGTATCCTACTTTCA---CGCGATTCA---  
---CAGGGTTCAACAAGCAATCGATATTTACG-----ATCAAAGGTGTAGTACTGCTTGT  
AGTAGCG---GTCCTTCTATAT-----CGTATTAACAATCGAAATATGGTCGAAAGAAAA  
AATCTCTATTTGATGGGGCTTCTT-----CCTATACCTATGAATTCCATTGGACCCAG  
AAATGATACATTGGAAGAATCTTTT--GGGTCTTCCAATATCAATAGGTTGATTGTTTCG--  
-CTCCTGTATCTTCCAAAAGGGAAAAAGATCTCTGAGAGTTGTTTCATGGATCCGAAAG  
AGAGTACTTGGGTTCTCCCAATAACT-----AAAAAGTGTATCATGCCTGAATCTAAC  
TGGGGTTCGCGGTGGTGGAGGAACCGGATCGGAAAAAAGAGG-----GATTCTAGTTGT  
AAGATATCT-----AATGAAACCGTAGCTAGAATTGAGGTCTCATTCAAAGAGAAAGAT  
ATAAAA---TATCTGGAGTTTCTTTTTGTATCCTATACGGAT-----GATCCGATCCGCAAGGA  
CCATGATTGGGAATTGTTTGATCGTCTTTCTCCGAGGAAGAAGCGAAACATAATCAACT  
TG-----AATTCGGGACAGTTATTTCGAAATCTTAGTGAAACACTGGATTTGTTATCTCATGT  
CTGCTTTTTCGTGAAAAAGACCAATTGAAGTGGAGGGT--TTCTTCAAACAACAAGGA-  
--GCTGAGTCAACTATTCAATCAAATGATATTGAGCATGTTTCCCAT-----CTCTTCTCGAG  
AAACAAGTGGGGTATTTCTTTGCAAATTTGTGCTCAATTTATATGTGGCAATTCCGCC  
AAGATCTTTCGTT-----AGTTGGGGGAAG---AATCCGCACGAATCGGATTTTTTGAGG  
AAC---GTATCGAGAGAGAATTGGATTTGGTTAGACAATGTGTGGTTGGTAAACAAGGAT  
CGG-----TTTTTTAGC-----AAGGTACGGAATGTATCGTCAAATATTCAATATGATTCC---  
-----ACAAGA-----TCTATTTTCGTTCAAGTAACGGATTCTAGCCAATTGAAAGGATCTTCT  
---GATCAATCCAGAGATCGTTTTCGATTCCATTAGTAATAGT-----AATGAGGATTTGGAA---  
-----TATCACACATTGATCAATCAAAGAGAGATTCAACAATAAAA  
AGAAAGATCGATTCTT--TGGGAT-----CCTTCTTTCTTCAAACGGAACGAACAGAGAT

AGAATCAGAG-----CGATTCCCGAAA-----TGCCTTTCTGGATATTCC-----TCAATGTCCC  
GGCTATTCACG---GAACGTGAGAAGCAGATGAATAATCATCTGCTTCCGGAAGAAATCG  
AAGAATTTCTT-----GGGAATCCTACAAGATCAATTCGTTCTTTTTTCTCTGACAGATGG--  
---TCAGAACTTCAT--CTGGGTTCTGAATCCTACTGAGAGGTCCACTAGAGATCAG-----  
---AAATTGTTGAAGAAACAACAAGATGTTTCT--TTTGTCCCTTCCAGGCGATCGGAA---  
-----AATAAAGAAATGGTTGATATATTCAAGATAATTACGTATTTACAAAAT-----ACCGT  
CTCAATTCATCCTATTTTCATCAGATCCGGGATGTGATATGGTTCCG---AAGGATGAACCG  
GAT--ATGGACAGTTCCAATAAGATTTCAATTCTTGAACAAAAATCAATTTTTTGAT-----TT  
ATTTTCATCTATTCCATGACCGGAACAGGGGGGGATATACGTTA-----CACCACGATTTTG  
AATCAGAG-----GAGAGATTTCAAGAAATGGTAGATCTATTACTCTATCAATAACCGAG  
CCG---GATCTGGTGTATCATAAGGGATTTGCCTTTTTCTATTGATTCCTACGGATTGGATCA  
AAAAAAA-----TTCTTGAATGAGGTATTCAACTCCAGGGATGAATCGAAAAAGAAATCT  
TTA-----TTGGTTCTACCTCCTATTTTTTAT-----GAAGAGAATGAATCTTTTTATCGAAG  
GATCAGAAAAAATCGGTCCGG---ATCTCCTGCGGGAATGATTTGGAAGATCCAAAAC  
CAAAAAGAGTGGTATTTGCTAGCAACAACATAATGGAGGCAGTCAATCAAGATAGATT  
GATCCGAAATCTGATTCAAATCCAATATAGCACCTATCGA-----TACATAAGAAATGTATC  
GAATCGATTTCTT-----TTAATGAATAGATCCGATCGCAACTTCGAATATGGAATTCAA--  
-----AGGGATCAAATAGGAACTGATACTCTGAATCATAGAACTATAATGAAATATACGAT  
CAACCAACATTTATCGAATTTGAAAAAG---AGTCAGAAGAAATGGTTCGATCCT-----  
-CTTATTTCTCGAACCGAGAGATCCATGAATCGGGATCCTGATGCATATAGATACAAATG  
GTCCAATGGGAGCAAGAATTTCCAGGAACATTTGGAACATTTTCGTTTCTGAGCAGAAG  
AGC-----CGTTTTCAAGTAGTGTTCGATCGATTACGTATTAATCAATATTCGATTGATTG  
GTCCGAGGTTATCGACAAACAAGATTTGTCTAAGTCACTTCGTTTCTTTTTGTCCAAGT  
CA-----CTTCTTTTTGTCC-----AAGTCACTTCTTTTTGT  
CTAAG---TCACTTCCTTTTTTCTTTGTGAGTTTCGGGAATATCCCATTCATAGGTCCGA  
G---ATCCACATCTAT--GAATTGAAAGGTCCGAATGATCAACTCTGCAATCAGTTGTTAG  
AATCAATAGGTGTTCAAATCGTTCATTTGAATAAATTGAAACCCTTC-----TTATTGGCT--  
-----GATCATGATACTTCC---CAAAAATCGAAATTCTTGATCAATGGAGGAACAATATCAC  
CATTTTTGTTCAATAAGATATCA---AAGTGG---ATGATTGACTCATTCCATACT-----AGAA  
ATAATCGCAGGAAATCCTTTGATAAACAATGATTCCATTTCTCAATGATATCCCACGATC  
GAGACAATTGGCTGAATCCCGTGAAACCCTTTCATAGAAGTTCATTGATATCTTCTTTTT  
ATAAAGCAAATCGACTTCGATTCTTGAATAATCCACATCACTTCTGGTTCTAT-----TGTA  
ACAAAAGATTCCCTTTTTATGTG-----GAAAAGGCCCGTATCAATAATTATGAT-----C  
TTACGTAT--GGACAATTCCTCAATATCTTGTTCAATCGCAACAAA---ATATTTCTTTGTG  
CGTCGGTAAA-----AAAAACATGCTTTTTTTGGAG---AGAGATACTATTTACCAATCGA  
GTCACAGGTATCTAACATATTCATACCTAACGATTTCCACAAAGTGGTGATGAAACG---  
TATAACTTGTACAAATCT-----TTCCATTTCCAATTCGATCCGATCCATTCGTTTCGT----  
-AGAGCTATTTACTCGATCGCAGACATTTCTGGAACACCTCTAACAGAGGGGCAAATAG  
TCAATTTTGAAGAAGTATTGTCAACCTCTTTCAGATATGAATCTATCTGATTCAGAAG  
GGAAGAAGTGGATCAGTATCTCAAT-----TTCAATTCAAACATGGGTTTGATTCACACT  
CTATGTTCTGAGAAATCTTTACCA-----TCCGAAAAGAGGAAAAA-----C  
GGAGTCTTTGTCTAAAG-----AAATGCGTTGAGAAACGGCAGATGTATAGAACCTTTCA  
ACGAGATAGTGCTTTTTCAAATCTCTCAAATGGAATCTGTTCCAAACATATATGCCATG  
GTTCTTACTTCGACAGGGTGCAAATATCTAAATTTACCCTTTTAGATACTTTTTTCAGA

CCTATTG-----CCGATACTAAGTAGCAGT--CAAAAATTTGTATCCATTTTTTCATGATATTAT  
GCATGGATCAGATATCTCATGGCCAATTCCTCAGAAAAAATGG-----TGTCTTC  
CACAATGGAATCTG---ATAAGTGAGATTTTCGAGTAAGTGTTTACATAAT-----CTTCTTCT  
GTCCGAAGAAATGATTCATCGAAATAATGAGTCACCCGTTCCATTGATATGGACACATC  
TGAGATCACCAAATGCTCGGGAGTTC---CTGTATTCAATCCTTTTCTTCTTCTTGTTC  
TGGATAT--CTCGTTCGTACACATCTTCTCTTTGTTTCCCGA-----GCCTCTAGTGAGTTAC  
ACACAGAGTTCGAAAAGATCAAATCTTTGATGATTCCATCATAATGATTGAGTTGCGA  
AAACTTCTGGATAGGTATCTACATCTGAACTGAATTCTTTCTGGTTAAAGAATCTCTTT  
CTAGTTGCTCTGCAACAATTAGGAGATTCTCTAGAAGAAATACGGGGTTCTGCTTCTGG  
CGGCAACATGCTATTGGGTGGTGGTCCC-----GCTTATGGG---GTCAAATCAATAC  
GTTCTAAGAAGAAATATTTGAATATCAATCTCATCGATATCATCGATCTCATA---AGTATC  
ATACCAAATCCCATCAATCGAATCACTTTTTTCGAGAAATACGAGACATCTAAGTCGTAC  
AAGTAAAGAGATCTATTCATTGATAAGAAAAAGAAAAACGTGAACGGTGATTGGATT  
GATGATAAAATAGAATCCTGGGTCGCGAACAGTGATTTCGATTGATGATGAAGAAAGAG  
AATTCTTGGTTCAGTTCTCC-----ACCTTAACGACA-----GAAAAAAGGATGGATCAAATT  
CTATTGAGTCTGACT--CATAGTGATAATTTATCA-----AAGAATGACTCTGGTTAT  
CAAATGATTGAACAACCGGGATCAATTTACTTACGATACTTAGTTGATATTCAT-----AAA  
AAGTATCTAATGAATTATGAGTTCAATAGATCCTGTTTAGCAGAAAGACGGATATTCCTT  
GCTCATTATCAGACAATCACTTAT-----TCACAAACCTCGTGTGGGGCTAATAGTTTTTAT  
TTCCCATCTCATGGA-----AAACCCTTTTCGCTCCGCTTAGCCCTATCCCCCTCT--AGG  
GGTATTTTAGTGATAGGTTCTATAGGAACGGACGATCATATTTGGTCAAATACCTAGCG  
ACAAACTCCTATGTTCTTTTATTACGGTATTTCCGAACAAGTTCCTGGATGACAAGCC  
TAAAGGTTATCTTATTGATGAT-----ATCGATATTGAT-----GATATTGAT-----  
-----GATAGTGACGATATCGATGATGACCTTG  
ATACGGAGCTGCTAACTATGATGAATGCGCTA-----ACTATGGATATGACG-----CCG  
AAAATAGACCGATTTGATATCACCTTCAATTCGAATTAGCAAAAGCAATGTCTCCTTG  
CATAATATGGATTCCAAACATTCATGATCTGTATGTGAATGAGTCGAATTACTTATCCCTC  
GGTCTATTAGTGAACATCTCTCC-----AGAGATTGTGAAAGATGTTCC---ACTAGAAA  
TATTCTTGTTATTGCTTCGACTCATATTTCCCAAAAAGTGGATCCCGCTCTAATAGCTCC  
GAATAAATCAAATACATGCATTAAGATACGAAGGCTTCTTATTCCACAACAACGAAAGC  
ACTTTTTCACTTTTCATATACTAGGGGATTTCACTTGGAAAAGAAAATTTCCATACT--  
---AATGGATTCGGGTCCATAACCATGGGTTCGAATGCACGAGATCTTGTAGCACTTACCA  
ATGAGGCCCTATCAATTAGTATTACACAGAAGAAATCCATTATAGACACTAATACAATTA  
GATCCGCTCTTCATAGACAAACTTGGGATTTGCGA-----TCCCAGGTAAGATCGGTT  
AGGATCATGGGATCCTTTTCTATCAGATAGGAAGGGCTGTTGCACAAAATGTACTTCTA  
AGTAATTGCCCCATAGATCCTATATCTATATGAAGAAGAAA-----TCATGTAAGGAA  
GGGGATTCTTATTTGTACAAATGGTACTTCGAACCTTGGAACGAGCATGAAGAAATTAAC  
GATACTTCTTTATCTTTTGTAGTTGTTCTGCCGGATCGGTCGCTCAAGATCTTTGGTCTCT  
ACCC-----GGACCCGATGAAAAA--AATGGGATCACTTCTTATGGATTCGTTGAGAATGA  
TTCT--GATCTAGTTCATGGCCTATTAGAAGTAGAAGGCGTTCTGGTGGGA-----TCCTCG  
CGGACAGAAAAAGATTGCAGTCAGTTTGATAATGAT-----CGAGTGACATTGCTTCTCG  
GTCCGAACCAAGGAAT--CCCTTAGATATGATGCAAAATGGATCTTGTCTATCGTTGAT  
CAGAGATTTCTATATGAAAAA-----TACGAATCGGAGTTTGAAGAA--GGGGAA-----GG  
AGCCCTCGACCCGCAA-----CAGATAGAGGAGGAT-----TTATTCAATCAC-----A

TAGTTTGGGCTCCT-----AGAATATGGCGCCCT-----TGTGGCAATCTATTTGATTGTATC  
GAAAGGCCCAATGAATTGGGATTTCCC---TATTGGGCCAGGTCATTTCCG-----GGCA  
AGCGGATCATTATCATAAAGAGGATGAGCTTCAAGAGAATGATTCGGAGTTCCTTGCAG  
AGTGGAACCATGCAGTACCAGACACGAGATAGATCTTCCAAAGAACAAGGCTTTTTTC  
GAATAAGCCAATTCATTTGGGACCCTGGAGGTCCATTCTTTTTTCTATTCAA---GATCA  
GCCCTTTGTCTCTGTGTTTTACGTGCGAGAATCTTTGCAGATGAAGAGATGTCAAAGG  
GGCTTCTTACTTCCCAAACAATCCTCCTACATCTATATATAAACGCTGGTTCATC-----A  
AGAATACGCAAGAAAAGCACTTCGAATTGTTGATTCATCGCCAGAGATGGCTTAGAAC  
C-----AATAGTTCATTATCT-----AATGGATCTTTCCGTTCTAAT-----ACTCCATCCGAGA  
GTTATCAGTATTTATCAAATCTGTTCCCTATCTAAC---GGAACGCTATTGGATCAAATGACA  
AAGACATTGTTGAGAAAGAGATGGCTTTTCCCGGATGAAATGAAACATTTGATT-----CA  
TGTAACAGGAGAAAGATTTCCCATTCCTATGCCTAGATCGCGA---ATAAATGGAAATTTT  
ATTGATAAGACCTCTTCAATTGTAGCCAATATCTTATTACGAATAATTCCGACAACCTTCA  
GGAGAAAAGAGGCATTTACCTATTACAGAGATGGG-----ATGTCAGCTCAATCCGAAG  
GAAATTATGCGGAAGCTTTACAGAATTATTATGAAGCTATGCGACTAGAAATTGATCCCT  
ATGATCGAAGTTATATACTCTATAACATAGGCCTTATCCACACAAGCAACGGGAGAACATA  
CAAAGCTTTAGAATATTATTTCCGGGCACTAGAACGAAACCCATTCTTACCACAAGCT  
TTAATAATATGGCCGTGATCTGTCAATTAC---CGGGGAGAACAGGCCATTTCGACAGGGA  
GATTCTGAAATTGCGGAGGCTTGGTTCGATCAAGCTGCTGAGTATTGGAACAAGCTAT  
AGCACTTACTCCAGGTAATTATATTGAAGCACATAATTGGTTGAAGATAACGAGGCGAT  
TCGAA-----ATGAACTGGCGATCAGAACGTATATGGATAGAACTTATAACGGGGTCTCGA  
AAAACAAGTAATTTTTGCTGGGCCTTTATCCTTTTTTTAGGTTTCATTAGGTTTCTTATTGG  
TTGGAACCTCCAGTTATCTTGGTAGGAATCTGATATCCTTATTTCCGTCTCAGCAAATCA  
TTTTTTTTCCACAAGGGATCGTGATGTCTTTCTATGGGATCGCAGGTCTGTTCATTAGCT  
CCTATTTGTGGTGCACAATTTTCGTGGAATGTAGGTAGTGGTTATGATCGATTTCGATAGAA  
AAGAAGGAATAGTGTGATTTTTTCGTTGGGGATTTCTTGGAATAAACCGTTCGCATCTTC  
CTTCGATTCTTTATGAAAGATATTCAGTTCGATCAGAATAGAAGTTAAAGAGGGTCTTTAT  
CCTCGTCTGTCTTTATATGGAATCAGAGGCCAGGGAGCCATTCCCTTGACTCGTAC  
TGATGAGAAT--TTGACTCCACGAGAAATTGAACAAAAGCTGCTGAATTGGCCTATTT  
CTTGCGGTACCAATTGAAGTATTT

>Nandina

AAGGAAAATGGTGGTTCAATTCGATGTTGTTTCTAAGTAAATCGACGGATGGTATTGG  
TCCATTTGGAAATACTAATGGAAGTGAAGACCCTGTTATAGAT-----AAAACATTCAT-  
--TGCAATAATGTTGATCGTTTATTCGGTGTGAGGGCATTTCGGAATTTTCATCTCTGATGA  
CACTTTTTTAGTTAGGGATAGTAATGGTGACAATTATTCCATCTATTTTGATATTGAAAAT  
CATATTTTTGAGATTGACAACGAT-----CGTTATGAACTCGAAAGTTCTTTTTCTA  
GTTATCTAAATTCTAGTTATCTGAATACTGGGTCTAAGAGTAACAATCACTACTATGATC  
GTTACATGTATGATACTAAATATAGTTGGAATAATCACATTAATAGTTGCATTGACAATTA  
TCTTGATTCTGAGATCCGT-----ATTAATAGTTACTTTTCAAGTGGTGGCGACAATTACAG  
TAAGAGTTACATTTATAGTTACATTTGTAGTGCCAATGCGAGTTCATAAAA-----AAT  
GAAAGTGATTCCCATATGCGAGGAAAATAT--GATCTCGATATAAATAAAAAATACAGGC  
ATTTGTGGGTTCAATGCGAAAATTGTTATGGATTAATATAAGAAATTTTTTAGATCAA  
AATTAATATTTGTGAACAATGTGGATATCATTGAAAATGAGTAGTTCAGATAGAATCG  
AATTTTCGATTGATCCGGCACTTGGGATCCTATGGATGACGACATGGTTTCTGTGGAC

CCCATTGAATTTTCATTCGGAGGAGGAACCTTATAAAGATCGTATTGATTCTTATCAAAAA  
AAGACAGGGTTAACTGAGGCTGTTCAAACAGGTATAGGTCAATTAACGGTATTCCCAT  
AGCAATTGGGGTTATGGATTTTCAGTTCATGGGGGGAAGTATGGGATCCGTAGTAGGCG  
AGAAAATAACTCGTTTGATCGAATATGCTACTAATAGATCTCTACCTGTTATTATAGTGTG  
TGCTTCCGGAGGAGCGCGCATGCAAGAAGGAAGTTTGAGTTTGATGCAAATGGCAA  
AATATCTTCCGCTTCATATAATTATCAATCAAATAAAAAGTTATTATATGTATCAATCCTTA  
CATCTCCTACAACCGGTGGGGTGACCGCAAAGTTTTGGTATGTTAGGAGATATCATTATTG  
CCGAACCTAATGCCTACATTGCATTTGCGGGTAAAAGAGTAATTGAACAAACATTGAAT  
AAGATAGTACCTGATGGTTCACAAGCGGCTGAGTATTTATCCATAAAGGCCTATTTCGA  
CCCAATCGTACCACGTAATCTTTTAAAGGGTGTTTTGAGTGAGTTATTTCAACTTCACG  
GTTTTTTTTCCCGTGAATTCAAATTCATCAAGATGGCAACCCCTTCGAGCCGACGAAATT  
AGTAACATTATCCGCGAGCGTATTGAGCAATATACTACAGAAGTAAAGATTGTGAATAC  
CGGCACCGTACTTCAAGTGGGCGATGGCATTGCTCGTATTCACGGTCTTGATGAAGTAA  
TGGCAGGCGAATTAGTAGAATTTGAAGAGGGTACAATAGGCATTGCTTTGAATTTGGAA  
TCAAATAATGTTGGTGTGTTGATTAATGGGTGATGGTTTGATGATACAAGAGGGAAGTTC  
TGTAAGCAACAGGAAGAATTGCTCAGATACCGGTGAGCGAGGCTTATTTGGGTGCT  
GTTATAAATGCTCTGGCTAAACCTATTGACGGTAGAGGTGAGATTCCAGCTTCTGAATC  
TCGATTAATTGAATCTCCCGCTCCAGGTATTATTTTCGAGACGTTCCGTATATGAACCTAT  
GCAAACAGGGCTTATTGCTATTGATTCGATGATCCCTATAGGACGAGGTCAGCGAGAAT  
TAATTATTGGGGACAGACAGACCGGTAACAGCAGTAGCCACGGATACTATTCTCAAT  
CAAAAAGGGCAAAATGTAATATGTGTTTATGTAGCTATTGGGCAAAAAGCATCTTCTGT  
GGCTCAGGTAGTACTACTTTCCAGGAACAGGGGGCGATGGAATATACTATTGTGGTAG  
CCGAAACAGCCGACGCGCTGCTACATTACAATACCTCGCTCCTTATACAGGAGCGGCT  
CTGGCTGAATATTTTATGTACCGTGAACGACATACTTCAATCATTTATGATGATCCTTCTA  
AACAGGCACAAGCTTATCGCCAAATGTCTCTTCTATTACGAAGACCACCAGGTCGCGA  
AGCTTATCCAGGAGATGTTTTTTATTTGCATTCACGCCTTTTGAAAGAGCCGCTAAATC  
AAGTTCTCGTTTAGGTGAAGGAAGTATGACTGCTTTACCAATAGTTGAGACTCAAGCG  
GGAGACGTTTCAGCTTATATTTCCAATAATGTAATTTCCATTACAGATGGACAAATATTC  
TTATCCGCTGATCTATTCAATTCTGGAATCCGACCTGCTATTAATGTGGGTATTTCCGTTT  
CCAGAGTAGGGTCTGCGGCTCAAATTAAGCCATGAAACAAGTAGCTGGCAAATTA  
ATTGGAACGGCTCAATTCGCAGAGTTAGAAGCCTTTGCACAATTCGCTTCTGATCTCG  
ATAAAGCTACTCAGAATCAATTGGCAAGAGGTCAACGATTACGTGAGTTGCTCAAACA  
ATCCCAAGCAGCCCCTCTCACGGTGGGAGAACAAATATTGACGATTTATACCGGAACG  
AATGGATATCTTGATTGTTAGAAATTGGACAGGTAAAGAAATTTCTCGTTGAATTACGT  
ACCTATTTAAAAACAAATAAACCTCAGTTCCAAGAAATCATATCTTCTACCAAGACATT  
GACCGAAGAGGCAGAAGTACTTTTGAAGAAGCTATTCAGGAACAGACGGAGCGGTT  
TATACTTCAGGAACAAACAATGAGAATCAATCCTACTACTTCTGGTCCTGGGGTTTCCG  
CACTTGAAGAAAAAACCAGGGGCGTATCGTTCAAATCATTGGTCCGGTACTGGATGT  
AGCCTTTCCACCGGGCAAGATGCCTAATATTTACAATGCTTTGGTAGTTAAAGGTCAAG  
ATACTGTTGGCCAACAAATTAATGTGACTTGTGAAGTACAGCAATTATTAGGAAATAAT  
CGAGTTAGAGCTGTAGCTATGAGTGCTACAGATGGTCTGATGAGAGGAATGGAAGTGA  
TTGACACAGGAGCTCCTCTAAGTGTTCCGGTTGGTGGAGCGACTCTCGGACGAATTTT  
CAACGTTCTTGGAGAGCCTGTTGATAATTTAGGTCTGTAGATACCCGCACAACATCTC  
CTATTCATAGATCTGCGCCTGCCTTTATACAGTTAGATACCAAATTATCTATTTTTGAAAC

AGGGATTAAAGTAGTGGATCTTTTAGCTCCCTATCGCCGTGGAGGAAAAATCGGACTAT  
TCGGGGGGGCTGGAGTAGGTAAAACAGTACTCATCATGGAATTGATCAACAACATTGC  
CAAAGCTCATGGAGGTGTATCCGTATTTGGCGGAGTAGGCGAACGTACTCGTGAAGGA  
AACGATCTTTACATGGAAATGAAAGAATCCGGAGTGATTAATGAACAAAATATTGCAGA  
ATCAAAGTAGCCCTAGTCTATGGTCAGATGAATGAACCGCCGGGAGCTCGTATGAGA  
GTTGGATTGACTGCCCTAACCATGGCCGAATATTTCCGGGATGTTAATGAACAAGACGT  
ACTTCTATTTATTGACAATATTTTTTCGTTTCGTCCAAGCAGGATCCGAAGTATCTGCTTTA  
TTAGGCAGAATGCCCTCTGCTGTAGGTTATCAACCGACTCTTAGTACAGAAATGGGTTC  
TTTGCAAGAAAGAATTACTTCTACCAAAGAGGGATCCATAACTTCCATTCAAGCAGTTT  
ATGTACCTGCGGACGATTTGACTGACCCCGCCCCTGCCACAACATTTGCACATTTAGAT  
GCCACTACCGTACTATCAAGAGGACTGGCTGCCAAAGGTATCTATCCAGCAGTAGATCC  
TTTAGATTCAACGTCAACTATGCTCCAACCTCGGATCGTTGGTGAGGAACATTATGAAA  
CTGCGCAAAGAGTTAAGCAAACCTTTACAACGTTACAAAGAACTTCAGGACATTATAGC  
TATTTCTGGATTGGACGAATTATCCGAAGATGATCGTTTAAACCGTAGCAAGAGCACGAA  
AAATTGAGCGTTTCTTATCACAACCCTTCTTCGTAGCAGAAGTTTTTACAGGTTCCCCG  
GAAAAATATGTTGGTCTAACAGAAACAATTAGGGGGTTTTCAACTGATCCTTTCCGGAG  
AATTAGATAGTCTTCCCGAGCAGGCCTTTTATTTGGTAGGTAACATCGATGAAGCTACC  
CGAAGGCTATGAACTTAGACGTGGAGAGCAAATTGAAGAAAATGACCTTAAACCTAT  
GTGTACTGACTCCTAATCGAATTGTTTGGAAATCAGAAGTGAACGAAATCATTTTATCTA  
CTAATAGTGGCCAAATTGGTGTATTACCAAATCACGCCCTATTGCCGCGGCTGTAGATA  
TAGGCATTTTGAGAATACGTCTTAACGACCAATGGTTAACAATAGCTCTGATGGGGGGT  
TTCGCTAGAATAGGCAATAATGAAATAACCGTTTTAGTAAATGATGCGGAGAGGGGTAG  
TGACATTGATCCGCAAGAAGCTCGGCAAACCTTTGAAATCGCCGAAGCTAACTTGAGT  
AGAGCTGAAGGCAAGAGACAAACAATTGAGGCAAATTTAGCTCTCAGACGAGCTAGG  
ACGCGGGTAGAGGCGATTAATGCCATCTCGATGAAAAATGTAACCGATTCTTTCGTTTC  
CTTGGGTCACTGGCCATCCGCCGGGAGTTTTCGGATTTAATACCGATATTTTAGCACAA  
ATCCAATAAATCTAAGTGTAGTACTTGGTGTATTGATCTTTTTTTGGAAAGGGAGTGTTAA  
GTGATTTATTAGATAATCGAAAACAGAGAATCTTGAATACTATTGAAATTCAGAAGAA  
CTGCGTGAAGGTGCCATTGAAAGGCTGGAAAAAGCCCGGGCCCGCTTACGGAAAGTG  
GAAAAGGAAGCAGAGGATTATATAGTGAATGGATATCAGGAAATAGAACGAGAAAAAT  
TAAATTTGCGTAATTCAATAGGTAAGAATTTGGAACGGTTAGAAAATTACAAAAACGAA  
ACCATTAGTTTTGAACAACAAGAGCAATTAATCAAGTCCGACAACGAGTTTTCCAAC  
AAGCCTTACAAGGAGCTCTAGGAACCTCTGAATAGTTGTTTGAACAACGAGTTACATTA  
CGCACCATCAGTGCTAATATTGGGATGTTTGGGGCGATGAAAGAAATAACTGATATGAA  
TCCATTGATTTCTGCCGCTTCCGTTATTGCTGCTGGATTGGCCGTAGGGTTGGCTTCTAT  
TGGACCTGGAGTTGGTCAAGGTACTGCCGCGGGCCAAGCCGTAGAGGGTATCGCGAG  
ACAACCAGAGGCAGAGGGTAAAATACGAGGTACTTTATTGCTTAGTTTTGGCTTTTATGG  
AAGCTTTAACTATTTATGGACTGGTCGTGGCATTAGCACTTTTATTTGCAAATCCTTTTG  
TTATGAATGTTCTACCATGTTTCGATCAACACACTAAAAGGTCTATACGAAATATCCGGTG  
TGGAAGTAGGCCAACATTTCTATTGGCAAATAGGGGGTTTTCCAAGTACATGCCCAAGTA  
CTTATTACTTCTTGGGTCGTAATGGCTATCTTACTAGGTTTCAGCCACTATAGTTGTTTCGA  
AATCCACAAACCATTCCGACCGACGGTCAGAATTTCTTCGAATATGTCCTTGAATTCAT  
TCGAGACTTGAGTAAAACCTCAAATTGGAGAAGAATATGGTCCTTGGGTTCCCTTTATTG  
GAACTATGTTCTTATTTATTTTTGTTTCTAACTGGTCAGGGGCTCTTTTACCTTGAAAA

TCATACAGTTACCTCATGGGGAGTTAGCCGCACCCACGAATGATATAAAATACTACTGTTG  
CTTTAGCTTTACCTACGTCAGTGGCATATTTCTATGCGGGTCTTACAAAAAAGGATTG  
GGTATTTTCGGTAAATACATTCAACCAACTCCAATCCTTTTACCTATTAACATCCTAGAA  
GATTTTACAAAACCCCTATCACTTAGTTTTTCGACTTTTTGGGAATATATTGGCTGATGAA  
TTAGTAGTTGTTGTTCTTGTCTTTAGTACCTTCAGTGGTTCCTATACCTGTTATGTTCC  
TTGGGTATTTACAAGTGGTATTCAAGCTCTATTTTTGCAACTTTAGCCGCGGCTTATAT  
AGGGGAATCCATGGAGGGTCATCATATGATATTTTTGACTTTAGAACATATATTAECTCA  
CATATCTTTTTCGATTGTTTCAATTGTAATTACGATTTATTTGATGACCTTATTAGTCCACG  
AACTGTAGGACTATATGATTCGTCAGAAAAAGGACTGATAGCTACTTTTTCTGTATAA  
CAGGATTTTAGTTATTCGTTGGATTTATTCTGGGCATTTCCCCTTAAGTGATTTATACGA  
ATCATTAAATGTTCTTTTCATGGAGTTTTTCCATTATTCATATGGTTCCTATTTTACGAACC  
ATAAAAATCTTTTAAGTACAATAACTGCACCAAGTGCTATTTTTACCCAAGGCTTTGCTA  
CTTCAGGTCTTTTAACTGAAATGCATCGATCCACAAAATTAGTACCTGCTCTCCAATCCC  
AGTGGTTAATGATGCATGTAAGTATGATGATATTGAGCTACGCAGCTCTTCTATGTGGAT  
CATTATTATCAATAGCTCTTCTAGTAATTACATTTGAAAAAACGTAGAGAATTTTGGTA  
AAAGTAAAGAGATCAAATACGTGAATGAAATAAAC---GTTTTACGAAACACTTTTTTGA  
TTTCGTTTAGAAATTTTCGTAGGTATCAAGTGATTCAGCAATTGGATTGTTGGAGTTGTC  
GTGTCATTAGTCTAGGGTTTATCTTTTTAACCATCGGCATTCTTTCAGGAGCAGTATGGG  
CTAATGAAGCATGGGGATCATATTGGAATTGGGACCCCAAAGAACTTGGGCATTTATT  
ACTTGGACTATATTTCGCGATTTATTTGCATACTCGAACAAATAAAAATTTGCAAGGCATA  
AATTCTGCAATTGTAGCTTCTATAGGATTTCTTATAATTTGGATCTGCTATTTTCGGGGTAA  
ATCTATTAGGAATAGGGCTACATAGTTATGGTTCATTTACATCTAATATGACAAAAAGA  
AAGCATTACCCCCCTTCCATATCTTGCATCTATAGTATTTTTGCCCTGGTGGATCTCTTT  
CTCATTTAATAAAAAGTCTGGAATCCTGGGTTATTCATTGGTGGAACTAGTCAACCCGA  
AGCCTTTTTGAATGATATTCAAGAAAAGAACGTTCTAGAAAAATTCATAGAATTAGAAG  
AACTTTTTCTTTTGGACGAAATGATAAAGGAGTACCCGAAGACACATATACAAAAGTTT  
CGTATAGGAATCCACAAAGAAACGATAACAATTGGTCAAGATGCACAATGAGGGTCATAT  
CCATACCTTTTTACAATCTCGACAAATATAATAAGTTTTGCTATTCTAAGTGGTTATTCT  
ATTCTGGGTAATGAAGAACTTGTCTGTTCTTAATTCTTGGATTCGGGAATTTCTCTATAAT  
TTAAGCGACACAATAAAAGCTTTTTCTATTCTTTTGTTAACTGATTTATGTATTGGATTCC  
ATTCGCCTCATGGTTGGGAATAATGATTGATTTTGTCTACAAGGATTTTGGATTTTCTC  
ATAATGATCAAATTATATCTGGTCTTGTCTTCCACCTTCCAGTCATTCTAGATAACCATTTT  
TAAATATTGGATCTTCCGTTATTTAAATCGTGTATCTCCCTCACTTGTAATTTATCATT  
CAATGAATGACATGCCTATTGGTGTTCAAAAGTACCCTTTCGGAGTCCGGGAGAGGA  
GGATGCAGTTTGGGTTGACGTATACAACCGACTTTATCGAGAAAGATTACTTTTTTTAG  
GCCAAGAGGTTGATAGCGAGATCTCGAACCAACTTATTGGTCTCATGGTATATCTAAGT  
ATAGAGGATGAGACCAAGGATCTTTATTTATTTATAAACTCGCCCGGTGGATGGGTAATA  
CCCGGAGTAGCTATTTATGATACTATGCAATTTGTACCACCAGACGTACATACAATATGC  
ATGGGATTAGCCGCTTCAATGGGATCTTTCATTCTGGTTCGGAGGAGAAATTACCAAACG  
TTTAGCATTCCCTCAGCCAGGGTAATGATCCACCAACCTGCTAGTTCTTTTTTATGAGGC  
ACAAACAGGAGAATTTGTCTAGAAAGCGGAAGAAGTACTGCTGAAACTCCGCGAAACCCT  
CACAAGGGTTTATGTACAAAGAACAGGCAACCCCTTATGGGTTGTATCCGAAGACATG  
GAAAGGGATGTTTTTATGTCAGCAACAGAAGCCCAAGCTCATGGAATTGTTGATCTTGT  
AGCAGTCGAAATGAAAGAACAAAATGGATTCATGAAGGTTTAATTACTGAATCACTT

CCCAACGGTATGTTTCGAGTTCGTTTAGATAACGAAGATCTGATTCTAGGTTATGTTTCA  
GGAAGGATACGACGTAGTTTTATAACGAATACTACCCGGTGATAGAGTAAAAATTGAAGT  
AAGTCGTTATGATTCAACCAGGGGACGCATAATTTATAGACTCCGCAACAAAGATTTCGA  
ATGATATGGAAGAATTA AAAAGGATATTTAGAAATAGATAGATCTCGACAACAAGACTTC  
CTATATCCACTTCTATTTTCAGGAGTATATTTATGCACTTGCTCATGATCATGGTTTAGAAA  
ATTTAGGTTATAAATCCAGTTCAGTGTGTGAAACGTTTAATTA CTGCAATGTATCAAC  
AGAAGCATTTGGTTTTTTTTGATAATGATCCTAACCAAAAATAAATTTGTTGATAAGAATT  
TTTATCTCAAATGATATCAGAGGGTTTTGCAAGTCATTGTGGAAATTCCATTTTCACTGC  
GATTAGTATCTTCCCTGATAACAAAATCTCATAATTTACGCTCAATTCATTCAACATTTCC  
CTTTTAGAGGATCAATTTTACATTTAAATCATGTATTAGATATACTAATACCCTATCCTA  
TTCATCTGGAACCTCTTGATTCAACTCCTTCGCTGTTGGATAACAAGATGCCCCCTCTTTCG  
ATTTATTGCGAGTCTTCTCTACGAGTATCAGAATTGGAATAGTCTTATTACTAAAACT  
TTTCCGTTTTTTCAAATCAAAGATTATTCTTGTTCCATATAATTTTTATGTATATGAATGT  
GAATCCATATTCGTTTTTCTCCGTAAACAATCTGTTCAATTTACGATCAACGCTTCTAGA  
GCCTTTCTTGAGCGAACACATTTTTATAGAAAAATAGAAAATTTTATAGTAGTTTTTCGT  
AATGTTTTTAACCTATGGTTGTCAAGGATCCTTTCATGCATTATGTCAGATATCAAGGA  
AAATCCATTCTGGCTTCAAAGGGAACCTCTTCTGATGAATAAATGGAAGTATTACCT  
TGAAATTTCTGGCAATGTCATTTTTACTTGTGGTCTCAACCAGATAGGATTCATATAAA  
CCAATTATCCAACCATCCCTCGATTTTTTGGGCCATCTTCAAGTGTACGACTAAAGAC  
TTCTGTGGTACGGAGTCAAACGTTAGACAATTCCTTTATTATAGATATTGCTATT-----AA  
AAAATTTGATACTATAGTCCCAATAATTCCTTTGATTGGATCATTGGCTAAAGCGAAATT  
TTGTAACGTATCAGGGCATCCCATTAGTAAGCCGGCTTGGACTGATTCATCGGATTCTGA  
TATTATTGATAGATTTGGGCGGATATGCAGAAATCTTCTCATTATTATAGTGGATCCTCA  
AAAAAAAATAGTTTGTATCGAGTAAAATATATCCTTCGACTTTCGTGTGCTAGA ACTTTG  
TCTCGTAAACACAAAAGTACTGTACGTTCTTTTTTGAAAAGATTAGGTTTCGAAATTATT  
GGAAGAATTCCTTACAGAGGAAGAACAAGTTCTTCTTTGATCTTCCCAAGACGGATT  
TGGTATTTGGATATTATTTCGTATCAATGACCTGGCCAATCATTCAATGATAATTGATACGA  
CA---AAAGTACAACAAGCTATCAATTCTTTTCCAGATCGGAA---TCCTTAAAAGAGGTT  
TATGGGCTCATATGGTTGCTTGTTCCTATTTTTACTCCTTTATTGGGAATCATAATAGGGG  
TACTAGTAATTGTGTGGTTAGAAAGACAAATATCCGCAGGGGTACAACAACGTATTGGA  
CCTGAATACGCCGGCCCTTTGGGAATTTCAAGCTCTAGCAGATGGGACCAA ACTGC  
TTTTCAAAGAGGATCTTCTCCCATCTAGAGGTGATATCTTTTTATTCAAGTCTCGGACCAT  
CTATAGCGGTCAATCAATTTTACTAAGTTATTCAGTAATTCCTTTTGGCTATCACCTTGT  
TTTAGCCGATCTCAGTATAGGCGTTTTTTTTATGGATTGCTATTTCAAGTATTGCTCCTATT  
GGACTTCTTATGTCAGGATATGGATCGAATAATAAGTATTCCTTTTTAGGTGGTCTACGA  
GCTGCCGCTCAATCAATTAGTTATGAAATACCATTA ACTCCATGTGTGTTATCAATTTCTC  
TACTATCTAACAGTTCAAGTACAGTTGATATAGTTGAGGCGCAGTCAA AATATGGTTTTT  
GGGGGTGGAATCTGTGGCGTCAACCTATAGGGTTTATGGTTTTTCTAATTTCTTCCCTAG  
CAGAATGTGAGAGATTGCCCTTTGATTTACCAGAAGCAGAGGAAGAATTGGTTGCGGG  
TTATCAAACCGAATATTCAGGTATAAAATTTGGTTTTATTTTACGTTGCTTCCCTATCTAAC  
CTACTAGTTTCTTCATTATTTGTAACCGTTCTTTACTTGGGCGGTTGGAATCTCTCTATTC  
CGTTCATTTTCATTCTGAGCTTTTCAGAATTAATGAAGTTTGTGGAATCTTTGGAATGA  
CAATTGGTATATTTATTACATTAGCTAAAGCTTATTTGTTCCCTGTTCAATTTCTATCACAAC  
AAGATGGACTTTACCTAGGATGAGAATGGACCAACTGTTGAATCTTGGGTGGA AATTT



CTTTTACCTATTTTCATTAGGTAATCTATTATTGACAACTTCTTTCCAACCTCCTTTCACTGA  
TGATCTGGCATGTACAGAATGAAAACCTCATTCTCGATTCTACGAGAATTTTTATGAAA  
GCGTTTCATTTGCTTCTCTTCCATGGAAAGTTTTATTTTCCCAGAATGTATCCTAATTTTTG  
GCCTAATTTCTTCTTCTGATGATCGATTCAACCTCTGATCAAAAAGATATACTTGGTTATA  
TTTCATCTCTTCAACAAGTTTAGTAATGAGCATAGCGGCCCTATTGTTCCGATGGAGAG  
AAGAACCTATGATTAGCTTTTCGGGAAATTTCCAAACGAACAATTTCAACGAAATCTTT  
CAATTTCTTATTTTACTATGTTCAACTCTATGTATTCCTCTATCCGTAGAGTACATTGAAT  
GTACAGAAATGGCTATAACAGAGTTTCTGTTATTTCGTATTAACAGCTACTCTAGGAGGA  
ATGTTTTTGTGTGGTGCTAACGATTTAATAACTATCTTTGTAGCTCCAGAATGTTTCAGT  
TTATGCTCCTACCTATTATCTGGATATACCAAGAGAGATGTACGGTCTAATGAGGCTACT  
ACGAAATATTTACTCATGGGTGGGGCAAGCTCTTCTATTCTGGTTCATGGTTTCTCTTGG  
CTATATGGTTCATCCGGGGGAGAGATCGAGCTTCAAGAAATAGTGAATGGTCTTATCAA  
TACACAAATGTATAACTCCCCAGGAATTTCAATTGCGCTTATATTCATCACTGTAGGAAT  
TGGGTTCAAGCTTTCCCCAGCCCCTTCTCATCAATGGACTCCTGACGTATAACGAAGGAT  
CTCCCACTCCAGTCGTTGCTTTTCTTTCTGTTACTTCGAAAGTAGCTGCTTCAGCTTTAG  
CCACTCGAATTTTCGATATTCCTTTTTTATTTCTCATCAAACGAATGGCATCTTCTTCTGGA  
AATCCTAGCTATTCTTAGCATGATATTGGGGAATCTCATTGCTATTACTCAAACAAGCAT  
GAAACGTATGCTTGCATATTCGTCCATAGGTCAAATCGGATATGTAATTATTGGAATAATT  
GTTGGAGACTCAAATGATGGATATGCAAGCATGATAACTTATATGCTGTTCTATATCTCC  
ATGAATCTAGGAACTTTTGCTTGCATTGTATTATTTGGTCTACGTACCGGAACTGATAAC  
ATTCGAGATTATGCAGGATTATACACGAAAGATCCTTTTTTGGCTCTCTCTTTAGCCCTA  
TGTCTCTTATCCCTAGGAGGTCTTCCCTCCACTAGCAGGTTTTTTTCGGAAAACCTCCATCTA  
TTCTGGTGTGGATGGCAGGCAGGCCTATATTTCTTGGTTTTCAATAGGACTCCTTACGAG  
CGTTGTTTCTATCTACTATTATCTAAAAATAATCAAGTTATTAATGACTGGACGAAACCA  
AGAAATAACCCCTCACGTGCGAAATTATAGAAGATCTCCTTTAAGATCAAACAATTCCA  
TCGAATTGAGTATGATTGTATGTGTGATAGCATCTACTATAACCAGGAATATCAATGAACC  
CCATTATTGCAATTGCTCAGGATAACCTTTTTTATGTTTCTGCTTCACGAATATGATATTTT  
CTGGGCATTTCTAATAATATCAAGTGTTATCCCTATTTTGGCATTTCCTAATTTCCGGCGTT  
TTGGCCCCTATTAGTGAAGGACCGGAGAACTTTCTAGTTACGAATCGGGTATAGAACC  
AATGGGCGATGCTTGGTTACAATTCCGAATCCGTTATTATATGTTTGTCTAGTTTTTGT  
GTTTTTGTATTTGAAACGGTTTTTCTTTATCCATGGGCGATGAGTTTCGATGTATTGGGT  
GTATCTGTATTTATAGAAGCTTTAATTTTCGTGCTTATCCTAATTGTTGGTTTAGTTTATGC  
ATGGCGAAAGGGGGCATTGGAATGGTCTACGAATTCTTTTCTTGGTTAAACAATAATTG  
TAGTTTTGCCGATATTCGCGGGTCTTCAATTTTCTTTTTCCCTCATAGGGGAAATAAGG  
TAATACGGTGGTATACTATTTGTATTTGTTTATTGGAACCTCCTTCTAACCACCTATGCATT  
CTGTTATCATTTTCAGTTGGACGATCCATTAGTCCAATTGGAACAGGATTATAAATGGAT  
AAATATTTTTGATTTCACTGGAGACTCGGAATCGATGGACTTTCCATAGGACCCGTTTT  
ACTAACGGGATTCATTACTACTTTAGCCACTTTAGCGGCTTGGCCAGTTACTCGGGATT  
CGCGATTGTTCCATTTCTGATGTTAGCAATGTACAGCGGTCAAATAGGATCATTTTCTT  
CTCGGGATCTTTTACTTTTTTTCATCATGTGGGAGTTAGAATTAATTCCTGTCTACCTACT  
TCTATCCATGTGGGGAGGAAAGAAACGTTTGTACTCAGCTACAAAGTTTATTTTGTACA  
CTGCGGGAGGTTTCGATTTTTCTCTTAATAGGAGTTTCTGGTATGGGTTTATATGGTTCCA  
ATGAACCAACATTAATTTTGAACATCAGCTAATCAATCGTATCCTGTAGCATTGGAAA  
TACTATTATATTTTGGATTTTTTATTGCTTATGCTGTCAAACCTGCCGATCATACCCCTACAT

ACATGGTTACCGGATACCCACGGAGAAGCACATTATAGTACATGTATGCTTTTAGCCGG  
AATCTTATTA AAAATGGGAGCATATGGATTGGTTCGGATCAATATGGAATTATTACCCCA  
CGCTCATTCTATATTTTCTCCTTGGTTGATGATAGTAGGCACAATTCAAATAATCTATGCA  
GCTTCAACATCTCTCGGTCAACGCAACTTAAAAAAGAGAATTGCTTATTCGTCCGTATC  
TCATATGGGTTTCACAATTCTAGGAATTAGTTCCATAACGGATACGGGACTCAATGGGG  
CCATTTTACAAATGATATCTCATGGATTATTGGTGCTGCACTTTTTTTCTTGGCAGGAA  
CGAGTTACGATAGAATACGTCTTGT TTTATCTCGACGAAATGGGAGGAATAGCTATCCCA  
ATGCCAAAATTTTACACTGTT CAGTAGTTTCTCAATGGCTTCTCTTGCATTGCCGGG  
AATGAGCGGTTTTGTTGCGGAATTGGTAGTATTTTTTGGCATAATTACTAGCGAAAAATT  
TTTTTTAATGCCAAAATACTAATTACATTTGTAACGGCAATTGGAATGATATTA ACTCCT  
ATTTATTCAATTATCTATGTTACGCCAGATTTTTTATGGATACAAGCAATTTAATGTTCCAA  
ACTCTCATTTTTTTGATTCTGGACCACGAGA ACTTTTTGTTTCGATCTGTATTTTTCTACC  
CGTAATAGGTATTGGTATTTATCCGGATTTTCGTTTTTCACTATCAGTTGACAAAGTCGA  
AGCTATTTTATCTAATTACTTTTATAGAATGATGCTCGAGCATGTACTTGT TTTGAGTGCC  
TATTTATTATCTATCGGTATTTATGGATTGATTACAAGCCGAAATATGGTTAGAGCGCTTA  
TGTGTCTTGAGCTTATACTGAATGCGGTTAATATGAATTTTCGTAACATTTTCTGATTTATT  
TGATAGTCGCCAAATAAAAGGAGACATTTTCTCGATTTTTGTTATAGCTATTGCAGCCGC  
TGAAGCCGCTATTGGATTAGCTATTGTTTCATCAATTTATCGTAACAGAAAATCAACTCG  
TATAAACCAATCGAATTTGTTGAATAAAATGGAACATACATATCAATATGCATGGATCAT  
ACTTTTCGTTCCTACTCCAGTTCCCTATAGCAATAGGAGTGGGGCTTCTCCTTGTTC CGA  
CGGCAACAAAAGTCTTCGTCGTATGTGGGCTTTTCTTAGCGTTTTTACTAAGTATCA  
TCATGATTTTTTTCAGCCGATCTGTCTATT CAGCAAATAAAAGGCAGTCTTATCCATCAAT  
ATGTATGGTCTTGACTATCAATAATGATTTTTCTTAGAATTTGGCTACTTGATCGATCC  
ACTTACTTCCATTATGTTAATATTAATCACTACTGTTGGAATAATGGTCTTATTTATAGTG  
ACAATTATATGTCTCATGATCAGGGCTATTTGAGATTTTTTGTCTATATGAGTTTTTCCAA  
TGCTTCCATGTTGGGATTAGTTACCAGTTGCAATTTAATACAAATTTATATTTTTTGGGAA  
TTAGTAGGAATGTGTT CATATCTATTAATAGGGTTTTGGTTCACACGACCAATTGCGGCA  
AGTGCTTGTCAAAAAGCCTTTGTA ACTAATCGTGTAGGGGATTTTGGTTTATTATTAGGA  
ATTTTGGGTTTTTATTTTATAACGGGTAGTTTCGAATTTTCGGGATTTGTTTCGAAATAACC  
ATAACGGTGGAGTCAATCCTTTATTCCTTACTTTGTGTGCCAGCCTCTTATTCGTCCGT  
GCAATTGCTAAATCGGCGCAATTCCTTCATGTATGGTTACCGGATGCCATGGAGGG  
GCCTACTCCTATTT CAGCTCTTATCCATGCTGCTACTATGGTAGCAGCAGGAATTTTTCT  
TG TAGCTCGACTTCTCCTCTTTTTACAGTCATACCTTATGTAATGAATTCATTTCTTTG  
ATAGGTATAATAACAATACTTTTAGGGGCTACTTTGGCTCTTGCTCAAAGAGACATTAAG  
AGAAGTTTAGCCTATTCTACAATGTCTCAATGGGTTATACTATGTTAGCTTTAGGTATG  
GGGTCTTATCGAGCTGCTTTATTTCA TTTGATCACTCATGCCTATTCGAAAGCATTATTAT  
TTTTAGGATCCGGATCCATTATTCATTCAATGGAACCGTTATTGGATATTCACCAGAGA  
AAAGTCAGAACATGGTTCTTATGGGGGTTTAAACAAAATATGTGCCAATAACAAA AAC  
TGCCTTTTTATTAGGTACACTTTCTCTTTGTGGTATTCCACCTCTTGCTTGT TTTTGGTCC  
AAAGACGAGATTCTTAATGATAGTTGGTTGTATTACCGATTTTCGCGATAATAGCTTGT  
TTCACAGCGGGTTTAACTGCATTTTATATGTTTCGAATGTATTTACTAACTTTTGAAGGG  
CATTTAAATGCTCATTTTCAA AATTACAGTGGCAAAAAAATAGCTCGTTCTATTCAATA  
TCTATATGGGGTAAAGAAGGAGCGAAAAGCGATAAAACAGAAT---TCTGTTTTATCAACA  
ATGAATCTTTTTTCATTTTCGAATAAAAAAACCTCCCCGTATCCCCACGAATCGGATAAT

ACTATGCTATTGCCCTTCTTATATTGGTCTTATTTACTTTGTTTGTCTGGATTTCATAGGAAT  
TCCTTTTGATTTTGATATATTATCAAATTGTAACTCCGTCGATAAATCTTTTACATTCA  
AATTCGAAC---TCCGTGGATTGGTATGAATTTGTGACAAATGCTTTTTTTTCAGTAAGTA  
TAGCCTATTCCGGAATATTTATAGCGTCTCTTTTATATAGGCCTGTTTATTCATCTTTCCAG  
AATTTGGACTTAATCAATTCTTTTGTATTTTTTTGGGACAAAATAATAAATGTGATATATA  
ATTGGTCATATAATCGTGGTTACATCGACGTTTTTTTATAACAACAACCTTTACTAGGGGTAT  
AAGAGGGGTAGCGGAACCTCATTTATTTTTTTGATAGACAAGTAATTGATGGAATTACGA  
ATGGGGTTGGTATTACAAGTTTCTTTGTAGGAGAGGGGATTAAATATGTAGGGGGCGGA  
--CGAATTTCTTCGTATCTATTCTTGTATTTATTTTATGTATCAATTTTTTTATTAATTTACTA  
CATGGATTTACCTGCACCAATACATGATTTTCTTTTAGTATTTTTGGGGTTGGGTCTTATA  
GTCGGCGGTCTAGGAGTAGTATTACTTACCAATCCAATTTATTCTGCCTTTTCTTTGGGA  
TTGGTTCTTGTTTGTATATCCTTATTCCATATTCCAGCGAACTCTCATTTTGTAGCTGCTG  
CACAGCTCCTTATTTACGTGGGAGCCATAAACGTATTAATTGATTTGCTGTGATGTTCA  
TGAATGGTTCAGAATATTACAATGATTTCCATCTTTGGACCGTTGGGGATGGAGTCACT  
TCGCTGGTTTGTACAAGTATTTTTGTTTCACTAATTACTACTATCTCAGATACGTATGTT  
ACGGGATTATTTGGACTACAAGATCAAACCAAATTATAGAGCAAGATTTGATAAATAAG  
GGTCAACAGCTTGGGATTCATTTATCAACAGACTTTTTTTCTTCCATTTGAACTTATTTCT  
ATAATCTTTTLAGTTGCCTTGATAGGTGCAATTGCTATGGCTCGCCAGATGACTGTACCA  
ACTACAAGAAAAGATCTAATGATAGTTAATATGGGTCCTCAGCACCCATCAATGCATGG  
TGTTCTTCGACTCATCGTTACTCTAGATGGTGAAGATGTTATTGACTGTGAACCCATATT  
GGGTTATTTACACCGAGGAATGGAAAAAATTGCAGAAAATCGAACAATTATACAATATC  
TGCCCTATGTAACACGTTGGGATTATTTAGCTACTATGTTTACAGAGGCAATAACGGTAA  
ATGCACCAGAACAGTTGGGAAATATTCAAGTACCTAAAAGAGCCAGTTATATTAGAGTC  
ATTATGCTGGAACCTGAGTCGTATAGCTTCTCATTATTTATGGCTTGGCCCTTTTATGGCGG  
ATATCGGTGCACAGACTCCTTTCTTCTATATTTTTCAGAGAGAGAGAATTAATATATGATCT  
ATTCGAAGCTGCCACAGGTATGCGAATGATGCATAATTATTTTCGTATCGGAGGAGTAG  
CTGCTGATTTACCCCATGGCTGGATAGATAAATGTTTATGATTTCTGTGATTATTTTGTAA  
AGGGGTTACTGAATATCAAAGCTCATTACGCGGAATCCTATTTTTTTTGGAAACGAGTTG  
AAGGAGTCGGCTTTATTAGTGGAGAGGAGGCAATAAATTGGGGCTTATCTGGACCCAT  
GCTACGAGCTTCCGGAATTCAATGGGATCTTCGTAAAGTTGATCATTATGAGTGTTACG  
ACGAGTTTGTATTGGGAAGTACAATGGCAAAAAGAAGGAGATTCGTTAGCTCGTTATTT  
AGTCCGAATCAATGAAATGACGGAATCTATTAATAATTATTCAACAAGCTTTGGAACGAA  
TTCCCGGGGGACCCTATGAAAATTTAGAGGTACGACGCTTTGATAGGACAAGGGATTC  
CGAATGGAATGATTTTGTATTATCGATTCATTAGTAAAAAACCTTCGCCCACTTTTGAATT  
GTCGAAACAAGAACTTTATGTGAGAGTAGAAGCCCCAAAGGGGGAGTTGGGAATTTT  
TCTGATAGGGGATCAGAGTGTTTTTCCCTGGAGATGGAAAATTCGTCCACCTGGTTTTTA  
TCAATTTGCAAATTTCTCCTCAGCTAGTTAAAAGAATGAAATTGGCTGATATTATGACAA  
TACTAGGTAGTATAGATATCATTATGGGAGAAGTTGATCGTATGTTCCCTATGGTAACTG  
GGTTCATGAATTATGGTCAACAAACAGTCCGAGCTGCAAGGTATATCGGTCAAAGTTTT  
ATGATTACCTTATCCACGCGAATCGTTTACCTGTAACCTATTCAATATCCTTATGAAAAT  
TGATCACATCAGAGCGTTTCCGCGGTGCAATACATTTTGAATTTGATAAATGTATTGCTT  
GTGAAGTATGTGTTTCGTGTATGCCCTATCGATCTACCCGTTGTTGATTGGAAATTGGAAA  
CTGATATTCGAAAGAAACGATTGCTTAATTACAGTATTGATTTTGGAACTGTATATTTG  
TGTAACCTGCGTCGAGTATTGTCCAACAAACTGTTTATCAATGACTGAAGAATATGAAC

TTTCTACTTATGATCGTACGAATTGAATTATAATCAAATTGCTTTGGGTCGGTTACCAAT  
GTCAGTAATTGGAGATTACACAATTCGAACAATTTTGAATTCGAAAAAACCGCGGGT  
AACCCCCTTGATTCAAAAACAATTACCAATTTTATGCAGGGTTCGTTTGTCTGCTTGGCT  
AGTCAAGCATGGGCTAGTTCATAGATCTTTGGGCTTCGATTACCAAGGAATAGAACTT  
TACAAATAAAGCCTGAGGATTGGCACTCCATTGCTGTCATTCATATGTATATGGTTACA  
ATTATCTACGCTCCCAGTGTGCCTATGATGTAGCACCGGGCGGACTGTTAGCTAGTGTGT  
ATCATCTTACGAGAATACAGTATGGTGTGGATCAACCAGAAGAGGTCTGCATAAAAGTA  
TTTGCCCCAAGGAGGAATCCTAGAATTCCGTCTGTTTTCTGGATTGGAAGCGCGGA  
TTTTCAAGAACGGGAATCTTATGATATGTTGGGAATCTCTTATGATAATCATCCACGCCT  
GAAACGTATTTTATGATGCCTGAAAGTTGGATAGGATGGCCTTTACGTAAGGATTATATTGC  
TCCAAATTTCTATGAAATACAAGATGCTCAT-----

-----  
---ATGAATTCATTGAGTTTCCGTTACTTGATCGAATAACCCAAAATTCAGTTATTTCAA  
CTACATCAAATGATCTTTTGAATTGGTCAAGACTCTCCAGTTTATGGCCGCTTCTCTATG  
GTACCAGCTGTTGCTTCATTGAATTTGCTTCATTAATAGGCTCACGATTCGACTTTGATC  
GTTATGGACTGGTACCAAGATCGAGTCCTAGGCAAGCGGACCTCATTTTAACAGCCGG  
CACAGTAACAATGAAAATGGCTCCTTCTTTAGTGAGATTATATGAGCAAATGCCTGAAC  
CAAATATGTCATTGCTATGGGAGCTTGTACTATTACAGGAGGGATGTTTCACTACCGATT  
CTTATAGTACTGTTCCGGGAGTCGATAAGCTAATTCCTGTCGATGTTTATTTGCCGGGTT  
GTCCACCTAAACCGGAGGCAGTTATAGATGCTATAACAAAATTCGTAAGAAGGTATCT  
CGAGAAATTTATGAAGATAGAACCGGGTCTCAACAGGAGACTCGATGTTTTACTACCA  
ATCACAAGTTTCGTGTTGGACGCAGTATTCATACCGGAAATTATAATCAAGGATTACTCT  
ATCAATCGCCATCTACTTCAGAGACCCCTTCTGAAACATTTTTCAAATACAAAAGTTCA  
GTATCTCCTCACGAATTAGTGAATATGCAAAATAGAAATATCTTTTCTTGGGTA---GAGC  
AGACGACTCGATCCATTTCTGTATCGATCATGATATTGATAATAACTTGGACATCTATTT  
ACATGCATATCCCATTTTTGCACAACAGAGTTATGAAAATCCACGAGAAGCAACTGGG  
CGTATTGTATGTGCCAATTGCCATTTAGCTAATAAGCCCGTGGATATTGAGGTTCCACAA  
GCGGTAATCCGGATACTGTATTTGAAGCAGTTGTTAGAATCCCTTATGATATGCAACTG  
AAACAAGTTCTTTCTAATGGGAAAAGGGGGTCTTTGAATGTGGGGGCGGTTCTTATTTT  
ACCTGAGGGATTTCGAACTAGCTCCTCCCGATCGTATTTCTCCCGAAATGAAAGAAAAG  
ATGGGAAATCTGTCTTTTTCAGAATTATCGGCCGACTAAAAAAAATATTCTTGTGATAGG  
TCCTGTTCCCTGGCCAGAAATATAGCGAAATAACTTTTCTTATTCTTTCTCCGGATCCTGC  
TACTAAGAAAGATGTTTACTTCTTAAAATATCCTATATACGTCGGTGGGAACAGGGGAA  
GGGGTCAGATTTATCCCGATGGGAGTAAGAGTAACAATACAGTCTATAATGCTACAGCG  
GCAGGTATAGTAAGCAAAATAGTACGTAAAGAAAAGGGAGGGTATGAACTAACCATAG  
CAGACGCATCGGAAGGACGCCAAGTCGTTGATATTATACCTCCAGGACCAGAACTTCT  
TGTTTCAGAAGGTGAATCCATCAAGCTTGATCAACCATTAACGAGTAATCCCAACGTGG  
GAGGATTTGGTCAGGGAGATGCAGAAATAGTACTTCAAGATCCATCACGTGTCCAAGG  
TCTTTTTTTCTTCTTTGCATCCGTTATTCTGGCACAAATTTTTTTGGTTCTTAAAAAGAA  
ACAGTTTGAGAAGGTTCAATTGTCCGAAATGAATTTTCATGAGTAAAGTATATGATTGGT  
TCGAAGAGCGTCTCGAAATTCAGGCGATTGCAGATGATATAACTAGTAAATATGTTCCC  
CCTCATGTCAACATATTTTATTGTCTGGGAGGGATTACGCTTACTTGTTTCTTAGTACAA  
GTAGCTACGGGGTTTTGCCATGACTTTTTTACTACCGTCCAACCGTTACCGAGGCTTTTAC  
CTCGGTTCAATACATAATGACTGAAGCTAACTTTGGTTGGTTAATCCGATCAGTTCATCG

ATGGTCGGCGAGTATGATGGTCCTAATGATGATCCTCCACGTATTTTCGTGTGTATCTCAC  
TGGCGGATTTAAAAAACCTCGCGAATTGACTTGGGTTACGGGCGTGGTTCTGGGTGTAT  
TGACCGCATCTTTTGGTGTAACAGGTTATTCCCTACCTCGGGACCAAATTGGCTATTGG  
GCCGTCAAATCGTGACAGGCGTACCTGACGCGATTCTGTAAATAGGATCACCTTGGT  
CGAGTTATTGCGCGGAAGTGCTAGTGTGGGTCAATCCACTTTGACTCGTTTTTATAGTTT  
ACACACTTTTGTATTACCTCTTCTTACTGCCGTATTTATGTTAATGCACTTCCTAATGATA  
CGTAAGCAAGGTATTTCTGGTCCTTTAATGGGAGTAACAAAGAAACCTGATTTGAATGA  
TCCTGTATTAAGAGCTAAGTTGGCGAAAGGGATGGGTCATAATTATTATGGTGAACCCG  
CATGGCCTAATGATCTTTTATATATTTTCCGGTAGTAATTTGGGTACTATTGCATGTAG  
CGTAGGGTTAGCGGTTCTAGAACCATCAATGATTGGTGAACCAGCAGATCCATTTGCAA  
CCCCTTTGGAAATATTACCCGAATGGTACTTCTTCCCGTATTTCAAATACTCCGTACAG  
TACCAATAAGTTATTGGGAGTTCTTTAATGGTTTCAGTACCGGCCGGATTATTAACAG  
TACCTTTTTTGGAGAATGTTAATAAATCCAAAACCCGTTTCGTTCGTCCAGTAGCTACA  
ACCGTCTTTTTGATTGGTACCGCGGTAGCCCTTTGGTTGGGTATTGGAGCAACATTGCC  
TATTGATAAATCTCTAACTTTAGGTCTTTTTATGATTGAAGTTTACTATTTGGAATCGTG  
TTAGGTTTAAATCCTATTACTTTGGCTGGATTATTCGTAACACTGCATATTTACAATACAGAC  
GCGGGGATCAGTTGGATCTTATGCTTACTATAACTAGTTATTTCCGGTTTTCTACTGGCGG  
CTTTAACTATAACCTCAGTTCTATTTATTGGTCTGAACAAGATACGACTTATTATGGATAT  
AGTAAGTCTTGCTTGGGCTGCTTTAATGGTAGTCTTTACATTTTCCCTTTCACTCGTAGT  
ATGGGGAAGAAGTGGACTCATGATTATTCGTTTCGCCGAACCAGAAGTTAAAATTTTG  
GTGGATAGGGATCCCGTTAAACTTCTTTTCGAGGAATGGGCTAGACCGGGTCATTTCTC  
AAGAACACTAGCTAAGGGCCCGGAGACTACCACTTGGATCTGGAACCTACATGCTGAT  
GCTCACGATTTTCGATAGCCATACGAGTGATTGGAGGAGATCTCTCGAAAAATATTTAG  
TGCCCATTTTGGTCAACTCTCCATCATATTTCTTTGGCTGAGTGGCATGTATTTCCATGG  
TGCCCGTTTTTCCAATTATGAAGCATGGCTAAGCGATCCTACTCACATTCGACCCAGCG  
CCCAGGTGGTTTGGCCAATAGTGGGCCAAGAAATATTGAATGGTGATGTGGGTGGGGG  
TTTCCGAGGAATACAATAACCTCTGGTTTTTTTTTCAGATTTGGCGAGCGTCTGGAATAA  
CTAGTGAATTACAACCTCTATTGTAAGTACTGCAATTGGTGCATTGGTTTTTTGCGGCGTTAATGC  
TTTTTGCCGTTTGGTTCCATTATCACAAGGCTGCTCCAAAATTGGCTTGGTTCCAAGAT  
GTAGAATCTATGTTGAATCACCACCTTAGCGGGGTTACTAGGACTTGGGTCTCTTTCTTG  
GGCAGGGCACCAAGTACATGTATCTTTACCGATTAACCAATTTCTAGACGCTGGAGTAG  
ATCCTAAAGAGATCCCACTTCCTCATGAATTCATCTTGAATCGGGATCTTTTGGCTCAAC  
TTTATCCCAGTTTTTGGCGAGGGAGCAACTCCTTTTTTTCACCTTGAATTGGTCAAATAAC  
GCAGAATTTCTTACTTTTTTCGTGGAGGATTAGATCCAGTAACGGGGGGTCTATGGCTGAC  
CGATATTGCACACCATCATTAGCTATTGCAATTCTTTTCCCTGATAGCTGGTCCACATGTAT  
AGGACCAACTGGGGCATTGGTTCATGGTCTGAAAGATATTTTAGAGGCTCATAAGGGTC  
CATTTACTGGCCAGGGTCATAAAGGCCTCTATGAGATCCTAACAACGTCATGGCATGCT  
CAATTAGCTCTTAACTTAGCTATGTTAGGCTCTTTAACGATTGTTGTAGCTCACCATATGT  
ATTCCATGCCCCCTTATCCATATCTAGCTACTGACTATGGTACACAACCTTTTCGTTGTTTAC  
ACACCACATGTGGATCGGGGGATTTCTCATAGTTGGTGCTGCTGCACATGCAGCCATTT  
TTATGGTAAGAGACTATGATCCAACACTCGATACAATGATCTATTAGATCGTGTCTTAA  
GGCACCGCGATGCAATCATATCACATCTCAACTGGGCTTGTATATTTCTAGGGTTTCACA  
GTTTTGGTTTGTATATTCATAATGATACCATGAGCGCTTTAGGGCGTCCCAAGATATGT  
TTTCAGATACCGCTATACAATTACAACCTGTCTTTGCTCAATGGATACAAAACACCCATG

CTTTAGCACCTAGTGCAACAGCCCCTGGTGCAACAACAAGTACCAGCTTGACTTGGGG  
GGGTGGTGGTTTAGTAGCAGTAGGCGGCAAAGTAGCTTTGTTACCTATTCCATTAGGAA  
CCGCAGATTTTTTGGTACATCACATTCAATGCATTTACAATCCATGTGACAGTATTGATACT  
ATTGAAGGGGGTTCTATTTGCTCGTAGTTCCCGTTTGATACCAGATAAAGCAAATCTTG  
GTTTTCGTTTCCCTTGTGACGGACCTGGAAGAGGGGGGACATGTCAAGTATCCGCCTG  
GGATCATGTCTTCTTAGGTCTATTTCTGGATGTACAATGCTATTTTCGGTAGTAATATTCCAT  
TTCAGTTGGAAAATGCAGTCGGATGTTTGGGGTAGTATAAATGATCAAGGGGTGGTAA  
CTCATATCACGGGAGGAACTTTGCGCAGAGTTCCATTACTATTAATGGATGGCTCCGT  
GATTTTTTATGGGCACAGGCATCCCAGGTAATTCAGTCTTATGGTTCATCATTATCTGCAT  
ATGGCCTTTTTTCCCTAGGTGCTCATTTTTGTGTGGGCTTTCAGTTTAATGTTTCTATTAG  
CGGCCGTGGTTATTGGCAAGAACTTATTGAATCTATCGTTTGGGCTCATAACAAATTA  
AAGTTGCTCCTGCTACTCAGCCTAGAGCCTTGAGCATTGTACAAGGACGTGCTGTAGG  
AGTAACCCATTACCTTCTGGGTGGAATTGCCACAACATGGGCGTTCCTTCTAGCAAGAA  
TTATTGCAGTAGGAATGGCATTAAAGATTTCCAAGGTTTAGCCAAGGCTTAGCTCAGGAC  
CCCCTACTCGTTCGTTATTTGGTTTGGTATTGCTACCGCACATGACTTCGAGAGTCATGAT  
GATTAATGAGGAACGCTTTTATCAGAATATTTTTGCTTCTCACTTTGGGCAATTAGCA  
ATAATTTTTCTGTGGACTTCCGGGAATCTGTTTCATGTAGCTTGGCAAGGAAATTTTGA  
GTCATGGGTACAGGACCCCTTACATGTAAGACCTATTGCTCATGCAATTTGGGATCCTCA  
TTTTGGTCAACCGGCTGTGGAAGCCTTACTCGAGGGGGTGCTCTCGGCCAGTGAAT  
ATCGCTTATTCTGGTGTATTATCAGTGGTGGTATAACAATCGGCTTACGCACTAATGAAGAT  
CTTTATACTGGAGCTCTTTTTCTATTATTTCTTTCTGCCATATCCTTAATAGCGGGTTGGTT  
ACATCTACAACCGAAATGGAACCAAGTGTTCGTGGTTCAAAAATGCTGAATCTCGC  
CTGAATCATCATTTGTCGGGACTTTCGGAGTAAGCTCCTTGGCTTGGACGGGGCATT  
AGTTCATGTTGCTATTTCCCGGATCCAGGGGGGAGTACGTTTCGATGGAATAATTTCTTAG  
ATGTATTACCGCATCCCCAAGGGTTAGGCCACTTTTTACAGGTCAGTGAATCTTTATG  
CCAAAACCCCGATTCCGGTAGTCATTTATTTGGTACCTCGCAAGGAGCGGGAACCTGC  
CATCCTAACCTTCTTGGGGGATTTTCATCCACAAACGCAAAGTTTATGGCTAACCGATA  
TGGCTCATCATCATTTAGCCATTGCATTTATTTTTCTTGTGCTGGTTCATATGTATAGAAC  
TAATTTCCGGATTGGGCACAGTATGAAAGATCTTTTAGAAGCGCATATTCCTCCCGGAG  
GTCGATTGGGGCGTGGACATAAGGGTCTTTATGATACAATCAATAATTCGATTCAATTTT  
AATTAGGCCTTGCTCTAGCCTCTTAGGGGTTATTACTTCTTTAGTAGCTCAACACATGT  
ACTCGTTACCTGCTTATGCATTCATAGCGCAAGACTTTACTACCCAAGCTGCGTTATATA  
CTCATACCAATACATTGCAGGATTCATCATGACAGGAGCCTTTGCTCATGGAGCTATAT  
TCTTCATTAGAGATTACAATCCGGAACAGAATGAGGATAATGTATTGGCAAGAATGTTA  
GACCATAAAGAAGCTATCATATCCCATTAAAGTTGGGCCAGCCTATTTCTGGGGTTCCAT  
ACCTTGGGACTTTATGTTTATAACGACGTCATGCTCGCTTTTGGTACTCCGGAGAAACA  
AATCTTGATCGAACCTATATTTGCCAATGGATACAATCTGCTCATGGTAAGACTTCCTA  
TGGGTTTCGATGTAATTTTATCTTCAACGAACGGCCCGGCATTTAATGCGGGTTCGAAGCA  
TATGGTTGCCTGGCTGGTTAAATGCGGTTAATGAG-----AATAGTAATTCATTATTCTTAA  
CAATAGGCCCGGGAGACTTTTTGGTTCATCATGCTATTGCTCTAGGTTTACATACAATA  
CATTGATCTTAGTAAAAGGCGCTTTAGATGCACGTGGTTCCAAGTTAATGCCAGATAAA  
AAGGATTTCCGTTATAGTTTTCTTGTGACGGTCCGGGACGAGGTGGTACTTGTGATAT  
TTCGGCTTGGGATGCATTTTATTTGGCAGTTTTCTGGATGTTAAATACCATTGGATGGGT  
TACTTTTTATTGGCATTGGAAGCACATCACATTATGGCAGGGTAACGTTTCACAGTTTAA

TGAATCCTCCACTTATTTGATGGGATGGTTAAGAGATTACCTATGGTTAAACTCTTCACA  
ACTTATCAATGGATATAACCCTTTTGGTATGAATAGTTTATCGGTATGGGCGTGGATGTTT  
TTATTTGGACATCTTGTGGGCTACTGGATTTATGTTCTTAATTTCCCTGGCGTGGATATT  
GGCAGGAATTAATTGAAACTTTAGCATGGGCTCATGAACGCACACCTTTGGCTAATTTG  
ATTCGATGGAGAGATAAACCGGTGGCTCTGTCCATTGTGCAAGCAAGATTGGTTGGATT  
AGCCCACTTTTCTGTAGGTTATATATTCACTTATGCAGCTTTCTTGATTGCCTCTACATCC  
GGCAAATTTGGTATGTCACATTCAAGTAAAGATTTATGATACATGTATAGGGTGTACTCAA  
TGTGTACGAGCCTGCCCCACAGATGTATTAGAAATGATACCTTGGGACGGATGTAAAGC  
TAAGCAAATTGCTTCTGCTCCAAGAACAGAGGACTGTGTAGGTTGTAAAAGGTGTGAA  
TCAGCCTGTCCAACAGATTTTTTGGAGTGACGGGTTTATTTATGGCATGAGACAACCTCG  
CAGCATGGGTCTAGCTTATATGACAAATTTCAACTTCCCCTCCATTTTTGTGCCTTTAGT  
GGGCCTAGTATTTCCGGCAATTGCAATGGCTTCTTTATCTATTTCATGTTCAAAAAACAA  
GATTGTCATGCGAGATCTAAAACATATCTCTGTGGCACCTGTGCTAAGTACTCTATG  
GTTCCGGTCTTTAGCAGGCTTATTGATAGAGATCAATCGTTTATTCCCGGATGCGTTGAC  
ATTCCCCTTTTTTTCATTCATGACTGCAATTTTAGAGAGACGCGAAAGCGAAAGCCTGT  
GGGGTCGTTTCTGTAATTGGATAACCAGCACTGAAAACCGTCTTTACATTGGATGGTTC  
GGTGTTTTGATGATCCCTACTTTATTGACTGCAACTTCTGTATTTATTATCGCCTTCATCG  
CTGCTCCTCCAGTAGATATTGATGGTATTCGTGAACCTGTTTCTGGGTCTCTACTTTATG  
GAAACAATATTATTTCTGGTGCCATTATTCCCTACTTCTGCAGCTATAGGTTTGCCTTTTA  
CCCGATATGGGAAGCAGCATCCGTTGATGAATGGTTATACAATGGTGGTCCTTATGAACT  
AATTGTTCTACTTCTTACTTGGTGTAGCTTGTACATGGGTGCTGAGTGGGAACTTA  
GTTTCCGTCTAGGTATGCGCCCTTGGATTGCTGTTGCATATTCAGCTCCTGTTGCAGCTG  
CTGCTGCGGTTTTCTTGATCTACCCAATTGGTCAAGGAAGCTTCTCTGATGGTATGCCT  
CTAGGAATTTCTGGTACTTTCAACTTCATGATTGTATTCCAGGCTGAACACAACATCCTT  
ATGCACCCATTTACATGTTAGGCGTAGCTGGTGTATTTCGGCGGCTCCCTATTTCAGTGCT  
ATGCATGGTTCCTTGGTAACCTCTAGTTTGATCAGGGAAACCACTGAAAATGAATCTGC  
TAATGCAGGTTACAGATTCGGTCAAGAGGAAGAACTTATAATATCGTAGCTGCTCATG  
GTTATTTTGGCCGATTGATCTTCCAATATGCTAGTTTCAACAATTCTCGTTCTTTACACTT  
TTTCTAGCTGCTTGGCCTGTAGTAGGTATTTGGTTCCTGCTTTAGGTATCAGCACCAT  
GGCTTTCAACCTAAATGGTTTCAATTTCAACCAATCTGTAGTTGATAGTCAAGGTCGTG  
TAATTAACACTTGGGCTGATATCATCAACCGCGCTAACCTTGGTATGGAAGTTATGCATG  
AACGTAATGCTCACAACCTCCCTCTAGATCTAGCTGCTGTTGAAGCTCCATCTACAAAT  
GGCATGGGTTTTGCCTTGGTATCGTGTTCATACCGTTCGATTGAATGATCCCGGCCGGTTG  
CTTGCTGTCCATATAATGCATACAGCTCTAGTTTCTGGGTGGGCTGGTTCAATGGCTCTA  
TACGAATTAGCAGTTTTTGTATCCCTCTGACCCCGTTCTTGATCCAATGTGGAGACAAGG  
TATGTTTCGTTATACCCTTCATGACTCGTTTAGGAATAACCAATTCATGGGGTGGTTGGAG  
TATCACA---GGAGGAACTGTAACAAATCCGGGTATTTGGAGTTACGAAGGCGTAGCCGG  
GGCACATATTGTGTTTTCTGGCTTGTGCTTCTTGGCAGCTATCTGGCATTGGGTGTATTG  
GGATCTAGAAATATTCCGTGATGAACGTACAGGAAAACCTTCTTTGGATTTGCCAAGA  
TTTTTGGAAATTCATTTATTTCTCTCAGGGTTAGCTTGCCTTGGGTTTGGTGCATTTTCATGT  
AACAGGCTTGTATGGTCCGGGAATATGGGTGTCCGATCCTTATGGACTAACTGGAAAAG  
TACAATCTGTAAGTCCTGCGTGGGGCGTAGAAGGTTTTGATCCTTTTGTCCAGGAGGC  
ATAGCTTCTCATCATATTGCAGCAGGGACATTGGGCATATTAGCGGGCCTATTTTCATCTT  
AGTGTCCGTCCGCCCAACGCCTATACAAAGGATTACGTATGGGTAATATTGAAACTGT

CCTTTCCAGCAGTATCGCTGCTGTCTTTTTTGCAGCTTTTGTGTTGCTGGAACATATGTG  
GTATGGTTCAGCAACTACCCCATCGAATTATTTGGTCCCCTCGTTATCAATGGGATCA  
GGGATACTTCCAGCAAGAAATATATCGAAGGGTTGGTGCCGACTAGCAGAAAATCAG  
AGTTTAGCAGAAGCTTGGTCTAAAATCCCGAAAAATTAGCTTTTTATGATTACATCGG  
CAATAATCCAGCAAAAGGGGGATTATTAGAGCGGGCTCAATGGACAACGGGGATGGA  
ATAGCCGTTGGGTGGTTGGGACATCCTATCTTTAGAGATAAAGAGGGGCGCGAGCTTTT  
TGTACGTCGTATGCCTACTTTTTTTGAAACATTTCCAGTAGTTTTGGTAGATGGAGACGG  
AATTGTGAGAGCTGATGTTCCTTTTAGAAGGGCAGAATCCAAGTATAGTGTGAGCAA  
GTGGGGGTAACGTGTGAGTTCTATGGTGGCGAACTTAATGGCGTCAGTTATAGTGATCC  
TGCAACTGTGAAAAATATGCTAGACGTGCTCAATTAGGTGAAATTTTTGAATTAGATC  
GTGCTACTTTGAAATCTGATGGTGTTTTTCGTAGCAGTCCAAGAGGTTGGTTCACTTTT  
GGGCATGCTTCGTTTGCTTTGCTCTTCTTTTTCGGACACATTTGGCATGGTGCTAGAAC  
CTTGTTCAAGAGATGTTTTTGGTGGTATTGATCCAGATTTGGATGCTCAAGTGAATTTGG  
AGCATTCCAAAACTTGGAGATCCAACACTACAAAGAGGCAAGTCGTC-----  
-----GTGGAAACGCTCTTTAATGGAACTTTAGCTTTAGCTGGTTCGTGACCAAGAAA  
CCTACTGGTTTCGCTTGGTGGGCCGGGAACGCCCGGCTTATCAATTTGTCCGGTAAACTA  
CTCGGGGCTCACGTAGCCCATGCCGATTAATCGTATTCTGGGCCGGAGCAATGAACCT  
ATTTGAAGTGGCTCATTTCTGACAGAGAAACCCATGTATGAACAAGGATTGATTTTAC  
TTCCCATCTAGCTACTCTAGGTTGGGGGGTAGGTCCTGGTGGGGAAGTTATAGATACC  
TTCCATATTTTGTATCTGGAGTACTTCACTTAATTTCCCTCTGCAGTATTGGGCTTTGGCG  
GTATTTATCATTCACTTCTGGGACCTGAAACTCTTGAAGAATCTTTTCCATTCTTCGGTT  
ATGTATGGAAAGATAGAAATAAAATGACCACCATTTTGGGTATTCACTTAATTTGTTAG  
GTATAGGTGCTTTTCTTCTAGTACTCAAGGCTCTTTATTTTGGGGGCGTATACGATACCT  
GGGCTCCTGGGGGGGAGATGTAAGAAAAATTACCAACTTGACGCTTAGCCCAAGTGT  
TATATTTGGTTATTTACTAAAATCCCCCTTGGGGGAGAAGGATGGATTGTTAGTGTGGA  
CGATTTAGAAGATATAATTGGAGGACATGTATGGTTAGGTTCCATTTGTATATTTGGTGG  
AATCTGGCATATCTTAACCAAACCTTTGCGTGGGCTCGCCGAGCACTTGTATGGTCTG  
GAGAGGCTTATTTGTCTTATAGTTTAGCTGCTTATCTATCTTTGGTTTCACCGCTTGTTG  
CTTTGTATGGTTCAATAATACCGCTTATCCTAGTGAGTTTTACGGGCCACCGGGCCAG  
AAGCTTCTCAAGCTCAAGCATTCACTTTTCTAGTTAGAGACCAACGCCTTGGGGCTAA  
CGTGGGATCCGCTCAAGGACCTACAGGTTTAGGTAAATATCTAATGCGTTCCCGACTG  
GAGAGGTCATTTTGGAGGAGAACTATGCGTTTTTGGGATCTCCGTGCTCCTTGGTTG  
GAACCTCTAAGAGGTCCCAACGGTTTGGACTTGAGTAGGTTGAAAAAAGACATACAA  
CCTTGGCAAGAGCGGCGCTCTGCGGAATATATGACTCACGCTCCTTTAGGTTCTTTAAA  
TTCCGTGGGTGGTGTAGCTACCGAGATCAATGCAGTCAATTATGTTTCTCCTAGAAGTT  
GGTTAGCTACCTCTCATTTTGTCTAGGATTCTTCCATTCGTGGGCCATTTATGGCATGC  
GGGAAGGGCCCGTGCAGCTGCAGCAGGATTTGAAAAAGGAATTGATCGTGATTTGGA  
ACCTGTTCTTTTCATGACCCCTCTTAACATGACTATAGCCCTTGGTAGATTTACCAAAGA  
CGAAAAAGATTTATTTGATATTATGGATGACTGGTTACGGAGGGACCGTTTCGTTTTTGT  
AGGTTGGTCTGGTCTATTGCTCTTTCCCTGTGCCATTTTTGCTTTAGGGGGCTGGTTTAC  
AGGTACAACCTTTGTAACCTCATGGTATAACCCACGGATTGGCCAGTTCTTATTTGGAAG  
GCTGCAATTTCTTAACGGCCGCAGTTTCTACCCCGCTAATAGTTTAGCACATTCTTTGT  
TACTACTATGGGGTCCGTAAGCACAAGGAGATTTTACTCGTTGGTGTCAATTAGGCGGT  
CTGTGGACTTTTTGTTGCTCTCCATGGCGCTTTCCGACTAATAGGTTTCATGTTACGCCAA



TTTGAACCTTGCTCGATCTGTTCAATTGCGACCTTATAATGCAATCGCATTCTCCGGACCA  
ATTGCCGTTTTTTGTTTTCTGTATTCTGATTTATCCATTAGGCCAATCCGGTTGGTTCTTTG  
CACCTAGTTTTGGTGTAGCAGCTATATTTTCGATTCATCCTCTTCTTCCAAGGATTTCATAA  
TTGGACGTTGAACCCATTTTCATATGATGGGAGTTGCCGGCGTATTGGGCGCTGCTCTGC  
TATGCGCTATTCATGGTGCTACCGTAGAAAATACTTTATTTCGAAGATGGTGACGGTGCA  
AATACATTCCGTGCTTTTAACCCAACCTCAGGCTGAAGAGACTTATTCAATGGTCACCGC  
TAACCGCTTTTTGGTCCCAAATCTTTGGGGTTGCTTTTTTCCAATAAACGTTGGTTACATTT  
CTTTATGTTATTTGTACCAGTAACCGGTTTATGGATGAGCGCTCTTGGAGTAGTCGGTCT  
GGCTCTGAACCTACGTGCCTATGACTTTGTTTCCCAGGAAATCCGTGCAGCGGAAGAT  
CCTGAATTTGAGACTTTCTACACCAAAAATATTCTTTTAAACGAAGGTATTTCGTGCTTG  
GATGGCGGCTCAGGATCAGCCTCATGAAAACCTTATATTCCCCGAGGAGGTTCTACCCC  
GTGGAACGCTCTTATGTCTGGAAGCACGGGAGAACGTTCTTTTTGCTGATATTATTACC  
AGTATTCGATACTGGGTCAATTCATAGCATTACTATACTTCCCTTTTCATTGCGGGTTGGT  
TATTCGTGAGCACGGGTTTAGCTTATGATGTGTTTGGAAAGTCCCCGACCAAATGAGTAT  
TTTACAGAGAGCCGACAAGGAATTCCATTAATCACAGGCCGCTTTGATTCTTTGGCGCA  
ACTCGATGAATTTAGTAGATCCTTTATGACTATAGATCGAACCTATCCAATTTTTACAGTG  
AGATGGTTAGCTGTTACGGACTAGCTGTACCTACCGTTTCTTTTTTGGGGTCAATATCA  
GCAATGCAATTCATCCAACGAATGGCTACACAAACCGTTGAGGGTAATTCTAGA---TCT  
GGCCCAAGACAAACTGGTCTAGGAAATTTATTGAAACCATTGAATTCGGAATATGGTAA  
AGTAGCTCCTGGATGGGGAACCTACCCCTTTGATGGGTGTCGCAATGGCTCTATTTGCGG  
TATTCCTATCTATTATTTGGAGATTTATAATTTCTCCGTTTTACTGGATGGAATTTCAATG  
AATATGCTTACTCTCAAACCTCTTCGTTTACACAGTAGTGATATTCTTTGTTTCTCTCTCA  
TCTTCGGATTCCCTATCTAATGATCCAGGGCGTAATCCTGGACGCGAGGAAATGGCCGAT  
ACTACTGGAAGGATTCCCTCTTTGGCTGATAGGTACTGTAGCTGGTATTCTTATAATTGGT  
TTACTAGGTGTTTTCTTTTACGGTTCATATTCCGGATTGGGTTTCATCCCTGATGCTTAATA  
TCTTTAGTTTGATCTGTATCTGTCTTAATTCTGCCCTTCATTTCGAGTAGTTTTTTCTTTGC  
TAAATTACCCGAGGCTTACGCTTTTTTCAATCCAATCGTAGATTTTATGCCAGTCATACC  
TGTGCTCTTTTTTCTCTTAGCCCTTGTTTGGCAAGCTGCTGTAAGTTTTTCGAATGACAC  
AATCAAATCCGAACGAACAAAATGTAGAATTGAATCGTACCAGTCTTTATTGGGGATTA  
TTACTCATTTTTGTACTTGCTGTTTTATTTTCAAATTATTTCTTCAATATGGAAGTAAATAT  
TCTCGCATTTATGCTACTGCATTGTTCAATTCTAATTCCTACTGCTTTTTTTACTTATCATT  
ACGTAAAGACGGTCAGTCAAATGATATGGAAACAGCAACCCTAGTCGCCATCTTTATA  
TCTGGTTTACTTGTAAGTTTTACCGGGTACGCCTTATATACCGCTTTTTGGGCAACCCTCT  
CAACAATAAGAGATCCATTTCGAGGAACACGGGGACATGGAAGCATTGGTTTATACAT  
TCCTCTTAGTTTCGACTCTAGGAATCATTTTTTTTCGCTATCTTTTTTTCGAGAACCACCTA  
AGGTTCCGACTAAAAGGGTGAATAATGACTATTGCTTTCCAATTGGCTGTTTTTGCATTA  
ATTGCTACTTCATCAATCTTATTAATTAGTGTACCCGTTGTATTTGCTTCTTCTGATGGTT  
GGTCAAGTAACAAAATATTGTATTTTCTGGTACATCATTATGGATTGGGTTAGTCTTTCT  
AGTAGCTATCCTTAATTCTCTCATCTCT-----ATGTCACCACAAACAGAGACT  
AAAGCAAGTGTTGGATTCAAAGCGGGTGTAAAGATTACAAATTGAATTATTATACTCC  
TGACTATGTAACCAAAGATACTGATATCTTGGCAGCATTCCGAGTAACTCCTCAACCTG  
GAGTTCCACCTGAAGAAGCAGGGGCCGCTGTAGCTGCCGAATCTTCTACAGGTACATG  
GACAACTGTGTGGACCGATGGACTTACCAGTCTTGATCGTTACAAAGGACGATGCTAC  
CACATTGAGCCCGTTGCTGGAGAAGACAATCAATATATTTGTTATGTAGCCTATCCTTTA

GACCTTTTTGAAGAAGGGTCTGTTACTAACATGTTTACTTCTATTGTAGGTAATGTTTT  
GGGTTCAAAGCGCTGCGCGCTCTACGTCTGGAGGATCTGCGAATTCCTACTTCTTATGT  
TAAACTTTCCAAGGCCCGCTCATGGCATCCAGGTTGAGAGAGATAAATTGAACAAG  
TATGGTCGTCCCCTATTAGGATGTACCATTAACCAAAATTGGGATTATCTGCTAAGAAC  
TACGGTAGAGCGGTTTATGAATGTCTCCGTGGTGGACTTGATTTTACCAAGGATGATGA  
GAACGTGAACTCTCAACCATTTATGCGTTGGAGAGACCGTTTCCTATTTTGTGCCGAAG  
CACTTTTTAAAGCACAAGCTGAAACAGGTGAAATCAAAGGACATTACTTGAATGCTAC  
TGCGGGTACATGCGAAGAAATGATGAAAAGGGCTGTATTTGCCAGAGAATTGGGAGTA  
CCCATCGTAATGCACGACTATTTAACGGGGGGATTCCTGCAAATACTACCTTGGCCCA  
TTATTGCCGGGATAATGGTCTACTTCTTCACATCCACCGCGCAATGCATGCAGTTATTGA  
TAGACAGAAGAATCATGGTATACATTTCCGTGTACTAGCTAAAGCGTTACGTATGTCTG  
GTGGAGATCATATTCACGCTGGTACCGTAGTAGGTAAACTGGAAGGGGAAAGAGAGAT  
CACTTTGGGCTTTGTTGATTTATTACGTGATGATTTTATTGAAAAAGACCGAAGTCGCG  
GTATTTATTTACCCAAGATTGGGTCTCTCTACCAGGGGTTCTACCCGTGGCTTCAGGG  
GGTATTCATGTTTGGCATATGCCTGCTCTGACCGAGATCTTTGGGGATGATTCGGTACTA  
CAGTTCGGTGGAGGAACTTTAGGACACCCTTGGGGAAATGCACCGGGTGCCGTAGCTA  
ATCGAGTAGCTCTAGAAGCGTGTGTACAAGCTCGTAATGAGGGACGTGATCTTGCTCG  
TGAAGGTAATGAAATTATCCGTGCGGCTTGCAAATGGAGCCCTGAACTAGCTGCTGCTT  
GTGAGGTATGGAAGGAGATCAAATTTGAATTTGAAGCAATGGATACTTTG-----ACGGC  
GATACATTTATACAAAACCTTCTACTCCGAGCACACGAAATGGAACCGTCGGCAGTCAA  
GTGAAATCCAATCCACGAAATAATTTGATCTATGGACAGCGTCGTTGCGGTAAAGGTCG  
TAATGCCAGAGGAATCATTACCGCAAGGCATAGAGGGGGAGGTCATAAGCGTCTATAC  
CGTAAAATCGATTTTCGACGGAATGAAAAAGACATATCTGGTAGAATCGTAACCATAGA  
ATACGACCCTAATCGAAATGCATACATTTGTCTCATACTATGGGGATGGTGAGAAGA  
GATATATTTTACATCCCAGAGGGGCTATAATTGGAGATACCATTGTTTCTGGTACAGAAG  
TTCTATCTCAATGGGAAATGCCCTACCTTTGACCGATATGCCCTTAGGCACGGCCATAC  
ATAACATAGAAATCACACTTGGAAAGGGTGGACAATTAGCGAGAGCTGCGGGTGCTGT  
AGCGAAACTGATTGCAAAAGAGGGTAAATCGGCCACATTAATAATTACCATCTGGGGAG  
GTCCGTTTGATATCCAAAACTGCTCAGCAACAGTCGGACAAGTGGGTAATGTTGGGG  
TGAACCAGAAAAGTTTGGGTAGAGCCGGATCTAAGCGTTGGCTAGGTAAGCGTCCTGT  
AGTAAGAGGAGTAGTTATGAACCCTGTAGACCATCCCCATGGGGGTGGTGAAGGAAG  
GCCCCAATTGGTAGAAAAAACCACAACCCTTGGGGTTATCCTGCGCTTGGAAAGAA  
GAAGTAGAAAAGGAATAAATATAGTGATAGTTGATTCTTCGTCGCCGTAGTAAAATG  
ATTCAACCTCAAACCCATTTAAATGTAGCGGACAACAGCGGGGCTAGAGAATTAATGT  
GTATTCGAATCATAGGAGCTAGT---AATCGACGATATGCTCATATTGGTGACGTTATTGTT  
GCTGTAATCAAAGAAGCAGTGCCCCATATGCCTCTACAAAGATCAGAAGTGATCAGAG  
CTGTAATTGTACGTACACGTAAAGAACTCAAACGTGACAACGGTATGATAATACAATAT  
GATGACAATGCAGCAGTTGTCATTGATCAAGAAGGAAATCCAAGAGGAACTCGAGTTT  
TTGGCGGATCGCTCGAGAATTGAGACAGTTGAATTTTACGAAAATAGTTTCATTAGCT  
CCTGAGGTATTAATGCTTAGTCCCAAAAGAACCAGATTCCGTAAACAACATAGAGGAA  
GAATGAAGGGAATATCTTATCGAGGCAATCATATTTGTTTCGGTAGATATGCTCTTCAGG  
CACTTGAACCCGCTTGGATCACTTCTAGACAAATAGAAGCGGGGCGAAAATCAATGGC  
ACGATATGCGCGTCGTGGTGGAAAAATATGGATACGTATATTTCCAGACAAACCTGTTA  
CAGTAAGACCTACAGAAACGCGTATGGGTTTCGGGAAAAGGATCTCCTGAATATTGGGT

ATCTGTCGTTAAACCAGGTCGAATACTTTATGAAATGGGTGGAGTATCAGAAATTGCAG  
CCAGAGAAGCTATTTCAATAGCTGCGTCCAAAATGCCTATACGAACTCAATTCGTTATT  
GCGGGAATGACCAGAATTAGACGAGGGGTATATAGCTCGGAGACGTAGAACAAAAATTC  
GTTTATTTGCATCAACCTTTTCGAGGGGCTCATTCAAGACTTACTCGAACTATTATTCAAC  
AAAAAATGAGAGCTTTGGCTTCTTCTCATCGGGATAGGGGCAGACAAAAGAGAAATTT  
TCGTCGTTTATGGATCACTCGGATAAATGCAGCAATTCGTGAGATT-----GTATCCTATAG  
TTATAGTAGATCCATAAAAGATCTGTACAAGAGTCAGTTGCTTCTTAATCGTAAAATACT  
TGCACAAATAGCCATATCAAATACAAATTGTCTTTACATGATTTCCAAGGAGATCATTAA  
ATTTAAA-----GAAGTATACGCTTTAGGTCAACATATATGTATGTC  
TGCTCACAAAGCGCGAAGAGTAATTGATCAGATTCGTGGGCGTCCCTACGATGAAATA  
CTTATGATACTAGAACTCATGCCTTATCGAGCGTGTTATCCATTTTTAAATTAGTTTATT  
CTGCAGCAGCAAATGCTACTAACAATAAGGGTTTCAACAAAACGGCTTTAATAATTAGT  
CAAGCCGAAGTTAACGAGGGTACTGTTCGTGAAAAAGTTAAAACCTCGAGCTAGAGGA  
CGTAGTTATCCGATAAAAAGACCTACCTGTCATATAACTATCGTATTACAAGATATATCTA  
AAGATGAGGTGGTATGGGACAAAAAATGGATGGAATCAAATATGCAGTATTTACAGA  
CAAAAGTATTCGGTTATTGGGGAACAAT--CAATATACTTCTAATGTGCAATCAGGATCA  
ACTAGGACAGAAATAAAGCATTGGGTGCAACTCTTTTTTGGTGTCAAGGTAATAGCTAT  
GAATAGTCATCGACTCCCGGGAAAGGGTAGAAGAATGGGACCCATTATGGGACATACA  
ATGCATTACAGACGTATGATCATTACGCTTCAACCGGGTATTCTATTCCACCTCTTAGA  
AAGAAAAGA ACTATGGCGGTTCCGAAGAAACGTACTTCTATATCAAAAAAGCGTATTC  
GTAAAAATATTTGGAACTAAAAGGGCATTGGGCAGCGAAAAAAGCAATTTCTTTAGC  
AAAATCTATTTCTACCGGAAATTCAAAAAGTTTTTTTTGTGCAACAAACAAGTAATATGG  
CCAAGGGTAAAGATGTCAGAATAAGAGTTATTTTGGAAATGTAACAGTTGTGTCCGAAA  
CGATCTTAAT-----AAGGAATCACCTGGCATTTCAGATATATTACCCAAAAGAATCGAC  
ACAATACGCCAGTCGATTGGAATTGAGAAAATTCTGTCCCTATTGTTACAAACATACG  
ATTCATGGGAGATAAAGAAAATGAAAATAAGGGCCTCCGTTTCGTAATAATTTGTGAAA  
AATGTGCACTGATCCGTAGGCGGGGACGAATTATAGTAATTTGTTCCAACCCAAGGCAT  
AAACAGAGACAAGGAATGCTTCGAGAAGAAGTAGCAGTATCTACTCGGACACTACAG  
TGGAGGTGTGTTGAATCAAGAACAGACAGTAAGCGTCTTTATTATGGCCGTTTTGTTCT  
GTCTCCGCTTATGAAAGGTCAAGCCGATACGATCGGCATCGCGATGCGAAGGGCTTTG  
CTTGGAGAAATCGAAGGAACATGTATAACACATGCAAAATCTGAA-----AAGATAACCAC  
ATGAATATTCTACCATAGTTGGTATTGAAGAATCAGTACATGAAATCTTAATGAATTTGA  
AAGAAATTGTATTGAGAAGTAATCTGTATGGAACCTTGCATGCGTCTATTTGCGTCAAG  
GGTCCTATAAACATAACTGCTAAAGACATCATCTCACCGCCTTCTGTGGAAATCGTTGAT  
ACTACACAGCATATAGCTAGCCTGACGGAACCATTTGATTTGTGTATTGGATTACAAATC  
GAGAGGAATCGAGGATATCGTATGAAAACACCAATAAGGCTCAAAATGGAAGTTAT--  
---CCTATAGATGCAGTATTCATGCCTGTTTCGAAATGCGAATCATAGTATTCATTCTTATGG  
GAATGGGAATGAAAAACAAGAGATACTTTTTCTCGAAATATGGACGAATGGAAGTTTA  
ACTCCTAAAGAAGCACTTCACGAAGCCTCCCGTAATTTGATTGATTTATTTATTCCTTTT  
CTACATGCGGAAGAACAA-----GACATAATTTTAGAGGACAATCAA---AACAGGGTACT  
TTACCTTTTTTTACCTTTCATGATGGATTGGCT--AAACTAAAAAAA---AAAAAC-----AT  
AGCATTGAAATTTATTTTTATTGACCAATCAGAATTGCCTTCCAGGACTTATAATTGCCT  
CAAAAAGTCCAATATAAATACATTATTAGACCTTTTTGAATAAGAGTCAAGAAGATCTTC  
TGAAAATTGAACATTTTCGAATAGAAGATGTAAAAAGGGTATTGGGCATTCTACAAA

GCGT-----TTTGTAATTGATTTACCGAAGAATAAGATGCTTCGAGATGCAAAT--GAGGGA  
ATGTCTACAATACCTGGGTTTAGTCAGATAACAATTTGAGGGATTTTGTAGGTTTCATTGAT  
CGGGGCTTGATGGAAGAACTTAATAAGTTTCCAAAATTGAAGATACAGATCAAGAAA  
TTGAATTTCAATTATTTGTGGAAACATATCAATTGGTAGAACCTTTAATAAAAAGAAAGA  
GATGCTGTGCATGAATCACTCACATATTGTTCTGAATTATATGTACCTGCGGGATTAATTT  
GGAAAACCGGTAAGGATATACAAGAACAACCATATTTATTGGAAACATTCCTCTAATG  
AATCCCTGGGAACCTCTATAGTAAATGGAATATACAGAATAGTGATCAATCAAATATTG  
CAAAGTCCCGGTATTTATTACCGTTCAGAATTGGACCATAACGGAATTTTCGGTCTATAACC  
GGTACCATAATATCAGATTGGGGAGGAAGATCAGAATTAGAGATTGATAGAAAAGCAA  
GGATATGGGCGCGTGTGAGTAGGAAACAAAAATATCTATTTTAGTTCCATCATCAGCT  
ATGGGTTTCGAATCTAAAAGAAATTATAGATAATGTTTGCTATCCTGAAATTTTCTTGTCT  
TTCCGAATGATAAGGAGAAAAAAAATTGGGTCAAAGAAAATGCCATTTTGGAGT  
TTTATCAACAATTTGCTTGTGTAGGTGGGGATCCAGTATTTTCTGAGTCCCTTATGTAAGG  
AATTACAAAAGAAATTTTTTCAACAAAGATGTGAATTAGGAAGGATTGGGCGACGAAA  
TATGAACAGGAGACTTAATCTTGATATACCTCATAACATTACATTTTTGTACCGCGGGA  
TGTATTGGCAGCTGCGGATCACTTGATCGGAATGAAGTTTGGAAATGGGTACACTTGACG  
AT-----ATGAACCACTTGAAAAATAAACGCATTTCGTTCTGTAGCGGATCTGTTACAAGAT  
CAATTCGGATTGGCTATGGTTCGTTTAGAAAATGCAGTTCGAGGAACTATAGGTGGAGC  
AATTAGG--CAAAAATTGATA--CCGACTCCTCATAATTTGGTAACTTCAACTCCA-----  
---TAAACAACCACTTATGAATCATTTTTTCGGCCTACACCCCTTATCTCAAGTTTTGGATCG  
AACAAATCCATTGACACAAATAGTTCATGGGCGAAAATCGAGTTATTTGGGCCCTGGG  
GGGTTGACAGGGCGGACTGCTAGTTTTTCGGATACGAGATATCCATCCTAGTCACTATGG  
ACGATTTGCCCAATTGACACATCTGAAGGAATCAATGTTGGACTCATTGGATCCTTAG  
CAATTCATGCGAGGATTGGTCATTGGGGG---TCTTTAGAAAGACCTTTTTTAT-----GAA  
ATTTCTGAGAGATCG-----AAAGGGGTACGGGTGATTTATTTATCACCAAGTATAGATGA  
ATACTATATGGTAAACGGCAGGAAATCTTTGGCATTAAATCATGGTATTCAGGAAGAAC  
AGGTTGTTCCCTGCTCGATACCGTCAAGAATTCCTGACTATTGCATGGGAACAGATTTCAG  
CTTCGAAGCATTTTTCCCTTCCAATATTTTTCTGTTGGAGCTTCCCTCATTCCTTTTATCG  
AGCACAATGATGCGAATCGGGCTTTAATGAGTTCTAATATGCAACGTCAAGCAGTTCCG  
CTTCTCGATCCGAGAAGTGCATTGTTGGAACCTGGGTTGGAACGCCAAGCGGCCCTAG  
ATTCGGGGGTTTTCCGCTATAGCTGAACACGAGGGAAAGATCATTTATACCGATACTGAC  
AAGATCATTTTATCGGGTAATGGAGCCACTCTAAGCATTCCCTTGGTTATGTATCAACGT  
TCCAACAAAAACACTTGTATGCATCAAAAACCTCAGGTTTCGCGGGGTAATGTATTA  
AAAGGGACAAATTTTAGCGGATGGTGCTGCTACAGTTGGTGGCGAACTCGCTTTGGGA  
AAAACGTATTAGTAGCTTATATGCCCTGGGAGGGCTACAATTTTGAGGATGCGGTACT  
CATTAGTGAACGCCTGGTATATGGAGATATTTATACTTCTTTTCATATACGGAAATATGAA  
ATTCAGACTCATGTGACAAGCCAAGGC---CCTGAAAGAATACTAATGAAATACCGCAT  
TTAGAAGCCCATTTACTCCGCAATTTAGACAGAAATGGAATTGTGATGCTGGGCTCTTG  
GGTAGAAACGGGCGATATTTTAGTAGGTAATTAACACCGCAGGTGGCGAAAGAA---T  
CATCATATGCCCGGAAGATAGATTATTACGAGCCATACTTGGCATTTCAGGTATCCACTG  
CAAAGGAACTTGTCTAAAATTACCTATAGGTGGCAGGGGTCGAGTTATTGATGTGAGA  
TGATCCATAAAAAAGGG---GGTTCAGTTATAATCCAGAAACGATTCGTGTATATATTT  
CACAGAAACGTGAAATCAAAGTAGGTGATAAAGTAGCTGGAAGACATGGGAATAAGG  
GTATCATTTCTAAAATTTGCCTAGGCAAGATATGCCTTATTTGCAAGATGGAACACCTG

TTGATATGGTCTTCAACCCATTAGGAGTACCTTCACGAATGAATGTAGGACAGATTTTT  
GAATGCTCGCTCGGGTTAGCGGGGGTCTGCTAGACAGGCATTATCGAATAGCACCCTT  
TGATGAGAGATATGAGCAAGAGGCTTCGAGAAAAGTAGTGTCTTCTGAATTATATGAAG  
CCAGTAAGCAAACAGCGAATCCATGGGTATTTGAACCCGAATATCCGGGAAAAAGCAG  
AATTTTTGATGGAAGAACGGGGGATCCTTTTCGCACAACCTGTTATAATAGGAAAGTCCT  
ATATCCTGAAATTAATTCATCAAGTTGATGATAAAATCCACGGACGTTCCAGTGGACATT  
ACGCGCTTGTTACACAACAACCTCTTAGAGGAAGGGCCAAGCAAGGGGGACAACGGG  
TAGGAGAAATGGAAGTTTGGGCTCTAGAGGGATTTGGTGTGCTCATATTTTACAAGAG  
ATGCTTACTTATAAATCTGATCATATTAGAGCTCGTCAAGAAGTACTTGGTACTACGATC  
ATTGGAGGAACAATACCTAACCCCGAGGATGCTCCAGAATCTTTTCGATTGCTCGTTTCG  
AGAACTACGATCTTTGGCTCTAGAACTGAACCATTTCCTTGTATCTGAGAAGAACTTCC  
AGATTAATAGGAAGGAAGCT-----ATGATCGACCGGTATAAACATCAACAAC  
TTCGAATTGGATCAGTTTCTCCTCAACAAATAAGTGCTTGGGCCAAAAAATCCTACCT  
AATGGAGAGATGGTTGGAGAGGTGACAAAACCCTATACTTTTCATTACAAAACCAATA  
AACCGGAAAAAGATGGATTGTTTTGTGAAAGAATTTTGGGCCTATAAAAAGTGGAAT  
TTGTGCTTGTGGAAATTATCGAGTAATCGGAGATAAAAAAGAAGACCCGAAATTTTGT  
GAACAATGCGGAGTCGAATTTGTTGATTCTCGGGTACGAAGATATCAAATGGGATACAT  
TAAACTGGCATGTCCAGTAACTCATGTGTGGTATTTGAAACGTCTTCCTAGTTATATCGC  
GAATCTTTTAGATAAACCTCTTAAAGAATTAGAAGGCCTCGTATACTGCGAT-----TTTTT  
GTTTGTAGGCC---GTAGCTAAAAACCTACTTTCTTACGATTACGAGGTTTCATTTCGAA  
TATGAAATACAATCTTGGAAATATAGCATCCCACTTTTTTTTACTACTCAAGGCTTCGAT  
ACATTTTCGAAATAGAGAAATCTCGACTGGAGCAGGTGCTATCAGAGAACAATTAGCCG  
ATCTAGATTTGCGACTTATTACAGATTCTTCATTGGTTGAATGGAAAGAATTAGGGGAA  
GAA---GGAGCCACCGTAATGAATGGGAAGATAGAAAAATTGGAAGAAGAAAGGATTT  
TTTGGTTAGACGCATGGAATTAGCTAAGCATTATTCGAACAACGTAGAACCAGAAC  
GGATGGTTTTGTGCCATTACCGGTTCTTCCTCCCGAATTGAGACCGATCATTAGATAG  
ATGGGGGTAAACCAATGAGTTCGGATATTAATGAACTCTATAGAAGAGTTATTTATCGGA  
ACAATACCCTTACGGATCTATTAACAACAAGTAGATCTACGCCAGGGGAATTAGTAATG  
TGTCAGGAGAAGTTAGTACAAGAAGCCGTGGATACACTTCTTGATAATGGGATCCGCG  
GACAACCAATGAGGGACAGTCATAATAAAGTTTACAAGTCGTTTTTCAGATGTAATTGAA  
GGCAAAGAGGGAAAGATTTTCGTGAGACTCTGCTTGGTAAACGGGTCGATTATTCGGGGC  
GTTCCGTCATTGTCGTGGGTCCTTCGCTTTCATTACATCGATGTGGGTTGCCTCGCGAAA  
TAGCAATAGAGCTTTTCCAGACATTTGTAATTCGTGGTCTAATCAGACAACACGCTGCT  
TCCAACATAGGAGTTGCCAAAAGTAAAATTAGGGAAAAAGAACCAATCGTGTGGGAA  
ATACTTCAAGAAGTTATGCAGGGGCATCCTGTATTGCTGAATAGAGCACCCACTTTGCA  
TAGATTAGGCATACAGGCATTCCAACCCATTTAGTGGAAGGACGTGCTATTTTTTTTACA  
TCCATTAGTTTGTAAAGGATTAATGCAGACTTTGATGGGGATCAAATGGCTGTTTCATGT  
ACCTTTATCTTTAGAGGCTCAAGCAGAGGCTCGTTTACTTATGTTTTTCTCATATGAATCT  
CTTGTCTCCAGCTATTGGAGATCCCATTTCCGTACCAACTCAAGATATGCTTATGGGACT  
CTATGTATTAACGACTGGGAATCATCGAGGTATTTGTGCAAATAGGTATAATCCAAGTAA  
TCACAGAAAC-----TATCAAAATGAAAAAATTGACGATAATAACTATAAGTATACA-----  
AAAGAACCCTATTTTTGTAGTTCCTATGATGCACTTGGGGCTTATCGGCAGAAACGAAT  
CTATTTAGATAGTCCTTTGTGGCTCCGTTGGCGACTAGATCAACGC---GTCATTGCATCA-  
----AGAGAAGTTCCTATCGAAGTTCATATGAATCTTTGGGTACCTATCATGAGATTTAT

GGGCACTATCTAATAGTAAGAAATGTCAAAAAAGAAATCCTTTGTATAGATATTCGAAC  
CACTGTTGGTCATATTTCTTTTTATCGAGAAATAGAAGAAGCCATACAAGGGTTTTGCC  
GGGCTTGCTCATACGGTACC-----ATGGCAGAACGGGCCGATCT  
GGTCTTTCACAATAAAGCGATAGATGGAACCTGCCATGAAACGACTTATTAGCAGATTAA  
TAGATCACTTTGGAATGGCATATACATCACATATCCTGGATCAAATAAAGACTCTGGGTT  
TCCAACAAGCCACTGCTACATCCATTTTCATTAGGAATTGATGATCTTTTAAACAATACCTT  
CTAAGGGATGGTTAGTCCAAGATGCTGAACAACAAAGTTTGATTTTGGAAAAACACCA  
TCATTATGGGAATGTACACGCGGTAGAAAAATTACGTCAATCTATTGAGATATGGTATGC  
TACAAGTGAATATTTGCGACAAGAAATGAATCCTAATTTTAGGATGACTGATCCTTCTAA  
TCCAGTCCATATAATGTCTTTTTTCGGGAGCTCGAGGAAATGCATCTCAGGTACACCAAT  
TAGTAGGTATGAGAGGATTAATGTCGGATCCCCAAGGACAAATGATTGATTTACCCATT  
CAAAGCAATTTACGCGAAGGACTCTCTTTAACGGAATATATCATTTCCTGCTATGGAGC  
CCGCAAAGGAGTTGTGGATACTGCTGTACGAACATCAGATGCTGGATACCTCACGCGC  
AGACTTGTGAAGTAGTTCAACACATTGTTGTACGTAGAACAGATTGTGGCACTCTCCG  
GGGTAGTTCCGTAAGTCCCTCGAAATGGGACGATAACA---GAAAGAATTTTATCCAAAC  
ATTAATTGGTCGTGTATTAGCAGACGATATATATATAGGTTCCCGGTGTATTGCCATTGCA  
AATCAAGATATTGGGATTGGACTTGTGAATCGATTCATAACC-----TTTCGAGC  
ACAACCAATATCTATTGCAACCCCTTTACTTGCAAAAGTACATCTTGGATCTGTGATT  
ATGTTATGGTCGGAGTCCCACTCATGGTGACCTGGTCGAATTGGGAGAAGCAGTAGGT  
ATTATTGCGGGTCAATCTATTGGGGAACCTGGGACTCAACTAACATTAAGAACTTTTCAT  
ACCGGTGGAGTATTCACAGGCGGTACTGCAGAACATGTCCGAGCTCCTTCTAATGGAA  
AAATAAAATTCAAAGAAGATTTGGTTCATCCCACACGTACACGTCATGGTCATCCTGCT  
TTTCTATGTTATATAGATCTATATGTAACCTATTGAGGGTCAAGATATTCGACATAATGTGA  
CTATTCCCCCAAAAAGTTTTCTTTTAGTTCAAATGATCAATATGTAGAATCAGAACAA  
GTGATTGCTGAGATTCGCGCGGGAACATCCACCTTG---AATTTTAAAGAGAGGGTTGCA  
AAACATATTTATTCGACTCAGAGGGAGAA---ATGCACTGGAGTACCGCCGTGTACCAT  
GCACCCGAATATACATATGGTAATGTTTCATCTCTTACCAAAAACAAGTCATTTATGGATA  
TTATCAGGGGGTCCATACAGA-----TCTAGTATAGTCTCTTTTTTCGCTCCACAAGGATCA  
AGATCAAATGAATGTTTCAT-----TCTCTTTCTGCCGAACAAAAATCCATTTCTAAT-----CT  
CCTGGTGACTAATAACCAA---GTGAGACACAAATTTTTGAGTTCGGAGCCTTCTGGT-----  
-GGGAGAGGATTCCTTGATTAT--TCAGGACCTAATCGAATCATATGCAATGGTCATTGTA  
ATTTTCATATATCCTGCC---ATTCTCCACGAGAATTCT-----TATTTATTGGCAAAGAGGAGA  
AGAAATAGATTCATCATTCCATTCCAATATAATCAAGAACAAGAGAAAGAACTAATAAC  
CCGTTCCGGTATCTCGATTGAAATACCCATAAAT-----GGTATTTCCGTAGAAATAGTAT  
TCTTGCTTATTTGACGATCCCCGATACAGAAGAAACAGTTCGGGAATTACTAAGTATG  
GGACTATAGAGGCGCATTCAATCGTCAAAAAAGAAAGAT-----TTGATTGAGTATCGAAA  
A-----AGGCCAAAATACACGAAAATAGATAGATTTTTTTTTCATTCCCGAGGAAGT  
GCATATTTTACCGGATCTTCTCCGTAATGGTACGGAATAATAGTATTATTGGAGTAAAT  
ACACGAATCACTTTCAGACAAGAAGCCGAGTAGGCGGATTGGTCCGAGTGGAGAAA  
AAAAAAAAAAGATTGAACTAAAATATTTTCTGGAGATATCCATTTTCCTGGAGAGAC  
AGATAAGATATCCTGGCACAGCGGTATCTTGATACCCCTGGAACGGGAAAAAAA-----  
AATTCTAAGGAATCAAAA-----AATTTTAAAAATTGGATCTATGTCCAACGG-----ATCAC  
CCCTACCAAGAAAAAG-----TATTTTGTTTTGGTTCGACCCGTAGTTACATATGAAATAG  
CAGATGGGATAAATTTAGCAACGCTTTTTTCCCAGGATCCATTGCAGGAAAGGGATAAT

GTGCAACTTCGAGTTGTTAATTATATCCTTTATGGAAATGGTAAACCAATTCGAGGAATT  
TCTCATACAAATATTCAATTAGTTCGAACTTGTTTAGTATTGAATTGGGACCAAGAAAA  
AAAT-----GGTTCGTCTATGGAGGAGGTTTCATGCTTCCTTTGTTGAAGTAAGGGTAAAT  
AATCTGATTCGAGATTTTATAAGAATGGACTTAGTGAAGTCCCCTATTTTCGTATACCAGA  
AAAAGGAATGCTCCGGCAGGGTCAGAATTAATCCTCGCT---AATGGATCAGATTACACA  
AATCTCAATCCT---TTTTATTCC-----AAGGCAAGG-----ATTCAACAATCACTTACC  
CAACATCAAGGAATTCGTACGTTATTGAATAGA-----AATAAGGAATGCCAATCCT  
TGATATTTTTGTCATCATCTAATTGTTTTCGA-----ATAGGTCCATTCAAGGGTTTGAATA  
TAACAAT-----ATGACAAAAAATCAGATTCCCTACTTCTAATTAGGAATTCGTTGGGT  
CCTTTAGGGATT-----GTCCCTAAAATTGCGAATTTTTCTTCA-----TTTTACTATTTAATAA  
CT-----CATAATCAGATCTTG---ATAAATAAATATTTGTTACTTGACAAT-----TTAAAACA  
GACTTTCCAAAAA-----CTCAA---TATTATTTAATGGATGAAAATGGGAGA-----ATTTAT  
AATCCCAGCCCGTGCAGTAACATGATTTTGAATCCATTCAATTGGAATTGGTATTTTCTC  
CATCACGATTATTGTGAAGAAACATCGACAATAATTAGC---CTTGGACAATTTTTTTGTG  
AAAATGTATGTATATCTAAATACGGACCA-----CATCTAAAATCTGGCCAGGTTATAATT  
GTTTCAT--GTTGACTCTTTAGTAATAAGATCAGCTAAGCCCTATTTGGCTACTCCAGGAG  
CAACCGTTCATGGCCATTATGGGGAAATACTTTACAAAGGAGATACATTAGTTACATTTA  
TATATGAAAAATCGAGATCTGGTGATATAACACAAGGCTTCCAAAAGTAGAACAAGTG  
TTAGAAGTCCGTTTCGATCGATTCAATATCAATGAACCTTAGAAAAGCGGGTTGAAGGTTG  
GAACGAACGTATAACAAGAATTCCTTGGGATTCTTGGGGATTCTTGATTGGCGCTGAGC  
TAACCATAGCGCAAAGTCGTGTCTCTTTGGTTAATAAGATTCAAAGGTTTATCGATCC  
CAGGGAGTGCAGATCCATAATAGGCATATAGAAATTATTGTACGTCAAATAACATCAA  
AGTGTGGTTTCAGAA-----GATGGAATGTCTAATGTTTTTTCACCTGGCGAATAATT  
GGGTTGTTGCGCGCGGAACGAACGGGGCGCTTTGGAAGAAGCGATTTGTTACCGA  
GCCGTCTTATTGGGAATAACGAGGGCGTCTCTGAATACTCAAAGTTTCATATCTGAAGC  
GAGTTTTCAAGAAACCGCTCGAGTTTTAGCAAAGCAGCTCTACGAGGTCGTATCGAT  
TGTTGAAGGGTCTGAAAGAGAACGTTGTTCTGGGGGTATGATACCTGTTGGTACCG  
GATCAAAGGATTAGTGCACCGTTCC-----AGTCAACACAGCAACATTTCT-----TTGGAA  
ATCCAAAATACGAATCTATTCGAAGGGGGCATGCGA-----GATATTTGTTCCACCACAG  
AGAATTATTTATTCTTGTATTCCAAAGAATTTCCATGATACATCAGAACAAAATTTAC  
AGGATTTATTGATTCC-----ATGACAAGAAGATATTGGAACATCAATTTGGAAG  
AGATGATGGAAGCAGGAGTTCATTTTGGTCATGGTACTAGGAAATGGAATCCTAGAATG  
GCACCTTACATCTCTGCAAAACGTAAAGGTATTCATATTACAAATCTTACTAGAACTGCT  
CGTTTTTTATCAGAAGCTTGTGATTTAGTTTTTGGATGCAGCAAGTAGAGGAAAACAATT  
CTAATAGTTGGTACCAAAAATAAAGCGGCTGATTCAGTAGCATCGGCTGCAATAAGGG  
CTCGATGCCATTATGTTAATAAAAAATGGCTCGGTGGTATGTCAACGAATTGGTCCACTA  
CGAAACGAGACTTCATAAATTCAGGGACTTGAGAGCGGAACAAAAGACGGGAAGAT  
TCAATCGTCTTCCGAAAAGAGATGCAGCAATGTTGAAGAGACAATTATCTCACTTGCA  
AACATATCTGGGTGGCATCAAATATATGACCGGGTTGCCAGATATTGTAATCATCGTTGA  
TCAGCAAGAAGAATATACGGCTCTTCGAGAATGTGTCACTTTGGGAATTCCAACAATTT  
GTTAATCGATACAAATTGTGACCCGGATCTCGCAGATATTTTCGATTTCCCGCAATGATG  
ACGCTATAGCTTCAATCCGATTCATTCTTAACAAATTAGTATCCGCAATTTGTGAGGGTC  
GTTCTAGC---TATATAAGAAATCGTATGGGACAAAAAATAAATCCACTTGGTTTCAGACT  
TGGTACAACCCAAAGTCATCATTCCCTTTGGTTTGCACAACCAAAAAAATTATTCTGAAG

GTCTACAGGAAGATCAAAAAATACAGGATTGTATCAGAAATTATGTACAAAAAATATG  
AGAATCTCCTCTGGT---GTTGAGGGAATTGCACGTATAGAGATTCAAAAAAGAATCGAT  
CTGATCCAGGTCATAATATATATGGGGTTTCCAAAATTGTTAATAGAGGGTAGATCACGA  
-----GGAATCGAAGAATTACAGAGCAGTGTACAAAAAAGATTTAATTCTGTAAACC  
GAAAACCTAACATTGCTATCACAAGAATTGCAAAACCTTATGGACACCCTAACATTCTT  
GCAGAAATTATAGCCGGACAATTAAGAATAGAGTTTCATTTGCAAAGGCAATAAAAA  
AAGCTATTGAATTAACGGAACAAGCGGATACAAAAGGAATTCAAGTCCAAATAGCGGG  
GCGTATCGACGGAAAAGAAATTGCACGTGTGCAATGGATTAGAGAAGGTAGGGTTCCC  
CTACAAACCATTGAGCTAAAATTGATTATTGTTCTTACAGTTTCGAACTATTTATGGG  
GCATTAGGCATCAAATTTGGATATTTACAGACGAGGAGATGTCTCGTTACCGAGGGCC  
TCGTTTTAAAAAATACGCCGTCTGGGGCTTTACCGGGACTTACTAGTAAAAGGCCTA  
CGCCCGGAAGTGATCTTCGAAACCAATCGCGTTCCGGGAAA---AGATCTCAATATCGTA  
TTCGTCTAGAAGAAAAACAAAAGTTGCGGTTTCATTATGGTCTGACAGAGCGGCAATT  
ACTTAAATACGTTGCTATTGCGGGAAAAGCCAAAGGCTCAACAGGTCAGGTTTTACTA  
CAATTACTCGAAATGCGTTTGGATAATATCCTTTTTTCGATTAGGTATGGCTTCGACCATT  
CTGGAGCCCGACAATTAGTTAACCATAGACATATTTTAGTTAATGGTCGTATAGTAGATA  
TACCAAGTTATCGCTGCAAACCCGAGATATTATTACGACAAGGGATGAACAAAAATCC  
AGAGCTCTGATTCAAATTTATCTTGATTCATCCCCCAT---GAGGAATTGCCAAAACATT  
TGACTCTTCACTCATCTCAATAT-----AAAGGATTAGTCAATCAAATAATAGATAGTAAGT  
GGTTGGTTTGAAAATAAATGAGTTGCTAGTCGTAGAATATTATTCTCGTCAGACTATGT  
CACGTGAGGTAAGTGCAGAAAGAAAAACTGCAAAATCCGATCCAATTTATCGTAATCG  
ATTAGTTAACATGTTGGTTAACCGTATTTTGAAACACGGAAAAAATCATTGGCTTATC  
AAATTATCTATCGAGCCCTGAAAAGATTCAACAAAAGACAGAAAACAAATCCACTATG  
TGTTTTACGTCAAGCAATACGTGGAGTAACTCCCGATATAGCAGTAAAAGCAAGACGT  
GTAGGCGGATCGACTCATCAAGTTCCCATGAAATAGGATCTACACAAGGAAAAGCAC  
TTGCCATTCGTTGGTTATTAGGGGCATCCCGAAAACGTCCGGGTGCAAATATGGCTTTC  
AAATTAAGTTCCGAATTAGTGGATGCTGCCAAAGGGAGTGGCGATGCCATACGCAAAA  
AGGAAGAGACTCATAGAATGGCAGAGGCAAATCGAGCTTTTGCACATTTTCGTATGGG  
TAGGGACACTATTGCCGACATAATCACTTCTATACGAAATGCTGACATGGATAAAAAGG  
GAACGGTTGCAATCGCATCTACGAATATTACCGAAACCATTGTTAAAATACTTCTACGG  
GAAGGCTTTATTGAAAATGTGAGAAAACATCGAGAAAACGATCAATTTTTCTTGGTTTC  
AACTCTGCGACATAGAAGG-----AATAGGAAAGGACCATATAGA-----ACTATTTA-----  
-AAACGTATCAGCCGACCCGGTCTACGAATCTATTCCAATCAACGAATTCCTAGGAT  
TTTAGGAGGAATGGGAATTGTAATCTTTCTACTTCTCGAGGTATAATGACAGACCGAG  
AGGCTCGACTAGAAGGAATCGGGGGAGAAATTTGTGTTATATATGGATGACAAAACC  
CATATCAAGAATTGGTTCACGTAGGAATGTACGCATCGGTTACGTAAGAGTGGACGTA  
GAATACCAAAGGAGTTATTTCATGTTCAAGCAAGTTTCAACAATACCATTGTAACGGTT  
ACAGATATACGGGGTTCGGGTGGTTTCGTGGTCTCCGCCGGTACTTGTGGATTACGGG  
GCACAAGAAGAGGCACGCCATTTGCTGCTCAAACCGCAGCATCAAATGCTATTTCGTAC  
AGTAGTAGATCAGGGTATGCAACGAGCAGAAGTCAGGATAAAAAGGTCCTGGTCTCGGA  
AGAGATGCAGCATTACGAGCCATTCGTAGAAGTGGTATACTATTAAGTTTTGTCAGAGA  
CGTAACCCCTATGCCACATAATGGATGTAGACCTCCTAAAAAAGACGTGTAATGCCAA  
CTATTAACAACCTTATTAGAAACACAAGACAGCCAATAAAAAATGTCACAAAATCCCC  
CGCTCTTCGGGGATGCCCTCAGCGTAAAGGAACATGTACTAGGGTGTACTATCACCC



CCAAAAACCAAACCTCTGCCTTACGTAAAGTTGCCAGAGTACGATTAACCTCTGGATT  
TGAAATCACTGCTTATATACCTGGTATTGGCCATAATTTACAAGAACATTCTGTAGTCTT  
AGTAAGAGGAGGAAGGGTTAAGGATTTACCCGGTGTGAGATATCACATTGTTTCGAGGA  
ACCCTAGATGCTGTCGGAGTAAAAGATCGTCAACAAGGGCGTTCTAAATATGGGGTCA  
AAAAGCCAAAATGGCAAGGAAAAGTTTGATTAGAGGGAGAAGAAGAGGCAGAGA  
TTGGAACAGAAATATCATTGATTTCGTCGATCCTCAAAAAAGAAATAAAA-----AAA  
GTTCCGTCCTTGAGTGAAAAATGGAAATTCACGGAAAATTACAATCCCCACCACGTA  
ATAGTGCACCTACACGTCTTCATCGACGTTGTTTTTCGACCGGAAGACCAAGAGCTACC  
TATCGAGACTTTGGGTTATCCGGACATATACTTCGTGAAATGCTTCATGCATGTTTGTTA  
CCGGGGGCAACAAGATCAAGTTGGATGATAAAAAATCCATTCATCTCGGTTATTTTCGCA  
AGAAGAAAAAGAAGAAAATAAG-----GGGTCTGTTGAATATCAAATATTAAGTTTCACC  
ATAAGATACGGAGACTTACTTCACATTTAGAATTGCACAGAAAAGATTTTTTATCTCA  
GAGGGGTTTGCAGAAAATTCTGGGAAAACGTCAACGTCTGCTGGCTTATTTGTCAAAG  
AAAAATAGAGTACGTTATAAAGAATTAATTAGTCAATTGGATATTCGGGAACCAAAAAC  
TCGT-----ATGGTAAAACCTTCGTTTAAAACGATGTGGTAGAAAGCAACGAGCTATCTATC  
GAATCGTTGCAATTGATGTTTCGATCCCGAAGAGAAGGAAGGGATCTTCAGAAAGTGGG  
TTTTTACGATCCGATAAAGAATCAAACCTTATTCAAATGTTCCCGCTATTCTATATTTCTT  
GAAAAAGGCGCTCAGCCTACAGGAACCGTTCATGATATTTTAAAGAAGGCAGAGATTT  
TTAAAGAACTTCACGTTAAT-----ATGGATAAATCCAAG---CTTTTTCTTAAATC  
CAAGCGATCTTTTTCGTAGGCGTTTGCCCCCAATTGGATCGGGGGATCGAATTGATTATA  
GAAACATGAGTTTAATTAGTCGATTTATTAGTGAGCAAGGAAAAATATTATCTAGACGA  
GTGAATAGATTGACTTTGAAACAACAACGATTAATTACTATTGCCATAAAACAAGCTCG  
TATTTTATCTTCGTTACCTTTTCTTAATAATGAGAAA-----CAATTTGAGAGAACTGAGTC  
TACTCCTAGAACTACAGGTCCTCGAACCAGAAAGAAAGTGACACGTTCACTAAAAAA  
AAATCCTTTTGTAGCTAATCATTATTGGGAAAAATCGAGAAGCTCAACATGAGGGCAG  
AAAAAGAAATAATCGTAACTTGGTCCCGGGCATCTACCATTATACCCATAATGATCGGC  
CATAAATTGCTATTATAATGGAAAAGAACATTTGCCTATTTATATAACAGAGAGTATG  
GTAGGTCACAAATTGGGAGAATTTCGCACCTACTCTGACTTTCCGGGGGCATGCGAGAA  
ATGATAAAAATCTCGCCGATGATTTTTAACTCTTTTCTACTAGGTAATCTATTATCTTTA  
TGCATGAAGATAATCAATTCGGTCGTTGTGGTTCGGACTCTATTATGGATTTCTGACCACA  
TTCTCCATAGGGCCCTTTATCTCTTCTTCTCCGAGCTCGGGTTATGGAAGAAGGA-----  
---ACCGAGAAGGAGGTATCAGCAACAACCTGGTTTTATTACGGGACAGCTCATGATGTT  
CATATCGATCTATTATGCGCCTCTGCATCTAGCATTGGGTAGACCTCATAAATAACTGTC  
CTAGTTCTACCGTATCTTTTGTTCATTTCTTCTGGAACAATCACAACACTTTTTTGGATT  
ATGGATCTACTACCAGAAATCAATGCGTAATCTCAGCATTCAATGTGTATTCCTGAATA  
ATCTCATTTTTCAATTATTCAACCATTTCATTTTACCAAGTCCAACGTTAGCCAGATTAGT  
CAACATTTATATGTTTCGATGCAACAACAAGATGTTATTTGTAACAAGTAGTTTTGTTGG  
TTGGTTAATTGGTCAATTTTATTCATGAAATGGGTTGGATTGGTATTATTCTGGATACGG  
CAAATCGTTCTATTAGATCG-----AAGTACCTTGTGTCAGAATTGAGAAATTCTA  
TGGCTCGAATTTTTAGTATTCTTATTATCACCTGTGTCTACTATTTAGGCAGAATACC  
GTCGCTATTGTCACTAAAAAACTGAAAGAAGCCGAAAAAGAAAAACCTCTTGTGAC  
TCTTCTTTTCGACTATAAACGATGGAATCGTCCATTGCGATATATAAAAAACGAGCGATT  
TGAAAATGCTGTAAGAAATGAAATGTCACAATATTTTTTTTATACATGTATAAGTGACGG  
AAAACAAAGAATATCTTTTACATATCCACCCAGTTTATCAACCTTTTTTGAATGATACA

AAAAAAGTTGTTTTTGTGCACGACAGAAAAAATATCTTCGGAAGAGTTGTATAATCACT  
GGGCTTATACCAATGAACAAAAAAGAAACAACCTGAGCAAGGAATTTATCAATCGAAT  
TGAAACTCTAGACGAGGGGTCTCTTGATCTGGATATACTCGAAAAAAGACTAGGTTG  
TGCAAT--GAGAATGAACAAAAATGCTTACCTAAAATATATGATCCTTTTTTTGAATGGAC  
CCCATCGCGGAACAATTCAAATTTGTATTCACACACT-----CTTTGGATAAATAAGTATC  
AAGGTATCCTTTGCCGAGAATTTGAAAAAGAATATCCTAACGATCAA---CTTGAAATAA  
ATGAAATCAAAAAAACGGTTCCTCGATGGTTATACAAATTAACCGATTTAGAAGAAGA  
GGAGATAGAAGGTATTCGTTACGAAAAGCAAACGTGTAGTAATTTTTACTGATGCCT  
TGACGCGTTATTCGCAACAACCAGATTTTCGTCGAGATCTAATCAAAGGATCCATGCGC  
GCTCAGAGACGTA AACAGTTACTTGGGAAGTGTTC AAGCAACAGTGC GTTCCCCAC  
TTTTTTTGGACAGAGTAGACAAAAC TTTTTTTTTTTCTTTTGATATC-----TCCGGAACGC  
TGAAATATTTTTTCAGAAATAGACAGGAGAATGAACGGATAAGAATATCAGAAACTTG  
GGATACTATTATATTTGCTCAAGCAATAAGGGGTTATATGTTAGTAACCCAATCGATTCTT  
AGAAAATATATAGTATTGCCCTCGTTGATAATAGCCAAAAATATTGGGCGTATGTTATTAT  
TTCAATTTCCCGAGTGGCACGAGGATTTGAAAGCGTGGAATAAAGAAATGCATGTTAA  
ATGCACTTATAATGGTGTTCAATTGTCAGAAAAAGAATTTCCGAAAAATTGGTTAACCG  
ACGGTATTCAGATAAAGATCCTATTTCTTTCTGTCTGAAACCTTGGCACAGATCTAAA  
AAAGGAAAACAGAGAATTTTTGTTTTTTAACGGTTTGGGGAATGGAAGCTGAACTAC  
CGTTTGGTTCTCCCCGAAAACGACCTTCCTTTTTTTGAACCCATCTGGAAAGAAATTGA  
AAAAACATTATAAAAATGAAA---AAGAAATGTTTTATAGCTCTAAGAATTTTAAAAGA  
AAGAACAAAATGGTTTATAAGGGTTTCAAAGAAAAAACACGATGGGTTATCAAATA  
TTTCTA-----TTTATAAAAAGAATAATGAAAGA ACTTGCAAAAAGCAAAA-----ATTAAA  
GTAATCAGATTATTCACGAATCTCCCATTCGAATTAGATCCCTGGATTGGATAAATTATTC  
ATTGACAGCAAAAAAATAAAAAGATGTGGTTGATAGGACAAGTACAATCAGAAATCAA  
ATCGAAAAAATCACAAAAGACAAGAAAAAAAATCCTAACAAAATAGGTTGTGATGATA  
AGGGATTAGAATCGCTGAAAAAATTTGGCAGAAATTA AAAAGAAGAAGTAACCGATT  
AATACGCAAATGTTACTATTTTTTTGAAATTTTTTATTGAAAGGATATAC---GATATCCTTTT  
TTGTATCATAAATAGTCTCAGAATCAAAGTCAAAC TTTTTATTCATTTTATTTCG---GACC  
TTGACTCCTTGTACAGGCATATGTATTTTACAAATTATCACAAACCCAAGTTTTTAACA  
AGTATCACTTGAGATCTGTACTTCAATATACACTTCTTTTTCTTAAGGATAGAATAAAGG  
ATTCTTTTACACAGGGAATATTTCAATTCGGAATCAGGACATAAGAACTTCGCAATTTTA  
GAATGAATGAATGGAAAACTGGTTAAGAGGCCGTTATCAATACGATTTTTTCTCAGACT  
CGATGGTCTCGATTAGTACCGCAAAAATGGCGAAATAGAATCCATCAAAGATGTATGGT  
TCAAAC TAAAAC TTTATTCG GATTTATATGAAAAAGACCAA-----TTAATTCATTACGAGA  
ACAATTTAAAAC TATAAATATGATAAATATGATCGTTTATCACATAAATATATTCATGA  
C-----TCTGATCTGGATAGAAAATTTTTGATTGGAAAATTTTTAATTTTTGTCTTAGATCT  
TTTACTGGATGGCAATGAATGAAGAAATACTAAATTGTTGGTTTTTCCCGGAATTTGT  
GTCATTTTATAATGCCTATAAGATTCAACCGTGGACCATAACCAATTAATTTACTTCTTTTA  
AATCTACGGGCAACATAGCAGCGGAATTAGATTTATTCTTGAAAAGATATTTTCTTTTT  
CAATTAAGATGGGATAATCCTTTGAATAAAAAAATAATCAATAATGTCAAAGTCTATTGT  
CTACTGCTTAGACTAAAAAATCCAAAGGAAATTGCTATAGCCTCTATTCAAAGAGACGA  
AATGAGTTTGGATGTAATGCCGATTCGAAGACTCTAACTCTTGCAAAATTAATAAATA  
AAGGAATGTTGATTATTGAACCTGCTCGGTTATCTATAAAAAGGGATGGACAATTTCTTT  
TGTATCAAAC TATAACTATTTACGGGTGCATAAAAATAAGCACAAT-----CCTTTGCTTG

TTCTTGAAAATATTTTATCTTCTCAACGTCGTAGAGAATTGAGAATTCGAATTTGTTTAA  
GATTGCTTTGGCCCAATTATCGATTAGAAGATTTAGCTTGTATAAATCGCTATTGGTTTGA  
TACCAATAATGGCAGTCGTTTCAGTATGTCAAGGATACGTATGTATCCAGCAAAACGAC  
ATCCATTTAAATCCTGGATCTTCGAATTGAGAGAGATATTGAGAGAGATCAAGAATTCT  
CACTATTTCTTAGATTTCGTGGACCAAATTCGATTCAGTGGGATCTTTCACTCACATTTT  
TTCCACCAAGAACGTTTTATGAAACTCTTTGACCCCGAATTTGGAGTATCCTACTTTC  
A---CGCGATTCA-----CAGGGTTCAACAAGCAATCGATATTTACG-----ACCAAAGGT  
GTAGTACTGCTTGTAGTAGCG---GTCCTTATATAT-----CGTATTAACAATCGAAATAT  
GGTCGAAAGAAAAAATATCTATTTGATGGGGCTTCTTCT-----ATACCTATGAAT  
TCCATTGGACCCAGAAATGATCCATTGGAAGAATCTTTT---GGGTCTTCCAATATCAATA  
GGTTGATTGTTTCG---CTCCTGTATCTTCCAAAAGGGAAAAAGATCTCTGAGAGTTGTT  
TCATGGATCCGAAAGAGAGTACTTGGGTTCTCCAATAACT-----AAAAATGTATC  
ATGCCTGAATCTAACTGGGGTTCGCGGTGGTGGAGGAACCGGGTCGGAAAAAAGAGG  
-----GATTCTAGTTGTAAGATATCT-----AATGAAACCGTAGCTGGAATTGAGATCTCAT  
TCAAAGAGAAAGATATCAA---TATCTGGAGTCTCCTTTTGTATCCTATACGGAT-----GA  
TCCGATCCGCAAGGACCATGATTGGGAATTGTTTGTATCGTCTTTCTCCGAGAAAGAAG  
CGAAACATAATCAACTTG-----AATTCGGGACAGCTATTCGAAATCTTAGTGAAACACTG  
GATTTGTTATCTCATGTCTTCTTTTCGTGAAAAAAGACTAATTGAAGTGGAGGGT---TTC  
TTCAAACAACAAGGA---GCTGGGTCAACTATTCAATCAAATGATATTGAGCATGTTTCC  
CAT-----CTCTTCTCGAGAAACAAGTGGGGTATTTCTTTGCAAATTGTGCTCAATTCAT  
ATGTGGCAATTCCGCCAAGATCTCTTCGTT-----AGTTGGGAGAAG---AATCCGCACG  
AATCAGATTTTTTTAGGAAC---GTATCGAGAGAGAATTGGATTTGGTTAGACAATGTGTG  
GTTGGTAAACAAGGATCGGTTTTTTAGCTTTTTTTAGC-----AAGGTACGGAATGTATCGT  
CAAATATGCAATATGATTCC-----ACAAGA-----TCTATTTTCGTTCAAGTAACGGATTCT  
AGCCAATTGAAAGGATCTTCT--GATCAATCCAGAGATCATTTCGATTCCATTAGT-----  
---AATGAGGATTCGGAA-----TATCACACATTGATCAATCAAAG  
AGAGATTCAACAATAAAAGAAAGATCGATTCTT--TGGGAT-----CCTTCCTTTCTTCAA  
ACGGAACGAACAGAGATAGAATCAGAC-----CGATTCCCGAAA-----TGCCTTTCTGGAT  
ATTCC-----TCAATGTCCCGGCTATTACG---GAACGTGAGAAGCAGATGAAAAATCATC  
TGCTTCCGGAAGAAATCGAAGAATTTCTT-----GGGAATCCTACAAGATCAATTCGTTCT  
TTTTTCTCTGACAGATGG-----TCAGAACTTCAT--CTGGGTTCGAATCCTACTGAGAGGT  
CCACTAGAGATCAG-----AAATTGTTGAAGAAACAACAAGATGTTTCT--TTTGTCC  
CTTCCAGGCGATCGGAA-----AATAAAGAAATGGTTGATATATCAAGATAATTACG  
TATTTACAAAAT-----ACCGTCTCAATTCATCCTATTTTCATCAGATCCGGGATGTGATATGG  
TTCCG---AAGGATGAACCGGAT--ATGGACAGTTCCAATAAGATTTTCATTCTTGAACCAA  
AAT-----GATTTATTTTCATGACCGGAACAGGGGAGGATACACGTTG-----CA  
CCACGATTTTGAATCAGAA-----GAGAGATTTCAAGAAATGGCAGATCTATTAACTCTAT  
CAATAACCGAGCCG---GATCTGGTGTATCATAAGGGATTTGCCTTTTCTATTGATTCCTAC  
GGATTGGATCAAAAAAAA-----TTCTTGAATGAGGTATTCAACTCCAGGGATGAATCGA  
AAAAGAAATCTTTA-----TTGGTTCTACCTCCTATTTTTTAT-----GAAGAGAATGAATC  
TTTTTATCGAAGGATCAGAAAAAAATGGGTCCG---ATCTCCTGCGGGAATGCTTTGGA  
AGATCCAAAACCAAAAAGAGTGGTATTTGCTAGCAACAACATAATGAAGGCAGTCAAT  
CAATATAGATTGATCCAAAATCTGATTCAAATCCAATATAGCATCCATGGG-----TACATA  
AGAAATGTATCGAATCAATTCTTTTTAATG-----AATAGACCCGATCGCAACTTCGAAT

ATGGAATTCAA-----AGGGATCAAATAGGAAATGATACTCTGAATCATAGAACTATAAT  
GAAATATACGATCAACCAACATTTATCGAATTTGAAAAAG---AGTCAGAAGAAATGGTT  
CGATCCT-----CTTATTTCTCGAACCGAGAGATCCATGAATCGGGATCCTGATGCATA  
TAGATACAAATGGTCCAATGGGAGCAAGAATTTCCAGGAACATTTGGAACATTTCTGTTT  
CTGAGCAGAAGAGCCGT-----TTTCAAGTAGTGTTCGATCGATTACGT-----CAATATTC  
GATTGATTGGTCCGAGGTATCGACAAACAAGATCTTTCTAAGTCACTTCGTTTCTTTTT  
GTCC-----AAGTTGCTTCTCTTTTTG-----TCCAAGTTGCTT  
CTCTTTTTGTCTAAGTCACTTCCTTTTTTCTTTGTGAGTATCGGGAATATCCCCATTGATA  
GGTCCGAG---ATCCACATCTAT--GAATTGAAAGGTCCGAATGATCAACTCTGCAATCAG  
TTGTTAGAATCAATAGGTGTTCAAATCGTTCATTTGAATAAATTGAAACCC-----TTCTTA  
TTGGAT-----GATCATGATACTTCC---CAAAAATCGAAATTATTGATCAATGGAGGAAC  
AATATCACCATTTTTGTTCAATAAGATACCA---AAGTGG---ATGATTGACTCATTCCATAC  
T-----AGAAAAATCGCAGGAAATCCCTTGATAAACTGATTCCCTATTCTCAATGATATC  
CCACGATCGAGACAATTGGCTGAATCCCGTGAAACCTTTTCATAGAAGTTCATTGATAT  
CTTCTTTTTATAAAGCAAATCGACTTCGATTCTTGAATAATCCACATCACTTCTGGTTCTA  
T-----TGTAACAAAAGATTCCCTTTTTATGTG-----GAAAGGGCCCGTATCAATAATTA  
TGAT-----CTTACGTAC---GGACAATTCCTCAATATCTTGTTCAATCGCAACAAA---ATATT  
TTCTTTGTGCGTCCGTAA-----AAAAACATGTTTTTTGGAG---AGAGATACTCCG-----  
-ATCGAGTCACAGGTATCTAACATATTCATACCTAACGATTTTCCACCAAGTGGTGACGA  
AACG---TATAACTTGACAAATCT-----TTTCATTTTCCAATTCGATCCGCTCCATTCGTT  
CGT-----AGAGCTCTTACTCGATCGCAGACATTTCTGGAACACCTCTAACAGAGGGAC  
AAATAGTCAATTTTGAAGAACTTATTGTCAACCTCTTTCAGATATGAATCCATCTGATT  
CAGAAGGGAAGAACTTGCATCAGTATCTC-----AATTTCAATTCAAACATGGGTTTGATT  
CACATTCCATGTTCTGAGAAATATTTACCA-----TCCGAAAAGAGGAAAAA-----  
-----CGGAGTCTTTGTCTAAAG-----AAATGCGTTGAGAAACGGCAGATGTATAGACCC  
TTTCAACGAGATAGTGCTTTTTCAAATTTCTCAAATGGAATCTGTTCCAAACATATATG  
CCATGGTTCCTTACTTCGACAGGGTGCAAATATCTAAATTTACCCCTTTTAGATACTTTT  
TCAGACCTATTG-----CCGATACTAAGTAGCAGT---CAAATTTTGTATCCATTTTTTCATGA  
TATTATGCATGGATCAGATATATCATGGCCAATTCCTCAGAAAAAATTGTGG-----GT  
GATTCTTCCACAATGGAATCTG---ATAAGTGAGATTTTCGAGTAAGTGTTTACATAAT-----  
CTTCTTCTGTCCGAAGAAATGATTTCGTCGAAATAATGAGTCACCCATTCCATTGATATGG  
GCACATCTGAGATACCAAATGCTCGGGAGTTC---CTCTATTCAATCCTTTTCTTCTTC  
TTGTTGCTGGATAT--CTCGTTCGTACACATCTTCTTTTGTTCCTCGA-----GCCTCTAGT  
GAGTTACAGACAGAGTTCGAAAAGATCAAATCTTTGATGATTCCATCATAATGATTGA  
GTTGCGAAAACCTTCTGGATGGGTATCCTACATCTGAACTGAATTCTTCTGGTTAAAGA  
ATCTCTTTCTAGTTGCTCTGAAACAATTAGGAGATTTTCTAGAAGAAATACGGGGTTCT  
GCTTCTGGTGGCAACATGCTTTTTGGGTGGTGGTCCC-----GCTTATGGG---GTCAA  
ATCAATACGTTCTAAGAAGAAATATTTGAATATCAATCTCATCGATATCATCGATTTCTTA  
---AGTATCATACCAAATCCCATCAATCGAATCACTTTTTTCGAGAAATACGAGACATCTAA  
GTCGTACAAGTAAAGAGATCTATTCATTGATAAGAAAAAGAAAAACGTGAACGGTGA  
TTGGATTGATGATAAAATCGAATCCTGGGTGCGCAAACAGTGATTTCGATTGATGATGAAG  
AAAGAGAATTCTTGGTTCAGTTCTCC-----ACCTTAATGAAA-----GAAAAAAGGATTGA  
TAAAATTCTATTGAGTCTGACT---CATAGTGATCATTTATCA-----AAGAATGATTC  
TGTTATCAAATGATTGAACAACCGGGATCAGTTTACTTACGATACTTAGTTTACATTCA

T-----AAAAAGTATCTAATGAATTATGAGTTCAATAGATCCTGTTTAGCAGAAAGACGGA  
TATTCCTTGCTCATTATCAGACAATCACTTAT-----TCACAAACCTCGTGTGGGGCTAATA  
GTTTTCAATTTCCCATCTCATGGA-----AAACCCTTTTCGCTCCGCTTAGCCCTATCCCC  
TCT--AGGGGTATTTAGTGATAGGTTCTATAGGAACTGGACGATCATATTTGGTCAAATA  
CCTAACGACAAACTCCTATGTTCTTTTATTACGGTATTTCCGAACAAGTTCCTGGATG  
ACAAGCCTAAAGGTTATCTTATTGATGATATC-----AATATTGAT--ATTGATGATAGTGA  
CGAT-----ATCGATGATGACC  
TTGATATTGATACGGAGCTGCTAACTATGATGAATGCGCTA-----ACTATGGAT-----A  
TGACGCCGAAAATAGACCGATTTTATATCACCCCTTCAACTCGAATTAGCAAAAGCAATG  
TCTCCTTGATAATATGGATTCCAAACATTCATGATCTGTCTGTGAATGAGTCGAATTAC  
TTATCCCTCGGTCTATTAGTGAACCATCTCTCC-----AGGGATTGTGAAAGATCCTCC--  
ACTAGAAATATTCTTGTTATTGCTTCGACTCATATTCCCCAAAAGTGGATCCCCTACTTA  
ATAGCTCCGAATAAATCAAATACATGCATTAAGATACGAAGGCTTCTTATTCCACAACA  
ACGAAAGCACTTTTTCACTCTTTTATATACTAGGGGATTTCACTTGGAAAAGAAAATGT  
TCCATACT-----AATGGATTTCGGGTCCATAACCATGGGTTCCAATGCACGAGATCTTGTA  
GCACTTACCAATGAGGCCCTATCAATTAGTATTACACAGAAGAAATCCATTATAGACACT  
AATACAATTCGATCCGCTCTTCATAGACAAACTTGGGATTTGCGA-----TCCCAGGTAA  
GATCGGTTCAAGATCATGGGATCCTTTTCTATCAGATAGGAAGGGCTGTTGCACAAAAT  
GTACTTCTAAGTAATTGCCCCATAGATCCTATATCTATCTATATGAAGAAGAAA-----TCAT  
GTACGGAAGGGGATTCTTATTTGTACAAATGGTACTTCGAGCTTGGAACGAGCATGAA  
GAAATTAACGATACTTCTTTATCTTTTGAGTTGTTCTGCCGGATCGGTGCTCAAGATCT  
TTGGTCTCCACCC-----GGACCCGATGAAAAA---AATTGGATCACTTCTTATGGATTCGTT  
GAGAATGATTCT--GATCTAGTTCATGGCCTATTAGAAGTAGAAGACGCTCTGGTGGGA-  
----TCCTCACGGACAGAAAAGATTGCAGTCAGTTTGATAATGAT-----CGAGTGACATT  
GCTTCTTCGGTCCGAACCAAGGAAT--CCCTTAGATATGATGCAAAATGGATCTTGTTCT  
ATCGTTGATCAGAGATTTCTATATGAAAA-----TACGAATCGGAGTTTGAAGAA---GGG  
GAAGGAGAAGGAGCCCTCGACCCGCAA-----CAGCTAGAGGAGGAT-----TTAT  
TCAATCAC-----ATAGTTTGGGCTCCT-----AGAATATGGCGCCCT-----TGTGGCAATTT  
ATTTGATTGTATCGAAAGTCCCAATGAATTGGGATTTCCC--TATTGGGCCAGGTCATTT  
CGG-----GGCAAGCGGATCATTGATCATGAACATGATGAGCTTCAAGAGAATGATTGCG  
GAGTTCTTGAGAGTGGAAACCATGCAGTACCAGACACGAGATAGATCTTTCAAAGAAC  
AAGGCTTCTTTGAATAAGCCAATTCATTTGGGACCCTGCGGATCCATTCTTTTTTCTAT  
TCAA---GATCAGCCCTTTGTCTCTGTGTTTTACGTCGAGAATTCTTTGAGATCAAG  
AGATGTCAAAGGGGCTTCTTACTTCCCAAACAGATCCTTCTACATCTATGAATAAACGC  
TGTTTCATC-----AATAATACGCAAGAAAAGCACTTCGAATTGTTGATTCATCGCCAGAG  
ATGGCTTAGAACC-----AATAGTTCAATTATCT-----AATGGATCTTTCCGTTCTAAT-----A  
CTCCATCCGAGAGTTATCAGTATTTATCAAATCTGTTCCCTATCTAAC---GGAACGCTATTG  
GATCAAATGACAAAGACATTGTTGAGAAAGAGATGGCTTTTCCCGGATGAAATGAAAC  
ATTTGATT-----CATGTAACAGGAGAAAGATTTCCCATTCCTATGCCTAGATCGCGG---AT  
AAATGGAAATTTTATTGATAAGACCTTTTCAATTGTAGCCAATATCTTATTACGAATAATT  
CCGACAACCTCAGGGGAAAAAGAGGCATTTACCTATTACAGAGATGGG-----ATGTCAG  
CTCAATCCGAAGGAAATTATGCGGAAGCTTTACAGAATTATTATGAAGCTACGCGACTA  
GAAATTGATCCCTATGATCGAAGTTATATACTCTATAACATAGGCCTTATCCATACAAGCA  
ACGGAGAACATACGAAAGCTTTGGAATATTATTTCCGGGCACTAGAACGAAACCCATT

CTTACCACAAGCTTTTAATAATATGGCCGTGATCTGTCATTAC---CGAGGAGAACAGGCC  
ATTCAACAAGGGGATTCTGAAATTGCAGAGTCTTGGTTCGATCAAGCTGCTGAGTATTG  
GAAACAAGCTATAGCGCTTACTCCAGGTAATTATATTGAAGCACATAATTGGTTGAAGA  
TCACGAGGCGGTTTGA-----ATGAACTGGCGATCAGAACGGATATGGATAGAACTTAT  
AACGGGGTCTCGAAAAACAAGTAATTTCTTCTGGGCCTGTATCCTTTTTTTAGGTTTAC  
TAGGATTCTATTGGTTGGAACCTTAGTTATCTTGGTTCGGAATCTGATATCTTTATTTCC  
GTCTCAGCAAATCCTTTTTTTTCCACAAGGGATCGTGATGTCTTTCTATGGGATCGCGG  
GTCTGTTTCATTAGCTCCTATTTGTGGTGCACAATTTGGTGGAAATGTAGGCAGTGGTTATG  
ATCAATTCGATAGAAAAGAAGGAATAGTGTGTATTTTTTCGTTGGGGATTTCTGGAAGA  
AATCGTCGCATCTTCTTCGATTCCTTATGAGAGATATCCAGTCGATTAGAATAGAAGTT  
AAAGAGGGCCTTTATCCTCGTCGTGACTTTATATGGAAATCCGAGGTCAGGGGGCCCT  
TCCGCTGACTCGTATTGATGAGAAT--TTGACTCCGCGAGAAATTGAACAAAAAGCTGC  
TGAATTAGCCTATTTCTTGC GCGTACCAATTGAAGTATTT

>Morus

ATGGAAAAATGGCGGTTTCGATTCAATGTTGTTTCTAAGTAAATCAATAAATAGTCTTGG  
TCCTATTGAA---ACTAGTGTAATGAAGATCCGATTATAAATGATATGGATAAAGACATTC  
CTAGTTACAGTAATGTTGATCATTAGTTCGGCGTCAGGTACATTCGGAATTTCTATCTG  
ATGACACTTTTTTAGTTAGGGATAGTAATAGGGATAGTTACACCATATATTTTGATATTGA  
AAATCAAATTTTTGAAATTGACAACCATGAT-----TCTTTTATAAGTGAACCAGAAAATT  
CTTTTATAGTTATCAGAATCTAGTTATCTGAATAATGTATCGAAGAATGACGATCCTCG  
CTATGATCGTTACGTGTATGATACTCAATATAGTTGGAATAATCACATTAATAGTTGCATT  
GGCAGTTATCTTCGT-----TATCAAATCTGTATTGATAGTGACATTTAACTAGTAGTGAC  
AATTACAATGACAATTACATTTATACTTATATTTGTGGCAGCGAGAGTTCCAATATAAGA  
ACTGGTGC GGATGATAGTGATTTAACA ACTATAAGAGAGAGTTCT-----GTA ACTCAA  
AAATACAGGCATTTGTGGTTC AATGTGAAAATTGTTATGGATTAAATTATAAGAGATTT  
TTGAAATCAAAAATGAATATTTGTGAACATTGTGGATGTCATTTGAAAATGAGTAGTTC  
AGATAGAATCGAACTTTTGATTGATCCAGGTACTTGGGATCCTATGGATGAAGACATGG  
TCTCTCTGGATCCTATTGAATTTAATTCGGAGGAGGAACCTTATAAAGATCGTATTGATT  
CTTATCAAAGAAAGACGGGATTAACGGAGGCTGTTCAAACAGGTACAGGTAAACTAAA  
CGGCATTTCCCGTAGCAATTGGGGTTATGGATTTTCAGTTTATGGGGGGTAGTATGGGATC  
TG TAGTGGGCGAGAAAATTACACGTTTGATCGAGTATGCTACCAATCAATCTTTACCTC  
TTATTCTAGTATGTGCTTCCGGAGGAGCACGCATGCAAGAAGGAAGTTTGAGTTTGATG  
CAAATGGCTAAAATATCTTCTGCTTTATATGATTATCAATCAAATAAAAAGTTATTCTATAT  
AGCAATCCTTACATCTCCTACTACGGGTGGGGTGACAGCTAGTTTTGGTATGTTGGGAG  
ATATCATTATTGCCGAACCCAATGCCTACATTTGCATTTGCGGGTAAAAGAGTAATTGAAC  
AAACATTGAATAAGACAGTACCTGAGGGTTCACAAGTGGCTGAATATTTATTCCATAAG  
GGCTTATTCGATCCAATCGTACCACGTAATCCTTTAAAAGGCGTTCTGAGCGAGTATTT  
CAGCTCCATGCTTTCTTTCTTTGAATCAA AATTCAATCAAGATGGTAACCATTCGAGC  
CGATGAAATTAGTGATATTATCCGTGAACGTATTGAACAATATAATAGAGAAGTAAAGAT  
TTAAATACCGGTACCGTACTTCAAGTAGGCGATGGCATTGCTCGTATTTAIGGTCTTGA  
TGAAGTAATGGCAGGTGAATTAGTAGAATTTGAAGAAGGTACGATAGGCATTGCTCTG  
AATTTGGAATCAAATAATGTTGGTGTGTATTAATGGGTGACGGTTTGATGATACAAGA  
AGGAAGTTCTGTAAAAGCAACAGGACGAATTGCTCAGATACCGGTAAGTGAGGCTTTT  
TTGGGTCGTGTTATAAATGCACTGGCTAAACCTATTGATGGTCGAGGTGAAATTCAGC

TTCTGAATCTCGTTTAATTGAATCTCCTGCTCCGGGTATTATTTTCGAGACGTTCTGTATAT  
GAGCCTCTTCAAACAGGACTTATTGCTATTGATTCAATGATACCTATAGGACGTGGTCA  
GCGAGAATTAATTATTGGGGACAGACAGACTGGTAAAACAGCGGTAGCTACAGATACG  
ATTCTCAATCAACAGGGGCAAAACGTAATATGTGTTTATGTAGCTATTGGTCAAAAAGC  
ATCTTCTGTGGCTCAGGTAGTACTACTTTACAAGAAAGGGGAGCAATGGAATACACTA  
TTGTGGTAGCTGAAACGGCGGATTCTCCGGCTACATTACAATACCTCGCTCCTTACACA  
GGAGCAACTTTGGCTGAATATTTTATGTACCGTGAACAACACACTTCAATCATTATGAT  
GATCCCTCCAAACAAGCACAGGCTTATCGCCAAATGTCTCTTTTATTACGAAGACCGCC  
GGGTCGCGAAGCTTATCCCGGAGATGTTTTTTATTTGCATTACGCCTTTTGAAAGAG  
CTGCTAAATCAAGTTCTCGTTTAGGTGAAGGAAGTATGACTGCTTTACCAATAGTTGAG  
ACTCAATCGGGAGATGTTTCGGCTTATATTCTACTAATGTAATTTCCATTACAGATGGA  
CAAATATTCTTATCCGCGGATCTGTTCAATGCTGGAATCAGACCTGCTATTAATGTGGGT  
ATTTCTGTTTCCAGAGTAGGATCTGCGGCGCAAATTAAGCTATGAAACAAGTAGCCG  
GCAAATTAATTTGGAATTGGCACAATTCGCAGAATTAGAAGCCTTTGCACAATTTGCC  
TCTGATCTCGATAAAGCTACTCAGAATCAATTGGCAAGAGGTCAACGATTACGTGAGTT  
GCTCAAACAATCTCAATCAGCCCCTTAGCGGTGGAAGAACAGATAATCACTATTTATA  
CCGGAACGAATGGTTATCTTGATTCATTAGAAATTGGACAGGTAAGGAAATTTCTCGTT  
GAGTTACGGACTTACTTAAAAACGAATAAACCTCAGTTCCAAGAAATCATATCTTCTAC  
CAAGACATTTACTAAGGAAGCAGAAGCCCTTTTGAAAGAAGCTATTCAGGAACAGATG  
GAGCGTTTTCTCCTTCAAGAACAAGTAATGAGAATAAATCCTACTACTTCTAGTCCTGG  
GGTTCCCGCGCTTGAAAAAAAACCTGGGGCGTATTGCTCAAATCATTGGTCCGGTA  
CTAGATGTAGCTTTTCCGCCGGGCAAGATGCCTAATATTTACAACGCTCTGGTAGTTAA  
GGGTCGAGATACTGTTGGTCAACAAATTAATGTGACTTGTGAAGTACAGCAATTATTAG  
GAAATAATCGAGTTAGAGCTGTAGCTATGAGTGCTACAGATGGTCTAATGAGAGGAATG  
GAAGTGATTGACACAGGAGCTCCTTTAAGTGTTCCAGTCGGCGGAGCGACGCTAGGA  
CGAATTTTCAACGTGCTTGGAGAGCCATTGATAATTTAGGTCCTGTAGATACTCGCAC  
AACATCTCCTATTCATAGATCTGCGCCTGCCTTTATACAATTAGATACAAAATTATCTATT  
TTTGAAACAGGAATTAAGTAGTAGATCTTTTAGCCCCTTATCGCCGTGGAGGAAAAAT  
AGGACTATTCGGGGGGGCTGGAGTAGGTAACACTGTACTCATTATGGAATTGATCAACA  
ACATTGCCAAAGCTCATGGAGGTGTATCCGTATTTGGCGGAGTAGGTGAGCGTACCCGT  
GAAGGAAATGATCTTTACATGGAAATGAAAGAATCCGGCGTAATTAATGAACAAAATAT  
TGCAGAATCAAAGTGGCTCTAGTCTACGGTCAGATGAATGAACCGCCGGGGGCTCGT  
ATGAGAGTTGGTTAACTGCCCTAACTATGGCGGAGTATTTTAGAGATGTTAATGAACA  
AGACGTACTTCTATTTATCGACAATATCTTTTCGTTTTGTCCAAGCGGGATCCGAAGTATC  
CGCCTTATTGGGTAGAATGCCTTCTGCTGTGGGTATCAACCCACTCTTAGTACCGAAAT  
GGGTTCTTTACAAGAAAGAATTACTTCTACCAAAGAGGGGTCCATAACTTCTATTCAAG  
CAGTTTATGTACCTGCGGACGATTTGACCGATCCAGCTCCGGCCACGACATTTGCACAT  
TTAGATGCTACTACCGTACTATCAAGAGGATTGGCCGCCAAAGGCATCTATCCAGCAGT  
AGATCCTTTAGATTCAACGTCAACTATGCTCCAACCTCGGATTGTTGGTGAAGAACATT  
ATGAAACTGCGCAAAGAGTTAGACAACTTTACAACGTTACAAAGAACTTCAGGACAT  
TATAGCTATCCTTGGGTGGACGAATTATCCGAAGAAGATCGCTTAACCGTAGCAAGAG  
CACGAAAAATTGAGCGTTTCTGTCAACAACCTTTTTTTGTAGCAGAAGTATTTACCGGT  
TCCCCAGGGAAATATGTTGGTCTAGCAGAAACAATTAGAGGGTTTAAATTGATCCTTTC  
TGGAGAATTAGATGGTCTTCTGAACAGGCTTTTTATTTGGTAGGTAACATCGATGAAG

CTACCGGAAGGCTATGAACTTAGAAATGGAGAACAAATTGAAGAAAATGACCTTAAA  
TCTTTGTGTACTGACCCCGAATCGAATTGTTTGGGATTCGGAAGTGAAAGAAATAATTT  
TATCTACTAATAGTGGACAAATTGGCATATTACCAAATCACGCGCTATTGCCACAGCCG  
TAGATATCGGTATTTTGAAGAATACGCCTTAACGACCAATGGTTAACGATGGCTCTGATGG  
GCGGTTTTGCTAGAATAGGTAATAATGAGATCACTGTTTTAGTAAATGATGCGGAGAAG  
GGTAGTGACATTGATCCACAAGAAGCTCAGCAAACCTTTGAAATGGCGGAAGCTAACT  
TGAGTAAAGCTGAAGGCAAGAGACAAACAATTGAGGCAAATCTAGCTCTCAGACGAG  
CTAGGACACGAGTAGAGGCTATCAATATGATGTCGATGAAAAATGTAACCGATCCTTTC  
CTTTCCTTGAGTTATTGGCCATCCGCCGGAAGTTTCGGGTTTAATACCGATATTTTAGCA  
ACAAATCCAATAAATCTAAGTGTAGTGCTTGGTGTATTGATTTTTTTTTGGAAAGGGAGT  
GTAAAGTGATTTATTAGATAATCGAAAACAGAGGATCTTGAAGACTATTTCGAAATTCAG  
AAGAACTACGCGAAGGGGCCCTAGAACAGCTGGAAAAAGCCCGTTCCCGCTTACGAA  
AAGTAGAAAAGGAAGCGGATCAGTTTCGAGTGAATGGATATTCTGAGATAGAACGAGA  
AAAATTGAATTTGATTAATTCAACTTCTAAGACTTTGGAACAATTAGAAAATTACAAA  
ATGAAACCATTCATTTTGAACAACAAGAGCGATTAACGAAGTTCGACAACGGGTTTT  
TCAACAAGCCTTAGAAGGAGCTCTAGGAACTCTGAATAGTTGTTTGAACAACGAGTTA  
CATTTACGTACCATCAGTACTAATATTGGCATGTTTGGAAACCATGAAAGAAATAACGGA  
CATGAATCCACTGATTTCTGCCGCTCCGTTATTGCTGCTGGATTGGCCGTAGGGCTTGC  
TTCTATTGGACCTGGAGTTGGTCAAGGTACTGCTGCGGGACAAGCTGTAGAAGGGATC  
GCGAGACAACCAGAGGCAGAGGGAAAAATACGAGGTACTTTATTGCTTAGTCTGGCTT  
TTATGGAAGCTTTAACAATTTATGGACTCGTTGTGGCATTAGCACTTTTATTTGCGAATC  
CCTTTGTTATGAATGTTTTATTATGTTCCATCAACACACTAAAAGGGTTATACGATATATC  
CGGCGTGGAAGTAGGCCAACATCTCTATTGGAAAATAGGAGGTTTCCAAGTTCATGCC  
CAAGTACTTATTACTTCTTGGGTTGTAATTGCTATCTTATTAGGTTCCATTATAGCTG  
TTCGTAATCCACAAACAATTCCTACTGACGGTCAGAATTTCTTTGAATATGTCCTTGAAT  
TCATTCGAGACGTGAGCAGAACCAGATTGGAGAAGAATATGGTCCATGGGTTCCATTT  
ATTGGAACATGTTTTCTATTTATTTTTGTTTCGAATTGGTCAGGGGCTCTTTTACCTTGA  
AAATCATAAGTTACCTCATGGTGAGTTAGCCGCACCCACAAATGATATAAATACTACC  
GTTGCTTTAGCTTTACTCACGTCAGTAGCATATTTCTATGCGGGCCTTACCAAAAAGGG  
ATTAGGTTATTTCCGGTAAATACATTCAACCAACTCCAATCCTCTTACCCATTAACATCCTA  
GAAGATTTACAAAACCCCTATCGCTTAGTTTTTCGACTTTTTCGGAAATATATTAGCTGAT  
GAATTAGTAGTTGTTGTTCTTGTTCCTTTAGTACCTTTAGTGGTTCCTATACCTGTCATGT  
TCTTGGATTATTTACAAGTGGCATTCAAGCTCTATTTTTGCAACTTTAGCTGCGGCTT  
ATATAGGAGAATCCATGGAAGGTCATCATATGATATTTTCAACTTTAGAGCATATATTAAC  
TCATATATCCTTTTCAGTCGTTTCAATTGTAATTACAATTCATTGATAACCTTATTAGTC--  
-GAAATCATAGGACTATATGATTCGTTAGAAAAGGGGATGATGACTACTTTTTTCTGTATA  
ACAGGATTATTAATGACTCGTTGGATTTATTTGAGATATTTACCATTAAGTAATTTATATG  
AATCATTAATCTTTCTTTCATGGAGTTTCTCCATTATTCATATGGTTCCGTATTTTAAAAA  
GTATAAAAATATTTAAAGGCAATAACCGCGCCAAGTGCTATTTTTACCCAAGGTTTTG  
CTACTTCGGGTCTTTTAACTGAAATGCATCAATCCGAAATATTAGTACCAGCTCTCCAAT  
CCCATTGGTTAATGATGCACGTAAGTATGATGGTATTGGGCTATGCAGCTCTTTTATGCG  
GATCATTATTATCACTAGCTCTTCTAGTCATTACATTCGAAAATTCATAAGTATTTTTAGT  
AAAAGCAATGAGATTCAATATGTGAGAGAAAAGAATAATCTTTTACCA-----TCTTTTCT  
TTCTTCTAGGAATTATTACAGGTTTCAATTGATTCAACAATTGGATCTTTGGAGTTATCGT



ATTATTAGTCTAGGGTTTATCTTTTTAAACCATAGGTATTCTTTCGGGAGCAGTATGGGCTA  
ATGAAGCATGGGGATCATATTGGAATTGGGATCCAAAGGAGACTTGGGCATTTATTACG  
TGGACCCTATTTTCGATTTATTTACATACTCGAACAAATAAAAATTTTGAAAGTGTAAT  
TCCGCAATTGTAGCCTCGATGGGCTTCTTATAATTTGGATATGCTATTTTGGGGTTAATT  
TATTAGGAATAGGGTTGCATAGTTATGGTTCATTTACCTTAACAATGGCAAAAAGAAA  
GCATTTATTTCCCTTCTATATCTTGCATCTATAGTATTTTGCCTTGGTGGATCTCTTTTAC  
ATTTAATAAAAAGTCTGGAATCTTGGGTTAATAATTGGTGGAACTAGGCCCTCCGAAAT  
TCTTTTGAACGATATTCAAGAAAAGAGTATTCTAAAAAATTCATAGAATTAGAGGAAC  
TCTCCCTCTTCGACGAAATGCTAAAGGAATACTCGGAAAGGCGTTTACAAAAGCTTCA  
CGTCGGA---TACAATGAAACGATCCAATGGATCAAGATGCACAATGAGGGTCGTATCCA  
TACGATTTTACATTTCTCAACAAATATAATTTCTTTCGTTATTCTAAGTGTTTTTTCTATT  
TAAGTAATGAAGAACTTATTTTTCTTAACTCTTGTCTTCAAGAATTTCTATATAATTTAAG  
CGACACAATAAAGGCTTTTTCTATTCTTTTATTAACCGATTTATGTATAGGATTCCATT  
CCCATGGTTGGGAACTAATGATTGGCTCTATCTACAAAGATTTTGGATTTGCTCATAAT  
GATCAAATTATATCCGGTGTGTTTCTACTTTTCCAGTCATTTTAGATACAATTTTAAAT  
ATTGGATTTTTCGTTATTTAAATCGTGTATCTCCGTCACTTGTAGTAATTTATCATTCAAT  
GAATGATATGCCTATTGGTGTTCAAAAGTACCTTTTTCGAAGTCCTGGAGACGAAGATG  
CATCGTGGGTTGACGTAATCAACCGACTTTATCGAGAAAGATTACTTTTTTTAGGCCAA  
GAGGTTGATAGCGAGATCTCGAATCAACTTATTGGTCTTATGGTATTTCTCAGTATAGAG  
GATGATACTAAGGATCTCTATTTGTTTATAAACTCTCCCGGCGGATGGGTAATACCTGGA  
TTAGGTATTTATGATACTATGCAATTTGTGCAACCAGACGTACAAACAATATGCATGGGA  
TTAGCCGCTTCAATGGGATCTTTTATTCTGGTCGGAGGAGAAATTACCAAACGTCTAGC  
ATTCCTCACGCT--GTAATGATCCATCAACCTGCTAGTTCTTTTTATGAGGCACAGACG  
GGAGAATTTATCTGGAAGCGGAAGAATACTGAAGCTGCGCGAAACCATCACAAAGG  
GTTTATGTACAAAGAACGGGCAAATCCTTATGGGTTATTTCCGAAGACATGGAAAGAGA  
TGTTTTTATGTACAGCAACAGAAGCCCAAGCTCACGGACTTGTTGATCTTGTAGCGGTTG  
A

A????????????????????????????????????????????????????????????  
????????????????????????????????????????????????????????????  
????????????????????????????????????????????????????????????  
ATGGCGGAATTTCAAGGATATTT  
AGAAGTATAGATCTTGGAAACATGACCTCCTATACCCACTTATCTTTCGGGAGTATAT  
TTATGTATTTGCTCATGATCTTGGTTTAGTAGGTTATGACAATAAATCTAGTTTACTAATT  
GTAACGTTTAAATTTCTCGAATGTATCAACAGAATCATTTTATTATTTCCGCTAACGATT  
CGAACCAAAATCAACTTTTTGGGAAGAATTTGTATTCTCAAATGATATCAGAGGGATTT  
GCAGTCATTGTGGAAATTCATTTTCCCTACGATTAGTATCTTCCCTAATCGTAAATATT  
ATAATTTACGATCAATTCATTCAATATTTCCCTTTTTTAGAGGACAAATTTCTCACAGTTAAA  
TTATGTATCAGATGTATTAATACCCTACCCGATTCATCTGGAAATCTTAGTTCAAACCCTT  
CGCTACTGGGTAAAAGATGCCTCCTCTTTGCATTTATTACGGTTTTTTCTTCACGACTAT  
TATAATTGGAATACTCTTATTATTAATATATTTCTATTTTTTCAAACCAAGATTATCTT  
GTTCCCTATATAATTTCTCATGTTTGCGAATACGAATCTATCTTACTCTTTCTACGTAACCAA  
TCTTCTCATTTACGATTAACATCTTCTGGGGTTTTTTTTGAGCGAATATATTTCTATGGAA  
AAATAAACATGTAGAAGAAGTCTTTGCTAATCCGACTAGCTTATGGTTCCTCGAGGAT  
CTCTTCATGCATTATGTTAGATATCAAGGAAAATCAATTCTGGCTTCAAAGGATACGCCT  
CTTTTCATGAATAAATGGAAATATTACCTTGTCTTTTATGGCAATGTCATTTTTATGTGT

GGTCTCAACCAGGAAGGATGTATATAAACCAATTATGCAAACATTCCTTCAGCTTTTTG  
GGCTATCTTTCAAGTATGCAAATAAATCTTTCAGTAGTACGGAGTCAAATGCTAGAAAA  
TTCGTTTCTAATGGATAAT-----GCTATGAAGAAGATTGATACATTAGTTCCAATTAGTCTT  
CTGATTGGATCGTTGGATAAAATGAAATTTTGTAACGTATTAGGACATCCCGTTAGTAAG  
TCGACCTGGGCCGATTTCGTCGGATTTTGATATTATCGACCGATTTGTGTGTATATGCAGA  
AATCTTTTTTCATTATTACAGTGGATCCTCAAAAAAAAAAAGAGTTTGTATCGAATAAAATAT  
ATACTTCGACTTTCTTGTGTTAAAACTTTGGCTCGTAAACACAAAAGTACTGTACGCAC  
TTTTTTGAAAAAATTAGGTTTCAATTTATTGGAAGAATTCTTTACGGAGGAAGAAGAGG  
TTCTTTCTTTGATTTTTCCAAGACGAATTTGGTATTTGGATATTTTTTGCATCAACGATCT  
TGTCATCATAAAATGATAAGTCATACACCAGAA-----GTACAAGATATTAATTCTTTTTTC  
TAGATTCGAATTT---TTAAAAGAGACCTATGGAATTATATGGGCCTTTATTCTATTTTTTAC  
TCCTGTATTGGGAATCACAATAGGTGTACTAGTAATTGTATGGTTAGAAAGAGAAATATC  
CGCAGGGATACAACAACGTATTGGACCTGAATACGCCGGACCTTTGGGAGTTCTTCAA  
GCTTTAGCAGATGGGGCAAAGCTACTTTTTCAAAGAAAATCTTTTTCCATCTAGAGGAG  
AAACTCGTTTATTTCAGTATCGGACCATCCATTGCGGTCATATCCATTTTAGTAAGCTATTC  
GGTAGTTCCTTTTGGTTCTCACCTTGTTTTAGTGGATCTCAATATCGGTGTTTTTTTTATGG  
ATTGCCATTTCAAGTATTGCTCCCATTGGCCTTCTTATGTCAGGATATGGTTCAAATAATA  
AATATCTTTTTTAGGCGGTCTACGAGCTGCTGCTCAATCGATTAGTTATGAAATACCATT  
AACTTTATGTGTGTTATCAATATCTCTATTATCTAATAGTTCAAGTACAGTTGATATAGTT  
GAGGCGCAATCAAATATGGTTTTTGGGGGTGGAATTTGTGGCGTCAACCTATAGGGTT  
TATTATTTTTCTAATTTCTTCCCTAGCAGAATGTGAAAGATTACCCTTTGATTTACCAGAA  
GCAGAAGAAGAATTAATAGCAGGGTATCAAACCGAATACTCGGGTATCAAATTTGGTTT  
ATTTTACGTTGCTTCCATCTAAACCTATTAGTTTCTTCATTATTTGTAACAATTCTTTACT  
TAGGTGGTTGGAATATCTCTATTCCGTACATATTTGTTTTTGATTTTTTTGAAATAAATAA  
AACATATGGTGTTTTTGAACCCACAATTGGTATGTTTATTACATTAGCTAAAACCTATTTG  
TTCTTGTTCAATCCTATCACAACAAGATGGACTTTACCTAGGCTAAGAATGGACCAGCT  
ATTGAATCTTGATGGAATTTCTTTTACCTATTTCTCTCGGTAATCTATTATTAACAACCT  
TCTCCCAACTCTTTTCACTGATGATCTGGCATGTACAGAATGAAAACCTTCATTCTCGAT  
TCTACGAGAATTTTTATGAAAGCCTTTCATTTGCTTCTCTTCGATGGAAGTTTTATTTCC  
CAGAATGTATCCTAATTTTTGGCCTAATTCTTCTTCTGATGATCGATTCAACCTCTGATCA  
AAAAGATATACCTTGGTTATATTTTCACTCTTCAACAAGTTTAGTAATGAGCATAACGGC  
CCTATTGTTCCGATGGAGAGAAGAACCTATGATTAGCTTTTTCGGGAAATTTCCAAACGA  
ACAATTTCAACGAAATCTTTCAATTTCTTATTTTACTATGTTCAACTTTATGTATTCTCTA  
TCCGTAGAGTACATTGAATGTACAGAAATGGCTATAACGGAGTTTCTGTTATTTCGTATTA  
ACAGCTACTCTAGGAGGAATGTTTTTATGCGGTGCTAACGATTTAATAACTATTTTTGTA  
GCTCCAGAATGTTTCAGTTTATGCTCCTACCTATTATCTGGATATACCAAGAAAGATGTA  
CGGTCTAATGAGGCTACTACGAAATATTTACTCATGGGTGGGGCAAGCTCTTCTATTCTG  
GTTTCATGGTTTCTTGGCTCTATGGTTCATCCGGGGGAGAGATCGAGCTTCAAGAAAT  
AGTGAATGGTCTTATCAATACACAAATGTATAACTCCCAGGAATTTCAATTGCGCTGAT  
ATTCATCACTGTAGGAATTGGGTTCAAGCTTTCCCCAGCCCCTTCTCATCAATGGACTC  
CTGACGTATACGAAGGATCTCCCACTCCAGTTGTTGCTTTTTCTTTCTGTTACTTCGAAA  
GTAGCTGCTTCAGCTTCAGCCACTCGAATTTTCGATATTCCTTTTTATTTCTCATCAAC  
GAATGGCATCTTCTTCTGGAAATCCTAGCTATTCTTAGCATGATATTGGGGAATCTCATT  
GCTATTACTCAAACAAGCATGAAACGTATGCTTGCATTCGTCCATAGGTCAAATTGG

ATATGTAATTATTGGAATAATTGTTGGAGACTCCAATGGTGGATATGCAAGCATGATAAC  
TTATATGCTGTTCTATATCTCCATGAATCTAGGAACTTTTGCTTGCATTGTATCATTGGT  
CTACGTACCGGAACTGATAACATTCGAGATTATGCAGGATTATACACGAAAGATGCTTT  
TTTGGCTCTCTTTAGCCCTATGTCTCTTATCCTTAGGAGGTCTTCTCCACTAGCAGG  
TTTTTTCGGAAACTTCATTTATTCTGGTGTGGATGGCAGGCAGGCCTATATTTCTTGGT  
TTCAATAGGACTCCTTACGAGCGTTGTTTCTATCTACTATTATCTAAAAATAATCAAGTTA  
TTAATGACTGGACGAAACCAAGAAATAACCCCTCACGTGCAAAATTATAGAAGATCCC  
CTTTAAGATCAAACAATTCCATCGAATTGAGTATGATTGTATGTGTGATAGCATCTACTAT  
ACCAGGAATATCAATGAACCCGATTATTGAAATTGCTCAGGATACCCTTTTTATGTTTCT  
GCTTTATGAATATGATATTTTCTGGGCATTTTAATAATATCAAGTGTTATTCCCTATTTTTG  
CATTTATAATTTCCGGAGTTTTAGCCCCGATTAGCAAAGGACCAGAAAACTTTCTAGT  
TATGAATCGGGAATAGAACCAATGGGGGATGCTTGGTTACAATTCGAATCTGTTATTAT  
ATGTTTGCTTTAGTTTTTGTGTTTTTGGATGTTGAAACAGTTTTTCTTTATCCATGGGCAA  
TGAGTTTCGATATATTGGGGGTATCCGTATTTATAGAAGCTTTAATTTTCGTACTTATCCT  
AATTGTTGGTTCAATTTATGCATGGCGAAAAGGAGCATTGGAATGGTCTACGAATTATTT  
TCCTTGGTTAACGATAATTATAGTTTTGCCAATATTTGCGGGTTTCCTAATTTTATTTCTTC  
CTCATAGAGGAAATAAGGTAATTAGGTGGTATACTCTTTGTATATGTATAATCGAACTCC  
TTCTAACAACTATGCATTTGGCTATCATTTCCAATTGGACGATCCATTAATCCAAGTGG  
CAGAGGATTATAAATGGATCGATTTTTTGGATTTTTCTGGAGATTGGGAATAGATGGAA  
TTTCGATAGGACCTATTTTGCTGACGGGGTTTACTACTTTAGCTACTTTAGCGGCTC  
GGCCAGTTACTCGGGAATCCCGAGTATTCCATTTCTGATGTTAGCAATGTATAGCGGTC  
AAATAGGACCATTTTCTTCTCAAACCTTTTACTTTTTTTTATCATGTGGGAATTAGAATT  
AATCCAGTTTATCTACTTCTATCCATGTGGGGAGGAAAGAAACGTTTGTATTAGCTAC  
AAAATTTATTTGTACACTGCAGGAAGTTCCGCCTTTTTTATTAGTGGGAATTCTAGGTAT  
TTGTTTATCTGCTTCTAATGAACCAACATTAATTTTGAACATCAGCTAATCAATCGTA  
TCCGTAGCACTCGAAATGCTATTCTATATTGGATTTTTTATTGCTTTTGCTGTCAAATCG  
CCGATTATAACCCTTACATACCTGGTTACCAGACACTCATGGAGAGGCACATTACAGTAC  
TTGTATGCTTCTAGCTGGAATCTTATTAAAAATGGGAGCGTATGGATTGGTTTCGAATCAA  
TATGGAATTATTACCTCACGCACATTCTATATTTTCTCCTTGGTTGATGATAGTCGGCACA  
ATTCAAATAATCTATGCAGCTTCAACATCTCCTGGTCAACGTAATTTAAAAAAAAGAAT  
AGCTTATTCTCCGTATCTCATATGGGTTTCATAATTATAGGACTTGGTTCTATAAACGAT  
ACAGGACTCAATGGAGCCATTTACAAATAATCTCTCATGGATTTATTGGCGCGGCGCT  
TTTTTTCTTGGCAGGAACGAGTTATGATAGAATACGCCTTGTTTATCTCGATGAAATGGG  
CGAATGGCTATCACAATTCCAAAAATATTTACGACTTTCAGTATCTTATCAATGGCTTC  
TCTTGCATTACCGGGCATGAGCGGTTTTGTTGCAGAAATTAATATTATTTTTTGGAACTT  
ACTAGCCAAAAATATCTTTAATGACAAAAATACTAATTAATTTTGTAAATGGCAATTGGA  
ATGATATTAACTCCTATTTATTCAATTATCTATGTTACGCCAGATGTTCTATGGATACAAGCT  
TTTTACTGCTACAACTCTTATTTTGTGCGATTCTGGTCCGCGAGAATTTTTTGTTCGAT  
CTCTATTCTTTTACCCGTAATAGCTATTGGTATTTATCCAGATTCGTTTTTCTCACTATCAG  
TTGACAAAGTCGAAGCTCTTCTATCTAATTAATTTTATCCAATGATGCTCGAACATGTAC  
TTGTTTTGAGTGCCTACTTATTTTCTATCGGTATCTATGGATTGATCACCAGCCGAAATAT  
GGTTAGAGCTCTTATGTGTCTTGAACCTATACTAAATGCGGTAAATATAAATTTTGTAAACA  
TTTTCTGATTTTTTTGATAGTCGCCAATTAAGGAAATATTTTTTCCATTTTTGTTATAG  
CCATTGCAGCCGCTGAAGCCGCCATTGGACCAGCTATTGTTTCGTCAATTTATCGTAATA

GAAAATCAACTCGTATCAATCAATCGAATTTGTTGAATAAGATGGAATATATATATCAATA  
TTTCTGGATTATAACTTTCATCTCACTTCCTGTTCCCTATATTAATAGGAGTAGGACTTCTA  
CTTTTTCCAACGGCAACAAAAAGTCTTCGCCGTATGTGGGTTTTTCCAAGTGTTTTATT  
GTAAAGTATAATTATGCTTTTTTCAACCTATCTAGCTATTCAACAAGTAAATAACCTTCT  
ATATATCTATCTATATGGTCTTGGACTATAAATAATGACTTTTCTTTAGAATTTGGCTATTT  
AGTTGACCCACTTACTTCTATTATGTAAATTAATTACTACTGTTGGAATTTTGGTTCTT  
ATTTATAGTGACAATTATATGTCTCATGATCAGGGATATTTGAGATTTTTTGCCTATATGA  
GTTTTTCAATACTTCAATGGTAGGATTGGTTACTAGTTCTAATCTCATACAAATTTATTT  
TTTTTGGGAATTTGGTTGGAATGTGTTCTTATCTATTAATAGGTTTTTGGTTTACACGACCT  
ACTGCAGCGAATGCTTGTCAAAAAGCGTTTGTCACTAATCGCGTCGGAGATTTTGGTTT  
ATTATTAGGAATTTTAGGTTTTTATTGGATAACGGGCAGTTTAGAATTTTCGGGATTTGTTT  
GAAATATTCAATAAC--GAAGTTAATCTTTTATTTGCTACTTTGTGTGCCTTTCTATTATTT  
GCTGGTGCAATTGCTAAATCTGCCCAATTTCCCTTCATGTATGGTTACCCGATGCTATG  
GAAGGGCCTACCCCTATTTTCACTCTTATAATGCTGCTACTATGGTAGCAGCTGGAATT  
TTTCTTGGAGCTCGGCTTCTTCCGCTTTTCATAGTTATGCCTTATATAATGAATCTAATAG  
CTTTATTAGGTATAATAACATTACTTTTAGGAGCCACTTTAGCCTTTGCTCAAAAAGGATA  
TTAAGAGAGGTTTAGCTTATTCTACAATGTCTCAATTGGGTTATATGATGTTGGCTCTAG  
GTATGGGTTCTTATCGGGCTGCTTTGTTTCATTTGATTACTCATGCTTATTCCAAGCATT  
GTTGTTTTTAGGATCTGGATCTATTATTCATTCAATGGAAAGTATTGTTGGATATTCTCCA  
GATAAAAGCCAGAATCTGGTCTTATGGGAGGTTTTAAAAAACATGTACCAATTACAAA  
AACATCTTTTTTATTAGGTACACTTTCTCTTTGTGGTATTCCACCTCTTGGCTGTTTTTGG  
TCCAAAGATGAAATTTCTAATGATAGTTGGTTGTATTACCAATTTTTGCAATAATAGCT  
TTTTCCACAGCGGGATTAACCTGCATTTTATATGTTTCGGATCTATTTACTTACTTTTGAGG  
GACATTTAAATCTTTATTTTCAAACCTTACAGTGGTAAAAAAGAAGTTCTGTCTATTCAA  
TATCTTTATGGGGTAGAGAA---GAGCAAAAGTGGATTAAAACATTATTACCTTTATTAAC  
AATGAATTTTTTTTTTGGTACTAAGAAC---AGTTTCTCGTATCCTCATGAGTCGGAAAAT  
ACTATGCTATTTTCTATGCTTGTATTAGGTCTATTTACTTTGTTTATTGGAATTATAGGA---  
TTCTTCCAGTTGGATATATTAACAAAATTATTAACCTCCGTCTATAAACCTTTTATATCAAA  
ATAAAAA---TTGATGGATTGGGATGAGTTTATAACAAATGCAACTTATTCAGTCAGTAT  
AGCTTCTTTCGGAATCCTTATAGCATCCTTTTTTATATAATCCTGGTTATTCACTTTTACAA  
AATTTTAATTTATTTAATTCATTTGTTTTTTTTTGGAGGATAAAATAATAAATGTGACATATGA  
TTGGTCGTATAATCGGGGTTATATTGATTTTTTTTTATGCAACATTTTAAATTCAAGGTATA  
AGAATATTGTCTGAACTAATTCATTTTTTTGATAGACAAGTAATTGATGGAATTACGAAT  
GGGGTCGGTATTTTCGAGTTTTTTTCGTAGGAGAAGGTATTAATATGTAGGTGTCGGT--C  
GAATCTCTCCTATCTTTTAGTGTATATATCTTATGTATTAATCTTTTTTATTAATTTACTCCA  
TGGATTTGCCTGGACCAATACATGATTTTCTTTTAGTCTTTCTGGGATTAGGTCTTATCTT  
AGGAGGTATAGGAGTAGTATTACTTACCAACCAATTTATTCTGCCTTTTCGCTGGGATT  
AGTTCTTGTGTTGATATCCTTATTATATATTCTATCAAATTCATATTTTGTAGCCGCCGCAC  
AACTCCTTATTTACGTGGGAGCTATAAATGTTTTAATCATATTTGCTGTGATGTTTCATGAA  
TGGTTCAGAATATTACAAAGATTTTAAATCTTTGGACCGTTGGGAATGGGTTTACTTTGCT  
GATTTGTACAAGTATTTTTGGTTTACTAATAACTACTATTACGGATACATCATGGTACGGG  
ATTATTTGGACTACAAGATCAAACCAGATTATAGAGCACGATTTGATAAGTAATAGTCAA  
CAAATTTGGAATTCATTTATCAACAGATTTTTTTCTTCCATTTGAATTCATCTCAATAATTC  
TTTTAGCCGCTTTGATAGGTGCAATTACCGTGGCGGTCAAATGAATATAACCAGCTCCA

AGAAAAGACCTCATGATAGTAAATATGGGTCCCCACCACCCATCAATGCATGGTGTCT  
TCGACTCATCGTTACTCTCGATGGTGAAGATGTTATTGACTGTGAACCAATATTAGGCTA  
TTTACACCGAGGAATGGAAAAAATTGCGGAAAACCGAACCAATTATACAATATCTGCCTT  
ATGTAACGCGTTGGGATTATTTAGCTACTATGTTACAGAAAGCAATAACCATAAATGGAC  
CGGAGTTGTTGGGAAATATCCAAGTGCCTAAAAGAGCCAGCTATATCAGAGCAATTATG  
TTGGAGTTGAGCCGTATAGCTTCTCATCTGTTATGGCTTGGTCCTTTTCTGGCAGATATT  
GGGGCGCAGACTCCTTTCTTCTATATTTTCAGAGAAAGAGAATTAGTATATGATCTATTT  
GAAGCTGCCACCGGTATGAGAATGATGCATAATTTTTTTTCGGATCGGAGGAGTAGCGGC  
TGATTTACCTCACGGCTGGATAGATAAATGTTTAGATTTTTTTCGATTATTTTTTAATAGGA  
GTTACTGAATATCAAAACTTATTACCCGAAATCCTATTTTTTTTAGAACGAGTTGAGGG  
AGTAGGCGTTATTGGTAGAGAGGAAGTAATAAATTGGGGTTTATCAGGACCAATGCTGC  
GAGCTTCTGGAATACAATGGGATCTTCGTAAAGTTGATCATTATGAATGTTACGACGAA  
TTTGATTGGGAAGTACAGTGGCAAAAAGAAGGAGATTCATTAGCTCGTTATCTAGTCCG  
AATTGGTGAAATGACAGAATCTATAAAAATTATTCAACAGGCTCTAGAAGGAATTCCAG  
GGGGTCCATATGAGAATTTAGAAATCCGATACTTTGATAGAGAAAGGAATCCAGAATGG  
AATGATTTTGACTATCGATTTATTAGTAAAAAACCTCTCCTACATTTGAATTGCCGAAA  
CAAGAACTCTATGTGAGAGTTGAAGCTCCAAAAGGAGAATTGGGAATTTTTTTGATAG  
GGGATCAGAGTGGTTTTCTTGGAGATGGAAAATTCCGCCCGCCGGGTTTTATCAATTTG  
CAAATTCTCCTCAGTTAGTTAAAAGAATGAAATTGGCCGATATTATGACAATACTAGGT  
AGCATAGATATCATTATGGGAGAAGTTGATCGTATGTTCCCTATGATAACCGGGTTCATG  
AATTATGGTCAACAAACAGTCCGAGCTGCAAGGTACATAGGTCAAAGTTTCATGATTAC  
CTTGTCCCACGTAAATCGTTTACCATAACTATTCAATATCCTTATGAAAAGGTAATCGC  
TGCGGAGCGTTTCCGCGGTGCAATCCATTTGAATTTGATAAATGTATTGCTTGTGAAGT  
ATGTGTTTCGTGTATGTCCTATAGATCTGCCCGTCGTTGATTGGAAATTGGAAACTGATAT  
TCGCAAGAAACAATTACTTAATTACAGTATTGATTTTCGGAATCTGTATATTTTGTGGTAA  
CTGTGTTGAGTATTGTCCAACAAATTGTTTATCAATGACTGAAGAATATGAGCTTTCTAC  
TTATGATCGTCACGAATTGAATTATAATCAAATTGCTCTAGGTTCGTTTACCAATGTCAGT  
AATTGACGATTATACAATTTCGAACAATTCTGAATTCT---ATAAAAAATAAG-----  
-----ATGCAGGGTCGTTTGTCTGTTTGGTTAATCAAACATGGGCTAGTTCATAGAT  
CTTTGGGGTTCGATTACCAAGGAATAGAGACGTTACAAATAAAGCCCGAGGATTGGCA  
TTCCATTGCTGTCAATTTATATGTATATGGTTACAATTATCTACGTTCCCAATGTGCCTATG  
ATGTAGCACCGGGCGGACTGTTAGCCAGTGTATATCATCTTACGAGAATAGAGTATGGT  
ATAGATCAACCGGAAGAAGTATGCATAAAAGTATTTGCCCAAGGAGGAATCCTAGAAT  
TCCGTCTGTTTTCTGGATTTGGAAAAGTGCGGATTTTCAAGAAAGAGAATCTTATGATA  
TGTTGGGAATCTCTTATAATAATCATCCACGTCTGAAACGTATCTTAATGCCTGAAAGCT  
GGATAGGATGGCCTTTACGTAAGGATTATATTGCCCTAATTTTTTATGAAATACAAGATG  
CTCATATGGGCAATGAGTTTCGATATATTGGGGGTATCCGTATTTATAGAAGCTTTAATTT  
TCGTACTIONTCTAATTGTTGGTTCAATTTATGCATGGCGAAAAGG-----AGCATTGG  
AATGGTCTTAGCTCTTGAATATTCATCCGACAATAAAAAAGATAACATTGAGACAGTTAT  
GAATATTATTGAGTTTCCCTTACTTGATCGAACAAACCCAA---TCAGTCATTTCAACTACA  
TCAAGTGATCTTTCAAATTGGTCAAGACTCTCCAGTTTATGGCCGCTTCTCTATGGTACC  
AGTTGTTGCTTTATTGAATTTGCTTCATTAATAGGCTCACGATTCGACTTTGATCGTTATG  
GACTGGTGCCAAGATCTAGTCCTAGACAGGCAGACCTAATTCTAACAGCGGGCACAGT  
ACAATGAAAATGGCTCCTTCTTTAGTGAGATTATATGAACAAATGCCGGAACCGAAAT

ATGTTATTGCTATGGGAGCATGTACAATAACGGGGGGGATGTTTCAGTACCGATTCTTATA  
GTACTGTTTCGGGGGGTTCGATAAGCTAATTCCTGTGGATGTTTATTTGCCGGGATGTCCA  
CCTAAACCGGAGGCAGTTATAGATGCTATAACAAAACCTTCGTAAGAAAATATCTCGAGA  
AATCTATGAAGATCGAATTAGATCTCAACAGGAGAATCGGTGTTTTACTACCAGCCACA  
AGTTTCGTGTTGGACGCAGTACTCATACTGGAAATTATAATCAAGGATTACTGTATCAAT  
CACCATCTACTTCAGAGATCCCCACTGAAAACCTTTTTTCGAATACAAAAGT---GTATCTTC  
TCACGAATTAGTGAATATGCAAATGAGAAATACCTTTTTCTTGGATAAAGGAAGAGATTA  
TTCGATTCATTGCCGTATCGCTCATAATATATATAATAACTCGGGCACCCATTTCAAATGC  
GTATCCTATTTTTGCACAGCAGAGTTATGAAAATCCACGAGAAGCGACTGGCCGTATTG  
TATGTGCCAATTGCCATTTAGCTAACAAGCCCGTGGATATCGAGGTTCCACAAGCGGTA  
CTTCCTGATACTGTATTTGAAGCAGTTGTTCGAATTCCTTATGATTTGCAACTGAAACAA  
GTTCTTGCTAATGGTAAAAAAGGAGCCTTGAATGTGGGAGCTGTTCTTATTTTACCTGA  
GGGGTTTGAATTAGCCCCCTCCCGATCGTATTTCCGCCGAGATTAAAGAAAAGATAAGCA  
ATCTGTCTTTTCAGAGCTATCGCCCCACGAAAAAAAATATTCTTGTGATAGGTCCTGTTC  
CTGGTCAAAAATATAGTGAAATCACCTTTCCTATTCTTTCCCGGACCCCGCTACTAAG  
AAAGACGTTCACTTCTTAAAATATCCCATATACGTAGGCGGGAACAGGGGAAGGGGTC  
AGATTTATCCCACGGGAGCAAGAGTAACAATAATGTTTATAATGCTACATCGGCGGGT  
ATAGTAAGCAAAATCATAAGAAAAGAAAAGGGGGATACGAAATAACCATAGTGGATG  
CATCGGATGGACGTCAAGTGGTTGATATTATCCCTCCAGGACCAGAACTTCTTGTTTTCA  
GAGGGCGAATCCATCAAACCTGGATCAACCATTAACGAGTAATCCGAATGTGGGTGGAT  
TTGGTCAGGGGGATGCGGAAATAGTACTTCAAGATCCATTACGTGTACAAGGCCTTTTG  
CTCTTCTTGGCATCTATTATTTTGGCACAAATCTTTTTGGTTCTTAAAAAGAAACAGTTT  
GAGAAGGTTCAATTGTCCGAAATGAATTCATGAGTAAAATCTATGATTGGTTTCGAAGA  
ACGTCTTGAGATTCAGGCAATTGCGGATGATATAACTAGTAAATATGTTCTCCTCATGT  
CAACATATTTTATTGTCTAGGAGGAATTACGCTTACTTGTTTTTTAGTACAAGTAGCTAC  
AGGGTTTGCTATGACTTTTTTATTATCGTCCGACCGTTACGGAGGCTTTTGCTTCTGTTC  
ATATATAATGACTGAAACTAACTTTGGTTGGTTAATCCGATCAGTTCATCGATGGTCGGC  
AAGTATGATGGTACTAATGATGATTCTTCACGTATTTTCGTGTGTATCTCACTGGTGGCTTT  
AAAAACCTCGCGAATTGACTTGGGTTACTGGTGTGGTTTTGGCTGTATTGACCGCATC  
TTTTGGTGTAACCTGGTTATTCCCTTACCTTGGGACCAAATTGGTTATTGGGCAGTAAAAT  
TGTAACAGGTGTACCGGAAGCGATTCCCTGTAATAGGATCACCTTGGTAGAGTTATTAC  
GCGGAAGTGCTAGTGTGGGACAATCCACTTTGACTCGTTTTTATAGTTTACACACTTTT  
GTATTACCTCTTCTTACTGCCGTATTTATGTTAATGCACTTCTTAATGATACGTAAGCAAG  
GTATTTCTGGCCCTTTAATGGGAGTGACAAAAAACCCGACTTGAACGATCCTGTATTA  
AGAGCTAAATTAGCTAAAGGGATGGGTCATAATTATTACGGAGAGCCCGCATGGCCCAA  
TGATCTTTTATATATTTTTCCAGTAGTAATTTTAGGTAATTTGCATGTAACGTAGGTTTA  
GCAGTTCTAGAACCATCAATGATTGGTGAACCTGCGGATCCATTTGCAACTCCCTTGA  
GATATTGCCTGAATGGTATTTTTTTCCCGTATTTCAAATACTTCGTACAGTGCCCAATAAA  
TTATTGGGTGTTCTTTTAAATGGTTTCAGTACCTGCGGGATTATTAACAGTACCTTTTTTG  
GAGAATGTTAATAAATTCCAAAACCCATTTTCGTTCAGTAGCGACAACCGTCTTTTT  
GATTGGTACCGCGGTAGCCCTTTGGTTGGGTATTGGTGCAACATTACCTATTGATAAATC  
CCTAACTTTAGGTCTTTTTATGATTGAAGTTTTTCTATTTGGAATCGTCTTAGGTCTAATT  
CCTATTACTTTGGCTGGATTATTCGTAACCTGCATATTTACAATATAGACGTGGTGATCAAT  
TGGACCTTATGTCTACTATAACTAGTTATTTCCGGTTTTCTACTAGCAGCTTTGACTATAAC

CTCAGCTATAATTTATCGGTCTGAACAAGATACGACTTATTATGGATATAGTAAGTCTCGCT  
TGGGCTGCTTTAATGGTAGTCTTTACATTTTCCCTTTCACTCGTAGTATGGGGAAGAAGT  
GGACTCATGATTATTCGTTTCGCCGAACCAGACGTTAAAATTTTGGTAGATAGGGATCC  
CATAAAGACTTCTTTTCGAGGAATGGGCCAGACCGGGTCATTTCTCAAGAACAATAGCT  
AAGGGGCCTGATACTACCACTTGGATCTGGAACCTACATGCTGATGCTCACGATTTTCTGA  
TAGCCAAACCAGTGATTTAGAAGAGATCTCTCGAAAAGTATTTAGTGCCCATTTCCGGTC  
AACTCTCCATCATCTTTCTTTGGCTGAGTGGTATGTATTTCCACGGTGCTCGTTTTTCCA  
ATTATGAAGCATGGCTAAGCGATCCTACTCACATTGGACCTAGTGCCAGGTGGTTTTGG  
CCAATAGTGGGTCAAGAAATATTGAATGGTGTAGTAGGCGGGGGTTTCCGAGGAATAC  
AAATAACCTCTGGTTTTTTTCAGATTTGGCGAGCATCTGGAATAACTAATGAATTACAA  
CTCTATTGTAAGCAATTGGTGCATTGGTTTTTGCAGCCTTAATGCTTTTTTGCTGGTTGG  
TTCCATTATCACAAAGCTGCTCCAAAATTGGCTTGGTTCCAAGATGTAGAATCTATGTTG  
AATCACCATTAGCAGGGCTACTAGGACTTGGGCTCTTTCTTGGGCGGGGCATCAAGT  
ACATGTATCTTTACCGATTAATCAATTTCTAAATGCTGGAGTAGATCCTAAAGAGATTCC  
ACTTCTCATGAATTTATCTTTGAATCGGGATCTTTTGGCTCAACTTTATCCCAGTTTTGC  
TGAGGGAGCAACCCATTTTTCACCTTGAATTGGTCAAAATATGCAGAATTTCTTACTT  
TTCGTGGAGGATTAGATCCAGTAACTGGGGTCTCTGGCTGACCGATATTGCACACCAT  
CATTTAGCTATTGCAATTTCTTTCTGGTAGCGGGTCACATGTATAGGACCAACTGGGGC  
ATTGGTCATGGCATAAAAGATATTTTAGAGGCTCATAAAGGCCATTTACCGGCCAGGG  
CCATAAAGGCCTATACGAGATCCTAACAACGTCATGGCATGCTCAATTATCTCTTAACCT  
AGCTATGTTGGGCTCTTTAACCATTTGTTGTAGCTCATCATATGTATTCCATGCCCCCTTAT  
CCATATCTAGCTACTGACTATGGTACACAACCTTTCATTGTTACACATCACATGTGGATT  
GGTGGATTTCTCATAGTTGGTGCTGCTGCGCATGCAGCCATTTTTATGGTAAGAGACTAT  
GATCCAACCACTCGATACAACGATCTATTAGATCGTGTCTTAGGCATCGCGATGCAATC  
ATATCACATCTCAATTGGGTATGTATATTTTAGGCTTTCACAGTTTTGGTTTTGTATATTCA  
TAATGATACTATGAGCGCTTTAGGGCGTCCCAAGATATGTTTTTCAGATACCGCTATACA  
ATTACAACCCGTATTTGCTCAATGGATACAAAACACCCATGCTTTAGCACCTGGTGCAA  
CAGCCCTGGTGCAACAACAAGCACCAGTTTGACTTGGGGAGGTGGTGATTTAGTAGC  
AGTGGGCGGCAAAGTTGCTTTGTTACCTATTCCATTAGGAACCGCAGATTTTTTGGTCC  
ATCACATTCATGCATTTACGATTCATGTGACGGTATTGATACTTCTGAAAGGTGTTCTATT  
TGCTCGTAGCTCGGTTTTGATACCAGATAAAGCAAATCTAGGTTTTCGTTTTCCCTTGTGA  
TGGACCTGGAAGAGGGGGGACATGTCAAGTATCTGCCTGGGATCATGTCTTCTTAGGG  
CTATTCTGGATGTATAATTCAATTTAGTCGTAATATTCATTTAGTTGGAAAATGCAGT  
CAGACGTTTTGGGGTAGTATAAGTGATCAAGGAGTGGTAACTCATATCACGGGAGGAAA  
CTTTGCGCAGAGTTCCACTACTATTAATGGGTGGCTCCGCGATTTCTTATGGGCACAGG  
CATCCCAGGTAATTCAGTCCATGGTCTTTCATTATCTGCATATGGCCTTTTTTTTCTAGG  
TGCTCACTTTGTATGGGCTTTTAGTCTAATGTTTCTATTTCAGCGGGCGTGGTTATTGGCA  
AGAACTTATTGAATCCATCGTTTGGGCTCATAATAAATTAAGGTTGCTCCTGCTACTCA  
GCCTAGAGCCTTGAGCATTGTCCAAGGACGTGCTGTAGGAGTAACCCATTACCTTCTG  
GGTGGAAATTGCCACAACATGGGCATTCTTCTTAGCAAGAATTATTGCAGTAGGAATGGC  
ATTAAGATTTCCAAGGTTTAGCCAAGGCTTAGCTCAGGACCCCACTACTCGTCGATTTT  
GGTTTTGGTATTGCTACCGCACATGACTTCGAGAGTCATGATGATATTACTGAAGAACGT  
CTTTATCAGAATATTTTTGCCTCGCATTTCCGGGCAATTAGCAATAATTTTTTTGTGGACTT  
CCGGAAATTTGTTTCATGTAGCTTGGCAAGGAACTTTGAGGCATGGGTACAGGACCC

CTTACATGTAAGACCTATTGCTCATGCAATTTGGGATCCTCATTGTTGGCCAACCGGCTGT  
GGAAGCTTTTACTCGAGGGGGTGTCTTGGCCCAGTGAATATCGCTTATTCTGGTGTTT  
ATCAGTGGTGGTATAACAATCGGTTTACGTACTAATGGAGATCTTTATAATGGAGCTCTTT  
TTCTATTATTTATTTTCGGCCATATCTTTAATAGCGGGTTGGTTACACCTACAACCGAAATG  
GAAACCGAGCGTTTTCGTGGTTTAAAATGCCGAATCTCGTCTCAATCATCATTGTGTCAG  
GGCTATTTCGGAGTAAGCTCCTTGGCTTGGACAGGACATTTAGTTCATGTTGCTATTCCCT  
GGATCCAGGGGAGAATACGTTTCGATGGAATAATTTCTTAGACGTATTGCCGCATCCCCA  
AGGATTAGGTCCACTTTTTACGGGTACGTGGAATCTTTATGCTCAAACCCCTGATTCAA  
GTAGTCATTTATTTGGTAACTCCCAAGGAGCAGGAACTGCCATTCTAACCCCTTCTCGGG  
GGATTCCATCCACAAACGCAAAGTTTATGGCTGACCGATATTGCTCATCATCATTTAGCT  
ATTGCATTTATTTTTCTTATTGCTGGTCATATGTATAGAATAATTTTCGGGATTGGGCACA  
GTATCAAAAATCTTTTAGAAGCACATATTCGCCGGGGGACGATTGGGGCGTGGGCAT  
AAAGGTCTTTATGACACAATCAATAATTCGATTCATTTTCAATTAGGTCTTGCTCTAGCC  
TCTTTAGGGGTTATTACTTCCTTGGTCGCTCAACACATGTATTCTTTACCCGCTTATGCAT  
TCATAGCACAAGACTTTACTACTCAAGCTGCTTTATATACTCATCACCATAACATTGCAG  
GATTCATCATGACAGGAGCTTTTGTCTATGGAGCTATATTTTTTATTAGAGATTACAATCC  
GGAACAGAACGAGGATAATGTATTGGCAAGAATGTTAGACCATAAAGAAGCTATCATAT  
CCCATTTAAGTTGGGCTAGCCTCTTTCTAGGGTTCCATACTTTGGGACTTTATGTTCATA  
ATGATGTCATGCTTGCTTTTGGTACTCCGGAAAAACAATCTTGATCGAACCTATATTTG  
CCCAATGGATAACAATCTGCCCATGGTAAACTTCATATGGGTTCGATGTACTTTTATCTT  
CAACGAATGGTCCGGCATTCAATGCCGGTTCGAAGCATATGGTTGCCCGGTGGTTAAAT  
GCTATTAATGAA-----AATAGTAATTCACTATTCTTAACAATAGGACCTGGAGACTTTTTG  
GTTTCATCATGCTATTGCTCTAGGTTTACATACA ACTACATTGATCTTAGTAAAGGGGGCT  
TTAGATGCACGTGGCTCCAAGTTAATGCCAGATAAAAAGGATTTTGGTTATAGTTTTCTT  
TGTGATGGTCCGGGACGAGGCGGTACTTGTGATATTTTCGGCTTGGGACGCATTTTATTT  
GGCGGTTTTTTGGATGTTAAATACCATTGGATGGGTGACTTTTTTATTGGCATTGGAAGCA  
CATCACATTGTGGCAGGGTAACGTTTTCACAGTTAATGAGTCTTCAACTTATTTGATGG  
GATGGTTAAGAGATTATCTATGGTTAAACTCTTCACA ACTTATTAACGGATATAACCCCT  
TCGGTATGAATAGTTTATCAGTCTGGGCGTGGATGTTCTTATTTGGACATCTTGTTTGGG  
CTACTGGATTTATGTTCTTAATTTCTGGCGTGGATATTGGCAGGAATTGATTGAAACTT  
TAGCATGGGCTCATGAACGAACACCTTTGGCTAATTTGATTTCGATGGAGAGATAAACCG  
GTGGCTCTTTCCATTGTTCAAGCAAGATTGGTTGGGTAGCCACTTTTCTGTGCGTTAT  
ATATTCACTTATGCGGCTTTCTTGATTGCTTCTACATCAGGAAAATTTGGTATGTCACATT  
CAGTAAAGATTTATGATACGTGTATAGGGTGTACTCAATGTGTCCGAGCTTGCCCCACA  
GATGTATTAGAAATGATACCTTGGGATGGGTGTAAAGCTAAACAAATTGCTTCTGCTCC  
AAGAACAGAGGACTGTGTGGGTTGTAAAGATGTGAATCTGCCTGTCCAACGGATTTT  
TTGAGTGTTCGAGTTTATTTGTGGCATGAAACA ACTCGAAGTATGGGTCTAGCTTATATG  
ACA ACTATCAACTTACCCGCTATTTTTGTGCC TTTAGTGGGCTTAGTATTTCCGGCAATT  
GCAATGGTTTCTTTATCTTTCATGTTCAAAAAACAAGATTTTTTATGCGAAATCTAAAA  
ACATACCTTTCCGTGGCACCGGTAGTAAGTACTCTATGGTTTGGGTCTTTAGCGGGTTTA  
TTGATAGAGATCAATCGTTTATTTCCGGATGCGTTGATATTCCCTTTTTTTTTCATTAATGA  
CTGCAATTTTAGAGAGACGCGAAAGCGAAAGCCTATGGGGTTCGCTTTTGTAACTGGAT  
AACCAGCACTGAAAACCGTCTTTACATTGGATGGTTTGGTGTTTTGTGATGATCCCTACCT  
TATTGACCGCAACTTCTGTATTTATTATCGCTTTCATTGCTGCCCTCCGGTAGATATTGA



TGGTATTCGTGAACCTGTTTCTGGATCTCTACTTTATGGAAACAATATTATTTCTGGTGC  
CATTATTCCTACTTCTGCAGCTATAGGTTTGCACTTTACCCAATCTGGGAAGCGGCTTC  
TGTTGATGAATGGTTATACAATGGTGGTCCTTATGAGTTAATTGTTCTACACTTCTTACTT  
GGTGTAGCTTGTATATAGGGTCGTGAGTGGGAACCTAGTTTCCGTCTGGGTATGCGCCC  
TTGGATTGCTGTTGCATATTCAGCTCCTGTTGCAGCTGCTACTGCTGTTTTCTTGATCTAT  
CCAATTGGTCAAGGAAGCTTTTCTGACGGTATGCCTCTAGGAATCTCTGGTACTTTCAA  
CTTCATGATTGTATTCCAAGCTGAGCACAACATCCTTATGCACCCATTTACATGTTAGG  
TGTAGCTGGTGTATTTCGGCGGCTCCCTATTCAGTGCTATGCATGGTTCCTTGGTAACCTC  
TAGTTTGATCAGGGAAACCACAGAAAATGAATCTGCTAATGCAGGTTACAGATTCGGT  
CAAGAGGAAGAAACCTATAATATTGTAGCCGCTCATGGTTATTTTGGCCGATTGATCTTC  
CAATATGCAAGTTTCAACAATTCTCGTTCCTTACACTTCTTCCTAGCTGCTTGGCCTGTA  
GTAGGTATTTGGTTTACCGCTTTAGGCATTAGCACTATGGCTTTCAACTTAAATGGTTTT  
AATTTCAACCAATCTGTAGTTGATAGTCAAGGTCGTGTAATTAATACTTGGGCTGATAC  
ATTAACCGTGCTAATCTTGGTATGGAAGTTATGCACGAGCGTAATGCTCATAACTTCCCT  
CTAGACCTAGCTGGTGTAGAAGTTCCATCTACAAATGGAATGGGTTTGCCTTGGTATCG  
TGTTCATACGGTTCGTATTGAACGATCCCGGTCGTTTGATTTCTGTCCATATAATGCATAC  
AGCTCTGGTTGCTGGTTGGGCCGGTTCGATGGCTCTATATGAATTAGCTGTTTTTGATCC  
CTCTGACCCTGTTCTTGATCCAATGTGGAGACAGGGTATGTTTCGTTATACCCCTTCATGAC  
TCGTTTAGGAATAACCAATTCATGGGGGGGTTGGAGTATTACC---GGGGGACTATAAC  
GAATCCGGGTATTTGGAGTTACGAAGGTGTGGCTGGTGCACATATTGTGTTTTCTGGCT  
TGTGCTTTTTGGCAGCTATCTGGCATTGGGTGTATTGGGATCTAGAAATATTTTGTGATG  
AACGTACAGGCAAACCCTCTTTGGATTTGCCAAGATCTTTGGAATTCATTTATTTCTCT  
CAGGAGTGGCGTGCTTTGGTTTTGGCGCATTTCATGTAACAGGATTGTATGGTCCTGGA  
ATATGGGTATCCGATCCTTATGGACTAACGGGAAGGGTACAAGCTGTAAATCCAGCATG  
GGGTGTGGAAGGTTTTGATCCTTTTGTTCGGGAGGAATAGCCTCTCATCATATTGCAG  
CAGGAACCTTGGGCATATTGGCGGGTCTATTCCATCTTAGTGTCGGTCCGCCCCAACGT  
CTATACAAAGGATTACGTATGGGAAATATTGAAACCGTCCTTTCCAGTAGTATCGCTGCG  
GCTTTTTTTGCAGCTTTTGTAGTTGCTGGAACCTATGTGGTATGGCTCGGCAACTACCCC  
CATTGAATTATTTGGTCCCACCCGTTATCAATGGGATCAAGGATACTTCCAACAAGAAAT  
ATATCGAAGAGTTAGTGCTGGGCTAGCCGAAAATAAAAGTTTATCTGAAGCTTGGTCTA  
AAATTCCTGAAAAATTAGCCTTTTATGATTACATTGGCAATAATCCGGCAAAAGGGGGA  
TTATTTAGAGCGGGCTCAATGGACAACGGGGATGGAATAGCTGTTGGTTGGTTAGGAC  
ACCCGATCTTTAGAGATAAAGAAGGGCGTGAACCTTTATGTACGTCGTATGCCTACTTTT  
TTTGAAACATTTCCGGTTGTTTTGGTAGACGGAGACGGAATTGTTAGAGCCGATGTCCC  
TTTTAGAAGGGCAGAATCGAAATATAGTGTGCAACAAGTAGGTGTAAGTGTGAGTTCT  
ATGGCGGTGAACTCAATGGAGTCAGTTATAGTGATCCAGCTACTGTGAAAAAATATGCT  
AGACGTGCTCAATTGGGTGAAATTTTTGAATTAGATCGTGCGACTTTGAAATCCGATGG  
TGTTTTTCGTAGCAGTCCGAGGGGTTGGTTTACTTTTGGACATGCTTCGTTTGCTCTGC  
TCTTCTTCTTTGGACACATTTGGCATGGTGCTAGAACCCTGTTTCCAGGATGTTTTTGCT  
GGTATTGACCCGATTTGGATGCTCAAGTGGAAATTTGGAGCATTCCAAAACTTGGAG  
ATCCAATAACAAGAAGACAAGTAGTCATGAAAACCTTATATCCCTGAGGAGGTTCTAC  
CCCGTGAAACGCTCTTTAATGGAACCTTAGCTTTAGCTGGTCGTGACCAAGAAACCA  
CTGGTTTTCGCTTGGTGGGCCGGGAATGCCCGACTTATCAATTTATCCGGTAAACTGCTG  
GGGGCTCATGTAGCACATGCCGATTAATCGTATTCTGGGCCGGAGCAATGAACTTATT

TGAAGTGGCTCATTTCGTACCAGAGAAGCCTATGTATGAACAAGGATTAATTTTACTTC  
CCCACCTAGCTACTCTAGGTTGGGGGGTAGGGCCTGGCGGGGAGGTTCTAGACACCTT  
TCCATACTTTGTATCTGGAGTACTTCACTTAATTTCCCTCTGCAGTATTGGGCTTTGGCGG  
TATTTATCATGCACTTCTGGGACCTGAGACTCTTGAAGAATCTTTTCCATTCTTCGGTTA  
TGTATGGAAAGATAGAAATAAAATGACTACAATTTTGGGTATTCATTTAATCTTGTTAGG  
TATAGGTGCTTTTCTTCTAGTATTTAAGGCTCTTTATTTTGGGGGTGTATATGATACCTGG  
GCTCCGGGGGGGGGAGATGTAAGAAAAATTACCAATTTGACCCTTAGCCCAAGTATTG  
TATTTGGTTATTTACTAAAATCCCCCTTTGGTGGAGAGGGGTGGATTGTTAGTGTGGAC  
GATTTGGAAGATATAATTGGAGGACATGTATGGTTAGGTTCCATTTGTATACTTGGTGGA  
ATCTGGCATATCTTAACCAAACCCTTTGCATGGGCTCGCCGTGCACTTGTATGGTCTGG  
AGAGGCTTACTTGTCTTATAGTTTAGGTGCTTTATCCATTTTGGTTTTGTTGCTTGTTC  
TTTGTCTGGTTCAATAATACCGCTTATCCTAGTGAGTTTTACGGGCCCACTGGTCCAGA  
AGCTTCTCAAGCTCAAGCATTACTTTTCTAGTTAGAGATCAACGTCTTGGAGCTAACG  
TGGGATCCGCTCAAGGACCTACTGGTTTAGGTAAATATCTAATGCGTTCCCCGACTGGG  
GAAGTTATTTTGGAGGGGAAACCATGCGTTTTTGGGATCTACGAGCTCCATGGTTAGA  
ACCTCTAAGGGGTCCCAATGGTTTGGACTTGAGTAGGCTGAAAAAGACATACAGCCT  
TGGCAAGAACGGCGTTCTGCGGAATATGACTCACGCTCCTTTAGGTTCTTTAAATTC  
CGTGGGTGGCGTAGCTACCGAGATCAATGCAGTCAATTATGTCTCTCCGAGAAGTTGGT  
TAGCTACCTCTCATTTTGTTCTAGGATTTTCCATTCGTAGGTCATTTATGGCACGCGGG  
AAGGGCTCGTGCAGCTGCAGCAGGATTTGAAAAAGGAATTGATCGTGATTTTGAACCT  
GTTCTTTCCATGACTCCTCTTAACATGACTATAGCCCTTGGTAAATTTACCAAAGACGAA  
AATGATTTATTTGATATTATGGATGACTGGTTACGTAGGGACCGTTTCGTTTTTGTAGGTT  
GGTCCGGTCTATTGCTCTTCCCTTGTGCCATTTTCGCTTTAGGAGGTTGGTTCACAGGTA  
CAACCTTTGTAACCTCATGGTATACTCATGGATTAGCAAGTTCCTATTTGGAAGGATGCA  
ACTTCTTAACTGCCGCAGTTTCTACTCCTGCTAATAGTTTAGCACACTCTTTGTTGTTAC  
TATGGGGTCCCTGAAGCACAAAGGCGATTTACTCGTTGGTGCAATTAGGTGGTCTGTGG  
ACTTTTGTGCTCTCCACGGCGCTTTCGCACTAATAGGTTTCATGTTACGTCAATTTGAA  
CTTGCTCGATCTGTTCAATTGCGACCTTATAATGCAATCGCATTCTCCGCTCCAATTGCT  
GTTTTTGTCTGTATTCTGATTTATCCGTTAGGTCAGTCTGGTTGGTTCTTTGCGCCTA  
GTTTTGGTGTAGCAGCTATATTTGATTCATCCTCTTTTTCCAAGGGTTTCATAATTGGA  
CATTGAACCCATTTATATGATGGGAGTTGCCGGGGTATTGGGCGCTGCTCTGCTATGC  
GCCATTCATGGTGCTACCGTAGAAAATACTTTATTTGAAGATGGTGATGGTGCAAATACA  
TTCCGTGCTTTTAACCCAACTCAAGCTGAAGAACTTATTCAATGGTCACCGCTAACCG  
CTTTTGGTCCCAAATCTTTGGGGTTGCTTTTTCCAATAAACGTTGGTTACATTTCTTTAT  
GTTATTTGTACCAGTAACTGGTTTATGGATGAGTGCTCTTGGAGTAGTCGGTCTGGCTTT  
GAATCTACGTGCTTATGACTTCGTTTCTCAGGAAATCCGTGCAGCGGAAGATCCTGAAT  
TTGAGACTTTCTACACCAAAAATATTCTCTTAAACGAGGGTATTTCGTGCTTGGATGGCG  
GCTCAAGATCAGCCTCATGAAAACCTTATATTCCCTGAGGAGGTTCTACCCCGTGAAAA  
CGCTCTTATGTCTGGAAGCACAGGAGAACGTTCTTTTGTGATATTATTACCAGTATTCG  
CTACTGGGTCAATCATAGCACTACTATACCTTCCCTATTCATTGCGGGTTGGTTATTTGTC  
AGCACGGGTTTAGCTTACGATGTATTTGGAAGCCCCGTCCAAATGAGTATTTTACAGA  
GAGCCGACAAGGAATTCCATTAATAACTGGCCGTTTTGATCCTTTGGAACAACCTCGATG  
AATTTAGTAGATCTTTTATGACTATAGATAGAACCTATCCAATTTTACAGTGCGATGGTT  
AGCTGTTACGGACTAGCTGTACCTACCGTTTTCTTTTTTGGGGTCAATATCAGCAATGC

AGTTCATCCAACGAATGGCTACACAAACCGTTGAGGGTAGTTCTAGATCTGGT---TCAA  
GACGAACTAGTGTAGGGAATTTATTGAAACCCTTGAATTCAGAATATGGTAAAGTAGCT  
CCTGGGTGGGGAACACTCCTTTGATGGGTATCGCAATGGCTCTATTTGCGATATTCCTA  
TCTATTATTTTGGAGATTTATAATTCTTCTATTTTACTGGACGGAATTTCAATGAATATGCT  
TACTCTAAACTATTTGTTTACACGGTAGTGATATCTTTGTCTCTCTATTCATCTTCGGA  
TTCCTATCTAATGATCCAGGACGTAATCCTGGGCGTGAAGAAATGGCCGATACTACTGG  
AAGGATTCCTCTTTGGATAATAGGTACTGTAACCTGGTATTATTGTGATCGGTTTAATCGG  
TATTTTCTTTTATGGTTCATATTCTGGATTAGGTTCAATCCCTTATGCTTAATATATTTAGTTT  
GATTTGTATCTGTCTTAATCTGTCCCTTAT--AGTAGTTTTTTCGTGCGCAAATGCCCCG  
AGGCCTACGCTTTTTTAAATCCAATCGTAGATGTTATGCCAGTAATACCTGTGCTATTTTT  
TCTCTTAGCTTTTGTGGCAAGCTGCTGTAAGTTTTTCGAACGACACAATCAAACCCGA  
ACGAACAAAATGTTGAATTAATCGTACCAGTCTCTACTGGGGGTATTACTCATTTTTG  
TACTTGCTGTTTTATTTTCCAATTATTTCTTCAATATGGAAGTAAATATCTCGCATTATT  
GCTACTGCACTGTTCAATTCCTACTGCTTTTTTACTTATAATATACGTAAAAACAG  
TAAGTCAAAGTGATATGGAAACAGCAACGCTCGTTGCCATCTTTATATCTGGTTTACTTG  
TAAGTTTTACTGGGTATGCCTTATATACTGCTTTTTGGGCAACCCCTCTCAACAATAAGAG  
ATCCATTGAGGAACACGGAGACATGGAAGCATTGGTTTATAACATTCCTCTTAGTATCA  
ACTCTGGGAATAATTTTTTCGCTATCTTTTTTCGAGAACCGCCTAAAGTTCCAACATAAA  
AAGATGAAAATGACTATTGCTTTCCAATTGGCTGTTTTTGCATTAATTGCTACTTCATCA  
ATCTTACTGATTAGTGTACCCGTTGTATTTGCTTCTCCTGATGGTTGGTTGGGTAATAAAA  
AATGTTGTATTTCTGGTACATCATTATGGATTACATTAGTATTTCTCGTAGGTATCCTTAA  
TTCTCTTATCTCT-----ATGTCACCACAAACAGAGACTAAAGCAAGTGTTGG  
ATTCAAAGCTGGTGTTAAAGATTATAAATTGACTTATTACACTCCTGAATATGAAGTCAA  
AGATACTGATATCTTGGCAGCATTTCGAGTAACTCCTCAACCTGGAGTTCCCCCTGAAG  
AAGCAGGGGCTGCGGTAGCTGCTGAATCTTCTACTGGTACATGGACAACCTGTATGGAC  
TGACGGGCTTACCAGTCTTGATCGCTACAAAGGTCGATGCTACAACATCGAGCCCGTT  
GCTGGAGAAGAAAGTCAATTTATTGCTTATGTAGCTTACCCTTTAGACCTTTTTTGAAGA  
AGGTTCTGTTACTAACATGTTTACTTCCATTGTGGGTAATGTATTTGGGTTCAAGGCCCT  
GCGTGCTCTACGTCTGGAAGATTTGCGAATCCCTAATGCTTATATTAATAAACTTTCCAAGG  
ACCACCTCATGGTATCCAAGTTGAGAGAGATAAATTGAACAAGTATGGCCGCCACTAT  
TGGGATGTACTATTAACCTAAATTGGGGTTATCCGCTAAGAATTACGGTAGAGCAGTTT  
ATGAATGTCTTCGCGGTGGACTTGATTTTACCAAAGATGATGAGAACGTGAATTCCCAA  
CCCTTTATGCGTTGGAGAGATCGTTTCTATTTTGTGCAGAAGCAATTTATAAATCACAG  
GCTGAAACAGGTGAAATCAAAGGACATTACTTGAATGCTACTGCAGGTACATGTGAAG  
AAATGATGAAAAGGGCTGTATTTGCCAGAGAATTGGGAGTTCCTATCGTAATGCATGAT  
TACTTAAACAGGAGGATTCCTGCAAATACTACCCTGGCTCATTATTGTGCGAGATAATGGT  
CTACTTCTTACATCCATCGTGCAATGCATGCAGTTATTGATAGACAGAAAATCATGGT  
ATGCACTTTCGCGTACTAGCTAAAGCCTTACGTATGTCTGGTGGAGATCATATTCACGCA  
GGTACTGTAGTAGGGAACTTGAAGGGGAAAGAGAAATCACTTTAGGCTTTGTTGATT  
TACTACGTGATGATTTTATTGAAAAAGATCGAAGTCGTGGTATTTATTTCACTCAAGATT  
GGGTTTCTCTACCAGGTGTTCTGCCCGTGGCTTCAGGGGGTATTCACGTTTGGCATATG  
CCTGCTTTGACCGAGATCTTTGGAGATGATTCCGTACTIONTCAATTCGGTGGAGGAACTTT  
AGGACATCCTTGGGGAAATGCACCCGGTGCCGTAGCTAATCGAGTAGCTCTAGAAGCA  
TGTGTA AAAAGCTCGTAATGAGGGACGTGATCTTGCTGTTGAGGGTAATGAAATTATTCG

TGAGGCTAGTAAATGGAGTCCTGAACTAGCTGCTGCTTGTGAAGTGTGGAAGGAAATC  
AAATTTGAATTCGAGGCAATGGATACTTTG-----ATGGCGATACATTTATACAAACTTCT  
ACCCCGAGCACACGCAAAGGAGCCGTAGACAGGCAAGTGAAATCCAATCCACGAAAT  
AATTTGATCTATGGACAGCATCGTTGTGGTAAAGGTCGTAATGCCAGAGGAATCATTAC  
CGCAGGGCATAGAGGGGGAGGTCATAAGCGTCTATACCGTAAAATCGATTTTCGACGG  
AATGAAAAGACATATATGGTAAAATCGTAACTATAGAATACGACCCTAATCGAAATGC  
ATACATTTGTCTCATACTATGGGGGTGGTGAGAAAAGATATATTTTACATCCCAGAGG  
GGCTCTAATTGGAGATACCATTGTTTCTGGTACAGAAGTTCCTATAAAAATGGGAAATG  
CCCTACCTTTGACCGATATGCCCTTAGGCACGGCCATACATAACATAGAAATCACACTT  
GGAAAGGGTGGACAATTAGCTAGAGCAGCAGGTGCTGTAGCGAAACTGATTGCAAAA  
GAGGGGAAATCGGCCACATTAATAATTACCTTCTGGGGAGGTCCGTTTGATACCCAAA  
ACTGCTCAGCAACAGTCGGACAAGTGGGGAATGTTGGGGTGAACCAGAAAAGTTTGG  
GTAGAGCCGGATCTAAATGTTGGCTAGGTAAGCGTCCTGTAGTAAGAGGAGTAGTTATG  
AACCTGTAGACCATCCCATGGGGGTGGTGAAGGGAGGGCCCAATTGGTAGAAAA  
AAACCCGCAACCCCTTGGGGTTATCCTGCACTTGGGAAGAAGAAGTCGAAAAAGGAAT  
AAATATAGTGATAATTTGATTCTTCGTCGCCGTAGTAAAATGATTCAACCTCAAACCCAT  
TTGAATGTAGCGGATAATAGCGGAGCCAGAAAATTGATGTGTATTGCAATCATAGGAGC  
TAGT---AATCGACGATATGCTAAGATTGGTGACGTTGTTGTTGCTGTAATCAAGGAAGCA  
ATACCAAATACACCGCTAGAAAGATCAGAAGTGATCAGAGCCGTAATTGTACGTA CTTG  
TAAAGAACTCAAACGCGACAATGGTATGATAATACGATATGATGACAATGCTGCAGTTG  
TTATTGATCAAGAAAGAAATCCAAAAGGAACTCGAATTTTTGGCGCAATCGCCCGGGA  
ATTAAGACAATTAATTTCACTAAAATAGTTTCGTTAGCGCCTGAAGTATTGATGCTTAG  
TCCCAAAGAACCCGATTCCGTAAACACCATAGGGGAAGAATGAAAGGAATATCTTAT  
CGAGGTAATCATATTTGCTTCGGTAGATATGCCCTTCAAGCGCTTGAACCTGCTTGGATC  
ACATCTAGACAAATAGAAGCAGGGCGACGAGCAATGACACGAAACGCACGCCGCGGC  
GGAAAATATGGGTACGTATATTTCCAGACAAAACCAATTACAGTAAGACCTACAGAAAC  
ACGTATGGGTTCAGGAAAAGGATCTCCTGAATATTGGGTAGCTGTCTGTTAAACCAGGTA  
GAATACTTTATGAAATGAGCGGAGTACCAGAAAATATAGCCAGAAAAGCTATTGCAATA  
GCGGCATCCAAAATGCCTATACGAACTCAATTCATTATTTAGGAATGACTAGAATTA  
ACGAGGATATATAGCTCGAAGACGTAGAACCAAAATTCGTTTATTTGCATCAAGCTTTC  
AAGGGGCTCGTTCAAGACTTACTCGAACTATTACTCAACAGAAAATAAGAGCTTTGGT  
TTCGGCTCATCAGGATAGAGGTAGGCAAAGAGAGATTTTCGTCGTTTGTGGATCACT  
CGGATAAACGCAGTAATTCGAGCCAAT---AAAGTATACTACAGTTATAGTACATTAATAC  
ACCATCTGTACAAGAGGCAGTTGCTTCTTAATCGTAAAATACTTGCACAAATAGCTATAT  
TAAATAGGAATTGTCTTTATATGATTTCCAATGAGATCTTAAAA-----  
ATGATAAAGGAAGTCTATGCTATAGCCCAATATATATCTATGTCTGCTCATAAAGCGCGA  
AGAGTAATTGATCAAATTCGTGGACGTTTCATATGCGGAAACGCTTATTATACTAGAACTC  
ATGCCGTATCGAGCATGTTATCCAATTTTAAAATTGGTTTATTCTGCAGCAGCAAATGCT  
AATCACAATATGCGCTTCAACGAAGCAAATTTAATAATTAGTAAAGCTGAAGTCAACGA  
GGGCAACACTGTGAAAAAATTAACCTCGAGCTCGAGGACGGGGTTATCCGATAAA  
AAGACCCACTTGTATATACTATTGTACTGAAAGATTTAGATGTAGAG-----  
ATGGATGGAATCAAATATTTTCGTAGTTACAGACAAAAGTATTCGGTTATTGCTGAAAAAT  
---CAATATACTTCTAATGTGCAATCAGGATCAACTAGGACAGAAATAAAGCATTGGGTC  
GAACTCTTCTTTGGTGTCAAGGTAATAGCTATGAATAGTCATCGACTCCCGGGAAAGGG

TAGAAGAATGGGACCTATTATGGGACATACAATGCATTACAGACGTATGATCATTACGCT  
TCAACCGGGTTATTATATTCCACCTCTTATAAAGAAAAGCACTATGGCAGTTCCGAAAA  
AACGTA CTCTATCTCAAAAAAGCGGATTCGTAAAAATATTTGGAAAAAGAAAGGATAT  
TGGGCAGCATTGAAAGCTTTTTTCGTTAGGTAAATCTCTTTCTACAAGGAATTCAAAAAG  
TTTTTTT-----CCAACAATGGCCAAGGGTAAAGATGCCCGAGTAACGATTATTTTGG  
AATGTACCAGTTGT--CTTCGAAAC-----GTTAATAAGGAATCAAGGGGCATTTCCCGATA  
TATTACTCAAAAAAATCGACATAATACGCCTAGTCGATTGGAATTGAGAAAATTCTGTC  
CCTCTTGTTACAAACATACGATTCACGGGGAGCTAAAGAAAATGAAAATAAGGGCCTC  
CGTCCGTAAAATTTGTGAAAAATGTCGACTGATCCGTAGGCGAGGACGAATTATAGTAA  
TTTGTTCACCAACCAAGACATAAACAAAGACAAGGAATGGGTCAAGAGAAAGTAACAG  
TATCTACTCGGCCACTACAGTGGAAGTGTGTTGAATCAAGAGCAGACAGTAAACGTCT  
TTATTATGGACGCTTTCTTCTGGCTCCACTTATGAGAGGACAAGCCGATACAATAGGCAT  
TGCGATGCGAAGAGCTCTGCTTGGAGAAATAGAAGGAACATGTATCACACGCGCAAAA  
TCCGAG-----AAAATACCACATGAATATTCTACCATAGTCGGTATTCAAGAATCCGTACAT  
GAAATTTTAATGAATTTGAAAGAAATTGTATTGAGAAGTAATCTGTATGGAACCTCGCGA  
TGCGTCTATTTGTGTCAAAGGTCCCGGATATGTAACCGCTCAAGATATCATCTTACCACC  
TTCCGTGGAAATCGTTGATAATACACAACATATAGCTAATCTAACAGAACCAATAACCTT  
GTGTATTGAATTACAAATCGAGAGGAATCGCGGATATCGTATAAAAACGCCAAATAATT  
TTCAAACCGGAAGTTAT-----CCTATAGATGCTGTATTTCATGCCTGTTTCGAAATGCAAATC  
ATAGTATTCATTCTTATGTGAATGGAAATGAAAACCAAGAAATACTTTTTTCTCGAAATAT  
GGACAAATGGAAGTTTAACTCCTAAAGAAGCACTTCATGAGGCCTCCCGAAATTTGAT  
TGATTTATTTATTCCTTTTTTCCATGCAGAAGAA-----CATTTAGAAAACAATCAA--  
--CACAAAGGTA CTTTACCCCTTTTTAATTTTCATGGTAGATTAGCTAAA---CCAAGGAAA  
ACGAAAAAA---GAAATAGCATTGAAATATATTTATATTGACCAATCAGAATTGCCCCCA  
GGGTCTATAATTGCCTCAAAGGTCTAATATCAATACATTTTTAGAACTTTTGAATAACA  
GTCAAGAAGA ACTTATGAAAATTCAAGATTTTCGGATAGAAGATGTAAAACATATATTG  
GACGTTCTAGAAATA-----ATGCTTGAGGGTGGAAAT--GAGGAA  
ATCTCTACAATACCCGGATTTAATCAGATACAATTTGAAGGGTTTTGTAGGTTTCATTGAT  
CAGGGCTTAACAGAAGAACTTTATAAGTTTCAAAGATTGAAGATACAGATCAAGAAA  
TTGAATTTCAATTATTTGTGGAAACATATCAATTGGTAGAACCGTTGATAAAAGAAAGA  
GATGCTGTATATGAATCACTCACATATTCTTCTGAATTATATGTATCCGCGGGATTAATTT  
GGAAAACCAGTAGGGATATGCAAGAACAACAATTTTTATTGGAAACATTCCTCTAATG  
AATCCCTGGGAACTTCTATAGTAAATGGAATATACAGAATTGTGATCAATCAAATATTG  
CAAAGCCCCGGTATCTATTACCGGTCAGAATTGGACCATAACGGAATTTTCGGTCTATAC  
CGGCACCATAATATCAGATTGGGGAGGAAGATTAGAATTAGAGATTGATAGAAAAGCA  
AGGATATGGGCTCGTGTGAGTAGGAAACAGAAAATATCTATTCTAGTTCTATTATCAGCT  
ATGGGCTTGAATCTAAGAGAAATTCTAGAGAATGTTTGTACCCTGAAATTTCTTGTCT  
TTCTGAAAGATAAGGAAAAAAAAAAAAATTAAGTCAAAAAGAAAATGCCATTTTGGAG  
TTTTATCAACAATTTGCTTGTGTAGGCGGAGATCCGGTATTTTCTGAATCCTTATGTAAG  
GAATTACAAAAAAATTCCTTTCAACAAAGATGTGAATTAGGAAGAATTGGTCGACGAA  
ATATGAACCGTAGACTGAATCTTGATATACCTCAGAACACTACATTTTTGTTACCGCGAG  
ATATATTGGCAGCTGCGGATCATTGATTGGAATGAAGTTCGGAATGGGTATACTTGACG  
AT-----ATGAATCATTTGAAAAATAAACGTATTCGTTCTGTAGCGGATCTTTACAAGATC  
AATTCGGATTGGCCCTGGTTCGTTTAGAAAATATGGTTAGAGGAACTATGTGTGGAGCA

ATTAGG---CATAAATTGATA---CCGACTCCTCAAAATTTGGTAACTTCCACTACA-----  
TTAACAACTACTTATGAATCTTTTTTCGGATTACACCCATTATCTCAAGTTTTGGATCGA  
ACTAATCCATTGACACAAATAGTTCATGGAAGAAAAGCGAGTTATCTGGGCCCTGGAG  
GATTGACAGGGCGAACTGCTAGTTTTTCGGATACGAGATATCCATCCTAGTCACTATGGA  
CGCATTTGTCCTATAGATACGTCCGAAGGAATCAATGTTGGACTTATTGGATCCTTAGCA  
ATTCATGCGAGGATTGGTCATTGGGGA---TCTCTAGAAAAGTCCGTTTTAT-----GAAAT  
CTCTGAGAGATCAAAAAA-----GTACGAATGCTTTATTTATCACCAAGTATAGATGAAT  
ACTATATGGTAGCGGCGGAAATTCCTTTGGCACTGAATCGAGGTAGTCAGGAAGAACA  
GGTTGTTCCGGCTCGATACCGTCAAGAATCTTGACTATTGAGTGGGAACAGGTTTCATC  
TTCGAAGTATTTTTCCCTTCCAATATTTTTCTATTGGAGCTTCCCTTATTCTTTTTATCGA  
GCATAATGATGCGAATCGTGCTTTAATGAGTTCTAATATGCAACGTCAAGCCGTTCCGCT  
TTCTCGATCGGAAAAGTGCATTGTTGGAAGTGGGTTGGAATGCCAAGTGGCTCTAGAT  
TCCGGGGTTCCTACTATAGCCGAACATCAGGGAAAGATCATTATACCGATACTGAGAA  
GATCATTTTTATCGGGCAATAGAGATACTTTAAGCATTCCATTAGTTATATATCAACGTTCT  
AACAAAAATACTTGTATGCATCAAAAACCCCAAGTTTCGCGAGGTAAATGTATTA AAAA  
GGGACAGATTTTAGCGGATGGTGCTGCTACAGTTGGCGGCGAACTCGCTTTGGGAAAA  
AATGTATTAGTAGCTTATATGCCATGGGAAGGTTACAATTCTGAGGATGCAGTACTCATT  
AACGAGCGTCTGGTATATGAGGATATTTATACTTCTTTTCACATACGGAAATATGAAATT  
CATACTCATGTGACAAGCCACGGG---CCTGAAAGAATCACTAATGAAATACCGCATCTA  
GAAGCCATTTACTCCGAAATTTAGACAAAAATGGCATTGTGATGTTGGGGTCTTGGGT  
GGAGACGGGCGATATTTTAGTAGGTAAATTAACGCCTCAGATGGCGAAAGAA---TCATC  
GTATGCTCCGGAAGATAGATTATTACGAGCCATACTTGGCATTAGATATCCATTTCAA  
GGAACTTGTCTAAAACCTATAGGCGGTAGAGGTGAGTATTGATGTGAGATGGA  
TCCAGAAAAAGGGG---GTTTCTAGTTATAATCCAGAAACGATTCGTGTATATATTTACA  
AAAACGTGAAATCAAAGTGGGCGATAAAGTAGCTGGAAGGCATGGAAATAAAGGTAT  
CGTTTCAAAAATTTTACCTAGACAAGATATGCCTTATTTGCAAGATGGAAGACCTGTTG  
ATATGGTCTTCAACCCATTAGGAGTACCTTCACGAATGAATGTAGGACAGATATTTGAAT  
GTTTCGCTCGGGTTAGCGGGGGGGTTGCTAGATAGACATTATCGAATAGCACCTTTTGAT  
GAGAGATATGAACAAGAGGCCTCGAGAAAACCTAGTCTTTTCTGAATTATATGAAGCCA  
GTAAGCAAACAGCGAATCCATGGGTATTTGAACCCGAGTATCCGGGAAAAAGCAGAAT  
ATTTGATGGAAGAACGGGGGATCCTTTTGAGCAACCTGTTATAATAGGAAAGCCTTATA  
TCTTGAATAAATTCATCAAGTTGATGATAAAATACATGGACGTTGCAGTGGACATTATG  
CACTTGTTACACAACAACCCCTTAGAGGAAGGGCCAAGCAAGGGGGACAGCGGGTAG  
GAGAAATGGAAGTTTGGGCTCTAGAGGGATTTGGTGTGCTCATATTTTACAAGAGATG  
CTTACTTATAAATCTGATCATATTAGAGCTCGTCAAGAAGTACTTGGTACTACAATGGTT  
GGAGGACCAATACCTAAACCCGAGGATGCTCCAGAATCTTTTCGATTGCTCGTTTCGAG  
AACTACGATCCTTGGCTCTGGAATTGAATCATTTCCTTGTATCTGAGAAGAACTTCCAG  
ATTAATAGGAAGGACGTT-----ATGATCGATCGGTATAAACATCAACAACCTC  
GAATTGGATCAGTTTCTCCTCAACAAATAAGTGCTTGGGCCAAAAAATCCTACCTAAT  
GGAGAAATAATTGGAGAGGTGACAAAACCTACACTTTTCATTACAAAACCAATAAAC  
CTGAAAAAGATGGATTATTTTGTGAAAGAATTTTTGGGCCTATAAAAAGTGGGATTTGT  
GCTTGTGGAATTATCGAGTAATCGGAAATGACAAAGAAGACCCGAAATTTTGTGAAC  
AATGCGGGGTCGAATTTGTTGATTCTCGGATACGAAGATACCAAATGGGCTACATCAA  
CTGGCATGCCAGTAACCCATGTGTGGTATTTGAAACGTCTTCCTAGTTATATCGCCAAT

CTTTTAGATAAGCCTCTTAAAGAATTAGAAGGCCTAGTATACTGCGAT-----TTTTCTTTT  
GCTAGGCC---ATAGCTAAAAACCTACTTTCTTACGATTACGAGGTTTCATTCGAATATG  
AAATCCAATCCTGGAAATATAGCATCCCCTTTTTTTTACTACCCAAGGTTTCGATGCAT  
TTCGAAATCGAGAAATTTCTACTGGAGCAGGTGCTATCCGAGAACAATTAGCCGATCTA  
GATTTGCCAATTATTATAGATTATTCATTGGTAGAATGGAAAGAATTAGGGGAAGAA---A  
GGCCTACGGTTAATGAATGGGAAGATCGAAAAGTTGGAAGAAGAAAGGATTTTTTGGT  
TAGACGCATGGAATTAGCTAAGCATTTTTATTTCGAACAAATATAGAACCAGAATGGATGG  
TTTTATGTCTATTACCTGTTCTTCCCTCCCGAGTTGAGACCCATCATTTCAGATAGATGGGG  
GTAAACTAATGAGTTCCGATATTAATGAACTCTATAGAAGAGTTATCTATCGGAACAATA  
CTCTTATCGATTTATTAACAACAAGTAGATCTACGCCAGGGGAATTAGTAATGTGTCAGG  
AGAAATTGGTACAAGAAGCCGTGGATACACTTTTTTGATAATGGAATCCGCGGACAACC  
AATGAGAGACGGTCATAATAAGGTTTACAAGTCGTTTTTCAGATATAATTGAAGGCAAAG  
AGGGTAGATTTCTGTGAGACTCTACTTGGGAAACGGGTTGATTATTCGGGGCGTTCTGTCT  
ATTGTCTGATGGCCTTCACTTTTATTACATCGATGTGGATTGCCTCGCGAAATAGCAATA  
GAACTTTTCCAGACTTTTGTAAATTCGTGGTTTAATTAGACAACATTTTGCTTCGAACATA  
GGAGTTGCTAAGAGTAAAATTCGGGAAAAAGAGCCGGTTGTATGGGAAATACTTCAGG  
ACGTTATGCAAGGGCATCCCGTATTGCTGAATAGGGCGCCACTCTGCATAGATTAGGC  
ATACAGGCCTTCCAACCCATTTTAGTAGAAGGACATGCTATTTGTTTACATCCATTAGTT  
TGTAAGGGGTTCAATGCAGACTTTGATGGGGATCAAATGGCTGTTTCATGTACCTTTATC  
TTTAGAGGCTCAAGCAGAGGCTCGTTTACTTATGTTTTCTCATACGAATCTTTTGTCTCC  
AGCTATTGGAGATCCATTTCCGTACCAACTCAAGATATGCTTATCGGGCTTTATGTATTA  
ACGAGCGGGAATCGCCGAGGTATTTGTGCAAATAGGTATAATCCATGTAATTACAGAAA  
T-----TATCAAATGAAAGAATTGACGATAATAAGTATAAATATACAAAAACACAAGA  
GCCCTTTTTTTGTAATTTCTTATGATGCAATTGGAGCTTATCGGCAGAAAAGAATCCATTT  
AGATAGTCCTTTGTGGCTCCGGTGGCGACTAGATCAACGC---GTTACTTCA-----AG  
AGAAGCTCCCATGAAAGTTCACTATCAATCTTTGGGTACCTATCATGAGATTTATGGACA  
CTTACTAATAGTAAGAAGTATAAAAAAAGAAATTTTGTATATATCTTCGAACCACTGT  
TGGTCATATTTCTCTTTATCGAGAAATCGAAGAAGCTATACAAGGGTTTTTCCGGGCCT  
GCTCATATGGTACC-----ATGGAGGTTACTTATGGCAGAACGGGCCGATCTG  
GTCTTTTCGCAATAAAGTGATAGATGGAACCTGCCATTAACGACTTATTAGTAGATTAATA  
GATCACTTCGGAATGGCATATACATCACATCCTGGATCAAGTAAAGACTCTGGGGTT  
CCGGCAAGCCACTGCTACATCCATTTTATTAGGAATTGATGATCTTTTAAACAATACCTTC  
TAAGGGATGGCTAGTCCAAGATGCTGAACAACAAAGGTTAATTTTGGAAAAACACCAT  
CATTATGGAAATGTACACGCGGTAGAAAAATTACGACAATCTATTGAGATATGGTATGCT  
ACAAGTGAATATTTGCGACAAGAAATGAATCCTAATTTTCGTATGACTGATCCTTTTAAAT  
CCAGTCCATATGATGTCCTTTTCGGGAGCTAGAGGAAATGCATCTCAAGTACACCAATT  
AGTAGGTATGAGAGGATTAATGTCGGACCCACAAGGACAAATGATTGATTTACCTATTC  
AAAGCAATTTACGTGAGGGACTGTCTTTAACAGAATATATCATTCTTTGTTACGGAGCC  
CGCAAAGGAGTTGTGGATACTGCTGTACGAACATCGGATGCTGGATATCTTACACGCAG  
ACTTGTTGAAGTAGTTCAACACATTGTTGTACGGAGAACAGACTGTGGCACCATCCAA  
GGGATTTCTGTCACTCCTCAAATGGGATGATGCCG--GAAAGAATTTTATCCAAACAT  
TGATTGGTCGTGATTAGCGGATTATATATATATAGGATCACGATGCATTGCCGTTTCGAAA  
TCAAGATATGGTATTGGACTTGTCAATCGATTACATAACC-----TTTCAAACACA  
ACCCATCTCTATTTCGAACCTCCCTTTACTTGTAAAGAGTACGTCTTGGATCTGTTCGATTATG

TTATGGCCGGAGCCCTACTCATGGCGACCTCGTCTGAATTGGGAGAAGCTGTAGGTATTA  
TTGCGGGTCAATCTATTGGGGAACCCGGCACTCAATTAACATTAAGAACTTTTCATACC  
GGCGGAGTATTCACAGGGGGTACTGCAGAACATGTACGAGCCCCTTCTAATGGAAAAA  
TCAAATTCATGAGGATTTGGTTCATCCACACGTACACGTCACGGGCATCCCCTTTT  
CTATGTTCTATAGACTTGTATGTAACCTATTGAGAGTGAAGATATTATACATAACGTGACTA  
TTCCGCCAAAAAGTTTTATTTTAGTTCAAACGATCAATATGTAGAATCAGAACAAGTG  
ATTGCTGAGATTTCGCGCGGGAACATACACTTTT--CATTTTAAAGAGAGGGTTCGAAAA  
CATATTTATTCTGACTCAGAGGGGGAA---ATGCACTGGAGTACCGATGTATATCATGCAC  
CCGATTTTACATATAGTAATGTACATCTCTTACCAAAAACAAGTCATTTATGGATATTATC  
AGGAGGCTCGTACAAA-----TCCAGTGTAGTCCCTTTTTCAATCCATAAAGATCAAGATC  
AAACGAACGTTTAT-----TTTCTTTCTGCAGCAAAAGGAAAAGCTAGAAATAGCTTT--T  
CAGTAAATAATGATCAACAAGGGAAACACAAATCTTTACTTCGGGTCTTTCTGGTAAA  
---GAAAGCGGTATTCCTGATTAT--TCAGAATTTAATCGAATCTTAGATACGGATCATTCT  
AATCTCATATTTCTTCT--ATTCTCCACAAGGATTCTGAT--TTTTTATTGGCAAAGAGGC  
GAAGAAATCGATTCATCATTCCATTCCAATGGATTCAAGAACGAGAGAAAGAACTATG  
GCCTCGTTCAGTATTTTCGATTGAAATACCGATAAAT-----GGTATTTTTTCGAAAAATAG  
TATTCTTGCTTATTTTGATGATCTTCAATACAGAAGAAAGGGTTCAGGAATTACTAAATA  
TGGGGCTATAGGCTTGCATTCAATCCTCAAAAAAGAGGAT-----TTAATTGAGTATGGA---  
GGAGTCAAAGAATTTAAGCCAAAATACACGAAAGTAGATCAATTTTTTTTTCATTCCCGA  
GGAGGTGCATATTTTACCTGAATCTTTTTCCATAATGGTACGAAACAATAGTATTATTGG  
AGTAGATACACGAATCACTTTAAATACAAGAAGCCGAGTAGGCGGATTGGTCCGAGTG  
GAGAAAAAAAACAAAAGGATTGAACTTAAAATCTTTTCTGGAGATATCCATTTTCTGT  
AGAGATGGATAAGATATTCCGACATAGTGGCATCTTGATACCACCGGGAAGGGTAAAA  
AAA-----GAATTTAAGGAATCAAAAAA-----TGAAAAAATTGGATCTATGTCCAATCG---  
---ATCACACCTACCAAGAAAAA-----TATTTTGTTTTGGTTTCGGCCTGTAATCATATATG  
AAATAGCGGACGGTATAAATTTAGAAACACTTTTTCCCCAGGATCCGTTGCAGGAAAA  
AGATAATTTAGAACTTAGAGTTGTAAATTATATTCTTTATGGAAATGGCAAACCCATTTT  
GGGAATTTCCGGAACCTGTATTCAATTAGTTCGGACTTGTTTAGTGTGAACTGGGACC  
AAGGCAAC-----AAAAGTTCTTCTAGCGAAGAAACCCACGCTTCCTTTGTTGAAGTA  
AGTACAAGAGATCTGATTTCGAGATTTCTAAGAATCAACTTAGTGAAATCCCATATTTCT  
GTATATCAGAAAAAGAAATGATCCGTTAGGGTCCGTATTGATCTCT--GATAATAGGTCA  
GATCGTACC-----AATCCATTTATTCTATTTATTCCAAGGAAAAG-----ATTCGAC  
AATTAATAAGAAAATCAAGGAACTATTCATACGTTGTTGAATAGA-----AGTAAGG  
AATCTCAATCTTTAATAATTTGTATCATCTAATTGTTTTGAAATGGGTCCA-----TTCAA  
CGATGTAAAACATTACAAT-----GTGATAAAAGAATCA---CCTCTAATTCCAATTAGGA  
ATTCCTTAGGCCCTTTAGGAACA-----GCCTGTCAAGTTGCAAATTTT-----TAT-----TACA  
TTTTAAAAACT-----CATAATCAGATCTCG---GTAATAAAAATTTGCAACTTGAA-----AA  
T---TTAAAACAGACCTTTCAAGTACTT-----AAA---TATTATTTAATGGACGAAAACGGGA  
GA-----ATTTATAATTCCGATCCATGCAGTAACATCCTTTTTAATCCATTCAACTTGAATTG  
GCATTTTCTCCATCAT--TATTGTGAAAAAAAATCCACAATAATTAGC---CTTGGGCAGTT  
TTTTTTTCGAAAATGTATGTATAACCAAACATGGACCA-----CACCTAAAATCAGGTCA  
AGTTATAATTGTTCAA---ATTGACTCTGTAGTAATAAGATCGGCGAAGTCTTATTTGGCC  
ACTCCAGGAGCAACTGTTTCATGGACATTATGGCGAAATACTCTCCGAAGGAGATACATT  
AGTTACATTTATATATGAAAAATCGAGATCGGGTGTATATAACGCAGGGTCTTCCAAAAG



TGGAACAAGTGTTAGAAGTGCGTTCAATTGATTCAATATCAATGAACCTAGAAAAGAG  
AGTTGAGGGTTGGAACGAACGTATAACAAGAATTCTTGGAATTCCTGGGGATTCTTG  
ATTGGTGTCTGAGCTAACTATAGTGC AAAGTTCGTATCTCTTTAGTTAATAAGATCCAAA  
GGTTTATCGATCCCAGGGTGTGCAGATCCATAATAGACATATAGAAATTATTGTGCGTCA  
AATAACATCAAAGTGTTGGTTTCAGAA-----GATGGAATGTCTAATGTTTTTTTACCC  
GGAGAACTAATTGGATTGTTTTGAGCGGAACGAACGGGGCGTGCTTTGAAAGAAGCG  
ATTTGTTACCAAGCTATATTATTGGGAATAACGAAAGCATCTCTAAATACTCAAAGTTTC  
ATATCCGAAGCGAGTTTTCAAGAACTGCTCGAGTTTTAGCAAAGCCGCTCTACGCG  
GTCGTATCGATTGGTTGAAGGGTCTGAAAGAGAATGTTGTTCTAGGGGGGATGATACCC  
GTTGGTACCGGATTCAAAGGATTAGTGCACCGTTCA-----AAGCAGCATAATAACATTCC  
TTTGAAACCAAAAAGAAGAAT-----TTATTTGAGTGC GAAATGAGA-----GATATTTTGT  
TCCACCACAAAGAATTATTTGATTTTTGCATTTCAACCAATATACATGATACATCAGAAC  
ACTTATTTCTAGGATTTAATGATTCT-----ATGACAAGACGATACTGGAACATCA  
ATTTGGAAGAGATGATGGACGCAGGAATTCATTTTGGTCATGGTACTAGGAAATGGAAT  
CCTAAAATGGCACCTTATATCTCTGCAAAGCGTAAAGGTATTCATATTATAAATCTTACTA  
GAACGGCTCGGTTTTTATCAGAAGCTTGTGATTTAGTTTTTGGATGCAGCAAGCAGGGG  
AAAACAATTCTTAATTGTTGGTACCAAAAATAAAGCAGCTGATTCAGTAGCACAGGCT  
GCAATAAAGGCTCGGTGTCATTATGTTAATAAAAAATGGCTTGGTGGTATGTTAACGAA  
TTGGTATACTACAGAAACGAGACTTCATAAGTTCAGGGACTTGAGAACGGAACAAAAA  
ACAGGCAGACTCAAACGCCTTCCGAAGAGAGATGCGGCTGTGTTGAAGAGACAAATA  
TCTCACTTGCAAACATATCTGGGCGGGATTAATATATGACAGGGTTACCTGATATTGTA  
ATAATTGTTGATCAGCAAGAAGAATATACGGCTCTTCAAGAATGTATCACTTTGCGAATT  
CCAACGATTTGTTAATCGATACAAATTGTGACCCGGATCTAGCAGATATTTCTATTCCA  
GCGAATGATGACGCTATAGCTTCAATCCGATTAATTCTTAACAAATTAGTATTTGCAATT  
TGTGAGGGTCGTTCT--AGCTATATACGAAATTCTATGGGACAAAAATAAATCCGCTTG  
GTTTCAGACTTGGTGCAACCCAAGGTCATCATTCCCTTTGGTTTGCACAACCAAAAAA  
TTATTCCGAGGATCTACAAGAAGATCAAAAAATACGAGATTGTATCAAGAATTATATAA  
AAAAAATATGAAAATTTTTTCTAGT--GTCGAGGGAATTGCATGTATAGAGATTCAAAA  
AAGAATCGACTTGATTCAAGTCATAATCTATATGGGATTCCCAAAGTTATTAATAGAACA  
T-----CAAAAAATCGAAGAATTACAGATGAATATACAAAAAGAACTTAATTCTG  
TGAACCGTAAACTAAACATGGCTATTACAAGAATTGCAAATCCTTACGGACACCTAAT  
ATTCTTGCAGAATTTATAGCCGGACAATTA AAAAATAGAGTGTCAATTCCGCAAAGCAAT  
GAAAAAAGCTATTGAATTA ACTGAACAGGCAGGTACAAAAGGAATTCAAATACAAATT  
GCAGGGCGTATCGACGGAAAAGAAATTGCACGTGTCGAATGGATCAGAGAAGGTAGG  
GTGCCTCTACAAACCATTAAGGCTAAAATTGATTACTGTTCCCTATACAGTTTCGAACTATC  
TATGGGGCTTTAGGTATCAA AATTTGGATATTTGTAGACGAG---ATGTCACGTTACCGAG  
GACCTCGTTTCAAAAAAATACGTCTGCTGGGGGCTTTACCGGGACTAACTAGTAAAAA  
GCCTAGAGCTGGAAGCAATCTTAGAAACCAATTACGCCCCGGTAAA---AAATCTCAATA  
TCGTATTCGTTTAGAAGAAAAACAAAAATTGCGCTTTCATTATGGTCTTACAGAACAAC  
AATTA CTAAATACGTTTCGTATAGCCGGAAAAGCAAAGGGTCAACAGGTCAAGTTTT  
ACTACAATTA CTGAAATGCGGTTGGATAACATCCTTTTTTCGATTAGGTATGGCTTCAAC  
TATTCCTCAAGCCCGGCAATTGGTTAACCATAGACATATTTTAGTTAATGGTCGTATAGT  
AGATATACCAAGTTATCGCTGCAAACCCCGAGATATTATTAGAGTGAAAGATGAACAAA  
AATCTAAGTCTCTGGTTCAA AATTATCTTGATTATCCTCCCGT--GAGGAATTGCCAAA

ACATTTGACTCTTCACCCATTCCAA-----TATAAAGGATCAGTCAATCAAATAATAGATAG  
TAAATGCGTCGGTTTGAAAATAAATGAATTGCTAGTTGTAGAATATTATTCTCGTCAGAC  
TATGTCACGTCGAGGTACTGCAGAAGAAAAACTGCAAATCCGATCCAATTTATCGTA  
ATCGATTAGTTAACATGTTGGTTAACCGTATTCTGAAACACGGAAAAAAATCATTGGCT  
TATCAAATTATCTATCGAGCCATGAAAAAGATTCAACAAAAGACAGAAACAAATCCACT  
ATCTGTTTTACGTCAAGCAATACGTGGAGTTACTCCCGATATAGCAGTAAAAGCAAGAC  
GTGTAGGCGGATCGACTCATCAGGTTCCCATTGAAATAGGATCCACACAAGGAAAAGC  
ACTTGCCATTTCGTTGGTTATTAGGGGCATCCCGAAAACGTCCGGGTCGAAATATGGTTT  
TCAAATTAAGTTCCGAATTAGTGGATGCTGCCAAAGGGAGTGGCGATGCCATACGCAA  
AAAGGAAGAGACTCATAGAATGGCAGAGGCCAAATAGGGCTTTTGCACATTTTCGTATG  
AGTAAAGACACTATTGCTAACATACTAACTTCTATACGAAATGCTGACATGAATAAAAA  
AAGAACAGTTCGAATACCATATACTAACATCACTGAAAACATTCTTAAAATCCTTTTAC  
GAGAAGGTTTTATTGAAAACATGAGGAAACATCAGGAAAGCAACAATCTTTTTTTTGT  
TTTAACCCTACGACATAGAAGGAAAAGGAATAGGAAAGGACCAGATAAAACT--GTT--  
---TTAAATTTAAAACGGATCAGTCGACCCGGTCTACGAATCTATTCTAACTATCAACGAA  
TCCAAGAATTTTAGGCGGGATGGGAATTGTAATTCCTTCTACTTCTCGGGGTATAATGA  
CAGACCGAGAGGCTCGACTAGAAGGAATCGGTGGAGAAATTTTGTGCTATATATGGAT  
GGCAAACCTCTACCAAGAATTGGTTCACGTAAGAATAGACATATGGGTTACAGT---AA  
TGACGTAGAATACCAAAGGGAGTTATTCATGTCCAAGCAAGTTTCAACAATACTATTG  
TACTGTTACAGATGTACGGGGGCGGGTAATTTCTTGGTCCTCCGCCGGTACTTGCGGA  
TTCAAAGGTACAAAAGAGGGACACCATTTGCCGCTCAAACCGCAGCAGGAAATGCT  
ATTCGGACAGTAGTGGATCAGGGTATGCAACGAGCAGAAGTCATGATAAAAGGCCCCG  
GTCTCGGAAGAGATGCGGCATTAAGAGCTATTTCGCAGAAGTGGTATACTATTAAGTTT  
ATACGAGACGTAACCTATGCCACATAATGGCTGCAGGCCCCCTAAAAAAGACGTG  
TGATGCCAACTATTAACAACACTTATTAGAAACACAAGACAGCCAATCAAAAATGTCAC  
GAAATCCCCCGCTCTTCGGGGATGTCTCAGCGACGAGGAACATGTACTAGGGTGTAT  
ACTATCACCCCAAAAAACCAAACCTCTGCCTTACGTAAAGTTGCCAGAGTACGCTTAA  
CCTCTGGATTTGAAATCACTGCTTATATACCTGGTATTGGCCATAATTTACAAGAACATT  
CTGTAGTCTTAGTAAGAGGGGGAAGGGTTAAGGATTTACCCGGTGTGAGATATCACATT  
GTTTCGAGGAACCCTAGATGCTGTTCGGAGTAAAGGATCGTCAACAAGGGCGTTCTAAAT  
ATGGGGTCAAAAAGCCAAAATGGCAAGAAAAAGTTTGATTTCAGAGGGAGAAGAAG  
AGGCAAAAATTGGAACAAAATATCATTGATTTCGTCGATCCTCAAAAAAAGAAATAA  
GC-----AAAGTTCCGTGCTTGAATGAGAAATGGAAAATTCATGGAAAGCTACAATCCC  
TACCACGTAATAGTGCACCTATACGCCTTCATCGACGTTGTTTTTCGACTGGAAGACCG  
AGGGCTAACTATCGGGACTTTGGGCTATCCGGACACATACTTCGTGAAATGGTTCAGGC  
CTGTTTGTGCCCCGAGCAACAAGATCCAGTTGGATGATAAAAAAGTCATTCATCTCGG  
TTATTTACACGAAGAAAAAGAAAAAACAGG-----GGGTCTGTTACATTTCAAATACT  
AAGCCTACTAATAGGATACGAAAACCTTCTTCACATTTGGAATTGCACAGAAAAGACT  
ATTTATCTCAGAGAGGCCTCCGTAAAATTTTGGGAAAACGCCAAAGGATGCTGTCTTAT  
TTGTCAAAGAACAATAGAATACGTTATAAGAATTAATTAATCAGTTAGATATTCGGGAA  
TCAAAAACGCGT-----ATGGTAAAACCTTCGTTTAAAACGATGTGGTAGAAGGCAACGTG  
CTATTTATCGAATTGTTGCAATTGATGTTTCGATCCCGAAGAGAAGGAAGAGCTCTTCGG  
AAAGTGGGTTTTTATGATCCGATAAAGAATCAAACCTATTTAAACGTTCCCTGTATTCTA  
TATTTCTTGAAAAAGGCGCTCAGCCTACAGGAAGTTCATGATATTTCAAAGAAGGC

GGGGGTTTTTATGGAACCTTCGCCTTAATCACCAAACAAAATTCAATATGGATAAATCCA  
AGCGACTCTTTCTTAAATCTAAGCGATCTTTTCGTAGGCGTTTGCCCCGATAACAATCG  
GGGGATCGAATTGATTATAGAAACATGAGTTTAATTAGTCGATTTATTAGTGAACAAGG  
AAAGATATTATCTAGACGGGTGAATAGATTGACCTTAAAACAACAACGATTAATTAAT  
TGCTATAAAACAAGCTCGTATTTTATGTTTGTTACCCTTTCTTAATAATGAG-----AAACA  
GTTTGAAAAGAAGCGAGTCGACTCCTAGAACTACTGGTCTTAGAATTAATAAATAAAGTG  
GCACGT--CTAAAAAAAAATCCTTTTGTAGCCAATCATTATTAAGAAAAATAAATATGC  
TTAACACAAAAGCAGAAAAAGAAATAATAGTAACTTGGTCCCGAGCATCTACCATTATA  
CCCACAATGATCGGTCATACTATCGCTGTTTATAATGGAAAGGAGCACTTGCCCATTAT  
ATAACAGATCGTATGGTAGGCCATAAATTAGGAGAATTTGCACCCACTTTAAATTTTCA  
GGGACATGCAAAAAATGATAATAGATCTCGTCGTATGATTTTTCAATCTTTTATACTAGG  
TAATCTAGTATCCTTATGCATGAAGATAATAAATTCGGTCGTTGTGGTCGGACTCTATTAT  
GGATTTCTGACCACATTCTCCATAGGGCCCTCTATCTCTCCTTCTCCGAGCTCGTGTT  
ATGGAAGAAGGAGAAGAAGGAACCGAGAAGAAAGTATCAGCAACAACCGGTTTTTATT  
ACGGGACAGCTCATGATGTTTATATCGATCTATTATGCGCCTCTGCATCTAGCATTGGGT  
AGACCTCATACAATAACTGTCCTAGCTCTACCGTATCTTTTGTTCATTTCTTCTGGAAC  
AATCACAAACACTTTTTTGTATTATGGATCTACTAACAGAAATTCAATGCGTAATCTTAGC  
ATTCAATGTGTATTCTGAATAATCTCATTTTTTCAATTATTCAACCATTTTCAATTTACCA  
GTTCAATGTTAGTCAGATTAGTCAACATTTATATGTTTCGATGCAACAACAAGATGTTAT  
TTGTAACAAGTAGTTTTGTTGGTTGGTTAATTGGTACATTTTATTTCATGAAATGGGTTG  
GATTGGTATTAGTCTGGATACAGCAAAACAATTCTATTAGATCT-----AATAAGTACC  
TTATGTCAGAATTGAGAAATTTTATGGTTCGAATCTTTAGTATTCTATTATTTATTACCTGT  
GTCTACTATTTAGGCAGAATACCGTCACCCATTCTACTAAGAACTGAAAGAAACCGA  
AGAAGATAAACCTCTTGTGACTATTCTTTTCGACTATAAACGCTGGAATCGTCCATTTTCG  
TTATATCAAAAACGATAAATTTGAAAATGCTGTAAAAAATGAAATGTCACAATATTTTTT  
TCATACATGTGAAAGCGATGGAAAAAAGAATATCTTTTACGTACCCACCCAGTTTGT  
CAACTTTTTTCGAAATGATACAAAGAAAGATGTCTCTGTTTACAACAGATAAACTTTAC  
TCTGATGAATTATATAATAATTGGAGTTATACTAATGAACAAAAAAGAAAAAACCTAAA  
CAACAAATTGATAAATATAATCAAGGATCTTGACAAAGCTCTACTTATTTTGGATGTACT  
AGAAAAAAGACCTAGATTGTGTCATGATAATACGAAAAAAATACTTACCAAAAGTAT  
ATGATCCTTTCTTGAATGGGGCATAACCGTGGACAAATTAATAAAGGTTTTTCACTTATA  
GAAAGAGGTTGGATAAATAAGATCCACGGTCTCTTTTATTTAGAAATTTGAAGAAAAAGA  
TCCTAACAATAAAGCTATTGGGATAAAAGAAATCAGAAAAAAATTCGCAATGGTCAT  
ACAAATTAATCGATTTGGAACAAGAGGAGGAGAACAGATTTCGTTCAAGAAAATGCA  
AACGTGTATTGATTTTAATCATGCTTTGATACGTTATTTCGCAACAATCGGATTTTCGTCG  
AGACATAATCAAAGGCTCAATGCGCGCTCAAAGGCGTAAACAGTTATTTGGAAAACC  
TTTCAAGCAAACGTACACTCCCTTCCTTTTTTGGACAGAATCGACAAAGATGTT-----TA  
TTTTTCTTTTGATATGTTGAGGCCGATAAAAAAAATTTCAACATAGAAGGGAGAATG  
CACGTATAGAAATAGCGGAAACCTGGGATAGCATTGTAGTTGCTCAAGTAATAAGAGGT  
TTTGTATTAGTAATCCAATCAATTCTGAGAAAATATATTATATTACCCTCATTGATAAATAGT  
TAAAAATATTGGTCGTATACTATTATTTCAATTTCTGAATGGTTCGGAGGATGTAAAGGA  
TTGAAAAGAGAAGTGCATGTTAACTGCACTTATAATGGTGTTCATTAGCAGAAAAA  
GAATTTCCGAAAAACTGGTTAATAGACGGTATTCAGATAAAGATCCTATTTCTTTTCGT  
CTGAAACCTTGGCACAAATCTAAGAAAGAACAACAATAAATGATTTTTGTTTTTAAACAG

TTTGGGGAATGGAAACTGAACTTCCTTTTGGTTGCGCCAGAAAACAACCTTTCGTTTTT  
GAACCTATTTTTAAAGAACTCAAAAAAGACTTATAAAATTA AAAAAGAAATGTTTTAG  
AATT---CTAATAATTTTAAAGAAAGAACAAAATTATTTCTAAATGTCTCAAAGAAAG  
AAAAAATGGGTTATTA AAAATATTGTA-----TTTCTAAAAAAAATAATAAAGAACTTT  
CAAAAATGAACAATTTGATAATCGATAACGAGCTAATTCATGAACCG---ATTAACATTCA  
ATCTACAAATTGGACAAC---TCATTAACAAAAAAAATAACAAGATCTAACTAATAG  
AACAAACACAACCATAAATCAAATACAAAAAATTTCAAAGACAACAAAAAAAATAA  
A-----ATGAGTTATAATGATAAAAAGATTGGAATTACCAAAAAATATTTTGCAGCTATTA  
A-----AATGTTGCGACTAATCCGTAATCAAATTATTTATAAAATTTTTCATTGAAAGAATA  
TATAGAAATATATTTTTATTTATCAGTAATATTCCTAAAATAAATGCACAACCTTTTT-----  
----TGTAATTTATCTTATTTGTCCACAAGCATATGTCTTTTACAAATTATCACAAAGCCGGT  
TTTTTAATAAGTTAAGATTAAGATCTGTCTTCAATATGCTTTTCTTTTTCTTAAGAATGA  
AATAAAGGATTATTTTACACAAAAAATATTTTCATTCCGAATTAAGACATAAGAACATCCC  
C---TATGAAATAAATCAATGGAAAAATTGCTTAAGGGGTTATTATCAAATAATTTATCTC  
AG-----TCTAGATTAGTACCACAAAAAGGTATAAATATAGTAAATCAACACTCTATAGC  
TCAAAATAACAAC-----AAATATGATTCATATGAAAAAAT---AATGTT  
AAAAAAAATATAGATATGATCTTTTATCATATAATTTTATTAATGATAATATTATAGATCC  
GGATAGAAAAAATTTTCGATTGGATAAATTCTCAATTTTTGTCTTAGACTTTTTGATTGGAT  
GAGAATGAATGAAGAAATACTAAGTTGTTGGTTTTTCCCAGAATTTTGTACTTTTATAC  
TTCGTATAAGATTA AACCATGGTACATACCAATCAAATTTCTCCTTTTAAATACCAAC-----  
-ATGGAAGCGGAGTTTGATTCTTACTAAAAGGTATTTGCTTTTTTCAATTGAGATGGGA  
C-----AATAAAAAAATGATCGATAACATCAAAGTATATTGTTCCCTGCTTAGACCGATA  
AACCTAAGAGAAATTA CTATAGCCTCTATTCAAAGGGGAGAAATAAATCTGGATCTTCT  
AATGATTCAGAAAAATTTTCATTCTTACAGAATTGATTA AAAAGGGAATATTACTTATTGA  
ACCAGTTCGTCTGTCTAGAAAAAATGAAGGACAATTTATTATGTATCAA ACTATAGGTAT  
TTCGTTGGTTCATAAAAGTAAACACCATTATGAT---TTGTTTGTTCCTGAAACTATTTTAT  
CCCCTAGACATCGTAGAGAATTGAGAATTCTAATTTGTTTCAGCTTTCTTTGGCCTAATT  
ATCGATTAGAAGATTTTCGCTTGATGAATCGCTATTGGTTTTGATACCAATAATGGCAGTC  
GTTTCAGTATGGTAAGGATACATATGTATCCGATGAAAGGACATCAATTCAAATCCTGGA  
TTTTCGAATTGAGAGAGATATTGAGAGAGATCAAGAATTCTCACTATTTCTTAGATTCAT  
GGACCAATTGAATTCAGTGGTATCTTTCAATCACATTTTTTTCCATCAAGAACGTTTTTA  
TAAACTCTTGGACTCCCGAATTTGGAGTATCCTACTTTCA---CGCAATTCACATTTACA  
GGTTCAACAAGCAATCGATATTTA-----ACGATCAAGGGTGTAGTACTATTTGTAGTA  
TCG---GTCCTTATATATCGT-----ATTAACAATCGAAAGATGGTCGAAAGAAAAAATC  
TCTATTTGACAGGGCTTCTTCT-----ATACCTATGAATTTTCATTGGACCCAGAAAT  
GATACATTGGAAGAATCTTTT---GGGTCTTCCAATATCAATAGGTTGATTGTTTCG---CTC  
CTGTATCTTCCAAAAGGAAAAAAGATCTCTGAGAGCTGTTTCTGGATCCAAAAGAGA  
GTA CTTGGGTTCTCCCAATAACT-----AAAAAGTGTATCATGCCTGAATCTAACTGG  
GGCTCGCGATGGTGGAGGAACTGGCTCGGAAAAAAGAGG-----GATTCTAGTTGTAAG  
ATATCTAAC-----GAAACCGTCACTGGAATTGAGATCTCATTCAAAGAGAAAGATATC  
AAA---TATCTGGAGTTTCTTTTTGTATATTATATGGAT-----GATCCGATCCGCAAGGACCA  
TGATTGGGAATTGTTTGTATCGTCTTTCTCCGAGGAAGAGGCGAAACATAATCAACTTG--  
----AATTCGGGACAGCTATTCGAAATCTTAGTGAAAGACTGGATTTGTATCTCATGTTG  
CTTTTCGTGAAAAAATACCAATTGAAGCGGAGGGT---TTCTTCAAACAACAAGGA---GC

TGGGTCAACTATTCAATCAAATGATATTGAGCATGTTTCCCAT-----CTCTTCTCGAGAAA  
CAAGTGGGCTATTTCTTTGCAAATGTGCTCAATTCATATGTGGCAATTCCGCCAAGA  
TCTCTTCTTT-----AGTTGGGGGAAG--AATCCGCACGAATCGGATTTTTTGAGGAAC--  
-ATATCGAGAGAGAATTGGATTGGTTAGACAATGTGTGGTTGGAAAACAAGGATCGG--  
-----TTTTTTAGC-----AAGGTACGGAATGTATCGTCAAATATTCAATATGATTCC-----A  
CAAGA-----TCTAGTTTCGTTCAAGTAACGGATTTTAGCCAATTGAAAGGATCTTCT--GA  
TCGATCCAGAGATCATTTTGATTCCATTAGG-----AATGAGGATTCAGAA-----  
-----TATCACACATTGATCAATCAAAGAGAGATTCAACAACACTAAAAGAAA  
GATCGATTCTT--TGGGAT-----CCTTCCTTTCTTCAAATGGAACGAACAGAGATAGAATC  
AGAC-----CGATCCCCTAAA-----TGTCTTTCTGGATATTCC-----TCAATGTCCCGGCTATT  
CACG--GAACGTGAGAAGCAGATGAATAATCATCTGCTTCCGGAAGAAATCGAAGAAT  
TTCTTGTTCTTGGGAATCGTACAAGATCCATTCTGTTCTTTTTTCTCTGACAGATGG-----T  
CAGAACTTCAT--CTGGGTTCGAATCCTACTGAGAGGTCCACTAGAGATCAT-----A  
AATTGTTGAAGAAAGAACAAGATGTTTCT--TTTGTCCCTTCCAGGCGATCGGAA-----  
---AATAAGGAAATAGTTAATATATTCAAGATAATTACGTATTTACAAAAT-----ACCGTCT  
CAATTCATCCTATTTTCATCAGATCCGGGATGTGATATGGTTCCG--AAGGATGAACTGGA  
T--ATGGACAGTTCCAATAAGATTTCAATTCTTGAACAAAATCCATTTTTTGATTTA-----T  
TTCATCTATTCCATGACCGGAACAGGGGGGATAACAGTTA-----CACCACGATTTTGAA  
TCAGAA-----GAGAGATTTCAAGAAATGGCAGATCTATTCACTCTATCAATAACCGAGCC  
G--GATCTGGTGTATCATAAGGGATTTGCCCTTTCTATTGATTCCTACAGATTGGATCAAA  
AACAA-----TTCTTGAATGAGGTATTCAACTCCAGGGATGAATCGAAAAAGAAATCTTT  
A-----TTGGTTCTACCTCCTATTTTTTAT-----GAAGAAAATGAATCTTTTTATCGAAGGA  
TCAGAAAAAATGGGTCCGG--ACCTCCTGCGGGAATGATTTGGAAGATCCAAAACCA  
AAAATAGTCGATTTGCTAGCAACAACATAATGGAGGCAGTCAATCAATATAGATTGAT  
CCGAAATCTGATTCAAATCCAATATAGCACCTATGGG-----TACATAAGAAATGTATTGAA  
TCGATTCCTTTTAATGAAT-----AGATCCGATCGCAACTTCGAATATGGAATTCAA-----  
--AGGGATCAAATAGGAAATGATACTCTGAATCATAGAACTATAATGAAATATACGATCAA  
CCAACATTTATCAAATTTGAAAAAG--AGTCAGAAGAAATGGTTTCGATCCT-----CTTATT  
TTTATTTCTCGAACCGAGAGATCCATGAATCGGGATCCTAATGCATATAGATACAAATGG  
TCCAATGGGAGCAAGAATTTACAGGAACATTTGGAACATTTCAATTTCTGAGCAGAAGA  
GC-----CGTTTTCAAGTAGTGTTCGATCGATTACGTATTAATCAATATTCGATTGATTGG  
TCTGAGGTTATCGACAAAAAAGATTTGTCTAAGTCACTTCCTTTCTTTTTGTCCAAGTT  
ACTTCTT-----TTTTGTCC-----AAGTTTCTTCTTTTTTGTCT  
AACTCACTTCCT--TTTTCTTTGTGAGTTTCGGGAATATCCCCATTCATAGGTCAGAG--  
ATCCACATCTAT--GAATTGAAAGGCCCGAATGATCAACTCTGCAATCAGTTGTTAGAAT  
CAATAGGTCTTCAAATCGTTCATTTGAAAAAATTGAAACCCTTC-----TTATTGGAT-----  
-GATCATGATACTTCC--CAAAAATCGAAATCTTGATCAATGGAGGAACAATATCACCA  
TTTTTGTTCAATAAGATACCA---AAGTGG--ATGATTGACTCATTCCATACTAGA-----AA  
GAATCGCAGGAAATCTTTGATAACACAGATTCCTATTTCTCAATGATATCCCACGATCA  
AGACAATTTGGCTGAATCCCGTGAAACCATTTTCATAGAAGCTCATTGATATCCTCTTTTTTA  
TAAAGCAAATCGACTTCGATTCTTGAATAATCCACATCACTTCTGCTTCTAT-----TGTA  
CAAAAGATTCCCTTT-----TAT--GTGGAAAAGGCCCGTATCAATAATTATGAT-----TTT  
ACGTATGGA--CAATTCCTCAATATCTTGTTCATTTCGCAACAAA--ATATTTCTTTGCGC  
GGCGGTA---AAAAAATATGCTTTTTTGGAG--AGAGATACTATTTACCAATCGAG

TTACAGGTGTCTAACATATTCATACCTAACGATTTTCCACAAAATGGTGACGAAAGG---T  
ATAACTTTTACAAATCT-----TTCCATTTTCCAATTCGATCCGATCCATTTCGTTTCGT-----  
AGAGCTATTTACTCGATCGCAGACATTTCTGGAACACTTCTAACAGAGGGGACAAATAGT  
CAATTTTGAAAGAAGCTTATTGTCAACCTCTTTCAGATATGAATCTGTCTGATTCAGAAG  
GGAAGAAGCTTGCATCAGTATCTCAAT-----TTCAATTCAAACATGGGTTTGATTCACACT  
CCATGTTCTGAGAAATATTTACCATCCGAAAAG-----AGGAAAAAA-----C  
GGGGTCTTTGTCTAAAG-----AAATGCCTTGAGAAAAGGGCAGATGTATAGAACCCTTCA  
ACGAGATAGTGCTTTTTCAACTCTCTCAAATGGAATATATTCCAAACATATATGCCATG  
GTTCCTTACTTCGACAGGATACAACCTATCTAAATTTGCTATTTTATAGATACTTTTTTCAGAC  
---CTATTGCCGATACTAAGTAGCAGC-----CAAAAATTTGTATCCATTTTTCATGATATTAT  
GCATGGATTAGATATATCATGGCGAATTCTTCAGAAAAGATTG-----TGTCTTCC  
ACAATGGAAT---CTGATAAGTGAGATTTTCGAGTAAGTGTTTACATAAT-----CTTCTTCTGT  
CCAAAGAAATGATTCATCGAAATAATGAGTCA-----CCATTGATATCGACACATCTGAGA  
TCGCCAAATGTTTCGGGAGTTC---CTCTATTCAATCCTTTTCTTCTTCTTGTGCTGGATA  
T--CTCGTTTCGTACACATCTTCTTTTTGTTTTCTCGA-----ACCTATAGTGAGTTACAGACA  
GAGTTTCGAAAGGGTCAAATCTTTGATGATTCCATCATAATGATTGAGTTGCGAAAAGT  
TCTGGATAGGTATCCTACATCTGAACTGAATTCCTTCTGGTTAAAGAATCTCTTTCTAGT  
TGCTCGAGAACAATTAGGAGATTCTCTAGAAGAAATACGGGGTTCTGCTTCTGGCGGC  
AACATGCTATGGGGTGGCGGTCCC-----ACTTATGGG---GTCAAATCAATACGTTT  
TAAGAAGAAATATTTGAATATCAATCTCATCGATATCATCGATTTTCATA---AGTATCATACC  
AAATCCCATCAATCGAATCGCTTTTTTCCAGAAATACGAGACATCTAAGTCATATAAGTAA  
AGAGACCTATTCAATTGATAAGAAAAAGAAAAAGGTGAACGGTGATTGGATTGATGAT  
AAAATAGAATCCTGGGTCTCGAACAGTGATTCGGTTGATGATAAAGAAAGAGAATTCT  
TGGTTCAGTTCTCC-----ACCTTAACGACA-----GAAAAAAGGATTGATCAAATTCTATTG  
AGTCTGACT---CAGAGTGATCATTATCA-----AAGAATGACTCTGGTTATCAAAT  
GATTGAACAACCGGGAGCAATTTACTTACGATACTTAGTTGACATTCAT-----AAAAAGT  
ATCTAATGAATTATGAGTTCAATACATCCTGTTTAGCAGAAAGACGGATATTCCTTGCTC  
ATTATCAGACAATCACTTAT-----TCACAAACCTCCTGTGGGGCTAATAGTTTTTCATTTCC  
CATCTCATGGA-----AAACCTTTTTCGCTCCGCTTAGCCCTATCCCTCTCT---AGGGGTA  
TTTTAGTGATAGGTTCTATAGGAACTGGACGATCCTATTTGGTCAAATACCTAGCGACAA  
ACTCCTATGTTCTTTTCATTACAGTATTTCTGAACAAGTTCTGGATAACAAGCCTAAGG  
GTTTTCTTATTGAT-----GATAGTGAC-----GATATTGATGATAGTGACGAT  
ATCGAC-----CGCGACCTTGATACGGAGCT  
GGAGCTTCTAACTATGATGAATGCGCTA-----ACTATGGATATGATGCCG-----GAAAT  
AGACCGGTTTTATATCACCTTCAATTCGAATTAGCAAAAGCAATGTCTCCTTGCATAAT  
ATGGATTCCAAACATTCATGATCTGGATGTGAATGAGTCGAATTACTTATCCCTCGGTCT  
ATTAGTGAACCTATCTCTCC-----AGGGATTGTGAAAGATGTTCC---ACTAGAAATATTCT  
TGTTATTGCTTCGACTCATATTCCTCCAAAAGTGGATCCCGCTCTAATAGCTCCGAATAA  
ATTAATACATGCATTAAGATACGAAGGCTTCTTATTCCACAACAACGAAAGCACTTTT  
TCACTCTTTCATATACTAGGGGATTTCACTTGGAAAAGAAAATGTTCCATACT-----AATG  
GATTCGGGTCCATAACCATGGGTTCCAATGTACGAGATCTTGTAGCACTTACCAATGAG  
GCCCTATCGATTAGTATTACACAGAAGAAATCAATTATAGACACTAATATAATTAGATCC  
GCTTTTCATAGACAAACTTGGGATTTGCGA-----TCCCAGGTAAGATCCGTTTCAGGAT  
CATGGGATCCTTTTCTATCAGATAGGAAGGGCTGTTGCACAAAATGTACTTCTAAGTAA







TGTAGATACTCGTACAACATCTCCTATTCATAGATCTGCGCCTGCCTTTATACAGTTAGAT  
ACAAAATTATCTATTTTTGAAACAGGAATTAAGTAGTAGATCTTTTAGCCCCTTATCGC  
CGTGGGGGAAAAATAGGACTATTTGGAGGAGCTGGAGTTGGTAAAACGGTACTCATT  
TGGAATTGATTAACAATATTGCCAAAGCCCATGGGGGCGTATCCGTATTTGGCGGAGTG  
GGTGAACGTACTCGTGAAGGAAATGATCTTTACATGGAAATGAAAGAATCTGGAGTGA  
TTAATGAAGAAAATATTGCAGAATCAAAGTGGCTCTAGTTTACGGTCAGATGAATGAA  
CCGCCTGGAGCTCGTATGAGAGTTGGTTTACTGACCCTAACGATGGCGGAATATTTCCG  
AGATGTTAATGAACAAGACGTACTTCTATTTATCGACAATATCTTCCGTTTTCGTACAAGC  
AGGATCCGAAGTGTTCGGCCTTATTGGGTAGAAATGCCTTCTGCTGTCGGTTATCAACCTA  
CCCTGAGTACCGAAATGGGTACTTTACAAGAAAGAATTACTTCTACCAAAGAAGGGTC  
CATAACTTCGATCCAAGCAGTTTATGTACCTGCAGACGATTTGACCGACCCTGCTCCTG  
CTACGACATTTGCACATTTAGATGCTACTACCGTACTATCAAGAGGATTAGCTGCCAAA  
GGGATCTATCCAGCAGTAGATCCTTTAGATTCAACGTCAACCATGCTTCAACCCCGGAT  
CGTTGGTGAGGAACATTACAAAATTGCGCAAAGAGTTAAGCAAACCTTTACAACGTTAC  
AAAGAGCTTCAGGACATTATAGCTATCCTTGGGTTGGACGAATTATCCGAAGAGGATCG  
TTTAACCGTAGCAAGAGCGCGAAAAATTGAGCGTTTCTTATCACAACCTTTTTTTGTAG  
CAGAAGTATTTACCGGTTCTCCAGGAAAATATGTTGGTCTAGCAGAAACCATTAGAGGG  
TTTCAATTGATCCTTTCCGGAGAATTAGATGGTCTTCCCGAACAGGCCTTTTTATTTGGTA  
GGTAATATCGATGAAGCTACCGCCAAGGCTATGAACTTAGAAATGGAGAGCAATTTGA  
AGAAAATGACTTTTAATCTTTGTGTACTGACCCCAATCGAATTATTTGGGATTAGAA  
GTGAAAGAAATCATTTTATCTACTAATAGTGGTCAAATTGGCGTATTACCAAATCATGCC  
CCTATTGCTACAGCTGTAGATATAGGGATTTTGAGAATACGCTTTAACGACCAATGGTTA  
ACGGTGGCTCTAATGGGTGGTTTTGCTAGAATAGGCAATAATGAGATCACTGTTTTGGT  
AATGATGCGGAAAGGGGGAGTGACATTGATCCACAAGAGGCTCAGCAAACCTTTGA  
AATAGCCGAAGCGAATTTGAGAAAAGCTGAAGGAAAGAGACAAAGAATTGAGGCCAAA  
TCTAGCTCTCCGACGAGCGAGGACAAGACTAGAGGCTGTCAATGTGATTTCCATGAAA  
AATGTAACCGATTCTTTTCGTTTCTTTGGGCCACTGGCCATCTGCCGGGAGTTTCGGATG  
GAATACCGATATTTTAGCAACAAATCTAATAAATCTAAGTGTAGTAATTGGTGTATTGAT  
CTTTTTTGGAAAGGGAGTGTTAAGTGATTTATTAGATAATCGAAAACAAAGGATCTTGA  
ATACTATTCGTAATTCAGAAGAATTACGTGGGGGGGCCATTGAACAGCTGGAAAAAGC  
CCGGGCTCGCTTACGGAAAATGGAATGGAAGCAGATCAGTTTCGGGTGAATGGATAC  
TCTGAGATAGAGCGAGACAAATGGAATTTGATTAATTCAACTTCTAAGACTTTGGAACA  
ATTCGAAAATTTCAAAAATGAAACGATTCAGTTTGAACAGCAAAGGGCGATTAATCAA  
GTCCGACAGCGGGTTTTCCAACAAGCCTTACAAGGAGCTTTAGGAACTCTGAATAGTT  
GTTTGAACAAGGAGTTACATTTACGTACCATTAGTGCTAATATTGGTATATTGGGAGCGA  
TGAAAGAAATAACTGATATGAATCCACTGATTTCTGCCGCTTCTGTTATTGCTGCTGGAT  
TGCCCGTAGGGCTTGCTTCTATTGGACCTGGAGTTGGTCAAGGGACTGCAGCGGGTCA  
AGCTGTAGAGGGTATCGCGAGACAGCCGAGGCAGAGGGAAAAATACGAGGTAATCT  
ATTGCTTAGTCTAGCTTTTATGGAAGCTTTAACAATTTATGGATTGGTTGTAGCATTAGC  
ACTTTTATTTGCGAATCCTTTTTGTTATGAATGTGCTATCATGTTCCATCAACACACTAAA  
AGGGTTATACGATATATCCGGTGTGGAAGTAGGCCAACATTTCTATTGGCAAATAGGGG  
ATTTCCAAGTCCATGGCCAAGTACTTATTACTTCTTGGGTTGTAATTGCTATTTTATTAGG  
TTCAGCTACTCTAGCTGTTCCGGAACCCACAAACCATTCGACTGGGGGTCAGAATTTCT  
TCGAATATGTTCTTGAATTCATTCGAGATATGAGTAAACTCAAATTGGAGAAGAATAT

GGCCCTTGGGTTCCCTTTTATTGGAACATGTTTCTATTTATTTTTGTTTCGAATTGGTCAG  
GAGCTCTTTTACCTTGGAATAATCATAAATTGCCTCATGGAGAGTTAGCCGCACCTACG  
AATGATATAAATACTACCGTTGCTTTGGCTTTACTCACGTCAGTGGCATATTTCTATGCG  
GGTCTTACCAAAGGGGATTAAGTTATTTTCGGGAAATATATTCAACCAACTCCAATCCT  
TTTACCCATTAACATCTTAGAAGATTTACAAAGCCCTTATCACTTAGTTTTTCGGCTTTT  
CGGGAATATCTTAGCAGATGAATTAGTAGTTGTTGTTCTTGTTTTCTTTAGTACCTTCAGT  
GGTTCCTATCCCTGTCATGTTCCCTTGGATTATTTACAAGTGGTATTCAAGCTCTATTTTT  
GCAACTCTAGCCGCGGCTTATATAGGTGAATCTATGGAGGGCCATCATATGATATTTTCA  
ACCTTAGAACATATATTAACCTCATATTTCTTTTTTCGATCGTTTCAATTCTAGTTACAATTCA  
TTTGATAACCTTTTTTAGTCGATGAAATCAGAAACTCTACGATTCGTTTCGAAAAGGGCA  
TGATATTGGCTTTTTTCTGTATAACAGGATTATTAGTTATTCGTTGGATTTATTCAGGACA  
TTTTCCACTAAGTAATTTATATGAATCATTAAATGTTCCTTTTCGTGGAGTTTATCCCTTATC  
ATAGAGTTCCGTAT-----AAAAATCAAAAATTTTTAAGTACAATAATCGGCCCAAGCGCT  
ATTTTTACCCAAGCCTTTGCTACTTCAGGTCTTTTAACTGAAATACACGAATCCACAATA  
TTAGTACCCGCTCTTCAATCCGAGTGGTTAATAATGCATGTAAGTATGATGATATTGGGC  
TATGCAGCCCTTTTATGTGGATCCTTATTATCAGTAGCACTTCTAGTCATTGCAGTTAGA  
AAAAACAAAAGTCTTTTTTT-----ACAGAAATCGAATACATGGATGAAAGAATAAATG  
TTTTACAAAATACTCCAAATACTTCTACAAAGAATTATTACAGATCACAATTTATTCAAC  
AATTAGATTATTGGAGTTATCGGGTTATTAGTCTAGGATTTCTCTTTTTTAACCATAGGGAT  
CCTTTCTGGAGCAGTATGGGCTAACGAAGCCTGGGGTTCGTATTGGAGTTGGGACCCA  
AAGGAAACTTGGGCATTTATTACTTGGATCGTATTCGCGATTTTTTTTACATATTCGAACC  
AATGTAATGGAAGGGTACGAATTCGCAATTGTGGCGTCTATCGGCTTTCTTATAATT  
TGGATATGCTATTTTGGAGTCAATCTATTAGGAATAGGGCTACATAGTTATGGTTCATTTA  
CATTAACAATGGCAAAAAGAAAGCATTCACTCCTCTTTTGTATTTTGCATCTATAGTCT  
TTTTGCCCTGGTGGATTTCTCTCTCATTACGAAAAGTATGGAATCTTGGGTTACTAATT  
GGTGGAAACTGGGCAATCCGAAATTTCTTGAATGATATTCAAGAAAAGAGTATTCTA  
GAAAGGTTTCATAGAATTAGAGGAAATCCTCCTTGGACGAAATGATCAAGGAACACT  
CGGAGACACGATTACAAAAGCTTGGTATA---ATCCACAAAGAAACGATCCAATTAATCA  
AGATACAGAATGAGGATCGTATCCATACGATTTTGCCTTATCGACAAATATAATCTCTT  
TTGTTATTCTAAGCGTTATTCCATTTTTGGTAATGAAGAACTTGTATTCTTAACTCTTT  
GGCTCAGGAATTCCTATATAACTTAAGCGACACAGTAAAAGCTTTTTCAATTTCTTTTATT  
AACGGATTTATGTATCGGATTCATTACCCCGCGGTTGGGAACATAATGATTGGCTCTGT  
CTACAAAGATTTTGGATTTGTTTATAATGATCAAATGATATCTGGTCTTGTTCCACTTTT  
CCAGTCATTCTCGATACTCTTTTGAATATTGGATTTTCCGTTATTTAAATCGTGTATCTC  
CGTCACTTGTAAGTTATTTATCATTCAATGAATGACATGCCTATAGGTCTTCCAAAAGTAC  
CCTTCTTCGATTACGAAGAAAGAAAACAAGCCTGGACTGACTTATACAGCAAACCTTTA  
TCACGGTGAATACTTTTTCTAGGCGACGTAATTGATACCGAGCTCGCGAATGAACTGA  
TTGCTGCTATGGTATATCTCGATTCGCACCATCCTGAGATACGGTGTATATGTATATAAA  
CTCTCCTGGCGGAGGTGTATTTGATGGACTAGCTATTTACGATGCCATGAAAATTATGAC  
GCAAGAAGTCCGGACAACGGTGTACGGACAAGCCGCGTCAATGGCAAGTTTGTCTCCT  
GGCTTCAGGAGAAAAGGCCACCGTATTGCACTCCCTCACTCTGAGATAATGTTGCAC  
GAACCTTCTATGAGTCTACCCGGGAAAAGTGGAATTTCTTCTATCGGAATGTGACGT  
TCTCGCTAGCCTAAAAGAAAGAAATGCTAAACATATATGTAATCGAAACGGGCAAAGAC  
CGATTAGTTTTTTCGAAGTCTACAAAGAGATCATTATTTGGAACCAGAAATAGCCCTCG

AATGTGGAATTAT-----GAAAAAGAAGCAAAATGGGTTGTTGAGGGTTTAGT  
CACAGAAGGGCATCCCAGTGGTATGTTCCGGGTTTCAGTTAGATAATGGAGCTCGGGTT  
CTAGGTTATATTTTCAGGAAAGATCCGGCGTAAGGCTATACGGATAATGCAAGGAGATAG  
AGTCCAAATTGAACTAAGCCATTATGATTTAACCAAAGGACGTATAATTTATCGACTCA  
AGCCCAAGGATTCGGATGATATGCAGGAAATCAAAGATATTTACAG---GATAGACCTC  
AACAACACGACTTTTTATATCCACTTATCTTTCAGGAGTATATTTATGCACTTGCTCATGA  
TCGGGGTTTCCCGGGTTATGACAATAAATCCAGTTTACTAATTGTA AACGGTTAATTAC  
TCGAATGTATCAACAGAATCATTTTTGGATTTCTTCTAATGATTCGAACCAAATCCATT  
TTTTGGGAAGAATTTGTATCCTCAAATCTATCCGAGGGGTTTGCATTCAATTCTGGA  
ACTTCCATTTTCTCTACGATTAATACTTTCTCTAATAGTAAATCTCAGAATTTACGATCA  
AATTCAATATTTCCTTTTTTAGAGGATAACTTTTCACATTTCCCTTTTGTCTTAGATACT  
CATACCCACCCCATCCATCTGGAAATCTTGGTTCAAATCTTCGCTGTTGGGTAAAAG  
ATGCCTCTTCTTGCATTTATTACGATTCTTCTTCACGAGTATTGGAATTGGAATAGTCT  
TAGTACTGCCAGT--TCTTCTTTTTCAAACAAAGATTATTCTTCTTATATAATTTCTCA  
TGTATGTGAATACGAATCTATTTTCGTCTTCTACGTAACCAATCTTCTCATTACGATCA  
ACATCTTCTGGGGCTCTTCTTGAACGAATCTATTTCTATGGAAAAATAGAACGTCTTGT  
GAACGTCTTCTT--GATTTAACCTATGCTTGTCAAGGATCCTTTTATGCATTATGTTA  
GATATCAAGAAAAATCAATTCTGGCGTCAAAGGGACGCCTCTTTTCATGACTAAATGG  
AAATATTACCTTGTACCTTTTTGGCAATGTTATTTTTCGCTGTGGTTTCATCCAAGAAGG  
ATTTATCTAAACCAATTATCTAAGAATTTCCCTGAATTTGGGGGCTATCTTCAAGTGTG  
CGACTAAATGCTTCAGTGATACGGAGTCAAATTCTAGAAAATTCATTTCTAATCAATAAT  
GCTATT-----ATAAGTTCGATACTTTTGTCCAATTATTCCTCTGATTGGATCATTGGCTA  
AAGCACAATTTGTAAACGTATTAGGGTATCCCATTAGTAAGCTGGTTCGGACTGATTTAT  
CAGATTCTGATATTATTGATCGATTTGGGCGTATATGCAGAAATCTTCTCATTATCATAG  
CGGATCTTCCAAAAGAAAGAGTTTGTATCGAATAAAGTATATACTTCGACTTTCTTGTG  
CTAGAACCTTGGCTCGGAAACACAAAAGTACTGTACGTGCTTTTTTGAAGAGATTAGG  
CTCGGAATTATTGGAAGAATTTCTTATGTCCGAAGAACAAGTTCTTTCTTTGACCTTCC  
CAAACGGATTTGGTTTTTGGATATTATTGTCTCCACGATCTGGTCAATCAGAAAATGA  
TAATTTATAATACAACAGAACTACAA--GCTATCCATTCTTTTTCCAGATTGGAATTC---TT  
AAAAGAAGTCTATGGGAGCATATGGGTGCTTATCCCTATTTTACTCTTGTATTAGGAAT  
CACACTAGGTGTACTAGTAATTGTTTGGTTAGAAAGAGAAATATCTGCAGGGATACAAC  
AACGTATTGGACCTGAATACGCTGGCCCTTGGGAATTCTTCAAGCTCTAGCAGATGGT  
ACAAACTACTTTTCAAAGAGAATCTTTTTCCATCTAGAGGGGATACTCGTTTATTCACT  
ATCGGGCCATCCATAGCAGTCATATCCATTTTACTAAGTTATTCAGTAATTCCTTTTGGTT  
ATCGCCTTATTTAGGCGATCTTAGTATTGGTGTTTTTTTTATGGATCGCTGTTTCAAGCCT  
TGCTCCCATTTGGACTTCTTATGTCCGGATATGGATCAAATAATAAATATTCCTTTTTAGGT  
GGTTAAGAGCTGCTGCTCAATCAATTAGTTATGAAATACCATTA ACTCTATGTGTATTG  
TCAATATCTCTACTATCTAACAGTTTTAGTACAGTTGATATAGTTGAAGCGCAATCAAAA  
TATGGTTTTTGGGGGTGGAATTTGTGGCGTCAACCTATAGGGTTTATTGTTTTTCTAATT  
TCTTCTCTAGCCGAGTGTGAGAGATTACCTTTTGATTTACCAGAAGCGGAAGAGGAATT  
AGTAGCAGGTATCAAACCGAATATTCAGGTATCAAATTTGGTTTATTTTATGTTGCTTC  
GTATCTGAATCTACTAGTTTCTTCAATTTTGTAAACAGTTCTTACTTGGGAGGTTGGAA  
TCTTTCCATTCCGTACCTATTTCGTTCCCTGAGCTTTTTGAA-----AGAGGTAAAGTTTTT  
GAAACAATAATTTGTATCTTTATTACATTAGCTAAAACCTATTTGTTCTTGTTCATTTCTAT

TGCAACAAGATGGACTTTACCGAGATTAAGAATGGACCAACTATTAATCTTGGATGGA  
AATTTCTTTTACCTATTTCTCTAGGTAATCTATTATTAACAACCTCATTCCAACCTTCTTC  
ACTGATGATCTGGCATGTACAGAATGAAAACCTCATTCTCGATTCTACGAGAATTTTTAT  
GAAAGCCTTTCATTTGCTTCTCTTCGATGGAAGTTTGATTTTCCCAGAATGTATCCTAAT  
TTTTGGCCTAATTCTTCTTCTGATGATCGATTCAACCTCTGATCAAAAAGATCTACCTTG  
GTTCTATTTTCATCTCTTCAACAAGTTTAGTAATGAGCATAACGGCCCTATTGTTCCGATG  
GAGAGAAGAACCTATGATTAGCTTTTTCGGGAAATTTCAAACGAACAATTTCAACGAA  
ATCTTTCAATTTCTTATTTTACTATGTTCAACTCTATGTATTCCTCTATCCGTAGAGTACAT  
TGAATGTACAGAAATGGCTATAACAGAGTTTCTCTTATTCGTATTAACAGCTACTCTAGG  
AGGAATGTTTTTATGCGGTGCTAACGATTTAATAACTATCTTTGTAGCTCCAGAATGTTT  
CAGTTTCTGCTCCTACCTATTATCTGGATATACCAAGAAAGATGTACGGTCTAATGAGGC  
TACTATGAAATATTTACTCATGGGTGGGGCAAGCTTCTTATTCTGGTTCATGCTTTCTCT  
TGGCTATATGGTTCATCCGGGGGAGAGATCGAGCTTCAAGAAATAGTGAATGGTCTTAT  
CAATACACAAATGTATAACTCCCCAGGAATTTCAATTGCGCTCCTATTCATCACTGTAGG  
AATTGGGTTC AAGCTTTCCCCAGCCCCCTCTCATCAATGGACTCCTGACGTATACGAAG  
GATCTCCCCTCCAGTCGTTGCTTTTCTTTCTGTTACTTCGAAAGTAGCTGCTTCAGCTT  
CAGCCACTCGAATTTTCGATATTCCTTTTTTATTCTCATCAAACGAATGGCATCTTCTTCT  
GGAAATCCTAGCTATTCTTAGCATGATATTGGGAAATATCATTGCTATTACTCAAACAAG  
CATGAAACGTATGCTTGCATATTCGTCCATAGGTCAAATCGGATATGTAATTATTGGAATA  
ATTGTTGGAGACTCAAATGATGGATATGCAAGCATGATAACTTATATGCTGTTCTATATCT  
CCATGAATCTAGGAACTTTTGCTTGCATTGTATTATTTGGTCTACGTACCGGAACCTGATA  
ACATTCGAGATTATGCAGGATTATACACGAAAGATCCCTTTTTGGCTCTCTCTTTAGCCC  
TATGTCTCTTATCCCTAGGGGGTCTTCCTCCACTAGCAGGTTTTTTTCGGAAAACCTCTATT  
TATTCGGTGTGGATGGCAGGCAGGCCTATATTCCTTGGTTTTAATAGGACTCCTTACAA  
GCGTTGTTTCTATCTACTATTATCTAAAAATAATAAAGTTATTAATGACTGGACGAAACC  
AAGAAATCACCCCTCACGTGCGAAATTATAGAAGATCCCTTTAAGATCAAACAATTC  
ATCGAATTGAGTATGATTGTATGTGTGATAGCATCTACTATAACCAGGAATATCAATGAAC  
CCGATTATTGCAATTGCTCAGGATACCCTTTTTATGTTTTTGCTTTACGAATATGATATTT  
TTGGGCATTTCTAATAATCTCAAGCCTTATTCCTATTTGGCATTTTTCATTTCCGGGATT  
TTAGCCCCGATTAGGAAAGGGCCAGAGAACTTTTCGAGTTATGAATCGGGTATAGAAC  
CAATGGGCGACGCTTGGTTCCAATTTGCAATCCGTTATTATATGTTTGCTCTAGTTTTTG  
TTGTTTTTGATGTTGAAACGGTTTTTCTTTATCCATGGGCAATGAGTTTCGATGTATTGG  
GTCATCTGTATTTCTAGAAGCTTTCGTTTTTGCTTATCTTAATTGTTGGTTAGTTTAT  
GCGTGGCGAAAGGGGGCATTGGAATGGTCTACGAATCATTTTCCTTGGTTAACAATAAT  
TGTTGTTTTGCCAATATTTGCGGGTTCCTTAATTTCTTTCTTCCACATAGAGGAAATAG  
GGTCATTTTTTGGTATACTATATGTATATCTATTTTAGAACTTCTTCTAACGACTTATGCAT  
TCTGTTATCATTCCAATCGGACGATCCATTAATCCAACCTGGTGGAGGATTATAAATGGA  
TCGATTTTTTTGATTTCCATTTGGAGATTAGGAATAGATGGCCTTTCTATAGGACCAATCTT  
ACTGACGGGATTCATCACTACTTTAGCTACTTTAGCGGCCCGGCCAGTTACTCGCGATG  
CTCGACTATTTCAATTCCTGATGTTAGTAATGTACAGTGGTCAAATAGGATTATTTTCTTG  
TCGGGACCTTTTACTTTTTTTTCTCATGTGGGAGTTCGAATTAATTCCCGTTTATCTACTT  
CTATCCATGTGGGGAGGAAAAAACGTCTGTACTCAGCTACTAAATTTATTTGTACAC  
GGCGGGGGTCTGTTTTTCTTTAATGGGAGCTCTAGGTATCGGTTTATATGGTTCTAA  
TGAACCAACATTCAATTTAGAAATATTAGCCAATCAGTCCTATCCTGTGGCCTTGAAA

GAATATTTTATATTGGATTTTTTATTGCTTTTGCTGTCAAATTGCCGATTATAACCCCTACAT  
ACATGGTTACCAGATAACCCATGGAGAAGCACACTATAGTACTTGTATGCTTCTAGCCGG  
AATCTTATTA AAAATGGGAGCGTATGGATTAAGTTCGGATCAATATGGAATTATTATCTCAT  
GCTCATTCTCTATTTTCTCCTTGGTTGATGATAGTAGGTGCAATGCAAATAATCTATGCA  
GCTTCAACATCTCTCGGTCAACGGAATTTAAAAAAAAGAATAGCCTATTCCTCTGTATC  
TCATATGGGTTTTTTAATTATAGGAATTGGTTCATCACCGATATAGGGCTCGATGGAGC  
CCTTTTACAAATAATATCTCATGGATTTATTGGTGTCTGCACTTTTTTTCTTGGCAGGAAC  
GACTTATGATAGAATACGTCTTGTTTATCTTGACGAAATGGGTGGAATAGCTATCCCAAT  
GCCAAAAATATTCACAATGTTTCAGTATCTTTTCGATGGCCTCCCTTGCAATACCAGGTAT  
GAGTGGTTTTTGTACTGAATTCATAGTATTTTTTGGACTAATTACTAGTCCAAAATACCT  
TTAATGGCAAAAATACTAATTCCTTTTGTAAATGGCAATTGGAATCATATTA ACTCCTATT  
TATTCATTATCTATGTCACGCCAGATGTTCTATGGATACAAGATATTTAATGCTCCAAACT  
CTTATTTTTTGGATTCTGGACCACGAGAGTTATTTCTTTTCGATCTCCATTTTTTTACCCAT  
ACTCGGTATTGGTCTCTACCCCGATTTTCGTTCTTTCCCTATCAGTTGACAAGGTCGAAGT  
TATTTTATCTAATTCTTTTGACAGAATGATGCTCGAACATATACTTGTTTTGAGTGCCTAT  
TTATTTTCCATCGGTATCTATGGATTGATCACAAGTCGAAATATGGTTAGAGCCCTTATGT  
GTCTTGAACCTTATATTCAATTCAGTTAATATCAATTTTGTAACTTTTCTGGTTTTTTTGTAT  
AATCGTCAATTAAGAGGAGATATTTTCTCCGTTTTTGTTCGCTATTGCAGCCGCTGAA  
GCAGCTATTGGACTAGCTATTGTTTCATCAATTTATCGTAACAGAAAATCCACTCGTATT  
AACCAATCGAATTTGTTGAATAAAAATGGAACAGACATATCAATATGCGTGGATTATACCT  
TTCATTCCACTTCCAGTTCCTATCTTAATAGGAGTGGGACTTCTCCTTTTTTCCGACGACA  
ACAAAAATCTTCGTCTGATCTGGGCCTTCCGAGTATTTTATTGTTAAGTATAGTCATG  
ATTTTTTCAATTAATCTGTCTATTCAACAAATAAAGAGGAGTCCATCTATCAATATGTAT  
GGTCTTGGACCATCAATAATGATTTTTTCTTTTCGAATTCGGCTACTTGATCGATCCACTTA  
CTTCTATTATGTCAATGTTAATCACTACTGTTGGAATTATGGTTCTTGTTTATAGTGATAAT  
TATATGGCTCATGATCAAGGACTTGGAGATTTTTTGTCTCTATGAGTTTTTTTCAGTACTT  
CCATGTTGGGTTTAGTTACTAGTTCCAATTTGATACAAATTTATATTTTTTGGGAATTGGT  
TGGAATGTGCTCCTATCTATTAATAGGGTTTTGGTTCACACGACCTCTTGCGGCAAATGC  
TTGTCAAAAGGCGTTTTGTA ACTAATCGTGTAGGGGATTTTTGTTTATTATTAGGAATTTT  
AGGTTTTTATTGGATAACAGGTAGTTTTGAATTTAGAGATTTTTTTGAAATATTA AAAA  
CAATGAAGTCAATCTTCGTTTCTTACTTTGTGTGCTTCTCTTATTACCCGGTGCAGT  
TGCCAAATCTGCACAATTTCCCTTCATGTATGGTTACCTGATGCTATGGAGGGACCTAC  
TCCATTTTCGGCTCTTATACATGCTGCTACTATGGTAGCAGCGGAATTTTTCTTGTAGCT  
CGCCTTCTCCTCTTTTTATAGTTATACCTTACATAATGAATTTTCATCTCGTTGATCGGAAT  
AATAACCATATTATTAGGAGCTACTTTAGCTCTTGCTCAAAAAGACATTAAGAGAGGTTT  
AGCCTATTCGACAATGTCTCAATTGGGTTATATGATGTTAGCTTTAGGAATGGGGTCTTA  
TCGAAGCGCTTTATTTCAATTTGATTACTCATGCTTATTCGAAAGCATTATTATTTTTAGGG  
TCCGGATCTATTATTCATTC AATGGA AACTCTTGTGGCTATTCTCCAGATAAAAGTCAG  
AATATGGTTCCTTATGGGTGGTTTAAGAAAACATATACCAAGTAGCCAAATCTCTTTTTTA  
TTAGGTACACTTTCTCTTTGTGGTATTCCACCTCTTGCTTGTTTTTGGTCAAAAAGATGAA  
ATTCTTAATGATAGTGGGTTCTATTCGCCGATTTTCGCAATAATAGTTTGGACCGCAGCA  
GGATTAACCCTATTTCCGCATTTTTGTGGCAATTTACTTACTTTTGGGGGCATTTAAAT  
GTTCAATTTCCAAAATTACAGTGGAAACAAAAATACCCCTTCTATTCAATATCTCTATGG  
GGAAAAGAGGGTTCGAAAAGA-----AATTATCGTTTATTCAAAATGAAGTTTTTTTC

ATTTGAGAATAAAAAGTCTTATTCCCTATCCTTATGAATCCGACAATACTATGTTATTTCCCT  
TACTTGTATTGGGCAGCTTTACTTTGTTTATTGGATCTCTAGGAATTCCTTTTCGAATTGG  
ATGTATTAACCAAATGGTTAACTCCATCAATAAACCTTTTACACCAAAGTTGAAT--TC  
GATCGATTGGTATAAATTTTTGAAGATTCCATTTTTTCAGTGAGTATAGCTTATTTTCGGA  
ATATTTCTAGCGTCCTTTTTATATAAACCCATTTATTCTCTTTCCAAAATTTTGACTTAAC  
AAATTTCTTTTTGAGTATTTTCGGACAAAATTATAAATGGTCTATATAATTGGTCATATAAT  
CGTGCTTATATAGATACTTTTTATACAACATCTTTAATTGAGACCTTACGAGGATTATCCC  
TATTGGCTCGGTTTTTTGATCGACGAGCCATTGATGGAATTACGAACGGGGTTGGTGTT  
TTGAGTTTCTTTTTAGCAGAAGGTATTAATATGTAGGGGGTGGA---CGTATCTCTCTTA  
TCTTTTCTTCTATTTATCCTGTCTATCAATCTTTTTATTAGGTCTTTATATGGATTTACCTG  
GACCAATACATGATTTTCTTTTAGTCTTTTTGGAATTGGGTCTTATATTAGGAAGTCTAG  
GAGTAGTATTCCTTCCCAATCCAATTTACTCGGCCTTTTCATTGGGATTGGTTCTTTTTTG  
TATATCCTTATTCTATATTCTATTGAACTCCTATTTTGTAGCTGCTGCGCAGCTCCTTATTT  
ATGTGGGAGCTATAAATGTTTTAATCATTTTTGCTGTGATGTTTCATGAATGGTTCAGAAT  
ATTACAAAGATTTTTATCTTTGGACCGTTGGGGATGGAGTTACTTCAATGGTTTGTACAA  
GTCTTTTTATTTCACTAATTACTACTATTCCAGATACGTCATGGTACGGGATTATTTGGAC  
TACAAAATCAAACCAGATTATAGAGAAAGATTTGATAAGTAATAGTCAACAGATTGGAA  
TTCATTTAGTAACAGATTTTTTTCTTCCGTTTGAACCTATTTCAATAATTCTTTTAGTCGC  
TTAATAGGTGCAATTGCTATAGCTCGTCAAATGATTGCACCAACTACAAGAAAAGACC  
TCATGATAATCAATATGGGCCCTCATACCCATCAATGCATGGTGTCTTCGACTTATCAT  
TACTCTCGATGGTGAAGATGTTATTGACTGTGAACCAATATTGGGTATTTACACAGAG  
GAATGGAGAAAATTGCGGAAAACCGGACAATCCTACAATATTTGCCTTATGTAACACGT  
TGGGATTATTTAGCTACTATGTTTACAGAAGCAATAAGCGTAAATGGACCCGAACA  
AGGCAATATTCAAGTACCTAAAAGGGCTAGCTATATCCGAACCATTATGTTGGAGTTGA  
GCCGTATAGCTTCCCATTTGTTATGGCTTGGCCCTTTTATGGCAGATATTGGGGCACAGA  
CCCCTTTCTTCTATATTTTTTCGAGAACGAGAATTCATATATGACCTATTCGAAGCTGCCA  
CCGGTATGCGAATGATGCATAATTTTTTTTCGTATCGGAGGAATAGCTGCCGATCTACCTC  
ATGGATGGATAGATAAATGTTTGGATTTTTGCGATTATTTTTTAAGAGGGGTTGTTGAAT  
ATCAAAAACCTTATTACACGGAATCCCATTTTTTTAGAACGGGTTGAGGGCGTAGGCATT  
ATTGGAGCAGAAGAAGCACTAAATTGGGGTTTATCAGGACCAATGCTACGGGCTTCCG  
GAATACAATGGGACCTTCGTAAAATGGATCATTATGAGTGTTATGACGAATTTGATTGG  
GAGGTTCAATGGCAAAAAGAGGGGGATTTCATTGGCTCGTTATTTAGTACGAATCAGTG  
AAATGACAGAATCCATAAAAATTATCCAACAGGCCCTGGAAAGAATTCCAGGGGGGCC  
CTTTGAGAATTTAGAAATCCGACGCTTTGATAGAATAAAAGATACTGAATGGAATGATT  
TTGAATATCGATTTATTAGTAAAAACCTTCTCCAACCTTTGAATTGTCCAAACAAGAA  
CTTTATGTAAGAGTCGAAGCACCAAAAAGGAGAATTGGGAATTTTTCTGATAGGAGATC  
AGAGTGTTTTTCCCTGGCGATGGAAAATTCGCCACCGGGTTTTATCAACTTGCAAATT  
CTTTCTCAGTTAGTTAAAAGAATGAAATTGGCTGATATTATGACTATACTAGGTAGTATA  
GATATCATTATGGGAGAAGTTGATCGTATGTTTCCATGGTAACTGAGTTCATGAATTAT  
GGTCAACAAACAATACGAGCTGCAAGGTACATTGGTCAAGGTTTCATGATTACCCTCTC  
CCACGCGAATCGTTTACCTGTAACCTATTCAATACCCATACGAAAAATTGATCACATCAG  
AACGTTTCCGAGGACGAATCCACTTTGAATTTGATAAATGCATTGCTTGTGAGGTATGT  
GTTTCGTGATGTCTATAGATTTACCCGTTGTTGATTGGAAATTGGAAACGGATATTCGA  
AAGAAACGATTACTTAATTACAGTATTGATTTTTGGAATCTGTATATTTGTGGTAATTGCG

TTGAGTATTGTCCAACAAATTGTTTATCGATGACCGAAGAATATGAACTTTCTACTTATA  
ATCGTCACGAATTGAATTATAATCAAATTGCTTTAGGCCGATTACCGGTGTCAATAATTG  
ACGATTACACAATCCGAACAATTTTCGAGCTCA-----ATG  
CAAGGCCGTTTGTCTGCTTGGCTAGTCAAGCGTGGGCTAATTCATAGATCTTTGGGCTT  
TGATTATCAAGGAATAGAGACTTTACAAATAAAGCCCAAGGATTGGCATTCCATTGCTG  
TCATTTTATATGTATATGGTTACAATTATCTACGCTCTCAATGTGCCTATGATGTAGCACCT  
GGCGGACTGTTAGCTAGTGTGTATCATCTTACGAGAATAGAGTATGGTGGAGATCAACC  
AGAAGAGGTATGCATCAAAGTATTTGCCTCAAGGAGGAATCCTAGAATTCGGTCGGTTT  
TCTGGGTTTGGAAAAGTGTGATTTTCAAGAACGAGAATCTTACGATATGCTGGGAATC  
TCTTATGATAATCATCCACGCTTGAAACGTATCTTAATGCCGGAAGTTGGATAGGATGG  
CCCTTACGTAAGGATTATATTGCCCCCAATTTTATGAAATACAAGATGCTCAT-----

-----ATGAATTCCATTGAGTTTCCTTTACTTGATCAAACA  
GTCCAAAATTCCGTTTTTTCAACTACATTAATGATCTTTCAAATTGGTCAAGACTCTCG  
AGTTTATGGCCGCTTCTCTATGGTACCAGTTGTTGTTTTATTGAATTTGCTTCACTAATAG  
GATCACGATTTCGACTTTGATCGTTATGGATTAGTACCAAGATCGAGTCTTAGACAAGCA  
GATCTCATTTTAAACAGCCGGAACAGTAACAATGAAAATGGCACCTCTTTAGTGAGATT  
ATATGAGCAAATGCCCGAACCCAAATATGTTATTGCTATGGGAGCCTGTACAATTACAG  
GAGGGATGTTTACGTACCGATTCTTATAGTACTGTTCCGGGAGTCGATAAATTAATTCCCG  
TGGATGTCTATTTGCCAGGTTGTCCACCTAAACCGGAAGCAGTTATAGATGCTATAACA  
AAACTTCGTAAGAAAATATCTCGAGAAATCTATGAAGATAGAATTCGGTCTCAACAAGC  
AAATCGGTGTTTTACTACCAATCACAAGTTTCATGTTGGACGCAGTATGAATACTGGAA  
ATTATGATCAAGGATTCCTTTATCAACCACCATCTACTTCAGAGATCCCTACTGAAACCT  
TTTTGAAA-----ATGCAAAGTAGAAAGACTTTTTCTTGGATAAAG  
GAACAGATTGCTCGATCTATTTCCGTATCGCTCCTGATATATATCATAACTCGGACATCCA  
TTTCAAGTGCATATCCCATTTTTGCGCAGCAGGGTTATGAAAATCCACGAGAAGCGACT  
GGGCGTATTGTATGTGCCAATTGCCATTTAGCTAATAAGCCCGTGGATGTTGAGGTTCCA  
CAAGCGGTACTCCCTGATACTGTATTTGAAGCAGTTGTTTCGAATTCCTTATGATAAGCA  
ACTGAAACAAGTTCTTGCTAATGGTAAGAAAGGGGTTTGAATGTAGGGGCTGTTCTT  
ATTTTACCGGAGGGGTTTGAATTAGCCCCTACCGATCGTATTTCTCCCGAGATGAAAGA  
AAAGATAGGCAATTTGTCTTTTTCAGAGCTATCGCCCAATAAAAAAATATTCTTGTGAT  
AGGGCCTGTGCCTGGTCAGAAATATAGTGAATCATCTTTCTATTCTTTCCCCGACCC  
TGCTACTAACAAGATGTTCACTTCTTAAAATATCCTATATACGTAGGCGGGAACAGGG  
GAAGGGGTCAGATTTATCCCGACGGAAGCAAGAGTAACAATACGGTTTATAATGCTAC  
AGCAGCGGGTATAGTAAGCAAATAATACGAAAAGAAAGGGGGGATATGAAATATCC  
ATAACAGATCCATCGGATGGACGTCAAGTAGTTGATATTATCCCTCCAGGGCCAGAACT  
TCTTGTTCAGAGGGTGAATCCATCCAATTTGATCAACCATTAACGAGTAATCCTAATGT  
GGGCGGATTTGGTCAGGGAGATGCAGAAATAGTACTTCAAGATCCATTACGTGTTCAA  
GGCCTTTTGTCTTCTTGGCATCTGTTATTTGGCACAAATCTTTTTGGTTCTTAAAAAG  
AAACAGTTTGAAGAAGTTCAATTGGCCGAAATGAATTCATGAGTAAAGTCTATGATTG  
GTTTCAAGAACGTCTCGAGATTCAGGCGATTGCGGATGATATAACTAGTAAATACGTTT  
CTCCCATGTGAATATATTTATTGTTTGGGGGAATTACGCTTACTTGTTTTTTAGTACA  
AGTTGCTACTGGGTTTGTATGACTTTTTACTACCGTCCGACCGTACTGAGGCTTTTGC  
CTCTGTTCAATATATAATGACGGAAGCTAACTTTGGTTGGTTAATCCGATCAGTTCATCG

ATGGTCCGCAAGTATGATGGTTCTAATGATGATCCTGCATGTTTTTCGTGTCTATCTCAC  
CGGTGGATTTAAAAAACCCCGCGAATTGACTTGGGTTACAGGTGTGGTTCTGGGGGTA  
TTGACCGCATCTTTTGGCGTAACTGGTTATTCCCTTACCTCGGGACCAAATTGGCTATTGG  
GCAGTGAAAATTGTAACAGGTGTACCTGAAGCTATTCCCTGTAATAGGAGCGCCTTTGGT  
AGAATTATTGCGCGGAAGTGCTAGTGTGGGACAATCCACTTTGACTCGTTTTTATAGTTT  
ACACACTTTTGTATTGCCACTTCTTACTGCTGTATTTATGTTAATGCACTTTCCAATGATA  
CGTAAACAAGGTATTTCTGGTCCTTTAATGGGAGTAACAAAAAACCTGATTTGAATGA  
TCCTGTATTAAGAGCAAAATTGGCTAAAGGTATGGGTCATAATTATTACGGAGAACCCG  
CATGGCCCAATGATCTTTTATATATTTTCCAGTAGTAATTCTAGGTAATGTCATGTAA  
CGTAGGCTTAGCGGTTCTAGAACCATCAATGATTGGTGAACCGGCCGATCCGTTTGCAA  
CCCCTTTGGAAATATTACCGGAATGGTATTTCTTTCCCGTATTTCAAATACTTCGTACAG  
TGCCCAATAAATTATTGGGTGTTCTTTAATGGTTTCAGTACCTGCGGGATTATTAACAG  
TACCCTTTTATAGAAAATGTTAATAAATTCCAAAATCCATTTGTCGTCGTCAGTAGCGACAA  
CCGTCTTTTTGATTGGTACCGCAGTCGCTCTTTGGTTGGGTATTGGTGAACATTACCTA  
TTGATAAATCCCTAACTTTAGGTCTTTTTATGATTGAAGTTTTTCTATTTGGAATCGTGTT  
AGGTCTAATTCCTATTACTTTGGCTGGATTATTCGTAACCTGCATATTTACAATACAGGCG  
GGGTGATCAGTTAGATCTTATGCTTACTATAACCAGTTATTTCCGTTTTTTACTAGTGGTT  
TTAACTATAACTTCAGCTCTATTTATTGGTCTGAGCAAGATACGACTTATTATGGATATAG  
TAAGTCTCGCTTGGGCTGCTTTAATGGTAGTCTTTACATTTTCTCTTTCACTCGTAGTGT  
GGGAAGAAGTGGACTCATGATTATTCGTTCCGCCGAACCAGAAGTCAAATTTTGGT  
AGATAGGGATCACATAAAAACCTTTTCGAGGAATGGGCCAGACCGGGCCATTTCTCA  
AGAACAATAGCTAAAGGACCTGATACTACCACTTGGATCTGGAACCTACATGCTGATGC  
TCACGATTTTCGATAGCCATACCAGTGATTTGGAGGAGATCTCTCGAAAAGTATTTAGTG  
CCCATTTCCGGTCAACTTTCCATCATCTTTCTTTGGCTGAGCGGTATGTATTTCCACGGTG  
CTCGTTTTTCCAATTATGAAGCGTGGCTAAGTGATCCAACCTCACATTGGGCCTAGTGCC  
CAGGTGGTTTGGCCAATAGTGGGCCAAGAGATATTGAACGGTGATGTGGGGCGGGGGTT  
TCCGAGGCATACAAATAACCTCTGGTTTTTTTTCAGATTTGGCGAGCATCTGGAATAACT  
AGTGAATTACAACCTTATTGTACCGCAATCGGTGCATTGGTCTTTGCAGCGTTAATGCTT  
TTTGCTGGTTGGTTTCATTATCATAAAGCGGCCCCAAAATTGGCTTGGTTTCAAGATGT  
GGAATCTATGTTGAATCACCATTTAGCGGGGCTACTAGGACTTGGGTCTCTCTCTTTGGG  
CGGGGCATCAAGTACATGTATCTTTACCGATTAACCAATTTTAAACGCTGGAGTAGATC  
CTAAAGAGATAACCACTTCCTCATGAATTTATCTTGAATCGAGAACTTTTGGCTCAACTTT  
ATCCAAGTTTTGCCGAGGGAGCAACTCCATTTTTACCTTGAATTGGTCAAATATGCG  
GAATTTCTTAGTTTTTCATGGAGGATTAGATCCAGTAACTGGGGGTCTATGGCTGACCGAT  
ATTGCACACCATCATTAGCTATTGCAATTCTGTTCCCTGATAGCGGGTCACATGTATAGG  
ACTAACTGGGGTATTGGCCATGGCCTAAAAGATATTTTAGAAGCTCATAAAGGTCCATTT  
ACAGGTCAGGGCCATAAAGGCCTATATGAGATCCTAACAACGTCATGGCATGCTCAGTT  
ATCTCTTAAACCTAGCTATGTTAGGCTCTTTAACCATTGTTGTAGCTCACCATATGTATTCC  
ATGCCTCCTTATCCATATCTAGCTACTGACTATGGTACACAACCTGTCATTGTTTACACATC  
ACATGTGGATTGGTGGATTCTCATAGTTGGTGCTGCTGCGCATGCAGCCATTTTTATGG  
TAAGAGACTATGATCCAACCTACTCGATAACAACGATCTATTAGATCGTGTCTTAGACATC  
GTGATGCAATCATATCACATCTCAACTGGGCATGTATCTTTCTAGGCTTTTACAGTTTTG  
GTTTATATATTATAATGATAACCATGAGCGCTTTAGGGCGTCCTCAAGATATGTTTTTCA  
TACCGCTATAACAATTACAACCCGTTTTTGGCTCAATGGATACAAAACACTCATGCTTTAGC



ACCTGGCGCAACGGCTCCTGGTGCAACAGCAAGCACCAGTTTAACTTGGGGGGGTGG  
TGATTTAGTAGCAGTGGGTGGCAAAGTGGCTTTGTTACCTATTCCGTTAGGAACCGCGG  
ATTTTTTGGTCCATCACATCCATGCATTTACGATTCATGTCACGGTATTGATACTCCTGAA  
AGGTGTTCTATTTGCTCGTAGCTCCCGTTTGATACCGGATAAAGCAAATCTTGGTTTTCG  
TTTTCTTGTGATGGACCTGGAAGAGGGGGTACATGTCAAGTATCGGCTTGGGATCATG  
TCTTCTTAGGACTATTCTGGATGTACAATTCATTTCCGGTAGTAATATTCCATTTAGTTG  
GAAAATGCAGTCAGATGTTTGGGGCAGTCTAAGTGATCAAGGGGTAGTAACATCATATC  
ACGGGAGGAACTTCGCGCAGAGTTCTATTACTATTAATGGGTGGCTCCGGGATTTCTT  
ATGGGCACAGGCATCTCAGGTAATTCAGTCTTATGGTTCTTCATTATCTGCATATGGCCT  
TTTTTTCCTAGGTGCTCATTGTTGATGGGCTTTTAGTTAATGTTTCTATTAGCGGACGT  
GGTTATTGGCAAGAACTTATTGAATCCATCGTTTGGGCTCATAATAAATAAAAGTTGCT  
CCTGCTACTCAGCCGAGAGCCTTGAGCATTGTACAAGGACGTGCTGTAGGAGTAACCC  
ATTACCTTCTGGGCGGAATTGCCACAACATGGGCGTTCTTCTTAGCAAGAATTATTGCA  
GTAGGAATGGCATTAAAGATTTCCAAGTTTAGCCAAGGCTTAGCTCAGGACCCCACTAC  
TCGTCGTATTTGGTTTGGTATTGCTACCGCACATGACTTCGAGAGTCATGATGATATTAC  
TGAGGAACGTCCTTATCAGAATATTTTGGCTTCTCACTTCGGTCAATTAGCAATAATTTT  
TCTGTGGACTTCCGGGAATCTGTTTCATGTAGCTTGGCAAGGAAATTTGAATCATGGG  
TACAGGACCCTTACATGTAAGACCTATTGCTCATGCAATTTGGGATCCCATTTTGGTC  
AACCGGCCGTGGAAGCTTTTACTCGAGGGGGTCTCTTGGCCCAGTGAATATCGCTTAT  
TCCGGTGTATCAGTGGTGGTATAACAATCGGTTTACGCACTAATGAAGATCTTTATACT  
GGAGCTCTTTTTCTATTATTTCTTTCTGCCATATCCTTACTAGCAGGTTGGTCCACTTAC  
AACCGAAATGGAAACCGAGCGTTTCGTGGTTCAAAAATGCCGAATCTCGTCTGAATCA  
TCATTTGTCAGGACTCTTCGGCGTAAGTTCCTTGGCTTGGACAGGGCATTTAGTACATG  
TCGCTATTCTGGATCCAGAGGGGAGTATGTTTCGATGGAATAATTTCTTAGAGGTATTAC  
CGCACCCACAAGGGTTAGGCCCACTTTTTACAGGTCAATGGAATCTTTATGCTCAAAAC  
CCTGACTCAAGTAGTCATTTATTTGGGACCTCCCAAGGAGCAGGAACTGCCGTTCTAA  
CTCTTCTTGGGGGATTCCATCCACAAACCCAAAGTTTATGGCTGACCGATATTGCTCAT  
CATCATCTAGCTATTGCATTTATTTTTCTTGTGCTGGTCATATGTATCGAACGAATTCG  
GGATTGGCCACAGTATCAAAGATCTTTTAGATGCACATATTCCTCCGGGGGGCGGTTG  
GGACGAGGGCATAAGGGTCTTTATGACACAATCAATAATTCGCTTCATTTTCAATTAGG  
CCTTGCTTTAGCTTCTTTAGGGTTATTACTTCTTAGTAGCTCAACACATGTACTCTTTA  
CCTGCTTATGCATTCATAGCACAAGACTTTACTACTCAAGCTGCATTATATACTCATCAC  
CAATATATCGCAGGATTCATCATGACAGGAGCTTTTGGCTCATGGAGCTATTTTTTTTATT  
AGAGATTACAATCCGGAGCAAATGAAGATAATGTATTGGCAAGAATGTTAGACCATAA  
AGAAGCTATCATATCTCATTTAAGTTGGGCCAGCCTCTTCTGGGATTCCATACCTTGGG  
ACTTTATGTTTATAATGATGTCATGCTTGCTTTGGTACTCCAGAAAAGCAAATTTGAT  
CGAACCCATATTTGCTCAATGGATAACAATCGGCTCATGGGAAAACCTTCTATGGGTTG  
ATGTACTTTTATCTTCAACGAGCGGTCGGGCATTCAATGCGGGTTCGAAACATCTGGTTG  
CCCGGTTGGTTAAATGCTATTAATGAA-----AATAGTAATCACTCTTCTTAAACAATAGGT  
CCTGGAGACTTTTTGGTTCATCATGCTATTGCTCTGGGTTTACATACAACACTACATTGATC  
TTAGTAAAAGGTGCTTTAGATGCACGCGTTCCAAGTTAATGCCAGATAAAAAGGATTT  
CGTTTATAGTTTTCCATGCGATGGCCCGGGACGGGGGGTACTTGTGATATTCGGCAT  
GGGACGCCTTTTATTTGGCAGTTTTTTGGATGTTAAATACTATTGGATGGGTTACTTTTTA  
TTGGCATTGGAAGCACATTACATTATGGCAGGGTAACGTTTCACAGTTAATGAATCTT

CCACTTACTTGATGGGTTGGCTAAGAGATTATTTATGGTTAAACTCTTCACAACCTTATCA  
ATGGATATAACCCTTTTGGTATGAATAGTTTATCGGTCTGGGCATGGATGTTCTTATTTGG  
ACATCTTGTTGGGCTACTGGATTTATGTTCTTAATTTCTGGCGTGGATATTGGCAGGA  
ATTGATTGAAACCCTAGCATGGGCTCATGAGCGCACACCTTTGGCCAATTTGATTGAT  
GGAGAGATAAACCTGTGGCCCTTTCCATTGTCCAAGCAAGATTAGTGGGATTGGCCCA  
CTTTTCTGTAGGTTATATATTCACTTATGCAGCTTTCTTGATTGCCTCTACATCGGGCAA  
TTTGGCATGTCACATTCAGTAAAGATTTATGATACATGTATAGGATGTACTCAATGTGTC  
CGAGCGTGTCCACCGATGTATTAGAAATGATACCTTGGGACGGATGTAAAGCTAAACA  
AATAGCTTCTGCCCCAAGGACCGAGGACTGTGTTGGTTGTAAGAGATGTGAATCCGCC  
TGCCAACAGATTTCTTGAGTGTTCGAGTTTATTTATGGCATGAAACAACCTCGAAGTAT  
GGGTCTAGCTTATATGACAACCTTTCCATTTTCCTTCTATTTTCGTGCCTTTAGTGGGCCTA  
GTATTTCCGGCAATTGCAATAGCTTCTTTATTTCTTCATGTTCAAAAAACAAGATTGTT  
ATGCGAGATCTAAAAACATATCTCTGTGGCACCAGTACTAAGTACGCTATGGTTCCG  
GGCTTTAGCAGGTTTATTGATAGAGATTAATCGTTTTTTCCCGGATGCTTTGACACTTTC  
CCTT-----ATGACTGCAATTTTAGAGAGACGCGAAAGCGAAAGCCTATGGGGTGCCTT  
CTGTAACCTGGATAACCAGCACCGAAAACCGTCTTTACATTGGATGGTTTGGTGTTTTGA  
TGATCCCTACCTTATTGACCGCAACTTCTGTATTTATTATTGCCTTCATTGCTGCTCCTCC  
AGTAGATATTGATGGTATTTCGTGAACCTGTTTCTGGATCTCTACTTTACGGAAACAATAT  
TATCTCAGGTGCCATTATTCCTACTTCTGCAGCTATAGGTTTGCACTTTTACCCAATCTG  
GGAAGCGGCATCCGTTGATGAATGGTTATACAATGGTGGTCCTTATGAACATAATTGTTCT  
ACACTTCTTACTTGGTGTAGCTTGTATATGGGTCGTGAGTGGGAGCTTAGTTTCCGTCT  
GGGTATGCGACCTTGGATTGCTGTTGCATATTCAGCTCCTGTTGCAGCTGCTACCGCTG  
TTTTCTTGATCTACCCAATTGGTCAGGGAAGTTTTTCTGATGGTATGCCTCTAGGAATTT  
CTGGTACTTTCAACTTCATGATTGTATTCCAGGCTGAGCACAAACATCCTTATGCACCCAT  
TTCACATGTTAGGCGTAGCTGGTGTATTTCGGCGGCTCCCTATTTCAGTGCTATGCATGGTT  
CCTTGGTAACTTCTAGTTTAAATCAGGGAACCACAGAAAATGAATCTGCTAATGAAGGT  
TACAGATTCGGTCAAGAGGAAGAAACTTATAATATCGTAGCCGCTCATGGTTATTTTGG  
CCGATTAATCTTCCAATATGCTAGTTTCAACAACCTCTCGTTCGTTACTTCTTCCCTAGC  
TGCTTGGCCTGTAGTAGGTATCTGGTTCCTGCTTTAGGTATCAGCACTATGGCTTTCAA  
CCTAAATGGTTTCAATTTCAACCAATCTGTAGTTGATAGTCAAGGCCGTGTAATTAATAC  
TTGGGCTGATATCATTAACCGTGCTAACCTTGGTATGGAAGTTATGCATGAACGTAATGC  
TCATAACTTCCCTCTAGACCTAGCTGCTATCGAAGCTCCATCTACAAATGGAATGGGTTT  
ACCTTGGTATCGTGTTCATACCGTTGTATTAATGATCCCGGTCGGTTGCTTTCCGTTTCAT  
ATAATGCATACAGCTCTGGTTGCTGGTTGGGCGGTTTCGATGGCTCTGTATGAATTAGC  
AGTTTTTGATCCTTCTGACCCGGTTCTTGATCCAATGTGGAGACAGGGTATGTTTGTAT  
ACCTTTTCATGACTCGTTTAGGAATAACCAATTCATGGGGCGGTTGGAGTATCACA---GG  
AGGTAAGTGTAAACGAATCCGGGAATTTGGAGTTACGAAGGTGTAGCTGGGTACATATTG  
TGTTTTCGGGCTTATGCTTTTTGGCAGCTATCTGGCATTGGGTCTATTGGGATCTAGAAA  
TATTTTGTGATGAACGTACAGGAAAACCTTCTTTGGATTTGCCAAGATCTTTGGAATT  
CATTTATTTCTCTCAGGGGTGGCTTGTTTTGGTTTGGTGTATTTCAITGTAACAGGCTTG  
TATGGTCTGGAATATGGGTGTCCGATCCTTATGGACTAACGGGAAAAGTACAACCTGT  
AAATCCGGCGTGGGGCGTGAAGGGTTTGTATCCTTTTGTTCGGGAGGAATAGCTTCT  
CATCATATTGCAGCAGGGACATTGGGCATATTAGCCGGTCTATTCCATCTTAGCGTCCGC  
CCGCCACAACGTCTATACAAAGGATTACGTATGGGAAATATTGAAACCGTACTTTCCAG

TAGTATCGCGGCTGTTTTTTTTGCAGCTTTTGTGTTGCTGGAACATGTGGTATGGTTC  
AGCAACAACCCCATCGAATTATTTGGGCCGACCCGTTATCAATGGGATCAGGGTACT  
TCCAGCAAGAGATATACCGAAGAGTTAGTGCTGGGCTAGCAGAAAATAAAAGTTTATC  
AGAAGCGTGGTCTAAAATTCCCGAAAAATTAGCTTTTTATGATTATATCGGCAATAATCC  
GGCAAAGGGAGGATTATTCAGGGCGGGCTCAATGGATAACGGAGATGGAATAGCGGTT  
GGATGGTTAGGACACCCTATCTTTAGAGATAAAGAGGGGCGTGAACCTTTTTGTACGCCG  
TATGCCTACTTTTTTTGAAACATTTCCGGTCGTTTTGGTAGACGGCGACGGAATTGTTA  
GAGCTGATGTTCCTTTTCGAAGGGCAGAGTCGAAGTATAGTGTTGAACAAGTAGGTGT  
AACTCTTGAGTTCTACGGCGGCGAACTCAATGGAGTCAGTTATAGTGATCCTGCTGTTG  
TGAAAAATATGCTAGACGCGCTCAATTGGGCGAAATTTTTGAGTTAGATCGTGCTACT  
TTGAAATCCGATGGTGTTTTTTCGTAGCAGTCCAAGAGGTTGGTTTACTTTTTGGTCATGC  
TTCGTTTGCTTTGCTCTTCTTCTTCGGACACATTTGGCATGGTGCTAGAACCTTGTTTAG  
GGATGTTTTTGCCGGTATTGACCCAGATTTGGATGCTCAAGTAGAGTTTGGAGCATTCC  
AAAACTCGGGGATCCAACCTACCAGAAGAGAGGTAGTCATGAAAACCTTATATTCCCT  
GAGGAGGTTCTACCACGTGGAACGCTCTTTAATGGAACCTTAGCTGTAACCTGGTCGT  
GACCAAGAAACCACCGGTTTTGCTTGGTGGGCGGGAATGCTCGACTTATTAATTTATC  
CGGTAACTACTAGGAGCTCATGTAGCCATGCCGATTAATCGTATTCTGGGCCGGAG  
CAATGAACCTATTTGAAGTGGCTCATTTCGTACCAGAGAAGCCTATGTATGAACAAGGA  
TTAATTTTACTTCCCCATCTAGCTACTCTAGGTTGGGGGGTAGGTCCTGGGGGAGAAGT  
TACAGACACCTTCCATACTTTGTATCTGGAGTACTTCATTTAATTTCCCTCTGCAGTATTA  
GGCTTTGGCGGTATTTATCATGCACTTCTAGGACCTGAGACACTTGAAGAATCTTTTCC  
ATTCTTCGGTTATGTATGGAAAGATAGAAAATAAAATGACCACAATTTTAGGTATTCATT  
AATCTTGTTAGGTCTAGGTGCTTTTTCTTCTAGTATTCAAGGCTCTTTATTTCCGGGGCGT  
ATATGATACTTGGGCTCCGGGAGGGGAGATGTAAGAAAAATTACCAACTTGACCCTTA  
GCCCAAGTATTCTATTTGGTTATTTACTAAAATCGCCCTTTGGGGGGGAAGGATGGATTG  
TTAGTGTGGACGATTTAGAAGATATAATCGGAGGACATGTATGGTTAGGTTCCATTTGTA  
TACTTGGTGGAAATCTGGCATATCTTAACCAAACCCTTCGCATGGGCTCGACGTGCTCTT  
GTATGGTCTGGGGAGGCTTACTTATCTTATAGTTTAGGGGCTTTATCCGCCCTTTGGTTTC  
ATTGCTTGTTGTTTTGTCTGTTTCAATAATACCGCTTATCCTAGCGAGTTTTACGGACCT  
ACTGGTCCAGAAGCTTCTCAAGCTCAAGCATTACTTTTTCTAGTTAGAGACCAACGTCT  
TGGGGCTAATGTAGGATCTGCTCAAGGACCTACTGGTTTAGGTAAATATCTAATGCGTTC  
CCCGACCGGAGAAGTCATTTTTGGAGGAGAACTATGCGTTTTTTGGGATCTGCGTGCT  
CCTTGGTTAGAACCCTTAAGAGGTCCAAATGGATTGGACTTGAGTAGGTTGAAAAAAG  
ACATAAACCTTGGCAAGAACGGCGTTCGCGAGAATATGACTCATGCCCTTTAGGT  
TCTTTAAATTCTGTGGGTGGCGTAGCTACCGAGATTAATGCAGTCAATTATGTCTCTCCT  
AGAAGTTGGTTAGCTACCTCTCATTTTTGTTCTAGGATCTTTTTCTTTGTAGGTCATTTG  
TGGCATGCGGAAGGGCTCGTGCAGCTGCAGCAGGATTTGAAAAAGGAATTGATCGT  
GATTTTGAACCTGTTCTTTCCATGACCCCTCTTAATATGACTATAGCCCTTGGTAAATTA  
CCAAAGACGAAAAGGATTTATTTGATATTATGGATGACTGGTTACGGAGGGACCGTTTC  
GTTTTTGTAGGCTGGTCCGGTCTATTGCTCTTTCCTTGTGCCTATTTTCGCTGTAGGGGGT  
TGGTTCACAGGTACAACCTTTGTAACCTTCATGGTATAACCCATGGATTGGCCAGTTCCTAT  
TTGGAAGGCTGTAATTTCTTAACGGCCGCAGTTTCTACTCCTGCTAATAGTTTAGCGCAT  
TCTTTATTGTTACTGTGGGGTCCGTAAGCACAAAGGAGATTTTACTCGTTGGTGTCAATT  
AGGCGGTCTGTGGACTTTTGTGCTCTCCATGGCGCTTTCGGACTAATAGGTTTCATGTT

ACGTCAATTCGAGCTTGCTCGATCTGTTCAATTGCGACCTTATAATGCAATCGCATTCTC  
TGGTCCAATTGCTGTTTTTGTCTGTATTCCTGATTTATCCACTAGGTCAGTCTGGTTG  
GTTCTTTGCACCTAGTTTTGGTGTAGCAGCTATATTTTCGATTCATCCTCTTTTTTCAAGGA  
TTTCATAATTGGACGCTAAACCCATTTTCATATGATGGGAGTTGCCGGCGTATTGGGTGCT  
GCTTTGCTATGCGCGATTCATGGTGCTACTGTAGAAAATACTTTATTTGAAGATGGTGAT  
GGTGCAAATACATTCGCGCTTTTAAACCCAACCTCAAGCTGAAGAAACTTATTCAATGGT  
CACCGCTAACCGCTTTTGGTCCCAAATCTTTGGGGTTGCTTTTTTCCAATAAACGTTGGT  
TACATTTCTTTATGTTATTTGTACCAGTAACGGGTTTATGGATGAGTGCTCTTGAGTAG  
TCGGTCTGGCCCTGAACCTACGCGCCTATGACTTCGTTTCTCAGGAAATTCGTGCAGCG  
GAAGATCCTGAATTTGAGACTTTCTACACCAAAAATATTCTATTAACGAAGGTATTTCG  
TGCTTGGATGGCAGCTCAAGATCAGCCTCATGAAAACCTTATATTCCCTGAGGAGGTTCT  
TACCACGTGGAAACGCTCTTATGTCTGGAAGCACAGGAGAACGTTCTTTTTGCTGATATT  
ATTACCAGTATTCGATACTGGGTCATTCATAGCATTACTATACTTCCCTATTCATTGCGG  
GTTGGTTATTCGTCAGTACCGGTTTAGCTTATGATGTATTTGGAAGCCCTCGGCCAAC  
GAATATTTTACAGAGAGCCGACAAGGAATTCATTAATAACTGGCCGTTTTGATCCTTT  
GGAACAACCTCGATGAATTTAGTAGATCATTTATGACTATAGATCGAACCTATCCAATTTT  
TACAGTACGATGGTTGGCTGTTACGGCCTAGCTGTACCTACCGTCTTTTTTTTTGGGGT  
CAATATCAGCAATGCAGTTCATCCAACGAATGGCTACACAAACTGTTGAGACCAGTTCT  
AGA---TCTCGTCCAAAACCAACTATTGTAGGGAGTTTATTAACCATTGAATTCGGAAT  
ATGGTAAAGTAGTCCCGGGTGGGGAACGACTCCTTTGATGGGTGTCGCAATGGCTCT  
ATTTGCGGTATTTCTTTCTATTATTTTGGAAATTTATAATTCTTCCGTTTTATTGGATGGAA  
TTTCAATGAATATGCTTACTCTGAAACTCTTCGTTTATACCGTAGTGATATTTTTTGTTC  
TCTCTTCATCTTTGGATTCCCTATCTAATGATCCAGGACGTAATCCTGGACAACGTGAAAT  
GGCCGATACTACTGGAAGGATTCCCTTTGGATAATAGGTACTGTAACCTGGTATTCTTGT  
GATCGGTTTAGTGGGTATTTCTTTTATGGTTCATATTCCGGATTGGGCTCATCCCTGATG  
CTTAATATCTTTAGTTTGATCTCTATTTGTCTTAATTCTGCCCTTTAT--AGTAGTTTTTCT  
TCGGCAAATTGCCCGAAGCCTATGCTTTTTTGAATCCAATCGTAGATGTTATGCCAGTCA  
TACCTGTGTTTTTTTTCTCTTAGCCTTTGTTTGGCAAGCTGCTGTAAGTTTTCGAATGA  
CACAATCAAACCCGAACGAACAAAATGTTGAATTGAATCGTACCAGTCTCTACTGGGG  
GTTATTACTCATTTTTGTACTTGCTGTTTTATTTTCCAATTATTTCTTCAATATGGAAGTAA  
ATATTCTTGCAATTTATTGCTACTGCACTATTCATTCTAGTTCCCTACCGCCTTTCTACTTATC  
ATTTACGTAAAAACAGTCAGTCAAATGATATGGAAACAGCAACGCTAGTCGCCATCTT  
TCTATCTGGTTTACTTGTCAGTTTTACTGGGTACGCCTTATATAACCGCTTTTGGGCAACC  
TTCTCAACAACCTAAGAGATCCATTTCGAGGAACATGGGGACATGGAAGCATTGGTTTATA  
CATTCCTCTTAGTCTCGACTCTAGGGATAATTTTTTTCGCTATCTTTTTTTCGAGAACCGC  
CCAAAGTTCCGACTAAAAGGTGAAAATGACTCTTGTTTTCCAATTGGCTGTTTTTGCA  
TTAATTGCTACTTCATCAATCTTATTGATTAGTGTAACCGTTGTATTGCTTCTCCTGATG  
GTTGGTCAAGTAACAAAATGTCGTATTTTCCGGTACATCATTATGGATTGGGTTAGTCT  
TTCTGGTGGGTATCCTTAATTCTCTCATCTCT-----ATGTCACCACAAACAGA  
GACTAAAGCAAGTGTGGATTCAAAGCAGGTGTTAAAGAGTACAAATTGACTTATTATA  
CTCCTGAATACGAAACCAAAGATACGGATATCTTGGCAGCATTCCGAGTAACTCCTCAA  
CCTGGAGTTCCGCCTGAAGAAGCAGGGGCTGCGGTAGCTGCCGAATCTTCTACTGGTA  
CATGGACAACCTGTGTGGACCGATGGACTTACCAGTCTTGATCGTTACAAAGGGCGATG  
CTACCATATTGAGCCGTTCCCTGGAGAAACAGATCAATATATCTGTTATGTAGCTTACCC

CTTAGACCTTTTTGAAGAAGGTTCTGTTACTAACATGTTTACTTCCATTGTGGGTAATGT  
ATTTGGGTTCAAAGCCCTGCGTGCTCTACGTCTGGAAGATCTGCGAATCCCCCTGCTT  
ATATTAAACTTTCCAAGGCCCGCCCCATGGGATCCAAGTTGAGAGAGATAAATTGAAC  
AAGTACGGTCGTCCTGTTGGGATGTAATAAACCAAATTAGGGTTGTCCGCTAA  
AACTATGGTAGAGCAGTTTATGAATGTCTTCGCGGTGGACTTGATTTACCAAAGATG  
ATGAGAACGTGAACTCCCAGCCATTTATGCGTTGGAGAGATCGTTTCTTATTTGTGCC  
GAAGCAATTTATAAATCACAGGCTGAAACAGGTGAAATCAAAGGGCATTACTTGAATG  
CTACTGCGGGTACATCCGAAGAAATGATCAAAAGAGCTGTATTTGCTAGAGAATTGGG  
AGTTCCTATCGTAATGCATGACTACTTAACAGGAGGATTTACTGCAAATACTAGCTTGGC  
TCATTATTGCCGAGATAATGGACTACTTCTTCACATTCACCGTGCAATGCATGCAGTTAT  
TGATAGACAGAAGAATCATGGTATACACTTCCGTGTAAGCTAAAGCGTTACGTATGT  
CTGGTGGGGATCATATCCACTCTGGGACCGTAGTAGGTAACTTGAAGGGGAAAGAGA  
CATCACTTTGGGCTTTGTTGATTTACTGCGCGATGATTTTATTGAAAAGATCGAAGTC  
GCGGTATTTATTTCACTCAAGATTGGGTCTCCCTACCAGGTGTTCTGCCCGTGGCTTCA  
GGGGTATTCACGTTTGGCATATGCCTGCTCTGACCGAGATCTTTGGGGATGATTCCGT  
ACTACAGTTCGGTGGAGGAACTTTAGGACACCCTTGGGGTAATGCGCCAGGTGCCGTA  
GCTAACCGAGTAGCTCTAGAAGCATGTGTAAGCTCGTAATGAAGGACGTGACCTTG  
CTTCTGAGGGTAATGTAATTATCCGTGAGGCTGCCAAATGGAGTCCTGAACTATCTGCT  
GCTTGTGAGGTATGGAAAGAGATCAGATTTGACTTTAAAGCAGTGGATACTCTAGATCC  
AATGGCGATACATTTATACAAACTTCTACCCCGAGCACACGCAATGGAACCGTAGACA  
GTCAAGTGAAATCCAATCCACGAAATAATTTGATCTATGGACAGCATCATTGTGGTAAA  
GGTCGTAATGCCAGAGGCGTCATTACCACAAGGCATAGAGGGGGAGGTCATAAGCGTC  
TATACCGTCAAATCGATTTTCGACGGAATAAAAAAGACATATATGGTAGAATCGTAACCA  
TAGAATACGACCCTAATCGAAATGCATACATTTGTCTCATACACTATGGGGATGGTGAG  
AAGAGATATATTTACATCCCAGAGGGGCTCTAATTGGAGATACCATTGTTTCTGGTACT  
AAAGTTCCTATAAAAATGGGAAATGCCCTACCTTTGACCCATATGCCCTTAGGCACGGC  
CATACATAACATAGAAATCACACTTGGAAAGGGTGGACAATTAGTTAGAGCAGCGGGT  
GCTGTAGCGAAACTGATTGCAAAAGAGGGGAAATCGGCCACATTAATAATTACCTTCTG  
GGGAGGTCCGTTTGATATCCCAAACTGCTCAGCAACAGTCGGACAAGTGGGGAATGT  
TGGGGCGAAGCATAAAAAGTTTGGGTAAAGCCGGATCTAAGCGTTGGCTAGGTAAAGCGT  
CCTGTAGTAAGAGGAGTAGTTATGAACCCTGTAGACCATCCCCATGGGGGGGGGGAAG  
GGAGAGCCCCAATTGGTAGAAAAAACCACAACCCTTGGGGTTATCCTGCACTTGG  
AAGCAGAAGTAGAAAAAGGAATAAATATAGTGAGAATTTGATTCTTCGTCGCCGTAGT  
AAAATGATTCAACCTCAGACCCATTTAAATGTAGCAGATAACAGCGGGGCTCGAAAAT  
TGATGTGATTCGAATCATAGGAGCTAGC---AATCGTCGATATGCTCATATTGGTGACGTT  
ATTGTTGCTGTGATTAAGAAGCAGTACCCCATATGTCCCTAGAAAAATCAGAAGTAGT  
CAGAGCTGTAATTGTTTCGTACCTGTAAAGAACTTAAACGTGACTGCGGTATGATAATAC  
GATATGATGACAATGCTGCAATTGTGATTGATCAAAAAGGAAATCCAAAAGGAAGTCG  
AGTTTTTGGTGCATCCCCGAAGAATTGAGACAATTCGGTTTTACTAAAATACTTTCAA  
TAGCTCCCGAGGTATTAATGCTTAGTCCCAAAAAAATACTAGATTCGGTAAACAACATAGA  
GGAAGAATGAAGGGAATATCTTCTCGAGGTAATTATATTTGTTTCGGTAGATATGCCCTT  
CAGGCACTTGAACCTGCTTGGATCACATCTAGACAAATCGAAGCAGGTTCGACGAGCAA  
TGACACGAAATGTACGCCGTGGTGGAAAAATCTGGGTCCGTATATTTCCAGACAAACC  
GGTTACAGCAAGATCTACCGAAGCACGTATGGGTGCGGGGAAGGGAGACCCTAAATAT

TGGGTAGCTGTTGTTAAACCGGGTCGAATACTATATGAAATGGGCGGAGTAACTAAAA  
TATAGCTAGAAGGGCTATTTCTATAGCAGCATCCAAAATGCCTATACGAACTCAATTCAT  
TATTTCCGGGAATGACCAGAATTAACGCGGATCTATAGCTCGGAGACGTAGAACAAAA  
GCTCATTCTTTTGCCTCCAAATTTTCGAGAGGCTCATGCAAGACTTACTCGAGCTATTACT  
CAACAGCAAATAAGAGCTTTATTTTCGGCTGATCGGGATAGAGATAAGCAAAGATAGA  
TTTTTCGTCGTTTGTGGATCACTCGGATAAACGCACTAATTCGCGAAAAG-----TCCAT  
AATTATAGTAAATTCATAAATGATCTATAACAAGAGCCAGTTGCTTCTTAATCGTAAAATA  
CTTGACAAAATAGCTATATCAAATAGGAATTGTCTTTATATGATTGCCAACGAGATCATA  
AAAAAGTAGGATTCGAATCCGCCGTAATAATT--ATGCGAAAGGAAGTATACGCTTTA  
CGTCGACATATATCCCTATCGGCTGACAAAGCAAGAAGAGTAATTGATCAAATTCGTGG  
ACGCTCCTATGAAGAAACACTTATGATACTAGAACTCATGCCCTATAGAGCATGTTCTCC  
CATTTCAAATTTGGTTTATTCTGCAGCAGCAAATGCTAATTCCAATATGGGTTCCAACAA  
AGCGAATTTAGTCATTAGTAACGCTGAAGTTAACGAGGGTACTACCAGAAAGAAATTC  
AAACCTCGAGCTCGAGGACATTGTTATCCGATAAAAAGACGTACCTGTATATAACTAT  
TGGAGTGAAAGATATATCTTTAGATGGGAGAGTATGGGACAAAAAATGGATGGAATC  
AAATATGCAGTATTTACAGAAAAAAGTATTCGGTTATTGGGGAAAAAT--CAATATACTT  
CTAATGTGCAATCAGGATCCACTAGGACAGAAATAAAGCATTGGGTGCAACTCTTCTTT  
GGTGTCAAGGTAATAGCTATGAATAGTCATCGACTTCCGGGAAAGGGTAGAAGAATGG  
GACCTATTATGGGACATACAATGCATTACAGACGTATGATCATTACGCTTCAACCCGGTT  
ATTCTATTCCACCTCTTAGAAAGAAAAGAACTATGGCAGTTCCAAAAAACGTACTTCT  
GCATCAAAAAAGCGTATTCGTAAAAATAGTTGGAAAGGGAAGGGATATGGGACAGCGT  
TAAAAGCATTTCCTTAGGGAAATCTCTTTCTACCGGGAATTCTAAAAGTTTTTTTGTGC  
CAAAAAATTCTCTCATGGCCAAGGGGAAAGATGCGCGAGTAAGGGTTATTTTGGAAATG  
TACCGGTTGT--GTCCGAAAC-----GTATCAAGG-----GGCGTTTCCAGATATATTACTC  
AAAAGAACCGGCACAATACGTCTAAACAATTAGAATTGAGAAAATTCTGTCCCTATTGT  
CACAAACATATGATTCATGGGGAAATCAAATAATGAAAAAAGAGCTTCTGTTCGTA  
AAATTTGTCAAAAATGTCGCCTAACCCGGAGGCGGGGACGCATTAGAGTAATTTGTTC  
CAACCCGAGACATAAAAAAAGACAAGGAATGGTTTCGAGAGAAAGTAAGAGTATCTAC  
TCGGACACTACAGTGGAAAGTGTGTTGAATCAAGAGAAGACAGTAAACGTCTTTATTAT  
GGACGCTTTATTCTGTCTCCACTTAGAAAAGGTCAAGCCGATACAATAGCCATTGGGAT  
ACGAAGAGCTTTACTTGGAGAAATAGAAGGAACATGTATCACACGTGTAATTAAG-  
----AACGTCCCGCATGAATATTCTACCATAGCGGGTATTCAAGAATCGGTCCATGAAATT  
TTAATGAATTTCAAAGAAATTGTATTGAGAAGTAATCTATATGGAACTTGTGACGCGTCT  
ATTTGTGTTAGAGGTCCAGGGTATGTAAGTGTCAAGATATCATCTTACCACCTTATGTA  
GAAATCGTTGATAATACACAACATATAGCTAGCTTGACAGAACCAATTGATTTGTGTATT  
GGATTACAAATCGAGAGAAATCGCGGATATCTTATGAAAATGCCACAT--AACTCTGATG  
GAAGTTAT-----CCTATAGATGCTGTATTTCATGCCTGTTGAAATGCAAATCATAGTATTCA  
TTCTTATGGGAGTGGGAATGAAAAACACGAGATACTATTTCTCGAAATATGGACAAATG  
GGAGTTTAACTCCGAAAGAAGCACTTCATGAAGCCTGCCGAAATTTGATTGATTTATTT  
ATTCCCTTTTTACATAAGGAAGAGGAA-----ACCTCACCTTTAGAGGACAATCAC---CAC  
ACGGTTCCTTTATCCCCTTTACCTTTACGATAAAGCGGAT--AACTCAGAAAAAGA  
AAAAA---GAAATAAAAAA-----  
-----  
-----ATGCTGGGGGATGGA---AATGAGGGAATGTCTACAATACCTGGATTGAATCA

GATCCAATTTGAAGGATTTTGTAGGTTTCATTGATCAGGGTTTGACAGAAGAAGAACTTTCTA  
AGTTTCCAAAAATTGAAGATACAGATCAAGAAATTGAATTCAGTTATTTATGGAAAGA  
TATCAATTGGTAGAACCATTGAGAAAAGAAAGAGATGCTGTCTATGAATCACTCACATA  
TTCTTCGGAATTCTATGTATCCGCGGGATTAATTTGGAAAAGTAGTAGGGATATGCAAGA  
ACAAACCATTTTGATTGGAAACATTCCTCTAATGAATTCCTGGGAACTTCTATAGTAA  
AGGGAATATATAGAATTGTGATCAATCAAATATTGCAAAGCCCCGGCATTATTACCGAT  
CTGAATTGGACCATAACGAAATTTTCGGTCTATACCGGCACCATAATATCAGATTGGGGA  
GGAAGATCAGAATTAGAGATTGATAGAAAAGCAAGGATATGGGCTCGTGTGAGTAGGA  
AACAAAAATATCTATTCTAGTTCTATCATCAGCTATGGGTTTCGAATCTAAAAGAAATTC  
TAGACAATGTTTTTATCCTGAAATTTTTTGTCTTTTCTGAAAGATAAGGAGAGAAAA  
AAAATTGGATCAAAGAAAATGCCATTTTGGAAATTTTATCAACAATTTGCTTGTGTAGG  
TGGGGATCCAGTATTTTCTGAATCCTTATGTAAGGAATTACAAACGAAGTTCCTTCAAC  
AAAGATGTGAATTAGGAAGGATTGGTCGACGAAATATGAACCGAAGACTGAACCTTGA  
TATACCCAGAACATAATATTTTTGTTACCACGAGACATATTGGCAGCCGCTGATCATT  
GATTGAACAGAAATTTGGAATGGGTACACTTGACGAT-----ATGAATCATTGAAAAATA  
AACGTATTCGTTCTGTAGCGGATCTTTTACAAGATCAACTCGGATTGGCTCTGGTTCGTT  
TAGAAGATGAGGTTGAGAAACTATATGTGGACCAATTCGG---CATAAATGGAGAACTC  
CTCATCCTCAGAATTTAGTAACTTCAACTCCA-----TTAACAACCACTTATGAATCTT  
TTTTCGGTTACACCCCCTATCTCAAGTTTTGGATCAAATAATCCATTGACCCAAATAG  
TTCATGGGAGAAAGTGGAGTTATTTGGACCCTGGAGGACTAACAGGGCGAACTGCTAG  
TTTTCGGATACGAGATATCCATCCTAGTCACTATGGGCGTATTTGCCAATTGACACATC  
TGAGGGAATCAATGTTGGACTTATTGGATCCTTAGCAATTCATGCGAAGATTGGTCATT  
GGGA---TCTCTAGAAAGTCCATTTAT-----GAAATTTCTGAAAGATCAACAGGG-----  
GTACAGATGCTTTATTTATCACCAGGTAGAGATGAATACTATACGGTAGCGGGCGGAAA  
TTCTTTGGCGTTGAATCAGGATATTCAGGAAGAAGAGGTTGTTCCAGCTCGATACCGTC  
AAGAATTCCTGACTATTGCATGGGAACAGGTTTCATTTTCGAAGTATTTTGCCTTCCAAT  
ATTTTCTATTGGAGCTTCCCTCATTCCTTTTATCGAACATAATGATGCGAATAGGGCTTT  
AATGAGTTCGAATATGCAACGTCAAGCAGTTCGCTTTCTCGACCCGAGAAATGCATTG  
TTGGAAGTGGGTTGGAACGACAAGTAGCTCTAGATTCAGGGGCTCTTGCTATAGCCGA  
ACGTGAGGGAAAGATCGTTTCTACTGATACTGAAAAGATCCTTTTCTCAGGTAATGGGG  
ATACTCTAAGCATTCCATTAGTTATGTATCAATCTTCCAACAAAATACTTGTATGCATCA  
AAAACCCAGGTTTCAGCGGGTAAATGTATTA AAAAGGGACAAATTTTAGCAGATGGT  
GCTGCTACGGTTGGTGGCGAACTTGCTTTGGGGAAAAACGTATTAGTAGCTTATATGCC  
ATGGGAAGGTTACAATTCTGAAGATGCAGTACTCATTAGTGAGCGTTTGGTATATGAAG  
ATATTTACTTCTTTTACATACGGAAATATGAGATTCAGACT-----GCTGGG---ACT  
GAAAGGATCACTAATGAAATACCGCATTTAGAAGCCCATTTACTCCGAAATTTAGACAA  
AATGGAATTGTGATGCTGGGATCTTGGGTGGAGACGGGTGCTATTTTAGTAGGTAAT  
TAACGCCCGAAGTGGTGAAAGAA---TCC-----CCCGCAAATAGATTGGTATACGACAT  
AGTAGGCATTCAGGTATCTACTTCAAAGACACTTGTTTAAAACCTACCTATAGGTGGTA  
GGGGCCGGGTATTGATGTGAGGTGGATCCAGAAAAGGGGG-----GATAATGATAATCC  
AGAAACGATTCGTATATATATTTACAGAAACGTGAAATCAAAGTAGGCGACAAAGTG  
GCTGGAAGACACGGAAATAAAGGTATCATTTCAAAATTTGCCTAGACAAGATATGCC  
TTATCTGCAAGATGGAAGACCTGTTGATATGGTTTTCAACCCATTAGGAGTACCCTCAC  
GAATGAATGTAGGACAGATATTTGAATGTTTCGCTCGGGTTAGCAGGGGGTCTGCTAGAC

AGACATTATCGAATAGTGCCTTTTGGATGAGAGATATGAACAAGAAGCTTCGAGAAAAC  
AGTGTTTTCTGAATTATATGAAGCCAGTAAGCAAACAACGAATCCATGGGTATTTGAAC  
CCGAGTATCCAGGAAAAAGCAGAATATTTGATGGAAGGTCGGGGAATCCTTTTGAGCA  
ACCCATTCTAATAGGAAAGCCTTATATCTTGAAATTAATTCATCAAGTTGATGATAAAAT  
CCATGGACGTTCCGTTGGAAATTATACGCATATTACACAACAACCCCTTAGAGGAAGGG  
CAAAAGGGGGGGGGCAACGAGTAGGAGAAATGGAAGTTTGGGCTCTAGAAGGATTTG  
GTGTTGCTCATATTTTACAGGAAATGCTTACTTATAAATCTGATCATATTCGAGCGCGCC  
AAAAAATACCTGGTACTACGATGATTGGGGGAACAATACCGAATCCTGAGGATGCTCC  
AGAATCTTTTCGAGTGCTCGTTTCGAGAATTACGATCTTTAGCTCTGGAACCTGAACCATT  
TCCTTGTATCTGAGAAAACTTCCAGATTAATCGGAAGGAAGCT-----ATGA  
TCGATCGGTATAAACATCAACAGCTACGAATTGGATTAGTTTCTCCTGAACAAATAAGT  
GCTTGGGCCACTAAAATCCTGCCTAATGGAGAGATCGTTGGAGAGGTGACAAAACCCT  
CTATTTTGCATTACAAAACCAATAAAGCGGAAAAAGGTGGATTATTTTGTGAAAGAATT  
TTTGGTCTCAAAAAAGTGGAAATTTGCGCTTGTGGAAATTATCGAGTAATCGGAGATGA  
AAAAGAAGACCCGAAATTTTGTGAACAATGTGGAGTCGAATTTGTCGATTCTCGCATA  
CGAAGATATCAAAATGGGCTACATCAAACTCGCATGCCAGTAACCCATGTGTGGTATTT  
AAAACGTCTTCTAGTTATATTGCGAATCTTTTAGATAAACCTCTTAAAGAATTAGAAGG  
CCTAGTATACCGCGAT-----TTTTCTTTTGCTAGGCC---ATAACTAAAAAACCTACTTTCT  
TACGATTAAGAGGTTTATTTCGAATATGAAATTAATCTTGGAAATACAGTATCCCGCTCT  
TTTTTACTATCCAAGGCTTCGATACATTTTCGCAATCGAGAAATCTCTACTGGTGCAGGTG  
CTATCCGAGAACAATTAGTCGACTTAGATTTACGAATTATTTTAGATAATTCGTTGGTAG  
AATGGAAAGAATTAGGGGAAGAA---GGACCCACAGGAAATGAATGGGAGGATCAAAA  
GGTTAGAAGAAGAAGGGGTTTTTTAGTTAGACGCATGGAATTGGCTAAGCATTTTATTC  
GAACAAATATAGAACCAGAATGGATGGTTTTTGTGTTTATTACCAGTTCTTCTCCTGACT  
TGAGACCCGTCATTCAGATAGCTGAGGGTAAAGTAATGAGCTCGGATATTACTAAACTC  
TATCAAAGAGTTATCTATCGGAACAAAATCTTACCGATCTATTAACAAGAAGTGTATCC  
ACGCCAGGAGATTTAGTAACGTCTCAGGAGAAATTAGTACAAGAAGCCGTGGATGCAC  
TTCTTGATAATGGAACCCGTGGACAACCAATGAGGGACGGTCAGAATAAAGTTTACAA  
GTCATTGTCAGATATAATTGAAGGCAAAGAGGGAAGATTTTCGTCAGACTCTGCTCGGG  
AAACGGGTTGATTATTCAGGTCGTTCCGTCATTGTCGTGGGTCCCTTCACTTTCATTATAT  
CGATGTGGATTGCCGCGGAAATAGCAATAGAGCTTTTCCAGACATTTGTAATTCGTGG  
TCTAATTAGACAAGATCCTGCCTCCAACATCAAAGTTGCTAAGAGTCAAATTCGGGAA  
AAAGAACCAATTGTATGGGAAATACTTCAGGAAGTTATGCAGGGACATCCTGTATTGCT  
GAATAGAGCACCCACTCTGCATAGATTAGGCATACAGGCATTCCAGCCCGTTTTAGTGG  
AGGGCGTGCTATTTGTTTACATCCCTTAGTTTGTAAAGGATTCAATGCAGACTTTGATG  
GGGATCAAATGGCTGTTTCATGTACCTTTATCTTTGGAGGCTCAAGCGGAGGCCCGTTTA  
CTTATGTTTTCTCATATGAATCTTTTGTCTCCAGCTATTGGGGATCCATTTCCATACCAA  
CTCAAGATATGCTTGTGGGCTCTATGTATTAACGAGCGGGAATCGTCGAGGTATTTGTG  
TAAATAGGTATAATCCGTGGAATCAC-----AGAACTATGAGAATCAAAGAAGTAAGA  
ATAATACTATAGGTATACG-----GAACCCCTTTTTTCGAATTCCTATGATGCAATTGGG  
GCTTATCGGCAGAAACGAATCAAATTAGATAGTCTTTTGTGGCTCCGGTGGCCGCTAGA  
TCAACGG---GTTATTGCTTCA-----AGAGAAAGTCCCATCGAAGTTCACTATGAATCTTA  
GGTACTTATTATGAGATTTATGGACACTATCTAATAGTAAGAAGTATAAAAAAAGAAATT  
CTTTTCTATACATCCGAACCACTGTTGGTCATATTTCTCTTTATCGAGAAATCGAAGAA



GCCATAGAGGGGTTTTCTCAGGCCTGTTTCATCTTCATATGGTACCTACACCAAGCTAAG  
TAATATGGAGGTTACTTATGGCAGAACGGGCCAATCTGGTATTTACAATAAAGTGATAG  
ATGGAACCTGCCATGAAACGACTTATTAATAGATTAATAGAACACTTCGGAATGGCATATA  
CATCACACATACTAGATCAAGTAAAGGCTCTGGGTTTCCACCAAGCTACTACTACATCC  
ATTCATTAGGAATTGATGATCTTTTAACAATACCTTCTAAGCGATGGCTAGTTCAAGAT  
GCTGAACAACAAAGTTTGGTTTTGGAAAAACACCATCATTATGGGAATGTACACGCGG  
TTGAAAAATTACGCCAATCCGTTGAAATATGGTATGCTACAAGTGAATATTTGCGACAA  
GAAATGAATCCTAATTTTCAGGATGACTGACCCCTTTAATCCAGTTCATATAATGTCCTTT  
TCGGGAGCTAGAGGAAATGCATCTCAGGTACATCAATTAATAGGTATGAGAGGATTAAT  
GTCGGATCCTCAAGGACAAATGATAGATTTACCCATTCAAAGCAATTTACGCGAAGGAC  
TCTCTTTAACAGAATATATCATTCTTGCTACGGAGCCCGTAAAGGGGTTGTGGATACTG  
CTGTACGAACATCCGATGCTGGATATCTCACGCGCAGACTTGTTGAAGTAGTTCAACAC  
ATTGTTGTACGTCCGACAGATTGTGGCACCATTCTGGGGTATTTCTCTAAGTCCCTCGGAA  
TGGGATGATGCCG---GAAAGGGTTTTTATCCAAACATTAATGGGTCGTGTATTAGCAGAT  
GATATATATATAGGCACACGATGTCTTGCCACTCGAAATCAAGACATTGGGATTGGACTT  
GTAAATCGATTTCATAACC-----TTTCGAGCACAGCCAATATCTATTTCGAACTCCC  
TTTACTTGTAGGAGTGCCTCTTGATCTGTGATTCTGTTATGGTCGGAGTCTACTCAT  
GGCGACCTGGTTGAATTAGGAGAAGCTGTTGGTATTATTGCAGGACAATCGATTGGAG  
AACCGGGTACTCAATTAACATTAAGAACTTTTCATACCGGCGGAGTATTCACGGGAGGT  
ACTGCAGAACATGTGAGGGCCCTTCTAATGGAAAAATCAAATTC AACGAGGATTTGG  
TTCATCCGACACGTACACGTACATGGGCATCCCGCTTTCTATGTTCTATAGACTTATATGT  
AACTATTGAGAGTGAAGATATTCTACATAATGTAAATATTCCACCCAAAAGTTTTCTTTT  
AGTTCAAAACGATCAATATGTAGAATCAGAGCAAGTGATTGCTGAGATTTGCGTAGGA  
ACATCCACT--TTGAATTTTAAAGAGAAGGTTTCGAAAACATATTTTTTCTGACTCAGACG  
GAGAA---ATGCACTGGAGTACTGATGTGTATCATGCACCTGAATTTACCTATGGTAATGT  
TCATCTATTACCAAAAACAAGTCATTTATGGATATTATTAGGGGGGCCGTGCAGA-----TC  
CAGTCGAGTCTCACTTTTCGTTCCACAAGGATCAAGATCAAATGAACGCGCAT-----TCCC  
CTTCTATCAAGCGAAGATATACTTCGAACCTCTCA-----GAAACGAATGATCCG---GAGA  
GACAAAAACTCTTTAGTTCGTATTTTTATGGTAAAAAATAAGGATTTCCGATTAT--  
-TCAAACCTTAATCAAATCTATGTAATTCATATCTCCA---ACCACTCT  
CCACCAAAATTCT-----GATTTATTCTCAAAAAGGCGGAAAAATAAATTCTTGATTCCAC  
TCCAATCGATTCAAGAACCTGAAAACAACTAATGCCCGTTCAAGTATCTCGATTGAA  
ATCCCC-----CAAATGGCACTTTCCGTGGAAATAGTATTCTTGCTTATTTTGATGATCCT  
CGATACAGAAGAAAGGGTTCGGGCATTCCCAATATGGGACTATAGAAATGCATTCAAT  
CGTCAAAAAGAGGAT-----TTGGTTGAGTATCGAGGA---GTCAAGGCATTTAGGCCAA  
AATACATGAAAGTAGATCGCCTTTTTTTTATTCCCGAGGAAGTGCATATCTTACCTAGAT  
CTTCTTCCATAATGGTACGGAATAATAGTCTCATTGGGGTAGATACACAACCTGACTTTAA  
ATATAAGAAGCCGAGTAGGCGGGTTTGTCCGAGTGGAGAGAAAAAATAAGAAATTG  
AACTGAAAATCTTTTCTGGAGATATCCATTTTCTTGAGAGACCAATAAGATATCTCGA  
CATAGCGACGTTTTGATACCA---CCA-----GGCAAACCAATTCCAAGGAATCCAAAA  
AA-----TGAAAAATGGGATCTATGTTCAACGG-----ATCACACCTAGGAAG-----AAAA  
GTTTTTTGTTTTGGTTTCGACCTGTCATCACATATGAAATAACGGACGGTATAAATTTAGC  
AACACTTTTTCCCCGGATCTTTGCAGGAAAGGGATAATGTGCAACTTCGAGTTGTCA  
ATTATATCCTTTATGAAAATGGCAACCCAATTCGAGGTTTTTCTCATAACAGATAGTCAATT

AGTTCGGACTTGTTTAGTATTGAATTGGGACCAAGACAAAAA-----AGTGCTTCT  
AGTGAAGAAGCCCGTGCTTCCTTTGTTGAAATAAGGACAAATGGTTTGATTTCGACATTT  
CCTAAGAATCGACTTAGTGAAATCCCCGATTTTCATATATCGGAAAAGGAATGATCCAT  
CGGGTTCAGGATTGCCCTCTGAT---AATGGATCTGGTTGGACCAATATGAATCCGTTTTCT  
TTCC-----ATTTAT-----TCCAAGGCAAGAATTCAACAATCCCTTAACCAAAATCAAGG  
AACTATTCATACATTGTAAATCGA-----AATACGGGATTCCAATCGTTGAGAATTTTG  
TCATCATCCAATTGTTCTCGAATGGGTCCA-----TTCAACGATGTAATAAAATATCACAAA  
-----GAATCAATTCCAATTGATCCTTTTCATTCCAATTAAGAATTCGCTGGGGCCTTTTGA  
ACA-----GCCTTTCCAATTGCGAATTTTGATTCA-----TTTTCTCATTTA-----ATAACTCAG  
AATCGAATCTTG---GTAATAACTATTTGGAACCTTGACAAT-----TTCAAACAGACTTT  
CCAAGTAATTCAA-----TATTATTTAATGGATGAAAAT-----CCAAAATTTATAACCCCG  
ATCTAGGCAGTAACATTCTTTTGAATCCATTCAATTGGAATTGGTATTTTTATCATCATAC  
TTATTGTCAAGAAACATCT---CCAATAATTAGTCTTGGACAGTTTATTTGTGAAAATGTAT  
GTATAGCCAAAATGCACCACAC---CTAAAA-----TCGGGTCAAGTTATACTTGTTCAA---  
GTTGCCTCTGTAGTAATACGATCAGCTAAGCCTTATTTGGCCACTCCAGGAACAACCTGT  
TCATGGCCATTATGGAGAAATCCTGTATGAAGGAGATACATTAATTACATTTCTATATGA  
AAAATCGAGATCTAGTGATATAACGCAGGGGCTCCCAAAGTGGAAGAGGTGTTTCGAA  
GTGCGTTTCGATTGATTCAATATCGATGAATCTAGAAAAGAGGTTTAAGGGTTGGAACAA  
ACGTATAACAAGAATTCTTGGAATGCCGTGGGGTTTCTTGATTGGTGCTGAGCTAACTA  
TAGTGCAAAGTCGTATCTCTTTGGTTAATAAGATCCAAAGGGTTTATCGATCCCAGGGG  
GTGCAGATTCATAATAGGCATATAGAAATTATTGTACGCCAAATAACATCAAAAGTGCTG  
GTTTCCGAA-----GATGGAATGTCTAATGTTTTTTCACCCGGAGAATTAATTGGATTAT  
TGCGAGCGGAACGAATGGGGCGCGCTTTGGAAGAAGCGGTCTATTACCGAGCCATCTT  
ATTGGGAATAACAAGAGCATCTCTCAATACTCAAAGTTTCATATCTGAAGCGAGTTTTCT  
AAGAGACTGCTCGAGTTTTAGCAAAGCAGCTCTCCGGGGTTCGGATCGATTGGTTGAA  
GGGCCTGAAAGAGAACGTTGTTTTGGGGGGTATGATACCCCTTGGTACCGGATTTAAA  
GGATTA-----GTGCCCCCTCAAACAAGATAACAACAGTTCT-----TTGGAACAAAAA  
AAAAAATCTATTCGAAGGGGAAATGAGA-----GATATTTTCTTTCACCATAGAAAATTA  
TTTGATTCTTGTCGTTCAAAGAATTTCCATGATACATCAGAACAATCACTTCTAGGA-----  
-----TTTCATGATTCCATGGCAAGAAGATATTGGAATATCAATTTGGAAGAGATGAT  
GGTGGCCGGAGTTCATTTTGGCCATCCGACTAAGCAATGGAATCCTAAAATGGCACCTT  
ATATCTATGCAAAGCGTAAAGGTATTTCATATCCAAATCTTACTAGAACTGCTCGTTTTTT  
ATCCGAAGCCTGTGATTTGGTTTTTGTATGCAGCAAGTAGGGGAAAAGAATCTTAATTG  
TTGGTACCAAACCGAAAGCAGCTGGTTCAGTAGTACGGGCTGCGATAAGGGCCCGGTG  
TCATTATGTTAATAAAAAATGGCTCGGCGGTATGTTAACGAATTGGTTCACTACAAAAA  
CGAGACTTCATACGTTACAGGACTTGAGAATGGAACAAAAAACAGGAAGACTCAACC  
GTCTTCCGAAAAGGGACGTAGCTATGTTGAAAAGACAATTATCTCGTTGCAAGCATAT  
CTGGGCGGGATTCAATATATGACAGGGTTACCCGATATTGTAATTCTCGTTGATCAGCAC  
GAAGAATATACGGCCCTACGAGAGTGTATCACTTTGGGAATTCACAATTTGTTTAAT  
CGATACAAATTTGTGACCCCGATCTTGCAGATCTTCCGATTCCAGCGAATGATGACGCTA  
AACCTTCAATCCGCTTAATTCTTAACAAATTAGTATTCGCAATTTGTGAGGGTCTGTTCT--  
AGCTATATAAGAAATCCTATGGGACAAAAATAAATCCACTTGGTTTCAGACTTGGTAC  
AACCCAAGGTCACCATCCCTTTGGATTTCAACCAAAAAATTAATTCTAAGGGTTTAA  
AAGAAGATCAAAACATAAGAGATTTTATCCAAAATTATATACAAAAGAATATGAGAATA

TCCTCCCGCCGCGTCGAGGGAATTGCACGTATAGAAATTAATAAAAAACAATTGATTTGAT  
CCAGATCATAATCTTTATGGGATTCCCG-----ATAGAAAATAGACCGCGAAAAGTCAA  
AGAAAAAATAAAGAATTACAGATTCACCTAGAAAAAGAATTTTCATTATGTGAAAAAA  
AAACTTAAGATTGCTATCACAAAAATTGCAAAACCTTATCAAAACCCAAAAATTCTTGC  
AGAATTTCTAGCTGGACAATTAAGATAGAGTTTCATTTGAAAAGCAATGAAAAAG  
GCTATTGAATTGGCTGAACAAGCAGATACAGAAGGAATTCGAGTACAAATGGCAGGGC  
GTATCAACGAAAAGATATTGCACGGTTCGAATGGATCAGAAGGGGTAGGCTTCCCCT  
ACAAACCATTGCAACTAAAATTGATTATTGTTGCTATAACAATTCGAACTATCTATGGGGT  
ATTGGGTATCAAAATTTGGATATTTATAGACGAAAAATGCCGCGTTACCTAGGACCTC  
GTTTCAAAAAATACGCCGCTGGGGGCTTACCAGGACTAATAAAAAGTCCTAA  
AGCCGGAAGTGATCTTAGAAAGCAACCACGTTCCAGGAAA---AAATCTCAATATCGTAT  
TCGTCTAGAAGAAAAACAAAAATTGTGTTTTTCATTATGGTCTTAGAGAATACCAATTAC  
TTAATTATGTTTCGTATCGCCGCAAAAGCCAAGGGGCCAACAGGTCAAGTTTTACTACAA  
TTACTTGAAATGCGTTTGGATAACATCCTTTTTTCGATTGGGTATGGCTTCGACTATCCC  
GCAGCCCGCCAATTAGTTAACCATAGACATATTTTAGTTAATGGGCGTATAGTAGATAGA  
CCAAGTTATCGCTGCAAAACCCGAGATATTTATGACGAAGGATAACCAAAAATCTAG  
AACTCTGATTCAAATTTCTCTCGGCTCATCCCCTCAG---AAGGAATTGCCAAACCATTT  
GACTCTTACCCATTCCA-----TATAAAGGATTAGTCAATCAAATAATAGATAGTAAATG  
GGTCGGTTTGAAAATAAATGAATTGCTAGTCGTAGAATATTATTCTCGTCAGACTATGTC  
ACGTCGAGGTAAGTGCAGAAGAAAAACAGCAAAATCCGATCCATTTTATCGTAATCGA  
TTAGTTAACATGTTGATTAACCGTATTCTGAAACACGGAAAAAAATCATTGGCTTATCA  
ACTTCTCTATCGAACCTGAAAGAGGTTCAAAAAAGACAGAAAGAAATCCACTATCT  
ATTTTACGTGAAGCAATACGTCGAGTAACCTCCCGATATAGCAGTAAAAGCAAGACGAA  
AAGGTGGATCAACTCGTCAAGTTCCCATGAAATAGGATCCACACAAGGAAAAGCACT  
TGCCATTCGTTGGTTATTAGCGGCATCCCGAAAACGTCCGGGTGGAAATATGGCTTTCA  
AATTCAGTTCCGAATTAGTGGATGCTTCCAAAGGGAAGGGCGGTGCCATACGCAAAAA  
GGAAGAGACTCATAAAATGGCAGAGGCCAAATAGAACTTTTGCACATTTTCGTATGTGTA  
GGGATACCATTGCTGAGATACTAACCTCTATACGAAATGCTTATATGGATAGAAAAAGA  
GTGGTTCGCATCGCATCTACTAATATTACCGAAAATATTGTGAAAATACTTTTCCGAGAA  
GGTTTTATTGAAAACGTTAGAAAACATCGAGAAAAAAACAAATCTTTTTTGATTTAAA  
CCTGCAGTGGAATAGG-----AAAAGACTCCATAAAAAT-----TTGTTTCAGTTTTAAATTA  
AAACGTATCAGTCGACCCAGTCTACGAATCTATTCTAACTCTCAACGAATTCCTAGAAT  
TTTCGGTGGGATGGGGATTGTAATCTTTTCTACTTCTCGAGGTATAATGACAGACCGAG  
AGGCTCGACTCCACGGAATGGGAGGGGAAATTTTATGTTGTATATGGATGGCAAAAGG  
AACTCGTTTTATTAATTTTCGTAGATATGGACGTTTTGGTTCACGTAAGAGTGTACGTAA  
AATACCAAGAGGGGTTATTCATATTCAAACAAGTTTCCACAATACCATTGTCACGGTTA  
CAGACGGACGGGGTCAGGTGGTTTCTTGGTCCTCGGCGGGTACTTGTAGATTCAAGGG  
TCCGAGAAAAAGGACACCCTTTGCCGCTCAAATTTGTAGCAGCAGATGCTATTGGTCCA  
GTAGTGGATCAGGGTCTGCAACGAGCAAAAATCAAGCTAAAGGGTACCGGTCCGCGGA  
AGAGACGCAGCATTACGAACTATTTCTAAAAGTGGTATAGGATTTACTTCCGTACAGGA  
TGTAACCCCTGTCCCCATAATGGTTGCAGACCCCCGAACAAAAACGTCAAATGCCA  
ACTATTAACCAACTTATTAGAAATACAAGACAGTCAATTCGAAATGTCAAAAAATCCCC  
CGTCTTTCAGGGGTGTCTCAGCGCCGAGGAATATGTAAGGGTGTATACTATCAACC  
CAAAAAACCAAACTCTGCCACACGTAAAGTTGCCAGAGTACGATTAACCTCTGGATT

TGAAATCACTGCTTATATACCCGGTATTGGCCATAATTCACAAGAACATTCTTCAGTCTT  
AGTAAGAGGGGGAAGGGTCCGGATTTACCCGGTGTAATATCACATTGTTTCGAGGA  
ACCCTAGATGCTGTCGGAGTAAAGGATCGTCAACAAGGGCGTTCTAAATATGGGGTCA  
AAAAGCCAAAATGGCAAGGAAAAGTTTGATTTCAGAGGGAGAAAAAGAGGCAACAA  
TTGGAACAGAAATATCATTGATTTCGTCGATCCTCAAAAAAGAAATAAGC-----AAA  
ATTCCATCGTTGAGTTACAAATCGGAATTTTATAGAAAATTACAATCCCCACCACGGAAT  
AGTGCACCTACACGCCTTCATCGACGTTGTTTTTCGACCGGAAGGGCGAGAGCTCACT  
ATCGAGACTTTGGACTATCCGGATACATACTTCGTGAAATGTTTCATGCATGTTTGTTC  
CAGGAGCAACAAGATCAAGTTGGATGGTAAGAAATTCATTCAATTATTTCTCAA-  
-----AAAGAAAACAAGAAAACAGAGGGTCTGTTGAATTTCAAGTACTCAGTTTTACCA  
CTAAGATAAGGAGACTTACTTCACATTTGAAATTGCACAAAACAGACTATTCATCTGAG  
AGAGGTTTTCGAAAAATTTTGGGAAAACGCCAAAGAGTACTGGCTTATTTGTCAAAAA  
AAAATAGAGTACGTTATCAAGAATTAATTAGTCAGTTGAATATTCGAGAGACAAAACCT  
CGT-----ATGATAAAACTTCGTTTGAACGATGTGGTAGAAAGCAACGAGCCGTCTATC  
AAATCGTTGCAATTGATGTTTCGATCCCCAAGAGAAGGAAAAGCTCTTCGAAAGGTGGG  
TTTTTATGATCCAATAAAGAATCAAACGATTTAAACGTTTCGTGCCATTCTATATTTCTT  
GAAAAGGGTGCTCAACCTACAGGAAGTTCAGGATATTTTAAAGAAGGCGGAAATTG  
ATAAGGAACTTCGACCTAATCAAACGAAATTCAT---ATGGAAAAAAAAAAGCGACCT  
TTTCGTAAAAAAAAAGCGATCTTTTCGTAAGCGTAGGTCCCCGATTGAATCGGGACATCA  
AATTGATTTTACAAACACGAGTTTGGCTGAATCAATTTATTAGTCAACAAGGAAAAATATT  
ACCTAGAAAAGTGACTAGATTGACCTTGAAACAACAACGATTTATGACTAGTGCTATAA  
ACAAGCTCGTATTTTATCTTTGTTACCTTTTGTCTTTGATGATAAAAAAAAAACAATTC  
AAAAGAAAGAAATCGACTGCTAGAACGACTAATGAGAAACAAACCAATGAGAGGGCAC  
GT--CTAAAAAAAAACCCCTTTGTAGTCCATCATTTAGTAAGAAAAATTGATAAGCTTAA  
TAAAAAAAAAAGAAAGGAATAATAAAAACCTGGTCCCGCGCAAGTACCATTATACCT  
ACAATGATCGGTCATACTATTGCTGTTTATAAGGGTAAGGAACATTTGCCGATTTATATA  
ACAGATTATATGACAGGACACAAATTGGGAGAATTTGCCCTACTTTATATTTCCGAGG  
ACATACAAAAACGATAATAGATCTCAGCGTATGCTTTTTTACTTTTTTCTACGTTGTAA  
TCTAGCATCCTTATGCATCAAGATAGTCAATTCGGTCGTTGTGGTTCGGACTCTATTATGG  
ATTGCTGACCACATTTTCCATAGGGCCTTCTTATTTCTTCTTCTCCGAGCTCAGGTTAT  
GGAAGAAGGA-----ACCGAGAAGAAGGTATCAGCAACAACCTGGTTTTATTACGGGAC  
AGCTCATAATGTTTCATATCGATCTATTATGCGCCTCTGCATCGAGCATTGGCTAGACCTCA  
TACAATAACTGTCTAGCTCTACCATATCTTTTCGTGTATTTTCATCTTTTACTGACAAA  
CGTTTTATGCGCAAAAATCTTAACACAACAACCTTCAATGCGTAATTTTCAGCATTCAATG  
TGTATTCCTGAATAATCTCATTTTTTCAATTATTCAACCATTTCAATTTTACCAAGTTCAATG  
GTAGCCAGATTAGTCAACATTTATATGTTTCGATGCAACAACAAGATGTTGTTTGTAA  
AGTAGTTTTGTTGGTTGGTTAATTGGTACATTTTATTCTGGAAATGGCTTGGATTGGTA  
TTAGTCTGGATACGGCAAAATCGATCTATTCGTATT---AAGTACATTCCGAAGTACCTTGT  
GTCAAAATGGGGAGATAGG-----ATCTTTTATATTCTGGTAATTTCTTATCTGGTTCTACT  
TAGGAGGCAAAATACCCGGCACCCCTTCTTTCTATGAAATTCGACGAAGAAAAAGA  
T--CATTTTTCGACTCTTCTTTTTGATCCTAACCGTTGGAATCGACCATTTTCGCTACATA  
AAAATGATCGATTTGACAACGCTTTCAGAACTGAAATGTCACAATATTTTTTTGACACA  
TGCCCAAGTGCTGGAAAGGAAAGAATATCTTTTACATATCCACCAGTTTGTCAACTTT  
TTGGAAATGATCGAAAGAAGAATATCTCTGCCTACACTATTCTCATCTAAT-----GAACT

TTCCAATCATTGGGTTTATACCAATGAACAAAAAGTAATAATTTAAAGAACGAATTTG  
TAAATCGAATTGAAGCTCTAGACAAAGAATCC-----CTCGAAACAACGAGTAGG  
TTGTGCAAT-----ACTACAAAGGAATACTTACCGGAACCCCTATGATCCTTTCTTGAACGG  
ACCATATCGGAGAACAATAAAAAAACGAAAAGCCTTTTGGAAACTTCGAGAGACAA  
TTTGGAAACTTCGAGAGACAGAGACAATTTGGAAACTTCGGTATTTTCAGACGAA-----  
-----GACGAAAAAGGAAAAAATATTTTCGAATATGAAAATAGAATTGGAAC  
AATACTATAGCAAAAATCCGTAAAAAAGTGTCTCGATGGATATACAATGCAGACAAGAT  
AATCTTTCAGAACATGGAGATTTTCGCCGAGATGTAATCTGGGGTTCTATACGTGCTC  
AAAGACGTAAAATAGTTATTTGGGAGAACGCTTCAAAGATACACGCATTCCTCTTTTT  
CTTGACAGCCTAAAAGACTTCCGACATTATTTTGTGATTTCTTCTGATATTCTTAATA  
TCTTTATTATTCGAAATCCGGAGCGAGAGCCCCGACTATGGGTATCCGAGTTCTGGACA  
ATCATTGAATATGCGCAAGAAGTGAGAGGTTGCGTATTACTAACTCACTCTTTTATTAGA  
AGAAATATTGTAATACCTTTATTGATAATAGTGA AAAATATTGGACGTATGTTACTATTTC  
AACGTCCTGAATTGTATGAAGATTTTCGAGGACTGGCAAAGGGAGTCACATGTTAAATG  
TACCTATGAGGGTATTCCATTATCCGAAACAGACTTTCCGGAAGATTGGTTGGTAGAGG  
GTATTCAGATAAAAATCTTATATCCTTTCCGTCTGAAACCTTGGCACGTACCTGGAGCA  
GAAGAAAAGGGGATTTTTGTTTTTAAACAGTTTATGGAACGTAAACCAACCTTCCTTT  
TGGTTATTCCCGACTACCAGAGTCTTTTTTAAACCTATTTTTCAGGAACTCAAGAAAC  
AA-----ATGAGAAAT-----TCGAAAA  
AGAACATTTGGAAACTTGGAAAAATGCTTTTTCAAAAAGTGAAAGGAACAAAATTCC  
GAAAAGTTGATCCATAACCAGCAATCAGATGATTCCTGAATCATTTTCA-----TCTCC  
AAGTTCGACAAATTCAGAAAAAAAAGAAACAAAATGCAGGATCTTACTAATAGAGC  
AAATAAAGCTAGAAATGAAATCGAAAGAATTCGAAAAGAGAAAAAAA-----  
--AGTTCTAAT-----GCTTTGCAAAGAATAAAGGATCGA-----TTAATCCGT  
AAATTACCCGTTTATTTGAAATTATTCATTCAAAGAATATAC---GGTATTTTTTCTCTATC  
ATTAATATTTCGCAGAATGAGT-----TATGACTTGTCTACTTGTCAACAAG  
CATATGTGTTTACAAATTATCAGAAATCCAACCTTAGTAATTTGGATAAATTCAAATCAG  
TTCTTCAATATATCCCTTTTTTCTTAGGTCTGAAATAAAGGATTCTTTTACACAAGGAAT  
AGTTCATTCG-----AAGAGACTTCCG--TCGGAAATGAATCAATGGAAAACTGGTT  
AAGAGGGCATTCTCAATACGATTTATCTAAGACCAGATGGTCTATATTAATACCACAACG  
ATGGCGAAATAGAGTTTCATCGTATGGTTAAA-----AGGAAAAACAAAAGGAATTTATATG  
AAAAATATGAA-----AAAGATCAATTCATTGATTCCGATAATTTTCAAAAATGCTGTAAAT  
ATGATCTTTTATCATATAAATCTATTCATGGCGATATTCATATCCCGATAGAAAATATTTG  
GATTGGAAAATGATCCATTTT-----TTTTTGGATTGGATGGGGTTGAATGAAACACAAA  
CACATCCCAATTTATTTCCAGAAATTGTCTTGTTTTATAATGCATATAAAACGCAACCTT  
GGCTTCTATCAAGCAAATTACTTCTTTTAAATACGAGTAAAGAACTACAAAAAGAACTA  
GATGCGTTCCTGCAACGTTATTCTGGTTATCTAGTGAATGGAACCGGCGGGTGGTTCC  
AAAATCCGAAATAAATTGGGAGGTATATTCTTACCTGTATAGACTATTCGACGATGAAAA  
TTTGGTTCTATCCTCGGCAAAGAGAGGAGAATTGGCTTTTGGAGATACTGGCGACTCGTC  
CGATTCAAAGTTGGAAAAAATTGCTGCTAAAGGAACTGGTTTTTTTCGAACCCATTTCG  
CCTGTTTGGAAAAACAACGGGCAGTTTATTATGTATCAAACCATCGGTATTTTCATTGG  
TTCATAATAATAAGCACAAATCATTGGATTGCTTGTCCGGAAAATATTTCTCATTAG  
GCGTCGTAGAAAATTAAGAATTCTAAACTGTTTGGAGATTTCTTTGGCCTAATTATCGATT  
GGAAGATTTAGCTTGTATGAATCGCTATTGGTTTGATACCAATAATGGCAGTCGTTTCAG

TATGTTAAGGATACGTTTGTATCCAGTCCAATGGAGA-----TGGGGAGAGCGATTGG  
GAGAGATATTGAGAGAGATCAAGAATTCTGATTCAATTCTTTGATTCATGGACCCAATC  
AATTCAGTGAGATCTTTCATTCCCATTTTTTTCCACCAAGAACGCTTCTAAAACCTGGCT  
GACCCCCGAATTTGGAGTATCCTACTTTCACGCACACAGGGGTCAACACAGGGGTCAA  
CAAGCATCACGATCAAGGGTGTAACTCTTTAAGGGTGTAACTCTTTGTAGTAGCG-  
--GCCCTTATATATCGT-----ATTAACAATCGAAATATGGTTCGAAAGCAAAACTCTCTA  
TTTGAGAGGGCTTCTTCCT-----ATACCTATGAATTCCATTGGACCCAGAAATGAT  
ACGTTGGAAGAATCCGTT--GGGTCTTCCAATATCAATAGGTTGATTGTTTCG--CTCCTG  
TATCTTCCAAAAGGAAAAAGGATCTCTGAGAGTTCTTTCCTGAATCCGAAAGAGAGTA  
CTTGGGTTCTCCCAATAACTAAAAAG-----TCTAGCATGCCCTGGGGTTTCG  
GGTGGTGGAGGAACTGGATCGGAAAAAAGAGG-----  
-----  
-----  
-----  
-----  
-----  
-----  
-----  
-----  
-----GATTCTAGCCAACCTGAAAGGGTCTTCT--TATCAATCC  
AGAGATCATTTGGATTCCATTAGT-----AATGAGGATTCGGAA-----  
-----TATCAC-----AATCAAAGAGAGATTCCACTTCCGGAAGAAAGA-----  
-----  
-----  
-----AAAATCGAAGAATTTCTT----GAGAATCCTACAAGATCC  
GTTCGTTCTTTTTTCTCTGATAGATGG----TCAGAACTTCAT--CTGGGTTTCGAATCCTAC  
TGAGAGGTCCACTAGAGATCAG-----AAATTGTTGAAGAAACAACAAGATCTTCT-  
--TTTGTCCCTTCGAGGCGATCGGAA-----AAGAAAGAGATGGTTCATATATTCAAGA  
TAATTACGTATTTACAAAAT-----ACTGTCTCAATTCATCCTATTTTCATCCGATCCGGGGTG  
TGATAGGGTTCCG--AAGGATGAATCGGAT--ATGGACAGTTCCAATAAGATTTTCATTCT  
TGAACAAAAATCCATTTTCA-----  
-----GAAGAGAGATTTCAAGAAATGGCAAATCGATTCACTCTATCAATAACCGAGCCG--  
GATCTGGTCTATCCTAAGGGATCTCGCTTT-----  
-----  
-----TGTAATGAATCTATTTATCGAAGG  
ATCATAAAA-----AAATGGGTCCCGCGCGGGAATGTTTTGGAAAATCTAAAACGACA  
AATAGTGGTATTTGTTAGCAACAACATAATGGAGGCAGTCAATCAATATAGA--ATCCGA  
AATCTGATTCAAATCCAATATAGTACCTATGGG-----TACATAAGAAATGTATTGAATCGA  
TTCTTTTTAATGAAT-----CGATCCGATCGCAACTTCGAATATGGAATTCAAAGG-----  
GATCAAATAGGAAAGGGTACTCTGAATCATAGAACTCTAATGAAATATATGATCAACCA  
ACATTTATCGAATTTTTTTTTG---AAAAGAGTCCG--TTCGATTCT-----CTTATCGTGAT  
TGAG-----AAATCCAAGAATCGGGATCCTTTTGCATATAGATACAAATGGTCCAATGGG  
AGCAAGAATTTCCAGGAACATTTGGAACATTTCTTTCTGAGCAGAAGAGC-----  
-----  
-----CGTTTGGAATAGCGTTC  
GATCAA-----TTCCAAAGGAATTATGATA  
AG--CCACTTCCACTTCTGTTAGAATCAATAGCA-----  
-----  
-----TCAATAGGTCTTCAAATTGTTCAATTTGAAAAAATGGAAACC  
CTTC-----TTATTGGAT-----GATCATGATACTTCC--CGAAAG-----  
-----  
-----ATGATTGACTCATTCCATACTAGA-----AATAATCGCAGGAAA



ACTCTTTTATATACTAGGGGATTTACCCCTCACTTGGAAAAG-----AACGCATTTCG  
GGTCCATAACCCTGGGTTCAGTGCACAAGATCTTAGACCACTTATCAATGACGCCCTA  
TTGATTGGTATTTACAGAGGAAATCAATTATAGACACTAATAACAATTAGATGCGCTCTT  
CATAGAGAACTTGGGAGTTCCAATCCCAT---CCAAAATGGGTTCGAATAGTCAG-----  
ATCCTTTTCTATCAGATAGGAAGGGCTGTAGTACAAAAAGTACTTCTAAGTAATTGCCT  
AATAGACCCTCTATCTATCTATATGAAGAAGAGA-----TCATTTGCGGAAGGGGATTCTTC  
TTTGTACAAATGGTACTTCGAACTTGGAACGAGCCTCAAGCTAGTAACGATACTTCTTT  
ATCTTTTGAGTTGTTCTGCCGGATCGGTTCGCTCGAGATCTTTGCTTTCTACCC-----  
---GGAGAAGATAGGATCAAACCTTTTGAGAAT---GAGATGGATTCT---ACTCTATTTTCAT  
GAGGTATTAGCATTAGAAAGCCCTCTGATGGGATCTTCA-----CGGACAGAAAAAGATT  
GCAGTCAGTTTGATAATGAT-----CGAGTGCCATTCCCTTTTTCGGCCCGAGCCGAGGAAG  
--CTCTTAGCTATTCAGAGATTTCTCTCTGAAAAAGAAGAATGGGAGTTGGCAGAAGG  
GAAGGAA-----GAAGGACTCCTTCAACCGCCG-----  
CAAGAG-----ATAGAGGGGCAC-----ATAGTTTCGGCTCCT-----AAAATATGGCGCCC  
T-----TGGTTCTGTCTACTTGATGGCCTGGATAGGCCCGTTGAATTTTGGAAATTG---GG  
ATATCCCTATTGCTATGGGTACAGG---GGCAAGCAGATCCTTTTGGATAAAGAGGATGAG  
CTTGAAGAGAATGATTCGGAGTTCTTGCAGAGTTTCATCCCGAGATCT-----TC  
CGACGAACACGGCTTTTTTAAACTAAACCAATTCATTTGGGACCCCTCCAGATCCGCTCT  
TTTTGCTATCCACA---GATGAGTTCCTGGCTCTGTGTTTTTCATATCGAGAATTATTTGCA  
GACGAAGAACTTCGT-----AAGCTTCGTACATTTAGGACTCGCTGGCTT  
AGC-----AAGAAAGCACAAAAAGGGCGCCTCGAATTGTTGATTAATCGTCAGAGATGGC  
TTAGACCC-----AATAGTGATGAAAGTGAGGACTCT-----CTCTATTCTCAA-----ATTCT  
ATCCGAGATTTTGGAGTATTTAAAAAATCTCTTCCCTATCTAAGAGA---GGGCTATTGGAT  
CAAACGAGAAAGGTATTGTTTCAGAAAAAGATGGGTTTTCCCGGATGAAATGCACATTT  
TCTTC-----ATG-----ATGCCTAGATCGCGG---ATAAATGGAAATTTTATTG  
ATAAGACCTTTTCAATTGTAGCCAATATCTTATTACGAATAATTCCGACAACCTTCAGGAG  
AAAAAGAGGCATTTACCTATTACAGAGATGGA-----ATATCAGCTCAATCCGAAGGAAAT  
TATGCGGAAGCTTTACAGAATTATTATGAAGCTATGCGACTAGAAATTGATCCCTATGAT  
CGAAGTTATATACTCTATAATATAGGTCTTATCCATACAAGTAATGGAGAACATACGAAA  
GCTTTGGAATATTATTTTCGAGCACTAGAACGAAACTCATTCTTACCCCAAGCTTTTAAAT  
AATATGGCCGTGATCTGTCATTAC---CGGGGAGAGCAGGCCATTCCGAGGGGAGATTCC  
GAAATTGCGGAGGCTTGGTTTGATCAAGCAGCTGAGTATTGGAAACAGGCTATAGCGC  
TFACTCCTGGTAATTATATTGAAGCACATAATTGGTTAAAGATCACGAGGCGTTTCGAA--  
---ATGAGTTGGCGATCAGAAGATATATGGATAGAACTTCTAACGGGGTCTAGAAAACTA  
AGTAATTTCTGCTGGGCCCTTATCCTTTTTTTTAGGTTTCATTAGGATTCTTATTGGTTGGAA  
CTTCCAGTTATCTTGGTAGAAATTGGATATCGTTTTGTTCCGTCTCAGCAATTCATTTTTTT  
TCCACAAGGGATTGTGATGTCTTTCTACGGGATCGCGGGTCTCTTTATTAGTTCCCTATTT  
GTGGTGCACAATTTCTGGAATATAGGTAGTGGTTATGATCGATTTCGATCGAAAGGAAG  
GGATAGTGTGATTTTTTCGTTGGGGATTTCTTGAAAAAATCGTCGCATATTCCTCCGAT  
TCCTTATAAAGATATTCAGTCCGTTAGAATAGAAGTGAAAGAGGGTTTATATGCTCGTC  
ATGTCCTTTATATGGATATCAGAGGCCAAGGGGCCATTCCCTTGACCCGTACTIONGATGAG  
AAT---TTGACTCCACGAGAAATTGAACAAAAAGCCGCGCAATTGGCCTATTTCTTGCGC  
GTACCAATTGAAGTCTTT

>Pelargonium





TTATAACGCGCTAGTAGTTCAGGGTCGAGATACTGTCGGTCAACAAATTCATGTGACTT  
GCGAGGTACAACAATTATTAGGAAATAATCGAGTTAGAGCTGTAGCTATGAGTGCTACA  
GATGGTCTAATGAGAGGAATGGAAGTGATTGACACGGGAGCTCCGCTGAGTGTTCCAG  
TCGGTGGAGCGACTCTAGGACGAATTTTCAACGTAAGTGGGAGAGCCTGTTGATAATTA  
GGCCCTGTAGATAATCGGACAACATCCCCTATTCATAAATCTCCGCCTGCTTTTATTGAG  
TTAGATACAAAATTATCCATTTTTGAAACAGGAATTAAGTAGTGGATCTTTTAGCCCCT  
TATCGCCGTGGAGGAAAAATTGGATTATTCGGAGGGGCTGGAGTGGGTAAAACAGTAC  
TCATTATGGAATTGATCAATAACATTGCCAAAGCTCACGGAGGTGTATCCGTATTTGGCG  
GAGTAGGTGAGCGTACTCGTGAAGGAAATGATCTTTACATGGAAATGAAAGAGTCTGG  
CGTAATTAATGAACAAAAGGTTGCGGAATCAAAGTAGCTCTAGTCTACGGTCAGATG  
AATGAACCGCCGGGAGCTCGTATGAGGGTTGGTTTACTGCCCCTAATGAGGAGGATA  
TTCCCGTGATGTTAATAACAAGACGTAATTTTATTTATCGACAATATCTTTGCTTCGTC  
CAAGCAGGATCCGAAGTATCTGCCTTATTGGGTAGAAATGCCTTCCGCTGTGGGTTATCA  
ACCCACCCTTAGTACCGAAATGGGTTCTTTACAAGAAAGAATTACTTCTACAAAAAAG  
GGGTCGATAACTTCTATTACGGCAGTTTATGTACCTGCGGACGATTTGACCGATCCTGC  
TCTGCCACGACATTTGCACATTTAGATGCTACTACCGTACTATCAAGAGGATTAGCTGC  
CAAAGGTATATATCCAGCAGTGGATCCTTTAGACTCAACGTCAACTATGCTTCAACCTC  
GGATCGTCGGCAATGAACATTATGAAATTGCGCAAAGAGTTAAGCAAACCTTTACAACG  
TTACAAAGAACTTCAGGACATTATAGCTATCCTTGGGTTGGACGAATTATCCGAAGAGG  
ATCGGTTAACCGTAGCAAGAGCACGAAAAATTGAGCGTTTCTTATCACAAACCCTTTTTT  
GTAGCGGAAGTCTTTACAGGTTCTACGGGTAAATATGTTGGTCTGTCAGAAACAATTAG  
AGGGTTTCATTTGATTCTTTCCGGAGAATTTGATGGTCTTCCTGAGCAGGCCTTTTATTT  
GGTAGGTAACATTGATGAAGCTACTGCGAAGGCTATGAAGTTAGAAAAGGAGAGTAAT  
TTGAAGAAAATGACCTTAAATCTTTGTGTACTGACCCCTAATCGAATTCCTTTGGGATTC  
AGAAGTGAAAGAAATCATTTTACCTACTAATAGCGGACAAATTGGGGTATTACCAAACC  
ACGCATCTATTGTCACAACCTATAGATATAGGTGTTTTGAGAATACGCTTTAACGACCAAT  
GGTTCACAATAGCTCTGATGGGCGGTTTTACTAGAATCCGCAATAATGAGATCACTATTT  
TAGCAACTGCTGCGGAAAAAGGTAGTGACATTGATCCACAAGAAGCTCAGCAAACCTC  
TTCAAATAGCGGAAGATAGCTTGAGGAAAGCTGAGGACAAAAGGCAAAGAATCGAGG  
CGAAGCTAGCTATCAAACGAGCTAGTACACGAGTAAAGGCTATCAATCCTATTTTCGATG  
AAAAATGTAACCGATTCTTTTCGTTTCTTGGGTCGCTGGCCATCCGCCGGGAGTTTCGG  
GTTGAATACCGATATTTAGCAACAAATCCAATAAATCTAAGTGTAAGTACTTGGTGTATT  
GATCTTTTTTGGAAAGGGAGTGTTAAATGATTTATTAGATAATCGAAAACAGAGGATATT  
GAATACTATTCGAAATTCAGAGGAACTGCGGGGGGGGCCATTGAACAGCTGGAAAA  
GGCCCGGGCTCGTTTACGGAAAGTGAAAACGGAAGCGGCTCGGTTTCGAGTGAACCA  
GTATTCTGAGGCGGAACGGGAAAAGTTGAATTTGATTAATTTAACTTATAAGAGTTTAG  
AAGACTTCGAAAATTACAAAAATGACAGCATTCTGTTTTGAACAACAAAGGGCAATTCA  
TCAAGTCCGGCAACGGGTTTTCCAACAAGCCCTACGAGGAGCTTTGGAAACTCTGAAT  
AGTTGTTTGAACAAGGAATTACATTTACGTACCATTAGTGCTAATATTCGCCTCTTTAGA  
TCGATGAAAGAACTAACTAATATGAATCCACTGATTTCTGCCGCGTCTGTTATTGCTGCT  
GGGTTGGCCGTCGGGCTTGCTTCTATTGGACCTGGGATTGGGCAGGGGACTGCCGCGG  
GCCAAGCTGTAGAAGGTATCGCGAGACAGCCCGAAGCGGAGGGAAAAATACGAGGTA  
CCTTATTACTGAGTCTCGCTTTTATGGAAGCTTTAACAATTTATGGGCTCGTTGTAGCATT  
AGCACTTTTATTTGCGAATCCCTTTGTTATGAATATTCTATCATGTTCTATAAACACATTC

AAGGAGTTATACGATATATCCGGTGTGGAAGTAGGTCAACATTTTTATTGGCAAATAGG  
GGGTTTCCAAGTCCACGGCCAAGTACTTATTACTTCTTGGGTTGTAATTGCGATCTTATT  
AGGTTTCATCCATTCTAGCTGTTTCGAAATCCGCAAACCATTCCGACGGATGTTTCAGAATT  
TCTTCGAATATGTCCTTGAATTCATTCGAGACGTGAGCAAACTCAGATTGGAGAAGAA  
TACGGCCCATGGGTTCCCTTTATTGGAACCTGTTTTCTTTTTATTTTTGTTTTCGAATTGGT  
CGGGGGCTTTTTCCCTTGGAAAATCATAACAGTTACCGCAGGGGGAGTTAGCCGCACC  
TACAAATGATATAAATAACAACCGTTGCTTTAGCCTTACTCACGTCAGTGGCATATTTTTAT  
GCAGGTCTTACTAAAAAAGGATTGGCTTATTTCAATAAATACATAACAACCGACTCCAAT  
CCTTTTACCCATTAACATCTTAGAAGATTTTACAAAACCTTTATCACTTAGTTTTCGACT  
TTTCGGGAATATATTAGCCGATGAATTAGTCGTTGTTGTTCTTCTTTCTTTAGTACCTTTA  
GTGGTTCTTATACCTGTCATGTTCCCTTGGATTATTTACAAGCGGTATTCAAGCTCTTATTT  
TTGCAACTTTAGCTGCGGCTTATATAGGCGAGTCCATGGAGGGTCATCATATGATCTTTT  
TGACTTTAGAGCACATATTAACCCATATATCTTTTTCGGTTGTTTCAATTGTAATTACAAT  
TCATTTGATAAACTTATTGGTCAATGAAATCGTAGGACTATATAATTCGTCAGAAAAAGG  
CATGATAGTGACTTTGTTCTGTATAACAGGATTCTTAATAATTCGTTGGATTATTTCAGGG  
CATTTCCCATTAAGTAATTTATATGAATCCTTAATCTTTCTTTCATGGAATTTCTCCATTAT  
TAATATGCTTCCGTATTTGAAAAACCTTAAAAATCATTAAAGGGAAATAACCTCACCAA  
GCACTCTTTTTATCCAAGGCTTTGCTACTTCGGGTCTTTTAACTCAAATCCATGAACAA  
AAAATATTAGTGCCCGCTCTCCAATCCCAGTGGTTAATGATGCACGTAAGTATGATGATA  
TTGAGCTATGCATCTCTTTTGTGTGGATCATTATTATCAATAGCTCTTCTAGTCATTACAT  
TTCGAAAAAGTCGAAGCGTGGTTGGTAAAAGAAATAATATCCAATACATAAATGAAAG  
AGAG-----ATTAAGACTTCCCTTACCTATTCTATAAATTATTACAGGTCTCACTTGCTTC  
AACAAATTTGATTTTTGGAGTTATCGTATTATTAGTATAGGATTTCTATTTTTAACCATAGG  
GATTTCTTTCGGGAGCAGTATGGGCTAATGAGGCATGGGGGTCATATTGGAGTTGGGACC  
CAAAGGAACTTGGGCGTTTATTACTTGGACGATATTTGCTATTTATTTACATATTCGAG  
AAAAGAAAAACGCAGAAGGTGTAATCGGCAATTGTGGCTTCTATTGGCTTTCTTATA  
ATTTGGATATGTTATTTTGGAAATCAATATATTAGGAATAGGGTTACATAGTTATGGTTCATT  
TCCAATATCTAAAATGAAAAAAGAAACCACCCCTTTCTATATCTTGCATCTATAGT  
CTTTTTACCCCTGGTGGATCTCTCTCTTTTAAAGAAAAGTCTAGAATCTTGGGTTACTAA  
TTGGTTGAATATCAGTCAATCCGAACCTTTTTTGAATGATATTCAAGAAAAAAGTCTTAT  
AGAAAAATTCATAGAATTAGAGGAACTCCTTCTCTTGGACGAAATGATAAAGGAATGC  
CCGAAACTAGATCTACAAAAGTTTCGTATAGGAATCCACAAAGAAACGATCCAATTGAT  
GAATATGTACAATGATGATCGTATCCATACGATTTTGCACCTTCTCGACAAATATAATCTCT  
TTCGTTATTCTAAGTGTGTTGTTCTATTCTGGGTAATGAAGAACTTGTTATTCTTAACTCTT  
GGATTAAGAATTCTTATATAATTTAAGCGACACACTGAAAGCCTTTTGTCTTCTTGCAT  
TAACTGATTTTTTGTTCGGATTCCATACGATCAGTGCTTGGGAATTAATAATTGGCTCCG  
TTGTTACATAAC-----GATCAAATGAGATCTCTTCTTGTGTTGCCTTTTCCCATCCG  
TTTTACATAACATTTATTACTTTTGGACCTTCAATTATTTAAACTGTGTATCCCCGTCACT  
TGTAGTGCTTTATGATTCAGTTGACATGCCAGTGGGTGTTCCATAAAGTACCTTTTCT  
AAATCCAATGAGGAAAAGGCTACTTGGGTTGACTTATATAACCGCCTTTATCGCCAAA  
GATGGCTTTTTTTAGGCAAAGACCTGGAAGAGGAGGTTGCAAATAACATCGTGGGTCT  
TATGATACATCTCAATATAGAAGATCCTTTCTGGACTCAAACCTTGTATATAAACTGTCTT  
GGCGGATTGATAATTCCCAGGCTGGCTCTTTATGATACTATTGGCTTTGTGGAACCAGA  
CGTAAAGACAATATGCCTGGGAATAGCCGCTTCGATGGCATCCGTTGTCCTGGTCCGAG

GAACCGTTACAGAACGTTGCGCATTCCCTAACGCTAGGGTAATGATCCATCAACCTCGT  
GCGAAGGAGTTTGACGACCGTTTTTCGGACCTTAATTTGGAAGGGCATCTATTCTTACA  
ATTGCGCAACTGCGTCACACAAATTTATATCCATAGAACAACAAACCTGCTTGGGTTA  
TAATTGCAGACCTGGAAAGGGATACTTTTATGTCAGCAACAGAAGCGAGGACTTATGG  
A A T T A T T G A T G G G G T A T A T G C T T T  
C????????????????????????????????????????????????????????????  
????????????????????????????????????????????????????????????  
????????????????????????????????????????????????????????????  
????????????????????????????????????????????????????????????  
ATGGAAGAATTTCAAGGATATTT  
AGAACTCGATAGATCGAGGCAACATGATTTTCTATACCCACTTATCTTTCGGGAGTATAT  
TTATGGACTTGCGCATGGTCATGGTTTAGTTGATTATGACAATAAATATAGTTTTCTGATT  
GTGAAACGTTTAATTGCTCGAATGTATCAACAGAACCCTTTCACATTTGCGAAAATGA  
TTCTGCCCTAAATCAATTTATTGGGAAGAATTTGTATTCTCAAATGATATCAGAAGGATT  
TGCAGACATTGTGGAATTTCACTTTTTATACAACTAGTATCTTACTTAACATCAAAATC  
TCTTAATTTACGATCAATTCATTCAATCTTCCCTTTTTAGAGGATGAATGTTCTCATTTA  
AATTATGCGTCAGATATACTAATACCCACCCTACCCATCTGGAAATACTAGTTGAAGTT  
CTTCGTTATTCGGTGAAAGATGCCTCTTTCCTGCATTTTTTAAGGTTCCCTTCTTTACGAG  
TATTGG-----AGTTGGAAGAGTCTTAAAGCGAGTTCATTGTGTCAAAGAAAGATTCT  
TCGTCTTCCCTATATAATTCTCATGTATGTGAATACGAATCTATCCTCCTTTTTCTTCGCAAT  
CAATCTTCTCATTACGATCAACATCTTTTGGAAATCCTTCTTGAGCGAATTTTTTTCTATA  
AAAAAATTGGAGGTCTTGTAGCTATCTTTGGGACTGAGCATATTTTGGCGTTTTTAAAG  
GACCCCTTAATCCATTATGTTAGATACCAAGGAAAATCCATTCTGATTTCAAAGACCG  
GCCCTTTTGATGAATAAATGGAAATATTATCTTGTCAAGTTATGGCAATGTCATTTTTAT  
GTATGGTCTCAACCAGGAAGGATCCACATAAACCAATTATCCCAACATTCCCTACACCT  
TCTAGGCTATCTTTTAAGCGTAGGAACAAATCCTTTGGTAGTACGGAGTCAAGTATTCG  
ACAATTCATTCTAATAGATAAT-----GCTATGAATAAGTTAGAAACAAGAATTCCCCTTT  
TTTCTCTAATTGGATCCTTGACTAAAGCGCAATTTTGTAAATCCGTTAGGGCAGCCCATCA  
GTAAGTCCACTTGGGCCGATTTCATCCGATTCTGATATTATTGACCGATTTGTGCGTATGT  
GCAGAAATCTTTCTCATTATTACAGCGGGTCTTCAAAAAACAGAGTTTGTATCGACTC  
AAATATATACTTCGACTTTCTTGTGTAAACTTTGGCTCGTAAACACAAAAGTACTGTA  
CGTGCTTTTTTGA AAAAATTAGGTTCCGAATTATTGGAAGAATTTATTAAGGAGGAAGA  
ACAAGTCCTTTCTTTGCTCTTTCCAAGACGGATTTGGTATTTTGATATTCTTTGTATCAA  
CGATTTGGCCAATCATGAAATGATAATTGATACACCA---GAAGTACAAGATATCAAT--TC  
TTTTTCCAGATTTCGAATCC---CTACAAGAGATATATGGGATCGTCTGGATGCTTGCCCTA  
TTTTGACCCTTGTAGTGGGAATCACAATAGGTGTATTAGTAATTGTGTGGTTAGAAAGA  
GAAATATCCGCGGGGATACAACAACGTATTGGGCCTGAATACGCGGGTCCTTTCGGAAT  
TCTTCAAGCTCTAGCAGATGGGACAAAACCTGCTTTTGAAAGAGAACCTTCTTCCATCT  
AGAGGGGATAGCCCTTTGTTTCAGTATTGGCCCATCCATGGCAGTCATATCAATTCTTCTA  
AGTTATTAGTAATTCCTTTTAGCTATCGCCTTGTTTTAGCTGATCTAAATGTTGGTGT  
TTTTATGGATTGCCATTTCAAGTATTGCTCCATTGGACTTCTTATGTCAGGATATGGATC  
AAATAATAAATATTCCTTTTTAGGTGGTCTACGAGCTGCCGCTCAATCAATTAGTTATGA  
AATACCATTA ACTCTATGTGTGTGTCAATATCTCTACTTTCTAATAGTTCAAGTACAGTC  
GATATAATTGAGGCACAATCAAAATATGGTTTTTGGGGATGGAATTTGTGGCGTCAACC  
TATAGGGTTTCTTATTTTTCTAATTTCTTCCCTAGCCGAATGCGAAAGATTACCCTTTGAT  
TTACCAGAAGCAGAGGAAGAATTAGTAGCCGGATATCAAACGGAATATTCAGGTATAA

AGTTTGCTTTTTTTTACATTACTTCCTATTTCAATTTATTAGTTTCTTCTTTATTTGTAACA  
ATTCTTTATTTAGGCGGTTGGAATATGTCTATTCATACATAGACTTTCTT---TTATTTGAA  
ATAAATAACGTGGGTGGAATCTTTAGAACAACAACCGAACTTTTTATTACATTAGCTAA  
AACTTTTTTTTTCTTGTATTATTTCTATCACAACAAGATGGACTTTACCTAGGCTAAGAAT  
GGACCAACTCTTAAATCTTGGGTGGAATTTCTTTTACCTATTTCTCTCGGTAATCTATTA  
TTAACAACTTCTTCTCAACTCCTTTCTCTG-----ATTCTCGATTCTACG  
AGAATTTTTATGAAAGCCTTTCATTTGCTTCTCTTCGATGGAAGTTTGATTTTCCCAGAA  
TGTATCCTCATTTTTGGCCTAATTCTTCTTCTGATGATCGATTCAACCTCGGATCAAAAA  
GATATACCTTGGTTCTATTTTCATCTCTTCAACAAGTTTAGTAATGAGCATAACGGCCCTAT  
TGTTCCGATGGAGAGAAGAACCTATGATTAGCTTTTCAGGAAATTTCCAAACGAACCAT  
TTCAACGAAATCTTCAATTTCTTATTTTACTATGTTCAACTCTATCTATTCCTCTATCCGT  
AGAGTACATAGAATGTACAGAAATGGCTATAACAGAGTTTCTGTTATTCATATTAACAGC  
TACTCTAGGAGGAATGTTTTATGCGGTGCTAACGATTTCAACTATCTTTGTAGCTCC  
AGAATGTTTCAGTTTATGCTCCTACCTATTATCTGGATATACCAAGAAAGATGTACGGTC  
TAATGAGGCTACTATGAAATATTTACTCATGGGTGGGGCAAGCTCTTCTATTCTGGTTCA  
TGCTTTCTCTTGGCTATATGGTTCATCCGGGGGAGAGATCGAGCTTCAAGAAATAGTGA  
ATGGTCTTATCAATACACAAATGTATAACTCCCCAGGAATTTCAATTGCGCTTATATTCAT  
CACTGTGGGAATTGGATTCAAGCTTTCCCCAGCCCCTTCTCATCAATGGACTCCTGACG  
TATACGAAGGATCTCCCACTCCAGTCGTTGCTTTTCTTTCTGTTACTTCGAAAGTAGCTG  
CTTCAGCTTCAGCCACTCGAATTTTCGATATTCCTTTTTATTCTCATCAAACGAATGGC  
ATCTTCTTCTGGAAATCCTAGCTATTCTTAGCATGATATTGGGGAATCTCATTGCTATTAC  
TCAAACAAGCATGAAACGTATGCTTGCATATTCGTCCATAGGTCAAATCGGATATGTAAT  
TATTGGAATAATTGTTGGAGACTCAAATGGTGGATATGCGAGCATGATAACTTATATGCT  
CTTCTATATCTCCATGAACCTAGGAACTTTTGCTTGCATTGTCTTATTTGGTCTACGTACC  
GGAAGTATAACATTTCGAGATTATGCAGGATTATACACAAAAGACCCTTTTTTGGCTCT  
CTCTTTAGCCCTATGTCTCTTATCCCTAGGAGGTCTTCCCCACTAGCAGGTTTTTTTCGG  
AAAACCTCCACTTATTCTGGTGTGGATGGCAGGCAGGCCTATCTTCTTGGTTTCAATAG  
GACTCCTTACGAGCGTTCTTTCTATCTACTATTATCTCAAATAATCAAGTTATTAATGAC  
TGGACGAAACCAAGAAATAACCCCTCACGTGCGAAATTATAAAGATCCCCTTTAAGA  
TCCAAAATTCATCGAATTGAGTATGATTGTATGTGTTATAGCATCTACTATAACCAGGA  
ATATCAATGAACCCGATTATTGCAATTGCTCAGGATACCCTTTTTATGTTTCTGCTTTACG  
AATATGATCTTTTCTGGGTCTTTCTAATAATATCAAGTCTTATTCCTATTTTGGCATTCTA  
ATTTCCGGCGTTTTAGCCCCAATTAGCGAAGGGCCGGAAAAACTTTCGAGTTATGAATC  
GGGTATAGAACCAATGGGCGATGCTTGGTTACAATTTAGAATACGTTATTATATATTTGCT  
CTAGTTTTTGTGTTTTTGGATGTTGAAACGGTTTTTCTTTATCCATGGGCAATGAGTTTC  
GACGTATTGGGGGTATCCGTATTTATAGAAGCTTTGGTTTTTCGTGCTTATCCTAATTGTTG  
GTTACGTTTATGCATGGCGAAAGGGAGCATTGGAATGGTCTACGAATGATTTTCCCTTGG  
TTAACACTAATTGTTATTTTTCCGATCTCAGCGGGTCTTTTCTTTTCTTCTCCCCATA  
GAGGAAATAAGGTAACATAATGGTATACTTTGTGCGTATGTTCACTAGAACTCCTTCTA  
ACGACCTATACATTCTGTTATCATTTCCAATTGGACGATCCATTAATCCAACCTTGTGGAG  
GATTCTAAATGGATCTTTTTTTTTTCAATTTGACTGGAGATTGGGAATAGATGGACTCTCC  
TTCGGACCCATTTTACTGACGGGATTATCACCACTTTGGCTACTTTAGCGGCTTGGCCC  
GTTACTCGAGATTCCCATTATTCATTTTCATGATGTTAGCAATGTACAGTGGTCAAATA  
GGATCATTTTCTTCTCAGGATCTTTTGGCTTTTTTTCATGATGTGGGAGCTCGAGTTAAT

CCCGTTTATTACTTTTTATCCATGTGGGGGGGAAAGAAACGCCTGTATTACAGCTACAAA  
GTTTATTTTGTACTGCAGGAAGCTCGATCTTTTTATTAATAGGCGTTCTAGGTATCGG  
GTTATACGGTCCAACGAGCCAACATTCAATTTGAAATATCAGCTCATAGATCGTATCC  
TGCGGCACTAGAAATAATATCTATATCGGCTTTCTTATTGCTTTTGCTGTCAAATCACCG  
ATTATACCCTTACATACATGGTTACCAGACACTCATGGAGAGGCCATTACAGTACTTGT  
ATGCTTCTCGCCGGAATCTTATTAATAATGGGAGCTTATGGATTAGTTCCGGATCAATATG  
GAATTATTGCCCATGCGCATTCTATATTTGCCCCCTACTTGATTATAGTAGGTGCAATCC  
AAATAGTTTATGCAGCTTCAACATCTCTTGGTCAACGTAATTTAAAAAAAAGAATAGCC  
TACTCATCTGTATCTCATATGGGTTTCATAATTATAGGAATTGGCTCTATAACGGATGCAG  
GACTCAGCGGAGCTCTTTTACAAATAATATCTCATGGATTTATTGGTGTCTGCTCTTTTTT  
TCTTGGCAGGGACTAGTTATGATAGAATACGTCTTGGTTTTTTTCGACGAAATGGGTGGA  
ATGGCCGTCGCCATTCCGAAAATCTTTACCATGTTCAAGTATCTTATCCATGGCCTCCCTT  
GCATTACCGGGCATGAGTGGTTTTGTTGCAGAATTGATAGTCTTTTTTGGGAATAATTACC  
AGCCAAAATTTCTTTTAATGCCAAAATACTAATTACTTTTGTAAATGGCAATTGGAATG  
ATATTAECTCCGATTTATTCATCTATGTTACGCCAGATGTTCTATGGTTACAGGCTTT  
TTAATGCCCAAACCCCTCTTTTTTTGATTTCTGGTCCCTCGAGAGTTATTTGTTTCTATTT  
TATCCTTTTACCGTAATAGGTATGGGTATTTATCCCGATTTCTTCTCTCATTATCGGTTG  
ACAAGGTTGAATTGATTGTATCTCAATTTTTTTATAGAATGATACTGGAACATGTCCTTG  
TTTTGAGTTCTTTTTTATTTTCTATTGGTATCTATGGATTGATCACGAGTCGGAATATGATT  
AGGGCTCTTATGTCTCTTGAACCTATGCTGAATGGGGTTAATCTCAATTTTCGTAACATTT  
TCTGATTTTTTTGATAGTCGCCAACTAAAAGGTGACATTTTCTCCATTTTTGTTATAGCC  
ATTGCAGCCGCTGAAGCCGCTATTGGACCGGCTATTCTGTCTCAATTTATCGTAACAA  
AAAATCAATTCGTATTAATCAATCAATTTATTGAATAAGATGGAACATATATCAATAT  
TCATGGATTATGCCGTTCAATCCACTTCCCCTTCTATGTTAATAGGAGTTGGACTTCTA  
CTTTTTCCAACGACAACAAAACATCTTCGGCGTATATGGGCCTTTCTACTCTTTTTTTG  
TTAGGTCTAGTTATGCTTCTTTTCGGCCTATTTCTTTATTTCAACTAAATAAAAGTTATA  
TCTATCAATATGTCTGGTCTTGGACCATCAATAATGATTTTTCTTTAGAGTTTGGTCATTT  
GGTAGATCCACTTACTTCTATCATGTCAATTTAATTACTACGGTTGGGATTACCGTTCTT  
ATTTATAGTGAGAAATATATGTTTCATGATCAAGGATATTTAAGATTTTTTTCTTATATGAC  
CCTTTTTCATGTTTCAATGTTGGGATTAGTGACTAGTTCCAATTTGATACAAATTTATATT  
TGTTGGGAATTCGTTGGAATGTTTTCTTACCTATTAATAGGCTTTTGGTTTACACGACCG  
GTTGCCGCGAATGCCTGTCAAAAAGCATTGTAACTAATCGTGTAGGGGATTTCAAGTTT  
CTTATTAGGAATCTGGGTCTTTATTGGATAACGGGAAGTTTTGAATTTAGAGATTTGTT  
CGAAATCTTTTATAAC---GAAATTCCTTTTTTCTTTTTGACTCTGTGTGCCTTCTTATTATT  
TGGGGGCGCACTTGCTAAATCCGCGCAATTTCCCCTTCATGTATGGTTACCTGATGCCAT  
GGAAGGACCTACTCCTATTTAGCTCTTATCCATGCTGCTACTATGGTAGCCGCAGGAAT  
TTTTCTTGTAGCTCGTCTTCTTCTCTTTTTCATAGTTATGCCTTACATACTGAATCTAATAT  
CTTTCATAGGTATAATCACAGTCTTTTTTAGGAGCTACTTTAGCTCTTTCTCAAAAAGGATA  
TTAAAAGGGGCTTAGCTTATTCTACAATGTCTCAATTGGGTTATATGATGTTAGCTCTAG  
GCATGGGGTCTTATCGAGCCGCTTTATTTCAATTTGATTACTCACGCTTATTCGAAAGCGT  
TGCTCTTTTTTAGGAGCTGGATCCATAATTCATTCATGGAAGCTTTTGTGGTTATTCTC  
CAGAAAAAGTCAGAATATGGTTCTTATGGGCGGTTTAATAAACATATGCCAATTACA  
AAAATTCCTTTTTTATAGGTACACTTTCTCTTTGTGGTATTCCACCTCTTGCTTGTTTTT  
GGTCCAAAGATTCCATTCTAATGATAGTTGGTTGTATTACCGATTTTCGCAATAATAG

CTTGTTCCACTACAGGATTCACTGCATTTTATATGTTTCGGATCTATTTACTTACTTTTGA  
AGGACACTTAAACGTTCAATTTAGAAATTATAGTGGAAAAAGAAGTAATTCCTTCTATT  
CAATATCTTTATGGGGTAACGAA---GGACCAAAAACGCTTCAAAAATTCAAAACCTTTAT  
TAACAATGAATTTTTTTTGTGAGGCTAAGAAT---ACTCTGCCGTATCCCATGAATCCGA  
CAATACTATGCTATTCCCTATGGTTCTATTGGTTCTATTTACTTTATTTGTTGGAGCCATCG  
GA-----TTCAATTTGGATATATTGTCGAAATTCTTAACCCCATCAATAAACCTTTTACACG  
AAAAGTCAAAT--TCTGTGGATTGG---GAATTTATACCAAATGCAACTTTGTCAGTTAGT  
CTATCTTATTTTGGAAATAGTTATAGCCTCTGTTTTATATAAGCCTAATTATTTATCTTTAAC  
AAAATTGAACTTACTGAATCTCTTTGTTATTTTTGGGGACAGAATAAGAAATCGGATATA  
TGATTGGTCGTATAATCGTGGTTACATAGACACTTTTTACGCAATATCCTTAGCTAGGGG  
TCTAAGAGGATTCGCTGAATTCACTCATTTTTTTGATGCGCGAGTTATTGATGGAATTAC  
GAACGGGATGGGTATTTTGAGTTTTTTTTTAGGCGAAGGCATCAAATGTGTAGGGGGCG  
GT--CGCCTTCTCTTATCTTTTATTGTATTTTGATTGTGTATTGCTTTTTTTATTCAATTC  
TTCCATGGATTTGCCCGGACCAATACAGATTTTCTTTTAGTTTTTCTGGGATCAGGTAT  
TATATTAGGGGGTCTAGGGGTCGTATTACTTACCAACCAATTTATTCTGCCTTTTCTTTG  
GGATTTGTTTTTATTTGTATATCTTTATTTTATATTCTATCAAACCTCCTATTTTGTAGCTGCT  
GCACAGCTCCTTATTTATGTAGGAGCTATAAATGTTTTAATACTATTTGCTGTGATGTTCA  
TGAATGGTTCAGAATATTACAAAGATTTTCATCTTTGGACTCTTGGGGATGGGCTTACTT  
CACTAATTTGTACAATCTTTTTCTTCACTAATTACTACTATTCTAGATACATCATGGTAT  
GGTATTCTTTGGACTACAAAATCAAACCAGATTATAGAGAAAGATTTTATAAGTAATAGT  
CAACAACCTTGGAAATCTTTTATCAACAGATTTTTTTCTTCCATTTGAACTCATGTCTATAA  
TTCTTTTAGTTGCTTTGCTAGGTGCAATTGCTGCGGCTCGTCAGATGACTATAACCAGCTA  
CAAGAAAAGACCTCATGATAGTCAATATGGGCCCTCACCAACCATCAATGCACGGTGTT  
CTTCGGCTCATCTTACTCTAGATGGTGAAGATGTTATCGACTGTGAACCCGTATTGGGT  
TATTTACACAGAGGGATGGAAAAAATTGCCGAAAATCGAACTATTATACAATATCTGCC  
TTATGTAAACACGTTGGGATTATTTGGCTACTATGTTACAGAAAGTAATAACTGTAAATGC  
CCCAGAGCAATTGGGAAATATTCAAGTACCTAAAAGGGCTGGCTATATCAGAACAATTA  
TGCTGGAATTAAGTCGTATAGCTTCTCATCTATTATGGCTTGGACCCTTTATGGCCGATAT  
TGGCGCACAAACCCCTTTTTTTTATATTTTTCAGAGAAAGAGAATTAATATATGATCTGTT  
TGAAGCAGCCACCGGTATGAGAATGATGCATAATTATTTTCGTATCGGAGGAGTTGCAG  
CCGATCTACCTCATGGCTGGATAGATAAATGCTTGGATTTCTGTAATTATTTTTTAAACAG  
GACTTGCTGAATATGAAAAGCTTATTACGCGGAATCCTATTTTTTTAGAGCGAGTAGAG  
GGAATAGGCATTATTGGTAAAGAAGAAGCAATAAGTTGGGGTTTATCAGGACCAATGCT  
ACGAGCTTCCGGAATGCAATGGGATCTTCGTAAAATCGATAATTCTGAATGTTACAAA  
AATTCGATTGGGAGGTTTCAGTGGCAAAAAGAAGGAGATTCATTAGCTCGCTATTTAGTC  
CGAATCGGTGAAATGAGGGAATCCATAAAAATGATTCAACAGGCTCTGGAAGGAATTC  
CGGGAGGTCCTTATGAGAATTTAGAAATTCGATGTTTTGATAGAGAAAGGTATCCAGAA  
TGGGGCGTTTTTGAATATCGATTCATTAGTAAAAAACCTTCTCCTACTTTTGAATTGCCG  
AAACAAGAACTTTATGTGAGAGTTGAAGCCCCAAAAGGAGAATTGGGAGTTTTTCTGA  
TAGGAGATCGGAGCAGCTTTTCTTGGAGATGGAAAATACGTCCACCGGGTTTTATGAAT  
TTGCAAATCTTCTCAGTTAGTTAAAAGAATGAAATTTGGCTGATATTATGACAATACTA  
GGTAGCATAGATATCATTATGGGAGAAGTTGATCGTATGTTCCCTATGGTAACTGGATTC  
ATGAATTATGGTCAACAAACCGTACGAGCCGCAAGGTACATTGGTCAAAGTTTGATTAT  
TACCTTATCCCACTCAAATCGTTTTCCCTGTAACCTATTCAATATCCCTATGAAAAATTAATG

ACATCGGAGCGTTTTTCGCGGTCGAATTCATTTTGAATTTGATAAATGCATTGCGTGTGA  
AGTATGTGTTTCGTGTATGCCCCGATAGATCTACCTGTTGTTGATTGGAAATTTGAAAGGGA  
TATTCGAAAGAAACGCTTACTTAATTACAGTATTGATTTTGGAAATTTGTATATTTTGTGGT  
AATTGCGTTGAGTATTGTCCAACAAATTGTTTATCGATGACCGAAGAATATGAACTTTC  
AACCTATGATCGTACGAATTGAATTATAATCAAACCTGCTCTGGGTCGTTTACCAATGCC  
AGTAATTGATGATTATACAATTCGAACCATTTTAATTTA-----  
-----ATGCAGGGTCCTTTGTCTGCTTGGCTAGTCAAACGTAGGCTAGTTCATAGATCGTT  
GGGTTTTCGATTATCAAGGAATAGAGACTTTAGAAATAAAGTCCGAGGATTGGCATTCCG  
TTGCTGTCATTTTATATGTATATGGTTACAACCTATCTACGTTTCGCAATGTGCTTATGATGT  
AGCACCAGGCGGACTCTTGGCTAGTGTATAACCATTTTACGAGAATTGAATATGGCATAG  
ATCAACCGGAAGAGGTATGCATAAAAGTCTTTCTTGCAAGGAGTAATCCTAGAATTCG  
TCGATTTTCTGGGTTTGGAAAAGTGCAGATTTTCAAGAAAGGGAATCTTATGATATGTT  
GGGAATCTCTTATGATAATCATCCGCGACTGAAACGTATTTAATGCCTGAAAGTTGGAT  
AGGATGGCCCTTACGTAAGGATTATATTGCTCCCAATTTTATGAAATACAAGATGCTCA  
T-----  
-----ATGAATTCCGTCGAGTTTCCCTTACTTG  
ATCGAAGAACCAAAAATTCAGTGATTTCAACTACATCAAACGATCTTTCAAATTGGTCA  
AGGCTCTCCAGTCTATGGCCACTTCTTTATGGTACGAGCTGTTGTTTCATTGAATTTGCT  
TCATTAATAGGCTCACGATTTGACTTTGATCGTTATGGACTCGTACCAAGATCAAGTCCT  
AGACAGGCGGACCTTGTATTAACAGCTGGTACAGTAACAATGAAAATGGCTCCCTCTTT  
AGTGAGATTATATGAACAAATGCCCGAACCAAAATATGTTATTGCTATGGGAGCCTGTA  
CAATTACAGGAGGAATGTTTCAGTACAGATTCTTATAGTACTGTTTCGGGGAGTTGATAAG  
CTAATTCCTGTAGATGTTTATTTGCCGGGTTGTCCGCCTAAGCCAGAGGCAGTTATAGAT  
GCTATAACAAAATTCGTAAGAAGATATCTAGAGAAATCTATGAAGATCGAGTTAGGTC  
T-----GTTAATCGCTATTTTACTACCAATCACAAGTTTCTTATTGGACGCAGTATTCATATC  
GGAAATTCGATAAAGGATTCTTATACCAACCACCAGCTACTTCAAACCTACCGGCTGA  
AAAATTTTCAAATACAAAAGTTCAGCACCTTACACGAATTAGTGAATATGCAAACCTA  
GAAAGACCCTCTCTTGGATAAAGGAAGAGATTACTCGATCCATTTCCCTATCGCTAATG  
CTATCTATAATAACTCATGCATCCCTTCAAATGCATATCCCATTTTTCGCGCAGCAAGGTT  
ATGAAAATCCGCGAGAAGCGACTGGGCGTATTGTATGTGCGAATTGCCATTTAGCCAAT  
AAGCCTGTGGATATTGAGGTTCCACAAACGGTACTTCCCTGATACTGTATTTGAAGCAGT  
TGTTTCGAATTCCTTATGATATGCAAATTAACAAGTTCTTGCTAATGGTAAAAAAGGGG  
CTTTAAATGTAGGAGCTGTTCTTATTTTACCCGAGGGGTTTGAATTAGCCCCCTCCTGATC  
GTATTTGCCCCGAGATGAAAGAAAAGATAGGCAATCTTCTTTTTCAGAGCTATCGCCCC  
ACTCAAAAAAATATTCTTGTGATAGGTCCTGTTCTGTTCAAAAAATATAGTGAAATCGC  
CTTTCCTATTCTTTCGCCGAACCCCGAGACTAATAAGGATGTTTCATTTCTTAAATATCC  
CATATATGTAGGCGGGAACAGGGGAAGGGGTCAGATTTATCCTGACGGGAGCAAGAGT  
AACAAATACAGTTTCTAATGCTACAGCAGCGGGTATAGTAAGCAAAATCATAACGAAAAG  
AGAGGGGGGGCTACGAAATAACCATAGCGGATGCATCGAACGGACGTCAAGTGGTTGA  
TATTATCCCTCCAGGACCGGAACTTCTTGTTCGGAGGGCGAGTCTCTCAAAGTGGATC  
AACCATTAACAAGTAATCCTAATGTGGGTGGATTTGGTCAGGGGGATGCAGAAATAGTA  
CTTCAAGATCCATTACGTGTCCAAGGCCTTTTGTCTTCTTGACATCTGTTCTTTTGGCA  
CAAATCTTTTGGTTCTTAAAAAGAAACAGTTTGGAGAAAGTTCAATTATCCGAAATGAA  
TTTCATGAGTAAAGTATATGATTGGTTCGAAGAACGTCTCGAGATTCAGGCGATTGCGG



ACGATATAACTAGTAAGTACGTTCCCCCTCATGTCAACATATTTTATTGTCTGGGAGGAA  
TTACGCTTACTTGTTTTTTAGTACAAGTAGCTACCGGATTTGCTATGACGTTTTACTACC  
GCCCTACTGTTACTGAGGCTTTTGTCTCTGTTCAATACATAATGACTGAAGCCAACTTT  
GGGTGGTTAATCCGATCAGTCCATCGATGGTCGGCAAGTATGATGGTTCTAATGATGATC  
TTGCACGTATTTCTGTGTATCTTACCGGTGGTTTTAAAAACCTCGGGAATTGACTTG  
GGTACAGGTGTGGTTTTGGCTGTATTGACTGCATCCTTTGGTGTAACCTGGTTATTCCTT  
ACCTCGGGACCAAATTGGTTATTGGGCAGTCAAATTTGTAACAGGCGTACCGGACGCT  
ATTCCTGTAATAGGATCGCCTTTGGTAGAGTTATTGCGCGGAAGTGCTAGCGTGGGACA  
ATCCACTTTGACGCGTTTTTATAGTTTACACACTTTTGTATTACCCCTTGTTAGCGCTGTA  
TTTATGTTAATCCATTTCTAATGATACGTAAGCAAGGGATTTCTGGCCCTTAATGGGA  
GTAACAAAAAAACCCGACTTGAATGATCCTGTATTAAGAGCTAAATTGGCTAAAGGAA  
TGGGCCATAATTATTACGGAGAACCCGCGTGGCCCAATGACCTTTTATATATTTTTCCCG  
TAGTCATTCTAGGTAATTTGCATGTAACGGAGGCTTAGCGGTTCTAGAACCATCAATGA  
TTGGTGAACCCGCTGACCCATTTGCAACTCCTTTGGAAATCTTACCTGAATGGTATTTCT  
TTCCCGTATTTCAAATACTTCTGTACAGTACCCAATAAGTTATTGGGTGTTCTTTAATGG  
TTTCAGTACCTGCGGGATTATTAACAGTACCCTTTTTAGAAAACGTTAATAAATTCCAAA  
ATCCCTTTCTGTCGGCCAGTAGCCACAACCGTCTTTTTGGTTGGTACTTTAGTGGCCCTT  
TGGTTGGGTATTGGAGCAACATTACCTATTGAGAAATCCCTCACTTTAGGTCTTTTTATG  
ATTGAAGTTTTTCTATTTGGAATCGTTTTGGGTCTAATTCCTATTACTTTGGCTGGATTAT  
TTGTAACCTGCATATTTACAATACAAACGCGGTGATCGGTTGGGCCTTATGTTGACTATAA  
CTAGTTATTTCTGTTTTCTACTCGTCGTTTTAACTATAACCTCAGCTCTATTTATTGGTCT  
GAGCAAGATACGACTTATTATGGATATAGTAAGTCTCGCGTGGGCTGCTTTAATGGTAGT  
CTTTACATTTCCCTTTCACTGGTAGTATGGGGAAGAAGTGGACTTATGATTATTCGTTCT  
GTCGGAACCAGAAGTCAAATTTTGGTAGATAGGGATCCTATAAAAACGTTCTTTGAG  
GAGTGGGCTAGACCGGGTCATTTCTCAAGAACAATAGCCAAGGGCCTGATACTACCA  
CTTGGATCTGGAACCTACATGCTGATGCTCACGATTTGATAGCCATACCAGCGATTTG  
GAGGAGATCTCTCGAAAAGTCTTTAGTGCCCATTTGCGCCAACCTCTCGATCATCTTTCT  
TTGGCTGAGTGGCATGTATTTCCATGGTGCTCGTTTTTCCAATTATGAAGCCTGGCTAAG  
TGATCCTACTCACATTGGACCTAGCGCTCAGGTGGTTTGGCCAATAGTAGGCCAAGAAA  
TATTGAATGGTGTATGTTGGGTGGGGTTTTTCGAGGAATACAAATAACCTCTGGGTTTTTT  
CAGATTTGGCGAGCATCTGGAATAACTAGTGAATTACAACCTCTATTGTACCGCAATTGG  
TGCATTGGTCTTTGCAGCCTTAATGCTTTTTGCTGGTTGGTTCCATTATCACAAAGCTGC  
TCCCAAATTGGCTTGGTTCCAAGATGTAGAATCTATGTTGAATCACCATTTAGCAGGGC  
TACTAGGTCTTGGGTCTCTTTCTTGGGCGGGGCATCAAGTCCATGTCTCTTTACCAATTA  
ACCAATTTCTAAACGCTGGAGTAGATCCTAAAGAAATCCCACTTCCTCATGAATTTATCT  
TGAATCGGGATCTTTTGGCTCAACTTTATCCTAGTTTTTCCGAGGGAGCAACCCCCCTC  
TTTACCTTGAATTGGTCAAATATGCGGAATTTCTGACTTTTCGTGGAGGATTAGATCCA  
GTAACAGGCGGTCTCTGGCTGACCGATATTGCACACCATCATTTAGCTATTGCAATTCCT  
TTTCTGATAGCAGGTACATGTATAGGACCAACTGGGGCATTGGCCATGATCTAAAAGA  
GATTTTAGAAGCCATAAAGGACCCTTTACAGGCCAGGGCCATAAAGGTCTATATGAGA  
TTCTAACAAACGTCATGGCATGCTCAATTATCCCTTAACTTAGCTATGTTAGGCTCTTTAA  
CCATTGTTGTAGCTCACCATATGTATTCCATGCCCCCTTATCCATATCTAGCTACTGATTAT  
GGTACACAACCTGTCGTTGTTACACACCACATGTGGATTGGCGCATTTCTCATAGTTGG  
CGCTGCTGCGCATGCAGCCATTTTTATGGTACGAGACTATGATCCAACCTACTCGATACA

ACGATCTATTAGACCGTGTCCCTTAGGCATCGCGATGCAATCATATCACACCTCAACTGG  
GTATGTATCTTTTTAGGCTTTCACAGTTTTGGTTTTGTATATCATAATGATAACCATGAGCG  
CTTTGGGGCGTCCCAAGATATGTTTTACAGATACTGCTATCCAATTACAACCTGTCTTTG  
CTCAATGGATACAAAAACACCCACGCTTTAGCACCTGGTTCAACAGCCCCCGGTGCAAC  
AACAGGTACCAGTTTGACTTGGGGAGGGGTTGATTTAGTGGCAGTGGGTGGCAAGGTT  
GCTTTGTTACCTATTCCATTAGGAACCGCAGATTTTTTGGTACATCATATTCATGCATTA  
CGATTCATGTGACCCTATTGATACTTCTCAAAGGCGTTCTATTTGCTCGTAGTTCTCGTT  
TGATAACCGGATAAAGCAAATCTTGATTCCGTTTCCCTTGTGATGGGCCTGGAAGAGGG  
GGGACATGCCAAGTATCCGCTTGGGATCATGTCTTCTTAGGTCTTTTTTGGATGTACAAT  
GCTATTTCCGGTAGTAATCTTCCATTTAGTTGAAAATGCAGTCAGATGTTTGGGGTAGT  
ATAAGTGAGCAAGGGGTGGTAACTCATATTACGGGAGGGAACTTTGCGCAGAGTTCCA  
TTACTATTAATGGGTGGCTCCGTGATTTCTTATGGGCACAGGCATCCCAGGTCATTCAGT  
CTTATGGTTCTTCATTATCTGCATATGGCCTTTTTTTTCCCTAGGTGCTCATTTTGTATGGC  
TTTTAGTTAATGTTTCTATTAGCGGGCGTGGTTATTGGCAAGAAGTGAATCCAT  
TGTTTGGGCTCATAATAAATTAAGTTGCTCCTGCTACTCAGCCTAGAGCCTTGAGCA  
TTGTACAAGGACGTGCTGTAGGAGTAACCCATTACCTTCTGGGTGGAATTGCCACAAC  
ATGGGCGTCTTCTTAGCAAGAATTATTGCAGTAGGAATGGCATTAAAGATTTCCAAGGT  
TTAGCCAAGGCTTAGCCCAGGACCCCACTCGTCGTATTTGGTTTGGTATTGCTACC  
GCGCATGACTTCGAGAGTCATGATGATTAATCTGAAGAACGCCTTTATCAGAATATTTTT  
GCTTCTCACTTCGGGCAATTAGCAATAATCTTCTGTGGACTTCGGGAAATCTCTTTCAT  
GTAGCTTGGCAAGGAAATTTGAGGCATGGGTACAGGACCCTTTACACGTAAGACCTA  
TTGCTCATGCAATTTGGGATCCTCATTTTGGTCAACCAGCTGTAGAAGCTTTTACTCGG  
GGGGGTGCTCTTGGCCAGTGAATATCGCCTATTCTGGCGTTTATCAGTGGTGGTATAC  
AATTGGTTTACGTACTAATGAGGATCTTTATACTGGAGCTCTTTTTCTATTATTTCTATCT  
GCCATATCCTTAATCGCAGGTTGGTTACACTTACAACCGAAATGGAAACCCAGCGTTTC  
GTGGTTCAAAAATGCCGAATCTCGTCTCAATCATCATTTGTCAGGGCTCTTCGGAGTAA  
GCTCTTTGGCTTGGACAGGACATTTAGTCCATGTGCTATTCTGCATCCAGGGGGGAA  
TATGTTGCTGGAATAATTTCTTAGATGTATTACCGCATCCTCGGGGATTAGGCCCACTT  
TTTACAGGTCAGTGAATCTTTATGCTCAAAACCCAGACTCAAATAGTCATTTTTTTGGT  
ACCTCTCAAGGATCAGGAACTGCCATTCTAACCTTCTTGGGGGATTCCATCCACAAAC  
GCAAAGTTTATGGCTGACTGATATTGCTCATCATCATTTAGCTATTGCTTTTCTTTTCTT  
GTTGCTGGTCATATGTATAGAATACTTTGGGATTGGACACAGTATAAAAGATCTTTTA  
GAAGCCCATATTCCTCCGGGGGGGCGATTAGGGCGCGGACATAAGGGTCTTTATGACA  
CAATCAATAATTCAATTCATTTTCAATTAGGCCTTGTCTAGCCTCTTTAGGGGTTATTAC  
TTCCTTGGTAGCTCAACACATGTATTCTTACCTGCTTATGCGTTCATCGCACAAAGACTT  
TACGACTCAAGCCGCTTATATACCCATCACCAATATATCGCAGGATTCATCATGACAGG  
AGCTTTTGTCTCATGGAGCTATCTTTTTTATTAGAGATTACAATCCGGAACAGAATGAGG  
ATAATGTCTTGGCAAGAATGTTAGACCATAAAGAAGCTATCATATCTCATTTAAGTTGGG  
TCAGCCTTTTTCTCGGGTTCCATACTTTGGGACTTTATGTTTATAATGATGTCATGCTTGC  
TTTTGGGACTCCGGAGAAACAAATCTTGATCGAACCCATATTTGCCCAATGGATACAAT  
CTGCTCATGGTAAACTTCATACGGGTTGACGTAATTTTATCTTCAACGAATAGCCCA  
GCATTCATTGCTGGTCAAGCATATGGTTGCCCGGGTGGTTAAATGCTATTAATGAA-----  
-AATAGTAATTCATATTCTTAAAAATAGGGCCGGGAGACTTCTTGGTCCATCACGCTAT  
TGCTCTAGGTTTACATACAACTACATTGATCTTAGTAAAAGGTGCCTTAGATGCACGTG

GTTCCAAGTTAATGCCAGATAAAAAGGATTTTGGGTATAGTTTTCTTGCGATGGTCCA  
GGACGGGGTGGTACTTGTGATATTTCCGCTTGGGACGCCTTTTATTTAGCAGTTTTCTG  
GATGTTAAATACCATTGGATGGGTTACTTTTTACTGGCATTGGAAGCATATTACATTATGG  
CAGGGTAAACGTTTCACAGTTTAATGAATCTTCCACTTATTTGATGGGATGGTAAAGAGA  
TTATCTATGGTTAAACTCTTCGCAACTTATCAATGGGTATAACCCCTTTGGTATGAATAGT  
TTATCCGTTTTGGGCGTGGATGTTCTTATTTGGACATCTTGTTTGGGCTACCGGATTTATG  
TTCTTAATTTCTGGCGTGGATATTGGCAGGAATTAATTGAAACTTTAGCATGGGCTCAT  
GAACGCACGCCTTTGGCCAATTTGATTGCGATGGAGAGATAAACAGTGGCTCTTTCTAT  
TGTGCAAGCAAGATTGGTTGGATTAGCCCACTTTTCCGTAGGTTATATATCACTTATGC  
GGCTTTCTTGATTGCTTCTACATCGGGCAAATTCGGTATGTCACACTCAGTAAAAATTA  
TGATACATGTATAGGGTGTACTCAATGTGTTAGAGCTTGCCCCACGGATGTATTAGAAAT  
GATACCTTGGGACGGATGTAAAGCTAAGCAAATCGCTTCAGCTCCAAGAACAGAGGAT  
TGTGTCCGGTGTAAAGAGATGTGAATCCGCCTGTCCAACGGATTTCTTAAGTGTTCGGGT  
TTATTTATGGCACGAAACAACCTCGAAGTATGGGTCTAGCTTATATGACAACTCTCAACT  
ACCCTCCATTTTAGTGACTTTAGTAGGCCTAGTATTTCCGGCATTGCAATGGCTTCTTT  
ATTTCTTCATGTTCAAAAAACAAGATTTTGATGCGAGATCTAAAAACATACCTCTCCG  
CGGCGCCGGTACTAAGTACTATATGGTTCGGGGCTTTAGCAGGTCTATTGATAGAGATTA  
ATCGTTTCTTTCCGGATGCGTTAACATCCCCTTTTTTTTCATTCATGACTGCAATTTTAGA  
GAGACGCGAAAGCGAAAGCCTATGGGGTCGTTTCTGTAACCTGGATAACTAGCACCGAA  
AACCGTCTTTATATTGGCTGGTTTGGTGTTTTGGATGATTCTACCTTATTGACCGCAACT  
TCCGTATTTATTATCGCCTTCATTGCTGCCCTCCGGTGGATATTGATGGTATTCGTGAAC  
CTGTTTCTGGATCTCTACTTTATGGAAACAATATTATCTCGGGTGCCATTATCCTACTTC  
TGCAGCGATAGGTTTGCATTTTACCCAATATGGGAAGCGGCGTCTGTTGACGAATGGT  
TATACAATGGCGGTCCGTATGAGTTAATTGTTCTACACTTCCTACTTGGTGTAGCTTGT  
ACATGGGCCGCGAGTGGGAACCTAAGTTTTCTGCTGGGTATGCGACCTTGGATTGCTGTT  
GCATATTCAGCTCCTGTTGCAGCTGCTACCGCTGTTTTCTTGATCTATCCAATTGGTCAA  
GGAAGTTTTTCTGATGGTATGCCTCTAGGAATCTCTGGTACTTTCAACTTCATGATTGTA  
TTCCAGGCCGAGACAATATCCTTATGCACCCATTTACATGTTAGGCGTAGCTGGCGTA  
TTCGGCGGCTCCCTATTAGTGCTATGCATGGTTCCTTGGTAACCTCTAGTTTGATCAGG  
GAAACCACAGAAAACGAATCCGCTAATGAAGGTTATAGATTCCGGCCAAGAGGAAGAA  
ACTTATAATATCGTGGCTGCTCATGGTTATTTTGGCCGACTGATCTTCCAATATGCTAGTT  
TTAACAACCTCCCGTTCTTTACATTTCTTCTTGGCTGCTTGGCCTGTAGTAGGTATCTGGT  
TTACCGCTTTAGGTATCAGCACTATGGCTTTCAACCTAAACGGTTTTCAATTTCAACCAAT  
CCGTAGTTGATAGTCAAGGTCGTGTAATTAATACCTGGGCTGATATTATTAACCGTGCTA  
ACCTTGGTATGGAAGTTATGCATGAACGTAATGCTCATAACTTCCCTCTAGACCTAGCTG  
CTGTGCAAGCCCCATCTACAAATGGAATGGGTTTGCCTTGGTATCGTGTTCATACCGTT  
GTATTGAATGATCCCGGCCGTTTGTCTTCTGTCCATATAATGCATACAGCGCTAGTTGCT  
GGTTGGGCCGGCTCGATGGCTTTATATGAATTGGCAGTTTTTGGACCCCTCTGATCCTGTT  
CTTGATCCAATGTGGAGACAAGGTATGTTTGTATCCCTTTCATGACTCGTTTAGGAATA  
ACCAATTCCTGGGGTGGTTGGAGTATCACA---GGAGGGACTATTACGAATTCGGGTATT  
TGGAGTTACGAAGGTGTGGCCGGTGCACATATTGTGTTATCTGGCTTGTGCTTCTTGGC  
AGCTATCTGGCATTGGGTATATTGGGATCTAGAAATCTTTTCTGATGAACGTACGGGAA  
AACCTCTTTGGATTTGCCGAAGATCTTTGGAATTCATTTATTTCTCTCAGGGGTGGCTT  
GCTTTGGTTTTGGTGCATTTTCATGTAACAGGATTGTACGGTCCCTGGGATATGGGTGTCC

GATCCTTACGGATTAACCGGAAGGGTACAATCCGTAAATCCAGCGTGGGGTGTGGGCG  
GTTTTGATCCCTTTGTTCCGGGAGGAATAGCTTCTCATCATATTGCAGCGGGGACATTG  
GGCATATTGGCGGGCCTCTTCCATCTTAGTGTCCGTCGCCCCAGCGTTTATACAAAGG  
ATTACGTATGGGCAATATTGAAACCGTCCTTTCCAGTAGTATTGCTGCTGTCTTTTTTGC  
AGCTTTTGTGTTGCTGGAACATATGTGGTATGGTTCAGCAACTACCCCAATCGAATTGT  
TTGGCCCCACTCGTTATCAATGGGATCAGGGATATTTTCAGCAAGAAATATATCGAAGA  
ATTGGTGTCTGGACTGGCCGAAAATCAAAGTTTATCAGAAGCTTGGTCTAAAATTCCTG  
AAAAATTAGCCTTTTATGATTATATTGGTAATAATCCGGCAAAGGGGGGGTTATTAGAG  
CCGGCTCAATGGACAATGGGGATGGGATAGCTGTTGGATGGTTAGGACACCCTGTCTTT  
AGAGATAAAGAAGGGCGCGAACTTTTTGTACGTCTGATGCCTACTTTTTTTGAAACATT  
TCCGGTAGTTTTGGTTCGACGGAGACGGAATCGTTAGGGCTGATGTTCTTTTTAGAAAG  
GCAGAATCCAAGTATAGTGTGCAACAAGTAGGTGTAAGTGTGAGTTCTATGGCGGCG  
AACTAAATGGAGTTAGTTATAGTGATCCTGCTACTGTTAAAAAATATGCTAGACGCGCT  
CAATTAGGTGAAATTTTTGAGTTAGATCGTGTCTGCGTTAAAAATCCGATGGTGTTTTTCGT  
AGCAGCCCAAGGGGTTGGTTTACTTTTTGGGCATGTTTCATTTGCTCTTCTCTTCTTCTC  
GGACACATTTGGCATGGTGTAGAACTTTGTTTCAGAGACGTTTTTGTCTGGTATTGATCC  
GGATTTGGATGCGCAAGTTCGAATTTGGGGCATTCCAAAAACTGGGGGATCCAACTACA  
AAAAGACAAGCAGTCATGAAAACCTTATATTCCCTGAGGAGGTTCTACCCCGTGGAAA  
CGCTCTTTAATGGAACTTTAGCTTTAGCCGGCCGTGATCAAGAACTACCGTTTTCGCT  
TGGTGGGCCGAAATGCCCGACTTATTAATTTATCCGGCAAACCTGCTGGGGGCTCATGT  
AGCCCATGCGGGCTTAATCGTATTCTGGGCCGGAGCAATGAACCTATTTGAAGTGGCTC  
ATTTTCGTACCAGAGAAGCCTATGTATGAACAAGGATTCATTTTACTTCCCCACTTAGCTA  
CTCTAGGTTGGGGAGTAGGTCCGGGCCGGGAAGTTATAGACACCTTTCCCTATTTTGT  
TCCGGAGTACTTCATTTAATTTCCCTCCGCAGTATTGGGCTTTGGTGGTATTATCATGCA  
CTTCTTGGACCTGAGACTCTTGAAGAATCTTTTCCCTTCTTCGGTTATGTGTGGAAAGA  
TAGAAACAAAATGACCACAATTTGGGTATTCACTTAATCTTGTTAGGTATAGGCGCTTT  
TCTTCTAGTATTCAAGGCTCTTTCTTTTTGGGGGTGTATATGATACCTGGGCTCCAGGGG  
GGGAGATGTCAGAAAATCACTAATTTGACCCTTAGCCCAAGTGTCTATTTGGTTATTT  
ACTAAAATCCCCCTTTGGAGGAGAGGGCTGGATTGTTAGTGTAGACGATTTGGAAGATA  
TAATTGGAGGTCATGTATGGTTGGGTTCCATTTGTATACTTGGGGGAATCTGGCATACT  
TAACCAAACCTTTGCGTGGGCTCGTCTGCACTTGTATGGTCTGGCGAGGCTTACCTG  
TCTTATAGTTTAGGTGCTTTATCTGTTTTTGGGTTTATTGCTTGTGCTTTGTCTGGTTCA  
ATAACTGCTTATCCGAGCGAGTTCTACGGACCCACTGGGCCTGAAGCTTCTCAAGCT  
CAAGCATTTACTTTTCTAGTTAGAGACCAACGCCTTGGAGCTAACGTAGGATCTGCTCA  
AGGACCCACAGGTTTAGGTAAGTATCTAATGCGTTCGCCGACTGGAGAAGTCATTTTTG  
GAGGAGAACTATGCGTTTTTGGGATCTGCGCGCTCCGTGGTTAGAGCCTCTAAGGGG  
TCCTAATGGGTTGGACTTGAGTAGGCTGAAAAAAGATATAACCTTGGCAAGAACGA  
CGTTCGGCAGAATATGACTCACGCTCCTCTAGGTTCTTTAAATTCGGTAGGTGGTGTA  
GCTACCGAGATCAATGCAGTCAATTATGTCTCTCCTAGAAGTTGGTTAGCTACCTCTCAT  
TTTGTCTAGGATTTCTTCTGTTCGTAGGTCATTTATGGCACGCTGGAAGGGCTCGTGC  
AGCTGCTGCAGGATTTGAAAAGGAATTGATCGTGATTTTGAACCTGTCTTTCCATGA  
CCCCTCTAACATGACTATAGCCCTTGGTAAATTTACCAAAGAAGAAAATGATTTATTG  
ATATTATGGATGACTGGTTGCGGAGGGACCGTTTTCGTTTTTGTAGGTTGGTCCGGCCTAT  
TGCTATTTCCCTGCGCCTATTTTGTCTTAGGAGGTTGGTTCACAGGGACAACCTTTGTA

ACTTCATGGTATACCCATGGATTGGCTAGTTCCTATTTAGAAAGGCTGCAATTTCTTAACC  
GCTGCAGTTTCAACTCCTGCTAATAGTTTAGCGCATTCTTTGTTATTACTATGGGGTCCC  
GAAGCACAAGGAGATTTGACTCGTTGGTGCCAATTAGGCGGTCTGTGGACTTTTGTG  
CTCTCCACGGCGCTTTCGGACTAATAGGTTTTATGTTACGTCAATTTGAACTTGCTCGAT  
CCGTTCAATTGCGACCTTATAATGCAATCGCATTCTCTGGTCCAATTGCTGTTTTTGT  
CTGTATTTCTGATTTATCCACTGGGTCAGTCTGGTTGGTTCTTTGCACCCAGTTTTGGTG  
TAGCAGCTATCTTTCGATTCATACTCTTTTTCCAAGGATTCATAATTGGACATTGAACC  
CATTTCAATGATGGGAGTTGCCGGTGTATTGGGCGCTGCTTTACTATGCGCTATTGATG  
GCGCTACCGTAGAAAATACTTTATTTGAAGATGGTGATGGTGCAAATACATTCCGTGCT  
TTAACCCTCAACTCAAGCCGAAGAACTTATTCAATGGTCAACCGCTAACCCTTTTTGGTC  
CCAAATTTTTGGGGTTGCTTTTTCAATAAACGTTGGTTACATTTCTTTATGTTATTTGTA  
CCAGTAACCGGTTTATGGATGAGTGCTCTTGGAGTAGTCGGTCTGGCTCTGAACCTACG  
TGCCTATGATTTTGTTCAGGAAATCCGTGCGGGCGGAAGATCCTGAATTTGAGACTT  
TCTACACCAAAAATATTCTCTTAAACGAAGGGATTCTGTGCTTGGATGGCGGCTCAAGAT  
CAGCCTCATGAAAACCTTATATTCCCTGAGGAGGTTCTACCCCGTGAAACGCTCTTAT  
GTCTGGAAGCACAGGAGAAGGTTCTTTTGTGATATTATTACCAGTATTGCTACTGGG  
TCATTCATAGCATTACTATACCCTCCCTATTCATTGCGGGTTGGTTATTTCGTCAGCACGG  
GATTGGCTTATGATGTGTTTGGAAAGTCCCTCGTCCAAACGAGTATTTTACAGAAAGCCGA  
CAAGGAATTCCATTAATAACTGGCCGTTTTGATCCTTTGGAACAACCTCGACGAATTTAG  
TAGATCTTTTATGACCATAGATCGAACCTATCCAATTTTTACAGTGCGATGGTTGGCTGT  
TCACGGACTAGCTGTACCTACCGTTCTTTTTTGGGATCCATATCCGCAATGCAGTTCAT  
CCAACGAATGGCTACACAAAGCGTTGAGGATAGTTCTCGATCTGGT---CCAAGAAGAA  
CTAATGTAGGGAGTTTATTGAAACCCTTGAATTCGGAATATGGTAAAGTAGCTCCTGGA  
TGGGGAACTACTCCTTTGATGGGTGTGCAATGGCTCTATTTGCGATATTCTATCCATT  
ATTTTGGAGATTTATAATTCCTCCGTTTTACTGGATGGAATTTAATGAATATGCTTACTC  
TCAAACCTTTGTTTATACAGTAGTGATCTTTTTTGTCTCTCTCATATTCGGATTTCTA  
TCTAATGATCCGGGGCGTAATCCTGGACGTGAAGAAATGGCCGATACTACTGGAAGGA  
TTCTCTTTGGATAATAGGTACTGTAGCTGGTATTCTGTGATCGGTTAATAGGCATTTT  
TTTTTATGGTTCCTATTCCGGGTTGGGTTATCCTTGATGATTAACATCTTTAGTTTTATC  
TGTATCTATCTTCATTCTGCCCTTTATTCGAGTAGTTTTTTCTTCGGCAAATTGCCGGAA  
GCCTACGCTTTTTTGAATCCAATCGTAGATGTTATGCCAGTCATACCTCTTTTCTTTTTTC  
TCTTAGCCTTTGTTTGGCAAGCAGCAGTAAGTTTTCGAACGACACAATCAAACCCGAA  
CGAACAAAATGTTGAATTGAATCGTACCAGTCTTTACTGGGGGTTACTACTATTTTGT  
ACTTGCTGTTTTATTTTCCAATTTTTTTCAATATGGAAGTCAATATTCTCGCATTTATTG  
CTACTGCATTGTTCAATCTAGTTCCTACCGCCTTTTTACTTATCATTACGTAAAAACGGT  
TGGTCAAAGCGATATGGAAACAGCAACCCTAGTCGCTATCTCTATATCTGGGTTACTTGT  
AAGTTTTACGGGATATGCCTTATACTGCTTTTGGGCAACCCTCTCAACAATTAAGAGA  
TCCATTCGAGGAACACGGGGACATGGAAGCATTGGTTTATACATTCCTTTTGTCTCGA  
CTCTAGGGATCCTTTTTTTCTCGATCTTTTTTTCGAGAACCGCCTAAAGTTCCAACCTCAA  
AAA-----ATGACTATTGCTTTCCAATTGGCTGTTTTTGCATTAATTTCTACTTCATTAATCT  
TACTTATTGGTGTACCCGTTGTATTTGCTTCTCCTGAGGGTTGGTCAAGTAATAAAAATA  
TTGTCTTTTCTGGTACATCGTTATGGATTGGATTAGTCTTTCTTGTGGGTATCCTGAATC  
TCTCATCTCT-----ATGTCACCACAAACAGAGACGAAAGCAAGTGTGGATT  
TAAAGCAGGTGTTAAAGATTATAAATTGACTTATTATACTCCTGATTATGAAACCAAGGA

TACTGATATCTTGGCAGCATTCCGAGTCACTCCTCAACCTGGAGTTCCACCTGAGGAAG  
CGGGGGCCGCGGTAGCTGCTGAATCCTCTACTGGTACATGGACAACCGTGTGGACTGA  
TGGGCTTACCAGCCTTGATCGTTACAAAGGACGCTGCTATCACATCGAGCCCCTTGTCTG  
GAGAAGAAAATCAATATATTGCTTATGTAGCTTACCCTTTAGATCTTTTTGAAGAAGGTT  
CCGTTACTAATATGTTTACTTCCATCGTGGGTAATGTATTTGGGTTCAAAGCCCTTCGCG  
CTCTGCGTCTCGAGGATTTGCGAATCCCTACTGCTTATGTTAAAACGTTCCAAGGCCCG  
CCACATGGCATCCAAGTTGAGAGAGATAAATTGAACAAGTATGGACGTCCCCTATTGG  
GATGTACTATTAAACCTAAATTGGGATTATCCGCTAAGAAGTACGGTAGAGCGGTTTATG  
AATGTCTTCGTGGTGGACTTGATTTTACCAAAGATGATGAAAACGTGAACTCCCAACCA  
TTTATGCGTTGGAGAGACCGTTTCTTATTTTGTACCGAAGCCCTTTATAAAGCGCAGAC  
CGAAACAGGTGAAATCAAGGGGCATTACTTGAATGCTACTGCAGGTACATGTGAAGAA  
ATGATCAAAAAGGGCCGTGTTTGCCAGAGAGTTGGGGGTTCTATCGTAATGCATGACTA  
CTTAACAGGGGGATTACTGCAAATACTAGCTTAGCTCATTATTGCCGAGATAATGGTCT  
ACTTCTTACATCCATCGTGCAATGCATGCAGTTATTGATAGACAGAAGAATCACGGTAT  
ACACTTTCGTGTACTAGCAAAGCCTTACGTATGTCTGGTGGAGATCATATTCACTCCG  
GTACCGTAGTAGGTAACCTTGAAGGCGAAAGAGACATCACCTTGGGCTTTGTTGATTT  
ACTACGCGATGATTTTATTGAAAAAGACCGAAGCCGCGGTATTTACTTCACTCAAGATT  
GGGTCTCTTACCAGGGCGTTTTGCCTGTGGCTTCTGGGGGTATTACGTTTGGCATATG  
CCTGCGCTGACCGAGATCTTTGGAGACGATTCCGTAACAATTCCGGTGGGGGAACTTT  
AGGACACCCTTGGGGAAATGCGCCGGGTGCCGTAGCTAATCGAGTAGCCCTAGAAGCA  
TGTGTACAAGCTCGTAATGAGGGGCGTGATCTTGCTCGTGAGGGTAATGAAATTATCCG  
TAAGGCTTGCAAGTGGAGTCGTGAACTGGCTGCTGCTTGTGAAGTATGGAAGGAGATC  
AAATTTGAGTTTGAAGCAATGGATACCTTG-----ATGGCGATACATTTATACAAAACCTTCT  
ACCCCGAGCACACGCAAGAGAGCCGTAGACAGTCAAGGGAAATCCAATCCACGAAAT  
CATTTGATCTATGGACAGCATCGTTGTGGTAAAGGTCGTAATGCCAGAGGAATCATTAC  
TGCAGGGCATAGAGGGGGAGGTCATAAGCGTCTATACCGTCAAATCGATTTTCGACGG  
AACGAAAACAACATATACGGTAGAATCGTAACCATAGAATACGACCCTAATCGAAATGC  
ATACATTTGTCTCATACTATGGGGATGGTGAGAAGAGATATATTTTACATCCCAGAGG  
GGCTAGAATTGGAGATACCATTGTTTCGGGTACAGAAGTTCCTATCAAATGGGAAATG  
CCCTACCTTTGACCAATATACCCTTAGGCACGGCCATAACATAGAAATCACACTTG  
GAAAGGGTGGACAATTAGCTAGAGCAGCGGGTGCTGTAGCGAAACTGATTTCAAAG  
AGGGGAAATCGGCCGAGTCAAATTACCTTCTGGAGAGGTACGTTTGATATCCCAAAA  
CTGCTCAGCAACAGTCGGACAAGTGGGGAATGTTGGAGTGAACCGGAAAAGTTTGGG  
TAGAGCCGGATCTAAACGTTGGCTAGGGAAGCGTCCCTGTAGTAAGAGGAGTAGCTATG  
AACCTGTAGACCACCCCATGGGGGTGGTGAAGGGAAAGCCCCAATTGGTAGAAAA  
AAACCCGCAACCCCATGGGGCCGTCTGCACTCGGAATCAGAACTAGAAAAAGGAAA  
AAATATAATGATAATTTGATTCTTCGTCGCCGTAGTAAAATGATTCAATCTCAGACCCTT  
TTGAATGTAGCGGACAACAGCGGTGCCCGGAAATTGATGTGTATTTCGAATCGTAGGAG  
CTAGC---AATCAACGATATGCTCATATTGGCGACGTTATTGTTGCTGTAATTAAGGAAGC  
AAAGCCAACTTCGGCTCTAAAACGATCAGAAGTGATCAAAGCTGTAATTGTACGTA  
TGTAAGAATTCAAATGTGATGATGGTATGATAATAAGATATGATGACAATGCTGCAGTT  
GTCATTAATAAAGACAGAAATCCAGTAGGAACTCGCATTTTTGGTGCGATCCCCCTAGA  
ATTGCATCAAAT---TTCGACAAAATAGTTTTATTAGCGCGTGAAGTAATAATGTTGAGT  
CCAAAAAAAACCAAATTCGTAAGAACATCGAGGAAGAATGAAAGGAAGATCTTCT



G TTCCTTGATCAGGGCTTAATAGAAGAACTTTCTCAGTTTCCATTTCTAGAATATAGAGA  
CGAAGAGATAGACTTTCAATTATTTTCGAAAACATATCACTTGGTAAAACCGTTGATAA  
AAGAACGAGATGCTAGATATGAATCACTCACCTATTCCTTCTAAATTATATGTATCCGCGG  
GATTCCTTTGGAAAGAC-----AGGCCGCAAAAAAAGACCATTTGTATTGGAAACCTTCC  
TTAATGAATCCGTGGGAACTTTTATAGTAAATGGAATATCCAGAGTGGTGATCAATCA  
AATATTGCAAAGTCCGGGTATCTATTACGGATCAGAATTGGACTATCAGGGATTTACGGT  
CTATATCGCCACCATAATATCAGATTGGGGAGGAAGATTAATAATTAGAGATTGATAAAA  
AAGAACGTATATGGGCTCGCGTGAGTAGGAAACAGAAAATATCTATTCTAGTTCTATCA  
TCGGCTATGGGTTCGAATCTAAAAGAAATTCTAGAGAATGCTTGCTACCCTGAAATTTT  
TCTGGCTTTAAATTTAAAGAAGGAGTGTGGG---TTCAAAGAAAAAAATATGCGATTTT  
AGAATTGTATGCAAAATATAAAGATTTCACTGAAGATTCATTAGATTTTGATTTCTTATGT  
GAGACATTACGAAAAACATTCTTTAGCCACAAGTGTGAATTAGGAAGGGTTGGTCGAC  
AAAATATTAACCGAAGATTGAATCTTGATATATCCCATAAAAACACGTTTTTTGTTACCCC  
AAGATATATTGGCAGCCACCAATCATTGATTGGAATGAAATTTGGAATGGGTACACTT  
GACGAT-----ATGAATCATTTGAAAAATAAACGGATTCGTTCTGTAGCGGATCTCTTACA  
AGATCAATTCGGATTGGCTCTAAATCGTTTAGAAGACGCGGTTTGGGATACAATAGGAA  
GAGCAATAGCA---AAGGACAAAATA--CCTACCCTTCGGCATTGGAACCTTCAACTCC  
A-----TTAACAACCACTTATGAATCTTTTTTCAAATTACACCCATTATCTCACGTTTT  
CGATGAAACGAATCCATTGACACACATAGTTCATGGGAGAAAATGGAGTTTTTTGGGT  
CCTGGGGGATTGACAGAAAGAACTGCAAGGTTTCGAGTACGAGATATTCATCCTAGTA  
ACTATGGACGCAATTTGCCCAATTGACACATCTGAAGGAATCAAAGTTGGCCTTATCGGA  
TATTTAGCAACTCATGCGAGAATCGGTGATTGTGGG---TCTCTAGAAAGTCCATTTTAC--  
-----GAAATGTCCGAGAAATCAAAAAGG-----GTCCGGATGCTTTCTTTATCATCAAGGA  
AAGAGGAATACTATATGATCGGGACAGGGAATTCCTTGGCACTGAATCAAGGTATTTCAG  
GAAGAACAGATTATTCGGCTCGATACCGTCAAGAATTCCTGACTATTGCATGGGAAGA  
GGTTCATTTTCGAAGTGTTTTTCTTTTTCAATACTTTTCTATTGGAGTTTCTCTAATTCCT  
TTTCTCGAGCATAATGACGCGACTCGGGCTTTAATGAGTTCAAATATGCAACGACAAGC  
AGTTCCGCTTTCTAGGTCCGAGAAGTGCATTGTTGGAACCTGGGTTCGAAGGCCAAGTG  
GCTCTAGACTCCGGGATTCCCCTTATACTGAACACGCGGGAAAGATCATTCTACCCA  
TACTGACAAGATCCTTTTATCGGTCAATGGGGAGACTCTAAGCAGTCCATTAGTTTTGT  
TTCAACGTTCCAACAAAATACTTGGATACATCAAACCCCCAGGTTTCGCGGGGTAA  
CTGCACTAAAAGGGACAAATTTTAGCGGACGGTGCCGCTACGGTTGGGGGAGA  
CGTTTTGGGGAAAAACGTATTAGTAGGTTATATGCCATGGGAAGGTTACAATTTGAAG  
ATGCGGTACTTATTAGTGAGCGTCTGGTCTATGAAGATATTTATACTTCTTTTACATACG  
TAAATGTGAAATTAAGATTTTATGACAATGAAAGGT---CCCGAAAAGATCACTAACCA  
AATACCGCATATAGACCCCCATTTACTACGAAATTTAGACAAAAACGGAGTTGTAATCT  
TGGGATCTTGGGTAGAAGCGGGCGATATTTAGTAGGTAAATTAACACCTGAGCTGGTT  
GAATTATCT-----CCGAAAAAAGGTTAATAGAAGCCTTGTTTGACGCTCCTATAGG  
CACTACAAGACAAAGTTGTCTAAAACCTGCCTATATGGGGGAGGGGCCGAGTTATTGAT  
GTGAGATGGATCCATAAAGGGAGCGCGTCCCCTTCT-----GAAAGGATTCGTGTATATA  
TTTTACAGAAACGTAAAATCAAAGTAGGCGATAAAGTCGCCGAAGACATGGAATAA  
AGGGATCGTTTCCAAAATTTGCCTATACAGGATATGCCTTATTTGCAAGACGGAAGGC  
CTCTTGATATGGTCTTCAACCCATTAGGAGTACCTTCGCGAATGAATGTAGGACAGATC  
TTTGAATGCTCGCTCGGGTTGGCGGGAGGTCTTCTAGATAGACATTATCGAATAGCACC



TTTTGATGAGAGATATGAAGAAGAGGCTTCGAGAAAAGTCTTTTTCTGAATTATATG  
AAGCCAGTAAGCAAACGGGGAATCCTTGGGTATTTGAACCCGAGTATCCGGGAAAAA  
GCATAATATTTGATGGAAGAACGGGAGATCCCTTTGAACAACCTGTTATAGTGGGACAG  
TCTTATATCTTGAAATTGATTCATCAAGTTGATGATAAAATACATGGGCGTTCCTACTGGT  
CCTTATTCACGTGTTACACAACAACCCGTTAAGGGAAGGGCCCGCGGGGGGGTCAGC  
GAGTAGGAGAAATGGAGGTTTGGGCTCTACAGGGATTGGGGGTTGCTCATATTTTAGA  
AGAGATACTTACTTATAAGTCTGATCATCTTACAACCTCGCAACCAAATATTTGGTACTCT  
ACTGCTTGGAGGAGCGCTACCGAAACCTGAACCTCGTCCAGAATCCTTTCTGGTTGCTT  
GTTTCGAGAACTACGATCTTTGTCCCTAGAACTGAATTATTTCTTGTATCTAAGAATAAG  
TGGAAGATGAATAGGGTGAAGTT-----ATGATCGATAAGTATAAACACCAC  
CAACTTCGAATTGGGTTAGTTTCTCCTCAACAATAATGGCTTGGGCCAATAAAACCCT  
GCCCACTGGAGAGATAGTCGGAGAGGTGAAGAAGTATCGAACTTTTTCTTATGATACAT  
ATAAGCCAGAAAGGGATGGTTTGTGTTTGTGAAAGAATTTTGGACCTATAAAAAGCGG  
AGTTTGTGCTTGTGGAGAGTCTCGTAAAATCGGAGATGAAAAAGAAAAGAGAACATTT  
TGCGAAAATGCGGAGTCGAGTTTGTGATTCTCGGATACGAAGATATCAAATGGGCTA  
CATCAAACCTGGCATCCCCATGGCCCATGTGTGGTATTTGAAGCGTATTCCTAGTTATAT  
CGCCAATCTTTTAGATGAAAAGATTAAAGACTTAGAAAACCTAGTATACCGCGAT-----T  
TCATTTTTGTGGGCT---CTAACTAAAAACCCTTTATTACGATTACGAGGGTCCCT  
CAAAACCAAATTCTCGGGATCGAGAGATATCCTCTCCCAATTTTTGAAGACCAAAGC  
TTCAAATAATTGCGAGATCGTGAATTTCTGCTGGAGCAGGCGCTATCCGAAAACGATT  
GGCCAATCTAGATTTGGAAGTTATTATATATTCTTCGTTAGCAGAATGGAAAAACGCG  
CGGAGATAATAAGCCCACGCGTACTGAAGAAGAAGATCGGAAAATTGAAAGAAGAA  
TGCGCGTTTTGGTTAGACGCATGGAATTAGCTAAGCATTCTTGAACAAATGTAAAA  
CCTGAATGGATGATTTTACGTCTATTACCGGTTCTTCCCCCGAGTTGAGACCGATATTT  
AAGATATCTGAGGTTCAATTTATAAGTTCGGATCTTAATACCCTCTATAAAGAAGTTATT  
AGTAATAACAAAATTCTTAGTGACTCATTATTAGGTTGTAAATTTGTGCCAGAGCAGTTA  
TTAACGGGTCAAGAGAAAATAGTACAAGTAGCTGTGGATCAACTTCTTGATAATAGAAT  
CAGCGGACAGCCACGAAGGGATCGTAATAAGCAGCTTTACAAGTCGTTTTTCAGATATA  
CTTGCAGGCAAAGAGGGGAGATTTCTGTCAGACTCTGCTTGGCAGACGGGTTGATTATT  
CGGGGCGTTCTGTCAATTGTTGTAGGCCCTCACTAGCATTACATCAATGTGGATTACCTC  
GTGAAATAGCACTAGAGCTTTTCCAACATTTATAATTGCTCTCTAATTAGACAGCGCC  
TTGCTTCAAGCGTAAAACTGCTAAGAAGCAAATTCGGGAACAAGAAAGAATTGTATG  
GGACATACTTGAGGAAGTTGTGCAGGAGCATCCTGTATTACTGAATAGGGCACCTACTT  
TGCATAGATTGGGTATACAGGCCTTCCAACCCATTTTAAACGAAAGAGCGCGCTATTTATT  
TACATCCACTCGTTTGTAAAGGATTCAATGCAGACTTTGATGGGGATCAAATGGCTGTT  
CATTTACCTTTATCTTTGGAGGCTCAAGCGGAAGCTTATTTACTTATGTTTTCTACTCAG  
AATCTCTTGTCTCCGGGTAATGGAGATCCCATTTGCGTACCAACCCAAGATATGCTAAC  
TGGGCTCTATACCTTAACCTTGGGAATCGTCGAGGTATTTGTGCAACTAGGTATAATTT  
GTGGAATCGCAGAAAC-----TCTCAAATGAAAGAATTGACGATAAGCACTATGGGT  
CTACCAAAGGAAAAGAAGTCTTTTTTTGTAATCCCGATGATGCAATTGGAGCTTATCGA  
CAGAAAAGAATCAATTTAGATAGCCCTTTTTGGCTTAAGGTTACGGGACAACACCGT----  
--ATTGTTTCA-----AAAGAAGTTCCTGTGCAAGTTCATTATGAATCTTTGGGTACCCATCA  
TGAGATTTATGGACACTGTAAAATAGTAAGAAGTGTAAAAACAGAAAGGCATTTTATAT  
ACATTCGAACTACTGTTGGTCATCTTTTTCTTGTATCGAGAAATCGAAGATGCTCTAAAA

GATTTTCAGGGCTGTC-----ATGAAAGAATGGCCCAAT  
CTGGCCTTTCACAATAAAGTAATAGACGGGGCTGCTATTAACAACCTTATTAGTCGATTA  
ATACAGCGCTTCGGAATGTTATATACATCCCACGTCCTAGATCAAGTAAAGCTTCTGGGT  
TTCAAGCAAGCCACGGCTTCATCCATTTTCATTAGGAATTGATGATCTTTTAACGATACCG  
TCTAAGAGATGGCTAGTCCAGGATGCTCAACAACAAAGTTTTCTTTTGGAAAAATACTA  
TCAGTATGGGAATGTACACGCAGTAGAAAAATTACGCCAATCCATCGAGATCTGGGATG  
CTATAAGTGCATATTTGCGACAAGAAATGACTCCCAATTTTGGAAATGACTGACCCCTT  
AATCCAGTCCATATAATGTCTTTTTTCGGGAGCTAGAGGAAATGCATCTCAAGTAAACCA  
ATTAATAGGTATGAGAGGGCTGATGTCCGATCCACTAGGACAAATGATTGATTTACCTAT  
TCAAAGCAATTTACGTGAAGGGCTCTCATTAACAGAATATATCATTCTAGCTATGGCGC  
CCGCAAAGGGGTTGTGGATACTGCTATACGAACAGCAGATGCTGGGTATCTTACCCGCA  
GACTTGTTGACGTAGTTCAACATATTATTGTACGTGGAACAGATTGTGGTACCACCCGA  
GGGCTTCTCTAAGTCCTCAAATGGGGGGGTGCCA---GAAAGT-----ACTCAAACATTA  
ATCGGTCGTGTATTAGCAAAGGATATTTATATCGGTCCGCGATGCATTGCGGTTCGAAAT  
CAAGATCTTGGGGGTGGCCTTGTCAATCGACTCATAACC-----TTCAAAAAA  
AGCCAATATATGTTAGAACTCCCTTTACTTGTAGGAGTACGTCTTGGATCTGTGCGATTCT  
GTTATGGTCAAGTCCTACTTGCAGTACTTGGTCAATTAGGGGAAGCTGTAGGTATT  
ATTGCGGGTCAATCCATTGGAGAACCAGGGGACTCAACTAACATTAAGAACCTTTCATAC  
CGGTGGAGTATTCACAGGAGGTACTGCAGAACAAAGTACGAGCCCCTTTC AACGGAAA  
AATCAAATCAATGAGGACTTGGTTCATCCACACGGACACGCCATGGGCAACCCGCT  
TTTCTATGTTATATAGATTTGTATTTAACTATTGAGAGTGAAGATATTATACATAGCGTGC  
CTATTCCACCAAAGAGTTTTCTTTTAGTTCAAAATGATCAATATGTAGAATCAGAACAA  
GTCATTGCCGAGATTAGCGCGGGAACATCCACTTTT---GCTTTTAAAGATAGAGTTCGA  
AAACATATTTATTCTGACTCATCGGGAGAA---ATGCACTCGAATACCGGCATGTACCATG  
CACGCAAATTTCTTTTAGTAATGTTTCATATCTTACCAAAAACAAGCCATTTATGGATCT  
TATTAGGGGATTTATGCGGA-----TCCGGTCCAGTCTTTTTTTCGATGTACAAGGATCAA  
GATCAAATGAGCATTAT-----TCTCTTTCTGTCCAAGGCAGAAATACGCCTAGCCTTTC  
C-----GTGAATAATGATCAA---TTGAAACACAGA-----CGTTTGAGTCTTTATGACAAAAA  
TAGTATACCGATTCTTAATTAT--TCAGAAATGACTCGAAGTCTATCGACTGCCCGTTGCA  
ATCTCCTATATCCTGCT--ATTCTCCACGAGAATTTTTCT-----TTATTGGCCAAGAAGCGA  
AGAACGAGATTTCTCATTCCATTCCAATCCGAACATCGACGAAAAAACGAACGAATAC  
TCTGTTCTGACATCTCGATTAAAATACCCAGA-----AATGGTCTTTTCCGTGGAAATAGC  
ATTCTTGCTTATTTTCGATGATCCTCGATACAAAATAGGGGTTTTCGGGAATTACGAAATAT  
GGTACTATAGAGGTGGATTCAATCGTCACAAAAGAGTCT-----TTCATCAACTATGGA-----  
-----GGAGTCCAGCCAAAAGACGGGAAGGTAGATCCGCTTTTTTTTCATTCCCGAAGAA  
GTGCATATTTTCCCGAAACCTCTTCCATAATGGTACGGAACAATAGTATCATTGGAATA  
AATACAAAATTACTTTAAATAAAAGAAGCCGAGTCGGCGGATTGGTACGAGTGAAGA  
AAATACACCGTGGGATTAACCTTCAAATATTTTCTGGAGATATCTTTTTCCGAGGAAG  
AGAGATAAGAGATTTATACCCCAAAAACAAGGACATCTTGATACCACCACAAATAAGAA  
AAAGAAATTTTAATAAATCCAAAAA-----GCGAAAAATTGGATCTATGTCCAAAAA-----  
-ATGAGACCTACCAATAAAAAT-----TCTTTTTTTTTACTTCAACCCGTAGTCACATATGA  
AATAGCGGACGGTATAAATTTAGCAAGACTTTTTTCTCCAGATCTATTGCAGGAAATAG  
ATAATATACAACTTCGAGTTGGCAATTATATTCGTTATGGGGATGGCGAGTTGATTCCAG  
GCATTTCTGGCAAAAATATTCAATTAGTTCGGACTTTTTTTAGTCTTGAATTGGGACCAA

GACAAA-----AAAGATTCGTCTATCGAGGAGGCTCACGCTTCCTTTGTGGAAGTAAGT  
ACAAAGGGCATGGTTCGAGATTCCTAAGAATTCACTTAAGGAAATCCGCGTATGCGTA  
TATGAGAAAAGGAATGATCCGTCAGGGTCAGGATTCCTCTGAT--AATGAGTTAGA  
TCACAGCAATAGAAATCCCTTTTCTTCCAGTTATCCC-----AAGGCAAGGGTTCG  
ACAATCACTTAAC-----ACTATTCGTACATTGTTGAAT-----AGAAATAAGGAATGC  
CAATCTTACTCATTTTGTATCATCTAATTGTTTTGACTAGGTCCC-----TTCAACAATG  
TAAAATATCACAAAT-----CCGAAAAAAGAATCAGACCCTCTCATTCCAATTAGGAATTT  
TTCAGGCCCTTTAGGAACA-----GTCCCTCAAATTGCGAATTTTGATGTA-----TTTTACCA  
TTTAATCACA-----AAGAATCGGATTTTCG--GTATTCATTATTTGCCACCTGAA-----  
--AAAGGGAACTTCAAGTCATT-----CAA---TCTTTTTTAATGGATGAAAACGGGAGA----  
--ATCTATAAGTCTGATCCATATAGTAACATCTTTTTGAATCCATTCAATTTCAATTGGTAT  
TTTCTACAGCATAATTATTGTGAAGAAACATCTACAATAATCAAT--CTTGGGCAGTTTCT  
TTTTGAAACTGTATGTATAGCCAAAAACGGACCA-----CGCCTAAAATCGGGTCAAGT  
TTTCATTCTTCAA--GTTGGCTATGTAATAATAAGATCAGGTAAGCCCTATTTGGCTATTC  
CAGGAGCAACCGTTCATGGCCATTCTGGACAAATCGTTTACGGGGGGGATACACTAGT  
TACATTTATATATGAAAAAGCACGGTCTGCTGATATAACACAGGGTCTTCCAAAAGTAG  
ACGCGATGTTTCGAAGTTCGTTCAAAGAATTCAATATCCATGCGCCTAAAAGCGAGAGA  
TGAGTATTGGAACGAGTATATAACAAGAAATCTTGAATTTATTGGGGATTATTGATTGG  
TGCCAAGCTAACAATAGCGCAAAGCTCTCTTTCTTTGGTTAATGAGATTCAAAAAGGTTT  
ATCGATCCCAGGGAGTCCAGATCGATAATAGGCATATAGAACTGATTGTACGCCAAATA  
ACATCAAAAAGTCTTGATTTTCAGAA-----GATGGGATGTCTAATCTTTTTTTTACCCGGAG  
AACTTATTGGATTGTTACAAGCGGAACGGACGGGGCGTGCTTTGGAAAAGGGGATCTG  
TTACCGCGCCATCTTAGTGGGAATAACGAAAGCATCTCTGAATACTCAAAGTTTCATAT  
CCGAAGCGAGTTTTCAACAAACTGCTCGGGTTTTAGCAAAAAGCCGCTCTCCGAGGTCG  
TATCGATTGGTTAAAAGGCCTGAAAGAGAACGTTGTTCTAGGGGGGATGAGCCCCGCT  
GGGACCGGATTCAGAGGATTAGTGACCCCTCTTCA---AAAAATATAAGACTCTTTCT-  
----CTGGAAACTCAAAGGAAGATTTTATTTCGACGGGAAA---GTG---AGGGATCTTTTATT  
CCATCATAAAAAGAATTGTT-----  
---ATGACAAAAAGATCTTGGAACATCCGGTTGGAAGACATGGTAGCAGCAAGAGTTCA  
TCTTGGTCATGATATTAAGAAACGGAATCCTAGAATGGCGCCTTATATTTCTGCAAAGCT  
TAAAGATACTGATATTACAAATCTTAAGAAAACCGCGCGCTTTTTATCAGAAACTTGTG  
ATTTAGTTTTTGAGGCAGCAAGTAAGGGAAAAAAATTCTTAATTGTTGGTACCAAAA  
AGAAGTAGCTAATTCAGTAGCACAGGCTGCAAGAACGGCTGGATGCCATTATGTTAATC  
AAAAATGGCTCGGCGGTATGTTAACAATTGGTCCACTACAAAAAAGAGACTTCATAA  
GTTCAAGGACTTGATAAGGCAACAA-----GGGAGACTCAACCGCCTTCCGAAAAGAGA  
TGCAGCTATTTGAAGAGACAATTGTTTCACTTGCAAAAATCTCTAGGCGGGGTGAAAT  
ATATGAAGGAATTACCCGATATTGTAATCATCCTTGATCAGCACGGCGAATTTACGGCCC  
TTCGAGAATGTATTAGTTTGAAGATTCCAACAATTGGTTTAATCGATACAAATTGTGACC  
CCGATCTCGTGGATCTCCGATTCCAGCAAATGATGACTCTATCCCTTCAATCCGATTCA  
TTCTTAACAAATTAATACTCGCAATTTGTAAGGGTCGTTCTAGATCGCACATAAAAAAG  
AAAATGGGACAAAAAATCAATCCATTAGGTTTCCGACTTGGTACAACCCAAACCCATC  
ACTCTATTTGGTTTGA AAAACGAAAAGATTATTCTGAAGGCCTACAAGAAGATCACAA  
AATACGAGAACACATTCAGAATTATATAGAAAAGGAGAGA---TCCGATTCG-----A  
TTTCACGAATACAGATTGACAAATCAATCGATGTGGTTAAAGTCATAATATATATGGGAT

TCTCACAGTTATTAACAGAGGATGAACCGCCCAA-----ACCAAATCAAAGAATTACA  
GGTAAGTTTAAAAAAGCCATTCCTTCACTTCATTCAACGAAAAGCTGAATCTTGCTGTTAGA  
AAAATGAAAAGCCTTACGGAGACCCTACTATTCTTGGAATATATAGCCAACCAATT  
AAAGAATAGAGTTTCATTTTCGCAAAGTAATGAAAAGGCTGTTGAATTAGTC-----GAA  
AAAAAAGGGAATTCAAGTACAAATTGCCGGATGTATTGGCGGAAAAGAAATGGCA  
CGCGTCGAATGGCTTAGAAAAGGGTCGAGTCCCTCTCAAACCGTTACCGCTAAAATAG  
ATTTTGTTCCTCAAGTTATACTATCCGTGGGGTATTGGGCATAAAAGTTTGGATCT  
TT-----ATGTGCGGTTACCGAGGACCTCGTGTAATAAAATAAAACGTCTGGGGTC  
TTTACCGGACTAACTACTAAAAGCCGCCTATAGTAAGGGATCCTCGATTATCGCGCC  
CCAAGCCCAAGAAAAATCTCAATATCGTATTTCGTTTAGAAGAAAAACAAAATTGCG  
TTTTATTATGGTCTTACAGAACGGCAATTACTGAAATACGTTTCGTATCGCCGAAAAG  
CCAAGGGGCCGACGGGTCAAGTTTTACTACAATTACTTGAAATGCGTTTGGATAATACC  
CTTTCCGATTGGGTATGGCTTCGACTATTCCTCAAGCCCGCCAATTAGTTAATCATAGA  
CATATTTTAGTAAACGGTCGCATAGTCGATATACCAAGTTATCGCTGCAAACCCCGAGAT  
CTTATTTAGGGAGGGAGAAAGAAAATCAAAGCTCTGATTCAAATTATCTTGATTC  
AACCGCCAAGCCAATACCACTACCAAAACATTTACTTCTTTTTCATAGTGATGACCCATT  
AAAGGAAGCGTCAAGAAAATAATAGATAGGAAAGAGGTTCGTTTAAAAATAAAGGA  
ATTGTTGGTCATAGAATATTATTCTCGTCAGATTATGTCACGCCGAGGTCTGCAGAAAA  
AAAACTGTCAAACGCGATCCATTTTATCGTAATCGAGTAGTTAACATGTTGATTAACC  
GTATTCTGAAACACGGAAAAAATCATTGGCTTATAAAATTCTCTATCGAGCCATGAAA  
AAGATTCAACAAAAGAAAAAAGAAATCCACTATCTATTTTACGTCAAGCAATACGTC  
GAGTAACTCCCAAGATAGCAGTAAAAGAAGACGTGTAAGCGGATCGGCTTATCAAGT  
TCCATTGAAATAAAAGCCCCACAAGGAAAAGTACTTGCCATTCGTTGGTTATTAGAGG  
CAGCCCGAAAACGTCCGGGTCGAAATATGGCTTTCAAATTAAGTTCCGAATTAATGGAT  
GCTACCAAAGGGAAGGGCAATGCCATACGCAAAAAGGAAGAGACTTATAGAATGGCA  
GAGGCAAATCGAACTTTTGCAAATTTTCGTATGGGTAAAGGACACTCTTTCTGAAATAGT  
CACATCTATACGAAATGCCGATATGGCTAAAAAAGAGACGGTTCGAATAACATTTACTA  
ACATCGCCCAAACATTGTGACAATACTGTTACGAGAGGGTTTTATCAAAAATGCGAG  
GGAACATCGGGAAGCAAAAATCCTTTTTGGTTTTAACCTACGCCATAGAAGG-----  
AATAGAAAGGGTCCGTCTAGAACT---CTTTTCAAT-----TTAAAACGGGTTCAGTCGACCC  
GGTCTACGAATCTATTCTAACTATCAAAAATTCCTAGGATTTTGGGCGGGATGGGGGT  
TGCAATTTCTTCTACTTCTAAAGGTATAATGACAGACCGAGAGGCTCGATTAAAAAGAA  
TAGGTGGAGAAATCTTGTGTATATCTGGATGGCAAAAACGATACGAAGATATAGTTCA  
AGG---AATAGACGCATT---TCGCGTAAGAGTGCACGGAAAATACCCAAAGGAATTATTC  
ACGTTCAAGCAAGTTTCAGCAATACCATTGTTACTGTTACAGATGTAGGGGGTCGGGTG  
GTTACTTCGGCCTCTGCCGGCGCTTGTGGATTCAAGGGTAGAAGAAGGGGTACGCCCT  
TTGCCGCCAAACAACCGCCGAAAATGCTATTCGCACAGTAGTAACTCAAGGTATGCA  
CCGAGCTGTTGTCTTAGTAAAAGGTGTCGGTCGTGGGAGAGATGCGGCATTACGAGCT  
ATTTTGAGAAGCGGTGTGCGGTTGCATTTGTTACGAGATAGAACCCCTTTACCACACAA  
TGGGTGTAGGCCTCCTAAAAGAAGACGTACGATGCCAACTAGTAACCAACTTCTTAGA  
AACTCAAGACAGCCAGTCAGAAAAACCAAGAAAACCCCGCTCTTAGGGGATGCCCT  
CAGCGCCGAGGAAGATGTAGTAAGGTGTATATTATCAACCCCAAAAACCAACTCTG  
GCAATCGTAAAGTTGCCAGAGTACGATTAACCTCTGGATTTGAAATCACTGCTTATATAC  
CTGGTGTGGGCCATAATGTACAAGAACATTCTGTAGTCTTAGTAAGAGGGGGAAGGGT

TAAGGATTTACCCGGTGTGAGATATCACATTGTTTCGAGGAACCCTAGATGCTGCCGGAG  
TCAAGGATCGTAAACAAGGGCGTTCTAAATATGGGGTCAAAAAGCCAAAAGTGGCAA  
AGAAATGTTGGATTCAGAGGGAGAAGAAGAGACAAAATTGGAACAAAATATCGTT  
TGATTCGCCGATCCTCAAAAAAAGAAATACGC-----GAAGTTACGTCCTTGAGTGAG  
AAATGGGAAATTCAGAGAAAGTTACAATCCTCACCGCGCAATAGTGCACCTACACGTC  
TTCGTCGACGTTGTTTTTCAACCGGAAGACCGAGAGCTACCTATCGAGACTTTGGACTA  
TCGAGACACATACTTCTTAAAATGTTTCGTGCGGGTTTGTGCGGGGGCAACAAGAT  
CGAGTTGGATGGTCAAAACTCCATTAATTCAGTTATCTCGCAAGAA-----AAAGAAA  
AGAATAGAGGGTCCGTTGAATTTCAAGTATTGTGTTTTACCAAGAAAATAGACCAAATT  
TCTTCCCATTTGAAATTGCACAGAAAGGACTATTTATCTCAGAGAGGTCTACATAAAAT  
TTTGGGAAAACGCCAGCGTCTGCTGTCTTATTTGTCAAAGAAAAATAGAGTACGTTATA  
AAGAATTAATAAATAGGTTGAATATTCGCGAGTCAAAAACCTCGT-----ATGGTAAAACCT  
CGTTTGAAACGCTGTGGACGAAAGAAACGAGCGGTTTATCGAATCGTTGCAATTGATG  
TTCGATCCCGAAGAGAAGGAAGGGATCTTCGAAAGGTGGGTCTTTATGATCCGATAAA  
CAATAAAACCCATTTAAATGTTCTGCTATTCTATATTTTATTGAAAGAGGCGCTCAACC  
TACAAGAACTGTTAATGATCTTTTAAAGAAGGCGGGAGTTTTGAAGGGGATTCCCGTT  
GTTGGAACTTTAGTATCAAAAATGGAAAAATGGCTACGCGAATTTATCGCAACCAAGA  
AACCGCTACCTCCTCGTTCGTCGCGAATCAAACCAGGGGATCTAATTGATTATAGAAAC  
ATTAGTTTAATTGGTCGATTTATTAGTCAACAAGGAAAAATCTTATCTAGACGGGTGAAT  
AGAGTGACTTTAAAACAACAACGACGTCTTACTATTGCTATAAAAACAAGCTCGTATTTT  
ATCTTCGTTACTTTTTACGCTACTGATCAACTT---AAAATAAAAAAAGAAGGTGCGAC  
CGCCAGAAAAAAGAGAAAAAAGGGCTTTAGAAAACCGTTCCCTTCAGTAAAAAGAA  
ACCCTTTTGTAGCGAATCCGTTATTAAGAAAATCGAGAACTGAATGCCAAGGCCCA  
GAAAGATTTCTCAAAACTTGGTCGCGTGCATCTACCATTATACCCGCAATGATCGGAT  
ACACTATTTATATCCATAACGGGAGGGAACATGTGCCTATTCTATAACGAAATATATGG  
TCAATTATAAATGGGAGATTTTGTACCCACTAGAATTTTTCAACACAACAGCAAAAGT  
GATACTAAATCTGTTAGG-----ATGAACCATATCACGAGTAAGCGTCTTGATA  
TTCGG---GCAACTTTGATTTTCGGTATTTTTTATGGAATACTCATAACATTTTCAAACTC  
ACAAGTTATCTTTTCTTATCCGGATTTCTCAAGACGACGAAGGG-----ACTGGTAA  
GGCGAGAGCACTAAGCGGGTTCACTGTGGGGCATTGCTGGGCTATTTATTGATTTATT  
ACTTACCTTTTTATAAGGCCCTGAGCAATTTTTATCTGAAAATCATACTCGCTCTTGCC  
TTATGTTGTATCAATTCTGGACGAATCATCATCTGGATATTTTT-----AAATCTTTTTCAA  
CTCCACAGCGA-----GATCAGACCCTAGCAATTTGTTTATGGGTAAAGTTATAGATTATTA  
ATTATACCTTTTTTCCAAATTCAATTTTCTCGAGAATGATCGTAGGGTACTTGGTACAGT  
GCCAATTCAAAATCTTATTTCTCTATACGACTTTTTTTGTTTGGATGATCGGTCACCTTGAT  
TTGTATAAATGGGTTCAATTTTGTGACATTATGGCTACAGAAAAACTATTTCGGCTTTTCT  
GAAGATCAGATCCCGGATAGCCAAAATATTTGAGTATAAACCGGATATGAAACAAATCT  
TAGCTACGATTCTATTTATCGTTGCGCTGTATTTGTTGGGAAAATCCCCATACCTTTTTGT  
TCCGAATGCAGTCGAGCTAGAGGAAGAGAATCGCGGTTTTTCCATTTCTTTTTCAACC  
CTAGGAGGTGGGTTATACCTTACCGCTATATCAAAACTTCTTTCTACGAATATGTA AAAA  
AGGGGGGGTTTTTACAATTTTGTTTTTATAAATGTCAAAGCGATGGAAAAGAACGGAC  
CTCTTTCACATATCCACTTTCTTTAATCACTTTTTTATAAATGATTGAAGGAAAACCTTCT  
TTGTTTAGAAAAAAGCGACTCCCCAGGGATAGATTGTACACCCTTTGGGTTTTACGAAA  
TGCAAAGAAAAAGGACAGTCTCAACAAGGAATTAATAAAAAGAGTACAGAAGCTAAA

AAGCGGATCTCCTTTGAGGGATGTATTGGACATACGGAGAAAGCTCTTTCAATCTGAG  
ACCCTCTTTGACCAAAGAAAAGGGAAAATGACCCAGTCTGGGATGGACCTTCTCGC  
GGAGCTTTAAATCAGAAAGAGCAGTATTTGAAAAGAGTCTATTAGGGAAAACCTTTGA  
GAATACTTGCGCCACAGTACATCCCAAGTAACCGTAACACGGTACAGCTGAAACTACG  
GACAATCATGAAAGAAGTCCCTCGATGGGGATACAACATAGATAAAAATAGATTATAGTG  
ATTACAATTATTTGCGTACAAGAAAAGCAAAATTTAGGGTATTTAGAACCAAATATTTTT  
ACCGTTACGCTAAGATCACGCATTTTCGTCGCAATATGGTCAAAGGTGCGGACCGCACC  
CAAAGGCGAAAAGTAACGATTTGTGGGTGGTATGAACACCGGGTCCAGTCGCCCTTT  
TTTTGCCAAAATGAAAAAATGTTATAGATTTTTACGACAGGACTCCCGGTTTCAAGTT  
AGAGTTAAGATAAACCGAATTGAGGCGCATGAGATCCGAATTTGTATAGCGGAACTT  
GGAACTCCTTCAATCGGGTCATGCAGTAAGATCTCTGATCCTATTAATCCAATCGTTTT  
TGAGGAAAATGTGATCTTTCCTTCTTGATAATAGCTAAAAATATGGCTCGTATACTCT  
TCTTCAAAGTCCCGAATTGTTTCAGGATTTTCGCGGATTTAAAGAAGGAACTCACAC  
CTTGTGCGATTTTGGTGGTATTCCACTTGACGAGTCACAAGACCCAATAGGGTGGTTCA  
CAGATGGTTGTCAGATAAGGATCCACTTTCCTTTTGAGTGGAACCTTGGCGAGAAAC  
CGAGGAGAGCAGTGTGGCAGAGGATTTGTATTTAACCGTTTTTGGAAGAATCACTAATA  
TTCCTTTTGGTACGGCTCGCAAGCCCTACCCGTTTTTTAAAACCGTTTTTGAAGAACTA  
AAGAAAAA-----AAAGCTTCTCAAGAACTCAAACCTCACA  
AGTGGAATTAGAAAGTTGCAAAGAAGGGTTTTTTGAAGTTTAAAAAAGGGCTTT  
CTTCGAAAACGTCTTTTAGCTTTTCAA-----GTAAAAGTAAAAAAGA-----  
---ACAAATTTGAAAAAAGGGCCACAATCTAAA-----TTAACAAAAAAGAAAAAGAAA  
GGAAAGTGGATAAAACAAGGGCAATCATAAATGAAATAGAAAGGGTTCTAAAAGAAA  
AGAAAAAAGTTTCGACCAAACAAGTTCTCATTCTAAAACATCAGAAGCACTACGAA  
GACTTTCTAAAATCTTAAAAAGAAGAAAGGCACGATTCATTTCGTAAATCTACAATTTTT  
AGAAAATGGATCATTGAATGGATATACGTGAAAATCCTTTTCGATTTGAAAAATAGATTT  
GATTTGAAAAAGAGGTTTCTA-----CGCTTTGACTTATCCTCTCTGTCAAGCATA  
TGTATTTTATAAATTATCACAACCTGAAAAGTCTTCTGTCTCTAAATTCCAGAATTTGAG  
AAATTGTTGGAAAGAATGGTTAAGAGGCCATTTGACTACTATCTTGAAGCACAAAAT  
GGCGAAATACGGCTGAAAATCACAATTTCAAGTCATATGAAATAGACCCACAAAAT  
GAAATTTAAAAACACCTTAGATATGATCTTTTAGCATATAGCTTCTTAATGCTGAATAT  
AAGAAGGTCATAGCGTTAGTAAGTAATAACCAGACCGCAATTCACATCACAAGAAA  
GCCTTGTGAATATGCTTACAAGTAATTATAAGCATTTCGCGGATTCCACGGCGCTGCGTA  
GGCGGATGAATTATAATCAGATACTTTTCATGTTGAAGATGATGAATCGTTTCAGACTGG  
AGCACTACATCCATAAAATTTGTGATATGCACTTTTTCTCTGTTTTTTTTGATTGGATGGG  
ATTAAATAATGAAAACGAACTAGAATTTCTCTTCCCAGAATTTATCCAACCTTACAATCT  
TTATGCGAAAGCGGAGTGGACCACGCCGATTCATTCTTTTTTGCAAATGTGAGTACAT  
TGAAACCGATAAAGTATTCAAGGTTCCGAAAGACGTATTTCCGGTATCAAGTGCATAT  
AGCCTACGTTATATCGCCGACTTCCCTTACTAATGTTACACGTACAAGCCAAGTCACGAAT  
AAAATAACCCGAAGCTCCTTCTTGTTCATTAAAGATCTTATAGAAATGAGTCAGTT  
TGGAATAATGGGAACTACTCAAATCAACTTCCAACCTTTGGAAGATATCGGGTATCTCG  
TTCTGAACCCCATTCGTACCTTTAAAAGATTGAGGTGGGAGCACGTTACGTATCAAATC  
CTAGCCATTTCCCTGCTTCATAAGAATCAATTCGTCGAAAAGGGTCTGCTTGTTCCTGA  
AAATCTTTTATCCCCAGACGCCGACACAATTGAGAATTGAAATGAACTCATCTTTC  
TTTGGCCGAATTATCGACTCGAAGACTTAGCTTGTATGAATCGCTATTGGTTTGATACTA

CTAATGGCAGCCGTTTCAGTATGTTAAGGATCCGAGTATATCCAATGGATGAACAAGAA  
CTTAAATTCTTTATTCTCGAATTAAGGGATCCTTCGAGAGATCAAGAATTCTCACCA  
GTTATTAGATTCCCTGGACCAAATTGAATTCATTGGGCACTTTGATTCAAATTTTTTCAA  
CCCAGAACGTGCTTTTCAATTATTGGACCCACGGGTTTGGGAAGATCCTACTTTCA---CG  
CAACTCA-----CGGGGTTGGAGAAAGACTCGACATTTACG-----ATCGGGCGTGTA  
CTACTATTTGTAGTAGTAGTCCCTTATGTATAGG-----ATGAGCCGTCGGAATATGGTC  
GAAAACAAAAAGAGCTATTTGACAGGGGTTCTTCCT-----ATACCCCTGAATCCC  
ATTGGACACAGAAATGATACATTGGAAGAATCTATT--GGGTTTTCCAATATCAATAGGT  
TGATTCTTCCG---CTCCTCTATCTTCCAAAAGGAAAAAAGATCCCTGAGAGCTCTTTCCT  
GGATCCGAATGAGAGTACTTGGGCTCTCCAATCACT-----AAAAGTTCGATCATGC  
CCGAATCTAGATGGGGTTCGCGGTGGTGGTGTAGCTGGGTGGGAAAAAGGAGG-----G  
ATTCTAGTTGAAAAGAGCTCAT-----AAAACCGTGGCTGGGATTGAGATCTCATTCA  
AAGAGAAAAAGAGCAA-----  
-----  
-----  
-----  
-----  
-----TATCTGGAGTTTCTG  
GAG-----GATTCAGAA-----TATCCACATTGATCAATC  
AAAGAGAGATTCAACAAATAAAGAAGAATCGATTCTT--TGGCATCCTTCTCCTTCCT  
TGGAACGAACA-----  
-----GAAGAAATCAAAGAATTTCTT----GGAATTCTACAAGAT  
CCCTTCGTTCTTTTTTCTCTGACAGATGG-----TCAGAACTTTAT--CTGAGTTCGAATCCT  
ACTGAGAGGTTCACTAGAGATCAG-----AAATTGTTGAAGCAA-----GACCTTCT--  
TTGTACCCTACCGGCGATCGGAA-----AATCAAGAAATAGTGAATCTATTCAAGAT  
CATTACGTATTTACAAAAG-----ACCGTATCAATTTATCCTATTTTCATCAGATCCGGGATGT  
GATAGGGTCCG--AAGGATGAACTGGAT--GTGGACAGTTCCAAGAAGATTTCAATTTT  
CAAAAAAATCCATTTTTTGATTTA-----TTGAATCTATTCCATGACCGTAGCAGGGGGG  
GATACACGTTA-----GAGCGGATTTTGAATCAGAA-----GAGCGATTTGAAGAAAGGGC  
GGATCTATTCACTCTATCAATAACCGAGCCA--GATCAGGTGTATCATAAT-----  
-AGTCCGAAAATGGAT-----  
-----  
-----CTGATTCACATCCAAGAGAAGGGG-----TA  
CATAAGAAAGGTATTGGATCGATTCTTTTTAATGAAT-----CGATCCGCTCGCAACTTC  
GAGTCTGGAATTCCA-----GGGGCTCAAATAGGAAATGAGACTCTGAGTCATAGAAC  
TCTAATGAAATATACGGTCAACCGACATTTCTCGAGTTTGAAAAAG--AGTCGAAAGAA  
AAGCTTCGATCCT-----CTTCTTTTATCGAGAGATCC-----ATGAATCGGGATCCTGCC  
GCATATAGAGACAAATGGTCCAAGGGGGGCAAGACTTTCCAGGAACATTTGGAACATT  
TCGTTTCTGAGCAGAAGAACCGTTTTAAACGTTTTAAAGCAGTCTTCGATCGATTCCAT  
CAATCTCAATATTCGATTGATTGGTCCGTGTTTATTGACAAACAAGATTTGTACAAGTCA  
CTTCCTTTCTTGTTGTCGAAGTTACCT-----CTCTTGTTGTCG-----  
-----AAGTTACCTCTTTGGTGTGCAAGAAGTACTGCCTTTTTTCTTTGTGAGTTGCGG  
GAATATCCCATTCATAGGTCCGAG--ATCCGCATCTAT--GAATTGAAGGGTCCGACTGA  
TCAACCCTGCAATCCGTTGTTAGAATCAATAGGTCTTCAAATCCTTCATTTGAACAAATT

GAAACCCTGC-----TTATTGGAT-----GATCATGAGACTTCC---CAAAAATCCAAAATTG  
TAGGA-----ACAA  
TTGATAACACGGATTCCCTATTTCTCAATTCTATTCGACGATGAAGAGAATTGGATGAATC  
CCGTGAAAGCATTTCAGAGAAGTTCATTGATATCTGCTTTTTATAAAGCAAATAGACTT  
CGATTCTTGAATAATCCACATCGTTTCTCCTTCTAT-----TGTAACAAAATCTTCCCTTTG  
TTGTG-----GAAAAGCTCGTTTCAAGAATTCTGAT-----TTTTTGTATGGA---CAATT  
CCTTAAGACTTTCTTCATTTCGCAAGAAA---CCATTTTCTTTGTGCGGCGAAAAA-----  
-CATGCTTTTGGGGAG---AGAGCTACTCTTTTACCCTCATACCTCAGGTATCTAAGATAC  
TCATACCTGACGATTTTCCACAAAGTGGTGACGAAAGG---TATAACTTGTGCAAATCT---  
-----TTCCATTTCCCAACTCGATCTGTTCCATTAGTTGAT-----AGAGCCCTTACTCGATC  
GCCGACATTTCTGAAAGACCTCTAACAGAGGGACAAATGGTCAATTTGGAAAGAACTT  
CTTTTCAACCTCTTTTCAGATATTCATTTATCTGATTCAGAAAGGAAGAACTTGCATCAAG  
ATCTCAAT-----TTCAATTCAAACATGGGTTTGATTCACACTCCATATTTCTGAAAAAGATT  
TACCGTCCGAA-----AAGAGGAAAAA-----CGGAATCTTGGTCGAAATCT  
AAAGAAATGCGTTGAGAAAGGGCAGATGTTTCGAACTCTTCTCTCGAAGATGTATCGA  
ACCCTTCTCTCAAAATGGAATCTCTTCCAAACATATATGCCATGGTTCCTTACTTCAACA  
GGGTACAAATATCTAACTTTGCTATTTTATAGATCTTTTTTTCAGACCTAGTG-----CCGATA  
CTCAGTCTAGGTGCTCAAAATTGTGTATCCCTTTTTTGTATGATATTAGGCAGGGGGTC-----  
CCGTGGCAAATCTTTCAGGAAAAATGG-----GTTCTTCCACAAAGGAACCGG--  
-ATAAGGGAGATTTTCGAGGATGTGTTTACGAAAT-----CTTACTCTGTCTGCAGAAAGGA  
TTCGTGCAATAATGAGTCA-----CCATTGACACATACACATCTGAGATCACCCAATGTT  
CTGGAGTTC---CTCTATTCAACCCTTTTACTTCTTCTTGTGCTGGATAT---CTCGTTTGTA  
CATATCTTTCCCGTCTTTCCAAA-----GACTATGGTGAGTTACAGACAGAGCTCAAAAAG  
GTCAAATCTTTGATGATTCCATCATAACGATTGAGTTGCGAAAACCTGATGGATAGGTAT  
CCTCCATCTGAACTGAATTCTTTCGGATTAAGAATCTCTTTCCTAGTTGCTATGGAAGAA  
CTAAAGGAGTCTTTTCTGTAGTCGGC-----AACATGCTAGAGGGTGGTGGTC  
GC-----GCTTATGGG-----GTCGAAGCAATCTTTTCTAATTGGAATCTCAATCT  
CATCGATATCAGCGATCTTATC---AGTCTCATACCAAATCCCATCGATCGAATCACTTTTT  
CGATAAATACGAGACATCTAAGTCATACAAGTAAAGAGATCTATTCATTCATAAGAAAA  
AGAGAAAGGGTGTATGGTGCTTGGATTGATGATAAATAGAATCCTTGCTCTCGACCTC  
TGTGGCTATTGATGATTGCGACAGAGGCAACTTGCTTTCAGTTCTCCACCCTCACCTTAA  
CGACA-----GAAAAGGGGTTGATCAAATTCTGTTGAGTCTGACT--CAGAGTTCA-----  
-----AAGAATGCCTCTGGTTCTCAAATGATTGAACAACCGGGAGAAATGTACTT  
ACGACACGTAGTTGACCTTCAG-----AAGAAGTATCTAATGGGTTATGAGTTCAATACAT  
CCTCTTTAGCAGAAAGACGGATATTCCTTGCTCATTATCAGACAATGACTTAT-----TCAA  
AAACCTCGTGTGGGGTTAATGCTTTTCATTTCCCATCTCATGAA-----AAACCTTTTC  
GCTCCGCTTAGACCTATCCCCCCT---AGGGGTATTTTAGTGATAGGTTCTATAGGAACT  
GGACGATCCTATTTGATCAAATCCCTAGCGAAAAATACCCACTTTCCCTTATTACGTTA  
CATTTGGATGAGATCTATGGTGACCAGCTGGAGTATGTGTATGACGATACTAGTCTTAGT  
GTGGAGGTGGAGGATACTCGTGAGGATGACGAGATTGAGGATCAGGCTGAGATGGATA  
CGAGACGTGATCTTGATGGT-----ATTGAGTATACGCATGCTATTCAGGATATGATTGAT  
TTGGGGATTTCTGTTGATGCTCAGTTAAATTTTTTACCTGAGTCCATTCTCATCGAGACC  
GAGTTGTGGGAGTTATGGATGGAGGAATGGGACCGGCTTGGTATCTCCCTTCAATTTCG  
ATTAGTAAGAGCAATGACTCCTTGCATATTATGGATTCCAAACATTCATGATGTGGATCT



GGAGGATAGGACAACCCTGGCCGGA-----TTAATGAACTCTCTCTCTGGG-----GATTC  
TGAAGGACGTTCC---ACTAGAAAGACTCTTGTTATTGCTTCGACTCATCTTCCCAAAA  
AGTGGATCCCGCTCTAATAGCTTCAAATAGATTCAATACATGCATTAAGGTACGAAGGC  
TTCTTAGTACACAAGAACGAGAGCGCTTTTTCACTCTTTCATATACTAGAGGATTTCACT  
TTGAAAAGGAAATCTTCGATACT-----AATGGATTCCGG-----TCTATAACCACACAA  
GATCTTGCAGCACTTACCAATGAGGCCCTATCGATTAGTATTACCAAAAAAATCCATT  
ATAGACACTAATACAATTCGATTTGCTCTTCATAGGCAAACCTGGGCTGTGGAA-----T  
CCCGGTCAATCTCGATTTCCGGATCACGGGATCCTTTTTCTATCAGACAGGAAGGGCTCTT  
GCACAAAATCTATTTCTAAGTCAAGGCCTCATAGATCCTATCTCTGTATATATAAAGAAG  
AAG-----TCGTGTAACGACGGTTATTCTTATTTGTACAGATGGTACTTAGAGCTTGGAAC  
GAGCATGAAGAGGTTAACGATACTTCTTTATCTTTTGAGTTGTTTTGCCGGATCGGTGC  
CTCAAGACCTTTGGTCTCCACCT-----GGGCCCGATGACAAA--GCGGAGATGTTTTCTT  
ATGGACTTGTGAGAATGATTCT--CATCTAGCTCAGGGCCTATTAGAACTAGAAGGCGC  
TCTGGTGGCC-----TCAGGGACAGAAAAGCTTGCAGTCGGTTTGATAATGAT-----CA  
AGTGACACTGCTTTTTCCGGCCGAACCAAGCTTA-----GATAGAATGCAAGATGGATT  
TTGTTCTATCTTTGAACAA-----GAGGGAGAAGAA-----  
GCAGCCCCTGGC-----CTAGAGAAGCCT-----TTAGTCACTCAC-----ATAGTT  
TCGGCTCCT-----AGAATATGGAACCCT-----TGGCTCATTCTATTTGATTGGCTTCAAG  
AGTTTCAAGATCTTGAAGATCCTCAAGATCAAGAGGGTGGGCTTCAAGAGCTTAAGGA  
AGAGGCCTATCTTTATCAAAGGGCTGATGAGCTTCAAAGTATGGTCCGGGGTTCTTG  
AGAGTGGAACCATAATGAAGAAGTATCCGACACGAAATCGATTTGACAAGGCTTTTT  
TCAAGCAAGCCAATTCATTTGGTACCCCGCGGATTCCTTTTTCTACTCAA---GA  
GCAGGCTCTTGGCTTTGTGTTTTCGCAGCCAGAGTTCTTTCGAGATGAAGAGATCTCA  
AAAGAAGGGCTTCTTGCTTTGACTGTCTTCTTCTCCACAACCTTGCCTACTGGTTTAT  
C-----AAGAAAAGGCAAGAAAGGCACTTTCGAATCTTGATTCATCGCGAGAGATGGCTT  
AGAACG-----AATAGTTCATTATCT-----AATGGATTTTTCTGTTCTAAGACTCAGACTC  
TATTTGAGAGTTATCAGTATTTATCAAATCTCTTCCCTATCTAAC---GGAAGGCTAGTGGAT  
CAAATGACAAAGACATTGTTGAGAAAAAGATGGATTTTCCCGGATGAAATGAAAATTC  
AAATTGGATTCATGTATACAGGAGAAGGGTTTCCATTACTATGCCTAGATCACGG---AT  
AATGGAAATTTTATTGATAAGACCTTCTCAATTGTAGCCAACATCTTATTACGAATAAT  
TCCTACAACCTTCAGGAGAAAGGGAGGCTTTTACCTATTACAGAGATGGG-----ATGTGC  
GCTCAATCCGAAGGAAATTATGCGGAAGCTTTGCAGAATTATTATGAAGCGATGCGACT  
AGAAATGGATCCCTATGATCGAAGCTATATCCTCTATAACATAGGCCTTATCCATACAAG  
TAACGGAGAACATACGAAAGCTTTGGAATATTTTTTCGGGCACTCGAGCGAAACCCG  
TTCTTACCACAAGCTTTGAATAATATGGCTGTGATCTGTCATTAC---CGGGGCGAACAGG  
CCATTCGCCAGGGAGATTCCGAAATTGCGGAGGCTTGGTTTCGACCAAGCTGCTGAGTA  
TTGGAACAAGCTATAGCGCTTACTCCTGGTAATTATATTGAAGCGCAGAATTGGTTGA  
AGATTACGAGGCGTTTTCGAA-----ATGAGTTGTCGATCTGAAAATCTATGGCTAGAACTT  
ATAGCGGGTCTCGAAAAACAAGTAATTTCTCTGGGCTTATCCTTTTTTTAGGTTCA  
TTCGCACTCTTATTGGTTGGAACCTCCAGTTATCTTGGCAGAAATTGGATATCTTTATTT  
CGTCTCAGCAAATCTTTTTTTCCCAAGGGGTTGTGATGTCTTCTATGGAATCGCG  
GGTCTCTTATAAGCTCTTATTTGTGGTGACAATTCATGGAATGTAGGTAGTGGTTAT  
GATCGATTCGATAGAAAAGAAGGAATAGTGTGATCTTTCGTTGGGGATCCCCGGAAG  
AAATCGTCGTATCTTCTACGATTCCTTATGAAAGATATTCAGTCCATCAGAATAGAAGC

TAGAGAGGGTTTTTATGCTCGTCGTATCCTTTATATGGAAATCAGAGGTCAGGGGGCCA  
TTCCCTTAACCCGTA CTGCCGAGAAT--TGGACTCCACGCGAAATTGAGCAAAGGCTG  
CTGAATTAGCCTATTTCTTGCGTGTCCCGATGGAAGTCTTT

>Drimys

ATGGAAAATGGTGGTTCAATTCGATGTTGTCTTTAAGTAAATCAATGAACAGTCTTGG  
TGCTATTGGAAATACCAGTGGAAGTGAAGACCTCATTATAAACGATACGGATAAAAACA  
TTCAT--TGCAATAATGTTGATGATTTATTTGGTATCAGGGACATTTGGAGTTTCGTCTCT  
GATGACACTTTTTTLAGTTAGGGATAGTAATGGTGACAGTTATTCCGTCTATTTTGATATTG  
AAAATCAGATTTTTCAGATTGACAATGAT-----AGTTCTTTTCTGAGTGAAGTAGAAAGC  
TCTTTTTCTAATTATCTGAAT--AGTTATCTGAATAGTGGGTCTAAGAGTGACAATCGCTA  
TTATGATCGTTACATGTATGATATTAATATAGTTGGAATAATCACATTAATAGTTGCATTG  
ATAGTTATCTCCATTCTGAAATCAGT-----ATTGAGAGTTATATTTCAAGTAGTAGCGACA  
ATTACGGTGACAGTTACATTTCTAGTTTCATTTGTAATGACAATGGGAGTTCAATAAGAA  
CTAGCGGTAATGGCAGCGATTTCAATATAAGAGGAAGATCT--GATTTGATATCAATCA  
AAAATACAGACATTTGTGGGTTCAATGCGAAAATTGTTATGGATTAAATTATAAGAAATT  
TTTTAGGTCAAAAATGAATATTTGTGAACAGTGTGGATATCATTGAAAATGAGTAGTT  
CAGATAGAATCGAACTTTTCGATTGATCCGGGCACTTGGGATCCTATGGATGAAGACATG  
GTCTCTATCGACCCCATTTGAATTTCACTCGGAGGAGGAACCTTATAGAGATCGTATCGA  
TTCTTATCAAAGAAAGACAGGTTTAACTGAGGCTGTTCAAACAGGCATAGGTCAACTA  
AATGGTATTCCCATAGCAATTGGGGTTATGGATTTTCAGTTCATGGGGGGTAGTATGGGA  
TCCGTAGTAGGCGAGAAAATAACCCGTTTGATCGAGTATGCTACTAATGGATCTCTACCT  
ATTATTATGGTGTGTGCTTCTGGAGGAGCACGCATGCAAGAAGGAAGTTTGAGCTTGAT  
GCAAATGGCGAAAATATCTTCTGCTTCATATAATTATCAATCAAATAAAAAGTTATTCTAT  
GTATCAATCCTTACATCTCCTACAACCCGGTGGAGTGACAGCCAGTTTTGGTATGTTGGG  
AGATATCATTATTGCTGAGCCCAATGCCTACATTGCATTTGCGGGTAAAAGAGTAATTGA  
ACAAACATTGAATAAGACAGTACCCGACGGTTCACAAGCGGCTGAGTATTCATTCCATA  
AGGGCTTATTTCGATTCAATCGTACCACGTAATCCTTTAAAAGGTGTTCTGAGTGAATTAT  
TTCAGCTACATGGTTTCTTTCCCTTGAATCAAAAT-----ATGGTAACCCTTCGAGTCGA  
CGAAATTAGTAATATTATCCGTGAACGTATTGAACAATATAATAGAGAAGTCACGATTGT  
GAATACCGGCACCGTACTTCAAGTAGGCGACGGTATTGCTCGTATTCATGGTCTTGATC  
AAGTAATGGCAGGGGAATTAGTAGAATTTGAAGAGGGTACCGTAGGCATTGCTCTGAA  
TTTGAATCAAATAATGTTGGTGTGTTATTAATGGGTGACGGTTTGATGATACAAGAGG  
GAAGTTCTGTAAAAGCAACAGGAAGAATTGCTCAGATACCCGTGAGTGAGGCTTATTT  
GGGTCGTGTTATAAATGCTCTGGCTAAACCTATTGATGGGAGAGGTGAAATTTACGCTT  
CTGAATCTCGGTTAATTGAATCTCCCGCTCCGGGTATTATTTGAGACGTTCCGTATATG  
AGCCTCTTCAAACGGGACTTATTGCTATTGATTCGATGATCCCTATAGGACGCGGTCAG  
CGGGAATTAATTATTGGGGACAGACAGACCGGAAAACAGCAGTAGCCACAGATACTA  
TTCTCAATCAAAAAGGGCAAAATGTAATATGTCTTTATGTAGCTATTGGTCAAAAAGCA  
TCTTCCGTGGCTCAGGTAGTGACTACTTTCCAAGAACGAGGGGCGATGGAATACACTA  
TTGTGGTAGCCGAAACAGCGGATTCGCCTGCAACATTACAATACCTCGCGCCTTATACA  
GGAGCGGCTCTGGCTGAATATTTTATGTACCGTGAACGACATACTTCAATAATTTATGAC  
GATCTCTCAAACAAGCACAAGCTTATCGCCAAATGTCTCTTCTATTAAGAAGACCACC  
CGGTCGCGAAGCTTATCCAGGAGATGTTTTTTATTTGCATTACGCCTTTTGAAAGAG  
CCGCTAAATCAAGTTCTCATTAGGTGAAGGAAGTATGACCGCTTACCCTATAGTTGAG

ACTCAATCTGGGGACGTTTCGGCTTATATTCTACTAATGTGATTTCCATTACAGATGGA  
CAGATATTCTTATCTTCCGATCTATTCAATGCTGGAATCCGCCCTGCTATTAATGTGGGTA  
TTTCCGCTCCAGAGTAGGATCTGCAGCTCAAATTAAGCCATGAAACAGGTAGCTGG  
TAAATCAAAATTGGAAGTGGCTCAATTCGCAGAGTTAGAAGCCTTTCACAATTCGCTT  
CTGATCTCGATAAAGCCACTCAGAATCAATTGGCAAGAGGTCAACGATTACGCGAGTT  
GCTCAAACAATCTCAATCAGCCCCTCTCACGGTGGAAAGAACAATACTTACTATTTATA  
CTGGGGCGAATGGGTATCTTGATCCGTTAGATATTGGACAGGTAAAGAAATTTCTCGTT  
CAGTTACGTACCCACTTAAAAACAATAAACCTCAGTTCCAAGAAATCATATCTTCTAC  
CAAGACATTCACCGAGCAAGCAGAAGCCCTTTTGAAGGAAGCTATTCCGGAACAGAT  
GGAAGTGTTTATACTTCAGGAACAAACAATGAGAATCAATCCTACTACCTCTGGTCCTG  
GGGTTTCCACACTTGAAGAAAAAACCTGGGGCGTATTGCTCAAATCATTGGTCCGGT  
ACTGGATGTAGTTTTTCCCCGGGCAAGATGCCTAATATTTACAACGCTTTGGTGGTTA  
AGGGTCGAGATACTGTCGGTCAACAAATTAATGTGACTTGTGAGGTACAGCAATTATTA  
GGAATAATCGAGTTAGAGCTGTAGCTATGAGTGCTACAGATGGTCTGATGAGAGGAAT  
GGAAGTGATTGACACGGGAGCCCCTCTAAGTGTTCCAGTCGGTGGGGCTACACTCGGA  
CGAATTTTCAATGTTCTTGGAGAACCTGTTGATAATTTAGGTCCTGTAGATACTCGCAC  
ACATCTCTATTATAGGTCTGCGCCTGCTTTTATCCAGTTAGATACAAGATTATCCATCT  
TTGAAACAGGGATTAAGTGGTGGATCTTTTAGCTCCTTATCGCCGTGGAGGAAAAATC  
GGACTATTCGGAGGAGCTGGAGTGGGTAAAACAGTACTCATCATGGAATTGATCAACA  
ACATTGCCAAAGCTCATGGAGGTGTATCTGTATTTGGCGGAGTAGGCCAACGTACTCGT  
GAAGGAAATGATCTTTACATGGAAATGAAAGAATCCGGAGTTATTAATGAAGAAAATAT  
TGCAGAATCAAAAGTAGCTCTAGTCCATGGTCAGATGAATGAACCGCCGGGAGCTCGT  
ATGAGAGTTGGTTAACTGCCCTAACCATGGCGGAATATTTCCGGGATGTTAATGAACA  
AGACGTACTTCTATTTATCGACAATATCTTCCGTTTTCGTCCAAGCAGGATCAGAAGTATC  
CGCCTTGTTAGGTAGAATGCCTTCTGCTGTGGGTATCAACCTACCCCTTAGTACAGAAA  
TGGGTTCTTTACAAGAAAGAATTACTTCTACCAAAGAGGGATCTATAACTTCTATTCAA  
GCAGTTTATGTACCTGCTGACGATTTGACCGACCCCTGCTCCTGCTACGACATTTGCACA  
TTTAGATGCTACTACTGTACTATCAAGAGGATTAGCTGCCAAAGGTATCTATCCAGCAGT  
AGATCCTTTAGATTCAACGTCAACTATGCTCCAACCTAGGATCGTTGGCGAGGAACATT  
ATGAAACTGCGCAAAGAGTTAAGCAAACCTTACAACGTTACAAAGAAGTTCAGGACA  
TTATAGCTATCCTTGGGTCGGACGAATTATCCGAAGAAGATCGTTTAAACCGTAGCAAGA  
GCACGAAAAATTGAGCGTTTCTTATCACAACCCCTTCTTCGTAGCAGAAGTATTTACTGG  
TTCTCCAGGGAAATATGTTGGTCTCGCAGAAACAATTAGGGGGTTTCAACTGATCCTTT  
CCGGAGAATTAGATGGTCTTCCCGAACAGGCCTTTTTATTTGGTGGGTAACATCGATGAA  
GCTACCGCGAAGGCTATGAACTTAGATGTGGAGAGCAAATTGAAGAAAATGACCTTAA  
ATCTTTGTGTACTGACTCCTAATCGAATTTATTTGGGATTCAGAGGTGAAAGAAATTTT  
TATCTACGAATAGTGGCAAATTGGCGTATTACCAAATCACGCCCTATTGCCACAGCT  
GTAGATATAGGTATTTTGAAGAATACGCCTCAACGACCAATGGTTAACGATGGCTCTGAT  
GGGTGGTTTTCGCTAGAATAGGCAATAATGAGATCACCATTTTAGTAAATGATGCGGAGA  
GGGGTAGTGACATTGATCCGCAAGAAGCTCAGCGAACTCTTGAATAGCCGAAGCTAG  
CTTGAGTAGAGCTGAAGGCAAGAGACAAGAAATTGAGGCGAATCTAGCTCTCCGAAG  
AGCTAGGACACGAGTAGAGGCTATCAATGTTATTTTCGATGAAAAATGTAACCGATTCTT  
TCGTTTTCTTGGGTCAGTGGTCATCCGCCGGGAGTTTCGGGCTTAATACCGATATTTTAG  
CAACAAATCCAATAAATCTAAGTGTAGTGCTTGGTGTATTGATCTTTTTTGGAAAGGGA-

--GTAAGTGATTTATTAGATAATCGAAAACAGAGGATCTTGAGTACTATTTCGAAATTCAG  
AAGAACTACGTGGAAGAGCCATTGAGCAGCTCGAAAAAGCCCGGGCTCGCTTACGGA  
AAATAGGAATGGAAGCAGATGAGTTTCGAGTGAATGGATACTCTGAGATAGAACGAGA  
AAAAGAGAATTTGATTAATGCTACTTATAATAATTTGGAACGATTAGAAAATTTCAAAAA  
TGAAACCATTTCGTTTTGAAGAACAACGAGCAATTAATCAGGTACGACAACGAGTGTTT  
CAGCAAGCCTTACAAGGAGCTCTAGGAACTCTGAATAGTTGTTTGAACAGTGAGTTAC  
ATTTACGCACCATCAGTGCTAATATTGGCATGCTCGGGACCATCAAAGAAATAACTGATA  
TGAATCCACTGATTTCTGCCGCTTCCGTTATTGCTGCTGGATTGGCCGTAGGGCTTGCTT  
CAATTGGACCTGGGGTTGGTCAAGGTACTGCTGCGGGTCAAGCTGTAGAAGGTATTGC  
GAGACAACCAGAAGCAGAGGGTAAAATACGAGGTACTTTATTGCTTAGTCTGGCTTTTA  
TGGAAGCTTTAACAATTTACGGACTGGTCGTGGCATTAGCGCTTTTATTTGCGAATCCTT  
TTGTTATGAATGTTCTACCATGTTCCATTAACACACTCAAAGGGTTATACGATCTATCCG  
GTGTGGAAGTAGGCCAACATTTCTATTGGCAAATAGGGGGTTTCCAAGTCCATGCCCA  
AGTACTTATCACTTCTTGGGTCGTAATTGCTATCTTATTAGGTTTCAGCCACTATAGCTGTT  
CGGAACCCACAAACCATTCCAATAAGAGTCAGAATTTCTTCGAATATGTACTTGAATT  
CATTCGAGACTTGAGCAAAACCCAGATTGGAGAAGATTATGGTCCTTGGGTTCCCTTTA  
TTGGA ACTATGTTCTATTTATTTTGTCTTACTGGTCAGGTGCTCTTTTACCTCGGA  
AAATCGTACAGTTACCTCACGGGGAGTTAGCTGCACCCACGAATGATATAAATACTACT  
GTTGCTTTAGCTTTACCCACGTCAAGTGGCATATTTCTATGCGGGTCTTACTAAAAAAGGA  
TTGGGCTATTTTCGGTAAATACATTCAACCAACTCCAATACTTTTACCAATTAACATCCTA  
GAAGATTTACAAAACCTTTATCACTTAGTTTTTCGACTTTTTCGGGAATATATTGGCTGAT  
GAATTAGTAGTTGTTGTTCTTGTCTTTAGTACCTTTAGTGGTTCCTATACCTGTCATGT  
TTCTTGGATTATTCACAAGCGGGATTCAAGCTCTATTTTTGCGACTTTAGCCGCGGCTT  
ATATAGGTGAATCCATGGAGGGTCATCATATGATATTCGCGACTTTAGAACATATATTAAC  
TCACATATCTTTTTCGATCATTTC AATTGTTATTACGATTCAATTGATAGACTTATTAGTCT  
ATCAAATCGTAGGAATATGTGATTATCAGAAAAAGGCATTATAGCTACTTTTTTCTGTA  
TAACAGGATTATTAATAACTCGTTGGATTATTTCGAGACATTTCCCGTTAAGTGATTATA  
TGAATCATTAATGTTCTTTTCATGGAGTTTCTCCATTATTCATATGGTTCC TAAAGCGGG  
GAACCATAAAAATGATTTAAGCGCAATAACTGGGCCAAGTGCTATTTTTTACCCAAGGCT  
TTGCCACTTCAGATCTTTTAACTGAAATGCATCAATCCGCAATATTAGTACCCGCCCTAC  
AATCCCAGTGGTTAATGATGCACGTAAGTATGATGTTATTGAGCTATGCAGCTCTTTTAT  
GTGGAGCGTTATTATCAGTAGCTTTTCTAGTCATCACATTTTCGAAAAACACAGATATTG  
CTGTTAAAAGCAATGAGATCCAATACTTGAATGAGAAAAGAAGTGTTTTACAAAACAC  
TTCTTTTCTTCATTTAGAAATTATCACAGGTATCGATTGACTCAGCGATTGGATCATTG  
GAGTTATCGTGTCATTAGTCTAGGGTTTATCTTTTCAACCATAGGTATTCTTTTCGGGAGC  
AGTATGGGCTAATGAGGCATGGGGATCTTATTGGAATTGGGACCCCAAGGAACTTGG  
GCATTTATTACTTGGACCATATTTCGCAATTTATTTACATACTAGAACAAATCAAAGTTTGC  
AAGGTGTGAATTCGTCAATTGTAGCTTCTATCGGATTTCTTATAATTTGGATATGCTATTT  
TGGGGTCAATCTATTAGGAATAGGGCTACATAGTTATGGTTCATTACATTAACAGTGCC  
AAAAAAAAGCATTGACTCCCCTCCCATATCTTGCATCTATAGTCTTTTTGCCCCTGGTG  
GATCTCTCTCATTTAATAAAAAGTCTGGAACCTTGGGTTACTCATTGGTGGAATACCA  
GGCAATCCGAAACTTTTTTGAATGATATTCAAGAAAATAACGTTCTAGAAAGATTATA  
GAATTAGAAGAACTATTCTGTTGGACGAAATGATAAAGGACTACCCGGAGACACAGA  
TACAAAAGTTTCGTATAGGAATCCACAAAGAAACGATACAATTGATCAAATGCACAAT

GAAGATCATATCCATATCATTTTTGCATTTCTCGGCAAATATAATCTGTTTCGCTATTTTTA  
GCGGTTATTCTATTCTGGGTAATGAAGAACTTGTCAATTTGAATTCTTGGGTTTCAGGAAT  
TCCTCTATAACTTAAAGTGACACAATAAAAGCTTTTTCTATTCTTTTATTAAGTATTATG  
TATCGGATTCCACTCGCCTTTTGGTTGGGAACTAATGATTGGCTCGGTCTACAAAGATTT  
TGGATTTGCCATAATGATCAAATTATATCTGGTCTTGTCTTCTACCTTTCCAGTCATTCTA  
GATACAATTTGAAATATTGGATCTTCCATATTTAAATGGTGTATCTCCTTCACTTGTAG  
TCATTTATCATTCAATGAATGAAATGCCATTGGTGTTCAAAAGTACCTTTTCGGAGTC  
CTGGAGAGGAAGATGCAGTTTGGGTTGACGTATACAACCGACTTCATCGAGAAAGATT  
ACTTTTTTTAGGACAAGAGGTTGATAGCGAGATCTCGAATCAACTGTTGGTCTCATGG  
TATATCTCAGTATAGAGGATGATACCAGGGATCTGTATTTGTTTATAAACTCTCCTGGCG  
GATGGGTAATACCAGGAATAGCTATTTATGATACTATGCAATTTGTGCCACCAGATGTAC  
ATACAATATGCATGGGATTAGCCGCTTCAATGGGATCTTTTATCCTAGTCGGAGGAGAAA  
TTACCAAACGTCTAGCATTCCCTCACGCTAGGGTTATGATCCACCAACCTGCTAGTTCTT  
TTTATGAGGCACCCACAGGAGAATTTATCCTGGAAGCGGAAGAAGTACTGAAACTCCG  
CGAAACCCTCACAAGGGTTTATGTACAAAGAACCGCAACCCTTTATGGGTTATATCCG  
AAGACATGGAAAGGGATGTTTTTATGTCAGCAACAGAAGCCCAAGCTCATGGCATTGT  
TGATGTTGTTGCGGTGCAAATGAAAGAACAAAATTGATTCATGAAGGTTTAATTACTG  
AATCACTTCCCAATGGTATGTTCCGGGTTTCGTTTAGATAATGAAGATCTGATTCTAGGTT  
ATGTTTCGGGGAGGATCCGACGTAGTTTTATACGGATACTACCAGGAGATAGAGTGAAA  
ATCGAAGTAAGTAGTTATGATTCAACCAAGGGACGTATAATTTATAGACTTCGCAACAA  
AGATTTCGAATGATATGGAGGAATTACAAGGATATTTAGAAATAGACGGATCTCGACAAC  
AATGCTTCCTATATCCACTTTTCTTTCAGGAGTATATCTATGCACTTGCTCATGATCATGG  
TTTATTCGGTTATGACAAT--TTCAGTTCACTAATTGGGAAACGTTTAATTACTCGAATGC  
ATCAACAGAATCATTTGATTCTTTCGGTTAAAGATTCTAAACAAAATCTATTTGTTGTTA  
AATATTTTGATTCTCAAATGATGTCAGAGGTTTTTGCAGTCATTGTGGAAATTCCATTCT  
CACTACGATTAGTATCTTCCCTAATAGCAAAATCTCATTCTATTCAATCTATTCAATCAATA  
TTCTTTTTTTTCGAGGACAAATTTTCACATTTAAATCATGTGTCAGATATACTAATACCCC  
ACCCTATACATCTGGAAATCTTGGTTCAAACCCTTCGCTGCTGGATACAAGATGCTCCC  
TCTTTGCATTTATTGAGATTTTTTCTCTACGAGTCTCGTAATTCGAATAGTCTCATTATTA  
AATCCATTTCCTTTTTTTTCAAACAAAGATTCTTCTTGTTCCTATATAATTCTCATATATAT  
GGATGCGAATCCATATTCGTTTTTCTCCGTAAACAATCCTCTCATTACGATCAACATCT  
TCGAGAACCCTTCTTGAGCGAACACATTTATATGGAAAAATAGAACAT--TLAGTAGTGC  
TTCGTAATCAGAGG---CTATGGTTGTTCAAGGATCCTTTCATGCATTATGTCAGATATCAA  
GGAAAAGCGATTATGGCTTCAAAGGGACTCATTCTGATGAAGAAATGGAAATATC  
ACCTTGCAATTTATGGCAATGTCATTTTTACTTGTGGTCTCAACCTGACAGTATCCATAT  
AAACCAATTATACAATCATTCTTTCTACTTTCTGGGCTATCTTTCACGTGTACAACATAAA  
CCCTTCGGTAGTAAGGAGTCAAATGCTAGAGAATTTATTTATAATAGATACTGCTATT-----  
-AATAAATTTCGAGACTATAGTCCCAATGATTCCTCTAATTAGATCATTGGCTAAAGCGAA  
ATTTTGTAACGTATCAGGGCATCCATTAGTAAGCCGGCCCGGCGATTATCTGATTC  
TGATATTATTGATAGATTTGGGCGTATATGTAGAAATCTTTTTCATTATCACAGTGGATCC  
TTAAAAAACAGAGTTTGTATCGAATAAAGTATATACTTCGACTTTCGTGTGCTAGAAC  
TTTGGCTCGTAAACATAAAAGTAAGGTACGCGCTTTTTTGAAAAGATTAGGTTCCGGAT  
TCTTCCAAGAATTCCTTACGGAAGAAGAACAAGTTCTTTCTTTGATCTTCCCAAGACGG  
ATTTGGTATTTGGATATTATCCGTATCAATGACCTGGCCAATCATGAAATGATAATTGATA

CGACA---GAAGTACAA---GCTATCAATTCCTTTTTCCAGATCGGAA---TCTTTAAAAGAAG  
GCTATGGCCTTATAGGGATGCTTGTCCCTATTTTTACTCCTGTATCGGGGATCACAATAG  
GGGTACTCGTGATTGTGTGGTTAGAAAGAGAAATATCCGCAGGGATACAGCAACGTATT  
GGGCCTGAATATGCTGGTCCCTTGGGAATTCCTCAAGCTCTAGCGGATGGGACCAAAC  
TGCTTTTCAAAGAGGATCTTCTCCCATCTAGAGGAGATATTCGTTTATTCAGTATCGGGC  
CATCCATAGCGGTCATATCAATTCATAAGTTATTCAGTAATTCCTTTTGGCTATCGCCT  
TGTTCTAGCCGATCTCAGTATAGGTGTTTTTTTTATGGATCGCCATTTCCAGTATTGCTCCT  
ATTGGACTTCTTATGTCAGGATATGGATCGAATAATAAATATTCTTTTTCAGGTGGTCTAC  
GAGCTGCTGCTCAATCTATTAGTTATGAAATACCATTAACCTCCATGTGTGTTATCAATATC  
TCTACTATCTAACAGTTCAAGTACAATTGATATAGTTGAGGCACAGTCAAATATGGCTT  
TTGGGGATGGAATCTGTGGCGTCAACCCATAGGGTTTATAGTTTTTATAATTTCTTCCCT  
AGCAGAATGTGAGAGATTACCTTTTGATTTACCAGAAGCAGAAGAAGAATTAGTAGCG  
GGTTATCAAACCGAATATTCAGGTATCAAATTTGGTTTATTTTACGTTGCTTCTTACCTAA  
ATCTACTAGTTTCTTCATTATTTGTAACAGTTCTTTACTTGGGCGGGTGAATCTCTCTAT  
TCCGTACATATTCATTCTGAACTTTTCGGAATAATAAAACGGGGGGAGTATTTGGAA  
CAACGATTGGTATCCTTATTACATTAGCTAAAGCTTATTTGTTCTGTTCATTCCCTATCAC  
ACAAGATGGACTTTACCTAGGATGAGAATGGACCAACTATTAATCTTGGATGGAAAT  
TTCTTTTACCTATTTCTCTGGGTAATCTATTATTGACAACTTCTTCCCAACTCCTTTCACT  
GATGATCTGGCATGTACAGAATGAAAACCTCATTCTCGATTCTACGAGAATTTTTATGAA  
AGCGTTTCATTTGCTTCTTCCATGGAAGTTTCATTTTCCCAGAATGTATCCTAATTTTT  
GGCCTAATCTTCTTCTGATGATCGATTCAACCTCTGATCAAAAAGATATACCTTGGTTA  
TATTTCATCTCTTCAACAAGTTTAGTAATGAGCATAACGGCCCTATTGTTCCGATGGAGA  
GAAGAACCTATGATTAGCTTTTTCGGGAAATTTCCAACGAACAATTTCAACGAAATCTT  
TCAATTTCTTATTTTACTATGTTCAACTCTATGTATTCTCTATCCGTAGAGTACATTGAAT  
GCACAGAAATGGCTATAACAGAGTTTCTGTTATTTCGTATTAACAGCTACTCTAGGAGGA  
ATGTTTTTATGTGGTGCTAACGATTCAATAACTATCTTTGTAGCTCCAGAATGTTTCAGT  
TTATGCTCCTACCTATTATCTGGATATACCAAGAGAGATGTACGGTCTAATGAGGCTACT  
ACGAAATATTTACTCATGGGCGGGGCAAGCTCTTCTATTCTGGTTCATGGTTTCTCTTGG  
CTATATGGTTCATCCGGGGGAGAAATCGAGCTTCAAGAAATAGTGAATGGTCTTATCAA  
TACACAAATGTATAACTCCCCAGGAATTTCAATTGCGCTTATATTCATCACTGTAGGAAT  
TGGGTTCAAGCTTTCCCCAGCCCCTTTTCATCAATGGACTCCTGACGTATACGAAGGAT  
CTCCCCTCCAGTCGTTGCTTTTCTTTCTGTTACTTCGAAAGTAGCTGCTTCAGCTCCA  
GCCACTCGAATTTTCGATATTCCTTTTTATTTCTCATCAAACGAATGGCATCTTCTTCTGG  
AAATCCTAGCTATTCTTAGCATGATATTGGGGAATCTCATTGCTATTACTCAAACAAGCA  
TGAAACGTATGCTTGCATATTCGTCCATAGGTCAAATCGGATATGTAATTATTGGAATAAT  
TGTTGGAGACTCAAATGATGGATATGCAAGCATGATAACTTATATGCTGTTCTATATCTC  
CATGAATCTAGGAACTTTTGCTCGCATTGTCTTATTTGGTCTACGTACCGGAACTGATAA  
CATTCGAGATTATGCAGGATTATACACGAAAGATCCTTTTTTGGCTCTCTCTTCAGCCCT  
ATGTCTCTTATCCCTAGGAGGTCTTCTCCACTAGCAGGTTTTTTTCGGAAAACCTCCATCT  
ATTCTGGTGTGGATGGCAGGCAGGCCTATATTTCTTGGTTTCAATAGGACTCCTTACGA  
GCGTTGTTTCTATCTACTATTATCTAAAAATAATCAAGTTATTAATGACTGGGCGAAAGC  
AAGAAATAACCCCTCACGTGCGAAATTATAGAAGATCTCCTTTAAGATCAAACAATTCC  
ATCGAATTGAGTATGATTGTATGTGTGATAGCATCTACTATAACCAGGAATATCAATGAAC  
CCAATTATTGCAATTGCTCAGGATACCCTCTTATGTTTTCTGCTTTACGAATATGATATTT

TCTGGGCATTTCTAATAATATCAAGTCTTATTCCTATTTTAGCATTTCTAATTTCTGGGAGT  
TTTAGCCCCGATTAGTGAAGGACCAGAGAACTCTCTAGTTATGAATCGGGTATAGAAC  
CAATGGGGGATGCTTGGTTACAATTCCGAATTCGCTATTACATGTTTGTCTAGTTTTG  
TTGTTTTTGATGTTGAAACGGTCTTTCTTTATCCATGGGCAATGAGTTTCGATGTATTGG  
GTGTATCTGTATTTATAGAAGCTTTAATTTTCGTGCTTATCCCAATTATTGGTTCAGTTTAT  
GCATGGCGAAAAGGAGCATTGGAATGGTCTACGAGTTATTTTCCCTTGGTTAACAATAAT  
TGTTGTTTTTCCGATATCCGCGGGTTCATCAATTTTCTTTCTCCCTCATAGAGGGAATAA  
GGTGGTGAGATGGTATACTATATGCATCTGCTTGTTAGAACTCCTTCTAACGACCTATGC  
ATTCTGTTATCATTTCOAATTGGACGATCCATTAATCCAATTGGAGGAGGATTATAAATG  
GATAAATATTTTGGATTTTCACTGGAGACTGGGGATCGATGGACTTTCATCGGACCCA  
CTTTACTGACGGGATTCATCACTACTTTAGCTACTTTAGCGGCTTGGCCAGTTACTCGA  
GATTCGCAATTGTTCCATTTTCTGATGTTAGCAATGTACAGCGGTCAAATAGGATCATT  
TCTTCTCGAGACCTTTTACTTTTTTTCATCATGTGGGAGTTAGAATTAATTCCTGTTTACC  
TACTTTTATCCATGTGGGGAGGTAAGAAACGTCTGTACTCAGCTACAAAGTTCATTTTG  
TACACTGCGGGGGTCTATTTTTCTCTTAATGGGAGTTCAGGTATGGGTTTATATGGT  
TCCAATGAACCAACATTAATTTGGAAACATCAGCTAATCGATCGTATCCCGCGGCATT  
GGAATAATATTCTATTTTGGCTTCTTTATTGCTTATGCTGTCAAATCACCGATTATACCC  
CTACATACATGGTTACCAGATACCCATGGAGAAGCGCATTACAGTACATGTATGCTTCTA  
GCTGGAATTTTATTAATAATGGGAGCATATGGATTGGTTCGGATCAATATGGAATTATTA  
CCCATGCTCATTCTATATTTTCTCCCTGGTTGATGATAGTCGGAACGATTCAAATAATCT  
ATGCAGCTTCAACTTCTCCCGGTCAACCCAATTTTAAAAAGCGAATAGCCTATTCCTCC  
GTTTCTCATATGGGTTTCAACAATTATCGGAATTGCTTCCATAACTGATATGGGACTCAAT  
GGAGCCATTTTACAAATCATTCTCATGGATTTATTGGTGTGCACTCTTTTTCTTGGCA  
GGAACGAGTTACGATAGAATAGGTCTTGTATCTCGACGAAATGGGAGGAATAGCTAT  
CCAATGCCAAAATATTTACCATGTTCAAGTACTTCTCGATGGCTTCTCTTGCCTGCC  
AGGAATGAGTGGTTTTTTTGCAGAATTGGTAGTCTTTTTTGGATAATTACCAGCACGA  
AATACCTTTTAAATGCCAAAATACTAATTACTTTTTGTAATGGCAATTGGAATGATATTAAC  
TCCATTTATTCAATATCTATGTTACGTGATGTTCTATGGATACAAATCAATGTTA  
CAAATCCTACTTTGTGGATTCTGGACCACGAGAACTATTTGTTTCGATCTGTATCTTTC  
TACCCGTAATAGGTATCGGTATTTATCCCGATTTTGTCTCTCACTATCAGTTGAGAAGAT  
AGAAGCTATTCTATCTAATTACCTTCATAAAATGATGCTCGAGCATGTACTTATTTTGAGT  
GCCTATTTATTTCTATTGGTATTTATGGATTGATCACAAGTCGAAATATGGTTAGAGCAC  
TTATGTGTCTTGAGCTTATACTGAATGCGGTTAATATGAATCTCATAAAATTTCTGATTT  
ATTTGATAGTCGACAATTAAGGAGACATTTTCTCGATCTTTGTTATAGCTATTGCAGC  
CGCTGAAGCAGCTATTGGGCCAGCTATTGTTTCGTGATCCATCGTAACAGAAAATCAA  
CTCGTATCAATCAATCGAACTTGTGTAATAAAATGCAACCCATATATCAATATGCATGGA  
TCATACCTTTCGTTCCACTTCCAGTTACTATGTCAATAGGATTGGGACTTCTGCTTGTTC  
CGACCGCAACAAAAATCTTCGTGATGTGGGCTTTTCCCAGTGTTTCATTGCTAAGT  
ATAGTTATGGTTTTTTCGGCCGATCTGTCTGTTCAACAAATAGATGGCAGTTCATCTAT  
CAATATCTATGGTCTTGGACCATCAATAATGATTTTTCTTAGAGTTTGGGACTTGTATC  
GACCCACTTACTTCTATTATGTCAATACTAATCACTACTGTGGAATTATGGTCTTATTT  
ATAGTGACAAGTATATGTCTCATGATCAAGGATTTGAGATTTTTTCTTATATGAGTTT  
TTCCAATACTTCTATGTTGGGATTAGTTACTAGTTCCAATTTGATACAAATTTATATTTTT  
GGAACTCGTGGGAATGTGTTTCGATTTTATTAATAGGTTTTTGGTTCACACGACCAATC

GCAGCAAATGCCTGTCAAAAAGCACTTGTAAC TAATCGTGTAGGGGATTTTGGTTTATT  
ATTAGGAATCTTAGGTCTTTATTGGATAACAGGTAGTTTCGAATTCGTGATTTGTTTGA  
AATCTTCAATAACAATGGGGTTAATTCCTTATTTGCTACTCTGTGTGCTTCCCTATTATTC  
GCTGGTGCAGTTGCTAAATCTGCACAATTTCCCCTTCATGTATGGTTACCTGATGCCATG  
GAGGGACCCACTCCTATTTCCGGCTCTTATACATGCTGCTACTATGGTAGCAGCGGGAAT  
TTTTCTTGTCGCTCGACTTCTTCCTCTTTTCACAGTTATACCTTACATAATGAATCTAATT  
TCTTTGATAGGTGTAATAACGGTACTATTAGGAGCTACTTTGGCTCTTGCTCAAAGAGA  
CATTAAAGAGAAGCTTAGCTTATTCAACAATGTCGCAATTGGGTTATATTATGTTAGCTCC  
AGGGATAGGTTCTTATCGAGCTGCTTTATTCCATTTAATTACTCATGCCTATTCGAAAGC  
ATTATTGTTTTTAGGCTCCGGATCCATTATTCAATGGAACCCATTGTTGGATATTCT  
CCAGATAAGAGTCAGAACATGGTTCCTATGGGTGGTTTAAAGAAAATATGTACCAATTAC  
AAAAATGACTTTTTTATTAGGTACACTTTCTCTTTGTGGTATTCCACCTCTTGCTTGTTTT  
TGGTCCAAAGATGAAATTCTTAATGATAGTTGGCTGTATTCACCGATTTTCGCGATAATA  
GCTTGTGCCACAGCGGGATTAAC TGCATTTTATATGTTTCGGACATATTTACTTACTTTTG  
AGGGGTATTTATATGCGCATTTTCAA AATTACAGTGGCACTCAA AATAGTTCGTTTTATT  
CAATATCTATATGGGGGAAAGAAGA ACCAAA ACTGGTTAACAGA---AATTTGCTTTTAT  
CAACAATAAATAAGGTTTCCAATAAAGAC-----ACTTCGATGTATCCTCATGAATCAGAT  
AATACAATGCTATTGCCTCTACTTGTGTTGGTCTTATTACTTTGTTTCGTTGGATT CATAG  
GAATTCCTTTCCGTTTGGATATATTATCCAATGGTTAACCCCATCAATAAACCTTTTACA  
TCAA AATTCGA ACTATTCCGGTGAATTGGTATGAATTTGCGACAAATGCATTTTTTTTCAGT  
CAGTATAGCCTATTTCCGGAATATTCATAGCGTCTCTTTTATATGGTCTGTATTATTTATTT  
TTCAGAATTTGGAATTAATCAATTCATTTGTTATTTTCTTGGACCAAATAATAAATGTGAT  
CTACAATGGT CATATAATCGTGGTTACATAGACGTTTTTTATGCAACATCTTTAACTAAA  
GGCATAAGAGGATTAGCCAACTAACTCATTTTTTTGATAGACGAGTAATTGATGGAAT  
TATGAATGGGGTTGGTGTTC AAGTTTCTTTGTAGGAGAGGGGATCAAATAC---CTAGG  
GGGTGGACGAATCTCTTCTTATCTCTTTGTATATTTATCTTATGTGTCAATCTTTTTATTA  
TTTACATCATGGATTTACCTGGACCAATACACGATATCTTTTTAGTATTTTTGGGATCAGG  
TCTTATACTAGGGGGTCTAGGAGTGGTATTATTTACCAATCCCATTTTTTCTGCCTTTTCA  
TTGGGATTGGTTCTTGTTTGTATATCCTTATTCCATATTCTATCTAACTCCTATTTTGTAGC  
TGCTGCACAGCTCCTTATTTACGTGGGAGCTGTAAATGTCTTAATCATATTTGCTGTGAT  
GTT CATGAATGGTTCAGAATATTACAATGATTTCTATCTTTGGACCGTTGGAGATGGGGT  
CACTTCACTGGTTTGTACAAGTATTCTTTTTTCACTAATTACTACTATCTCAGATACGTCA  
TGGTATGGGATTATTTGGACTACAGGATCAAACCAGATTATAGAGCAGGACCTGATAAG  
TAATGTTCAACAAATTGGGATTCATTTATCAACAGATTTTTATCTTCCATTTGAACTCATT  
TCTATAATTCTTTTAGTTGCCTTGATAGGTGCAATTGCTATGGCTCGTCAGATGACTGTA  
CCGGCTACAAAAAAGACCTCATGATAATCAATATGGGTCCCTCACCACCCATCAATGCA  
TGGTGTCTTCGACTCATTGTTACTCTAGATGGTGAAGATGTTATTGACTGTGAACCTAT  
ATTGGGTTATTTACACAGAGGGATGGAAAAAATTGCGGAAAACCGAACAATTATACAAT  
ATCTGCCATATGTAACACGTTGGGATTATTTAGCTACTATGTTACAGAGGCAATAACGG  
TAAATGCCCCCGAACAATTGGGAAATATTCAAGTACCTAAAAGAGCCAGTTATATCAGA  
GTTATTATGCTGGAGCTAAGTCGTATAGCTTCTCATTTGTTATGGCTTGGGCCTTTTATGG  
CAGATATCGGTGCACAGACCCCTTCTTCTATATTTCCGAGAGAGAGAATTGCTATATG  
ATCTATTCGAAGCTGCCACAGGTATGCGAATGATGCATAATTATTTCCGTATCGGAGGAG  
TAGCTGCTGATCTACCTCATGGATGGATAGATAAATGTTTGGATTTCTGCGATTATTCTTT



AACAGGAGTTGTTGAATATCAAAAGCTTATTACGCGGAATCCCATTTTTTTTGGAAACGAG  
TTGAAGAAGTGGGCATTATTGGTGGAGAGGAAGCAATAAATTGGGGTTTATCAGGACC  
AATGCTACGAGCTTCCGGAATCCAATGGGATCTTCGTAAAGTTGATCATTATGAATGTTA  
TGATGAATTCGATTGGGAAGTCCAATGGCAAAAAGAAGGAGACTCGTTAGCTCGTTAT  
TTAGTACGAATCAGTGAAATGACGGAATCCATAAAAATTCTTCAACAGGCTCTGGAAG  
GAATTCCGGGGGGACCCTATGAGAATTTAGAAGTCCGACGCTTTGATAGAGCAAAGGA  
TTCTGAATGGAACGATTTTGAATATCGATTTCATTAGTAAAAAACCTTCTCCACCTTTGA  
GTTGTTAAAACAAGAACTTTATGTGAGAGTAGAAGCCCCAAAAGGAGAATTAGGAATT  
TTTCTGATAGGAGATAATAGTGTTTTTCCCTGGAGATGGAAAATTCGTCCACCGGGTTT  
CATAAATTTGCAAATTCCTCCTCAGCTAGTTAAAAGAATGAAATTGGCTGATATCATGAC  
GATACTAGGTAGTATAGATATCATTATGGGAGAAGTTGATCGTATGTTCCCTATGATGACT  
GGGTTTCATGAATTATGGTCAACAAACAGTACGAGCTGCAAGGTACATTGGTCAAAGTT  
TCATGATTACCTTATCCACGCGAATCGTTTACCTGTAACCTATTCAATATCCTTATGAAA  
ATCGATCACATCAGAGCGTTTCCGTGGTCAATCCACTTTGAATTTGATAAATGTATTGC  
TTGTGAAGTATGTGTTTCGTGTATGCCCCATAGATCTACCCGTTGTTGATTGGAGATTGGA  
AACAGATATTAGAAAGAAACGATTGCTTAATTATAGTATTGATTTCCGGAATCTGTATATTT  
TGTGGTAACTGCGTCGAGTATTGTCCAACAACTGTTTATCAATGACTGAAGAATATGA  
ACTTTCCATTTATGATCGTCACGAGTTGAATTATAATCAAATTGCTTTGGGTGCGCTACC  
AATGTCAGTAATTGGAGATTACACAATTCGAACAATTATGAATTCGAAAATAACCACGG  
ATAAACCCCTTGATTCAATAACGATTACCAATGACATGCAAGGTCGTTTATCTGCTTGGC  
TAGTCAAGCATGAGCTAGTGCATAGATCTTTGGGCTTCGATTACCAAGGAATCGAGACT  
TTACAAATAAAGCCCGAGGATTGGTACTCCATTGCTGTCATTTTCATATGTATATGGTTAC  
AATTATCTACGTTCCAGTGTGCTTATGATGTAGCACCTGGGGGGTTGTTAGCTAGTGTG  
TATCATCTTACGAGAATACAGTATGGTGTGGATCAACCCGAAGAGGTATGCATAAAAGT  
ATTTGCCCAAGGAGGAATCCTAGAATCCCGTCTGTTTTCTGGATTTGGAAAAGTGCTG  
ATTTTCAAGAACGGGAATCTTATGATATGTTGGGAATCTCTTATGAAAATCATCCACGCC  
TGAAACGTATCTTGATGCCTGAAAGTTGGATAGGCTGGCCCCTACGTAAGGATTATATT  
GCCCCCAATTTCTATGAAATACAAGATGCTCAT-----

-----ATTAATTCTATTGAGTTTCCGTTACTTGACCGAACAACCCAA---TCAGTTATTTCA  
ACTACATCGAATGATCTTTTCGAATTGGTCAAGACTTTCCAGTTTATGGCCGCTTCTCTAT  
GGTACCAGTTGTTGCTTCATTGAATTTGCTTCATTAATAGGCTCGCGATTGACTTTGAT  
CGTTATGGACTGGTACCAAGATCGAGTCCTAGGCAAGCAGACCTCATTTTAACAGCCG  
GCACAGTAACAATGAAAATGGCGCCTTCTTTAGTGAGATTATATGAGCAAATGCCTGAA  
CCAAAATATGTCATTGCCATGGGAGCTTGTACTATTACAGGAGGGATGTTTCAGTACGGA  
TTCTTATAGTACCGTTCCGGGGAGTCGATAAGCTAATTCCCTGTGGATGTCTATTTGCCGGG  
CTGCCCCCCAAACCAGAGGCAGTTATAGATGCTATAACGAAACTTCGTAAGAAAGTA  
TCTCGAGAAATCTATGAAGATCGAATTGGGTCTCAACAAGAAAATCGATATTTTACTAC  
CAATCACAAGTTTCATGTTGGACGCAGTACTCATACTGGAAATTACGATCAAGGATTAC  
TCTATAAATCTCCATCTACTTCAGAAATACCTACTGAAACATTTTTTCAAATACAAAAGT---  
GTATCTTCCCACGAATTAGTGAATATGCAAAATAGAAATACCTTTTCTTGGGTAAAGGA  
ACAGATGACTCGATTCATTTCCGTATCGATCATGATATATGTAATAACTAGGACATCTATT  
TCAAATGCATATCCTATTTTTGCGCAGCAGGGTTATGAAAATCCACGAGAAGCAACTGG  
GCGTATTGTATGTGCCAATTGCCATTTAGCTAATAAACCCGTGGATATTGAGGTTCCACA

AGCTGTGCTTCCTGATACTGTATTTGAAGCAGTTGTTAGAATCCCTTATGATATGCAACT  
GAAACAAGTTCCTTGCTAATGGTAAAAAGGGGTCTTTGAATGTCGGGGCTGTTCTTATTT  
TACCCGATGGATTGGAATTAGCTCCCCCGATCGTATTTCTCCCGAGATGAAAGAAAAG  
ATAGGCAACCTGTCTTTTCAGAGTTATCGCCCCACTAAAAAAAATATTCTTGTGATAGG  
TCCTGTTCCCTGGTCAGAAATATAGTGAAATCGTCTTTCCATTCTTTCTCCGGACCCTGC  
TACTAAGAAAGACGTTAACTTCTTAAAATATCCCATATACGTAGGTGGGAACAGGGGAA  
GGGGTCAGATTTATCCCGATGGGAGCAAGAGTAACAATACAGTCTATAATGCTACAGGA  
GCAGGTATAGTAAGCAGAATAGTACGTAAAGAAAAAGGGGGGTATGAAATAACCATAG  
CTGATGCATCGGATGGACACCAAGTAATTGATATTATACCTCCAGGACCAGAACTTCTT  
GTTTCAGAGGGTGAATCTATCAAGCTTGATCAACCATTAACGAATAATCCTAATGTGGG  
TGGATTTGGTCAGGGAGATGCAGAAATAGTACTTCAAGATCCATTACGTGTCCAAGGGT  
TGTTGTTCTTTTTGGCATCTGTTATTCTGGCACAAATCTTTTTGGTTCTTAAAAAGAAAC  
AGTTTGAGAAGGTTCAATTGTCCGAAATGAATTCATGAGCAAAGTATATGATTGGTTC  
GAGGAGCGTCTAGAGATTGAGGCGATTGCGGATGATATAACTAGTAAATATGTTCTCCTCC  
TCATGTCAACATATTTTCATTGCCTAGGGGGGATTACACTTACTTGTTTTTTAGTACAAGT  
AGCTACAGGTTTTGCTATGACTTTTTACTATCGTCCGACCGTTACAGAGGCCTTTGCCCTC  
TGTTCAATACATAATGACTGAAGCCAACTTTGGTTGGTTAATCCGATCAGTTCACCGAT  
GGTCAGCAAGTATGATGGTCCTAATGATGATCCTGCACGTATTTCTGTGTATCTTACAG  
GTGGATTTAAAAAACCTCGTGAATTAACCTGGGTTACGGGTGTGGTTCTAGCTGTATTG  
ACTGCATCTTTTGGTGTAACGGTTATTCTTACCTCGGGACCAAATTGGTTATTGGGCA  
GTCAAATCGTGACAGGCGTACCTGACGCTATTCCTGTAATAGGATCGCCTTTGGTGA  
GTTATTACGTGGAAGTGCTAGTGTGGGTCAATCCACTTTGACCCGTTTTTATAGTTTACA  
CACTTTTGTATTACCTCTTCTTACTGCCGTATTTATGTTAATGCACTTCCCAATGATACGT  
AAGCAAGGTATTTGAGGTCCTTTAATGGGAATAACAAAGAAACCTGACTTGAATGATC  
CTGTATTAAGAGCTAAATTGGCTAAAGGGATGGGGCATAATTATTATGGCGAACCTGCAT  
GGCCAACGATCTTTTATATATTTTTCCAGTAGTAATTCTAGGTACTATTGCATGTAACGT  
AGGCCTAGCAGTTCTAGAACCGTCAATGATTGGTGAACCGGCGGATCCATTTGCAACG  
CCTTTGGAAATATTACCTGAATGGTACTTCTTTCCCGTATTTCAAATCCTCCGTACAGTA  
CCCAATAAGTTATTGGGTGTTCTTTTAATGGTTTCAGTGCCAACGGGATTATTGACAGTA  
CCTTTTTTGGAGAATGTTAATAAATCCAAAATCCATTCGTCGTCCAGTGGCTACAAC  
AGTCTTTTTGATCGGTACCGCAGTAGCTCTTTGGTTAGGTATTGGAGCAACATTACCTAT  
TGATAAATCTCTAACTTTAGGTCTTTTTATGATTGAAGTTTTTCTATTTGGAATCGTCTTA  
GGTCTAATTCCTATTACTTTGGCCGGATTATTCGTAACCTGCATATTTACAATACAGACGC  
GGAGATCAGTTGGACCTTATGCCTACTATAACTAGTTATTTCCGGTTTTCTACTAGCTGCT  
TCAACTATAACCCAGCTCTATTGATGGGTCTGAGCAAGATACGACTTATTATGGATATA  
GTAAGTCTCGCTTGGGCTGTTTTAATGGTAGTCTTTACATTCTCCCTTTCACTCGTAGTA  
TGGGGAAGAAGTGGACTCATGATTATTCGTTCCCGGAACCAGAAGTGAAGATTTTGG  
TGGATAGGGATCCCGTAAAACTTCTTTTCGAGGAATGGGCCAGACCCGGCCATTTCTC  
AAGAACAATAGCTAAAGGCCCTGAGACTACCACTTGATCTGGAACCTTACATGCCGAT  
GCTCACGATTTTCGATAGCCATACCAGTGATTTGGAGGAGATCTCTCGAAAAGTATTTAG  
TGCTCATTTCGGTCAACTCTCCATCATCTTTCTTTGGCTGAGTGGTATGTAATCCATGG  
CGCCCGTTTTTCCAATTATGAAGCGTGGCTAAGCGATCCTACTCACATCGGACCCAGCG  
CCCAGGTGGTTTGGCCAATAGTGGGTCAAGAAATATTGAATGGTGATGTGGGGGGTGG  
TTCCGAGGAATACAAATAACCTCTGGTTTTTTTTTCAGATTTGGCGAGCGTCTGGAATAA

CTAGTGAATTACAACCTCTATTGCACCGCAATTGGTGCGTTGGTCTTTGCAGGGTTAATG  
CTTTTTGCTGGTTGGTTCCATTATCACAAAGCTGCTCCAAAATTGGCTTGGTTCCAAGA  
TGTAGAATCTATGTTGAATCACCCTTAGCGGGGTTACTAGGACTTGGGTCTCTTTCTTG  
GGCGGGACACCAAGTACATGTATCTTTACCGATTAACCAATTTCTAGACGCTGGAGTGG  
ATCCTAAAGAGATAACCACTTCCTCATGAGTTTATCTTGAATCGGGATCTTTTGGCTCAAC  
TTTATCCCAGTTTTGCCGAGGGAGCAACCCATTTTTACCTTGAATTGGTCAAATAAC  
GCGGAATTTCTTACTTTTTCGTGGAGGATTAGATCCTGTAACAGGGGGTCTATGGCTGAC  
CGATATTGCACATCATCATTTAGCTATTGCAATTCTTTTCCTGATAGCTGGTCACATGTAT  
AGGACCAACTGGGGCATTGGTCATGGTCTGAAAGATATTTTAGAGGCTCATAAAGGGC  
CATTTACAGGCCAGGGTCATAAAGGCCTCTATGAGATCCTAACACGTTCATGGCATGCT  
CAATTATCTCTAACCTAGCTATGTTAGGTTCTTTAACCAATTGTTGTAGCTCACCATATGT  
ATTCCATGCCCCCTTATCCATACCTAGCTATTGACTATGGTACACAACCTTTTCGTTGTTTAC  
ACATCACATGTGGATCGGTGGATTTCTCATAGTTGGTGTGCTGCACATGCAGCCATTTT  
TATGGTAAGAGACTATGATCCAATACTCGATAACAACGATCTATTAGACCGTGTCTTAG  
GCACCGAGATGCAATCATATCACATCTCAACTGGGCATGTATATTTCTAGGCTTTTACAG  
TTTTGGCTTGATATTCATAATGATACCATGAGCGCTTTAGGGCGTCCCCAAGATATGTTT  
TCAGATAACCGCTATAACAATTACAACCCATCTTTGCTCAATGGGTACAAAACACCCACGC  
TTTAGCGCCCCGGTGCAACAGCTCCTGGTGCAACAACAAGCACCAGCTTGACTTGGGG  
GGGTGGTGATTTAATAGCAGTAGGCGGCAAAGTCGCTTTGTTACCTATTCCATTAGGAA  
CCGCAGATTTTTTGGTACATCACATTCATGCATTTACGATCCATGTGACTGTATTGATACT  
ACTGAAAGGTGTTCTATTTGCCCGTAGCTCACGTTTGATACCTGATAAAGCAAATCTTG  
GTTTTCGTTTCCCTTGTGACGGACCTGGAAGAGGGGGGACATGCCAAGTATCTGCCTG  
GGATCATGTCTTCTTAGGCCTATTCTGGATGTACAATGCAATTTCCGGTAGTCATATCCAT  
TTCAGTTGGAAAATGCAGTCAGATGTTTGGGGTAGTATAAGTGATCAAGGGGTGGTAA  
CTCATATCACGGGAGGAACTTTGCACAGAGTTCCATTACTATTAATGGGTGGCTCCGG  
GATTTTTTATGGGCACAAGCATCTCAGGTAATTCAGTCTTATGGTTCTTCATTATCTGCAT  
ATGGCCTTTTTTTCCTAGGTGCTCATTTTGTCTGGGCTTTTAGTTTAATGTTTCTATTAG  
CGGCCGTGGTTATTGGCAAGAACTCATTGAATCCATCGTTTGGGCTCATAACAAATTA  
AAGTTGCTCCTGCTACTCAGCCTAGAGCCTTGAGCATTGTACAAGGACGCGCTGTAGG  
AGTAACCCATTACCTTCTGGGTGGAATTGCCACAACATGGGCATTCTTCTTAGCAAGAA  
TTATTGCAGTAGGAATGGCATTAAAGATTTCCAAGGTTTAGCCAAGGCTTAGCTCAGGAC  
CCCCTACTCGTCGTATTTGGTTTGGTATTGCTACCGCACATGATTTTCGAGAGTCATGAT  
GATATTACTGAAGAACGTCTTTATCAGAACATTTTTGCTTCTCACTTCGGGCAGTTAGC  
AATAATCTTCTGTGGACTTCCGGAAATCTGTTTCATGTAGCTTGGCAAGGAAATTTG  
AGTCATGGGTACAGGACCCTTTACATGTAAGACCTATTGCTCATGCAATTTGGGATCCT  
CATTTTGGTCAACCAGCTGTAGAAGCCTTTACTCGAGGGGGTGCTCTCGGCCAGTGA  
ATATCGCTTATTCCGGTGTTTATCAGTGGTGGTATAACAATTGGCTTACGCACCAATGAGG  
ATCTTTATACTGGAGCTCTTTTTCTATTAATTTCTTTCTGCCATATCCTTAATAGCGGGTTGG  
TTACACCTACAACCCAAATGGAAACCAAGCGTTTCGTGGTTCAAAAATGCCGAATCTC  
GTCTCAATCATCATTTGTGAGGACTCTTCGGAGTAAGTTCCCTTGGCTTGGACAGGACAT  
TTAGTTCATGTCGCTATTTCCCGATCGAGGGGGGAGTACGTCAGATGGAATAATTTCTT  
AGATGTATTACCGTATCCCCAGGGGTTGGGCCACTTTTTACAGGTCAGTGAATCTTTA  
TGCCCAAAACCCCGATTCCAGTAGTCATTTATTTGGTACCTCCCAAGGAGCAGGAACTG  
CCATTCTAACCCCTTCTCGGGGGATTCCATCCACAACGCAAAGTTTATGGTTGACCGAT

ATTGCTCATCATCATTTAGCTATTGCATTTCTTTTTCTCGTTGCTGGTCATATGTATAGAA  
CTAACTTCGGGATTGGTCACAGTATGAAAGATCTTTTAGAGGCACATACTCCTCCCGGG  
GGTCGATTGGGCCGTGGGCATAAGGGTCTTTATGACACAATCAATAATTCGATTCATTTT  
CAATTAGGTCTTGCCCTAGCCTCTTTAGGGGTATTACTTCTTGGTAGCTCAACACATG  
TACTCTTTACCTGCTTATGCATTCATAGCACAAGACTTTACTACTCAAGCTGCGTTATATA  
CTCATACCAATACATTGCAGGGTTCATCATGACAGGGGCCTTTGCCCATGGAGCTATAT  
TCTTCATTCGAGATTACAATCCGGAACAGAATGAGGATAATGTATTGGCAAGAATGTTA  
GACCATAAAGAAGCTATCAAACTCATTTAAGTTGGGTGAGCCTGTTTCTGGGGTTCCA  
TACCTTAGGACTCTATGTTTATAACGACGTCATGCTTGCTTTTGGTACTCCAGAGAAAC  
AAATCTTGATCGAACCCATATTTGCCCAATGGATACAATCCGCTCATGGTAAGACTTCAT  
ATGGGTTTCGATGTACTCTTATCTTCAACGAATGGCCCAGCATTCAATGCTGGTTCGAAGC  
ATATGGTTACCCGGCTGGTTAAATGCCGTTAATGAG-----AATAGTAATTCACTATTCTTA  
ACAATAGGTCCTGGAGACTTCTTGGTTCATCATGCTATTGCTCTAGGTTTGCATACAACC  
ACATTGATCTTAGTAAAAGGTGCTTTAGACGCACGTGGTTCCAAGTTAATGCCAGATAA  
AAAGGATTTTCGGTTATAGTTTTCTTGCACGGTCCGGGACGAGGGGGTACTTGTGATA  
TTTCGGCTTGGGACGCATTTTATTTGGCAGTTTTCTGGATGTTAAATACCATAGGATGGG  
TTACTTTTTATTGGCATTGGAAGCACATCACACTATGGCAGGGTAACGTTTACAAATTTA  
ATGAATCCTCCACTTATTTGATGGGATGGTTAAGAGATTATCTATGGTTAAACTCTTCAC  
AACTTATCAATGGATATAACCCTTTTGGTATGAATAGTTTATCAGTGTGGGCGTGGATGT  
TTTTATTTGGGCATCTTGTTTGGGCTACTGGATTTATGTTCTTAATTCCTGGCGTGGATA  
TTGGCAGGAATTGATTGAAACTTTAGCATGGGCTCATGAACGCACACCTTTGGCTAATT  
TGATTTCGATGGAGGGATAAACCCGTGGCTCTTCCATTGTACAAGCAAGATTGGTTGGA  
TTAGCCCACTTTTCTGTAGGTTATATATTCACTTATGCAGCTTCTTGATTGCCTCTACAT  
CAGGCAAATTTGGTATGTCACATTCAGTAAAGATTTATGATACATGTATAGGATGTACTC  
AATGTGTACGAGCCTGCCCCACAGATGTATTGGAAATGATACCTTGGGACGGATGTAAA  
GCTAAGCAAATTGCTCCTGCTCCAAGAACAGAAGACTGTGTAGGTTGTAAGAGATGTG  
AATCCGCTTGTCCAACAGATTTCTTGAGTGTCCGGGTTTATTTATGTCATGAGACAAC  
CGCAGCATGGGTCTAGCTTATATGACAGATCTCAACTTACCCCTATTTTTGTGCCTTTA  
GTGGGCCTAGTATTTCCGGCAATTGCAATGGCGTCTTTATCTCTTCATGTTCAAAAAA  
CAAGATTGTTATGCGAGATATAAAAACATATCTCTCCGTGGCACCTGTGCTAACTACTCT  
ATGGTTCGGGTCTTTAGCAGGTCTATTGATAGAGATCAATCGTTTATTTCCAGATGCGTT  
GACATTCTCCTTTTTTTCATTATGACTGCAATTTTAGAGAGACGCGAAAGCACAAGCC  
TATGGGGTCGCTTCTGCAACTGGATAACCAGCACGGAAATCGTCTTTATATTGGATGG  
TTTGGTGTTTTGTATGATCCCCACCTTATTGACCGCAACTTCTGTATTTATTATCGCATTCA  
TTGCTGCTCCTCCAGTGGATATTGATGGTATTCGTGAACCTGTTTCTGGTTCTTTACTTTA  
TGGAACAATATATCTCTGGTGCCATTATTCCTACTTCTGCAGCCATCGGTTTGCACCTT  
TTACCCGATATGGGAAGCGGCATCTGTTGATGAATGGTTATACAATGGTGGTCCTTATGA  
ACTAATTGTTCTACACTTCTTACTTGGTGTAGCTTGTACATGGGTTCGTGAGTGGGAAC  
TTAGTTTCCGTCTGGGTATGCGCCCTTGGATTGCTGTTGCATATTCAGCTCCAGTTGCAG  
CTGCTACTGCTGTTTTCTTGATCTACCCTATTGGTCAAGGAAGCTTCTCTGATGGTATGC  
CTCTAGGAATATCTGGTACTTTCAATTTTATGATTGATTCCAGGCGGAACACAACATCC  
TTATGCATCCATTTACATGTTAGGCGTAGCTGGTGTATTTCGGCGGCTCCCTATTCAGTG  
CTATGCATGGTTCCTTGGTAACTTCTAGTTTTGATCAGGGAAACCACAGAAAATGAATCT  
GCTAATGAAGGTTACAGATTCCGGTCAAGAGGAAGAACTTATAATATCGTCGCCGCTCA

TGGTTATTTTGGCCGATTGATCTTCCAATATGCTAGTTTCAACAATTCTCGTTCCTTACAT  
TTCTTCCTAGCTGCTTGGCCTGTAGTAGGTATCTGGTTCCTGCTTTAGGTATTAGCACC  
ATGGCTTTCAACCTAAATGGTTTCAATTTCAACCAATCTGTAGTTGATAGTCAAGGTCG  
TGTTATTAACACTTGGGCTGATATCATCAATCGTGCTAACCTTGGTATGGAAGTTATGCA  
TGAACGTAATGCTCACAACCTTCCCTCTAGACCTAGCTGCTGTGCAAGCTCCATCTACAA  
ATGGAATGGGTTTGCCTTGGTATCGTGTTACATCCGTCGTATTGAATGATCCCGGTCGGT  
TACTTTCTGTCCATATAATGCATACAGCTCTAGTTTCTGGTTGGGCCGGTTCGATGGCTC  
TATACGAATTAGCAGTTTTTGTATCCCTCTGATCCCGTTCCTGATCCAATGTGGAGACAAG  
GTATGTTTCGTTATACCCTTCATGACTCGTTTAGGGATAACCAATTCATGGGGTGGTTGGA  
GTATCACA---GGAGGAACTATAACGAATCCGGGTATTTGGAGTTACGAAGGTGTGGCTG  
GGGCACATATTGTGTTTTCTGGCTTGTGCTTCTTAGCAGCTATCTGGCATTGGGTGTATT  
GGGACCTAGAAATATTCTGTGATGAACGTACGGGAAAACCTCTTTGGATTTGCCCAA  
GATCTTTGGAATTCATTTATTTCTATCAGGGGTGACTTGCTTTGGGTTTGGCGCATTTC  
TGTAACAGGCTTGTATGGTCCTGGAATATGGGTGTCCGATCCTTATGGTCTAACCGGAA  
AAGTACAATCTGTAAATCCAGCGTGGGGCACAGAAGGTTTTGATCCTTTTGTCCGGG  
AGGAATAGCCTCCCATCATATTGCAGCGGGGACATTGGGGATATTGGCGGGGCTATTCC  
ATCTTAGTGTTCGTCCGCCCAACGTTTATACAAAGGATTACGTATGGGCAATATTGAAA  
CTGTACTTTCTAGTAGTATCGCTGCTGTCTTTTTTGCAGCTTTCGTCGTTGCTGGAACTA  
TGTGGTATGGTTCAGCAACGACTCCCATAGAATTATTTGGTCCCCTCGTTATCAGTGG  
GATCAGGGATACTTCCAGCAAGAAATATATCGAAGAGTTGGCGCCGGGCTAGCCGAAA  
ATCTGAGTTTATCGGAAGCTTGGTCTAAAATTCCCGAAAAATTAGCTTTTTTATGATTACA  
TCGGTAATAATCCGGCGAAGGGGGGATTATTCAGAGCAGGCTCAATGGACAATGGGGA  
TGGAATAGCTGTTGGATGGTTAGGACACCCCATCTTTAGAGATAAAGAGGGGCATGAG  
CTTTTTGTACGTCGTATGCCTACTTTTTTTGAAACATTTCCAGTGGTTTTTGGTAGACGGA  
GACGGAATTGTGAGAGCGGATGTTCTTTTTAGAAGGGCAGAATCGAAGTATAGTGTGCG  
AACAAAGTAGGTGTAACCTGTTGAGTTCTATGGTGGCGAACTCAATGGGGTCAGTTATGG  
CGATCCTGCTACTGTGAAAAAATATGCTAGACGTGCCCAATTGGGTGAAATTTTTGAAT  
TAGATCGTGCTACTTTGAAATCCGATGGTGTTTTTTCGTAGCAGTCCAAGGGGTTGGTTC  
ACTTTTGGACATGCTACGTTTGCTTTGCTCTTCTTTTTTCGGACACATTTGGCATGGGGCT  
AGAACCTTGTTTCAGAGATGTTTTTGGCTGGTATTGACCCTGATTTGGATGCTCAAGTGGAA  
ATTTGGAACATTTCCAAAACTTGGAGATCCAACCTACAAGGCGACAAGTAGTCATGAAA  
ACCTTATATTCCCTGAGGAGGTTCTACCCCGTGGAAACGCTCTTTAATGGAACCTTTAGC  
TTTAGCTGGTTCGTGATCAAGAAACCACTGGTTTCGCTTGGTGGGCCGGGAATGCCCGA  
CTTATCAATTTGTCCGGTAAACTACTCGGGGCTCACGTAGCCCATGCCGGATTAATCGTA  
TTCTGGGCCGGAGCAATGAACCTATTTGAAGTGGCTCATTTCGTACCAGAGAAACCCA  
TGATGAACAAGGATTGATTTTACTTCCCATCTAGCTACTCTAGGTTGGGGGGTAGGT  
CCGGGTGGGGAAGTTATAGACACTTTTCCATACTTTGTATCTGGAGTACTTCACTTAATT  
TCCCTCTGCAGTCTTAGGCTTTGGTGGTATTTATCATGCACTTCTCGGACCTGAGACTCTT  
GAAGAATCCTTTCCATTCTTCGGTTATGTATGGAAAGATAGAAATAAAATGACCACAAT  
TTTGGGTATTCACTTAATCTTGTAGGTATAGGTGCTTTTCTTCTAGTACTCAAGGCTCTT  
TATTTTGGGGCGTATATGATACCTGGGCTCCCGGGGGGGGAGATGTAAGAAAAATTAC  
CAACTTGACCCTTAGCCCAAGTGTTATATTTGGTTATTTACTAAAATCTCCCTTTGGTGG  
AGAAGGATGGATTGTTAGTGTGGATGATTTAGAAGATATAATTGGAGGACATATATGGTT  
AGGTTCCATTTGTATACTTGGTGGAAATCTGGCATATCTTAACTAAACCCTTTGCATGGGC

TCGCCGAGCATTGTCTGGTCTGGAGAGGCTTACTTGTCTTATAGTTTAGCTGCTTTATC  
TGTCTTTGGTTTCATCGCTTGTGTTTCGTCTGGTTCAATAATACCGCTTATCCTAGTGA  
GTTTTACGGGCCCCTGGGCCAGAAGCTTCTCAAGCTCAAGCATTACTTTTTCTAGTTA  
GAGACCAACGTCTTGGGGCTAACGTAGGATCCGCTCAAGGACCTACTGGTTTAGGTAA  
ATATCTAATGCGTTCCTCCGACCGGAGAGGTCATTTTTGGAGGAGAACTATGCGTTTTT  
GGGATCTCCGCGCTCCCTGGTTGGAACCTCTAAGGGGTCCCAATGGTTTGGACTTGAG  
TAGACTGAAAAAAGACATAACAACCTTGGCAAGAACGACGTTTCGGCGGAATATATGACT  
CATGCTCCTTAGGTTCTTTAAATTCTGTGGGTGGCGTAGCTACAGAGATCAATGCAGT  
CAATTATGTATCGCCTAGAAGTTGGTTAGCTACCTCTCATTTTTGTTCTAGGATTCTTCCTA  
TTCGTGGGTCATTTGTGGCATGCGGGAAGGGCCCGTGCAGCTGCAGCAGGATTTGAAA  
AAGGAATTGATCGTGATTTTTGAACCTGTTCTTTCTATGACCCCTCTTAACATGACTATAG  
CCCTTGGTACATTTACTAAAGAAGAAAATGATTTATTTGATATTATGGATGACTGGTTAC  
GTAGGGACCGTTTTCGTTTTTGTAGGTTGGTCCGGTCTATTGCTCTTCCCTGTGCTTATT  
TTGCTTTAGGGGGTGGTTCACAGGTACAACCTTTTGTAACTTCATGGTATACCCATGGAT  
TGCCAGTTCCTATTTGGAAGGCTGCAATTTCTTAACCGCTGCAGTTTCTACTCCTGCT  
AATAGTTTAGCACATTTCTTTGTGCTATTATGGGGTCTGAAGCACAAGGAGATTTACT  
CGTTGGTGTCAATTAGGTGGTCTGTGGACTTTTGTGCTCTCCATGGCGCTTTCGGACT  
AATAGGTTTCATGTTACGTCAATTTCGAACCTGCTCGATCGGTTCAATTGCGACCTTATAA  
TGCAATCGCATTCTCTGGTCCAATTGCTGTTTTTGTCTGTATTCTGATTTATCCACTA  
GGTCAGTCTGGTTGGTTCTTTGCGCCCAGTTTTGGTGTAGCAGCTATATTTCGATTCATC  
CTATTCTTCCAAGGATTTTATAATTGGACGTTGAACCCATTTTATATGATGGGAGTTGCC  
GGAGTATTGGGTGCTGCTCTGCTATGCGCTATTCATGGTGCTACCGTAGAAAATACGTTA  
TTCGAAGATGGTGATGGTGCAATACATTCCTGCTTTTTAACCCTCAAGCTGAAG  
AGACGTATTCGATGGTCACTGCTAACCGCTTTTGGTCCCAATCTTTGGGGTTGCTTTT  
TCCAATAAACGTTGGTTACATTTCTTTATGTTATTTGTACCAGTAACCGGTTTATGGATGA  
GTGCTATTGGAGTAGTTGGTCTGGCTCTGAATCTACGTGCCTATGACTTCGTTTCCCAG  
GAAATCCGTGCAGCGGAAGATCCTGAATTTGAGACTTTCTACACCAAAAATATTCTCTT  
AAACGAAGGTATTTCGTGCTTGGATGGCGGCTCAGGATCAGCCTCATGAAAACCTTATAT  
TCCCTGAGGAGGTTCTACCCCGTGGAAACGCTCTTATGTCTGGAAGCACGGGAGAACG  
TTCTTTTGTGATATTATCACCAGTATTCGATACTGGGTCATTCATAGTATTACTATACTT  
CCCTATTCATTGCGGGTTGGTTATTCGTGACGACGGGTTAGCTTATGATGTGTTTGGAA  
GCCCTCGGCCAAACGAGTATTTACAGAGAGCCGACAGGGGATTCCATTAATAACTGG  
CCGTTTTGATCCTTTAGAACAACTCGATGAATTTAGTAGATCCTTTATGACCATAGATCG  
AACCTATCCATTTTTACAGTGCCTGGTTGGCCGTTACGGACTGGCTGTACCTACCG  
TTTCTTTTTTGGGGTCAATATCAGCAATGCAGTTCATCCAACGAATGGCTACACAAACC  
GTTGAGGGTAGTTCCAGA---TCTAGGCCAAGACGAACTACGACAGGGAAATTTATTGAA  
ACCATTGAATTCGGAATATGGTAAAGTAGCCCTGGATGGGGAACCTACTCCTTTGATGG  
GTGTCGCAATGGCTCTGTTTGCATATTCCTATCTATTATTTTGGAGATTTATAATTCTTC  
CGTTTTACTGGATGGAATTTCAATGAGTATGCTTACTCTCAAACCTTTCGTTTACACAGT  
AGTGATATTCTTTGTTTCTCTCTTCATCTTCGGATTCTATCTAATGATCCAGGACGTAAT  
CCTGGACGTGAGGAAATGGCCGATACTACTGGAAGGATTCCTCTTTGGCTGATAGGTAC  
TGTAACCTGGTATTCTGTGATTGGTTCAATAGGTATTTCTTTTACGGTTCATACTCCGGA  
TTGGGCTCATCCCTAATGCTTAATATCTTTAGTTTGGATCTGTATCTGTCTTAATTCTGCC  
TTCATTCGAGTAGCTTTTTCTTCGCCAAATTGCCCGAGGCTTATGCTTTTTTCAATCCAA

TCGTAGATTTTATGCCAGTCATACCTGTGCTCTTTTTCTCTTAGCCCTTGTTGGCAAG  
CTGCTGTAAGTTTTCGAACGACACAATCAAACCCGAACGAACAAAATGTTGAATTGAA  
TCGTACCAGCCTCTACTGGGGTTTATTACTCATTTTTGTACTTGCTGTTTTATTTCCAAT  
TATTTCTTCAATATGGAAGTCAATATTCTCGCATTTATTGCTACTGCGCTGTTCAATTCTAG  
TTCCTACTGCTTTTTTACTTATCATCTACGTAAAAACAGTCAGTCAAATGATATGGAAA  
CAGCAACCCTAGTCGCCATCTCCATATCTGGTTCACCTTGTAAGCTTTACTGGGTACGCCT  
TATATACCGCTTTTGGGCAACCCTCTCAACAATAAGAGATCCATTTCGAGGAACACGGG  
GACATGGAAGCATTGGTTTATACGTTCCCTGTTAGTCTCGACTCTAGGGATAATTTTTTC  
GCTATCTTTTTTCGAGAACCACCTAAGGTTCCGACAAAAGGATGAAAATGACTATTGC  
TTTTCAATTGGCTCTTTTTGCATTAATTGCTACTTCATCAATCTTACTGATTAGTGTACCT  
ATTGTATTTGCTTCTTCCGATGGTTGGTCAAGTAACAAAATGTTGTATTTCCGGTACA  
TCATTATGGATTGGATTAGTCTTTCTGGTAGCTATCCTTAATTCTCTCATCTCT-----  
-----ATGTCACCAAAAACAGAGACTAAAGCAAGTGGTGGATTCAAAGCGGGTGTTAAA  
GATTACAAATTGACTTATTATACTCCTGACTATGAAACCAAAGATACTGATATCTTGGCA  
GCATTCCGAGTAACTCCTCAACCCGGAGTTCACCGGAGGAAGCGGGAGCTGCTGTA  
GCTGCCGAATCTTCTACTGGTACATGGACAACGTGTGTGGACCGATGGACTTACCAGCCT  
TGATCGTTACAAAGGACGATGCTACCACATCGAGCCTGTTGCTGGGGAGGAAGATCAA  
TATATTGCTTATGTAGCTTACCCTTTAGACCTTTTTGAAGAAGGTTCTGTTACTAACATGT  
TACTTCCATTGTGGGTAATGTATTTGGGTTCAAAGCCCTACGAGCTCTACGTCTAGAG  
GATCTGCGAATTCCTACTGCATATGTCAAACCTTCCAAGGCCACCCCATGGCATCCA  
AGTTGAGAGAGATAAATTGAACAAGTATGGTCGTCCCCTATTGGGATGTAATAAAC  
CAAATTTGGGGTTATCCGCCAAGAATACTACGGTAGAGCGGTTTATGAATGTCTCCGCGT  
GGACTTGATTTTACCAAGGATGATGAGAACGTGAACTCCCAACCATTATGCGTTGGAG  
AGACCGTTTCTTATTTGTGCCGAGGCTCTTTATAAAGCACAGGCCGAAACAGGTGAA  
ATCAAAGGACATTACTTGAATGCTACTGCGGGTACATGTGAAGAAATGATGAAAAGGG  
CAGTATTTGCCAGAGAATTGGGAGTTCCCATCGTAATGCATGACTACTTAACAGGGGGA  
TTCCTGCAAATACTACCTTGGCTCATTATTGCCGAGACAACGGTCTACTTCTTACATC  
CATCGCGCAATGCATGCAGTTATTGATAGACAGAAAATCATGGTATACTTTTCGTGTA  
CTAGCTAAAGCGTTACGTATGTCTGGTGGAGATCATATTCACGCTGGTACCGTAGTAGG  
TAACTGGAAGGGGAACGGGACATCACTTTGGGTTTTGTTGATTTACTACGTGATGATT  
TTATTCAAAAAGACCGAAGTCGCGGTATTTATTTCACTCAAGATTGGGTCTCTATGCCA  
GGTGTCTGCCCGTAGCTTCAGGGGGTATTCACGTTTGGCATATGCCTGCCCTGACCGA  
GATCTTTGGGGATGATTCCGTACTACAGTTCGGCGGAGGAACTTTAGGACACCCTTGG  
GGAAATGCACCTGGTGCAGTAGCTAATCGGGTGGCTTTAGAAGCGTGTGTACAAGCTC  
GTAATGAGGGACGTGATCTTGCTCGTGAAGGTAATGAAATTATCCGTGAAGCTTGCAAA  
TGGAGCCCTGAACTAGCTGCTGCTTGTGAGGTATGGAAAGAGATCAAATTCGAATTCA  
AAGCAGTGGATACCTTGGATATCACGGCGATACTTATACAAAACTTCTACCCCGAGC  
ACACGCAATGGAGCCGTAGACAGTCAAGTCAAATCCAATCCACGAAATAATTTGATCTA  
TGGACAGCATCATTGTGGTAAAGGTCGTAATGCCAGAGGAATCATTACCGCAGGGCAC  
AGAGGGGGAGGTCATAAGCGTCTATACCGTAAAATCGATTTTCGACGGAATGAAAAG  
ACATATCTGGTAGAATCGTAACCATAGAATACGACCCTAATCGAAATGCATACATTTGTC  
TCATACACTATGGGGATGGTGAGAAGAGATATATTTTACATCCCAGAGGGGCTATAATTG  
GAGATACCATTGTTTCTGGTACAGAAGTTCCTATATCAATGGGAAATGCCCTACCTTTGA  
CCGATATGCCCTTAGGCACGGCCATACATAACATAGAAATCACACTTGGAAAGGGTGGA

CAATTAGCTAGAGCAGCAGGTGCTGTAGCGAAACTGATTGCAAAAAGAGGGTAAATCGG  
CCACATTAAGATTACCATCTGGGGAGGTCCGTTTGATATACAAAACTGCTTAGCAACA  
GTCGGACAAGTGGGTAATGTTGGGGTGAACCAGAAAAATTTGGGTAGAGCCGGATCTA  
AGTGTGGCTAGGTAAGCGTCCTGTAGTAAGAGGAGTAGCTATGAACCCTGTAGACCA  
TCCCATGGGGTGGTGAAGGGAGGGCCCCGATTGGTAGAAAAAACCCACAACCCC  
TTGGGGCTATCCTGCGCTTGGAAGAAGAAGTAGAAAAAGGAATAAATATAGTGATATTT  
ATATTCTTCGTCGCCGTA---ATGATTCAACCTCAGACCCATTTGAATGTAGCAGACAA  
CAGCGGGGCTCGAGAATTGATGTGATTTCGAATCATCGGAGCTAGT---AATCGCCGATAT  
GCTCATATCGGTGATGTTATTGTTGCTGTAATCAAAGAAGCAGTACCCAATATGCCTCTC  
CAAAGATCAGAAGTGATCAGAGCTGTAATTGTACGTACATGTAAAGAACTCAAACGTG  
ACAACGGTATGATAATACGATATGATGACAATGCAGCGGTTGTCATTGATCAAGAAGGA  
AATCCAAAAGGAACTCGAGTTTTTGGCGCGATCGCTCGGGAATTGAGACAGTTGAATT  
TCACTAAAATAGTCTCATTAGCTCCTGAGGTATTAATGCTTAGTCCCAAAAAGAACCAGA  
TTCCGTAAACAACATAGAGGAAGAATGAAGGGAATATCTTATCGAGGCAATTATATTTG  
TTTCGGTAGATACGCTCTTCAGGCACTTGAACCCGCTTGGATCACATCTAGACAAATAG  
AAGCAGGGCGACGAGCAATGACACGATATGCGCGTCGTGGTGGAAAAATCTGGGTAC  
GTATATTTCCCGACAAACCCGTTACAGTAAGACCCACAGAAACACGTATGGGTTCAGG  
GAAGGGATCCCCGAATATTGGGTATCCGTCGTTAAACCGGGTCAATACTTTATGAAA  
TGGGCGGAGTCTCAGAACTGTAGCCAGAGCAGCTATTGAAATAGCTGCGTGCAAAAT  
GCCTATACGAACTCAATTCGTTATTGCGGGAATGACCAGAGTTAGGCGAGGATATATAG  
CTCGGAGACGTCGAACAAAAATTCGTTTATTTACATCAACCTTTCGAGGGGCTCATTCA  
AGACTTACTCGAACTACTACTCAACAGAAAATGAGAGCTTTGGTTTCCAGTCATCGGG  
ATAGATGCAGGCAAAGAGAGATTTTCGTCGTTTGTGGATCACTCGGATAAATGCAGTA  
ACTCGTGAAAAT-----GTCTCCTATAGTTATAGTCGATTAATGCACGATCTGTACAAGAGG  
CAGTTGCTTCTTAATCGTAAATACTTGCACAAATAGCTATATCAAATAGGAATTGCATT  
TACATGATTTCAAATGAGATTATCAA-----AGGAAGAAGCAAGTA  
CAAGCTTTAGCTCAACATATATGTATGTCTGCTCACAAAGCGCGAAGAGTTATTGATCA  
GATTCGTGGACGTTCCATGAGAAAACACTTATGCTACTAGAACTTATGCCTTATCGAG  
CATCTTATCCATTTTAAAATTGGTTTATTCTGCAGCAGCAAATGCTAGTCACAATAAGG  
GTTTCAACAAAGCTGATTTAGTCATTAGTCAAGCCGAAGTCAATGGGGTACTATCATT  
AAAAAGTTAAAACCTCGGGCTCGAGGACATAGTTATCCGATAAAAAGACCCACCTGCC  
ATATAAATATCGTTTTGAAAGATCAATCTAAAACG-----ATGGATGGAATCAA  
ATATGCAGTCTTTACAGAAAAAGTATTCGGTTATTGGGGAACAATCAA---TATACTTCT  
AATGTGCAATCAGGATCAACTAGGACAGAAATAAAGCATTGGGTGCAACTCTTCTTTG  
GTGTCAAGGTAATAGCTATGAATAGTCATCGACTCCCGGGAAAGGGTAGAAGAATGGG  
ACCTATTATGGGACATACAATGCATTACAGACGTATGATCATTACGCTTCAACCGGGTTA  
TTCTATTCCACCTCTTATAGAGAAAAGAACTATGACGGTTCCAAAGAAACGTACTTCTA  
TGTCAAAAAAGCGTATTCGCAAAAATATTTGGAAGAGAAAGGGATATTGGGCCGCGTT  
AAAAGCTTTATCCTTGCTAAATCTATTTCTACCGGGCATTCAAAAAGTTTTTTTGTGCA  
ACAAACAAGTAATATGGCCAAGGGTAAAGATGTCAGAATAAGAGTGATTTTGGGAATGT  
ACCAGTTGTGTCCGAAATGATTTAAAT-----AAGGAATCGCGGGGCATTTCCAGATATATT  
ACTCAAAGAATCGACACAATACACCTAGTCGATTGGAATTGAGAAAATTCTGTCCTTA  
TTGTTACAAGCATAACGATTCACGGGGAGATAAAGAAAATGAAAATAAGGGCTTCTGTT  
CGTAAAATTTGCGAAAAATGTCGACTGATCCGTAGGCGAGGACGAATTATAGTAATTTG



TTTCAATCCGAGACATAAACAGAGACAAGGGATGGTTCGAGAGGAAGTAGCAGTATCC  
ACTCGGACACTACAGTGGAAGTGTGTTGAATCAAGAACAGACAGTAAGCGCCTTTCCT  
ATGGACGTTTCATTCTGTCCCCGCTTATGAAAGGTCAAGCAGATATGATAGGTATCGCTA  
TGCGAAGGGCTTTACTTGGAGAAATAGAAGGAACATGTATCACACGCGCAAAATCTGA  
T-----AAGATACCACATGAATATTCTACGATAGTCGGTATTGAAGAATCAGTACATCAAAT  
TTTAATGAATTTGAAAGAAATTGTATTGAGAAGTAATCTGTATGGAACCTTGCACGCAT  
CTATTTTCGTCAGGGGTCCTAGATGCGTAACTGCTCAAGATATCATCTCACCACCTTCTG  
TGAAAATGGTTGATACTACACAGCATATAGCTAGCCTGACAGAACCCATTGATTTGTGT  
ATTGGATTACAAATCGAGAGGGATCGCGGATATCGTATGAAAACCCCAAATAATGATCA  
AGATGGAAGTTATCCTATTCTATAGAGGCTGTATCCATGCCTGTTGAAATGCGAATCA  
TAGTATTCATTCTTATGGGAATGGGAATGAGAAACAAGAAATACTTTTTCTAGAAATATG  
GACGAATGGAAGTTAACTCCTAAAGAAGCACTTCACGAAGCTTCCATAATTTGATTG  
ATTTATTTATTCCTTTTCTACATGGGGAGGAAGAGGCATCAATTTA-----GAGGACAGT  
CTA--AACAGGGGTACTTTACCTTTTTTTTACCTTTCAGGATAAATTGGCTAAT--CTAAGG  
AAAAACAAAAA---GCAATTGCATTGGAATGTATTTTTATTGACCAATCAGAATTGCCT  
CCCAGAACCTATAATTGTCTCAAAGGTCCAATATACATACATTATTGGACCTTTTGAGT  
AACAGTCAAGAAGATCTTATGAGAATTGAACATTTGCGCATAGAAGATGTAACCGGA  
TATTGGACATTCTACAGAAGCAT-----TTCACAATTGATTTACCTAAGAATAAGATGCTCC  
GGGATGGA---AATGAGGGAATGTTTACAATACCTGGATTTAGTCAGATACAATTTGAGG  
GATTTTTTAGGTTTCATTGATCAGGGCTTGACGGAAGAACTTCATAAGTTTCCAAAATT  
GAAGATACAGATCAAGAAATTGAATTTCAATTATTTGTAGACACATATCGATTGGTTCGA  
ACCCTTGATAAAAGAAAGAGATGCTGTGTATGAATCACTCACATATTCTTCTGAATTATA  
TGTAACCCGCAGGATTAATTTGGAACACTGGTAGAGATATGCAAGAACAAACCATATTTA  
TTGGAACATTCTCTAATGAATTCCTTGGGAACCTCTATAGTAAATGGAATATACAGAA  
TTGTGATCAATCAAATATTGCAAAGTCCCGGTATTTATTACCGTTCAGAATTGGACCATA  
ACGGAATTTCTGTCTATAACCGGTAGCATAATATCAGATTGGGGAGGAAGATCAGAATTA  
GAGATTGATAGAAAAGCAAGGATATGGGCCCGTGTGAGTAGGAAACAAAAAATATCTA  
TTCTAGTTCCATCATCAGCTATGGGTTCGAATCTAAGAGAAATTCTAGATAATGTTTGT  
ACCCTGAAATTTTCTTGTCTTTCCCGAATGAAAAGGAGAAAAAAGATTGGGTCAAG  
GGAATGCCATTTTGGAGTTTATCAACAATTTGCTTGTGTAGGTGGGGATCCGGTAT  
TTTCTGAGTCCTTATGTAAAGAATTACAAAAGAAATTTTTTCAACAAAGATGTGAATTA  
GGAAGGATTGGTCGACGAAATATGAACTGGAGATTGAATCTTGATATACCTCAGAACAA  
TCTATTTTTGTTACCACGAGATGTATTGGCTGCTGCGGATCATTGATCGGAATGAAATT  
TGGAATGGGCACCCTTGACGAT-----ATGAATCACTTGAAAAATAAACGTATTCTGTTCTG  
TAGCAGATCTGTTACAGGATCAATTCGGATTGGCTCTGGTTCGTTTAGAAAATGTGGTT  
CGAGGAACTATATGTGGAGCAATCAGG---CATAAATTGATA---CCGACTCCTCATAATTT  
GGTAACTTCAACTCCA-----TTAACAATACTTATGAATCGTTTTTCGGCCTACACC  
CTTTATCTCAAGTTTTGGATCGAACGAATCCATTGACACAAATAGTTCATGGGCGAAAA  
TCGAGTTATTTGGGTCCTGGAGGATTGACAGGACGAACTGCTAGTTTTTCGGATACGAGA  
TATCCATCCTAGTCACTATGGGCGTATTTGCCCAATTGACACGTCCGAAGGAATCAATGT  
TGGACTTATTGGATCTTTAGCTATTCATGCGAGGATTGGTTATTTGGGG---TCTATAGAGA  
GTCCGTTTTAT-----GAAATATCTCAGAGATCAAAGAG-----GTACAGACGGTTTTATTT  
ATCACCAAATAGAGATGAATATTATATGGTAGCAGCGGAAATTCTTTGGCGTTGAATC  
AGGGTATTCAGGAAGAACAGGTTGTTCCAGCTCGATACCGTCAAGAATTCCTGACTATT

GCATGGGAACAGATTCATCTTCGAAGCATTTCCTTTCCAATATTTTCTATTGGAGCT  
TCCCTCATTCCTTTTATCGAGCATAATGACGCGAATCGAGCTTTAATGAGTTCGAATATG  
CAGCGTCAAGCAGTTCGGCTTTCTCGGTCCGAGAAGTGCATTGTTGGAAGTGGGTTGG  
AACGACAAGCGGCTCTAGATTCGGGGGTTTCAGCTATAGCCGAACAAGATGGAAAGAT  
CATTTATACTGATACTGACAAGATCGTTTTATCAGGTAATGGAGACACTATAAGCATTCC  
ATTGGTTATATATCAACGTTCCAACAAAAATACCTGTATGCATCAAAAACCTCAGGTTCC  
GCGGGGTAAATGCCTTAAAAAGGGACAAATTTTAGCGGACGGTGCGGCTACAGTTGGT  
GGTGAAGTTCGCTTTGGGAAAAACGTATTAGTGTCTTATATGCCATGGGAAGGCTACAA  
TTTTGAAGACGCGTACTCATTAGTGAACGTCTAGTATATGGAGATATTTATACTTCTTTT  
CACATCCGGAATATGAAATTCAGACTCATGTGACAAGTCAAGGC---CCTGAAAGAATC  
ACTAATGAAATACCGCATTTAGAAGCCATTTACTCCGCAATTTAGACATAAATGGAATT  
GTGATGTTGGGATCTTGGATAGAAACAGGTGATATTTTAGTAGGTAAATTAACGCCTCA  
GACAGCAAAAGAA---TCATCGTATGCCCCGGAAGATAGATTATTACGAGCCATACTTGG  
AATTCAGGTATCCACTGCAAAGGAACTTGTCTAAAATTACCTATAGGCGGAAGGGGT  
CGAGTTATTGATGTGAGATGGATCCAGAAAGGGGG---GGTTCCAGTTATAATCCAGAA  
ATGATTCGTGTATATATTTACAGAAGCGTGAAATCAAAGTAGGTGATAAAGTAGCTGG  
AAGACATGGGAATAAAGGTATCATTTCAAAATTTGCCTAGACAAGATATGCCTTATTT  
GCAAGATGGAACACCGGTTGATATGGTCTTCAACCCATTAGGAGTACCTTCGCGAATGA  
ATGTGGGACAGATATTTGAATGCTCGCTCGGGTTAGCGGGGGACCTGCTGGACAGACA  
TTATAGAATAGCACCTTCGATGAGAGATATGAGCAAGAGGCTTCGAGAAAAGTACTAGT  
TTTCCTGAATTATATGAAGCCAGTAAGCAAACAGCAAATCCATGGGTATTTGAACCCGA  
GTATCCGGGAAAAAGCAGAATATTTGATGGAAGAACAGGAGATCCTTTTGAACAACCT  
GTTATAATAGGAAAGTCCATATCCTGAAATTAATTCATCAAGTTGATGATAAAATCCAT  
GGACGCTCCAGTGGACATTATGCACTTGTACACAACAACCCCTTAGAGGAAGGGCCA  
AGCAAGGGGGACAACGAGTAGGAGAAATGGAAGTTTGGGCTCTAGAGGGATTTGGTG  
TTGCTCATATTTACAAGAGATGCTTACTTATAAATCTGATCATATTAGAGCTCGTCAGG  
AAGTACTTGGTACTACGATCATTGGAGGAACAATACCTAACCCCGAGGATGCTCCAGAA  
TCTTTTCGATTACTCGTTCGAGAACTACGATCTTTGGCTCTGGAAGTGAATCATTTCCTT  
GTATCTGAGAAGAAGTCCAGATTCATAGGAAGGAAGCT-----ATGATCGAC  
AGGTATAAACATCAACAAGTCCGAATTGGATCAGTTTCTCCTCAACAATAAGTGCTTG  
GGCTAACAAAATACTACCTAATGGAGAGATGGTTGGAGAGGTGACAAAACCTATACT  
TTTCATTACAAAACCAATAAACCAGAAAAAGATGGATTGTTTTGTGAAAGAATTTCTGG  
ACCTATAAAAAGTGGAAATTTGTGCTTGTGGAAATTATCGAGTGATCGGAGATGAAAA  
GAAGACCCGAAATTTGTGAACAATGCGGAGTCGAATTTGTTGATTCTCGGATACGAA  
GATATCAAATGGGATACATCAAAGTGGCATGTCCAGTGACTCATGTGTGGTATTTTAAA  
CGTCTTCTAGTTATATCGCGAATCTTTTAGATAAACCCCTTAAGGAATTAGAAAGCCTA  
GTATACTGCGAT-----TTTTCTTTTGTAGGCC---ATAGTTAAAAAACCGACTTTCTTACG  
ATTACGAGGTTTATTTCGAATATGAAATACAATCCCGGAAATATAGCATCCCACTTTTTTT  
TACTACCAAGGCTTCGATACATTCGAAATCGAGAAATCTCTACTGGAGCAAGTGCTA  
TCAGAGAACAAATTAGCCGATCCAGATTTGCGAATTATTACAGATCATTATTGGTGGAAAT  
GGAAGGAATTAGGGGAAGAAGGGTCCGCT--GGGAATGAATGGGAAGATAGAAAAATT  
GGAAGAAGAAAGGATTTTTTGGTTAGACGCATGGAATTAGCTAAGCATTTTATTCGAAC  
AAATGTAGAACCAGAACGGATGGTTTTGTGCCTATTACCAGTTCTTCCCTCCGGAGTTGA  
GACCAATCATTAGATAGATGGGGGTAAACCAATGAGTTCGGATATTAATGAACTCTAT

CGAAGAGTTATCTATCGGAACAATACTCTTACCGATCCATTAACAACAAGTAGATCTAC  
GCCAGGGGAATCAGTAATGTGTCAGGAGAAATTGGTACAAGAAGCCGTAGATACTT  
CTTGATAATGGGATCCGCGGGCAACCAATGAGGAATGGTCATAATAAAGTTTACAAGTC  
GTTTTAGATGTAATTGAGGGCAAAGAGGGAAAGATTCGTGAGACTCTACTTGGTAAA  
CGGGTCGATTATTCGGGGCGTTCCGTCATTGTCGTGGGCCCTTCGCTTTCATTACATCGG  
TGTGGATTACCTCGAGAAATAGCAATAGAACTTTTCCAGACATTTGTCATTCGTGGTCT  
AATCAGACAACATATTGCTTCCAACATAGGGATTGCAAAAAATAAAATTCGGGAAAAA  
GAACCAATTGTATGGGAAATACTTCAAGAAGTTATGCAGGGGCATCCCATATTGCTGAA  
TAGAGCACCCACCCTGCATAGATTAGGCATACAGGCGTTCCAACCTATTTTAGCGGAGG  
GACGTGCTATTTGTTTACATCCATTAGTTCGTAAGGGATTCAATGCAGACTTTGATGGGG  
ATCAAATGGCTGTTTCATGTACCTTTATCTTTGGAAGCTCAAGCAGAGGCTCGTTTACTTA  
TGTTTTCTCATATGAATCTCTTGTCTCCAGCTATTGGGGATCCCATTTCATACCAACCC  
AAGATATGCTTATTGGACTCTATGTATTAACGATCGGAAATCGTCGAGGTATTTGTGCAA  
ATAGGTATAATCCATGGAATCGCAGA-----AAC---TATCAAAAATAAAACAGTTTACGAGTA  
TAATTATAGGTATACTAAAGAAAAAGAACCCTATTTTTGTAGTTCCTATGATGCACTTGG  
AGCTTACCGGCAGAAACGAATCAATTTAGATAGTCCTTTGTGGCTCCGGTGGCGACTA  
GATCAACGT--GTCATTGCCCA-----AGAGAAGTTCCCATCGAAGTTCAATATGAATCTT  
TGGGTACCTATCATGAGATTTATGGGCACTATCTACTAGTAAGAAGTGTCAAAAAAGAA  
AGCCTTTGTATATACATTCGAACCACTGTTGGTCATATTTCTTTTTATCGAGAAATAGAA  
GAAGCCATACAGGGGTTTTGCCGAGCCTACTCA-----ATGGAGGTA  
CTTATGGCGGAACGGGCCGATCTGGTCTTTCACAATAAAGTGATAGATGGAAGTCCAT  
GAAACGACTTATTAGTAGATTAATAGATCACTTCGGAATGGCATATACATCACACATACT  
GGATCAAGTAAAGACTATGGGTTTCCAGCAAGCCACTGCTACATCCATTCATTAGGAA  
TTGATGATCTTTTAAACAATACCTTCTAAGGGATGGCTAGTCCAAGATGCTGAACAACAA  
AGTTTGATTTGGAAAAGCACCATCATTATGGGAATGTACACGCGGTAGAAAAATTACG  
TCAATCCATTGAGATATGGTATGCTACAAGTGAATATTTGAGACAAGAAATGCATCCTAA  
TTTTAGGATGACGGATCCTTCTAATCCAGTCCATATAATGTCTTTTTCGGGAGCTCGGGG  
AAATGCATCTCAGGTACACCAATTAGTTCGGTATGAGAGGATTAATGTCGGATCCCCAAG  
GACAAATGATTGATTTACCCATTCAAAGCAATTTACGCGAAGGACTTTCTTTAACGGAA  
TATCTCATTTCTTGCTACGGAGCTCGCAAAGGAGTTGTGGATACTGCTGTACGAACATC  
AGATGCTGGATACCTCACGCGTCGACTTGTGGAAGTAGTTCAACACATTGTTGTACGTA  
GAACAGATTGTGGCACTATCCGAGGTATTTCCGTGAGTCCTCGAAATGGGATTGGGATG  
ACGGAAAAATGTTGATCCAAACACTAATTGGTCGTGTATTAGCAGACGATATATATATG  
GGTCTACGATGCATTGCCGCTCGAAATCAAGATATTGGGGTTGGGCTTGTCAATCGATT  
CATAGCC-----TTTCGAGCACAATCAATATATATTCGAACCCCTTTATTTGCAG  
GAGTACATCTTGGATCTGTGCGATTATGTTATGGTCGGAGTCCCACCTCATGGTGACCTGGT  
CGAATTGGGAGAAGCAGTAGGTATCATTGCGGGTCAATCAATTGGGGAACCAGGGACT  
CAACTAACATTAAGAACTTTTCATACCGGTGGAGTATTCACAGGTGGTACTGCAGAACA  
TGACGAGCCCCCTTAAATGGAAAAATTAAATTCAATGAGGATTTGGTTCATCCCACAC  
GTACACGTCATGGGCATCCTGCTTTTCTATGTTATATAGACCTGTATGTCACTATTGAGA  
GTCAGGATATTCTACATAATGTGAATATTCCACCAAAAAGTTTTCTTTTAGTTCAAATG  
ATCAATATGTAGAATCAGAACAAGTGATTGCCGAGATTCGCGCCAGAACATCCACTTTC  
-----TTTAAAGAGAGAGTTTCGAAAACATATTTATTCTGACTCAGAGGGAGAA---ATGCAC  
TGGAGTACCGATGTGTACCATGCACCTGAATATACATATGGTAATGTTTCATCTCTTACCT

AAAACAAGTCATTTATGGATATTATCAGGGGGTCCG-----CGCAGATCTAGTCTAGTGCC  
TTTTTCGCTCCACAAGGATCAAGATCAAATGAACATTCAT-----TCTCTTTCTGTCTGAAC  
AGAGAGAGAGTTCTGACCTCTCA-----GTGACTAATGATCGA---GCGAGACACAAATTG  
TTTAGTTCGGATCCTTCCGGTAAA---GAGGGAAAGATTCTTGATTATTCA---GGACCTGC  
TCGAATCATATCCAATGGTCATTGGAATTCATATATCCTGCC---ATTCTCCACGAGAATT  
CTTAT-----TTATTGGCGAAAAGGCGAAGAAATAGATTTCATCATCCCATCCAATATGATC  
AAGAACGAGAGAAAGAATAATGCCTCGTTCTGGTATCTCGATTGAAATACCCATAAAT  
-----GGTATTTTACGTAGAAATAGTATTCTTGCTTATTTTCGACGATCCCCGATACAGAAGA  
AGCAGTTCAGGAATTACTAAGTATGGGACTGTAGAAGTGGATTCAATCGTCAAAAAAG  
AGGAT-----TTGATTGAGTATCGAGGA---GCAAAGGAATTTAGTCCGAAATACATGAAAG  
TAGATCGATTTTTTTTTTTCATTCCCGAAGAAGTGCATATCTTACCTGGCTCTTCGTCCATAAT  
GGTACGGAACAACAGTATCATTGGAGTCGATACACGAATTACTTTAAATACAAGAAGCC  
GCATAGGTGGATTAGTCCGAGTGGAGAGAAAAAAGGATTGAACTGAAAATCT  
TTTCTGGAGATATCCATTTTCTGGAGAGGCAGATAAGATCTCCCGGCACAGCGGCATC  
TTGATACCACCAGGAACGGGAAAAA-----AATTCTAAGGAATCAAAA-----AAATTGC  
AAAATTGGATCTATGTCCAACGG-----ATCACACCTACCAAGAAAAAG-----TATTTTGT  
TCGGTTCGACCCGTAGTCACATATGAAATAGCTGATGGTATCAATTTAGCAACGCTTTTT  
CCCCAGGATCTATTGCAAGAAAGGGATAATGTGAAATTCCGAGTTGTCAATTCTATCCT  
TTATAGAAATGGCAAACCAATTCGAGGAATTTATTACACAAGTATTCAATTAGTTCGTAC  
TTGTTTAGTATTGAATTGGGACCAAGACCGAAATGGT-----TCTATAGAAAAGGTTA  
AGGCTTCCATTGTTGAAGTCAGGGCAAATGATCTGATTTCGAGATTTATAAGAATTGAC  
TTAGTGAAGTCCCCTATTTTCGTATACCGAAAAAGGAATGATATGGCAGGTTTCGGGATT  
GATCCCAGAT---AATGGATCAGATCACACCAATATCAATCCTTTTTATTCCAAGGTGAGG  
AGG-----ATTCAATCACTTACCAACATCAAGGAATTCGTACGTTGCT  
GAATAGA-----AATAAGGAATGCCAATCTTTTCTAATTTTGTATCATCCAATTGTTCTC  
GAATTGGTCCA-----TTCAATGGTTCTAAATCTCACAATGTGACA-----AAAGAATCAG  
ATCCCATGATCCCATTAGGAATTCGTTGGGTCCCTTAGGGACT-----GTACCTAAAATTG  
CGAATTTTGATTACCT-----TACTATTTAATAACT-----CATAATCAGATCTTGTTAAAT---A  
AATATTTGCTACTTGACAAT-----TTAAAACAGACTTTCCAAGTACTTAAATATTAT-----  
--TTAATGGATGAAAATGGGAGA-----ATTTATAATCCCTATCCATGCAGGAACATCATTTT  
TCATCCATTTGATTTGACTTGGTGCTTTCTCCATCACGATTATTGTGAGAAGACATCCAC  
AATAATTGTC---CTCGGACAGTTTATTTGTGAAAATGTATGTATATCCAAATACGGACCA-  
-----CAGATAAAATCTGGTCAAGTTCTAATTGTTTCAT--GTTGACTCCTTAGTCATAAGA  
TCAGCTAAGCCTCATTTGGCCACCCAGGGGCAACCGTTCACGGCCATTATGGAGAAA  
TCCTTTACGAAGGGGATACATTAGTTACATTTATATATGAAAATCGAGATCGGGTGATA  
TAACGCAAGGTCTTCCAAAAGTGGAACAAGTGTAGAAAGTGCCTTCGGTTGATTCAAT  
ATCGATGAACCTAGAAAAGAGGGTTGAGGGTTGGAACGAACATATAAAAAGAATTCTT  
GGAATTCGTTGGGATTCTTGATTGGTGCTGAGCTAACCATAGCGCAAAGTCGTATCTC  
TTTGGTTAATAAGATCCAAAAGGTTTATCGATCCCAGGGGGTGCAAATCCATAATAGGC  
ATATAGAGATTATTGTACGTCAAATAACATCAAAGTGTGGTTTCAGAA-----GATGG  
AATGTCTAATGTTTTTTTACCCGGAGAACTAATAGGATTGTTGCGGGCGGAACGAACA  
GGGCGTTCTTTGGAAGAAGCGATCTGTTACCGAGCCATCTTATGGGGAATTACCAGGG  
CATCTCTGAATACTCAAAGTTTCATATCCGAAGCGAGTTTTCAAGAACTGCTCGAGTT  
TTAGCAAAAGCCGCTCTACGAGGTCGTATTGATTGGTTGAAAGGCCTGAAAGAGAACG

TTGTTCTGGGGGGGATGATACCTGTTGGTACCGGATTCAAAGGATTAGTGCACCGTTCA  
AGG-----CAAGACAACAACATTCCT-----TTGGAAATCAAAAAGAAGAATCTATTCGAGG  
GGGAAATTAGA-----GATATTTTGTTCACCACAGAGAATTATTTGGTTCCTTGCATCCCA  
AATAATTTCCATAATACA-----ATGACAAAAAGATATT  
GGAACATTAATTTAGAAGAGATGATGGAAGCAGGAGTTCATTTTGGTCATGGTACTAGG  
AAATGGAATCCTAGAATGGCACCTTACATCTCTGCAAAGCGTAAAGGTATTCATATTAC  
AAATCTTACTAGAACTGCTCGTTTTTTTTTCAGAAGCCTGTGATTTAGTTTTTGTATGCAGC  
AAGTAGGGGAAAACACTTCTTAATAGTTGGTACCAAAAATAAAGCAGCTGATTCAGTA  
GCATCAGCTGCAATAAAGGCTCGGTGTCATTATGTTAATAAAAAATGGCTCGGTGGTAT  
GTCAACGAATTGGTCCACTACAGAAACGAGACTTCATAAGTTCAGGGATTTGAAAGCG  
GAACAAAAGGCGGGGAAACTCAACCGTTTACCGAAAAGAGATGCAGCAATGTTGAAG  
AGACAATTATCTCACCTGCAAACATATTTGGGTGGGATCAAATATATGACGGGCTTACCC  
GATATTGTAATCATCGTTGATCAGCAAGAAGATATACGGCTCTTCGAGAATGTCTCACT  
TTAGGGATCCGACGATTTGCTTAATCGATACAAATTGTAACCCAGATCTCGCAGATATT  
TCTATTCCAGCCAACGATGACGCTATAGCGTCAATCCGATTGATTCTTAACAAATTAGTA  
TCCGCAATTTGTGAGGGTTCGTTCTAGC---TATATAAGAAATCGTATGGGAAAAAAAAATA  
AATCCACTTGGTTTCCGACTTGGT--GCACAAAGTCATCGTTCCTTTGGTTCGCACAA  
CCAAAAGTTATTCCAGGGGTCTCCAAGAAGATGAAAAAATACGGGATTGTATCAAGA  
ATTATGTACAAAAAATATGAGATCTGGTTCA-----GAAGGAATTCACATATAGAGAT  
TAAAAAATCGACCTGATCCAGGTCATAATCTATATTGGATCCCAAATTTGTTAAT  
AGAGGGT-----CGAACGCGA-----GGAATCGAAGAATTACGGATCAATGTACAAAAGG  
GTTTCGTTCTGTGAACCGTAGACTTAACATTGCTATCACAAGAGTTGCAAAACCTTATG  
GACAACCTAATATTCTTGCAGAATATATAGCTCTACAATTAAGAATAGAGTTTCGTTTC  
GAAAGGCAATGAAAAAGCTATTGAATTAAGTGAACAAGCTGATACAAAAGGAATTCA  
AGTGCAAATTGCAGGGCGTATCGACGGAAAAGAAATTGCACGTGTCGAATGGATCAGA  
GAAGGTAGGGTTCCCTACAAACCATTCGAGCTAAAATTGATCATTGTTCCCTATACAGT  
TCGAACCTATCTATGGGGTATTAGGCATCAAATTTGGATATTTGTAGATGAGCAGATGTC  
TCGTTACCGAGGGCCTCGTTTCAAAAAAATACGCCGTTTAGGGGCTTACCGGGACTC  
ACTAGGAAAAGACCTAGATCCGGAAGTGATCTTAGAAATCAATCGCGTTCGGGAAA--  
-AGATCTCAATATCGTATTCGTCTAGAAGAAAACAAAATTGCGTTTTTCATTATGGTCT  
GACAGAGCGACAATTACTTAGATATGTTTCGTATCGCTGGGAAAGCCAAAGGGTCAACG  
GGTCAGGTTTTACTACAACACTTGGAGATGCGTTTTGGATAACATCCTTTTTTCGATTGGGT  
ATGGCTTCGACCATTCGGGAGCCAGGCAATTAGTTAATCATAGACATATTTTAGTTAAT  
GGTCGTATAGTAGATATCCCAAGTTATCGCTGCAAACCCCAAGATATTACTACGAGG  
GATGAACAAAGATCCAGAGCTCTGATTCAAAATTATATGGATTCATCCCCCAC---GAG  
GAGTTGGCAAAACATTTAAGTCTTTATTCATCCCAATAT-----AAAGGATTAGTAAATCAA  
ATAATAGATATTAAGTGGATCGGTTTGAAAATCAATGAGTTGCTAGTCGTAGAATATTAT  
TCCCGTCAGACTATGTCACGTCGAGGTAAGTGCAGAAGAAAAAATGCAAAAATCCGATC  
CAATTTATCGTAATCGATTAGTTAACATGTTGGTTAACCGTATTCTGAAACACGGAAAA  
AAATCATTGGCTTATCAAATTATCTATCGAGCCGTGAAAAAGATTCAACAAAAGACAGA  
AACAAATCCACTATCTGTTTTACGTCAAGCAATACGTGGAGTAACTCCCGATATAGCAG  
TAAAGGCAAGACGTGTAGGCGGATCGACTCATCAAGTTCCTTGAATAGGATCTAC  
ACAAGGAAAAGCGCTTGCCATTCGTTGGTTATTAGGGGCATCCCGAAAACGTCCGGGT  
CGAAATATGGCTTTCAAATTAAGTTCCGAATTAGTGGATGCTGCCAAAGGGAGTGGCGA

TGCCATACGCAAAAAGGAAGAGACTCATAGAATGGCAGAGGCAAATAGAGCTTTTGCA  
CATTTTCGTATGAGTAAGGACACTATTGCCGATATAATAACTTCTATAAGAAATGCTGAC  
ATGGATAAAAAGGAACAGTTCGAATAGCATCTACTAATATAACCGAAAACATTATTAA  
AATACTTCTACGAGAAGGTTTTATTGAAAATGTTAGGAAACATCGAGAAAACAACAAA  
TATTTATTGATTTTAACCCTGCGACATAGAAGG-----AATCGGAAAGGAACATATAGA-----  
----AATATTTTA-----AAGTGTATCAGCCGACCCGGTCTACGAATCTATTCCAAC TATAAAC  
GAATTCCTAGGATTTTAGGTGGAATAGGTATTGTAATTCCTTCTACTTCTCGAGGTATAAT  
GACAGATCGAGAAGCTCGACTAAAAGGAATTGGAGGAGAAATTTTATGTTATATATGGA  
TGGCAAAACCTATACCAAGAATTGGTTCGCGTAGGAATGGA-----CGTAG  
AATACCAAAGGAGTTATTCATGTTCAAGCGAGTTTCAACAATACCATTGTAACGTGTA  
CGGATGTGCGAGGTCGGGTGTTTTCTTGGTCTCCGCGGGTACTTGTGGATT CAGAGG  
CACAAGAAGAGGGACACCTTTTGTGCTCAAACCGCAGCAGGAAATGCTATTTCGTACA  
GTAGTGGATCAGGGTATGCAACGAGCAGAAGTCATGATAAAGGGTCTGGTCTCGGAA  
GAGATGCAGCATTACGAGCCATTTCGTAGAAGTGGTATACTATTAAGTTTCGTACGTGAC  
GTAACCCCTATGCCACATAATGGATGTAGACCTCCTAAAAAAGGCGTGTGATGCCAAC  
TATTAACAACCTATTAGAAAACACAAGACAGCCAATCAAAAATGTCACGAAATCCCC  
GCCCTTCGAGGATGTCCTCAGCGTCGAGGAACATGTACTAGGGTGTATACTATCACCCC  
CAAAAACCAAACCTCTGCCTTACGTAAAGTTGCCAGAGTACGATTAACCTCTGGATTT  
GAAATCACTGCTTATATACCTGGTATTGGCCATAATTTACAAGAACATTCTGTAGTCTTA  
GTAAGAGGAGGAAGGGTTAAGGATTTACCCGGTGTGAGATATCACATTGTTTCGAGGAA  
CCCTAGATGCTGTGCGAGTAAAGGATCGTCAACAAGGGCGTTCTAAATATGGGGTCAA  
AAAGCCAAAATGGCAAGGAAAAGTTTGATT CAGAGGGAGAGGAAGAGGCAGAAAT  
TGGAACAGAAATATCATTGATTCGTCGATCCTCAAAAAAGAAATAAGC-----AAAG  
TTTCATCGTTGAGTGACAAATGGGAAATTCATGGAAAATTGCAATCCCCACCACGTAAT  
AGTGCACCTATACGTCTTCATCGACGTTGTTTTCAACCGGAAGATCTAGAGGTA ACTA  
TCGAGACTTTGGACTATCCGGGCACATACTTCGCGAAAAGGTTTCATGCATGTTTGTTC  
CAGGGGCAACAAGATCAAGTTGGATGGTAAAAAATTTATTTATCTCAGTTATTCCGCAA  
GAAGAAAAAGAAAA-----AACAAAGGGTCTGTTGAATTTCAAGTATTCAATTTACCA  
ATAAGATACGGAGACTTACTGCACATTTAGAATTTACAGAAAAGACTATTTATCTCAG  
AGAGGTCTGCGAAAAATTCTGGGAAAACGTCAACGGCTGCTGGCTTATTTGTCAAAAA  
AAAATAGAGTACGTTATAAGGAATTAATTGGTCAGTTGGATATTCGGGAGCCAAAAC T  
CGT-----ATGGTAAAACCTTCGTTTGAAACGATGTGGTAGAAAGCAACGAGCCATCTATC  
GAATCGTTGCGATTGATGTTTCGATCCCAAAGAGAAGGAAGAGATCTTCGTAAAGTGGG  
CTTTTACGATCCGATAAAGAATCAAACCTTATTCAAACGTTCTCTGCTATTCTATATTTCTT  
GAAAAAGGCGCTCAACCTACAGGAACTGTTTCATGATATTTCAAAGAAGGCAGAGGTCT  
TTAAGGAACTTCGAATTAATCAAACGAAATCAAATAAAATGGATAAATCCAAGCGACC  
CTTTCGTAAATCCAAGCGATCTTTTCGTAGGCGTTTGCCCCCAATTGGATCGGGGGATC  
GAATTGATTATAGAAATATGAGTTTAATTAGTCGATTTATTAGTGAACAAGGAAAAATAT  
TATCTAGACGAGTGAATAGATTGACCTTGAAACAACAAGATTAATTACTATTGCTATAA  
ACAAGCTCGTATTTTATCTTCGTTACCTTTTCTTAATAATGAGAAA-----CAATTTGAAA  
GAACCGAGTCGACCCCTAGA ACTGCTGGTCTAAAACCAGAAATAAAGTGACGCGTTC  
ACTAAAAAAAATCCTTTTGTGGATAATCATTATTGGGAAAATTGAGAAGCTCAACA  
TGAGGGAGGAGAAAGAGATAATAGTAACTTGGTCCCGAGCATCTACCATTATACCCAC  
AATGATAGGCCATACAATTGCTATTCATAATGGAAAAGCACATTTACCCATTTATATAATA

GATCGTATGGTGGGTCACAAATTGGGAGAATTCGCACCGACTCTGACTTTCGGGGGAC  
ACGCGAGAAACAATAATGTATCTCGTCGTATGATTTTGAAATCTTTTCTACTAGGTAATC  
TATTATCCTTATGCATGAAGATAATCAATTCGGTCGTTGTGGTCGGACTCTATTATGGATT  
TCTGACCACATTCTCCATAGGGCCCTTATCTCTTCCTTCTCCGAGCTCGGGTTATGGA  
AGAAGGA-----ACCGAGAAGGAGGTATCAGCAACAACCTGGTTTTATTACTGGACAGC  
TCATGATGTTTCATATCGATCTATTATGCGCCTCTGCATATAGCATTGGGTAGACCTCATA  
AATAACTGTCCTAGTTCTACCGTATCTTTTGTTCATTCTTCTGGAACAATCACAAACA  
CTTTTTTGATTATGGATCTACTACCAGAAATCAATGCGTAATCTCAGCATTCAATGTGTA  
TTCTGAATAATCTCATTTTTCAATTATTCAACCATTTTCAATTTACCAAGTTCAACGTTAG  
CCAGATTAGTCAACATTTATATGTTTCGATGCAACAACAAGATGTTATTTGTAACAAGTA  
GTTTTATTGGTTGGTTAATTGGTCACATTTTATTCATGAAATGGGTTGGATTGGTATTATT  
CTGGATACGGCAAAAAAATTCTATTAGATCT--ATTCGATCGAATAAGTACCTTGTGTCA  
GAATTGAGAAATTCTATGGCTCGAATCTTTAGTATTCTTATTATTCATCTGTGTCTACT  
ATTTAGGCAGAATACCGTCGCCTATTGTCACTAAGAACTGAAAGAAACCGAAGAAGA  
CAAAGCTTTATCGACTCAACTTTTCGAAAAAAAAGATGGAATCGTCCATTGCGCTATA  
TAAAAACGATCGCTTGGAAAATTCTGTACGAACAGAAATGTCACAATATTTTTTTTCC  
ACTACTTGTACATGTGGAAAAAATAATATCTTTTACATTTCCGCCTAGTTTGTGCGACT  
TTTTGGAAAATGATACAAAGAAATATTTCTTTGTGCACGACAGAAAACTATCCCCAA  
AGATCTGTATAATCATTGGGTTTATACTAATGAACAAAAAAGGCACAACCTGAGCAATG  
AGTTCAGAAATCGAATGGAAGCTCTAGAC-----AAGCTTGCTCTAGATGTACTCGAAAA  
AAGGATAAGATTTTGAATGATGAGAATGAACAAGAATGCTTGCCTAAAGTGTATGATC  
CTTTTTTGAACGGACCATATCGTGGAACAATAAAAAAAGGATATTCACGTACAGGAATG  
GTTTGGATAAATAGGATTCATGGTATCCTCTACCAAGAATTTGAAGATAAAGAT---CCAA  
ACGATTCCATTGGAATAGAGGAAATAGGCAAAAAGGTTCCCTCGATGGTCATATAAATTG  
ACCGATTTGGAAGAACAAGAGGCGGAAGGTATTTCGTTCAAGAAAAGCCAAACGTGTG  
GTAATTTATACTTATGCTTTGATACGTTACTCACAACAATCGGATTTTCGTGCGAATCTAA  
TCAAAGGATCCATGCGCGCTCAAAGACGTAAAACAGTGACTTGGGAAATGTTTCAAGC  
AAATGTGCATTCCCCACTTTTTTTGGACAGAATAGACAAAACATTTTTTTTTTTCTTTTGA  
TATC-----TCCGGAATGATGAATCCATTTTTGAGGAATAAGGAGGAGAATGAACGGATAG  
CAATATCAGAACTTGGGATACTATTATATTGCTCAAGCAATAAGAGGTTCTATGTTAG  
TAACCAATCGATTTTTAGAAAATACATCATATTGCCTTCATTGATAATAGCTAAAAATCT  
TGGTCGTATGTTATTATTCAATTTCCCGAGTGGTACGAGGATTTGAAGGAGTGGAAATA  
AAGAAATGCATGTTAAATGCACCTATAATGGTGTTCATTTATCAGAAACAGAATTTCCCTA  
AAAACCTGGTTAACAGACGGGATTGAGATAAAGATCTTATTCCCTTTCTGTCTGAAACCT  
TGGCGGGGATCTAAAAAAGTAAAAAAGAAAATTTTTGTTTTTTAACGGTCTGGGGAA  
TGGAACCTGAATTACCTTTTGGTTCTCCACGAAAAGAACCTTCCTTTTTTTGAACCCATT  
TTTAAAGAACTCGAAAAAAAATGAGAAAAGTTCAA---AAAAAATATTTTCGAGTTTT  
AAAATTTTTTAAAGAAAGAACAAAATGGTGTCTAAAGGTCTCAAAGAAAAAATAAG  
ATGGGTTATCAAATAGTTCTA-----TTTATAAAAAGAATAATGAAAGAACTTGCAAAAG  
TGAAC---TCCATAATCAGTAATAAGATTACTCACGAATCGACTATTCAAATTAGACCCAT  
GGGTTGGACAAATTATTCAGTACAGAAAAAAAATGAAAGATCTGGCTGATAGTACA  
ACCACAATCAAATCAAATAGAAAGAATCAAAAAGACAAGAAAAAATTCCTAAC  
AAGACAAGTTTTGATGATGAAAGATCGGAATCACAGAAACATATTTGGCAGAGATCAA  
AAAAAAGAAGTGCCCGATTAATACGTAAATCGCAATATTTTATAAATATTTTCATTGAAA

TAATATACATGGATATCTTTCTATGTACCATTAATATTCCAAGGATCAATGCACAACCTTTT  
CATTCAGTTTATTTTCGTGTGACTTATCTTTCTTGTCCCAAGCATATGTATTTTACAAATTA  
TCACAAAACCAAGTTATTAACAAGTATCACTTGATATCTGTACTTCAATATGCATCTCCT  
TTTATTAAGCATAGAATAAAGGAC-----ACACGAGGAATTTTTGATTCCAAATCAAGACA  
TAAGAACTTCCGAATTCAGAATGAATGAATGGAAAACTGGTTAAAGCGTCATTATC  
AATACAATTTATCTCAGAATAGATGGTCTAGATTAGTATCGAAAAAATGGCGAACTAGA  
GTAAATCAGCGTCGTACGATTCAAATAAAAAAAAAATTTGGATTTCATATGAAAAAGAAA  
AAGACCAATTCATTCATTACGAGAAAGAAGAAAAATTTAAAAAACTACAGATATGA  
TCTTTTATCATATAAATATATTAATGAGTCTATTATGGATCCGGATATAAAATATTTTAAGT  
GGAGAATTCTCCATTTTTTTCTTAGATTTTTTGGATTGGGAAATGAATGAAGAAATGC  
GATATCGTTGGTTCTTCCCAGAATTTGTGCGACTTTATGATACATATAAAATGAAACCAT  
GGATCATAACCAATCAAATTAATCTTTTTAAATTACAAGAGCAACAAAGAAGCAGAACTA  
GAGTTCTTCCTGAAAAGATATTTGCTTTTTCAATTGAGATGGGACGATTCTTTGAATCA  
AAGAATGATCAATAATATCAAGGTATATTGTCTCCTGCTTAGACTGATAAATCCAAGGGA  
AATTGCTATATCCTCTATTCAAAGAGGAGAAATGCGCCTAGATGTAATGTTGATTATAA  
GGATCTGACTCTTACGGAATGATAAAAAGGGGAATATTTATTATTGAACCGGCTCGTCT  
GTCTATAAACGGGATGGACAATTTATTATGTATCAAACCATAGGTATTTTCATTGATCCAT  
AAAAGTAAACACAATCATTATGATTGCTTATTTCTGAAAATATTCTATCTCCTAGACGT  
CGTAGAAATTTGAGAATTTAATGTGTTTCATATTTCTTTGGCCCAATTATCGATTAGAA  
GATTTAGCTTGTATGAATCGCTATTGGTTTGATACGAATAATGGCAGTCGTTTCAGTATG  
TCAAGAATATATATGTATCCAATGAAACGACATCAATTCAAATCCTGGATCTTCGAATTG  
AGAGAGATATTGAGAGAGATCAAGAATTCTCACTATTTCTTAGATTCATGGACCAAATT  
CGATTCAGTGGGATCTTCACTCACATTTTTTCCACCAAGAACGTTTTATGAAACTCTT  
TGACCCCGAATTTGGAGTATCCTACTTTCA---CGTGATTCA-----CAGGGTTCAACAAG  
CAATCTATATTTTC-----ACGATCAAAGGTGTAGTACTGCTTGTAGTAGCG---GTCCTTAT  
A-----TATCGTATTAACAATCGAAATATGGTCGAAAGAAAAAATCTCTATTTGATGG  
GGCTTCTCCTATAACCTATTTCTCCTATAACCTATGAATTCCATTGGACCCAGAAATGATAC  
ATTGGAAGAATCTTTT---GGGTCTTCCAATATCAATAGGTTGATTGTTTCG---CTCCTGTA  
TCTTCAAAGGGGAAAAAGATCTCTGAGAGTTGTTTCATGGATCCGAAAGAGAGTACT  
TGGGTTCTCCCAATAACT-----AAAAGTGTATCATGCCTGAATCTAACTGGGGTTC  
GCGGTGGTGGAGGAACCGGATCGTCAAAAAGAGG-----GATTCTAGTTGTAAGATATCT-  
-----AATGAAACCGTAGCTGAAATTGAGATCTCATTGAGAGAGAAAGATATAAAA---TA  
TCTGGAGTTTCTTTTTGTATCCTATACGGAT-----GATCCGATCCGCAAGGACCATGATCG  
GGAATTCTTTGATCGTCTTTCTCCGAGGAAGAAGCGAAACATAATCAACTTG-----AATT  
CGGGACAGCTATTCGAAATCTTAGTGAAACACTTGATTTGTTATCTCATGTCTGCTTTTC  
GTGAAAAAAGACCAATTGAAGTGGAGGGT---TTCTTCAAACAACAAGGA---GCTGAGG  
CAACTATTCAATCAAATGATATTGAGCATGTTTCCCAT-----CTCTTCTCGAGAAACAAGT  
GGGGTATTTCTTTACAAAATTTGTGCTCAATTTTCATATGTGGCAATTCGCAAGATCTCT  
TCGTT-----AGTTGGGGGAAG---AATCAGCACGAATCGGATTTTTTGGAGGAAG---GTAT  
CGAGAGAGAATTTGATTTGGTTAGACAATGTGTGGTTGGTAAACAAGGATCCG-----T  
TTTTTAGC-----AAGGTACAGAATGTATCGTCAAATATTCATATGATTCC-----ACAAG  
A-----TCTATTTTCGTTCAAGTAACGGATTCTAGCCAATTGAAAGGATCTTCT---GATCAA  
TCCAGAGATCATTTCGATTCCATTAGT-----AATGAGGATTCCGAA-----  
-----TATCACACATTGATCAATCAAACAGAGATTCAGCAACTAAAAGAAAGATC



GATTCTT--TGGGAT-----CCTTCCTTTCTTCAAACGGAACGAACAGAGATAGAATCAGAT  
-----CGATTCCCGAAA-----TGCCTTTCTGGATATTCC-----TCAATGTCCCGGCTATTACG  
--GAACGTGAGAAGCAGATGAATAATCATCTGCTTCCGGAAGAAATCGACGAATTTCTT-  
-----GGGAATCCTACAAGATCAATTCGTTCTTTTTTCTCTGACAGAGGG-----TCAGAACT  
TAAT--CTGGGTTCGAATCCTACTGAGAGGTCCACTAGAGATCAG-----AAATTGTT  
GAAGAAACAACAAGATGTTTCT--TTTGTCCGATCCAGGCGATCGGAA-----AATAA  
AGAAATGGTTGATATATTCAAGATAATTACGTATTTACAAAAT-----ACCGTCTCAATTCAT  
CCTATTTTCATTAGATCCGGGATGTGCTATGGTTCCG---AAGGATGAACCGGAT--ATGGA  
CAGTTCCAATAAGATTTTCATTCCTTGAACAAAAATCCATTTTTTGGAT-----TTATTTTCATCTA  
TTCCATGACCGGAACAAAGGGGGATACACGTTA-----CACCACGATTTTGAATCAGAA---  
--GAGAGATTTCAAGAAATGGCGGATCTATTCCTCTATCAATAACCGAGCCG--GATCT  
GGTGTATCATAAGGGATTTGCCTTTTTCTATTGATTCCTACGGATTGGATCAAAAAAAAA---  
--TTCTTGAATGAGGTATTCAACTCCAGGGATGAATCGAAAAAGAAATCTTTA-----TT  
GGTTCTACCTCCTATTTTTTAT-----GAAGAGAATGAATCTTTTTATCGAAGGATCAGAAA  
AAAATCGGTCCG---ATCTCCTGCGGGAATGATTTGGAAGATCCAAAACCCAAAATAGT  
GGTATTTGCTAGCAACAACATAATGGAGGCGGTCAATCAATATAGATTGATCCGAAATTT  
GATTCAAATCCAATATAGCACCTATGGG-----TACATAAGAAATGTATCGAATCGATTCTT  
TTTAATG-----AATAGATCCGATCGCAACTTTGAATATGGAATTCAA-----AGGGATC  
AAATAGGAAATGATACTCTGAATCATCTAACTATAATCAAATATACGATCAACCAACATT  
TATCGAATTTGAAAAAG---AGTCAGAAGAAATGGTTCGAT-----CCTCTTATTTCTCG  
AACCGAGAGATCCATGAATCGGGATCCTGATGCATATAGATACAAATGGTCCAATGGGA  
GCAAGA ACTTCCAGGAGCATTGGAACATTTGTTTCTGAACAGAAGCAC-----CGTT  
TTCAAGTAGTCTTCGATCGATTACGTATTAATCAATATTCGATTGATTGGTCCGAGGTTAT  
CGACAAACAAGATTTGTCTAAGCCACTTCGTTTCTTTTTGTCCAAGTCA-----  
-----CTTCTTTTTGTCC-----AAGTCACTT--CTCTTTTTGTCCAAGTCACT  
TCCTTTTTTCTTTGCGAGTATCGGGAATATCCCATTCATAGGTCCGAG---ATCCACATCT  
AT--GAATTGAAAGGTCCGAATGATCAACTCTGCAATCAGTTGTTAGAATCAATAGGTGT  
TCAAATCGTTCATTTGAATAAATTGAAACCC-----TTCTTATTGGAT-----GATCATGATA  
CTTCC---CAAAGATCGAAATCTTGATCAATGGAGGAACAATATCACCATTTTTTTTCAA  
TAAGATACCA---AAGTGG---ATGATTGACTCATTCCATACT-----AGAAATAATCGCAGGA  
AATCCTTTGATAACACTGATTCCTATTTCTCAATGATATCCACGATCGAGACAATTGGC  
TGAATCCTGTGAAACCATTTATAGAAGTTCATTGATATCTTCTTTTTATAAAGCAAATC  
GACTTCGATTCTTGAATAATCCACATCACTTCTGGTTCTAT-----TGTAACAAAAGATTCC  
CTTTTTATGTG-----GAAAAGACCCGTATCAATAATTATGAT-----CTTACATAT--CGA  
CAATTCCTCAATATCTTGTTCAATTCGCAACAAA---ATATTTCTTTGTGCGTCCGGTAAA---  
--AAAAACATGTTTTTTTGGAG---AGAGATACTATTTACCAATCGAGTCACAGGTATCT  
GACATATTCATACCTAATGATTTTCCACAAAGTGGTGACGAAACG---TATAACTTGTACA  
AATCT-----TTCCATTTTCCAATTCGATCCGATCCATTCGTTCTGT-----AGAGCTATTTAC  
TCGATCGCAGACATTTCTGGAACACCTCTAACAGAGGAAGAAATAGTCAATTTTGA  
GAACTTATTGTGACGCTCTTTCAGATATGAATCTATCTGATTCAGAAGGGAAGAACTTG  
CATCAGTATCTCAGT-----TTCAATTCAAACATGGGTTTGGATTCACACTCCATGTTCTGAG  
AAATCTTTACCA-----TCCGGAAGAGGAAAAA-----CGGAGTCTTTGTC  
TAAAG-----AAATGCGTTGAGAAAGGGCAGATGTATCGAACCTTTCAACGAGATAGTGC  
TTTTTCAAATCTCTCAAATGGAATCTGTTCCAAACATATATGCCATGGTTCCTTACTTC

GACAGGGTGCAAATATCTCAATTTACCCCTTTTAGATACTTTTTTCAGACCCATTG-----CC  
GATACTAAGTAGCAGT--CAAAAATTTGTATCCATTTTTCATGATATTATGCATGGATCGG  
ATATATCATGGCCAATTCCTCAGAAAAAATGGTGG-----GCGATTCTTCCACAATGG  
AATCTG---ATAAGTGAGATTTTCGAGTAAGTGTTTACAGAAT-----CTTCTTCTGTCCGAAG  
AAATGATTCATCGAAATAATGAGTCACCCGTTCCATTGATATGGACACATCTGAGATCA  
CCAAATGCTCGGGAGTTC---CTCTATTCAATCCTTTTCTTCTTCTTGTGCTGGATAT--C  
TCGTTTCGTACACATCTTCTCTTCGTTTCCCGA-----GCCTCTAGTGAGTTACAGACAGAG  
TTAGAAAAGATAAAATCTTTGATGATTCCATCATAATGATTGAGTTGCGAAAACCTTCTG  
GATAGGTATCCTACATCTGAACCTGAATCCTTCTGTTAAAGAATCTCTTCTAGTTGCT  
CTGGAACAATTAGGAAATTCTCTGGAAGAAATACGGGGTTCTGCTTTTGGCGGCAACA  
TGCTATTGGGTGGTGGTCCC-----GCTTATGGG---GTCAAATCAATACGTTCTAAG  
AAGAAATATTTGAATATCAATCTCATCGATATCATCGATCTCATA---GGTATCATACCAA  
TCCCATCAATCGAATCACTTTTTTCGAGAAATACGAGACATCTAAGTCGTACAAGTAAAG  
AGATCTATTCATTGATAAGAAAAAGAAAAACGTGAACGGTGATTGGATTGATGAGAA  
AATAGAATCCTGGGTGCGCAACAGTGATTGATTGATGATGAAGAAAGAGAATTCTTG  
GTTCAAGTCTCC-----ACCTTAACGACA-----GAAAAAAGGATTGATCAAATTCTATTGAG  
TCTGACT--CATAGTGATCATTATCA-----AAGAATGACTCTGGTTATCAAATGAT  
TGAACAACCGGGATCAATTTACTTACGATACTTAGTTGACATTCAT-----AAAAAGTATCT  
AATGAATTATGAGTTCAATAGATCCTGTTTAGCAGAAAGACGGATCTTCTTGTCTATTA  
TCAGACAATCACTTAT-----TCACAAACCTCGTGTGGGGCTAATAGTTCTCCTTTCCATC  
TCATGGA-----AAACCCTTTTCGCTCCGCTTAGACCTATCCCCTTCT--AGGGGTATTTT  
AGTGATAGGTTCTATAGGAACTGGACGATCCTATTTGGTCAAATCCCTAGCGACAACT  
CCTATGTTCTTTCATTACGGTATTTTCGAACAAGTTCCTGGATGACAAGCCTAAAGGTT  
ATCTTATTGAT-----GATATCGAT--ATTGATGATAGTGACGATATCAAT-----AT  
TGATGATAGTGACGATATT-----GATGATGACCTTGA  
TACGGAGCTGCTAACTATGACGAATGTGCTA-----ACTATGTATATGACG-----CCGA  
AAATAGACCTATTTGATATCACCCCTCAATTAGAATTAGCAAAAGCAATGTCCCCTTGCA  
TAATATGGATTCCAAACATTCATGATCTGTATGTGAATGAGTCGAATTACTTATCCCTCG  
GCCTATTAGTGAACCTATCTCTCC-----AGAGATTGTGAAAGATGTTCC--ACTAGAAAT  
ATTCTTGTATTGCTTCGACTCATATCCCCAAAAGTGGATCCCGCTCTAATAGCTCCG  
AATAAATTAATACATGCATTAAGATACGAAGGCTTCTTATCCACAACAACGAAAGCA  
CTTTTTCATTCTTTCATATACTAGGGGATTTTCGCTTGGAAAAGAAAATGTCCCATACT----  
-AACGGATTTCGGGTCCATAACCATGGGTTCCAATGCACGAGATCTTGTAGCACTTACCA  
ATGAGGCCCTATCAATTAGTATTACACAGAAGAAATCAATTATAGACACTAATACAATTA  
GATCAGCTCTTCATAGACAAACTTGGGATTTGCGA-----TCCGAGGTAAGATCGGTTT  
AGGATCATGGGATCCTTTTCTATCAGATAGGAAGGGCTGTTGCACAAAATGTACTTCTA  
AGTAATTGCCCCATAGATCCTATATCTATATGAAGAAGAAA-----TCATGTAAGGAA  
GGGGATTCTTATTTGTACAAATGGTACTTCGAACTTGGAAACGAGCATGAAGAAATTAAC  
GATACTTCTTATCTTTTGTAGTTGTTCTGCCGGATCGGTCGCTCAAGATCTTTGGTCTCC  
ACCC-----GGACCCGATGAAAAA---AATGGGATCACTTCTTATGGATTGCTTGAGAATGA  
TTCT--GATCTAGTTCATGGC---TTAGAAGTAGAAGGCGCTCTGGTGGGA-----TCCTCAC  
GGACAGAAAAAGATTGCAGTCAGTTTGATAATGAT-----CGAGTGACATTGCTTCTTCGG  
TCCGAACCAAGGAAT---CCGTTAGATATGATGCAAAATGGATCTTGTCTATCGTTGATC  
AGAGATTTCTATACGAAAAA-----TACGAATCGGAGTTTGAAGAA---GGGGAAGGAGAA

GGAGCCCTCGACCCGCAA-----CAGATAGAGGAGGAT-----TTATTCAATCAC---  
---ATAGTTTGGGCTCCT-----AGAATATGGCGCCCT-----TGTGGCAATCTATTTGATTGT  
ATCGAAAGGCCCAATGAATTGGGATTTCCC---TATTGGGCCAGGTCATTTCCG-----GG  
CAAGCGGATCATTATCATAAAGAGGATGAGCTTCAAGAGAATGATTCCGAGTTCTTGC  
AGAGTGGAACCATGCAGTACCAGACACGAGATAGATCTTCCAAAGAACAAGGCTTTTT  
TCGAATAAGCCAATTCATTTGGGACCCTGCAGATCCATTCTTTTTCTATTCAA---GAT  
CAGCCCTTTGTCTCTGTGTTTTACGTCGAGAATTCTTTGCAGATGAAGAGATGTCAA  
GGGGCTTATTACTTCCCAAACAATCCTCTACATCTATATATAAACGCTGGTTCATC-----  
-AAGAATACGCAAGAAAAGCACTTCGAATTGTTGATTCATCGCCAGAGATGGCTTAGAA  
CC-----AATAGTTCATTATCT-----AATGGATCTTCCGTTCTAAT-----ACTCCATCCGAG  
AGTTATCAGTATTTATCAAATCTGTTCCCTATCTAAC---GGAACGCTATTGGATCAAATGAC  
AAAGGCATTGTTGAGAAAGAGATGGCTTTTCCCGGATGAAATGAAACATTTGATT-----C  
ATGTAACAGGAGAAAGATTTCCCATTCCTATGCCTAGATCTCGG---ATAAATGGAAATTT  
TATTGATAAGACCTCTTCAATTGTAGCCAATATCTTATTACGAATAATTCGACAACCTC  
AGGAGAAAAAGAGGCATTTACCTATTACAGAGATGGG-----ATGTCAGCTCAATCCGAA  
GGAAATTATGCGGAAGCTTTACAAAATTATTATGAAGCTATGCGACTAGAAATTGATCC  
CTATGATCGAAGTTATATACTCTATAACATAGGCCTTATCCACACAAGCAACGGAGAACA  
TACGAAGGCTTTGGAATATTATTTCCGGGCACTCGAACGAAACCCATTCTTACCACAAG  
CTTTTAATAATATGGCCGTGATCTGTCATTAC---CGGGGAGAACAGGCCATTCGACAGG  
GAGATTCTGAAATTGCAGAGGCTTGGTCCGATCAAGCTGCTGAATATTGGAAACAAGC  
TATAGCGCTTACTCCAGGTAATTATATTGAAGCACATAACTGGTTGAAGATCACACGAC  
GGTTCGAA-----ATGAACTGGCGATCAGAACGTATATGGATAGAACTTATAACGGGGTCT  
CGAAAATAAGTAATTTCTGCTGGGCCTGTATCCTTTTTTTTAGGTTTCGCTAGGATTCTTA  
TTGGTTGGAACCTCCAGTTATCTTGGTAGGAATTTGATATCCTTATTCCCGTCTCAGCAA  
ATCATTTTTTTTTCCACAAGGGATCGTGATGTCTTTTTATGGGATCGCGGGTCTGTTTCATT  
AGTTCTTATTTGTGGTGCACAATTCGTGGAATGTGGGTAGTGGTTATGATCGATTCGAT  
AGAAAAGAAGGAGTCGTGTGTATTTTTCGTTGGGGATTTCTTGAATAAATCGTCGAAT  
CTTCCTTCGATTTCTTATGAGAGATATCCAGTCGATCAGAATGGAAGTTAAAGAGGGCC  
TTTATCCCGTCGTGTCCTTTATATGGAATTAGAGGCCAGGGAGCTATCCCCTTGACTC  
GAACTGATGAGAAT---TTGACTCCACGAGAAATTGAACAAAAGCTGCCGAATCGGCC  
TATTTCTTGCGCGTACCAATTGAAGTATTT

>Piper

ATGGAAGGGCGGCGGTTTCGATTCGGTGTGTCTCTAAGTAAATCAATGGGCAGTTTTAG  
TCCTATTGGAAATATCAGCGGAAGCGGGACTCCACTATAAATGATAGGGATAAAACTA  
TTGAGAATTGCCCTAATGTTGATTATTTATTCGGTGTATGGACATTTTGGGTTTGGTTTC  
TGATGACACTTTTTTCGTGAGGATGGTAGTGGTGACACCTATTCCATATATTTTGATGT  
CGAGAGTCAGATTTTGGAGATTGACAATGAT-----AGTTCCTTTCTAAGTGAAGTAGAAA  
GTTCTTTTTCTAGTTATCAGAAT-----AGTAGATTTGGGCCGAAGGACGACAATCGCGA  
TTATTATTGTTACATGTATGATACGAAATACAGTTGGAATACGCACATTAATAGTTGCATT  
GATAGCTACCTTCGCTCTGAAATCAGT-----ATTGATAGTTACATTTCAAGTAGTAGCGAC  
TATTACAACGATAGTTACATTTATACTTTTCAATTTTAGTGAGAGCGGGAGCTCGATAAAA  
ACTATCACTAATGATCACGATTCCAATATAAGAGAAAAATCGAACGATTTTCGATATAAAT  
AAAAAATACAGACATTTATGGGTTCAATGCGAAAATTGTTATGGATTAATAATATAAGAAA  
TTTTTTCAGTCAAAAATGAATATTTGTGAACAATGTGGATATCATTTGAAAATGAGTAGT

TCAGATAGAATCGAACTTTCGATTGATCCGGGCACTTGGGATCCTATGGATGAAGACAT  
GGTTTCTATCGACCCTATTGAATTTCACTCGGAGGAAGAACCCTATAAGGATCGCCTCG  
ATTCTTATCAAAGAAAGACGGGTTTAACTGAGGCCGTTCAAACAGGTGTAGGTCAACT  
AAATGGTATTCCTGTAGCAATTGGAGTTATGGATTTTCAGTTCATGGGGGGTAGTATGGG  
ATCCGTAGTAGGCGAGAAAATAACCCGTTTGATCGAGTATGCTACTAATAGATCTCTACC  
CGTCATTATGGTGTGTGCTTCTGGGGGAGCGCGCATGCAAGAAGGAAGCTTGAGCTTG  
ATGCAAATGGCTAAAATATCTTCTGTTTCATACGATTATCAATCAAATCAAAGTTATTCT  
ACGTATCAATCCTTACATCTCTACAACCTGGTGGAGTAACTGCCAGTTTTGGTATGTTGG  
GGGATATCATTATTGCCGAACCCAACGCCTACATTGCTTTTGCGGGTAAAAGAGTAATT  
GAACAAACGTTGAATAAAACAGTCCCCGAAGGTTCAACAAGCGGCTGAGTATTTATTCC  
ATAAGGGCTTATTCGATCTAATTGTACCAGTAATCCTTTAAAAAGTGTTCTGAGTGAAT  
TTTTTCAGTTACATGGTTTCTTTCCTTTGAATTCTAATTCAAAGCATATGGAAACCTTC  
GAGCTGACGAAATTAGTAATATTATCCGCGAGCGTATTGAACAATATAATAGAGAAGTC  
AATATTGTGAATACCGGCACCGTACTTCAAGTGGGCGATGGCATTGCTCGTATTCACGG  
TCTTGATGAAGTAATGGCAGGAGAATTAGTAGAGTTTGATGAGGGTACAATAGGCATTG  
CTCTAAATTTGGAATCAAATAATGTTGGCGTTGTATTAATGGGCGACGGTTTGATGATAC  
AAGAAGGAAGTTCTGTAAAAGCAACAGGAAGAATTGCTCAAATACCGGTGAGTGAGG  
CTTATTTGGGGCGTGTATAAATGCTCTGGCTAAACCCATTGATGGGAGAGGTGAAATT  
TCTGCTTCTGAATCCCGGTTAATTGAATCTCCCGCTCCAGGCATTATTTCAAGACGTTCC  
GTATATGAGCCTCTTCAGACAGGTCTTATTGCTATTGATTTCGATGATCCCTATAGGACGA  
GGCCAGCGAGAATTAATTATTGGGGACAGACAGACTGGAAAAACAGCAGTAGCCACA  
GATACTATTCTTAATCAAAAAGGGCAAATGTAATATGTGTTTATGTAGCTATTGGTCAA  
AAAGCATCCTCCGTGGCTCAGGTAGTACTACTTTCCAGGAGCAAGGGGCAATGGAAT  
ATACTATTGTAGTAGCCGAAACGGCGGATTCCCCTGCGACATTACAATACCTCGCGCCTT  
ATACAGGGGCGGCTCTTGCTGAATATTTTATGTACCGTGAACAACATACTTCAATAATTT  
ATGATGATCCCTCCAAACAAGCACAAGCATATCGCCAAATGTCTCTTCTATTAAGAAGG  
CCACCGGGGCGCGAAGCTTATCCAGGAGATGTTTTTTTATTTACATTCACGCCTTTTGG  
AAGAGCTGCTAAATTAATTCTAGTTTAGGCGAAGGAAGTATGACCGCTTTACCAATAG  
TTGAGACTCAATCCGGGGACGTTTCGGCTTACATTCCCCTAATGTGATTTTCGATTACA  
GATGGACAAATATCTTATCCTCGGATCTATTCAATGCTGGAATTCGTCCGGCTATTAAC  
GTGGGCATTTTCGGTCTCCAGAGTAGGATCCGCGGCTCAAATTAAGCCATGAAACAGG  
TAGCTGGCAAATTAATGGAAGTACTCAATTCGCAGAGCTAGAAGCCTTTGCGCA  
ATTTGCTTCTGATCTTGATAAAGCCACCCAAAACCAATTGGCAAGAGGTCAACGATTAC  
GCGAGTTGCTTAAACAATCTCAATCAGCTCCTCTTGCGGTCGAAGAACAATAGTTACT  
ATTTATACTGGAGCGAATGGGTATCTTGATCCCTTAGAACTGGGCAGGTAAAGAAATT  
TCTAGTTCAATTACGTACTTACTTAAAAACAATAAACCTCAGTTCCAAGAAATAATATC  
TTCGACCAAGATATTCACCAAGACGCGGAAGCTATTTTAAAGGAAGTAATTCAGAA  
CAGATAGAACTGTTTCTACTTCAAGAACAACAATGAGAATCAATCCTACTACTTCTGG  
TCCTGGGGTTTCTACACTCGAAGAAAAAATCAGGGGCGTATTGTTCAAATCATTGGTC  
CGGTACTGGATGTAGCCTTTTCCCCGGGCAAGATGCCTAATATTTACAACGCTTTGATAG  
TTAAGGGTCAGGATACCGTCGGTCAGCAAATTAATGTAACCTGTGAAGTACAGCAATTA  
TTGGGAAATAATCGAGTCAGAGCTGTAGCTATGAGTGCTACAGACGGTCTGACGAGAG  
GAATGGAAGTAATTGACACGGGAGCTCCTCTAAGTGTTCCAGTCGGTGGAGCTACTCT  
AGGACGAATTTCAACGTTCTTGGAGAGCCTGTTGATAATTTAGGTCCTGTAGATACTC

GTACAACATCTCCATTCATCGATCTGCGCCCGCTTTTATCCAGTTAGATACCAAATTAT  
CTATTTTTGAAACAGGGATTAAAGTAGTGGATCTTTTAGCTCCTTATCGCCGTGGAGGA  
AAAATCGGACTATTCGGAGGAGCTGGAGTGGGTAAAACGGTACTCATCATGGAATTGA  
TCAACAACATTGCCAAAGCTCATGGGGGCGTATCCGTATTTGGTGGAGTAGGCGAGCG  
CACTCGTGAAGGAAATGATCTTTACATAGAAATGAAGGAATCCGGAGTTATTAACGAA  
CAAAATCTTGCAGAATCAAAAGTGGCTCTAGTTTATGGTCAGATGAATGAACCTCCGG  
GAGCTCGTATGAGAGTTGGTTGACTGCCTTAACCATGGCGGAATATTTCCGGGATGTT  
AATGAGCAAGACGTACTTCTATTTATCGACAATATCTTCCGCTTCGTCCAAGCAGGATC  
AGAAGTATCTGCCCTATTAGGTAGAATGCCCTCTGCTGTGGGTATCAACCTACTCTTAG  
TACGGAAATGGGTTCTTTGCAAGAAAGAATTACTTCTACCAAAGAAGGATCTATAACTT  
CCATTCAAGCAGTTTATGTACCCGCGGATGATTTAACCGACCCTGCTCCTGCTACGACG  
TTTGCGCATTGGATGCTACTACCGTACTATCAAGGGGATTAGCCGCGAAAGGAATCTA  
CCCGGCAGTAGATCCTTTAGATTCAACGTCAACTATGCTCCAACCCAGGATCGTTGGAG  
AGGAACATTATGAAACTGCACAAAGGGTTAAGCAAACCTTTACAACGTTACAAGGAACT  
TCAGGACATTATAGCTATCCTTGGGTTGGATGAATTATCTGAAGAGGATCGTTTAACCGT  
AGCAAGAGCACGAAAAATTGAGCGTTTCTTATCACAACCCTTCTTCGTAGCAGAAGTA  
TTTACAGGCTCCCCGGGAAATACGTCGGTCTCCAGAACTATTAGGGGGTTTCGATT  
AATCCTTTCTGGAGAATTAGATGGTCTTCCAGAACAAGCCTTTTATTTGGTAGGTAACA  
TCGATGAAGCTACCGCGAAGGCTATGAACTTAGATGAGGAGAGCAAATTAAGAAAAT  
GACCTTAAATCTTTGTGTACTGACTCCTAATCGAATTATTTGGGACTCAGAAGTGAAAG  
AAATTATTTTACCTACGAATAGTGGCCAAATTGGCGTATTACCAAACCACGCCCCCATG  
CTACAGCTGTAGATATAGGTATTTTGAGAATACGCCTCGATGACCAATGGGTAACGATG  
GCTTTGATGGGAGGTTTCGCTAGAATAGGCAATAATGAAATCACCATTTTGGTAAATGA  
TGCAGAGAGGGGTAGTGACATTGATCTGCAAGAAGCTCAGGGAACCTTGAATAGCT  
GAAGCTAATTTGAATAAAGCTGAGGGCAAGAGACAAGTAATTGAGGCCAATCTTGCTC  
TTAGGCGAGCTAGGACACGAGTGGAGGCTGTCAATACGATTTTCGATGAAAAATGTAAC  
CGATTCTTTTCGTTTCTTAGGTCACTGGCCATACGCCGGGAGTTTCGGGTTTAATACCGA  
TATTTTAGCAACAAATCCAATAAATCTAAGTGATGCTTGGTGTATTGATCTTTTTTGG  
AAAGGGAGTGTTAAGTGATTTATTAGATAATCGAAAACAGAGGATCTTGAGCACTATTC  
GAAATTCAGAAGA ACTACGCGGAGCAGCCATTGAACAGCTCGAAAAAGCCGAACTC  
GCTTGCGGAAAGTAGAAATCGAGGCAGATGAGTTTCGAGTGAACGGGTA CTCTGAGAT  
AGAACGCGAAAAATCAAATTTGATTAATGCCGCTTCTGAGAATTTGGAACGATTAGAA  
AATTATAAAAACGAAACCATTTCGTTTTGAACAACAAAAAGCAATTAATCAGGTCCGAC  
AACGAGTTTTCCAACAAGCCTTACAAGGAGCTCTAGGAACCTTGAATAGTTGTTTGAA  
CAAAGAGTTACATCTACGAGCTATCAGTTCTAATATTAGCATTCTCGGTGCCATGAAAG  
AAATAATGGATATGAATCCATTGATTTCTGCCGCTTCTGTTATTGCTGCCGGATTGGCAG  
TAGGGCTTGCTTCCATTGGACCTGGAATCGGTCAAGGTACTGCTGCAGGCCAGGCTGT  
AGAAGGTATCGCGAGACAACCAGAAGCAGAAGGTAAAATACGAGGTACTTTATTGCTT  
AGTCTGGCTTTTATGGAAGCTTTAACAATTTATGGACTAGTTGTGGCATTAGCCCTTTTA  
TTTGCAAATCCTTTTGTATGAATGTTCTACCATGTTCCATCAACACACTAAAGGGGCTG  
TACGATATATCTGGTGTGGAAGTGGGTCAACACCTCTATTGGCAGATAGGGGGTTTCCA  
AGTTCATGGCCAAGTACTTATCACTTCTTGGGTCGTAATTGCTATCTTATTAGGTTCACT  
CACTATAGCGGTTTCGAAATCCACAAACAATTCCAACCAATAGCCAGAATTTCTTCGAAT  
ATGTTCTCGAATTCATTTCGAGATTTGAGCAAAACTCAGATTGGAGAAGATTATGGCCCT

TGGGTTCCCTTTATTGGAACCTATGTTTCTATTCATTTTTGTTTTCGAACTGGTCGGGTGCT  
CTTTTCCCTTGGAATAATCATAACAGTTGCCTCATGGAGAGTTAGCTGCACCCACGAATGA  
TATAAATACTACTGTTGCTTTAGCTTTACCCACGTCAGTGGCATATTTCTATGCGGGTCTT  
ACAAAAAAGGATTGGGTATTTTTAGTAAATACATTCAACCAACCCCAATACTTTTACC  
AATTAACGTTCTAGAAGATTCTACTAAGCCTTTATCACTTAGTTTTGACTTTTTGGGAA  
TATATTGGCTGATGAATTAGTAGTTGTTGTTCTTGTTCCTTTAGTACCTTCAGTGGTCCC  
ATACCTGTCATGTTTCTTGGATTATTCACAAGCGGAATTCAAGCTCTTATTTTTGCAACT  
TTAGCTGCGGCTTATATAGGCGAATCCATGGAGGGTCATCATATGATATCTATCGCTTTAG  
AACATGTATTAACCTCACATCTCTTTTTCGATTATTTCAATTGTGATTTCCGGTTCATTTAAT  
CAAATTTTTAGTTCCTGAAATCATAGGACTATGTGACTCGTTAGAAAAGGGCATAATAA  
CTACCTCTTTTTGCATAACAGGTTTATTAATTATTCGTTGGGTTTATTCAAGACATTTACC  
GTTAAGTAATTTATATGAATCATTAAATGTTCCCTTCGTGGGTTTTCTCCACTATTCATATAT  
TTTCCAAAATATGGAACCATCAAAATGATTTAAGCACAAATTACGGCTACAGGTGCTATTT  
ATTGCCAAGCCTTTGCAACTTCAGGTATTTTAAATGAAATGCATCAATCCGCAATACTAG  
TACCTGCTCTACAATCTCAATGGCTAATGATGCACGTAAGTATGATGTTATTAAGTTATG  
GAGCCCTTTTGTGCGGATCCTTATTATCAGTATCTCTTTTAGTTATTACATTTGAAAAAA  
CATAGAAATCTTGAGAAAATGAATGAAGTACGTCCTTTAAAAAAGAAAAAAGTTTT  
TTACAAAATATTTCTTTTCTTTCAATTTAAAAATTATCATAAATATCAATTTACTCAACAGT  
TGGATCATTGGAGTTATCGGATTATAAATCTAGGATTTACTTTGTTAACCATAGGCATTCT  
ATCAGGAGCAGTATGGGCGAACGAGGCGTGGGGATCTTATTGGAATTGGGACCCCAAG  
GAAACCTGGGCATTTATTACTTGGACTATATTCGCTACTTATTTACATACGAGAACAAAT  
CAACGAATGCCGGGTATGCATTCCGGCAATTGTAGCTTCGATTGGATTTCTTATTATTTGG  
ATATGTTATTTCCGAGTAAATCTATTAGGAATAGGGCTACATAGTTATGGTGCATTCACCT  
CTAATGTGCCGAAAAAGCATTGGCC---CCGCCCCATATCTTGTATCTATAGTTTTTTTA  
CCGTGGTGGATCTCTCTTTCATTTCAAAAAGTCTGGAACCTTGGATTACTAATTGGTG  
GAATAGCAGGAAATCCGAACTTTTTTGAATGATATTCAAGAAAAGGGCGTTCTAGAA  
AAATTCATAGAATTAGAGGAACTACTTCTGCTAGACGAAATAACAAAAGAGTGCCCCG  
AAACACAGATACAAAAGCTTTATATAGGAATATACAAAGAAACGATTCAATTGGTGA  
ATTAATAATGAAGAGCATATCCATATTATTTACAGATTTCCGGCAATATAATCTGTTTTG  
CTACTCTAAGTGGCTATGCTATTCATGTAATGAAGAACTTGTGATTGTGAATCCTTGG  
TTCAGGAATTCCTATATACTTAAGCGACACAATAAAGGCTTTTTCTATTTCTTTAGTAA  
CGGACTTATGTATTGGATTCCACTACCCCATGGTTGGGAGCTAATGATTGGTTCGGTCT  
ACAAAGATTTTGGATTTGCTCATAATGAGCAAATATATCTGGTCTTGTTCCTACCTTTC  
CAGTCATTCTAGATACAATTTTGAATATTGGATCTTTCATTATTTAAATCGTGTATCTCC  
TTCACTTGTAGTGATTATCATTCAATGAATGAAATGCCCATGGTGTTCCTAAAAGTACC  
TTTTCGGAGTCCTGGAGAGGAAGACGCGGCTTGGGTTGACGTATACAACCGACTTCAT  
CGAGAAAGATTACTTTTTTTAGGTCAAGAAGTTGATAGTGAGATCTCGAATCAAATGT  
TGGTTTGTGATGATATCTCAGTATAGAGGATGGTACTCGGGATCTTTATTTGTTTATAAAC  
TCTCCCGGCGGGTGGGTAATCCCGGAATAGCTATTTATGATACTATGCAATTTGTGTCA  
CCAGATGTACATAAATATGCATGGGATTAGCAGCTTCAATGGGATCTTTCATCCTGGT  
GGAGGGGAAATTACCAAACGTCTAGCATTCCCTCACGCTTGGGTTATGATCCACCAACC  
TGCTAGTTCTTTTTATGAGGCACCTACAGGAGAATTTATCCTGGAAGCGGAAGAATTAC  
TGAAACTCCGCGAAACCCTCACAAGGGTTTATGTACAAAGAACAGGCAACCCTTTATG  
GGTTGTATCTGAGGACCTGGAAGGGATGTCTTTATGTCAGCAACAGAAGCCCAAGCT

CATGGCATTGTTGATCTTGTAGCCGTCGAAATGAAAGAACAAAAATTGATTCATGAAGG  
TTTAATTACTGAATCACTTCCCAATGGTATGTTCCGGGTTTCGTTTAGATAATGAAGATTT  
AATCCTAGGTTATGTTTCAGGGAGAATCCGGCGCAGTTTTATACGGATACTGCCGGGGG  
ATAGAGTCAAATCGAAGTAAGTCGTTATGATTCAACCAGAGGACGTATAATTTATAGA  
CTTCGCAACAAAGATTCGAACGATATGGAAAAATTCAAAGATATTTAGAAACATTTAG  
ATCTGAGCAAAGTACTTCCTGTATCCACTTCTTTTTTCAGGAATATATCTACGCACTCGG  
CCATGATCATGGTTTATTAGGTTATGGCGATAAATCTAGTTCACTAATTGTGAAACGTTT  
AATTATTCGAATGCATAAACAGAATCATTTTTCTTATTTCTTGTAATGAATTTCAACAAAAT  
CGATTGTTGGGGAACAATTTGGATTTCGAAAATTATATCGGAGGCTTTTTCAATTATTGTG  
GAAATTCCATTCTCCTTCCAATTAGTGTCTTGCCTAATAGCAAATCTCATAATTTACGAT  
CTATCCATTCAATATTTCCCTTTTTTGAGGACAATATATTCTATTTATATCATATATCGGATG  
TATTAATACCGTACCCTATTCATCCAGAAATTTTAGTTCAAACCCTTCGTTACTGGATAC  
AAGACGTTCCCTCTTTGCATTTATTGCGAATCTTTTTATACGAGTATTGTCATTTCGGGCA  
GTTTCATTAGCAAAAAATTTCTTTTCTTTTCAAAGAAAAGATTATCCTTATTCATATATAA  
TTCTTATGTATATGAATGGGAATCCATATTTCTTTTTATCCGTAAACAATCTTCTCATTAC  
GATCAATATCCTGGGAAGCCCTTCTTGAACGAGTCCATTTCTATGGGAAAATAGAACAT  
CTTGTAGTAGTGCTTTGTAATGATTTTGCTTTGTGGGTATTCAAAGATTGTTTCATGCATT  
ATGTTAGGTATCAGGGAAAATCCCTTTTTGATTTCAAAGGGAAGTACTTTTTGATGAAG  
AAATGGAAATATCACTTTATCTATTTATGGCAATGTAATTTTCACTTGTGGTCTCAACCG  
CACAGGATCCATATAAACCAATTAGATAATCGTTCCTTTCATTTTTTGGGTTATGCTTCAA  
GTGTACGAATAAATCTTTCGGTGGTAAAAAGTCAAATTCTAGAGAATTCATTTCTAATG  
GAGACTTCCGTT-----AAGAAATTCGAAACCACAGTCCCAATTATTTCTCTCATTGGTTC  
ATTGTCAAAGAAAAATTTGTAATCTATCGGGGCATCCCACTAGTAAGGCAATTTGGG  
CGGATTCGTCAGATTCTGATATTATGGAACGATTTGGGCGCGTATGCAGAAATCTTCTC  
ATTATTACAGTGGATGTTCAAAAAACAAATTTTGTATCGAATCAAGTATATACTTCGAC  
TTTCTTGTGCTAGAACTTTGGCTCGTAAACATAAAAGTACGGTACGCGTCTTTCTGAAA  
AGATTAGGTTTCGGGATTTTTGAAGGAATTCCTTGCCGAAGAGGAACAAGTTCTTTTATT  
TTTTCTCCCAAGACGGATTTGGTATTTGGATATTACCCATACAAATGACTTGGCCAATCA  
TGAAATGATAATTGATACGACA---AAAGTACAA---GCTATCAATTCTTTTTCCAGATCGG  
AA---TCTTTAAAGGAGGTCATAGGGCTCATATGGATGCTTGTCCCTATTTGACTCTTGTA  
TTGGCAATAACAATAGGAGTACTCGTGATCGTGTGGCTAGAAAGGCAAATCTCCGCGG  
GGATAACAACGATTTGGTCTGAATATGCCGGTCCCCTGGGAATTCCTCAAGCTATA  
GCGGACGGAACGAACTACTTTTCAAAGAGGATATCCTCCCATCTAGGGGGGATATTC  
GTTTATTCAGCATCGGGCCGTCTATAGCAGTCATATCCATAATACTAAGTTATTAGTAAT  
TCCTTTTAGTTATCACCTTGTCTAGCTGATCTTGGTATAGGTGTTTTTTTTATGGATTGCC  
GTTTCTAGTATAGCTCCTATTGGGCTTCTTATGTCAGGATATGGATCAAATAATAAGTATT  
CCTTTTCAGGTGGTCTACGAGCTGCTGCTCAATCAATTAGTTATGAAATACCATTAACCT  
TATGCGTATTATCAATATCTCTATTATCTAACAGTTTAAAGTACAATTGATATTGTTGAAGTA  
CAATCCAAATATGGAATTTGGGGATGGAATCTTTGGCGTCAACCCGTAGGGTTTATAGT  
TTTTCTAATTTTCATCCCTAGCAGAATGTGAAAGATTGCCCTTTGATTTACCAGAGGCAG  
AAGAAGAATTAGTTGCAGGTTATCAAACCGAATACTCCGGTATCAAATTTGGTTTATTTT  
ATGTTGCTTCTTACCTAAATCTACTAGTTTCTTCAATTATTTGTAACAGTTCTGTACTTTGG  
GGGTTGGAATCTTCTATTCCGTACACATCTATTTTTGGACTTTTTTGAATAAATCAAAC  
CAGCGGAGTTTTTGAACAACAATGGGTATGTTTATTACACTAGCCAAAACCTTATTTATT

CCTCTTCATTTTCGGTTGCAACAAGATGGACTTTGCCTAGAATGAGAATGGATCAACTAT  
TAAATCTCGGATGGAAATTTCTTTTGCCTATTTCTTTAGGTAATTTATTATTGACAACCTC  
TTTCCAACCTCTTTTCGCTGATGATCTGGCATGTACAGAATGAAAACCTTCATTCTCGATTC  
TACGAGAATTTTTATGAAAGCGTTTCATTTGCTTCTATTCCATGGAAGTTTCATTTTCCC  
AGAATGTATCCTCATTTTTGGCCTAATCTTCTTCTGATGATCGATTCAACCTCTGATCA  
AAAAGATATAACCTTGGTTATATTTTCATCTCTTCGACAAGTTTAGTAATGAGCATAACGGC  
CCTATTGTTCCGATGGAGAGAAGAACCTATGATTAGCTTTTTCGGGAAATTTCCAAACGA  
ACAATTTCAACGAAATCTTTCAATTTCTTATTTTACTATGTTCAACTCTATGTATTCCTCT  
ATCCGTAGAGTACATTGAATGTACAGAAATGGCTATAACAGAGTTTCTGTTATTCGTATT  
AACAGCCACTCTAGGAGGAATGTTTTTATGTGGTGCTAACGATTTAATAACTATCTTTGT  
AGCTCCAGAATGTTTCAGTTTATGCTCCTACCTATTATCTGGATATAACCAAGAGAGATGT  
ACGGTCTAATGAGGCTACTACGAAATATTTACTCATGGGTGGGGCAAGCTCTTCTATTCT  
GGTTCATGGTTTCTCTTGGCTATATGGTTCATCCGGGGGAGAGATCGAGCTTCAAGAAA  
TAGTGAATGGTCTTATCAATACACAAATGTACAACCTCCCAGGAATTTCAATTGCGCTTA  
TATTCATCACTGTAGGAATTGGGTTCAGCTTTCCCAGCCCCTTTTCATCAATGGACTC  
CTGACGTATACGAAGGATCTCCCACTCCAGTCGTTGCTTTTCTTTCTGTTACTTCGAAA  
GTAGCTGCCTCAGCTTCAGCCACTCGAATTTTCGATATTCCTTTTTATTTCTCATCAAAC  
GAATGGCATCTTCTTCTGGAAATCCTAGCTATTCTTAGCATGATATTGGGGAATCTCATT  
GCTATTACTCAAACAAGCATGAAACGTATGCTTGCATATTCGTCCATAGGTCAAATTGGA  
TATGTAATTATTGGAATAATTGTTGGAGACTCAAATGATGGATATGCAAGCATGATAACT  
TATATGCTGTTCTATATCTCCATGAATCTAGGAACTTTTGCTTGCATTGTCTTATTTGGTCT  
ACGTACCGGAACTGATAACATTCGAGATTATGCAGGATTATACACAAAAGATCCTTTTTT  
GGCTCTCTCTTCAGCCCTATGTCTCTTATCCCTAGGAGGTCTTCCTCCACTAGCAGGTTT  
TTTCGGAAAACCTATCTATTCTGGTGTGGGTGGCAGGCAGGCCTATATTTCTTGGTTTC  
AATAGGACTCCTTATGAGCGTTGTTTCTATCTACTATTATCTAAAAATAATCAAGTTATTA  
ATGACTGGACGAAACCAAGAAATAACCCCTCACATGCGAAATTATAGAAGATACCCTTT  
AAGATCAAACAATTCATCGAATTGAGTATGATTCTATGTGTGATAGCATCTACTATACC  
AGGAATATCAATGAACCCCATTTATTGCAATTGCTCAGGATACCCTCTTTATGTTTCTTCTT  
CACGAATATGATATTTTCTGGACATTTCTAATAATATCAAGTGTTATTCCTATTTTGGCATT  
TCTAATTTCCGGGGTTTTAGCCCCGATTAATGAAGGACCGGAGAAACTCTCTAGTTATG  
AATCGGGTATAGAACCAATGGGGGATGCTTGGGTCCAATTCCGAATTCGGTATTACATG  
TTTGCTCTAGTTTTTGTGTTTTTGTATGTTGAAACGGTCTTTCTTTACCCATGGGCAATG  
AGTTTCGATGTATTGGGTGTATCCGTATTTATAGAAGCTTTTATTTTCGTGCTTATCCCAA  
TTGTTGGTTCAGTTTATGCATGGCGAAAAGGAGCGTTGGAATGGTCTACGAGTAATTTT  
CCTTGGTTAACAATAATTGTTGTTTTTCCGATATTCGCAGGTTTATTTCATTTTCTTTCTGC  
CGCATAGAGGGAATAAAGTGGTAAGGTGGTATACAATCTCTATATGTTTATTAGAACTCC  
TTCTAACAACCTATGTTTTTTGTTATCATTTCAAATTGGACGACCCGTTAATTCAATTGG  
AGGAGAATTATAAATGGATAACCATTTTCGATTTTCACTGGAAACTGGGAGTTGATGGG  
CTTTCATAGGACCCATTTTACTGACAGGATTCATCACTACTTTAGCTACCTTAGCGGCC  
TGGCCAGTTACTCGATATTCGCGATTGTTCCATTTCCCTGATGTTAGCAATGTACAGCGGT  
CAAATAGGCTCATTTTCTTCTCGAGACCTTTTACTTTTTTTTCTAATGTGGGAGTTAGAA  
TTAATTCCTGTTTACCTCCTTTTATCTATGTGGGGAGGGGAAAACGCCTTACTCAGCT  
ACAAAGTTTATTTTGTATACAGCAGGAGGTTCCATTTTCTCTTAATAGGAGTTCTGGGT  
ATGGGCTTATATGGTTCCAATGAACCAACATTAATTTGGAAACATTAGCTAATCAATCA



TATCCCCTAGCATTGGAAATAATATTCTATATTGGCTTCCTTATTGCTTATGCTGTCAAATC  
ACCAATTATACCTCTGCATACATGGTTACCGGATACCCATGGAGAAGCACATTACAGTAC  
ATGTATGCTTCTAGCTGGAATCTTATTA AAAATGGGAGCATATGGGCTGATTTCGAATCAA  
TATGGAATTATTGCCTCATGCCATTCTATATTTTCTCCTTGGTTGATTCTAGTAGGGGCT  
ATTCAAATAATCTATGCAGCTTCAACTTCGCTCGGTCAACGCAATTTAAAAGGAGAAT  
AGCTTATTCTTCTATATCTCACATGGGTTTTACAATTATTGGAATTGGTTCTATAACTGAT  
ACGGGACTTAATGGAGCCCTTTTACAAATAATTTCTCATGGATTTATTGGTGCTGCACTT  
TTTTTCTTGGCAGGAACAAGTTACGATAGAATACGTCTTGTTTATCTTGACGAAATGGG  
GGGAATAGCTATCCCAATGCCTAAAATATTTACCATGTTTAGTAGTTTTTCAATGGCTTCT  
CTTGCACTGCCAGGAATGAGTGGTTTTATTGCAGAGTTGGTAATCTTTTTTGGGAATAATT  
ATCAGCCCTCAATATCTTTTAATCCCAAAAATAGTAATTACTTTTTGTAGTGGCTATTGGAA  
TGATATTA ACTCCTATTTATTCAATTATCTATGTTACGGCAGATGTTCTATGGATACAAGCTA  
TTCAACTGCAAAAAGTCTCATTTTTTTCGATTCTGGACCACGAGA ACTTTTTATTTCATC  
TGTATCCTTTTACCTGTAATAGGTATTGGTATTTATCCAGATTTTGTCTCTCGTTATCAGT  
CGACAAGGTAGAACTATTTTTATCTAATTACTTT-----ATGATGCTCGAGCATGTACTTTT  
TTTGAGTGCCTATTTATTTTCTATCGGTATTTTTGGATTGATTACAAGTCGAAACATGGTT  
AGAGCACTTATGTGCCTTGAGCTTATTCTGAATGCAGTTAATCTAAATCTTGTAACATTT  
TCTCATTTATTTGATAGTCGCCAATTAAGGGCGACATTTTTTCTATTTTTGTTATAACTA  
TTGCAGCCGCTGAAGCAGCTATTGGACTGGCCATTGTTTCATCAATCCATCGTAACAGA  
AATCAACTCGTATCAATCAATCCAATTTGTTAAATAAAAATGGAACGTACATACCCATAT  
GCGTGGATCATACTTTTATTCCACTCCCGTTACTGTGTTAGTAGGATTAGGACTTCTA  
GTTGTTCCGAATGCAACAAAAAAGATTCGCCGTATGTGGGCTTTTATTAGTGTTTTATTA  
TTAAGCATAGCTTTACTTTTTTCGATCAATATATCCATTCAACAAATAGGGGGCAGCTCG  
ATTTATCAATATCTATGGTCTTGGACCATAAATAATGATTTTTCTTTGGAGTTTGGCTACT  
TGATTGATTGCTTACTTCTATTATGTTAATACTAATCACTACTGTTGGAATCATGGTTCT  
TATTTATAGTGATAATTACATGTCTCATGACCAAGGATATTTGAGATTTTTTGCATCTG  
AATTTTTTCAATGCTTCCATGCTTGGATTAGTTACTAGTTCCAATTTAATACAAATTTATA  
TTTTTTGGGA ACTTGTGGGAATGTGTTTCATATTTACTAATAGGTTTTTTGGTTACACGAC  
CCAGTGCAGCAAATGCTTGTCAAAAAGCCTTTGTA ACTAATCGTGTAGGGGATTTTGGT  
TTATTATTAGGAATCTTAGGACTTTATTGGATAACGGGCAGTTTTGAATTTTCGGGATTTAT  
TCGAAATTTTCAATATCAATA CAATAAATCTTTTTTTTGCAGCTCTATGTGCCTCTCTATT  
ATTTCTTGGTGCAATTGCGAAATCCGCGCAATCCCTCTTCATGTATGGTTGCCCGATGC  
AATGGAAGGTCTACGCCTATCTCCGCTCTTATACATGCTGCGACTATGGTTCGACGCG  
GGATTTTTCTTGTGCTCGACTTTTTCTCTTTTTTATCAACTTACCATACATAATGTATTTT  
ATTTCTTTGATAGGCATAATAACAGTATTATTAGGAGCTACTTTAGCTCTTGCGCAAAGA  
GACATTAAGAGAAGTTTGGCCTATTCGACAATGTCACAATTGGGTTATATTATGCTAGCG  
ATGGGGATAGGTTCTTATCGAGCCGCTTTATTTCAATTTGATTACTCATGCCTATTCGAAA  
GCATTATTGTTTTTGGGATCCGGATCCATATTCAATCTATGGAACCCATAGTTGGATATT  
CGCCAGACAAAAGTCAGAACATGGTTCTTATGGGTGGTTTAAACAAAATATGTGCCAATT  
ACAAAACCCTTTTTTATTAGGTACTTTCTCTTTGTGGTATTCCACCTCTTGCTTGC  
TTTTGGTCCAAGATGAAATCTTAATGATAGCTGGTTATATTCACCAATTTTTGCGATAA  
TAGCTTATTCTACAGCTGGTTTAAACCGCATTTTATATGTTTCGAGTATATTTACTTACTTTT  
GATGGACATTTGCGCATTCATTTTACAAATTTGAATGGAGCTAAAAGTCGTTCACTCTAT  
TCAATATCTATATGGGGAAAAGAAGAAATCAAACCTGAATAATACA---AATTGTTTTTTAT

CAGAAATCAACAAGGTTTTCAATGAAATA-----GTTTTTCCATATCCACATGAATCAGAC  
AGTACCATGTTATTATCAGTATGTGTATTGGGTCTGTTACTTTGTTTCGTTGGATTTCATAG  
GAATCCCTTTGGATTTTGATATATTATCAAAATGGTTAACTCCATCAATAAACCTTTTGCA  
TAAAAATGCACATTATTCTGTGGATTGGTATGAGTTTGTGATAAATGCCATTTTTTCAGTT  
AGTATAGCATTGTTTGGAAATATTCATAGCGTCTTTTTTATATGGGTCTGTTTTTTCATCTTT  
TAAAAGTTTGGACTTAATTAATTCATTTGAAATTTTTTTAGATCGAATTTTAAATGTAATA  
TATAATTGGTCAGATAATCGTGGTTATATAGACACCCTTTTTTCACTCTATTTAACTAGAA  
ATATAAGAAAGTTGTCCGAATTAACCCATTCTTTTGACAAACGGCTGATTGATGGAATT  
ACCAATGGGGTTGGTGTGCGAGTTTTTTTGTGGGAGAGGGGTCAAATAC---GTAGGA  
GGGGGGCGCATTCTTCTTACTTGTGTGTATCTATCTTATGTATCCGTTTTTTTTAGTAG  
TAATTTACATGGGTTTACCTGGACCAATACATGATATCTTTTAGTATTTTTGGGGTCGGG  
TATTGTATTAGGAAGTCTAGGGGTAATTTACTTACCAATACAATCTATTCTGCTTTTTCT  
TTGGGTTTCGTTCTTGTGTGTATATCCTTATTTTATATTCTATCTAATTCCTATTTTGTAGCC  
GCCGCGCAGCTCCTTATTTACGTGGGAGCCATAAATGTTTTAATAATATTTGCTGTGATG  
TTTATGAAAGGTTTCAAGATATCCAACGATTTTTCTATTTGGACTGTTGGGGATGGGGTT  
ACTTCATTAGTTTGTACAAGTATCTTTTTTTCATTAATTAATACTACTATCTTGGATACATCATG  
GTACGGTATTATTTGGACTACAAGATCAAACCAGATTATGGAGCAAGACCTTTTAAAGTA  
ACGTTCAACAAATTGGAATTCATCTAGTAACCGATTTTATTCTTCCATTTGAACTTATTT  
AATAGTTCTTTTAGTTGCTTTGATAGGTGCAATTGCTATGGCTCGTCAGATGACTGTACC  
GGCTACAAGAAAAGATCTGATGATAGTCAATATGGGTCCACACCACCCATCAATGCACG  
GTGTTCTTCGGCTCATCGTCACTCTAGATGGTGAAGATGTTATTGACTGTGAACCCATAT  
TGGGTTATTTACACAGAGGGATGGAAAAAATTGCGGAAAATCGAACAATTATACAATAT  
TTACCTTATGTAACCCGTTGGGATTATTTAGCTACTATGTTCCACAGAGGCAATAACGGTA  
AATGCACCAGAGCAGTTGGGAAATATTCAAGTACCTAAAAGAGCTAGCTATATCAGAGT  
AATTATGCTGGAGCTGAGTCGTATAGCTTCTCATTTATTATGGCTTGGACCTTTTATGGC  
GGATATCGGTGCACAACTCCTTTCTTCTACATTTTTAGAGAGAGGGAATTACTGTATGA  
TCTATTTGAAGCTGCCACAGGTATGCGAATGATGCATAATTACTTCCGTATCGGAGGGGT  
AGCTACCGATCTGCCTTATGGTTGGATAGATAAATGTTTTGATTTCTGTGATTATTTTTTA  
ACAGGAGTGGTGGAAATATCAAAAGCTTATCACGCAAAATCCTATTTTTTTTGGAACGAGT  
TGAAGGGATAGGCATTATTGGTGGAGAAGAAGCAATAAATTGGGGTTTATCAGGACCG  
ATGTTACGAGCTTCCGGCATCCAATGGGATCTTCGTAAAGTTGATCGTTATGAGTGTTAT  
GATGAATTCAATTGGGAAGTCCAATGGCAAAAAGAGGGGGATTTCATTATCTCGTTATTT  
AGTACGAATCGGTGAAATGACGGAGTCCATAAAAATTATTCAACAGGCTCTAGAAGGA  
ATCCCAGGGGGGCCCTATGAGAATTTGGAAGTACGGCGCTTTGATAAAAACAAAGGATT  
CCGAATGGAATGATTTTGAATATCGATTCATTAGTAAAAAACCTTCCCCCTCTTTTGAAT  
TGTCTAAACAAGAACTTTATGTAAGAGTAGAAGCTCCAAAGGGAGAATTGGGAATTTT  
TTTGATAGGGGATAATAGTGTTTTTCCCTGGAGATGGAAAATCCGTCCGCCCGGTTTCA  
TTAATTTGCAAATTTCTCCTCAGCTAGTTAAAAGAATGAAATTGGCCGATATCATGACGA  
TACTAGGTAGTATAGATATCATTATGGGGGAAGTTGACCGTATGTTCCCTATGATAACTG  
GGTTCATGAATTATGGTCAACAAACAGTACGAGCCGCAAGATACATTGGTCAGAGTTTC  
GCGATTACCTTATCTCACACGAATCGGTTACCTGTAACCTATTCAATATCCTTATGAAAAA  
TCAATCACATCAGAGCGTTTCCGCGGTGCAATCCACTTTGAATTTGATAAATGTATTGCT  
TGTGAAGTATGTGTTTCGTGTATGTCCCATAGATCTACCTGTTGTAGATTGGAAATTAGAA  
ACAGATATTCGAAAGAAAAGGTTGCTTAATTATAGTATTGATTTTGGAAATATGTATTTTT

GTGGTAATTGCGTCGAGTATTGTCCGACAAACTGTTTATCAATGACTGAAGAGTATGAA  
CTTCTACCTATGATCGTCACGAATTGAACTATAATCAAATTGCTTTGGGTCGCTTACCA  
ATATCAGTAATTGAAGACTATAACAATTCAAACAAACAATTATGAATCAGAAAAGATTAC  
CAAT-----ATGCAGGGTCGTTTATCTGCTTGGCTAGTCAAGCACGAGC  
TAGTTCATAGATCTTTGGGCTTCGATTACCGAGGAATAGAGACTTTACAAATAAAGTCG  
GAGGATTGGTATTCCATTGCTGTCAATTTATATGCATATGGTTACAATTATCTACGTTCCC  
AATGTGCTTATGATGCAGCGCCGGGCGGGTGTAGCTAGCGTATATCATCTTACGAGA  
ATACAGTATGGTATAGATCAACCAGAAGAGGTATGCATCAAAGTATTTGTCCCAAGGAC  
AAATACTAGAATCCCGTCTGTTTTCTGGATTTGGAAAAGCGCGGACTTTCAAGAGCGA  
GAATCTTATGATATGCTGGGAATCTCGTATGAGAATCACCCACGTCTGAAACGTATCTTG  
ATGCCCGAAAGTTGGATAGGCTGGCCCTTACGTAAAGATTATATTGCCCTAATTTCTAT  
GAAATACAAGATGCCCAT-----  
-----ATGAACTCTA  
TGAAGTTTCCGTTACTTGATCGAACAACCTCAAAGTTCAGTTATTTCAACTACATTGAAT  
GACCTTTCGAATTGGTCAAGACTTTCCAGTTTATGGCCACTTCTATATGGTACCAGTTGT  
TGCTTCATTGAGTTTGCTTCATTAATAGGCTCGAGATTGACTTTGATCGTTATGGACTA  
GTACCAAGATCAAGCCCTAGGCAAGCAGACCTCATTTTAACAGCTGGCACAGTAACAA  
TGAAGATGGCTCCTTCTTTAGTAAGATTATATGAGCAAATGCCTGAACCAAAATATGTCA  
TTGCTATGGGAGCTTGTACTATTACGGGGGAATGTTTAGTACCGATTCTTATAGTACTG  
TTCGGGGAGTCGATAAGCTAATTCCTGTGGATGTCTATTTGCCGGGCTGTCCGCCTAAA  
CCAGAAGCAATCTGGATGCTATAACGAAACTTCGTAAGAAGGTCTCTCGAGAAATTTA  
TGAAGATAAGATTGGGTCTCAACGGGAAAATCGATATTTACTACCAATCACAAGTTTC  
ATGTTCCCAAGAGTACTCATATTGAAAATTATGATCAAGGA-----CTTCTCAATCTAC  
GCCCCGAAATAGCCTCTGAAAACCTTTTTCAAATACAAAAGTTTAGTACCTAATTATGATAT  
GAAT---ATGCAAATAGAAATACATTTTCTTGGGTAAAGGAACCGATAAATCGATCTATT  
TCTGTATTGATCATTATATATGTAATAACTCAGACATCTATTTCAAATGCATATCCTATTTT  
TGCACAGCAGGGTTATGAAAATCCACGAGAAGCAACTGGACGTATTGTATGCGCCAAT  
TGCCATTTAGCTAATAAACCAGTAGATATTGAGGTTCCACAAGCGGTACTCCCGGATAC  
TGTATTTGAAGCAGTTGTTTCGAATCCCTTACGATTCACAACCTGAAACAAGTTCTTGCTA  
ATGGTAAAAAGGGGGGGTGAATGTGGGGGCTGTTCTTATTTTACCCGAGGGATTGTA  
ACTAGCCCCCGGATCGTATCTCTCCCGAGATGAAAGAAAAGATAGGCAATCTATCTT  
TTCAGAGCTATCGCCCCAATAAAAAAATATTCTTGTAAATAGGTCCCGTTCCTGGTCAA  
AAATATAGGGAAATTTTATTTCCCATTTCTGTCTCCGGACCCCGCGCTAAGAAGGACGC  
TCACTTCTAAAATATCCTATATATGTAGGGGGCAACAGGGGTAGGGGTGAGATTTATCC  
AGATGGAAGCAAGAGTAATAATACAGTCTATAATGCTACAGCTGCAGGTACAATAACTA  
AAATTTTACGTAAAGAAAAAGGAGGATATGAAATATCCATCGCTGATGCATCGGACGGC  
CGCCAAGTGGTTGACAATATACCTCCAGGGCCAGAACTTCTTGTTTTGAGAGGGTGAAT  
CTATCAAACCTTGATCAACCATTAACAAGTAATCCTAATGTAGGTGGATTTGGTCAGGGA  
GATGCAGAAATAGTACTTCAAGATCCATTACGGGTCCAAGGTTTGTGTTCTTTTTGGC  
ATCTGTTACTCTGGCACAATCTTTTTGGTTCTAAAAAAGAAACAATTTGAGAAGGTTT  
AATTGTCCGAAATGAATTTTCATGAGCAAAGTATATGATTGGTTTCGAAGAGCGTCTCGAG  
ATTCAGGCGATCGCAGATGATATAACCAGTAAATATGTTCCCCCTCATGTCAACATATTT  
TATTGTCTAGGAGGGATCACACTTACTTGTTTTTTAGTACAAGTTGCTACGGGTTTTGCT  
ATGACTTTTTACTACCGTCCGACCGTTACCGAGGCTTTTGCCTCGGTTCAATACATAATG

ACTGAAGCTAATTTTGGTTGGTTAATCCGATCAGTTCATCGATGGTCGGCAAGTATGAT  
GGTCCTAATGATGATTTTGCACGTATTTTCGTGTTTATCTCACAGGTGGATTTAAAAAACC  
TCGCGAATTAACCTGGGTTACCGGTGTAATCTAGCTGTATTGACTGCATCCTTTGGCGT  
AACCGGTTATTCCTTACCTTGGGATCAGATTGGTTATTGGGCAGTCAAAATTGTGACAG  
GCGTACCAGAAGCAATTCCTGTAATTGGATCCCCTTTAGTAGAATTACTGCGTGGAAGT  
ACTAGTGTGGGTCAATCCACCCTGACCCGCTTTTATAGTTTACACACTTTTGTATTACCT  
CTTCTTACTGCCGTATTTATGTTAATGCACCTTTTCAATGATACGTAAGCAAGGCATTTCA  
GGTCCTTTAATGGGAATAACAAAGAAACCTGATTTGAACGATCCTGTATTAAGAGCGA  
AATTAGCTAAAGGGATGGGGCATAATTATTATGGCGAACCCGCATGGCCAAACGACCTT  
TTGTATATTTTTCCAGTAGTAATTCTAGGTACTATTGCATGTAACGTGGGCTTAGCAGTTC  
TAGAACCGTCAATGATTGGTGAACCAGCAGATCCATTTGCAACTCCTTTGGAAATATTA  
CCGGAATGGTACTTCTTTCCCGTATTTCAAATCTCCGTACAGTACCCAATAAGTTATTG  
GGTGTCTTTTAATGGTTTCAGTACCTGCAGGATTGTTGACAGTGCCCTTTTTGGAGAA  
TGTTAATAAATTCCAAAATCCATTTCCGGCGTCCAGTGGCTACAACAGTCTTTTTGGTCG  
GTAAGTGTAGTACTCTTTGGTTAGGTATTGGAGCAACATTACCTATTGATAAATCTCTAA  
CTTTAGGTCTTTTTATGATTGAAGTTTTTCTATTTGGAATTGTATTAGGTTTAATTCCTATT  
ACTTTGGCCGGATTATTTGTAAGTGCATATTTACAATATAGACGCGCGATCAGTTAGAC  
CTTATGCCTACCATAACTAGTTATTTGGTTTTCTACTGGCTGCTTTAACTATAACCTCGG  
CTCTATTGATTGGTCTGAGCAAGATACGACTTATTATGGATATAGTAAGTCTCGCTTGGG  
CTGCTTTAATGGTAGTCTTTACTTTTTCCCTTCGCTTGTAGTATGGGGAAGAAGTGGAC  
TCATGATTATTCGTTCCCGGAATCAGAAGTGAAGATTGTGGTGGATAGGGATCCCGTA  
AAAACCTCTTTGAGGAATGGGCCAAACCCGGCCATTTTTCAAGAACAATAGCTAAGG  
GCCCCGATACTACCACTTGGATCTGGAACCTACATGCGGATGCTCACGATTTTGATAGC  
CATAACAGTGATTTGGAGGAGATCTCTCGAAAAGTATTTAGTGCTCATTTCGGTCAACT  
CTCCATCATCTTCCTTTGGCTGAGTGAATGTATTTCCATGGTGCTCGTTTTTCCAATTAT  
GAAGCGTGGCTGAGCGATCCTACTCACATTGGGCCAGCGCGCAGGTAGTTTGGCCGA  
TAGTGGGTCAAGAGATATTAATGGTGATGTGGGCGGAGGTTTTTCGAGGAATACAAATA  
ACCTCCGGGTTTTTTCAACTTTGGCGCGCATCTGGAATAACTAATGAATTACAACCTTTA  
CTGTACCGCAATTGGTGCATTGGTCTTTGCAGGATTAATGCTTTTTTGCCGGTTGGTTCCA  
TTATCACAAAGCTGCTCCAAAATTGTCTTGGTTCCAAGATGTAGAATCCATGTTGAATC  
ACCACTTGGCGGGGTACTAGGACTGGGGTCTTTTCTTGGGCGGGACACCAAGTACA  
TGTATCTTTACCGATTAACCAATTTCTAGATGCTGGAGTAGATCCTAAAGAGATAACCACT  
TCCTCATGAATTTATCTTGAATCGGGACCTTTTGGCTCAACTTIATCCCAGTTTTGCCGA  
GGGAGCAACCCCACTTTTACCTTGAATTGGTCAAAATACGCGGAATTTCTTACTTTTC  
GTGGAGGATTAGATCCAACAACAGGAGGCCTATGGCTAACCGATATTGTACACCACCAT  
TTAGCTATTGCAATCTTTTCCCTGATAGCAGGTACATGTATAGGACTAACTGGGGCATT  
GGTCACAGTCTAAAAGATATTTTAGAGGCTCATAAAGGTCCATTTACGGGTCAGGGTCA  
TAAAGGCCTCTATGAGATTCTAACAACATCATGGCATGCTCAATTATCCCTAACCTAGC  
TATGTTAGGCTCCTTGACCATTGTTGTAGCTCACCATATGTATTCCATGCCCCCTATCCA  
TACCTAGCTACTGACTACGGTACACAACCTTTCGTTGTTACACATCACATGTGGATTGG  
TGGATTTCTCATAGTTGGTGCTGCCGCACATGCAGCCATTTTTATGGTAAGAGACTACG  
ATCCAACACTCGATATAATGATCTATTGGATCGTGTCTTAGGCACCGTGATGCAATCA  
TATCCCATCTTAACTGGGCATGTATATTTCTAGGCTTTCACAGTTTTTGGCTTGATATTCA  
TAATGATACTATGAGTGCTTTAGGACGTCCCAAGATATGTTTTTCAGATACCGCTATACA

ATTACAACCTATCTTTGCTCAATGGATACAAAATACCCATGCTTTAGCGCCGAGTGCAA  
CAGCTCCTGGTGCAATAGCAAGCACCAGCTTGACGTGGGGAGGTGCTGATTTAGTGGC  
AGTAGGTGGCAAGGTCGCTTTGTTACCTATTCCATTAGGAACTGCAGATTTTTTGGTCC  
ATCACATTCATGCATTTACGATCCACGTGACTGTATTGATATTAAGGCGTTCTATT  
TGCTCGTAGCTCGCGGTTGATACCCGATAAAGCAAATCTAGGTTTTCGTTTCCCTTGTG  
ACGGACCCGGAAGAGGGCGGGACATGCCAAGTATCCGCCTGGGATCATGTTTTCTTAGG  
CCTATTCTGGATGTACAATGCGATTTTCGGTAGTCATATTCCATTTTCAGTTGGAAAATGCA  
GTCAGATGTTTTGGGGTAGCATAAGTGATCAAGGGGTGGTAACTCACATCACGGGAGGA  
AACTTTGCACAGAGTTCCATTACTATTAATGGGTGGCTCCGGGACTTCTTATGGGCACA  
GGCATCCCAGGTAATCAATCTTATGGTTCTTCATTATCTGCATATGGTCTTTTTTTCCCTA  
GGTGCTCATTTTTGTCTGGGCCTTTAGTTAATGTTTCTATTTCAGCGGACGGGGTTATTGG  
CAAGAACTCATTGAATCCATCGTCTGGGCTCATAACAAATTAAGTTGCTCCTGCTAC  
TCAGCCTAGAGCCTTGAGTATTGTACAAGGACGTGCTGTAGGAGTAACCCATTACCTTC  
TGGGTGGAATTGCCACAACATGGGCATTCTTCTTAGCAAGAATTATTGCAGTAGGAATG  
GCATTACGATTTCCAAGGTTTAGCCAAGGCTTAGCTCAGGACCCCACTACTCGTCGTAT  
TTGGTTTTGGTATTGCTACCGCACACGATTTGAAAGTCATGATGATTAAGTGGAGC  
GTCTTTATCAGAACATTTTTGCTTCCCACCTTGGGCAGTTAGCAATAATCTTTCTGTGGA  
CTTCCGAAATCTGTTTCATGTAGCTTGGCAAGGAAATTTGAGTCATGGGTAAAGGAC  
CCTTTACATGTAAGACCTATTGCTCATGCAATTTGGGATCCTCATTTTGGTCAACCGGCT  
GTTGAAGCCTTTACTCGAGGAGGTGCTTTCGGCCCGGTGAATATCTCTTATTCCGGTGT  
TTATCAGTGGTGGTATAACAATCGGCTTACGCACCAATGAGGATCTTTATACTGGAGCTCT  
TTTTCTATTATTTCTTTCTGCTATATCCTTAGTAGCGGGTTGGTTACACCTACAACCAAAA  
TGAAACCGAGCGTTTTCGTGGTTCAAAAATGCGGAATCTCGTCTCAATCATCATTTGTC  
AGGACTTTTTGGAGTAAGTTCTTTGGCTTGGACAGGGCATTAGTGCATGTCGCCATCC  
CTGGATCGAGAGGGGAGTACGTCCGATGGAATAATTTCTTAGATGTATTACCGTATCCCC  
AAGGGTTGACCCCACTTTTTACAGGCCAGTGGAAATCTTTATGCCCAGAACCCTGATTCT  
GGTAGTCATTTATTTGGTACCTCCCAAGGATCGGGAAGTCCATTCTAACCCTTCTCGG  
AGGATTCCATCCACAAACGCAAAGTTTATGGTTGACCGATATTGCTCATCATCATTTAGC  
TATTGCATTTATTTTTCTCGTAGCCGGTCATATGTATAGAACTAAGTTCCGGAATTGGGCAC  
AGTATGAAAGATCTTTTAGAGGCACATACTCCTCCAGGGGGTTCGATTGGGACGTGGGC  
ATAAGGGTCTTTATGACACAATCAATAATTCGCTTCATTTTCAATTAGGTCTTGCTCTAG  
CCTCTTTAGGGGTATTACCTCCTTGGTAGCTCAACACATGTATTCTTTGCCCGCTTATG  
CATTCATAGCACAAAGACTTTACTAGCCAAGCTGCGTTATATACTCATCACCAGTATATCG  
CAGGGTTTATCATGACAGGAGCCTTTGCTCATGGAGCTATATTCTTCATTCCGGGATTACA  
ATCCGGAACAGAATGAGGATAATGTATTGGCAAGAATGTTAGACCATAAAGAAGCTATC  
ATATCTCATTTAAGTTGGGCTAGCCTATTTTTGGGATTCCATACCTTAGGACTTTACGTT  
ATAACGACGTATGCTCGCTTTTTGGTACTCCGGAGAAACAAATTTGATTGAGCCATA  
TTTTGCCAATGGATACAATCTGCTCATGGTAAGACTTCATATGGGTTTCGATATACTCTTAT  
CTTCAACGAATGGTCCGGCATTTAATGCTGGTAGAAGCATATGGTTACCGGGCTGGTTG  
AGTGCCGTTAATGAT-----AATAGTAATTCATTTCTTAACAATAGGCCCCCGGAGACTTC  
TTGGTTTCATCATGCTATTGCTCTAGGCTTGCATACAACACTACATTGATTTTAGTAAAGGGT  
GCTTTAGATGCGCGCGGCTCCAAGTTAATGCCAGATAAAAAGGATTTTGGTTATAGTTT  
TCCTTGCGACGGGCGGGGGCGAGGCGGTAAGTGTGATATTTCCGGCTTGGGACGCATTTT  
ATTTGGCAGTTTTCTGGATGTTAAATACCATTGGATGGGTCACTTTTTATTGGCATTGGA

AGCACATCACATTATGGCAGGGTAATGTTTCACAATTTAATGAATCCTCCACTTATTTGA  
TGGGATGGTTAAGAGATTATTTATGGTTAAACTCTTCACAACCTTATCAATGGATATAACC  
CTTTTGGTATGAATAGTTTATCGGCTCTGGGCATGGATGTTCCCTATTTGGTCATCTTGTTG  
GGCTACTGGATTTATGTTCTTAATTTCTGGCGTGGATATTGGCAGGAATTGATTGAAAC  
TTAGCATGGGCTCATGAGCGTACACCTTTAGCCAATTTGATTTCGATGGAGGGATAAAC  
CTGTAGCTCTTTCCATTGTGCAAGCAAGGTTGGTTGGATTAGCCCATTTTTTCGGTAGGTT  
ATATATTCACCTATGCAGCTTTCTTGATTGCTTCTACATCAGGCAAATTTGGTATGTCGCA  
TTCAGTAAAAATTTATGATACATGTATAGGATGTACTCAATGTGTACGAGCCTGCCCCAC  
GGACGTGTTGGAAATGATACCTTGGGACGGATGTAAAGCTAAGCAAATAGCTTCGGCT  
CCAAGAACAGAGGACTGTGTAGGTTGTAAAAGATGCGAATCCGCCTGTCCAACGGATT  
TTTTGAGTGTTCGAGTTTATTTATGGCATGAAACAACCTCGCAGCATGGGTCTAGCTTATA  
TGACAGATTTAGTTTACCCTCTATTTTGGTGCCTTTAGTAGGCCTAGTATTGCCGGCAA  
TTGCAATGGCGTCTTTATCTCTTCATGTTCAAAAAACAAAATTGTTATGCGAGATATAA  
AACATATCTCTCCGTGGCACCCGTGTTAGCTACTTTATGGTTCGGTTCCTTTAGCAGGTC  
TATTGATAGAGATCAATCGTTTATCCCGGATGCGTTGGTATTCCCCTTTTTTTCATTCAT  
GACTGCAATTTTAGAGAGACGCGAAAGCACAAAGCCTGTGGGGCCGCTTCTGTAACCTG  
GATTACTAGCACTGAAAACCGTCTTTATATTGGATGGTTTGGTGTTTTGATGATCCCTAC  
TTTATTGACCGCAACTTCTGTATTTATTATCGCCTTCATTGCTGCTCCTCCAGTGGATATT  
GATGGTATTCGTGAACCTGTTTCCGGTTCCTACTTTATGGAAACAATATTATCTCTGGC  
GCTATTATTCCTACTTCTGCGGCTATCGGTTTGCATTTTACCCGATCTGGGAAGCTGCA  
TCGGTTGATGAATGGCTATAAATGGTGGTCCCTATGAGCTAATTGTTCTACACTTCTTG  
CTTGGTGTAGCTTGTACATGGGTCGTGAATGGGAACTTAGTTTCCGTCTGGGTATGCG  
CCCTTGGATTGCTGTTGCATATTCAGCTCCTGTTGCAGCTGCTACTGCTGTTTTCTTGAT  
CTACCCTATTGGTCAAGGAAGCTTCTCTGATGGTATGCCTTTAGGAATTTCTGGTACTTT  
CAATTTATGATTGTATTCCAGGCTGAGCACAAACATCCTTATGCATCCATTTACATGCT  
AGGCGTAGCTGGTGTATTCGGCGGCTCCCTATTCAGTGCTATGCATGGTTCCTTGGTAA  
CCTCTAGTTTGATCAGGGAAACCACAGAAAATGAATCTGCTAATGAAGGTTACAGATTC  
GGTCAAGAGGAAGAAACTTATAATATCGTTGCTGCTCATGGTTATTTTGGCCGATTGATC  
TTCCAATATGCTAGTTTCAACAATTCTCGCTCCTTACATTTCTTTTTAGCTGCTTGGCCTG  
TAGTAGGTATTTGGTTCACTGCTTTAGGTATCAGCACCATGGCTTTCAACCTAAATGGAT  
TCAACTTTAATCAATCCGTAGTTGACAGTCAAGGTCGTGTTATTAACACTTGGGCTGATA  
TCATTAACCGTGCAAACCTTGGTATGGAAGTTATGCATGAGCGTAATGCACACAACCTC  
CCTCTAGACTTAGCTGCTGTTGAAGCTCCATCTACAAATGGAATGGGTTTGCCTTGGTA  
TCGTGTTTCATACCGTCGTATTGAATGATCCCGGCCGATTACTTTCTGTCCATATAATGCAT  
ACAGCTCTAGTTTCTGGTTGGGCCGGCTCGATGGTTTTATACGAATTAGCGGTTTTTTGAT  
CCCTCTGACCCTGTTCTTGATCCAATGTGGAGACAGGGTATGTTTGTATACCCTTCATG  
ACTCGTTTAGGCATAACTAATTCATGGGGTGGTTGGAGTATTACC---GGGGGACTATAA  
CGAATCCGGGTATTTGGAGTTACGAAGGTGTAGCCGGAGCACATATTATGCTTTCCGGT  
TTGTGCTTCTTAGCAGCTATCTGGCATTGGGTGTATTGGGACCTAGAAATATTCCGCGAC  
GAGCGTACGGGAAAACCTCCTTGGATTTGCCAAGATCTTTGGAATTCATTTATTTCT  
TGCCGGAGTGGCTTGCTTTGGGTTTGGAGCATTTTCATGTAACAGGCTTGTATGGTCTG  
GAATATGGGTGTCCGACCCTTACGGCTTAACCGGAAAAGTACAACCTGTAAACCCATCT  
TGGGGGGCAGAAGGTTTTGATCCTTTTGTTCAGGAGGAATAGCCTCTCATCATATTGC  
AGCGGGGACATTGGGTATATTAGCGGGCCTATTCCATCTTAGTGTTCCGCCGCCCAAC

GTTTATACAAAGGATTACGTATGGGCAATATTGAAACTGTCCTTTCTAGTAGTATCGCTG  
CTGTCTTTTTTGCAGCTTTCGTAGTTGCTGGAACCTATGTGGTATGGTTCAGCAACTACCC  
CAATTGAATTATTTGGGCCCCTCGTTATCAGTGGGATCAGGGGTACTTTCAGCAAGAA  
ATATATAGAAGAGTTAGCGCTGGGCTAGCCGAAAATCTGAGTTTATCAGAAGCTTGGTC  
TAAAATTCCCGAAAAATTAGCTTTTTACGATTACATTGGTAATAATCCGGCAAAGGGAG  
GATTATTCAGAGCAGGTTCAATGGACAACGGCGATGGAATAGCTGTTGGCTGGTTAGG  
ACACCCCGTCTTTAGAGATAAAGAAGGTCATGAACTTTTTGTCCGTCGTATGCCTACCT  
TTTTTGAAACATTTCCGGTAGTTTTGGTAGATGGAGACGGAATTGTGCGAGCAGATGTT  
CCTTTTAGAAGGGCGGAATCAAAGTATAGTGTGGAACAGGTAGGTGTAACCTGTTGAGT  
TCTATGGCGGTGAACTCAATGGAGTTAGTTATAGTGATCCTGCTACTGTGAAAAAATAT  
GCTAGACGTGCTCAATTGGGGGAGATTTTTGAATTGGATCGTGCTACTTTGAAATCAGA  
TGGTGTTTTTTCGCAGCAGTCCAAGGGGTTGGTTTACTTTTGGACATGCTTCATTTGCTT  
TGCTCTTCTTTTTTCGGCCACATTTGGCATGGCGCTAGAACCCTTGTTTCAGAGATGTTTTG  
CTGGTATTGATCCAGATTTGGATTCTCAAGTAGAGTTTGGAACATTCCAAAAAATCGGA  
GACCCAACCACAAGGAGACAAGCAGTCATGAAAACCTTGTATTCCCTGAGGAGGTTCT  
ACCCCGTGGAACCGCTCTTTAATGGAACCTTAGCTTTAACCGGTCGTGACCAAGAAAC  
TACTGGTTTCGCTTGGTGGGCTGGTAATGCCCAGCTTATCAATTTATCCGGTAAACTACT  
TGGGGCTCACGTAGCCCATGCTGGATTAATCGTATTCTGGGCCGGAGCAATGAACCTAT  
TTGAAGTGGCTCATTTTCGTACCAGAGAAACCCATGTATGAACAAGGATTAATTTTACTT  
CCACATCTAGCTACTCTAGGTTGGGGCGTAGGCCCGGGTGGGGAAGTTATCGACACCT  
TTCCATACTTTGTATCTGGAGTACTTCACTTAATTTCTTCCGCAGTCTTAGGCTTTGGTG  
GTATTTACCATGCACTTCTAGGACCTGAGACTCTGGAAGAATCTTTTCCATTCTTCGGTT  
ATGTATGGAAAGATAGAAATAAAATGACCACCATTTTGGGTATTCACTTAATTTTGTAG  
GTATAGGTGCATTTCTTCTAGTATTTAAAGCTCTTTATTTTGGAGGCGTATATGACACCTG  
GGCTCCCGGGGGAGGAGATGTAAGAAAAATTACCAACCTGACCCTTAGCCCAAGTGTT  
ATATTTGGTTATTTACTAAAATCTCCCTTTGGAGGGGAGGGTTGGATTGTTAGTGTAGAC  
GACTTAGAAGATATAATTGGGGGACATGTATGGTTAGGTTCCATTTGTATACTTGGTGGG  
ATCTGGCATACTTAACCAAACCCTTTCATGGGCTCGTCGAGCATTGTATGGTCTGGG  
GAGGCTTACTTGTCTTATAGTTTAGGTGCTTTAGCTATCTTTGGTTTCGTGCTTGCTGC  
TTTGTATGGTTCATAATAACCGCTACCCTAGTGAGTTTTATGGTCCTACTGGCCAGAA  
GCTTCTCAAGCTCAAGCATTACCTTTCTAGTTAGAGACCAGCGTCTTGGGGCTAACGT  
AGGGTCTGCTCAAGGGCCCCTGGTTTAGGTAAATATTTAATGCGTTCCCAACGGGA  
GAGGTATTTTTGGAGGAGAAACTATGCGTTTTTTGGGATCTCCGTGCTCCTTGGTTGGA  
ACTTTTAAGAGGGCCCAATGGTTTGGACTTGGGTAGGCTGAAAAAGGACATACAACCT  
TGGAAGAACGACGTTCCGCAGAGTATATGACTCATGCTCCTTTAGGTTCTTTAAATTC  
CGTAGGGGGCGTAGCTACCGAGATCAATGCAGTCAATTATGTCTCTCCTAGAAGTTGGT  
TAGCTACCTCTCATTTTGTCTAGGATTCTTCTTTTTTCGTGGGCCACTTATGGCATGCGG  
GAAGGGCCCGTGCGGCTGCAGCTGGATTTGAAAAAGGAATCGATCGCGATTTTGAACC  
CGTTCTTTCCATGACCCCTCTTAACATGACTATAGCCCTTGGTAGATTTACCAAAGAAG  
AAGAAGATTTATTTGATATTATGGATGACTGGTTACGAAGGGACCGTTTCGTTTTTGTAG  
GTTGGTCTGGTTTATGCTCTTTCCTTGTGCTTATTTTCGCTTTAGGGGGTTGGTTCACAG  
GTACAACCTTTGTAACCTTCATGGTATACCCATGGGTTGGCGAGTTCCTATTTGGAAGGC  
TGTAATTTCTTAACCGCTGCAGTTTCTACTCCTGCTAATAGTTTAGCACACTCCTTATTGT  
TACTATGGGGCCCTGAGGCGCAGGGAGATTTTACCCTTGGTGTCAATTAGGCGGTTTG

TGGACTTTTGTGCTCTTCATGGTGCTTTCGCACTAATTGGTTTCATGTTACGTCAATTC  
GAACTTGCTCGATCTGTTCAATTGCGACCTTATAATGCAATCGCATTCTCTGGCCCAATT  
GCGGTTTTTGTCTGTATTCTTGATTTATCCACTAGGCCAGTCTGGTTGGTTCTTTGCA  
CCTAGTTTTGGAGTTGCTGCTATAATTCGATTCATCCTCTTTTTTCCAAGGGTTTCATAATT  
GGACCTTGAACCCATTTTCATATGATGGGAGTTGCCGGAGTATTGGGCGCTGCTCTACTA  
TGCGCTATTCATGGTGCTACCGTCGAAAATACTTTATTTCGAAGATGGTGATGGTGCAAAT  
ACATTCCGTGCTTTTTAACCCAACCTCAAGCCGAAGAGACTTATTCAATGGTCACTGCTAA  
CCGCTTTTTGGTCTCAAATTTTTGGGGTTGCTTTTTTCCAATAAACGTTGGTTACATTTCTT  
TATGTTATTTGTACCAGTAACCGTTTTATGGATGAGCGCTCTTGGAGTAGTCGGTTTTGGC  
TCTGAATCTACGTGCCTATGACTTTGTTTCCCAGGAAATTCGTGCAGCGGAAGATCCTG  
AATTTGAGACTTTTTACACCAAAAATATTCTTTTTAAATGAAGGTATTCGTGCTTGGATGG  
CGGCTCAGGATCAGCCTCATGAAAACCTTGTATTCCCTGAGGAGGTTCTACCCCGTGG  
AAACGCTCTTATGTCTGGAAGCACGGGAGAACGTTCTTTTTGCTGATATTATTACCAGTAT  
TCGATACTGGGTCATTCATAGTATTACTATACTTCCCTATTCATTGCAGGTTGGTTATTT  
GTCAGCACGGGTTTAGCTTACGATGTGTTTGAAGTCCTCGGCCAAACGAGTATTTTAC  
AGAGAGCCGGCAAGGGATTCCATTAATAACTGGCCGTTTTGATCCTTTGGAACAACCTC  
GATGAATTTAGTAGATCCTTTATGACCATAGATCGAACCTATCCAATTTTTTACAGTGCGA  
TGGTTGGCTGTTACGGACTAGCTGTACCTACCGTTTCTTTTTTGGGCTCAATATCAGC  
AATGCAGTTCATCCAACGAATGGCTACACAAACCGTTGAGGATAGTTCC---AAATCTGG  
GCCAAGACGAACTGTTATAGGGGATTTATTGAAACCTTTGAATTCGGAATATGGTAAAG  
TAGCCCCTGGGTGGGGAACGACCCCTTGATGGGGGTCGCAATGGCCTTATTTGCGATA  
TTCTTATCCATTATTTGGAGATTTACAATTCTTCCGTTTTACTGGATGGAATTTTAGTCA  
GTATGCTTACTCTCAAACCTTTCGTTTACACAGTAGTGATATTCTTTGTTTCTCTTTCAT  
CTTCGGATTCCTATCTAATGATCCAGGACGTAATCCTGGGCGTGAGGACATGGCTGATA  
CTACTGGAAGGATTCCTCTTTGGCTGATAGGTAAGTACTGTAACCGGTATTATTGTGATTGGTT  
TAATGGTATTTTCTTTTACGGCTCATATTCCTGGATTGGGCTCATCCCTAATGCTTAATATC  
TTTAGTTTGATCTGT-----CTTAGTTCTGCCCTTCATTTCGAGTAGCTTTTTTCTTCGCGAAAT  
TGCCGGAAGCTTATGCCCTTTTCAATCCAATCGTGATGTTATGCCAGTGATACCTGTGC  
TCTTTTTTCTCTTAGCCCTTGTTTGGCAAGCTGCTGTAAGTTTTTCGAACGACACAATCA  
AACCCGAACGAACAAAGTGTGAATTAATCGTACCAGTCTATACTGGGGGTTATTACT  
CATTTTTGTAAGTGTGTTTTATTTTCCAATTTTCTTCAATATGGAAGTTAATATTCTCG  
CATTTATTGCTACTGTGCTATTCAATCTAGTTCCTACTGCTTTTTTACTTATCATCTACGTA  
AAAACGGTTAGTCAAATGATATGGAAACAGCAACCCTAGTCACCATCTTCATATCTGG  
TTCACTTGTAAGCTTTACTGGGTATGCCCTATATAACCGCTTTTGGGCAACCCTCTCAACA  
ATTAAGAGATCCTTTCGAAGAACACGGGGACATGGAAGCATTGGTTTATACATTCTGT  
TAGTATCGACTTTAGGGATAATTTTTTTCGCTATTTTTTCCGAGACCCACCTAGGATTC  
TACTAAGAAG-----ATGACTATTGCTTTCCAATTGGCTGTTTTTGCATTAATTGCAACTTC  
GTTAATCTTAGTAATTGGTGTACCCGTTGTAATTTGCTTCTCCTGATGGTTGGTCAAGTAAT  
AAAAATATTGTATTTTCGGGTACATCATTGTGGATTGGATTAGTTTTTCTAGTGGGTATCC  
TTAATTCTCTCATCTCT-----ATGTCACCAAAAACAGAGACTAAAGCTTATGT  
TGGATTCAAAGCTGGTGTAAAGATTACAAATTAACCTTATTATACTCCTGAGTATGAAAC  
CAAAGATACTGATATCTTGGCAGCATTCCGAGTAACTCCGCAACCCGGAGTTCCACCCG  
AAGAAGCAGGGGCTGCAGTAGCTGCCGAATCCTCTACTGGTACATGGACAAGTGTATG  
GACCGACGGACTTACCAGCCTTGATCGTTACAAAGGACGATGCTACGACATCGAGCCC



GTTGCTGGAGAGGAAAATCAATATATTTGCTATGTAGCTTATCCTTTAGACCTTTTTTGAA  
GAAGGTTCCGTTACTAACATGTTTACTTCCATTGTGGGTAATGTATTTGGCTTCAAAGCC  
CTACGAGCCCTACGTCTGGAAGATCTACGAATCCCTCCTGCTTATTCCAAAACCTTTCCA  
AGGCCACCCCATGGAATCCAAGTTGAAAGAGATAAATTGAACAAATATGGTCGTCCT  
CTATTGGGATGTACTATTAACCAAAGTTAGGGTTATCGGCTAAGAACTACGGTAGGGC  
GGTTTATGAATGTCTCCGCGGTGGCCTTGATTTACCCAAGGATGATGAAAATGTGAACT  
CCCAACCGTTTATGCGCTGGAGAGACCGTTTCTATTTTGTGCCGAAGCTCTTTTTTAAA  
GCGCAGACCGAAACGGGTGAAATTAAGGACATTACTTAAATGCTACGGCGGGTACAT  
GCGAAGAAATGATAAAAAGGGCCGTATTTGCTAGAGAATTGGGAGTTCCTATTGTAATG  
CATGACTACTTAACCGGGGATTACCGCAAATACTAGCTTGGCTCATTATTGCCGAGA  
CAACGGCCTACTACTTCATATCCACCGTGCAATGCACGCAGTTATTGATAGACAGAAGA  
ATCATGGTATGCACTTCCGTGTACTAGCAAAAGCATTACGTATGTCTGGTGGAGACCAT  
GTTCACTCAGGTACGGTAGTAACTAGAAAGGGGAGCGGGATACACTCTGGGTT  
TTGTTGATTTGCTACGTGATGATTTTATTGAAAAGATCGAAGTCGCGGTATTTATTTCA  
CTCAAGATTGGGTCTCTATGCCGGGCGTTTTGCCAGTAGCTTCAGGGGGTATTCACGTT  
TGGCATATGCCTGCTCTGACCGAGATCTTTGGGGATGATTCCGTACTACAGTTTGGTGG  
AGGAACTTTAGGACACCCTTGGGGAAATGCACCTGGCGCGGTAGCGAATCGTGTGGCT  
TTAGAAGCGTGTGTACAAGCTCGTAATGAAGGACGTGATCTTGCTCGTGAGGGTAATG  
AAATTATTCGTGAAGCTGCTAAATGGAGCCCAGAACTAGCGGCTGCTTGTGAAGTATG  
GAAAGAAATTAATTCGAATTCGCCGCAATGGATACCTTG-----ACGGCGATCAATTTAT  
ACAAAACCTTCTATCCCGAGCACACGCAAAGGAGCCGTAGACAGTCAAGTGAAATCCA  
ATCCACGAAATAATTTGATCTATGGACAGCATCGTTGTGGTAAAGGTCGTAATGCCAGA  
GGAATCATTACCGCAGGGCATAAGGGGGAGGTCATAAGCGTCTATACCGTAAAATCGA  
TTTTCGACGGAATGACAAAGACATATCTGGTAGAATCGTAACCATAGAATACGACCCTA  
ATCGAAATGCATACATTTGTCTCATACTATGGGGATGGTGAGAAGAGATATATTTTAC  
ATCCCAGAGGGGCTATAATTGGAGATACCATTGTTTCTGGTACAGAAGTTCCTATATCAA  
TGGGAAATGCCCTACCTTTGACCGATATGCCCTTAGGCACGGCCATACATAACATAGAA  
ATCACACTTGAAAAGGGTGGACAATTAGCTAGAGCTGCGGGGGCTGTATCGAACTGA  
TTGCAAAAGAGGGTAAATCAGCTACATTAAGATTACCATCTGGGGAGGTCCGTTTGATA  
TCCAAAACCTGCTCAGCAACAGTCGGACAAGTGGGTAATGTTGAGGTGAACCAGAAA  
AGTTTGGGTAGAGCCGGATCTAAGTGTGGCTAGGTAAGCGTCCTGTAGTAAGAGGAG  
TAGTTATGAACCCTGTAGACCATCCCATGGGGGTGGGGAAGGAAGGGCCCAATTGG  
TAGAAAAAACC CGCAACCCCTGGGGTTATCCTGCGCTTGGAAGAAGAAGTAGGAA  
AAGGAATAAATATAGTGATCGTTTTATTCTTCGCCGCGTAAA---ATGATTCAAACTCAA  
ACCTATTTGAATGTAGCAGACAACAGCGGAGCTCGAGAATTGATGTGTATTCTGAATCTT  
AGGAGCTAGT--AATCGGCGATATGCTAATATTGGTGATATTATTGTTGCTGTAATCAAAG  
AAGCGGTGCCAATATGCCTCTAGAAAGATCCGAAGTAATTCGGGCTGTGATTGTACGT  
ACATGTAAAGAACTTAAACGTGACAACGGTATGATAATACGATATGATGACAATGCAGC  
AGTTGTCATTGATCAAGAAGGAAATCCAAAAGGAACCCGAGTTTTTGGAGCGATCGCT  
CGGGAATTGAGACAATTGAATTTACTAAGATAGTTTCATTAGCTCCCGAGGTATTAATG  
CTTAGTCCAAAAGAACCAGATTCCGTAAACAACATAGAGGAAGGATGAAGGGAATAT  
CTTATCGGGGCAATCGTATTTGTTTCGGTAGATACGCTCTTCAAGCACTTGAACCCGCTT  
GGATTACATCTAGACAAATAGAAGCAGGCGGACGGGCTATGGCACGGTATGCACGTCG  
CGGGGAAAAATATGGGTACGTATATTTCCCGATAAGCCCGTTACAGTAAGACCTGCGG

AAACCCGTATGGGTTTCAGGTAAAGGATCCCCTGAATATTGGGTATCTGTTCGTTAAACCG  
GGCCGAATACTTTATGAGATCGGGGGAATATCAGAACTGTAGCTAGAGCCGCGATTTC  
CATAGCTGCGTCAAAAATGCCTATACGAACTCAATTCGTTATTGCAGGAATGACCAGAG  
TTAGACGAGGATATATAGCTCGCAGGCGCCGAACAAAAATTCGTTTATTTGCATCAACT  
TTTCGAGGGGCTCATTCAAGACTTACTCGAACTATTACGCAGCAGAAAATGAGAGCTT  
TGGTTTCTGCTCATCGGGATAGAGGCCGGAAGAGGGATTTCGTCGTTTGTGGAT  
CACTCGGATAAATGCTGTAATCCGGGGGTCG-----GTATCCTATAGTTATAGTCGATTAAT  
ACACGATTTGTACAAGAGACAATTGCTGCTAAATCGTAAAATACTTGCGCAAATAGCTA  
TATCAAATAGGAATTGTTTTTACATGATTTCTAATCAGATCATCAAATCGGGAGAATGTG  
AAGAATTTAACGAATTATTAAGGCAAAGCGAGTACAAGCTTTCGCGCGAGATGTACG  
CATTCAGCGCACAAAGGCACGAAGAGTCATTGATCAGATTCGTGGACGTTCTTATGTGG  
AAACACTTACACTACTCGAGCTCATGCCCTACCGAGCATCTTATCCCATTTTTAAATTGC  
TTTATTCGCGCAGCAGCAAGCGCTAGTCACAATCTGGGTTTCAAAGAAGCTGACTCATA  
ATTAGTAAAGCGGAAGTTAATGAGGGTGTGTTTTGAAAAGGTTAAAGCCTCGGGCTC  
GAGGGCGTAGTTATCTGATAAAAAACCCACCTGTATATAACTATTGTATTGAAGGATA  
GAACCTTAAAT-----ATGGATGGAATCAAATATATAGTCTTTACAGAAAAAAG  
TATTCGGTTATTGGGGAACAATCAA---TATACTTCTAATGTCGAATCAGGATCAACTAGG  
ACAGAAATCAAGCATTGGGTGCAACTCTTCTTTGGTGTCAAGGTAATAGCTATGAATAG  
TCATCGACTCCAGGGAAAGGGTAGAAGAATGGGACCTATTATAGGACATACAATGCATT  
ACAGACGTATGATCATTACGCTTCAACCGGGTATTCTATTCCACCTCTTATAGAGAAAA  
GAACTATGGCGGTTCCAAAGAAACGTACTTCTATATCAAAAAACGTATTCGTAGAAAT  
ATTTGAAAAACGGGGATATTGGGAAGCTAAAAGGGCTTTTTCTTAGCTAAATCCAT  
TTCTTCTGGACGTTCAAAAAGTTTTTT-----CAAAAAATAAGATGGCCAAGGGTAAA  
GATGCTAGAGTAATAGTTCTTTTGGAAATGTACCAGCTGT---GTCCGAAAT-----TTCAATA  
AACAAAAAAAGGCGTTTCAAGATATATTACTCAAAGGAATCGACACAATACACCCGG  
TCGATTAGAATTGAGAAAATTTTGCCCATATTGTCACAAGCATAACGATTCACGGAGAGA  
TAAAGAAAATGAAAATAAGAGCCTCTGCTCGTAAAATTTGTGAAAAATGTCGTTTGTATT  
CGTAGACGTGGACGAATTTTAGTAATTTGTTCCAACCCGAGACATAAACAGAGACAAG  
GAATGGTTCGAGAGGAAATAGCAGTAGCCACTGGCGCACCGCGGTGGAAGTGC GTT  
AATCAAGAATAGACAGTAAGCGACTTTATTATAGCCGTTTCATTCTGTCCCCGCTTATGA  
AAGGTCAAGCAGATATGATAGGTATCGCGATGCGAAGAGCTTTACTTGGAGAAATAGA  
AGGAACATGTATTACACGTGTAAAATCTGAG-----AAGGTGCCTCATGAATTTCAACGA  
TAGTCGGTATTGAAGAATCAGTACATGAAATTGTAATGAATTTGAAAGAAATTGTATTG  
AGAAGTAATCTGTATGGAACCTCTGACGCATCTATTTGCATCAGGGGTCCTAGATATGTA  
ACGGCTCAAGATATCATTTTACCACCTTCTGTGCAAAATAGTTGATGCTACACAGCATATA  
GCTAATCTGACGGAACGAGTTGATTTGTGTATTAATTAACAATCGAGAGAGATCGCGG  
ATATAGTATGAAAACCCCTCATAACGACGAAGATGGAAGTTAT-----CCGATAGATGCTAT  
ATTCATGCCTGTTTCGAAATGCAAATCATAGTGTTCATTCTTACGGGAATGGGAATGAAA  
ACAAGAGATACTCTTTATAGAAATATGGACAAATGGAAGTTTAACTCCTAAGGAAGC  
ACTTTACGAAGCTTCCCGCAATTTAATTGATTTATTTATCCCTTTCTACATGCGGAAGA  
GCGG-----GAAATCCATTTAGAGGACAATGCA---AACGGGGTCCCTTTAGCTCTTTTTAC  
CTTTCATGATGAATTCGCTATCAATATAAGGAAAAACAAAAA---AAAATGGCGTTGAA  
AAGTATTTTTATTGATCAATCAGAATTGCCTTCCAAGACCTATAACTGTCTCAAAAAGTC  
CAATATACATACATTATTGGACCTTTTGAATAACAGTCAAGAAGATCTTCTAAAAATTGA

ACATTTTTGCATGGAAGATGTGAAACGGATATTGGACATTCTACAGAAACAT-----TTCG  
GATTTGATTTACCTAAAAATGGAATGCTACGGAATAGA---AATGAGGGAATGTCTACAAT  
ACCGGAGTTTAGCCAGATACAATTTGAAGGGTTTTGTAGGTTTCATTGATTGGGGCTTGG  
CCGAAGAACTTCATAAGTTTTCTAAAATTGAAGATACAGATCAAGAAATTGAATTTCAA  
TTATTTGTGCGAAACATATCAATTGGCAGAACCCTTTGATAAAAGAGCGAGATGCTGTGTA  
TGAATCACTCACATAATTCTTCTGAATTGTATGTACCCGCAGGATTGATTTGGAAGCCCGG  
TAAAGATATGCAAGAACAGACCGTATTCATTGGAAATATTCCTCTAATGAGTTCCTTGG  
GAATCTTCATAGTAAATGGAATATACAGAATTGTGATCAATCAAATATTGCAAAGTCCCG  
GCATTTATTATCGTTCAGAATTGGACCATAACGGAATTTTTATCTATAACCGGGACCATAAT  
ATCAGATTGGGGAGGAAGATCAGAATTAGAGATTGATAGAAAAGCAAGAATATGGGCT  
CGTGTGAGTAGGAAACAAAAAATATCTATTCTAGTTTTATCATCGGCTATGGGTTTGAAT  
TTAAGAGAAATTCTAGAAAATGTCCGTTACCCTGAAATTTTCTTGTCTTTCTGAATGA  
AAGGGATAAAAAAAGATTGGGTCAAGGGAAAATGCAATTTTGGAGTTTTATCAACAA  
TTTGCGTGTGTAGGTGGGGACCCGGTATTTTCTGAGTCTTTATGTAGGGAATTACAAA  
AAAATTTTTTCAACAAAGGTGTGAATTAGGTAGGATTGGTTCGACGAAATATGAACCGG  
AGGCTGAATCTTGATATACCCCAAGATAATACATTTTTGTTACCACGAGATGTATTGGCC  
GCTGCGGATCATTGATTGGCATGAAATTTGGAATGGGCACACTTGACGAT-----ATGAA  
CCACTTGAAAAATAAACGTATTTCGTTCTGTAGCAGATCTATTACAGGATCAATTTGGATT  
GGCTCTGGTTCGTTTAGAAAATGTAGTTCGAGGCACTATATGCGGAGCAATCCGG---CAT  
AAATTGATA---CCGACTCCTCAGAATTTGGTAACTTCAACTCCA-----TTAACAACC  
ACTTATGAATCGTTTTTTCGGGCTACACCCTTTATCTCAAGTTTTGGATCGAACGAATCCA  
TTGACTCAAATAGTTCATGGGCGAAAATCGAGTTATTTGGGTCCTGGAGGATTGACAG  
GGCGAACCGCCAGCTTTCGGATACGAGATATCCATACTAGTCACTATGGGCGTATTTGC  
CCAATTGACACGTCTGAAGGAATCAATGTTGGGCTTATTGGATCTTTAGCCATTCATGC  
AAGGGTTGGCCCTTGGGGG---TCTATAAAGACTCCATTTTAT-----GAAATATCTGAGA  
GATCGAAAAGG-----TTACAGTTGGTTTATTTATCACCAAGTGTAGATGAATACCATATGG  
TAGCGGCAGGAAATTTTGGCGCTAAATCGGGGTATTCAGGAAGAACAGGCTGTTCC  
AGCCCGATACCGTCAAGAATTCCTGACTATTGCATGGGAACAAATTCATCTTCGAAGCA  
TTTTTCCCTTCCAATACTTTTCTATGGGAGCCTCCCTCATCCCTTTTATTGAGCATAATGA  
CGCGAATCGGGCTTTAATGAGTTCAAATATGCAGCGCCAAGCAGTTCGGCTTTCTCGGT  
CCGAGAAGTGCATTGTGGGAACTGGGTTGGAACGACAGGCGGCTCTAGATTCAGGGG  
TTTCCGCTATATCCGAACGCGAAGGAAAGGTCATTTATACCAATACAGATAAGATCATT  
TATCAGGTAATGGAGACACTATAACCATTCCATTGGTTATGTATCAACGTTCCAACAAAA  
ATACTTGTATGCATCAAAAAACTCAGTTTTCGCGAGGTAAGTGCATAAAAAAGGGACA  
AATTTAGCGAATGGTGCAGCTACTGTTGGGGGTGAACCTTGCTTTGGGAAAAAATGTAT  
TAGTAGCGTATATGCCATGGGAGGGCTACAATTTTGAAGATGCAGTACTAATTAGTGAA  
CGTCTGGTATATGAAGATATTTATACTTCTTTTCATATACGGAAATATGAAATTCAGACTC  
ATGTAACAAGCCAAGGT---CCTGAAAGAATTACTAAGGAAATACCGCATTTAGAAACTC  
ATTTACTCCGAAATTTAGACAGAAATGGAATTGTGATGCTGGGGTCTTGGGTAGAGACA  
GGCGATATTTAGTAGGTAATTAACACCTCAGACAGCGAAAGAA---TCGTCTATGCC  
CCGGAGGATCGGTTATTACGAGCTATACTTGGCATTTCAGGTATCCACTTCAAAGGAAAC  
TTGTCTAAACTACCTATAGGAGGAAGGGGTCGAGTTATTGATGTGAGATGGATACAGA  
AAAAGGGG---GGTCCAGTTATAATCCAGAACTATTCGTGTATATATTTACAGAAACG  
TGAAATGAAAGTAGGTGATAAAGTAGCTGGAAGACATGGGAATAAGGGTATTATTTCC

AAAATCTTGCCTAGGCAAGATATGCCTTATTTGCAAGATGGAACACCGGTTGATATGGT  
CTTCAACCCATTGGGAGTACCTTCACGAATGAATGTGGGACAGATATTTGAATGCTCGC  
TAGGGTTAGCGGGGGACTTTCTAGGCAGACATTATAGAGTAGCACCTTTTGATGAAAGA  
TATGAGCAAGAAGCTTCGAGAAAAGTAGTGTCTTCTGAATTATATGAGGCTAGTAAGCA  
GACAGCAAATCCATGGGTATTTGAGCCCGAGTATCCGGGAAAAAGCAGAATATTTGAT  
GGAAGAACAGGGGATCCTTTTGACCAACCTGTTTTAATAGGAAAGTCCTATATCCTGAA  
GTTAATTCATCAAGTTGATGATAAAATCCATGGACGCTCCAGTGGGCATTATGCACTTGT  
TACACAACAACCCCTTAGGGGAAGGGCGAAGCAAGGGGGACAACGCGTAGGAGAAA  
TGGAGGTTTGGGCTCTAGAGGGGTTTGGTGTGCTCATATTTTACAAGAGATGCTTACT  
TATAAATCTGATCATATTAGATCTCGCCAGGAAGTACTTGGTACTACGATCGTTGGAGGA  
ACAATAGCTAATCCCGGGGATGCTCCAGAATCTTTTCGACTACTCGTTCGAGAACTACG  
ATCTTTGGCTTTGGAAGTGAATCATTTCCTTTTATCTGAGAAAGACTTCCAGATTCATAG  
GAAGGAAGCT-----ATGATCGACCGGTATAAACATCAACAACCTTCGAATTGG  
ACCAGTTTCTCCTCAACAATAAGTGC GTGGGCCAACAAAATCCTACCTAATGGCGAG  
ATTGTTGGAGAGGTGACAAAACCTATACTTTTCATTACAAAACGAATAAACCGGAAA  
AGGATGGATTGTTTTGTGAAAGAATTTCTGGGCCATAAAAAGTGGAATTTGTGCTTGT  
GGAAATTATCGAGTGATCGGAGATGAAAAAGAAGACCCGAATTTTTGTGAACAATGCG  
GAGTCGAATTTGCGGATTCTCGGGCACGAAGATATCAAATGGGATACATCAAACCTGACA  
TGTCAGTGACTCATGTGTGGTATTTGAAACGTCTTCCTAGTTATATCGCAAATCTGTTA  
GATAAACCCCTTAAGGAATTAGAAGGCC TAGTCTATTGCGAT-----TTTTCTTTGCTAGG  
CCC---GTAGCTAAAAACCTACTTTCTTACGATTACGGGGTTTATTTCGAATATGAAATCC  
AATCTCGGAAATATAGCATCCC ACTTTTTTTTACTACCCAAGGCTTCGATACATTCGAA  
ATCGAGAAATATCTACTGGAGCAAGTGCTATCAGAGAACAATTAGCCGATCTAGATTTG  
CGAATTATTATAGATCGTTCATTGGTGGAAATGGAAGGAATTAGGGGAAGAAGGGTCCAC  
T---GGAAATGAATGGGAAGATAGAAAAATAGGAAGACGGAAGGATTTTTTTGGTTAGAC  
GCATAGAATTAGCTAAACATTTTATTTCGAACAAATGTAGAACCAGAACGGATGGTTTTG  
TCCCTATTACCAGTTCTTCCTCCCGAGTTGAGACCAATCATTTCAGATAGATGGGGGTAA  
GCCAATGAGTTCGGATATTAATGAACTCTATCGAAGAGTTATTTATCGGAACAATACTCT  
TACTGATCTATTAACAACAAGTAGATCCACGCCAGGAGAATTAGTAATGTGTCAAGAGA  
AGTTGGTACAAGAAGCCGTGGATACACTTCTTGATAATGGTATTCGCGGGCAACCGATG  
AGGGATGGTTATAATAAAGTTTACAAGTCGTTTTTCAGATGTAATTGAAGGGAAAGAAG  
GAAGATTCGTGAGACTCTGCTTGGTAAGCGAGTTGATTATTCGGGGCGTTCGGTCATT  
GTCGTGGGCCCTCGCTTTCATTACATCGATGTGGATTGCCTCGAGAAATAGCAATAGA  
ACTTTTCCAGACATTTTTAATTCGAGGTCTAATAAGGCAGCGCGTTGCTTCCAACATAG  
GGATTGCTAAAAGTAAAATTTCGAGAAAAAGAGCCCATTTGATGGGAAATACTTCAAGA  
AATTATGCGGGGCCATCCCGTATTGCTAAATCGAGCACCCACCCTCCATAGATTAGGTAT  
ACAAGCGTTCACACCCATTTTAGTAGAGGGGCGTGCTATTTGTTTACATCCATTAGTTTG  
TAAGGGATTCAATGCAGACTTTGATGGGGATCAAATGGCTGTTTCATGTACCTTTATCTTT  
GGAAGCGCAAGCGGAGGCTCGTTTACTTATGTTTTCTCATATGAATCTCCTGTCTCCAG  
CTATAGGGAGTCTATTTCCGTACCAACTCAAGATATGCTTATTGGACTCTATGTATTAAC  
GATCGGAAATCGTCAAGGTGTTTGTGCAAATAGATATAATCCATGGAATCGCAGG-----A  
AC---TATCAAAACGAAACAGTTGACCATACTAAATATCGGTATACAAAAGAAAAAGAAC  
CCTATTTTTGTAGTTCTATGACGCACTTGGCGCTTATCGGCAGAAACGAATCCATTTAG  
ATACTCCTTTGTGGCTCCGGTGGCGACTAGATCAACGT---ATCATTTCTTA-----AGAGA

AGTTCCAATCGAAGTTCAATATGAATCCTTGGGTACCTATCATGAAATTTATAGGCCCTA  
TTAATAGTAAAAAGTGTCAAAAAAGAAATCCTTTGTATATACATTCTGAACCACTGTTG  
GCCATATTTCTTTCTATCGAGAAATAGAAGAAGCCATACAGGGATTTTGTCTGGGCTTACT  
CATACGACGGTACC-----ACGGAGGTACTTATGGCGGAACAAGCAGATCTGG  
TCTTTCACAATAAAGCGATAGATGGAACCTGCCATGAAACGACTTATTAGCAGATTAATA  
GATCACTTCGGAATGGCATATACATCACATATACTGGATCAAGTAAAGACTCTGGGTTTC  
CAACAAGCCACCGCTACATCCATTTTCATTAGGAATTGATGATCTTTTAACAATACCCTCT  
AAGGGATGGCTAGTCCGAGATGCTGAACAACAAGGTTTGATTTTGGAAAAACACCATC  
ATTATGGGAATGTACACGCTGTAGAAAAATTACGTCAATCTATTGAGATATGGTATGCTA  
CAAGTGAATATTTGAGACAAGAAATGCATACTAATTTTCGAATGACTGATCCTTCTAATC  
CAGTCCATATAATGTCTTTTTTCAGGAGCTAGGGGAAATGCATCTCAGGTGCATCAATTA  
GTAGGTATGAGAGGGTTAATGTCTGGATCCCCAAGGACAGATGATTGATTTACCCATTCA  
AAGTAATTTACGCGAAGGACTCTCTTTAACAGAATATATTTTCTGCTACGGAGCTCG  
CAAGGGAGTTGTGGATACTGCTGTACGAACATCCGACGCTGGATACCTCACACGTAGA  
CTTGTTGAAGTAGTTCAACACATTGTTGTACGTAGAACAGATTGTGGCACTATCCGAGG  
TATTTCTGGCGAGTCTCTCGAAATAGTATGGAAGAA-----AAAATTTGGATTCAAAGACTAA  
TTGGTCATGTATTAGCATATGACATATATATCGGTCCACGGTGCATTGCTGCCCGAAACC  
AGGATATTGGGATTGGACTTGTCATCGCTTCATAACC-----TTTCAAGCGAAA  
TCTATATATATTCGAACTCCTTTTATTTGTAGGAGCACTTCTTGGATCTGTCTGATTATGTTA  
TGGTCTGGAGTCCCCTCATGGCGATCTAGTTGAGTTGGGGGAAGCAGTGGGTGTCATT  
GCGGGTCAATCAATTGGAGAACCGGGCACTCAACTAACATTAAGAACGTTTCATACCG  
GTGGAGTGTTACAGGCGGTACTGCAGAATATGTACGAGCCCCTTCGAATGGAAAAAT  
TAAATTTTCATGAAGATTTGGTTCATCCACACGTACACGGCACGGGCATCCCGCCTTTC  
TATGTTATATAGACCTTTATGTAACTATTGAAAGTCTGGGATATTCTACATAAAGTCAATAT  
TCCCCAAAAAGCTTTATTTTAGTTCAAACAATCAATATGTAGAATCAGAACAAGTGA  
TTGCTGAGATTCGTGCTGGAACATCCGCTTTA---AGTTTTAAAGAAAAAGTTCGAAAAC  
ATATTTATTCTGATTCAGAGGGAGAA---ATGCACTGGAGTACCAATGTATACCATACCCC  
CCAATACACGTATGGTAATGTTTCATCTATTACCAAAAAACAAGCCATTTATGGATATTATCA  
GGAAATCCGTGCAA-----TCTAATGGAGCACTCTTTTCTCTACACAAAGATCAAGATC  
AATGAATCTTTATTCTCTTTCTCTTTTCTTTAGAACAAAGATCCATTTCTGACTTCTCA---  
---GTGACTAATGATCGA---GTGAGACGTAAATCGTTTAGTTTGGATCCTTCCAGGGAGGG  
GGGGGGGAGGTTTTTTGATTAT--TCAGTACCTGACAAAAGCATAACCAACGACTGTTG  
GAATTTTATATATTCTGCC---ATTCTCCACGAGAATTCGTAT-----TTCTTGGCGAAGAGGC  
GAAGAAATAGATTCATCATTCCATTCCAATAT---CAAGAAGGGGAGAAAGAACCAATGC  
CTTGTTCTGGTATCTCCATTGAAATACCCAAAACCT-----GGTATTTTACGTAGAAATACGA  
TTCTTGCTTACTTCGACGATCCCCGATACAGAAGAAGCGGCTCGGGAATTACTAAATAT  
GGGACCGTAGAGGTGGATTCTCTTGTAATAAAGAGGAT-----TTGTTGAATATCGAG  
GA---GAAAAAGAATTGAGGACGAAATACACAAAAGTAGATCGATTTTTTTTTCATTCCCG  
AGGAAGTGCATATCTTACCTGGGTCTTCGTCCATAATGGTACGGAACAATAGTATCATTG  
GAGTCGATACAGAGATCGCTTTAATAACAAGAAGTCTGGGTAGGTGGATTAGTCCGAGT  
GGAGAGAAAAAAGGACTGAACTCAAATATTTTCTGGAAATATTCATTTTCT  
GGAGAGACAGATAAAATTTCTCGGCATAGCGGAATCTTGCTACCGCCAGGAATGGAAA  
AAAAA-----AACTCTAAGGAATCAAAAAA-----TGAAAAAATTGGATCTATGTCCAACG  
A-----GTTACACCTATCAAGAAAAAG-----TATTTTGTTCGGTTCGACCCGTAGTTACAT

ACGAAATAGCAGATGGCATAAACTTAGCAACACTTTTTCCCCAGGATTCGTTGCAAGA  
ACGGGATAACGTACAACCTCCGAGTCGTCAATTATATTCTTTACGGAAATGGCAAACCCA  
TTCGAGGAATTTCTCACACAAGTATTCAATTAGTTCTGAACTTGTTTAGTATTGAATTGGG  
ATCAAGACAACAAAAA-----TCTATAGAAGAAGTTTTTGCTTCCTTTGTTGAAGTA  
AGGGCAAATGATCTGATTTCGAGATTCATAAGAGTTGATTTAGTGAAGCCCCGTGTTTT  
GAATACTGGAAAAAGAAATGATACGGCAGGCTACGGGTTGAATCCTGAT---AATGGATC  
AGATTGCCCAATAGAAATCCTTTTTATTCC-----AAGATTAAGATTCAA  
TCTTTACTCAAGATAACGGGACTATTCATACGTCGTTGAATATT-----ATAAGCAATT  
ACCGCCCTTTCTCATTTTGTCAATCGAATTGTTTTCAAGCTGGTCCCCTCAAAGTCAA  
TGGTTCGAAATCTGACAATGGA-----AAAAAAAATCAGATCCCGCTATTTTGATTAG  
GAATTTCTTCGGGCCCTTAGGGACT-----ATAGCTAAAATTACGAATTGGATTCA-----C  
GAAACTATTATCTGACT-----GATAATCAGATCTTA---TTAAAGAAATATTTAATACTTGAC  
AAT-----TTAAAAACCTTTTCCAAGACGTTCTC-----TATTATTTAATAGATGAAAAG  
GGTAGA-----ATTTTGAATCCCGATCCATGTAGTAACATAATTTTAAATGCATTTCGATTTG  
AATTGGTGTTTTCTACATCACAATTCTTGTGAGAAGACATTCTCAATAATTAGT---CTTG  
GACAGCTTTTTTATGAAAATGGATCGATATACAAATATAGATCA-----CACATCAAATC  
GGGACAAATTGTAACCGTTCAT--GGTGACTCCTTAGTAATCAGATCGGCCAAGCTTCAT  
TTGGCCACTCCAGGAGCAACTGTTTCATGGCCATTATGGGGAAATCATTACGAAGGAG  
ATACATTAGTTACATTTATATACGAAAAATCGCGATCGGGTGATATAACGCAAGGTCTTC  
CAAAGTAGAACAGGTGTTAGAAGTTCGTTTCGATTGATTCAATATCGATGAATTTAGAA  
AAGAGGGTTGAGGGTTGGAATGAAAATATAACCAAATTTCTTGGAATTCCTTGGGGAT  
TTTTAATTGGCGCTGAGTTAACCATAGTGCAAAGTCGTATCTCTTTGGTTAATAAGATTC  
AAAAGGTTTATCGATCCCAGGGGGTGCAGATCCATAATAGGCATATAGAGATTATTGTAC  
GCCAAATAACATCAAAGTTTTGGTTTCAGAA-----GATGGAATGTCAAATGCTTTTT  
CACCCGGAGAACTAATCGGGTTGCTGCGAGCAGAGCGGACAGGACGCGCTTTGGAGG  
AAACGATCTGTTACCGAGCAATCTTATTGGGATTAACGAGGGCATCTTTGAATACTCAA  
AGTTTCATATCCGAAGCGAGTTTTCAAGAAACCGCCGAGTTTTAGCAAAAGCTGCGC  
TGCGGGGTCGTATTGATTGGTTGAAAGGCCTGAAAGAAAATGTTGTTCTGGGTGGGAT  
GATACCCGTTGGTACCGGATTTAAAGGATTTGTCCGCCGCTCA-----AGGCAACACAAC  
AACATTTCT-----TTGGAAAAAAAAGGAATAATTTGGTTAAG-----GGGGAGATAGGCA  
ATATTTTGTTCACCACAGAGAGCTTTTTAGTTCTTGCATATCCAAAAATAAAAAGAAAT  
TTTCA-----ATGACAAAAGATATTGGAACATCAATTTA  
GAAGAGATGATGGAAGCGGGAGTTCATTTCCGGTCATGGTACTAGGAAATGGAATCCTA  
GAATGGCACCTTACATCTCTGCAAAGCGTAAAGGTATTCATATTACAAATCTTACTAGAA  
CTGCTCGTTTTTTATCAGAAACCTGTGATTTAGTTTTTACGCGAGCAAGTAGGGGAAAG  
CACTTTTTAATAGTTGGTACAAAAGTAAGGCTGCGGATTTAGTAGCATTAGCTGCAAT  
AAGGGCTCGCTGCCATTATGTTAATAAAAATGGCTCGGTGGTATGTTAACGAATTGGT  
CCACTACAGAAACGAGACTTCATAAGTTCAGGGATTTGAGAGCGGAACAAAGGGCGG  
GGAAACTCAACTGTCTGCCGAAAAGAGATGCTGCAATGTTGAAGAGAAAATTATCTCA  
TTTGCAAACATATCTGGGTGGAATCAAGTATATGACGGGGTTGCCTGATATTGTAATAAT  
CGTTGATCAGCATGAAGAATATACGGCTCTTAGGGAATGTATCACTTTAGGGATTCCGA  
CGATTTGTTAATTGATACAAATTGTGATCCAGATCTGTCAGATATTTGATTCCAGCTAA  
TGACGACGCTATCGTTCAATCCGATTGATTCTTAACAAATTAGTATCTGCACTTTGTGA  
GGCCATTCTAGC---TATATAAGAAACCGTATGGGGAAAAAATAAATCCACTTGGTTTC

CGACTTGGT--GCACAAAGTCATCGTTCCATTTGGTTTGCACAATCCAAAAGTTATTCTA  
GAGGTCTTCAGGAAGATGAAAAAATACGAGATTGTATCCAACATTATGTAGAAAAAAT  
ACGAGAATATCCTCGGGT--TTCGAAGGAATCTCCCATATAGAAATTCAAAAAATC  
GATCTTATCCAGGTAATAATCTATATGGGATCCCCAAATTCGTTAATGGAGGGT-----CGA  
ACACGA-----GGAATCGACGAATTACAGACCAATGTACAAAAAGAATTTCTTTCCGTGA  
ACAGGAGACTTAACATTGCTATTATACGAGTTGCAAAACCTTATGCACAACCCACTATT  
CTTGCAAGACATATAGCTCTGCAATTAAGAATCGAGTTTCATTTTCGAAAGGCAATGAA  
AAGTGCTATTGAATTAAGTGAACAAGCAGATACAAAAGGAATTCAAATACAAATAGCA  
GGGCGTATCGATGGAAAAGAGATTGCACGTGTCGAATGGATCAGAGAAGGAAGGGTT  
CCCCTACAAACCATTTCGAGCTAAAATTGATTATTGTTCTTACACAGTTTCGAACTATTTAT  
GGGATATTAGGCATTAATAATTTGGATATTTTTGGATGAGAAAATGTCTCGTTACCGAGGG  
CCTCGTTTCAAAAAAATACGACGTTTGGGGGCTTTACCGGGACTCACTAGTAAAAGAC  
CTAGATCTGAAAGTAGTCTTAGAAGTCAACCGCGTTCTGGGAAA---AGATCTCAATATC  
GTATTCGTTTAGAAGAAAAACAAAATTGCGCTTTCATTATGGGCTAACAGAGCGACA  
ATTAATTAGATATGTTTCGTATCGCCGGAAAAGCCAAAGGATCAACGGGTCAGGTTTAC  
TACAACTACTTGAGATGCGCTTGATAACATCCTTTTTTCGATTGGGCATGTCTCGACCA  
TTCCCGGAGCCAGACAATTAGTTAACCACAGACACGTTTTAGTTAATGGGCGTATAGTA  
GATATCCCAAGTTATCGCTGTAAACCTCGCGATATTATTTCTACGAGAAATGAACAAAGA  
TCCAAAGTTTTGGTTCAAAATTCTATGGATTCTGCTTCCCGCGAA-----TTGCCAAAACA  
TTGACTCTTGACTCG-----TCCCAATATAAAGGGGTAGTAAATCAAATAATAGATAGTAA  
AGGGGTTCGGTTTAAAAATCAATGAGTTGCTAGTCGTGGAATATTATTCACGTCAGACTA  
TGTCACGTCGAGGTACTACAGAAGAAAAAAGTCAAAAATCCGATCCAATTTATCGTAAT  
CGATTAGTTAACATGTTGGTTAACCGTATTCTGAAACACGGAAAAAATCATTGGCTTA  
TCAAATTATCTATCGAGCCGTGAAAAAATTCAAACAAAAGACAGAAACAAATCCACTA  
TCTGTTTTACGTCAAGCAATACATGGAGTAACTCCCGATATAGCAGTAAAAGCAAGACG  
TGTAGGCGGATCGACTCATCAAGTTCCCATTGAAATAGGATCTACACAAGGAAAAGCA  
CTTGCCATTTCGTTGGTTATTATGGGCATCCCGAAAGCGTCCGGGTTCGAAATATGGCTTTC  
AAATTAAGTTCCGAATTAGTGGATGCCGCCAAGGGGAGTGGCGATGCCATACGCAAAA  
AGGAAGAGACTCATAGAATGGCAGAGGCAAATAGAGCTTTTGCACATTTTCGTATGGG  
TAGGGACACTATTGCTGATATAATAACTTCGATAAGAAATGCTCATATGGATAAAAAAGG  
AACGGTTCGAATAGCATCTACAAATATGACCGAAAACATAGTTAGAATACTTTTACGAG  
AAGGCTTTATTGAAAACGTTAGGAAACATCGAGAAAATCAGAAAAATTTCTTGGTTTC  
AACCTACGACATAGAAGG-----AATAGGAAAGGAACATCTAGA-----ACTATTTAAA  
TTTAAAGCGTATCAGCCGACCGGGTTTACGAATCTATTCCAATATCAAAAAATACCTA  
GAATTTTAGGCGGAATGGGGATTGTCATTCTTTCTACTTCTCGAGGGGTAATGACAGAT  
CGTGAAGCTCGACTAGAAGGCATTGGAGGAGAAATTTGTGTTATATATGGATGACAAA  
ACCTATACCAAGGATTGGTTCACGTAGAAGTGGGCGTATTGGTTCACGTAAGGCTGGG  
CGTAGAATACCAAAAAGGGGTATTTCATGTTCAAGCGAGTTTCAACAATACCATTGTGAC  
TGTTACAGATGTACGAGGTCGAGTCGTTTCTTGGTCCTCCGCCGTTACTTGCGGATTCA  
AGGGCACCAAGAGGGACACCCTTTGCAGCTCAAACCGCTGCGGGAAATGCTATTC  
GTACAGTAGTAGATCAGGGTATGCAACGAGCAGAAGTCATGATAAAGGGTCTGGTCT  
CGGAAGAGATGCAGCATTGCGGGCCATTTCGAGAAAGTGGTCTACTTTTAAAGTTTCGTA  
CGTGATGTAACCCAATGCCACATAATGGATGTAGACCCCTAAAAAAGGCGTGTGAT  
GCCAACTATTAACAACCTATTAGAAACACAAGACAGCCAATCCGAAATGTCACGAAA

TCCCCTGCTCTTCGGGGGTGTCCTCAGCGCCGAGGAACATGTACTAGGGTGTATACTAT  
CACCCCCAAAAACCAAACCTCTGCCTTACGTAAAGTTGCCAGAGTACGATTAACCTCT  
GGATTTGAAATCACTGCTTATATACCTGGAATTGGCCATAATTTACAAGAACATTCTGTA  
GTCTTAGTAAGAGGAGGAAGGGTTAAGGATTTACCCGGTGTGAGATATCACATTGTTCCG  
GGGAACCCTAGATGCTGTTCGGAGTAAAGGATCGTCAACAAGGGCGTTCTAAATATGGG  
GTCAAAAAGCCAAAAATGGCAAGGAAAAGTTTGATTTCAGAGGGAAAGGAAGAGGCA  
GAAATTAGAACAAAAATTTCAATTCGATTCGCCGATCCTCAAAAAAAGAAATAAGC-----  
--AAGGTTTCGTCGTTGAGTGGCAAATGGGAAATTCATGGAAAATTGCAATCCCCCCCG  
CGCAATAGTGCACCTATACGCCTTCATCGACGTTGTTTTTTGACCGGAAGGCCTAGAGG  
TAACTATCGAGATTTTGGGCTATCCGGACACATACTTCGCGAAAGGTTTCATGCATGTTT  
GTTACCTGGGGCAACAAGATCAAGTTGGATGGTAAAAAATTCATTCATCTCAGCTATTT  
CGCAAGAAGAAAAAGAAAAAACA---GGATCTACTGAATTTCAAATATTGAATTT  
CACTAAAAGGATACGTAGACTTACTTCACATTTGGAATTGCACAAAAAAGATTATTTAT  
CTCAGAGGGGGCTTCGGAAGATTTTAGGAAAACGTCAACGGCTACTGACCTATTTGTC  
AAATAAAAATAGAGTACGTTATAAAGAATTAATTGGTCAACTGGATATTCGGGAACCAA  
AAACTCGT-----ATGGTAAAACCTTCGTTTGAACGATGTGGTAGAAAGCAACGGGCCGT  
CTATCGAATCGTTGCAATTGATGTTTCGATCACGAAGAGAGGGGAAGGGATCTTCAGAAA  
GTGGGTTTCTATGATCCGATCAAGAATCAAACATATTTAAATGTTCCCTGCTGTTCTATAC  
TTCTCGGCAAGGGTGCTCAACCTACAGGAACTGTTTCATGATATTTCAAAGAAGGCGG  
AGATATTTAAAGAACTTCGAGTTAATCAACAATTCGAGTTAATATGGATAAAACCAAG  
CGACCCCTTCGTAAATCCAAACGATCTTTTCGTAGGCGTTTGCCCCCAATTGGATCGGG  
GGATCGAATTGATTATAGAAACATGAGTTTAATTAGTCGATTTATTAGTGAACAGGGAA  
AAATATTATCTAGAAGAGTGAACAGATTGACCTTGAAACAACAACGATTAATTACTATT  
GCCATAAAACAAGCTCGTATTTTATCTTCGTTACCTTTTCTTAATAATGAAAAA-----CAG  
TTTGAGAGACCTGAGTCAATCCCTAAAACCTGCCGGACCGAGTATCAGAAATAAAATGG  
CGCGT--TTAAAAAAAAGCCCCTTTGTAGCTAATCATTATTGAAAAAAATTGAGAAGC  
TCAATATGAAAGGGGGGAAGGAAATAATAGTAACGTGGTCCCGGGCATCTACCATTATC  
CCCACAATGATTGGCCATACAATCGCTATTCATAATGGGAAAGAACATTTACCCATTTAT  
ATAACAGACCGTATGGTGGGTCACAAATTGGGAGAATTCGCACCTACTCTTACTTTCCG  
GGGACACGCGAGAAACGATAATCGATCTCGCCGTATGATTTTGAAATCTTTTCTACTAG  
GTAATCTATTATCCTTATGCATGAAGATAATCAATTCGGTTCGTTGTGGTCCGATTCTATTA  
TGGATTTCTGACCACATTCTCCATAGGGCCCTCTTATCTCTTCCTTCTCCGAGCTCAAGT  
TATGGAAGAAGAA-----ACCGAGAAGGAGATATCATCAACAACCTGGTTTTATTACGGG  
GCAGCTCATGATGTTTATATCGATCTATTATGCGCCTCTGCACCTAGCATTGGGTAGACC  
TCATAACAATACTGTCCTAGTTCTACCGCACCTTTTGTTCATTTCTTCTGGAACAATCA  
CAAACACTTTTTGGATTATGGATCTACTACCAGAAATTCATGCGTAATCTCAGCATTCA  
ATGTGTATTCTGAATAATCTCATTTTTCAATTATTCAACCATTTCAATTTACCAAGTTCA  
ACGTTAGCCAGATTAGTCAACATTTATCTGTTTCGATGCAACAGTAAGATCTTATTTGTA  
ACAAGTAGTTTTGTTGGTTGGTTAATTGGTCACATTTTATTCATGAAATGGGTTGGATTG  
GTATTATCCTGGATACGGCAAAATCATTCT-----ATTCGATCTAATAAGTACCTTGTGT  
CAGAATTGACAAAT-----TCTCGAATCTTTAGTATTCTTATTATTTATCACCTCTGTCTACTA  
TTTAGGCAGAATGCCATCGCCTATTGTTACTAAGAACTGAAAGAAACCGAAGAAGAC  
-----  
-----GGAAGAGAT-----CCGAGTGAA-----





ATTCAATATGATTCC-----ACAAGA-----TCTATTTTCGTTCAAGTAACGGATTCTAGCC  
AATTGAAAGGATCTTCT--GATCAATCCGGAGATCATTTCGATTCCATTAGG-----AA  
TGAGAATTCCGAA-----TATCACACATTGATCAATCAAACAGA  
GATTCAGCAACTAAAAGAAAGATCGATTCTT--TGGGAT-----CCTTCCTTTCTTCAAACG  
GAACGAACAGAGATAGAATCAGAT-----CGATTCCCGAAA-----TGCCTTTCTGGATATTC  
C-----TCAATATCCCGGCTATTACG--GAACGTGAGAAGCAGATGAATAATCATCTGCTT  
CCGGAAGAAATCGAAGAATTTCTT-----GGGAATCCTACAAGATCAATTCGTTCTTTTTT  
CTCTGACAGATGG-----TCAGAACTTCGT--CTGGGCTCGAATCCTACTGAGAGGTCCAC  
TAGAGATCAG-----AAATTGTTGAAGAAACAACAAGATGTTTCT--TTTGTCCCTTC  
CAGGCGATCCGAA-----AATAAAGAAATGGTTGCTATATTCAAGATAATTACGTATTT  
ACAAAAT-----ACCGTCTCAATTCATCCTATTTTCATCAGATCCGGGATGTGATATGGTTCC  
G--AAGGATGAACCAGAT--ATAGACAGTTCCATAAGATTTTCATTCTTGAATAAAAATC  
CATTTTTGGAT-----TTATTTTCATCTATTCCATGACCGGAACAAAGGGGGGATACACGTTA--  
---CACCACGATTTTGAATCAGAA-----GAGAGATTTCAAGAAATGGCAGATCTATTCACT  
CTATCAATAACCGAGGCG--GGTCTGGTATATCATAAGGGATTTACCTTTTCTATTGATTC  
CTACGGATTGGATCAAAAAA-----TTCTTGAATGAGGTATTCAACTCCAGGGATGAAT  
CGAAAAGAAATCTTTA-----TGGTTTCTACCTCCTATTTTTGAT-----GAAGAGAATGA  
ATCTTTTTACGGAAGGATCAGAAAAAATCGGCCCGG---ATCTCCTGCGGCAATGATTT  
GGAAGATCCAAACCCCAAATAGTGGTATTTTCTAGCAACAACATAATGGGGGCGGTC  
AATCAATATAGATTGATCCGAAATCTGATTCAAATCCAATATCGCACCTATGAG-----TAC  
ATAAGAAATGTATCGAATCGATTCTTTTTAATG-----AATCGACCCGATCGCAACTTCG  
AATATGGAATTCAA-----GGGGATCCAATAGGAAATGATACTCTGAATCATCTAACTAT  
AATCAAACATACGATCAACCAACATTTATCGAATTTGAAAAAG---AGTCAGAAGAAATG  
GTTCGAT-----CCTCTTATTTCTCGAACCGAGAGATGCATGAATCGGGATCCTGATGC  
ATATAGATACAAATGGTCCAATGGGAGCAAGAATTTCCAGGAACATTTGGAACATTTTCG  
TTTCTGAACAGAAGCAC-----CGTTTTCAAGTAGTGTTCGGTTCGATTACGTATTAATCA  
ATATTGATTGATTGGTCCGAGGTTATCGACAAACAAGATTTGTCTAAGTCACTTCGTTT  
CTTTTTGTCCAAGTCA-----CTTCTTTTTTGTCT-----AAGTC  
ACTTCGTTTCTTTTTGTCTAAGTCACTCCCTTTTTTCTTTGTGAGTATCGGGAATATCCCC  
ATTCATAGGTTTCGAG---ATCCACATCTAT--GAATTGAAAGGTCCGAATGATCAACTCTG  
CAATCCGTTGTTAGAATCAATAGGTGTTCAAATCGTTTCATTGAATAAATTGAAACCC---  
--TTTTATTGGAT-----GATCATGATATTCC---CAAAGATCGAAATCTTGATCAATGG  
AGGAACAATATCACCTTTTTGTTCAATAAGATACCA---AAGTGG---ATGATTGACTCAT  
TCCATACT-----AGAAAGAATCGCAGGAAATCCTTTGATAACACGGATTCTTATTCTCA  
ATGATATCCCACGATCGAGACAATTGGCTGAATCCCGTGAAACCATTTTCATAGAAGTTC  
ATCGATATCTTCTTTTTATAAAGCAAATCGACTTCGATTCTTGAATAATCCGCATCACTTA  
TGTTCTAT-----TGTAACAAAAGATTCCTTTTTGATGTG-----GAAAAGGCCCGTAT  
CAATAATTATGAT-----CTTACATAT--GGACAATTCCTCAATGTCTTGTTCATTTCGCAACA  
AA---ATATTTCTTTGTGCGTCAGAAAA-----AAAAACATGTTTTTGGGGG---AGAGA  
TGCTATTTACCAATCGAGTCACAGGTATCTGACATATTCATACCTAACGATTTTCCACA  
AAGTGGTGACGAAACG---TATAACTTGTACAAATCT-----TTCCATTTTCCAATTTCGATC  
CGATTCATTTCGTTTCGT-----AGAGCTATTTACTCGATTGCAGACATTTCTGGAACACCTCT  
AACAGAGGAACAAATAGTCCATTTTCAAAGAACTTATTGTCAGCCTCTTTCAGATATGA  
ATCTATCTGATTGAGAAGGGAAGAACTTGCATCAGTATCTCCGT-----TTCAATTCAAAC

ATGGGTTTGATTACACTCTATGTTCTGAGAAAGATTTCCCA-----TCCGGAAAGAGGA  
AAAAA-----CGGACTCTTTGTCTAAAG-----AAATGCGTTGAGAAATGGCA  
GATGTATAGAACCTTTCAACGAGATAATGATTTTTCAAACTCTCTCAAATGGAATCTGTT  
CCAAACATATATGCCATGGTTCCTTACTTCGACAGGGTGCAAATATCTAAATTTACCCT  
TTAGATACTTTTTCAGACCCATTG-----CCGATACTAAGTAACAGT--CCAAAATTTGTAT  
CCATTTTTCATGATATTATGCATGGATCAGATATATCATGGCCAATTCCTCAGCAAAAAG  
GGCGG-----GCGATTCTTCCACAAAGGAATTGG---ATAAGTGAGATGTCGAGTAAGT  
GTTTACAGAAT-----CTTCTTCTGTACGAAGAAATCATTCATCGAAATAATGAGTCACCC  
GCTCTATTAATATGGACACATCTGAGATCACCAAATGCTCGGGAGTTA---CTCTATTCAA  
TCCTTTTCTTCTTCTTGTGCTGGATAT---CTCGTTCGTACACATCTTCTCTTTGTTCC  
GA-----GCCTCTAGTGAGTTACAGACAGAGTTAGAAAAGATCAAATCTTTAATGATTCCA  
TCATACATGATGGAGTTGCGAAAACCTTCTGGATAGGTATCCTACACCTGAACTGAATTC  
TTTCTGGTTAAAGAATCTCTTTCTAGTTGCTCTGGAACAATTAGGAGATTCTCTGGAAG  
AAATACGCGGTTCTGCTTCTGGCGGCAACATACTATTGGGTGGTGGTCCC-----G  
CTTATGGG---GTCAAATCAATACGTTCTAAGAAGAAATATTTGAATATCAATCTCATCGAT  
ATCATTGATTTTATA---AGTATCATACCAAATCCCATCAATCGAATCACTTTTTTCGAGAAA  
TACGAGACATCTAAGTCATACAAGTAAAGAGATCTATTGATAAGAAAAAGAAAA  
AACGTGAACGGTGGTTGGATTGATGAAAAAATCGAATCCTGGGTGCGCAACAGTGATT  
CGATTGATGATGAAGAAAGAGAATTCTTGGTTCAGTTCTCC-----ACCTTAACGACA-----  
GAAAAAAGGATTGATCAAATTTCTATTGAGTCTGACT---CATAGTGATCATTATCA-----  
-----AAGAATGACTCTGGTTATCAAATGATTGAACAACCGGGATCAATTTACTTACGATA  
CTTAGTTGACATTCAT-----AAAAGTATCTAATGAATTATGAGTTCAATAGATCCTGTTT  
AGCAGAAAGACGGATATTCCTTGCTCATTATCAGACAATCACTTAT-----TCACAAACCT  
CGTGTGGGACTAATAGTTCTCATTTCATCTCATGGA-----AAACCCTTTTCGCTCCG  
CTTAGCCCTATCCCCTTCT---AGGGGTATTTAGTGATAGGTTCTATAGGAACTGGACGG  
TCATATTTGGTCAAATACCTAGCGCAAACTCCTATGTTCTTTTATTACGGTATTTCCG  
AACAAGTTCCTGGATGACAAGCCTAAAGGTTCTCTTTTTGAT-----AATATCGAT--  
ATTGATGATAGTGACGATATCGAT-----ATTGATGATAGTGACGATATCGATATTGATG  
ATAGTGACAAT-----ATTGATGACCTTGATACGGAGCTGCTAACTAT  
GACGAATGTGCTA-----ACTATGTATATGACG-----CCGAAAATAGACCGATTGATAT  
CACCTTCAATTCGAATTAGCAAAAGCAATGTCTCCTTGCATCATATGGATTCCAAACAT  
TCATGATCTGTATGTGAATGAGTCGAATTACTTATCCCTCGGTCTATTAGTGAACATCTC  
TCC-----AGAGATTGTGAAAGATGTTCC---ACTAGAAATATCTTCTTATTGCTTCGACT  
CATATTCCCCAAAAAGTGGATCCCGCTCTAATAGCTCCGAATAAATTAATACATGCATT  
AAGATACGAAGGCTTCTTATTCCACAACAACGAAAGCACTTTTTTCATTCTTTTCATATACT  
AGGGGATTTCACTTGGAAAAGAAAATGTTCCATACT-----AACGTATTCGGGTCCATAAC  
CATGGGTTCCAATGCACGAGATCTTGTAGCACTTACCAATGAGGCTCTATCAATTAGTAT  
TACACAGAAGAAATCAATTATAGACACTAATAAATTCGATCAGCTATTTCATAGACAAA  
CTTGGGATTTGCGA-----TCCCAGGTGAGATGGGTTTCCAGGATCATGGGATCCTTTTCTA  
TCAGATAGGAAGGGCTGTTGCACAAAATGTAATCTAAGTGATTGCCCCATAGATCCTA  
TATCTATCTATATGAAGAAGAAA-----TCATGTAAGGAAGGGGATTCTTATTGTACAAAT  
GGTACTTCGAGCTTGGAACGAGCATGAAGAAATTAACGATACTTCTTTATCTTTTGAGT  
TGTTCTGCCGGATCGGTGCTCAAGATCTTTGGTCTCCACCC-----GGACCCGATGAAA  
GA---AATTGCATCACTTCTTATGGATTGAGTTCGTTGAGAATGATTCT--GATCTAGTTCATGGC---

TTAGAAGTAGAAGGCGCTTTGGTGGGA-----TCCTCACGGACAGAAAAAGATTGCAGT  
CAGTTTGATAATGAT-----CGAGTGATATTGCTTCTTCGGTCCGAACCAAAGAAT--CCGT  
TCGATATGATACAAAATGGATCCTTGTCTATTGTTGATCAGAGATTTCTATATGAAAAA---  
--TACGAATCGGAGTTGGAAGAA--GGGGAAGGAGAAGGAGCCCTCGACCCGCAA-----  
-----CAGATAGAGGAGGAT-----TTATTCAATCAC-----ATAGTTTGGGCTCCT-----AG  
AATATGGCGCCCT-----TGTGGCAATCTATTTGATTGTATCGAAAGACCCAATGAATTG  
GGATTTCCCTATTGGTGGACCAGGTCATTTCCG-----GGCAAGCGGATCCTTTATCATA  
AAGAGGATGCGCTTCAAGAGAATGATTCGGAGTTCTTGCAGAGTGGAACCGTGCGGTA  
CCAGAGACTAGATAGATCTTCCAAAGAACAAGGCTTTTTTTCGAATAAGCCAATTCATTT  
GGGACCCTGCAGATCCATTCTTTTCCCTATTCAA---GATCAGCCCTTTGTC-----TTTTC  
ACGTCGAGAATTCTTTGCAGATGAAGAGATGTCAAAGGGGCTTATTACTTCCCAAACA  
AATCCTACTACATCTATATATAAACGCTGGTTCATC-----AAGAATACGCAACAAAACCAC  
TTCGAATTGTTGATTCATCGCCAGAGATGGCTTAGAACC-----AATAGTTTATTATCG---  
--AATGGATCTTCCGTTCTAAT-----ACTCTATCCGAGAGTTATCAGTATTTATCAAATCT  
GTTCCCTATCTAAC---AGAACGCTATTGGATCAAATGACAAAGGCGTTGTTGAGAAAGAG  
ATGGCTTTTCCCGGATGAAATGAAACATTGGATT-----CATGTAACAGGAGAAAGATTC  
CCATTCCTATGCCTAGATCTCAG---ATAAATGGAAATTTTATTGATAAGACCTTTTCAATT  
GTAGCTAATATCTTATTACGAATAATCCGACAACCTTCAGGAGAAAAAGAGGCATTTAC  
CTATTATAGAGATGGG-----ATGTCGGCTCAATCCGAAGGAAATTATGCGGAAGCTTTAC  
AAAATTATTATGAAGCTACGCGACTAGAAATTGATCCCTATGATCGAAGTTATATACTCT  
ATAACATAGGACTTATTACACAAGCAACGGGGAGCATAACGAAAGCTTTGGAATATTAT  
TTCCGGGCACTCGAGCGAAACCCATTCTTACCGCAAGCTTTTAATAATATGGCCGTGAT  
CTGTCAATTAC---CGGGGAGAACAGGCCATTTCGACAGGGAGATTCTGAAATTGCAGAGG  
CTTGGTCCGATCAAGCTGCTGAATATTGGAACAGGCTATATCGCTTACTCCAGGCAAT  
TATATTGAAGCACATAATTGGTTAAAGATCACAGGTCGCTTCGAA-----ATGAACCGACG  
ATCAGAACGTATATGGATAGAATTTATAATGGGATCTCGAAAAACAAGTAATTTCTGCTG  
GGCTTGATCCTTTTGTGGGCTCGCTAGGATTCTTATTGGTTGGAATTTCCAGCTATCT  
TGGTCGGAATCTCATATCCCTATTCCCCTCTCAGCAAATCAATTTTTTCCCCCAAGGGAT  
TGTCATGTCTTTCTATGGGATTGCTGGTTTGTTCATTAGTTCCTATTTGTGGTCCACGATT  
TTGTGGAATATAGGTAGTGGTTATGATCGATTTCGATAGAAAAGAAGGAATAGTGTGTATT  
TTTCGTTGGGATTCCTGGAATAAATCGCCGCATCTTCTACGAGTATTTATGGGAGAT  
ATCCAGTCCATCCGAATCGAAGTCAAGGGGGTGTTTATCCTCGTCGTGTCTTTATATG  
GACATCAGAGGCCAGGGTCCGTTCCCTTACTCGTACTGATGAGAAT---TTCCTCCA  
CGAGAAATTGAACAAAAAGCTGCGGAATCGGCCTATTTTTTTCGCGTACCAATTGAAG  
TATTT

>Coffea

ATGGAAGATGGTGGTTTAATTCGATGTTGTTTCTAAATAAATCAACGGAAAGTCTTGG  
TTCTATTGAAAATGCCAGTGAAGGTGATGAGCCGGATATAAAAGATAGGACTAAAAAC  
ATTCAGAGTTACAGTAAGGTTGATCATTTATTCGTCGTTAAAGACATTCGGAATTCATC  
TCCGATGACACTTTTTTAGTTAAGGATAGTAATGGAGACAATTTTTCCATATATTTTGATA  
TTGAAAATCAAATTTTTGAGATTGACAACAATCAT-----TCGTTTCGGAGTGAACATAAAA  
AAT-----ACTTATTGGAATCTAGTTATCTGAATAATGGATCTACGAGCGAAGATACCTA  
CTATAATCATTACATGTATGATACTCAATATAGTTGGAATAATCATATTAATAGTTGCATTG  
ACAGTTATCTTCAG-----TCTCAAATTTGGATTGAGACTTCCATTGTAAGTGGAGGGGAT

AATTACAGCGATAGTTACATCTATAGTTCCATTTGTGGT---GAGGTTTCGGATATACAAAC  
CCACGTGAAGGGGAGCGATTTTACTATAATAGAAAAGTTCTAATGATCTCGATGTAAC  
AAAAATATAGGCATTTGTGGGTTCAATGTGAAAATTGTTATGGATTAAATTATAAGAAAT  
TTTTGAAATCAAAAATGAATATTTGTGAACAATGTGGATATCATTGAAAATGAATAGTT  
CAGAAAGAATCGAACTTTCGATCGATCCTGGTACTTGGGATCCTATGGATGAAGACATG  
GCCTCTCTGGATCCCATTGAATTTTCATTTCGGAGGAGGAACCTTATAAAGATCGTATTGAT  
TCTTATCAAAAAGAAGACAGGATTAACCGAGGCTGTTCAAACAGGCATAGGCCAACTAA  
ACGGCATTCCCGTAGCAGTTGGGGTTATGGATTTTCAGTTTATGGGGGGTAGTATGGGA  
TCCGTAGTTGGGGAAAAATAACCCGTTTGATTGAATACGCTACCAAAGAGTTGCTACC  
TCTTATTATAGTATGTGCTTCGGGGGGGGCACGCATGCAAGAAGGAAGTTTGAGCTTGA  
TGCAAATGGCTAAAATTTTCGTCTGCTTTATATGATTATCAATCAAATAAAAAGTTATTTTA  
TGTATCAATCCTTACATCTCCTACTACTGGCGGAGTAACAGCCAGTTTTTGGTATGTTGGG  
TGATATCATTATTGCCGAACCAACGCCTATATTGCATTTGCAGGTAAAAGAGTAATTGA  
ACAAACATTGAATACAACAGTACCTGAAGGTTTACAAGCCGCTGAATATTTATTCCAGA  
AGGGTTTATTTCGACCTAATCGTACCGCGTAATCTTTTAAAAAGCGTTCTTAGTGAGTTAT  
TTAAGTTCCATGCTTTTCGTTCCTTTGAATCAAAATGAAACAGAGATGGTAACCATTTCGA  
GCTGACGAAATTAGTAATATTATTTCGCGAACGGATTGAACAATATAATAGAGAAGTAAA  
GATTGTAAATACTGGGACCGTGCTTCAAGTAGGCGATGGCATTGCTCGTATTTCATGGTC  
TTGATGAAGTAATGGCGGGCGAATTAGTTGAATTTGAAGAGGGGACAATAGGCATTGC  
TCTGAATTTGGAATCAAATAATGTTGGTGTGTATTAATGGGTGACGGTTTGATGATACA  
AGAAGGAAGTTCTGTAAAAGCAACAGGAAGAATTGCTCAGATACCAGTGAGTGAGGC  
CTATTTGGGGCGCGTTATAAACGCCCTGGCTAAGCCTATTGATGGTAGGGGTGAAATTT  
CAGCTTCTGAATCTCGATTAATTGAATCTCCTGCCCCGGTATTATTTTCGCGGGCCTCCG  
TATATGAGCCTCTTCAAACCGGGCTTATTGCTATTGATTTCGATGATTTCCTATAGGGCGGG  
GCCAGCGAGAATTAATTATTGGGGACAGACAGACCGGTAAAACAGCAGTAGCCACAG  
ATACGATTCTCAATCAACAAGGTCAAATGTAATATGTGTTTATGTAGCTATTGGTCAA  
AAGCTTCTTCTGTGGCTCAGGTAGTAACTACTTTCCAGGAAAGGGGAGCGATGGAATAT  
ACCATTGTGGTAGCCGAAACGGCGGATTCCCCTGCTACATTACAATATCTCGCTCCTTAT  
ACAGGAGCAGCTCTCGCTGAATATTTTATGTACCGCGAACGACACACTTCAATTATTTA  
CGATGATCCCTCCAAACAAGCGCAAGCTTATCGCCAAATGTCTCTTCTATTACGAAGAC  
CGCCTGGGCGTGAAGCTTATCCGGGGGATGTTTTTTATTTGCACTCACGCCTTTTGGAA  
AGAGCCGCTAAATCAAGTTCAATTTAGGTGAAGGAAGTATGACCGCCCTGCCAATAG  
TTGAAACTCAATCGGGAGATGTTTCGGCTTATATTCCTACTAATGTAATTTCCATTACTGA  
TGGACAAATTTTCTATCCGCCGATCTATTCAATGCTGGAATCAGGCCTGCTATTAATGT  
GGGTATCTCCGTTTCCAGAGTCGGGTCTGCCGCTCAAATTAAGCCATGAAACAAGTA  
GCTGGTAAATTAAGTTGGAACCTGGCGCAATTTGCAGAATTAGAAGCTTTTGCACAATT  
TGCCTCTGATCTCGATAAAGCTACTCAGAATCAATTGGCAAGAGGTCAACGATTACGTG  
AATTGCTTAAGCAATCCCAAGCAGCCCTCTTGCAGTGGAAGAACAGATAATGACTATT  
TATACCGGAACAACCGGCTATCTTGATTCATTAGAAATTGGACAGGTAAGGAAATTTCT  
TGTTGCGTTACGTGCTTATGTAAAACTAATAAACCTCAGTTCCAAGAAATCATTCTTC  
TACCAAACATTTACCGAGGAAGCGGAATCCCTTTTGAAGAAGCTATTCAGGAGCAA  
ATGGACCGTTTTTTACTTCAGGAACAAGCAATGAAAATAAATCCTACTACTTCTGGTTC  
TGGGGTTTCCACGCTTGAAAAAAAACATGGGGCGTATTGTCAAATCATCGGCCCG  
GTACTAGATGTAGCCTTCCGGCGGGCAAGATGCCGAATATTTATAACGCCCTAGTAGTT

AAAGGTCGAGATACTGTTGGTCAACCAATTAATGTAACCTGTGAGGTACAGCAATTATT  
AGGAAATAATCGCGTTAGAGCTGTAGCTATGAGTTCTACAGATGGTCTAACGAGAGGA  
ATGGAAGTGATTGACACGGGAGCTCCTCTAAGTGTTCCGGTAGGAGGAGCAACTCTGG  
GACGAATTTTCAACGTGCTTGGAGAACCCGTTGATAATTTAGGTGCTGTAGATACTCGT  
ACAACATCTCCTATTCATAGATCTGCGCCCGCCTTTATACAGTTAGATACAAAATTATCTA  
TTTTTGAAACGGGAATTAAGTAGTAGATCTTTTAGCCCCTTATCGCCGTGGAGGAAAA  
ATAGGACTCTTCGGGGGAGCTGGAGTAGGTAAAACAGTACTCATTATGGAATTGATTAA  
CAATATTGCCAAAGCCCATGGAGGCGTATCCGTATTTGGCGGAGTGGGTGAACGTACTC  
GTGAAGGAAATGATCTTTACATGGAAATGAAAGAATCTGGAGTGATTAATAAAGAAAA  
TATTGCAGAATCAAAGTGGCTCTAGTTTACGGTCAGATGAATGAACCGCCGGGAGCT  
CGTATGAGAGTTGGTTTACTGCCCTAACTATGGCGGAATATTTCCGAGATGTTAATGA  
ACAAGACGTACTTCTATTTATCGACAATATTTCCGTTTTCGTCCAAGCAGGATCCGAAG  
TCTCGGCCCTTATTGGGTAGAATGCCTTCCGCTGTGGGCTACCAACCCACCCTGAGTACC  
GAAATGGGTTCTTTACAAGAAAGAATTACGTCTACCAAAGAGGGATCTATAACTTCTAT  
TCAAGCAGTTTATGTACCTGCAGACGATTTAACCGACCCCGCCCCTGCTACGACATTTG  
CACATTTAGATGCCACTACCGTACTATCAAGAGGATTAGCTGCCAAAGGTATCTATCCCG  
CAGTAGATCCTTTAGATTCAACATCAACCATGCTTCAACCTCGGATTGTTGGTGAGGAA  
CATTATGAAACTGCGCAAAGGGTTAAGCAAACCTTTACAACGTTATAAAGAACTCCAGG  
ATATTATAGCTATCCTCGGGTTAGATGAATTATCCGAAGAGGATCGTTTAAACCGTAGCAC  
GAGCACGAAAAATTGAGCGTTTCTTATCACAACCCTTTTTTCGTAGCAGAAGTATTTACC  
GGTTCTCCAGGAAAATATGTTGGTCTAGCAGAAACAATTAGAGGATTTCAATTGATCCT  
TTCCGGAGAATTAGATAGTCTTCTGAACAGGCTTTTTTATTTGGTAGGTAATATCGATGA  
AGCTACCGCGAAGGCTATGAACTTAGAAATGGAGAACAATTTGAAGAAAATGACCTTA  
AATCTTTGTGTACTAACGCCTAATCGAATTGTTTGGGATTCAGAAGTAAAAGAAATAAT  
TTACCTACTAATAGTGGTCAAATTGGCGTATTACCCAACCATGCCCTATTGCCACAGC  
TGTAGATATAGGTATTTTGAGAATACGCCTAATGGCCAATGGTTAACGATGGCTCTTAT  
GGGTGGTTTTGCTAAAATAGGCAGTAATGAAATCATTGTTTTAGTAAATGATGCGGAGA  
AGGGTAGTGACATTGATCCACAAGAAGCTCAGCAAACCTTTGAAATAGCGGAAGCTAA  
TTTGAAAAAAGCTGAAGGAAAGAGACAAACAATTGAAGCAAATCTAGCTCTCCGGCG  
AGCTAGGACACGGGTAGAGGCTATCAATGCGGTT---ATGAAAAATGTAACCGATTCTTT  
CCTTTCTTTGGGCCACTGGCCATTTGCCGGGAGTTTCGGGTTTAATACCGATATTTTATC  
AACAAATCTAATAAATCTAAGTGTAGTGCTTGGTGTATTGATCTTCTTTGGAAAGGGAG  
TGTTAAGTGATTTATTAGATAATCGAAAACAGAGGATCTTGAATACTATTCGAAATTCAG  
AAGAACTTCGTGGAGGGGCCATTGAACAGTTGGAAAAAGCCCGGACCCGCTTACGGA  
AAGTGGAATGGAAGCAGATCAATTTTCGAGTGAATGGATACTCTGAGATAGAGCGAGA  
AAAGTTGAATTTAATTAATTCAATTTATAAGACTTTGGAACAATTAGAAAATTATAAGAA  
TGAAACTATTAGTTTGAACAGCAAAGGACGATTAATCAAGTTCGACAACGGGTTTTT  
CAACAAGCCTTACAGGGAGCTTTAGGAACTCTGAATAGCTGTTTGAACAACGAGTTAC  
ATTTACGTACGATTAGTGCCAATATTGGCATCTTAGGGTCGATAAAAGAAAAAACTGATA  
TGAATCCACTGATTTCTGCCGCTTCCGTTATTGCTGCTGGATTGGCTGTAGGGCTTGCTT  
CTATTGGACCCGGAGTTGGTCAAGGAACTGCTGCGGGTCAAGCCGTAGAGGGTATCGC  
GAGACAGCCCGAGGCAGAGGGAAAAATACGAGGTACTCTATTGCTCAGTCTAGCTTTT  
ATGGAAGCTTTAACAATTTATGGACTGGTTGTAGCATTAGCACTTTTGTGTTGCGAATCCT  
TTTGTTATGAATGTTCTA-----GCAAACACACTAAAAGGGTTATACGATGTATCCGGTG

TGGAAGTAGGCCAACATTTCTATTGGCAAATAGGGGGTTTCCAAGTCCACGGCCAAGT  
ACTTATTACTTCTTGGGTTGTAATTGCTATCTTATTAGGTTTCGGCTGCTATAGCTGTTTCGG  
GACCCACAAACCATTCCAACCTGGGGGTCAGAATTTCTTTCGAATATGTTCTTGAATTTAT  
TCGAGATGTCAGTAAAACCCAAATTGGAGAAGAATATGGTCCTTGGGTTCCTTTTATTG  
GAACTCTGTTTCTATTTATTTTTGTTTCTAATTGGTCAGGAGCCCTTTTACCTTGGA  
TCATACAATTACCTCACGGGGAGTTAGCTGCACCCACGAATGATATAAATACGACTGTT  
GCTTTGGCTTTACTGACGTCAGTGGCATAATTTCTATGCGGGTATTACCAAAAAGGGATTA  
AGTTATTTCTGGGAAATATATTCAACCAACCCCAATCCTTTTACCCATTAATATCTTAGAA  
GATTTACAAAACCTTTATCGCTTAGTTTTTCGACTTTTTCGGAAATATCTTAGCTGATGAA  
TTGGTTGTTGTTGTTCTTGTTCCTTAGTACCTTTAGTGGTTCCCTATACCTGTCATGTTCC  
TTGGATTATTTACAAGTGGTATTCAAGCTCTATTTTTGCAACTTTAGCCGCGGCTTATAT  
AGGTGAATCCATGGAGGGCCATCATATGATATTTTCAACCGTAGAACATATATTA  
TATTTCCCTTTCCATCGTTTCAATCATAATTACAATGCGTTTGATAAGCTTTTTTAGTAGAT  
GGGATCGTACAACCTATATGATTCGTCTGAAAAGGGCATGATAGTTACTTTTTTATGTCTA  
ACAGGATTATTAGTTACGCGTTGGACTTATTTCGGGACATTTCCCACTAAGCAATTTATAT  
GAATCATTAATCTTCCCTTCGTGGAGTTTTTCCCTTATTCATATAGTTCGGTAT-----AAAA  
ATAAAAAGTATTTAAGCACATAACCGGTTCAAGTGTGTTTTTACTCAAGGCTTTACT  
ACTTCAGGTCTTTTAACTGAAATAGACCAATCTTCAATATTAGTGCCTGCTCTTCAATCC  
GAATGGTTAATAATGCACGTAACAATGATGATATTGGGCTATGCGTCCCTTTTATGTGGA  
TCATTATTGTCAATAGCACTTCTAGTCATTACATTTAGAAAAACAAAAAGATTCTTTAT-  
-----AGAGAAATCGAATATATGAATGAAAGAAGTAATCTTTTGCAAAATACTTCT-----G  
CTAAGAATTATTATAGGTCTCAATTGATTCAACAATTGGATTATTGGAGTTCCCGGGGCA  
TCAGTCTGGGGTTTATATTTTTAAACCATAGGTATTCTGTCAGGAGCAGTATGGGCTAACG  
AAGCGTGGGGATCGTATTGGAATTGGGATCCAAAGGAAACTTGGGCATTTATTACTTGG  
ATCATATTCGCGATTTATTTACATACTCGAACAACCTAGAAACCCGAAATGTGCAAACTC  
AGCAATTGTAGCGTCTATAGGCTTTCTTATAATTTGGATTGCTATTTTGGGGTCAATCTA  
TTAGGAATAGGGCTGCATAGTTATGGTTCATTTACATTAATGACAAAAAAGAAAGC  
ATTCACTCCCCTTTTATATCTTGTATCTATAGTATTTTTGCCCTGGTGGCTTTCTCTCAT  
TTAATAAAAGTCTGGAATCTTGGGTTAATAATTGGTGGAAATGCTGGGCAATCCGAAATT  
TTTTTGAATGATATTCAAGAAAAGAGTATTCTAGAAAAATTCATAGAATTAGAGGAACT  
CCTCGTCTTAGACGAACTGATCGAGGAATACTCGGAGACACATCTACAAAAATTCGTA  
TA---ATCCAAAAGAAGCGATCCAATTAATCAACATATACAACGAGGGTTCGGATCCATA  
CGATTTTGCATTTCTCGACAAATATAATCTGTTTTGTTATTCTAAGCGGTTTTTCTATTTT  
GGGTAATGAAGAACTTGTATTCTTAACTCTTGGACCCAGAAATTCCTATATAACTTAAG  
CGACACAGTCAAAGCTTTTTCTATTCTTTTATTAACGGATTTATGTATCGGATTCCATTCA  
CCTCATGGTTGGGAACTAATGGTTGGCTCTGTCTACAAAGATCTTGGATTTGTTCAAT  
GATCAAATTATATCTGGTCTTGTTCCTACTTTTCCAGTCATTCTTGATACAATTTTTAAAT  
ATTGGATTTTCCGTTATTTAAATCGTGTATCTCCTTCACTTGTAGTTATTTATCATTCAATG  
AATGACATGCCTATTGGTGTTCAAAAGTACCTTTCCGAAGTCCTGGAGAGGAAGATG  
CATCTTGGGTTGACGTATACAACCGACTTTATCGAGAAAGATTACTTTTTTTAGGTCAA  
GCAGTTGATAGCGAGATCTCAAATCAACTTATTGGTCTTATGATATATCTCAGTATCGAA  
GATGATACCAAAGATCTGTATTTGTTTATAAACTCTCCCGGCGGATGGGTAATCCCCGGA  
GTAGCTATTTATGATACTATGCAATTTGTACGACCAGATGTCCATACAATATGCATGGGGT  
TAGCCGCTTCAATGGGATCTTTTATCTGTTGGGGGAGAAATTACCAAACGTCTAGCA

TTCCCTCACGCT--GTAATGATCCATCAACCTGCTAGTTCGTTTTATGAGGCACAAGCGG  
GAGAATTTATCCTGGAAGCGGAAGAAGCTGCTGAAACTGCGTGAAACCCTCACAAGGG  
TTTATGTACAAAGAACGGGCAAACCTTTATGGGTTGTATCCGAAGACATGGAAAGAGA  
TGTTTTTATGTCAGCAACAGAAGCACAAGCTTATGGAATTGTTGATCTTGAGCGGTTG  
AAATGAAAGAACAAAATGGACTCATGAAGTTTAATTACCGAATCGCTTCCCAATGG  
CATGTTCCGGGTTTCGTTTAGATAATGAAGATCTGATTCTAGGTTATGTTTCAGGAAAGAT  
CCGACGCAGTTTTATCCGGATACTACCAGGAGATAGAGTCAAATGAAGTAAGTCGTT  
ATGATTCAACCAGAGGACGCATAATTTATCGACTCCGCAACAAGGATTCAAAGGATATG  
GAGGAAATTCAAGGATATTTACAG--GATAGATCTCAACAACACGGCTTTCTATATCCAC  
TTATCTTTCAGGAGTATATTTATGCACTTGCTCATGATCATAGTTTACCAGTTTATGATAAT  
AAATCCAGTTTCCCTAATTGTGAAACGTTTAATTAAGTCTGAATTTATCAACAAAATCATT  
ATTATTTTTGCTAATAATTCTAATCAAATCTATTTTTTGGTAAGAATTTATATTCTCAAAC  
AATATCAGAAGGACTTGCATTTATTGTGGAAATTCCATTTATATACGATTAATATCTTCT  
CAAATATTAATAATTTGTAATTTACGATCAATTCATTCACCATTTCTTTCTTAGAGAACA  
ATTTTTACATTTAAATTCTGTGTTAGATATACTAATACCCCATCCCGTACATCTGGAAAT  
CTTGTTCAAACCTTCGTTATTGGGTAAAAGACGCCTCCTCCTTGCATTTATTACGATT  
CTTTTTCCACGAATATTGGAATTGGAATACTCTTATTGATCCCAGT--TTTGATTTTTAC  
CACAAAATTTCTTCTTGTATATAATTCTCATGTATGTGAATACGAATCCATTTTCTT  
CTTCTCCGTAAGCAATCTTCTCATTTGCGATCAACATCTTTTGGAGTCTTTCTTGAACG  
GATATATTTCTATGAAAAAAGAACGTCTTGTAGAAGTCTTTGCT---GATTTTAGTCTAT  
GGTTGTTCAAAGATCCTTTCATACATTATGTTAGGTATCAAGGAAAATCCATTCTGGTTT  
CAAATGGGACGCCTCTTTGATGAATAAATGGAAATCTTACCTTGTTAATTTTTGGCAAT  
GTCATTTTGGTATTTGGTTTCAACCGGGAAGGGTCTATATAAACCAATTACCCAATTATT  
CCTTAACTTTATGGGCTATCTTCAAGTGTGCGACTAAACCATTCAATGGTACGAAGTC  
AAATGCTAGAAAATGCATTTCTAATCAATAATGCTATT-----AAGAAATTTGATACCCTTG  
TTCCACTTATCCCCTTATTGGATCATTGGCTAAAGCGAAATTTGTAACTTATTAGGAC  
ATCCTATTAGTAAGCCGATTTGGACTGATTTGGCAGATTCTGATATTATTGACCGATTTG  
GCATATATGCAGAAACCTTCTCATTATTATAGCGGATCTTCAAAAAAAGAGTTTGTA  
TCGAATAAAATATATACTTCGACTTTCTTGTGCTAAAACCTTTGGCTCGGAAACACAAA  
GTAATGTGCGTGCTTTTTTTGAAAGGATTAGGCTCGGAATTTTTGGAAAATTCCTCACG  
TCGGAAGAAGAAGCTCTTCTTTGACCTTCTCAAGACGAATTTGGTATTTGGATATTATT  
TATATCAATGATCTGACCAATTATCAAATGATAATTGAT---ACAACCGAACTACAG---GCT  
ATTAATTCTTTTTTCAAATTGGAATCC---CTAAAAGAAGTCTATGGGATCATATGGATACT  
TATCCCATTTTTACTCTTGTATTAGGAATCACAATAGGTGTACTCGTGATTGTTTGGTTA  
GAAAGAGAAATATCTGCAGGGATACAACAACGTATTGGACCTGAATATGCCGGCCCTTT  
AGGAATCTTCAAGCTCTAGCGGATGGTACAAAACACTTTTTCAAAGAGAACCTTCTTC  
CATCTAGGGGCGATGCTCGTTTATTCAAGTATTGGACCATCCATCGCAGTCATATCAATTT  
ACTAAGTTATTCAGTAATTCCTTTTTGGTTATCGACTTGTCTAGCCGATCTTACTATTGGT  
GTTTTTTTATGGATCGCCATTTCAAGTATTGCTCCCATTTGGACTTCTTATGTCGGGATATG  
GATCAAATAATAAATATTCCTTTTTAGGTGGTCTAAGGGCTGCTGCTCAATCAATTAGTT  
ATGAAATACCATTAATCTATGTGTATTATCAATATCTCTATTATCTAACAGTTCAAGTAC  
AGTTGATATAGTTGAAGCGCAGTCAAATATGGTTTTTGGGGATGGAATTTATGGCGTC  
AACCTATAGGATTTATCATTTTTCTAATTTCTTCTTTAGCCGAGTGTGAGAGATTGCCTTT  
TGATTTACCAGAAGCCGAAGAAGAATTAGTAGCGGGTTACCAAACCTGAATATTCAGGTA



TCAAATTTGGTTTATTTTACGTTGCTTCGTATCTAAATCTACTGGTTTCTTCATTATTTGTA  
ACAGTTCTTTACTTGGGAGGCTGGAATCTTTCTATTCCGTACATATTCGTTTCTGAGATA  
TTTGACATAAATAAAGCGGGTAAAGTTTTTGGCCCAGTAATTGGTATCTTTATTACATTA  
GCTAAAACCTTATTTGTTCTTGTTTCATTCCATTGCAACAAGATGGACTTTACCAAGGCTG  
AGAATGGATCAACTATTAATCTTGGGTGGAAATTTCTTTTACCTATTTCTCTAGGTAAT  
CTATTATTAACAACCTTCGTCCCAACTTCTTTTCATTGATGATCTGGCATGTACAGAATGAA  
AACTTCATTCTCGATTCTACGAGAATTTTTATGAAAGCCTTTCATTTGCTTCTCTTCGAT  
GGAAGTTTGATTTTCCCAGAATGTATCCTAATTTTTGGCCTAATCTTCTTCTGATGATCG  
ATTCATCCTCGGATCAAAAAGATATACCTTGGTTATATTTTCATCCCTTCAACAAGTTTAGT  
AATGAGCATAACGGCCCTATTGTTCCGATGGAGAGAAGAACCTATGATTAGCTTTTTCGG  
GAAATTTCCAAACGAACAATTTCAACGAAATCTTTCAATTTCTATTTTACTATGTTCAA  
CTCTATGTATTCTCTATCCGTAGAGTACATTGAATGTACAGAAATGGCTATAACAGAGT  
TTCTCTTATTCGTATTAACAGCTACTCTAGGAGGAATGTTTTTATGCGGTGCTAACGATT  
TCATAACTATCTTTGTAGCTCCAGAATGTTTCAGTTTATGCTCCTACCTATTATCTGGATA  
TACCAAGAAAGATGTACGGTCTAATGAGGCTACTATGAAATATTTACTCATGGGTGGGG  
CAAGCTCTTCTATTCTGGTTCATGGTTTCTTCTGGCTATATGGTTCATCTGGGGGAGAGA  
TCGAGCTTCAAGAAATAGTGAATGGTCTTATCAATACACAAATGTATAACTCCCCAGGA  
ATTTCAATTGCGCTCATATTCATCACTGTAGGAATTGGGTTCAGCTTTCCCCAGCCCCT  
TCTCATCAATGGACTCCTGACGTATACGAAGGATCTCCCACTCCCGTCGTTGCTTTTCTT  
TCTGTTACTTCGAAAGTAGCTGCTTCAGCTTCAGCCACTCGAATTTTCGATATTCCTTTT  
TATTTCTCATCAAACGGATGGCATCTTCTTCTGGAAATCCTAGCTATTCTTAGCATGATAT  
TGGGAAATCTCATTGCTATTACTCAAACAAGCATGAAACGTATGCTTGCATATTCGTCCA  
TAGGTCAAATCGGATATGTAATTATTGGAATAATTGTTGGAGACTCAAATGATGGATAG  
CAAGCATGATAACTTATATGCTCTTCTATATCTCCATGAATCTAGGAACTTTTGCTTGCAT  
TGTATTATTTGGTCTACGTACCGGAACAGATAACATTCGAGATTATGCAGGATTATACAC  
GAAAGATCCTTTTTTGGCTCTCTTTAGCCCTATGTCTCTTATCCCTAGGAGGCCTGCC  
TCCACTAGCAGTTTTTTTTCGGAAAACCTTATTTATTCTGGTGTGGATGGCAGGCAGGCC  
TATATTTCTTGGTTTTAATAGGACTCCTTACAAGCGTTGTTTCTATCTACTATTATCTAAA  
AATAATCAAGTTATTAATGACTGGACGAAACCAAGAAATAACCCCTCACGTGCGAAATT  
ATAGAAGATCTCCTTTAAGATCAAACAATTCCATCGAATTGAGTATGATTGTATGTGTAA  
TAGCATCTACTATAACCAGGAATATCAATGAACCCGATTATTGCAATTGCTCAGGATAGCC  
TTTTTATGTTTCTTCTTTACGAATATGATATTTTTTGGACATTTCTAATAATATCAAGTCTT  
ATTCCTATTTTGGCATTFTTTATTTCCGGAATTTTAGCCCCGATTAGCAAAGGGCCGGAG  
AAACTCTCTAGTTATGAATCGGGTATAGAACCAATAGGCGACGCTTGGTTACAATTTTCG  
AATCCGTTATATATGTTTGTCTAGTTTTTGTGTTTTTGTGTTGAAACAGTTTTTCTT  
TATCCATGGGCAATGAGTTTCGATATTTTGGGTGTATCTGTATTTATAGAAGCTTTAATTT  
TTGTAATTATCTTAATAGTTGGTTTAGTTTATGCATGGCGAAAGGGGGCATTGGAATGGT  
CTACGAATTATTTTCTTGGTTAACAATAATTGTAATTTTGCCAATATTTGCAGGTTCTT  
AATTTTTTTTTCTTCCCATAGAGGAAATAGGGTCATCCGTTGGTATACTATATTTATATGT  
ATTTTCGAACTCCTTCTAACGGCCTATACATTCTGTTATCATTTCCAAACAGATGATCCAT  
TAATCCAACCTGATGGAGGATTATAAATGGATACAGTTGTTTGGATTTCCATTGGAGATTAG  
GAATAGATGGACTTTCTATAGGACCTATTTACTAACGGGATTCATCACCCTTTAGCGA  
CTTTAGCAGCTTGGCCGGTTACTCGGGATTCCTCGGTTATTTAATTTCTGATGTTAGCGA  
TGACAGTGCTCAAATAGGATTATTTTCTTCTCGAGACCTTTTACTTTTTTTTCATTATGTG

GGAGTTAGAATTAATTCCTGTTTATCTACTTCTATCTATGTGGGGAGGAAAGAAACGTCT  
GTACTCGGCTACAAAATTTATTTTGTATACGGCGGGGGTTCTATTTTTCTCTTAATGGG  
AGTTTTGGGTATCGGTTTATATGGTTCTAATGAACCAACATTAATTTTGAAACATCAGC  
CAATCAGTCGTATCCTCTTCCCTTGGAATAATATTCTATATTGGATTTTTTATTGCTTTTG  
CTGTGAAATTGCCTATTATACCCCTACATACATGGTTACCAGATACCCACGGGGAAGCA  
CATTACAGCACTTGTATGCTTCTAGCCGGAATCTTATTAATAAATGGGAGCATATGGGCTG  
GTTCCGGATCAATATGGAATTATTATCTCACGCCATTCTATATTTTCGCCCTGGTTACTGA  
TAGTAGGCACAATACAAATAATCTATGCAGCTTCAACATCTCTTGGCCAACGTAATTTAA  
AAAAAGAATAGCTTATTCTTCCGTATCTCATATGGGTTTCATAATTATAGGAATTGGTTC  
TATAACTGATACCGGACTCAATGGAGCTCTTTTACAAATAATCTCTCATGGATTTATTGG  
TGCTGCACTTTTTTTCTTGGCAGGTACGACTTATGATAGAATACGTCTTGTTTACCTTGA  
CGAAATGGGCGGAATAGCTATCCTAATGCCAAAAATATTCACGATATTTAGTACCTTTTC  
CATGGCGTCCCTTGCATTACCGGGTATGAGTGGTTTTGTTGCCGAATTGATAGTATTTTT  
TGGAATAATTACCAGCCAAAAATATCTTTTAATGCCAAAAATACTAATTACTTTTTGTAAT  
GGCAATTGGAATGATATTAACTCCTATTTATTCATTATCTATGTCACGCCAGATGTTCTAT  
GGATACAAGTTCTTTAATATTCCAAACTCTTATTTTTTTGATTCTGGACCACGCGAGTTA  
TTTTTTTCGATTTCTCTATTTTTTACCCGTACTCGGCATTGGCATGTACCCCGATTTCAAT  
TTTCACTGTCAGTTGACAAAGTCGAAGTTATTCTATCTAACTCTTTTTCTAAAATGATGC  
TCGAACATGTACTTGTTTTGAGTGCCTATTTATTTTCTATCGGTATCTATGGATTGATCAC  
AAGTCGAAATATGGTTAGAGCTCTTATGTGTCTTGAACCTTATATTGAATGCAGTTAATAT  
CAATTTTGTAACATTTTCTGATTTTTTTGATAATCGTCAATTAAGGAGACATTTTTTCA  
ATTTTTGTTATAGCTATTGCAGCCGCTGAAGCGGCTATTGGACTGGCTATTGTTTCATCA  
ATTTATCGTAACCGAAAATCAACTCGTATTAACCAATCGAATTTGTTGAATAACATGCAA  
CAGACATATCAATACGGGTGGATCATCCCTTTCATTCCACTTCCAATTCCTATATTAATAG  
GGGTCGGACTTCTTCTTTTTCCGACGGCAACAAAAATCTTCGTTCGTATGTGGTCTTTT  
CAGAGTGTTTTATTGTTAACTATAGTCATGATTTTTTCAATCAATCTGTCTATTCAGCAA  
TAAATAGCAATTCGATCTATCAATATGTATGGTCTTGGATCATAATAATGATTTTTCTTTA  
GAATTCGGCTATTTGATCGATCCGCTTACTTCTATTATGTCAATATTAATAACTACCGTTG  
GAATTATGGTCTTATCTATAGTGATAATTATATGGCTCATGATCAAGCATATTTGAGATTT  
TTTGCTTATATGGGTTTTTTCAGTACTTCCATGTTAGGATTAGTTACTAGTTCGAATTTGA  
TACAAATTTATATTTTTTGGGAATTGGTTGGAATGTGTTCTTATTTATTAATAGGGTTTTG  
GTTTACACGACCTCTTGTGCAAATGCTTGCCAAAAAGCTTTTGTGACTAATCGTATAG  
GGGATTTTGGCTTATTATTAGGAATTTAGGTTTTTACTGGATAACGGGTAGTTTTGAATT  
TCGTGATTTATTCGAAATATTCAATAACAATGAAGTCAATTCCTTGTGTTGTTACTTTGTGT  
GCTGGTCTAGTATTTGCCGGTGCCGTTGCTAAATCGGCACAATTTCCCCTTCATGTGTG  
GTTACCTGATGCCATGGAAGGGCCCACTCCTATTTCTGCTCTTATACACGCTGCTACTAT  
GGTAGCAGCGGAATTTTCTTGTAGCTCGGCTTATTCTCTTTTTCATAGTTATACCTTAC  
ATAATGAATTTTATTTTCGTTGATAGGAATAATAACAGTATTATTAGGAGCTACTTTAGCTC  
TTGCTCAAAAAGACATTAAGAGGATTAGCTTTTTCCACAATGTCTCAATTGGGTTAT  
ATGATGCTAGCTCTAGGTATGGGATCTTATCGAAGTGCTTTATTTCAATTTGATTACTCATG  
CCTATTCCAAAGCATTATTATTTTTAGGATCTGGATCCGTTATTCATTCAATGGAAACAAT  
TGTTGGATATTCTCCTTATAAAAGTCAAAATATGGTCTTATGGGAGGTTTAAACAAAGCA  
TATACCAATTACCAAAAATACTTTTTTATTAGGTACACTTTCTCTTTGTGGTATTCCACCC  
TTGGCTTGTTTTTGGTCCAAAGATGAAATCTTAATGATAGTTGGTTGTATTCAACGATT

TTCGCAATAATAGCTTGGGCTACCGCGGGATTAACCGCATTTTATATTTTTTCGGATATATT  
TACTTACTTTTGAAGGGCATTTAAGTGTTTCAAAAATTACATTGGTAAAGAAAA  
GTATTTTTCTATTCAATATCTCTATGGGGTAGGGGAGCTTCGAAAAAATTAACAAC---T  
TATCAACA-----ATGAATTTTTTGAATTTGAGAATAAAAAGTTTTATTCTATCCTTAT  
GAACCAGACAATACTATGTTATTCCCTTACTTATATTGGGTCTATTTACTTTGTTTCGTTG  
GATCTATAGGAATTCCTTTCGATTTARATATATTATCCAAATGGTTAACTCCATCTATAAAT  
CTTTTGCACCAAAAAGTTGAGT---TCGATGGATTGGTACGAATTTTGGAAAGATACAGTAT  
CTTCTGTCAGTATAGCTTATTTAGGAATATTTATAGCATCCCTTTTATATAAACCCCCCTAC  
TCCTCTTTACAAAATTTTGATTTAATTAATTCAATTCTTATCTTTGGGACAAAATTATAA  
ATGGCGTATATAATTGGTCGTATAATCGTGCTTACATAGATTCTTTTATAACAAGATCCTT  
CACTGGAGGAATAAGAGGATTGGCTAAATTAACCTCATTTTTTTTGATCGACGGATAGTTG  
ATGGAATTACGAATGGTGTGGTGTATTAAATTTCTTTATAGGAGAAGCTATTAATATAT  
AGGTGGCGGG---CGTATCTCTTCTTATCTTTCTTCTATTTAACTTATGTATCTATTTTTTA  
TTAGTTTTTTTTATGAATTTACCTGGACCAATACACGATTTTCTTTTAGTCTTTCTGGGGT  
CGGGTCTAATCTTAGGAGGTCTAGGAGTGGTATTACTTCCAATCCAATTTATTCTGCCT  
TTTCATTGGGATTCGTTCTTGTGTGTATATCTTTATTCTATATTCTATTGAACTCCTACTTT  
GTAGCTGCTGCGCAGCTGCTTATTTACGTAGGAGCTATAAATGTTTTAATCATTTTTGCT  
GTGATGTTTCATGAATGGCTCAGAATATTACAAAGATTTTCATCTTTGGACTATTGGGGAT  
GGAGTACTTCGGTGGTTTGTACAGGTCTTTTTATTTCACTAATTACTACTATTCCAGATA  
TGTCATGGTACGGTATTATTTGGACTACAAAATCAAACCAGATTCTAGAGCAAGATTTG  
ATAACTAATAGTCAACAAATTGGAGTTCATTTATCAACAGATTTTTTTCTTCCATTTGAA  
CTCGTTTCAATAATTCTTTTAGTTGCTTTAATAGGTGCAATTGCTGTAGCTCGTCAAATG  
ACTGTACCAGCTACAAGAAAAGACCTCATGATAGTCAATATGGGCCCTCATCACCCATC  
AATGCACGGTGTCTTCGACTCATCGTTACTTTAGATGGTGAAGATGTTATTGATTGTGA  
ACCAATATTGGGTTATTTACACAGAGGGATGGAGAAAATTGCGGAAAATCGAACAATT  
GTACAATATTTACCCTATGTAACACGTTGGGATTATTTAGCTACTATGTTACAGAAGCA  
ATAACCGTAAATGGACCTGAACAATTAGGAAATATTCAAGTACCTAAAAGAGCTAGCTA  
TATCCGAGCCATTTTGTGGAGTTGAGTCGTATCGCTTCCCATTTGTTATGGCTTGGTCC  
CTTTATGGCAGATATTGGCGCACAGACCCCTTCTTCTATATTTTTTCGAGAAAGAGAATT  
GATATATGACCTATTCGAAGCTGCTACCGGTATGCGAATGATGCATAATTTTTTTCGCATA  
GGAGGAGTAGCCGCTGATCTACCTCATGGCTGGATAGATAAATGTTTGGATTTTTGCGA  
TTACTTTTTAACAGGGGTTGCTGAATATCAAAAATTTATTACACGTAATCCTATTTTTTTA  
GAACGAGTTGAAGGCGTAGGCATTATCGGCGGAGAAGAAGCACTAAATTGGGGTTTAT  
CAGGACCAATGCTACGAGCTTCCGGAATACAATGGGATCTTCGTAAAGTTGATCATTAT  
GAGTGTATGACGAATTTGATTGGGAGGTTCAATGGCAAACGAAGGTGATTCATTAG  
CTCGTTATTTAGTACGAATCCGCGAAATGACAGAATCCATAAAAATTATACAACAGGCT  
CTGGAAGGAATCCAGGAGGCCCTTATGAGAATTTAGAAATCCGCGCTTTTGATAGAGT  
AAAAGATCCCGAATGGAATGATTTTGAATATCGATTTATTAGTAAAAAACCTTCTCCGA  
CCTTTGAATTGTCGAAACAAGAACTTTATGTGAGAGTTGAGGCACCAAAAAGGAGAATT  
GGGAATTTTTCTGGTAGGAGATCGAAGTGTTTTTCTTGGAGATGGAAAATTCGTCCAC  
CGGGTTTTATCAATTTGCAAATCTTCTCAGTTAGTTAAAAGAATGAAATTGGCTGATA  
TTATGACGATACTAGGTAGCATAGATATCATTATGGGAGAAGTTGATCGTATGTTTCCTAT  
GTTAACTGAATTCATAAATTATGGTCAACAAACAATCCGAGCTGCCAGGTACATTGGTC  
AAGGTTTCATGATTACCCTGTCTCATGCGAATCGTTTACCTATAACTATTCAATACCCCTA

CGAAAACTGATCACACCGGAACGTTTCCGGGGCCGAATCCACTTTGAATTTGATAAA  
TGCATTGCTTGTGAAGTATGTGTTTCGTGTATGTCCTATAGATCTACCCGTTGTTGATTGG  
AAATTGGAAACCGATATTCGAAAGAAACAGTTGCTTAATTACAGTATTGATTTTGGAGT  
CTGTATATTTTGTGGTAATTGCGTTGAGTATTGTCCAACAAATTGTTTATCAATGACTGA  
AGAATATGAACTTTCTACTTATGATCGTCACGAATTGAATTACAATCAAATTCATTGGG  
TCGGTTACCAACATCAGTAATTGATGATTACACAATTCGAACAATTCGAATTCA-----  
-----ATGCAGGGTCGTTTGTCTGCTTGGCTAGTCAAGCATGGGC  
TAATTCATAGATCTTTGGGCTTTGATTACCAAGGAATAGAGACTTTACAAATAAAGTCC  
GAGGATTGGCATTCTATTGCTGTTATTTTATATGTATATGGTTACAATTATCTCCGTTCCCA  
ATGCGCCTATGATGTAGCACCCGGCGGGCTGTTAGCTAGTGTATATCATCTTACGAGAAT  
AGAGTATGGTGTAGATCAACCAGAAGAGGTATGCATAAAAGTATTTGTCTCAAGGAGG  
AATCCTAGGATTCCGTCTGTCTTCTGGGTTTGGAAAAGTGTGGATTTTCAAGAACGAG  
AATCTTATGATATGTTGGGAATATCTTATGATAATCATCCACGCTTGAAACGTATCTTAAT  
GCCTGAAAGTTGGATAGGATGGCCCTTACGCAAGGATTATGTTGCTCCCAATTTTATG  
AAATACAAGATGCTCAT-----  
-----ATGAATTCATT  
GAGCTTCCTTTACTTGATCGAACAGCCCAAATTCAGTTATTTCAACTACATTAATGAT  
TTTTCAAATTGGTCAAGACTCTCTAGTTTATGGCCACTTCTCTATGGTACCAGTTGTTGT  
TTCATTGAATTTGCTTCACTAATAGGGTCACGATTCGACTTTGATCGTTATGGACTAGTA  
CCAAGATCAAGTCTTAGACAGGCAGATCTAATTTAACAGCCGGAACGGTAACAATGA  
AAATGGCCCCTTCTTTAGTGAGATTATATGAACAAATGCCTGAACCAAATATGTTATTG  
CTATGGGAGCATGTACAATTACAGGAGGGATGTTTACGTACCGATTCTTATAGTACTGTTT  
GGGGGGTTGATAAGCTAATTCCTGTAGATGTCTATTTGCCAGGCTGTCCCCCTAAACCG  
GAAGCAGTTATAGATGCTATAACAAAACCTTCGTAAGAAAATATCTCGAGAAATCTATGA  
AGATAGAATTAGGCCTCAACGTTTCAATCGGTGTTTACTACAAATCACAAGTTTCATAT  
TAGCCGCAGTATGAATACTGGAAATTATGATCAAGGATTCCTTTATCAACCGGCATCTAC  
TTCAGAAATACCTACTGAAACATTTTTCAAATACAAAAGTTCAGTCTCTTCCCATGAAT  
TGGTGAATATGGAACTAGAAATATTTTTTCTTGGATAAAGGAACAGTACTCGATCTA  
TTTCTGTATCTCTCATGATATATATCATAACTCGAACAGCCGTTTCAAATGCATATCCCAT  
TTTCGCACAACAGGGTTATGAAAATCCACGCGAAGCAACTGGGCGTATTGTATGTGCC  
AATTGCCATTTAGCTAATAAGCCCGTAGATATTGAGGTTCCACAGGCGGTACTTCTGAT  
ACTGTATTTGAAGCAGTTGTTTCAATTCCTTATGATAAGCAACTAAAACAAGTTCTTGC  
TAATGGTAAAAAGGGGGGTTTGAATGTAGGGGCTGTTCTTATTTTACCGGAGGGGTTT  
AATTAGCTCCCCCGATCGTATTTCTCCCGAGATTAAGAAAAGATAGGCAATTTGTCT  
TTTCAGAGCTATCGCCCTAATAAAAAAATATTCTTGTGATAGGACCTATCCCCGGTCAG  
AAATATAGCGAAATAACCTTTTCTTATTTCCCCCGACCCGCTACTAAGAAGGATGTT  
CACTTCTTAAAATATCCTATATACGTAGGCGGGAACAGGGGAAGGGGTCAGATTTATCC  
CGACGGGAGCAAGAGTAACAATACAGTTTATAATGCTACAGGAGCAGGTATAGTAAGC  
AAAATTATACGAAAAGAAAAGGGGGATATGAAATAACCATAACAGATACG--GATGGA  
CGTCAAGTGGTTGATATTATCCCCCAGGACCAGAAGTCTTGTGTTTACAGAGGGGCGAATA  
CATCAAATTGGATCAACCATTAACGAGTAACCCCAATGTGGGCGGATTTGGTCAGGGA  
GATGCAGAAATAGTACTTCAAGATCCATTACGTGTCCAAGGCCTTTTGTCTTCTTGGC  
ATCTGTTATTTTGGCACAAATCTTTTTGGTTCTTAAAAAGAAACAGTTTCGAGAAGGTT  
AATTGGCCGAAATGAATTCATGAGTAAAGTCTATGATTGGTTTCGAAGAACGTCTCGAG

ATTCAAGCGATTGCAGATGATATAACTAGTAAATACGTTCTCCCCACGTCAATATATTTT  
ATTGCTTAGGGGAATTACGCTTACTTGTTTTTTAGTCCAAGTTGCTACGGGATTTGCTA  
TGACTTTTTACTACCGTCCAACCGTACTGAGGCTTTTGCTTCTGTTCAATACATAATGA  
CTGAAGCTAACTTTGGTTGGTTAATACGGTCAGTTCATCGATGGTCAGCAAGTATGATG  
GTCCTAATGATGATTCTTCATGTATTTTCGTGTGTATCTCACCGGTGGATTTAAAAACCT  
CGCGAATTGACTTGGGTTACAGGTGTGGTTCTGGCTGTATTGACCGCATCTTTTGGTGT  
AACTGGTTATTCTTACCTCGGGACCAAATCGGTTATTGGGCAGTAAAAATTGTAACAG  
GTGTACCTGAAGCTATTCTGTAAATAGGATCTCCTTTGGTAGAATTATTGCGCGGAAGTG  
CTAGTGTGGGACAATCCACCTTACTCGTTTTTATAGTTTACACACTTTTGTATTGCCGC  
TTCTTACTGCCGATTTTATGTTAATGCACTTTCCAATGATACGTAAACAAGGTATTTCTGG  
CCTTTAAATGGGAGTAAACAAAAAGCCTGACTTGAATGATCCTGTATTAAGAGCTAAAT  
TGGCTAAAGGTATGGGTCATAATTATTATGGAGAGCCCGCATGGCCCAACGATCTGTTAT  
ATATTTTCCAGTAGTAATTCTAGGTACTATTGCATGTAACGTAGGCTTAGCGGTTCTAG  
AACCATCAATGGTTGGTGAACCGGCAGATCCATTTGCAACTCCTTTGGAAATATTACCG  
GAATGGTATTTCTTTCCCGTATTTCAAATACTTCGTACAGTACCAAATAAATTGTTGGGT  
GTTCTTTTAAATGGTTTTCAGTACCTGCGGGATTATTAACAGTACCCTTTTTAGAGAATGTT  
AATAAATTTCAAATCCATTTTCGTTCGTCCAGTAGCGACAACCTGTCTTTTTGATTGGTACC  
GCAGTCGCCCTTTGGTTGGGTATTGGTGCAACATTACCTATTGATAAATCCCTAACTTTG  
GGTCTTTTTATGATTGAAGTTTTTCTATTTGGAATCGTGTTAGGTCTAATCCTATTACTT  
TGGCTGGATTATTCGTAACCTGCATATTTACAATACAGGCGTGGTGATCAGTTGGACCTTA  
TGCTTACTATAACAAGTTATTTTGGTTTTCTACTAGCAGCTTAACTATAACCTCAGCTCT  
ATTTATTGGTTTGAACAAAATACGACTTATTATGGATATAGTAAGTCTCGCTTGGGCTTC  
TTAATGGTAGTCTTTACATTTTCCCTTTCACTCGTAGTGTGGGGAAGGAGTGGACTCA  
TGATTATTCGTTTCGCCGGAACCAGAAGTAAAAATTTGGTAGATAGGGATCCCGTAAAA  
ACTTCTTTTCGAGGAATGGGCCAAACCAGGTCATTTCTCAAGAACAATAGCTAAAGGAC  
CTGATACTACCACTTGGATCTGGAATCTACATGCTGATGCTCATGATTTTCGATAGCCATA  
CCAGTGATTTGGAGGAGATTTCTCGAAAAGTATTTAGTGCCCATTTTCGGCCAACCTCTCC  
ATCATCTTTCTTTGGTTGAGCGGCATGTATTTCCACGGTGCTCGTTTTTCCAATTATGAA  
GCGTGGCTAAGTGATCCAACCTCACATTGGGCCTAGTGCCAGGTGGTTTGGCCAATAG  
TGGGCCAAGAAATATTGAATGGTGATGTGGGCGGAGGTTTCCGAGGAATACAAATAAC  
TTCCGGTTTTTTTCAGATTTGGAGAGCATCTGGAATAACTAATGAATTACAACCTCTATTG  
TACCGCAATTGGTGCATTGATTTTTGCAGCGTTAATGCTTTTTGCTGGTTGGTTTCATTAT  
CATAAAGCAGCTCCAAAATTGGCTTGGTTTCAAGATGTAGAATCTATGTTGAATCACCA  
TTTAGCGGGGCTACTAGGACTTGGGTCTCTCTCTTGGGCGGGACATCAAGTACATGTAT  
CTTTACCGATTAACCAATTTCTAAACGCTGGAGTAGATCCTAAAGAAATACCACTTCCT  
CATGAATTTATCTTGAATCGGGATCTTTTGGCTCAACTTTATCCTAGTTTTGCCGAGGGA  
GCAACCCCATTTTTACCTTGAATTGGTCAAATATGCGGAATTTCTTACCTTTCGTGGA  
GGATTAGATCCAGTAACTGGGGGTCTGTGGCTGACCGATATTGCACACCACATTTAGC  
TATTGCAATTTCTTTCTGATAGCAGGTCACATGTATAGGACCAACTGGGGTATTGGTCA  
TGGTCTGAAAGATATTTTAGAAGCTCACAAAGGTCCATTTACAGGCCAGGGCCATAAA  
GGACTATATGAGATACTAACAACGTCATGGCATGCTCAATTATCTCTTAATCTAGCCATG  
TTAGGCTCTTTAACCATTGTTGTAGCTCACCATGTATTCCATGCCCCCTTATCCATATC  
TAGCTACTGACTATGGTACACAATTGTCGTTGTTACACACCACATGTGGATTGGTGGA  
TTTCTCATAGTTGGTGCTGCTGCGCACGCAGCCATTTTTATGGTAAGAGACTATGATCCA

ACTACTCGATAACAATGATCTATTAGATCGTGTTCTTAGACATCGTGATGCAATTATATCAC  
ATCTCAACTGGGCATGTATATTTCTAGGCTTTCACAGTTTTGGTTTTGTATATTCATAATGA  
TACCATGAGCGCTTTAGGGCGTCCTCAAGATATGTTTTTCAGATACCGCTATCCAATTACA  
ACCCGTTTTTTGCTCAATGGATACAAAACACCCACGCTTTAGCACCCGGTGCAACGGCT  
CCTGGTGCAACAGCAAGCACCAGTTTAACTTGGGGAGGTGGTGATTGGTAGCAGTGG  
GTGGCAAAGTGGCTTTGTTACCTATTCCATTAGGAACCGCAGATTTTTTTGGTCCATCAC  
ATTCATGCATTTACGATTCATGTGACAGTATTGATACTCCTGAAAGGTGTTCTATTTGCT  
CGTAGCTCCCGCTTGATAACCGGATAAAGCAAATCTTGGTTTTCGTTTTCCCTGTGATGG  
GCCCCGAAGGGGGGTACATGTCAAGTATCGGCTTGGGATCATGTCTTCTTAGGACTAT  
TCTGGATGTACAATGCAATTTCCGGTAGTAATATTCCATTTAGTTGGAAAATGCAGTCAG  
ACGTTTTGGGGCAGTATAAGTGATCAAGGGGTAGTAACTCATATTACGGGAGGAACTTT  
GCGCAGAGTTCTATTACTATTAACGGATGGCTCCGCGATTTCTTATGGGCGCAGGCATCC  
CAGGTAATTCAGTCTTATGGTTCGTCAATATCTGCATATGGCCTTTTTTTCCTAGGTGCTC  
ATTTTGTATGGGCTTTTAGTTTTAATGTTTTCTATTCAGTGGACGTGGTTATTGGCAAGAAC  
TTATTGAATCCATCGTTTGGGCTCATAATAAATTAAGTTGCTCCTGCTACTCAGCCGA  
GAGCCTTGAGCATTGTACAAGGACGTGCTGTAGGAGTAACCCATTACCTTCTGGGTGG  
AATTGCCACAACATGGGCATTCTTCTTAGCAAGAATTATTGCAGTAGGAATGGCATTAA  
GATTTCCAAGGTTTAGCCAAGGCTTAGCTCAGGACCCCACTACTCGTCGTATTTGGTTT  
GGTATTGCTACCGCACATGACTTCGAGAGTCATGATGATATTACTGAAGAACGTCTTTAT  
CAGAATATTTTTGCTTCTCACTTTGGTCAATTAGCAATAATTTTTCTATGGACTTCCGGA  
AATCTGTTTCATGTAGCTTGGCAAGGAAATTTTGAGTCATGGGTACAGGACCCTTTACA  
CGTAAGACCTATTGCTCATGCAATTTGGGATCCTCATTTTGGTCAACCGGCTGTGGAAG  
CTTTACTCGAGGGGGTGCTCTTGGCCCAGTAAATATCGCCTATTCTGGTGTTTATCAGT  
GGTGGTATAACAATCGGTTTACGCACCAATGAAGACCTTTATACTGGAGCTCTTTTTCTAT  
TATTTATTTCTGCCATATTCTTAATAGCAGGTTGGTTACACCTACAACCGAAATGGAAAC  
CGAGTGTTCGTGGTTCAAAAATGCCGAATCTCGTCTGAATCACCATTTGTCAGGACTC  
TTCGGTGTAAGTTCCTTGGCTTGGACAGGGCATTTAGTACATGTCGCTATTCTGGATCC  
AGAGGTGAATATGTTTCGATGGAATAATTTCTTAGATGTATTACCGCATCCCCAAGGGTTA  
GGTCCACTTTTTACAGGTCAGTGGAATCTTTATGCTCAAACCCCGATTAGGTAGTCA  
TTATTTGGGACCTCTCAAGGAGCAGGAACTGCCATTCTAACGCTTCTCGGGGGATTTC  
ATCCGCAAACACAAAGTTTATGGCTGACTGATATTGCCATCATCATTTAGCTATTGCAT  
TTATTTTTCTCGTTGCTGGTCATATGTATAGAACTAATTCGGGATTGGGCACAGTATGA  
AAGACCTTTTAGATGCACATATTCTCCGGGGGGACGATTGGGACGTGGACATAAGGG  
TCTTTATGATAACAATCAATAATTCGCTTCATTTCAATTAGGCCTTGCTCTAGCTTCTTTA  
GGTGTATTACTTCCCTTGGTAGCTCAACACATGTACTCTTTACCTGCTTATGCATTCATAG  
CACAAGACTTTACTACTCAAGCTGCATTATATACTCATCACCATATATTGCAGGATTCAT  
CATGACAGGAGCTTTTGCCCATGGAGCTATATTTTTTCATTAGAGATTACAATCCAGAAC  
AAAATGAAGACAATGTATTGGCAAGAATGTTAGACCATAAAGAAGCTATTATATCTCAT  
TTAAGTTGGGCCAGCCTCTTTCTGGGATTCCATACTTTAGGACTTTATGTTTCATAATGAT  
GTCATGCTTGCCTTTGGCACCCCGGAGAAGCAAATCCTGATCGAACCTATATTTGCTCA  
ATGGATAACAATCTGCTCATGGTAAAACCTTCATATGGGTTTGTATGACTTTTATCTTCAAC  
GAGCGGACCAGCATTCAATGCGGGTCGAAGCATCTGGTTGCCGGGTTGGTTAAATGCT  
GTTAATGAA-----AATAGTAATTCATTATTCTTAAACAATAGGTCCTGGAGACTTTTTGGTT  
CATCATGCTATTGCTTTAGGTTTACATACAACTACATTGATCCTAGTAAAAGGTGCTTTA

GATGCACGTGGGTCCAAGTTAATGCCAGATAAAAAGGATTTTCGGTTATAGTTTTCCGTG  
CGACGGTCCAGGACGGGGCGGCACTTGCATATTTTCGGCATGGGACGCATTTTATTTAG  
CGTTTTTTTTGGATGTTAAATACTATTGGATGGGTACTTTTTATTGGCATTGGAAGCACA  
TCACATTATGGCAGGGTAACGTTTCACAATTTAATGAATCTTCCACCTATTTGATGGGCT  
GGTTAAGAGATTATTTATGGTTAAACTCTTCACAACCTATTAATGGCTATAACCCCTTTG  
GTATGAATAGTTTATCGGTCTGGGCATGGATGTTCTTATTTGGACATCTTGTTTGGGCTAT  
TGGATTTATGTTCTTAATTTCTGGCGTGGGTATTGGCAGGAATTGATTGAAACTTTAGC  
TTGGGCTCATGAACGCACACCTTTAGCCAATTTGATTCGTTGGAGAGATAAACCCGTAG  
CCCTTTCCATTGTGCAAGCAAGATTGGTTGGACTAGCCACTTTTCTGTAGGTTATATAT  
TTACGTATGCGGCTTTCTTAATTGCCTCTACGTTCGGGCAAATTTGGTATGTCACATTCAG  
TAAAGATTTATGATACGTGTATAGGATGTACTCAATGTGTCCGAGCTTGCCCGACCGATG  
TATTAGAAATGATACCTTGGGACGGATGTAAAGCTAAACAAATTGCTTCTGCTCCAAGA  
ACCGAAGACTGCGTTGGTTGTAAAAGATGTGAATCCGCCTGTCCAACGGATTTCTTGA  
GTGTTTCGAGTTTATTTATGGCATGAAACAACCCGCAGTATGGGTCTAGCTTATATGATAA  
CTTTCAGCTTTCCCTCTATTTTTGTGCCTTTAGTAGGCCTAGTATTTCCGGCAAATTGCAAT  
GGCTTCTTTATCTTTCATGTTCAAAAAATAAGATTATTATGCGAGATTTTAAACATAT  
CTCTCCGTGGCACCAGTACTAAGTACACTATGGTTCGGGGCTTTGGCAGGTCTATTGAT  
AGAGATTAATCGTTTTTTTTCCGGATGCGTTGACCTTCCCCTTTTTTTTCATTCATGACTGC  
AATTTTAGAGAGACGCGAAAGCGAAAGCCTATGGGGTCGCTTCTGTAATTGGATAACC  
AGCACTGAAAACCGTCTTTACATTGGATGTTTTGGTGTTTTGATGATCCCTACCTTATTG  
ACCGCAACTTCCGTATTTATTATCGCCTTCATTGCTGCACCTCCAGTAGATATTGATGGTA  
TTCGTGAACCTGTTTCTGGATCTTTACTTTACGGAACAATATTATTTTCAGGTGCCATTA  
TTCTACTTCTGCAGCTATAGGTTTGCACTTTTACCCAATATGGGAAGCGGCGTCTGTTG  
ATGAATGGTTATATAACGGCGGTCCTTATGAACTAATTGTTCTACACTTTTTACTTGGTGT  
AGCTTGTTACATGGGTCGTGAGTGGGAGCTTAGTTTCCGTCTGGGTATGCGACCTTGA  
TTGCTGTTGCATATTCAGCTCCTGTTGCAGCTGCTACCGCTGTTTTCTTGATTTATCCAAT  
CGGTCAAGGAAGTTTTTCTGATGGTATGCCTCTAGGAATCTCTGGTACTTTCAACTTCAT  
GATTGTATTCCAAGCTGAGCACAACATCCTTATGCACCCATTTACATGTTAGGCGTAG  
CTGGTGTATTCGGCGGCTCCCTATTCAGTGCTATGCATGGTTCCTTGGTAACTTCTAGTT  
TGATCAGGGAAACACAGAAAATGAATCTGCTAACGCAGGTTACAGATTTGGTCAAGA  
GGAAGAAACTTATAATATCGTAGCTGCTCATGGTTATTTTGGCCGATTGATCTTCCAATA  
TGCTAGTTTCAACAACCTCTCGTTCATTACACTTCTTCTAGCTGCTTGGCCTGTAGTAGG  
TATCTGGTTCACATCTTTAGGTATTAGCACTATGGCTTTCAACCTAAACGGGTTAATTT  
CAACCAATCTGTAGTTGATAGTCAAGGTCGTGTAATTAATACTTGGGCGGATATCATTA  
CCGCGCTAACCTTGGTATGGAAGTTATGCATGAACGTAATGCTCATAACTTCCCTCTAG  
ACCTAGCTGCTATAGATGCTCCATCTGTAAATGGAATGGGTTTGCCTTGGTATCGCGTTC  
ATACTGTTGTATTGAATGATCCCGGCCGCTTGCTTCTGTTTCATATAATGCATACAGCTCT  
GGTTGCTGGTTGGGCTGGTTTCGATGGCTCTATATGAATTAGCAGTTTTTTGATCCTTCCGA  
TCCTGTTCTTGATCCAATGTGGAGACAGGGTATGTTTGTATACCCTTTATGACTCGTTT  
AGGAATTACCAATTCATGGGGCGGTTGGAGTATCACA---GGGGGAACGTGAACGAATGC  
GGGTATTTGGAGTTACGAAGGTGTAGCGGGGGCACATATTGTGTTTTCTGGTTTATGCT  
TTTTGGCAGCCATCTGGCATTGGGTATATTGGGATCTAGAAATATTTTGCATGAACGTA  
CAGGAAAACCTTCTTTGGATTTGCCCAAGATCTTTGGAATTCATTTATTTCTTTCAGGAG  
TGGCTTGCTTTGGTTTTGGTGCATTTTCATGTAACAGGCTTATATGGTCTGGAATATGGG

TGTCGGATCCTTATGGACTAACGGGCAAAGTACAACCCGTAAATCCGGCATGGGGCGT  
GGAAGGTTTTGATCCTTTTGTCCGGGAGGAATAGCCTCTCATCACATTGCAGCAGGGA  
CATTGGGCATATTAGCGGGGTATTCCATCTTAGCGTCCGCCCACCACAACGCCTATACA  
AGGGATTGCGTATGGGAAATATTGAAACCGTCCTTTCCAGTAGTATCGCTGCTGTCTTTT  
TTGCGGCTTTTGTGTGGCCGGAACACTATGTGGTATGGTTCAGCAACTACTCCGATCGAA  
TTATTTGGGCCCACTCGTTATCAATGGGATCAGGGGTACTTTCAGCAAGAGATATATCGA  
AGAGTTAGTGCTGGACTAGCAGAAAATCAAAGTTTATCAGAAGCCTGGTCTAAAATTC  
CTGAAAAATTAGCTTTTTATGATTACATCGGAAATAATCCGGCAAAGGGGGATTATTC  
AGGGCAGGTTCGATGGATAACGGGGATGGAATAGCGATTGGATGGTTGGGACACCCTA  
TCTTTAGAGATAAAGAAGGGCGGGAACCTTTTGTACGTCGTATGCCTACTTTTTTTGAA  
ACATTTCCAGTCGTTTTGGTAGACGGCGACGGAATTGTTAGAGCGGATGTTCCTTTTAG  
AAGGGCAGAATCAAAGTATAGTGTGAACAAGTAGGTGTAAGTGTGAATTCTACGGC  
GGTGAACCTCAATGGAGTCAGTTATAGCGATCCTGCTACTGTGAAAAAATATGCTAGGCG  
CGCTCAATTGGGTGAAATTTTTGAATTAGATCGTGCTACTTTGAAATCCGATGGTGT  
TCGTAGCAGTCCAAGGGGTTGGTTTACTTTTGGACATGCTTCATTTGCTTTGCTCTTCTT  
TTTCGGACACATTTGGCATGGTGCTAGAACCTTGTTTCAGAGATGTTTTTGGTGGTATTG  
ACCCGGATTTGGATGCTCAAGTCGAATTTGGAGCATTCCAAAAAATGGGGATCCAAC  
ACAAGAAGACAGGCAGTCATGAAAACCTTATATTCCCTGAGGAGGTTCTACCACGTGG  
AAACGCTCTTTAATGGAACCTTAGCTTTAGCTGGTCGTGACCAAGAAACCACCGGTTT  
CGTTGGTGGGCGGGAAATGCCCCGACTTATCAATTTATCCGGTAAACTACTAGGAGCTC  
ATGTAGCCCATGCTGGGTAAATCGTATTCTGGGCCGGAGCAATGAACCTATTTGAAGTG  
GCTCATTTTCGTACCAGAGAAGCCTATGTATGAACAAGGGTTAATCTTACTTCCCCACCT  
AGCTACTCTAGGTTGGGGGGTAGGCCCTGGGGGGGAAGTTATAGACACCTTTCCATAC  
TTTGTATCTGGAGTACTTCATTTAATTTCCCTCTGCGGTTTTGGGCTTTGGAGGTATTTACC  
ACGCACTTCTGGGTCTGAGACGCTTGAAGAATCTTTCCATTCTTCGGTTATGTATGG  
AAAGATAGAAATAAAATGACCACAATTTAGGTATTCATTAATCTTGTTAGGTATAGGT  
GCTTTTCTTCTAGTATTCAAGGCTCTATATTTTGGGGGCGTGTATGATACCTGGGCTCCG  
GGAGGGGGAGATGTAAGAAAAATTACCAATTTGACCCTTAGCCCAGGTATCATTTTTGG  
TTATTTACTAAAATCCCCTTTTGGAGGGGAGGGTTGGATTGTTAGTGTGGACGATTTAG  
AAGATATAATCGGCGGACATGTATGGTTAGGTTTCGATTTGTATACTTGGTGGAACTCGGC  
ATATCTTAACCAAACCTTCGCGTGGGCTCGGCGCGCACTTGTATGGTCTGGAGAGGCT  
TACTTATCTTATAGTTTAGGGGCTTTATCCATCTTTGGTTTCACTGCTTGTGTTTTGTCT  
GGTTCAATAATACCGTCTATCCTAGTGAGTTTTACGGACCTACTGGGCCAGAAGCTTCT  
CAAGCCCAAGCATTTACTTTTTTAGTTAGAGACCAACGTCTTGGGGCTAATGTGGGATC  
CGCCAAGGGCCTACTGGTTTAGGTAAATATCTAATGCGTTCGCCAACCGGAGAAGTCA  
TTTTTGGAGGAGAAACCATGCGTTTTTGGGACCTGCGCGCTCCCTGGTTAGAACCTTTA  
AGAGGTCCAAATGGGTTGGACTTGAGTAGGTTGAAAAAAGACATAACAACCTTGCAA  
GAACGGCGTTCGCGAGAATATGACTCATGCCCTTTAGGTTCTTTAAATTCGTTGGG  
TGCGGTAGCTACCGAGATCAATGCAGTCAATTATGTCTCTCCTAGAAGTTGGTTAGCTA  
CCTCTCATTTTGTCTAGGATTCTTCTTCTCGTGGGTCAATTTATGGCATGCGGGAAGGG  
CTCGTGCAGCTGCAGCAGGATTTGAAAAGGGAATTGATCGTGATTTTGAACCTGTCT  
TTCAATGACCCCGCTTAATATGACTATAGCCCTTGGTAAATTTACCAAAGACGAAAAT---  
TTATTTGATATTATGGATGACTGGTTACGTAGGGACCGTTTCGTTTTTGTAGGCTGGTCC  
GGCCTATTGCTCTTCCCTGTGCCTATTTGCTTTAGGGGGTTGGTTCACAGGTACAACC



TTTGTAAC TTCATGGTATA CCCACGGGTTAGCCAGTTCCTATTTGGAAGGCTGCAATTC  
TAACTGCCGCAGTTTCTACTCCTGCTAATAGTTTAGCACATTCTTTGTTGTTACTATGG  
GGCCCTGAAGCACAAGGAGATTTTACTCGTTGGTGTCAATTAGGCGGTCTGTGGACTT  
TTGTTGCTCTCCACGGCGCTTTTGGATTAATAGGTTTCATGTTACGTCAATTCGAACTTG  
CTCGATCTGTTCAATTGCGACCTTATAATGCAATCGCATTCTCTGCCCAATTGCCGTTT  
TTGTTTCTGTATTCCTCAFTTATCCACTAGGTCAAGTCTGGTTGGTTCCTTTGCGCCTAGTTT  
TGGTGTAGCAGCTATATTTTCGATTCATCCTCTTTTTTCAAGGGTTCATAATTGGACATTG  
AACCCATTCATATGATGGGAGTTGCCGGTGTATTGGGCGCTGCTTTGCTATGCGCTATT  
CATGGTGCTACTGTAGAAAATACTTTATTTGAAGATGGTGATGGTGCAAATACATTCCGT  
GCTTTTAAACCAACGCAAGCCGAAGAACTTATTC AATGGTCACCGCTAACCGCTTTTG  
GTCCCAAATCTTTGGGGTTGCTTTTTCCAATAAACGTTGGTTACATTTCTTTATGTTATTT  
GTACCAGTAACCGGTTTATGGATGAGTGCTCTTGGAGTAGTCGGTTTGGCCCTGAATCT  
ACGTGCCTATGATTTTCGTTTCTCAGGAAATTCGCGCAGCGGAAGATCCGGAATTTGAAA  
CTTTCTACACCAAAAATATTCTCTTAAATGAGGGTATTCGTGCTTGGATGGCAGCTCAA  
GATCAGCCTCATGAAAACCTTATATTCCCTGAGGAGGTTCTACCACGTGGAAACGCTCT  
TATGTCTGGAAGCACAGGAGAACGTTCTTTTGTGATATTATTACCAGTATTCGATACTG  
GGTCATTCATAGCATTACAATACCTTCCCTATTCATTGCTGGTTGGCTATTCGTCAGCAC  
CGTTTTAGCTTATGATGTGTTTGGAAAGCCCTCGGCCAAACGAGTATTTACAGAAAGCC  
GGCAGGGAATCCATTAATAACTGGCCGTTTTGATCCTTTGGAACAACCTTGATGAATTT  
AGTAGATCTTTTATGACTATAGATCGAACCTATCCAATTTTTACAGTACGATGGTTGGCT  
GTTACGGCCTAGCTGTACCTACCGTCTTTTTTTTAGGATCAATTCAGCAATGCAGTTC  
ATCCAACGAATGGCTACACAACTGTTGATAACAGTTCTAGATCTGGT---CCAAGACGA  
ACTACTGTAGGGAGTTTATTA AAAACCAATTGAATTCAGAAATATGGTAAAGTAGCTCCGGG  
GTGGGGAACAACCCCTTTGATGGGTGTCGCAATGGCTCTATTTGCGGTATTTCTATCTAT  
TATTTTGGAGATTTATAATCTTCCGTTTTATTGGATGGAATTTCAATGAATATGCTTACT  
CTCAA ACTCTTCGTTTACACAGTAGTGATATTTTTTGTCTCTCTTCATCTTTGGATTCC  
TATCTAATGATCCCGGGCGTAATCCTGGGCGTGAAGAAATGGCCGATACTACTGGAAGA  
ATTCCTCTTTGGATAGTAGGTACTGTAAC TGGTATTCTTGTGATCGGTTTAATAGGTGTTT  
TCTTTTATGGTTCATATTCCGGATTGGGTT CATCCCTGATGCTTAATATTTTTAGTTAATC  
TGGATCTGTCTTAATCTGCCCTTAT---AGTGGTTTTTCTTCGGAAAATTGCCCGAGG  
CCTATGCTTTTTTGAATCCAATCATAGATTTTATGCCAGTCATACCTGTCTTCTTTTTTTTA  
TTAGCTTTTGTGGCAAGCTGCTGTAAGTTTTCGAATGACACAATCAAACCCGAACG  
AACAAAATGTTGAATTGAATCGTACCAGTCTATACTGGGGGTTATTACTCATTTTTGTAC  
TTGCTGTTTTATTTTCCAATTATTTCTTCAATATGGAAGTAAATATTCTTGCATTTATTGCT  
ACTGCACTATTCATTCTAGTTCCTACGGCCTTTCTACTTATAATTTACGTAAAAACAGTC  
AGTCAAAAATAATATGGAAACAGCAACCCTAGTAGCCATCTTTATATCTGGTTTACTTGTA  
AGTTTTACCGGGTACGCCTTATATAACCGCTTTTGGGCAACCTTCTCAACA ACTAAGAGA  
TCCGTTTGGAGGAACATGGGGACATGGAAGCACTGGTTTATACATTCCTCTTAGTCTCGA  
CTCTAGGGATAATTTTTTTCGCTATCTTTTTTCGAGAACCTCCTAAAGTTCCA ACTAAA  
AGATAAAAATGACTCTTGCTTTCCAATTGGCTGTTTTTGC ACTAATTGCTACCTCATCAA  
TCTTATTGATTAGCGTGCCCGTTGATTTGCTTCTCCTGATGGTTGGTCAAGTAACAAA  
ATGTTATATTTTTCTGGTACATCATTATGGATTGGCTTAGTCTTCTAGTTGGTATCCTAAT  
TCTCTCATCTCT-----ATGTCACCACAAACAGAGACTAAAGCAAGTGGTGGGA  
TTCAAAGCTGGTGTTAAAGAGTACAAATTGACTTATTATACTCCTGAATACGAAACCAA

AGATACTGATATCTTGGCAGCATTCCGAGTAACTCCTCAACCGGGAGTTCCACCTGAAG  
AAGCGGGGGCCGCGGTAGCTGCCGAATCTTCTACTGGTACATGGACAGCTGTGTGGAC  
CGATGGGCTTACCAGCCTTGATCGTTACAAAGGGCGATGCTATCACATCGAGCCAGTTC  
CTGGGAAGAAAATCAATATATTGCTTATGTAGCTTACCCCTTAGACCTTTTTTGAAGAA  
GGTTCTGTTACTAACATGTTTACTTCCATTGTAGGTAATGTATTTGGGTTCAAAGCCCTG  
CGCGCTCTACGTCTGGAAGATTTGCGAGTCCCACCTGCTTATATTAACCTTCCAAGG  
GCCGCTCATGGCATCCAAGTTGAGAGAGATAAATTGAACAAGTATGGTCGTCCCCTG  
TTGGGATGTACTATTAACCTAAATTAGGTTTATCTGCTAAAACTATGGTAGAGCTGTT  
TATGAATGTCTTCGCGGGGACTTGATTTTACCAAAGACGATGAAAACGTGAACTCCC  
AACCATTTATGCGTTGGAGAGATCGTTTCTGCTTTTGTGCTGAAGCGCTTTTTAAAGCA  
CAGGCTGAAACAGGTGAAATCAAAGGGCATTACTTGAATGCTACTGCAGGTACATGCG  
AAGAAATGATCAAAAGAGCTGTATTTGCTAGAGAATTAGGAGTTCCTATCGTAATGCAT  
GATTACTTAACAGGGGGATTACTGCAAATACTAGCTTGGCCATTATTGCCGAGATAAT  
GGCCTACTTCTTACATCCACCGCGCAATGCATGCGGTTATTGATAGACAGAAGAATCA  
TGGTATGCACTTCCGCGTACTAGCTAAAGGGTTACGTATGTCTGGTGGAGATCATATTCA  
CGCCGGTACCGTAGTAGGTAACCTTGAAGGGGAAAGAGATATCACTTTGGGCTTTGTT  
GATTTACTGCGTGATGATTTTATTGAAAAAGACCGAAGCCGCGGTATTTATTTCACTCA  
AGATTGGGTCTCTTACCAGGTGTTATACCCGTGGCTTCAGGAGGTATTCACGTTTGGC  
ATATGCCTGCTCTGACCGAGATTTTTGGGGATGATTCTGTACTACAGTTCGGTGGAGGA  
ACTTTAGGACACCCTTGGGGTAATGCGCCAGGTGCTGTAGCGAATCGAGTAGCTCTAG  
AAGCATGTGTAAGCTCGTAATGAAGGGCGTGATCTTGCTGCTGAGGGTAATGAAAT  
TATCCGCGAGGCTAGTAAATGGAGTCCTGAACTAGCTGCTGCTTGTGAGGTATGGAAG  
GAAATCCGATTTAATTTGAAGCGATGGATAAATTGGATAAATGGCGATACATTTATAC  
AAACTTCTACCCCGAGCACACGCAATGGAAGTGTAGACAGTCAAGTGAATCCAATC  
CACGAAACAATTTGATCTATGGACAGCATCGTTGTGGTAAAGGTCGTAATGCCAGAGG  
AATCATTACCGCAGGGCATAGAGGGGGAGGTCATAAGCGTCTATACCGTAAAATCGATT  
TTCGACGACTGAAAAAGACATATATGGTAGAATCGTAACCATAGAATACGACCCTAAT  
CGAAATGCATACATTTGTCTCATACTATGGGGATGGTGAGAAGAGATATATTTTACAT  
CCCAGAGGGGCTCTAATTGGAGATACCATTGTTTCTGGTACAGAAGTTCCTATAAAAAT  
GGGAAATGCCCTACCTTTGACCGATATGCCCTTAGGCACGGCCATACATAACATAGAAA  
TCACACTTGAAAGGGTGGACAATTAGCTAGAGCAGCGGGTGCTGTAGCGAAACTGAT  
TGCAAAAGAGGGTAAATCGGCCACATTAATAATTACCTTCTGGGGAGGTCCGTTTGATAT  
CCAAAACTGCTCAGCAACAGTCGGACAAGTAGGGAATGTTGGGGTGAATCAGAAAA  
GTTTGGGTAGAGCCGGATCTAAGCGTTGGCTAGGTAAGCGTCCTGTAGTAAGAGGAGT  
AGTTATGAACCCTGTAGACCATCCCCATGGAGGTGGGGAAGGGAGAGCTCCAATTGGT  
AGAAAAAAACCCACAACCCCTTGGGGTTATCCTGCACTTGAAGAAGAAGTAGAAAA  
AGGAATAAATATAGTGATAATTTGATTCTTCGTCGCCGTAGTAAAATGATTCAACCTCAA  
ACCCATTTAAATGTAGCAGATAACAGCGGGGCTCGAGAATTGATGTGTATTTCGAATCAT  
AGGAGCTAGC---AATCGTCGATATGCTCATATTGGTGATGTTATTGTTGCTGTGATCAA  
GAAGCAGTACCAAATATGCCCTAGAAAGGTCAGAAGTCGTACAGAGCTGTAATTGTGC  
GTACCTGTAAAGA ACTCAAACGTGACAATGGTATGATAATACGATATGATGACAACGCT  
GCAGTTGTTATTGACCAAGAAGGAAATCCAAAAGGAACTCGAATTTTTGGCGCGATCG  
CCCGGGAGTTGAGACAATTAATTTTACTAAAATAGTCTCATTAGCTCCCGAGGTATTA  
TGCTTAGTCCCAAAAGAACCAGATTCCGTAAACAACATAGAGGAAGAATGAAAGGAAT

ATCTTATCGAGGGAATCGTATATGTTTTCGGTAAATTTGCTCTTCAGGCACTTGAACCCGC  
TTGGATCACATCTAGACAGATAGAAGCAGGTCGACGAGCAATGACACGAAATGTACGC  
CGTGGTGGAAAAATATGGGTACGTATATTTCCAGACAAACCGATTACAGCGAGACCTGC  
CGAGACACGTATGGGTTCGGGGAAAGGATCCCCGAATATTGGGTAGCTGTTGTTAAA  
CCGGGTCAATACTTTATGAAATGGGTGGAGTAACAGAACATATAGCTAGAAGGGCTAT  
TTCAATAGCAGCATCCAAAATGCCTATACGGACTCAATTCATTATTTTCGAGAATGACTAG  
AATTAGACGGGGATATATAGCTCGGAGACGTAGAACAAAAATTCGTTTTATTTGCATCAA  
GCTTTCGGGGGGCCATTCAAGACTTACGCGAACTATTACTCAACAAAAAATAAAAGC  
TTTGTTTTCGGCTCATCGAGATCGGGATAGTAAAAAGAGAAATTTTCGTCGTTTGTGGA  
TCATTCCGATAAACGCAATAATTCGTGAAAGATGGGCACTATCCTATAGTTATAGTAGAT  
TAATACACGATCTGTACAAGAGACAGCTGCTTCTTAATCGTAAAATACTTGCACAAATA  
GCTATATCAAATAGGAATTGTCTTTATATGATTTCCAATGAGTTATATAAATATAAAGAAG  
TCGAAGAATCCAGTGAATAATTATGCTAAAAGAAGTATATGCTTTAGGTCAACATATAT  
CTATGTCTGCTGACAAAGCACGAAGAGTCATTGATCAAATTCGTGGACGTTCTTACGA  
AGAAACACTTATAATACTAGAGCTCATGCCCTATCGAGCATGTTATCCCATTTTTAAATT  
AGTTTATTCTGCAGCAGCAAATGCTAGTTACAATATGAGTTCCAACGACGCCAACTTAC  
TCATTAGTAAAGCTGAAGTCAATGAGGGTACTACCATAAAGAAATTTAAACCCCGGGCT  
CGGGGGCGTAGTTATCCGATAAAAAGACCTACCTGCCATATAACTATTGTAATGAAAGA  
TATATCTTTAGATGGAGGAGTATGGGACAAAAAATGGATGGAATCAAATATGCAGTAT  
TTACAGACAAAAGTATTCGGTTATTGGGGAAAAAT---CAATATACTTTTAAATGTCGAATC  
GGGATCAACTAGGACAGAAATAAAGCATTGGGTGCAACTCTTCTTTGGTGTCAAGGTA  
ATAGCTATGAATAGTCATCGACTTCCGGGAAAGGGTAGAAGAATGGGACCTATTATGGG  
ACATACAATGCATTACAGACGTATGATCATTACGCTTCAACCCGGGTATTCTATTCCACC  
TCTTAGAAAAGAAAAGA ACTATGGCAGTTCCAAAAAAGCGTACTTCTACATCAAAAAAG  
CGTATTCGTAAAATATTTGGAAAAAGAGGGATATTGGACAGCCTTAAAAGCTTTTTTC  
CTTAGGAAAATCTCTTTCTACTGGGAATTCAAAAGTTTTTTTTGTACAGCAAACAAATA  
AAATGGCCAAGGGTAAAGACGTACGAGTAACGGTGATTTTGAATGTACCGATTGTGT  
TCGAAACAGTGTTAAT-----AAGGTATCAACGGGGATTTCCAGATATATTACTCAAAGA  
ACCGGCACAATACACCCAATCGATTAGAATTGAAAAAATTCTGTCCCTATTGTTACAAG  
CATACGGTTCATGGGGAGATAAAGAAAATGAAAATAAGAGCTTCTGTTTCGTAAAATTTG  
TGACAAATGTGACTAATCCGCAGGCGAGGGCGAATTATAGTAATTTGTTCCAACCCGA  
GACATAACAAAGACAGGGAATGGTTCGAGAGAAAATAACAGTATCTACTCGGACACT  
AGAGTGGAAGTGTGTTGAATTAAGAACAGACAGTAAACGTCTTTATTATGGGCGTTTTA  
TTCTGTCTCCACTGATGAAAGGTCAAGCCGACACAATAGGCATTGCAATGCGACGAGC  
TTTGCTTGGAGAAATAGAAGGAACATGTATCACACGTGTAAAATCTGAG-----AAAGTC  
GCACATGAATATTCTACCATAGCGGGTATTCAAGAATCGGTACATGAAATCTTAATGAAT  
TTGAAAGAAATTGTATTGAGAAGTAATCTATATGGAACCTTGTGATGCATCTATTTGTGTC  
AGGGGTCCTGGATATGTAACGTCTCAAGATATCGTCTTACCGCCTTATGTAGAAATCGTT  
GATAATACACAACATATAGCTAGATTGATGGAACCAATCAATTTGTGTATTAGATTAGAA  
ATCGAGAGAAATCGAGGATATCTTATAAAAACGCCACAG---AACTTTGATGGAAGTTAT-  
-----CCTATAGATGCTGTATTTATGCCTATTCGAAATGCGAATTATAGTATTCATTCTTATGG  
GAATGGGAATGAAAAACAAGAGATACTTTTTCTCGAAATATGGACAAACGGAAGTTTA  
ACTCCGAAAGAAGCACTTCATCAAGCCTCCCGCAATTTGATTGATTTATTTATTCATTT  
TTACATATGGAAGAACAA-----AACTCACATTTAGAGAACAATCAA---CACACGGTTCCT

TTAGCTCCTTTTTTCTTTCATGATAAATTGGAT--AAACTCAGAAAAACAAAAA---GA  
AATAGCATTAATAATCGATTTTTATTGACCAATCAGAATTGCCCCAAGGATCTACAATTG  
CCTCAAAAGGTCCAATATATATACATTATTGGACCTTTTGAATAATAGTCAAGAAAATCT  
TATGAAAATTGAACATTTCCACATAGAAGATGTAAAAGAGATATTGGGCATTCTCGAAA  
AACAG-----TTGGTAATTTTTTACCGAAAAA---ATGCTCGGGGATGGA---AATGAGGG  
AATGGCTACAATACCTGGATTAATCAGATACAATTTGAAGGCTTTTGTAGGTTTATTGA  
TCAGGGTTTGGCGGAAGAACTTTATAAGTTTCCAAAAATTGAAGATACAGATCAAGAA  
ATCGAATTTCAATTATTGTGGAAACATACCAATTAGTAGAACCATTGATAAAGGAAAG  
AGATGCCGTGTATGAATTACTCACATATCTTCGGAATTATATGTATCCGCAGGATTGATT  
TGGAAAACCGGCAGGGATATGCAAGAACAACAATTTTTATTGGCAACATTCCTCTAAT  
GAATTCCCTAGGAACTTTTATAGTAAATGGAGTATATAGAATTTTGATCAATCAAATATTG  
CAAAGTCCCGGTATTTATTACCGGTCAGAATTGGACCATAACGGAATTTCTGTCTATACC  
GGGACCATAATATCAGATTGGGGAGGAAGATCAGAATTAGAGATTGATAGAAAAGCAA  
GGATATGGGCTCGTGTGAGTAGGAAACAAAAAATATCTATTCTAGTTTTATCATCAGCTA  
TGGGTTTCAATCTAAGAGAAATTCTAGAGAATGTTTGTATCCTGAAATTTTTTTGTCTT  
TTCTGAATGATAAGGAGAGAAAAAAATTGGGTCAAAGAGAATGCCATTTTAGAGTT  
TTATCAACAATTTGCTTGTGTAGGCGGAGATCCGGTATTTTCTGAATCCTTATGTAAGGA  
ATTACAAAAAAATTCTTTCAACAAAGATGTGAATTAGGACGGATTGGTTCGACGAAATA  
TGAACCGAAGACTGAACCTTGATATCCCTCAGAACAACCCATTTTTGTTACCACGAGAT  
ATATTGGCAGCCCGCCGATCATTGATTGGACTCAAATTTGGAATGGGTACACTTGACGA  
T-----ATGAATCATTTGAAAAATAAACGTATTTCGTTCTGTAGCGGATCTTTTACAAGATCA  
ATTCGGGTTGGCTCTGGTTCGTTTAGAAAATGCTGTTTCGAGGAACTATATGTGGAGCAA  
TTCGA---CATAAATTG---ATACCGACCCCTCAAATTTGGTAACCTTCAACTCCA-----  
TTAACAACACTTATGAGTCTTTTTTTGGTTTACACCCATTATCTCAAGTTTTGGATGGA  
ACCAATCCGTTGACACAAATAGTTCATGGGAGAAAATTGAGTTATTTGGGCCCTGGAG  
GACTAACAGGGCGAACTGCTAATTTTCGGATACGAGATATCCATCCCAGTCACTATGGG  
CGTATTTGCCCAATTGACACATCTGAAGGAATTAATGTTGGACTTATTGGATCCTTATCA  
ATTCATGCGAGGATTGGCCATTGGGGA---TTTCTAGAAAGCCCATTTTAT-----GAAATT  
TCTGAGAGA-----CGGGTGCTTTTTTTATTGCCGGGTAGAGATGAATACTATAA  
GGTAGCGGCAGGGAATCTTTGGCCTTAAATCAAGATATTCAGGAAAACAGGTTGTT  
CCAGCTCGATACCGTCAAGAATTCCTGACTATTGCATGGGAACAGGTTTCATCTTCGAAG  
TATTTTTCTTTCCAATATTTTTCTATTGGAGCTTCCCTCATTCTTTTATTGAACATAATG  
ATGCGAATCGGGCTTTAATGAGTTCAAATATGCAACGTCAAGCAGTTCCCCTTTCTCGA  
TCCGAGAAATGCATTGTTGGAACCTGGGTTGGAACAACAAGCAGCTCTAGATTCAGGGG  
CTCTTTCTATAGCCGAACGAGAGGGAAAGGTCCTTTATACCGATACGGACAAAATCCTT  
TTATCAGGTAATGGGGGACTCTAAGCATTCCATTAGTTATGTATCAACGTTCCAACAAA  
AATACTTGATGCACCAAAAACCACGGGTTTCAGCGGGGTAATGCATTA AAAAGGGAC  
AAATTTTAGCCGATGCTGCTGCTACGGTTGGTGGCGAACTTTCTTTGGGAAAAAACGTA  
TTAGTAGCTTATATGCCATGGGAAGGTTACAATTTTGAAGATGCAGTACTCATTAGCGAG  
CGTTTAGTATATGAAGATATTATACTTCTTTTCACATACGGAAATATGAAATTCAGACTC  
ATGTGACAAGCCAAGGT--CCTGAAAGGGTCACTAATGAAATACCCACTTAGAAGCC  
CATTTACTCCGCAATTTAGACAAAAGCGGAATTGTGATGTTGGGATCTTGGGTAGAAAC  
GGGTGATATTTAGTAGGTAATTAACGCCTCAGATGGTGAAAGAA---TCTTCTATGCC  
CCGGAAGATAGATTATTACGAGCCATACTTGGCATTTCAGGTATCTACTTCAAAGAAAC

TTGTCTAAAACCTACCTATAGGCGGTAGGGGTCGGGTTATTGATGTGAGATGGATCCAGA  
AAAAGGGG--GGCTCTAGTTATAATCCAGAAATGATTCGTGTATATATTTACAGAAACG  
TGAAATCAAAGTAGGCGATAAAGTAGCTGGAAGACACGGAAATAAGGGTATTATTTCA  
AAAATTTTGACTAGACAAGATATGCCTTATTTGCAAGATGGAAGACCTGTTGATATGGT  
CTTCAACCCACTAGGAGTACCTTCACGAATGAATGTTGGACAGATATTTGAATGTTTCAT  
TGGGGTTAGCGGGAAGTCTGCTAGACAGACATTATCGAATAGCGCCCTTTGATGAGAG  
GTATGAACAAGAAGCTTCGAGAAAACCTGGTGTTCCTGAATTATATCAAGCTAGTAAGC  
AAACAGCGAATCCATGGGTATTTGAAGCCGAGTATCCAGGAAAAGCAGAATATTTGA  
TGGAAGAACGGGGAATCCTTTTGAACAACCCGTTCTAATAGGAAAGCCTTATATCTTAA  
AATTAATTCATCAAGTTGATGATAAAATCCACGGACGTTCAAGTGGACATTATGCACTT  
GTTACACAGCAACCCCTTAGGGGAAGGGCAAAGCAGGGGGGACAACGGGTAGGAGA  
AATGGAGGTTTGGGCTCTAGAAGGGTTTGGTGTGCTCATATTTTACAAGAAATGCTTA  
CTTATAAATCTGATCATATTAGAGCTCGCCAGGAAGTACTTGGTACTACGATCGTTGGAG  
GAACAATACCGAATCCTGAGGATGCTCCAGAATCTTTTCGATTACTCGTTCGAGAACTA  
CGATCCTTAGCTCTAGAACTGAAACATTTTCCTTATATCTGAGAAAACTTCCGGATTCAT  
AGGAAGGAAGCT-----ATGATCGATAGGTATAAACATCAGCAGCTCCGAATT  
GGATTAGTTTCTCCTCAACAAATAAGTGCTTGGGCTACTAAAATCCTGCCTAATGGAGA  
GATAGTTGGAGAGGTAACAAAACCCCTATACTTTTCATTACAAAACCAATAAACGGAA  
AAGGATGGATTATTTGTGAAAGAATTTTGGACCTATTAAGTGGAAATTTGTGCTTG  
TGAAATTATCGAGTAATCGGAGATGAAAAGAAGACCCGAAATTTTGTGAACAGTGC  
GGAGTCCAATTTGTTGATTCTCGGATACGAAGGTATCAAATGGGATACATCAAACCTCGC  
ATGCCCGTAACCCATGTGTGGTATTTAAAACGCTTTCCTAGTTATATTGCGAATCTTTT  
AGATAAATCCCTTAAAGAATTAGAAGGCCTAGTGTACTGCGAT---AATTTTCTTTTGCT  
AGGCC---ATAACTAAAAAACCCACTTTCTTACGATTACGAGGTTCAATCAAATATGAGA  
TCCAATCTTGGAATACAGCATCCCACTTTTTTTTACTACCCAAGGCTTTGATACATTC  
GCAATCGAGAAATATCTACTGGTGCGGTTGCTATCCGAGAACAAATTAGCAGATCTAGAT  
TTGCGAATTATTCTAGAAAATTCGTTAGTAGAATGGAAAGAATTGGGGGAAGAG---GGG  
CCCACAGGTAATGAATGGGAGGATCGAAAAGTTGGAAGAAGAAAGGATTTTTTGGTTA  
GACGTATGGAATTGACTAAGCATTTTATTTCGAACAAATATAGAACCAGAATGGATGGTT  
TTGTTTCTATTACCAGTTCCTCCTCCTGAGTTGAGACCTATCATTAGATAGATGGGGGT  
AAACTAATGAGCTCGGATATTAATGAACTTTATAGAAGAGTTATCTATCGGAACAACAC  
TCTTACCGATCTATTAACAACAAGTAGATCTACCCAGGAGAGTTAGTAATGTGTCAGG  
AGAAATTAGTACAAGAAGCGGTGGATACACTTCTGGATAATGGAATTCGCGGCCAACCC  
AATGAAGGATGGTCATAATAAAGTTTACAAGTCATTTTCAGATGTAATTGAAGGCAAAG  
AAGGAAGATTCGCGAGACTCTGCTTGGCAAACGAGTCGATTATTCAGGGCGTTCCGT  
TATTGTTGTGGGTCCCTTCACTTTTCAATACATCGATGTGGATTGCCGCGAGAAATAGCAAT  
AGAATTTTCCAGACATTTGTAATTCGTGGTCTAATTAGACAACATCTTGCTTCGAACAT  
AGGAGTTGCTAAGAATAAAATTCGGGAAAAAGAACCCATTGTATGGGAAATACTTCAG  
GAAGTTATGCAGGGGCATCCCGTATTGCTGAATAGAGCACCAACTCTGCATAGATTAGG  
CATACAGGCATTCCAGCCCGTTTTAGTAGAAGGGCGTGCTATTTGTTTACATCCATTAGT  
TTGTAAGGATTCAATGCAGATTTTGTGATGGGGATCAAATGGCTGTTTCATGTACCTTTATC  
TTTGAAGCCCAAGCGGAGGCTCGTTTACTTATGTTTTCTCATATGAATCTTTTGTCTCC  
AGCTATTGGGGATCCCATTTCAAGTACCAACTCAAGATATGCTTATGGGGCTCTATGTATT  
AACGAGCGGGAATCGTCGAGGTATTTGTGTAATAGATATAATCCATGGAATCGC-----

AGAAACTATCAAACCTAAAAAAGTGACAATAATAACTATGAGTATACG-----GAACCT  
TTTTTTTGTAAATCCTATGATGCAATTGGAGCTTATCGTCAGAAACGAATCAATTTAGAT  
AGTCCTTTGTGGCTCCGGTGGCCACTAGACCAACGC---GTTATTGCTTCA-----AGAGAA  
ATTCCCATTGAAGTTCCTATGAATCTTTAGGGATTTATTATGAGATTTATGGACTATC  
TAATAGTAAAAAGTATAAAAAAAGAAATCTTTTTCTATATATTCGAACCACTGTTGGTC  
ATATTTCTCTTTATCGAGAAATTGAAGAAGCCATACAGGGGTTTTCTCATGCCTGTTTCAT  
ACGGTACC-----ATGGAGGTACTTATGGCCGAACGGGCCAATCTGGTCTTT  
CACAATAAATCGATAGACGGAACCTGCCATGAAACGACTTATTAGTTCGATTAATAGATCA  
CTTCGGAATGGCATATACATCACACATCCTGGATCAAGTAAAACTCTGGGTTTTAAAC  
AAGCTACCGCTACATCCATTTTATTAGGAATTGATGATCTTTTAAACAATACCCTCAAAGG  
GATGGCTAGTTCAAGATGCTGAACAACAAAGTTTGATTTTGGAAAAACACCACCATTA  
TGGGAATGTACACGCAGTAGAAAAATTACGCCAATCCATTGAAATATGGTATGCTACAA  
GTGAATATTTGCGACAAGAAATGAATCCTAATTTTAGGATGACTGACCCTTTTAAATCCA  
GTTTCATATAATGTCTTTTTTCAGGAGCTAGAGGAAATGTATCTCAAGTACATCAATTAGTA  
GGTATGAGAGGATTAATGTCTGATCCTCAAGGACAAATGATTGATTTACCCATTCAAAG  
CAATTTACGCGAAGGACTCTCTTTAACAGAATATATCATTTCTTGCTACGGAGCCCGTAA  
AGGGGTTGTGGATACTGCTGTACGAACATCAGATGCTGGATATCTCACGCGCAGACTTG  
TTGAAGTAGTTCAACACATTGTTGTACGCCGAACAGATTGTGGCACCGTCCGGGGTATT  
TCTGTGAGTCCTCCGAATGGGATGATGCC---GAAAAATTTTTTATTCAAACATTAGTTG  
GTCGTGTATTAGCAGATGATATATATATGGGTCCTCGATGTATTGCCACTAGAAATCAAG  
ACATTGGGATTGAACTTGTAATCGATTCATAACC-----TTTCGAGCCCAACCA  
ATATCTATTTCGAACCTCCCTTTACCTGTAGGAGTACATCTTGGATCTGTTCGATTATGTTATG  
GCCGGAGTCCTACTCATGGCGACCTGGTTGAATTGGGAGAAGCTGTAGGTATTATTGCA  
GGTCAATCGATTGGAGAACCGGGTACTCAATTAACATTAAGAACTTTTCATACCGGCGG  
AGTATTTGCAGGAGGTATTGCAGAACATGTGAGAGCTCCTTCTAATGGAAAAATAAAAT  
TCAATGAGGATTTAGTTTCATCCGACACGTACACGTCATGGACACCCCGCCTTTCTATGT  
TTTATAGACTTGTATGTAACATTAAGAGTGAAAATATTCTACATAATGTGAATATTCCAC  
CCAAAAGTTTTCTTTTAGTTCAAATGATCAATATGTAGAAGCAGAACAGGTGATTGCT  
GAAATTCGTGCGGGAACATCTACT--TTGAGTTTCAAAGAGAAGGTTTCGAAAACATATT  
TATTCTGACTCAGACGGAGAA---ATACACTGGAGTACCGATGTGTATCATGCGCCCCAA  
TTTACATATGGTAATGTGCATCTATTACCAAAAACAAGTCATTTATGGATATTATTAGGAG  
GGCCGTGCAGA-----TCGAGTCTAGTCTCCCTTTCGCTTCACAAGGATCAAGATCAAAT  
GAACACGCAT-----TCTCTTTCTGTAAAGCGAAGATATACTTATAAACTCTCA-----GTAAC  
GAATGATCGG---GTGAGGTACAAATCTTTAGTTTCGGATTTTTTATGGTAAA---AAAAATA  
GGATTCCTGATTAT--TTAGACCTTAATCGAATCATATGTACTGGTTATTGTAATCGCATAT  
ATCCG---GCCATTCCTCACGAGAATTCT-----GATTTATTGTCAAAGAGGCGAAGAAATA  
GATTTATTATGCCACTCCAA-----TCGATTCAAGAACGCGAGAACGAATCCCCAGGCA  
TCTCGATTGAAATCCCC-----ATAAATGGAATTTTCCGTAGAAATAGTATTCTTTCTTATTT  
CGACGATCCTCGATATAGAAGAAAGAGTTCGGGAATTACTAAATATGGGACTATCGAAA  
TGCATTCACTCGTCAAAAAGGAAGAT-----TTGATTGAGTATCGAGGG---GTTAAGGAAT  
TTAGGCCAAAATACATGAAAGTAGATCGATTTTTTTTCATTCGAGGAAGTGCATATCT  
TACCCGGATCTTCTCCATAATGGTACAGAACAATAGTATCATTGGAATAGATACACAAA  
TTACTTTAAATATAAGAAGCCGAGTGGGTGGGTTGGTCCGGGTGGAGAGAAAAAAA  
AAGGAATTGAACTTAAATCTTTTCTGGAGATATCCATTTTCCTGGAGAGACAGATAAA

ATATCCCGACATAGCGGCGTTTTGATACCGCTACCACCAGGAACGGGAAAAATAAATTC  
CAAGGAATCAAAAAA-----TTGAAAAATTGGATCTATGTCCAACGG-----ATTACACCT  
AGCAA-----AAGGGGTATTTTGCTTTGGTTCGTCTGTATCACATATGAGAAAAGAG  
ACGGTCTAAATTTAGCAACACTTTTCCCCCGATCTGTTGCAGGAACGGGACAATGTT  
CGACTTCAGGTTGTCAATTATATCCTTTATGGAAACGGCAAACCAATTCGAGGAATTC  
TGATACAAGTATTCAATTAGTTCGGACTTGTTAGTATTGAATTGGGACCAAGACAAAA  
AA-----AGTTCCTTAGCGAAGAAGCCCTGCTTCTTTTGTGAAATAAGGACAAATG  
GTTTGATTTCGACATTTCCCTAAGAATTGACTTGGTGAAATCTCCCATTTTCGTATATCGTAA  
AAAGGAATGATCCATCGGGTTCGGGATTGCTCTCTGAT--AATGGATCAGATTGCACCAA  
TATCAATCCGTTTTCTTCCATTTATTCTAT-----TCCAAGGCAAGAATTCAACAATTCC  
TTAACCCAAATCAAGGAATTCATACGTTGTTGAATAA-----AATAGGGAATTCCA  
ATCATTGATAATTTGTTATCATCCAATTGTTCTCGAATGGGTCCA-----TTCGCTGGTGTA  
AAATATCACAATGTA-----ATAAAGAATCAGATCCCCGAATTTCAATTAGGAATTCGT  
TGGGCCCTTTAGGATCA-----GCCCTCCAATTGCGAATTTTTTTTCA-----TTTTCCATT  
TA-----CTAACTCATAATCAGATCTTG---GTAECTAACTATTTGCAACTTGAC-----AAT--A  
TAAAAGAGACTTTTCAAGTAATTA-----TATTATTCAATGGATGAAAAT-----GGGAA  
AATTTATAATCCCGATCCATGCAATAACATTATTTTGAATCCATTGAATTTGAATTTGGTAT  
TTTCGCCATCACAATTATTGTGAAGAGACATCT---ACAATAATAAGTCTTGGACAGTTTA  
TTTGTGAAAATGTGTGTATAGCTAAAAATAGACCACAC---CTAAA-----CCGGGGCAAG  
TTATATTTGTTCAA---GTTGACTCCGTAGTAATACGATCAGCTAAGCCTTATTTGGCCACC  
CCGGGAGCAACTGTTTCATGGCCATTATGGGGAAACCCTTTACGAAGGAGATATATTAGT  
TACATTTATATATGAAAAATCGAGATCTGGTGATATAACGCAGGGTCTTCCAAAAGTGG  
AACAAATATTAGAAGTGCCTTCGATTGATTCAATATCGATGAATCTACAAAAGAGGATT  
GAGGGTTGGAACAAATGTATAACAAGAATTCTTGGAACTCCTTGGGGATTCTTGATTAG  
TGCTGAACTAACTATAGTGCAAAGTCAGATCTCTTTGGTTAATAAGATCCAAAAGGTTT  
ATCGATCCCAGGGGTACAGATTCATAATAAGCATATAGAAATTATTGTACGTCAAATAA  
CATCAAAGTGTGATTTAGAA-----GACGGAATGTCTAACGTTTTTTTACCCCGCG  
AACTAATTGGATTGTTGCGAGCAGAGCGAATGGGGCGCGCTTTAGAAGAAGCGATCTG  
TTACCGAGCCGTCTTATTGGGAATAACAAGAGCATCTCTCAATACTCAAAGTTTCATATC  
TGAAGCGAGTTTTCAAGAACTGCTCGGGTTTTAGCAAAGCCGCTCTTCGTGGGCGT  
ATCGATTGGTTGAAGGGTCTGAAAGAGAACGTAGTTTTGGGGGAATGATACCCGTTG  
GGACCGGATTCAAAGGATTA-----GTGAAACCTTCAAACAACATAACAAGGCTCTC----  
--TTGAAACCAAAAAAAGAATCTATTCGAGGGGAAATGAGA-----GATATTTTGT  
CATCACAGAAATTTTTTTGATTCTTTCTTTTAAAAAATTCATGATCCATCAGAACAA  
TCTTTTATAGGA-----TTAATGATTCAATGACAAGAAGATATTGGAACATCAAT  
TTAGAAGAGATGATGGAGGCAGGGTTCATTTGGCCATGGTACTAGGAAATGGAATC  
CTAAAATGGAACCTTATATCTCTGCAAAGCGTAAGGGTATTCATATTACAAATCTTACTA  
GAACTGCTCGTTTTTTTATCAGAAGCTTGTGATTTGGTCTTTGATGCGGGAAGTCGAGGA  
AAACAATTCTTAATTGTTGGTACAAAAATAAAGCAGCAGATTCAGTAGCATGGGCTGC  
AATAAGGGCCCGGTGTCATTATGTTAATAAAAAATGGCTCGGCGGTATGTTAACGAATT  
GGTCCACTACAGAAACGAGACTTCATAAGTTCAGGGACTTGAGAATGGAACAAAAA  
CAGGGAGACTTAATCGTCTTCCAAAAGAGATGCAGCTATGTTGAAAAGACAATTATC  
TCGTTTGCAAACATATCTGGGCGGGATTAATATATGACAGGGTTACCCGATATTGTAAT  
CATCATTGATCAGCACGAAGAATATACGGCCCTACGAGAGTGTATTACTTTGGGAATTC

CAACAATTTGTTTAATCGATACAAATTGCGACCCCGATTTAGCAGATATTTGATTCCGG  
CGAATGATGACGCTATATCTTCAATCCGATTAATTCTTAACAAATTAGTATTCGCAATTTG  
TGAGGGTCGCTCT---AGCTATATAAGAAATCCTATGGGACAAAAATAAATCCACTTGGT  
TTTAGACTTGGTACAACCCAAGGTCATCATTCTCTTTGGTTTACACAAGCAAAAAATTA  
TTCTGAGGGTCTACAAGAAGATCAACAAATAAGAAATTGTATTAATAAATTATGTTCAA  
AGAATACGAAAATATCCTCTGGG---GTAGAGGGAATTGCACGTATAGAGATTCAAAAA  
GAATCGATTTGATCCAAGTAATAATTTTTATGGGATTCCTAAAACCATTACTAGAAAATC  
AACCACGA-----GGAATCGAAGAATTACAGACGAATCTACAAAAAAATGTAATTC  
TGTGAACAGAAAATTTAACATTGCTATCACAAAAATTGCAAAACCTTATGGAAACCCTA  
ATATTCTTGCAGAATATATAGCTGGGCAATTAAGAATAGAGTTTCATTTCGAAAAGCAA  
TGAAAAAGGCTATTGAATTAAGTGAACAAGCAAATACAAAGGGAATTCAGTCCAAAT  
TGCAGGTCGTATCGACGGAAAAGAAATTGCACGCGTCGAATGGATTAGAAGGGGTAGG  
GTTCTCTACAAACCATTTCGAGCTAAAATTGATTATTGTTCCCTATACAGTTCGAACTATC  
TATGGTGTATTAGGCATAAAAATTTGGATATTTATAGACGAGGAAATGTCGCGTTACCGA  
GGACCTCGTTTCAAAAAAATACGCCGTCTGGGAGCTTTACCAGGACTAATAATAAAA  
AGCCTAGAGCTGGAAATGATCTTAGAAACCAATTACGTTTCGGGAAAA---AAATCTCAAT  
ATCGTATTCGACTAGAAGAAAAACAAAAGTTGCGTTTTTCATTATGGTCTTACAGAACGA  
CAATTAATAATATGTTTCGTATCGCCGGAAAAGCCAAGGGGTCAACAGGCCAAGTTTT  
ACTACAATTACTTGAAATGCGTTTGGATAACATCCTTTTTTCGATTGGGTATGGCTTCAAC  
TATTCCTGCAGCTCGTCAATTAGTTAACCATAGACATATTTTAGTTAATGGTTCGTATAGTA  
GATATACCAAGTTATCGCTGCAAACCCCGAGATATTATTACGGGGAAGGATGAACAAAA  
ATCCCGAGCTCTGATTCAAAAATCTCTGGATTCATCCCCTCAA---GAGGAATTGCCAAG  
TCATTTGACCCTTCACCCATTCCAA-----TATAAAGGATTAGTCAATCAAATAATAGATAG  
TAAATGGGTTCGGTTTGAAAATAAATGAATTGTTAGTTCGTAGAATATTATTCTCGACAGAC  
TATGTCACGTTCGAGGTGCTGCAGAAGAAAAACAGCCAAATCCGATCCAATTTATCGC  
AATCGATTAGTTAACATGTTGGTTAACCGTATTCTGAAACACGGAAAAAATCATTGGC  
TTATCAAATTATCTATCGAGCCGTGAAAAAGATTCAACAAAAGACAGAAACAAATCCA  
CTATCTGTTTTACGTCAAGCAATACGTGGAGTAACTCCCGATATAACAGTAAAAGCAAG  
ACGTGTAGGCGGATCGACTCATCAAGTCCCATTGAAATAGGATCCACACAAGGAAAA  
GCACTTGCCATTCGTTGGTTATTAGCGGCATCCCGAAAACGTCCGGGTTCGAAATATGGC  
TTTCAAATTAAGTTCCGAATTAGTGGATGCTGCCAAAGGGAGTGGCGATGCCATACGCA  
AAAAGGAAGAGACTCATAGAATGGCAGAGGCAAATAGAGCTTTTGCACATTTTCGTAT  
GGGTAGGGACACTGTTGCTGAGATAATAACCTCTATACGAAATGCTGATATGGATAAAA  
AAAGAGTGGTTCGAATAACATCTACTAATATTACCGAAAATATCGTTAAAATACTTTTAC  
GAGAAGGTTTTATCGAAAATGCGAGAAAACATCGAGAAAACAACAAATATTTTTTGGT  
TTTAACGCTGCGACATAGAAGG-----AACAGGAAAGGGCCCAT-----AGAAATATTTT  
TAATTTAAACGGATCAGTCGACCCGGTCTACGAATTTATGCTAACTCTCAACGAATTC  
CTCGAATTTTAGGTGGGATGGGGATTGTAATTTTTTCTACTTCTCGAGGAATAATGACAG  
ACCGAGAGGCTCGACTAGAAGGAATCGGTGGAGAAATTTTGTGTTATATATGGATGGC  
AAAAGCTATACCGAGAGTTGGTTCACGTAAGAACGGACGTATTAGTTCACGTAAGAGT  
GCGCGTAGAATACCAAAGGGAGTTATTCATGTTCAAGCAAGTTTTTATAATACCATTGT  
CACTGTTACAGATGTACGGGGTCGAGTGGTTTTCTTGGTCTCCGCCGGTACTTGTGGAT  
TCAGAGGTACGAGAAGAGGGACACCATTTGCTGCTCAAACCGCAGCAGCAAATGCTAT  
TCGTACAGTAGTGGATCAAGGTATGCAACGAGCAGAAGTCATGATAAAAAGGTCCCGGC



CTCGGGAGAGACGCAGCGCTTCGAGCTATTCGTAGAAAGTGGTATAGTATTAACCTTTCGT  
ACGAGATGTAACCTCCTATGCCACATAATGGCTGTAGACCTCCCAAAAAAAGACGTGTG  
ATGCCAACTATTAACAACCTTATTAGAAATGCAAGACAGCCAATAAGAAATGTCACGA  
AATCCCCCGCCCTTCGGGGATGCCCTCAGCGTCGAGGAACATGTACTCGGGTGTATACT  
ATCACCCCCAAAAACCAAACCTCTGCCTTACGTAAAGTTGCCAGAGTACGATTAACCT  
CTGGATTTGAAATCACTGCTTATATACCCGGTATTGGCCATAATTTACAAGAACATTCTG  
TAGTCTTAGTAAGAGGGGGAAGGGTTAAGGATTTACCCGGTGTGAGATATCACATTGTT  
CGAGGAACCCTAGATGCTGTGCGGAGTAAAGGATCGTCAACAAGGGCGTTCTAAATATG  
GGGTAAAAAAGCCAAAAATGGCAAGGAAAGGTTTGATTACGCGGGAGAAGAAGAGG  
CAAAGTTGGAACAGAAATATCATTGATTTCGTGATCCTCAAAAAAAGAAATAAGC---  
-----AAAGTTCAGTCATTAATGACAAATGGGAAATTTATAGAAAGTTACAATCTCCACC  
GCGGAATAGTGCACCTACACGCCTTCATCGACGTTGTTTTGCGACCGGAAGACCAAGA  
GCTAATTATCGAGACTTTGGACTGTCCGGACATATACTTCGTGAAATGGTTCATGCATGT  
TTGTTGCCAGGAGCAAGAAGATCAAGTTGGATGGTAAAAAATACTCACTCATTTCAGTCA  
TTTCTGAAGAA-----GAAAAG-----AGGGGTCTGTTGAATTTCAAGTATTCCGTTTTA  
CCAATAAGATACGGAGACTTACTTCACATTTGGAATTGCACAAAAAAGACTATTTATCT  
CAAAGAGGCTTACGAAAAATTTGGGAAAACGTCAACGGCTGTTGGCTTATTTGGCAA  
AAAAAATAGAGTACGTTATAAGAATTAATTGGTCTATTGAGTATTCGAGAGACCAAA  
ACTCGT-----ATGCTAAAACCTTCGTTTGAACGATGTGGTAGAAAGCAACGAGCTGTCT  
TTCGAATCGTTGCAATTGATGTTTCGATCCCGAAGAGAAGGAAAAGATCTGCAGAAAGT  
GGGTTTTTATGATCCGATAAAGAATCAAACCTATTTAAACGTTACTGCTATTCTATATTT  
CTTGAACAGGGTGCTCAACCTACAGGAACTGTTCAAGATATTTTTAAAAAGGCGGGGG  
TTTTTAAGGAACTTCGCCCTAATCAAATGAAGTTCAAT---ATGGATAAATCCAAACGATC  
TTTTCTTAAATCCAAGCGATCTGTTTCGTAGGCGTTTGCCCCGATTCAATCGGGGGATCT  
AATTGATTATAGAAACATGAGTTTAATTAGTCGATTTATTAGTGAACAAGGAAAAATATT  
ATCCAGACGGGTGAATAGATTGACCTTGAAACAACAACGATTAATTACTGTTGCTATAA  
ACAAGCTCGTATTTTATCTTTGTTACCTTTCTGAATAATGAGAAA-----CAGTTTGAA  
AGAACCGAGTCGACTGCTAGAACTACTGGTCTTAGAACTAGAAATAAAGTGACACGTT  
CACTAAAAAAAATCCTTTTGTGGCCAATCATTATTAAAAAAATTGATAAACTTAATA  
CAAAGCAGAAAAAGAAATAATAGTAACCTGGTCCCGGCATCTACCATTATACCCAC  
AATGATAGGACATAACCATTTGGTATCCATAATGGTAAAGAACATCTGCCTATTTATATAAC  
AGATCGTATGGTAGGCCACAAATTGGGAGAATTTGCACCTACTTTAAATTTCCGAGGAC  
ATGCAAAAAGCGATAATAGATCTCGTCGTATGATTTTTCAATCTTTTCTACTAGGTAATCT  
AGTATCCTTATGCATGAAGATAATCAATTCGGTCGTTGTGGTTCGGACTCTATTATGGATT  
TCTGACCACATTCTCCATAGGGCCCTCTTATCTCTTCCTTCTCCGAGCTCGGGTTATGGA  
AGAAGGA-----ACCGAGAAGAAGGTATCAGCAACAACCTGGTTTTTATTACGGGACAGC  
TCATGATGTTTCATATCGATCTATTATGCGCCTCTGCATCTAGCATTGGGTAGACCTCATA  
AATAACTGTCCTAGCTCTACCATATCTTTGTTTCATTTCTTCTGGAACAATCACAAACA  
CTTTTTTGATTATGGATCTACTACCCGAAATTTAATGCGCAATCTCAGCATTCAATGTGTA  
TTCCTGAATAATCTCATTTTTCAATTATTCAACTATTTCAATTTACCAAGTTCAATGTTAG  
CCAGATTAGTCAACATTTATATATTTTCGATGCAACAACAAGATGTTATTTGTAACAAGTA  
GTTTTGTTGGTTGGTTAATTGGTCAATTTATTCATGAAATGGCTTGGATTGGTATTAGT  
CTGGATACGGCAAAATCATTCTATTAGATCGTACATTCGATCTAATAAGTACCTTGTGTC  
AGAATTGAGAATTTTTATGGCTCGGATCTTTAGTATTCTCTTATTTATTACCTGTGTCTAC

TATTTAGGCAGAATACCGTCCCCATTCTTACTAAGAACTGAAAGAAACCGAAGAAG  
ATAAACTCTTGTA ACTACTCTTTTCGATTATAACCGATGGAATCATCCATTTTCGTTACAT  
AAAAATGATCGATTTGAAAAGGCTTTACGAAAAGAAATGTCACAATATTTCTTTTCAGA  
TCTACGAAAGCAATGGGAAACAAAGAATATCTTTTACATACTTGCCCAGTTTAGCAACT  
TTTGGAGAAATGATAAAAAGAAAGATATCTCTGTACACACTAGAAAAATCTTCCTCTAA  
TGAATTTGACAAACGTTGGGTTTACACGAATAAGCAAAAAATAAAG---CTAAACAATG  
AGTTTAGAAATCGAATTCAGCCCTAGACAAGGAATTTCTTTTTCTGGATATACTCGAA  
GCAAGA ACTAGATTGTGTAATGACGATACTAAAAATGAATATTTTCCTAAAATGTATGAT  
CCTTTCTTAAAAGGTGCATATCGCGGAAGAATCAAAACAATACTTTCACCTAGAGATAC  
AATTGGTATAAATCGAATTCATAGTATTCTTTATCAAGAATTTGAACAGAAATATCCTATT  
GATCAATCTGTTGGAATAAAAAGAAATTATCAAAAAAGTCCCTCGATGGTCATACAAATT  
AATCGATTTAGAACAACAATCA--GGACAAATTCGCTCAAGAAAAGCCAAACGTGTAG  
TGATTTTACTGATGCTTTGATACGCTATTTCGCAACAGTCGGATTTTCGAAGAAGAATAA  
TTAAAGGTTCTATGCGCGCTCAAAGACGTA AAAATTGTTATTTGGGAACTCTTTCAAGCA  
AATGTGCATTCTCCCCTTTTTTTGGACAGGATAAAAAAATCTCCTCGTTTTCTTTGAT  
ATA-----TCCGTA CTGATTA AACTTCTTTTTAGAAATAGAAAGGAACAAGCGCGGATAGA  
GATAGCAGAAGCCTGGGATACCATTCTTTTGCACAAGTAATAAGAGGTTCCATGTAA  
TAAGTCAATCTTTTTTTAGAAAATATATTCGTTTACCTGTATTAATAATAGGCAAAAATAT  
TGACGTATGATATTATTCCAATTTCCGGAATGGTCTGAGGATCTAGAGGGATGGAATAG  
AGAAATGCATATTA AATGTACCTATAATGGTGTTC AATTATCGGAAACAGAATTTCCGAA  
AAATTGGTTAACAGATGGTATT CAGATAAAAATCCTATTTCTTTCTGTCTGAAACCTTG  
GCATAGATCGAAAAAAAACAAAAAGATGATTTTTGTTTTTTAACAGTTTGGGGAATG  
GAAACTGAACTTCCGTTTGGTTCTCCAGAAAACAATCTTCTTTTTTTGAGCCCCGCTGT  
TAAGGAGCTGGAAACAAAATTATAAAATTCAAAAGGGCATATTTTCTAGCT--CTAAA  
AGTTTTAAAGAGAAAAACAAAATTACTTCTAAGAGTTTCAAAGAAACAAAAAAATG  
GATTATCGAAAGTTTTTTA-----TTTCTAAAAGACTAATAAAGA ACTTTCTAAATTA  
TGATTCCATAATCAGCAATCAGATAATTCATGAATCCTTTAGTAAAATTA ACTCTCCAAA  
TTGGACAAATTCTTCACTGACAGAAAAAAAAGAAGGATATGTCTCATAGAACAAGT  
ACAATCAGAAATCAAATAGAAAGATTATAAAAGAAAAAAAAGTCCTAATAAAA  
GAAATTGGAATACTAAAAGATTAGAATTGCCAAAAACATTTGGCAAATATTA AAAA  
AAGAAATGCCGATTATTCTCTAAATTCAATCTTTTTATAAAAATTTTCGTTGAAAGAAT  
ATACATAGATATATTTTATTTATCATTAAATATTACCAGACTGAATACACA ACTTTTT--TAC  
TTTATTTTCGTGTGATTTATCTACTTGT CACAAGCATATGTATTTTACAAATTATCACAAA  
CTAAAGTTAGTAACTTGTATAAATTAAGATCTTTTTTTTCACTACACCTCTTTTTTTCTTAA  
AACTGAAATAAAGCATTTCGTTTAAACAAGGAATAATTCAGAATGAATTAAGTCTTAAGA  
AACTTCCGAGTTATGGGATGGATCAATGGAAAGGTTGGTTAAAAGGACATTATCAATAC  
GATTTACCCTCGATTAGATGGTCTAAATTAATATCAGAAAAATGGAGAAATAGAGTTAAT  
CAACATCATATGGCTCAAAATCAATTC AATTGAATTCATATGAAAAG-----GGCC  
ATTACAAAAACAA--AATTTTCAAAAAA ACTCTAGATATGATCTTTTATCATATAAATAT  
ATTAATGGTAATATTAGATATACCGATAGAAAATATTTTGATTGGAAAATCATCAAATTTT  
TTCTTAGATTTTTGGATTGGATGGGAATGAATGAAGAAATATTAATCGTTGGTTCTTTC  
CAGAATTCGTA CTCTTTATAATCTATATAAAATGAAACCGTGGGTTATACCAAGCAAAG  
TACTTCTTTTCAATTACAAAAGTAAAACGGAAAGCAGAACTGGATTTTTTCTAAAACGT  
TATTTAGTTTTTCAATTGAGATGGGGCGATGCTTTGAATCAAAGAATGATCAATAATGTC

AAAATATATTGTCTCCTGCTTCGACTGATAAATCCAAGAAAAATTACTATATCTTCGATT  
CAAAGAAGAGAAATGAGTTTGGATATAATGCTGATTCAGAAGAATTTAAGTCTTACAG  
AATTGATCAA---GGAGTATTGGTTATCGAACCTGACCGCCTGTCTGTAAAAAATGATG  
GACAATTTATTATGTATCAAATCTTAGGTATTTAGTAGTTCATAAGAATAAGCAC---CGT  
TTTGATTTACTTGTTCCTGAAAATATTTTATCGACCAGGTGCCGTAGAGAGTTGAGAATC  
CTAATTTGTTTCAAATTTCTTTGGCCTAATTATCGATTAGAAGATTTGGCTTGTATGAATC  
GCTATTGGTTTGATACCAATAACGGCAGTCGTTTCAGTATGTTAAGGATATATATGTATCC  
AATGAAAGGACATCAATTCAAATCCTGGATTTTCGAATTGAGAGAGATATTGAGAGAGA  
TCAAGAATTCTCACTATTTCTTAGATTCATGGACCCAATTCAATTCAGTGGGATCTTTCA  
TTCACATTTTTTTCCACCAAGAACGTTTTATAAACTCTTTGACCCCGAATTTGGAGTA  
TCTACTTTCA---CGCAATTCA-----CAGGGTTCAATAAGCAATCGATATTTACAG-----A  
TCAAGGGT---GTAATACTCTTTGTAGTAGTGGTCCTTATATATCGT-----ATTAACAAT  
CGAAATATGGTCGAAAGCAAAAATCTCTATTTGATAGGACTTCTTCT-----ATAC  
CTATGAATTCATTGGACCCAAAATGATACATTGGAAGAATCCGTT---GGGTCTTCCAA  
TATCAATAGGTTGATTGTTTCG---CTCCTCTCTCTTCCAAAAGGAAAAAAGATCTCTGAG  
AGTTGTTTCCTGAATCCGAAAGAGAGTACTTGGGTCTCCCAATAACT-----AAAA  
AGTGTAGCATCCCTGAATCTAACTGGGGTTCGCGATGGTGGAGGAAATGGATCGGAAA  
AGGGGGG-----GATTCTAGTTGTAAGATATCTAAT-----GAAACCGCGCTGGAATTGA  
GATCTTATTCAAAGAGAAAGATCTCAA---TATCTGGAGTTTCTTTTTGTATATTATATGG  
AT-----GATCCGACCCGCAAGGACCGTGATTGGGAATTGTTTGATCGTCTTTCTCTGAGG  
AAGAGGCGAAATACAATCAACTTG-----AATTCGGGACCGCTATTCGAAATCTTAGTGA  
AACACTGGATTTCTTATCTCATGTCTGCTTTTCGTGAAAAAATACCAATTGAAGCGGAG  
GGT---TTCTTCAAACAACAAGGG---GCTGGGTCAACTATTCAATCAAATGATATTGAGCA  
TGTTTCCCAT-----CTCTTCTCGAGAAACAAGTGGGCTATTTCTTTGCAAATTTGTGCTC  
AATTCATATGTGGCAATTCCGCCAAGATCTCTTCATT-----AGTTGGGGGAAG-----  
--GAATCGGATTTTTTGAGGAAC---GTATCGAGAGAGAATTTGATTTGGTTAGACAATGTA  
TGGTTGGTAAACAAGGATCGG-----TTTTTTAGC-----AAGGTACGGAATGTATCGTCA  
AATATTCAATATGATTCC-----ACAAGA-----TCTAGTTTCGTTCAAGTAACGGATTCTA  
GCCAACTGAAAGGATCTTCT---GATCAATCCAGAGATCATTGGATTCCATTAGT-----  
-AATGAGGATTCGGAA-----TATCACACATTGATTAATCAAAGA  
GAGATTCAACAATAAAAGAAAGATCGATTCTT---TTGGAT-----CCTTCTTTCTTCAA  
CGAACGAACAGAGATAGAATCAGAC-----CGATTCCCGAAA-----TGCCTTTCTGGCTA  
TTCC-----TCAATGTCCCGGCTATTCACG---GAACGTGAGAAGCAGATGATTAATCATCTG  
CTTCCGGAAGAAATCGAAGAATTTCTT-----GGGAATCCTACAAGATCCGTTCTGTTCTTT  
TTTCTCTGATAGATGG-----TCAGAACTTCAT---CTGGGTTTGAATCCTACTGAGAGGTCC  
ACTAGAGATCAA-----AAATTGTTGAAGAAACAACAAGATCTTTCT---TTTGTCCCT  
TCCAGGCGATCGGAA-----AATAAAGAAATGGTTAATATATTCAAGATAATTACGTAT  
TTACAAAAT-----ACCGTCTCAATTCATCCTATTTTCATCAGATCCGGGATGTGATATGGTT  
CCG---AAGGATGAACCGGAT---ATGGACAGTTCAAATAAGATTTTCATTCTTGAACAAAA  
TCCATTTTTTGATTTA-----TTTCATCTATTCCACGCCCGGAATAGGGGAGGATACACCTT  
A-----CACCACGATTTTGAATTAGAA-----GAGAGATTTCAAGAAATGGCGGATCTATTCA  
CTCTATCAATAACCGAGCCG---GATCTGGTGTATCATAAGGGATTTGCCTTTTCTATTGAT  
TCTACGGATTGGATCAAAAACA-----TTCTTGAATGAGGTATTCAACTCCAGGGATGA  
ATCGAAAAAGAAATCT-----TTATTGGTTCTACCTCTTATTTTTTAT-----GAAGAGAATG

AATCTTTTTCTCGAAGGATCAGAAAAAATGGGTCCGG---ATCTCCTGCGGGAATGATT  
TGGAAGATCCACAACCAAAAATAGTGATATTTGCTAGCAACAACATAATGGGGGCAGT  
CAATCAATATAGATTGATCCGAAATCTGATTCAAATACAATCTAGTACCTATGGG-----TA  
CATAAGAAATGTATTGAATCGATTCTTTTTAATGAAT-----CGATCTGATCGCAACTTCG  
AATATGGAATTCAA---ATTCAAAGGGATCAAATAGGAAAGGATACTCTGAATCATAGAA  
CTATAATGAAATATACGATTAACCAACATTTATCGAATTTGAAAAAG---AGTCAGAAGAA  
ATGGCTCGATCCTCTT-----ATTTTAATTTCTCGAACCGAGAGATCCATGAATCGGGATCC  
TGATGCATATAGATACAAAGGGTCCAATGGGAGCAAGAATTTCCAGGAACATTTGGAA  
CATTCGTTTCTGAGCAGAAGAGCCAT-----TTTCAAGTAATGTTTGATCGATTACGTA  
TTAATCAATATTCGATTGATTGGTCTGAGGTTATCGACAAAAAAGATTTGTCTAAGCCAC  
TGC GTTTCTTTTTGTCCAAG-----TCACTTCTTTTTTTGTCC-----  
---AAGTTGCTTTTCTTTTTGTCTAAC---TCACTTCTTTTTTCTGTGTGAGTTTCGGGAAT  
ATCCCATTATAGGTCGGAG---ATCTACATCTAT--GAATTCAAAGGTCCGGATGATCAA  
CTCTGCAGTCAGTTGTTAGAATCAATAGGTCTTCAAATTGTTCAATTTGAAAAAATTGAA  
ACCCTTC-----TTATTGGAT-----GATCATGATACTTCC---CAAAAATCCAAATTCTTGAT  
CAATGGAGGAACAATATCACCATTTTTGTTCAATAAGATACCA---AAGTGG---ATGGTTG  
ACTCATTCCATACTAGA-----ATAATCGCAGGAAATCCTTTGATAACACGGATTCTTATT  
TCTCAATGATATTCACGATCAAGACAATTGGCTGAATCCCGTGAAACCATTTCATAGA  
AGTTCATTGATATCTTCTTTTTATAAAGCAAATCGACTTCGATTCTTGAATAATCCTCATC  
ACTTCTGCTTCTAT-----TGTAACACAAGATTCCCCCTTCTGTG-----GAAAAGGCC  
CGTATCAAT-----AATTATGATTTTACGTATGGA---CAATTCCTCAATATTTTGTGCGAAT  
GAACAAA---ATATTTCTTTGTGCGTTCGGTAAA-----AAAAACATGCTTTTGGGGGG---  
AGAGATACTATTTACCAATCGAGTCACAGGTATCTAACATATTCATACCTAATGATTTTC  
CACAAAGTGGT--GACGAAACGTATAACTTGTACAAATCT-----TTCCATTTTCTAAGT  
CGATCCGATCCATTTCGTTTCGT-----AGAGCTATTTACTCGATCGCAGACATTTCTGGAACA  
CCTCTAACAGAGGGACAAATAGTCAATTTTGAAAGAACTTATTGTCAACCTCTTTCAGA  
TATGAATCTATCTGATTGAGAAGGGAAGAACTTGCATCAGTATCGCAAT-----TTCAATTC  
AAACATGGGTTTGATTACACCCCATATTCTGAGAAATATTTACCATCCGAAAAG-----A  
GGAAAAA-----CGGATTCTTTGTCTAAAG-----AAATGCGTCGAAAAAGG  
GCAGATGTATAGAACTTTTCAACGAGATAGTGCTTTTTCAACTCTCTCAAATGGAATC  
TATTCAAACATATATGCCATGGTTCCTTACTTCGACAGGGTACAAATATCTAAATTTGAT  
ATTTTATAGATACTTTTTCAGACCTATTG-----CCGATACTAAGTAGC---AGTCAAAAATTG  
GTATCCATTTTTCACGATATTATGCATGGATCGGGTATATCATGGCGAATTTCTTCAGAAAA  
ATTTG-----TGTCTTCCACAATGGAATCTG---ATAAGTGAGATTTTCGAGTAAGTG  
TTTACATAAT-----CTTCTTCTGTCCGAAGAAAGGATTCATCGAAATAAAAATAATGAGTC  
ACCATTGATATCGACACATCTGAGATCGCCAAATGTTTCGGGAGTTC---CTCTATTCAACC  
CTTTTCTTCTTCTTGTGCTGGATAT--CTCGTTCGTACACATCTTCTCTTTGTTTTCCCG  
G-----GTCTCTAGTGAGTTACAGACAGAGTTTCGAAAAGGTCAAATCTTTGATAATTCCAT  
CATCTATGATTGAGTTGCGAAAACCTTCTGGATAGGTATCCTACATCTGAACCAAATCTT  
TCTGGTTAAAGAATATCTTTCTAGCTGCTCTGGAACAATTAGGAGATTCTCTAGAAGAA  
ATACGGGGTTCTGCTTCTGGCGGCAACATGCTTGGT-----CCCGCT-----TATGG  
G---GTCAAATCAATACGTTCTAAGAAAAAATATTTGAATATCAATCTCATCGATATCGTCG  
ATCTCATA-----CCAAATCCCATCAATCGAATCACTTTTTTCGAGAAATACGAGACAT  
CTAAGTCATACAAGTAAAGAGATCTATTCAATTGATAAGAAAAAAGAAAAAACGTGAACG

GGGATTGGATTGATGATAAAATAGAATCCTGGGTCGCGAACAGTGATTTCGATTGGTGAT  
GAAGAAAGAGAATTCTTGGTTCAGTTCTCC-----ACCTTAACGACA-----GAAAAGGGGA  
TTGATCAAATTCTATTGAGTCTGACT--CATAGTGATCATTTA-----TCAAAGAATG  
ACTCTGGTTATCAAATGATTGAACAACCGGGAGCAATTTACTTACGATACTTAGTTGAC  
ATTCAT-----AAAAGTATCTAATGAATTATGAGTTCAATACATTTTGTTTAGCAGAAAG  
CGGATCTTCCTTGCTCATTATCAGACAATCACTTAT-----TCACAAACTTCGTGTGGGGCT  
AATAGTTTTTCATTTCCCATCTCATGGA-----AAACCTTTTTCGCTCCGCCTAGCTTTATC  
CCCCTCT--AGGGCTATTTTAGTGATAGGTTCTATAGGAAGTGGACGATCCTATTTGGTC  
AAATACCTAGCGACAACTCCTATGTTCTTTTATTACGGTATTTCTGAACAAGTTCCTG  
GATAACAAGCCTAAAGGTTTTCTTATTGAT-----GATATCAAT-----ATT  
GATGATAGTGACGATATTGATGCTAGTGAC-----GAT  
ATCGATCGTGACCTTGATACGGAGCTG--GAGCTGCTAACTATGATGAATGCGCTAACTA  
TGGATATGATGCCGAA-----ATAGACCGATTTTATATCACCCTTCAATTTCGAATTAGCA  
AAAGCAATGTCTCCTTGCATAATATGGATTCCAAACATTCATGATCTGGATGTGAATGAG  
TCGAATTAATTATCCCTTGGTCTATTAGTGAACCATCTCTCCATG-----GATTGTGAAA  
GATGTTCC--ACTAGAAATATTCTTGTATTGCTTCGACTCATATTCCCCAAAAAGTGGAT  
CCTGCTCTAATAGCTCCGAATAAATTAATACGTGCATTAAGATACGAAGGCTTCTTATT  
CCACAACAACGAAAGCACCTTTTCACTCTTTCATATACTAGGGGATTTCACTTGGAAAA  
GAAAATGTTCCACACC-----AATGGATTTCGGGTCCATAACCATGGGTTCCAATGCACGA  
GATCTTGTAGCACTTACCAATGAGGCCCTATCGATTAGTATTACACAGAAGAAATCAATT  
ATAGACACTAATAACAATTCGATCCGCTCTTTATAGACAAACTTGGTATTTGCGA-----T  
CCCAGGTAAGATCGGTTTCAGGATCATGGGATCCTTTTCTATCAGATAGGAAGGGCTGTA  
GCACAAAATGTATTTCTAAGTAATTGCCCATAGATCCTATATCTATCTATATGAAGAAGA  
AA-----TCATGTAACGAAGGGGATTTTTATTTGTACAAATGGTACTTCGAACCTTGGACG  
AGCATGAAGAAATTAACGATACTTCTTTATCTTTTGTAGTTGTTCTGCCGGATCGGTCGCC  
CAAGATCTTTGGTCTCTACCC-----GGACCCGATGAAAAA---AATGGGATCACTTCTTAT  
GGACTCGTTGAGAACGATTCG--GATCTAGTTCATGGCCTATTAGAAGTAGAAGGCGCT  
CTGGTGGGA-----TCTTCACGGACAGAAAAAGATTGCAGTCAGTTTGATAATGAT-----C  
GAGTGACATTGCTTCTTCGGCCCGAACCGAGGAAT--CCCTTAGATATGATGCAGAGCG  
GATCTTGTCTATCCTTGATCAGAGATTCTCTATGAAAAATAT-----GAATCGGAGTTTG  
AAGAG--GGGGAGGGGGAAGGAGCCCTTGACCCGCAACAG-----ATAGAGGAGGA  
T-----TTATTCAATTAC-----ATAGTTTGGGCTCCT-----AGAATATGGCGCCCT-----T  
GGGCCTTTCTATTTGATTGTATTGAAAGGCCCAATGAATTGGGATTTCCC---TATTGGTCC  
AGGCCATTTTGGGGCAAG-----CGGATCATTTATGATGAAGAGGATGAGCTTCAAGAG  
AATGATTTCGGAGTTCTTGCAGAATGGAACCGTGCAGTACCAGACACGAGATAGATCTT  
CCAAAGAACAAGGCCCTTTTTCGAATAAGTCAATTCATTTGGGACCCTGCGGATCCACT  
CTTTTCCCTATTCAA---GATCAGCCCCCTGGCTCTGTGTTTTTACATCGAGAATTATTG  
CAGATGAAGAGATGTCAAAGGGGCTTCTTACTTCCCAAACAGATCCTCCTACATCTATA  
TATAAACGCTGGTTTATC-----AAGAATACGCAAGAAAAGCACTTTGAATTGTTGATTAA  
TCGTCAGAGATGGCTTAGA-----ACCAATAGTTCATTATCG-----AATGGATCTTTCCGT  
TCTAAT-----ACTCTATCCGAGAGTTATCAGTATTTATCAAATCTGTTTCTATCTAAC--GG  
AACGCTATTGGATCAAATGACAAAGACATTGTTGAGAAAAAGATGGCTTTTCCCAGAT  
GAAATGAAAATTGGATTC-----ATG-----ATGCCTAGATCACAA--ATAAA  
TGAAATTTTATTGATAAGACCTTTTCAATTGTAGCCAATATCTTATTACGAATAATTCCG



TGTAGCTATCGGTCAAAGAGCATCCTCCGTGGCTCAAGTAGTAACAACCTTCCACGAA  
GAGGGGGCCATGGAATACACTATTGTAGTAGCTGAAATGGCGGATTCACCCGCTACATT  
ACAATATCTCGCTCCTTATACGGGAGCAGCCCTGGCTGAATATTTTATGTACCGCGAACG  
GCATACTTTAATAATTTATGATGATCTCTCCAAACAGGCACAAGCTTATCGCCAAATGTC  
CCTTCTATTAAGAAGACCTCCCGGCCGCGAAGCTTATCCAGGGGATGTTTTTTATTTGCA  
TTCACGCCTTTTAGAAAGAGCCGCTAAATTAATTTCTCTTTTAGGCGAAGGGAGTATGA  
CCGCTTTACCAATAGTGGAGACTCAATCTGGAGACGTTTCCGCCTATATTCCTACTAATG  
TAATCTCAATTACAGATGGACAAATATTCTTATCCGCGGATCTATTCAATGCCGGAATTC  
GACCTGCTATTAATGTGGGTATTTACAGTTTCCAGAGTGGGATCCGCAGCTCAAATTTAAA  
GCCATGAAACAAGTAGCTGGCAAATCAAATTTGGAAGTACTAGCTCAATTCGCAGAATTAC  
AAGCCTTTGCACAATTCGCCTCTGCTCTGGATAAAACAAGTCAGAATCAATTGGCAAG  
GGGTCGACGATTACGGGAATTGCTTAAACAATCCCAATCAAACCCTCTCCCAGTGGAA  
GAGCAGGTAGCTACTATTTATACCGGAACGAGAGGATATCTTGATTTCGTTAGAAATTGA  
ACAGGTAAAGAAATTTCTGGATGAGTTACGTAAACACCTAAAAGATACTAAACCTCAA  
TTCCAAGAAATTATATCTTCTAGTAAGACATTCACCGAGCAAGCAGAAACCCTTTTGAA  
GGAAGCTATTCAGGAACAGCTTGAACGGTTTTCCCTTCAGGAACAAACAATGAGAACC  
AATCCTACTACTTCGCGTCCCGGGGTTTTCCACAATTGAAGAAAAAGCGTAGGGCGTA  
TTGATCAAATTAATTGGACCCGTGCTGGATATCACTTTTCCCCCGGGCAAGTTGCCTTATA  
TTTATAATGCTTTGATAGTCAAGAGTCGAGACACTGCCGATAAGCAAATTAATGTGACT  
TGTGAGGTACAACAATTATTAGGAAATAATCGAGTTAGAGCTGTGGCTATGAGTGCTAC  
AGACGGGTTGATGAGAGGAATGGAAGTGATTGACACGGGAACCTCTCTCAGTGTTCC  
AGTCGGTGGAGCTACTCTCGGACGAATTTTAAACGTTCTTGGGGAGCCTATTGACAATT  
TGGGTCTGTGGATACTAGTGCAACATTCCTATTCATAGATCTGCGCCTGCCTTTATCG  
AGTTAGATACGAAATTATCTATCTTTGAAACAGGTATTAAGGTGGTCGATCTTTTAGCTC  
CCTATCGACGTGGAGGAAAAATCGGACTGTTTGGGGGGGCAGGAGTAGGTAAAACAG  
TACTCATCATGGAATTAATCAATAACATTGCTAAAGCTCATGGAGGCGTATCCGTATTTG  
GCGGAGTAGGGGAACGGACTCGTGAAGGAAATGATCTTTATATGGAAATGAAGGAATC  
CGGAGTAATTAATGAAAAAATATTGAGGAATCAAAGGTAGCTCTAGTCTATGGCCAAA  
TGAATGAACCGCCGGGAGCTCGTATGAGAGTTGGTTTAACTGCCCTAACTATGGCAGA  
ATATTTCCGAGATGTTAATAAGCAAGACGTGCTTTTATTCATCGATAATATCTTTGTTTT  
GTTCAAGCAGGATCGGAAGTATCCGCCTTATTAGGCAGAATGCCCTCCGCAGTGGGTTA  
TCAACCTACCCTTAGTACAGAAATGGGTTCTTTGCAAGAAAGAATTACTTCTACCAAAA  
AGGGATCTATAACTTCGATCCAAGCAGTTTATGTACCTGCAGACGATTTGACCGACCCT  
GCTCCTGCCACAACATTTGCACATTTGGACGCTACTACCGTACTTTCCAGAGGATTAGC  
TTCCAAGGGTATTTATCCCGCAGTAGATCCTTTAGATTCAACCTCAACTATGTTACAGCC  
TCGGATCGTTGGCAACGAACATTATGAAACTGCGCAAAGAGTTAAGGAAACTTTACAA  
CGTTACAAAGAACCTCAGGACATTATCGCAATTCTTGGATTGGATGAATTATCGGAGGA  
GGATCGTTTAACTGTAGCAAGAGCACGAAAAATCGAGCGGTTCTTATCACAACCGTTC  
TTTGTGGCAGAAGTTTTTACCGGTTCTCCAGGAAAGTATGTTGGTCTTGCAGAAACAAT  
TAGGGGATTTCAACTAATCCTTTCCGGAGAATTAGACGGCCTACCCGAACAGGCTTTTT  
ATTTAGTGGGGAACATCGATGAAGCTAGCACGAAAGCTATAAACTTAGAAGAGGAGAG  
CAAATTGAAGAAAATGAAATTAATCTTTATGTAAGTACTGACTCCTAAACGAATTATTTGGGA  
TTGTGAAGTGAAGAAATCATTTTATCTACTAATAGTGGCCAAATGGTGTATTACCAA  
ACCACGCCCCCATTAACACAGCTGTAGATATGGGTCCTTTGAGAATACGCCTCAACGAC

CAATGGTTAACGGCGGTTCTGTGGAGTGGTTTTGCGAGAATAGTTAATAATGAGATCAT  
CATTTTAGGAAATGATGCAGAACTGGGTAGTGACATTGATCCAGAAGAAGCTCAACAG  
GCACTTCAAATAGCCGAAGCTAACTTGAGTAAAGCTGAGGGTACGAAAGAATTGGTTG  
AAGCGAAGCTAGCTCTCAGACGAGCTAGGATACGAGTCGAGGCTGTCAATTGGATTCC  
CATGAAAATGTAACCCATTCTTTTCGTTTTTTTAGCTCACTGGCCATTTCGCTGGGAGTTT  
CGGGCTTAATACCGATATTTTAGCAACAAATCTAATAAATCTAACTGTAGTGGTTGGTGT  
ATTGATTTTTTTTGGAAAGGGAGTGTTAAAAGATTTATTAGATAATCGAAAACAGAGGA  
TCTTAAGTACTATTTCGAAATTCGGAAGAATTGCGTAGAGGGACCCTTGAACAACCTCGA  
AAAAGCTCGTATTTCGATTACAGAAAGTCGAACTAGAAGCAGATGAGTATCGAATGAAT  
GGATACTCTGAAATAGAACGAGAAAAAGAAAATTTGATTAATGCTACTTCTATTAGTTT  
GGAACAATTAGAAAAGTCTAAAAACGAAACCCTTTTTTATGAAAAACAAAGGGCGATG  
AATCAGGTCCGACAACGGGTTTTCCAACAAGCTGTACAAGGAGCTCTAGGAACTCTGA  
ATAGTTGTTTGAATACCGAGTTACATTTCCGTACGATTTCGTGCTAATATTGGCATTCTCG  
GGGCCATAGAATGGAAGAGA---ATGAATCCACTAATTGCTGCTGCTTCCGTTATTGCTGC  
TGGATTGGCCGTAGGGCTTGCTTCTATTGGGCCCGGAGTTGGTCAAGGTACTGCTGCA  
GGACAAGCTGTAGAAGGTATTGCGAGACAGCCAGAAGCAGAAGGTAAAATAAGAGGT  
ACTTTATTGCTTAGTCTAGCTTTTATGGAAGCTTTAACAATTTATGGACTGGTTGTGGCA  
CTAGCGCTTTTATTTGCGAACCCCTTTTGTTATGAATATTACCCATGTTCCATTAACA  
CTCAAGGGGTTATATGATATATCGGGTGTAGAAGTAGGCCAACACTTCTATTGGCAAATA  
GGGGGTTTCCAATTCATGCCCAAGTACTCATCACTTCTTGGTTCGTAATTACTATTTTG  
CTAGGTTTCAGTTATCATAGCTGTTTCGGAATCCACAAACCATCCCGACCGATGGTCAGAA  
TTCTTTCGAATATGTCCTTGAGTTTATTTCGAGACTTGAGCAAACTCAGATTGGAGAAG  
AATATGGTCCCTGGGTTCCCTTTATTGGAACATGTTCCCTTTTTATTGTTTCGAATTG  
GTCAGGCGCTCTTTTACCTTGGAAAATTATAGAGTTACCCCATGGGGAATTAGCAGCGC  
CCACGAATGATATAAATACTACTGTTGCTTTAGCTTTACTAACATCAGCGGCATATTTTA  
TGCGGGTCTTAGCAAAAAGGATTGAGTTATTTGAAAAATATATTAACCAACCCCAA  
TCCTTTTACCTATTAACATCCTAGAAGATTTACAAAACCGTTATCACTTAGTTTTTCGAC  
TTTTTCGAAATATATTGGCGGATGAATTAGTCGTTGTTGTTCTTGTTTTCTTTAGTCCCCTT  
AGTAGTCCCTATAACCGTTCATGTTTCTTGGATTATTTACAAGCGGTATTCAAGCTCTTATT  
TTTGCAACGTTAGCCGCAGCCTATATAGGTGAATCCATGGAAGGTCATCATATGCTATTT  
GCAACTTTAGAACATATACTAACTCATATCTCTTTCTCAACCATTTCAATTGTGATTACGA  
TTCATTTGATAACCTTATTAGTTTCGTGAACTTAGGGGATTACGTGATTTCGTCAGAAAA  
GGAATGATAGCTACTTTTTCTCTATAACAGGATTTTTAGTCTCTCGTTGGGTTTTCTTCG  
GGACATTTCCATTAAGTAATTTATATGAGTCATTGATCTTCTTTCATGGACTCTGTATA  
TTCTTCATACTATTCCCTAAGATACAGAACTCGAAAACGATTTAAGCACAATAACTACG  
CCAAGTACTATTTAACGCAAGGCTTTGCCACGTCGGGTCTTTAACTGAAATGCATCA  
ATCCACAATACTAGTACCTGCTCTACAATCTCAGTGGTTAATGATGCATGTCAGTATGAT  
GTTACTAAGCTATGCAACTCTTTTGTGCGGATCCTTATTATCCGCCGCTCTTCTAATCATT  
AGATTTTCGAAATCTTTTCGATTTCTTTTCA---CTAAAGGAGATTGAATATTTATATGCAA  
AAGAAGTGCTTTAAAAAACACCTCTTTTCCCGTATTTCCAATTTATTACAAATATCAATT  
AACTGAGCGTTTGGATTCTTGGAGTTATCGTGTCATTAGTCTAGGGTTTACTCTTTTAAAC  
CGTGGGTATTCTTTGTGGAGCAGTATGGGCTAATGAGGCATGGGGATCCTATTGGAATT  
GGGATCCTAAGGAACTTGGGCATTTATTACCTGGACCATATTTGCAATATATTTACATA  
GTAGAACAAATCCAATTTGGAAGGGTACGAATTCCGCACTTGTAGCTTCGATAGGATTT



CTTATAATTTGGATCTGCTATTTTGGTATCAATCTGTTAGGAATAGGTTTACATAGTTACG  
GTTCAATTTACATTACCAATGAAAAAAAAAGAAAGCATTGCCTTCTTTCTTATATCTTGTAT  
TTATCGTACTTTTGGCCCTGGGGAGTCTCTTTCTCTTTTAAACAAATGTCTGGAACCTTTGGA  
TTAAGAATTGGTGGAAATACCAGGCAATCCGAAACTTTCTTAACTGATATCAAGAGAAA  
AGGATTCTAGAAGGATTCATAGAATTAGAAGAACTTTTTCTCTTGGACGAAATGATAAA  
AGAGAAACCGAAGACACATGTACAAAACTTCCTATAGGAATACACAAGGAAATAATA  
CAATTGGCCAAAATAGATAATGAGGATCATCTCCATATCATTTTGCATTTCTCAACAAAT  
ATAATCTGTTTGGCTATTCTAAGTGGTTCTTTTTTTCTGGGTAAAGAAGAAGCTTGTCAAT  
TTGAATTTCTGGGTTTCAAGAAATTTTCTATAACTTAAATGATTCAATAAAAGCTTTTTTTA  
TTCTTTTAGTTACTGATTTTTTTGTTGGATTTCACTCCACCCGCGGTTGGGAACTACTAA  
TTCGTTGGGTCTACAACAATCTTGGATGGGCTCCTAACGAGCTAATTTTCACTATTTTTG  
TTGTAGTTTTCTGTGATTCTAGACACGTGTTTGAATTTTGGGTCTTTTTTTGTTTAA  
ACCGTCTATCTCCTTCACTTGTAGTCATTTATCATTCAATTAGTGAAATGCCCATTTGGTGT  
TCCAAAAGTACCTTACCGGATTTCCCGGAGATGAAGAAGCGACTTGGGTTGACTTATAC  
AATGTTATGTATCGAGAAAGGACACTTTTTTTAGGTCAAGAGATTCGTTGCGAGATCAC  
GAATCATATTACAGGTCTGATGGTATATCTCAGTATAGAAGATGGAAATAGCGATATTTTT  
TTGTTTATAAACTCCCTGGCGGGTGGCTAATCTCAGGAATGGCGATTTTTTGATACGATG  
CAAACGGTGACACCTGATATATATAACAATATGCCTCGGAATAGCCGCGTCCATGGCCTCC  
TTCATTCTGCTTGGAGGAGAACCCACCAAGCGTATAGCATTCCCTCACGCTAGGATTAT  
GCTTACCAACCTGCTAGTGCTTATTATCGGGCAAGGACACCAGAATTTTTACTAGAAG  
TGGAAGAGTTACACAAAGTTCGCGAAATGATCACAAGGGTTTATGACTAAGAACAGG  
CAAGCCTTTTTGGGTTGTATCCGAAGACATGGAAAGGGATGTTTTTATGTCAGCAGACG  
AAGCCAAAGCTTATGGACTTGTTCGATATTGTAGGGGATGAACCGAGAGAAGCAAAAGT  
AACTTTTGAAGGTTTGTACGGAAGCCCTACCCAACGGAATGTTCCGCGTTCGCCTA  
GAGAATGACACGATCATCCTGGGCTATATTTAGGAAAGATCCGGTCTAGCTCTATACG  
AATACTGATGGGGGATAGGGTCAAAATTGAAGTAAGTCGTTATGATTCCAGCAAAGGT  
CGTATAATTTATAGACTTCCCCATAAGGATTCGAAGGATATGGAAAAATTCGAAGGGTAT  
TCAGAAAAACAGAAATCTCGTCAACACTACTTCGTCTACCCACTTCTCTTTCAGGAATA  
TATTTATGCATTTGCTCATGATTATGGATTATTTGGTTGTAATAACAAATTTAGTTCAATAC  
TTGTGAAACGTTTAAATTATTCGAATGTATCAGCAGAATTTTTGGATTAATTCGGTTAATTA  
TCCTAACCAAGATCGATTGTTTGTATCTGAGTTTTATTCTCAGATTCTATCTGAGGGGTT  
TGGGATTGTTGTAGAAATCCACTCTCGCTAGGGCAACTATCTTGTCCAATACCAAAGT  
TTCAAATTTACAATCTATTCATTCAATATTTCCCTTTTTAGAAAGACAAATTTTTGCATTT  
ACATTATCTATCACATATAGAAATACCCTATCCTATCCATTTAGAAATCCTGGTTCAACTC  
CTTGAATACCGGATTCAAGATGTTCCCTCTTTGCATTTATTGCGATTCTTTCTCCACTATT  
ATTCGAATTGGAATAGTCTTATTAATAAATCCATTTTTCTTTTGAIAAAAAAAAAAGACTAT  
TTCGATTCTATATAACTCTTATGTATCAGAATATGAATTTTTCTTGTGTTTCTTCGTAAA  
CAATCTTCTTGCTTACGATTAACATCTTCTGGAACCTTTCTGGAACGAATCATTTTTCT  
GGGAAGATGGAACAT-----GTAATGTACCCGGGGCGGAAAACCATATGGTTCTTTATGGA  
TCCTCTTATGCATTATGTTTCGATATCAAGGAAAGGCAATTCTTGCATCAAAAGGCACTCT  
TCTTTTGAAGAAGAAATGGAAATCTTACCTTGTCAATTTCTCGCAATATTTTTTCTCTTT  
TTGGACTCAACCACAAAGGATTCGTCTAAACCAATTAACAAACTCTTGCTTCGATTTTC  
TGGGGTACCTTTCAAGTGTACCAATAAATACTTTGTTAGTAAGGAATCAAATGCTGGAG  
AATCTTTTTCTAATAGATACTCGAATG-----AAAAAATTCGATACCACAGTCCCTGCAAC

TCCCCTCGTTGGATCCTTATCAAAAAGCTCAATTTTGTACTGGATCGGGGCATCCTATTAG  
TAAACCCGTTTGGACTGATTTATCAGATTGGGATATTCTGGATCGTTTTGGTCGGATATG  
TAGAAATCTTTTTTCATTATCATAGTGGATCTTCGAAAAACAGACTTTGTATCGACTAAA  
ATATATACTTCGACTTTTCATGTGCTAGAACTTTAGCTCGTAAACATAAAAAGTACGGTACG  
AACTTTTATGCAACGATTGGGTTTGGTATTTTTAGAGAATTTTTTACGGAAGAAGAGC  
AAGTTTTTCTTTGATGTTACCAAACGTATTTGGTATTTGGATATTATCCGTATCAATGA  
CCTGGTGAATCCTCTTATGATAATAGATAGGGTA---GAGGTAGAA---ACTATCAATTCTTT  
TTCGAAATCGGAA---TTATTA AAAAGAAATCTACGGACTTATATGGATTCTA---CCCATTT  
GGCCCTCCTACTGGGAATCACAATAGAAGTACTCGTAATTGTGTGGTTAGAAAGAGAA  
ATATCCGCATCGATAACAACGTATTGGTCCTGAATATGCTGGCCCCCTGGGACTGCTT  
CAAGCTATAGCAGATGGA ACTAACTACTTTTTAAAAGAGGATATCCTCCCATCCCGAGG  
AGAGATTCCTTTATTTAGCATTGGTCCCTCTATAGCAGTCATATCCGTTTTATTAAGTTTT  
TTAGTTATCCCTTTGGGATATCGTTTTGTTTTAGCTGATCTTAGTATTGGTGTTTTTTTATG  
GATTGCGATTCAAGTATTGCTCCTATTGGTCTTCTCATGGCAGGATATAGCTCAAATAAT  
AAATATTCTTTTTCAGGCGGTCTACGAGCGGCTGCTCAATCTATTAGTTATGAAATACCA  
TTAACTTTTTGTGTACTAGCAATATCTCTATTATCTAATAGTTCAAGTACAGTTGATATAG  
TTGAAGCACAGTCAA AATATGGTTTTTTTTGGGTGGAATCTTTGGCGTCAGCCTATAGGT  
TTTTCTAGTTTTTCTAATTTCTTCTTTAGCAGAATGTGAAAGATTACCCTTTGATTTACCAG  
AAGCAGAAGAAGAATTAGTAGCAGGTTATCAAACCGAATATTCTGGTATTAATATGGT  
TTATTTTATCTTGTTTCTTACCTAAATTTATTAGTTTCCCTCCTTATTTGTA ACTGTTCTATAC  
TTAGGCGGGTGGAATTTCTCTATTCCCTATATATCCTTTTTTTGGATTTTTCCAAATGAATA  
AAATAATTGGAATTTTGGAATGGTAATAGGTATCTTTATTACATTA ACTAAAGCTTATTT  
ATTTCTCTTCATTTCTATCACAATAAGATGGACTTTACCCAGGATGAGAATGGATCAGTT  
ATTAATCTTGATGGAATTTCTTTTTACCTATTTCTCTGGGCAATCTCTTATTAACA ACT  
TCTTCCCACTAGTTTCACTAATGATCTGGCATGTACAGAATGAAA ACTTCATTCTCGAT  
TCTACGAGAATTTTTATGAAAGCGTTTCATTTGCTTCTCTTCAATGGAAGTTTCATTTT  
CCAGAATGTATCCTAATTTTTGGCCTAATTTCTTCTTCTGATGATCGATTTAACCTCTGATC  
AAAAAGATAGACCTTGGTTCTATTTTCATCTCTTCAACAAGTTTAGTAATAAGCATAACG  
GCCCTATTGTTCCGATGGAGAGAAGAACCTATAATTAGCTTTTTCGGGAAATTTCCAAAC  
GAACAATTTCAACGAAATCTTTCAATTTCTTATTTTATTATGTTCAACTTTATGTATTCCCT  
CTATCCGTAGAGTACATTGAATGTACAGAAATGGCTATAACAGAGTTTCTGTTATTCGTA  
TTAACAGCTACTCTAGGGGGAATGTTTTTATGTGGTGCTAACGATTTAATAACTATCTTT  
GTAGCTCCAGAATGTTTCAGTTTATGTTCCCTACCTATTGTCTGGATATAACCAAGAGAGAT  
CTACGGTCTAATGAGGCTACTATGAAATATTTACTCATGGGTGGGGCAAGCTCTTCTATT  
CTGGTTTCATGGTTTCTCTTGGCTATATGGTTCATCTGGGGGGGAGATCGAGCTTCAAGA  
AATTGTGAATGGTCTTATCAATACACAAATGTATAACTCCCCAGGAATTTCAATTGCGCT  
TATATTCATCACTGTAGGACTTGGGTTCAAGCTTTCCCCAGCCCCTTTTTCATCAATGGAC  
TCTGACGTCTACGAAGGATCCCCACTCCAGTCGTTGCTTTTTCTTTCTGTACTTTCGA  
AAGTAGCTGCTTCAGCTTTAGCCACGCGAATTTCTCGATATTCCTTTTTTATTCTCATCAA  
ACGAATGGCATCTTCTTCTGGAATCCTAGCTATTCTTAGCATGATATTGGGGAATCTCC  
TTGCTATTACTCAAACAAGCATGAAACGTATGCTTGCATATTCGTCCATAGGGCAAATCG  
GATATGTAATTATTGGAATAATTGTTGGAGACTCAAATGATGGATATGCAAGCATGATAA  
CTTATATGCTGTTCTATATCTCCATGAATCTAGGAACTTTTTGCTTGCATTGTATTATTTGGT  
CTACGTACCGGAACTGATAACATTTCGAGATTATGCAGGATTATACACGAAAGATCCTTTT

TTGGCTCTCTCTTTAGCCCTATGTCTCTTATCCCTAGGAGGCCTTCCTCCACTAGCAGGT  
TTCTTCGGAAAACCTCTATCTATTCTGGTGTGGATGGCAAGCAGGCCTATATTTCTTGGTT  
TCAATAGGACTCCTTACGAGCGTTCTTTCTATCTACTATTATCTAAAAATAATCAAGTTAT  
TAATGACTGGACGAAACCAAGAAATAACCCCTTATGTGCGAAATTATAGAAGATCCCCT  
TTAAGATCAAACAATTCCATCGAATTGAGTATGACTGTATGTGTGATAGCATCTACTATA  
CCAGGAATATCAATGAACCCCAATTCTTGCAATTGCTCAGGATACCCTCTTTATGTTTCTG  
CTTCACGAATATGATATTTTTTGGACATTTCTAATAATAGCAAGCCTTATTCCTATTTTTGG  
TATTTTGGATTCAGGACTTTTAGCCCCGGTTAGTGAAGGACCAGAGAAGCTTTCTAGT  
TATGAATCGGGTATAGAACCATGGGGGGGGCTTGGTTACAATTCCGAATACGCTATTA  
CATGTTTGCCTAGTTTTTTGTTGTTTTTATGATGTGGAAACAGTCTTTCTCTACCCTTGGGC  
AATGAGTTTCGACGTATTGGGTGTATCCGTTTTTATCGAAGCTTTCATTTTTGTGCTTATC  
CTAGTTGTTGGTTTAGTTTATGCATGGCGAAAAGGAGCCTTGAATGGTCTATGAGTTA  
TTTTCTTGGTTAACAATACTTGTGTTTTGCCGATATTTGCAGGTTCAATATTTCTTT  
TTACCTCATAAAGGAAATAAAATCGTTAGGTGGTATACTATAGCTATTTGTTTTATTAGAAT  
TCCTTATAATGACTTATGCATTCTGTTATCATTCCAATTGGAGGATCCCTTAATCCAATT  
AAAGGAGGATTCGAAATGGATAGATGTTTTCGATTTCCACTGGAGATTGGGAATCGATG  
GACTTTCATTAGGATCTATTTTTATTGACAGGATTTATCACTACTTTAGCTACTTTAGCGGC  
TTGGCCGGTTACTCGGAATTCGCAATTATTCTATTTCCCTGATGCTAGCAATGTATAGCGG  
TCAAATAGGATTATTTCTTCACGAGACCTTTTACTTTTTTTTTATCATGTGGGAGTTAGAA  
TTAATTCCTGTTTACTTACTTTTATCCATGTGGGGGGGAAAGAGGCGTCTGTATTACAGCT  
ACCAAGTTTATTTGTATACTGCGGGTGGTTCCATTTTTTTCTTAATTGGAGTTCTGGGTA  
TGGGATTATATGGTTCCAATGAACCCGGATTAGATTTAGAAAGATTGATTAATCAATCAT  
ACCCTACAACATTAGAAATACTACTGTATTTTGGCTTCCTTATTGCTTATGCTGTCAAATT  
GCCGATTATACCTTTACATACGTGGTTACCAGATACCATGGGGAAGCGCATTACAGTAC  
ATGTATGCTTTTAGCCGGAATTCTATTAAGATGGGAGCATACGGATTGATTCCGGGTCAA  
CATGGAATTGTTACCGCATGCTCATTATCTATTTTCCCCTGGTTGGTAATAATAGGAGC  
GGTGCAAATAATCTATGCAGCTTCAACTTCTCTTGGTCAACGAAATTTCAAAAAAAGAA  
TAGCCTACTCCTCCGTATCTCACATGGGTTTCCATAATTATAGGAATTGGTTCCATAACCA  
ACATTGGACTAAATGGAGCTATTTTACAAATATTATCTCATGGATTTATTGGTGCTACACT  
TTTTTTCTTGGCGGGAACGGCTTGTGATAGAATGCGTCTTGTTTATCTCGAAGAAGCTGG  
GGGGAATATCTATCCCAATGCCAAAAATTTTACCATGTTTAGTAGCTTTTCAATGGCTT  
CTCTTGCCCTGCCGGGAATGAGCGTTTTTGTGTCAGAATTAGTAGTATTTTTTGGACTAA  
TFACTAGTCCATAATTTATGTTAATGCCAAAAATGCTAATTACTTTTTGTAATGGCAATAG  
GAATGATATTAACCTATTTATTTATTATCTATGTTACGCCAGATGTTCTATGGATAACAAG  
CTATTTCATGTTCCAAACAAAAATTTGTAGATTCTGGACCACGGGAACCTTTCTTTTA  
ATCTGTATCTTTTTACCAGTAATAGGAATTGGTATTTATCCAGATTTTGTCTCTCTATC  
CGTTGATAGGGTAGAGGCTCTATTATCCAATTATTATACTAAAATGATGTTTGGAGCATGTA  
CTTTTTTTGAGTGTCTATTTATTTTCGATTGGTATCTATGGATTGATCAACAAGCCGAAACA  
TGGTTAGAGCTCTAATATGTCTTGAACCTTATACTGAATTCAATTAATCTAAATCTCGTAAC  
ATTTCTGATCTATTTGATAGTCGCCAATTAAGGAGACATTTTCGCAATTTTTGTTATA  
GCCCTTGGCGCTGCTGAAGCAGCTATTGGACTATCCATTCTTTCTTCCATCCATCGTAAC  
AGGAAATCAACTCGTATCAATCAATCCAATTTTTTAAATAATATGGAACATACATATCAAT  
ATGCCTGGGTAATTCCTCTTCTCCCACTTCCAGTTATTATGTCAATGGGATTTGGACTTT  
TTCTTATCCCACAGCAACAAAAAATCTTCGTGCGCATATGGGCTTTTCTAGTATTTTAC

TCTTAAGTATAGCTATGGTATTCTCACTTCACCTGTCTATTCAACAAATAAATGGAAGTT  
CTATCTATCAATATCTATGGTCTTGGACCATCAATAATGATTTTTTCCTTAGAATTTGGATA  
CTTGGTCGACCCCCTTACGTCTATTATGTTAATACTAATTACTACTGTAGGAATCTTAGTT  
CTTATTTATAGTGACGATTATATGTCTCACGATGAAGGATATTTGAGATTTTTTGTTTATAT  
AAGTTTTTTAATACTTCCATGTTGGGATTGGTTACTAGTTCCAATTTGATACAAATTTAT  
TTTTTTTGGGAACTTGTTCGGAATGTGTTCCATTTATTGATAGGCTTTTTGGTTTACGCGG  
CCAATTGCAGCGAGTGCTTGTCAAAAAGCTTTTGTAACTAATCGTGTAGGGGATTTTTGG  
TCTGTTATTAGGAATTTTAGGTTTTTTTTTGGATAACGGGTAGTTTGGAGTTTCGGGATTT  
GTTCAAAATAGCTAATAACAATGGGATTAATTCCTTACTTACTACTTTGTGTGCTTTTTTA  
TTATTCCTTGGTGCAGTTGCAAAATCTGCACAATTTCCCTTTCACGTATGGTTACCTGAT  
GCTATGGAAGGACCCACTCCCATTTTCGGCTCTTATACACGCAGCAACTATGGTTGCTGC  
GGGGATTTTTCTTCTAGCTAGACTTCTTCCTCTTTTCATATCCCTACCCTTGATAATGAGT  
TTCATTTCTTTAGTAGGTACAATAACACTCTTCTTAGGAGCCACTTTAGCTCTTGCTCAG  
AGAGATATTAAGAAGCTTAGCCTATTCTACAATGTCTCAATTGGGTTATATGATGTTA  
GCTCTAGGTATAGGTTCTTATCAAGCTGCTTTATTCCATTTGATCACTCATGCTTATTCTGA  
AAGCTTTATTGTTCTTAGGATCCGGATCCGTTATTCATTCAATGGAACCTCTTGTTGGAT  
ATTCACCAGATAAAGTCAGAATATGGTTCCTTATGGGTGGTTAAGAAAATACGTTCCA  
ATTACAAGAACTACTTTTTTATGTGGTACACTTTCTCTTTGCGGTATTCCACCTCTTGCTT  
GCTTCTGGTCCAAAGATGAAATACTTAGTAATAGTTGGTTGTATTCACCCTTTTTTGGAA  
TAATAGCCTCTTTTACTGCAGGATTAACTGCATTTTATAATGTTTCGGATATATTTACTTACT  
TTTGATGGGTATTTGCGTGTTAATTTTCAAATTACAGTAGTACTAAAGAAGGTTTCGTTG  
TATTCAATATCCTTATGGGGAAAAAGTATATCCAAGGAGTCAATAGG---GATTTTGT  
ATCAACAATGAAGTTTTTTTCAGCTAAAAA-----ACTTTTGTCTATCCTCATGAAACGG  
GAAATACTATGCTATTTCTCTTCTTATATTACTACTTTTTACTTTGTTTATTGGATCCATA  
GGAATCCCTTTTGGATTAAACCATATTATCAAAGTGGCTAACTCCTTCAATAAACTTGTTT  
CAAGAAAATTCTAATTCTTCCATAAATTCATATGAATTTCTCACTAATGCAATTTCTTCTG  
TAAGTTTAGCAATTTTGGTCTATTCATAGCATATATCTTTTATGGATCCGCTTATTCTTTT  
TTTCAGAAATTTGAATTTTCAAATTCCCTTGTAAGCTTTTTTGGATGAAGTAAAAA  
GATATACAGCTGGTCATATAATCGTGGTTATATAGATTTTTTCTATACTAGGGTTTTATCC  
TAGGTATAAGAAGATTAGCTGAACTAACGCATTTTTTTGATAAAGGTGTCATTGATGGA  
ATTATCAATGGAGTAGGTCTTGCTGGTTTTTTGTATAGGAGAAGAAATCAAATAT---GTAG  
GGGGAGGGCGAATATCGTCTTATCTATCTTTTTTTTTATGTTACGTATCCTTGTCTTATTC  
TTTATTCCAATGGATTTACCTGGACCAATACATGAGATTCCTTGTGCTATTTGGGGGATTT  
GTTCTTCTACTAGGAGGTCTAGGAGTAGTATTACTTACCAACCCAATTTATTCTGCCTTT  
TCGCTGGGATTAGTTCTTGTGTTGTATATCCTTATTCTATTTTTTATTAAATTCCTACTTTGT  
AGCTGTCGCACAACTTCTTATTTATGTGGGAGCCATAAATGTCTTGATCATATTTGCTGT  
AATGTTTGTAACGGCTCAGAGTGGTCTAAAGATAAGAATTATTGGACGATTGGAGATG  
GGTTTACTTTACTCCTTTGTATAACTATTCTTTTTTCACTAATGACTACTATCCAGATAC  
GTCGTGGTATGGAATCTTTGGACTACAAGATCAAACCAAATAGTAGAACAGGGTCTCA  
TAAATAACGTTCAACAAATTGGGATTCATTTAGCAACCGATTTTTATCTTCCGTTTGAAC  
TCATTTCCCTAATCTTCTAGTTTTCTTTAATAGGTGCAATTACTATGGCTCGACAAATGA  
GTCTATCGCTTAAAGAAAAGATCTCATGATAGTCAATATGGGTCCTCAACACCCATCA  
ATGCATGGTGTTCTTCGACTGATTGTTACTCTCGATGGTGAAGATGTTATTGATTGCGAA  
CCCATATTAGGGTATTTACACAGAGGAATGGAAAAAATTGCGGAAAACAGAAGTATTAT

ACAATACTTGCCTTATGTAACACGATGGGATTATTTAGCTACTATGTTTACAGAAGCAAT  
AACGGTAAATGCACCAGAATTCTTAGAGAATATTCAAATACCCCAAAGAGCCAGCTATA  
TTAGAGTAATTATGTTAGAATTGAGCCGTATAGCTTCTCATTGTTATGGCTTGGACCTTT  
TATGGCGGATCTCGGGGCACAGACTCCTTTTTTCTACATTTTTAGAGAGAGAGAATTGA  
TATATGATCTATTTGAAGCTGCTACAGGTATGCGAATGATGCATAATTACTTTCGCATCGG  
AGGGGTAGCAGCCGATCTCCCTTATGGATGGATGGATAAATGTTTAGATTTCTGTGATTA  
TTTTTTACAAGGAGTTGTTGAATATCAACAACCTTATTACACGGAATCCCATTTTTTTAGA  
ACGAGTTGAAGGAGTCGGTTTTATTAGCGGAGAAGAAGCTGTAAATTGGGGCTTATCG  
GGACCAATGTTACGAGCTTCTGGAATACAATGGGATCTTCGTAAAATCGATCCTTATGA  
GTCTTACAATCAATTCGATTGAAAGTCCAATGGCAAAAAGAAGGAGATTCGTTAGCT  
CGCTATTTAGTACGAGTCGGTGAATGAGGGAATCCATAAAAATAATTCAACAGGCTGT  
AGAGAAAATTCCTGGAGGACCTTATGAGAATTTAGAAGCCCGACGC---AAGAAAGCAA  
AGAATCCCGAATGGAATGATTTTGAATATCGATTTCTTGGTAAAAAACCGTCGCCAAT  
TTTGAATTATCAAAGCAAGAGCTTTATGTAAGAGTAGAAGCTCCAAAAGGCGAATTAG  
GAATTTATCTGGTAGGAGATGATAGTCTTTTCCCCTGGAGATGGAAAATTCGTCCACCG  
GGTTTTATTAATTTGCAAATTCCTCAGCTAGTTAAAAAATGAAATTTGGCTGATATC  
ATGACAATATTAGGTAGTATAGATATCATTATGGGGGAAGTTGATCGTATGTTCCCTATGC  
TAACTGGGTTTCATTAGTTATGGTCAACAAACAATACGCGCCGCAAGATATATTGGTCAA  
GGTTTAATAATTACCCTATCCACACAAATCGTTTACCTATAACGATTCACTACCCTTATG  
AAAAATCAATTACATCGGAGCGTTTCCGGGGGCGAATACACTTTGAATTTGATAAATGC  
ATTGCTTGTGAAGTATGTGTTTCGCGTATGCCCGATAGATCTACCCCTTGTGGATTGGAAA  
TTTGAAAAGGATATTAAGAAAACAATTGCTTAATTATAGTATTGATTTTCGGAGTTTGT  
ATATTTTGTGGTAACTGTGTTGAATACTGTCCACAAATTGTTTATCAATGACTGAAGAA  
TATGAACTTTCTACTTATGATCGTCATGAATTGAATTACAATCAAATTCGTTTGTAGTCGG  
TTACCAATCTCCATAATGGGAGATTACACAATTCAAACAATTAGGAATTCGAAAATAGA  
CGAAGAAAAATCTTGAATTCAGAACGATTACGGATTACCAGCAGGGTTGGTTATCT  
AATTGGCTAGTTAAACATGACGTGGTTCATAGGTCTTTGGGCTTCGATCATCGAGGAGT  
CGAGACTTTACAAATAAAAGCGGGGGATTGGGATTCATTGCTGTCAATTTATATGTATA  
TGGTTACAATTATTTACGTTCCCAATGTGCTTATGACGTAGCACCCGGTGGATCTTTAGC  
TAGCGTGTATCATCTTACGAGAATACAGTATGGTATAGATAACCCAGAAGAGGTATGCAT  
AAAAGTCTTTGCCCAAAGGATAATCCTAGAATCCCGTCTGTTTTCTGGGTTTGGAGAA  
GTGCCGATTTTCAAGAACGCGAATCTTATGATATGGTGGGAATTTCTTATGATAATCATC  
CACGTCTTAAACGTATCTTAATGCCTGAAAGTTGGATAGGCTGGCCCTTACGTAAGGAC  
TATATAACCCCAATTTCTATGAAATACAAGATGCTCAT-----

-----ATGAGTTTGATTGAGTTTCCGTTACTCGACCAAACAAGTTCTAATTCCGT  
TATTTCAACTACACCAAACGATCTTTCGAATTGGTCAAGACTCTCAAGTTTATGGCCCC  
TTCTATATGGTACCAGTTGTTGTTTCATTGAATTTGCCCTCATTAATAGGCTCGCGATTGCA  
CTTTGATCGTTATGGATTGGTACCAAGATCAAGTCCTAGACAAGCGGACCTAATTTTAA  
CAGCTGGTACGGTAAACAATGAAAATGGCTCCATCTTTAGTGCGATTATATGAGCAAATG  
CCTGAACCGAAATACGTCATTGCTATGGGAGCCTGTACTATTACAGGGGGCATGTTTCAG  
TACAGATTCCTATAGTACTGTTTCGAGGAGTTGATAAGTTAATTCCTGTGGACGTCTACCT  
GCCGGGTTGCCCGCCTAAACCAGAGGCTGTTATAGATGCCCTAACAAAACCTTCGTAAG  
AAGATAGCGCGAGAAATAATTGAGGATCGAACTCTATGTCAAAGTAAAAATAGATCTTT

TACTACCCGTCACAAACTTTATGTTTCGGCGCAGTACTCACACTGGAACCTTACGAACAA  
GAATTGCTCTATCAATCACCATCTACTTTAGATATATCTACT-----TTTTTCAAATCCAAAA  
GTTTCAGTATCTTCCCTACAAATTAGTGAATATGGAAAATAGAAAAACTTTTTCTTGGTTAA  
AGGAACAGATGATTCGATCGATTTCTGTATCGATCATGATATACGTAATAACTCGCACAT  
CTATTTCAAACGCATATCCCATTTTTGCGCAGCAGGGTTATGAAAACCCGCGGGAAGCA  
ACTGGACGAATTGTATGTGCCAATTGCCATTTAGCTAATAAGCCTGTAGATATTGAAGTT  
CCCCAAGCAGTGCTTCCCTGATACTGTATTTGAAGCAGTTCTTCGAATTCCTTATGATATG  
CAGCTGAAACAAGTTCTTGCTAATGGTAAAAAGGGAGGGTTGAATGTGGGTGCTGTTC  
TTATTTTGCCTGAGGGATTTCGAATTAGCGCCGCCGACCGTATTTCTCCTGAGTTGAAA  
GAAAAGATAGGAAATCTCTCTTTTCAGAGTTATCGTCCCAATAAAAAAATATTCTTGT  
GATAGGCCCTGTTCCCGGTAAGAAATATAGTGAAATTGTCTTTCCCATTTCTTTCCCCCGA  
TCCCGCTACAAAAAAGACGTTCAATTTCTTAAAATATCCCATATATGTAGGGGGAAACC  
GAGGAAGGGGACAGATCTATCCTGATGGTAGCAAGAGTAACAATACGGTCTATAATGCT  
ACGTCAACAGGTATAGTAAAAAATACTACGTAAAGAAAAGGGGGGATATGAAATAT  
CCATAGTGGATGCGTTCGGATGGACGCCAAGTGATTGATATTATACCTCCCGGGCCAGAA  
CTTCTTGTTTTAGAGGGGGAATCAATCAAGCTTGATCAACCATTAACAAGCAATCCTAA  
TGTAGGAGGGTTTGGTCAGGGGGATGCAGAAATAGTGCTTCAGGATCCATTGCGCGTC  
CAAGGCCTTTTGTCTTCTTCGCATCTGTTATTTTGGCACAAGTTTTTTTTGGTTCTCAA  
AAGAAACAGTTTGAAGGTTCAATTGTACGAAATGAATTTCTCAATAAAGTATATGA  
TTGGTTTGAAGAACGTCTTGAGATTACAGGCAATTGCAGATGATATAACTAGTAAATATG  
TTCTCCTCATGTCAACATATTTTATTGCTTAGGGGGAATTACACTTACTTGTTTTCTAGT  
ACAAGTCGCTACCGGTTTTGCTATGACTTTTTACTACCGACCCACCGTTACAGAGGCTT  
TTCTCCTCCGTTCAATATATAATGACGGAGGCCAACTTTGGTTGGTTAATCCGATCGGTT  
ATCGATGGTCAGCAAGTATGATGGTTCTAATGATGATCCTGCACGTATTTTCGTGTGTATC  
TCACAGGTGGATTTAAAAAACCCCGTGAATTAACCTGGGTACAGGCGTGGTTTTTGGC  
TGATTTGACTGCATCATTTGGTGTAACCTGGTTATTCTTTGCCTTGGGATCAAATTGGTTAT  
TGGGCAGTCAAATTGTTACAGGTGTACCCGAAGCTATTCGGTAATAGGGTCCCCTTT  
AGTGGAATTATTACGTGGAAGTGCTAGTGTAGGCCAATCCACTTTGACTCGTTTTTATA  
GTTTACATACCTTTGACTACCTCTGCTTACTGCCGTATTTATGTTAATGCACTTTCCAAT  
GATACGTAAGCAAGGTATTTCCGGTCTTTAATGGGAGTAACAAAGAAACCGGACTTA  
AATGATCCTGTATTAAGAGCAAATTAGCTAAAGGGATGGGACATAATTATATGGGGA  
ACCTGCGTGGCCCAACGATCTTTTATACATTTTTCCAGTAGTAATTCTAGGTACTATTGC  
GTGTAATGTGGGTTTAGCGGTTCTAGAGCCGTCAATGATTGGTGAACCGGCGGATCCGT  
TTGCAACTCCTTTGGAAATATTACCCGAGTGGTACTTCTTTCCCGTATTTCAAATACTCC  
GTACAGTACCCAATAAGTTATTGGGCGTTCTCTTAATGGTTTCTGTGCCAACGGGCTTAT  
TGACAGTACCCTTTCTAGAGAATGTCAATAAATCCAAAATCCATTTTCGTGCGCCAGTA  
GCTACGACCGTTTTTTAATCGGTACTGTAGTAGCTCTTTGGTTAGGTATTGGAGCAACA  
TTACCCATTGATAAATCCTTAACCTTAGGCTTTTTTATGATTGAAGTTTTTCTATTTGGAA  
TCGTCTTAGGCCTAATTCCTATTACTTTAGCGGGATTATTCGTGACTGCGTATTTGCAATA  
CAGGCGTGGGGATCAGTTGGATCTTATGCTTACTATAACTAGTTATTTCCGTTTTTCTACT  
GGCTGCTTTAACTATAACCCAGCTCTATTTATTGGCTTGAACAAGATACGTCTTATTAT  
GGATATAGTAAGTCTCGCTTGGGCTGCTTTAATGGTAGTCTTTACATTTCTCTTTTCGCTA  
GTAGTATGGGGGAGGAGTGGACTCATGATTATTCGTCCGTCGGAACCAAGTAAAA  
TTGCTGTGGATAGGGATCCTGTAAAAACATCTTTTGAGGAATGGGCCAGACCCGGGCA

TTTCTCAAGAACAATAGCTAAGGGTCCCGACACTACCACTTGGATCTGGAACCTACATG  
CTGATGCTCACGATTTTCGATAGTCATAACCGGTGATTTGGAGGAGATCTCCCGAAAAGTC  
TTTAGTGCTCATTTCGGCCAACCTCTCCATTATCTTTCTTTGGTTGAGTGGCATGTA  
CTTCACGGTGCCCGTTTTTCCAATTATGAAGCATGGCTAAGCGATCCTACTCACATTGGACC  
CAGTGCTCAGGTAGTTTGGCCAATAGTAGGACAAGAAATTTGAATGGTGTAGTGGC  
GGGGTTTTCCGAGGAATCCAAATAACCTCTGGTTTTTTTTTCAGATTTGGCGAGCATCCGG  
AATAACTAGTGAATTACAACCTCTATTGTACCGCAATTGGTGCATTGATTTTTGCATCGTT  
AATGCTTTTTTGCCGGTTGGTTCCATTATCACAAAGCCGCTCCCAAATTGGCCTGGTTCC  
AAGATGTAGAATCCATGTTGAATCACCCTTAGCGGGGTTATTAGGACTTGGGTCTCTT  
TCTTGGGCGGGACACCAAATCCATGTATCTTTACCGATTAACCAATTTCTCGACGCTGG  
GGTTGATCCTAAAGAGATAACCACTTCCTCATGAATTTATCTTGAATCGCGACCTTTTGGC  
TCAACTTTATCCTAGTTTTGCCGAAGGAGCAACCCCTTTTTTCACCTGAATTGGTCCA  
AATATGCGGAATTTCTTAGTTTTTCGCGGAGGACTAGATCCAATAACCGGTGGTCTATGG  
TTGAGCGATATTGCACACCATCATTAGCTATTGCTATTCTTTTTCTGATCGCTGGTCATA  
TGTATAGGACCAATTGGGGTATTGGTCATGGACTTAAAGATATTTTGGAGGCTCATAAG  
GGCCCATTTACAGGACAAGGCCATAAAGGTCTCTATGAAATCCTAACAACGTCATGGC  
ACGCTCAATTATCTCTTAACCTAGCTATGCTAGGCTCTACAACCTATTGTTGTAGCTCATCA  
TATGTA  
CTATGCCCCCTATCCATACTAGCTACTGACTATGGTACACAACCTTTCTTGG  
TTCACACACCACATGTGGATTGGCGGATTTCTAATAGTTGGTGCTGCTGCACATGCAGC  
CATTTTTATGGTAAGAGACTATGATCCA  
ACTACTCGATACAACGATCTATTAGATCGCGT  
CCTTAGACACCGCGATGCAATCATATCCACCTTAACTGGGTATGTATATTTCTGGGTTT  
TCACAGTTTTGGCTTGTACATTCATAATGATACCATGAGTGCTTTAGGCCGTCCCAAGA  
TATGTTTTCGGATACCGCCATA  
CAATTACAACCCATCTTTGCTCAATGGATACAAAATAT  
CCATGCTGGCGCGCCTGGCGTAACAGCTCCTGGTGCAACAACAAGTACCAGCTTAACG  
TGGGGAGGCGCGAGTTAGTAGCTGTAGGCGGCAAAGTAGCTTTGTTACCTATTCCATT  
AGGAACCGCGGATTTTTTAGTCCATCACATTCACGCATTTACCATCCATGTGACTGTATT  
AATACTTTTGAAAGGTGTTTTATTGCTCGCAGTTC  
CCGTCTGATACCTGATAAAGCAA  
TCTTGGCTTTTCGTTCCCTTGGCGACGGACCTGGGCGAGGGGGAACATGTCAAGTATCC  
GCCTGGGATCATGTTTTCTTAGGTCTATTCTGGATGTACAATTCTATTTCCGGTAGTCATTT  
TCCATTT  
CAGTTGGAAAATGCAGTCGGATGTTTTGGGGTACTATAAGTGATCAAGGGATA  
GTA  
ACTCATATCACAGGGGGAACTTTGCGCAGAGTTCATTACGATTAATGGTTGGCT  
TCGAGATTTCTTGTGGGCACAGGCATCCCAAGTAATTCAGTCTTATGGTTCCTCATTATC  
TGCATATGGTCTTTTTTTCTTAGGGCGCTCATTTTGTCTGGGCTTTCAGTTAATGTTTTTA  
TTCAGCGGCCGTGGTTATTGGCAAGAACTCATTGAATCTATCGTTTGGGCTCATAACAA  
ATTAAAAGTTGCTCCTGCTACTCAGCCTAGAGCCTT  
GAGCATTATAACAAGGACGTGCTG  
TAGGAGTAACCCATTACCTTCTGGGTGGAATTGCCACAACATGGGCATTCTTCTTAGCG  
AGAATTATTGCAGTAGGAATGGAATTAAGATTTCCAGGTTTAGCCAAGGCTTAGCTCA  
GGACCCCACTACTCGTCGTATTTGGTTGGTATTGCTACCGCACATGATTTCGAAAGTCA  
TGATGATATTACTGAGGAACGTCTTTATCAGAACATTTTTGCTTCTCACTTTGGGCAGTT  
AGCAATAATCTTTCTATGGACGTCCGGAAATCTGTTTCATGTAGCTTGGCAAGGAAATT  
TTGAATCATGGATACAGGATCCTTTACACGTAAGACCTATTGCTCATGCCATTTGGGATC  
CTCATTTTGGGCAACCCGCCGTGGAAGCCTTTACTCGAGGAGGTGCTGCCGGTCCAGT  
GAATATCGCTTATTCTGGGGTTTATCAGTGGTGGTATA  
CAATTGGATTGCGCACCAATGA  
AGATCTTTATACTGGAGCTCTTTTTCTATTATTTCTTTCTACGCTATCCTTAATAGGGGGT

TGGTTACATCTACAACCCAAATGGAAGCCAAGCCTTTCGTGGTTCAAAAACGCCGAAT  
CTCGTCTGAATCATCATTGTCAGGACTTTTCGGAGTAAGTTCTTTGGCTTGGACAGGA  
CATTTAGTTCATGTTGCTATTCCCGGATCCAGGGGGGAGTACGTTTCGATGGAATAATTTC  
TTAGATGTATTACCCTATCCCCAGGGGTTGGGTCCCCTTCTGACGGGTCAGTGGAAATCT  
TTATGCCCAAATCCTGATTGAGTAATCATTATTTGGTACCACTCAAGGAGCGGGAA  
CTGCCATTCTGACCCCTTCTTGGGGGATCCATCCACAAACACAAAGTTTGTGGCTGACC  
GATATTGCTCATCATCATTAGCTATTGCATTTATTTTCTCATTGCCGGTCATATGTATCG  
AACTAACTTCGGAATTGGGCACAGTATCAAAGATCTTTTAGAAGCACATACTCCTCCGG  
GGGGTCGATTAGGACGTGGGCATAAAGGCCTTTATGATACAATCAATAATTCGATTCATT  
TTCAATTAGGCCTTGCTCTAGCTTCCTTAGGGGTTATTACTTCCTTAGTAGCTCAACATAT  
GTACTCTTTACCTGCTTATGCATTCATAGCACAAAGACTTTACTACTCAAGCTGCTTTATAT  
ACTCATCACCATAACATTGCAGGGTTCATCATGACAGGGGCTTTTGCTCATGGAGCTAT  
TTTTTTCATTAGGGATTACAATCCGGAACAGAATGAAGATAATGTATTGGCAAGAATGTT  
AGACCATAAGGAAGCTATCATATCTCATTAAAGTTGGGCTAGCCTCTTCCTAGGATTCCA  
TACCTTGGGCCTTTATGTTTATAACGACGTTATGCTTGCTTTTGGTACTCCAGAAAAGCA  
AATCTTGATCGAACCTATATTTGCCCAATGGATACAATCTGCTCATGGTAAGACGCACATA  
TGGGTTTCGATATACTCTTATCTTCAACGAATGGCCCCGCTTCAATGCAGGTCGAAACAT  
ATGGTTACCGGGATGGTTGAATGCTGTTAATGAG-----AATAGTAATTCGCTTTTCTTAAC  
AATAGGACCTGGGGATTTCTTGGTTCATCATGCTATTGCTCTAGGTTTGCATACAACTAC  
ATTGATTTTAGTAAAGGGTGCTTTAGATGCACGCGGTTCCAAATTAATGCCGGATAAAA  
AGGATTTTCGGGTATAGTTTTCCTTGCATGGCCAGGGCGCGGGGCTACTTGTGATATT  
TCTGCTTGGGACGCGTTTTATTTGGCTGTTTTCTGGATGTAAATACCATCGGATGGGTT  
ACTTTTTATTGGCATTGGAAACACATTACATTATGGCAGGGCAACGTTTCACAATTTAAT  
GAATCCTCCACTTATTTGATGGGATGGTTAAGAGATTACCTATGGTTAAACTCTTCACAA  
CTTATTAATGGATATAATCCTTTTGGGATGAATAGTTTATCAGTATGGGCTTGGATGTTCT  
TATTTGGACATCTTGTTTGGGCTACAGGATTTATGTTCTTAATTTCTGGCGTGGATATTG  
GCAGGAATTAATTGAGACTTTAGCATGGGCTCATGAACGCACACCTTTGGCTAATTTAA  
TTCGCTGGAGAGATAAGCCCGTGGCTCTTTCCATTGTGCAAGCAAGATTGGTTCGGATTA  
GCCCACTTTTCCGTGGGTTATATATTTCACTTATGCAGCTTTCTTGATTGCCTCAACATCA  
GGCAAGTTTGGTATGTCACATTCTGTAAAAATTTATGATACATGTATAGGATGCACTCAA  
TGTGTACGAGCTTGCCCAACAGATGTATTAGAAATGATACCTTGGGATGGATGTAAAGC  
CAAGCAAATTGCTTCCGCGCCGAGAACCGAAGATTGTGTGGGTTGTAAGAGATGCGAA  
TCTGCTTGCCCAACGGATTTTTTAAGTGTCCGCGTTTATTTAAGGTCTGAAACAACCCG  
CAGCATGGCTCTATCTTATATGACAGATCTTAACTTACCCTCTATTTTCGTACCTTTAGTA  
GGCTTAGTATTTCCGGCAATTGCAATGACTTCCTTATTTCTTTATGTGCAGAAAAATAAG  
ATTGTCATGCGGGATATAAAAACATATCTCTCTGTAGCACCCGTGCTAAGTACTCTATGG  
TTTGGGGCTTTAGCAGGTTTATTGATAGAAATCAATCGTTTATTCCAGATGCTTTGTCA  
TTCCCTTTTTTT-----ATGACTGCAATTTTAGAGAGACGCGAAAGTACAAGCCTGTGGGG  
TCGCTTCTGCAACTGGATAACTAGCACCGAAAACCGTCTTACATTGGATGGTTCCGGTG  
TTTTGATGATCCCTACCTTATTGACCGCAACTTCCGTATTTATTATCGCCTTCATCGCTGC  
TCCTCCAGTAGATATTGATGGTATTCGTGAGCCTGTTTCTGGTTCTTTACTTTATGAAA  
CAATATTATCTCTGGTGCTATTATTCCTACTTCTGCGGCGATCGGATTGCATTTTTACCCA  
ATTTGGGAAGCTGCATCTGTTGATGAATGGTTATACAATGGCGGTCTTATGAGCTAATT  
GTTCTACACTTCTTACTTGGTGTAGCTTGTATATGGGTCGTGAGTGGGAACCTTAGTTTC



CGTCTGGGTATGCGCCCTTGGATTGCTGTTGCATATTCAGCTCCTGTTGCAGCTGCTACT  
GCTGTTTTCTTGATTTACCCTATTGGTCAAGGAAGTTTCTCTGATGGTATGCCTTTAGGA  
ATAICTGGTACTTTCAACTTTATGATTGTATTCCAGGCAGAGCACAAACATCCTTATGCAT  
CCATTTACATGTTAGGTGTAGCTGGTGTATTCGGCGGTTCCCTATTCAGTGCTATGCAT  
GGTTCCTTGGTAACTCTAGTTTGATCAGGGAAACCACTGAAAATGAGTCTGCTAATGA  
GGTTACAAATTTGGTCAGGAAGAAGAGACTTATAATATTGTGGCTGCTCACGGTTATT  
TCGGTCGATTAATCTTCCAATATGCTAGTTTCAACAACCTCTCGTTCTTTACACTTCTTCTT  
GGCTGCTTGGCCTGTAGTAGGGATCTGGTTCCTGCTTTAGGTATTAGTACTATGGCATT  
CAACCTAAATGGTTTCAATTTCAACCAATCTGTAGTTGATAGCCAAGGTCGCGTTATTA  
TACTTGGGCTGATATCATTAAACCGTGCTAATCTTGGTATGGAGGTAATGCACGAACGTAA  
TGCTCACAACTTCCCTCTAGACCTAGCTGCTCTTGAAGTCCATCTCTAATGGAATGG  
GTTTGCCTTGGTATCGTGTTCACTACTGTCGTATTGAATGATCCGGGTCGATTGCTTTCGG  
TGCATATAATGCACACAGCTCTAGTTTCTGGTTGGGCTGGCTCGATGGCTTATACGAAT  
TAGCGGTTTTTGATCCCTCTGATCCTGTTCTGGATCCAATGTGGAGACAAGGTATGTT  
GTCATCCCCTTCATGACTCGTTTAGGAATAACGAATTCGTGGGGTGGTTGGAGTATTC  
A--GGAGGAACTGTAACGAATCCGGGTATTTGGAGTTATGAAGGTGTGGCAGGTGCGC  
ATATTGTGTTTTCTGGCTTGTGTTTCTTGGCAGCTATCTGGCATTGGGTATATTGGGACCT  
AGAAATATTCTGTGATGAGCGGACGGGAAAACCTTCTTTGGATTTGCCAAGATCTTTG  
GAATTCATTTATTTCTTGCAGGGGTGGCTTGTTTTGGCTTTGGTGCATTTTCATGTAACGG  
GTTTATATGGCCCTGGGATATGGGTGTCCGATCCTTACGGACTAACTGGAAAAGTACAA  
GCTGTAAATCCTGCGTGGGGTGCAGAAGGTTTTGATCCTTTCGTTCCGGGAGGAATAG  
CTTCGCATCATATTGCTGCGGGTACTTTGGGCATATTAGCGGGCCTATTCCATCTAAGTG  
TCCGTCCGCCTCAACGCTATACAAAGGGTTACGTATGGGCAATATTGAAACTGTACTT  
TCCAGTAGTATCGCTGCTGTTTTTTTTGCTGCTTTCGTAGTTGCCGGAATATGTGGTAT  
GGATCAGCAACTACCCCAATCGAATTATTTGGGCCTACTCGTTATCAGTGGGATCAGGG  
ATACTTTCAGCAAGAAATATATCGAAGAGTTAGCGATGGGTTAGCCGAAAATCTTAGTT  
TATCAGAAGCTTGGTCTAAAATCCCGAAAAATTAGCCTTTTATGATTATATTGGTAATAA  
TCCAGCAAAGGGGGGATTATTCAGAGCAGGCTCAATGGACAATGGGGATGGCATAGCT  
GTTGGATGGTTAGGACATCCGGTCTTTAGAGATAAAGAAGGACGCGAGCTTTTTGTAC  
GTCGTATGCCTACTTTTTTTGAAACATTTCCGGTAGTTTTGGTAGATGAAGAGGGAATT  
GTGAGAGCGGACGTTCTTTTAGAAGAGCAGAATCCAAATATAGTGTGAACAAGTAG  
GCGTAAACGGTGGAGTTCTATGGTGGCGAACTCAATGGAGTAAGTTATTCTGATCCTGCT  
ACTGTAAAAAATATGCGCGGCGTGCTCAATTAGGGGAAATTTTTGAATTAGATCGAGC  
TACTTTGAAATCAGATGGTGTTTTTCGCAGCAGTCCAAGGGGTTGGTTCCTTTTGGTC  
ATGCTACCTTTGCTTTGCTCTTCTTTTTTCGGACACATTTGGCATGGCGCTCGAACCTTGT  
TCCGAGATGTTTTTGCTGGTATTGATCCAGACTTGGATGCTCAAGTGGAATTTGGAACA  
TTCCAAAAGTTGGAGATCCAACCTACAAGGAGACAGGCAGCCATGAAAATCTTATATT  
CCCTGAGGAGGTTCTACCACGTGGAACGCTCTTTAATGGAACTTTCGTTTTAGCTGGT  
CGTGACCAAGAAACCACCGGCTTTGCTTGGTGGGCTGGGAATGCCAGACTTATCAATT  
TGTCGGTAAACTACTTGGAGCTCATGTAGCCCATGCCGATTAATCGTATTCTGGGCC  
GGAGCAATGAACCTATTTGAAGTGGCCATTTTCGTACCAGAAAAGCCCATGTATGAAC  
AAGGGTTGATTTACTTCCGCACTTAGCTACTCTAGGTTGGGGAGTAGGGCCGGGGGG  
AGAAGTTCTAGATACTTTTCTTACTTTGTATCCGGAGTACTTCACTTAATTTCTCCGC  
AGTCTTAGGCTTCGGTGGCATTATCACGCGCTTCTGGGACCCGAGACTCTTGAAGAAT

CTTTTCCATTCTTTGGTTATGTATGGAAAGATAGAAATAAAATGACTACAATTTTGGGTA  
TTCACCTAATTTTGTAGGTCTAGGTGCTTTTCTTCTAGTACTCAAGGCTCTTTATTTTGG  
CGGCGTATATGATACCTGGGCCCCCGGGGGGGGGATGTAAGAAAATTACCAATTTG  
ACCCTTAGCCCCGGTGTATATTTGGTTATTTACTAAAATCCCCTTTTGGGGGAGAAGGA  
TGGATTGTTAGTGTGGATGATTTAGAAGATATAATTGGGGGGCATGTATGGTTGGGTCC  
ATTTGTGTACTTGGCGGAATTTGGCATATCTTAACCAAACCCTTTGCATGGGCTCGCCGT  
GCATTTGTATGGTCTGGCGAAGCTTACTTGTCTTATAGTTTLAGGTGCTTTATCTGTTTTG  
GTTTTATCGCTTGTGTTTTGTCTGGTTCAATAATACGGCTTATCCAAGTGAGTTTTACG  
GGCCACTGGACCAGAAGCTTCTCAAGCTCAAGCATTACTTTTCTAGTTAGAGACCA  
GCGTCTTGGAGCTAATGTAGGGTCTGCCAAGGACCGACGGTTTLAGGTAATAATCTAA  
TGC GTTCCCCAACGGGAGAGGTTATTTTTGGAGGGGAAACTATGCGTTTTTGGGATCTT  
CGTGCTCCGTGGTTAGAACCTCTAAGGGGCCCAACGGTTTGGACTTGAGTAGGTTGA  
AAAAAGATATCCAACCTTGGCAAGAACGACGTTACAGCAGAATATATGACCCATGCTCCT  
TTAGGCTCTTTAAATTCGTTGGGTGGCGTAGCTACCGAGATCAATGCAGTTAATTATGTC  
TCTCCTAGAAGTTGGTTAGCGACCTCCCATTTTGTCTAGGATTCTTCTTTTTTGTGGGC  
CATTTGTGGCATGCAGGAAGAGCCCGAGCTGCTGCAGCAGGCTTTGAAAAGGGAATT  
GATCGTGATTTGGAACCTGTTCTTTACATGACCCCTCTTAACATGACTATAGCCGTTGGT  
AGAGTACTAAAGAAGAAAACGATCTATTTGATATTATGGACGACTGGTTACGAAGGG  
ACCGTTTTGTTTTGTAGGATGGTCCGGCTTATTGCTCTTTCCTTGTGCTTATTTGCTTT  
AGGGGGTTGGTTTACAGGGACTACTTTTGTAACTTCTTGGTATACCCATGGATTGGCTA  
GTTCCATTTGGAAGGTTGCAATTTCTTAACCGCGGCGTTTCCACACCTGCCAATAGT  
TTAGCACACTCTTTGTTGCTACTATGGGGACCGGAAGCACAGGGGGATTTACTCGTTG  
GTGTCAATTAGGTGGTCTTTGGACTTTTGTGCTCTCCATGGAGCTTTTGCACATAATAG  
GTTTTATGCTACGTCAATTTGAACTTGTCTCGGTCTGTTCAATTGCGGCCTTATAATGCAA  
TTTCATTCTCTGGTCCAATCGCTGTTTTTGTTCGGTATTCTTATTTATCCACTGGGACA  
ATCTGGTTGGTTCTTTGCGCCGAGTTTTGGCGTAGCAGCTATATTTGCGTTCATCTTTT  
CTTCCAAGGATTCATAATTGACGTTGAACCCATTTTCATATGATGGGAGTTGCCGGAG  
TATTAGGCGCAGCTCTGCTATGCGCTATCCACGGGGCTACCGTAGAAAACACTCTATT  
GAAGATGGCGATGGTGCAAATACCTTCCGTGCTTTTAACCCAACTCAAGCTGAAGAAA  
CTTATCAATGGTCACTGCTAACCGCTTTTGGTCCCAAATCTTTGGTGTGCTTTTTCCA  
ATAAACGTTGGTTACATTTCTTTATGCTATTTGTACCCGTCACCGGTTTATGGATGAGTG  
CTATTGGCGTAGTTGGTCTGGCTCTGAACCTACGTGCCTATGACTTCGTTTCCCAGGAA  
ATCCGTGCAGCGGAAGATCCTGAATTTGAGACTTTCTACACCAAAAATATTCTTTAAA  
TGAGGGTATTCGTGCGTGGATGGCAGCTCAGGATCAGCCTCATGAAAATCTTATATTC  
CTGAGGAGGTTCTACCACGTGGAAACGCTCTTATGTCTGGAAGCACGGGAGAACGTT  
TTTTGCTGATATTATTACCAGTATTGATACTGGGTTATTATAGCATTACTATACCTCCC  
TATTCATTGCGGGTTGGTTATTTGTCAGTACGGGTTTAGCTTATGACGTGTTTGAAGTC  
CTCGACCAAACGAGTATTTACGGAAAGCCGACAAGGAATTCCATTAATAACCGACCG  
TTTTGATTCTTTAGAACA ACTAGATGAATTTAGTAGATCCTTTATGACCATAGATCGAAC  
CTATCCTATTTTTACAGTGCGATGGCTGGCTGTTACGGATTAGCTGTACCCACGGTTTT  
TTTCTTGGGATCAATATCAGCAATGCAGTTTCATCCAACGAATGGCTACACAAACCGTTG  
AAGATAGTTCTAGACCTAAG---CCAAAACGGACTGGCGCAGGTAGTTTATTGAAACCCT  
TGAATTCGGAATATGGGAAAGTTGCTCCGGGTTGGGGGACTACTCCTTTTATGGGGGTC  
GCAATGGCTTTATTGCGGATATTCCTATCTATAATTTTAGAAATTTATAATCTTCTGTTTT

ACTGGACGGAATTTTAACGAATATGCTTACTCTCAAACCTTTTTGTTTATACAGTAGTGAT  
ATTCTTTGTTTCCCTCTTTATCTTTGGATTCTTATCTAATGACCCAGGACGTAATCCTGGG  
CGTGAGGAGATGGCCGATACTACTGGAAGAATTCCTCTTTGGCTGATAGGTACTGTAAAC  
TGGTATTCTTGTGATTGGTTTAATAGGTGTTTTCTTTTACGGTTCGTATTCTGGATTGGGT  
TCATCTCTAATGCCTAATACTTAGTTAAACCTGTATCTGTTTTAATTCTGTTCTTTGTCC  
GACTAGCTTTTTCTTCGCCAAATTACCCGAAGCTTATGCCATTTTCAACCAATCGTGGA  
TGTTATGCCTGTCATACCTGTACTCTTTTTTCTATTAGCGTTTGTGGCAAGCTGCTGTA  
AGTTTTCGAATGACACAATCAAACCCGAATGAACAAAATGTTGAATTGAATCGTACCA  
GTCTATACTGGGGTTTATTACTCATTTTTGTACTTGCTGTTTTATTTCCAATTACTTCTTC  
AATATGGAAGTCAATATTCTCGCATTATTGCTACAGCATTGTTTCATTCTAGTTCCTACTG  
CCTTTTTACTTATTATTATGTAAAAACAGCCAGTCAAATGATATGGAAACAGCAACTT  
TAGTCGCCATCTCCATATCTGGTTTACTTGTAAGCTTACTGGGTATGCCTTATATAACGC  
GTTGGGCAACCCTCTCAACAATTAAGAGATCCATTCGAAGAACATGGGGACATGGAA  
GCATTGGTTTATACGTTCTTTTAGTTTCGACTTTAGGGATAATTTTTTCGCTATCTTCT  
TCCGAGAACCACCTAAGGTTCCGACTAAGAAA-----ATGACTATTGCTTTCCAATTAGCT  
GTTTTTGCATTAATTGCGACTTCCTCAGTTTTAGTAATTAGTGTACCCCTTGTATTTGCTT  
CTCCTGATGGTTGGTCAAATAATAAAAACGTTGTATTTCCGGTACATCATTATGGATTG  
GATTAGTCTTTCTGGTAGCTATTCTGAATTCTCTTATTCT-----ATGTCACCA  
CAAACAGAACTAAAGCAAGTGTGGATTTAAAGCTGGTGTAAAGGATTATAAATTGA  
CTTACTACACCCCGGAGTACGAAACCAAGGATACTGATATCTTGGCAGCATTCCGAGTA  
ACTCCTCAGCTCGGGGTTCCGCCTGAAGAAGCAGGAGCTGCAGTAGCTGCGGAATCTT  
CTACTGGTACATGGACAACCTGTTTGGACTGATGGACTTACCAGTCTTGATCGTTACAAA  
GGACGATGCTATCACATCGAGCCCGTTCTGGGGACCCAGATCAATATATCTGTTATGTA  
GCTTATCCATTAGACCTATTTGAAGAGGGTTCTGTTACTAACATGTTTACTTCCATTGTG  
GGTAACGTATTTGGTTTCAAAGCCTTACGCGCTCTACGTTTGGAGGATCTACGAATTCC  
CCCTGCTTATGTAAAACTTTCCAAGGTCCGCCTCACGGTATCCAAGTTGAAAGGGATA  
AGTTGAACAAGTACGGTCGTCTTTATTGGGATGTACTATTAACCAAATTTGGGATTAT  
CCGCAAAAATACGGTAGAGCGTGTATGAGTGTCTACGCGGTGGACTTGATTTTACC  
AAAGATGATGAAAACGTAAACTCACAACCATTTATGCGCTGGAGAGACCGTTTTGTCT  
TTTGTGCCGAAGCAATTTATAAAGCACAAGCCGAAACCGGTGAAATCAAGGGGCATTA  
CTTGAATGCGACTGCAGGTACATGCGAAGAAATGATTAAGAGAGCTGTATTTGCAAAG  
GAATTAGGGGTTCTATTGTAATGCATGACTACTTAACAGGAGGATTCACCGCAAATAC  
TACTTTGTCTCATTATTGCCGCGACAACGGCCTACTTCTTACATTCACCGAGCAATGCA  
TGCAGTTATTGATAGACAGAAAAATCATGGTATGCATTTCCGTGTATTAGCTAAAGCATT  
GCGTATGTCGGGGGAGATCATATCCACTCCGGTACAGTAGTAGGTAAGTTAGAAGGG  
GAACGCGAAATAACTTTAGGTTTTGTTGATTTATTGCGCGATGATTTTATTGAAAAAGAT  
CGTTCTCGCGGTATCTTTTTCACTCAGGACTGGGTATCCATGCCAGGTGTTATACCGGTG  
GCTTCAGGGGGTATTCATGTTTGGCATATGCCAGCTCTGACCGAAATCTTTGGAGATGA  
TTCCGTATTACAATTTGGTGGAGGAACTTTAGGACATCCTTGGGGAAATGCACCTGGTG  
CAGCAGCTAATCGTGTGGCTTTAGAAGCCTGTGTACAAGCTCGTAACGAAGGGCGCGA  
TCTTGCTCGTGAAGGTAATGAAATTATCAAAGCAGCTTGTAATGGAGTGCTGAACTAG  
CCGCAGCTTGTGAAATATGGAAGGAGATCAAATTTGATTTCAAAGCGATGGATACCTTA  
-----ACGGCGAAACATTTATACAAAACACCTATCCCAGCACACGCAAGGGAAACCGTAG  
ACAGGCAAGTGAATCCAATCCACGAAATAAATTGATCCATGGACGGCACCGTTGTGG

TAAAGGTCGTAATGCCAGAGGAATCATTACCGCAAGGCATAGAGGGGGAGGTCATAAG  
CGCCTATACCGTAAAATCGATTTTCGACGGAATCAAAAAGACATATCTGGTAGAATCGT  
AACCATAGAATACGACCCTAATCGAAATGCATACATTTGTCTCATACACTATGGGGATGG  
TGAGAAGAGATATATTTTACATCCCAGAGGGGCTATAATTGGAGATACTATTGTTTCTGG  
TACAAAAGTTTCTATATCAATGGGAAATGCCCTA-----ACCGATATGCCCTTAGGCACGG  
CCATACATAACATAGAAATCACACGTGGAAGGGGTGGGCAATTAGCTAGAGCAGCAGG  
TGCTGTAGCGAAACTGATTGCAAAAAGAGGGTAAATTGGCCACTTTAAGATTACCATCTG  
GGGAGGTCCGTTTGGTATCCCAAAACTGCTTAGCAACAGTCGGACAAGTGGGTAAATGT  
TGGGGTGAACCAAAAAAGTTTGGGTAGAGCCGGATCTAAGTGTTGGTTAGGTAAACGC  
CCCGTAGTAAGAGGGGTAGTTATGAACCCTGTGGACCACCCCATGGGGGTGGTGAAG  
GGAAAGCCCCATTGGTAGAAAAAAACCACAACCCCTTGGGGTTATCTGCGCTTGG  
AAGAAGAACTAGGAAAAGGAAAAAATATAGTGATAGTTTTATTCTTCGTCGCCGTAAG-  
--ATGATTCAACCTCAGACCCTTTTAAATGTAGCAGATAACAGTGGAGCTCGAAAATTGA  
TGTGTATTTCGAGTCATAGGAGCCGCTGGTAATCAGCGATATGCTCGTATTGGTGTATGTTA  
TTATTGCTGTAATCAAAGACGCAGTGCCCAAATGCCTCTAGAAAGATCCGAAGTAATT  
CGAGCTGTAATTGTACGTACACGTAAAGAATTCAAAGGCGACGACGGTATAATAATACG  
CTATGATGACAATGCAGCAGTTATCATTGATCAAAAAGGAAATCCAAAAGGAACTCGA  
GTTTTTGGCGCGGTTGCCGAAGAATTAAGAGAATTGAATTTTACTAAAATAGTTTTATT  
AGCTCCTGAAGTATTAATGCTTAGTCCCAAAGAAGACTAGATTTTCGTAAACAACATAGAG  
GAAGAATGAAGGGAAAATCCTGCCGAGGCAATCATATTTGTTTTGGTAGATATGCTCCT  
CAAGTACTTGAACCCGCTTGGATCACCGCGAGACAGATAGAAGCAGGACGAAGAGCA  
ATGACACGATATGCACGTCGTGGTGGAAAAATATGGGTGCGTATATTTCCCGACAAACC  
GGTTACAATAAGACCCACAGAAACACGTATGGGCTCGGGAAAGGGATCCCCGAATAT  
TGGGTAGCCGTTGTTAAACCAGGTGCAATACTTTATGAAATGAGCGGAGTATCCGAAAC  
TG TAGCTAGAGCAGCTATCTCTATAGCTGCCAGTAAAATGCCCATACGAAGTCAATTTCT  
TCGATTAGAGATGACCAGAGTTCCGCGAGGATATATAGCTCGGAGACGACGAACAAAA  
ATGCGTTTCAATTTGCCTCAAACCTTTAGAGGGGCTCATTTAAGACTTAATCGAATGATTACT  
CAACAAGTAAGAAGAGCTTTTGTCTTCTCATCGAGATAGAGGCAGGCAAAAAGAGG  
GATTTTCGTCGTTTGTGGATCACTCGGATAAACGCAGCAACACGGGTATAT-----GTATTC  
AATAGTTATAGTAAATTAATACACAATCTGTCCAAGAAGGAATTGATTCTTAATCGTAAA  
ATGCTTGCACAAGTAGCTGTATCAAATCCAAATAATCTTTACACGATTTCCAATAAAATA  
AGGACTATCAAT-----AGGATAAAGCGGGTTTTCAAAGCACAAAAACG  
CATACATATGCTGTTTTCAAAGCACAAAGAGTTCTAGATGAGATTCGCTGGCGTTACT  
ACGAGGAAACCGTTATGATACTGAATCTCATGCCTTATCGAGCATCGTATCCCATCTTAA  
AGTTGGTTTATTTCGGCAGCAGCAAATGCTACTCATTATAGGGATTTTCGACAAAACGAAT  
TTATTCATCACTAAAGCCGAAGTCAGTAGGAGTACTATTATGAAAAAATTCAGACCTCG  
AGCTCGAGGACGTAGTTATTCTATAAAAAAACGATGTGTAATATAACAATTGTACTAA  
AT--GTAAAGAAATCT-----ATGGATGGAATCAAATACGCAGTATTTACAGAA  
AAGAGTCTTCGTTTATTGGGAAAGAAT--CAATATACTTTAATGTCGAATCGGGATTCA  
CTAAGACAGAAATAAAGCATTGGGTGCAACTCTTCTTTGGTGTTAAGGTAGTAGCTGTG  
AATAGCCATCGACTACCCGAAAGGGTAGAAGAATGGGACCTATTCTGGGACATACAA  
TGCATTACAGACGTATGATCATTACCCTTCAACCGGGTATTCTATTCCACTTCTAGATAG  
AGAAACGAACATGGCAGTTCCAAAAAACGTACTTCGATGTCAAAAAGCGTATTCGT  
AAAAATCTTTGGAAAAAAAAGACTTATTTTTCCATAGTACAATCTTATTCTTTAGCAAAA

TCATTTTCTAGCGGCAAACCAAAGGTTTTCTGGGCAACAAGCAAACAAAATGGCCA  
AGGGCAAAGATGTTAGAATCCGAGTTATTTTGAATGTATTAGTTGTGTTTCGAAAG-----  
GGT-----AAGGAATCGACGGGATTTCTAGATATAAGTACTCAAAGAATCGCCACAATAC  
GCCCCGACAATTAGAATTAAGAAAATTTTGTGTTATTGTGCGAAAGCATACCACTCATA  
ATGAAATAAAGAAAATGAAAATAAGAGCTTCCGTTTCGTAATAATTTGTACAAAATGTGCG  
ACTGATTCGCAGGCGTGGGCGAATTAGAGTCATTTGTTCCAATCCGAAGCATAAACA  
AGACAGGGGATGGTTCGAGAAGAGATAACAGGATCCACTCAAAAAGTAGAGTGGAAG  
TGTGTTGAATCAAGAGTAGATAGTAAACGTCTTTATTATGGTTCGTTTCATTCTGTCTCCG  
CTTAGAAAGGGCAAGCGGATACTGTGCGTATTGCCTTGCGAAGAGCTTTACTTGGAG  
AAATAGAAGGAACATGTATCACACGCGCAAATTTGGG-----AACGTGCCACATGAATA  
TTCCACAATAGTAGGTATTGAAGAATCCATACAAGAAATTTTACTAAATTTGAAAGAAA  
TTGTATTGAGAAGTAATCTCTATGGAGTTAGAGACGCATCAATTTGCGTCAAAGGTCCT  
AGATACATAACCGCTCAAGATATAATCTTACCGCCTTCCGTAGAAATCGTTGATACGGCA  
CAACCTATAGCTAACTTGAGAGAGCCATTGATTTCTGTATTGAGTTACAGATCAAGAG  
AGATCGCGGATATCATAACGGAAGTCAAGAAAGACTCTCAAGATGGAAGTTAT-----CCTA  
TAGATGCTGTATTCATGCCTGTTTCGAAATGTGAATTATAGTATTTTTTCTTGTGGGAATGG  
AAATGAAAACACGAGATACTTTTTTTAGAAATATGGACGAATGGAAGTTTAACTCCTA  
AAGAAGCGCTTTATGAAGCTTCTCGTAATTTGATTGATTTATTTCTTCTTTTATACACAC  
GGAGGAAGAG-----GGCACTAGTTTCGAAGAAAGTAAA---AACAGGTAACTCCACCCC  
TTTTAACCTTTCAAAAAGATTCACT---AATCTAAAGAAAACAAAAA---GGAATTCC  
ATTGAATTGTATTTTTTATTGATCAATTAGAATTGCCTTCTAGAACGTATAATTGTCTCAA  
AGGGCCAATATACATACTATTGGACCTTTTGAGTAAGACTGAAGAAGATCTTATGCG  
AATTAATAGTTTTTCGTATGGAAGATGGAAACTGATATGGGACACTCTAGAGAAGCAT---  
---CTCCAATTGATTTACCTAAGAACAAGATGCTCCGGAATGGAAT---GAGGGAATGTC  
CACAATACCCGGATTTAGTCAGATCCAATTCGAGGGATTTTGTAGATTCATTAATCAAGG  
ATTGGCGGAAGAAGTGTGAGAAGTTTCCACAATTAAGATCCAGATCACGAAATTGCA  
TTTCAATTATTTGCGAAAGGATATCAATTGCTAGAACCTTCGATAAAAGAAAGGAATGC  
TGTGTATGAATCACTCACCTATTCTTCCGAATTATATGTATCCGCGAGATTAATTTTTGGT  
TTC-----GATGTGCAAAGCAAACATTTCTATTGGAAACATTCCTATAATGAATTCCTTA  
GGAACCTTTATAATAAATGGAATATAACCGAATTGTGATCAATCAATATTGCTAAGTCCT  
GGTATTTACTACCGCTCGGAATTAGACCATAAGGGAATTTCTATATACACCGGTACTATA  
ATATCAGATTGGGGAGGAAGGTCGGAATTAGCAATTGATAAAAAGAAAGGATATGGG  
CTCGCGTGAGTAGAAAACAAAAGATATCTATTTTAGTTCTATCATCAGCTATGGGTTTCGA  
ATCTAAGAGAAATTTTAGATAATGTTTCCTACCCGAAATTTTCTTGTCTTTCCCGAATG  
CTAAGGAGAAGAAGAGGATTGAGTCAAAGAAAAGCTATTTTGGAGTTTATCAACA  
ATTTGCTTGTGTAGGTGGGGACCTGGTATTTTCGGAGTCCTTATGCGAGGAATTACAAA  
AGAAATTTTTTCAACAAAATGTGAATTAGGAAGAGTTGGTTCGACGAAATATGAATCG  
GAGACTGAATCTTGATATCCCTCAGAACAATACATTCTTGTACCACGAGATGTATTGGC  
CGCTACGGATCATTTGATTGGAATGAAATTTGGAACGGGTATACTTGACGATGACGATA  
TGAATCACTTGAAAAATAACGTATTCGTTCCGTTGCAGATCTGTTACAAGATCAATTC  
GGACTGGCTCTTGGCCGTTTACAACATGCGGTTCAAAAAGTATCCGTAGAGTATTCAT  
ACGTCAATCGAAA-----CCGACTCCACAACTTTGGTAACTCCAATTCACTTCGATTT  
TATTAATCACTACTTATGAGACCTTTTTTGGCACATACCCCTTAGCTCAAGTTTTTGATC  
AAACCAATCCATTGACACAAACGGTTCATGGGCGAAAAGTGAGTTGTTTGGGTCCTGG

AGGATTGACGGGGAGAACTGCAAGTTTTTCGTAGCCGAGATATTCATCCGAGTCACTATG  
GGCGTATTTGTCCAATTGACACGTCCGAAGGAATCAATGTTGGACTTACCGGATCGTTA  
GCTATTCATGCGAGAATTGATCACTGGTGGGGATCTATAGAGAGTCCGTTTTATGAAATA  
TCTGAGAAAGCAAAAGAAAAAAAAGAG-----AGACAGGTAGTTTATTTATCACCAAATA  
GAGATGAATATTATATGATAGCAGCAGGAAATTCCTTGTCTTGAATCAGGGTATTCAGG  
AAGAACAGGTTGTTCCAGCTAGATACCGTCAAGAATTCCTGACTATTGCATGGGAACA  
GATTCATGTTAGAAGTATTTTTCTTTTCCAATATTTTTCTATTGGAGGTTCTCTCATTCT  
TTTTATTGAGCATAATGATGCGAATCGGGCTTTAATGAGTTCTAATATGCAGCGCCAAGCA  
GTTCCACTTTCTCGGTCCGAGAAGTGCATTGTTGGAAGTGGATTGGAACGACAAACAG  
CTCTAGATTTCGAGGGTTTTCCGTTATAGCCGAACGCGAGGGAAAGATCATTCTAGTGAT  
AGTCACAAGATCCTTTTATCAAGTAGTGGGAAGACCATAAGTATTCCTTTAGTTGCCCA  
TCGGCGCTCTAACAAAAATACTTGTATGCACCAAAAACCTCGGGTTCGCGGGGTAAA  
TCCATTA AAAAAGGGCAAATTTTAGCGGAGGGAGCAGCTACAGTTGGCGGGGAACTT  
GCTTTAGGAAAAACGTTTTAGTAGCTTATATGCCCTGGGAGGGTTACAATTTTGAAGA  
CGCAGTACTAATTAGTGAACGTTTGGTATATGAGGATATTTATACTTCTTTTCACATCCGA  
AAATATGAAATTCAGACGGATACGACAAGCCAAGGCTCCGCTGAAAAAATCACTAAAC  
AAATACCACATCTAGAAGAACATTTACTCCGCAATTTGGACAGAAATGGAGTTGTGAG  
GTTGGGATCCTGGGTAGAACTGGCGATATTTTAGTAGGTAAATTAACGCCTCAGATAG  
CGAGCGAA--TCGTCTATATCGCGGAAGCTGGATTATTACGGGCTATTTTTGGTCTTGA  
GGTATCCACTTCAAAGAAACTTCTCTCAAACCTACCTATAGGTGGAAGAGGGCGCGTT  
ATCGATGTGAAATGGATCCAGAGG-----GACCCATAATGGTTCGTGTATATA  
TTTTACAGAAACGTGAAATCAAAGTTGGGGATAAAGTAGCCGGAAGACACGGGAATA  
AGGGGATCATTCCAAAATTTTGCTAGGCAAGATATGCCCTATTTGCAAGATGGAACA  
CCTGTTGATATGGTCTTCAATCCCTTAGGAGTACCCTCACGAATGAATGTGGGACAAAT  
ATTTGAAAGCTCGCTCGGATTAGCAGGGGATCTGCTAAAGAAACATTATAGAATAGCAC  
CCTTTGATGAGAGATATGAGCAAGAGGCTTCAAGAAAACCTTGTGTTTTCGGAATTATAT  
GAAGCCAGTAAACAAACAAAAAATCCATGGGTATTTGAACCCGAGTACCCGGGAAAA  
AGCAGAATATTTGATGGAAGAACAGGAGATCCCTTCGAACAGCCTGTTCTAATAGGGA  
AGTCCTATATCTTAAATTAATTCATCAAGTTGATGAGAAAATTCATGGACGTTCTACTG  
GGCCCTACTCACTTGTTACCCAACAACCCGTTAGAGGAAGAGCCAAGCAAGGGGGAC  
AACGAATAGGAGAAATGGAAGTTTGGGCTTTAGAAGGATTTGGTGTGCTCATATTTTA  
CAAGAGATACTTACTTATAAATCTGATCATCTTATAGCTCGCCAAGAAATACTTAATGCT  
ACGATCTGGGGAAAAAGAGTGCCTAATCACGAGGATCCGCCAGAATCTTTTCGAGTGC  
TCGTTTCGAGAACTACGATCTTTGGCTCTAGAACTGAACCATTTCTTGTATCTGAGAAG  
AACTTCCGGGTTAATAGGGAGGATGTT-----ATGATTGACCAATATAAACATA  
AACAACTTCAAATTGGACTCGTTTTCCCTCAACAAATAAAGGCTTGGGCTAAAAAAT  
CCTACCTAATGGGGAAAGTCGTTGGCGAAGTCACAAGGCCCTCCACTTTTCATTATAAAA  
CCGATAAACCAGAAAAAGATGGATTGTTTTGCGAAAGAATCTTTGGACCCATAAAAAG  
CGGAATTTGTGCTTGTGGAACTCTCGAGCGAGCGTAGCTGAAAACGAAGACGAAAG  
ATTTTGTCAAAAATGCGGGGTAGAATTTGTTGATTCTCGGATACGAAGATATCAAATGG  
GATACATCAAACCTAGCATGTCCAGTCACTCATGTGTGGTATTTGAAAGGTCTTCCTAGTT  
ATATTGCGAATCTTTTAGATAAACCCCTTAAGAAATTGGAGGGCCTAGTATATGGTGAT---  
---TTCTCTTTTGCTAGGCC---AGCGCTAAAAAACCTACTTTCTTACGATTACGGGGTTTA  
TTCGAGGATGAAATTTATCCTGTAACCACAGTATTTCTCCCTTTTTTTCTACCCAGGC

TTTGCAACATTTTCGAAATCGGGAAATTGCAACAGGAGCAGGTGCTATTAGAGAACAAT  
TAGCGGATTTAGATTTGCGAATTATTATAGAGAATTCCTTTGGTTGAATGGAAGGAATTAG  
AAGACGAG---GGGTATAGTGGAGATGAATGGGAAGATAGAAAAAGACGAATAAGAAA  
AGTTTTTTTGGATTAGACGCATGCAATTGGCGAAACATTTTATTCAAACAATGTAGAAC  
CAGAATGGATGGTTTTGTGCTTATTACCGGTTCTTCTCCCGAATTGAGACCCATTGTTT  
ATAGATCTGGGGATAAAGTAGTGACTTCAGATATTAATGAACTTTATAAGAGAGTTATCC  
GCCGGAACAACAACCTTGCCTATCTATTAATAAGAAAGTGAATTAGCACCAGCAGATTT  
AGTAATGTGCCAGGAAAAATTGGTACAAGAAGCCGTGGATACACTTCTTGATAAGTGGG  
TCCCGCGGGCAACCGATGAGGGATGGTCACAATAAAGTATACAAATCACTTTCAGATGT  
AATTGAGGGTAAAGAGGGGAGGTTTCGCGAGACTCTGCTTGGGAAACGGGTTCGATTA  
CTCGGGGCGTTCTGTCAATTGTTGTGGGTCTTCGCTTTCATTACATCAATGTGGATTACC  
TCTAGAGATAGCAATAAAGCTTTTTTCAGCTATTTGTAATTCGCGATTTAATCACGAAACG  
TGCTACTTCTAATGTCAGGATTGCTAAAAGGAAAAATTGGGAAAAGGAACCCATTGTAT  
GGGAAATACTTCAAGAAGTTATGCGGGGACATCCTGTACTGTTGAACAGAGCACCTAC  
CCTGCATAGATTAGGCATACAGGCCTTCCAACCCACTTTAGTAGAGGGACGTAATTT  
GTTTACATCCATTAGTGTGTAAGGGTTTCAATGCGGACTTTGATGGGGATCAAATGGCT  
GTTACCTACCTTTATCCTTGGAAAGCTCAGGCGGAAGCCCGTTTACTTATGTTTTCTCAT  
ATGAATCTCCTGTCTCCCGCTATTGGAGATCCTATTTGCGTGCCAACCCAAGACATGCTT  
ATCGGACTTTATGTATTAACGATTGGAAACCGTCGAGGTATTTGTGCAAATAGATATAAT  
AGTTGCGGAAAC-----TCTCCAAATAAAAAAATCAACTACAATAATTATAAGTATA  
CGAAAGATAAAGAACCCCATTTTTCTAGTTCCTATGATGCACTGGGAGCTTATAGACAG  
AAACGAATCGGTTTAAACAGTCCCTTGTGGCTCCGATGGAAACTAGATCAACGC---ATC  
GTTGGGTCA-----AGAGAAGTTCCGATTGAAGTTCAATATGAATCTTTTGGGACTTATCA  
TGAGATTTATGCCACTATCTAGTAGTGGGAAATAGAAAAAAGAAATCCGTTCTATAT  
ACATTCGAACCACTCTTGGTCATATTTCTTTTTATAGAGAAATAGAGGAAGCCATACAA  
GGATTTAGTCCGGCCTATTCATACACTATC-----ATGGCAGAACG  
GGCCAACCTGGTCTTTTCATAATAAAGAGATAGACGGAAGTCTATGAAACGGCTTATTA  
GCAGATTAATAGATCATTTCCGAATGGGATATACTCCCATATACTGGATCAAATAAAGA  
CTCTGGGCTTCCATCAAGCCACTACTACATCGATTTCTTTAGGAATCGAGGATCTTTTAA  
CAATACCTCTAAAGGATGGTTAGTCCAAGACGCGGAACAACAGAGTTTTCTTTTGGGA  
GAAACACTATTATTATGGAGCTGTACACGCGGTAGAAAAATTACGCCAATCCGTTGAGA  
TATGGTATGCTACAAGTGAATATTTGAAACAAGAAATGAATTCGAATTTTCGAATAACG  
GATCCTTCTAATCCAGTCTATCTAATGTCTTTTTCAGGAGCCAGAGGAAATGCATCTCAG  
GTACACCAATTAGTAGGTATGAGAGGGTTAATGGCGGATCCTCAAGGACAAATGATTGA  
TTTACCTATTCAAAGCAATTTACGCGAGGGACTTTCTTTGACAGAATATATAATTTCTG  
CTACGGAGCCCGAAAAGGGTTGTAGATACTGCTGTACGAAACAGCGGATGCTGGCTAT  
CTTACACGTAGACTTGTGTAAGTAGTTCAACATATTATTGTGCGTAGAAGAGATTGTGG  
TACTATCCAAGGTATTTCTGTGAGTCTCAAATGGGATGACGGAA-----AACTTTTTG  
TCCAAACACTAATTGGTCGTGTATTAGCAGACGATATATATATTGGTTCACGATGCATTG  
CTTCTCGAAATCAAGATATTGGAATTGGATTAGTCAATCGATTCATAACTGCCTTTCGAG  
CACAACCGTTTCGAGCACAACCAATATATATTAGAACCCCTTTACTTGCCGGAGCACA  
TCTTGGATCTGTCAATTATGTTATGGGCGGAGTCCCACTCATGGGGATCTGGTTCGAATT  
GGGGGAAGCTGTAGGTATTATTGCGGGTCAATCAATTGGGGAGCCAGGGACTCAACTA  
ACATTAAGAACTTTTCATACTGGTGGAGTATTCACAGGGGGTACTGCCGACCTTATACG

ATCCCCCTCGAATGGAAAAATCCAATTCAATGAGGATTTGGTTCACCCACACGTACCC  
GTCATGGGCAGCCTGCTTTTCTATGCTATATAGACTTGCATGTAAC TATTCAGAGTCAGG  
ATATTCTACATAGTGTGAATATTCCGTTAAAAAGCTTGATTCTAGTGCAAATGATCAAT  
ATGTAGAATCTGAACAAGTAATTGCGGAGATTTCGTGCCGGAACGTCCACTTTG-----TTT  
AAAGAAAAGGTACAAAAGCATATTTATTCCGAATCAGACGGGGAA---ATGCACTGGAG  
TACTGATGTTTACCATGCGCCC GAATATCAATATGGTAATCTTCGTGATTACCAAAAAC  
AAGCCATTTATGGATATTGTCAGTAAGTATGTGCAGA-----TCCAGTATAGCATCTTTTTC  
ACTGCACAAGGATCAAGATCAAATGAATACTTATTCTTTTTCTGTTGATGGAAGA-----T  
ATATCTTTGACTTCTCA-----ATGGCTAAT--GATCAAGTAAGCCATAGACTGTTGGATACT  
TTTGGT-----GATAGGGAAATTCTTGATTATTTA---ACGCCAGATCGAATCGTGTCCA  
ACGGTCATTGGAATTGTTTCTATCCTTCT--ATTCTTCAAGATAAT-----TCGGATTTGTTG  
GCGAAAAAGCGAAGAAATAGGTTTGCCGTTCCATTACAATATCATCAAGAACAAGAAA  
AAGAGCGAATATCCTGTTTGGGTATTTCAATGGAAATACCCTTTATG-----GGTGTTTTAC  
GTAGAAATACTATTTTTGCTTATTTTGACGATCCACGATACAGAAAAGAT-----GGAATTG  
TTAAATTTAGAAGCCCGGAGGAAGATTCTATCTTAAAA-----AAAGAGGGTTTTATTGAG  
CATCGAGGA---ACAAAAGAATTTAGTCTAAAATAC---GAAGTAGATCGGTTTTTTTTTCAT  
TCTTCAAGAACTGCATATCTTGCCGAGATCCTCATCCCTAAAGGTACTTGACAATAGTAT  
TATTGGAGTCGATACACA ACTCACAAAAATACAAGAAGTCGACTAGGTGGATTGGTC  
CGAGTGAAGAGAAAAAAAAGCCATACAGAACTCAAATCTTTTCCGGAGATATTCATT  
TTCCTGAAGAGGCGGATAAGATATTAGGT-----GGCAGTTTGATACCCCCAGAAAGAGA  
AAAAAAA-----GATTCTAAGGAA---TCAAAA---AAAAGGAAAAATGGGTTTTATGTTCA  
ACGGAAAAAATTCTCAAAGCAAGGAAAAG-----TATTTTGTTCGGTTCGACCTGCA  
GTCTCATATGAAATGGACGAAGGGAGAAATTTAGCAACACTTTTCCCGCAGGATCTCCT  
GCAAGAAGAGGATAATCTCCA ACTTCGACTTGTC AATTTTATTTCTCATGAAAATAGCA  
AGTTAACTCAAAGAATTTATCACACGAAT--CAATTCGTTCGAACTTGCTTAGTAGTGAA  
TTGGGAACAAGAAGTAAAAGAGGGGGCTCGT-----GCTTCTCTTGTTGAGG  
TAAGAACAACGATCTAATTCGCGATTTCCTAAGAATTGAGTTAGTCAAGTCTACTATTT  
CGTATACACGAAGAAGGTATGATAGGACAAGTG TAGGACTGATTCCCAAT-----TTAG  
ATCGCAACAATACCAATTCTTTTATTCCAAGGCGAAGATTCAATCA-----CTTAG  
CCAACATCAAGAAGTTATTGGC-----ACCTTGTTGAATCGAAATAAA-----GAATA  
TCCATCTTTGATGATTTTGTGGCATCCA ACTGTTCTCGAATTGGT-----TTATCAAGAA  
TTCGAAATATCCC-----AATGCGGTAAAAGAATCGAATCCTAG AATTCTTATT--GATGT  
TTTTGGGCTCTTAGGCGTTATTGTACCT--AGTATATCGAATTTTCTTCATCT--TACTATT  
TATTAACG-----CATAATCAGATCTTGTTAAAA---AAATACTTGTTCTTGGAC-----AA  
TTTGAAACAAACCTTCCAAGTACTTCAAGGACTTAAATACTCTTTAATAGACGAAAATC  
AAAGG-----ATTCGAATTTTGGC-----AGTAACATCATGTTGGAGCCATTCCATTTGAAT  
TGGCACTTTCTCCATCATGACTCATGGGAAGAGACATTGGCAATAATTCAC---CTTGGA  
CAATTTATTTGTGAAAATTTATGTCTATTTAAATCACACATA-----AAAAAATCTGGT  
CAAATTTTCATTGTTAAT--ATGGACTCCTTTGTTCTAAGAGCAGCTAAGCCTTATTTGGC  
CACTATAGGAGCAACTGTT CATGGTCATTATGGAAAATCCTTTACAAAGGAGATAGGT  
TAGTTACGTTTATATATGAAAATCGAGATCCAGTGATATAACGCAAGGTCTTCCAAA  
GTAGAACA AATCTTCGAAGCGCGTTCAATTGATTCACTATCGCCGAATCTCGAAAGGA  
GAATTGAGGATTGGAATGAACGTATACCAAGAATTCTTGGGGTTCCCTGGGGATTCTTG  
ATTGGAGCTGAGCTAACCATAGCCCAAAGTCGTATCTCTTTGGTTAATAAGATCCAAA



GGTTTATCGATCCCAAGGGGTACAGATCCATAATAGACATATAGAGATTATTATACGCCA  
AGTAACATCAAAAAGTAAGGGTTTCCGAA-----GATGGAATGTCTAATGTTTTTTTACCT  
GGGGAATTAATAGGACTATTGCGAGCGGAACGAGCAGGGCGGGCTTTAGATGAATCGA  
TCTATTATCGGGCAATCTTATTGGGAATAACAAGGGCTTCCCTGAATACCCAAAGTTTCA  
TATCTGAAGCAAGTTTTCAAGAACTGCTCGAGTTTTAGCAAAAGCTGCCCTACGAGG  
TCGTATTGATTGGTTGAAAGGCCTGAAAGAAAACGTAGTTCTGGGGGGGATTATACCT  
GTTGGTACCGGATTCCAAAAATTTGTGCATCGTTCCCA-----CAAGACAAGAACCTTTA  
T-----TTCGAAATTAAAAAAAAAAATCTATTTCGCGTCGGAAATG-----AGAGATATTTTGT  
TTCTCCATACAGAATTAGTTTCTTCTGATTCTGACGTAACAAAC-----TCAGAGACCCC  
GTTTACCCCTATTTATACGATT-----ATGACAAGAAGATATTGGAACATCAATTT  
GAAAGAGATGATAGAAGCGGGAGTTCATTTTGGTTCATGGTATTAAGAAATGGAATCCC  
AAAATGGCCCCTTACATCTCGGCAAAGCGTAAAGGTACTCATATTACAAATCTTGCTAG  
AACAGCTCGTTTTTATCAGAAGCTTGTGATTTAGTTTTTGGATGCAGCAAGTCAGGGAA  
AAAGCTTCTTAATTGTTGGTACCAAAAAAAGAGCAGCGGATTTAGTAGCATCAGCTGC  
AATAAGGTCTCGTTGTCATTATGTTAATAAAAAGTGGTTCAGCGGTATGTTAACGAATTG  
GTCGATTACCAAACTAGACTTTCTCAATTTAGAGACTTAAGAGCAGAAGAAAAAATG  
GGAAAATTCCACCATCTCCAAAAAGAGATGCGGCAATCTTAAAGAGAAAATTATCTA  
CCTTGCAAAGATATCTCGGCGGGATCAAATATATGACGAGGTTGCCTGACATTGTGATC  
GTCCTTGATCAGCAAAAAGAGTATATAGCTCTTCGGGAATGTGCCATTTTGGGGATTCC  
TACTATTTCTTTAGTCGATACAAATTGTGACCCAGATCTTGCGAATATATCGATTCCCTGCC  
AACGATGACACTATGACTTCAATTCGATTAATCTTAACAAATTAGTATTTGCAATTTCT  
GAGGGCCGTTCTCTC---TATATAAGAAATCGTATGGGACAAAAAATAAATCCACTCGGTT  
TCAGACTTGGTACAACCCAAAATCACCATTCCTTTTGGTTCGCACAACCAAAAAATTAT  
TCTGAAGGTCTACAGGAAGATAAAAAAATACGGAATTGTATCAAGAACTATATACAAAA  
GAATAGGAAAAAAGGCTCGAATAAAATGGAATCAATTACACATATAGAAATTCAAAA  
GAAATCGATACAATCCACGTCATAATCCATATTGGATTCCCAAT---TTATTAAGAAAA  
AGGGA-----GCAATCGAAGAATTAGAGAAAGATCTCCAAAAGGAAGTTAATTCT  
GTAAACCAGAGACTTAATATTGCTATTGAAAAGGTTAAAGAACCTTATAGACAACCTAA  
TATTTCTGCGGAATATATAGCTTTCCAATTAATAAATAAGAGTTTCATTCCGAAAAGCAAT  
GAAAAAAGCTATTGAATTAATAAATAAAGCGGATATAAAGGGAATAAAAATCCAAATT  
GCGGGTCTGCTAGCAGGAAAAGAAATTGCACGTGCCGAATGCATCAAAAAGGGTAGA  
CTACCCCTCCAAACAATTCGCGCTAAAATTGATTATTGCTGCTATCCAATTCGAACTATC  
TATGGAGTATTAGGTGTCAAAATTTGGATATTCGTAGAGAAGAAATGTCCCATTATCG  
AGGGCCTCGTTTAAAAAAAATACGCCGTCTGGGAGCTTTACCAGGACTACTAGAAAA  
ACGCCTAAATCCGGAAGTAATCAGAAAAAGAAATTCATTCTGGGAAA---AAAGAGCA  
ATATCGTATTCGTCCTCAAGAAAAACAGAAATTGCGTTTTTCATTATGGTCTGACAGAAC  
GACAATTACTIONTAGATATGTACATATCGCTGGAAAAGCGAAAAGATCCACAGGTCAGGTT  
TTACTACAATTACTIONTGAATGCGTTTTGGATAATATCCTTTTTTCGATTGGGTATGGCTTCAA  
CCATTCCTGGGGCCCGACAATTAGTTAACCATAGACATATTTTAGTTAATGGTTCGTATAG  
TTGATATACCAAGCTTTTCGTTGCAAACCCCGAGATATTACTACGAAGGATAACCAAC  
GATCAAAACGTTTGGTTCAAATTTATATTGCTTCATCCGATCCGAAA-----TTACCAAAG  
CATTTGACGTTGACACA-----TTGCAATATAAAGGACTAGTCAAAAAAATTCTAGATAG  
GAAGTGGGTCGGTCTCAAATAAATGAGTTGTTAGTTGTAGAATATTATTCTCGCCAGA  
CTATGTCACGTCGAGGTACTIONTGCAGAAAAAAGAACCACAAAATCCGATCCAATTTTTTCG

TAATCGATTAGTTAACATGGTGGTTAACCGTATTATGAAAGACGGAAAAAATCATTGG  
CTTATCAAATTCTCTATCGAGCCGTGAAAAAGATTCAACAAAAGACAGAAACAAATCC  
ACTATTGGTTTTACGTCAAGCAATACGTAGAGTAACTCCCAATATAGGAGTAAAAACAA  
GACGTAAAAAAGGATCGACGCGGAAAGTTCCGATTGAAATAGGATCTAAACAAGGAA  
GAGCACTTGCCATTCGTTGGTTATTAGAAGCATCCCAAAGCGTCCGGGTCGAAATATG  
GCTTTCAAATTAAGTTCCGAATTAGTAGATGCTGCCAAAGGGAGTGGGGGTGCCATAC  
GCAAAAAGGAAGCGACTCATAGAATGGCAGAGGCAAATAGAGCTCTTGCACATTTTCG  
TATGGGCAAGGACACTATTGCTGATTTACTAACCTCTATAAGAAACGCAGACATGAATA  
AAAAAGGGACTGTTTCGAGTAGTATCCACAAATATTACCGAAAACATTGTTAAAATACTT  
CTACGAGAGGGTTTTATTGAAAGTGTTTCGAAACATCAGGAAAGTAACAGATATTTCTT  
GGTTTCAACTTTGCGACATCAAAGGAGAAAGACTAGAAAGGGAATATATAGAACT-----  
--AGAACCTTTTTAAAGCGTATCAGCCGACCTGGCTTACGAATTTATGCCAACTATCAAG  
GAATTCCTAAGTTTTGGGCGGAATGGGAATTGCTATTCTTTCTACTTCTCGAGGTATAA  
TGACAGATCGAGAAGCTCGACTAAACAGAATTGGGGGAGAAGTTTTATGTTATATATGG  
ATGACAAAAGCTATAACCAAAAATAGGTTACGTAAGAAAGTGCGTATTGGTTTTCGTA  
AGAGTGCACGTAGAATAACAAAAGGGGTTATTCATGTTCAAGCCAGTTTCAACAATAC  
CATTATAACCGTTACAGACCCACAAGGTCGGGTCGTTTTCTGGTCTCCGCAGGTACTT  
GTGGATTCAAAGCTCAAGAAAAGCATCACCTATGCTGGTCAAAGAACAGCAGTAGA  
TGCTATTTCGTACAGTGGGT-----TTGCAACGAGCAGAAGTTATGGTAAAAGGTGCTGG  
TAGCGGAAGAGATGCCGCATTACGAGCTATTGCTAAAAGTGGTGTACGGTTAAGTTGTA  
TACGCGATGTAACACCTATGCCGCATAATGGATGTCGACCTCCTAAAAAAGACGTCTG  
CACCTACATGTTCTCGACGCTGAGGACATCCCTTAAGCGCGGCCGATTTTCTAGCAT  
TTCGTATTGGCTGTCT--TGCATTTCTAATAAG---TTGTTAAACCGTTGGCATACTATCAAC  
CCAAAAAACCAACTCTGCCTTACGTAAAGTTGCCAGAGTACGATTAACCTCTGGAT  
TTGAAATCACTGCTTATATACCTGGTATTGGCCATAATTTACAAGAACATTCTGTAGTATT  
AGTAAGAGGAGGAAGGGTTAAGGATTTACCCGGTGTGAGATATCGCATTATTTCGAGGA  
ACCTTAGATGCTGTCGCAGTAAAGAATCGTCAACAAGGGCGTTCTAAATATGGGGCCA  
AAAAGCCAAAATGGCAAAAAAAGTTTGATTCAGAGGGAGAAGAAGCGGCATAAAT  
TAGAACAAAATATCATTGATTCGTCGATCCTCAAAAAAAGATAAGAAGCAAAGT  
TTCCCTTTGAGTTTGAGCGAAAAAACA AAAATGCAAGAAAAATTGCAATCCCTACCA  
CGTAATAGTGCACCTACACGCCTTCATCGACGTTGTTTTTTAAACCGGAAGACCTAGAGC  
TAACTATCGAGACTTTGGGCTATCCGGACACATACTTCGAGAAATGGTTTATGCATGTTT  
GTTACCGGGTGCAACAAGATCCAGTTGG-----ATGGTTAAAGAAGAAA  
AACAAGAAAAC-----AGGGGTTCTGTTGAATTTCAAGTATTCAGTTTCACCAATAAGATA  
CGGAGACTTGCTTACATTTAGAATTACACAAAAAAGATTTTTTCATCGGAAAGAGGTCT  
ACGAAGACTTTTGGGAAAACGTCAACGTTTGGCTGGCTTATTTGGCAAAGAAAAATAGA  
GTACGTTATAAGAAATTAATCAGTCAGTTGGATATTCGGGAGAAG-----ATGGTAA  
AACTTCGTTTTAAACGATGTGGTAGAAAGCAACAAGCTATCTATCGAATCGTTGCAATT  
GATGTTTCGATCTCGAAGAGAAGGAAGAGATCTTCGAAAAGTAGGTTTTTATGATCCGAT  
AAAGAATCAAACCTTGTTTAAATGTTCCAGCTATTCTCTATTTCCCTGAAAAGGGTGCTC  
AACCTACAAGAAGCTGTTTATGATATTTAAGGAAGGCAGAATCTTTAAAGATAAAGAA  
AGAAGCTTTGAGT-----TTTCATAAATCTAAGCAACCTTTTCGTAAATTCAAACAACC  
TTTTTCGTAAGGGGCTTCTCGAATAGGCCCGGGGATCGAATTGATTATAGAAACATGA  
GTTTAATTAATCGATTTATTAGTGAACAAGGAAAAATATTATCCAGACGAATAAATAGAT



repeatedly





AAAATATCTTCTGCTTTATACAACCTATCAATCAAATAAAAAGTTATTCTATGTATCAATCC  
TTACATCCCCACAACCTGGTGGAGTGACAGCCAGTTTTGGTATGTTGGGAGATATCATT  
ATTGCCGAACCCAATGCTTACATTGCATTTCGCGGGTAAAAGAGTAATTGAACAAACATT  
GAAGAAGACAGTACCTGAGGGTTCGCAAGTAGCGGAGTATTCATTCCATAAGGGTTTA  
TTTGATCCAATCGTACCGCGTAATCTTTTAAAAGGCGTTCCGAGTGAGTTATTCAGTTC  
CATGGTTTTCTTTCCCGCCCT-----ATGGTAACCATTTCGAGCCGAAGAAATTAGTA  
ATATTATCCGCGAACGGATTGAGCAATATAATAGAGAAGTAAAGATTGTGAACACTGGC  
ACCGTACTTCAAGTGGGCGACGGCATTGCTCGTATTCATGGTCTTGATGAAGTAATGGC  
AGGTGAATTAGTAGAATTTGAAGAGGGTACAATAGGTATTGCTCCGAATTTGGAATCAA  
ATAATGTTGGCGTTGTATTAATGGGTGACGGCTTGATGATACAAGAGGGTAGTTCTGTA  
AAAGCAACAGGACGAATTGCTCAGATACCGGTGAGTGAGGCTTATTTGGGTCTGTGTA  
TAAATGCCCTAGCTAAACCTATTGATGGGAGGGGTGAAATTTTAGCTTCCGAATATCGG  
TTAATTGAGTCTCCCGCTCCAGGTATTATTTTCGAGACGTTCCGTATATGAGCCTCTCAA  
ACGGGGCTTATTGCTATTGATTCGATGATCCCTATAGGACGCGGTCAGCGAGAATTAATT  
ATTGGGGACAGACAGACCGGTAAAACAGCAGTAGCTACAGATACTATTCTCAATCAA  
AAGGTCAAATGTAATATGCGTTTATGTAGCTATTGGTCAAAAAGCATCTTCCGTGGCT  
CAGGTAGTGACTACTTTCCAGGAACGGGGAGCGATGGAATACACTATTGTGGTAGCGG  
AAACGGCGGATTCGCTGCTACATTACAATACCTCGCTCCTTATACAGGAGCCGCTCTG  
GCTGAATATTTTATGTACCGTGAACGACATACCTTAATAATTTATGATGATCTCTCAAAC  
AGGCACAAGCTTATCGCCAAATGTCTCTTCTATTAAGAAGACCACCCGGTTCGCGAAGC  
TTATCCAGGAGACGTTTTTTTATTTGCATTCCCGCCTTTTGGAAAGAGCCGCTAAACCAA  
GTTCTCGTTTAGGCGAAGGAAGTATGACTGCTTTACCAATAGTTGAGACTCAATCCGGG  
GACGTTTCGGCTTATATCCCACTAATGTAATTTCCATTACAGATGGGCAAATCTTCTTG  
TCCGCGGATTTATTCAATGCTGGAATCCGTCCAGCTATTAATGTGGGTATTTCCGTCTCC  
AGAGTAGGATCCGCAGCTCAAATTAAGCCATGAAACAAGTAGCCGGCAAATCAAAT  
TAGAATTGGCTCAATTTGCAGAGTTAGAAGCCTTTGCGCAATTCGCTTCCGACCTAGAT  
AAAGCTACTCAGAATCAATTGGCAAGAGGTCAACGATTACGGGAGTTGCTCAAACAAT  
CCCAATCATCCCTCTCGCGGTGGACGAACAGATAGTTACTATTTATAACCGGAACGAAT  
GGATATCTTGATCAATTAGAAATTGGACAGGTAAGGAAATTTCTTGTTTCAGTTACGTAC  
CTATTTAAGAACGAATAAGCCTCAGTTCCAAGAAATCATATCTTCTACCAAGGTATTAC  
CGAGCAAGCAGAAGCCATTTGAAGGAGGCTATTCAGGAGCAGATCGAACTATTTCTA  
CTTCAGGAACAAACAATGAGAATCAATCCTACTACTTCTGGTCCCGGTGTTTCAACA----  
----AAAATCTGGGACGTATCGCTCAAATCATTGGTCCGGTACTGGATGTAGCTTTTCCC  
CCGGGAAGATGCCTAATATTTACAACCTTTTGGTAGTTAAGGGTCGAGATACCGCAGG  
TCAGGAAATTAATGTGACTTGTGAGGTACAGCAATTATTAGGAAATAATCGAGTTAGAG  
CTGTAGCTATGAGTGCTACAGATGGGCTGATGAGAGGAATGGAAGTGATTGACACGGG  
AGCTCCTCTAAGTGTTCCAGTCGGTGGAGCCACTCTAGGACGAATTTTCAATGTTCTTG  
GAGAACCTGTTGATAATTTAGGTCTGTAGATACTCGCACAACATCTCCTATTCATAGAT  
CCGCACCCGCTTTTATACAGTTAGATAACCAAATTATCAATCTTTGAAACGGGCATTAAG  
TGGTGGATCTTTTAGCGCCTTATCGGCGTGGGGGAAAATCGGACTATTCGGGGGAGC  
CGGAGTGGGTAAAACAGTACTCATCATGGAATTAATCAACAACATTGCCAAAGCTCAT  
GGGGTGTATCTGTATTTCGGCGGAGTAGGAGAACGCACTCGTGAAGGAAATGATCTTT  
ACATGGAAATGAAAGAATCCGGGGTGATTAATGAAGAAAATATTGCAGAATCCAAAGT  
AGCTCTAGTATATGGACAGATGAATGAACCGCCGGGAGCTCGTATGAGAGTCGGTTTG

ACTGCCCTAACCATGGCGGAATATTTCCGTGATGTTAATGAACAAGACGTACTTCTATTT  
ATCGACAATATCTTTTCGCTTCGTCCAAGCGGGGTCAGAAGTATCTGCCTTATTAGGTAG  
AATGCCTTCCGCCGTGGGTATCAGCCTACCCTTAGTACAGAAATGGGTTCTTTGCAAG  
AAAGAATTACTTCTACTAAAGAAGGATCTATAACTTCCATTCAAGCAGTTTATGTACCTG  
CGGACGATTTGACTGATCCTGCTCCTGCTACGACATTTGCGCATTGGATGCTACTACC  
GTAATCAAGAGGATTAGCTGCCAAAGGTATCTATCCAGCAGTAGATCCTTTAGATTCA  
ACGTCAACTATGCTCCAACCTCGGATCGTTGGCGAAGAACATTACGAAACTGCGCAA  
GAGTTAAGCAAACCTTTACAACGTTACAAAGAAGTTTCCAGGACATTATAGCTATTCTTGA  
CTGGACGAATTATCCGAAGAGGATCGTTTAAACCGTAGCAAGAGCGCGAAAAATTGAAC  
GTTTCTTATCACAACCCTTCTTTGTAGCAGAAGTATTTACTGGTTCTCCAGGGAAATATG  
TTGGTCTCGCAGAAACAATTAGGGGGTTTCAACTGATCCTTTCCGGAGAATTAGATAGT  
TTCCCGAGCAGGCCTTTTATTTGGTAGGTAATATCGATGAAGCTACCGCGAAGGCTAT  
GAACTTAGAAGTAGAGAGCAAATTGAAGAAAATGACCCTAAATCTTAGTGTACTGACT  
CCTAATAGAATTATTTGGGATTCAGAAGTGAAAGAAATCATTTTATCTACTAATAGTGGC  
CAAATCGGCGTATTACCAAACCACGCCCCGTTGCCACGGCCGTGGATATCGGTATTTT  
AAGAATACGCTCGACGACCAATGGTTAACGATGGCTCTGATGGGGGGGTTTGCCAGA  
ATAGGCAATAATGAAATCACCATATTAGTAAATGATGCGGAGAAGGGTAGTGATATTGAT  
CCGCAAGAAGCTCAGCAAACCTTTGAAATAGCTGAAGCTAACCTGAGGAAAGCGGAA  
GGCAAGAGACAAGTAATTGAGGCGAATTTAGCTCTCAGACGAGCTAGGGCACGAGTA  
GAGGCTATCAATGCTATTTTCGATGAAAAATCTAACCGATTCTTTTCGTTTTTTGGGTCAC  
TGGCCATCCGCCGGGAGTTTCGGGTTTAAATACCGATATTTTAGCAACAAATCTAATAAT  
CTAAGTGTAGTGCTTGGTGTATTGATCTTTTTTCGGAAAGGGAGTGTTAAGTGATTTATTA  
GATAATCGAAAGCAGAGGATCTTGAGTACTATTCGCAATTCAGAAGAACTATCTGGAG  
GAGCCGTTGAGCAGCTTGAAAAGCACGGGCTCGCTTACGGAAAGTGGAAGGGGAA  
GCGGAGGAGTTTCGAGTGAATGGATACTCTGAGATAGAACAAGAAAAGGTGAATTTGA  
TTAATGCCGCTTATCAGAATTTGGAACAATTAGAAAATTACAAAAACGAAACCATTAT  
TTCGAACAACAAAGAGCGATTAATCAGGTCCAACAACGAGTTTTCCAGCAAGCCTTAC  
AAGGGGCTCTAGGAACTCTGAATAATTGTTTGAACGGCGAGTTACATTTACGCACCATC  
GGTGCTAATATTGGCATACTCGGGGCCATGAAAGAAATAACCGATATGAATCCCCTAATT  
TCTGCTGCTTCCGTTATTGCTGCTGGATTGGCCGTAGGACTTGCTTCTATTGGACCCGG  
AGTCGGTCAAGTACTGCTGCGGGCCAAGCCGTAGAAGGTATCGCTAGACAACCAGA  
AGCAGAGGGTAAAATACGAGGTACTTTATTGCTTAGTCTGGCTTTTATGGAAGCTTTAA  
CAATTTACGGGCTGGTCGTGGCATTAGCACTTTTATTTGCTAATCCCTTTGTGATGAATG  
TTCTACCATGTTCCATCAACACACTAAAGGGGTTATACGAGATATCCGGTGTGGAAGTA  
GGCCAACATTTCTATTGGCAAATAGGGGGTTTCCAAGTGCATGCCCAAGTACTTATAAC  
TTCTTGGGTCGTAATTGCTATCTTATTAGGTTTCAGCCGCTATAGCCGTTCCGGAATCCACA  
AACTATTCCGACCGACGGCCAGAATTTCTTTCGAATATGTTCTTGAATTCATTGAGACG  
TGAGCAAAACTCAAATTGGAGAAGAATATGGTCCTTGGGTTCTTTTATTGGAACCTG  
TTCTATTTATTTTGTCTTAACTGGTCAGGTGCTCTTTTACCTTGGAGAATCATAAGT  
TACCTCATGGGGAGTTAGCTGCACCTACGAATGATATAAATACTACTGTTGCTTTAGCTT  
TACTCACGTCAGTGGCATAATTTCTATGCAGGCCTTACTAAAAAGGGATTGGGTTATTTG  
GTAAATACATTCAACCAACTCCAATACTTTTACCAATTAATGTCTTAGAAGATTTACAA  
AACCTTTATCACTTAGTTTTTCGACTTTTCGGGAATATATTGGCCGATGAATTAGTAGTTG  
TTGTTCTTGTCTTTAGTACCTTTAGTGATTCCTATACCTGTGATGTTCTCGGATTATT



CACAAGCGGTATTCAAGCTCTGATTTTTGCAACCTTAGCCGCGGCTTATATAGGTGAAT  
CCATGGAAGGTCATCATATGATATTTGCAACTTTAGAACATATATTA ACTCACATATCTTT  
TTCGATCATTCAATTGTGATTCTACTCATCTGATGACC---TCGGTCTATGAAATTGTAG  
GACTATGTGATTTGTCGGAAAAAGGCATGATAGCTACTTTTTTCTGTATAACAGGATTAT  
TAGTTACTCGTTGGATTTATTCGGGACATGTACCATTAAGTGATTTATATGAATCATTAAAT  
GTTCTTTTCATGGAGTTTCTCTTTTATTTCATATAGTTCCATATTTTAGAAACTATAAGAATT  
ATTCAGTACAATAACCGCCCCAAGCGCTATTTTAACCCAGGGCTTTGCCACTTCGGGT  
CTTTTAACTAAAATGCATCAATCTGCAATATTAGTGCCTGCTCTCCAATCCCGTTGGTTA  
ATGATGCACGTAAGTATGATGCTGTTGAGCTATGCAGCTCTTTTATGTGGATCATTATTAT  
CCATAACTCTCCTGGTCATTACATTTAGAAGAAACATAGATATTATCGGTAAAACCAATG  
AGATCCAATACTTGAAT-----GTTTCGTTTAGAAATTATCACAGATAT  
CAATTGACTCAGCGATTGGATCATTGGAGTTATCGTGTCAATTGGCTTGGGTTTTACCCTT  
TTAACTATAGGTATTCTTTTCAGGAGCAGTATGGGCTAATGAGGCATGGGGATCTTATTGG  
AATTGGGACCCCAAGGAAACCTGGGCATTTATTACTTGGACCGTATTTCGCGATTTATTC  
ACATACTAGAACAATAAAAAGTTTGCAAGGTGCAAATTCAGCAATTGTAGCTTCTATAG  
GATTTCTTATAATTTGGATCTGCTATTTTCGGGGTTAATCTATTAGGAAGAGGGCTACATA  
GTTATGGTTCATTCACATTAACGTGACGAAAAAA---GCATTGAATCCCCTACCATATCT  
TGCATCTATCGTATTTCTGCCCTGGGGAATTTCTCTCATTTAATAAAAAGTATGGAACC  
TTGGGTGACTAATTGGTGGAATACCAGCCAATCCGAAACTTTTTTGAATGATATTCAAG  
AAAAGAACATTCTAGAAGGATTCATAAAATTAGAAGAACTGTTCTTGTGGACGAAAT  
GATAAAGGAGTATCCGGAGACACATATACAAAAGCTTCGTATAGGAATCCACAAAGAA  
ACGATACAGTTGGTAAGAATGCACAATCAAGATCATATACATATCATTTCGATTTCTCG  
ACAAATATAACCTGTTTCGCTATTCTAAGTGCTTATTCTATTCTGGGTAATGAAGA ACTTA  
TCGCTCTTAATTCTTGGGTTTCAGGAATTCCTCTATAACTTAAGCGACACAATAAAAAGCTT  
TTTCTATTCTCTTATTAACCGATTTATGTATTGGATTCCATTTCGCCCCACGCTTGGGAACT  
AATGATTGGTTCGTTCTACAAAGATTTTGGATTTGTTTCAGAATGATAAAATTATATCCGG  
TCTCGTTTCTACTTTTCCGGTCAATCTAGATACAATTTTGAAATATTGGATCTTTCATTATT  
TAAATCGTGTATCTCCTTCACTTGTAGTGATTTATCATTCACTGAATGAGATGCCCATTTG  
GTGTTCCAAAAGTCCCTTTTTCGGAGTCCTGGAGAGGAAGATGCAGTTTGGGTTGACAT  
ATACAACCGACTTCATCGAGAAAGATTACTTTTTTTAGGCCAAGGTGTTGATAGCGAGA  
TCTCGAATCAACTTGTGGTCTCATGGTATATCTCAGTATGGAAGATAATACCAGGGATC  
TCTATTTGTTTATAAATTCTCCCGCGGATGGGTAATACCAGGGAATAGCTATTTATGATGC  
TATGCAAATTGTTCCACCAGACGTACATACAATATGCATGGGATTAGCTGCTTCGATGGG  
ATCTTTCATCCTGGTCGGAGGAGAATTTACCAAACGTCTAGCATTCCCTCACGCTAGGG  
TTATGATCCACCAACCTGCTAGTTCTTTTTATGAGGCACAAGCAGGAGAATTTATCCTG  
GAAGCAGAAGA ACTGTTGAACTTCGCGAAATACTCACAAAGAGTTTATGTACAAAGA  
ACGGGCAAACCTTTATGGGTTGTATCTGAAGACATGGAAAGGGATGTTTTTATGTCAGC  
AACAGAAGCCCAAGCTCATGGCATTGTTGATCTTGTAGCGGTTCGAAATGAAAGAACAA  
AAATTGATCCATGAAGGTTTAATTACTGAATCACTTCCCAATGGCATGTTCTGGGTTTCGC  
TTAGATAACGAAGACCTGGTTCTAGGTTATGTTTCAGGGCGGATACGACGTAGTTTTAT  
ACGAATACTACCAGGAGATAGGGTTAAAATTGAAGTCAGCCGTTATGATTCAACAAGG  
GGACGTATAATTTATAGACTTCGCAATAAAGATTCAAACGATCAATACGAATTGCAAGG  
CTATTTAGAAATAGATAGATACCGGAAACAGCGCTTCCTATATCCACTTCTTTTTTCGGGA  
GTATATCTATGCACTTGCTCATGATCATGGTTTATTAGGTTATGACAAT--TCTAGTTCACT

AATTGTGAAACGCTTAATTACTCGACTGCATCAACAGAATCATTTAATCATTTCGGTTAA  
TGATTCT-----AGGTTTCGTCGGGAGGAGTTTTTATTCTCAAACGATATCAGAGGGTTTT  
GCAGGAATTATGGAAATTCATTCTCGATGCGATTAGTACCTTCCCTAATAGCAAATAT  
CAG---TTACGATCTATTCAATCAATATTTCCCTTTTTAGAGGACAAATTATCACATTTATAT  
TATGTGTCAGATATACTAATACCCACCCAATCCATCTGGAAATCTTGCTTCAAACCTTT  
CGCACCCGGATACGAGATGCTCCTTCTTTGCATTTATTGAGATGCTTTCTACACGAGCAT  
CATAATTGGAATAGCCTTATTACTAAATCCACTTCAATTTTTTCAAAGCAAAGATTATTCT  
TGTTCTTGATAATTCTCATGTATATGAATGCGAATCCGTATTAGTTTTCTTCGTAACA  
ATCCTCTCATTACGGTCAATATCTTCTTAGCCTTTCTTGAGAGAACACATTTCTATGG  
AAAAATAAAACAT---GTAGTGGCACCTCGTAATCAAAGGCCCTCTGGTTCTTCAAGGA  
ACCCTTGATGCATTATGTTAGGTATCAAGGAAAATCAATTATGGCTTCAAGGTGACTAA  
TTTACTGATGAAGAAATGGAAATATTACCTTGTTAATTTCTGGCAATGTCATTTTCACTTA  
TGGTCTCAACCGGGTGGGATCCATATAAATGAATTATCCAATCATTCTTTCTATTTTCTGG  
GCTATCTTTCAGGTGTACGACTAATGCCTTGGGTGATAAGGAGTCAAATGCTAGAGAAT  
TCATTTATGATCGATACTGCTATT-----AAGAGATTTCGATACAATAGTCCCAATTTTTCTC  
TGATTGGATCGTTGGTTAAAGCGAAATTCTGTAACGTATCAGGGTATCCTATTAGTAAAT  
CAGTCTGGGCCGATTTCGTCGGATTCTGATATTATTGCTCGATTTCGGGTGGATATGCAGAA  
ATCTCTCTCATTATCACAGCGGATCCTCAAAAAAACACAGTTTGTGTGCAATAAAGTAT  
ATACTTCGACTTTCGTGTGCTAGAACTCTAGCTCGTAAACATAAAAGTACGGTACGCGT  
AATCTGTAAGAGATTAGGTTCGAAACTATTGGAAGAGTTCCTTACAGAGGAACAAGAA  
ATTGTTTCTTTCATCTTCCGAGGACGGATTTGGTATTTGGATATTATCCGTATCAACGGTC  
TGGTCCCCCATTCAATGATAATTGAAGAAGCACAA-----GCTATCAATTCTTTTTTCA  
GATCGGAATCC---TCAAAGGAGGTCTATGGGCTCATATGGTTACTTGTACCTATTTTGAC  
TCTTGTATTGGGAATCACAAATAGGGGTATTAGTAATTGTGTGGCTAGAAAGAAAAATAT  
CTGCAGGGATACAACGACGAATTGGTCTGAGTATGCCGGTCCCTTGGGGATTCTTCA  
AGCTCTAGCGGATGGGGTCAAACACTTTTTCAAAGAAGATCTTCTTCCATCTAGAGGA  
GATATTCGTTTATTTAGTGTGCGCCCATCTATAGCGGTTCGTATCAATTCTACTGAGTTATT  
CAGTAATTCCTTTTGGCCATCACCTTGTTCTAACCGATCTCAGTATAGGTGTTTCTCTAT  
GGATCGCTATTTCAAGTATTGCCCCATCGGACTTCTTATGTCCGGATATGGATCAAATA  
ATAAATATTCTTTTCAGGTGGTTTACGAGCTGCTGCTCAATCTATTAGTTATGAAATACC  
ATTAACCTCATGCGTGTATCCATATCTCTACTATCTAACAGTTCAAGTACGGTTGATATA  
GTTGAGGCGCAGTCAAATATGGTTTTTGGGGGTGGAATCTTTGGCGTCAACCTATAGG  
GTTTATAGTTTTTATAATTTCTTCACTAGCAGAATGTGAGAGATTGCCCTTTGATTTACCG  
GAAGCCGAGGAGGAATTAGTAGCAGGTTATCAAACCTGAATATTCAGGTATAAAATTTGG  
TTTATTTTATGTTGCTTCTTACCTAAATCTACTAGTTTCTTTCATTATTTCGTAACAATTCTGT  
ACTTGGGCGGGTGAATCTTTCTATTCATATATACCAATTACTGAACTTTTCGAAAAAA  
ATCAAACCTAGTGAAGTCTTTGGAACAACAATTAGTCTCCTCATTACATTAGCTAAAGCT  
TATTTGTTCTGTTTCATTCCATCTCAACAAGATGGACTTTACCTAGGATGAGAATGGAC  
CAACTATTAAATCTTGGGTGGAAATCTCTTTTACCTATTGCTCTCGGTAATCTATTATTGA  
CAACTTCTTCCCAACTCGTTTCGCTGATGATCTGGCATGTCCAGAATGAAAACCTTCATT  
CTCGATTCTACGAGAATTTTTATGAAAGCGTTTCATTTGCTTCTCTTCAATGGAAGTTTT  
ATTTCCAGAAATGTATCCTAATTTTTGGCCTAATTCTTCTTCTGATGATCGATTCAACCT  
CTGATCAAAAAGATACACCTTGGTTATATTTTCATCTCTTCCACAAGTTTAGTAATGAGCA  
TAACCGCCCTATTGTTCCGATGGAGAGAAGAACCTATGATTAGCTTTTCGGGAAATTC

CAAACGAACAATTTCAACGAAATCTTTCAATTCCTTATTTTACTATGTTCAACTCTATGT  
ATTCCTCTATCCGTAGAGTACATTGAATGTACAGAAATGGCTATAACAGAGTTTCTGTTA  
TTTGTATTAACAGCTACTCTAGGAGGAATGTTTTTATGTGGTGCTAACGATTTAATAACT  
ATCTTTGTAGCTCCAGAATGTTTCAGTTTATGCTCCTACCTATTATCTGGATATACCAAGA  
GAGATGTACGGTCTAATGAGGCTACTACGAAATATTTACTCATGGGTGGGGCAAGCTCT  
TCTATTCTGGTTTATGGTTTCTCTTGGCTATATGGTTCATCCGGGGGAGAGATCGAGCTT  
CAAGAAATAGTGAACGGTCTTATCAATACACAAATGTATAACTCCCCAGGAATTTTCGAT  
TGCGCTTATAATCCATCACTGTAGGAATTGGGTTCAAGCTTTCCCCAGCCCCTTTTTCATCA  
ATGGACTCCTGACGTATAACGAAGGATCTCCACTCCAGTCGTTGCTTTTCTTTCTGTAC  
TTCGAAAGTAGCTGCTTCAGCTTCAGCCACTCGAATTTTCGATATTCCTTTCTATTTCTC  
ATCGAACGAATGGCATCTTCTTCTGGAATCCTAGCTATTCTTAGCATGATATTGGGGAA  
TCTCATTGCTATTACTCAAACAAGCATGAAACGTATGCTTGCATATTCGTCCATAGGTCA  
AATCGGATATGTAATTATTGGAATAATTGTTGGAGACTCAAATGATGGATATGCAAGCAT  
GATAACTTATATGCTGTTCTATATCTCCATGAATCTAGGAACTTTTGCTTGCATTGTATTAT  
TTGGTCTACGTACTGGAACCTGATAACATTTCGGGATTATGCAGGATTATACACGAAAGAT  
CCTTTTTTCGGCTCTCTTTCAGCCCTATGTCTCCTATCCCTAGGGGGTATTCCTCCATTAG  
CAGGTTTTTTTCGGAAACTCTATCTATTCTGGTGTGGATGGCAGGCAGGCCTATATTTCT  
TGGTTTTCAATAGGACTCCTTACGAGCGTTGTTTTCTATCTACTATTATCTAAAATAATCA  
AGTTATTAATGACTGGACGAAACAAAGAAATAACCCCTCACGTGCGAAATTATAGAAG  
ATCTCCTTTAAGATCAAACAATCCATCGAATTGAGTATGATTGTATGTGTAATAGCATCT  
ACTATACCAGGAATATCAATGAACCAATTATTGCAATTGCTCAGGATACCCTCTTTATG  
TTTCTGCTTCACGAATATGATATTTTCTGGGCATTTCTAATGATATCAAGTGTTATTCCTAT  
TTTGGCATTATAATTTCCGGGGTTTTAGCCCCAATTAGTGAAGGACCAGAGAAGCTCT  
CCAGTTATGAGTCGGGTATAGAACCAATAGGGGATGCTTGGATACAATTCCGAATCCGC  
TATTACATGTTTGCTCTCGTTTTTGTGTTTTTGATGTCGAAACGGTCTTTCTTTATCCAT  
GGGCCGTGAGTTTCGATGTATTGGGCGTATCCGTATTTATAGAAGCTTTGATTTTCGTGC  
TTATCCCAGTTGTTGGTTCAGTTTATGCATGGCGAAAAGGAGCATTGGAATGGTCTACG  
AGTGATTTTTTATTGGTTAACAATCATTGTTGTTTTGCCCATATCTGCGGGTTCCTTAATTG  
CCTTCTCCCTCATAGAGGAAATAAGGTAGTTCGATGGTATACTATCTGTATCTGCTTATT  
TGAACCTCCTTCAACGACCTACGTATTCTGCTATCATTTTCAATTGGATGATCCATTAATC  
CAATTGGAAGAAGATTTTAACTGGATAAATCTTTTTGATTTTCACTGGAGACTCGGAAT  
CGACGGACTTTCCATAGGACCTATTTTATTGACAGGATTTATCACTACTTTAGCTACTTC  
AGCGGCTCGGCCAGTTACCCGAAATTCGCGATTGTTCCATTTCCCTGATGTTAGCAATGT  
ACAGTGGTCAAATAGGATTATTTTCTTCTCGAGATCTTTTACTTTTTTTTCATCATGTGGG  
AGTTAGAGTTAATTCCTGTTTACCTACTTCTATCCATGTGGGGAGGAAAGAAACGCTCG  
TACTCAGCTACAAAGTTCATTTTGTACACTGCAGGAGGTTCCATTTTTCTCTTAATGGG  
AGTTCTAGGTATGGGTTTATATGGTTCCAATGAACCAAAAATTAATTTTGAACATTAGC  
TAATCAATCGTATCCCGTGGCATTGGAAATAATAATTTTATTTTGGCTTCCTTATTGCTTATG  
CTGTCAAATCACCGATCATACTTTACATACATGGTTGCCAGATACCCATGGAGAGGCG  
CATTACAGTACATGTATGCTTCTAGCTGGAATCTTATTAATAAATGGGAGCATACGGGTTG  
GTTCCGATCAATATGGAATTATTACCCACGCCCATTCATATTTTCTCCTTGGTTGATGA  
TAGTAGGAACTATTCAAATAATCTATGCAGCTTCAACTTCTCTCGGTCAACGCAATTTAA  
AAAAGAGAATAGCCTATTCTTCCGTATCTCATATGGGTTTCATAATAATAGGAATTAGTT  
CTATAACCGATGCGGGACTCAATGGAGCCATTTTACAAATAATCTCTCATGGATTTATTG

GTGCTGCACTTTTTTTCCTGGCAGGAACAAGTTATGATAGAATACGTCTTCGTTATCTTA  
ACGAAATGGGAGGAATAGCTATACTAATGCCAAGAATCTTTACGATGTTTACGATAGCTTC  
TCGATGGCTTCTCTCGCATTACCAGGAATGAGTGGTTTTGTTGCGGAATTGGTGATATTT  
TTGGGAATAATTAAGCTAGCCCAAATACTTGTAGTGTCAAAAATACTAATTACTTTTGTA  
ATGGCAATTGGAATGATATTAACCTATTTATTCATTATCTATGTCACGCCAGATGTTCT  
ATGGATACAGGTTATCAATGTTCCAAACTCTTACTTTGTGGATTCTGGACCACGAGAA  
ATATTTATTTTGATATGTATCCTTTTACCTATAATAGGTATTGGTATTTATCCCGATTTCTGT  
CTCTCACTATCAGTTGACAAGGTAGAAGCTATTCTATCTAATTACTTTTCATGGGATGATG  
CTCGAGCATGTACTTGTGTTTGTAGTGCCTATTTATTTTCTATTGGTATCTATGGATTGATCA  
CAAGTCGAAACATGGTTAGAGCACTTATGTGTCTTGAACCTTATACTGAATGCTGTTAATA  
TGAATCTCGTAACATTTTCTGATTTATTTGATAGTCGCCAATTAAAGGGAGACGTTTTCT  
CGATCTTCGTTATCGCTATTGCAGCCGCCGAAGCAGCTATTGGACCAGCTATTGTTTCTT  
CGATCTATCGTAACAGAAAATCAACTCGTATAAATCAATCAAATTTATTGAATAAAATGG  
AACGCACATATCAATATGCATGGATTATACCTTTTCGTTCCGCTTCTAGTTACTATGTTAAT  
AGGATTGGGACTCCTGCTTATTCCAACAGCAACAAAAAATATTCGTCGTATATGGGCTT  
TTCCCGCTGTTTTATTGTTAAGTATAGTTATGGTCTTTTCCACCAAGCTGGCGATCCAGC  
AAATAAACGGTAGCTCAATTTATGAATATCTATGGTCTTGGAGCATCACCAGTGATTTTT  
CCTTAGAGTTCGGCTACTTGATTGATCCACTTACTTCTATTATGTCGATATTAATCACTAC  
TGTTGGAATCATGGTTCTTATCTATAGTGATAATTATATGTCTCATGACCAAGGATATTTG  
AGATTTTTTGGCTTATATGAGTTTTTCAATACTTCTATGCTGGGATTAGTTACTAGTCCCA  
ATTTGATACAAATCCATATTTTTTGGGAACCTTGTGGGAATGTGTTTCTATTTGTTAATAGG  
TTTTTGGTTTACCCGACCAATTGCAGCAAATGCCTGTCAAAAAGCGTTTGTGACTAATC  
GTGTGGGGGATTTGGTTTATTATTAGGAATCTTAGGTTTTTATTTAATAACAGGTAGTTT  
CGAATTTTCCAGGATTTATTCGAAATATTCAATGATAATGAGATTAATTCCTCATTGCTACG  
TTGTGTGCCTTCTTATTATCCTTGGTGCAGTTGCTAAATCCGCGCAATTCGCGCTTCAT  
GTATGGTTACCTGATGCTATGGAGGGACCTACTCCTATTTCCGGCTCTTATACATGCGGCT  
ACTATGGTAGCCGCAGGAATTTTTCTTGTAGCTCGGCTTCTTCTCTTTTCATAGGCATA  
CCTTACATAATGAATATCATTCTTTGATAGGGCTAATAACGGTACTATTAGGAGCTACCT  
TGGCTCTTGCTCAAAGAGATATTAAGAGAAGTTTAGCTTATTCCACGATGTCTCAATTG  
GGATACATTATGTTAGCTTTGGGTATAGGTTCTTATCGAGCCGCTTTATTCCATTTGATCA  
CTCATGCTTATTCTAAAGCATTATTGTTTTTAGGATCTGGATCAATCATTCAATCCATGGA  
ACCCATTGTTGGGTATTCTCCAGCTAAGAGCCAGAATATGGTTCTTATGGGTGGTTAAC  
CAAATATATGCCAATTACAAAACAACCTTTTTTTTTTAGGTACACTTTCTCTTTGTGGTAT  
TCCACCCCTCGCTTGTTTTTGGTCCAAAGACGAAATTATTAATGATAGTTGGTTGTATTC  
ACCGATTTTTGCGACAATAGCTTGCTACACAGCAGGATTAACCTGCATTTTATATGTTTCG  
TATGTATCTACTTACTTTTCGAAGGACATTTACGTAGTAATTTTAAAAATTACAGCGGACA  
TACAAATAGTTCCTTCTATTCAATATCTATATGGGGGCAAGAAGGTTCCAAACCAGTTAG  
CAGT---AATTTGCTTTTAGCAACAAGGAATTTTTCG---AATAAGGACCCTTATACTTTACT  
ATATCCGCATGAATCGGACAATACCATGTTATTTCCCCTGCTTATATTGGCCATATTTACT  
TTGTTTCGTTGGATGCATAGGAATTCGTTTCGAGGTTGACATATTATCGAAATGGTTAACC  
CCATCGATGAACTTTTACATCAGAATTCAACT-----GAAGATTGGTATAAATTTGTGAC  
GAATGCGTTTTATTTCAGTCAGTATAGCCTATTTTGGAAATTTTATAGCATCCGTTCTATAT  
GGGTCTGTCTATTCAGACCGACAAAATTTGTACTTAATCAATTCATTTGCTATTCGCTTA  
GAACAAATAATAAATGTCATATACTGGTGCATACAATCGCGGCTACATAGACGTTTAT

TACGAAAAAGTATTCATTAGGGGTATACGAGGATTAGCTCAACTAGCTCATTCTTTTGAT  
CGACGAGTAATTGATGGAGTTACGAATGGGGTTGGTGTGCAAGTTTCTTTCTGGGAG  
AAGGGATTAAATAT---ATAGGGGGGGGGCGAATTTCTTCTTATCTATTCTTATATTTAGCT  
TGTGTATCAATAGTCTTACTATTGGTAAAAATGGATTTACCTGCACCAATACATGATATTC  
TTTTAGTATCTCTGGGATCAGGTCTTATAGTAGGAGGTCTAGGAGTGGTATTACTTACCA  
ATCCAATTTATCTGCCTTTTCGTCGGGATTGGTTCCTGTTTGTATATCTTTATTTTATATT  
CCATCGAACTCTTATTTTGTAGCTGCTGCGCAGCTCCTTATTTACGTGGGAGCCATAAAT  
GTCTTAATCCTATTTGCTGTGATGTTTATGAATGGTTCAGAATATTACAATTCTTTTCATT  
TTTGGACTATCGGAGATGGGTTCACTTCGGTAGTTTGTACAAGTATTTTTTTTTCACTAA  
TTGCTACTATCCCAAACACGTCATGGTACGGGATTATTTGGACTACAAGATCAAACCAG  
ATCATAGAACAGGACCTGACAAGTAATGTTCAACAGATTGGGATTCATTTATCAACAGA  
TTTTTATCTTCCATTTGAACTTATTTCTATAATCCTTTTAGTTTCCTTAGTGGGCGCAATT  
GCTATGGCTCGCCGGATGACTGTACCAGACGCAAGAAAAGACCTCCTCGTTGTCAATA  
TGGGTCTCACCACCCGTCATGCATGGTGTCTTCGACTCATTGTTACTCTAGATGGC  
GAAGATGTTATTGACTGTGAACCCATATTGGGTTATTTACACAGAGGAATGGAAAAAAT  
TGCAGAAAACCGAACAAATTATACAATATCTACCTTATGTGACACGTTGGGATTATTTAGC  
TACTATGTTACGGAGGCAATAACGGTAAATGCACCAGAGGAATTGGGAAATATTCAAG  
TACCTAAAAGAGCCAGCTATATCAGGGTAATTATGCTGGAGTTGAGTCGTATAGCTTCG  
CATTTGTTATGGCTTGGACCTTTTATGGCCGATATCGGTGCGCAGACTCCTTTCTTCTATA  
TTTTCAGAGAGAGAGAATTGTTATATGATCTATTTCGAAGCTGCCACAGGTATGCGAATG  
ATGCATAATTATTTCCGTATCGGGGGGGTAGCTGCTGATCTACCTCATGGCTGGATAGAT  
AAATGTTTAGATTTCTGCGATTATTTTTTAACGGGAGTTGTTGAATATCAAAAAGCTTATT  
ACGCGCAATCCTATCTTTTTAGAACGAGTTGAAGGGGTAGGCTTTATTGGGGGAGAGG  
AAGCAATAAATTGGGGTTTATCAGGACCAATGCTACGAGCTTCTGGAATCCAATGGGAT  
CTTCGTAAAGTCGATCGGTATGAGTGTATGATGAATTCGATTGGGAAGTCCAATGGCA  
AAAAGAAGGAGACTCATTAGCTCGTTATTTAGTAAGAATTGGCGAAATGACGGAATCC  
ATAAAAATTATTCAACAGGCTCTAGAAGGAATCCCGGGGGGGCCTTATGAAAATTTAGA  
ATTCCGACGCTTTGCTGGAACAAAAGATTCAGAATTGAACGATTTTGAATATCGATTCA  
TTAGTAAAAAGCCTTCTCCCAGTTTTGAATTGTCAAAAACAAGAACTTTATGTGAGAGTA  
GAAGCCCCAAAGGGAGAATTGGGTATTTTTCTGATAGGAGACAATAGTGTTTTTCTTG  
GAGATGGAAAATCCGTCCACCCGGTTTCATCAATTTGCAAATTCCTCCTCAGCTAGTTA  
AAAGAATGAAATTGGCGGATATTATGACAATACTAGGTAGTATAGATATCATTATGGGAG  
AAGTTGATCGTATGTTTCTTATGGTACTGGGTTTCATGAATTATGGTCAACAGACAGTA  
CGAGCTGCAAGATACATTGGTCAAAGTTTCATGATTACCTTATCTCACGCGAATCGTTTA  
CCTGTA ACTATTCAATATCCTTATGAAAATCGATCACATCAGAGCGTTTCCGTGGGCG  
AATCCACTTTGAATTTGATAAATGCATTGCTTGCGAAGTATGTGTTCCGCTATGTCCGAT  
AGATCTACCTGTTGTTGATTGGCGATTAGAAACAGATATTAGAAAGAAACGATTGCTTA  
ATTATAGTATTGATTTCCGAATCTGTATATTTTGTGGTAATTGCGTGGAGTATTGCCCCAC  
AACTGTTTATCAATGACGGAAGAATATGAACTTTCCACCTACGATCGTCACGAATTAA  
ATTATAATCAAATTGCTTTGGGTCGGTTACCAATGTCTGTAATTGGGGATTACACAGTTC  
GAACAATTATGAATTCAAAATATCTATGGATAAATCCCTTGATTCAAGAACGATTACCA  
AT---ATGCAGGGTCGTTTCATCCGCTTGGCTAGTTAAACACGAGCTAGTTCATAGATCTTT  
GGGCTTTGATTACCAAGGAATAGAGACTTTACAAATAAAGCCCGAGGATTGGTACTCCA  
TTGCTGTCATTTACATACGTATATGGTTACAATTATCTACGTTCCCAGTGTGCCTATGATGT

AGCACCGGGTGGGTTGTTAGCTAGTGTGTATCATCTGACGAGAATACAGTATGGTGTGG  
ACCAACCGGAAGAGGTATGCATAAAAGTATTTGTCCCAAGGAGTAATCCTAGAATCCC  
GTCTGTTTTCTGGATTTGGAAAAGCGCCGATTTTCAAGAACGGGAATCCTATGATATGT  
TGGAATCTCTTATGATAATCATCCACGCATGAAACGGATTTTGATGCCCGAAAAGTTGG  
GTTGGTTGGCCCTACGCAAGGATTATATTGCCCTAATTTCTATGAACTACAGGATGCT  
CAT-----  
-----ATGAATTCTATGGAGTTTCCGTTCCCT  
TGACCGAACAACCCCAATTCAGTTATTTCAACTACATTGAATGATCTTTCGAATTGGT  
CAAGACTTTCAGTTTATGGCCGCTTCTCTATGGTACCAGTTGTTGCTTCATTGAATTTG  
CTTCATTAATAGGCTCTCGATTGACTTTGATCGTTATGGACTGGTGCCAAGATCAAGTC  
CTAGGCAAGCCGACCTTATTTAACAGCCGGTACAGTAACAATGAAAATGGCTCCTTCT  
TTAGTAAGACTATATGAACAAATGCCTGAACCAAATATGTAATTGCTATGGGAGCCTG  
CACTATTACAGGAGGAATGTTTCAGTACCGATTCTTATAGTACTGTTCCGGGGAGTCGATA  
AGTTAATTCCCCTCGATGTCTATTTGCCAGGCTGCCACCTAAACCAGAGGCAATTATA  
GACGCTATAACGAACTTCGTAAGAAAGTATCTCGAGAAATCTATGAAGATAGAACGG  
AGTCCCAACAGGAAAATCGATGTTTTACTACTAATCACAAGTTTCATCTTGGACGCAGT  
ACTCGTGCTGTAAATTATGATCAAGGA-----CTCTATCAATCGACTTCAGAGATACCTT  
CTGAAGCATTTTTCAAATACAAGAGTTCAGTATCTTCTCACGAATTAGTGAATATGCAA  
AAAAATAGAAATTTTTCTTGGGTAAAGGAACAGATGACTCGATGCATTTCCGTATCGAT  
GATGATATATGTAATAACTCGGGCATCTATTTCAAATGCATATCCCATTTTTGCGCAGCAG  
GGTTATGAAAATCCGCGAGAAGCAACTGGGCGTATTGTATGCGCCAATTGCCACCTGG  
CTAGCAAGCCCGTGGATATTGAGGTTCCACAAGCTGTGCTTCTGATACTGTATTTGAG  
GCAGTTGTTAGAATCCCCTACGATATGCAACTGAAACAGGTTCTTGCTAATGGTAAAAA  
GGGAGGTTTGAATGTAGGGGCTGTTCTCATTTTACCCGAAGGATTTGAATTAGCTCCCC  
CTGATCGTATTTCTCCCGAGATGAAAGAAAGGATGGGTAATCTGTCTTTTCAGAGTTAT  
CGTCCTAATAAAAAAATATTCTTGTGGTAGGCCCTGTTCCCTGGTCAGAAATATAGTGA  
AATCGTCTTTCCCATCCTTTCTCCAGATCCCGCTACTAAGAAAGAGGTTCACTTCTTAA  
AATATCCTATATATGTAGGTGGGAACAGGGGAAGGGGTCAGATTTATCCCGATGGAAGC  
AAGAGTAACAATACAGTCTATAATGCTTCAGCAGCAGGTATAGTAAGTAAAATAGTACG  
TAAAGAAAAAGGTGGATATGAAATAACCATAGCTGATGCATCGAATGGACAGCAAACG  
GTTGATATTACCTCGAGGACCAGAACTTCTTGTCTTCTGAAGGTGAATACATCAAGCT  
TGATCAGCCATTAACAAGTAATCCCAATGTAGGTGGTTTTGGTCAAGGCGATGCGGAAA  
TAGTACTTCAAGATCCATTGCGTATCCAAGGCCTTTTGTCTTCTTAGTATCCGTTATTCT  
GGCGCAAATCTTTTTGGTTCTTAAAAAGAAACAGTTTGAGAAGGTTCAATTAGCCGAA  
ATGAATTTTCATGAGTAAAGTATATGATTGGTTTCGAGGAGCGTCTCGAGATTCAAGCGAT  
TGCAGATGATATAACTAGTAAATATGTTCCCTCCTCATGTCAATATATTTTCATTGCTAGGA  
GGGATCACACTTACTTGCTTTTTAGTACAAGTAGCTACAGGTTTTGCTATGACTTTTTAC  
TATCGCCCCGACCGTCACAGAAGCTTTTGCCTCTGTTCAATACATAATGACTGAAGCCAA  
CTTCGGTTGGTTAATCCGATCAGTTCATCGATGGTCAGCAAGTATGATGGTTCTAATGAT  
GATCCTGCACGTATTTTCGTGTTTATCTCACAGGCCGTTTTAAGAAACCACGCGAATTGA  
CGTGGGTTACGGGTGTAGTTCTGGCTGTATTGACTGCATCCTTTGGTGTAACTGGTTATT  
CTTACCTTGGGACCAAATTGGTTATTGGGCAGTCAAATTTGTAAGTGGCGTACCCGAG  
GCTATCCCTGTAGTGGGATCGCCTTTGGTAGAGTTATTACGCGGAAGTGCTAGCGTGGG  
TCAATCCACTTTGACCCGTTTTTATAGTTTACACACTTTTGTATTACCTCTTCTTACTGCC

GTATTTATGTTAATGCACTTCTCAATGATACGTAAGCAAGGTATTTTCAGGTCCTTTAATG  
GGAGTAACAAAGAAACCCGACTTGAATGATCCTGTATTAAGAGCTAAATTGGCTAAGG  
GGATGGGACATAATTATTACGGAGAACCCGCATGGCCTAATGATCTTTTATATATTTTTCC  
CGTAGTAATTCTAGGTACTATTGCATGTAACGTAGGTCTAGCGGTTCTAGAACCATCAAT  
GATTGGTGAACCAGCAGATCCATTTGCAACTCCTTTGGAAATATTACCCGAATGGTACT  
TCTTTCCCGTATTTCAAATACTCCGTACAGTACCTAATAAATATTGGGTGTTCTTTTAAT  
GGTTTCGGTACCAGCGGGATTATTGACAGTACCCTTTTTGGAAAATGTTAATAAATTC  
AAAATCCATTCCGTCGCCAGTAGCTACAACAGTCTTTTTGATCGGTACGGCAGTAGCC  
CTTTGGTTAGGTATTGGAGCAACATTACCTATTGATAAATCTCTAACTTTAGGTCTTTTTA  
TGATTGAAGTTTTTTCATTTGGAATCGTGTTAGGTCTAATTCCTATTACTTTAGCCGGATT  
GTTTGTAACCTGCATATTTACAATACAGACGCGGTGATCAGTTGGACTTTATGCCTACTAT  
AGCTAGTTATTTCCGTTTTCTACTGACTGCTTCAACTATAACCCAGCTCTATTCATTGG  
TCTGAGCAAGATACGACTTATTATGGATATAGTAAGTCTCGCTTGGGCTGCTTTAATGGT  
AGTTTTTACGTTTTCCCTTTCACTCGTAGTATGGGAAGAAGTGGACTCATGATTATTCG  
TTCGCCGGAACCAGAAGTGAAGATTTTGGTGGATAGGGATCCATAAAAACCTTCATTC  
GAGGAATGGGCCAGACCCGGCCATTTCTCAAGGACAATAGCTAAGGGCCCTGATACTA  
CCACTTGGATCTGGAACCTACATGCTGATGCTCACGATTCGATAGCCATAACCAGTGATT  
TGGAGGAGATCTCCCGAAAAGTATTTAGTGCTCATTTCCGGTCAACTATCCATCATCTTTC  
TTTGGCTGAGTGGCATGTATTTCCATGGAGCCCGTTTTTCCAATTATGAAGCATGGCTG  
AGCGACCCTACTCACATCGGACCCAGTGCCAGGTGGTTTTGGCCAATAGTGGGTCAAG  
AAATATTGAATGGCGATGTAGGCGGGGGTTTTCCGAGGAATACAAATAACCTCTGGATTT  
TTTCAGATTTGGCGAGCATCAGGAATAACTAGTGAATTACAACCTTTATTGTACTGCAATT  
GGAGCATTGGTCTTTGCAGCGTTAATGCTTTTTGCGGTTGGTTCCATTATCACAAAGC  
TGCTCCAAAATTGGCTTGGTTCCAAGATGTAGAATCCATGTTGAACCACCACTTAGCAG  
GGTACTAGGACTTGGGTCTCTTTCTTGGGCAGGGCATCAAGTACATGTATCTTTACCG  
ATTAACCAATTTCTGAACGCTGGGGTGGATCCTAAAGAAATACCACTTCCCTCATGAATT  
TATCTTGAATCGGGATCTTTTGGCTCAACTTTATCCAGTTTTGCAGAGGGAGCAACCC  
CGTTTTTACCCTGAATTGGTCAAATATGCGGAATTTCTTACTTTTTCGTGGAGGATTAG  
ATCCAGTAACAGGAGGTCTATGGCTAACCGATATTGCGCACCATCATTTGGCTATTGCAA  
TTCTTTTCCCTGATAGCTGGTCACATGTATAAGACCAACTGGGGCATTGGTCATGACCTG  
AAAGATATTTTAGAGGCTCATAAGGGTCCGTTTACAGGTGAGGGTCATAAGGGCCTCTA  
TGAGATCCTAACAACGTCATGGCATGCTCAATTAGCTCTTAACCTAGCTATGTTAGGTTT  
TTAACCATTGTTGTAGCCCACCATATGTACTCTATGCCTCCTTATCCATAACCTAGCTACT  
GATTATGGTACACAACCTTTTCGTTGTTACACATCACATGTGGATCGGTGGATTTCTCATA  
GTTGGTGCTGCTGCACATGCAGCTATTTTTATGGTAAGAGACTATGATCCAACCTACTCGA  
TACAACGATCTATTAGATCGTGTCCCTTAGGCACCGAGATGCAATCATATCACATCTAAC  
TGGGCGTGATATTTCTAGGCTTTCACAGTTTTGGCTTGTATATTCATAATGATACCATGA  
GCGCTTTGGGGCGTCCCAAGATATGTTTTAGATAACCGCTATAACAATTACAACCTATCT  
TTGCTCAATGGATACAAAACACTCATGCTTTAGCACCTAGCGCAACAGCTCCTGGTGCA  
ACAACAGGCACCAGCTTGACTTGGGGGGGTGGTGATTTAGTAGCAGTAGGCGGCAA  
GTAGCTTTGTTACCTATTCCTAGGGAACCGCAGATTTTTTGGTACATCATATTCATGCA  
TTTACGATCCATGTGACTGTATTGATACTACTGAAAGGTGTTCTATTTGCCCGCAGTTCT  
CGTTTGATACCTGATAAAGCAAATCTTGGTTTTTCGTTTCCCTTGTGACGGACCCGGAAG  
AGGGGAACATGCCAAGTATCCGCTTGGGATCATGTCTTCCTAGGTCTATTCTGGATGT

ACAATGCGATTTTCGGTAGTAATATTCCATTTTCAGCTGGAAAATGCAGTCAGATGTTTGG  
GGTAGTATAAGTGATCAAGGGGTGGTAACTCATATCACGGGGGAAACTTTGCACAGA  
GTTCCATTACAATTAATGGGTGGCTACGAGATTTTTTATGGGCACAGTCTCTCAAGTAA  
TCCAGTCTTATGGCTCTTCATTATCCGCCTATGGTCTCTTTTTCTTAGGTGCTCATTTTGT  
CTGGGCCTTCAGTTAATGTTTCTATTTAGTGGTCGTGGTTATTGGCAAGAACTCATTGA  
ATCCATCGTCTGGGCTCATAACAAATTAAGTTGCTCCTGCTACTCAGCCTAGAGCCT  
TGAGCATTATAACAAGGACGTGCTGTAGGAGTAACCCATTACCTTCTGGGTGGAATTGCC  
ACAACATGGGCATTCTTCTTAGCAAGAATTATTTTCAGTAGGAATGGCATTAAAGATTTCC  
AAGGTTTAGCCAAGGCTTAGCTCAGGACCCACTACTCGTCGTATTTGGTTTGGTATTG  
CTACCGCACATGACTTCGAGAGTCATGATGATATGACCGAGGAACGTCTTTATCAGAAT  
ATTTTTGCTTCTCACTTCGGGCAGTTAGCAATAATCTTTCTGTGGACTTCCGGCAATCTG  
TTTCATGTGGCTTGGCAAGGAAATTTGAGTCATGGGTACAGGACCCCTTACATGTAAG  
ACCCATTGCTCATACTATTTGGGATCCTCATTTTGGTCAACCGGCTGTAGAAGCTTTTAC  
TCGAGGGGGTGCTCTTGGCCCAGTGAATATTGCTTATTCCGGTGTTTATCAATGGTGGTA  
TACAATCGGCATGCGCACCAACGAAGATCTTTATACTGGAGCTCTTTTTCTATTATTATT  
TCTGCCATATCCTTAGTAGCGGGTTGGTTACATCTACAACCCAAATGGAAGCCAAGCGT  
TTCGTGGTCAAAAATGCCGAATCTCGTCTCAATCATCATTTGTCAGGGCTCTTCGGAG  
TAAGCTCCTTGGCTTGGGCAGGACATTTAGTTCATGTCGCTATTCCCGGATCAAGGGGT  
GAATACGTCAGATGGAATAATTTCTTAGATGTATTACCATATCCCCAAGGATTGGGGCCA  
CTTTTACAGGTCAGTGAATCTTTATGCCAAAACCCCGATTCCAGTAGTCATTTATTC  
GGTACCTCCCAAGGAGCGGGAAC TGCCATTCTAACCTTCTCGGGGGATTCCATCCGC  
AAACTCAAAGTTTATGGCTGACCGATATTGCCATCATCATTTAGCTATTGCATTTATTT  
TCTCGTTGCTGGTCATATGTATAGAACTAACTTCGGGATTGGGCACAGTATTAAGATCT  
TCTAGAGGCGCATATTCCTCCGGGGGGTCGATTGGGACGTGGGCATAAAGGTCTTTATG  
ACACAATCAATAATTCGATTCATTTTCAATTAGGTCTTGCTCTAGCCTCTTTGGGAGTTG  
TTACTTCCTTGGTAGCTCAACACATGTACTCTTTACCTGCTTATGCATTCATAGCACAAG  
ACTTTACTACTCAAGCTGCATTATATACTCATACCAATACATCGCAGGGTTCATCATGA  
CAGGAGCCTTTGCTCATGGAGCTATAATTCTTCATTAGGGATTACAATCCGCAGCAGAAT  
GAGGATAATGTATTGGCAAGAATGTTAGACCATAAAGAAGCTATCATATCTCATTTAAGT  
TGGGCTAGCTTGTTCCTGGGGTTCATACCTTGGGACTCTATGTTTATAATGACGTCATG  
CTTGCTTTTGGTACTCCAGAAAAACAAATCTTGATCGAACCCATATTTGCCAATGGAT  
ACAGTCCGCTCATGGTAAGACTTCATATGGGTTCGATGTACTCTTATCTTCAACGAATGG  
CCCAGCATTTAATGCTGGTCAAAGCTTATGGTTACCTGGCTGGTTGAATGCTATTAATGA  
A-----AATCGTAATTCACTATTCTTAACAATAGGGCCCGGGACTTCTTGGTACATCATGC  
TATTGCTCTAGGTTTGCATACAACACTACATTGATCTTAGTAAAAGGTGCTTTAGATGCACG  
TGGTTCCAAGTTAATGCCAGATAAAAAAGATTTGGGTATAGTTTCCCCTGCGATGGTC  
CAGGACGAGGTGGTACTTGTGATATTTTCGGCTTGGGACGCATTTTATTTGGCAGTTTTC  
TGGATGTTAAATACCATTGGATGGGTACCTTCTATTGGCATTGGAAGCATATCACATTAT  
GGCAGGGTAATGTTTCGCAATTTAATGAATCTTCCACTTATTTGATGGGATGGTTAAGAG  
ATTATCTATGGTTAAACTCTTTCGCAACTTATCAACGGATATAATCCTTTTGGTATGAATAG  
TTTATCCGTCTGGGCGTGGATGTTCTTATTTGGGCATCTTGTTTGGGCTACTGGATTCAT  
GTTCTTAATTTCTGGCGTGGATATTGGCAGGAATTGATTGAAACTTTAGCATGGGCTCA  
TGAACGCACACCTTTGGCTAATTTGATTCGCTGGAGGGATAAACCGGTGGCTCTTTCCA  
TTGTACAAGCAAGATTGGTTGGCTTAGCTCACTTTTCTGTAGGTTATATATTTACCTACG



CAGCTTTCTTGATTGCTTCTACATCGGGCAAATTTGGTATGTCACACTCAGTAAAGATTT  
ATGATACATGTATAGGGTGTACCCAATGCGTACGAGCGTGTCTACAGATGTCTGGAA  
ATGATACCCTGGGACGGATGTAAAGCTAAGCAAATTGCTTCCGCACCAAGAACGGAGG  
ACTGTGTAGGTTGTAAGAGATGTGAATCTGCTTGTCCAACGGATTTCTTAAGTATACGG  
GTTTATTTATGGCATGAGACAACCCGTAGCATGGGTCTAGCTTATATGACAGATCTCAAC  
TTACCCTCTATTTTTGTGCCTTTAGTAGGCCATTATTTCCGGCAATTGCAATGGCTTCTT  
TATTTCTCCATGTTCAAAAAAACAATAATTGTCATGCGAGATATCAAAACATACCTTTCC  
GTGGCGCCTGTGCTAACTACTCTATGGTTCGGTTCCTTAGCAGGTCTATTGATAGAGATC  
AATCGCTTATCCCAGATGCGTTGACATTTCCCTTTTTTTCATTCATGACTGCAATTTAG  
AGAGACGCGAAAGCACAAGCCTATGGGGTTCGCTTCTGCAACTGGATAACCAGCACTG  
AAAATCGTCTTTACATTGGATGGTTCGGTGTTTTGATGATCCCTACCCTATTGACCGCTA  
CTTCTGTATTTATTATCGCCTTCATTGCGGCTCCTCCAGTAGATATTGATGGTATTCGTGA  
ACCTGTTTCCGGTCTCTACTTTATGGAAATAATATTTCTGGTGCCATTATTCTACT  
TCTGCGGCTATAGGATTGCATTTTACCCGATATGGGAAGCATCATCCGTGATGAATGG  
TTATATAATGGTGGTCCCTTATGAACTAATTGTTCTACACTTCTTACTTGGTGTAGCTTGT  
ACATGGGTCGTGAGTGGGAGCTTAGCTTCCGTCTGGGTATGCGCCCTTGGATTGCTGTT  
GCGTATTCAGCTCCTGTTGCAGCTGCTACTGCTGTTTTCTTGATCTACCCTATTGGTCAA  
GGAAGCTTCTGATGGTATGCCTCTAGGAATATCTGGTACTTTCAACTTCATGATTGTA  
TTCCAGGCTGAACACAACATCCTTATGCATCCATTTACATGTTAGGCGTGGCTGGTGT  
ATTCGGCGGCTCTCTATTCACTGCTATGCATGGTTCCTTGGTAACCTCTAGTTTGATCAG  
GGAAACTACTGAAAATGAGTCTGCTAATGCAGGTTACAGATTCCGTCAAGAGGAAGAA  
ACCTATAATATCGTAGCTGCTCATGGTTATTTGGCCGATTGATCTTCCAATATGCTAGTT  
TCAACAACCTCTCGTTCCTTACACTTCTTCCCTAGCTGCTTGGCCTGTTGTAGGTATCTGGT  
TCACCGCTTTAGGTATCAGCACTATGGCATTCAACCTAAATGGATTCAATTTCAATCAAT  
CCGTAGTTGACAGTCAAGGTCGTGTTATTAACACTTGGGCTGATATCATTAAATCGTGCTA  
ACCTTGGTATGGAAGTTATGCATGAACGTAATGCTCACAACTTCCCTCTAGACCTAGCT  
GCTGTGCAAGCTCCATCTACAAATGGAATGGGTTTGCCTTGGTATCGTGTTCATACTGT  
CGTATTGAATGATCCTGGTTCGCTTCTGTCCATATAATGCATACAGCTCTAGTTTCT  
GGTTGGGCCGTTCCATGGCTCTATATGAATTAGCTGTTTTTGTATCCCTCTGATCCCGTT  
CTTGATCCAATGTGGCGACAAGGTATGTTTCGTTATAACCTTCATGACTCGTTTAGGAATA  
ACCAATTCATGGGGCGGTTGGAGTATTACA--GGAGGAACTATAACCAATCCAGGTATT  
TGGAGTTACGAAGGTGTTGCCGGGGCACACATTGTGTTTTCTGGCTTGTGCTTCTTGGC  
AGCTATCTGGCATTGGGTGTATTGGGATCTAGAAATATTCTGCGATGAACGTACGGGAA  
AACCTCTTTGGATTTGCCCAAGATCTTTGGAATTCATTTATTTTTATCTGGGGTGGCTT  
GCTTTGGGTTTGGTGCATTTTCATGTAACAGGTTTGTATGGCCCTGGAATATGGGTGTCTG  
ATCCTTATGGGCTAACCGGAAAAGTGCAACCTATAAGTCTTTCGTGGGGCGCGGAGGG  
TTTTGATCCTTTTGTTCGGGGGGAATAGCTTCTCATCATATTGCAGCGGGAACCTTGG  
GAATATTAGCGGGTCTATTCCATCTTAGTGTCCGCCGCCCAACGTCTATACAAAGCAT  
TACGTATGGGGAATATTGAACTGTGCTTTCCAGTAGTATCGCTGCTGTGTTTTTGCAG  
CGTTCGTTGTTGCTGGAACCTATGTGGTACGGTTCGCGACTACTCCGATCGAATTTTGG  
GTCCTACTCGTTATCAGTGGGATCAGGGATTTTCCAGCAAGAAATATATCGAAGAGTT  
AACGCCGGGCTAGCCGAAAATCTGAGTTTATCGGAATCTTGGTCTAAAATTTCCCGATAA  
ACTAGCTTTTTATGATTACATCGGTAATAATCCGGCGAAAGGAGGATTGTTTCAGAGCCG  
GCTCAATGGACAACGGAGATGGAATAGCTGTTGGGTGGTTAGGACACCCTATCTTTAG

AGATAAAGAGGGGCATGAACTTTTTGTACGTCGTATGCCTACCTTCTTTGAAACATTTCCGGTAGTTTTGGTAGATGGAGACGGAATTGTGAGAGCCGATGTTCCTTTTAGAAGGGCAGAATCAAAGTATAGTGTCAACAAGTGGGTGTAAGTGTGAGTTCTATGGTGGTGAACTCGATGGAGTCAGTTATAATGATCCTGCTACTGTGAAAAAATATGCTAGACGTGCCCA GTTGGGTGAAATTTTTGAATTGGATCGCGCTACTTTGAAATCCGATGGTGTTTTTTCGTA GTAGTCCAAGGGGTTGGTTCACCTTTGGACATGCTTCGTTTGCTTTGCTTTTCTTTTTTCG GCCACATTTGGCATGGTGCTAGAACCTTGTTTCAGAGATGTTTTTGGCTGGTATCGACCCA GATTTAGATGCTCAAGTGGAATTTGGAACCTTCAGAACTAGGAGATCCAACCTACAA GGAGACAAGTAGTCATGAAAACCTTATATCCCTGAGGAGGTCTACCCCGTGGAAC GCTCTTTAATGGAACCTTAGCTTTAGCTGGTTCGTGACCAAGAAACCACCGTTTTCGCTT GGTGGGCGGGGAATGCCCGACTTATCAATCTGTCCGGTAAATTACTCGGAGCTCACGT GGCCCATGCCGGATTAATCGTATTCTGGGCTGGAGCAATGAACCTATTTGAAGTGGCTC ATTTTCGTACCGGAGAAGCCTATGTATGAACAAGGATTGATTTTACTTCCCATCTAGCTA CTCTAGGTTGGGGGGTGGGTCCTGGCGGGGAAGTTGTAGACACCTTTCCATACTTTGTA TCTGGAGTACTTCACTTAATTTCCCTCCGAGTCCTAGGCTTTGGCGGTATTTATCATGCG CTCTTTGGACCCGAGACTCTTGAAGAATCCTTTCCATTCTTCGGTTATGTATGGAAGAT AGAAATAAATGACCACAATTTTGGGTATTCACTTAATCTTGTTAGGTCTAGGCGCTTTT CTCCTAGTGTTC AAGGCTCTTTATTTTTGGGGGCGTATATGATACCTGGGCCCCTGGCGG GGGAGATGTAAGAAGAATTACCAACTTGACCCTTAGCCCAAGTATTATATTTGGTTATTT ACTAAAGTCTCCCTTTGGGGGAGAAGGATGGATTGTTAGTGTGGACGATTTAGAAGATA TAATTGGAGGACATGTATGGTTAGGTTCCATTTGTATACTTGGTGAATCTGGCATATCTT AACCAAACCTTTGCGTGGGCTCGTCGCGCATTTGTATGGTCTGGAGAAGCTTACTTGT CTATAGTTTAGGGGCTTTATCTGTCTTTGGTTTCATTGCTTGTGTTTCGTCTGGTTCAA TAATACCGCTTATCCTAGTGAGTTTTACGGGCCTACTGGGCCGGAAGCTTCTCAAGCTC AAGCATTACTTTTTCTAGTTAGAGACCAACGTCTTGGAGCTAACGTGGGATCCGCTCAA GGACCTACTGGTTTAGGTAAATATCTAATGCGTTCCCCGACCGGAGAGATTATTTTTGG GGGAGAACTATGCGTTTTTTGGGATCTCCGTGCTCCTTGGTTGGAACCCCTAAGGGGA CCTAACGGTTTGGACTTGAGTAGGTTGAAAAAAGACATAACAACCTTGGAAGAACGA CGTTCGGCGGAATATATGACTCATGCTCCTTTAGGTTCTTTAAATTCCGTGGGTGGTGTA GCTACAGAGATCAATGCAGTCAATTATGTCTCCTAGAAGTTGGTTAGCTACCTCTCAT TTTGTTCTAGGATTCTTCTTTTTTGTGGGTCATTTGTGGCATGCGGGAAGGGCCCCTGC AGCTGCAGCAGGTTTTGAAAAAGGAATCGATCGCGATTTTGAACCTGTTCTTTTCATGA CTCCTCTTAATATGACTATAGCCCTTGGTAGATTTACCAAAGAAGAA---GATTTATTTGAT ATTATGGATGACTGGCTACGGAGGGACCGTTTCGTTTTTGTAGGTTGGTCCGGTCTATT GCTCTTTCCTTGTGCCTATTTTCGCTTTAGGAGGGTGGTTCACAGGTACAACCTTTGTAA CTTCATGGTATACCCATGGATTGGCTAGTTCCTATTTGGAAGGCTGCAATTTCCTAACCG CTGCAGTTTCTACCCCTGCTAATAGTTTAGCACATTCTTTATTGCTACTATGGGGCCCGG AAGCACAAGGAGATTTTACTCGTTGGTGCCAATTAGGCGGTCTGTGGACTTTTGTGCGCT CTCCACGGCGCTTTCGGACTAATAGGCTTCATGTTACGTCAATTCGAACTTGCTCGATC TGTTCAATTGAGACCTTATAATGCAATCGCATTCTCTGCTCCAATTGCTGTTTTTGTTC CGTATTCCTGATTTATCCACTAGGTCAGTCTGGCTGGTTCCTTTGCGCCTAGTTTTGGTGT AGCAGCTATATTTCCGTTTCATCCTTTTCTTCCAAGGGTTTCATAATTGGACGTTGAACCC ATTTTCATATGATGGGAGTTGCTGGAGTATTGGGTGCTGCTCTGCTATGCGCTATTCACGG TGCTACCGTAGAAAATACTTTATTCGAAGATGGTGACGGTGCAAATACATTCCGTGCCT

TTAACCCA ACTCAAGCTGAAGAGACCTATTTCGATGGTCACTGCTAACCGCTTTTGGTCA  
CAAATCTTTGGGGTTGCTTTTTCCAATAAACGTTGGTTACATTTCTTTATGTTATTTGTAC  
CAGTCACCGGTTTATGGATGAGTGCTCTTGGGGTAGTCGGTCTGGCTTTGAACCTACGT  
GCCTATGACTTCGTTTCCAGGAAATCCGTGCAGCAGAAGATCCTGAATTTGAGACTTT  
CTACACCAAAAATATTCTTTTAAACGAAGGTATTTCGTGCTTGGATGGCGGCTCAGGATC  
AGCCTCATGAAAACCTTATATTCCCTGAGGAGGTTCTACCCCGTGGAACGCTCTTATG  
TCTGGAAGTACGGGAGAACGCGCTTTTGTGATATTATTACCAGTATTTCGATACTGGGT  
CATTCATAGCATTACTATACCTTCCCTATTTCATTGCAGGTTGGTCATTTCGTCAGCACGGG  
TTTAGCTTACGATGTGTTTGGAAAGCCCTCGACCCAACGAATATTTACAGAAAGCAGA  
CAAGGGATTCCGTTAATAACTGGCCGTTTCGATTTCATTGGAACAACCTCGATGAATTTAG  
TCGATCCTTTATGACCATAGATAGAACCTATCCAATTTTCACAGTGAGATGGTTGGCTGT  
TCACGGACTAGCTGTACCTACCGTTTCTTTTTTGGGGTCAATATCAGCAATGCAGTTCAT  
CCAACGAATGGCTACACAAACCATTGAGGGTAGTTCC---AGATCTGGGGCCAAGACGAA  
CTATTATAGGCGATTTATTA AAAACCATTGAATTCGGAATATGGTAAAGTAGCTCCTGGAT  
GGGGA ACTACACCCTTTATGGGTGTCGCAATGGCTCTATTTGCAGTATTCCCTATCTATTAT  
TTTGGAGATTTATAACTCTTCTGTTTTACTGGATGGGATTTTCATTAAGTATGCTTACTCTC  
AAACTGTTTCGTTTATACGGTGGTGATATTCTTTGTTTCGCTCTTCATCTTCGGATTCCCTGT  
CTAATGACCCAGGACGTAATCCTGGGCGCGAGGAAATGGCCGATACTACTGGAAGGAT  
TCCTCTTTGGCTGATAGGTA CTGTA ACTGGTATTCCCTGTGATCGGTTTAGTGGGCGTTTT  
CTTCTACGGCTCATATTCCGGATTGGGATCATCCCTGATGCCTAATATCTTTAGTTTAATC  
TGTATCTGTCTTAATTCTGCCCTTCAG---AGTGGTTTTTTCTTCGCAA AATTGCCCGAGG  
CTTATGCTTTTTTTGAACCAATCGTAGATGTTATGCCGGTCATACCTGTGCTCTTTTTTCT  
CTTAGCCTTTGTGTGGCAAGCTGCTGTAAGTTTTTCGAACGACACAATCAAATCCGAAC  
GAACAAAACGTTGAATTGAATCGTACCAGTCTCTACTGGGGGTTATTACTCATTTTTTGT  
ACTTGCTGTTTTATTTTTCCAATTATTTCTTCAATATGGAAGTAAATATACTCGCATTATTG  
CTACTGCGCTGTTTCATTCTAGTTCCTACTGCTTTTTTTACTTATCATCTACGTAAAAACAGT  
CAGTCAA AATGATATGGAAACTGCAACTCTAGTCGCCATCTCCATATCTGGTTTACTTGT  
AAGCTTTACTGGGTATGCCTTATATAACCGCCTTTGGGCAACCCTCTCAACA ACTAAGAG  
ATCCGTTTGAGGAACACGGGGACATGGAAGCATTGGTTTATACATTCCTGCTGGTCTCG  
ACTCTAGGGATAATTTTTTTTTGCTATCTTTTTTCGAGAACC GCCTAAGGTTCCGAATAAA  
AAGATGAAAATGACTATTGCTTTCCAATTGGCTGTTTTTGCATTAATTGCTACTTCATCA  
ATCTTATTGATTAGTG TACCCGTTGTATTTGCTTCTCCCGAGGGTTGGTCAAGTAATAAA  
AATGTTTTATTTCCGGTACGTCATTATGGATTGGATTAGTATTTCTGGTAGGTATTCTTA  
ATTCGCTCATCTAT-----ATGTCACCAAAAACAGAACTAAAGCAAGTGTTG  
GATTCAAAGCTGGTGTTAAAGATTACAGATTGACTTATTACACTCCTGATTATGAAACCC  
TTGCTACTGATATCTTGGCAGCATTCCGAGTAACTCCTCAACCTGGAGTTCCGCCTGAG  
GAAGCAGGAGCTGCGGTGGCTGCCGAATCTTCCACTGGTACATGGACA ACTGTGTGGA  
CCGATGGACTTACCAGCCTCGATCGTTACAAAGGACGATGCTACCACATCGAGCCAGT  
TCCTGGGGAGGAAAATCAATATATTGCTTATGTAGCTTACCCTTTGGACCTTTTTGAAGA  
AGGTTCTGTTACTAACATGTTTACTTCCATTGTGGGTAATGTATTTGGGTTCAAAGCCCT  
ACGAGCTCTACGTCTGGAGGATCTGAGAATTCCTCCTGCTTATTCTAAA ACTTTCCAGG  
GCCACCTCATGGAATCCAAGTTGAGAGAGATAAATTGAACAAGTATGGTCGTCCCCTA  
TTGGGATGACTATTA AACCAAAATTGGGGTTATCCGCAAAGAACTATGGGAGAGCGGT  
TTATGAGTGTCTCCGTGGTGGACTTGATTTTACCAAGGATGATGAGAACGTGAACTCCC

AACCGTTTATGCGTTGGAGAGACCGTTTCTTATTTTGCGCCGAAGCTCTTTATAAAGCG  
CAGGCCGAAACAGGTGAAATTAAGGACATTACTTGAATGCTACTGCAGGTACATCCG  
AAGAAATGCTCAAAGGGCGGCATGTGCCCGAGAGTTGGGAGTTCCATATCGTAATGCA  
TGACTACTTAACAGGGGGATTACCCGCAAATACTAGCTTGGCTCATTATTGCCGAGACA  
ATGGCCTACTTCTTCACATCCACCGCGCAATGCATGCAGTTATTGATAGACAGAGGAAT  
CATGGTATTCACCTCCGTGTACTAGCTAAAGCGTTGCGTATGTCTGGGGGGGATCATATT  
CACTCTGGTACCGTAGTAGGTAACCTGGAAGGGGAACGAGATGTCACCTTTGGGCTTTG  
TTGATTTACTACGTGATGATTTTATTGAAAAAGACCGGAGTCGCGGTATTTATTTCACTC  
AAGATTGGGTATCTATGCCAGGTGTTCTGCCCCTGGCTTCAGGGGGTATTCACGTTTGG  
CATATGCCTGCCCTGACCGAGATATTTGGGGATGATTCCGTGCTACAGTTCGGTGGAGG  
AACTTTGGGACACCCTTGGGGTAATGCACCTGGTGCAGTAGCTAATAGGGTAGCTTTAG  
AAGCGTGTGTACAAGCTCGTAATGAGGGACGTGATCTTGCTCGTGAAGGTAATGAAGT  
TATCCGTGAAGCTAGCAAATGGAGTCCTGAACTGGCTGCTGCTTGTGAGGTATGGAAG  
GAGATCAAATTCGAATTCGAAGCAATGGATGTCTTG-----ATGGCGATACATTTATACAA  
AACTTCTACCCCTAGCACGCGCAAAGGAGCCGTAGACAGTCAAGTGAAATCCAATCCA  
CGAACAAATTTGATCTATGGACAGCATCGTTGTGGTAAAGGTCGTAATGCCAGAGGAAT  
CATTACCGCAAGGCATAGAGGGGGAGGTCATAAGCGTCTATAACCGTAAAATCGATTTTC  
GACGGAATGAAAAAGACATATCTGGTAGAATCGTAAACCATAGAATACGACCCTAATCGA  
AATGCATACATTTGTCTCATACTATGGGGATGGTGAGAAGAGATATATTTTACATCCC  
AGAGGGGGCTATAATTGGAGATACCATTGTTTCTGGTACAGAAGTTCCTATATCAATGGG  
AAATGCCCTACCTTTGACCGATATGCCCTTAGGCACGGCCATACATAACATAGAAATAA  
CACTTGGAAGGGTGGACAATTAGCTAGAGCAGCAGGTGCTGTAGCGAAACTGATTGC  
AAAAGAGGGTAAATCGGCCACATTAAGATTACCATCTGGAGAGGTTTCGTTTGATATCCA  
AAAATGCTCAGCAACAGTCGGACAAGTGGGTAATGTTGGGGTGAACCAGAAAAGTT  
TGGGTAGAGCCGGATCTAAATGTTGGCTAGGTAAGCGTCCTGTAGTAAGAGGAGTAGT  
TATGAACCCTGTAGACCATCCCCATGGAGGTGGTGAAGGGAGGGCCCCGATTGGTAGA  
AAAAAACCACAACCTCCTTGGGGTTATCCCGCGCTTGAAGAAGGAGTAGGAAAAGG  
AATAAATATAGTGATATTTTATTCTTCGTCGCCGTAAA---ATGATTCAACCTCAGACCCA  
TTTGAATGTAGCGGACAACAGCGGAGCTCGAAAATGATGTGTATTCTGAATCATAGGA  
GCTAGT---AATTACCGATATGCTCATATCGGTGACGTTATTGTTGCTGTAATCAAAGAAG  
CAGTGCCAAATATGCCCTGGAAAGATCAGAAGTAATCAGAGCTGTAATTGTACGTACA  
TGTAAGAAGACTCAAACGCGACAACGGTATGATAATACGGTATGATGACAATGCAGCAG  
TTGTCATTGATCAAGAAGGAAATCCAAAAGGCACTCGAGTTTTTTGGTTTCGATTGCTCGT  
GAATTGAGACAGTTAAATTTCACTAAGATAGTCTCATTAGCTCCCGAAGTATTAATGCTT  
AGTCCCAAAGAACCAGGTTTCGTAAACAACATAGAGGAAGAATGAAGGGAGTATCTT  
ATCGTGGCAATCATATTTGTTTCGGTAGATATGCGCTTCAGGCACTTGAACCCGCTTGG  
TCACATCTAGACAAATAGAAGCAGGGCGACGCGCAATGGCACGATATGCCCGTTCGTGG  
CGAAAAAATATGGGTACGTATATTTCCCGACAAACCCGTTACACTAAGACCCGCGGAA  
ACACGTATGGGTTTCGGGGAAGGGATCTCCTGAATATTGGGTATCCGTCGTTAAACCGGA  
TCGAATACTTTATGAAATGGGCGGAGTATCAGAAACCGTAGCCAGAGCCGCTATGGAA  
CTAGCTGCGCGCAAATGCCTATACGAACTAAATTCGTTATTGAGGAAATGACAAGAGT  
TAGACGTGGATATATTGCGCGGAGGCGTCGAAGAAAAATTCGTTTATTTGCATCAACCT  
TTCGAGGAGCTCATTCAAGACTTACTCGAACTGCTACTCAACAGAAAATAAGGGCTTT  
GGTTTCCAGCCATAGGGGTAGAGGAAGGCAAAGCGAGATTTTCGTCGTTTGTGGATC

ACTCGGATAAATGCAGTAACCCGCGAGAAT-----GTACCC-----TATAGTCGATTAATACA  
CGATCTGCGCAAGAGGCAGCTCCTTCTTAATCGTAAAATACTTGCACAAATAGCTATAT  
CAAATAGGAATTGCCTTTACATGATATCCAATGATATCATCAA-----  
-ATGATAAAGGAAATACGAGCTTTAGCTCGACATATAGGTATGTCTGCTCAAAAAGCAC  
GAAGGGTAATTGATCAAATTCGTGGTTGCTCCTATGAGCAAACACTTATGATACTGGAA  
CTCATGCCTTATCGAGCATGTTACCCCATTTTCAAATTAGTTTATTCCGCAGCAGCAAAT  
GCTAGTCACAATAGGGGTTTGAAAGAAGCTGATTTATTTATTAGTAAAGCCGAAGTCAA  
CGAAGGTGTTATCGTCAAAAAGGTTAAAACCGCAAGCTCGGGGACGTAGTTACCCAATA  
AAAAGACCCACCTGTCATATAACTATTGTATTGAGC-----GAAAGACCT-----A  
TGGATGGAATCAAATATGCAGTATTTACAGAAAAAGTATTCGGTTATTGGGGAACAAT  
CAA---TATACTTCTAATGTCGAATCAGGATCAACTAGGACAGAAATAAAGCATTGGATC  
GAACTCTTCTTTGGTGTCAAGGTAGTAGCTATGAATAGCCATCGACTCCCGGGAAAGG  
GTAGAAGAATGGGACCTATTATGCGACATACAATGCATTACAGACGTATGATCATTACGC  
TTCAACCGGGTTATTCTATTCCACCTCTTATAGAGAAAAGAAGTATGGCGGTTCCAAAA  
AAACGTACTTCTATATCAAAAAGCATATTCGTAGAAATTTTTGGAAGAGAAAGGGATA  
TTGGGCAGCGGTAAGCTTTTTCTTTAGCTAAATCCATTTCTACCGGTTATTCAAAG  
GTTTTTTT-----CAAAAAAAA---ATGCCCAAGGGTAAAAATCCCAGAGTTACGGTTATTT  
TGAATGTACCAGTTGTGTCCGAAATGGT-----AAGAAGAAGGAATCACCGGGCATTTC  
CAGATATATTACTCAAAAAGAATCGACACAATACACCTGGTCGATTGGAATTGAAGAAAT  
TCTGTCCCTATTGTTACAAACATACGATTCACGGGGAGATAAAGAAAATGAAAATAAGA  
GCCTCTGTTCGTAAGATTTGTGAAAAATGTCGACTGATCCGTAGGCGAGGACGAATTAT  
AGTAATTTGTTCCAATCCGAAACATAAACAGAGACAGGGAATGGTTCGAGAGGAAGTG  
CCAGTATCCACTCGGACACTACAGTGGAAAGTGTGTTGAATCAAGAGCAGACAGCAAG  
CGCCTTTATTATGGTCGTTTCGTTTTATCCCCACTTATGAAGGGTCAAGCCGATACAATA  
GGTATCGCGATGCGAAGGGCTTTACTTGGAGAAGTGAAGGAACATGTATTACGCGCG  
CAAATCTGAT-----AAGGTACCACATGAATATTCTACAATAGTAGGTATTGAAGAATCA  
GTCCATGAAATTTAATGAATTTGAAAAAGATTGTATTTAGAAGTGATCTGTACGGAAC  
TCTCGACGCATCCATCTGTGTCAGGGGACCTAGACACGTAAGTCTCAAGATATCATCT  
CACCACCTTCTGTAGAAATAGTTGATACTACACAGCATATAGCTATCCTAACAGAACCG  
GTTGATTTGTGCATTGAATTAATAAATTGAGAGGGGTCGTGGATATTGTATGAGAACCCC  
CAATAACTATCAAGACGGAAGTTAT-----CCTATAGATGCTGTATCCATGCCTGTTTCGAAA  
TGCGAATCATAGTATTCATTCTTATGGGAATGGGAATGAAAAACAAGAGATACTTTTTCT  
CGAAATATGGACGAATGGAAGTTAACTCCTAAAGAAGCGCTTTACGAAGCTTCTCGT  
AATTTGATCGATTTATTTATTCCTTTTCTACATGCGGAGGAACAGGACATAAAT-----ATA  
GAAGACAATCTA---AAAAGGGCTACTGTGCCCTTTTTTACCTTTCATGATGGATTGGAT--  
-AATATGAAAAGA-----GAAATCATATTGAAACGTATTTTTTATTGATCAATCAGAATT  
GCCTCCTAGGACTTATAACTGTCTCAAAAAGTCTAATATACATACATTATTGAACCTTTT  
GAGTAAGAGTCAAGAAGATCTTATGAGAATTGAGCATTTTTCGCGTAGAAGACGTAAAA  
CAAATATTCGACATTCTACAGAAGGGT-----TTCACAATCGACTTGCTTAAAAATAAAT  
GCTCCGGGATGGTGGAGATGAGGGAATGTTTACAATACCTGGATTAGTCAGATCCAAT  
TTGAGGGATTTTGTAGGTTCAATTGATCAGGGCTTGATGGAAGAACTTCATCAATTTCCA  
AAAATTGAGGATACGGATCAAGAAATTGAATTTAAATTATTTGGGGAATCATATCAATTG  
GTGGAACCTTTGATAAAGAAAGAGATGCTGTGTATGAATCAATTACATATTCCTCTGA  
GTTATATGTACCCGCGGGGTTAATTTGGAGAACCGGTAGAAATATGCAAGAACAAACC

GTATTGCTTGGAAACATTCTCTAATGAATTCCTCGGGAACCTCTATAGTAAATGGAATT  
TACAGAATTGTCATCAATCAAATATTGCAAAGTCCCGGTATTTATTACGGTACAGGATTG  
GATCATAACGGAATTTCTGTCTATACTGGCACCATAATATCAGATTGGGGAGGAAGATC  
AGAATTAGAGATTGATAGAAAAGAAAGGATATGGGCCCGTGTAAAGCAGGAAACAAAA  
AATTTCTATTCTAGTTCTACCATCAGCTATGGGTTCAAGTCTAAGAGAAATTCTAGACAA  
TGTTTGCTACCCTGAAATTTTCTTGTCTTTCCCAAACGAGAAGGAGAAAAAAAAGATT  
GGTTCAAAGGAAAATGCCATTTTAGAGTTTTATCAAAAATTTGCTTGTGTAGGCGGGGA  
TCCGGTGTTTTCTGAGTCCTTATGTAAAGAATTACAAAAGAAATTTTTTCAACAAAGAT  
GTGAATTAGGAAGGATTGGTCGACGAAATATGAACCAGAGACTGAATCTTGATATACCC  
CAGAACAATACATTTTTGTTACCACGAGATGTATTGGCTGCTGCCGATCATTTGATCGGA  
ATTAAATTTGGAATGGGTACACTTGACGAT-----ATGAATCACTTGAAAAATAAACGTATT  
CGTTCTGTAGCGGATCTGTTACAGGATCAATTCGGATTGGCTTTGGTTCGCTTGGAAAA  
TGTGGTTCGAGGAACTATATGTGGAGCAATTCGG---CATAAATTGATA---CCGACTCCTC  
ATAATTTGGTAACTTCAACTCCA-----TTAACAACAACCTTATGAATCATTTTTCGGCC  
TACACCCTTTATCTCAAGTCTTGGATCGAACTAATCCATTGACACAAATAGTTCATGGGC  
GAAAATCGAGTTATTTGGGTCTGGGGGATTGACAGGACGAACTGCTAGTTTTTCGTATA  
CGAGATATCCATCCTAGTCACTATGGACGTATTTGCCCAATTGACACGTCCGAAGGAAT  
CAATGTTGGACTTATTGGGTCTTAGCTATTCATGCAAGGGTTGGTGATTGGGGG---TCT  
ATAGAGACCCCGTTTTAT-----GAAATATCTGAGAGATCAAAAGAG-----GAACAGATG  
GTTTATTTATACCAAGTAGAGATGAATACTATATGGTGGCGGCGGGAAATCCTTTGGCG  
TTGAATCGGGGTATTCAGGAAGAAGAAGTTGGTCCAGCTCGATACCGTCAAGAATTCT  
TGACTATTGCATGGGAACAGATTCATCTTCGAAACATTTATCCCTTCCAATATTTTTCTAT  
TGGAGCTTCCCTCATTCCTTTTATCGAGCATAATGATGCGAATCGGGCTTTAATGAGTTC  
TAATATGCAGCGTCAAGCAGTTCCGCTTTCTCAGTCCGAAAAGTGTATTGTTGGAACCG  
GGTTGGAACGCCAAGCGGCTCTCGATTGAGGGGTTTCGGCTATAGCCGAACGCGGAGG  
GAAAGATCATTTATACCGATGCTGAAAAGATCATTTTATCAGGTAATGGAGACACTATAA  
GCATTCCGTTGGTTATGTATCAGCGTTCCAACAAAATACTTGGATGCATCAAAAACCT  
CAGGTTTCATCGGGGTAAATACCTTAAAAAGGGGCAAATTTTGGCGGATGGTGC GGCTA  
CGTTGGTGGCGAACTCGCTTTGGGGAAAAATGTATCAGTAGCTTATATGCCATGGGAA  
GGTTACAATTCTGAAGACGCGGTACTCGTTAGTGAACGCTAGTCTATGACGATATTTAT  
ACTTCTTTTCATATCCGGAAATATGAAATTCAGACTCATGTGACAAGCCAAGGA---CCT  
GAAAGAATCACTAATGAAATACCTCATTTAGAGCCTTATTTACTCCGCAATTTAGACAG  
AAATGGAATTGTGATGCTGGGATCTTGGGTAGAACTGGTGATGTTTTAGTAGGTAAT  
TAACGCCTCAGACAGCGAAAGAA---TCATCCTATGCCCCAGAAGATAGATTATTACGAG  
CCATACTTGGCATTGAGGATCCACTGCAAAGGAACTTGTCTAAAGTTGCCTATAGGC  
GGAAGAGGTCGAGTTATTGATGTGAGATGGGGCCAGAAAAGGGGG---GGTCCATTTAT  
AATCCAGAAATGATTTCGTGTATATATCTCACAGAAACGTAAAATCAAAGTGGGCGATAA  
AGTAGCTGGAAGACATGGGAATAAAGGTATCATTTCAAAAATTTTTGCCTAGACAGGATA  
TGCCTTATTTGCAAGATGGAACACCAGTTGATATGGTATTCAATCCATTAGGAGTACCTT  
CGCGAATGAATGTGGGACAGATGTTTGAATGCTCACTCGGATTAGCGGGAGACCTGCT  
GGGCAGACATTATAGAATAACACCCTTTGATGAGAGATACGAGCAAGAGGCTTCGAGA  
AACTAGTGTTTTCTGAATTATATGAAGCCAGTAAGCAAACAGCAAATCCATGGGTATT  
TGAACCCGAGTATCCTGGAAAGAGCAGAATATTTGATGGAAGAACAGGAGATCCTTTT  
GAACAACCTGTTATAATAGGAAAGTCCTATATGTTAAAATTAATTCATCAAGTTGATGAT

AAAATCCACGGGCGTTCCAGTGGTCATTATGCACTTGTTACACAACAACCCCTTAGGG  
GAAGGGCTAAGCAAGGTGGACAACGAGTAGGAGAAATGGAAGTTTGGGCTCTAGAGG  
GATTTGGTGTGCTCATATTTTACAAGAGATGCTCACTTATAAATCCGATCATATTAGAG  
CTCGTCAGGAAGTACTTGGTACCACGATCGTTGGGGGAACAATACCTAATCCTGAGGG  
TGCGCCAGAATCTTTTCGATTGCTCGTTCGCGAACTACGATCTTTATCTCTGGAAGTGA  
ATCATTTCTTGTATCTGAGAAAACTTCCAGATTAATAGGAAGGAAGTTGTGAATCAG  
AATTTTTCTTCTATGATCGACCAGTATAAACATCAACAACCTTCGAATTGGATCAGTTTCT  
CCTAAACAATAACATGCTTGGGCCAACAAAATCCTACCGAATGGAGAGATAGTTGGAG  
AGGTGACAAAACCTATACTTTTCATTACAAAACCAATAAACCGGAAAAAGATGGGTT  
GTTTTGTGAAAGAATTTTTGGACCTATAAAAAGTGAATTTGTGCTTGTGGAATTATC  
GAGTGATCGGGGGCGAAAAAGAAGAACCGAAATTTTGCGAACAATGCGGAGTCGAAT  
CTGTTGATTCTCGGATCCGAAGATATCAAATGGGATACATCAAACCTAGCATGTCCGGTG  
ACTCATGTATGGTATTTGAAACGCCTTCCTAGTTATATCGCGAATCTTTCAGATAAACCT  
CTTAAGGAATTAGAAGGCCTGGTATACTGCGAT-----TTTTCTTTTGTAGGCC---ATAG  
CTAAAAACCTACTTTCTTACGATTACGAGGTTTCATTCGAATATGAAATCCAATCCCGG  
AAATACAGCATCCACTTTTTTTTACTACCCAAGGCTTCGATACATTTAGAAATCGAGA  
AATATCTACCGGAGCTACTGCTATCAGAGAACAATTAGCCGATCCGGATTTGCGAATTAT  
TATAGATCGTTCATTGGTGAATGGAAGGAATTGGGAGAAGAA---GGATCAACCGGGA  
ATGACTGGGAAGACAGAAAAATTGGAAGGAGAAAAAGATTTTTTGGTTAGACGCATGG  
AATTGGCTAAGCATTCTTTCGAACAAATGTAGAACCAGAATGGATGGTTTTGTGCCTA  
TTACCAGTCTTCCCTCCCGAGTTGAGGCCAATCATTTCAGATTGATGGGGGTAAACCAAT  
GAGTTCAGATATTAATGAACTTTATAGAAGAGTTATCTATCGGAACAATACTCTTACCGA  
TCTATTAACAACAAGTAGATCTACGCCGGGGGAATTAGTAATGTGTTCAGGAAAAGTTG  
GTACAAGAAGCTGTAGATACACTTCTTGATAATGGGATCCGCGGACAACCAATGAGGG  
ACGGTCACAATAAAGTTTACAAGTCGTTTTTCAGATGTAATTGAAGGCAAAGAGGGAAG  
ATTTTCGCGAGACTCTACTTGGTAAACGGGTTCGATTATTCGGGTTCGTTCCGTCATTGTGG  
TAGGCCCTTCGTTTTATTGCATCGATGTGGATTACCTCGAGAAATAGCAATAGAGCTTT  
TTCAGACATTTGTAATTCGTGGTCTAATCAGACAAAATCTTGCTTCCAACATAGGGCTT  
GCTAAAAGTAAAATTCGGGAAAAAGAACCATTGTATGGGAAATACTTCAAGAAGTTA  
TGCAGGGGCATCCTGTATTGCTAAATAGAGCACCTACTTTGCATAGATTAGGCATACAG  
GCGTTCCAACCTATTTTAGTAGAGGGGCGAGCTATTTGTTTACATCCATTGGTTTTGTAAG  
GGATTCAATGCAGACTTCGATGGAGATCAAATGGCTGTTTCATGTACCTTTATCTTTGGA  
AGCTCAAGCAGAAGCTCGTTTACTTATGTTTTCTCATAACGAATCTCTTGTCTCCAGCCAT  
TGGGGATCCCATTTCCGTACCAACTCAAGATATGCTTATGGGGCTCTATGTATTAACGAT  
GGGGAATCGTAGAGGTATTTGTGCAAATAGGTATAATCCATGTAACCTCCAGAACTAC---  
-----CAAAATGAAAGAAGCTGATCATAATAACTATAAGTATAGGAAAGGGAAAGAACCCT  
ATTTTTGTAGTTCCTACGATGCACTTGGGGCTTATCGGCAGAAAGGGATCGATTTATATA  
GTACTTTTATGGCTACGGTGGCGACTAGATCAACGT--GTCATTGCCTCAATAAATAGAGA  
AATCCCATCGAAGTTCAATATGAATCTTTGGGCACTTATCATGAGATTTATGATCACTAT  
CGAGTAGTAAGAAGTGTAAAAAAAGGAATGCTTTGTATATACATTCGAACCACTGTTGG  
TCATATTTCTTTTATCGAGAAATAGAAGAAGCCGTACAGGGGTTTTGTGCGTCTTATTC  
ATACGGTACC-----ATGGAGGTACTTATGGCAGAACGGGAT--CTGGTCTTT  
CACAATAAAGTGATAGATGGAACCTGCAATGAAACGGCTTATTAGCAGATTAATAGATCA  
TTTTCGGAATAGCCTATACATCACACATTCTGGATCAAGTAAAACTCTGGGTTTTTCATCA

AGCCACCGCTACATCCATTTTCATTAGGAATTGATGATCTTTTAACAACACCTTCTAAGGG  
ATGGTTAGTCCAAGATGCTGAACAACAAAGTTTGATTTTGGAAAAGCACCATCATTATG  
GGAATGTACACGCTGTAGAAAAATTACGTCAATCAATTGAGATATGGTATGCTACAAGT  
GAATATTTGAGACAAGAAATGAATCTTAATTTTAGGATGACTGATCCTTCTAATCCAGTC  
CATATAATGTCCTATTCTGGAGCTAGAGGAAATGCATCTCAGGTCCACCAATTAGTAGG  
CATGAGAGGATTAATGTCAGATCCCCAAGGACAAATGATTGATTTACCCATTCAAAGCA  
ATTTACGCGAAGGACTTTCTTTAACGGAATATAACCATTTCTGCTACGGAGCCCGCAA  
GGAGTTGTGGATACTGCTGTACGAACGTCAGACGCTGGATACCTCACGCGTAGACTTG  
TTGAAGTAGTTCAACATATTGTTGTACGTAGAACGGATTGTGGAACCTACCCGAGGTATT  
TCCGTGAGTCTTCGAAAGGGGATGACGGAA-----AGAATTTTATCCAAACATTGATAG  
GTCGCGTATTAGCAAACGATGTCTATCTGGGTCTACGATGCATTGCCACCAGAAATCAA  
GATATTGGGATTGGACTTGTCAATCGATTGATGACC-----TCTCGGGCGCAGCC  
AATATATATTCGAACTCCCTTCACTTGCCGAAGTGCATCTTGGATCTGTCGATTATGTTAT  
GGTCGGAGTCCCACTCATGGTGACCTGGTTGAATTGGGAGAAGCAGTAGGTATTATTG  
CGGGTCAATCCATTGGAGAACCAGGGACTCAACTAACATTAAGAAGCTTTTCATACCGG  
TGGAGTATTCACAGGCGGTACTGCAGAACATGTACGAGCTCCTTCTAATGGAAAAATC  
AAATTCAATGAGGATTTGGTTCATCCACACGCACGCGTCATGGACATCCTGCTTTTCT  
CTGCTATGTAGACCTATATGTGACTATTGAGAGTCAGGATATTATACATAGTGTGAATATT  
CCACCAAAAAGTTTTCTTTTGGTTCAAATGATCAATATGTGGAATCAGAACAAGTGAT  
TGCTGAGATTTCGCGCTGGAACATCCACTTTC-----TTAAAGAGAGGGTTTCGAAAACAT  
ATTTATTCTGACTCAGAGGGAGAA---ATGCATTGGAGTACCGATGTGTACCATGCACCT  
GAATATACACACGGTAATGTTCAATTTCTTACCCCAAACAAGTCATTTATGGATCTTATCT  
GGAGGTCCGTGCAA-----TCCAGTCTAGTGCCTTTTTCACTCCACAAGGATCAAGATC  
AAATGAATGTTCAA-----TCTCTTTCTGTCCAAGAGAGATATATTTCTGACTTCTCG-----G  
TGAATAATAATCGA---GTGAGACACAAATTGTTTGGCTCAGATCCCCTGGCGAAA---GG  
GCAGAGGATTTCTGATTATGCA-----TTTGAGCGAGTCATATCCAATGGGCATTGGGATT  
TCATATATCCCGCC---ATTCTCCGAGAGAATTCCTAT-----TTATTGGCGAAGAGGGCGAAG  
AAATAGATTCATCATAACCATTCCAATATGATCCGGAACGGGAGAAGGAACTAACGCCCC  
GTTCTAGTATCGCGGTTGAAATACCCGCAAAT-----GGTATTTTACGTAGAAATAGTATTC  
TTGCTTATTTTACGATCCACGATACAGAAGAAGCAGTTCGGGAATTACCAAATATGGC  
-----GTCGATTCAATCGTCAAAAAAGAGGGT-----TTGATTGAGTATAGAGGACCGAAA  
---GAATCTAGACCGAAATAC-----GTAGATCGATTTTTTGTATTCCCGAAGAAGTCCATA  
TCTTGCCCGGGTCTTCGTCCATAATGGTACGGAACAATAGTATCATTGGAGTAGATACA  
CGAATCACGTTTAATACAAGAAGCCAAATAGGTGGATTGGTCCGAGTAGAGAAAAAAA  
AAAAAAGATTGAACTGAAAATCTTTTCTGGAGGTATCCATTTTCTGGAGAAACAGA  
TAAGATATCCCGACACATTGGTATCTTGATACCACCAGGAGCGAGAAAAAAAATGGATA  
AGGGATCAAAGGGGAAAAATTGGGAAGGGAAAAATTGGGTCTATGTCCAACGG-----A  
TCACACCTATCAAGAAAAA-----TATTTTGTTCAGTACGACCCGTAGTGACATATGAA  
ATAGCTGACGGGATAAATCTAGTAACGCTTTTCCCCAGGGATATGTTACAGGAAAAGGA  
GAATTTGCGACTCCGAGTTGTCAATTATATCCTTTATGGGGATGGCAAACCAATTCGAG  
GAATTTCC-----CACATTCAATTAGTTCGTACTTGTTTAGTATTGAATTGGGACCAAGAC--  
-----AAATCTATAGAAAAGGTTTCAGGCTTCTTCTGCTGAAGTAAGAGCAAATGAT  
CTGATTCGATATTTTATAAGAATTGATTTGGTGAAGTCTCCTATTTTGTATACTGGAAAG  
AGGAATGATAGGGCAGGTTTCAGTGATTCTGATACT-----GGGTCAATTTGCGCCAATAC



CAATCTTTTTTCTTCCAAGGTGAAGATGAAATCA-----CTTAGTCAACAT  
CAAGGAACCGTTCATACATTTCTTAATAGA-----AATAAGGAAGGCCAATCCCTTATAG  
TTTTTTCATCATCCAATTGTTCTCGCATCAAT-----GTTTCAAATATCACAAT-----  
--GTGACCAAAGAATCAATTCCAATTCTGAATTCGTCG-----GGTCCCTTAGGTACT-----  
GTACCTAAAATTTATAATTTTCCCTCATCT-----TATCATTCAATAACT-----CATAATGAGAT  
CCTATTAAAT---AAATATTTACTACTGGATAAT---AATAATCCAAAACAGACTTTCCA  
ACTTAAA-----TATTATTTAGTGGATGAAAACGGGAGA-----ATCTCTAATCCAAATCCA  
TGCAGTGACATCATTTTAAATCTATTTCGATTGCAATTCGTGCTTTCTCCCTCACGATTATT  
GTGAGGGGACATCCACAACCACAATAATTCTTGGACAGTTTATTTGTGAAAATGTATGT  
CTATCCAAACACGGAACA-----CGCATAAAATCTGGTCAAGTTATAATGGTTTAT---GTT  
GACTCTTTCATAATAAGATCAGCTAAACCCTACTTGGCCACCCGAGGAGCAACCGTTCA  
TGGTGATTATGGAGAAATCTTTTACGAAGGAGATACATTAGTTACATTTATATATGAAA  
ATCGAGATCTGGTGATATAACTCATGGCCTTCCAAAGGTTGAACAAGTGTTAGAAGTTC  
GTTCAATTGATTCAATATCGATGAACCTAGAAAAAAGGGTTGAAGGTTGGAACGAACA  
TATAACAGGAATTCTTGAATTCTTGGGGATTCTGATTGGTGCTGAACTCACCATAG  
CGCAAAGTCGTATTTCTTTGGTTAATAAGATCCAAAAGGTTTATCGATCCCAGGGGGTA  
CAGATTCATAATAGGCATATAGAGATTATTGTACGACAAATAACATCAAAGTGTTGGTT  
TCAGAA-----GATGGAATGTCTAATGTTTTTTCACCCGGGGAATAATCGGATTGTTGC  
GAGCAGAACGAGCAGGTCGTGCTTTGGAAGAGGCTATTTGTTACCGAGCCGTCTTATT  
GGGAATAACGAGAGCATCTCTGAATACTCAAAGTTTCATATCAGAAGCTAGTTTTTCAGG  
AAACCGCTCGAGTTTTAGCAAAAGCCGCTCTCCGGGGTTCGTATTGATTGGTTGAAAGG  
CCTGAAAGAGAATGTTGTTCTGGGGGGGATGATACCCGTTGGTACCGGATTCAAACGA  
TTCGTTACCGTTCAAGG-----GAATACAACAACATTCCT-----TTGGAAATACAAAAGA  
AGAATCTATTCGGGGGGGAAATGAGA-----GATATTCTGTTCCACCACAGAGAATTATTT  
GGTTCTTGCATCCCAAAGCCAAAGAGTTTCCATTCAGAACAACCATTCTATGGGATC----  
-----ATGACAAGAAGATATTGGAACATCAGTTTGGAAAGAGATGATGGAAGC  
GGGGGTTCATTTTGGTCATGGTACTAGGAAATGGAATCCTAGAATGGCACCTTACATCT  
CTGCAAAGCGTAAAGGTATTTCATATTACAAATCTTACGAGAAGTCTGCTGTTTTTTTATCAG  
AAGCCTGTGATTTAGTTTTTACGACAGCAAGTAGAGGAAAACACTTCTTAATAGTTGGT  
ACGAAAGATAAAGCAGCTGATTCCGGTAGCATCAGCTGCAATAAGGGCTCGGTGTCATT  
ATGTCAATAAAAAATGGCTCGGTGGTATGTCAACGAATTGGTCCACTACAGAAACGAG  
ACTTCATAAGTTCAGGGACTTGAGAGTGAGAGCCGAGATGGGGCAACTCAGTCGTCTC  
CCGAAACGGGATGCAGCAATATTGAAGAGACAATTATCTCACTTTCAAACATATCTGGG  
TGGTATCAAATATATGACGGGGTTACCCGATATTGTAATCATCATTGATCAGCAAGAAGA  
ATATACGGCCCTTCGAGAATGCGTCACTTTGGGTATTCCAACATTTGTTAATCGATAC  
AAATTGTGATCCAGATCTCGCAGATATCCGATTCCAGCCAACGATGACGCTATAGCTTC  
CATCCGATTGATTCTTAACAAATTAGTATCCGCAATTTGTCAGGGACGTTCTAGCAGCTA  
TATAAGAAGTCGTATGGGACAGAAAATAAATCCAATTGGTTTCAGACTTGGTACAACCC  
AAAGTCATCGTTCCTTTTGGTTCGCACAACCAAAAAATTATTCTAAAGGTCTCCAGGAA  
GATGAAAAAATACGGGATTGTATCAAGAATTATGTACAAAAACATATGAGAATATCCTC  
AGGT--TTTGAGGGAATTGCACGTATAGATATTAATAAAGAATTGATTTGATCCAAGTC  
ATAATTCATATTGGATTCGCCAATATGTTAATAGAGGGT-----AGAGCCCGA-----GGAATC  
GAAGAATTACAGACTAATGTACAAAAAAGCTTTCATTCTGTGAACCGGAGACTCAACA  
TTGCTATCGCAAGAGTTCCAAGACCTTACGGGCAACCTAATATTCTTGCAGAATATATCG

CTCTGCAATTAAGAATAGAGTTTCCTTTTCGAAAGGCAATGAAAAAAGCTATTGAATTA  
GCTGAACAAGCAGATGCAAAGGGAATTCAGGTACAAATTGCAGGACGTCTCAACGGA  
AACGAAATTGCCCGCGTTGAATGGATTAGAGAGGGTAGGGTTCCCTACAGACCATT  
GAGTTAAAATTGATCATTGTTCCCTATCCAGTTCGAACTATCTATGGAGTATTAGGGATCA  
AAATTTGGATATTTTTGGATGAAGAGATGTCTCGTTACCGAGGACCTCGTTTTAAAAA  
ATACGCCGTCTGGGGGCTTTGCCGGGACTAACTAGTAAAAAACCTAGATCTGCAAGTG  
ATCTTAGAAACCAATCCCGCTCTGGGAAA---AGATCTCAATATCGTATTTCGTTTAGAAGA  
AAAACAGAAATTGCGTTTTTCATTATGGTCTGACGGAGCGACAACACTACTTCGATATGTT  
GTATCGCTGGAAAAGCAAACGGTTCAACAGGCCAGGTTTTACTGCAACTACTTGAGAT  
GCGTTTGGATAACATCCTTTTTTCGATTGGGTATGGCTTCAACTATTCCTGGAGCCAGGC  
AATTAGTTAACCATGGACATATTTTAGTTAATGGTCGTCTAGTAGATATACCAAGTTATCG  
CTGCAAACCCCGAGATATTACTACTACGAAGGATAAACAAAGATCCAGAGCTTTGATTC  
AAAATCATATGGATTCATCCTCCAACGAA-----TTGCCAAAACATTTGACTCTGCACTCA-  
----TTGCAATATAAAGGGGTAGTAAATCAAATAATAGATAGTAAATGGGTTCGTTTTGAAA  
ATCAATGAATTGCTAATCGTAGAATATTATTCCCGACAACTATGTCACGTTCGAGGTA  
GCAGAAGAAAAAACTGCAAAATCCGATCCAATTTATCGTAATCGATTAGTTAACATGTT  
GGTTAACCGTATTCTGAAACACGGAAAAAAATCATTGGCTTATCAAATTATCTATCGAG  
CCGTGAAAAAGATTCAACAAAAGACAGAAACAAATCCACTATCTGTTTTACGTCAAGC  
AATACGTGGAGTAACTCCCAATATAGCAGTAAAAGCAAGACGTGTAGGCGGATCGACT  
CATCAAGTTCCCATGAAATAGGATCTACACAAGGAAAAGCACTTGCCATTCGTTGGTT  
ATTAGGGGCATCCCGAAAACGTCCGGTTCGAAATATGGCTTTCAAATTAAGTTCCGAAT  
TAATCGATGCTGCCAAGGGGAGTGGCGATGCTATACGCAAAAAGGAAGAGACTCATAG  
AATGGCAGAGGCCAATAGAGCTTTTGCACATTTTCGTATGGGTAGAGACACTATTGCCG  
ATATAATAACTTATATAAGAAATGCTGACATGGATAAAAAAGGAACGGTTTGAATAGCA  
TCCACAAATATTACCGAAAACATTGTTAAAATACTTCTACGAGAGGGTTTTATCGAAAA  
TGTTAGGAAGCATCGGGAAAACAACAATATTTCTTGGTTTTAACCTACGACATAGAA  
GA-----AATAGGAAAGGAGCATATAGA-----AATATTTA-----AAGCGTATCAGCAGAC  
CAGGTCTGCGAATCTATTCCAACCTCTCAACGAATTCCTAGGATTCAGGCGGGATAGGG  
GTTGTAGTTCTTTCTACTTCTAGAGGTATAATGACAGATCGAGAAGCTCGACTAGAAGG  
AATTGGAGGAGAAATTTGTTTTATATATGGATGACAAAACCTATACCAAGAATTGGTTC  
ACGTAGAAATAGCCGATTAGTTCACGTAAGAGTGGGGTTCGAACACCAATAGGAGTT  
ATTCATGTTCAAGCGAGTTTCAACAATACTATTGTTACTGTTACAGACCCACAAGGTCG  
GGTCGTTTCTTGGTCTCCGCGGGTACCTGTGGATTCAAGGGCACAAGAAGGGGTACC  
CCATTTGCTGCTCAAACCGCAGCAGGAAATGCTATTCGTACGGTAGTAGACCAGGGTAT  
GCAACGAGCAGAAGTCATGATAAAAGGTCCCGTCTCGGAAGAGATGCAGCATTACG  
AGCGATTCGTAGGAGTGGTATACTATTAATTTTCGTACGTGACGTAACCCCTATGCCACA  
TAATGGATGTAGACCGCCAAAAAAAGGCGCGTTATGCCAACTATTAACAACCTATTA  
GAAACACAAGACAGCCAATGAGAAATGTCACGAAATCTCCTGCTCTTCGAGGATGTCC  
TCAGCGTAGAGGAACATGTACTAGGGTGTATACTATCACCCAAAAAAACCAAACCTCT  
GCCTTACGTAAAGTTGCCAGAGTACGATTAACCTCTGGATTTGAAATCACTGCTTATATA  
CCTGGTATTGGCCATAATTTACAAGAACATTCTGTAGTATTAGTAAGAGGAGGAAGGGT  
TAAGGATTTACCCGGTGTGAGATATCACATTGTTTCGAGGAACCCTAGATGCTGTCCGAG  
TAAAGGATCGTCAACAAGGGCGTTCTAAATATGGGGTAAAAAAGCCAAAAAATGGCAA  
GGAAAAGTTTGATTGAGAGGGAGAAGAAGAGGCAGAAATTAGAAGAGAAATATCATT

TGATTCGTCGATCCTCAAAAAAAGAAATAAGC-----AAAGTTTCATCGTTGAGCGAGA  
AATGGGAAATTCATAGAAAATTGCAATCCCCACCACGTAATAGTGCACCTATACGTCTT  
CATCGACGCTGTTTTTTGACCGGAAGACCTAGAGCTAACTATCGAGACTTTGGGCTATC  
CGGACACGTACTCCGCGAAATGGTTCATGCATGTTTGTGCGGGGGCAACAAGATCA  
AGTTGGATGGTAAAGAATTCGTCCATATCAGTTATTCCGCAAGAAGAAAA-----  
AGGGGTTCTGTTGAATTTCAAGTATTTAGTTTTACCAATAAGATAAAGAGACTTACTTC  
ACATTTGGAAGTGCACAGAAGGGATTATTTATCCCAGAGGGGTCTGCGGAAAATGCTG  
GGGAAACGTCAACGACTGTTGGTTTATTTATCAAAGAAAAATCGAGTGCGTTATAGGG  
AATTAATTGGTCAATTGGGCATTCGGGAACCAAAGACTGGT-----ATGGTAAAACCTTCGT  
TTGAAACGATGTGGTAGAAGGCAACGAGCCACCTATCGAATCATTGCAATTGATGTTAG  
ATCCCGAAGAGAGGGGAGAGATCTTCGGAAAGTAGGCTTTTTACGACCCGATAAAGAAT  
CAAACCTATTTAAATGTTCCCTGCTATTCTATATTTGCTTGAAAAAGGAGCTCAACCCACG  
GAAACTGTTTCATGATATTTCAAAAAAGGCAGAGGTATTTAAGGAACTTCTAGTTAATCA  
AACAAA-----ATGGATAAATTCAAGCGACCTTTTCGTAAATCCAAGCGATCTTTTCG  
TAGGCGTTTGCCCCAATTGGGTTGGGGGATCGAATTGATTATAGAAACATGAGTTTAA  
TTAGTCGATTTATTAGTGAACAAGGAAAAATATTACCTAGGCGAGTGAATAGATTGACC  
TTGAAACAACAACGATTAATTACTATTGCTATAAAACAAGCTCGTATTTTATCTTTGTTA  
CCTTTTCTTAATAATGAGAAA-----CAATTTGAGAGAGCCGAGTCGATCTCTAGAACTAC  
TGGCACTAGAACCAGAAAAAAGTGGCCCGT--TCTAAAAAAATCCTTTTGTAGCTAA  
TCACTTATTAAGTAAAATTGAGAAGCTCAACGTGGAGGAGGAAAAAAGGATAATAGTA  
ACTTGGTCCCGGCATCGACCATTATACCTGCAATGGTCGGTCATACAATTGCTATTCAT  
AACGGAAAGGAGCATTTACCTATTTATATAACGGATCGTATGGTGGGTCGCAAATTGGG  
AGAATTTGCACCTACTCTGACTTTCCGGGGACACGCGAAAAACGATAATAGATCTCGG  
CGGATGATTTTGAATATAGTCTACTCGGTAATCTATTATTATTATGGATGAATATAGTTAA  
TTCGGTCGTTTTGGTCGGACTTTATTATGGATTTCTAACCACATTTTCTATAGGTCCCTCT  
TATCTCTACTTCTACGAACTCGGGTTATGAAAGAAGGG-----AGCGAAAAAGAGGTA  
TCAGCAACAACCGCTTTTATTATGGGACAGTTCATAATATTCATATCGACCTATTATCCGC  
CCCTGCATCTAGCATTGAGTAGACCCCATACACTAACTGTCCTAGTTCTACCGTATCTTT  
TGCTTCATTTCTTCTGGAACAATCACAATCCCTTTTTGATCATAGATCTACTCACGGGA  
ATTCATTCCCAACCTTAGCATTCAATACGTATTCCTGAATAATCTAATTTTTCAATTATTC  
AACCATTTTATTTTACCAAGTTCAACATTAACCAGATTAGTCGACATTTCTATGTTTCGAT  
GCAACAATAAGATATTATTTGTAATAAGTAGTTTTTTTTGGCTGGTTAATTGGTCACATTTT  
ATTGATGAAATCTATTGGCTTAGTATTATCTTGGCCATGGGAAAA-----ATGAGATCT---T  
TTAGATCTAATAAGTATCTTGTGTCAAATGGAGAAATTCTGTGTCTCAAATCTTTAGTA  
TTCTCTTATTTATCACCTGTGTCTGCTATCTAGGAAGAATGCCATCACCTATTATAACTAA  
GAAACTGAAAGAAGTGAAGAAGACAAATCCCTTCTGTCTCTCTTTTCGATTATCAA  
CGATGGAATCGACCCCTGCGATATATAGAAAACGATCGATTTTCAAATGCTGTAAGAAA  
TGAAATGTCTCAATATTTTTTTAACACATGCGCAAGTGATGGAAAACAAATAATATCTTT  
CACATATCCACCCAGTTTGTCTACTTTTTTTGAAATGATACAAAAAAGATGTATTTTCG  
CACAGCGGAAAAACTACCTGAGGAC-----CTGTCTAATTGGGTTTCGACCACTGAAAAA  
CAAAGAGATAACTTAAGGAACGAATTCATAAATCGAATAGAAGCTATAGAC-----AAAC  
TTATCCTCGATGTGGTCGAAAAAAGGGCCAGATTGTGCAATGATGAAGAGGAACAAGA  
ATGCTTACCTAAGTTTTATGATCCTCTTTTGAACGGACCCTATCGTGGAAACAATCAAAA  
AAGGGTATTTATATACCAAATTTCTTGGATAAATAAGATTCATGGTATCCTT---CGAGAA

TTTGAACACGAAGAT---CCGAATGATTCAATAAAAATTGAAGAAATGAAGAAAAAGGT  
TCCTCGATGGTTATACAAACTGACTGATTTTGAAGAAAGAGGAGGGGATTTCGTT  
CAAGAAAAGCTAAACGTGTGGTAATTTATACTGATGCCTTGATACGTTACTCGCAACAA  
TCGGATTTTCGTCGGGATATAATCAAAGGGTCGATGCGGGCTCAAAGACGTAAAAACAG  
TGACGTGGGAAATGTTTCAAACAGATGTGCATTCCCCCTTTTTTTGGACAGAATAGAC  
AAAACACCTTTGTTTTCTTTTGATATC-----TCAAGGATGATGAACCTAATTTTTAGGAAT  
AGACAGGAGGATGAACGGATAGCAATAGCAGAAGCTTGGGATACTATTCCATTTGCTC  
AAGCAGTAAGGAGTTCCTATTAGTAACCCACTCGATTCTTCGAAAATACATCGTATTAC  
CTTCATTGATAATAGTTAAAAATATTGGTCGTATGTTATTATTTCAATTCCCCGAGTGGTA  
TGAAGATTTTAAGGAATGGAGTAGGGAAATGCATGTCAAATGCACATATAACGGTGTTC  
AATTATCGGAAACAGAATTTCCAAAAGACTGGTTAACAGACGGTATTCAGATAAAAAT  
CCTATTTCTTTCTCTCTGAAACCTTGGCGTAGATCTAAGAGAAAAAACAAAAAATT  
TCTGTTTTTTAACGGTCTGGGGGGTGGAAACAGAACTGCCCTTTGGCTCTCCCCGAAA  
AAACCTTTCTTTTTTGAACCCATTCATAAAACACTCGAAAAAAAATTAGAAAAGTA  
AAA---AAGAAAGGTTTTTTCATTTTAAAAATTCTAAAAGACAACATAAAAGGTTTTCTA  
GAGATTTTCAAAGAAAAATAAGATGGGTTATCAAATAGTTCTA-----TTATAAAATC  
A-----AAAGATTCCAAAATAAGTAATAGGATCATCCATGAATCACCCATTA  
GAATTGGGTCCAGAGATTGGGCAAACGATTCACTGACAGAAAGAAAAATTAATGATCT  
GGCTGATAAGACAATCAAATCCGGGATCAAGTAGAAAAGATTATGAAAGACAAGAA  
AAAA-----ATAACGGAATCACAGAAATATATTTGGCAAATATCTAAAA  
AAAGAAGTGCCCGATTAATTCCTAAATGGAACCTTTTTATGAAATCTTTCATTGAAAGA  
ATATACATGGGTATCCTTCTATGTATCACTAACATTTACAAGATCAATGTAATTTTTTA  
TTCCC-----TTCTGCGACTTATCTTCTTTGTCCCAAGCCTATGTGTTTTACAAATTATTGCA  
AACCCAAGTTAGTAACAAATATAAGTCAGAATCCATATTTCAATACACATATCCTTTTATT  
AAGGATAGAATAAAAGACTATTTACACGAGGAATATCTGATTCTGAATCAAAACACA  
AGAAACTGCGGAATTTCTGGAATGAATGAATGGAAAACTGGTTAAGGAACCATTATCA  
ATACAATTTATCCCGTGCCAAATGGTCTGGATTAGCACCTCTAAAATGGAGAAATAAAG  
TCAATCAGCATCGTACGATTAATAAATAACCAAAAATTGGATTTCATATGAA---GAAAAAG  
ACCAATTAATTCATTGAGAGATAAAGAAAAAATGAAAAACACTACAGATATGATCTT  
TTATCATATAAATATATTAATAAATATATAATTGATCTAGATAGAAAATATTTTGAATTGAG  
AATCATCTATTTTACCCTAGATTTTTTGGATTGGATGGGAATGAATGAACAAATGTTAGA  
TCGTTGGTTCTTACCAGAATTTGTGCCACTTTATGATCGATATAGAACTAATCCGTGGAT  
CATACCAATCAAATGCTTCTATTTGATTTCAAGAGCAAGAAGGAAGCGGAACCTAGAC  
CTCCTTCTGAAAAAATATTTCTTTTTCAACTGCGATGGGGTGAATCTTTTAATCAAAGA  
ATGACTAATAATATAAAGGTATATTGCCTACTGCTTAGACTTATGGATCCGAGTGAAT  
GCTATATCCTCTATTGAAAGAGGAGAAATGGGTCTAGATGTAATGCTGATTCATAAGGAT  
CTGTCTCTCCAGAATTGATAAAAAGGGGAATATTTATTATTGAACCGGTTTCGTTTGTCT  
ACCAATGGGATGGAATTCGATTATGTATCAAACCATAGCTATTTTCATTGACACATAAG  
GTTGAGCACAATAATTATGATTTGCTTGTTCCTGAAAATATTTTATCTCCTAACCATCGTA  
GAGAATTTAGAATTATAAGCCGTTTTCAAGTTTCTTTGGCCCACTCATCGATTAGAAGATT  
TAGCCTGTATGAATCGCTATTGGTTTGATACCAATAACGGGAGTCGTTTCAGTATGTCAA  
GGATCCATATGTATCAGATGAAACGGCATCAATTCAAATCCTGTATTTTGAATTGAGAG  
AGATATTGAGAGAGATCAAGAATTCGCTATTTCTTAGATTCATGGACCAAAATTCGATT  
CAGTGGTGTCTTCACTCACATTTTTTTCCACCAAGAACGTTTTGTGAAACTCCTTGGC

CCCCAACTTGGAGTGCCTGCTTTCA---CGTGATTCA-----CAGGGTTCAACAAGCAAT  
CGATATTTTC-----ACGATCAAAGGTGTAGTACTGCTTGTAGTAGCG---GTCCTTATA-----  
-----TATCGTATTAACAATCGAAATATGGTCGAAAGAAAAAATCTCTATTTGATGGGGCTT  
CTT-----CCTATACCTATGAATTCATTGGACCCAGAAATGATACATTGGAAGAAT  
CTTTT---TGGTCTCCAATATCAATAGGTTGATTGTTTTCG---CTCCTGTATCTTCCAAAAG  
GGAAAAAGATCTCTGAGAGTTGTTTCATGGATCCGAAAGAGAGTACTTGGGTCCTCCC  
AATAACT-----AAAAAGTGTATCATGCCTGAATCTAACTGGGGTTCGCGGTGGTGGGA  
GGAAGTGGATCGGAAAAAAGAGG-----GATTCTAGTTGTAAGATATCT-----AATGAAA  
CAGTAGCTGGAATTGAGATCTCATTCAAAGAGAAAGATATCAAA---TATCTGGAGTTTC  
TTTTTGTATCCTATATGGAT-----GATCCGATCCGCAAGGACCATGGTTGGGAATTGTTTG  
ATCGTGTCTCCGAGGAAGAAGCGAAACATAATCAATTTG-----AATTCGGGACAGCTA  
TTCGAAATCTTAGCGAAACACTTGATTTGTTATCTCATGTCTGCTTTTCGTGAAAAAAG  
ACCAATTGAAGTGGAGGGT---TTCCTCAAACAACAAGGA---GCTGAGGCAACTATTCAA  
TCAAATGATATTGAGCATGTTTCCCAT-----CTCTTCTCGAGAAACAAGTGGGATATTTCT  
TTGCAAATTTGTGCTCAATTCATGTGTGGCAATTCCACCAAGATCTCTTCGTT-----A  
GTTGGGGGAAG---AATCATCACGAATCGGATTTTTTTGAGGAAC---GTATCGAGAGAGAA  
TTTGATTTGGTTAGACAATATGTGGTTGGTAAACAAGGATCGG-----TTTTTTAGC-----  
AAGGTACGGAATGTATCGTCAAATATTCAATATGATTCC-----ACAAGA-----TCTATTTT  
CGTTCAAGTAACGGATTCTAGCCAATTGAAAGGATCTTCT--GATCAATCCAGAGAGAA  
TTTCGATTCCATTAGT-----AATGAGGATTCGGAA-----TAT  
CACACATTGATCAATCAAACAGAGATTCAGCAACTAAAAGAAAGATTGATTCTT--TGG  
GAT-----CCTTCCTCTCTTCAAACGGAACGAACAGAGATAGAATCAGAT-----CGATTCCC  
GAAA-----TACCCTTCTGGATATTCC-----TCAATGTCCCGGCTATTACG---GAACGTGAA  
AAGCAGATGAATAATCATCTGTTTCCGGAATAAATCGAAGAATTTCTT-----GGGAATCC  
TACAAGATCAATTCGTTCTTTTTTCTCCGACAGATGG-----TCAGAACTTCAT--CTGGTT  
TCGAATGCTACTGAGAGGTTTCGCTAGAGATCAT-----AAATTGTTGAAGAAACAAC  
AAGATGTTTTTTCTTTTTGTCCCTTCCAGGCGATCGGAA-----AAGAAAGAAATGGTT  
GATATATTCAAGATAATTACGTATTTACAAAAT-----ACCGTCTCAATTCATCTATTTTCAT  
CAGATCCGGGATGTGATATGGTTCCG---AGGGATGAACCGGAT--ATGGACAGTTCTAAT  
AAGATCTCATTCTTGAACAAAACCCATTTTGTGAT-----TTATTCCATCTATTCCATGAC  
CGGAACAAAGGGAGATACACGTTG-----CACCACGATTTTGAATCAGAA-----GAGAGAT  
TTCAAGAAATGGCAGATCTATTCACTCTATCAATAACCGAGCCT--GATCTGGTGTATCAT  
AAGGGATTTGCCTTTTTCTATGGATTCTACGGGTTGGATCAAAAAAAA-----TTCTTGAA  
TGAGGTATTCAACTCCAGGGATGAATCGAAAAAGAACTCTTTA-----TTGGTTCTACC  
TCATATTTTTTAT-----GAAGAGAATGAATCTTTTTATCGAAGGATCAGAAAAAATGGGT  
CCGG---ATCTCTGCAGGAATGGTTTGGAAAGATCCAAAACCAAAAATAGTGGTATTTGC  
TAGCAACAACATAATGGAGGCAGTCAATCAATATAGATTGATCCGAAATCTGATTCAAA  
TCCAATATAGCACCTATGGG-----TACATAAGAAATCTATCGAATAGATTCTCTTTAATG---  
-----AATAGATCCGATCGCAACTTCGAATATGGAATTCAA-----AGGGATCAAATAGGA  
AATGATACTCTGAATCATATAACTATAATGAAATATATGATCAACCAACATTTATCGAATG  
TGAAAAAG---AGTCAGAAGAAATGGTTCGAT-----CCTCTTATTTCTCGAACCGAGA  
GATCCATGAATCGGGATCCTAATGCATATAGATACAAATGGTCCAATGGGAGCAAGAAT  
TTCCAGGAGCATTTGGAGCATTTCTGTTTTCTGAACAGAAGAAC-----CGTTTTCAAGTA  
GTGTTTCGATCGATTACGTATTAATCAACATTCGATTGATTGGTCCAAGGTTATCGACAAA

CAAGATTTGTCTAAGTCACTTCATTTCTTTTTGTCCAAGTCA-----CTTC  
TCTTTTTGTCT-----AAGTCACTT-----ACTTTTTCTTTGTGAGT  
ATCGGGAATATCCCCATTCATAGGTCCGAG--ATCCACATCTAT--GAATTGAAAGGTCCG  
AATGATCAACTCTGCAATCAGTTGTTAGAATCAATAGGTGTTCAAATCGTTCATTTGAAT  
AAATTGAAACCT-----TTCTTATTGGAT-----GATCATGATACTTCC---CAAAGATCGAAA  
TTCTTGATCAATGGAGGAACAATATCAGCATTTTTGTTCAATAAGATACCA---AAGTGG--  
-ATGATTGACTCACTCCATACT-----AGGAATAATCGCAGGAAATTCTTTGATAACACCGA  
TTCCTATTTCTCAATGATATCCCACGATCGGGACAATTGGCTGAATCCCGTGAAACCATT  
TCATAGAAGTTCATGATATCTTCTTTTTATAAAGCAAATCTACTTCGATTCTTGAATAAT  
CCACATCACTTCTGCTTCTAT-----TCTAACAAAAGATTCCCTTTTTAT-----GCGGAA  
AAGACCCGTATCGATAATTATGAT-----CTTACATATGGAGGACAATTCCTCCATATCTCGT  
TCATCCGCAACAAG---ATATTTCTTTGTGCGTCGGTAAA-----AAAAACATGTTTTTTT  
GGAG---AGAGATACTATTTACCAATCGAGTCACAGGTATCTGACATATTCATACCTAAC  
GATTTTCCACAAAGTGGTGATGAAACG--TATACTTGTACAAA-----  
-----TCTCAGCCTCTTTCA-----ACTT  
ATTGTCAGCCTCTTTTCAGATATGAATCTATCTGATTCAGAAGGGAAGAACTTGCATCAG  
TATCTCAGT-----TTCAATTCAAACATGGGTTTGATTCACTCCATGTTCTGAGAAATAT  
TTACCA-----TCCGCAAAA-----AAA-----CGGAATCTTTGTCTAAAG-----A  
AATGCGTTGAGAAAGGGCAGATGTATAGAGCCTTTCAACGAGATAGTGCTTTTTCAAAT  
CTCTCAAATGGAATCTGTTCCAAACGTATATGCCATGGTTCCTTACTTCGGCAGGGTG  
CAAATATATAAATTTAATCCTTTTAGATACTTTTTTCAGACCCATTG-----CCGATACTAAGT  
AGCAGT--CACAAATTTGTATCCTTTTTTTATGATATTACGCATGGATCAGATATATCATGG  
TCAATTCTTCAGATTCCATTGTGG-----GCGATTCTCCACAATGGAATCTG---ATAA  
GTGAGATTTGAGTAAGTGTTTACAGAAT-----CTTCTTCTGCCCCGAAGAAATGATTCAT  
CGAAATAATGAGTCACCCGTTCCGTTGAAATGGACACATCTGAGATCACCAAATGCTC  
GGGAGTTC---CTCTATTCAATCCTTTTCTTCTTCTTGTGCTGGGTAT--CTCGTTTCGTAC  
GCATCTTCTTTATTTCCCGA-----GTCTCTAGTGAGTTACAGACAGAGTTAGAAAAGA  
TCAAATCTTTGATGATTCAATCATAATGATTGAGTTGCGAAAACCTTCTGGATAGGTATC  
CTCCACCTGAACTGAATTCTTTCTGGTTAAAGAATCTCTTTCTAGTTGCTCTGGAACAA  
TTAGGAGATTCTCTGGAAGAAATACGGAGTTCTGCTTCTGGTGGCAACATGCTATTGGG  
TGGTGGTCCC-----ACTTATGGG--GTCAAATCAATACGTTCTAAGAAGAAAGATT  
TGAATATCAATCTCATCGATATCATCTATCTATA---AGTATCATACCAAATCCCATCAATC  
CAATCACTTTTTTCGAGAAATACGAGACATCTAAGTCGTACAAGTAAAGAGATCTATTCA  
TTGATAAGA-----AAAAACGTGAACAGTGATTGGATTGATGATCAAATAGAATCCTGGG  
TCGCGAACAGTGATTTGATTGATGATGAAGAAAGAGAATTCTTAGTTCAGTTCTCC-----  
ACCTAACGACA-----GAAAAAAGGATTGATCAAATCTATTGAGTCTGACT--CATAGT  
GATCATTTATCA-----AAGAATGACTCTGGTTATCAAATGATTGAACAACCGGGAT  
CCATTTACTTACGATACTTAGTTGACATTCAT-----AAAAAGTATCTAATGAATTATGAGTT  
CAATAGATCCTGTTTAGCAGAAAGACGGATATTCTTGCTCATTATCAGACAATTA  
T-----TCACAAACCCCGTGTGGGGCTAATAGTTCTCATTTCCCATCTCATGGA-----AAA  
CCTTTTTCGCTCCGCTTAGCCCTACCCCTTCT--AGGGTATTTTAGTGATAGGTTTTAT  
AGGAACTGGACGATCATATTTGTCAAATACCGAGTGACAACTCCTATGTTCCCTTCA  
TTACGGTATTTCCGAACAAGTTCCTGGATGACAAT--AAAGGTTATCTTATTGAT-----  
--GATATCGAT--ATTGATGATAGTGACGATATCGAT-----ATTGATGATAGTGACGATA

TC-----GATGATGACCTTGATACGGAGCTGCTAACT  
ATGCCGAATGTGCTA-----ACTATGTATATGACG-----CCGAAAATAGACCGATTTGA  
GATCACCCCTCCATTAGAATTAGCAAAAGCAATGTCTCCTTGATAATATGGATTCCAAA  
CATTCATGATCTGTATGTGAATGAGTCGAATTACTTATCCCTCGGTCTATTAGTGAACCAT  
CTCCCC-----AGGGATTGTGAAAGATGTTCC---ACTAGAAATATTCTTGTATTGCTTCG  
ACTCATATTCCCCAAAAGTGGATCCCGCTCTAATAGCTCCGAATAAATCAAATACATGC  
ATTAAGATACGAAGGCTTCTTATTCCACAACAACGAAAGCACTTTTTTCATTCTTTCATAT  
ACTAGGGGATTCCGCTTGGAAAAGAAAATGTCCCATACT-----AATGGATTCCGGTCCAT  
AACCATGGGTTCATGCACGAGATCTTGTAGCACTTACCAATGAGGTCCTATCAATTA  
GTATTACACAAAAGAAATCAATTATAGACACTAATAAATTAGATCAGCTCTTCATAGAC  
AAACTTGGGATTTGCGA-----TCCCAGGTAAGATCCGTTCCAGGATCATGAGATCCTTT  
TCTATCAGATAGGAAGGGCTGTTGCACAAAATGTACTTCTAAGTAATTGCTCCATAGAT  
CCTATATCTATCTATATGAAGAAGAAA-----TCATGTAAGGAAGGGGATTCTTATTTGTCC  
AAATGGTACTTCGAACTTGGAACGAGCATGAAGAAATTAACGATACTTCTTTATCTTTT  
GAGTTGTTCTGCCGGATCGGTCTCAAGATCTTTGGTCTCCACCC-----GGACCCGATG  
AAAAA---AATTGGATCACTTCTTATGGATTCGTTGAGAATGATTCT---GATCTAGTTCATG  
GC-----TTAGAAAGCGCTCTGGTGGGA-----TACTCACGGACAGAA-----TGCAGTCAG  
TTTGATAATGAT-----CGAGTGACATTGCTTCTTCGGTCCGAACCAAGGAAT---CAGTTAG  
ATATGATGCAAAATGGATCTTGTCTATCGTTGATCAGAGATTTCTATATGAAAAA-----T  
ACGAATCGGGGTTTGAAGAA---GGGAAGGAGAAGGAACCCCTCGACCTGCAA-----  
-CAGATAGAGGAGGATGAG-----GATTTATTCAATCAC-----ATAGTTTGGGCTCCT-----AG  
ACTATGGCGCCCT-----CATGGCAATCTATTTGATTGTATCGAAAGGCCCAATAAATTG  
GGATTTCCC---TATTGGGTCAGGTCATTTCCG-----GGCAAGAAGATCATTATCATAA  
AGAGGATAAGCTTCAAGAGAATGATTCGGAGTTCTTGCAGAGTGGAAACCGTGCAGTAC  
CAGACACGAGATAGATCTTCCAAAGAACAAGGGTTTTTTTCGAATAAGCCAATTCATTG  
GGACCCCTGCAGATCAATTCTTTTTTCTATTCAA---GATCAGCCCTTTGTCTCTGTGTTT  
TCACGTCGAGAATTTTTTGCAGATGAAGAGATGTCAAAGGGACTTATTACTTCCCAAAC  
AAATCCTCCTACATCTATATATAAACGCTGGTTGATC-----AAGAATACGCAAGAAAAGC  
ACTTCGAATTGTTGATTCATCGCCAGAGATGGCTTAGAACTAAT---ACTAATAGTTCATTA  
TCT-----AATGGATCTTCCGTTCTAAT-----ACTCTATCCGAGAGTTATCAGTATTTATCAA  
ATCTGTTTCTATCTAATAACGGAACGCTATTGGATCAAATGACAAAGACATTGTTGAGA  
AAGAGATGGCTTTTCCCGGATGAAATGAAACATTTGATT-----CATGCACCAGGAGAAA  
GATTTCCCATTCCTATGCCTAGATCTCGA---ATAAATGGAAATTTTATTGATAAAACCTCT  
TCAATTGTAGCCAATATCTTATTACGAATAATTCCGACAACCTTCGGGAGAAAAAGAGGC  
ATTACCTATTACAGAGATGGG-----ATGTCAGCTCAATCTGAAGGAAATTATGCGGAAG  
CTTTACAGAATTATTATGAAGCTATGCGACCAGAAATTGATCCCTACGATCGAAGTTATA  
TACTCTATAATATAGGCCTTATACACACAAGCAACGGAGAACATACGAAGGCTTTGGAA  
TATTATTTCCGAGCACTAGAACGAAATCCATTCTTACCACAAGCTTCTAATAATATGGCC  
GTGATCTGCCATTAC---CGGGGAGAAGAGGCCATTTCGACAGGGAGATTCTGAAATTGC  
GGAGGCTTGGTTCGATCAAGCTGCTGAGTATTGGAAACAAGCCATAGCGCTTACTCCA  
GGTAATTATATTGAAGCACAGAATTGGTTGAAGATTACAGGGCGGTTTCGAA-----ATGAA  
TTGGCGATCAGAACATATATGGATAGAACTTATAACGGGTTCTAGAAAAATAAGTAACT  
TCTGCTGGGCTGTATCCTTTTTTTTAGGTTCACTAGGATTTTTTATTGGTTGGAACCTCCA  
GTTATTTTGGTAGGAATCTGATATCCTTATTCCCATCTCAGCAAATCATTTTTTTTCCACA

AGGGATCGTGATGTGTTTCTATGGTATCGCGGGTCTATTCATTAGCTCCTATTTGTGGTG  
CACAATTCATGGAGTGTAGGTAGTGGTTATGACAAATTCGATAGAAAAGAAGGAATA  
GTTTGTATTTTCGTTGGGGATTCCTGGAAGAAATCGTTCGCATCTTCTTTCGATTCCGT  
ATAAGAGATATCCGTTTCGATCAGAATGGAAGTTAAAGAGGGTCTTTTTCTCGCCGTGT  
CCTTTATATGGAAATCGGAGGCCGGGAGACATTCCATTGACACGTACCAATGAGAAT--  
-TTAACTCCACGAGAAATTGAACAAAAGCTGCCGAATCGGCCTATTTTTTGC GCGTAC  
CAATTGAAGTATTT

>Ranunculus

ATGGAAAATGGCGTTTCAATTCGATGTTGTCTCTAAGTAAATCACTAAAATGTACGGG  
TTCCATTGGGAATACCAATGGGGGTGAAGACCTTGCTATAAAT-----AATATGATTCCG-  
----AGTAATATTGATCATTTAGTAGGTGTTAGCAACATTCGGAGTTTGATCTCTGATGAC  
ACTTTTTTAGTTAGGGATAGTAATGGTAAAAATTATTCAATATATTTTGATATTGAAAATC  
AGATTTTTGAGATTGAAATTGAAGGCGATCGTTCTTTTCTGAGTGAATTGGAAAGTTTT  
TTTTCTAGTTACCTAAATTTAAGTTATCCGAATGATGGATCTAAAAGTGACAATCACTAC  
TATGATCGTTCCATGTATGATACTCAATATAGTTGGAATAATTACATTACTAGTTGTATTG  
AGAATTATCTTCGTTCTGAAATACAT-----ATTGATAGTTACATTTCAAGCAGTAGTGACA  
ATTACAGTAAGAGTTACATTTCTAATTATGTTTGTAGTGACAGCGAGAGTTTCATACAA--  
-----AATGGAAGTACT---GATATGATAGGAAAATTT---AATTTTCGATATAAGTCCAAAATA  
CAGCCATTTGTGGGTTCAATGCGAAAATTGTTATGGATTAATTATAAGAAATTTTTTCG  
ATTAAACTTCATATTTGTGAACAATGTGGATATCATTTGAAAATGAGTAGTTCAGAAA  
GAATCGAAATTTTGATTGATCCAGGCACTTGGGATGCTATGGATGAGGATATGGTTTCC  
GTGGATCCCATTGAATTTCAATCAGAGGAGGAACCTTATAAAGATCGTATTGATTCTTAT  
CAAAAAAAGACAGGGTTAACTGAGGCTGTTCAAACAGGAATAGGTCAATTAAACGGT  
ATTTCCATAGCAATTTGGGGTTATGGATTTTCAGTTTATGGGAGGCAGTATGGGATCCGTA  
GTAGGCGAGAAAATAACTCGTTTGATCGAATATGCTACAAATGGATTTCTCCCTCTTATT  
ATAGTGTGTGCTTCCGGGGGAGCGCGCATGCAAGAAGGGAGCTTGAGCTTGATGCAAA  
TGGCTAAAATATCTTCAGCTTCATATGATTATCAATCAAATAAAAAGTTATTCTACGTATC  
AATCCTTACATCTCTACAACCTGGTGGAGTAACCGCCAGTTTTTGGTATGTTAGGAGATAT  
TATTATTGCCGAACCTAATGCCTACATTGCATTTGCGGGTAAAAGAGTAATTGAACAAA  
CATTGAATAAGACAGTACCAGATGGTTCACAAGAAGCTGAGTACCTATTTCCAAAAGGG  
CTTATTCGACCTAATTGTACCACGTAATCTTTTAAAGGGTGTCTGAGTGAGTTATTCCA  
GCTTCACGGTTTCTTTCCATTAATAAAAATTTTCATCAAGATGGCAACCCTTCGAGCCG  
ACGAAATTAGTAATATTATCCGTGAACGTATTGAGCAATATAATAGAGAAGTCAAGATTG  
TGAATACCGGCACCGTACTTCAAGTAGGTGATGGCATTGCTCGTATTATGTTCTTGAT  
GAAGTAATGGCAGGTGAATTAGTAGAATTTGAAGAGAAGACAGTAGGTATTGCTCTTA  
ATTTGGAATCCAATAATGTTGGTGTGTTCTTAATGGGTGACGGTTTGATGATACAAGAG  
GGGAGTTCTGTAAAAGCAACAGGAAGAATTGCTCAGATACCGGTGAGCGAGGATTATT  
TGGGTCTGTTATAAATGCTCTAGCTAAACCTATTGATGGTAGGGGTGAAATTTACGCTT  
CGGAATCTCGGTTAATTGAATCGCCCGCCCCGGGTATTATTTCAAGACGTTCCGTATATG  
AGCCGATGCAAACCGGACTTATTGCTATTGATGCGATGATCCCTATAGGACGCGGTCAG  
CGAGAATTAATTATTGGGGATAGACAGACCGGTAAAACGGCAGTAGCCACGGATACGA  
TTCTCAATCAAAAAGGTCAAATGTTATATGCGTTTATGTAGCTATTGGACAAAAAGCA  
TCTTCTGTGGCTCAGGTAGTGACTACTTTCCAGGAACAGGGGGTAATGGAATACACTAT  
TG TAGTAGCCGAAACGGCCGACGCGCCTGCTACATTACAATACCTCGCTCCTTATACAG



GAGCGGCTTTGGCCGAATATTTTATGTACCGTGAACGGCATACTTTAATCATTTATGATG  
ATCTGTCCAAACAGGCACAAGCGTATCGCCAAATGTCTCTTCTATTACGAAGACCCCA  
GGTCGTGAAGCTTATCCGGGAGATGTTTTTATTTGCATTCACGCCTTTTGGAAAGAGC  
AGCAAATTAAGTTCTCGTTTTAGGTGAAGGAAGTATGACTGCGTTACCAATAGTTGAG  
ACTCAATCAGGAGATGTTTCGGCTTATATTCTACTAATGTAATTTCCATCACAGATGGA  
CAAATATTCTTATCCGCCGATCTATTCAATTCTGGAATTCGCCCCGCGATTAATGTAGGTA  
TTTCTGTCTCGAGAGTAGGATCCGCGGCTCAAATTAAGCTATGAAACAAGTTGCTGG  
CAAATTAATAATTGGAATTGGCTCAATTCGCAGAGTTAGAAGCTTTTGCACAATTCGCTT  
CTGATCTCGATAAAGCTACTCAGAATCAATTGGCGAGGGGTCAACGATTGCGTGAGTT  
GCTCAAACAATCTCAAGCAGCCCCTCTAACGGTGGAAAGAACAGGTAGTGACGATTTAT  
ACCGGAACAAATGGGTATCTTGATTCGTTAGAAATTGGACAAGTAAAGAAATTTCTCGT  
TCAATTACGTACTTACTTAAAAAGTAGTAAACCTCAGTTCCAAGAAATAATATCTTCTAC  
CAAGACATTCACCGAAGAAGCAGAAGTCCTTTTGAAGGAAGCTATTCAGGAACAGAT  
GGAGCGATTTCTACTTCAGGAACAAACAATGAGAAGCAATCCTACTACTTCTGGTCCT  
GGGGTCCC CGCTTGAAGAAAAAACCTGGGACGTATAGCTCAAATCATTGGTCCGG  
TACTGGATGTATCCTTTCCACCGGGCAAGATGCCTAATATTTACAACGCTTTGGTTGTTA  
AAGGTCAAGATGCTGTTGGCCAGCAAATTAATGTAACCTTGCAGAGGTACAGCAATTATTA  
GGAAATAATCGGGTTAGAGCTGTAGCTATGAGTGCTACGGATGGTCTGATGAGAGGAAT  
GGAAGTGATTGACACAGGAGCTCCTCTAAGTGTTCGGTTGGGGGAGCGACTCTCGG  
ACGAATTTCAACGTTCTTGGAGAGCCTGTTGATAATTTGGGTCTGTAGATACTCGCA  
CAACATCTCCTATTCATAGATCCGCGCCTGCCTTTATACAGTTAGATACTAAATTATCTAT  
TTTTGAAACGGGGATTAAGGTAGTGGATCTTTTAGCTCCTTATCGTCGTGGAGGAAAAA  
TCGGGCTATTCGGGGGGGCTGGAGTGGGTAAAACCGTACTCATCATGGAATTGATCAA  
CAACATTGCCAAAGCTCATGGAGGTGTATCCGTATTTGGAGGGGTGGGCGAACGCACT  
CGTGAAGGAAATGATCTTTACATGGAAATGAAAGAATCCGGGGTGATTAATGAAGAAA  
ATATTGCGGAATCGAAAGTAGCTCTAGTCTATGGTCAGATGAATGAACCGCCAGGAGCT  
CGTATGAGAGTTGGTTTACTGCCCTAACCATGGCAGGAATATTTCCGGGATATTAATGA  
ACAAGACGTACTTCTATTTATCGATAATATTTCCGTTTCGTCCAAGCAGGATCCGAAGT  
ATCCGCTTTATTAGGAAGAATGCCTTCCGCTGTAGGTTATCAACCTACTCTTAGTACAGA  
AATGGGTTCTTTGCAAGAAAGAATTACTTCTACCAAAGAGGGATCCATAACTTCTATTC  
AAGCAGTTTATGTACCTGCGGACGATTTGACCGACCCTGCCCTGCCACAACATTTGCG  
CATTTAGATGCAACTACCGTACTATCAAGAGGACTGGCTGCCAAAGGTATCTATCCAGC  
AGTGGATCCTTTAGATTCAACGTCAACTATGCTTCAACCTCGAATTGTTGGTGAGGAAC  
ATTATGAAACTGCGCAAAGAGTTAAGCAAACCTTCAACGTTACAAAGAACTTCAGGA  
CATTATAGCTATCCTTGGGTTGGACGAATTGTCCGAAGAGGATCGTTTAAACCGTAGCAA  
GAGCACGAAAAATTGAGCGTTTCTTATCACAACCCTTCTTCGTAGCAGAAGTTTTTACC  
GGTCTCCAGGTAAATATGTTGGTCTAACAGAAACAATTAGGGGTTTTCAATTGATCCT  
TTCCGGAGAATTAGATGGTCTTCCGGAACAGGCCTTTTATTTGGTAGGTAATATCGACG  
AAGCTACCGCGAAGGCTATAAACTTAGATGAGGAGAGCAAATCGAAGAAAATGACCTT  
AAATCTATGTGTACTGACTCCTAATCGAATTGTTTGGGATTCAGAAGTGAAAGAAATCA  
TTTTATCGACTAATAGCGGTCAAATTGGTGTATTACCAAATCACGCACCTATTGCCACGG  
CTGTAGATATAGGCATTTTGAAGAATACGTCTTAACGACCAATGGTTAACCGTAGCTCTGA  
TGGGCGGTTTCGCTAGAATAGGTAATAATGAAATAACCATTTTAGTAAATGATGCAGAG  
AGGGCAGTGACATTGATCCGCAAGAAGCTCAGCAAACCTTTGAAATAGCTCAAGCTA

ACTTGAGTAGCGCGGAAGGCAAGAGACAAACAATCGAGGCAAATTTAGCTCTCAGAC  
GAGCTAGGACGCGGGTAGAGGCTATCAATGCAATT--ATGAAAAAAGTAACCGATTCTT  
TCGTTTCCTTGGGGTCACTGGCCATCCGCCGGGAGTTTCGGATTTAATACCGATATTTTAG  
CAACAAATCCAATAAATCTAAGTGTAGTCCTTGGTGTATTGATTTTTTTTTGGAAAGGGA  
GTGTTAAGTGATTTATTAGATAATCGAAAACAGAGAATCTTGAGTACTATTCGAAATCC  
GAAGAGCTGCGCGGAGGGGCCATTGAAAAGCTGGAAAAAGCCAAGGCCCGCTTACG  
AAAAGTAAAAGCGGAAGCGGATGAGTTTCGAACGAATGGATACTCCGAGATAGAACG  
AGAAAAATGTAATTTGATTAATTCAACTTATCAGAATTTGGAACGATTAGAAAATTACA  
AAAATGAAACCATTCAGTTTGAACAACAAAGAGCGATTAATCAAGTTAGACAACGCAT  
TTTTCAACAAGCTCTACAAGGAGCTCTAGGAACCTCTGAATAGTTGTTTGAACAACGAG  
TTACATTTACGCACCATCAGCGCGAATATTGGTATGTTTGGGGCGATGAAAGAAATAAC  
G--ATGAATCCACTGATTTCTGCCGCTCCGTTATTGCTGCTGGATTGGCTGTAGGGCTG  
GCTTCTATTGGACCTGGAGTTGGTCAAGGTACTGCTGCGGGACAAGCCGTAGAAGGTA  
TTGCGAGACAACCAGAGGCAGAGGGTAAAATACGAGGTACTTTATTGCTTAGTCTGGC  
TTTTATGGAAGCTTTAACAATTTATGGACTGGTCGTGGCATTAGCGCTTTTATTTGCAA  
TCCCTTTGTTATGAATGTTCTACCATGTTCCGTCAACACACTAAAAGGGTTATATGATATA  
TCCGGTGTAGAAGTAGGCCAACATTTCTATTGGCAAATAGGGGGTTTCCAAGTCCATGC  
CCAAGTACTTATTACTTCTTGGTTCGTAATTGCTATCTTATTAGGTTCCGCTATTATAGCT  
GTTTCGCAATCCACAAACCATTCCAACCGACGGTCAGAATTTTTTTGAATATGTCCTTGA  
ATTCATTTCGAGATTTGAGCAAAACCCAAATTGGAGAAGAGTATGGTCCTTGGGGTTCCTT  
TTATTGGAAGTATGTTCTTATTTATTTTTGTTTCCAAGTGGTCAAGGGGCTCTTTTACCTTG  
GAAAATCATACAATTACCTCATGGGGAGTTGGCCGCACCCACGAATGATATAAATACTA  
CTGTTGCTTTAGCTTTACCTACGTACGTAGCATATTTCTATGCGGGTCTTACAAAAAAG  
GATTGGGTTATTTTCGGTAAATATATTCAACCAACTCCAATACTTTTACCAATTAACATCCT  
AGAAGATTTACAAAACCCATTACTTAGTTTTTCGACTTTTTGGTAATATATTGGCTGA  
TGAATTAGTAGTTGTTGTTCTTGTCTTTAGTACCTTCAGTAGTTCCCTATACCTGTTATG  
TTCCTTGGATTATTTACAAGTGGTATTCAAGCTCTTATTTTTGCAACTTTAGCCGCGGCT  
TATATAGGGGAATCCATGGAGGGTCATCATATGATATTTTTTACTTTAGAACACGTATTAA  
CTCACATTTCTTTATCGATTATTTTAATTGTAATTACAATTTTTTTGATGAACTTATTAGTC  
TACGAAATTGAAGGGCTATCCTATTCGTCCGAAAAAGGAATGGTAGCTTCTTTTTTATGT  
ATAACGGGATTGTTAGTTATTCGTTGGATTTATTCGGGACATTTACCCTTAAGTGATTTAT  
ATGAATCATTAATGTTTCTTTCATGGAGTTTCTCAATTTTTTATATGATTCCTTATTTTGA  
AATAAAAAAAGTAATTTAAATGTATTAACAGCGCCCGTACTATTTTTACCCAAGGGTTT  
GCAACTTCAGGTGTTTTAAGAGAAATACATCAATCTACAATATTAGTACCTGCTCTACAA  
TCACAGTGGTTAATGATGCACGTAAGTATGATGGTATTGAGTTATGCGGGCGCTTCTGTGT  
GGATCATTATTATCAGTAGCCCTTCTAGTCATTCTATTTTCGAAAAAGTAGTTTTACTTTTT  
CGAAATATAAGGAAATCCAATATGTGAATGAAAAAAA-----AATATTTTTCTTTC  
GTTTAGAAATTATCACAGGTATCAATTAATTAGCAATTGGATTGTTGGAGTTCACGTGT  
TATTAGTCTCGGCTTTTTATTTTTAACCATAGGTATTCTTTCTGGAGCAGTATGGGCTAAT  
GAAACATGGGGGTCGTATTGGAATTGGGATCCAAAAGAACTTGGGCATTTATTACTTG  
GACAATATTCGCAATTTATTTACATAACCAGAACAATAAAAAGTTTGCAAAGCTCAAATT  
CGGCAATTGTTGCTTCTATCGTTTTTTTTATAATTTGGATATGCTATTTTGGAGTAAATCT  
ATTAGGAATAGGGCTGCATAGTTATGGTTCAATTTGCAATAACAATGCAAAAAAAG  
CATTTAACCCCTTCTATACCTTACATCTATAGTCTTTTTGTCTGGTTCGATTTCTTCTCA

TTTAAAAAAGTATGGAATCTTTGGTTATTCATTGGTGGAATGCAGAGCAATCCGAAGT  
TTTTTTGAATGATATTCAAGAAAAAGCGCCCTAGAAAAATTCATAGAATTAGAAGAAC  
TCCTCTTTTTGGATGAAATGATAAAGGAGTCCCCGGATATACATATACAAAACTTCGCA  
TAGGAATACACAAAGAAACGATACAATTGGTCAAATGTACAATGAGGGCCATATCCAT  
ACCATTTTAACTTTTTGACAAATATAATAAGTTTCGCTATTCTAAGCGTTTTTTATATTC  
TGGGTAATGAACAACCTTGTTATTTTAAATCCTTGGGTTTCGTGAATTTATATATAACTTAAG  
TGATACAATAAAAGCTTTTTGTATTCTTTTATTAAGTATTATGTATTGGATTCCACTCG  
CCTCATGGTTGGGAACATAATGATCGGTTCTGTCTACAAGGATTTTGGATTTTCTCATAAT  
AATCAAATTATATCCGGTCTTGTTTCCACCTTTCCAGTTATTCTAGATACAATTTTAAAT  
ATTTAATCTTCCGTTATTTAAATCGTGTATCTCCGTCACCTGTAGTCATTTATCATTCAATA  
AATGACATGCCTATTGGTGTCCAAAAGTACCTTTTTCGGATTCCCGGAGAGGAAGATGC  
AGTTTGGGTTGACGTATAC---CGACTTCATCGAGAAAGATTACTTTTTTTAGGACAAGG  
GGTTGATAGCGAGATCTCAAACCAACTTATCGGTCTGATGGTATATCTCAGTCTAGAGG  
ACGAAACCCGGGATCTTTTTTTGTTATAAACTCGCCCGCGGGTGGGTAGTCCCCGGA  
GTAGCCATTTATGATACTATGCAATTTGTGCCACCAGATGTACATACAATATGCATGGGAT  
TAGCCGCTTCAATGGGATCTTTCCTCTGGTTCGGAGGAGAAATTACCAAACGTATAGCA  
TTCCCTCACGCTAGGGTAATGATCCACCAACCTGCTAGTTCTTTTTATGAGGCACAAAC  
AGGAGAATTTGTCCTAGAAGCGGAAGAAGTCTGAAACTCCGCGAAACCCTCACAAG  
GGTTTATGTACAAAGAACGGGCAACCCATTGTGGGTTGTATCCGAAGATATGGAAAGG  
GATGTTTTTATGTACGAACAGAAGCCCAAGCTCATGGAATTGTTGATTTTGTAGCGGT  
C G A

A????????????????????????????????????????????????????????????????  
????????????????????????????????????????????????????????????????  
????????????????????????????????????????????????????????????????  
????????????????????????????????????????????????????????????????  
ATGGAGGAATTACAAAGATATTT  
AAAAATGGATAGATCTCGAGAACGAGACTTCCTATATTCACTTCTCTTTCAGGAATATAT  
TTATGCACTTGCTCATGATTTTGGGTTACAAATTTTAAAGT---AAATATAGTTCACTAATTG  
TTAAACGTTTAATTATTCTGAATGTATCAACAGAAGCATTGATTATTTTGGATAATGATTC  
GAAAAACAAAATTTTCTTGGGAAAAATTTGTATTCTCAAATGATATCAGAGGGGTTTG  
CTGTCATTGTAGAAATTCATTTGCATTGCGATTAGTATCCTCCTACATAGAAAAATCGA  
TTAATTTAGGATCCATTCATTCTACATTTCCATTTTATAGAGGATAAATTTGTACATTTAAAT  
CATGTATTAATATACTAATAACCCTATCCGATCCATTTTGAACATAATAGTTCAAACCTTC  
GTTGTTGGATACAAGATGCCTCCTTTTGCCTTATTGAGATTCTTCTCTATGAGTATCA  
TAATTGGAATAGTTTTACTACTAAACAGAACTCTTTTTTTTAAAACGAAGATTCTTCTT  
GTTCCCTATATAATTTTCATGTATATGAATCGGAATCCATATTTCTTTTTCTACGTAAAAAAT  
CTTATCATTACGATCAACATCTTCTATAGCTTTTCTTGTATCGAACACATTTTTTTTGGAAA  
AATAGAACATTTGAAAGTCGTTTTTCGTAATGATTTTATGCTATGGTTGTTCAAGGATCC  
CTTCATGCACTATTTCCGATATCAAGGAAAATCAATTATGTCTTCAAAGGAACTCCTCT  
TCTGATGAAGAAATGGAAATATTACCTTGTAACCTTATGGGAATGTCATTTTTTATTTTTG  
GTCTCAGCCGAATAGGATTCATATAACCAATTATCCAATATTTTTCTCAATTTTTTGGGT  
TATCTTTCAAGTGTACGACCAAATCCTTCGGTGGTAAGGAATCAAATGTTAGAAAATGC  
ATTTATTATAGATATTTCTAGA-----AATAAGTTGAGTACTTTAGTTCCAATTATTCCTTTGA  
TTGGATCATTAGCAAAGCGAAATTTTGTAACTTATCTGGGCAGCCCATCAGTAAGCCG  
GCTTGGACCGATTCACTAGATTCTGATATTATCGATAGATTTGGCCGGATATGCAGAAAT  
GTTTCTCATTATTATAGCGGATCCTCAAAAAAAAACCTTTGTATCGAATAAAGTATATA

CTTAGACTTTCATGTGCTAGAACTTTGGCACGTAAACACAAAAGTACTGTACGTTCTTT  
TTTAAAAGATTGGGTTTCGGAATTTTGGGAAGAATTCCTTATAGAGGAAGAACAGGTTC  
TTTCTTTTATTCTCCCAAAAAGGATTTGGTATTTTGATATTATTTCGTATTAATGACCTGAT  
GGATCTT--ATGATAATTGATACGACA---AAACTACAA---GCTATCAATTCTTTTTACAGAT  
CGGAA---TCCTTAAAAGAAGTTTACGGACTCGTATGGTACTTATTCCCATTTTTATTCTT  
GTATTGGGAATCGTAATAGGGGTGCTAGTAATTGTGTGGTTGGAAAGGCAAATATCCGC  
GGGGGTGCAACAACGTATTGGGCCCGAATACGCGGGTCTTTGGGAATTCTTCAAGCT  
CTAGCAGACGGTACCAAACTACTTTTCAAAGAAGATCTTCTCCCATCTAGAGGAGATAT  
TTATTTATTCAGTATCGGGCCATCTATAGCGGTGATAGCCATTTACTAAGTTATTTAGTA  
ATTCCTTTTGGCTATCACCTTGTTTTAGCCGATCTCAGTATAGGGGTTTTTTTATGGATTG  
CTATTTCCAGTATTGCTCCCATTGGACTTCTTATGTCAGGATATGGATCAAATAATAAATA  
TTCCTTTTTAGGTGGTCTACGAGCTGCTGCTCAATCAATTAGTTATGAAATACCATTAAC  
TCCATGTGTGTTATCAATATCTCTACTATCTAACAGTTCAAGTACAGTTGATATAGTTGAG  
GCGCAGGCAAATATGGTTTTTGGGGTTGGAATCTGTGGCGTCAACCTATAGGGTTTAC  
TGTTTTTTTTATTCTTCACTAGCAGAGTGCGAAAGATTACCTTTTGATTTACCAGAAGC  
AGAGGAAGAATTAGTAGCGGGTTATCAAACCTGAATATTCCGGTATAAAATTTGGTTTTATT  
TTATGTTGCTTCTATCTAAATCTCCTAGTTTCTTCATTATTTGTAACCGTTCTTTACTTGG  
GAGGCTGGAATCTATCTATTCCACATATATTAATTCTGAGCTTTTCGGAATAAATGAAA  
TGGGTGGGGTTTTTGGAAATGACAATTGGTATCTTTATTACATTAGCTAAAGCTTATTTGT  
TCTTGTTCAATTCATCACACAAGATGGACGTTACCGAGGATGAGAATGGACCAACTA  
TTAAATCTTGGATGGAAATTTCTTTTACCTATCTCTTTAGGTAATCTATTATTGACAACCT  
CTTTCCAACCTTTTTTCCCTGACGATCTGGCATGTACAGAATGAAAACCTCATTCTCGATT  
CTACGAGAATTTTTATGAAAGCGTTTCATTTGCTTCTCTTCCATGGAAGTTTTATTTTCC  
CAGAATGTATCCTAATTTTTGGCCTGATTCTTCTTCTGATGATCGATTTAACCTCTGATCA  
AAAAGATATACCTTGGTTATATTTTCACTCTTCAACAAGTTTAGTAATGAGCATAGCGGC  
CCTATTGTTCCGATGGAGAGAAGAACCTATGATTAGCTTTTCGGGAAATTTCCAAACGA  
ACAATTTCAACGAAATCTTTCAATTTCTTATTTTACTATGTTCAACTCTATGTATTCTCT  
ATCCGTAGAGTACATTGAGTGTACAGAAATGGCTATAACAGAGTTTCTGTTATTCGTATT  
AACAGCTACTCTAGGAGGAATGTTTTTATGTGGTGCTAACGATTTAATAACTATCTTTGT  
AGCTCCAGAATGTTTCAGTTTATGCTCCTACCTATTATCTGGATATACCAAGAGAGATGT  
ACGGTCTAATGAGGCTACTATGAAATATTTACTCATGGGTGGGGCAAGCTCTTCTATTCT  
GGTTCATGGTTTCTTGGCTATATGGTTCATCCGGGGGAGAGATCGAGCTTCAAGAAA  
TAGCGAATGGTCTTATCAATACACAAATGTATAACTCCCCAGGAATTTCAATTGCACTTA  
TATTCATAACTGTAGGAATTGGGTTCAAGCTTTCCCTAGCCCCTTCTCATCAATGGACTC  
CTGACGTATACGAAGGATCTCCCCTCCAGTCGTTGCTTTTCTTTCTGTTACTTCGAAA  
GTAGCTGCTTCAGCTTTAGCCACTAGAATTTTCGATATTCCTTTTTATTCTCATCAAACG  
AATGGCATCTTCTTCTGGAAATCCTAGCTATTCTTAGCATGATATTGGGGAATCTCATTG  
CTATTACTCAAACAAGCATGAAACGTATGCTTGCATATTCGTCCATAGGTCAAATCGGAT  
ATGTAATTATTGGAATAATTGTTGGAGACTCAAATGATGGATATGCAAGCATGATAACTT  
ATAIGCTGTTCTATATCTCCATGAATCTAGGAACTTTTGCTTGCATTGTATCATTGGTCT  
ACGTACCGGAACTGATAACATTCGAGATTATGCAGGATTATACACGAAAGACCCTTTTT  
TGGCTCTCTTTAGCCCTATGTCTCTTATCCCTAGGAGGACTTCTCCACTAGCAGGTT  
TTTTCGGAAAACCTCCATCTATTTCTGGTGTGGATGGCAGGCAGGCCTATATTTCTTGGTTT  
CAATAGGACTCCTTACGAGCGTTGTTTCTATCTACTATTATCTAAAATAATCAAGTTATT

AATGACTGGACGAAACCAAGAAATAACCCCTCACGTGCGAAATTATAGAAGATCTCCT  
TTAAGATCAAACAATTCCATCGAATTGAGTATGATTGTATGTGTGATAGCATCTACTATAC  
CGGGAATTTCAATGAACCAATTATTGCAATTGCTCAGGATACCCTTTTTATGTTTTTGC  
TTCACGAATATGATATTTTCTGGGCATTTCTAATAATATCAAGTGTTATTCCTATTTTAGCA  
TTTCTAATTTCCGGAGTTTTGGCCCAATTAATGAAGGGCCCGAGAACTTTCTAGTTA  
TGAATCGGGTATAGAACCAATGGGCGATGCTTGGTTACAATTCCGAATCCGTTATTATAT  
GTTTGCCTCGTTTTTGTGTTTTTGTATGTTGAAACCGTTTTTCTTTATCCATGGGCAAT  
GAGTTTCGACGTATTGGGTGTATCCGTATTTGTAGAAGCTTTAATTTTCGTGCTTATCCTA  
ATTGTTGGTCTAGTTTATGCATGGCGAAAAGGAGCGTTGGAATGGTCTACGAATGATTT  
TCCTTGGTTAACAATAATTGTTGGTTTGCAGATATTCGCGGGTACTTTGATTTTCTTTTT  
CCTCATAGAGGAAATAAGATTATTAGGTGGTATACTATATGTATATGCATTCTTGAATTAC  
TTATAACAGCCTATGTATTCTGTTATCATTCCAATTAGACGATCCATTAATCCAATTAGA  
GCAGGATTATAAGTGGATTCATTTTTTGTATTTCACTGGCGACTAGGAATTGATGGACT  
TTCCGTAGGACCTATTTTACTTACAGGATTTATAACTACTTTAGCTACTTTAGCGGCTTG  
GCCAGTTACGCGGGATTCGCGATTGTTCCATTTCCCTATGTTAGCAATGTACAGTGGGC  
AAATAGGATTATTTCTTCTCGGGATCTTTTACTTTTTTTATAATGTGGGAGTTTGAATT  
AATCCTGTCTACCTACTTTTATCTATGTGGGAGGTAAGAAACGTTTGTATTACAGCTAC  
AAAGTTTATTTGTACACTGCCGGTGGTTCTATTTTTCTTTTAAATGGGAGTTCTTGGTAT  
GGGTTTATATGGTTCCAATGAACCAACATTAATTTTGAACATCAGCCAATCAACCGT  
ATCCTGTGGCATTAGAAATACTATTTTATTTGGATTCTTATTGGTTATGCTGTCAAATT  
GCCGATTATACCCTACATACATGGTTACCAGATACCCACGGAGAAGCACATTACAGTA  
CATGTATGCTTTTAGCCGGAATTTTATTAATAATGGGAGCATATGGATTGGTTCGGATCA  
ATATGGAATTATTACCCATGCTCATTCTATATTTCTCCCTGGTTGATAATAGTAGGTGC  
AATCAAATAATCTATGCAGCTTCAACATCTCTTGGTCAGCGCAATTTAAAAAAAAGAA  
TTGCCTATTCTCTGTATCTCATATGGGTTTCATAATTATAGGAATTTGTTCCATAACAGAT  
ACAGGACTTAATGGAGCCATTTTACAAATGATCTCTCATGGATTTATTGGTGTGCACTT  
TTTTTCTTGGCAGGAACGAGTTACGATAGAATACGTCTTGTATCTTGACGAAATGGG  
AGGAATTGCTATTCCAATGCCAAAATATTTACAATGTTTACGATAGCTTCTCGATGGCTTC  
TCTGCCTTGCCTGGAATGAGTGGTTTTGCTGCAGAATTGGTGGTCTTTTTTGGACTAA  
TTACAAGCCAAAATATTTATTAATGCCAAAATACTAATTACTTTTGTAAACGGCAATTG  
GAATGATATTAACCTATTTATTCATTATCTATGTTACGTCAAATGTTTTATGGATACAAG  
CAATTTAAATCTCTTAATTCTTCGTTTTTGTATTCTGGGCCACGAGAACTTTTTGTTTCA  
ATCTGTATTTTTTACCCGTTATAGGTATCGGTATTTATCCGGATTCGTTCTCTCACTATC  
AGTTGACAAGGTAGAAGCTATTCTATCTAATTACTTTTATAGAATGATGCTCGAACATGT  
ACTTGTTTTGTAGTTCCATTTATTATCCATTGGTATCTACGGATTGATTACAAGTCGAAAT  
ATGGTTCGAGCGCTTATGTGTCTTGGAGCTTATACTGAATGCAGTTAACATAAATTCGTA  
ACATTTTCTGATTTATTTGATAATCGTCAATTAAGGAGACATTTTCTCAATTTTGTTA  
TAGGAATTGCAGCTGCCGAAGCAGCTATTGGATTAGCTATTATTTAGCAATTCATCGTA  
ACAGAAAATCAACTCGTATCAATCAATCTAATTTGTTGAATAAAATGGAGCATATATATC  
AAGATGCATGGATCATACTTTTATTCCCCTTCCAATTCCTATAGCAATAGGGCTGGGTC  
TTCTCCTTTTCCCAGCACCACAAAAGGATTCGTCCGATATGGGCCTTTTTTATGTTT  
TTATTATTAAGTATCATAATGATTTTTTCTGTAATCCTTTCTATTAAGCAAATTGATGGTAA  
TCCATCTACCAATATGTATGGTCTTGGACCATCAATAATGATTTTTCTTTAGATTTTGGT  
AACTTTATAGATCCGCTTACCTCCATTATGTTAATTAATTACGACTGTTGGAATAATGG

TTCTTATTTATAGTGACAATTATATGTCTCATGATCAAGGTTATTTGAGATTTTTTGCTTAT  
ATGAGTTTTTTAATGCTTCCATGCTGGGATTAGTTACAAGTTCAAATTTGATACAAATT  
TATATTTTTTGGGAATTAGTTGGAATGTGTTACATACCTATTAATAGGTTTTTGGTTCACAC  
GACCTCTTGACGCAAATGCTTGTCAAAAAGCCTTTGTAACATAATCGGGTAGGGGATTTT  
AGTTTATTTTTAGGAATCTTAGGTCTTTATTGGATAACAGGCAGTTTTGAATTTAGGGAT  
TTTTTTGAAATAGCAAAGAATAATGGGTACAATTCTTTCTTTCTTACTTTGTGTACTTCC  
CTATTATTTGTTGGTGC GGTTGCTAAATCTGCACAATTCCCTCTTCATGTATGGTTACCCG  
ATGCTATGGAAGGCCCAACTCCTATTTCCGGCTCTTATACATGCTGCTACTATGGTGGCAG  
CAGGTATTTTTCTTGTAGCTCGACTTTTTCTCTTTTTTACAGTTATACCTTACATAATGAA  
TATTATTGCGTTGGTTGGTATAATAACGCTACTATTAGGAGCTACTTTAGCCCTTGCTCAA  
AGAGACATTA AAAAGAAGTTTAGCCTATTCTACAATGTCTCAATTAGGTTATATTATGTTA  
GCTTTAGGTATGGGATCTTACCGAGCTGCTTTATTTCAATTTGATTACTCATGCTTATT CGA  
AAGCATTATTATTTTTAGGATCTGGGTCCATTATTCATTCAATGGAAAACGTTGTTGGATA  
TTCCCCAGATAAAAAGCCAGAACATGGCTCTTATGGGTGGTTTAAACAAAATATGCGCCAA  
TTACAAAACCTTCATTTTTATTAGGTACACTTTCTCTTTGTGGTATTCCACCTCTTGCTTG  
TTTTTGGTCCAAAGATGAAATTCTTAATGATAGTTGGTTATATTACCGATATTTGCAAC  
AATAGCTTGTGTTGACAGCAGGATTA ACTGCATTTTATATGTTTCGAATGTATTTACTTACT  
TTTGAGGGGCATTTAAATATTAATTGTA AAAATTATAGTGCCAAAAAAAATAATGGATTA  
TATTCAATATCCATATGGGGCAAAATGGGGTCAAAAGTGATACAAAATAAT---TATTTTGT  
ATCAACAATGAATTTAAAAGCATTGATAATACAAAACCTTTCACGTATCCTTATGAATC  
CGACAATACTATGTTATTTCCACTTTTTGTATTGGTTATATTTACTTTTTTTATTGGATACA  
TAGGACTTCCTTTTCATTTTGATATATTATCAAAATGGTTAATCCCTCGATAAATTTTTTA  
CATTCAGACTTTAAC---TCTTTTGATTGGTATGAGTTTCTGATAAATGCCCTTTTTTCAGT  
TAGTATAGCTTATTTCCGAATATTTATAGCCTTATTTTTATATGGTCCTGCTTATTCATATTT  
TCATAATTTTAACTTAATAAATTTTTTTATTATTCTCTGGGACAAAATTATAAATCGAGTAT  
ATAATTGGTCATATAATCGTGGTTACATAGATATTTTTTATGCAAAAATATTAATTGCGGG  
TATAAGAGGATTAGCCGACTTTACTTATTTTTTTGATAAAAAGTAATTGAGGGAATTGT  
GAATGGTATTGGTGTATAAGTTTTTTTTGTGCGAGAAAGTATTAATACGTAGGTGGGG  
GG---CGAATATCTTCTTATCTATCTTTTACTTATTTTATGTAGCTGTTTTTTTAGTAATTTG  
CCTTATGGATTTACCTGGACCAATACATGATTTTCTTCTAGTTTTTTTGGGGTTAGGTTTT  
ATAATGGGAGGTCTAGGAGTGGTATTACTACCAATCCCATTTTTTCTGCCTTTTCATTA  
GGGTTGGTCTTGTGTTGTACATCCTTATTCTATACTCCATCGAACTCTCATTTTGTGCTG  
CTGCACAGCTCCTTATTTATGTAGGAGCAATAAATGTATTAATTATATTTGCTGTGATGTT  
CATGAATGGTTCAGAATATTACAGCGATTTCCATCTTTGGACCGTTGGAGATGGAGTTA  
CTTCACTAGTTTGTACAAGTATTTTTGTTTCACTAATTACTACTATCCAGATACATCATG  
GTACGGGATTGTTGGACTACAAGATCAAACCAATTATAGAGCAGGACTTGATAAATA  
ATAGTCAACAAATTGGGATTCATTTATCAACGGATTTTTTTCTTCCATTTCGAACTTATTC  
GATAATCTTTTAGTTGCCTTGATTGGTGCAATTTCCATGGCTCGGCAGATGACTGTACC  
AACTACAAGAAAAGATCTCATGATAGTCAATATGGGTCTCAACACCCATCAATGCATG  
GTGTTCTTCGACTCGTCTGTTACTCTAGATGGGGAAGATGTTATTGACTGTGAACCCATAT  
TGGGTATTTACACAGAGGAATGGAAAAAATTGCGGAAAATAGAACAAATTATACAATAT  
CTTCCTTATGTAACACGTTGGGATTATTTAGCGACTATGTTTACAGAGGCAATAACGGTA  
AATGGACCAGAACAGTTGGGAAATATCAAGTACCAAAAAGAGCAAGCTATATTAGAG  
TAATTATGCTAGA ACTGAGTCGTATAGCTTCTCATTTATTATGGCTTGGCCCTTTTATGGC

GGATATTGGTGCGCAGACTCCTTTCTTTTATATTTTCCGAGAAAGGGAATTAATATATGA  
CCTATTCGAATCTGCCACAGGTATGCGAATGATGCATAATTATTTCCGTATTGGGGGGGT  
CGCTGCGGATCTACCTTATGGCTGGATAGACAAATGTTTGGATTTCTGTGATTATTTTTT  
AACGGGGGTTACTGAATATCAAAAAGCTTATTACGCGCAATCCCATTTTTTTTGGAACGAG  
TTGAAGGGGTGGGCATTATTGGTGGAGAAGAAGCAATAAATTGGGGTTTATCAGGGCC  
AATGCTACGAGCTTCCGGAATCAATGGGATCTTCGTAAAGTCGATCATTATGAGTGTT  
ACGACGAATTTGATTGGGAAGTGCAGTGGCAAAAAGAAGGAGATTCATTAGCTCGTTA  
TTTAGTCCGAATTAGTGAAATGACGGAATCCATAAAAATTCTTCAACAAGCTCTGGAAG  
GAATTCGGGGGGGCCCTATGAAAATTTAGAGGTACGCCGCTTTGATAGAGCAAAGGA  
TTCCGAATGGAATGATTTTATTATCGATTCATTAGTAAAAAGCCTTCACCCACTTTTGA  
ATTATCTAAACAAGAGCTTTATGTGAGAGTAGAAGCCCCAAAAGGAGAATTGGGGATT  
TTTCTGGTAGGAGATAAGAGTGTTTTTCCCTGGAGATGGAAAATTCGCCACCTGGTTT  
TATCAATTTGCAAATTCCTCCTCAGTTAGTTAAAAGAATGAAATTGGCCGATATTATGAC  
AATACTAGGTAGTATAGATATTATTATGGGAGAAGTTGATCGTATGTTCCCTATGGTAACT  
GGGTTTCATGAATTATGGACAACAACGGTACGAGCTGCAAGGTATATTGGTCAAAGTTT  
GATGATTACTTTATCTCACGCGAATCGTTTACCTGTAACGATCCAATATCCTTATGAAA  
AGTGATCACATCAGAGCGTTTCCGTGGACGAATCCACTTTGAATTTGATAAATGCATTG  
CTTGTGAAGTATGTGTTCCGGGTATGTCCTATAGATCTCCCCGTTGTTGATTGGAAATTGG  
AACTAATATTCGAAAGAAACGATTGCTTAATTATAAGTATTGATTTCCGGAATCTGTATATT  
TTGTGGTAACTGCGTTGAATATTGTCCAACGAATTGTTTATCAATGACTGAAGAATATGA  
GCTTTCGGCGTATGATCGTCACGAGTTGAATTATAATCAAATTGCTTTGGGTCGGTTACC  
AATGTCAGTGATTGGAGATTACACAATTCGAACAATTACGAATTCAGAAATAGCCACGG  
GTAAACGATTTGATTCAAAAACAATTACTAATTATATGCAGGGTCGTTTGTCTGCTTGGC  
TAGCGAAGCATAGGCTAGTTCATAGATCTTTGGGCTTCGATTACCAAGGAATAGAACT  
TTACAAATAAAGCCCGAGGATTGGCACTCCATTGCTGTCATTTTATATGTATATGGTTAC  
AATTATCTACGCTCTCAGTGTGCGTATGACGTAGCACCGGGCGGACTATTAGCTAGTGT  
GTATCATCTTACGAGAATACAGTATGGTGTGGATCAACCAGAAGAGGTATGCATAAAG  
TATTTGCCCAAGGAGGAATCCTAGAATCCATCTGTTTTCTGGATTTGGAAAAGTGCG  
GATTTTCAAGAACGGGAATCTTATGATATGTTGGGCATCTCTTATGATAATCATCCACGC  
TTGAAACGAATTTGATGCCTGAAAGTTGGATAGGATGGCCTTTACGTAAGGATTATATT  
GCCCTAATTTTTATGAAATTCAAGATGCTCAT-----

-----ATGAATTCCATTGAGTTTCCATTACTTAATCAAACAACCCAA---TCAGTTATTTCA  
ACTACATCAAACGATCTTTCGAATTGGTCAAGACTCTCCAGTTTATGGCCGCTTCTCTAT  
GGTACCAGTTGTTGCTTCATTGAATTTGCTTCATTAATAGGCTCGCGATTGACTTTGAT  
CGTTATGGACTGGTACCAAGGTCGAGTCCTAGGCAAGCGGACCTCATTTTAACAGCGG  
GCACAGTAACGATGAAAATGGCGCCTTCTTTAGTGAGATTGTATGAGCAAATGCCCGA  
ACCAAAATATGTCATTGCTATGGGAGCCTGTACTATTACAGGAGGGATGTTTCAAGTACCG  
ATTCTTATAGTACTGTTCCGGGAGTCGATAAGCTAATTCCTGTCGATGTTTATTTGCCGG  
GTTGTCTCCGAAACCAGAGGCAGTTATAGATGCTATAACAAAACCTTCGTAAAAGGTA  
TCTCGAGAAATCTATGAAGATAGGGTTGGGTCTCAACAGGAGACTCGATGTTTTACTAT  
CAACCACAAATTCGTGTTGGCCGTAGTACTCATACTGGAAATTATGATCAAGGATTGC  
TCTACCAATCGCCATCTATTTACAGAGATACCTAATGAAACATTTTTAAATAACAAAT--  
GTATCTTCCCACAAATTAGTGAATATGCAAAATAGAAATATCTTTTCTTGGATA---GAAC

AGATGACTCGATCCATTTTCGTATCGATCATTATATTTATAATAACTCAGCCATCTATTTCA  
CATGCATATCCCATTTTTGCACAACAGGGTTATGAAAATCCTCGAGAAGCAACTGGGCG  
TATTGTATGCGCAATTGTCAATTTAGCTAATAAGCCTGTGGATATTGAGGTTCCACAAGC  
GGTACTTCCAGATACTGTATTTGAAGCAGTTGTTTCAATTCCTTATGATATCCAAGTGAA  
ACAAGTTCTTTCTAATGGAAAAGGGGTTCTTTGAATGTGGGGGCCGTTCTTATTTTAC  
CTGAGGGATTTCGAATTAGCCCCCCCCAACCGTATTTCTCCGAAATGAAAGAAAAGAT  
GGGCAATCTTTCTTTTCAGAGTTATCGTCCTACTAAAAAAAATATTCTTGTGATAGGTCC  
TGTTCCCTGGTCAGAAATATAGCGAAATCACCTTTCCTATTTTGTCTCCAGACCCTCTTAC  
TAATAAAGACGTTTATTTTTTAAAATATCCTATATACGTGGGCGGTAATAGGGGAAGGGG  
TCAGATTTATCCTGATGGGAGTAAGAGTAACAATACAGTCTATAATTCTACAGCATCGGG  
TATAATAAGCAAATTTGTACGTAAAGAAAAGGGGGGTATGAGATAACCATAGGGGAT  
GTATCAGACGGACGCTCGGTCGTTGATATTATACCTCCGGGCCCGGAACTTCTTGTTC  
AGAGGGTGAATCCATCAAGCTTGATCAACCATTAACGAGCAATCCCAATGTGGGTGGA  
TTTGGTCAGGGGATGCCGAAATAGTACTTCAAGACCCATCGCGCGTCCAAGGCCTTT  
TTTTCTTCTTGGCGTCCGTTATTCTGGCACAATTTTTTGGTTCTTAAAAAGAAACAGT  
TTGAGAAGGTTCAATTGTCCGAAATGAATTTTCATGAGTAAAGTATATGATTGGTTCGAA  
GAGCGTCTCGAGATTCAGGCGATTGCAGATGATAACTAGTAAATATGTTCCCTCCTCAT  
GTCAACATATTTTATTGTCTAGGGGGGATTACACTTACTTGTTTTTTTAGTACAAGTAGCC  
ACAGGGTTTGCCATGACTTTTTACTATCGTCCGACCGTTACCGAGGCTTTTGCCTCAGT  
TCAATACATAATGACTGAAGCCAACCTTGGTTGGTTAATTAGATCAGTTCATCGATGGTC  
GGCAAGTATGATGGTTCTAATGATGATCCTGCACGTATTTTCGTGTGTATCTCACCGGTGG  
GTTTAAAAAACCTCGCGAATTAACCTTGGGTTACGGGTGTGGTTCTGGGTGTATTGACCG  
CATCTTTTGGTGTAACCGGTATTCTTTACCTTGGGACCAAATTGGTTATTGGGCAGTAA  
AAATTGTGACAGGCGTACCTGACGCGATTCTGTAAATAGGATCGCCCTTAGTCGAGTTA  
TTGCGTGGAAGTGCTAGTGTGGGTCAATCAACTTTAACTCGTTTTTATAGTTTACACAC  
ATTTGTATTACCCCTTCTTACCGCTGATTTTATGTTAATGCACCTTCCAATGATTCGTAAG  
CAAGGTATTTCTGGTCTTTAATGGGAGTAACAAAGAAACCTGACTTAAATGATCCTGT  
ATTAAGAGCTAAATTGGCAAAGGGATGGGTCATAATTATTATGGCGAACCTGCATGGC  
CAAACGATCTTTTATATATTTTTCCAGTAGTAATTCTAGGTACTATTGCATGTAATGTGGG  
TTTAGCGGTTTTAGAACCATCAATGATTGGTGAACCCGCGGATCCGTTTGCAACTCCTT  
TGGAATATTACCTGAATGGTACTTTTTTCCCGTATTTCAAATACTTCGTACAGTACCCA  
ATAAGTTATTGGGAGTTCTTTTAAATGGTTTCAGTACCGGCAGGATTATTAACAGTACCTT  
TTTTGGAGAATGTTAATAAATTCCAAAACCCGTTTCGTTCGTCCAGTAGCTACAACCGTC  
TTTTTGATTGGTACTGCAGTAGCCCTTTGGTTGGGTATTGGAGCAACATTACCTATAGAT  
AAATCTTTAACTTTAGGTCTTTTTATGATTGAAGTTTTACTATTTGGAATCGTGTTAGGCT  
TAATTCCTATTACTTTGGCTGGATTATTCGTAACCTGCATATTTACAATATAGACGCGGTGA  
TCAGTTGGACCTTATGCCTACTATAACTAGTTATTTCCGGTTTTCTCCTGGCGGCTTTAACT  
ATAACCTCCGCTTTATTTATTTGGTCTGAGCAAGATACGGCTTATTATGGATATAGTAAGTC  
TTGCTTGGGCTGCTTTAATGGTAGTCTTTACATTTCCCTTTCACCTGTAGTATGGGGAA  
GAAGTGGACTAATGATTATTCGTTTCGCCGGAATCAGAAGTTAAAAATTTGGTGGATAGG  
GATCCCGTAAAAACTTCTTTTCGAGGAATGGGCCAGACCGGGCCATTTCTCAAGAACAA  
TAGCTAAAGGACCGGATACTACAACCTGGATCTGGAACCTACATGCCGATGCTCACGAT  
TTTGACAGCCATACCAGTGATTTGGAGGAGATCTCTCGAAAAGTATTTAGTGCCCATTT  
CGGTCAACTCTCCATCATATTTCTTTGGCTGAGTGGGATGTATTTCCACGGTGCCCGTTT



TTCCAATTATGAAGCATGGCTAAGTGACCCTACTCACATTGGACCCAGTGCGCAGGTGG  
TTTGGCCAATAGTGGGCCAAGAAATATTGAATGGTGATGTCGGCGGAGGTTTCCGAGG  
AATCCAAATAACCTCTGGGTTTTTTTCAGATTTGGCGAGCATCCGGAATAACGAGTGAAT  
TGCAGCTCTATTGTAAGTCAATTGGTGCAATTGGTTTTTTTCCGCGTTAATGCTTTTTGCGG  
GTTGGTTCATTATCACAAAGCTGCTCCAAAGTTGGCTTGGTTCGAAGATGTAGAATCT  
ATGTTGAATCACCCTTAGCAGGGTTACTAGGACTTGGGTCTCTTTCTTGGGCGGGGCA  
TCAAGTACATGTATCTTACCGATTAACCAATTTCTAGACGCTGGAGTAGATCCTAAAGA  
GATCCCACTTCCTCATGAATTTATCTTGAATCGGGATCTTTTGGCTCAACTTTATCCTAGT  
TTTGCCGAGGGAGCAACCCCTTTTTACCTTGAATTGGTCAAAATATGCAGAATTTCT  
TACTTTTCGTGGAGGGTTAGATCCAGTAACGGGAGGTCTATGGCTGACAGATATTGCAC  
ACCATCATTTGGCTATTGCAGTTCTTTTTCTGATAGCCGGTCACATGTATAGGACTAATT  
GGGGTATTGGTCATGGCCTGAAAGATATTTAGAGGCTCATAAAGGACCATTTACTGGC  
CAGGGCCATAAAGGTCTATATGAGATCCTAACCAACGTCATGGCATGCTCAATTATCTCT  
AACTTAGCTATGTTAGGCTCTTTAACTATTGTTGTAGCTCACCATATGTATTCCATGCCCC  
CTTATCCATATCTAGCTACTGACTATGGTACACAACCTTCGTTGTTACACATCACATGT  
GGATCGGTGGATTTCTCATAGTTGGTGCTGCTGCCATGCAGCCATTTTTATGGTAAGA  
GACTATGATCCAACACTACTCGATAACAACGATCTCTTAGATCGTGTACTTAGGCACCGCGAT  
GCAATCATATCACATCTCAACTGGGCATGTATTTTTCTAGGCTTTCACAGCTTTGGTTTG  
TATATTCATAATGATACCATGAGCGCTTTAGGGCGCCCTCAAGATATGTTTTCAGATACC  
GCTATACAATTACAACCCATCTTTGCTCAATGGATACAAAACACCCATGCTTTAGCACCC  
GGTGTAACAGCTCCTGGTGCAACAGCAAGCACCAGCTTGACTTGGGGTGGTGGTGCTT  
TAATAGCAGTAGGCGGCAAAGTAGCTTTGTTACCTATTCCATTAGGAACCGCAGATTTT  
TTGGTACATCATATTCATGCATTTACGATCCATGTGACGGTATTGATATTATTGAAAGGTG  
TTCTATTCGCTCGCAGTTCCCGTTTTGATACCTGATAAAGCCAATCTTGGTTTTCGTTTTCC  
CTTGTGACGGGCCTGGAAGAGGAGGGACATGTCAAGTATCCGCCTGGGATCATGTCTT  
CTTAGGTCTATTTGGATGTACAATGCTATTTTCGGTAGTCATATTTCAATTCAGTTGGAAA  
ATGCAATCCGATGTTTGGGGTAGTATAAACGATCAAGGGGTGGTAACTCATATCACGGG  
AGGAAACTTTGCGCAGAGTTCATTACTATTAATGGGTGGCTACGCGATTTTTTATGGG  
CCCAGGCATCCCAGGTAATTCAGTCTTATGGTTCGTATTATCCGCATATGGCCTTTTTTT  
CCTAGGTGCTCATTTTGTATGGGCTTTTCAGTTAATGTTTTTATTAGTGGCCGCGGTTAT  
TGGCAAGAACTTATTGAATCTATCGTTTGGGCTCATAACAAGTTAAAAGTTGCTCCTGC  
TATTCAGCCTAGAGCCTTGAGTATTGTACAAGGACGTGCTGTAGGAGTAACCCATTACC  
TTCTGGGTGGAATTGCCACAACGTGGGCATTCTTCTTAGCAAGAATTATTGCAGTAGGA  
ATGGCATTACGATTTCCAAGGTTTAGCCAAGGCTTAGCTCAGGACCCACTACGCGTCG  
TATTTGGTTTTGGTATTGCTACCGCGCATGACTTCGAGAGTCATGATGATATTACTGAGGA  
ACGTCTTTATCAGAATATTTTTGCTTCTCACTTCGGGCAGTTAGCAATAATTTTTCTGTG  
GACTTCCGAAATCTGTTTCATGTAGCTTGGCAAGGAAATTTGAGTCATGGGTACAGG  
ACCCTTTACATGTAAGACCTATTGCTCATGCAATTTGGGATCCCCATTTTGGTCAACCGG  
CTGTAGAAGCCTTTACTCGAGGGGGTGCTCTCGGCCAGTGAATATCGCTTATTCGGGC  
GTTTATCAGTGGTGGTATAACAATTGGCTTACGCACAAATGAAGATCTTTATACTGGGGC  
GCTTTTTTTTATTATTTCTTTCTGCCATATCCTTAATAGCGGGTTGGTTACACCTACAACCG  
AAATGGAAACCAAGTGTTCGTGGTTCAAAAATGCCGAATCTCGTCTTAATCATCATTT  
GTCAGGACTCTTCGGGGTAAGTTCCTTGGCTTGGACGGGGCATTTAGTTCATGTGCGTA  
TTCCCGCTCTAGGGGGGAGTACGTTTCGATGGAATAATTTCTTAGATGTATTACCGCATC

CCCAAGGGTTAGGCCCCCTTTTTACGGGTCAGTGGAATCTTTATGCCCAAACCCCGAT  
TCCGGTAGTCATTTATTTGGTACCTCCCAAGGGGGGGGACAGCCATTCTAACCCCTTCT  
CGGGGGATTTTCATCCACAAACGCAAAGTTTATGGTTGACCGACATTGCTCATCACCATT  
TAGCTATTGCAATTATTTTTCTCGTTGCTGGGCATATGTATAGAATACTTCGGGATTGG  
GCACAGTATAAAAGATCTTTTAGAAGCACATATTCCTCCGGGGGGTCTGACTGGGGCGT  
GGACATAAAGGTCTTTATGACACAATCAATAATTCGATTCAATTTCAATTAGGCCTTGCT  
CTAGCCTCTTTAGGGGTTATTACTTCTTTGGTAGCCCAACACATGTACTCTTTACCTGCT  
TATGCATTCATAGCACAAGACTTTACTACTCAGGCTGCGCTATATACTCATCATCAATA  
TTGCAGGATTCATCATGACAGGAGCCTTTGCTCATGGAGCTATATTTTTTCATTAGAGATT  
ACAATCCGGAGCAGAATGAGGATAATGTATTGGCAAGAATGTTAGACCATAAAGAAGC  
TATCATATCCCATTTAAGTTGGGCCAGCCTGTTTCTGGGATTCCATACCTGGGACTTTAT  
GTTCATAACGACGTGATGCTCGCTTTTGGTACTCCGGAGAAACAAATATTGATCGAGCC  
CATATTTGCCCAATGGATACAATCTGCTCATGGTAAGACTTCATATGGGTTTCGATGACT  
TTTATCTTCAACGAGTGGACCGGCATTCAATGCGGGTTCGAAGCATATGGTTGCCTGGCT  
GGTTAAATGCTATTAATGAG-----AATAGTAATTCATTATTCTTAACAATAGGCCCCGGGG  
ACTTTTTGGTTTCATCATGCTATTGCTCTAGGTTTACATACAACTACATTAATCTTAGTAAA  
AGGTGCTTTAGATGCACGTGGTTCGAAGTTAATGCCAGATAAAAAGGATTTCCGGTTATA  
GTTTTCTTGCACGGTCCGGGTCGGGGCGGTACTTGTGATATTTACAGCTTGGGACGCG  
TTTTATTTGGCGGTTTTCTGGATGTTAAATACCATTGGATGGGTTACTTTTTATTGGCATT  
GGAAGCATATCACATTGTGGCAGGGTAACGTTTTACAGTTAATGAATCCTCTACTTATT  
TGATGGGGTGGTTAAGAGATTATCTATGGTTAAATCTTCCCAACTTATCAACGGGTATA  
ACCCCTTTGGTATGAATAGCTTATCGGTATGGGCGTGGATGTTCTTATTTGGACATCTTG  
TTTGGGCTACCGGGTTTTATGTTCTTAATTTCCCTGGCGCGGGTATTGGCAGGAATTAATTG  
AACTTTAGCCTGGGCTCATGAACGCACACCTTTGGCTAATTTGATTTCGATGGAGAGAT  
AAACCGGTGGCTCTTTCCATTGTGCAAGCAAGATTGGTTGGATTAGCCCACTTTTTCTGT  
AGGTTATATATTCATTTATGCAGCTTTCTTGATTGCCTCTACCTCAGGCAAATTTGGTATG  
TCACATTCAGTAAAGATTTATGATACATGTATAGGGTGTACTCAATGTGTACGAGCTTGT  
CCCACGGATGTATTAGAAATGATACCTTGGGATGGGTGTAAAGCTAAGCAAATTGCTTC  
TGCTCCAAGAACAGAAGACTGTGTAGGTTGTAAGATGTGAATCCGCTTGTCCAACG  
GATTTTTTGAGTGTCCGAGTTTATTTATGGCACGAGACAACCTCGTAGTATGGGCTTAGCT  
TATATGACAACCTTTCAACTTACCCTCTTTTTTTGTGCCTTTAGTGGGTCTAGTATTTCCA  
GCAATTGCAATGGCTTCTCTATCTCTTCATGTTCAAAAAACAAAATTGTCATGCGAGA  
TCTAAAAACATATCTCTCCGTGGCACCTGTGTTAAGCACTCTATGGTTTTGGGTCTTTAGC  
AGGTCTATTGATTGAGATCAATCGTTTTATTCCCAGATGCGTTGACATTCCCATTTTTTTCA  
TTCATGACTGCAATTTTAGAGAGACGCGAAAGTGAAAGCCTATGGGGTCTGCTTCTGTA  
ACTGGGTAACCAGCACTGAAAACCGTCTTTACATTGGATGGTTCGGTGTTTTGATGATC  
CCAACCTTATTGACCGCTACTTCTGTATTTATTATCGCCTTCATTGCTGCACCTCCAGTAG  
ATATTGATGGTATTCGTGAACCCGTTTTCTGGGTCTCTACTTTATGGAAATAATATTATTC  
TGGTGTATTATTCCTACTTCTGCAGCTATCGGGTGCACCTTTTATCCGATTTGGGAAGC  
AGCATCTGTCGATGAATGGTTATACAATGGTGGTCTTATGAACTAATTGTTCTACACTT  
CTTACTTGGTGTAGCTTGTACATGGGTCGTGAGTGGGAACCTTAGTTTTCCGTTTAGGTAT  
GCGCCCTTGGATTGCTGTTGCATATTCAGCTCCTGTTGCAGCGGCTACCGCTGTTTTCTT  
GATCTACCCAATTGGTCAAGGAAGCTTCTCTGATGGTATGCCTCTAGGAATTTCTGGTA  
CTTCAACTTTATGATTGTATTCCAGGCTGAGCACAACATCCTTATGCACCCATTTACA

TGTTAGGCGTAGCTGGTGTATTTCGGCGGCTCCCTATTTCAGTGCTATGCATGGTTCTTTGG  
TAACCTCTAGTTTGTATCAGGGAACCACTGAAAATGAATCTGCTAATGAAGGTTACAGA  
TTCGGTCAAGAGGAAGAACTTATAATATCGTAGCTGCTCATGGTTATTTTGGCCGATTG  
ATCTTCCAATATGCTAGTTTCAACAATTCTCGTTCTTTACACTTCTTCTTAGCTGCTTGGC  
CTGTAGTAGGTATTTGGTTCCTGCTTTAGGTATCAGCACTATGGCTTTCAACCTAAACG  
GTTTCAATTTCAACCAATCTGTAGTTGATAGTCAAGGTCGTGTAATTAACACTTGGGCA  
GATATCATCAACCGCGCTAACCTTGGTATGGAAGTTATGCATGAACGTAATGCTCACAAT  
TTCCCTCTAGACTTAGCTGCTGTTGAAGTTCATCTATAAATGGCATGGGTTTGCCTTGG  
TATCGTGTTCATACCGTCGTATTGAATGATCCCGGTCGGTTGCTTGCTGTACATATAATGC  
ATACAGCTCTCGTTTCTGGTTGGGCCGGTTCATGGCTCTCTACGAATTAGCCGTTTTTG  
ATCCCTCTGACCCGTTCTTGATCCAATGTGGAGACAGGGTATGTTTCGTTATAACCTTCA  
TGAATCGGTTAGGAATAACCAACTCATGGGGTGGTTGGAGTATTACA--GGAGGGACTA  
TAACGAATCCGGGTATTTGGAGTTACGAAGGTGTGGCCGGGGCACATATTGTGTTTTCT  
GGTTTGTGCTTCTTGGCAGCTATCTGGCATTGGGTATATTGGGATCTCCAAATATTCTGT  
GATGAACGTACAGGGAACCCCTCTTTAGATTTGCCTAAGATCTTTGGAATTCATTTATTT  
CTCTCAGGATTAGCTTGTCTTGGATTTGGTGCATTTTCATGTAACAGGCTTGTATGGTCT  
GGAATATGGGTGTCCGATCCTTATGGACTAACCGGAAAAGTACAATCTGTAAATCCTGC  
GTGGGGAGTGGAAAGGTTTTGATCCTTTTGTTCGGGGAGGAATAGCCTCCCATCATATTG  
CAGCGGGTACGTTGGGCATATTAGCGGGCCTATTCCATCTTAGTGTCCGCCCCGCCCAA  
CGTCTCTATAAAGGATTACGGATGGGTAATATTGAAACAGTCCTTTCCAGTAGTATTGCT  
GCTGTCTTTTTTGCAGCTTTTGTGTTGCTGGAACATATGTGGTACGGCTCCGCAACTAC  
CCCGATCGAATTATTTGGTCCCCTCGTTATCAATGGGATCAAGGATACTTCCAACAAG  
AAATATATCGAAGGGTTGGTGCCTGACTAGCCGAAAATAAGAGTTTATCAGACGTTTGG  
TCTAAAATTTCCGAAAAATTGGCTTTTTTATGATTACATTGGAATAACCCAGCAAAAGG  
GGGATTATTTAGAGCAGGCTCAATGGACAACGGGGATGGAATAGCCGTTGGATGGTTA  
GGACATCCCATCTTTAGAGATAAAGAGGGACGCGAGCTGTTTGTACGTCGTATGCCTAC  
TTTTTTTGAACATTTCCAGTAGTTTTTGGTAGATGGAGATGGAATTGTAAGAGCCGATG  
TTCCTTTTAGAAAGGGCAGAATCCAAGTATAGTGTGCAACAGGTAGGAGTAACTGTTGA  
GTTCTATGGTGGCGAACTCGATGGAGTCAGTTATAGCGACCCCGCTACTGTGAAAAAGT  
ATGCTAGACGCGCTCAATTGGGTGAAATTTTTGAATTAGATCGCGCTACTTTGAAATCC  
GACGGTGTTTTTTCGTAGCAGCCCAAGGGGTGGTTCACTTTTGGACACGCTTCGTTTCG  
CTTTACTCTTCTTTTTTCGGACATATTGGCATGGTGCTAGAACCTTATTCAGAGATGTTT  
TTGCTGGTATTGACCCGGATTGGATGCTCAAGTGGAAATTTGGAGCATTCCAAAAACTT  
GGAGATCCAACACTACAAAGAGACAAGTAGTC-----GTGGAAACG  
CTCTTTAATGGAACCTTAGCTTTAGCTGGTTCGTGACCAAGAAACCACTGGTTTCGCTTG  
GTGGGCCGGGAACGCCCCACTTATTAATTTGTCCGGTAACTACTCGGGGCTCACGTA  
GCCATGCTGGATTAATTGTATTCTGGGCAGGAGCAATGAACCTGTTTGAAGTGGCGCA  
TTTCGTACCCGAGAAGCCCATGTATGAACAAGGATTGATTTTACTTCCCCACTTAGCTA  
CTCTAGGTTGGGGAATAGGCCCTGGGGGGGAAGTTATAGACACTTTTCCATACTTTGTA  
TCTGGAGTACTTCACTTAATTTCCCTCTGCAGTATTAGGCTTCGGCGGTATTTATCATTCA  
CTTCTCGGGCCCGAACTCTTGAAGAATCTTTTCCATTCTTCGGTTATGTATGGAAAGAT  
AGAAATAAAATGACCACAATTTTGGGGATTCACTTAATCTTGTAGGTATAGGTGCTTTT  
CTGTTAGTACTCAAGGCTCTTTATTTTGGGGGAGTATATGATACCTGGGCTCCTGGGGG  
GGGAGATGTAAGAAAAATTTCCAACCTTGACACTTAGCCCAAGTATTATTTGGTTATTT

ACTAAAATCTCCTTTTGGAGGAGAGGGTTGGATTGTTAGTGTGGACGATTTAGAAGATA  
TAATTGGAGGACATGTATGGTTAGGTTCCATTTGTATATTTGGTGAATCTGGCATATCTT  
AACCAAACCTTTGCGTGGGCTCGACGAGCGCTTGTATGGTCTGGCGAAGCTTACTTG  
TCTTATAGTTTAGCTGCTTTATCTGTTTTTGGTTTCACCGCTTGTGTTTTTGTCTGGTTCA  
ATAATACCGCTTATCCTAGTGAGTTTTATGGGCCTACTGGCCCAGAAGCTTCTCAAGCTC  
AAGCATTCACTTTTCTAGTTAGAGACCAACGTCTTGGGGCTAACGTCGGATCCGCTCAA  
GGACCCACAGGTTTTGGGTAAATATCTAATGCGTTCTCCGACTGGAGAGGTCATTTTTGG  
AGGAGAAACTATGCGTTTTTGGGATCTCCGTGCTCCATGGTTGGAACCTCTAAGGGGT  
CCTAATGGTTTGGACTTGAGTAGGCTGAAAAAAGATATAACAACCTTGGCAAGAACGTC  
GTTCCGCGGAATATATGACTCATGCTCCTTTAGGTTCTTTAAATTCCGTCGGTGGTGTAG  
CTACCGAGATCAATGCAGTCAATTATGTTTTCGCCTAGAAGTTGGTTATCCACCTCTCATT  
TTGTTCTAGGATTCTTCCTATTCGTGGGTCACTTGTGGCATGCGGGAAGGGCCCGTGCA  
GCTGCCGAGGATTTGAAAAAGGAATTGATCGGGATTTGGAACCTGTTCTTTTCATGAC  
CCCTCTAACATGACTATAGCCCTTGGTAGATTTACCAAAGACGAAAAGGATTTATTTGA  
TACTATGGATGACTGGTTACGGAGAGACCGTTTTCGTTTTTGTAGGTTGGTCTGGTCTATT  
GCTCTTCCCCTGCGCCTATTTTGCTTTAGGGGGTTGGTTCACGGGTACAACCTTTGTAA  
CTTCCTGGTATACCCATGGATTGGCTAGCTCCTATTTGGAAGGATGCAATTTCTTAACCG  
CCGCAGTTTCTACTCCTGCTAATAGTTTAGCACACTCTTTGTTGTTACTATGGGGTCTCG  
AAGCACAAGGAGATTTCACTCGTTGGTGTCAATTAGGTGGTCTATGGACTTTTGTGCT  
CTCCACGGTGCTTTCGGACTAATAGGTTTCATGTTACGTCAATTCGAGCTTGCTCGATCT  
GTTCAATTGCGACCTTATAATGCAATCGCATTCTCCGGTCCAATTGCCGTTTTTGTGTTCT  
GTATTCCTGATTTATCCATTAGGTCAATCTGGTTGGTTCTTTGCACCTAGTTTTGGTGTAG  
CAGCTATATTTTCGATTCATCCTCTTCTTCCAAGGATTCATAATTGGACGTTGAATCCATT  
TCATATGATGGGAGTTGCCGGCGTATTAGGCGCTGCTCTACTATGTGCTATTCATGGTGC  
TACCGTGGAAAATACTTTATTCGAAGATGGTGACGGTGCAAATACATTCCGTGCTTTTA  
ACCAAATCAAGCAGAAGAGACTTATTCAATGGTCACTGCTAACCGGTTTTTGGTCTCA  
AATCTTTGGGGTTGCTTTTTTCCAATAAACGTTGGTTACATTTCTTTATGCTATTTGTACCA  
GTAACCGGTTTATGGATGAGTGCTCTTGGAGTAGTCGGTCTGGCTCTGAACCTGCGTGC  
CTATGACTTTGTTTCCCAGGAAATCCGTGCAGCGGAAGATCCCGAATTTGAGACTTTCT  
ACACCAAAAATATTCTTTTAAACGAGGGTATTTCGTGCTTGGATGGCGGCTCAGGATCAG  
CCTCATGAAAACCTTATATTCCCCGAGGAGGTTCTACCCCGTGGAAACGCTCTTATGTC  
TGGAAGCACGGGAGAACGTTCTTTTGTGATATTATCACCAGTATTCGATACTGGGTCA  
TTCATAGCATTACTATACTTCCCTATTCATTGCGGGTTGGTTATTTCGTCAGTACGGGGCT  
AGCTTATGATGTGTTTGGAAAGTCCCGCCAAATGAGTATTTTACAGAGAACCGACAA  
GGAATTCCATTAATAACAGGCCGTTTTGATTCTTTGGCGCAACTCGACGAATTTAGTAG  
ATCCTTTATGACTATAGATCGAACCTATCCAATTTTTACAGTGAGATGGTTGGCTGTTCA  
CGGACTAGCTGTACCTACCGTTTTCTTTTTTGGGGTCAATATCTGCAATGCAGTTCATACA  
ACGAATGGCTACACAAACCATTTAGGGTAGTTCTAAATCTGGT---CCAAGAGGAACTAC  
TGTGGGGAGTTTATTGAAACCGTTAAATTCGGAATATGGAAAAGTAGCTCCTGGTTGGG  
GGACTACCCCTTTGATGGGGGTTGCAATGGCACTATTTGCAGTATTCTTATCTATTATTCT  
CGAGATTTATAATTCATCCGTTTTACTGGATGGAATTTTCGATGAATATGCTTACTCTCAA  
CTCTTCGTTTACACAGTGGTGATATTCTTTGTTTCTCTCTTTATTTTTGGATTCCATCTAA  
TGATCCAGGACGTAATCCCGGGCGTGAGGAAATGGCCGATACTACTGGAAGGATTCCT  
CTTTGGCTTATAGGCACTGTAGCTGGTATTCTTGTGATCGGTTTAATAGGTGTTTTCTTTT

ATGGTTCATATTCTGGATTGGGCTCATCCCTGATGCTTAATATCTTTAGTTTGATCTGTAT  
CTATCTTAATTCTATACTGCATTCAAGTCATTTTTTATTTGCCAAATTGCCTGAGGCTTAC  
GCTTTTTTTAACCCAATCGTAGATATTATGCCAGTCATACCTTTGTTCTTTTTGCTCTTAG  
CCTTTGTTTGGCAAGCTGCTGTAAGTTTTTCGAATGACACAATCAAACCCGAACGAACA  
AAGTGTTGAATTGAATCGTACCAGTCTTTATTGGGGGTTATTACTCATTTTTGTACTTGC  
TGTTTTATTTTCCAATTATTTCTTCAATATGGAAGTAAATATTCTCGCATTCAATGCTACTG  
CACTGTTCAATTCTAGTTCCTACTGCTTTTTTACTTATTATTTACGTAAAAACGGTCAGTCA  
AAATGATATGGAAACCGCAACCCTAGTCGCCATCTTTATATCTGGTTTACTTGTAAGTTT  
TACCGGGTACGCCTTATATACCGCTTTTGGGCAACCCTCTCAACAACTAAGAGATCCAT  
TCGAGGAACACGGAGACATGGAAGCATTGGTTTATACATTCTCTTAGTTTCGACTCTA  
GGAATTATTTTTTTCGCTATATTTTTCCGAGAGCCGCCTAAGGTTCCGACTAAAAAA-----  
ATGACTATTGCTTTCCAATTGGCTGTTTTTGCATTAATTGCTACTTCATCAATCTTATTGA  
TTAGTGTACCCGTTGTATTGCTTCTTCTGACGGTTGGTCAAGTAACAAAATTTTTGTAT  
TTTCCGGTACATCATTATGGATTGGATTAGTCTTTCTAGTAGCTATCCTTAATTCTCTCAT  
CTCT-----ATGTCACCACAAACAGAGACTAAAGCAAGTGTGGCTTCAAAG  
CAGGTGTTAAAGAGTACAAATTGAATTATTACTCCTGAGTATGAACCCAAAGATACA  
GATACCTTGGCGGCATTCCGAGTAACCTCAACCGGGAGTTCCACCTGAAGAAGCGG  
GGGCTGCTGTAGCTGCCGAATCTTCTACAGGTACATGGACAACGTGTGTGGACCGATGG  
ACTTACCAGCCTTGATCGTTACAAAGGACGATGCTACCACATTGAGCCCGTTGCTGGA  
GAAGAAAATCAATATATTTGTTATGTAGCCTATCCTTTAGATCTTTTTGAAGAAGGTTCT  
GTTACTAACATGTTTACTTCTATTGTGGGTAATGTATTTGGTTTCAAAGCGTTACGCGCT  
CTGCGTCTGGAAGATCTGCGAATCCTGTTGCTTATGTTAAACTTTCCAAGGCCCGCC  
TCACGGTATCCAAGTTGAGAGAGATAAATTGAACAAGTATGGTCGCCCTCTATTGGGAT  
GTACTATTAACCAAAAATTAGGATTATCTGCTAAGAACTACGGTAGGGCGGTTTATGAAT  
GTCTCCGCGGTGGACTTGATTTTACCAAGGATGATGAGAACGTGAACTCCAACCCTTT  
ATGCGTTGGAGAGACCGTTTTCTTTTTGTGCTGAAGCAATTTATAAAGCACAGGCCGA  
AACAGGTGAAATCAAAGGACATTACTTGAATGCTACTGCGGGTACATGCGAAGATATG  
ATGAAAAGGGCTGTATTTGCCAGAGAATTGGGAGTACCCATCGTAATGCATGACTACTT  
AACGGGGGGATTACCCGCAAATACTAGCTTGGCTCATTATTGCCGCGATAATGGTCTAC  
TTCTTACATCCACCGCGCAATGCATGCAGTTATTGATAGACAAAAGAATCATGGTATA  
CATTTCCGTGTACTAGCTAAAGCGTTACGTATGTCTGGTGGAGATCATATTCCTCCGGT  
ACCGTAGTAGGTAAACTGGAAGGGGAAAGAGAGATCACCTTGGGTTTTGTTGATTAC  
TACGTGATGATTTTATTGAAAAGACCGAAGTTCGTGGTATTTACTTCACTCAAGACTGG  
GTCTCTCTACCAGGTGTTCTACCCGTTGCTTACGGGGTATTACGTTTTGGCATATGCCT  
GCTCTGACCGAGATCTTTGGGGATGATTCCGTAACAGTTCCGGTGGAGGAACTTTAGG  
ACACCCTTGGGGGAATGCACCGGGTGCTGTAGCGAATCGAGTAGCCCTAGAAGCTTGT  
GTACAAGCTCGTAATGAGGGACGTGATCTTGCTCGTGAAGGTAATGAAATTATCCGTGA  
GGCTTGCAAATGGAGCCTTGAAGTACCGCTGCTTGTGAGGTATGGAAGGAGATCAAA  
TTCGAATTTGAAGCAATGGATACTTTG-----ACGGCGATACATTTATACAAAATTCTACC  
CCGAGCACACGCAATGGAGCCGTCGGCAGTCAAGTGAATCCAATCCACGAAATAATT  
TGATCTATGGACAGCGTCATTGTGGTAAAGGTCGTAATGCCAGAGGAATCATTACCGTA  
AGGCATAGAGGGGGAGGTCATAAGCGTCTATACCGTAAAATCGATTTTCGACGGAATG  
AAAAAGACATATCTGGTAAAATCGTAACCATAGAATACGACCCAAATCGAAATGCATAT  
ATTTGTCTCATACACTATGGGGATGGTGAGAAGAGATATTTTTACATCCAGAGGGGCT

ATAATTGGAGATACCATTGTTTCTGGTACAGAAGTTCCTATCTCAATGGGAAATGCCCTA  
CCTTTGACCGATATGCCCTTAGGCACGGCCATACATAACATAGAAATCACACTTGGAAA  
GGGTGGACAATTAGCGAGAGCAGCGGGTGTGTAGCGAAACTGATTGCAAAAAGAGGG  
TAAATCGGCCACATTAATAATTACCCTCTGGGGAGGTACGTTTGATATCCAAAACTGCT  
CAGCAACAGTCGGACAAGTGGGTAATGTTGGGGTGAACCAGAAAAGTTTGGGTAGAG  
CCGGATCTAAGCGTTGGCTAGGTAAGCGTCCTGTAGTAAGAGGAGTAGTTATGAACCCT  
GTAGACCATCCCCATGGGGGTGGTGAAGGGAGGGCCCCATTGGTAGAAAAAACCC  
ACAACCCTTGGGGTTATCCTGCGCTTGAAGACGAAGTCGAAAAAGGAATAAATATA  
GTGATAGTTTGATTCTTCGTCGCCGTAGTAAAATGATTCAACCTCAGACCTATTTAAATG  
TAGCGGACAACAGCGGGCTAGAAAATTAATGTGTATTAGAATCATAGGAGCTAGT---A  
ATCGACGTTATGCTCATATTGGCGACGTTATTGTTGCGGTAATCAAAGAAGCAGTTCCC  
AATATGCCTCTACAAAGATCAGAAGTGATCAGAGCTGTAATTGTACGCACGTGTAAAGA  
ACTCAAACGTGACAATGGTATGATAATACAATATGATGACAATGCAGCAGTTGTCATTG  
ATCAAGAAGGAAATCCAAAAGGAACTCGAGTTTTTGGTGCAATCGCTCGAGAGTTGA  
GACAGTTGAATTTACTAAAATAGTTTCATTAGCCCCTGAAGTATTAATGCTTAGTCCCA  
AAAGAACCAGATTTTCGTAAACAACATAGAGGAAGAATGAAGGGAATATCTTATCGAGG  
CAATCGAATTTGTTTCGGGGGATATGCCCTTCAGGCACTTGAACCCGCTTGGATCACAT  
CTAGACAAATAGAGGCGGGGCGACGAGCTATGACACGATATGCGCGCCGTGGTGGAA  
AAATATGGGTACGTATATTTCCAGACAAACCCGTTACAGTAAGGCCTGCCGAAACACGT  
ATGGGTTCCGGGAAAGGATCTCCCGAATTTTGGGTATTTCGTCGTTAAACCTGGTTCGAAT  
ACTTTATGAAATGGGTGGAGTATCAGAAATTGTAGCCAGAGAAGCTATTTCTATAGCTG  
CGTCCAAAATGCCTATAAGAACGCAATTCATTATTGCGGGAATGACCAGAATTAGACGA  
GGGTATGTAGCTCGGAGACGTAGAACAAAATTCGTTTATTTGCATCAACTTTTCGAGG  
GACTCATTCAAGACTTACTCGAAGTACTATTCAACAGAAAATGAGAGCCTTGGTTTCTG  
CTCATCGGGATAGGGGCAGGCAAAAGAGAAATTTTCGCCGTTTGTGGATCAGTCCGAT  
AAATGCAGCAATTCGTAAGATG-----GTATCCTATAGTTATAGTAGATCAATACATGATCT  
GTACAAGAGGCAATCACTTCTTAATCGTAAAATACTTGCACAAATAGCAATATCAAATA  
CGAATTGTCTTTACATGATTTCCAATAAGATTCTTAAGAAAGTA-----AT  
GATAAAGGAAGTATACGCTTTAGGTAAACATATACGTATGTCTGCTCATAAAGCACGAA  
GAGTAATTGATCAGATTTCGTGGGCGCCCCTACGAGGAAACACTTATGATACTAGAACTC  
ATGCCTTATCGAGCATGTTATCCTATTTTAAAATTTGGTTTATTCTGCAGCAGCAAATGCTA  
GTCACAATATGGGTTTTAATGAAACGGCTTTAATTATTAGTCAAGCCGAAGTTAATGAG  
GGTACTATCACGAAAAAGTTAAAACCACGAGCTCGAGGACGTAGTTTTGCGATAAAAA  
GACCTACCTGTCATATAACTATTGTATTGCAAGATATATCAAAGATGAGGTATTATGGG  
ACAAAAAATGGATGGAATCAAATATGCAGTATTTACAGACAAAAGTATTCGGTTATTG  
GGGAACAAT---CAATATACTTCTAATGTGCAATCAGGATCAACTAGGACAGAAATAAAG  
CATTGGGTGCAACTCTTCTTTGGTGTCAAGGTAAGTACTAGCTATGAATAGTCATCGACTCCC  
GGGAAAGGGTAGAAGAATGGGACCCATTATGGGACATACAATGCATTACAGACGTATG  
ATCATTACGCTTCAACCGGGTTATTCTATTCCACCTCTTAGAAAAGAAAAGAACTATGGC  
AGTTCCGAAAAACGTACTTCTATATCCAAAAGCGTATTCGTAAAAATTTTTGGAAAA  
ACAAAGCATATTGGGCAACAATAAAAGCTTTTTCTTTAGCAAAATCTCTTTCCACCGGG  
AATTCTAAAAGTTTTTTTTGTGCGACAAACA---AACATGGCTAAGGGTAAAGATGTCAGA  
ACAAGAGTTATTTTGGAAATGTAACAGTTGTGTTTCGAAACGATATTAAT-----AAGAAATC  
GCGGGGCATTTTCGAGATATATTACTCAAAGAATCGACACAATACGCCTAGTCGATTGG

AATTGAGAAAATTTTGTCCCTATTGTTACAAGCATACGATTCATGGGGAGATAAAAAAA  
ATGAAAATAAGAGCCTCCGTTTCGCAAAATTTGTGAAAATGTTCGGCTGATCCGTAGAC  
GGGGACGAATTATCGTAATTTGTTCCAATCCGAGGCATAAACAGAGACAGGGAATGCT  
TCGAGATGAAGTAGCAGTATCGGCTCGGACACTGCAGTGGAAGTGC GTTGAATCAAGA  
GCAGACAGTAAGCGTCTTTATTATGGACGTTTTATTCTGTCTCCGCTTATGAAAGGTCAA  
GCCGATACAATAGGCATTGCAATGCGAAGGGCTTTGCTTGGAGAAATAGAAGGAACAT  
GTATCACACGCGCAAAATCTGAA-----AAAATACCACATGAATATTCTACCATAGTAGGT  
ATTGAAGAATCCGTACATGAAATTTAATGAATTTGAAAGAAATTGTATTGAGAAGTAA  
TTTGTATGGA ACTCGCGACGCATCCATTTGCGTTAAGGGTCCTGGATATGTA ACTGCTC  
AAGACATCATCTCACCGCCTTCCGTGGAAATCGTTGATACTACACAGCATATAGCTAGT  
CTGACGGAACCTGTTGATTTTTGTATTGGATTACAAATTGAGAGTAATCGTGGATATCGT  
ATGAAAACACCAAATAACGCTCAAAAAGGAAGTTAT-----CCTATAGATGCTGTATTCAT  
GCCTGTTTCGAAATGCAAATCATAGTATTCAATTCCTTATGGTAATGGGAATGAAAACCAGG  
AAATACTTTTTCTAGAAATATGGACGAATGGAAGTTTAACTCCTAAAGAAGCACTTTAC  
GAAGCCTCGCGCAATTTAATTGATTTATTTATTCCTTTTCTACATGCAGAAGAACA-----  
GACCAAAATTTAAAGGACAATCAAAAAAATGGGGTTACTTTACCATTTTTACTTTTTCA  
TGATGGATTTGAT--AAACTAAAAAAAAACAAAAA-----ATTGAATTGAAATGTATTTTT  
ATTGATCAATCAGAATTGCCCTCCAGGACCTATAATTGCCTTAAAAGGGCTAATATACAT  
ACATTATTAGACCTCTTGAATAAGAGTCAAGAAGATCTTATGAAAATAGAGCATTTCG  
CATAGAAGATGTA AACAGATATTGGACATTATACAAAAGCATTTT---GTCGTAATTGAT  
TTACCTAAAATAAGATGCTCCGGGATGGAAT--CAGGGAATGTCTACAATACCTGGG  
TTTAGTCAGATACAATTTGAGGGATTTTGTAGATTCAATTGATCAGGGATTGGCGGAAGA  
ACTTTCTAAGTTTCCAAAATTGAAGATACAGATCAAGAAATTGAATTTCAATTATTTGT  
GGAAACATATCAATTAGTAGAACCTTGATAAACGAACGGGATGCTGTGTATGAATCAC  
TCACATATTCTTCTGAATTATATGTGCCCGCGGGATTAATTTGGAAAATGGTAGGGATA  
CGCAAGAACAACAATATTTATTGGAAAATTCCTCTAATGAATCTTTTTGGAACCTTTA  
TAATAAATGGAATATACAGAATTGTGATCAATCAAATATTGCAAAGCCCCGGTATTTATT  
ACCGTTCAGAGTTGGATCATAACGGGATTTCCGGTCTATACCGGTACCATAATATCAGATT  
GGGGAGGAAGATCAGAATTAGAGATTGATAGAAAAGCAAGGATATGGGCGCGTGTA  
GTAGGAAACAAAAATATCTATTCTAGTTCATCATCAGCTATGGGTTTCGAATCTAAGA  
GAAATTATAGATAATGTTTGCTACCCCGAAATTTTCTTGTCTTTCCTGAATGATAAGGAA  
AAAAAAAAAATAGGATCAAAGGAAAATGCAATTTTGGAGTTTTATCAACAATTTGCTT  
GTGTAGGCGGGGATCCGGTATTTTCGGAGTCTTATGTAAGGAATTACAAAAAATTT  
TTTCAACAAGATGTGAATTAGGAAGGATTGGTTCGACGAAATATAAACCGTAGACTGA  
ATCTTGATATACCTCAGAACATTACATTTTTTGTACCACGGGATATCGTGGCGGCTGCAG  
ATCATTTGATCAGAATGAAATTTGGAATGGGTACACTTGACGAT-----ATGAATCATTTGA  
AAAATAAACGTATACGTTCTGTAGCGGATCTGTTACAAGATCAATTCGGATTGGCTCTG  
GTTTCGTTTAGAAAATGTGGTTCGAGGGACTATAGGTGGAGCAATCCGG---CATAAATTG  
ATA--CCGACGCCGCATAATTTGGTAACCTCCACTCCA-----TTAACAACCACTTATG  
AATCCTTTTTTGGCCTACACCCCTTATCTCAAGTTTTGGATCGAACGAATCCATTGACAC  
AAATAGTTCATGGGCGAAAATTGAGTTATTTGGGTCCTGGGGGTTTGACAGGACGAAC  
TGCCAGTTTTTCGGATACGAGATATACACCCTAGTCACTATGGACGTATCTGCCCAATTGA  
CACATCGGAAGGAATCAATGTTGGACTCATTGGATCCTTAGCAATTCATGCAAGGATTG  
GTCATTGGGGG---TCGTTAGAAAGGCCCTTTTAT-----GAAATTTCTGAGAAATCA-----

AAAGAGGTACGCGTGGTTTATTTATCACCAAGTAAAGATGAATACTATATGGTAGCGGC  
AGGCAATTCTTTAGCGTTGAATCGGGGTATTCAGGAAGAACAGGTTGTTCCAGCTCGAT  
ATCGCCAAGAATTTCTGACTATTACATGGGAGCAGATTCATCTTCGAAGCATTTCCTCCT  
TCCAATATTTTCTATTGGAGCTTCTCTTATTCTTTTATCGAACACAATGATGCAAATCG  
AGCTTTAATGAGTTCTAATATGCAACGTCAAGCAGTTCCACTTTGTGATCGGAGAAGT  
GCATTGTTGGGACGGGGTTGGAACGCCAAGTGGCTCTCGATTCTGGGGGTTTCCGCTAT  
AGCCGAACATGAGGGAAAGATCATTTATACCGATACTGACAAGATCATGTTATCAGGTA  
ATGGGGACACTCTAAGCATTCCATTGGTTATGTATCAACGTTCCAATAAAAATACTTGTA  
TGCATCAAAAACCCCGGGTTCCACGGAGTAAATGTATTA AAAAGGGACAAATTTTAGC  
TGATGGTGCCGCTACAGTTGGTGGCGAACTCGCTTTGGGAAAAAATGTATTAGTAGCTT  
ATATGCCGTGGGAGGGGTACAATTTTGAAGATGCGGTACTTATTAACGAACGTCTGGTA  
TATAGAGATATTTATACTTCTTTTCACATACGGAAATATGAAATTCAGACTCATGTGACA  
AGCCAAGGT---CCTGAAAGAATCACTAATGAAATACCACATTTAGAAGCCCACTTACTT  
CGCAATTTAGACAGAAATGGAATTGTGATGCTGGGGTCGTGGGTAGAAACGGGGTGATA  
TTTTAGTAGGTAAATTAACGCCACAGATAGCCAAAGAA---TCGTCATATGCCCCGGAAG  
ATAGATTATTACGGGCCATACTTGGTATTCAGGTATCCACGGCAAAGGAACTTGTCTA  
AAACTACCTATAGGTGGCAGAGGCCGAGTTGTTGATGTGAGATGGATTCAGAAAAAAG  
GG---GGTTCAGTTATAATCCAGAAACGATTCTGTATATATTTTACAGAAACGTGAAAT  
AAAAGTAGGGGATAAAGTAGCCGGAAGACATGGGAATAAGGGTATCATTTCAAAAATT  
TTGCCTAGACAAGATATGCCTTATTTGCAAGATGGAACACCCGTTGATATGGTCTTCAA  
CCCGTTAGGAGTACCTTACGAATGAATGTCGGACAGATATTTGAATGCTCGCTCGGGT  
TAGCAGGGAATCTGCTAGACAGGCATTATCGAATATCACCTTTGACGAGAGATATGAG  
CAAGAGGCTTCGAGAAAAC TAGTGT TTTCTGAATTATATCAAGCCAGTAAGCAAACCTG  
GGAATCCATGGGTATTTGAACCCGAGTATCCGGGAAAAAGCAGAATCTTTGATGGAAG  
AACGGGGGATCCTTTTGAACAACCTGTTATAATAGGAAAGTCCTATATTCTGAAATTAAT  
TCATCAAGTTGATGATAAAATTCATGGACGTTCTAGTGGACATTACGC ACTTGTACAC  
AACAAACCCCTTAGAGGAAGGGCCAAGCAAGGGGGACAGCGGGTAGGAGAAATGGAA  
GTTTGGGCTCTAGAGGGGTTTGGTGTGCTCATATTTTACAAGAGATGCTTACTTATAAA  
TCGGATCATATTCGAGCTCGTCAGGAAGTGCTTGGTACTACGATCATGGGAGGGACAAT  
ATCGAACCCCGAGGATGCTCCCGAATCTTTTCGACTGCTCGTTCGAGAACTACGATCTT  
TGGCTCTGGA ACTGAACCATTTCTTGTATCTGAGAAGA ACTTCCAGATTAATAGGAAG  
GAAGCT-----ATGATCGACCGATATAAACATCAACA ACTTCAAATTGGATTAG  
TTTCTCCTCAACAAATAATTACTTGGGCCGAGAAAATTTTACCTAATGGAGAGATTGTT  
GGAGAGGTAACAAAACCCCTATACTTTTCATTACAAAACCAATAAACCGGAAAAAGATG  
GGTTGTTTTGTGAAAGAATTTTTGGACCCATAAAAAGTGAATTTGTGCTTGTGGAAAT  
TATCGAGTAATCGGAAATGAAAAAGAAGACCCGAAATTTTGTGAACAATGTGGAGTCG  
AATTTGTGATTCTCGAGTACGAAGATATCAAATGGGATACATTA AACTCGCGTGTCCA  
GTA ACTCATGTGTGGTATTTGAAGCGTCTTCC TAGTTATATCGCGAATCTTTTAGATAAA  
CCTCTTAAAGAGTTAGAAGGCCTTGTATATTGTGAT-----TTTTCTTTTGCTAGGCC--GT  
AGTTAAAACCCGACTTTCTTGC GATTACGAGGTTTCAATTCGAATATGAAATCCAATCAT  
GGAAATACAGTATCCCGCTTTTTTTTACTACACAAGGATTTGATACGTTTCGAAATCGAG  
AAATATCTACTGGAGCAAGTGCTATCAGAGAACAATTAGCCGATCTGGATTTGCGACTT  
ATTATAGATTGTTCAATTGTTAGAATGGAAGAATTGGGTGAAGAG---GGGCCCGCCGGT  
AATGAGTGGGAAGATAGAAAATGGGAAGAAGAAAGTCTTTTTTGGTTAGACGTATGG



AATTAGCTAAGCATTTTATTTCGAACAAATGTAGAACCAGAACGGATGGTTTTGTGCCTA  
TTGCCGGTTCCTCCTCCCGAGTTGAGACCTATCATTTCAGATAGATGGGGGTAAACTAAT  
GAGTTCGGATATTAATGAACCTATCGAAGAGTTATCTATCGGAACAATACTCTTACCGA  
TCTATTAACAACAAGTAGATCTACACCCGGAGAATTAGTAATGTGTTCAGGAGAAATTAG  
TACAAGAGGCTGTGGATACTTCTTGATAATGGGATCCGCGGACAACCAACGAGGGA  
CGGTCATAATAAAATTTATAAATCATTTCGGATGTAATTGAAGGAAAAGAGGGAAGAT  
TTCGTGAGACTTTGCTTGGTAAACGGGTCGATTATTCGGGACGTTCCGTTATTGTTGTG  
GGCCCTTCGCTTTCATTACATCGATGTGGATTGCCCGTGAAATAGCAATAGAGCTTTTC  
CATACTTTGTAATTCGTGGTCTAATCAGACAACACATTGCTTCCAACATAGGAGTGGCT  
AAAAGTAAAATTCGGGAAAAAGCACCAATTGTGTGGGAAATACTTCAAGAAGTTATGC  
AGGGGCATCCTGTATTGCTGAATAGAGCGCCACTTTGCATAGATTAGGCATACAAGCA  
TTCCAACCCATTTTAGTGGAAGGTCGTGCTATTTGTTTACACCCATTAGTTTGTAAGGGA  
TTCAATGCAGATTTTGATGGGGATCAAATGGCTGTTTCATATACCTTTATCTTTGGAGGCT  
CAAGCGGAGGCGGTTTACTTATGTTTTCTCATATGAATCTTTTGTCTCCGGCTATTGGA  
GATCCCATTTCGTACCAACTCAAGATATGCTTATGGGACTCTATGTATTAACGATCGGG  
AATCGTCGAGGTATTTGTGCAAATAGATATAATCCGTGGAATCACAGAAAAC-----TCTC  
AAAATGAAAAAATTGACGATAATAACCATACGTATACA-----AAAGAACCCTATTTTGT  
AGTTCGTATGATGCACTTGGGGCTTTTCGCCAGAAACGGATTAATTTAGACAGTCCTCT  
GTGGCTTCGATGGCGACTAGATCAACGC---GTCATTGCACCA-----AGAGAAGTTCCAAT  
CGAAGTTC AATGTGAATCTTTTGGTACCTATCATGAGATTTATGGTCACTATCTAATAGTA  
AGAAATGTCAACAAAAAAATCTTTTGTATAGACATTCGAACTACTGTTGGTCTTATTTCT  
TTTTATCGAGAGATAGAAGAAGCCATACAAGGGTTTTGTTCGGGCTTGCTCATATAGTAC  
C-----ATGGCAGAACGGGCCGATCTAGTCTTTCACAATAAAGCGA  
TAGATGGAACCTGCCATGAAACGGCTTATTAGCAGATTAATAGATCACTTTGGAATGGCA  
TATACATCACATATCCTGGATCAAGTAAAACTCTGGGTTTCCAGCAAGCAACTACTAC  
ATCTATTTTCATTAGGCATTGATGATCTTTTAAACAATACCTTCTAAGGGATGGCTAGTACA  
AGATGCAGAACAACAAAGTTTAATTTTGGAAAAACACCATAATTATGGAAATGTACATG  
CGGTAGAAAAATTACGTCAATCCATTGAGATCTGGTATGCTACAAGTGAATATTTACGC  
CAAGAAATGAATCCTAATTTTAGGATGACTGATCCTTCTAATCCAGTCCATATAATGTCT  
TTTTTCGGGAGCTAGAGGAAATGCATCTCAGGTCCATCAATTAGTAGGTATGAGAGGATT  
AATGTTCGGATCCTCAAGGACAAATGATTGATTTACCCATTCAAAGCAATTTACGCGAAG  
GACTCTCTTTAACAGAATATATTATTCTTGCTATGGAGCTCGCAAAGGAGTTGTAGATA  
CTGCTGTACGAACATCAGATGCTGGATACCTCACGCGCAGACTTGTGAAGTAGTTCA  
ACACATTGTTGTACGTAGAACAGATTGTGGTACCACCCGAGGGATTTCTGTGAGTCCTC  
GAAATGGGATGATAACA---GAAAGAATTTTATACAAACATTAATTGGTCGTGTATTAGC  
AGACGATCTATATATGGGTTACGATGCATTGCCATTAGAAATCAAGATATTGGAGTTGG  
ACTTGTCAATCGATTCAACT-----TTTCGATCCCAACCAATATCTATTAGAAC  
CCCCTTACTTGCAGGAGTACATCTTGGATCTGTTCGATTATGTTATGGCCGCAGTCCCAC  
TCACGGCGACCTAGTCGAATTGGGAGAAGCAGTCGGTATTATTGCGGGCCAATCTATTG  
GGGAACCGGGGACTCAACTAACATTAAGAACCTTTCATACCGGCGGAGTATTTACAGG  
TGGTACTGCAGAACATGTACGAGCTCCTGATAATGGAAAAATAAAATTCAACGAAGGT  
TTGGTTTATCCACACGCACACGTCATGGATATCCTGCTTTTCTATGTTATATAGATCTAT  
CTGTAACCTATTGAGGGTCCAGATATTTACATAATGTGAATATTCACCAAAAAGTTTTA  
TTTTAGTTAAAAATGATCAATATGTAGAATCAGAACAAGTGATTGCTGAGATTCGCGCC

GAAGCATCCACCTTG---AATTTTAAAGAGAGGGTTCGTAAACATATTTATTCTGACTCAG  
AGGGAGAA--ATGCACTGGAGTACCGCTGTGTACCATGCACCCGAATATACATATGGTA  
ATGTTTCATCTCTTACCAAAAACGAGTCATTTGTGGATATTATCCGGAGTTCCGCAGAGA-  
----TCAAGTATAGTCCCCTTTTCACTCCACAAGGATCAAGATCAAATAAATATTCAT-----  
TCTCTTTCTGCCAAACAAAATTTATTTTTCGAATCTTTCTCTTTCAATGACTAATGATCAA-  
--GTGATCAAAAAATTGTTTAGGTCAGATTCTTCTGTT-----GGGGGTTGGGTTCTTGATTA  
T--TCAGGACCTGCTGAAGTCCTATGTAATGGTCATTGTAATTTAATACTCTGCC---ATT  
CTCGACGAGAATTCCGAT-----TTATTGGCAAAGAGGCGCAGAAATAGATTCACCATTCC  
ATTACAATCTAATCAAGAAAAAGAA-----CAAAAACCCCGTTCAGGTATCTCGATTGAA  
ATACCATAAAT-----GGTCTTTTCCGTATAAACAGTATTCTTGCTTATTTTCGAAGATCCCC  
GATACAGAAGAAAGAGTTTCGGGAATTAATAATATGGGACGATAGAGGTGGATTCAAT  
CGTAAAAAAGAAGAT-----TTGATTGAGTATCGAAGA-----AAAGAATTTAGGCCAAAA  
TACATGAAAATAGATCGATTTTTTTTTTTCATCCCGAGGAAGTGCATATCTTACCCGGATCC  
TCTCCATAATGATACGGAACAATAGTATCATTGGCGTAGATACAAGAATTACTTTCAAT  
ATAAGAAGTCAAGTAGGCGGATTGGTCCGAGTAGAGAAAAAAAAAAAAAAAAAGATTGAA  
TTAAAAATATTTTCTGGGAATATTTATTTTCTGGAGAGACAGATCCGATATCCTGGCAC  
AGCGGCATCTTGATACCACCTGGAGCAGGAAAAAAAA-----AATTCTAAAGAATCTAAA--  
----AAATTGAAAAATGGGATCTATGTCCAAAGG-----ATTACACCTACAAAAAAAAAAG----  
-TATTTTGTTTTGGTTCGGCCCGTTGTCACATATGAAAGGGCGGACGGGATAAATTTAGC  
AGCGCTTTTCCCCAAGATCCTTTGCAGGAAAGGGATAATGTGCAACTTCGAGTTGTC  
AATTATATTCTTTATGGAAATGGAAAACCAATTCGCAGAATTTCTCACACAATATTCAA  
TTAGTTCGAACTTGTTTAGTATTGAATTGGGACCAAGACAAAAA-----GGTCTTCT  
ATAGAGGAGGTTTCGTGCGTCTTTGTTGAGATAAAGATAAATGCTCTGATTTCGAGATT  
CATAAAAATGGACTTAGTGAAGTACCCTATTTTCGTATACCAGAAAAGAAATGATCCGG  
TAGGGTCAGGATTGATCCCCGTT--AATGGATCAGATCACACCAATCTTAATCCT--TTTT  
ATTCC-----AAGGCAAGT-----ATTAACAATCACTTATTCGTCATCAAGGAATAT  
TCGTACGTTGTTGAATAA-----AATAAGGAATGCCAATCCTTGATAACTTTGTCATCA  
TCTAATTGTTCTCGA-----ATAGATCCATTCAACAGGTTGAAATATCACACAAC-----AT  
GATAAAAAATCAGATATCCTACCCCAATTCGTAATTTGTTGGGTCCTTTAGGAATT---  
--ATCCCTAAAATTACGAATTTTTTTTCA-----TTTTATTATTTAATAACT-----CATAATCAA  
TCTTG--GTAAAAAAAAAATTCGCAGCTTGACAAT-----TTAAAACGGACTTCCCAGTA  
CTTAAA-----TATTATTTAATAGATGAAAATGGACGA-----ATTTTAAATCCGGACCCATC  
CATTAACATGATTTTGAATCCATTCAATTGGAATTGGTATTTTATCCATCACGATTATTGT  
GAAGAAACATCGACAATAATTAAC---CTTGGACAGTTTTTTTTGTGAAAATGTATGTATAT  
CGAAATCTGGACCA-----CATCTAAAATCGGGGCAGGTTCTAATTGTTGAT--GTTGAC  
TCTTTAGTAATAAGATCTGCAAAGCCCTATTTGGCTACTCCAGGAGCAACCGTTCATGG  
CCATTATGGGGAAATCCTTTACGAAGGAGATACATTAGTTACATTTATATATGAAAAATC  
GAGATCGGGTGATATAACGCAAGGTCTTCCAAAAGTAGAACAAGTGTAGAAAGTTTCGT  
TCGATTGATTCAATATCAATGAACTTGAAAACCGGGTTGAAGGTTGGAACGAACGTAT  
ACAAGAACTCTTGGGATTCCTTGGGGATTCTTGATTGGCGCTGAGCTAACCATAGCAC  
AAAGTCGTATATCTTTGGTTAATAAGATTCAAAAGGTTTATCGCTCGCAGGGCGTGCAG  
ATACATAATAGGCATATAGAAATTATTGTACGTCAAATAACATCAAAGTGTTGGTTTCA  
GAA-----GATGGAATGTCTAATGTTTTTTTACCCGGTGAATTAATTGGATTGTTGAGGG  
CGGAACGAACGGGGCGCGCTTTGGAAGAAGCGATCTGTTACCGAGCCGTTTTATTAGG

AATAACGAGGGCATCTCTGAATACTCAAAGTTTCATATCTGAAGCGAGTTTTCAAGAAA  
CTGCTAGAGTTTTAGCAAAAGCCGCTTTACGAGGTCGTATTGATTGGTTGAAAGGACT  
GAAAGAGAATGTTGTTCTGGGGGGTATGATACCCGTTGGTACTGGATTCAAGGGATTAG  
TGCACCGTTTA-----AGC-----AATATTTCT-----TTGGAAATCGAAAAGAAGAATCTATT  
CAAGGGAGGCATGAGA-----GATATTTTGTCCACCACAAAGAATTGTTTGATTCTTGCA  
TCCCCAGGAATTTCCCCGATACAACAAAACAATCATTTACAAGGTTTACTGAT-----  
-----ATGATAAGAAGGTATTGGAACATAAATTTGGAAGAGATGATGGAAGCGGGAGTT  
CATTTTGGTCATGGTACTAGAAAGTGAATCCTAGAATGGCACCTTATATCTCTGCAAA  
GCGTAAAGGTATTCATATTATAAATCTTACTAGAACTGCTCGTTTTTTATCAGAAGCTTG  
TGATTTAGTTTTTGTATGCAGCAAGTCGAGGAAAACAATTTTAATCGTTGGTACAAAA  
ATAAAGCAGCTGATTCAGTAGCATCGGCTGCAATAAGGGCTCGGTGTCATTATGTTAAT  
AAAAATGGCTCGGTGGTATGTTAACTAATTGGTCCACTACAGAAACAAGACTTCATAA  
GTTCAGGGACTTGAGAGCAGAGCAAAAGATGGGAAGACTCAACCATCTCCGAAACG  
AGATTCAGCAATGCTCAAGAGACAATTATCTCACTTGCAAACATATCTAGGCGGCATCA  
AATATATGACGGGATTGCCCGATATTGTAATCATCGTTGATCAGCAAGAAGAATATACGG  
CTCTTCGAGAGTGTATTACTTTGGGAATCCAACAATTTGTTAATCGATACAAATTGCG  
ACCCGGATCTTGCAGATATTTTCGATTCCAGCCAATGATGACGCGATAGCTTCAATCCGAT  
TAATCTTACTAACTAGTATCCGCAATTTGTGAGGGTTCGTTCTAGC---TATATAAGAAAT  
CGTATGGGACAAAAATAAATCCACTCGGGTTCCGGCTTGGTACAACCCAAAGCCATC  
ATTCTGTTTGGTTTGCACAACCAAAAAATTATTCCGGGGGTCTCCAAGAAGATAAAAA  
AATAAAGGATTGTATCAAGAATTATGTACAAAAAATAGGAAAATATCCTCGGGT--GTC  
GAGGGAATTGCACGGATAAAGATTAAAAAAGAATCGATCTGATCCAGGTCATAATATA  
TATGGGATTCCTAAAATTTTTAGAG---GGCAACCCACAA-----GGAATCGAAGAATT  
ACAGAGCAATATACAAAAAGAATTTAATTCTGTGAACCAAAAACTTAACATTGCTATCA  
CAAGAATTGCAAAACCTTATGGGCAACCTAATATTCTTGCAGAATTTATAGCTGGACAA  
TTAAAGAATCGAGTTTCATTTTCGAAAGGCAATGAAAAAAGCTATTGAATTAACGAAC  
AGGCAGATACAAAAGGAATTCAAATACAAATTGCAGGGCGTATTGACGGAAAAGAAAT  
AGCACGTGTGAATGGATCAGAGAAGGTAGGGTTCCTTACAAACCATTTCGAGCCAAA  
ATTGATTATTGTTCTTATACAGTTCGAACTATTTATGGGGCATTAGGAATCAAAATTTGGA  
TATTTGCAGGCGAGGAAATGTCTCGTTACCGAGGGCCTCGTTTCAAAAAAATACGCCG  
TCTGGGTGTTTTACC GGACTA ACTAGTAAAAGGCCGACACCCGGAAGTGATCTTAGA  
AACCAATCGCGCCCCGGGAAA---AGATCTCAATATCGTATTTCGTCTAGAAGAAAAACAA  
AAATTGCGTTTTTCATTATGGTCTCACAGAGAGACAATTAATAACGTTTCATATCGCT  
GGAAAAGCGAAAGGGTCAACAGGTCAGGTTTTACTACAATTAATTGAAATGCGTTTTGG  
ATAATATTCTTTTTTCGATTAGGTATGGCTTCGACCATTCTGGAGCCCGACAATTAGTTA  
ATCATAGGCATATTTTAGTTAATGGTCGTATAGTAGATATACCAAGTTATCGATGCAACC  
CCGAGATATTACTACAAGGGATGAACAAAAATCCAGAGCTCTGATTCAAATTTTA  
TGGATTCATCCCCCAC---GAGGAATTGCCAAAACATTTGACTCTTACCCATCCCAATA  
T-----AAAGGATCAGTCAATCAAATAATTGATAGTAAATGGGTTCGGTTTGAAAATCAATG  
AGTTGCTCGTCTAGAAATATTATCCCGTCAAACCTATGTCACGTCGAGGTTACTGCAGAA  
GAAAAAATGCAAAATCTGATCCAATTTATCGTAATCGATTAGTTAACATGTTGGTTAAC  
CGTATTTTGAAACACGGAAAAAATCATTGGCTTATCAAATTATCTATCGAGCCCTGAA  
AAAGATTCAACAAAAGACAGAAACAAATCCACTATCTGTTTTACGTCAAGCAATACGT  
GGAGTAACTCCCGATATAGCAGTAAAAGCAAGACGTGTAGGCGGATCGACTCATCAAG

TTCCATTGAAATAGGATCTACACAAGGAAAAGCACTTGCCATTCGTTGGTTATTAGGG  
GCATCCCGAAAACGTCCGGGTCGAAATATGGCTTTCAAATTAAGTTCCGAATTAGTGGA  
TGCTGCCAAAGGGAGTGCCGATGCCATACGCAAAAAGGAAGAGACTCATAAAATGGC  
AGAGGCAAATAGAGCTTTTTCGCGATTTTCGTATGGGTAGGGACACTATTGCTGAAATAA  
TAACTTCGATACGAAATGCTGACATGGATAAAAAAGGAACGGTTCGAATAGCATCTACA  
AATATTACCGAAAACATTGTAAAATACTTCTACGTGAAGGCTTTATTGAAAATGTGAG  
AAAACATCGAGTAAGCAAGAAATATTTCTTGGTTTCAACTCTGCGACATAGAAGG-----  
AATAGAAAAGGACCATATGGA-----ATGGTTTTA-----AAACGTATAAGCCGACCCGGC  
CTACGAATCTATTCCAATATCAAAGAATTCCTAGGATTTTAGGAGGAATGGGCATTGTA  
ATTCTTTCGACTTCTCGAGGTCTAATGACAGACCGAGAGGCTCGACTAGAAAGAATCG  
GGGGAGAAATTTGTGTTATATATGGATGACAAAACCATACCAAGAATTGGCTCACGT  
AGGAGTGGGCGCATTAGTTCACGCAAGAATGGACGTCGAATACCAAAAAGGTGTTATCC  
ATGTTCAAGCAAGTTTCAACAATACCATTGTAACGGTCACAGATATACGGGGTCGGGTG  
GTTTCTTGGTCTCGGCGGGTACTTGTGGCTTCAGAGGCACAAGAAGAGGGACGCCAT  
TTGCTGCCAAACCGCAGCCGCAAATGCTATCCGTACAGTAGTAGATCAGGGTATGCAG  
CGAGCAGAGGTCATGATAAAGGGTCTGGTCTTGGGAAGAGATGCAGCATTACGAGCCA  
TTCGTAGAAGTGGTATACTATTAAGTTTTGTTCAGAGACGTAACCCCTATGCCGCATAATG  
GATGCAGGCCTCCTAAAAAAGGCGTGTAATGCCAACTATTAACAACCTTATTAGAAA  
CACAAGACAGCCAATAAAAAATGTAACAAAATCCCCGCTCTTCGGGGATGTCCTCAG  
CGTCGAGGAACATGTACTAGGGTGTATACTATCACCCCAAAAAACCAACTCTGCCTT  
ACGTAAAGTTGCCAGAGTACGATTAACCTCTGGATTTGAAATCACTGCTTATATACCTG  
GTATTGGCCATAATTTACAAGAACATTCTGTAGTCTTAGTAAGAGGAGGAAGGGTTAAG  
GATTTGCCCGGTGTGAGATATCACATTGTTTCGAGGAACCCTAGATGCTGTCCGGAGTAAA  
AGATCGTCAACAAGGGCGTTCTAAATATGGGGTCAAAAAGCCAAAAATGGCAAGGAA  
AAGCTTGATTCAGAGGGAGAAAAAGAGGCAGAAATTAGAACAGAAATATCATTTGATT  
CGTCGATCCTCAAAAAAGGAAATAAAA-----AAAGTTCCGTCGTTGAGTGAAAAATG  
GGAAATTCATGAAAATTACAATCCCCACCTCGTAATAGTGCACCTACACGTCTTCATC  
GACGTTGTTTTTCGACCGGAAGACCGAGAGCTAACTATCGAGACTTTGGGTTATCCGG  
ACACATACTTCGTGAAATGGTTCAGGCATGTTTGTACCAGGCGCAACAAGATCAAGT  
TGGATGATAAAAAATTTATTTGTTTCATCTATTTTCGCAAGGA---GAA---AAAAAGAAAA  
CAGGGGGTCCGTTGAATTTCAAGTATTCAGCTTCACCAATAAAATACGTAGACTTACTT  
CCCATTTGGAATTACACAGAAAAGACTTTTTATCTCAGAGAGGTCTACGAAAAATTCTG  
GGAAAACGTCAGCGGCTGCTGTCTTATTTGTCAAAGAAAAATAAAGTACGTTATAAAG  
AATTAATTAGTAATTTGAGTATTCGGGAGTCAAAAACCTCGT-----ATGGTAAAACCTTCGT  
TTAAAACGATGTGGTAGAAAGCAACGAGCCATCTATCGAATCGTTGCAATTGATGTTTCG  
ATCCCGAAGAGAGGGAAGAGATCTTAAGAAAGTCGGTTTTTTATGATCCGATAAAGAAT  
CAAACCTTATTCAAATGTTCCCGCCATTTTAAATTTCTTGA AAAAGGGCGCTCAACCCAC  
GGAACTGTTTCATGATATTTTAAAGAAGGCAAAGATATTTAAG-----  
-ATGGATAAATCCAAGCGACTTTTTATTAATCCAAGCGGTCTTTTCGTAGGCGTTTGCC  
CCCAATTGGGTCGGGGGATCGAATTGATTATAGAAACATGAGTTTAATTAGTCGATTTAT  
TAGTGAACAAGGAAAAATATTATCTAGACGAGTGAATAGGTTGACTTTGAAACAACAA  
CGATTAATTACTGTTGCTATAAAACAAGCTCGTATTTTATCTTTGTTACCTTTTCTTAATA  
ATGAGAAA-----CAATTTGAGAGAACTGAGTCGACTCCTAGAACCACGGGTCTCGAA  
CTAGAAATAAAGTGACACGTTCACTAAAAAAAATCCTTTTGTAGCTAATCATTTATTG

ATAAAAATTACGAAGCTAAACATGAGGGCAGAAAAAGATAACAATCGTAACTTGGTCCC  
GGGCATCTACCATTATACCCACAATGATTGGCCATACAATTGCGATTCATAATGGAAAAG  
AACATTTACCTATTTATATAACCGATCGTATGGTAGGTCACAAATTGGGAGAATTTGCAC  
CTACTTTGAATTTCCGGGGACATGCGAGAAACGATAATAAATCTCGTCGTATCACCTTAA  
TATTACTAATAAAAAGTAATCTAGTATCCTCATGCATGAAGATAATAAATTCGGTTCGTTG  
TGGTCGGACTCTATTATGGATTTTTTACCACATTCTCCATAGGGCCCTCTTATTTCTTCCT  
TCTGCGAGCTCGAGTTCTGGAAGTTGGC-----GACGAGAAGGAGATATCAGCAACAA  
CAGGTTTTATTGCGGGACAGCTTATGATGTTTCATATCGATCTATTATGCGCCGCTGCATTT  
AGCGTTGCGTAAACCTCATAACAATACTGCCCTAGTTCTACCATACCTTTTGTTTCATTT  
CTTCTGGAATAATCACAAAACCTTTTTTGATTCTGTATATACTACCGGAAATTC AATGCG  
TAATCTCAACATTCAGTGTATATTCTTGAATAGTCTCATTTTTTCAATTATTCAACCATTTC  
ATTTTACCAAGTTCAACGCTAGCCAGATTAATCAACATTTATATGTTTCGATACAACAAC  
AAGATGTTATTTGTAGCAAGTAGTTTTGTTGGTTGGTTAGTTGGGCACATTTTCTTCATG  
AAATGGGTTGAGTTGGTATTATTCTGGATACGACAAAATCATTTGATTAGATCG-----  
---AAGTACCTTGTCTCAGAATTGAAAACTCTATGTCTCGAATTTTTAGTATTCTATTATT  
TATCGTCTGTATCTACTATTTAGGCAGAATGCCATCGCCTCTTGTCACTAAGAACTAAA  
AAAAGCCGAAGAAGACAAACCCCTTGTGACTCTTCTTTTCGACTATAAACGCTGGAAT  
CGTCCATTGCGTTATATAAAAAATGATTTTTTTGAGAACGCTGTAAGAAATGAAATGTC  
ACAATATTTTTTTTATACATGTCAAAGTGATGGAAAACAAAAGATATCTTTTACATATCT  
GCCAGCTTGTCAACATTTTTGGAAATGATACAACAAAAGATGCTTTTGTGCATTACAG  
AAAACGATCCTATGAAGAGTCATATAATAATTGGGTTTATACCAATGACGAAAAGAAA  
AAAATCTAAGTAACGAACTTTTTAATCGAATAGCAGTTCTAGACAAGGGGTTTCTTGT  
TACGGATGACTCGAAAAAAGAACTAGATTGTGCAAT--GAGAATGAACAAGAATGCTT  
ACCGAAAATTTATGATCCTCTTTTGAACGGACCCTATCGTGGAACAATTAAGAATTGT  
ACTCGCGTACT-----ATTTGGATAAATAAACTTTATGACATCTTTTTTAAAGAATTA  
AAAAA-----ATAAATGAAATAAAAAAAAAGGTTTTTCAGTGGTCATACAA  
ATTAATTGATTTGGAAGAAGAG-----GAAGGTATTCGTTACGAAAAGCCAAACGTGTA  
GTTATTTTTAATGATGCTTTGATAAGTTATTCACAACAATCAGATTTTCGTCGAGACATAA  
TTAAAGGATCCATGCGTGCTCAAAGACGGAAAACCGTTACTTGGAAAGCTGTTTCAAAC  
AAGAGTACATTCGCCACTTTTTTTGGACAGAATAGACAAAATTTTTGTTTTATCTTTTGA  
TATC-----GACCGAATATTGAATTTTCATTTTCAGGAATAAAAAGGAAAATGAACGTATAA  
CAATAGCAGAACTTGGGATACCGTTCTATTTGCTCAAACAATAAGGGGTTGTATACTA  
GTAATTC AATCAATTCTTAGAAAATTGATAGTATTGCCTTCGTTGATAATAGCAAAAAAT  
ATTGGGCATATGTTAGTATTTAAACCCACCGAGTGGCATGAAGATTTCGAAGAGTTGAA  
TAAAGAAATTCATGTTAAGTGCACTTATAATGGTGTTC AATTATCAGAAAACGAATTTCC  
AAAAAATTGGTTAACCGACGGGATTCAGATAAAGATCCTATTTCTTTTTGTCTAAAAT  
CGCGGCACCGATCTAAGAAAGGGAAAAACAAAATTTTTATTTTTTAAACAGTTTGGGG  
AATGGAAGCAGAACTACCCTTTGGTTCTCCCCGGAAAGGACCCTCCTTTTTTTGAGACT  
ATTTGGAAACAATAAAAAAAAACATAAAAAAGTAAAA---GTGAAAAGTTTTGTAGC  
TGTA AAAATTATAAAAAGAAAGAACAAAGTGGTTTTGGAAAAGTATCAAACGAAAAAAC  
AAAATGGGTTACAAAAAAGTGCAA-----TTTATAAAAAAAAATAATGAAAGA ACTTACA  
AAAAGAAAT-----ATAATAAGCAATAAAATGATTCCGGAATTCGCCATTCGAATTCGATC  
CATTGATTGGACAAATTATTCACTGACAGAAAAAAAATGAAAGATATGGCTGATAGAA  
TAAATACAATTCGAAATCAAATCGAAAAATAACAAAAGACAAGAAAAGTCGTCCTAA

CAAAACAAGTTGGGATGATAAAAGATTAGAACAGTCGAAAATTTTTTGGCAGATAGTA  
AAAAGAGGAAGGGCAAAAATAACGCAAATGTAACCTTTTTTTTCATTTTTGTATTGA  
AAAGATATGC--GATATCTTTTTAAGTATCATTAAATTCCTTCCAGGAATATACAAATTTT  
AATTCATTTTTATTTTCG--GACCTTTCTTTTTGTGACAAAGCATATGTATTTTACAAATTATC  
ACAAATACAAGTTAGTAACAAGTATAACTTAAAATCCTTATTTCAATATACAATTCCTTTT  
ATTAAGGATAAAATAAAGATTTTTTTTACACAAGGAATTTTAATTCCGAATCAAGACAT  
AAAAATTTTCACGATTTTGAATGAATGAATGGCAAAGCTGGTTGATGGGTAATTATCA  
ATACAATTTATCTCAAACCTTGCTGGTCTGGATTAGTACCGCAAAAATGGCGAAATAGAA  
TAAATAAAAATTTGGCAAACCTCAAGC-----AATTTTTATTTCTATGAAAAAGAGCCA-----  
TTAATTCATTACGAGAAGGAAGAGAAATTA AAAAAC---TACAAATATGATCTTTTATCAA  
ATAAATATATTAATGATTATGATATTGATTCGGATAGAAAATATCTTGATTGGAGAACTTT  
TAATTTTTGTCTTAGATTTTTTACTGGATGGGAATGAATGAAGAAATACTAAATTGGTG  
GTTTTTCCAGAAATTTCTATTACTTTATGATGCATATAAAATTC AACCTTGGATCATACCA  
CTTAATTTGCTTCTTTTA--TCGAAGAGCAACATAGCAGCAGAATTGGATTTCTTCCTGA  
AAAAATATTTCTTTTTCAATTGAGATGGGATAATTCCTTTAGCGAAAAATAATTAACA  
ATATTAAGATATATTGTCTACTCCTTAGATTGAAAAATCCAAAGGAAATTGCGATATCCT  
CTATTCAAAGAGACGAAATGAGTATGGATGTAATGCTGGTTCGAAAGCTACAACTTTT  
ATAAAATTGAGAAAAAGAAGACTCTTGCTTATTGAGCCAGCTCGTCTATCCATAAATTG  
GGATGGGCTGTTTATAATGTACCAAACCTTAGTTATTTTTGCAGGTGCATAATAGTAAGTA  
TAATAATTATGATTTTCTTATTCTGAAAATCTTTTATCTTCCAGACGTCGTAGAGAATTG  
AGAATTCAAATTTGTTAAGATTTCTTTGGCCCAATTATCGATTAGAAGATTTAGCTTGT  
ATGAATCGCTATTGGTTTGATACCAATAATGGTAGTCGTTTTAGTATGTCAAGAATACATA  
TGATCCAGTGAAACGACATCCATTA AAATCCTGGATCTTCGAATTGAGAGAGATACTG  
AGAGAGATCAAGAATTCTCACTATTTCTTAGATTTCGTGGACAAAATTCGATTCCGTGGG  
ATCTTTCACTCACATTTTTTTCCACCAAGAACGTTTTATGAAACTCTTTGACCCCGAAT  
TTGGAGTATCCTACTTTCA---CGCGATTTCG-----CAGGGTTTAAACAAGCAATCGATATTC  
ACG-----ATCAAAGGGGTAGTACTGCTTGCAGTAGCG---GTCCTTATATAT-----CGT  
ATTAACAGTCGAAATATGGTCGAAAGAAAAAATATCTATTTGATGGGGCTTCTTCCT-----  
-----ATACCTATGAATTCCATTGGACCCAGAAATGATGCATTGGAAGAATCCTTT--GG  
GTCTTCCAATATCAATAGGTTAATTGTTTTCG---CTCCTGTATCTTCCAAAAGGGAAAAAG  
ATCTCTGAGAGTTGTTTCATGGATCCGAAAGAGAGTACTTTGGTTCTCCCAATAACT----  
-----AAAAGTGTATCATGCCTGAATCTAACTGGGGTTCGCGGTGGCGGAGGAACCAG  
ATCGAAAAAGGAGG-----GATTCTAGTTGTAAGATATCG-----AATGAAACCGTAGCT  
GGAATTGAGATCTCATTCAAAGAGAAAGATCTCAA---TATCTGGAGTCTCCTTTTGTAT  
CCTATACGGAT-----GATCCGATCCGCAAGGACCATGATTGGGAATTGTTTGATCGTCTTT  
CTCCGAGGAAGAAGCGAAACATAATTA ACTTG-----AATTCGGGACAGCTATTCGAAAT  
CTTAGTGAAACACTGGATTTGTTATCTCATGTCTGCTTTTCGTGAAAAAAGACCTATTG  
AAGTGGAGGGT--TTCTTCAAACAACAAGGA--GCTGGGTCAACTATTCAATCAAATGA  
TATTGAGCGTGTTTCCCAT-----CTCCTCTCGAGAAACAAGTGGGGTATTTCTTTGCAA  
ATTGTGCTCAATTTTCATATGTGGCAATTCGCCAAGATCTCTTCGTT-----AGTTGGGG  
TAAG---AATCCGCACGAATTGGATTTTTTGAGGAAC---GTATCGAGAGAGAATTGGATTT  
GGTTAGACAGTGTGCGGTTGGTAAACAAGGATCGG-----TTTTTTAGC-----AAGGTAC  
GGAATGTATCGTCAAATATGCAATATGATTCG-----ACAAGA-----TCTATTTTCGTTCA  
AGTAACGGATTCTAGCCAATTGAAAGGATCTTCT--GATCAATCCAGAGATCATTTAGAT

TCCATTAGT-----CATGAGGATTTCGGAA-----TATCACACAT  
TGATCAATCAAAGCGAGATTCAACAATAAAAGAAAGATCGATTCTT--TGGGAT-----C  
CTTCCTTTTTTCAAACGGAACGAACAGAGATAGAATTAGAC-----CGATTCCCGAAA-----  
-CGCCTTTCTGGGGATTCC-----TCAATGTCCCGACTATTCACG--GAACGTGAGAAGCC  
GATGATTATTCATCGGCTTCCGGAAGAAATCGAAGAATTTCTT-----GGGAATCCTACAA  
GATCAATTCGTTCTTTTTTCTCTGACAGGTGG-----TCAGAACTTCAT--CTGGGTTTCGAA  
TCCTACTGAGGGGTCCACTAGAGATCAG-----AAATTGTTGAAGAAACAACAAGAT  
TTTTCT--TTTGTCCCTTCCAGGAGATCGGAA-----AATAAGAAATGGTTGATATAT  
TCCGGATAATTACGTATTTACAAAAT-----ACCGTCTCAATTCATCCTATTTTATCAGATCC  
GGGATGTGATATGGTTCCG--AAGGATGAACCGGAT--ATGGACAGTTCCAATAAGATTT  
CATTCTTAAACCAAAATTCATTTTTTTAT-----TTATTTTCATCTATTCCATGACCGGAACAG  
GGGAGGATACACGTTG-----CACCACGATTTTGAATCCGAA-----GAGAAATTTCAAGAA  
ATGGCAGATCTATTAACCTCTATCAATAACCGAGCCG--GATCTGGTGTATCATAAGGGAT  
CGGCCTTTTCTATTGATTCCTACAGATTGGATCAAAAAAAA-----TTCTTGAATGAGGTAT  
TCAACTCCAGGGATGAATCGAAAAAGAAATCTTTA-----TTGGTTCTACCTCCTATTTT  
TTAT-----GAAGAGAATGAATCTTTTTTATCAAAGGATCAGAAAAAAATGGGTCCAG--AT  
CTCCTGCGGGAATGCTTTTGAAGATCCAAAACAAAAAAGAGTGGTATTTGCTAGCAAC  
AACATAATGAAGGCAGTCAATCAATATAGATTTATCCAAAATCTGATTCAAATCCAATAT  
AGCACCCATGGG-----TACATAAGAAATGTATCGAATCAATTCTTTAAG-----AGAT  
CCGATCGCAACTTCGAATATGGAATTCAA-----AGGGATCAAATAGGAAATGATACTC  
TGAATCATAGAACTATAATGAAATATACGATCAACCAACATTTATCGAATTTGAAAAAG--  
-AGTCAGAAGAAATGGTTCGATCCT-----CTTATTTCTCGAACCGAGAGATCCACGA  
ATCGGTATCCTGATGCATATAGATACAAATGGTCCAAGGGGAGCAAGAATTTACAGGAA  
CATTTGGAACATTTTCGTTGCTGAGCAGAAGAGCCTT-----TTTCAAGTAGTGTTTCGATC  
GATTACGT-----CAAATTCGATTGATTGGTCCGAGGTTATCGACAAACAATATTTTTCTA  
AGTCACTTCGTTTCTTTTTGTCC-----  
AAGTCGCTTCTCTTTTTGTCTAAGTCACTTCCTTTTTTCTTTGTGAGTATCGGGAATATC  
CCCAGTCATAGGTCCGAG--ATCCACATTTAT--GAATTGAAAGGTCCGAATGATCAACT  
CTGCAATCAGTTGTTAGAATCAATAGGTGTTCAAATTGTTCAATTTGAATAAATGGAAATC  
C-----TTCTTATTGGAT-----GATCATGATACTTCC--CAAAAATCGAAATTCCTTGATCAA  
TGGAGGAAGAATATCACCATTTTTGTTCAATAAGATACCA--AAGTGG--ATGATTGAAT  
CATTCCATAACC-----CGAAATAATCGCAGGAAATCCTTTGATAACGCGGATTCTTATTTCT  
CAATGATATCCCACGATCGAGACAATTGGCTGAATCCTGCGAAACCATTTTCATAGAAGT  
TCATTGATATCTTCTTTTTATAAAGCAAATCGACTTCGATTCTTGAATAATCCACATCACT  
TCTGGTTCTAT-----TGTAACAAAAGATTCCCTTTTTATGTG-----GAAAAGGCCCGTA  
TCAATAAGTATGAT-----CTTACGTAT--GGACAATTCCTCAATATCTTGTTTCATTCGCAAG  
AAA--ATATTTTCTTTGTGCGTCGGTAAAGGTAAAAAAAACATGTTTTTGGGGAG--A  
GAGATACTATTTACCAATCGAGTCACAGGTATCTAACATATTCATACCTAATGATTTTCC  
ACAAAGTGGTGACGAAACA--TATAACTTGTACAAATCT-----TTCCATTTTCCAATTC  
GACCCGCTCCATTCGTTTCGT-----AGAGCTCTTACTCGATCGCAGACATTTCTGGAACA  
CCTCTAACAGAGGGACAAATTTGTTCAATTTGAAAGAACTTATTGTCAACCTCTTTTTCAGA  
TATGAATCCATCTGATTCAGAAGGGAAGAACTTGCATCAGTATTC-----AATTTCAATTC  
AAACATGGGGTTGATTCACACTCCATATTCTGAGAAATATTTACCA-----TCCGAAAAGA  
GAAAAAAA-----AGGAGTCTTTGTCTAAAG-----AAATGCGTTGAGAAAC

GGCAGATGTATAGAACCTTTCAACGAGATAGTACTTTTTCAAATCTCTCCAAATTGAAT  
CTGTTCCAAACATATATGCCATGGTTCCTTACTTCGGCAGGGTGCAAATATCTAAATCTC  
ACCCTTTTAGATACTTTTTCAGACCTATTG-----CCGATACTAAGTATCAGT--CAAAAATG  
GGTATCCATTTTTTCATGATATTATGCGTGGATCAGATATATCATGGCCAATTCCTCAGAAA  
AAATTGTGG-----GCGATTCTTCCACAATGGAATCTG---ATAAGTGAGATTTTCGAGT  
AAGTGTTACATGAT-----CTTCTTCTGTCTGAAGAAACGATTTCGTCGACATAATGAGTC  
ACCCGTTCCATTGATATGGGCACATCTGAGATCACCAAATGCTCGGGAGTTA---CTCTAT  
TCAATCCTTTTCTTCTTCTTGTGCTGGATAT--CTAGTTCGTACACATCTTCTCTTTGTT  
TCCCGA-----GCCTCTAGTGAGTTACAGACAGAGTTCGAAAAGATCAAATCTTTGATGA  
TTCCATCATAATGATTGAGTTGCGAAAACCTTCTGGATGGGTATCCTACATCTGAACGG  
AATCTTTCTGGTTAAAGAACCTCTTTCTAGTTGCTCTGAAACAATTCGGAGATTCTCTA  
GAAGAAATACGGGGTTCTGCTTCTGGCGGCAACATGCTATTGGGTGGTGGTCCC-----  
-----GCTTATGGG---GTCAAATCAATACGTTCTAAGAAGAAATATTGGAATATCAATCTCG  
TCGATATTATGGATCTCATA---AGTATCATAACCAAATCCCATCAATCGAATCACTTTTTTCG  
AGAAATACGGGACATCTAAGTCGTACAAGTAAAGAGATCTATTCAATTGATACGAAAAA  
GAAAAAACGTGAACGGTGATTGGATTGATGATAAAATAGAATCCTGGGTTCGGAACAG  
TGATTTCGATTGATGATGAAGAAAGAGAATTCTTGGTTCAGTTCTCC-----ACCTAACGA  
CA-----GAAAAAAGGATTGATCAAATTCTATTGAGTCTGACT---CATAGTGATCATTATC  
A-----AAGAATGATTCTGGTTATCAAATGATTGAACAACCGGGATCAGTTTACTTA  
CGATACTTAGTTGACATTCAT-----AAAAAGAATCTAATGAATTATGAGTTCAATAGATCC  
TGTATAGCAGAAAGACGGATATTCTTGTCTCATTCTCAGACAATCACTTAT-----TCACAA  
ACCTCGTGTGGGGCTAATAGTTTTTCATTTCCCATCTCCTGGA-----AAACCCTTTTCGC  
TCCGCTTAGCCCTATCCCCCTCT---AGGGGTATTTTAGTGATAGGTTCTATAGGAACTGG  
ACGATCCTATTTGGTCAAATACCTAGCGACAACTCCTATGTTCTTTTCATTACGGTATT  
TCCGAACAAGTTCCTGGATGACAAGCCTAAAGGTTATCTTATTGATGATATC-----GAT  
ATTGAT---ATTGATGATAGTGACGATATTGATGATAGT-----  
-----GACGATATCGATGATGACCTTGATACGGAGCTGCTAACTATGACGA  
ATGCGCTA-----ACTATGTAT-----ATCACGCCGAAAATAGACCGATTGATATTACCC  
TTCCATTTCGAATTAGCAAAGCGATGTCTCCTTGCATAATATGGATTCCAAACATTCATG  
ATCTGTATGTGAATGAGTCGAATTACTTATCCCTCGGTCTATTAGTGAACCATCTCTCC---  
-----AGGGATTGTGAAAGATGCTCC---ACTCGAAATATTCTTGTATTGCTTCGACTCATA  
TTCCCCAAAAGTGGATCCTGCTCTAATAGCTCCGAATAAATCAAATACATGCATTAAG  
ATACGAAGGCTTCTTATTCCACAACAACGAAAGCACTTTTTCACTCTTTTCTATACTAG  
GGGATTTTACTTGGAAAAGAAAATGTTCCATACT-----AATGGATTTCGGGTCCATAACCA  
TGGGTTCGAATGCACGAGATCTTGTAGCACTTACCAATGAGGCCCTATCAATTAGTATTA  
CACAGAAGAAATCCATTATAGACACTAATAACAATTAGATCCGCTCTTCATAAAACAACT  
TGGGATTTGCGA-----TCCCAGGTACGATCGGTTCCAGGATCATGGGATCCTTTTCTATC  
AGATAGGAAGGGCTATTGCACAAAATGTACTTCTAAGCAATTGCCCATAGATCCTATAT  
CTATCTATATGAAGAAGAAA-----TCGTGTAAGGAAGGGGATTCTTATTTGTACAAATGG  
TACTTCGAGCTTGGAAACGAGCATGAAGAAATTAACGATCCTTCTTTATCTTTTGTAGTTG  
TTCTGCCGGATCGGTCGCTCAAGATCTTTGGTCTCCACCC-----GGACCCGATGAAAAA-  
--AACGGGATCACTTCTTATGGATTTCGTTGAGAATGATTCT--GATCTAGTTCATGGCCTAT  
TAGAAGTAGAAGGCGTTCTGGTGGGA-----TCCTCACCGACAGAAAAAGATTGCAGTC  
AGTTTTATAAGGAT-----CGAGTGACATTGCTTCTTCGGTCCGAACCAAGGAAT--CCTTT



CGATATGATGCAAAATGGATCTTATTCTATCGTTGATCAGAGATTTCTATATGAAAAA-----  
-TACGAATTGGAGTTTGAAGAA---GGGGGAGGAGAAGGAGCCCTCGACCCGCAA-----  
---CAGCTCGAGGAGGAT-----TTATTCAATCAC-----ATAGTTTGGGCTCCT-----AGA  
ATATGGCACCCCT-----TGTGGCAATCTATTTGATTGTATCGAAAGGCCCAATGAATTGG  
GATTTCCC---TATTGGGCCAGGTCATTTCCG-----GGCAAGCGGATCATTATCATAAA--  
-GATGAGCTTGAAGAGAATGATTCGGAGTTCTTGCAGAGTGGAACCATGCAGTACCAG  
ACACGAGATAGATCTTCCAAAGAACAAGGCTTTTTTCGAATAAGCCAATTCATTTGGGA  
CCCTGCAGATCCATTCCTTTTCTATTCAA---GATCAGCCCTTTGTCTCTGTGTTTTTCAC  
GTCGAGAATTCTTTGCAGATCAAGAGATGCCAAAAGGGCTTCTTACTTCCCAAACAAA  
TTCTCCTACATCTATATATAAACGCTGGTTCATC-----AAGAATACGCAAGAAAAGCACTT  
CGAATTGTTGATTCATCGCCAGAGATGGCTTAGAACC-----AATAGTTCATTATCT-----  
AATGGATCTTCCGTTCTAAT-----ACTCTATCCGAGAGTTATCAGTATTTATCAAATCTGT  
TCCATCTAAT--GGAACGTTATTGGATCAAATGACAAAGACATTGTAAAGAAAGAGATG  
GCTTTTCCCGGATGAAATGAAACATTTGATT-----CATGTAACAGGAGAAAGATTTCCCA  
TTCCTATGCCTAGATCGCGG---ATAAATGGAAATTTTATTGATAAGACCTTTTCAATTGTA  
GCCAATATCTTATTACGAATAATTCCGACAACCTTCAGGAGAAAAAGAGGCATTTACCTA  
TTACAGAGATGGG-----ATGTCAGCTCAATCCGAAGGAAATTATGCAGAAGCTTTACAA  
AATTATTATGAAGCTACGCGACTAGAAATTGATCCCTATGATCGAAGTTATATACTCTATA  
ACATAGGCCTTATCCACACAAGCAATGGAGAACATACGAAAGCCTTGGAATATTATTTTC  
CGGGCACTAGAACGAAACCCATTCTTACCACAAGCTTTTAATAATATGGCCGTGATTG  
TCATTAC---CGAGGAGAACAGGCCATTTCGACAGGGAGATTTCGGAAATTGCGGAGGCTT  
GGTCCGATCAAGCTGCTGAGTATTGGAAACAAGCTATAGCGCTTACTCCCGGTAATTAT  
ATTGAAGCGCATAATTGGTTGAAGATTACGAGGCGGTTTGAA-----ATGAACTGGCGAT  
CAGAACGTGTGTGGATAGAACTTATAACAGGGTCTCGAAAAGCAAGTAATTTCTTTTG  
GGCCTGTATCCTTTTTTTAGGTTCAACGGGATTCTTATTAGTTGGAACCTTCTAGTTACCT  
TGGCAGGAATTTGATATCTTTATTTCTTCTCAGCAAATCCTTTTTTTCCACAAGGGAT  
CGTGATGTCTTTTTTATGGAATCGCGGGTCTGTTTATTAGCTCCTATTTGTGGTGCACAAT  
TTCGTGGAATGTAGGTAGTGGTTATGATAGATTCGATAGAAAAAAGGGAATAGTTTGTA  
TTTTTCGTTGGGATTTCTGGAAGAAATCGTCGCATCTTTCTTCGATTCTTATGAGGG  
ATATTCAGTCGATTAGAATAGAGGTTAAAGAGGGTATTTATCCTCGGCGTATACTTTATAT  
GGAAATCAGAGGCCAGGGTGCTGTTCCCTTAACCTGACTGATCAGAAT---TTGACTCC  
ACGAGAAATTGAACAAAAGGCTGCGGAATTGGCCTACTTTTTGCGCGTGCCCATTTGAG  
GTATTT

>Populus

ATGAAAAAATGTTGGTTCATTCGATGTTATCCCTAAGTAAATCAATGGATAATCTTGGT  
CCTCTTGAAAATACCAGTGTAAGTGAAGACCCGATTCTAAATGATACAGAAAAAACA  
CCTATAAT-----AATGTTGATCATTTAGTCGGCGTTAGGGACATTCGGAATTTAAACGTGG  
ATGACACTTTTTTAGTTTTAGATAATAAAAAAGACGGTTATTCCATATATTTTGATATTGA  
AAATCAAGTTTTTGGGATTGACAATAATCAT-----TCTTTTTTGGAGTAAATTAGAAAAAG  
AATTTTCTAGTTATTGGAATTCTAGTTATTTAAATAAGGGGTCTAGGAGTGACGATTCCC  
ACTATGATTATTCTATGTATGATAATAAATATAGTTGGAATAATTACATCAATAGTTGCATT  
GACAGTTATCTTCGT-----TCTCAAATCGGGATTGCTAGTTCTATTTAAGTGGTAGTGAA  
AGTTACAGCGAAAGTTACATTTCTACTTACATTTTGGGTACCGGGAATTCCAGGCTAAG  
AACTAGCACGAACGGCAGCGATTTTCGCTCTAAGAGAAAATTCTAAT--CTCGGCGTAAC

TCAAAAATACAAGCATTGTGGGTTCAATGTGAAATTTGTTATGGATTAAATTATAAGAA  
ATTTTTTAAATCAAAAATGAATATTTGTGAACAATGTGGATATCATTGAAAATGAGTAG  
TTCAGATAGAATTGAACTTTCGATTGATCCAGGCACTTGGGATCCTATGGATGAGGAGA  
TGTTCTCTCTGGATCCATTGACTTTCATTCAGAGGAGGAACCTTATAAAGATCGTATTG  
ATTCTTATCAAAAAAAGACAGGATTAACCGAGGCCATTCAAACCGGCATAGGTCAACT  
AAACGGCATTCCCGTAGCAATTGGGGTTATGGATTTTCAGTTTATGGGGGGTAGTATGG  
GATCGGTAGTAGGCGAGAAAATTACTCGTTTAAATCGAGTATGCTACCAATCAATTTTTAC  
CTCTTATTCTAGTGTGTGCTTCCGGAGGAGCACGCATGCAAGAAGGAAGTTTGAGCTT  
GATGCAAATGGCTAAAATTTCTTCCGCTTATATGATTATCAATCGAATAAAAAGTTAGT  
TTATGTATCAATCCTTACATCTCCTACGACTGGTGGGGTGACAGCTAGTTTTGGTATGTT  
GGGGGATATCATTATTGCTGAACCCAACGCCTACATTGCATTTGCAGGTAAAAGAGTAA  
TTGAACAAACATTGAATAAGACAGTACCTGAAGGTTACAAGCGGCTGAATTTTTATTTC  
CATAAGGGCTTATTTCGATCCAATCGTACCACGTAATCTGTTAAAGGGCGTTCTGAGTGA  
GTTATTTTCAGCTCCACGCTTTCCTTTCCTTTGAATCATAACTTAAGTAGAATGGTAACCAT  
TCGAGCCGACGAGATTAGTAATATTATCCGTGAACGTATTGAGCAATATAATAGGGAAGT  
AAAGATTGTAAATACTGGGACCGTACTTCAAGTGGGTGACGGCATTGCTCGTATTTATG  
GTCTTGATGAAGTAATGGCAGGTGAATTGGTAGAATTTGAAGAGGGTACGATAGGCATT  
GCTCTTAATTTGGAATCAAATAATGTTGGTGTGTATTAATGGGTGACGGCTTGATGATA  
CAAGAGGGAAGTTCTGTAAAAGCAACAGGAAAAATTGCTCAGATACCAGTGAGTGAG  
GCGTATTTGGGTGCTGTTATAAATGCCCTGGCTAAACCCATTGACGGTCGAGGTGCAAT  
TTCATCTTCTGAATCTCGGTTAATTGAATCTCCCGCTCCAGGGATTATTTCTAGGCGTTC  
CGTATATGAGCCTCTTCAAACAGGACTTATTGCTATTGACTCAATGATCCCTATAGGACG  
TGGTCAGCGAGAATTAATTATTGGGGACAGGCAGACCGGTAAAACAGCAGTAGCCACA  
GATACGATTCTCAATCAACAAGGGCAAATGTAATATGTGTTTATGTAGCTATTGGTCAA  
AAAGCATCTTCTGTGGCTCAGGTAGTAAATGCTTTACAGGAAAGAGGAGCAATGGAGT  
ATACTATTGTGGTAGCCGAAACGGCGGATTCCCCGGCTACACTACAATATCTCGCTCCTT  
ATACAGGAGCAGCTCTGGCTGAATATTTTATGTACCGTGAACGACACACTTTAATTATTT  
ATGATGATCTTTCCAAACAAGCGCAAGCTTATCGCCAAATGTCTCTTCTATTACGAAGA  
CCGCCTGGACGTGAAGCTTATCCAGGAGATGTTTTTTATTTGCATTCACGCCTTTTGGA  
AAGAGCCGCTAAACCAAGTTCTTCTTTAGGTGAAGGAAGTATGACTGCTTTACCAATA  
GTTGAGACCCAATCGGGAGACGTTTCGGCTTATATTCCTACTAATGTAATTTCCATTACA  
GACGGACAAATATTCTTATCCGCCGATCTATTCAATGCTGGAATCAGGCCTGCTATTAAT  
GTGGGTATTTCCGGTCTCCAGAGTAGGATCCGCAGCTCAAATTAAGGCTATGAAACAAGT  
AGCTGGTAAATTAATAATTGGAATTGGCGCAATTCGCAGAATTAGAAGCCTTTGCGCAAT  
TCGCTTCGGATCTTGATAAAGCTACTCAGAATCAATTGGCAAGAGGTCAACGATTGCGT  
GAGTTGCTCAAACAATCCCAAGCCGCCCTTTCACGGTGGCAGAACAGATAATGACTA  
TTTATACCGGAACGAATGGTTATCTTGATTCATTAGAAATTGGACAAGTAAGGAAATTC  
TCGTTGAGTTACGTACCTACTTAAAAACGAGTAAAACCTCAGTTTCAAGAAATTATATCT  
TCTACAAAAACATTTACTGAAGAAGCGGAAGCCCTTTTGAAAGAAGCCATTACAGGAAC  
AGATGGAACGTTTTCTACTTCAGGAACAGGTAATGAGAATCAATCCTACTACTTCTGGT  
CCTGGAGTTTCCGCGCTTGAAAAAAGAACCTGGGACATATCGCTCAAATCATTGGCC  
CAGTGCTAGATGTAGTTTTTCCCCGGGCAAGATGCCTAATATTTACAACGCTCTGGTA  
GTTAAGGGTCGAGATACTGTCAAGTCAACAAATTAATGTCACCTTGTGAAGTACAGCAATT  
ATTAGGAAATAATCGAGTTCGAGCTGTAGCTATGAGTGCTACAGATGGTCTAATGAGAG

GAATGGAAGTGATTGACACGGGAGCTCCCCTAAGTGTTCCAGTAGGCGGGGCGACTCT  
AGGACGAATTTTCAACGTGCTTGGAGAACCTGTTGATGATTTAGGTCCTGTAGATACTC  
AGATAACATCCCCTATTCATAGATCTGCGCCTGCCTTTATACAGTTAGATACAAAATTATC  
TATTTTTGAAACAGGAATTAAGTCGTAGATCTTTTAGCCCCTTATCGCCGTGGAGGAA  
AAATCGGACTATTTGGGGGCGCTGGAGTAGGTAAAACAGTACTAATTATGGAATTAATC  
AACAAATTGCGAAAGCTCATGGGGGTGTATCCGTATTTGGCGGAGTAGGTGAACGTA  
CTCGTGAAGGAAACGATCTTTACATGGAAATGAAAGAATCCGGAGTAATTAATGAAGA  
AAATATTGCAGAATCTAAAGTGGCTCTAGTTTATGGTCAGATGAACGAACCACGGGA  
GCTCGTATGAGAGTTGGTTTACTGCCCCTAATGAGCGGAATATTTCCGAGATGTTAAT  
GAACAAGACGTACTTCTATTTATCGACAATATCTTTTCGTTTCGTCCAAGCAGGATCCGA  
AGTATCCGCCTTATTGGGTAGAATGCCCTCTGCTGTGGGTATCAACCCACCCTTAGTAC  
CGAAATGGGTACTTTACAAGAAAGAATTACTTCTACCAAAGAAGGGTCCATAACTTCTA  
TTCAAGCAGTTTATGTACCTGCGGACGATTTAACCGACCCTGCTCCTGCCACGACATTT  
GCGCATTTAGATGCTACTACTGTACTATCAAGAGGATTAGCTGCTAAAGGTATCTATCCA  
GCAGTCGACCCTTTAGATTCAACATCAACTATGCTCCAACCTCAGATCGTTGGCGAGGA  
ACATTATGAAACTGCGCAAAGAGTTAAGCAAACCTTTACAACGTTACAAAGAACTTCAA  
GACATTATAGCTATCCTTGGGTGGACGAATTATCCGAAGAGGATCGCTTAACTGTAGC  
AAGAGCACGAAAAATTGAGCGTTTCTTATCACAAACCTTTTTTCGTAGCCGAAGTATTA  
CCGGTTCCCCGGGAAAATATGTCGGTCTAGCAGAAACAATTAGAGGGTTTAAATTGATC  
CTTCCGGAGAATTAGATAGTCTTCTGAGCAGGCCTTTTATTTGGTAGGTAACATTGAT  
GAAGCTACTGCGAAGGCTACGAACTTAGAAATGGAGAACAACCTGAAGAAAATGATC  
TTAAGTCTTTGTGATTGACCCCGAATCGAATTGTTTGGGATTCAGAAGTGAAAGAAAT  
CATTTTATCTACTAATAGTGGGCAAATTGGTGTATTACCTAATCACGCGCCTATTGCCAC  
AGCCGTTGATATCGGTATTTTGGAGAATACGCCTTAATGACCAATGGTTAACGATGGCTCT  
GATGGGCGGTTTTGCTAGAATAGGCAATAATGAGGTTACTGTTTTAGTAAATGATGCGG  
AGAAGGGGAGTGACATTGATCCACAAGAAGCTCAGCAAACCTTTGAAATAGCAGAAG  
CTAACTTGAGGAAAGCGGAAGGCAAGAGACAAATAATCGAGGCAAATCTAGCTCTCA  
GACGAGCTAGAGCACGAGTAGAGGCTATCAATGTGATTTTCGATGAAAAATATAACCGAT  
TCTTTCGTTTCCTTGGGTCACTGGTCATCCGCCGGGAGTTTCGGGTTTAAATACCGATATT  
TTAGCAACAAATCCAATAAATCTAAGTGTAGTCCTTGGTGTATTGATTTTTTTTTGGAAAG  
GGAGTGTTAAGTGATTTATTAGATAATCGAAAACAGAGAATTTTGAATACTATTCGAAAT  
TCAGAAGAACTACGCGGAGGAGCCATTGAACAGTTGGAAAAAGCCCGGGCCCGCTTA  
CGGAAAGTGGAATAGAAAGCGGATCAATTTTCGAGTGAACGGATACTCTGAAATAGAAC  
GAGAAAAATTGAATTTGATTAATTCAACTTATAAGACTTTGGAACAATTAGAAAATTAC  
AAAAACGAAACCATTCTTTTTGAACAACAAAGAGCGATTAATCAAGTTCGACAACGGG  
TTTTCCAACAAGCCTTACAAGGAGCTCTAGGGACTTTGAATAGTTGTTTGACCAACGA  
GTTACATTTACGTACTATTAGTGCCAATATTGGCATGTTTGGGGCAATGAAAGAAATAAC  
TAATATGAATCCATTGATTTCTGCCGCTTCCGTTATTGCTGCTGGGTGGCCGTTGGGCT  
TGCTTCTATTGGACCTGGGGTTGGTCAAGGTACTGCTGCGGGCCAAGCTGTAGAAGGT  
ATCGCGAGACAACCCGAGGCAGAGGGGAAAATACGAGGTACTTTATTGCTTAGTCTGG  
CTTTTATGGAAGCTTTAAACAATTTATGGACTGGTTGTAGCATTAGCACTTTTATTTGCGA  
ATCCTTTTGTATGAATGTTCTATCATATTCCATTAACACATTAAGGGTTATATGAAAT  
ATCTGGTGTGGAAGTAGGCCAGCATTCTATTGGAATAAGGCGGTTTCCAAGTCCATG  
CCCAAGTACTTATTACTTCTTGGGTTGTAATTGTTATCTTATTAGGTTTCAGCCATTGTAAC

TGTTTCGGAATCCACAAACCATTCTACTGACGGTCAGAATTTCTTCGAATATATCCTTGA  
ATTTATTCGAGATGTGAGCAAAACCCAGATTGGAGAGGAATATGGTCCATGGGTTCCCT  
TTATTGGAACTTTGTTCCTATTTATTTTTGTTTTCTAATTGGTCAGGGGCGCTTTTACCTTG  
GAAAATCATAGAGTTACCTCATGGGGAGTTAGCCGCACCCACGAATGATATAAATACTA  
CCGTTGCTTTAGCTTTACTTACGTCAATAGCATATTTTTATGCGGGCCTTAGCAAAAAG  
GATTAGGTTATTTTCGGTAAATACATAACAACCACTCCAATCCTTTTACCCATTAACATTTT  
AGAAGATTTACAAAACCTTTATCACTTAGCTTTTCGACTTTTTTGGAATATATTAGCGGA  
TGAATTAGTAGTTGTTGTTCTTGTTCCTTAGTACCTTCAGTGGTTCCTATACCTGTCATG  
TTCTTGGATTATTTACAAGTGGTATTCAAGCTCTTATTTTTGCAACTTTAGCTGCGGCTT  
ATATAGGTGAATCCATGGAGGGACACCATATGATATTTTTGACTTTAGAACATATATTAAC  
TCATATATCTTTTTTCGGTTCGTTTCAATTGTAATTATAATTCATTTTTCTAACCTTATTAGTCA  
ATGAATTCGTGGGACTCTATGATTCGTCAGAAAAAGGCATGTAACTACTTTTTTCTGC  
CTAACAGGATTACTAATTACTCGTTGGATTTATTCGGGACATTTACCAATAAGTGATTTAT  
ACGAATCATTAATATTTCTTTTCATGGATTTTCTCTATTATTCATATGGTTCATATTTTAAA  
AACATAAAAATTATTTAAGCACAATAACCGCACCAAGTACTTTTTTTACCCAAGGCTT  
TGCTACTTGGGGTCTTTTAAACCGACATGCATCAATCTAAAATCTTAGTACCTGCTCTCCA  
ATCCCAGTGGTTAATAATGCACGTAAGTATGATGGTATCGGGCTATGCAGCTCTTTTGTG  
TGGATCATTATTGTCAGCAGCACTTCTAGTAATTACATTTTCGAAAAGTCATAAGAATTGT  
TGGT-----AAAGAGATCCAATACATG-----ATGGAAAGTATTTTAAAAAATACTTTTTTCC  
TTCTTCTAGGAATTATTACAGGTTTCAATTGATTCAACAATTAGATCATTGGGGTTTTTCGT  
ATTCTTAGTATAGGGTTTCTTTTTTTAACCATAGGTATTCTTTTCAGGAGCAGTCTGGGCT  
AATGAAGCATGGGGATCATATTGGAATTGGGACCCAAAAGAACTTGGGCATTTATTAC  
TTGGACCATATTCGCGATTTATTTCCATACTCGAACAAATAAGAATTTGGAAGGTTTAAA  
TTCTGCAATTGTCGCTTCTATCGTTTTTCTTATAATCTGGATATGCTATTTTTGGGGTTAAT  
TTATTAGGAATAGGACTACATAGTTATGGTTCATTTACATTAATA---ATGGAAAAAAAAG  
CATTCATTCCCCTTCTATATCTTACGTCTATAGTATTTTTGCCCTGGTGGGTCTCTTTTTCA  
TTTAATAAAAAGTCTGGGATCTTGGATTATTAATTGGTGGAACTAGTAAATCCGAAACT  
TTTTTAAATGATATTCAAGAAAAGAGTATTCTAGAAAAATTAATAGAATTTGAGGAACT  
CTTCCTGTTGGACGAAATGATAAAGGAATACCCCGAAACACATCTACAAAAGTTTCGTA  
TCGGA---CACAAAGAAACGATCCAATTGATCAAGATGCACAACGCAGATCGTATAGATA  
CGATTTTGCACCTTCTCGACAAATATAATCTGTTTCGTTATTCTAAGTGGTTATTCTTTTTT  
AGTTAATGAAGAACTTTTTATTCTTAATTCTTGGGTTCAAGAATTCATATATAACTTAAGC  
GACACGATAAAAAGCCCTTTCTATTCTTTTTATTAACCGACTTATGTATAGGATTCATTAC  
CCCACGGTTGGGAACATAATGATTAGCTCTTTCTACAAGGATTTTGGATTTGCTCATAATG  
ATCAAATTATATCTGGACTTGTTCACCTTTCCAGTAATTTTCGATACAATTTTTTAAATA  
TTGGATCTTCCGTTATTTAAATCGTGTATCTCCGTCACCTGTAGTGATTTATCATTCAATG  
AATGACATGCCTATTGGTGTCCAAAAGTCCTTTTTCGAAATCCCGGAGAGGATAGTTC  
AAATTGGATTGACGTATAACAACCGACTTTATCGAGAAAGATTACTTTTTTTTAGGTCAAG  
ATATTGATAGTGAGATCTCGAATCAACTTATCGGTCTTATGGTATATCTCAGTACAGAAA  
GTGAGATCAAAGATTTGTATTTGTTTATCAACTCTCCTGGCGGATGGGTAATACCCGGA  
ATAGCTATTTATGATACTATGCAATTTGTGCGACCAGATGTACAAACAGTATGCATGGGA  
TTAGCCGCTTCAATGGGATCTTTTATCCTGGTCGGAGGAAAAATTACCAAACGTCTAGC  
ATTCCTCACGCTAGGGTAATGATCCATCAACCTTTTTGCTGCTTTTTTATGAAGCACAAT  
AGGAGAATTTGTCCTGGAAGCGGAAGAACTACTGAAACTGCGCGAAATCCTCACAAG



AAAAAGTAGGTAGAGTCTTTGGAACAACAATGGGTATTCTTATTACATTGGTTAAAAC  
TATTTGTTCTTGTTTCATTCCATCACAACAAGATGGACTTTACCTAGACTAAGAATGGAC  
CAACTATTAAATCTTGGATGGAAATTTCTTTTACCTATTTCTCTTGGCAATCTATTATTA  
CAACCTCTTCCCAACTCTTTTCACTAATGATCTGGCATGTACAGAATGAAAACCTTCAAT  
CTCGATTCTACGAGAATTTTTATGAAAGCCTTTCATTTGCTTCTCTTCGATGGAAGTTTT  
ATTTTCCCAGAATGTATCCTAATTTTTGGCCTAATTTCTTCTTCTGATGATCGATTCAACCT  
CTGATCAAAAAGATATGCCTTGGTTATATTTTCATCTCTTCAACAAGTTTAGTAATGAGTAT  
AACGGCCCTATTGTTCCGATGGAGAGAAGAACCTATGATTAGCTTTTTCGGGAAATTTCC  
AAACGAACAATTTCAACGAAATCTTTCAATTTCTTATTTTACTATGTTCAACTCTATGTAT  
TCCTCTATCCGTAGAGTACATTGAATGTACAGAAATGGCTATAACAGAGTTTCTCTTATT  
CGTATTAACAGCTACTCTAGGAGGAATGTTTTTATGCGGTGCTAACGATTTAATAACTAT  
CTTTGTAGCTCCAGAATGTTTCAGTTTATGCTCATACTATTATCTGGATATAACCAAGAA  
AGATGTACGGTCTAATGAGGCTACTACGAAATATTTACTCATGGGTGGGGCAAGCTCTT  
CTATTCTGGTTCATGGTTTCTCTTGGCTATATGGTTCGTCGGGGGAGAGATCGAGCTTC  
AAGAAATAGTGAATGGTCTTATCAATACACAAATGTATAACTCCCCAGGAATTTCAATT  
GCGCTTATATTCATCACTGTAGGAATTTGGGTTCAAGCTTTCCCCAGCCCCTTCTCATCAA  
TGGACTCCTGACGTATACGAAGGATCTCCCACTCCAGTCGTTGCTTTTTCTTTCTGTTACT  
TCGAAAGTAGCTGCTTCAGCTTCAGCCACTCGAATTTTCGATATTCTTTTTATTCTCA  
TCAAACGAATGGCATCTTCTTCTGGAAATCCTAGCTATTCTGAGCATGATAGTGGGGAA  
TCTCATTGCTATTACTCAAACAAGCATGAAACGTATGCTTGCATATTCGTCCATAGGTCA  
AATTGGATATGTAATTATTGGAATAATTGTTGGAGACTCAAATGGTGGATATGCAAGCAT  
GATAACTTATATGCTCTTCTATATCTCCATGAATCTAGGAACTTTTGCTTGCATTGTATTAT  
TTGGTCTACGCACCGGAACTGATAACATTCGAGATTATGCAGGATTATACACGAAAGAT  
CCTTTTTTTGGCTCTCTTTTAGCCCTATGTCTCTTATCCCTAGGAGGTCTTCCCTCCACTAG  
CAGGTTTTTTTCGGAAAACCTCCATTTATTCTGGTGTGGATGGCAGGCAGGCCTATATTTCT  
TGGTTTTCAATAGGACTCCTTACGAGCGTTCTTTCTATCTACTATTATCTAAAAATAATCAA  
GTTATTAATGACTGGACAAAACCAAGAAATAACCCCTCACGTGCGAAATTATAGAGGAT  
CCCCTTTAAGATCAAACAATTCCATCGAATTGAGTATGATTGTATGTGTGATAGCATCTA  
CTATACCGGGAATATCAATGAGCCCGATTATTGAAATTGCTCAAGATACCCTTTTTATGT  
TTCTGCTTTACGAATATGATATTTTCTGGGCATTTCTAATAATATCAAGTGTTATTCCTATT  
TTGGCATTTCATAATTTTCGGGCCTTTTATCCCCAATTAGAAAAGGACCAGAGAAACTTTC  
TAGTTATGAATCCGGTATAGAACCAATGGGCGATGCTTGGTTACAATTTCGAATCCGTTA  
TTATATGTTTGCTCTAGTTTTTGTGTTTTTGTATGTTGAAACGGTTTTTTCTTTATCCATGG  
GCAATGAGTTTCGATGTATTGGGGGTATCCGTATTTATAGAAGCTTTAATTTTCGTGCTTA  
TCCTAATTGTTGGTTTAGTTTATGCATGGCGAAAAGGAGCATTAGAATGGTCTACGAATT  
CTTTTCCTTGGTTAACAATATTTGTAGGTTTACCAATATCCGCGGGTTTTCTTGATTTTCGT  
TTCCCTCATAGAGGAAATAAGGTAATTAGGTGGTATACTATATTTATATGTGTACTAGAA  
CTCCTTTTAATGACCTATGCATTCTCTTATTATTTCCAATTGGACGATCCCTTAATCCAAT  
TGACGGAGTCTTATAAATGGATTAATTTTTTTGATTTTTACTGGAGATTAGGAATAGATG  
GACTTTCTCTAGGACCTATTTTACTGACCGGATTTATCACCACTTTAGCTACTTTAGCGG  
CTCGGCCAATTACTCGGGATTCCCGATTATTTCAATTTTTTGATGTTAGCAATGTATAGTGG  
TCAAATAGGATTATTTCTTCTCAAATCTTTTACTTTTTTTTATTATGTGGGAGTTAGAA  
TTAATTCCTGTTTATCTACTTCTAGCTATGTGGGGGGGAAAGCAACGTCTGTATTACAGCT  
ACAAAATTTATTTTGTATACTGCAGGAAGTTCTGTTTTTTTTTATTAATGGGGGCCTTAGGT

ATCGCTTTCTATGCTTCCAATGAACCAACATTCAATTTTGAACATCAGCTAATCAATCA  
TATCCTGTGACCTTGGAATACTATTCTATATTGGATTTCTTATTGCTTTTGCTGTCAAAT  
CACCGATTATACCCTTACATACATGGTTACCAGACACCCATGGAGAAGCACATTACAGT  
ACTTGTATGCTTTTAGCTGGAATCTTATTAATAAATGGGAGCATATGGATTGGTTCGAATA  
AATATGGAATTATTATCCCACGCCATTCTATATTTCTTCTTGGTTGATAATAGTAGGCG  
CAATACAAATAATCTATGCAGCTTCAACATCTTCTGGTCAAAAAAATTTAAAAAAAAGA  
ATAGCCTATTCTTCTGTATCTCATATGGGTTTACAATTATAGGAATTTGCTCTATAAGCG  
ATATGGGACTCAACGGGGCCATTTTACAATAATATCTCATGGATTTATCGGGCTGCGC  
TTTTTTTCTTGTGAGCAAGTTATGATAGAATACGTCTTGTATTCTTGACGAAATGG  
GCGGAATGGCTACCCTAATGCCAAAATATTCATGATGTTGAGTATCTTATCGTTAGCTT  
CTCTTGCAATTACCGGGCATGAGCGGTTTTTTTTGCGGAATTGGTAGTATTTTTTGAATAA  
TTACTGCCAAAAAATATTTTTTAATGCCAAAAATACTAATTACTTTTTGTAACGGCAGTTG  
GAACGATATTGACTCCTATTTATTTATTATCTATGTTACGCCAGATGTTCTATGGATACAA  
GCTGTTAATGCCAGAAATCTTATTTTTTTGATTCTGGACCACGAGAATTATTTGTTTC  
GATTGCTATCCTTCTGCCTGTAATCAGTATTGGTATTTATCCGGATTCGTTTTCTCATTAT  
CAGTTGACAAGGTGCAAGCTATTCTATCTAATTTTTTATAGCATGATGCTCGAATATGT  
GCTTGGTTGAGTGCTTATTTATTTCTATCGGTATCTATGGATTGATCACGAGTCGAAAT  
ATGGTTAGAGCCCTTATGTGCTTGAACCTATATTGAATGCCGTCAATATAAATTTTCGTAA  
CATTTTCTGATTTTTTTGATAGTCGACAATTAAGGAAATATTTTTTCAATTTTTGTTAT  
ATCTATCGCAGCCGCTGAAGCAGCTATCGGGCCGGCTATAGTTTCGTCAATTTATCGTAA  
CAGAAAATCAATCCGTATTAATCAATTGAATTTGTTGAATAAGATGGAACATACATATCA  
ATATTTATGGATTATATCTTTTCGTTACACTTCCAGTCCCTATGTTAATAGGAATGGGACTG  
CTACTTTTTCCGGTGTCAACAAAAAACTTCACCGTATATGGGCTTTTCCCAGTGTTTTA  
TTGTTAAGTATAGTTATGGTTTTTTTCGATCGATCTGTTTATTCAGCAAATAAATAGCAGTT  
CCATTTATCAATATGTATGGTCTTGGACCATCAACAATGATTTTTTCTTAGAGTTCGGGT  
ACTTGATTGACCCACTTACTTCTATTTTGTAAATTAATTACTACGGTTGGAATTTTGGT  
TCTTGTTTATAGTGACAGTTATATGTCTCATGATCAAGGCTATTTGAGATTTTTTGTTTATA  
TGAGTTTTTTCAATACTTCAATGCTGGGATTAGTTACCAGTTCGAATTTAATCCAAATTT  
ATATCTTTTGGGAATTGGTTGGAATGTGCTCTTACCTATTAATAGGTTTTTGGTTCACAC  
GACCTATTGTGTCCAATGCTTGTCAAAAAGCATTTCGTAACATAATCGTGTAGGCGATTTT  
GGTTTATTATTAGGAATTTTAGGTCTTTATTGGATAACAGGCAGTTTCGAATTTAGGAT  
TTGTTTGAATATTCAATAACAATGAGGTTCAATTTTTATTGTTACCTTGTGCGCTTCC  
TATTAATTTCCGGTGCAATTGCTAAATCGGCGCAATCCCCCTTCATGTGTGGTTACCGG  
ATGCCATGGAAGGACCTACCCCTATTTTCGGCTCTAATACATGCTGCTACCATGGTAGCA  
GCGGGAATTTTTCTGTAGCTCGACTTCTTCTCTTTTTCGTAGTTATACCTTACATAATGA  
AGCTAATAGCTTTGATAGGTATAATAACAGTACTATTAGGAGCCACTTTAGCTTTTGTCTC  
AAAAGATATTAAGAGAGGTTTAGCTTATTCTACAATGTCTCAATTGGGTTATACGATGT  
TAGCTTTAGGTATGGGCTCCTATCGAGCCGCTTTATTTCAATTTGATTACTCATGCTTATTC  
GAAAGCATTGTTGTTTTTAGGATCTGGATCCATTATTCAATGGAAGTTATTGTTGG  
CTATTCTCCGGATAAGAGTCAAAAATATGGTTCTTATGGGTGGTTTTAACAAAACATGTTCC  
AATTACAAAATTTGCTTTTTTATTAGGAACCCTTTCTCTTTGTGGTATTCCACCTCTCGC  
CTGTTTTTGGTCCAAAGATGAAATCTTAATGATAGTTGGTTCGATTTCACCTATTTTCGC  
AATAATAGCTTTTTCCACAGCAGGATTAATGCAATTTTATATGTTTCGGGTTTATTTACTT  
ACTTTTTGAAGGGCATTAAATATTTATTTTCAAATTTATAGTGGTAAAAAAAACAGCGCA

TTCTATTCAATATCTTTATGGGGTAAACAGGGATCAAAAATCTTAAAAAAA---TTATTAC  
CTTTATTAACAATAAATTTTTTTTTGGGGTACTAAAAGA---ATTTTTTCCTATCCCCAGGAA  
TCGGATAAATACTATATTATTTCCGATGCTTGTTTTGGTACTATTTACCTTGTTTATTGGAGC  
TATAGGAAATCAATTCAATTTTGATATATTATCCAAACTGTTAATCCGTCTTTAAGTCTT  
TTACATCAAATCAAAT---TCTGTAGATTGG---GAATTTGTAACAAATTCAACTTTTTCA  
GTCAGTATAGCTTCTTTTGGGATATTATAGCGTCTTCTTTATATAAGCCGATTTATTCATC  
CTTACAAAATTTGAAATTCCTTAATTTGGTTGCTATTCTTAGGGACAAAATAATAAATGT  
GATATATGATTGGTCCATAATCGTGGTTACATAGATGTTTTTTATGCAATATCTTTAACA  
GAAGGCATAAGAAGATTGGCAGAATTAACCTCTTTTTTTGATAGACGAGTAATTGATGG  
AATTACCAATGGAGTTGGTTTTACGAGTTTCTTTGCAGGAGAAGGCATAAAATATGTAG  
GAGGTGGT---CGCATCTCTTTTTATCTCTTATTATATTTATTTTATGTATTAATCTTTTTATTA  
ATTTCTTCAATGAATTTACCTGGACCAATACATGATTTTCTTTTAGTCTTTCTAGGATTAG  
GCTTATATTAGGAGGTCTAGGAGTGGTATTACTTACCAATCCAATTTTTTCTGCCTTTTC  
ATTAGGATTGGTTCTTGTTTTGTATATCCTTATTCTATATTTTATCAAACCTCTCATTTTGTAG  
CTGCGGCGCAGCTCCTTATTTATGTGGGAGCTATAAATGTTTTAATTTTATTGCTGTGAT  
GTTTCATGAATGGTTCAGAATATTACAAAGATTTCAATCTTTGGACTGTTGGGAATGGTC  
TACTTCTCTAATTTGTACAAGTCTTTTTGTTTTACTAATTACTATTATTTCAAATACAACA  
TGGTATGGGATTATTTGGACTACAAGAGCAAACCAGATTATAGAGCAAGATTTGGTAAG  
TAATGGTCAACAAATTGGAATTCATTTATCAACAGATTTTTTTCTTCCATTTGAATTTATT  
TCAATAATTTCTTTAGTTGCTTTGATAGGTGCGATTGCCACGGCTCGTCAGATGAATGTA  
CCAGCTACAAGAAAGGACTTTATGATAGTCAATATGGGTCCCCACCACCATCAATGCA  
TGGCGTTCTTCGACTCATCCTTAGTCTAGACGGTGAAGATGTTATTGACTGCGAACCAA  
TATTAGGTTATTTACACAGAGGGATGGAAAAAATTGCGGAAAACCGAACAATTATACAA  
TATTTGCCTTATGTAACACGTTGGGATTATTTAGCTACTATGTTTACAGAAGCGATAACA  
ATAAATGGACCGAACAGTTGGGAAATATTCAAGTACCTAAAAGAGCTAGCTATATCAG  
AGTAATTATGTTGGAGTTGAGTCGTATAGCTTCTCATCTCTTATGGCTTGGCCCTTTTATG  
GCAGATATTGGTGGGCAGACCCCTTTCTTCTATATTTTTAGAGAAAGAGAGTTAATATAT  
GATTTATTCGAAGCTGCCACTGGTATGAGAATGATGCATAATTATTTTCGTATCGGAGGA  
GTAGCAGCTGATCTACCTCATGGCTGGCTAGATAAATGTTTGGATTTCTGCGATTATTTT  
TTAACAGGAGTTGCTGAATATCAAAAACCTATTACGCGAAATCCTATTTTTTTTAGAACGC  
GTTGAAGGAATAGGTATTGTTAGTGCAGAGGAAGCAATAAATTGGGGTTTATCAGGAC  
CAATGCTACGAGCTTCCGGAGTACGATGGGATCTTCGTAAAGTTGATCATTATGAGTGT  
TATGACGAATTTGATTGGGGAGTCCAGTGGCAAAAAGAAGGGGATTTCGTTAGCTCGTT  
ATTTAGTCCGAATTGGTGAAATGACGGAATCCGTAAAAATTTATTCAACAGGCTTTGGAA  
GGGATTCCAGGGGGGCCTTATGAAAATTTAGAACTCGAAGTTTTGATAGAGAAAGGA  
ATCGAGAATGGAATGATTTTGAATATCGATTTATTAGTAAAAAACTTCTCCCGCCTTTG  
AATTGCCGAAACAAGAACTTTATGTTGAGTTGAAGCACCAAAGGGAGAGTTGGGAA  
TTTTTCTAATAGGGGATCAAAGTAGTTTTCTTGGAGATGGAAAATTCGCCCCCCGGGT  
TTTATCAATTTGCAAATCTTCTCAATTAATTAAGAATGAAATTGGCTGATATTATGA  
CAATACTAGGTAGCATAGATATTATTATGGGGGAAGTTGATCGTATGTTCCCTATGGTAA  
CTGGGTTTCATGAATTATGGTCAACAAACCGTACGGGCTGCAAGGTACATTGGTCAAAG  
TTTCATGACTACCTTATCCCACGTAAATCGTTTACCTGTAACCTATTCAATATCCTTATGAA  
AAATTAATCACATCGGAGCGTTTTCCGCGGTCAATCCATTTTGAATTTGATAAATGCATT  
GCTTGTGAAGTATGTGTTTCGTGTATGTCCTATAGATTTACCTGTTGTTGATTGGGAATTG



GAAACTAATATTTCGAAAGAAACGATTGCTTAATTACAGTATTGATTTCCGGAATCTGTATA  
TTTTGTGGCAACTGTGTTGAGTATTGTCCAACATAATTGTTTATCAATGACTGAAGAATAT  
GAACTTTCTACCTATAATCGTCACGAATTGAATTATAACCAAATTGCTTTAGGTCGTTTA  
CCAATGTCAGTAATTGACGATTATAACAATTCGAACAATTTTGAATTCATTGATTAAGAT-  
-----ATGCGGGGTCCTCTGTCTGCTTGGCTGGTCAAACATGGGCT  
AGTTCATAGATCTTTGGGCTTTGATTACCAAGGAATAGAGACTTTACAAATAAAGCCCG  
AGGATTGGCATTCCATTGCTGTCATTCTATATGTATATGGTTACAACATCTGCGTTCCCA  
ATGTGCCTATGATGTAGCACCGGGCGGGCTGTTAGCTAGTATATATCATCTTACGAGAAT  
AGAATATGGTCTAGATCAACCTGAAGAAGTATGTATAAAAGTATTTGCTCCTAGGAAGA  
ATCCTAGAATCCATCTGTTTTCTGGGTTTGGAAAAGTGCGGATTTTCAAGAAAGAGAA  
TCTTATGATATGTTGGGAATCTCTTATGATAATCATCCACGTCTGAAACGTATCTTAATGC  
CGGAAAGTTGGATAGGGTGGCCTTTACGTAAAGATTATATTGCTCCCAATTTTTATGAAA  
TACAAGATGCTCAT-----  
-----ATGAATTCATTGAG  
TTCCCTTACTTGATCGAACAACCCCAATTTTCAGTTATTTCAACTACATCAAATGATCTT  
TCAAATTTGGTCAAGACTCTCCAGTTTATGGCCGCTTCTCTATGGTACCAGTTGTTGCTTC  
ATTGAATTTGCTTCATTAATAGGCTCACGATTCGACTTTGATCGTTATGGGCTAGTACCA  
AGATCTAGTCCTAGACAAGCGGACCTGATTTTAAACAGCCGGCACAGTAACCATGAAAA  
TGGCTCCTTCTTTAGTGAGATTATATGAACAAATGCCGGAACAAAAATATGTTATTGCTA  
TGGGAGCATGTACAATTACAGGGGGAATGTTTCAGTACGGATTCTTATAGTACTGTTCCG  
GGAGTCGATAAGCTAATTCCTGTAGATGTCTATTTGCCGGGCTGCCCTCCTAAACCGGA  
GGCGATTATAGATGCTATAACAAAACCTTCGTAAAAAAATATCTCGAGAGATTTATGAAG  
ATCGAATTAGGTCT-----GGGAATCGGTGTTTTACTACCAATCACAAGTTTCATATTGGAC  
GTACTACTAATACTGGAAATTATGATCAAGGATTACTCTATCAACCGCCG---ACTTCAA  
AATAGCTCCTGAAGCCTTTTTCAAATACAAAAGTCAGTATCGTCCCCTGAATTAGTAA  
ATATGCAAACCTAGAAAGACCCTCTCTTGGATAAAGGAAGAGATTACTCGCTCCATTTCC  
GTATCGCTCATGATATATATAATAACTGGGGCATACATTTCAAATGCATATCCCATTTTTG  
CACAGCAGGGTTATGAAAATCCGCGCGAAGCAACTGGTCGTATTGTATGCGCGAATTG  
TCATTTAGCTAATAAGCCCGTGGGTATTGAGGTCCACAAGCGGTACTTCTGATACTGT  
ATTTGAAGCAGTTGTTTCGAATTCCTTATGATATGCAACTAAAACAAGTTCTTGCTAATGG  
TAAAAAGGGAGCTTTGAATGTGGGGGCTGTTCTTATTTTACCTGAGGGGTTTGAATTAG  
CCCCTCCTGATCGTATTTCCGCCAGAGATGAAAGAAAAGATAGGTAATCTCTTTTTTCAG  
AGTTATCGCCCCGCTAAAAAAAATATTCTTGTGATAGGTCCCCTTCCCTGGTCAAAAATAT  
AGTGAAATCACCTTTTCTATTCTTTCTCCGGACCCTGCTGCTAAGAAGGATGCTCACTT  
CTTAAAATATCCCATATACTAGTGGCGGGAACAGGGGAAGGGGTCAGATTTATCCCGACG  
GGAGCAAGAGTAACAATAACGGTTTATAATGCTACAGCAGCGGGTATAGTAAGCAAAAT  
CATACGAAAAGAAAAGGGGGGTACGAAATAACTATAACAGATGCGCCAGAGGGGCG  
TCAAGTGATTGATAGTATCCCCCAGGACCAGAACTTCTTGTTCAGAAAGGCGAATCCA  
TCAAACCTCGATCAACCATTAACAAGTAATCCTAATGTGGGCGGATTTGGTCAGGGAGA  
CGCAGAAATAGTACTTCAAGACCATTACGTGTCCAAGGCCTTTTGTCTTCTTGGCAT  
CCGTTATTTTGGCACAAATCTTTTTGGTTCTTAAAAAGAAACAGTTTGAGAAGGTTCAA  
TTGTCCGAAATGAATTTTCATGAGTAAAGTATATGATTGGTTTCAAGAACGTCTTGAGAT  
TCAGACGATTGCAGATGATATAACTAGTAAATACGTTCCCTCCTCATGTCAACATATTTTAT  
TGTTTAGGAGGAATTACGCTTACTTGTTTTTTAGTACAAGTAGCTACGGGATTTGCTATG

ACTTTTTACTATCGTCCGACCGTTACTGAGGCCTTTGCTTCTGTTCAATATATAATGACT  
GAAGCTAACTTTGGTTGGTTAATCCGATCAGTTCATCGATGGTCGGCAAGTATGATGGT  
CCTAATGATGATCCTGCACGTATTTCTGTGTATCTCACGGGTGGCTTTAAAAACCTC  
GTGAATTGACTTGGGTTACAGGTGTGGTCTTGGTGTATTAACCGCATCCTTTGGCGTA  
ACTGGTTATTCCTTACCTTGGGACCAAATTGGTTATTGGGCAGTAAAAATTGTAACAGG  
CGTGCCGGAAGCTATTCCGGTAATAGGATCTCCTTTGGTAGAGTTATTACGTGGAAGTG  
CTAGTGTAGGACAATCCACTTTGACTCGTTTTTATAGTTTACACACTTTTGTATTACCTCT  
TCTTACTGCCGTATTTATGTTAATGCATTTTCCAATGATACGTAAGCAAGGTATTTCCGGT  
CCTTTAATGGGAGTGACAAAAAACCTGACTTGAATGATCCTGTATTAAGAGCTAAATT  
GGCTAAAGGAATGGGTCATAATTATTACGGAGAACCCGCATGGCCAAATGATCTTTTATA  
TATTTTTCCAGTAGTAATTCTAGGTAATGTCATGTAATGTAGGATTAGCGGTTCTAGAA  
CCATCAATGATTGGTGAACCTGCAGATCCATTTGCAACTCCTTTGGAAATATTGCCTGA  
ATGGTATTTCTTTCCCGTATTTCAAATACTTCGTACAGTACCCAATAAGTTATTGGGTGTT  
CTTTTAATGGTTTCAGTACCTGCGGGATTATTAACAGTACCCTTTTTGGAGAATGTAAAT  
AAATTTCAAATCCATTTCTGTCGTCCGGTTCGCGACAACCTGTTTTTTGATTGGTACTGTA  
GTGGCCCTTTGGTTGGGTATTGGAGCAACATTACCTATTGATAAATCCTTAACTTTAGGT  
CTTTTTATGATTGAAGTTTTTCTATTTGGAATCGTCTTAGGTCTAATTCCTATTACTTTGG  
CTGGATTATTCGTAACCTGCTTATTTACAATACAGACGTGGTGACCAGTTGGATCTTATGC  
CCACTCTAACTAGTTATTTTTGGTTTTCTGTTAGTAGCTTTAACTATAACTTTAGTTCTATT  
TATTAGTCTGAGCAAGATACGACTTATTATGGATATAGTAAGTCTCGCTTGGGCTGCTTT  
GATGGTAGTCTTTACATTTTCCCTTTCACTCGTAGTATGGGGAAGAAGTGGACTCATGA  
TTATTCGTTCCCGGAACCAGAAGTAAAAATTTTGGTAGATAGGGATCCCATCAAACCT  
TCTTTCGAGGAATGGGCCAGACCCGGTCATTTCTCAAGAACAATAGCTAAAGGACCTG  
ATACTACCACTTGGATCTGGAACCTACATGCTGATGCTCACGATTTGATAGCCATACCA  
GTGATTTGGAAGAGATCTCCCGAAAAGTCTTTAGTGCTCATTTCGGCCAACCTCTCCATC  
ATCTTCTTTGGCTGAGTGGCATGTATTTCCACGGTGTCTCGTTTTTCCAATTATGAAGCA  
TGGCTAAGCGATCCTACTCACATTGGGCCTAGCGCCCAAGTAGTTTGGCCAATAGTGGG  
CCAAGAAATATTGAATGGTGATGTGGGTGGGGGTTTTCCGAGGAATACAAATAACCTCC  
GGTTTTTTTTCAGATTTGGAGAGCATCTGGAATAACTAGTGAATTACAATTGTATTGTACG  
GCAATTGGTGCATTGGTCTTTGCAGCCTTAATGCTTTTTTGCTGGTTGGTTCATTATCAC  
AAAGCTGCTCCAAAATTGGCTTGGTTCCAAGATGTAGAATCTATGTTAAATCACCATTT  
AGCAGGGCTACTAGGGCTTGGGTCTCTTTCTTGGGCGGGGCATCAAGTCCATGTATCTT  
TACCAATTAACCAATTTCTAAACGCTGGAGTAGATCCTAAAGAGATCCCCTTCTCAT  
GAATTTATCTTGAACCGGGATCTTTTGGCTCAACTTTATCCCAGTTTTGCTGAGGGAGC  
AACCCCATTTTTCACTTTGAATTGGTCAAATATTCGGAATTTCTTACTTTTTCGTGGAGG  
ATTAGACCCAGTAACTGGGGGTCTATGGCTGACCGATATTGCACACCACCATTTAGCTA  
TTGCAATTCCTTTTCTGGTAGCGGGTACATGTATAGGACTAACTGGGGCATTGGTCAT  
GGTATAAAAGATATTTTAGAGGCTCATAAAGGTCCATTTACAGGTCAGGGTCATAAGGG  
CCTATATGAGATCCTAACAACGTCATGGCATGCTCAATTATCTCTTAACTAGCTATGTTA  
GGCTCTTTAACCATTGTTGTAGCTCACCATATGTATGCCATGCCCTTATCCATATCTAG  
CTACAGACTATGGTACACAACTGTCATTGTTACACATCACATGTGGATTGGTGGATTT  
CTCATAGTTGGTGCTGCTGCGCATGCAGCCATTTTTATGGTAAGAGACTACGATCCGAC  
TACTCGATACAACGATCTGTTAGATCGTGTCTTAGGCATCGCGATGCAATCATATCACA  
TCTTAACTGGGTATGTATATTTTTAGGCTTTACAGTTTTGGTTTTGTATATTCATAATGATA

CCATGAGCGCTTTAGGGCGCCCTCAAGATATGTTTTTCAGATACTGCTATAACAATTACAAC  
CTGTCTTTGCTCAATGGATACAAAACACGCATGCTTTAGCACCTGGTGCAACGGCTCCT  
GGTGCAACAGCAAGCACCAGTTTGACTTGGGGGGGCGATGACTTAGTGCCAGTGGGG  
GGCAAGGTTGCTTTGTTACCTATTCCATTAGGAACCGCGGATTTTTTGGTCCATCACATT  
CATGCATTTACGATTCATGTGACGGTATTGATACTCCTGAAAGGAGTTCTATTTGCCCGT  
AGCTCTCGTTTTGATACCAGATAAAGCAAATCTTGGTTTTTCGTTTTCCCTTGTGATGGACC  
TGGAAGAGGGGGGACATGTCAAGTATCCGCTTGGGATCATGTCTTCTTAGGACTCTTTT  
GGATGTACAATGCAATTTCCGGTAGTAATATTCCATTTTCAGTTGGAAAATGCAATCAGATG  
TTTGGGGTAGTATAAGTGATCAAGGGGTGGTAACTCATATCACGGGAGGAAATTTTGGC  
CAGAGTTCTATTACTATTAATGGATGGCTCCGCGATTTCTTATGGGCACAGGCATCCCAG  
GTAATTCAGTCTTATGGTTCTTCATTATCTGCATATGGCCTTTTTTTTCTAGGCGCTCACT  
TTGTATGGGCTTTTAGTTTAATGTTTCTATTTCAGCGGTCGTGGTTATTGGCAAGAACTTA  
TTGAATCAATCGTTTGGGCTCATAATAAATAAAAGTTGCTCCTGCTACTCAGCCTAGA  
GCCTTGAGCATTATAACAAGGACGTGCTGTAGGAGTAACTCATTACCTTCTGGGTGGAAT  
TGCCACAACATGGGCGTTCTTCTTAGCAAGAATTATTGCAGTAGGAATGGCATTAAAGAT  
TTCCAAGGTTTAGCCAAGGCTTAGCTCAGGACCCCACTACTCGTCGATTTGGTTTGGT  
ATTGCTACCGCGCATGACTTCGAGAGTCATGATGATATTACGGAGGAACGTCTTTATCA  
GAATATTTTTGCTTCTCACTTCGGGCAATTAGCAATAATTTTTCTGTGGACTTCCGGAAA  
TCTGTTTCATGTAGCTTGGCAGGGAAATTTGAAACATGGGTACAGGACCCTTTGCATG  
TAAGACCTATTGCTCATGCAATTTGGGATCCTCATTTTGGTCAACCGGCCGTGGAAGCT  
TTTACTCGAGGGGGTGCTCTTGGCCCAGTGAATATCGCTTATTCTGGTGTATTATCAGTGG  
TGGTATACGATAGGTTTACGTAATAATGAAGATCTTTATATTGGAGCTCTTTTTCTATTAT  
TTCTTTCCGCCGTATCCCTACTAGGGGGTTGGTTACACCTACAACCGAAATGGAAACCT  
AGCGTTTCGTGGTTCAAAAATGCCGAATCTCGTCTCAACCACCATTTGTCAGGACTATT  
TGGAGTAAGTTCCTTGGCTTGGACAGGACATTTAGTCCATGTGCGCTATTCTGGCTCCA  
GGGGGAATCTGTTTCGATGGAATAATTTCTTAGATGTATTACCGCATCCCCAAGGGTTA  
GGCCCGCTTTTTACAGGTCAGTGGAATCTTTATGCTCAAATCCCGATTCAAGTAGTCA  
TTTATTTGGTACCTCCCAAGGAGCAGGAATGCCATTCTAACCTTCTCGGGGGGTTCC  
ACCCACAAACACAAAGTTTATGGCTGACCGATATGGCACATCATCATTTAGCTATTGCAT  
TTCTTTTCTGATAGCGGGTCACATGTATAGGACTAACTTCGGGATTGGGCACAGTATA  
AAAGATCTTTTAGAAGCACATATTCCTCCAGGGGGGCGATTGGGGCGTGACATAAGG  
GTCTTTATGACACAATCAATAATCACTTCATTTTCAATTAGGCCTTGCTCTAGCTTCTTT  
AGGGGTATTACTTCTTTAGTAGCTCAACACATGTACTCGTTACCTGCTTATGCGTTTAT  
AGCACAAGACTTTACTACTCAAGCTGCATTATATACTCATCACCAATACATCGCAGGATT  
CATTATGACAGGAGCTTTTGGCTCATGGAGCTATATTTTTTATTAGAGATTACAATCCGGA  
ACAGAATGAGGATAATGTATTGGCAAGAATGCTAGATCATAAAGAAGCTATCATATCCC  
ATTTAAGTTGGGCCAGCCTCTTTCTGGGATTCATACTTTGGGACTTTATGTTTCATAATG  
ATGTCATGCTTGCTTTTGGTACTCCGGAGAAACAAATCTTGATCGAACCCATATTTGCC  
CAATGGATACAATCCGCTCATGGTAAACTTCATATGGGTTTCGATGTACTTTTATCTTCA  
ACGAATAGTCCAGCCTTCAATGCAGGTGCAAGCATATGGTTGCCCGGCTGGTTAAATGC  
TATTAATGAA-----AATAGTAATTCATTATTCTTAACAATAGGGCCTGGAGACTTCTTGGT  
TCATCATGCTATTGCTCTAGGTTTACATACA ACTACATTGATCTTAGTAAAAGGTGCTTT  
AGATGCGCGTGGTTCTAAGTTAATGCCAGATAAAAAGGATTTTGGTTATAGTTTTCTTG  
CGATGGTCCGGACGAGGCGGTACTTGTGATATTTCCGCTTGGGACGCATTTTATTTGG

CGGTTTTCTGGATGTAAATACCATTGGATGGGTACTTTTTATTGGCATTGGAAGCACA  
TAACATTATGGCAGGGTAACGTTTCACAGTTAATGAATCTTCTACTTATTTGATGGGAT  
GGTTAAGAGATTATTTATGGTTAAACTCTTCAACAATTATCAATGGGTATAACCCCTTTG  
GGATGAATAGTTTATCGGTCTGGGCATGGATGTTCTTATTTGGACATCTTGTTTGGGCTA  
CTGGATTTATGTTCTTAATTCCTGGCGCGGATATTGGCAGGAATTGATTGAAACTTTAG  
CATGGGCTCATGAACGTACACCTTTGGCTAATTTGATTTCGATGGAGAGATAAACAGTA  
GCTCTTTCCATTGTGCAAGCAAGATTGGTTGGATTAGCCCACTTTTCTGTAGGTTATATC  
TTCACTTATGCGGCTTTCTTGATTGCCTCTACATCGGGCAAATTTGGTATGTCACATTCA  
GTAAAAATCTATGATACATGTATAGGGTGTACTCAATGTGTCCGGGCCTGCCCCACGGA  
TGTATTAGAAATGATACCTTGGGACGGGTGTAAAGCTAAGCAAATTGCTTCTGCTCCAA  
GAACAGAAGACTGTGTTGGCTGTAAGAGATGCGAATCCGCCTGTCCAACAGATTTCTT  
GAGTGTTTCGAGTTTATCTATGGCATGAAACAACCTCGAAGCATGGGTCTAGCTTATATGA  
CAATTCTCAACTACCCTCTATTTTTGTGCCTTTAGTGGGCTTAGTATTTCCGGCAATTG  
CAATGGCTTCTTTATCTCTTCATGTTCAAAAAACAAGATTTTTATGCGAGATCTAAAAA  
CATATCTATCCGTAGCGCCAGTAATAAGTACTCTATGGTTCGGGCTTTTAGCAGGTCTAT  
TGATAGAGATCAATCGTTTTTTCCCGGATGCTTTGACATTCCCTTTTTTTTCATTCATGAC  
TGCAATTTTAGAGAGACGCGAAAGCGAAAGCCTTTGGGGTCGCTTCTGTAATTGGATA  
ACCAGCACTGAAAACCGTCTTTATATTGGATGGTTTGGTGTTTTGATGATTCCTACTTTA  
TTGACCGCAACTTCTGTATTTATTATCGCTTTCATTGCTGCCCCTCCAGTAGACATTGAT  
GGTATTCGTGAACCTGTTTCTGGATCTCTACTTTATGGAAACAATATCATTTCCTGGTGCC  
ATTATTCCTACTTCTGCGGCTATAGGGTTGCACCTTTTACCCAATATGGGAAGCGGCATCC  
GTTGATGAATGGTTATACAACGGCGGTCTTATGAGCTAATTGTTCTACACTTCTTACTT  
GGTGTAGCTTGTTACATGGGGCGTGAGTGGGAACTTAGTTTCCGTCTGGGTATGCGTCC  
TTGGATTGCTGTTGCATATTCAGCTCCTGTTGCGGCGGCTACTGCTGTTTTCTTGATTTA  
TCCAATCGGTCAAGGAAGTTTTTCGGATGGGATGCCTCTAGGAATCTCTGGTACTTTTA  
ACTTTATGATTGTATTCCAGGCTGAGCACAAACATCCTTATGCACCCATTTACATGTTAG  
GCGTAGCTGGTGTATTCCGGCGGCTCCCTATTAGTGTATGCATGGTTCCTTTGGTAACCT  
CTAGTTTGATCAGGGAAACCACAGAAAATGAATCTGCTAATGAAGGTTACAGATTTGG  
TCAAGAGGAAGAACTTATAATATCGTAGCCGCTCATGGTTATTTGGCCGATTGATCTT  
CCAATATGCTAGTTTTAACAACCTCTCGTCTTTACATTTCTTCTTAGCTGCTTGGCCTGTA  
GTAGGTATCTGGTTCACTGCTTTAGGTATTAGCACTATGGCTTTCAATCTAAATGGTTTC  
AATTTCAACCAATCTGTAGTTGATAGTCAAGGTCGTGTAATTAATACCTGGGCTGATATT  
ATTAACCGTGCTAACCTTGGTATGGAAGTTATGCATGAACGTAATGCTCATAATTTCCCT  
CTAGACCTAGCTGCTGTCGAAGTTCCATCTACAAATGGAATGGGTTTGCCTTGGTATCG  
TGTTCATAACCGTCGTATTGAATGATCCCGGTCGTTTGGCTGGCTGTCCATATAATGCATAC  
AGCTTTGGTTGCTGGTTGGGCCGGCTCGATGGCTCTATATGAATTAGCAGTTTTTTGATCC  
TTCTGACCCCGTTCTCGATCCAATGTGGAGACAAGGTATGTTTCGTTATAACCCTTCATGAC  
TCGTTTAGGAATAACCAATTCATGGGGTGGTTGGAGTATTACA---GGAGGAACTATAAC  
GAATCCGGGTATTTGGAGTTATGAAGGTGTGGCTGGGGCGCATATTGTGTTTTCTGGCT  
TGTGCTTCTTGGCAGCTATCTGGCATTGGGTGTATTGGGATCTAGAAATCTTTTGTGATG  
AACGTACAGGAAAACCTTCTTTAGATTTGCCCAAGATCTTTGGAATTCATTTATTTCTCT  
CAGGAGTGGCTTGTTTTGGGTTTGGTGCTTTTCATGTAACAGGATTGTATGGTCCTGGA  
ATATGGGTGTCTGATCCTTATGGGCTAACCGGAAAAGTACAATCTGTAAATCCAGCGTG  
GGGTGTGGAAGGTTTTGATCCTTTTGTTCGGGAGGAATAGCCTCTCATCATATTGCAG

CAGGGACATTGGGCATATTGGCGGGCCTATTCCATCTTAGTGTCGCCCGCCCAACGT  
CTATACAAAGGATTACGTATGGGAAATATTGAAACCGTGCTTTCCAGTAGTATCGCTGCT  
GCTTTTTTGCAGCTTTTGTGTGCTGGAACATATGTTGGTATGGTTCAGCAACTACCCCC  
ATTGAATTATTTGGTCCCACTCGTTATCAATGGGATCAAGGATACTTCCAGCAAGAAATA  
TATCGAAGAGTTGGTACTGGGCTGGCTGAAAATCAAAGCTTATCCGAAGCTTGGTCTA  
AAATTCCTGAAAAATTAGCTTTTTATGATTACATCGGAAATAATCCGGCAAAGGGTGGA  
TTGTTTCAGAGCAGGTTCAATGGATAACGGGGATGGAATAGCTATTGGGTGGTTAGGACA  
TCCTCTATTTAGAGATAAAGAAGGGCGTGAGCTTTTTGTACGTCGTATGCCTACTTTTTT  
TGAAACATTTCCGGTTGTTTTGGTAGACGGAGACGGAATTGTTAGAGCCGATGTTCCCTT  
TTCGAAGGGCAGAATCGAAGTATAGTGTGAACAAGTAGGTGTAAGTGTGAGTTCTAT  
GGTGGTGAACATAATGGAGTCAGTTATAGTGATCCTGCTACTGTGAAAAAATATGCTAG  
ACGCGCACAAATTGGGTGAAATTTTTGAATTAGATCGTGCTACTTTGAAATCCGATGGTG  
TTTTTCGTAGTAGTCCAAGGGGTTGGTTACTTTTGGACATGCTTCGTTTGCCTGCTCT  
TCTTCTCGGACACATTTGGCATGGCTCTCGAACCTTGTTTCAGAGATGTTTTTGCTGGTA  
TTGATCCAGATTTAGACGCTCAGGTGGAATTTGGAGCATTCCAAAACTTGGAGATCC  
AACTACAAGAAGACAAGTAGTTATGAAAACCTTATATTCCTGAGGAGGTTCTACCCCG  
TGAAACGCTCTTTAATGGAACCTTAGCTTTAGCTGGTCGTGACCAAGAAACCACAGG  
TTTCGCTTGGTGGGCCGGAATGCCCGACTTATCAATTTATCCGGTAAACTGCTGGGAG  
CTCATGTAGCCCATGCTGGATTAATCGTATTCTGGGCCGGAGCAATGAACCTATTTGAA  
GTGGCCCATTTTCGTACCGGAGAAGCCAATGTATGAACAAGGATTAATTTTACTTCCCA  
CCTAGCTACTCTAGGTTGGGGGGTGGGTCTGGCGGGGAAGTCATAGACACCTTTCCAT  
ACTTTGTATCTGGCGTACTTCACTTAATTTCTCTGCAGTATTGGGCTTTGGCGGTATTTA  
TCATGCACTTCTAGGACCCGAGACTCTTGAAGAATCTTTTCCATTTTTTGGTTATGTATG  
GAAAGATAGAAATAAAATGACAACAATTTAGGTATTCATTAATCTTGCTAGGTATAG  
GTGCTTTTCTTCTAGTATTCAAAGCTCTTTATTTTGGGGCGTATATGATACCTGGGCTC  
CGGGGGGGGAGATGTAAGAAAAATTACCAACTTGACCCTTAGCCCAAGTGTTATTTT  
TGGTTATTTACTAAAATCTCCTTTTGGAGGAGAAGGATGGATTGTTAGTGTGGATGATTT  
GGAAGATATAATTGGGGGGCATGTATGGTTAGGTTCCATTTGTATACTTGGTGGAATCTG  
GCATATCTTAACCAAACCCTTTGCATGGGCTCGCCGTGCACTTGTATGGTCCGGGGAGG  
CTTATTTGTCTTATAGTTTLAGGCGCTTTAGCTGTTTTTGGTTTCATTGCTTGTGCTTGT  
CTGGTTCAATAATACCGCTTATCCTAGTGAGTTTTACGGGCCCACTGGACCAGAAGCTT  
CTCAAGCTCAAGCTTTTACTTTTCTAGTTAGAGACCAACGTCTTGGGGCTAACGTGGGA  
TCCGCTCAAGGACCTACCGGCTTAGGTAAATATCTAATGCGTTTCGCCACCGGAGAAGT  
TATTTTTGGAGGAGAAACTATGCGTTTTTGGGATCTGCGCGCTCCTTGGTTAGAACCCTC  
TAAGAGGTCCAAATGGTTTGGACTTGAGTAGGTTGAAAAAAGACATACAACCTTGGCA  
AGAACGACGTTCTGCGGAATATATGACCCATGCGCCTTTAGGTTTCATTAATTCGGTAG  
GTGGCGTAGCTACCGAGATCAATGCAGTCAACTATGTCTCTCCTAGAAGTTGGTTAGCT  
ACCTCTCATTTTGTCTCGGGTTCTTCCATTCGTAGGTCATTTATGGCACGCGGGAAGG  
GCTCGTGCAGCTGCAGCAGGATTTGAAAAAGGAATTGATCGTGATTTTGAACCTGTTT  
TTCCATGACTCCTCTTAACATGACTATAGCACTTGGTAAATTTACCAAAGATGAAAATG  
ATTTATTTGATATTATGGATGACTGGTTACGGAGGGACCGTTTTCGTTTTTGTGGGTTGGT  
CCGGTCTATTGCTCTTTCCTTGTGCCTATTTTGCCTTAGGGGGTTGGTTCACAGGTACAA  
CCTTTGTAACCTCATGGTATACCCATGGATTGGCCAGTTCCATTTGGAAGGTTGCAACT  
TCTTAACCGCCGAGTTTCTACTCCTGCTAATAGTTTLAGCCATTCTTTATTACTATG

GGGTCCTGAAGCACAAGGAGATTTTACTCGTTGGTGTCAATTAGGTGGCTTGTGGACT  
TTTGTGCTCTCCACGGAGCTTTTCGGACTAATAGGTTTTATGTTACGTCAATTTGAACTT  
GCTCGATCCGTGCAATTACGACCTTATAATGCAATCGCATTCTCTGGTCCAATTGCGGTT  
TTTGTCTCTGTATTCCTGATTTATCCACTAGGTCAGTCTGGTTGGTTCTTTGCGCCTAGTT  
TTGGCGTAGCAGCTATATTTGATTATCCTCTTTTTCCAAGGATTCATAATTGGACAC  
TGAACCCATTTATATGATGGGAGTTGCCGGTGTATTGGGCGCTGCTCTGCTATGCGCTA  
TTCATGGTGTACTGTAGAAAATACTTTATTTGAAGATGGTGTGGTCAAATACATTCC  
GTGCTTTTAACCCAACTCAAGCTGAAGAACTTATTCATGGTCAACGCCAACCGCTTT  
TGGTCCCAAATTTTGGGGTTGCTTTTTCCAATAAACGTTGGTTACATTTCTTTATGTTAT  
TTGTACCAGTAACCGGTTTATGGATGAGTGCTCTTGGAGTAGTTGGTCTGGCTCTGAAC  
CTACGTGCCTATGACTTCGTTTCTCAGGAAATCCGTGCAGCGGAAGATCCTGAATTTGA  
GACTTTCTATACCAAAAATATTCTTTTAAATGAAGGCATTTCGTGCTTGGATGGCGGCTCA  
AGATCAGCCTCATGAAAACCTTATATTCCTGAGGAGGTTCTACCCCGTGGAAACGCTC  
TTATGTCTGGAAGCACAGGAGAACGTTCTTTTGGCTGATATTATTACCAGTATTTCGATATT  
GGGTCATTCATAGCATTACTATACTTCCCTATTCATTGCAGGTTGGTTATTCGTCAGCAC  
AGGTTTAGCTTATGATGATTTTGAAGCCCTCGTCCAAATGAATATTTTACAGAGAGCC  
GACAAGGAATCCCTTAATAACTGGCCGTTTTGATCCTTTGGAACAACCTGATGAATTT  
AGTAGATCTTTTATGACTATAGATCGAACCTATCCAATTTTACAGTGCGATGGCTTGCT  
GTTACGGACTAGCTGTACCTACCGTTTTCTTTTTTGGGGTCAATATCAGCAATGCAGTT  
CATCCAACGAATGGCTACACAAAGCGTTGAGGGGAGTTCTAGATCTGGT---CCAAGAC  
GAACTATTGTAGGGGATTTATTGAAACCATTGAATTCGGAATATGGTAAAGTAGCTCCG  
GGTTGGGGAACACTCCTTTGATGGGTGTCGCAATGGCTCTATTTGCGGTATTCTATCT  
ATTATTTGGAGATTTATAATTCTTCCGTTTTACTGGATGGAATTTCAATGAATATGCTTA  
CTCTCAAACCTCTTTGTTTACACAGTAGTAATATTCTTTGTTTCCCTTTTCATCTTTGGATT  
TTTATCTAATGATCCAGGGCGTAATCCTGGACGTGAAGAAATGGCCGATACTACTGGAA  
GGATTCTCTTTGGATAATAGGTAAGTGAATCGGATTCCTGTGATCGGTTTAAATAGGTAT  
TTTCTTTTATGGCTCCTATTCCGGCTTGGGTTTCATCCCTGATGCTTAATATTTTAAATTTG  
ATTTGTATCTGTCTTAATTTTGCCCTTTAT---AGCAGTTTTTTCTTCACAAAATTGCCTGA  
AGCCTACGCTTTTTTGAATCCAATCGTAGATGTTATGCCAGTAATCCCTCTGTTCTTTTTT  
CTATTAGCCTTTGTTTGGCAAGCTGCTGTAAGTTTTCGAATGACACAATCAAACCCGAA  
CGAACAAAACGTTGAATGAATCGTACCAGTCTTTACTGGGGTTATTACTCATTTTTGT  
ACTTGCTGTTTTATTTTCTAATTATTTCTTTAATATGGAAGTAAATATTCTCGCATTATTG  
CTACTGCACTGTTCAATTCTAGTTCCCTACTGCTTTTTTACTTATAATATATGTA AAAACTGT  
TAGTCAAAGTGATATGGAAACAGCAACCCTAGTCGCCATCTCTATATCTGGTTTACTTGT  
AAGTTTTACTGGGTATGCCTTATATACTGCTTTTTGGGCAACCCTCTCAACA ACTAAGAG  
ATCCATTTCGAGGAACACGGGGACATGGAAGCATTAGTTTATA CATTCCCTCTTAGTATCG  
ACTCTAGGAATAATTTTTTCGCTATCTTTTTTCGAGAACC GCCTAAAGTTCCA ACTAAA  
AAGGTGAAAATGACTATTGCTTTCCAATTGGCTGTTTTTGCATTAATTGCTACTTCGTC A  
ATCTTATTAATTAGTGTACCTGTTGTTTTTTCTTCTCCTGACGGTTGGTCAAGCAACAAA  
AATGTTGATTTTCCGGTACATCATTATGGATTGGATTAGTCTTTCTGGTAGGTATTCTTA  
ATTCTCTCATCTCT-----ATGTCACCACAAACAGAGACTAAAGCAGGTGTTG  
GATTCAAGGCTGGTGTAAAGATTATAAATTGACTTATTATACTCCTGACTATGAAACCA  
AAGATACTGATATCTTGGCAGCATTCCGAGTAACTCCTCAACCTGGAGTTCCGCCCGAG  
GAAGCAGGGGCCGAGTAGCTGCTGAATCTTCTACTGGTACATGGACA ACTGTGTGGA

CCGACGGGCTTACCAGTCTTGATCGTTATAAGGGACGATGCTACGACATCGAGCCCGTT  
GCTGGAGAAGAAAATCAATTTATTGCTTATGTAGCTTACCCCTTAGACCTTTTTGAAGA  
AGGTTCTGTTACTAACATGTTTACTTCCATTGTGGGTAATGTATTTGGGTTCAAAGCCCT  
ACGCGCTCTACGTCTGGAGGATTTGCGAATTCCTCCTGCTTATGTTAAAACCTTTCAAG  
GCCCACCTCATGGTATCCAAGTTGAAAGAGATAAATTGAACAAGTATGGTCGCCCCCTA  
TTGGGCTGTACTATTAAACCTAAATTGGGGTTATCCGCTAAGAATTACGGTAGAGCAGT  
TTATGAATGTCTACGCGGTGGACTTGATTTTACCAAAGATGATGAGAACGTGAACTCCC  
AACCATTTATGCGTTGGAGAGATCGTTTCTTATTTTGTGCCGAAGCACTTTATAAAGCAC  
AGGCTGAAACCGGTGAAATCAAAGGGCATTATTTAAACGCTACTGCAGGTACATGCGA  
AGAAATGATCAAAGGGGCTGTATTTGCCAGAGAATTGGGAGTTCCTATCGTAATGCATG  
ACTACTTAACAGGGGGATTACCCGCAAACACTAGTTTGGCTCATTATTGCCGAGATAAT  
GGTTTACTTCTCACATCCATCGCGCAATGCATGCAGTTATTGATAGACAGAAAAATCAT  
GGTATACACTTTCGTGTACTAGCTAAGGCATTACGTATGTCTGGTGGAGATCATATTCAC  
TCTGGTACCGTAGTAGGTAACCTTGAAGGGGAAAGAGACATAACTTTGGGTTTTGTG  
ATTTACTGCGTGATGATTTTGTGAAAAAGATCGAAGCCGCGGTATTTATTTCACTCAA  
GATTGGGTCTCTTACCGGGTGTCTACCCGTGGCTTCGGGGGGTATTCACGTTTGGCA  
TATGCCTGCTCTGACCGAGATCTTTGGAGATGATTCCGTACTACAATTCGGTGGAGGAA  
CTTTAGGGCACCCTTGGGGAAATGCACCCGGTGGCGTTGCTAATCGAGTAGCTCTAGA  
AGCATGTGTACAAGCTCGTAATGAGGGACGTGATCTTGCTCGTGAGGGTAATGAAATTA  
TCCGTGAAGCTAGCAAATGGAGCCCTGAACTAGCTGCTGCTTGTGAAGTATGGAAGGA  
GATTAATTTGAATTCCAAGCAATGGATACGTTG-----ATGGCGATACATTTATACAAAAC  
TTCTACCCCGAGCACACGCAATGGAGCCGTAGACAGTCAAGTGAAATCCAATACACGA  
AATAATTTGATCTATGGGCAGCATCGTTGTGGTAAAGGCCGTAATTCAGAGGAATCATT  
ACCGCAAGGCATAGAGGGGGAGGTCATAACGTCTATAACCGTAAAATCGATTTTCGAC  
GGAATGAAAAATACATATATGGTAGAATCGTAACCATAGAATACGACCCTAATCGAAAT  
GCATACATTTGTCTCATACTATGGGGATGGTGAGAAGAGATATATTTTACATCCCAGA  
GGGGCTATAATTGGAGATAACCATTATTTCTGGTACAGAAGTTCCTATAAAAATGGGAAAT  
GCCCTACCTTTGACCGATATGCCCTTAGGCACGGCCATACATAACATAGAAATCACACT  
TGGAAGGGGTGGACAATTAGCTAGAGCTGCAGGTGCTGTAGCGAAACTGATTGCAAA  
AGAGGGGAAATCGGCCACATTAATAATTACCTTCTGGGGAGGTTTCGTTTAAATATCCAAA  
ACTGCTCAGCAACAGTCGGACAAGTAGGGAATGCTGGGGTGAACCAGAAAAGTTTGG  
GTAGAGCCGGATCTAAATGTTGGCTAGGTAAACGTCCTGTAGTAAGAGGAGTAGTTATG  
AACCTGTAGACCATCCCCATGGGGGTGGTGAGGGGAGGGCCCCAATTGGTAGAAAA  
AAACCCGCAACCCCTTGGGGTTATCCTGCACTTGGAAGAAGAAGTAGAAAAAGGAAT  
AATATAGTGATAATTTGATTCTTCGTCGCCGCAGTAAAATGATCCAATCTCAGACCCAT  
TTGAATGTAGCAGATAATAGCGGAGCTCGAGAATTGATGTGTATTTCGAATCATAGGAAC  
TAGT---AATCGCCGATATGCTCATATCGGCGACATTATTATTGCTGTGATCAAGGAAGCA  
GTCCCCAATTCACCTCTAGAAAGATCTGAAGTGATCAGAGCTGTAATTGTGCGTACTTC  
TAAAGAACTCAAACGCGACAACGGTATGATAATACGATATGATGACAACGCTGCAGTT  
GTAATTGATCAAGAAGGAAATCCAAAGGGAACCTCGAATTTTTGGTGCAATCGCTCGGG  
AATTGAGACAGTTAAATTTCACTAAAATAGTTTCATTAGCACCTGAAGTATTAATGCTTA  
GTCCCAAAGAACCAGATTCCGTAAACAACATAGAGGAAGAATGAAAGGAATATCTTC  
TCGAGGCAATCGTATTTGTTTCGGTAGATATGCTCTTCAGGCACTTGAACCCGCTTGG  
TTACGTCTAGACAAATAGAAGCAGGGCGTCGGGCAATGACACGAAATGTACGCCGCG

TGGAAAAATATGGGTACGTATCTTTCCCGACAAACCAGTTACCCTAAGACCCTCGGAA  
ACACGTATGGGTTCGGGGAAGGGATCTCCCGAATATTGGGTAGCTGTCGTTAAACCGG  
GTAGAATGATTTATGAAATGGGCGGGGTAGCAGAAAATATAGCCAGAAAGGCTATTTCA  
ATAGCAGCGTCCAAAATGCCTATACGAACTCAATTCATTATTTTGAGAATGACCAGAATT  
AGACGAGGATATATAGCTCGGAGGCGTAGAACAAAAATTCGTTTATTACATCAAGCTT  
TCGTGGGGCTCATTCAAGACTTACTCGAACTATGATTCAACAAAAAATAAAAAGCTTTGT  
TTTCGGCCTATCGGGATAGAGATAGGCACAAAAGAAATTTTCGGTGTTTATGGGTCACT  
CGTATAAATGCAGCAATTCGAGAG---AATGGAGTATCCTATAGTTATAGTACATTAATAAA  
CAATCTGTACAAGAGACAGTTGCTTCTTAATCGTAAAATACTTGCACA ACTAGCTATATT  
AAATAGGAATTGCCTTTATCTGATTTCCAATGACATGATAAAA-----  
ATGATAAAGGAAGCATCCGCTTCAGGGTTCATATATCTATGTCTGCTCACAAAGCGCG  
AAGAATAATTGATCAGATTCGTGGACGTTCCCTATGAGGAAACACTTATGATACTCGAAC  
TAATGCCTTATCGAGCATGTTATCCCATTTTTAAATTGGTTTATTCGCGCAGCAGCCAATGC  
TAGTCACAATATGGGTTTGAACGAAGCCAGTTTAGTCATTAGCAAAGCCGAAGTCAAC  
GAAGGTGCTACTATGAAAAAATTTAAACCTCGGGCTCGAGGACGAAGTTATCTGATAA  
AAAGACAGACTTGCCATATAAGTATTGTATTGGAGGATATATCATATGAA-----  
-ATGGATGGAATCAAATATGCAGTAGTTACAGACAAAAGTATTTCGGTTATTGTTGAAAAA  
T--CAATATACTTCTAATGTGCAATCAGGATCAACTAGGACAGAAATAAAGCATTGGGTC  
GAACTCTTCTTTGGTGTCAAGGTAATAGCTATGAATAGCCATCGACTCCCGGGAAAGGG  
TAGAAGAATGAGACCTATTATGGGACATAACAATGCATTACAGACGTATGATCATTACGCT  
T C A A C C G G T T A T T C T A T T C C A C C T C T T A G A A A G A A A G A A C  
T????????????????????????????????????????????????????????????????  
????????????????????????????????????????????????????????????????  
????????????????????????????????????????????????????????????????  
-----????????????ATGGCCAATGGT  
AAAGACGTCCGAATAAGGGTTATTTTAGAATGTACCAGTTGT--GTTGAAAG-----GTT  
AATAAGAAA-----GGCATTCTAGATATATTACTCAAAGAATCGACACAATAGGCCTAG  
TCGATTGGAGTTGAGAAAATTCTGTCCCTATTGTTACAAACATACAATTCACGGGGAGA  
TAAAGAAAATGAAGATAAGGGCTTCCGCTCGTAAAATTTGTGAAAAATGTCGACTAAT  
ACGTCGACGGGGACGAATTCTAATAATTTGCTCCAACCCGAGACATAAACAAAGACAA  
GGAATGGTTCGAGAGAAAGTAAGAATATCTACTCGGACACTACAGTGAAGTGTGTTG  
AATCAAGAGCTGACAGTAAGCGTCTTTATTATGGACGTTTTATTCTGTCTCCACTTATGA  
AAGGTCAAGCCGACACAATAGGCATTGCGATGCGAAGAGCTTTGCTTGGAGAAATAGA  
AGGGACATGTATCACACGCGCAAAATCTAAG-----AAAATACCACACGAATTTTCTACTA  
TAACGGGTATTCAAGAATCAATACATGAAATTTTAATGAATTTGAAAGAAATTGTATTGA  
GAAGCAATTTATATGGAACTCATGACGCGTCTATTTGTGTCAAGGGTCTGATGTGTA  
ACTGCTCAAGACATCATCTTACCGCCGTCTGTGGAAATCATTGATAATACACAACATATC  
GCTAGCTTAAGGGAACCGATTGATTTGCATATTGGATTAGAAATCGAGAGGAATCGTGG  
CTATTGTATGAAACCGCCAAAAAATTTCAAGACGGAAGTTATTCC-----ATAGATGCTG  
TATTCATGCCTGTTTCGAAATGCGAATCATAGTGTTCAATCTTATGGAAATGGGAATGAAA  
AGCAAGAGATACTTTTTCTCGAAATATGGACAAATGGAAGTTTAACTCCTAAGAAGC  
ACTTCATGAAGCCTCCCGGAATTTGATTGATTTATTTATTCTTTTCTACATGCAGAAGA  
AGAAAATTTCCATTTAGAA-----AAAAATCAA---CACAAGATTACTTTACCCCTTTTTGC  
TTTTCATGATAGATTGGCT---AAACTAAGGAAAAATCAAAA---GAAATAGCATTGAAAT  
CTATTTTATTGACCAACTCGAATTGGCTCCTAAGATTATAATTGCCTAAAAAGGTCCA  
ATATACATACATTGTGGGACCTTTTGAAGAACAGTCAAGAAGACCTTATGAAAATTGAA



CATTTTCGCATAGAAGATGTAAAACATATATTTGGCATTCTAAAAATAGAAAAGCATTTC  
ACAATTAATTTACCAAAGAATAAAATGCTTGGGGATGGAAAT--GGGGGAATGTCTACA  
ATACCTGGATTTAATCAGATACAATTTGAAGGATTTTGTAGATTCATTGATCAGGGCTTA  
GCAGAAGAACTTTATAAGTTTCCAAAAATTGAAGATAGAGATCAAGAAATTGAATTC  
AATTATTTGTGGAAACATATCAATTAGTAGAACCATCGATAAAAGAAAGAGATGCTGTAT  
ATGAATCACTTACATATCTTCTGAATTATATGTATCCGGGGGATTAATTTGGAAAAACA  
GTAGGGATATGCAAGAACAAACAATTTTTATTGGAAACATTCCTCTAATGAATTCCCTG  
GGAACCTCTATAGTAAATGGAATATACAGAATTGTGATCAATCAAATATTGCAAAGTCCT  
GGTATCTATTACCGGTCAGAATTGAACCATAACGGAATTTCCGGTCTATACCGGCACTATA  
ATATCAGATTGGGGGGGAAGAGTAGAATTAGAGATTGATAAAAAAGCAAGGATATGGG  
CTCGTGTGAGTAGGAAACAGAAAATATCTATTTTAGTTCTATCATCAGCTATGGGTTTGA  
ATCTAAGAGAAATTCTAGAGAATGTGTGCTACCCCGAGATTTTCTTGTCTTTCCTGAGC  
GATAAGGAAAAAATAAATTTGGGTCAAGGGAAAATGCCATTTTGGAGTTTATCAAC  
AATTTACTTGTGTAGGCGGAGGTCCAGTATTTTCTGAATCCTTATGTAAGGAATTACAAA  
AGAAATTTTTTCAACAAAGATGTGAATTAGGAAGGATTGGTCGACTAAATATGAACCA  
GAGACTGAATCTTGATATACCTCATAACAATACATTTTGTACCAGCAGATATATTGGC  
AGCCGCGGATCATTGATTGGAATGAAATTTGGAATGGGTACACTTGATGAC-----ATGA  
ATCATTTAAAAATAAGCGTATTCGTTCTGTAGCGGATCTTTACAAGATCAATTCGGAT  
TGGCTCTAATTCGTTTAGAAAATGTGGTTAGAGGAACTATATGTGGAGCAATTAGG---CA  
TAAATTGATA---CCGACCCCTCAAATTTGGTAACTTCAACTCCA-----TTAACAACC  
ACTTATGAATCTTTTTTCGGATTACACCCCTTATCTCAAGTTTTGGATCGAACGAATCCA  
TTGACACAAATAGTTCATGGGAGAAAATCGAGTTATTTGGGCCCTGGAGGATTGACAG  
GGCGAACTGCTAGTTTTCTGATACGAGATATCCATCCTAGTCACTATGGGCGCATTTGCC  
CAATTGACACGTCTGAGGGAATCAATGTCGGACTTATCGGATCCTTAACAATTCATGCC  
AAGATTGGCCATTTGGGG---TCTTTAGAAAGCCCGTTTTAT-----GAAATCTCTGCGAG  
ATCAAAA-----AAAGTACGGATGCTTTATTTATCACCAAATAGGGATGAATACTATATGAT  
AGCGGCAGGAAATTGTTTGGCGCTGAATCGAGGTGCTCGGGAAGAACAGGTTGTTCC  
AGCTCGATACCGTCAAGAATTCCTGACTATTGCATGGGAACAGGTGCGTCTTCGAAGTT  
TTTTCCCCTTCCAATATTTTTCTATTGGAGCTTCTCTCATTCTTTTATCGAGCATAATGAT  
GCGAATCGGGCTTTAATGAGTTTCGAATATGCAACGTCAAGCAGTCCGCTTGCTCGTTC  
CGAGAAGTGCATTGTTGGAACGGATTGGAACGCCAAGTGGCTCTTGATTTCGGGGGTT  
CCTGCTATAGCCGAACACGAGGGAAAGATAATTTATACCGACATTGACAAGATTATTTTA  
TCGGGGAATGGCTATACTGTAAGCATTCCATTAGTTATGTATCAACGTTCCAACAAAAAT  
ACCTGTATGCATCAAAAAACTCAGGTTTCAGCGAGGAAAATGCATTAAGGGGACAA  
GTTTTGGCGGACGGTGCCGCTACAGTTGGTGGCGAACTCGCCTTGGGCAAAAACATAT  
TAGTAGCTTATATGCCATGGGAAGGCTACAATTTTGAAGATGCGGTACTCATTAGCGAA  
CGTCTGGTATATGAAGATGTTTATACTTCTTTTACATACGGAAATACGAAATTCAGACT  
CATGTGACAAGCCAAGGC---CCCGAAAGGATCACTAACGAAATACCGCATCTAGAAGC  
CCATTTACTCCGAAATTTAGACAAAAACGGAATTGTGATGCTGGGATCTTGGGTAGAGA  
CAGGCGATATTTTAATAGGTAAATTAACGCCTCAATTGGCGAAAGAA---TCATCGTATGC  
CCCCGAAGATAGATTATTACGAGCCATACTGGGCATTCAAGTATCTACTTCAAAGGAAA  
CTTGTCTAAAACCTACCTACAGGCGGTAGGGGTGAGTTATTGATGTGAGATGGATCCAG  
AAAAAAGGG---GGTTCCAGTTATAATCCAGAAACAATTCGCGTATATATTTTACAGAAA  
CGTGAAATCAAAGTAGGGGATAAAGTCGCTGGAAGACATGGAAATAAAGGCATCATT

CCAAAATTTTGCCTAGACAAGATATGCCTTATTTGCAAGATGGAGCACCTGTTGATATG  
GTCTTCAACCCATTAGGAGTACCTTCACGAATGAATGTAGGACAGATATTTGAATGCTC  
ACTCGGGTTAGCGGGAAGTCTGCTAGATAGACATTATCGAGTAGCACCTTTTGATGAGA  
GATATGAACAAGAGGCTTCGAGAAAAGTATTTTCTGAATTATATGAAGCCGGTAAAG  
CAAACAGGAAATCCGTGGGTATTTGAACCCGAATGCCCGGGAAAAAGTAGAATATTTG  
ATGGAAGAACGGGAGATCCTTTTGAGCAGCCTGTTATAATAGGAAAGCCTTATATCTTG  
AAATTAATTCATCAAGTTGCTGATAAAATACATGGACGTTCCAGTGGGCATTATGCACTT  
GTTACACAACAACCCCTTAGAGGAAGGGCCAAACAAGGGGGACAACGGGTAGGAGA  
AATGGAGGTTTGGGCTCTAGAGGGATTTGGTGTTCATATTTTACAAGAGATGCTTA  
CTTATAAATCTGATCATATTAGAGCTCGCCAAGAAGTGCTTGGTACTACGATCAGTGGA  
CGAACAATACCTAAACCTGAGGATGCTCCAGAATCTTTTCGATTGCTCGTTTCGAGA  
ACTACGATCTTTGGCTCTGGAACCTGAAACATTTCTTATATCTGAGAAGAACTTCCAGATTA  
ATAGGAAGGAAGTTATGAATCAGAATTTTCTTCTATGATCGATCGGTATAAACATCAAC  
AACTCCGAATTGGATCAGTTTCGCCTCAACAAATAAGTGCTTGGACTAATAAAATCCTA  
CCTAATGGAGAGATTGTTGGAGAGGTTACAAAACCTATACTTTTCATTACAAAATAA  
TAAACCTGAAAAAGATGGATTATTTGTGAAAGAATTTTGGGCCTATAAAAAGTGGAA  
TTTGTGCTTGTGGAAATTATCGAGTAATTGGCGATGAAAAAGAAGAACCAAAATTTTGT  
GAACAATGCGGGGTCGAATTTGTTGATTCTCGGATACGAAGATATCAAATGGGCTACAT  
CAAACCTGGCATGCCAGTAACCTCATGTGTGGTATTTGAAACGTCTTCCCTAGTTATATCGC  
CAATCTTTTAGATAAACCTCTTAAACAATTAGAAGGCTTAGTATACTGCGATTTT-----T  
TTGCTAGGCC---ATAGCCAAAAACCTACTTTCTTACGATTACGAGGTTTCGTTTCAATA  
TGAAATACAATCTTGAAATACAGTATTCCGCTTTTTTTTACTACCCAAGGGTTCGATAC  
ATTTTCGAAATCGAGAAATTTCTACTGGAGCTGGTGCTATCCGAGAACTATTAGCCGATC  
TGGATTTGCGAATTATTCTAGATTATTCGTGCTTAGAATGGAAAGAATTAGGGGAAGAA--  
--GGACCCACCGGGAATGAATGGGAAGATCGAAAAGTTGGAAGAAGAAAGGATTTTTT  
AGTTAGACGCGTGGAATTAGCTAAGCATTTTATTTCGAACAAATATAGAACCAGAATGGA  
TGGTTTTATGTCTATTACCAGTTCTTCCCTCCGAATTGAGACCCATCATTAGATAGATG  
GAGGTAAACTAATGAGTTCAGATATTAATGAACTCTATAGAAGAGTTATTTATCGGAAC  
AATACTCTTACGGATCTATTAACAACAAGTAGATCTACGCCAGGGGAATTAGTAATGTG  
TCAGGAGAAATTGGTACAAGAAGCCGTAGATACACTTCTTGATAATGGAATCCGCGGA  
CAACCAATGAGAGACGGTCATAATAAGGTTTACAAGTCGTTTTTCAGATGTAATTGAAG  
CAAAGAGGGAAGGTTTCGTGAGACTATGCTTGGCAAACGGGTTGATTATTCGGGGCGT  
TCTGTCAATTGTCGTAGGACCCTCACTTTCATTACATCGATGTGGATTGCCTCGCGAAATA  
GCAATAGAGCTTTTCCAGACATTTGTAATTCGTGGTCTAATTAGGCAACATCTTGCTTCA  
AACATAGGAGTTGCTAAGAGTAAAATTCGAGAAAAAGAGCCAATTGTATGGGGAATAC  
TTCAGGAGGTTATGCGCGGACATCCTATATTGCTGAATAGAGCGCCTACTCTGCATAGAT  
TAGGCATACAGGCATTCCAACCCATTTTAGTGGAAGGACGTGCTATTTGTTTACATCCAT  
TAGTTCGTAAGGGATTCAATGCAGATTTTGATGGGGATCAAATGGCTGTTTCATGTACCTT  
TATCGTTGGAGGCTCAAGCGGAGGCTCGTTTACTTATGTTTTCTCATATGAATCTCTTGT  
CTCCAGCTATCGGAGATCCCATTTCCGTACCAACTCAAGATATGCTTATGGGGCTCTATG  
TATTAACAAGCGGGAATCGTCGAGGATTTGCGCAAATAGGTATAATCCGTTTAATTGCA  
GAAAT-----TTTCAAATGAAAAAATTGACGCTAATGCTGATAAGTATATAAAA-----GA  
ACCCTTTTTTTGTAATTCCTATGATGCAATTGGAGCTTATCGCCAGAAAAGAATCAATTT  
AGAGAGCCCCTTGTGGCTTCGGTGGCAACTAGATCAAGGC---CTTATTGCTTCA-----AG

AGAAGCTCCCATCGAAGGTCAC TTTGGATCTTTAGGTACCTATCATGAGATTTATGGAC  
ACTATCTAATAGTAAGAAGTATAAAAAAAAAAATTCTTTCTATATACATTCTGAACCACTG  
TTGGTCATATTTATCTTTATCGAGAAATCGAAGAAGCTATAACAAGGGTTTTGCCAAGCCT  
GCTCAGACGGTACC-----ATGGCCGAACGGGCCAATCTCTTCTTT  
CACAATAAAGTGATAGATGGA ACTGCCATTAAACGAATTATTAGTCGATTCATAGATCAC  
TTCGGAATGGCATATACATCACACATCCTGGATCAAGTAAAGACTCTGGGTTTCCATCA  
AGCCACTGCTACATCTATTT CATTAGGAATTGATGATCTTTTAAACAATACCTTCGAAAGG  
ATGGCTAGTCCAAGATGCTGAACAACAAAGTTTGATTTTGGAAAAACACCATCATTATG  
GAAATGTACACGCGATAGAAAATTACGTCAATCCATTGAGATATGGTATGCTACAAGT  
GAATATTTGCGACAAGAAATGAATCCGAATTTTAGGATGACGGAACCCTTTAAATCCAGT  
CCATATAATGTCCTTTTCGGGAGCTAGGGGAAATGCATCTCAAGTACACCAATTAGTAG  
GTATGAGAGGATTAATGTCGGATCCACAAGGACAAATGATTGATTTACCCATTCAAAGC  
AATCTACGGGAAGGATTGTCTTTAACAGAATATATCATTCTTGCTATGGAGCCCGAAA  
AGGAGTTGTGGATACTGCTGTACGAACATCAGATGCTGGATATCTTACGCGCAGACTTG  
TTGAAGTAGTTCAACACATTGTTGTACGTAGAACAGACTGTGGCACCACCCGAGGGAT  
TTCTGTGAGTTCTCGAAATGGAATGATACCG---GAAAGAATTTTTATTCAAACATTAATA  
GGTCGTGTATTAGCAGACAATATATATATGGGTCTACGATGCATTGCCACTCGAAATCAA  
GATATTGGGATTGGACTTGTCAATCGATTCAACACC-----TTTCGAACACAACC  
AATATCTATTCGAACTCCTTTTACTTGTAGAAGTACGTCCTGGATCTGTCGATTATGTTAT  
GGTCGAAGTCTACTCATGGCGACCTGGTGGAAATTGGGAGAAGCTGTAGGTATTATTGC  
GGGTCAATCCATTGGAGAGCCGGGTACTCAACTAACATTAAGAACGTTTCATACCCGGC  
GGAGTATTCACAGGGGGTACTGCCGAACATGTACGAGCCCCCTCTAATGGAAAAATCA  
AATTAATAAGGGTTTGGTTCATCCACACGTACACGTCATGGGCATCCTGCTTTTCTCT  
GTTCTATGGACTTATATGTA ACTATTGAGAGTCAAGATATTATACACAACGTGACTATTC  
CACCAAAAAGTTTTCTTTTAGTTCAAATGATCAATATGTAGAATCAGAACAAGTGATT  
GCTGAAATTCGCTCGGGAACATACACTTTG---AATTTTACAGAGAGGGTTTCGAAAACAT  
ATTTATTCCGATTCAGAAGGAGAA---ATGCACTGGAGTACTGATGTATACCATGCATCTG  
AATTTACATATAGTAATGTCCATCTTTTACCAAAAACAAGCCATTTATGGATATTGTCAG  
GGGGTTCGTGCAGA-----TCCAGTATAGTCCCGTTTTCACTACACAAGGATCAAGATCA  
AATAACGTTTCAT-----TCTCTTTCTGTGCAAGA---GGATATATTTCTAACCCT--TCAGT  
AAATAATGATAAA---GTAAACACAAATTCTTTAGTTTCATATCTTTTCGAGTAAAAGTAAA  
AGTAGGATTCTTGATTAT--TCAGACCTTAATCGAATGATATGTACTGGT-----TTCATAT  
ATCCTACT--ATTCTCCACGAGAATTCTGAT-----TTATTGGCAAAGAGGCCGAAAAAATAG  
ATTTATCATCCCATTCCAATCGATTCAAGAA-----AAAGA ACTAATGTCCATTCCGATAT  
CTTGATTGAAATACCTATAAAT-----GGCATTTTCCGTAGAAATAGTATTTTTGCTTATTTT  
GACGATCCCCAATACCGAAGAAAGAGTT CAGGAATTAATAATGTGGCTATAGGGGT  
GCATTCAATTGTCAAAAAGAGGAT-----TTAGTTGAGTATCGA---GGAGTCAAAGAATT  
TCAGCCAAAATACATGAAAGTAGATCGCTTTTTTTTTTCATTCCCGAGGAAGTGATATTTT  
ACCCGAATCTTCTTCCCTAATGGTACGGAACAATAGTATCATTGGAGTCGATACACAAA  
TCACTTTAAATACAAAAGTCGAGTAGGGGGGTTGATCCGAATAGAGAGAAAAAAA  
AAAAAATGGA ACTTAAAATCTTTTCTGGAGATATCCATTTTCCGAGGGCGACAGATAAG  
ATATCCCGATACAGTGGTATCTTGATACCACCAGGAACAGTAAAAACA-----AATTCTAA  
GGAGTCGAAAAG-----GTGAAAAATTGGATCTATGTCCAACGG-----ATCACACCTACC  
AAGAAAAAG-----TCTTTTGT TTTGGTTCGACCAGTACTCATATATGAAAGAGGGGACG

GTATAAATTTAGAAAGACTTTTTCCGCCGGATTTATTGCAGGAAAAAGAGAATCTGAAA  
CTTCGAATTGTCAATTATATTCTTTATGGAAATGGTAAACCAATTCAGGGAATTTCTAAC  
ACAAGTATTCAATTAGTTCGTACTIONTGTTTAGTGTGAATTGGAACCAAGACAAA-----  
AAAAGTTCTTCTATCGAAGAGGCTCGTGTATTATTTGTTGAAGTAAGTATAAATGGTCT  
GATTCGTGATTTCTAAGAATCCACTTAGGGAAATCACGCATTTCTATATCAGAAAAA  
GGAACGATCCATCAGGTTTGGGATTGATCTCT--GATAATGGGCCAGATCGCACCAATAT  
TAATCCGTTTTATTCCATTTATTCCAAGACAAGG-----ATTCCACAATCACTTAAA  
CAAATCAAGGAAGTATTAGTACGTTGTTGAATAGA-----AATATGGAATGTCAATCTT  
TGATAATTTTGTTCATCATCTAATTGTTTTCGAATGGATCCA-----TCCAACGGTGTAAAAT  
CTTATAAT-----GTAATAAAAGAATCA---CCTATAATTCCAATTAGGAATTTGTTGGGCC  
CTTTAGGA-----ACAGCCCTTCAAATTGCGAATTTT-----TATTCATTTTACCATTTACTA---  
--ACTCATAATCAGATCTCG--GTAATTAATATTTGAAACTTGACAATTTAAAA--TTAAA  
ACAGACTTCAAAGTACTA-----AAA---TATTATTTAATGGATGAGAACGGTAGA-----AT  
TGTTAATCACGATCCGTACAGTAACAACGTTTTGAATCCATTCAAATTGAATTGGTATTT  
TCTCCATCATAATTATTGTGAAGAAACATTCACAATAATTAAC---CTGGGACAGTTTATTT  
GTGAAAATGTATGTATGACAAAAACGGACCA-----CGCCTAAAATCAGGTCAAGTTC  
TAATTGTTTAC---GCCGACTCTGTAATACTAAGATTGGCTAAGCCCTATTTGGCCACTCC  
AGGAGCAACTGTTTCATGGCCATTATGGGGAAATCCTTTATGAAGGAGATACATTAGTTA  
CATTTATATATGAAAAATCGAGATCTGGTGATATAACGCAGGGTCTTCCAAAAGTGGAA  
CAGGTGTTAGAAGTGCCTCAATTGATTCAATATCGATAAACCTAGAAAAGAGAGTGG  
AGAATTGGAACGAGTGTATAACAAGAATTGTTGGAATTCCTTGGGGATTCTTGATTGGT  
GCTGAGCTAACTATAGTGCAAAGTCGTATTTCTTGGTTAATAAGATCCAAAAGGTTTAT  
CGATCCCAGGGGTACAGATCCATAATAGGCATATAGAAATTATTGTACGCCAAATAACA  
TCAAAGTCTGTTTTAGAA-----GATGGAATGTCTAATGTTTTTTTACCCGGAGAA  
CTAATTGGATTGTTGCGGGCGGAACGAGCGATGCGCGCTTTGGAAGAAGCGATCTGTT  
ACCGAACCGTATTCTTGGGAATAACGAGAGCATCTCTGAGTACTCAAAGTTTCATATCC  
GAAGCGAGTTTTCAAGAACTGCTCGCGTTTTAGCAAAGCTGCTCTCCGCGGTCTGTA  
TCGATTGGCTGAAAGGCCTGAAAGAAAACGTCGTTCTAGGTGGTATGATACCCGTTGG  
TACCGGATTCAAAGGATTAGCGCACCGCTCA-----AGCCAACATAAGATCATTCTTTCA  
AAACCAAAAAGAAGAAT-----TTATTTCGAGGGGGAAATGAGA-----GATATTTTGTTC  
CCACAGAGAGTTATTTGATTCTTGCATTTCAAAAATTTCTATAATATATCAGAACAAATC  
ATTTATAGGATTTAACGATTCC-----ATGATAAGAAGATATTGGAACATTAATTT  
GAAAGAGATGTTGGAAACAGGAGTTCAATTTGGTCATGCTACTAGAAAATGGAATCCG  
AAAATGGCACCTTATATCTCTGCAAAGCGTAAGGGTATTTCATATTACAAATCTTACTAGA  
ACTGCTCGTTTTTTATCAGAAGCGTGTGATTTGGTTTTTTGATGCAGCAAGTAGGAGAAA  
ACAATTCTTAATTGTTGGTACCAAAAATAAAGCAGCTGATCCAGTAGCGCGGGCTGCAA  
TAAGAGCTCGGTGTCATTATGTTAATAAAAAATGGCTAGGCGGCCTTTTAAACGAATTGG  
TCCACTACAGAAATGAGACTTCAAAGTTTCAAGGACTTGAGAATGGAACAAAAGACA  
GGGGGAATCCACCGCCTTCCGAAAGGGGATGCGGCTCGATTAAAGAGACAGTTATTT  
ACTTGCAAACATATTTGGGCGGGATTAATATATGACAGGGTTACCCGATATTGTAATAA  
TCGTTGATCAGCAAGAAGAATATATGGCTCTTCAAGAATGTATCACTTTGGGAATTTCCA  
ACAATTTGTTAATTGATACAACTGTGACCCGGATCTCACAGATATTTGATTCCAGCG  
AATGATGACGCTATAGCTTCAATCCGATTAATTTCTTAAACAAATTAGTATTTGCGATTTGTG  
AAGGGCGTTCT--AGCTATATACGAAATCCCATGGGACAAAAAATAAATCCACTTGGTTT

CAGACTTGGTACAACCCAAGATCATTATTCTCTTTGGTTTGCACAACCAAAAAATTTTT  
TTGAGGGTCTGCAAGAAGATCAAAAAATAAGAAATTGTATCAAAAATTATGTACAAAA  
AAATATGAAAATTTCTTCTGGT--GTTGAAGGAATTGGACATATAGAGATTCAAAAACG  
AATCGATGTGATTCAAGTTATAATCTACTTAGGATTCCCAAAATTTTAAACAGAAGGTAA  
A-----CCTAAAAGGATCAAAGAATTACAGATAAATGTACAAAAAGAACTTAATTGTA  
TGAACCGAAAACCTCAACATTTCTATTACAAGAATTGAAAACCTTACATGCACCCGAAT  
GTTCTTGCAGAATTTATAGCCGGACAATTAAGAATCGAGTTTCATTTTCGCAAAGCAAT  
GAAAAAGGCTATTGAATTAAGTGAAGCAATACAAAAGGAATTCAAGTACAAATT  
GCAGGGCGTCTTGATGGAAAAGAAATTGCACGCGCCGAATGGGTAGAGAGGGCAGG  
GTTCTCTACAACTCTTCGAGCTAAAATTAATTATTGTTCTTATACAGTTAGAACTATTT  
ATGGGGTCTTAGGTATAAAAATTTGGATATTTGTAGACGAGGAAATGTCACGTTACCGA  
GGCCTCGTTTTCAAAAAAATACGCGTCTGGGGGCTTTACCGGGACTAACTAGTAAAA  
GGCCTAGAGCCGGGAGCGATCTTAGAAATCAATCGCGCGCCGGTAAA---AAATCTCAAT  
ATCGTATTCGTTTAGAAGAAAAACAATAATTGCGTTTTTCATTATGGTCTTACAGAACGA  
CAATTGCTTAAATACGTTTCGTATCGCCGAAAAGCCAAGGGTCAACAGGTCAGGTTT  
TACTACAATTACTTGAAATGCGTTTGGATAACATCCTTTTTTCGATTAGGTATGGCGTCAA  
CTATTCCTCGAGCCCGCAATTAGTTAACCATAGACATATTTTAGTTAATGGTCGTATAGT  
AGATATACCAAGTTATCGCTGCAAACCCCGAGATATTATTACAGCGAAGGATGAACAAA  
AATCTAGAGTTATGATTCAAAATTTCTTTGATTCAATCCCCCAG---GAGGAATTGCCAAA  
ACATTTGACTCTTCACCCATTCCAA-----TATAAAGGATTGGTCAATCACATAATAGATAG  
TAAATGGATTGGCTTGAAAATAAATGAATTGTTAGTTGTAGAATATTATTCTCGTCAGAC  
TATGTCACGTCGAGGTACTGCAGAAGAAAAAACTGCAAATCCGATCCAATTTATCGTA  
ATCGATTAGTTAACATGTTGGTTAACCGTATTCTGAAACACGGAAAAAAATCATTGGCT  
TATCAAATTTCTATCGAGCCATGAAAAAGATTCAACAAAAGACAGAAACAAATCCAC  
TATCTGTTTTACATCAAGCAATACGTGGAGTAACTCCCGATATAGCAGTAAAAGCAAGA  
CGTGTAGGCGGATCGACTCATCAAGTTCCCATTTGAAATAGGATCCACACAAGGAAAAG  
CACTTGCCATTCGTTGGTTATTAGGAGCATCCCGAAAACGTCCGGGTGCAAATATGGTT  
TTCAAATTAAGTTCCGAATTGGTGGATGCTGCCAAAGGGAGTGGCGATGCCATACGCA  
AAAAGGAAGAGACTCATAGAATGGCAGAGGCAAATAGAGCTTTTTGCACATTTTCGTAT  
GGGTAGGGACACTCTTGCTGACATAATAACCTCTATACGAAATGCGGACATGGATAGAA  
AAGGAACCGTTCGAATACCATCTACTAACATCACCGAAAACATTATTAATAACTTTTTAC  
GAGAAGGTTTTATTGAAAATGTGAGGAAACACCAGGAAGGCAATTTTTTTTTTTTTGCT  
TTAACCTACGACATAGAAGA-----AATAGGAAAGGACGAACGAGT-----CTAAAT  
TTAAAACGCATCAGTCGCCCTGGTCTACGAATCTATTCTAACTATCAACAAATTCCGAG  
AATTTTAGGTGGAATGGGGATTGTAATCCTTTCTACTTCTCGGGGTATAATGACAGACCG  
AGAGGCTCGACTAGAAAGAATCGGTGGAGAAATTTTGTGTTATATATGGATGGCAAAA  
CTTTTACCAAGAATTGGTTCCCGCAAGAATGGACGTATTAGTTCACGTAAAAATGCACG  
TAAAATTCCTAAGGGAGTTATTCATGTCCAAGCAAGTTTCAACAATACTATTGTGACCG  
TTACAGATGTACGAGGTCGGGTGATCTCTTGGTCTCCGCAGGCGCTTGTGGATTCAGG  
GGCACAAGAAGAGGGGACGCCATTTGCTGCTCAAACCTGCAGCAGGAAATGCTATTCCG  
ACCGTAGTGGATCAAGGTATGCAACGAGCAGAAGTCATGATAAAGGGTCTTGGTCTAG  
GAAGAGATGCGGCATTAAGAGCTATTCGTAGAAGTGGTATACTATTAAGTTTCGTCCGG  
GATGTAACCCCTATGCCACATAATGGCTGCAGGCCTCCTAAAAAAGACGTGTGATGCC  
AACTATTAACAACCTTATTAGAAACACAAGACAGCCAATCAGAAATGTCACCAAATCC





TGCAAATTGTGCTCAATTCATATGTGGCAATTCCGCCAAGACCTCTTCGTT-----AG  
TTGGGGGAAT--AATCCGCACGAATCGGATTTTTTGTAGGAAC--ATATCGAGAGAGAATT  
GGATTTGGTTAGACAATGTGTGGTTGGTAAACAAGGATCGG-----TTTTTTAGC-----A  
AGGCACGGAATATATCGTCAAATATCAATATGATTCC-----ACAAGA-----TCTAGCTT  
CGTTCAAGGAAGGATTCTAGCCAATTGAAGGGATCTTCT--GATCAATCCAGAGATCA  
TTTCGATTCCATTAGT-----AATGAGGATTCGGAA-----TAT  
CACACATTGATCAATCAAAGAGAGATTCAACAATAAAAGAAAGATCGATTCTT--TGG  
GAT-----CCTTCCTTTCTTCAAACGGAACGAACAGAGATAGAATCAGAC-----CGATTCCC  
TAAA-----TGCCTTTCTGGATATCC-----TCAATGTCCCGGCTATTCACG--GAAGGTGCG  
AAGGAGATGAATAATCATCTGCTTCCGGAAGAAATCGAAGAATTT-----CTTGGGAATCC  
TACAAGATCCATTCGTTCTTTTTTCTCTGACAGATGG-----TCAGAACTTCAT--CTGGGT  
TCGAATCCTACTGAGAGGTCCACTAGAGATCAG-----AAATTGTTGAAGAAAGAAC  
AAGATGTTTCT--TTTGTCCCTTCCAGGCGATCGGAA-----AATAAAGAAATAGTTAA  
TATATTCAAGACAATTACGTATTTACAAAAT-----ACCGTCTCAATTCATCCTATTTTCATCA  
GATCCGGGATGTGATATGGTTCTG--AAGGATGAACTGGAT--ATGGACAGTTCCAATAA  
GATTTCTTTCTTGAACAAAATCCATTTTTTGTATTTA-----TTTCATCTATTCCATGATCGA  
AACGGGGGGGGGATACACGTTA-----CACCACGATTTTGAATCAGAA-----GAGAGATTC  
AAGAAATGGCGGATCTATTCACTCTATCAATAACCGAGCCG--GATCTGGTGTATCATAA  
GGGATTTGCCTTTTTTATTGATTCCTACGGATTGGATCAAAAACAA-----TTCTTGAATGA  
GGTATTCAACTCCAGGGATGAATCGAAAAAGAAATCTTTA-----TTGGTTCTACCTCCT  
ATTTTTTAT-----GAAGAGAATGAATCTTTTTATCGAAGGATCAGAAAAAATGGGTCCG  
G--ATCTCCTGCGGGAATGATTTGGAAGATCCAAAACAAAAAAGAGTGGTATTTGCTAG  
CAACAACATAATGGAGGCAGTCAATCAATATGGATTGATCCGAAATCTGATTCAAATCC  
AATATAGCACCTATGGG-----TACATAAGAAATGTATTGAATCAATTCTTTTTAATGAAT---  
-----AGATCCGATCGCAACTTCGAATATGGAATTCAA-----AAGGATCAAATAGGAAATG  
ATACTCTGAATCATAGAACTCTAATGAAATATACGATCAACCAACATTTATCGAATTTGA  
AACAG---AGTCAGAAGAAATGGTTCGATCCT-----CTTATTTTTCTTTCTCGAACCGAGA  
GATCCATGAATTGGGATCCTAATTCATATAGATACAAATGGTCTAATGGGAGCAATAATT  
TCCAGGAACATTTGGAACATTTCAATTTCTGAGCAGAAGAGCCGTTTT--CTTTTTCAAGT  
AGTGTTCGATCGATTACGTATTAATCAATATTCGATTGATTGGTCTGAGGTTATCGACAA  
AAAAGATTTGTCTAAGTCACTTCTTTCTTTTTGTCCAAGTTACTTCTT-----  
-----TTTTTGTCC-----AAGTTTCTTCTTTTTTGTCTAACTCACTTCTT--TTTT  
TCTTTGTGAGTTTCGGGAATATCCCCATTCATAGGTCCGAG--ATCCATATCTAT--GAGT  
TGAAAGGTCCGAATGATCAACTCTGCAATCAGCTGTTAGAACCAATAGGTCTTCAAATC  
GTTCAATTTGAAAAAATGGAAACCCTTT-----TTATTGGAT-----GATCATGATACTTCC--  
CAAAAATCGAAATTTTTGATCAATGGAGGAACAATATCACCATTTTTGTTCAATAAGATA  
CCA---AAGTGG---ATGATTGACTCATTCCATACTAGA-----ATAATCGCAGGAAATCTTT  
TGATAACACGGATTCCTCTTTCTCAATGATATCCACGATCAAGACAATTGGCTGAATCC  
CGTGAAACCATTTATAGAAAGTTCATTGATATCTTCTTTTTATAAAGCAAATCGACTTCG  
ATTCTTGAATAATCTACATCATTCTGCTTCTAT-----TGTAACAAAAGATTCCCTTTT-----  
--TAT--GTGGAAAAGGCCCGTATCAAGAATTATGAT-----TTTACGTATGGA--CAATTCCT  
CAATATCCTGTTCAATTCGCAACAAA---ATATTTCTTTGTGCGGCGGTAAA-----AAAAAA  
CATGCTTTTTTGGAG---AGAGATACTATTTACCAATCGAGTCACAGGTATCTAACATAT  
TCATACCTAATGATTTTCCACAAAGTGGTGACGAA-----AGCTTGTACAAATCT-----



TTCCATTTTCCAATTCGACCCGATCCATTCGTTTCGT-----AGAGCTATTTATTCTATCGCAG  
ACGTTTCTGGAACACCTCTAACAGAGGGACAAATATTCAATTTTGAAAGAACTTATTGT  
CAACCTCTTTCCGATATTAATCTATCTGATTCAGAAGGGAAGAAGAACTTGCATCAGTATCTC  
AAT-----TTCAATTCAAACATGGGTTTGATTACACTCCATGTTCTGAGAAATATTTACCA  
TCCGAAAAA-----AGGAAAAA-----CGGAGTCTTTGTCTAAAG-----AAAT  
GCGTTGAAAAGGGGCAGATGTATAGAACCTTTCAACGAGATAGTGCTTTCTCAACTCT  
CTCTAAATGGAATCTATTCCAAACATATATGCCATGGTTCCTTACTTCGACAGGGTACAA  
ATATCTAAATTTGATATTTTATAGATACCTTTTCAGACCACCTATTACCGATACTAAGTAGC  
AGT-----CAAAAAATTGTATCCATTTTTCATGATATTATGCATGGATCAGATATATCATGGC  
GAATTCTTCAGAAAAATTTG-----TGGAAGACACAATGGAAT--CTGATAAGTG  
AGATTTGAGTAAGTGTTTACATAAT-----CTTCTTCTGTCCGAAGAAATGATTCATCGAA  
ATAATGAACCA-----CCATTGATATCGACACGGCTGAGATCGCCAAATGTTCCGGGAGTTC  
---CTTTATTCAATCCTTTTCTTCTTCTTGTGTCAGGATAT--CTCGTTCGTACACATCTTC  
TCTTTGTTTCCCGA-----GCCTATAGTGAGTTACAGACAGAGTTCGAAAAGGTCAAATCT  
TTGATGATTCCATCATACTGATTGAGTTGCGAAAACCTTCTGGATAGGTATCCTACATCT  
GAACTGAATTCTTCTGGTTAAAGAATCTATTTCTAGTTGCTCTGGAACAATTAGGAGA  
TTTGCTAGAAGAAATACGGGGTTCTGCTTCTGGCGGCAACATGCTATGGGGTGGTGGT  
CCC-----GCTTACGGG---GTCAAATCAATACGTTCTAAGAAGAAATTTTTTAATATC  
AAT-----CTCATCGATCTCATA---AGTATCATACCAAATCCTATCAATCGAATCACTTTTT  
CGAGAAATACGAGACATCTAAGTCATACAAGTAAAGAGATTTATTTCATTGATAAGAAAA  
AGAAAAACGTGAACGGTGATTGGATTGATGATAAAATCGAATCCTTGGTTCGCGAACA  
GTGATTCGATTGATGATAAAGAAAGAGAATTCTTGGTTCAGTTCTCC-----ACCTTAACG  
ACA-----GAAAAAAGGATTGATCAAATCTATTGAGTCTGACC---CATAGTGATCATTAT  
CA-----AAGAATGACTCTGGTTATCAAATGATTGAAGAGCCGGGAGCAATTTACT  
TACGATACTTAGTTGACATTCAT-----AAAAGTATCTAATGAATTATGAGTTCAATACAC  
CCTGTTTAGCAGAAAGACGGATATTCCTTGGCTCATTATCAGACAATCACTTAT-----TCAC  
AAACCTCGTGTGGGGCGAATAGTTTTTCATTTCCCATCTCATGGA-----AAACCTTTTC  
GCTCCGCTTAGCCTTATCCCCCTCG---AGGGGTATTTTAGTGATAGGTTCTATAGGAACT  
GGACGGTCCATTTGGTCAAATACCTAGCGACAACTCCTATGTTCTTTTATTACAGTA  
TTTCTGAACAAGTTCTTGGATAACAAGCCTAAGGGTTTTCTTATTGAT-----GATA  
GGGACGATATTGATGATAGTGACGATATTGATGTGAGTGACGATATCGACCGT-----  
-----GACCTTGATACGGAGCTGGAGCTTCTAACTAGG  
ATGAATGTAATA-----ACTATGGATATGATGCCG-----GAAATAGACCGATTTTATATC  
ACCCTTCAATTCGAATTAGCAAAAGCAATGTCTCCTTGCATAATATGGATTCCAAACATT  
CACGATCTGGATGTGAATGAGTCGAATTACTTATCCCTCGGTCTATTAGTGAACATATCTC  
TCC-----AGGGATTGTGAAAGATGTCC---ACTAGAAATATTCTTGTTATTGCTTCGACT  
CATATCCCCAAAAGTGGATCCCGCTCTAATAGCTCCGAATAAATTAATACATGCATT  
AAGATACGAAGGCTTCTTATTCCACAACAACGAAAGCACGTTTTTCACTCTTTCATATAG  
TAGGGGATTTCACTTGGAAAAGAAAATGTTCCATACT-----AAGAGATTCCGGTCCGTA  
ACCATGGGTTCCAATGTACGAGATCTTGTAGCACTTACCAATGAGGCCCTATCGATTAGT  
ATTACACAGAAGAAATCAATTATAGACACTAATATAATTAGATCTGCTCTTCATAGACAA  
ACTTGGGATTTGCGA-----TCCCAGGTAAGATCGGTTCAAGGATCATGGGATCCTTTTCT  
ATCAGATAGGAAGGGCTGTTGCACAAAATGTATTTCTAAGTAATTGCCCCATAGATCCTA  
TATCTATCTATATGAAGAAGAAA-----TCATGTAACGAAGGGGATTCTTATTGTACAAAT

GGTACTTCGAACTTGGAACGAGCATGAAGAAATTAACGATACTTCTTTATCTTTTGAGT  
TGTTCTGCCGGATCGATTGCTCAAGACCTTTGGTCTCTACCC-----GGACCCGATGAAAA  
A---AATGGGATCACTTATTATGGACTTGTTGAGAATGATTCT--GATCTAGTTCATGGCCT  
ATTAGAAGTAGAAGGCGCTCTGGTGGGA-----TCCTCACGGACAGAAAAAGATTGCAG  
TCAGTTTGATAATGAT-----CGAGTGACATTGCTTCTTCGGCCCGAACCAAGGAGT---CC  
CTTAGATATGATGCAAAATGGATCTTGTTCTATCCTTGATCAGAGATTTCTCTATGAAAA  
A-----TATGAATCGGAGTTTGAAGAA---GGGGAAGTAGAAGGAATCCTCGACCCGCAA--  
-----CAGATAGAGGAGGAT-----TTATTCAATCAC-----ATAGTTTGGGCTCCT-----  
AGAATATGGAGCCCT-----TGGGGCTTTCTATTTGATTGTATCGAAAGGCCCAATTCAT  
TGGGATTTCCC---TATTGGGCCAGGTCATTTCCGGGGTAAG-----CGGATCATTTATGATG  
AAGAGGATGAGCTTCAAGAGAATGATTCGGAGTTCTTGCAGAGTGGAACCATGCAGTA  
CCAGATACGAGATAGATCTTCCAAAGAACAAGGCGTTTTTTCGAATAAGCCAATTCATTT  
GGGACCCTGCGGATCCACTCTTTTTCTATTCAA---GACCAGCCCCTTGTCTCTGTGTT  
TTCACATCGAGAATTCTTTGCAGATGAAGAGATGTCAAAGGGGCTTCTTACTTCCCAA  
CAGATCCTCCTACATCTATATATAAACGCTGGTTTATC-----AGAATACGCAAGAAAAGC  
ACTTCGAATTGTTGATTCATCGCCAGAGATGGCTTAGA-----ACCAAGAGTTCATTATC  
T-----AATGGATTTTTCCGTTCTAAT-----ACTCTATCCGAGAGTTATCAGTATTTATCAAAT  
CTGTTCCCTATCTAAC---GGAAGGCTATTGGATCAAATGACAAAGGCATTGTTGAGAAAA  
AGATGGCTTTTCCCGGATGAAATGAAAATTGGATTC-----ATG-----ATGC  
CTAGATCCCGG---ATAACTGGAAATTTGATTGATAAGACCTTTTCAATTGTAGCCAATAT  
CTTATTACGAATAATTCCGACAACCTCAGGAGAAAAAGAGGCATTTACTTATTACAGAG  
ATGGT-----ATGTCTGCTCAATCCGAAGGAAATTATGCGGAAGCTTTACAGAATTATTATG  
AAGCTATGCGACTAGAAATCGATCCCTATGATAGAAGTTATATACTCTATAATATAGGCCT  
TATTCACACAAGTAATGGAGAACACACAAAAGCTTTGGAATATTATTTTCGGGCATTAG  
AACGAAACCCTTTCTTACCACAAGCTTTTAATAATATGGCCGTAATCTGTCATTAC---CG  
AGGAGAACAGGCCATTCCGGCAGGGAGATTCTGAAATTGCGGAGGCTTGGTTCCGACCA  
AGCCGCGGAGTATTGGAAACAAGCTATAGCGCTTACTCCTGGAAATTATATTGAAGCGC  
AGAATTGGTTGAAGATCACAAGGCGTTTCGAA-----ATGAGTTGGCGATCAGAACATAT  
ATGGATAGAACTTATAGCGGGTCTCGAAAAATAAGTAATTTCTGCTGGGCCATTATACT  
TTTTTTAGGTTTCATTGGGGTTTTTATTGATTGGAATTTCCAGTTATCTTGACAGAAATTTG  
ATATCTTTATTCCCGTCTCAGCAAATCCTTTTTTTTCCACAAGGGATCGTGATGTCTTTCT  
ATGGGCTCGCCGGTCTGTTTATTAGCTCTTATTTGTGGTGCACAATTCGTGGAATGTAG  
GTAGTGGTTATGATCGATTTCGATAGAAAAGAAGGAATAGTGTGTATTTTCGTTGGGGA  
TTTCCAGGAAAAAATCGTCGCATCTTACTACGACTCTTTATGAAAGATATTAGTCTATC  
AGAATAGAAGTTAAAGAGGGTTTTTATGCTCGGCGTGTCTTTTATATGGAAATCAGAGG  
CCAGGGGGCCATTCTTTGACTCGTACTGATGAGAAT--TTGACTCCACGAGAAATTGA  
GCAAAAAGCAGCGGAATTGGCCTATTTTTTTCGCGTGTACCAATTGAAGTATTT

>Phaseolus

ATGCAAAAATGGCGGTTCAATTCTATGTTACTTTTCAAG-----GAGAGTCTTGGTCCTA  
TTGAGAATACCAGTCTAAACGAAGAACCCATTTTAAGTGATATACATAAAAAAATTAAT  
AGGTATAACTCTTTGGATTATTTAGTAGGTGCCGATAACATACAGGATTTCTATCTGATA  
AACTTTTTTAGTTAGGGATAATAAGAGGAACAGTTATTCCATATATTTAGATATTGAAA  
AGAAAACCTTTGGAGATTAACAACAATCAT-----TCTTTTATAAGTGAACAAGAAAATTTT  
TTTTCT-----AGATATCTGAATACTGTTATTAAGAGTGATTACGAT-----CATTACA

TGTATAATACTCCATTTAGTTGGAACAATAATATTCATAGTTGCATTGAGAGTTATTTTCA  
T-----TCTCAAATCTGTATTGATAGTTGCATTTTTGGTGATATTGAAAAATACAATCAA---T  
CTTTTTATAGTTACTTTTTTTGGTAATTCTAGTTTTAGTTTCATAACTAGTACGAATGATAAT  
GATTCCTACT-----TTGTGGATTGAATGCGAAAATTGTTAT  
CAATTCAATTTGAAAAAATTGTTTCAATGGAAAATGAATGTTTGTGATTACTGTGGATAT  
CTTTTTAAAATTGACAGTTCAGAGAGAATCGAATTTTCGATTGATTTCGGGACTTGGAA  
TCCTATGGATGAAGACATGGTTTCTACGGATCCCATGAAATTTTCATTCAAAAAGAAGAAC  
TTTATAAAGATCGTATTGATTCTTATCAATAAAAACAGGATTAAGTGGGCTGTTCAAA  
CAGGGACAGGTCAACTAAATGGCATTCTGTAGCAATTGGTATTATGGATTTTAATTTTA  
TGGGAGGTAGCATGGGATCCGTAGTAGGTGAAAAATCACTCGTTTGGTAGAATATGCT  
ACTAATCAACTTTTACCCCTTATTCTCGTATGTTTCGTCGGGAGGAGCGCGTATGCAAGA  
AGGATGTTTGAGCTTGATGCAAATGGCTAAAATATCTTCTGCTTTATATTATTATCAAAC  
AATCAAAAATTATTATATGTATCGATACTTACATCTCCTACTACCGGTGGGGTGACGGC  
TAGTTTTGGCATGTTGGGGGATATCATTATTGCCGAACCAAAGACTTATATTGCATTTGC  
TGGTAAAAGAGTAATTGAACAAACATTGAGTAAGGCAATATCTAAAATTCAACAAGTA  
GCTGAATATTATTACATAAGGGCTTTGTTGATTCAATCGTACCGCGTCATCTTTAAAG  
GGAGTTGTTACTGAGTTATTTCAATTCCATAATTTCTTTTCTTTGGCTAAAATGAAAGA  
AATATGGTAACCATTCGTGCAGATGAAATTAGTAAAATTATCCGTGAACGCATTGAGCA  
ATATAATACCGAAGTCAAATTGTAAATACAGGTACCGTACTTCAAGTAGGCGATGGTA  
TTGCTCGTATTTATGGTCTTGATGAAGTAATGGCGGGTGAATTGGTGGAAATTTGAAGAA  
GGTACTATAGGCATTGCTTTGAATTTGGAATCAAAAATGTTGGTGTGTATTAATGGGT  
GATGGTTTGATGATACAAGAAGGAAGTTCAGTAAAAGCAACAGGAAGAATTGCTCAGA  
TACCTGTAAGTGAGGCTTATTTGAGTCGTGTTATAAATGCCCTGGCTAAACCAATTGAC  
GGTCGAGGAGAAATTTAGCTTCGGAATCTCGATTAATTGAATCTCCCGCTCCCGGTATT  
ATTTCAAGACGTTCCGGTATATGAGCCTCTCCAAACAGGACTTATTGCTATTGATTTCGATG  
ATCCCATAGGACGGGGCCAGCGAGAATTAATTATTGGAGACAGACAAACAGGTAAAA  
CAGCAGTAGCCACAGATAACCATCTCAATCAACAGGGACAAAATGTAATATGTGTTTAT  
GTAGCTGTTGGTCAAAAAGCATCTTCTGTGGCTCAAGTGGTAACTACCTTACAAGAAA  
GAGGAGCAATGGAATACACTATTGTAGTAGCTGAAACAGCGGATTCTCCAGCTACATTA  
CAATACCTCGCGCCTTATACAGGAGCAGCTCTGGCTGAATATTTTATGTACCGTGAACG  
TCACACTTTAATCATTTATGACGATCTCTCAAACAAGCACAGGCTTATCGGCAAATGT  
CTCTTCTATTACGAAGACCACCAGGTCGCGAAGCTTATCCAGGGGATGTTTTTTATTTAC  
ATTCGCGTCTTTTGGAAAGAGCCGCTAAATTAAGTTCTCAGTTAGGCGAAGGAAGTAT  
GACTGCTTTACCAATAGTTGAAACTCAATCGGGAGATGTTTCAGCTTATATTCCTACTAA  
TGTAATTTCCATTACAGATGGCCAAATATTCTTATCGGCCGATCTATTCAATGCTGGAATA  
AGACCCGCTATTAATGTTGGTATTTAGTTTCCAGAGTTGGATCGGCGGCTCAAATTA  
AGCCATGAAACAAGTAGCTGGTAAATTAATTTGGAATTAGCACAATTCGCAGAATTAG  
AAGCTTTTGCACAATTTGCTTCTGATCTAGATAAAGCTACTCAAATCAATTAGCAAGA  
GGTCAACGATTGCGCGAGTTGCTTAAACAATCCCAATCAGCTCCTCTTACTGTGGAAG  
AACAGATAGTAACTATTTATACCGGAACGAATGGTTATCTTGATTCAATAGAAATTGGAC  
AGGTAAGGAAATTTCTTGTGAGTTACGTGCTTACTTAAAGACGAATAAACCTCAATTC  
AAAGAAATCATATCTTCTACTAATACATTGACTGGGGAAGCAGAAGCCCTTTTAAAGGA  
CGTATTAAGGAACAGATGGAACCTTTTTTATTCAGGAACAAGTAATGGGAATCAATC  
CTACTACTTCCGGTCTGAAGTTTCTTCGCGTGAAAAAAAATCTGGGACATATTGTC

CAAATAATCGGTCCGGTACTAGATGTAGCCTTTCCCCGGGGAAGATGCCTAATATTTAC  
AACGCTCTGGTAGTTAAGGGTCGAGATACTGTTGGTCAACAAATTAATGTGACTTGTGA  
AGTACAGCAATTATTAGGAAATAATCGAGTTAGAGCTGTAGCTATGAGTGCAACAGATG  
GTCTAATGAGAGGAATGGAAGTTATTGACACAGGAACTCCCCTAAGTGTTCAGTAGG  
CGGAGCAACTCTAGGACGAATTTCAACGTGCTTGGAGAGCCGATTGATAATTTAGGTC  
CTGTAGATACTCGTACAACATCTCCCATTCATAGATCTGCGCCTACCTTTATACAATTAGA  
TACAAAATTATCTATTTTTGAAACAGGAATAAAAAGTAGTAGATCTTTTAGCTCCTTATCG  
TCGTGGAGGAAAAATTGGACTTTTCGGTGGAGCTGGAGTAGGTAAAACAGTACTTATT  
ATGGAATTGATCAATAACATTGCCAAAGCTCATGGAGGTGTATCTGTATTTGGCGGCCT  
AGGTGAGCGTACTCGTGAGGGAAATGATCTTTATATGGAAATGAAAGAATCTGGAGTA  
ATTAATGAACAAAATATTGCAGAATCAAAAAGTAGCTCTAGTATATGGTCAAATGAATGA  
ACCGCCCGGAGCTCGTATGAGAGTTGGTTAACTGCCCTAACTATGGCGGAATATTTTC  
GAGATGTCAATGAACAAGATGACTTTTATTTATCGACAATATCTTCCGCTTCGTACAAG  
CAGGATCTGAAGTATCTGCTTTATTGGGTGCAATGCCCTCTGCTGTGGGTATCAACCC  
ACTCTTAGTACTGAAATGGGTTCTTTACAAGAAAGAATCACTTCTACCAAAGAAGGGT  
CCATAACTTCTATTCAAGCAGTTTATGTACCTGCAGACGATTTAACTGACCCTGCCCTG  
CTACGACATTTGCACATTTAGATGCTACTACTGTACTATCAAGAGGATTAGCCGCTAAAG  
GTATCTATCCAGCAGTAGATCCTTTAGATTCAACCTCAACTATGCTCCAACCTCGAATCG  
TTGGTGAAGAACATTATGAGACTGCGCAACGAGTGAAACAACTTTACAACGTTACAA  
AGAACTTCAAGACATTATAGCTATCCTTGGCTTGGACGAATTATCCGAAGAAGATCGCT  
TAACCGTAGCAAGAGCACGAAAAATTGAGCGTTTCTTATCACAACCTTTTTTCGTAGCA  
GAAGTTTTTACTGGTTCGGCTGGGAAATATGTTGGTCTAGTAGAAACAATTAGAGGGTT  
TAATTTGATTCTTTCTGGAGAATTAGACAGTCTTCCTGAACAAGCCTTTTATTTGGTAGG  
TAATATCGATGAAGCTACTGCGAAGGCTACGAACTTAGAAATGGAGAGCAATTTGAAG  
AAAATGACTTTAAATCTTTGTGTACTGACCCCAATCGAATTGTTTGGGATTCAGAAGT  
GAAGGAAATCATTTTACCTACTAATAGCGGACAAATTGGAGTATTACCTAATCATGCGCC  
TATTGCCTCAGCTGTTGATATAGGTATTTTGAAGAATACGTCTTAAAGATCAATGGTTAAC  
AATGGCTCTGATGGGGGGGTTTGGCTAGAATAAACAATAATGAGATAACTGTTTTAGTAA  
ATGATGCGGAAAAGGGGAGTGACATTGATCCACAAGAAGCACAGCAAACCTTTGAAA  
TAGCAGAAACTAATTTGAATCAGGCTGAAGGCAAGAGACAAACAATTGAGGCAAATCT  
AACTCTTAGACGAGCTAGAACACGAGTAGAGGCTATCAATGTTATTTCAATGAAAAATA  
TAACCGATTCTTTCTTTGTTTGGGCTCCTGGCCATCCGCCGGAAGTTTCGTGTTAATA  
CCGATATTTTAGCAACAAATCCAATAAATCTTAGTGTAGTGTTAGGTGACTGGTTTTTT  
TTGGAAAGGGAGTGTTAAGTGATTTATTAGATAATCGAAAACAGAAAATATGGAGA  
ACTATTCAAACCTCAGAAGAATTACAGGAAGAGGCCATTGAACAACCTCGAAAAAGCCCAG  
GCCCGTTTAAAGGAAAGTTGAAACCGAAGCAGATCGGTTTCGGGTGAATGGCTATTCTG  
AGATCAAACGAGAAAAATTGAATTTAATTCATTCAATTTATACAACCTTTGGAACAATTA  
GAAAATTACAAAACGAAGCCATTGATTTTGAACAACAAAGAGTGATTAATCAAGTCC  
GACAGCGGGTTTTACAACAAGCCTTACAGGGAGCTCTAGGAACTCTAAATAGTTGCTT  
GAACAACGAGTTACATTTACGTA  
CTGTTAGTGCTAATATTGGCATGTTTGGGACGATGA  
AAGAAAAAATAACATGAATCCAATTATTTCTGCCGTTCTGTTATTGCTGCTGGATTGG  
CCGTAGGACTTGCTTCTATTGGACCTGGGGTTGGTCAAGGCACTGCCGCAGGGCAAGC  
TGTAGAGGGGATTGCACGACAACCAGAGGCAGAGGGAAAAATACGGGGTACTTTATTA  
CTTAGTCTGGCTTTTATGGAAGCTTTAACAATTTACGGGCTGGTTGTAGCATTAGCACTT

TTATTTGCTAATCCTTTTGTATGAATGTTTTATTATGCTCTATCAACACATTA AAAAAGATT  
ATACGATATATCTGCTGTGGAAGTAGGTCAACATTTCTATTGGCAAATAGGGGGTTTCCT  
AGTACATGCCCAAGTACTTATTACTTCTTGGGGTTGTAATTGCTATCTTATTGGTTTCAGCC  
TTTCTAGTTATTTCGAAATCTGCAAACCATTCCCGCTTTCGGTCAGAATTTCTTTGAATAT  
GTTCTTGAATTCATTCGAGACGTGAGCAAACTCAGATTGGAGAAGAATATGGTCCGT  
GGGTTCCTTTTATTGGAAC TTTGTTTCTATTTATTTTTGTTTCTAATTGGTCAGGGGCTCT  
TTTCCCTTGGA AAATCATA CAATTACCTCATGGGGAATTAGCTGCACCTACAAATGATAT  
AAATACTACCGTTGCATTAGCTTTACTTACATCAGTTGCATATTTCTATGCGGGTCTTTCA  
AAAAAAGGATTAGCTTATTTTAGTAAATACATCCAACCAACTCCAATCCTTTTACCGATT  
AACATATTAGAAGATTTACAAAACCCTTATCCCTTAGTTTTTCGACTTTTCGGAAATATA  
TTAGCTGATGAATTAGTAGTTGTTGTTCTTGTCTTTAGTACCTTTAGTAGTTCCTATAC  
CTGTGATGTTCCCTGGATTATTTACAAGCGGTATTCAAGCTCTCATT TTTGCTACTTTAGC  
TGCGGCTTATATAGGTGAATCCATTGAAGGCCATCATATGGTATTTTCCACTTTAGAGCAT  
ATATTA ACTCATATATCGTTTTTCGGTCGTATCTCTTTTAATTTCAATTCATTTGATAACCTT  
ATTATTAGGCGAAATAATAGGATTAGACAATTCGTTCAAAAAGGCATGATAATCACTTT  
TTTTTGTATCACAGGATTGTTAGTTACTCGTTGGATTTTTTCGGGCCATTTACCATTTAGT  
AATTTATATGAATCATTAAATTTCTTTTCATGGACTTTTTCTATTTTTTATATGGTTCCTTGC  
TTAAAAA AAAAAAAAAA AACTATTTCAATACAATAATAACGCCAAGTATTCTTTTTACCCA  
AGGCTTTGCTACTTCGGGTCTTTTAACCGAAATGCATCAATCCTTAATATTAGTGCCTGC  
TTTACAGTCCCATTGGTTAATGATGCACGTAAGTATGATGATATTGGGTTATACA ACTCTT  
TTATGTGGATCATTATTATCAGTGGCTATTTTAGTCATTACTTTTCAAGAACTAATACACA  
TGATTGGTAAAAGCAAGGAAATCAAATACATGAATATGAATGATAATCTTTTACAAAA  
ACTCCTTTTATGTCTTATATAAATTATTATAGATATCAATTTATTCAACAATTGGATCGTTG  
GGGTTACCGTACTATTAGTCTAGGTTTTATCTTTTTAACAGTAGGTAATATATCAGGAGC  
AGTATGGGCTAATGAGGCATGGGGATCATATTGGAATTGGGATCCAAAGGAACTTGG  
GCTTTTATTACTTGGATTATTTTCGCGATTTATTTACATATTAGAAAAAATAAAAAATTGG  
AATATCTCAATCTTCGATAGTGGCCTCCATGGGCTTTCTTATAATTTGGATATGTTATTTA  
GGGATAAATCTTTTAGGAATAGGACTACATAGTTATGGTTCATTTACATCTAATATGAAA  
AAAAAAGT-----ATTTCCCTTCTATATCTTATATCTATAGTCTTTTTGCCCTGGTGTATCT  
CTTTCACATTTAAGAAAAGTCTGGAATCTTGGTTTATTAATTGGTGGAATACTAGTCAAT  
CCGAAATTTTCTTGAATGATATTAAGAAAAGAGTATTCTAAAAAATTCATAGAATTG  
AAGGAACTGTTTTTCTTAGATGACATGTTAAAGGAATGTCCGAAAACATATCTACAAAA  
TCTTCGTA CTGGA---TATAAAGAAACAATCCAATTAATCAAACGCACAACGAAGATCG  
TATGAATACGATTTTGCAC TTTCCACAAATATAATTTGTTTCTTTATTCTAAGCGGTTAT  
TCTATCTTGGTAATCAAGAACTTATTCTTATTA ACTCTTTGGTTCGAGAATTTATATATAA  
TTTAAGTGACACAATAAAAAGCTTTTTCTATTCTTTTATTA ACTGATTTATGTATAGGATTC  
CATTC AACCCGTGGGTGGGAACTCATTATGGGTTTCGTTTCTAAAGATTTTGGATTTGCT  
CAAATGATCAAATTATATCCGGTCTTGTGTCCACTTTTCCAGTCATTTTAGATACAATTT  
TCAAATATTGGATTTTCCGTTATTTAAATCGCATATCTCCATCACTTG TAGTGATTTATCAT  
TCAATGAATGATATGCCCATTTGGTGTTC AAGAGTACCCTTTTCGAACCCCGGGGACCG  
TGATGCATCTTGGGTTGATATCCTAATCCGACTTTATCGAGAAAGATTACTTTTTTTAGG  
TCAAGACGTTGATAGTGAAATATCGAATCAACTTATTAGTCTTATGATATATCTGAGCATA  
GAGAAAGAGAATAAAGATTTATATCTGTTTATAAACTCTCCGGGCGGTTGGGTAATACC  
TGGAATAGCTCTTTATGATACTATGCAATTTGTACAACCAGATGTACAGACAGTATGTTT

GGGATTAGCTGCTTCAATGGGATCCTTTCTTTTGGCAGGAGGCACAATTACCAAACGTC  
TTGCATTTCCCTCACGCA-----ATGATCCACCAACCCGCTAGTTCTTTTATGAAGCACAA  
GCGGGAGAATTTATCCTGGAAGCGGAAGAGCTACTGAAAATGCGTGAACTATCACAA  
GGGTTTATGTACAAAGAACGGGCAAATCTTTATGGGTTATATCGGAAGACATGGAAAGG  
GATGTTTTTATGTCAGCAGCAGAAGCCCAAGCTCATGGAATTGTAGATCTTGTAGCAGT  
T G A  
A????????????????????????????????????????????????????????????  
????????????????????????????????????????????????????????????  
????????????????????????????????????????????????????????????  
????????????????????????????????????????????????????????????  
ATGGAGAAATATCAAGCATATTT  
AGAACTCCGTAGATCTCGATACCAGGATATCCTATACCCACTTTTTTTTCGGGAATCTAT  
TTATGGACTAGCTTATGGTCAT-----ATAGATTATAACAATAAATTTAGTTTACTAATTGTA  
AAACGTTTAAGTACTCGAATGTATCAACAGACTAATTTCAATCTTTTTGCTAACGATTCT  
AACAAAAGACTTTTGGGGTTATAATTTGATTCTCAAATAATATTAGAAGTTTTGGT  
GTCGTCGTGGAGATTCTATTTCTCTACAATTATTTATCTCTTTAAGCGTAAAATCTTATA  
ATTTGCAATCAATTCATTCATTTTTCCCTTTTTTCGAAGATAAACTGATATATTTAAATCAT  
AAGTCAGATATACGAATACCTTATCCTATCCATCTGGAAATCTTGGTTCAAATCCTTCGA  
TATTGGATAAAAGATGTCTCTTTCTTTCAATTAATAAGGTTTTTTTTTTTATTACTATTCTAA  
TTGGAATAGTCTTTTTCCCTAAAGGGATTCTCCTTTTTTTTTCACTAAGAATTTCTTGTTCT  
CTATATAATTTATATGTATGGGAATATGAATCTATCTTTCTTTTTCTACGTAACAAATCCTC  
TCAGTTACAGTTAAAACATTTTCGCGTTTTTTTTTGAGCGAATTTTTTCTATGAAAAAAG  
AAAACATCTTGTAGAAATATCTACAAAGTCATATACCTTATTTCTTTAAGGATACTTTC  
ATTCATTATGTTAGATATCAAGGAAAATCAATTCTGGTTTTAAAGAATACTCCTCTTTTGA  
TAAATAAATGGAAATACTATTTCTATATTTATGGCAATGTTATTTTGATATTTGGGCTGG  
ACCAGAAACGATCTATATAAACCAATTATCTCAGTATTCATTTCACTTTTTAGGCTATTTT  
TTAAGTATTCCACAAAATCTTTCAGTAGTACGAAGTCAAATGTTGAAAAATTCATTTCTA  
ATCAAAAT-----GTTATCAAAAAACTTGATACAATAATCCCATTATTCCTCTAATGAGAT  
CATTTGGCTAAAACAAAATTTTGTAAATGTAATGGGTCATCCTATTAGTAAACCGGTTTGGG  
CCAATTTCTCTGATTTTTATATTCTTGACCGTTTTTTGCGCATATGCAGAAATTTTTCTCA  
TTATTACAATGGATCCGCAAAAAAAGAGTTTCTATCAAATCAAATATATACTTCGGTT  
TTCTTGATAAAAACCTTGGCTCGTAAGCACAAAAGTACTGTGCGCACTTTTTTGAAAA  
AATTAAGTTCAAAATTTGTTGGAAGAATTTTTTACA---GAAGAAGATCTTTTTTCTTTGAT  
TTTTCCAAAACGGATTTGGTATTTGGATATTCTTTTCAGAAATGATTTGTTAATCATTTA  
ATGATAATTGATTTAACA---GAAATACAAGATATACAT---TTTTTTTTCAGATTAGAATTT---  
TTTAAAGAGATATATGAAATTTTGGGTATTTGTGCCTATTTAATTTTTATAGTAGGAA  
TTACTATAAGTGTACTAGCAATTGTATGGTTAGAAAGAGAAATATCTGCAGGGATACAA  
CAGCGTATTGGTCTGAATACACCGGTCTTTTGGAGTTCTTCAAGCTCTAGCAGACGG  
AACAAAATTACTTTTTAAAGAGAATCTTATTCATCTAGAGGAGATATTCGTTTATTTAG  
TTTTGGACCAGCTATATCAGTCATATCCATTATATTAAGCTATTCAGTAATTCCTTTTTGGTT  
ATAACTTTGTTTTATCTGATCTGAATATTGGTGTTTTTTTTATGGATTGCTATTTTCGAGTATT  
GCCCCATTGGACTTCTTATGTCAGGATATGGGTCAAATAATAAATATTCCTTTTTGGGT  
GGTCTACGAGCAGCTGCTCAATCAATTAGTTATGAAATACCATTAATCTTTGTGTGTTA  
TCGATATCTCTATTATCTAACAGTTTAAGTACAGTTGATATCGTTGATGCACAATCAAAT  
ATGGTTTTTGGGGATGGAATTTGTGGCGTCAACCTATGGGTTTCCTCGTTTTTCTAATAT  
CTTCCCTAGCAGAATGTGAAAGATTACCTTTTGATTTACCGGAAGCGGAAGAAGAACT

AATAGCGGGTTATCAAACCGAATATCCGGTATCAAATTTGGTTTATTTTACGTTGCTTC  
CTATTTAAACCTATTAGTTTCTTCTTATTTGTAACAGTTCTTTATTTGGGTGGTTCAAAT  
ATCTCTATTCCGTACATTTTCGTTTCTAACTTTTTTGAAATTAATAAAACATACGGAGTTT  
TTGTAACGATAATTGGTATCTTTATTACACTAGTTAAAACTTTTTTATTCATATTCTGTTTCT  
ATCACAACAAGATGGACTTTGCCTAGGCTAAGAATAGATCAATTATTAATCTTGGGTG  
GAAGTTTCTTTTACCCATTTCTCTCGGTAATCTATTATTAACAACGTCGTCTCAACTGTTT  
TCACTG-----ATGAAAGCCTTTCATTTGCTTCTCTTC  
GATGGAAGTTTGATTTTCCCAGAAATGTATCCTCATTTTGGCCTAATTCTTCTCTGATGA  
TTGATTCAACCTCTGATCAAAAAGATATATCTTGGTTCTATTTTATCTCTTCAACAAGTTT  
AGTAATGAGCATAACGGCCCTATTGTTCCGATGGAGAGAAGAACCTATGATTGCCTTTT  
CGGGAAATTTACAAACGAACAATTTCAACGAAATCTTTCAATTTCTTATTTTACTATGTT  
CAACTCTATGTATTCTCTATCCGTAGAGTACATTGAATGTACAGAAATGGCTATCACAG  
AGTTTCTCTTATTCATATTAACAACACTACTCTAGGAGGAATGTTTTTATGCGGGCGCTAACG  
ATTTAATAACTATCTTTGTAGCTCTAGAATGTTTCAGTTTATGTTCCCTATCTACTATCTGGA  
TATACCAAGAAAGATGTACGGTCTAATGAGGCTACTACGAAATATTTACTCATGGGTGG  
GGCAAGCTCTTCTATTTCTGGTTCATGGTTTCTCTTGGCTATATGGTTCATCCGGGGGAGA  
GATCGAGCTTCAAGAAATAGTGAATGGTCTTATCAATACACAAATGTATAACTCCCCAG  
GAATTTAATTGCACTTTTATTCATCACTGTAGGAATTGGGTTCAAGCTTTCCCCAGCCC  
CTTCTCATCAATGGACTCCTGACGTATACGAAGGATCTCCCACTCCAGTCGTTGCTTTT  
CTTCTGTTACTTCGAAAGTAGCTGCTTCAGCTTCAGCCACTCGAATTTTCGATATCCCT  
TTTTATTTCTCATCAAACGAATGGCATCTTCTTCTGGAATCCTAGCTATTCTTAGCATGA  
TATTGGGGAATCTGATTGCTATTACCCAAACAAGCATGAAACGTATGCTTGCGTATTCGT  
CCATAGGTCAAATCGGATATGTAATTATTGGAATAATTGTTGGAGACTCCAATGGTGGAT  
ATGCAAGCATGATAACTTATATGCTGTTCTATATCTCGATGAATCTAGGAACTTTTGGCTTG  
CATTGTATCATTGGTCTACGTACCGGAACTGATAACATTCGAGATTATGCAGGATTATA  
CACGAAAGATCCTTATTTGGCTCTCTTTAGCCCTATGTCTCTTATCCTTAGGAGGTCT  
TCCTCCACTAGCAGGTTTTTTTCGGAAAACCTTCATTTATTCTGGTGTGGATGGCAGGCAG  
GCTTATATTTCTTGGTTTCAATAGGACTCCTTACAAGTGTGTTTCTATCTACTATTATCT  
AAAAATAATCAAGTTATTAATGACTGGACGAAACCAAGAAATAACTCCTCACGTGCGA  
AATTATAGAAGGTCCCCTTTCAGATCAAACAATTCCATCGAATTCAGTATGATTGTATGT  
GTGATAGCATCTACTATAACCAGGAATATCAATGAACCCTATTATTGAAATTGCTCAGGAT  
ACCCTTTTTATGTTTCTTCTTTACGAATATGATATTTTTTGGGCATTTCTAATAATATCAAG  
TTGATTCCATTTTAGCATTTCATAATTTCTGGAATTTTAGCCCCATTAGCAAGGGACCT  
GAAAAACTTTCTAGTTATGAATCCGGAATAGAACCAATAGGCGATGCTTGGTTACAATT  
TCGAATCCGTTATTATATGTTTGTCTCATTTTTGTTGTTTTTGGATGTTGAAACGGTTTTT  
CTTTATCCATGGGCAATGAGTTTCGATGTATTAGGGGTATCCGTATTTTLAGAAGCTTTCT  
TATTCGTGCTTATCCTAATTGTTGGTTCAGTTTATGCATGGCGAAAGGGGGCATTAGAAT  
GGTCTACGAATGATTTTCTTGGTTAACAACAGTTGTAGTTTTGCCAATAGTCGGAGGT  
TCTTTAATTGTCTTATTTCCCATAAAGGAAATAAGACAATTAATGGTATACTTATTGTA  
TATGTTTCATAGATCTGCTTCTAATAGCCTATGTATTTGTTATCATTTCGAATTGGATGAT  
CCACTAATCCAATTGACAGAAAATTATAAATGGATCCATTTTTTTGACTTTTACTGGAGA  
TTCGGAATAGATGGACTCTCTCTAGGACCCATTCTATTAACGGGATTTATCACTACGTTA  
GCTACGTTATCGGCTCAGCCGGTACTCGAGAATCTAAATTAATCTATTTTCTGATGTTA  
GCAATGTATAGTGGTCAACTAGGAACATTTTCTTCTCGAGACATTTTACTTTTTTTCATC

ATGTGGGAATTAGAATTAATTCCCGTTTATCTACTTTTTATCTATGTGGGGTGGAAAAAAA  
CGTTTGTATTCAGCTACAAAGTTTATTTTGTACACTGCGGGAAGTTCTGTTTTTTTATTA  
CTGGGAATTCTGGGTATGAGTTTATATAGTTCTAATGAACCAACATTAATTTTGAATCA  
TTAACTAATCAATCATATCCCGTGGCACTAGAAATAATCTTCTATATGGGATTTCTTATTG  
CTTTTGCTGTCAAATCACCAATTATAACCCTTACATACATGGTTACCTGATACGCATGGAG  
AGGCGCATTACAGTACTTGTATGCTTTTAGCCGGAATATTATTAATAAATGGGAGCGTATG  
GGTTGGTTCGAATTAATATGGAATTATTATCTCGCGCTCATTCTATATTTTGTCCCTGGTT  
AATGCTATTAGGTTCAATTCAAATAATCTATGCAGCTTCAACATCTCTGGTCAACGCAA  
TGTAATAAAGAATAGCTTATTCCTCGGTATCCCATATGGGTTTCTTAATTTTAGGAAT  
TGGTTCTATAAGCGAGACAGGGCTGAATGGGGCTATTTTACAAATAATCTCTCACGGAT  
TTATTGGTGTGCGCTTTTTTTCTTGGCGGGAAGTATGATAGACTACGTCTTCTTT  
ATCTCGACGAAATGGGTGGAATGGCTATCCCAATGCCAAAAATATTCACGATTTTCACT  
ACTTTGTCGATGGCTTCTCTTGCATTACCGGGCATGAGCGGTTTTGTTGCAGAATTGAT  
AGTCTTATTGGGAATCATTACCAATCAAAAATATCTTTTAATCACAAAAATACTCATCAC  
TTTTGTAACCGCAATTGGAATGATATTAACTCCTATTTATTATTATCTATCTTACGTCAA  
TGTTCTATGGATACAAGCTTTTTAATACACCAAATTTTATTTTTTTGATTCGGGGCCAC  
GAGAATTATTTATTTCAATTTTCGATCCTTATACCCGTAATAAGTATTGGCATTATCCAGA  
TTTTATTTTTTCATTTTCGGCTGACAAGGTTGAAGCGATTCTCTCTAATTTTTTA-----ATG  
ATATTCGAGCATGCACTTGTTTTGAGTGCTTTTTTATTTTCTATAGGTATCTATGGATTGA  
TCACGAGCCGAAATATGGTTAGAGCCCTTATGTGTCTTGAACCTTATACTGAATGCAGTA  
AATATAAATCTCGTAACCTTTTCTGATTTTTTTGATAGGCGGCAATTAAGGAAATATT  
TTTTCAATTTTTGTTATAGCTGTTGCAGCCGCTGAAGCAGCTATCGGACCGGCTATTGTT  
TCCTCAATATATCGTAATAGAAAATCAACCCGATCAATCAATCAAATTTGTTGAATAAA  
ATGGAATATACACATCAATATTCATGGATCACCTTTTATTCCATTCCCAGTCCAATGT  
TAATAGGAGTGGGACTTCTACTTTTTCCGACGGCAACAAAAAAGATTTCGCCGTATTTGG  
GCTTTTCCTAGTATCTTATTGTTAACTATAGTTATGTTTTTTTCGCTTGATTTGTCTATTCA  
TCAAATCCAGAATAGTTTCGATTTTTCAATATGTATGGTCTTGGACCATAAATAATGATATT  
TCTTTAGAGTTTGGGTACTTGATCGATTCACTACTTCTATTATGTCAATATTAATTA  
CGTTTGGCATTCTTGTCTTATTTATAGTGATAATTATATGTCTCATGATCAAGGATATTTG  
AGATTTTTTGGCTTATATGACTCTTTTTAATATTTCAATGTTGGGATTAGTTACTAGTTCAA  
ATTTGATACAAATTTATTTTTTTGGGAATTAATAGGAATGTGTTCTTATTTATTAATAGGC  
TTTTGGTTCACCCGTCCTATTGCGGCAAATGCTTGTCAAAAAGCATTGTAACATAATCG  
TGTAGGGGATTTTGGATTATTATTGGGAATTTAGGTATTTATTGGATAACGGGTAGTTG  
GAATTTCCGGATTTGTTTTCAAATTATAAATAAT---GAAATGAATCTTTTTTTTGTACTTT  
GTTTGCCCTCTTGCTATTTTGTGGCTCAGTTGCCAAATCGGCTCAATTCCTCTTCATGT  
ATGGCTACCTGATGCTATGGAGGGGCCTACTCCAATTTCCGCCCTTATACATGCTGCTAC  
TATGGTAGCCGCGGGAATTTTTCTTGTGGCTCGACTTCTTCTCTTTTCGTACTTCTACC  
CCAAATAATGAACACAATAGCTTTTATAGGTCTAATAACAGTAATATTAGGAGCTACTTT  
AGCTATTGCTCAAAAAGATATTAAGAAAAATTTGGCCTATTCTACAATGTCTCAATTGGG  
TTATATGATGTTAGCTCTGGGTATGGGATCTTATCGAGGTGCTTTATTTCAATTAATTA  
CATGCTTATTCAAAGCATTGTTGTTTTTAGGATCTGGATCCATTATTCAATCAATGGAA  
GCTCTTGTGCGATATTCTCCAGCTAAAAGTCAAATATGGTTTTTATGGGCGGTTTAAACA  
AAACATGTACCAATTACAAAATTTTTTTTTTTAGTGGGTACACTCTCTCTTTGCGGTATT  
CCACCCTTGTCTGTTTTTGGTCTAAGGATGAGATTCTAATGATAGTAGGTTGTATTCA



CCAATTGTTGCAATAATAGCTTGTCTGCAGCAGCATTAACTGCATTTTATATGTTTCGG  
ATTTATTTACTTGTTTTTGAAGGGTATTTAAACGTTCATTTTTTGAATTTCAATGGAAAA  
AAAAATAGTTCATTCCTATTCAATATCTTTATGGGGGAAGAAACAAGTAAAACCTAAAAT  
AAAAAACTTATTAGTTTTACTAAAAATAAAATTTTTTATCGGCATGAAAAAACTGCTT  
GCTTATATCCTAATGAATCTAACAATACTATGCAATTTTCTATGCTTGTTTTAGTGCTCTTT  
ACTTTATTCGTTGGGGCCATAGGA-----TTTGATTGGATATATTATCAAAAATTGTTAATTC  
CGTTTATAGACCTTTTACATAAAGATTCAAAA---TTTGTGAATTAT---GAATTTTTCACAA  
ACGCAACTTTTTCTTTGATTCTAACTTTTTGGGGAATATTATAGCGTCTTTTTTTTTACAA  
ATCGGTTTATTCCTATTTAAAAAATTTGAATTTATTAATTTATTTGAAAAATTTCCGAT  
CATTTTCAAATATCATATATAATTGGTCGTATAATCATGGTTATATAGATGTTTTTTATGA  
AATATCTTTCATTTCCAGTATAAGAAGATTAGTGAAATTCATTTCTTTTTTTGATAAAAA  
AAGAATTGATGGAATTACGAATGGAATAGGTATTACAAGTTTTTTTTCTGGGAGAGGCTA  
TCAAAAATGTGGGGGGTGGG---CGAATATCTTCGTATATCTTATTGTATATTCTAGATATAT  
TAATCTTTATATTAATTTATATTATGGATTTGTCCGAATCGCTACATGATTTTATTTTAGTCT  
TTCTTGGATCAGGTCTTATATTAGGAAGTCTAGGAGTAGTATTCTTTACGAATACGATTT  
TTTTCTGCTTTTTTCATTTGGGACTAGTTCTTGTTTGTGTATCTTTATTCTATATTTTATCAAAC  
TCCATTTTGTAGCTGCCTCACAGCTACTTATTTACGTGGGCGCTATAAATGTTTTAATAA  
TATTTGCTGTGATGTTTATGAATGGTTCCGAATATGACCAAAAATTTTCGTGTTTGGACCG  
TTGGGGATGGAATTACTTTGATGGTTTGTACCAGTATCTTTATTTCAAAAATCAATACTAT  
TCTAGATACATCATGGCACGGGATTATTTGGACGACAAGACCCAATCAGATTTTAGAGC  
AAGATTTGATAAGTACTAGTCAACAAATGGAATTCATTTATCAACAGATTTTTTTCTTC  
CATTTGAACTAATTTCAATTATTCTTTTAGTTGCTTTAATAGGTGCAATTTTTGTGGCTCG  
TCAAATGAATATCTCAACTATAAGAAAGGACTTCATGATAGTCAATATGGGGCCTCACC  
ACCCCTCAATGCACGGTGTCTTAGACTTATTGTTACTCTAGATGGTGAGGATGTTATTG  
ATTGTGAACCGATATTGGGTATTTACACAGAGGAATGGAAAAATAGCGGAAAACCG  
AACAAATATAAATATCTGCCTTATGTAACACGTTGGGACTATTTAGCTACTATGTTTAC  
AGAAGCAATAACTGTAAATGGACCTGAACAGTTGGGAAATATTCAAGTACCTAAAAGA  
GCCAGCTATATCCGAGTAATCATGTTGGAGTTAAGCCGTATAGCTTCTCACCTACTATGG  
TTAGGACCTTTTATGGCAGATATTGGTGCACAAACCCCTTTTTTCTATATTTTAGAGAA  
AGAGAATTCATATATGATCTATTTGAAGCTGCGACAGGTATGAGAATGATGCATAATTTT  
TTTCGTATCGGGGGGTAGCGACTGATCTACCTTATGGTTGGGTAGATAAATGTTCTGAT  
TTCTGCGATTATTTTTTAACAAGTATTGCCGAATATCAAAAACCTATTACGCGAAATCCTA  
TTTTTTTAGAACGGGTTGAGGGCGTAGGTGTGCGTTGATGTAAAGAAGTTATTAATTGG  
GGTTTATCAGGACCGATGCTTCGGGCTTCCGGAATACAATGGGATCTACGTAAAGTGGA  
TAATTATGAATGTTACGAGGAATTTCAATTGGGAAGTTCAATGGCAAAAAGAAGGAGATT  
CTTTAGCTCGTTATTTAGTTTCGAATTTGGTGAATGGTGAATCCATAAAAATTTCAAC  
AGGCTTTGGAAGGACTTCCCGCGGGCCATATGAAAATTTAGAAATCCGCTGCTTTGAT  
AGAGAAAAAGAACCAGAATGGAATGAGTTTGGAGTATCGATTTATTAGTAAAAAATCGT  
CTCCGAGTTTTGAATTGCCAAAACAAGAACTTTATGTAAGAATTGAAGCCCCCAAAGG  
AGAATTAGGAATTTTTATAATAGGCGATCAAAAATGGTTTTTCTTGGAGATGGAAAATTCA  
TCCGCCGGGTTTTATAAATTTGCAAATTTCTCCTCAATTAGTTAAAAGAATGAAATTGGC  
CGATATTATGACAATACTAGGTAGCATAGATATTATTATGGGAGAAGTTGATCGTATGTTT  
CTTATGGTAACTGAATTCATAAATTATAGTGAACAAATAATCCGAGCTGCTAGGTATATT  
GGTCAAGGTCTCATGATTACCTTATCTCATGCAAATAGGTTACCCGTAACCTATTCAATAT

CCTTATGAAAAATAATCTCATCAGAACGTTTTTCGCGGTTCGAATACATTTTGAATTTGAT  
AAATGCATTGCTTGTGAAGTATGTGTTTCGTGTCTGTCCTATAGATCTACCCATTGTTGAT  
TGGAAACTAGAACTGATATTCGAAAGAAACGGTTGCTTAATTACAGTATTGATTTTGG  
AATCTGTATATTTTGTGGTAACTGTATTGAGTATTGTCCAACAAATTGTTTATCAATGACC  
GAAGAATATGAACTTTCAACTTATGATCGCCACGAATTGAATTATAATCTAATAGCTTTG  
GGTCGTTTACCAGTATCAGTAATAGATGATTATACAATTCGAACAATTCAAATAAAA-----  
-----ATGCAAGGTCGTTTGTCTTCTTGGCTAGTAAAACATGG  
ACTAATTCATAGATCCTTGGGTTTCGATTACCTAGGAGTAGAACTTTACAAATAAAGC  
CCGAGGATTGGCATTCCATTGCTGTCATTTTATATGTATATGGTTACAATTATCTACGTTT  
CCAATGTGCCTATGATGTAGCACCTGGAGGACTCTTAGCTAGTGTATATCATCTTACAAG  
AATAGAGTATGGTATAAATCAACCCGAAGAGGTATGCATAAAAATATTTGTATCAAGAA  
AAAATCCCAGAATTCCTTCTATTTTTTTGGGTTTGGAAAAGTGCGGATTTTCAAGAACAG  
GAATCTTATGATATGTTGGGAATCTCTTATGATAGTCATCCGCGTCTAAGACGTATTTTAA  
TGCCCGAAAATTGGATAGGATGGCCTTTGCGTAAAGATTATATCGCTCCAAATTTTATG  
AAATAACAAGATGCTCAC-----  
-----ATGAATTCCAT  
TGAGTTTCCCTTACTTGATCAAACAACCCAAAATTCAGTTATTTCAACTACATTAATGA  
TTTTTCAAATTGGTCAAGATTATCCAGTTTATGGCCGCTTCTTTATGGTACCAGTTGTTG  
CTTCATTGAATTTGCTTCATTAATAGGATCACGATTCGATTTTGATCGTTATGGACTAGTA  
CCACGATCGAGTCCTAGGCAGGCGGACCTCATTTAACC GCGGGCACTGTA ACTATGA  
AAATGGCCCCTTCTTTAGTTCGATTATATGAACAATGCCCGAACCTAAATATGTTATTG  
CTATGGGAGCCTGTACAATTACGGGGGGGATGTTTAGTACCGATTCTTATAGTACTGTTT  
GAGGCGTAGATAAGCTAATTCCTGTAGATGTATATTTGCCGGGCTGTCCACCTAAACCG  
GAGGCCATTATAGATGCTATAACAAAACCTTCGTAAGAAAATATCTCGAGAAATATATGA  
AGATCCAATAAGTTTTCAA---GAGAATAGATGTTTTACTATCAACCACAAGTTTCATGTT  
GGATACAGTACTTATACTGGCAATTATGGTCAAGAATTTTTCTATCAACCGCCATCTACT  
TCAGAGATAGCGACA-----TTTTTT-----ATGCAAACCTAGAAAT  
GCTTTTTCTTGTATAAAAAGAAGGGATTACCCGATCCATTTCTATATCGGTTCATGATATATA  
TAATAATTCGAGCACCTTTTTCAAATGCATATCCAATTTTTGCACAGCAGGGTTATGAAA  
ATCCCCGAGAAGCAACCGGTCGTATTGTCTGTGCCAATTGCCATTAGCTAATAAGCCC  
GTGGATATTGAGGTTCCACAAGCGGTACTTCCTGATACTGTATTTGAAGCAGTTGTTTCG  
AATTCCTTATGATATGCAAGTGAAACAAGTTCTAGCTAATGGTAAAAAGGGAACCTTTGA  
ATGTGGGGGCTGTTCTTATTTTACCGGAAGGTTTTGAATTGGCACCCCCGATCGTATTT  
CGCCTGAGATTAAAGAGAAGATAGGCAATCTGTCTTTTCAAACCTATCGCCCTACAAA  
AAAAAATATTCTTGTGGTAGGCCCTGTTCTGGTCAGAAATATAAGGAAATAACCTTTC  
CTATTCCTTTCCCGGATCCCGCTAGTAAAAGAGATATTCATTTCTTAAATATCCTATATA  
CGTAGGCGGGAACAGGGGAAGGGGTCAGATTTATCTTGACGGGAGCAAGAGTAATAAT  
AATGTTTATAATGCTACAGCAGCAGGTATAGTCAAAAAATAATACGAAAAGAAAAAG  
GGGGGTACGAAATCACTATAGTAGATACATTGGATGAGCATGAAGTGATTGATATTATAC  
CTCCAGGACCAGA ACTTCTTGTTCAGAAGGTGAATCTATCAAACCTTGATCAGCCATTA  
ACAAGTAATCCTAATGTTGGTGGATTTGGTCAGGGGGATGCGGAAATAGTACTTCAAGA  
TCCATTACGTGTCCAAGGTCTCTTATTCTTCTTGGCATCTATTATTTAGCACAAATTTTT  
TTAGTTCTTAAAGAAGAAACAATTTGAGAAGGTTCAATTGTTTCGAAATGAATTTTATGAG  
TAAAGTTTATGATTGGTTCGAAGAACGTCTTGA AATTCAGGCGATTGCCGATGATATAA

CCAGTAAATACGTTCCGCCTCATGTGAACATATTTTATTGTTTAGGAGGAATTACACTTA  
CTTGTTTTTTAGTCCAAGTAGCAACGGGGTTTGCTATGACTTTTTATTATCGTCCAACCG  
TACTGAAGCTTTTGCTTCTGTTCAATATATAATGACTGAAGCTAATTTTGGTTGGTTAAT  
CCGATCAGTTCATCGATGGTCGGCAAGTATGATGGTCTTAATGATGATTCTACACGTATT  
TCGTGTATATCTTACAGGTGGTTTTAAAAACCTCGCGAATTAACCTGGGTTACGGGTG  
TAGTTTTGGCTGTATTAACAGCATCTTTTGGGTGTAACCTGGTTATTCCTTACCTGGGATC  
AAATTGGTTATTGGGCAGTAAAAATTGTAACAGGCGTACCCGAAGCTATTCCTGTAATA  
GGATCGTCTTTGGTAGAGTTATTACGCGGAAGTTCAGTGTGGGCCAATCTACCTAAC  
TCGTTTTTATAGTTTGCATACTTTTGTATTACCTCTTCTTACTGCTGTATTTATGTTAATGC  
ACTTTTCAATGATACGTAAGCAAGGCATTTCTGGTCTTTAATGGGAGTGACAAAAAAA  
CCTGACTTGAATGATCCTGTATTAAGAGCTAAATTGGCTAAGGGAATGGGTCATAATTAT  
TATGGAGAACCCGCATGGCCTAACGATCTTTTATATATTTTTCCAGTAGTCATTCTAGGTA  
CTATTGCCTGTAACGTAGGCTTAGCGGTTCTAGAACCATCCATGATTGGGGAACCCGCG  
GATCCTTTTGCAACTCCTTTGGAAATACTACCAGAATGGTATTTCTTTCCCGTATTTCAA  
ATACTTCGTACAGTGCCCAATAAGTTATTGGGCGTTCTTTAATGGTTTCGGTACCTACG  
GGATTATTAACAGTACCCTTTTTGGAGAATGTTAATAAATCCAAAATCCATTTCCGCCG  
CCAGTAGCAACCACCATCTTTTTGATTGGTACTGTAGTTGCCCTTTGGTTAGGTATTGGA  
GCAACATTACCTATTGAGAAATCCCTAACGTTAGGTCTTTTTATGATTGAAGTCTTTCTA  
TTTGAATCGTTTTAGGGTTAATTCCTATTACTTTGGCTGGATTATTTGTAACCTGCATATT  
TACAATACCGACGAGGTGATCAGTTGGATCTTATGCTCACTATCACTAGTTATTTCCGTT  
TTTTACTAGCGTTTTTAATTATAACCTCGTCTCTATTTATTGGTCTTAGTAAAATACAAC  
TATTATGGATATAGTAAGTATTGCTTGGGCTGCTTTAATGGTAGTTTTTTCATTTCCCTTT  
CCCTTGATGATGGGGAAGAAGTGGACTAATGATTATTCGTTACCCGGAACCAGAAGTT  
AAAATTTTGGTAGATAGGGATCCTATAAAAACCTCTTTTGGAGGAATGGGCAAAACCTGG  
TCATTTCTCAAGAACAATAGCTAAGGGACCAGATACTACTACTTGGATCTGGAACCTAC  
ATGCTGACGCTCATGATTTTGATAGCCATACTAATGATTTAGAGGAGATTTCCCGAAAA  
GTGTTTAGTGCTCATTTCCGCCAACTCTCTATCATCTTTCTTTGGCTGAGTGGCATGTAT  
TTTCATGGTGCTCGTTTTTCCAATTATGAGGCATGGTTAAGTGATCCTACTCACATTAGG  
CCTAGTGCTCAGGTGGTTTGGCCAATAGTGGGTCAAGAAATATTGAATGGTGATGTAGG  
GGGAGGGTTCCGAGGAATACAATAACCTCTGGTTTTTTTCAGATTTGGAGAGCATCTG  
GAATAACTAATGAATTACAACCTCTATTGTACTGCAATTGGTGCATTGGTCTTTGCAGCCT  
TAATGCTTTTTGCTGGTTGGTTTCATTATCACAAAGCTGCTCCAAAATTGGCTTGGTCC  
AAGATGTAGAATCTATGTTGAATCACCATTTGACAGGGCTCCTAGGGTTGGGATCTCTT  
TCTTGGGCAGGACATCAAATACATGTATCTTTACCTATTAACCAATTTCTAAATGCTGCA  
GTAGATCCCAAAGAGATACCACTTCCTCATGAATTTATCCTAAATCGGGATCTTTTGGCT  
CAACTTTATCCGAGTTTTTGCCGAGGGAGCAACTCCATTTTTACCTTGAATTGGTCAAA  
ATATGGAGAATTTCTTACTTTTCGTGGAGGATTAGATCCAGTAACTGGAGGTCTATGGCT  
GACCGATATTATACACCATCATTTAGCTATTGCAATTTCTTTCTTGATAGCGGGTCACATG  
TATAGGACCAACTGGGGTATTGGTCACAGTATAAAAGACATTTTAGAGGCACATAAAGG  
TCCATTTACAGGCCAGGGTCATAAAGGTCTATATGAGATCCTAACAACGTCATGGCATG  
CTCAATTATCTATTAATCTAGCTATGTTAGGCTCTTTGACCATTGTTGTAGCTCACCATAT  
GTATTCTATGCCTCCTTATCCATACCTAGCTACTGACTATGGGACACAACCTGTCATTGTTT  
ACACATCACATGTGGATTGGTGGATTTCTCATAGTCGGTGCTGCTGCGCATGCAGCTAT  
TTTTATGGTAAGAGATTATGATCCGACTATTCGATACAACGATCTATTAGATCGTGTCTT

AGACATCGTGATGCAATCATATCACATCTTAACTGGGTATGTATCTTTTTAGGTTTTTCAC  
AGTTTTGGTTTGTATATTCATAATGATACCATGAGCGCTTTAGGGCGCCCTCAAGATATG  
TTTTTCAGATACCGCTATAACAATTACAGCCGATCTTTGCTCAATGGATCCAAAATACCCAC  
GCTTTAGCACCTGGTACAACAGCCCCAGGTGCAGCAACAAGTACCAGTTTGACTTGGG  
GAGGTGAAAATTTAGTAGCAGTAGGCGGTAAAGTTGCTTTGTTACCTATTCCATTAGGA  
ACTGCGGATTTTTTGGTCCATCATATTCATGCATTTACAATTCATGTAACAGTATTGATAC  
TCTTAAAGGGTGTCTATTTGCTCGTAGTTCACGATTGATACCGGATAAAGCAAATCTAG  
GTTTTCGTTTTCCCTTGTGATGGACCTGGAAGAGGGGGTACATGCCAAGTATCCGCTTGG  
GATCATGTCTTCTTAGGACTATTTGGATGTACAATCAATTCGGTAGTCATTTCCATT  
TCAGTTGGAAAATGCAGTCAGATGTTTGGGGTAGTATAAGTGATCAAGGGATAGTAACT  
CATATCACAGGAGGAAATTTTGCAGAGATTCCATTACCATTAATGGGTGGCTCCGTGA  
TTTCTTATGGGCGCAGGCATCCCAGGTAATTCAGTCTTACGGTCTTTCATTATCTGCATAT  
GGTCTTTTTTTCTTGGGTGCACATTTTGTATGGGCTTTTAGTTAATGTTTCTATTACGG  
GGCGTGGTTATTGGCAAGAACTTATTGAATCCATTGTTTGGGCTCATAATAAATAAAAG  
TTGCTCCTGCTACTCAGCCCAGAGCCTTGAGCATTGTACAAGGACGTGCTGTAGGAGT  
AACACATTACCTTCTAGGTGGAATTGCCACAACATGGGCATTCTTCTTAGCAAGAATTA  
TTGCAGTAGGAATGGCATTAAAGATTTCCAAGCTTTAGTCAAGGCTTAGCTCAAGACCCC  
ACTACTCGTCGTATTTGGTTTGGTATTGCTACCGCACATGACTTCGAAAGTCATGATGAT  
ATTACTGAGGAACGTCTTTATCAGAATATTTTTGCTTCTCATTTCGGGCAATTAGCAATC  
ATTTTTCTGTGGACTTCCGGGAATCTTTTCATGTAGCTTGGCAAGGGAATTTTGAGAC  
ATGGGTACAGGATCCTTTACATGTAAGACCTATTGCTCATGCAATTTGGGATCCTCATT  
TGGTCAACCAGCTGTAGAAGCTTTTACCCGAGGAGGTGCTCTAGGCCCTGTTAATATAG  
CCTATTCTGGTGTTTATCAATGGTGGTATAACAATCGGTTTACGTAATAATGGGGATCTTTA  
TACTGGAGCTATTTTTCTATTAATTCTATCTACTATATCTTTAATAGCGGGTTGGTTACACC  
TGCAACCAAATGGAAACCAAGTGTTTCGTGGTTTAAAATGCTGAATCCCGCCTCAA  
TCATCATTTGTCAGGACTATTCGGAGTAAGTTCCTTGGCTTGGACAGGACATTTAGTCC  
ATGTCGCTATTCGGGGTCCAGGGGGGAATACGTTTCGATGGAATAATTTATTAGGTATAT  
TGCCGCATCCCGAAGGATTAGGTCCATTTTTTACAGGTCAAGTGAATCTTTATGCTCAA  
AACCCCGATTCCAATAATCATATATTTGGTACCCCTCAAGGAGCAGGAACTGCTATTCTA  
ACACTTCTCGGGGGATTTCATCCGCAAACCTCAAAGTTTATGGTTGACCGATATTGCACA  
CCATCATTTGGCTATTGCATTTATTTTTCTAGTTGCTGGCCATATGTATAGAATAACTTC  
GGGATTGGTCACAGTATTAAGATCTTTTAGAAGTACATACTCCTCCGGGAGGTAGATT  
GGGGCGTGGACATAAGGGTCTTTATGACACAATCAATAATTCAATTCATTTCAATTAGG  
TCTTGCTCTAGCCTCTTTAGGGGTTATTACTTCTTGGTAGCACAAACACATGTACTCTTT  
ACCTGCTTATGCGTTTATAGCGCAAGACTTTACTACTCAAGCTGCCTTATATACTCATCAT  
CAATATATAGCAGGCTTCATTATGACAGGGGCTTTTGCTCATGGAGCTATCTTTTTTATTA  
GAGATTATAATCCAGAGCAGAATAAAGATAATGTCTTGGCAAGAATGTTAGACCATAAA  
GAAGCTATCATATCCCACTTAAAGTTGGGCTAGCCTCTTTCTGGGGTTCCATACTCTTGA  
CTTTATGTCCATAACGATGTCATGCTTGTCTTTGGTACTCCGGAGAAACAAATTTTGATT  
GAACCTATATTTGCTCAATGGATACAATCTGCTCATGGGAAAACCTTCTAATGGGTTTGGT  
ATACTTTTATCTTCAACGAACAGTCCGGCGTTCAATGCGGGACGAAGCATATGGTTGCC  
TGGTTGGTTAAACGCTGTAAATGAG-----AATAGTAATTCTCTATTCTTAACAATAGGGCC  
TGGAGACTTCTTGGTTCATCATGCTATTGCTCTTGGTTTACATACAATACTACATTGATCTTA  
GTAAAAGGTGCTTTGGATGCGCGTGGTTCTAAGTTAATGCCTGATAAAAAAGATTTTGG

TTATAGTTTTCTTGTGATGGCCCGGGACGAGGCGGAACTTGTGATATTTCCGCTTGGG  
ACGCATTTTATTTGGCAGTTTTCTGGATGTAAATACCATTGGATGGGTTACTTTTTATTG  
GCATTGGAAACACATTACACTATGGCAGGGTAATATTTTCACAGTTAATGAATCTTCTAC  
CTATTTGATGGGATGGTTAAGAGATTATCTATGGTTGAACTCTTCACTTATCAATGG  
ATATAACCCCTTTGGTATGAATAGTTTATCAGTCTGGGCATGGATGTTCTTGTGGACA  
TCTTGTGGGCTACTGGATTTATGTTCTTAATTTCCCTGGCGCGGATATTGGCAGGAATT  
GATTGAAACTTTGGCATGGGCTCATGAACGTACACCTTTGGCTAATTTGATTGATGGA  
GAGATAAACCAGTGGCTCTTTCCATTGTGCAAGCAAGATTGGTTGGACTAGCCCACTTT  
TCCGTAGGTTATATATTTACTTATGCAGCCTTCTTAATTGCCTCTACATCGGGCAAATTCG  
GTATGTCACATTCAGTAAAGATTTATGATACATGTATAGGATGACTCAATGTGTCCGGG  
CCTGCCCAACAGATGTATTAGAAATGATACCTTGGGGCGGATGTAAAGCTAAACAAATT  
GCTTCTGCCCAAGAACAGAGGACTGTGTTGGTTGTAAGAGGTGTGAATCCGCCTGTC  
CGACGGATTTCTTAAGTGTAGAGTTTATTTATGGCATGAAACAACCTCGAAGCATGGGT  
CTAGCTTATATGATA-----AACTTTCCTTCCATTTTTGTTCCTTTAGTGGGTCTAGTATTC  
CGCAATTGCAATGGCTTCTTTATTTCTTCATGTTCAAAAAACAAGATTTTATGCGAG  
ATCTAAAAACATATCTTTCCGTGGCACCAGTAGTAAGTACTTTATGGTTCGGGGCTTTG  
GCGGGTCTATTGATAGAGATCAATCGTTTTTTTCCAGATGCACTTATATTTCCCTTTTTTT  
CATTTATGACTGCAATTTTAGAGAGACGCGAGAGCGAAAGCCTATGGGGTTCGTTCTGT  
AACTGGATAACCAGCACCGAAAATCGTCTTTACATAGGATGGTTTGGTGTTTTGATGAT  
TCCTACTTTTATTGACTGCAACTTCTGTATTTATTATCGCTTTTATCGCTGCCCTCCAGTA  
GATATTGATGGTATTCGTGAACCTGTTTCTGGATCCCTACTTTATGGAAACAATATCATT  
CTGGTGCATTATTCTACTTCTGCGGCTATAGGTTTGCATTTTTATCCTATATGGGAAGC  
GGCTTCTGTTGATGAATGGTTATAACAACGGCGGTCTTATGAACTAATTGTTCTACACTT  
CTTACTTGGTGTAGCTTGCTACATGGGTCGTGAATGGGAACTTAGTTTTCTGCTGGGTAT  
GCGTCTTGGATTGCTGTTGCATATTCAGCTCCTGTTGCAGCCGCTACTGCTGTTTTCTT  
GATCTATCCTATTGGTCAAGGAAGCTTTTCGGATGGTATGCCTTTAGGAATTTCTGGTAC  
TTTCAATTTTATGATTGTATTTTCAAGGCTGAGCATAATATTCTTATGCATCCATTTACATGT  
TAGGTGTAGCTGGTGTATTCGGCGGCTCCCTATTAGTGCTATGCATGGTTCCCTGGTAA  
CTTCTAGTTTGATCAGGGAAACCACAGAAAATGAATCCGCTAATGAAGGTTACAGATTT  
GGTCAAGAGGAAGAAACCTATAATATTGTAGCTGCTCATGGTTATTTGGCCGATTGATC  
TTCCAATATGCAAGTTTCAACAATTTCTCGTTCTTTACATTTCTTCCCTAGCTGCTTGGCCT  
GTAGTAGGTATTTGGTTTACCGCTTTAGGTATCAGCACTATGGCTTTCAACTTAAATGGT  
TTAATTTCAACCAATCCGTAGTTGATAGTCAAGGTTCGTGTAATAAATACCTGGGCTGAT  
ATTATTAACCGAGCTAACCTTGGTATGGAAGTCATGCATGAACGTAATGCTCATAATTC  
CCTCTAGATCTAGCTGCGATGGAAGCTCCATCTGTTAATGGAATGGGTTTACCTTGGTAT  
CGTGTTCACTGTTGTATTAATGATCCGGGCCGTTTGCTTTCTGTTTATATAATGCACA  
CAGCTCTAGTTGCTGGTTGGGCCGTTTCGATGGCTCTATATGAATTAGCAGTTTTTGATC  
CCTCTGACCCTGTTCTTGATCCAATGTGGAGACAGGGTATGTTTCGTTATTCCTTTCATGA  
CTCGTTTAGGAATAACTAATTCGTGGGGCGGTTGGAATATCACA--GGAGGGGCTATAA  
CGAATCCGGGTATTTGGAGTTACGAAGGTGTGGCCGGAGCACATATTGTGTTTTCAGGC  
TTGTGCTTTTTAGCGGCTATTTGGCATTGGGTTTATTGGGATCTAGAAATCTTTTGTGAT  
GAACGTAAGTAAACCTTCTTTGGATTTGCCAAAAATTTTGGAAATCATTATTTCTT  
GCGGGAGTAGCTTGTGTTTTGGTTTTGGCGCATTTTCATGTAACAGGATTGTATGGTCCCGG  
AATATGGGTGTCTGATCCTTATGGACTGACTGGAAGGATACAATCCGTAAATCCCGCGT

GGGGTGTGGAAGGTTTTGATCCTTTTGTTCGGGGGGGGTAGCTTCTCATCATATTGCG  
GCAGGAACGTTGGGCATATTAGCGGGTCTTTTCCATCTTAGTGTGCGTCCACCCCAACG  
TCTATATAAAGGATTACGTATGGGAAATATTGAAACTGTCCTTTCTAGCAGTATTGCTGC  
TGTCTTTTTTGCAGCTTTTGTGCGTTGCTGGA ACTATGTGGTATGGTTCAGCAACAACCC  
CCATTGAATTATTTGGTCCTACTCGGTATCAATGGGATCAGGGATACTTCCAGCAAGAA  
ATATATCGAAGAGTTGGTGCGGGACTAGCCGAAAATCAAAATTTAACAGAAGCTTGGT  
CTAAAATTCCTGAAAAATTAGCTTTTTATGATTACATCGGAAATAATCCAGCAAAAAGG  
GGTTATTAGAGCGGGTCAATGGACAATGGAGATGGAATAGCCGTCGGTTGGTTAG  
GACATCCCATTTTTCGAGATAAAGAGGGACATGAGCTTTTTGTACGTCGTATGCCTACT  
TTTTTTGAAACATTTCCAGTTGTTTTAGTAGATGGGGACGGAATTGTTAGAGCCGATGT  
TCCTTTTTCGAAGGGCAGAATCAAAATATAGTGTGCAACAAGTAGGTGTA ACTGTTGAG  
TTCTATGGTGGTGAGCTTAATGGCATAAGTTATAGTGATCCCACTACTGTGAAAAAATAT  
GCTAGACGTGCTCAATTGGGTGAAATTTTTGAATTAGATCGTGCTACTTTGAAATCAGA  
TGGTGTTTTTTCGTAGCAGCCCAAGGGTGGTTTACTTTTTGGGCATGCTTCATTTGCTC  
TGCTATTCTTTTTTCGGGCACATTTGGCATGGTGTCTAGA ACTTTGTTTCAGAGATGTTTTG  
CTGGTATCGACCCAGATTTAGATGCTCAAGTAGAATTTGGAGCATTCCAAAACTTGGA  
GATCCA ACTACAAGAAGACAGGTAGTAATGAAAACCTTATATCCCTGAGGAGGTTCTA  
CCACGTGGAACGCTCTTTAATGGA ACTTTAGCTTTAACTGGTCGTGACCAGGAACT  
ACCGGTTTCGCTTGGTGGGCCGGGAATGCCGACTTATCAATTTATCCGGTAAACTATT  
AGGGGCCCATGTAGCCCATGCTGGATTAATAGTATTCTGGGCCGGAGCAATGAACCTTT  
TTGAAGTGGCTCATTTTCGTACCCGAGAAGCCATGTATGAACAAGGTTAATTTTGCTT  
CCCATCTAGCTACTCTAGGTTGGGGAGTAGGTCCTGGAGGGGAAGTTATAGACACCTT  
TCCATACTTTGTGTCTGGAGTACTTCACTTAATTTCCCTCTGCAGTATTGGGCTTTGGCGG  
TATTTATCATGCACTTCTGGGACCTGAGACTCTTGAAGAATCTTTTCCCTTCTTCGGTTA  
TGTATGGAAAGATAGAAATAAAATGACTACAATTTTGGGTATTCACTTAATCTTGTTAGG  
TATAGGTGCTTTTCTTCTAGTATTCAAGGCTCTTTATTTTGGAGGTATATATGATACATGG  
GCTCCGGGGGGGGGAGATGTAAGAAAAATAACCAATTTGACCCTTAGTCCAAGTATTC  
TATTTGGATATTTATTAATAACCTTTTGGGGCGAAGGATGGATTGTTAGTGTGGACG  
ATTTGGAAGATATAATTGGAGGGCATGTATGGTTGGGTTCCATTTGTATACTTGGTGGAA  
TCTGGCATACTTAACCAAACCCTTTGCATGGGCTCGGCGTGC ACTTGTATGGTCTGGA  
GAAGCTTACTTATCTTATAGTTTAGGTGCTTTATCTGTTTTTGGTTTTATTGCTTGTGCT  
TTGTCTGGTTAATAATACCGCTTATCCTAGTGAGTTTTATGGGCCCACTGGTCCAGAAG  
CTTCTCAAGCTCAAGCATTTACTTTTCTAGTTAGAGACCAACGCTTGGGGCTAATGTA  
GGATCTGCTCAAGGACCTACAGGTTTAGGTAAATATCTAATGCGTTCCCCGACTGGCGA  
AGTATTTTTTGGCGGAGAACTATGCGTTTTTGGGATTTGCGTGCTCCTTGGTTAGAAC  
CTCTAAGGGGTCTAATGGTTTAGACTTGAGTAGACTGAAAAAAGATATACAGCCTTGG  
CAAGAACGTCGTTCTGCGGAATATATGACTCATGCTCCTTTAGGTTCCTTAAATTCCGTG  
GGTGGCGTAGCTACAGAGATTAATGCAGTAAATTATGTTTCTCCTAGAAGTTGGTTAGC  
TACTTCTCATTTTGTCTAGGATCTTTCTATTTGTAGGCCATTTATGGCACGCGGGAAG  
AGCTCGCGCAGCTGCCGCAGGATTTGAAAAAGGAATTGATCGCGATTTTGAACCTGTT  
CTTTCCATGACTCCTCTTAATATGACTATAGCTCTTGGTAAATTTACCAAAGATGAAAAG  
GATTTATTTGATATTATGGATGACTGGTTGCGGAGGGACCGTTTTCGTTTTTGTGGGTTGG  
TCCGGTCTA TACTCTTTCCGTGCGCCTATTTTCGCTTGGGGGGTTGGTTTACAGGTACG  
ACCTTTGTA ACTTCATGGTATACTCACGGCTTGGCAAGTTCTTATTTAGAAGGCTGCAA

CTTCTTAACCGCTGCAGTTTCCACTCCCGCTAATAGTTTATCACACTCTTTGTTGTTACT  
GTGGGGTCCTGAAGCACAGGGAGATTTTACCCGTTGGTGTGTCAGTTAGGTGGTCTGTGG  
ACTTTTGTGCTCTCCATGGTGCTTTCGGATTAATAGGTTTCATGTTACGTCAATTTGAA  
CTTGCTCGATCTGTTCAATTACGACCTTATAATGCAATCGCATTCTCAGGTCCAATTGCT  
GTTTTTGTCTGTATTCCCTATTTATCCACTGGGTCAGTCTGGTTGGTTCTTTGCTCCTA  
GTTTTGGTGTAGCAGCTATTTTTTCGATTATCCTCTTTTTTCCAAGGATTCATAATTGGAC  
ATTAAACCCATTTTCATATGATGGGAGTTGCTGGTGTATTGGGCGCTGCACTACTATGCGC  
TATTCATGGTGCAACCGTAGAAAATACTTTATTTGAAGATGGTGTGGTGC AAATACATT  
CCGTGCTTTTAACCCAACCCAAGCTGAAGAACTTATTCAATGGTTACTGCTAATCGCT  
TTTGGTCCCAAATCTTTGGGGTTGCTTTTTCCAATAAACGTTGGTTACATTTCTTTATGTT  
ATTTGTACCAGTAACTGGTTTATGGATGAGTGCTCTTGGGGTAGTCGGTTTGGCCCTGA  
ACTTACGTGCTTATGATTTTCGTTTCTCAAGAAATCCGCGCAGCGGAAGATCCTGAATTT  
GAGACTTTCTACACCAAAAATATTCTCTTAAACGAAGGTATTCTGTCGTGGATGGCAGC  
TCAAGATCAGCCTCATGAAAACCTTATATTCCCTGAGGAGGTTCTACCACGTGGAAACG  
CTCTTATGTCTGGAAGCACAGGAGAACGTTCTTTTGGCTGATATTATTACCAGTATCCGAT  
ACTGGATTATTCATAGCATTACTATAACCCTCCCTATTTCATTGCAGGTTGGTTATTTGTCAG  
TACGGGTCTAGCTTACGATGTATTTGGAAGTCCCCGCCAAACGAGTATTTTACAGAGA  
ACCGACAAGGAATTCCTTTAATAACTGGCCGTTTTGATCCTTTGGAACA ACTTGATGAA  
TTTAGTAGATCTTTTATGACTATAGATAGGACCTATCCAATTTTTTACAGTACGATGGTTAG  
CTGTTACGGACTAGCGGTACCCACTGTTTCTTTTTTGGGATCAATATCAGCAATGCAG  
TTCATCCAACGAATGGCTACGCAAACCGTTGAGGATAATTCTAGATCTGGT---CCAAGA  
CGAACTGTTGTAGGGAATTTATTGAAACCTTTAAATTCAGAATATGGTAAAGTAGCCCC  
AGGGTGGGGA ACTACTCCTTTGATGGGTGTTGCAATGGCTCTATTTGCGATATTTCTATC  
TATTATTTGGAGATTTATAATTCGTCCATTTTATTGGACGGAATTTATATGAATATGCTTA  
CTCTAAACTATTTGTTTATAACGGTAGTGATTTTTTTTCGTTTCTCTTTTTCATCTTCGGATT  
CCTATCTAACGATCCAGGGCGTAATCCAGGACGTGAAGAAATGGCCGATACTACTGGA  
AGAATTCCTCTTTGGATAATAGGTACTGTAACCTGGTATTACTGTGATCGGTTTAAATTGGT  
ATTTTCTTTTATGGTTCGATTCCGGATTGGGCTCATCTCTGATGCTTAATATCTTTAGTTT  
GGTCTGTATTTGTATTCACTCCGTCTTTATTCAAGTAATTTTTTCTTGGAGAAATTGCC  
GAAGCCTACGCTTCTTGAATCCAATTGTGGATATTATGCCAGTAATACCGCTACTCTTT  
TTTCTTTTAGCTTTTGTGGCAAGCTGCTGTAAGTTTTTCGAATGACACAATCAAACCC  
AAATGAACAAAATGTTGAATTGAATCGTACCAGTCTCTACTGGGGTTATTACTTATTTT  
TGACTTGTGTTTTATTTTCAAATATTTCTTCAATATGGAAGTAAATATTCTCGCATTTA  
TTGCTACTGCACTGTTTATTCTAGTTCCTACTGCTTTTTTTACTTATAATTTATGTAAAAAC  
GGTAAGTAAAAGTGACATGGAAACAGCAACCCTAATTGCCATCTCTATACTGGTTTAC  
TTGTAAGTTTTACTGGGTATGCCTTATACTGCCTTTGGGCAACCCTCGCAACA ACTAA  
GAGATCCATTTGAAGAACATGGGGACATGGAAGCTTTGGTTTATACATTCTCTTAGTT  
TCAACTTTAGGAATTAATTTTTTTCGCTATTTTTTTTAGAGAACCCCTAAAGTTCCGACG  
AAAAAGGTTAAAATGACTATTGCTTTCCAATTAGCTGTTTTTGCATTAATTGCTATTTTCAT  
TTCTTTTATTGATTAGTGTACCTGTTTTATTTGCTTCTCCTGAAGGTTGGTCAAATAACA  
AAAATGTTCTATTTTCTGGTACATCATTATGGATTGGATTAGTGTCTTAGTGGGTATTCT  
TAATTCTCTCATTCT-----ATGTCACCACAAACAGAGACTAAAGCAAGTGTT  
GGGTTCAAAGCTGGTGTAAAGATTATAAATTGACTTATTATACTCCTGACTATGAAACC  
AAAGATACTGATATCTTGGCAGCATTCCGAGTAACTCCTCAACCTGGAGTTCCACCTGA

AGAAGCAGGTGCCGCGGTAGCCGCTGAATCTTCTACTGGTACATGGACAACCTGTGTGG  
ACCGATGGGCTTACCAGTCTTGATCGTTACAAAGGACGATGCTATCACATCGAACCTGT  
TGCTGGGGAAGAAAATCAATTTATTGCTTACGTAGCTTATCCCTTAGACCTTTTTGAAG  
AAGGTTCTGTTACTAACATGTTTACTTCTATTGTCTGGTAATGTATTTGGGTTCAAGGCAC  
TGCGTGCTCTACGTCTGGAGGATTTGCGAATCCCAACCGCTTATATTAACCTTTCCAA  
GGTCCGCTCATGGCATCCAAGTTGAGAGAGATAAATTGAACAAGTATGGTCGTCCCCT  
ATTAGGATGTACTATTAACCTAAATTGGGGTTATCCGCTAAGAATTATGGTAGAGCAGT  
TTATGAATGTCTTCGTGGAGGACTTGATTTTACCAAAGATGATGAAAATGTGAATTTCC  
AACCATTTATGCGTTGGAGAGACCGTTTCTTATTTTGTGCTGAAGCGATTTATAAAGCA  
CAGGCTGAAACAGGTGAAATCAAAGGGCATTACTTGAATGCAACTGCGGGTACATGTG  
AAGAAATGATAAAAAGAGCTGTATTTGCCAGAGAATTAGGCGTTCCTATCGTAATGCAT  
GATTATTTAACAGGGGGATTCACTGCAAATACTAGCTTGGCTCATTATTGCCGGGATAAT  
GGTCTACTTCTCATATACATCGTGCAATGCATGCAGTTATCGACAGACAAAAGAATCAT  
GGTATGCACTTTCGTGTCCTAGCTAAAGCATTACGTTTGTCTGGTGGAGATCATGTTCA  
CTCCGGTACCGTAGTAGGTAACTTGAAGGGGAAAGAGAAATCACTTTAGGTTTTGTT  
GACTTATTGCGTGATGATTTTATTGAAAAAGATCGAAGTCGTGGTATTTATTTCACTCAG  
GATTGGGTTTTCTACCAGGTGTTCTGCCGGTTGCTTCGGGAGGTATTCACGTTTTGGCA  
TATGCCTGCTCTGACCGAAATCTTTGGAGATGACTCCGTACTTCAATTTGGCGGAGGAA  
CTTTAGGACACCCTTGGGGAAATGCACCAGGTGCTGTAGCTAATCGAGTAGCTCTTGA  
AGCATGTGTGCAGGCTCGAAATGAAGGACGTGATCTTGCTCGTGAAGGTAATGAAATT  
ATCCGTGAGGCTAGCAAATGGAGTCCTGAATTAGCTGCTGCTTGCGAAGTATGGAAGG  
AGATCAAATTTGAATTCGAAGCAATGGATACTTTGGAT---ATGGCGATACATTTATACAA  
AACTTCTACCCCAAGCACACGCAATGGAGCCGTAGACAGTCAAGTAAAATCCAATCCA  
CGAAATCATTTGATCTATGGACAGCATCGTTGTGGTAAAGGCCGTAATGCCAGAGGAAT  
AATTACCGCAGGGCATAGAGGGGGAGGTCATAAGCGTCTATACCGTCAAATTTGATTTTC  
GACGGAATGAAAAAACATATATGGTAGAATCGTAACCATAGAATATGACCCTAATCGA  
AATGCATCCATTTGTCTCATACTATGGGGATGGTGAGAAAAAATATATTTTACACCCC  
AGAGGGGCTATAATTGGAGATACCATTGTTTCTGGTACAGAAGTTCCTATAAAAATGGG  
AAATGCCCTACCTTTGACCGATATGCCCTTAGGCACGGCCATACATAACATAGAAATCA  
CACTCGGAAAGGGTGGACAATTAGCTAGAGCAGCTGGTGCTGTAGCGAAACTAATTGC  
AAAAGAGGGGAAATCGGCCACATTAATAATTACCTTCTGGGGAGGTCCGTTTGATATCC  
AAAACTGCTCGGCAACAGTTGGACAAGTGGGAAATGTTGGGGTAAACCAGAAAAAT  
TTAGGTAGAGCCGGATCTAAATGTTGGCTAGGTAAACGTCCTATAGTAAGAGGAGTAGT  
TATGAACCCTGTAGACCATCCGCATGGGGGTGGTGAAGGGAGGGCCCAATTGGTAGA  
AAAAAACCCGCAACTCCTTGGGGTTTTCTGCCTTGGGAAGAAGAAGTAGAAAAAGG  
AAGAAATATAGTGATAATTTGATTCTTCGTCTGCTACTAAAATGATTCAACCTCAA  
CATTTAAATGTAGCGGATAACAGCGGAGCACGTAAACTGATGTGTATTCTGAATTCTAGG  
AGCTAGT---AATCGACGATATGCTTATATTGGCGACATTGTTGTTGCTGTAATCAAACAA  
GCAGTACCAAATACGAACCTTAGAAAGATCAGAAGTGATCAGAGCTGTAATTGTACGGA  
CTTGTAACAACATAAAACGTAGCAACGGTATAATAATTCAGTATGATGATAATGCTGCA  
GTTGTAATTGATCAAGAAGGAAATCCAAAAGGAACTCGAATCTTTTGCGCAATCGCCC  
GGGAATTGAGACAGTTAAATTTCACTAAAATAGTTTCATTAGCACCCGAGGTATTAATG  
CTTAGTCCCAAAGAACCAGATTTTCGTAAACAACATAGAGGAAGAATGAAGGGAAATAT  
CTTCTCGAGGGAATCGTATTTGCTTCGGAAGATATGCTCTTCAGGCACTTGAGCCAGCT





TTTGAACATTTTCACGTAGAAGATGGAAAATCTATATTGGACATTTTAAAAATACAAAA  
ATATTTTGCA-----ATGCTTGGGAGTGGAAAT--GAAGAAATGTCTACACTAC  
CTGGATTGAATCAGATACAGTTGGAAGGGTTTTGTAGATTCATTGATCGGGGCTTAACA  
GAAGGGCTTTTTAAGTTTCCAAAAATTGAGGATACAGATCAAGAAATTGAATTTCAATT  
ATTTGCCGAAACATATCAATTATTAGAACCCTTGATAAACGAAAAAGATGCTGTATATGA  
ATCACTTACATATTCTGCTGAATTATATGTATCCACGGGATTAATTTGGAAAAGTAGTAG  
AGACATAAAAAAACAACACTATTTTTGTTGGAAACATTCCTCTAATGAATTCTCTGGGAA  
CTTCTATAGTAAATGGAATATATAGAATAGTAATTAATCAAATATTGCAAAGTCCTGGTAT  
CTATTACCGTTCAGAATTGGACCCTAACGGAATTTTCGGTCTATACTGGCACTATAATATC  
AGACTGGGGGGGTAGATTAGAATTAGAGATTGATAAAAAAGCAAGGATATGGGCTCGT  
GTGAGTAGGAAACAGAAAATATCTATTCTAATTCTATTATCAGCTATGGGTTTCGAATTA  
AGCGAAATTCTAGAAAATGTTTGTATCCTGAAATTTTCGTGTCTTTCCTAAATGATAAG  
GATAAAAAAAAATTGGGTCAAAGAAAATGCCATTTTGGAGTTTTATCGACAATTTG  
CTTGTGTTGGCGGAGATCCAGTATTTTCTGAATCTTTATGGAAAGAATTACAAAAAAA  
TTTTTTCAACAAAGATGTGAATTAGGAAGAATTGGTCGACGAAATATGAACCAAAGC  
TTAATCTTGATATACCCAGAACAATACATTTTTTGTACCACGAGATATATTGACAGCTG  
CGAGTCATTTGATTGGCATGAAATTTGGAATGGCTCTACTTGACGAT-----ATAAATCATT  
TGAAAAATAAACGTATTTCGTTCCGTAGCCGATCTATTACAAGATCAATTTGGATTGGCCT  
TGGTTCGTTTAGAAAATATGGTTAGAGGAACTATATGTGGAGCAATTAGA---CATAAATT  
GATA---CCGACTCCGCAGAATTTGGTGACGTCAACTCCA-----TTAACAACGACTTA  
TGAATCTTTTTTTGGATTACATCCATTATCTCAAGTTTTTGGATCAAATAATCCATTGACC  
GAAATAGTTCATGGGAGAAAATTGAGTTATTTGGGTCCTGGAGGATTGACGGGGCGAA  
CTGCGAGTTTTTCGGATACGAGATATCCACCCTAGTCACTATGGACGCATTTGTCCAATTG  
ACACGTCTGAAGGAATCAATGTTGGACTTATTGGATCTCTAGCAATTCATGCGAGGATT  
GGTATTTGGGGG---GCCATAGAAAGTCCATTTTTT-----GAAATATCCGAGAGATCAAA  
AAGA-----ATACGCATGCTTTATTTATCACCAAGTATAGATGAATACTATATGGTAGCAAC  
AGGAAATTCTTTGGCACTTACTCGAGATATTCAGGAGGAACAGATTGTTCCAGCCCGAT  
ATCGTCAAGAATTTCTTACGATTGCATGGGAACAGGTTTCATCTTCGAAGTATTTATCCCT  
TCCAATATTTTTCTATTGGAGCTTCTCTGATTCCTTTTATCGAACATAATGATGCGAATCG  
AGCTTTAATGAGTTCTAATATGCAACGTCAAGCAGTTCCGCTTTCTCAGTCCGAAAAAT  
GCATTGTTGGAACCTGGATTGGAATGCCAAGTAGCTTTAGATTGAGGGGTTTCCGCTATA  
GCCGACCACGAGGGAAACATCGTTTATACTGATACTGACAGGATCTTTTTATTTGTTAAT  
GGAGATACTCTAAGTATTCCATTAACAATATATCAACGTTCCAACAAAAATACTTGCATG  
CATCAAAAACCCAGGTTACCGAGGTAAATTCATCAAAAAGGGACAAATTTTAGCGG  
ATGGTGCTGCTACAGTTGGCGGCGAACTCGCTTTGGGAAAAAACGTATTAGTAGCTTAT  
ATGCCATGGGAAGGTTACAATTCTGAAGATGCTGTACTCATTAGTGAGCGCCTGGTTTA  
TGAAGATATTTTACTTCTTTTACATACGGAAATATGAAATTCAGACTCATATGACAAG  
CTATGGT--TCTGAAAGAATAACTAATAAAATTCCACATCTAGAAGCCAATTTACTCCGA  
AATTTAGACAAAAACGGAATTGTGATCCTCGGGTCGTGGGTCGAAACGGGCGATGTTT  
TAGTGGGTAAATTAACACCTCAAATGGCAAAGAA---TCCTCATATTCCCCCGAAGATA  
GATTATTACGAGCTATACTTGGCATTGAGGTATCCACTTCAAAGGAACTTGTCTAAAA  
CTACCCATAGGTGGTAGGGGTCGAGTTATTGATGTGAGATGGATCCAAAAAAGGGG---  
GGTTCAGTTATAATCCAGAACTATTCGGATTTCTATTTTACAGAAACGTGAAATTTAA  
GTAGGAGATAAAGTGGCCGGGAGACATGGAAATAAAGGTATCGTTTCAAAAATTTTGT

CTAGACAGGATATGCCTTATTTGCAAGACGGAGAACCGGTCGATATGGTCTTCAATCCA  
CTAGGGGTACCTTCACGAATGAATGTAGGACAAATATTTGAATGCTCGCTCGGTTTATC  
AGGAGGTATGTTAGATAAACATTATCGAATAACACCATTTGATGAGAGATATGAACAAG  
AAGCTTCGAGAAAAC TAGTGT TTTCTGAATTATATGAAGCCAGTAAAAAACATCTAAT  
CCATGGATATTTGAACCCGAGTATCCTGGAAAAAGCAAATATTTGATGGAAGAACAG  
GGAATTC TTTTAAACAGCCTGCTATAATGGGAAAGACTTATA TTTTGAAATTAATTCATC  
AAGTTGATGATAAAAATCCATGGACGTTCCAGTGGACATTATGCACTTGTTACACAACAA  
CCACTTAGAGGAAGGGCTAAGCAGGGAGGACAACGGGTAGGCGAAATGGAGGTTTGG  
GCCTTGGAAGGATTTGGTGTGCTCATATTTTACAAGAGATGCTTACTTATAAATCTGAT  
CATATTA AAACTCGCCAAGAAGTACTCGGGACTACGATCATTGGAGGAACAATACCTAA  
ACCTACAGATGCTCCAGAATCTTTTCGATTGCTCGTTCGAGAATTACGATCTTTAGCTAT  
GGA ACTGAATCATTTCTTGTATCTGAGAAGA ACTTCCGGATTCATAGGAAGGAAGCT--  
-----ATGATTGATCAGTATAAACATCAACA ACTCCGAATTGGATCAGTTTCTCC  
TCAACAAATGAGTGCTTGGGCAAAAAGAATCTTACCTAATGGAGAGATAGTGGGGGAG  
GTAACAAAACCCTATACTTTTCATTATAAAACCAATAAACCTGAAAAAGATGGATTATTT  
TGTGAAAGAATTTTTGGGCCTATCAAAAGTGGGATTTGTGCTTGTGGAAATTATCGAGT  
AATCAGAGATAAAAAGGACGATCCAAAATTTTGTGAACAATGCGGAGTAGAATTTATA  
GATTCTCGAATACGTAGATATCAAATGGGCTATATAAACTGGCATGTCTAGTAACTCAT  
GCATGGTATTTGAAACGTCTTCC TAGTTATATTGCAAATCTTTTAGATAAACCTCTAAAA  
GAATTAGAAAGTCTAGTATATGGCGATGTG-----TCGTTTGCTAGACCC---GTAGTTAAAA  
AACCCACTTTCTTACGATTACGAGGTTTCATTTCGAATATGAAATCCAATCTTGGAACAC  
AGCATAACACTTTTTTTTACTACCCGAGGTTTTGATATATTTCGAAATCGAGAAATTTCA  
AGCGGAGCTGTTGCTATCCGAGAACAATTAGCCGATCTGGATTTGAGAATTATTATGGA  
TTATTCGTTGATAGAATGGAAAGAATTAGGGAAAGAG---GGATCCCCGACAATGAATG  
GGAAGATCGAAAAGTTGGAAGAAGAAAGAATTTTTTGGTTCGACGTATAGAATTAGCT  
AAGCATTTTATCCGAACAAATATAGAACCAGAATGGATGGTTTTATGTCTCTTACCAGTT  
CTTCCTCCCGAATTGAGACCGATTATTCAAGTAGATGGGGGTAAATTAATGAGCTCGGA  
TATTAATGAATTATATAGAAGAGTTATCTATCGGAATAATACTCTTATCGATCTATTAACAA  
CAAGTAGATCTACTCCAGGAGAATTAGTAATATGTCAGGAGAAATTGGTACAAGAAGC  
CGTGGATACACTTCTTGATAATGGAATCCGCGGACAGCCGATGAGGGACGGTCATAATA  
AGGTTTACAAATCATTTTCTGATATAATCGAGGGCAAAGAGGGAAGATTTGCGGAGACC  
CTACTTGGGAAACGAGTTGATTATTCGGGTCGTTCTGTCATTATCGTAGGTCCATCACTT  
TCATTACATAGATGTGGATTGCCCGGCGAAATAGCAATAGA ACTTTTCCAGACATTTCTA  
ATTCGTGGTCTAATTCGAAAACATTTTGCTTCGAACATAGGAATTGCTAAGAGTAAAAT  
TCGGCAAAAAGAACCGATTGTATGGGAAATACTTCAAGAAGTTATGCAGGGACATCCC  
GTATTGCTAAATAGAGCACCTACTCTGCATAGATTAGGTATACAGGCATTCCAACCCATT  
TTAGTAGAGGGGCGTGCTATTTGTTTGCATCCATTAGTTTGTAAGGGATTCAATGCAGA  
CTTTGATGGCGATCAAATGGCTGTTTCATGTGCCTTTATCTTTAGAAGCTCAAGCAGAAG  
CTCGTTTACTTATGTTTTCTCATACGAACCTCTTGTCTCCAGCTATCGCGGATCCAATTC  
CGTACCAACTCAAGATATGCTTATTGGACTTTACATATTAACGAGTGGGAATCGTCGAG  
GTATTTATTCAAATAGGTATAATCCACGGAATTGC-----AGAAATTTGAAAAATGAAAG  
AATCCAAATAATAACTATAAGTATACGAAAAA---GAACCTTTTTTTTGTAAATTCCTATG  
ATGCAATTGGAGCTTATCAACAGAAAAGAATAACCTTCGATAGTCCTTTGTGGCTCCGG  
TGCGGACTAGATCTACGC---ATTATTCGTCA-----AGAGAAGTTCCTATCGAAGTTCCT

ATGAATCTTTAGGTACCTATCATGAAATTTATGGGCATTATCTAGTAGTAAGAAGTATAA  
AAAAACAAATGCGTTCTATATACATTCGAACCAATGTAGGTCATATTTCTTTTTATCGAG  
AAATCGAAGAAGCTGTACAAGGTTTTTGCCGGGCCTATTCATATGATAATC-----  
-----ATGGCAGAACGGACCAATCTAATGTTTCACAATAAAGTGATAGGTGGAAC  
TGCCATTAACGACTTATTAGCAGATTAATAGATCACTTCGGAATGGCATATACATCACA  
TATCTGGATCAAGTCAAGACTCTGGGATTCCGCCAAGCTACGGCTACATCCATTCATT  
AGGAATTGATGACCTTTTAAACAATACCTTCTAAAGGATGGCTAGTCCGAGATGCTGAAC  
ACCAAAATTTGATTTTGGAAAAACAGCATCATTATGGAAATGTACATGCGGTAGAAAAA  
TTACGCCAATCCATTGAGATATGGTATGCTACGAGTGAATATTTTCGACAAGAAATGAAT  
CCTAATTTTAGAATGACCGATCCTTTTAAATCCAGTCCATATAATGTCCTTTTTCGGGAGCT  
AGAGGAAATGCATCTCAAGTACACCAATTAGTAGGTATGAGAGGATTAATGTCGGATCC  
ACAAGGACAAATGATTGATTTACCTATTCAAAGCAATTTACGCGAAGGGCTCTCTTTAA  
CAGAATATATAATTTCTTGCTATGGAGCTCGTAAAGGGGTTGTAGATACTGCTGTACGAA  
CATCAGATGCTGGATATCTTACACGTAGACTTGTGGAAGTGGTTCAACATATTGTTATAC  
GTCGAACAGATTGTGGTACCATTTCGAGGAATTTTCAGTGAATACCCAGAATGAAATGATG  
CCG---GAAAGTACTTGGACACAAACATTAATTGGTCGTGTATTAGCAGACGATATATACA  
GAGGTTACGATGCATTGCCGTTAGAAATCAAGATATTGGAATTGGACTTTTCAATCAA  
TTTAAAACC-----TTTCAAACACAACCAATATCTATACGAACTCCTTTTACCTGT  
AGGAATACATCTTGGATCTGTCGATTGTGTTATGGCCAAAGTCCTACTCAAGGTCACTT  
GGTGGAAATTAGGAGAAGCTGTGGGTATTATTGCGGGCCAATCCATTGGAGAACCGGGC  
ACTCAATTAACATTAAGAACTTTTCATACTGGCGGAGTATTCACAGGGGGTACTGCAGA  
ACAGGTGCGAGCACCTTATAATGGAAAAATTAATTCATGAGGATTTGGTTCATCCTA  
CACGTACACGTCACGGACATCCTGCCTTTCTATGTTATATAGACTTGTATGTTAGTATTG  
AAAATGGTGACATTATACATAATGTGACTATTCCACCAAAAAGTTTTCTATTAGTTCAAA  
ATAATCAATATGTAAAATCAGAACAAGTGATTGCCGAGATTTTGGCAGGAACATACACG  
TTT--AATTTCAAAGAAAAAGTACGAAAACATGTTTATTCTGACTTAGAAGGAGAA---AT  
GCATTGGAGTACCAATGTGTATCATGCATCAGAATTTAAATATAGTAATGTCCATATCTTA  
CCAAAAACAAGTCATTTATGGATTTTATCAGGAAAATCAGACAGG-----TCCGGTTCAGT  
CTCTTTTTCAACCCGAAAAGATCAAGATCAATTGAACATTCAT-----TCTCTTTCTACAGG  
AGAAAGAGATATTTGTAACCATTTA-----GCAAGTAATAATAAA---ATCAGACATAAATTG  
TTTCATTTCAATCCTTCTGAGAAAAAAGAAAGAAGGATTTTCAGATTAT--TCAATAATTA  
ATCAAATCATATGTATAGATCATTGTCATTTTACACATCCTGCT---ATTTTTCATGATACTA  
CGGAT-----TTATTAGCAAAGAGGGCGGAGAAATCGATTCAATTATCCATTTCAATTCATC  
AAGAACGAGACAAAGCACTAATGTTAGCTTCCAGTATCTCGATTGAAATACCAATC-----  
AACGGTCTTTTTTCGTAGAAATAGTATTTTTGCTTATTTTGTATGATCCTCAATACCGAACA  
CAGAGCTCGGAATTACTAAATATAGGACTATTGATATCAATTACATTTTAAAAAAGAG  
GATTTT---GTAATCGAGTATCCT---GGAGTTAAAGAATTTAAGACAAAATACATGAAAGT  
AGATCAATTTTTTTTCATTCGCCAAGAAGTGTATATTTTACCAGAATTTTCTTCCATAATG  
GTACGGAACAATAGTATCGTTGAAGTAGATACACCAATCACTGTAAATATAAGAAGTCA  
AGTAAGCGGGTTGGTCCGATTGGAGAAGAAAAAAGATTCAATTAATAATATTT  
TCCGGGAATATCTACTTTCCCGGAGAAATGGATAAGATATCCCGACACAGTGCCATGTT  
GATACCACCG---AGAACGGTAAAAAATTCAAAAGGATCAAAAAA-----ATG  
AAAAATGGATCTATGCCAATGG-----ATCACAATTACGAAAAAAG-----TATTTTGT  
TTTGGTTCGACCGTAATTTTATATGAAATAGCAGATAGGATCAAATTAATCAAATTTT

TTCCCAAGATATGTTACAAGAAAGAGATAATCTGGAACCTCAAGTTATTAATTATATTCT  
TTCTGGAAATGGAAAATCAATTCGGGGAATTTCTAATACAAGTATTCAACTAGTTCGGA  
CTTGTTTAGTCTTAAATTGGGATCAAGACAAA-----AAAGTTTCTTCTATCGAAAAAG  
GACATGCTTCTTTTGTGAACTAAGTATAAATGGTTTGGTTAGATATTTTTTAAAAAATTG  
CCTTAGTGAAA---CATATTCATATATAAGAAAAAGGAATGATCCGTCGGTTCAGATT  
TATCTTAGAT---AATGAGTCGGACTGGACCAACATCAATCCATTT-----TTTTCTATGAA  
TTCG-----AGGGAAAAAGTTCAACAATCACTTAGTCAAATCAT---ACTATTCATATGTTG  
TTGAAT-----AGAAATGATAAATGCCGATCTTTGATAATTTTGTTCATCATCGAATTGTTT  
T-----CAAATACGATCATTCCACGATGGAAAATATTAC-----AAAGAAGAAGATC  
CTCTGATTCCAATTAAGAATTCGTTAGGTCCTTTAGGAATA-----GCCCTTCAAGTTGCC  
AATTTGGAT-----TTTTACCTTTTAATTAAT---CATAATCAGATCTCG---ATAAATAAAA  
ATGGGCAACTTGACAAA-----TTAAAAGAACTTTTCAAGTATTC-----AAA---TATTAT  
TTAATAGACGAAAACGAGAGA-----ATTTATAAACCTGATATATCTAGTAACATCCTTTTA  
AATCCATTCTATTTGAATTGGCATTTTTTTCCATCATAAT-----ACGTTTCCAATAATAA  
GT---CTTGGTCAATTTATTTGCGAAAATGTATGTATAGTTCAAATGCACCA-----CACC  
TTAAATCGGGTCAAATTCCTCACTGTTCAA---ATGGATTCTGTAGGAATAAGATCGGCTAA  
CCTTATTTGGCGACTCCTGGAACAACCTGTTTCATGGCCATTATGGAGAAATACTTTCTG  
AAGGAGATATATTAGTTACATTTATATATCAAAAATCGAGATCGGGTGATATAACACAAG  
GTCTTCCAAAAGTAGAACAGGTATTAGAAGTTCGTTTCGATTGATTCAATATCAATAAAC  
CTAGAAAAGAGAGTAGGTAAGTGGAAATGGGCGTATAACAAGAATTCTTGGCATTCTTG  
GGGATTCTTCATTAGTGCTGAGCTAACTATAGCGCAAAGTCGTATTTCTTTGGTTAATCA  
AATCAAAAAGTTTATCGATCCCAGGGAGTTCACATTCATAATAGACATATAGAAATTAT  
TGTGCGTCAAATAACATCAAAGTATTGGTTTCAGAA-----GATGGAATGTCTAATGTT  
TTTTTGCCCGGTGAACTAATTGGATTGTTGCGGGCCGAACGAGCTGGGCGTTCCTTAG  
AAGAGTCGATTTGCTACCGAGTTCTATTATTGGGATAACAACAAAACATCTTTAAATACTC  
AAAGTTTCATATCTGAAGCAAGTTTTCAAGAACTGCTAGAGTTTTATCAAAGCCGCT  
CTCCGGGGTTCGCATAGATTGGTTGAAAGGTCTGAAAGAGAACGTTGTTTTAGGGGGAA  
TGATGCCAGTTGGTACCGGATTCAAAGAATAATATACCGTTCAAAGCAAAGGCAATAT  
ACAAGATTACC-----TCGGAAACAAAAAAAAGA-----ATTGATATGATA  
TATCAAAGC-----AATCTAGGATTTAAGAATTCC-----  
-----ATGACAAAAAGATATTGGAACATAATTTTGGAAAGAGATGATGGAAGCTGG  
AGTTCATTTTGGCCACGGTACTAGAAAATGGAATCCTAAAATGTCACCTTATATATCTGC  
AAATCGTAAGGGTATTCATATTACAAATCTTATTAGAAGTCTCGGTTTTTATCAGAATCT  
TGTGATTTAGTTTTTTCATGCCGCAAGTGGGGGAAAACAATTCTTAATTGTTGGTACAAA  
AAAAAAAGCAGCTGATTCAGTAGCGCGGGCTGCAATAAGAGCTCGGTGTCATTATGTT  
AATAAAAAATGGCTCGGCGGTATGTTAACCAATTGGTATACTACAAAACACGACTTCA  
AAAGTTCAGGGACTTGAGAATGCAACAAAAGACGGGGAGATTGATTGTTTTCCAAA  
AAAAGATGCCGCTATATTGAAGAGACATTTAGCTCAATTGGAACATATCTTGGCGGCA  
TTAAATATATGAAGGGTTACCTGATATTGTAATAATCATCGATCAACAAGAAGAATATA  
CGGCTCTTCGAGAATGTATCACTTTGGAAATCCAACAATTTGTTTAATTGATACAAATA  
GTGACCCGGACCTCGCTGATATTTCAATTCCAGCTAATGATGATGCTATAGCCTCAATTC  
GATTCATTCTGAACAAATTAGTTTTTTCGAATTTGTGAGGGTCGTTCTAGA---TCTATACG  
AAATTCTATGGGACAAAAAATAAATCCGCTTGGTTTCAGACTTGGTACAACCTCAAAGTC  
ATGATTCTATTTGGTTTGCACAACCAACAAAATATTCCGAGAATATACAAGAAGATAAA

AAAATACGAGATTGGATCAAAAATTATATACAAAAAATATAAGAATATCCTCG---GGTG  
TCGAGGGAATTGGAGAGATAAAGATCCAAAAAGAATCGATCTGATTCAAGTCATAATA  
TATATGGGATTTCCCAAGTTATTAATAGAAGGTAAGCCGCAT-----AAAATCGAAGA  
ATTCCAGACGAATATGCACAAAAAACTGAATTGTGTGAATAAAAAACTAAACATTGCTA  
TTGTAAAAATAACAAATGCTTATAAACACCCTAATATTCTTGCAGAATTTATAGCTGGAC  
AATTAAGAATAGAGTTTCATTTTCGTAAAGCAATGAAAAAAGCTATTGAATTAAGTAA  
CAAGCAGGTACAAAAGGAGTTCAAGTACAGATTGCAGGGCGTATTGATGGCAAAGAA  
ATTGCGCGTGTAGAATGGATAAGAGAAGGTAGGGTTCCTTTACAAACCATTTCGAGCTA  
AAATTGAATATTGTTGTTATACAGTTTCGAACTATTTATGGGATTTTAGGGATAAAAGTTT  
GGATATTTTCTAAA-----ATGTCACGTTACAGAGGACCTTGTTTCAAAAAAATACGTCGT  
CTGGGATATTTACCAGGACTTACTAGTAAAAAGCCAACAGTCAAAAACGAACTTAGAA  
ATCAATTGCGCTTCAGTAAA---AAATCTCAATATCGTATTTCGTTTAGAAGAAAAACAAA  
AATTGCGTTTTTCATTATGGTCTTACAGAACGACAATTGCTGAAATACGTTTCGTATCTCCG  
GAAAAGCTAAAGGATCAACTGGTCAGGTTTTATTACAACACTACTTGAAATGCGCTTGGAT  
AACATACTTTTTTCGATTGGGTATGGCTGCGACTATTCCTCAAGCCCAGCAATTCATAAAC  
CATAGACATGTTTTAGTTAATGGTTCGTATAGTAGATATACCAAGTTATCGTTGCAAACCT  
CAAGATATTATTACAGCGAAGGATGAACAAAAATCGAAAACCTGATTCAAAATTATCT  
TGATTACAGCCCCCGT---GATAAATTGCCAAATCATTGACTGTTACCCCTTTCCAA-----  
TATAAAGGTTTAATTAATCAAATAATAGATAATAAATGGGTTGGTTTGAAAATCAATGAA  
TACTGGTTGTAGAATATTATTCTCGTCAAACACTATGTCACGGCGAGGTAAGTGCAGAAGA  
AAAAACCGCAAAATCCGATCCAATTTATCGTAATCGATTAGTTAACATGTTGGTTAAC  
GTATTCTGAAACACGGAAAAAATCATTGGCTTATCAAATTCTCTATCGAGCTATGAAA  
AATATTCAACAAAAGACAGAAACAAATCCACTATCTGTTTTACGTCAAGCAATACGTGG  
AGTAACTCCCGATATAGCAGTAAAAGCAAGACGCGTAGGGCGGATCAACTCATCAAGTT  
CCCGTTGAAATAGGATCCGCACAAGGAAAAGCACTTGCCATTCGTTGGTTATTGGGGG  
CATCCCGAAAACGTCCGGGTCGAAATATGGCTTTCAAATTAAGTTCCGAATTAGTGGAT  
GCTGCCAAAGGTAGTGGCGATGCCATACGCAAAAAGGAAGAGACTCATAGAATGGCA  
GAGGCAAATAGAGCTTTTGCACATTTTCGTATGGGGAAGGACACTATCGCCAACATAAT  
AACCTATATACGAAATGCTGACATTAATAAAAAAGGAATGGTTCAATTACCTTTTACTAA  
CATTACTGAAAAAATTGTAAAAATACTTTTACGAGAGGGTTTTGTTGAAAACATCAGAA  
AACATAGAGAAAACGACAAATCTTTTTTAGTTTTAACTCTACGGTATAGAAGA-----AAT  
AGAAAAGAATCGTATAAAAGT---TTT-----TTAAATTTAAAACGAATAAGTACACCCGGT  
CTACGAATATATTACAATTATAAAAAAATCCCTCGAATTTTAGGGGGCATGGGGATTGTC  
ATTCTTTCCACTTCTAGAGGTATAATGACAGATCGAGAGGCTCGATTAGAAAAAATTGG  
CGGCGAAGTTTTATGTTATATATGGATGGCAAATATATACCTAAAACAGGTTTCGCGTAA  
AAATGTACGTATTGGTTTCG---AATCATACGCGTAAAATACCAAAGGAATTATTCATGTT  
CAAGCTAGTTTCAACAATACTATTGTAAC TATTACAGATGTACGAGGTCGGGTGATTCT  
TGGTCTCCGCTGGTACTTGTGGATTCAAGGGTACACGAAGGGGAACACCTTTTGCCG  
CTCAAAC TGCAGCAGGAAATGCTATTCGAACAGTATCGGATCAAGGCATGCAACGAGC  
AGAAATCATGATCAAAGGGCCTGGTCTCGGAAGAGATGCAGCATTAAAGAGCTATTTCGT  
AGAAGTGGTATACTCTTAAATTTTATACGAGATGTAAC TCTATGCCACATAATGGATGT  
AGGTCTCCTAAAAAAGACGTGTAATGCCAACTATGAAACA ACTTATTAGAAACACAA  
GACAGCCAATCCGAAACGTCACAAAATCCCAGCTTTCAGGGATGCCCTCAACGCCG  
AGGAACGTGTACCAGGGTGTACTATTACCCAAAAAACC AA ACTCTGCCTTACGTA

AAGTTGCCAGAGTACGTTTAACTCTGGATTTGAAATTACTGCTTATATACCCGGTATTG  
GCCATAATTTACAAGAACATTCTGTAGTCCTAGTAAGAGGGGGGAGGGTTAAAGATTTA  
CCCGGTGTGAGATATCACATTGTTTCGAGGAACCCTAGATGCTGTCGGAGTAAAGGATC  
GTCAACAAGGGCGTTCCTAAATATGGTGCCAAAAAGCCAAAAATGGCAAGGAAAAGTG  
TGATTACAGAGGGAGAAGAAGAGACAAAAATTGGAACAGAAATATCATTTGATTGCGCG  
ATCCTCAAAAAAAGAAATAAGC-----AAAGTTCGTCGTAAAGTGATAAATGGGAAAT  
TCATGGAAAATTAGAATCACTACCGCGTAATAGTGCACCTATACGTCTTCATCGACGTTG  
TTTTTCAACCGGAAGACCGAGAGCTAATTATCGAGACTTTGGATTATCTGGACACATAC  
TTCGGGAAATGGTTCATGCATGTTTCTTGCCGGGTGCAACAAGATCCAGTTGGATGGTA  
AAAAATTCATTTATACCTGTTCTTTCACAAGAA---AAAAAAGGAAAA---AACCCGGGAT  
TGTTGAATTTCAAATATTCCAATTTACTAATAGAATACGAAGACTTACGTCACATTTTG  
AATTGCACCCAAAAGACTATTCATCCCAAACAGGTTTACGTAAAATCTTGGGAAAACG  
GCAAAGATTACTGTCTTATTTGTCAAAGAAAGATGGAATACAGTATAAAAAATTAATAA  
A T C A G T T T G A T A T T C G G C A G T C A C A A A T T C G T - - - -  
-????????????????????????????????????????????????????????????????????????????????????  
????????????????????????????????????????????????????????????????????????????????????  
????????????????????????????????????????????????????????????????????????????????????  
ATGGAAAATCTAAGCGACTCTTTATTAATCGAAGCGATCTTTTCGTAGACGTTTGCC  
CCCGATTCAATCGGGGGACCGAATTGATTATAAAAACATGGGTTTAATTTGTGATTTAT  
TAGTGAACAAGGAAAATATTATCTAGACGCGTAAATAGATTGACCTTAAACAACAAC  
GATTAATTACAATTGCTATAAAACAAGCTCGTATTTTATCTTCGTTACCTTTTCTTAATAA  
CGAAAAA-----CAATTTGAAAAAAGCGAGTCGACTGAGAAAATTACTACTTTAAGAAA  
AAAA---AATGTGACGCGT---CTAAAAAAAATCCTTTTGTAGCGAATCATTTATTAAGAA  
AAATAAATAAGCTTAACACAAAAGCGGAAAAAGATATAATATTAACTTGGTCCAGAGCA  
TCTACCATTATACCTACAATGATTGGCCATACCATTGCTATCCATAATGGAAAAGAACAT  
TTACCTATTTATATAACAGATCGTATGGTAGGCCATAAATTAGGAGAATTTTCACCTACTC  
TAAACTTCCGAGGACATGCGAAAAATGATAATAGATCTCGTCGTATGATTTTTGAATCTT  
TTATACTGGAGAATCTAGTATTCTTATGCATGAAGATAATGAATTCGATAGTTGTGGTCG  
GACTCTATTATGGATTTATGACCACATTTTCCATAGGGCCCTCTTATCTCTTCCTTCTTCG  
AGCTAGACTTGTGGAAGAAGGA-----ACCGAGAATAAAATATCAGCAACAACCTGGGT  
TTATTACGGGACAGCTCATAATCTTCATGTCTATCTATTATGCGCCTTTGCATTTAGCATT  
GGGTAGACCCCATACAATAACTGTCATAGCTATACCCTATCTTTTATTTAGTTCTTCGGC  
AATAGTAAAAAAAACCTTTTTGAATTATGGATACAAGAATCCAAATTCATACGTAATTTT  
AGTATTCAAAGAATATTTTTTCAGAATCTTCTTTTTTCAGTTTTTCAATCCCCTTTTCTTAC  
CAAGTTCAATATTCATGAGATTCGTCAATATTTATTTATTTTCGATGTAACAATAAAGTGTT  
ATTTTTAACA-----AAAAGTGTTCATTCTAATATCT-----  
-----TATAAA---ATAAAT-----  
-----  
-----  
-----  
-----  
-----  
-----  
-----





CTGGATATTCC-----TCAATGTGCCGACTATTCATG---GAACGTGAGAAGCAGATGAATAA  
TCATCTGCTTCCGGAAGAAATCGAAGAATTT-----CTTGGGAATCCTGCAAGAGCCACT  
CGTTCTTTTTTCTCTGACAGATGG-----TCAGAACTTCAT---CTGGGTTCGAATCCTACTG  
ATAGGTCTACTAGAGATCAG-----AAATTGTTGAAAAAAGAACAAAAGAAACAT---  
CTTGCTCTTCCAGGCGATCGGAA-----AAGAAAGAAATAGTGAATTTATTCAAGAT  
AATTATGTACTTACAAAAT-----ACCGTCTCAATTCATCCTATTTTCATCCTATCGAGGATGT  
GATATGGTTCCA---AAGGATGAATTG-----GACAGTTCCAATAAGATTTTCATTCTTGAA  
CAAAAATCCATTTTGGGGTTTC-----TTTCATCTATTCCATGACCGGAACAGGGGGGAGAT  
ACACGTTA-----CACCACGATTTTGAATCAGAA-----GATCTATTTCAAGAAATGGCAGAT  
CTATTCCTCTATCAATAACCGAGCCG---GATCTGGTGTATCATAAGGAATTTGATTTTTC  
TATTGATTCTCCGGATTGGATCAAAAACAT-----TTCTTGAATGAGTTATTGAACTCCAG  
GGATGAATCGAAAAAGCACTCTTTA-----TTGGTTCTACCTCCTCTTTTTTTAT-----GAA  
CAGAATGAATCTTTTTATCGAAGGATCATAAAAAAATGGGTCCAG---ACCTCTTGCGGG  
AATAATTTGGAAGATCCAAAACCTAAAATAGTTGTATTTGCTAGCAACAACATAATGGA  
GGCAGTCAATCAATATAGATTGATCCGAAATCTGATTCAAATCCAATATAGCACCCAT-----  
-GTTTACATAAGAAATGTATTGAAT-----CGATTCAATTGCAACTTCGAAT  
ATGGAATTCAA-----AGGTATCAAATAGGAAATGATACTCTGAATCATCGAACTAGAAT  
GAAATACACGATCAACCAACATTTCTCAAATTTGAAAAAG---AGTCAGAAGAAATGGT  
TCGATCCT-----CTTATTTTGATTTCTCGAACGGAGAGATCTATGAATTGGGATCCTAATG  
CATATAGATACAAATGGTCCAATGGGAGCAAGAATTTCCAGGAACATTTGGACTATTTTC  
ATTTCTGAGCAGAATAGC-----CTTCAAGTAGTGTTTCGATCGATTACATATTAATCAA  
TATTCGATTGATTGGTCTGAGGTTATCGACAAAAAAGATTTGTCTAAGTCACTTTGTTTA  
TTTTTGTTCCAAGTTACTTCTT-----TTTTTGCCC-----AAGTTT  
CTTCTCTTTTTGTCTAACTCACTTCCTTCTTTTTTCTTTGTGAGTTTTGGGGGTATCTCCA  
TTCATAGGTCCGAG---ATCCACATCTAT---GAATTGAAAGGTCCGAATGATCCACTCTGT  
AATCAGTTATTAGAATCAATAGGTCTTCAAATCTTTCATTTGAAAAAAGGAAACCCTT  
A-----TTATTGGAT-----GACCAAGATACTTCC---CAAAAATCGAAATTCCTTGATCAATG  
GAGGAACAATATCACCATTTTTGTTCAATAAGATACCA---AAGTGG---ATGATTGACTCA  
TTCCATACTAGA-----AAGAATCGCAGGAAATCTTTTGATAACACAGATTCCTATTTCTCA  
ATGATATCCCACGATCCAGACAATTGGCTGAATCCCGTGAAACCATTTTCATAGAAGTTC  
ATTGATATACTATTTTTATAAAGCAAATCAACTTCGATCTTGAATAATCAATATCACTTC  
TGCTTCTAT-----TGTAACAAAAGATTCCCTTTT-----TAT---GTGGAAAAGGCCCGTATC  
AATAATTATGAT-----TTTACGTATGGA---CAATTCCTCAAAATCTTGTTTCATTTCGCAACAA  
A---ATCTTTTCTTTTTGCGATGGTCAA-----AAAAACATGCTTTTTTTGAAG---AGAGATA  
CTATTCACCAATCGAGTTACAGGTATCTAACATATTGATACCTAACGATTTTCCGCAA  
GTGGCGACGAAGGG---TATAACTTCTACAAATCT-----TTCCATTTTCCAATTCGATACG  
ATCCATTCGTTTCGT-----GGAGCTATTTACTCGATCGCAGACATTTCTGGAACACCTCTAA  
CAGAGGGACAAATAGTCCATTTTGAAAAAAATTTATTGTCAACCTCTTTCAGATATGAAT  
ATACCTGATTCAGAAGGGAAGAACTTGTATCAGTATCTCAAT-----TTCAATTCAAACAT  
GGGTTGGATTACACTCCATGTTCTGAGAAATATTTACCATCCGAAAAA-----AGGAAA  
AAA-----CGGAGTTCTTGCTACAA-----AAATGCCTTGAGAAAGGTCAGA  
TGTATAGAACCTTTCAACAAGATAGTGTTTTTTCAACTCTCTCAAATGGAATCTATTCC  
AAACATATATACCATGGTTCCCTTACCTCGACGGGGTACAAATATCTAAATTTTCATATTTTT  
AGATACTTTTTTCAGAC---CTATTGCCGATACTAAGTAGCAGC-----CAAAAATTTGTATCC

ATTTTTCATGATATTATGCATGGGTCAGATATATTATGGCGAATTCGTCAGATTCCATTG---  
-----TGTCTTCCACAATGGAAT--CTGATAAGTGAGATTCCGGGTAATTGTTTCCAT  
AAT-----CTTCTTCTGTCCGAAGAAATGACTCATCGAAATAATGAGTTA-----CTATTGATA  
TCGACACATCTGAGATCGCTAAATGTTTCAGGAGTTC--TTCTATTCAATCCTTTTCTTCT  
CCTTGTTGCTGGATAT--CTCGTTCGTACACATCTTCTCTTTGTTTCTCGA-----GTCTATA  
GTGAGTTACAGACAGAGTTCGAAAAGGTAATAATCTTTGATGATTCCATCATACATGATT  
GAGTTGCGAAAACCTTCTGGATAGGTATCCTACATCTGAACTGAATTCTTTCTGGTTAAA  
GAATCTCTTTCTAGTTGCTCTGGAACAATTAGGAGATTCTCTAGAAGAAATACGGAGTT  
TTGCTTTTGGTGGCAACATGCTATGGGGTGGTGGTCCC-----GCTTATGGG---GTC  
AAATCCATACGTTCTAAGAATAAATCTTGAATCTC-----ATCGATCTCATA---AGT  
ATTATACCAAATCCCATCAATCGAATCGCTTTTTTCGAGAAATACGAGACATCTAAGTCAT  
CCAAGTAAAGCAATCTATTCCCTTGATAAGAAAAATAAAAAACGTGAATGGTGATTGGAT  
TGATGATCAAATAGAATCCTGGGTCTCGAACACTGATTTCGATTGATGATAAAGAAAAAG  
AATCTTGGTTCAGTTTTCT-----ACCTTAACAACA-----GAAAAAAGGATTGATCAAATT  
CTATTGAGTCTTACT--CATAGTGATCTTTTATCA-----AAGAATAACTCTGGTTATC  
AAATAAGTGAACAACCGGGAGCAATTTACTTACGATACTTAGTTGACATTCAT-----AAA  
AAGTATCTAATGATTTATGAATTCAATACATCCTGTTTAGTAGAAAGACATATATTCCCTG  
CTAATTATCAGACAATTACTTAT-----TCACAAACCTTGTGGGGGGCTAATAGTTTTTCAAT  
TCCCATCTCATGGA-----AAACCCTTTTCGCTCCGCTTAGCCCTACCTCCCCCTAGTAG  
GGGTATTTTAGTGATAGGTTCTATAGGAACTGGACGATCCTATTTGGTCAAATACCTAGC  
GAAAAACTCCTATGTTCTTTTATTACAGTATTTCTGAACAAGTTCCTGGATAACAAGC  
CTAAGGGTTTTCTTATTGAT-----GATAGTGAC-----GATATTGATGATAGT  
GACGATAGTGACGAT-----ATCGACCGTGACCTT  
GATATAGAGCTGGAGCTTCTAACTATGATGAATACGCTA-----ACTATGGATATGATGCC  
A-----GAAATAGACCGATTTTATATCACCTTTCACTTCGAATTAGCAAAAGCAATGTCT  
CCTTGCATAATATGGATTCCTAACATTCATGATCTGGATGTGAATGAGTCGAATTACTTAT  
CCCTCGGTCTTTTAGTGAACCTATCTCTCC-----AGGGATTGTGAAAGATGTTCC---ACT  
AGAAATATTCTTGTTATTGCTTCGACTCATATTCCCCAAAAAGTAGATCCAGCTCTAATA  
GCTCCGAATCAATTCAATACATGCATTAAGATACGAAGGCTTCTTATTCCACAACAACG  
AAAACACTTTTTCACTCTTTTATATACTAGGGGATTTCACTTGGAAAAGAAAATGTCCC  
ATACT-----AATGGATTTCGGGTCCACAACGATGGGTTCAAATGTACGAGATCTTGTAGCA  
CTTAACAATGAGGCCCTATCGATTAGTATTATACAAAAAATCCATCATAGACACTAAT  
ATAATTAGCTCTGTTCTTCATAGACAACTTGGGATTTCCGA-----TCTCAGGTAAGAT  
CGGTTTCAGGATCATGGGATCCTTTTCTATCAGATAGGAAGGGCTGTTTCACAAAATGTA  
CTTCTAAGTAATTGCTCCATAGATCCTATCTCTATCTATATGAAGAAGAAA-----TCATGT  
GACGGGGGGGATTCTTATTTGTACAAATGGTACTTCGAACTTGGAACGAGTATGAAGA  
AATTAACGATACTTCTTTACCTTTTGTAGTTGTTCTGCCGGATCGGTCGCTCAAGACCTTT  
GGTCTTACCC-----GGACCTGATGAAAAA---AATGGGATCACATCTTATGGACTCGTTG  
AGAATAATTCT--GATCTAGTTCATGGCCTATTAGAAGTAGAAGGCGCTCTGGTGGGA---  
--TCCTCACGTACAGAAAAGATTGCAGTCAGTTTGATAAGGAT-----CGAGTGACATTG  
CTTCTTCGGTCCGAACCAAGGAAT--CCCTTAAATAGGATTCAAATGGATCTTATTCTA  
TCGTTGATCAGAGATTTCTCTATGAAAAA-----TATGAATCGGAGTTTGAAGAA-----C  
GGGGAGGAGTCTCGACCCGCAA-----CAGATAGAGGAGGAT-----TTTTTCAA  
TCAC-----ATCGTTTGGGCTCCT-----AGAATATGGCGCCCT-----TGGGGCTTTCTATTT

GATTGTATTGAAAGGCCCAATTCATTGGGATTTCCC---TATTGGGCCAGGTCATTTCCGGG  
ACAAG-----CGGATCATTTATGATGAAGAGGATGAGCTTCAAGAGAATGATTCAGAGT  
TCTTGCAGGGTGAACCATGCAGTACCAGACACGAGATAGATCTTCCAAAGAACAGG  
GCTTTTTTCGAATAAGCCAATTCATTTGGGACCCCGCGGATCCACTCTTTTTCTATTCA  
AA---GATCAGCCTTTTGTCTCTGTGTTTTACATCGACAATCTTTACAGATGAAGAGAT  
GTCAAGGGAACTTCTTACTTCCCAAACAGATCTTCTACATCTATATATAAACACTGGTT  
TATC-----AAGAATACGCAAGAAAAGCATTTTGAATTGTTGATTCATTGCCAGAGATGGC  
TTAGA-----ATCAATAGTTCATCATCT-----AAAGGATTTTTCCCTTCTAAT-----ACTCTA  
TCTGAGAGTTATCAATATTTATCAAATCTGTTCCTATCTAAC---GAAGCGCTATTGGATCA  
AATGACAAAGACATTGTTGAGAAAAGATGGCTTTTCCAGATGAGATAGTTGTTGCTA  
TC-----TGCTCCAATAACGAATCATTGGTTTCACTGATGCCTAGATCTCGG---ATAAATGA  
AAATTTTATTGATAAGACCTTTTCAATTGTAGCCAATATCTTATTACGAATAATTCCGACA  
ACTTCAGGAGAAAAAAGGGCATTCACTTATTACAGAGATGGT-----ATGTCAGCTCAATC  
TGAAGGAAATTATGCAGAAGCTTTACAGAATTATTATGAGGCTATGCGACTGGAAATTG  
ATCCCTATGATCGAAGTTATATACTTTATAACATAGGCCTTATTCACACAAGTAACGGAG  
AACATACTAAAGCTTTGGAATATTATTTTCGGGCGCTCGAACGAAACCCATTTTTACCCC  
AAGCTTTTAATAATATGGCCGTGATCTGTCATTAC---CGAGGAGAACAGGCCATTCGAC  
AGGGAGACTCAGAAGTTGCGGAGTCTTGGTTTAATCAAGCCGCTGAATATTGGAAACA  
AGCTATAGCTCTTACCCCCGGTAATTATATTGCAGCACAGAATTGGTTGAAGATCACAG  
GGCGTTTTGAA-----TTGAAAAACGATCAAAGAAGTACTGATATATTCTATAACAGAG  
TCA---AAAATAAGCAATATCTTTTCAGCCTTGATCATTTTTTTTAGGTTCAATTGGGGTTATT  
GTTGGTTGCAATTTCCAGTTATCTCGGTATGGATCTTTTCCTTTTTTCTGAGATTAGTAAT  
TTCCCATTTATTCCACAAGGGGCCACGATGGCTTTTTATGGAATTGGGGGTCTCTTTATT  
AGTTTTTATTGTTGGTGGATTCTTTTGTGGAATATAGGTGGTGGTTTTGATATCTTCGATA  
AAAAAATAAAAAAGTATGTTTTATTCGTTGGGGATTTCTGGAAAAAATCGTCGTATT  
ATTCTCAAATACCTATGAACGAGATTCAATCTATCAGAATAATAGCAGGACGAGGTATT  
TTGACTCGTACCATCGTTTATATGGAACAATAGAACAGGGGTTTATTACCTTGACTCGT  
ATTGAAGATAAT---TTGACTCCGCCAGAAATTGCAAATAAAGCTGGCGAATTAGCTTTTT  
TTTTAGGTGTACCACTTCTGTAT---

>Chloranthus

ATGGAAAAATGGTGGTTCAATTCGATGTTGTCTTTAAGTAAATCAATGGAAAGTCTTGG  
TCCTATTGGAAATACCAGGGGAAGTGAAGACCCCATTTATAAATGATACAGATAAAAAACA  
TTCATAGTTGCAGTAATGTTGATCATTTCTTCGGTGTGAGCGACATTTGGAGTTTCATCT  
CTGATGAAACTTTTTTAGTTAGGGATAGTAATGGTAAAGGTTATTCCGTATATTTGATAT  
TGAAAATCGGATTTTTGAGATTGACAATGAT-----AGTTCTTTTCTGAGTGAAGTGAAGAA  
GTTCTTTTTCT-----AGTTATCTGAGTAATGGGTCCAAGAATGACAATCGCTACTA  
TGATAGTTACATGTATGATACTAAATATAGTTGGAATAATCACATGAATAGTTGCATTGAT  
AGTTATCTTCGTTCTGAAATCAGT-----ATTGATAGTTACATTTCAACTGGTAGCGACAAT  
TTCAGTGACAGTTACATTTATAGTTACATTTTTAGTGACAGTGAGAGTTCTATAAGA  
AGCGGTAATGACAGTAATTTCAATGTAAGAGAAAGAGAT---GATTTTCGATAGAAATCAA  
AAATACGGACGTTTATGGGTTCAATGCGAAAATTGTTATGAATTAATTTATCGGAGTTTT  
TTAGATCCAAAATGAATATTTGTGAACAGTGTGGATATCATTTGAAAATGAATAGTTTA  
GATAGAATCGAACTTTTCGATTGATTCGGGCACTTGGAAATCCTATGGATGACGACATGGT  
CTCTATGGACCCCATTTGAATTTCAATGAGGAACCTTATAGAGATCGTATTGATTC

TTATCAAAGAAATACGGGTTTAACTGAGGCTGTTCAAACAGGCATAGGTCAACTAAAT  
GGTATTCCCATAGCAATTGGGGTTATGGATTTTCAGTTCATGGGAGGTAGTATGGGATCC  
GTAGTAGGCGGAGAAAATCACCCGTTTGATCGAGTATGCTACTAATGAATCTATACCTGTT  
ATTATGGTGTGTGCTTCTGGAGGAGCACGCATGCAAGAAGGAAGTTTGAGCTTGATGC  
AAATGGCTAAAATATCTTCCGCTTCATATAATTATCAATTAATAAAAACTATTCTATGT  
ATCAATCCTTACATCTCCTACAACCGGTGGGGTGACAGCCAGTTTTGGTATGTTGGGAG  
ATATCATTATTGCCGAACCCAATGCCTACATTGCATTTGCGGGTAAAAGAGTAATTGAAC  
AAACATTAATAAGACAGTACCCGATGGTTCACAAGTGGCTGAGTATTCATTCCATAAG  
GGCTTATTCGATCCAATCGTACCACGTAATCCTTTAAAAGGTGTTCTAAGCGAATTATTT  
CAACTCCACGGTTTCTTTCCCTTGAATCAAATTCAAGTGGAAATGGTAACCATGCGAGC  
CGACGAAATTAGTAATATTATCCGTGAACGTATTGAACAATATAATAGAGAAGTAAAGG  
TTGTGAATACCGGCACCGTACTTCAAGTGGGCGATGGCATTGCTCGTATTCATGGTCTT  
GATGAAGTAATGGCGGGTGAATTAGTAGAATTTGAAGAGGGTACAATAGGCATTGCTCT  
GAATTTGGAATCAAATAATGTTGGCGTTGTATTAATGGGTGATGGTTTGATGATAACA  
GGGAAGTTCTGTAAAAGCAACAGGAAGAATTGCTCAGATACCAGTGAGTGAGGCTTAT  
TTGGGTCGTGTTATAAATGCTCTGGCTAAACCTATTGATGGTAGAGGTGAAATTTTCAGC  
TTATGAATCTCGGTTAATTGAATCTCCCGCTCCAGGTATTATTTTCGAGACGTTCCGTATAT  
GAGCCTCTTCAAACGGGGCTTATTGCTATTGATTTCGATGATCCCTATAGGACGCGGTCA  
GCGAGAATTAATTATTGGGGACAGACAGACTGGTAAAACAGCAGTAGCCACAGATACC  
ATTCTCAATCAAAAAGGGCAAATGTAATATGTGTTTATGTAGCTATTGGTCAAAAAGC  
ATCTTCTGTGGCTCAAGTAGTGACTIONTTCCAGGAACGAGGGGCGATGGAATACACC  
ATTGTGGTAGCCGAAATGGCGGATTCACCCGCTACATTACAATACCTCGCTCCTTATACA  
GGAGCGGCTCTGGCTGAATATTTTATGTACCGTGAACGACATACTTCAATAATTTATGAT  
GATCCCTCTAAACAGGCACAAGCTTATCGTCAAATGTCTCTTCTATTAAGAAGACCGCC  
CGGTCCGGAAGCTTATCCAGGAGATGTTTTTTATTTGCATTCACGCCTTTTGGAAGAG  
CTGCTAAATTAAGTTCTCGTTTAGGGGAAGGAAGTATGACCGCTTTACCAATAGTGGAG  
ACTCAATCTGGGGACGTTTCGGCTTATATTCTACTAATGTAATTTCCATTACGGATGGG  
CAAATATTCTTATCTGCCGATCTATTCAATGCGGGAATCCGACCTGCTATTAATGTGGGC  
ATTTCCGTCTCCAGAGTAGGATCCGCAGCTCAAATTAAGCCATGAAACAAGTAGCTG  
GCAAATCAAAATTGGAAGTAGCTCAATTTCGAGAGTTAGAAGCCTTTGCACAATTTCG  
TTCTGATCTCGATAAAGCTACTCAGAATCAATTGGCAAGAGGTCAACGATTACGCGAGT  
TGCTCAAACAATCTCAATCAGCCCCTCTCACGGTGGGAAGAACAGATAGTAACTATTTAT  
ACCGGGGCGAATGGGTATCTTGATTCGTTAGAAATTGGGCAGGTAAAGAAATTTCTCGT  
TCAGTTACGTACCTACTTAAAAACGAATAAACCTCAGTTCCAAGAAATCATATCTTCTA  
CCAGGACATTCACCGAGCAAGCAGAAGCTCTTTTGAAAGAAATTATTCAGGAACAGAT  
AGAACTCTTTCTACTTCAGGAACAAACAATGAGAATCAATCCTACTACTTCTGGTCCTG  
GGGTTTCCACACTTGAAGAAAAATCCTGGGGCGTATCGCTCAAATCATTGGTCCGGT  
ACTGGATGTCGCTTTTCCCCCGGGAAGATGCCTAATATTTACAACGCTTTGGTAGTTA  
AGGGTCGAGATACTGTCGGTCAACAAATTAATGTGACTTGTGAGGTACAGCAATTATTA  
GGAATAATCGAGTTAGAGCTGTAGCTATGAGTGCTACAGATGGTCTGATGAGAGGAAT  
GGAAGTGATTGACACGGGAGCTCCCCTAAGTGTTCCAGTTGGTGGAGCTACTCTCGGA  
CGAATTTTCAACGTTCTTGGAGAGCCTGTTGATAATTTGGGTCTGTAGATACTCGCAC  
AACATCTCCTATTCATAGATCTGCGCCTGCCTTTATACAGTTAGATACAAAATTATCTATC  
TTTGAAACAGGGATTAAGTGGTGGATCTTTTAGCTCCTTATCGCCGTGGAGGAAAAAT

CGGACTATTCGGGGGAGCTGGAGTGGGTAAAACAGTACTCATCATGGAATTGATCAAC  
AACATTGCCAAAGCTCATGGGGGTGTATCCGTATTTGGAGGAGTAGGCCAACGTACTC  
GTGAAGGAAATGATCTTTACATGGAAATGAAAGAATCCGGAGTGATTAATGAAGAAA  
CATTGCAGAATCAAAGTAGCTCTAGTCTATGGTCAGATGAATGAACCGCCGGGAGCT  
CGTATGAGAGTTGGTTTACTGCCCTAACCATGGCGGAATATTTCCGCGATGTTAATGA  
ACAAGACGTACTTCTATTTATCGACAATATCTTCCGTTTTGTCCAAGCAGGATCAGAAGT  
ATCCGCCTTATTAGGTAGAATGCCTTCTGCTGTAGGTTATCAACCTACCCTTAGTACAGA  
AATGGGTTCTTTGCAAGAAAGAATTACTTCTACCAAAGAGGGGTCTATAACTTCCATTC  
AAGCAGTTTATGTACCTGCGGACGATTTGACCGACCCTGCTCCTGCCACGACATTTGCA  
CATTTAGATGCTACTACCGTACTATCAAGGGGATTGGCTGCCAAAGGTATCTATCCAGCA  
GTAGATCCTTTAGATTCAACGTCAACTATGCTCCAACCTAGGATCGTTGGCGAGGAACA  
TTATGAAACTGCGCAAAGAGTTAAGCAAACCTCACAACGTTACAAAGAACTTCAGGAC  
ATTATAGCTATCCTTGGGTTGGACGAATTATCCGAAGAGGATCGTTTAAACCGTATCAAGA  
GCACGAAAAATTGAGCGTTTCTTATCACAACCTTCTTCGTAGCAGAAGTATTTACTGG  
TTCTCCAGGAAAATATGTTGGTCTTGCAGAAACAATTAGGGGATTTCAACTGATCCTTT  
CCGGAGAATTAGATGGTCTTCCCGAGCAGGCCTTTTATTTGGTAGGTAACATCGATGAA  
GCTACCGCGAAGGCTATGAACTTAGAAGTGGAGAGTAAATTGAAGAAAATGACCTTAA  
ACCTTTGTGTGCTGACTCCTAATCGAATTATTTGGGATTCAGAAGTGAAAGAAATCATT  
TTATCTACTAATAGTGGCCAAATTGGCGTATTGCCAAACCACGCCCTATTGCCACAGCT  
GTAGATATAGGTATATTGAGAATACGCCTCAACGACCAATGGTTAACGATGGCTCTAATG  
GGTGGTTTTGTAGATAATAGGCAATAATGAGATCACCATTTTAGTAAATGATGCGGAGAA  
GGGCAGTGACATTGATCCGCAAGAAGCTCAGCAAACGCTTGAAATAGCGGAAGCTAA  
CTTGAGTCGAGCTGAAGGCAAGAGACAAGCAATTGAGGCGAATCTAGCTATCAGACG  
AGCTAGGACACGAGTAGAGGCTATCAATGTTATTTTCGATGAAAAATATAACCGATTCTT  
TTGTTTCCGTGGGTTACTGGTCATCGGCCGGAAGTTTCGGGTTTAATACCGATATTTTAG  
CAACAAATCCAATAAATCTAAGTGTAGTGCTTGGTGTATTGATCTTTTTTGGAAAGGGA  
GTGTTAAGTGATTTATTAGATAATCGAAAACAAAGAATCTTGAGTACTATTCGAAATTCA  
GAAGAACTACGTGGAGGAGCTATTGAGCAGCTCGAAAAAGCCCCGGGCTCGCTTACGG  
AAAGTAGAAATGGAAGCAGATGAGTTTCGAGTGAATGGATATTCTGAGATAGAACGAG  
AAAGGGTGAATTTGATTAATGCCACTTATGAGAATTTGGAACGATTAGAAAATTTACAAA  
AATGAAACCATTCATTTTGAACAACAAAGAGCGATTAATCAGGTCCGACAACGAGTTT  
TCCAACAAGCCTTACAAGGAGCTCTAGGAACTCTGAATAGTTGTTTGAACAGTGAGTT  
ACATTTACGCACCATCAGTGCTAATATTGGCATGTTCCGGGGCCATGAAAGAAATAACGG  
ATATGAATCCATTGATTTCTGCCGCTTCGGTATTGCTGCTGGATTGGCTGTCGGGCTTG  
CTTCGATTGGACCTGGAGTTGGTCAGGGTACTGCTGCGGGCCAAGCCGTAGAAGGTAT  
CGCGAGACAACCAGAAGCAGAGGGTAAAATACGCGGTACTTTTACTTAGTCTGGCT  
TTTATGGAAGCTTTAACAATTTACGGACTGGTCGTGGCATTAGCGCTTTTATTTGCGAAT  
CCTTTTGTATGAATGTTCTACCATGTTCCATCAACACACTAAAAGTGTTATACGATATAT  
CCGGTGTGGAAGTAGGCCAACATTTCTATTGGCAAATAGGGGGTTTCCAAGTCCATGCT  
CAAGTACTTATCACTTCTTGGGTCGTAATCGCTATCTTATTAGGTTTCAGTACTATAGCTG  
TTCGGAATCCACAAACCATTTCCGACTGACGGTCAGAATTTCTTCGAATATGTCCTTGAA  
TTCATTCGAGATTTGAGCAAAACTCAGATTGGAGAAGAATATGGTCCTTGGGTTCCCTT  
TATTGGAATATGTTCCATTTATTTTGTCTTAACTGGTCAGGTGCTCTTTTACCTCGG  
AAAATCATAACAGTTACCTCATGGGGAGTTAGCTGCACCTACGAATGATATAAATACTACT

GTTGCTTTAGCTTTACCCACGTCAGTGGCATATTTCTATGCAGGTCTTACCAAAAAAGG  
ATTGGGCTATTTTGGTAAATATATTCAACCAACTCCAATCCTTTTACCAATTAACATCCTA  
GAAGATTTACAAAACCTTTATCACTTAGTTTTTCGACTTTTTCGGAAATATATTGGCTGAT  
GAATTAGTAGTTGTTGTTCTTGTTCCTTTAGTACCTTCAGTAGTTCCTATACCTGTCATGT  
TCCTTGGATTATTCACAAGTGGTATTCAAGCTCTTATTTTTGCAACTTTAGCCGCGGCTT  
ATATAGGTGAATCTATGGAGGGCCATCATATGATATTTGCGACTTTAGAACATATATTAAC  
TCACATCTGTTTTTTCGATCATTTTAATTGTCATTACGATTCAATTTGATTACCTTATTAGTCC  
ATGAAATAGGA---CTATATAATTTGTCAGAAAAAGGCATGATAGCTACTTTTTTCTGTATA  
ACAGGATTATTAGTTTTCTCGTTGGATTTATTCAGGACATTTCCCGTTAAGTGATTTATATG  
AATCATTAATATTTCTTTCATGGAGTTTCGCTATTATTCATATGGTTCCTAAAATACGGAA  
CCATCCAAATTTCTTAAGCACAACTGCGCCAAGTACTATTTTTACCCAAGGCTTTAC  
CACTTCGGGTCTTTTAACTAAAATGCATCAATCTACAATATTAGTACCCGCTCTACAATC  
CAAATGGTTAATGATGCACGTAAGTATGATGTTATTGAGCTATGCAGCTCTTTTATGTGG  
ATCGTTATTATCCATAGCTCTTCTAGTCATTACATTTCGAAAAACATAGATATTTTGGGT  
AAAAGTAATAAGACCCAATACTTGAATGAAAAAAGATTACATTTACAAAAGGCTTCTTT  
TCTTTCATTTAGAAATTATCACAGGTATCAATTGACTCATCGATTGGATTATTGGAGTTAT  
CGTGTCAATTAGCCTAGGGTTTACCTTTTTAACCATAGGCATTCTTTCGGGAGCGGTATGG  
GCTAATGAGGCATGGGGTCTTATTGGAATTGGGACCCCAAGGAACTTGGGCGTTTAT  
TACTTGGACCATATTCGCGATTTATTACATACTAGAACAATAAAAGTTTGCAAGGTG  
CAAATTCGGCAATTGTGGCTTCTATGGGATTTCTTATAATTTGGATATGTTATTTCCGGGT  
CAATCTATTAGGAATAGGGCTGCATAGTTATGGTTCATTCACATTAACAAAAGAAAAGG  
AATCGACCCCCCTCCCATTCATATCTTGCATCTATAGTATTGTTGCCCTGGTGGATTTC  
TCTTTCATTTAAGAAATGTTTCGAACCCCTGGGTTACTCATTGGTGTAAATACCAGACAATC  
CAAATTTTTTTTGAATGATATTCAAGAGAAGGGCACTCTAGAAAGATTCATAGAATTAG  
AAGAACTATTCTGTTGGACAAAATAATAAAGTACTACCCGGACACACATATACAAAGG  
CTTTGGATAAGAATCCACAAAGAAACGATACAATTGGTCAAAATTCACAATGAAGATC  
ATAATCATATCATTTTTTGTCTCTCGACAAATATAATTTCTTTCACTATTCTAAGTGGTTAT  
TCCATTCTGGGTAATGAAGAGCTTTTTATTCTGAATTCTTGGGTTTCAGGAATTCCTCTAT  
AACTTAAGCGACACAATAAAAGCTTTTTTCGATTCTTTTATTACCGATTTATGTATCGGA  
TTCCACTCACCCCATGGTTGGGAATAATGATTGGTTCATCTACAAAATTTTTGGATTT  
GCTCATAACGATCAAGTTATATCGGGTTTTGTTTCCACTTTTCCAGTCTTTCTAGATACAT  
TTTTCAAATATTTGATCTTCCGTCATTTAAATCGTGTATCTCCTTCACTTGTAGTGATTTAT  
GATTCATAAATGAGATGCCCATTTGGTGTTCAAAAGTACCTTTTCGGAGTCCCTGGAGA  
GGAAGATGCAGTTTGGGTTGACGTAAAC---CGACTTCATCGAGAAAGATTACTTTTTTT  
AGGCCAAGAGGTTGATAGTGAGATCTCGAATCAACTTGTGGTCTCATGGTATATCTCA  
GTATAGAGGATGATACTAGGGATTTGTATTTGTTTATAAACTCTCCCGGTGGATGGGTAA  
TACCAGGACTAACTATTTATGATACTATGCAATTTGTGCCACCAGATGTACATACAATAT  
GCATGGGATTAGCCGCTTCAATGGGATCTTTCATCCTGGTTGGAGGAGAAATTACCAAA  
CGTCTAGCATTCCCGCACGCTAGGATTATGATCCACCAACCTGCTAGTTCTTTTTATGAG  
GCACAAGCAGGAGAATTTATCCTGGAAGCGGAAGAATACTGAAACTCCGCGAAACC  
CTCACAAGGGTTTATGTACAAAGAACGGGCAACCCTTTATGGATTGTATCCGAAGACAT  
GGAAAGGGATGTTTTTATGTCAGCAACAGAAGCCCAAGCTCATGGCATTGTTGATCTTG  
TAGCGGTTCGAAATGAAAGAACAAAATTTGATTCATGAGGGTTTAATTAATGAACTCACTT  
CCCAACGGTATGTTCCGAGTTCGTTTAGATAATGAGGATCTGATTCTAGGTTATGTTTCG

GGGAGGATCCGACGTAGTTTTATACGGATACTACCCGGAGATAGAGTCAAAAATCGAAGT  
AAGTCGTTATGATTCAACCAGGGGGCGTATAATTTATAGACTTCGCAACAAAGATTCTGA  
ACGATATGGAAGAATTACAAAGATATTTAGAAATTGATAGATCTCGTCAACAACACTTC  
CTATATCCGCTTCTCTTTTCAGGAGTATATCTACGTA CTGCTCATGATCATGGTTTATTAG  
GTTATGACAAT---TCCAGTTCACTAATTATCAAACGTTTAATTATTTCGAATGCATCAACAG  
AATCATTGATGATTTTCGGTTAATCATTTCGAACCAAATCGATTCCCTTGGGAAGAATTTT  
GATTATCAAATGATATCAGAGGGTTTTGCAGTCATTGTGGAAATTCATTCTCTCTGCAA  
TTAGTATCTTCTCTAATAGCAAAAATTCAT---TTACGATCTATTCAATACTTCCCTTT  
TTAGAGGACAAATTCTCACATTTAAATTATGTGTCAGATATCCTAATACCTTACCCCA  
CATCTGGAAATCTTGGTTCAAACCCTTACCGTTGGATACAAGATGCTCCCTCTTTGCA  
TTTATTGCGATTCTTTCTCCACGAGTATACTAATTGGAATAGTTTCATTACTAAATCCATT  
TATCTTTTTACAAAACAAGATTATTCTTGTTCCTATATAATTCTCATGTATATGAATGCG  
AATCCGATTCATTTTCTCCGTAAACAGTCTTCTTATTTAGGATCAAATATTCTGGAGC  
CTTTATTGAGCGAACACATTTCTATGGAAAAATGGAATAT---GTGGTAGTCTTCGTAAT  
CAGAAA---CTATGGTTGTTCAAGGATCCTTTCATGCATTATGTCAGATATCAAGGAAAAG  
CAATTCTGGCTTCAAAGGGGGCTCATCTTCTGATGAAGAAATGGAATATCACCTTGT  
AATTTCTGGCAATGTCATTTTTACTTGTGGTATCAACCGGATAGGATCCATATAAACCA  
TTATCCAATCATCCTTCTATTTTCTGGGCTATCTTCAAGTGTACTCCTAAATCTTTCG  
CGTAAGGAGTCAAATGCTAGAGAATTCATTTCTAATAAATACTGCTATT-----AAGAAAT  
TCGATACCATAGTCCCTATTATTCTCTGATTGGAGCATTGGCTAAAGCAAATTTTGT  
ACATATCAGGGCATCCCATAGTAAGCCGGTCCGGGTTGATTTCGTCAGATTCTGATATTA  
TCGATCGATTGGGCGGATATGCAGAAATCTTCTCACTATCATAGTGGATCTTCAAAA  
AACAGAGTTTGTATCGAATAAAGTATATCCTTCGATTTTCATGTGCTAGA ACTTTGGCTC  
GTAAACATAAAAGCACGGTACGCACTTTTTTGAAGATTAGGTTTCGGAATTGTTGGA  
AGAATTCCTTACAGAGAAAGAACAAGTTATTTCTTTGATCTTCGCAATACGGATTTGGT  
ATTTGGATATTCTCTGTATTAATGACCTGGCCAATCATGAAATGATAATTGATACGACA---  
GAAATAAAA---GCTATCAATTCTTTTTCCAGATCGGAA---TCCTTAAAAGAGGTCTATGG  
ACTCATATGGATGCTTGTCCCTATTTTTACTCCTGTATCAGGGATCACACTAGGGGTACT  
AGTGATTGTGTGGTTAGAAAGAGAAATATCCGCAGGGATACAACAACGTATTGGGCCT  
GAATATGCCGGTCCCTTGGGGATTCTTCAAGCTTTAGCAGACGGGACCAA ACTACTTTT  
CAAAGAGGATCTTCTCCCATCTAGAGGAGATATTCGTTTATTTCAGCATTGGACCATCTAT  
AGCAGTCATATCCATTCTACTAAGTTATTTCAGTAATTCCTTTTTACCATCGCTTTGTTCTA  
GCGGATCTCAGTATAGGTGTTTCTTTATGGATCGCCATTTCAAGTATTGCTCCTATTGGA  
CTTCTTATGTCAGGGTATGGATCGAATAATAAATATTCCTTTTTCAGGTGGTCTACGAGCT  
GCTGCTCAATCTATTAGTTATGAAATACCATTA ACTCCATGTGTGTTATCAATATCTCTATT  
ATCTAACAGTTCAAGTACAGTTGATATAGTTGAGGCACAGTCCAAATATGGGTTTTGGG  
GATGGAATCTGTGGCGTCAACCCATAGGGTTGATGGTTTTTCTAATTTCTTCCCTGGCA  
GAATGTGAGAGATTACCCTTTGATTTACCAGAAGCGGAAGAAGAATTAGTAGCAGGTT  
ATCAAACCGAATATTCAGGTATCAAATCCGGTTTATTTTACGTTGCTTCTTACCTAAATCT  
ACTAGTTTCTTCATTATTTGTAACAGTTCTTTATTTGGGCGGGTGGAATTTCCCTATTCCG  
TACATATTCATTCCGGA ACTATTTCGGAATAAATAAAAACAGGTGGAGTCTTTGGAACGAC  
AATTGGTATCCTTATTACATTAGCTAAAGCTTATTTGTTCCCTGTTTCATTCCCTATCACA  
AGATGGACTTTACCTAGGATGAGAATGGACCAACTATTAAGCCTTGGATGGAAATTTCT  
TTTACCCATTTCTCTAGGTAATCTATTATTGACA ACTTCTTCCCACTTGTTC ACTGATG

ATCTGGCATGTACAGAATGAAAACCTTCATTCTCGATTCTACGAGAATTTTTATGAAAGC  
GTTTCATTTGCTTCTCTTCCATGGAAGTTTCATTTTCCCAGAATGTATCCTCATTTTTGGC  
CTAATTCTTCTTCTGATGATCGATTCAACCTCTGATCAAAAAGATATACCTTGGTTATATT  
TCATTTCTTCAACAAGTTTAGTAATGAGCATAACGGCCCTATTGTTCCGATGGAGAGAA  
GAGCCTATGATTAGCTTTTTCGGGAAATTTCCAAACGAACAATTTCAACGAAATCTTTCA  
ATTTCTTATTTTACTATGTTCAACTCTATGTATTCCTCTATCCGTAGAGTACATTGAATGTA  
CAGAAATGGCTATAACAGAGTTTCTGTTATTCGTATTAACGGCTACTCTAGGAGGAATG  
TTTTTATGTGGTGCTAACGATTCAATAACTATCTTTGTAGCTCCAGAATGTTTCAGTTTAT  
GCTCCTACCTATTATCTGGATATAACCAAGAGAGATGTACGGTCTAATGAGGCTACTACGA  
AATATTTACTCATGGGTGGGGCAAGCTCTTCTATTCTGGTTCATGGTTTCTTGGCTATA  
TGGTTCATCCGGGGGAGAGATCGAGCTTCAAGAAATAGTGAATGGTCTTATCAATACAC  
AAATGTATAACTCCCCAGGAATTTCAATTGCGCTTATATCCATCACTGTAGGAATTGGGT  
TCAAGCTTTCCCCAGCCCCTTCTCATCAATGGACTCCTGACGTATACGAAGGATCTCCC  
ACTCCAGTCGTTGCTTTTCTTTCTGTTACTTCGAAAGTAGCTGCTTCAGCTTCAGCCAC  
TCGAATTTTCGATATTCCTTTTTATTTCTCATCAAACGAATGGCATCTTCTTCTGGAAATC  
CTAGCTATTCTTAGCATGATATTGGGGAATCTCATTGCTATTACTCAAACAAGCATGAAA  
CGTATGCTTGCATATTCGTCCATAGGTCAAATCGGATATGTAATTATTGGAATAATTGTTG  
GAGACTCAAATGATGGATATGCAAGCATGATAACTTATATGCTGTTCTATATCTCCATGA  
ATCTAGGAACTTTTGCTCGCATTGTATCATTGGTCTACGTACCGGAACTGATAACATTC  
GAGATTATGCAGGATTATACACGAAAGATCCTTTTTTGGCTCTCTCTTCAGCCCTATGTC  
TCTTATCCCTAGGAGGTCTTCTCCACTAGCAGGTTTTTTTCGGAAAACCTCCATCTATTCT  
GGTGTGGATGGCAGGCAGGCCTATATTTCTTGGTTTCAATAGGACTCCTTACGAGCGTT  
GTTTCTATCTACTATTATCTAAAAATAATCAAGTTATTAATGACTGGACGAAACCAAGAA  
ATAACCCCTCACGTGCGAAATTATAGAAGATCTCCTTTAAGATCAAACAATTCCATCGA  
ATTGAGTATGATTGTATGTGTGATAGCATCTACTATAACCAGGAATCTCAATGAACCCAAT  
TATTGCAATTGCTCAGGATACCCTCTTTATGTTTCTGCTTCACGAATATGATATTTTCTGG  
GCATTTCTAATAATATCAAGTGTATTTCCTATTTTGGTATTTCTCATTCCGGAGTTTTAGC  
CCCGATTAATGAAGGACCAGAGAAGCTCTCTAGTTATGAATCGGGTATAGAACCAATGG  
GGAATGCTTGGTTACAATTCCGAATCCGCTATTACATGTTTGCTCTAGTTTTTGTGTTTT  
TGATGTTGAAACGGTCTTTCTTTATCCATGGGCAATGAGTTTCGATGTATTGGGCGTATC  
CGTATTTATAGAAGCTTTAATTTTCGTGCTTATCCCAATTGTTGGTTCAGTTTATGCATGG  
CGAAAAGGAGCATTGGAATGGTCTACGAGTTCTTTTCCCTGGTTAACAATAATTGTTGT  
TTTGCCGATATTCGCAGGTTCTTCCATTTTCTTTCTCCCCATAGAGGAAATAAGATAGT  
TCGATGGTATACTATATGTATATGTTTGTAGAACTCCTTCTAACGACCTATACATTCTGTT  
ATCATTTCCAATTGGATGATCCACTAATCCAATTGGAGGAGGATTATAAATGGATAAATA  
TTTTTGATTTTCACTGGAGACTAGGAATCGATGGACTTTCCATAGGACCCATTTTACTGA  
CGGGCTTCATCACTACTTTAGCTACTTTAGCGGCTCGGCCAGTTACTCGAGATTTCGCGA  
TTGTTCCATTTCTGATGTTAGCAATGTACAGTGGTCAAATAGGATCATTTTCTTCTCGA  
GACCTTTTACTTTTTTTCATCATGTGGGAATTAGAATTAATTCCCGTTTACCTACTTCTAT  
CCATGTGGGGGGGAAAGAAACGCTGTACTCAGCTACAAAGTTTATTTTATACACTGCA  
GGGGGTTCTATTTTCTTTTAATGGGAATTCGGGTATGGGTTTATATGGTTCCAATCAA  
CCACCATTAAATTTTGAACATCAGCTAATCAATCGTATCCTGTGGCATTGGAAATTCTG  
TTCTATTTTGGCTTCCCTTATTGCTTATGCTGTCAAATCACCGATTATACCTCTACATACAT  
GGTTACCAGATACCCATGGAGAAGCACATTACAGTACATGTATGCTTTTAGCCGGAATC



TTATTA AAAAATGGGAGCATATGGGTTGGTTCGGATCAATATGGAATTATTACCCCATGCT  
CATTCTATATTTTCTCCCTGGTTGATGATAGTGGGAACAATTCAAGTAATCTATGCAGCT  
TCAACTTCTCCCGGTCAACGCAATTTAAAAAAGAGAATAGCTTATTCTTCCGTATCTCAT  
ATGGCTTTCATAATTATAGGAATTGGTTCATAACCGATACGGGACTCAATGGAGCTATT  
TTACAAATAATCTCTCATGGGTTTATTGGTGCTGCACTTTTTTTCTTGGCAGGAACGAGT  
TACGATAGAATACGTCTTATTTATCTCGACGAAATGGGAGGAATAGCTATCCCAATGCCA  
AAAATATTTACCATGTTCAAGTAGCTTCTCGATGGCTTCTCTTGC GTTGCCAGGAATGAGT  
GGTTTTGTGTCAGAATCGATAGTGTTTTTTGG AATAATTACCAGCCCTAAATATTTTTTCA  
TGCCAAAATACTAATTACTTTTTGTAATGGCGATTGGAATGATATTA ACTCCTATTTATTC  
ATTATCTATGTCACGCCAGATGTTCTATGGATACAAGCTATTCAATGTTCCAAACTCTTAT  
TTTTGTGGATTCTGGACCAGAGA ACTATTTGTTTCGATCTGTATCTTTCTACCCGTAATA  
GGTATTGGTATTTATCCCGATTTCTGTTCTCTCGCTATCAGTTGACAAGGTGGAAGCTATT  
CTATCTAATTACTTTCATAGAATGATGCTCGAGCATGTACTTGT TTTGAGTGCCTATTTAT  
TTTCTATTGGTATCTATGGATTGATCACAAGCCGAAACATGGTTAGAGCACTTATGTGTC  
TTGAGCTTATATTGAATGCGGTAAATATGAATCTCGTAACATTTTCTGATTTATTTGATAG  
TCGTCAATTA AAAGGAGACATTTTTTCGATCTTTGTTATAGCTATTGCAGCCGCTGAAGC  
AGCTATTGGGCCAGCTATTGTTTTCGTCGATCCATCGTAACAGAAAATCAACTCGTATCA  
ATCAATCGAATTTGTTGAATAAAATGGAACATACATTTCAATATGCATGGGTCATACCTT  
TCGTTCCACTTCCAGTTACTATGTCAATAGGATTGGGACTTCTGCTTGTTCGGACGGCA  
ACAAAAAATCTTCGTCTGATGTGGGCTTTTCCTAGTGTTTTATTGCTAAGTATAACAATG  
GTTTTTTTCGTCCAATCTGTCTATTCAGCAAATAAATGGCAGTTTTATTTATCAATATCTAT  
GGTCTTGGACCATCAATAATGATTTTTCTTAGAGTTTCGGTTACTTGATCGATCCACTTA  
CTTCTATTATGTCAATATTAATCACTACTGTTGGAATCGTGGTTCTTATTTATAGTGACAA  
TTATATGTCTCATGATCAAGGATACTTGAGATTTCTTTCTTATATGAGTTTTTCCAATACT  
TCCATGTTGGGATTAGTTACTAGTTCCAATTTGATACAAATTCATATTTTTTGGGAGCTA  
GTGGGAATGTGTTTCGATCTATTAATCGGTTTTTGGTCCACACGAACCGTTGCAGCAAA  
TGCTTGCAAAAAGCGTTTGTA ACTAATCGTATAGGGGATTTTGGTTTACTATTAGGAAT  
CTTAGGTCTTTATTGGATAACAGGTAGTTTCGAATTTCCGGATTTGTTTCGAAATTTTCAA  
GAACAATGGGGTTCATTTTGTATTTGCTACTCTTTGTGCCTCCCTATTATTCGTTCGGTGC  
AGTTGCTAAATCTGCACAATTCCTCCCTTCATGTATGGTTACCGGATGCCATGGAGGTAC  
CCACTCCTATTTCCGGCTCTTATACATGCTGCTACTATGGTAGCAGCGGGAATTTTTCTTG  
TCGCTCGACTTCTTCCTATTTTCACAGTCATACCTTATATAATGAATCTCATTGCTTTGAT  
AGGTGTAATAACAGTACTGTTAGGAGCTACTTTGGCTCTTGCTCAAAGAGATATTAAGA  
GAAGTTTAGCCTATTCTACAATGTCTCAATTGGGTTATACTATGTTAGCTTTGGGTATAG  
GTTCTTATCGAGCTGCTTTATTCCATTTGATCACTCATGCCTACTCTAAAGCATTATTGTT  
TTTAGGATCTGGATCCATTATTCATTCAATGGAACCTATTGTTGGATATTCTCCAGATAAA  
AGTCAGAATATGGTTCTTATGGGTGGTTTAAGAAAATATATCCCAATTACAAAAACTACT  
TTTTTATTAGGTACATTTTCTCTTTGTGGTATTCCGCCTCTTGCTTGT TTTTGGTCCAAAG  
ATGAAATCTTAATGATAGTTGGTTGTATTCACCCATTTTTTGCGATAATAGCTTATTCCAC  
AGCAGGGTTAACCGCATTTTACATGTTTCGGATGTACTTACTTACTTTTGAGGGGCATTT  
ACACATTCATTTTCAA AATTACAACAGTATTA AAAAATGGCTCGCTCTATTCAATATCTATA  
TGGGGGAAAGAAGGACCGAAACCCGTTAAAATC---AATTTTCGTTTTATCAACAATGAAT  
AAGGTTTCCAATAAAGAA-----ACTTCCGTGTATCCTCAAGAATCGGACAATACTATGTT  
ATTTCTCTCCTTGTATTGGTCCTATTTACTTTGTTCGTTGGATCCATCGGAATTT CAGGA

GATTTTGATATATTATCGAAATGGTTAACCCCATCGATAAACCTTTTGCATAAAAATTTGA  
GCTATCCCCGGATTGGTATGAATTTTTATAAATGCAATTTTTTCAGTTAGTATATCCTAT  
TTCGGAATACTCATAGCGTTTCTTTTATATGGGTCTGTTTATTCATCTTCCAGAATTTGG  
ACTTAATCAATTTATTTGTTATTTTATTGGACCGAATAAAAAATGTGATATATAATTGGTC  
ATATAATCGTGGTTACATAGATGTTTTTATGCAACAGCCTTAAGTGGGGTATAAGGGG  
ATTAGCTCAATTAACCTCACTTTTTTGATAGACGCGCAATTGATGGAATTACGAATGGGGT  
TGGTGTGCAAGTTTCTTTGTAGGAGAAGGGATCAAATAT--GTGGGTGGCGGACGAAT  
TTCTTCTATCTCTTCTTGTATTTATTTATATAATTATAATAATCTTTTTGTTAATTATGGAT  
TTACCTGGACCAATACATGATATCTTTTAGTATTTTTGGGATCGGGTCTTATATTAGGAG  
GTCTAGGAGTAGTATTACTTACCAATCCAATTTCTTCTGCCTTTTCATTGGGATTGGTTCT  
TGTTTGTATATCCTTATTCTATATTCCATCGAATTCCTATTTTGTAGCTGCTGCACAGCTCC  
TTATTTACGTAGGAGCAATAAATGTCTTAATCGTGTGCTGTAATGTTTATGAATGGTTC  
AGAATATTACAATGATTTCCATCTTTGGACCATGGAGATGGATTCACCTCATTGGTTTG  
TACAAGTATTCTTTTTTACTAATTACTACTATCCAGATACGTCATGGTACGGAATTATT  
TGGACTACAAGATCAAACCAGATTATAGAGCAGGACCTGACAAGTAATGTTCAACAAA  
TTGGGATTCATTTATCAACAGATTTTTATCTTCCATTTGAACTCATTTCTATAATTTCTTTA  
GTTGCCTTGATAGGTGCAATTGCTATGGCGCGCCAGATGACTGTACCGGCTACAAGAA  
AAGACCTCATGATAGTCAATATGGGTCTCACCACCCATCAATGCATGGTGTCTTCGA  
CTCATCGTTACTCTAGATGGTGAAGATGTTATTGATTGTGAACCTATATTGGGTATTTAC  
ACAGAGGGATGGAAAAAATTGCAGAAAACCGAACAATTATACAATATCTGCCTTATGTA  
ACACGTTGGGATTATTTAGCTACTATGTTACAGAGGCAATAACGGTAAATGCACCAGA  
ACAATTGGGAAATATTCAAGTACCTAAAAGAGCCAGCTATATCAGAGTCATTATGCTGG  
AGCTAAGTCGTATAGCTTCTCATTGTTATGGCTTGGACCTTTTATGGCGGATATTGGTG  
CACAGACTCCTTTCTTCTATATTTTCAGAGAGAGGGAATTGCTATATGATCTATTTGAAG  
CTGCCACAGGTATGCGAATGATGCATAATTATTTCCGTATCGGAGGAGTAGCTGCTGATC  
TACCTCATGGCTGGGTAGATAAATGTTTGGATTTCTGTGATTATTTTTAACGGGAGTTG  
CTGAATATCAAAGCTTATTACGCGGAATCCCATTTTTTTGGAACGAGTTGAAGGAGTG  
GGCATTATTGGCGGAGAGGAAGCAATAAATTGGGGTTTATCAGGACCAATGCTACGAG  
CTTCCGGAATCCGATGGGATCTTCGTAAAGTTGATCATTATGAGTGTTACGATGAATTCG  
ATTGGGAAGTCCAATGGCAAAAAGAAGGGACTCGTTAGCTCGTTATTTAGTACGAATT  
AGTGAAATGACAGAATCCATAAAAATTATTCAACAGGCTCTGGAAGGAATTCGGGGG  
GGCCCTACGAGAATTTAGAAGTCCGCCGCTTTGATAGAGCAAGGGATGCCGAATGGAA  
TGATTTTGACTATCGATTCATTAGTAAAAAGCCTTCTCCCACTTTTGAATTGTCGAAACA  
AGAACTTTATGCGCGAGTAGAAGCCCCAAAGGGAGAATTAGGAATTTTTCTGATAGGA  
GATAATAGTGTTTTTCCATGGAGATGGAAAATCCGTCCACCAGGTTTCATCAATTTGCA  
AATCTTCCCTCAGCTAGTTAAAAGAATGAAATTGGCTGATATCATGACGATACTAGGTA  
GTATAGATATCATTATGGGAGAAGTTGATCGTATGTTCCCTATGGTGAAGTGGGTTTCATGA  
ATTATGGTCAACAAACAGTACGAGCTGCAAGGTATATTGGTCAAAGTTTCATGATTACC  
TTATCTCACGCGAATCGTTTACCTGTAATTTCAATATCCTTATGAAAAATCGATCACAT  
CAGAGCGTTTCCGTGGTCAATCCACTTTGAATTGGATAAATGCATTGCTTGTGAAGTA  
TGCCTTCGTGTATGCCCATAGATTTACCGTTGTTGATTGGAGATTGGAAACAGATATT  
AGAAAGAAACGATTGCTTAATTATAGTATTGATTTCCGAATCTGTATATTTTGTGGTAAC  
TGCCTCGAATATTGTCCAACAACTGTTTATCAATGACTGAAGAATATGAACTTTCTACT  
TATGATCGTCACGAATTGAATTATAATCAAATTGCTTTGGGTCCGTTACCAATGTCAGTA

ATTGAAGATTACACAATTCAGACAATTTTGAATTCGCAAATAGTTACGGATAAACCCCTT  
AATTCAAGAACGATTACCAATTCATGCAGGGTCGTTTATCCGCTTGGCTAGTCAAGCA  
TGAGCTAGTTCATAGATCTTTGGGCTTCGATTACCAAGGAATAGAGACTTTACAAATAA  
AGCCCGAGGATTGGTATTCTATTGCTGTCATTTTCATATGTATATGGTTACAATTATCTACG  
TTCCCAGTGTGCCTATGATATAGCACCAGGTGGATTGTTAGCTAGTGTGTATCATCTTAC  
GAGAATACAGTATGGTGTGGATCAACCGGAAGAGGTATGCATAAAAGTATTTGCCCCA  
AGGAGGAATCCTAGAATCCCGTCTGTTTTCTGGATTTGGAAAAGTGCCGATTTTCAAGA  
AAGGGAATCTTATGATATGTTGGGAATCTCTTATGATAATCATCCACGCCTGAAACGTAT  
CTTGATGCCTGAAAGTTGGATAGGCTGGCCTTTACGTAAGGATTATATTGCCCCCAATTT  
CTATGAAATACAAGATGCTCATATGGGCAATGAGTTTCGATGTATTGGGCGTATCCGTAT  
TTATAGAAGCTTTAATTTTCGTGCTTATCCCAAT-----TGTTGGTTCAGTTTAT  
GCATGGCGAAAAGGAGCATTGGAATGGTCTTAAAAAATAAAAAAGAAGGAAAAGATA  
ACATTGAGACCATCATGAATTCTATTGAGTTTCCGTTATTTGAGCGAACAGCCCAAAAT  
TCAGTTATTTCAACTACATCGAATGATCTTTCGAATTGGTCAAGACTCTCCAGTTTATGG  
CCGCTTCTCTATGGTACCAGTTGTTGCTTCATTGAATTTGCTTCATTAATAGGCTCGCGA  
TTTGACTTTGATCGTTATGGACTGGTACCAAGATCGAGTCCTAGGCAAGCAGACCTAAT  
TTAACAGCCGGCACAGTAACAATGAAGATGGCTCCTTCTTTAGTGAGATTATATGAGC  
AAATGCCTGAACCAAAATATGTCATTGCTATGGGAGCGTGTACTATTACAGGAGGGATG  
TTCAGTACCGATTCTTATAGTACCGTTCGGGGAGTCGATAAGCTAATTCCTGTGGATGTC  
TATTTGCCGGGCTGCCACCTAAACCAGAGGCAGTTATAGATGCTATAACGAACTTCG  
TAAGAGGGTATCTCGAGAAACCTATGAAGATAGAATTGGGTCTCAACAGGAAAATCGA  
TGTTTTACTACCAATCACAAGTTTCATGTTGGACGAAGTACTCATACTGGAAATTACGAT  
CAAGGATTACTCTATCAATCGCCATAT-----AAACCTTCTGAAATCTTTTTCAGATACAA  
AAGTTCAGTATCTTCCACGAATTAGTGAATATGCAAAATAGAAATACCTTTTCTTGGGT  
AAAGGAACAGATGACTCGATCCATTTCCGTATCGATCATTATATATGTAATAACTCGGAC  
ATCTATTTCAAATGCATATCCCATTTTTCACAGCAGGGTTATGAAAATCCACGAGAAG  
CAACTGGGCGTATTGTATGTGCCAATTGTCATTTAGCTAATAAGCCCGTGGATATTGAGG  
TTCCACAAGCCGTGCTTCCCTGATACTGTATTTGAAGCAGTTGTTAAAATCCCTTATGATA  
TGCAACTGAAACAAGTTCTCGCTAATGGTAAAAAGGGGGCTTTGAATGTAGGGGCTCT  
TCTTATTTTACCCGAGGGATTTCGAATTAGCTCCCCCGATCGTATTTCTCCCGAGATGAA  
AGAAAAGATGGGTAAATCTGTCTTTTTCAGAGTTATCGCCCTACTAAAAGAAATATTCTTG  
TGATAGGTCCTGTTCCCTGGTCAGAAATATAGTGAAATTGTCTTTCCATTCTTTCCCGG  
ACCCTGCTACTAAGAAAGACGTTCACTTCTTAAAATATCCCATATACGTGGGTGGGAAC  
AGGGGAAGGGGTGAGATTTATCCCGATGGGAGCAAGAGTAACAATACAGTCTATAATG  
CTAGAACAGCAGGTATAGTAAGCAGAATAGTACGCAAAGAAAAGGGGGGATATGAAAT  
AACCATAGCTGATGCATCGGATGGGCACCAAGTGGTTGATATTATACCTCAGGACCAG  
AATTCTTGTTTCAGAGGGGGAATCCATCAAGCTTGATCAACCATTAACGAGTAATCCC  
AATGTAGGTGGATTTGGTCAGGGGGGTGCAGAAATAGTACTTCAAGATCCATTACGTGT  
CCAAGGTCTTTTGTCTTCTTGGCATCTATTATTCTGGCACAATCTTTTGGTTCTTAA  
AAAGAAACAGTTTGAGAAGGTTCAATTGTCCGAAATGAATTTCTCAATAAAGTATATG  
ATTGGTTTCGAGGAGCGTCTCGAGATTCAGGCGATTGCAGATGATATAACTAGTAAATAT  
GTTCTCTCATGTCAACATATTTTATTGTCTAGGAGGTATCACACTTACTTGTTTTTTAG  
TACAAGTAGCTACGGGTTTTGCTATGACTTTTTACTATCGTCCGACTGTTACAGAGGCAT  
TTGCCTCTGTTCAATATATAATGACTGAAGCCAACCTTTGGTTGGTTAATCCGATCAGTTC

ATCGATGGTCAGCAAGTATGATGGTCCTAATGATGATCCTGCACGTATTTTCGTGTGTATC  
TCACAGGTGGATTTAAAAACCTCGTGAATTGACTTGGGTACGGGTGTGGTTCTGGC  
TGTATTGACTGCATCTTTTGGTGTAACTGGTATTTCCTTGCCTCGGGACCAAATTGGTTA  
TTGGGCAGTCAAATCGTGACAGGTGTACCTGAAGCTATTCTGTAAATAGGATCGCCTT  
TGGTAGAGTTATTACGTGGAAGTGCTAGTGTGGGTCAATCCACTTTGACCCGTTTTTAT  
AGTTTACACACTTTTGTATTACCTCTTCTTACTGCCGTATTTATGTTAATGCACTTCCCAA  
TGATACGTAAGCAAGGTATTTTCAGGCCCTTTAATGGGAATAACAAAGAAACCTGACTTG  
ACTGATCCTGTATTAAGAGCTAAATTGGCTAAAGGGATGGGGCATAATTATTACGGAGA  
ACCCGCATGGCCCAATGATCTTTTATATATTTTCCAGTAGTAATTCTAGGTACTATTGCA  
TGTAACGTGGGCCTAGCGGTTCTAGAACCGTCAATGATTGGTGAACCAGCAGATCCATT  
TGCAACTCCTTTGGAGATATTACCCGAATGGTACTTCTTTCCCGTATTTCAAATACTCCG  
TACAGTACCCAATAAGTTATTGGGTGTTCTTTAATGGTTTCAGTACCAACGGGATTATT  
GACAGTACCCTTTTTGGAGAATGTTAATAAATCCAAAATCCATTTTCGTTCGTCCAGTAG  
CTACAACAGTCTTTTTGATCGGGACCGCAGTAGCTCTTTGGTTAGGTATTGGAGCAACG  
TTACCTATTGATAAATCCTTAACTTTAGGTCTTTTTATGATTGAAGTTTTTCTATTTGGAA  
TCGTGTTAGGTCTAATTCCTATTACTTTAGCCGGATTATTCGTAACCCGCATATTTACAATA  
CAGGCGCGGCATCAGTTGGACCTTATGCCTACTATAACTAGTTATTTTCGGTTTTTTACT  
GGCTGCTTCAACTATAACCTCAGCCCTATTGATTGGTCTGAGCAAGATACGACTTATTAT  
GGATACAGTAAGTCTCGCTTGGGCTGCTTTAATGGTAGTCTTTACATTTTCTTTTCACT  
CGTAGTATGGGGAAGAAGTGGACTCATGATTATTCGTTCCGCCGAACCAGAAGTGAAG  
ATTGTGGTGGATAGGGATCCATAAAAACCTTCTTTTGGAGGAATGGGCCAGACCCGGCC  
ATTTCTCAAGAACAATAGCTAAGGGCCCCGATACTACCACTTGGATCTGGAACCTACAT  
GCTGATGCTCAGATTTTCGATAGTCATAACAGTGATTTGGAGGAGATCTCTCGAAAAGT  
ATTTAGTGCTCATTTTGGTCAACTCTCTATCATCTTTCTTTGGCTGAGCGGCATGTACTT  
CCATGGCGCTCGTTTTTCCAATTATGAAGCATGGTTAAGCGATCCTACTCACATTGGACC  
CAGCGCCCAGGTGGTTTGGCCGATAGTGGGTCAAGAAATATTGAATGGTGACGTGGGC  
GGAGGTTTCCGAGGAATACAAATAACCTCCGGTTTTTTTTCAGATTTGGCGAGCGTCTGG  
AATAACTAGTGAATTACAACCTTATTGTACCGCAATTGGTGCATTGGTTTTTGCAGCGTT  
AATGCTTTTTGCTGGTTGGTTCCATTATCACAAAGCTGCTCCAAAATTGGCTTGGTTCC  
AAGATGTAGAATCTATGTTGAATCACCACTTAGCGGGGTACTAGGACTTGGGTCTCTT  
TCTTGGGCAGGACACCAAATACATGTATCTTTACCGATTAACCAATTTCTAGATGCTGGA  
GTAGATCCTAAAGAGATAACCACTTCCTCATGAATTTATCTTGAATCGGGATCTTTTGGCT  
CAACTTTATCCCAGTTTTTGGCGAGGGGTCAACCCCATTTTTTACCTTGAATTGGTCAAA  
ATACGCAGAATTTCTTAGTTTTTCGTGGAGGATTAGATCCCGTAACAGGGGGTCTATGGC  
TAACCGATATTGCACACCATCATTTAGCTATTGCAATTCTTTTCCTGATAGCAGGCCACA  
TGTATAGGACCAACTGGGGCATTGGCCATGGACTGAAAGATATTTTAGAGGCTCATAAA  
GGTCCATTTACAGGCCAGGGCCATAAAGGCCTCTATGAGATCCTAACAAACGTCATGGCA  
TGCTCAATFATCTTAACTAGCTATGTTAGGCTCTTCAACCATTGTTGTAGCTCACCAT  
ATGTATTCCATGCCTCCCTATCCATACCTAGCTATTGATTATGGTACACAACCTTCGTTGT  
TTACACATCACATGTGGATCGGTGGATTTCTCATAGTTGGTGCTGCTGCACATGCAGCC  
ATTTTTATGGTAAGAGATTATGATCCAACTACTCGATAACAACGATCTATTAGATCGTGTCC  
TTAGGCACCGCGATGCAATCATATCACATCTCAACTGGGCATGTATATTTCTAGGCTTTC  
ACAGTTTTGGCTTGTATATTCATAATGATACCATGAGCGCTTTAGGGCGTCCCAAGATA  
TGTTTTCAGATACCGCTATAACAATTACAACCCATTTTTGCTCAATGGGTACAAAACACTC

ACGCTTTAGCACCTGGTGCAACAGCTCCTGGTGCAACAACAAGCACCAGCTTGACTTG  
GGGGGGTGTGTTTAGTAGCAATAGGCGCAAAGTTGCTTTGTTACCTATTCCATTAG  
GAACCGCAGATTTTTTGGTACACCACATTCATGCATTTACGATCCATGTGACTGTATTA  
TACTACTGAAAGGTGTTCTATTTGCTCGTAGCTCCCGTTTGATCCCCGATAAAGCAAATC  
TTGGTTTTCGTTTTCCCTTGTGACGGACCTGGAAGAGGGGGGACATGTCAAGTATCCGC  
CTGGGATCATGTCTTCTTAGGTCTATTCTGGATGTACAATGCCATTTCCGGTAGTCATATTC  
CATTTAGTTGAAAATGCAGTCGGATGTTTGGGGTAGTATAAGTGATCAAGGGGTGGT  
GACTCATATCACGGGAGGAACTTTGCACAGAGTTCCATTACTATTAATGGGTGGCTCC  
GGGATTTTTATGGGCACAGGCATCTCAGGTAATTCAGTCTTATGGTTCTTCCTTATCCG  
CATATGGCCTTTTTTTCCTAGGTGCTCATTTTGTCTGGGCTTTTAGTTAATGTTTCTATT  
CAGTGGCCGTGGTTATTGGCAAGAACTTATTGAATCCATCGTTTGGGCTCATAACAAAT  
TAAAAGTTGCTCCTGCTACTCAGCCTAGAGCCTTGAGCATTGTACAAGGACGTGCTGTA  
GGAGTAACCCATTACCTTCTGGGTGGAATTGCCACAACATGGGCATTCTTCTTAGCAAG  
AATTATTGCAGTAGGAATGGCATTAAAGATTTCCAAGGTTTAGCCAAGGCTTAGCTCAGG  
ACCCCACTACTCGTCGTATTTGGTTTGGTATTGCTACCGCACATGACTTCGAGAGTCAT  
GATGATATTACTGAGGAACGTCTTTATCAGAACATTTTTGCTTCTCACTTCGGTCAGTTA  
GCAATAATCTTTTTGTGGACTTCCGGAATCTGTTTCATGTAGCTTGGCAAGGAAATTT  
TCAGTCATGGGTACAGGATCCTTTACATGTGAGACCTATTGCTCATGCAATTTGGGATCC  
TCATTTTGGTCAACCAGCTGTAGAAGCCTTTACTAGAGGGGGTGCTCTCGGCCCAGTG  
AATATCGCTTATTCGGGTGTTTATCAGTGGTGGTATAACAATCGGCTTACGCACCAATGAG  
GATCTTTATACTGGAGCTCTTTTTCTATTATTTCTTTCTGCTATATCCTTAATAGCAGGTTG  
GTTACACCTACAACCCAAATGGAAACCAAGCGTTTCGTGGTTCAAAAATGCCGAATCT  
CGTCTCAATCATCATTTGTGTCAGGACTCTTCGGAGTAAGTTCCCTTGGCTTGGACAGGGCA  
TTTAGTTCATGTCGTATTCCCGGATCAAGGGGGGAGTATGTCAGATGGAATAATTTCTT  
AGATGTATTACCGCATCCTCAAGGGTTGGGCCACTTTTTTACAGGTCAGTGGAATCTTT  
ATGCCCAAACCCCGATTCCAGCAGTCATTTATTTGGTACCTCCCAAGGAGCGGGAAC  
TGCTATTCTAACCTTCTCGGGGGATTTCATCCACAAACGCAAAGTTTATGGCTAACCG  
ATATGGCTCATCATCATTTAGCTATTGCATTTATTTTTCTCGTTGCTGGTCATATGTATAGA  
ACTAACTTCGGGATTGGGCACAGTATGAAAGATCTTTTAGAAGCACATATTCCTCCCGG  
GGGTCGATTGGGACGTGGGCATAAGGGTCTTTATGACACAATCAATAATTCGATTCATT  
TTCAATTAGGTCTTGTCTAGCCTCCTTAGGGGTTATTACTTCCTTGGTAGCTCAACACA  
TGTAATCTTTACCTGCTTATGCATTCATAGCACAAGACTTTACTACTCAAGCTGCATTATA  
TACTCATACCAATACATCGCAGGGTTCATCATGACAGGAGCCTTTGCTCATGGAGCTA  
TATTTCTTATTAGAGATTACAATCCGGAACAGAATGAGGATAATGTATTGGCTAGAATGT  
TAGACCATAAAGAGGCTATCAAATCTCATTTAAGTTGGGCCAGCCTGTTTTTGGGGTTC  
CATACTTGGGACTCTATGTTTATAACGACGTCATGCTCGCTTTTGGTACTCCGGAGAA  
ACAAATCTTGATCGAACCCATATTTGCCCAATGGATAACAATCCGCTCATGGTAAGACTTC  
ATATGGGTTTCGATGTACTTTTATCTTCAACGAATGGCCCAGCATTCAATGCTGGTTCGAAG  
CATATGGTTACCTGGCTGGTTGAATGCTGTTAATGAG-----AATAGTAATTCATATTCTT  
ACAATAGGTCCTGGGGACTTCTTGGTTCATCATGCTATTGCTCTAGGTTTTGCATACAAC  
TACATTGATTTTTAGTAAAAGGTGCTTTAGATGCACGTGGTTCCAAGTTAATGCCAGATA  
AAAAGGATTTTCGTTATAGTTTTCTTTCGACGGTCCAGGACGAGGCGGTACTTGTGAT  
ATTTTCGGCTTGGGACGCATTTTATTTGGCAGTTTTCTGGATGTTAAATACTATTGGATGG  
GTTACTTTTTTATTGGCATTGGAAGCACATCACATTATGGCAGGGTAACGTTTACAATTT

AATGAATCCTCCACTTATTTGATGGGATGGTTAAGAGATTATCTATGGTTAAACTCTTCC  
CAACTTATCAATGGATATAACCCTTTTGGTACGAATAGTTTATCGGTCTGGGCGTGGATG  
TTCCTATTTGGGCATCTTGTTTTGGGCTACTGGATTTATGTTCTTAATTTCCCTGGCGTGGAT  
ATTGGCAGGAATTGATTGAAACTTTAGCATGGGCTCATGAACGCACACCTTTGGCTAAT  
TTGATTCGATGGAGGGATAAACCAGTGGCTCTTCCATTGTGCAAGCAAGATTGGTGG  
GATTAGCCCACTTTTCTGTAGGTTATATATTCACCTTATGCAGCTTTCTTGATTGCCTCTAC  
ATCAGGCAAATTTGGTATGTCACATTCAGTAAAGATTTATGATACATGTATAGGGTGCAC  
CCAATGTGTACGAGCCTGCCCCACAGATGTATTGGAAATGATACCTTGGGACGGATGTA  
AAGCTAAGCAAATTGCTCCTGCTCCAAGAACAGAGGACTGTGTAGGTTGTAAGCGATG  
TGAATCTGCTTGTCCAACAGATTTCTTGAGTGTACGGGTTTATTTATCGAATGAGACAA  
CTCGCAGCATGGGTCTAGCTTATATGACAGATCTCAATTTACCCTCTATTTTTGTGCCTTT  
CGTGGGCCTAGTATTTCCGGCAATTGCAATGGCTTCTTTATCTCTTCATGTTCAAAAAA  
CAAGATTGTCATGCGAGATATAAAAACATATCTCTCTGTGGCACCTGTGCTAGCTACTCT  
ATGGTTCGGGTCTTTAGCAGGTCTATTGATAGAGATCAATCGTTTATTTCCAGATGCGTT  
GGCATTCCCCTTTTTTC-----ATGACTGCAATTTTAGAGAGACGCGAAACCACAAGTTTAT  
GGGGTCGCTTTTGTAAGTGGATAACCAGCACTGAAAACCGTCTTTACATTGGATGGTTC  
GGTGTTTTGATGATCCCTACCTTATTGACCGCAACTTCTGTATTTATTATCGCCTTTATTG  
CTGCTCCTCCAGTAGATATTGATGGTATTTCGTGAACCTGTTTCTGGGTCTCTACTTTATG  
GAAACAATATTATCTCTGGTGCCATTATTCCTACTTCTGCCGCTATAGGTTTGCATTTTA  
CCCGATATGGGAAGCAGCATCCGTTGATGAATGGTTATACAATGGTGGTCCTTATGAGCT  
AATTGTTCTACACTTCTTACTTGGTGTAGCTTGTACATGGGTTCGTGAGTGGGAGCTTA  
GTTTCCGTCTGGGTATGCGCCCTTGGATTGCTGTTGCATATTCAGCTCCTGTTGCAGCTG  
CTACTGCTGTTTTCTTGATCTACCCTATTGGTCAAGGAAGCTTCTCTGATGGTATGCCCC  
TAGGAATATCTGGTACTTTCAACTTCATGATTGTATTCCAGGCTGAGCACAATATCCTTA  
TGCATCCATTCACATGTTAGGCGTAGCTGGTGTATTTCGGCGGTTCCCTATTTAGTGCTA  
TGCATGGTTCCTTGGTAACTCTAGTTTGATCAGGGAAACCACAGAAAATGAGTCTGCT  
AATGCAGGTTACAGATTTCGGTCAAGAAGAAGAACTTATAATATCGTAGCTGCTCATGG  
TTATTTTGGCCGATTGATCTTCCAATATGCTAGTTTCAACAATTCTCGTTCCTTACATTC  
TTCTAGCTGCTTGGCCTGTAGTAGGTATTTGGTTCACTGCTTTAGGTATCAGCACCATG  
GCTTTCAACCTAAATGGTTTTAATTTCAACCAATCTGTAGTTGATAGTCAAGGTCGTGTC  
ATTAACACTTGGGCTGATATTATCAATCGTGCTAACCTTGGTATGGAAGTTATGCATGAA  
CGTAATGCTCATAACTTCCCTCTAGACCTAGCTGCTGTTGAAGCTCCATCTATAAATGGA  
ATGGGTTTGCCTTGGTATCGTGTTACATCCGTCGTATTGAATGATCCTGGTTCGGTTGCTT  
TCTGTCCATATAATGCATACAGCTCTAGTTTCTGGTTGGGCCGGTTCGATGGCTCTCTAC  
GAATTAGCAGTTTTTTGATCCCTCTGACCCCGTTCTTGATCCAATGTGGAGACAAGGTAT  
GTTTCGTTATACCCTTCATGACTCGTTTAGGAATAACAATTCATGGGGTGGTTGGAGTAT  
CACA---GGAGGAACTATAACAATCCGGGTATTTGGAGTTACGAAGGTGTGGCCGGAG  
CACATATTGTGTTTTCTGGCTTGTGCTTCTTGGCAGCTATCTGGCATTGGGTGTATTGGG  
ACCTAGAAATATTCTGCGATGAACGTACGGGAAAACCCTCTTTGGATTTGCCAAAGATC  
TTTGGCATTCAATTTATTTCTCTCAGGGGTGGCTTGCTTTGGGTTTGGCGCATTTCATGTA  
ACAGGCTTATATGGTTCCTGGCATATGGGTATCCGATCCTTATGGACTAACCGGAAAAGTA  
CAATCTGTAAATCCAGCGTGGGGCGCGGAAGGTTTTGATCCTTTTGTCCGGGAGGAAT  
AGCCTCTCATCATATTGCAGCGGGGACATTGGGCATATTAGCGGGCCTATTCCATCTTAG  
TGCCGCCCGCCCCAACGCCTATACAAAGGATTACGTATGGGCAATATTGAAACTGTCC

TTTCTAGTAGTATCGCTGCTGTCTTTTTTGCAGCTTTCGTTGTTGCTGGAACATATGTGGT  
ATGGTTCAGCAACTACCCCGATCGAATTATTTGGTCCCCTCGTTATCAGTGGGATCAG  
GGATACTTCCAGCAAGAAATATATCGAAGAGTTGGCACCCGGGCTATCCGAAAATCAGA  
GTTTATCGGAAGCTTGGTCTAAAATTTCCCGAAAAATTAGCTTTTTATGATTACATCGGTA  
ATAATCCGGCGAAGGGGGGATTATTCAGAGCGGGCCCAATGGACAACGGGGATGGAAT  
AGCTGTTGGATGGTTAGGACACCCAATCTTTAGAGATAAAGAAGGGCATGAGCTTTTT  
GTGCGTCGTATGCCACTTTTTTTGAAACATTTCCAGTGGTTTTGGTAGATGGAGACGG  
AATTGTGAGAGCCGATGTTCCTTTTAGAAGGGCAGAATCGAAGTACAGTGTGCAACAA  
GTAGGTGTAACCTGTTGAGTTCTATGGTGGCGAACTCAATGGAGTCAGTTATAGTGATCC  
TGCTACTGTGAAAAAATATGCTAGACGTGCCCAATTGGGTGAAATTTTTGAATTAGATC  
GTGCTACTTTGAAATCCGATGGTGTTTTTTCGTAGCAGTCCAAGGGGTTGGTTCACTTTT  
GGGCATGCTACGTTTGCTTTGCTCTTCTTTTTTCGGACACATTTGGCATGGCGCTAGAAC  
TTTGTTTCAGAGATGTTTTTGCTGGTATTGACCCAGATTTGGATGCTCAAGTGGAATTTG  
GAACATTTCAAAAACCTTGGAGATCCAACACTACAAGGAGACAAGTAGTCATGAAAACCTT  
ATATCCCTGAGGAGGTTCTACCACGTGGAAACGCTCTTTAATGGAACTTTAGCTTTAG  
CTGGTTCGTGACCAAGAAACCACAGGTTTTGCTTGGTGGGCCGGGAATGCCCGACTTAT  
CAATTTGTCAGGTAAACTACTCGGGGCTCACGTAGCCCATGCCGGATTAATCGTATTCT  
GGGCCGGAGCAATGAACCTATTTGAAGTGGCTCATTTTCGTACCAGAGAAGCCGATGTA  
TGAACAGGGATTGATTTACTTCCCCATCTAGCTACTCTAGGTTGGGGGGTAGGTCCTG  
GTGGGGAAGTTATAGACACCTTTCCATACTTTGTATCTGGAGTACTTCACTTAATTTCCCT  
CTGCAGTCTTAGGCTTTGGCGGTATTTATCATGCACCTTCTCGGACCTGAGACTCTTGAA  
GAATCCTTTCCATTCTTCGGTTATGTATGGAAAGATAGAAATAAAATGACCACCATTTTG  
GGTATTCACTTAATCTTGTAGGGATAGGTGCTTTTCTTCTAGTACTCAAGGCTCTTTATT  
TTGGGGGCGTATATGATACCTGGGCTCCAGGGGGGGGAGATGTAAGAAAAATTACCAA  
CTTGACCCCTTAGCCCAAGTGTTATATTTGGTTATTTCACTAAAATCACCCCTTTGGGGGAGA  
AGGATGGATTGTTAGTGTGGACGATTTAGAAGATATAATTGGAGGACATGTCTGGTTAG  
GTTCCATTTGTATACTTGGTGGAACTCTGGCATATCTTAACCAAGCCCTTTGCATGGGCTC  
GCCGCGCATTTGTATGGTCTGGAGAGGCTTACTTGTCTTATAGTTTAGGTGCTTTATCTG  
TCTTTGGTTTCATCGCTTGTGTTTCGTCTGGTTCAATAATACCGCTTATCCTAGTGAGTT  
TTACGGGCCTACCGGGCCAGAAGCTTCTCAAGCTCAAGCATTACTTTTTCTAGTTAGAG  
ACCAACGTCTTGGGGCTAACGTGGGATCCGCTCAAGGACCTACTGGTTTAGGTAAATAT  
CTAATGCGTTCCCCGACTGGAGAAGTCATTTTTGGAGGAGAACTATGCGTTTTTGGGA  
TCTACGTGCCCTTGGTTGGAACCTTAAGGGGTCCCAATGGTTTTGGACTTGAGTAGG  
CTGAAAAAAGACATAACAACCTTGGCAAGAACGACGTTTCGGCAGAATATATGACTCATG  
CTCCTTTAGGTTCTTTAAATTCGGTGGGTGGCGTAGCTACCGAGATCAATGCAGTCAATT  
ATGCTCTCTCTAGAAGTTGGTTAGCTACCTCTCATTTTTGTTCTAGGATTTCTCCTATTCGT  
GGGTCATTTGTGGCATGCGGGAAGGGCCCGTGCAGCTGCAGCAGGATTTGAAAAGG  
AATCGATCGTGATTTTGAACCTGTTCTTTCCATGACCCCTCTTAACATGACTATAACCCT  
TGGTAGATTTACCAAAGAAGAA--GATTTATTTGATATTATGGATGACTGGTTACGGAGG  
GACCGTTTCGTTTTTGTAGGTTGGTCCGGTCTATTGCTCTTTTCCTTGTGCTTATTTTCGCTT  
TAGGAGGTTGGTTCACGGGTACAACCTTTGTAACCTCATGGTATAACCATGGATTGGCC  
AGTTCCTATTTGGAAGGCTGCAATTTCTTAACCGCTGCAGTTTCTACTCCTGCTAATAGT  
TTAGCACATTTCTTTGTTGCTACTATGGGGCCCCGAAGCACAAAGGAGATTTTACTCGTTG  
GTGTCAATTAGGTGGTCTGTGGACTTTTTGTTGCTCTCCATGGCGCTTTCGGACTAATAG

GTTTCATGTTACGTCAATTTCGAACTTGCTCGATCTGTTCAATTGCGACCTTATAATGCAA  
TCGCATTTTCTGCTCCAATTGCTGTTTTTGTCTGTATTCCTGATTTATCCACTAGGTCA  
GTCTGGTTGGTTCTTTGCGCCCAGTTTTGGTGTAGCAGCTATATTTTCGATTCATCCTTTT  
CTTCCAAGGGTTTCATAATTGGACGTTGAACCCCTTTCATATGATGGGAGTTGCCGGAG  
TATTGGGCGCTGCTCTGCTATGCGCTATTCATGGTGTACCGTAGAAAATACTTTATTTCG  
AAGATGGTGACGGTGCAAATACATTCCGTGCTTTTAACCCAACCTCAAGCCGAAGAGAC  
TTATTCGATGGTCACTGCTAACCCTTTTGGTCCCAAATCTTTGGGGTTGCTTTTTTCCAA  
TAAACGTTGGTTACATTTCTTTATGTTATTTGTACCAGTAACCGGTTTATGGATGAGTGC  
TCTTGGAGTAGTCGGTCTGGCTCTGAACCTACGTGCCTATGACTTTGTTTCCCAGGAAA  
TCCGTGCAGCGGAAGATCCTGAATTTGAGACTTTCTATAACCAAAAATATTCTCTTAAAC  
GAAGGCATTCGTGCTTGGATGGCGGCTCAGGATCAGCCTCATGAAAACCTTATATTCCC  
TGAGGAGGTTCTACCACGTGGAAACGCTCTTATGTCTGGAAGCACGGGAGAACGTTCT  
TTTGCTGATATTATCACCAGTATTCGATACTGGGTCATTCATAGCATTACTATACCTTCCC  
TATTCATTGCGGGTTGGTTATTCGTACGACGGGTTTAGCTTACGATGTATTTGGAAGCC  
CTCGGCCAAACGAGTATTTACAGAGAGCCGACAAGGGATTCTTTAATAACTGGCCG  
TTTTGATTCTTTGGAACAACTCGATGAATTTAGTAGATCTTTTATGACTATAGATCGAAC  
TTATCCAATTTTTACAGTGCGATGGTTGGCTGTTACGGACTAGCTGTGCCTACTGTTTC  
TTTTTTGGGGTCAATATCAGCAATGCAGTTCATCCAACGAATGGCTACACAAACCATTG  
AGGATAGTTCTAGATCTGGG---CCAAGACGAACTACTACAGGGAGTTTATTGAAACCAT  
TGAATTCGGAATATGGTAAAGTAGCTCCTGGATGGGGAACACCCCTTTATGGGGGTC  
GCAATGGCTCTATTTGCGATATTCCTATCTATTATTTTGGAGATTTATAATTCTTCCGTCTT  
ACTGGATGGAATTTCAATGAATATGCTTACTCTCAAACCTTTCGTTTACACAGTAGTAAT  
ATTCTTTGTTTCTCTCTTCATCTTCGGATTCTATCTAATGATCCAGGACGTAATCCTGGA  
CGTGAGGAAATGGCCGATACTACTGGAAGGATTCTCTTTGGCTGATAGGTACTGTAAC  
TGGTATTCCTGTGATCGGTTCAATAGGTATTTCTTTTACGGTTCATATTCGGATTGGGC  
TCATCCCTGATGCTTAATATCTTTAGTTTCATTTTTATCTGTCTTAATTCTTCCCTTCATC  
GAGTAGTTTTTTCTTCGCCAAATTGCCCGAGGCTTATGCTTTTTTTCAATCCAATCGTGGA  
TGTTATGCCAGTCATACCTGTGTTCTTTTTTCTTTAGCCCTTGTTTGGCAAGCTGCTGT  
AAGTTTTCGAATGACACAATCAAACCCGAACGAACAAAATGTTGAATTGAATCGTACC  
AGTCTCTACTGGGGATTATTACTTATTTTTGTGCTTGTGTTTTATTTTCCAATTATTCTT  
CAATATGGAAGTCAATATTCTCGCATTTATTGCTACTGCATTGTTTATTCTAGTTCCTACT  
GCTTTTTTACTTATCATCTACGTAAAAACAGTCAGTCAAATGATATGGAAACAGCAAC  
CCTAGTCGCCATCTCCATATCTGGTTCACTTGTAAGCTTTACTGGGTACGCCTTATATACC  
GCTTTTGGGCAACCCTCTCAACAACCTAAGAGATCCATTCGAGGAACACGGGGACATGG  
AAGCATTGGTTTATACATTTCTGTTAGTCTCGACTCTAGGGATAATTTTTTTTCGCTATCTT  
TTTTCGAGAACCACCAAGGTTCCGACTAAAAAGATGAAAATGACTATTGCTTTCCAAT  
TGGCTGTTTTTGCATTAATTGCTACTTCATCAATCTTATTGATTAGTGTACCCGTTGTATT  
TGCTTCTTCTGATGGTTGGTCAAGTAACAAAATGTTGTATTTTCCGGTACGTGCTTATG  
GATTGGATTAGTCTTTCTGGTAGCTATCCTTAATTCTCTCATCTCT-----ATGT  
CACCACAAACAGAGACTAAAGCAAGTGTTGGATTCAAAGCTGGTGTAAAGAGTACA  
AATTAATTTATTATACTCCTGACTATGAAACCAAAGATACTGATATCTTGGCAGCATTCC  
GACTAACTCCTCAACCCGGAGTTCCACCTGAGGAAGCAGGGGCTGCGGTAGCTGCTG  
AATCTTCTACTGGTACATGGACAACGTGTGTGGACCGATGGACTTACCAGCCTTGATCGT  
TACAAAGGACGATGCTACCACATCGAGCCCGTTGCTGGGGAGGAAAATCAATACATTG



CTTATGTAGCTTACCCTTTAGACCTTTTTGAAGAAGGTTCTGTTACTAACATGTTTACTT  
CCATTGTGGGTAATGTATTTGGGTTCAAAGCCCTACGAGCTCTACGTCTGGAGGATCTG  
AGAATTCCTCCTGCTTATACCAAACTTTCCAAGGCCCGCCCATGGCATCCAAGTTGA  
GAGAGATAAATTGAACAAGTATGGTTCGTCCTTATGGGATGTACTATTAACCAAAAT  
TGGGGTTATCTGCCAAGA ACTATGGTAGAGCGGTTTATGAATGTCTCCGCGGTGGACTT  
GATTTTACCAAGGATGATGAGAACGTGAACTCCCAACCATTTATGCGTTGGAGAGACC  
GTTTCGTATTTTGTGCCGAAGCCCTTTATAAAGCGCAGGCCGAAACCGGTGAAATCAA  
AGGACATTACTTGAATGCTACTGCAGGTACATGCGAAGAAATGATCAAAAAGGGCCGTA  
TTTGCCAGAGAATTGGGAGTTCCTATCGTAATGCATGACTACTTAACAGGGGGATTAC  
TGCAATACTAGCTTGGCTCATTATTGCCGAGACAACGGCCTACTTCTTCACATCCATC  
GCGCAATGCATGCAGTTATTGATAGACAAAAGAATCATGGTATACTTTTCGTGTACTA  
GCTAAAGCATTACGTATGTCTGGTGGAGATCATATTCACGCCGGTACCGTAGTAGGTAA  
ACTGGAAGGGGAACGGGACATCACTTTGGGTTTTGTTGATTTACTACGTGATGATTTTA  
TTGAAAAAGACCGGAGTCGCGGTCTTTATTTCACTCAAGATTGGGTCTCTCTGCCGGG  
TGTTCTGCCTGTGGCTTCAGGGGGTATTCACGTTTGGCATATGCCTGCCCTAACCGAGA  
TCTTTGGGGATGATTCCGTA CTACAGTTCGGTGGAGGAACTTTAGGACACCCTTGGGG  
AAATGCACCTGGTGCAGTAGCCAATCGGGTGGCTTTAGAAGCGTGTGTACAAGCTCGT  
AATGAGGGACGTGATCTTGCTCGTGAAGGTAATGAAGTTATTCGTGAAGCTAGCAAAT  
GGAGCCCTGAACTAGCTGCTGCTTGTGAGATATGGAAGGAGATCAAATTCGAATTCGA  
AGCAATGGATACCGTG-----ACGGCGATACTTATACAAACTTCTACCCCGAGCACAC  
GCAATGGAGCCGTAGACAGTCAAGTGAAATCCAATCCACGAAATAATTTGATCTATGGG  
CAGCATCATTGTGGTAAAGGTCGTAATGCCAGAGGAATCATTACCGCAGGGCATAGAG  
GGGGAGGTCATAAGCGTCTATACCGTAAATAGATTTTCGACGGAATGAAAAAGACATA  
TCTGGTAGAATCGTAACCATAGAATACGACCCTAATCGAAATGCATACATTTGTCTCATA  
CACTATGGGGATGGTGAGAAGAGATATATTTTACATCCCAGAGGGGCTATAATTGGAGA  
TACCATTGTTTCTGGTACAGAAGTTCCTATATCAATGGGAAATGCCCTACCTTTGACCGA  
TATGCCCTTAGGCACGGCCATACATAACATAGAAATCACACTTGGAAGGGTGGACAAT  
TAGCTAGAGCAGCAGGTGCTGTAGCGAAACTGATTGCAAAAAGAGGGTAAATCGGCCA  
CATTAAAGATTACCATCTGGGGAGGTCCGTTTGATATCCAAAACTGCTCAGCAACAGTC  
GGACAAGTGGGTAATGTTGGGGTGAACCAGAAAAGTTTGGGTAGAGCCGGATCTAAG  
TGTTGGCTAGGTAAGCGTCTGTAGTAAGAGGAGTAGTTATGAACCCTGTAGACCATCC  
CCATGGGGGTGGTGAAGGGAGGTCCCAATTGGTAGAAAAAACCACAACCCTTG  
GGTTATCCTGCGCTTGGAAAGAAGAAGTAGGAAAAGGAATAAATATAGTGATAGTTG  
ATTCTTCGTCGCCGTA---ATGATTCAACCTAAGACCCATTTGAATGTAGCAGACAAC  
AGCGGGGCTCGCGAATTGATGTGTATTTCGAATCATAGGAGCTAGT---AATCACCGATATG  
CTCATATTGGTGACGTTATTGTTGCTGTAATCAAAGAAGCAGTGCCAAATATGCCTTTAG  
AAAGATCAGAAGTGATCAGAGCTGTAATTGTACGTACATGTAAAGAACTTAAACGCGA  
CAACGGTATGATAATACGATATGATGACAATGCAGCAGTTGTCATTGATCAAGAAGGAA  
ATCCAAGAGGAACTCGAGTTTTTGGCGCAATCGCTCGGGAATTGAGACAGTTGAATTT  
CACTAAAATAGTCTCATTAGCTCCTGAGGTATTAATGCTTAGTCCCAAAAAGAACCCGAT  
TCCGTAAACAACATAGAGGAAGAATGAAGGGAATATCTTATCGAGGCAATAATATTTGT  
TTCGGTAGATACGCTCTTCAGGCACTTGAACCCGCTTGGATCACATCTAGGCAAATAGA  
AGCGGGACGACGAGCAATGACACGATATGCGCGTCGTGGTGGAAAAATATGGGTACGT  
ATATTTCCAGACAAAACCCGTTACAATAAGACCTACGGAAACACGTATGGGTTTCGGGGA

AGGGATCTCCCGAATATTGGGTAGCTGTCGTTAAACCGGGTCTGAATACTTTATGAAATG  
GCCGGAGTATCAGAAAGTATAGCCAGAGCAGCTATTTCAATAGCTGCGTGCAAAATGC  
CTATACGAACTCAATTCGTTATTGCGGAAATGACCAGAGTTAGACGGGGATATATAGCT  
CGGAGACGTCGAACAAAAATTCGTTTATTTGCATCAACCTTTCGAGGGGCTCATTCAA  
GACTTACTCGAACTATTACTCAACAGAAAATGAGAGCTTTGGTTTCCACTCATCGGGAT  
AGAGGCAGGCAAAAGATCAATTTTCGTCGTTTGTGGATCACTCGGATAAATGCAGTAA  
CTCGTGAGAAT-----GTATCCTATAGTTATAGTCGATTAATACACGATTTGTACAAGAGGC  
AGTTGCTTCTTAATCGTAAAATACCTGCACAAATAGCTATATCAAATAGGAATTGTCTTT  
ACACGATTTCCAGTGAGATCATCAA-----ATGAAAAAGGAAGTAC  
AAGCTTTCGCTCGACATATATGTATGTCCGCTCACAAAATGCGAAGAGTAATTGATCAG  
ATTCGTGGGCGTTCCTATGAACAAACACTTATGATACTGGAACTCATGCCTTATCGAGC  
ATCTTACCCCATTTTTAGATTGATTTATTCTGCAGCAGCAAATGCTAGTAAACTATGGG  
TTCCAAAGAAGCTGATTCATTGATTAGTAAAGCCGAAGTTAATGAGGGTACTTTCATAA  
AAAAGTTAAACCTCGGGCCCGAGGACGTAGTTATCCGATAAAAAAACCTACCTGTCA  
TATAATTATTGTATTGAAGGATAAATCCAAAAAG-----ATGGATGGAATCAA  
TATATAGTACTTACAGACAAAAGTATTCTCTTATTGGGGAACAATCAA---TATACTTCTAA  
TGTCGAATCAGGATCAACTAGGACAGAAATAAAGCATTGGATCGAACTCTTCTTTGGT  
GTCAAGATAATAGCTATGAATAGTCACCGACTCCCGGAAAGGGTAGAAGAATGGGAC  
CTATTATGGGACATAACAATGCATTACAAACGTATGATCATTACGCTTCAACCGGGTTATT  
CTATTCCACCTCTTATAGAGAAAGGCACTATGGCGGTTCCAAAGAAACGTACTTCTATG  
TCAAAAAAGCGTATTTCGTAAAAATATTTGGAAGAGAAAGGGATATCGGGCCGCGATAA  
AAGCGTTTTCTTTAGCTAAATCTGTTTCTACCGGACATTCTAAAAGTTTTTTAGTGCGAC  
AA-----ATGGCAAAGGTAAGATGTCAGAGCAATAGTTATTTTAGAATGTACCAGTT  
GTGTCCGAAATGGTGTCAAT-----AAGGAATCGCCGGGCATTTCCAGATATATACTCAA  
AGGAATCGGCACAATACACCTAATCGATTGGAATTGAGAAAATTCTGTCCCTATTGTTA  
CAAGCATAACGATTCATGGGGAGATAAAGAAAATGAAAATAAGGGCCTCCGTTTCGTA  
ATTTGTGAAAAATGTCAACTGATCCGTAGGCGGGGACGAATTCTAGTAATTTGTTCCAA  
TCCGAGACATAAACAGAGGCAAGGGATGGTTTCGAGAGGAAATAGCAGTATCCACTCG  
GACACTACAGTGGAAGTGTGTTGAATCAAGAGCAGACAGTAAGCGTCTTTATTATGGC  
CGTTTCATGCTGTCCCCACTTATGAAAGGTCAAGCGGATACAATAGGTATCGCAATGCG  
AAGGGCTTTACTTGGAGAAATAGAAGGAACATGTATCACACGTGCAAAATTGGAT-----  
AAGGTACCACATGAGTATTCTACAATAGTAGGTATTGAAGAATCAATACATGAAATTTTC  
ATGAACTTGAAAGAAATTGTATTGAGAAGTAATCTGTATGGAACCTCGCAACGCATCTAT  
TTGCGTCAGGGTTCCTAGATACGTAACCTGCTCAAGATATCATCTCACCACCTTCTGTGG  
AAATAGTTGATACTACACAGCATATAGCTAGCCTGACGGAACCGATTGATTTGTGTATTG  
AATTACAAATCCAAAGGGATCGAGGATATCGTATGAAAACCCCAAATAAATATCAAAT  
GGAAGTTAT-----CCTATAGATGCTGTATCCATGCCTGTTTCGAAATGCGAATCATAGTATT  
CATTCTTATGGGAATGGGAATGAGAAACAAGAAATCCTTTTTCTCGAAATATGGACGAA  
TGGAAGTTTAACTCCTAAAGAAGCACTTACGAAGCTTCTCGTAATTTGATTGATTTAT  
TTATTCCTTTTCTACATGCGGAGGAAGAGGGCATTCTGTTTA-----GAGGACAATCCA---A  
ACCGGTTTAAATATACCTTTTTTTTACCTTTCATGATGGGTTGGCTAATAATATAAGGAAAA  
AGAAAAA---GGAATTGCATTGAAATGTATTTTTATTGACCAATCAGAATTGCCTCCCA  
GGACCTATAATTATCTCAAAGGTCCAATATAAATACATTATTGGACCTTTTGAGTAACA  
GTCAAGAAGATTTTCTGAAAATTGAACATTTTCGTATAGAAGATGTA AACAGATATTG

GACATTCTACAGAAGCAT-----TTCACAATTGATTGT-----ATGCTCCGGGATGGA---A  
ATGAGGGAATGTCTACAATACCTGGATTTAATCAGATACAATTTGAGGGATTTTGTAGGT  
TCATTGATCAGGGCTTGACGGAAGA ACTTCATAAGTTTCCAAAAATTGAAGATACAGAT  
CAAGAAATTGAATTTCAATTATTTGTGGAAACATATCAATTGGTGGAACCTTTGATAAA  
AGAAAGAGATGCTGTGTATGAATCACTCACATATTCTTCTGAATTATATGTACCCGCGGG  
ATTAATTTGGAAAACCAGTAGAGATATGCAAGAACAACCGTATTTATTGGAAACATTC  
CTCTAATGAATTCCCTGGGAACCTCTATAGTAAATGGAATATACAGAATTGTGATCAATC  
AAATATTGCAAAGCCCCGGTATTTATTACCGTTCAGAATTGGACCATAACGGAATTTCTG  
TCTATACCGGCACCATAATATCAGATTGGGGAGGAAGATCAGAATTAGAGATTGATAGA  
AAGGCAAGAATATGGGCCCGTGTGAGTAGGAAACAAAAATATCTATTCTAGTTCCATC  
ATCAGCTATGGGTTGCAATCTAAGAGAAATTCTAGATAATGTTTGCTACCCTGAAATTTT  
CTTGTCTTTCCCGAACGATAAGGAGAAAAAAAATTTGGGTCAAAGGAAAATGCCATT  
TTGGAGTTTATCAACAATTTGCTTGTGTAGGTGGGGATCCGATATTTTCTGAATCCTTA  
TGTAAGGAATTACAAAAGAAATTTTTTCAACAAAGATGTGAATTAGGAAGGATTGGTC  
GACGAAATATGAACCGGAGACTGAATCTTGATATACCTCAGAACAATATATTTTTGTTAC  
CACGAGATGTCTTGGCTGCTGCGGATCATTGATCGGAATGAAATTTGGAATGGGTACA  
CTTGACGAT-----ATGAATCATTGAAAAATAAACGTATTCGTTCTGTAGCAGATCTTTTA  
CAGGATCAATTCGGATTGGCTCTGGTTCGTTTAGAAAATGTAGTTCGAGGAACTATATG  
TGGAGCAATCAGG---CATAAATTGATA---CCGACTCCTCATAATTTGGTAACTTCAACTC  
CA-----TTAACAACCCTTATGAATCGTTTTTTCGGCCTACACCCTTATCTCAAGTTT  
TGGATCGAATAATCCATTGACACAAATAGTTCATGGGCGAAAATCGAGTTATTTGGGT  
CCTGGAGGATTGACAGGGCGAACCGCTAGTTTTTCGGATACGAGATATACATCCTAGTCA  
CTATGGACGATTTGCCCAATTGATACGTCCGAAGGAATCAATGTTGGACTTATTGGATC  
TTTAGCTATTCATGCCAGGATTGGTCATTGGGGG---TCTATAGAGAGTCCATTTTAT-----  
-GAAATTTATGAGAGATCAAAGAG-----GTACAGATGGTTTATTTATCACCAAGTAGAG  
ATGAATACTATATGGTAGCGGCAGGAAATCTTTGGCGTTGAATCAGGGTATTCAGGAA  
GAACAGGTTGTTCCAGCTCGATACCGTCAAGAATTCCTGACTATTGCATGGGAACAGAT  
TCATCTTCGAAGCATTTTTCCCTTTCAATATTTTTCTATTGGCGCTTCCCTCATTCTTTTA  
TCGAGCATAATGATGCGAATCGGGCTTTAATGAGTTCATATATGCAGCGTCAAGCAGTT  
CCACTTTCTCGGTCCGAGAAGTGCATTGTTGGAACCTGGGTTGGAACACCAAGCGGCTC  
TAGATTCGGGGGTTTTCAGTTATAGCCGAACACGAAGGAAAGATCATTTATACCGAGACT  
ACAAGATCGTTTTCTCAGGTAATGGAGATACTATAAGCATTCCATTGGTTATGTATCAA  
CGTTCCAACAAAATACTTGTATGCATCAAACCCCTCAGGTTACGCGTGGTAAATGCAT  
TAAAAAAGGACAAATTTTAGCGGGGGGTGCGTCTACCGTTGGTGGCGAACTCGCTTTG  
GGAAAAACATATTAGTAGCTTATATGCCATGGGAAGGCTACAATTCTGAAGACGCGGT  
ACTATTAGCGAACGCCTGGTATATGGAGATATTTATACTTCTTTTCACATCCGGAAATAT  
GAAATTAAGACTCATGTGACAAGCCAAGGT---CCCGAAAGAATTACTAAGGAAATACC  
GCATTTAGAAGCTAATTTACTCCGCAATTTAGACAAAAATGGAATTGTGATGTTGGGAT  
CTTGATAGAAACAGGTGATATTTAGTAGGTAAATTAACACCTCAGACAGCAAAAAGA  
A---TCATCGTATGCCCCGGAGGATAGATTATTACGAGCCATACTTGGCATTACAGGTATCC  
ACTACAAGGGAACTTGTCTAAA ACTACCTATAGGCGGAAGGGGGCGAGTTATTGATG  
TGAGATGGATCCAGAAAAAGGGG---GGTTCAAGTTATAATCCAGAAACGATTTCGTGTAT  
ATATTTACAGAAACGTGAAATCAAAGTAGGTGATAAAGTAGCCGGAAGACATGGGAA  
TAAAGGTATCATTCAAATAATTTGCCTAGACAAGATATGCCTTATTTGCAAGATGGAA

GACCAGTTGATATGGTCTTCAACCCATTAGGAGTACCTTCACGAATGAATGTGGGACAG  
ATATTTGAATGCTCCCTAGGGTTAGCGGGGGATCTGCTGGACAGACATTATAGAATAGC  
ACCCTTTGATGAGAGATATGAGCAAGAGGCTTCGAGAAAAGTGTGTTCCCTGAATTAT  
ATGAAGCCAGTAAGCAAACAGCAAATCCATGGGTATTTGAACCCGAATATCCGGGAAA  
AAGCAGAATATTTGATGGAAGAACAGGAGATCCTTTTGAACAACCTGTTATAATGGGA  
AAGTCCATATCCTGAAATTAATTCATCAAGTTGATGATAAAATCCATGGACGTTCCAGT  
GGGCATTATGCACTTGTTACACAACAACCCCTTAGAGGAAGGGCCAAGCAAGGGGGA  
CAACGTGTAGGAGAAATGGAGGTTTGGGCTCTAGAGGGATTGGTGTGCTCATATTC  
ACAAGAAATGCTTACTTATAAATCTGATCATATTAGAGCTCGTCAGGAAGTACTTGGTAC  
TACGATCATTGGAGGAACAATACTTAACCCCTGAAGATGCTCCAGAATCTTTTCGATTGC  
TCATTTCGAGAACTACGATCTTTGGCTCTGGAACCTGAATCATTTCCTTGTATCTGAGAAG  
AACTTCCAGATTAATAGGAAGGAAGCT-----ATGATCGACCGGTATAAACAT  
CAACAACCTCGAATTGGATCAGTTTCTCCTCAACAAATAACTGCTTGGGCCAACAAAA  
TCCTACCTAATGGAGAGATAGTTGGAGAGGTGACAAAACCCCTATACTTTTCATTACAAA  
ACCAATAAACCGGAAAAAGATGGATTGTTTTGTGAAAGAATCTTTGGACCTATAAAAA  
GTGGAATTTGTGCTTGTGGAAATTATCGAGTGATCGGAGATGAAAAAGAAGACCCGAA  
ATTTTGTGAACAATGCGGAGTCGAGTTTGTGATTCTCGGATACGAAGATATCAAATGG  
GATACATCAAACCTGGCATGTCCAGTGACTCATGTGTGGTATTTGAAACGCTTCCCTAGT  
TATATCGCGAATCTTTTAGATAAACCCCTTAAGGAATTAGAAGGTCTAGTATACTGCGAT  
GTGAATTTTCTTTTGCTAGGCC---ATAGCTAAAAACCTACTTTCTTACGATTACGAG  
GTTCAATTCGAATATGAAATCCAATCCTGGAAATACAGCATCCCACTTTTTTTTACTACCC  
AGGGCTTCGATACATTTTCGAAATCGAGAAATCTCGACTGGAGCAGGTGCTATCAGAGA  
ACAATTAGCCGATCCGGATTGCGAACTATTACAGATCATTATTGGTAGAATGGAAGG  
AATTAGGGGAAAAAGGATCTACT--GGGAATGAATGGGAAGATAGAAAAATTGGAAGA  
AGAAAGGATTTTTTAGTTAGACGCCTGGAATTAGCTAAGAATTTGATTCGAACAAATGT  
AGAACCAGAATGGATGGTTTTGCGCCTATTACCAGTTCTTCCCTCCTGAGTTGAGGCCAA  
TCATTAGATAGATGGGGGTAAACCAATGAGTTCGGATATTAATGAACTCTATAGAAGA  
GTTATCTATCGGAACAATACTCTTACCAGTCCATTAACAACAAGTAGATCTACGCCAGG  
GGAATCAGTAATGTGTCAGGAGAAATTGGTACAAGAAGCCGTGGATACACTTCTTGAT  
AATGGGATCCGCGGACAACCAATGAAGGATGGTCATAATAAAGTTTACAAGTCTGTTTTC  
AGATGTAATTGAAGGCAAAGAGGGGAAGATTCCGTGAGACTCTACTTGGTAAACGGGTC  
GATTATTCGGGGCGTTCCGTCATTGTCGTGGGTCCTTCGCTTTCATTACATCGATGTGGA  
TTACCTCGAGAAATAGCAATAGAGCTTTTCCAGACATTTGTAATTCGTGGTCTAATCAG  
ACAGCATGTTGCTTCCAACATAGGTATTGCTAAAAGTAAAATTCGGGAAAAAGAACCC  
ATTGTATGGGAAATACTTCAAGAAGTTATGCAGGGACATCCTGTATTGTTGAATAGAGC  
ACCCACCCTGCATAGATTAGGCATACAGGCGTTCCAACCCATTTTAGTGGAGGGGGCGC  
GCTATTTGTTTACATCCATTAGTTCGTAAGGGATTCAATGCAGACTTTGATGGGGATCAA  
ATGGCTGTTTACATGACCTTTATCTTTGGAAGCTCAAGCAGAGGCTTGTACTTATGTTT  
TCTCATATGAATCTCCTATCTCCAACCTATTGGGGATCCATTTCCGTACCAACTCAAGATA  
TGCTTATTGGACTCTAATGATTAACGATCGGAAATCGCCGAGGTATTTGTGCAAATAGGT  
ATAATCCATGTAATTGCAGAAACGATAAC---GATCAAAATGAAACAGTTGACGATAAT--  
TATAAGTATACGAAAGAGAAAGAACCCTATTTTTGTAGTTCCTATGATGCACTTGGAGC  
TTATCGGCAGAAACGAATCCATTTAGATAGTCCTTTGTGGCTTCGGTGGCGACTAGATC  
AACGT---GTCATTGCCTCA-----AGAGAAGTTCATCGAAGTTCAATATGAATCTTCGG

GTACCCATCATGAGATTTATGGGCACTATCTAATAGTAAGGAGTGTAAGGAGGAAATC  
CTTTGTATATACATTCGAACCACTGTTGGTCATATTTCTTTTTATCGAGAAATAGAAGAA  
GCCATACAAGGGTTTTGTCGGGCCTACTCATAACGGTACC-----AT  
GGCAGAACGGGCAGATCTGGTCTTTCACAATAAAGTGATAGATGGAACCTGCCATGAAA  
CGACTTATTAGCAGATTAATAGATCACTTCGGAATGGCATATACATCACACATCCTGGAT  
CAAGTAAAGACTCTGGGTTTCCAACAAGCCACTGCTACATCCATTTCAATAGGGATTGA  
TGATCTTTTAAACAATACCTTCTAAAGGATGGCTAGTCCAAGATGCTGAACAACAAAGTT  
TGATTTTGGAAAAGTACCATCATTATGGGAATGTACACGCGGTAGAAAAATTACGTCAA  
TCCATTGAGATATGGTATGCTACAAGTGAATATTTGAGACAAGAAATGAATCCTAATTTT  
AGGATGACTGATCCTTCTAATCCAGTCCATATAATGTCTTTTTCGGGAGCTAGAGGAAA  
TGCATCTCAGGTACACCAATTAGTAGGTATGAGAGGATTAATGTCGGATCCCCAAGGAC  
AAATGATTGATTTACCCATTCAAAGCAATTTACGCGAAGGACTTTCTTTAACGGAATATA  
TCATTTCTGCTACGGAGCCCGCAAAGGAGTTGTGGATACTGCTGTACGAACATCAGAT  
GCTGGATACCTCACGCGTAGACTTGTGGAAGTAGTTCAACACATTGTTGTACGTAGAAC  
AGATTGTGGCACTATCCGAGGTATTTTCGTGAGTCCTCAAAT-----GGGATGGCGAAAA  
GAATCTTTATCCAAACACTAATTGGTTCGTGATTAGCAGACGATATATATATGGGTCCAC  
GATGCATTGCCGCTAGAAATCAATATATTGGGATTGGACTTGTCAATCGATTCATAACC--  
-----TTTCGAGCACAACCAATATCTATTCGAACCCCTTTACTTGCAGAAGTACG  
TCCTGGATCTGTGATTATGTTATGGTTCGGAGTCCCACTCATGGGGATCTGGTTCGAATTG  
GGAGAAGCAGTAGGCATTATTGCGGGTCAATCAATTGGGGAACCAGGGACTCAACTAA  
CATTAAAGAACTTTTCATACCGGTGGGGTATTCACAGGTGGTACTGCGGAACATGTACGA  
GCTCCTTCTAATGGAAAATAAAATTCAATGAGGATTTGGTTCATCCACACGTACACG  
TCATGGACATCCTGCTTTTCTATGTTATATAGACCTGTATGTAACCTATTGAGAATCAGGAT  
ATTATTCATAATGTGAATATTCCGCCAAAAAGTTTTCTTTTAGTTCAAATGACCAATAT  
GTAGAATCAGAACAAGTGATTGCTGAGATTCGCGCCGGAGCATCCACTTTG-----TTTA  
AAGAGAGGGTTTCGAAAACATATTTATTCTGACTCAGAGGGAGAA---ATGCACTGGAGT  
ACCGATGTGTACCATGCATCTGAATATACATACGGTAATGTTTCATCTCTTACCCAAAACA  
AGTCATTTATGGATATTATCAGGAAGTCCG-----TACAGATCTAGTATAGTGCCTTTTTTCG  
CTCCACAAGGATCAAGATCAAATGAATGTTTCAT-----TCTCTTTCTGTGCAACGGGGATC  
TATTTCTGACCTCTCA-----GTGACTAATGATCGA---GTGAGACACAAATTGTTTAGTTCG  
GATCTGTCTGGTAAA---AGGGGGGGGATCCTTGATTATTCA---GGCCTGATCGAATCAT  
ATCCAATGGTCATTGGAATTTTCATATATCCTGCC---ATTCTCCACGAGAATTCTGAT-----T  
TATTGGCGAAGAGACGAAGAAATAGGTTTCATCATTCCATTCCAATATGATCAAGAACGA  
GAGAAAGAATAATGCCCGGTCTGGTATCTCGATTGAAATACCCATAAAT-----GGTAT  
TTTTCGTAGAAAGAGTATTCTTGCTTATTTTCGACGATCCTCGATACAGAAAGAGCAGTT  
CAGGAATTACTAAATATGGGACCATAGAGGTGGATTCAATCGTCAAAAAAGAGGAT-----  
TTGATTGAGTATCGAGGA---GCAAAGAATTTAGGCCGAAATACATGAAAGTGGATCGA  
TTCTTTTTTCAATCCCGAAGAAGTGCATATCTTAACCGGATCTTCGTCCATAATGGTACGG  
ACAATAGTATCATTGGAGTGGATACACGAATCGCTTTAAATACAAGAAGCCGAGTAGG  
GGGATTGGTCCGAGTGGAGAAAAAAGGATTGAACTGAAAATATTTTCAGG  
AGATATCCATTTTCTGGAGAGACAGATAAGATATCCCGGCACAGCGGCATCTTGATAC  
CACCAGGAACGGGAAAAAA-----AATCCTAAGGAATCAAAA-----AAATGGAAAATT  
GGATCTATGTACAACAG-----ATCACACCTACCAAGAAAAAG-----TATTTTGTTCGGTT  
CGATCCGTAGTCACATATGAAATAGCTGATGGGATAAATTTAGCAACGCTTTTCCCCCA

GGATCTGCTGCAGGAAAGGGATAATGTGCAACTCCGAGTTGTCAATTATATCCTTTATG  
GAAATGGAAAACCAATTCGAGGAATTTCTCACACAAGTATTCAATTAGTTCGGACTTGT  
TTAGTATTGAATTGGGACCAAGACCGAAATGGT-----TCTATAGAAGAGGCTCATGC  
TTCTTTGTTGAAGTAAGGGCAAATGCTCTGATTTCGAGATTCATAAGAATTCACTTAGT  
AAAGTCCCCTATTTTCGTATAACCGTAAAAAGGAATGATACGGCAAGTTCAGGATTGATCC  
CCGAT--AATGCATCAGATCGCCCCAATATCAATCCTTTTGATTCAAGGCGAGG-----  
-----GTTCAATCACTTACCCAACATCAAGGAAGTATTTCGTACGTTACTGAATAGA-  
-----AATAAGGAATGTCAATCTTTGATCATTGTTGTCATCATCCAATTGTTCTCGACTTGG  
TCCA-----TTAATGGTTCGAAATATCACAATGTGACA-----AAAGAATCAGATCCCTC  
GATTTCAATTAGGAATTCGTTGGGCCCTTAGGGATT-----GTACCTAAAATTGCGAATTT  
T-----TATTATTTAATGACT-----CATAATCAGATCTTGTTAAAT--AAATATTTGCTAC  
TTGACAAT-----TTAAAACAGACTTTCCAAGTACTTCAATATTACAAATATTCTTTAATG  
GATGAAAATGGGCAA-----ATTTATAATCCCGATCCATACAGTAACACCATTTTGAATCCA  
TTCGATTTGAATTGGCGCTTTCTCCATCACGATTATTGTGAAGAGACATCCACAATAATT  
AGC---CTTGGACAGTTTATTTGTGAAAATGGATGTATATCTAAATACGGACCA-----CA  
CATAGAATCTGGTCAAGTTCTAATTGTTTCAT--GTTGACTCCTTAGTAATAAGATCAGCTA  
AGCCCCATTTGGCTACTCCAGGAGCAACCGTTCATGGCCATTATGGAGAAATCCTTTAC  
GAAGGAGATACATTAGTTACATTTATATATGAAAAATCGAGATCTGGTGATATAACGCAA  
GGTCTTCCAAAAGTGGAACAAGTGTTAGAAGTGCGTTCGATTGATTCAATATCGATAAA  
CCTAGAAAAGAGGGTTGAAGTTGGAACGAGCGTATAACAAGAATTATTGGAATTCCT  
TGGGGATTCTTGATTGGTGCTGAGCTAACCATAGCGCAAAGTCGTATCTCTTTGGTTAAT  
AAGATCCAAAAGGTTTATCGATCCCAGGGAGTGCAGATCCATAATAGGCATATAGAGAT  
TATTGTACGTCAAATAACATCAAAGTGTGGTTTCAGAA-----GATGGAATGTCTAAT  
GTTTTTTCACCCGGAGAATAATCGGATTGTTGCGAGCGGAACGAACAGGGCGTGCTT  
TGGAAGAAGCGATCTGTTACCGAGCCATCTTATTGGGAATAACGAGGACATCTCTGAAT  
ACTCAAAGTTTTATATCTGAAGCGAGTTTTCAAGAAACCGCTCGAGTTTTAGCAAAAG  
CCGCCCTACGAGGTCGTATTGATTGGTTGAAAGGCCTGAAAGAGAACGTTGTTCTGGG  
GGGGATGATACCTGTTGGTACTGGATTCAAAGGATTAGTGCACCGTTCAAGG-----CAA  
CACAACAATAGTCCT-----TTGGAAATCAAAAAGAAGAATCTATTCGAGGGTGAAATGA  
GA-----GATATTTTGTCCACCATAGAGAATTATTGGTTCTTGCATCCCAAACCATTTC  
ATGATACAACATTTACGGGATTTTCATGATTC-----ATGACAAGAAGATA  
TTGGAACATAAATTTGGAAGAGATGATGGAAGCAGGAGTTCATTTTGGTCATGGTACTA  
GGAATGGAATCCTAGAAATGGCACCTTACATCTCCGCAAAGCGTAAAGGTATTCATATT  
ACAAATCTTACTCGAACTGCTCGTTTTTTATCAGAAGCCTGTGATTTAGTTTTTGTGCA  
GCAAGTAGTGGAACAACACTTCTTAATAGTCGGTACCAAAAATAAAGCAGCGGATTCAG  
TAGCATCAGCTGCAATAAGGGCTCGGTGTCATTATGTTAATAAAAAATGGCTTGGTGGT  
ATGTCAACGAATTGGTCGACTACAGAAACGAGACTTCAGAAGTTCAGGGACTTGAGA  
GCGGAACAAAAGATGGGTAGACTCAATCGTCTCCAAAAGAGATGCAGCAATGTTG  
AAGAGACAATTATCTCGCTTGCAAACATATCTGGGTGGGATCAAATATATGACGGGTTT  
ACCCGATATTGTAATCATCGTTGATCAGCAAGAAGAATATACGGCTCTTCGAGAATGTG  
TTACTTTGGGGATTCCGACGATTTGTTAATCGATACAAATTTGTGACCCGGATCTAGCGG  
ATATTCGATTCCAGCCAATGATGACGCTATAGCTTCAATACGATTGATTCTTAACAAATT  
AGTATCCGCTATTTGTGAGGGTCTTCTGGC---TATATAAGAAATCGTATGGGACAAAA  
ATAAATCCACTTGGTTTCAGACTTGGT--GCACAAGGTCATCATTCCCTTTGGTTCGCAC

AACCAAAAAGTTATTCCAGAGGTCTCCAGGAAGATGAAAAAATAAAGGATTGTATCAA  
GAATTATGTACAAAAAATATGAGAATATCCTCGGAT--TACGAAGGAATTGCACATATA  
GAGATTAAAAAAGAATCGATCTGATTCAGGTCATAATCTATATGGGATCAAAAAATAT  
GTTAATAGAGGGT-----CCAACACGA-----GGAATCGAAGAATTACAGATCAATGTACAA  
AAAGAGTTTCATTCTGCGAACCAGAGACTCAATATTGACATCACAGAAGTTGCAAACC  
CTTATGGACAACCTAATCTTCTTGCAGAATATATAGCTCGACAATTAAGAAGAGAGTT  
TCGTTCCGAAAGGCAATGAAAAAACTATTGAATTCGCTGAACAAGCAGATACAAAAG  
GAATTCAAGTGCAAATTCAGGACGCATCGACGGAAAAGAAATTGCGCGTGTGCGAATG  
GGTCAGAGAAGGTAGGGTCCCTACAACTATTCGAGCTAAAATTGATTATTGTTCCCT  
ATACAGTTCGAACTATCCATGGGGTATTGGGCATAAAAATTTGGGTATTTGTAGACGATA  
AAATGTCTCGTTACCGAGGGCCTCGTTTCAAAAAAATACGCCGTCTAGGGGCTTTACC  
GGGACTAACTAGTAAAAGACCTAGGTCCGGAAGTGATCTTAGAAACCAATCACGTTTC  
GGAAA---AGATCTCAATATCGTATTCGTCTAGAAGAAAAACAATAATTGCGTTTTTCAT  
TATGGTCTGACAGAGCGACAGTTACTTAGATATGTTTCGTATCGCTGGAAAAGCCAAAGG  
ATCAACAGGTCAGGTTTTACTACAACACTTGTAGATGCGTTTGGATAACACCCTTTTTC  
GATTGGGTATGGCTTCGACCATTCCTGGAGCCAGGCAATTAGTTAACCATAGACATATTT  
TAGTTAATAGTCGTATAGTAGATATACCAAGTTATCGCTGCAAACCCCGAGATATTATTAC  
TACGAGGGATGAACAAAGATCCAGAACTCTGATTCAAAATCATATTGATTCATCCCCC  
AC--GAGGAATTGCCAAAACATTTGACTCTTCACTCATTCCAATAT-----AAAGGATTAGT  
AAATCAAATAATAGATAGTAAATCTATTGGTTTGAAAATCAATGAGTTGCTAGTCGTAGA  
ATATTATCCCGTCAGACTATGTACGTCGAGGTACTGCAGAAGAAAAAACTACAAAAT  
CCGATCCAATTTATCGTAATCGATTAGTTAACATGTTGGTTAACCGTATTCTGAAACACG  
GAAAAAATCATTGGCTTATCAAATTATCTATCGAGCCGTGAAAAAGATTCAACAAAAG  
ACAGAAACAAATCCACTATCTGTTTTACGTCAAGCAATGCGTGGAGTAACTCCCGATAT  
AGCAGTAAAAGCAAGACGTGTAGGCGGATCGACTCATCAAGTTCCCCTTGAAATAGGA  
TCTACACAAGGAAAAGCACTTGCCATTCGTTGGTTATTAGGGGCATCCCGAAAACGTC  
CGGGTCGAAATATGGCTTTCAAATTAAGTTCCGAATTAGTGGATGCTGCCAAAGGGAGT  
GGCGATGCCATACGCAAAAAGGAAGAGACTCATAGAATGGCAGAGGCAAATAGAGCT  
TTTGACATTTTTCGTATGGGTAAGGACACTATTGCCGATATAATAACTTCTATAAGAAAT  
GCTGACATGGAAAAAAAAGGAACAGTTAGAATAGCATCTACTAATATAAGTGAAAACA  
TTGTTCAAATACTTCTACGAGAAGTTTTATTGAAAACGTTAGGAAACATCGGGAAAA  
CAACAAATATTTCTTGGTTTCAACCCTGCGGCATAGAAGG-----AATAGGAAAGGAGCA  
TATAGA-----AATATTTTA-----AAGCGTATCAGCCGACCCGGTCTACGAATCTATTCTG  
ACTATCAACGAATTCCTAGGATTTTAGGTGGAATGGGAATTGTAATTCTTTCTACTTCTC  
GAGGTATAATGACAGATCGAGAGGCTCGACTAGAAGGAATTGGAGGAGAAATTTTGTG  
TTATATATGGATGACAAAACCTATACCAAGAATTGGTTCACGCAAGAATGGACGTATTA  
GTTACGTAAGAATGGACGTAGAATACCAAGGGAGTTATTTCATGTTCAAGCGAGTTT  
CAACAATACCATTTGTGACTGTTACAGATGTACGGGGTTCGGGTGGTTTCTTGGTCTCCG  
CTGGTACTTCCGATTTAGAGGAACAAGAAGAGGAACCCCATTTGCTGCTCAAACCGC  
AGCAGGAAATGCTATTCGTACAGTAGTGGATCAAGGTATGCAGCGAGCAGAAGTCATG  
ATAAAGGGACCCGGTCTCGGAAGAGATGCAGCATTACGAGCCATTCGTAGAAGTGGTC  
TACTATTAAGTTTCGTACGTGACGTAACCCCTATGCCACATAATGGATGTAGACCTCCTA  
AAAAAAGACGTGTGATGCCAACTATTAAGCAACTTATTAGAAATACAAGACAGCCAAT  
CAGAAATGTCAGAAATCCCCGCTCTTCGAGGATGTCCTCAGCGCCGAGGAACGTGT

ACTAGGGTGTATACTATCACCCCCAAAAACCAAACCTCTGCCTTACGTAAAGTTGCCAG  
AGTACGATTAACCTCTGGATTTGAAATCACTGCTTATATACCTGGTATTGGCCATAATC  
ACAAGAACATTCTGTAGTCTTAGTAAGAGGAGGAAGGGTTAAGGATTTACCCGGTGTG  
AGATATCACATTGTTTCGAGGAACCCTAGATGCTGTCGGAGTAAAGGATCGTCAACAAG  
GGCGTTCTCAATATGGGGTCAAAAAGCCAAAAATGGCAAGGAAAAGTTTGATTCAGA  
GGGAGAGGAAGAGGAAGAAATTGGAACAGAAATATCATTGGATTCGTTCGATCCTCAA  
AACAGAAATAAAC-----AAAGTTCATCGTTGAGTGACAAATGGGAAATTCATGGAA  
AATTGCAATCCCACCACGTAATAGTGCACCTATACGCTTTCATCGACGTTGTTTTTCGA  
CCGGAAGACCTAGAGCTAACTATAGAGACTTTGGGCTATCCGGACACATACTTCGCGA  
AATGGTTCATGCATGTTTTGTTGCCGGGGCAACAAGATCGAGTTGGATGGTAAAAAAT  
TCATTCAACTCAGTTATTCCGCAAGAAGAA-----ACAAGGGATCTGTTGAATTT  
CAAGTATTCAATTTACCAATAAGATACGGAGACTTACTTCACATTTGGAATTACACAG  
AAAAGACTATTTATCTCAAAGAGGCCTGCGGGGAATTCTGGGAAAACGTCAACGACTG  
CTGGCTTATTTGTCAAAAAAATAGAGTACGTTATCAGGAATTAATTGGTCAGTTGGA  
TATTCGGGAGCCAAAACTCGTGAATTTATGGTCAAACCTTCGTTTGAAACGATGTGGTA  
GAAAGTCC-----ATCTATCGAATCGTTGCAATTGATGTTTCGATCCCGAAGAGAAGGAAG  
AGATCTTCGAAAGTGGGTTTTTACGATCCAATAAAGAATCAAACCTTATTTAAATGTTT  
CTGCTATTCTTTATTTCTTGAAAAAGGCGCTCAACCTACAGGAAGTTCATGATATTT  
CAAAGAGGGCGGAGGTATTTAAGGAATTTAAAATTAATCAATTGAAA-----ATGGATA  
AATCTAAGCGACTTTTTCGTAAATCCAAGCGATCTTTTCGTAAGCGTTTGCCCCAATT  
GGATCGGGGGATCGAATTGATTATAGAAACATGAGTTTAATTAGTCGATTTATTAGTGAA  
CAAGGAAAAATATTATCTAGACGAGTAAATAGATTGACCTTGAAACAACAACGATTAAT  
TACTACTGCTATAAAACAAGCTCGTATTTTATCTTCGTTACCTTTTCTTAATAATGAGAAA  
-----CAATTGGAGAGAACCGAGTCGATCCCTAGAACTACTGGTACTAGAATCAGAAATA  
AAGTGACACGTTCAATTAAAAAAATCCTTTTGTAGCTAATCATTATTAGAAAAAGTT  
GAGAAGCTCAACATGAGAGAGGAAAAAATAATAGTAACTTGGTCCCGTCATCTA  
CCATTATACCTACAATGATCGGTCATACAATTGCTATTATAATGGAAGGGAACATTTAC  
CTATTTATATAACAGATCGTATGGTGGGTCACAAATGGGGGAATTTGCACCTACTCTTA  
CTTTCCGAGGACATGCGAGAAACGATAATAGATCTCGTCGTATGATTTTGAAATCTTTTC  
TACTAGGTAATCTATTATCCTTATGCATGAAGATAATAAATTCGGTCGTTGTGGTCCGAC  
TCTATTATGGATTTCTGACCACATTTCCGTCAGGGCCCTTTATCTCTTCTCCTCCTCCGAGC  
TCGGGTTATGGAAGAAGGA-----ACCGAGAAGGAGGTATCAGCAACAACCTGGTTTTA  
TTACGGGGCAGCTCATGATGTTTCATATCGATCTATTATGCGCCTCTGCATCTAGCATTGG  
GTAGACCTCATACAATAACTGTCCTAGTTCTACCATATCTTTTGTTCATTTCTTCTGGAA  
GAATCACAAACACTTTTTTGATTATGGATCTACTACCAGAAATTCAATGCGTAATCTCAG  
CATCAATGTGTATTCTGAATAATCTCATTTTTCAATTATTCAACCATTTCAATTTACCA  
AGTTCAACGTTAGCCAGATTAGTCAACATTTATATGTTTTCGATGCAACAACAAGATGTTA  
TTTGTAACAAGTAGTTTTGTTGGTTGGTTAATTGGTCCATTTTATTCATGAAATGGGTT  
GGATTGGTATTATTCTGGATACGGCAAAATAATTCTATTAGATCG-----GTACTTATTAAGT  
ACCTTGTGTCAGAATTGAGAAATCTATGGCTCGAATCTTTTCGTATTCTTATTATTCAC  
CTGTGTCTACTATTTAGGCAGAATACCGTCGCCTATTGTCACTAAGAACTGAAAGAAA  
CCGAAGAAGACAAACCTCTTTTACTCTTTTTCGACTATAAACGATGGAATCGTCCA  
TTGCGATATATAAAAAACGATCGATTTGAAAATGCTGTAAAGAAATGAAATGTCACAATA  
TTTTTTTACACATGCCCAAGTGATGGAAAACAAATAATATCTTTTACATATCCACCTAG





TGGTTAGACAATGTGTGGTTGGTAAACAAGGATCGG-----TTTTTTAGC-----CAGGTA  
CGGAATGTATCGTCAAATATTCAATATGATTCC-----ACAAGA-----TCTATTTTCGTTCA  
AGTAACGGATTCTAGCCAATTGAAAGGATCTTCT--GATCAATCCAGAGATCATTTCGAT  
TCCATTAGT-----AATGAGGATTTCGGAA-----TATCACACAT  
TGATCAATCAAACAGAGATTTCAGCAACTAAAAGAAAGATCGATTCTT--TGGGAT-----C  
CTTCCTTTCTTCAAACGGAACGAACAGAGATAGAATCAGAT-----CGATTCCCGAAA-----  
-TCCCTTTCTGGATATTCC-----TCAATGTCCCGGCTATTTCACG--GAACGTGAGAAGCAG  
ATGAATAATCATCTGCTTCCGGAAGAAATCGAAGAATTTCTT-----GGGAATCCTACAAG  
ATCAATTCGTTCTTTTTTCTCTGACAGATGG-----TCAGAACTTCAT--CCGGGTTCGAAT  
CCTACTGAGAGGTCCACTAGAGATCAG-----AAATTGTTGAAGAAACAACAAGATG  
TTTCT--TTTGTCCCTTCCAGGCGATCGGAA-----AATAAAGAAATGGTTGATATATT  
CAAGATAATTACGTATTTACAAAAT-----ACCGTCTCAATTCATCCTATTTTCATCAGATCCG  
GGATGTGATATGGTTCCG---AAGGATGAACCGGAT--ATGGGCAGTTCCAATAAGATTTC  
ATTCTTGAACAAAAATCCATTTTTTGAATTTCTATTTATTTTCATCTATTCCATGACCGGAAC  
AAAGGGGGATACACGTTA-----CACCACGATTTTGAATCAGAA-----GAGAGATTTCAAG  
AAATGGCAGATCTATTCACTCTATCAATAACCGAGCCG--GATCTGGTGTATCATAAGGG  
ATTTGCCTTTTCTATTGATTCCTACGGATTGGATCAAAAAAAAA-----TTCTTGAATGAGGT  
ATTCAACTCCAGGGATGAATCGAAAAAGAAATCTTTA-----TTGGTTCTACCTCCTATT  
TTTTAT-----GAAGAGAATGAATCTTTTTATCGAAGGATCAGAAAAAATCGGTCCGG---  
ATCTCCTGCGGGAATGATTTGGAAGACCCAAAACCCAAAATAGTGGTATTTGCTAGCA  
ACAACATAATGGAGGCAGTCAATCAATATAGATTGATCCGAAATCTGATTCAAATCCAAT  
ATAGCACCTATGGG-----TACATAAGAAATGTATCGAATCGATTCTTTTTAATG-----AAT  
AGATCCGATCGCAACTTCGAATATGGAATTCAA-----AGGGATCAAATAGGAAATGAT  
ACTCTGAATCATATAACTATAATGAAATATACGATCAACCAACATTTATCGAATTTGAAA  
AAG---AGTCAGAAGAAATGGTTTGAT-----CTTCTTATTTCTCGAACCGAGAGATCC  
ATGAATCGGGATCCTGATGCATATAGATACAAATGGTCCAATGGGAGCAAGAATTTCCA  
GGAACATTTGGAACATTTTCGTTTCTGAACAGAAGAAC-----CATTTTCAAGTAGTGTT  
CGATCGATTACGTATGAATCAATATTCGATTGATTGGTCCGAGGTTATCGACAAACAAGA  
TTTGTCTAAGTCACTTCGTTTCTTTTTGTCCAAGTCA-----CTTCTTTTT  
TGTC-----AAGTCACTT--CTCTTTTTGTCCAAGTCACTTCCTTTTTTCTTTG  
TGAGTATCGGGAATATCCCATTCATAGGTCCGAG--ATCCACATCTAT--GAATTGAAAG  
GTCCGAATGATCAACTCTGCAATCAGTTGTTAGAATCCATAGGTGTTCAAATCGTTCATT  
TGAATAAATTGAAACCC-----TTCTTATTGGAT-----GATCAATATACTTCC---CAAAGAT  
CGAAATCTTGATCAATGGAGGAACAATATCACCTTTTTGTTCAATAAGACACCC---A  
AGTGG--ATGATTGACTCATTCCATACT-----AGAAATAATCGCAGGAAATCGTTTGATAA  
CACTGATTCCTATTTCTCAATGATATCCCACGATCGAGACAATTGGCTGAATCCCGTGAA  
ACCATTTTCATAGAAGTTCATTGATATCTTCTTTTTATAAAGCAAATCAACTTCGATTCTTG  
AATAATCCACATAACTTCTGGTTCTAT-----TGTCACAAAAGATTCCCTTTTTTATGTG-----  
----GAAAAGACCCGTATCAATAATTACGAT-----CTTACATAT--GGACAATTCCTCAATAT  
CTTGTTCAATTCGCAACAAA---AGATTTTCTTTGTGCGTCGGTAAA-----AAAAACATGT  
TTTTTTGGAG---AGAGATACTATTTACCAATCGAGTCACAGGTATCTGACATATTCATA  
CCTAACGATTTTCCACAAAGTGGTGACGAAACA---TATAACTTGTACAAATCT-----TT  
CCATTTTCCAATTCGATCCGATCCATTCGTTTCGT-----AGAGCTATTTACTCGATCGCAGA  
CATTTCTGGAACACCTCTAACAGAGGAACAATAAGTCAATTTTGAAGAAGTATTGTC

AGCCTCTTTCAGATATGAATCTATCTGATTTCAGAAGGGAAGAACTCGCATCAGTATCTC  
AGT-----TTCAATTCAAACATGAGTTTGATTACACTCCATGTTCTGAGAAATATTTACCA  
-----TCCGGAAAGAGGAAAAA-----CGGAGTCTTTGTCTAAAG-----AAAT  
GTGTTGAGAAACGGCAGATGTATAGAACCTTTCAACGAGATAGTGCTTTTTCAAATCTC  
-----TGGAAATCTGTTCCAAACCTATATGCCATGGTTCCTTACTTCGACAGGGTGCAAATAT  
CTAAATTTACCCTTTTAGATACTTTTTTCAGACCCATTG-----CCGATACTAAGTAGCAGT-  
--CCAAAATTTGTATCCATTTTTTCATGATATTATGCATGGATCAGATATATCATGGCCAATT  
CCTCAGAAAAAATTGTGG-----GTGATTCTTCCACAATGGAATCTG---ATAAGTGAG  
ATTTTCGAGTAAGTGTTTACAGAAT-----CTTCTTCTGTCCGAAGAAAGAATTCGTCGAAA  
TAATGAGTCACCCGTTCCATTGATATGGACACATCTGAGATCACCAAATGCTCGGGAGT  
TC---CTCTATTCAATCCTTTTCTTCTTCTTGTGCTGGATAT--CTCGTTCGTACACATCT  
TCTCTTTGTTTCCCGA-----GCCTCTAGTGAGTTACAGACAGAGTTAGAAAAGATCAAAT  
CTTTGATGATTCATCATACTGATTGAGTTGCGAAAACTTCTGGATAGGTATCCTACAT  
CTGAACTGAATTTCTTCTGGTTAAAGAATCTCTTTCTAGTTGCTCTGGAACAATTAGGA  
GATTCTCTGGAAGAAATACGAGGTTCTGCTTCTGGCGACAATATGCTATTGGGTGGTGG  
TCCC-----GCTTATGGG---GTCAAATCAATACGTTCTAAGAAGAAATATTTGAATAT  
CAATCTCATCGATATCATCGATCTCATA---AGTATCATACCAAATCCCATCAATCGAATCA  
CTTTTTCGAGAAATACGAGACATCTAAGTCGTACAAGTAAAGAGATCTATTCATTGATA  
AGAAAAAGAAAAACGTGAACGGTGATTGGATTGATGATAAAATAGAATCCTGGGTCG  
CGAACAGTGATTGATTGATGATGAAGAAAGAGAATTCTTGATTGATTCTCC-----ACC  
TTAACGACGACA---GAAAAAGGGATTGATAAAATTCTATTGAGTCTGACT--CATAGTGA  
TCATTTATCA-----AAGAATGACTCTGGTTATCAAATGATTGAACAACCGGGATCC  
ATTTACTTACGATACTTAGTTGACATTCAT-----AAAAAGTATCTAATGAATTATGAGTTCA  
ATAGATCCTGTTTAGCAGAAAGACGGATATTCCTTGCTCATTATCAGACAATCACTTAT--  
---TCACAAACCTCGTGTGGGGCTAATAGTTCTCATTTCATTTCCCATCTCATGGA-----AAACC  
CTTTTCGCTCCGCTTAGCCCTATCCCCTTCT--GGGGGTATTTTAGTGATAGGTTCTATAG  
GAACTGGACGATCCTATTTGGTCAAATACCTAGTGACAACTCCTATCTTCCTTTCATTA  
CGGTATTTCCGAACAAGTTCGAC-----AAGTCTAAAGGTTATCTTATTGAT-----GA  
TATCGAT--ATTGATGATAGTGACGAGATCGAT-----ATTGATGATATTGACGAGATCA  
ATATGGATGATAGTGACGAGATCGATATTGATGATATTGGCGAGATCAATATGGATGATG  
ACCTTGATACGGAGCTGCTAACTAGGGCGAATGCGCTA-----ACTATGTATATGACG----  
----CCGAAAATAGACCGATTTGATCTCACCTTCCATTTCGAATTAGCAAAAGCAATGTCT  
CCTTGCATAATATGGATTCCAAACATTCATGATCTGTATGTGAATGAGCCGAATTACTTAT  
CCCTCGGTCTATTAGTGAACCTATCTCTCC-----AGGAATTGTGAAATATGTTTC---ACTA  
AAAATATTCTTGTTATTGCTTCGACTCATCTTCCCCAAAAAGTGGATCCCGCTCTAATAG  
CTCCGAATAAATTAATACATGCATTAAGATACGAAGGCTTCTTATTCCACAACAACGA  
AAGCACTTTTAAATTCTTTCATATACTAGGGGATTTCACTTGGAAGAAAGAAATGTTCCAT  
ACT-----AACGGATTCGGGTCCATAACCATGGGTTCCAATGCACGAGATCTTGTAGCACT  
TACCAATGAGGCCCTATCAATTAGTATTACACAGAAGAAATCCATTATAGACACTAATAC  
AATTAGATCAGCTCTTCATAGACAACTTGGGATTTGCGA-----TCCCAGGTAAGATC  
GGTTCAGGATCATGGGATCCTTTTCTATCAGATAGGAAGGGCTGTTGCACAAAATGCAT  
TTCTAAGTAATTGCCCCATAGATCCTATATCTATCTATATGAAGAAGAAA-----TCATGTAA  
GGAAGGGGATTCTTATTTGTACAAATGGTACTTCGAACTTGGAACGAGCATGAAGAAA  
TTAACGATACTTCTTTATCTTTTGTAGTTGTTCTGCCGGATCGGTCGCTCAAGATCTTTGG

TCTCCACCC-----GGACCCGATGAAAAA---AATTGGATCACTTCTTATGGATTGTTGAG  
AATGATTCT--GATCTAGTTTATGGC--TTAGAAGTAGAAGGCGCTCTGGTGGGA-----TC  
CTCACGGACAGAAAAAGATTGCAGTCAGTTTGATAATGAT-----CGAGTGACATTGCTTC  
TTCGGTCCGAACCAAGGAAT---CCGTTAGATATGATGCAAAATAGATCTTGTCTATCGT  
TGATCAGAGATTTCTATATGAAAAA-----TACGAATCGGAGTTTGAAGAA---GGGGAAGG  
AGAAGGAGCCCTCGACCCGCAA-----CAGATAGAGGAGGAT-----TTATTCAAT  
CAC-----ATAGTTTGGGCTCCT-----AGAATATGGCGCCCT-----TGTGGCAATCTATTG  
ATTGTATCGAAAGGCCCAATGAATTGGGATTTCCT---TATTGGGCCAGGTCATTTCGG----  
----GGCAAGCGGATCATTATCATAAAGAGGATGAGCTTCAAGAGAATGATTTCGGAGTT  
CTTGACAGAGTGGAACCATGCAGTACCAGACACGAGATAGATCTTCCAAAGAACAAGG  
CTTTTTTCGAATAAGCCAATTCATTTGGGACCCTGCAGATCCATTCTTTTTCTATTCAA  
A--GATCCGCCCTTTGTCTCTGTGTTTTACGTCGAGAATTCTTTGCAGATGAAGAGAT  
GTCAAAGGGGCTTACTTCCCAAACAATCCTCCTACATCTCTTTAAACGCTGGT  
TCATC-----AAGAATACGCAAGAAAAGCACTTCGAATTGTTGATTTCATCGCCAAAGATG  
GCTTAGAACC-----AATAGTTCATTATCT-----AATGGATCTTCCGTTCTAAT-----ACTC  
CATCCGAGAGTTATCAGTATTTATCAAATCTGTTCCATCTAAC---GGAGCGCTATTGGAT  
CAAATGACAAAGACATTGTTGAGAAAGAGATGGCTTTTCCCGATGAAATGAAGCATT  
TGATT-----CATGTAACAGGAGAAAGATTTCCCATTCCTATGCCTAGATCTCGG---ATAAA  
TGAAATTTTATTGATAAGACCTTTTCAATTGTAGCCAATATTTATTACGAATAATTCCG  
ACAACCTCAGGAGAAAAAGAGGCATTTACCTATTACAGAGATGGT-----ATGTCAGCTC  
AATCCGACGGAATTATGCGGAAGCTTTACAGAATTATTATGAAGCTACGCGACTAGAA  
ATTGATCCCTATGATCGAAGTTATATACTCTATAACATAGGCCTTATCCACACAAGCAAC  
GGAGAACATACGAAGGCTTTGGAATATTTTTCGAGCACTAGAACGAAATCCATTCTT  
ACCACAAGCTTTTAATAATATGGCCGTGATCTGTCATTAC---CGGGGAGAACAGGCCATT  
CGACAGGGAGATTCTGAAATTGCAGAGGCTTGGTCCGATCAAGCTGCCGAGTATTGGA  
AACAAGCTATAGCGCTTACCCAGGTAATTATATTGAAGCACATAATTGGTTGAAAATC  
ACGAGGCGGTTTCGAA-----ATGAACTGGCGATCAGAACGTATATGGATAGAACTTATAAC  
GGGGTCCCGAAAAACAAGTAATTTCTGCTGGGCCGTGATCCTTTTTTTTAGGATCACTAG  
GATTCTTATTGGTTGGAACCTCCAGTTATCTTGGTAAGAATCTGATATCCTTACTCCCGT  
CTCAGCAAATCCTTTTTTTTCCACAAGGGATCGTGATGTCTTTCTATGGGATCGCAGGT  
CTGTTTATTAGCTCCTATTTGTGGTGCACAATTCGTGGAATGTAGGTAGTGGTTATGAT  
CGATTTCGATAGAAAAGAAGGAATAGTGTGATTTTTTCGTTGGGGATTTCCTGGAATAAA  
TCGTGCAATCTTCCCTTCGATTCCCTATGAGAGATATTCAGTCAATCAGAATGGAAGTTAA  
AGAGGGTCTCTATTCTCGTCGTGTCCTTTATATGGAATAAAGAGGCCAGGGAGCCATTC  
CCTTGACTCGTACTGATGATAAT---TTGACTCCACGAGAAATTGAACAAAAAGCTGCTG  
AATTGGCCTATTTCTTGCCTGTACCAATTGAATTGAAA

>Buxus

ATGGAAAAATGGTGGTTCAATTCGATGTTGTCTCTAAGTAAATCAATGGAAAGTCTTGG  
TCCTATTGGAAATACCAGTGGAGGTGAAGACCATATTATAAATAATATGGATAAAAACAT  
TCAT--TGCAGTAATGTTTATCCTTTATTCCGGTGCAGGGGAATTCAGGGTTTCATCTCTG  
ATGACACTTTTTTAGTTAGGGATAGTAATGGGGACAGTTATTCCATATATTTTGATATTGA  
AATAAGATTTTTGAGATTGACAATGAT-----CATTCTTTTCTGAGTGAAGTAAAGTT  
CTTTTTCTAGTTATCAGAAT-----AATGGCTCTAATAGTGACAATCCATACTATGAT  
CGTTACATTTATGATACTAAATATAGTTGGAATAATTACATTAATAGTTGCATTGATAGTTA

TCTTCGTTCTGAAATCCGT-----ATTGATAGTTACATTTTAAAGTGGTAGCGACAATTACAG  
TGACAGTTACATTTATAGTTACATTTGTAGT-----GAGAGTTCCATAAAA-----AATGGC  
AGTGAT--AATATAAGAGGAAGATAT--GATCTCGATCTAAATAAAAAATACAGGCATTTG  
TGGGTTCAATGCGAAAATTGTTATGGATTAAATTATAAGAAATTTTTTAGGTCAAAAATG  
AATATTTGTGAACAATGCGGATATCATTGAAAATGAGTAGTTCAGATAGAATCGAACT  
TTCGATCGATACCGGTACTTGGGATCCTATGGATGAAGACATGGTCTCTATGGACCCTAT  
TGAATTTCAATTCGGAGGAGGAACTTTATAAGGATCGTATCAATTCTTATCAAAGAAAGA  
CGGGCTTAACTGAGGCTGTTCAAACAGGTATAGGTCAACTAAATGGTATTCCCATAGCA  
ATTGGGGTTATGGATTTTCAGTTCATGGGGGGTAGTATGGGATCCGTAGTAGGCGAGAA  
AATAACCCGTTTGATCGAGTATGCTACTAATAGATCTCTACCTGTTATTATAGTGTGTGCT  
TCCGGAGGAGCGCGCATGCAAGAAGGAAGTTTGAGCTTGATGCAAATGGCTAAAATAT  
CTTCCGCTTCATATAATTATCAATCAAATAAAAAGTTATTCTATGTATCAATCCTTACATCT  
CCTACAACCCGGTGGGGTGACAGCTAGTTTTGGTATGTTGGGGGATATCATTATTGCCGA  
ACCAAATGCCTACATAGCATTTCGCGGGTAAAAGAGTAATTGAACAAACATTGAATAAG  
ACAGTACCTGATGGTTCACAAACAGCTGAGTATTTATCCATAAGGGCTTATTTCGATCCA  
ATCGTACCACGTAATCTTTTAAAAGGCGTCTGAGTGAGTTATTTTCAGCTCCACGGTTT  
CTTCCCTTGAATTCAAATTCAATCAAGATGGTAACCATTCAAGCCGACGAGATTAGTA  
ATATTATCCGTGAACGTATTGAGCAATATAATAGAGAAGTAAAGATTGTGAATACCGGTA  
CCGTACTTCAAGTAGGCGACGGCATTGCTCGTATTCATGGTCTTGATGAAGTAATGGCA  
GGTGAATTAGTAGAATTTGAAGAGGGGTACAATAGGCATTGCTCTGAATTTGGAATCAA  
TAATGTTGGTGTGTGATTAATGGGTGACGGTTTGATGATAACAAGAGGGAAGTTCTGTAA  
AAGCAACAGGAAGAATTGCTCAGATACCGGTGAGCGAGGGTTATTTGGGTCGTGTTAT  
AAATGCTCTGGCTAAACCTATTGATGGTAGAGGTGAAATTTTCAGCTTCTGAATCTCGGT  
TAATTGAATCTCCCGCCCCAGGTATTTTCGAGGCGTCCGTATATGAGCCTCTTCAA  
CGGGCTTATTGCTATTGATTTCGATGATCCCTATAGGACGCGGTCAGCGAGAATTAATTA  
TTGGGGACAGACAGACCGGTAAAACAGCAGTAGCCACAGATACGATTCTCAATCAA  
AAGGACAAAATGTAATATGTGTTTATGTAGCTATTGGTCAAAAAGCATCTTCTGTGGCT  
CAGGTAGTGACTACTTTCCAGGAAAGGGGGCGATGGAATACACTATTGTGGTAGCCG  
AAACGGCGGACTCGCCTGCTACATTACAATATCTTGCTCCTTATACAGGAGCGGCTCTG  
GCTGAATATTTTATGTACCGTGAACGACATACTTCAATCATTATGACGATCCCTCCAAA  
CAAGCACAAGCTTATCGCAAATGTCTCTTCTATTACGAAGACCCCCGGTTCGTGAAGC  
TTATCCAGGAGATGTTTTTATTTGCATTACGCCTTTTGAAAGAGCTGCTAAATCAAG  
TTCCCGTTTAGGTGAAGGAAGTATGACCGCTTACCAATAGTTGAGACTCAATCGGGA  
GACGTTTCGGCTTATATTCCTACTAATGTAATTTCCATTACAGATGGCCAAATATCTTAT  
CCGCCGATCTATTCAATGCTGGAATCCGACCTGCTATTAATGTGGGTATTTCCGTCTCCA  
GAGTAGGATCCGCAGCTCAAATCAAAGCCATGAAACAAGTAGCTGGCAAATCAAATT  
GGAAGTGGCTCAATTCGAGAGTTAGAAGCCTTGCACAATTCGCTTCTGATCTCGATA  
AAGTACTCAGAATCAATTGGCAAGAGGTCAACGATTACGTGAATTGCTCAAACAATC  
CCAATCAGCCCCCTCTCACGGTGAAGAACAGATAGTGACTATTTATAACCGGAACGAAT  
GGGTATCTTGATTCATTAGAAATTGGACAGGTAAAGAAATTTCTCGTTCAGTTACGTAC  
CTACTTAAAAACGAATAAACCTCAGTTCCAAGAAATCATATCTTCTACCAAGACATTCA  
CCGAGGAAGCAGAAGCCCTTTTGAAAGAAGCTATTCAGGAACAAATGGAACGCTTTCT  
ACTTCAAGAACAAACAATGAGAATCAATCCTACTACTTCTGGTCCTGAGGTTTCCACA  
CTTGAAGAAAAAACCTGGGGCGTATCGCTCAAATCATTGGTCCGGTACTGGATGTAG

CTTTTCCCCCAGGCAAGATGCCTAATATTTACAACGCTCTAGTAGTTAAGGGTCGAGAT  
ACTGTTCGGCCAACAAATTAATGTGACTTGTGAGGTACAACAATTATTAGGAAATAATCG  
AGTTAGAGCTGTAGCTATGAGTGCTACAGACGGTCTGACGAGAGGAATGGAAGTGATT  
GACACGCGAGCTCCTCTAAGTGTTCCAGTCGGTGGAGCGACTCTCGGACGTATTTTCA  
ACGTTCTTGAGAGCCTGTTGATAATTTAGGTCCTGTAGATACTCGCACAAACATCTCCTA  
TTCATAGATCTGCGCCTGCCTTTATACAGTTAGATACCAAATTATCTATTTTTGAAACAG  
GAATTAAGGTAGTGGATCTTTTAGCTCCTTATCGCCGTGGAGGAAAAATCGGACTATTC  
GGGGGGGCTGGAGTGGGTAAAACAGTACTCATCATGGAATTGATCAACAACATTGCCA  
AAGCTCATGGGGGTGTATCCGTATTTGGCGGAGTAGGCGAACGTACTIONCGTGAAGGAAA  
TGATCTTTACATGGAAATGAAAGAATCTGGAGTGATTAATGAACAAAATATTGCGGAAT  
CAAAAGTGGCTCTAGTATACGGTCAGATGAATGAACCGCCGGGAGCTCGTATGAGAGT  
TGGTTTACTGCCCTAACCATGGCAGAGTATTTCCGGGATGTTAATGAACAAGACGTAC  
TTCTATTTATCGACAATATTTCCGTTTCGTCCAAGCAGGATCCGAAGTCTCTGCCTTATT  
AGGCAGAATGCCTTCTGCTGTGGGTATCAACCTACCCTTAGTACAGAAATGGGTCTT  
TGCAAGAAAGAATTACTTCTACCAAAGAAGGATCCATAACTTCTATTCAAGCAGTTTAT  
GTACCTGCGGACGATTTGACCGACCCCGCTCCTGCCACGACATTTGCGCATTTAGATGC  
TACTACCGTACTATCAAGAGGATTGGCTGCCAAAGGTATCTATCCAGCGGTAGATCCGT  
TAGATTC AACGTCAACTATGCTCCAACCTCGGATCGTTGGTGAGGAACATTATGAAACG  
GCGCAAAGGGTTAAGCAAACCTTTACAACGTTACAAAGAACTTCAAGACATTATAGCTA  
TCCTTGGGTGGACGAATTATCCGAAGAGGATCGTTTAAACCGTAGCAAGAGCAAGAAA  
AATTGAGCGTTTCTTATCACAACCTTCTTCGTAGCAGAAGTATTTACCGGTTCTCCAG  
GAAATATGTTGGTCTAGCGGAAACAATTAGGGGGTTTCAATTGATTCTTTCCGGAGAA  
TTAGATGGTCTTCTGAGCAGGCCTTTTATTTGGTAGGTAACATCGATGAAGCTACCGC  
GAAGGCTATGAACTTAGAAGTGGAGAGCAAATTGAAGAAAATGACCTTAAATCTTTGT  
GTACTIONGACTCCTAATCGAATTGTTTGGGATTCAGAAGTGAAGAAATCATTTTATCTACT  
AATAGTGGGCAAATTGGAGTATTACCAAATCACGCCCCATTGCCACAGCTGTAGATAT  
AGGTATTTTGAAGAATACGACTTAATGACCAATGGGTAACGATGGCTCTGATGGGCGGTT  
TCGCTAGAATAGGCAATAATGAGATCACTATTTTAGTAAATGATGCGGAGAAGAGTAGT  
GACATTGATCCGCAAGAAGCTCAGCGAACTCTTGAAATAGCTGAAGCTAACTTGAGGA  
GAGCTGAAGGCAAGAGACAAACAATTGAGGGCAATCTAGCTCTCAGACGAGCTAGGA  
CGCGAGTAGAGGCTATCAATGTAATTTGATGAAAAATGTAACCGATTCTTTTCGTTTCT  
TGGTTAACTGGCCATCCGCCGGGAGTTTCGGGTTTAAATACCGATATTTTAGCAACAAAT  
CCAATAAATCTAAGTGTAGTGCTTGGTGTATTGATCTTTTTTGGAAAGGGAGTGTAAAG  
TGATTTATTAGATAATCGAAAACAGAGGATCTTGAGTACTATTGAAATTCAGAAGAAC  
TACGTGTAGGGGCCATTGAACAGCTGGAAAAAGCCCGGGCCCGCTTACGGAAAGTTG  
AAATGGAAGCAGATGAATTTGAGTGAATGGATACTCTGAGATAGAACGAGAAAAATT  
AAATTTGATTAATTCAACTTATAAGAATTTGGAACGATTAGAAAATTACAAAAATGAAA  
CCATTCATTTTGAACAACAAAGAGCGATTAATCAAGTCCGACAACGAGTTTTCCAACA  
AGCCTTACAGGGAGCTCTAGGAACTCTAAATAGTTGTTTGAACAACGAGTTACATTTAC  
GCACTATCAGTGCTAATATTGGCATGTTTGGGGCGATGAAAGAAATAACCGATATGAAT  
CCACTGATTTCTGCCGCTTCTGTTATTGCTGCTGGATTGGCCGTAGGGCTTGCTTCTATT  
GGACCCGGAGTTGGTCAAGGTACTIONGCTGCGGGCCAAGCCGTAGAAGGTATCGCGAGA  
CAGCCAGAAGCGGAGGGTAAAATACGAGGTACTIONTATTGCTTAGTCTGGCTTTTATGGA  
AGCTTTAACAATTTATGGACTGGTTCGTGGCATTAGCGCTTTTATTTGCGAATCCCTTTGT

TATGAGTGTTCTACCATGTTCCATCAATACACTAAAAGTGTTATATGATATATCCGGTGTG  
GAAGTAGGACAACATTTCTATTGGCAAATAGGAGGTTTCCAAGTCCATGCCCAAGTACT  
TATTACTTCTTGGGTCGTAATTGCTATCTTATTAGGTTTCAGCCACTATAGCTGTTCCGGAAT  
CCACAAACTATTCCGACTGACGGTCAGAATTTCTTCGAATATGTCCTTGAATTCATTCG  
AGACTTGAGCAAACTCAGATTGGAGAAGAATATGGCCCTTGGGTTCCCTTTATTGGA  
ACTATGTTCCATTTATTTTTGTTTCTAATTGGTCAGGGGCCCTTTTACCTTGGAATAATCA  
TACAGTTACCTCATGGGGAGTTAGCCGCACCCACCAATGATATAAATACGACTGTTGCT  
TTAGCTTTACTCACGTCAGTAGCATATTTCTATGCGGGTCTTACCAAAAAAGGGTTGGG  
TTATTTCCGGTAAATACATTCAACCAACTCCAATCCTTTTACCAATTAACATACTAGAAGA  
TTTCACAAAACCTTTATCACTTAGTTTTTCGACTTTTTCGGGAATATATTAGCTGATGAATT  
AGTAGTTGTTGTTCTTGTCTTTAGTACCTTCAGTTGTTCCCTATACCTGTCATGTTCCCT  
GGATTATTTACAAGTGGTATTCAAGCTCTTATTTTTGCAACTTTAGCCGCGGCTTATATAG  
GCGAATCCATGGAGGGTCATCATATGATATTTTTGACCTTAGAACATATATTAACCTCACAT  
CTCTTTTTTCGATCGTTTTCAATTGTAATTACGATTCATTTGATAACCCTATTAGTCGATGAA  
ATCGTAGGACTATATGATTCGTTAGAAAAAGGCATGATATCCACTTTTTTATGTATAACA  
GGATTATTAGTTACTCGTTGGATTTATTCGGGGCATTACCATTAAGTAATTTATATGAAT  
CATTAACTTCCTTTCATGGAGTTTCTCCATTATTCATATGATTCCGTATTTTTAAAAACCAT  
AAAAATCATTAAAGCCTAGTAACCGCGCCAAGTGCTATTTTTACCCAAGGCTTTGCCAC  
TTCGGGTCTTTTAACCGAAATGCATCAATCCGCAATATTAGTACCTGCTCTACAATCCCA  
GTGGTTAATGATGCATGTAAGTATGATGGTATTGAGCTATGGAGCTCTTTTATGTGGATC  
ATTATTATCAGTAGCTCTTCTAGTCATTACATTTTCGAAAAACATAGATATTTTTGGTAAA  
AGAAATGAGATCCAATACACGAATGAAAGAAGTAATGTTTTACGAAACGTTTCTTTTCT  
TTCCCTTAGAAATTATCGCAGATATCAATTGATTCGGCAATTGGATAATTGGAGTTATCG  
TGTTATTAGTCTAGGGTTTATTTTTTTAACCATAGGTATTCTTTTCGGGAGCAGTATGGGCC  
AATGAGGCATGGGGATCATATTGGAATTGGGACCCTAAAGAACTTGGGCATTTATTAC  
TTGGACCATATTCGCTATTTATTTACATACTCGAACAAATAAAAATTTTCAAGGTGCAGA  
TTCCGCAATTGTGGCTTCTATTGGATTTATCATAATTTGGATATGCTATTTTGGGGTCAAT  
CTATTAGGAATAGGTCTACATAGTTATGGTTCATTCATACTAACAAATGGCAAAAAAGAA  
AGCATTCACTTCCCTTCCATATCTTGCATCTATAGTTTTTTTTGCCCTGGTGGATCTCTCTC  
TCATTTAATAAATGGCTGGAATCTTGGGTTACTAATTGGTGGAACTAGGGCAATCCGAA  
ACCTTTTTGAATGATATCAAGAAAAGAACATTTTAGAAAAATTCATAGAATTAGAAGA  
ACTATTCCTCTTGGACGAAATGATAAAGGAATACCCGGAGACACATATACAAAGGAGA-  
-----ATCCACAAAGAAACGATCCAATTAGTCAAGATGCACAATGAGAGTCATATCCATA  
CGATTTTGCACCTCTCGACAAATATAATCTGTTTCGCTATTCTAAGCGGTTATTCTATTCT  
GGGTAATGAAGGACTTTTTATTCTTAATTCTTGGGTTTCAGGAATTCCTATATAACTTAAG  
CGACACAATAAAAGCTTTTTCTATTCTTTTATTAACCTGATTTATGTATCGGATTCCTCA  
CCCATGGTTGGGAACCTAATGATTGGCTCTGTCTACAAAGATTTGGATTTGCTCATAAC  
GATCAAATTATATCTGGTCTTGTTCCTACTTTTCCAGTCATTCTAGATACAATTTTAAAAT  
ATTGGATCTTTCGTTATTTAAATCGTGTATCTCCGTCCTTGTAGTGATTTATCACTCAAT  
GAATGACATGCCTATTGGTGTTCCAAAAGTCCCTTTTTCGGAATCCTGGAGAGGAAGAT  
GCAGTTTGGGTTGACGTATAACCGACTTCATCGAGAAAGATTACTTTTTTTAGGCCA  
AGAGGTTGATAGCGAGATCTCGAATCAACTTATTGGTCTCATGGTATACCTTAGTATAGA  
GGATGATACCAAGGATTTGTATTTGTTTATAAACTCTCCCGGCGGATGGGTAATACCCGG  
AATAGCGATTTATGATACTATGCAATTTGTGCCACCAGATATACATACGATATGCATGGGA

TTAGCCGCTTCAATGGGATCCTTTCTCCTGGTAGGAGGAGAAATTACCAAACGTCTAGC  
ATTCCCTCACGCTAGGGTAATGATCCATCAACCTGCTAGTTCTTTTTATGAGGCACAAA  
CAGGAGAATTTATCTTGGAAAGCGGAAGAATACTGAAACTCCGCGAAACCGTCACAA  
GGGTTTATGTACAAAGAACGGGCAACCCCTTATGGGTTGTATCAGAAGACATGGAAAG  
GGATGTTTTTATGTCAGCAATCGAAGCCCAAGCTCATGGAATTGTTGATCTTGTAGCGG  
TCGAAATGAAAGAACAATAATGGATTTCATGAAGGTTAATTACTGAATCACTTCCAAT  
GGTATGTTCCGGGTCGTTTAGATAATGAGGATCTGATTCTAGGTTATGTTTCAGGAAAG  
ATACGACGTAGTTTTATACGGATACTACCAGGAGATAGAGTAAAAATCGAAGTAAGCCG  
TTATGATTCAAGCAGAGGGCGTATAATTTATAGACTCCGCAACAAAGATTCTAATGATAT  
GAAGGAATTACAAGGATATTTAGAAATATATAGATCTCGTCAACAAGATTTCCCTATATCC  
ACTTCTCTTTCAGGAGTATATTTATGTACTTGTCTACGATCATGGTTTAGAAAATTTAGGT  
--AAATCCAGTTCATTAGTTGTGAAACGTTTAATTGCTCGAATGTATCAACAGAATCATT  
TGATTATTTCCGGCTAATAATTCTAACCAAAATAAATTTGTTGGAAAGGATTTTTATTCTCA  
AATGATATTAGAGGGATTTGCGGTCATTGTGGAAATCCATTTTACTACGATTCGTATC  
TTCACTAATATTAGAATCTCATAATTTACGATCAATTCATTCAATATTTCTTTTTTAGAGG  
ACACATTATCACATTTAAATTATGTGTCAGATATACTAATACCCACCCCATCCATCTGGA  
AATCTTGGTTCAAAGCCTTCGCTGCTGGGTACAAGATGCCCTTCTTTGCATTTATTGC  
GATCTTTCTCCACGAGTATCATAATTGGAATAATTTTATTTCTAAATCAATTTTTATTTTT  
TCAAAAAAAGATTCTTCTTGTTCCTATATAATTTCTTATGTCTATGAATGTGAATCCATAT  
TCGTTTTTCTCTGTAAACAATCTTCTCATTACGATCAACATCTTCTGGAGCCCTTCTTG  
AGCGAACACATTTCTATGTAAAAATAGAGGATCTTGTAATAGTCTTTCGTAATGATTTTA  
TCCTATGGTTGTTCAAGGATCCTTTGATGCATTATGTCAGATATCAAGGAAAATCAATTC  
TGGCTTCAAAGGGGACTCCTCTTCTGATGAATAAATGGAAATATTACCTTGTAATTTCT  
GGCAATGTAATTTTTACTTATGGTCTCAATCAGGCAGGATCCATATAAAGCAATTATCCA  
ATCACTCCCTCGATTTTCTGGGTTATCTTTCAAGGTACGACTAAATCCTTCAGTGGTAA  
AGAGTCAAATGCTAGAAAATTCATTTATAATAGATAGTGCTATT-----ATAAGTTCGATA  
CCATAGTCCCAATTATTTCTCTGATTGGATCATTGGCTAAAGCGAAATTTTGTAACGTAT  
CAGGGCACCCCTATTAGTAAGCCGGTACGGGCTGATTCATCAGATTCTGATATTATTGACC  
GATTTGGGCAGATATGCAGAAATCTTCTCATTATCACAGTGGATCCTCAAAAAAACG  
AGTTTATATCGAATAAAGTATATACTTCGACTTTCGTGTGCTAGAACTTTGGCTCGTAAA  
CACAAAAGTACTGTACGGGCTTTTTTTGAAAAGATTAGGTTTAGAATTATTGGAAGAATT  
CCTTACAGAGGAAGAACACGTTCTTTCTTTGATCTTTCCAAGACGGATTTGGTATTTGG  
ATATTATTCGTATCAATGATCTGGCAAATCATCAAATGATAATTGATACGACA---GAAGTA  
CAA---GCTATCAATTCTTTTTCCAGACCAGAA---TCCTTAAAAGAGGTCTATGGGCTCAT  
ATGGTTGCTTGTTCCATTTTTTACTACTGTATCGGGAATCACAATAGGGGTACTAGTAAT  
CGTTTGGTTAGAAAGAGAAATATCTGCAGGGATACAACGACGTATTGGACCTGAATAC  
GCCGGTCCTTTGGGAATTCTTCAAGCTCTAGCAGATGGGACCAAATACTTTTTAAAGA  
GGATCTTCTACCATCTAGAGGGGATACTCGTTTATTCAGTATCGGACCATCTATAGCAGT  
CATATCAATTCTACTAAGTTATTCAGTAATTCCTTTTGGACACCACCTTGTCTAGCCGAT  
CTCAGTATAGGTGTTTTTTTTATGGATTGCCATTTCAAGTATTGCTCCTATTGGACTTCTTA  
TGTCAGGATATGGATCAAATAATAAATATTCCTTTTTAGGTGGTCTACGAGCTGCTGCTC  
AATCAATTAGTTATGAAATACCATTAACTCCATGTGTGTTATCAATATCTCTACTATCTAA  
CAGCTCAAGTACAGTTGATATAGTTGAGGCGCAGTCAAATATGGGTTTTGGGGATGG  
AATTTGTGGCGTCAACCTATAGGGTTTATCGTCTTTATAATTTCTTCCCTAGCAGAATGT



GAAAGATTACCTTTTCGATTTACCAGAAGCAGAGGAAGAATTAGTAGCGGGGTATCAAA  
CCGAATATTCAGGTATAAAATTTGGTTTATTTTATGTTGCTTCCTATCTAAATCTACTAATT  
TCTTCATTATTTGTAACAGTGCTTTACTTTGGCGGTTGGAATATTTCTATTCCGTACATAT  
CCATTCCTGAGCTATTTGAAATAAATAAAACAGATGGAATCTTTGGAACGACAATTGGT  
ATCTTTATTACATTAGCTAAAGCTTATTTGTTTCTGTTTCATTTCTATCGCAACAAGATGGA  
CTTTACCTAGAATGAGAATGGACCAACTATTAATCTTTGGGTGGAAATTTCTTTTACCTA  
TTTCTCTAGGTAATATATTATTGACAACCTCTTTCCAACCTCCTTTCACTGATGATCTGGCA  
TGACAGAATGAAAACCTCATTCTCGATTCTACGAGAATTTTTATGAAAGCGTTTCATTT  
GCTTCTCTTCCATGGAAGTTTCATTTTCCCAGAATGTATCCTAATTTTTGGCCTAATTCTT  
CTTCTGATGATCGATTCAACCTCTGATCAAAAAGATATACCTTGGTTATATTTCATCTCTT  
CAACAAGTTTAGTAATAAGCATAACGGCCCTATTGTTCCGATGGAGAGAAGAACCTATG  
ATTAGCTTTTCGGGAAATTTCCAAACGAACAATTTCAACGAAATCTTTCAATTTCTTATT  
TACTATGTTCAACTCTATGTATTCTCTATCCGTAGAGTACATTGAATGTACAGAAATG  
GCTATAACAGAGTTTCTGTTATTCGTATTAACAGCTACTCTAGGAGGAATGTTTTTATGC  
GGTGCTAACGATTTAATAACTATCTTTGTAGCTCCAGAATGTTTCAGTTTATGCTCCTAC  
CTATTATCTGGATATACCAAGAGAGATGTACGGTCTAATGAGGCTACTACGAAATATTTA  
CTCATGGGTGGGGCAAGCTCTTCTATTCTGGTTCATGGTTTCTCTTGGCTATATGGTTCA  
TCCGGGGGAGAGATCGAGCTTCAAGAAATCGTGAATGGTCTTATCAATACACAAATGTA  
TAACTCCCCAGGAATTTCAATTGCGCTTATATTCATCACTGTAGGAATTGGGTTCAAGCT  
TTCCCAGCCCCTTCTCATCAATGGACTCCTGACGTATACGAAGGATCTCCCCTCCAG  
TCGTTGCTTTTCTTTCTGTTACTTCGAAAGTAGCTGCTTCAGCTTCAGCCACTCGAATCT  
TCGATATTCTTTTTATTTCTCATCAAACGAATGGCATCTTCATCTGGAAATCCTAGCTAT  
TCTTAGCATGATATTGGGGAATCTCATTGCTATTACTCAAACAAGCATGAAACGTATGCT  
TGCATATTCGTCCATAGGTCAAATCGGATATGTAATTATTGGAATAATTGTTGGAGACTC  
AAATGATGGATATGCAAGCATGATAACTTATATGCTGTTCTATATCTCCATGAATCTAGGA  
ACTTTTGCTCGCATTTGTATCATTGGTCTACGTACCGGAACTGATAACATTCGAGATTAT  
GCAGGATTATACACGAAAGATCCTTTTTTGGCTCTCTCTTTAGCCCTATGTCTTTTATCCC  
TAGGAGGTCTTCCCTCCACTAGCAGGTTTTTTTCGGAAAACCTCCATCTATTCTGGTGTGGA  
TGGCAGGCAGGCCTATATTTCTTGGTTTCAATAGGACTCCTTACGAGCGTTGTTTCTATC  
TACTATTATCTAAAATAATCAAGTTATTAATGACTGGACGAAACCAAGAAATAACCCCT  
CACGTGCGAAATTATAGAAGATCTCCTTTAAGATCAAACAATTCCATCGAATTGAGTAT  
GATTGTATGTGTGATAGCATCTACTATACCAGGAATATCAATGAACCCAATTATTGCAATT  
GCTCAAGATACCCTTTTTATGTTTCTGCTTCACGAATATGATATTTTCTGGGCATTTCTAA  
TAATATCAAGTGTTATTCCATTTTTGGCATTCTAATTTCCGGAGTTTTAGCCCCAATTAG  
CAAAGGACCAGAGAAACTCTCTAGTTATGAATCGGGTATAGAACCAATGGGCGATGCT  
TGGTTACAATTTAGAATCCGTTATTATATGTTTGTCTAGTTTTTGTGTTTTTGACGTGG  
AAACGGTTTTTCTTTATCCATGGGCGATGAGTTTCGATGTGTTGGGTGTATCTGTATTTAT  
AGAAGCTTTAATTTTCGTGCTTATCCTAATTTGTTGGTTTCAGTTTATGCATGGCGAAAAGG  
AGCATTGGAATGGTCTACGAATTATTTTCTTGGTTAACAATAATTGTAGTCTTGCCAAT  
ATCCGCGGGTTCTTTAATTTTATTCTACCTTATAAAGGAAATAAGACGATTTCGCTGGTAT  
ACGATATGTATATGTATATTGGAACCTTCTTATAACGACCTATGCATTCTGTTATCATTCCA  
ATTGGACGATCCATTAATACAACTGGAAGAGGATTATAAATGGGTAAATTTTTTTGATTT  
TCACTGGAGATTGGGAATCGATGGACTTCCATAGGACCTATTTTACTGACGGGATTCA  
TCACTACTTTAGCTACTTTAGCGGCTCGGCCAGTTACTCGGGATTCCCGATTGCTACATT

TATTGATGTTAGCAATGTACAGCGGTCAAATAGGATCATTTTCTTCTCGAGACCTTTTAC  
TTTTTTTCATCATGTGGGAGTTAGA ACTAATTCCTGTTTACCTACTTCTATCCATGTGGG  
GGGGGAAGAAACGTCTATATTCGGCTACAAAGTTTATTTTGTACACTGCAGGGGGTTCA  
ATTTTCTCTTAATGGGAGTTCTGGGTATGGATTATATGGTTCCAATGAACCAACATTA  
AATTTTGAACATTAGCTAATCAATCGTATCCTGTGGCATTGGAAATACTATTTTATTTTG  
GATTTATTATTGCTTTTGTGTCAAATCACCGATTATACCTCTACATACATGGTTACCAGA  
TACCCATGGAGAAGCACATTACAGTACATGTATGCTTCTAGCCGGAATTTTATTA AAAAT  
GGGAGCGTATGGATTGATTCGTATTAATATGGAATTATTACCCACGCCCATTTCTATATTT  
TCTCCCTGGTTGGTGATAGTAGGCACAATGCAAATAATCTATGCAGCTTCAACATCTCC  
CGGTCAACGCAATTTAAAAAAAAGAATAGCCTATTCCTCCGTATCGCATATGGGTTTCAT  
AATTATAGGAATTGGGTCCATAACCGATGCGGGGCTCAATGGAGCCATTTTACAAATAA  
TCTCTCATGGATTTATTGGCGCTGCACTTTTTTTCTTGGCAGGAACGAGTTACGATAGAA  
TACGTCTTATTTATCTCGACGAAATGGGCGGAATAGCCATACAAATGCCAAAAATATTTA  
CGATGTTT CAGTAGCTTCTCGATGGCTTCTCTTGCAATTGCCGGAATGAGTGGTTTTGTT  
GCAGAATTGATAGTCTTTTTTGAATAATTACCAGCCAAAAATATTTTTTAATGCCAAA  
ATACTAATTACTTTTGTAAATGGCAATTGGAATGATATTA ACTCCTATTTATTCATTGTCTAT  
GTCACGCCAGATGTTCTATGGATACAAGCTATTCAATACTACAACTCTTTTTTTTCGGA  
TTCTGGACCACGAGAGCTATTTGTTTCGATCTCTATCTTTCTACCCGTAATAGGTATTGGT  
ATTTATCCGGATTTTCGTTCTCTCGCTATCAGTTGACAAGGTCGAAGCTATTCTATCTAATT  
ACTTTTATAGAATGATGCTCGAACATGTACTTGT TTTGGGTGCCTATTTATTTTCTATTGG  
TATCTATGGATTGATCACGAGCCGAAATATGGTTAGAGCGCTTATGTGTCTTGAGCTTAT  
ACTTAATGCAGTTAATATAAATTTAGTAACATTTTCTGATTTTTTTGATAGTCGACAATTA  
AAAGGAGACATTTTATCCATTTTGTATAGCTATTGCAGCCGCTGAAGCAGCTATTGGT  
CTTGCTATTGTTTCGTCAATTTATCGTAACAGAAAATCAACTCGTATCAATCAATCGAAT  
TTGTTGAATAAAATGGAACATACATATCAATATACATTGATCATACCTTTTCGCTCTACTTC  
CAGTTCCTATGTTAATAGGAGTGGCACTTATTTTTTTTCCGACGGCAACAAAAAATGTT  
CGTCGTATGTGGGCTTTTCTAGTGT TTTATTGCTAAGTATAGTTATGATTTTTTCGTTCA  
ATCTGTCTATTCAACAAATAAATGGAAGTTCCATATATCAATATGTATGTTCTTGACCAT  
CAATAACGATTTTTCTTTCGAGTTTGGCCTCTTGATCGATTCACTTACTTCTATTATGTTA  
ATATTAATCACTACTGTTGGAATTCTGGTTCTTATTTATAGTGACAATTATATGTCTCATGA  
TCAAGGCTATTTGAGATTTTTTGCTTATATGAGTTTTTCCAATATTTCTATGTTGGGATTA  
GTTACTAGTTCCAATTTGATACAAATTCATATTTTTTGGGAATTAGTTGGAGTGTGCTCAT  
ATCTATTAATAGTTTTTTGGTTACACGACCAATTGCGGCAAATGCTTGTCAAAAGGCG  
TTTGTA ACTAATCGTGTAGGAGATTTTGGTTTATTATTAGGAATCTTAGGTTTTTATTGGA  
TAACGGGTAGTTTCGAATTTAGGGATTTATTTCGAAATATTCATAACAATCAGGTTAATT  
CTTTATTTGTTATTTTGTGTGCCTCCCTATTATTTCGTCGGTGCAGTCGCTAAATCTGCTCA  
ATTCCCCCTTCATGTATGGTTACCTGATGCAATGGAAGGGCCTACTCCCATTTACGCCCT  
TATACATGCTGCTACTATGGTTCGACGCGGAATTTTTCTTGTAGCTCGGCTTCTTCTCT  
TTTCACAGTCATACCTTACATAATGAATATAATTTCTTTGATAGGTATAATAACAATACTAT  
TAGGAGCTACTTTGGCTCTTACTCAAAAAGACATTAAGAGAAGTTTAGCTTATTCTACA  
ATGTCTCAATTGGGTTATATTATGTTAGCTCTAGGTATGGGGTCTTATCGAGCTGCTTTAT  
TTCATTTGATCACTCATGCCTATTCGAAAGCGTTATTGTTTTTAGGATCCGGATCAATTAT  
TCATTC AATGGAATCCATTGTTGGATATTTCTCCCGATAAAAGTCAGAACATGATTTCTAT  
GGGGGGTTAAAAAATATGTGCCAATTACAAAAACTGCTTTTTTTTTTAGGTACACTTT

CTCTTTGTGGTATTCCACCTCTTGCTTGTTTTTGGTCAAAAAGACGAAATTATTAATGATA  
GTTGGTTGTATTCACCGATTTTCGCGATAATAGCCTGTTCCACAGCAGGATTAAGTGCAT  
TTTATAIGTTTTCGAACATATTTACTTACCTTTGAAGGACATTTAAACGTTAATTTAAAAA  
TTACAGTGGTAAAAAAACCAGCTCGTCTATTCAATATGTCTATGGGGTAAAGAAGGAT  
CAAAAACGATTAAAAAAAT--TATTGTTTATCAACAATAAATTTTTTTTCGTTTGACAAT  
AAAGAACTTTCTCGTATCCTCATGAATCGGACAATAATATGCTATTTCTCTACTTGTAT  
TGGTCTATTTACTTTTTTCGTTGGATCCATAGGAATACCTTTCGATTTGGATATATTATC  
GAAATGGTTAACTCCATCGATAAATCTTTTACATACAAATTCGAAC---TCTTTCGATTGGT  
ATGAATTTGTGAAAAATTCAATTTTTTCGGTCAGTATAGCCTATTTTCGGAATATTTATATC  
GTCCTTTTTTATATAGGCCTATTTATTCATCTTTACAGAATTTGGAATTAATCAATTCATTG  
TGAGTCTTTGGGACAAAATAAATAATGTGATATACAAATGGTCAATAATCGTGGTTACA  
TAGACTTTTTTTTATTCAATAGCGTTAACTAGGAGTATAAGAGTAATATCTGAACTAACTC  
ATTTTTTTGATAGACGAGTAATTGATGGGATTACGAATGGAGTTGGTGTACAAGTTTCT  
TTGTAGGAGAGGGAGTGAGATATGTAGGGAGCGGA---CGAATTTCTTCTTATCTCTTCTT  
GTATTTATTTTCTGTATCAATCTTTTTCTTAATTTTTCAAATGGATTACCTGGACCAATAC  
ATGATTTTCTTTTAGTATTTCTGGGATCGGGTATTATATTAGGAGGTCTAGGAGTAGTATT  
ACTTACCAATCCAATTTTTCTGCCTTTTCATTGGGATTGGTCTTTTTTTGTATATCCTTAT  
TCCATATTCCATCGAACTCCCATTTGTAGCTGCTGCGCAGCTCCTTATTTACGTAGGAG  
CCATAAATGTCTTAATCATATTTGCTGTGATGTTACGAATGGTTCAGAATATTACAACG  
ATTTCCATGTTTGGACCGTTGGAGATGGGGTCACTTCACTGGTTTGTACAAGTATTTTT  
GTTTCACTAATTACTACTATACTAGATACGTCATGGTACGGGATTATTTGGACTACAAGA  
TCAAACCAGATTATAGAACAGGATTTGATAAGTAATGGTCAACAAATTGGGATTCATTTA  
TCAACAGATTTTTTTCTTCCATTTGAGCTCGTTTCTATAATTCTTTTAGTTGCCTTGATAG  
GTGCAATTGCTATGGCCCGTCAGATGACTGTACCATCTACAAGAAAAGACCTCATCATC  
GTCAATATGGGTCCCTACCACCCATCAATGCATGGTGTCTTCGACTCATCGTTTCTCTA  
GATGGTGAAGATGTTATTGACTGTGAACCCATATTGGGTTATTTACACAGAGGAATGGA  
AAAAATTGCGGAAAACCGAACAATTATACAATATCTGCCCTATGTAACCTCGTTGGGATT  
ATTTAGCTACTATGTTTACAGAAGCAATAACCATAAATGCACCCGAGCAATTAGGAAATA  
TTCAAGTACCTAAAAGAGCCAGCCATATCAGAGTAATTATGCTGGAGCTTAGTCGTATA  
GCTTCGCATTTGTTATGGCTTGGCCCTTTTATGGCGGATATTGGTGCACAGACTCCCTTC  
TTCTATATTTTTCAGAGAAAGAGAATTGATATATGATCTATTCGAAGCTGCCACAGGTATG  
CGAATGATGCATAATTATTTCCGTATCGGAGGAGTAGCTGCTGATCTACCTCATGGCTGG  
ATAGATAAATGTTTGGATTTCTGTGATTATTTTTTAACAGGGGTTGTTGAATATCAAAAA  
CTTATTACACGTAATCCCGTTTTTTTTGGAACGAGTTGAAGGAGTAGGCATTATTGGTGG  
AGAGGAAGCAATAAATTGGGGTTTATCAGGACCAATGCTGCGAGCTTCCGGAATTCAA  
TGGGATCTTCGTAAAGTTGATCATTATGAGTGTTACGACGAATTTGACTGGGAAGTACA  
ATGGCAAAAAGAAGGAGATTCATTAGCTCGTTATTTAGTACGAATCAGTGAAATGACG  
GAATCCATAAAAATTATTCAACAGGCTCTGGAAGGAATTCAGGGGGGCCTTATGAGA  
ATTTAGAAGTTCGGCGCCTTGATAGAACAAAGGATTCCGAATGGAATGATTTTGAATAT  
AGATTCATTAGTAAAAAGCCTTCCCCTACTTTTTGAATTATCTAAACAAGAAGCTTTATGTG  
AGAGTAGAAGCCCCAAAGGGGAATTGGGAATTTTTCTAATAGGGGATCAGAGTGT  
TTCCTTGGAGATGGAAAATTCGCCACCGGGTTTTATCAATTTGCAAATTTCTCCTCAG  
CTAGTTAAAAGAATGAAATTTGGCCGATATTATGACGATACTAGGTAGTATAGATATCATT  
TGGGAGAGGTTGATCGTATGTTCCCTATGATAACTGGGTTTCATGAATTATGGTCAACAA

ACAGTACGAGCTGCAAGGTATATCGGTCAAAGTTTCATGATTACCTTATCCCACACAAA  
TCGTTTACCTGTAACCTATTCAATATCCTTATGAAAAATTGCTCACATCCGAGCGGTTCCG  
CGGTCGAATTCACCTTGAATTTGATAAGTGCATTGCTTGTGAAGTATGTGTTCCGTGTATG  
TCCTATAGATCTACCCGTTGTTGATTGGAAATTGGAACTTATATTCGAAAGAAACGATT  
ACTTAATTACAGTATTGATTTCCGAATCTGTATATTTTGTGGTAACTGCGTTGAGTATTGT  
CCAACAAACTGTTTATCAATGACTGAAGAATATGAACTTTCTACTTATGATCGTCATGAA  
TTGAATTATAATCAAATTGCGTTAGGTTCGGTTACCAATGTCAGCAATTGGAGATTATACA  
ATTCGCACAATTATGAATTCTAAAACAAGCATGGATAAACCTTTGATTCAAGAACAAT  
TACCAATCACATGCAGGGTCGTTTGTCTGCTTGGCTAGTCAAGCATGGGCTAGTTCATA  
GATCTTTGGGCTTCGATTACCAAGGAATAGAGACTTTACAAATAAAGCCCCGAGGATTGG  
CACTCTATTGCTGTCATTTTCATATGTATATGGTTACAATTATCTACGTTCCCAGTGTGCCT  
ATGATGTAGCACCTGGCGGGCTGTTAGCTAGTGTGTATCATCTTACGAGAATACAGTATG  
GTGTGGATCAACCGGAAGAGATATGCATAAAAGTATTTACCCCAAGGAAGAATCCTAG  
AATCCGTCTGTTTTCTGGATTTGGAAAAGTGCAGGATTTTCAAGAACGGGAATCTTATG  
ATATGTTAGGAATCTCTTATGATAATCATCCACGCTTGAAACGAATCTTGATGCCTGAAA  
GTTGGATAGGATGGCCCTTACGTAAGGATTATATTGCCCCCAATTTCTATGAAATACAAG  
ATGCTCATATGGGCGATGAGTTTCGATGTGTTGGGTGTATCTGTATTTATAGAAGCTTTA  
ATTTTCGTGCTTATCCTAATTGTTGGTTCAGTTTATGCATGGCGAAAAGGAGCATTGGAA  
TGGTCTTAGTTCCAGAC-----AATAACAAGAAAAAGAAGAAAAAAATTACATTGAG  
ATAGTTATGAATCCATTGAGTTTCCGTTAGTTGATCGAACAACCCAAAATTTCAGTTATT  
TCAACTACATCGAATGATCTTTCAAATTGGTCAAGACTCTCCAGTTTATGGCCGCTTCTC  
TACGGTACCAGTTGTTGCTTCATTGAATTTGCTTCATTAATAGGCTCGCGATTTCGACTTT  
GATCGTTATGGACTGGTACCAAGATCGAGTCCTAGGCAAGCAGATCTAATTTTAAACAGC  
CGGTACAGTAAACAATGAAAATGGCTCCTTCTTTAGTGAGATTATATGAGCAAATGCCTG  
AACCAAATATGTCATTGCTATGGGAGCCTGTACGATTACAGGAGGGATGTTTCAGTACC  
GATTCCTATAGTACTGTTTCGGGGAGTCGATAAGCTAATTCCTGTGGATGTCATTTTGGCG  
GGCTGCCCCGCCGAAACCGGAGGCAGTTATAGATGCTATAACAAAACCTTCGTAAGAAGG  
TATCTCGAGAAATCTATGAAGATAGAATTTTGTATCAACAGGAGAATCGATGTTTTACTA  
CCAATCACAAGTTTCATGTTGGACACAGTACTCTTACTGGAAATTATGATCAAGGATTA  
CTCTATCAATCG-----ATGCAAACCTA  
GAAATACCTTTTTTTTGGATAAAGGAACAGATGACTCGATCCATTTCCGTATCGATCATAG  
TATATGTAATAACTCAGACATCCATTTCAAATGCATATCCCATTTTTGCACAGCAGGGTTA  
TGAAAATCCACGAGAAGCGACTGGGCGTATTGTATGTGCCAATTGCCATTTAGCTAATA  
AGCCCTTGGATATTGAGGTTCCACAAGCGGTACTTCCCGATACTGTATTTGAAGCGGTT  
GTTAGAATCCCTTATGATATGCAACTGAAACAAGTTCTTGCTAATGGCAAAAAGGGAGC  
TTTGAATGTAGGGGCTGTTCTTATTTTACCCGAGGGATTCTGAATTAGCTCCCCCGATCG  
TATTTCTCCCGAGATGAAAGAAAAGATAGGAAATCTGTCTTTTCAGAGCTATCGCCCCA  
CTAAAAAAAATATTCTTGTGATAGGTCCTGTTCCCTGGTCAGAAATATAGTGAAATCACC  
TTTCTATTCTTTCCCGGACCCCGCTACTAAGAAGGACGTTCACTTCTTAAAATATCCC  
ATATACGTGGGCGGGAACAGGGGAAGGGGTCAGATTTATCCTGACGGGAGCAAGAGT  
AACAAATACAGTCTATAATGCTACAGCAGCGGGTATAATAAGCAAATTATACGTAAAGA  
AAAGGGGGGATATGAAATAACCATAGCGGATGCATCGGATGGACATCAAGTGGTTAATA  
TTATACCTCCAGGACCGGAACTTCTTGTTCAGAGGGTGAATCTATCAAGCTTGATCAA  
CCATTAACGAGTAATCCCAATGTGGGTGGATTTGGTCAGGGAGATGCAGAAATAGTACT

TCAAGACCCATTACGTGTCCAAGGCCTTTTGTTCCTTTGCATCTGTTATTCTGGCACA  
AATCTTTTTGGTTCCTAAAAAGAAACAGTTTGAGAAGGTTCAATTGTCCGAAATGAATT  
TCATGAGTAAAGTATATGATTGGTTCGAAGAACGTCTCGAGATTCAGGCGATTGCAGAT  
GATATAACTAGTAAATATGTTCCCTCCCATGTCAACATATTTTATTGTCTAGGAGGAATTA  
CGCTTACTTGTTTTTTAGTACAAGTAGCTACGGGGTTGCTATGACTTTTTACTATCGTC  
CGACCGTACTGAGGCTTTTGCTTCTGTTCAATACATAATGACTGAAGCCAACCTTTGGT  
TGGTTAATCCGATCAGTTCATCGATGGTCGGCAAGTATGATGGTCCTAATGATGATACTG  
CATGATTTTCGTGTCTACCTCACCGGTGGATTTAAAAAACCTCGCGAATTGACTTGGGT  
TACGGGTGTGGTCTGGCTGTATTGACCGCATCTTTTGGTGTAAGTGGTTATTCCTTACC  
TCGGGACCAAATTGGTTATTGGGCAGTAAAAATTGTGACAGGTGTGCCGGAGGCTATT  
CCTGTAATAGGAGCACCTTGGTAGAGCTATTACGCGGAAGTGCTAGTGTGGGTCAATC  
CACTTTGACTCGTTTTTATAGCTTACACACTTTTGTATTACCCCTTCTTACTGCCGTATTT  
ATGTTAATGCACTTCCCAATGATACGTAAGCAAGGTATTTCTGGTCCTTTAATGGGAGTA  
ACAAAAAACCTGACTTGAATGATCCTGTATTAAGGGCTAAATTGGCTAAAGGGATGG  
GTCATAATTATTACGGGAGAACCCGCATGGCCCAATGATCTTTTATATATTTTCCGGTAGT  
AATCTGGGTACTATTGCATGTAACGTAGGCTTGGCGGTTCTCGAACCGTCAATGATAG  
GTGAACCAGCAGATCCATTTGCAACTCCTTTGGAAATATTACCCGAATGGTACTTCTTT  
CCCGTATTTCAAATACTTCGTACAGTACCAAATAAGTTATTGGGTGTTCTTTTAATGGTT  
TCAGTACCTGCGGGATTATTGATAGTACCCTTTTTGGAGAATGTTAATAAATTCCAAAAT  
CCATTTTCGTCCAGTAGCTACAACCGTCTTTTTGATCGGTACCACAGTAGCTCTTTG  
GTTGGGTATTGGAGCAACATTACCTATTGATAAATCCCTAACTTTAGGTCTTTTTATGATT  
GAAGTTTTTCTATTTGGAATTGTGTTAGGTCTAATTCCTATTACTTTGGCTGGATTATTCG  
TAACTGCATATTTACAATACAGACGCGGTGATCAGTTGGACCTTATGCCTACTATAACTA  
GTTATTTTGGTTTTCTATTGGCGGCTTCAACTATAACCCAGCTCTATTTATTGGTCTGAG  
CAAATACGACTTATTATGGATATAGTAAGTCTCGCTTGGGCTGCTTTAATGGTAGTCTT  
TACATTTTCCCTTTCCTCGTAGTATGGGGAAGAAGTGGACTCATGATTATTCGTTCCGC  
GGAACCAGAAGTGAAAATTTGGTGGATAGGGATCCCGTAAAAACTTCTTTTCGAGGAA  
TGGGCCAGACCCGGCCATTTCTCAAGAACAATAGCTAAGGGCCCTGATACTACCACTT  
GGATCTGGAACCTACATGCTGATGCTCACGATTTTCGATAGCCATAACCAGCGATTTGGAG  
GAGATCTCTCGAAAAGTATTTAGTGCTCATTTCGGTCAACTCTCCATCATCTTTCTTTGG  
CTGAGTGGCATGTATTTCCACGGTGCCCGTTTTTCCAATTATGAAGCATGGCTAAGTGAT  
CCTACTCACATTGGACCTAGCGCCCAGGTGGTTTTGGCCAATAGTGGGCCAAGAAATATT  
GAATGGTGATGTGGGCGGGGGTTTTCCGAGGAATACAAATAACCTCTGGGTTTTTTTCAG  
ATTTGGCGAGCATCTGGAATAACTAGTGAATTACAACCTCTATTGTACCGCAATTGGTGCA  
TTAGTCTTTGCAGCGTTAATGCTTTTTGCTGGTTGGTTCCATTATCACAAAGCTGCTCCA  
AAATTGGCTTGGTTCCAAGATGTAGAATCTATGTTGAATCACCACTTAGCGGGATTACT  
AGGACTTGGGTCTCTTTCTTGGGCGGGACACCAAGTACATGTATCTTTGCCGATTAACC  
AATTTCTAGACGCTGGAGTAGATCCTAAAGAGATCCCGCTTCTCATGAATTTATCTTGA  
ATCGGGATCTTTTGGCTCAACTTTATCCCAGTTTTGCCGAGGGAGCAACCCCATTTTC  
ACCTTGAATTGGTCAAAAATATGCAGAATTTCTTACTTTTTCGTGGAGGATTAGATCCAGTA  
ACAGGGGGTCTATGGCTGACCGATATTGCACACCATCATTTAGCTATTGCAATTTCTTTTC  
TTGATAGCTGGTCACATGTATAGGACCAACTGGGGCATTGGTCATGGCCTAAAAGATAT  
TTTAGAAGCTCATAAAGGCCATTTACAGGCCAGGGTCATAAAGGCCTCTATGAGATCC  
TAACAACGTATGGCATGCTCAATTATCTTTAACCTAGCTATGTTAGGCTCTTTAACCA

TTGTTGTAGCTCACCATATGTATTCCATGCCCCCTTATCCATATCTAGCTACTGACTATGG  
TACACAACTTTTCGTTGTTACGCATCACATGTGGATTGGTGGATTTCTCATAGTTGGTGC  
TGCTGCGCATGCAGCCATTTTTATGGTAAGAGACTATGATCCAACACTCGATACAACG  
ATCTATTAGATCGTGTCTTAGGCACCGCGATGCAATCATATCACATCTCAATTGGGCAT  
GTATATTTCTAGGTTTTTACAGTTTTGGTTTGTATATTCATAATGATACCATGAGCGCTTT  
AGGGCGTCCCAAGATATGTTTTCGGATACCGCTATAACAATTACAACCGGTCTTTGCTC  
AATGGATACAAAACACCCATGCTTTAGCACCTAGTGTAACAGCTCCTGGTGCAACAAC  
AAGCACTAGCGTGACTIONGGGAGGTGGTGATTTAGTAGCAGTAGGTGGCAAAGTTGCT  
TTGTTACCTATTCCATTAGGAACCGCAGATTTTTTGGTACATCACATTCATGCATTTACGA  
TCCATGTGACGGTATTGATACTACTGAAAGGTGTTCTATTTGCTCGTAGCTCCCGCTTGA  
TACCTGATAAAGCAAATCTTGGTTTTTCGTTTTCCCTTGTGACGGACCTGGAAGAGGAGG  
GACATGTCAAGTATCCGCCTGGGATCATGTCTTCTTAGGTCTATTCTGGATGTACAATGC  
TATTTCCGGTAGTAATTTCCATTTCAAGTTGGAAAATGCAGTCGGATGTTTGGGGTAGTAT  
AAGTGATCAAGGGGTGGTAACTCATATCACGGGAGGAACTTTGCGCAGAGTTCATT  
ACTATTAATGGGTGGCTCCGTGATTTTTTATGGGCACAGGCATCTCAGGTAATTCAGTCT  
TATGGTTTCGTCATTATCTGCATATGGTCTTTTTTTCCTAGGCGCTCATTTTGTCTGGGCTT  
TCAGTTAATGTTTCTATTCAAGTGGCCGTGGTTATTGGCAAGAACTTATTGAATCCATCG  
TTTGGGCTCATAACAAATTAAGTTGCTCCTGCTACTCAGCCTAGAGCCTTGAGCATT  
GTACAAGGACGTGCTGTAGGAGTAACCCATTACCTTCTGGGTGGAATTGCCACAACAT  
GGGCGTCTTCTTAGCAAGAATTATTGCAGTAGGAATGGCATTAAAGATTTCCAAGGTTT  
AGCCAAGGCTTAGCTCAGGACCCCACTACTCGTCGTATTTGGTTTGGTATTGCTACCGC  
ACATGACTTCGAGAGTCATGATGATATTACCGAGGAACGTCTTTATCAGAATATTTTTGC  
ATCTCACTTCGGGCAGTTAGCAATAATTTTTCTGTGGACTTCCGGAAATCTGTTTCATGT  
GGCTTGGCAAGGAAATTTTCGAGTCATGGGTACAGGACCCTTTACATGTAAGACCTATTG  
CTCATGCAATTTGGGATCCTCATTTTGGTCAACCGGCTGTGGAAGCCTTTACTAGAGGG  
GGTGCTCTCGGACCAGTGAATATCGCTTATTCTGGTGTTTATCAGTGGTGGTATAACAATC  
GGTTTACGCACTAATGAAGATCTTTATACTGGAGCTCTTTTTCTATTATTTCTTTCTTCCA  
TATCCTTAACAGCGGGTTGGTTACACCTACAACCGAAATGGAAACCGAGCGTTTCGTG  
GTTCAAAAATGCCGAATCTCGTCTCAATCATCATTTGTCAGGACTCTTCGGAGTAAGTT  
CCTTGGCTTGGACAGGACATTTAGTTCATGTGCTGCTATTCCTGGATCCAGGGGGGAGTAC  
GTTTCGATGGAATAATTTCTTAGATGTATTACCACATCCCAAGGGTTAGGCCCACTTTTT  
ACAGGTCAGTGGAATCTTTATGCTCAAAATCCCGATTCCAGTAGTCATTTATTTGGTACC  
TCTCAAGGAGCGGGAACCTGCCATTCTAACCCTTCTCGGGGGATTCCATCCACAAACGC  
AAAGTTTATGGCTGACCGATATTGCACACCATCATTTAGCTATTGCATTTATTTTTCTCGT  
TGCTGGTCATATGTATAGAATACTTCGGGATTGGGCACAGTATGAAAGATCTTTTAG  
AAGCACATATTCCTCCGGGGGGGCGATTGGGACGTGGACATAAGGGTCTTTATGACAC  
AATCAATAATTCGATTCATTTTCAATTAGGCCTTGTCTAGCTTCTTTAGGGGTTATTACT  
TCCTTGGTAGCTCAACACATGTACTIONTACCCTTATGCGTTCATAGCACAAAGACTTT  
ACTACTCAAGCTGCGTTATATACTCATCACCATAACATTGCAGGATTTATCATGACAGGA  
GCTTTTGTCTCATGGAGCTATATTTTTTATTAGAGATTACAATCCGGAACAGAATGAGGAT  
AATGTATTGGCAAGAATGTTAGACCATAAAGAAGCTATCATATCCATTTAAGTTGGGCC  
AGCCTCTTCTGGGGTTCCATACCTTGGGACTTTATGTTTATAACGATGTCATGCTCGCT  
TTTTGGTACTCCGGAAAAACAAATCTTGATTGAACCCATATTTGCCCAATGGATACAATC  
TGCTCATGGTAAGACTTCATATGGGTTTCGATGTACTTTTTATCTTCAACAAATGGCCCAGC

ATTTAATGCGGGTCGAAGCATATGGTTACCTGGCTGGTTAAATGCTATTAATGAG-----AA  
TAGTAATTCACTATTCTTAACAATAGGCCCTGGAGACTTCTTGGTTCATCATGCTATTGC  
TCTAGGTTTACATACAACTACATTGATCTTAGTAAAAGGAGCTTTAGATGCACGCGGTT  
CCAAGTTAATGCCGGATAAAAAGGATTTTCGGTTATAGTTTTCTTGGCAGCGTCCGGGA  
CGAGGTGGTACTTGTGATATTTTCGGCTTGGGACGCATTTTATTTGGCAGTTTTCTGGATG  
TTAAATACCATTGGATGGGTTACTTTTTATTGGCATTGGAAACACATTACATTATGGCAG  
GGTAACGTTTCACAGTTTAATGAGTCCTCCACTTATTTGATGGGATGGTTAAGAGATTAT  
CTATGGTTAAACTCTTCACAACCTTATCAATGGATATAACCCTTTTGGTATGAATAGTTTAT  
CGGTCTGGGCGTGGATGTTCTTATTTGGACATCTTGTTTGGGCTACTGGATTTATGTTCT  
TAATTTCTTGGCGTGGATATTGGCAGGAATTGATTGAAACTTTAGCATGGGCTCATGAA  
CGCACACCATTGGCTAATTTGATTTCGATGGAGAGATAAACAGTGGCTCTTTCCATTGT  
GCAAGCAAGATTGGTTGGATTAGCCCACTTTTCTGTAGGTTATATATTTACTTATGCAGC  
TTTCTTGATTGCCTCTACATCGGGAAAATTTGGTATGTCACATTCAGTAAAAATTTATGA  
TACATGTATAGGGTGTACTCAATGTGTACGAGCCTGCCCCACAGATGTATTAGAAATGAT  
ACCTTGGGACGGATGTAAAGCTAAGCAAATTGCTTCTGCTCCAAGAACAGAGGACTGT  
GTAGGTTGTAAAGAGATGTGAATCCGCTTGTCCAACGGATTTCTTGAGTGTCCGGGTTTA  
TTTATGGCATGAGACAACCTCGTAGTATGGGTCTAGCTTATATGAAC-----AACTTACCTTC  
TATTTTTGTGCCTTTAGTGGGCCTAGTATTTCCGGCAATTGCAATGGCTTCTTTATCTCTT  
CATGTTCAAAAAACAAGATTGTCATGCGAGATCTAAAAACATATCTCTCCGTGGCACC  
TGTGCTAAGTACTCTATGGTTCGGGTCTTTAGCAGGTCTATTGATAGAGATCAATCGTTT  
ATTCCCAGATGCGTTGACATTTCCCTTTTTTTTCATTCATGACTGCAATTTTAGAGAGACG  
CGAAAGCGAAAGCCTATGGGGTCGCTTCTGTAACCTGGATAACCAGCACTGAAAACCGT  
CTTTACATCGGATGGTTCGGTGTTTTGATGATCCCTACTTTATTGACCGCAACTTCTGTA  
TTTATTATTGCCTTTATTGCTGCTCCTCCAGTAGATATTGATGGTATTCGTGAACCTGTTT  
CTGGATCTCTACTTTATGGAAACAATATTATCTCTGGTGCCATTATTCCTACTTCTGCAGC  
TATAGGTTTACACTTTTATCCGATCTGGGAAGCGGCATCCGTTGATGAATGGTTATACAA  
TGGTGGTCCTTATGAGTTAATTGTTCTACACTTCTTACTTGGTGTAGCTTGTACATGGG  
TCGTGAGTGGGAACCTAGTTTTCCGTCTGGGTATGCGCCCTTGGATTGCTGTTGCATATTC  
AGCTCCTGTTGCAGCTGCTACTGCTGTTTTCTTGATCTACCCAATTGGTCAAGGAAGCT  
TCTCTGACGGTATGCCCCTAGGAATCTCTGGTACTTTCAACTTCATGATTGTATTCCAGG  
CTGAGCACAACATCCTTATGCACCCATTTACATGTTAGGCGTAGCTGGTGTATTCCGGC  
GGCTCCCTATTTAGTGCTATGCATGGTTCCTTTGGTAACCTCTAGTTTGATCAGGGAAACC  
ACAGAAAATGAATCTGCTAATGAAGGTTACAGATTCCGGTCAAGAGGAAGAAACTTATA  
ATATCGTAGCTGCTCATGGTTATTTTGGCCGATTGATCTTCCAATATGCTAGTTTCAACAA  
TTCTCGTTCTTTACATTTCTTCCTAGCTGCTTGGCCTGTAATAGGTATCTGGTTCACTGCT  
TTAGGTATTAGCACCATGGCTTTCAACCTAAATGGTTTCAATTTCAACCAATCCGTAGTT  
GACAGTCAAGGTCGTGTAATTAACACTTGGGCTGATATCATTAAACCGTGCTAACCTTGG  
TATGGAAGTTATGCATGAGCGTAATGCTCACAACTTCCCTCTAGACCTAGCTGCTGTGCG  
AAGCTCCATCCACAAATGGAATGGGTTTGCCTTGGTATCGTGTTCCATACCGTTCGTATTG  
AATGATCCCGGTCGCTTGGCTTGTCCATATAATGCATACAGCTCTAGTTGCTGGTTGG  
GCCGGTTCAATGGCTCTATATGAATTAGCAGTTTTTTGATCCCTCTGACCCCGTTCTTGAT  
CCAATGTGGAGACAGGGTATGTTTCGTTATACCCTTCATGACTCGTTTAGGAATAACCAA  
TTCATGGGGGGGTTGGAGTATTACA---GGAGGGACTATAACGAATCCGGGTATTTGGAG  
TTACGAAGGTGTGGCAGGGGCACATATTGTGTTTTCTGGCTTGTGCTTCTTGGCGGCTA

TTTGGCATTGGGTGTATTGGGATCTAGAAATCTTTTGTGATGAACGTACAGGAAAACCT  
TCCTTGGATTGCCCCAAGATCTTCGGAATTCATTTATTTCTCTCCGGGGTGGCTTGCTTC  
GGTTTTGGTGCATTTTCATGTAACAGGCTTGTATGGTCCTGGAATATGGGTGTCCGATCCT  
TATGGACTAACTGGAAAAGTACAATCTGTAAATCCC GCGTGGGGCGTGGAAGGTTTTG  
ATCCTTTTGTTCGGGAGGAATAGCCTCTCATCATATTGCAGCAGGGACATTGGGCATAT  
TAGCGGGTCTTTTCCATCTTAGCGTCCGCCGCCACAACGTCTATACAAAGGATTACGT  
ATGGGCAATATTGAAACTGTACTTTCCAGTAGTATTGCTGCTGTCTTTTTTGCAGCTTTT  
GTTGTTGCTGGAACTATGTGGTATGGTTCAGCAACTACCCCGATCGAATTATTTGGCCC  
CACTCGTTATCAATGGGATCAGGGATACTTCCAGCAAGAAATATATCGAAGAGTTGGCG  
TCTCGCTAGCCGAAAATAAAAGTTTATCAGAAGCTTGGTCTAAAATTCCTGAAAAATTG  
GCTTTTTATGATTACATCGGAAATAATCCAGCAAAAGGGGGATTATTTAGAGCGGGTTC  
AATGGACAATGGGGATGGAATAGCTGTTGGATGGTTAGGACACCCCATATTTAGAGATA  
AAGAAGGGCGTGAGCTTTTTGTACGTCGTATGCCTACTTTTTTGAACATTTCCAGTC  
GTTTTGGTAGACGGAGACGGAATTGTGAGAGCCGACGTTCTTTTTAGAAGGGCAGAAT  
CGAAGTATAGTGTGCAACAAGTAGGTGTAAGTGTGAGTTCTATGGTGGAGAAGTCAA  
TGGAGTCAGTTATAGTGATCCTGCTACTGTGAAAAAATATGCTAGACGCGCTCAATTGG  
GTGAAATTTTTGAATTAGATCGCGCTACTTTAAAATCCGACGGTGTTTTTTCGCAGCAGC  
CCAAGGGGCTGGTTACTTTTTGGACATGCGTCGTTTGCTTTGCTCTTCTTTTTTCGGACA  
CATTTGGCATGGCGCTCGAACCTTGTTTCAGAGATGTTTTTGCTGGTATTGACCCAGATTT  
AGATGCTCAAGTGGAATTTGGAGCATTCCAAAAACTTGGAGATCCAAGTACAAGGAGA  
CAAGTAGTCATGAAAACCTTATATTCCTGAGGAGGTTCTACCCCGTGGAAACGCTCTT  
TAATGGAACCTTTAGCTTTAGCTGGTCGTGACCAAGAAACCACCGTTTTCGCTTGGTGG  
GCCGGGAATGCCCGACTTATCAATTTGTCCGGTAAACTACTCGGGGCTCACGTAGCCCA  
TGCCGGATTAATCGTATTCTGGGCCGGAGCAATGAACCTTTTTGAAGTGGCTCATTTCCG  
TACCAGAGAAGCCCATGTATGAACAAGGATTGATTTTACTTCCCATCTAGCTACTCTA  
GGTTGGGGGGTAGGTCCTGGTGGGGAGGTTATAGACACCTTTCCATACTTTGTATCTGG  
AGTACTTCACTTAATTTCCCTCTGCAGTATTGGGCTTTGGCGGCATTTATCATGCACTTCT  
TGGACCTGAGACTCTTGAAGAATCTTTTCCATTCTTCGGCTATGTATGGAAAGATAGAA  
ATAAAATGACCACGATTTTGGGTATTCACTTAATTTGTTAGGTATAGGCGCTTTTCTTCT  
AGTACTCAAGGCTCTTTATTTTGGGGGCGTATATGATACCTGGGCTCCTGGGGGGGGAG  
ATGTAAGAAAAATTACAAATTTGACCCTTAGTCCAAGTGTATATTTGGTTATTTACTAA  
AATCTCCCTTTGGGGGAGAGGGATGGATTGTTAGTGTGGACGATTTAGAAGATATAATT  
GGAGGACATGTATGGTTAGGTTCCATTTGTATAGTTGGTGGAAATCTGGCATATCTTAACC  
AAACCTTTGCATGGGCTCGACGCGCACTTGTATGGTCTGGGGAGGCTTACTTGTCTTA  
TAGTTTAGGTGCTTTATCTGTCTTTGGTTTCATCGCTTGTTGCTTTGTCTGGTTCAATAAT  
ACCGCTTATCCTAGTGAGTTTTATGGGCCCACTGGGCCAGAAGCTTCTCAAGCCCAAG  
CATTTACTTTTTTAGTTAGAGACCAACGCTTGGGGCTAACGTGGGATCTGCTCAAGGA  
CCTACTGGTTTAGGTAAATACCTAATGCGTTCCCGACTGGAGAGGTAATTTTTGGAGG  
GGAGACTATGCGTTTTTGGGATCTCCGGGCTCCTTGGTTGGAACCTCTAAGGGGTCCC  
AATGGTTTGGACTTGAGTAGACTGAAAAAAGACATACAACCTTGGCAAGAACGGCGT  
TCCGCGGAATATATGACTCATGCCCTTTAGGTTCTTTAAATCCGTGGGTGGCGTAGCT  
ACTGAGATCAATGCAGTCAATTATGTCTCTCCTAGAAGTTGGTTAGCTACCTCTCATTTT  
GTTCTAGGATCTTCCATTCGTAGGTCATTTGTGGCATGCTGGAAGAGCCCGTGCGGC  
TGCAGCAGGATTTGAAAAAGGAATTGATCGTGATTTTGAACCTGTTCTTTCCATGACCC



CTCTTAACATGACTATAGCCCTTGGTAGATTTACCAAAGACGAAAATGACTTATTTGATA  
TTATGGATGACTGGTTGCGGAGGGACCGTTTTCGTTTTTGTAGGTTGGTCCGGTCTATTG  
CTCTTTCCTTGTGCCTAATTCGCTTTAGGAGGTTGGTTCACGGGTACAACCTTTGTAAC  
TCATGGTATACTCATGGATTGGCTAGTTCTTATTTGGAAGGCTGCAATTTCTTAACCGCC  
GCAGTTTCTACTCCTGCTAATAGTTTAGCACATTCTTTGTTGCTACTATGGGGTCCTGAA  
GCACAGGGAGATTTTACTCGTTGGTGTCAATTAGGTGGTCTGTGGACTTTTGTGCTCT  
CCATGGCGCTTTCGGACTAATAGGTTTCATGTTACGTCAATTCGAACTTGCTCGATCTGT  
TCAATTGCGACCTTATAATGCAATCGCATTCTCTGCTCCAATTGCTGTTTTTGTTCCTGTA  
TTCTGATTTATCCACTAGGTCAGTCTGGTTGGTCTTTGCACCTAGTTTTGGTGTAGCA  
GCTATATTTTCGATTCATCCTCTTCTTCCAAGGATTTATAATTGGACATTGAACCCATTTC  
ATATGATGGGAGTTGCCGGTGTATTGGGCGCTGCTCTGCTATGCGCTATTCACGGTGCTA  
CCGTGGAAAATACTTTATTCGAAGATGGTGACGGTGCAAATACATTCCGTGCTTTTAAAC  
CCAACCTCAAGCCGAAGAGACTTATTCATGGTCAACCGTAACCGCTTTTGGTCCCAA  
TCTTTGGGGTTGCTTTTTTCCAATAAACGTTGGTTACATTTCTTTATGTTATTTGTACCAGT  
AACCGGTTTATGGATGAGTGCTCTTGGAGTAGTCGGTCTGGCTCTGAACCTACGTGCCT  
ATGACTTCGTTTTCCAGGAAATACGTGCAGCGGAAGATCCTGAATTTGAGACTTTCTAT  
ACCAAAAATATTCTCTTAAACGAAGGTATTCGTGCTTGGATGGCGGCTCAGGATCAGCC  
TCATGAAAACCTTATATTCCCTGAGGAGGTTCTACCCCGTGGAACGCTCTTATGTCTG  
GAAGCACGGGAGAACGTTCTTTTGTGATATTATTACCAGTATTCGATACTGGGTCATTC  
ATAGCATTACTATACCTTCCCTATTCATTGCGGGTTGGTTATTCGTCAGCACGGGTTTAG  
CTTACGATGTGTTTGAAGCCCTCGGCCAAACGAGTATTTTACAGAGAGCCGACAAGG  
AATCCATTAATAACTGGCCGTTTTGATTCTTTGGCACAACCTCGATGAATTTAGTAGATC  
CTTTATGACCATAGATCGAACCTATCCAATTTTACAGTGCATGGTTGGCTGTTACCGG  
ACTAGCTGTACCTACCGTTTTTTTTTTAGGGTCAATATCAGCAATGCAGTTCATCCAACG  
AATGGCTACACAAATCGTTGAGGGTAGTTCTAGATCTGGT---CCAAGACGAACTACTGT  
AGGGGAATTATTGAAACCATTGAATTCGGAATATGGTAAAGTAGCTCCTGGATGGGGAA  
CTACTCCTTTGATGGGTGTTGCAATGGCTCTATTTGCGGTATTTCTATCTATTATTTTGA  
AATTTATAATTCTTCCGTTTTACTGGATGGAATTTCAATGGGTATGCTTACTCTCAAACCT  
TTCGTTTACACAGTAGTGATATTCTTTGTTTCTCTGTTTCATCTTCGGATTCCTATCTAATG  
ATCCAGGGCGTAATCCTGGACGTGAAGAAATGGCCGATACTACTGGAAGGATTCTCTT  
TGGCTGATAGGTAAGTAACTGGTATTCCTGTGATCGGTTTAAATAGGTATTTTCTTTTACG  
GTTTCATATTCCGGATTGGGTTTCATCCCTAATGCTTAATATCTTCAGTTTGATCTGTATCTAT  
CTTAATTTCTCCCTTCATTCGAGTAGTTTTTTCTTCTCCAATGCCCCGAGGCTTACGCT  
TTTCTCAATCCAATCGTAGATGTTATGCCAGTTATACCTGTGCTTTTTTTCTCTTAGCCC  
TTGTTTGGCAAGCTGCTGTAAGTTTTTCGAACGACACAATCAAACCCGAACGAACAAAA  
TGTTGAATTGAATCGTACCAGTCTCTACTGGGGGTTATTACTCATTTTTGTACTTGCTGT  
TTTATTTTCCAATATTTCTTCAATATGGAAGTAAATATTCTCGCATTATTGCTACTGCAC  
TCTTCATTCTAGTTCCCTACTGCTTTTTTACTTATCATCTATGTA AAAACAGTGAGTCAAA  
ATGATATGGAAACAGCAACCCTAGTCGCCATCTTTATATCTGGTTCACTTGTAAGTTTTA  
CCGGGTACGCCCTTATATACCGCTTTTGGGCAACCCTCTCAACAACCTAAGAGATCCATTC  
GAGGAACACGGGGACATGGAAGCATTGGTTTATACATTCCTCTTAGTCTCGACTCTAGG  
GATTCTTTTTTTCGCTATTTTTTTTCGAGAACCGCCTAAAGTTCCGACTAAAAAGATGA  
AAATGACTATTGCTTTCCAATGGCTGTTTTTGCATTAATTGCTACTTCATCAATCTTACT  
GATTAGTGTAACCCGTTGTATTTGCTTCTCCTGATGGTTGGTCAAGTAACAAAAATGTTGT

ATTTTCCGGTACATCATTATGGATTGTATTAGTCTTTCTGGTGGGTATCCTTAATTCTCTC  
ATCTCT-----ATGTCACCACAAACAGAACTAAAGCAAGTGTTGGATTCAA  
GCTGGTGTAAAGATTACAAATTGACTTATTATACTCCTGAATATCAAACCAAAGATACT  
GATATCTTGGCAGCATTCCGAGTAACTCCTCAACCTGGAGTTCCACCCGAGGAAGCAG  
GGCCCGCGGTAGCTGCCGAATCTTCTACTGGTACATGGACAACCTGTGTGGACTGATGG  
ACTTACCAGCCTTGATCGTTACAAAGGACGATGCTACCACATCGAGCCTGTTGCTGGA  
GAAGAAAATCAATTTATTGCTTACGTAGCTTACCCTTTAGACCTTTTTGAAGAAGGTTT  
TGTTACTAACATGTTTACTTCCATTGTGGGTAATGTATTTGGGTTCAAAGCCCTACGCGC  
TCTACGTCTGGAGGATCTGCGAGTCCCTCCTGCTTATTCTAAAACCTTTCCAAGGCCAC  
CTCATGGCATCCAAGTTGAGAGAGATAAATTGAACAAGTATGGTCGTCCCCTATTGGGA  
TGTACCATTAAACCAAATTTGGGGTTATCCGCTAAGAAGTACGGTAGAGCTGTTTATGA  
ATGTCTCCGCGGTGGACTTGATTTTACCAAGGATGATGAGAACGTAAACTCCCAACCAT  
TTATGCGTTGGAGAGACCGTTTCGTATTTTGTGCCGAAGCAATTTATAAAGCACAGGCT  
GAAACAGGTGAAATCAAAGGACATTACTTGAATGCTACCGCAGGTACATGCGAAGAAA  
TGATCAAAGGGCTGTATTTGCGAGAGAATTGGGTGTTCCCTATCGTAATGCATGACTAC  
TTAACAGGGGGATTCACTGCAAATACTAGCTTAGCTCATTATTGTGCGAGATAATGGCTA  
CTTCTTACATCCACCGCGCAATGCATGCAGTTATTGATAGACAGAAGAATCATGGTAT  
ACACTTCCGTGTACTAGCTAAAGCGTTACGCATGTCTGGCGGAGATCATATTCACGCTG  
GTACCGTAGTAGGTAACCTTGAAGGGGAAAGAGACATAACTTTGGGCTTTGTTGATTT  
ACTACGCGATGATTTTATTGAAAAGACCGAAGTCGCGGTATTTATTTCACTCAAGATT  
GGGTCTCTTACCTGGCGTTCTGCCCGTGGCTTCCGGGGGTATTCACGTTTGGCATATG  
CCTGCTCTGACCGAGATCTTTGGGGATGATTCCGTACTACAGTTCGGTGGAGGAACTTT  
AGGACATCCTTGGGGAAATGCACCAGGTGCCGTAGCTAATCGAGTCGCCCTAGAAGCA  
TGTGTACAAGCTCGTAATGAGGGACGTGATCTTGCTCGTGAAGGTAATGAAATTATCCG  
TGAGGCTAGCAAATGGAGTCCTGAACTAGCTGCTGCTTGTGAGGTATGGAAGGAGATC  
AAATTCGAATCCCAGCAATGGATACTTTG-----ATACATTTATACAAAACCTTCTACC  
CCGAGCACACGCAATGGAGCCGTAGACAGTCAAGTGAAATCCAATCCACGAAATAATT  
TGATCTATGGACAGCATCGTTGTGGTAAAGGTGTAATGCCAGAGGAATCATTACCGCA  
GGGCATAGAGGGGGAGGTCATAAGCGTCTATACCGTAAAATCGATTTTCGACGGAATG  
AAAAAACATATATGGTAGAATCGTAACCATAGAATACGACCCTAATCGAAATGCATAC  
ATTTGTCTCATACTATGGGGATGGTGAGAAGAGATATATTTTACATCCAGAGGGGCT  
ATAATTGGAGATAACCATTGTTTCTGGTACAGAAGTTCCTATAAAAATGGGAAATGCCCT  
ACCTTTGACCGATATGCCCTTAGGCACGGCCATACATAACATAGAAATCACACTTGGAA  
AGGGTGGACAATTAGCTAGAGCGGCGGGTGTGTAGCGAAACTGATTGCAAAGAGG  
GTAAATCGGCCACATTAATAATTACCTTCTGGAGAGGTCCGTTTGATATCCAAAACTGC  
TCAGCAACAGTCGGACAAGTGGGTAATGTTGGGGCGAACCAGAAAAGTTTGGGTAGA  
GCCGGATCTAAGTGTGGCTAGGTAAGCGTCTGTAGTAAGAGGAGTAGTTATGAACC  
CTGTAGACCATCCCCATGGGGGTGGTGAAGGGAGGGCCCCAATTGGTAGAAAAAAC  
CCACAACCCCTTGGGGTTATCCTGCGCTTGAAGAAGAAGTAGAAAAAGGAATAAATA  
TAGTGATAGTTTGTATTCTTCGTCGCCGTAGTAAAATGATTCAACCTCAGACCTATTTGAA  
TGTAGCGGACAACAGCGGGGCTCGAAAATTGATGTGTATTGGAATCGTAGGAGCTAGT-  
--AATCGCCGATATGCTCATATTGGTGACGTTATTGTTGCGGTAATCAAAGAAGCAGTAC  
CTAATATGCCTCTAGAAAGATCAGAAGTTATCAGAGCTGTAATTGTACGTACATGTA  
GAACTCAATCGCGGCAACGGTATGATAATACGATATGATGACAATGCAGCAGTTGTCAT

TGATCAAGAAGGCAATCCAAAAGGAACTCGAGTTTTTGGTGCGATCGCCCGGGAATTG  
AGACAGTTGAATTTACTAAAATAGTTTCATTAGCTCCTGAAGTATTAATGCTTAGTCCC  
AAAAGAACCAGATTCCGTAAACAACATAGAGGAAGAATGAAGGGAATATCTTATCGGG  
GCAATCGTATTTGTTTCGGTAGATATGCTCTTCAGGCACTTGAGCCCACTTGGATCACAT  
CTAGACAAATAGAAGCAGGGAGACGAGCAATGACACGATATGCACGTCGTGGTGGAA  
AAATATGGGTACGTATATTTCCAGACAAACCCGTTACAGTGAGACCTACGGAAACACGT  
ATGGGTTCTGGTAAAGGATCTCCCGAATACTGGGTATCCGTCGTTAAACCCGGGTGCAAT  
ACTTTATGAAATGGGCGGAGTATCAGAAATTGTAGCCAGAGAGGCTATTTCAATAGCGG  
CGTCAAAAATGCCTATACGAACTCAATTCATTATTGCTGGAATGACCAGAATTAGACGA  
GGATATATAGCTCGAAGGCGTAGAACAAAATTCGTTTTATTTGCATCAACCTTTCGGGG  
GTCTCATTCAAGACTTACTCGAACTACTACTCAACAGAAAATCAGAGCTTTGGTTTTCGG  
CGCATCGGGATAGGGGCAAGCAAAAGAGATATTTTCGTCGTTTTATGGATCACTCGGATA  
AATGCAGTAATTCGTGATAAT-----GTATTCTATAGTTATAGTAGATTAATACACGATCTGT  
ACAAGAAGCAGTTGCTTCTTAATCGTAAATACTAGCACAAATAGCTATATCA AATAGG  
AATTGTCTTTACATGATTTCCAATGAGATCATCAA-----GA  
AGTGTACGCTTTAGGTCAACATATATGTATGTCTGCTCACAAAGCGCGAAGAGTAATTG  
ATCAGATTCGTGGACGTTCCCTATGAGGAAGCACTTATGATACTAGA ACTCATGCCTTATC  
GAGCATGTTATCCATTTTTAAATTGGTTTTATTCTGCAGCAGCAAATGCTAGTCACAATA  
TGGGTTTTCAACGAAGCGGATTCAGTCATTAGTAAAGCCGAAGTCAACGATGGTACTTC  
CGTGAAAAGTTAAACCTCGAGCTCGGGGGCGTAGTTATCTGATAAAAAGACCTACC  
TGTCATATAACTATTGTATTGAAAGATATATACTTAGATGGGGGAGTATGGGACAAAAAA  
ATGGATGGAATAAAATATGCAGTATTTACAGACAAAAGTATTCGGTTATTGGGGAACAA  
T--CAATATACTTCTAATGTGCAATCAGGATCAACTAGGACAGAAATAAAGCATTGGGTC  
GAACTCTTCTTTGGTGTCAAGGTAATAGCTATAAATAGCCATCGACTCCCGGGAAAGGG  
TAGAAGAATGGGACCTATTATGGGACATAACAATGCATTACAGACGTATGATCATTACGCT  
TCAACCGGGTATTCTATTCCACCTCTTAGAAAAGAAAAGAACTATGGCGGTTCCAAA  
AAACGTATTTCTATGTCAAAAAGCGTATTCGTAAAATATTTGGAAAAGGAGGGGATA  
TTGGGCAGCCGTAAAAGCTTTTTCGTTAGCGAAATCTCTTTCTACCGGGAATTCAAAA  
GTTTTTTTGTGCGACAAAGACAAATAATGGCCAAGGGTAAAGATGTCAGAGTAAGAGT  
TATTTTGGAAATGTACCAGTTGTGTCCGAAACGGTGTTAAT-----AAGGAATCACTGGGCA  
TTTCCAGATATATTA CTCAAAGAATCGACACAATACGCCTAGTCGACTGGAATTGAGA  
AAATTCTGTCCCTATTGTTACAAACATACGATTCATGGAGAGATAAAGAAAATGAAAAT  
AAGGGCCTCCGTTTCGTAAAATTTGTGAAAATGTCGACTAATCCGTAGGCGTGGACGA  
ATTATAGTAATTTGTTCCAACCCGAGACATAAACAAGACAAGGAATGGTTCGAGAAG  
AAGTAAGAGTATGTA CTGACACTACAGTGGAAGTGTGTTGAATCAAGAGCAGACAA  
TAAGCGTCTTTATTATGGACGTTTTATTCTGTCTCCACTTATGAAAGGTCAAGCTGATAC  
GATAGGCATCGCGATGCGGAGGGCTTTGCTTGGAGAAATAGAAGGAACATGTATCACA  
TGTGCAAAAATCTGAG-----AAAATACCACACGAATATTCTAACATAGTAGGTATTGAAGA  
ATCAGTACATGAAATTTAATGAATTTGAAAGAAATTGTATTGAGAAGTAATTTGTATGG  
AACTCGCGACGCGTCTATTTGCGTCAGGGGTCCTAGACACGTAACCGCTCAAGACATC  
ATCTCACCGCCTTCTGTAGAAATCATTGATACTACACAGCATATAGCTAGCCTGACAGA  
ACCAATTGATTTGTGTATTGGATTACAAATCGAGAGGAATCGCGGATATAATATGAAAAC  
ACCGAAAACCTCTCAAGATGGACGTTAT-----CCTATAGATGCTGTATTTATGCCTGTTCG  
AAATGCGAATCATAGTATTCATTCTTATGGGAATGGGAATGAGAAACAAGAGATACTTT

TTCTCGAAATATGGACGAATGGAAGTTTAACTCCTAAAGAAGCACTTCACGAAGCCTC  
CCGGAATTTGATTGATTTATTTATTCCTTTTCTACATGCGAACGAAGAA-----AACTTTAT  
TTTAAAGGACAATCAA---ACAAGGTAGCTTTACCCCTTTTACCTTTCATGATAGATTG  
GCT--AAACAAAGGAAAAACAAAAA-----ATATCATTTCAATGTATTTTTATTGACCAAT  
CAGAATTGCCTCCCCGGACCTATAATTGCCTCAAAGGTCCAATATACATACATTATTGG  
ACTTTTGAATAACAGTCAAGAAGATCTTATGAAAATTGAACATTTTCGCATAGAAGAT  
GTAAAGCAGATATTGGGCATTCTACAAAAGCAT-----TTCGCAATTGATTTACCGAAGAA  
TAAGATGATCCGGGATGGAAAT--GAGGAAATGTCTACAATACCTGGGTTTAGTCAGAT  
ACAATTTGAGGGATTTTGTAGGTTTCATTGATCAAGGCTTGATGGAAGAACTTTATAAGT  
TTCCAAAATTGAGGATACAGATCAAGAAATTGAATTTCAATTATTTGTGGAAACATAT  
CAATTGGCAGAACCCTTGATAAAAGAAAGAGATGCTGTGTATGAATCACTCACATATTC  
TTCTGAATTATATGTACCCGCGGGATTAATTTGGAAAACCAGTAGGAATATGCAAGAAC  
AAACAATTTTATTGGAAACATTCCTCTAATGAATTCCTGGGAACTTCTATAGTAAATG  
GAATATACAGAATTGTGATCAATCAAATATTGCAAAGCCCCGGTATTTATTACCGTTTCAG  
AATTGGATCATAACGGAACTTCGGTCTATACCGGCACCATAATATCAGATTGGGGAGGA  
AGATCAGAATTAGAGATTGATAGAAAAGCAAGGATATGGGCGCGTGTGAGTAGGAAAC  
AAAAAATATCTATTCTAGTTCTATCATCAGCTATGGGTTTCAATCTAAGAGAAATTCTAG  
ATAATGTTTGCTACCCTGAAATTTTCTGTCTTTCCCGAATGATAAGGAGAAAAAAAAG  
ATTGGGTCAAAGAAAATGCCATTTTGGAGTTTTATCAACAATTTGCTTGTGTAGGCGG  
GGATCCGGTATTTTCTGAGTCATTATGTAAGGAATTACAAAAGAAATTTTTTCAACAAA  
GATGTGAATTAGGAAGGATTGGTCGACGAAATATGAACCGGAGGCTGAATCTTGATATA  
CCTCAGAACAATACATTTTTGTTACCGCGAGATATATTAGCAGCTGCGGATCGTTTGATC  
GGAATTAATTTGGAATGGGTACACTTGACGAT-----ATGAATCACTTGAAAAATAACG  
TATTCGTTCTGTAGCGGATCTGTTACAAGATCAATTCGGATTGGCTCTGGTTCGTTTAGA  
AAATGCGGTTTCGAGGAACTATATGTGGAGCAATTAGG---CATAAATTGATA---CCGACTC  
CTCAGAATTTGGTAACTTCAACTCCA-----TTAACA ACTACTTATGAATCATTTTTCG  
GCTTACACCCCTTATCTCAAGTTTTGGATCGAACTAATCCATTGACACAAATAGTTCATG  
GGCGAAAATCGAGTTATTTGGGTCCTGGAGGATTGACGGGGCGAACTGCTAGTTTTTCG  
GATACGAGATATCCATCCTAGTCACTATGGACGCATTTGCCCAATTGACACGTCTGAAG  
GAATCAATGTTGGACTTATTGGATCCTTAGCGATTCATGCGAGGATTGGTCATTGGGGG-  
-TCTCTAGAAAGTCCATTTTAT-----GAAATTTCTGAGAGATCAAAAAAG-----GTACG  
GATGCTTTATTTATCACCAAGTAAAGATGAATACTATATGGTAGCGGCAGGAAATTCSTT  
GTCCTTGAATAAGGGTATTCAGGAAGAACAGGTTGTTCCAGCTCGATACCGTCAAGAA  
TTCTGACTATTGCATGGGAACAGGTTTCATCTTCGAAGTATTTTTCCCTTCCAATATTTTT  
CTATTGGAGCTTCCCTCATTCCTTTTATCGAGCATAATGATGCGAATCGGGCTTTAATGA  
GTTCTAATATGCAACGTCAAGCAGTTCCACTTTCTCGGTCCGAGAAGTGCATTGTTGGA  
ACTGGGTTGGAACGCCAAGCGGCTCTAGATTCCGGGGTTTCCGCTATAGCTGAACACG  
AGGGAAAGATCATTTATACCGATATTGACAAGATCATTTTATCAGGTAATGGAGACTC  
TACGCATTCCATTGGTTATGTATCAACGTTCCAACAAAAATACTTGTATGCATCAAAAAC  
CCCAGGTTACGCGGGGTAAATGCATTA AAAAGGGACAAATTTTAGCGGACGGTGCCGC  
TACAGTCGGTGGCGAACTCGCTTTGGGAAAAAACGTATTAGTAGCTTATATGCCGTGGG  
AAGGCTACAATTCTGAAGACGCGGTA CTATTAGTGAGTGTCTGGTATATAGAGATATTT  
ATACTTCTTTTACATACGGAAATATGAAATTCAGACTCATGTGACAAGCCAGGGC---CC  
CGAAAGGATCACTAACGAAATACCGCATTTAGAAGCCCATTTACTCCGCAATTTAGACA

AAAATGGAATTGTGATGCTGGGATCTTGGGTAGAAACGGGTGATATTTTAGTCGGTAAA  
TTAACGCCCCAGACGTGCAAAGAA---TCATCGTATGCCCCGGAAGATAGATTATTACGA  
GCCATACTTGGAATTCAGGTATCCACTTCAAAGGAACTTGTCTAAAACCTTCTATAGG  
TGGCCGGGGTCGAGTTATTGATGTGAGATGGATCCAGAAAAAAGGG---GGTTCCAATTA  
TAATCCAGAAACGATTCGTGTATATATTTACAGAAACGTGAAATCAAGGTAGGTGATA  
AGGTAGCTGGAAGACATGGGAATAAAGGTATCATTTCAAAAATTTTGCCTAGACAAGAT  
ATGCCTTATTTGCAAAATGGAACCCCTGTTGATATGGTCTTCAACCCATTAGGAGTACCT  
TCACGAATGAATGTAGGGCAGATATTTGAATGCTCGCTTGGGTAGCGGGGGGTCTGCT  
AGACAGACATTATCGAATAGCACCTTTTGATGAGAGATATGAACAAGAGGCTTCGAGA  
AAACTAGTGTTTTCTGAATTATATGAAGCCAGTAAGCAAACAGCAAATCCATGGGTATT  
TGAACCCGAGTATCCGGGAAAAAGCAGAATATTTGATGGAAGAACGGGAGATCCTTTT  
GAACAACCTGTTATAATAGGAAAGTCCTATATTATGAAATTAATTCATCAAGTTGATGAT  
AAAATCCACGGGCGTTCCAGTGGACATTATGCGCTTGTACACAACAACCCCTTAGAG  
GAAGGGCCAAGCAAGGGGGACAACGGGTAGGCGAAATGGAAGTTTGGGCTCTAGAG  
GGATTTGGTGTGCTCATATTTTACAAGAGATGCTTACTTATAAATCTGATCATATTAGAG  
CTCGTCAGGAAGTACTTGGTACTACGATCATTGGAGGAACAATACCTAACCCCTGAAGA  
CACTCCAGAATCTTTTCGATTGCTCGTTCGAGAACTACGATCTTTGGCTCTGGAAGTGA  
ATCATTTCCTTGTATCTGAGAAGAACTTCCAGATTAATAGGAAGGCAGCT-----  
--ATGATCGACCGGTATAAACATCAACAACCTTCGAATTGGATTAGTTTCTCCTCAACAAA  
TAAGTGCTTGGGCCAACAAAATCCTACCTAATGGAGAGATAGTTGGAGAGGTGACAAA  
ACCCTACACTTTTTCATTACAAAATAATAACCGGAAAGGGATGGATTATTTTGTGAAA  
GAATTTTGGGCCTATAAAAAGTGGAATTTGTGCTTGTGGAAATTATCGAGTAATCGGA  
GATGAAAAAGAAGACCCGAAATTTGTGAACAATGCGGAGTCGAATTTGTTGATTCTC  
GGATACGAAGATATCAAATGGGATACATCAAATTGGCATGCCAGTAACCTCATGTGTGG  
TATTTGAAACGTATTCCTAGTTATATCGCGAATCTTTTAGATAAACCTCTTAAAGAATTAG  
AAGGCCTAGTATACTGCGAT-----TTTTCTTTGCTAGGCC---GTAGCTAAAAACCTAC  
TTTCTTACGATTACGAGGTTCAATTTGAATATGAAATCCAATCCCGGAAATACAGCATCCC  
ACTTTTTTTTACTACCCAAGGCTTCGATACATTTGCAAATCGAGAAATCTCTACTGGAG  
CGGGTGCTATCCGAGAACAATTAGCCGATCCGGATTTGCGAATTATTACGGATTATTCAT  
TGGGAGAATGGAAAGAATTAGGGGAAGAA---GGTCCCACGGGTAATGAATGGGAAGAT  
AGAAAAATTGGAAGAAGAAAGGATTTTTTGGTTAGACGCATGGAATTAGCTAAGCATT  
TTATTCGAACAAAGGTAGAACCAGAACGGATGGTTTTTGTGCCTATTACCAGTTCTTCCT  
CCCGAGTTGAGACCGATCATTAGATAGATGGGGGTAAATCAATGAGTTCGGATATTA  
TGAATCTATAGAAGAGTTATCTATCGAAATAATACTCTTATCGATCTATTAACAACAAG  
TAGATCGACGCCAAGGGAATTAGTAATGTGTCAGGAGAAATTGGTACAAGAAGCCGTG  
GATACACTTCTTGATAATGGGATTCGCGGACAACCAATGAGGGACGGTCATAATAAAGT  
TTACAAGTCATTTTCAGATGTAATTGAAGGCAAAGAGGGAAAGATTCGTGAGACTCTG  
CTTGGCAAACGGGTCGATTATTCGGGGCGTTCGTCATTGTTGTGGGACCTTCGCTTTC  
ATTACATCGATGTGGATTGCCTCGCGAAATAGCAATAGAGCTTTTCCAGACATTTGTAAT  
TCGTGGTCTAATTAGACAACATGTTGCTTCCAACATAGGAGTTGCTAAAAGTAAAATTA  
GGGAAAAGGAACCAATTGTATGGGAAATACTTCAAGAAGTTATGCAGGGGCATCCTGT  
ATTGCTGAATAGAGCACCTACTCTGCATAGATTAGGCATACAGGCATTCCAACCCATTTT  
AGTAGAAGGACGTGCTATTTGTTTACATCCATTAGTTTGTAAAGGGGTTCAATGCAGACT  
TTGATGGGGATCAAATGGCTGTTTCATGTACCTTTATCTTTGGAGGCTCAAGCAGAGGCT

CGTTTACTTATGTTTTTCTCATATGAATCTCTTGTCTCCAGCTATTGGGGATCCCATTTCCG  
TACCAACTCAAGATATGCTTATTGGACTCTATGTATTAACGAGCGGGAATCGTCGAGGTA  
TTTGTGCAAATAGGTATAATCCATGTAACCGCGGTAACCGTGTAACCTTCAAAAATGAA  
AGAATTGACGATAATAACTATAAGTATACGAAAGAAAAAGACCCTTATTTTTGTAGTTC  
CTATGATGCAATTGGAGCTTATCGGCAGAAACGAATCAATTTAGATAGCCCTTTGTGGC  
TCCGGTGGCGACTAGATCAACGC---ATCATTGCATCA-----AGAGAAGTTCCCATCGAAG  
TTCATATGAATCTTTGGGTACCTATCATGAGATTTATGTGAACTATCTAATAGTAAAAA  
GTGTAAAAAAAGAAATTCCTTTGTATATACATTCGAACCACTGTTGGTCAATTTATTTTA  
TCGAAAAATAGAAGAAGCCGTACAAGGTTTTTTCCGGGCCTGCTCCTACGGTACC-----  
-----ATGGAGGTACTTATGGCAGAACGGGCCGATCTGGTCTTTCACAATAAAGT  
GATAGATGGAACCTGCCATGAAACGACTTATTAGCAGATTAATAGATCACTTCGGAATGG  
CGTATACATCACACATCCTGGATCAAGTAAAGACTCTGGGTTTCCAACAAGCCACTGCT  
ACATCCATTTCAATAGGAATTGATGATCTTTTAACAACACCTTCTAAGAGATGGCTAGTC  
CAAGATGCTGAACAACAAAGTTTTATTTTGGAAAAACACCATCATTATGGGAATGTACA  
CGCGGTGCAAAAATTACGTCAATCCATTGAGATATGGTATGCTACAAGTGAATATTTACG  
ACAAGAAATGAATACTAATTTTAGGATGACTGACCCTTCTAATCCAGTCCATATAATGTC  
TTTTTCGGGAGCTAGAGGAAATCCATCTCAGGTACACCAATTAGTAGGTATGAGAGGAT  
TAATGTCGGATCCCCAAGGACAAATGATTGATTTACCCATTCAAAGCAATTTACGCGAA  
GGACTCTCTTTAACGGAATATATCATTTCCTGCTATGGAGCCCGCAAAGGAGTTGTAGAT  
ACTGCTGTACGAACATCAGATGCTGGATATCTCACGCGCAGACTGGTTGAAGTAGTTCA  
ACACATTGTTGTACGTAGAACGGATTGTGGCACCATCCGAGGTATTTATGTGACTTCTC  
GAAATGGGATGATGACG---GAAAGAATTTTTATCCAAACATTAATTGGTCGTGTATTAGC  
AGACGATATATATATGGGCCACGATGCATTGCTACTCGAAATCAAGATGTTGGGATTGA  
ACTTGTCAACCGATTACATAACC-----TTTTCGAGCACAACCAATATCTATTCGAA  
CCCCCTTTACTTGCAGGAGTACATCTTGGATCTGCCGATTATGTTATGGTTCGGAGTCCCA  
CTCATGGCGACCTGGTCAATTGGGAGAAGCTGTAGGTATTATTGCGGGTCAATCTATT  
GGGGAACCAGGGACTCAACTAACATTAAGAACTTTTCATACCGGTGGAGTATTCACAG  
GGGGTACTGCAGAACATGTACGAGCTCCTTTAATGGAAAAATAAAATTCAATGAGGAT  
TTGGTTCATCCCACACGCACACGTCATGGGCATCCTGCTTTTCTATGTTATATAGACCTG  
TATGTAACCTATTGAGAGTCAGGATATTATACATAATGTAAATATTCCACAAAAAAGTTTT  
CTTTTAGTTCAAAAATAATCAATATGTAGAATCAGAACAAGTAATTGCTGAGATTGCGCG  
GGAAACATCCACTTTT---AATTTTAAAGAGAGGGTTCGAAAACATATTTATTCTGACTCA  
GAGGGAGAA---ATGCACTGGAGTACCGATGTGTACCATGCACCTGAATATACATATGGT  
AATGTTTCTCTTTACCAAAAACAAGTCATTTATGGGTATTATCAGGAGGTCCGTGCAG  
A-----TCCCGGATAGTCCCTTTTTTCGCTTCACAAGGATCAAGATCAAAATGAACGTTTCA--  
---TCTCTTTCTGCCGAACGACGATATATTTCTAAC-----CTCTCAGCGACTAATGATCAA---  
GTGAGACATAAATTGTTTAGTTCCGATCCTTCTGGT-----GGGGTAGTATTCTTGATTAT-  
--TCAGGACCTAATCGAATCATATGCAATGGTCATTTGAATTTTCATATATCCTACC---ATTCT  
ACATGAGAATTCTGAT-----TTATTGGCAAAGAGGCGAAGAAATAGATTCATACTCCCAC  
TCCAATCTAATCAAGAACGAGAGAAAGAACTAATGCCCTGTTCCAGGTATCTCGATTGA  
AATACCCATAAAT-----GGAATTTCCGTAGAAATAGCATTCTTGCTTATTTTCGATGATCCT  
CTATACAGAAGAAAGAGTTCGGGAATTACTAAATATGGGACTATAGAGGTGCATTCAAT  
CGTCAAAAAAGAGGAT-----TTGATTGAATATCGAGGG-----AAAGAATTTAGGTCAAAA  
TACATGAAAGTAGATCGATTTTTTTTTTTCATCCCGAGGAAGTGCATATCTTACCCGGATCT

TCTTACATAATGGTACGGAACAATAGTATCATTGGAGTAGATACACGAATCACTTTAAAT  
ATAAGAAGCCGGGTAGGCGGATTGGTTCGAGTGGAGAGAAAAAAAAAAATATTGAA  
CTTAAAATATTTCCGGAGATATCCATTTTCCTGGAGAAACAGACAAGATATCCCGGCA  
CAGTGGCATCTTGATACCACCAGGAACGGAAAAAAAA-----AAATCTAAAGAATCCAA  
AAAA---AAATTGAAAAATTGGATCTATGTCCAACGG-----ATCACACCTACCAAGAAA  
AG-----TATTTTGTGGTTCGACCTGTAGTCACATATGAAATAGCGGACGGAATAAATT  
TAGTAACGCTTTTCCCCCAGGATTTGTTGCAGGAAAGGGATGATGTACAACCTTCGAGTT  
GTCAATTATATCCTTTATGAAAACGGCAAACCAATTTCGAGGAATTTCTGATACAAGTATT  
CAATTAGTTCGAACTTGTTTAGTATTGAATTGTGACCAATACAAAAAT-----GGTCTT  
CTATGGAAGAGATTCATGCTTCCTTTGTTGAAGTAAGAACAAATGGTCTGATTTCGATATT  
TTTTAAGAATGGACTTAGTGAAATCCCCTATTTTCGTATATCGTAAAAAGGAATGATCCGT  
CAAGCTCAGGATTGATCCCCGAT--AATGGATCAGATCGTAACAATATCAATCCTTTTTAT  
TCCATTTATTACAAGGCAAGG-----ATTCAACAATCACTTAGCCAACATCAAGGA  
ACTATCCGTACGCTGTTGAATAGA-----AATAAGGAATGCCAATCGTTGATAATTTTGT  
CATCATCCAATTGTTCTCGA-----ATGCATCCATTCAACGGTTTGAAATATCACAAT-----  
GTGACAAAAGAATCAGATCCCCTAATTCCAATTAAGAATTGGTTGGGTCTTTAGGGAC  
A-----GTCCCTAAAATTGCGAATTTTATTCA-----TTTTACCATTTAATAACT-----CATAAT  
CAGATTTTG---GTGAATAAATATTTGATACTTAACAAT-----TTAAAACAGATTTTTCAA  
GTACTTAAA-----TATTATTTAATGGATGAAAATGGAAGG-----ATTTATAATCCCGATCG  
ATGCAGGAACATCATTTTTAATCCATTCAATTTTAATTGGTATTTTCTCCATCACGATTAT  
TGTGAAGAGACATCCACAATAATTAGT--CCTGGACAGTTTATTTGTGAAAATGTGTGTA  
TATCCAAAACGGACCA-----CACCTAAAATCTGGTCAAGTTCTAATTGTTTCAT---ATT  
GACTCTTTAGTAATAAGATCAGCAAAGCCTTATTTAGCCACTCCAGGAGCAACTGTTCA  
TGGACATTATGGGGAAATCCTTTATGAAGGAGATACATTAGTTACATTTATATATGAAAA  
ATCGAGATCTGGTATATAACGCAGGGTCTTCCAAAAGTGGAACAAGTCTTAGAAGTG  
CGTTCGATTGATTCAATATCGATGAACCTAGAAAAGAGGGTTGAGGGTTGGAACGAAC  
GTATACCAAGAATTCTTGGAATTCCTTGGGGATTCTTGATTGGCGCTGAGCTAACCATA  
GCGCAAAGTCGTATCTCTTTGGTTAATAAGATCCAAAAGGTTTATCGATCCCAGGGGGT  
GCAGATCCATAATAGGCATATAGAAATTATTGTACGTCAAATAACATCAAAGTGTGGT  
TTCAGAA-----GAGGGAATGTCTAATGTTTTTTCACCCGGAGAACTAATTGGATTGTT  
GCGAGCGGAACGAACGGGGCGCGCTTTGGAAGAAGCGATCTGTTACCGAGCCGTCTT  
ATTGGGAATAACAAGGGCATCCCTGAATACTCAAAGTTTCATATCCGAGGCGAGTTTC  
AAGAACTGCTCGAGTTTATGCAAAAAGCCGCCCTACGAGGTCGGATCGACTGGTTGA  
AAGGCCTGAAAGAGAACGTTGTTCTGGGGGACTGATACCTGTTGGTACCGGATTCAA  
AGTATTAGTCCACCGTTCA-----AGACAACACAACAACATTCCT-----TTGGAAACCAA  
AAGAAGATATATTCGAGGGGGAATGAGA-----GATATTTGTTCCACCACAGAAAATT  
ATTGAATTATTGCATTCCAAAGAATTTCCACGATACACCAGAACAATCGTTTACAGGATT  
TAATGATTCC-----ATGACAAGAAGATATTGGAACATCAATTTGGAAGAGATGA  
TGGAAGCAGGAGTTCATTTTGGTCATGGTACTAGGAAATGGAATCCTAGAATGGCACCT  
TACATCTCTGCAAAGCGTAAAGGTATTTCATATTACAAATCTTACTAGAACTGCTCGTTTT  
TTATCAGAAGCTTGTTGATTTACTTTTTGATGCAGCAAGTAGGGGAAAACAATTCTTAAT  
TGTTGGTACCAAAAATAAAGCAGCTGATTTAGTAGCATCGGCTGCAATAAGGGCTCGGT  
GTCATTATGTTAATAAAAAATGGCTCGGTGGTATGTCAACGAATTGGTCCACTACAGAA  
ACGAGACTTCATAAGTTCCGGGACTTGAGAGCGGAACAAAAGACGGCGAGACTCGCC

CGTCTTCCGAAAAGAGATGCAGCAATGTTGAAGAGACAATTATCTCACTTGCAAACAT  
ATTTGGGCGGGATCAAATATATGACGAGGTTACCCGATATTGTAATCATCGTTGATCAGC  
AAGAAGAATATACAGCTATTCGAGAATGTGTCACTTTGGGAATTCCAATGATTTGTTTAA  
TCGATACAAATTGTGATCCGGATCTCGCAGATATTTCTATTCCAGCGAATGATGACGCTA  
TAGCTTCAATCCGATTAATTCTTAACAAATTAGTATCCGCAATTTGTGAAGGTCGTTCTA  
GC---TATATAAGAAATCGTATGGGACAAAAATAAATCCACTAGGTTTTAGACTTGGTAC  
AACCCAAGGTCATCATTCCCTTTGGTTTGCACAACCAAAAAGTTATTCCGAGGGTCTAC  
AGGAAGATCAAAAAATACGGGATTGTATCAAGAATTATGTACAAAAAATATGAGAATA  
TCCTCAGGT---GCCGAGGGAATTGCACGTATAGAGATTCAAAAAGAATCGATCTGATC  
CAAGTTATAATCTATATGGGATTCCCAAAGTTGTTAATAGAGGGTAGACCACGA-----  
-GGAGTTGAAGAATTGCAGATCAATGTACAAAAAGAGTTTAATTCTGTAAACCGAAAA  
CTAAACATTGCTATCACAAGAATTGCAAAACCTTATGGACAACCTAATATTCTTGCGGA  
ATTTATAGCTGGACAATTAAGAATAGGGTTTCGTTTCGAAAGGCAATGAAAAAGGCTA  
TTGAATTAACCTGAACAGGCAGATACAAAAGGAATTCAAATACAAATTGCAGGGCGTAT  
CGACGGAAAAGAAATTGCACGTGTGCAATGGATCCGAGAAGGTAGGGTTCCTTACA  
AACCATTCGAGCTAAAATTTATTATTGTTCTATACAGTTTCAACTATCTATGGGGTATTA  
GGAATAAAAATTTGGATATTTGTAGACGAGGAAATGTCTCGTTACCGAGGGCCTCGTTT  
CAAAAAATACGCCGTCTGGGGGCTTTACCGGGACTAACTAGTAAAAGGCCTAGAGCC  
GGAAGTGATCTTAGAAACCAATCGCGTTCCGGGAAA---AGATCTCAATATCGTATTCGT  
CTAGAAGAAAACAAAAATTGCGTTTTTCATTATGGTCTGACAGAACGACAATTACTTA  
AATACGTTTCGTATCGCTGGAAAAGCAAAAGGGTCAACAGGTCAGGTTTTACTACAATT  
ACTTGAAATGCGTTTGGATAACATCCTTTTTTCGATTGGGTATGGCTTCGACCATTCTGG  
GGCCCGCAATTAGTCAACCATAGACATATTTAGTTAATGGTTCGGATAGTAGATATCCC  
AAGTTATCGCTGCAACCCCGAGATATTATTACGGCGAAGGATGAACAAAAGTCCAGA  
GCTCTAATTCAAAATTATCTTGATTCATCCCCCAT---GAGGAATTGCCAAAACATCTAA  
CCCTTCACTCATTCCAATAC-----AAAGGATTAGTCAATCAAATAATAGATAGTAAATGGG  
TCGGTTTGAAAATAAATGAATTGCTAGTCGTAGAATATTATTCCCGTCAGACTATGTCAC  
GTCGAGGTACTGCAGAAGAAAAACTGCAAAATCCGATCCAATTTATCGTAATCGATTA  
GTTAACATGTTGGTTAACCGTATTCTGAAACACGGAAAAAATCATTGGCTTATCAAAT  
TATCTATCGAGCCGTGAAAAGATTCAACAAAAGACAGAAACAAATCCACTATCTGTT  
TTACGTCAAGCAATACGTGGAGTAACTCCCGATATAGCAGTAAAAGCAAGACGTGTAG  
GTGGATCGACTCATCAAGTTCCCATGAAATAGGATCTACACAAGGAAAAGCACTTGC  
CATTCGTTGGTTATTAGGGGCATCCCGAAAACGTCCGGGTCGAAATATGGCTTTCAAAT  
TAAGTTCCGAATTAGTGGATGCTGCCAAAGGGAGTGCGATGCCATACGCAAAAAGGA  
AGAGACTCATAGAATGGCAGAGGCAATAGAGCTTTTGCACATTTTCGTATGGGTAGG  
GACTATTGCAAACATAATAACTTCTATACGAAATGCTGACATGGATAAAAAGGAAC  
AGTTCGAATAGCATCCACTAATATCACCGAAAACATTGTTAAAATACTTCTAAGAGAGG  
GTTTTATCGAAAACGTGAGGAAACATCGGGAAAGCAACAAATATTTCTTGGTTTCAAC  
CTTGCGACATAGAAGG-----AGTAGGAAAGGACCATATAGA-----ACTATTTA-----AA  
ACGTATCAGCCGACCCGTTTACGAATCTATTCCAACCTATCAACGAATTCCTAGGATTTT  
AGGTGGAATGGGAATTGTAATTTCTACTTCTCGAGGTATAATGACAGACCGAGAGG  
CTCGACTAGAAGGAATCGGAGGAGAAATTTGTGTTATATATGGATGGCAAAACCTATA  
CCAAGAATTGGTTCACGTAAGAATGGGCGTATCGGTTTACGTAAGAGTGACGTAGAA  
TACCAAAGGGGGTTATTCATGTTCAAGCAAGTTTCAACAATACCATTGTGACTGTTACA



GATGTACGGGGCAGGGTGGTTTCTTGGTCCTCCGCCGGCACTTGTGGATTACAGGGGAA  
CAAGAAGAGGGACACCTTTTGTGCTCAAACCGCAGCGGGAAATGCTATTCGTACAGT  
AATGGATCAGGGTATGCAACGAGCAGAAGTCATGATAAAGGGTCTTGGTCTCGGAAGA  
GATGCAGCATTACGAGCTATTCGTAGAAGTGGTCTACTATTAAGTTTCGTACGGGACGT  
AACCCCTATGCCACATAATGGATGTAGACCTCCTAAAAAAGACGTGTGATGCCAACTA  
TTAAACAACCTATTAGAAAACACAAGACAGCCAATCAGAAATGTCACGAAATCCCCCGC  
TCTTCGGGGATGTCTCAGCGTCGAGGAACATGTACTAGGGTGTATACTATCACCCCA  
AAAAACCAAACCTCTGCCTTACGTAAAGTTGCCAGAGTACGATTAACCTCTGGATTTGA  
AATCACTGCTTATATACCTGGTATTGGCCATAATCACAAGAACATTCTGTAGTCTTAGT  
AAGAGGAGGAAGGGTTAAGGATTTACCCGGTGTGAGATATCACATTGTTTCGAGGAACC  
CTAGATGCTGTCCGAGTAAAGGATCGTCAACAAGGGCGTTCTAAATATGGGGTCAAAA  
AGCCAAAATGGCAAGAAAAAGTTTGATTACAGAGGGAAAAGAAGAGGAAAAAATTG  
GAACAGAAATATCATTTGATTTCGTGATCCTCAAAAAAAGAAATAAGC-----AAAGTT  
CCGTCGTTGAGTGACAAATGGGAAATTCATGGAAAATTACAATCCCACCGCGTAATAG  
TGCACCTACACGTCTTCATCGACGTTGTTTTTCGACAGGAAGACCGAGAGCTAACTATC  
GAGACTTTGGGTTATCCGGACACATACTTCGTGAAATGGTTCATGCATGTTTGTGGCG  
GGGGCAACAAGATCAAGTTGGATGGTAAAAAATTCATTCATCTCAGTTATTTTCGCAAGA  
A---AAA---AAAGAAGAAAACAAGGGGTTCGTTGAATTTCAAGTATTTAATTTCAACAAT  
AAGATACGGATACTTACTTCACATTTGGAATTACACAGAAAAGACTATTCATCTCAGAG  
AGGTCTACGGAAAATTCTGGGAAAACGCCAACGGCTGCTGTCTTATTTGTCAAAGAAA  
AATAGAGTACGTTATAAGGAATTAATTGGTTCAGTTGGGTATTCTGGAACAAAAGCTCG  
T-----ATGGTAAACTTCGTTTGAACGATGTGGTAGAAAGCAACGAGCCATCTATCGAA  
TCGTTGCAATTGATATTCGATCTCGAAGAGAAGGAAGAGACCTTCGTAAGTGGGTTT  
TTACGATCCGATAAAGAATAAACTTATTCAAACGTCCCTCTATTCTATATTTCCCTTGA  
AAAAGGGGCTCAACCTACAGTAACTGTTTCATGATATTTCAAAGAAGGCAGAGATTTTT  
AAGGAACTTCGTATTAATCAAACGAAA-----ATGGATAAATCCAAGCGACCTTTTCTT  
AAATCCAAGCGATCTTTTCGTAGGCGTTTGCCCCCAATTGGATCGGGGGATCGAATTGA  
TTATAGAAACATGAGTTTAATTAGTCGATTTATTAGTGAACAGGGAAAAATTTTATCTAG  
ACGAGTAAATAGATTGACCTTGAAACAACAACGATTAATTACTATTGCTATAAAACAAG  
CTCGTATTTTATCTTCGTTACCTTTTCTTAATAATGAGAAA-----CAATTCGAGAGAACCG  
AGTTTACTGCTAGAACTACGGGTTCTAGAACTATAAATCTAGTGGCACGTTCACTAAAA  
AAAAATCCTTTTGTAGCTAATCATTTATTAGAAAAAATTGAGAAGCTTAACATGAGGGC  
GAAAAAAGAAATAATAGTAACTTGGTCCCGGGCATCTACCATTATACCCACAATGATCG  
GCCATACAATTGCTATTCATAATGGAAAGGAACATTTGCCTATTTTTATAACAGATCGTAT  
GGTAGGTCACAAGTTGGGAGAATTTGCGCCTACTCTTAATTTCCGGGAACACGCGAGA  
AACGATAATAAATCTCGTCGTATGATTTTGAATCTTTTCTACTAGGTAATCTATTATCCT  
TATGCATGAAGATAATAAATTCGGTCGTTGTGGTTCGGACTCTATTATGGATTTCTGACCA  
CATCTCCATAGGACCCTTTATCTCTTCTTCTCCGAGCTCGGGTTATGGAAGAAGGA-  
-----ACCGAGAAGAAGGTATCAGCAACAACCTGGTTTTATTACGGGACAGCTCATGATG  
TTCATATCGATCTATTATGCGCCTCTGCATTTAGCATTGGGTAGACCTCATAACAATACTG  
TCCTAGCTCTACCGTATCTTTTGTTCATTTCTTCTGGAACAATCACAACACTTTTTTG  
ATTATGGATCTACTACCAGAAATTCAATGCGTAATCTCAGCATTCAATGTGTATTCTGA  
ATAATCTCATTTTTCAATTATCAACCATTTCAATTTACCAAGTTCAACGTTAGCCAGATT  
AGTCAACATTTATATGTTTCGATGCAACAACAAGATGTTATTTGTAACAAGTAGTTTTGT

TGGTTGGTTAATTGGTCACATTTTATTCATGAAATGGGTTGGATTGGTATTATTCTGGATA  
CGTCAAAATCATTCTATTAATCT--AATGTACTTATTAAGTACCTTGTGTCAGAATTGAG  
AAATTCTATGGCTCGAATCTTTAGTATTCTCTTATTTATCACCTGTGTCTACTATTTAGGT  
AGAATGCCGGCACCTATTGTCACTAAGAACTGAAAGAAACCGAAGAAGACAAACCT  
CTTGTGACTCTTCTTTTCGACTATAAACGATGGAATCGTCCATTGCGATATATAAAAAAT  
GATAGATTTGAGAATGCTGTAAGAAATGAAATGTCACAATACTTGTTTTATAACATGTA  
AATGATGGAAAACAAAGAATATCTTTTACATATCCACCCAGTTTGTCAACTTTTTTGG  
AATGATACAAAGAAAGATATATTTGTGTACCAAAGAAAACTCTCCTCTGAAGAAATGT  
ATAATCATTGGATTTATACCAATGAACAAAAAAGAACAACCTTGAGAAACGAGTTTATA  
AATAGAATAGAAGCTTTAGACAAGGAATTTGTTTCTCTAAATGTACTCGAAAAATAAC  
TAGATTGTGTAATGATGAGACTGAACAAGAATGCTCGCCTAAAGTGTATGATCCTTTATT  
AACGGACCCTATCGTGGACAATAACAATTTGTATTCAAGTACTCTTTGTCTTTGTAT  
AAATAAGATTCATGGTATCCTTTACCGAGAATTTGAACATAAA-----GTCA  
AAGAAATCAGTAAAAGGGTCCCTCGATGGTCATACAAATTGATCACTTTGGAACAAGA  
GGAGAGAGAAGAGATTTCGTTCAAGAAAAGCCAAACGTGTAGTAATTTTAAATGATGCT  
TTAATACGTTATTCGCAGCAATCAGATTTTCGTGAGATATAATCAAAGGATCTATGCGC  
GCTCAAAGACGTAATAAGTTACTTGGAAATTGTTTCAAGCAAATGTGCATTCCCCGCT  
TTTTTTGGACAGAATAGACAAAACCTTTTTTTTTCTTTTGATATC-----TCCGGAATGAT  
GAAAATAATTTTCAGGAATAGAGAAGAGAAAACGCGAATATTAATAGCAGAAACCTGG  
GATAGTATTCTTTGTGCTCAAGTAATAAGGGGTCCATGTTAGTAATCCAATCGATTATTA  
GAAAATATATTGTATTGCCTTCATTGATAATAGCTAAAAATATAAGCCGTATGTTATTATT  
CAATTTCCCGAGTGGTCCGAAGATTTAAAGGATTGGAGTAGAGAAATACATGTTAAATG  
CACCTATAATGGTGTTCATTATCAGAAACAGAATTTCCGAAAACTGGTTAATAGACG  
GTATTTCAGATAAAGATCCTATTTCTTTCTGTCTGAAACCTTGGCACAGATCTAAAAAA  
AGAAAAAAAATGATTTTTGTTTTTAAACAGTTTGGGGAATGGAAGCTGAACTTCCCTT  
TGGTTCTCCCCGAAAACGCCTTTCTTTTTGAACCCATTTGTAAAGAACTCGAAAA  
AAAATTAGAAAAGTTAAA---AAGAACTATTTTATAGTTTTTAAAAATTTTAAAAGAAAGA  
ACAAAATTGTTTATAAAGGTCTCAAAAGAAAAAAGGATGGGTTATCAAAAGAGTTC  
TA-----TTTATAAAAAGGATAATTAAGAACTAAATAAAATT-----ATAATCAGTAATCA  
GATGATTCATGAATCGTCTATTTCGAATTAGATCCATGGATTGGACAAATCTTTATTGAC  
AGAAAAAAAATGAAGGATCTGACTGATAGGACAAATACAATTAGAAAAAAAATAGA  
AAGAATCAAAGAGACAAGAAAAAAGTCCGAACGAAAGAAGTTGTGATAATAAAA  
AATTAGAATCACCAAAAATATTTGGCAAATATTA AAAAGAAATACCCGATTAATA  
CGTAAATGGAACCTATTTTATAAAAATTTTAAATTGAAAGGATATAC---GATGCACTTCATA  
TATCATTAAATATTCCCAGGATCCATGGGCGCCTTTTCACTCACTTTATTTCG---GACCTAT  
CCTCCTTGTCAAGCATATGTATTTTACAAATTATCACAACCCAAGTTATTAACAAGT  
ATACTTGAGATCTGTACTTCAATATGCATCTCTCTTTCCTAAGGAGAGAATAAGGTATT  
TTTGTACACGGGAATATTTAATTCCCAATCAAAGCATAAAAAGACTTAGAAAATTTTGG  
ATGAATGAATGGAAAACTGGTTAAGGGATCATTATCAATATGATTTATCTCAGATTA  
TGGTCCAGATTAGTACTACAAAATGGCGAAATAGAGTCAATCAACGTCGGACGGTTC  
AAAATAAAAAAATTTGGGTTTCATATGAAAAAGACCAA-----TTAATTCATTACGAGAC  
AGAAGAAAATTTAAAAAAAACCTATAGATATGATCTTTTGTATATACTATATTTCATGA  
TTATATTATTGATCCGGATAGAAAATATTTTGATTGGATAATTTCTAAATTTTGTCTTAGAT  
TTTTTGATTGGATGGGAATGAATGAAGAAATATTAATCGTTGGTTCTTCCAAGAATTTG

TGCTACTATATAATGCATATAAGATTA AACCATGGGTCATACCAATCAAATTACTTCTTTT  
AAATTGCACAAGCAATACAGAAGCGGA ACTAAATTTCTTGCTGAAAAGATATTTGCTTT  
TTCAATTGAGATGGGATGATCCTTTTAATCAAAGAATGATAAATAATATCAAAGTATATT  
GTCTCCTGCTTAGGCTGATAAATCCAAAGGAAATATCTATATCCTCTATTCAAAGCGGAG  
AAATGAGTCCGGATATAATACAGAAG-----GATCTAACTATCACAGAATTGATCAAAAAA  
GGGCTATTAATTATTGAACCAGTTCGTCTGTCTATAAAGCGAGATGGACAATTTATTATG  
TATCAAACCATAAGTATTTTCATTGGTCCATAAGAATAAGCAAAATCATTATGAGTTGCTT  
GTTCCCTGAAAATATTTTCATCGCCTAGACGTCGTAGAGAATTGAGAATTAGAATTTGTTTC  
AGATTTCTTTGGCCTAATTATCAATTAGAAGATTTAGCTTGTATGAATCGCTATTGGTTTA  
ATACCAATAATGGCAGTCGTTTCAGTATGTCAAGGATACATATGTATCCAATGAAACGAC  
ATCAATTCAAATCCTGGATCTTCGAATTGAGAGAGATATTGAGAGAGATCAAGAATTCT  
CACTCTTTCTTAGATTCATGGACCAAATTCGATTCAGTGGGATCTTTCACTCACATTTTT  
TTCCACCAAGAACGTTTTATGAACCTCTTTGACCCCGAATTTGGAGTATCCTACTTTC  
A---CGCGATTCA-----CAGGGTTCAACAAGCAATCGATATTTACG-----ATCAAAGGT  
GTAGTACTATTTGTAGTAACG---GTCCTTATATAT-----CGTATTAACAATCGAAATATG  
GTCGAAAGAAAAAATCTCTATTTGATGGGGCTTCTTCCTATT-----CCTATACCTATGAA  
TTCCATTGGACCCAGAAATGATACATTGGAAGAATCTTTT--GGGTCTTCCAATATCAAT  
AGGTTGATTGTTTTCG---CTCCTGTATCTTCCAAAAGGGAAAAAGATCTCTGAGAGTTGT  
TTCTGGATCCGAAAGAGAGTACTTGGGTTCTCCAATAACT-----AAAAAGTGCAT  
CATGCCTGAATCTAACTGGGGTTCGCGGTGGTGGAGGA ACTGGATCGGAAAAAAGAG  
G-----GATTCTAGTTGTAAGATATCT-----AATGAAACCGTAGCTGGAATTGAGATCTCA  
TTCAAAGAGAAAGATATCAA---TATCTGGAGTTTCTTTTTGTATACTATACGGAT-----GA  
TCCGATCCGCAAGGACCATGATTGGGAATTGTTGATCGTCTTTCTCCGAGGAAGAAG  
CGAAACATAATCAACTTT-----AATTCGGGACAGCTATTCGAAATCTTAGTGAAACACTG  
GATTTGTTATCTCATGTCTGCTTTTCGTGAAAAAAGACCAATTGAAGTGGAGGGT---TTC  
TTCAAACAACAAGGA---GCTGAGTCAACTATCCAATCAAATGATATTGAGCATGTTTCC  
CAT-----CTCTTCTCGAGAAACAAGTGGGGTATTTCTTTGCAA AATTGTGCTCAATTCAT  
ATGTGGCAATTCCGCCAAGATCTCTTCGTT-----AGTTGGGGGAAG---AATCCGCACG  
AATCGGACTTTTTGAGGAAG---GTATCGAGAGAGAATTGGATTTGGTTAGATAATGTGT  
GGTTGGTAAACAAGGATCGG-----TTTTTTAGC-----AAGGTACGGAATGTATCGTCAA  
ATATTCAATATGATTCC-----ACAAGA-----TCTATTTTCGTTCAAGTAAGGGATTCTAGC  
CAATTGAAAGGATCTTCT--GATCAATCCAGAGATCATTTCGATTCCATTAGG-----A  
ATGAGGATTCGGAA-----TATCACACATTGATCAATCAAAGAG  
AGATTCAACA ACTAAAAGAAAGATCGATTCTT--TGGGAT-----CCTTCCTTTCTTCAAAC  
GGAACGAACAGAGATAGAATCAGAC-----CGATTCCCGAAA-----TGCCTTTCTGGATAT  
TCC-----TCAATGTCCCGGCTATTACG---GAACGTGAGAAGCAGATGAATAATCATCTG  
CTTCCGGAAGAAATCGAAGAATTTCTT-----GGGAATCCTACAAGATCCATTCGTTCTTT  
TTTCTCTGACAGATGG-----TCAGAACTTCAT--CTGGGTTCGAATCCTACTGAGAGGTC  
CACTAGAGATCAG-----AAATTGTTGAAGAAACAACAAGATGTTTCT--TTTGTCCC  
TTCCAGGCGATCGGAA-----AATAAGAAATGGTTGATATATTCAAGATAATTACGTA  
TTTACAAAAT-----ACCGTCTCAATTCATCTATTTTCATCAGATCCGGGATGTGATATGGT  
TCCG---AAGGATGAACCAGAT---ATGGACAGTTCCAATAAGATTTTCATTCTTGAACAAA  
ATCCATTTTTGGAT-----TTATTTTCATCTATTCATGACCGGAACAGGGGGGATACACGT  
TA-----CACCACGATTTTGAATCAGAA-----GAGAGATTTCAAGAAATAGCAGATCTATTC

ACTCTATCAATAACCGAGCCG---GATCTGGTGTATCATAAGGGATTTGCCCTTTCTATTGA  
TTCTTACGGATTGGATCAAAAAAAAA-----TTCTTGAATGAGGTATTCAACTCCAGGGATG  
AATCGAAAAATAAATCTTTATCT-----CTTGCAGATCCTCCTATTTTTTAT-----GAAGAGA  
ATGAATCCTTTTATCGAAGGATCAGAAAAAATCGGTCCGG---ATCTCCTGCGGGAATG  
ATTTGGAAGATCCAAAACAAAAAATAGTGGTATTTGCTAGCAACAACATAATGGAGGC  
AGTCAATCAATATAGATTGATCCGAAATCTGATTCAAATCCAATATAGCACCTATGGG-----  
-TACATAAGAAATGTATCGAATCGATTCTTT-----TTAATGAATAGATCCGATCGCAACT  
TCGAATATGGAATTCAA-----AGGGATCAAATAGGAAATGATACTCTGAATCATAGAA  
CTATAATGAAATATATGATCAACCAACATTTATCGAATTTGAAAAAG---AGTCAGAAGAA  
ATGGTTTGATCCC-----CTTATTTCTCGAACCGAGAGATCCATGAATCGGGATCCTGA  
TGCATATAGATACAAATGGTCCAATGGGAGCAAGAATTTCCAGGAACAT-----TTCGTT  
TCTGAGCAGAAGAGC-----CGTTTTCAAGTAGTGTTCGATCGATTACGTATTAATCAAT  
ATTCGATTGATTGGTCCGAGGTTATCGACAAAAAAGATTTGTCTAAGTCACTTCGTTTC  
TTTTTGTCCAAGTCA-----CTTCTCTTTTTGTCC-----AAGTC  
GCTTCTCTTTTTGTCTAAG---TCACTTCCTTTTTCTTTGTGAGTTTCGGGAATATCCCCA  
TTCATAGGTCCGAG---ATCCACATCTAT--GAATTGAAAGGTCCGAATGATCAACTCTGC  
AATCAGTTGTTAGAATCAATAGGTGTTCAAATCGTTCATTTGAATAAATTGAAACCCCTC  
-----TTATTGGATACTTCC---CAAAAATCGAAATCTTGATCAATGGAGGAA  
CAATATCACCATTTTTGTTCAATAAGATACAA---AAGTGG---ATGATTGACTCATTCCATA  
CT-----AGAAATAATCGCAGGAAATCCTTTGATAACACTGATTCCTATTTCTCAATGATAT  
CCCACGATCGAGACAATTGGCTGAATCCCGTGAACCATTTTCATAGAAGTTCATTGATA  
TCTTCTTTTTATAAAGCAAATCGACTTCGATTCTTGAATAATCCACATCACTTCTGGTTCT  
AT-----TGTAACAAAAGATTCCCTTTTTATGTG-----GAAAAGGCCCGTATCAATAATT  
ATGAT-----CTTACGTAT--GGACAATTCCTCAATATCTTGTTCATTTCGCAACAAA---ATATT  
TTCTTTGTGCGTCCGTAAA-----AAAAACATGCTTTTTTGGAG---AGAGATACTATTTCA  
CCAATCGAGTCACAGGTATCTAACATATTCATACCTAACGATTTCCACAAGGTGGTGA  
CGAAACG---TATAACTGTACAAATCT-----TTCCATTTCCAATTTCGATCCGATCCATT  
CGTTCGT-----AGAGCTATTTACTCGATCGCAGACATTTCTGGAACACCTCTAACAGAGG  
GACAAATAGTAAATTTGAAAGAACTTATTGTCAACCTCTTTCAGATATGAATATATCTG  
ATTCAGAAGGGAAGAACTTTCATCAGTATCTCAAT-----TTCAATTCAAACATGGGTTTG  
ATTCACACTCCATGTTCTGAGAAATTTACCA-----TCCGAAAAGAGGAAAAAC-----  
-----CGGAGTCTTTGTCTAAAG-----AAATGCGTTGAGAAACGGCAGATGTATAGA  
ACTTTTCAACGAGATAGTGCTTTTTCAAATCTCTCAAAATGGAATCTGTTCCAAACATAT  
ATGCCATGGTTCCTTACTTCGACAGGGTGCAAATATCTAAATTTACCCTTTTAGATACT  
TTTTCAGACCTATTG-----CCGATACTAAGTAGCAGT---AAAAAATTTGTATCCATTTTAA  
TGATATTATGCATGGATCAGATATATCATGGCCAATTCCTCAGAAAAAATGG-----  
--TGTCTTCCACAATGGAATCTG---ATAAGTGAGATTTTCGAGTAAGTGTTCACATAAT-----  
CTTCTTCTGTCCGAAGAAATGATTCATCGAAATAATGAGTCAACCGTTCCATTGATATGG  
GCACATCTGAGATACCAAATGCTCGGGAGTTC---CTCTATTCAATCCTTTTCTTCTTC  
TTGTTGCTGGATAT--CTCGTTCGTACACATCTTCTCTTTGTTTCCCGA-----GCCTCTAGT  
GAGTTACAGACAGAGTTCGAAAAGATCAAATCTTTGATGATTCATCATAATGATTGA  
GTTGCGAAACTTCTGGATAGGTATCCTACATCTGAACTGAATTCTTCTGGTTAAAGA  
ATCTCTTTCTAGTTGCTCTGGAACAATAGGAGATTCTCTAGAAGAAATACGGGGTTCT  
GCTTCTGGCGGCAACATGCTATTGGGTGGTGGTCCC-----GCTTATGGG---GTCAA

ATCAATACGTTCTAAGAAGAAATATTTGAATATCAAT-----CTCATCGATCTCATA---AGT  
ATCATAACCAAATCCCATCAATCGAATCACTTTTTTCGAGAAATACGAGACATCTAAGTCGT  
ACAAGTAAAGAGATCTATTCAATTGATAAGAAAAAGAAAAACGTGAACGGTGATTGGA  
TTGATGATAAAATAGAATCCTGGGTCGCGAACAGTGATTCGATTGATGATGAAGAAAG  
AGAATTCTTGGTTCAGTTCTCC-----ACCTTAACGACA-----GAAAAAAGGATTGATCAA  
ATTCTATTGAGTCTGACT--CATAGTGATCATTATCA-----AAGAATGACTCTGGT  
TATCAAATGATTGAACAGCCGGGATCAATTTACTTACGATACTTAGTTGACATTCAT-----  
AAAAAGTATCTAATGAATTATGAGTTCAATAGATCCTGTTTAGCAGAAAGACGGATATT  
CCTTGCTCATTATCAGACAATCACTTAT-----TCACAAACCTCGTGTGGGGCTAATAGTTT  
TCATTTCCCATCTCATGGA-----AAACCCTTTTTCGCTCCGCTTAGCCCTATCCCCCTCT--  
-AGGGGTATTTTAGTGATAGGTTCTATAGGAACTGGACGATCATATTTGGTCAAATACCT  
AGCGACAAACTCCTATGTTCTTTTATTACGCTATTTCCGAACAAGTTCCTGGATGACA  
AGCCTAAAGGTTATCTTATTGATGAT-----ATCGATATTGATGATATTGATGATAGTGAC  
GATATTTAT-----GATAGTGACGATATT  
GATGAC---CTTGATACGGAGCTGCTAACTATGACGAATGCGCTA-----ACTATGTATATG  
ACG-----CCGAAAATAGACCGATTGATATCACCTTCAATTTCGAATTAGCAAAAAGCA  
ATGTCTCCTTGCATAATATGGATTCCAAACATTCATGATCTGTATGTGAATGAGTCGAATT  
ACTTATCCCTCGGTCTATTAGTGAACCTATCTCTCC-----AGGGATTGTGAAAGATGTT  
C---ACTAGAAATATTCTTGTTATTGCTTCGACTCATACTCCCCAAAAGTGGATCCCGCT  
CTAATCGCTCCGAATAAATTAATAACATGCATTAAGATACGAAGGCTTCTTATTCCACAA  
CAACGAAAGCACTTTTTCACTCTTTCATATACTAGGGGATTTTCGCTTGGAAGAAAGAAAT  
GTTCCATACT-----AATGGATTTCGGGTCCATAACCATGGGTTCGAATGCACGAGATCTTGT  
AGCACTTACCAATGAGGCCCTATCAATTAGTATTACACAGAAGAAATCAATTATAGACA  
CTAATACAATTAGATCCGCTCTTCATAGACAACTTGGGATTTGCGA-----TCCCAGGT  
AAGATCGGTTTCGGGATCATGGGATCCTTTTCTATCAGATAGGAAGGGCTGTTGCACAAA  
ATGTACTTCTAAGTAATTGCCCCATAGATCCTATATCGATCTATATGAAGAAGAAA-----T  
CATGTAAGGAAGGGGATTCTTATTTGTACAAATGGTACTTCGAACTTGGAAACGAGCATG  
AAGAAATTAACGATACTTCTTTATCTTTTGAGTTGTTCTGCCGGATCGGTTCGCTCAAGAT  
CTTTGGTCTCTACCC-----GGACCCGATGAAAAA---AATTGGATCACTTCTTATGGACTC  
GTTGAGAATGATTCT--GATCTAGTTCATGGCCTATTAGAAGTAGAAGGCGCTCTGGTAG  
GA-----TCCTCACGGACAGAAAAAGATTGCAGTCAGTTTGATAATGAT-----CGAGTGAC  
ATTGCTTCTTCGGTCCGAACCAAGGAAT--CCCTTAGATATGATGCAAAATGGATCTTGT  
TCTATCGTTGATCAGAGATTTCTATATGAAAAA-----TACGAATCGGAGTTTGAAGAA---G  
GGGAA-----GGAGCCCTCGACCCGCAA-----CAGATAGAGGAGGAT-----TTATT  
CAATCAC-----ATAGTTTGGGCTCCT-----AGAATATGGCGCCCT-----TGTGGCAATCTA  
TTTGATTGATCGAAAGGCCCAATGAATTGGGATTTCCC---TATTGGGCCAGGTCATTT  
GT-----GGCAAGCAGATCATTATCATAAAGAGGATGAGCTTCAAGAGAATGATTTCG  
AGTTCTTGCAGAGTGGAACCATGCAGTACCAGACACGAGATAGATCTTCCAAAGAACA  
AGGCTTTTTTTCGAATAAGCCAATTCATTTGGGACCCTGCAGATCCATCTTTTTCTATT  
CAAA---GATCAGCCCTTTGTCTCTGTGTTTTACGTCGAGAATTCTTTGCAGATGAAGA  
GATGTCAAAGGGGCTTCTTACTTCCCAAACAACCCTCCTACATCTATATATAAACGCT  
GGTTCATC-----AAGAATACGCAAGAAAAGCACTTCGAATTGTTGATTCATCGCCAGAG  
ATGGCTTAGAACC-----AATAGTTCAATTATCT-----AATGGATCTTTCGGTTCTAAT-----A  
CTCTATCCGAGAGTTATCAGTATTTATCAAATCTGTTCCCTATCTAAC---GGAACGCTATTG

GATCAAATGACAAAGACATTGTTGAGAAAGAGATGGCTTTTCCCGGATGAAATGAAAA  
TTGGATTC-----ATG-----ATGTCTAGATCGCGG---ATAAATGGAAATTTTA  
TTGATAAGACCTTCTCAATTGTAGCCAATATTTTATTACGGATAATTCCGACAACCTCAG  
GAGAAAAAGAGGCATTTACCTATTACAGAGATGGG-----ATGTCAGCTCAATCCGAAGG  
AAATTATGCGGAAGCTTTACAGAATTATTATGAAGCTACGCGACTAGAAATTGATCCCTA  
TGATCGAAGTTATATACTCTATAACATAGGCCTTATCCACACAAGCAACGGGAGAACATA  
CGAAAGCTTTGGAATATTATTCCCGGGCACTAGAACGAAACCCATTCTTACCACAAGCT  
TTTAATAATATGGCCGTGATCTGTCAATTAC---CGGGGAGAACAGGCCATTCGACAGGGG  
GATTCTGAAATTGCGGAGGCTTGGTCCGATCAAGCCGCTGAATATTGGAACAAGCTAT  
AGCACTTACTCCGGGTAATTATATTGAAGCGCATAATTGGTTGAAGATCACGGGTCCGT  
TCGAA-----ATGAGCTGGCGATCAGAACGTATATGGATAGAACTTATAATGGGGTCTCGA  
AAAACAAGTAATTTCTGCTGGGCCTTTATCCTTTTTTTAGGTTCACTAGGATTCTTATTG  
GTTGGAACCTCCAGTTATATTGGCAGGAATCTGATATCTTATTTCCGTCTCAGCAAATA  
ATTTTTTTTCCACAAGGAATTGTGATGTCTTTTTATGGGATCGCAGGTCTGTTCAATTAGC  
TCCTATTTGTGGTGTACAATTTCTGTGGAATGTAGGCGGTGGTTATGATCGATTTCGATAGA  
AAAGAAGGAAGAGTGTGTATTTTTCTGTTGGGGATTTCCCTGGAATAAATCGTCGCATCTT  
CCTCCGATTCCTTATGAGAGATATCCAGTCGATCAGAATAGAAGTTAAAGAGGGTCTTT  
ATCCTCGTCGTGTCTTTATATGGAAGTAAGAGGCCAGGGGGCCATTCCCTTGACTCGT  
ACTGATGAGAAT--TTTACTCCACGAGAAATTGAGCAAAAAGCTGCTGAATTGGCATAT  
TTTTTGCGCGTACCAATTGAAGTATTT

>Illicium

ATGGAAAAATGGTGGTTCAATTCGATGTTGTCTTTAAGTAAATCAGCGGACAGTCTTGG  
TCCTATTGGAAATGCCAGTGGAAGTGAAACCCCCATTATAAATGGTATAGATAAAAAACA  
TTCAT--TGTAAGTAATGTTGATCATTATTTCGGTGTGAGGGACATTTGGAGTTTCATCTCT  
GATGACACTTTTTTTGGTTAGGGATAGTAATGGTGACAGTTATTCCGTATATTTTGATATTG  
AAAATCAGATTTTTGAGATTCACAATGAT-----AGTTACTTTCTGAGTGAAGTAAAGT  
GCTTTTTCTAGTTATTTGAATAAAAGTTATCTGAATAGTGGGCCTAAGAGTTACAATCGC  
AACTATGATCGTTACATGTATGATACTCAATATAGTTGGAATAATCACATTAATAGTTGCA  
TTGATAGTTATCTTCATTCTGAAATCAGT-----ATT-----GATAGTG  
ACATTTATAGTTACATTTGTAGTGACAGTGAGAGTTTCGATAAGAAGTACG---AATGGC---  
-----GATTTTCGATATAAATACAAATATGGACGTTTGTGGGTTCAATGCG  
AAAATTGTTATGGATTGAATTATCAGAAATTTTTTAGGTCAAAATGAATATTTGTGAAC  
GATGTGGATATTATTTGAAAATGAGTAGTTTCAGATAGAATCGAACTTTTCGATTGATCCGG  
GCACTTGGGATCCTATGGATGAAGACATGATCTCTATGGACCCTATTGAATTTCAATTCTG  
AGGAGGAACCTTATAGAGATCGTATCGATTTTTTTTCAAAGAACGACAGGTTTAACTGAG  
GCTGTTCAAACAGGCATAGGCCAACTAAATGGTATTCCAATAGCCATTGGGGTTATGGA  
TTTTCAGTTCATGGGAGGTAGTATGGGATCCGTCGTAGGTGAGAAAATCACCCGTTTGA  
TCGAGTGTGCTACTAATAGATCTCTCCAGTTATTATAGTGTGTGCTTCTGGAGGAGCAC  
GCATGCAAGAAGGAAGTTTGAAGCTTGTATGCAAATGGCTAAAATATCTTCCGCTTTATAT  
AATTATCAATCAAATAAAAAGTTATTCTATGTATCAATCCTTACCTCTCCTACAACCGGT  
GGAGTGACAGCCAGCTTTGGTATGTTGGGAGATATAATTATTGCCGAACCCAATGCCTA  
CATTGCATTTGCGGGTAAAAGAGTAATTGAACAAACATTGAAGAAGACAATACCCGAG  
GGTTCACAAGCGGCTGAGTATTTATCCATAAGGGCTTATTTCGATCTAATCGTACCACGT  
AATCCTTTAAAAGGTGTTCCAAGTGAGTTATTTTCAGCTCCACGGGTTCTTTCCCTTGAA

T-----CAAATGGTAACAATTTCGAGCCGACGAAATTAGTAATATTATCCGTGAACGGA  
TTGAACAATATAATAGAGAAGTAAAGATTGTGAATACCGGCACGGTACTTCAAGTAGGT  
GACGGCATTGCTCGTATTCATGGTCTTGATGAAGTAATGGCAGGTGAATTAGTAGAATT  
TGAAGAGGGTACAATAGGCATTGCTCCGAATTCGGAATCAAATAATGTTGGCGTTGTAT  
TAATGGGTGACGGTTTGTATGATACAAGAAGGAAGCTCTGTAAAAGCTACAGGAAGAAT  
TGCTCAGATACCAGTGAGTGAGGCTTATTTGGGTCGTGTTATAAATGCTCTGGCTAAAC  
CTATTGATGGGAGGGGTGAAATTCAGCTTCCGAATCTCGGTTAATTGAATCTCCTGCT  
CCAGGTATTATTCGAGACGCTCTGTATATGAGCCTCTTCAAACGGGTCTTATTGCTATT  
GATTCGATGATCCCTATAGGACGCGGCCAGCGAGAATTAATTATTGGGGACAGACAGAC  
CGGTAACAGCAGTAGCTACGGATACTATTCTCAATCAAAAAGGGCAAATGTAATAT  
GTGTTTATGTAGCTATTGGTCAAAAAGCATCTTCCGTGGCTCAGGTAGTGACTACTTTC  
CAGGAACGGGGGCAATGGAATACACTATTGTGGTAGCCGAAACGGCGGATTCACCTG  
CTACATTACAGTACCTCGCTCCTTATACAGGAGCGGCTCTGGCCGAATATTTTATGTACC  
GTGAACGACATACTTTAATAATTTATGATGATCCCTCAAAAACAGGCACAAGCTTATCGC  
CAAATGTCTCTTCTATTAAGAAGACCACCCGGTCGCGAAGCTTATCCAGGAGATGTTTT  
TTATTTGCATTTCCGCTTTTGGAAAGAGCCGCTAAATCAAGTTCTCGTTTAGGCGAAG  
GAAGTATGACCGCTTTACCAATAGTTGAGACTCAATCTGGGGATGTTTCGGCTTATATTC  
CCACTAATGTCAATTTCCATTACAGATGGCCAAATATTCTTATCTGCCGATCTATTCAATGC  
CGGAATCCGCCCTGCTATTAATGTGGGTATTTCCGTCTCCAGAGTAGGATCCGCAGCTC  
AATTAAGCCATGAAACAAGTAGCTGGCAAATCAAAATTGGAGCTGGCTCAATTTGC  
AGAGTTAGAAGCCTTTGCGCAATTCGCTTCTGATCTCGATAAAGCGACTCAGAATCAAT  
TAGCAAGAGGTCAACGGTTACGCGAGTTGCTTAAACAATCCCAATCAGCCCCTTTCAC  
AGTGGAAGAACAGATAGTTACTATTTATACCGGAGCAAATGGGTATCTTGATCTATTAGA  
AATTGGACAGGTAAAGAAATTTCTCGTTCAGTTACGTACCCACTTAAGAACGAATAAG  
CCTCAGTTCCAAGAAATCATATGTTCTACCAGGACATTCACCGAGCAAGCAGAAGCCC  
TTCTGAAGGAAGCTATTCAGGAACAGATAGAAGTCTTCAAGAAACAGCAAT  
GAGAATCAATCCTACTACTTCTGGTCCCAGGGTTTCCACACTTGAGGAAAGAAACCTG  
GGCGTATCACTCAAATCATTGGCCCGGTAAGGATGTAGCTTTTCCCCGGGCAAGAT  
GCCTAATATTTACAACCTTTTGGTAGTTAAGGGTCGAGATACTGTCCGTCAGCAAATTA  
TGTGACTTGTGAGGTACAACAATTATTAGGAAATAATCGAATTAGAGCTGTAGCTATGA  
GTGCTACGGATGGTCTGATGAGAGGAATGGAAGTGATTGATACGGGGGCTCCTCTAAG  
TGTTCCAGTCGGTGGATCCACTCTCGGACGAATTTCAACGTTCTTGGAGAGCCTGTTG  
ATAATTTGGGTCCCGTGGATACTTGCAACAATCTCCTATTATAGATCTGCGCCTGCCT  
TTATACAGTTAGATACCAAATTCGATCTTTGAAACAGGGATTAAGTGGTGGATCTTT  
TAGCTCCCTATCGCCGTGGAGGAAAAATCGGACTATTCGGGGGAGCCGGGGTGGGTAA  
AACAGTACTGATCATGGAATTGATCAACAACATTGCCAAAGCTCATGGGGGTGTATCTG  
TATCTGGTGGAGTAGGTGAACGTACTCGTGAAGGAAATGATCTTTACATGGAAATGAA  
AGAATCCGGAGTGATTAATGAACAAAATATTGCAGAATCAAAAAGTAGCTCTAGTCTACG  
GTCAGATGAATGAACCGCCAGGAGCTCGTATGAGAGTTGGTTTACTGCCCTAACCAT  
GGCGGAATATTTCCGGGATGTTAATGAACAAGACGTACTTCTATTTATCGACAATATCTC  
CCGCTTCGTCCAAGCAGGATCAGAAGTATCTGCCTTATTAGGTAGAATGCCTTCTGCCG  
TGGGTTATCAGCCTACCCTTAGTACAGAAATGGGTTCTTTGCAAGAAAGAATTACTTCT  
ACCAAAGAGGGATCTATAACTTCCATTCAAGCAGTTTATGTACCTGCAGATGATTTGAC  
CGACCCTGCTCCTGCCACGACATTTGCACATTTAGATGCTACTACCGTACTATCAAGAG

GGTTAGCTGCCAAAGGTATCTATCCAGCAGTGGATCCTTTGGGTTCAACGTCAACTATG  
CTCCAACCTAGGATTGTTGGTGAGAAGCATTATGAACTGCACAAAGAGTTAAGCAAA  
CTTCACAGCGTTACAAAGAACTTCAGGACATTATAGCTATTCCTGGGTTGGACGAATTA  
TCCGAAGAGGATCGTTTAAACCGTAGCAAGAGCACGAAAAATTGAGCGTTTCTTATCAC  
AACCTTCTTCGTAGCAGAAGTATTTACTGGTCTCCAGGGAAATATGTTGGTCTCGCA  
GAAACAATTAGGGGGTTTCAACTGATCCTTTCCGGAGAATTAGATGGTCTTCCCGAAC  
AGGCCTTTTATTTGGTAGGTAACATCGATGAAGCTACCGCGAAGGCTATGAACTTAGAA  
GTGGAGAGCAAATTGAAGAAAATGACTTTAAATCTTTGTGTACTGACTCCTAATCGAAT  
TATTTGGGATTCAGAAGTGAAAGAAATCATTTTATCCACTAATAGTGGCCAAATTGGCG  
TATTACCCAACCACTCTCCTATTGCAACAGCTGTGGATATAGGTATTTGAGAATACGCC  
TCAACGACCAATGGTTAACGATGGCTCTTATGGGCGGTTTCGCGAGAATAGGCAATAAT  
GAGATAACCATTTTAGTAAATGATGCGGAGAAGGGTAGTGACATTGATCCGCGAGAAG  
CTCAGCGAACTCTTGAATAGCTGAAGCTAACCTGAGTAGAGCTGAAGGCAAGAGAC  
AAGCAATTGAGGCGAATCTAGCTCTCAGACGAGCTAGGACACGAGTCGAGGCTATCAA  
TGCTATTTTCGATGAAAAATGTAAACGATTCTTTTCGTTTCTTTGGGTCACTGGCCATTTCG  
CGGGAGTTTCGGGTTTAAATACCGATATTTAGCAACAAATCCAATAAATCTAAGTGTAGT  
GCTTGGTGTATTGATCTTTTTTCGAAAGGGAGTGTTAAATGATTTATTAGATAATCGAAA  
ACAAAGGATTTTAAAGTACTATTTCGAATTCGGAAGAACTACGCGGAGGAGCCATTGAG  
CAGCTCGAAAAAGCCTGGGCTCGCTTACGGAAAGTAGAAATGGAAGCAGATGAGTTT  
CGAGTGAATGGATACTCGGAGATAGAACGAGAAAAAATGAATTTGATTATTGCCACTAA  
TGAAAATTTGGAACGATTAGAAAATTACAAAAATGAAACCATTCAATTTGAACAACAA  
AGAGCGATTAATCAGGTCCGGCAACGAGTTTTCCAACAAGCCTTACAAGGAGCTCTAG  
GAACTTTGAAAAGTTGTTTGAACAGCGAGTTGCATTTACGCACCATCAGTGATAATATT  
GGCACGCTCGGGAATATGAAAGAAATAACTGATATGAATCCCCTAATTTCTGCCGCTTC  
CGTTATTGCTGCTGGATTGGCCGTAGGACTTGCTTCTATTGGACCCGGAGTTGGTCAAG  
GTA CTGCTGCGGGCCAAGCCGTAGAAGGTATCGCAAGACAACCAGAAGCAGAAGGTA  
AAATACGCGGTACTTTTACTTAGTCTGGCTTTTATGGAAGCTTTAACAATTTACGGAC  
TGGTCGTGGCGTTAGCGCTTTTATTTGCGAATCCTTTTGTATGAACGTTCTACCATGTT  
CCATCAACACACTAAAAGGGTTATACGAGATATCCGGTGTGCAAGTAGGCCAACATTTTC  
TATTGGCAAATAGGAGGTTTCCAAGTCCATGCCCAAGTACTTATCACTTCTTGGGTCGT  
AATTGCTATCTTATTAGGTTTCAGCCGTATAGCTGTTCGGAATCCACAAACTATTCCAAC  
CGACGGTCAGAATTTCTTCGAATATGTCCTTGAATTCATTTCGAGATTTGAGCAAACTC  
AAATTGGAGAAGAATATGGTCCCTGGGTTCCCTTTATTGGAACATGTTCCATTTATTTT  
TGTTTCTAACTGGTCGGGTGCTCTTTTACCTTGGAAAATTATACAGTTACCTCACGGGG  
AGTTAGCTGCACCTACGAATGATATAAATACTACTGTTGCTTTAGCTTTACCCACGTCAG  
TGGCGTATTTCTATGCAGGTCTTACAAAAAGGGATTGGGCTATTTCCGGTAAATACATTC  
AACCAACTCCAATACTTTTACCAATTAATATCTTAGAAGATTCACAAAACCATTATCAC  
TTAGTTTTTCGACTTTTTCGGGAATATATTGGCTGATGAATTGGTCGTTGTTGTTCTTGTTC  
TTTAGTGCCTTCAGTAGTTCCTATACCTGTCATGTTCCCTGGATTATTCACAAGCAGTATT  
CAAGCTCTGATTTTGTCAACTTTAGCCGCGGCTTATATAGGTGAATCCATGGAAGGCCA  
TCATATGATATTTGTGATTTTAGAACATATATTA ACTCACATCTTTTTTCAATCATTGCAA  
TCGTCATTACGACCCATTTGATGACTTTATTAGTCCACGAAATCGTAGGACTATGTGACT  
CGTCAGAAAAAGGCATGATAGCTACGTTTTTCTGTATAACAGGATTATTGGTTACTCGTT  
GGATTTATTACAGGGCATTTCCTTAAATGATTTATATGAATCATTAAATGTTCTTTTCGTG



GAGTTTCTCTCTTATTCTTATGGTTCCATATTTTAAGAACCATAAGAATCATTTTCAGCACATAACCGCGCCAAGTGCTATTTGTACCCAAAGCTTTGCCACTTCGGGGCTTTCAACTGA AATACATCAATCCGAAATATTAGTACCTGCTCTACAATCCCATTGGTTAATGATGCACGT AAGTATGATGTTATTGAGCTACGCAGCTCTTTTATGTGGATCATTATTATCAATAGCTCTT CTAGTGATTACATTTAGAAAAACATAGATATGATTGGTTTTACAAATGAGATCAAATAC TTGAATGAAAAAAGAAGTCTTTTGAAAAACACTTCTTTTCTTTTATTTAGAAATTATCA CAGGTATCAATTGACTCAGCGATTGGATCATTGGAGTTATCGTGTTCATTGGCCTAGGGTT TACCTTTTCAACTATAGGTATTCTTTTCGGGAGCAGTATGGGCTAATGAGGCATGGGGATC TTATTGGAATTGGGACCCCAAGGAACTTGGGCATTTATTACTTGGACTATATCCGCGAT TTATTCACATACTAGAACAATAAAAGTTTACAAGGTATGAATTCGGCAATTGTGGCTT CTATGGGATTTCTTATAATTTGGATCTGCTATTTTCGGAGTCAATCTATTAGGAATAGGATT ACATAGTTATGGTTCATTCACA-----GTGCCAAAAAAA---GCATTGACTCCCTTCCCATAT CTTGCATCTATAGTATTTCTGCCATGGGGGATCTCTCTCTCATTTAATAAAAGTCTTGAAT CTTGGGTATAAATTGGTGAATACCAGGCAGTCCGAAACTTTTTTGAATGATATTCAA GAGAAGAAAGTTCTAGAAAGATTCATAGAATTAGAAGAAGTTCCTGTTGGACGAAA TGATAAAGGAGTATTCGGGGACACATATACAAAGCTTCGTATAGGAATCTACAAAGAA ACGATACAATTGGTCAGAATGCACAATCAGGATCATATCCATCTCATTTTGCATTTCTCA ACAAATATAATCTGTTTCACTATTCTAAGTGCTTATTCTATTCTGGGTAATGAAGAAGTTG TCATTCTTAATTCTTGGGTTTCAGGAGTTCCTCTATAACTTAAGCGATACAATAAAAGCTT TTTCTATTCTTTTATTAAGTATTGTGTATCGGATTCCTCGCCCCATGGTTGGGAACT AATGATTGGTTTGGTCTACCAAATTTTGGATTTGCTCATAATGAGCAAGTTATATCCGG TCTCGTTTCCACTTTTCCAGTCATTATAGATACAATTTTGAATATTGGATCTTCCTTTTT TAAATCGTGTATCTCCTTCACTTGTAGTGATTATCATTCAATGAATGAAATGCCCATTG GTGTTCCAAAAGTACCTTTTTCGGAATCCTGGAGAGGAAGGTGCAGTTTGGGTTGACGT ATACAACCGACTTCATCGAGAAAGATTACTTTTTTTAGGCCAAGGGGTTGATAGCGAAA TCTCGAATCAACTTGTGGTCTCATGGTATATCTCAGTATAGAAGATGATACCAGGGATC TCTATCTGTTTATAAACTCCCCCGCGGATGGGTAATACCAGGAATAGCTATTTATGATA CTATGCAATTTGTGCCACCAGACGTACATACAATATGCATGGGATTAGCCGCCTCAATGG GATCTTTCTCCTGGCCGGAGGAGAAATTACCAAACGTCTAGCATTCCCTCACGCTAGG GTTATGATCCACCAACCTGCTAGTCTTTTTTATGAGGCGCAAACAGGAGAATTTATCTT GGAAGCGGAGGAGCTACTGAACTCCGCGAAACCATCACAAGAGTTTATGCACAAAG AACCGCAACCCTTTATGGGTTGTATTCTGAAGACATGGAAAGGGATGTTTTTATGTCAG CAACAGAAGCCCAAGCTCACGGCATTGTTGATCTTGTAGCGGTCGAAATGAAAGAACA AAAATGGATTCATGAAGGTTTAATTACTGAATCACTTCCCAACGGTATGTTCCGGGTTT CTTAGATAATGAAGACCTGATTCTAGGTTATGTTTCGGGGAGGATCCGACGTAGTTTTTA TACGGATACTACCAGGAGATAGAGTGAAAATCGAAGTAAGTCGTTATGATTCAACCAG GGGGCGTATAATTTATAGACTTCGCAACAAGATTCGAACGATATGGAGGAATTACAAG GATATTTAGGAATAGATAGATCTTGTCAACAACGTTTCTTATATCCGCTTCTGTTTCAGG AGTCTATCTACGCACTTGCTCATGATTATGGTTTATTAGGTTATGACAAT--CCCAGTTTA CTAATTGTGAAACGTTTAATTATTCGAATGCATCAACAGAATCTTTTTTTTATTCTTGTTA ATGGTTCTAACCAAATCGATTTCGTTGGGAGGAGTTTTTATTCTCAAATGATATCCGAG GTTTTTGCAGGAATTGTGGAATTCCTCTCGATGAGATTAGCATCTTCCCTAATAGCT AAATCTCAT--TTACGATCTATTCATTCAATATTTCCATTTTATAGAGGACAAATCTCACAT TAAATCATGTGTCAGATATACTAATACCCACCCCGTACATCTGGAAATCTTGGTTCAA

ACTCTTCGCCGCTGGATACAAGACGCTCCTTCTTTGCATTTATTGCGATTCTTTCTCCAC  
GGGCATCCTAATTGGAATAGTCTCATTACTAAATCCATTTCTCTTTTTTCAAACCAAGA  
TTTTCTTGTTCCTATATAATTCTTATGTATATGAATACGAATCCATCTTAGTTTTCTCCA  
TAAACAATCTTCTCATTACGATCAATCTCTTCTGGAGCCTTCTTGAGCGAACAAATTT  
CTATGGAAAAACAGAGCAT--CTAGTAGTGCTTCGTAATCAAAGTGGTTATGGTTGTTT  
AAAGATCCTTTCATGCATTATGCCAGGTATCAAGGAAAAGCCATTATGGCTTCAAAGG  
TACTCATCTTCTGATGAAGAAATGGAAATATCACCTTGTCATTTCTGGCAATTGCATTT  
TACTTGTGGTCTCAATCGGGCAGGATCCGTATAAATGAATTATCCAATCATTCTTCTAT  
TTCCGGGCTATCTTTCAGGCATACGACTAAACCCTTCGGTAGTAAGGGGTCAAATGAT  
AGAGAATTCATTTATGATAGATACTGGTATT-----AAGAAATTCGATATGATAGTCCCAATT  
ATTCCTTTGATTGGATCATTGGTTAAAGCAAATTTCTGTAACATATCTGGGTATCCCATTA  
GTAAGTCGGTTCGGGCTGATTCGTCAAATTTCTGATATTATCAATCGATTTGGGCGAATAT  
GCAGAAATCTTCTCATTATCATAGTGGATCCTCAAAAAACACAATTTGTATCGAATAA  
AGTATATACTTCGACTTTCGTGTGCTAAAACCTTTGGCTCGTAAACATAAAAGTACGGTA  
CGCACAATTTTGAAAAGATTAGGTTTCAGAACTATTGGAAGAGTTCCTTACGGAAAAAG  
AAGAAATCTTCTTTGATCTCCCAAGAGGGATTTGGTATTTGGATATTATCCATATCCA  
TGGCATGTCCAATCATTCAATGATAATTGATACGACA--GAAGTACAA--GCTATTAATTC  
TTTTTCCAGATCGGAA---TCCTCAAAGAGTTCTATGGACTCATATGGCTGCTTGTGCCT  
ATTTTTACTCCTGTATCGGGAATCTTAATAGGGGTATTAGTGATTGTGTGGTTAGAAAGA  
GAAATATCCGCAGGGATACAACAACGCATTGGGCCTGAATACGCCGGTCCCTTGGGGA  
TTCTTCAAGCTCTAGCAGATGGGACAAAATTACTTTTCAAAGAAGATCTTCTCCCATCT  
AGAGGAGATATTCGTTTATTCAGTGTCGGACCCTCCATAGCGGTCATATCAATTCTACTG  
AGTTATTCAGTAATTCCTTTTGGCTATCGCCTTATTATAGCCGATATCAGTATAGGTGTTT  
TTTTATGGATTGCCATTTCAAGTATTGCTCCATTGGACTTCTTATGTCAGGATATGGGTC  
GAATAATAAATATTCTTTTTCAGGTGGTCTACGAGCTGCTGCTCAATCTATTAGTTATGA  
AATACCATTAACCTCATGTGTGTTATCAATATCTTATTATCTAACAGTTCAAGTACAGTT  
GATATAGTCGAGGCACAGTCAAATATGGATTTTGTGGGTGGAATCTGTGGCGTCAACC  
TATAGGGTTTATAGTTTTTCTAATTTCTTCCCTAGCGGAATGTGAGAGATTGCCCTTTGAT  
TTACCAGAAGCAGAAGAGGAATTAGTAGCAGGTTATCAAACCGAATATTCAGGTATCA  
AATCTGGTTTATTTTACGTTGCTTCTTACCTAAATCTACTAGTTTCTTCAATTATTTGTAAC  
AGTTCTTTACTTAGGCGGATGGAATCTTCTATTCCGTACATATCAATTCCTGAACTTTTC  
GGAATAAATAAACTGGTGGAGTCTTTGGAAGCACAATTGGTATCCTTATTACATTAGC  
AAAAGCTTATCTGTTCCCTGTTCCCTATCACAACAAGATGGACTTTACCCAGGATGA  
GAATGGACCAACTTTTAAATCTTGGATGGAATTTCTTTTACCTATTGCTCTAGGTAATC  
TATTATTGACAACCTTCTTCCCAACTCCTTTCATTT-----  
---ATGAAAGCGTTTCATTTGCTTCTTCCATGGAAGTTTCATTTTCCCAGAATGTATCCT  
CATTTTTGGCCTAATTCTTCTTCTGATGATCGATTCAACCTCTGATCAAAAAGATACACC  
TTGGTTATATTTTCACTCTTCAACAAGTTTAGTAATGAGCATAACGGCCCTATTGTTCCG  
ATGGAGAGAAGAACCTATGATTAGCTTTTCGGGAAATTTCAAACGAACAATTTCAAC  
GAAGTCTTTCATTTCTTATTTTACTATGTTCAACTCTATGTATTCCTCTATCCGTAGAGT  
ACATTGAATGTACAGAAATGGCTATAACAGAGTTTCTGTTATTTCGTATTAACAGCGACTC  
TAGGAGGAATGTTTTTATGTGGTGCTAACGATTTAATAACTATCTTTGTAGCTCCAGAAT  
GTTTCAGTTTATGCTCCTACCTATATCTGGATATACCAAGAGAGATGTACGGTCTAACG  
AGGCTACTACGAAATATTTACTCATGGGTGGGGCAAGCTTCTTATTCTGGTTCATGGTT

TCTCTTGGCTATATGGTTCATCCGGGGGAGAGATCGAGCTTCAAGAAATATTGAATGGT  
CTTATCAATACACAAATGTATAACTCCCCAGGAATTTCAATTGCGCTTATATCCATCACT  
GTAGGAATTGGGTTCAAGCTTTCCCCAGCCCCTTCTCATCAATGGACTCCTGACGTATA  
CGAAGGATCTCCCACTCCAGTCGTTGCTTTTCTTTCTGTTACTTCGAAAGTAGCTGCTT  
CAGCTTCAGCCACTCGAATTTTCGATATTCCTTTCTATTTCTCATCGAACGAATGGCATC  
TTCTTCTGGAATCCTAGCTATTTCTTAGCATGATATTGGGGAATCTCATTGCTATTACTCA  
AACAAGCATGAAACGTATGCTTGCATATTCGTCCATAGGTCAAATCGGATATGTAATTAT  
TGGAATAATTGTTGGAGACTCAAATGATGGATATGCAAGCATGATAACTTATATGCTGTT  
CTATATCTCCATGAATCTAGGAACTTTTGCTCGCATTGTATCATTGGTCCACGTACCGG  
AACTGATAACATTCGGGATTATGCAGGATTATACACGAAAGATCCTTTTTTGGCTCTCTC  
TTCAGCCCTATGTCTCCTATCCCTAGGAGGTATTCCTCCATTAGCAGGTTTTTTTCGGAAA  
ACTCCATTTATTCTGGTGTGGATGGCAGGCAGGCCTATATTTCTTGGTTTTCAATAGGACT  
CCTTACGAGCGTTGTTTCTATCTACTATTATCTAAAAATAATCAAGTTATTAATGACTGGA  
CGAAACAAAGAAATAACCCCTCACGTGCGAAATTATAGAAGATCTCCTTTAAGATCAA  
ACAATTCCATCGAATTGAGTATGATTGTATGTGTAATAGCATCTACTATAACCAGGAATATC  
AATGAACCAATTATTGCAATTGCTCAGGATAACCCCTTTTATGTTTTCTGCTTCACGAATA  
TGATATTTTCTGGGCATTTTTAATGATATCAAGTGTTATTCTATTTTGGCATTTCATTTT  
CCGGGGTTTTAGCCCCGATTTCGTGAAGGACCAGAGAAGCTCTCTAGTTATGAATCGGG  
TATAGAACCGATGGGGGATGCTTGGTTACAATTCCGAATCCGCTATTACATGTTTGCTCT  
AGTTTTTGTGTTTTTGTATGTGCGAAACGGTCTTTCTTTATCCATGGGCAATGAGTTTCGA  
TGTATTAGGCGTATCCGCATTTATAGAAGCTCTGATTTTTCGTGCTTATCCCAATTGTTGGT  
TCAGTTTATGCATGGCGAAAAGGAGCATTGGAATGGTCTACGAGTCATTTTCTTGGTT  
AACAATAATTGTTGTTTTGCGGATATCCGCGGGTCTTCAATTGGATTCTTCCCTTATAG  
AGGAAATAAGGCGGTTAGATGGTATACTATATGCATATGCATATTGGAACCTCCTTCTAAC  
AACCTATGCATTCTGTTATCATTTCCAATTGGACGATCCATTAATCCAATTGGAGGAGGA  
TTATAATTGGATAAATCTTTTTGATTTTTAACTGGAGACTGGGGATCGATGGACTTTTCGAT  
GGGCCCTGTTTTATTGACGGGATTCATCACTACTTTAGCTACTTTAGCGGCTTGGCCAGT  
TACTCGAGATTCGCGATTGTTCCATTTTCTGATGTTAGCAATGTACAGTGGTCAAATAGG  
ATCATTTTTCGTCTCGAGACCTTTACTTTTTTTCATGATGTGGGAGTTAGAATTAATCCT  
ATTTACCTACTTCTATCCTTGTGGGGGGGGAAGAAACGTCTGTACTCAGCTACAAAGTT  
TATTTTGTACACTGCAGGGGGTCTATTTTTCTCTTAATGGGAGTTTCGGGTATGGGTTT  
ATATAGTTCCAATGAACCAACATTAATTTTGAACATTAATAATCAATCGTATCCCGT  
GGCATTAGAAATAATATTTTATATTGGCTTCTTTATTGCTTATGCCGCCAAATCACCGATT  
ATACCCCTACATACATGGTTACCAGATACCCATGGAGAAGCACATTACAGTACATGTATG  
CTTCTAGCTGGAATCTTATTAATAAATGGGAGCATATGGATTGGTTTCGAATCAATATGGAA  
TTATTACCCACGCCCATTCTATATTTTCTCCCTGGTTGATGATAATAGGAGCTATTCAA  
TAATCTATGCAGCTTCAACTTCTCCCGTTCAGCGCAATTTAAAAAAGAGAATTGCCTAT  
TCCCTCCGATCTCATATGGGTTTCATAACCATAGGAATTGGTTCCATAACCGATACAGGA  
CTGAATGGGTCTATTTTACAAATAATCTCTCATGGATTTATTGGTGCTGCACTTTTTTTCC  
TGGCAGGAACGACTTACGATAGAATACGTCTTGTATTCTTGACGAAATGGGTGGAATA  
GCCATACTAATGCCAAAATGTTTATGATGTTTCAGTAGCTTCTCGATGGCTTCTCTTGCA  
TTGCCCGGAATGAGTGGTTTTGTTGCAGAATCGGTAGTATTTTGGGAATAATTACCAG  
CCCGAAATACTTTTTAATGCCAAAATACTAATTACTTTTTGTAATGGCAATTGGAATGAT  
ATTAACCTCTATTTATTCAATTATCTATGTCACGCCAGATCTTCTATGGATACAAGCTATTC

AATGTTTCAAACCTCTTATTTTGTGGATTCTGGACCACGAGAACTATTTATTTTGATCTGT  
ATCCTTTTACCCGTAATAGGTATTGGTATTTATCCCGATTTCGTTCTCTCACTATCAGTTG  
ACAAGGTAGAAGCTATTCTATCTAGTTACTTTCATAGAATGATGCTGGAGCATGTA CTG  
TTTTGAGTGCCTATTTATTTTCTATCGGTATCTATGGCTTGATCACAAGCCGAAACATGG  
TTAGAGCACTTATGTGTCTTGAGCTTATACTGAATGCTGTTAATAAATCTCGTAACATT  
TTCTGATTTATTTGATAGTCGCCAATTA AAAAGGAGACATTTTCTCAATCTTCGTTATAGC  
GATTGCAGCCGCTGAAGCAGCTATTGGGCCAGCTATTGTTTCGTCCATCTATCGTAACA  
GAAAATCAA CTCTGATCAATCAATCTAATTTGTTGAATAAAAATGGAACGTACATATGACT  
ATGCATGGATCATACTTTTCATTTCCACTTACAGTTCCTATGTCAATAGGATTGGGACTCC  
TGCTTGTTCGACGGCAACAAAAGCATTCTTCGTATGTGGGCTTTTTTTTAGTGTTTCA  
TTGCTAAGTATAGTTATGGTTTTTTCTGCCGATCTGTCTATTCAGCAAATAAATTGCAGTT  
TCATCTATCAATATCTATGGTCTTGACTATCAATAGTGATTTTTCCCTTAGAGTTGGGCTG  
CTTGATCGACCCACTTACTTCTATTATGTTAATACTAATCACTACTGTTGGAATCATGGTT  
CTTATCTATAGTGACAATTATATGTCTCATGATCAGGGATTTGAGATTTTTTGTCTCTAT  
GAGTTTTTCCAATACTTCCATGTTGGGATTAGTTACTAGTTCTAATTTGATACAAATCTAT  
ATTTTTTGGGAACTGGTGGGAATGTGTTTCGTATCTATTAATAGGTTTTTGGTTCACCCGA  
CCAATTGCAGCAAATGCTTGTCAAAAAGCATTGTGTAATACTCGTGTAGGAGATTTTGG  
TTTATTATTAGGAATCTTAGGTCTTTATTGGATAACAGGTAGTTTCGAATTCGGGATTG  
TTCAAATATTCAATAACAATGGAGTCAATTTCTTTATTTGTTACTTTTTTGCCTCCCTAT  
TATTTCTCGGTGCAGTTGCTAAATCCGCACAATTTCCCCTTCATATATGGTTACCCGATG  
CTATGGAGGGACCCACTCCTATTTTCGGCTCTTATACATGCTGCTACTATGGTAGTGGCGG  
GCATTTTTCTTG TAGCTCGGCTTCTTCCTCTTTTCACAGTTATACTTATATAATGAATCT  
AATTTCTTTGATAGGTGTAATAACGTTACTATTAGGAGCTACTTTTCGCTCTTGCTCAAAG  
AGACATTAAGAAAAGTTTAGCTTATTCTACGATGTCTCAATTGGGTATATTATGTTAGC  
TCCAGGTATAGGTTCCCTATCGAGCTGCTTCATTTCAATTAATCACTCATGCCTATTCAA  
AGCATTATTGTTTTTAGGATCCGGATCCATTTATTCAATGGAACCCATTGTTGGATAT  
TCTCCAGACAAAAGCCAGAACATGATTCTTATGGGGGGTTTAACCAAATATCTTCCAAT  
TACAAAATTAACGTTTTTTGTTAGGTACACTTTCTCTTTGTGGTATTCCCCCCTTGCTTG  
TTTTTGGTCCAAAGACGAAATTTAATGATAGTTGGTTGTATTACCTATTTTCGCGAT  
AATAGCTTGTTCACAACAGGATTA ACTGCATTTTATATGTTTCGTATGTATTTACTTACT  
TTTGAAGAACATTTACGCGTTCATTTTCAAATAACAGCGGCCACAAACAGCTCTTT  
CTATTCAATATCGATATGGGGGAAAGAGGCATCCCAATTACTTAATAGT---GGTTTGCTGT  
TATCAACAATGAATGTTTCCTTTAAAAA-----ACTCCCATGTATCCCATGAATCG  
GACAATACAATGCTACTGCCTCTGCTTGTATTGGTTATATTTACTTTGTTTCGTTGGATTCA  
TAGGGGTTTCGTTTCGATTTAGATATATTGTGCGAAATGGTTAACTCCATCAATAAATTTTT  
ACACCGAAATTTGAATGATCCCTGGGATTGGTATGAATTTGCGACAAATGCCATTTTTTC  
AGTCAGTATAGCCTGTTTCGGAATATGGATAGCGTCTCTTTTATATGGGTCTGTTTATTCA  
TCATTTCAAATTTGGACTTAATGAATTCATTTGTAATTTTATTGGAACCAATAATAAATG  
TGATATACAATTTGGTCATATAATCGTGGTTACATAGACGTTTATTATGCAACAGTATTCAC  
TAGGGGTATAAGAGGATTAGCCAAACTAACTCATTCTTTTGATAGACGAGTAATTGATG  
GAATCACGAATGGGTTTGGCATTGCCAGTTTCTTTGTGCGAGAGGGAGTCAAATAT---G  
TAGGGGGGGGGCGAATCTCTTCTTACCTATTCTTGTATTATCTTATGTATCAATATTTTT  
AGTAATTTCTTATATGGATTTACCTGGACCAATACATGATATTTTTTTAGTATTTCTGGGAT  
CAGGTCTTATATTAGGCGGTCTGGGAGTGGTATTACTTACCAATCCAGTTTATTCTGCCT

TTTCATTGGGATTGGTTCTTGTGTTGTATATCCTTATTCCATATTCCATCGAACTCCTATTTT  
GTAGCTGCTGCACAGCTCCTTATTTACGTTGGAGCCATAAATGTCTTAATCGTATTTGCT  
GTGATGTTTCATGAATGGTTCAGAATATTACAATTATTTCCACCTTTGGACCGTCGGAGAC  
GGGGTCACTTCACTGATTTGTACAAGTATTCTTTTTTCTCTAATTAAGACTATCCTAGATA  
CGTCATGGTACGGGATTATTTGGACTACAAGATCAAACCAGATCATAGAGCAGGACCTG  
ATAAGTAACGTTCAACAGATTGGGATTCATTTATCAACAGATTTTTATCTTCCATTTGAA  
CTCATTTCTATAATCTTTTTAGTTGCTTTGGTAGGTGCAATTGCTATGGCTCGTCAGATGA  
CTGTACCAGCTACAAGAAAAGACCTCATGATAGTCAATATGGGTCCTCACCACCCATCA  
ATGCATGGTGTCTTCGACTCATTGTTACTCTAGATGGTGAAGATGTTATTGACTGTGAA  
CCCATATTGGGTTATTTACACAGAGGGATGGAAAAAATTGCAGAAAACCGAACCAATTAT  
ACAATATCTCCCTTATGTAACACGTTGGGATTATTTAGCTACTATGTTACAGAAAGCAAT  
AACAGTAAATGCACCAGAAGAATTGGGAAATATTCAAATACCTAAAAGAGCCAGTTATA  
TCAGAGTAATTATGCTGGAACCTGAGTCGTATAGCTTCTCATTTGTTATGGCTTGGGCCCT  
TTATGGCTGATATCGGTGCACAGACTCCTTTCTTCTATATTTCCAGAGAGAGAGAATTAC  
TATATGATCTATTTGAAGCTGTCACAGGTATGCGAATGATGCATAATTATTTCCGTATCGG  
GGGAGTAGCTGCTGATTTACCTCATGGCTGGATAGATAAATGTTTGGATTTCTGCGATTA  
TTCTTTAACAGGAGTTGCTGAATATCAAAGCTTATTACGCGCAATCCTATCTTTTTTGA  
ACGAGTTGAAGGAGTGGGCATTATTGGTGGAGAGGAAGCAATAAATTGGGGTTTATCA  
GGACCAATGCTACGAGCTTCCGGAATACAATGGGATCTTCGTAAAGTCGACCATTATGA  
GTGTTATGATGAATTAGATTGGGAAGTCCAGTGGCAAAAAGAAGGAGACTCATTAGCT  
CGTTATTTAGTAAGAATCGGTGAAATGACGGAATCCATAAAAATTATTCAACAGGCTCT  
GGAAGGAATTCGGGGGGGCCCTATGAAAATTTGGAAGTCCGGCGCTTTGATAGAGCA  
AGGGATCCGAATGGAATTATTTGAATATAGATTCATTAGTAAAAAGCCTTCTCCCACT  
TTTGAATTGTCAAAGCAAGAACTTTATGTGAGAGTGGAAAGCCCCAAAGGGAGAATTAG  
GTATTTTTCTGATAGGAGATAATAGTGTTTTTCCCCTGGAGATGGAAAATTCGTTACCAG  
GTTTCATCAATTTGCAAATCTTCCTCAGCTGGTTAAAAGAATGAAATTGGCTGATATCA  
TGACGATACTAGGTAGTATAGATATTATTATGGGAGAAGTTGATCGTATGTTCCCTATGCT  
GAATGGATTCATGAATTATGGTCAACAAACAGTACGAGCTGCAAGGTACATTGGTCAA  
AGTTTCATGATTACCTTATCTCACACGAATCGTTTACCTGTA ACTATTCAATATCCTTATG  
AAAAATCGATCACATCAGAACGTTTCCGTGGTTCGAATCCACTTTGAATTTGATAAGTGC  
ATTGCTTGTGAAGTATGTGTTTCGCGTATGCCCTATAGATCTACCCGTTGTTGATTGGAGA  
TTGGAACAGATATTAGAAAAAACGATTGCTTAATTATAGTATTGATTTTGAATCTGT  
ATATTTTGTGGTAACTGCGTCGAGTATTGCCCGACAACTGTTTATCAATGACTGAAGA  
ATATGAACTTTCTACTTATGATCGTCACGAATTGAATTATAATCAAATTTCTTTGGGTCGA  
TTACCAATGTCAGTAATTGGAGATTACACAATTCAAACAATTATGAATTCGAAAATAGC  
CATGGATAAATCCCTTGATTCAAGAACGATTACCAATTACATGCAGGGTCGTTTATCTGC  
TTGGCTAGTGAAGCATGAGCTAGTTCATAGATCTTTGGGCTTCGATTACCAAGGAATAG  
AGACTTTACAAATAAAGCCCGAGGATTGGCACTCTATTGCTGTCATTTCATATGTATATG  
GTTACAATTATCTACGTTCCCAGTGTGCCTATGATGTAGCACCAGGTGGATTGTTAGCTA  
GTGTGTATCATCTTACGAGAATACAGTATGGTGTGGATCAACCAGAAGAGGTATGCATA  
AAAGTATTTGCCAAAAGGAGGAATCCTAGAATCCCGTCCGTTTTCTGGATTTGGAAAA  
GTGCGGATTTTCAAGAACGGGAATCTTATGATATGCTGGGAATCTCATATGATAATCATC  
CACGCTGAAACGTATCTTGATGCCTGAAAGTTGGATCGGTTGGCCCCCTGCGCAAGGA  
TTATATTGCCCCCAATTTCTATGAAATACAGGACGCTCAT-----

-----ATGAATTCTATGAGGTTTTTCGTTACTTGACCGAACAAACCCAAAATTCA  
GTTATTTCAACTACATCGAATGATCTTTTCGAATTGGTCAAGACTCTCCAGTTTATGGCCA  
CTTCTCTATGGTACCAGTTGTTGCTTCATTGAATTTGCTTCATTAATAGGCTCGCGATC  
GACTTTGATCGTTATGGACTGGTACCAAGATCGAGTCCTAGGCAAGCCGACATAATTT  
AACAGCCGGCACAGTCACAATGAAAATGGCTCCTTCTTTAGTGAGATTATATGAACAAA  
TGCCTGAACCAAAATATGTCATTGCTATGGGAGCCTGTACTATTACAGGAGGGATGTT  
AGTACCGATTCTTATAGTACCGTTCGAGGAGTCGATAAGTTAATTCCTGTGGATGTCTAT  
TTGCCAGGCTGCCACCTAAACCAGAGGCCATTATAGATGCTATAACGAACTTCGTAA  
GAAGCTATCTCGAGAAATCTATGAAGATAGAATTGGGTGCCAACAGGAAAATCGATGT  
TTTACTACCAATCACAAGTTTCGTGTTGGACGCAGTACTCATACTGGAAATTACGATCA  
AGGA-----CTCTATCAATCGACTTCAGAGATACCTTTTGAATCATTTTTAAAATACAAG  
AGTTCAGTATCTTCCACGAATTAGTGAATATGACTCGATCAATTTCA-----ATTTCT---  
----GTATTGATAATTTCTGTATTGATCATGATATATGTAATAACTCGGACATCCATTTCAA  
TGCATATCCCATTTTTGCGCAGCAGGGTTATGAAAATCCACGAGAAGCCACTGGGCGTA  
TTGTATGTGCCAACTGCCATTTGGCTAATAAGCCCGTGGATATTGAGGTTCCACAAGCT  
GTGCTTCCCAATACTGTATTTGAAGCAGTTGTTAGAATCCCTTATGATATGCAACTGAAA  
CAAGTTCTTGCTAATGGTAAGAGGGGGGGTTGAATGTGGGAGCTGTTCTTATTTTACC  
CGAGGGATTCGAATTAGCTCCCCCTGATCGTATTTCTCCCGAGATGAAAGAAAAGATGG  
GTAATCTGTCTTTTTCAGAATTATCGTCCCCTAAAAGAAATATTCTTGTGATAGGTCTCTG  
TTCTTGGTCAGAAATATAGTGAAATCGTCTTCCCATTCTTTCCCAGACCCTGCTACG  
AAGAAAGAGGTTCACTTTTTAAAATATCCCATATATGTAGGTGGAAACAGGGGAAGGG  
GTCAGATTTATCCCGATGGGAGCAAGAGTAACAATACAGTATATAATGCTACAGGAGCA  
GGTCTAGTAAGCAAAATAGTACGTAAAGAAAAAGGAGGATATGAAATAACCATAGCGG  
ATGCCTCGGATGGGCACCAAGCGGTTGATATTATACCTCCAGGACCAGAACTTCTTGTT  
TCAGAGGGCGAATACATCAAGCTTGATCAACCATTAACGAGTAATCCCAATGTGGGTG  
GATTTGGTCAGGGAGATGCAGAAATAGTACTTCAAGATCCATTACGTGTCCAAGGGCTT  
CTGTTCTTCTTGGCATCTGTTATTCTGGCACAATCTTTTTGGTTCTGAAAAAGAAACA  
ATTTGAGAAGGTTCAATTGGCCGAAATGAATTTTCATGAGTAAAGTATATGATTGGTTCG  
AGGAGCGTCTCGAGATTCAGGCGATTGCAGATGATATAACTAGTAAATATGTTCCCTCCT  
CATGTCAACATATTTTCATTGTCTAGGAGGGATCACACTTACTTGTTTTTTAGTACAAGTA  
GCTACGGGTTTTGCTATGACTTTTTACTATCGTCCGACCGTTACAGAGGCTTTTGCCTCT  
GTTCAATACATAATGACTGAAGCCAACCTTGGTTGGTTAATCCGATCAGTTCATCGATG  
GTCAGCAAGTATGATGGTCCCTAATGATGATCCTGCACGTATTTTCGCGTTTATCTCACAGG  
TGGATTTAAGAAACCTCGCGAGTTGACTTGGGTTACGGGTGTGGTTCTAGCTGTATTGA  
CTGCATCTTTTGGCGTAACTGGTTATTCTTACCTCGGGACCAAATTGGTTATTGGGCAG  
TCAAATCGTGACCGGCGTACCTGAGGCTATCCCTGTCATAGGATCGCCTTTGGTAGAG  
TTATTACGCGGAAGTGCTAGTGTGGTCAATCCACTTTGACCCGTTTTTATAGTTTACAC  
ACTTTTGTATTACCTCTTCTTACTGCCGTATTTATGTCAATGCACTTTCCAATGATACGTA  
AACAGGGCATTTCAGGTCCTTAATGGGAGTAACAAAGAAACCTGACTTGAATGATCC  
TGTATTAAGAGCTAAATCGGCTAAAGGGATGGGGCATAATTATTACGGAGAACCCGCAT  
GGCCTAATGATCTTTTATATATTTTTCTGTAGTAATTCTAGGTAATGTCATGTAACGT  
GGGTCTAGCAGTTCTAGACCCGTCAATGATTGGTGAACCAGCAGATCCATTTGCAACTC  
CTTTGGAAATATTACCCGAATGGTACTTCTTTCCCGTATTTCAAATACTCCGTACAGTAC

CCAATAAGTTATTGGGTGTTCTTTTAATGGTTTCTGTACCAACGGGATTATTGACAGTAC  
CTTTTTTGGAGAATGTTAATAAATTCCAAAATCCATTTTCGTTCGTCCAGTAGCTACAACA  
GTTTTTTTGTAGGTACCGCAGTAGCTCTTTGGTTAGGTATTGGAGCAACATTACCTATT  
GATAAATCCCTAACTTTAGGTCTTTTTATGATTGAAGTTTTTCTATTTGGAATCGTGTTAG  
GTTTAATTCCTATTACTTTGGCCGGATTATTTGTAAGTGCATATTTACAATACAGGCGCGG  
TGATCAGTTGGACCTTATGCCTACTATAACTAGTTATTTTCGGTTTTTCTACTGGCTGCTTCA  
ACTATAACCCCAGCTCTATTGATTGGTCTGAGCAAGATACGACTTATTATGGATATAGTA  
AGTCTTGCTTGGGCGGCTTTAATGGTAGTCTTTACATTTTCCCTTTCCTACTCGTAGTATGG  
GGAAGAAGTGGACTCATGATTATTCGTTTCGCCGGAACCAGAAGTGAAGATTGTGGTGG  
ATAGGGATCCCGTAAAACTTCTTTTCGAGGAATGGGCCAGACCCGGCCATTTCTCAAG  
ACAATAGCTAAGGGCCCTGATACTACCACTTGGATCTGGAACCTACATGCTGATGCTC  
ACGATTTTCGATAGCCATAACCAATGATTTGGAGGAGATCTCTCGAAAAGTATTTAGTGCT  
CATTTCCGGTCAACTATCCATCATCTTTCTTTGGCTGAGTGGCATGTACTTCCATGGCGCC  
CGTTTTTCCAATTATGAAGCATGGCTGAGCGATCCTACTCACATTGGACCCAGTGCCCA  
GGTGGTTTGGCCAATAGTGGGTCAAGAAATACTGAATGGCGATGTAGGCGGAGGTTTC  
CGAGGAATACAAATAACCTCTGGGTTTTTTCAGATTTGGCGAGCGTCTGGAATAACTAG  
TGAATTACAACCTCTATTGTACCGCAATTGGTGCATTGGTCTTTGCAGCGTTAATGCTTTT  
TGCCGGCTGGTTCCATTATCACAAAGCTGCTCCAAAACCTGGCTTGGTTCCAAGATGTAG  
AATCCATGTTGAACCACCACTTAGCGGGGTTACTAGGGCTTGGGTCTCTTTCTTGGGCG  
GGACACCAAGTACATGTATCTTTACCGATTAACCAATTTCTAGATGCTGGAGTGGATCCT  
AAAGAAATACCGCTTCCCTCATGAATTCATCTTGAATCGGGATCTTTTGGCTCAACTTTAT  
CCCAGTTTTGCCGAGGGATCAACCCATTTTTACCTTGAATTGGTCAAATAACGCGGA  
ATTTCTTAGTTTTTCGTGGAGGATTAGATCCAGTAACAGGGGGTCTATGGCTGACCGATAT  
TGCTCATCATATTTGGCTATTGCAATTTCTTTTCTGATAGCAGGTCACATGTATAGGAC  
CAACTGGGGCATTGGTCATGGCCTGAAAGATATTTTAGAGGCTCATAAAGGTCCATTTA  
CAGGCAAGGGTCATAAAGGTCTTTATGAGATCCTAACAACGTCATGGCATGCTCAATTA  
GCTCTTAACCTAGCTATGTTAGGCTCTTCAACCATTGTTGTAGCTCACCATATGTATTCTA  
TGCCCCCTATCCATACTAGCTATTGACTATGGTACACAACCTTTTCGTTGTTACACATC  
ACATGTGGATCGGTGGATTTCTCATAGTTGGCGCTGCTGCACATGCAGCCATTTTTATGG  
TAAGAGACTATGATCCAACCTACTCGATACAACGATCTATTAGATCGTGTCCCTAGGCATC  
GCGATGCAATCATATCACATCTCAACTGGGCCTGTATATTTTTAGGCTTTCACAGTTTTG  
GCTTATATATTCATAATGATACCATGAGCGCTTTAGGGCGTCCTCAAGATATGTTTTCAGA  
TACCGCTATACAATTACAACCCATCTTTGCTCAATGGGTACAAAACACTCATGCTTTAGC  
ACCTGTTGCAACAGCTCCTGGTGCAACAACAAGCACCAGCTTGACTTGGGGTGGTGG  
TGTTTTAGTAGCAGTAGGTGGCAAAGTCGCTTTGTTACCTATTCCATTAGGAACCGCAG  
ATTTTTTGGTACATCACATTCATGCATTTACGATCCATGTGACTGTATTGATACTACTGAA  
AGGTGTTCTATTTGCTCGCAGCTCCCGTTTGATACCCGATAAGGCAAATCTTGGTTTTCG  
TTTTCCCTTGTGACGGACCTGGAAGAGGGGGAACATGTCAAGTATCCGCTGGGATCAT  
GTCTTCTTGGGTCTATTTGGATGTACAATGCGATTTCCGGTAGTAATATTCCATTTAGTT  
GGAAAATGCAGTCGGATGTTTTGGGGTAGTATAAGTGATCAAGGGGTGGTAACTCATATC  
ACGGGAGGAAACTTTGCACAGAGTTCTATTACTATTAATGGGTGGCTCCGGGATTTTTT  
ATGGGCACAGGCCTCTCAGGTAATTCAGTCTTATGGTTCCTCATTATCCGCATATGGCCT  
TTTTTTCCTAGGTGCTCATTTTGTCTGGGCCTTCAGTTTAATGTTTTCTATTCAGCGGCCG  
TGTTATTGGCAAGAACTCATTGAATCCATCGTTTTGGGCTCATAACAAATAAAAGTTG

CTCCTGCTACTCAGCCTAGAGCCTTGAGCATTGTACAAGGACGTGCTGTAGGAGTAAC  
CCATTACCTTCTGGGTGGAATTGCCACAACATGGGCATTCTTCTTAGCAAGAATTATTGC  
AGTAGGAATGGCATTAAAGATTTCCAAGGTTTAGCCAAGGCTTAGCTCAGGACCCACT  
ACTCGTCGTATTTGGTTTGGTATTGCTACCGCACATGACTTCGAAAGTCATGATGATAC  
ACTGAAGAACGTCTTTATCAGAACATTTTTGCTTCTCACTTCGGGCAGTTAGCAATAAT  
CTTCTGTGGACTTCCGGGAATCTGTTTCATGTGGCTTGGCAAGGAAATTTGAATCAT  
GGGTACAGGACCCCTTACATGTAAGACCTATTGCTCATGCAATTTGGGATCCTCATTTTG  
GTCAACCAGCCGTAGAAGCCTTACTCGAGGAGGTGCTCTCGGTCCAGTGAATATCGC  
TTATTCGGTGTTTATCAGTGGTGGTATAACAATCGGCTTACGCACAAATGAAGATCTTTA  
TACTGGAGCTCTTTTTCTATTATTTCTTCTGCCATATCCTTAATAGCGGGTTGGTTACAC  
CTACAACCCAAATGGAAACCAAGCGTTTCGTGGTTCAAGAATGCCGAATCTCGTCTCA  
ATCACCATTTGTCAGGACTTTTCGGAGTAAGTTCCTTGGCTTGGACAGGGCATTTAGTT  
CATGTCGCTATTCCCGGATCAAGGGGGGAGTACGTCAGATGGAACAATTTCTTAGATGT  
ATTACCATATCCCAAGGGTTGGGTCCACTTTTTACAGGCCAGTGGAATCTTTATGCC  
AAAACCCCGATTCCAGTAGTCATTTATTTGGTACCTCCCAAGGAGCGGGAACGGCCATT  
TTAACCTTCTCGGGGGATTCCATCCACAAACTCAAAGTTTATGGCTGACCGATATTGC  
TCATCATATTTAGCTATTGCATTTGTTTTCTCGTTGCTGGTCATATGTATAGGACTAAC  
TTCGGGATTGGGCACAGTATGAAAGATCTTTTAGAAGCACATATTCCTCCGGGGGGTGC  
ATTGGGGCGCGGACATAAGGGTCTTTATGACACAATAAATAATTCGATTCATTTCAATT  
AGGTCTTGCTCTAGCCTCTTTGGGGGTTACTTCTTTGGTAGCTCAACATATGTACTC  
TTTACCTGCTTATGCATTCATAGCACAAAGACTTTACTACTCAAGCTGCGTTATATACTCAT  
CACCAATACATCGCAGGGTTCATTATGACAGGAGCCTTTGCTCATGGAGCTATATTCTTC  
ATTAGAGATTACAATCCGGAACAGAATGAGGATAATGTATTGGCAAGAATGTTAGACCA  
TAAAGAAGCTATCAAATCTCATTTAAGTTGGGCCAGCTTGTTTCTGGGTTTCCATACCTT  
GGGACTCTATGTTCATAACGACGTCATGCTTGCTTTTGGTACTCCAGAGAAACAAATCT  
TGATCGAACCCATATTTGCCCAATGGATAACAATCTGCTCATGGTAAGACTTCATATGGGT  
TCGATGTACTIONTATCTTCAACGAATGGCCAGCATTCAATGCCGGTTCGAAGCATATGG  
TTACCTGGCTGGTTGAATGCTATTAATGAG-----AATGGTAATTCACTATTCTTAACAATA  
GGTCCTGGAGACTTCTTGGTCCATCATGCTATTGCTCTAGGTTTGCATACAACACTACATTG  
ATCTTAGTAAAAGGTGCTTTAGATGCACGCGGCTCCAAGTTAATGCCAGATAAAAAAGA  
TTTCGGTTATAGTTTCCCTTGTGATGGTCCGGGGCGGGGCGGTACTTGTGATATTTCCGC  
TTGGGACGCATTTTATTTGGCAGTTTCTGGATGTTAAATACCATTGGATGGGTTACTTT  
TTATTGGCATTGGAACATATCACATTATGGCAGGGTAACGTTTCACAATTTAATGAATC  
CTCCACTTATTTGATGGGATGGTTAAGAGATTATCTATGGTTAAACTCTTCACAACCTTAT  
CAATGGATATAACCCTTTTGGTACGAATAGTTTATCTGTCTGGGCGTGGATGTTCCCTATT  
TGGGCATCTTGTTTGGGCTACTGGATTCATGTTCTTAATTTCTGGCGTGGATATTGGCA  
GGAATTGATTGAAACTTTAGCATGGGCTCATGAACGCACACCTTTGGCTAATTTGATTC  
GATGGAGAGATAAACCGGTGGCTCTTCCATTGTGCAAGCAAGATTGGTAGGCTTAGC  
CCACTTTTCTGTAGGTTATATATTTCACTTATGCAGCTTTCTTGATTGCCTCTACATCAGGC  
AAATTTGGTATGTCACATTCAGTAAAATTTATGATACATGTATAGGGTGTACTCAATGT  
GTACGAGCCTGCCCCACAGATGTATTGGAAATGATACCTTGGGACGGATGTAAAGCTAA  
GCAAATTGCTCCTGCTCCAAGAACGGAGGACTGTGTAGGTTGTAAGAGATGTGAATCT  
GCTTGTCCAACAGATTTCTTGAGTGTACGAGTTTATTTATGGTATGAGACAACCTCGCAG  
CATGGGTCTAGCTTATATGACAGATCTTAACTTACCCTCTATTTTTGTGCCTTTAGTAGGC



CTATTATTTCCGGCAATTGCAATGGCTTCTTTATCTCTTCATGTTCAAAAAACAAGATT  
GTCATGCGAAATATAAAAACATATCTCTCCGTGGCACCTGTGCTAGCTACTCTATGGTTC  
GGGTCTTTAGCAGGTCTATTGATAGAGATCAATCGTTTATTCCCGGATGCGTTGGCATT  
CCCTTTTTCTCATTGACTGTAATTTTAGAGAGACGCGAAAGCACAAGCCTATGGGG  
TCGCTTCTGTAAGTGGATAACCAGCACTGAAAACCGTCTTACATTGGATGGTTCCGGT  
TTTTGATGATCCCTACCTTATTGACCGCAACTTCTGTATTTATTATCGCCTTCATTGCTGC  
TCCTCCAGTAGATATTGATGGTATTCGTGAACCTGTTTCTGGTTCTCTACTTTATGGAAA  
CAATATTATCTCTGGTGCAATTATCCCACTTCTGCAGCTATAGGCTTGCATTTTTACCCG  
ATATGGGAAGCAGCGTCCGTTGATGAATGGTTATACAACGGTGGTCCTTATGAGCTAAT  
TGTTCTACACTTCTTACTTGGTGTAGCTTGTACATGGGTTCGTGAGTGGGAACCTTAGTTT  
CCGTCTAGGTATGCGCCCGTGGATTGCTGTTGCATATTCAGCTCCTGTTGCAGCTGCTAC  
TGCTGTTTTCTTGATCTACCCTATTGGTCAAGGAAGCTTCTCTGATGGTATGCCCCTAGG  
AATATCTGGTACTTTCAACTTCATGATTGTATTCCAGGCTGAACACAACATCCTTATGCA  
TCCATTTACATGTTAGGTGTAGCTGGTGTATTCCGGCGGCTCCCTATTAGTGCTATGCA  
TGGTTCTTTGGTAACCTCTAGTTTGATCAGGGAAACCACTGAAAATGAGTCTGCTAATG  
CAGGTTACAGATTCGGTCAAGAGGAAGAACTTATAATATCGTAGCTGCTCATGGCTAT  
TTTGCCGATTAATCTTCCAATATGCTAGTTTCAACAATTCTCGTTCCTTACATTTCTTCC  
TAGCTGCTTGGCCTGTAGTAGGCATCTGGTTTACCGCTTTAGGTATCAGCACCATGGCTT  
TCAACCTAAATGGTTTCAATTTCAACCAATCCGTAGTTGACAGTCAAGGTCGTGTCATT  
AACACTTGGGCTGATATCATCAATCGTGCTAACCTTGGTATGGAAGTTATGCATGAACGT  
AATGCTCACAACCTCCCGCTAGACTTAGCTGCTGTGCAAGCTCCGTCTATAAACGGAAT  
GGGTTTGCCTTGGTATCGTGTTACATACCGTCGTATTGAATGATCCTGGTCGGTTGCTTTC  
TGCCATATAATGCATACAGCTCTAGTTTCTGGTTGGGCCGGTTCGATGGCTCTATACGA  
ATTAGCGGTTTTTGTATCCCTCTGATCCCGTCTTGTATCCAATGTGGAGACAAGGTATGTT  
CGTTATAACCCTTCATGACTCGTTTAGGAATAACCAATTCATGGGGTGGATGGAGTATTAC  
C---GGAGGAACTATAACGAATCCGGGTATTTGGAGTTACGAGGGTGTGGCCGGGGCAC  
ATATTGTGTTTTCTGGCCTGTGCTTCTTGGCAGCTATCTGGCATTGGGTGTACTGGGACC  
TAGAAATATTCTGTGATGAACGTACGGGAAAACCCTCTTTGGATTGCCCCAAGATCTTT  
GGAATTCATTTATTTCTCTCAGGGGTGGCTTGTCTTGGGTTTGGCGCATTTTCATGTAACA  
GGCTTGTATGGTCCCTGGAATATGGGTGTCTGATCCTTATGGACTAACCGGAAAAGTGCA  
ATCTGTAAATCCAGCGTGGGGCGCGGAAGGTTTTGATCCTTTTGTTCGGGGAGGAATA  
GCTTCTCATCATATTGCAGCGGGGACTTTGGGTATATTAGCAGGTCTATTCCATCTTAGT  
GTCCGCCCACCCCAACGTCTATACAAAGGATTACGTATGGGCAATATTGAAACTGTCCT  
CTCCAGTAGTATAGCTGCTGTGTTTTTTGCGGCTTTCGTTGTTGCTGGAACCTATGTGGTA  
CGTTTACGCAACGACTCCGATCGAATTATTTGGTCCCACTCGTTATCAGTGGGATCAGG  
GATACTTCCAGCAAGAAATATATCGAAGAGTTGGTACCGGGCTAGCCGAAAATCTGAG  
CTTATCAGAAGCTTGGTCTAAAATTCCCGATAAACTAGCTTTTTTATGATTACATCGGTAA  
TAATCCGGCGAAGGGAGGATTATTCAGAGCGGGCTCAATGGACAACGGAGATGGAATA  
GCTGTTGGATGGTTAGGACACCCCATCTTTCGAGATAAAGATGGGCATGAGCTTTTTGT  
ACGACGTATGCCCACTTTTTTTGAAACATTTCCAGTGGTTTTTGGTAGATGGAGACGGAA  
TTGTGAGAGCCGATGTTCCTTTTAGAAAGGGCGGAATCCAAGTATAGTGTGCAACAAGT  
AGGTGTAAGTGTGAGTCTATGGTGGCGAACTCAATGGAGTCAGTTATGGCGATCCGG  
CTACTGTGAAAAATATGCTAGACGTGCCCAATTGGGTGAAATTTTTGAATTAGATCGT  
GCTACTTTGAAATCCGATGGTGTTTTTTCGTAGCAGTCCAAGAGGTTGGTTCATTTTTGG

ACATGCTTCGTTTGCTTTGCTCTTCTTTTTTCGGACACATTTGGCACGGCGCTAGAACCT  
TGTTCAAGAGATGTTTTTGCCGGTATTGACCCAGATTTGGATGCTCAAGTGGAATTTGGA  
GCATTCCAAAACTTGGAGATCCAACCTACAAGGAGACAAGTAGTCATGAAAACCTTAT  
ATTCCCTGAGGAGGTTCTACCCCGTGGAACGCTCTTTAATGGAACCTTAGCTTTAGCT  
GGTCGTGACCAAGAAACCACCGGTTTCGCTTGGTGGGCCGGGAATGCCCGACTTATCA  
ATTTGTCTGGTAACTACTCGGGGCTCACGTAGCCCATGCCGGATTAATCGTCTTCTGG  
GCCGGAGCAATGAACCTATTTGAAGTGGCTCATTTTCGTACCAGAAAAGCCTATGTATGA  
ACAAGGATTGATTTACTTCCCATCTAGCTACTCTAGGTTGGGGGGTAGGTCCGGGTG  
GGGAAGTTATAGACACCTTTCCGTACTTTGTATCTGGAGTACTTCACTTAATTTCTCTG  
CAGTCTTAGGCTTTGGCGGTATTTATCATGCACTTCTCGGGCCTGAGACTCTTGAAGAA  
TCCTTTCCATTTTCGGTTATGTATGGAAAGATAGAAATAAAATGACCACAATTTTGGGT  
ATTCACTTAATCTTGTTAGGTATAGGTGCTTTTCTCCTAGTGCTCAAGGCTCTTTATTTG  
GAGGCGTATATGATACCTGGGCTCCTGGGGGGGGAGATGTAAGAAGAATTAACCT  
GACCCTTAGCCCAAGTGTTATATTTGGTTATTTACTAAAATCCCCCTTTGGGGGAGAAG  
GCTGGATTGTTAGTGTGGACGATTTAGAAGATATAATTGGAGGACATGTATGGGTAGGT  
GCCATTTGTATACTTGGTGGAACTGGCATATCTTAACCAAACCCTTTGCATGGGCTCG  
CCGCGCACTTGTATGGTCTGGAGAAGCTTACTTGTCTTATAGTTTAGGGGCTTTATCTGT  
CTTTGGTTTCATCGCTTGTGTTTCGTCTGGTTCAATAATACCGCATATCCAGTGAGTT  
TTACGGACCCACTGGGCCAGAAGCTTCTCAAGCTCAAGCATTACTTTTTCTAGTTAGAG  
ACCAACGCCTTGGGGCTAACGTGGGATCCGCTCAAGGGCCTACTGGTTTAGGTAAATAT  
CTAATGCGTTCCCCGACGGGAGAGGTCATTTTTGGAGGAGAACTATGCGTTTTTTGGG  
ATCTCCGTGCTCCCTGGTTGGAGCCTCTAAGGGGTCCCAATGGTTTGGACTTGAGTAG  
GCTGAAAAAAGACATACAACCTTGGCAAGAACGACGTTCCGGCGGAATATATGACTCAT  
GCTCCTTTAGGTTCTTTAAATTCCTGGGTGGCGTAGCTACTGAGATCAATGCAGTCAA  
TTATGTCTCTCCTAGAAAGTTGGTTAGCTACCTCTCATTTTTGTTCTAGGATTCTTCTTATC  
GTGGGTCACTTGTGGCACGCGGAAGGGCCCGTGCAGCTGCAGCAGGATTTGAAAA  
GGAATCGATCGTGATTTTGAACCTGTTCTTTCCATGACCCCTCTTAACATGACTATAGCC  
CTTGGTAGATTTACCAAAGAAGAA---GATTTATTTGATATTATGGATGACTGGTTACGCA  
GGGACCGTTTTCGTTTTTTGTAGGTTGGTCCGGTCTATTGCTCTTTCCTTGTGCTTATTTG  
CTTAGGAGGTTGGTTCACAGGTACAACCTTTGTAACCTTCATGGTATACCCATGGATTG  
GCCAGTTCCTATTTGGAAGGCTGCAATTTCTTAACCGCTGCAGTTTCTACTCCTGCTAAT  
AGTTTAGCACATTCTTTGTTGCTACTATGGGGCCCCGAAGCACAAGGAGATTTACTCG  
TTGGTGTCAATTAGGCGGTCTGTGGACTTTTGTGCTCTCCATGGCGCTTTCGGACTAAT  
AGGTTTCATGTTACGTCAATTCGAACTTGCTCGATCTGTTCAATTGCGACCTTATAATGC  
AATTGCATTCTCTGCCCAATTGCTGTTTTTTGTTTCCGTCTTCCCTGATTTATCCACTAGGT  
CAGTCTGGTTGGTTCCTTTGCACCCAGTTTTGGTGTAGCAGCTATATTTTCGATTCATCTC  
TTCTCCAAGGGTTTCATAACTGGACGTTGAACCCATTTTCATATGATGGGAGTTGCCGG  
AGTATTAGGAGCTGCTCTGCTATGCGCTATTCATGGTGTACGGTAGAAAATACTTTATT  
CGAAGATGGTGATGGTGCAAATACATTCCGTGCTTTTAACCCAACTCAAGCTGAAGAG  
ACTTATTTCGATGGTCACTGCTAACCGCTTTTGGTCCCAAATCTTTGGGGTTGCTTTTTCC  
AATAACGTTGGTTACATTTCTTTATGTTATTTGTACCAGTAACCGGTTTATGGATGAGT  
GCTCTTGGAGTAGTCGGCCTGGCTCTGAACCTACGTGCCTACGATTCGTTTCCCAGGA  
AATACGTGCAGCGGAAGACCTGAATTTGAGACTTTCTACACCAAAAATATTCTCTTAA  
ACGAAGGCATTCGTGCTTGGATGGCGGCTCAGGATCAGCCTCATGAAAACCTTATATTC

CCTGAGGAGGTTCTACCCCGTGGAACGCTCTTATGTCTGGAAGCACAGGAGAACGTT  
CTTTTGCTGATATTATTACCAGTATTCGATACTGGGTCATTCATAGTATTACTATACTTCC  
CTATTCATTGCAGGTTGGTTATTCGTCAGCACGGGTTTAGCTTACGATGTGTTTGGAAG  
CCCTCGGCCAAACGAGTATTTACGGAGAACCGACAGGGGATTCATTAATAACTGGC  
CGTTTCGATCCTTTGGAACAACCTTGATGAATTTAGTAGATCCTTTATGACCATAGATAGA  
ACCTATCCAATTTTTACAGTGAGATGGTTGGCTGTTACGGACTAGCGGTACCTACCGT  
GTTTTTTTTGGGGTCAATATCAGCAATGCAGTTCATACAACGAATGGCTACACAAACCA  
TTGAGGGTAGTTCAGCAGATCTGGGCCAAGACGAACAATTGTAGGGGATTTATTA  
ACCATTGAATTCAGAATATGGTAAAGTAGCTCCTGGATGGGGAACACTCCCTTTATGG  
GTGTCGCAATGGCTCTATTTGCGATATTCCTATCTATTATTTGGAGATTTATAATTCTTCC  
GTTTTACTGGATGGAATTTACAGTAAGTATGCTTACTCTCAAACCTCTTCGTTTACACAGTA  
GTGATATTCTTTGTTTCTCTTTCATCTTCGGATTCCTATCTAATGACCCAGGACGTAATC  
CTGGACGTGAAGAAATGGCCGATACTACTGGAAGGATTCCTCTCTGGCTGATAGGTA  
GTAACCTGGTATTCCTGTGATCGGTTCAATGGGCATTTTCTTCTACGGCTCATATTCTGGG  
TTGGGCTCATCCCTGATGCCTAATATCTTTAGTTAATCTGTATCTGTCTTAATTATGCCCT  
TCATTCGAGTAGTTTTTTCTTCGCCAAATTGCCCGAGGCTTATGCTTTTTTTAATCCAAT  
CGTAGATGTTATGCCAGTCATACCTGTGCTCTTTTTTCTCTTAGCCCTGTTTTGGCAAGC  
TGCTGTAAGTTTTCGAACGACACAATCAAACCCGAACGAACAAAATGTTGAATTGAAT  
CGTACCAGTCTCTACTGGGGTTTATTACTCATTTTTGTACTTGCTGTTTTATTTTCCAATT  
ATTTCTCAATATGGAAGTAAATATCCTCGCATTTATTGCTACTGCACTGTTCAATTCTAGT  
TCCACTGCTTTTTTACTTATCATTTACGTAAAAACAGTCAGTCAAATGATATGGAAAC  
AGCAACCCTAGTCGCCATCTCCATATCTGGTTCACTTGTAAGCTTTACTGGGTACGCCTT  
ATATACCGCTTTTGGGCAACCCTCTCAACAACATAAGAGATCCATTCGAAGAACACGGG  
GACATGGAAGCATTGGTTTATACATTCCTGTTAGTCTCGACTCTAGGGATAATTTTTTTC  
GCCATCTTTTTTCGAGAACCGCCTAAGGTTCCGAATAAAAAGATGAAAATGATTATTGC  
TTTCCAATTGGCTGTTTTTGCAATTAATTGCTACTTCATCAATCTTACTGATTAGTGACCT  
GTTGTATTTGCTTCTTCTGATGGTTGGTCAAATAACAAAATGTTGTATTTCCGGTACG  
TCATTATGGATTGGATTAGTGTCTGGTAGCTATCCTTAATTCTCTCATCTCT-----  
-----ATGTCACCAAAAACAGAGACTAAAGCAAGTGTTGGATTCAAGGCTGGTGTTAAA  
GATTACAGATTGACTTATTATACTCCTGAATATGAAACGAAAGAGACTGATATCTTGGCA  
GCATTCCGAGTAACTCCTCAACCCGGAGTTCACCTGAGGAAGCGGGAGCTGCGGTA  
GCTGCGGAATCCTCTACTGGTACCTGGACCACTGTGTGGACTGATGGACTTACCAGCCT  
CGATCGTTACAAAGGGCGATGCTACCACATTGAGCCCGTTGCTGGGGAGGAAAATCAA  
TATATTGCTTATGTAGCTTATCCTTTAGACCTTTTTGAAGAAGGTTCTGTTACTAACATGT  
TACTTCCATTGTGGGTAATGTATTTGGGTTCAAAGCCCTACGAGCTCTGCGTCTGGAA  
GATTTGCGAATTCCTCCTGCTTATTCCAAAACTTTCCAAGGCCACCTCATGGCATCCA  
AGTTGAGAGAGATAAATTGAACAAGTATGGTCGTCTCTATTGGGATGTAATAAAC  
CAAATTAGGATTATCTGCCAAGAATACTCGGTAGAGCGGTTTATGAATGCCTCCGCGGT  
GGACTTGATTTTACCAAGGATGATGAGAACGTGAACTCCCAACCATTTATGCGTTGGAG  
GGACCGTTTCGTATTTGTGCCGAAGCTATTTATAAAGCGCAGGCCGAAACAGGTGAA  
ATTAAAGGACATTACTTGAATGCTACTGCAGGTACATGCGAAGAAATGATCAAAAAGG  
CTGTATTTGCCAGAGAATTGGGAGTTCCTATCGTAATGCATGACTACTTAACAGGGGGA  
TTCCTGCAAATACTAGCTTGGCTCATATTGCCGAGACAACGGCTTACTTCTTACATC  
CATCGCGCAATGCATGCAGTTATTGATAGACAGAGGAATCATGGTATGCACTTTCGTGT

ACTAGCTAAAGCGTTGCGTATGTCTGGTGGAGATCATATTCACGCTGGTACTGTAGTAG  
GTAAACTGGAAGGGGAACGGGATGTCACCTTGGGTTTTGTTGATTTACTACGTGATGAT  
TTTATTGAAAAAGACCGAAGTCGCGGCATTTATTTCACTCAAGATTGGGTATCTATGCC  
AGGTGTTCTGCCCGTGGCTTCAGGGGGTATTACGTTTTGGCATATGCCTGCCTTGACCG  
AGATCTTTGGGGATGATTCCGTACTACAGTTCGGTGGAGGAACTTTAGGACACCCTTG  
GGAAATGCGCCTGGTGCAGTAGCTAATCGTGTGGCTTTAGAGGCGTGTGTACAAGCTC  
GTAATGAGGGACGTGATCTTGCTCGTGAAGGTAATGAAGTTATCCGTGAAGCTAGCAA  
ATGGAGCCCTGAACTAGCTGCTGCTTGTGAGGTATGGAGGGAGATCAAATTCGAATTC  
GAAGCAATGGATGTCTTA-----ATGGCGATACATTTATACAAAACCTTCTACCCCGAGCAC  
ACGCAACGGAGCTGTAGACAGTCAAGCGAAATCCACTCCACAAAAGAGTTTGATCTAT  
GGACAGCATCATTGTGGGAAAGGTCGTAATGCCAGAGGAGTCATTACCACAGGGCATA  
GAGGGGGAGGTCATAAGCGTCTATACCGTAAAATCAATTTTCGACGGAATGAAAAAGA  
CATATCTGGTAGAATCGTAACCATAGAATACGACCCTAATCGAAATGCATACATTTGTCT  
CATACTATGGGGATGGTGAGAAGCGATATATTTTACATCCAGAGGGGCTAGAATTG  
GAGATAACCATTGTTTCTGGTACAGAAGTTCCTATATCAATGGGAAATGCCCTACCTTTGA  
CCGATATGTCCTTAGGCACGGCCATACATAACATAGAAATAACACTTGGAAAGGGTGGA  
CAATTAGCTAGGGCAGCAGGTACTGTAGCGAAACTGATTGCAAAGAGGGGGAAATCG  
GCCACATTAAGATTACCATCTGGGGAGGTTCTTTGGTATCCAAAACTGCTCAGCAAC  
AGTCGGACAAGTAGGTAATGTTGGGGTGAACCAGAAAAGTTTGGGTAGAGCCGGATCT  
AAGTGTGGCTAGGTAACGTCCTGTAGTAAGAGGAGTAGTTATGAATCCTGTAGACCA  
TCCCATGGAGGTGGTGAAGGGAGGGCCCCCATTGGTAGAAAAAGACCCACAACCCC  
TTGGGGTTATCCCGCGCTTGAAGAAGAAGTAGGAAAAGGAATAAATATAGTGATAGT  
TTTATTCCTCGTCGCCGTA---ATGATTCAACCTCAGACCCATTTAAATGTAGCGGACA  
ACAGCGGGGCTCGAGAAGTGTGTATTGAATCATAGGAGCTAGT---AATCACCGAT  
ATGCTCATATCGGTGACGTTATTGTTGCTGTAATCAAAGAAGCAGTGCCCAACATGCCT  
CTGGAAGATCAGAAGTGATCAGAGCTGTAATTGTACGTACATGTAAAGAAGTCAAAC  
GTGACAACGGTATGATAATACGATATGATGACAATGCAGCAGTTGTCATTGATCAAGAA  
GGAAATCCAAAAGGAACGCGAGTTTTTGGTGCGATCGCTCGGGAATTAAGACAGTTAA  
ATTTACTAAGATAGTCTCATTAGCTCCCGAGGTATTAATGCTTAGTCCCAAAGAACC  
AGATTCCGTAAACAACATAGAGGAAGAATGAAGGGAGTATCTTATCGAGGCAATCATAT  
TTGTTTCGGTAGATACGCTCTTCAGGCACCTTGAACCCGCTTGGATCACATCTAGACAAA  
TAGAAGCAGGGCGGCGAGCAATGACACGATACGCGCGTCGTGGTGAAGAATATGGG  
TACGTATATTTCCCGACAAACCCGTTACAGTAAGACCTACGGAAACACGTATGGGTTCC  
GGGAAGGGATCCCCGAATATTGGGTATCTGTTGTTAAACCAGGTGCAATACTTTATGA  
AATGGGCGGAGTATCAGAACTGTAGCCAGATCAGCTATTTCAATAGCTGCGTCCAAA  
TGCCTATACGAACTCAATTCGTTATTGCGGGAATGATCAGAGTTAGGCGCGGATATATAG  
CTCGAAGACGTGCAACAAAATTTTTTTTATTTGCATCAACCTTTCGGGGGGCTCATTCA  
AGACTTACTCGAACTACTACTCAACAGAAAATGAGAGCTTTGGTTTCCGCTCATCGGG  
ATAGAGGCAGACAAAAGAGAGATTTTCGTCGTTTGTGGATCACTCGGATAAACGCAGT  
AACTCGTGAGAAT-----GGA-----TCCTATAGTCGATTAATACATGATCTGTACAAGGGGC  
AGTTGCTTCTTAATCGTAAAATACCTGCACAAGTACTATATCAAATGGGAATTGTCTTT  
ACATGATTTCCAATGAGATCGGATCGGCAAATAAGGAGATTGGCAGGAGTTTCGTCGGA  
AATGATAAAGGAAGTCAAAGCTTTAGCTCAATATATATGTATGTCTGCTCACAAAGCGA  
GAAGAGTAATTGATCAGATTCGTGGGCGTTCCTATGAACAAACACTTATGATACTAGAA

CTCATGCCTTATCGAGCATCTTATCACATCTTCAAATTAGTTTATTCTGCAGCAGCAAAT  
GCTAGTCACAATAAGGGTTTGAACGAAGCTGATTCATTCATTAGTAAAGCCGAAGTCAA  
TGGAGGTGTTATCGTGAAAAAGTGCAAACCTCGAGCTCGGGGACGCAGTTATCCGATA  
AAAAGACCCACCTGTCATATAACTATTGTATTGAATAAGAGATCTAAT-----  
ATGGATGGAATCAAATATGCAGTATTTACCGAAAAAGTCTTCGGTTATTGATGGTGAA  
CAATCAATATACTTCTAATGTCTGAATCAGGATCAACTAGGACAGAAATAAAGCATTGGG  
TCGAACTCTTCTTTGGTGTCAAGGTAATAGCGATAAATAGTCATCGACTCCCCGAAAG  
GGTAAAAGAATGGGACCTATTATGGGACATACAATGCATTACAGACGTATGATCATTAC  
GCTTCAACCAGGTTATTCTATTCCACCTGTTATAAGAACT-----ATGGCGGTTCCAAAGA  
AACGTACTTCTATGTCAAAAAAGCGTATTCGTAGAAATATTTGGAGGAGAAAGGGATAT  
TGGACCGCAGTAAAAGCTTTTTCTTTAGCTAAATCTGTTTCTACCGGGCATTCAAAAAG  
TTTTTTT-----ATGGCCGCGGGGAAAGATGTCAGAGTAACAGTTATTTTGGAGT  
GTACCAGTTGTGCCAAAAATGGT-----AAG-----AAATCACCGGGCGTTTCCAGATATATT  
ACTGAAAAGAATCGACACAATACGCCGGCAGGTTGGAATTGATAAAATTCTGTCCCTA  
TTGTTACAAGCATAAATTCATGGGGAGATAAAGAAAATGAAAATAAGGGCCTCTGTTC  
GTAAGATTTGTGAAAAATGTCTGACTGATCCGTAGGCGGGGACGAATTATAGTAATTTGT  
CCCAATCCTAGACATAAACAGAGACAGGGGATGGTTCGAGAGGAAATAGCAGTATCCA  
CTCGGACACTACAGTGGAAGTGTGTTGAATCCAGAGCAGACAGTAAACGTCTTTATTA  
TGGCCGTTTCGTTCTGTCCCCGCTTATGAAAGGTCAAGCAGATAACAATAGGTATCGCGA  
TGCGAAGGGCTTTACTTGGAGAAATAGAAGGAACCTGTATCACACGTGCAAAATCTGA  
G-----AAGGTACCGCATGAATATTCTACGATAGTAGGTATTGAAGAATCAGTACATGAAA  
TTTTAATGAATTTGAAAGAAATTGTATTTAGAAGTCATTTGTACGGAACCTCGTGGCGCA  
TCTATCTGCGTCAGGGGTCCTAGATATGTAAGTCCCAAGATATCATCTCACACCTTCT  
GTGAAAATAGTTGATACTACACAGTATATAGCTAGCCTGACGGAACCAATAGATTTATGT  
ATTGAATTACAAATCGAGAGGGATCGCGGATATCGTATAAAAACCCCAATAACTATCA  
AGATGGAAGTTAT-----CCTATAGATGCTGTATCCATGCCTGTTTCGAAATGCGAATCATAG  
TATTCATTCTTATGGGAATGGGAATGAGAAACAAGAGATACTTTTTCTCGAAATATGGA  
CAAATGGAAGTTTCACTCCTAAAGAAGCACTTTACGAAGCTTCCCGTAATTTGATCGAT  
TTATTTCTTCTTTTCTACATGCAGAAGAACAGGACATCAATGTA-----GAGGACAATCA  
A---AACAGGGCGACTGCGCCCCTTTTTACCTTTCATGATGGATTGACTAAT---ATAGGGA  
AAAGGAAAAAA---GGAATTGCATTGAAACGTGTTTTTTATTGACCAATCAGAATTGCCTA  
CCAGGACCTATAATTGTCTTAAAAGGTCCAATATACATACATTATTGGACCTTTTGAGTA  
ACAGTCAAGAAGATCTTATGAGAATTGAGCATTTCGCATAGAAGATGTAACAGATA  
TTGGGCATTCTACAGAAGCGT-----TTCGCAATTGAT-----AT  
GTCTACAATACCTGGATCTAGTCAGATAACAATTTGAGGGATTTTGTAAAGTTCATTGATCA  
GGGCTTGGCGGAAGAACTTCATAAGTTTCCAAAAATGGAAGATACAGATCAAGAAATG  
GAATTTCAATTATTTGTGAAACATATCAATTGGTAGAACCTTTGATAAAAGAAAGGGA  
TGCTGTGTATGAATCACTCACATATTCTTCTGAATTATATGTATCGGCGGGATTAATTTGG  
AGAGCCGGTAGGGATATGCGAAAACAAACCGTATTTATTGGAAACATTCCTCTAATGAA  
TTCCCTGGGAACCTCTCTAGTAAATGGAATATACAGAATTGTGGTCAATCAAATATTGCA  
AAGCCCTGGTATTTATTACCGTTCAGAATTGGACCATAACGGAATTTCTGTATATACCGG  
TACCATAATATCAGATTGGGGAGGAAGATCAGAATTAGAGATTGATAGAAAAGCAAGG  
ATATGGGCCCCTGTGAGTAGGAAACAAAAAATATCTATTCTAGTTCCATCATCAGCTATG  
GGTTCGAATCTAAGAGACATTCTAGACAATGTTTGCTACCCTGAAATTTTCTGTCTTTC

CCGAATGATAAAGAGAAAAAAGATTGGGTCAAAGGAAAATGCCGTTTTGGAGTTTT  
ATCAACAATTTGCTTGTGTAGGTGGGGATCCGGTATTTTCTGAGTCCTTATGTAAGGAAT  
TACAAAAGAAATTTTTCAACAAAGATGTGAGTTAGGAAGGATTGGTCGACGAAATAT  
GAACCAGAGACTAAATCTTGATATACCTCAGAACAGTACATTTTTGTTACCACGAGATG  
TATTGGCTGCTGCGGATCATTGATCGGAATGAAATTTGGAATGGGGACACTTGACGAT-  
----CTGAATCACTTGAAAAATAAACGTATTCGTTCTGTAGCCGATCTGTTACAGGATCAA  
TTCGGATTGGCTCTGGTTCGTTTGGAAAATGTGGTTCGAGGAACTATATGTGGAGCAAT  
CAGG---CATAAATTGATA---CCGACTCCTCATAATTTGGTAACTTCAACTCCA-----TT  
AACAACTTATGAATCGTTTTTCGGCCTACACCCTTATCTCAAGTTTTGGATCGAAC  
TAATCCATTGACACAAATAGTTCATGGGCGAAAATGGAGTTATTTGGGTCTCGGAGGAT  
TAACAGGACGAACTGCTAGTTTTCGGATACGAGATATCCATCCTAGTCACTATGGGCGT  
ATTTGCCCAATTGACACGTCCGAAGGAATTAATGTTGGACTTATTGGATCCTTAGCTATT  
CATGCAAGGATTGGTGATTGGGGG---TCTATAGAAAGTCCGTTTTAT-----GAAATATCT  
GAGAGATTAAGAG-----GAACAGATGGTTTATTTATCTCCAAGGAGAGATGAATACTA  
TATGGTAGCGGCAGGAAATCTTTGGCATTGAATCGGGGTATTCAGGAAGAACAAGTT  
GTTCCAGCTCGATACCGTCAAGAATTCCTGACTATTGCATGGGAACAGATTCATCTTCG  
AAGCATTATCCCTTCCAATATTTTTCTATTGGAGCTTCCCTCATACTTTTATCGAGCAT  
AATGATGCGAATCGGGCTTTAATGAGTTCTAATATGCAGCGTCAAGCAGTTCGCTTTC  
TCATTCCGAGAAGTGCATTGTTGGAACGGGTGGAACGCCAAGCGGCTCTAGATTTCG  
GGGGTTTCAGCTATAGCCGAACACGAGGGAAAGATTACTTATACCGATACTGAAAAGA  
TCGTTTTATCGGGGAATGGAGACACTATAAGCATTCCATTGGTTATGTATCAACGTTCCA  
ACAAAATACTTGTATGCATCAAAAACCCAGGTTTCATAGGGGTAAATGCGTGAAAAA  
GGGACAAATTTAGCGGACGGTGC GGCTATAATTGGTGGCGAACTCGCTTTGGGAAAA  
AACATATTAGTAGCTTATATGCCATGGGAAGGTTACAATTCTGAAGACGCGGTACTCATT  
AGTGAACGTCTGGTATATGGAGATATTTATACTTCTTTTCACATCCGAAATATGAAATT  
CAGACTCATGTCACAAGCCAAGGA---CCTGAAAGAATCACTAACGAAATACCGCATTTA  
GAGGCTCATTTACTCCGCAATTTAGACAAAAATGGAATTGTTATGCTGGGATCTTGGGT  
AGAAACAGGTGATATTTTAGTAGGTAAATTAACGCCTCAGACAGCGAAAGAA---TCATC  
GTATGCTCCGGAAGATAGATTATTACGAGCCATACTTGGCATTTCAGGTATCCACCGCAA  
AGGAACTTGTCTAAAACCTATAGGCGGAAGGGGGCGAGTTATTGATGTGAGATG  
GATCCAGAAAAACGG---GGTTCAGTTCTAATCCAGAAACAATTCGTGTATATATTTCA  
CAGAAACGTGAAATCAAAGTGGGTGATAAAGTAGCTGGAAGACATGGAATAAAGGT  
ATCATTTCCAAAATTTTGCCTAGACAAGATATGCCTTATTTACAAGATGGAACACCGGTT  
GATATGGTCTTCAACCCATTAGGAATACCTTACGAATGAATGTGGGGCAGATGTTTGA  
ATGCTCGATTGGTTTAGCGGGGAACCTGTTGAACAGACATTATAGAATCATACCCTTTG  
ATGAGAGATATGAGCAAGAGGCTTCGAGAAAACCTAGTGTTCCTGAATTATATAAAGCC  
AGTAAGCAAACAGCAAATCCATGGGTATTTGAACCCGAGTATCCTGGAAAAAGCAGAA  
TATTTGATGGAAGAACAGGAGATCCTTTTGAACAACCTGTTATAATAGGAAAGTCCTAT  
ATGATGAAATTAATTCATCAAGTTGATGATAAATCCATGGGCGTTCAGCGGGCATTAT  
GCACTTGTACACAACAACCCCTTAGAGGAAGGGCCAAGCATGGGGGACAACGAGTA  
GGAGAAATGGAAGTTTGGGCTCTAGAGGGATTTGGTGTGCTCATATTTACAAGAGA  
TGCTTACTTATAAATCCGATCATATTAGAGCTCGTCAGGAAGTACTTGGTACTACGATAA  
TTGGAGGAACAATACCTAACCCCTGATGGTGCTCCAGAATCTTTTCGATTGCTCGTTTCGA  
GAACTACGATCTTTGGCTCTGGAACCTGAATCATTTCCTTGTATCTGAGAAAAGCTTCCA

GATTAATAGGAAGGAAGCTATGAATCAGAATTTCTCTTCTATGATCGACCGGTATAAGTA  
TCAACAACCTTCGAATTGGATCAGTTTCTCCTCAACAAATAAGCGCTTGGGCCAACAAA  
ATCCTACCTAATGGAGAGATAGTTGGAGAGGTGACAAAACCCCTATACTTTTCATTACAA  
AACCAATAAACCCGAAAAAGATGGATTGTTTTGTGAAAGAATCTCTGGACCTATAAAA  
AGCGGAATTTGTGCTTGTGGAAATTATCGAGTGATCGGAGATGAAAAAGAAGGCCCGA  
AATTTTGTGAACAATGCGGAGTCGAATCTGTTGATTCTCGGATCCGAAGATATCAAATG  
GGATATATCAAACCTGGCATGCCCGGTGACTCATGTGTGGTATTTGAAACGTCTTCCGAG  
TTATATCGCGAATCTTTTAGATAAACCTCTTAAGGAATTAGAAGGCCTAGTATACTGCGA  
T-----TTTTCTTTTGTAGGCC---ATAGCTAAAAAACCGACTTTCTTACGATTACGAGGT  
TCATTCGAATATGAAATCCAATCCCGGAAATACAGCATCCCACTTTTTTTTACTACCCAG  
GGCTTCGATACATTTCGAAACCGAGAAATATCGACTGGAGCGAGTGCTATCAGAGAAC  
AATTAGCCGACCCGGATTTGCGAATTATTATGGATCGTTCATTGGTGGAATGGAAGGAA  
TTGGGGGAAGAAGGATCCACT--GGGAATGCATGGGAAGATAGAAAAATAGGAAGAAG  
AAAGGATTTCTTGGTTAAACGCATGGAATTGGCTAAGCATTTCCTTCGAACAAATGTAG  
AACCAGAACGGATGGTTTTGTGCCTATTACCAGTTCCTCCTCCCGAGTTGAGACCAATT  
ATTCAGATAGATGGGGGTAAACCGATGAGTTCGGATATTAATGAACTCTATCGAAGAGT  
TATCTATCGCAACAATACCCTTACCGATCCATTAACAACAAGTAGATCTACACCGGGGG  
AATTAGTACTGTGTCAGGAAAAGTTGGTACAAGAAGCCGTGGATACACTTCTTGATAAT  
GGGATCCGCGGACAACCAATGAGGGACGGTCATAATAAAGTTTACAAGTCTTTTTTCAG  
ATGTAATTGAAGGCAAAGAGGGGAAGATTCCGCGGAGACTTTACTTGGAAAACGGGGTCGA  
TTATTCGGGTCGTTCTGTTATTGTGGTGGGTCCTTCCCTTTCATTACATCGATGTGGATTA  
CCCCGAGAAATAGCAATAGAGCTTTTTTCAGACATTTGTTATTCGTGGTCTAATCAGACA  
ACGTGTTGCTTCCAACATAGGGATTGCTAAAAGTAAAATTCCGGGAAAAAGAACCATT  
GTATGGGAATACTTCAAGAAGTTATGCGGGGGCCTCCTGTATTGCTGAATAGAGCACC  
TACTCTACATAGATTAGGCATACAGGCGTTCCAACCTATTATAGGGGAGGGACGTGCTAT  
TTGTTTACATCCATTAGTTCGTAAGGGATTCAATGCAGACTTTGATGGGGATCAAATGG  
CTGTTTCATGTACCTTTATCTTTTGAAGCTCAAACGGAGGCTCGTTTACTTATGTTTTCTC  
ATATGAATCTCTTGTCTCCAGCTATTGGGGATCCATTTCCGTACCAACTCAAGATATGC  
TTATTGGACTCTATGTATTAACGATCGGGAATCATCGAGGTATTTGTGCAAATAGGTATA  
ATCCATGTAATTACAGA-----AAC---TATCAAAATGAAACAGTTGACGATAAT--TACCAG  
TATACGAAAGAGAAAGAACCCCATTTTTGTAGTTCCTACGATGCACTTGGAGCTTATCG  
GCAGAAACGAATCAATTTATATAGCCCTTTGTGGCTCCGGTGGAGACTAGATCAACGT--  
-GTCATTGCCTCA-----AGAGAAGTTCCTATCGAAGTTCATATGAATCTTTGGGTACCTA  
TCATGAGATTTATGGGCACTATCAAATAGTAAGAAGTATAAAAAAGGAAATCCTTTGTAT  
ATACATTGGAACCACTATTGGTCATATTTCTTTTTTATCGAGAAATAGAAGAAGCCGTACA  
GGGATTCTGTCCGGCCTATTCATACGGTACC-----ATGGAGGTACTIONTATGG  
CAGAACGGGCCAATCTGGTCTTTCACAACAAAGTGATAGACGGAACTGCCATGAAAC  
GACTTATTAGCAGATTAATAGATCACTTCGGAATGGCATATACATCACACATCCTGGATC  
AAGTAAAGACTCTGGGTTTCCAGCAAGCCACTGCTACATCCATTTATTAGGAATTGAT  
GATCTTTTAAACAATATCTTCTAAGGGATGGCTAGTCCAAGATGCTGAACAACAAAGTTT  
GCTTTTGGAAAAGCACCATCGTTATGGGAATGTACACGCGGTAGAAAAATTACGTCAAT  
CAATTGAGATATGGTATGCTACAAGTGAATATTTGAGACAAGAAATGAATCCTAATTTTA  
GGATGACGGATCCTTCTAATCCAGTCCATATAATGTCTTTTTTCGGGAGCTAGAGGAAAT  
GTATCTCAGGTCCACCAATTAGTAGGTATGAGAGGATTAATGTCGGATCCCAAGGACA

AATGATCGATTTACCCATTCAAAGCAATTTGCGCGAAGGACTTTCTTTAACGGAATATA  
CCATTTCTGCTATGGAGCCCGCAAAGGAGTTGTGGATACTGCCGTACGAACATCAGAT  
GCTGGATACCTCACGCGTAGACTTGTGAAGTAGTTCAACATGTTGTTGTACGTAGAAC  
AGATTGTGGCACTATCCGAGGTATTTCCATAAGTATTCGAAAT-----GGGATGACAGGAA  
GAATTTTGATCCAAACACTAATTGGTCGCGTATTAGCAGATGATGTATATATGGGTCTAC  
GATGCATTGCCGCTCGAAATCAAGATATTGGGATTGGACTTGTCAATCGATTTCATAACC-  
-----TCTCGAGCACAACCAATATATATTGCAACACCCTTCACTTGCAGGAGTACA  
TCTTGGATCTGTGATTATGTTATGGTCGGAGTCCCACTCATGGTGACCTGGTCGAGTT  
GGGAGAAGCAGTAGGTATTATTGCAGGTCAATCAATTGGGGAACCAGGGACTCAACTA  
ACATTAAGAACTTTTCATAACGGCGGAGTATTCACAGGCGGTACTGCAGAACATGTACG  
AGCTCCTTTTAATGGAAAAATCAAATCAATGAGGATTTGGTTCATCCCACACGTACAC  
GCCATGGGCATCCTGCTTTTCTATGTTATATAGACCTATATGTA ACTATTGAGAGTCAGGA  
TATTCTACATAATGTGAATATTCACCAAAAAGTTTTATTTTGGTTCAAAATGATCAATAT  
GTAGAATCAGAACAAGTGATTGCTGAGATTCGGGCTAGGACATCCACTTTC-----TTTAA  
AGAGAAGGTTTCGAAAACATATTTATTCTGACTCAGAGGGAGAA---ATCCACTGGAGTAC  
CGATGTGTACCATGTACCTGAATATACACATGGTAATGTTTCATCTCTTACCAAAAACAAC  
TCATTTATGGATACTATCAGGAGGTCCGGGCCCGTGCAGACGCAGTATAGTGCCTTTTT  
CACTCCACAAGGATCAAGATCAAATGAATCTTCAA-----TCTCTTTCTGTGCAACAGAG  
ATATATTTCTAACCTCTCA-----GTGAATAATGATCGA---GTGAGACACAAATTGTTTGAT  
TTGGATCCTTTTTTGAAA---AAGGGGGGGGTTGGT---TATTCA---GGACCTGATCGAATC  
CTATCCAACGGGCATTGGGATTTTCATATATCCTGCC---ATTCTTCACGAAAATTCGAAT---  
--TTATTGGCGAAGAGGGCGAAGAAATAGATTCATCATCTCATTCCAACATGATCAAGAAC  
GAGAGAAAAAACTACCGCCTCGTTCTGGTATCAAGATTGAAATACCCATAAAT-----GGT  
ATTTTACGTAGAAATAGTATTCTTGCTTACTTTGACGATCCCCGATACAGAAGAAGCAG  
TTCAGGAATTACCAAATATGGGACTATAGAGGTGGATTCAATCGTCAAAAAGACGAT--  
----TTGATTGAATATCGAGGA---GCAAAAAGAAATTGAGACCGAAATACATGAAAAGTAGATC  
CATTTTTTTTTTCATTCCCGAAGAAGTGCACATTTTACCCGGATCCTCGCCTATAATGGTAC  
GGAACAATAGTATCATTGGAGTGGATACACGAATCACTTTAAATACAAGAAGTCGAATA  
GGTGGATTGGTCCGAGTGGAGAGAAAAAAAAGGATTGAACTGAAAATATTTTCT  
GGAGATATCCATTTTCCTGGAGAGACAGATAAGATATCTCGGCACAGCGGCATCTTGAT  
ACCACCAGAAACGAGAAAAAAA-----AATTCTAAGGAATCCAAATCAAACAATTGAA  
AAATTGGATCTATGTCCAACGG-----ATCACACCTATTAAGAAAAAG-----TATTTTGTTC  
AGTTGAGCCGTAGTAATATATGAAATAGCTGATGGAATACATTTAGCAACACTTTTCCC  
CCAGGATCTGCTGCAGGAAAGGGATAATTTGCAACTCCGAGTTGTGAATTATTTCTTT  
ATGGAAATGGCAAACCAATTTCGAGGAATTTCTCACAAAAGTATTCAATTAGTTCGGACT  
TGTTTAGTATTGAATTGGGACCAAGACCAGAATGGT-----TCTATAGAAGAGGTTTA  
TGCTTCCTTTGTTAAAGTAAGGGCAAATGATCTGATTGAGATTTCATAAGAATTGACTT  
GGTGAAGTCCCCTATTTCA-----AAAAGGAATGATACGGCAGGTTCCGGGATTGATCCC  
CGTT--AATGGATCAGATCGCACCAATATCAATCCTTTTTGTTCCAAGGCGAGG-----  
-----ATTCAATCACTTAGCCAACATCAAGGAACTGTTTCGTACGTTTCTGAATAGA--  
-----AATAAGGAAGGTGAATCTTTTCTAGTTTTGTTCATCATCCAATTGTTCTCGAATTGG  
TCCA-----TTCAATGGGTTGAAATATCACAATCTTACAAA-----AAAGAATCAGATCCCA  
TGATTCCAATTAGGAATTCGTTGGGCCCTTTTGGGACG-----GTACCTAAAATTGCGAAT  
TTTTACTCATCT-----TACCAGTTAATAACT-----CATAATGAGATCTTGTTAAAT--AAATAT



TTGCTACTTGATAAT-----CCAAAACAGACTTTCGAAGCACTGAAATATTAT-----TTC  
ATGGATGAAAATGGGATA-----ATTTATAATCCCGATCCGTGCAGTAACATCATTTTGAAT  
CCGTTTGATTTCGAATTGGTACTTTCCACATCAAGATTATTGTGAAGAGACATGCACAAT  
AATTAGT--CTTGGACAGTTTATTTGTGAAAATGTATGTATATCCAAACACGGACCA-----  
--CGCATAAAATCTGGTCAAGTTCTAATTGTTTCAT--GTTGATTCCCTAGTAATAAGATCAG  
CGAAGCCTCATTGGCCACCCAGGAGCAACCGTTCATGGTCATTATGGAGAAATCCTT  
TACGAAGGAAATACATTAGTTACATTTATATATGAAAAATCGAGATCTGGTGATATAACT  
CAAGGTCTTCCAAAAGTAGAACAAGTGTTAGAAGTTCGTTTCGATTGATTCAATATCGAT  
GAACCTAGAAAAGAGGTTTGAAGGTTGGGGCGAGCGTATGACAGGAATTCTTGGAAT  
CCCTTGGGGATTTTGTATTGGTGCTGAGCTAACCATAGCGCAAAGCCATTCTCTTTGG  
TTAATAAGATCCAAAGGGTTTATCGATCCAGGGGGTGCAGATCCATAATAGGCATATAG  
AGATTATTGTACGCCAAATAACATCAAAAAGTATTGGTTTCAGAA-----GATGGAATGTC  
TAATGTTTTCTCACCCGGAGAACTAATCGGATTGTTGCGAGCCGAACGAACAGGTCGT  
GCTTTGGAAGAAGCGATCTGTTACCGAGCCGTCTTATTGGGAATAACGAGGGCATCTCT  
GAATACTCAAAGTTTCATATCCGAAGCGAGTTTCAAGAAACCACTCGAGTTTTAGCA  
AAAGCCGCTTACGAGGCCGTATTGATTGGTTGAAAGGACTGAAAGAAAATGTTGTTTC  
TGGGGGGGATGATACCTGTTGGTACCGGATTCAAGGGATTAGTTCACCATTCAAGG-----  
GAACACAACAACATTCCT-----TTTGAAATCCAAAAGAAGAGTAGATTTCGAGGGGGAAA  
TGAGA-----GATATTTTGTTCACCCACAGAGAATTATTTTGTCTTGCCTCGAAACAAATT  
TCCATGATACATCTTTTATGGGATTGAATGATTCA-----ATGACAAGAAG  
ATATTGGAACATCAATTTGGAAGAGATGCTGGAAGCAGGAGTTCATTTTGGTCATGGTA  
CTAGGAAATGGAATCCTAGAATGGCACCTTACATCTCTGCAAAGCGTAAAGGTATTCAT  
ATTACAAATCTTACTAGAACTGCTCGTTCTTTATCCGAAGCCTGTGATTTAGTTTTGAT  
GCAGCAAGTAGAGGAAAACACTTCTTAATAGTTGGTACGAAAGATAAAGCAGCGGATT  
CAGTAGCATCAGCTGCAATAAGGGCTCGGTGCCATTATGTCAATAAAAAATGGCTTGGT  
GGTATGTTAACTAATTGGTTCACTACAGAAACGAGACTTCATAAGTTCAGGGATTTGAG  
AGCAGAACAAAAGACAGGGGAGACTCAACCGTCTCCCGAAAAGAGATGCAGCAATGTT  
AAAGAGAAAATTATCTCACTTGCAAGCATATCTGGGCGGGATCAAATATATGACGGGGT  
TACCCGATATTGTAATCATCATCGATCAGCAAGAAGAATATACAGCTATTAGAGAATGTG  
CCACTTTGGGTATTCCAACGATTTGTTAATCGATACAAATTGTGACCCGGATCTCGCGG  
ATATTCCGATTCAGCCAATGATGACGCTATAGCTTCAATCAGATTAATCTTAAACAAATT  
AGTATCGGCAATTTGTGAGGGCCGTTCTAGC---TATATAAGAAATCATATGGGACAAAAA  
ATAAATCCACTTGGTTTTAGACTTGGTACAACCCAAAGTCATCATTGCCTTTGGTTTCG  
ACAACCAAAAAATTATTCGGGGGTCTCCAGGAAGATGAAAAAATACGGGATTGTATC  
AAGAATTATGTACAAAAACATATGAGAGTATCCTCAGGT---TTCGAAGGAATTGCGCGTA  
TAGGGATTCAAAAAAAAATCGATCTGATCCAGGTCATAATCCATATTGGATTCCCCATT  
TTTTAATAGAGGGT-----CGAGCCCGA-----GGAATCGAAGAATTACAGATCAATGTACAA  
AAAAAGTTAAATTCTGTGAACCGGAGACTCAACATTGCTATCACAAAGAGTTGCAAAAC  
CGTATGGACAACCCACTATTCTTGCAGAATATATAGCTCTACAATTAAGAATAGAGTTT  
CGTTTCGAAAGGCAATGAAAAAAGCTATTGAATTAAGTGAACAAGCGGACACAAAGG  
GAATTCAGGTACAAATTCGGGGCGTATCAACGGAAAAAGAAATTGCCCGTGTCAATG  
GATCAGAGAAGGTAGGGTTCCCCTACAGACGATTCGAGCTAAAATCGATCATTGTTCTT  
ATGCAGTTCGAACTATCTATGGGGTATTAGGCATCAAAATTTGGATATTTCTAGACGAGG  
AAATGTCTCGTTACCGAGGGCCTCGTTTTCAAAAAAATACGCCGTCTGGGGTCTTTACCG

GGACTAACTAGTAAAAGACCTAGATCCGGAAGTGATCTTAGAAACCAATCGCGCTCCG  
GGAAA---AGATCTCAATATCGTATTCGTCTAGAAGAAAAACAGAAATTACGTTTTTCATTA  
TGGTCTGACAGAGCGACAATTACTTAGATATGTTTCGTATCGCCGGAAAAGCCAAAGGG  
TCAACAGGCCAGGTTTTACTACAACACTTTGAGATGCGTTTGGATAACATCCTTTTTTCG  
ATTGGGTATGGCTTCGACCATTCTGGAGCCAGACAATTAGTTAACCATAGACATATTTT  
AGTTAATGGTCGTCTAGTAGATATACCAAGCTATCGCTGCAAACCCCGAGATATTATTAC  
TACGAGGGATGAACACAGATCCAGAGCTCTGATTCAAATTTCTATTGATTCATCCCAAA  
AA---GAGGAATTGCCAAAACATTTGACTCTTCACTCATTGCAATATCAATATAAAGGGTT  
AGTAAATCAAATAATAGATAGTAAATGGGTTCGGTTTGAAAATCAATGAATTGCTAGTCG  
TAGAATATTATTCCCGTCAGACTATGTCACGTCGAGGTACTGCAGAAGAAAAAACTGCA  
AAATCCGATCCAATTTATCGTAATCGATTAGTTAACATGTTGGTTAACCGTATTCTGAAA  
CACGGAAAAAATCATTGGCTTATCAAATTATCTATCGAGCCGTAAAAAAGATTCAACA  
AAAGACAGAAACAAATCCACTATCTGTTTTACGTCAAGCAATACGTGGAGTAACTCCC  
GATATAGCAGTAAAAGCAAGACGTGTAGGCGGATCGACTCATCAAGTTCCATTGAAAT  
AGGATCTACACAAGGAAAAGCACTTGCCATTCGTTGGTTATTAGGGGCATCCCGAAAA  
CGTCCGGGTTCGAAATATGGCTTTCAAATTAAGTTCCGAATTAGTGGATGCTGCCAAAGG  
GAGTGGCGATGCCATACGCAAAAAGGAAGAGACTCATAGAATGGCAGAGGCCAATAG  
AGCTTTTGCACATTTTCGTATGGGTAGGGATACTATTGCCGATATAATAACTTCTATAAGA  
AATGCTGACATGGGTACAAAAGGAATGGTTCGAATAGCATCTACTAATATCACGGAAAA  
TATTGTTAAAATACTTCTACGAGAAGGTTTTATTGAAAACGTTAGGAAACATCGGGAAA  
GCAACAATATTTCTTGGTTTCAACCCTGCGGCATAGAAGA-----AATAGGAAAGGAAC  
ATATAGA-----AATATTTTA-----AAGCGTATCAGCAGACCCGGTCTACGAATTTATTCA  
AACTATCAAGGAATTCCTAGGATCTTAGGTGGAATGGGGGTTGTAATCTTTCTACTTCT  
CGAGGTATAATGACAGATCGAGAAGCTCGACTAGAAGGAATTGGAGGAGAAATTTTGT  
GTTATATATGGATGACAAAACCTATACCAAGAATTGGTTTACGTAGGAATGGACGTATTG  
GTTTACGTAAGAATGGACGTAGAATATCAAAGGAGTTATTCATGTTCAAGCGAGTTTC  
ACAATACCATTGTGACTGTTACAGATGTACGGGGTTCGGGTTGTTTCTTGGTCTCCTCCGC  
GGGTACTTGTGGATTCAGAGGGCGCAAGAAGAGGGACACCATTGCTGCTCAAACCGC  
AGCAGGAAATGCTATTCGTACAGTAGTGGATCAGGGTATGCAACGAGCAGAAGTTATG  
ATAAAGGGCCCCGGTCTCGGAAGAGATGCAGCATTACGAGCCATTTCGTAGAAGTGGTA  
TACTATTAAGTTTCGTACGTGACGTAACCTCTATGCCACATAATGGATGTAGACCGCCTA  
AAAAAAGGCGCGTAATGCCAACTATTAACAACCTTATTAGAAACACAAGACAGCCAAT  
CAAAAATGTCACGAAATCCCCCGCTCTTCGAGGATGTCCTCAGCGTAGAGGAACATGT  
ACTAGGGTGTATACTATCACCCCCAAAAAACCAACTCTGCCTTACGTAAAGTTGCCAG  
AGTACGATTAACCTCTGGATTTGAAATCACTGCTTATATACCTGGTATTGGCCATAATTC  
ACAAGAACACTCTGTAGTATTAGTAAGAGGGGGGAAGGGTTAAGGATTTACCCGGTGTG  
AGATATCACATTGTTTCGAGGAACCCTAGATGCTGTTCGGAGTAAAGGATCGTCAACAAG  
GGCGTTCTAAATATGGGGTCAAAAAGCCAAAAATGGCAAGGAAAAGTTTGATTCAGA  
GGGAGAGGAAGAGAGATAAATTGGAACAGAAATATCATTTGATTCGTCGATCCTCAAA  
AAAACAATAAGC-----AAAGTTCCATCGTTGAGTGATAAATGGGAAATTCATGGAAA  
ATTGCAATCCCCACCACGTAATAGTGCACCTATACGTCTTCATCGACGTTGTTTTTTGAC  
CGGAAGACCTAGGGCTAACTATCGAGACTTTGGGCTATCCGGACATGTACTTCGCGAAA  
TGGTTCATGCATGTTTGTGCGGGGGCAACAAGATCAAGTTGGATGGTAAAAAATC  
GTTTCATCTTAGTTATTCCGCAAGAGGAAAAGAAAGGG-----TCTGTTGAATTTCA

AGTATCCAGTTTCACCAATAAAATACGGAGACTTACTTCACATTTGGAATTGCACAGAA  
AAGACTATTTATCTCAGAGAGGTCTGCGGAGAATTCTTGAAAACGTCAACGGTTGCT  
GGCTTATTTGTCAAAGAAAAATCGAGTACGTTATAAGGAATTAATCAGTCAGTTGGATA  
TTCGTGAGCCAAAGACTCAT-----ATGGTAAAACCTTCGTTTGAAACGATGTGGTAGAAA  
GCAACGAGCCATCTATCGAATCGTTGCAATTGATGTTAGATCCCGAAGAGAAGGAAGA  
GATCTTTGTAAAGTGGGTTTTTACGATCCGATAAAGAATCAAACCTATTCAAATGTTTCCT  
GCTATTCTATATTTCCCTTGAAAGGGGAGCTCAACCTACAGGAAGTTCATGATATTTCA  
AAGAAGGCGGAGGTATTTAAGGAACTTCGAGTTAATCAAACAAAA-----ATGGATAA  
ATCTAAGCGAACTTTTCGTAAATCCAAGCGATCTTTTCGTAGGCGTTTGCCCCAATTG  
GATCGGGGGATCGAATTGATTATAGAAACATGAGTTTAATTAGTCGATTTATTAGTGAAC  
AAGGAAAAATATTATCTAGACGAGTCAATAGATTGACCTTGAAACAACAACGATTAATT  
ACTATTGCTATAAAACAAGCTCGTATTTTATCTTCGTTACCTTTTCTTAATAATGAGAAA--  
---CAGTTTGAGAGAACCGAGTCGACCCCTAGAACTACAGGTAAGTAGAGCCAGAAAAA  
AAGTGGCGCGTTCACTAAAAAAAATCCTTTTGTAGCTAATCATTTATTGGGAAAAATT  
GAGAAGCTCAACATGAGGGAGGAGAAAGAGATAATAGTCACTTGGTCCCGGGCATCTA  
CCATTATACCCACAATGATCGGTCATACAATTGCTATTCACAATGGAAAGGAGCATTTAC  
CTATTTATATAACAGATCGTATGGTGGGTCACAAATTGGGAGAATTCGCACCTACTCTCA  
CTTCCCGGGGGCATGCGAGAAACGATAATAGATCTCGTCGGATGATTTTGAAATCTTTT  
CTACTAGGTAATCTATTATCCTTATGCATGAAGATAATAAATTCGGTCGTTGTGGTCGGA  
CTCTATTATGGATTTCTGACCACATTCTCCATAGGGCCCTCTTATCTCTTCTTCTCCGAG  
CTCGGGTTATGGAAGAAGGA-----ACCGAGAAGGAGGTATCAGCAACAACCTGGTTTT  
ATTACGGGACAGTTCATGATGTTTCATATCGATCTATTATGCGCCTCTGCATCTAGCATTGG  
GTAGACCTCATACAATAACTGTCCTAGTTCTACCGTATCTTTTGTTCATTTCTTCTGGA  
ACAATCACAAACACTTTTTTGATTATGGATCTACTACCAGAAATTCATGCGTAATCTCA  
GCATTCAATGTGTATTCCTGAATAATCTCAGTTTTCAATTATTCAACCATTTCATTTTACC  
AAGTTCAACGTTAGCCAGATTAGTCAACATTTATATGTTTCGATGCAACAACAAGATGT  
TATTTGTAACAAGTAGTTTTTGTGGTTGGTTAATTGGTCCACATTTTATTCATGAAATGGG  
TTGGATTGGTATTATTCTGGATACGGCAAATCATTCTATTAGATCT--ATTCGATCTAATA  
AGTATCTTGTGTCAGAATTAAGAAATCTATGGCTCGAATCTTTAGTATTCTCTTGTTTAT  
CACCTGTGTCTACTATTTAGGCAGAATACCATCGCCTATTGTCACTAAAAAACTGAAAG  
AAACCGAAGAAGGCAAACCTCTTGTTACTCTTCTTTTTCGACTATCTACGATGGAACCGG  
CCATTGCGGTATATAAATAACGATCGATTTCAAATGCTGTAAGAAATGAAATGTCCCAA  
TATTTTTTTGATACATCAAAAAGGGATGGAAACAAAATAATATCTTTCACATATCCACCA  
AGTTTGTGATTTTTAATGAAATGATACAAAAAAAATATTTTTGTCCACGACAGAAAA  
ACTATCTCCCGAAGGCCTGTATAATCATTGGATTTATGCTAATGAACAAAAAAAGTATAA  
CTTGAACAATGAGTTCATAAATCGAATAGAAGCTCTAGAC-----AAGCTTGTCTGGATG  
TGCTCGAACAAAAGAACCGATTGTGCAATGATGAAAATGAACAAGAATGCTTACCTAA  
AATGTATGATCCTTTTTTGAACGGACCATATCGTGGAAGAATCAAAAAATATTATTACA  
TGTAGAAACAGTTTGGATAAATAGGATTCATGATATCCTTTACCGAGAATTTGGACACA  
AAGAT--CCGAATAATGCCATTGGACTTGAAGAAATCGGGAAAAGGGTGCCCCGATGGT  
TATACAGATTGACCGATTTAGAAGAACAGGAGGACGAAGGGATTCGTTCAAGAAAAGC  
CAAACGTGTGATAATTTTTGCTGATACTTTGCTACGTTACTCACAAAAATCAGATTTTCG  
TAGGAATCTAATCAAAGGATCGATGCGTGCTCAAAGACGTAAAACAGTTACTTGGGAA  
ATGTTTCAAATAAATGTCCATTCTCCCTTTTTTTGGACAGAATAGACAAAACATTTTCT

TTTTCTTTTGATATC-----TCAAGAATGATGAATCTCATTTTTAGGAATAAAAAGGAGGAT  
GAACGGATAACAATAGCAGAACTTTTTGATACTATTATATTTGCTCAAGCAATAAGAGGT  
TCTATGCTAGTAATCCAATCGATTCTTAGAAAATACATCATATTGCCTTCATTGATAATAG  
CCAAAAATATTGGCCGTATGTTATTATTTCAATTCCCCGAGTGGTACGAGGATTGGAAG  
GCGTGGAGTAAAGAAATGCATGTTAAATGCACCTATAATGGTGTTCATTATCAGAAAC  
AGAATTTCCAAAAGACTGGTTAACAGACGGTATTCAGATAAAGATCCTATTTCTTTCT  
GTCTGAAACCTTGGCGTAGATCTAAGAAAGAAAAAAAAGACAATTTTTGTTTTTTAAC  
GATCTGGGGAATGGAAGCTGAACTACCTTTCGGTTCTCCCCGAAAAAGGCCTTCCTTT  
TTTAAACCCATTTGGAAAGAATTCCAACAAAAAATTACAAAAGTGAAA---AAAAAAG  
GTTTCTATTTCTAAGAGTTTTCAAAAAAAGAACAAGGGTTTCTAAAGATATCAAAA  
GAAAAACAAGATGGGTTATCAAATAGTTCTA-----TTTATAAAAAAAAAAATGAAAG  
AACTTACAAAAGAAACC---TCCATAATCAGCGATAAAATCACCCCGGAATCATCTCTTA  
GAGTTGGATCCATGGATTGGACAAATTATTCAGTACGAGAAAAAAAATGAAGGATCT  
AGCTGATAGGACAACCTCCAATCAGGGATCAAATAGAAAGGATCACAAAAGACAAGAA  
AGATAGTCCTAACGAGAGAAGTTGTGGTGATAAAAGACCAGAATTACAGAAACATATT  
TGGAAGGTATTCAAAAGGGAAAGTGCCCGATTAATCCCGAAATGGAACATTTTTATGAA  
ATCTTTTATTCAAAGAATATACATAGATATCTTCTATATGCCATTAACATGCCAGGGTC  
AATGCCCAACTTTTCATTCATTTTATTTTCGTGTGACTTATCTTCTTTGTCCCAAGCATAG  
TATTTTATATATTATCACAAACCCAAGTTTTAAACAAGTATTACTTGAAATCCCTATTTCA  
ACATGAATATCCTTTTATTAAGGATAAAATAAAGGACTATTTTACACGAGGAATATTTCA  
TTCTGAATCAAGATATAAGCAACTGCCGAATTGTAGAATGAATGAATGAAAAATTGGT  
TAAGGGGTCAATTATCAATATAATTTATCTCATACTAGATGGTCTCGATTAGTACCGCGAA  
AGTGCGGAAATAGGATTAACAACACCATAGGATTAAAAAAAAAAAAAAAAAATGGGATTC  
ATATGAAAAA-----GACCAATTAATTCATTACGAGAAAGATAAAAAAAAAATGGAAAAACATT  
ACAAATATGATCTTTTATCACATAAATATATTAATGAATATATTATCGGTCCGGATAGAAA  
ATATTTGGATTGGAGAATCATCCATTTTTGTCTTAGACTTTTTGATTGGATGGGAATGAA  
TCAAGAAATCCTATATCGTTGGTTCTTCCCAGAATTTATGCGACTTTATGAGGCATATAA  
GACGAAACCTTGGATCATAACCAACCAATTACTTATTTCCATAGCAAAGCAATAAGG  
AAGCGGAAGTACTTCTTCTGAAAAGATATTTCTTTTTCAATTGAGATGGGACGAC  
CCCTTGAATCAAAAAGGATCAATAATATCAAGGTATATTGTCTCCTACTTAGGTTGATG  
GATCCAAAAGAAATTGCCCTAGCCTCTATTCAAAGGGGAGAAATGTGCCTGGCTGCAA  
TGAAGATTCAGAAGGATCTAGCCGTTACAGAATTGATAAAAAGGGAATATTGATTCTC  
GAACCGGTTCTGTCTATTAATGGGATGGACAATTTATTATGTATCAAACCATAGGT  
ATTTCTTGGTACATAAGAGTAAGCACAGAATTATGATTTGCTTGTTCCTGAAAATATT  
CTATCTTTAGACGTCGTAGAGAATTGAGAATTCTAATTCGTTTCAGATTTATTTGGCCC  
AATTATCGATTAGAAGATTTAGCTTGCATGAATCGCTATTTGGTTTGATACTAATAATGGA  
AGTCATTTCAAGTATGTCAAGGATATATATGTATCCAATGAAACGAAATCAATTGAAATCC  
TGGATCTTCGAATTG-----AGAGAGATCAAAAATTTCTCACTATTTTCGTGGATTCATG  
GGACAAATTTGATTCAGTGGGATCTTTCACTTACATTTTTTTCCACCAAGAACGTTTTAT  
GAAACTCTTTGACCCCGAATTTGAGTATCCTACTTTCA---CACGATTCA-----CAGGAT  
TTAACAAGGAATCGATATTTCAATTTCC---ACGATCAAAGGTGTAGTACTGCTTGTAATGG  
GG---GTCCTTATATTTATATTTATATATCGTATTAACAATCGAAATATGGTCGAAAGAAA  
AATCTCTATTTGATGGGGCTTCTT-----CCTATACCTATGAATTCATTGGACTCAG  
AATGATACATTGGAAGAATCATTT---TTGTCTTCCAATATCAATAGGTTGATTGTTTCG--

-CTCCTGTATCTTCCAAAAGAGAAAAAGATTTCTGAGAGTTTTTTCATGGATCCGAAAG  
GGCGTTCTTGGGTTCTCCCAATAACG-----AAAAAGTGTATCGTGCCTGAGTCGAA  
CTGGGATTGCGGGGGTGGAGGAATCGGATCGTCAAAAAGAGG-----GATTCCAGTTGT  
AAGATATCT-----AATAAAAAGAGTCGCTGGAATTGAGATCTCATTCAAAGATAAAGATA  
TCAA---TATCTGGAGTTTCTTTTTGTATCCTATACGGAT-----GATCCGATCCGCAAGGA  
CCGTGATTGGGAATTGTTTGATCGTCTTCTCCGAGGAAGAAGCGAAACATAATCAACT  
TG-----AATTCAGGACAGCGATTTCGAAATCTTAGTGAAACACTTGATTTGTTATCTCATG  
CCTGCTTTTCATGAAAAAGGATCAATTGAAGTGGAGGGG---TTCTTCAAACAACAAGG  
A--GCTCAGGCAACTATTCAATCAAATGATATTGAGCATCTTTCCCAT-----CTCTTCTCG  
AGAAACAAGTGGGGTATTTCTTTGCAAAATTGTGCTCAATTTTCATATGTGGCAATTCCA  
CCAAGATCTCTTCGTT-----AGCTGGGGGAAG---ATAAGCACGAATCACATTTTTTTTA  
GGAAC--GTATCGAGAGAAAATTGGATTTGGTTAGACAATGTGTGGTTGGTAAACAATG  
ATCGT-----TTTTTTAGC-----AAGGTACGGAATGTATCGTCAAATATTCAATATGATTCT-  
-----ACAAGA-----TCGATTTTCGTTCAAGTAACGGATTCTAGCCAATTGAAAGGATCTT  
CT--GATCAATCCAGAGACCCTTTTGATTCCATTAGT-----AATGAGAGTTCGAAA----  
-----TATCACACATTGATCAATCAAACAGAGATTCAGCAACTAAA  
AGAAAGATTGATTCTT--TTGGAT-----CCTTCCTTTCGTCAAATGGAACGAACAGAGAC  
GGAA-----CGTGAAAAGCAGAT  
GGATAATCATCTGTTTCCGGCAGAAGTCAAAAAATGTCTT-----GGGAATCCCACAAGAT  
CCATTTCGTTCTTTTTTCTCTGACAGATGG-----TCAGAACTTCCT--CTGGGTTCGAATCC  
TACTGAAAGGTCCACTAGAGATCAG-----AAATTGTTGAAGAAACAACAAGATGTT  
TCT--TTTGTCCCTTCCAGGCGATCAGAA-----AATAAAGAAATGTTTGATATATTCA  
AGATAATTACATATTTACAAAAT-----ACCGTCTCAATTCATCTATTTTCATCAGATCCG----  
--GATATGGTCCG--AAGGATGAACCGGAT--AGGGACAGTTCCAATAAGATCTCATTCT  
TGAACAAAATCCATTTTTTTGAT-----TTATTCCATCTATTCCATGACCGGAACAAAGAGG  
GATACACGTT-----CATTACGATTTTGAATCAGAA-----GAGAGATTTCCAGAAATGTCG  
GATCTATTCACTCTATCAATAACCGAGCCC---AATCTGGTGTATCATAAGGGATTTGCCTT  
TTCTATTGATTCCCTACGGATTGGATCAAAAAAAA-----TTCTTGAATGAGGTCTCC-----T  
GGGATGAATCGAAAAAGAAATCTTTC-----TTGGTTCTACCTCATATTTTTTAT-----GA  
AGAGAATGAATCCTTTTATCGAAGGATCAGAAGAAAATCGGGCCGG---ATCTCCTGCAG  
GAATGGTTTGAAGAAAAAATAAGTGGTATTGCTAGCAACAACATAATG  
GGGGCAGTCAATCAATATCGATTGATACGAGATCTGATTCAAATCCAATATAGCCCCAT  
GGG-----TATATAAGAAATAGATTGAATAGATTTTTATTAATG-----AATAGATCCGATCA  
TAACTTCGAATATGGAATTCAA-----AGGGATCAAATAGGAAATGATACTCTGAATCAT  
ATAACTATAATGAAATATACGATCAACCAACATTTATCAAATTTGATAAAG---AATCGGA  
AGAAATGGCACGATTCTCAT-----TCTCTATTTTTCCAACCGAGAGATCCATGAATCGG  
GATCCTGATGCATATAGATACAAATGGTCCAACGAGAGCAATAATTTCCAGGAACATTT  
TGAACATTTTGTCTGAACAGAAGAAC-----CATTTTCAAGTAGTGTTTAATCAATTT  
CGTATTAATCAATATTCGATTGATTGGTCCGAGGTTATCGACAAACAAGATTTGTCTAAG  
TCATTTTCGTTTCTTTTTGTCCAATTCA-----CTTCTTTTTTTTCT-----  
-----AAGTCACTT-----CCTTTGTTCTTTTTGAGTATCGGGAATATCCCA  
TTCATAGTCGTGAG---ATCCACATCTAT--GAATTTAAAGGTCCGAATCATCAACTTTGCA  
ATCAGTTATTAGAATCAATCGGCGTTCAAATCGTTTCAATTTGAAAAAATTGAAACCT-----T  
TCTTATTGGAT-----GATCATGATATTTCC--CAAAGATCAAATTATTGATCAACGGAG

GAACAATATCACCATTATTCTTCAATAAGATACAA--GGGTGG---GTGATTGACTCATTCC  
ATATT-----AGAAAGAATCGCAGGAAATACCTTTATAATATGGATTCTTATTCTCAATGAT  
ATCCCACGATCGAGACAATTGCATGAATCCCGTGAAACCGTTTCATAGAAGTTCATTGA  
TATCTTCTTTTTATAAAGCAAATCGACTTCCATTCTTGAATAATTCACATCGCTTCTGGTT  
CTAT-----TGTGACAAAAGATTCCCCTTTTATGTG-----GAAGTGAAAAGGCCCGTATCA  
ATAATTATGAT-----CTTGCATAT--GCACAATTCCTCAATATCTCGTTCATTTCGCAACAAA--  
--ATATTTTCTTTGTGCGTCGGTAAA-----AAAAAAAAACCTTTTTTGGAG---ATAGATGCT  
ATTTACCAATCGAATCACAGGTATCTGACATATTCATACCTAATGATTTTCCACAAAGT  
GGTGACGAAAGA---TATAACTTGTACAAATCT-----TTCTATTTTCCAACCTCGATCCGAT  
CTATTCGTTTCGT-----AGAGCTATTTATTTCGATCGCAGACATTTTGAACACCTCTAACA  
GAGGGACAAATAGTCCATTTTGAAGAAGTATTGTCAGCCTCTTTCAGATATAAATCTA  
TCCGAGTCAGAAGGGAATAACTTGCATCAGTATCTCAGT-----TTCAATTCAAACATGGG  
TTTGATTTCGATTCCATGTTCTGAGAAATATTTACCA-----TCCAGAAAGAGGAAAAAA--  
-----CGAAGTCTTTGTCTCAA-----AAATGCGTTGAGAAACGGCAGATGTA  
TAGAACCTTTCAACGAAATAGTGCTTTTTCAAATCTCTCAAATGGAATCTGTTCCAAA  
CATATATGCCATGGTTTTTTACTTCTACAGGGTGCAAATATATAAATTAATCTTTTTAGAT  
ACTTTTGCAGATCCACTG-----CCAATACTAAGTAGCAGT--CAAAAATTTTATCAATTT  
TTCATGATATTATGCATGGATCAGATATATTATGGCCAACCGAACAGAAAAAATGGTGG--  
-----ACGATTCTTCCACAATCGAATTTG---ATAAGTGAAATTTTCGAGTAAATGTTTACA  
GAAT-----CTTCTTCTGTCCGAAGAAATGATTCATCGAAATAATGAGTCACCCGCTTCATT  
GATATGGACACATCTGATAGCACCAATGCTCGGGAGTTT---CTCTATTCAATCCTTTTC  
CTTCTTCTTGTGCTGGATAT--CTCGTTCGTACACATCTTCTCTTTGTTTCCCAA-----AC  
CTCTAGTGAGTTACAGACAGAGTTTGAAGAAGATCAAATCTTTGATGATTCCATCATATAT  
GGTTGAGGTGCGAAAACCTTCTGGATAGGTATCCTCCACTTGAACCTGAATTTTTTATGGT  
TAAAGAATCTCTTTCTAGTTGCTCTGGAACAATTAGAAGATTTTATGGAAAAAATCTGG  
GGTTCTGCTTCTGGTGGCAATACTATTGGGTGGTGGTCCC-----ACTTATGGG--  
-GTCAAATCAATACGTTCTAAGAAGAAAGATTTGAATATCAATCTCATCGATATCATA-----  
-----AGTATTATATCAAATCCCATCAATCTAATCACTTTTTTCGAGAAAAACGAGAGATCT  
AAGTCGTACAAGTAAAGAGATCTATTCATGGATAAGACAAAGAAAAACGTAAACAGT  
GATTGGATTGATGATAAATAGAATCCTGGGTGCGGAACAACGATTGGATTGATGATGA  
AGAAAGAGAATTCTTGGTTCAGTTCTCC-----ACCTTAACAACA-----GAAAAAAGGATT  
GATCAAATCTATTGAGTCTGACT--CATAGCGATCGTTTATCA-----AAGAATGAC  
TCTGGTTATCAAATGATTGAACAACCGGGATCAATTTACTTACGATATTTAGTTGACATT  
CAT-----CAAAGTATCTAATGAATTATGAGTTCAGTAGATTCTGTTTAGCAGAAAGAAG  
GATATTCCTTGCTCATTATCAGACAATCACTTAT-----TCACAAAGCTCGTGTATAGCTAAT  
AGTTCTCATTCCGATCTCACGGA-----AAACCCGTTTCGCTCCGCTTAGTCCTATCCC  
CTTCT--AGGGGTATTTAGTGATAGGTTCTATAGGAACTGGACGATCCTATTTGGTCAA  
ATACCTAGCAACAACTCCTATGTTCTTTCAATTACGGTATTTCCGAACAAGCTCCTGGA  
TGACAAGCCTAAAGATTATTTAGTGAT-----GATATCGAT--ATTGATGAGAGTGA  
CGATCTTAAF-----TAC-----G  
ACCTTGATACGGAGCTGCTAACTATGACGAATGTGCTA-----ACTATGTATATGACG-----  
---CTGAAAATGGACCAATTTGATATCACCTTCAATTCGAATTAGCAGAAGAAATGTCT  
CCTTGCATAATATGGATTCCAAACATTCATGAGCTGTATGTGAATGAGTCCAATTA  
TCCCTCAGTCTATTAGTAAACTATCTATCC-----AGGGATTGTGAAAGATGTTCC---ACT

CGAAATATTCCTTGTTATTGCTTCGACTCCTATTCCCCAAAAAGTGGATCCTGCTCTAATA  
GCTCCGAATAAATCAAATACATGTATTAAGATACGAAGGCTTCTTATTCCACAAGAACG  
AAAGCACTTTTTTCATTCTTTTCATCTACTAGGGGATTCCACTTGGAAAAGAAAATGTTCC  
ATACT-----AACAGATTTGGGTCCATAAGCATGGGTCCAATGCACGAGATCTTGTAGCA  
CTTACCAGTGAGGCCTTATCAATTAGTATTACACAGAAGAAATCCATTATAGATACTAAT  
ACAATTAATCAGCTCTTCATAGACAAACTTGGGATTTGCGA-----TCCCAGGTAAGA  
CCTGTTCAGGATCATGGGATCCTTTTCTATCAGATAGGAAGGGCTGTTGCACAAAATGC  
ACTTCTAAGTAATTGCTCCATAAATCCTATATCTATCTATATGAAGAAGAAA-----TCATGT  
AAGAAAGGGGATTCTTATTTGTACAAATGGTACTTCGAACTTGGAAACGAGCATGAAGA  
AATTAACGATACTTCTTTATCTTTTGTAGTTGTTCCGCCGGATCGGTTCGCTCAAGATCTTT  
GGTCTACATCC-----GGACCCGATGAAAAA---AATGGGATCACTTCTTATGGATTTGTTG  
AGAATGATTCT--GATCTAGTTCATGGA-----TTAGAAGGTGTTCTGGTGGGA-----TCC  
TCGCGGACAGAAAAAGATTGTAGTCAGTTTGATAATGCTCAAGCTCAAGTGACATTGC  
TTCTTCGGTCCGAACCAAGGAAT--CAGTTAGATATGATGCAAAACGGATCTTGTCTAT  
CGTTGATCAGAGATTTCTATATGAAAA-----TACGAATCGGAGTTTGAAGAA---GGGGA  
AAGAGAAGGAGCCCTCGACCCGCAA-----CAGATAGAGGAGGAT-----TTATTC  
AATCAC-----ATAGTTTGGGCTCCTAGAACTAGAATAAGGCGCCCT-----TGTGGCAAT  
CTATTTGATTGTATCGAAAGGACCAATGAATTGGGATTTCCC---TATTGGGCCAGGTCAT  
TTCGG-----GGCAAGCGGATCATTTATCATAAAGAGGATGAGCTTCAAGAGAATGATT  
CGGAGTCTTGCAGAGTGAACCATGCAGTACCAGACACGAGATAGATCTTCCAAAGA  
ACAAGGCTTTTTTCGAATAAGCCAATTCATTTGGGACCCTGCAGATCCATTCTTTTTCT  
ATTCAA---GATCAGCCCTTTGTCTCTGTGTTTTACGCCGAGAATCTTTGCAGATGAA  
GAGATGTCAAAGGGCTTATTACTTCCCAAACAAATCCTCCTACATCTATATATAAACGC  
TGGTTCATC-----AAGAATACGCAAGAAAAGCACTTCGAATTGTTGATTCATCGCCAGA  
GATGGCTTAGAACC-----AATAGTTCATTATCT-----AATGGATCTTCCGTTCTAAT-----  
ACTCCATCCGAGAGTTATCAGTATTTATCAAATCTGTTCCCTATCTAAC---GGAACGCTATT  
GGATCAAATGACAAAGGCATTGTTGAGAAAGAGATGGCTTTTCCCGGATGAAATGAAA  
CATTTGATT-----CATGTAACAGGC-----ATGTCTAGATCTCGT---ATAAATGGAA  
ATTTTATTGATAAGACCTTCAATTGTAGCCAATATCTTATTACGAATAATTCCGACAAC  
TTCAGGAGAAAAGGAGGCATTTACCTATTACAGAGATGGG-----ATGTCAGCTCAATCC  
GAAGGAAATTATGCGGAAGCTTTACAGAATTATTATGAAGCTACGCGACCAGAAATTGA  
TCCCTATGATCGAAGTTATATACTCTATAATATAGGTCTTATTCACACAAGCAACGGAGA  
ACATACGAAGGCTTTGGAATATTATTTCCGGGCACTAGAACGAAATCCATTCTTACCAC  
AAGCTTTTAATAATATGGCCGTGATCTGTCTATTAC---CGGGGAGAACAGGCCATTCCGGC  
AGGGGGATTCTGAAATTGCAGAGGCTTGGTCCGATCAAGCTGCTGAGTATTGGAAACA  
AGCTATAGCGCTTACTCCAGGTAATTATATTGAAGCACAGAAATTGGTTGAAGATCACGA  
GGCGGTTTCGAA-----ATGAACTGGCGATCAGAACGTATATGGATAGAACTTATAACGGGT  
TCTCGAAAAACAAGTAATTTCTGCTGGGCATGTATCCTTTTTTTTAGGGTCAATAGGCTTC  
TTATTGGTTGGAATCTCCAGTTATCTTGGTCGGAATCTGATATCCTTATTCCCGTCTCAGC  
AAATCCTTTTTTTTTCCACAAGGTATCGTGATGTGTTTCTATGGTATCGCAGGTCTGTTCA  
TTAGTTCCTATTTGTGGTGCACAATTCGTGGAATGTAGGTAGTGGTTATGACAGATTCG  
ATAGAAAAGAAGGAATAGTGTGCATTTTTCGTTGGGGTTTCCCTGGAATAAATCGCCGC  
ATCTTCCTTCGATTCGATGAGAGATATCCGGTCGATCAGAATGAAAGTGAAAGAGGG  
TCTTTATCCTCGCCGTGTCCTTTATATGGAAATCAGAGGTCGGGGAGACATTCCCTTGA

CTCGTACTGATGAGAAT---TTAAGTCCACTAGAAATTGAACAAAAAGCTGCTGAATGGG  
CCTATTTCTTGCGCGTACCAATTGAAGTATTT

>Dioscorea

ATGGAGAAATGGTGGTTCAATTCGATATTGTCTCTAAGTAAATCAATGGATAGTGTTAAT  
GGTATTGAATATACC-----AAGGACCCCATTTCTAAATGATACGGAAAAAACATTCTT--  
-TTCAGTACTGTTGATTATTTATTTGAGATCAGGAATATTTGGAGTTTGATCTCTGATGAC  
ACTTTTTTAGTTAGGGATAGTAATGGCGATAGTTATTCTGTATATTTTGATATTGAAAATC  
AGATTTTTGAGATTGACAATAAT-----AGTTCTTTTCTGGGTGAACTAGAAAGTTTCTTTT  
CTAGT-----TATTTGAATAGGGGGTCTAAAAATAAG-----TACTATCATTACATGT  
ATGATACTCAATTTAGTTGGAATAATCACACTAATTGTATTGATAGTTATCTTCGTTTT  
GAAATCGGTATTAGTACTAGTTACATTTCTGGGTGATATTGTCAATTACAGTGATGGTT  
ACATTTATAGTTTCATTTGTAAGTGGTAGTTCTATAAGAACTAGTAGTAATGGCA  
GCGATTTCAATATGAGAGAAAATTCT--GATTCTGATATAAATAAAAAATACAGACATTTA  
TGGGTTCAATGCGAAAATTGTTATGGATTAAATTATAAAAAATTTTTTAGGTCAAAAATG  
AATATTTGTGAACAGTGTGGATATCATTGAAAATGAGTAGTTCAGATAGAATCGAAGT  
TTCGATTGATCCGGATACTTGGGATCCTATGGATGAAGATATGGTCTCTATAGACCCATA  
GAATTTCAATCAGAGGAGGAACCATATAGAGATCGTATTGATTCTTATCAAAGAAAGAC  
AGGTTTAACTGAAGCTATTCAAACAGGCATAGGTCAACTAAACGGTATTCTATAGCAA  
TTGGGGTTATGGATTTTTCAGTTTATGGGAGGTAGTATGGGATCCGTAGTAGGCGAGAAA  
ATCACCCGTTTGATCGAGTATGCTACTAATGAATCTCTACCTGTCATTATTGTGTGTGCTT  
CTGGGGGAGCGCGCATGCAAGAAGGAAGTTTGAGCTTGATGCAAATGGCTAAAATATC  
TTCTGCTTCATATAATTATCAATCAAATAAAAAGTTATTCTATGTATCAATTCTGACATCT  
CCTACAACGGTGGAGTGACAGCAAGTTTTGGTATGTTGGGAGATGTCATTATTGCTGA  
ACCTAATGCCTACATTGCATTTGCGGGTAAAAGAGTAATTGAACAAACATTGAATAAGA  
CAGTGCCTGATGGTTCACAATCGGCTGAATATTTATTCCATAAGGGCTTATTCGATCCAA  
TTGTACCACGTAATCCTTTAAAAGGCGTTCTGAGTGAGTTATTTCAACTTCACGGTTTC  
CTTCCTTTGAATCAAATAAAAAAGAAATGGTAACTCTTCGAGCCGACGAAATTAGTAA  
TATTATCCGTGAACGTATCGAACAATATAATATAGGAGTAAAGATTGTGAATACCGGTAC  
CGTACTTCAAGTAGGGGATGGTATTGCTCGTATTCATGGTCTTGATGAAGTGATGGCAG  
GCGAATTAGTAGAATTTGAAGAGGGTACAATAGGCATTGCTCTGAATTTGGAATCAAAT  
AATGTTGGCGTTGTATTAATGGGCGATGGTTTGATGATACAAGAGGGAAGTTCTGTAAA  
AGCAACAGGAAGAATTGCCAGATACCTGTGAGTGAGGCTTATTTGGGTCTGTGTTATA  
AATGCTCTGGCTAAACCTATTGATGGGAGAGGAGAAATTTACGCTTCCGAATCTCGCTT  
AATTGAATCTCCTGCCAGGTATTATTTGAGACGCTCCGTATATGAGCCTCTTCAAAC  
AGGGCTTATTGCTATTGATTCTATGATCCCTATAGGACGTGGTCAACGAGAATTAATTATT  
GGAGATAGGCAGACCGGCAAAACAGCAGTAGCCACAGATACGATTCTCAATCAAAG  
GGACAAAATGTAATATGTGTTTATGTAGCTATTGGTCAAAAAGCATCTTCTGTGGCTCA  
GGTAGTGACTACCTTCCAGGAGCGAGGGGCGATGGAATACTATTGTAGTAGCCGAA  
ACAGCAGATTCACCCGCTACATTACAATATCTCGCACCTTATACAGGTGCGGCTCTAGC  
TGAATATTTTATGCACCGTGAGCAACATACTTCAATAATTTATGATGATCTCTCAAACA  
AGCACAAGCTTATCGTCAAATGTCTCTTCTATTAAGAAGACCCCCGGTCTGTAAGCTT  
ATCCGGGGGATGTCTTTTATTTGCATTCACGCCTTTTGGAAAGAGCTGCTAAATCAAGT  
TCTCGTTTATAGGTGAAGGAAGTATGACCGCTTTACCAATAGTTGAGACTCAATCTGGAGA  
CGTTTCAGCTTATATTCCACTAATGTAATTTCTATTACGGATGGACAAATATTTTATCC



GCCGATCTATTCAATGCTGGAATACGACCTGCTATTAATGTGGGTATTTCTGTTTCCAGA  
GTGGGATCCGCAGCTCAAATTAAGCCATGAAACAAGTAGCCGGCAAATCAAAATTGG  
AACTAGCTCAATTCGCAGAATTAGAAGCTTTTGCACAATTCGCTTCTGATCTCGATAAA  
GCTACTCAGAATCAATTGGCAAGAGGTCAACGATTACGCGAGTTGCTCAAACAATCCC  
AATCAGATCCTCTCGCGGTAGAAGAACAATAGCTACTATTTATACTGGAGCGAATGGA  
TATCTTGATCCGTTAGAAATTGGGCAGGTAAAGAAATTTCTCGTTCAGTTACGTACTTAC  
TTAAAAAAGAATAAATCTCAATTCAAAGAAATTATATCTTCTACCAAGACATTTACTGA  
AGAAGCAGAAGCCCTTTTGAAGGGAGCTGTTTCAGGAACAAATTGAGCTCTTTCTACTT  
CAAGAACAAACAATGAGAATCAATCCTACTACTTCTGGTCCTATGATTTCCACACTTGA  
AGAAAAAACTTAGGACGTATCGTTCAAATTATTGGCCCAGTACTGGATGCCCTTTTTC  
CCCCAGGAAAGATGCCTAATATTTATAACGCTTTGGTAGTTAAAGGTCGA-----GCCGGT  
CAACAAATTAATGTGACTTGTGAGGTACAACAATTATTAGGAAATAATCGAGTTAGAGC  
TG TAGCTATGAGTGCTACAGATGGTCTGATGAGAGGAATGGAAGTGATTGACACGGGA  
GCTCCTCTAAGTGTTCAGTTGGCGGAGCTACTCTCGGACGAATTTTCAACGTTCTTGG  
AGAACCTGTTGATAATTTAGGGCCTGTAGATACTCGCACAAACATCTCCTATTCATAGATC  
TGCGCCTGCCTTTATACAGTTAGATACGAAATTATCAATCTTTGAAACAGGGATTAAAGT  
GGTGGATCTTTTAGCTCCTTATCGTCTGGGGGAAAAATCGGGCTATTTGGGGGAGCTG  
GGGTGGGTAAAACAGTCCTCATCATGGAATTGATCAACAACATTGCCAAAGCTCATGG  
GGGTGTGTCTGTATTTGGCGGAGTAGGCGAACGTACTCGTGAAGGAAATGATCTTTACA  
TCGAAATGAAAGAATCTGGAGTGATTAATGAAAAAATATTGCAGAATCAAAAGTGGC  
TCTAGTCTATGGTCAAATGAATGAACCACCGGGAGCTCGTATGAGAGTTGGTTTGACTG  
CCCTAACCATGGCGGAATATTTCCGGGATGTTAATGAACAAGACGTGCTTCTATTCATTG  
ACAATATTTTTTCGTTTCGTCCAAGCAGGATCAGAAGTATCCGCCTTATTGGGGAGAATG  
CCTTCTGCAGTGGGTTATCAACCCACCTTAGTACAGAAATGGGTTCTTTGCAAGAAA  
GAATTACTTCTACCAAAGAGGGATCTATAACTTCGATCCAAGCAGTTTATGTACCTGCG  
GACGATTTGACCGACCCTGCTCCTGCCACGACATTTGCACATTTAGATGCTACTACCGT  
ACTATCAAGAGGATTAGCTGCCAAAGGTATTTATCCAGCGGTAGATCCTTTAGATTCAA  
CGTCAACTATGTTACAGCCTGGCATCGTTGGCGAGGAACATTATGAAACTGCGCAAAA  
AGTTAAGCAAACCTTCACAACGTTACAAAGAACTTCAGGACATTATAGCTATCCTTGGGT  
TGGACGAATTATCCGAAGAAGATCGTTTAACTGTAGCAAGAGCACGAAAAATTGAGCG  
CTTCTTATCACAAACCCTTCTTCGTGGCAGAAGTATTTACGGGTTCTCCAGGGAAATATG  
TTGGTCTCGCAGAAACAATTAGGGGGTTTCAACTCATTCTTTCCGGAGAATTAGATAGC  
CTTCCCGAACAGGCCTTTTATTTGGTGGGTAACATCGATGAAGCTACCGCGAAAGCTAT  
GAACTTAGAAGTGGAGAACAATTAAGAAAATGACCTTAAATCTTTGTGTACTGACT  
CCTAATCGAATTATTTGGGATTCAGAAGTGAAAGAAATAATTTATCTACTAATAGTGGC  
CAAATTGGCGTATTACCAAACCACGCACCTATTGCCACGGCCGTAGATATAGGTCTTTT  
GAGAATACGCCTCAATGATCAATGGTTAACGGTGGCTCTGATGGGCGGTTTCGCTAGAA  
TAGGTAATAATGAGATCACCATTTTAGGAAATGATGCGGAGATGAATACTGATATTGATC  
CGCAAGAAGCTCAACAAACTCTTGAATAGCTGAAGCTAACTTGAGTAGAGCTGAGG  
GTAAGACAAGTAATTGAAGCCAATCTAGCTCTCAGACGAGCTAGGACACGAATAGA  
GGCTATCAATGTTATCTCCATGAAAAATGTAACCGATTCTTTTGTTTACTTGGGGCACTG  
TCCATTCGCCGGAAGTTTCGCATTTAATACCGATATTTTAGCAACAAATCCAATAAATCT  
GAGTATAGTGCTTGGTGTATTGATTTTTTTTTGGAAAGGGAGTGTTAAATGATTTATTAGA  
TAATCGAAAACAGAGGATCTTGAGTACTATTCAAAATTCGGAAGAATTGCGTAAAAAAG

ACCATTGAGCAACTCGAAAGAGCCCGAGATCGCTTACGCAAAGTGGAATAGAAGCA  
GATGAGTATCGAATTAATGGATACTCTGAGATAGAACGAGAAAAACAAATTTGATTAA  
TGCTACTTATGATAGTTTGGAACGATTAGAAAATTACAAAATGAAACCCCTTCATTTTG  
AACAAACAAGAGCGATTAATAAAGTACGACAACGAGTTTTTCAGGAAGCCTTACAAG  
GAGCTCTAGGAACTCTGAATAGTTGTTTGAATAGTGATTTACATTTCCGTACAATCAGTG  
CTAATATTGGCCTCCTCGGAGCCATGGAAGAAATAACCGATATGAATCCACTGATTTCTG  
CTGCTTCCGTTATTGCTGCTGGATTGGCTGTAGGGCTTGCTTCTATTGGACCTGGAGTTG  
GTCAAGGTAAGTCTGCTGCAGGTCAAGCCGTAGAAGGTATTGCGAGGCAACCAGAAGCAG  
AGGGTAAAATACGAGGTACTTTATTGCTTAGTCTAGCTTTTATGGAAGCTTTAACAATTT  
ACGGGCTGGTCGTGGCATTGGCGCTTTTATTTGCGAATCCTTTTGTATGAATGTTATAC  
CATGTTCCATTAACAACTCAAAGGATTATATGATATATCGGGTGTAGAAGTAGGCCAAC  
ATTTATATTGGCAAATAGGGGCTTTACAAATCCATGCCCAAGTACTTATCACTTCTTGGG  
TCGTAATTGCTATCTTATTAGGTTCAAGTCATCATAGCTGTTCCGGAATCCACAAACCATC  
CGAGCGGGGGTTCAGAAATTTCTTCGAATATGTCTTGAATTTATTTCGAGATTTGAGCAA  
GCCCAAATTGGAGAAGAATATGGTCTTGGGTCCCTTTATTGGAACATGTTTCTTATTT  
ATTTTTGTTTTCTAACTGGTCAGGTGCTCTTTTACCTTGGAAAATCATAACAGTTACCTCAC  
GGGGAGTTAGCTGCGCCACGAATGATATAAATACTACTGTTGCTTTAGCTTTACCCAC  
GTCAGTAGCATATTTTTATGCAGGTCTTACCAAAAAGGATTGGGTATTTCAGAAAAT  
ACATTCAACCAACTCCAATTCTTTTACCAATAAATATCCTAGAAGATTCACAAAACCTT  
TATCTCTTAGTTTTCGACTTTTCGGGAATATATTGGCTGATGAATTAGTAGTTGTTGTTCT  
TGTTTTCTTAGTACCTTCATTAGTTCCTATACCCGTTATGTTTTCTTGGCTTATTTACAAGT  
GGTATTCAAGCTCTTATTTTTGCAACTTTAGCCGCGGCTTATATAGGCGAATCCATGGAA  
GGTCATCATATGATATTTGTGACTTTAGAACATATATTAACATATCTCTTTTTTCGATCAT  
TTCAATTGTGATTACGATTCATTTGATGACTTTATTAATCCACAAAATTGCAGGATTATGT  
GATTCGTCGGAAAAAGGGATAATATCCACTTTTTTCTCTATAACAGGATTATTAATTACT  
CGGTGGATTTATTTCGGGGCATTTCCTGTTAAGTAATTTATACGAATCATTAATCTTCCCTT  
CGTGGAGTTTCTCATTATTATCATATGATTCCTATCTTAGGAATCATAAAAATGATTTAAG  
CGTAATAACTGTACCAAGTGTATTTTTACTCAAGGCTTCGTACGTCGTGCTTTTCAAC  
TGAAATGCGGCAATCTGCAATATTAGTACCTGCTCTAAAATCTCAATGGTTAATAATGCA  
CGTAAGTATGATGTTATTGAGCTACGCAACTCTTTTATGCGGATCATTATTATCAGTCGCT  
CTTTTAGTTATTACATTTTCGAAAAACATGGATATTTTTTGAAAAGGAAAGAGACCGA  
ATATTTGAATAAAAAAAGAAGTGTTTTTAAAAACACCTCTTTTCTTTTCAATTCGAAATTA  
TTACAAATATCAATTGACTCAGCGTTTGGATTATTGGACTTATCGTATCATTAGTTTAGGG  
TTCATTTTTTTAACCATGGGCATACTTTTCGGGAGCAGTATGGGCTAATGAGGCATGGGG  
ATCCTATTGGAATTGGGACCCCAAGAACTTGGGCATTTATTACTTGGACCATATTTCGC  
GATTTATTTCGCATATTAGAATAAATATAAATTTTCAAGGTACCAATCCAGCACTTGTAGCT  
TCTATAGGATTTCTTATAATTTGGATATGCTATTTTGGGATCAATCTTTTAGGAATAGGTCT  
ACATAGTTATGGTTCATTCACATTACCAATGAAAAAAAAGCATTGATT---TCCATACCAT  
ATCTTGTATCTATAGTATTTTTGCCCTGGTGGGTCTCTCTCTCATTAAATAAAGTCTGGA  
ACCTTGGATTACTAACTGGTGGAAATAGCGAGCAATCCGAAACCTTTTTGAATGATATTC  
AAGAGAAAAACGTTCTAGAAAGATTCATAGAACTAGAAGAACTATTCCTCTTGGACGA  
AATGATAAAAGAAAACCCAGAGACACATATACAAAAGTTTCGTATAGAAATACACAAG  
CAAACAATACAATTGATCAAAACACACAATGAATATAATCTCCATATCATTTTGCATTT  
TCCACAAATATAATCTGTTTTGTTATTCTAGGTGGTTATTTTTTTCTGAGTAATGAAGAAC

TTATCATTCTTAATTCTTGGATTTCAGGAATTATTGTATAACTTAAGTGACACAATAAAGG  
CTTTTTCTATTCTTTAATCACTGATTTATGGATCGGATTTCACTCCACCCATGGTTGGGA  
ACTAATGATTGGTTCGGTCTACAACGATTTTGGATTGGCTCATAACGATCAAATTATATC  
TGGTCTTGTTCACATTTTCCAGTTATTCTAGATAACAATTGTGAAATATTGGATTTTCCAT  
TATTTAAATCGTGTATCTCCTTCACTTGTAATTATTTATCATTCAATGAATGAAATGCCTAT  
TGGTGTTCAAAAGTACCTTTTTCGGAGTCCTGGAGAGGAAGATGCGGTTTGGGTTGAC  
GTAAAC---CGACTTCATCGAGAAAGATTACTTTTTTTGGGCCAAGAGGTTGATAATGAG  
GTCTCAAATCAACTTGTTGGTCTCATGGTATATCTCAGTATAGAAGATGCTACTAAGGAT  
CTTTATTTGTTTATAAACTCTCCCGCGGATGGGTAATCCCAGGAATGGCCATTTATGAT  
ACTATGCAATTTGTGTACCCGATGTGCATAACAATATGCATGGGATTAGCCGCTTCGATG  
GGATCCTTAATTCTAGTCGGAGGAGAAATTACCAAACGCCTAGCATTCCCTCACGCTAG  
GGTTATGATTCACCAACCTGCTAGTTCTTTTATGAGGCACAAGCAGGGGAATTTATCC  
TGGAAGCAGAAGAAGTACTGAAACTTCGTGAAACACTCACAAAGGTTTATGTACAAA  
GAACGGGCAATCCCTTATGGGCTGTCTCCGAAGACATGGAAAGGGATGCTTTTATGTC  
AGCAACAGAAGCCCAAGCTCATGGCATTGTTGATCTTGTAGCGGTGCAAATGAAAGAA  
CAAAAATTGATTCATGAAGGTGTAATTATTGAATCACTTCCCAACGGTATGTTCCGGGT  
ACGTTTAGATAATGAAGATTTAATTCTAGGTTATGTTTCAGGAAGGATACGGCGCAGTTT  
TATACGGATACTACCTGGAGATAGAGTCAAATCGAAGTAAGTCGTTATGATTCAACCA  
AGGGACGTATAATTTATAGACTTCGTAACAAGGATTCAAACGATATAGAAGAATTACAA  
GGATATTTAGAAAAAGATGGATCTAGGCAAAGGCACTTCCTATATCCACTTCTCTTTCA  
GGAGTATATTTACACACTTGCTCATGATCATGGTTTATTGGATTATGACAAT---TCTAGTT  
CAGTACTTGTGAAACATTTAATTACTCGAATGTATCAACAGAATTATTTGATTTATTCAG  
CTGATGATTCGAACCAAATCGAATCGTTGGG-----TCTAAAATGATATCAGAAGGT  
TTTGCAGTCAGTATGGAAATTCATTTTTACTGCGATTAGGATCTTCCCTCATACTAAA  
TCACAAAATTTGCGATCTATTCATTCAATATTTCCCTTCTTAGAGGATAAATCATCACATT  
TAAATTATGTGTACAGATATATTAATACCCCATCCCATCCATCTGGAAATCTTGGTTCAAAT  
ACTTCAATGCTGGACTCAAGATGTTTCCCTCTTGCATTTATTGCGATTCTTTCTCCACGA  
ATATCATAATTCGAATAGTTTCATTAATAACCTGTTTACGTGATTTCAAAAAAAGATT  
TTTTCGATTCCTATATAATTCTTATGTATTTGAATGTGAATTTTTATTAGTTTTTTTTCATAA  
ACAATCCTCTTATTTACGATCAAGGTCTTCTGGAGTCTTCTTGTGAGCGAACACATTTCTA  
TGAAAAAATGGGGAAT-----GTAGTGTGTTGTAATCAGAAGACCAATGGTTCTTCAAG  
GATCCTTTTCTGCATTATGTTTCGATATCAAGGAAAAGCAATTCTGGTGTCAAAGGGAAC  
TCATCTTTTGATGAGGAAATGGAGATCTTACCTTGTGCATTTTTGGCAATATTATTTCAA  
TTTTGGTCTCATCCCATAGGATTCATATAACCAATTATCAAATTATTCCTTCTGTTTTCT  
TGGGTTATCTTTCAAATTTACTAATAAATCTTCCGTGGTAAGGAGTCAAATGCTAGAAA  
ATTCATTTGTAATAGATATTCTTACT-----AAGAAATTTGATACCAGAGTTTCAGTTATTGC  
TCTTATTCGATCATTGTCTAAAGCGAAATTTTGTACCGTATCCGGGCATCCATTAGTAA  
GTCAATATGGACAAATTTATCAGATTTGGATATTATTCATCGATTTGGTTGGATATGTAGA  
AATCTTTCTCATTATCACAGTGGATCCTCAAAAAACAGAGTTTGTATAGAATAAAGTAT  
ATACTTCGGATTTTCGTGTGCTAGAACTTTGGCTCGTAAACATAAAAGTAAGGTACGCGC  
TTTTTTGCAAAGATTAGGTTCCGGATTTTACAAGAATTTCTTTAGAGAAGAAGAAGAAA  
TTCTTTCTTTGATCTTCCCTCAACGCATTTGGTATTTGGATATTATCTGTATCAATGACCT  
GCGGAATCTCATGATGATAATTGATATGACA---GAAGTGCAA---GCTATCAATCTTTTTTC  
TAGTTCGGAA---TCCGTAAAAGAAGTCTATGGACTCATATCGCTGTTTATCCCATTTTG

TCCCTTATATTAGGAATCATAATAGGGGTTACTAGTAATTGTGTGGTTAGAAAAGAGAAATA  
TCCGCAGCGATAACAACAACGTATTGGACCTGAATATGCTGGTCCATTGGGAATTCTTCA  
AGCTATAGCAGATGGGACCAAACACTTTTTAAAGAGGACCTTTTCCCATCTAGAGGTA  
ATATTCGTTTTGTTTAGTATTGGACCGTCTCTAGCGGTTATATCGATTCTACTAAGTTATTT  
AGTAATGCCCTTCGGGTATCGTCTTGTTTTAGCCGATCTCAGTATCGGTGTTTTTTTTATG  
GATCGCCATTCAAGTATTGCCCTATTGGGCTTCTTATGTCAGGATATGGCTCGAATAAT  
AAATATTCTTTTCGGGTGGTCTACGGGCTGCTGCTCAATCTATTAGTTATGAAATACCA  
TTAACTCTATGTGTGTTATCAATATCTCTATTATCTAACAGTTAAGTACAGTTGATATAG  
TTGAGGCGCAGTCAAAATATGGTTTTGGGGGGTGAATCTATGGCGTCAACCTATAGGA  
TTTATAGTTTTTCTAATTTCTTCTCTAGCAGAATGTGAGAGATTACTTTTGATTTACCAG  
AAGCAGAAGAGGAATTAGTAGCAGGTTATCAAACCGAATATTCAGGTATCAAATACGG  
TTTATTTTACGTTGCTTCTTACCTAAATTTATTAGTTTCTTCATTATTTGTAACAGTTCTTT  
ACTTAGGTGGGTGGAATTTCTTTATTCCATACATATTCATTCCCAGCTTTTCGTAAAAA  
AGAAAATGGTTGTAGTCTTTGGAATGACAATTGGTATCTTTATTACATTAGTTAAAGCTT  
ATTTGTTTCTGTTCATTTCTATCACAACAAGATGGACTTTACCTAGGATGAGAATGGACC  
AGCTATTAATCTTGGATGGAAATTTCTTTTACCTATCTCTTTAGGTAATCTATTATTGAC  
AACTTCTTTTCAACTTGTTTCACTAATGATCTGGCATGTACAGAATGAAAACCTTCATTCT  
CGATTCTACGAGAATTTTTATGAAAGCGTTCATTTGCTTCTCTTCCATGGAAGTTTCAT  
TTTCCCAGAATGTATCCTAATTTTTGGCCTAATCTTCTTCTGATGATCGATTCAACCTCT  
GATCAAAAAGATAGACCTTGGTCTATTTTCATCTCTTCAACAACCTTAGTAATGAGCATA  
ACGGCCCTATTGTTCCGATGGAGAGAAGAACCTATAATTAGCTTTTTCGGGAAATTTCCA  
AACGAACAATTTCAACGAAATCTTTCAATTTCTTATTTTACTATGTTCAACTCTATGTATT  
CCTCTATCCGTAGAGTACATTGAATGTACAGAAATGGCTATAACAGAGTTTCTGTTATTC  
GTATTAACAGCTACTCTAGGAGGAATGTTTTTATGTGGTGCTAACGATTTAATAACTCTC  
TTTGTAGCTCCAGAATGTTTCAGTTTATGTTTCTTACCTATTATCTGGATATACCAAGAGA  
GATGTACGGTCTAATGAGGCTACTATGAAATATTTACTCATGGGTGGGGCAAGCTCTTCT  
ATTCTGGTTCATGGTTTCTTGGCTATATGGTTCATCTGGGGGGGAGATCGAGCTTCAA  
GAAATAGTGAATGGTCTTATCAATACACAATGTATAACTCCCCAGGAATTTCAATTGCG  
CTTATATCCATCACTGTAGGAATTGGGTTCAGCTTTCCCCAGCCCCTTTTCATCAATGG  
ACTCCTGACGTATACGAAGGATCTCCCACTCCAGTCGTTGCTTTTCTTTCTGTTACTTCG  
AAAGTAGCTGCTTCAGCTTCAGCCACGCGAATTTTCGATATTCCTTTTTATTTCTCATCA  
AATGAATGGCATCTTCTTCTGGAAATCCTAGCTATTCTTAGCATGATATTGGGGAATCTC  
ATTGCTATTACTCAAACAAGCATGAAACGTATGCTTGCATATTCGTCCATCGGTCAAATT  
GGATATGTAATTATTGGAATAATTGTTGGAGACTCAAATGATGGATATGCAAGCATGATA  
ACTTATATGCTGTTCTATATCTCCATGAATCTAGGAACTTTTGCTTGCATTGTATCATTG  
GTCTACGTACCGGAACTGATAACATTCGAGATTATGCAGGATTATACACGAAAGATCCT  
TTTTTGGCCCTCTCTTTAGCCCTATGTCTCTTATCCCTAGGAGGTCTTCCCTCCACTAGCA  
GGTTTTTTCGGAAAACCTCATCTATTCTGGTGTGGATGGCAGGCGGGCCTATATTTCTTG  
GTTTCAATAGGACTCCTTACGAGCGTTGTTTCTATCTACTATTATCTAAAAATAATCAAG  
TTATTAATGACTGGGCGAAACCAAGAAATAACCCCTCACGTGCGAAATTATAGAAGATC  
TCCTTTAAGATCAAACAATTCATCGAATTGAGTATGACTGTATGTGTGATAGCATCTAC  
TATACCGGGAATATCAATGAACCAATTCTTGCAATTGCTCAGGATACCCTCTTTATGTT  
TTTGCTTACGAATATGATATTTTCTGGGCATTTCTGATAATATCAAGCATTATTCCTATCT  
TGGCATTTCTAATTTCCGGAGTTTTAAACCCGATTAGGGAAGGATCAGAGAAACTCTCT

AGTTATGAATCGGGTATAGAACCTATGGGGAATGCTTGGTTACAATTCCGAATCCGCTAT  
TACATGTTTGCTCTAGTTTTTGTGTTTTTGTATGTTGAAACGGTCTTTCTTTATCCATGGG  
CAATGAGTTTTGATGTATTGGGCATATCTGTATTTATAGAAGCTTTCATTTTCGTGCTTAT  
CCCAATTGTTGGTTTAGTTTTATGCATGGCGAAAAGGAGCATTGGAATGGTCTACGAGTT  
ATTTTCCTTGGTTAACAATAATTGTCGTTTTGCCAATATTTGCAGCTTCTTCAATTTTTT  
TCTCCCCATAAGGGGAATAAGGTCTTTCGATGGTATACTACTTGTATTTGTTAACGGA  
ACTCCTCCTAACAACCTATGTATTCTGTTATCATTTCCAATTGGATGATCAATTGATCCAA  
TTGGAGGAGGATTTGAAATGTATAAATATTTTTGATTTTCACTGGAGACTGGGAATCGA  
CGGACTTTCATAGGACCCATTTTACTAACAGGATTTATCACTACTTTGGCAACTTTAGC  
GGCTTGGCCAGTTACTCGAAATTCGCGATTGTTCTATTTACTGATGTTAGTAATGTATAG  
CGGTCAAATAGGATTATTTTCTTCTCGGGACTTTTACTTTTTTTCATCATGTGGGAGTT  
AGAATTAATTCCTGTTTACTTACTTCTATCTATGTGGGGGGGAAAGAAACGTTTGTATTC  
GGCTACAAAGTTTATTTTGTACACTGCAGGGGGTCTGTTTTTCTCTTAATAGGAGTTCT  
AGGTATGGGTTTATATGGTTCCAATGAACCAACATTAGATTTTGAAAGATTAGCTAATCA  
ATCATATCCTGTGGCATTGGAATAATATTCTATTTTGGTTTCCTTATTGCTTATGCTGTCA  
AATCGCCGATTATACCCCTGCATACATGGTTACCAGATACCCATGGAGAAGCACATTAC  
AGTACATGTATGCTTCTAGCTGGAATCTTATTA AAAATGGGAGCATATGGATTGATTTCGA  
ATTAATATGGAATTATTACCTCACGCTCATTCTCTATTTTCTCCCTGGTTGGTGATAGTTG  
GAACGATACAAATAATCTATGCAGCTTCAACCTCTTTCGGTCAACGCAATTTAAAAAAG  
AGAATAGCCTGCTCTTCCGTATCTCACATGGGTTTCATAATTATAGGAATTGGTTCTATAA  
CCGACACAGGACTTAATGGGGCTATTCTACAAATACTCTCTCATGGATTTATTGGTGCTG  
CACTTTTTTCTTGTGCGGAACGAGTTGTGATAGAATACGTTTTGTTTATCTAGACGAAA  
TGGGTGGGATATCTTCCAATGCCAAAAATTTACTATGTTTAGTAGTTTCTCGATGG  
CTTCTCTTGCATTGCCGGGAATGAGTGGTTTTGTTGCCGAATTAGTAGTATTTTGGGGA  
TAATTACCAGTCCAAAATATCTTTAATGCCAAAAATCCTAATTACTTTTGTAAATGGCAAT  
TGGAATGATATTAACCTCTATTTATTTATTGTCTATGTCACGTCAGATGTTCTATGGATAC  
AAGTTATTCAATGTCCAAACTCCTTTTTTGTAGATTCTGGACCGCGAGA ACTATTTGTT  
TCGATCTGTATCTTTTACCCGTAATAGGTATTGGTATTTATCCGGATTGCGTTTTCTCAC  
TATCAGTTGATAAGATAGAAGGTATCTTATCTAATTATTTTCATAGAATGATGTTTCGAACA  
TGTA CTAGTTTTGAGTGTATATTTATTTTCTATCGGTATCTATGGATTGATCACAAGTCGA  
AACATGGTTAGAGCACTTATGTGTCTTGATCTTATACTAAATTCGGTTAATATGAATCTCG  
TAACATTTTCTGATTTATTTGATAGTCGACAATTA AAAAGGAGACATTTTCTCAATCTTTG  
TTATAGCTGTTGCAGCTGCTGAAGCAGCTATTGGTCTAGCTATTGTTTCGTCGATCTACC  
GTAACAGAAAATCAACTCGTATCAATCAATCCA ACTTGTGTAATAATATGGAACATACAT  
ATCAATATGCGTATATAATACTCTTTCTTCCACTTCCAGTTACTATGTCAATAGGATTTGG  
ACTTCTATTTGTTCCGACAGCAACAAAAAATATTCGTCGTATGTGGGCTTTTGTAGTGT  
TTTATTGCTAAGTATGGTTATGGGGTTTTCGGTCAATCTGGCTATTCAGCAAATAAATGG  
AAGTTTTATCTATCAATATCTATGTTCTTGGACCATCAATAATGATTTTTCTTAGAGTTC  
GGATACTTGATCGATCCACTTACTTCTATTATGTCATTACTAATTTCTACTGTTGGAATCA  
TGGTTCTTATGTATAGTGACAATTATATGTCTCACGATCAGGGATATCTGAGATTTTTTGC  
TTATATGAGTTTTTTCAATACTTCCATGTTGGGATTAGTTACTAGTTCCAATTTGATACAA  
ATTCATATTTTTTGGGA ACTAGTGGGAATGTGTTCC TATTTATTAATAGGTTTTTGGTTCA  
CACGACCTATTGCGGCAAGTGCTTGTCAAAAAGCTTTTTGTAATTAATCGGGTAGGTGAT  
TTTTGTTTTATTATTAGGAATCTTAGGTTTTTATTGGATAACAGGTAGTTTAGAATTTAGAG

ATTTGTTTCGAAATAGTTAATAACAATGGGGTCAATTTTAGATTTGCTATTTTATGTGCCTG  
TTTATTATTCTTGGTGCAGTTGCTAAATCCGCACAATTTCCCCTTCACGTATGGTTACCC  
GATGCTATGGAGGGACCTACTCCCATTTTCGGCTCTTATTCATGCTGCTACTATGGTAGCA  
GCCGGAATTTTTCTTGTAGCACGACTTCGTCCTCTTTTTATAGTCATACCTTACATAATG  
AATCTCATTCTTTAATAGGTATAATAACACTATTATTAGGAGCTACTTTGGCTCTTGCTC  
AAGGAGACATTA AAAAGAAGTTTAGCCTATTTCGACAGTGTCCCAATTGGGTTATATTATG  
TTAGCCCTAGGTATAGGTTCTTATCGAGCTGCTTTATTTCAATTTGATCACTCATGCCTATT  
CTAAAGCTTTATTGTTTTTGGGATCCGGATCCATTATTCATTCAATGGAACCTGTTGTTG  
GATATTCGCCGATAAAAAGTCAGAATATGGTCTTATGGGTGGTTTAAAAAATATGTTT  
CAGTTACAAGAACCACGTTTTTATTAGGTACACTTTCTCTTTGTGGTATTCCACCTCTTG  
CTTGTTTTTGGTCCAAAGATGAAATCTTACTGATAGTTGGTTGTATTACCCATTTTCG  
CAATAATAGCTTATTTACAGCAGGATTAACCGCATTTTATATGTTTCGAGTGTATTTACT  
TACTTTTGATGGCTGTTTGCGCGTTCATTTCAAATATAGTAGCACTAAGCGTAGCTT  
GTTCTGTTCTGTATCTGTATGGGGGAGAGAACCACTTAAAATAGACAATCAA---AATTTA  
CCTTTCTTAATCTTAAAATTTTTTTCAAATAAATAC-----ACTTACATGTATCCTCATGAAT  
CGGAAAATACTGTGCTATTTCTCTGCTTGTATTGGTACTATTTACTTTGGTTCGTTGGATT  
AATAGGAATTCCTTTTGATTTTGATATATTATCGAAATGGTTAACT-----AACCTTTCC  
AAAAGAATTTGAATCATTCTGTGGATTGGTACGAATTTTGACGAATGCTATTTTTTCAG  
TAAGTGTATCCCTTTTCGGACTATTCATAGCATCCATTTTCTATGGGTCTGTTTATTCATC  
TTCCAGAATTTGGACTTAATCAATTTTTTTGTAATTCTATTGGATCAAATAAAAAATGTA  
ATATACAATTTGGTCATATAATCGTGGTTACATAGATATTTTTTATACTAAGGGCTTAACTAT  
GAGTATAAGACGACTGTCCAAATTAATTCAGTTTTTTGATAGATATATAATTGATGGAATT  
ACAAATGGGATTGGTGTGCAAGTTTCTTTATAGGGGAAGGGATAAGATAT--ATAGGCG  
GGGGCGAATATCGTCTTATTTATTCTTGTATTTATCTTATGTATCAATATTTTTAATATTTT  
ATCAAATGGATTTACTTGGACCAATACATGATATTCTTGTAAATTTCTGGGATCAGTTCT  
TATATTAGGGGGTTTGGGAGTAGTATTACTTAAACAATCTAATTTATTCTGCCTTTTCATTG  
GGATGGGTCTTTTTTTGTATATCCTTATCTATATTTTCATCAAACCTCCTATTTTGTAGCTGC  
TGCGCAGCTCCTTATTTATGTGGGAGCCATAAATGTCTTAATTATATTTGCTGTAATGTTT  
ATAAGTGGTTCAGAATATTCTAATGATTCCCATCTTTGGACCGTTGGGGATGGGGTCACT  
TCAGTGGTTTGTACAAGTATTTTTTTTTCACTAATTACTACTATCCCAGATACATCATGGT  
ACGGGATTATTTGGACTACAAGATCAAACCAAATATAGAACAGGACCTAATAAGTAAT  
GTTCAACAAATTTGGGATTCATTTATCAACAAATTTTTATCTTCCGTTTGAACCTATTTTCGA  
TAATCTTTTAATTTCTTTAATAGGTGCAATTAATGCTCGTCAAATGACTGTACCGGA  
TACAAGAAAGGGTCTGATGATAGTCAATATGGGTCTCACCACCCATCAATGCATGGTG  
TTCTTCGACTGATCGTTACTCTCGAGGGTGAAGATGTTATTGACTGTGAACCCATATTG  
GGCTATTTACACAGAGGAATGGAAAAATAGCGGAAAACCGAACAATTATACAATATCT  
GCCTTATGTAACACGTTGGGATTATTTAGCTACTATGTTTACAGAGGCAATAACGGTAAA  
TGCGCCAGAACAGTTGGGAAATGTTCAAGTACCTCAAAGAGCGAGTTATATAAGAGTA  
ATTATGCTGGAACCTGAGTCGTATAGCTTCTCATTTGTTATGGCTTGGACCTTTTATGGCG  
GATATTGGTGCACAGACTCCCTTTTTCTATATTTTTCAGAGAGAGGGAATTACTATATGAT  
TTATTCGAAGCTTCTACAGGTATGCGAATGATGCATAATTTATTTCCGTATCGGAGGAGTA  
GCTGCTGATCTACCTCATGGATGGATAGATAAATGTTTGGATTCTGCGATTATTTTTTAA  
CCAGAGTTGCTGAATATGAAAACTTATTACGCGGAATCCCATTTTTTTTGGACCGAGTT  
GAAGGAGTGGGCATTATTGGTGGGGAGGAAGCAATAAATGGGGCTTATCAGGACCAA

TGTTACGAGCTTCTGGAATACCATGGGATCTTCGTAAAGTTGATCATTATGAGTGTTACA  
ATGAATTCGATTGGGAAGTCCAATGGCAAAAAGAAGGAGATTCATTAGCTCGTTATTTA  
GTACGAATAGGTGAAATGACGGAATCCATAAAAATTATTCAACAGGCTATAGAAGGGAT  
TCCAGGGGGGCCCTATGAGAATTTGGAAGTCCGACGCTTTGATGGAGCAACAAATTCT  
GAATGGAATGATTTGGAATATGGATTCATTAGTAAAAACCTTCACCCAATTTTGAATTG  
TCCAAACAAGAACTTTATATGAGAGTAGAAGCCCCAAAAGGAGAATTAGGAATTTATAT  
GATAGGAGATAATAGTGTTTTCCCTTGGAGATGGAAAATTCGTCCACCCGGTTTCATCA  
ATTTGCAAATTCCTCCCAATTAGTTAAAAGAATGAAATTGGCTGATATCATGACGATAC  
TAGGTAGTATAGATATCATTATGGGAGAAGTTGATCGTATGTTCCCTATGGTGACTGGGT  
TCATAAATTACGGTCAACAAACAATACGAGCTGCAAGGTACATTGGTCAAAGTTTTATA  
ATTACCCTATCTCACACAAATCGTTTACCTGTAACTATTCAATATCCTTATGAAAAATCAA  
TCGCATCAGAGCGATTCCGTGGTCAATTCACCTTGAATTTGATAAATGTATTGCTTGTG  
AAGTATGTGTTGCGTGTATGTCCAATAGATCTACCCGTTGTTGATTGGAGATTAGAAAA  
AATATAAAAAAAAAACAATTGCTTAATTACAGTATTGATTTTGGATTCTGTATATTTTGTG  
GTAAGTGTGTCGAGTATTGCCCAACAACACTGTTTATCAATGACTGAAGAATATGAACTT  
TCCACTTATGATCGTCACGAGTTGAATTATAATCAAATTGCTTTGGGACGGTTACCGATG  
TCAGTAATTGGGGATTACACAATTCAAACAGTTCTGAATTGGAAAATAGACAAGAATA  
AACTACTTGATTGAGAACGATTACCAATTACATGCAGAGCCGTTTATCTGATTGGCTA  
GTCAAGCATGAGCTAGTCCATAGATCCTTGGGCTTCGACTACCAGGGAATAGAGACTTT  
ACAAATAAAACGGAGGATTGGGACTCCATTGCTGTCATTTCATATATATATGGTTACAA  
TTATTTACGCTCCCAGTGTGCCTATGATGTAGCACCAGGCGGATTTTTAGCTAGTGTGTA  
TCATCTTACGAGAATACAATATGGTATAGATAAAGTGGAAAGAGGTATGCTTAAAAGTATT  
TGTCTCAAGGAATAATCCTAGAATTCCTTCTGTTTTCTGGATTGGAAAAGTGCTGATT  
TCAAGAGCGGGAATCTTATGATATGTTGGGAATCTCTTATGCTAATCATCCACACCTTAA  
ACGTATCTTGATGCCCGAAAGTTGGATAGGTTGGCCCCTACGTAAGGACTATATTACTCC  
CAATTTCTATGAAATAACAAGATGCTCGT-----

-----  
ATGAATTTGATTGAGTTTACGTTACTTGACCAAACGACCCCAATTCAGTTATCTCAACT  
ACATCGAATGATCTTTCGAATTGGTCAAGACTATCCAGTTTATGGCCACTTCTCTATGGT  
ACCAGTTGTTGTTTCATTGAATTTGCTTCATTAATAGGTTTCGCGATTCGACTTTGATCGT  
TATGGATTGGTACCAAGATCGAGTCCTAGGCAAGCGGACCTAATTTAACAGCCGGCAC  
AGTAACAATGAAAATGGCTCCTTCTTTAGTGAGATTATATGAGCAAATGGCTGAACCAA  
AATATGTTATTGCTATGGGAGCCTGTACTATTACGGGAGGGATGTTTCACTGATTCTT  
ATAGTACTGTTCGGGGAGTTGATAAGCTAATTCCTGTGGATGTCTATTTGCCGGGCTGCC  
CCCCTAAACCAGAGGCAGTTATAGATGCTATAACGAAACTTCGTAAGAAGATATCTCGA  
GAAATCTCTGAAGATAGGGTTATGTCTCAA--GAAAATCGATCTTTTACTACCAATCACA  
AGTTTGATATTCGACGCAGTACTCATACTGGAAATTATGATCAAGGATTGTTCTATCAAT  
CATCATATACTTCAGAGATATCTAGA-----TTTTTCAAATCCAAAATTCAGTATCTTCCC  
ACGAATTAGTGAATATGCAAAATAGAAATACTTTTTTGGGGGTAAAGGAGCAGATAACT  
CGATCCATTTTTGTATCGATCATGATATAIGTAATAACTCGGGCATCTATTTCAAATGCATA  
TCCATTTTTGCACAACAGGGTTATGAAAATCCACGAGAAGCAACTGGACGAATTGTA  
TGTGCCAATTGTCATTTAGCTAGTAAGCCCGTGGATATTGAAGTTCCCAAGCTGTGCT  
TCTTGATACTGTATTTGAAGCAGTTGTTTCGAATCCCTTATGATATGCAACTGAAACAAGT  
TCTTGCTAATGGTAAAAAGGGGCTTTGAATGTGGGGGCTGTTCTTATTTTACCCGAAG

GATTCGAATTAGCCCCTCCCGATCGCATTCTCCTGAAGTGAAAGAAAAGATGGGAAA  
TCTGTCTTTTCAGAATTATCGTCCCAATAAAAAAATATTATTGTGATAGGTCCCGCTCC  
TGGTCAGAAATATAGTGAAATCGTCTTTCCTATTCTTTCCTCCCGACCCCTGCTACGAAAA  
AAGACGTTCACTTTTTTAAAATATCCTATATATGTAGGTGGGAACAGAGGAAGGGGACAG  
ATTTATCCTGATGGAAGCAAAGTAACAATACAGTCTATAATGCTACATCAGCAGGTATA  
GTAAGCAAATAGTACGTAAAGAAAAGGGGGGATATGAAATAACCATAATTGATGCATC  
GGACGGACATCAGGTGGTTGATATTATACCTCGAGGACCAGAACTTCTTGTTTCAGAGG  
GTGAATCCATCAAGCTTGATCAACCATTAACAAGTAATCCAAATGTGGGGGGCTTTGGT  
CAGGGAGATGCAGAAATAGTGCTTCAAGATCCATTACGCATCCAAGGTCTTTTGTCTT  
CTTGGCATCTGTGATTTTGGCACAAATTTTTTTGGTCTTAAAAAGAAACAATTTGAAA  
AGGTTCAATTGTACGAAATGAATTCATGAGTAAAGTATATGATTGGTTCGAGGAACGT  
CTCGAGATTCAGGCGATTGCAGATGATATAACTAGTAAATATGTTCCCTCCTCATGTTAAC  
ATATTTTATTGTCTAGGAGGGATCACACTTACTTGCTTTTTAGTACAAGTAGCTACGGGT  
TTTGCTATGACTTTTTACTATCGTCCAACCGTTACGGAAGCCTTTTCCTCTGTTCAATAC  
ATAATGACTGAGGCCAACTTTGGCTGGTTAATCCGATCAGTTCATCGATGGTCGGCAAG  
TATGATGGTCTAATGATGATCCTGCACGTATTCGTGTGTATCTCACAGGTGGATTTAA  
AAAACCTCGCAATTAACCTGGGTTACAGGCGTGGTTTTGGCTGTATTGACTGCATCTT  
TTGGTGTAACCTGGTTATTCCCTACCTCGGGACCAAATTGGTTATTGGGCCGTAAAAATT  
GTGACAGGTGTACCTGAAGCTATTCCTGTAATAGGATCCCCTTTGGTAGAGTTATTACGT  
GGAAGTGCTAGTGTGGGGCAATCCACTTTGACTCGTTTTTATAGTTTACACACTTTTGTA  
TTGCCTCTTCTTACTGCTGTATTTATGTTAATGCACTTTCTAATGATACGTAAGCAAGGTA  
TTTCAGGTCCTTTAATGGGAATAACAAAGAAACCTGATTTAAATGATCCTGTATTGAGA  
GCTAAATTGGCCAAAGGAATGGGGCATAATTATTATGGAGAACCTGCCTGGCCCAATGA  
TCTTTTATATATTTTTCCAGTAGTAATTCTAGGTAATTTGCATGTAACGTAGGCTTAGCA  
GTTCTAGAACCGTCAATGATTGGTGAACCGGCGGATCCATTTGCAACTCCTTTGGAAAT  
ATTACCCGAATGGTACTTTTTTCCCGTATTTCAAATACTTCGGACAGTACCAAATAAGTT  
ATTGGGTGTTCTTTTAATGGTTTCAGTACCAATAGGATTATTGACAGTGCCATTTTTGGA  
AAATGTGAATAAATTCCAAAATCCATTCGTCTGTCAGTAGCTACAACAGTTTTTTTTGAT  
CGGTACCGCAGTAGCTCTTTGGTTAGGTATTGGAGCAACATTACCTATTGATAAATCTTT  
AACTTTAGGTCTTTTTATGATTGAAGTTTTTCTATTTGGAATCGTCTTAGGTCTAATTCCT  
ATTACTTTGGCAGGATTATTTGTAACCTGCATATTTACAATATAGACGCGGTGATCAGTTG  
GACCTTATGCTTACTATAACTAGTTATTTGGTTTTCTGCTGGCTGCTTTAACTATAACCC  
CGGCTCTATTAATTAGTTTGAACAAGATACAACTTATTATGGATATAGTAAGTCTCGCTT  
GGGCTGCTTTAATGGTGGTCTTTTCCTTTTCCCTTTCACTTGTAGTATGGGGAAGGAGT  
GGACTCATGATTATTCGTTACCCGGAACCAGAAGTGAAAATTGTTGTAGATAGGGATCC  
CATAAAAACGTCTTTCGAGGAATGGGCCCACCCGGCCATTTCTCAAGAACAATAGCT  
AAGGGCCCCGATACTACCACTTGGATCTGGAACCTACATGCCGATGCTCACGATTTCGA  
TAGTCATAACCAGTGATTTGGAAGAGATTTCTCGAAAAGTATTTAGTGCTCATTTCCGGTC  
AACTCTCCATTATCTTTCTTTGGCTGAGTGGCATGTATTTCCATGGTGCCCGTTTTTTCCA  
ATTATGAAGCATGGCTAAGTGATCCTACTCATATTGGACCCAGTGCGCAGGTGGTTTTGG  
CCAATAGTAGGTCAAGAAATATTGAATGGTGATGTGGGCGGGGGTTTTCCGGGAATAC  
AAATAACTTCCGGTTTTTTTTCAGATTTGGCGAGCATCTGGAATAACTAGTGAATTACAA  
CTCTATTGTAAGCAATTGGTGGATTGGTCTTTGCATCGTTAATGCTTTTTGCCGGTTGG  
TTCCATTATCACAAAGCCGCCCAAATTTGGCTTGGTTCCAAGATGTGGAATCTATGTT



GAATCACCACCTTAGCAGGGTACTAGGGCTTGGGTCTCTTTCTTGGGCGGGGCACCAA  
ATCCATGTATCTTTACCGATTAACCAATTTCTCGACGCTGGAGTTGATCCTAAAGAAATA  
CCACTTCCTCATGAATTTATCTTGAATCGGGATCTTTTGGTTCAACTTTATCCCAGTTTT  
GCCGAGGGAGCAACCCCTTTTTTACCTTGAATTGGTCAAATAACGCAGAATTTCTGA  
GTTTTCGTGGGGATTAGATCCAATAACAGGGGGTCTGTGGCTGAGCGATATAGCACAC  
CATCATTTAGCTATTGCAATTTCTTTCTGATCGCCGGTCATATGTATAGGACCAACTGG  
GGTATTGGTCATGGCCTTAAAGACATTTTAGAAGCCATAAAGGTCCATTTACAGGCCA  
GGGTCATAAGGGTCTTTATGAAATCCTAACACATCATGGCATGCTCAATTATCTCTTAA  
CCTGGCTATGTTAGGTTCTTTAAACAATTGTTGTAGCTCACCATATGTATTCCATGCCCCC  
TATCCATACTAGCTATTGACTATGGTACACAACCTTCCCTTGTTACACATCACATGTGG  
ATCGGTGGATTTCTCATAGTTGGTGCTGCTGCACATGCAGCCATTTTTATGGTAAGAGA  
CTACGATCCAACACTCGATAACAACGATCTATTAGATCGTGTCCCTTAGGCACCGTGATGC  
AATCATATCACATCTTAATTGGGCATGTATATTTTTAGGGTTTCACAGTTTTGGCTTATATA  
TTCATAACGATACCATGAGCGCTTTAGGTCTGCCCAAGATATGTTTTTACAGATACCGCTA  
TACAACTACAACCCGTCTTTGCTCAATGGGTACAAAACACCCATGCTTTAGCGCCGGGT  
GTAACAGCTCCTGGTGCAACAACAAGTACCAGCTTAACTTGGGGAGGTGATCAATTAG  
TAGCAGTAGGTGGCAAAGTAGCTTTGTTACCTATTCCATTAGGAACCGCAGATTTTTTG  
GTCCATCACATTCATGCATTTACAATCCATGTGACTGTATTGATACTACTGAAAGGCGTT  
CTATTTGCTCGCAGTTCCCGTTTGATACCTGATAAAGCAAATCTTGGTTTTCTGTTTTCCC  
TGTGATGGGCCTGGAAGAGGAGGAACATGTCAAGTATCCGCCTGGGATCATATCTTCTT  
AGGTCTATTCTGGATGTACAATGCAATTTTCGGTAGTAATTTTCCATTTTAGTTGGAAAAT  
GCAGTCAGATGTTTGGGGTACTATAAGCGATCAAGGAGTGGTAACCCATATCACAGGA  
GAAACTTTGCACAGAGTTCCATTACTATTAATGGGTGGTTACGGGATTTCTTATGGGC  
ACAGGCATCTCAGGTAATTCAGTCTTATGGTTCTTCATTATCTGCATATGGTCTTTTTTTC  
TTAGGTGCTCATTGTTGCTGGGCTTTCAGTTTAATGTTTCTATTACAGCGCCGTGGTTAT  
TGGCAAGAACTCATTGAATCCATCATTGGGCTCATAACAAATTAAGTTGCTCCTGC  
TACTCAGCCTAGAGCCTTGAGTATCGTACAAGGACGCGCTGTAGGAGTAACCCATTACC  
TTCTGGGTGGAATTGCCACAACATGGGCATTCTTCTTAGCAAGAATTATTGCAGTAGGA  
ATGGCATTAAAGATTTCCAAGGTTTAGCCAAGGCTTAGCTCAGGACCCCACTACTCGTCG  
TATTTGGTTTTGGTATTGCTACTGCACATGACTTCGAGAGTCATGATGATATTACTGAGGA  
ACGTCTTTATCAGAACATTTTTGCTTCTCATTGTTGGGCAGTTAGCAATAATTTTTCTGTG  
GACGTCCGGAAATCTGTTTCATGTAGCTTGGCAAGGAAATTTGAGTCATGGATAACAGG  
ACCCCTTACATGTAAGACCTATTGCTCATGCAATTTGGGATCCTCATTTTGGTCAACCCG  
CTGTAGAGGCCCTTACTCGAGGAGGTGCTATCGGCCCGTGAATATTGCTTATTCCGGT  
GTTTATCAGTGGTGGTATAACAATCGGATTACGCACCAATGAAGATCTTTATACTGGAGCT  
CTTTTTCTATTATGTCTTTCTGCTATATCTTTAATAGCAGGTTGGTTACACCTACAACCCA  
AATGGAAACCCAGCCTTTCTGTTGTTTAAAATGCCGAATCTCGCCTCAATCATCATTG  
TCAGGACTTTTCGGAGTAAGTTCCTTGGCTTGGGCAGGACATTTAGTTCATGTTGCTAT  
CCCCGGATCCCGGGGGAGTACGTCAGATGGAATAATTTCTTAAACGTATTACCACATC  
CCCAAGGGTTGGAACCCCTTCTACGGGTGAGTGGAAATCTTTATGCCCAAACTCTGAT  
TCCAGCAGTCATTTATTTGGTACCTCCAAGGGGGCGGGAAGTCCATTCTAACTCTTCT  
TGGGGATTCCATCCACAAACGCAAAGTTTATGGCTGACCGATATTGCTCATCATCATT  
AGCCATTGCATTTCTTTTTCTCGTTGCTGGTCATATGTATAGAATACTTCGGGATTGG  
GCACAGTATCAAAGATCTTTTAGAAGCACATATTCCTCCTGGGGGTCGATTAGGACGTG

GACATAAAGGTCTTTATGACACAATCAATAATTCGATTCATTTTCAATTAGGTCTTGCTC  
TAGCCTCTTTAGGGGTTATTACTTCCTTAGTAGCTCAACACATGTA CTCTTTACCTGCTTA  
TGCATTCATAGCACAAGACTTTACTACTCAAGCTGCGTTATATACTCATACCAATACAT  
CGCAGGGTTCATCATGACAGGAGCCTTTGCTCATGGAGCTATATTCTTCATTAGAGATTA  
CAATCCGGAACAGAATGAAGATAATGTATTGGCAAGAATGTTAGACCATAAAGAAGCTA  
TCATATCTCATTTAAGTTGGGCCAGCTTGTTTCTGGGATTCATACTTTGGGACTTTATG  
TTCATAACGACGTCATGCTCGCTTTTGGTACTCCGGAAAAACAAATCTTGATTGAACCC  
ATATTTGCCCAATGGATACAATCTGCTCATGGTAAGACTTCATATGGGTTTCGATGTACTC  
TTATCTTCAACGAATGGCCCAGCATTCAATGCGGGTCGAAGTATATGGTTACCTGGTTG  
GCTGAATGCTATTAATGAG-----AATAGTAATTCACTCTTCTTAACAATAGGTCTGGAGA  
TTTCTTGGTCCATCATGCTATTGCTCTAGGTTTGCATACA ACTACATTGATTTTTAGTAAAA  
GGTGCTTTAGATGCACGTGGTTCCAAGCTAATGCCAGATAAAAAGGATTTTGGTTATAG  
TTTTCTTGGCAGTTTTCTGGATGTTAAATACCATTGGATGGGTTACTTTTTATTGGCATTG  
GAAACACATCACATTATGGCAGGGTAACGTTTCACAATTTAATGAATCCTCCACTTATTT  
GATGGGATGGTTAAGAGATTATCTATGGTTGAACTCTTCACA ACTTATCAATGGATATAA  
CCTTTTTGGTATGAATAGTTTATCGGTATGGGCGTGGATGTTCTTATTTGGGCATCTTGTT  
TGGGCTACTGGATTTATGTTCTTAATTTCTGGCGTGGATATTGGCAGGAATTGATTGAA  
ACTTTAGCATGGGCTCATGAACGTACACCTTTGGCTAATTTAATTCGGTGGAGAGATAA  
GCCAGTGGCTCTTTCCATTGTTCAAGCAAGATTGGTTGGATTAGCCC ACTTTTCCGTAG  
GTTATATATTTACTTATGCAGCTTTCTTGATTGCCTCTACATCTGGAAAATTTGGTATGTC  
GCATTCAGTAAAAATTTATGATACATGTATAGGGTGTACTCAATGTGTACGAGCCTGTCC  
CACAGATGTATTGGAAATGATACCTTGGAATGGATGTAAAGCTAAACAAATTGCTTCTG  
CGCCAAGAACCGAGGACTGTGTAGGTTGTAAGAGATGTGAATCTGCTTGCCCAACAAA  
TTTTTTGAGTGTCCGTGTTTATTTATGGCATGAAACA ACTCGGAGCATGGGTCTATCTTA  
TATGACAGATCTTAACTTACCCTCTATTTTTGTGCCCTTAGTAGGCCTAGTATTTCCGGC  
AATTGCAATGGCTTCATTATCTCTTTATGTCCAAAAAATAAGATTGTGCATGCGAAATAT  
AAAAACATATCTTTCCACGGTTCTGTACTA ACTACTCTATGGTTTGGATCTTTGGCGGG  
TCTCTTGATAGAAATTAATCGTTTATTCCCGGATGCCTTATTATTCCCTTTTTTTTTCATTCA  
TGA CTGCAATTTTAGAGAGACGCGAAAGTACAAGCCTATGGGGTCGCTTCTGTA ACTG  
GATAACCAGCACTGAAAACCGTCTTTACATTGGATGGTTTGGTGT TTTGATGATCCCTA  
CCTTATTGACCGCAACTTCTGTATTTATTATCGCCTTCATTGCTGCTCCTCCAGTAGATAT  
TGATGGTATTCGTGAACCTGTTTCTGGTTCTCTACTTTATGGAAACAATATTATCTCTGGT  
GCCATTATTCCTACTTCTGCAGCTATAGGTTTGCATTTTTATCCGATATGGGAAGCAGCAT  
CTGTTGATGAGTGGTTATAACAATGGCGGTCCTTATGAACTAATTGTTCTACACTTCTTAC  
TTGGTGTAGCTTGTTATATGGGTCGTGAGTGGGAACTTAGTTTCCGTCTGGGCATGCGT  
CCTTGGATTGCTGTTGCATATTCAGCTCCTGTTGCAGCTGCTACTGCTGTTTTCTTGATC  
TATCCTATTGGTCAAGGAAGTTTTTCTGATGGTATGCCTTTAGGAATTTCTGGTACTTTT  
AACTTTATGATTGTATTCCAGGCAGAACACAATATCCTTATGCACCCATTTACATGTTA  
GGCGTAGCTGGTGTGTTTCGGCGGCTCCCTATTTAGTGCTATGCAITGGTTCTTTGGTAACC  
TCTAGTTTGATCAGGGAAACCACTGAAAACGAGTCTGCTAATGAAGGTTACAAATTCG  
GTCAAGAGGAAGAACTTATAATATCGTAGCTGCTCATGGTTATTTTGGTCGATTGATCT  
TCCAATATGCTAGTTTCAACAATTCTCGTTCCTTACATTTCCCTCTTGGCTGCTTGGCCCTGT  
AGTAGGTATTTGGTTTACTGCTTTGGGTATTAGTACTATGGCTTTCAACTTAAATGGTTT

CAATTTCAACCAATCTGTAGTTGACAGTCAAGGCCGTGTCATTAACACTTGGGCTGATA  
TCATTAATCGCGCTAACCTTGGTATGGAAGTAATGCATGAACGTAATGCTCACAACCTTC  
CTCTAGACCTAGCTGCTGTTGAAGCTCCATCTACAAATGGAATGGGTTTACCTTGGTAT  
CGTGTTCATACTGTCGTATTGAATGATCCCGGTCGATTACTTTCTGTCCATATAATGCATA  
CAGCTCTAGTTTCTGGTTGGGCCGGCTCGATGGCTCTATACGAATTAGCGGTTTTTGATC  
CCTCTGACCCCGTTCTTGATCCAATGTGGAGACAAGGTATGTTTGTATAACCCTTCATGA  
CCCGTTTAGGAATAACCAATTCATGGGGTGGTTGGAGTATTTCA---GGGGGAAGTATAA  
CGAATCCGGGTATTTGGAGTTATGAAGGTGTGGCAGGGGCACATATTGTGTTTTCCGGC  
TTGTGCTTTTTGGCAGCTATCTGGCATTGGGTGTATTGGGACCTAGAAATATTCTGTGAT  
GAACGTACGGGAAAACCTTCTTTGGATTGCCCCAAAATCTTTGGAATTCATTTATTTCTC  
TCAGGATTGGCTTGTTTTGGCTTTGGCGCATTTCATGTAACAGGCTTGTATGGTCCTGG  
AATATGGGTGTCCGATCCTTATGGACTAACTGGAAAAGTACAATCTATAAATCCAGCAT  
GGGGTGTGGAAGTTTTGATCCTTTTGTCCGGGAGGAATAGCCTCTCATCATATTGCA  
GCGGGTACATTGGGCATATTAGCGGGTCTATTCCATCTTAGTGTTTCGTCCACCTCAACGT  
CTATACAAAGGATTACGTATGGGAAATATTGAAACTGTACTTTCCAGTAGTATCGCTGCT  
GTTTTTTTTGCAGCTTTCGTAGTTGCCGGAATATGTGGTATGGTTCAGCAACTACCCC  
AATCGAATTATTTGGTCCCACTCGTTATCAGTGGGATCAGGGATACTTCCAGCAAGAAA  
TATATCGAAGAGTTGGGGTTGGACTGGCCGAAAATCTGAGTTTATCGGAAGCTTGGTCT  
AAAATTCCCGAAAAATTAGCTTTTTATGATTATATTGGTAATAATCCAGCAAAAAGGGGGA  
TTATTTAGAGCAGGCTCAATGGACAACGGGGATGGAATAGCTGTTGGATGGTTAGGAC  
ACCCCATCTTTAGAGATAAAGAAGGGCGTGAGCTTTTTGTACGTCGTATGCCTACCTTT  
TTTGAACATTCCCGGTAGTTTTGGTAGATGTAGACGGAATTGTTAGAGCCGATGTTCC  
TTTTAGAAGGGCGGAATCAAAATATAGTGTTGAACAAGTAGGTGTAAGTGTGAGTTCT  
ATGGTGGCGAACTCAATGGAGTCAGTTATAGTGATCCCACTACTGTGAAAAAATATGCT  
AGACGTGCCCAATTAGGTGAAATTTTTGAATTAGACCGGGCTACTTTGAAATCCGATGG  
TGTTTTTCGTAGTAGTCCAAGAGGTTGGTTCCTTTCGGGCATGCCTCATTGTCTCTGC  
TCTTCTTTTTCGGACACATTTGGCATGGCGCTAGAACCTTGTTTCAGAGATGTTTTTGT  
GGTATTGATCCAGATTTGGATGCTCAAGTGGAAATTTGGAGCATTCCAAAAAATTGGAGA  
TCCAACCTACACGGAGACAGGCAGTCATGAAAACCTTATATTCCCTGAGGAGGTTCTAC  
CCCGTGGAAACGCTCTTTAATGAACTTTAGCTTTAGCTGGTCGTGACCAAGAACTA  
CCGGTTTCGCTTGGTGGGCCGGGAATGCCAGACTTATAAATTTGTCTGGTAAACTACTT  
GGGGCTCACGTAGCCCATGCCGATTAATCGTATTCTGGGCCGGAGCAATGAACCTATT  
TGAAGTGGCTCATTTCGTACCAGAGAAACCCATGTATGAACAGGGATTGATTTTACTTC  
CCCACCTAGCTACTCTGGGTTGGGGGGTAGGTCCGGGGGGGAAGTTATAGACACCTT  
TCCCTACTTTGTATCTGGAGTACTTCACTTAATTTCTTCTGCAGTCTTAGGCTTTGGCGG  
TATTTATCATGCACTTCTCGGACCTGAGACTCTTGAAGAATCCTTTCCATTCTTCGGTTA  
TGTATGGAAAGATAGAAATAAAATGACTACAATTTTAGGTATTCATTAATTTTGTAGG  
TATAGGTGCTTTTCTTCTAGTACTCAAGGCTCTTTATTTTGGTGGTGTATAACGATACTTGG  
GCCCCAGGGGGAGGAGATGTAAGAAAAATTACCAACTTGACCCTTAGCCCAAGCGTTA  
TATTTGGTTATTTACTAAAATCCCCTTTTGGGGGAGAAGGTTGGATTGTTAGTGTGGAC  
GATTTAGAAGATATAATTGGGGGGCATGTATGGTTAGGTTCTATTTGTATACTTGGCGGA  
ATTTGGCATACTTAACCAAACCCTTTGCATGGGCTCGCCGTGCATTTGTATGGTCTGGA  
GAGGCTTACTTGTCTTATAGTTTAGGTGCTTTATCTGTCTTTGGTTTCATCGCTTGTGTT  
TCGTCTGGTTTAATAATACCGCCTATCCTAGTGAATTTTACGGACCCACCGGACCAGAA

GCTTCTCAAGCTCAGGCATTTACTTTTTCTAGTTAGAGACCAACGTCTGGGGGCTAACGT  
GGGATCCGCCCAAGGACCTACTGGGTTAGGTAAATATCTAATGCGGTCCCCGACCGGA  
GAGGTTATTTTTGGAGGAGAACTATGCGTTTTTTGGGATCTCCGTGCTCCTTGGTTGGA  
ACCTCTAAGGGGTCCCAATGGTTTGGACTTGGGTAGACTGAAAAAAGACATAAACCT  
TGGCAAGAACGACGTTTCGGCGGAATATATGACCCATGCTCCCTTAGGTTCTTTAAATC  
CGTGGGTGGCGTTGCTACTGAGATCAATGCAGTCAATTATGTCTCTCCTAGAAGTTGGT  
TGGCTACCTCTCATTTTGTCTAGGATTCTTCCTATTTGTGGGACATTTGTGGCATGCGG  
GAAGGGCCCCGTGCAGCTGCAGCAGGATTTGAAAAAGGAATCGATCGTGATTTGGAAC  
CTGTTCTTTCCATGACCCCTCTTAGCATGACTATAGCCGCTGGTAGATTTACCAAAGAA  
GAA---GATTTATTTGATATTATGGATGATTGGTTACGCAGAGACCGTTTTCGTTTTTGTGG  
GTTGGTCCGGTCTATTGCTCTTTCCTTGTGCTTATTTTCGCTTTAGGAGGTTGGTTCACAG  
GTACAACTTTTGTAACCTTCATGGTATAACCCATGGATTGGCCAGTTCCTATTTGGAAGGTT  
GTAATTTCTTAACCGCTGCAGTTTCTACTCCTGCGAATAGTTTAGCGCATTCTTTGTTGC  
TACTATGGGGTCTGAAGCACAAGGAGATTTTACTCGTTGGTGTCAATTAGGCGGTCTG  
TGGACTTTTGTGCTCTCCATGGTGCTTTCGGACTAATAGGTTTTATGTTACGTCAATTT  
GAACTTGCTCGATCTGTTCAATTACGACCTTATAATGCAATCGCATTCTCTGCTCCAATT  
GCTGTTTTTGTCTGTATTCTGATTTATCCACTAGGTCAGTCTGGTTGGTTCTTTGCG  
CCCAGTTTTGGCGTAGCAGCTATAATTCGATTCATCCTCTTCTTCCAAGGGTTTCATAAT  
TGGACGTTGAACCCATTTCATATGATGGGGGTTGCTGGAGTATTAGGCGCTGCTTTGCT  
ATGCGCTATTCATGGTGCTACCGTAGAAAATACTTTGTTTGAAGATGGCGACGGTGCAA  
ACACCTTCGCTGCTTTTAAACCCAACTCAAGCTGAAGAGACTTATTCAATGGTGACTGCT  
AACCGTTTTTGGTCCCAAATCTTTGGGGTTGCTTTTTCCAATAAACGTTGGTTACATTC  
TTTATGTTATTTGTACCAGTAAACCGTTTATGGATGAGTGCTCTTGGGGTAGTTGGTCTG  
GCTCTGAACCTACGTGCCTATGATTTTCGTTTCCCAAGAAATCCGTGCAGCAGAAGATCC  
GGAATTTGAGACTTTCTACACCAAAAATATTCTCTTAAATGAAGGTATTCGTGCTTGGAT  
GGCAGCTCAGGATCAGCCTCATGAAAACCTTATATCCCTGAGGAGGTTTACCCCGTG  
GAAACGCTCTTATGTCTGGAAGCACGGGAGAACGTTCTTTTGCTGATATTATTACCAGT  
ATTCGATACTGGGTCATTCATAGCATTACTATACCTTCCCTATTCATTGCGGGTTGGTTAT  
TCGTAAGTACAGGTTTAGCTTACGATGTGTTTGAAGTCCTCGGCCAAACGAATATTC  
ACAGAGAGCCGACAGGGGATTCCACTAATAACTGGCCGTTTTGACTCTTTGGAACAAC  
TCGATGAATTTAGTAGATCCTTTATGACCATAGATCGAACCTATCCAATTTTACAGTGC  
GATGGTTGGCTGTTTATGGACTAGCTGTACCTACTGTTTTTTTTTTGGGATCAATATCAG  
CAATGCAGTTCATCCAACGAATGGCTACACAAACCGTAGAGGGTAGTTCT---AGATCTG  
GGCCAAGACGAACTATTATAGGGGATTTATTTAAACCGTTGAATTCGGAATATGGTAAA  
GTAGCTCCAGGCTGGGGTACTACACCTCTTATGGGGGTGGCAATAGCTTTATTTGCGGT  
ATTCCTATCTATTTTGGAAATTTATAATTCCTCCGTTTTACTGGATGGAATTTACAGTG  
AGTATGCTTACTCTCAAACCTCTTCGTTTACACCGTGGTGATATTCTTTGTTTCTCTCTCA  
TCTTCGGATTCTTATCTAATGATCCGGGACGTAATCCTGGACGTGAGGAAATGGCCGAT  
ACTACTGGAAGGATTCCTCTTTGGCTAATAGGTACTGTAACCTGGCATTCTGTGATCGG  
TTCAATAGGTATTTTCTTTTATGGTTCATATTCGGGGTTGGGTTTCATCTCTGATGCTTAAT  
ATCTTTAGTTAATGTGTATCTGTCTTAAATCTGTCTTTTATTCGAGTGGTTTTTTCTTCG  
CAAATTACCCGAGGCTTATGCCCTTTCAATCCAATCGTAGACGTTATGCCCGTCATAACC  
TGACTCTTTTTTCTCTTAGCCTTTGTTTGGCAAGCTGCTGTAAGTTTTAGAATGACACA  
ATCAAATCCGAATGAACAAAATGTTGAATTAATCGTACCAGTCTATACTGGGGTTTATT

ACTTATTTTTGTACTTGCTGTTTTATTTTTCCAATTATTTTTTCAATATGGAAGTAAATATTC  
TCGCATTTATTGCTACTGCACTCTTTATTCTAGTTCCTACTGCTTTTTTACTTATCATCTAC  
GTAAAAACAGTTAGTCAAATGATATGGAAACAGCAACCCTAGTCACCATCTTCATATC  
TGGTTTACTTGTAAGCTTTACTGGGTACGCTTTATATATCGCCTTTGGCCAACCTTCTCA  
ACAAC TAAGAGATCCATT CGAAGAACACGGGGACATGGAAGCATTGGTTTATACATTC  
CTCTTAGTCTCGACGTTAGGGATAATTTTTTCGCTATCTTTTTTCGAGAACCACCTAAG  
GTTCCGACTAAAAAATGAAAATGACTATTGCTTTCCAATTAGCTGTTTTTGCATTAATT  
GCGACTTCATCAATCTTACTGATTAGTGTACCCGTTGTATTGCTCTTCTGATGGTTGG  
TCAAGTAAAAAATGTTGTATTTTCAGGTACATCATTATGGATTGGATTAGTCTTTCTA  
GTAGCTATCCTTAATTCTCTCATCTCT-----ATGTCACCACAAACAGAGACTA  
AAGCAAGTGTGGATTCAAAGCTGGTGTAAAGATTATAAATTGACTTATTATACTCCTG  
ACTACGAAACCAAAGATACTGATATCTTAGCGGCATTCCGAGTAAGTCCTCAACCTGGG  
GTTCCGCCCGAAGAAGCAGGAGCTGCAGTAGCCGCCGAATCGTCCACTGGTACATGG  
ACAAC TGTTGGACTGATGGACTTACCAGTCTTGATCGTTACAAAGGACGATGCTACC  
ACATCGAAAGCGTTGTTGGGGAGGAAAACCAATATATTGCTTATGTAGCTTATCCTTTA  
GACCTTTTTGAGGAAGGTTCTGTTACTAATATGTTTACTTCCATTGTAGGTAATGTATTTG  
GTTTCAAAGCCCTACGAGCCCTACGTTTGGAGGATCTGCGAATTCCTACTTCTTATTCC  
AAAAC TTTCCAAGGCCACCGCATGGCATCCAAGTTGAAAGAGATAAGTTGAACAAGT  
ATGGCCGTCCCCTATTGGGATGCACTATTAACCAAATTTGGGGTTATCCGCAAAGAAC  
TACGGCAGAGCCGTTTATGAATGTCTACGCGGTGGACTTGACTTTACCAAGGATGATGA  
AAATGTGAACTCACAACCATTTATGCGTTGGAGAGACCGTTTCTTATTTTGTGCCGAAG  
CAATTTATAAAGCACAGGCCGAAACAGGCGAAATCAAGGGACATTACTTGAATGCTAC  
TGCGGGTACATGTGAAGAAATGATCAAAAGGGCTGTATTTGCAAGAGAATTGGGAGCT  
CCTATCGTAATGCATGACTACTTAACAGGGGGCTTCACTGCAAATACTAGCTTGGCTCA  
TTATTGTTCGCGATAACGGCCTACTTCTTCACATCCATCGCGCAATGCATGCAGTTATTGA  
TAGACAGAAAAATCATGGTATGCATTTTCGTGTACTAGCTAAAGCATTACGTATGTCTGG  
TGGAGATCATATTCACGCTGGTACAGTAGTAGGTAAGGAGGGAACGCGAGATG  
ACTTTGGGTTTTGTTGATTTATTACGTGATGATTTTATTGAAAAAGACCGAAGTCGCGGT  
ATTTTTTCACTCAAGATTGGGTCTCTATGCCGGGTGTTCTGCCCGTGGCTTCTGGGGG  
TATTCATGTTTGGCATATGCCTGCTCTGACCGAAATCTTTGGGGATGATTCCGTACTACA  
GTTCCGTGGAGGAAC TTTGGGGCACCTTTGGGGAAATGCACCTGGTGCAGTAGCTAAT  
CGGGTGGCTTTAGAAGCGTGTGTACAAGCTCGTAATGAGGGACGTGACCTTGCTCGTG  
AAGGTAATGAAATTATCCGCGAAGCTTGCAAATGGAGTCTGAACTAGCTGCTGCTTGT  
GAAGTATGGAAGGAGATCAAATTCGAATTCAAACCAGTAGATACACTAGACTTGACGG  
CGATACATTTATACAAAAC TTTCTACCCCGAGCACACGCAATGGAGCCGTAGACAGTCA  
AGTGAAATCCAATCTACGAAATAATTTGATCTCTGGACAGCATCGTTGTGGTAAAGGTC  
GTAATGCCAGAGGAATCATTACCGCAGGGCATAGAGGGGGAGGTCATAAGCGTCTATA  
CCGTAAAATCGATTTTCGACGGAATGAAAAAGACATATCTGGTAGAATCGTAACCATAG  
AATACGACCCTAATCGAAATGCATACATTTGTCTCATACTATGGGGATGGTGAGAAG  
AGATATATTTTACATCCAGAGGGGCTATAATTGGAGATAACCATTGTTTCTGGTACAGAA  
GTTCTTATATCAATGGGAAATGCCCTACCTTTGACCGATATGCCCTTAGGCACGGCCATA  
CATAACATAGAAATCACACTTGGAAAGGGTGGACAATTAGCTAGAGCAGCGGGTGTCTG  
TAGCGAAACTGATTGCAAAGAGGGTAAATCGGCCACATTAAGATTACCATCTGGGGA  
GGTCCGTTTGATATCCAAAACTGCTTAGCAACAGTCGGACAAGTGGGTAATGTTGGG

GTGAATCAAAAAAGTTTGGGTAGAGCCGGATCTAAGTGTTGGCTAGGTAAGCGCCCTG  
TAGTAAGAGGAGTAGTTATGAACCCTGTAGACCATCCCCATGGGGGCGGTGAAGGAAG  
AGCCCCATTGGTAGAAAAAACCCACAACCCCTTGGGGTTATCCTGCGCTTGGGAAGA  
AGAAGTAGGAAAAGAAAAAATATAGTGATAGTTTTATTCTTCGTCGCCGTAAA---ATG  
ATTCAACCCCAAACCCTTTTGAATGTAGCAGATAACAGCGGGGCTCGAGAATTGATGT  
GTATTCGAATCATAGGGGCAGGG---AATCCCCGATATGCTCATATTGGTGACGTTATTGTT  
GCTGTAATCAAAGAAGCAGTACCCAATATGCCTCTAGAAAAGATCAGAAGTAATTAGAG  
CTGTAATTGTACGTACATGTAAAGAACTCAAACGTAACAACGGTATCATAATACGATATG  
ATGACAATGCAGCAGTTGTCAATTGATCAAGAAGGAAATCCAAAAGGAACTCGAGTTTT  
TGGTGCATTCTCGGGAATTGAGACAGTTTAATTTTACTAAAATAGTTTCATTAGCTCC  
CGAGGTATTAATGCTTAGTCCAAAAAGAACCAGATTTTCGTAAACAACATAGAGGAAGA  
ATGAGGGGAATATCTTGTGAGGCAATCATATTAGTTTTGGTAGATATGCTCTTCAGGCA  
CTTGAACCCGCTTGGATCACAGCTAGACAAATAGAAGCAGGGCGAAGAGCAATGACA  
CGATATGCGCGTCGTGGTGGAAAAATATGGGTACGTATATTTCCCGACAAACCTGTTAC  
AGTAAGACCCACGGAAACACGTATGGGTCAGGAAAGGGATCTCCCGAATATTGGGTA  
TCCGTTGTAAACCGGGTCGAATACTTTATGAAATGAGCGGAGTATCCGAAACTGTAGC  
TAGGACCGCTATTTAATAGCTGCGTCCAAAATGCCTATACCAACTCAATTTGTTATTAC  
AGGAATGACCAGAGTTAGACGAGGATATACAGCTCGGAGACGTCGAATAAAAATTCGT  
TTATTTGCATCAACTTTTAGGGGGGCTCATTCAAGACTTACTCGAACA ACTACTCAACA  
AAAAATGAGAGCCTTAGTTTCTTCTCATCGGGATAGAGGCAGGCAAAAGAGGGATTTT  
CGCCGTTTGTGGATCACTCGTATAAATGCAGTAACTCGCGACAAT-----GTATTCCATAGT  
TATAGTAAATTCATACACAATCTGTACAAGAGGCAATTGCTTCTTAATCGTAAAATACTT  
GCGCAAATAGCTATAGAAAATAAAAATTGTCTTTACATGATTTCGAATAAGATCTCTCAA  
ATAAAAGAGATTATT-----ATGTCTGTTTTCAAAG  
CACGAAGAATAATTAATCAGATTCGTGGGCGTTCCTATGAAGAAACACTTATGATACTG  
GAACTCATGCCTTATCGAGCATCTTATCCATTTTGAAATTGGTTTATTCTGCAGCAGCA  
AACCGGAGTCATAACATGGGTTTGAACAAAGCTGATTTATTCATTAGTAAGGCCGAAGT  
CAATGGAGGTA TATTGTGAAAAAGTTAAGACCTAGAGCTCAAGGGCGTAGTTATCCT  
GTAAAAAACCTACTTGTATATAACAATTGTATTGAAG---AAATCGAAATCG-----  
-----ATGGATGTAATCAAATATGCAGTATTTACAGAAAAAGTATTCGGTTATTGGGGAA  
CAATCAA---TATACTTCTAATGTGCAATCAGGATCAACTAGGACAGAAATAAAGCATTG  
GGTTCGAACTCTTCTTTGGTGTCAAGGTAATAGCTATGAATAGTCATCGACTCCCGGGAA  
AGGGTAGAAGAATGGGACCTATTATGGGACATACAATGCATTACAGACGTATGATCATT  
ACGCTTCAACCGGGTATTCTATTCCACCTCTTATAGAGAAAAGAACTATGGCGGTTCC  
AAAAAACGTA CTCTATATCAAAAAACGTATTCGTAGAAATATTTGGAAGAAAAGG  
GGGTATTTAGCTGCAATAAAAGCTTTTTCTTTAGCTAAATCGGTTTCCACTAGGCATTCA  
AAAAGTTTTTTT-----CAAAAAATAATATGGCCAAGGGTAAGGATGTCAGAGTCAGAA  
TTATTTTGGAAATGCGCCAGTTGTGTCCGAAAT-----GGT-----AAAGAATTGCCGGGTATT  
TCTAGATATATTACTCAAAGAGTCGACACAATACACCTAATCGATTAGAATTAAGAAA  
ATATTGTCACTATTGTGCGCACACATACAATTCATGGAGAAATAAAGAAAATGAAAATAA  
GGGCTTCCGTTTCGTAAAATTTGTGAGAAATGTGCACTGATTCGTAGGCGTGGACGAATT  
ATGGTGATTTGTTCCAATCCGAGACATAAACAGAGACAAGGGATGGTTCGAGAGGAAA  
TAGCAGAATCCACTCGAACACTACAGTGGAAGTGTGTTGAATCACGAGTAGACAGTAA  
CGCTCTTTATTATGGACGTTTCATTCTGTCCCCGCTTATGAAAGGGCAAGCAGATACCAT

AGGTATCTCCATGCGAAGGGCTTTACTTGGAGAAATAGAAGGAACATGTATCACACGT  
GCAAAATCTGAG-----AAGGTACCACATGAATATTCTACAGTAGTAGGTATTGAAGAATC  
AGTACATGAAATTTTATTCAATTTGAAAGAAATTGTATTGAGAAGTAATCTCTATGAAAT  
TAGAGACGCATCCATTTGTGTTAGAGGTCCTAGGTACGTAAGTACTGCTCAAGATATCATCT  
CACCACCTTACGTGGAAATAGTTGATACGACACAGTATATAGCTAACCTGACAGAACCA  
ATTGATTTGTGCATTGAATTAGAAATCAAAAGAGATCGCGGATATCGTATGAAACCCAT  
AACTAATTCTCAAGATGGAAGTTAT-----CCTATAGATGCTGTATTTCATGCCTGTTTCGAAA  
TGCAAAATCATAGTATTCAATCTTATGGTAATGGGAATGAAAAACAAGAAATACTTTTTTCT  
AGAAATATGGACAAATGGAAGTTTAACTCCTAAAGAAGCACTTTATGAAGCTTCTCGTA  
ATTTAATTGATTTATTTGTTCCTTTTCTCCATGCAGAGGAAGAA-----GACATTAATTTTCG  
AGGAAAATAAA---AACAAAGTTTACTTTACCCCTTTGACCTTTCAAGATAGATTATCT---  
AATCTAAAGAAAAACAAAAG---GGAATTCCATTGAAATATATTTTTATTGACCAATTAG  
AATTGCCTTCCAGGACCTATAATTGTCTCAAAGGTCCAATACATACATTATTGGACC  
TTTTGAGTAAGGGTCAAGAAAATCTTATAAAAATGGAATATTTTACATAGAAGATGTA  
AAACAGATATTGGACACTCTACAGAAGCAT-----TTTGCAGTTGATTTACCTAAAGTTTT  
AATGATTCGGGAT---GGAAATGAGGGAATGTACACAATACCTGGATTTAATCAGATCCAA  
TTTGAGGGATTTTGTAGGTTCAATTAATCAGGGCTTGATGGAAGAAGTTCATAAGTTTCC  
AAAAATTGAAGATACAGATCAAGAAATTGAATTTCAATTATTTGTGGAAACATATCAAT  
TGGTAGAACCTTGATAAAAGAAAGAGATGCTGTGTATGAATCACTCACATATTCTTCT  
GAATTATATGTACCCGCGGGATTAATTTGGAAAACGAGTAGAGCTATGCAAGAACAAC  
CATTTTTATTGGAAACATTCCTTTAATGAATTCGTTGGGAACTTCTATAATAAATGGAATA  
TACAGAATTGTAATCAATCAAATATTGCAAAATCCCGGTGTTTACTACCGTTCAGAATTA  
GACCATAACGGAATTTCTGTCTATACCAGTACTATAATATCAGATTGGGGAGGACGATTG  
GAATTAGAAATTGATAGAAAAGCCAGGATATGGGCGCGTGTGAGTAGGAAACAAAAAA  
TATCTATTCTAGTTCTATTATCGGCTATGGGTTCGAATCTAAGAGAAATTCTAGATAATGT  
TTGTTACCCTGAAATTTTCTTGTCTTTCCCAAATGATAAGGAAAAAAAAAAGATTGGGT  
CAAAGAAAATGCTATTTTGGAGTTTTATCAACAATTTGCTTGTGTAGGGGGGGATCCC  
GTATTTTCTGAGTCCCTTATGTAAGGAATTACAAAAGAAATTTTTTCAACAAAGATGTGA  
ATTAGGAAGGATTGGTCGACGAAATACGAACCAGAGACTGAATCTCGATATACCCAG  
AAGAATACATTTTTTGTACCACGAGATGTATTAGCTGCTGCGGATCATTGATCCGAATG  
AAATTTGGAATGGGTACGCTTGACGAC-----ATGAATCACTTGAAAAATAACGTATTCG  
TTCTGTAGCGGATCTGTTACAGGATCAATTCGGATTGGCTCTTGTTCGTTTAGAAAATG  
GGTTTCGAGGAACTATATGTGGGGCAATCAGG---CATAAATTGATA---CCGAATCCTAAA  
AATTTGGTAACCTTCAACTTCA-----TTTACAACCACTTATGAATCGTTTTTTCGGCCTA  
CACCTTTATCTCAAGTTTTTGGATCGGACTAATCCATTGACCCAAATTGCTCATGGGCGT  
AGGCTGAGTTATTTGGGTCCTGGGGGGTTGACAGGGCGAACTGCTAGTTTTTCGGATAC  
GAGATATCCATCCTAGTCACTATGGACGTATTTGCCCAATTGATACGTCTGAAGGAATCA  
ATGTTGGACTTATTGGATCTTTAGCTATTTCATGTAAGGATTGGTCATTGGGGA---TCTATA  
GAGAGTCCCTTTTAT-----GAAATATCTGAGAGATCAAAAAG-----GCACAGATGATT  
TATTTATCGCCAAGTAGAGATGAATATTATATGGTAGCAGCAGGAAATCTTTTGGCCTTG  
AACCGGGGTATTCAAGAAGAACAGGTTGTGCCAGCTCGATACCGTCAAGAATTCCTAA  
CTATTGCATGGGAACAGATTCATCTTAGAAGCATTTTTCCCTTCCAATATTTTTCTATTGG  
AGCTTCTCTCATTCTTTTATTGAGCATAATGATGCAAATCGAGCTTTAATGAGTTCTAAT  
ATGCAACGTCAAGCAGTTCCGCTTTCTCGATCGGAAAAGTGATTGTTGGAACCTGGAC

TGGAACGTCAAACGGCTCTAGATTCTGGGGTTTCAGCTATAGCCGAACGGGAGGGAAA  
GATCATTTATACTGATACTCACAAGATCATTTTCTCAAGTAATGGAGACACTATGAGCAT  
TCCATTAGTTATGTATCAACGTTCTAACAAAAATACTTGTATGCATCAAAAACCTCAGGT  
TCCGAGGGGTAAATGCATTA AAAAGGGACAAATTTTAGCAGACGGTGCGACTACAGTT  
GGTGGGGAACTCGCTTTAGGAAAAACGTATTAGTAGCTCATATGCCATGGGAAGGTT  
ACAATTCTGAAGACGCAGTACTAATTAGTGAACGTTTAGTATATGAAGATATTTACTT  
CTTTTTACATTCGGAAATATGAAATTCAGACTCATGTGACAAGCCAAGGT--CCTGAAA  
GAATCACTAAGGAAATACCACATTTAGAGGATCACTTACTCCGCAATTTAGACAGAAAT  
GGAATTGTGATGCTTGGATCTTGGATAGAAACAGGTGATATTTAGTAGGTAAATTAAC  
GCCTCAGACAGCGACCGAA---TCGTCTGATGCTCCGGAAGATAGATTATTACGAGCCAT  
ACTCGGCATT CAGGTATCCACCGCAAAAAGAACTTCTCTAAAATTATCTATAGGTGGAA  
GGGGTCGAGTTATTGATGTGAGATGGATTCAGAAAAGGGGT--GGTCCATTTATAATCC  
AGAAATGATTTCGTGTATATATTTACAAAAACGTGAAATCAAAGTAGGTGATAAAGTAG  
CTGGAAGACATGGGAATAAAGGTATCATTTCCAAAATTTTGCCTAGGCAAGATATGCC  
TATTTGCAAGATGGAACACCTGTTGATATGGTCTTCAACCCATTAGGAGTACCCTCAG  
AATGAATGTAGGACAGATATTTGAATGCTCGCTCGGGTTAGCGGGGGATCTGCTAAAA  
GACATTATAGAATAGCACCTTTTGTGAGAGATATGAGCAAGAGGCTTCGAGAAAATA  
GTATTTTCTGAATTATATTCAGCCAGTAAGCAAACAAAAAATCCATGGGTATTTGAACCC  
GAGTATCCGGGAAAAAGCAGAATATTTGATGGAAGAACGGGGGATCCTTTTGAACAAC  
CTGTTCTAATAGGAAAACCCTATATCTTGAAATTAATCCATCAAGTTGATGATAAATCC  
ATGGGCGTTCCAGTGGACATTACGCACTTGTTACACAACAACCCCTTAGAGGAAGGGC  
CAAGCAAGGGGGACAACGAGTAGGAGAAATGGAAGTTTGGGCTCTAGAGGGATTTGG  
TGTTGCTCATATTTTACAAGAGATGCTTACTTATAAATCTGATCATATTAGAGCTCGTCAA  
GAGGTA CTGGTGCTACAATTGTTGGAGGAACAGTACCTAACCCCGAAGATGCTCCAG  
AATCCTTTTCGATTGCTCGTTTCGAGAACTACGATCTTTGGCTCTGGA ACTGAATCATTTC  
TCGTATCTGAAAAGAATTTCCAGATTAATAGGAAGGAAGCT-----ATGATCG  
ACCAGTATAAACATCAACA ACTTCGAATTGGACCAGTTTCTCCTCAACAATAAGGGCT  
TGGGCTAACAAAATACTACCTAATGGAGAGATAATTGGTGAGGTGACAAAACCGTATAC  
TTTTATTACAAAACCAATAAACC GGAAAAAGATGGATTGTTTTGTGAAAGAATCTCTG  
GACCTATAAAAAGTGAATTTGTGCTTGTGGAAATTATCGAGTGATTGGGGCTGAAA  
AGAAGACCCGAAGTTTTGTGAACAATGCGGGGTGGAGTTTGTGATTCTCGGATACGA  
AGATATCAAATGGGATACATCAA ACTCGCATGCCAGCGACTCATGTGTGGTATTTGAA  
ACGTCTTCCTAGTTATATCGCGAATCTTTTAGATAAACCCCTTAAGGAATTAGAAGGCCT  
AGTATACTGTGAT--GTGTTTTCTTTGCTAGGCCT--ATATCTAAAAAACCAACTTTCTT  
ACGATTACGAGGTTCAATTCGAGTATGAAATCCAATCCTGGAAATACAGCATCCCACTTT  
TTTTTACTAATCAAAGCTTCGAGACATTTCGAAATCGAGAAATCTCGACAGGAGCAGG  
TGCTATTAGAGAACAATTAGCCGATTCGGATTTGCAAATTATTCTAAATAATTCATTGGT  
AGAATGGAAGGAATTAGGAGATGAGGTGATTGGA ACTGGAATGAATGGGAAGATAG  
AAAAATTAGAAGAAGAAAGGATTTTTTGGTTAAACGCATGGAATTAGCTAAACATTTTA  
TTCGAACAAATGTAGAACCAAAAACGGATGGTTTTTGTGCCTATTACCAGTTCCTCCTCC  
GAGTTGAGACCAATCATT CAGATAGATGGAGGTAAATTAATGAGTTCGGATATTAATGA  
ACTCTATAGAAGAGTTATCTATCGGAACAATACTCTTACCGATCTATTAGCAACAAGTAG  
ATCTATGCCAGGTGAATTAGTAATGTGTCAGGAGAAATTGGTACAAGAAGCCGTGGATA  
CACTTCTTGATAATGGGATCCGTGGGCAACCCATGAAAGATGGTCATAATAAAGTTTAC



AAGTCATTTTCAGATGTAATTGAAGGCAAAGAGGGAAGATTTCGTGAGACTCTCCTTG  
GCAAACGGGTCGATTATTCGGGACGTTCTGTCATTGTTGTGGGTCCTTCGCTTTCATTA  
CATCAATGTGGATTACCTCGCGAAATAGCAATAGAGCTTTTCCAAACATTTCTAATTCAT  
GGTCTAATTAACAACATGTTGCTTCTAACATAGGGATTGCTAAAAGTAAAATTCGGGA  
AAAAGAACCAATTGTATGGGAAATACTTCAAGAAGTTATGCGGGGGCATCCTATATTGT  
TGAATAGAGCACCTACCTGCATAGATTGGGTATACAGGCGTTCCAACCCATTTTAGTA  
GAGGAACGTGCTATTTGTTTACATCCATTAGTTTGTAGAGGCTTCAATGCAGACTTTGAT  
GGGGATCAAATGGCTGTTTCATGTACCTTTATCTTTGGAAGCTCAAGCGGAGGCTCGTTT  
ACTTATGTTTTCCCATATGAATCTCTTGTCTCCAGCTATTGGAGATCCCATTTCCGTACCA  
ACCCAAGATATGCTTATTGGGCTCTATGTATTAACGATCGGGAATCGTCGAGGTATTTGT  
GCAAATAGGTATAATACATATAATTGCAGAAATTCG-----CAAATAAAAATACTTAACA  
ATAATAAGTATAACTATATAAAAATGAAAGCGACGTATTGTTGTAGTTCCTATGATGCAC  
TTGGAGCTTATCGGCAAAAACGAATCGATTTAGATAGTCCTTTGTGGCTCCGGTGGCGA  
CTAGATCAACGT--GTCATTGGCTCA-----AGAGAAGTCCCATCGAAATCAATATGAAT  
CTTTGGGTACTTATCATGAGATTTATAGGCACTATCTAATTGTAAGAAGTGTAAAAAAAA  
AAATTCGTTGGATATACATTCGAACCACCATCGGTCATATTTCTTTTATCGAGAAATAG  
AAGAAGCCGTACAGGGGTTTTGTTGGGCTATTTCATACGTTATT-----ATG  
GGGGTATTTATGACGGAACGGGCTGATCTGGTCTTTCACAATAAAGTGATAGATGGAAC  
TGCTATGAAACGACTTATTAGCAGATTAATAGATCATTTCGGAATGGGATATACATCACA  
TATCCTGGATCAATCGAAGATTCTGGGTTTCCAGCAAGCCACTGCTACGTCTATTTTATT  
GGGGATTGATGATCTTTTAAACAATACCTTCTAAGGAATGGTTAGTCCAAGACACTGAAC  
ACAACGTTTTATTTTGGAAAAACACTATCATTATGCGAATGTACACGCGGTAGAAAAA  
TTACGTCAATCCATTGAGATATGGTATGCTACAAGTGAATATTTGAGACAAGAAATGAAT  
CCTAATTTTCGTATGACTGATCCTTCTAATCCAGTCCATTTAATGTCTTTTCGGGAGCTC  
GAGGAAATGCATCTCAGGTACACCAATTAGTGGGTATGAGAGGATTAATGTCAGATCCC  
CAAGGACAAATGATTGATTTACCCATTCAAAGCAATTTACGCGAAGGACTTTCTTTGAC  
GGAATATATAATTTCTGCTACGGAGCCCGCAAAGGCGTTGTAGATACTGCTGTACGAA  
CATCAGATGCTGGATACCTCACGCGTAGACTTGTGTAAGTAGTTCAACACATTATTGTA  
CGTAGAACGGATTGTGGTACTATCCGAAGTATTTCCGTGAGTCCTCGAAAAGGGATGA  
CGAA-----AAAATTTTGTCCAAACATTAATTGGTTCGTGTATTAGCAGACGATATATATA  
TGGGTCTACGATGCATTGCCGTTTCGAAAGCAAGAGATTGGGATTGGACTTGCCAATCG  
ATTAATAACT-----TTTCGAGCACGACCAATATATATTCGAACCCCTTTTACATGT  
AGAAGTACATCTTGGATTTGTCAATTATGTTATGGTTCGAAGTCCCCTCATGGTGACCT  
GGTTGAATTGGGAGAAGCCGTAGGTATTATTGCGAGTCAATCAATTGGGGAACCGGGG  
ACTCAACTAACATTAAGAACTTTTCATACCGGTGGTGTATTTACAGGGCGGTACTGCCGA  
ACATGTACGAGCTCCTTCCAGTGGAAAAATCAAATTCATGAGGATTTGGTTCATCGCA  
CACGTACCCGTCATGGACATCCTGCTTTTTTATGCTCTATAGGCTTGTATGTAACCTTTG  
AGGGTTCGGGATATTATACATAATCTGAATATTCACCAAAAAGGTTTGATTTTAGTTCAA  
ATGGTCAATATGTGGAATCAGAACAATTGATTGCCGAGATTCGTGCCGGAGCATTCACT  
TTA-----TTTAAAGAGAGGGTCCGAAAGCATATTTATTCTGAATCAGAGGGGGAA---ATG  
CACTGGAGTACCAATGTATACCATGCACCCGAATACCCATATGGTAATATTCATTTATTAC  
TAAAAACAAGTCATTTATGGATATTAGCAGGAGCGTCACGTAGA-----TCCAGTATAGTG  
TCTTTTTTCGCTCCACAAGGATCAAGATCAAATGAATGTTTCATTCTTTTTCTGTGCGAAGA  
AAGATATATCTATATCTTTGACCTCTCA-----ATGACTAAT--CATCGAGTAAAACATAAAT

TGTTGGATACTTCTGGT-----GATAGAGAAATTCTTGAATATTCA---ATATCTGATCGA  
ATCATATCCAATGGTCATTGGAATTTAATATCTCCTTCT---ATTCTTCAAGATAAT-----TTG  
GATTTCTTGGCGAAAAGGCGAAGAAATAGATTCATCATCCCATTACAATATGATCAAGA  
ACGAGAGAAAGAACTAATACCCTGTTTTGATATTTCTATTGAAATACCCATAAAT-----GG  
TATTTTACGTGGAAATAGTATTCTTGCTTATTTTCGATGATCCAGTATATAGAAGAAGC-----  
GGAATTACTAAATAT---ACCTTAGAGGTAGATTCAATTGTAAAA-----AAGGAAGATTTGA  
TTGAGTATCGAGGA---ACAAAAGAATTTAAC---CAAATA---AAAGTAGATCGCTTTTTTT  
TCATTCCCGAAGAGGTGCATATCTTACCTGGATCTTCGTCCATAATGGTCCGGAACAATA  
GTCTCATTGGAGTACATACGACTCACTTTAAATACAAGAAGCAAAATAGGCGGATTA  
GTCCGAGTGGAGAGAAAAAAGTATTGAACTGAAAATCTTTTCTGGAATATCC  
ATTTTCCTGGAGAGACAGATAAGATATCCAGGCACAGCGGCATCTTGATACCCCCAGGA  
ACAGGAAAGAAA-----AATTTAATCAATCAAAAAA---GAATTGAAAATTGGATTTAT  
GTTCAACGA-----ATCACACCCACCAAGAAAAAG-----TATTTTGTTCAGTTCGACCTGT  
AGTCACATATGAAATAGCTGATGGCATAAATTTAGCAACACTTTTCCCTCAGGACCTCTT  
ACAGGAAAAGATAATGTCCAACCTAGGGTTGTCAATTATATCCTTTATGGAAATGGCA  
AGTCAATTCGCGGAATTTATCACACAAGT---CAATTAGTTCGACTTGCTTAGTATTGAA  
TTGGGACCAAGAACAATAATGATTCTATAGAA-----GAGGTTCATACTTCCTTTATTG  
AGGTAAGAGCAAATGATCTAATTCGCGATTTCATAAGAATTGACTTAATCAAGTCCACT  
ATTTTCATATACCGGAAAAAGGAATGATACGGGGAGTTCGGGATTGATTCCCGAT-----T  
TAAATAGCACCAATATCAATCCTTTTTATTCCAAGTCGAAGATTCAATCA-----CTT  
ACTCAAGACCAAGAACTATCGGTATG-----GGTACCTTGTGAATCGAAATAAA-----  
GAATGCCAATCTTTGATAATTTGTCATCATCCAATTGTTCTCAAATTGGT-----CCATTA  
ATGGTTCGAAATATAAG-----AATGTGACAAAAGAATCGGAGAACATAATTCCAATT---  
GATTTTCTGGGTTCTCTAGGTACTATTGTACCT---AAAATAGCGAATTTTTATTTCATCT---T  
ACCATTTAATAACT-----CATAATCAGATCTTGTTAAAG---AGATTTTGTACTTGAC---  
-----AATTCTAAACAGACTTTCCAAGTACTT-----AAATACGGTTTAATAGATGAAAATA  
GTAGG-----ATTTATAGTCCCGATCCATGCAGTAACATCATCTTGAATCCATTCCGTTTGA  
ATTGGTGCCTTCTCCGTCACAATTATTGTGAAGAGACATCCACAATAATTAGC---CTTGG  
ACAATTTTTTTGTGAAAATATATGTCTATTCAAATACGGACCGAACATAAACATAAAAAA  
ATCTGGTCAAATTATAATTGTTTAC---GTTGATTCCTTAGTGATAAGATCAGCAAAGCCC  
TATTTGGTCACTCTGGGAGCAACTGTTTCATGGTCATTATGGGAAAATACTTTATGAAGG  
AGATAGATTAGTTACATTTATATATGAAAGATCGAGATCTGGTGACATAACGCAGGGTCT  
TCCAAAAGTGGAACAAGTCTTAGAAGTGCGTTCGATTGATTCCATATCGATGAACCTCG  
AAAAGAGAGTTAATAGTTGGAACGAATGTATATCAAGAATTCTTGGAAGACCTGGGG  
ATTCATGATTGGATCTGAGCTAACCATAGCCCAAAGTCGTATCTCTTTGGTTAATAGGAT  
TCAAAAGGTTTATCGATCCCAGGGGTACAGATCCATAATAGACATATAGAAATTATTGT  
ACGTCAAGTAACATCAAGAGTGTGGTTTCAGAA-----GATGGAATGTCTAATGTTTT  
TTCACCTGGAGAATTAATCGGATTATTGCGAGCAGAACGCGCGGGACGTGCTTTAGAC  
GAAGCGATTTGTTATCGGGCAATCTTATTGGGAATAACGAGGGCATCTCTGAATACTCA  
AAGTTTCATATCCGAAGCGAGTTTTCAAGAACTACTCGGGTTTTAGCAAAGCTGCT  
CTACGAGGGCGTATTGATTGGTTGAAAGGACTGAAAGAGAACGTTGTTCTGGGGGGGA  
TTATACCTGTTGGTACCGGATTCCAAAATAGTGCACCGTTCAAGA-----CAAGACAA  
GAACATTCAT-----TTGGAAATTAAGAAATAATCTATTCGACTTAGAAATG-----AGAG  
ATATTTTGTACACCATAGAGAATTATTTGTTCTTGCATCCAAGAC-----TCAGA

ACAATCATTTACGAATTCC-----GTGAAAAGAAGATATTGGAACATCAA  
TTTGCCGGAGATGATGGAAGCAGGAGTTCATTTCCGGTCATGGTACTAAGAAATGGAAT  
CCTAGAATGGCCCCTTACATCTCCGCAAAACGTAAAGGTATTCATATTACAAATCTCACT  
ATAACTGCTCGTTTTTTTATCAGAAGCCTGTGATTTAGTTTTTGTATGCAGCAAGTAGGGG  
AAAAAGCTTTTTAATCGTTGGTACCAAAAATAAAGCAGCGGATTCAGTAGCATCGGCT  
GCAATAAGGGCTCGGTGTCATTATGTTAATAAAAAATGGCTTGGCGGTATGTTAACGAA  
TTGGTCCACTACGGAAACGAGACTTCATAAGTTCAGGGACTTAAGAGCAGAACAAAA  
CATGGGGAAACTGAACCGTCTCCCCAAAAGAGATGCAGCGATGTTGAAGAGAAAATTA  
TCTGCCCTGCAATCATATCTGGGTGGGATCAAATATATGACGGGTTTGCCCGATATTGTA  
ATCATCGTTGATCAGGAAAAAGAATATATGGCTCTTCAAGAATGTGCCATTTTGGGGAT  
TCCGACAATTTGTTAATCGATACAAATTGTAACCCAGATCTTGCAGATATTTTCGATTCC  
AGCCAACGATGATGCTATAGCTTCAATCCGATTGATTCTTAACAAATTAGTATTTGCAAT  
TTGCGAGGGTTCGTTATAGC---TATATAGGAAATCGTATGGGACAAAAAATAAATCCACTT  
GGTTTCAGACTTGGTACAACCCAAAGTCATCATTCCTTTTGGTTTCGCACAACCAAGAA  
ATTTTTCCACGGGTCTACAGGAAGATGAAAAATACGAAATAGTATCAAGAACTATATA  
CAAAAAAATAGGAGAATATCCTCAGGT---TTCGAAGGAATTGCACGTATAAGAATAAAA  
AAAAGAATTGATTTGATTCAGGTCATAATCCACATTGGATTCCCAAATTTGTTAATAGAA  
GGA-----CGAACACGA-----GGAATTGAAGAATTACAGATAAATGTGCAAAAAGAGTTTC  
ATTTTTCGAATCGCAGACTCAAGATTGCTATCACAAGAGTTGAAAAACCTTATGAACAA  
GCAAATATTCTTGCAGAATATATAGCTTTACAATTAATAAATAAGAGTTTCGTTTCGAAAG  
GCAATGAAAAAGGCTATTGAATTAAGTGAACAAACGGATACAAAAGGAATTCAAGTGC  
AAATTGCAGGGCGTATCGACGGAAAAGAAATTGCACGTGTTGAATGGATCAGAGAAG  
GGAGAGTTCCCCTACAAACAATTTCGCGCTAAAATTGATCATTGTTCTTATACAATTTCGA  
ACTATCTATGGAGTATTAGGCATAAAAATTTGGATATTTGTAGAC-----ATGTCTCGTTAC  
CGAGGACCTCGTTTCAAAAAAATACGCCGTCTGGGGGCTTTACCGGGACTAAGTAGTA  
AAAGGCCTAGATCCGGAAGTGATTTTAAAAACCAATCGCGTTTTTGGGAAA---AAATCCC  
AATATCGTATTTCGTCTAGAAGAAAACAGAAATTGCGTTTTTCATTATGGTCTGACAGAA  
CAACAATTACTTAGATATGTACATATTGCTGGAAAAGCCAAAGGGTCAACAGATCAGGT  
TTTATTACAACACTTGGAGATGCGTTTGGATAACATACTTTTTTCGATTGGGTATGGCTTC  
GACCATTCCCTGCAGCCAGGCAATTAGTTAACCATAGACATATTTTAGTTAATGGTCGTAT  
AGTGGATATACCAAGTTATCGTTGCAAACCCAGAGATATTACTAGCAAAGATAAAC  
AAAGATCGAAAGTTCTGATTCAAATTTCTATTGAATCGTCCCCCATGAA-----TTGCCA  
AAACATTTGACTATTGACTCA-----TTCCAATATAAAGGATTAGTAAATCAAATAATAGAC  
AGTAAATTGATTGGTTTGAATAAATGAGTTGTTAGTCGTAGAATATTATTTCCCGTCAG  
ACTATGTCACGTCGAGGTAAGTGCAGAAAGAAAAACTGCAAAATCCGATCCAATTTATC  
GTAATCGATTAGTTAACATGTTGGTTAACCGTATTCTGAAACACGGAAAAAATCATTG  
GCTTATCAAATTATCTATCGAACCGTGAAAAAGATTCAACAAAAGACAGAAACAAATC  
CACTATCTGTTTTACGTCAAGCAATACGTGGAGTAACTCCCGATATAGCAGTAAAAGCA  
AGACGTGTAGGCGGATCGACTCATCAAGTTCCTATTGAAATAGGATCTACACAAGGAA  
AAGCACTTGCCATTCGTTGGTTATTAGGGGCATCCCGAAAACGTCCGGGTCGAAATATG  
GCTTTCAAATTAAGTTCCGAATTAGTAGATGCTGCCAAAGGGAGTGGCGATGCCATACG  
TAAAAGGAAGAGACTCATAGAATGGCAGAGGCAAATAGAGCTTTTGCACATTTTCGT  
ATGGGTAGGGATACTATTGCCAATATAAATACTTCTATAAGAAATGCTGACATGGATAAA  
AAAGGAACGGTTCGAATAGCATCCACTAATATCACCGAAAACATTGTTAAAATACTTCT

ACGAGAAGGTTTTATTGAAAACGTTTCGAAAACATCAGGAAAATCAGAGATTTTTCTTG  
GTTTCAACCCTACGACATAGAAGG-----ACTAGTAAAGGAGTATATAGA-----ACT  
ATTTTAAAACGTATCAGCCGACCCGGTCTACGAATCTATTCCAACCTATCAACGAATTCCT  
AAGATTTTAGGTGGAATAGGGATTGTAATCTTTCTACTTCTCAAGGTATAATGACAGAT  
CGAGAAGCTCGACTAAAAAAATTGGAGGAGAAATTTGTGTTATATATGGATGACAA  
AACCTATACCAAGAATTGGTTCCTCGTAGGAATGGGCGTATTGGTTCACGCAAGAATGCA  
CGTAGAATACCAAAAAGGAGTTATTCATGTTCAAGCGAGTTTCAATAATACCATTGTAAC  
TGTTTCAGATGTACGTGGTCAGGTGATTTCTTGGGCCTCCGCGGGTACTTCTGGATTCA  
AAGGCACAAGAAGAGGAACACCCTATGCTGCTCAAGCTGCAGCAGTAAACGCTATTC  
GTACAATAATTGATCAGGATATGCAACGAGCAGAAGTTATGATAAAGGGTGCTGGTTTC  
GGAAGAGATGCAGCATTACGAGCCATTCGTAGAAGTGGTATACTATTAAGTTTCGTACG  
TGATGTAACACCTATGCCACATAATGGATGTGACCTCCCCAAAAAAGACGTGTAATGC  
CAACTATTAAACAACCTATTAGAAATACAAGACAGAAAATAAGAAATGTCACGAAATC  
CCCCGCTCTTCGAGGATGTCCTCAGCGTCGAGGAACATGTACTAGGGTGATACTATCA  
CCCCAAAAAACCAACTCTGCCTTACGTAAAGTTGCCAGAGTACGATTAACCTCTGG  
ATTTGAAATCACTGCTTATATACCTGGTATTGGCCATAATTTACAAGAACATTCTGTAGTA  
TTAGTAAGAGGAGGAAGGGTTAAAGATTTACCGGGTGTGAGATATCACATTGTTCCGGG  
GAACCCTAGATGCTGTGCGGAGTAAAGGATCGTCAACAAGGGCGTTCTAAATATGGGGT  
AAAAAAGCCAAAAATGGCAAGAAAAAGTTTGATTCATAGGGAGAAGAAACGGCATAA  
ACTGGAACAGAAATATCAGTTGATTTCGTGATCCTCAAAAAAAGAAATAAGC-----A  
AAGTTCTACCGTTGAGTGAAAAATGGAAAATTCATAGGAAATTGCAATCGTCACCACG  
TAATAGTGCACCTATACGTCTTCATCGACGTTGTTTTTTGACTGGAAGACCTAGAGCTA  
ACTATCGAGACTTTGGGCTATCCGGACACATACTTCGTGAAATGGTTTATGCATGTTTGT  
TACCGGGCGCAATAAGATCAAGTTGGATGATCAAAAATTCATTCATCTCAGTTATTCCA  
CAAGAAGAAAAAGAGGAAAAC-----AAGGGATCTGTTGAATTTCAAGTATTCAGTTTCA  
CCAATAAGATACGTAGACTTACTTCCCATTTAGAATTGCACAAAAAAGATTTTTTATCGC  
AAAGAGGTCTACGAAAAATTCTGGGAAAACGTCAACGACTGCTGACTTATTTGTTAAA  
GAAAAATAGAGTACGTTATAAGAAATTAATTGGTTCAGTTGGATATTCGGGAACCTAAAA  
T T C A T - - - -  
-????????????????????????????????????????????????????????????????????????????????????????  
????????????????????????????????????????????????????????????????????????????????????????  
?????????????????????????????????????????????????????????????????????????????????????????  
ATGGATAAATCCAAGCAACCTTTTCGTAAATCCAAGCGATCTTTTCGTAGGCGTTTGGC  
CCCAATTGGATCGGGGGATCAAATCAATTATAGAAACATGAGTTTAATTAGTCGATTTAT  
TAGTGAACAAGGAAAAATATTATCTAGACGTGTCAATAGATTGACCTTGAAACAACAA  
CGATTAATTACTATTGCTATAAAACAAGCTCGTATTTTATCTTTGTTACCTTTTCTTAATAA  
TGAGAAA-----CAATTTGAGAGAGCCGAGTCGATCCCCCGAACTACTGGTCTTAGAACC  
AGAAATAAAGTGACACGTTCACTAAAAAAAATCCTTTTGTAGTTGATCATTATCGGG  
AAAAATTGAAAACTCAACATGAGGGAGGAGAAAGAAATAATAGTAACTTGGTCTCG  
GGGATCTACCATTATACCCGCAATGATGGGACATACAATTGCCATTCATAATGGAAAGG  
AGCATTTCCCTATTTATATAACAGATCAAATGGTAGGTCACAAATTGGGAGAATTTCCC  
CTACTCTTACTTTCGCAAGACATACGAGAAATGATAATAAATCTCGTCGTATGATTTTA  
AATCTTTTCTACTAGGTAATCTATTATCCTTATGCATAAAGATAATAAATTCGGTTCGTGT  
GGTTCGACTCTATTATGGATTTCTGACCACATTCTCCATAGGGCCCTTATCTCTTCCTT

CTCCGAGCTCGGGTTATGGAAGAAGGA-----ACCGAGAAGGAGGTATCAGCAACAAC  
TGGTTTTATTACGGGACAGCTCATGATGTTTCATATCGATCTATTATGCGCCTCTGCATCTA  
GCATTGGGTAGACCTCATACAATGACTGTCCTAGTTCTACCATATCTTTTGTTCATTTCT  
TCTGGAAAAATCAAAAAAACTTTACCAGTATTAGAGCCAGTACCAGAGATTCAATGTGT  
AATCTCAACATTCAATGTGTATTCTTGAATAATCTAATCTTTCAATTATTGAACCATTCA  
TTTTACCAAGTTCAACGTTAGCCAGATTAGTAAACATTTATATGTTTCGATGCAACAACA  
AGATGTTATTTGTAACAAGTAGTTTTGTTGGTTGGTTAATTGGTCACTTTTTTATTATGAA  
ATGGCTTGGATTGGTATTATTCTGGATAACCACAAAATTATTCTATTCGATCT-----AAT  
AAGTATCTTGTGTCAGAATTGAGAAATTCTATGGGTGCAATCTTTAGTATTCTCTTATTTA  
TCACTTGTGTCTACTATTTAGGCAGAATGCCGTGCGCTATTGTCACTAAGAAACTGAAA  
GAAACCGAGGAAGACAAACCTCTTGTGAATTTTCTTTTCGATTATAAACGATGGAATCG  
CCCATTGCGATATATAAAAAATGATCGATTTGAAAATGTTGTACGAAATGAAATCTCACA  
ATATTTTTTTTATACATGTCCAAGTGATGGAAAAAAAAGAATATCTTTTACATATCCACTC  
AGTTTATCCACTTTATCGGAAATGATAGAACGGAAAAATTTTTTTGTACACGACAGAAAA  
ACTATCCCATGAGGGCCTG-----TATTGGGTTTATACCAATGAACAAAAAAGTACAACA  
TGAGTAATGAATTAAGTCGAATAAAAGTTCTAGAAAAAGAAAAGCTTGTATAGAT  
ATGCTCGAAAAAAGGACCAGATTGTACAATGATGAAAATGAACAAAAATGCTTGCACA  
AAACATATGATCCTCTTTTGAATGGACCATATCGCGGAACAATAAAAAAATTATATTCAA  
AGATAGAAACGTTTTGGATAAATAAGATTCATGATATACTTTCCCGAAAATTTGAACATC  
AAGATCTCAATGATGAATCTATTGGAATAGAAGAAATTTTGAAAAGGTTCCCTCGATGG  
TCATATAAATTGACCGGTTTAGAAGAA---GAGGACGAAGGGCTTCGTTCAAGAAAAGC  
TAAACGTGTGGTAATTTATACTGATGCTTTAATACGTTACTCACACAATCCGATTTTCG  
TCGGGATATAATCAAAGGATCCATGCGTGCTCAAAGACGTAAAACAGTTACTTGGGAA  
ATGTTTCAAGCAAATATGCATTCTGCACTTTTTTTGGATCGAATAGACAAAACATTTTTT  
TTCTCTTCTTTTGAT---ATATCTGAAATGAGAAATATCATTTTTTAGGAATGAAAATAACG  
GATACGGATAGCAATATCCGAAACTTGGGATACCATTATATTTGCTCAAGCAATAAGGGG  
TTCAATGTTAATAACGCAATCTTTTCTTAGAAAATACATTATATTGCCCTCATTGATAATA  
GCTAAAAATATTGGTCGTATATTATTATTCCAATTCCCCGAGTGGGACGAGGATTTGAAA  
GAATGGAATAGGGAAATGCATGTTAAATGCACCTATAATGGTGTTCATTATCAGAAAC  
AGAATTTCCAAAGGATTGGTTAACAGACGGTATTCAGATAAAGATTCTATTTCCCTTTCTG  
TCTGAAACCTTGGCGAAAAGCCTAAGAAAAGAAAAAAGAAAATTTTTGTTTTTTAACA  
ATCTGGGGAATGGAAGCAGAGCTTCCCTTCGGTTCCTCCCGAAAACAATCTTCTTTTTT  
TGAACCTATTTATAAGGAACTCGAAAAAAAATGAGAAAAGTCAAA---AAGAAATTTT  
TTCGAGTTTTAAGAGTTTTCAAAGAAAGAAAAAAGGGTTTTCTGAAAGTTAGGAAAG  
AAAAACGGGATGGATCCTCCCAATAGTTCTA-----ATTCGAAAACAAATAATGAAAGA  
ATTTGAAAAAATAAACGACAAAACCTCCT--AATAAGATTACTCGTGAATCGAGTATTCA  
AATTCGATCTATGAATTGGACAAATTATTCACTCATAGAAAAAAAATGAAAGATCTTG  
CCGATAGGACACTCACACAAGGAATCAAATAGAACAATCACAAAAGACAATAAAAA  
AA-----GGTAAAAGATTGGAATCGCGTAAAAAGATTTTTTCAGATACTCAA  
AAGACAATACATTTCGATTATTACGTAAATCAGATTCTTTTATGAAATCTTTCATCGAAAA  
AATATACATAAATATCTTCTATGTACCATTAATATTTTCAGTATCAATATACAACCTTTTCA  
TGAACCTCATTTTCGTACAACCTTATCCTCCTTGTCTCAAGCATATGTATTTTACATATTATC  
ACAAACCAATTAATTAACAAGTATCACTTGAGATCCGTACTTCACTATACTTATCCATTT  
CTTAGGGATACAATTAATAAATTATTGTACACAAGGAATATTTGATACCAAATCAAGGTAC

AAGAAAATTCATAAGTCTGAAATAAATGAATGGAAAACTGGTTAAGGGATCATTATCA  
ATACAAATTATCTCAGACGAAATGGTTTCGATTAGTACCCCAAAAATGGGGAAATAAAG  
TCAATAAACATTATATAATTCAAAATAAAATAAAATTGGATTTCATATAAAAAAGAAAAAG  
ACCAATTAATTCATTACATGAAACAAGAAAAATTGAAAAAACACTACAGATATGATCTT  
TTATCACATGAATATATGAATGGATATATTGTTGATATGAATAGAAAATATTTTGATTCTAG  
AATCCTTTGTTTTCTATTAGAGTTTTTTGATTGGATAGGAATGAACGAAGAAAGATTATA  
TCATTGGTTCTTCCCAGAATTTTGGCTACTTTTTAATGCGTATAAAAATTAACCACAGAT  
CATACCAATTCAATTACTTTTTTTGAATTCCAAAAGCAATAAGGAAGCAGAACTCTATTT  
TTTCTTGAAAAAATATTTACTTTTTCAATTAAGATGGGATGACTCCTTGAATCAAAGAAT  
GATCGATAATATCAAGGTATATTGTCTCCTACTTAGACTAATAAATACAAAGGAAATTGT  
TATATCCTCGATTCAAAGAGGAGAGATGTGTCTGGATGTGATGCTGATTCAAAGGATC  
TAGCTCTTACAGAACTAATAAAAAAAGGAATATTGATTATCGAACCAATTCGTCTATTT  
TAGAAAGGGGTGTAATAATTGATTATATATCAAACCATAGGTATTTTCATTGATCAATAAG---  
---ACAATCATTATGATTTTTTTGTTCTGAAAATATTCTATCTCCTAGACGTCGTAGAGA  
ATTAAGAATTCTAATTTGTTTCAGATTTCTTTGGCCCAATTACCGATTAGAAGATTTAGC  
TTGTATGAATCGTTATTGGTTTGATACCAATAATGGCAGTCGATTTCAGTATGTCAAGGAT  
ACATATGTATCCGATGAAACGACATCAATTCAAATCCTGGATCTTCGAATTGAGAGAGA  
TATGGAGAGAGATCAAGAATTCTCACTATTTCTTAGATTCATGGATCAAATTCGATTTCAG  
TGGGATTTTTCACTCACATTTTTTTCCACCAAGAACGTTTTATGAAACTCTTTGACCCCC  
GAATTGGGAGTATCCTACTTTCA---CGTGATTCA-----CAGGGTTCAACAAGCAATCGATA  
TTTTACG-----ATCAAAGGTGTAGTACTGCTTGTAGTAGCG---GTCCTTATATCT-----  
--CGTATTAACAATCGAAAGATGGTCGAAAGAAAAAATCTCTATTTGATGGGGCTTCTTC  
CT-----ATACCTATGAATTCCATTGGACCCAGAAATGAGACATTGGAAGAATCTTT  
T--TGGTCTTCCAATATCAATAGGTTGATTGTTTCG---CTCCTGTATCTTCCAAAAGGAA  
AAAGATTTCTGAGAGTTGTTTCATGGATCCGCAAGAGCGTACTTGGGTTCTCCCAATAA  
AT-----AAAAGTGTATCATGCCTGAATCTAACCAGGGTTTCGCGGTGGTGGAGGAA  
CCGGATCGGAAAAGGAGG-----GATTCTAGTTGTAAGATATCT-----AATGAAACCGT  
AGCTGGAATTGAGATCTCATTCAAAGAGAAAGATAGCAA---TATCTGGAGTTTCTTTT  
TTATCCTATACG-----GATAATCCGATCCACAAGGACCATGATTGGGAATTGTTTGATCG  
TCTTTCTCCGAGGAAGAAGCGAAACATAATCAACTTG-----AATTCGGGACAGCTATTC  
GAAATCTTAGGGAAAGACTTGATTTGTTATCTCATGTCTGCTTTTCGTGAAAAAAGACC  
AATTGAAGGGGAGGGT---TTCTTCAAACAACAAGGA---GCTGAGGCAACTATTCAATCA  
AATGATATTGAGCATGTTTCCCAT-----CTCTTCTCGAGAAACAAGTGGGGTATTTTCATTG  
CAAATTTGTGCTCAATTTTCATATGTGGCAATTCCGCCAAGATCTCTTCGTT-----AGTT  
GGGGAAAG---AATCAGCACGAATCGGATTTTTTTGAGGAAC---GTATCGAGAGAGAATTT  
GATTTGGTTAGACAATGTGTGGTTGGTAAACAAGGATCGG-----TTTTTTAGC-----AA  
GGTACGGAATGTATTGTCAAATATTCAATATGATTCC-----ACAAGA-----TCTATTTTCG  
TTCAAGTAACGGATTCTAGCCAATGGAAAGGATTTTCT--GATCAATCCAGAGATCATT  
CGATTCCATTAGA-----AATGTGGATTTCAGAA-----TATCAC  
ACATTGATCGATCAAACAGAGATTCAGCAACTAAAAGAAAGATCGATTCTT---TGGGAT-  
----CCTTCCTTTCTTCAAACGGAACGAACAGAGATAGAATCAGAT-----CGATTCGGAA  
A-----TGCCTTTTTGGATCTTCC-----TCAATGTCCCGGCTATTACG---GAACGTGAGAA  
GCAGATGAATAATCATCTGCTTCCGGAAGAAATCGAAGAATTTCTT-----GGGAATCCTA  
CAAGATCAATTCGTTCTTTATTCTCTGACAGATGG-----TCAGAACTTCAT--CTGGGTTC

GAATCCTACTGAGAGGTCCACTAGAGATCAG-----AAATTTTGGGAAGAAAAACAA  
GATGTTTCT--TTTGTCTTTCCAGGCGATCGGAA-----AATAAAGAAATGGTTGATA  
TATTCAAGATAATTACGTATTTACAAAAT-----ACCGTCTCAATTCATCCTATTTTCATCAGA  
TCCGGGATGTGATATGGTTCCG---AAGGATGAACCAGAT--ATGGACAGTTCCAATAAGA  
TTTCATTCTTGAACAAAAATCCATTTTCA-----  
-----GAAGAGGGATTCAAGAAATGGCAGATCTATTCACTCTATCAATAAC  
CGAGCCG---GATCTGGTGTATCATAGGGGATTTGCCTTTTCTATTGATTCTACGGATTG  
GATGAAAAAAA-----TTCTTGAATGAGGTATTCAACTCCAGAGATGAATCGAAAAAGA  
AATCTTTA-----TTGGTTTTACCTCCTCTTTTTTAT-----GAAGAGAATGAATCTTTTTAT  
CGAAGGATCAGAAAAAATCGGTCCGG---ATCTACTGCGGAATGATTTGGAAGATCC  
AAAATAAAAACAGCGGTATTTGCTAGCAACAACATAATGGAGGCAGTCAATCAATAT  
AGATTGATCCGAGATCTGATTCAAGTCCAATATAGAACCTATGGG-----TACATAAGAAA  
TGATCGAATCGATTCTTTTTAATG-----AATAGATCCGATCGCAACTTCGAATATGGAA  
TTCAA-----AGGGATCAAATAGGAAATGATACTCTGAATCATATAACTATAATGAAATAT  
ATGATCAACCAACATTTATCGAATCTGAAAAAG---AGT-----AAATGGTTTGATTCT-----  
---CTTATTTCTCGAACCGAGAGATCCATGAATCGGGATCCTGATGCATATAGATACAAAT  
GGTCCAATGGGAGCAAGAATTTCCAGAAACATTTGGAACATTTCAATTTCTGAACAGAA  
GAAC-----CGTTTTCAAGTAGTGTTCGATCGATTACGTATTAATCAATATTCGATTGATT  
GGTCCGAGGCTATCGACAAACAAGATTTGTCTAAGTCACTTCGTTTCTTTTTGTCCAAG  
TCA-----CTTCTCTTTTTGTCC-----AAGTCACTTCCCTTTTTG  
---TCCAAGTCACTTCCCTTTTTCTTTGTGAGTATCGGGGATATCCCCATTCATAGGTCCG  
AG---ATCCACATCTAT--GAATTGAAAGGTCCGAATGATCAACTCTGCAATCAGTTGTTA  
GAATCAATAGGTGTTCAAATCGTTCATTTGAATAAATTAACCC-----TTCTTATTGGAT-  
-----GATCATGATACTTCC---CAAAGACCGAAATCTTGATCAATGGAGGAACAATATTA  
CCATTTTTGTTCAAAAAGATACAA---AAGTGG---ATGATTGACTCATTCCATACT-----AG  
AAAGAATCGCAGGAAATCCTTTGATAACACGGATTTCTATTTCTCAATGATATCCCACGA  
TCGAGACGATTGGCTGAATACCGTGAACCATTTTCATAGAAGTTCATTGATATCTTCTTT  
TTATAAAGCAAATCGACTTCGATTCTTGAATGATCCACATCACTTCTGGTTCTAT-----TG  
TAACAAAAGGTTCCCTTTTTATGTG-----GAAAAGACCCGTATCAATAATTATGAT---  
--CTTACATAT--GGACAATTCCTCAATATCTTGTTCAATTCGCAACAAA---ATATTTTCTTTG  
TGCCTCGGTAAA-----AAAAACATATTTCTTTGGAG---AGAGAGACTATTTACCAATC  
GAGTCACAGGTATCTGACATATTCATACCTAACGATTTTCCACAAAGTGGTGACGAAAC  
G---TATAAATTGTACAAA-----TCTTTCCATTTTCCAATTCGATCCGATCCATTCGTTTCGT  
-----AGAGCTATTTATTCGATCGCAGACATTTCTGCAACACCTCTAACAGAGGAACAAAT  
AGCCAATTTTGAAAGAACTTATTGTCAGCCTCTTTCAGATATGAATCTATTTGATTCAGA  
AGGGAAGAACTTGCATCAGTATCTCAGT-----TTCAATTCAAACATGGGTTTGATTCACA  
CTCCATGTTCTGAGAAATATTTACCA-----TCCGAAAGAGGAAAAA-----  
-CAGAGTCTTTGTCTAAAG-----AAATGCGTTGAGAAACGGCGGATGTATAGAACCCTTC  
AACGAGATAGTGCTTTTTCAAATCTCTCAAATGGAATCTGTTCCAAACATATATGCCAT  
GGCTCCTTACTTCGACAGGGTGCAAATATCTAAATTTACCCCTTTTAGATACTTTTTTCAG  
ACCCATTG-----CCGATACCAAGTAGCAGT--CAAAAATTTGTATCCATTTTTAATGATATT  
ATGCACGGATCA-----GCATGGCCATTCTCAGAAAAAATTGTGG-----GCGATTCT  
TCCACAATGGACTCTG---ATAAGTGAGATTTTCGAGTAAGTGTTTACAGAATCTT---CTTC  
TTCTGTCCGAAGAAATGATTCATCGAAATAATGAGTCACCCGTTCTATTGATATGGACAC

ATCTGAGATCAACAAATGCTCGGGAGTTC---CTCTATTCAATCCTTTTCCTTCTTCTTGTT  
GCTGGATAT--CTCGTTCGTATACATCTTCTCTTTGTTTTCCGA-----GCCTCTAGTGAGTT  
ACAGACAGGGTTAGAAAAGATCAAATCTTTGATGATTCCATCATAATGATTGAGTTGC  
GAAAACCTTCTGTATAGGTATCCTACATCTGAACTGAATCTTTCTGGTTAAAGAATCTCC  
TTCTAGTTGCTCTGGAACAATTAGGAGATTCTCTGGAAGAAATACGGGGTTCTGCTTCT  
GGTGGCAACATGCTATTGGGTGGCGGTCCC-----GCTTATGGG---ATCAAATCAAT  
ACGTTCTAAGAAGAAATATTTGAATATCAAT-----CTCATCGATCTCATA---AGTATCATA  
CCAAATCCCATCAATCGAATCACTTTTTTCGAGAAATACGAGACATTTAAGTCGTACAAG  
TAAAGAGATCTATTCATTGATAAGAAAAAGAAAAAACGTGAACGGTGATTGGATTGAT  
GATAAATAGAATCCTGGGTCCGAACAGTGATTCAATTGATGATGAAGAAAGAGAAT  
TCTTGATTCAGTTCTCC-----ACCTTAACGACA-----GAAAAAAGGATTGATCAAATTCTA  
TTGAGTCTGACT--CATAGTGATCATTTATCA-----AAGAATGACTCTGGTTATCAA  
ATGATTGAACAACCGGGATCAATTTACTTAAGATACTTAGTTGACATTCAT-----AAAAA  
GTATCTAATGAATTATGAGTTCAATAGATCCTGTTTAGCAGAAAGACGGATATTCCTTGC  
TCATTATCAGACAATCACTTAT-----TCACAAACCTCGTGTGGGGCTAATAGTTTTTCATTT  
CCCATCTCATGGA-----AAACCCTTTTCGCTCCGCTTAGCCCTATCCCCTTCT--AGGG  
GTATTTTAGTGATAGGTTCTATAGGAACCGGACGGTCTATTTGGTCAAATACCTAGCGA  
CAAACCTCCTATGTTCCCTTTCATTACGGTATTTCCGAACAAGTTCCTGGATGACAAGCCT  
AAAGGTTATCTTATTGAT-----GATATCGAT--ATTGATGAGAGTGACGAT-----  
-----ATTGATGATGACCTTGATACG  
GAGCTGCTAACTATGACGAATGTGCTA-----ACTATGTATATGACG-----CCGAAAAT  
AGACCAATTTGATATCACCTTCAATTCGAATTAGCAAAAGCAATGTCTCCTTGCATAAT  
ATGGATTCCAAACATTCATGATTTGTATGTGAATGAGTTCGAATTACTTATCCATCGGTCTA  
TTAGAGAACTATCTCTCC-----AGGGATTGTGAAAGATGTTCC---ACTAGAAATATTCT  
TGTTATTGCTTCGACTCATATTCCCCAAAAAGTGGATCCCGCTTTAATAGCTCCGAATAA  
ATTAAATACATGCATTAAGATACGAAGGCTTCTTATTCCACAACGACGAAAGCACTTTT  
TCATTCTTTTCATATACTAGGGGATTTCTGTTTGGAAAAGAAAATGTTCCATACT-----AACG  
GATTCGAGTCCATAACCATGGGTTCCAATGCACGAGATCTTGTAGCACTTATCAATGAG  
GCCCTATCAAGTAGTATTACGCAGAAGAAATCAATTATAGAACTAATACAATTAGATCA  
GCTCTTCATAGACAAACTTGGGATTTGCGA-----TCCCAGGTAAGATCGGTTACAGGAT  
CATGGGATCCTTTTCTATCAGATAGGAAGGGCTGTTGCACAAAACGTACTTCTAAGTAA  
TTGCCCCATAGATCCTATATCTATCTATATGAAGAAGAAA-----TCACGTAAGGAAGGGG  
ATTCTTATTTGTACGAATGGTACTTCGAACTTGGAACGAGCATGAAGAAATTAACGATA  
CTTCTTTATCTTTTGAGTTGTTCCGCCGGATCGGTCGCTCAAGATCTTTGGTCTTACCT  
TCACCCGGACCCGATGAAAAA---AATGGGATCACTTCTTATGGATTTCGTTGAGAATGAT  
TCT--GATCTAGTTCATGGCCTATTAGAAGTAGAAGGCGCTCTGGTGGGA-----TCCTCAC  
GGACAGAAAAAGATTGCAGTCAGTTTGATAATAAT-----CGAGTGACATTACTCGAA-----  
---CCAAAGAAT--CAGTTAGATATGATGCAAAATGGATCTTGTTCTATCGTTGATCAGAGA  
TTTCAATATGAAAAA-----TACGAATCGGAGTTTGAAGAA--GGGGAAGGAGAAGGAGC  
CCTCGACCCGCAA-----CAGATAGAGGAGGAT-----TTATTCAATCAC-----ATAG  
TTTGGGCTCCT-----AGAATATGGCGCCCG-----TGTGGCAATCTATTTAATTGTATCGA  
AAGGCCCACTGAATTGGGATTTCCC---TATTGGGCTGGGTCAATTCGG-----GGCAAGC  
AGATCATTTATCATAAAGAGGATGAGCTTCAAGAGAATGATTCGGAGTTCTTGCAGAGT  
GGAACCATGCAGTACCAGACACGAGATAGATCTTCCAAAGAACAAGGCTTTTTTCGAA



TAAGCCAATTCATTTGGGACCCTGCAGATCCATTCTTTTTCTATTCAA---GATCAGCC  
CTTTGTCTCTGTGTTTTACGTCGAGAATTCTTTGCAGATGAAGAGATGTCAAAGGGGC  
TTATTACTTCCCAAACAATCCTCCTACATCTATATATAAACGCTGGTTCATC-----AAGA  
ATACGCAAGAAAAGCACTTCGAATTGTTGATTCATCGCCAGAGATGGCTTAGAACC-----  
----AATAGTTCATTATCT-----AATGGATCTTCCGTTCTAAT-----ACTCTATCCGAGAGTTA  
TCAGTATTTATCAAATCTGTTCCCTATCTAAC---GGAACGCTATTGGATCAAATGACAAAG  
ACATTGTTGAGAAAGAGATGGCTTTTCCCGGATGAAATGAAACATTTGATT-----CATGT  
AACAGGAGAAAGATTTCCCATTCCTATGCCTAGATCTCAG---ATAAATGGAAATTTTATT  
GATAAGACCTCTTCAATTGTAGCCAATATCTTATTACGAATAATCCGACAACCTCAGGA  
GAAAAAAGGCATTTACTTATTACAGAGATGGT-----ATGTCAGCTCAATCGGAAGGAA  
ATTATGCGGAAGCTTTACAGAATTATTATGAAGCTACACGATCAGAAATTGATCCCTATG  
ATCGAAGTTATATACTCTATAACATAGGCCTTATACACACAAGCAACGGAGAGCATAACA  
AAGGCTTTGGAATATTATTTCCAGGCAATAGAACGAAATCCATTCTTACCGCAAGCTTTT  
AATAATATGGCCGTGATCTGTCATTAC--CAGGGAGAACGGGCCATTCTACGGGGTGATT  
CTGAAATTGCAGAGGCTTGGTTCGATCAGGCTGCTGAGTATTGGAAACAGGCTATAGG  
GCTTACCCAGGTAATTATATTGAAGCACATAATTGGTTGAAGATTACGAGACGTTTAG  
AATTCGAAATGAACTGGCGATCAGAACATATATGGATAGAACTTATAACGGGGTCTCGA  
AAAACAAGTAATTTTTGCTGGGCCTGTATCCTTTTTTTAGGTTCACTAGGATTCTTAGTG  
GTTGGAACCTCCAGTTATCTTGGTAGGAATCTGATATCTGTATTTCCATCCCAGCAAATC  
ATTTTTTTTCCACAAGGTATTGTCATGTCTTCTATGGGATTGCGGGACTATTCAATTAGCT  
CCTATTTGTGGTGCACAATTCGTGGAATGTAGGTAGTGGTTATGACCGATTTCGATAGA  
AAAGAAGGAATAGTGTGTATTTTTTCGTTGGGGATTTCGGGAATAAATCGCCGCATCTT  
CCTTCGCTTCCTTATGCGAGATATCCAATCAATCAGAATGCAGGTTAAAGAGGGTCTTTA  
TCCTCGTCTGTCCTTTATATGGAATCAGAGGCCAAGGAGCCATTCCCTTGACTCGTA  
CTGATGAGAAT---TTACTCCACGAGAAATTGAACAAAAGCTGCTGAATTGGCCTATT  
TCTTGCGCGTACCGATTGAAGGAAAA

>Cycas

TTGAAAGAATGGTTC-----ATAAGTGGATCAATCGAAGAT-----CTGATCGAAAG  
G-----ACTAGTAAGGACTATATCGTCAATGAGATGGACAAGAACAAGAAT-----  
-----ATAA  
AGATTGATTTAAT-----

-----AACAGATTATGGGTCCAGTGCAGACAATCGTGAGAACTTGCTCTATATGA  
AATATTTGAGACAGAATAAGAGTGTTTGTGAAGAATGTGGATATCATTGCAAATGAGT  
AGTTCAGACAGAATCGAACTTTCAATTGATCATGGCACTTGGCATCCTATGGATGAGGA  
CATGGCCGCCCCAGATCCGATTCAATTCAT-----GATGAACCTCATATAGATCGTATCAC  
TTCTGCCAAATAAGGACAGGTTTAACTGATGCTGTTCAAACAGGCATAGGTGACCA  
AATGGTATTCCTATCGCAATTGGAGTTATGGATTTTCAGTTCATGGGAGGTAGTATGGGC  
TCCGTGGTAGGTGAGAAAATACTCGTCTGATCGAATACGCTACCAAGCAATTTCTCCC  
AGTAATCATGGTGTGTGCTTCCGGAGGAGCACGCATGCAAGAGGGAAGTTTCAGTTTA  
ATGCAAATGGCTAAAATATCTACTGCTTTATATATCCATCAATTGGAGAAAAGTTGTTAT  
ATGTATCGATCCTTACATATCCCACAACCGGTGGAGTGACTGCTAGTTTTGGTATGTTGG  
GAGATATCATCATTGCTGAACCTAAAGCATAATTGCATTTGCAGGTAGAAGAGTAATC

GAACAAACATCAGGTCAGAAAGTACCTGACGGTTTGCAGGTAGCTGAGCATTATTTG  
ATCATGGTTCATTTGATCTGATCGTTCGCGTAGTCTTTTAAAAGGTGTTCTGAGTGAGC  
CATTTCAACTTTACGGTATTCTTGTGAAAAAGAACGAACGTTAGGTATGGTAACCATT  
CGACCCGACGAAATTAGTAGTATTATCCGTAAACAGATCAAGCAATATAACCAAGAAGT  
AGAAGTTGTTAATATTGGCATCGTACTTCAAGTAGGAGATGGTATTGCTCGTATCCATGG  
TCTTGATGAAGTAATGGCAGGTGAATTAGTGGAATTTGAGGATGGTACAGTAGGCATTG  
CTCTGAATCTAGAATCAAATAATGTTGGAGCTGTATTAATGGGTGATGGTTTGATGATAC  
AAGAAGGCAGTTCGTAAGAGCAACTGGAAAAATTGCTCAGATACCAGTAAGTGATGC  
TTATTCGGGTCGTGTTGTAATGCTCTAGCTCAACCTATTGATGGCAGAGGTAAAATTAC  
AGCTTCCGAATCTAGATCGATCGAATCTCCTGCTCCAGGTATTATTTCAAGACGTTCCGT  
ATATGAACCTCTTCAAACGGGGCTTATTGCTATTGATTCCATGATCCCTATAGGGCGCGG  
TCAGCGAGAATTAATTATTGGAGACAGGCAGACAGGTAAAACAGCAGTAGCTACAGAT  
ACCATTATAAATCAAAGGGCCAAGATGTAATATGTGTCTATGTAGCTATTGGTCAAAAAG  
GCCTCTTCCGTGGCTCAGGTAGTTAATATATTCCAAGAACGTGGTGCAATGGAATACAC  
CATTGTGGTGGCAGAACTGCAGATTCTCCCCTACATTACAATATCTCGCTCCTTATAC  
AGGGGCAGCTCTAGCCGAATACTTCATGTATAAGGAACAACATACTTTAATAATTTATGA  
TGATCTTTCCAAACAGGCACGAGCTTATCGACAAATGTCTCTTCTATTGAGAAGACCAC  
CTGGTCCGGGAAGCTTATCCAGGAGATGTTTTCTATTTGCATTCTCGTCTTTTGGAAAGA  
GCAGCTAAATTAAGTTCTCAGTTAGGTGAAGGGAGCATGACTGCTTTACCGATAGTCGA  
AACCCAAGCAGGGGATGTTTCGGCTTATATCCCCTAATGTAATTTCTATTACCGATGG  
ACAAATATTCTTATCGGCTGATCTATTTAATGCCGGGATCAGACCCGCAATTAATGTGGG  
TATTTCTGTATCTAGAGTAGGATCCGCAGCTCAGATTAAGCTATGAAACAAGTAGCTG  
GAAAATTGAAATTAGAGTTAGCTCAATTTGCAGAGTTAGAAGCCTTTGCACAATTCGCT  
TCTGATCTTGATAGAGCTACTCAAATCAATTGGCAAGAGGTCAACGATTACGTGAGTT  
GCTCAAACAATCTCAATCAGCTCCCTTGACAGTGGAAGAACAATAGCTACTATTTATG  
CTGGAGCAAATGGATATCTAGATATATTAGAGATCGTACAGGTGAGAAAATTTCTCGTTC  
AGTTACGCGAGTATTTAATAACTAATAAACCTCAGTTTGGAGAAATTATACGCTCTACTA  
GGGCATTCACGGAACAAGCAGAAGCCCTTTTGAAGAGGGCTATTCAGGAACATATCGA  
ACTTTTTTTACTTCGAGAACAGAAAATGAGAACCAATCCTCTTGCTCTT-----GTTCCC  
ACACTTGTGGAAAAGAATGTGGGACATATTGTTCAAATCATTGGCCCAGTACTGGATGT  
AGTTTTTTCTCCAGGCAATATGCCTAATATTTTAAATTCTTTGATAATTAAGGGCAAAGAT  
ACGGCTGGTCAAGAAATTAATGTTACTTGCAGGTACAACAATTATTGGGAAATAATAA  
AGTGAGAGCTGTAGCTATGAGTGCTACAGATGGTCTGAAGAGAGGAATGAAAGTAATT  
GACACAGGAGCTCCCCTGAGTGTTCCGGTTGGTGGAGCTACTCTCGGACGAATTTTCA  
ATGTTATTGGAGAACCTGTCGATAATTTAGGTCCTGTAGATGCTCGCACAAACATCTCCTA  
TTCATAGACCCGCTCCTGCCTTTATACAGTTGGATACAAAGTTATCAATCTTCGAAACAG  
GCATTAAGTGGTGGATCTTTTAGCTCCTTACCGCCGTGGAGGAAAATAGGACTATTC  
GGGGGAGCTGGGGTAGGTAAAACAGTGCTCATCATGGAATTAATCAACAATATTGCTAA  
GGCTCATGGAGGTGTATCTGTATTTGGCGGAGTAGGAGAACGCACCCGTGAGGGAAAT  
GATCTTTACGTTGAAATGAAAGAATCGGGAGTAATTAATGAACAAGATATCTCGGGATC  
GAAAGTAGCTCTGGTCTATGGCCAGATGAATGAACCACCAGGAGCTCGTATGAGAGTT  
GGGTTAACCGCCCTAACCATGGCTGAATATTTCCGAGATGTCAATGAGCAAGACGTA  
TTTATTTATCGACAATATCTTCCGTTTTGTCCAAGCGGGATCAGAAGTATCTGCATTATTA  
GGCAGAATGCCTTCCGCTGTGGGTTATCAGCCAACCTTTAGTACAGAAATGGGTTCTTT

GCAGGAAAGAATTACTTCTACCAAAGAGGGATCTATAACCTCCATTCAAGCAGTTTATG  
TACCTGCAGACGATTTGACCGACCCCGCTCCTGCTACAACATTTGCACATTTAGATGCT  
ACTACCGTATTATCGAGAGGATTAGCTGCCAAAGGCATCTATCCAGCAGTAGATCCTTTA  
GATTCAACATCGACCATGCTCCAACCTTGGATCGTGGGCGAAGAACATTATGAAACTG  
CACAAGGAGTCAAGCAAACCTTTACAGCGTTATAAAGAACTTCAAGACATTATAGCTATT  
CTTGGACTGGACGAATTATCAGAAGAAGATCGTTTAAACCGTAGCAAGAGCACGAAAGA  
TTGAACGTTTCTTATCACAACCCTTTTTTTGTAGCAGAGGTATTCACTGGTTCCCCGGGT  
AAATATGTCGGTCTCGTAGAAACAATTAGAGGTTTTAAATGATCCTTTCCGGAGAATT  
AGATGGTCTTCCCGAACAGGCCTTTTTATTTGGTGGGTAACATTGATGAAGCTACCGCGA  
AGGCTATGAACTTAAAAGTGGAGAAT-----ATGACCCTAAATCTTCGTGTACTGACT  
CCTAATCGAGTTGTTTGGGATTCAGAAGTTGAAGAAATCATCTTATCTACCAATAGCGG  
TCAAATTTGGCGTATTACCAAATCATGCTCCCATTTGTTGCAGCTTTAGATATAGGGATCAC  
AAAATACGTCTCGATGGGCAATGGTCTACTATGGCTTTGATGGGCGGTTTCGCCAGGA  
TAGACAATAATAAAATCACCATATTGGTAAATGATGCAGAGAAAGGTATTGACATCGAT  
CCTCGAGAGGCTCGGGAAACTTTTCGAATAGCTGAAGCTGACCTAGCTCGAGCTGAAG  
GCAAGAGACAAGTGATTGAAGCTAATGTAGCTCTCAGAAGAGCCAGGACACGATTAG  
AGGCTATCCCCTCCGTCTCTATGATAAATGGGACTGATTTTTCTTTTCTTGGGTTATTG  
GCCTCTGCTGGAGGTTTCGGGTTGAATACCAATATTTTAGGAACAAATCTAATAAATCT  
AAGCGTGGTGCTCGGTGTACTGATCTATTTCCGAAAGGGA---TTAAGTAATTTATTAGAT  
GACCGTAAACAGAAAATATTGAGTACTATTTCGTGATTCGGAAGAGCTATACAAGGGAG  
CTACTGATCAGCTCGAAAAAGCTCGGGCTCGCTTACGAGAAGTAGAAATGAGAGCGGA  
TGAGATCCAGGTAAATGGATACTCTCAAATAGAACGAGAAAAAGAGGATCTGATCAAT  
GCTGCTCATGAGAATTTGGAACGATTAGAGGATTCTAAAACGAGACCGTTAACTTCG  
AACAAACAAGAGCAATTGACCAGGTCCGACAACAAATTTCTCGCCAAGCTTTACGAA  
GAGCTTTGGGAACTCTGAATAGTCGTTTGAATAACGAGTTACATTTACGTACGATCGAT  
CATAATATCAGCATGCTTAGAGCCATGAAAAACAACTGATATGAATCCCTTGATTCT  
GCTGCTTCCGTTATTGCTGCTGGATTAGCTGTAGGCCTCGCTTCTATCGGACCTGGTGTT  
GGTCAAGGCACTGCTGCGGGCCAAGCCGTAGAGGGTATTGCGAGACAACCAGAAGCA  
GAGGGTAAAATACGAGGTACCCTACTGTAAAGTTTAGCTTTTATGGAAGCTCTAACTAT  
TTATGGACTAGTTGTAGCGTTAGCACTTCTATTTGCAAATCCCTTTGTTATGGATATTGTA  
CAATCTTCTATTGACACACTAAATCATTTCTACGAGATATCCGGTGTGGAAGTAGGTCA  
ACATTTCTATTGGCAAATCGGGGGTTTTAAAGTTCATGCACAGGTGCTTATAACTTCCTG  
GGTTGTAATTGCTGTCTTATTAGGTTTCAGCTACTATAGCTGTTTCGAGATCCACAAACCAT  
TCCGACTGGTGGTCAAAAATTTTGTGAATATGTCCTTGGATTTGTCCGGGACCTGACCA  
GAACTCAGATTGGGGAAGAATATGGCCCCTGGGTCCCTTTTATCGGAACTATGTTCTTA  
TTTATTCTTGTCTTAACTGGTCAGGTGCTCTTCTCCCCTGGAAAATAATCCAATTACCT  
CATGGGGAGCTAGCTGCACCTACAAATGATATTAATACTACTGTTGCTTTAGCTTTGCTC  
ACGTCAGTAGCATATTTCTATGCAGGTCTTGCAAAAAAGGGGTTAGGTTATTTGGTAA  
ATATATTCAACCAACCCAGTACTTTTACCGATCAATATATTAGAGGATTTACGAAACC  
CTTATCACTTAGTTTTCGACTTTTTGGTAATATATTAGCTGACGAACTGGTAGTTGCTGTT  
CTTGTCTCTAGTACCTCTGGTGGTTCTTACCTGTGATGTTTCTGGGATTATTTACAA  
GCGCTATTCAAGCTCTGATCTTTGCAACTTTAGCCGCAGCTTATATAGGTGAATCTATGG  
AGGGTCATCATATGATATTCATAACCTTAGAACATATATTGGCTCACATTTCTTTTCTCT  
CATTTCTGTTGCTACTCTCGCTTATTGGGGAACC---TTGGTCCATCAAATTGAAGGGCTA

AGTAGTTCGGGAGGAAAAGGCATGATAGTTACTTTTTGTCTGTACAACGGGATTATTAAT  
TACTCGTTGGCTTTATTTCGGGACATTTACCGTTAAGTAATTTGTATGAGTCATTCATGTTC  
CTTTCATGGAGTTCATCTGTGATTACATATAATTCTAGAAGTACGAAGCCAAAAGGATGG  
ATTAGGTGCAATCACTGCACCAAGCACTATGTAACTCATGGTTTTGCTACTTCAGGTC  
TTCCGAAGGAAATGCAACAATCTGCAATGTTGGTACCTGCCCTGCAATCCCATTGGTTA  
ATGATGCATGTAAGCATGATATTACTCAGCTATGCAACCCTTTTATGTGGATCCCTATCAT  
CAATAGCTTTTCTGATCATTACATTTTCGGAGAAATAGAAGGATTCTTTCGCTTCTCAGTA  
ATAATTTGTATTTACATGAACAAGAAAGTGATTTGCAAAACACTTTTTATTGTTCATTCA  
CAAATCATCGTAAATGTAAATTGACTCAACAATTAGATTATTGGAGTTATCGTGTATTG  
GTCTAGGCTTTCTTCTTTAACTATAGGTATTCTTCTGGAGCAGTATGGGCTAATGAAG  
CATGGGGATCTCGTTGGAGTTGGGATCCTAAAGAGACTTGGGCATTGATTACTTGGATC  
ATATTTGCAATTTATTTGCATACCAGGGTGAATAAAGGTTGGCAAGATGAGAACCCGGC  
AATTATAGCTTCTTAGGATCTTTTATAGTTTGGATCTGTATTTTGGGGGTCGATCTATTA  
GGAATAGGTTTACATAGCTATGGATGGTTGATT-----GTGGCCAAAAA---GCATTAGCTT  
CCCTACGATACCTTGCATGTCTAGTATTCCTGCCCTGGGGAATCTCTATTTTCATTCCAGA  
AAGGTTTGGAACTTGGGTTACGAATTGGTGGAACTACTGGTCAGTCTCGGGAATTTTCT  
GATTATCTCCAAGAAGAAAACGCTCTAGAAAGATTTCGGAGAAATAGAAGAACTATTCC  
TGTTGGAGAGAATGGTGGAAAGATTCTTCGGAAACACATTCACAAGATCTTCGTATAGA  
GATTCGCAAAAAACGATCCAATTAGTCGAAATGTACAATGAAGATTTGATCCAGATCA  
TCTCACATTTATTGGCAAATTTTATATGTTTTGCTACTCCAGGTGCTTATTTTCATTCTGGG  
TAAGGAAAACTTGTCTGTTCTCAATTCCTGGATCCAAGAATTATTCCATAGCCTGAGCG  
ATACGATGAAAGCGTTTTCTATTCTTTTAGTAACCGATTTATGTATTGGGTTCCATTCCGC  
CCATGGTTGGGAACTGATGATCGATTTCGATCTCCGAAAATTATGGGTTTTCTCATGATGA  
ACAAAGAATATCTGGTCTCGTTTTCACTTTTCCGGTCATCTCAGATACAATTTTCAAATA  
TTGGATCTTCCGTCACTTAAATCGTATATCTCCTTCACTTGTAGTGATTTATCATTCAATG  
AATGAAATGCCCATTTGGTGTCCAAAAGTTCCTTTTCGGATCCCTGGAGAGGAAGAC---  
-----AAC---CGACTTATCGAGAGAGATTACTTTTTCCGGGTCAGCAGGTTCGATGA  
TGAGATCGCAAATCAACTTATTGGTATCATGATGTATCTGAATGGAGAAGATGAAAATA  
AAGATATATATCCATATATTA ACTCTCCCGGTGGAGCAGTGATACCGGGAATATCTATTTA  
TGATGCTATGCAATTTGTAGTACCAGATGTGCATACAATATGCATGGGGTTAGCTGCCTC  
GATGGGATCTTCTGTCCTAACTGGGGGGGAAATTACTAAACGTATAGCATTACCTCAG  
CT--GTTATGATCCACCAACCTGCTAGTTCTTATTATGATGGACAAGCAGGAGAATGTAT  
CATGGAAGCGGAAGAGGTATTGAAACTTCGCGATAGCATTACGAATGTTTATGTACAAA  
GAACAGGCAAGCCCTTATGGGTCATTTTCGGGGGACATGGAAAGAGATGTTTTTATGTC  
AGCAACAGAAGCCCAAGCTTACGGCATTGTTGATCTCGTAGCGGTGGAGATGAATAAA  
CAAAATTTGATCGATGAAGGTTTCACTTACTGAATCACTTCCCAATGGTATGTTCCGAGT  
TCGTTTAGATAACGGATGTCAGGTTCCAACCCATATCTCGGGGAAAATTTCGGCGTAATC  
ATGTACGAATACTACCAGGAGATAGGGTCAAGGTCGAATTAAGTCCTTATGATCTAACC  
AAAGGACGTATAATTTATCGACTTCGCAACAAATCTTCAAATGATATGGATAAGTTTCGA  
AGAAATGGAAAGGAAGATACATTCCGGCAGCGGCGTTTTCTATATCCACTCCTTTTTCA  
AGAAAATCTTTACGCAATTGCTTATGATCATTATTTATCAAGTTACAATGATCGATTCACT  
TTCCTAACTGTAAAACGTTTAATTAGTCGGATACGTCAACAGAATGGTTCAATTGTTTCA  
TTTGGAAATCAAATAAAAATAAATTAGTTGGTAGGAATTTCTATTCCGAATTGGTACTA  
GAAGGTTTGACAGTGGTTCTAGAAGTTACCTTCTCAATCCAA-----TCGAAACTA---AAT

GAATGGAATAGTTTCCGGTCCATCCATTCCATATCCCTTTTATGGAAGACAAATTTCCA  
CATTCCAATTTTCTCTTAGATATAACGAATACCCACTCTACTCATCCGGAAATTTTGGTTC  
GAACTTTTCGTTACTGGATCCAAGATGCTCCTTCTTTACACTCATTACGATCTGTTCTCC  
ACGAACATCGAAATCTTATTTCTTTTCGGAGAATATTCTCATCGCTTCGAAAGAAAAGACA  
AGGTTATCCCTGGTCCCTGTGGAATTATTATGTCTATGAATGTGAATCTCTTTTAGTTCCCC  
TTTGAAACGATTTTCTTATTCACGATCATTGTCCATGGAGCTTTTCTAGAGCGAACTA  
CTTTTATAGAAAGATCGAGCAT---ATTGTCATATTTTCTCATGATTTGAGGATCTGGTTT  
TTGAAGGATCCTTCCATTCATTATGTGAAAGATAGAGAAAGATTTCTTATAGCTCTGAG  
GGTACTTACCTTCTAGTGAAAAATGGAGATATCATCTTACAAATTTTGGCAGTGTCA  
TTTTCATCTCCGGTCCCAACCATATCGGATGTCTATCGATGAATTATCCAAGAATTGTTTT  
TCTTTCCTGGGCTATTTATTTAGCGTCCAAATGAAGACTTTCGTGGTTAAGATAAAAATG  
CTGGATGATTCATTACCGATCCCATTACC-----AAGGAATTCGATCCAATAGCTCCA  
ACTACACTTTTGATTGGATATTTAGCTAAAGAAAGGTTTTGTGATATCTCAGGGCGCCC  
AACTGGTAGATTGGCCTGGACTGGTCTAACAGATGACAATATCCTCCATCGATTTGATC  
GAATTTGGAGAAACATCTTACATTATTACAGTGGATCCTCAAAGAAAGATGGTTTATATC  
GTATGAAGTATACTTCGACTTCCATGTGCTAAAACCTTTAGCCTGTAAACATAAAAGTG  
CGATACGCGTAGTTCGGGAAAGATTCCGGTTCAGAACTATTCACGAAATCATCTCCAAA  
GAACGAGAATTGATCTCTTTGTCTTTCTCA---CGAATTTGGCATTAGATATTCTCCAAA  
GAAATCCTTTTGTTAATCCTGGATGGTGATTAATACGACG---GATCCTGAGGAACGAGT  
TATCAATTTATCTTTTGTACTGGGATTTATAAAAGAGATCTTCGGTCTTATATGGATTAGA  
ATTTACATTCTTATTCCTATATTGGGAGTTTTAATAGGATTATTAGTTATTGTATGGCTTGA  
AAGAAAGATATCTGCAGGAATACAACAACGTATTGGACCTGAATACGCCGGTCCCTTG  
GGAATCTTCAAGCTTTAGCAGATGGGATCAAACCTACTTCTGAAAGAGGATATTATCCC  
ATCTAGAGGGGATCTTTGGTTATTAGTATTGGACCAGCTATAGTGGTTATACCAATTCT  
TTCGAGTTATTTAGTAATCCCTTCGGCCGCCACATCGTTTTAGCTGATCTTAGTATAGGT  
GTTTTTTTCCGGATCGCCGTTTCAAGTATTGCTCCTCTTGGACTTCTTATGGCGGGGTAT  
GGATCAAATAATAAATATTCTTTCTCAGGTGGTCTCCGAGCTGCTGCTCAATCCATCAGT  
TACGAAATCCCTTAGCTTGTGTGTTATCTATATCTCTACTA---TCCAACAGTTTAGGTAC  
GGTTGATATAGTTGAAGCACAGTCTAGATATGGTTTTTGGGGATGGAATTTGTGGCGTC  
AACCTATAGGGTTTATAGCTTTCTTTATCTCTTCCCTAGCAGAATGTGAAAGATTGCCTT  
TTGATCTACCAGAAGCGGAAGAAGAATTGGTAGCGGGTTATCAAACCGAATATTCGGG  
TATAAAATTTGTTTTATTTTACGTTGCTTCCATCTGAATCTATTAGCTTCCCTCATTATTG  
TGACAATTCTCTATTTGGGCGGATGGAACCTTTCCATTCATCTATACCAATTTCCGGAAT  
ATTCGAATGGGATGGAACCTAGTGAGGTCCTTGGCATAACGATGGGGATCCTTATCACA  
TTAGCTAAAGCTTATCTGTTCTTGTTCATTTCTATCACGGCGAGATGGACTTTGCCAGA  
ATGAGGATAGACCAATTATTGGATCTTGGTTGGAAATTTCTTTTACCTATCGCTCTGGGT  
AATTTACTGACAGCTTCTTTTCAACTTCTTTTATTG-----  
-----ATGAAAGAGTTTCATTTGCTTCTCTTCCATGGAGGTTCTATTTTCCAGAATGT  
ATCCTAATTCCTCGGCCTAATTTCTTCTGATGATCGATCTAACCTCTGATCAAAAAGAT  
ACACCTTGGTTCTATTTTCATCTCTTTAACAAGTTTAGTAATGAGCATAACGGTCTTATTAT  
TTCGATGGAGAGAAGAACCTATGATTAGCTTTTTGGGTAATTTCCAAACGAGCAATTC  
AGCAAATCTTTCGATTTCTCATTTTACTATGTTCAACTCTATGTATTCTCTATCCGTGG  
AGTACATCAAATGTACAGAAATGGCTATAACAGAGTTCCTGTTATTCTATTAACAGCTG  
CTCTAGGGGGAATGGTTTTATGTGGTGCTAATGATTTAGTCACTATCTTCGTAGCTCTGG

AATGTTTCAGTTTATGTTCTTATCTATTATCTGGATATACCAAGAGAGATGTACGGTCTAA  
TGAGGCTACTATGAAATATTTACTTATGGGTGGGGCAAGCTCTTCTATTCTGGTTTATGG  
TTTTCTTGGCTATACGGTCTATCCGGGGGAGAGATTGAGCTTCAAGAAGTAGTAAATG  
GTCTCATAAATACACAAATGTATAACTCCCCAGGAATTTTGATTGCGCTCATATCCATAG  
CTGTAGGAATTGGATTCAAGCTTTCTCTAGTCCCTTTTCATCAATGGACCCCTGACGTAT  
ATGAAGGATCTCCCACTCCAGTCGTTGCTTTTCTTTCTGTTACTTCGAAAGTAGCTGCT  
TCAGCTTTAGCCACTCGAATTTTCGATCTTATTTTCTACTTTTCATCGAACGAATGGCAT  
CTTCTTTTGGAAATATTAGCTATTCTTAGCATGATATTAGGCAATTTAATTGCTATTACCC  
AAACGAGCATGAAACGTATGCTTGCATATTCGTCCATGGGTCAAATTTGGATATATCATT  
TTGGAATAATTGCTGGAGACTCAAAGAATGGATATGCAAGCATGATAACTTATATGCTGT  
TCTATATTTTCATGAATTTAGGAACTTTTGCTTGCATTGTATTATTTGGTCTACGCACAGG  
AACTGATAACATTCGAGATTATGCAGGATTATATACGAAAGATCCTTTTTCGGCTTTCTC  
TTTAGCTTTATGTTTACTATCCTTAGGAGGTATTCCCTCCATTAGCAGGTTTTTTTGGAAA  
CTTTATCTATTCTGGTGCGGGTGGCAGGCAGGCTCATATTTATTGGTTTCGATAGGACCC  
CTTATGAGCGTTATTTCTATATACTATTATCTAAAATAATCAAGTTATTAATGACTGAGC  
GAAACAAAGAAATAACTCCTCACGTGCAAAATTATAGAAGATCTCCATCTTCTTTCAA  
AATTCTATCGAATTGAGTATGATTGTATGTGTAACAGCATCTACTACACTGGGAATAGTA  
ATGAACCCAATTATTGCAATTGCTCAGGATACCTTATTTATGTTTCTACTTTTTGAATAG  
AGACTTTTTGGATCTTTTTACTAATATCTAGCCTCATGCCTATTCTGGCATTCCTAATTC  
CAGAGCTTTAGCCCCATTAGCGAAGGCCAGAGAAGCTCACTAGTTACGAATCCGGT  
ATAGAAGCAATGGGAGATGCTTGGATACAATTTAGGATTCGTTATTATATGTTTCGCTTTG  
GTTTTGTTGTTTTGATGTTGAAACAGTTTTTCTTTATCCATGGGCTATGAGTTTCGATA  
TATTGGGTATATCTACCTTTATAGAAGCTTCGATTTTCGTGCTTATCCTAATTGTTGGTTC  
AGTTCATGCATGGCGAAGAGGAGCATTGGAATGGTCTATGAGCGATTTACCTGGTTAA  
CAATAATTGTTATTTGCCATATCTGCGGGTTCCTCAATCCCATTGTTCCCTCATAGAGG  
GAATAATATAATTCGATGGTATACTCTGGGTATCTGCTTATTAGAATTCCTTCTAATGACC  
TATACATTTTCGTTATCATTTTCATTCGACGATCCATTGATCCAATTGGAAGAAGATTATG  
ACTGGATAGATCTTATTGACCTTCATTGGAGACTGGGAATTGATGGACTTTCTATTGGAC  
CTATTTCAATTGACGTCATTTGTTACTACTTTAGCCACTTTAGCCGCTTGGCCAGTTACCC  
GAAATCCCCGATTGTTCTATTTCTTGATGTTGGCAATGTACAGTGGCCAAGTAGGATTAT  
TTGCTTCTCGAGATATTCTACTTTTTTTCTCATGTGGGAGCTAGAACTAATCCCGTTTA  
CCTACTTATATCCATGTGGGGAGGAAAAAGACGTCTATATTCGGCTACAAAGTTCATTT  
GTACACTGCAGGTGGTTCATTTTTATCTCAATGGGAGCTTCAAGTATGGGTCTCTAT---T  
TTGATGGACCAACATTAGATTTTGAATATTGGCTAATAAATATTATCCTGTAGTACTGG  
AAATAGTATTCTATTTAGGATTCTTCATCGCTCATGCCATCAAATTGCCAATTCTCCCTTT  
ACATACCTGGCTACCGGATACTCATGGGGAAGCGCATTATAGTACATGTATGCTTTTGGC  
TGGAATTCATTGAAAATGGGGGATATGGATTAATTGCAATTAATATGGAATTATTACC  
TCATGCTCATTTCTATTTTCACCGTGGTTGGTAATAGTAGGAGCGGTTCAAATTATCTAT  
GCAGCTCTAACTTCTCTGAGTCAACGTAATTTGAAAAGGAGAATAGCCTATTCATCAGT  
ATCTCATATGGGTTTTGTAATTGTAGGAATTGGTTCATGGCAGATACGAGTCTTAATGG  
AGCCATTTTGCAGATGATTTCTCATGGATTAATTGGTGTGCTGCACTTTTCTTCTTGGCAGG  
ACAAGTTACGATGGGATACGTACTCTTTTCTTGACGGGATAGGAGGAATGGCTATAC  
CAATGTCCAAAATATCTACTATGTTTCAGTAGCTTTTCAATGGCTTCCCTCGCATTGCCAG  
GAATGAGTGGTTTTCGTAGCGGAATCTATGGTACTTCTGGGAATAATTACTAGTCGTAAGT

ATTCTTTGACTTTTCAAATAGTTATTGCTGCAATAATGGCAATTGGAATGATATTA ACTCC  
TATTCATTTATTATCTATGTTACGTCTGAATGTTCTATGGATATAAGTTTTTGAACGTCTTGA  
ACCCCTATTTAAAGGATTCTGGACCACGAGAAATCTTTATTTTCGATTTGTCTTTTTCTGC  
CAGTAATAGGTACTGGTACTTATCCTGATTTAGTCTTATCTCTATGGGATAAGAAAGTGG  
AAGCTATTATGTTCCGATCCTTCCATGAA---ATGCTCGAGCATGCGCTTATTTTCAGGTGC  
TTATTTGTTCTCTATCGGTATTTATGGACTGATCACAAAGTCGGAACATGGTTAGAGCACT  
TATGTGTCTTGAGCTAATACTGAATGCGGTTAATGTCAATCTCGTAACATTCTCCAATTAT  
TTTGATAGTCGACAAGTAAAGGGAGACATCTTCTCGATCTTTGTTACCGCTATTGACAGC  
CGCTGAAGCAGCCATTGGATTAGCTATTGCTTTAGCAATATATCGTAACAGAAAATCGA  
CTCGTATCGATCAATTTAATTTGTCAAATGGATGGAACCTATATATAAATATGTTTTGGAT  
CGTGCCTTTCCCTTCCACTTTCAGCCTCTGTGCCAATAGGATCGGGATCCTTACTTTTTCC  
AAGGGCAACCAGGGGTCTTCATCATATATGGGCTCTTATCAGCATTTCCTGCTAGGTAT  
AGCTATGCTCCTTTCTTCAATCTATTCTTGCAGCAAATTACAGGTGGTCCCGTCTATCA  
ATATTTATGGTCTGGACCATTAATAAGAATTTTTCCCCAGAGTTGGGCTATTTGATCGAT  
CCACTTACTTCCATTATGCCAATATCAGTTACTACTGTGCGAATCATGGTTATGATCTACA  
GTGATAATTATATGTCTCATGACCAAGGATATGTGAGGTTCTTTGCTTATCTTAGTCTTTT  
TAATGCTTCTATGTTGGGACTAGTGATTAGCCCTAATCTAGTACAAATATATATATTTTGG  
GAATTAGTAGGAATGTGTTCTTATTTATTAATAGGTTCCCTGGTTTACTCGACCCAGTGCA  
GCCAATGCCTGTCAAAAAGCGTTTATTACTAATCGTATAGGAGATTTTGGACTATTATTA  
GGAATTCTAGGATTTTATCAGATAACGGGTAGTTTCAAATTTAGATATTTATTGGGAAGA  
TCTAACGAA---GAAGTTAGTTCATTCTTTGCTACTCTGTGTGCTTTTTCTTATTTTTAGG  
TCCAGTAGCTAAATCCGCACAATTTCCACTTCATGTATGGTTACCTGATGCTATGGAAGG  
GCCTACCCCTATATCAGCTCTTATACATGCCGCTACTATGGTAGCAGCAGGAATTTTTCT  
CGTAGCTCGATTGTTCCCTCTTTTCAAAGCTCTACCTTTCATAATGAATCTCATCTCTTG  
GACAGGTGGAATAACGGCTCTATTGGGAGCGACTATGGCTCTTGCTCAAAGTGATCTTA  
AAAGAGGTTTGGCTTATTCTACTATGTCCCAATCAGGTTATATGGTGTTAGCTCTAGGTA  
CAGGTTCTTATCGAGCTGCTTTGTTCCATCCGATTACACATGCCTATTCTAAAGCGTTAT  
TGTTCCCTAGGATCTGGATCAGTGATTCATTCCATGGAATCTCTTGTGGATATTGCCCCG  
CTGAAAGTCAGAATATGGCTCTCATGGGTGGTTAAGTAAATACATGCCAATTACAGGA  
ACAACCTTTCTTTTAGGTACACTTTCTCTTTGTGGTATTTCCCCCTTTGCTTGTTTTTGGT  
CTAAGGATGAAATTATTAGTGATAAGTTGGCTATATTCTACCATTCTTGGGGGGATAGCTC  
GATCCGCAGCAGGATTTACTGCATTTTACATGTCTCGTATGTATTTCTTGCTTTCGAAG  
GAGATCTCCGCGTAAAT-----TTGTATAACGACCCTATTCCGTTCTATTCGATCTCTAT  
GTGGGGAGAAAAAGAATCTGGTACATTCACCGAAACTATGCCGCAATTACCGGGAAAT  
AAGTTTCAATTCCCTCTCGATAAAGGGGATCCTCCATATCCCAAGGAATCGGACAATAC  
AATGCTATTGCCTTCACTTGTACTGGGACTATTCACTCTATTTGTGGGATCTATAGGAGT  
TTCTTTTAGTTCTGATATCTTATCCCAACGGTTGACTCTA---ATGAACCATTTCCATGAGA  
ACCATCCT-----GAAAATTGGTCCGAATTTTTTGTAGATGCGAATCCCTCAGTTGGTATAG  
CATTTTCTAGCACATTCGTGGCCTTTGTCCTATATGGACCTATAAATTTT-----AAT  
TTCTCCTCACCATATTTAGGTATCCCAGACCGATTCATCAATGTCATATACAATTGGTCAT  
ATTACCGAGGCTACATAGACATATATTATAACAAAATTTTACTATGGGTATACGGAGATT  
AGCTGAACATAACTTATTTATTTGATCGATGGGTAATTGATGGAATTATAGATAGAGTCGG  
TATCCTGGGTCTCTTTGTAGGAGAGGGAATGAAATATTTAGGGGGGGGA---CGGACATC  
TTCTATCTATTTGGATTCTTGTTTTTTGCAGTAATCTTTCTACTGACAATTTTTTATGGATC

TGCCTGGGCCGATACGTGATATTCTTTTGGTCCCTCTAGAGCTGGGTCTCATATTAGGAG  
GTTTGGAAAGTAGTACTACTTACCAATATAATTTATTCTGCCCTTTCATTGGGACCGGTT  
TTGTTTGTATATCTTTATTATATATTTTTATTGAACGCAGATTTTGTAGCTGCTGCACAAATC  
CTGATCTACGTAGGAGCTGTCAATGTCTTGATCGTGTGGCCGTGATGTTGATGAATAAT  
CAAAAATAT---CCAAATTTTCTCTCTGGACCGTCGGAGATGGTATCACTTTAGTAGTTT  
GTACGAGTCTCTTCTGTTCAATTAATACTATTATCCTGAACACATCATGGTCCGAGATATC  
TATGACTACAAAATCGAATCAAATTTTAGAACAGGACTTAACAAACAACGTTCAACGTA  
TTGGGGCTCATTATCAACTGATTTTTTCTTCCATTCGAACTTCTTTCTATAATACTTTT  
AGTTGCCCTCGTGGGAGCAATTACTATAGCTCGCCGAATGACCGTGCTTGCTACAGAA  
AAAGACTCCGTGATAGTAAGTATGGGCCCTCATCATCCATCGATGCATGGTGTTCTTCG  
ACTTATTGTTACTCTAGATGGTGAAGATGTTATTGACTGTGAACCTATATTAGGTTATTTG  
CATAGAGGGATGGAAAAATTGCCGAGAACCGAACAATTGTCCAATATCTTCCCTATGT  
AACACGATGGGATTATTTAGCCACTATGTTTACAGAAGCAGTAACGGTAAATGCGCCG  
AAAGATTGGGAAATATTCAGGTACCTAAAAGGGCTAGCTGTATCAGAGTTATCATGCTA  
GAGTTGAGTCGTATAGCTCCCCATTTGTTATGGCTTGGGCCTTTCATGGCTGATATTGGT  
GCACAGACTCCTTTCTTTTACATTTCCAGAGAAAGGGAAATTATCTATGATTTATTCGAA  
GCTGCCACGGGTATGCGAATGATGCATAATTATTTTCGTATCGGAGGAGTAGCTGTAGAT  
TTACCCTACGGTTGGATAGATAAATGTTTGGATTTTTGCGATTATTTCTTATCCAAAGTG  
GCTGAATATGAAAGGCTTATTACACGCAATCCCATCTTTTTAGAACGAGTTGAAGGAGT  
AGGCATCATTGGTAGAGAAGAAGCAATAGATTGGGGTTTATCAGGACCTATGCTACGAG  
CTTCCGGAATACAATGGGATCTTCGCAAAGTTGATCATTACGAATGTTACGATGAATTTG  
ATTGGGAGGTCCAATGGCAAAAAGAAGGGGATTCATTAGCTCGTTACTTGGTACGAAT  
TGGGGAAATGACAGAATCTATCAAATTATTCGACAGGCCCTAAAAATAATTCCGGGAG  
GACCCTATGAGAATTTGGAAGCCCGGCGCCTCGATAAAGGCAAAGATTCCGGAATGGAA  
TGATTTTGAATTCGATTTATTAGTAAAAACCTTCCCCTACTTTTGGAGTCACCAAAACA  
AGAACATTATGTGAGAGTAGAAGCTCCCAAAGGAGAATTAGGAATTTTTCTAATGGGA  
GATGATAGTATTTTTCCCTGGAGATGGAAAATTCGCCACCTGGTTTTTATTAATTTGCAA  
ATTCCTCTCAACTGGTTAAAAGCATGAAATTGGCCGATATCATGACAATTTTAGGTAGT  
ATAGATATCATTATGGGAGAGGTTGATCGTATGTTTTCCATGGTGACTGGATTCATAGATT  
ATAGTCAACGAGCGATACAAGCTGCGAGATATATTGGTCAAGGTTTTATGGTTACCCTAT  
ATCACATGAATCGTTTACCCATGACTATTCAATATCCCTATGACAAATTGATCCCATCAG  
AACGATTCGCGGACGGATTCATTTCAATTTGATAAATGTATTGCTCGTGAAGTATGTG  
TCCGTGTATGTCCGATCGATCTACCCGTTGTTGATTGGAACCTTTGGAAGAGATATCGGA  
AAAAAACGATTAGAAAATCATAGCATTGATTTCCGGAATTTGTATCTTTTGTGGGAATTGT  
GTCGAATATTGTCCCACAAATTGTCTGTCGATGACTGAAGAATATGAACTTTCGACCTAT  
GATCGTCATGAATTGAATTATGATCAGATTGCTCTAGGACGTTACCAATATCGGTGATT  
GAAGATTCTACAATTCGAACAATTTTCAGTTCA-----ACTATGGACGGACATTTAGATCC  
AAGAACTGTTACCAGTTCTGTACAGGGTCGATTATCCGCTTGGCTAGCCAAGCATAAGT  
TAGCTCACAGACCTCTGGGTTCTGATTACCAGGGCATAGAACTTTACAGATAAAATCT  
GAGGATCGGGCCTCTGTAGCTGTCGCTTTATAIGTTTATGGTTTCAATTAICTCCGTTCTC  
AGTGTGCCTATGATGTAGCGCCGGGGGATCATTGGCTAGTGTATATCACCTTACAAATA  
TACAGGATGATGCGGATCAACCTGAAGAGATATGTATAAAAGTTTTTGTCCCAAGGAAA  
AATCCCAGAATTCGTCTATTTTCTGGATCTGGAAAAGTGCTGATTTTTCAGGAACGAGA  
ATCTTATGATATGTTGGGAATCCTTCATGAAAGTCATCCACGCCTGAAACGTATATTGAT



GCCTGAGAGTTGGATTGGTTGGCCTCTACGCAAAGATTATATTACACCTAATTTCTACGA  
GATACAGGATGCTCAT-----ATGGGT-----TCTACAG  
AATCCCCTTTACTTGGTCAAACAACCTCCAAATTCAGTTATTTCAACTACCTAAATGATC  
TGTCGAATTGGGCCAGACTCTCCAGTTTATGGCCGCTTCTTTATGGTACTAGTTGTTGTT  
TTATTGAATTCGCTTCATTAATAGGTTTCACGATTCGACTTTGATCGTTATGGTCTGGTACC  
AAGATCTAGTCCTAGACAAGCCGACCTCATCATAACAGCTGGCACTGTGACCATGAAA  
ATGGCTCCTTCTTTAGTGAGATTATATGAACAAATGCCCGGACCAAATATGTAATTGCT  
ATGGGAGCATGTACTATTACAGGAGGAATGTTTCAGTACAGATTCTTATAGTACCGTTCGT  
GGAGTGGATAAATTAATTCCCCTAGATGTTTATTTGCCGGGTTGCCCCCAAACCAGA  
GGCTATTATAGATGCTATAATAAACTTCGTAAAAAGGTAGCTCGAGAAATATATGAAGA  
TAGGACCAAGCTCCAACAAGGAAAGAGATATTTCACTCAAATCATAAGTTTCGTGTT  
GGATCCACTTCAGAGATACTTTCCAAAACCTTTGAATCTACTTCAGAGAATTCAGTACA  
GGAATCGAGGAATGAAGAATATTTTGTAAGAGTAACGAACAGGAAATCAATTTTCAA  
AAATTCATATGCGGAATATAAATACTTATGACTGGATGAAAAGTGGATGACTCGATC  
AATTTCCATCTTGGTCATGATACATATGATAACTCGGACATCTATTTCAAATGCATATCCC  
ATTTTTCGCAGCAGGGTTATGAGAATCCCCGAGAAGCAACTGGACGTATTGTATGTGC  
TAATTGTCACCTGGCTAAGAAGCCTGTGAATATTGAGGTTCCACAATCCGTGCTTCTCG  
ATACTGTATTTGAAGCAGTTGTTCAAATCCCCTGCGATATGCAAATAAAACAAGTTCTT  
GCTAATGGTAAGAAAGGGGCTTTGAATGTAGGAGCTGTTCTAATTTTACCTGAGGGCTT  
TGAATTAGCCCCTCTGATCGTATTTCTCCCGAGATTAAGAAAAAATAGGTAATCTTTA  
TTTTCAGAATTATCGTCCTAATCAAAAAGAGATTCTTGTAATAGGTCCTGTTCCCGGTCA  
GAAATATAGTGAATTTGTGTTTCCCATCCTTTACCCGAATCCTGCTACTAATAAAGAAGT  
TCATTTTCTTAAATATCCCATATATGTGGGTGGTAATAGAGGAAGGGGACAAATTTATCC  
CGATGGAAGCAAGAGCAACAATACGGTCTATAATGCTTCAACAACGGGTAGAGTGAGC  
AAAATATTACGTAAAGAAAAGGGTGGATATGAAATCACTATCGATAATGCATCAGATGG  
TCGTCAAGTGGTGGATATCGTACCTCCGGGACCGGAACCTTCTTATTTCCGAGGGTGAAT  
TCATCAAAGTTGATCAGCCATTAACGAATAATCCTAATGTGGGTGGATTTGGCCAAGGA  
GATGCAGAAATAGTACTTCAAGATCCATTACGTGTTCAAGGTCTCTTATTACTCCTGGCA  
TCTGTCAATTTGGCACAAATCTTTTTGGTCCTTAAGAAGAAACAATTTGAGAAAGTTCA  
ATTGGCCGAGATGAATTTTATGGGTAAAGTATACGATTGGTTCGAAGAGCGTCTTGAGA  
TTCAGGCGATTGCGGATGATATCACTAGTAAATATGTTCCCTCCTCATGTCAATATATTTA  
TTGTCTAGGGGGGATTACGCTGACCTGTTTTTTGGTACAAGTAGCTACTGGTTTTGCTAT  
GACTTTTTACTATCGTCCGACCGTTACAGAAGCTTTTGCCTCTGTTCAATACATAATGAC  
CGAAGTAAACTTTGGTTGGCTAATTCGATCAGTTCATCGATGGTCCGCAAGTATGATGG  
TTTTAATGATGATCCTGCACGTATCCGTGTTTATCTCACAGGTGGATTTAAAAACCTC  
GTGAATTAACCTTGGGTTACAGGCGTAATTCTGGCTGTATTGACCGTATCTTTCGGTGTA  
CTGGTTATTTCTTGCCTTGGGATCAAATGGTTATTGGGCAGTCAAATTTGTGACTGGC  
GTGCCTGAGGCTATTCCTGTAATAGGGCCTCCCTTGGTAGAGCTACTACGCGGAAGTGT  
TAGTGTGGGTCAATCTACTTTGACTCGTTTCTATAGTTTACACACTTTTGTATTACCCCTT  
CTTACTGCTGATTTATGTTAATGCACTTTCTTATGATCCGTAAGCAAGGTATTCAGGTC  
CTTTAATGGGAGTAACAAAGAAACCTGATTTAAATGATCCTGTATTAAGGGCTAGATTA  
GCTAAGGGTATGGGGCATAATTATTATGGAGAGCCCGCTTGGCCCAATGATCTTTTATAT  
ATTTTCCAGTAGTAATTTTAGGTACTATTGCATGTACCATAGGTTTAGCGGTTCTAGCA

CCATCAATGATTGGTGAACCAGCAAATCCACTTGCAACTCCTTTGGAAATATTGCCCGA  
ATGGTATTTTTTCCCGTATTTCAAATACTTCGTACAGTACCTAATAAATTATTAGGTGTC  
CTTCTAATGGCCTCAGTACCTGCGGGATTATTGACGGTACCTTTCCAGAGAATGTGAA  
TCAATTTCAAATCCATTTTCGTCTCAGTAGCTACAACAGTCTTCTTGATCGGTACTGC  
AGTAGCCCTTTGGTTAGGTATTGGGGCAGCGTTACCTATTGATGAATCTTTCACCTTTAGG  
TCTTTTCATGATTGAAGCTTTGCCCTCTGGAATTGTGTTAGGTCTAATTCCTATAACTTC  
GGCCGGATCATCTGTAACCTGCATATTTACAATACCGACGTGGTGATCAATTGGATATTAC  
GCCTACTATAACTAGCTATTTTGGCTTTCTATTGGCTTCCCTAATCTTCACCTTAGCCCTA  
TTCATTGGTTCAAGCAAGATACGACTTCTTATGGATATAGTCAGTATCGCTTGGGCTGCT  
CTAATGGTAGTTTTTACATTCTCCCTTTCACTCGTGGTATGGGGAAGAAGTGGACTCAT  
GATTATTCGTTACCCGGAACCAGAAGTAAAGATTGTGGTGGAAAGGGATCCTATAAAA  
ACCTCTTTTGAAAAATGGGCCAAACCTGGGCATTTTTCAAGGACACTAGCTAAAGGCC  
CTAATACTACTACTTGGATCTGGAATCTACATGCTGATGCTCACGATTTTGGTAGCCATA  
CCAATGATTTGGAAGAGATCTCCCGCAAAGTCTTTAGTGCTCATTTTCGGTCAACTAGCC  
ATCATCTTGATTTGGCTAAGTGGGATGTACTTTCATGGCGCTCGTTTCTCCAATTATGAA  
GCATGGCTGAGTGATCCTACTCACATAAAACCCAGTGCTCAGGTAGTTTTGGCCAATAGT  
AGGTCAAGAAATACTGAATGGGGATGTAGGTGGAGGTTCTCGAGGGATACAAATAACC  
TCTGGTTTTGTTCAAATTTGGCGAGCATCTGGAATAACTAGTGAATTACAACCTTACTG  
CACTGCAATTGGTGCATTGATCTTTGCAGCGTTAATGCTTTTTGCTGGTTGGTTCCATTA  
TCACAAAGCTGCTCCAAAATTGGCTTGGTTCCAAGATGTAGAATCCATGTTGAACCAC  
CATTTAGCGGGGTTACTAGGACTTGGGTCTCTATCTTGGGCAGGACACCAAGTACACGT  
CTCTTTACCTATTAACCAACTCCTAGATGCTGGAGTGGATCCTAAAGAGATACCTCTTCC  
CCATGAATTTATTTCGAATCGCGATCTTTTAGCTCAACTTTATCCTAGTTTTGCTGAGGG  
ATTAACCCCACTTTTTACCCTAAATTGGTCGGAATATTCAGAATTTCTAACTTTTTCGTGG  
AGGACTAAATCCAGTCACGGGGGGTCTGTGGCTGACCGATACTGCACATCATCATTG  
GCTATTGCAATTTCTTTCCCTGATAGCCGGTCATATGTATAGGACCAATTGGGGCATTGGC  
CATAGCCTTAAAGAAATTTTGGGAGACTCATAAAGGTCCATTTACGGGTGAGGGTCATAA  
AGGTCTTTACGAGATCTTGACCACCTCATGGCATGCTCAATTAGCTCTTAACCTAGCTAT  
GTTGGGCTCTCTGACTATTGTCGTAGCTCACCATATGTATTCTATGCCTCCCTATCCATAC  
TTAGCTATTGACTATGGCACCCAACCTCTCTCTGTTACACATCACATGTGGATCGGCGG  
ATTTCTCATAGTTGGCGCCGCTGCACATGCAGCCATTTTTATGGTAAGAGACTATGATCC  
AACTACTCAATACAACAATCTATTAGATCGTGTCTTAGACATCGTGATGCGATTGTATC  
ACACCTCAACTGGGCATGCATATTCCTAGGTTCCATAGTTTTGGTCTGTATATTCATAAT  
GATACTATGAGCGCTTTAGGGCGTCCTCAAGATATGTTTTCGGATACTGCTATAACAATTA  
CAACCTATCTTTGCTCAATGGGTACAAAACACTCATGCTTTAGCACCGGGTTCAACAGC  
TCCTGATGCAACAGCGAGCACCAGCTTAACTTGGGGAGGTGGTGATCTAGTAGCAGTA  
GGCGGCAAAGTGGCTTTGTTACCAATTCCATTAGGAACCGCGGATTTTTTGGTACACCA  
CATTCATGCATTTACTATCCATGTGACTGTATTAATTTACTTAAAGGTGTTTTATTGGC  
CGTAGCTCTCGTTAATACCTGATAAAGCGAATCTTGGTTTTCGTTTTCTTGGCATGGA  
CCTGGAAGAGGAGGGACATGTCAGGTATCCGCCTGGGATCATGTTTTCTAGGTTTATT  
CTGGATGTACAATGCGATTTCCGTAGTGATATCCACTTCAGTTGGAAAATGCAGTCCG  
ATGTTTGGGGTAGTATAAGTGATCAGGGAATGGTAACTCATATCACGGGAGGAACTTT  
GCACAGAGTTCCATTACCATTAACGGGTGGCTTCGTGACTTTCTATGGGCACAAGCCTC  
TCAAGTGATCCAATCTTATGGTCTTTCATTATCTGCCTATGGTCTTCTTTTTAGGTGCT

CATTTTGTGGGGCCTTTAGTTTAAATGTTCCATTTAGTGGCCGTGGGTATTGGCAAGAA  
CTCATCGAATCTATCGTTTGGGCTCATAACAAATTAGAAGTTGCTCCTGTTATCCAGCCC  
AGAGCCTTGAGCATTGTGCAAGGACGTGCTGTAGGAGTGGCTCATTACCTTCTGGGTG  
GAATCGCCACAACATGGGCGTTCTTCTAGCAAGAATTCTTGCAGTAGGAATGGC  
AAGATTTCCGAAATCAGCCAAGGCTTAGCCCAGGACCCAACTACTCGTCGTATTTGGT  
TTGGTATTGCTACCGCACATGACTTCGAGAGTCATGATGATTAATACTGAAGAACGCCTT  
ATCAGAAGATTTTGGCTTCTCACTTTGGTCAGTTAGCAATAATCTTTCTGTGGACCTCTG  
GTAATTTATTCCACGTGGCTTGGCAAGGCAATTTCGAAGCATGGGTACGCGACCCCTTA  
CATGTAAGACCTATTGCTCATGCAATTTGGGATCTTCATTTTGGTCAACCGGCTGTAGAA  
GCCTTACCCGAGGAGGTGCTCCCGGCCCGGTTAATATTGCTCATTCTGGTGTATCA  
GTGGTGGTATAACAATTGGCTTGCGCACTAATGAAGATCTTTATACTGGAGCTCTTTTCTT  
GCTATTTCTTTCTGCCATCTCTCTAATAGCGGGTAGGTTTCATTTACAACCTAAATGGAA  
GCCAAGTGTTCATGGTTCAAAAATGCTGAATCTCGTCTCGATCATCATTTGTCAGGAC  
TCTTTGGAGTAAGTTCTTTGGCTTGGACAGGGCATTGGTTCATGTCGCTATTCTGAAT  
CAAGGGGGGAGCACGTCAGATGGGATAATTTCTTAGATGTATTACCGTATCCCCGGGGT  
CTAGGACCGCTTTTACAGGTCAGTGGAAATCTTTATGCTCAAAATCCTGATTCCAGTAG  
TCACTTATTTGGTACCTCTCAAGGAGCGGGAAGTCTATTTAACTCTTCTCGGAGGAT  
TCCATCCGCAAACCCAAAGTTTATGGCTGACTGATATCGCTCATCATCATTTAGCTATTG  
CATTTGTTTTTTTCATTGCTGGTCATATGTATAGAATACTTTGGGATCGGGCATAGTAT  
AAAGGATATTTTAGAAGCACATATTCTCCAGGAGGCCTATTGGGGCGTGGACATAAGG  
GTCTTTATAACAACAATCAACAATTCTTCACTTTCAATTAGGTCTTGCTCTAGCCTCTT  
TGGGAGTCATCACTTCCTTGGTAGCTCAACACATGTATTCTTTACCTGCTTATGCATTCA  
TAGCACAAGACTTTACTACCCAAGCTGCGTTATATACTCATCATCAATACATTGCCGGT  
TCATTATGACAGGGGCCTTTGCTCATGGAGCTATATTCTTCATTAGGGATTACAATCCGG  
AACAGAATAGGATAATGTATTGGCAAGAATGTTGGAGCATAAGGAGGCTATAATATCT  
CATCTGAGTTGGGCTAGTTTATTCCTAGGTTTCCATACCCCTGGGACTCTATGTTCCATAAC  
GATGTTATGCTTGCTTTTGGTACTCCAGAAAAACAAATCTTGATCGAGCCCATATTTGCT  
CAATGGATAACAATCTGCTCATGGTAAGGCCTTGTATGGGTTTGTATGACTTTTATCTTCA  
ACAAATAGTCCAGCATTCAACGCTGGTCAAAGCATATGGTTACCTGGTTGGTTGAATGC  
TATTAATGAT-----AATAGTAATTCATATTCTTAACAATCGGTCCTGGGGACTTTTTGGTT  
CATCATGCTATTGCTCTGGGGTTGCATACACTACGTTGATCTTAGTAAAAGGTGCTTTA  
GATGCGCGTGGTTCTAAGCTAATGCCAGATAAGAAAGATTTCCGGTTATAGTTTCCCTTG  
CGATGGCCCGGGACGAGGCGGCACCTGTGATATTTCCGGCCTGGGATGCTTTTTATTGG  
CAGTTTTTTGGATGTTGAATACCATTGGATGGGTTACTTTCTATTGGCATTGGAAGCATA  
TCACTTTATGGCAGGGTAATGTAGCGCAATTAATGAGTCTTCCACTTATTTAATGGGAT  
GGTTAAGAGATTATCTCTGGTTGAACTCTTCACAACTTATTAATGGATAACAATCCTTTTG  
GTATGAACAGTTTATCTGTCTGGGCGTGGATGTTCTTATTGGGCATCTTGTTGGGCTA  
CTGGATTTATGTTTCTGATCTCCTGGCGTGGATATTGGCAGGAACTGATCGAAACCTA  
GCATGGGCTCATGAACGCACACCCTTGGCTAATTCAGTTCGATGGAGGGATAAGCCAG  
TAGCTCTTTCCATTGTCCAAGCACGATTAGTTGGATTAGCTCACTTTTCCGTAGGTTATAT  
ATTCATTTATGCAGCTTTCTTAATCGCCTCTACATCAGGCAAATTCGGTATGGCACATTC  
AGTCAAAATTTATGATACATGTATCGGCTGTACTCAATGTGTACGAGCTTGTTCCACAGA  
TGATTGGAAATGATACCTTGGGAAGGATGTAAAGCTAAGCAAATGCTTCTGCTCCAA  
GAACAGAAGATTGTGTAGGTTGTAAGAGATGCGAATCTGCTTGTCCAACAGATTTCTT

GAGTGTACGTGTTTATTTGTGGCATGAGACAACTCGCAGTATGGGTCTAGCTTACATGA  
CAAATCCCAACTTACCTTCGATTTTCGTGCCTTTAGCGGGCTTATTTTTCCGGCAATTA  
CAATGGCTTTTTGTACTTTTATGTTTCAGAAAGGACGAGATTTAATGCGAGATATAAAGA  
CATATCTTTCCACAGCGCCTGTGCTAGCTACTTTATGGTTCGGGTCTTTGGCCGGTCTAT  
TGATAGAGATCAATCGTTTTTTCCAGATGCTTTGACTTTTCCCTTTTTTTCATTTATGAC  
CGCAATTCTAGAGAAACGCGAAAGCGCAAGCCTATGGGGTCGCTTCTGCGACTGGATT  
ACCAGCACCGAAAACCGTCTTTACATCGGATGGTTCGGTGTTTTGATGATCCCTACCCC  
TTTGTTGCAACCTCTGTATTCATTATCGCCTTCATCGCAGCTCCCCAGTATATATTGAT  
GGTATTCGTGAGCCTGTCCCCGGTCTCTTCTTTATGGGAACAATATCCGCTACGGTGCT  
ATTATCCCACCTCTGCAGCTATTGGTTTACACCTCTACCCTATTTGGGAAGCAGCTTCC  
GTCGATGGATGGCACTATTATGTTGGTCCCTACGAGCTAATTGTGATGCATCTTACTT  
GGTGTAGCTCGTTACATGGGTCGTGAGTGGGAACTTAGCTTCCGTCTAGGTATGCGCCC  
TTGGATTGCTGTTGCATATTCAGCTCCTGTGCGCAGCTGCTACTGCTGTTTTCTTGATCTA  
CCCATTGGTCAAGGGAACCTTCTCCGACGGTATGCCTCTAGGAATATCTGGTACTTTCA  
ACTTCATGATCGTATTCCAGGCTGAGCACAACATTCTTATGCATCCATTCCACATGTTAG  
GTGTAGCTGGCGTATTCGGCGGCTCTCTATTCAAGTGTATGCATGGTTCCTTTGGTAACT  
CCAGTTTGATCAGGGAACTACCGAGAATGAGTCTGCTAATGCGGGTTACAAATTTGG  
TCAAGAGGGAGAAACCTACAATATCGTAGCTGCTCATGGTTATTTGGCCGATTGATCT  
TCCAATATGCTAGTTTTAACAACCTCTCGCTCTTACATTTCTTCTTAGCTGTTTGGCCCGT  
AGTAGGTATCTGGTTACTGCTCTGGGTATTAGCACTATGGCTTTCAACTTAAATGGATT  
CAATTTCAATCAATCTGTAGTTGACGGTCAAGGTCGTGTAATTAACACTTGGGCTGATA  
TCATCAATCGCGGAATCTTGGTATGGAAGTTATGCACGAACGTAACGCTCACAATTC  
CCTCTAGATTTGGCCGTTGCCGAAGTGACCTTTATAGATGGAATGGGTTTGCCTTGGTAT  
CGTGTCCATAACCGTCGTATTGAATGATCCTGGCCGGTTGCTCTCTGTACATATAATGCAT  
ACAGCTCTAGTTTCTGGTTGGGCCGGTCAATGGCTCTGTACGAATTAGCAGTTTTTTGA  
TCCATCCGATCCTGTTCTTGATCCAATGTGGAGACAAGGTATGTTTCGTTATACCTTTTAT  
GACTCGTTTGGGAATAACAATTCATGGGGTGGGTGGAGTATCACC---GGAGAACTGT  
AACCAATCCAGGTCTTTGGAGTTATGAAGGTGTGGCCGGGGCACATATTGTGTTTTCTG  
GCTTGTGCTTTTTGGCAGCTATTTGGCATTGGGTCTATTGGGATCTAGACATATTCTGTG  
ATGAACGTACAGGAAAACCTTCTTTAGATTTGCCCAAGATCTTCGGAATTCATTTGTTC  
CTCTCAGGAGTAGCTTGTTCGGATCTGGAGCGTTTCATGTAACGGGTTTGTATGGTCC  
TGGAATATGGGTGTCTGATCCTTATGGACTAACTGGAAAAATACAACCTGTAAATCCAG  
CGTGGGGAGCTGAGGGTTTTGATCCTTTTGTTCGGGAGGAATAGCTTCTCACCATATT  
GCAGCAGGTATATTGGGTATCTTAGCAGGTTTATTCCATCTCAGTGTTCCGCCCCCCCAA  
CGTTTATACAAAGGATTACGTATGGGGAATATTGAAACTGTCCTATCCAGCAGTATTGCC  
GCTGTGTTCTTTGCAGCTTTCATTGTCGCTGGAACCATGTGGTATGGCTCCGCAACTGC  
TCCGGTCAATTAATTGGTCTACTCGTTACCAGTGGGATCAGGGATATTTTCAACAAG  
AAATAGATCGACGGGTTTCGTGCCGTTTTGTCCGAAAATCTAAGTTTATCGGAAGCTTGG  
TCCAAAATTCCCGAGAACTAGCTTTTTATGATTACATCGGTAATAATCCAGCTAAAGG  
AGGGTTATTCAGAGCAGGTGCGATGGACAATGGAGATGGAATAGCTGTTGGTTGGTTA  
GGACACCCTATCTTTAGAGATAAAGAAGGACATGAGCTTTTTGTACGTCGTATGCCTAC  
TTTTTTGAGACATTTCCAGTAGTTCTGGTGGATGAAGAAGGAATTGTGAAAGCCGATG  
TTCTTTTAGGAGAGCAGAATCAAAGTATAGTGTCGAACAGGTAGGTGTAACCTGTCTGA  
ATTCTATGGGGGTGAACTTGTGTTGGGTTAGTTTTGGTGTATCCTGCTACAGTGAAAAAAT

ATGCTAGGCGTGCTCAATTAGGTGAAATTTTCGAATTGGATCGTGCTACACTGAAATCC  
GATGGTGTTTTTTCGTAGTAGTCCAAGGGGTTGGTTCACTTTCGGACATGCCACATTTGC  
TCTCTTTTTCTTTTTTCGGACACATTTGGCATGGTGCTAGAACTTTGTTTCAGAGATGTTTT  
TGCTGGTATCGACCCGGATTTAGATGCCCAAGTAGAATTTGGAGCATTCCAAANACTAG  
GAGATCCCCTACTACTAAAAGACAAATAGTAATGAAAACCTTATATTCCCTGAGGAGGTTT  
TACCCCGTGGAACGCTCTTTAATGGAACCTCTAGCTTTAGCTGGTCGTGACCAAGAAA  
CCACCGGTTTTCGCTTGGTGGGCCGGTAATGCTCGACTTATCAATTTGTCTGGTAAATTA  
CTTGGGGCCACGTAGCCCATGCCGATTAATTGTATTCTGGGCTGGAGCAATGAACTT  
ATTTGAAGTGGCTCATTTTCGTACCGGAAAAGCCTATGTATGAACAAGGATTGATTTTAC  
TTCCCATCTAGCTACTCTAGGATGGGGAGTAGGTCCTGGTGGGGAAGTCGTGGACAC  
TTTTCCATATTTTGTATCTGGGGTACTTCACTTGATTTCTCTGCAGTTCTAGGTTTTCGGT  
GGTATTTACCATGCACTTATAGGACCCGAAACTCTCGAGGAATCCCTTCCATTTTTTGGT  
TATGTATGGAAAGATAGAAGCAAAATGACCACAATTTTAGGTATTCACCTAATCTTGCTA  
GGTGTGGTGTCTTTTCTTAGTGCTCAAGGCTTTGTATTTTGGAGGTGTATATGATACC  
TGGGCTCCTGGTGGTGGGGATGTAAGAAAATTACGAACCTGACTCTTAGCCCAAGTG  
TTATATTTGGTTATTTACTCGAGTCCCCCTTTGGGGGAGAGGGATGGATTGTAGTGTGG  
ACAATCTAGAAGATATAATTGGGGGACATGTATGGTTAGGTTCTATTTGTATCTTCGGGG  
GTATCTGGCATATCTTAACCAAACCTTTTGCATGGGGCCGTCGTGCGTTTGTATGGTCTG  
GAGAAGCTTACTTGTCTTATAGCTTAGGGGCTCTCTGTCTTTGGTTTTATTGCTTGT  
GTTTTGTTTGGTTCAACAATACAGCTTATCCCAGTGAATTCTATGGGCCTACCGGCCCA  
GAAGCCTCTCAAGCTCAAGCGTTCACTTTTCTAGTTAGAGACCAACGTCTTGGAGCTA  
ATGTGGGGTCCGCCAGGGACCTACCGGTTTGGGTAAATACCTTATGCGTTCCTCCTACC  
GGAGAGATTATCTTCGGAGGAGAAACAATGCGCTTTTGGGATCTTCGTGCTCCCTGGTT  
GGAACCTCTAAGGGGTCCTAATGGTTTGGACCTGAGTAGGCTGAAAAAAGACATACAG  
CCTTGGCAAGAACGACGTTTCGGCGGAATATATGACTCATGCTCCTTTGGGTTCTTTGAA  
TTCCGTGGGTGGTGTAGCTACCGAGATTAATGCGGTAAATTATGTATCTCCCCGAAGTT  
GGTTGGCTACCTCTCATTTTGTTTTAGGATTTTCTTTTTTCGTGGGCCATTTGTGGCATG  
CGGGAAGGGCTCGTGCAGCTGCAGCAGGATTCGAGAAAGGGATTGATCGTGATTTTCG  
AACCTGTCCTTTCCATGAACCCTCTTAACATGACTGTAGCTCTTGAAAGTCTTCCAAA  
GAAGAAAAAATTTATTTGATATTGCGGATGACTGGCTACGTAGGGACCGTTTTCGTTTT  
TGTGGGTGGTCTGGTCTATTGCTCTTTCCTTGTGCCTATTTTGCCTAGGTGGATGGTT  
CACGGGTACAACCTTTGTAACCTCATGGTATACTCATGGATTGGCCAGTTCTTATTTGGA  
GGGCTGTAATTTTTTGACCGCCGAGTTTCTACTCCTGCTAATAGTTTATGCACATTCCCT  
GCTGCTATTATGGGGTCCCTGAAGCACAAAGGAGATTTTACTCGTTGGTGTCAATTAGGTG  
GTCTATGGACTTTCGTTGCTTTTCATGGTGGTTTTGGTCTAATAGGCTTCATGCTACGCC  
AATTCGAACTTGCTCGATCTGTACAATTGCGACCTTATAATGCAATTGCATTCTCTGCTC  
CAATTGCTGTTTTTGTTCGGTATTCCCTGATCTATCCATTGGGCCAGTCTGGTTGGTTTTT  
TGCACCTAGTTTTGGCGTAGCAGCTATCTTTCGATTTATCCTCTTCTTTCAAGGGTTTCAT  
AATTGGACCTTGAACCCATTTATATGATGGGAGTTGCCGGAGTATTGGGTGCTGCTCT  
TCTATGTGCTATTCATGGTGTACTGTGGAAAATACTTTATTTGAAGATGGTGATGGTGC  
AAATACGTTCCGTGCTTTTAACCCAACTCAAGCTGAAGAGACCTATTCCATGGTCACCG  
CTAACCGCTTCTGGTCTCAAATCTTTGGAGTTGCTTTTTCCAATAAACGTTGGTTACATT  
TCTTTATGTTATTTGTGCCAGTGACCGGTTTATGGATGAGTGCCATTGGAGTAGTTGGTC  
TAGCTCTAAACTTACGTGCCTATGACTTTGTTTTCCAGGAGATCCGTGCAGCAGAAGAT

CCTGAATTTGAGACTTTCTATACAAAAATATCCTCTTAAACGAAGGTATTCGTGCTTGG  
ATGGCGGCTCAGGATCAGCCTCATGAAAACCTTATATCCCTGAGGAGGTTCTACCCCG  
TGGAAACGCTCTTATGTCTGGGAATACGGGAGAACGCTCTTTTGCTGACATTATTACCA  
GTATTCGATACTGGGTTATCCATAGCATTACTATACCTTCCCTATTCATTGCAGGTTGGTT  
ATTTGTCAGCACGGGTTTAGCTTACGATGTATTTGGAAGCCCCCGGCCGAACGAGTATT  
TCACAGAAAACCGACAAGAGGTTCCATTAATCACTGGCCGTTCCGATCCGTTGGAACA  
ACTCAATGAATTTACTAGATCTTTTATGACCATAGATAGAACCCTATCCAATTTTTACAGTT  
AGATGGTTGGCCGTTACCGACTAGCTGTACCTACAGTTTTTTTTCTTGGGATCAATATC  
AGCAATGCAGTTTATCCAACGAATGGCTGCACAGACCACTGATGATACTTTC---AGATC  
TGGACCGAGACGAACCGTTGTAGGAAATTTATTCAAACCACTTAATTCCGAATATGGTA  
AAGTAGCTCCCGGATGGGGAACACTCCTCTTATGGGTGCTGCGATGGCTCTATTTGCG  
GTATTCTTATCTATTATCCGGAGATTTATAATTCTTCCGTTTTATTGGATGGGATTCCGGT  
AAGCATGTTTACTCTTAAGTTGTTTCGTTTACACAGTAGTGATATTTTTCGTTTTCTCTCTT  
ATTTTTGGATTTCTATCGAACGATCCTGGACGTAATCCTGGACGTAAGAAATGGCCGA  
TACTACTGGAAGGATTCCCTCTTTGGCTGATAGGTAAGTAACTGGTACCCTTGTGATTG  
GTTAATAGGCATCTTTTTCTATGGTTCATATTCTGGATTAGGGTCATCCCTAATGCCAGC  
TATG-----TCTAATATCTGTCTAGATGATGCC---CTTCATGATCTATTT--CTGGCCAAATT  
ACCCGAGGCTTATGCTATTTTTGATCCAGTTGTAATGTAATGCCAATTATCCCTGTGTTA  
TTTTTCTCTTAGCCTTTGTTTGGCAAGCTGCTGTAAGTTTCCGAATGACACAATCGAA  
CCCGAACGAACAAAATGTTGAATTGAATCGTACTAGCCTCTACTGGGGGTTGTTACTCA  
TTTTTGTACTTGCTGTTCTATTCTCTAATTACTCTTTCAATACGGAAGTAAATATTCTCGC  
ATTTATCGCTATTGTACTGTTCAATTCAGTTCCTACTGCTTTTCTACTTATCATTACGTAA  
AAACAGTCAGTGAAAGCAATATGGAAACTGCAACCTTAGTCGCCATCTCCATATCCCGT  
TACTTGTGAGCTTACC GGTTATGCCCTGTATACCGCCTTTGGGCAACCCTCTGAACA  
ACTCAGAGATCCTTTCGAAGAGCACGAAGACATGGAAGCATTGGTTTATACATTCTGT  
TGGTATCGACCTTAGGGATAATTTTTTCGCTATTTTCTTCCGAGAACCGCCCAAAGTTC  
CGGATAAGGGGAGTAAAATGACTATTGCTTTCCAATTGGCCGTGTTTGCATTAATTGCTA  
TTTCATTCTCCTAGTGATTGGTGTACCTGTTCGACTTGCCTCTCCTGATGGTTGGTCAA  
GTAACAAAATGTTATATTTTCGGGCGCATCATTATGGATTGGATTAGTCTTTTTGGTAG  
GTATCCTTAATTCCTTTCATATCT-----ATGTCACCAAAAACAGAGACTAAGGC  
AAGTGTGGATTTAAAGCTGGTGTAAAGATTACAGATTAACCTTATTACACTCCTGAATA  
TCAAACCAAGATAACCGATATCTTAGCAGCGTCCGAGTAACTCCTCAACCTGGAGTG  
CCGCCTGAGGAAGCGGGAGCTGCAGTAGCCGCTGAATCTTCCACTGGTACATGGACCA  
CTGTTTGGACCGATGGACTTACCAGTCTCGATCGTTACAAGGGGCGATGCTATGACATC  
GAGCCCGTTCTGGGGAGGAAAATCAATTTATTGCCTATGTAGCTTACCCTTAGACCT  
CTTTGAAGAAGGTTCTGTTACTAACATGTTCACTTCCATTGTAGGTAATGTATTTGGATT  
CAAAGCCCTACGAGCTCTACGCCTAGAAGATTTGCGAGTTCCTCCTGCTTATTCAAAA  
CTTTCCAAGGTCCACCTCATGGTATCCAAGTTGAAAGAGATAAATTAACAAATATGGC  
CGTCCTCTATTGGGATGTACCATTAAACCCAAATTGGGTTTATCTGCCAAAACTATGGT  
AGAGCAGTTTATGAATGTCTTCGTGGTGGACTTGATTTTACCAAAGATGATGAGAACGT  
AAATTCCCAACCATTTATGCGCTGGAGAGATCGTTTCTGCTTCTGTGCAGAAGCAATTT  
ATAAAGCTCAGGCTGAGACGGGTGAAATTAAGGGACATTACTTGAATGCTACTGCAGG  
TACATGCGAAGAAATGATCAAAAAGGGCAGTATTTGCCAGAGAATTGGGAGTTCCTATC  
GTCATGCATGACTACCTGACAGGAGGTTTTACTGCAAATACCAGCTTGGCTCATTATTG

CCGAGACAATGGCCTACTTCTTCACATTCACCGCGCAATGCATGCAGTTATTGACAGAC  
AAAGAAATCATGGTATGCACTTCCGTGTGCTAGCTAAAGCATTGCGAATGTCCGGTGGA  
GATCATATTCACGCCGGTACTGTAGTAGGTAACCTTGAAGGAGAACGAGACGTAACCT  
TGGGTTTTGTTGATCTACTGCGTGACGATTTTATTGAAAGAGACCGAAGTCGTGGTATT  
TATTCACCCAAGATTGGGTATCTATGCCAGGTGTTCTGCCCGTAGCTTCGGGGGGTATT  
CACGTTTGGCATATGCCTGCTCTAACCGAGATCTTTGGGGATGATTCCGTAACAGTTC  
GGTGGGGGAACCTTTGGGACACCCTTGGGGAAATGCACCTGGTGCAGTAGCGAATCGA  
GTTGCCCTAGAAGCTTGTGTACAAGCTCGTAATGAAGGACGTGATCTTGCTCGTGAAG  
GTAATGAAGTGATCCGCGAAGCTAGTAAATGGAGTCCCGAATTAGCTGCTGCTTGTGA  
AGTATGGAAGGAGATCAAATTTGAATTTGAGGCAATGGATGTCTTG-----ATGGCCATCC  
GTTCATAACAGAACTTATACTCCAAGCACACGAAATAGACCCATATCAAGTAGGGTCCGG  
TCCAATCCACAAAAAAATTGACCTCTGGACAGCATCGTTGTGGAAAAGGTCGTAATA  
GTAGAGGAATTATTACCGCAAGACATAGAGGAGGAGGTCACAAGCGTCTGTATCGTCA  
AATTGATTTTCAACGGAATGAAAAATACATTTTGGAGAAATTGTAACCTATAGAATATGA  
CCCTAATCGAAGTGCATACATTTGTCTCGTACACTACGGGGATGGTGAGAAGAAATATA  
TTTTACACCCAGAGGGGTATAATTGGAGATACTATTACTTCCGGTCCAAGAGCTCCT  
ATATCAATAGGAAATGCCCTACCTCTGACCGATGTACCCTTGGGCACGGCTATACATAGC  
ATAGAAATAACATTAGGTAAAGGCGGACAATTGGCTAGAGCAGCAGGTGCTGTAGCAG  
AACTGATTGCAAAAAGAGGGTCGATCGACCACATTAAGATTACCATCTGGGGAGATTTCG  
TTAATATCTGAGAATTGTTTCAGCAACGATTGGACAAGTAGGTAATGTCAATGCGAACA  
ATGGAACCTTAGGTAAAGCTGGATCTAAACGTTGGCTGGGTAAACGTCCTAGAGTAAG  
AGGAGTAGTTATGAACCTGTAGACCATCCCATGGGGGTGGTGAGGGAAGAACTCCA  
ATTGGTAGAAAAAACCCGTGACCCCTTGGGGCTATGCTGCGCTTGGAAAGGAAAAGTC  
GGAAGAATAATAATATAGTGATGCTTCAATCCTTCGTCGACGTAAG---ATGATTCAACC  
TCAAACCTATTCAAATGTAGCGGACAACAGTGGAGCCCGAAAACCTAATGTGCATCCGG  
GTTCTAAAAGCTAGT---AATCGTCAATACGCTCATATTGGTGACGTTATCATTGCTATAAT  
TAAAGAAGCAGTACCAAATATGCCCTTAAAAGAATCAGAAATAGTTAGAGCCGTAGTT  
GTACGCACCTGTAAAGAACTTAAACGTGACAATGGAATGATAATACGATCTGATGACAA  
TGCAGCAGTTATCGTTGATCAGGAAGGAAATCCAAGAGGAACCCGGGTTTTTGGTTCA  
GTTGCTCGGGAATTGAGACAATTGAATTTTGCCAAAATAGTTTCATTGGCTCCCGAAGT  
CTTAATGCTTAGTCCCCAAAAGACAAAATTTGTAACAACATAGGGGGAGAATGAAG  
GGAGTATCTCATCGGGGCAATCATATTTGTTTTGGTAGATTCGCTCTTCAGGCGCTTGAA  
CCTGCTTGGATCACATCTGGACAAATAGAAGCGGGACGACGAGCAATTAATCGTTATG  
CTCGTCGTGGTGGAAAAATATGGGTACGTATATTTCCCGACAAACCTATTACAATGAGA  
CCTGCAGAAACACGTATGGGTTTCGGGGAAAGGATCTCCCGAATATTGGGTATCCGTCAT  
CAGACCATATCGAATACTTTATGAAATGGGCGGAGTATCCGAAACTGTAGCTAGAGCAG  
CTACTGAAATAGCTGCATACAAAATGCCTATACGTACTCGATTTGTTACTGCTTCAATGA  
CCAGAATTAACGTGGATATATAGCTCGGAAACGTCGAAAAAAGATTCTTGCAATTTGCA  
TCAGGCTTTCGAGGAGCTCATTCGAAACTTTTTCGAACTGCTGACCAACAAAAAATTA  
GAGCTTTAGTTTCTGCTCATCGAGATAGGAGTAAGCGAAAGAGAGATCTTCGCCGTTT  
GTGGATTACTCGGATCAATGCAGCAGCCGTAATAAT-----GTTTCTTATAACAAATT  
TATCCGATATTTGTACAAAAGGCAGTTGCTTTCAAATCGCAGAATACTTGCACAAATCG  
CTGTATTAGATAAGAATTGCTTTTCCACGATCATCAACAATATTATCGAA-----  
-----ATGGAAAAGAAAATACGAGCTCTAGCTAAACATATACGTATGTCTACTCATAG

AGCACGCAGAGTAATTGATCAAGTTCGTAATCGTTCGTATGAACAAGCACTTATGATAC  
TGGAACTCATGCCTTATCGAGCATGTTATCCTATATTACAATTAATTTCTTCCGCAGCGGC  
AAATGCTAATCACAAATATTGGGTTGAACAAAGCCAATTTATTTGTCTAGTAGGGCCGAAG  
TAAATGAAGGTGCTATTTTGAAAAGATCCCAACCTAGAGCTCAAGGACGTGGTTATCC  
AATACAGAAACCCACCTGTCATATACTATTGTATTGGAAGAAAGATCCAGATCG-----  
-----ATGAATGAAATGGAATACACAATACTTACAGAAAAAAGATTCGTTTATTAGA  
AAATAAT--CAATATACTTTTCGATGTAGGTTTCGAGACCGACCAAAACAGGGGTGAAAAA  
TTGGATCGAACTTTTCTTTGGTGTCAAAGTAATAGCTATGAATAGTTATCGACCTCCAAA  
AAAGGGAGGAACAGTAGGA---CCAATAGGACATCCAATACGTTGTAGGCGTATGATTAT  
TGCACTCCAGCCAGGTTATTCTATTCCACTTCTTTCAGAGGAA-----ATGGCAGTTCCGA  
AGAAGCGCACTTCTAAATCCAGAAAACGAATTCGTAAAAATGTTTGAAGGGAAAAAG  
CAGATCAGGCCGCGGTAAAAGCTTTTTCTTAGCTGAGTCTATCTCGACCGGTCCGGTCA  
AAAATTTTTTAC-----ACAAATGATAAGATGGCCAAGGGTGGAGATGTAAGAGTAAAAA  
TTACCTTGAATGCACTAGTTGTACTCGAGATAGT-----GTTGATAAAAAATACCCGGGT  
GTTTCTAGATATATTACTCAAAGAATCGACGCAATACACCTATTTCGATCGGAATTGAAG  
AAATTTTGTCCCTATTGTTACAAACATACTATTACGGAGAGATAAAGAAAATGAAAAT  
CCGCGCTTCTGTTTCGTAAAATTTGTGAAAAGTGTCTGACTAATTCGTAGGCCGGGGACGA  
GTTATGGTAATTTGTTCCAATCCGAGACATAAACAGAGACAGGGGATGATTTCGAGATGA  
AATCTCAGTCTCCACTCAGACACCGCGGTGGAGGTGCATTGGATCCGGAGCGGACAGT  
AAGCGTCTTCATTATGGCCGCTTCGCTTTATCTCCGCTTCGAAAAGGTCAAGCTAGTAC  
AATAGGCATCGCAATGCGAAGAGCTCTACTTGGAGAAATAGAAGGAACATGCATCACA  
CATGCGAAATTGGAA-----AAGGTAACACATGAATATTCCGCGATAATAGGTATTGAAGA  
ATCAGTACATGACATTTTAATCAATCTGAAAGAAATTGTCCTTAGAAGTGATCCGTACG  
GAACTCGAGAAGCATCTATCTGTATCGTCCGACCCAGAAATGTAACCGCTCAAGATATC  
ATATTACCACCTTCTGTGAGAATAATTGATGCTACACAACATATAGCTAGTCTTACCAA  
TCAATTAATTTGATATAAGATTATGGATCGAGAAAGATCGTGGATATCGTATACAGAGT  
CCGAAGAATTATCAGGATGGAATCTTT-----CCTATAGATGCTGTATTTATGCCTGTTTCGA  
AACGCAAATTATAGTATTCATTCCCTATGGGAACGGAAATGATATAAAGAAATCCTTTTT  
CTCGAGATATGGACGAATGGAAGTTTAGCTCCTAGAGAAGCACTTTACAGAGCTTCTC  
GTAATTTGATTGACTTATTCATTCTTTTTTTCGCTGCAGAAGAAGACAG-----AACATCGATG  
GAATGGACAATCAG---AATGGGTCTAATATGCCTTCCTTCTCCTTTTCCAATATCTCGGCT  
GAT--GAGAGAATGGAAGAAGAA-----GTTGCATTCAAACATATTTTTATTGACCAATCA  
GAATTACCTCCTAGGGTCTATAACTGCCTCGGAAGGGTCAATATACATACATTATCGGAC  
CTGTTGAATTACAGTCAAGAAGATTTAATGAGAATTGGACATTTTCGAAAGAAATCTGT  
CGAACAAGTATCGGAAGTTCTTCAAAAACAT-----TTTGCAGTTGATCTACCCAAGAATA  
AGATGCTATTAGATGAAAAT--AAGGGAACGTCTACAATCCCTGAATTTGGGAAAATAC  
AATTCGAAGGATTCTGTCTGTTTTCATTGATCAAGGCTTAATCGAGGAACTTCAGAATTTT  
CCGAAAATTGAGGATACAGATCAAGAAATTGAATCTCAACTATTTGGAAATAAATATGA  
ATTAGCAGAACCCCTGATCAAAGAGAGAAATGCTGTATATCAGTCCCTTACATATTCCTC  
TGAATTATATGTACCAGCAAGATTGATTCAGAGGAATAGTAGAAAGATACAGAAACAA  
ACTGTACTTATTGGAAATCTTCCCTTAATGAACTCTCAAGGAACCTTTGTAGTAAATGG  
AATTTCCAGAATCGTGGTCAATCAAATATTACGAAGTCCCGGTATTTATTACAGTTCGGA  
ACCAGACCAGAGTGGAATCACTCTATATAACCAGCACTATAATTTTCAGATTGGGGAGGAA  
GATCAAAATTAGAGATTGACGGAAAAACAAGGATATGGGCTCGTGTGAGCAAAAAAC



GAAAAATATCTATTCCAATTCTACTATCAGCTATGGGTTCAAATCTCGGAGAGATTCTAG  
ACAATGTTTGCTATCCAAAAATATTCTTATCT--GAGAGACAAGAACAAAAGGAATATCT  
TCGGTTCGAAGAAAAATGCCATTTTGGAGTTCTATAAGAACTCTATTGCGTAAGTGGCG  
ATTTGGTCTTTTCCGAGTCTCTATGTAAAGAATTACGAAAAAAATTTCTACAACAAAGA  
TGTGAATTAGGGAAGATTGGTCGACGAAATCCGAACCAAAAACCTGAATCTTGATATAC  
CCGAGAACGAGATTTTTTCATTACCGCAAGATGTATTGGCTGCTGTGGATTACTCGATC  
AGAGTTAAATTTGGAATGGGTACACTTGATGAT-----ATGGATCATCTAAAAAATCGGCG  
TATTCGTTCTGTAGCAGATTTATTACAAAATCAATTCGGATTAGCTCTAGGTCGTTTGA  
AAATGCAGTTCGAAGAACTATACGCAGAGCAACTAAGCGCAAATGTTTA-----CCAAC  
CCTAATAACTTGGTAACCTCAACTCCA-----TTAACAACACTTTTTCAGGATTTTTTC  
GGCTCACACCCCTTATCCCAATTTTTGGATCAAATAATCCATTGACAGAAATAGTTCAT  
AGGCGAAAATTAAGTTATTTGGGTCCCGGAGGATTGACGGGGCGAACTGCTAGTTCTC  
GAATACGGGATATTCATCCTAGTCATTATGGGCGTATTTGTCCGATTGAGACGTCGGAAG  
GAATGAATGCTGGACTTGTTCATCATTAGCTATTCGTGCAAGGATTGGTCATTGCGGC-  
--TCTTTACAAAGTCCATTCCAT-----AAAATCTCTGAGAGATCGGAAGAA-----GAACA  
TATGGTTTATCTATCATCGGGAGAAGATGAA-----CGGATAGCCACAGGAAATTATTTGG  
CGTTAAATCAAGGATTTCGAGAGGAACAAGTTACTCCAGCTCGATATCGACAAGAATT  
CTTAGCTATTGCATGGGAACAAATCCATTTTCGAAGTATCTTTCCTTTCCAATATTTCTCC  
GTTGGAGTTTCCCTCATTCTTTTTCTCGAGCATAATGATGCGAATCGCGCTTTAATGGGT  
TCGAATATGCAGCGTCAAGCAGTTCCTACTTTTCCAACCTGAGAAATGTATTGTCGGAAC  
TGGATTAGAAGGTCAAGCAGCTCCAGATTCAGGAAGTGCAGCTATAGCCACACAAGGG  
GGAAGGATCACGTATATCGATGCTGGAAAAATCACTTCATCGGTTGATGGAGACACTGT  
AGGAACAGAATTGGTTACATATCAACGTTCTAATAACAATACTTGTATGCATCAAAAAC  
CTAGGGTTCGCCGAGGGGAATATGTGAAGAAAGGACAAATTCTGGCGGACGGTGCAG  
CTACAGTAGGGGAGAACTCTCTTTGGGAAAAACATATTAGTAGCTCATATGCCATGG  
GAAGGATACAATTTTGAAGACGCAATACTCATTAGTGAACGTCTGGTATATGAAGATAT  
CTATACCTCTTTTCATATCGAAAGATATGGAATTGTAACCTTGTATGACAAGCCAGGGC---  
CCTGAGAGAATCACTAAAGAAATACCTCATTAGATGCTCATTACTCCGTCATCTAGAT  
GGAAATGGCCTTGTAATGCTAGGATCTTGGGTAGAAACAGGTGATGTTCTAGTGGGTAA  
ATTAACACCTCAACCAGCAGAAGAA---TCATTGCGTGCCCCGGAAGGAAGATTATTACA  
AGCCATATTTGGTATTCAAGTGTCTTCCGCAAGGGAAAGTTGTCTCAGAGTACCCATAG  
GTGGAAGAGGCCGGGTTATTGATGTGAGATGGATCCATAAAGAAGAG---AATTTTGGTG  
ATAATGCAGAAGTGGTCCACGTATATATCTTTCAGAAACGTAAAATACAAGTGGGCGAT  
AAAGTAGCGGAAGGCTTGGTAATAAAGGTATTATTTTCAAGATTTTGCCTAGACAAGA  
TATGCCTTATTTGCAAGACGGAACATCAGTTGATATGGTATTAACCCATTAGGGGTACT  
TTCACGAATGAATGTAGGACAGATCTTTGAATGTTTGCCCGGTTTAGCAGGGAACCTGA  
TGAACAGACATTATAGAATAACACCTTTTGACGAAAGATACGAGCGAGAAGCTTCGAG  
AAAACCAGTGTTCCTGAGCTCTATGGAGCTAGTGAGCAAACAGCTAATCCATGGGTAT  
TTGAACCTAATCATCCCGTAAAAATAGGTAAATTGATGGAAGAACAGGAGATACTCTT  
GAACAACCTGTTACAACAGGAAAAGCTTATATGCCGAAATTAATTCATCAGGTTGATGA  
TAAAATCCATGCACGTTCCAGTGGACCTTATGCACTTGTTACACAACAACCTCTTAGAG  
GAAAATCCAACGGGGAGGGCAACGAGTAGGAGAAATGGAAGTTTGGGCTCTAGAAG  
GTTTTGGTGTGCTTATATTCTGCAAGAGATGCTTACTCTTAAATCTGACCATATTGGAG  
CTCGTCATGAAGTACTTGGTGCCATTATCACTGGAGGACCAATACCTAGACCTGGTACT

GCTCCAGAATCTTTTCGATTGCTCGTTTCGAGAACTACGATCTTTAGCTCCAGAATTGGA  
TCATGCTATTATATATGAAAACGACTTTCAGATAGATAGGAAGGAAGTT-----  
ATGATCGACCGGATAAGCATCAACAGCTTTCGAATTGGATTAGCTTCTCCTGAACAAAT  
CTGTGCTTGGTCCAAGAGAATTTTACCTAATGGAAGGATAGTTGGACAGGTGACTAAA  
CCCTATACTTTACATTATAAAACCAATGAACCAGAAAAAGATGGATCGTTCTGTGAAAG  
AATCTTTGGACCTATCAAAAGTGGAGTTTGTGCTTGTGGAAATTCTCGAGTGATCGGAA  
ATGAAAAAGAAAACCTCAAAATTTTGTGAACAATGCGGAGTTGAATTTGTTGATTCTCG  
AATTCGAAGATATCGAATGGGATACATTGAACTGGCATGTCCAGTGGTTCACGTATGGT  
ATTCAAACGCCTTCCCAGTTATATTGCGAATCTATTAGCCAAACCTCTCAAAGAATCA  
GAAGGCCAGTATATTGCGAT-----CTTTTATTGCTAGGCC---ATAGCTAACAAACCAA  
CTTCATTACGATCACGGGGTCCATTCAAATATGAAATTCATCCTGGAGGGATATTATCC  
CTCATTATTTTTCTGCT--GGCTTTGGGGCATTTCGACATAGAGAAATAGCTACTGGAGG  
AGATGCTATCAGGGAACAACACTAGCTGGTCTGAATCTGCAAATCTGATGGATCGTTCAT  
ATATGGAATGGAAG-----TTGGGGAAACAGAAATCGGCCGAAATGGATGGGGAGATA  
GAAAAATTCAAAGAAGAAAGGATTTTTCGGTTAGACGCATGAAATTAGCTAAACATTT  
CCTCCAAACAGATATAGAACCAGAATGGATGGTTTTATGCCATTGCCAGTTCTTCTC  
CTGAACTGAGGCCAATCGTTCAATTAGGTGGAGGTGAACTGATCACTTCAGATCCAAA  
TGAACCTTATCGGAGAGTTATCTATCGGAATAATACTCTTACCGATCTATTAGCAAGAAG  
TAGATCTACGCCAGGGGATTAGTTATTTGTCAAAAAAATTGGTCCAGGAAGCCGTA  
GATGCACTTCTAGATAATGGCATTTCGTGGACAACCAATGAGAGACAGTCATGATAGACC  
TTATAAATCGTTTTTCAGATGTAATCGAAGGCAAAGAAGGAAGATCTCGTGAAAATTTAC  
TTGGTAAACGAGTTGATTATTCAGGTCGTTCTGTCATTGTGGTGGGCCCTCCCTTCCAT  
TACATCAATGTGGATTACCCCGAGAGATAGCAATAGAGCTTTTTTCAAGCATTGTGAATTC  
GTGGTCTAATTAGACGACATTTTGTCCCAACTTAAGGGCTGCGAAAAGTATAATTCGA  
GATAAAGAACCCATTGTATGGGAGGTACTTCAAGGAGTTATGCAAGGACACCCTGTATC  
GTAAATCGAGCACCCACCTTGCACAGATTAGGTATACAAGCATTTC AACCTATTTTAGT  
AGAAGGGCGTGCCATTCTGTTTACATCCATTGGTTTTGTGGGGGATTTAATGCGGACTCCG  
ACGGGGATCAGATGGCTGTTTCATGTACCTTTATCTCTGGAGGCTCAAGCAGAAGCTCGT  
TACTTATGTTTTCTCATACAAATCTATTGTCTCCAGCTATTGGAGATCCCATTTCGGTAC  
CAACTCAAGATATGCTTCTTGGACTTTATATATTAACGGTTCGGAAATAATCAAGGTATTT  
ATGGAAATAGGTACCACCCATATTACTCT-----AAATATAAGATC-----TTT  
TCCTGTAAAAA-----CCTTCTTTTTATAGTTATGATGATGCGCTCGGGGCTCATTGGC  
AAAAACGAATTGAATTAGACAGCCCTTTATGGTTTTCGGTGGGGGGTAGGTTTACGT---A  
TTATTACCTCAGTAGATCGAGAAGCCCCTATCGAGGTTCAATATGAATCTTTGGGTATCT  
TCCATGAAATTTATGAACATTACCGAATAGGAAAAAATGAAGTAGGAGAAATACTCAGT  
ATATACATTTCGGACAACCTGTTGGTTCGTTTCGATCGAGAAATAGAAGAAGCCAT  
ACAAGGCTTCTCTCGGGAACACCCGAATAAATCGCTACCAGCTATCATAATA-----AGGT  
TTTTCCCTATGGCAGAACGGGCTAAATTGCTCTTTTCAT--GAAGCGATGGATAAACTGC  
CATGAAACAACCTTATTAGCAGATTAATAAATCACTTCGGAATGACATATACATCAAATAT  
TTCGGATCAACTTAAGACTTCAGGTTTCCAACGAGCTACTGATGCGGCTATTTTCATTAG  
GAATTGATGATCTTCTAACAGCACCTTCCAAGGGATGGCTCGTCCAAGATGCGGAACA  
ACAAGGTTCTATTTTCGGAAAAACATCATCATTATGGGAATGTACATGCAGTGGAAAAAT  
TACGTCAATCAATTGAGACATGGTATGCTACAAGTGAATATTTGAGACAAGAAATGAAT  
CCTAATTTTCAGGATGACCGATCCTTTTAAATCCAGTACATATGATGTCATTCTCAGGATCC

AGAGGAAGTACATCTCAGGTTACCAATTAGTAGGTATGAGAGGATTAGTGTACAGATCC  
TCAAGGACAAATCGTTGATTTACCCATTCAAAGTAATTTCCGCGAAGGACTTTCTTTAA  
CAGAATATATCATTTCCTGTTATGGCGCTCGTAAAGGGGTTGTGGATACTGCTGTACGAA  
CATCGGATGCCGATACCTCACGCGTAGACTTGTTGAGGTGGTTCAACACATCGTTGTA  
CGTAAAACAGATTGTGGTACTATCCAAGGTATTTTTGTCAATCTCCGAGAGAGGATCAA  
GAATCGAATTGTTCTACAAACA-----CTAATTGGTTCGCGTGTAGCGGACGATGTATATAT  
A--ATGAGATGCATTGCCACGCGTAATCAAGATATTGGGGTTGGACTTGCCCATCAATTA  
ATAACC-----CTTCGAGCACAACCAATCTATATACGAACCCCTTCGACTTGCAA  
GAGTCTATCTCGGATCTGCCGATTATGCTATGGTCGTAGTCCTACTCATGGTAACTTGAT  
CGAATTAGGAGAAGCAGTAGGCATCATTGCGGGCCAATCAATTGGAGAGCCAGGAACT  
CAACTAACACTAAGGACTTTTCATACCGGTGGGATATTTACAGGTGATATTGCAGAACA  
TGACGAGCTCCTTTCAACGGAAAAATTGAATTCGATGAAAATTTGGTTTATCCTACGC  
GTACACGTCATGGGCATCCTGCTTTTATGTGCCATAATAACTTATCCATCACTCTTGATG  
GTCAAGATCAGGTACATGACTTAACTATTTACCACAAAAGTTTGTCTTTGGTTCAGAAT  
AATCAATATGTGGAATCGGAACAAATTATTGCCGAAGTTCATGCTAGAACATCTCCTTC  
G-----AAAGAGAAAGTTCGGAAACATATCTATTCTAACCTAGAGGGAGAA--ATGCAC  
TGGAGTACCAATGTGTGTCATGCACCTGAATATGTACAGGGTAATGTTTCATCTCATACTC  
AGGACAAGTCATTTATGGGTATTATCGGGGGGTATACACGGA-----TCCAGCGCGGTATC  
CTTTCCATTTCATAAGGATCAAGATCAAGTAAATGTTCAA-----CTTCCTCTTGCCAAAC  
ATGAATTACTTCCGGATTATTCG-----GTGAATCAAGATCGA---ATGAAACACAAATCAGT  
TGACTCGAACTTTTATGGAAAA--GAAGAACAAATCTCCAGTTATTCA--GAAATTGATC  
GGGTCATATCCAACGAGCATTGGGATTCTATCTATTCTACC---ATTTCTTCTGATAATTC  
AAT-----ATTTACAGGGAAAAAGCAAAGAAATAGATTCTTCGTCCCATGCGATACGATAA  
AGAACGGGGAAATAAGGGAATATCTCGTCCCAATCTTATTATTAATAATATCCAGAAAT---  
--GGTATTTACAGAGAAATGACATTTTTGCTGTTTTGGATGACCCTCGATACAGAATAA  
ATAGTTCAGGAATTATCAAATATGGGACTATAAAGGTCGATTTCGATCGGCAATAAAGAG  
AAT-----TACCTCGGAGATCAAAGA---GCAAGAGGATTCAGATCGAAAGATATGAAAGG  
AGGTCGCTTTCTTTTCATCCCCGAAGAAGTGCATATCCTATATGAATCTTCGTCTATAATG  
GTACAAAACAATAGTATTATTCGAGCAGGTACACAAATCACTTGCGATATTGAGAGTCA  
AGTAGGTGGATTAGTTCGGATAGTAAGAATTAATAAAGATCGAAATGAGAATATTGC  
CCGGAGATATTTATTTTCCCGGGGAGATACATGGAATATCTCGGCACAACGGCACTTTG  
ATACCCCGGGAAAGATTCTTTTT-----GATGAATTCCAATCTGAAAATTGGA  
TCTATTTACAATGG-----ATCATACCTCCTAAGGAAAAG-----CCTTTTGTTCGGTCCGA  
CCCGTCGTGGAATAT--ATACCTGATGGGCCAGATATAACAGCACCCCTTTCCCTAGATC  
TATTGAGGGAAGGGGACAACCTTGCAAGTTCGAGTTGGTAATTTTCTTCTCTATGGAGAT  
GGTGAACGAATCCAAGTAATTAATGACATAAGTATTCAATTGGTTCGAACTTATTTAGTA  
TTGGATTGGGAGCAAAAAGAT-----ATGGAA---GAGGCTTATGCCTATCTTACT  
GAAGTAAGAACAAATGGGATCGTTAGAAATNTTCTTCAAATTAGCTTGGCGAAATAC---  
-----TTGTATGGAAAAAGGAAGAATACAGCAGGTTCAAATCTATGTTTCAT--AACAAA  
TTGGATCACGCTAATCCC-----ATTTCTTCCAATGAGGAGAGT-----CAAT  
TACTTAGTCAGCATCAAGGGACTATCCGTGCATTACCTAATGAA-----AGGGAAGAAG  
GTGGATCTCTTATGGTCTGTACCATCCGATTGTTCCCGAATCGTTTAA-----TCCAAGG  
GATCTAAACATTATGATATG-----GTAATAGATCAGATTCCATGATGCAAATCATTGAA  
TTGTCGGGTTTCTTGGGTAAC-----TTAAGTATTGCTAACC GTTCTCCGTCT-----TCCC

ATTCGATAACT-----TATAATAAGTATTATAATATTAAGGAACAGCCTATTTTTGGCAAT----  
---TCCGAAAATACTCTCCGAGTACCAAAA-----TGGTATTTTATGGACGAAAATACGG  
TA-----GTTTCTAATTTTGGTCCATGCAGGAACATCATTCTGATCTATTCAATTCAAATA  
GGTGCTTTCCCTTATCTAAATTTTGCGAAAACCCATTTCCAGTAGTTAGC---CTTGGACA  
ATTGATTTCGTGAAAGTGTACGTATATCTGAGGATGAACCA-----CTCCCCGGATCTGGT  
CAAATTATAGCCGTTTCAT--GAGGAATCCTTAGTAATTAGATTAGCTGAGCTCTATTTGGC  
TACTCGAAGAGCAACTGTTTCATGGTCATTATGGAGAAATTATTAACGAGGGAGATACAT  
TGATAACATTGATATATGAAAGATTCAAATCTGGTGATATAATTCAGGGTCTTCCTAAGG  
TTGAACAATTGTCAGAGGCTCGTTCTATTAATTCAATATCGATGAATCTAGAAAAAAGT  
TTTGAGGATTGGAACAGAGATATGACGAGATCTCTCGGGAGCCCCTGGGGGTCTGTTCA  
TCAGTTCTAAGATAACCATGGAACAAAGTAGAATTCATTTGGTCAATCAGATTCAAAGG  
GTTTACCGATCCCAAGGAGTGCAAATTTCTGATAAGCATATAGAGATTATTGTACGCCA  
AATGACATCGAAAGTGTTAATTTCCGGGA-----GATGGAATGGCTGATGTTTTTTTACCC  
GGGGAATAATCGAATTATCGCGAGCACAAAGAATGGATCGGGCCCTGAAAGAGGCG  
ACCTACTATCGAACTATGTTATTGGGAGCAACAAGAGCATCTTTGGATACTCAAAGTTT  
TATATCAGAAGCGGGGTTTCAAGAACTGCTCGGGTCTTGGCCAGAGCTGCTCTTCAA  
GGTCGTATTGATTGGTTGAAAGGTTTGAAGAGAATGTCATTCTGGGGGGGATAGTACC  
TGCCGGTACCGGATTCAAACAATCTATTTACCATTTCAGGG-----GAACGGAACGAAATTG  
AT-----CCGAGAACGGGAAAA-----  
-----ATGACAAAGAGATATTGGAACATC  
AATTTGGAAGAGATGATGGAAGCAGGAGTTCATTTCCGGTCATCAAGCTAGGAAATGGA  
ATCCCAGAATGGCGCCTTACATTTTTTACAGAGCGCAGAGGTATTTCATATTATAAATCTGA  
CTCGAACTGCTCGCTTTTTTATCAGAAGCTTGTGATTTAGTGTTTCGATGCAGCAGGTA  
GGAAAACAATTCCCGATAGTTGGTACAAAATATCAAGCAGCTGATTCAGTAGCATCAGC  
TGCTATAAAAGCTCGATGTCATTATGTAAATAAAAAATGGCTTGGTGGTATGTTAACCAA  
TTGGTCCACTACAGGAACGAGACCCCGAAGTTCAAAGATTTGAAGAAAGAACAAGA  
TACGGGACAATCCAATCGACTTCAAAGAAAGAGGCAGCAATGCTCAAGAGACAATT  
AGCTCAATTGCAGAAATATTTAGGTGGGATTAAATACATGACAAGTTTGCCCGATATCGT  
AATAATTGCCGATCAACAAGAAGAATCCACTGCTATTGGGGAATGCATAACTTTAGGTA  
TCCCGACAATTTGCTTAGTTGATACGGATTGTGATCCAGATCTCACGGATATCCCAATC  
CAGCCAATGATGATGCTAGAGCTTCAATCCGATTGATCTTGAACAAATTAACGTATCA  
ATCTGCGAAGGTCATTAT-----AGCTCTATGAAAATGGGACAGAAAATGAATCCACTT  
GGTTTTAGACTTGGTATAACCCAAAATCATCGTTCCCATTGGTTTGCGCAACAAAAAAA  
TTATTCCGAAGATCTCCGGGAAGATGAAAAAATAAGTAATTGCATTGTGAATTATATACG  
AAGACATATGAGGAGTTCCTCGAAT-----ATTGCACGTGTAGAAATTAGAAGAAAG  
ATCGATTTAATTCAGGTCGAAATCCATATTGGATTTCCCAACTTGTTGATAGAAAATCGG  
GGT-----CGGGGAAGTGAACAATTAAGAACCGATGTACGAAATATGCTTAATCCTGT  
GGATGGAAAATAAACATTGCTATAGTGAAAGTTGCGAAACCTTATGGAGAACCTAATA  
TTCTTGCGGAATTTATTGCCCTGCAACTAGAGGATAGAGTTTCACTCGGAAGAACAGTC  
AAAAGAGCTATTGAACTGGCTGAACAGGCAGATATAAAAGGTATTCAAATACAAATTG  
CAGGACGTCTCGACGGAATGAAATTGCCCGTGTGCAATGGGCTAGAGAAGGTAGGG  
TTCCCCTACAGACCATTTCGAGCCAAAATTGATCATTGTTATTATCCAGCTCAAACCTATCT  
ATGGAGTATTAGGGATTAAAATTTGGATCTTCGGGGATGAGAAAATGTCCCGTTATCGA  
GGACCTCGTTTTAAAATAATACGTCGTCTAAGAACTTTACCAGGGCTGACTAATAAAAG

ACCGAAATCCAGGAATGATCCTACCAATCAATCTTCTTCTAGAAAA---ATATCTCAATAT  
CGTATCCGTCCGGAAGAAAAACAAAATTGCGTTTCCATTATGGACTGACAGAGCGAC  
AATTACTTAAATATGTTTCGTATTGCTGGAAGAGCCAAAGGATCAACGGGCCAGATCCTA  
TTGCAATTACTTGAAATGCGTTTGGATAATATTATTTTTCGATTGGGTATGGCTCTTACCA  
TTCCTGGAGCCAGACAATTGGTTAATCATAGACATATCCTGGTCAATGATCGTGTGGTA  
GATATACCAAGTTATCGTTGCAAACCCCGAGATGTTATTACTATAATAGATCAACGGAGA  
TCGAGAGCTATGATCGGGAAAAATCTCGATTTATCCCAGAAG---GATCAAATGCCGAAT  
CATTTGACTCTTCATTCGTACAA-----TATAAAGGATTAGTCAATCAAATAATAGATAGT  
AAATGGATCAGTTTAAAGATCAATGAATTGCTGGTTGTAGAATATTATCCCGTCAAGCT  
ATGTCACGTCGAAGTACTGCAGAAAAAGAACTGCAAAATCCGATCCAATTTATCGGA  
ATCGATTAGTTAACATGTTGGTTAACCGTATTCTTAGACATGGAAAAAATCATTGGCTT  
ATCGAATTCTTTATCGAGCCATGAAAAATATTCAACAAAAGACAGAAAAAATCCACTA  
TCTGTTTTACGCCAAGCGATACGGGGAGTAACTCCCAATGTAACAGTAAAAGCAAGAC  
GTGTAGGTGGATCGACTTATCAAGTTCCCGTTGAAATCAGATCTACACAAGGAAAAGC  
ACTTGCCATTTCGTTGGTTATTAGGGGCATCTCGAAAACGTCCGGGTGCAAAATATGGCTT  
TCAAATTGAGTTACGAATTAATGGATGCCGCCAGAGGGAATGGCAATGCTATACGAAA  
AAGGAAGAGACTCATAGAATGGCAGAGGCCAATAGAGCTTTTGCACATTTCCGTATGG  
GTAACGATACTATTGCCAATATAATAACTTCTATAAGAAACGCTGACATAGTAAAAAAA  
AAAACAGTTTCGAATAATAGCTACTAATACTACCAAAAACGTTGTAAGAATCCTTCTGCA  
AGAAGGTTTTATAGAAGATGCTAGAGAACATAGGGGAAGGTCAAAAATCTTTTTTCGGTT  
TTAACTTTAAGATATAGGGGA-----AGGAAGGAAACATATATAACC-----ACTTC  
AAAGCGTACTAGCAAACCTGGTCTGAGGATCTATTCCAATTCTCAAAAAGTTCCTAAA  
GTTCTAGGTGGAATGGGGGTCGTAATTCTTCTACTTCTCAAGGAATCATGACGGATCG  
AGAGGCTCGACGGAGAAGAATCGGAGGAGAAATATTATGTTATGTACGGATGTCAAAA  
CCTATAAGAAAAATTGGTTCACGTAGAAAT-----GAACGTAGAATACCAAA  
AGGAGTTATTACGTTCAAGCAAGTTTAAACAATACCATTGTTACTGTTACGGATGTAC  
GGGGACAGGTGGTTTCTTGGTCTTCTGCCGGTGCCTGTGGATTCAAAGGCACGAAAAG  
AAGTACACCATTGCTGCTCAGACTGCAGCAGAAAATGCTATTTCGTACGTTAATGGATC  
AAGGTATGGAACGAGCAGAAGTCATGATAAGTGGCCCTGGTCCGGGGAGAGATACAG  
CATTACGGGCCATTTCGTAGAAGTGGTGTACTCTTAAGTTTTGTACGTGACGTAACCCCT  
ATGCCACATAATGGATGTAGACCTCCAAGAAGAGACGTGTGGTGCCAACTATTCAAC  
AACTCATTAGAAATACGAGACAGCCAATAGTAAATGGAACAAAATCTCCTGCTCTTCG  
GGGATGTCCCAGCGTGGAGGAGTATGTACTAGGGTGTATACTACCACCCCAAAAAA  
CCGAACCTCTGCCTTGCGCAAAGTTGCCAGAGTACGATTAACCTCTGGATTTGAAATCA  
CTGCTTATATACCTGGTATTGGCCATAATTTACAAGAACATTCTGTAGTATTAGTAAGAG  
GGGGAAGGGTGAAAGATTTACCCGGTGTGAGATATCACATTGTTTCGAGGAACCCTAGA  
TGCTGTTCGGAGTAAAAGATCGTCAACAAGGGCGTCTTTTGTATATTCTTATC-----ATG  
GCAAGAAAAAGTCTCATTCAAAGAGAGAAAAAGAGACAAGTATTGGAACAGAAATAT  
CATTCGATTTCGTCAATCTTTGGAAAGAGAGATAAGC-----GAAGTTTCATCATTAGATG  
ACAAATGGGAAATTCATAGAAAATTGCAATCCTCACCACGTAATAGTACACCTACACGT  
CTTCATCGACGTTGTTTTCTGACTGGGAGATCCAGAGCCAATATCGGGACTTCGGTCT  
ATCCGGACATGTAATTCGTGAGATGACCCACGCATGTTTGTGCCCCGGGATGAAAAAAT  
CGAGTTGGATGCCAAAGAATTCGCCCAATTTCTCTGATTCTTAAAGAA-----CGG  
AGAAGATCCGTTGAATCTCAGATATATCATTTAACTGATCGGATTCTGAGACTTACTCAT

CATTTGGAATTGCACAGAAGAGACTATTCATCCCAAAGAGGTTTGTGGCAAATTTTGG  
GGAAACGTAAGCGACTTCTGGTTTATTTGTCCAAAAGGAACAGACCTCGTTACGAAGA  
TTTAATTGGTCAACTAAGTATTCGTGGGCTAAAATCCGT-----ATGGTAAAACCTTCGTTT  
AAAACGATGTGGTAGAAAAGCAACTAGCTACTTATCGAATTGTTGCAATTAACGTTGAAT  
CTCGAAGAGAAGGAAAAGCTCTTCAGGAAGTGGGTTTTTACGATCCAATGAAGGATCA  
AACTTATTCAAATGTTCCCTGCTATTCTACATTTTCTTGAGAAAAGGGGCTCAACCTACAG  
AAACCGTTCATGATATTTTGGAGAAGGCAGGGATATTTAAAAAATTCAGACCAATCTT-  
-----ATGAATAAATCTAAGCGATCCTTTTCGT-----CGTTTGCCGCCAAT  
TGGATCGAGAGATCAAATTGATCATAAAAATATGAGCTCAATTAGTCAATTTATTAGCGA  
ACGAGGAAAAATATTATCCGGACGGGTGAGTAGATTGACCCCAAACAGCAGCGCCTA  
ATGACTATTGCTATTAAACGAGCTCGTATTCATCTTCGTACCTTTCTTAATAATGACA  
AC-----ATGGCACGT--CTGAAAAAGAATCC  
TTTTGTAGCTAATCATTGAGGAAGATAGAGAATCTAAACATAAAAAAAGAGAAG  
AAGATAATAGTAACCTGGTCTCGGGCATCTACCATTGTACCCGCAATGATCGGTCATAC  
AATTGCTGTTTATAATGGAAAGGAACATTTACCTATTTATATAACGGATCGTATGGTAGG  
TCACAAATTGGGGGAATTTGCACCTACTCTAATTCCTCCGCGGACATGCGAAAAGCGATA  
ATAGATCCCGTCGTATACTTAGAATCTTGAGTCTACCATGGGATTCAATATCATCAAGGA  
TAGAAGTATCGGGTCCGATCATTTTATTTGGACTCTATTACGGATTTATTACCACATTGCC  
CATTAGTCCTTCTCAGATATCCCCATGAGA---ATTTTCTTTCTAGAAGGA-----ACT  
GTAGATGGTATAGTAACTATAGGTTCTATTACGGGACAATTAATAGTTTTTTTATCGATGT  
ACTATTCACCTATCTATACAGTATTGGGGAAACCTCACGCAATAACTTTATTAGTTGTAC  
CATACATGTTCTTCATGAGAACTTTCAAATTCAAAATCTCTGTAC-----ATAAATTC  
ACTTAACAATTCTAGA-----ATTCTAGGTCTATTTATGGATAGCCTAATTTTTCAATTAC  
TGAATCCTATTATTCTACCAAGTCCTATATTAACGAGACTGATGAACCTTTTTCTTTTTTCG  
TTATAGCAATAATATATCATTGTAATAAGTAGTCTTTGTGGTTGGTTGGGTGGTTCATGTT  
CTATTCATAAATTTGGCAAGATTGGTATCTTTCCGTATAGAACGTGATTCACCCATAGGTT  
AT-----CGAACTTTTAGTATTCTTATTATTATTCTCTGTT  
TATTATATTTGGGC-----TTCGATCAACCA-----TGGCCCATTATT  
TTGTTTGATCATCGCAGATGGAATAGGCCATTGCGATATATCAGAAATAGCCCATTTACT  
AACCTGTAAAGACCGAAGTATCCCAATATTTCTTCGACACATGTTCAAGTATGGAAA  
ACAAAGGATATCTTTCACATCTCTACCTAGTGTGTCGGTATTTTGGGAAAGGATCAGAA  
GATATAGGAATCTTTCAGATACCTCA-----TCCGAGGATCTTTATTATCAATGGATTGTC  
ACTGAAGAGCAGAGAAAAGGATAACTTGGGCAATGAATTCAGGAATCGAATAGAAGCT  
CTAAGCAATGGATCCCCTGTTGGAGATGTGATGGAAAAAGGAGTTAAATTATCCAAT---  
--TATCAGGGAGATTCCTTTTCTAAGATACATGATCCCTTTCTGAATGGACCGTTCCGTGG  
AATAATTGATCAATTAAGGTCACCTGCGGAAGGATCCTGGAATAATCAAATTGAAGAT---  
---GAACCACTACTTACAGATACCGAAATAGCTTCATGTATTGGCGGC---GAGAAAAATGT  
CACAAGTCCCATGAGATGGGAATTAATCCTTAGTCATTTGGAACAGAAGGAATGGACA  
AAATCTATTTCTGCCTTTTTCGGGAAATTCTTATTCAATGACCCTATTGTGAGACGTTAT  
TCGGAAGAGTCAGATTTTTCGCGGTAACCTAGTAAAAGGATCCATGCGTGCTCAAAGAC  
GTAGAACTATAATATGTAATGATACAAACGGGTGCACATTCCCCTTTATTTCTATTTTT  
G-----AGAATGGAGATACCCACTTTTTTAAAAGATTCTTTTTTATATGCCAAC-----  
TCTGGGGAGAGATCAAAGATCGTCTCTCAATAGCAAATTTGGATTTTTCACTAAATCA  
AAAAATAAGAGGTTTTATATTAGTGACCCAATCAATTCTTAGAAAATATATAATTTTACC

CTCATTAATAATAGCTAAAAATATTGGTTCGTATGCTATTATTTCAAGTCCCTGAATGGGAT  
GAAGATTGGGGGAATGGAGTAGAGAAATTCATATCAAATGCACTTATGATGGGATTGA  
ATTTTCAGAAACGGAATTTCCGGACAGATGGCTCAGGGATGGTATTCAGATCAAGATTC  
TATTTCCTTTTTCGTTTGAGACCTTGGCACGGATCTGAGAAAGGAGAAAAATCGAGTTCT  
AGCTATTTAACGACCTGGGGATTGGAACTGAAGTACCTTTTGGTTATCCAAAA-----CC  
TTCCTTTTGGGAACCCATTATCAAAGAATTGAAAGGACGA-----TTGATAAGAACA-----  
-----ATTCTATCAGGAATAGGACGAATAAAGGAA-----TCTGG  
ACCTCAA-----CCAGATAATAGGAGTACAGAAAATCTCGGAATA-----GACCAGATC  
CTCAATAAATTGCTCATCGGGACTAGGAGTGCAAATTTTTCATCGGAGATTCAGGATTAT  
GGAACTCAAACAAC---ATTGAAGATCTA---GATTGGACAACCACAATGAATGATCAGA  
TCACTGAGAAATATCTAGTGAATTTAGGGTGTCTAGTTATATAGAATCGGAATCAAAAA  
AGCGATTGATTCAGATTCGGCTTGTTCATTTAGAAAGAGAAGT--GTACGATTTTTTTG  
GAAATGGCCCAAT-----CTATTTATTGAAAGAATGGGC--GATATTTCCCTAAGTGTTAT  
TCGCCTCATCAGGTTGAACATACAATTTTGT-----ACCGATCGGGACATGATCTTA  
CAAGCATATCTATTTAACGAGATATGGCAAATAAGATCAATGAACAAGTCCCATTCAA  
ATATCTATTACAATATTCGTATCCTTTTTTAAAGGAAAGATCAAAGAATTTTTCATACAA  
GGAATATTGGATTCT--AAAGAACC GCAAGATTTGAGA-----GACTGGAAAGAGT  
GGTTAAAATGTTAC---CGATACAATTTATCCTCACAGATATGGTCTGGAATAGCACCACA  
GAGATGGAGAAATGAGATGAGTAAGCAACGGACGACTGAGAATCGA-----TCTCTTC  
ATTCCTATGAAGAAAATAGATTCATTCCCTATGAACAACAACGGAACTGAACAAACG  
TTACAGATACAATCTTTTCTCATATAGTTATATCGAT--ATTATACGTGAA-----  
-----GAAAGAGACAATTTTGATATTACTGATTCTCCGAGAATTAATTGGTT  
ATTCCCAGAACTTGTAGGAATGAATGATACATATAAACTGAATTGATGATCATACCAAG  
AAAATCGCTTATACGAGAATTTAGATGGGCAGAATCCATAGCGAGGGAACCTCGAAAAT  
AACATCATATGTTCTCTTTTAAGTGGAAATGAAGGATCCGGAGCCCTATCTTCGAACGGG  
AGATTTGGACCTGGATCTAATGTCTCATTCGATTAAG-----  
-----GATGTTTCAGGAACAGTAAAGGATGGA-----ATATTAATTGTGCAAC  
CATTTTCGTTTATCTGGGGTATTGGATGACCAATTCCTGATGTATAAAATCGTAAGTATTC  
ATTAAGATTTAAGAATAGGTTCAACATTTCAAGTTCTCTCATTTTTGAAGATATTTGCT  
TCCGAGACGTCGTAGAGAATTTAGAATTCATAATCGTTTTCGCATTTCTTTGGCCTAGTTA  
TCGATTAGAGGATCTGGCTTGTATGAATAGATATTGGTTCAATACAAATGATGGGAGTCG  
GTCTGTTATGTTAAGAATACGTATGTATCCCATGAAACGACAAAAA---AAATCCTGGATA  
TTGAAATTG-----GAAGAAATACGAAGCTTTCAATATTTATTCAATTCATGGACCGA  
ATTGAATTTGGTGAGATTGTTACGAAAATAGTTTCCCATCGAGAACGTCTTATTAAGC  
TCTTTGACTCTCGAATTCTTAGTACGTTGCTTTTACGCGATCTACGTGGT-----TCAAG  
AAGCAATCAATCTTTGACA-----ATCAAAGGTGTAGTACTACTTACATTACCA---GTCC  
TTATATATCAT-----GTGAATCAGAAAAGT--ATGATTGAAAGAAAAAAGTTCTATTCTGA  
TGAAACTCTTTCT-----ATACCTATAAACTATGCTGAACCTAGAAATGAAACATC  
GGAAGAATATTTTCGAGTCTTTCAATAAAAATTTGTTGATCTTTCCGCATCTTTTTCTGTC  
TTTCCCAAAGGGAGAAAGATATATCAAAGTCACTTGAGAAATTCGAAAGAGGACGCT  
TGGGTTCTCTCAAAAAGAAAAGTGTGTGTCATGCCTGCATATAATCAAATGATTCTTG  
GGGTTACGATGGTGAAGAATTGGATCATAGAAGAGATT-----CTCCTAGTTGGAAGA  
TCCCTCAG-----GGATCAATAGCGAAAATTGAGATGTCATTGAAAGAGAAAGATGTGG  
AA---CATCTAAAGGGTTTTTTTTGAATTCATATTGAT-----GATCTGATCCGCAAAGACTAT

GATTGGGAATATCATTTTCGATCGTGTGTTTTTATGAGAAATAAGCAGGACACGATCGAC---T  
TGAGCTCGAAGCAGCAAGTCGAAATATTAGGTAATAATCTAATCTGTTATCTCATGTCCG  
CTTTTTGTGAAAAAATGCTATTCGAAGCGGAGGGTCCATTCAAGCAGCAGAAATCG-----  
-AAATCAATTGTTGAATCGAATAATATTAAGCATTCTCCCATCTTCGATTATCCTATAAA  
GAGAAAGGGTATCTCTCTTTCCAAAATTATGCTGAATTT-----TGGCAATTCTATAAAGAT  
TCTTTTGTTAGTTGGGAGAAAGATCAGCAGAAATTGGAACCTTTCGAAGGACATTTTAA  
AAGAGAAATTCATTCAGTTGAATGATGTGAACAATGATCAGCTTTTTTAGCTCTAGCCAA  
TTGAAAAGATCTTATAATCGATCCATCGATCATTTTCGATCCATTAGTGAAAATTCAGAA  
TATGGCACGAAC---ATGAACAAAAAGGATGAGATAATCTCAGAGAATCAAAGACCGAT  
AATTGGGAGACTCATTCGGAGAGGGATGAGAAAGATATCGATTCGGAGATAGATTTG  
ACTCTCAATTTCACTGAGAATGAGTATTGGGAACCTGAAAAAGATCTTTGTGAACGGA  
TTTTCACAAATGGATATATAAATAAAACGGAGATCGAGCAACTAAAAGAAAGATCAATT  
CTTTGGGATCCT-----TCTTCTTCTATTCGAATAGAAAGAACAAAAATAAAATCAGAT-----  
TTGTCCTCAAAG-----TGTCTCTCAGAAGATTCTCCGATCTATTGGACGAAAGAACTATT  
TACGGAAGATAAAAAGTCTATAACAGAG---TTGTTTCAAAGGAAAGGAAAAGATTCA  
TC-----GAGAATTTCAAAAATCAATTCGTTCTTATTTTTTTGACATATTGTCAATAGATG  
AACCGTGCATGGGT---TCTAGTGTACTAAGAAGCCTATTGAAAATTTT-----AAATT  
ATTGAAAGGGCAACAAGATGTTTTT---TTCAGATATTTTCAGGGGCTCAGAA-----AA  
GAATGGGATAATTGATCCGTGGAAGATAAGAACATATTTTCAA-----AATCCTCCTCAA  
ATTGTGCTATTTCAATAGATCCCGGATGTAATATGATTAGAAAAAATCAGAGGGATATA---  
---AACAAATTAATTGTATTCTCTTTATGAACCGGAGTTTGTCTCGGAATCGA-----TTTT  
CTTCATTCTGTGATCAAAACAAAGAACAATACATATTC-----CACAACAATTTACGA-----  
TTTAAAAAAGAGTTCTAAAATAACAGATCAATTCGCTCTATTAATAACTAAGCCT---A  
ATCAGGTTTATGATAATACACTTGCTCCTGAT--CAATTCTATGAACTGAACAAGAATAG  
ATTCTTA-----GATCAGATCTTCAACCACAAGAATAAATTGAAGAATCAATCTTTA-----  
TTGATCCTACTCAATATTACTGAT-----AAAGAGAATGAATATTTAGATCGAATAATCGAA  
AAAGAATTGATCCAA---ATCTCTTCCAAAAAGGGTTCAGAAATAGGAACCCCT-----  
---CTTAACAATTACAGAACTGAAACTTCAAATTGGTACAAA-----TTGATTGATCGAT  
ATAAGATTCACGGG-----CATTTGAAAAATGCATTCAACAAATTATATTCAATGAAC-----  
--GGGTCCAGTCGCAATTTAAAGGATCAAATTCGA-----ACAAATTGGATAGAAAATGA  
AAATTTGAATAAT-----GTATCGAAAGATACAATTAACCGACATCCATCAAATTGGAGAA  
AA---GGTCAAAAAGAATGGTTTGATCATTCT-----ATTCTTCGAACTGATAAATGTAT  
CAATCGGAATTTGAATGTGTACAAATGGTCC-----AATCAGACCGAATACTTGAAGAGAT  
GTTTCGAAACATCTTGTTTCTAAACAAAACGAT-----TTGAAAATAGTGTTCGATCCG  
ATTGAAAGA-----GATTCAATTGGTTGGTCTGGAAGTCCCAACAAAAAAGATTATTCTA  
AGTTTTCTTTGATTGCTGAAAATACT-----  
-GTGAAGATCTTTCTTTCTAAG-----AAATCCATTTCTCATTCTG-----GCTATTTTCA  
TTCCCGAG---TTTTTCATTGAT---AAGTTAAAGGGTATGAATGATCAACTCTTCAATAAGT  
TGTTAAAATCAATTGGTGTTCGAATCGTTCATTTAAAAACATTCAAACCCTTT-----CTTT  
TGGAT-----AACCATAATCTTTCA--CAAAGATCGAAATCTTGATCGACGAAAGAACA  
GTAGCACAAATTTTCTATCATGAGATGCCGGTGAATCGATTTATTATTGACTTATTCGAG  
AATGAA-----AGAATTGCATGGAATTGTTTCGATAACACTGAT-----TTTTCGACGATATCC  
AACGATCGAGACAACCTGGTTGAATCCCGTAAACTATCTAATCAAAGCTCATCGAGAG  
CTTCTTTTTTACAAAGCAAATACACTACAATCTTCGATTATTCACATCATCCTCGGTTCA



AT-----TATAAGAAAAGATTACCTTATTATATG-----GAAAGGATTCATACAAAAAATC  
ATAAT-----CTTACATATGGA---CAATTATTCAATATTTTCGCCATCCACAGCAAT---CTATT  
TTCTTTGTCCATTAGTGAA-----ATAAGACCTGTTCACTTGGAG---AAAGATACTATTTCA  
CTTATAAAGTCACAAGTATCTAACATATTTCTTACCTAAATATTTGCAACAAAGCGGTAAC  
CAAACGTTTGTATCAATCTATGACTTGTACAAATCTTTTCGATTTACTAACTCGATTGAAT  
CCATTTGTTTCATGATAAAATAGATATTTCCCTCGATCGAAGAGATTTCTACAACGCCTTTA  
ACGAGAGAACGAATAGCCAATTTTCGAAAAAACTTCTTGTGTCAGCCCTTC-----TTAAATA  
GATCCGATTTAGAAGAAAACAACCTTCGATCAGTACCTTAAGGGGGGTTTCAGTTCAA  
CATGGGTCTTATTCAAACCTCAATCTTATCGAGATGATTTACTATCCGAACATCGGATTCG  
AGATCGGTTTGTAAAATCTAGTTCAACAGAAGGTTCAAAAAACAGAATTGAGAACAA  
AGCCATAGATAAAAGAAGCACCTTTTCAATTTCTCTAAAAAACAAGAGATGCATAGG  
ATCTCTAAATGGGATTTGTTCCGAGCATATACGCCATGGCTCTTGACTTCTGCATGGTGG  
AAATATCTTGAG---CTACTTCTAGAGACTTTTCCGGAGATATTGCTAAAT-----AGCAGTG  
AT-----CAACTTGTATCTATTTTG---GATATTATGCATAAATCGAATCTATCGTGGGCAAT  
TTCTCATCAATTATGGGCACTT-----CAATGTAATCTGAGAACCAAT-----  
----ATCTTGATAAGTTTTTTTCTTTATGGAATCTTTGTGAAATGATTAATCAA---TCATCG  
GTTCTATCTATATGGGCACATCTGAGATTGCTGAATGCTCGGGAGTAT--GAATATTCGAT  
CCTTATCCTTTTTTTCGTCCTTGGATAT---TTCGTTCTTCGATATTCTTTTCGTTGTTTCCCT  
A-----GCCTTTATTGAGTTACAGATACACCTTGAACGCATCAAAGATTTAATGGATCCGT  
CATACGCGATCGAGTTGCAAAAACTGATGGATCATCCTTTGCCT-----  
-----GGTCTGCTTTTC  
TCTATGGATATAAGGGACATATCCATCTATTTTCTGGACGAATTGATCTATTCTATGAGGA  
ATAGAAAGTTTTTATTCACCTATAAGA-----AGAGAGTTGAACAGATCGTGCTTCAGCATG  
GATATCTCTGGAAAAGAGAGAGAATTACTAGTTCAGTTTCTA-----ATAACA-----GA  
AAAAACATCTCTCAATTTGGATCGAATTTGACT--CACAGTCATAATTTCTTC-----  
--AGAATGAATTTGATTATCAAATCACTGAACAGCCGGGACTTATTTACCTGATCTATTT  
AGCCGACACTTAT-----CAGAAAGATCTAATGAATCACGAGTTCGATCAATCTCGTTTAA  
CAGAAAGATGGGTCTTCCTCGCTTTTTGTGCGGAAGATTACCTCT-----TCACAAATCTTT  
AGG-----GGTTTGAACCTCACATTTTATGGA-----AAACCTTTCCTACTCCACTTAGG  
ATCATCCCTTTCC---AAAGGGATTTTACTGATAGGTCCTACGGAAACCGGACGATCCTAT  
TTGGTCAAGGGTCTAGCAGCAGACTCTTATGTTCTCTGGTAAGAATA---CTAAACAAG  
TTCTGTATGACAAAGGTGAA-----TATTCTAATTTCTC  
GATATACGAAGTATGAAT-----AATGTGGTGCAAAAAATGCAC-----CAATT  
CAATCTCACCTTCGAATTGGCAAAAAGAATGTCCCCTTGCATAATATGGATTCCAAACA  
TTCATGAACTGAATGTCAATTACTTAACTCACTTTTTCTTGGTTTATTAGTGAACCATC  
TCTCT-----AGAGATGATGAGAAAGATTCT--ACTAGAAATCTTCTTGTATTGCTTCGA  
CTCATATTCTAAAAAAGTGGATCCAGCTCCAATAGCTCCAATCGATTAGACAGATCA  
ATCAATGTTTCGAATGCTTCCTATCCCACAACGACAAAAGGAATTTCTATTCTTTTACGC  
AGCAAAGGGTTTACTCGGAAAAAGAGTTGTCTTGTCCC-----AAGGAATTTGGATCTA  
GAACCATAGGTTCCAATGCACGGGATCTAGCAGCACTTGCCAATGAAGCCTTATCAATT  
AGTATTACCCAAAATAAATCAGTTATAGGCACTGATACAATTAGATTAGCTCTTTATAGA  
CAAACCTGGGGTTTGAATCTATAGATAATCAGGTTGGATCCGGTCAAAATTACGAAAT

ACTTCCCTATAAGGTGGGAAAAGCTGTTATACAAAATACACTTAGAAGGAATTCTTCTA  
TGAATCCTCTATCTATTAATAATGAATTATGGAAG-----AAAAGGTTTTCTTATTTGTC  
CAAATGGTATTTAGAACCTTCTACAACCTATGAAGGAATTGACCATACTCCCCCATATTTT  
GGGTTGCTTGGCCGGATCAGCAGCTCGAGATTCCTGGTTTATATCG-----GGACAAAATA  
GAGAG---AATTGGATCCTCTCGATAGATTTGCTGAGCATGATTTTC---GATTTAGCTTCTG  
GT-----CTTTTAGAAAGTCTTCTGGTGGAG-----TTCCATGGTTAGGAATATGCCGGGGT  
AAGCCTGATAAGAAT-----CAAATCACATTTGCTCCTCAGCCCAAACGAGAAAT---CAT  
CTCAATGTGATGCGAAAAGGGGTTTATTCTATGGTCAATAAAAATGTTTATATATAAAGAA  
TATGAATTGAAG-----TTTCAACAAGAACTCCCGGCGCAAAA-----CA  
AATGGAT-----GAAAATTAGTCAATAAC-----ATAGTTTGGGCTCCT-----AGGATCT  
GGCGTCTTAGTTTTCTTCGCAGTAATCTATTTGATCGTACAAAAAGACCCAATGAATTG  
GGATTTTCGTATCAGTTCGGATTGTTTCAAGAGGAGCAGTCTAACGCAAGACAAAAGA  
ATCTACAACATATATCATTACAAGAGTTTGAATAGGA---ATATTTCAATTTTCTATACAAT  
ATCAAATGCGATCTAAATCCTCTAATAAACCAATGTTCTTTCTAGGAAGACGATTTCTTT  
GGGATCCC-----GGTTTTCTATTTCAAGATCAG-----CACCTTGTGTTTTACGTCG  
GGAATTTTTTGCAAATGAAGAAATGCTGAGAAGGCTTTATATTACTTACGGTTCAACTC  
CTACATTTCTATATCAACGTTGGTTGATTGAAAATCCGCAAGAAAAGGTTGATCGCTTC  
GAATTGTTAATTCATCGCCAAAGATGGCTTGAAACC-----AATAGTTCATTATCG-----A  
ATGAATCTTTTCTTTATAAT-----ACTCTATCCGAGAGTTATAAATATTTATCAAATCTGTTC  
CTATCTAAC---AGAATGTTATTGAATCAAATGACAAGGACATTGTTGAAAATAGATGGC  
TTTTTCCGAAGGAAATTGAACACTTAATTCATACAACAAAAGATAGATTTACATATCTA  
TTTTAATGCCTAGATCTCAG---AGAAATGACAATTTTACTGATAAGACCTTCACAATTGT  
AGCGGATCCTATTGCGAATAATCCCCACAGCTCCAGGGGAAAAGAGGCATTTACCT  
ATTACAGAGATGGT-----ATGTCAGCTCAATCCGAAGGAGAATATGCGGAAGCTTTACAA  
AATTATTATGAAGCTATGCGACCGGAAATTGACCCTTATGATCGAAGTTATATACTGTATA  
ATATAGGTCTTATCCACATGAGTAACGGAGAGCATAACCGAGGCTTTGGAATATTATTTCC  
AGGCATTGAAACGAAACCCATCCCTACCACAAGCTTTTAATAATATGGCCGTGATCTGT  
CATTAC---CGGGGAGAACAGGCCATTCGACAGGGAGATCCTGAAACTGCGGAGGCTTG  
GTCCGATCGAGCTGCTGAGTATTGGAAACAAGCCATAGCGCTTGCTCCAGGCAATTACA  
TTGAAGCACAAAATTGGTTAAAGATTACAGGACGCCTTGCGCAA---ATGAATTGGCGAT  
CTGAATGGCTCTGGATAGAACCTATAACAGGATCTCGAAGAACAAGTAATTTTTGTGCG  
GCTTGTATCCTTTTTTTGGTTCACTAGGATTTTCTTGGTTCGGAATTTCAAGTTATCTTG  
GTAAGAACCTGATACCCGTATTGTCATCTCAGCAAATCCTTTTTGTTCCACAAGGAATT  
GTAATGTGTTTTTATGGTATTGCAGGTCTGTTCAATTAGCTCTTATTTGTGGTGTACAATTT  
TATGGAATGTAGGTAGTGGTTACGATAAGTTTGATGAAGAAGAAGGAATTGTATGTCTT  
TTTCGTTGGGGATTTCTGGAAGAAATCGTCGTACTTTTCTTCGATTTCTCATGAAAGAT  
ATTCAGGCGATCAAATGGAAGTTCAAGAAGGTCTTTATCCCCGTGCTGTTCTTTATAT  
GGAAATAAAGGGCCAGCGAGACATTTCCCTAGCTCGTACCGGTGAGAAT---TTAACCTT  
ACGGGAAATGGAACAAAAGCTGCCGAATTAGCTCGTTTCTTGCATATATCAATTGAA  
GTATTT

>Ipomoea

ATGGAAAAGTGGAGAATTTATTCG-----CTAAATAGCAGTCTTGGT-----CCTATTGA  
AACTACCGGTGAAGAT-----AATAGAAAAGATACGGTTAAAAACATTCAGAGTTGCAG  
TAATGTTGATCATTTATTCGGCGTTAAAGACAATGAGAATTTTCATCTCCGATGACACTTT

TGTAGTTTTTGATATTGAAAAT-----ATTTTTGAGATTGACAACGAT-----  
-----CATTCTTTTTTGAATGAACCTTTTTCTAGT--TATAGTGATCGGAATTCTAGCTATCT  
GACTAATGTATTT--AGTGAAGATCCCTACTATAAT-----ATGTATGATGCTCAATATAGTTG  
GAATAATCATATTAATGGTTGCATTGACAGTTATCTTCAG-----TCGCAAATCTGTATAGAT  
ACCACTGTAAGTGGTAGTGATAATAGTTACGAC-----ATTCATGGGTCCGTATGTGATGG  
TGGCGAGAGTTCCAGTAGACGAACTCATAACGAAGGGTGTGATTTAACTATAAGAGAA  
AGTTCTAATGATCTCGATCGAACTAAAAAATATAGGGATTTGTGGCTTCAATGCGAAAA  
TTGTTATGGATTAAATTATAAGAAATTTTTGAAATCAAAAATGAATATTTGTGAACAATG  
TGGATATCATTTGAAAATGAGTAGTTCAGATAGAATTGAACTTTTGATCGATCCGGGTAC  
GTGGGATCCTATGGATGAATACATGGTTTCTCAGGATCCCATTTGAATTTGATTTCGGAGG  
GGGAGCAGTATAAAGATCGTATTGATTTTTATCAAACAAAAACAGGATTAACCTGAAGCT  
GTTCAAACAGGCATAGGCCAACTAAACGGTATTCCCGTAGCAATTGGGGTTATGGATTT  
TCATTTTTTGGGGGGTAGTATGGGATCCGTAGTCGGGGAGAAAATCACCCGTTTGATTG  
AGCACGCTACCAACAACCTTTTTACCTCTTATTATAGTGTGTGCTTCAGGGGGTGC GCGC  
ATGCAAGAAGGAAGTTTGAGCTTGATGCAAATGGCTAAAATATCGTCTGCTTTATATGA  
GTATCAATTAATAAAAGGTTATTTTATGTATCAATCCTTACATCTCCTACAACCTGGTGGA  
GTAACAGCCAGTTTTGGTATGTTAGGGGATGTTATCATTGTCGAACCCAATGCTTACGTT  
GCATTTGCGGGTAAAAGAGTCATTGAACAAACATTGAATCAAACAGTACCTGAAGGTT  
CACAAGAGGCTGAATATTTATTCGAGAAGGGTTTTATTTGACTTAATTGTACCACGTCATC  
TTTTAAAAGCGTTCTGAGTGAGTTATTTGAGTTCACGCCCTTTTTCTTTGAATCAA  
AATTCAAATCAAATGGTAACCATTCAAGCCGACGAAATTAGTAATCTTATCCGTGAACG  
TATTGAACAATATAATAGAGAAGTCAATATTGTAATACCGGTACCGTACTTCAAGTAGG  
CGATGGCATTGCTCGTATTTACGGTCTGGATGAAGTAATGGCAGGGGAATTGGTAGAAT  
TTGAAGAGGGTACAATCGGCATTGCTCTCAATTTGGAATCAAAAATGTTGGTGTGTA  
TTAATGGGCGATGGGTTGATGATAACAAGAAGGAAGTTCTGTAAAAGCAACGGCAAGAA  
TTGCTCAGATACCGGTGGGTGAAGCCTATTTGGGTCTGTGTTATAAATGCCCTGGCTAAC  
CCTATTGATGGTAGGGGCGAAATTCAGCTTCTGGATTTTCGATTAATTGAATCCCCTGCT  
CCGGGGATTATTTGCGCTCGTTCCGTATATGAGCCTCTTCAAACCGGGCTTATTGCTATC  
GATTCGATGATCCCTATAGGACGTGGTCAGCGCGAATTAATTATTGGCGACAGACAAAC  
CGGTAAAACAGCAGTAGCCACGGATACGATTCTCAATCAACAAGGTCAAATGTAATAT  
GTGTTTATGTAGCTATTGGGCAAAAAGCATCTTCTGTGGCTCAGGTAGTTAATACCTTAC  
AGGAAAGGGGGCGATGGAATACACTATTGTGGTAGCCGAAACGGCAGGATTCCCCTGC  
TACATTACAATACCTCGCTCCTTATACAGGAGCAGCTCTGGCTGAATATTTTATGTATCGT  
GAAAGACACACTTTAATCATTATGATGATCTCTCCAAACAAGCCCAAGCTTATCGCCA  
AATGTCTCTTCTATTACGCAGACCGCCGGTCTGCGAAGCTTATCCAGGAGATGTTTTTTA  
TTTGCACCTACGCCTTTTGAAAGAGCTGCTAAATCAAGTTCTAAGTTAGGTGAGGGG  
AGTATGACCGCCTTACCTATAGTTGAAACGCAATCGGGAGATGTTTCGGCTTATATTCCT  
ACTAATGTAATTTCCATTAATGATGGACAAATATTCTTATCCGCCGATCTATTCATGCTG  
GAATCAGACCTGCTATTAATGTGGGTATCTCTGTTTCCCGAGTGGGGTCTGCAGCTCAA  
ATTAAAGCCATGAAACAGGTAGCTGGTAAATTAATAATTGAACTGGCGCAATTTCGCAG  
AATTAGAAGCCTTTGCACAATTTGCTTCTGATCTCGATAAAGCTAGTCAAATCAATTG  
GCAAGAGGTCAACGATTACGTGAATTGCTTAAACAATCCCAATCCGCTCCTCTCACGGT  
GGCAGAGCAGATAATAACTATTTTACTGGAATAAATGGTTATCTTGATTCAATAGAACT  
TGGACAGGTAAAGAAATTTATTGTTGAGTTACGTACTTACTTAAAACTAATAAACCTC

GGTTCGAAGAAATCATATCTTCTACTAAGATATTTACCGAGGAAGCAGAAGCCCTTTTG  
AAAGAAGCTATTCGGGACCAAATGGATCGTTTTCTACTTCAGCAACAAGTAATGAGAA  
TCAATCCTACTACTTCTGGTTCTGAAGTTTCCGCGGTTGAAAAAAAAAACCTGGGGCG  
TATCGTCAAATCATTGGTCCGGTATTAGATGTAGCTTTTCCCCCGGGAAGATGCCTAA  
TATTTATAATGCTCTGGTAGTTCAAGGACGAGAC-----AATGAACAAACGAACGTGACTT  
GCGAGGTACAGCAATTATTGGGAAATAATCGAGTTAGAGCTGTAGCTATGAGTGATACA  
GATGGTCTAATGAGAGGGATGGAAGTGATTGACACGGGAGCTCCTATAAGTGTTCCGG  
TCGGTGGATCGACTCTGGGACGAATTTTCAACGTGCTCGGACAACCTGTTGATAATTA  
GGTCCTGTAGATACTAATAACAACGTCTCCTATTCATAGATCTGCGCCCGCCTTTATACAG  
TTAGATACAAATATCTATTTTTGAAACAGGAATTAAGTAGTAGATCTTTTAGCCCCC  
TATCGCCGCGGGGAAATCGGACTATTTGGGGGAGCTGGAGTGGGGAAAACAGTA  
CTCATTATGGAATTGATTAACAATATTGCCAAAGCTCACGGGGGAGTATCCGTATTTGGC  
GGAGTGGGTGAACGTACTCGTGAAGGAAATGATCTTTACTTGGAAATGAAAGAATCCG  
GAGTGATTAATGAAGAAAATATTCCCGAATCAAAGTGCCCTAGTTTACGGTCAGATG  
AATGAACCGCCGGGAGCTCGTATGAGAGTTGGTTTGACTGCCCTAACTATGGCAGAATA  
TTTCCGAGATGTTAATGAGCAAGACGTACTTCTATTTATCGACAATATCTTTCGTTTCGT  
CCAAGCGGGATCGGAAGTATCGGCCTTACTGGGTAGAATGCCTTCTGCTGTGGGTTATC  
AACCGACCCTGAGTACCGAAATGGGTTCTTTACAAGAAAGAATTACTTCCACCAAAGA  
AGGTTCCATAACCTCGATTCAAGCAGTTTATGTACCTGCAGATGATTTGACCGATCCTG  
CTCCTGCTACGACATTTGCACATTTAGATGCGACTACCGTACTATCAAGAGGTTTAGCT  
GCCAAAGGTATCTATCCAGCAGTAGATCCTTTAGATTCAACGTCAACGATGCTTCAACC  
TCGGATCGTTGGTGAGGAACATTATGAAACTGCGCAAAGAGTTAAGCAAACCTTTACAA  
CGTTACAAAGAACTTCAGGACATTATAGCTATCCTTGGGTTGGACGAATTATCCGAAGA  
GGATCGTTTAACCGTAGCAAGAGCGCGAAAAATTGAGCGTTTCTTATCACAACCTTTT  
TCGTAGCAGAAGTATTTACTGGTTCTCCAGGAAAATATGTTGGTCTAGCAGAAACAATT  
AGAGGATTTCAATCGATCCTTTCCGGCGAATTAGATGGTCTTCCTGAACAGGCCTTTTA  
TTTGGTAGGTAATATCGATGAAGCTACCGCGAAGGCGATGAACTTAAAAATGGAGAGC  
GATTTGAAGAAAATGACCTTAAAACCTTTGTGTACTGACCCCTAATCGAATTGTTTGGGA  
TTCAGAAGTGAAAGAAATCATTTTATCTACTAATAGTGGTCAAATTGGAATATTACCCAA  
TCACGCTCCTATTGCCACAGCTGTAGATATAGGTATCTTGAGAATACGCCTTAAACGACCA  
ATGGGTAACGATGGCTCTGATGGGGGGGTTTGTAGAAATAGGCAATAATGAAATCACTG  
TTTTGGTCAATGATGCAGAAAAGGGTAGTGACATTGATTCACTAGAAGCTCAGCAAAC  
TCTTGAAATAGCAGAAGCTAATTTTAGAAAAGCTGAAGGAAAGAGACAAACAATTGA  
AGCAAATCTAGCTCTCCGCCGAGCTCGAACACGGGTCGAGGCTATTAATGCGATTTCAA  
TGAAAAACGTAACCGATTCTTTCCTTTCTTTGGGCCCTGGCCGTCTGCTGGGAGTTTC  
GGGTTTAATACCGATATTTTTGCAACAAATCCAATAAATCTAAGTGATGTAGTGGTGTA  
TTGATCTTTTTTGGAAAGGAGTATTAAGTGATTTATTAGATAATCGAAAACAGAGGAT  
CTTAAATACTATTCGAAATTCAGAAGAATTGCGCGGTGGGGCCATTGAACAACCTCGAA  
AAAGCCCGGGCTCGCTTACGGAAAATAGAAACGGAAGCCGAGCAGTTTCGAGTGAAT  
GGATACTCTGAGATAGAACGAGAAAATGAAATTTGATTCAGTCAACTTATAAGACTTT  
AGAACAATTAGAAAATTATAAAAATGAAACTATTCGGTTTGAACAGCAAAGGGCACTT  
AATCAAGTCCGACAACGGGTTTTCCAACAAGCCTTACAAAGAGCTCTAGGAACTCTGA  
ATAGTTGTTTGAACAACGAGTTACATTTACGTACCATTAGTGCCAATATTGGCATGTTGG  
GAACAATGAAAGAAATAACTGATATGGATCCACTCATTCTGCCGCTTCCGTTATTGCT

GCTGGGTTGGCCGTAGGACTTGCTTCTATTGGACCTGGAGTTGGTCAAGGGACTGCTG  
CGGGTCAAGCTGTAGAGGGTATCGCGAGACAGCCTGAGGCGGAGGGAAAAATACGAG  
GCACTCTATTGCTTAGTCTAGCTTTTATGGAAGCTTTAACAATTTATGGATTGGTTGTGG  
CATTAGCACTTTTATTTGCGAATCCTTTTGTATGGATGTTTTATCATGTTCCATCAATAC  
CCTAAAGGGGTTATACGATATATCTGGTGTGGAAGTAGGCCAACATTTCTATTGGCAAAT  
AGGGGGTGGCCAAGTTCACGGCCAAGTACTTATTACTTCTTGGGTTGTAATTGCTATCT  
TATTAGGTTTCAGCCACTATAGCTGTTTCGCAACCCACAAACCATTCCGACTGGGGGTCAG  
AATTTCTTCGAATATGTTCTTGAATTCATTCGAGATGTGAGTAAAACTCAAATTGGAGA  
AGAATATGGTCCTTGGGTTCCTTTTATTGGGACTATTTTTCTATTTATTTTTGTTTTCTAATT  
GGTCAGGGGCTCTTTTACCTTGGAAAATCATACAATTACCTCATGGGGAGTTAGCCGCA  
CCCACCAATGATATAAATACTACTGTTGCTTTGGCTTTACTCACGTCATTGGCATATTTCT  
ATGCGGGTCTTTCAAAAAAAGGATTAGGTTATTTTCGGGAAATATATTCAACCAACTCCG  
ATCTTTTACCCATTAACATCTTAGAAGATTTACAAAAGCCTTTATCGCTTAGTTTTCGA  
CTTTTCGGGAATATCTTAGCTGATGAATTAGTAGTTGTTGTTCTTGTTCCTTTAGTACCTT  
CAGTAGTTCCTATACCCGTGATGCTCCTTGGATTATTTACAAGCGGTATTCAAGCTCTTA  
TTTTTGCAACTTTAGCCGCGGCTTATATAGGTGAATCCATGGAGGGCCATCATATGATAT  
TTTCAACCTTAGAGCATATATTAACTCATATTTCCCTTTTCGATCATTTTAATTTAATGACA  
ATTCATTTGATAATATTTTTAGTCGACGAAATAAGAAAACCTATATGATTCATCAGAAAAG  
GGCATGCTAGTAACTTTTTTCTGTATAACAGGATTATTAGCTACTCATTGGATTTCTTCGG  
AACATTTCCCACTAAGTGATTTATATGAATCATTCAATTTCCCTTTTCATGGAGTTTCGCTCT  
GATTCATATCATTCCGTAT-----AAAAATACAAAATTTTTAAGCAAATAATCAGCCCAAG  
CGCTATTTTTACCCAAGGTTTTGCTACTTCAGGTCTTTTAAACAGAAATACATCAATCTTC  
AATATTAGTACCCGCTCTTAAATCCGAGTGGTTAATAATGCACGTAAGTATGATGATATT  
GGGCTATGCAGCCCTTTTATGCGGATCATTATTATCAGTAGCACTTCTGGTCATTACATTT  
CGAAAAAACGAAAGCTTTTTTCA-----GGGAAAATCTTTTTCAAAGACTTCTTTT---  
-----GCTAAGAATTATTATAGGACCCAATTCATTCAACAATTGGATTTTT  
GGAGTTATCGGGTTATTAGTCTAGGATTTCTCTTTTTTAACCATAGGAATACTTTTCGGGAG  
CCGTGTGGGCTAACGAAGCGTGGGGATCTTATTGGAGTTGGGACCCAAAAGAACTTG  
GGCTTTTATTACTTGGATTGTATTCGCAATTTTTTTACATACTCGAACAAATCTAAATTTG  
CAGAGTGTAATTCGCAATTGTAGCATCTATAGGCTTTCTTATAATTTGGATATGCTATT  
TTGGAGTCAATCTAGTAGGAATAGGTCTACATAGTTATGGTTCATTTCCATCAACAATGG  
CAAAAAGAAAGCATTCACTCCTCTTTTCTATCTTTCATTTATAGTCTTTTTGCCCTGGT  
GGATTTCTTTCTCATTTAAGAAATGTTTGGAAATCTGGATTACTAATTGGTGGAAATACCG  
GGCAATCCGAAATTTTCTTGAATGATATTCAAGAAAAGAGTATTCTAGAAAATTCATA  
GAATTAGAAGAATTCGTCCTTCTTGGACGAAATGATCAAAGAATACTCGGAGACACATC  
CACAAGAGTTTCGTATA---ATCCATAAAGAAAACAATCCAATTCATCAAGATACAAAATG  
AGGGTCATATCCATACGATTTTGCCTTCTCGACAAATCTCATCTGTTTTGTTATTCTAA  
GCGGTTATTTCTATTTGGGGTAATGAAAACCTTGTATTCTTAACTCTTGGTCTCGGGAAT  
TCCTATATAACCTAAGCGACACAGTCAAAGTCTTTTCCATTCTTTTATTAAGTATTATG  
TATCGGATTCCATTCACCACATGGTTGGGAATTAATGATTGGCTCTATCTATCAAGATTTT  
GGATTTGGTTATAATGATCAAATTTCTATCTGGTCTTGTTCACCTTTCCAGTCATTCTCG  
ATACAATTTGAAATATTGGATTTCCGTTATTTAAATCGTGTATCTCCGTCATTGTAGT  
TATTTATCATTCAATGAATGACATGCCTATTGGTGTTCAAAAGTACCTTTCCGAAATCC  
CGGAGATGAAGATGCATCGTGGATTGATATATAACAACCGACTTTATCGCGAACGATTCC



TTTATGTGTATTATCAATTTCTCTGCTATCTAACAGTTCAAGTACAGTTGATATAGTTGAA  
GCGCAGTCAAAGTATGGTTTTTGGGGGTGGCATTGTGGCGTCAACCGATAGGGTTTAT  
CATTTTTATAATTTCTTCTTTAGCCGAATGCGAGCGATTACCTTTTGATTACCAGAAGC  
GGAAGAAGAATTAGTAGCGGGGTATCAAACCGAATATCAGGCATCAAATTTGGTTTAT  
TTACGTTGCTTCATATCTGAATCTACTAATTTCTTCATTATTTGTAACAGTTCTTTACTTA  
GGGGTTGGAATCTTTCTATCCATACATAATTTGTTCTGAGCTTTTGGACATAACTAAA  
AGGGGTAAAGTCTTTGGAACAATAGTAAGTATCGTTATTACATTAGCTAAAACCTTTTC  
GTTCTTGTTCATTTCTATTGCAACAAGATGGACTTTACCAAGGCTCAGAATGGACCAAC  
TATTAATCTTGGATGGAAATTTCTTTTACCTATTTCTCTAGGTAATCTATTATTAACAAC  
TTCGTCTCAACTTCTTTACTGATGAGCTGGCATGTACAGAATGAAAACCTTCATTCTCG  
ATTCTACGAGAATTTTTATGAAAGCCTTTCAATTTGCTTCTCTTCGATGGAAGTTTGATTT  
TCCCAGAATGTATCCTAATTTTTGGCCTAATCTTCTTCTGATGATCGATTCAACCTCTGA  
TCAAAAAGAGAGACCTTGGTTATATTTTCATCTCTTCAACAAGTTTAGTAATGAGCATAA  
CGGCCCTATTGTTCCGATGGAGAGAAGAACCTATGATTAGCTTTTTCGGGAAATTTCCAA  
ACGAACAATTTCAACGAAATCTTTCAATTTCTTATTTTACTATGTTCAACTCTATGTATTC  
CTCTATCCGTAGAGTACATTGAATGTACAGAAATGGCTATAACAGAGTTTCTCTTATTCG  
TATTAACAGCTACTCTAGGAGGAATGTTTTTATGCGGTGCTAACGATTTCATAACTATCT  
TTGTAGCTCCAGAATGTTTCAGTTTATGCTCCTACCTATTATCTGGATATACCAAGAAAG  
ATGTACGGTCTAATGAGGCGACTATGAAATATTTACTCATGGGTGGGGCAAGCTCTTCTA  
TTCTGGTTCATGGTTTCTCTTGGCTATATGGTTTATCCGGGGGAGAGATTGAGCTTCAAG  
AAATAGTGAATGGTCTTATCAATACACAAATGTATAACTCCCCAGGAATTTCAATTGCGC  
TCATATTCATCACCGTAGGAATTGGGTTCAAGCTTTCCCCAGCCCCTTCTCATCAATGGA  
CTCCTGACGTATACGAAGGATCTCCACCCAGTCGTTGCTTTTTCTTTCTGTTACTTTCGA  
AAGTAGCTGCTTCAGCTTCAGCCACTCGAATTTTCGATATTCCTTTTTTATTTCTCATCAA  
ACGAATGGCATCTTCTTCTGGAAATCCTAGCTATTCTTAGCATGATATTGGGAAATCTCA  
TTGCTATTACTCAAACAAGCATGAAACGTATGCTTGCCTATTCGTCCATAGGTCAAATCG  
GATATGTCATTATTGGAATAATTGTTGGAGACTCAAATGATGGATATGCAAGCATGATAA  
CTTATATGCTGTTCTATATCTCCATGAATCTAGGAGCTTTTGCTTGCATTGTATTATTTGGT  
CTACGTACCGGAACTGATAACATTCGAGATTATGCAGGATTATACACAAAGGATCCTTTT  
TTGGCTCTCTCTTTAGCCCTATGTCTCTTATCCCTAGGGGGTCTTCCCTCCACTAGCAGGT  
TTTTTCGGAAAACCTATTTTATTTCTGGTGTGGATGGCAGGCAGGCCTATATTTCTTGGTT  
TTTATAGGACTCCTTACAAGCGTTGTTTCTATCTACTATTATCTAAAATCATCAAGTTAT  
TAATGACTGGACGAAACCAAGCAATAACCCCTCACGTGCGAAATTATAGAAGATCCCC  
A-----TCAAACAATTCATCGAATTGAGTATGATTGTATGTGTGATAGCATCTACTATACC  
AGGAATATCAATGAACCCGATTATTGCAATTGCTCAGGATACCCTTTTTATGTTTCTACTT  
TACGAATATGATCTTTTTTGGGCATTTCTAATAATATCCAGCCTTATTCCTATTTTGGCTTT  
TTTTATTTCCGGGGTTTTAGCTCCGATTAGCAAAGGGCCAGAGAACTTTCTACTTATG  
AATCAGGTATAGAACCTATGGGCGATGCTTGGTTACAATTTCGAATCCGTTATTATATGTT  
TGCTCTAGTTTTTGTGTTTTTGTATGTTGAAACGGTTTTTCTTTATCCATGGGCAATGAG  
TTTCGATGATTGGGTGTATCTGTATTTATAGAAGCTTTCATTTTCGTGCTTATCTTAAATG  
GTGGTTTAGTTTATGCATGGCGAAAGGGAGCATTGGAATGGTCTACGAATTTTTTTCCT  
TGGTTAACAATAATTGTCGTTTTTCCAATATTTGCGGGTTCATCGTTTTCTTTCTTCCCC  
ATAAAGGAAATAGGGTAATTAGATGGTATACACTTTGTATATGTATTTTAGAACTCCTTAT  
AACGACTTATACATTTTTGTTTTCAATTCAGGTGGACGATCCATTAATCCAACCTAGAGGA

GACTTATAAATGGATCAATTTTTTTGATTGCCATTGGAGATTGGGAATAGATGGACTTTC  
TGTAGGCCCTATTTTATTGACAGGATTTATAACCACTTTAGCTACTTTAGCGGCCCGGCC  
AGTTACTCGCGATTCTCGATTATTTTCATTTCCCTGATGTTAGCAATGTACAGTGGTCAAAT  
AGGATTATTTGCTTCTCGAGACCTTTTCTTTTTTTTCATCATGTGGGAATTAGAATTAATT  
CCCGTTTATCTACTTCTATCCATGTGGGGGGGAAGAAACGTCTATACTCAGCTACAAA  
ATTTATTTGTATACGGCAGGGGTTCCATTTTTCTATTAATGGGAGTTTTGGGTCTTACT  
TTATATGGTTCGAATGAACCAACATTCAATTTTGAAACATCAGTAAATCAGTCATACCCC  
GCGGCTTTAGAAATAATATTCTATATTGGATTTTTTATTGCTTTTGTCTGCAAATCACCTA  
TTTTACCCCTACATACATGGTTACCCGATACCCACGGAGAAGCACATTACAGTACTTGTA  
TGCTTCTAGCCGAATCTTATTAATAAATGGGAGCATATGGATTGATTCTGAATCAATATGG  
AATTATTTCTCACGCCATTCTCTATTTTCTCCCTATTTGGTGATAGTAGGCACAATCCA  
AATGATCTATGCAGCTTTAACATCTCTTGGACAACGAAATTTAAAAGACGAATAGCCT  
ATTCCTCTGTATCTCATATGGGTTTTATAATTATAGGAATTGGTCTATGACCGATACGGG  
ACTTAATGGAGCTTTTTTACAAATAATTTCTCATGGATTTATTGGTGCTGCACTTTTTTTC  
TTGGCGGGAACGACTTATGATAGAATACGGCTTGTTTATCTTGACGAAATGGGGGAAT  
AGCTATTCAAATGCCAAAATATTACGATGTTTCAGTAGCTTTTCAATGGCTTCCCTTGC  
ATTACCAGGTATGAGCGGTTTTGTTGCCGAATTACTAGTATTTTTTGAATAATTAGCGC  
CAAAAATATCTTTTCATGTCCAAAATACTCATTTCTTTTGAATGGCAATTGGAATTATA  
TTAACTCCTATTTATTCATTATCTATGTTACGCCAGATGTTTTATGGATACAAGCTATTTAA  
TGCCCCCAACTCTTCTTTTTTGGATTCTGGACCGCGAGAGTTATTTCTTCTATCTCCAT  
TTTTGTTACCTGTCATAGGTATTGGTATGTACCCCGATTTTCGTTCTTTCCTATCAGTTGAA  
AAGGTGCAAGTTATTCTATCTCATTTTTTTTTATCGAATGATGCTCGAGTACGCCCTTGTG  
TTGAGTGCCTTTTTATTTTCTATCGGTATCTATGGATTGATCACAAGTCGAAATATGGTTA  
GAGCCCTTATGTGTCTTGAACCTATACTTAATGCAGTTAATATGAATTTGGTAACCTTTTC  
GTATTTTTTTGATAATCGTCAATTAAGGAGACATTTTCTCAATTTTTATTATAGCTATT  
GCAGCTGCTGAAGCAGCTATTGGGCTGGCTATGTTTCTTCAATTTATCGTAACAGAAA  
ATCAACTCGTATTGACCAATCAAATTTGTTGAATAATATGGAACAAACATATCAATATGC  
GTGGATCATACTTTTGTTCCTTCTAGTTCCTATGTTAATAGGAGCAGGACTTCTTATT  
TTTCCACGGTAACAAAAATCTTCGTCTGATGTGGTCTTTTCAGAGTGTTTTATTGTTA  
AGTATAGTCATGGCATTTTCAATCTATCTATCTATTCAGCAAATAAATAGGGGTTCTATCT  
ATCAATATGTATGGTCTTGGATAATAAATAATGATTTTTCTTTGGAATTCGGTTACTTGAT  
CGACCCACTTACTTCTATTATGTCAATATTAGTCACTACTGTTGGAATTTGGTCTTATT  
TATAGTGATAATTATATGGCTCATGATCAAGGATATTTGAGATTTTTTACTTATATGAGTTT  
TTTCTGTGCTGCCATGTTGGGATTAGTTACTAGTTCTAATTTTATACAAATTTATATTTTTT  
GGGAATTTGGTTGGACTATGTTCCATCTATTAATAGGGTTTTGGTTTACACGACCTGGTG  
CGGCAAATGCTTGCCAAAAGCGTTTGTAACTAATCGTGTAGGGGATTTTGGCTTATTA  
TTAGGAATTTAGGCTTTTATTGGATAACAGGCAGTTTTGAATTTCCGGGAGTTATTCCAA  
ATATTGAATAATAAAGAGGTCAATCTTTTTATTTGTTACTTTATGCGCTGCGCTGTTATTTG  
TCGGTGCAATTGCGAAATCCGCGCAATTTCTCTTCATGTCTGGTTACCCGATGCCATG  
GAGGGACCTACTCCGATTTCCGGCTTTATACATGCTGCTACCTTAGTAGCAGCGGGAAT  
TTTTCTTGTAGCTAGGCTTCTTCTCTTTTCTTAGTTATACCTTACATAATGTATTTTCATCT  
CCTTGATAGGAATCATAACAGTTTTATTAGGAGCTACTTTAGCTCTTGCTCAACAAGACA  
TTAAAAGAGGTTTAGCTTATCCACAATGTCTCAATTTGGGTTATATGATGGTAGCTCTAG  
GAATGGGGTCTTACCGAAGTGCTTTATTTTCATTTGATTACTCATGCTTATTCCAAGGCAT



TATTATTCTTAGCGGCTGGATCCGTTATTCATTCAATGGAGACTATTATTGGTTATTCTCC  
CGAAAAAAGTCAGAATATGGTTATTATGGGCGGTTTAAACAAAACACGTACCGATAACC  
AAAGGTGCTTTTTTATTAGGTACACTTTCACCTTGTGGTATTCCGCCCTTGCTTGTTTT  
TGGTCAAAAGATGAAATTCTTAATGATAGCTGGCTTATTCGCCGATTTTCGCCCTAATA  
GCTTGGGGCACAGTGGGATTAACCGCATTTTATATGTTTCGGATTTATTTAATGACTTTT  
GAAGGACATTTAAATGTTGGTTTTAAAAATTATAGTGGAAAAAAAATAACCCTGCTGA  
TTCAATGTCTCTATGGGGAAAAAAGGGTTCAAAGCCA-----AATTTTCGCTTTTTCA  
CAATTGAT-----CAAACCAAATTTCTTATACTTCTGATCCTTTTGAATCAGAAAATACT  
ATGTTATTTCCACAAATCTATTGTGTTTTGTAACCTTTGTAATTGGATTCTTAGGAATTC  
CG---AATCTCGACATCTTAACCCAATGGTTACATCCTGCTATTTATCTTTTGCATCACACT  
AAT-----TCAACAGATTTAGCCGAGTTTTTAAAGCATAACGGTAATTTCCGGGGGGATTGC  
TTATTGCGGAATATTTATAGCATTTTTATTATATAAACCCACCTATTCGTCTTTCAAAGTT  
TTCTATTAATTAATTCGCTTCATGTTATTCGCGACAAAATAGTCTTTGTCATATATGACTG  
GGCCTATAATCGTGCTTATATAGATACTTTTTATAAGAATTTTTTTGTTGCCAAGTACGA  
AGTTTTTCTCAAATTATTCGTTCTTTTGATTAAAGAATTATTGACCAAATATTTAATTGTT  
TTGCTTTTCTTAGTTTTATTGCTAGCGAAGGTATCAAATATTTAGGATATGCG---AGAATT  
CCTTTTTATTTGTTTTTTTTATTTCTTTTTGTATCAATCTTTATTTTTCTGTTTACATGGAT  
TTACCTGGACCAATACATGATTTTCTTTTAGTTTTTTTAGGATCAGGTCTTATATTAGGGA  
GTATAGGAGTAGTATTATTTCCCAATCCAATTTATTCGGCCTTTTCGTTGGGATTGGTTCT  
TGTTTGTATATCCTTATTCTATATTCTATCTAACTCCTATTTTGTAGCTGCTGCACAACACTAC  
TCATTTATGTAGGAGCTATAAATGTTTTAATTTCTTTTTGCTGTGATGTTCTTGAATGGTTC  
AGAATATTCAAATGATTTTCTCTTTGGACCCTTGGAGATGGTATTACTTCACAAGTTTG  
TATAAGTCTTTTTATTTCACTAATTTGACTATTCTAGATACGTCATGGTACGGTATTATTT  
GGACTACACGATCAAACCAGATTATCGAGCAAGATTTGATAAGCAATAGTCAACAAATT  
GGAATTCATTTATCAACAGATTTTTTTCTTCCATTTGAACTCATTTCATAAATTCTTTTAG  
TTGCTCTAATAGGTGCAATTGTTATAGCTCGTCAAATGACTGCACCAGCTACAAGAAA  
GACCTCATGATAGTCAATATGGGTCTCACCACCCATCAATGCATGGTGTCTTCGACTT  
ATTCTTACTCTCGATGGTGAAGATGTTATTGACTGCGAACCAATATTGGGTATTTTACAC  
AGAGGGATGGAGAAAATTGCGGAAAACCGAACCAATTATACAATATTTGCCCTATGTCAC  
ACGTTGGGATTATTTAGCTACTATGTTTACAGAAGCAATAACCGTAAATGGACCTGAAC  
GATTGAGCAATATTCAAGTACCTAAAAGAGCTAGCTATATCAGAGTCATTATGTTGGAGT  
TAAGTCGTATAGCTTCCCATTTGTTATGGCTCGGTCCATTTATGGCGGATATTGGGGCGC  
AGACTCCTTTCTTCTATATTTTTTCGAGAAAGAGAGTTGATATATGACCTATTTCGAAGCTG  
CCACCGGTATGCGAATGATGCATAATTTTTTCGTATCGGGGGAGTAGCTGCTGATCTAC  
CCCATGGCTGGATAGATAAATGTTTGGATTTTTGCAATTATTTTTTAAACAGGGGTTGCTG  
AATATCAAAAACCTTATTACACAGAATCCCATTTTTTTAGAACGAGTTGAAGGTATAGGC  
ACTATTAGGGCAGAAGAAGCACTCAATTGGGGTTTATCCGGACCAATGCTACGAGCTT  
CGGGAATCGAATGGGATCTTCGTAAAATCGATCAGTATGAGTGTTACGACGAATTTGCT  
TGGGAGGTTCAATGGCAAAAAGAGGGGGATTCTTTAGCTCGTTATTTAGTAAGAATCG  
GCGAAATGGAAGAATCCATAAAAATGATTCAACAGGCCCTGGAAGGAATTCGGGGGG  
GGCCTTATGAGAATTTAGAAATCCGACGTTTTGATAGAGTAAAACATCCCAATGGAAT  
GATTTTGAATACCGATTCATTGCTAAAAAACCTCTCCTATTTTTGAATTATCGAAGCAA  
GAACTTTATGTGAGAGTCGAAGCTCCAAAGGGAGAATTGGGAATTTTTCTGATAGGAG  
ATCAGAGCGTTTTTCTTGGAGATGGAAAATTCGTCCACCGGGTTTATCAATTTGCAA

ATTCTTCCTCAGGTGGTTAAAAGAATGAAATTGGCTGATATTATGACGATACTAGGTAGC  
ATAGATATCATTATGGGGGAAGTTGATCGTATGTTCCCTATGGTAACTGAACTCAGGAAT  
TATGGTCAACAAACAATACGAGTTGCCAGGTATATCGGCCAAGGTTTCATGATTACCCT  
GTCCCATGCAAATCGTTTACCCGTAAC TATTCAATATCCCTATGAAAAATTGATCACACC  
AGAACGCTTTCGAGGCCGAATCCATTTTGAATTTGATAAATGCATTGCTTGTGAAGTTT  
GTGTTTCGTGTATGTCCTATAGATTTACCTGTTGTTGATTGGCAATTGGAAACAGATATTC  
GCAAGAAACGATTGCTTAATTACAGTATTGATTTTGGACTTTGTATATTTTGCGGTAATT  
GTGTTGAATATTGTCCAACAAATTGTTTATCAATGACTGAAGAATATGAACTTTCTACTT  
ATGATCGGCATGAATTGAATTTAATCAAATTGCTTTGGGTCGGTTACCAATGTCAGTAA  
TTGAGGATTATACAATTCGAAAAATTTCAATTTA-----A  
TGCAGAGTTTTTTGTCTGTTTGGCTAGTCAAGCATGGGATAATTCATAGATCTTTGGGCT  
TTGATTACCAAGGAATAGAGACTTTACAAATAAAGCCCGAGGATTGGCATTCCGTTGCT  
GTCATTTTATATGTATATGGTTACAATTATCTACGCTCTCAATGTGCCTATGATGTAGCAC  
CTGGCGGACTGTTAGCTAGTGTGTATCATCTTACGAGAATAGAGTATGGTGTACGCAA  
CCGGAAGAGGTCTGCATAAAAGTATTTGCCTCAAGGAAGAATTCTAGAATCCCTCTGT  
TTTCTGGATTTGGAAAAGTGC GGATTTTCAAGAACGAGAGTCTTATGATATGTTGGGAA  
TTTCTTATGATAATCATCCGCGCTTGAAACGTATCTTAATGCCTGAAAGTTGGATAGGAT  
GGCCTTTACGTAAGGATTACGTTGCCCCCCATTTTTATGAAATACAAGACGCTCAT-----

-----ATGAATTCCATTCAGTTTCCTTTACTTGATCGA  
ACAGCCAAAAATTCAGTTATTTCAACTACATTAATGATCTTTCAAATTGGTCAAGACT  
CTCTAGTTTATGGCCGCTTCTCTATGGTACCAGTTGTTGCTTCATTGAATTTGCTTCACTA  
ATAGGCTCACGATTCGACTTTGATCGTTATGGACTAGTACCAAGATCGAGTCCTAGACA  
AGCAGATCTCATTTTAAACAGCAGGAACAGTAACAATGAAAATGGCCCCCTCCTTAGTG  
AGATTATATGAGCAAATGCCTGAACCAAAATATGTTATTGCTATGGGAGCATGTACAATT  
ACAGGAGGGATGTTCAGTACCGATTCCCTATAGTACTGTTTCGCGGGGTGCATAAGCTAAT  
TCCTGTAGATGTCTATTTGCCGGGCTGTCCACCTAAACCGGAAGCAATTATAGATGCTAT  
AACAAAATTCGTAAGAAAATATCTCGAGAAATCTATCAAGATCGAATGAAGTCTCAA  
CGAGCGAATCGGTGTTTTACTACCAATCACAAGTTTCGTGTTGGACACAGTATTCATAC  
TGAAATTTATGATCAAAGATTCCTTTCTCAACCACCATCTACTTCATCGATCCCTACGGA  
AACGCTTTTCACATACAAAATTCAGTCTCTTCCCACGAATTAGTGAATATGCAAATA  
GAAATACTTTTTCTTGCATAAAGAAACAGATTACTCGATCTATTTCCGTATCGCTCATGC  
TATATATCATAACTCGGACATCCATTGCAAGTGCATATCCCATTTTTGCGCAGCAGGGTT  
TTGAAAATCCACGAGAAGCAACTGGCCGTTATTGTATGTGCCAATTGCCATTTAGCTAAT  
AAGCCCGTGGATATTGAGGTACCACAAGCGGTA CTTCCTCGATACTGTATTTGAAGCAGT  
TGTTTCGAATCCCTTATGATATGCAACTGAAACAAGTCTTTCTAATGGTAAAAAAGGGG  
GTTTGAATGTGGGGGCTGTTCTGATTTTACCGGAGGGTTTTGAATTAGCCCCCTCCGAT  
CGTCTTTCTACCGAGATGAAAGAAAAGATAGGCAATTTGTCTTTTCAGAGCTATCGCCC  
CAATAAAAAAATATTCTTGTGGTGGGCCCTGTCCCCGGTAAGAAATATAGTGAATCA  
CCTTTCCCTATTCTTTCCCCGGACCCCGCTACTAAGAAGGATGCTCGCTTCTTAAATATC  
CTATATACGTAGGCGGGAACAGGGGAAGAGGTCAGATTTATCCCGACGGGAGCAAGAG  
TAACAATACGGTTTATAATGCTACAGCAGCAGGTATAGTAAGCAAATCATAACGAAAAG  
AAAAAGGGGGGTATGAGATAACCATAACAGATGCATCGGATAGTCGTC AAGTGGTTGA  
TATTATCCCTCCAGGACCAGAACTTCTTGTTCAGAGGGTGAATCTATCAAATTTGATCA

ACCTTTAACGAGTAATCCTAATGTGGGCGGATTTGGTCAGGGAGACGCAGAAATAGTA  
CTTCAAGATCCATTACGTGTCCAAGGACTTTTGTTCCTTTTTGGCGTCTGTTATTTTGGCA  
CAAATCTTTTTGGTTCTGAAAAAGAAACAGTTCGAGAAAGTTCAATTGGCCGAAATGA  
ATTTTCATGAGTAAAGTCTATGATTGGTTTCGAAGAACGTCTGGAGATTCAGGCGATTGCG  
GATGATATAACTAGTAAATATGTTCCCTCCCCACGTCAATCTATTTTATTGTTTAGGGGAA  
TTACGCTTACTTGTTTTTTAGTACAAGTAGCTACCGGGTTTGCTATGACTTTTTACTATCG  
TCCGACCGTTACTGAGGCTTTTGCTTCTGTTCAATACATAATGACTGAAGCTAACTTTG  
GCTGGTTAATCCGATCAGTTCATCGATGGTTCGGCAAGTATGATGGTCCTAATGATGATCC  
TGCATGATTTTCGTGTGTATCTCACCGGCGGATTTAAAAACCTCGTGAATTGACTTGG  
GTTACAGGTGTGGTTCTGGCTGTATTGACCGCATCTTTTGGCGTAACTGGTTATTCTTA  
CCTCGGGACCAAAATTGGTTATTGGGCAGTAAAATTGTAACAGGTGTACCCGAAGCTA  
TTCCTGTAATAGGATCACCTTTGGTAGAATTATTGCGCGGGAGCGCTAGTGTGGGACAA  
TCTACTTTGACTCGTTTTTATAGTTTACACACTTTTGTATTGCCGCTTCTTACTGCCGTAT  
TTATGTTAATGCACTTTCCAATGATACGTAAACAAGGTATTTCTGGGCCTTTGATGGGAG  
TAACAAAAAACCTGACTTAAATGATCCTGTATTAAGAGCTAAATTGGCTAAAGGTATG  
GGTCATAATTATTACGGGGAGCCCGCATGGCCCAACGATCTTTTATATATTTTTCCAGTA  
GTAATTCTAGGTACTATTGCATGTAATGTAGGCTTAGCGGTTCTAGAACCATCAATGATT  
GGTGAACCGGCGGATCCATTTGCAACCCCGTTAGAAATATTACCTGAATGGTATTTTTTT  
CCTGTATTTCAAATACTTCGTACAGTGCCTAACAACTGTTGGGCGTTCTTTTAATGGTT  
TCAGTACCTGCGGGATTATTAACAGTACCTTTTTTAGAGAATGTTAATAAATTCCAAAAT  
CCATTTTCGTTCGTCAGTAGCGACGACTGTCTTTTTGATTGGTACCGCCGTTGCCCTTTG  
GTTGGGCATTGGTGCAACATTACCTATTGATCAATCTCTAACTTTAGGTCTTTTTATGATT  
GAAGTTTTTCTATTTGGAATCGTGTTAGGTCTAATTCCTATTACTTTGGCTGGATTATTCG  
TAACTGCATATTTACAATACAGGCGTGGTATCAGTTGGACCTTATGCTTACTCTAACTA  
GTTATTTTGGTTTTTTTATTAGCAGCTTTAACTATAACCTCAGCTCTATTTATTGGTCTGAG  
CAAGATACGACTTATTATGGATATAGTAAGTCTCGCTTGGGCTGCTTTAATGGTAGTCTT  
TACTTTTTCCCTTTCACTAGTAGTGTGGGGAAGAAGTGGACTCATGATTATTCGTTTCG  
CGGAACCAGAAGTCAAAAATTTGGTAGATAGGGATCCCGTAAAAACATCTTTCGAGGA  
ATGGGCCAAACCGGGCCATTTCTCAAGAACAATAGCCAAAGGCCCCGATACTACCACT  
TGGATCTGGAACCTACATGCTGATGCTCACGATTTTCGATAGCCATACTAGTGATTTGGA  
GGAGATCTCCCGAAAAGTATTTAGTGCCCATTTTCGGGCAACTCTCCATCATCTTTCTTTG  
GCTGAGCGGCATGTATTTCCACGGTGTCTCGTTTTTCCAATTATGAAGCGTGGCTAAGTG  
ATCCAACTCACATTGGGCCTAGTGCCAGGTGGTTTTGGCCAATAGTGGGCCAAGAAAT  
ATTGAATGGTGTATGTGGGCGGGGGTTTTCCGAGGAATACAAATAACCTCTGGTTTTTTTT  
AGATGTGGAGAGCGTCTGGAATAACTAGTGAATTACAACCTCTATTGTACCGCAATTGGT  
GCATTGGTCTTTGCAGCGTTAATGCTTTTTGCTGGTTGGTTTTCAATATCATAAAGCGGCT  
CCAAAATTGGCTTGGTTTCAAGATGTAGAATCTATGTTGAATCACCATTTGGCGGGTCT  
ACTCGGACTTGGGTCTCTCGCTTGGGCGGGGCATCAAGTACATGTATCTTTACCGATTA  
ACCAATTTCTAAACGCTGGAGTCGATCCTAAAGAGATAACCACTTCCTCATGAATTTATCT  
TGAATCGAGATCTTATGGCTCAACTTTATCCCAGTTTTGCCGAGGGAGCAACCCCATTT  
TTCACCTTGAATTGGTCAAAATATGCCGAATTTCTTACGTTTCGTGGGGGATTAGATCCA  
GTAACCTGGGGTCTGTGGCTGACCGATATTGCACACCATCATTTAGCTATTGCAATCTT  
TTCCTGATAGCGGGTACATGTATAGGACCAACTGGGGCATTGGTTCATGGACTAAAAG  
AAATTTTAGACGCTCATAAGGGTCCATTTACGGGTCAGGGCCATAAAGGCCTATATGAG

ATCCTAACAAACGTCATGGCATGCTCAATTATCTCTTAACCTAGCAATGTTAGGCTCTTTA  
ACCATTATTGTAGCTCACCATATGTATTCCATGCCCCCTTATCCATATCTGGCTACTGACT  
ATGGTACACAACACTGTCATTATTCACACATCACATGTGGATTGGTGGATTTCCTATAGTTG  
GTGCTGCTGCGCATGCAGCCATTTTTATGGTACGAGACTATGATCCAACACTCGATAACA  
ACGATCTATTGGATCGTGTCTTAGACATCGTGATGCAATCATATCACATCTCAACTGGG  
CATGTATAATTTCTAGGCTTTTCACAGTTTTGGTTTTGTATAATTCATAATGATACCATGAGCGC  
TTTAGGGCGTCTCAAGATATGTTTTTCAGATACCGCTATAACAATTACAACCCGTTTTTGC  
TCAATGGATACAAAACACCCATGCTTTAGCACCAGGTGCAACAGCTCCTGGTGCAACA  
GCAAGCACCAGTTTAACTTGGGGGGGTGGTGATTTTGTAGCAGTGGGTGGCAAAGTAG  
CTTTGGTGCCTATTCCATTAGGAACCGCAGATTTCTTGGTACATCACATTCATGCATTTA  
CGATTCATGTGACGGTATTGATACTCTTGAAAGGTGTTCTATTTGCTCGTAGTTCCCGTT  
TGATACCGGATAAAGCAAATCTTGGTTTTCGTTTTCTTGTGATGGACCTGGAAGAGGG  
GGTACATGTCAAGTATCAGCCTGGGATCATGTCTTTTTAGGCCTATTCTGGATGTACAAT  
TCCATTTCCGGTAGTAATATCCATTTTCAGTTGGAAAATGCAGTCAGATGTTTGGGGCAGT  
ATAAGCGATCAAGGGGTAATAACTCATATCACGGGAGGAACTTTGCGCAGAGTTCTAT  
TACTATTAATGGGTGGCTCCGCGATTTCTTATGGGCACAGGCATCCAGGTAATTCAGTC  
TTATGGTTCTTCATTATCTGCATACGGTCTTTTTTTCTTAGGTGCTCATTTTGTATGGGCT  
TTTAGTTTAAATGTTTCTATTTCAGTGGACGTGGTTATTGGCAAGAACTTATTGAATCCATC  
GTTTGGGCTCATAATAAATTAAGTTGCTCCTGCTACTCAGCCAAGAGCCTTGAGCAT  
TGTACAAGGGCGTGCTGTAGGAATAACCCATTACCTTCTGGGTGGAATTGCCACAACAT  
GGGCATTTCTTAGCAAGAATTATTGCAGTAGGAATGGCATTAAAGATTTCCAAGGTTT  
AGCCAAGGCTTAGCTCAGGACCCCACTACTCGTCGTATTTGGTTTGGTATTGCTACCGC  
ACATGACTTCGAGAGTCATGATGATTAATCTGAGGAACGCTTTTATCAGAATATTTTTGC  
TTCGCACTTCGGTCAATTAGCAATAATTTTTCTGTGGACTTCCGGAATCTGTTTCATGT  
AGCTTGGCAAGGAAATTTTGAGTCGTGGGTACAGGACCCTTACATGTAAGACCTATTG  
CTCATGCAATTTGGGATCCTCATTTTGGTCAACCGGCCGTGGAAGCTTTTACTCGAGGG  
GGTGCTCTCGGCCCGGTGAATATCGCTTATTCTGGTGTATTCAGTGGTGGTATAACAATC  
GGTTTACGCACTAATGAAGATCTTTATACTGGAGCTCTTTTTCTATTATTTCTTTCTGCCA  
TATCCTTAATAGCAGGTTGGTTACACCTACAACCGAAGTGGAACCGAGCGTTTCGTG  
GTTCAAAAATGCCGAATCACGGCTGAATCATATTGTCAGGACTCTTTGGCGTAAGTT  
CCTTGGCTTGGACAGGGCATTTAGTACATGTTGCTATTCCTGCATCCAGAGGGGAGTAC  
GTTTCGATGGAATAATTTCTTAGAAGTATTACCGCACCCCTCAAGGATTAGGCCCACTTTTT  
ACAGGTCAGTGGAATCTTTATGCTCAAAACCCCGATTCAAGTAGTCATTTATTTGGGAC  
CTCCAAGGAGCAGGAACCTGCCATTCTAACGCTTCTCGGGGGATTTCATCCACAAACG  
CAAAGTTTATGGCTGACCGATATTGCACACCATCATTTAGCTATTACATTTCTTTTTCTCG  
TTGCTGGTCATATGTATAGAACCAATTTCCGGGATTGGGCACAGTATGAAAGATCTTTTAG  
ATGCACATATTCCTCCGGGAGGACGACTAGGTCTGTTGGGCATAAGGGTCTTTATGACACA  
ATCAATAATTCGCTTCATTTTCAATTAGGCCCTGCTCTAGCTTCTTTAGGGGTTATTACTT  
CCTTGGTAGCTCAACACATGTACTCTTTACCTGCTTATGCATTCATAGCACAAGACTTTA  
CTACTCAAGCTGCATTATATAACCCATCACAGTATATCGCAGGATTCATCATGACAGGAG  
CTTTTGTCTCATGGAGCTATATTTTTCAATTAGAGATTACAATCCGGAGCAAATGAAGATA  
ATGTATTGGCAAGAATGTTAGATCATAAAGAAGCTATCATATCTCATTTAAGTTGGGCTA  
GTCTCTTTTTGGGATTCATACCTTGGGACTTTATGTTTATAATGATGTCATGCTTGCCTT  
TGGTACCCCGGAGAAGCAAATCTTGATCGAACCTATATTTGCTCAATGGATAACAATCCG

CTCATGGTAAAACCTTCATATGGGTTTCGATGTA CTTTTGTCTTCAACGAGCGGGCCGGCA  
TTCAATGCGGGCCGAAGCATCTGGTTGCCGGGTTGGTTAAATGCTGTTAATGAA-----A  
ACAGTAATTCATTATTCTTAACAATAGGACCCGGAGACTTTTTGGTTTCATCATGCTATTG  
CTCTGGGTTTACATACTACATTGATCTTAGTAAAAGGTGCTTTAGATGCACGTGGTT  
CCAAGTTAATGCCAGATAAAAAGGATTTTGGTTATAGTTTTCCGTGTGATGGCCCAGGC  
CGAGGCGGTACTTGTGATATTCGGCATGGGACGCATTTTATTTGGCAGTTTTTTGGATG  
TTAAATACTATTGGATGGGTTACTTTTTTATTGGCATTGGAAACACATCACATTATGGCAG  
GGTAACGTTTCACAGTTTAATGAATCTTCCACTTATTTGATGGGCTGGTTAAGAGATTAT  
TTATGGTTAAACTCTTCACAACCTTATCAATGGATATAACCCTTTTGGTATGAATAGTTTAT  
CGGTCTGGGCATGGATGTTCTTATTTGGACATCTTGTTTGGGCTACTGGATTTATGTTCT  
TAATTTCTTGGCGTGGCTATTGGCAGGAATTGATTGAAACTTTAGCATGGGCTCACGAA  
CGCACACCTTTGGCGAATTTGATTCGCTGGAGAGATAAACCAGTGGCCCTTTCTATTGT  
GCAAGCAAGATTAGTTGGATTAGCCACTTTTCTGTAGGTTATATATTCACCTATGCTGC  
TTTCTTAATTGCCTCTACATCGGGTAAATTTGGTATGTCACATTCGGTAAAGATTTATGAT  
ACATGTATAGGATGTA CTAATGTGTCCGAGCCTGCCCTACCGATGTATTAGAAATGATA  
CCGTGGGACGGATGTAAGGCTAAACAAATGCTTCCGCTCCAAGAACAGAGGACTGT  
GTTGGTTGTAAGAGATGTGAATCCGCTTGTCCAACAGATTTCTTGAGTGTCCGAGTTTA  
TTTATGGCATGAAACAACTCGCAGTATGGGTCTAGCTTAT-----ATGAACCTTCCCTCT  
ATTTTTGTACCATTAGTAGGCCTAGTATTTCCGGCAATTGCAATGGCTTCTTTATTTCTTC  
ATGTTCAAACAATAAGATTGTTATGCGAGATTTTAAACATATCTCTCCGTGGCACCA  
GTA CTAAGTACGCTATGGTTCGGGGCTTTAGCAGGTCTATTGATAGAGATTAATCGGTTT  
TTCCCGGATGCGTTGACATTTCCCTTTTTTTTCATTCATGACTGCAATTTTAGAGAGACGC  
GAAAGCCAAAGCCTATGGGGTTCGTTTCTGTAACCTGGATAACCAGCACTGAAAACCGTC  
TTTACATTGGATGGTTTGGTGTTTTGTATGATCCCTACTTTATTGACCGCAACTTCTGTATT  
TATTATAGCCTTCATTGCTGCTCCTCCAGTAGATATTGATGGTATTCGTGAACCTGTTTCT  
GGATCTCTGCTTTACGGAAACAATATTATCTCTGGTGCTATTATTCCGACTTCTGCAGCT  
ATAGGTTTACACTTTTACCCAATTTGGGAAGCGGCATCCGTTGATGAATGGTTATACAAC  
GGCGGTCCTTATGAAC TAATTGTTCTACACTTCTTACTTGGTGTAGCTTGTACATGGGT  
CGTGAGTGGGAACCTTAGTTTCCGTCTGGGTATGCGCCCTTGGATTGCTGTTGCATACTC  
AGCTCCTGTTGCAGCTGCTACCGCAGTTTCTTGATCTACCCAATCCGGTCAGGGAAGTT  
TTTCTGATGGTATGCCTCTAGGAATCTCTGGTACTTTCAATTTTCATGATTGTATCCAGGC  
TGAGCACAACATTCTTATGCACCCATTTTCATATGTTAGGTGTAGCTGGTGTATTCGGCGG  
CTCCCTATTCAGTGCTATGCATGGTTCCTTGGTAACTTCTAGTTTGATCAGGGAAACCAC  
AGAAAATGAATCTGCTAACGAAGGTTACAGATTCCGGTCAAGAGGAAGAAACTTATAAT  
ATCGTAGCTGCTCATGGTTATTTTGGCCGATTGATCTTCCAATATGCTAGTTTCAACAAC  
TCTCGTTTCGTTACACTTCTTCTTAGCTGCTTGGCCTGTAGTAGGTATCTGGTTCACTGCT  
TTAGGTATCAGCACTATGGCATTCAATCTAAACGGTTTCAATTTCAACCAATCCGTAGTT  
GATAGTCAAGGCCGTGTAATTAATACTTGGGCTGATATCATTAAACCGTGCTAACCTTGGT  
ATGGAAGTTATGCATGAACGTAATGCTCATAACTTCCCTCTAGACCTAGCTGCTATCGAA  
GCTCCATCTACAAATGGAATGGGTTTGCCTTGGTATCGTGTTCATACCGTTGTATTGAAT  
GATCCCGGTCGGTTGCTTTCGGTTCATATAATGCATACAGCTCTGGTTGCTGGTTGGGCT  
GGTTCGATGGCTCTGTATGAATTAGCGGTTTTTGTATCCTTCTGACCCTGTTCTTGATCCA  
ATGTGGAGACAGGGTATGTTTCGTTATACCCTTCATGACTCGTTTAGGAATAACCAATTCA  
TGGGGAGGTTGGAGTATCACA---GGCGGACTGTAACGAATCCGGGTATTTGGAGTTAC

GAAGGTGTAGCTGGGGCACATATTGTGTTTTCTGGCTTATGCTTTTTGGCAGCTATCTGG  
CATTGGGTGTATTGGGATCTAGAAATATTTGTGATGAACGTACAGGAAAACCTTCTTT  
GGATTTGCCCAAGATCTTTGGAATTCATTTATTTCTCTCAGGGTTGGCTTGGTTTT  
TGGTGCATTTTCATGTAACGGGCTTGTATGGTCCCGGAATCTGGGTGTCCGATCCTTATGG  
ACTAACGGGAAAAGTACAACCTGTAAACCCAGCGTGGGGCGTGGAAGGCTTTGATCC  
TTTTGTTCCAGGAGGAATAGCCTCTCATCATATTGCAGCGGGTACATTGGGCATATTAGC  
GGGTCTATTCCATCTTAGTGTCCGCCCGCCACAACGGCTATACAAAGGACTGCGTATGG  
GAAATATTGAAACCGTACTTTCCAGTAGTATCGCTGCTGTCTTTTTTGCAGCTTTTGTG  
TTGCCGGAACACTATGTGGTATGGTTCGGCAACTACCCCGATCGAATTATTTGGGCCACC  
CGTTATCAATGGGATCAGGGTACTTCCAGCAAGAGATATATCGAAGAGTTAGTGCTGG  
GCTAGCAGAAAATCAAAGTTTATCAGAAGCCTGGTCTAAAATTCCTGAAAAATTAGCTT  
TTTATGATTACATCGGCAATAATCCAGCAAAAGGAGGATTATTCAGGGCGGGCTCGATG  
GATAACGGGGATGGAATAGCAGTTGGATGGTTAGGACACCCTATCTTTAGAGATAAAGA  
AGGACGTGAACTTTTTGTACGCCGTATGCCTACTTTTTTTGAAACATTTCCGGTCGTTTT  
AGTAGACGGCGATGGAATTGTTAGAGCCGATGTTCCTTTTAGAAGGGCAGAATCGAAG  
TATAGTGTTGAACAAGTAGGTGTAACCTGTTGCGTTCTATGGCGGTGAACTCAATGGCGT  
CAGTTATAGCGATCCTACTACTGTGAAAAATATGCTAGACGCGCTCAATTGGGTGAAA  
TTTTTGAATTAGATCGTGCTACTTTGAAATCCGATGGTGTTTTTTCGCAGCAGTCCAAGG  
GGTTGGTTTACTTTTTGGGCACGCTTCATTTGCTTTGCTCTTCTTCTTCGGACACATTTGG  
CATGGTGCTAGAACCCTGTTTCAGAGATGTTTTTGTCTGGTATTGACCCAGATTTAGATGC  
TCAAGTAGAATTTGGAGCATTCTCTAAAACCTTGGAGATCCAACACTACAAAAAGACAAGCA  
GCC-----GTGGAAACGCTCTTTAATGGAACCTTAGCCTTAGCTGG  
TCGTGACCAAGAAACCACTGGTTTCGCTTGGTGGGCCGGGAATGCCCGACTTATCAAT  
TTATCCGGTAAACTACTAGGGGCTCATGTAGCCCATGCTGGATTAATAGTATTCTGGGCC  
GGAGCAATGAATCTATTTGAAGTGGCTCATTTTCGTACCAGAGAAGCCTATGTATGAACA  
AGGATTAATTTTACTTCCCCACCTAGCTACTCTAGGTTGGGGGGTAGGGCCTGGAGGGG  
AAGTTCTAGACACCTTCCCCTACTTTGTATCCGAGTACTTCATTTAATTTCTCTGCAG  
TATTGGGCTTTGGCGGTATTTATCATGCACTTCTGGGACCTGAGACGCTTGAAGAATCT  
TTCCATTTTTTGGTTATGTATGGAAAGATAGAAATAAAATGACCACAATTTTAGGTATT  
CACTTAATCTTGTTAGGTCTAGGTGCTTTTCTTCTAGTGTTC AAGGCCCTTATTTTGG  
GGTGTATATGATACCTGGGCCCCAGGAGGGGGAGATGTAAGAAAAATTACCAACTTGA  
CCCTGAGTCCAAGTATAATATTTGGTTATTTACTAAAATCTCCTTTTGGGGGAGAAGGGT  
GGATTGTAGTGTGGACGATTTAGAAGATATAGTCGGAGGACATGTATGGTTAGGTTC  
ATTTGTATACTTGGTGAATCTGGCATATCTTAACCAAGCCCTTTCATGGGCTCGACGC  
GCATTTGTATGGTCTGGAGAAGCTTACTTATCTTATAGTTT AAGGGGCTTTAGCCATATTTG  
GTTTCAACCGCTTGTTGTTTTGTCTGGTTCAATAATACCGCTTATCCTAGTGAGTTTTACG  
GACCTACTGGACCAGAAGCTTCTCAAGCTCAAGCATTACTTTTCTAGTTAGAGACCA  
ACGTCTTGGAGCGAACGTGGGATCCGCTCAAGGCCCTACTGGTTTAGGTAAATATCTAA  
TGC GTTCCCCGACCGGAGAAGTCATTTTTGGAGGAGAACTATGCGCTTTTGGGATCT  
GCGTGCTCCGTGGTTAGAGCCTCTAAGGGGGCCAAATGGGTTAGATTTGAGTAGGTTG  
AAAAAAGACATAACAACCTTGGCAGGAACGGCGTTCTGCAGAATATATGACTCATGCC  
CTTTAGGGTCTTTAAATTCCGTGGGGGGTGTAGCTACCGAAATTAATGCAGTCAATTAT  
GTCTCTCTAGAAAGTTGGTTAGCTACCTCGCATTTTGTCTTAGGATTCTTCTTCTCGTA  
GGTCATTTGTGGCACGCGGGAAGGGCTCGTGCAGCTGCAGCCGATTTGAAAAAGGA

ATTGATCGTGATTTTGAACCTGTTCTTTCCATGACCCCTCTTAATATGACTATAGCCCTTG  
GTCAATTTACCAAAGACGAAAATGATTTATTTGATACTATGGATGACTGGTTACGGAGG  
GACCGTTTCGTTTTTGTAGGCTGGTCCGGTCTATTGCTCTTTCCTTGTGCCTATTTTCGCT  
GTAGGAGGTTGGTTCACGGGTACAACCTTTGTAACCTTCATGGTATACCCATGGATTGGC  
TAGTTCCTATTTGGAAGGTTGCAATTTCTTAACTGCCGCAGTTTTCGACTCCTGCTAATAG  
TTAGCACATTCTTTGTTGTTACTATGGGGTCTGAAGCACAAGGAGATTTTACTCGTT  
GGTGTCAATTAGGGGGTCTGTGGACTTTTGTGCTCTCCACGGCGCTTTCGGACTAATA  
GGTTTCATGTTACGTCAATTCGAGCTTGCTCGATCTGTTCAATTGCGGCCTTATAATGCC  
ATCGCATTCTCTGGTCCAATTGCTGTTTTTGTCTGTATTCTTGATTTATCCGCTAGGTC  
AGTCTGGTTGGTCTTTTGCGCCTAGTTTTGGTGTAGCAGCTATATTTGATTCATCCTCT  
TTTTTCAAGGGTTTCATAATTGGACATTGAACCCATTTTCATATGATGGGAGTTGCCGGTG  
TATTGGGCGCTGCCTTGCTATGCGCTATTCATGGTGCTACCGTAGAAAATACTTTATTTG  
AAGACGGTGATGGTGCAAATACATTCCGCGCTTTTAACCCAACCTCAATCTGAAGAAAC  
TTATTCAATGGTTACTGCTAACCGCTTTTGGTCCCAAATCTTTGGGGTTGCTTTTTTCCAA  
TAAACGTTGGTTACATTTCTTTATGTTATTTGTACCAGTAACCGGTTTATGGATGAGTGC  
TCTTGGAGTAGTCGGTCTGGCCCTGAACCTACGTGCCTATGACTTCGTTTTCTCAAGAAA  
TTCGGGCAGCGGAAGATCCTGAATTTGAACTTTCTACACCAAAAATATTCTCTTAAAC  
GAAGGTATTCGTGCTTGGATGGCCGCTCAAGATCAGCCTCATGAAAACCTTATATTTCC  
TGAGGAGGTTCTACCACGTGGAAACGCTCTTATGTCTGGAAGCACAGGAGAACGCTC  
GTTTGTGATATTATTACCAGTATTCGATACTGGGTCATTCATAGCATTACTATAACCTTCC  
CTATTCATTGCGGGTTGGTTATTCGTCAGCACCGGTTTAGCTTACGATGTGTTTGAAGC  
CCTCGGCCAAACGAGTATTTTACAGAGAGCCGACAAGGAATTCCATTAATAACTGGCC  
GTTTTGATCCTTTGGAACAACCTCGATGAATTTAGTAGATCGTTTATGACTATAGATCGAA  
CCTATCCAATTTTTACAGTACGATGGTTGGCTGTTTCATGGCCTAGCTGTACCTACCGTCT  
TTTTTTTGGGATCAATATCAGCAATGCAGTTCATCCAACGAATGGCTACACAACTGTT  
GAGAACAGTTCATAGATCTGGT---CCAAGACGAACTACTGTAGGTAAATTATTAACCA  
TTGAATTCGGAATATGGTAAAGTAGCTCCCGGGTGGGGAACGACTCCTTTGATGGGTGT  
GGCAATGGGACTATTCGCGGTATTTCTATCTATTATTTTGGAGATTTATAATCTTCCGTT  
TTATTGGATGGAATTTCCATGAATATGCTTACTCTCAAACCTTTTGTGTACACAGTAGTG  
ATATTTTTTGTCTCTCTTCATCTTTGGGTTCCCTATCTAATGATCCAGGGCGTAATCCTG  
GACGTGAAGAAATGGCCGATACTACTGGAAGGATTCCTCTTTGGATAATAGGTACTGTA  
ACTGGTCTTCTTGTAAATCGGTTTAATAGGTATTTCTTTTATGGTTCATATTCCGGATTGG  
GTTTCATCCCTGATGCTTAAGATCTTTAGTTTG-----ATCTGTCTTAATTCTGCCCTTAT--A  
GTAGTTTTTTCTTCGGCAAATTGCCCGAAGCCTATGCTTTTTTTGAATCCAATCGTAGATT  
TTATGCCAGTCATACCTGTGCTCTTTTTTCTCTTAGCTTTTGTGTTGGCAGGCTGCTGTAA  
GTTTTCGAACGACACAATCAAACCCGAACGAACAAAATGTTGAATTGAATCGTACCAG  
TCTCTACTGGGGTTATTACTCATTTTTGTAAGTCTGCTGTTTTATTTTCCAATTATTTCTTAA  
ATATGGAAGTCAATATTCTTGCATTTATTGCTACTGCACTATTTATTCTAGTTCCCTACCGC  
CTTCTCCTTATCATTACGTAAAAACAGTCAGTCAAATGATATGGAAACAGCAACCC  
TAGTTACCATCTTTCTATCCGGTTTACTTGTAAAGTTTTACTGGGTACGCCTTATATACCGC  
TTTTGGGCAACCTTCTCAACAACCTAAGAGATCCATTCGAAGAACATGGAGACATGGAA  
GCATTGGTTTATACATTCTTCTTAGTCTCGACTCTAGGATAATATTTTCGCTATCTTTTT  
TCGAGAACCGCCTAAAGTTCCAACCTAAAAG-----ATGACTCTTGCTTTCCAATTGGCT  
GTTTTTGCATTAATTGCTACTTCATCAATCTTATTGATTAGTGTACCCGTTGTATTTGCTT

CTCCTGAGGGCTGGTCAAGTAACAAAAATGTTGTATTTTCCGGTACATCATTATGGATT  
GGATTAGTCTTTCTGGTGGGTATACTTAATTCTCTCATCTCT-----ATGTCACC  
ACAAACAGAGACTAAAGCAAGTGTGGATTAAAGCTGGTGTAAGACTACAAATTG  
ACTTATTATACTCCTGACTACCAAACCAAAGATACTGATATCTTGGCAGCATTCCGAGTA  
ACTCCTCAACCCGGAGTTCCGCCTGAAGAAGCAGGGGCCGCGGTAGCTGCGGAATCT  
TCTACTGGTACATGGACAACGTGTGTGGACCGATGGACTTACCAGTCTTGATCGGTACAA  
GGGGCGATGCTACCGCATCGAGCGGTTATTGGAGAAAAAGATCAATATATTGCTTATG  
TAGCTTACCCTTTAGACCTTTTTGAAGAAGGTTCTGTTACCAACATGTTTACTTCCATTG  
TGGGTAATGTATTTGGGTTCAAAGCACTGCGCGCTCTACGTCTGGAAGATTACGAATC  
CCTACGGCTTATATTA AAACTTTTCAAGGCCCTCCTCATGGCATCCAAGTTGAGAGAGA  
TAAATTGAACAAGTATGGTCGTCTCTGTTGGGATGTACTATTAACCTAAATTGGGGTT  
ATCTGCTAAAACTACGGTAGAGCGGTTTATGAATGTCTTCGCGGTGGACTTGATTTA  
CCAAAGATGATGAGAACGTAAACTCACACCATTATGCGTTGGAGAGACCGTTTCTTA  
TTTTGTGCCGAAGCAATTTATAAATCACAGGCTGAAACAGGTGAAATCAAAGGACATT  
ACTTGAATGCTACTGCAGGTACATGCGAAGAAATGATGAAAAGAGCTATATTTGCTAGA  
GAATTGGGAGTCCGATTGTAATGCATGACTACTTAACAGGGGGATTCACTGCAAATAC  
TTCTTTGGCTCATTATTGCCGAGATAATGGTCTACTTCTTACATCCACCGTGCAATGCA  
TGCAGTTATTGATAGACAGAAGAATCATGGTATGCACTTCCGTGTACTAGCTAAAGCGT  
TACGTCTGTCTGGTGGAGATCATATTCACGCGGGTACCGTAGTAGGTAAACTTGAAGGG  
GAAAGAGAGATTACTTTGGGCTTTGTTGACTTACTACGTGATGATTTTGTGACAAGA  
CCGAAGTCGCGGTATTTATTTCACTCAAGATTGGGTTTCTTTACCAGGTGTTCTGCCTGT  
GGCTTCAGGGGGTATTCACGTTTGGCATATGCCTGCTCTGACCGAGATCTTTGGGGATG  
ATTCCGTACTACAGTTCGGAGGAGGAACTTTAGGGCACCTTGGGGTAATGCGCCAGG  
TGCCGTAGCTAATCGAGTCGCTCTAGAAGCATGTGTACAAGCTCGTAACGAAGGACGT  
GATCTTGCTCGGGAAGGTAATGAAATTATTCGCCAGGCTTGCAAATGGAGCCCTGAACT  
AGCTGCTGCTTGTGAGGTATGGAAGGAGATCCGATTTGAATTTAAACCAGTGGATACCT  
TGGATCCAATGGTGATAACAATTATACAAACTTATACCCCGAGTACACGCAATGGAACC  
GTAAATGGTCAAGTGAAATCCACTCGAGGAAAGAATTTGATCTATGGACAGCATCGTT  
GTGGTAAAGGTCGTAATGCCAGAGGAATCATTACCGCAAGGCATAGAGGGGGAGGTCA  
TAAGCGTCTATACCGTAAATAGATTTTCGACGGAATGAAAAAGACATATATGGTCGAA  
TCGTAACCATAGAATACGACCCTAATCGAAATGCATACATTTGTCTCATACTATGGGA  
ATGGTGAGAAGAGATATATTTACATCCCAGGGGGCTATAATTGGAGATAGCATTGTTT  
CTGGTACAGAGGTTTCTATAAAAATCGGAAATGCCCTACCTTTGACCGAAATGCCCTTA  
GGCACGGCTATACATAACATAGAAATCACACTTGGAAAGGGTGGACAATTAGCTAGAG  
CAGCGGGTGTCTGTCGCGAAACTGATTGCAAAAGAGGGAAAATCAGCCACAATAAAAT  
TACCTTCTGGGGAGGTCCGTTTGATATCCAAAACTGCTCAGCAACAGTCGGACAAGT  
GGGGAATGTTGGGGTGAACCAGAAAAGTTTGGGTAGAGCCGAGCTAAACGTTGGCT  
AGGTAAGCGTCCTGTAGTAAGAGGAGTAGTTATGAACCCTGTAGACCATCCCCATGGA  
GGTGGTGAAGGGAGAGCTCCAATTGGTAGAAAAAAACCCACAACCCCTTGGGGTTAT  
CCTGCACTTGAAGAAAAAGTAGAAAAAGAAATAAATATAGTGAGAAGTTCATTCTTC  
GTCACCGTAGTAAGATGATTCAACCTCAGACCCATTTAAATGTAGCGGATAACAGCGG  
GCTCGAGAATTGATGTGTATTTCGAATCATAGGAGCTAGC---AATCGTCGATATGCTCATAT  
TGGTGACATTATTGTTGCTGTTATCAAAGAAGCAGTACCTAATATGCCTCTAGAAAGATC  
CGAAGTAGTCAGAGCGGTAATTGTGCGTACCTGTAAAGAACTCAAACGTGACAACGG



AATGATAATACGATATGATGACAATGCCGCAGTTGTTATTGATAAAGAAGGAAATCCAA  
AAGGAACTAGAATTTTTGGTGCAATCGCCCGAGAGTTGAGACAATTCAATTTTACTAAA  
ATAGTTTCATTAGCTCCCGAAGTATTAATGCTTAGTCCCAAAGAACCAGATTCGGTAA  
ACAACATAGAGGAAGAATGAAGGGGATATCTTCTGGAGGTAATCATATTTGTTTCGGTA  
AATATGCTCTTCAAGCACTTGAACCTGCTTGGATCACATCTAGACAAATAGAAGCAGGT  
CGACGAGCAATGACACGAAATGCACGTCGTGGGGGAAAGATATGGGTACGCATATTC  
CAGATAAACCAGTTACTGTACGACCCGCGGAAACACGTATGGGTTCGGGAAAAGGATC  
CCCTGAATATTGGGTAGCTGTTGTGAAACCCGGTTCGAATACTTTATGAAATGGGTGGAG  
TAACAAAAAAGATTGCCAGAAGGGCTATTTCAATAGCAGCATCCAAAATGCCTATACGA  
ACTCAATTCATTAGTTCGGAGATGACCAGAATTAACGGGGATATATAGCTCGGAGACG  
CCGAACAAAAATGCATTTCTTTGCATCAAGTTTTTCGAGGGGCTCATTCAAGGCTTACTC  
GAACTATGACTCAACAGGAAAAAAGAGCTTTGGTTTCAGCTCATCGGGATAGGGATAG  
GCAAAGAGAGATTTTCGTCGGTGTGGATCACTCGGATAAACGCAGTAATTCGCGAA  
AGA-----GTATCCTATAGTTATAGTAAATTCATACACGATCTGTACAAGAACCAATTGCTT  
CTTAACCGTAAAATACTTGCGCAAATAGCTATATCAAATAGGAAATGTCTTGATATGATT  
TCGAACGAGATCGTA-----GTGCTAAAGGAAGTATACGCTTTAGG  
TCAACATATATCTATGTCGGCTGACAAAGCACGAAGAGTCATTGACCAAATTCGTGGGC  
GTTCCCTATGAGGAAACACTTATGATATTAGAATAATGCCCTATCGAGCAGGTTATCCCA  
TTTTTAAATTGGTTTATTCTGCAGCAGCAAACGCTAGTTACACTATGGCTTCCAATGAAG  
CTAATTTAGTTATTAGTAAAGCTGAAGTGAATGAGGGGACTACCGTAAAGAAATTCAAA  
CCTCGAGCTCGCGGACGTAGTTATCCGATAAAAAGAACCACCTGCCATATAACTATTGT  
ACTGAAAGATATATCTTTAGACGGGGGTTTATGGGACAAAAAATGGATGGAATCAAAT  
ATGCAGTATTGACAGACAAAAGTATTCGGTATTGGGGAAAAAT---AAATATACTTTTAA  
TATCGAATCAAGAGCAACTAAGATAGGAATAAAGCTTTTCGATCGAACTCTTTTTTGGTG  
TCAAGGTAAAGGATGTGAATAGCCATCGCCTTCCCGCAAAGAGTAGAAGA-----AT  
GGGACAGACAATG-----AGACGTGTAATCATTACGCTTCAACCGGGTTATTCTATTCAAC  
CTCTTAAAAAGATAAAGAACATGGCAGTTCCAAAAAACGTATTTCGAAATCAAAAA  
GCGTATTCGTAAAAATACTTGGAAAAGAAAGAGCTTTTGGACAGCATTAAAAGCTTTT  
TCGTTAGGAAAATCCCTTTTCGACCGGGAATTTGAAAAGTTTTTTTGTATCACAAACAAA  
T---ATGGCCAAGAGTAAAGATGTACGAGTCGCGGTGATTTTGGAAATGTACCAGTTGTGT  
CCGAAACGGTGTTAAT-----AAGGTATCAACGGGCATTTCCAGATATATACTCAAAGA  
ACCGGCACAATACGCCTAATCCATTAGAATTGAAAAAATTCTGTCCCTATTGTTACAAA  
CATACGATTCATGGAGAGATCAAAAAAATGAAAATAAGAGCTTCTGTTTCGTAATAATTTG  
TGAAAATGTGCGACTAATCCGTAGAAGAGGACGAATTATAGTAATTTGTTCCAACCCGC  
GACATAACAACGACAAGGAATGATTTCGAGAGAAAGTCACAGTATCTACTCGGACACT  
ACAGTGGAAATGTGTTGAATCAAGAACAGACAGTAAACGCCTTTATTATGGCCGCTTTA  
TTCTGTCTCCACTTATGAAAGGTCAAGCCGACACAATAGGCATTGCGATGCGAAGAGC  
TTTGCTTGGGGAAATAGAAGGAACATGTATCACACGTGTAAAATCTGAG-----AAAGCC  
CCGCATGAATATTCTACCATAGCGGGTATTCAAGAATCGGTACATGAGATTTAATGAAT  
TTGAAAGAAATTGTATTGAGAAGTAATCTATATGGAACCTTGTGACGCGTCTATTTGTGTC  
AAGGGTCCTGGATGTGTAAGTGAAGATATCATCTTACCCCTTCTGTGGAAATCGT  
TGATAACACACAACATATAGCTTGGTTGACGGAACCAATTGATTTTTGTATTGGATTACA  
AATCGAGAGAAATCGCGGATATATTTAAAAACGCACCAT---AACTTTGATGGAAGTTAT  
-----CCTATAGATGCTGTATTTCATGCCGGTTCGAAATGCGAATCATAGTATTCATTCTTATG

GGAATGGGAATGAAAAACAAGAGATACTTTTTCTAGAAATATGGACAAACGGAAGTTT  
AACCCCGAAAGAAGCACTTCATGAAGCCTCCCGCAATTTGATTGATTTATTTATTCCCTT  
TTTACATATGGAGGAAGAA-----AACTTACATTTAGAGGATGGTGAA---CACACGATTCC  
TTTATCCCCCTTAGCTTTCATGATAAAGTGGCT---AAACTCAGAAAAAACAAAAA---  
AAACTAGCATTGAAATCAATTTTTATTGACCAATTAGAATTCCCTCCCAAGATCTATAAT  
TGCCTCAAAAAGTCCAATATCTCTACATTATTGGACCTTTTGAATAAAAGTCAAGAAGA  
TCTTATGAAAATAGAGCATTTCACATAGAAGATGTAAAACAGATATTGGGCATTCTAG  
AAAAACAT-----TTCGCAATTGATTTACCAAAAAATCAA---ATGGAAGGG-----GGGGG  
GATGACTACAATACCCGGATTTAATCAGATACAATTTGAAGGATTTTGTAGGTTCAATTGA  
TCAAGGTTTGCAGGAAGAAGCTTTCTAAGTTTCCAAAAATTGAAGATATAGATCAAGAA  
ATTGAATTTCAATTATTTGTGGAAACATATCAATTGGTAGAACCCTTGATAAAGGAAAG  
AGATGCTGTGTATGACTCACTCACATATTCTTCTGAATTATATGTATCAGCGAGATTAATT  
TGGAAAACAAGTAGGGATATGCAAGAACAACAATTTTTATTGGAAGCATTCTCTAAT  
GAATTTCCAGGGAAGCTTCTATAGTAAATGGAATATATAGAATTGTGATCAATCAAATATT  
GCAAAGCCCCGGCATTATTACCGGTCAGAATTGGACCATAATGGAATTTCCGGTCTATA  
CCGGCACATAATATCAGATTGGGGGGGAAGATCAGAATTAGAAATTGATAGGAAAGC  
AAGGATATGGGCTCGTGTGAGTAGGAAACAAAAAATATCTATTCTAGTTCTATCATCAG  
CTATGGGGTCGAATCTAAGAGAAATTCTAGAGAATGTCTGCTATCCTGAAATTTTTTTAT  
CTTTTCTGAGTGATAAGGAGAAAAAATAATTGGGTCAAAGAAAAACGCCATTTTGG  
AATTTTATCAACAATTTGCTTGCCTAGACGGGGATCCAATATTTTCTGAATCCTTATGGA  
AGGAATTACAAAAGAAATTTTTTCAACAAGATGTGAATTGGGAAGGATTGGTTCGACG  
AAATATGAACCGAAGACTGAACCTTGATATACCCAGAACAAATACATTTTTGTTACCGC  
GAGATTTATTGGCAGCCGCCGATCATTGATTGGACTGAAATTTGGAATGGGTACACTT  
GACGAT-----ATGAATCATTTGCAAATAAACGTATTTCGTTCTGTAGCGGATCTTTTACAA  
GATCAATTCGGATTGGCTCTAGTTCGTTTAGAAAATGCGGTTTCGAGGGACTATATGTGG  
AGCAATTCGG---CATAAATTG---ATACCCACTCCTCAGAATTTGGTAACTTCAACTCCC---  
-----TTAACAACACTTATGAATCCTTTTTTCGGGTTACACCCATTATCTCAAGTTTTTGA  
TCGAACTAATCCATTGACACAAATAGTTCATGGGAGAAAATTTAGTTCTTTGGGCCCTG  
GGGGGCTGACAGGGCGCACTGCTAGTTTTTCGGATACGAGATATCCACCCTAGCCACTAT  
GGGCGTATTTGCCCAATTGACACATCTGAAGGAATCAATGTTGGACTTATTGGATCCTT  
AGCAATTCATGCGAGGATTGGGCATTGGGGA---TCTCTAGAAAGCCCGTTTTAT-----G  
AAATTTCCGAGAGGTCAACAGGG-----GTACGGATGCTTTATTTATCACCAGGTAGGGAT  
GAATACTATATGGTAGCGGCAGGAAATCTTTGGCCTTGAATCAGGATATTCAAGAAGA  
CCAGGTTGTTCCAGCTCGATACCGTCAAGAATTCCTGACTATTGCATGGGAACAAGTTC  
ATCTTCGAAGTATTTTTCCTTTTCCAATATTTTTCTATCGGAGCTTCCCTCATTCTTTTATC  
GAACATAATGATGCGAATCGAGCGTTAATGAGTTCTAATATGCAACGTCAAGCAGTCC  
CCTTTCTCGGTCCGAGAAATGCATTGTTGGGACGGGGGTGGAACGACAAGCAGCTCTA  
GATTCAGGGGCTCTTGTATAGCCGAACGTGAGGGAAGGGTCGTTTATACCGATACTGA  
CAAGATCCTTTTTCTCTGGTGATGGAGAGACTCTAAGCATTCCATTAGTTATGTATAACG  
TTCCAACAAAAATACTTGTATGCATCAAAAACCCCAGGTTACGCGGGGTAAATGTATTA  
AAAAGGGACAAATTTTAGCGGATGGTGCTGCTACCGTTGAGGGCGAAGTTGCTCTGGG  
GAAAAACGTATTGGTAGCTTATATGCCGTGGGAGGGTTACAATTCTGAGGATGCAGTGC  
TCATTAGTGAACGTTTGGTATATGAAGATATTTATACTTCTTTTACATAAAGAAATATGA  
AATTCAAACTCATGTGACAAGCCAAGGC---CCTGAAAAAGTCACTAATGAAATACCAC

ATTTAGAAGCCCATTTTCATTCGCAATTTAGACAAAAATGGAATTGTGAAGCAGGGATCT  
TGGGTAGAGACGGGTGATGTTTTAGTAGGTAATAACACCCCAGGTGGTGAAAGAA--  
-TCGTCGTATGCACCGGAAGATAGATTGTTACGAGCCATACTTGGCATTTCAGGTATCTAC  
TTCAAAGAACTTGTCTAAAAGTTCCTATAGGTGGTAGAGGTCGGGTTATTGATGTGA  
GGTGGATCCAGAAGAAGGGG---GGTTCAGTTATAATCCCGAAATGATTTCGTGTCTATAT  
TTTACAGAAACGTGAAATCAAAGTGGGAGATAAAGTAGCTGGAAGACATGGAATAA  
AGGTATCATTTCAAAAATTTTACCTAGACAAGATATGCCCTATTTACAAGATGGAAGATC  
CGTTGATCTGGTCTTCAACCCATTAGGAGTACCTTCACGAATGAATCTAGGACAGATAT  
TTGAATGTTCACTCGGGCTAGCAGGGAGTCTGCTAGATAGACATTATCGAATAGCACCT  
TTTGATGAAAGATATGAACAAGAAGCTTCGAGAAAAGTAGTCTTTTTCTGAATTATATGA  
AGCCAGTAAACAAACAGCGAATCCATGGGCATTTGAACCTGAATATCCAGGAAAAAGC  
AGAATATTTGATGGAAGGACGGGGAATCCTTTTTGAACAACCTGTTCTAATAGGGAAGC  
CTTATATCTTGAAATTAATTCATCAAGTTGATGATAAAAATCCATGGGCGTTCAGTGGAC  
ATTATGCGCTTGTTACACAACAACCCCTTAGAGGAAGAGCCAAACAGGGGGGGCAAC  
GGGTAGGAGAAATGGAGGTTTGGGCTCTAGAAGGATTTGGGGTTGCTCATATTTTACA  
AGAGATGCTGACTTATAAATCAGATCATATTAGAGCTCGCCAGGAAGTACTTGGTACTA  
CGATCGTTGGAGGAACAATACCTAATCCCAAAGATGCTCCAGAATCTTTTCGATTGCTC  
GTTTCGAGAACTACGATCTTTAGCTCTGGAACTGAATCATTTCCTTGATCTGAGAAGAA  
CTTCCAGATTCATAGGAAGGAAGCTATGAATCCTAATTTTTCTTCTATGATCGATCGATAT  
AAACATCAACAGCTGCGAATTGGATCGGTTTTCTCCCAACAAATAAGTGCTTGGGCCA  
CTAAAATCCTGCCGAATGGAGAGATAGTTGGAGAGGTAAAAAAACCATATACTTTTTCTT  
TATAAAACCAATAAACCGGAAAAAGATGGATTATTTTGTGAAAGAATTTTTGGGCCTAT  
AAAAAGTGGAATTTGCGCTTGTTGAAATTATCGAGTAATCGGAGATGAAAAAGAAGAA  
CCCAAATTTTGTGAACAATGCGGAGTCGAATTTATTGATTCTCGGATACGAAGGTATCA  
AATGGGCTATATCAAACCTCGCATGCCAGTAACCCATGTGTGGTATTTAAAACGTCTTCC  
TAGTTATATTGCGAATCTTTTAGATAAACCTCTTAAAGAATTAGAGGGCTTAGTATACTG  
CGAT-----TTTTCTTTTGGCTAGGCC---ATAACTAAAAAACCCACTTTTTTTTACTACC  
GGTTTATTCGAATATGAAATCCAATCTTGAAATACAGCATCCCACTTTTTTTTTACTACC  
CAAGGTTTCGATACATTTTCGCAATCGAGAAATTTCTACGGGTGCGGGTGCTATCCGAGA  
ACAATTAGCCGATCTAGATTTACGAATTATTATAGAGAATTCGTTACTAGAATGGAAGA  
TTTGGGGGAAGAA--GAGCACACAGGGAATGAATGGGAAGATCGAAAAGTTGGAAGA  
CGAAAGGATTTTTTGGTTAGACGTATGGAGTTGGCTAAGCATTTCCTTCGAACAAATAT  
AGAACCCGAATGGATGGTTTTTGTGTCTATTACCAGTCCTTCTCCTGAGTTGAGACCAA  
TCATTAGATAGATGGGGGAAACTAATGAGCTCGGATATTAATGAACTCTATCGAAGA  
GTTATCTATCGGAACAATACCCCTTACCGATCTATTAACAACAAGTAGATCTACGCCAGGA  
GAATTAGTAATGTGTCAAGAGAAATTAGTACAAGAGGCTGTGGATACACTTCTGGATAA  
TGGAATCCGCGGACAACCAATGAGGGACGGTCATAATAAGATTTACAAGTCATTTTCGG  
ATTTAATTGAGGGCAAAGAGGGAAGATTTTCGCGAAACTCTGCTTGGTAAACGAGTCGA  
TTATTCAGGACGTTCTGTGATTGTCTGGGCCCTTCACTTTCATTACATCGATGTGGCTT  
GCCTCGCGAAATAGCAATAGAGCTTTTCCAGACATTTGTAATTCGCGGTCTAATTAGAC  
AACATCTTGCTTCGAACATAGGGGTTGCTAAGAGTAAAATTCGGGAAAAAGAACCGAT  
TGTATGGGAAATACTTCAAGAAGTTATGCAGGGGCATCCTGTATTGCTGAATAGAGCGC  
CGACTCTGCATAGATTAGGCATACAGGCATTCAGCCCGTTTTAGTGGAGGGGCGTGCT  
ATTTGTTTACATCCATTAGTTTGTAAAGGGTTCAATGCAGATTTTGATGGAGATCAAATG

GCTGTTTCATGTACCCCTTATCTTTGGAGGCTCAAGTGGAGGCCCGTTTACTTATGTTTTCT  
CATATGAATCTTTTATCTCCGGCTATTGGGGATCCCATTTCCGTACCAACCCAAGATATG  
CTTATTGGACTCTATGTATTAACGAGCGAAAATCGTCGAGGTATTTGTCTAAATAGGTAT  
ACTAAGTGTAATCGT-----AGAAACTCTCAA---ACTAAAAGAAGTGACAATAGTTATAA  
GTATAAG-----GAGCCCGTTTTTTGTAATTCCTATGATGCAATTGGAGCTTATCGACAG  
AAACGAATCAATTTAGATAGTCCTTTATGGCTCCGGTGGAGACTAGATCAACGC---GTTA  
TACTTCA-----AGAGAAACTCCCATCGAAGTTCACTATGAATCCCTAGGGACTTATTAT  
GAGATTTATGGACACTATCTAATAGTAAGAAGTCTAAAAAAGAAATTATTTTTATATAC  
ATTCGAACCACTGTTGGCCACATTTCTCTTTATCGAGAAATCGAAGAAGCTATACAGGG  
GTTTTCTCGGGCCGGGTCATCCGATACC-----ATGGAGGTACTTATGGCAG  
AACGGGCCAATCTGGTCTTTCACAATAAAGTGATAGACGGAAGTCCATGAAACGACT  
TATTAGTAGATTAATAAATCACTTCGGAATGGCATATACATCACATATCCTGGATCAAGTC  
AAAACCTCTGGGTTTTCAACAAGCTACTGCTACATCCATTTTATTAGGAATTGATGATCTT  
TTAACAATACCTTCTAAGGGATGGCTAGTTC AAGATGCGGAACAGCAAAGTTTGATTTT  
GGAAAAACACCATCATTATGGGAATGTACACGCGGTAGAAAAATTACGTCAATCCATTG  
AAATATGGTATGCTACAAGTGAGTATTTGCGACAAGAAATGAATCCTAATTTTAGGATG  
ACTGACCCTTTGAATCCAGTTCATATAATGTCTTTTTTCGGGAGCTAGAGGAAATGCATCT  
CAGGTACATCAATTGGTAGGTATGAGAGGATTAATGTCAGATCCACAAGGACAAATGAT  
TGATTTACCCATTCAAAGCAATTTACGCGAAGGACTTTCTTTAACGGAATACATCATTTC  
TTGCTACGGGGCCCGTAAGGGGGTTGTGGATACTGCTGTACGAACATCAGATGCTGGAT  
ATCTCACGCGCAGACTTGTGTAAGTAGTTC AACACATTGTTGTACGTCGAGCGGATTGT  
GGCACTGTCCGAGGGGTTTTCTGTGAGTCCTCAGAATGGGATGATGCCG---GAAAGAAT  
TTTGATCCAAACATTAATTGGTTCGTGATTAGCAGATGATATATACATAGGCCACGGTG  
TATTGCCACTAGAAATCAAACATTGGAGTTGGACTTGTAATCGATTTCATAACC-----  
-----TTTCGAGCCCAACCAATATCGATTCGAACTCCCTTTACTTGTAGGAGTACATCTT  
GGATTTGTGCGATTATGTTATGGCCGGAGTCC TACTCATGGCGACCTGGTTGAATTGGGG  
GAAGCTGTAGGTATTATTGCAGGTCAATCGATTGGAGAACCTGGGACTCAATTAACATT  
AAGAACTTTTCATACTGGCGGAGTATTCACAGGGGGTACTGCAGAACATGTCCGAGCC  
CCTTCTAATGGAAAAATAAGATTT CATGAGGATTTGGTTCATCCGACACGTACACGTCA  
TGGGCATCCCGCTTTTCTATGTTCTATAGATTTGTATGTA ACTATTGAGAGTGAAGATATT  
CTACATAATGTGAATATCCCCCAAAAAGTTTTCTTTTAGTTCAAACGATCAATATGTA  
GAATCCGAACAAGTGATTGCTGAGATTCGCGCAGGAACATCTACT--TTGAATTTGAAA  
GAGAAGGTTGCAAACATATTTATTCTGATTCAGATGGAGAA---ATGCACTGGAGTACT  
GATGTGTATCATGCACCTGAATTTACATATGGGAATGTTCAATTTATTATCAAAAACAAGT  
CATTTATGGATATTATTAGGGGAGCCGTGCCGT-----TCCAGTCTAGTCTCCCTTTTCGATC  
CACAGGGATCAGGATCAAAGAGTGCGCAT-----TCCCTTTTTGTCAAGCGAAGATCTAT  
TTCCAACCTCTCA-----GAAACTAATGATCGG---GCGAGACAAAAAATCTTTAGTGCGCA  
TTTTTCTGGTCAA---GAAGATAGGATTGCTGATTAT---TCAGACCTCAATCGAATCATATG  
TACTGATCATTCTAATCTCGTATATCCGGCTCCTATTCTAGCCGAGAATTCGGATTCAAAT  
TTATTATCAAAGAGGCGAAGAAATCAATTCATCATTCCACTCCAATCGATTCAAGAACG  
CAAGAAGGA ACTAATGCCCTGTT CAGGTATCTCGATGAAAATCCCC-----ACAAATGGTA  
TTTTCTGTGGAAATAGTATTATTGCTTATTTTCGACGATCCTCGGTACAGAAGAATGAGTT  
CGGGCAGTACTAAATATGGGACTCTAGAAATGCATTCAATCGTGAAAAAAGAGGAT-----  
-TTGATTCAGTATCGAGGA---GTGAGGGAAATTTGACCAAAAACACAAGAAAGTAGATCG

ATTTTTTTTCATTCCCGAAGAAGTGCATATCTTACCCGGATCTTCTTCCATAATGGTACG  
GAACAATAGTATCATTGGGGTAGATACACAAATCACCTTAAATATAAGAAGCCGAGTAG  
GCGGGTTGGTCAGGGTGGAGAAAAAAAAAAAAAAAAAGAATTGAACTGAAAATCTTTTCTG  
GAGATATATATTTCCCTGGAAGAGCAGATAAGATATCCCGACATAGCGGCGTTTTGATAC  
CA---CCAGGA---ACAAGAAAAACAAATGAGAAGGAATCCAAAAA-----GTGAAAAATT  
GGATCTATGTCCAACGG-----ATTACGCCGAGCAAG-----AAAAAGTTTTTTGTCTTGTT  
CGACCTGTCGTCACATATGAAATAATGGACGGTATAACTTTGGCCACACTTTTCCCCC  
CGATCTATTGCAGGAAAGAGATAATGTGCAACTTCGAGTTGTCAATTATATCCTTTATGG  
AAATGGCAAACCAATTCGAGGAATTTCTGACACAAGTATTCAATTAGTTCCGACGTGTT  
TAGTTTTGAATTGGAACCAAGACAAAAA-----AGTTCTTCTAGTGAAGCAGCCCGC  
GCTCCCGTTGTTGAACTAAGGACAAACGATTTGATTTCGTCATTTCTAAGAATCGACTT  
CGTAAAATCCCCAATTTTCGTATATCGGAAAAAGGAACGATCCTTGGGGTTTAGGATTGC  
TCGCTGAT--AATGGATTAGATTGGACCAATATCAATCCC-----TAT-----TCCA  
AGGCAAGAATTCAACAAACCCTTAACCAAAATCAAGGAACCATTACATATTTTTGAAT  
AGA-----ATAAGGGATGTCAGTCGTTGAGCATTGTGTCATCATCAATTGTTCTCGAA  
TGGACCA-----GTCAACGGTGCAAAATATCACACGTC-----ATACAAGAATCA---CC  
TCTAATTCCAATTAGGAATTCATTGGGTCCTTTAGGAACA-----TCCCTTCCAATTGCGAA  
TTTTTATTCA-----TTTGATCGGTTA-----CTAACTCATAATCAGATCTTA--GTAACACT  
ATTTGCAACTTGACAAT-----TTAAAACAGCCCTTTCAAGTATTAATAATTGAAA---TATT  
ATTTAATTGCGGAAAAT-----GGGAAAATTTATAATCCAAATCCACGCAGTAAGATTCTTT  
TGAATCCATTGAATTTGAATTGGTATTTTCTCCACCACAATTATTGTGCAGAGACATCT--  
AAAATAATGAGTCTTGGACAGTTTATTTGTGAAAATGTCTTTATAGCCAAAAAAGACC  
CCCC---CTCAA-----TCGGGTCAAGTTATCCTTGTTCAA---GTTGATTCTGTAGTAATAC  
GATCAGCTAAGCCTTATTTAGCCACCCGGGAGCAACTGTTTCGTGGCCTTTATGGAGAA  
ACTTTTTACGAAGGAGATACATTAGTTACATTTCACTATGAAAAATCGAGATCCGGTGAT  
ATAACACAAGGTCTTCCAAAAGTAGAACAGGTATTAGAAGTGCGTTCCGTTGATTCAAT  
ATCGATGAATCTAGAAAGGAGGGTTGAGGGTTGGAACAAATGTCTAACAAGAATTCTT  
GGAATTCCTTGGGGATTCTTGATTGGTGCTGAGCTAACTATAGCGCAAAGTCGCATCTC  
TTTGTTAATAAGATCCAAAAAGTTTATCGATCCCAGGGAGTGCAGATTCATAATCGGC  
ATATCGAAATTATTGTACGTCAAATCACATCAAACGTGTTGGTTTTAGAA-----GACGG  
AATGTCTAATGTTTTTTACCTGGAGAACTTATTAGATTGTTGCGAGCAAACGAATGG  
GGCGTGCTTTAGAAGAAGCAATCTGTTATCGAGCCCTTTTATTGGGAATAACAAAAGCA  
TCTCTCAATACTCAAAGTTTCATATCGGAAGCGAGTTTTCAAGAACTGCTCGAGTTTT  
AGCAAAGCAGCTCTCCAGGGGCGTATCGATTGGTTGAAAGGCTTGAAGAGAACGT  
TGTTTTGGGGGGGGTGATACCCGCAGGTACCGGATTCAGAGGATTA-----GTGCACCCT  
TCAAAACAATATAATAACCTTTCT-----TTAGAAACAACAAAAAGAATCTATTGAGGG  
GGGGGTGAGA-----GATATTTTGTCCCACCACAGAAAATTATTAGATTCTTCCCTTTCAA  
AAAAATCCACAATACATCACATAATAACAATACATCAAACAATCATTTATAGGATTTATAA  
TGATTCCATGACAAAAATATATTGGAACATCAATTTGGAAGAGATGATGGAGGCCGGAG  
TTCATTTTGGTCATGGTACTCGGAAATGGAATCCTAAATGGCCCTTATATCTCGGCAA  
AGCGTAAAGGTATTCATATTACAAATCTTACTGGAAGTCTCGTTTTTTTATCAGAAGCTT  
GTGATTTGGTTTTTTGATGCAGCAAGTAGGGGAAAACAATTCTTAATTGTTGGTACCAA  
AATAAAGCAGCTGATTCAGTAGCGCGGGCTTCAATAAGGGCCCGGTGTCATTATGTTAA  
TAAAAAATGGCTTGGCGGTATGTTAACGAATTGGTCCACTACAGAAACGAGACTTCATA

AGTTCAGGGACTTGAGAATGGAACAAAAAATGGGGGGACTCAATCGTCTTCCAAAAA  
GAGATGCTACTATATTGAAAAGACAATTAGCTCGCTTGCAAACATATCTGGGCGGTATG  
AAATATATGACAGGGTTACCCGATATTGCAATCATTGTTGATCAGCACAAAGAATATACG  
GCCTTGCAAGAATGTATTACTTTAGGAATTCCAACAATTTGTTTAATTGATACAAATTGT  
GACCCCAATCTCTCAGATATTTCAATTCCAGCGAATGATGACGCTATATCTTCAATCCGA  
TTCATTCTTAACAAATTAGTATTCGCAATTTGTGAGGGTCGTTCT---AGCTATATAATAAA  
TCCTATGGGACAAAAAATAAATCCACTTGGTTTCAGACTTGGTACAACCCAAGGTCATC  
ATTCCCTTTGGTTTTTCACAACCAAAAAATTATTCTGAAAGTCTACAAGAAGATCAAAAA  
ATAAGAAATTTTATCAAGAATTATGTACAAAAGAATATGATAACATCCTCTGGC---GTCA  
CGGGAATTGCACGTATAGATATTCAAAAAGGAATCGATCTGATCAAAGTCATAATTTTAA  
TGGGATTTCCAAAATTATTAATAGAAAATAGACCGCGA-----GCAACCGAAGAATTA  
CAAATGACTCTACAAAAAGAATTGAATTGTGTAAACCGAAAACTTAACATTGCTATCAC  
AAGAATTGCAAAACCTTACGGAAACCCTAAGATTCTTGCCGAATTTATAGCCGGACAAT  
TAAAGAATAGAGTTTCATTTGCAAAAAGCAATGAAAAAAGCTATTGAATTAGCTGAAAA  
AGCAGATACAAAAGGCATTCAAGTACAAATTGCAGGGCGCATTGACGGAAAGGAAAT  
TGCACGTGTCGAATGGATCAGAGAAGGGAGGGTTCCCCGACAACTATTCGAGCTAAA  
ATTGATTATTGTTCTTATCCAGTTCGAACTATCTATGGGGTATTAGGCATAAAAATTTGGA  
TATTTCTGGACGAGGCCATGTCGCGTTACCGAGGACCTCGTTTCAAAAAAATACGTGCG  
CTGGGGGCTTTACCAGGACTAACTAATAAAAGGCCTAGGGCTGAAAGTGATCTTAGAA  
ACCAATCGCGTTCGGGAAA---AAATCTCAATATTGTATTTCGCTAGAAGAAAAACAAA  
AATTGCGTTTTTCATTATGGTCTTACAGAACGACAGTTAATTCAATACGTTCCGATTGCCA  
GAAAAGCCAAGGGGTCAACAGGTCAAGTTTTACTACAATTACTTGAAATGCGTTTGGGA  
TAACATCCTTTTTCGATTAGGTATGGCTTCGACTATTCCTGCAGCCCGTCAATTAGTGAA  
TCATCGACATATTTTAGTGAATGGTCGTATAGTAGATATACCGAGTTATCGCTGCAAACC  
CCGAGATATTATTACGTGCAAGGATAACCAAAAATCCAGAGCTCTGATTCAAATTCCTC  
TCGAGTCATCCCCTCAT---GAGGAATTGCCAAACCATTTGGCCCTTGACCCATCCCCATA  
T---TATAAAGGCTTAGTCAATCAAATAATAGATACTAAATGGGTTCGGTTTGAAAATAAAT  
GAATTTCTAGTCATAGAATATTATTCTCGTCAGACTATGTCACGTCGAGGTACTGCAGAA  
AAAAAACAGCAAAATCCGATCCAATTTATCGTAATCGATTAGTTAACATGTTGGTTAA  
CCGTATTCTGAAACACGGAAAAAATCATTGGCTTATCAAATTATCTATCGAGCCGTGA  
AAAAGATTCAACAAAAACAGAAACAAATCCACTATCCGTTTTACGTCAAGCAATACG  
TGGAGTTACTCCCAATATAACAGTAAAAGCAAGACGTGTAGGTGGATCGACTCATCAA  
GTTCCCATTGAAATAGGATCCACACAAGGAAAAGCACTTGCCGTTTCGTTGGTTATTAGC  
GGCATCCCGAAAACGTCCGGGTCGAGATATGGCTTTCAAATTAAGTTCCGAATTAGTGG  
ATGCTGCCAAAGGGAGTGGCGATGCCATACGCAAAAAGGAAGAAACTCTTAGAATGG  
CAGAGGCAAATAGAGCTTTTTCGCGATTTTCGTATGGGTAGGGACACTATTGCTGAGATA  
ATCACTTCTATACGAAATGCTGATATGGATCGAAAAAGAGTGGTTCGAATAGCATCCAC  
CAATATTACCGAAAATATTGTAAGAATACTTTTACGAGAAGGTTTTATTGAAAACGTGA  
GAAAGCATCGAGAAAAAACAAAAATTTTTTTGTTTTAACCTGCGACATAGAAGG---  
--AATAGGAAAAGACCCTAT-----AGAAATATTTTCAATTTAAAACGGATCAGTCGACC  
CGGTTTACGAATCTATTCTAACTATCAACGAATCCCTAAAATTTTAGGTGGGATGGGAGT  
TGTAATTTCTTACTTCGCGAGGTATAATGACAGACCGAGAGGCTCGACTAGAAGGAA  
TCGGGGGAGAAATTTTGTGTTATATATGGATGGCAAAAGCTATACCGAGAAGAAGTTCG  
CGTAGGAATGGACGTATTGGTTCACGTAAGAGTGCACGTAGAATACCAAAGGGAGTTA

TTCATGTTCAAGCTAGTTTCAATAATACCATTGTCACTGTTACAGATGTACGGGGTCGGG  
TAGTTTCTTGGTCCTCCGCCGGTACTTCTGGATTCAAGGGAACGAGAAGAGGGACACC  
TTTTGCTGCTGAAACCGCGGCATCAAATGCTATCCGTACAGTAGTTGATCGGGGTATGC  
TACGAGCAGAAGTCATGATAAAGGGTCCCGGTCTCGGAAGAGACGCAGCATTACGCGC  
TATTCTTCAAAGTGGTATACTATTAACCTTTCGTACGGGATGTAACCCCTATGCCACACAA  
TGGCTGTAGACCTCCGAAAAAAGACGTGTGATGCCAACTATTAACAACCTATTAGA  
AATCCAAGACAGCCAATCAGAAATGTCACGAAATCCCCGCTCTTCGGGGATGTCTC  
AGCGTCGAGGAACATGTACTAGGGTGTATACTATCACCCCCAAAAACCAAACCTCTGC  
CTTACGTAAAGTTGCCAGAGTACGATTAACCTCTGGATTTGAAATCACTGCTTATATACC  
CGGCATCGGCCATAATTTACAAGAACATTCTGTAGTCTTAGTAAGAGGGGGAAGGGTTA  
AGGATTTACCCGGTGTGAGATATCACATTGTTGAGGAACCCTAGATGCTGTGCGGAGTA  
AAGGATCGTCAACAAGGGCGTTCTAAATATGGGGTAAAAAGCCAAAAATGGCAAGG  
AAAAGTTTGATTGAGAGGGAGAAGAAAAGGCCAAAAATTGGAAATGAAATATCATTGTA  
TTCGTGATCCTCAAAAAAAGAAATAAGC-----AAAGTTGCTTTGTTGAGTGACAAAT  
GGGAATTTTATGGAAAGTTACAATCCCACCGCGGAATAGTGCACCTACACGCCTTCAT  
CGACGTTGTTTTTTGACCGGAAGGCCGAGAGCTAACTATCGAGACTTTGGACTATCCG  
GACACATACTTCGTGAAATGGTTCAAGCATGCCTATTGCCAGGAGCAACAAGATCGAG  
TTGGATGGTAAAAAAGTTTCAATTTTCGGTTATTTCTCAA-----GAAGAAACCAAAGAAA  
ACAGAGGGTCCGTTGAATTTCAAATATTCAATTTACCAATAAGATACAGAGACTTACT  
TCCATTTAAAATTGCACAAAAAAGACTATTTATCTCAGAAAGGTTTGCGTAAAAATTT  
GGGAAAACGTCAACGGCTGCTAGCTTATTTGTCAAAAAAATAAAGTACGTTAT-----  
--ATTGAGAAATTGGATATTGAGAGACAAAACTCAT-----ATGGTAAACTTCGTTTGA  
AACGATGTGGTAGAAAGCAACGAGCCGTCTATCGAATCGTTGCAATTGATGTTGATCC  
CGAAGAGAAGGAAAAGATCTTCGGAAATTGGGTTTTTATGATCCGATAAGGAATCAAA  
CTTATTTAAATGTTCCGGCTATTCTATATTTCCTCGAAAAAGGTGCTCAACCTACAGGAA  
CTGTTCAAGGATATTTTAAAGAGGTCGGGGGTG-----GAACTTCGTCCCTAATCAAGCGAA  
ATTCAAT--ATGGATAAATCCAAGCGACCTTTTCTTAAATCCAAGCGATCTTTTCGTAGG  
CGTTTGCCCCGATTCAATCGGGGGATCGAATTGATTATAGAAACATGAGCTTAATTAG  
CCGATTTATTAGTGAACAAGGAAAAATATTATCTAGACGAGTGAATAGATTGACCTTGA  
AACAAACGATTAATTAATCTTTCGATAAAACAAGCTCGTATTTTATCTTTGTTACCCT  
TT-----AAAAGG-----AAAGGATTTCAAATAAGCGAGTCGACCGCTAGAATAATGCTTT  
GAAAGCTAGAACTCAAGTGGCACGTTCACTAAAAAAAATCCCTTTGTAGCGAATCAT  
TTATTAAAAAAATTGATAAGCTTAACAGAAAAGCAGAAAAAGAAATAATAAGAACTT  
GGTCCCGGGATCCACCATTATACCGACAATGATTGGTCATACTATTGCCATCCATAATG  
GAAAAGAGCATCTGCCTATTTATATAACGGATCATATGGTAGGACACAAATTGGGAGAA  
TTTGCATCTACTTTCAATTTCCGAGGACACACAAAAAGTGATAATAAATCTCGGCGT-----  
-----ATGAGGAATCAATTTCTTTTCGTTTCGGTTTATTACAAAATAATAAATTCAGTTCTT  
GCGGCTGGACTTTATTATGGGTTTTTGTAGCGCTTTCTCTATCAAGACCTCTCATTTATTA  
CTTCTCCGAGTTTTTGTAGGAGGAAGAAGAA-----ACCAAGAAGAGAATAGTAGCAAA  
AACTGGATTGATTATGGGGCAGATCTTACTATTCAATATCAATATATTATAAACCTTTCCATA  
TTGCTTTGACTAGACCTCGTACAATAACTGCACTCGGGTTTTTCTATCTTTTTTTCCAGA  
TCTTCTGGAAAAGTCAGAAACGCGTTTTTCAA-----AATTCATGTCTAAT-----  
CTCAGCTGTATATTTCTAAATCATCTCATTTTACAGTTGCTTAACACTTGCATTTTACCAA  
GTTCAAGCGGCAAGGAGATTAGTCAGCATTTACACGTTTTCGATCCAACAACAAGATGTTA

TTCGTAACAAGTCTTTTTTTGCCTGGTTCATTGGCCAAATTTTAGTATGCGAATTTTT  
GAATTGGCAGGAAAACACATACGTATTGAATTGGCAGGAAAACAC---AATCGTTCT---T  
CGATCATTGATCTGACTATTTTCATTTT-----TTCTTTGTGATTCTCTTTTTTATGATGA  
GTCTCCACTCTTTTGGCAGAATACCCTCACCCATTCTTCTTCTAAATGAGCAACGAA  
AAATTAGAAAGCCTCATTAGCCCATTGCTTTTTGATTATCGACGATGGTATCGCCCATT  
CGCTACATTCAAATAATAGACTTGAGCAAGCTATAAGAAATGAAATGTCACAATATTT  
TTTTGATACACAACAAAGTGATGGAAAAGAAAGAATATCTTTTACCTATCCAAGGAGTT  
TATCAACTTTTTTTAAAGTGATCAAAGAAAATAAAT---ATCCTACTAACTCTTTCTAAT  
-----CAATTGGACAATGCTTGGGTTTCTAGAAACAAAAAAAAAATGAATCATCTTAAAA  
ATGATTTTTTCAATAGAATTAACCATCTAGACAAAGAAAAAAAAAAGCAGTGGAGATACTT  
GAAACAAGAAGCTGATTATGTATAGATACGACTAAACAAGAATACTTACCCCAAATGTA  
TGATCCTTTCTTAAACGGGCCATACCGTGGAAAAATCAAAAAAGAGCTTCCGCCTAGA  
GAGACAGGTGAGCAAATCGGTTACATGATCTTCTTTACGAAAATTTTGACCAAATAAC  
TAATGCTAGCAAAGATACTATTGATAAAGAAACCAAGACTAATGCTAGCAAAGAGACT  
AATACTGTGAATGAAACGAAGCCTAATGCTAGCAAAGACTAATGCTAGCAAAGAGA  
CTGATACTGTGAATAAAGAAACGGTTTTGATGCGTTATGCACACCAACCCGATTTAAG  
CACGGCTTAATCAAAGGCTCTATGCGAACTCAAAGGCGTAAAATTGTTATTGAGAAAC  
TGTTTCAAGCAAATGCACATCCCCCTTTTTTTGACAGGATAAAAAAAAAAAAAAATT  
TTTTCTTTTGCTATCCCCCGCCGGTTCAA-----ATTTTTAGAAATGTAAAGGAAAAAA  
AGCGATTAGAGATAGGGGAAACCTGGGATACTTTTGAAATTACCCAAATGTTAAGGGG  
TTGCATTTAATAGCCCAATCAAGTCTTAGAAAAATCTTATATTACCTTCATTGATAATC  
GGTAAAAATCTTGGACGTATGCTATTATTGCAAATTCCTGAATGGTCTGAAGATTTTGA  
GGAATGGAATAGAGAAAAGCATATTAAGTCACTTATACTGGTAATCCGGTATCCGAAA  
CAGAATTTCCGAAAATTGGTTGACACAAGGTATTCAGATCAAGATTGTATATCCTTTC  
CATCTGAAACCTTGGCACACATCT---CTAACTTCTCGTGATGACGTTTGTTTTTTAACAA  
TTTTTGGAAGGGAAACAGAACTGCCTTTTGGCTCTCCCCGAAAAACA---TCCTTTTTTG  
AGCCCATTTTAAAGGAACTCGAAAAAAA-----  
-----ATTGGAAAATATGAAAAGGTTACAGCTGAAAGCGTTTTTAAAAAAAATAATAATAA  
AATTATTTAAAAAGTTTCAAAAGAAACAAGAACAACCAAGATTCTAGAATAAGCAA  
CCAGATAATTGATGAATCTTTTCAAAAATTCAAATTCAGATTGGACAAATTCTTCACT  
GATAGAACTAAAATGCAAGATATGACTGATAGAACAAGTACAATCAAAAATCAAATA  
GAAAGAATTACCGAAGAGAAAAAAA-----ACTTACAAAAAAGTTGTAGA  
TTAGAGTTGTCAATTTGGCAAATAGTAAACTAAAA-----AACATAATATGTAAATTTTCA  
TATTTTAGAAAATTTTTCATTCAAAGAATATAT--GATATTTGTTTATCTACTATTCATATTT  
GCCAAACGAATACACAACCTCTT-----TGTGATTTATCCAACCTGTCACAAGCATA  
TGATTTTTACAAAATATCACAAACCGGGGTGTTAACTTGTCTAAATTAAGATCCGTTCT  
TCAACATACATCTTCTTCTTAAACTCAAATGAAAGACTCCTTTACACAAGGAATAT  
TTCAGTCT---GTAATACATAAGAACTTCAG---TCTATAACGAGTCAATGGAAAAATTGG  
TTAAGAGGGAATTATCAATACGATTTATCTCAGATTATCTGGTCTAGCTTAATGTCACAA  
AATGGCGAAATAGGGTTAATCGATATTGTAGGTCTCAAAAAAAAAAAAAAATGGAATT  
CATGTGGAAAATACCAA-----TTAAGTCATTACAAG-----GATAATTTTCAAAAATGCTAT  
AGATATGATCTTTTATCATATAAATCCATTAATGTATATATTCCATATCTTAATAGAAAATAT  
TTAATTGGGAAAATATCTAT-----TTTTTTGATTGGATGGGAATGAATGAACAAATA  
CTAAATCGTTGGTTCTTCCCAGAATTTGTGCGGCTTTTTAATGTATATAAAACGAAACCG



TGGATTATACCAAGCAAATTACTTCTTTTAAATAAAAAGTCTAAGTACAAGAGAGCTAAG  
AGAGTTATTCATGAAAAAGTATTTCCTTTTGCAATTGAGATGGGATCAAAGGAATATTC  
GCAA-----AATGTCCGGATATTAGCTCTCCCGAAGAGCTCGATAAATCTAGAAACCA  
TGA CTCTATCATGCATTGAAAGGAGAAAATTACAATTGAATGTAATGTGGAAGTCGAAG  
AGCAATTTGAGTATTCTAAAATTTTTCAAAGGAATGGTT--GTGGACCGCCTTGGACTGT  
CTGTAAAAACAATGGGCAATTTCTTATGTATCAAACCATAGGTATTTTCGTTGGTTCATA  
AGAGTAAAAACAATCATTGATGCGCTTGTCTTGAAAATATTTTATCGTCTAGACGTC  
GTAGAGAATTGAGAATTCTAATTTGTTTCACCTTTCTTTGGCCCAATTATCGATTGGAAG  
ATTTAGCTTGTATGAATCGTTATTGGTTTGATACTAATAACGGCAGTCGTTTCAGTATCTT  
AAGGATCCACATGTATCTAACGCAAAAAAGACAAATCAAGTTCTGTATTTTCGAATTGA  
GAGAGATAATGAGAGAGATAAAGAATTCT-----TTCTTAGATTTCGTGGACCCAATTCAAT  
TCAGTGGGATCCTTTATTCACATTTTTTTCCACCAAGAACGTTTTCTAAAACCTTTGAC  
CCACGAATTTTTAGTATTCTACTTTCA---CGCAATTT-----CAGGGTTCAACAAGCAATC  
GATCTTTCACG-----ATCAGGGGAGTAATACTCTTTGTAGTAGCG--GTA CTTATATATC  
GT-----ATTAACAATCGAAATATGGTCGAAAGAAAAAACCTATATTTGACAGGGTTT  
CTTCCT-----ATACCTATGAATTCCACTGGACCCAGAAATGATCGATTGGAAGAAG  
CTGTT--GGGTCTTCCAATATCAATAGGTTGATTGTTTCG---CTCCTGTATCTTCCAAAAG  
GAAAAAAGATCTCTGAGAGTTCTTTCCTGAATCGGAAAGAGAGTACTGGGGTTCTCTC  
AATAACA-----AAGAGG-----AATTC  
TAGTTGTAAGATATCTAAT-----GAAACCGTCGCCGAAATTGAGATCTTATTCAAAGAG  
AAAGATAGCAA---TCTCTGGAGTTTCTTTTTGTATATTATATGGAT--GATGATTTCGACC  
CACAAGGACCATGATTGGAATTGGCTGATCCTATTTTATTGGAAAGA-----  
-----TTAGCGAAAGACTGGATTTCTTATCTTATGTCTGCTTTTCGTGAA  
AAAAGACCAATTGAAGCGGG-----ATTTTCTTCAAACAACAT  
GAGCATGTTTCCCAT-----CTCTTCTCGAGAAACAAGGGGGCTATCTCGTTGCAAATTG  
TACTCAATTCATATGTGGAAATTCCGCCAAGATCTCTTCCTTTTATTCCCTAGTTGGGG  
GAAT--AATCCGCCCGAATCGTATTTTTGGTTA-----GGCAATGTGT  
GGTTG--AAGAAGGATCGG-----TTTTTTAGC-----AAGGTACGGAATGTATGGTCAAAT  
ATTCAATATGATTCC-----ACAAGG-----TCTAGTTTCGTTCAAGTAACGGATTCTAGCC  
AACTGAAAGGATCCTCT--GATCAATCCAGAGATCATTGATTCCATTAGT-----AA  
TGAGGATTCGAA-----TATCGCACATTGATCAATCAAAGAGA  
GATTCAACA ACTAGAAGAAAGATCGATTCCCTGGGATCCT-----TCCTTTCTTCAAAC  
GGAACGAAAAGAGATAGAATCAGAC-----CGATTCCCGAAA-----AACCTTTCTGGATAT  
TCC-----TCAATGTCCAGCTATTCACG--GAACGCGAGAAACCGATGATTAATCATCTGT  
TTCCGGAAGAAATGGAAGAATTTCTT-----GGGAATGCTACAAGATCCGTTTCGTTCTTTT  
TTCTCTGATAGATGG-----TCAGAACTTCAT--CTGGGTTTCGAATCCTACTGAGAGGTCCA  
CTAGAGAGCAG-----AAATTGTTGAAGAAACATCTTTCTTTTGTC-----CGGC  
GATCAGAA-----AATAAAGAAATGATTCATTTATTCAAATCATTACGTATTTACAAA  
AT-----ACTATCTCAATTCATTCTATTTTCATTAGATCCGGGATGTGATATGGTTCCG--AAG  
GATGACCCGGAT--CTGGACAGTTCCAATAAGATTTTCATTCTTTAACA AAAATCCATTTT  
TTGATTT-----TTTACCAGATTCCATGAACGGAACAGGGGAGGATACGCGTTA-----CAC  
CATGATTTTGAATCAGAA-----GAGAGATTGCAAGAAATGGCAGATCTATTTACTCTATC  
AATAACCGAGCCG--GATCTGGTGTATCATAAGGGATTTCTTTTTCTATTGATTCGTACG  
GATTGGATCAAAAAA-----TTCTTGAATGAGGTATTCAACACCAGGGCTGAATCGAA

AAAGAAATCTTTA-----TTGGTTCTGTCTCCTGTTCTTTTTTCGTTATGAGGAGAATGAA  
TATTTTTTTTCGAAGGATCAGACAAAAACGGGTCTGG--ATCTCCTGCGGGAATGGTTTG  
GGAGATCTAAAGCAA---ATGGTGGTATTTGCTAGCAATAACATAATGGAAGCAGTCAAT  
CAATATAGATTGATCCGAAATCTGATTCAAATCCAATATAATAGGTAC-----ATAAGA  
AGTGTATTGAATCGATTCTTTTTAATGAAT-----AGATCCGATCGCAACTTCGAATATGG  
AATCAA-----AGGGATCAAAAAGGAAAGGATACTCTCAGTCATAGAACTCTAATGAA  
ATATATGATCAAACAAGATTATGCA-----  
-----TATATATACAAATGGTCCAATGGGAGCAAGAATTGCCAGGAACATT  
TGGAACATTTCTTTCTGAGCAGAAAAGCTGTTTTCAACGTTTTCAAGTAATGTTTGAT  
CAATTACGTATTAATCAATTTTTGATGAATTATTCTGAGGTTTGAAGAAATTCGAATGG  
TCCAGGTCACCTTCGTTTCTTTTTCTTTCTCCCAGTCACTTCGTTTTTTGGGCAAGTCA  
CTTCATTTTTTTGGCC-----AAGTTGCTTTTCTTTTGTCTAATCTTTCTTTTCC  
TTTTTCCTGTGTAAGTTTTGGGAATACCCCATTCATAGGTCCGAA---ATCAACATCTAT--  
-GAATTGAAAGGTCCGAATGATAAACTCTGCAATCAGTTGTTAGAATCGATAGGTTTTTC  
AAATTGTTCAATTTGAAAAAATTGAACCCCTTC-----TACTGGCT-----GATGAT--  
-GGTACTTCGAAATTCCTTGATCAATGGAGGAACAATATCACCATTTTTGTTCAATAAGAT  
ACCA---AAGCGG---ATGATTGACTCATTCCATACTAGA-----ACTAATCGCAGGAAATCCT  
TTGATAACAAAGATTCCTATTTCTCAATGATATTCTACGATCAAGACAATTGGCTGAATC  
CCGGGAAACCATTTACAGAAAGTTCATTGATATCCTCTTTTTATAAAGCAAATCGACTTC  
GATTCTTGAATAATCCGCATCACTTCTGCTTCTAT-----TGTAACAAAAGATTCCTTTTT  
CTGTG-----GAAAAGGCTCGTAATAATAATTCATAT-----TTTCTATATGGG---CAATTT  
CTCAATATCTTGTTCCTTCGCAAGAAA---AGATTTTCTTTGTGCGTTGGTAAA-----AAAA  
AACATGTTTTTGGGGGG---AGAACTACTATTTACCAATCGAGTCACAAGTATCTAACAT  
ATTCATACCTAACGATTTTCCACAAAGTGGTGACGAAAGG---TATAACTTGGACAAATCT  
-----TTTCATTTTCTAAGTCGACCCGATCCATTCGTTTCGT-----AGAGCTATTTATTCGAT  
CGTAGACACTTCTGGAAACCCTCTAACAGAGGGACAAATTGTCAATTTTGAAAGA  
TATTGTCAACCTCTTTCAGATATGAATCTATCTGATTGAGAAGGAAAGAACCCTTCATGA  
GTGTCCCAAT-----TTCAATTCAAATATAGGTTTGATTACATTCCATGTTCTGAGAAAGA  
TTTCCCATCCGAAAAAAGG-----AAAAA-----CAGAGTCTTTGTCTAAAG  
AAATGCGTTGGGGTTTCAGAAAGGGCGGATGTATAACAACCTTTCAACGAGATAGTGCTT  
TTTTCAATTCTCTCAAATGGAATCTATTCAAACATATATGCCAAGCTTCTTTACTTCGA  
CAGGGTACAAATATCTAAATTCGATATTTTAGATACTTTTTCAGACCTATTGTCA-----AT  
ACTAAGTAGCAGT-----GTATCCATTTTTCAT-----ATATCGTGGCGAATTC  
TTTTGTGGAAGATGCAATTTTTTCTCAGA-----AGTGAGATCTCGAGT  
AAATGGTTACATAAT-----CTTCTGTCCAAGAAATGATTCATCGAAATAAAAAGAATA  
AGTCGTCGTTGATATCGACACATCTGAGATCACCAATGTTTGGGAATTC---CTCTATTC  
AATCCTTTTCTTGTCTTGTGCTGGATAT---CTCGTTCTTATACATCTTTTCTTTGTTTC  
CCAG-----ACCTTTAGTGAGTTACAGACAGAGTTCGAAAAGGTCAAATCTTTGATGATT  
CCCTCATCAGAGATTGAGTTGCGAAAACCTTAGATAAGTATCCTACGTCTGAACCGAA  
TTCTTTCTGGTTAAAGAATCTCTTTCTATTT-----  
-----  
-----CCCATCAATCGAATCGCTTTTTCTATAAATACGAGACATCTAAGTCATACAA  
GTAAAGAGATCTATTCATTGATAAGAAAAAGAAAAACGTGAACGGGGATTGGATTGA  
TGATAAAATAGAATCCTGGGTCGCGAACAGTGATTTCGATTCATGAGGAAGAAAGAAAA

TTCTTGGTTCAGCTCTCC-----GCCTTAACGACA-----GAAAAAAGA-----ATTCTATTG  
AGTCTGACT--CATAGTGATCATTATCA-----AAGAATGACTCTGGTTATCAAATG  
ATTGAACAACCGGGAGCAATTTACTTACGATACTTGGTTGACATTCAT-----CAAAGCA  
TCTAATGAATTATGAGTTCAATATATCCTGTTTAGCAGAAAGACGGATATTCCTTGCTCA  
TTATCAGACAATCACTTAT-----TCACAACTTCGTCTGGGGCTAATAGTTTTCAATTTCCC  
ATCTGATGGA-----AAACCTTTTTTCGCTCCGCTTAGCCTTATCCCCCTCT--AGGGGTAT  
TTTAGTGATAGGTTCTATAGGAACTGGACGATCCTATTTGGTCAAATACCTAGCGACAA  
ACTCCTATGTTCCTTTCATTACGGTATTTCTTAAACAAGTTACTGGATAAGAAGCCTAAA--  
-TTTATTGCTGAT-----ATCGATATTGATAATATTGATGCTAGTGACGATATCGATATTG  
ATGATAGTGAC-----GATATCGATCGTGACCTT  
GATACGGAGCTGGAACCTGCTAACTTGGATGAATGCGCTA-----ACTATGGATAAGGAG  
ATGATG--GCGGAAATAAACCGATTGTCTATCACCTTCAATTCGAATTAGCAAGAGCAA  
TGTCTCCTTGCATAATATGGATCCCAAACATTCATGATCTGGATGTGAATGAGTCGAATT  
ACTTATCCCTCGGTCTATTAGTGAACCATCTCTCC-----AGGGATTGTGAAAGATGTTCT  
T--ACTAGAAATATTCTTGTATTGCTTCGACTCATATCCCCAAAAGTGGATCCCGCTC  
TCATAGCTCCGAACAAATCAATACGTGCATTAAGTTACGAAGGCTTCTTATTCCACAA  
CAACGAAAGTACTTTTTCACTCTTTCATATACTAGGGGATTTCACTTGGAAAAGAAAAT  
GTTCCATACT-----AACGGATTCGGGTCCATAACCATGGGGCCCAATGCACGAGATCTTG  
TAGCACTTACCAATGAGGTCCTATCGATTAGTATTACACAGAAGAAATCAATTATAGACA  
CTAATACAATTAGATCCGCTCTTCATAGACAACTTGGGATTTGCGA-----TCCCAGGT  
AAGATCGGTTTCCAGGATCATGGGATCCTTTTCTATCAGATAGGAAGGGCTGTAGCACAAA  
ATGTACTTCTAAGTAATTGTCCATAGATCCTATATCTATCTATCTGAAGAAGAAA-----TT  
ATGTAACGAAGGGGATTCTTATTTGTACAAATGGTACTTCGAACTTGGAAACGAGCATGA  
AGAAATTCACGATACTTCTTTATCTTTTGTAGTTGTTCTGCCGGATCGGTCGCTCAAGATC  
TTTGGTCTTTACCC-----GGACCCGATGAAAAA---AATGGGATCACTTCCTATGGACTCG  
TTGAGAATGATTCT--GATCTAGTTCATGGCCTATTAGAAGTAGAAGGCGCTCTGGTGGG  
A-----TCTTCGCGGACAGAAAAAAATTGCAGTCAGTTTGATAATGAT-----CGAGTGACAT  
TGCTTCTTCGGCCCGAACCGAGGAAT--CCCTTAGATATGATGCAAAACGGATCTTGTTCT  
TATCCTTGATCAGATATTTCTCTATGAAAAA-----TACGAATCGGAGTTTGAAGAA-----  
-----GGCGCCCTTGACCCTAACCTTGACCCGCAACAGATAGAGGAGGAT-----TTATT  
CAATCAC-----ATAGTTTGGGCTCCT-----AGAATATGGCGCCCT-----TGGGGCTTT  
CTTTGTATCGAAAGGCCCAATGAATTGGGATTTTCC--TATTGGTCCAGGTCATTTCCGGG  
GCAAG-----CGGATCTTTTATGATAAAGAGGATGAGCTTCAAGAGAATGATTCGGAGT  
TCTTGCAGAGTGGAACCATGCAGTACAAGACACGAGATAGATCTTCCAAAGAACAAG  
GCTTTTTTTCGAATAAGCCAATTCATTTGGGACCCCGCAGATCCACTCTTTTTCTATTCA  
AA--GATCGGTCCCTGGCTCTGTGTTTTACGTCGAGAATTATTTGCAGATGAAGAGA  
TGTCAAAGGGGCTTCTTACTGCCAACTTACACATCTAGATCTAAATCTACACGCTGG  
TTTATC-----AAGAATACGCAAGAAAAGCACTTTCGAATTGTTGATTAATCGTCAGAGATG  
GCTTAGAACC-----AATAGTTCATTATCT-----AATGGATCTTCCGTTCTAAT-----ACTC  
TATCCGAGAGTTATCAGTATTTATCAAATCTGTTCCCTATCTAAC--GGAACACTATTTGAT  
CAAATGACAAAGACTTTGTTGAGAAAAAGATGGCTTTTCCCGGATGAAATGAAAATTG  
GATTC-----ATG-----ATGCCGAGATCGCGG---ATAAATGGAAATTTTATTG  
ATAAGACCTTTTCAATTGTAGCCAATATCTTATTACGAATAATTCCGACAACCTCAGGAG  
AAAAAGAGGCATTTACCTATTACAGAGATGGG-----ATGTCGGCTCAATCCGAAGGAAA



AGGGGGCCATGGAATACACTATTGTAGTAGCTGAAATGGCGGATTCACCTGCTACATTA  
CAATACCTCGCTCCTTATACGGGAGCAGCCCTGGCTGAATATTTTATGTACCGCGAACG  
GCATACTTTAATAATTTATGATGATCTCTCCAAACAGGCACAAGCTTATCGCCAAATGTC  
CCTTCTATTAAGAAGACCCCCGGCCGTGAAGCTTATCCCGGGGATGTTTTTTATTTGCA  
TTCACGCCTTTTAGAAAGAGCCGCGAAATTAAATTCTCTTTTAGGCGAAGGAAGTATGA  
CCGCTTTACCAATAGTTGAGACTCAATCTGGAGACGTTTCTGCCTATATTCCTACTAATG  
TAATCTCCATTACAGATGGACAAATATTCTTATCTTCAGATCTATTCAATGCCGGAATTCG  
ACCTGCTATTAATGTGGGTATTTCTGTTTCCAGAGTAGGATCCGCGGCTCAAATTAAG  
CCATGAAACAAGTAGCTGGCAAATCAAATTGGAATTAGCTCAATTCGCAGAGTTACA  
AGCCTTTGCACAATTCGCCTCTGCTCTGGATAAAACAAGTCAGAATCAATTGGCAAGG  
GGTCGACGATTAAGGGAATTGCTTAAACAATCTCAGGCAAACCCTCTCCAGTGGAAG  
AACAGATAGCTACTATTTATACCGGAACGAGAGGATATCTGGATTCATTAGAGATTGAA  
CAGGTAAATAAATTTCTGGATGACTTACGTAAACACCTAAAAGATACTAAACCTCAATT  
CCAAGAAATTTCTATCTTCTAGCAAGACATTCACCGAGCAAGCGGAAATCCTTTTGAAG  
GAAGCTATTCAGGAACAGCTGGAACGGTTTTCCCTTCAGCAACAAACAATGAGAACC  
AATCCTACTACTTCTCGTCCCGGGTTCACAAATTGAAGAAAAAAGTACAGGTTCGTAT  
CGATCAAATTATTGGACCCGTGCTAGATGTCACTTTTCCCCCGGGCAAGTTACCTTATAT  
TTATAATGCTTTGGTAGTCCAGAGTATAGACTGCCAATAAGCAAATTAATGTGACTTG  
TGAGGTACAACAATTATTAGGGAATAATCGAGTTAGAGCTGTAGCTATGAGTGCTACAG  
ACGGGTTGATGAGAGGAATGGAAGTGATTGACACGGGAGCTCCTCTCAGTGTTCCGGT  
CGGCGGAGCTACTCTCGGACGAATTTCAACGTTCTTGGGGAGCCTGTTGACAATTTG  
GGTCTGTAGATAGTAGTGCGACGTTCCCTATTCATAGATCTGCACCCGCCTTTATCGAG  
TTAGATACGAAATTATCCATCTTTGAAACAGGTATTAAGGTTCGTCGATCTTTTAGCTCCT  
TATCGACGTGGAGGAAAATAGGACTATTCGGGGGGCCGGAGTAGGTAAAACAGTAC  
TCATCATGGAATTAATCAATAACATTGCTAAAGCTCATGGGGCGTATCCGTATTTGGTG  
GAGTCGGGGAACGGACTCGTGAAGGAAATGATCTTTATATGGAAATGAAGGAATCCGG  
AGTAATTAATGAAAAAATATTGAGGAATCAAAGGTAGCTCTAGTCTATGGCCAAATGA  
ATGAACCACCGGAGCTCGTATGAGAGTTGGTTAACTGCCCTAACTATGGCAGAATAT  
TTCCGAGATGTTAATAAGCAAGACGTGCTTTTATTCATCGATAATATCTTTCGTTTTGTT  
AAGCAGGATCGGAGGTATCCGCTTTATTAGGGAGAATGCCTTCTGCAGTGGGTTATCAA  
CCTACTCTTAGTACAGAAATGGGTTCTTTGCAAGAAAGAATTGCTTCTACTAAAAAGG  
ATCTATAACTTCGATTCAAGCAGTTTATGTACCTGCAGACGATTTGACCGACCCTGCTCC  
TGCCACAACATTTGCACATTTGGATGCTACTACCGTACTTTCCAGAGGATTAGCCTCCA  
AGGGTATTTATCCAGCAGTAGATCCTTTAGATTCAACCTCAACTATGTTACAGCCTAGGA  
TTGTTGGCAACGAACATTATGAAACTGCGCAAAGAGTTAAGGAACTTTACAACGTTA  
CAAAGAACTTCAGGACATTATCGCTATTCTTGGGTTGGATGAATTATCGGAGGAAGATC  
GTTTAACTGTAGCAAGAGCAAGAAAAATTGAGCGTTTCTTATCACAACCATTCTTTGTG  
GCAGAAGTTTTTACCGGTTCCGCAGGAAAGTATGTTGGTCTTGCAGAACTATTAGGG  
GATTTCAACTAATACTTTCGGGAGAATTAGATGGCCTACCCGAACAGGCTTTTTATTTGG  
TGGGTAACATCGATGAAGCTAGCACGAAAGCTATAACCTTAGAAGAGGAGAACAATC  
GAAGAAAATGAAATTAATCTTTATGTACTGACTCCTAAGCGAATTATTTGGGATTGTG  
AAGTAAAAGAAATCATTTTATCCACTAATAGTGGCCAAATTGGCGTATTACCAAACCAC  
GCCCCATTAACACAGCAGTAGATATGGGTCCTTTGAGAATACGCCTCAACGACCAATG  
GTTAACGGCGGTTCTGTGGAGCGGTTTTGCGAGAGTAGTTAATAATGAAATCATCATTT

TAGGAAATGATGCGGAACTGGGTAGTGATATTGATCCGGAAGAAGCTCAAGAGGCACT  
TAAAATAGCCGAAGCTAACTTGAGTAAAGCTGAGGGTACGAAAGAATTGGTTGAAGCG  
AAGCTAGCTCTCAGACGAGCCAGGATACGAATCGAGGCTGTCAATTGGATTCCCATGA  
AAAATGTAACCCATTCTTTCGTTTTTTTAGCTCACTGGCCATCCGCTGGCAGTTTCGGG  
CTTAATACCAATATTTTAGCAACAAATCTAATAAATCTAACTGTAGTGGTTGGTGTTTG  
ATTTTTTTTGGAAAGGGAGTGTTAAAAGATTTATTAGATAATCGAAAACAGAGGATCTT  
GAGTACTATTAGAAATTCAGAAGAATTGCGTAGAGGGACCATTGAGAAACTCGAAAA  
GCTCGGATTTCGATTACAGAAAGTCGAACTAGAGGGCGGATGAGTATCGAATGAATGGAT  
ACTCTGATATAGAACGAGAAAAAGCAAATTTGATTAATGCTACTTCTATTAGTTTGGAA  
CAATTAGAAAAGTCTAAAAATGAAACCCTTTATTTTAAAAACAAAGGGCAATGAATC  
AGGTCCGACAACGGGTTTTCCAACAAGCCGTACAAGGAGCTCTAGGAACTCTGAATAG  
TTGTTTGAATACCGAGTTACATTTCCGTACGATTCGTGCTAATATTGGCATTCTCGGGTC  
CATGGAATGGAAGAGA---ATGAATCCACTAATTGCTGCTGCTTCTGTTATTGCTGCTGGA  
TTGGCCGTAGGGCTTGCTTCTATTGGGCCTGGAGTTGGTCAAGGTACTGCTGCAGGAC  
AAGCTGTAGAAGGTATTGCGAGACAGCCAGAAGCAGAAGGTAAAATACGAGGTACTTT  
ATTGCTTAGTCTAGCTTTTATGGAAGCTTTAACAATTTATGGACTAGTTGTGGCACTAGC  
GCTTTTATTTGCGAACCCCTTTTGTATGAATATTATACCTTGTTCATTAACACTCAAG  
GGTTATACGATATATCGGGTGTAGAAGTAGGCCAACACTTCTATTGGCAAATAGGAAG  
TTTCAAATTCATGCCCAAGTACTCATCACTTCTTGGGTTGTAATTACTATCTTGCTAGG  
TTCAGTTGTCATAGCTGTTTCGGAATCCACAAACCGTACCGATGGACGGTCAGAATTTCT  
TTGAATATGTCCTTGAGTTTATTTCGAGACTTGAGCAAAACTCAGATTGGAGAAGAATAT  
GGTCCCTGGGTTCCATTTATTGGAAGTATGTTCTTTTTATTTTTGTTTCGAATTGGTCGG  
GTGCTCTTTTACCTTGGAAAATTATAGAGCTACCCCATGGGGAATTAGCAGCACCCACG  
AATGATATAAATACTACTGTTGCTTTAGCTTTACTCACGTCAGCAGCATATTTTTATGCGG  
GTCTTAGCAAAAAAGGATTGAGCTATTTTCGAGAAATATATTAACCAACTCCAATCCTT  
TTACCAATTAACATACTAGAGGATTTACAAAACCATTATCGCTTAGCTTTTCGACTTTTT  
GGGAATATATTGGCGGATGAATTAGTTGTTGTTGTTCTTGTTCCTTAGTCCCCTTAGTA  
GTCCTTATACCTGTCATGTTTCTTGGATTATTTACAAGCGGTATTCAAGCTCTTATTTTTG  
CAACATTAGCCGCAGCCTATATAGGTGAATCCATGGAGGGTCATCATATGCTATTTGCAA  
CTTTAGAACATATATTAATCATATCTCCTTCTCAACCATTTCCATTGTGATTACGATTCAT  
TTGATAACCTTATTAGTTCATGAACTTGGGGGATTACGTGATTTCGTCAGAAAAAGGAAT  
GATAGTTACTTTTTCTCTATAACAGGATTCCTAGTTTCTCGCTGGGCTTCTTCGGGACA  
TTTTCCATTAAGTAATTTATATGAGTCGTTGATCTTCTTTCATGGGCTCTGTATATTCTC  
ATACCATTCCCTAAGATACAGAACTCTAAAAATGATTTAAGCACAATAACTACGCCAAGT  
ACTATTTTAACGCAAGGCTTTGCCACATCGGGTCTTTTAACTGAAATGCATCAATCCAC  
AATACTAGTACCCGCTCTCCAATCTCAGTGGTTAATGATGCATGTCAGTATGATGTTACT  
AAGCTATGCAACTCTTTTGTGCGGATCCTTATTATCTGCCGCTATTCTAATCATTAGATTT  
CGAAATAATTTCTTTTTCTTTTCTAAAAAGAAAGAT-----TTCTATGTAAAAAGAAGTT  
CTTTAAAAAGCACCTCTGTCCCTTCATTCCCAAATTATTACAAATATCAATTAACGGAGC  
GTTTAGATTCTTGGAGTTATCGTGTCATTAGCCTAGGATTTACCCTTTTAAACCATAGGTAT  
TCTTTGTGGAGCAGTATGGGCTAATGACGCGTGGGGATCCTATTGGAATTGGGATCCTA  
AGGAACTTGGGCATTTATTACTTGGACCATATTTGCAATTTATTTACATAGTAGAACAA  
ATCTAAATTGGAAGGTACGAATTCGCACTTGTAGCTTCGATAGGATTTCTTATAATTT  
GGATCTGCTATTTTGGTATCAATCTATTAGGAATAGGTTTACATAGTTATGGTTCGTTTTATA

TTAACAATGAAAAAAAAAGAAAGCATTGCCTTCTTTACTATATCTTGTATTTATCGTACTT  
TTGCCCTGGGGAGTTTCTTTCTCATTAAATAAATGTCTGGAACCTTGGATTAAGAATTGG  
TGGAATACCCGGCAATCCGAAACTCTCTTACCTTATATTCAAGAGAAAAGGATTCTAGA  
AAGATTCATAGAATTAGAAGAACTTTCTCTCTTGGACGAGATGATAAAAGAGAACTA  
AAGACACATGCACAAAAACCTCCTATAGGGATACACAAGGAAATAATACAATTGGTCA  
AAATGGATAATGAGGATCATCTCCATATCATTGTCATTTCTCGACAAATATAATATGTTT  
GGCTATTCTAAGTGGTTTTTTTTTTCTGAGTAAAGAGGAACTTGTCAATTTGAATTCTTG  
GGTTCAGGAATCTTCTATAATTTAAATGACTCAATAAAAGCTTTTTTTATTCTTTTAGTT  
ACTGATTTTTTTGTGGGATTTCACTCCACCCGCGGTGGGAACTAGTAATTCGTTGGGT  
CTACAACGATCTTGGATGGGCTCCTAATGAGCTAATTTTCACTATTTTTGTTTGTAGTTTT  
CCAGTAATCTAGATACATGTTTGAAATTTGGGTATTTTTTTGTTTAAACCGTTTATCTC  
CTTCGCTTGTAGTCATTTATCATTCAATTAGTGAAATGCCCATTTGGTGTTCAAAAGTAC  
CTTACCGGATTCCTGGAGATGAAGAAGCGACTTGGGTTGACTTATACAATGTTATGTAT  
CGAGAAAGGACACTTTTTTTAGGTCAAGAGATTCGTTGCGAGATCACGAATCATATTAC  
GGGTCTCATGGTATATCTCAGTATAGAAGATGGAATTAGTGATATTTTTTTGTTTATAAAC  
TCCCCAGGTGGGTGGTTAATCTCAGGAATGGCTATTTTTGATACGATGCAAACGGTGAC  
ACCAGATATATACAATATGCCTCGGAATAGCTGCGTCCATGGCGTCTTTCATTCTGCTT  
GGAGGAGAACCCACCAAGCGTATAGCATTCCCTCATGCGAGGATTATGCTTCACCAAC  
CTGCTAGTGCTTATTATCGGGCAAGGACACCAGAATTTTTACTAGAAGTAGAAGAGTTA  
CACAAAGTTCGCGAAATGATCACAAGGGTTTATGCACTAAGAACAGGCAAACCTTTTT  
GGGTTGTATCCGAAGACATGGAAAGGGATGTTTTTATGTCAGCAGACGAAGCCAAAGC  
TTATGGGCTTGTGATATTGTAGGGGATGAACCGAGAGAAGCAAAAGTCACTTTTGAA  
GGTTTAGTTACGGAAGCCCTACCCAACGGAATGTTTCGCGTTCGGCTAGAGAATGATAC  
CATCATCTGGGCTATATTTTCAGGAAAGATCCGTTCTAGTTCTATACGAATACTGATGGG  
GGATAGGGTCAAATTGAAGTAAGTCGTTATGATTCAAGCAAGGGACGTATAATTTATA  
GACTCCACATAAAGATTCGAAGGATATGGAAAAATTCGAAGGGTATTCAGAAAAACA  
CAAATCTCGTCAACAATACTTTGTCTACCCACTACTCTTTCAGGAGTATATTTATGCATTT  
GCCCATGATTATGGATTATTTAGTTGTAATAACAAATTTAGTTCACTACTTGTGAAACGT  
TTAATTATTCGAATGTATCAGCAGAGTTTTTGGATGAACTCGGTTAATCATCCTAACCAG  
GATCGATTGTTGGATTCTGAGTTTTATTCTCAGATTCTATCTGAGGGATTTGCGATCGTT  
GTAGAAACTCCATTCTCGCTACGAGAATTACCTTGCCCGATACCCAAGTTTCAGAATTT  
ACACTCTATTCAATATTTTCTTTTTAGAAAGACAAATTTGTGCATTTGGATTATTTA  
TCACATATAGAAATACCCTATCCTATCCATTTGGAAATCTTGGTTCAACTCCTTCAATACC  
GTATCCAAGATGTTCCATCTTTGCATTTATTGCGATTCTTCTCAACAATTATTCAAATTG  
GAATAGTTTTATTACTAAATCTATTTTTCTTTTAAAAAAGAACTATTTTCGATTCCTA  
TATACTCTTATGTATCAGAATATGAATTTTTCTTGTGTTTCTTCGTAAACAATCTTCTT  
GCTTACCATTAGCAGCTTCAGGAACTTTTTTGGAAACGAATCCACTTTTCTAAGAAGATG  
GAACAT-----ATAATGTATCCTGGTAGGAAAACCTATATGGTTTTTTTATGGATCCTTATGC  
ATTATGTTTCGATATCAAGGAAAGGCCCTTTTTGCATCAAAGGTAATCCTTTTTTTGAAC  
AAAAAATGGAAATGGTATCTTATCAATTTGTGGCAATATTGTTTCTCTTTTTGGACTCAG  
CCGCGAAGGATCCATCTAAACCAATTAGCAAACCTTTGCTTTGATTTTATGGGGTACCT  
TTCAAGTGTACCAAAAAGTCTTTCTTAGTAAAGAATCAAATGCTGGATAATTCATTTCT  
AATAGATACTCTAATC-----CAAAAATTTGGATAACCATAGTTCCCGCTACTGCCCTCATAGG  
ATACTTATCAAAGCTCAATTTTGTACTGGATCGGGCCATCCTATTAGTAAACCCATTTG

GACAGATTTATCAGATTGGGATATTCTTGATCGATTTGGTCCGGATATGTAGAAATCTTTTT  
CATTATCATAGTGGATCTTCAAAAAACGGACTTTGTATCGACTAAAGTATATACTTCGA  
CTTTCATGCGCTAGAACTTTAGCTCGTAAACATAAAAGCACGGTACGAACTTTTATGCA  
ACGATTAGGTTCCGGCATTTTTAGAAGAATTTTTTACC GAAGAAGAGCTAGTGTTCCTT  
TGATGTTACCAAACGTATTTGGTATTTTGATATTATACGTATCAACGACCTGGTGAAGC  
CTCTTATGATAATAGATAGGGTA---GAAGTAGAA---ATTATCAATTCTTTTTTCGAAATCAG  
AA---TTATTAAGAAGTCTATGGACTCATATCGATTCTA---CCCATTTTGAGCCTCCTTT  
TGGGAATCACAATAGAGGTACTCGTAATTGTGTGGTTAGAAAGAGAAATATCTGCATCG  
ATACAACAACGTATTGGTCCTGAATATGCTGGCCCCCTAGGACTGCTTCAAGCTATAGC  
AGATGGGACTAAACTACTTTTTTAAAGAAGATATCTTACCATCCCGAGGAGATATTCCTTT  
ATTTAGCATTGGACCCTCTATAGCAGTCATATCAATTTTATTAAGTTTTTTAGTTATCCCTT  
TGGCATATCATTTTGTTTTAGCCGATCTTAGTATTGGTGTTCCTTTTATGGATTGCCATTC  
AAGTATTGCTCCTATTGGTCTTCTGATGGCAGGATATAGCTCAAATAATAAATATTCCTTT  
TCAGGTGGTCTACGAGCTGCTGCTCAATCCATTAGTTATGAAATACCATTAACCTTTTTGT  
GTGCTAGCAATATCTCTACTATCTAACAGTTCAAGTACAGTTGATATAGTTGAAGCACAG  
TCTAAATATGGGTTTTTTGGATGGAATATTTGGCGCCAGCCTATAGGTTTTCTGGTTTTTC  
TAATTTCTTCTTTGGCAGAATGTGAAAGATTACCCTTTGATTTACCAGAAGCGGAGGAA  
GAATTAGTAGCAGGTTATCAAACCGAATATTCGGGTATAAAATATGCTTTATTTTATCTTG  
TTTCTTACCTAAATTTATTAGTTTCCTCTTTATTTGTAACAGTTCTCTACTTAGGTGGGTG  
GGATTTATCTATTCCTATATATCCTTTTTTTGATTTTTTCAAATGAATAACGCAGTTGGA  
ATTTTGAAATAACAATGGGTATCTTTATTACATTAACATAAGCTTATTTATTTCTCTTCA  
TTTCTATCACAATAAGATGGACTTTACCAGGATGAGAATGGATCAGTTATTAATCTTG  
GATGGAAATTTCTTTTACCTATTTCCCTGGGCAATCTCTTATTAACAACCTTCTTCCAAC  
TGTTTACTAATGATCTGGCATGTACAGAATGAAAACCTCATTCTCGATTCTACGAGAAT  
TTTTATGAAAGCGTTTCATTTGCTTCTCTTCAATGGAAGTTTCATTTCCAGAAATGTAT  
CCTAATTTTTGGCCTAATCTTCTTCTGATGATCGATTCAACCTCTGATCAAAAAGATAG  
ACCTTGGTTCATTTTCATCTCTTCAACAAGTTTAGTAATAAGCATAACGGCCCTATTGTT  
CCGATGGAGAGAAGAACCTATAATTAGCTTTTCGGGAAATTTCCAAACGAACAATTTCA  
ACGAAATCTTTCAATTTCTCATTTTATTATGTTCCACTTTATGTATTCCTCTATCCGTAGA  
GTACATTGAATGTACCGAAATGGCTATAACAGAGTTTCTGTTATTCATATTAACAGCTAC  
TCTAGGGGGAATGTTTTTATGTGGTGCTAACGATTTAATAACTATCTTTGTAGCTCCAGA  
ATGTTTCAGTTTATGTTCCCTACCTATTGTCTGGATATACCAAGAGAGATCTACGGTCTAAT  
GAGGCTACTATGAAATATTTACTCATGGGTGGGGCAAGCTCTTCTATTCTGGTTCATGGT  
TTCTCTTGGCTATATGGTTCATCTGGGGGGGAGATCGAGCTTCAAGAAATTGTGAACGG  
TCTTATCAATACACAAATGTATAACTCCCCAGGAATTTCAATTGCGCTTATATCCATCACT  
GTAGGACTTGGGTTCAAGCTTTCCCCAGCCCTTTTCATCAATGGACTCCTGACGTCTA  
CGAAGGATCCCCACTCCAGTCGTTGCTTTTTCTTCTGTTACTTCAAAGTAGCTGCTT  
CAGCTTCAGCCACGCAATTCGATATTCCTTTTTTATTTCTCATCAAACGAATGGCATC  
TTCTTCTGGAAATCCTAGCTATTCTTAGCATGATTTTGGGGAATCTCCTTGCTATTACTCA  
AACAAAGCATGAAACGTATGCTTGCATATTCGTCCATAGGGCAAATCGGATATGTAATTAT  
TGGAATAATTGTTGGAGACTCAAATGATGGATATGCAAGCATGATAACTTATATGCTGTT  
CTATATCTCCATGAATCTAGGAACTTTTGGCTTGCATTGTATTATTTGGTCTACGTACCGGA  
ACTGATAACATTCGAGATTATGCAGGATTATACACGAAAGATCCTTTTTTTGGCTCTCTCT  
TTAGCCCTATGTCTCTTATCCCTAGGAGGCCTTCTCCACTAGCAGGTTTCTTCGGAAA



ACTCTATCTATTCTGGTGTGGATGGCAAGCAGGCCTATATTTCTTGGTTTCAATAGGACT  
CCTTACGAGCGTTCTTTCTATCTACTATTATCTAAAAATAATCAAGTTATTAATGACTGGA  
CGAAACCAAGAAATTACCCCTTATGTGCGAAATTATAGAAGATCCCTTTAAGATCAAA  
CAATTCCATCGAATTGAGTATGACTGTATGTGTGATAGCATCTACTTTACCAGGAATATC  
AATGAACCCCATTTCTTGAATTGCTCAGGATACCCTCTTTATGTTTCTGCTTCACGAATA  
TGATATTTTTTGGACATTTCTAATAATAGCAAGCCTTATTCTATTTTTGGCATTTTGGATTT  
CAGGGCTTTTAGCCCCGGTTAGTGAAGGACCTGAGAAGCTTTCTAGTTATGAATCGGGT  
ATAGAACCCATGGGGGGAGCTTGGCTACAATCCGAATACGCTATTACATGTTTGGCGCT  
AGTTTTTGTGTTTTTGTATGTCGAAACCGTCTTTCTCTACCCTGGGCAATGAGTTTCGA  
CGTATTGGGTGTATCCGTTTTTATTGAAGCTTTTATTTTCGTGCTTATCCTAGTTGTCCGT  
TTAGTTTATGCATGGCGAAAAGGAGCCTTGGAAATGGTCTATGAGTTATTTTCCTTGGTTA  
ACAATACTTGTGTTTTGCCGATATTTGCAGGTTCAATAATTTCTTTTTACCTCATAGGG  
GAAACAAAATAGTTAGGTGGTATACTATATCCATTTGTTTATTAGAATTCCTTCTAATGAC  
TTATGCATTCTGCTATCATTTCCAACTGGAGGATCCTTTAATCCAATTAAGGAGGATTAT  
AAATGGATAGATATCTTCGATTTCCACTGGAGATTGGGAATCGATGGACTTTCATTAGGA  
TCTATTTTATTGACAGGATTTACTACTTTAGCTACTTTAGCAGCTTGGCCAGTTACCC  
GGAATTCGCGATTATTTCTATTTCTTGATGCTAGCAATGTATAGTGGTCAAATAGGATTATT  
TTCTTCGCGAGACCTTTTACTTTTTTTTATCATGTGGGAGTTAGAATTAATTCCTGTTTAC  
TTACTTTTATCCATGTGGGGGGGAAAGAGGCGTCTATATTCAGCTACAAAGTTTATTTTG  
TATACTGCAGGCGGCTCCATCTTTTTCTTAATCGGAGTTCTGGGTATGGGCTTATATGGT  
TCCAACGAACTGGGATTAGATTTGGAAAGATTAATTAATCAATCATACCCTGCAACCTT  
GGAAATACTTTTATATTTTGGCTTCCTTATTGCTTATGCTGTCAAATTGCCAATTATACCC  
CTACATACGTGGTTACCCGATACCCATGGGGAAGCGCATTATAGTACATGTATGCTTTTA  
GCGGGAATCTTATTAAGATGGGAGCATATGGATTGATTTCGGATCAACATGGAATTGTT  
ACCTCATGCTCATTATCTATTTTCGCCCTGGTTAGTAATAATAGGAGCGATCCAAATAATC  
TATGCAGCTTCAACTTCTCTTGGTCAACGAAATTTCAAAAAAGAATAGCCTATTCTC  
TATATCTCACATGGGTTTCATAATTATAGGAATTGGTTCCATAACCAACATTGGACTCAAT  
GGAGCTATTTTACAAATATTATCCCATGGATTTATTGGTGCTACACTTTTTTTCTTGGCAG  
GAACGGCTTCCGATAGAATGCGTCTTGTTTATCTCGAAGAACTGGGAGGAATATCTATC  
CCAATGCCAAAAATTTTACTATGTTTAGTAGCTTTTCAATGGCTTCTCTTGCCTTACCA  
GGAATGAGTGGTTTTGTGCGAGAATTAGTAGTCTTTTTTGGCCTAATTAAGTCCAAA  
ATTTCTGTAAATGCCAAAAATGCTAATTACTTTTGTAAATGGCAATAGGAATGATATTAAT  
CCTATTTATTTATTATCTATGTTACGCCAGATGTTCTATGGATAACAAGCTATTTAATGTCC  
AAACGCAAATTTTGTGGATTCTGGACCACGAGAACTCTTTATTTAATCTGTATCTTTTT  
ACCAGTAATAGGAATTGGTATTTATCCAGATTTTGTCTCTCCCTATCCATTGACAGGGT  
GGAGGCTCTCGTATCCAATTATTATCCTAAAATGATGTTTGGAGCTTGACTTTTTTTGAG  
TGTCTATTTATTTTCGATTGGTATCTATGGATTGATCACAAGCCGAAACATGGTTAGAGC  
TCTAATATGTCTTGAACCTATACTTAAATCAATTAATCTAAATCTCGTAACATTTTCTGATC  
TATTTGATAGTCGCAATTAAGGAGACATTTTCGCAATTTTGTGATAGCCCTTGGCG  
CTGCTGAGGCCGCTATTGGACTATCCATTTCTTCTTCTATCCATCGTAATAGGAAATCAA  
CTCGTATCAATCAATCTAATTTATTGAATAATATGGAACATACATATCAATATGCATGGGT  
AATCCCTCTTCTCCACTTCCAGTTATTATGTCAATGGGGTTTGGCCTTTTTTTTATTCCG  
ACAGCAACAAGAAATCTTCGTCGCATATGGGCTTTTCTAGTGTTTTATTTCTTAAGTATA  
GCTATGGTATTCTCCATTCAACTGTCTATTCAACAAATAAATGGAAGTTCTATCTATCAGT

ACCTATGGTCTTGGACCGTCAATAATGATTTTTTCCTTAGAATTTGGATACTTGATTGACC  
CACTTACTTCTATTATGTTAATACTAATTACTACTGTAGGAATCCTGGTTCTTATTTATAGT  
GATGGTTATATGTCTCACGATGAAGGATATTTGAGATTTTTTGTATATAAGTTTTTCA  
CTACTTCTATGTTGGGATTGGTTACTAGCTCCAATTTGATACAAATTTATTTTTTTGGGA  
ACTCGTGGGAATGTGTTCCATTTATTGATAGGCTTTTGGTTTACACGACCGATCGCCGC  
GAGTGCTTGTCAAAAAGCTTTTGTAACTAATCGTGTAGGAGATTTTGGTTTATTATTAGG  
AATTTTAGGTTTTTTTTGGATAACAGGTAGTTTAGAGTTTAGGGATTTGTTCAAAATAGC  
TAATAACAATGGAATTAACTCTTACTTACTACTTTGTGTGCTTTTTTATTATTCCTTGGT  
GCAGTTGCGAAATCTGCACAATCCCTCTTCACGTATGGTTACCAGATGCTATGGAAGG  
ACCCACTCCCATTTTCGGCTCTTATACACGCAGCAACTATGGTTGCTGCCGGGATTTTCT  
TCTAGCTCGGCTTTTTCTCTTTTCATATCTCTACCTTTGATAATGACTTTAATTTCTTTAG  
TAGGTACAATAACACTTTTTCTTAGGAGCTACTTTAGCTATTGCTCAAAGAGATATTA  
GAAGCTTAGCCTATTCTACAATGTCTCAATTGGGTTATATGATGTTAGCTCTAGGTATAG  
GTTCTTATCAAGCTGCTTTATTTCAATTTGATCACTCATGCTTATTCAAAGCTTTATTGTT  
CTTGGGATCTGGATCCATTATTCAATGGAACCTCTTGTGGATATTCACCAGAAAA  
AAGTCAGAATATGGTTCTTATGGGCGGTTTAAAGAAAATACATTCCAATTACAAGAACA  
CTTTTTTATGGGGTACACTTTCTCTTTGTGGTATTCCACCTCTTGCTTGCTTTTGGTCCA  
AAGATGAGATTCTTAGTAATAGTTGGTTGTATTGCCCCTTTTTTGGAATAATAGCCTCCT  
TACTGCAGGATTAAGTGCCTTTTATATGTTTCGGATATATTTACTTACATTTGATGGGTAT  
TTGCGTGTTCATTTTCAAATACAGTACCCTAAAGAGGGTTACTTGTATTCAATATCC  
TTATGGGGAAAAAGATACCCAAAAGAGTTAATAGG---GATTTCATTTTATCAACAACA  
AAGTTTTTTTCAGCTAAAAAC-----ACTTTTGCTTATCCGCATGAAATGGGGAATACTAT  
GTTATTTCTCTTCTGATATTACTGCTTTTTACTTTTATTCAATGGATTATAGGAATCTCTT  
TTGAGTTAACCTATTATCAAAGTGGTTAACTCCCTCAATAAACTTGACTCAAGAAAGT  
TCTAATTCTTCTATAAATTCATATGAATTTCTTACTAATGCTATTTCTTCTGTAAGTCTAGC  
CATCTTTGGTTTATTCATAGCATATATCTTATATGGATCCCCTTATTCTTTTTTTTTCAGAATTT  
GGATTTAATAAATTCCTTTTACTTCTTTTTTAGATCAAGTAAAAAAAAGATATACAGTTG  
GTCATATAATCGCGGTTATATGGATATTTTTTATACTAGGGTCTTTACTCTCGGTATAAGA  
AGATTAACCGAACTAACGGAGTTTTTCGATAAGGGTATCATTGATGGAATTACCAATGG  
AGTGGGTCTTGTTAGTTTTTGTATAGGAGAAGAAATTAATAT---GTAGGAGGAGGGCG  
AATCTCGTCTTATTTATTCTTTTTTTTTATGTTATGTATCCGTTTTTTTTATTCTTTTTTATTATG  
GATTTACCTGGACCAATACATGAGATTCTTATGCTATTTGGGGGCTTTGTTCTTCTACTA  
GGAGGTCTAGGAGTAGTATTACTTACCAACCCCATTTATTCTGCCTTTTCGTTGGGATTA  
GTTCTTGTGTTGTATATCCTTATTCTATTTTTTATTAAATTCCTACTTTGTAGCTGTGGCACA  
ACTTCTTATTTATGTGGGAGCCATAAATGCTTTGATCATATTCGCTGTCATGTTTCGTAAAT  
GGCTCAGAATGGTCTAAAGATAAGAATTATTGGACTATTGGAGATGGGTTTACTTCAAT  
CGTTTGTATAACTATTGTTTTTTCACTAATGACTACTATCCCAGATACATCATGGTATGGA  
ATTTCTTTGGACGACAAGATCAAACCAATAGTAGAACAGGGTCTCATAAATAATGTTCA  
ACAAATTGGGATTCATTTAGCAACCGATTTTTATCTTCCGTTTGAACCTATTTCCATAATT  
CTTCTAGTTTCTTTAATAGGTGCAATTACTATGGCTCGGCAAATGAGTCTACCGCTTACA  
AGAAAAGATCTCATGATAGTCAATATGGGCCCTCAACACCCATCAATGCATGGTGTCT  
TCGACTGATCGTTACTCTCGATGGTGAGGATGTTATTGATTGTGAACCCATATTAGGCTA  
TTTACACAGAGGAATGGAAAAAATCGCGGAAAACAGAACTATTATACAATACTTACCTT  
ATGTAACACGGTGGGATTATTTAGCTACTATGTTTACGGAAGCAATAACAGTAAATGCA

CCAGAATTCTTAGAGAATATTCAAATACCCCAAAGAGCCAGCTATATTAGGGTAATTATG  
TTAGAGTTGAGCCGTATAGCTTCTCACTTGTTATGGCTTGGGCCTTTTATGGCGGATCTC  
GGGGCACAGACCCCTTTTTTCTATATTTTAGAGAGAGAGAATTGATATACGATCTATTT  
GAAGCTGCTACAGGTATGCGAATGATGCACAATTACTTTCGCATCGGAGGAGTAGCCG  
CGATCTACCTTATGGATGGATCGATAAATGTTTAGATTTCTGTGATTATTTTTTACGCGG  
AATTATTGAATATCAACAACCTATTAAACAGAATCCCATTTTTTTAGAGCGAGTTGAGGG  
AGTAGGTTTTATTAGTGGCGAAGAAGCAGTAAATTGGGGCTTATCAGGACCAATGTTAC  
GAGCTTCTGGAATACAATGGGATCTTCGTAAAGTAGATCTTATGAGTCTTACAACCAA  
TTTGATTGGAAAGTCCAATGGCAAAAAGAAGGGGATTCGTTAGCTCGCTATTTAGTACG  
AATCAGTGAAATGAGGGAATCCATCAAATAATTCAACAAGCTATAGAAAAAATTCCTG  
GAGGCCCTTATGAGAATTTAGAAGTCCGACGC---AAGAAAGCAAAGACTTCCGAATGG  
AATGATTTTGAATATAAATTTCTTGGTAAAAAACCTTCACCCAATTTGAATTATCAAAG  
CAAGAGCTTTATGTAAGAGTGGAAGCCCCAAAAGGTGAATTAGGAATTTATCTAGTAG  
GAGATGATAGTCTTTTCCCCTGGAGATGGAAAATTCGTCCGCCCGGTTTTATTAATTTAC  
AAATTCCTCCTCAGCTAGTTAAAAAATGAAATTGGCTGATATCATGACGATATTAGGTA  
GTATAGATATCATTATGGGGGAAGTTGATCGTATGTTCCCATGATAACTGGGTTTCATGA  
GTTATGGTCAACAAACAATACGTGCTACAAGGTACATTGGTCAAAGTTTCATAACTACC  
TTATCCACACAAATCGTTTACCTATAACGATTCATTACCTTATGAAAAATCAATTACA  
CCGGAACGTTTCCGGGGGCGAATCCACTTTGAATTTGATAAATGTATTGCTTGTGAAGT  
ATGTGTTCCGGGTATGCCCGATAGATCTACCCCTTGTGGATTGGAGATTTAAAAGGATAT  
TAAAAGGAAACAGTTGCTTAATTATAGTATTGATTTCCGAGTTTGTATATTTTGTGGCAA  
TTGTGTTGAGTACTGTCCGACAAACTGTTTATCAATGACTGAAGAATATGAACTTTCTA  
CTTATGATCGTCATGAATTGAATTACAATCAAATTGCTTTAAGCCGGTTACCCATCTCCAT  
AATGGAAGATTACACAATTCAAACAATTAGGAATTCGAAAATAGACGAAGAGAAATCG  
TCGAATTCAGAAGACTATTACTGATTACCAGCAGGGTTGGTTATCTAATTGGCTAGTCAA  
ACATGAGGTAGTTCATAGATCTTTGGGCTTTGATCACCGAGGAATAGAGACTTTACAAA  
TAAAAGCAGGGGATTGGGATTCCATTGCTGTCAATTTATATGTATATGGTTACAATTTTT  
ACGCTCCCAATGTGCTTATGATGTAGCACCCGGTGGATCTTTAGCTAGCGTGTATCATCT  
TACGAGAATACAGTATGGCATAAGATAATCCAGAAGAAGTCTGTATAAAAGTCTTTGCC  
AAAAGGATAATCCTAGAATTCCGTCTGTCTTCTGGATTTGGAGAAGTGCCGATTTTCAA  
GAACGCGAATCTTATGATATGGTGGGAATCTCTTATGATAATCATCCGCGCCTTAAACGT  
ATCCTAATGCCTGAAAGTTGGATAGGGTGGCCCTTACGTAAGGACTATATAACCCCAA  
TTTTTATGAAATACAAGATGCTCAT-----  
-----ATGGTCTTAACT--GAATATTTGGAC---AAAAAAAAAAAA  
AGAAGGAAAAGATTCCATTGAGACAGTTATGAATTTGATTGAGTTTCCCTTACTTGACC  
AAACAAGTTCCAATTCTGTTATTTCAACTACACCAAATGATCTTTCAAATTGGTCAAGA  
CTCTCCAGTTTATGGCCCCTTCTATACGGTACCAGTTGTTGTTTCATTGAATTTGCTTCAT  
TAATAGGCTCACGATTCGACTTTGATCGTTATGGATTGGTACCAAGATCAAGTCCTAGG  
CAAGCGGACCTAATTTAACAGCCGGGACGGTAACAATGAAAATGGCTCCCTCCTTAG  
TGAGGTTATACGAGCAAATGCCTGAACCAAATACGTCATTGCTATGGGAGCCTGTACT  
ATTACAGGGGGAATGTTTCAGTACGGATTCCTATAGTACTGTTCCGGGAGTTGATAAGTT  
AATCCTGTGGATGTCTACTTGCCGGGCTGCCACCTAAACCGGAGGCAGTTATAGATG  
CCCTAACAAAACCTTCGTAAGAAGATATCGCGAGAAATAGTTGAGGATCAAACCTCTATCT  
CAA---AAAAATAGATTTTTTACTACCAGTCAACAAGCTTTATGTTAGGCGCAGTACTCATA

CTGGAAC TTATGAACAAGAATTGCTCTATCAATCACCATCTACTTTAGATATATCTACT---  
--TTTTTCAAATCCAAAAGTCCAGTACCTTCCTACAAATTAGTGAATATGGAAAATAAAA  
ATACTTTTTCTTGGGTAAAGGAACAGATGACTCGATCGATTTCTGTATCGATCATGATAT  
ACGTAATAACTCAGACATCCATTTCAAATGCATATCCCATTTTTGCGCAGCAGGGTTATG  
AAAACCCACGAGAAGCAACTGGACGAATTGTATGTGCCAATTGCCATTTAGCTAGCAA  
GCCC GTGGATATTGAAGTTCCTCAAGCAGTGCTTCCCGATACTGTATTTGAAGCAGTTC  
TTCGAATTCCTTATGATATGCAATTGAAACAAGTTCCTTGCTAATGGAAAAAAGGGAGGG  
TTGAATGTGGGCGCTGTTCTTATTTTGCCTGAGGGATTCGAATTAGCGCCACCCGACCG  
TATTTCCCCTGAGTTGAAAGAAAAGATAGGAAATCTCTCTTTTCAGAGTTATCGTCCCG  
ATAAAAAAATATTCTTGTGATAGGCCCTGTTCCCGGTAAGAAATATAGTGAAATTGTCT  
TTCTATTCTTTCCCCTGATCCCGCTACGAAGAAAGATGCTTATTTCTTAAATATCCCAT  
ATATGTAGGGGGAAACCGAGGAAGAGGACAGATCTATCCTGATGGTAGCAAGAGTAAC  
AATACGGTCTATAATGCTACCTCAACAGGTATAGTAAAAAAATACTACGTAAAGAAAA  
AGGGGGGTATGAAATATCCATAGTTGATGCATCAGATGGACGCCAAGTGATTGATACTAT  
ACCTCCCGGGCCAGA ACTTCTTGTTTTAGAGGGGGAATCCATCAAGCTTGATCAACCA  
TTAACAAGCAATCCTAATGTGGGAGGTTTTGGTCAGGGGGATGCAGAAATAGTGCTTC  
AGGATCCATTACGCGTCCAAGGCCTTTTTGTTCTTTCGCATCCGTTATTTTGGCACAAG  
TTTTTTTTGGTTCTCAAAAAGAAACAGTTTGAAAAGGTTCAAGTTGTACGAAATGAATTC  
ATGAGTAAAGTATATGATTGGTTTGAGGAACGGCTTGAGATTCAGGCAATTGCAGATGA  
TATAACTAGTAAATATGTTCCCTCCCATGTCAACATATTTTATTGTTTAGGGGGAATTACA  
CTTACTTGTTTTCTAGTACAAGTCGCTACTGGTTTTGCTATGACTTTTTACTACCGACCA  
ACCGTTACAGAGGCTTTTTCCCTCGGTTCAATACATAATGACTGAGGCCAACTTTGGTTG  
GTTAATCCGATCAGTTCATCGATGGTCAGCAAGTATGATGGTTCTAATGATGATCCTGCA  
TGATTTTCGTGTGTATCTCACAGGTGGATTTAAAAAACCCTGGGAATTA ACTTTGGGTCA  
CAGGTGTGGTTTTGGCTGTTTTGACTGCATCATTGGGTGTA ACTGGTTATTCTTTGCCTT  
GGGATCAAATTTGGTTATTGGGCAGTCAA AATTGTGACAGGTGTACCTGATGCCATTCCG  
GTAATAGGATCCCTTTAGTGGAGTTATTACGTGGAAGTGCTAGTGTGGGTCAATCTAC  
TTTGACTCGTTTTTATAGTTTACATACCTTTGTA CTGCCTCTGCTTACTGCCGTATTTATG  
TTAATGCACTTTCCAATGATACGTAAGCAAGGTATTTCCGGTCTTTAATGGGAGTAAC  
AAAGAAACCAGACTTAAATGATCCTGTATTAAGAGCTAAATTAGCTAAAGGGATGGGA  
CATAATTATTACGGGGAACCCGCATGGCCCAACGATCTTTTATATATTTTTCCAGTAGTAA  
TTCTAGGTACTATTGCATGTAATGTAGGTTTAGCGGTTCTCGAGCCATCAATGATTGGTG  
AACCGGCGGATCCATTTGCAACTCCTTTGGAAATATTACCTGAGTGGTACTTCTTTCCC  
GTGTTTTCAAATACTCCGTACGGTACCCAATAAGTTATTGGGCGTTCTCTTAATGGTTTCT  
GTGCCAACAGGCTTATTGACAGTACCCTTTCTAGAGAATGTCAATAAATTCCAAAATCC  
CTTTCGCCGCCAGTAGCTACGACCGTTTTTTTAATTGGTACTGCAGTAGCTCTTTGGTT  
GGGTATTGGAGCAACATTACCCATTGATAAATCTTTAACTTTAGGCCTTTTTATGATTGA  
AGTTTTTCTATTGGAATCGTCTTAGGCCTAATTCTTACTTTAGCGGGATTATTCGTG  
ACTGCATATTTGCAATACAGGCGTGGAGATCAGTTGGATCTTATGCTTACTTTAACTAGT  
TATTTCCGGTTTTCTACTGGCTGCTTTAACTATAACCCCGGCTCTTTTTATTGGCTTGAAC  
AAGATACGTCTTATTATGGATATAGTAAGTCTCGCTTGGGCTGCTTTAATGGTAGTCTTT  
ACATTCTCTTTTCACTAGTAGTATGGGGGAGGAGTGGACTCATGATTATTCGTTCCGC  
GGAACCAGAAGTAAAAATTGTTGTGGATAGGGATCCTGTAAAAACATCTTTTGAGGAA  
TGGTCCAGACCCGGCCATTTCTCAAGAACACTAGCTAAGGGCCCCGATACTACCACTT

GGATCTGGAACCTACATGCTGATGCTCACGATTTTCGACAGTCATACCGGTGATTTGGAG  
GAGATCTCTCGAAAAGTCTTTAGTGCTCATTTCGGGCAACTCTCCATTATCTTTCTTTGG  
TTGAGTGGTATGTACTTTCATGGTGCCCGTTTTTCCAATTATGAAGCATGGCTAAGTGAT  
CCTACTCACATTGGACCCAGTGCTCAGGTAGTTTGGCCTATAGTAGGGCAAGAAATATT  
AAATGGTGATGTAGGTGGGGGCTTCCGAGGAATCCAATAACCTCTGGGTTTTTTCAG  
CTTTGGCGAGCATCTGGAATAACTAGTGAATTACAACCTATTGTAAGTGAATTGGTGCA  
TTGATTTTTGCAGCGTTAATGCTTTTTGCTGGTTGGTTCCATTATCACAAAGCCGCTCCC  
AAATTGGCCTGGTTCCAAGATGTAGAATCCATGTTGAATCACCACCTAGCGGGATTATT  
AGGACTTGGGTCTCTTTCTTGGGCGGGACACCAAATCCATGTATCTTTACCAATTAACC  
AATTTCTTGACGCCGGGGTTGATCCTAAAGAGATACCACCTCCTCATGAATTTATCCTGA  
ATCGGGACCTTTTGGCTCAACTTTATCCTAGTTTTTGGCGAAGGAGCAACCCCTTTTTTC  
ACCTTAAATTGGTCCAATATGCAGAATTTCTGACTTTTCGCGGAGGACTAGATCCAGT  
AACCGGTGGTCTATGGCTGACTGATATTGCGCACCATCATTAGCTATTGCTATTCTTTTC  
CTAATTGCAGGTCATATGTATAGGACCAACTGGGGTATTGGCCATGGACTTAAAGATATT  
TTGGAGGCTCACAAGGGCCCATTACAGGACAAGGCCATAAGGGTCTTTATGAAATCTT  
AACACGTCATGGCATGCTCAATTAGCTCTTAACTTAGCTATGCTAGGCTCTACAACCAT  
TGTTGTAGCTCATCATATGTAAGTCTATGCCCCCTATCCATACCTAGCTACTGACTATGGT  
ACACAACCTTTCTTGTTCACACACCACATGTGGATTGGCGGATTTCTAATAGTCGGTGC  
TGCTGCACATGCAGCAATTTTTATGGTAAGAGACTATGATCCAACCTACTCGATAACAACG  
ATCTATTAGATCGCGTCTTAGACACCGAGATGCAATCATATCCCACCTTAACTGGGTAT  
GTATATTTCTAGGTTTTTACAGTTTTTGGCTTATACATTCATAATGATACCATGAGTGCTTT  
AGGCCGTCCGCAAGATATGTTTTCGGATACCGCCATACAATTACAACCTATCTTTGCTCA  
ATGGGTACAAAATATCCATGCTACTGCGCCTGGCGTAACAGCTCCTGGTGCAACAACA  
AGTACCAGCTTAACTGGGGAGGTGGCGAGTTAGTAGCCGTAGGCGGTAAAGTGGCTT  
TGTTACCTATTCCATTAGGAACCGCAGATTTTTTAGTCCATCACATTCATGCATTTACCAT  
CCATGTGACTGTATTAATACTTTTGAAGGTGTTTTATTTGCTCGCAGTTCCCGTTTGAT  
ACCCGATAAAGCAAATCTAGGTTTTCGCTTTCCTTTCGATGGGCCTGGGCGAGGGGGA  
ACATGCCAAGTATCCGCTGGGATCATGTTTTCTTAGGTTTATTCTGGATGTACAATGCA  
ATTTCCGGTAGTCATTTTTCATTTAGTTGGAAAATGCAGTCGGATGTTTGGGGTACTATA  
AGTGATCAAGGGGTAGTAACTCATATTACAGGGGGAACTTTGCACAGAGTTCCATTAC  
GATTAATGGGTGGCTTCGAGATTTCTTGTGGGCACAGGCATCACAAGTCATTCAGTCTT  
ATGGTTCTTCATTATCTGCATATGGTCTTTTTTTCTTAGGTGCTCATTTTGTCTGGGCCTT  
CAGTTTAAATGTTTTTATTAGTGGCCGTGGTTATTGGCAAGAACTTATTGAATCTATCGT  
TTGGGCTCATAACAAATTAAGTTGCTCCTGCTACTCAGCCTAGAGCCTTGAACATTA  
TACAAGGACGTGCTGTAGGAGTAACCCATTACCTTCTGGGTGGAATTGCCACAACATG  
GGCATTCTTCTTAGCGAGAATTATTGCAGTAGGAATGGAATTAAGATTTCCAGGTTTA  
GCCAAGGCTTAGCTCAGGACCCCACTACTCGTCGATTTGGTTTTGGTATTGCTACCGCA  
CATGATTTGAAAGTCATGATGATTAAGTGAAGAAGTCTTTATCAGAACATTTTTGCT  
TCTCACTTTGGGCAGTTAGCAATAATCTTTCTATGGACGTCCGGAAATCTGTTTCATGTA  
GCTTGGCAAGGAAATTTGAATCATGGATACAGGATCCTTTACACGTAAGACCTATTGC  
TCATGCTATTTGGGATCCTCATTTTGGTCAACCCGCTGTGGAAGCCTTTACTCGAGGAG  
GTGCTGCTGGTCCAGTTAATATCGCCTATTCTGGAGTTTATCAGTGGTGGTATACAATAG  
GATTACGCACCAATGACGATCTTTATACTGGAGCTCTTTTTCTATTATTTCTTTCTACGCT  
GTCCTTAATAGCGGGTTGGTTACATCTACAACCCAAATGGAAACCAAGCCTTTCGTGGT

TCAAAAACGCGGAATCTCGTCTCAATCATCATTTGTCAGGACTTTTCGGGGTAAGTTCT  
TTGGCTTGGACAGGACATTTAGTTCATGTTGCTATTCCCGCATCCAGAGGGGAGTACGT  
TAGATGGAATAATTTCTTAGATGTATTACCTATCCCCAGGGGTTGGGACCCCTTTTAC  
GGGTCAGTGGAATCTTTATGCCCAAACCTGATTCGAGTAATCATTTATTTGGTACCGC  
TCAAGGAGCGGGAACCTGCCATTCTAACTCTTCTTGGGGGATTCATCCACAAACACAA  
AGTTTGTGGCTGACCGATATTGCTCACCATCATTAGCTATTGCATTTATTTTTCTCATTG  
CTGGTCACATGTATCGAACTAACTTCGGAATTGGGCACAGTATCAAAGATCTTTTAGAA  
GCGCATACTCCTCCGGGGGGTCGATTAGGGCGTGGGCATAAGGGCCTTTACGACACAA  
TCAATAATTCATTTCAATTAGGCCTTGTCTAGCTTCTTTAGGGGTTATTACTTC  
CTTAGTACTCAACATATGTACTCTTTACCGGCTTATGCATTTATAGCACAAAGACTTTACT  
ACTCAAGCTGCTTTATATACTCATCACCATATATTGCAGGGTTCATTATGACAGGGGCT  
TTTGCTCATGGAGCTATTTTTTTTCATTAGGGATTACAATCCGGAACAGAATGAAGATAAT  
GTATTGGCAAGAATGTTAGACCATAAAGAAGCTATCATATCTCATTTAAGTTGGGCTAGT  
CTCTTTCTAGGATTCCATAACCCTGGGCCTTTATGTTTATAACGACGTCATGCTTGTCTTT  
GGTACTCCAGAAAAGCAAATCTTGATCGAACCTATATTTGCCCAATGGATAACAATCTGC  
TCATGGCAAGACGACATATGGGTTTCGATATACTCTTATCTTCAACGAATGGCCCCGCTTT  
CAATGCAGGTAGAAACCTATGGTTGCCAGGATGGTTGAATGCTGTTAATGAG-----ATA  
GTAATTCGCTTTTCTTAAACAATAGGACCTGGGGATTCTTGGTTCATCATGCTATTGCTCT  
AGGTTTGCATACAACTACATTGATTTTAGTAAAGGGCGCTTTAGATGCACGTGGTTCCA  
AATTAATGCCGGATAAAAAGGATTTTGGGTATAGTTTTCCTTGTGATGGCCCAGGGCGC  
GGCGGTACTTGTGATATTTCTGCTTGGGACGCGTTTTATTTGGCAGTTTTCTGGATGTTA  
AATACCATTGGATGGGTTACTTTTTATTGGCATTGGAAACATATCACATTATGGCAGGGC  
AACGTTTCACAATTAATGAATCTTCCACTTATTTGATGGGATGGTTAAGAGATTACTTA  
TGGTTAAACTCTTCACAACTTATCAATGGATATAATCCTTTTGGGATGAATAGTTTATCG  
GTATGGGCATGGATGTTCTTATTTGGACATCTTGTTTGGGCTACTGGATTCATGTTCTTAA  
TTTCTGGCGTGGATATTGGCAGGAATTAATTGAGACTTTAGCATGGGCTCATGAACGC  
ACACCTTTAGCTAATTTAATTCGTTGGAGAGATAAGCCCGTGGCTCTTTCCATTGTGCA  
AGCAAGATTAGTTGGATTAGCCCCTTTCCGTGGGTTATATATTCACTTATGCAGCTTT  
CTTGATTGCCTCAACATCAGGCAAATTTGGTATGTCACATTCCGTAAAAATTTATGATAC  
ATGTATAGGATGCACTCAATGTGTACGAGCTTGTCCAACAGATGTATTAGAAATGATACC  
CTGGGATGGATGTAAAGCCAAGCAAATAGCTTCTGCCCCGAGAAGCTGAAGATTGTGTG  
GGTTGTAAGAGATGCGAATCCGCTTGCCCGACGGATTTTTTAAGTGTACGCGTTTATTT  
AGGGCTGAAACAACCCGTAGCATGGCTTTATCTTATATGACGGATTTAAACTTACCTTC  
TATTTTCGTGCCTTTAGTAGGCTTAGTATTTCCGGCAATTGCAATGGCTTCTTTATTTCTT  
TATGTGCAGAAAATAAGATTGTCATGCGGGATATAAAAACATATCTCTCTGTAGCACC  
CGTGCTAAGTACTCTATGGTTTGGTGCTTTAGCAGGTTTATTGATAGAAATTAATCGTTT  
ATTTCCAGATGCTTTGTCATTCCCTTTTTTT-----ATGACTGCAATTTTAGAGAGACGCGA  
AAGTACAAGCCTGTGGGGTCGCTTCTGCAACTGGATAACTAGCACTGAAAACCGTCTT  
TACATCGGATGGTTCGGTGTTTTGTGATGATCCCTACTTTATTGACCGCAACTTCTGTATTTA  
TTATCGCTTCATCGCTGCCCTCCAGTAGATATTGATGGTATTCGTGAGCCTGTTTCTG  
GTTCTTTACTTTATGGAAAACAATATTATCTCTGGTGCTATTATTCCTACTTCGGCGGCGAT  
CGGATTGCACTTTTACCCAATTTGGGAAGCTGCATCTGTTGATGAGTGGTTATACAATG  
GTGGTCTTATGAGCTAATTGTTCTACACTTCTTACTTGGTGTAGCTTGTATATGGGTC  
GTGAGTGGGAACTTAGTTTTCCGTTTGGGTATGCGTCCTTGGATTGCTGTTGCATACTCA

GCTCCTGTTGCGGCTGCTACTGCTGTTTTCTTGATTTACCCTATTGGTCAAGGAAGCTTC  
TCTGATGGTATGCCTTTAGGAATATCTGGTACTTTCAACTTTATGATTGTATTCCAGGCA  
GAGCACAACATCCTTATGCATCCATTCCACATGTTAGGTGTAGCTGGTGTATTCCGGCGG  
CTCCCTATTTAGTGCTATGCATGGTTCCTTGGTAACCTCTAGTTTGATCAGGGAAACTAC  
TGAAAATGAATCTGCTAATGAGGGTTACAAATTTGGTCAAGAGGAAGAGACTTATAATA  
TTGTGGCTGCTCATGGTTATTTGGCCGATTAATCTTCCAATATGCTAGTTTCAACAAC  
CTCGTTCTTTACACTTCTTCTTGGCTGCTTGGCCTGTAGTAGGAATCTGGTTCACTGCTT  
TAGGTATTAGTACTATGGCTTTCAACCTAAATGGTTTCAATTTCAACCAATCTGTAGTTG  
ATAGTCAAGGTCGCGTTATTAATACTTGGGCTGATATCATCAACCGAGCTAATCTTGGTA  
TGGAAGTAATGCACGAACGTAATGCTCACAACTCCCTCTAGACCTAGCTGCTCTTGAA  
GTTCCATCTCTAATGGAATGGGTTTGCCTTGGTATCGTGTTCCATACCGTCGTATTGAAT  
GATCCGGGTCGATTACTTGCGGTGCATATAATGCACACAGCTCTAGTTTCTGGTTGGGC  
TGGCTCGATGGCTTTATACGAATTAGCAGTTTTTGATCCCTCTGATCCTGTTCTGGATCC  
AATGTGGAGACAAGGTATGTTTCGTCATTCCCTTCATGACTCGTTTAGGAATAACGGATT  
CGTGGGGTGGTTGGAGTATTTCA---GGAGGAACTGTAACAAATCCGGGTATTTGGAGTT  
ATGAAGGTGTGGCAGGTGCGCATATTGTGTTTTCTGGCTTGTGTTTTCTTGGCAGCAATC  
TGGCATTGGGTATATTGGGACCTAGCAATATTCTCTGATGACCGGACGGGAAAACCCCTC  
TTTGGATTTGCCCAAGATCTTTGGAATTCATTTATTTCTTGCAGGGGTGGCTTGCTTTGG  
CTTTGGCGCATTTTCATGTAACGGGTTTGTATGGTCCTGGGATATGGGTATCCGATCCTTA  
TGGACTAACTGGAAAAGTACAAGCTGTAATCCAGCATGGGGTGCAGAAGGTTTTGAT  
CCTTTTGTCCGGGGGAATAGCTTCTCATCATATTGCTGCGGGTACGTTGGGTATATTA  
GCGGGCTTATTCCATCTTAGTGTCCGTCCGCCTCAACGTCTATACAAAGGATTACGTATG  
GGCAATATTGAAACTGTACTTTCCAGTAGTATCGCTGCTGTATTTTTTGCAGCTTTCGTA  
GTTGCTGGAACATATGTGGTATGGGTCAGCAACAACCCCAATTGAATTATTTGGGCCTAC  
TCGTTATCAGTGGGATCAGGGATACTTTCAGCAAGAAATATATCGAAGAGTTAGCAATG  
GTTTAGCTGAAAATCTTAGTTTATCAGAAGCTTGGTCTAAAATTCCCGAAAAATTAGCC  
TTTTATGATTATATTGGTAATAATCCGGCAAAGGGGATTATTCAGAGCAGGCTCAATG  
GACAATGGGGATGGAATAGCTGTTGGATGGTTAGGACATCCTGTCTTTAGAGATAAAGA  
AGGACGTGAGCTTTTTGTACGTCGTATGCCACTTTTTTTGAAACATTTCCGGTTGTTTT  
GGTAGATGAAGAGGGAATTGTGAGAGCGGACGTTCCTTTTAGAAGAGCAGAATCCAA  
ATATAGTGTGAAACAAGTAGGCGTAACGGTGGAGTTCTATGGTGGCGAACTTAATGGA  
GTAAGTTATTCTGATCCTGCTACTGTAAAAAATATGCGAGGCGTTCCCAATTAGGGGA  
AATTTTTGAATTAGATCGGGCTACTTTGAAATCAGATGGTGTTTTTTCGCAGCAGTCCAA  
GGGGTTGGTTCACTTTTGGTCATGCTACCTTTGCTTTGCTCTTCTTTTTTCGGACACATTT  
GGCATGGGGCTAGAACCTTGTCCGAGATGTTTTTGCTGGTATTGACCCAGATTTGGAT  
GCTCAAGTGGAATTTGGAACATTCAAAAAGTGGGAGATCCAACTACAAGGAAACAG  
GCAGTCATGAAAATCTTATATTCCCTGAGGAGGTTCTACCACGTGGAACGCTCTTTAA  
TGGAACTTTCGTTTTAGCTGGTTCGTGACCAAGAAACCACCGGCTTTGCTTGGTGGGCT  
GGGAATGCCAGACTTATCAATTTGTCCGGTAAGCTACTTGGAGCTCACGTAGCTCATGC  
CGGATTAATCGTATTCTGGGCCGGAGCAATGAACCTATTTGAAGTGGCTCATTTCGTAC  
CAGAAAAGCCCATGTATGAACAAGGCTTAATTTACTTCCACACTTAGCTACTCTAGGT  
TGGGGAGTAGGACCAGGGGGAGAAGTTCTAGATACTTTCCGTACTTTGTATCTGGAGT  
ACTTCACCTAATTTCCCTCCGAGTCTTAGGCTTCGGTGGCATTIATCACGCGCTTCTGGG  
CCCTGAGACTCTTGAGGAATCTTTTCCATTTTTTGGTTATGTATGGAAAGATAGAAATAA

AATGACTACAATTTTGGGTATTCACCTTAATTTTGTTAGGTCTAGGTTCTTTTCTTTTAGTA  
CTTAAGGCTCTTTATTTTGGCGGTGTATATGATACCTGGGCCCTGGGGGGGAGATGT  
AAGAAAGATTACCAATTTGACTCTTAGCCCCAGTGTTATATTTGGTTATTTACTAAAATC  
TCCTTTTGGGGGAGAAGGGTGGATTGTTAGTGTGGATGATTTAGAAGATATAATTGGTG  
GACATGTATGGTTGGGTTTCATTTGTGTATTTGGCGGAATTTGGCATATCTTAACCAAAC  
CCTTTGCATGGGCTCGCCGTGCATTTGTATGGTCTGGAGAAGCTTACTTGTCTTATAGTT  
TAGCTGCTTTATCTGTCTTTGGTTTTATCGCTTGTGTTTTGTATGGTTCAATAATACGGC  
TTATCCGAGTGAGTTTTATGGACCCACCGGGCCAGAAGCTTCTCAAGCTCAGGCATTTA  
CTTTTCTAGTTAGAGATCAGCGTCTTGGAGCTAATGTGGGATCTGCTCAAGGACCCACA  
GGTTTAGGTAATATCTAATGCGTTCCTCAACTGGGGAGGTTATCTTTGGAGGGGAAAC  
TATGCGTTTTTGGGACCTTCGCGCTCCATGGTTAGAACCTCTAAGGGGCCCAATGGTT  
TGGACTTGAATAGGTTGAAAAAGATATAACAACCTTGGCAAGAACGACGTTTCAGCAGA  
ATATATGACCCACGCCCTTTAGGCTCTTTAAATTTCTGTGGGTGGCGTAGCTACCGAGAT  
CAATGCAGTTAATTATGTCTCTCCTAGAAGTTGGTTATCAACTTCTCATTTTGTCTAGG  
ATTCTTCTTTTTTGTGGGCCATTTGTGGCATGCAGGAAGAGCCCGAGCTGCTGCAGCA  
GGTTTTGAAAAGGGAATCGATCGTGATTTGGAACCTGTTCTTTACATGAATCCTCTTAA  
CATGACTATAGTCCTTGGTAGAGTTCTTAAAGAAGAAAATGATCTATTTGATACTATGGA  
TGACTGGTTACGAAGGGACCGTTTTCGTTTTTGTAGGATGGTCTGGCCTATTGCTCTTTC  
CTTGTGCTTATTTTCGCTTTAGGGGGTTGGTTTACAGGGACAACCTTTTGTAACCTTCTTGGT  
ATACCCATGGATTGGCTAGTTCCTATTTGGAAGGTTGTAATTTCTTAACCGCAGCAGTTT  
CTACCCCTGCCAATAGTTTAGCACACTCTTTGTTGCTACTATGGGGGCCGGAAGCACAA  
GGAGATTTTACTCGTTGGTGTCAATTAGGCGGTTTATGGACGTTTGTAGCTCTCCACGG  
GGCTTTTGCACATAAGGTTTCATGTTACGCCAATTTGAACTTGCTCGGTCTGTTCAATT  
GCGGCCTTATAATGCAATCTCATTCTCTGGTCCAATCGCGGTTTTTGTCTGTATTCCTT  
ATTTATCCACTGGGGCAATCTGGTTGGTTCTTTGCGCCGAGTTTTGGCGTAGCAGCAAT  
ATTTTCGATTCATCCTTTTCTTCCAAGGATTCATAATTGGACGTTGAACCCATTTTCATATG  
ATGGGAGTTGCCGGAGTATTAGGCGCGGCTCTGCTATGCGCTATTCATGGAGCGACCGT  
AGAAAACACTCTATTTGAGGACGGTGATGGTGCAAATACCTTCCGCGCTTTTAAACCCA  
ACTCAAGCTGAAGAACTTATTCAATGGTCACGGCTAACCGCTTTTGGTCCCAAATCTT  
TGGTGTGCTTTTTTCCAATAAACGTTGGTTACATTTCTTTATGCTATTTGTACCCGTCACC  
GGTTTATGGATGAGTGCTATTGGCGTAGTAGGCCTGGCTCTGAACTTACGTGCCTATGA  
CTTTGTTTTCCAGGAAATCCGTGCAGCGGAAGATCCTGAATTTGAGACTTTCTACACCA  
AAAATATTCTTTTAAACGAGGGTATTCGTGCGTGGATGGCAGCTCAGGATCAGCCTCAT  
GAAAATCTTATATTCCCTGAGGAGGTTCTACCACGTGGAACGCTCTTATGTCTGGAAG  
CACGGGAGAACGTTCTTTTGTCTGATATTATTACCAGTATTCGATACTGGGTTATTCATAG  
CATTACTATACCTTCCCTATTTATTGCGGGTTGGTTATTTGTCAGTACGGGTTTAGCTTAT  
GACGTGTTTGGAAAGTCTCGGCCAAACGAGTATTTACGGAAAGACGACAAGGAATT  
CCGTTAATAACCGACCGTTTTGATTCTTTAGAACAACCTCGATGAATTTAGTAGATCCTTT  
ATGACCATAGATCGAACCTATCCTATTTTTACAGTGCGATGGCTGGCTATTCACGGACTA  
GCTATACCTACTGTTTTTTCTTGGGATCAATATCAGCAATGCAGTTCATCCAACGAATG  
GCTACACAAACCGTTGAAGATAGTTCTAAACCTAGG---CCAAAACGAACTGGTGCAGG  
TAGTTTATTGAAACCCTTGAATCCGAATATGGGAAAGTAGCTCCGGGTTGGGGGACTA  
CTCCTTTTATGGGGGTTGCAATGGCTTTATTCGCTATATTCTAGCTATCATTTTAGAAAT  
TTATAATCTTCTGTTTTTACTGGACGGAATTTTAAACCAATATGCTTACTCTCAAACCTTTT



GTTTATACAGTAGTAATATTTTTTGTTCCTATTTATCTTTGGATTCTTATCTAATGACCC  
AGGACGGAATCCTGGGCGGAGGAGATGGCCGATACTACTGGAAGAATTCCTCTTTGG  
CTTATAGGTAAGTAACTGGTATTCCTGTGATTGGTTTAGTAGGTGTTTTCTTTTACGGTT  
CATATCTGGATTGGGTTTCATCTCTAATGCCTAATACTTAGTTTAACTGTATCTTTTT  
AATTCTGTTCTTTATCCGACTAGTTTTTTCTTTGCCAAATTGCCCGAAGCTTATGCTATTT  
TCAACCCCATCGTGGATGTTATGCCTGTACACCTCTATTCTTTTTTCTATTAGCCTTTGT  
TTGGCAAGCTGCTGTAAGTTTTTCGAATGACACAATCAAACCCGAATGAACAAAATGTT  
GAATTGAATCGTACCAGTCTATACTGGGGTTTATTACTCATTTTTTGTAAGTGTGTTTTAT  
TTTCCAATTACTTCTTCAATATGGAAGTCAATATTCTCGCATTATTGCTACTGCACTGTT  
CATTCTAATTCCTACTGCTTTTTTACTTATTATTATGTAACAAACAGTCAGCCAAAATGAT  
ATGGAAACAGCAACTTTAGTCGCCATCTCCATATCTGGTTTACTTGTAAGCTTTACTGGG  
TACGCCTTATATACCGCGTTTTGGGCAACCCTCTCAACAATTACGAGATCCATTCTGAAGA  
ACACGGGGACATGGAAGCATTGGTTTATACGTTCCTTTTAGTTTCTACTTTAGGGATAAT  
TTTTTTCGCTATCTTCTTCCGAGAACCACCTAAGGTTCCAATAAAAAGAATAAAAATGA  
CTATTGCTTTCCAATTAGCTGTTTTTGCATTAATTGCGACTTCCTCAGTCTTAGTAATTAG  
TGTACCCCTTGTATTTGCTTCTCTGATGGTTGGTCAAATAATAAAAACGTTGTATTTTC  
CGGTACATCATTATGGATTGGACTAGTCTTCTCGTAGCTATTCTAAATTCTCTCATTTC-  
-----ATGTCACCACAAACAGAACTAAAGCAAGTGTGGATTTCAAGCTGGT  
GTAAAGATTATAAATTGACTTACTACACCCCGGAGTATGAAACCAAGGATACTGATATC  
TTGGCAGCATTCCGAGTAACTCCTCAGCCTGGGGTTCCGCCGAAGAAGCAGGGGCT  
GCAGTAGCTGCCGAATCTTCTACTGGTACATGGACAACCTGTTTGGACTGATGGACTTAC  
CAGTCTTGATCGTTACAAAGGACGATGCTATCATATCGAGCCTGTTGCTGGGGAAGACA  
ACCAATGGATCTGTTATGTAGCTTATCCATTAGACCTATTTGAAGAGGGTTCCGTTACTA  
ACATGTTTACTTCTATTGTGGGTAACGTATTTGGTTTCAAAGCCCTACGTGCTCTACGTC  
TGGAGGATCTACGAATTCCTGTTATTCAAACCTTTCCAAGGTCCGCCTCATGGT  
ATCCAAGTTGAAAGAGATAAGTTGAATAAGTATGGTCGTCCTTTATTGGGATGTACTATT  
AAACCAAATTGGGATTATCCGCAAAAATTATGGTAGAGCGTGTATGAGTGTCTACG  
TGGTGGACTTGATTTTACCAAAGATGATGAAAACGTAAACTCACAAACCTTATGCGCT  
GGAGAGACCGTTTTGTCTTTTGTGCCGAAGCTCTTTATAAAGCACAGGCCGAAACCGG  
TGAAATTAAGGGGCATTACTTGAATGCGACTGCAGGTACATGTGAAGAAATGATTAAG  
AGAGCTGTATTTGCGAGAGAATTAGGGGTTCCATTGTAATGCATGACTACATACTGG  
GGATTACCGCAAATACTAGTTTGGCTCATTATTGCCGCGACAATGGCCTACTTCTTC  
ACATTCACCGTGCAATGCATGCAGTTATTGATAGACAGAAAAATCATGGTATGCATTTCC  
GTGTATTAGCTAAAGCATTGCGTATGTCTGGGGGAGATCATATCCACTCCGGTACAGTA  
GTAGGTAAGTTAGAAGGGGAACCGGAAATGACTTTAGGTTTTGTTGATTTATTGCGCGA  
TGATTTTATTGAAAAGATCGTGCTCGCGGTATCTTTTCACTCAGGATTGGGCATCTAT  
GCCAGGTGTTATACCGGTAGCTTCAGGCGGTATTCATGTTTGGCATATGCCAGCTCTGA  
CCGAAATCTTTGGGGATGATTCTGTATTACAATTTGGTGGAGGAACTTTAGGACATCCT  
TGGGGAAACGCACCTGGTGCAGCAGCTAATCGAGTGGCTTTAGAAGCCTGTGTACAAG  
CTCGTAACGAAGGGCGTGATCTTGCTCGTGAAGGTAATGAAATTATCCGAGCAGCTTG  
CAAATGGAGTCTGAACTAGCCGCGGCTTGTGAAGTATGGAAGGCGATCAAATTCGAG  
TTCGAGCCGGTAGATACTATCGATAACACGGCGAAACATTTATACAAAACACCTATCCC  
GAGCACACGCAAGGGAACCGTAGACAGGCAAGTGAATCCAATCCACGAAATAATTT  
GATCCATGGACGACACCGTTGTGGTAAAGGTCGTAATTCCAGAGGAATCATTACCGCA

AGGCATAGAGGGGGAGGTCATAAGCGCCTATAACCGTAAAATAGATTTTACGGAATCA  
AAAAGACATATCTGGTAGAATCGTAACCATAGAATACGACCCTAATCGAAATGCATACA  
TTTGTCTCATACACTATGGGGATGGTGAGAAGAGATATATTTTACATCCCAGAGGGGCTA  
TAATTGGAGATACTATTGTTTCTGGTACAAAAGTTCCTATATCAATGGGAAATGCCCTAC  
CTTTGACCGATATGCCCTTAGGCACGGCCATGCATAACATAGAAATCACACGTGGAAGG  
GGTGGGCAATTAGCTAGAGCAGCAGGTGCTGTAGCGAAACTGATTGCAAAGAGGGT  
AAATCGGCCACTTTAAGATTACCATCTGGGGAGGTCCGTTTAGTATCCCAAACCTGCTT  
AGCAACAGTCGGACAAGTGGGTAATGTTGGGGTGAACCAAAAAAGTTTGGGTAGAGC  
CGGATCTAAGTGTTGGCTAGGTAAACGACCCGTAGTAAGAGGGGTAGTTATGAACCCT  
GTGGACCACCCCATGGGGGCGGTGAAGGGAAAGCCCCATTGGTAGAAAAAACCC  
ACAACCCTTGGGGTTATCCTGCGCTTGGAAGAAGAACTAGGAAAAGGAAAAATATA  
GCGATAGTTTTATTCTTCGTCGCCGTAAG---ATGATTCAACCTCAGACCCTTTTAAATGT  
AGCAGATAATAGTGGAGCTCGAAAATTGATGTGTATTTCGAGTCATAGGAGCCGCTGGTA  
ATCAGCGATATGCTCGTATTGGTGATGTTATTGTTGCTGTAATTAAGACGCATTGCCGC  
AAATGCCCTAGAAAGATCCGAAGTAATTCGAGCTGTAATTGTACGTACATGTAAAGAG  
TTCAAATGTGAAGATGGTATAATAATCCGCTATGATGACAATGCCGCGGTTATAATTGAT  
CAAAAAGGAAATCCAAAAGGAACTCGAGTTTTTGGTGCGATTGCCGAAGAATTGAGA  
GAATTGAATTTTACCAAATAGTTTCATTAGCTCCTGAAGTATTAATGCTTAGTCCGAAA  
AGAACCAGATTTTCGCAAACAACATCGAGGAAGAATGAAAGGAAAATCCTGCCGAGGC  
AATCGTATTTGTTTTGGTAGATATGCTCTTCAAGCACTTGAGCCTGCTTGGATCACAGCG  
AGACAGATAGAAGCAGGACGAAGAGCAATAACACGATATGCACGTGCTGGTGGAAAA  
ATATGGGTACGTATATTTCCCGACAAACCGTTACTAAGACCCACAGAAACACGTAT  
GGGCTCAGGAAAGGGGTCCCCGAATATTGGGTAGCCATTGTTAAACCAGGTCGTATA  
CTTTATGAAATGGGGGAGTATCCGAACTATAGCTAGAGCAGCTATGGAGATAGCTGC  
CAGTAAAATGCCAATACGAAGTCAATTTATTTCGATTAGAGATGACCAGAGTTCCGCGAG  
GATATATAGCCCGGAGACGACGAACAAAATGCGTTCATTTGCCTCAAACCTTAGAGG  
GGCTCATTTAAGACTTAATCGAATGATTACCCAACAGGTAAAAGAGCTTTTGTTCCT  
CTCATCGAGATAGAGGTAGGCAAAGAGAGATTTTCGTCGTTTGTGGATCACTCGGATA  
AACGCAGCAACGCGGATATAT-----GTATTTGATAGTTATAGTAAATTAATACACAATCTGT  
ACAAGAAGAAATTGATTCTTAATCGTAAAATGCTTGCACAAGTAGCTGTATCAAATCCA  
AATAATCTTTACACGATTTCAAATAAAAATAAAAATCATCAAT-----AGGA  
TAAAGCGAATTTTCAAAGCACAAAACGTATAAATATGTCTGTTTCAAAGCACAAAG  
AGTTCTTGATGAGATTCGCTGGCGTTACTACGAGGAAACTGTTATGATACTGAACCTCA  
TGCCTTATCGAGCATCTTATCCCATCTTAAAGTTGGTTTATTTCGGCATCAGCGAATGCTA  
CTCATTATAGGAATTTTCGACAAAGCAAATTTATTACTAATAAGCCGAAGTCAGTAGG  
AGTACTATTATGAAAAATTCAGACCTCGGGCTCGAGGACGTAGTTTCCCCATAAAAA  
AAACATGTGTCATATAACAATTATACTAAAT---GTAAAGAAA-----ATGGAT  
GGAATCAAATACGCAGTATTTACAGAAAAAGTCTTCGTTTATTGGGAAAGAAT---CAA  
TATACTTTAATGTGCAATCGGGATTCACTAAGACAGAAATAAAGCATTGGGTGCAACT  
CTTCTTTGGTGTTAAGGTAGTAGCTGTGAATAGCCATCGACTACCTGGAAAGGGTAGAA  
GAATAGGACCTATTCTGGGACATACAATGCATTACAGACGTATGATCATTACCCTTCAAC  
CGGGTTATTCTATTCCACTTCTAGATAGAGAAAAAACATGGCAGTTCCAAAAAACGT  
ACTTCAATGTCAAAAAGCGTATTCGTA AAAATATTTGGAAGAAAAGACTTATTTTTC  
CATAGTACAGGCTTATTCTTTAGCAAATCATTTTCGAGTGGCAAACCAAAAGGTTTTT

CTAGGCAACAAACAAACAAAATGGCAAAGGGGAAAGATGTTAGAATCAGAGTTATTTT  
GGAATGCATCAGTTGTGTTTCGAAAA-----GGT-----GAGGAATCGACGGGGATTTCTAGA  
TATAGTACTCAAAGAATCGCCACAATACACCCGGACAATTAGAATTCAAAAAATTTTG  
TCGTTATTGTCGCAAACATACTCATCACGAAATAAAGAAAATGAAAATAAGAGCTT  
CCGTTTCGTAAAATTTGTACAAAATGTCGACTGATTCGTAGGCGTGGACGAATCAGAGTC  
ATTTGCTCTAATCCGAAGCATAAACAAGACAGGGGATGGTTTCGAGAGGAGGTAGCAG  
GATCCACTCAAACACTACAGTGGAAATGTGTTGAATCAAGAGTAGATAGTAAGCGTCT  
TTATTATGGTCGTTTCATTCTGTCCCGCTTAGGAAAGGGCAAGCGGACACCGTAGGTA  
TTGCCTTGCGAAGAGCTTTACTTTGGAGAAATAGAAGGAACATGTATCGCACGCGCAA  
ATTTGGG-----AGCGTACCACACGAATATTCTACAATAGCAGGTATTGAGGAATCCGTAC  
AAGAAATTTTACTAAATTTGAAAGAAATTTGATTGAGAAGTAATCTCTATGGAGTTAGA  
GACGCATCAATTTGCGTCAAAGGTCCTAGATACATAACTGCTCAAGATATAATCTTACCA  
CCTTCCGTAGAAATCGTTGATACGTCACAACCTATAGCTAACTTGACAGAGCCTATTGA  
TTTTTGTATTGAGTTACAGATAAAGAGAGATCGTGGATATCAGACAGAACTCAGAAAG  
AATTATCAAGATGGAAGTTAT-----CCTATAGATGCTGTATCCATGCCTGTTTCGAAATGTG  
AATTATAGTATTTTTTCTTGTGGGAATGGAATGAAAAACACGAGATACTTTTTCTAGAA  
ATATGGACTAATGGAAGTTTAACCCCTAAGGAAGCGCTTTATGAGGCCTCTCGTAATTT  
GATTGATTTATTTCTTCTTTTCTACACGCGGAAGAAGAG-----GGCACTAGTTTCGAAG  
AAAATAAA---AATAGGTTTACTCCACCCCTTTTTACTTTTTCAAAAAAGATTAATAATAA  
TCTAAAGAAAAACAAAAA---GGAATTCATTGAATTGTATTTTTATTGATCAATTAGAA  
TTGCCTTCTAGAACGTATAATTGTCTCAAAGGGCCAATATACATACTATTGGACCTT  
TTGAGTAAGACTGAAGAAGATCTTATGAGAATTGACAGTTTTTCATATGGAAGATGGAA  
AACAGATCTGGGACACTCTAGAGAAGTAT-----CTCCAATTGATTTACTTAAGAATAAG  
ATGCTCCGGAATGGAAC---GAGGGAATGTCCACAATACCCGGATTTAGTCAGATCCAA  
TTCGAGGGATTTTGCAGGTTCAATTAATCAAGCCCTGGCAGAAGAACTTAACAAGTTTC  
CAGCAATTAAGATCCAGATCACGAAATGCAATTTCAATTTTTCGCAAAGGATATCAAT  
TGCTAGAACCCTCGATAAAAGAAAGGGATGCTGTGTATGAATCACTTACCTATTCTTCC  
GAATTATATGTATCCGCGAGATTAATTTTCGGTTTTC-----GATGTGCAAAGCAAACCATT  
TCTATTGGAAACATTCCTATAATGAATTCCTTAGGAACCTTTATTATAAATGGAATATACC  
GAATTGTGATCAATCAAATATTGCTAAGTCCTGGTATTTACTACCGCTCGGAATTAGATC  
ATAAGGGAATTTCTATCTACACCGGGACTATAATATCAGATTGGGGAGGAAGATCAGAA  
TTAGCAATTGATAAAAAAGAAAGGATATGGGCTCGCGTGAGTAGAAAACAAAAGATAT  
CTATCTAGTTCTATCATCAGCTATGGGTTTCGAATCTAAGAGAAATTCTAGATAATGTTTC  
CTACCCTGAAATTTTTTTGTCTTTCCCGAATGCTAAGGAAAAGAAGAGGATTGAGTCA  
AAAGAAAAGCTATTTTGGAGTTTTATCAACAATTTGCTTGTGTAGGTGGGGACCTGGT  
ATTTTCGGAGTCCTTATGTGAGGAATTACAAAAGAAATTTTTTCAGCAAAAATGTGAAT  
TAGGAAGGATTGGTCGCCGAAATATGAATCGGAGGCTTAATCTTGATATACCTCAGAAC  
AATACATTCTTGTTACCACGAGATGTATTGGCCGCTACAGATCATTGATTGGAATGAAA  
TTTGGAACGGGTATACTTGACGATGACGATATGAATCACTTGAAAAATAAACGTATTCG  
TTCGGTTGCGGATCTGTTACAAGATCAATTTGGACTGGCTCTTGGTCGTTTACAACATG  
CAGTTCAAAAAACTATCCGTAGAGTATTCATACGTCAATCGAAA-----CCGACTCCCAA  
ACTTTGGTAACTCCAACCTCAACTTCGATTTTATTAATAACTACTTATGAGACCTTTTTT  
GGCACATACCCGTTATCTCAAGTTTTTTGATCAAACGAATCCATTGACACAAACTGTTC  
TGGGCGAAAAGTGAGCTGTTTAGGTCCTGGAGGGTTGACAGGGAGAAGTTCAAGTTT

TCGGAGCCGAGATATTCATCCGAGTCACTATGGGCGTATTTGTCCAATTGACACGTCTG  
AAGGAATCAATGTTGGACTTACTGGATCCTTAGCAATTCATGCGAGAATTAATCACTTG  
TGGGGATCCATAGAGAGCCCGTTTTATGAAATATCTGAGAAAGCAAAAAAAAAAAAAAAT  
CA-----AGACAGGTAGTTTATCTATCACCAAATAGAGATGAATATTATATGATAGCAGCAG  
GAAATTCTTTGTCCTTGAATCAAGGTATTCAGGAAGAGCAGGTTGTTCCAGCTAGATAC  
CGTCAAGAATTCCTGACTATTGCATGGGAACAGATTCATGTTAGAAGTATTTTTCTTTC  
CAATATTTTTCTATTGGAGGTTCTCTCATTCTTTTTATTGAGCACAATGATGCGAATCGG  
GCTTTAATGAGTTCTAATATGCAGCGCCAAGCAGTTCCTCTTCTCGGTCCGAGAAGTG  
CATTGTTGAACTGGATTGGAACGCCAAACAGCTCTAGATTCGGGGGTTTCCGTTATAG  
CCGAACGCGAGGGAAAGATCCTTTCTACTGATAGTCATAAGATCCTTTTTATCAAGTAGT  
GGGAAGACTCTAAGTATTCCTTTAGTTAACCACCGTCGCTCTAACAAAAATAATTGTAT  
GCACCAAAAATCGCGGGTTCACGGGGTAAATCCATTA AAAAAGGACAAAATTTTAGCA  
GAGGGAGCTGCTACAGTTGGGGGGGAACTTGCTTTAGGAAAAACGTATTAGTAGCTT  
ATATGCCATGGGAAGGTTACAATTTTGAAGACGCAGTACTAATTAGCGAACGTTTGGTA  
TATGAAGATATTTATACCTCTTTTACATCCGAAATATGAAATTCAGACGGATACGACA  
AGCCAAGGCTCCGCTGAAAAATAACTAAAGAAATACCACATCTAGAAGCACATTTAC  
TCCGCAATTTGGACAGAAATGGAGTGGTTAGGTTGGGATCCTGGGTAGAACTAGTGA  
TATTTTAGTAGGTAAATTAACGCCTCAGATAGCGAGTGAA---TCGTCGTATATCGCGGAA  
GCTGGATTACTACGGGCCATATTTGGCCTTGAGGTATCCACTTCAAAGAAACTTCTCT  
CAAATTACCTATAGGCGGAAGAGGGCGCGTTATCGATGTGAAATGGATCCAGAGG-----  
-----GACCCATAATGGTTTCGTGTATATATTTTACAGAAACGTGAAATCAAAGTTG  
GGGATAAAGTAGCTGGAAGACATGGGAATAAGGGAATCATTTCAAAATTTTGCCTAG  
GCAAGATATGCCCTATTTGCAAGATGGAACACCTGTTGATATGGTCTTCAATCCCTTAGG  
AGTACCCTCCCGAATGAATGTGGGACAAATATTTGAAAGCTCGCTCGGATTAGCGGGG  
GATCTGCTAAAGAAACATTATAGAATAGCACCTTTGATGAGAGATATGAGCAAGAGGC  
TTCAAGAAAACTTGTGTTTTTACAATTATATGAAGCCAGTAAAGAAACAAAAATCCA  
TGGGTATTTGAACCCGAGTACCCGGGAAAAAGCAGAATATTTGATGGAAGAACAGGAG  
ACCCCTTCGAACAACCTGTTCTAATAGGGAAAGTCCCTATATCTTAAAATTAATTCATCAAG  
TTGATGAGAAAATTCATGGGCGTTCGACTGGGCCCTACTCACTTGTTACACAACAACC  
CGTTAGAGGAAGAGCCAAGCAAGGGGGACAACGAGTAGGAGAAATGGAAGTTTGGG  
CTTTAGAAGGATTTGGTGTGCTCATATTTTACAAGAGATACTTACTTATAAGTCTGACC  
ATCTTATAGCTCGCCAAGAAATACTTAATGCTACGATCTGGGGAAAAAGAATACCTAAT  
CACGAGGATCCTCCAGAATCTTTTCGAGTGCTCGTTCGAGAACTACGATCTTTGGCTCT  
AGAACTGAATCATTTCTTGTATCTGAGAAGAACTTCCAGGTTACTAGGGAGGAAGTT--  
-----ATGATTGACCAATATAAACATCAACAACCTTCAAATTGGACTCGTTTTCCCC  
TCAACAAATAAAGGCTTGGGCTAACAAAAACCTACCTAATGGAGAAGTCGTTGGCGAA  
GTCACAAGGCCCTCTACTTTTCATTATAAAACCGATAAACCAGAAAAAGATGGATTGTT  
TTGCGAAAGAATCTTTGGACCCATAAAAAGCGGAATTTGCGCTTGTGGCAATTCTCGA  
GCGAGCGGAGCTGAGAACGAAGACGAAAGATTTTGCCAAAAATGCGGAGTAGAATTT  
GTGGATTCTCGGATACGAAGATATCAAATGGGATACATCAAACCTCGCATGTCCCGTGAC  
TCATGTGTGGTATTTGAAAGGTCTTCCCTAGTTATATCGCGAATCTTTTAGATAAACCTCTT  
AAGAAGTTGGAAGGCCTAGTATACGGCGAT-----TTCTCTTTTGGCTAGGCC---AGCACT  
AAAAAACCCACTTTTTTACGATTACGAGGTTTATTCGAAGAGGAAATTGCATCCTGTAA  
CCACAGCATTTCTCCCTTTTTTTCTACCCAGGCTTTGCAACATTTCGAAATCGGGAAA

TTGCAACAGGAGCAGGTGCTATTAGAGAACAATTAGCAGATTTGGATTTGCGAATTATT  
ATAGAGAATTCCTTGGTTCGAATGGAAGGAATTAGAAGACGAG---GGGTATAGTGGAGAT  
GAATGGGAAGATAGAAAAAGACGAATAAGAAAAGTTTTTTTTGATTAGACGCATGCAAT  
TGGCGAAACATTTTATTCAAACAAATGTAGAACCAGAATGGATGGTTTTGTGCTTATTA  
CCGGTTCTTCTCCCGAATTGAGACCCATTGTTTATAGGTCTGGAGATAAAGTAGTAAC  
TTCGGACATTAATGAACTTTATAAGAGAGTTATCCGTCGGAACAACAACCTTGCCATC  
TATTA AAAAGAAGTGAATTAGCGCCAGCAGATTTAGTAATGTGCCAGGAAAAATTGGT  
ACAAGAAGCCGTGGATACACTTCTTGATAGTGGGTCCCGCGGGCAACCGATGAGGGAT  
GGTCACAATAAAGTATACAAATCACTTTCAGATGTAATTGAAGGTAAAGAAGGAAGGT  
TTCGCGAGACTCTGCTTGGGAAACGGGTTCGATTACTCGGGGCGTTCTGTCATTGTTGTG  
GGTCTTCGCTTTCATTACATCAATGTGGATTACCTCTAGAGATAGCAATAAAGCTTTTT  
CAGCTATTTGTAATTCGCGATTTAATCACGAAACGCGCTACTTCTAATGTAAGGATTGCT  
AAAAGGAAAATTTGGGAAAAGGAACCCATTGTATGGGAAATACTTCAAGAAGTTATGC  
GAGGACATCCTGTACTGTAAATAGAGCACCTACCCTGCATAGATTAGGCATACAGGCT  
TTTCAACCCACTTTAGTAGAGGGGCGTACTATTTCTTTACACCCATTAGTGTGTAAGGGT  
TTCAATGCAGACTTTGATGGGGATCAAATGGCTGTTTCATCTACCTTTATCCTTAGAAGCT  
CAGGCGGAAGCCGTTTACTTATGTTTTCTCATATGAATCTCTTATCTCCCGCTATCGGA  
GATCCTATTTGCGTACCAACCCAAGACATGCTTATCGGGCTTTATGTATTAACGATTGGA  
AACCGCCGAGGTATTTGTGCAAATAGATATAATAGTTGCGTAAAC-----TATCCAA  
CTAAAAAAGTTAATTACAAT-----ATGAAAGATAAAGAACCCCACTTTTCTAGTTCT  
TATGATGCACTGGGAGCTTATAGACAGAACTCATCAGTTTAGACAGTCCCTTGTGGCT  
ACGATGGAAACTGGATCAACGC---GTCATTGGGTCA-----AGAGAAGTCCGATTGAAG  
TTCAATATGAATCTTTGGGGACTTATCATGAGATTTATGCCCACTATCTAATAGTGGGAA  
ATAGAAAAAAGAAATTCGTTCTATATACATTGCAACCACTCTTGGTCATATTTCTTTTT  
ATAGAGA ACTAGAGGAAGCCATACAAGGATTTAGTCAGGCCTATTCATACACTATC-----  
-----ATGGCGGAACGGGCCAATCTGGTCTTTCATAATAAAGAGATAGA  
CGAACTGGTATGAAACGGCTTATTAGCAGATTAATAGATCATTTTGGAAATGGGATATAC  
ATCCCATATACTGGATCAACTAAAGACTCTGGGCTTCCATCAAGCCACTACTACATCCAT  
TTCGTTAGGAATCGAGGATCTTTTAAACAATACCCTCTAAGGGATGGTTAGTCCAAGACG  
CGAACAACAGAGTTTTCTTTTGGAGAAACACTATTATTATGGGGCGATACACGCGGTA  
GAAAAATTACGCCAATCCGTTGAGATATGGTATGCGACAAGTGAATATTTGAAACAAGA  
AATGAATTCGAATTTTCGGATAACGGATCCTTCTAATCCAGTCTATCTAATGTCTTTTCA  
GGAGCCAGAGGAAATGCATCTCAGGTACACCAATTAGTAGGTATGAGAGGATTAATGG  
CGGACCCTCAAGGACAAATGATTGATTTACCTATTCAAAGCAATTTACGCGAGGGACTT  
TCTTTGACAGAATATATAATTTCTGCTATGGAGCTCGCAAAGGGGTTGTAGATACTGCT  
GTACGAACAGCAGATGCTGGATATCTTACACGTAGACTTGTTGAAGTAGTTCAACATAT  
TATTGTGCGTAGAAGAGATTGTGGTACTATCCGAGGTATTTCTGTGAGTCCCTCAAATG  
GGATGACGGAA-----AACTTTTTGTCCAAACACTAATTGGTTCGTGTATTAGCAGACGAT  
ATATATATCGGTTACGATGCATTGCCGCTCGAAATCAAGATATTGGAATTGGATTAGTC  
AATCGATTACATACTGCCTTTCGAGCACAACCAATTTCTAGCACAACCAATATATATTAGA  
ACCCCTTTACTTGCCGGAGCACTTCTTGGATCTGTCAATTATGTTATGGCCGGAGTCCC  
ACTCATAGTGATCTGGTTCGAATTGGGAGAAGCCGTAGGTATTATTGCGGGTCAATCAAT  
TGGGGAGCCAGGTACTCAACTAACATTAAGAACTTTTCATACTGGCGGAGTATTCACAG  
GGGGTACTGCTGACCTTGTACGATCCCCTTCGAATGGAAAAATCCAATTCCTGAGAAT

TTGGTTCACCCACGCGTACCCGTCATGGACAGCCTGCTTTTCTATGTTATATAGACTTG  
CATGTA ACTATT CAGAGTCAGGATATTCTATATAGTGTA AATATCCCTCAAAAAGCTTG  
ATTCTAGTGCAAAATGATCAATATGTA AATCTGAACAAGTAATTGCGGAGATTTCGTGC  
CGGAACCCCCACTTTA-----TTTAAAGAAAGGGTACAAAAGCATATTTATTCCGAATCAG  
ACGGCGAA---ATGCACTGGAGTACTGATGTTTACCATGCGCCCGAATATCAATATGGTAA  
TCTTCGTGATTACCAAAAACAAGCCATTTATGGATATTGTCAAGTAAGTAGATGCAGA---  
---TCCAGTATAGCGTCTTTTTCCTCCACAAGGATCAAGATCAAATGAATACTTAT-----  
-----GGT-----GATAGG  
GAAATTTTGGATTATTCA---ACGTTGGTTCGAATCATGCCTAATGGCCATTGGAATTTGAT  
CTATCCTTCT---ATTTTAAAGAGAAT-----TCAGATTTGTTAGCGAAAAAGCGAAGAAAT  
AGGTTTCGTCAATCCATTACAATATCATCAAGAACAAGAGAAAGAACTAATATCCTGTTT  
GGGGATTTGATTGAAATACCCTTTATG-----GGTGTTTTACATAGAAATACTATTTTGC  
TTATTTTGACGATCCACGATACAGAAAAGAT-----GGAATTGTTAAATTTAGAAGCCCAG  
AGGAAGATTCTATCTTCAA-----AAGGAAGGTTTGATTGAGCATCGAGGA---ACAAA  
GAATTTAGTCTAAAATAC---GAAGTAGATCGGTTTTTTTTTTCATTCTTCAAGAACTGCATAT  
CTTGCCGAGATCCTCATCCCTAAAGGTA CTTGACAATAGTATTATTGGAGTGGATACAC  
AACTCACAAAAAATACAAGAAGTCGACTAGGTGGACTGGTCCGAGTGAAGAGAAAA  
AAAGCCATACAGA ACTCAAATATTTCCGGCGATATTCATTTTCCTGAAGAGGCAGAT  
AAGGTATTAGGC-----GGCTGTTTGATACCACCAGAAAGACAAAAAAG-----GATTCTA  
AGGAA---TCAAAA---AAAAGCAAAAATTGGGTCTATGTTCAACGGAAAAAATTATCA  
AGAGCAAGGAAAAG-----TATTTTGTTCATTTCGCCCTGCAGTCGCATATGAAATGGAC  
GAAGGGAGAAATTTAGCAACACTTTTCCCAGCAAGATCTCTTGCAAGAAGAAGATAATC  
TCCA ACTTCGACTTGTCAATTTTATTTCTCATGAAAATAGCAAGTAACTCAAAGAATTT  
ATCACACAAAT---CAATTTGTTAGA ACTTGCTTAGTAGTGAATTGGGAACAAGAAAAA  
AAGAGAAGGCTGGT-----GCTTCCCTTGTTGAGGTAAGAGCAAATGATCTTA  
TTCGCGATTTCTAAGAATTGAGTTAATCAAGTGC ACTATTTTCATATACAGAAAAAGGT  
ATGATAGGACAAGTGCAGGACCAATTCCTCAT-----TTAGATCACACCAATCTAAATTC  
CTTTTATTCCAAGGCGAAGATTGAATCA-----CTTAGCCAACATCAAGAAGCTATT  
GGC-----ACCTTGTTGAATCGAAATAA-----GAATACCAATCTTTGATGATTTTGT  
CGGCATCCA ACTGTTCTCAAATTGGT-----TTATTCAAGAACCCAAAACATCCC-----AA  
TACGATAAAAAGAAATTGAATCGTAGAATTCCTATT---GAAATTTTGGGCCCTTAGGGC GTT  
ATTGTCCCT---AGTATATCGAATTTTCTTCATCT---TACTATTTACTAACG-----CATAAT  
AAGATCCTGT TAAAA---AAATATTTGTTTCTTGAC-----AATTTGAAACAAACCTTCCA  
AGTACTTCAAGGACTTAAATACTCTTTAATAGATGAAAATAAAAGG-----ATTTCTAATTT  
CGAT-----AGTAACATAATGTTGGATCCATTCCTTTTGAATTGTC ACTTTGTCCATCATGAT  
TCTTGGGAGGAGACATCGGCAATAATTCAC---CTTGGACA ACTTATTTGTGAAAATGTAT  
GCCTATTTAAATCGCACATA-----AAAAATCTGGTCAAATTTTCATTATTAAT---ATG  
GATTCCTTTGTTATAAGAGCAGCTAAACCTTATTTGGCCACTACAGGAGCAACTGT TAA  
TGGTCATTATGGAGAAATCCTTTACAAGGGCGATAGGTTAGTTACGTTTATATATGAAA  
ATCGAGATCTAGTGACATAACGCAAGGTCTTCCAAAAGTGGAACAAATCTTTGAAGCG  
CGTTCAATTGATTCAATATCCCCGAATCTCGAAAGGAGAATTGAGGATTGGAATGAGCG  
TATACCAAGAATTCTTGGGATCCCCTGGGGATTCTTGATTGGAGCTGAGCTAACCATAG  
CCCAAAGTCGTATTTCTTTGGTTAATAAAATCCAAAAGTTTATCGATCCCAAGGGGTA  
CAGATCCATAATAGACATATAGAGATTATTATACGCCAAGTAACATCAA AAGTGCGGGTT

TCCGAA-----GATGGAATGTCTAATGTTTTTTTCACCTGGGGAATTAATCGGACTATTGC  
GAGCGGAACGAGCAGGGCGAGCTTTGGATGAATCGATCTATTATCGGGCAATTTTATTG  
GGAATAACAAGGGCTTCCCTGAATACCCAAAGTTTCATATCTGAAGCAAGTTTTCAAG  
AAACTGCTCGAGTTTTAGCAAAAAGCTGCCCTACGAGGTCGCATTGATTGGTTGAAAGG  
GTTGAAAGAAAACGTAGTTCTGGGGGGATTATACCCGTTGGTACCGGATTCCAAAAA  
TTTGTCCATCGTTCCCA-----CAAGACAAGAACCTTTAT-----TTTGAAATTCAAAAACA  
AAATCTATTTCGCGTCGGAAATG-----AGAGATTTTTTGTCTCCATACAGAATTAGTTTC  
TTCAGATTCTGACATAACAAAC-----TTAGAACCCCCATTTACCCCATTTATACGAGT-  
-----ATGACAAGAAGATATTGGAACATCAATTTGAAAGAGATGGTAGAAGCAG  
GAGTTCATTTTGGCCATGGTATTAAGAAATGGAATCCGAAGATGGCCCCTTACATTTTCG  
GCAAAGCGCAAAGGTACTCATATTATAAATCTCGCTAGAACGGCTCGTTTTTTTATCAGA  
AGCTTGTGATTTAGTTTTTGTATGCAGCAAGTCAGGGAAAAAGTTTCTTAATTGTTGGTA  
CAAAAAAAGAGCGACGGATTTAGTAGCATCAGCTGCAATAAGGGCTCGTTGTCATTA  
TGTTAATAAAAAGTGGTTCAGTGGTATGTTAACTAATTGGTTCGATAACGAAAAGTAGAC  
TTTCTCAATTTAGAGACTTAAGAGCAGAAGAAAAAATGGGAAAATTCCAACATCTCCC  
AAAAAGAGATGTGGCAATCTTGAAGAGAAAATTATCTACCTTGCAAAGATATCTCGGC  
GGGATCAAATATATGACGAGATTGCCAGACATTGTGATCGTCCTTGATCAGCAAAAAGA  
GTATATAGCTCTTCGGGAATGTGCCATTTTGGGGATTCTACTATTTCTTTAGTCGATA  
AATTGCGACCCGGATCTCGCGAATATATCGATTCCAGCCAACGATGACACTATGACTTC  
AATTCGATTGATTCTTAACAAATTAGTATTTGCAATTTGTGAGGGCCATTCTCTC---TATA  
TAAGAAATCATATGGGACAAAAATAAATCCACTCGGTTTCAGACTTGGTACAACCCA  
AAAACACCATTCCTTTTGGTTCGCACAACCAAAAAATTATTCTGAAGGTCTACAGGAA  
GATAAAAAATAAGGGATTGTATCAAGAACTATATACAAAAGAATAGGAAAAAGAGCT  
CGAATAAACTAGAATCAATTACACGTATAGAAATTCAAAAGAAATCGATACGATCCAC  
GTCATAATCCATATTGGATTCCCAAT---TTATTAAGAAAAAAGGA-----GCAATT  
GAAGAATTAGAGAAAGATCTACAAAAGGAAATTCACCTCCGTAAACCAGAGACTTAATA  
TTTCTATCGAAAAAGTTAAAGAGCCTTATAGAGAGCCTAACATTCTTGCAGAATATATAG  
CTTTCCAATTAATAAATAGAGTTTTATTCCGAAAGGCAATGAAAAAGCCATGGAATTA  
ACTAAAAAGCCGATATAAAGGGAGTCAAAGTAAAAATAGCGGGTCGTCTCGGAGGA  
AAAGAAATTGCACGTGCCGAATGCATCAAAAAGGGTAGACTTCCCCTCCAAACAATTC  
GCGCTAAAATTGATTATTGCTGCTATCCAATTCGAACTATCTATGGAGTATTAGGTGTAA  
AAATTTGGATATTCGTAGACGAAGAAATGTCCCATTATCGAGGACCTCGTTTAAAAAAA  
ATACGCCGTTTGGGAGCTTTACCAGGACTCACTAGAAAAACACCTAAATCCGGAAGTA  
ATCTGAAAAAGAAATTCATTCTGGGAAA---AAGGAGCAATATCGTATTCTGCTTCAAG  
AAAAACAGAAATTACGTTTTTATTATGGTCTGACAGAACGACAATTACTTAGATATGTA  
CATATCGCTGAAAAAGCAAAAAGGTCAACAGGCCAGGTTTTATTACAATTACTTGAAAT  
GCGTTTGGATAATATCCTTTTTTCGATTGGGTATGGCCTCAACCATTCTGGGGCTCGTCA  
ATTAGTAAACCATAGACATATTTTAGTTAATGGTTCGTATAGTCAATATACCAAGTTTTTCGT  
TGCAAACCCCGAGATATTACTACGAAAGATAACCAAAGATCAAAGGTCTGGTTCA  
AACTTTGATGGCTTCATCCGACCCAAA-----TTGCCAAAGCATTGACGATTGACACA-  
-----TTAGAATATAAAGGACTAGTAAATAAATCCTAGATAGGAAGTGGGTTCGGTCTCAA  
AATAAATGAGTTGTTAGTTGTAGAATATTACTCTCGTCAGACTATGTCACGTCGAGGTAC  
TGCAGAAAAAAGAACTGCAAAATCCGATCCTATTTTTTCGTAATCGATTAGTTAACATGG  
TGTTAACCGTATTATGAAAGACGAAAAAAATCATTGGCTTATCAAATCTCTATCGA

GCCGTGAAAAAGATTCAACAAAAGACAGAAACAAATCCACTATTGGTTTTACGTCAAG  
CAATACGTAGAGTAACTCCCAATATAGGAGTAAAAACAAGACGTAAAAAAGGATCGAC  
GCGGAAAGTTCCGATTGAAATAGGATCTAAACAAGGAAGAGCACTTGCCATTCGTTGG  
TTATTAGAAGCATCCCAAAAGCGTCCGGGTGCGAAATATGGCTTTCAAATTAAGTTCCGA  
ATTAGTAGATGCTGCCAAAGGGAGTGGGGGTGCCATACGCAAAAAGGAAGCGACTCAT  
AGAATGGCAGAGGCCAAATAGAGCTCTTGCACATTTTCGTATGGGCAAGGACACTATTG  
CTGATTTACTAACCTCTATACGAAACGCGGACATGAATAAAAAAGGAACAGTTCGAGT  
AATATCTACAAATATTACCGAAAACATTGTTAAAATACTTCTACGAGAGGGTTTTATTGA  
AAGTGTTTCGGAAACATCAGGAACGTAACAGATATTTCTTGGTTTTCACTTTGCGACATC  
AAAAGAGAAAGACTAGAAAAGGAATATATAGAACA-----AGAACTTTTTAAAGCGT  
ATAAGCCGACCCGGCTTACGAATTTATACCAACTATCAAGGAATTCCTAAAGTTTTGGG  
TGGAATGGGAATTGCTATTCTTTCTACTTCTCGAGGGATAATGACAGATCGAGAGGCTC  
GACTAAACAGAATTGGAGGAGAAGTCTTATGTTATATATGGATGGCAAAAGCTATACCA  
AAAATTGGTTCACGTAAGAAAGTGCGTATTGGTTTACGTAAGAGTGCGCGTAGAATAA  
CAAAGGGGTATTTCATGTTCAAGCTAGTTTCAACAATACCATTATACTGTTACAGAC  
CCACAAGGTCGGGTGGTTTTCTGGTCTTGCGGGTACTTGTGGATTCAAAGCTCAA  
GAAAAGCATCACCTTATGCTGGTCAAAGAACAGCAGTAGATGCTATTTCGTACAGTAGGT  
-----TTGCAACGAGCAGAAGTTATGGTAAAGGGTGCTGGTAGTGGAAAGAGATGCCGC  
ATTACGAGCCATTGCTAAAAGCGGTGTGCGATTAAGTTGTATACGGGATGTAACACCTA  
TGCCGCATAATGGATGTGACCCGCTAAAAAAGACGTCTGATGCCGACGGTTAAACA  
ACTTATTAGAAACGCAAGACAGCCAATACGAAATGCTAGAAAAACGGCCGCGCTTAAA  
GGATGCCCTCAGCGTCGAGGAACATGTGCTAGGGTGTATACTATCAACCCCAAAAAC  
CCAACTCTGCCTTACGTAAGTTGCCAGAGTACGATTAACCTCTGGATTTGAAATCACT  
GCTTATATACCTGGTATTGGCCATAATTTACAAGAACATTCTGTAGTATTAGTAAGAGGA  
GGAAGGGTTAAGGATTTACCCGGTGTGAGATATCGCATTATTCGAGGAACCCTAGATGC  
TGTCGCAGTAAAGAATCGTCAACAAGGGCGTTCTAAATATGGGGTCAAAAAGCCAAAA  
ATGGCAAAAAAAGTTTGATTTCAGAGGGAGAAGAAGAGGCAGAAATTAGAACAGAAA  
TATCATTTGATTCGTCAATCTTTAAAAAAAAGATAAGAAGCAAAGTTTCTTCCTTGAG  
TTTGAGTGAAAAACGAAAATGCGAGAAAAATTGCAATCCCTACCACGTAATAGTGCA  
CCTACACGCCTTCATCGACGTTGTTTTTTGACCGGAAGACCTAGAGCTAACTATCGAGA  
CTTTGGGCTATCCGGACACGTACTTCGAGAGATGGTTTATGAATGTTTGTACCAGGTG  
CAACAAGATCTAGTTGGATGAAAAAGAGAAAAATTTTGGGATTTATGGTTAAAGAAGA  
AAAAGAAGAAAAC-----AGGGGTCTGTTGAATTTCAAGTATTCAGTTTTACCAATAAG  
ATACGGAGACTTGCTTCACATTTGGAATTACACAAAAAAGATTTTTTCATCGGAAAGAG  
GTCTACGAATACTTTTGGGAAAACGTCGACGTTTGCTGGCTTATTTGGCAAAGAAAAAT  
AGAGTACGTTATAAGAAATTAATCAGTCAGTTGAATATTCGGGAGCAG-----ATG  
GTAAACTTCGTTTAAACGATGTGGTAGAAAGCAACAAGCTGTCTATCGAATCGTTG  
CAATTGATGTCCGATCTCGAAGAGAAGGAAGAGATCTTCGAAAAGTAGGTTTTTATGAT  
CCGATAAAGAATCAAACCTGTTTAAATGTTCCAGCTATTCTCTATTTCTTGAAGGGT  
GCTCAACCGACAAGAACTGTTTATGATATTTAAGGAAGGCAGAAATCTTTAAAGAAA  
AAGAAAGAACTTTGAGTTTATTGAAGAACTTTCGTAAATCCAAGCAACCTTTTCGTAAA  
TTCAAAAACCTTTTCGTAAAAGGCGTCCTCGGATTGGCCCGGAGATCGAATTGATTA  
TAGAAACATGAGTTTAAATTAATAGATTTATTAGTGAACAAGGAAAAATATTATCTAGACG  
AATAAATAGATTAACCTTGAAACAACAACGATTAATTACTCTTGCTATAAAACAGGCTC





repeated text





CCTACAGCTGGTGGAGTCACAGCCAGTTTTGGTATGTTAGGGGATATTATTATTGCCGA  
ACCCCGTGCTTACGTTGCATTTGCGGGTAAAAGAGTAATTGAACAAACATTGAATCAA  
ACCATACCTAATGATTCAACAAGAAGCTGAATTTTTATTCCATAAGGGTTTATTGACTTA  
ATTGTACCACGTCACTTTTTAAAAAGCGTGATTAGTGAGTTATTTACGCTCCACGACCTT  
TTCCCTTTGAATCAAATTCAAAGAAAATGGTAACCGTTCGAGCCGACGAAATTCGTA  
AAATTATCCGCGAGCGTATTGAACAATATAATAGAGAAGTAAATACTTTAAATACAGGTA  
CCGTCTTCAAGTAGGCGATGGCATTGCCCGTATTAACGGTCTTGATGAAGTAATGGCA  
GGGGAATTGGTAGAATTTGAAGAGGGTACAATCGGCATTGCTCTTAATTTGGAATCAAA  
AAATGTTGGTGTGTTTTAATGGGTGACGGGTGATGATAAAAGAAGGAAGTTCTGTA  
AAAGCAACGGGAAGAATTGCTCAGATACCGGTGGGTGAAGCCTATTTGGGTGCTGTTA  
TAAATGCCAGGCTAATCCTATTGATGGTAGAGGCCAAAATTCATCTTCTGCATTTGAT  
TAATAGAATCCTCCGCGCCGGGATTATTTGCGTCTGTTCCATATATGAGCCTCTTCAA  
CCGGGCTTATTGCGATTGATTGATGATACCTATAGGACGTGGTCAGCGAGAATTAATTA  
TTGGGGACAGACAAACCGGTAAAACAGCAGTAGCCACGGATACGATTATCAATCAACA  
AGGTCAAATGTAATATGTGTTTATGTAGCTATTGGGCAAAAAGCATCTTCTGTGGCTC  
AGGTAGTTACTACCTACAGGAAAGGGGGGCCATGGAATATACTATTGTGGTAGCCGAA  
ACAGCGGATTCCCCTGCTACATTACAATACCTCGCTCCTTATACAGGAGCAGCTCTGGC  
TGAATATTTTATGTATAGTGAAAGGCACACTTTAATCATTTATGATGATCTCTCGAAACA  
AGCCCAAGCTTATCGCAAATTTCTTCTATTACGCAGACCGCCCGGGCGGAGGCTT  
ATCCGGGAGATGTTTTTTATTTGCACTCACGCCTTTTGGAAAGAGCTGCTAAATTAAGT  
TCTAAGTTAGGGGAGGGGAGTATGACCGCCCTACCTATAGTTGAAACGCAATCGGGAG  
ATGTTTCGGCTTATATTCCACTAATGTAATTTCCATTACTGATGGACAAATCTTCTTATC  
CGCCGATCTGTTCAATGCTGGAATCAGACCTGCGATTAATGTGGGTATCTCTGTTTCCC  
GAGTGGGGTCCGAGCTCAAATTAAGCCATGAAAAAAGTAGCTGGTAAATTAATAAT  
GGAAGTGGCACAATTCGCGGAATTAGAAGCCTTTCACAATTTGCTTCTGATCTCGATA  
AAACTAGTCAAATCAATTGGCAAGAGGTCAACGATTACGTGAATTGCTTAAACAATC  
CCAATCCGCTCCTCTCACTGTGGCTGAGCAGATAATGACTATTTATACTGGAATAAATGG  
TTATCTTGATTCATTACAATTCGACAGGTGAGGAAATTTCTTCTTGAGTTATGTACTTA  
CTTAAAACTAATAAACCTCGGTTCCAAGAAATTATATCTTCCACTAAGACATTTACCGA  
GGAAGCAGAAGACCTTTTGAAGAAGCTATTCCGGACCAAACGGATCGGTTTCTAGTT  
AAGGAACAAGCAATGAGAATCAATCCTACTACTTATGGTTCTGAAATTTCTTGATTGA  
AAAAAAAAACCGAGGGCGTATCGTCAAATCATTGGTCCGGTACTAGATGTAGCTTTTC  
CCCCTGGCAAGATGCCGAATTTATAATGCTCTGGTAGTGAAAGGGCGAGAC-----ACT  
GAACAAATGAACGTGACTTGCAGGTTACAGCAATTATTGGGAAATAATCGAGTTAGAG  
CTGTAGCTATGAATGATACAGATGGTCTAATGAGAGGGATGGAAGTGATTGACATGGGA  
ACTCCTATAACTGTTCCGGTCGGTGGATCGACTCTAGGGCGAATTTTCAACGTGCTCGG  
AGAACCCTGTTGATAATTTGGTCTGTAGATACTAATAACAACGTCTACTATTCATAGATC  
TGCGCCCGCCTTTATACAGTTGGATACAAAATTATCTATTTTTGAAACAGGAATTAAGT  
AGTAGATCTTTTAGCCCCTTATCGCCGCGGAGGAAAAATCGGACTATTTGGGGGAGCTG  
GAGTGGGGAAAACAGTACTCATTATGGAATTGATTAACAATATTGCCAAAGCTCACGG  
GGGAGTATCCGTATTTGGCGGAGTGGGTGAACGTACTCGTGAAGGAAATGATCTTTACA  
TGAAATGAAAGAATCCGGAGTGATTAATGAAAAAATATTACAGAATCAAAGTGGC  
TCTAGTTTACGGTCAGATGAATGAACCGCCAGGAGCTCGCATGAGAGTTGGTTTGACT  
GCCCTAACTATGGCGGAATATTTCCGAGATGTTAATGAGCAAGACGTACTTCTTTTTATC

GACAATATCTTTCGTTTCGTCCAAGCGGGATCAGAAGTATCGGCCTTACTGGGTAGAAT  
GCCTTCTGCTGTGGGTTATCAACCGACCTTGAGTACAGAAATGGGTTCTTTACAAGAA  
AGAATTACTTCCACCAAAGAAGGTTCCATAACCTCGATTCAAGCAGTTTATGTACCTGC  
AGATGATTTGACCGATCCTGCTCCCGCTACCACATTTGCACATTTAGATGCAACTACCGT  
ACTATCAAGAGGTTTGGCTGCTAAAGGTATCTACCCAGCAGTAGATCCTTTAGATTCAA  
CGTCAATGATGCTTCAACCTCGCATCGTTGGTGAGGAACATTATGAAACTGCGCAAAA  
AGTTAAGCAAACCTTTACAACGTTACAAAGAACTTCAGGACATTATAGCTATCCTTGGGT  
TGGACGAATTATCTGAAGAGGATCGTTTAAACCGTAGCAAGAGCGCGAAAAATTGAGCG  
TTTCTTATCACAACCTTTTTTCGTAGCAGAAGTATTTACCGGTTCTCCAGGGAAATATGT  
TGGTCTAGCCGAAACAATTAGAGGTTTTAATTTGATCCTTTCTGGCGAATTAGATAGTCT  
TCTGAACAGGCTTTTTTATTTGGTAGGTAATATCGATGAAGCTACCAAGAAGGCAATGG  
ACTTAAA-----ATGACCTTAAACTTTGTGTACTGACCCCTAATAGAATTGT  
TTGGGATTCAGAAGTGGAAGAAATCATTTTATCTACTAATAGTGGGCAAATTGGAATATT  
ACCAACTCACACCCTATTGCCACATCTGTAGATATAGGTATTTTGAGAATACGTCTTAA  
CGACCAATGGTTAACGATGGCTTTGATGGGGGGTGGTGGCTAGACTAGGCAATAATGTAA  
TCACTGTTTTGGTAAATGATGCAGAAAGGGGCAGTGACATTGATCCCAAGAAGCCCA  
GCAAACCTGTTGAAATAGCAGAAGCAAATTTTATAAAAGCTAAAGGAAAGAGACAAAA  
AATTGAGGCAAATCTAGCTCTCCGTCGAGCTCGAACACGGGTAAAGGCCATCAGTCCG  
ATTTAATGAAAACGTAACCGATTCTTTCCTTTCTTTAGGACACTGGTCATCCGCCGG  
GAGTTTCGGGTTGAATACCGATATTTTAGCAACAAATCCAATAAATCTAAGTGTAGTGC  
TCGGTGTATTGATCTTTTTTGGAAAGGGAGTATTAAGTGATTTATTAGATAATCGAAAAC  
AGAGGATCCTAAAGACTATTCAAATTCAGAAGAACTGGGTGTCGGGGCAGTTGAAA  
AACTCGAAAAGCTCGGTCTCGTTTACGTAAAGTAAAAACGGAAGCCGAGCAGTTTCT  
AGTGAATGGATACTCTGATATAGAACGAGAAAAATTTAATTTGATTAAGTCAACTTCTAA  
TACTTTAGAACAATTAGAAAATGATAAAAATGAAACTCTTCGGTTTGAACAGCAGCGG  
TTAATTTATCAAGTCCGACAACGGTTTTTCCAACAAGCCTTACAAAGAGCTATAGGAAC  
TCTGAATAGTTGTTTGAACAACGAGTTACATTTACGTACCATTAGTGCCAATATTGGCAT  
GTTGGGAACAATAAAAGAAATAACTGATATGAATCCACTCATTTCTGCCGCGTCCGTTA  
TTGCTGCTGGGTTGGCCGTAGGACTTGCTTCTATTGGACCTGGAGTTGGTCAAGGGAC  
TGCTGCGGGTCAAGCTGTAGAGGGTATCGCGAGACAGCCTGAGGCAGAAGGAAAAAT  
ACGAGGCACTCTATTGCTTAGTCTAGCTTTTATGGAAGCTTTAACAATTTATGGATTGGT  
TGTGGCATTAGCACTTTTATTTGCGAATCCTTTTGTATGGATGTTTTATCATGTTCCATC  
AATACCCTAAAGGGGTTATACGATATATCTGGCGTGGAAGTGGGCCAGCATTCTATTGG  
CAAATAGGGGATTTCTAGTTCACGGACAAGTACTTATTACTTCTTGGGTTGTAATTGCT  
ATCTTATTAGGTTCAAGCCACTGTAGCTGTTTCGCAACCCACAACCATTCCGACTGGGGG  
TCAGAAATTTTTTGAATATGTTCTTGAATTTATTCGAGATGTGAGTAAACTCAAATTGG  
CGAAGAGTATGGCCCTTGGGTTCCGTTTATTGGTACTATGTTTCTATTATTTTTGTTTCG  
AATTGGTCAGGGGCTCTTTTACCTTGGAAAATCCTCCAATTACCTCATGGCGAGTTAGC  
CGCACCCACGAATGATATAAATACTACTGTTGCTTTGGCTTTACTTACGTCAGCGGCATA  
TTTCTATGCAGGTATTTTAAAAAAGGATTGGGCTATTTTCGAGAAATATATTAAACCAAC  
TCCGATCCTTTTACCATTAAACATCTTAGAAGATTTCAAAAGCCTTTATCACTTAGTTT  
TCGACTTTTCGGTAATATTTTAGCTGATGAATTAGTAGTTGTTGTTCTTGTTCCTTAGTA  
CCTTCAGTAGTTCCATACCCGTGATGCTCCTTGGATTATTTACAAGTGGTATTCAGCT  
CTTATTTTTGCAACTTTAGCTGCGGCTTATATAGGTGAATCCATGGAGGGACATCTTATG

ATAGTTTCAACCTTAGAGCATATATTAACATCATATTTTCCTTTTCGATAGTTTCAATTTAAT  
TACAATTAAGTTGAGAATATTTTTAGCCGACGAAATCAAAAACTCTATGATTCATCAG  
AAAGGGGCATGTTAGTCACTTTTTTCTGTATAACAGGATTATTAGCTACTCATTGGATTT  
ATTTGGGGCATTTCCTACTAAGTGATTATCTGAATCATTAATTTTTCTTTCATGGAGTTT  
CGCTCTTATTCATAGCATTGCATAT-----AAAAATACAAAATTGTTAAGCACAATAACGAG  
CCAAAGTACTGTTTTTACGCAAGGTTTTGCTACTTCGGGTATTTAACCAGAAATACAAA  
AATCTTCAATATTAGTACCCGCTCTTCAATCCGAGTGGTTAATAATGCACGTAAGTCTCA  
TGATATTAGGGTACGCAGCCCTTTTGTGCGGATCTTTATTATCAGTAGCACTTATGGTCAT  
TACATTTAGAAAAGATGGAAAGTTTTTTTCC-----AAGGAAATTTTTTATAAAAAAATTT  
TTGTT-----TATAATAATTATTATAAGACCCAATTAATTCAAGAATTGGA  
TTTTTGGAGTTATCAGGTTATTGGTCTAGGGTTTATCTTTTTAACCATAGGAATACTCTCG  
GGGGCAGTGTGGGCTAATGAAGCGTGGGGATCTTATTGGAGTTGGGATCCAAAAGAAA  
CTTGGGGCCTTATTACTTGGATAGTATTTGCAATTTATTACATACTCGAAAAAAGAGAA  
GTTTGCAGGGTACTAATTCCGCAATTGTTGCGTCTATAGGCTTTCTTATAATTTGGATATG  
CTATTTGGAGTCAATTTAGTAGGACTAGGTCTACATAGTTATGGTTCATTCCCATCAAC  
TATGACAAAAAAGAAAGCATTCACTCCTATTTTATATCTTTCATTTATAGTATTTTTGCCC  
TGGTGGATTTATTTCTCATTAAATAAATGTCTCGGATCTTGGATTACTAATTGGTGAATA  
CTAGGGAATCCGAAATATTCTTGAATGATCTTCAAGAAAAGAGTATTCTAGAAAAATTA  
ATAGAATTAGAAGAATTCCTCTTCGTGGACGAAATCTTAAAAAAACTCGGAGACAC  
ATCCACAAGAGTTTCATACA---ATACATAAAGAAGCAATCCAATTCATCAAGATACAAA  
ATGAGAGTTATATCCATATGATCTTGCCTTATCAACCAATCTAATATGTGTTGTTATTATC  
AGTGGTTTTTATATTTGGCGTAATGAAACCCTTGTTATTTTGAACCTTTGGTCTCGGGAA  
TTCCATATAACTTAAGCGACACAGTCAAAGTTTTCTCTATTCTTTTATTAAGTATTAT  
GCATCGGATTCCATTCACCCATGGTTGGGAATTAATGATTGGCTCTATCTATCAAGATT  
TTGGATTCGTTCAGAATGATCGAATTATATCCGGTCTTGTTCACCTTTCCAGTCATTC  
TCGATACAATTTTGAAATATTGGATTTCCGCTATTTAAATCGTGTCTCTCCGTCACCTGT  
AGTTATTTATCATTCAATCAATGACATGCCATTGGTGTTCGAAGAGTACGTTTCCAATA  
TCGCCGAGATAGAAGTCGAGTGTGGATTGATATATAACCGACTTTATCGCGAACGAT  
GTCTTTTTTTAGCTCACGTGGTTGATAGTCAGATCGCGAATCAACTTGTCCGGTCTTTTTA  
TATACCTTGGTGTCCAGGATGAGACCAAGGATATTTTTTTGTTTATAAACTCTCCCGGTG  
GAGGGATTATCTCTGGATTTGCTATTTATGATACTATGCAATTTGTGCGACCGGATATCCA  
ACAATATGCGTAGGATTAGCCGCTTCAATGGGATCTTTTCTACTAGTCGGGGGAGCAA  
TTACCAAACGTCTAGCATTCCCTCACGCTAGGGTAATGATCCATCAACCTATGAGTGCTT  
TTTTTGAGACTCAAACAGTAGAAGCGATCTTGAAGCGGAAGAGTTATTGAAACTGCG  
TGAAAGCCTCGCAGAGGTTTATGTACAAAGAACCGGCAAACCTGGCTGGGTCATAGCC  
GAAGACATGGAACGAGATGTTTTTTTATCAGCAACCGAAGCCCAAGCTTATGGAATTG  
T C G A T G T T G T A G G G G T T G C  
T????????????????????????????????????????????????????????????????????  
????????????????????????????????????????????????????????????????????  
????????????????????????????????????????????????????????????????????  
????????????????????????????????????????????????????????????????????  
ACGGAGGACTTCAAATAGATT  
TACAGCTGGAGAGATCTCAACAACACAATTTTATATATCCACTTCTTTTCCAGGAGTATA  
TTTATGCACTTGTTAATGATCGTGATTTAATAGGGTATGAAAAAAATTTTCGTTTTCAA  
TTGTTAAACGCTTAATTAATCGAATGTATAAACAGATACATTGGACTACTTATTTTTCTAA  
TTCTAACAAAAGGAAAATTTATGGGAAGAGTTTGTATTATAAACTGCTATCAGCGGGGT







Handwritten text consisting of approximately 45 lines of cursive script in an Indic script, possibly Devanagari, filling the page.



GTAAGTCTCGCTTGGGCTGCTTTAATGATAGTCTTTACTTTTTCCCTTTCACTAGTAGTG  
TGGGGAAGAAGTGGACTCATGATTATTCGTTCCGAGGAAGCAGAAGGCCAAAATTTTGG  
TAGATAGGGATCCCGTAAAACATCTTTTCGAGGAATGGGCCAGACCTGGCCATTTCTCA  
CGAACAATAGCTAAAGGCCCTGATACTACCACTTGGATCTGGAACCTACATGCTGATGC  
TCACGATTTTGATAGCCATACTAGTGATTTGGAGGAGATATCCCGAAAAGTATTTAGTGC  
TCATTTTGGCCAACCTATCCATAATTTTTCTTTGGCTGAGCGGCATGTATTTCCACGGTGC  
TCGTTTTTCCAATTATGAAGCGTGGCTAAGTGATCCAACCTCACATTGGGCCTAGTGCCC  
AGGTGGTTTTGGCCAATAGTGGGTCAAGAAATTTTGAATGGTGATGTGGGCGGAGGTTT  
CCGAGGAATACAAATAACCTCTGGGTTTTTTCAGATGTGGAGAGCATCTGGAATAACTA  
GTGAATTACAACCTCTATTGTACCGCAATTGGTGCATTGGTCTTTGCTGCGTTAATGCTTT  
TTGCTGGTTGGTTTCATTATCATAAAGCGGCTCCAAAATTGGCTTGGTTTCAAGAAGTA  
GAATCTATGTTGAATCACCAATTGGCGGGTCTACTCGGACTTGGGTCTCTCGCTTGGTC  
GGGTCATCAAGTACATGTATCTTTACCGATTAACCTATTTCTAAACGCTGGAGTCGATCC  
TAAAGAGATAACCGCTTCCTCATGAATTCATCTTGAATAGAAATCTTATGGCTCAACTTTA  
TCCCAGTTTTGCCGAGGGAGCAACCCCATTTTTTCACCTTGAATTGGTCAAAATATGCCG  
AATTTCTTACGTTTTCGTGGAGGATTAGATCCAGTAACAGGCGGTCTGTGGCTGACCGAT  
ATTGCACACCATCATTTAGCTGTTGCAATCTTTTCTGATAGCGGGTCCACATGTATAGG  
ACCAACTGGGGCATTGGTCATGGACTAAAAGATATTTTAGACGCTCATAAGGGTCCATT  
TACGGGTCAAGGCCATAAAGGTCTATACGATATCCTAACAACGTCATGGCATGCTCAATT  
ATCTCTAACCTAGCAATGTTAGGCTCTTTAACCATATTGTAGCTCACCATATGTATTCG  
ATGCCCCCTTATCCATATCTGGCTACTGACTATGGTACACAACCTGTCATTATTCACACATC  
ACATGTGGATTGGTGGATTTCTTATAAGTTGGTGCTGCTGCGCATGCAGCCATTTTTATGG  
TAAGAGACTATGATCCAATAATCGATACAATGATCTATTGGATCGTGTCTTAGACATC  
GTGATGCAATCATATCACATCTCAACTGGGCATGTATCTTTCTGGGCTTTCACAGTTTTG  
GTTTGTATATTCATAATGATACCATGAGCGCTTTAGGACGTCCTCAAGATAATGTTTTAG  
ATACCGCTATACAATTACAACCCATTTTTGCTCAATGGATACAAAACACCCATGCGTTAG  
CACCAAACGCAACGGCTCCTGGTGCAACAGCAAGCACCAGTTTAACTTGGGGGGGT---  
---GTAGTAGCAGTGGGTGGCAAAGTAGCTTTGGGGCCTATTCCATTAGGAACCGCGGAT  
TTCTTGGTACATCACATTCATGCATTTACGATTCATGTGACAGTATTGATACTTTTAAA  
GGTGTCTCTTTGCTCGTAGTTCCCGTTTGATACCGGATAAAGCAAATCTTGGGTTTCG  
GTTTCTTGTGATGGACCCGGAAGAGGGGTACATGTCAAGTATCGGCCTGGGATCAT  
GTCTTCTTAGGCCTATTCTGGATGTACAATTCCATTTCCGTAGTAATATTCCATTTAGTT  
GGAAAATGCAGTCAGATGTTTGGGGCAGTATAAGCGATCAAGGGGTAATCAATCATATC  
ACGGGAGGAAACTTTGCGCAGAGTTCTATTACTATTAATGGGTGGCTCCGTGATTTCTT  
ATGGGCACAGGCATCCCAGGTAATTCAGTCTTATGGTTCTTCATTATCTGCATATGGCCT  
TTTTTCTTGGGTGCTCATTTTGTATGGGCTTTTAGTTAATGTTTCTATTAGTGGACGT  
GGTTATTGGCAAGAACTTATTGAATCCATTGTTTGGGCTCATAATAAATTAAGTTGCT  
CCTGCTACTCAGCCGAGAGCCTTGAGCATTGTCCAAGGGCGTGCTGTAGGAGTAACCC  
ATTACCTTCTGGGTGGAATTGCCACAACGTGGGCATTCTTCTTAGCAAGAATTATTGCA  
GTAGGAATGGCATTAAAGATTTCCAAGGTTTAGCCAAGGCTTAGCTCAGGACCCACAA  
CTCGTCGATTTGGTTTGGTATTGCTACCGCACATGACTTCGAGAGTCATGATGATATTA  
CTGAGGAACGTCTTTATCAGAATATTTTTGCTTCGCACTTCGGTCAATTGGCAATAATTT  
TTTTGTGGACTTCCGGCAATCTGTTTCATGTAGCTTGGCAAGGAAATTTTGGAGTCGTGG  
GTACAGGACCTTTACATGTAAGACCTATTGCTCATACAATTTGGGATCCTCATTTTTGGT

CAACCAGCCGTGGAAGCTTTTACTCGAGGGGGCGCTCTTGGCCCGGTGAATATCGCTT  
ATTCTGGTGTATTATCAGTGGTGGTATAACAATTGGGTACGTACTAATGAAGATCTTTATA  
CTGGAGCTCTTTTTCTATTATTTATTTCTGCCATATCCTTAATAGCAGGTTGGTTACACTT  
ACAACCAAATGGAAACCGAGCGTTTCGTGGTTCAAAAATGCCGAATCTCGGCTGAAT  
CATCATTTGTCAGGACTCTTTGGCGTAAGTTCCTTGGCTTGGACAGGGCATTAGTACA  
TGTTGCGATTCTGCGTCCAGAGGGGAGTACGTTTCGCTGGAATAATTTCTTAGATGTATT  
ACCGCACCTCAAGGATTAGGCCCTTTTTACAGGCCAATGGAATCTTTATGCTCAA  
ATCCCGATTGAGTAGTCATTTATTTGGGACCTCCCAAGGAGCAGGAAGTCCATTCTA  
ACGTTTCTCGGGGATTTATCCACAAACGCAAAGTTTGTGGCTGACGGATATTGCAC  
ACCATCATTTAGCTATTACATTTCTTTTTCTCGTTGCTGGTCATATGTATAGAACCAATTT  
TGGGATTGGGCACAGTATGAAAGAGCTTTTAGATGCACATATTCTCCGGGAGGACGA  
CTAGGTCGTGGGCATCTGGGTCTTTATGACACAATCAATAATTCGCTTCATTTTCAATTG  
GGCCTTGCTTAGCTTCTTAGGGGTTACTTCTTGGTAGCTCAACATATGTACTCTT  
TACCCGCTTATGCATTCCTAGCACAAAGACTTTACTACTCAAGCTGCATTATATACCCATC  
ACCAATATATTGCAGGATTCCTTATGACAGGAGCTTTTGGCTCATGGAGCTATATTTTTCAT  
TAGAGATTACAATCCGGAACAAAATGAAGATAATGTATTGGCAAGAATGTTAGATCATA  
AAGAAGCGATCATATCTCATTTAAGTTGGGCGAGTCTATTCTTGGGATTCCATACCTTGG  
GACTTTATGTTTATAATGATGTGATGCTGGCCTTTGGTACCCCGGAGAAGCAAATCTTG  
ATTGAACCTATATTTGCTCAATGGATACAATCCGCCCATGGTAAACTTCCTATGGGTTT  
GATGTACTTTTGTCTTCAACGAGCGGGCCGGCATTCAATGCAAGCCGAAGCATATGGTT  
GCCGGGTTGGTTAAATGCTGTTAATGAC-----AGCAGCAATTCCCTATTCTTAAACAATAG  
GACCCGGAGACTTTTTGGTTCATCATGCTATTGCTCTGGGTTTACATACAACTACATTGA  
TCTTATTAAGGGTGCTTTAGATGCACGCGGTTCCAAGTTAATGCCAGATAAAAAGGAT  
TTTGGTTATAGTTTTCCGTGCGATGGCCCGGGCCGAGGCGGCACTTGTGATATTTCCGC  
ATGGGACGCGTTTTATTTGGCAGTTTTTTGGATGTTAAATACTATTGGCTGGGTTACTTT  
TTATTGGCATTGGAAACACATCACATTATGGCAGGGTAAACGTTGCACAGTTTAAATGAAT  
CTTCCACTTATTGATGGGCTGGTTAAGAGATTATTTATGGTTAAATTCTTCAACTTAT  
CAATGGATAACAACCCTTTTGGTATGAATAGTTTATCGGTCTGGGCATGGATGTTCTTATT  
TGGACATCTTGTGGGCTACTGGATTTATGTTCTTAATTTCTTGGCGTGGCTATTGGCA  
GGAATTGATTGAGACTTTAGCATGGGCTCATGAACGCACACCTTTGGCGAATTTGATTC  
GCTGGAGAGACAAACCGGTGGCCCTTTCTATTGTGCAAGCAAGATTAGTTGGATTAGC  
CCACTTTTCTGTAGGTTATATATTAACCTTATGCTGCTTTTTTAATTGCCTCTACATCGGGT  
AAATTTGGTATGTCCATTTTGTAAAAATTTATGATACATGTATAGGATGTACTCAATGTG  
TCCGAGCCTGCCCTACCGATGTTTTAGAAATGATACCGTGGGACAGATGTAAGGCTAAA  
CAAATTGCCTCTGCTCCAAGAACAGAGGATTGTGTAGGTTGTAAGAGATGTGAATCCG  
CTTGTCCAACGGATTTCTTGAGTGTCCGAGTTTATTTAGGGCGTGAAACAACCTCGGAGT  
ATGGGTCTAGCTTAT-----ATGAGCCACCTTCCCTCTGTTTTTGTACCATTAGTAGGCCTA  
GTATTGCCGGCAATTGCAATGATTTATTTATTTTAAATGTTCAAAAAAAA-----ATGCG  
AGATTTTAAAACATATCTCTCCGCGCACCAAGTACTAAGTACGCTCTGGTTGGGGGCTT  
TAGCAGGTCTATTGATAGAAATTAATCGCTTTTTCCCGGATGCGTTAACATTTCCCTTTT  
TT-----ATGACTGCAATTTTAGAGAGACGCGAAAGCGAAAACCTATGGGGGCGTTTCTG  
TAACTGGATAACCAGTACTGAAAACCGTCTTTACATTGGATGGTTTGGCGTTTTGATGA  
TCCCTACTTTATTGACCGCAACTTCTGTATTTATTATTGCCTTCATTGCTGCTCCTCCAGT  
AGATATTGATGGTATTCGTGAACCTGTTTCTGGATCTCTGCTTTACGGAAACAATATTAT

TTCGGGTGCCATTATCCCCTTCTGCAGCTATAGGTTTACACTTTTACCCAATATGGGA  
AGCGGCGTCTGTTGATGAATGGTTATAACAACGGTGGTCCTTATGAACTAATTGTTCTAC  
ACTTTTTACTTGGTGTAGCTTGTACATGGGTCGTGAGTGGGAACTAAGTTTCCGTTTG  
GGTATGCGCCCTTGGATTGCTGTTGCATACTCAGCTCCTGTTGCAGCTGCTACCGCAGT  
TTTCTTGATCTATCCAATTGGTCAGGGAAGTTTTTCTGATGGTATGCCTCTAGGAATCTC  
TGGTACTTTCAATTCATGATTGTATCCAGGCCGAGCACAAACATTCTTATGCACCCATT  
TCATATGTTAGGCGTAGCTGGTGTATTTCGGCGGCTCCCTATTCAGTGCTATGCATGGTTC  
CTTGGTAACTTCTAGTTTAATCAGGGAAACCACAGAAAATGAATCTGCTAACGAAGGTT  
ACAGATTCGGTCAAGAGGAAGAACTTACAATATCGTAGCCGCTCATGGTATTTTTGGC  
CGATTGATTTTTCAATATGCTAGTTTCAACAACCTCTCGCTCGTTACACTTCTTCTTAGCT  
GCTTGGCCTGTAGTAGGTATCTGGTTCACTGCTTTAGGTATCAGCACTATGGCGTTTAAAC  
CTAAACGGTTTTCAATTTCAACCAATCCGTAGTTGATAGTCAAGGCCGGTAATTAATAC  
TTGGGCTGATATCATTAATCGTGCTAATCTTGGTATGGAAGTTATGCATGAACGTAATGC  
TCACAACCTCCCTCTAGACCTAGCTGCTATTGAAGCTCCGGCTACAAATGGAATGGGTT  
TGCCTTGGTATCGTGTTACATACCGTTGTCTTGAATGATCCCGGTCGGTTACTTTCGGTTC  
ATATCATGCATACAGCTCTGGTTGCTGGTTGGGCCGGTTCGATGGCTCTGTATGAATTAG  
CCGTTTTTGATCCTTCTGATCCTGTTCTTGTATCCAATGTGGAGACAAGGTATGTTTCGTTA  
TACCCTTATGACTCGTTTAGGAATAACCAATTCCTGGGGAGGTTGGGGTATCGCA---GG  
CGGGACTGTAACGAATCCGGGTCTTTGGAGTTACGAAGGTGTAGCTGGGGCACATATT  
GCGTTTTCTGGCTTATGCTTTTTTGGCAGCGATCTGGCATTGGGTCTATTGGGATCTAGAA  
GTATTTTATGATGAACGTACAGGAAAACCTTCTTTGGATTTGCCCAAGATCTTTGGAATT  
CATTTATTTCTCTCAGGGGTGGCTTGTCTTGGGTTTGGTGCATTTTCATGTAACCTGGTTTG  
TATGGTCCCGGAATCTGGGTATCTGATCCTTATGGCCTAACAGGAAAAGTACAACCTCT  
AAAGCCAGCGTGGGGTGGGGAAGGTTTTGATCCTTTTTGTTCCAGGAGGAATAGCTTCT  
CATCATATTGCAGCGGGAACATTGGGCATATTAGCGGGTCTATTCCATCTTAGTGTCCGC  
CCGCCACAACGGCTATAACAAGGATTGCGTATGGGAAATATTGAAACCGTCTTTCCAG  
CAGTATCGCTGCCGATTTTTTTGCAGCTTTTGTGGTTGCCGGAACCTATGTGGTATGGTTC  
GGCGACTACCCCGATTGAATTATTTGGGCCACCCGTTATCAATGGGATCAGGGGTACT  
TCCAACAAGAGATATATCGAAGAGTTAGTGCTGGGCTAGCAGAAAATCAAAGTTTATC  
AGAGACCTGGTCTAAAATTCCTGAAAAATTAGCTTTTTATGATTACATTGGCAATAATCC  
AGCAAAAGGAGGGTTATTACAGAGCGGGCTCAATGGATAACGGGGATGGAATAGCAGTT  
GGATGGTTAGGTCACCCTATCTTTAGAGATAAAGAAGGACGTGAACTTTTTGTACGCCG  
TATGCCTACTTTTTTTGAAACATTTCCAGTCTTTTAGTAGACGGTGATGGAATTGTTAG  
AGCTGATGTTTCTTTTAGAAGGGCAGAATCAAATATAGTGTTGAACAAGTAGGCGTA  
ACTGTTGCGTTCTACGGCGGCGAACTCAATGACGTCAGTTATAGTGATCCTGCTACGGT  
GAAAAAATATGCTAGACGTGCTCAATTGGGTGAAATTTTTGAATTAGATCGTGCTACTT  
TGAAATCCGATGGTGTGTTTCGCAGCAGTCCAAGGGGTTGGTTTACTTTTTGGGCATGCT  
TCATTTGCTTTGCTCTTCTTTTTTCGGACATATTTGGCACGGTGCTAGAACTCTGTTTCA  
GATGTTTTTGCTGGTATTGACCCAGATTTAGATGCTCAAGTAGAGTTTGGAGCCTTCCA  
AAAACCTGGAGATCCAACCTACAAGACGACAAGCAGTCATGAAAACCTTATATTCCCTG  
AGGAGGTTCTACCACGTGGAAACGCTCTTTAACGGAACTTTAGCCTTAGCTGGTCGTG  
ACCAAGAAACCACCGTTTTCGCTTGGTGGGCCGGGAATGCCCGACTTATCAATTTATCC  
GGTAAACTACTAGGGGCTCATGTAGCCCATGCTGGATTAATAGTTTTTCTGGGCCGGAGC  
AATGAATCTATTTGAAGTGGCTCATTTTCGTCCAGAGAAGCCTATGTATGAACAAGGGT

TAATTTTACTTCCCCACCTAGCTACTCTAGGTTGGGGGGTAGGGCCCCGAGGGGAAGTT  
ATAGACACCTTTCCATACTTTGTATCCGGAGTACTTCATTTAATTCCTCTGCAGTATTGG  
GCTTCGGCGGTATTTATCATGCACTTCTGGGACCTGAGACGCTTGAAGAATCTTTTCCG  
TTCTTTGGTTATGTATGGAAAGACAGAAATAAAATGACCACAATTTTAGGCATTCACCT  
AATCTTGTTAGGTATAGGTGCTTTTCTTCTAGTGTTAAAGGCCCTTTATTTTGGAGGTGT  
ATATGATACCTGGGCCCCAGGAGGGGGAGATGTAAGAAAAATTGCCAACTTGACCCTG  
AGTCCAAGTCTCATATTTGGTTATTTACTGAAATCTCCTTTTGGGGGGGAGGGATGGATT  
GTAAGTGTGGACGATTTAGAAGATATAATCGGAGGACATGTCTGGTTAGGTTCCATTG  
TATACTTGGCGGAATATGGCATATCTTAACCAAGCCCTTTGCATGGGCTCGACGCGCATT  
TGTATGGTCTGGAGAAGCTTACCTATCTTATAGTTTAGGGGCTTTATCCATATTTGGTTTC  
ACCGCTTGTGTTTTGTCTGGTTCAATAATACCGCGTATCCGAGTGAGTTTTACGGACCT  
ACTGGACCCGAAGCTTCTCAAGCTCAAGCATTACTTTTCTAGTTAGAGACCAGCGTCT  
TGGAGCGAACGTGGGATCCGCTCAAGGCCCTACGGGTTTAGGTAAATATCTAATGCGTT  
CCCCACCGGAGAAGTCATTTTTGGCGGAGAACTATGCGCTTTTGGGATCTGCGTGC  
TCCGTGGTTAGAGCCTCTAAGGGGACCGAATGGGTTAGATTTGAATAGGTTGAAAAAA  
GACATAACAACCGTGGCAGGAACGGCGTTCCGCAGAATATATGACTCATGCCCTTTAGG  
ATCTTTAAATCCGTGGGAGGTGTAGCTACCGAAATTAATGCAGTCAATTATGTCTCTCC  
TAGAAGTTGGTTAGCAACCTCGCATTTTTGTTCTAGGATTTTTCTTCTTCATAGGTCATT  
GTGGCACGCGGAAGGGCTCGTGCAGCCGCAGCCGGATTGAAAAAGGAATTGATCG  
TGATTTTGAACCTGTTCTTTCCATGACCCCTCTTAATATGACTATAGCCCTTGGTAAATTG  
ACCAAAGAAGAAAAGGATTTGTTTGACACTATGGATGACTGGTTACGGAGGGATCGTT  
TCATTTTTGTAGGATGGTCCGGTCTATTGCTCTTTCCCTGTGCCTATTTTGCTTTAGGAG  
GTTGGTTCACGGGTACTACCTTTGTAACCTCATGGTATACTCATGGATTGGCTAGTTCCT  
ATTTGGAAGGTTGTAATTTCTTAACCTGCCGCAGTTTCTACTCCTGCTAATAGTTTAGCAC  
ATTCTTTGTTGTTCCATGGGGTCCTGAAGCACAAGGAGATTTTACTCGTTGGTGTCAA  
TTAGGGGGTCTGTGGACTTTTGTGCTCTCCACGGCGCTTTCGGACTAATAGGTTTTAT  
GTTACGCCAATTTGAACTTGCTCGATCTGTTCAATTGCGGCCTTATAACGCCATCGCCTT  
CTCTGCTCCAATTGCTGTTTTTGTCTGTATTCTTTATTTATCCGCTAGGTCAGTCTGGT  
TGGTCTTTGCCCTAGTTTTGGTGTAGCAGCTATATTCGATTCATCCGATTTTTTCAAG  
GGTTTCATAATTGGACATTGAACCCTTTTACATGATGGGAGTTGCCGGTGTATTGGGC  
GCTGCCTTGCTATGTGCTATTCATGGTGTACTGTAGAAAATACTTTATTTGAAGACGGT  
GATGGTGCAAATACATTCCGCGCTTTTAACCCAACTCAATCTGAAGAACTTATTCAAT  
GGTACCCTAACCCTTTTGGTCCCAAATCTTTGGGGTTGCTTTTTCTAATAAACGTTG  
GTTACATTTCTTTATGTTATTTGTACCAGTAACCGGTTTATGGATGAGTGCTCTTGGAGT  
AGTCGGTCTGGCCCTGAACCTACGTGCCTATGACTTCGTTTCTCAAGAAATTAGGGCAG  
CGGAAGATCCTGAATTTGAACTTTCTACACAAAAAATATTCTCTTAAATGAAGGTATT  
CGTGCTTGATGGCCGCTCAAGATCAGCCTCATGAAAACCTTATATTCCCTGAGGAGGT  
TCTACCACGTGGAAACGCTCTTATGTCTGGAAACACAGGAGAACGTTTCGTTTGCTGATA  
TTATTACCAGTATTCGATACTGGGTCATTCATAGTATTACTATACCTTCCCTATTCATTGCG  
GGTTGGTTATTCGTCAGCACCGGTTTAGCTTACGATGTGTTTGGAAAGTCCTAGGCCAAA  
CGAATATTTTACAGAGAGCCGGCAGGGAATTCCTTTAATAACTGGCCGTTTTGATCCTT  
TGGAACAACCTCAATGAATTTAGTAGATCGTTTATGACTATAGATCGAACCTATCCAATTT  
TTACAGTACGATGGTTGGCTGTTACGGCCTAGCTGTACCTACCGTCTTTTTTTTTGGGAT  
CAATATCAGCAATGCAATTCATCCAACGAATGGCTACACAACTTTTAATAAAGGTTCTA

TATCTGGT--CCAAGACGAACTACAGTAGGTGATTTATTA AAAACCATTGAATTCGGAATA  
TGGTAAAGTAGCTCCCGGGTGGGGAACGACTCCCTTTATGGGTGTGGCAATGGGGCTA  
TTCGCGGTATTTCTATCTATTATTTGGAGATTTATAATTCTTCCGTTTTATTGGATGGAAT  
TTCAATGAATATGTTTACTCTTAAACTCTTCGTGTACACAGTAGTGATCTTTTTTGTTCG  
CTCTTCATCTTTGGGTTCTATCTAATGATCCAAGACGTAATCCTGGGCGTGAGGAAAT  
GACCGATACTACTGGAAGGATTCCCTCTTTGGATAATAGGTACTGTA ACTGGTATTCTTGT  
AATCGGTTTAATAGGTATTTTCTTTTTTGGTTCATATTCCG GATTGGGTTCATCCCTGATG  
CTAAATTTCTTTAGTTTTATCTGT-----CTTAATTAIGTCCTTTATTTCGAGTGGTTTTTTTT  
AGGCAAATTGCCC GAAGCCTATGCTTTTTTGAATCCAATCATAAATTTTATGCCAGTCAT  
ACCAGTGCTCTTTTTCTTTTAGCTTTTGTGGCAGGCTGCTGTAAGTTTTAGAACGA  
CACAATCAAACCCGAACGAACAAAACGTTGAATTGAATCGCACCAGTCTCTACTGGGG  
GTTATTACTTATTTTTGTACTCGCTGTTTTATTTTCCAATTATTTCTTCAATATGGAAGTCA  
ATATTCTTGCAATTTATTGCTACTGCCCTATTGATTCTAGTT CCTACCGCCTTTCTCCTTATC  
ATTTACGTAAAAACAGCCAAA-----ATGGAAACAGCAACCCTAATCACCATTTTTCTA  
TCCGGTTTACTTGTAAGTTTTACTGGGTACGCCTTATATA CCGCTTTTGGGCAACCCTCT  
CAACAATAAGAGATCCATTGGAAGAACATGGAGACATGGAAGCCTTGGTTTATACATT  
CCTCTTAGTCTCGACTCTAGGAATAATTTTTTTCGCTATCTTTTTTCGAGAACCGCCTAA  
AGTGCCAATGAAAAAGATAAAAATGACTCTTGCTTTCCAATTGGCTGTTTTTGCATTAA  
TTGCTACTTCATCAATCTTATTGATTAGTGTACCCGTTGTCTTTGCTTCTCCCGAGGGCT  
GGTCAAATAACAAAAATGTTTTATTTTCCGGTACATCATTATGGATTGGATTAGTCTTTCT  
GGTGGGTATACTTAATTCTCTCATCTCT-----ATGTCACCACAAACAGAGACT  
AAAGCAAGTGTTGGATTCAAAGCTGGTGTTAAAGACTACAAATTGACTTATTATACTCC  
CGATTACGAAACCAAAGATACTGATATCTTGGCAGCATTCCGAGTCACTCCTCAACCCG  
GAGTTCCGCCTGAAGAAGCCGGGGCGGCGGTAGCTGCGGAATCTTCTACTGGTACATG  
GACAACTGTGTGGACCGATGGACTTACCAGCCTTGATCGGTACAAGGGGCGATGCTAC  
CGCATTGAGCGGTTATTGGAGAAAAAGATCAATATATTGCTTATGTAGCTTACCCTTTA  
GACCTTTTTGAAGAAGGTTCTGTTACCAACCTGTTTACTTCCATTGTGGGTAATGTATTT  
GGCTTCAAAGCACTGCGCGCTTTACGCTGGAAGATCTCCGAATACCTCCGGCTTATAC  
TAAAACATTTCAAGGCCCGCCTCACGGCATCCAGGTTGAGAGAGATAAATTGAACAAG  
TATGGTCGTCCTCTCTTGGGATGTACTATTA AACAAAATTGGGGTTATCAGCTAAAAA  
CTACGGTAGAGCGGTTTATGAATGTCTTCGCGGTGGACTTGATTTTACCAAAGATGATG  
AGAACGTAAACTCACAACCATTTATGCGTTGGAGAGACCGTTTCTTATTTTGTGCCGAA  
GCAATTTATAAATCACAGGCTGAAACAGGGGAAATCAAAGGACATTACTTGAATGCTA  
CTGCAGGTACATGCGAAGAAATGCTAAAAAGAGCTTTCTTTGCTAGAGAATTGGGAGT  
TCCTATTATAATGCACGACTACTTAACAGGGGGATTCACTGCAAATACTTCTTTGGCTCA  
TTATTGCCGAGAGAATGGTCTACTTCTTCACATCCATCGGGCAATGCATGCCGTTATTGA  
TAGACAAAAGAATCATGGTATACACTTCCGTGTACTAGCGAAAGCGTTACGTCTGTCTG  
GTGGAGATCATATTCATTCGGGTACTGTAGTAGGTA AACTTGAAGGCGAAAGAGAGATT  
ACTTTGGGCTTTGTTGACTTACTACGCGATGATTTTGTGTTGAACAAGACCGAAGTCGTGG  
TATTTATTTACTCAAGATTGGGTTTCTTTACCAGGTGTTATGCCCGTGGCTTCAGGGGG  
TATTCACGTTTGGCATATGCCGGCTCTGACCGAGATCTTTGGGGATGATTCCGTA CTACA  
GTTCCGGGGGAGGAACTTTAGGGCACCCCTGGGGTAATGCGCCGGGTGCCGTAGCTAAT  
CGAGTCGCTCTAGAAGCATGTGTACAAGCTCGGAACGAAGGGCGTGATCTTGCTCAGG  
AAGGCAATGACATTATTCGACAAGCTGGCAAATGGAGCCCTGAACTAGCTGCTGCTTG





?????????????ATGGCTGTTCCAAAAAACGTAGTTCGAAATCAAAAAAGCGTATTCGT  
AAAAACACTTGGAAAATAAAAAGCCTTTGGACAACATTA AAAAGCTTTTTTCGTTAGGAA  
AATCCCTTTTGACCGGGAATTTCAAAAAGTTTTTTTTTACGACAAACAAATACAATGGCC  
AAGAATAAAGATGTCCGAGTAACGGTTATTTTGAATGTACCAGTTGTGCCCAAAACG  
ATGTTTCATGGTAATAAGGTAGCAACGGGCATTTCCAGATATATTACTCAAAAAACCGT  
CACAATACGCCAATCGATTAGAATTTCAAAAATCTGTCCCCGTTGTTACAAACATAC  
GCTTCATGGAGAAATAAAAAACATGAAAATAAGAGCTTCTGTTTCGTCAAATTTGTGAC  
AAATGTCGACTAATCCGTAGAAGAGGACGAATCTAGTAATTTGTTACAACCCGAGACA  
TAAACAACGACAGGGAATGGTTCGAGAGAAAATAACAGTATCTACTCGGACACTACAG  
TGAAATGTGTTGAATCAAGAACAGACAGTAAACGCCTTTATTATGGCCGCTTTATTCT  
GTCTCCACTTAGGAAAGGTCAAGCCGACACAATAGGCATTGCGATGCGAAGAGCTTTG  
CTCGCAGAAATAGAAGGAACCCGTATCACGCGTGTA AAAATTTGCG-----AAAGCGTCAC  
ACGAATATTCACCATAGCGGGTATTCAAGAATCGGTACATGAGATTTTCATGAATTTGA  
AAGAAATTGTATTGAGAAGTAATCTATATGGAACCTTGATGCGTCTATTTCTATCAAAG  
GTCCTGGGCATGTA ACTGCTAAAGATATCATCTTACCCCTCATGTGGAATTTGTTGAC  
AGCACACAACATATAGCTTGGTTAACGGAACCAATCGATTTGTGTATTGGATTA AAAAT  
CGAGAGAAATCGTGGATATTTTATAAAAACACACCCT---AACTTTGATGGAAGTTAT-----  
CCTATAGATGCTGTATTCATGCCGGTTCGAAATGCGAATCATAGTATTCATTTCGTATGGG  
AAT-----GAGAAACAAGAGATACTTTTTCTCGAAATATGGACAAACGGAAGTTAACTC  
CGAAAGAAGCACTTCATGAAGCCTCCCGAAATTTGATTGATTTATTTATTCCTTTTTAC  
ATATGGAGGAAGAA-----AACTTACATTTAGAGGATGCTGAC---CACACAATTTCCCTAT  
CCCCCTTACCCTTTATGATAAAGTGGCT---AACTCAGAAAAACAAAAA---AAACG  
ATCATTGGAATCAATTTTTATTGACCAATTAGAATTCCTCCCAAGATCTATAATTGCTG  
AAAAAGTCGAATATCTTTACATTATTGGACCTTTTGAATAACAGTCAAGAGGATCTTATT  
AAAATAGAGCATTTCGCCTAGAAGATGTCAAACAGATATTGGGCATTCTAGGAAAACA  
T-----TTCGCACTTGATTTACCAAAAAAGAAGATGCTTGAAGATGGA---AAAGGGGGAA  
TTACTACAATACCGGATTGAATCAGATACAATTTGAAGGATTTTGTAGGTTTCATTGATC  
AAGGTTTGACGGAAGA ACTTTATAAGTTTCAAAAATTTGAAGATATAGATCAAGAAATT  
GAATTTCAATTATTTGCGGAAACGTATCAATTGGTAGAACCTTTGATAAAGGAAAGAGA  
TGCTGTGTATGATTCACTCACATATTCTTCTGAATTATATGTATCGGCGGGATTAATTAGG  
AAAGCAAGTAAGGATATGCAAGAACAAAAATTTTTATTGGAAGTATTCCTATAATGAA  
TTCCCTGGGA ACTTCTATAGTAAATGGAATCTATAGAATTGTGATCAATCAAATATTGCA  
AAGCCCTGGCATTATTACCGTTCAGAATTGGACCAGAACGGAATTTCCGGTCTATACCG  
GCACAATAATATCAGATTGGGGAGGAAGATCAGAATTAGAAATTGATAGAAAAGCAAG  
GATATGGGCTCGTGTAAGTAGGAAACAAAAATATCTATTTTAGTTCTATCATCAGCTAT  
GGGTGCAATCTCAGAGAAATTATAGAGAATGTCTGCTATCCTGAAATTTTGTATCTTT  
TCTGCGTGATAAGGAGAAAAAAAATTGGGTCAAAGAAAACGCCATTTTGGAGTT  
TTATAAAAATTTGCTTGCGTAGGCGGGGATCCATTATTTTCTGAATCCTTATGTAAGGA  
ATTACAAAATAAATTTTTTCAACAAAGATGTGAATTAGGAAGGATCGGTTCGACGAAATA  
TGAACCGAAGACTTCATCTTGATATACCCAGAACAAATACATTTTGTACCACGAGATA  
TATTGGAAGCCACCGATCTTTTATTGGACTTAAATTTGGAATGGGTACACTTGACGAT-  
-----ATGAATCATTGCGAATAAGCGCATTCGGTCTGTAGCGGATCTTTTACAAGATAAA  
TTCGGCTTGGCTCTAGTTTCGTTTAGAAAATGCGGTTCAAGGGACTATATGTGGAGCAAT  
TCAT--CATAAAAAG---ATACCCACTCCTCAGAATTTGGTAACTTCAACTCTC-----TT

AACAAC TACTTACGAGTCCTTTTTTCGGGTTACATCCATTATCTCAAGTTTTGGATCGAAC  
TAATCCATTGACACAAATAGTTCATGCAAGAAAAGTTAGTTCTTTGGGCCCGGGGCC  
TCACCGGACGCACTGCTAGTTTTTCGGATACGAGATATCCACCCTAGCCACTATGGGCGT  
ATTTGCCCAATTGACACATCTGAAGGAATAAATGTTGGACTTATTGGATCCTTAGCAATT  
CATGTGAGGATTGGTAATTGGGGA---TCTTTAGAAAGCCCGTTTTTT-----AAAATTC  
CGATAGGTAAACAGGA-----GTACGGGTGCTACATTTATCACCGGGTAGGGATGAATACT  
ATATGGTAGCGGCAGGAAATCTTTGGCCTTGAATCAGGATATTCAAGAAGACCTGGTT  
GTTCCAGCTCGATTTTCGTCAGGAATTCCTTACTATTGCATGGGAACAAGTTAATCTTCG  
AAGTATTTTTCTTTCCAATATTTTTCTATCGGAACTTCCCTCATTCTTTTATCGAACAT  
AATGATGCGAATCGAGCGTTAATGAGTTCGAATATGCAACGTCAAGCAGTCCCCTTGC  
TTGGTCCGAGAAATGCATTGTTGGAACAGGGGTGGAACGCCAAGCAGCTCTAGATTCA  
GGGTCTCTTGCTATAGCCGAACGGGAGGGAAGGGTCATTTATACTGATACTGAAAAGAT  
CCTCGTATCGGGTGATGGAAAGACTATAAGCATTCCATTAGTTATGTATCAACGTTCCAA  
CAAAAATACTTGTATGTATCAACAACCCCAAGGTTTCGGCGGGGTCAATTTATTA AAAAGG  
GACAAATTTTAGCGGACGGTGCTGCTACGGTTGAGGGCGAACTTGCTCTGGGGAAAA  
GCGTATTGGTAGCTTATATGCCGTGGGAGGGTTACAATTATGAGGATGCAGTGCTCATT  
GCGAATGTTTGGTATATGAAGATATTTTTACTTCTTTTACATAAGGAAATATGAAATTC  
AAACTCATGTGACAACCCAAGGC---CCAGAAAAAGTCACTAATGAAATACCACATTA  
GAAGCCCATTTAATTCGCAATTTGGACAAAAATGGAATTGTGCTGCAGGGATCTTGGGT  
AGAGCCGGGTGATGTTTTAGTAGGTAATTAACACCCCAAGTGGTGAAAGAA---TCGT  
CCTATGCACCGGAAGATAGATTGTTACGAGCCATACTTGGTATTCAGGTATCTGCTTCAA  
AAGAACTTGTCTCAAAGTCCCTATAGGCGGTAGAGGTTCGGGTATTGATGTGAGGTG  
GATCCAGAAGAAGGGG---GGTTACGGTTATAATCCTGAAAAGATTCGGGTATATATTTA  
CAGAAACGTGAAATCAAAGTGGGCGATAAAGTAGCTGGAAGACACGGAAATAAAGGT  
ATCATTTCAAAAATTTGCCTAGACAAGATATGCCTTATTTACAAGATGGAAGATCCGTT  
GATCTGGTCTTCAACCCATTAGGAGTACCTTCACGAATGAATGTGGGACAGATATTTGA  
ATGTTCACTCGGGCTAGCAGGGAGTCTGCTAGATAGACATTATAGAATAGCACCTTTTG  
ATGAGAGATATGAACAAGAAGCCTCCAGAAAAATAGTCTTTTCTGAATTATATGAAGCC  
AGTAAACAAACAGCGAATCCCTGGGCGTTTGAGCCCGAATATCCAGGAAAAAGCAGA  
ATATTTGATGGAAGGACAGGGAATACTTTTGAGCATCCTGTCCTAATAGGGAAGCCTTA  
TATATTGAAATTAATTCATCAAGTTGACGATAAAATCCATGGGCGTTCAGCGGACATTA  
TGCGCTTGTTACACAACAACCCCTTAGGGGAAGAGCCAAACAGGGGGGGCAGCGAGT  
AGGAGAAATGGAGGTTTGGGCTCTAGAAGGATTTGGGGTTGCTCATATTTTACAAGAG  
ATGCTTACTTATAAATCGGATCATATTAGAGCCC GCCAGGAAGTACTAGGTACTACGATC  
GTTGGAGGAACAATACCTAATCCCAAAAATGCGCCAGAATCTTTTAGATTGCTCGTTTCG  
AGA ACTACGATCTTTAGCTCTGGA ACTGACCCATTTCTTGTATCTGAGAAGA ACTTCC  
AGGTGAATAAAAGGGAAGCTATGAATAACAATTTTTCTTCTATGATCGATCGATATAAAC  
ATCAACAGCTGCAAATGGATCGGTTTCTCCCAACAATAAGTGCTTGGGCCACCAA  
AATCCTGCCGAATGGCGAGATCGTTGGAGAGGTAAAAAAACCCTATACCTTTCTTTATA  
AAACTAATAAACAGAAAAAGAGGGATTATTTTGTGAAAGAATTTTGGGCCTATCAA  
AAGTGGAATTTGCGCTTGTTGGAATTATCGAGTAATTGGAGATGAAAAAGAAGACAA  
AAATTTTGTGAACAATGCGGAGTCGAATTTGTTGATTCTCGGATACGAAGGTATCGAAT  
GGGCTGTATAAACTCGCATGCCCGTAACCCATGTGTGGTATTTAAAACGTCTTCTTA  
GTTATATTGCGAATATTTTAGATAAACCTCTTAAAGAATTAGAGGGCTTAGTACTGCG

AT-----TTTTCTTTTGCTAGGCC---ATAACTAACAAACCCACTTTCTTACGATTACGGGG  
TTTATTAATAATGAAATCCAATCTTGAAATCCAGCATCCCACCTTTTTTTTACTACTCA  
AGGTTTCGATACATTTCCGGAATCGAGAAATTTCTACGGGGGCGGGTGCTATCCGAGAAC  
AATTAGCTGATCTAGATTTACGAATTTCTTAGAAAATTCGTTACTAGAATGGAAAGACT  
TGGGGGAAGAA---GAGAACACAGGGAATGAATGGGAAGATCGGAAAGCTGGAAGAC  
GAAAGGGTTTTTTGGTTAGACGTATGGAGTTGGTTAAGCATTTTATTCGAACAAATATA  
GAACCAAATGGATGGTTTTATGTCTATTACCAGTTCTTCCTCCCGAGCTGAGACCAAT  
CATTCAGATCGACGGGGGGAAACTTATGAGCTCGGATATTAATGAACTCTATCGAAGAG  
TTATCTATCGGAATAATACCCTTACCGATCTATTAACAACAAGTAGATCTACGCCGGGAG  
AATTAGTAATGTGTCAAGAGAAATTAGTACAAGAGGCTGTGGATACACTTCTGGATAAT  
GGAATCCGCGGACAGCCAATGAGGGACGGTCATAATAAAGTTTACAAGTCCTTTTTCGG  
ATATAATTGAAGGCAAAGAGGGAAGATTTCCGCGAAACTCTGCTTGGTAAACGAGTCGA  
TTATTCAGGACGTTCTGTGATTGTCTGGGCCCTTCACTTTCATTACATCAATGTGGCCT  
GCCTCGGAAATAGCAATAGAGCTTTTCCAGCCATTTGTAATTCGTGATCTAATTAACA  
ACATCTTGCTTCGAACATAGGGGTTGCTAAGAGTAAAATTCGAGAAAAGAACCAATT  
ATATGGGAAATACTTCAAGACGTTATGCAGGGACATCCTGTATTGCTGAATAGAGCGCC  
GACTCTGCATAGATTAGGCATACAGGCATTTCCAGCCGTTTTAGTGGAGGGGCGTGTTA  
TTTTGTTTACACCCGTTAGTTTGTAAAGGGTTCAATGCAGATTTTGATGGAGATCAAATG  
GCTGTTCAATGTACCCTTATCATTGGAGGCTCAAGCGGAGGCCCGTTTACTTATGTTTTCG  
CATATGAATCTTTTATCTCCGGCTATTGGGGATCCCATTTCCGTACCAACCCAAGATATG  
CTTATTGGACTCTATGTATTAACAAGCGAAAAGCATCGAGGTATTTGTACAAATAGGTAT  
ACCAACTGTAATATA-----CGAACCCCTCAA---ACTAAAAGTAGTGACTATAGTTCTAA  
GTATAAAAATCCGTATGGGCCCTTTTTTTGTAATTCCTATGATGCAATTGGAGCTTATCGC  
CAGAAACGAATAAATTTAGAAAGTCCTTTGTGGCTTCGGTGGAGACTAGATCGACGC---  
GTTATTACTTCA-----AGAGAAACTCCGATCGAAGTTCACTATGAATCTAGAGGGACTTA  
TTTTGAGATTTATGGACACTTTCTAATAGTCAGAAGTCTAAAAAATAATCTTTTTTAT  
ATATCTTGAACACTACCGTTGGGCATATTTCTCTTTATCGAGAAATCGAAGAAGCTATACA  
AGGGTTTTCTCGGGCCTGGTCATCTGATAACC-----ATGGAGGTACTTATGG  
CAGAACGGATCAATCTGGTCTTTCACAATAAAGTGCTAGACAGAACTGCCATGAAACG  
ACTTATTAGTAGATTAATAGATCACTTCGGAATGGCATATACATCACACATCCTGGATCA  
AGTAAAAACTCTGGGTTTCCAACAAGCTACTGCTACATCCATTTTATTAGGAATTGATG  
ATCTTTTAACAATACCCTCGAAGGGATGGCTTGTTCAGATGCTGAACAGCAAAGTTTC  
ATTTTTGAAAATACCATCATTATGGGAATGTACACGCAGTAGAAAAATTACGTCAATCT  
ATTGAAATATGGTATGCTACAAGTGAGTATTTGCGACAAGAAATGAATCTTAATTTTAGG  
ATGACAGACCCCTTGAATCCAGTTCATCTAATGTATTTTTTCAGGAGCTAGAGGAAATGC  
ATCTCAGGTACATCAATTGGTAGGTATGAGAGGATTAATGTCAGATCCACAAGGACAAA  
TGATTGATTTACCCATTCAAAGCAATTTACGCGAAGGACTTTCTTTAACGGAATACATCA  
TTTCCTGCTATGGAGCCCGTAAGGGGGTTGTGGATACTGCTGTACGAACCTCAGATGCT  
GGATATCTCACGCGCAGACTTGTGTAAGTAGTTCAACACATTGTGGTACGTCGAACGG  
ATTGCGGCACTGCCCGAGGGATTTCTGTGAGTCCTCATAATGGGATGATGCCG---GAAA  
GGATGTTTATCCAACATTAATCGGTCTGTATTAGCGGATGATATATATATAGGCCACG  
GTGCATTGCGACTAGGAATCAAACATTGGAGTTGGACTTGTAATCGATTCTAAAC--  
-----TTTCGAGCCGAACCAATATTGATTGAACTCCCTTGACTTGTAGGAGTACA  
TCTTGGATTTGTGATTTATGTTATGGTCCGAGTCCTACTCATGGTGACCTGGTTGAATTG

GGGGAAGCTGTAGGTATTATTGCAGGTCAATCGATTGGAGAACCCGGGACTCAATTAA  
CACTAAGAACTTTTCATACTGGCGGAGTATTCACAGGGGGTACTGCCGAACATGTCCG  
AGCCCCTTCTAATGGAAAAATCAGATTGAATGAGGATTTGGTTCATCCGACGCGTACAC  
GTCATGGGTATCCCGCTTTTTTCTGTTCTATATACTTGTATGTA ACTATAGAGAGTCAAGA  
TATTCTACATCATGTTAAAATTCCCCAAAAAGTTTTATTTTAGTTCAAATGATCAATAT  
GTAGAATCCGAACAAGTGATTGCTGAGAGTTCGTGCGGGAACATCTACT--TTTAATTATA  
AAGAGAAGGTTTCGCAAACATATTTATTCTGATTCAGGCGGAGAA--ATGCACTGGAGTA  
CCAATGTGTATCATGCACCTGAATTTACATATGGGAATGTTCAATTTATTATCAAAAACAA  
GTCATTTATGGATATTATTAGGGGAGCCGTGTCAT-----TCCAGTCTAGTCTCCACTTCAA  
TCCACAGGGATCAGGATCAAATGAGTGTGCAG-----TCCCTTTCTGTCAAGCGAAGATC  
TACTTCCAAGCTCTCA-----GAAACTAATGATGAG--GCCAACCAAGAAATAGCTAGTGC  
GGATTTTTCTGGTAAA--GAAGATAGAATTGCCGATTTT--TCAGACGTAAATCGAAGCA  
TATGTA CTGATCATTATAATCTGGTATATCCGGCTCCTATTCTAGACGAGAATTTCGTCTTC  
AAATTGCTTATCAAAGAGGCGAAGAAATCAATTCATCATTCCACTCCAATCGATTCAAG  
AACACAAGAATGAACTAATGCCCTGTTCAAGTATCTCGATGAAAACCCCCCAAATGC  
AAATGGTATTTTCTGGGCAAATAGTATTTCTTGCTTATTTTGACGATCCTCGGTACAGAAG  
AAATAATTCGGGCAGTACTAAATATGGGACTCTAGAAATGCATTCAACCGTTAAAAAAG  
AAGAT-----TTTATTAAGTATCGAGGA--GTCAACGAATTTCGA-----CAAATGAAAGTAG  
AGCGATTTTTTTTTCATTCCCGAAGAGGTGCATATCTTACCCGGATCTTCTTCCATAATGG  
TACGGAACCATAGTCTCATTGGGGTAGATACACAAATCACCTTAAATCTAAGAAGCCGA  
GTAGGTGGGTAGTACAGGTTGGAGAGAAAAAATAAATTGAACTAAAAATCTTTT  
TTGGAGATATCTATTTTCTGGAGGGGCGGATAATATATCCCAACATAGCGGCGTTTTGA  
TACCA---CCCGGAACCGAAAGAAAAACAAATTACAAGGAATCCAAAAA-----GTAAA  
AGTTGGATAGATGTCCAACGG-----ATTACGCCGAGCAAG-----AAAAAGTTTTTTGTCT  
TGGTTCGACCTGTCGTCACATATGAAATAATGGATGATATAACCTCGGCAACACTTTTCC  
CCCCGATCTCTTGCAGCAAAGGGATAATGCGCAACTTCGCGTTGTCAATTATATCCTTC  
ATGGA ACTGGCAAACCAATTCGAGGAAATTATGACACAAGTATTCAATTAGTTCGGAC  
GTGTTTAGTTTTTAAACGGAACCAAGATAAAAAA-----AGTTATTATAGTGAAGCAGC  
CCGCGCTTCCGTTGTTGAAATAAGGACAACTATTTGATTCGTCATTTCTAAGAATCG  
ACTTCGTGAAAGCACCTATTTCTGATATCGGAAAGAGGAATGATCCTTTGGGTTTAGGA  
TTGCTCGTGAT--AATGGATTAGATTGGACCCATAAAAATCCC-----TAT-----  
TCCGAGGCAAGGATTCACCAAAACCTTAACCAAAATCAAGGAACTATTCATACATTTTT  
GAATAGA-----AATAAGGAATCTCAGTCGTTGAGCATTTTGTTCATCATCCAATTGTTCT  
CGAATGGACCCA-----GCAAACGGTGCAAATCTAACAACGTC-----ATACAAGAATC  
A---CCAATACTTAAAATTAGTAATCTTTGGGTCTTTAGGAACA-----TACCCTCCAATT  
GCGAATTGTGATTCG-----TTGAATCATTTA-----CTAACCCATAATCAGATCTTA---GTAAC  
TAACTATTTTAAACTCGACAAC-----GTAAAACCGCCCTTCAAGTATTCAAATTGAAA  
---TATTATTTTATTGCGGAAAAT-----TGGAAGTTTGCAACTACAATCCAGGCAGTAACC  
TTCGTTTGAACGATTTGATTTTCATTGGAATTTTCTCCACCACAATTCTTGTGCAGAGA  
CATCT---AAAATAATGAGTCTTGGACAATTTATTTGTCAAATGTCTGTATAGACAAAAC  
AAGACCCCCC---CGCAA-----TCGGGTCAAGTTATCCTTGTTCAA---GTTGACTCTGTA  
GTAATACGATTGGCTAAGCCTTATTTAGCCACCCAGGAGCAACTGTTTCATGGCCTTTAT  
GGAGAAACCTTTTTTCGGCGGAGATACAGTAGTTACATTTAACTATGAAAAATCAATATC  
TGGGGATATAACACAAGGTCTTCCAAAAGTAGAACAGGTATTAGAAGTGC GTTTCGGTT

GATTCCATATCGATGAATCTAGAAGGGAGGGTTGAGGGTTGGAGCAAATGTATAACAG  
GAATTCTTGGAATCCTTGGGGATTCTTTATTGGCGCTGAGCTAACTATAGTGCAAAGT  
CGCATCTCTTGGTTAATAAGATCCAAAAAGTTTATCGAGCCCAGGGGGTGCACATTCA  
TAATCGGCATATCGAAATTATTGTACGTCAAATAACATCAAAAAGTGTGGTTTCAGAA---  
-----GACGGAATGTCTAATGTTTTTTTCGCCCGGAGA ACTTATTGGATTGTTGCGAGCAGA  
ACGAACGGGGCGCGCCTTAGAAGAACCAATTCATTACCGATCCGTTTTTTTTGGGAATAA  
CAAAAGCATCTCTCAATACTCAAAGTTTCATATCAGAAGCGAGTTTTCAAGAAACGGC  
TCGAGTTTTATCAAAAGCAGCTCTCGGAGGGCGTATCGATTGGTTGAAAGGCTTGAAA  
GAGAACGTTGTTTTGGGGGGGGTGATACCCGCTGGTACCGGATTCAGAGGATTA-----G  
TGGACCCTTCAAAACAATATAAGACCATTCCC-----TTAAAAACT-----AATCTATTTGA  
GGGGGGGATGAGA-----GATCTTTTGGTCCACCACAGAAAATTATTTGACTCT-----  
-TTCCTTAATACATCACCATCA-----ATGACAAAAAGATATTG  
GAACATAAATTTGGAAGAGATGATGGGGGCTGGCGTTCATTTTGGTCATGGTACTCGGA  
AATGGAATCCTCAAATAGCCCCTTTTATCTCGGCAAAGCGTAAAGGTATTCATATTACAA  
ATCTCACTCGAACTGCTCGTTTTTTTATCAGAAGCTTGTGATTTGGTTTTTGTATGCAGCAA  
GGAGGGGAAAAAATTCTTAATTGTTGGTACAAACAATAAAGCAGCTTATTCAGTAGC  
GCGGGCTTCAAGAAAGGCCCGGTGTCATTATGTTAATAAAAAATGGCTTGCCGGTATGT  
TAACGAATTGGTCCACCACAGAAACGAGACTTAATAAGTTCAGGGACTTGAGAATGGA  
ACAAAAAAGGGGGGGCTCAATCATCTTCCAAAAAGAGATGCAACTATGTTTAAAAG  
ACAATTAGCTCGCTTGCAAACATATCTGGGCGGTATTCAATATATGACAGGGTTACCCGA  
TATTGTAATAATTGTTGATCAGCACAAAGAATATACGGCCTTGCGAGAATGTATCACTTT  
AGGAATTCCAACAATTTGTTAATCGATACAAATTGCGACCCCAATCTGTCAGATATTC  
AATCCAGCGAATGATGACGCTATATCTTCAATTTCGATTCATTCTGAACAAATTAGTATT  
CGCAATTTGTGAGGGTCGTTTT--AGCTATCTAAGAAGTCCTATGGGACAAAAAATAAA  
TCCACTGGGTTTCAGACTTGGTACAACCCAAGACCATCATTCACTTTGGTTTTTACAAC  
CAAAAAATTATTCTGAAAGTCTACAAGAAGATAAAAAAATAAGAGATTTTATCAAGAAT  
TATGTACAAAATAATATGATAAAAGCCTCTGGC---GCCGAGGGAATTGCACGTATATATAT  
TCAAAAAAGAATCGATCTGATCCAAGTCGTAATCTTTATGGGATTTCCAAAATTATTAAT  
AGAACTAGACCGCAG-----GGAATCAAAGAATTACAAAGGACTCTACAAAAAGA  
ATTCAATTTTGGAAACCAAAAACCTAACATTACTATCACAAGAATAGAAAAACCTTATG  
GAAACCCTAATATTCTTGCCGAATTTATAGCCGTACAATTAAGAATAGAGTTTCTTTTC  
GAAAAGCAATGAAAAAAGCTATTGAATTAGCTGAACAAGCAGATACAAAAGGAATTC  
AAGTACAAATTGCAGGGCGCGTTGACGGAAAGGAAATTGCACGTGTCGAATGGATCA  
GAGAAGGAAGGGTTCCACGACAAACTATTCGAGCTAATTTGGATTATTGTTCTTATCCA  
GTTTCAACTATCTACGGGGTCTTAGGCGTAAAAATTTGGATATTTCTAGATCAAGCCATG  
TCGCGTTATCGAGGACCTCGTTTTCAAAAAAATACGCCGCCTCGGGGCTTTACCAGGAC  
TAACTAATAAGAGGCCTAGGACTGTACGTGATCTTAGAAACCAATCGCGTTCGGGGAA  
A---AAATCTCAATATCGGATTCGTCTAGAAGAAAAACAAAAATTGCGGTTTCATTATGGT  
CTTACAGAACGGCAATTAATTA ACTACGTTTCGGATTGCCAGAAAAGCCAAGGGGTCAA  
CAGGGGAAATTTAATACAATTA CTGAAATGCGTTTTGGATAACATCCTTTTTTCGATTGG  
GTATGGCTTCTACTATTCCTGCAGCCCGTCAATTAGTTAACCATCGACATATTTTCGTGA  
ATGGTCATATAGTAGATATACCGAGTTATCGCTGCAAACCCCGAGATATTACTTTCGA  
AGGATAAACCAAAATCAGGAGCTTATTAAAAATTCTATCGAGGCATTCCCTCGT---GA  
GGAATTGCCAAACCATTTAACCTTCACCCAGCCCA-----TATAAAGGCTTAATAAATC

AAATAATAGATACTAAATGGGTCGGTTTGAAGATAAATGAATTGCTAGTCGTAGAATATT  
ATTCTCGTCAGACTATGTCACGTCGAGGTACTGCAGAAAAAAAACAGCAAAATACGA  
TCCAATTTATCGTAATCGATTAGTTAACATGTTGGTGAACCGTATTCTGAAACACGGAA  
AAAAATCATTGGCTTATCAAATTATCTATCGAGCCGTGAAAAAGATTCAACAAAAGACA  
GAAACAAATCCACTATCCGTTTTACGTCAAGCAATACGTGGAGTAACTCCCGATATAAC  
AGTAAAAGCAAGACGTGTAGGTGGATCGACTCATCAAGTTCCCGTTGAAATAGGATCA  
ACACAAGGAAAAGCACTTGCCGTTTCGTTGGTTATTAGCGGCATCCCGAAAACGTCCGG  
GTCGAGATATGGCTTTCAAATTAAGTTCGGAATTAGTGGATGCTGCCAAAGGGAGTGGC  
GATGCCATACGCAAAAAGGAAGAGACTCATAGAATGGCAGAGGCCAAATCGAGCTTTTG  
CGCATTTTCGTATGGGTAGGGACACTATTGCTGAGATAATAACTTCTATACGAAATGCTG  
ATATGGATCGAAAAAGAGTGGTTCGAATAGCATCCACTCATATTACCGAAAATATTGTA  
AAACTACTTTTACGAGAAGGTTTTTTTTGAAAACGTGAGAAAGCATCGAGAAAACAAC  
AAAAATTTTTTTGTTTTAACCTGCGACATAGAAGG-----AATAAGAAAAGACCCCTT----  
----AGAAATATTTTAAAATTAACCGATAAGTCGACCCGGTCTACGAATATATTATAAG  
TCTCAACGAATTCCTAGAATTTTAGGCGGGAGGGGGGTTGTAATTATTTCTACTTCCCG  
AGGTATAATGACAGACCGAGAGGCTCGACTAGAAGGAATCGGGGGAGAGATTTTATTT  
TATATATGGATGGCAAATCTATACCGAGAATTAGTTCGCGTAGGAATGGACCTATTGGT  
TCAGGTAAGACTGTACGGAGAATACCAAAGGAGTAATTCATGTTCAAGCTAGTTTCCA  
TAATACTATAGTCGCTGTTACAGATGTACGGGGTCGGGTAGTTTCTTGGTCCTCTGCCGG  
TACTTCTGGATTCAAAGGAACCAGAAGAGGGACACCTTTTGCTGCTCAAACCTGCGGCA  
ACAAAAGCTATCCGTACAGTAGTGGATCAAGGTATGCTACGAGCAGAAGTCTTGATAA  
AAGGTCCTGGTCTCGGAAGAGACGCAGCATTACGAGCTATTCGTAGAAGTGGTATACT  
TTAACTTTTGTACGGGATGTAACCCCTATGCCACACAATGGCTGTAGACCTCCGAAAA  
AAAGACGTGTGATGCCAACTATTAACAACCTTATTAGAAATACAAGACAGCCCATCAA  
AAATGTCACGAAATCCCCCGCTCTTGGGGGGTGCCCTCAGCGTCGAGGAACATGTACT  
AGGGTGTATACTATCACCCCAAAAAACCAAACCTCTGCCTTACGTAAAGTTGCCAGAG  
TACGATTAACCTCTGGATTTGAAATCACTGCTTATATACCCGGCATCGGCCATAATTTAC  
AAGAACATTCTGTAGTCTTAGTAAGAGGGGGAAAGGGTTAAGGATTTACCCGGTGTGAG  
ATATCACATTGTTTCGAGGAACCCTAGATGCTGTTCGGAGTAAAGGATCGTCAACAAGGG  
CGTTCTAAATATGGGGTAAAAAAGCCAAAAATGGCAAGAAAAAGTTTGATTTCAGAGGA  
ATAAAAAAAGGCCAAAAATTGGAACCTAAATATCATTGGATTCGCGGATCCTCAAAAAA  
AGAAATACAC-----CGAGTTCCTTTGTTAAGTGACAAATGGGAAATTTATGTAAAGTT  
ACAATCCTCACCGCGGAATAGTGCACCTACACGCCTTCATCGGCGTTGTTTTTTGACCG  
GAAGGCCGAGAGCTAACTATCGAGATTTTGGACTATCCGGACACATACTTCGCGAAAT  
GGTCAAGCATGTCTGTTGCCAGGAGCAACACGATCGAGTTGGATGGTCAAAAACCTTA  
TCTATTTGGGTTATTTCTCAA-----AAAGAAAACAAAGAAAACAGGGGGTCCGTTGAAT  
TTCAAATATTTAATTTTACCAAAAAGATACGGAGACTTACTTCCCATTTAAAATTGCATA  
AAAAAGACTTTTTATCTCAAAAAGGTTTTCGTAATAATTTTGGGAAAACGTCAGCGATT  
ACTAGCTTATTTATCAAAAAAAGTAAAATACGTTAT-----ATTGATAAATTGGAGCTT  
C G C G A T A C A A A A A C T C A T C A A - -  
-????????????????????????????????????????????????????????????????????????????????  
????????????????????????????????????????????????????????????????????????????????  
????????????????????????????????????????????????????????????????????????????????  
ATGGATAAATCCAAGCGACCTTTTATTAATCCAAGCGATCTTTTCGTAGGCGTTTGCCC

CCGATTAATCGGGGATCGAATTGATTATAGAAACATTAGCTTAATTAGCCGATTTCTG  
AGTGAACAAGGAAAAATATTATCTAAACGAGTGAATAGATTTACCTTGAAACAACAAC  
GATTAATTACTCTTGCGATAAAACAAGCTCGGATTTTATCTTTGTTACCCCTTACT--AAG  
AGG-----AAAGGCTTTGAAAGAAGCGAGTTGACCCCTAGAACTAATGCTTTGAAAGCA  
AGAAATAAAGTGGCACGTTCACTAAAAAAAATCCCTTTGTAGCTGATAATTTATTTAA  
AAAAATTGATAAACTTAACATAAAAGCAGAAAAAGAAATAATAAATACTTGGTCCCGG  
GGATCCACCATTATACCGATAATGGTTGGTCATACTATCGCCATCCATACTGGAAAAGAG  
CATCTGCCAATTTATATAATGGATCATATGGTAGGGCACAAATTGGGAGAATTTGCATCT  
ACTTTCAATTTCCGAGGACACGCAAAAAGTGATAATCGATCTCGTAGG-----  
-----ATGGAAAAAAAAACAAAT  
AAAAATAAG-----GGGGTAGCAGAAGAA-----ACCAAGAAGAAAGTAGCAGCA  
ACAACGGGTTTTATTATAGGACAGTTTATCCGATTTATATCCATCTATTACGCGCCCTTGT  
ATGTAGCTTTGGGTAGACCTCATACAATAACTATCCTTGCCTTACCCTATCTTTTGATTCA  
TCTCTTCTGGAACACTGACAAAAGCTTTTTTGGACTCT-----AAGAACTAAATTCATCC  
GTAATCTCGAGATTTCCAGTGTATTCCCTGAATCATTTCATTTGCAGTTACTTAACAGTT  
GCATTTTACCAAATTCACGCTAGCCCGATTAATAACCATTTATATGTTTCGATGCAACA  
ACAAGATTTTGTCTAACAAGTAGTTTTTTTGGCTTGGTTCATTGGTCAAATTTTCATGC  
TTAATCTTTTGAATTTGGTATTAGTCTGGATACGAAAAAGAATTATCTTAGATCG---AAT  
TATCTA---AATTCATCTTTGTTATTTTATTCAATTGT-----CTCTTTGGGAGTCTATTATT  
TATTCTCAGTATCCAATGTTTAGGCAGAATACCCTCACCCATTCCGACTCAGAACTTAG  
TGAGGAA-----CTTGCGGCTCTTCTTTTTGATTATAAACGATGGACTCGCCCATTT  
CGCTACATAAAAAATAATCGACTTGAACAAGCTCTAAGGAATGAACTGTCACAATACTT  
TTTTGACACATAACCAAAGTGATGGAAAAAATAGACTGTCTTTTACCCATCCGATAAGTT  
TATCAACTTTTTTGAATGATGAACTAAAGATCCCCCTGTTGTTAGTAACTCTTTATA  
AT-----CCATTGGACAATGGTTGGGTTTCTAGAAACAAAAACAATGAATTATCGGAG  
AATTTATTTTTAAATCGAGTGAACAATCTAGACAAAGCAGTA-----ACAAG  
AACTCGATTGTGTATAGATGAGACTAAACAAGAATACCTACCAGAAAATTATGATCCTTT  
ATTAAGTGGCCACATCGCGGAAGAATCAAAGAGGGGCTTTTGGACTAGAGAGACAATT  
ATACTAAATCGACTTCATGCTTTAGTTTCCAAAAATTTTAACCAAAGAAG-----  
-----GCCCCCGATGGTCATACAAATTAATTGAATTGGAACAAATATCCTA  
TTACCGTTCA-----AGAAAGGGGATAAGCGTAGTTATTTTTGATCCTGTTGTTATACGATA  
TCCGCAACAATCTGATTTTCGTCAAGGCTTAATCAAAGACTCGATGCGAACTCAAAGG  
CGTAAAATATTTCTTCAGGAATTTTTAACGCAAACGTGCACTCCCCCTTTTTTTGAC  
AGGCTTAGA-----ATCGTTTTTCTTTCCACGC-----ATTTTTATAAATCGA  
GAGCAAAAAGAACGATTAGAGATAGGGGAAGCCTGGGATGTTTTCTCTTGCCCAA  
TAATAAGGGGTTTGTGTTACTAACCCAATCATTATTAGAAAAAAATTATCTTACCTT  
CATTGATACTCGGCAAAAATATTGGGCGTATACTACTATGTCAAATTCCTGAATGGTCTG  
AAGATTTACAGGAATGGAATAGAGAACTCACATTAAGTGTACTTATAATGGTATTCCG  
TTATCGCAAAAAAATTTCCGGAAAATTGGTTGACGGAAGGGATTCAAATAAAAATTCT  
ATTTCTTTCTGTTTGAACCTTGGCACGCATAT--CGAACCTCTCACTATGACTTTTGCT  
TTTTAACAGTTTGGGGAAGGGAACAGAGCAGCCCTTTGGTCATCCCCGAAAAACA---  
TTCTTTTTGAGCCCGTTTTGCAGGAACCTTGATAAAAA-----  
-----ATTGTAAAT-----ATTAAAGCCCGCATTTTTTCAAAGTAAAAAT  
CAATTTATTTAAAAGGGTTTCAAAGAAAAC-----GATTTTCAAATAAGAAAACAG



ATAATGAATGAATCATTGAA-----GAAATCCAAGTTGTACAAATCCTTCACTGATAGA  
A---AAAATGCGGAATATGTCTGATAGAACAAGGACAATTAATAAAAAAAAAATCGAAAGAA  
TGACCGAAGATAAAAAAAAA-----ACTTACAAAAGAAGTTATAGATTAGCGTT  
GTCAATTTGTAAAATGGTCAAAGTC-----TTAATATGGAAATTTTCTTATTTTCAAAA  
ATTATTGAATCAAAGAGTCTAT--GATATTTTTTATATACTATATATATTTGCCGAATGACT  
ACACAACCTCTC-----TGTGATTTCTCGAACTTGTCAACAAGCATATGTATTTTACA  
AAATATCGCAAACCGGGGTTTTGAACATATGTAAATTAATATCTGTTCTTCAACATATATC  
TTTCTTCATTCAAACCTCAAATAAAGGACTTGGTTACAGAAGGAATATTTAAATCT--GTA  
ATACATCAAAAACCTCAG--CCTAAAACAAGTCAATGGAAAAATTGGTTAAGATTGAAT  
TCTAAATACGATTTATCTCCTATTTTCTGGTTTAGCTTAATATCACAAAATGGCGAAATA  
GGGTTACTAAATATCATAGGCCTAAAGAAAAAAAAACAATGGAATTCGCACGGAAAAATA  
CCGA-----TTGAGTGATTACAAG-----GATAATTCTAAAAATGCTATCAATATGATCTTTT  
ATCGTATAAATCCATTAATGTAGATATTCATACCTCGATAGAAAATATTTGATTTGGAAA  
AATATACAT-----TTAGTTGATTGGATGGGAATGAATGAACAAATATTAACCGTTGG  
TTTTTCCCAGAATTTGTGTGGCTTTTTAATGTATATAAAACGAAACCGTGGATTATACCA  
AGTAAAATACTTCTTTTAAAT-----GAGTTATTCACGAAAAAGTATTTCC  
TTTTTCAATTGAGAGGGGATCAG--ACTTTTTTCAA-----AATATCCAGATATATTGTC  
TCCTGCTTAGGCTGAGAAATCGAAAAAAATGACGCTATCGTGCATTCAAAGGAGAAA  
ATTGAATTTGCGCATAATGCCAAGTATGACTAATCTTTTGAATGTTCCAGAATTTTTAAA  
AGGATTGGTT--ATGGATCCCCTTCCACTATCGATAAAAACCGATGGAAAGTTTTTGCTG  
TATAAATCGTAGGCATTTCTTGGTTTATAAGAGTAAAGACAATCATTTGGATGTGCTT  
GTTCTTGAAAATATTTTATCGTCTAGGTGTCGTAGAGAATTGAGAACTTTAATTTGTTTT  
ACTTTATTTGGCCAAATATCGATTGGAAGATTTAGCTTGTATGAATCGTTATTCGTTTG  
ATACTACTAATGGCAGTCGTTTCAAGTATCCTAAGGTTCCATATGTATCTAATGATGAGAC  
ACCAAGTCAAGTTAGGCATTCTAGAATTGAGAGAGATAATGAGAGAGATCCATAATTAT  
TTATTATTATTAGATTCGTGGACCAAATTGAATTCAGTGGGATCCCTCATTCATCTTTTTT  
TCCACCAAGAACGTTTTTTAAACTCTTTGACCCACGAATTTTATAGTATCCTACTTTCA--  
-CGCAATTA-----CAGGGTTCACCAAGCAATCGATATTTACG-----ATCAAGGGCGTA  
ATACTCTTTGTAGTGGGG--GTCCTTATATATCGT-----ATTAACAATCAAATATGGT  
CGAAAGAAAAACCTCTATTTGACAGGACTTTTTCT-----ATACCTATGAATTCC  
ACTGGACCATAAAAGATCGATTGGAAGAAGCCATT--GGGTCTCAAATATCAATAGA  
TTGAGTGTTTTG--CTCCTGTATTTTCAAAGGGAAAAACATCTCCGAGAGGTATTC  
CTGAATCCGAAAGAGACTGCTGGAGTTCTCACAATAACA-----AAAAGGGTAGC  
GTGCCTGAATCAAACCTGGGGTTCGCGGCGGTGGAGGAACCTTATCGGGGTAAAAGG  
GGG--AATTTAGTTGTCCGATAGCTAAT-----GAAACTGTCGGCGGAATTGATATCTTA  
TTCAAAGATAAATTTAGAAAA--AATATGGAGTTTACATTTGTATATTATATGGAT--GAT--  
-CTGACCCACAATGACCCTGATTGGGAATTTTCTATCGTCTTTCTACGAGGAAGAGTG  
AAAATAGAATCAACTGG-----AATTCGGGACCTTTATTCAAATATTAGTGAAAGACTGT  
ATTTCTTATCTGATGTCTGCTTTTCGTGAAAAAAGACCAAAGGAGAAGGGCCT-----  
-----GAGTCAACTATTCAATCAAATAAGATTCGGCATGTTTTCCAT-----CTCTTCT  
CGATAAAAAGGGGGACTATCTCGTTGCAAATTTGTAATCACTTTTATATGTGGCAATTCC  
GCCGAGATCTTCCGT-----AGTTGGGGGAAT--AATCCGCCGAATCGTCTTTTTTG  
AGGAAT-----GTATCGAGAGAGATTTTCGAGCAATGCGTGGTTG--ACAAGGGTCG  
G-----TTTTTTAGC-----AAGGGACGGAATGTCTTGTCAAATCTTCAATATGATTCC-----

---ACAGGA-----TCTAGTTTAGTTAACGTAACGGATTCTAGCCAAGTAAAGGATCCGAG  
--GATCAATCCATAGAACGTTTGGCTTCCATTAGA-----AATGAGGATTCGGAA-----  
-----TATCACGCATTGATAAATAAAAGAGAGGTTCAACAACCTAGAA  
GAAAGCTCCATGACTTTAGAA-----TCAGAC-----CGATTA  
CCGAAA-----AGCCTTCCGGATATTGC-----TCAACGTCCCAGTTATTCAAG---GAACGC  
GAGAACCCGATGATAAATTTATGTTTCCGGGCGAAATGGAAGAATTTATT-----GGTAAT  
CCTACAAGATCCGTTTCGCTCTTTTGTCTCTGATAGATGG-----TCCGAACCTCAT--CTGT  
GGTCGAATCCTACTGAGAAGTCCACTTTAGATCAT-----AAATTCGTGAAGAACCAT  
CTTTCTTTTGTG-----CGGGGAGCAGAA-----AATAAAGAAATAAAAAATCTC  
CGAAGAATCATTACATATTTACAAAAG-----ACTGTCTCAATTCATTCTATTTCATCAGAT  
CCGCGCTGGGATAGGGTCCG--AAGCATGACCCGGAT--ATGGACAGT-----TT  
CAAGAAAATTCATTGTTTTTTTTA-----TTTACCGATTCCATGAAAGGAACCGTGGGG  
CATATCCGTTA-----CGCCACGATTTTGAATCAGAA-----GAGAGATTACAAGAAATGACA  
GAGCTTTTTACTCTATTAATAAGCGAGCCA--GATCTGGTGTATACAAGGGATTTTCTT  
TTTATATTGATTCATACGGATTGGATAAAAAAAT-----TTATTGAATGAGGTATTGAATGC  
CAGGGCTGAATCGAAAAATAAATCTTTA-----TGGGTCTGTCTCTATTCTTTTTTCGT  
TATGAGGAAATTGAATATTTTTTTAAGAGGATCAGACAAAACGGGTCTGGTGGATCTC  
CTGCGGGAATGGTTTGGTAGATCTAAAGCAA-----  
-----AACGATGATGGGTAC-----ATAAGAAATCTATTTAATATATTATTTTT  
AATGAAT-----AAATCCGACCGCAATTTTGAACATAGAATGCAA-----GGGGATCGA  
AAAGGAACGGCTATTTTCAATCAAAGAACTATAATGAAATGTATGATCAAACAGGATCA  
TACC-----TATATATA  
CAAAAGGTCCAATGGGACCAAGAATTTCCAGGAACATTTGGAACATTTCTTTCTCAG  
CAGAAAAGT-----TATTTTCAAGTTCTGTTTGTATCAATTACGTTTGATTCATTGGTTTGA  
AGTTCGCAAGAAAGTTGAAAAAAAAGTAGAA--TCCAAGTCACTTCGTTTCTTCTTTTT  
GCCCCAGTCACTTCATTTTTTTTTTATTAAGGTACTTCGTTTTGTGACC-----G  
AGGTTATTTTATTTTTGTCTAAT--TCATTTCTAGTTTATGTGTCAGCTTTGGGAATACCC  
CCATTCAGAGGTCCGAA--ATTTACATCTCT--GAATTGAAATCTTCGAATGAACAACCTC  
TGCAATAAGTTGTTTCGAATCGATAGGGTTTCAAATTGTTTCAATTTGAAAAAATTGAATCC  
ATTC-----TTATTGGAA-----GAGTTT--GATACTTCCAACCTTCGTAATCAATGTA  
GGAACAAGATCACCTTTTTGTTGAATAAGATACCA--AAGCGT--ATATTTGACTCATT  
CCTACTCGA-----ACTAATCACAGTAAATATTTGATAACAAAGATTCCTATTTCTCAAAG  
ATATTCCACGATAAAGACAATTTGGCTGAATCACCCGAAACCGTTTCACAGAAGTTCTTT  
GATATCCTCTTTTTATAAAGCAAATCAACTTCGATTCCGGAATCATCTGCACCACTTCTT  
GTTCTAT-----TGTAACAAAAGATTTCCCTTTTCTGTG-----GAAAAGGCTCGGAATA  
CTAATTCACAT-----TTTCTATATGGG--CAATTTCTCAATATCTTGTGTTTCGCAAAAAA--  
--ATCTTTTCTTTGTGCGTGGGTCAA-----AAAAACATGTTTTTTGGAGT--AGAGCTACT  
CTTTCACCAATCGAATCCCAAGTATCTAACATATTCATACCTAAGGATTTTCCCCAAAGT  
GGTGACGAAGGG--TATAACTTGGACAAATAT-----TTTAACTTTTTAATTCAACCCGAT  
CCAGTCATTCGT-----AGAGCTATTTCTTCGATCGTAGAAACTTCTGGAACACCTCTAAC  
AGAGGCACAAAAGGCGATTTGGAAAGAACTTATTGTAAACCTCTTTCAGATATTAATC  
TATCTGATTCAGAAGTAAATAATTTTCATGAGTATCCCAAT-----TTCAATTCAAATATGGG  
TTTGGTTACATTCTCTTTTCTGGTAAATATTTATCATCTGAAAAA-----  
-----CATAGTCTTTGTCTAAAGAAAGGCGCTGGGGTTCATAAAGAGCGGATGTTTAC

AACCTTTCAACGAGATAGTTCTTTTTCAATTTTATCAACATGGAATCTATTCCAAACATA  
TCTACCAAGCTTCTTTACTTCGACCGGGTACAAATATTTAACTTCTATTTTTAGCGAGAA  
TTTTTCATACCTATTGTCA-----ATATTAAGTAGCAGA-----GTCTCCCTTTTTTCAG-----  
-----TTATCATGGCGAATCTTTTTGTCGAAGATGCCGCTATTTCTCAGA-----  
-----AGAGAGATCTCGAGTAAGTGGTTACATAATCTT-----TTTCTGTCCAAAGAA  
ATGATTCGTCTGA-----AAAACCTCAGTCGTCTGTTGATATCCAAACATCTGAGATCAACCAA  
ATTTTGGGAATTT--TTCTATTCACCTCTTTTTCTTCTTCTTGTGCTGGCTAT--CTCGTTT  
CTATACATTTTTTCTTTATTTTCGCGG-----GCGTTTAGTGAGTTACAGACAGAGTTTAAAA  
GTTTAAAAATCATTGATGACTCCATCATCTGCGATTGAGTTGCGAAAACCTTCTAGATAAGT  
ATCCTAGGTCTGAACCAAATCTTTTTGGTTAAAGAATATTTTTCTAGTTGTTATGGAAC  
AATTACGAGATTCGTTAGAAGAAATAAAGGGTTTTGTTTTTGGCCTCAATAGGATTGGT  
CTAACTTCTGGG-----GTAAAATCAATCCGTTTTAAGAATTTAAGAATA  
AAGATTTAATATCAAAGGCATTGGTATCATC---GAGCTCATACTGCGCCCAATCACTCG  
AATCGCTTTTTCTCTAAATACGAGACATATAAGTCATACAAGTAAAGAGATCTATTCATT  
GATAATAAAAAGAAAAACGTGAACGGGGTTTGGATTGATGATAAAATAGAATCCTGG  
GTCGCGAACAGTGATTCGATTCATGAGGAAGAAAGAAAATTATTGGTTCAGCTATCC---  
--GCCTTAACGACA-----GAAAAAAGA-----ATTCTATTGAGTCTGACT--CATAGTGATC  
ATTTCTCA-----AAGAATGACTCTGGTTATCAAATGATTGAACAACCGGGAGCAA  
TTTATTTACGATACTTAGTTGACATTCAT-----CAAAGCATCTAATGAATTATGAGTTCAA  
TACCTCCTGTTTAGCAGAAAGACGGATATTCCTTGCTCATTCTCAGACAATCACTTAT---  
--TCACAAACTTCGTATGGGACTAATAGTTTTTCATTTCCCATCTCATGGA-----AAACCT  
TTTTCGCTCCGCTTAGCCTTATCCCCCTCT--AGGGGTATTTTAGTGATAGGTTCTATAGG  
AACTGGACGATCCTATTTGGTAAATACCTAGCGACAACTCCTATGTTCTTTTCATTAC  
GGTATTTCCGAACAAGTTCCTGGATAAGAATCCTCAA---TTTATTGATGAT-----ATC  
GATATTGATAATATTGATGCTAGTGACGATATCGATATGGATAATAGTGACAATATTGATG  
AC-----GATATCGATCGTGACCTTGCTACAGAGCTGGAA  
CTGCTCACTTGATGAATGCGCTA-----ACTATGGATAGGGAGATGAAG---GCGGAAAT  
AGCCCGATTGTTTATCACCTTCAATTCGAATTAGCAAGAGCAATGTCTCCTTGATAAT  
ATGGATCCCCAACATTCATGATCTGGATGTGAATGAGTCGAATTACTTATCCCTCGGGCT  
ATTAGTGAACCATCTCTCC-----AGGGATTGTGAAAGATGTTCT--CCTATAAATATTCT  
TGTTATTGCTTCGACTCATATTCCCCAAAAGTGGATCCCGCTCTAATAGCTCCGAAAA  
AATTAATACGTGCATTAAGTTACGAAGGCTTCTTATTCCACAACAACGAAAGTACTTT  
TTCACTCTTTCATATACTAGGGGATTTCACTTGGAAAATAAAATGTTCCATACT-----AAC  
GGATTCCGGGTCCATAACCATGGGGCCCAATGCACGAGATATTGTAGCACTTACCAATGA  
GGTCTATCAATTAGTATTACACAGAAGAAATCAATTATAGACACTAATAACAATTTCGATC  
CGCTCTTCATAGACAACTTGGGATTTGCAA-----TCCCAGGTAAGATTGGTTCAGGA  
TCATGGGATCCTTTTCTATCAGATAGGAAGGGCTGTAGCACAAAATGTACTTCTAAGTA  
ATTGCCCATAGATCCTATATCTATCTATCTGAAGAAGAAA-----TCATGTAACGAGGGGG  
ATTCTTATTTGTACAAATGGTACTTCGAACTTGGAACGAGCATGAAGAAATTGACGATA  
CTTCTTTATCTTTTGAGTTGTACTGCCGGATCGGTCTGCTCAAGATCTTTGGTCTTTACCC-  
----GGACCCGATGAAAAA---AACGGGATCACTTCCCTATGGACTCGTTGAGAATGATTCT--  
-GATCTAGTTCATGGCCTATTAGAAGTAGAAGGCGCTCTGGTGGGA-----TCTTCACGGA  
CAGAAAAAATTGCAGTAAGTTTGAGAATGAT-----CGAGTGACATTGCTTCTTCGGCC  
CGAACCGAGGAAT--CCCTTAGAGAGGAGGCAAAACGGATCTTGTTCTATCCTTGATCA

GAGATTTCTCTCTGAAAAA-----GACGAATCGGAGTTTGAAGAA-----GGCGCCC  
TTGCCCCG-----CAACAGATAGAGGAGGAT-----TTATTCAATCAC-----ATAGTT  
TGGGCTCCT-----ACAATATGGCGCCCT-----TGGGGCTTTCTTTGTATCGAAAGGC  
CCAATGAATTGGGATTTTCC--TATTGGTCCAGGTCATTTCCGGGGCAAG-----CGGATC  
TTGTATGATGAAGAGGATGAGCTTGAAGAGAATGATTTCGGAGTTCTTGCAGAGTGGAA  
CCATGCAGTACAAGACACGAGATAGATCTTCCAAAGAAAAAGGCCTTTTTTCGAATAAG  
CCAATTCATTTGGGACCCTGCAGATCCACTCTTTTTTCTATTCAA---GATCGGCCCCCT  
GGCTCTGTGTTTTACGCTCTAGAATTATTTCAGATGAAGAGATGTCAAAGGGGCTTCT  
TACTTCCCAAACCTCCCTATTTAGATATAAATATCCACGCTGGTTTATC-----ACAAGAC  
GCAAGAAAAGCACTTCGAATTTTTGATTCATCGTCAGAGATGTCTTAGAACC-----AA  
TAGTTCATTATCT-----AATAGATCTTTCCGTTCTAAT-----ACTCTATCCGAGAGTTATCAG  
TATTTATCAAATCTGTTCCCTATCTAAC---GGAACACTATTGGATCAAATGACAAAGACTT  
TGTTGAGAAAAAGATGGCTTTTCCCGGATGAAATGAAAATTGGATTC-----ATG-----  
-----ATGTCTAGATCGCGA---ATAAATGGAAATTTTTTGGATAAGACCTTTTCAATT  
GTAGCCAATATCTTATTACGAATAATTCCGACAACGTCAGGAGAAAAAGAGGCATTTAC  
CTATTACAGAGATGGG-----ATGTCGGCTCAATCCGAAGGAAATTATGCGGAAGCTTTAC  
AGAATTATTATGAAGCTATGCGACTAGAAATTGATCCCTATGATCGAAGTTATATACTCTA  
TAATATAGGTCTTATCCACACAAGTAATGGAGAACATATGAAAGCTTTGGAATATTATTT  
TAGAGCACTAGAACGAAATCCATTCTTACCACAAGCTTTTAATAATATGGCCGTGATCT  
GTCATTAC---CGGGGAGAAAAGGCCATTCAACAGGGAGATTCTGAAATTGCGGAGGCT  
TGGTTCGATCAAGCCGCTGAGTACTGGAACAAGCTCTAGCCCTTACTCCCGGTAATTA  
TATAGAAGCGCATAATTGGTTGAAGATCACAGGGCGATTTCGAC-----ATGAGTTGGCGAT  
CAGAACATATATGGATAGAGCTTATAGCTGGGTCTAGAAAAATAAGTAATTTATGCTGGG  
CTTTTATCCTTTTTTTAGGTTTATTGGGATTTTTTTTTAGTTGGAACCTCCAGTTATCTTGG  
TAGAAATTTGATATCGTTTTTTCCACTCCAGCAAATAATTTTTTTTTCCACAAGGAATAGT  
CATGTCGTTCTACGGAATTGCGGGTCTCTTTATTAGCTCCTATTTGTGGTGTACTATTTCA  
TGGAATGTAGGTAGTGGTTATGATCTATTCAATAGAAAGGAGGGAATCGTGTGTATTTTT  
CGTTGGGGATTTCCCTGGAATAAATCGTCGCATATTCCTCCGATTCTCCTAAAGGATATT  
CGGTCTGTTAGAATAGAAGTGGAAGAAGGAATTTATGCTGGTCGTGTCCTTTATATGGA  
CATCCGAGGCCAGAGGGCCATTCTTTGACTCGTACGGACGAGAAT--TTGACCCCAAG  
AGAAATTGAAAAAAAAGCTGCGGAATTGGCCTATTTTTTTCGCGTGTACCAATTGAAGTAT  
TT

>Lemna

ATGGAAGAGTTGTGGTTAAATTCGATGTTCTCTTTAAGTAGATCGATGGATAGTCTTGGT  
CCTATTAGATATTCAGTGGAAGTGAAGACCCGGTTTTAAATGCTATGGATAATAAAGTT  
TCC---TTCAGTAATGTTGAGCATTTTTTGGATATCATAGATATTTGGAGTTTTATTTCTGAC  
GACACTTTTTTAGTTAGGGATAGTAATGGGGATAGTTTTTCTATTTATTTGATATTGAAA  
ATCAGATTTTTGAGATTGACAATGAT-----AGTACTTTTATCAATGAAGTACTGTTCTT  
TTTCTAGTTACCTGGAT--AGTTCTATGAATAGTGGATCTAAAAAGAGTAGTCGCTACTAT  
TATCGTTACATGTATGATACTCAATCTAGTTGGAATAATCATATTAATAGTTGCATTGATA  
GTTATCTGCGTTATGAAATA-----AGTATTGATAGTTACATTTTCAGGCGAGACCCATAACT  
ACAGTGATAATTATGTTTATAATTTTATTGTAATGAAAGTCGTAATCTATAAGAAGTACTAG  
TGTTAATGGCAGTGATTTTAAATATAAGAGGAAGGTCT--GATTTAGATATAAATAAAAAAT  
ACAGACATTTATGGGTTTTCAGTGCGAAAATTGTTATGGATTAAATTATAAACAATTTTTTA

GGTCAAGACTCAATATTTGTGAACACTGTGGATATCATTGAAAATGAGTAGTTCAGAG  
AGAATCGAACTTTTGATTGATCCGGGCACCTGGGATCCTCTGGATGAAAATATGGTCTC  
GACCGACCCATTGAATTCATTCAGAGGAAGAACCTTATAGAGATCGTATTGATTCTTA  
TCAAAAAAAGACAGGTTAACTGAAGCTGTTCAAACAGGTATAGGTGAATTAATGGT  
ATTCCTATAGCAATTGGAGTCATGGATTTTCAGTTTATGGGAGGTAGTATGGGATCCGTA  
GTAGGCGAGAAAATCACCCGTTTGATCGAATATGCGACTAATAAGTCTCTACCTGTTATT  
ATTGTATGTGCTTCTGGCGGAGCACGCATGCAAGAAGGGAGTTTGAGCTTGATGCAAA  
TGGCTAAAATATCTTCTGCTTTATATAATTATCAATTAATAAAAAAGTTATTCTATGTAGC  
AATTCTCACATCTCCGACAACCTGGTGGGGTTACAGCCAGTTTTGGTATGTTGGGAGATA  
TCATTATTGCTGAACCTAATGCCTACATTGCATTTGCGGGGAAAAGAGTAATTGAACAA  
ACATTGAATAAGACAGTACCCGATGGTTCACAAGCAGCTGAATATTTATTCCAGAAGGG  
ATTGTTTGACCTAATCGTACCACGTAATCTTTTAAAGGGTGTCTGGGTGAATTATTTCA  
GCTCCACGGTTTTTTTTCCCTTGACT-----ATGGTAACCATTTCGAGCCGACGAAATT  
AGTAGTATTATCCGTGAACGTATTGAACAATATACTAGAGAAGTAAAGGTTGTGAATAC  
CGGCACCGTCCCTCAAGTGGGTGATGGCATTGCTCGTGTTCATGGTCTTGATAAAGTAA  
TGGCAGGTGAGTTAGTAGAATTTGAAGAGGGTACCGTAGGTATTGCTTTGAATTTGGAA  
TCAAATAATGTTGGCGTTGTGTTAATGGGCGATGGTTTGCTGATACAAGAGGGGAAGTTC  
TGTA AAAAGCAACAGGAAAAATTGCTCAAATACCGGTAAGTGACGGTTATTTGGGTCTG  
GTCCTAAATGCTCTAGCGAAACCTATTGATGGAAGAGGCGAAATTTTCAGCTTCGGAATC  
TCGCTTAATTGAATCTCCCGCTCCAGGCATTATTGCTAGACGTTCCGTATATGAACCTCT  
TCAGACAGGGATTATTGCTATTGATGCGATGATCCCTATAGGGCGCGGTCAGCGAGAAT  
TAATTATTGGTGATAGACAGACTGGTAAAACAGCAGTGGCTACAGATACGATTCTAAAT  
CAAAAAGGTCAAAATGTAATATGTGTTTATGTAGCTATTGGTCAAAAAGCATCTTCTGT  
AGCTCAAGTAGTA ACTGCTTTACAGGAACGCGGGGCTATGGACTACACTATTGTGGTAG  
CGGAAACAGCGGATTCGCCTGCTACATTACAATACCTTGCTCCGTATACAGGAGCAGCT  
TTGGCTGAATATTTTATGTACCGCAAACAGCATACTTTAATAATTTATGATGATCTCTCCA  
AACAGGCACAAGCGTATCGCCAAATGTCTCTTCTATTAAGAAGACCTCCGGGTCTGTA  
AGCTTATCCAGGAGATGTTTTTTATTTGCATTCACGTCTTTTGGAAAGAGCCGCTAAATT  
AAGTAATGAGTTGGGTGAAGGAAGTATGACTGCTTTACCAATAGTTGAGACTCAATCG  
GGAGACGTTTCAGCTTATATTCCTACTAATGTCATTTCCATTACAGATGGACAGATTTTC  
TTATCTGCTGACCTGTTCAATGCTGGAATCCGACCTGCTATTAATGTGGGTATTTCCGTG  
TCTCGAGTAGGATCCGCAGCTCAAATTAAGCCATGAAACAGGTAGCTGGTAAATTA  
AACTGGA ACTAGCTCAATTCGCAGAATTAGAAGCCTTTGCACAATTCGCTTCTGATCTT  
GATAAAGCTACTCAAATCAATTGGCGAGAGGCCAACGATTACGCGAATTGCTAAAAC  
AATCCCAATCTGCACCGCTTGGAGTCGATGAACAGATAGCTACTATTTTACTGGAGCA  
AACGGGTATCTTGATTCGTTAGAAGTTGGACAGGTAAGGAAATTTCTGGTTCAGTTGCG  
TACCTACTTAAAAAGAATAAACCTCAGTTCCAAGAAATTATATCTTCCACCAAGACAT  
TCACCCCGGAAGCAGAAGCCCTTTTGAAAGAGGCTATTCAGGAACACATCGAATTGTT  
TCTACAACAGGAGCAAGCCATGCAAATAAATCCTACTACTTCT--ACTGCGGTTTCCCAA  
TTGGAAGAAAAAACCTAGGGCGTGTGGCTCAAATTATCGGCCAGTACTGGATGTCG  
TTTTTCCCCCGGTAAAATGCCCAATTTATAATGCCTTGGTAGTTAAAGGTCAAGATG  
CCGATGGTCAGGAAATTAAGTGACTTGTGAGGTACAGCAATTATTAGGAAATAATCGA  
GTTAGAGCTGTAGCTATGAGTGCTACAGACGGTCTAACGAGAGGAATGGACGTGATTG  
ATACGGGAGCTCCTCTAAGCGTTCAGTTGGTGGAGCCACTCTGGGACGAATTTTCAA

CGTTCTTGGTGAGCCTGTTGATAATTTAGGTCCTGTAGATACTCGCACAAACATCTCCTAT  
TCATAGATCCGCACCTGCCTTTATCCAGTTAGATACGAAATTAGCAATCTTTGAAACAG  
GAATTAAGTAGTGATCTTTTAGCCCCCTTATCGCCGTGGAGGAAAAATTGGACTATTT  
GGGGGAGCTGGAGTGGGTAAAACAGTACTCATTATGGAATTGATCAACAACATTGCTA  
AAGCTCATGGAGGTGTATCCGTATTTGGTGGAGTAGGCGAACGTACTCGTGAAGGAAA  
TGACCTTTACATGGAAATGAAAGAATCCGGAGTTATTAATGAAAAAATATTACAGAAT  
CAAAAGTAGCTCTCGTCTATGGGCAGATGAATGAACCGCCGGGAGCTCGTATGAGAGT  
TGGGTTGACCGCCCTAACCATGGCGGAATATTTCCGAGATGTTAATGAACAAGACGTAC  
TTCTATTCATTGACAATATCTTTTCGATTCGTCCAAGCAGGATCTGAAGTATCTGCTTTGTT  
AGGGAGAATGCCTTCTGCGGTAGGTTATCAACCTACCCTTAGTACAGAAATGGGTTCTT  
TGCAAGAAAGAATTACATCTACAAAAGAGGGATCTATAACTTCTATTCAAGCAGTTTAT  
GTACCTGCAGACGATTTGACCGACCCTGCGCCTGCAACGACATTTGCGCATTTAGATGC  
TACTACCGTACTATCAAGAGGATTAGCTGCTAAAGGTATTTATCCAGCAGTGGATCCTTT  
AGATTCAACGTCAACCATGCTACAACCTGGGATCGTCGGCGAGGACCATTATGAAACT  
GCGCAAAGAGTTAAGGAACTTTACAACGTTACAAAGAACTGCAAGACATTATCGCTA  
TCTTGGGTTAGACGAATTATCCGAAGAGGATCGTTTAAACCGTAGCAAGAGCACGCAA  
AATTGAGCGTTTCTTATCACAAACCCTTCTTTGTAGCGGAAGTATTTACAGGTTCTCCAG  
GGAAATATGTTGGCCTTGAAGAAACCATTAGGGGCTTTAAACTTATCCTCTCCGGAGAA  
TTAGACAGTCTTCCCGAACAGGCCTTTTATTTGGTGGGTAACATCGATGAAGCTACCGC  
GAAAGCTATAAACTTAGAAGTGGAGAGCAAATTGAAGAAAATGACCTTAAATCTTTGT  
GTAAGTACCCCTAATCGAATTGTTTGGGATTCAGAAGTGAAGAAATTATTTTATCTACT  
AATAGTGGCCAAATTGGTGTATTACCAAACCACGCTCCTATTGCCACAGCTGTAGATATA  
GGTCTATTGAGAATACGCCTAACTGACCAATGGGTAACAGTAGCTTTGATGGGCGGGTT  
TGCTCGAATAGGTAATAATGAGATCACGATTTTAGGAAATGATGCAGAGATAAGTACTG  
ATATTGATCCGCAAGAAGCTCAACAAGCTCTTGAAAAAGCGGAAGATAACTTGCGTAA  
AGCAGAAGGTAAGACAAGCAATTGAGGCGAATCTAGCTCTGAGACGAGCTAAGAC  
ACGAGTAGAGGCTATCAATGTTATTTCTATGCAAATGTAAGTATTCTTTTGTTCCTT  
G---CACTGGCCATCCGCCGGCGGTTTTGGGTTAATACCGATATTTAGCAACAAATCCA  
ATAAATCTAAGCGTAGTACTTGGTGTAGTAATTTATTTTGGAAAGGGAGTGTTAAATGAT  
TTATTAGATAATCGAAAACAGAGGATCTTGAGTACTATTCGAAATTCAGAAGAGTTACG  
TCAAGCAGCTATTGAACAGCTCGAAAAAGCCCGTGC GCGCTTACGTAAAGTGGAAC  
AGAAGCCAATGACTATCGAGTCAATGGATACTCCGAGATAGAACGAGAAAAACAAAAT  
TTGATTAAGGCTACTTCTGAGAATTTAGAACGATTAGAAAATTACAAAATGAAACCCT  
TCTTTTTGAACAACAAAGAGCGATTAATCAAGTCCGACAACGAGTTTTCCAACAAGCC  
TTACAAGGAGCTCTAGGTAAGTCTGAATAGTTGTTTG---AGTGAGTTACATTTTCGTACCA  
TCAGTGCTAATATTGGCATTCTCGGGGTTATGGAAGAA-----ATGAATCCACTGATTC  
TGCCGCTTCTGTTATTGCTGCTGGATTGGCTGTAGGACTTGCTTCTATTGGACCTGGGGT  
TGGTCAAGGTAAGTCTGCTGCGGGTCAAGCTGTAGAAGGTATTGCGGAGACAGCCAGAAGC  
AGAAGGTAATAACGAGGTACTTTATTGTTAAGTCTGGCTTTTATGGAAGCTTTAACAA  
TTTATGGACTGGTTGTGGCATTAGCACTTTTATTTGCGAATCCATTTGTTATGAATGTTAT  
ACCATGTTCCATTAACACACTCAAAGGGCTATATGATATATCGGGTGTAGAAGTAGGCC  
AACATTTATATTGGCAAATAGGAGGTTTACAAGTCCATGCCCAAGTACTTATTACTTCTT  
GGGTCGTAATTGCTATTTTATTAGGTTCAAGTTACCCTAGCTGTTTCGGAATCCACAAACCA  
TTCCGGCTGATGGTCAGAATTTCTTCGAATATCTCCTTGAATTCATTTCGAGACTTGAGTA

AAACTCAGATTGGAGAAGAATATGGTCCTTGGGTTCCCTTTATTGGAACATGTTCTTAT  
TTATTTTGTCTTCTAACTGGTCAGGTGCTCTTTTACCTTGGAAAATCATAACAGTTACCTC  
ATGGGGAGTTAGCTGCGCCACGAATGATATAAACACTACTGTTGCTTTAGCTTTACTC  
ACCTCAGTCGCATATTTCTATGCGGGTCTTAGCAAAAAAGGTTTGAGTTATTTTGGTAAA  
TACATTCAACCAACTCCAATACTTTTACCGATTAACATCCTCGAAGATTTACAAAAACC  
TTTATCACTTAGTTTTCGACTTTTCGGAAATATATTGGCTGATGAATTAGTAGTTGTTGTT  
CTTGTCTTTAGTCCCTTTAGTAGTTCTTATACCTGTTATGTTTCTTGGATTATTCACAA  
GCGGTATTCAAGCTCTTATTTTTGCAACTTTAGCCGCAGCTTATATAGGTGAATCCATGG  
AGGGTCACCATATGATATTTGTAACCTTTAGAACACATATTAACTCATATCTTTTTCAAT  
CATTTAGTTGTAATTATCATTAGTTGATGACCTTTTTTCGTTACGAGATCCAGCATT  
GTCTGATTCATTGAAAAGGGTATGATAGCTACGTTTTTTGTCAATAACAGGGTTGTTAAT  
AATTCGTTGGATTTATTCAGGACATTTTCCATTAAGTAATTTATACGAATCATTAAATGTTT  
CTTTCCTGGAGTTTCGCTATAATTCATATGATTCCTAAAATATGAAAAATAAAAAATTATT  
TAAGTGCAATAACCATACCGAGCGCTATTTTTACTCAAGCCTTTGCGACTTCAGGTCTTT  
CAACAGAAATGCATGAATCGGGAATATTAGTACCTGCTCTACGATCCCATTGGTTAATGA  
TGCATGTAAGCATGATGTTGTTGAGTTATGCAGCTCTTTTAGTTGGATCCTTATTTTCAAT  
TGCTCTTCTAGTAATTACATTTGAAAAAATGAAAAACTTGTGTTGAAAACCAGCAGA  
TGGACTATTTAAATTTCAATGAAAACGTTTTAGAAAAATCCTTCTTTTTCTCTTTTAAAA  
ATTATTATAAATATCAATTGGTAGAAAAGATTGGATTATTGGAGTTCTCGTGTTATTAGTAT  
AGGATTTAGTTTTCTAACTATAGGTATTCTATCTGGAGCAGTATGGGCTAATGAGGCATG  
GGGATCCTATTGGAATTGGGACCCTAAAGAACTTGGGCATTTATTACTTGGACAATAT  
ACGCAATTTATTCACACACTAGAACAACCAAAAATGGGCAAGGTGCTAATTCGGCAAT  
AGTAGCTTCTATAGGATTTTTTATAATTTGGATATGTTATTTGGGGTTAATCTATTAGGAA  
TAGGACTACATAGTTATGGTTCATTCATATTAAGT-----

-----ATGATAAAGGAGTACCCCGAGACACATTTACAAAAG  
CTTCGTATAGGGATCCACAAAGAAACAGTACAATTGGTCAAATAACATAATGAATATAA  
TTTGCATAGTATTTTGCATTTCTCGACAAATATAATCTGTTTCGCTATTCTAAGTGGTTAT  
TTTATTCTGGGTAATGAAAACTAGTCATTCTTAATTCTTGGATTCAGGAATTCTTATATA  
ACTTAAGTGACACAATAAAAGCCTTTTCTATTCTGTTAGTCACTGATTTATGGATAGGAT  
TCCACTCTCCACATGGTTGGGAATTAATGATTGGTTCGGTCTACAACGATTTTGGATTG  
GCACATAATGATCAAATTATATCCGGTCTTGTTCCTTTCCAGTTATTCTAGATACAA  
TTGTAATAATTTGGATTTTCCATTATTTAAATCGTGTATCTCCTTCACTTGTAGTGATTTAT  
CATTCATGAATGAAATGCCATTGGTGTTCAAAAGTACCTTTTCGGAGTCTTGGAGA  
GGAAGATGCAGTTTGGGTTGACGTATAACAACCGACTTTATCGAGAAAGATTACTTTTTT  
TAGGCCAAGAGGTTGATAGCGAGATCTCGAATCAACTTGTGGTCTTATGGTATATCTTA  
GTATAGAGGATGATACTAAGGATCTTTATTTGTTTATAAACTCCCCGGTGGATGGGTAA  
TACCTGGAATAGCTATTTATGATACTATGCAATTTGTTCCACCCGATGTACATACAATATG  
CATGGGATTAGCAGCTTCAATGGGATCTTTCATTCTGGTCGGAGGAGAAATTACCAAAC  
GTCTAGCATTCCCTCACGCTAGGGTTATGATTCACCAACCTGCTAGTTCTTTTTATGAGG  
CACAAGCAGGGGAATTCATCTGGAAGCAGAAGAATACTGAAACTTCGCGAAACCC  
TGACAAGGGTTTATGTACAAAGAACCGTAACCCATTATGGGTTGTATCCGAAGACATG  
GAAAGGGATGTTTTTATGTCAGCAACGGAAGCCCAAGCTTATGGCCTTATTGATCTTGT  
G G C A G T C G A

A????????????????????????????????????????????????????????????????????????????????????????????  
????????????????????????????????????????????????????????????????????????????????????????????  
????????????????????????????????????????????????????????????????????????????????????????????  
????????????????????????????????????????????????????????????????????????????????????????????  
ATGGAAGAATTCAAAGGATATT  
TACAAAAAGGTGGATTAAACAACAACACTTCCTATATCCACTTCTCTTTCAAGAGTAT  
ATTTATGCACTTGCTCACGATCAGGGTTTATCAGGTTATGGCAAT---TATAGCTCATTACT  
TGTGAAACGGTTAATTACTCGAATATACCAACAGAATAGTTTTATCTATTCTGTCAATAA  
TTCTAAGCAAATAGATTCGTTGGAAAGAATTTTTATTATAAAATGATATCAGAGGGTTT  
TGCTATTGTTGTAGAAATCCGTTTTACTGCGATTAGTATCTTCTCTCATAACGAAATCT  
CAGAATTTACGATCTATTCATTCACTATTTCCATTTTTAGAGGATAAATTTTCACATTTAA  
ATTATGTATCAGATATACTAATACCTTATCCGGTCCATCTAGAAATATTGGTTCAAATTCT  
ACAATGCTGGATACAAGATCTTCCCACCTTACATTTATTACGATTGATTTTTACGACTAT  
CACAATGGGAGTAATAGCATTCTAAATCT---AGTTTTTTTTCAAACCAAGACTCTATA  
GGTTCCTATATAATCCTTATGTAGTTCGAATGCGAATCCATTTGATTTCTTCGTAAATCA  
TCTCTTATTTACGATCAACATCTTTTGGACCCCTTCTTGAGCGAACACACTTCTATGGA  
AAAATGAAA---GGA---GTAACCTTGTGTAATCAGAAAACCCTATGGTTGTTCAAGGATC  
CTTTCATGCATTATGTTAGGTATCAAGGAAAATGCATTATGGCTTCAAAGGGACTCATC  
TTCTGATGAAGAAATGGAAATCTTACTTTGTGAATTTATGGCAATGTCATTTTCACTTTT  
GGTCTCAACCCAGTAGGATACACATAAACCAATCCCCCATTTTTCTTTCTATTTATTGG  
GTTATCTTTCAAGTGTGCCAATAAATCCTTCATCCGCGAAGAGTCAAATGCTAGAGAAT  
TCCTTTTTAATAGATAGCTTTACT-----CCAAAATTTGAAACAATGATATCAATTATTCCTA  
TGATTGGGTCATTGGCAAAGCTAAATTTTGTAACTATCAGGGAATCCTATTAGCAAGC  
CAGCTTGGGCAGATTTGTCAGATTCTGATATTATTGATCGATTTGGTAGAATATATAGAA  
ACCTTTCTCATTATTACAGTGGGTCTTCAAAAAACAGAGTTTGTATCGAATAAAATATA  
TACTTAGACTTTTCTGTGCTCGAACTTTGGCTCGTAAACATAAAAGTACAGTACGCGCT  
TTTTTGCAAAGATTAGGTTTCAAGATTTTTTTCGAAGAATCTTTATGGAACAAGAAAAAGT  
GCTTTCTTTAATCTTACCAAGACCCATTTGGTATTTGGATATTATTCGTATAAATGACTTG  
GTAAATCATTTCATGATAATTGATATACGA---GAAGTGGAA---ACTATCAATTCTTTTTATG  
TATCGGAA---TTTTTAAAGAAATTTATGAACTTATATGGCTTTTTGTCCCTATTTTTGTT  
CTGATATTAGGGATCATCATAGGTGTACTAGTAATTGTGTGGCTCGAAAGAGAAATATCT  
GCCGCAATACAACAGCGTATTGGTCCCTGAATATGCAGGACCATTAGGAATTCCTCAAGC  
TTTAGCTGATGGAACCAAACCTGCTTTTTTAAAGAGGATCTCCTACCGTCTAGAGGGGATA  
GACGTTTGTTCAGTGCCGGTCCAGCAATTGCAGTCGTATCCATTTACTAAGTTATTTAG  
TAGTTCCCTTTGGGTCTCAACTAGTTCTAGCTGATCTCAGTATAGGTGTTTTTTTTATGGA  
TCGCTATTTCCAGTATAGCTCCTATTGGACTTCTTATGTCAGGATATGGATCGAATAATAA  
GTATCTTTTTTATAGGTGGTTTACGAGCTGCTGCTCAATCGATTAGTTATGAAATACCATTA  
ACACTATGTGTATTATCAATATCTCTACTATCTAACAGTTCAAGTACAGTTGATATAGTTG  
AGGCACAGTCAAATATGGTTTTTTGGGATGGAATTTGTGGCGTCAACCTATAGGGTTT  
ATAGTTTTTTAATTTCTCTCTAGCCGAATGTGAGAGATTACCTTTTGATTTACCAGAA  
GCAGAAGAGGAATTAGTAGCAGGTTATCAAACCGAATATTCCGGTATAAAATATGGTTT  
ATTTATGTTGCTTCTTACCTTAATTTATTAGTTTCTTCATTATTTGTAACAGTTCTTTACT  
TAGGTGGATGGAATATCTCTCTCCATACATGTTTATTCTGAACTTTTTTGAATAAATAC  
AATT-----TTTGAATAACAATTGGTATTTTTATCACATTAGCTAAAGCCTTTTTGTTCC  
TGTTTATTTCTATCGCAACAAGATGGACTTTACCTAGGTTGAGAATGGACCAACTATTTAA  
ATCTTGATGGAAATTTCTTTTACCTATTTCTCTAGGCAATCTATTATTGACAACCTTCTC



CCAAC TTGTTTCACTCATGATCTGGCATGTACAGAATGAAGTTTTTCATTCTCGATTCTAC  
GAGAATTTTTATGAAAGCGTTTCATTTGCTTCTCTTCAATGGAAGTTTCATTTTACCAGA  
ATGTATTCTCATTTTTGGCCTAATTCTTCTTCTGATGATCGATTCAACCTCTGATCAAAAA  
GATAGACCTTGGTTCTATTTCACTCTTCAACAAGTTTAGTAATGAGCATAACAGCCCTA  
TTGTTCCGATGGAGAGAAGAACCTATGATTAGCTTTTCGGGAAATTTCCAAACGAACA  
ATTTCAACGAAATCTTTCAATTTCTATTTTACTATGTTCAACTTTATGTATTCTCTATCC  
GTAGAGTACATTGAATGTACAGAAATGGCTATAACAGAGTTTCTGTTATTCATATTAACA  
GCTACTCTAGGAGGAATGTTTTTATGTGGTGCTAACGATTTAATAACTATCTTTGTAGCT  
CTAGAATGTTTCAGTTTATGCTCCTACCTATTATCAGGATATAACCAAGAGAGATGTACGG  
TCTAATGAGGCTACTACGAAATATTTACTCATGGGCGGGGCGAGCTCTTCTATTCTGGTT  
CATGTTTTCTTTGGCTATATGGTTTATCCGGGGGGGAGATCGAGCTTCAAGAAATAGT  
GAATGGTCTTATCAATACACAAATGTATAACTCCCCAGGAATTTCAATTGCGCTTATATT  
CATCACTGTAGGAATTGGGTTCAAGCTTTCCCTAGCCCCTTTTTCATCAATGGACTCCTG  
ACGTATACGAAGGATCTCCCACTCCAGTCGTTGCTTTTTCTTTCTGTTACTTCGAAAGTA  
GCTGCTTCAGCTTTAGCCACGCGAATTTTCGATATTCCTTTTTATTTCTCATCAAATGAAT  
GGCATCTTCTTCTGGAAATCCTAGCTATTTCTTAGCATGATATTGGGGAATCTCATTGCTAT  
TACTCAAACAAGCATGAAACGTATGCTTGCCTATTCGTCCATCGGTCAAATCGGATATGT  
AATTATTGGAATAATTGTTGGAGACTCAAATGATGGATATGCAAGCATGATAACTTATAT  
GCTGTTCTATATCGCCATGAATCTAGGAACTTTTGCTCGCATTGTATTGTTTGGTCTACGT  
ACCGGAACTGATAACATTCGAGATTATGCAGGATTGTACACGAAAGATCCTTTTTTTGGC  
TCTCTCTTTAGCCCTATGTCTCTTATCCCTAGGAGGTCTTCCCTCCACTAGCAGGTTTTTT  
CGGAAA ACTCCATCTATTCTGGTGTGGATGGCAGGCAGGCCTTTATTTCTGGTTTTCAAT  
AGGACTCCTTACGAGCGTTGTTTTCTATCTACTATTATCTAAAAATAATCAAGTTATTAATG  
ACTGGACGAAACCAAGAAATAACCCCTCACGTGCGAAATTATAGAAAATCCCCTTTAA  
GATCAAACAATTCATCGAATTGAGTATGACTGTATGTGTGATAGCATCTACTATAACCAG  
GAATATCAATGAACCAATTCCTTGCAATTGCTCAGGATACCCTCTTTATGTTTTCTGCTTTA  
TGAATATGATATTTTCTGGGCATTTCTCGTAATATCAAGTGTTATTCCTATCTTAGCATTTA  
TAATTTCTGGAGTTTTAGCCCCCTTAGTGAAGGACCGGAGAAGCTCTCTAGTTATGAA  
TCGGGTATAGAACCTATTGGGGATGCTTGGGTACAATTCCGAATTCGTTATTATATGTTT  
GCTTTAGTTTTTTGTTGTTTTTGATGTTGAAACCGTCTTTCTTTATCCGTGGGCAATGAGT  
TTTGATGTATTAGGTGTATCCGTATTTATCGAAGCTTTAATTTTTGTGCTTATCCTAATTGT  
CGTTTCAGTTTATGCATGGCGAAAAGGAGCATTGGAATGGTCTACGAGTTATTTTCCTT  
GGTTAACACTAATTGTTGTTTTTCCGATATTTGCGGGGCTGTTTCATTTTTTTCTCCCGCA  
TAAAGGAAATAAGGTAGTTCGTTGGTATACTATGGGTATATGTTTATTAGA ACTCCTTATC  
ATGACCTATGTATTCTGTTATCATTTTTAAATTGGACGATCCATTAATACAAATGGAAGATG  
ATTTTCAATGGATAAATGTTTTTGATTTTCACTGGAGACTGGGAATTGATGGACTTTTCGA  
TAGGACCTATTTTACTCACAGGATTTATCACTACTTTAGCGACTTTAGCGGCTTGGCCAG  
TTACTCGAGATTCCAGATTGTTTCATTTCCCTGATGTTAGCAATGTATAGCGGTCAAATAG  
GATTATTTTCTTCTCGAGACCTTTTACTTTTTTTTATGATGTGGGAGTTAGAATTAATTCC  
AGTTTATTTACTTTTATCCATGTGGGGGGGAAAAAACGTCTTTATTCAGCTACAAAGT  
TTATTTTATACACTGCGGGGGGTTCTATTTTTCTTTTAAATAGGAGTTCTAGGTATGGGTTT  
ATACGGCTCCAATGGACCTACTTTAAATTTTGAACAGTAGCTAATCAATCGTATCCCCT  
AGGATTGGAAATCCTATTATACTTTGGCTTCCTTATTGCTTTTGCTGTAAAATTACCAATA  
ATACCCTACATACATGGTTACCTGATACACACGGGGAAGCACATTACAGTACATGTATG

CTTCTAGCTGGAATCTTATTA AAAATGGGAGCATATGGATTGATTTCGTATTAATATGGAAT  
TTTTATCCCATGCTCATTCCATATTTTCACCATGGTTGGTAATTGTGGGAAC TATACAAAT  
AATTTATGCCGCTTTAACCTCTCTCGGACAACGCAATTTAAAAAAGAGAATAGCGTATT  
CTTCTGTATCTCACATGGGTTTCATCATTATAGGAATTGGTTTCGCTAACCAACACAGGTC  
TTAACGGAGCTATTTTACAATTACTCTCCCATGGATTTATTGGTGCTGCCCTTTTTTTCTT  
GGGGGAACAAGTTGTGATAGAATAAGGCTTGTTTATCTTGACGAAATGGGAGGAATT  
TCTATCCCAATGCCAAAAATATTTACTATGTTTCAGTAGTTTCTCAATGGCTTCTCTTGCAT  
TGCCAGGAATGAGTGGTTTTGTTGCAGAATTAATGGTATTTTTGGGAATAATTACTAGTC  
AAAAATATCTTTTAATGACAAAAATAATAACTTTAGTTATGGCAATTGGAATTATATT  
AACTCCTATTTATTTATTATCTATGTTACGGCAGATGTTCTATGGATACAAACTTTTTAATC  
TTTTCAAACTCGTTTTTTGTGGATTCTGGACCACGAGAATTATTTGTTTCAATCTGTATCT  
TTCTACCCGTAATAGCGATTGGTATCTATCCGGATTTAGTTATTTTATTATCAGTTGATAA  
GGTACAACAAATTCTATCTAATTATTACTATAGAATGATGTTTGAGCATGTACTTTTTTTG  
AGTGCATATTTGTTTTCTATTGGTATTTATGGATTGATCACAAGTCGAAGCATGGTTAGA  
GCACTTATGTGTCTTGAGCTTATACTAAATTCCGTGAATATCAATCTTGTCACATTTTCGG  
ATTTATTTGATAGTCGACAATTA AAAGGAGATATTTTCTCTATTTTTGTGATAGCTATTGC  
AGCGGCTGAAGCAGCTATTGGTCTAGCTATTGTCTCGTCGATCTATCGTAACCGAAAAT  
CAATACGTATCAATCAATCCAATTTGTTGAATAAAATGGAACATACCTATCAATATGCAT  
GGATAATACCTCTCCTTCCACTACCTGTTACTATGTCAATAGGATTTGGACTTCTACTTAT  
TCCAACAGCAACAAAAAGCATTTCGTCGATGTGGGCTTTTCCCAGTGTTTTACTGCTAA  
GTATAGGTCTTATTTTTTCGGCCAATCTGGCTTTTCAACAAATAAATGGAAGCTTTATTTA  
TCAATATCTATGGTCTTGACCATCAATAATGATTTTTCTTAGAGTTCCGGATACTTTATT  
GATCCACTTACTTCTGTTATGTTAATTTAATCACTACTGTTGGAATTATGGTTCTTATCTA  
TAGTGACAATTATATGTCTCATGATCAAGGATATTTGAGATTTTTTGCTTATATGAGTTTT  
TTAATGCTTCAATGTTGGGATTAGTTACGAGTTCCAATTTGATACAAATTTATATTTTTT  
GGGAATTGGTAGGAATGTGTTTCGTATTTATTAATAGGTTTTTGGTTCCACCCGACCAAGTG  
CAGCAAGTGCTTGCCAAAAAGCCTTTATAACCAATCGTGTAGGGGATTTGGTTTTGTTA  
TTAGGAATCTTAGGTTTTTACTGGATAACAGGAAGTTTCGAATTTCCGGGATTTGTTTTGA  
AACATTTAATAAG---GAGGGCAATTCCTTATTTCCAACCTCTGTGTGCCTTTCTATTATTC  
TCGGTGCAATTGCTAAATCCGCACAATCCCCCTTCATGTATGGTTACCCGATGCGATGG  
AGGGGCCTACTCCTATTTCTGCTCTTATACATGCGGCTACTATGGTAGCAGCGGGAATTT  
TTCTTGTGGCAAGGCTTCTCCTCTTTTTACAGGCATACCTTATATAATGAATATAATTC  
CTAATAGGTGTAATAACTACTATTAGGAGCAACTTTGGCTCTTGCTCAAAGAGATAT  
TAAAAGAAGTTTAGCCTATTCTACAATGTCTCAATTGGGTTATATTATGTTAGCCTTGGG  
ACTAGGGTCTTATCGAGCTGCTTTATTTCAATTTGATCACTCATGCTTATTCTAAAGCATT  
TTGTTTTTGGGTTCCGGATCTATTATTCATTCTATGGAACCTCTTGTTGGATATTCACCCG  
ATAAAAGTCAGAATATGGTCTTATGGGTGGTTAACAAGATATATTCCAATTACAAGAA  
CTACATTTTTATTAGGTACACTTTCTCTTTGTGGTATTCCACCTCTTGCTTGTTTTTGGTC  
TAAAGATGAAATCTTAGTGAAAGTTGGTTATATTCACCTAGTTTCGCAGTAATAGCTTA  
TTTTACTGCAGGACTTACTGCATTTTATATGTTTCGGGTATACTTACTTACTTTTTGAAGGG  
AGTTTACATGTTAATTTCCAAAATTATAGTGGAAC TCAAATACTTCAGCCTATTTCGATA  
TCCTTATGGGGAAAAGAAGAACCTAAGTCAGTA-----AATTCATTTTCTCAACAATG  
AAAAC TAAAAACAGAAAAAAT-----ACTTCTATGTATCCTCATGAGTCCGATAATACTAT  
GTTATATCCTTTGCTTATATTGGTAGTATTTACTTTGTTTGGATT CATAGGAATTCCTT

TAGATTTGAATTTATTATCCAAATGGTTGGCGCCCTCAAAAAATCTTTTATATCCAAATTC  
AGAGGATTCCATAGACTTGTATGACTTTTTTATAAATGCAAGTTTCTCAGTAAGTATAGC  
TACTGGTGGAATATTTTAGCATTCATTTTTACGGATCTCCTTATTCACCTTTACAAAAT  
TTAGATTTAATGAATTTACTTGTCTGTTTCTTTGGACAAAATGCAAATATTGTATACAATT  
GGTCCCATAATCGTGGTTACATAGATATATTCTATACAAACGTAGTAAGTACTCAGAGTATAA  
GAGAATTAGCTAAACTCACTCAGTTTTTTGATAGATATATCATTGATGGAATTACCAACA  
GTGTTGGTGTCTAAGTTTCTTTGCAGGCGAAGCAATAAAAATATTTAGTAGGAGGGGGT  
CGAATCTCCTTTTATCTCTTTTTCTATTTATTTTTTCATATTAATCTTCGTTTATTTCTTGTTT  
ATGGATTTAACTGGACCAATACATGATATCTTGATGATTTTTGGGATTAGTCTTATATT  
AGGGGGCCTAGGAGTAGTTTTATTTACCAATCCTATTTATTCCGCTTTTTCTTTGGGATT  
GGTCTTATTTGTGTATCTTTATTTTATATTTTATTGAACTCCTATTTTGTAGCTGCTGCAC  
AACTCCTTATTTATGTGGGGGCTATAAATGTCTTAATCTTATTCGCTGTAATGTTTATGAA  
AGGTTTCAAGATATTTCCAATGATTTAAATCTTTGGACTGTAGGAGATGGGGTACTTCCCT  
GGTTTGTACAAGTATCTTTTTTTACTAATTAGTACTATTTTTCAGATACATCATGGTACGGG  
ATTATTTGGACTACAAAAGCAAACACATTATAGAGCAAGATCTTATAAGTAATGTTCA  
ACAGATTGGAATTCATCTCTCAACAGATTTCTTTCTTCCATTTGAACTGATTTCTATAATT  
CTTTTAGTTGCCTTAATAGGTGCAATTAGTATGGCTCGTCAAATGACTGGACCGACTAC  
AAAAAACGATCTTATGATAGTCAATATGGGTCCTCAGCACCCATCAATGCATGGTGTTC  
TTCGATTAATCGTGACTTTGGATGGCGAAGACGTTATTGACTGTGAACCCATACTAGGT  
TATTTACACCGAGGGATGGAAAAAATTGCGGAAAACCGAACAATTGTACAATATTTACC  
TTATGTAACACGTTGGGATTATTTAGCTACTATGTTTACAGAAGCAATAACTGTAAATGC  
ACCAGAACAATTAGGAAATATTCAAGTACCTCAAAGAGCAAGCTATATCAGAGTCATTA  
TGCTAGAGCTAAGTCGTATAGCTTCTCACTTGTATGGCTTGGCCCTTTTATGGCAGATA  
TTGGTGCACAGACTCCCTTTTTCTATATTTTATAGAGAGAGAGAATTAATATATGATCTATT  
TGAAGCTGCCACAGGTATGCGAATGATGCATAATTATTTCCGTATTGGCGGAGTAGCTG  
CTGATTTACCTTATGGCTGGATAGATAAATGCTTAGATTTTTGCGATTATTTTTAACAGG  
AATTGACGAATATGAAAACTTATTACAAGAAATCCCATTTTTTTGGAACGAGTTGAGG  
GAATAGGAATTATTAGTGGAGAGGAAGCAATAAATTGGGGATTGTCGGGACCCATGTTA  
CGAGCTTCCGGAATCTCATGGGATCTGCGTAAAGTTGATCAATATGAATGTTATAATGAA  
TTGATTGGGAAGTCCAATGGCAAAAAGAAGGAGATTCTCTAGCTCGTTATTTAGTACG  
AATGAGTGAAATGAGGGAATCCATAAAAATAATTCAACAGGCTTTAGAAGGCATTCCG  
GGGGACCCCTATGAAAATTTGGAGGTCAGACGT---GATAAAACAAAAGATTCCGAATG  
GAATGATTTTGAATATCGATTCAATTAGTAAAAAACCTTCGCCCAATTTTGAATTGTCAA  
ACAAGAACTTTATGTAAGAGTAGAAGCTCCAAAAGGAGAATTAGGGATTTTTCTAATA  
GGAGATCAGAACGTTTTCCCTTGGAGATGGAAAATTCGTCCGCCAGGTTTTATCAATTT  
ACAAATTTTGCCTCAGCTAGTTAAAAGAATGAAATTGGCTGATATCATGACGATACTAG  
GTAGTATAGATATTATTATGGGAGAAGTTGATCGTATGTTTCCCTATGGTGACTGGATTCAT  
GAGTTATGGCCAACAAACAGTACGAGCTGCAAGATATATCGGTCAAGTTTTTATAATTA  
CCTTATCCCATGCAAATCGTTTGCCCGTAACTATTCAATATCCTTATGAAAAATCAATCA  
CATCAGAACGTTTCCGTGGTTCGAATACATTTCGAATTCGATAAATGTATCGCTTGTGAA  
GTATGTGTTTCGTGTATGTCCTATAAATCTACCTGTTGTAGATTGGAGATTGGAAACTAAT  
ATTA AAAAGAAACAATTGCTTAATTATAGTATAGATTTTGGAGTATGTATATTTTGTGGTA  
ATTGTGTCGAGTATTGTCCAACAACTGTTTATCCATGACTGAGGAATATGAACTTTCTG  
CTTATGATCGCCATGAATTAATTATAATCAAATTGCATTGGGTGCTTTACCTATATCTATA

ATGGGGGATTACGCGATTCAACCTATTATGAATTCAAAAATAGACAAGGATAAACCTCT  
TGAT-----ATGCAGAGTCATTTATCTGCTTGGTTAGTCAAGCATGAGCTTGTT  
CATAGATCCTTGGGCTTTGATTACCAAGGAATAGAGACTTTACAAATAAAACCGGAAGA  
TTGGGACTCCATTGCTGTCAATTCATATGTGTATGGTTACAATTATTTACGCTCTCAGTGT  
GCCTATGATGTCGCACCAGGTGGATTTTTAGCTAGTGTATATCATCTTACGAGAATACAG  
TATGGGGTGGATCAACCGGAGGAAGTATGTATAAAAGTATTTGTCCCAAGGGAAAATCC  
TATAGTCCCATCTGTTTTCTGGGTTTGGAGGAGTGTGATTTTCAAGAACGCGAATCTTA  
TGATATGTTTTGGAATTTCTTATGATAATCATCCACGCCTTAAACGTATTTTGATGCCTGAA  
AGTTGGATAGGCTGGCCTTTACGTAAGGACTATATTACGCCCAATTTCTATGAAATTCAA  
GATGCTCAT-----  
-----ATGGTCTTAGCTCCTGAATATTCAAACAATAAA-----AAAGAGTCCATTG  
AGACAGTTATGAATTTGATCGAGTTCCCGTCACTTGACCAAACAATGCCAAATTCCGTT  
ATTTCAACTACGTTGAATGATCTTTCAAATTGGTCAAGACTCTCGAGTTTATGGCCTCTT  
TTATATGGTACCAGTTGTTGTTTTATTGAATTTGCTGCATTAATAGGCTCACGATTTGACT  
TTGATCGTTATGGATTGGTACCAAGATCAAGTCCTAGGCAAGCAGACCTCATTTTAACA  
GCCGGTACAGTCACAATGAAAATGGCTCCTTCTTTAGTGAGATTGTATGAACAAATGCC  
TGAACCTAAATATGTCATTGCTATGGGAGCCTGTACTATTACAGGAGGGGATGTTTAGTAC  
CGATTCTTATAGTACCGTTCCGGGGAGTTGATAAGTTAATTCCTGTTGATGTCTATTTGCC  
GGGTTGCCACCTAAACCCGAGGCAGTTATAGATGCAATAACGAAACTTCGTAAGAAG  
ATATCTCGAGAAATATATGAAGATAGAATTGGTTCTAAA---GAAAATAGATGTTTTACTAT  
CAATCACAAGTTTCATGTTTCAGCGCAGTATTCATACTGGAAATTACAATAAGAATTGC  
TCTATCAATCACCATCTACTTCAGAAATAACTGAA-----TTTTTTAGATCCAAAAGTTCAA  
TATCTTCCACAAATTAGTGAATATGCAAAATAGAAATACTTTTTTTGGGGTAAAGCAG  
CAGATTACTCGATTTATTTCTGTATCGATCGGGATATATGTAATAACTCAGACATCTATTT  
CAAATGCATATCCCATTTTTGCACAGCAGGGTTATGAAAATCCACGAGAAGCAACAGG  
ACGAATTGTTTGTGCCAATTGTCATTTAGCTAGTAAACCTGTGGATATTGAGGTTCTCA  
ATCTGTGCTTCTGATACTGTATTTGAAGCAGTAGTTAGAATCCCTTATGATACGCAAGT  
GAAACAAGTTCTTGCTAATGGCAAAAAAGGGGGTTGAATGTGGGGGCTGTTCTTATT  
TTACCTGAGGGATTTGAATTAGCCCCTCCTGATCGTATTTCCCCTGAGCTCAAAGAAAA  
GATAGGCAATATCTCTTTTCAGAGTTATAGTCCGACCAAAAAAATATTCTTGTTATAGG  
TCCAGTGCCTGGTCAGAAATATAGGGAAATAGTCTTTTCTTCTTCTCCAGACCCGG  
CAACTAGTAAGGACGTTCAATTTCTTAAAATATCCTATATATGTAGGCGGAAACAGGGGA  
AGGGGTGAGTTTATCCCGATGGCAGCAAGAGTAACAATACTGTTTATAATGCGACATC  
CGCCGGTGTGTAAGCAAAATAGTACGTAAAGAAAAAAGGGATATGAAATAATCATA  
ACTGATCCATCGGATGGCCGTGAAGTGGTTGATATTATACCTCCAGGACCCGAACTTCT  
TGTTTCAGAGGGTGAGTCTATCAAGCTTGATCAACTATTAACGAGTAATCCAAATGTCG  
GTGGATTTGGTCAGGGAGATGCTGAGATAGTGCTTCAAGATCCGTCACGTGTCCAAGG  
TCTTTTGTCTTCTTAGCATCTGTGTTCTAGCACAAATCTTTTTAGTTCTTAAAAAGAA  
ACAGTTTGAAGAGTTCAATTGTTTCGAAATGAATTTTATGAAAAAGTTTATGACTGGT  
TCGAAGAGCGTCTTGAGATTCAGGCAATTGCAGATGATATAACTAGTAAATATGTTCCCT  
CCTCACGTCAACATTTTTTATTGTCTAGGGGGGATCACACTTACTTGTTTTTTAGTACAA  
GTAGCTACGGGTTTTGCTATGACTTTTTACTATCGCCCAACAGTTACAGAGGCCTTTTCC  
TCAGTTCAATACATAATGACTGAGGTGAATTTGGTTGGTTAATCCGATCAGTGCATCGA  
TGGTCAGCAAGTATGATGGTTCTAATGATGATTTTACACGTATTTTCGTGTGTATCTTACA

GGTGGATTAAAAACCTCGTGAATTAACCTGGGTAACCGGTGTAATTCTGGGTGTATT  
GACTGCATCTTTTGGTGTAACCTGGTTATTCTTTACCTTGGGACCAAATTGGTTATTGGGC  
AGTCAAATTGTTACAGGCGTACCTGACGCTATCCGGTAATAGGATCACCTTTAGTAG  
AGTTATTACGCGGAAGTGCTAGTGTGGGTCAATCCACTTTGACTCGTTTTTATAGTTTAC  
ACACTTTTGTATTACCTCTCCTTACTGCCGTATTTATGTTAATGCATTTCTTAATGATACGT  
AAGCAAGGTATTTTCAGGTCCTTTAATGGGAGTAACAAAGAAACCTGATTTGAATGATCC  
TGTATTAAGAGCTAAATTGGCTAAAGGGATGGGACATAATTATTACGGAGAACCTGCAT  
GGCCAAATGATCTTTTATATATTTTTCCAGTAGTTATTTTTGGGTACTATAGCATGTAACGT  
AGGCTTAGCGGTCTTAGAACCTCAATGATTGGTGAACCGGCAGATCCATTTGCAACTC  
CTTTGGAAATATTACCTGAATGGTACTTCTTTCCCTGTATTTCAAATACTTCGCACAGTAC  
CTAATAAGTTATTGGGTGTTCTTTAATGGTTTCAGTACCTGCGGGATTATTAATTGTACC  
TTTTTTGGAAAATGTAAATAAATCCAAAATCCATTTGTCGACCAGTAGCTACAACAG  
TCTTTTTGATCGGTACTGTGGTAGCTCTTTGGTTAGGTATTGGAGCAACATTACCTATTG  
ATAAATCTCTTACTTTAGGTCTTTTTATGATTGAAGTTCTTCTATTTGGAATTGTGTTAGG  
TCTAATTCCTATTACTTTGGCAGGATTATTTCGTAACGGCGTATTTACAATACAGACGTGG  
TGATCAGCTGGACCTTATGCTTACTATAACTAGTTATTTTCGGTTTTCTATTGGCTGCTTCA  
ACTATAGCCTCAGTGCTTTTCATTGGTTTGAACAAGATACGACTTATTATGGATATAGTA  
AGTCTCGCTTGGGCTGCTTTAATGGTAGTCTTTACATTTTCCCTTTCACTTGTAGTCTGG  
GGTAGGAGTGGACTTATGATTATTAGTTCGCCGGAACCAGAAGTTAAAATTTTGGTGGA  
TAGGAATCCCGTAAAAACGTCTTTTGAGCAATGGGCCAAACCCGGTCATTTCTCAAGA  
ACAATAGCCAAGGGCCCTGAACTACCACTTGGATCTGGAACCTACATGCTGATGCTC  
ACGATTTTGATAGTCATACCAATGATTTGGAGGAGATCTCTCGAAAAGTATTTAGTGCTC  
ATTTTCGGTCAACTCTCCATTATCTTTCTTTGGCTGAGTGGCATGACTTCCATGGCGCTC  
GTTTTTCAAATTATGAAGCATGGCTAAGTGATCCTACTCACATTGCACCCAGTGCCCAG  
GTGGTTTGGCCAATAGTGGGTCAAGAAATATTAATGGTGATGTGGGCGGCGGTTTCCG  
AGGAATACAAATAACCTCTGGATTTTTTCAGCTTTGGCGAGCATCTGGAATAACTAGTG  
AATTACAACCTCTATTGTACTGCAATTGGTGCATTGGTCTTTTCAGCATTAAATGCTTTTTG  
CGGGTTGGTTCCATTATCACAAAGCTGCCCAAAACTGGCTTGGTTCCAAGATGTAGA  
ATCTATGTTGAATCACCATTTAGCGGGTTACTAGGACTTGGGTCTCTCTCTTGGGCGG  
GACACCAAATCCATGTATCTTTGCCAATTAACCAATTTCTTAATGCTGGAGTAGATCCTA  
AGGAGATCCCACTTCCCTCATGAATTTATCTTGAATCGGGATCTTTTGTCTCAGCTTTATC  
CTAGTTTTGCTGAGGGAGCAACCCCATTTTTTACCTTGAATTGGTCAAATATTCAGATT  
TTCTGAGTTTTTCGTGGAGGATTAGATCCAATAACCGGGGTCTATGGCTGAGCGATATT  
GCACACCATCATTAGCCATTGCTATTCTTTTCCCTGATAGCTGGTCATATGTATAGGACCA  
ACTGGGGTATTGGTCATGGGTTGAAAGATATTTTAGAGGCTCATAAAGGTCCATTTACC  
GGTCAGGGCCATAAGGGTCTCTATGAAATACTAACAACGTCATGGCATGCTCAATTATC  
TCTTAACCTGGCTATGTTAGGCTCTTTAACCATTATTGTAGCTCACCATGTACGCCAT  
GCCCCCTTATCCATACTTAGCTACTGACTATGGTACACAACCTTTCATTGTTACACATCAT  
ATGTGGATTGGTGGATTTCTCATAGTTGGAGCTGCTGCACATGCAGCCATTTTTATGGTA  
AGAGACTACGATCCAACCTACTCGATACAACGATCTATTAGATCGTGTCTTAGGCACCG  
TGATGCAATCATATCACATCTTAACCTGGGTCTGTATATTTCTAGGTTTTTACAGTTTCGGC  
TTGTATATTCATAATGATACCATGAGTGCTTTAGGGCGTCCTCAAGATATGTTTTCAGATA  
CCGCTATACAATTACAACCTATCTTTGCCAATGGATACAAAACACCCATGCTTTAGCAC  
CCGGTACAACAGCTCCTGGTGCAACAGCAAGCACCAGCTTAACTTGGGGGGGAGGTG

AATTAGTAGCAGTAGGGCGGAAAAGTCGCTTTATTACCTATTCCATTAGGTACCGCAGAC  
TTTTTGGTCCATCACATTCATGCATTTACGATCCATGTGACTGTATTGATACTACTAAAAG  
GTGTTCTATTTGCTCGTAGTTCCCGTTAATACCTGATAAAGCAAATCTTGGTTTTCGTT  
TCCCTTGTGATGGGCCTGGAAGAGGGGGTACATGTCAAGTATCCGCATGGGATCATGTT  
TTCTTAGGTCTATTCTGGATGTACAATTCAATTCGATAGTCATATTCCATTTTCAGTTGGA  
AAATGCAATCGGATGTTTTGGGGTACTGTAAGTGATCAAGGGGTCATAACTCATATCACA  
GGAGGAAACTTTGCACAGAGTTCCACTACTATTAATGGGTGGCTTCGAGACTTTTTATG  
GGCACAGGCAGCTCAAGTAATTCAGTCTTATGGTTCTTCATTATCTGCCTATGGTCTTTT  
CTTCTTAGGTGCTCATTGTGATGGGCTTTCAGTTAATGTTTCTATTTCAGCGGTCGTGG  
TTATTGGCAAGAACTTATTGAATCTATTGTTGGGCGCATAACAAATTAAGTTGCTCC  
TGCTACTCAGCCTAGAGCCTTGAGCATTGTACAAGGACGTGCTGTAGGAGTAACCCATT  
ACCTTCTGGGTGGAATTGCCACAACATGGGCATTCTTCTTAGCAAGAATTATTTTCAGTA  
GGAATGGCATTAAAGATTTCCAAGGTTTAGCCAAGGTTTAGCTCAGGACCCACTACTCG  
TCGTATTTGGTTTTGGTATTGCTACCGCGCATGACTTCGAGAGTCATGATGATTAATCTGA  
AGAACGTCTTTATCAGAACATTTTTGCTTCTCACTTTGGGCAGTTAGCAATAATCTTTCT  
GTGGACGTCCGGAATCTGTTTCATGTAGCTTGGCAAGGAACTTTGAGTCATGGGTA  
AAGGACCCTTACATGTAAGACCCATTGCTCATGCAATTTGGGATCCTCATTTTGGTCA  
ACCGGCAGTAGAAGCCTTACTAGAGGAGGTGCTCTGGGCCAGTTAACATTGCTTATT  
CTGGTGTTTATCAGTGGTGGTATAACAATCGGATTACGCACCAACGAGGATCTTTATACTG  
GAGCTCTTTTTCTATTATTCTTTCTGCTATATCTTTAATAGCAGGTTGGTTACACCTACA  
ACCTAAATGGAAACCAAGTGTTCCTGGTTCAAAAATGCTGAATCTCGTCTTAATCATC  
ATTTGTCAGGACTTTTCGGAGTCAGTTCCTTGGCTTGGGCAGGACATTTAGTTCATGTC  
GCAATTCCTGGATCCAGGGGGGAGTATGTCAGATGGAATAATTTCTTAGATGTATTACCG  
TATCCGCAAGGGTTGGGTCCACTTTTTACAGGTCAGTGGAATCTTTATGCCCAAACCC  
GGATTCTAGTAGTCATTTATTTGGTACCTCCCAAGGAGCGGGAACGGCAATTTAAACCC  
TTCTTGGTGGATTCCATCCACAAACCCAAAGTTTATGGCTGACTGATATGGCTCATCAC  
CATTTAGCCATTGCATTTATTTTTCTGGTTGCTGGTCATATGTATAGAATAACTTTGGGA  
TTGGGCATAGTATAAAAGATCTTTTAGAAGCGCATAACCCACCAGGAGGTCGATTAGGA  
CGTGGTCATAAAGGTCTTTATGACACAATAAATAATTCGATTCATTTCAATTAGGTCTT  
GCTCTAGCTTCTTTAGGCGTTATTACTTCTTTAGTAGCTCAACATATGTATTCTTTACCTG  
CTTATGCATTTATAGCCCAAGACTTTACTACTCAAGCTGCGTTATACTCATCACCAAT  
ACATCGCAGGTTTCATCATGACAGGAGCCTTTGCTCATGGAGCTATATTCTTCATTAGAG  
ATTACAATCCAGAACAGAATGAAGATAATGTATTGGCAAGAATGTTGGCCATAAGGAA  
GCTATCATATCTCATTAAAGTTGGGCCAGCTTATTTTTAGGATTCCATACTTTAGGCCTTT  
ATGTTCATAATGACGTCATGCTTGCCTTTGGTACTCCGGAAAAACAAATCTTAATTGAA  
CCTATATTTGCCCAATGGATACAATCTGCTCATGGGAAGACTTCATATGGGTTTGATGTA  
CTTTTATCTTCAACGACAGGCCCTGCATTTAATGCCGGTAAAAGCATATGGTTACCTGGT  
TGGTTGAATGCTGTTAATGAG-----AGTAGTAATCACTCTTCTTAACGATAGGTCCTGG  
AGATTTCTTGGTTCATCATGCTATTGCTCTAGGTTTGCATACAACCTTGATTTTAGTA  
AAAGGTGCTTTAGATGCACGTGGTTCTAAGTTAATGCCGGATAAAAAGGATTTCCGGTTA  
TAGTTTTCTTGCACGGCCCGGACGAGGTGGTACTTGTGATATTTCCGGCTTGGGACG  
CATTTTATTTGGCAGTTTTCTGGATGTTAAATACCATTGGATGGGTTACTTTTTATTGGCA  
TTGGAACACATTACATTATGGCAAGGTAATGTTTCACAATTTAATGAATCCTCCACTTA  
TTTGATGGGATGGTTAAGAGATTATCTATGGTTAAACTCTTCACAACCTTATCAATGGATAT

AACCCTTTTGGTATGAATAGTTTATCGGTTTGGGCGTGGATGTTCTTATTTGGACATCTT  
GTTTGGGCTACTGGATTTATGTTTTTAATTCCTGGCGCGGTTATTGGCAGGAATTAATT  
GAAACTTTAGCCTGGGCTCATGAGCGCACACCTTTAGCAAATTTGATTTCGATGGAGAG  
ATAAGCCAGTGGCCCTTTCCATTGTGCAAGCAAGGTTAGTTGGATTGGCCCATTTTTCT  
GTAGGTTATATATCACTTATGCCGCTTCTTGATTGCCTCTACATCAGGAAAATTTGGTA  
TGTCACATTCAGTAAAAATTTATGATACATGTATAGGGTGTACTCAATGTGTTCGTGCCT  
GCCCTACAGATGTTTTGGAAATGATACCTTGGGATGGATGTAAGGCTAAGCAAATTTGCA  
TCCGCTCCGAGAACAGAAGATTGTGTAGGTTGTAAGAGATGTGAATCCGCTGTCCAA  
CAGATTTTTTGAGTGTCCGTGTTTATTTAGGTAGTGAAACAACCTCGAAGTATGGGCCA  
GGTTACATGACAGATTTCAACTTACCCTCAATTTTTGTGCCTTTAGTAGGCCTAGTATTT  
CCGGCATTGCAATGGCTTCTTTATTTCTTTATGTTCAAAAAATAAGATTGTCATGCAA  
GATCTAAAAACATATCTATCTGTGGCACCTGTACTGAGTACTCTATGGTTTGGGATTTA  
GCAGGTTTATTGATAGAAATTAATCGTTTATTCCCAGATGCCTTATTATCCCTTTTTTT---  
--ATGACTGCAATTTTAGAGAGACGCGAAAGTACAAGCCTATGGGGTTCGTTTCTGCAAC  
TGGGTAACCAGCACCGAAAACCGTCTTTACATCGGATGGTTTGGTGTTTTGATGATCCC  
TACCCTATTGACTGCAACTTCTGTATTTATTATCGCCTTCATTGCTGCTCCTCCAGTAGAT  
ATTGATGGTATTTCGTGAACCTGTTTCTGGATCTCTACTTTACGGAAACAATATCATTCT  
GGTGCCGTTATTCCTACTTCTGCAGCGATTGGTTTGCATTTTTATCCAATCTGGGAAGCA  
GCATCTGTTGATGAATGGTTATACAATGGTGGTCCTTACGAACTAATCGTTTTACTTCT  
TTACTTGGTGTAGCTTGTACATGGGTTCGTGAGTGGGAACCTTAGTTTCCGTTTGGGTAT  
GCGTCCCTGGATTGCTGTTGCATATTCAGCTCCTGTAGCAGCTGCTACTGCTGTTTTCTT  
GATCTACCCTATTGGTCAAGGAAGTTTTTCTGATGGTATGCCTCTAGGAATTTCTGGTAC  
TTTCAACTTCATGATTGTATTCCAGGCAGAACACAACATCCTTATGCATCCATTCCACAT  
GCTAGGCGTAGCTGGTGTATTCGGCGGCTCCCTATTTAGTGCTATGCATGGTTCCTTGGT  
AACTTCTAGTTTGATCAGGAAACCACTGAAAACGAATCTGCTAATGAAGGTTACAGA  
TTCGGTCAAGAGGAAGAACTTACAATATCGTAGCTGCTCATGGTTATTTTGGCCGATT  
GATCTTCCAATATGCTAGTTTCAACAACCTCTCGTTCCTTACTTCTTCCCTAGCTGCTTG  
GCCTGTAGTAGGTATTTGGTTTACTGCTTTAGGTATTAGCACTATGGCTTTCAACCTAAA  
TGGTTTCAACTTTAACCAATCTGTAGTTGATAGCCAAGGCCGTGTTATTAACACTTGGG  
CTGATATCATCAACCGTGCTAATCCTTGGTATGGAAGTTATGCACGAACGTAATGCTCACA  
ACTTCCCTCTAGACTTAGCTGCAGTTGAAGCTCCATCTACCATTGGAATGGGTTTGCCT  
TGGTATCGTGTTCATACTGTTGTATTGAATGATCCCGGTCGATTGCTTCTGTCCATATAA  
TGCATACAGCTTTAGTTGCTGGTTGGGCCGGTTCAATGGCTCTCTACGAATTAGCGGTT  
TTTGATCCCTCTGATCCCGTTCTTGATCCAATGTGGAGACAGGGTATGTTTCGTTATACCT  
TTCATGACTCGTTTAGGAATAACCAATTCATGGGGCGGTTGGAGTATTACA---GGTGGA  
ACTATAACTAATCCAGGTATTTGGAGTTACGAAGGTGTGGCAGGTGCACATATTGTGTT  
TTCCGGCTTGTGTTTCTTGGCAGCTATCTGGCATTGGGTTTATTGGGATTTAGAAATATT  
CTGTGATGAACGTACAGGAAAACCTTCTTTGGATTTGCCTAAGATCTTTGGAAATTCATTT  
ATTTCTTTCAGGAGTGGCTTGCTTTGGGTTTGGTGCATTTTCATGTAACAGGCTTGTATGG  
TCCTGGAATATGGGTATCTGATCCTTATGGACTAACTGGAAAAGTGCAACCTGTAAGTC  
CAGCATGGGGCGCAGAAGGTTTTGATCCTTTTGTCCAGGAGGAATAGCTTCTCATCAT  
ATTGCAGCGGGGACATTGGGCATATTAGCAGGTCTATTCCATCTTAGTGTTCCGCCGCT  
CAACGTCTATACAAGGGCTTACGTATGGGAAATATTGAAACTGTTCTTTCCAGTAGTATC  
GCTGCTGTGTTTTTTGCAGCTTTCGTTGTTGCTGGAACCTATGTGGTATGGTTCAGCAACT

ACCCCTATTGAATTATTTGGCCCTACTCGTTATCAGTGGGATCAGGGATATTTTCAGCAA  
GAAATATATCGAAGAATTAGTGCTGGATTAGCAGAAAATCTGAGTTTATCAGAAGCTTG  
GTCTAAAATTCCTGAAAAATTAGCTTTTTATGATTACATTGGTAATAATCCTGCAAAAGG  
GGGACTATTTTCGAGCGGGCTCGATGGACAATGGGGATGGAATCGCTATTGGATGGTTAG  
GCCACCCTGTTTTTAGAGATAAAGAAGGACGCGAGCTTTTTGTACGTCGTATGCCTACT  
TTTTTTGAAACATTTCCAGTAGTTTTGGTAGATGGAGATGGAATTGTGAGAGCCGATGT  
TCTTTTTCGAAGGGCAGAATCTAAGTATAGTGTCGAACAAGTAGGTGTAACCTGTTGAAT  
TCTATGGTGGCGAACTTAATGGAGTGAGTTACAGTGATCCTGCTACTGTGAAAAAATAT  
GCTAGACGTGCTCAATTGGGCGAAATTTTTGAATTGGATCGTGCTACTTTAAAATCCGA  
CGGTGTTTTTCGTAGCAGTCCAAGGGGTTGGTTCACCTTCGGGCATGCCTCATTTCGCTT  
TGCTGTTCTTTTTTCGGACACATTTGGCATGGGGCTAGAACCTTGTTCGGGATGTTTTT  
GCTGGTATTGATCCAGATTTGGATGCTCAAGTAGAATTTGGAGCATTCCAAAAATTGGG  
AGATCCAACCACAAAGAGACAGGCAGTT-----GTGGAAACGCT  
CTTTAATGGAACCTTAGCTTTAGCTGGTCGTGACCAAGAAACCACCGGTTTTGCTTGGT  
GGGCCGGGAATGCCAGACTTATCAATTTGTCCGGTAAACTACTTGGGGCTCACGTAGC  
CCACGCTGGATTAATTGTATTTGGGCTGGAGGAATGAACCTATTTGAAGTGGCTCATT  
TCGTACCGGAAAAGCCCATGTATGAACAAGGATTGATTTTACTTCCCCATCTAGCTACT  
CTAGGTTGGGGGTAGGTCCGGGAGGGGAAGTTATAGACACTTCCCATACTTTGTGTC  
TGGAGTACTTCACTTAATTTCTCTGCAGTCTTAGGCTTTGGCGGCATTTATCATGCACT  
TCTGGGACCTGAAACTCTTGAAGAATCCTTTCCATTCTTTGGTTATGTATGGAAAGATA  
GAAATAAAATGACCACAATTTTAGGTATCACTTAATTTTGTAGGTCTAGGTGCTTTTC  
TTTTAGTATTCAAAGCTCTTTATTTTGGTGGTGTATATGATACCTGGGCTCCTGGAGGGG  
GAGATGTAAGAAAAATTACCAACTTGACCCTTAACCCAAGTGTTATATTTGGTTATTTAC  
TAAAATCTCCTTTTGGAGGAGAAGGGTGGATTGTTAGTGTGGACGATTTAGAAGATATA  
ATTGGGGGACATGTATGGTTAGGTCCATTTGTATACTTGGTGGAAATTTGGCATATCTTA  
ACTAAGCCTTTTTCGTGGGCTCGCCGCGCATTTGTCTGGTCTGGAGAGGCTTACTTGTG  
TTATAGTTTAGCTGCTTTATCTGTCTTTGGTTTTATAGCTTGTGTTTTGTCTGGTTCAAT  
AATACTGCTTACCCTAGTGAATTTTATGGTCCAACCGGCCCAAGCCTTCTCAAGCTCA  
AGCTTTTACTTTTCTAGTTAGAGACCAACGCCTTGGGGCTAATGTGGGCTCCGCTCAAG  
GACCGACTGGTTTAGGTAAGTATCTAATGCGTTCCCCAACAGGAGAGATCATTTTTGGA  
GGGGAAACCATGCGTTTTTGGGATCTACGAGCTCCTTGGTTGGAACCTCTAAGAGGTC  
CAAATGGGTTGGACTTGAGCAGGCTGAAAAAAGATATAACAACCTTGGCAAGAACGCC  
GTTACGCAGAATATATGACTCACGCTCCTTAGGTTCTTTAAATTCGGTGGGTGGCGTA  
GCTACCGAAATCAATGCAGTCAATTATGTATCTCCTAGAAGTTGGTTATCTACTTCTCAT  
TTTGTCTAGGATTCTTCTTTTTTGTGGGTCATTTGTGGCATGCGGGAAGGGCCCCGTGC  
AGCTGCAGCAGGATTTGAAAAAGGAATCGATCGTGATTTGGAACCTGTTTTGTTTCATG  
ACCCCTCTTAGTATGACTATAGCCCTTGGTAGATTTACCAAAGAAGAA---GATTTATTTG  
ATATTATGGATGACTGGTTACGTAGGGACCGTTTTCGTTTTTGTGGGTTGGTCCGGCCTAT  
TGCTGTTTCCTTGTGCCTATTTTCGCCTTAGGAGGGTGGTTTACCGGTACAACCTTTTGTA  
CTTCATGGTATACCAATGGATTGGCGAGTTCTTATTTGGAAGGCTGCAATTTTTTAACTG  
CAGCAGTTTCTACTCCTGCGAATAGTTTAGCACATTTCTTTGTTGCTACTGTGGGGACCA  
GAAGCCCAAGGAGATTTTACTCGTTGGTGTCAATTGGGTGGTCTGTGGACTTTTGTGTC  
TCTTCATGGGGCTTTTTCGCCTAATAGGTTTCATGTTACGTCAATTTGAACTTGCTCGATC  
TGTTCAATTGCGACCTTATAACGCAATCGCCTTTTCCGGTCCAATTGCAGTTTTTGTTC



CGTATTCTTGATTTATCCACTGGGTCAGTCTGGTTGGTTCTTTGCACCTAGTTTTGGTGT  
AGCAGCTATATTTAGATTCATCCTTTTCTTCCAAGGGTTTCATAATTGGACCTTGAATCC  
ATTCATATGATGGGAGTTGCTGGAGTATTAAGGCGCTGCTTTGCTATGCGCTATTCAITGG  
TGCTACTGTAGAAAATACTTTATTTCGAAGATGGTGACGGTGCAAATACATTCGCTGCTT  
TTAACCCAACTCAAGCGGAAGAGACTTATTCAATGGTCACTGCTAACCGCTTCTGGTCC  
CAAATCTTTGGGGTTGCTTTTTCCAATAAACGTTGGTTACATTTCTTTATGTTATTTGTAC  
CAGTAACTGGTTTATGGATGAGTGCTCTTGGAGTAGTCGGTCTGGCTCTGAACCTACGC  
GCTTATGACTTCGTTTCCCAAGAAATCCGTGCAGCAGAAGATCCTGAATTTGAGACTTT  
CTACACCAAAAATATTCTCTTAAACGAAGGTATTCGTGCTTGGATGGCGGCTCAGGATC  
AGCCTCATGAAAATCTTATATTCCCTGAGGAGGTTCTACCACGTGGAAACGCTCTTATG  
TCTGGAAGCACGGGAGAACGTTCTTTTGTGATATTATTACCAGTATTCGATACTGGGTC  
ATTCATAGTATTACTATACCTTCCCTATTTATTGCGGGTTGGTTATTCGTCAGTACGGGTT  
TAGCTTATGATGTGTTTGGGAAGCCCTCGCCAAACGAATATTTTACAGAGAACCGACAA  
GGTATTCCATTAATAACTGGCCGTTTTGATTCTCTGGAACAACCTCGATGAATTTAGTAGA  
TCCTTTATGACTATAGATCGAACCTATCCAATTTTACAGTACGATGGTTGGCTGTTTCAT  
GGACTAGCTGTACCTACCGTTTCTTTTTTGGGATCAATATCAGCAATGCAGTTCATCCAA  
CGAATGGCTACACAACTGTTGAGGGTAGTTCT--AAATCTGGGCCAAGACGAACCTCG  
TGTAGGGGATTTATTGAAACCATTAATTCGGAATATGGTAAAGTAGCTCCGGGCTGGG  
GGACTACTCCTCTTATGGGAGTCGCTATGGCTCTATTTGCGGTATTCCTGTGTATTATTTT  
GGAGATTTATAATTCTTCCGTTTTATTGGATGGAATTTTAGTAAGTATGCTTACTCTCAA  
CTTTTCGTTTACACAGTAGTGATATTTTTTGTCTCTCTTCATCTTCGGATTTTTATCTAA  
TGATCCAGGACGTAATCCTGGGCGCGAGGAAATGGCCGATACTACTGGAAGGATTCCT  
CTTTGGCTGATAGGTAAGTGTGTTGGTATTGTTGTGATTGGTTTACTTGGTCTTTTCTTTT  
ACGGTTCATATCCGGATTAGGCTCATCTCTGATGCTTAATCCATTCAATTTAATCTGTAT  
CTGTCTTAATTCTGCTCTTTCTTCAAGTGGT--TTCTTCGGAAAATTGCCTGAGGCTTAT  
GCGATTTTCAATCCAATCGTAGACATTATGCCCGTTATACCTGTATTTTCTTTCTTTAG  
CATTTGTTTGGCAAGCTGCTGTAAGTTTTCGAATGACACAATCAAATCCAATGAACAA  
AATGTTGAATTAATCGTACCAGTTTATACTGGGGGTTATTACTCATTTTTGTACTTGCTG  
TTTTATTTTCTAATTTTCTTCAATATGGAAGTAAATATTCTCGCATTATTGCTACTGCA  
CTCTTCATTCTAGTTCCTACTGCTTTTTTACTTATCATCTACGTAAAAACAGTGAGCCAA  
AATGATATGGAACAGCAACCTTAGTCGCCATCTCCATATCTGGTTTACTTGTAAGCTTT  
ACTGGGTACGCCTTATATACTGCCTTTGGGCAACCCTCTCAACAACCTAAGAGACCCATT  
CGAGGAACACGGGGATATGGAAGCATTGGTTTATACATTCCTGTAGTCTCTACTCTGG  
GAATAATTTTTTTCGCTATCTTTTTTTCGAGAACCTCCTAAGGTTCCGACTAAAAAA-----A  
TGACTATTGCTTCCAATTGGCTGTTTTTGCATTAATTGTGACTTCATCAATCTTACTGAT  
TAGTGTACCTGTTGTATTTGCTTCTTCTGATGGTTGGTCAAGTAACAAAAATGTTGTATT  
TTCTGGTACATCATTATGGATTGGATTAGTCTTTTTTAGTAGCTATCCTTAATTCTCTAATCT  
CT-----ATGTCACCACAAACAGAGACTAAAGCAAGTGCTGGATTCAAAGCT  
GGTGTAAAGATTACAAATTGAATTATTATACTCCTGAGTATGAGACAAAAGATACGGAT  
ATCTTGGCAGCATTCCGAGTAACTCCTCAACCTGGAGTTCCACCTGAAGAAGCAGGGG  
CTGCAGTAGCTGCCGAATCTTCTACTGGTACATGGACAACCTGTGTGGACTGATGGACTT  
ACCAGCCTTGATCGTTACAAAGGACGATGCTACCATATCGAACCCGTTGCTGGAGAAG  
AAAATCAATTTATTGCTTATATAGCTTACCCATTAGACCTTTTTGAAGAAGGTTCTGTTA  
CTAACATGTTTACCTCCATTGTAGGTAACGTATTTGGGTTTAAAGCTTTACGAGCTCTAC

GTTTGGAAGATTTGCGAATTCCTCCTGCTTATTCCAAAACCTTCCAAGGCCACCTCAT  
GGGATCCAAGTTGAGAGAGATAAATTGAACAAGTATGGTCGTCCTCTATTGGGATGTAC  
CATCAAACCAAAATTGGGATTATCCGCGAAAACTACGGTAGAGCGGTTTATGAATGTC  
TACGTGGTGGACTTGATTTTACCAAGGATGATGAAAACGTAAACTCACAACCATTTATG  
CGTTGGAGAGACCGTTTCTTATTTGTGCCGAAGCAATTTATAAAGCACAAGCCGAAA  
CAGGTGAAATTAAGGGCATTACCTAAATGCTACTGCAGGTAAGTGTGAAGAAATGATC  
AAAAGGGCTGTGTTTGTAGAGAATTGGGAGTCCCTATTGTAATGCATGACTACTTAAC  
AGGGGGATTCACTGCAAATACTTCTTTAGCATATTATTGCCGAGACAACGGCCTACTTC  
TTCACATCCACCGCGCAATGCATGCAGTTATTGATAGACAGAAAAATCATGGTATGCAT  
TTCCGTGTACTAGCTAAAGCATTACGTATGTCTGGGGGGGATCACGTTCACTCTGGTAC  
AGTAGTAGGTAAGTGAAGGTGAACGTGAGATGACTTTAGGTTTTGTTGATTTATTAC  
GTGATGATTTTATTGAAAAAGACAGAAGTCGTGGTATTTTCTTCACTCAAGATTGGGTC  
TCTATGCCAGGTGTTCTGCCTGTAGCTTCAGGTGGTATTCATGTTTGGCATATGCCTGCT  
CTGACCGAGATCTTTGGAGATGATTCCGTAACAGTTTGGTGGCGGAACTTTAGGACA  
CCCTTGGGGAAATGCACCAGGTGCTGTAGCTAACCGTGTAGCTTTAGAAGCGTGTGTA  
AAAGCTCGTAATGAGGGACGTGACCTTGCTCGTGAAGGTAATGAAATTATCCGTGAAG  
CTTGCAACTGGAGTCTGAATTAGCGGCTGCTTGTGAAGTTTGGAAAGAGATCAAATT  
TGAGTACGAACCAGTAGATAAGCTAGATGTTACGGCGATACATTTATACAAACTTCTA  
CCCCGAGCACACGCAACGGAGCCGTAGACAGAAAAGTGAAATCCAATCCACGAAATA  
ATTTGATCTATGGACAGCATCGTTGTGGTAAAGGTCGTAATGCCAGAGGAATCATTACC  
GCAGGACATAGAGGGGGAGGTCATAAGCGTCTATACCGTAAATCGATTTTCGACGGA  
ATGAAAAAGACATATATGGGAGAATCGTAACCATAGAATACGACCCTAATCGAAATGCA  
TACATTTGTCTCATACTATGGGGATGGTGAGAAGAGATATATTTTACATCCAGAGGG  
GCTATAATTGGAGATACCATTGTTTCTGGTACAGAAGTTCCTATATCAATGGGAAATGCC  
CTACCTTTG---GATATGCCCTTAGGCACGGCCATACATAACATAGAAATCACACTTGGAA  
AGGGTGGACAATTAGCTAGAGCAGCAGGCGCTGTAGCGAACTTATTGCAAAAGAGG  
GTAAATCGGCCACATTAAGATTACCTTCTGGGGAGGTCCGTTTGATATCCAAAACCTGC  
TTAGCAACAGTCGGACAAGTAGGTAATGTTGGGGTGAACCAAAAAAGTTTGGGTAGA  
GCCGGATCTAAGTGTTGGCTAGGTAAGCGTCCTGTAGTAAGAGGAGTAGTTATGAACC  
CTGTAGACCATCCCCATGGGGGCGGTGAAGGTAGAGCACCAATTGGTAGAAAAAGAC  
CCATGACCCCTTGGGGTTATCCTGCACTTGGAAAAAGAAGTAGGAAAAAGAAAAGATA  
TAGTGATCGTTTTATTCTTCGTCGCCGTAAA---ATGATTCAACCTCAGACCCTTTTGAAT  
GTAGCGGATAATAGCGGAGCTCGAGAATTGATGTGTATTTCGAATCTTAGGAGCTAGT---A  
ATCGCCGATATGCTAATATTGGTGACGTTATTGTTGCTGTAATCAAAGAAGCAGTGCCA  
AATATGCCACTTGAAAGATCAGAAGTTATTAGAGCTGTAATTGTACGTACGCGTAAAGA  
ACTCAAGCGTGAAAACGGTATGAGAATAAGATATGATGACAATGCAGCAGTTGTCATT  
GATCAAGAAGGAAATCCAAAAGGGACTCGAGTTTTTTGGTGCAATCGCGAGGGAATTG  
AGAGAGTTGAATTTACAAAAATCGTCTCATTAGCTCCAGAAGTATTAATGCTTAGTCC  
CAAAAGAACCAGATTCCGTAAACAACATAGAGGAAGAATGAAAGGAACATCTTATAGA  
GGCAATCATATTAGTTTTGGAAGATACGCTCTTCAAGCACTTGAACCCTCTTGGATCAC  
AGCTAGACAAATAGAAGCCGGGCGAAGAGCAATTAGCCGATATGCGCGTCGTGGTGG  
AAAATATGGGTACGTTTTATTTCCCGATAAACCCGTTACACTAAGACCTGCAGAGACAG  
TATGGGTTCCGGAAAGGGATCTCCCGAATATTGGGTATCTGTTGTTAAACCAGGTCGAA  
TACTTTATGAAATAGGGGGAGTATCCGAAAATGTGCCAGAACAGCTATGTTACTAGCT

GCGTCCAAAATGCCTATACGAACTCAATTTATTATTGAGGGAATGACCAGAGTTAAACG  
AGGATATATAGCTCGGAGACGCCGAACAAAAATTCGTTTATTTGCATCAAGCTTTCGAG  
GGGCTCATTCAAGACTTACTCGAACTATTACTCAACAGAAAATGAGAGCTTTAGTTTCT  
GCTTATAGAGATAGAGGTAGGCAAAAGAGAGATTTTCGTCGTTTGTGGATCACTCGAAT  
AAATGCAGTAACTCGAGAGAAC-----GTTTCCTATAGTTATATTAGATTGATACATAACCT  
GTACAAGAGGCAATTGCTTCTTAATCGTAAAATACTTGCGCAAATAGCTATATTGAATAA  
GAATTGTCTTCACATTATTTCCAAAAAGATCATTTAA-----ATGGTA  
ACGAAAGCTTTA---GCTCAAAATATACAT---ATGTCTCCTTTCAAAGCACGAAGAGTAAT  
TGACCAAATTCGCGGACGTTTCTATGAAGAAACACTCATGATACTGGAACCTCATGCCTT  
ATCGAGCAGCCTTTACTATTTTAAAATTGGTTTATTCTGCAGCAGCAAATGCT---AACAA  
TCTTGGTTTGAACGAAGCGGAGTCATTCATTAGTAAGGCTGAAGTTAATGGGGGTACC  
GTTCTAAAAAGGTTAAGACCTAGGGCTCGAGGACGCAGTTATCGAATAAAACGCCCA  
CCTGTACATAACAATTGTATTAAG---AAATCGAAA-----ATGGATGGAAT  
CAAATATGCAGTATTTACAGAAAAAGTATTCGGTTATTGGGGAACAATCAA---TATACT  
TCTAATGTGCAATCAGGATCAACTAGGACAGAAATAAAGCATTGGGTGCAACTCTTCTT  
TGGTGTCAAGGTAATAGCTATGAATAGTCATAGACTCCCGAGAAAGGGTAGAAAAAGG  
GGACCTATTATGGGACATAACAATGCATTACAGACGTATGATCATTACGCTTCAACCGGGT  
TATTCTATTCCACCTTTATAGAGAAAAGAACTATGGCAGTCCCAAAAAAACGCACTTC  
TATGTCAAAAAACGTATTCGTAAAAGTATTTGGAAGAAAAAAGCATATTTTGCCGCGC  
TAAAAGCTTTTTCTTTAGCTAAATCGATCTCCACAGGACAGTCAAAAAGTTTTTTTTGTG  
CGACAAACTAATAATATGGCAAAAGGTAAAGATGTTAGAGTCAGAGTTATTTTAGAATG  
TAACAGTTGTGGCAGAAATGAAAATGGT-----AAGGAAGTTCCAGGTGTTTCTAGATAT  
GTGACTCAAAAGAATCGACACAATACCCAGTCGATTAGAATTGAAAAATTTTGTG  
GCTACTGTAACAAGCATAACAATTCATGTGGAAGTAAAGAAAATGAAAATAAGGGCTTC  
TGTTTCGTAAAATTTGTGACAAATGTTCGATTGATCCGTAGGCGCGGACGAATTATAGTAA  
TTTGTCTAATCCAAGACATAAACAGAGACAAGGAATGGTTCGAGAGGAAATAGCAGG  
ATCCACTCGAACACTACAGTGGAAGTGTGTTGAATCAAGAGTCGACAGTAAACGTCTT  
CATTATGGGCGTTTCGTTCTGTCCCCGCTTATGAAAGGTCAAGCAGATAACAATAGGTATT  
GCTATGCGACGGGCTTTACTTGAAGAAATGGAAGGAACATGTATAACACGTGCAAAAT  
CTGAA-----AAAGTACCACATGAATACTCTACAATAGTAGGTATTGAAGAATCAGTACAT  
GAAATTTAATGAATTTGAAAGAAATTGTATTGAGAAGTAATCTATATGGCACTCGAGA  
GGCATCCATTTGCGTCAAAGGCCCAAAAACCATAACAGCGGAAGATATTATCTTACCGG  
CTTCTGTGGAATAAGTTGACACGACACAGCATATAGCTACCTTGACAGAACCCTCTCGAT  
TTATATATTGGATTACAAATCCAAGAGATCGCGGATATCGTATGAGACCCACAAATAAC  
TCCAAGATGGAAGTTAT-----CCTATAGATGCAGTATTTATGCCTGTTTCGAAATGCCAAT  
CATAGTATTTATTCGTATGGAAATGGGAATGAAAAACAAGAAATCCTTTTTCTAGAAATC  
TGGACAAATGGAAGTTAACCCTAAAGAAGCACTCCATGAAGCTTCTCGTAATTTGAT  
TGATTTATTTATTCCTTTTCTACATGCGGAGGAAAAG-----GATATTAATTTGGAAGAAAA  
TAAG---AGCAGATTTACTCTACCCCTTTTTACCTTTCATGATAAATTAGTT---AATCTCAC  
GAAAAACAAAAA---GAAATAGGATTGAAATGCATTTTTATTGACCAATTAGAATTGCC  
TTCCAGG-----GACCTA-----  
-----ATGCTCCGCGAT---GGAAATGAGG  
GAATGTTCAACAATACCTGGATTTAGTCAGATACAATTTGAGGGATTTTGTAGGTTTATTA  
ATCAGGGCTTAATGGAAGAATTTAATAAGTTTCCAAAAATTGAAGATACAGATCAAGAA

ATTGAATTTAAATTATTTGTGGAAACATATCAATTGGCAGAACCCTTGATAAAAGAAAG  
AGATGCTGTGTATGAATCACTCACATATCTTCTGAATTATATGTCCTTGCGGGATTAATT  
TGGAAAACAAATAGAGATATGAAAGAACAAACAGTATTTATTGGAAATATTCCTCTGAT  
GAATTCCCTCGGAACCTTTATAGTAAATGGAATTTACAGAATTGTAATTAATCAAATATT  
GCAAAGTCCCGGTATTTATTACCGTTCTGAATTGGACCATAACGGAATTCAGTCTATAC  
CAGCACCATAATATCAGATTGGGGAGGAAGATCAGAATTAGAAATTGATAGAAAAGCA  
AGGATATGGGCCCCTGTGAGTAGGAAACAAAAATCTCTATTCTCGTTCTATTATCAGC  
TATGGGTTTAAATCTAAGAGAAATTCTAGATAATGTTTGTATCCTGAAATTTTCTTGTCT  
TTTCTGAATGATAAGGAAAAAAAAAAGATCGGGTCAAAGAAAATGCCATTTTGGAGT  
TTTATCAACAATTTGCTTGTGTAGGTGGGGATCCTGTATTTTCTGAGTCCTTGTGTAAGG  
AATTACAAAAGAAATTTTTTCAACAAAGATGTGAATTAGGAAGAATTGGTTCGGCGAAA  
TATCAACCAAAGATTGAATCTTGATATACCTCACAACAATACATTTTTGTACCACGAGA  
TGTATTGGCGGCTGCCGATCATTGATCGGAATGAAATTTGGAATGGGTACACTTGACG  
AT-----ATGAACCACTTAAAAAATAAACGTATTCGTTCTGTAGCAGATCTGTTGCAGGAT  
CAATTCGGACTGGCTCTTGTTCGTTTAGAAAATGCGGTTTCGAGGTACTATATCTGGAGC  
AATCAGG---CATAAATTGATA---CCAACTCCTCAAATTTGGTAACTTCAACTTCA-----  
---TTAACAACAACCTTATGAATCATTTTTTCGGCCTACACCCTTTATCTCAAGTTTTGGATCG  
AACTAATCCATTGACACAAATAGTTCATGGTAGAAAATTGAGTTATTTAGGTCTGGAG  
GGGTGACAGGGCGAACGGCAAGTTTTTCGGATACGAGATATCCATCCTAGTCACTATGG  
ACGATTTTGCCCAATTGACACCTCTGAAGGAATCAATGTTGGACTTATTGGATCCTTAG  
CTATTCATGTAAGGATTGGTCATTGGGGA---TCCATAGAGACTCCATTTTAT-----GAAA  
TCTCTGAGAGATCAAAGAAAAAGAAGCACGGATGATTTATTTATCACCAAGTAGGGA  
TGAATATTATATGATAGCGGCAGGAAATTCTTTGGCCTTAAATCGAGGTATTCAAGAAG  
AACAGGTTGTTCCGGCTAGATACCGTCAAGAATTCCTGACTATTGCCTGGGAACAGGTT  
CATCTTCGAAGCATTTCCTTTCCAATATTTTTCTATTGGGGCCTCTCTCATTCTTTTA  
TTGAGCATAATGATGCGAATAGAGCTTTAATGAGTTCATATATGCAGCGTCAAGCAGTT  
CCCCTTTCTCGGTCCGAGAAGTGATTGTAGGAACCGGGCTGGAACGCCAAGCGGCTT  
TAGATTCTGGCGTTTCAGTTATAGCCGAACACGAGGGAAAAGTCATTTCTACTGATACT  
CACCAAATTGTTTTCTCAGGTAATGGAAACACTCTAAATATTCCATTAGTTATGTATCAA  
CGTTCCAACAAAATACTTGTATGCACCAAAAACCTCAGGTTCAACGGGGTAAATACG  
TTAAAAGGGACAAATTTTAGCTGACGGGGCGGCTACCGTTGGTGGAGAACTCGCTTT  
GGGAAAAAATGTATTAGTAGCTTATATGCCGTGGGAAGGCTACAATTTGAAGATGCGG  
TACTTATTAGTGAGCGTTTTGGTATATAGCGATATTATACTTCTTTTCACATCCGAAAATA  
TGAAATTCAACTCATATGACAAGCCAGGGC---CCTGAAAGAATTACTAATGAAATACC  
TCATTTAGAGGCTCATTTACTCCGCAATTTAGACAGAAATGGAATCGTGATGCTGGGAT  
CTTGGGTAGAAACAGGTGATATTTTAGTAGGTAAATTAACGCCTCAGATAGCGAATGAA  
---TCATCGTATGCCCCAGAGGATAGATTATTAAGAGCCATACTTGGTATTCAGGTTTCCA  
CTGCAAAGGAGACTTCTCTAAAATTACCTATAGGGGGAAGGGGTCGAGTAATTGATGT  
GAGATGGATCCAGAAAAAGGG---GGTTCCAGTTATAACCCAGAAATAATTCGTGTATA  
TATTTTACAGAAACGGGAAATCAAAGTGGGTGATAAAGTAGCAGGAAGACATGGGAAT  
AAAGGTATTATTTCAAAAATTTTGCCTAGACAAGACATGCCCTATTTACAAGATGGAAC  
TCCGGTTGATATGGTCTTCAACCCTTTAGGAGTACCCTCACGAATGAATGTGGGACAAA  
TATTTGAATGTTTCGCTCGGCTTAGCGGGAGATCTTTTAAATAGACATTATAGAATAGCCC  
CTTTTGATGAGAGATACGAGCAAGAGGCTTCAAGAAAACCTAGTGTTTTTTCAGAATTATAT

GAAGCCAGTAAGCAAACAAAAATCCATGGGTATTTGAACCCGAATATCCAGGAAAAA  
GTAAAATATTTGATGGAAGAAGCTGGAGATCCTTTTGAACAAGCTGTCCTAATAGGAAA  
GTCCTATATACTTAAATTAATTCATCAAGTTGATGATAAAATCCATGGACGTTCTAGTGG  
ACATTATGCACTTGTACACAACAACCTCTTAGAGGAAGGGCAAAACAGGGGGGACA  
ACGAGTGGGAGAAATGGAAGTTTGGGCTTTAGAGGGCTTTGGCGTTGCTCATATTTAC  
AAGAGATGCTTACTTATAAATCTGATCATATCAGAGCTCGTCAGGAAGTACTTGGTACTA  
CCATTATTGGAGGAACAATAGTTAATCCTGAGGACGCTCCAGAATCTTTTCGATTGCTT  
GTTAGAGAACTACGATCTTTGGCTCTAGAACTGAATCATTTCCTTGTATCTGAGAAAAA  
TTTTCAGATTAATAGGAAGGAAGCTATGAATCAGAATTTCTATTCTATGATTGACCGGTA  
TAAACATCAACAACCTTCGAATTGGACCAGTTTCTCCTCAACAAATAAGTGCTTGGGCTA  
ACAAAATTCTACCTAATGGGGAGGTAGTCGGAGAGGTGACAAAACCTACACTTTTCA  
TTATAAAACCAATAAACCAGAAAAAGACGGATTGTTTTGTGAAAGAATCTTTGGACCTA  
TAAAAAGTGGAATTTGTGCTTGTGGAAATTATCGAGTGATCGGAGCTGAAAAGGAAGA  
CCCAAATTTTGTGAACAATGCGGGGTCGAATTTGTTGATTCTCGTGTACGAAGATATC  
AATGGGATACATAAACTCGCCTGTCCAGTGAATCATGTGTGGTATTTAAAACGCCTT  
CCTAGTTATATCGCGAATCTTTTAGATAAACCACTTAAGGAATTAGAAGGCCTAGTATAC  
TGC-----GATTTTTCTTTTGTAGGCC---ATAGCTAAAAAACCCACTTTCTTACGATTAC  
GAGGTTCAATCGAATATGAAATCCAATCCTGGAAATACAGCATCCCACTTTTTTTCACTA  
CCCAAGGCTTTGAAACATTTCGAAATAGAGAAATCTCTACTGGAGCAGGTGCTATAAG  
AGAACAATTAGCCGATTTGGATTTACGAATTATTACAGATAATTCATTGATAGAATGGAA  
AGAATTAGGAGATGAA---GGGTCTACCGGAATGAATGGGAAGATAGAAAAATTCGAA  
GAAGAAAGGATTTTTTGGTTAGACGCATGGAATTAGCTAAACATTTTATTCGAACAAAT  
GTAGAACCAGAATGGATGGTTTTGTGCCATTACCAGTTCTTCCTCCTGAGTTAAGACC  
TATTATTAGATAGATGGGGGTAAATTAATGAGTTCGGATATTAATGAACTCTATAGAAG  
AGTTATTTATCGAAACAATACTCTTACTGATCTACTAACAACAAGTAGATCTACCCCGGG  
TGAATTAGTAATGTGTCAGGAGAAATTGGTACAAGAAGCCGTAGATACACTTCTGGATA  
ATGGTATCCGCGGACAACCAATGAGGGACGGTCATAATAAAGTTTACAAATCATTTTCA  
GATGTAATTGAAGGAAAAGAGGGAAAGATTCCGGGAAACCTTGCTTGGTAAACGAGTC  
GATTATTCGGGTCGTTCCGTCATTGTTGTGGGCCCTTCACTTTCATTACATCAATGTGGA  
TTACCTCGAGAAATAGCAATAGAACTTTTCCAGACATTTGTAATTCGTGGTCTAATAAG  
ACAACACGTTGCTTCCAACATCGGGATTGCTAAAAGCAAAATTAGAGAAAAAGAGCC  
CATAGTATGGGAGATACTTCAAGAAGTCATGCAGGGGCATCCTGTGTTGCTCAATAGAG  
CACCGACCCTGCATAGATTGGGCATACAGGCGTTTCAACCCATTTTAGTAGAAGGTCGT  
GCTATATGTTTACATCCATTAGTTTGTAAAGGTTTTAATGCAGACTTTGATGGGGATCAA  
ATGGCTGTTTATGTACCCTTATCTTTAGAAGCTCAAGCAGAGGCTCGTTTACTTATGTTT  
TCTCATATGAATCTCTTGTCTCCGGCTATTGGTGATCCCATTTCTGTGCCAACTCAAGAT  
ATGCTAATTGGACTTTATGTATTAACGATCGGGAATCCTCGAGGTATTTGTGCAAATAGG  
TATAATTTTTTTAATTGCAAAAACGAT-----GAAAATGCACCTCTTGACAATGATAATTA  
TCAGGCTACGAAAGAGAAGGAACCCCATTTTAGTAGTTCCTATGACGCACTTGGCGCTT  
ATCGTCGAAAACGAATCCGTTTGGATAGTCCTTTGTGGCTCCGGTGGCGACTAGATCAA  
CGTGTCAATATTGGATCC-----AGGGAAGTCCGCTTGAAGTTCAATATGAATCTTTTGGT  
ACCTACCATGAAATTTATAGACACTATTTAATAGTAAGAAGTGTAAAAAAAGAAATCTG  
TTCTATATACATTCGAACCACTGTTGGTCATATTTCTTTTTATCGAGAAATAGAAGAAGC  
CATACAAGGCTTTTACCGAGCCTACTCCTATGCTAGC-----ATGG

CAGAACGGGCCGATCTAGTCTTTCACAATAAAGTGATAGATGGAGCTGCCATGAAACG  
ACTTATTAGCAGATTAATAGATCACTTCGGCATGGCATATACATCACACATTCTAGATCA  
AGTGAAAACCTCTGGGTTTCCAGCAAGCCACTGCTACATCTATTTTCATTAGGAATTGATG  
ATCTTTTAAACAATACCCCTCTAAGGGATGGTTAGTACAAGATGCTGAGCAACAAAGTTTA  
ATTTTGGAAAAACACCATCATTATGGAAATGTACACGCGGTAGAAAAATTACGTCAATC  
CATTGAAATATGGTATGCTACCAGCGAATATTTGAGACAAGAAATGAATCCTAATTTTAG  
GATGACTGATCCCTCTAATCCAGTCCATTTAATGTCCTTTTCGGGAGCTAGAGGAAATG  
CATCTCAGGTACACCAATTAGTAGGTATGAGAGGATTGATGTCAGATCCCCAAGGACAA  
ATGATTGACTTACCCATTCAAAGCAATTTACGCGAAGGACTTTCTTTGACGGAATATATA  
ATTTCTTGCTACGGGGCCCGTAAAGGAGTTGTAGATACTGCTGTACGAACATCAGATGC  
TGGCTACCTCACACGTAGACTTGTTGAAGTGGTTCAACACATTATAGTACGTAGAACAG  
ATTGTGGTACTATTTCGAAGTATTTCCGTAAGTCCTCGAAATGGGGTGCCAGAA-----CGC  
ATTTTTATCCAAACACTAATTGGTCGTATTAGCAGACGATATATATATCGGTCCACGAT  
GCATTGCCGCCGAAATCAAGATATTGGGATTGGACTTGTCAATCGATTATAAGC-----  
-----TTTCGAGCACAACCTATACATATTCGAACTCCATTTACTTGCAGGAGTACATCT  
TGGATCTGTCAATTATGTTATGGTCGTAGTCCCACTCACGGTGACCTGGTTCGAATTGGG  
AGAAGCAGTAGGTATTATTGCGGGTCAATCTATTGGGGAACCTGGGACTCAACTAACAT  
TAAGAACTTTTCATACTGGCGGAGTATTTACGGGGGGTACTGCTGAACATGTACGAGCT  
CCTTTAAATGGAAAAATCAAATTCAATGAGGATTTAGTTTATCCACACGCACCCCGTCA  
TGGGCATCCTGCTTTTCTATGTTCAATAGACCTGTATGTAACCTATAGAAAGTCAGGATAT  
TATCCATAATGTAAATATTCCCCCTAAAAGTTTGATTTTAGTTCAAATGATCAATACGTA  
GAATCAGAACAAGTGATTGCTGAAATTCGTGCCGGAGCAGCCACTTTA-----TTTAAAG  
AGAAGGTTTCGAAAACATATTTATTCTGAATCAGAAGGAGAA---ATGCACTGGAGTACCG  
ATGTCTATCATGCACCTGAATATACTTATGGTAATGTGCATCTATTACCGAAAACAAGTC  
ATTTATGGATATTAGCAGTAGGTACGTGCAGA-----TACAGTATTGTGTCTTTTTCCCTTC  
ACAAGGATCAAGATCAAATAAACGCTCATTCTCTTCTCTCGAAGAAAGA-----TATATC  
TCTGACCTATCA-----GTAACCTAAGGATCTTGCAGACATCAATGTTTAGTTTCAAGATTCT  
TCTAGT-----AGGGGAGGAACTTTTGATTAT-----AGACCTGATGGCAGCATATCTAATG  
GTCATTGGAATTTACAATATCCTTTT---ATTCTGCACGAAAAT-----TCTGATTTTTTGGCT  
AAGAGGCGCAGAAATAAATTCATCATTCCATTACAATATGATCAAGAACGTGATAAAGA  
ACTAATACCCCATTTTGGTGTTCGATTGAAATACCCATAAAT-----GGTATTTTACGTAG  
AAATAGTATTCTTGCTTATTTTCGACGATCCCCGATACCGA-----AGAGGAATTAATAA  
TAT--GCTGTAGAGGTTCGATTCAATACTCAA-----AAAGAGGATTTGATTGAATATCGAG  
GA---ACAAAAGAATTGAGTCCAAAATAC-----GTAGATCGATTTTTTTTCATTCCCGAGG  
AAGTGCATGTCTTACCAGGATCTTCGTTGATAATGGTCCGTAACAATAGTATTATAGGAG  
TGGATACACCACTCACTTTAAATATAAGAAGCCGAGTAGGTGGATTGGTCCGAGTGGA  
GAGAAAAAAGTATTGAACTCAAATATTTTCTGGGGATATCCATTTTCTGGAG  
AGACAGATAAGATATCCAGGCATAGCGGCATCTTGATACCCCCGGGAACGGGAAAAAT  
G-----ACTTCCAAGGAA---TCCAAA---AAATTGAAAAATTGGATCTATGTTCAACGG-----  
ATCACACCTACTAAGAAAAAG-----TATTTTGTTCAGTTTCGACCCGTAGTCACATATGA  
AATAGCGGATGGGATCAATTTAGCAACATTTTTTCCAAAGGATCTTTTGCAGGAAGGGG  
ATAACATCCAACCTTAGAGTTGTCAATTATATCCTTTATGGAAATGGCAAGCCAATTCGAG  
GAATTTCTCACACAAGT--CAATTAGTTTCGGACTTGCTTAGTATTAATTTGGCACCAAGA  
AGAAAAAAGTTCTATAGAA-----GATAGTCATGCTTCTTTTGTGAAATAAAGACAA

ATGATCTAACTTGCAATTTTCATAAGAATTGAGTTAGGTAAGTCCCCCTTTTGTATACCG  
GAAAAAGAAATAGTGTGGTGAGTTCAGGATTGATTAACCAT-----TTAGATTACCTAAA  
TAGTAATCCTTTTTATTCCAAAGCAAAGATTCCATCA-----CTTACCAAACAGAAA  
GGAAGTGGT-----GGTACGTTGTTGAATGGAAATAAG-----GAATGTCAATCTTTG  
AAAATTTTGTATCATCCAACCTATTCTCGAATTGGT-----CCATTCAATGGTTTGAAATATA  
AC-----ACTGTGACAAAACAATCAGATCCTGTAACCTCAATT---AATTGTTTAGGCCTG  
TTAGGTACAGTAGTATTA---AAAATTGCGAACTTTTATTTCATCT---TGCCATTTAATAACT--  
-----TATAATAAGACTTTGTAAAA---AAATATTTCTTAATTGAA-----AATTTGAGTCA  
GACTTTTCAAGGAATAATT-----TTTTTTTAAATAGATGAAAATAGGGGT-----ATTTATA  
ATCTTGATCCATGCAGTAAGACAGTTTTTAATCCATTCGATTTAAATTGGCGTTTTTTTCCA  
TCACGATTATTGTGATGAAACATCCACACTTATTACC---CTTGGACAAATTTTTTTGTGAA  
AATGTATGCCTATTCAAATATGGATCA-----CAGAAAAAATCCGGTCAAGTTATAATTG  
TTCAT---GTTGACTACTTAGTTATAAGATCAGCTAAGCCTTATTTGGCTACTCCAGGAGC  
GACGGTTCACGGTCATTATGGAGAAACCCTTCATGAGGGAGATACATTAGTTACATTTAT  
ATATGAAAAATCAAGATCCGGTGACATAACGCAGGGTCTTCCAAAAGTGGAACAAGTA  
TTAGAAGTGC GTTCAATTGATTCAATATCGACAAATCTGGAAAAGAGGGTTAAAGCTTG  
GAATGAACGTATATCCAGAATTCTTGGGAACCCTTGGGGATTCTTGATCAGCACGGAGC  
TAACCATCGCCCAAAGCCGTATCTCTTTGGTTAATAAGATCCAAAAGGTTTATCGATCCC  
AAGGGGTACAGATCCACAATAGACATCTAGAGATTATTGTACGTCAAGTAACATCAAAA  
GTATTGGTTTCAGAA-----GATGGAATGTCTAATGTTTTTTTACCCGGAGAACTTATAG  
GATTGTTGCGAGCGGAAAGAGCAGGGCGTGCTTTGGATGAAGCAATCTCCTATCGAGC  
AATCTTATTGGGAATAACGAGGGCATCTCTTAATACTCAAAGTTTTATATCCGAAGCTAG  
TTTTCAAGAACTGCTCGAGTTTTAGCAAAAGCTGCTCTACGAGGTCGTATTGATTGGT  
TGAAAGGCCTGAAAGAAAATGTTGTTCTGGGGGAATTATCCCTGTCGGTACTGGATT  
CAAAAATTAGTCCATCATTCAAGG-----CAGCATAAAAACATTCAT-----TTGGAAATAA  
AAAATAAGAATTTGTTCTGAAGGAAAGATG-----AGAGATATCTTATTTACCATAGAGAA  
TTTTTGAGTTCTTGCATCCCAAAC-----AT  
GACAAGAAGATATTGGAACATCAATTTGGAAGAGATGCTGGAAGCAGGAGTTCATTT  
GGTCATGGGACTAGGAAATGGAATCCTAGAATGGCACCTTTCATCTCCGCAAAAACGTA  
AAGGTATTCATATTACAAATCTTACAAGAAGTGCAGGTTTTTTTATCAGAGGCCTGTGATT  
TAGTTTTTTGATGCAGCAAGTAAAGGAAAACACTTTTTGATCGTTGGGACAAAAAATAA  
AGCAGCGGATTTAGTAGCATCCGCTGCAATAAAGGCTCGTTGCCATTTTGTAAATAAAA  
AATGGCTTGGTGGTATGCTAACGAATTGGTCCACTACGGAAACGAGACTTCAAAGTT  
CAGGGATTTAAGAGCGGAACAAAGGATGGGAAAACCTGAACAGTCTACCCAAAAGGGA  
TGCAGCAATGCTCAAGAGACAATTATCTACCCTGCAAACATATCTGGGTGGGATCAAAT  
ATATGACAGGGTTACCTGATATTGTCATTATTGTTGATCAGCAAGAAGAATATACCGCTC  
TTAGAGAATGTGTCATTTTGGGGATTCCGACGATTTGTTAATCGATACAAATTGTGACC  
CAGATATCGCAGATATCTCGATTCCAGCTAACGACGATGCTATCGCTTCAATCCGATTAA  
TTCTTAACAAATTAGTATCTGCAATCATTGACGGCCGTTCTAGC---TATATAAGAAATCAT  
ATGGGACAAAAAATAAATCCACTTGGTTTCAGACTTGGTACAACACAAAATCATTATTC  
CTTTTGGTTTCGCACAGCCAAAAGTTTTTCGATGGGTCTCCAGGAAGATGAAAAAATA  
CGAGATTGTATCAAGAATTATGTACAAAAAATATGAAAACATCTTCGGGT---TTCGAAG  
GAATTGCACGTATAGAAATACAAAAAGAATTGATCTTATTCAGGTCATAATCCATATTG  
GATCCCAATTTATTAATAGAGGGT-----CGAAGACGA-----GGAATCGAAGAATTACAA

ACGAATGTACAAAAAGAGTTGAATTCCGCCAATCGGGCGACTTAACATTGCTATCACAA  
GAGTTGAAAAACCTTATGGACAACCTAATATTCTAGCGGAATATATAGCTTTACAGTTAA  
AAAATAGAGTTTCATTTCCGAAAGCAATGAAAAAAGCTATTGAATTGACTGAACAAAC  
TGATACAAAAGGAATTCAAGTGCAAATTGCAGGACGTATCGACGGAAAAAGAAATTGCA  
CGTGTGCAATGGATCAGAGAAGGAAGGGTTCCTCTACAAACCATTTCGCGCGAAAATAG  
ATTATTGTTCCCTATACAGTTCGAACTATCTATGGAGTATTGGGTATAAAAAATTTGGATATT  
TGTAGACGATAAAATGTCTCGTTACCGAGGACCTCGTTTCAAAAAAATACGCCGTCTAG  
GTGCTTTACCAGGACTAACTAGTAAAAGACCTAAATCTGGAAGTGATCTTAAAAACCA  
ATTGCGTTCTGGTAAA---AGATCACAATATCGTATTCGTTTAGAAGAAAAACAGAAATT  
GCGCTTTCATTATGGTTTGACAGAGCGCCAATTACTTAGATATGTGCATATCGCTGGAAA  
AGCCAAAGGATCAACAGGGCAGGTTTTGCTACAACACTTTGAGATGCGTTTTGGATAAC  
ATCCTTTTTTCGATTGGGCATGGCTTCGACTATTCTGCAGCCAGGCAATTAGTTAATCAT  
AGACATATTTTAGTTAATGGTCGTATAGTAGATATACCAAGTTATCGTTGCAAACCCAG  
GATATTATTTCAACAAAGGATAATCAAAGATCAAAGCTCTGATTCAAATAATATGACT  
TCATCCCCCCTGAG-----GTCCCAAACATTTGACTCTTGACTCA-----ATCCAGAGTAA  
AGGATTAGTAAACCAAATAATAGATAGTAAGTGGATCGGTTTGAAAATAAACGAGCTCT  
TAGTTGTAGAATATTATTCTCGTCAGACTATGTCACGTCGAGGTACTGCGGAAAAAAAA  
ACTGCAAATCCGATCCAATTTATCGTAATCGATTAGTTAACATGTTGGTTAACCGTATT  
CTGAAACACGGAAAAAAATCATTGGCTTATCAAATTATCTATCGAGCCGTGAAAAAGAT  
TCAACAAAAGACAGAAACAAATCCACTATCTGTTTTACGTCAAGCAATACGTGGAGTA  
ACTCCCGATATAGCAGTAAAATCAAGACGTGTAGGCGGATCGACTCATCAAGTTCCTAT  
TGAAATAGGATCTACACAAGGAAAAGCACTTGCCATTCGTTGGTTATTAGCAGCATCCC  
GAAAACGTCCGGGTCGAAATATGGCTTTCAAATTAAGTTCGGAATTAGTAGATGCTGCC  
AAAGGAAGTGGCGATGCCATACGCAAAAAGGAAGAGACTCATAAAATGGCAGAGGCA  
AATAGAGCTTTTGCACATTTTCGTATGGGTAGGGACACTATTGCTGAAGTACTAACTTCT  
ATCAGAAATGCTGAGATGAATAAAAAAGGAACGGTTCGAATAGCATCCACTAATATCAC  
CGAAAACATTGTAAAATACTTCTCCAAGAAGGTTTTATTGAAAACGTTAGAAAACATC  
GAGAAAATAATAAAAATTTCTTGGTTTTCAACCCTGCGA-----CATAAAAGAACTAGGAA  
AATAATATATAAAACA-----GTTTTGAAGCGTATCAGCCGACCAGGTCTACGAATT  
TATCCAATTCTCAACGAATTCCTAGGATTTTGGGCGGAATGGGAATTGCTATTCTTTCT  
ACTTCTCAAGGTATAATGACAGATCGAGAAGCTCGCCTAAAAGGAGTTGGAGGAGAAA  
TTTGGTGTATATATGGATGATAAACCTATAACCAAGAATTAGTTCACGTAGGAATGGAC  
GTATTGGTTCGCGTAAGACTGGACGTAGAATACCAAAAGGTATTATTCATGTTCAAGCG  
AGTTTCAACAATACCATTGTAACAGTTACAGATGTACGGGGACGAGTGGTTTCTTGGTC  
CTCCGCGGGCACTTCTGGATTCAAAGGGGCAAAAAGAGGGACACCCTTTGCTGCTCA  
ATCGGCTGCGGTAAATGCTATTTCGTACAGTAGTGGATCAAGGTATGCAAAGAGCAGAA  
GTCATGATAAAAGGTCCGGGTCCCGGACGAGATGCAGCATTGCGAGCTATTCGTGCGAA  
GTGGTATACTTTTAAGTTTCGTACGCGATATAACTCCTATGCCACATAATGGATGCAGAC  
CCCCTAAAAAAGACGTGTAATGCCAACAATTAACAACCTCATTAGAAATGCAAGACA  
GCCAATCAGGAATGTCACAAAATCTCCCGCTCTTCGAGGATGTCCTCAGCGTCGAGGA  
ACATGTACTAGGGTGTATACTATCACCCCAAAAAACCAAACCTCTGCCTTACGTAAAGT  
TGCCAGAGTACGATTAACCTCTGGATTTGAAATCACTGCTTATATACCTGGTATTGGCCA  
TAATTTACAAGAACATTCTGTAGTATTAGTAAGAGGGAGGAAGGGTTAAGGATTTACCCG  
GTGTGAGATATCACATTGTTTCGAGGAACCCTAGATGCTGTTCGGAGTAAAGGATCGTCA



ACAAGGGCGTTCTAAATATGGGGTCAAAAAGCCAAAAATGGCAAGAAAAAGTTTGAT  
TCAGAGGGAGAAGAAGAGACAGAAATTGGAGCAGAAATTCATTTGATTCGTCGATCC  
TAAAAAAGAAATAAGC-----CAAATTCGTCGTTGAGTGAAAAATGGGAAATTCAT  
GGAAATTGCAATCCCTACCACGTAATAGTGCACCCACACGTCTCCATCGACGTTGTTT  
TTTGACCGGAAGGCCTAGAGGTA ACTATCGAGACTTTGGACTATCCGGACACATACTTC  
GAGAGATGGTTAATACATGTTTGTTACCGGGCGCTACAAGGTCCAGTTGGATGGTAAAA  
AATTCATTTATCTCAATTATTTTCGCAAGAAGAAAAAGAAGAAAAC-----AAAGGGTCTG  
TCGAATTTCAAGTATTCAGTTTCACCAATAAGATACGAAGACTTACTTCCCATTGTTGGAT  
TGCATAAAAAAGATTTTTTCATCTCAGAGGGGTTTACGAATAATCCTGGGAAAACGTCAA  
CGGCTGCTGGCGTATTTGTCAAAGAAAAATAGAGTACGTTATAAGAAATTAATTGGTCA  
GTTGGATATTCGGGAGCCAAAACTCGT-----ATGGTAAAACCTCGTTTGAAACGATGTG  
GTAGAAAGCAACGAGCAATCTATCGAATCGTTGCAATTGATGTTTCGATCCCGAAGAGA  
AGGAAGAGATCTTCGGAGAGTGGGTTTTTATGATCCGATAAAAAATAAACTTATTCAA  
ATGTTCCAGCTATTTTAGATTTTCTTGAAAAAGGGGCTCAACCTACAAGAACTGTTTCAT  
GATATTTTTAAAAAGGCGGAATTGTTTAAA-----ATGGATAAATCCA  
AGCAACCCTTTCATAAAACCAAGCGATCTTTTCGTAGGCGTTTGCCCCAATTGGATCG  
GGGGATCGAATTGATTATAGAAACATGAGTTTAATTAGTTCGATTTATTAGTGAACAAGG  
AAAAATATTATCTAGACGAGTGAATAGATTAACCTTGAAACAACAACGATTAATTACTAT  
TGCTATAAAACAAGCTCGTATTTTATCTTTGTTACCTTTTCTTAATAATGAGAAA-----CA  
ATTTGAGAGAACCGAGTCGATCCCTAGAGCTACTGGTCCTAGAACCAGAAATAAGGTG  
ACACGTTCAATAAAAAAAAATCCTTTTGTAGCTAATCATTATTGGTCAAATTGAGAA  
ACTCAACATGAGACAGGAAAAAGAAATAATAGTAACTTGGTCTAGAGCATCTACTATTA  
TACCCACAATGATTGGACATACAATTGCCATTCATAATGGAAAGGAACATTTGCCCATTT  
ATATAACAGATCGTATGGTAGGTCACAAATTAGGAGAATTTGCACCTACTCGTAGTTTCG  
GAAAACATGCGAGAAACGATATTAATCTCGTCGCATGATTTTGAAATTTTTTCTATTAG  
GTAATCCATTATCCTTATGCATGAAAATAATAAATTCGTTGTTATAGTTGGACTCTATTA  
TGGATTTATGACCACGTTCTCTATAGGGCCATCTTATCTCTTCCTTCTTCGAGCTTGGCTT  
ATGGAAGAAGGA-----ACCGAAAAGCAGATATCAGCAACAACCGGTTTTATTATGGG  
ACAGCTTATTATTTTTATATCAATCTATTATGCGCCTCTGCATTTAGCATTAGGTAAACCT  
CATACAATGACTGTCCTAGTTCTACCATATCTTTTGTTTAATTTCTTCTGGAACAATAACA  
AGA ACTTTTTGGATTATAGATCTACTACTAGAAATTCAATACGTAATTTCAACATTCAAT  
GTATATTCCTGAATAATTTTATTTTTCAATTATTCAACCATTTCAATTTTACCAAGTTCAAC  
ACTAGCCAGATTAGTCAACATTTATATGTTTCGATGCAACAACAAGATGTTATTTGTAAC  
AAGTACTTTTATTGGTTGGTTAATTGGTCACATTTTTTTTTATTAAGTGCGTTGGATTAGTA  
TTATTCTGGATACGGCAAAATCATTCCATTCAATCT-----AATAAGTACCTTCTTTCA  
GAATTGAGAAATTCTCTGGCTCGAATCTTTAGTATTCTTATTATTACTTGTGTATACT  
ATTTAGGCAGAATGCCTTTACCTATTATTACTAAAAAACTGAAGGAAACCGAAGAAAA  
CAAACCGCTTGTCACTTTTCTTTTCGACTGTAAACGATGGAATCGTCCATTTTCGATATAT  
AAAAAATGATCGATTTGAAAATGCTGTACGAAATGAAATGTCACAATATTTTTTTTATAC  
ATGTCCAAGTGATGGAAAACAAAGAATATCTTTTACATATCCACCGAGTTTATCGACTTT  
TTCAGAAATGATAGAACGAAAGATATCTTTGTACACGACCGAAAACTATCCCACGAG  
GAT-----TGGGTTTATACTAATGAACAAAAAAGCACACCTTGAGCAATGAATTAAT  
AAATCGAATAAAAACTCTAGAAAAAAAACACTTGTCTAGATGTGCTCGAGAAAAGA  
ATCAGATTATGCAATGATGAAAATGAAAAGGAATGCTTGCCTAAAATGTACGATCCTTT

TTTGAACGGACCATATCGCGGAAAAATCACAAAATTAGATTCACGTATAGAAATAGTCT  
GGATAAATAAAATTCATGGTCTACTTAAAAAAGAATTTGAATATCAAGATTACAATGATC  
AATTTCTGGAATAGAAGAAATCAGAAAAGAGGTTCCCTCGATGGTCATACAAATTGAC  
CGATTTGGAAGAACAAGAGGAAGAAGAATTCGTTCAAGAAAAGCCAAACGTGTTGT  
AATTTATACTGATGCTTTGATACGTTACTCACACAATCGGATTTTCGTCGGGATCTAAT  
CAAAGGATCCATGCGTGTCAAAGACGTAAAACAGTTATTTGGGAAATGTTTCAAGCA  
AATGTGCATTCCGCACTTTTTTTGGATCAAATAGACAAAACA---TTCTTTTTATCTTTTGA  
T---ATCTCCGAAATGATGAATCTCGTTTTTAGGGGT---GAGGAAAATGAACGTATAACAA  
TATCAGAACTTGGGATAGCATTATATTTGCTCAAGCAATAAGGGGTTTCGATGTTAGTAA  
CCCAATCGATTCTTAGAAAATACATTGTATTGCCTTCCTTGATAATAGCGAAAAATGTTG  
GCCGTATGTTATTATTCCAATTCCTGAGTGGTACGAGGATTTGAAAGATTGGAATAGA  
GAAATGCATGTTAAATGCACTTATAATGGTGTTC AATTATCCGAAACAGAATTTCCAAA  
AGATTGGTTAACGGATGGTATT CAGATAAAAATTCTATTTCCCTTTCCGTCTGAAACCTTG  
GCGAAAATCTAAAAAAGGAAAAAACAATTTTTGTTTTTTAACAGTCTGGGGAAG  
AGAAGCGGAACCTCCCTTCGGTTCTCCTCGAAAACAACCTTCTTTTTTTCAACCTATTT  
GGAAAGAGCTAAATAATAAAATTAGAAAACCTGGAAAAATTTTCTCTTTCTCTAGTTCTA  
AGAGTTTCTAAAAAACGAGAAAATGGTTTTTAAAGATTTCAAAGAAAAAACAAGA  
TGGGTAAACAAAATAGTTCTA-----GTTATAAACGAATAATGAAAGA ACTTGAAAAAAT  
AACTCTATAATCAGT---ATAAGACTACCGACGAATCAACCATT CGAATTCGATCCACG  
AATTGGACAAAACATTC ACTTATAGAGAAAAAAGTAAAGGATCTTGCTGATAGGACAA  
CCACAATCAGAAATCAAATAGAACAAATCACAAAAGACAAGAAAAAAGCCCTAATA  
AGACAAATTGTGCTGATAAAAATTCAGAATTGCAAAAACCTATTTGGCAAATATTCAA  
AGAAAAAGTACCCGATTAATACGCAAATTCATTACTTTCTCAAATATTTCAATTGAAAGA  
ATATACAGCGATATCCTTCTATGTACCATTAACAGTCTTAGGACCAATGCACAGCTTTTC  
ATCACTTTATTTTCGTGTGACTTATCCTCTTTGTCACAAGCATATGTATTTTACACATTGT  
CACAAGTTCAAGTTAATAACAAGTATTACTTGAGATCTGTATTTCAATATACCCATCTTTT  
TCTTAAAGATAGAATCAAGGATTATTGTACACGAGGACTTTTTGATTACAAACCAAAGC  
ATAAGAAAGTTGATAAGTCTGGAATAAATGAATGGAAAAACTGGTTAAAGAGTCATTAT  
CAATACAATTTATCTCAAACCTCAATGGTCTCGATTAGTACCACAAAATGGAGAAATAG  
AGTCAATCAACGTTGTACAATTCAAAAAATAATATTGGATT CATATAAAAAAACC  
AA-----TTAATTCATTACGTGAAACAAGAAAAATTAAAAAA AACTACAAATACGATCTT  
CTAGCACATAAATATATGAATGAATCTAGTCTATATTTGGATAGAAAATATTTTGATTGTA  
GAATTTCCGGTTTTGTTTTAGACTTTTTGATTGGATGGGAATGAATAAAGAAAGGCTAT  
ATCGTTGGTTCTTCCAGAAATTTGGACTACTTTATGATGCATATAAGCTTAAACCATGGA  
TTATACCAATCCAATTTCTTCTTTTAAACTTCAAGAGCAAGAAGGAAGCAGA ACTCGAT  
TTTTTCCTGAAAAATATTTCTTTTTCAATTAAGATGGGATGATTCTTTGAATCAAAGA  
ATGATCAACAATATCAAGGTATATTGTCTACTACTTAGACTGATAAATCTAAAGGAAATT  
GCTATATCCTCAATTC AAAGAGGAGAGATGCGTCTAGATGTAATGTTGATTCAAAGGA  
TCTATCTCTTACTGAATTGATAAAAAGGGGAATATTTATTATTGAACCGGTTTCGTCTCTCT  
ATAAAATGGGATGAAGAATTTTTTATATATCAAACCCTAGGTATTTCAATTGGTCAATAAG  
AGTAAACAAAATTATTATGATTTATTTGTTCTGAAAATATTCTATCTACTAGACGTCGTA  
GAGAGTTGAGAATTCTAATTTGTTTCGTATTTCTTTGGCCCAATTATCGATTAGAAGATT  
TAGCTTGTATGAATCGGTATTGGTTTGATACCAATAATGGTAGTCGTTTCAGTATGTCAA  
GAATACAGATGTATCCAATGAAACGACATCAATTC AATCCTGGATCTTCCGAATTCAGA

GAGATATTGAGAGAGATCAAGAATTCTCACTATTTCTTAGATTTCATGGATCAAATTCGAT  
TCAGTGGGATCTTTCACCTCACATTTTTTCCACCAAGAACGTTTTATGAAACTCTTTGA  
CCCCGAATTTGAGTATCCTACTTTCA--CGTGATTCA-----CAGGATTCAACAAGCAAT  
CGATATTTACG-----ATCAAAGGTGTAGTACTGCTTGTAGTAGCG--GTCCTTATATCT-  
-----CGTATTAACAATCGAAAGATGGTCGAAAGAAAAAATCTCTATTTGATGGGGCT  
TCTTCCTATACCTATTCTTCTATACGTATGAATTCCATTGGACACAGAAATGAGACATT  
GGAAGAATCTTTT--TGGTCTTCCAATATCAATAGGTTGATTGTTTCC---CTCCTGTATCTT  
CCAAAAGGGAAAAAGATTTCTGAGAGTTGTTTCATGGATCCGCGCGAGAGTACTTGGG  
TTCTCCCAATAAAT-----CAAAGTGTATCATGCCGAATCTAACCGGGGTTTCGCGG  
TGGTGGAGTAACCGGATCGGAAAAAAGAGG-----GATTCTAGTTGTAAGATATCT-----  
AATGAAACCGTAGCTGGAATTGAGATCTCATTCAAAGAGAAGGATAGCAA---TATCTG  
GAGTTTCTTTTTTATCCTATACG-----GATGATCGGATCCGCAAGGACCCTGATTGGGAA  
TTGTTTGATCGTCTTCTCTGAGGAAGAAGCGAAACATAATCAACTTG-----AATTCGGG  
ACAGCTATTCGAAATCTTAGGGAAAGACTTGGTTTGTATCTCATGTCTGCTTTTCGTGA  
AAAAAGACCAATTGAAGGGGAGGGT--TTCTTCAAACAACAAGGA---GCCGAGGCAAC  
TATTCAATCAAATGATATTGAGCATGTTTCCCATCTCTTCTCTTCGAGAAACAAGTG  
GGGTATTTCTTTGCAAATTGTGCTCAATTTTCATATGTGGCAATTCCGCCAAGATCTCTT  
CGTT-----AGTTGGGGGAAG---AATCGTCACGAATCGGATTTTTTTGAGGAAC---GTATC  
GAGAGAGAATTTGATTTGGTTAGACAATGTGTGGTTGGTAAACAAGGATCGG-----TT  
TTTTAGC-----AAGGTACGGAATGTATCGTCAAATATTCAATATGATTCC-----ACAGGA-  
----TCTATTTTCGTTCAAGTAACAGATTCTAGCCAATTGAAAGGATCTTCT--GATCAATC  
CAGAGATTGTTTTGATTCCATTAGA-----AATGAGGATTCAGAA-----  
-----TATCACAAATTGATCGATCAAACAGAGATTCAGCAACTAAAAGAAAGATCGA  
TTCTT--TGGGAT-----CCTTCTTTAGTCAAACGGAACGAACAGAAATAGAATCAGAT---  
--CGATTCCCGAAA-----TGCCTTTTTGGATCTTCC-----TCAATGTCCCGCTATTCACG---  
GAACGTGAGAAGCCGATAAATAATCATCTGCTTCCGGAAGAAATCGAAGAATTTCTT---  
--GGGAATCCTACAAGATCAATTCGTTCTTTTTTCTCTGACAAATGG-----TCAGAACTTC  
AT--CTGGGTTTCGAATCCTACTGAGAGGTCCACAAGAGATCAG-----AAATTTTTGA  
AGAAAAACAAGATGTTTCT--TTTGTCCCTTCCAGGCGATCAGAA-----AATAAAG  
AAATGGTTGATATATTCAAGATAATTACGTATTTACAAAAT-----ACCGTCTCAATTCATCC  
TATTTTCATCAGATCCGGGATGTGATATGGTAGTTCCGAAGGATGAACCGGAT--ATGGAC  
AGTTCCAATAAGATTTCAATCTTGAACAAAAATCCATTTTTGGAT-----TTATTTTCATCTAT  
TCTATGACCGGAACAATGGGGGATACACGTTA-----CGCCACGATTTT--GAATCA---GAA  
GAGAGATTTCAAGAAATGGCGGATCTATTCACTCTATCAATAACCGAGCCG---GATCTG  
GTGTATCATAGGGATTGCTTTTTCTATTGATTCCCTACGGATTGGATCAAAAAAAAA-----  
TTATTGAATAGGGTATTCAACTCCAGAGATGAATCGAAAAAGAAATCTTTA-----TTGG  
TTCTACCTCTCTTTTTTAT-----GAAGAGAATGAATCTTTTTTATCGAAGGATCAGAAAA  
AATCGGTCCGG---ATCTACTGCGGGAATTTTGGAAAGATCCAAAATCAAAATAGTGG  
TATTTGCTAGCAACAACATAATGGAGGCAGTCAATAAATATAGATTGATCCGAAATATGA  
TTCAAATCCAATATAACACCTATGGG-----TACATAAGAAATGTATCGAACCGATTCTTTT  
TAATG-----AATAGATCCGATCGCAACTACGAATATGGAATTCAA-----AAGGATCAA  
ATAGGAAATGATACTCTGAATCATATAACTATAATGAAATATACGATCAACCAACATTTAT  
CGAATTTGAAAAAG---AGTCAGAAGAAATGGTTTGATCCT-----CTTTTTTCTCGAA  
CCGAGAGATCCATCAATCTGGATCCTGATGCCTATAGATACAAATGGTCCAATGGGAAC

AATAATTTCCAGGAACATTTGGAACATTTTCGTTTCTGAACAGGGGAAC-----CATTTTC  
AAGTAGTGTTTCGATCGATTAGGTATTAATCAATATTCGATTGATTGGTCCAAGGCTATCG  
ACAAACAAGATTTTTCTAAGTCACTTCGTTTCTTTTTGTCCAAGGCA-----  
--CTTCTCTTTTTTCT-----AAGTCACTTCGTTTCTTTTTGTCCAAGACTTC  
CTTTTTCTTTGTGAGTATTGGAAATATCCCCATTCATAGGTCCGAG---ATCCACATCTAT-  
--GAATTGAAAGGTACAAACGATCAACTCTGCAATCAGTTGTTAGAATCCATAGGTGTTT  
AAATTGTTCAATTTGAATAAATTGAAACCC-----TTCTTATTGGAT-----GATCATGATACT  
TCC---CAAAGACCGAAATTCCTTGATAAATGGAAGAACAATATTACCATTTTTGTTCAATA  
AGATACCA---AAGTGG---ATGATTGACTCATTCCATACT-----AGAAATAATCGCAGAAAA  
TCCTTTGATAACACGGATTCCATTTCTCAATGATATCCCACGATCGAGACAATTGGCTG  
AATCCCGTGAAACCATTTTCATAGAAGTTCATTGATATCTTCTTTTTATAAAGCAAATCGA  
CTTCGATTCTTGAATAATCCACATCACTTCTGGTTCTAT-----TGTAACAAAGGATTCCCC  
TTTTATGTG-----GAAAAGACCTGTATCAATAATTATGAT-----CTTACGTAT--GGACA  
ATTCTCAATATCTTGTTCATTTCGCAACAAA---ATATTTTCTTTGTGCGTCGGTAAAGGTA  
AAAAACACATATTTTTTTGGAG---AGAGAGGCTATTTTACCAATCGATTACAGGTCTC  
TGACATATTCATATCTAACGATTTTCCAAAAAGTGGTGACGAAACG---TATACTTGATC  
AAA-----TCTTTCCATTTTCCAATTCGACCCGATCCATTTCGTTTCGT-----AGAGCTATTTA  
CTCGATCGCAGACATTTCTGCAACACCTCTAACAGAGGAACAAATAGTCCATTTTGAA  
AGAACTTCTTGTGAGCCTTTTTTTCAGATATGAATCTATCTGATTGAGAAGGGAAGAACTC  
GCATCAGTATCTCAGT-----TTCAATTCAAACATGGGTTTGATTACACTCCATGTTCTGA  
GAAATATTTACCA-----TCCGGAAAGAGGAAAAAA-----CAGAGTCTTTGT  
CTAAAG-----AAATGCGTTGATAAACAGCAGATGTATAGAACCCTTCAACGAGATAGTGC  
TCTTTCAAATCTCTCAAATGGAATCTGCTGCAACATATATGCCATGGTTCCTTACTTC  
GACAGGGTGCAAATATCTAAATTTACCCCTTTTAGATGCTTTTTTCAGACTCATTG-----CC  
GATACTAAGTAGCAGT---CCAAAATTTGTATCCATTTTTCATGATATTATGCATGGATCAG  
ATATATCATGGCCAATTCGTCAGAAAAAATGGTGG-----GCGATTCTTTCACAATGG  
ACTCCG---ATAAGTGAGATTTTCGAGTAAGTGTTTACAGAAT-----CTTCTTCTGTCCGAAG  
AAACGATTCATCGAAATAATGAGTCACCCGTTCCATTGATATGGACACATCTGAGATCA  
ACAAATGCTCGGGAGTTC---CTCTATTCAATCCTTTTCTTCTTCTTGTGCTGGATAT--C  
TCGTCCGTATACATCTTCTCTTTGTTTCCCGA-----GCCTCTAGTGAGTTACAGACAGAG  
TTAGAAAAGATCAAATCTTTGATGATTCCATCATAATGATTGAGTTGCGAAAACTTCT  
GTATAGGTATCCTACATCGGAACTGAATTCCTTCTGGTTAAAGAATCTCTTTTCGAGTTGC  
TCTGGAACAATTAGGAGATTCTCTGGAAGAAATACGGGGTTATGCTTCTGACGGCAAC  
ATGCTATTGGGTTCGTTGGTCCC-----GCTTATGGG---GTCAAATCCATACGTTCTAA  
GAATAAATATTTGAATATAAAT-----CTCATCGATCTCATA---AGTATCATACCAAATCCC  
GTCAATCGAATCACTTTTTTCGAGAAATACGAGACATCTAAGTCGTACAAGTAAAGAAAT  
CTATGCATTGATAAGAAAAAGAAAAACGTGAACGGTGATTGGATTGATGATAAAATA  
GAATCCTGGGTCGCGAACAGTGATTTCGATTGATGATGACGAAAGAGAATTCCTGGTTC  
AGTTCTCC-----ACCTTAACGACA-----GAAAAAAGAATTGATCAAATTCTATTGAGTCTG  
ACT--CATAGTGATCATTATCA-----AAGAATGACTTTGGTTATCAAATGATTGAA  
CAACCGGGATCAATTTACTTACGATACTTAGTTGACATTCAT-----AAAAAGTCTCTAATG  
AATTATGAGTTCAATAGATCCTGTTTAGCAGAAAGACGGATATCCTTGCTCATTATCAG  
ACAATCACTTAT-----TCACAAACCTCATGTGGGGCTAATAGTTTTTCATTTCCGATCTCAT  
GGA-----AAACCCTTTTCGCTCCGCTTAGCCCTATCTCCTTCT--AGGGGTATTTTAGTG

ATAGGTTCTATAGGAACTGGACGATCATATTTGGTCAAATACCTAGCTACAACTCTTAT  
GTTCTTTTCATTACGGTATTTCCGAACAAGTTCCTGGATGACAAGCCTAAAGGTTATCTT  
ATTGAT-----GATATTGAT--GAT-----AGTAACGATATTGAT-----CTTGACGATA  
CTGACGATATCGATATTGAGGATAGTGAC-----GATATTGATAATGACC  
TTGAGACGGAGCTGCTAACTATGACGAATGTGCTC-----ACTATGTATATGACG-----  
TCGAAAATAGACCGATTTGATATCACCCCTCAATTCGAATTAGCAAAAAGCAATGTCTCC  
TTGCATAATATGGATTCCAAACATTCATGATCTGTATGTGAATGAGTCGAATTACTTATCC  
CTCGGTTTATTAGTGAAGTATCTCTCC-----AGGGACTGTGAAAGAAGTTCC---ACTAG  
AAATATTCTTGTTATTGCTTCGACTCATATTTCCCAAAAAGTGGATCCCGCTCTAATAGC  
TCCGAATAAATCAAATACATGCATTAAGATCCGAAGGCTTCTTATTCCACAACAACGAA  
AGCACTTTTTTCATTCTTTTCATATACTAGGGGATTTCACTTGGAAAAGAAAATGTTCCATA  
CT-----AACGGATTCGGGTCCATAACCGTGGGTCCAATGCACGAGATCTTGTAGCACTT  
ATCAACGAGGCCCTATCAATTAGTATTACACAGAAGAAATCCATTATAGAACTAATAC  
AATTAGATCAGCTCTTCATAGACAACTTGGGATTTGCGA-----TCCCAGGTCAGATC  
GGTTCAGGATCATGGCATCCTTTTCTATCAGATAGGAAGGGCTGTTGCACAAAATGTAC  
TTCTAAGTAATTGCCCATAGATCCTATATCTATCTACATGAAGAAGAAA-----TCATGTA  
AGGAAAGGGATTCTTATTTGTACAAATGGTACTTCGAACTTGGAACGAGCATAAAGAA  
ATTAACGATACTTCTTTATCTTTTGAGTTGTTCTGCCGGATCGGTGCTCAAGATCTTTG  
GTCTCCATCC-----GGACCCGATGAAAAA---AATGGGATTACTTCGTTTGGATTTGTTGA  
GAATGATTCT--GATCTAGTTCATGGCCTATTAGAAGTAGAAGGCGCTCTGGTGGGA-----  
TTCTCACGGAAAGAAAAGATTGCAGTCAGTTTGATAATAAT-----CGAGTGACATTGCT  
TCTTCGGTCCGAACCAAGGAAT--CCGTTAGATATGATGCAAAATGGATCTTGTCTATC  
GTTGATCAGAGATTTCTATATGAAAAA-----TATGAATCGGAGTTTGAAGAA--GGGGAA  
GGA-----GCCCTCGACCCGCAA-----CAGATAGAGGAAGAT-----TTATTAATCA  
C-----ATAGTTTGGGCTCCT-----AGAATATGGCGCCCT-----TGTGGCAATCTATTTGATT  
GTATCGAAAGGACCAATGAATTGGGATTTCCC--TATTGGGCCAGGTCATTTCCG-----  
GACAAACGGATCATTTTTTCATAAAGAGAATGAGCTTCAACAGAAGGATTCGGAGTTCT  
TGCAGAGTGGAACCATGCAGTACCAGACACGAGATAGATCTTCCAAAGAACAAGGCT  
TTTTTCGAATAAGCCAATTCATTTGGGACCCTGCCGATCCATTCTTTTTCTATTCAAA---  
GATCAGCCCTTTGTCTCTGTGTTTTTCACGTCGAGAATTCTTTGCAGATGAAGAGATGTC  
AAAGGGGCTTATTACTTCCCAAAAAAATCCTCCTACATCTATATATAAACGCTGGTTCAT  
C-----AAAATACGCAAGAAAAGCACTTCGAATTGTTGATTCATCGCCAGAGATGGCTT  
AGAACC-----AATAGTTCATTATCT-----AATAGATCTTTCTGTTCTAAT-----ACTCTATC  
CGAGAGTTATCAGTATTTATCAAATCTGTTCTATCTAAC---GGAAGGCTATTGGATCAA  
ATGACAAAGACATTGTTGAGAAAGAGATGGCTTTTCCCGGATGAAATGAAACATTTGA  
TT-----GATGTAACAGGAAAAAGATTTCCCATTCCTATGCCTAGATCTCGG---ATAAATGG  
AAATTTTATTGATAAGACCTTTTCAATTGTAGCCAATATCTTATTACGAATAATCCGACA  
ACTTCAGGAGAGAAAAGAAGCATTACCTATTACAGAGATGGG-----ATGTCGGCTCAAT  
CTGAAGGAAATTATGCGGAAGCTTTACAAAATTATTATGAAGCTACGCGACCAGAAATT  
GATCCTTATGACCGAAGTTATATACTCTATAACATAGGCCTTATACACACAAGTAATGGG  
GAGCATACAAAGGCTTTGGAATATTTTTTCGGGCATTAGAACGCAATCCATTCTTACCA  
CAAGCATTTAATAATATGGCCGTGATCTGTCATTAC---CGGGGAGAACAGGCCATTCTAC  
AGGGTGATTCTGAAATTGCAGAGGCTTGGTCCGATCAAGCTGCTGAGTATTGGAAACA  
AGCTATAGCGCTTACTCCGGTAATTATATTGAAGCACATAATTGGTTGAAGATAACAAG

ACGGTTCGAA-----ATGAACTGGCGATCAGAACATATATGGATAGAATTCATAACAGGGT  
CTCGAAAAACAAGTAACTTTTTCTGGGCCTGTATCCTTTTTTTTAGGTTCACTAGGATTCT  
TAGTCGTTGGAACCTCCAGTTATCTTGGTAGGAATCTAATATCTGTATTTCCATCTCAGC  
AAATATCTTTTTTCCACAAGGGATTGTAATGTCTTTCTATGGAATTGCGGGTCTATTCAT  
TAGTTCCTATTTGTGGTCCACTATTTGTGGAATGTAGGTAGTGGTTATGATCGATTTCGAT  
AGAAAAGAAGGAATAGTGTGATTTTTCGTTGGGGATTTCCCTGGAAAAAATCGTCGTAT  
AGTCCTTCGATTCTTATGAGTGATGTTCAATCAATCAGAGTGGAGGTTAAAGAGGGCC  
TTTATACTCGACGTGTGCTTTATATGGAAGTAAGGGGCCAGGGAACTATTCCCTTGACT  
CGTACTGATGAGAAT--TTAACTCCACGAGAAATGGAACAAAAAGCTGCAGAATTAGC  
CTATTTCTTGC GCGTACCCATTGAAGGTTTT

>Carica

ATGGAAAAATCGTGGTTCAATTCGATGTTGTCTCTAAGTAAATCAATGGATAGT---CTTC  
CTATTGAAAATACTAGTATAAGTGAAGACCCGGTTATAAATGATCCGGATAAAAACATTT  
ATAATTACAGTAATGTTGATCATTAGTCGGCGCCAAGGACATTCGGAATTTTCATCTCGG  
ATGACACCTTTTTAGTTAGGGATAGTAATAGGGATAGTTATTCTATATATTTTGATATTGA  
AAATAACAATTTTGAGATTGACAATGATCAT-----TCTTTTTTGAGTGAAGTAGAAAGTTT  
TTTTTATAGTTATCGTAATTCTAGTTATATGAATAATAGATCTAAAAGTGAC-----CACTAT  
GATCCTTACATGTACGATACTAAATATAGTTGGACTAATCACATTAATAGTTGCATTGACT  
CTTATCTTCGT-----TCTCAAATCTGTATTGATAGTTCTATTTAAGTGGTAGTGACAATTA  
CAATGACAGTTACATTTATAATTACATTTGTAGTAGCGAAAATTCCAATATAAGAATAA  
CACGAATCGTAGTGATTTAACTATAAAAGAGAGTTCTAAT---CTCGATATAACTCAAAAA  
TACAGGCATTTGTGGGTTCAATGCGAAAATTGTTATGGATTAATTATAAGAAATTTTG  
AAGTCAAAAATGAATATTTGTGAACAATGTGGATATTATTTGAAAATGAGTAGTTCAGAT  
AGAATTGAACTTTTGGTTGATCCGGTACTTGGAACTCTATGGATGAAAACATGGTCTC  
TCTGGATCCCATTGAATTTCAATTCGGAAGAGGAACCTTATAAAGATCGTATTGATTCTTA  
TCAAAGAAAGACAGGATTAACCTGAGGCTGTTCAAACAGGTACAGGTCAACTAAACGG  
GATTCCTATAGCACTTGGGGTTATGGATTTTTCAGTTTATGGGGGGTAGTATGGGATCCGT  
AGTAGGCGAGAAAATCACCCGTTTGTATCGAGTATGCTACCAATGAATTTTTACCTCTTAT  
TATAGTGTGTGCTTCCGGAGGAGCGCGGATGCAGGAAGGAAGTTTGAGTTTGATGCAA  
ATGGCTAAAATATCTTCCGCTTTATATGATTATCAATCAAATAAAAAGTTATTCTATGTAT  
CAATTCTTACATCTCCTACTACCGGTGGGGTGACAGCTAGTTTTTGGTATGTTGGGGGATA  
TCATTATTGCCGAACCTAATGCTTATATTGCATTTGCGGGTAAAAGAGTAATTGAACAAA  
CATTGAATAAGACAGTGCCTGAGGGTTCACAAGCGGCTGAATATTTATTCCATAAGGGC  
TTATTCGATTCAATTGTACCACGTAATCCTTTAAAAGGTGTTCTGAGTGAGTTATTTTCAG  
CTTCACGGTTTTTTTTCTTTGAATCAAATTCATCAAATGGTAACCATTAGAGCCGA  
CGAAATTAGTAATATTATCCGTGAACGTATTGAGCAATATAATAGAGAAGTAAAGGTTGT  
AACTATTGGTACCGTACTTCAAGTGGGCGACGGCATCGCTCGTATTTATGGTCTTGATG  
AAGTAATGGCAGGTGAATTAGTAGAATTTGAAGAGGGTACAATAGGCATTGCCCTGAAT  
TTAGAATCAAACAATGTTGGTGTGTTAATGGGTGATGGTTTGATGATACAAGAGGG  
AAGTTCTGTCAAAGCAACAGGAAAAATTGCTCAGATACCCGTAAGTGAGGCTTATTTG  
GGTCGTGTTATAAATGCTCTGGCTAAACCTATTGATGGTCGGGGTGAAATTTCCGCTTCT  
GAATCTCGGTTAATTGAATCTCCCGCTCCAGGTATTATTTTCGAGACGTTCCGTATATGAG  
CCTCTTCAAACAGGACTTATTGCTATTGATTTCGATGATCCCTATAGGGCGTGGGCAGCG  
AGAATTAATTATTGGGGACAGACAGACCCGGTAAAACCTGCAGTAGCCACAGATACAATT

CTCAATCAACAAGGGCAAATGTAATATGTGTTTATGTAGCTATTGGTCAAAAAGCATC  
TTCTGTGGCTCAGGTAGTGACTACTTTACAGGAAAGGGGGGCGATGGACTACACTATT  
GTGGTAGCCGAAACGGCGGATCCCCAGCTACATTACAATACCTCGCGCCTTATACAGG  
AGCAGCTTTGGCTGAATTTTTTATGTATCTTAAACAACACACTTTAATCATTTATGATGAT  
CCTTCCAAACAAGCACAGGCTTATCGCCAAATGTCTCTTCTATTACGAAGACCGCCTGG  
TCGTGAAGCTTATCCAGGAGATGTTTTTTATTTGCATTCACGTCTTTTAGAAAGAGCCG  
CTAAATTAAGCTCTCAGTTAGGTGAAGGAAGTATGACTGCTTTACCAATAGTTGAGACC  
CAGTCGGGAGACGTTTCGGCTTATATTCCTACTAATGTAATTTCCATTACAGATGGACAA  
ATATTTCTTATCCGCCGATCTATTCAATGCTGGAATCAGACCCGCTATTAATGTAGGTATTT  
CCGTCTCCAGAGTAGGATCCGCAGCTCAAATTAAGCTATGAAACAAGTAGCTGGTAA  
ATTAAAATTGGAATTGGCTCAATTCGCCGAATTAGAAGCCTTTGCACAATTTGCTTCTG  
ATCTCGATAAAGCTACTCAGAATCAATTGGCAAGAGGTCAACGATTACGTGAGTTACTC  
AAACAATCCCAATCAGCCCCTCTCACGGTGGAAAGAGCAGATAATGACCATTTATACCGG  
AACGAATGGTTATCTTGATTCATTAGAAATTGGACAGGTAAGGAAATTTCTCGTTGAGT  
TACGTACTIONTAAACAATAAACCTCAGTTCCAAGAAATCATATCCTCTACCAAG  
ACATTCCTGAGGAAGCAGAAACCATTTTGAAAGAAGCTATTCAGGAACAAATGGAA  
CGTTTTCTACTTCAAGAA-----ATGAGAATAAATCCTACTGCTTCTGGTCCTGGGGTTTC  
CACGCTTGAAAAAACAACCTGGGACGTATCGCTCAAATCATTGGTCCGGTACTGGAT  
GTAGCCTTTCCCCGGGCAAGATGCCTAATATTTACAACGCTCTGGTGGTTAAGGGTCG  
AGATACTGTCGGTCAACAAATTAATGTGACTTGTGAAGTACAGCAATTATTAGGAAATA  
ATCGAGTTAGAGCTGTAGCTATGAGTGCTACGGATGGTCTAACGAGAGGAATGGAAGT  
GATTGATACGGGAGCTCCTTTAAGTGTTCCAGTCGGCGGAGCGACTCTAGGACGAATT  
TTCAACGTGCTTGGAGAGCCAGTTGATAATTTAGGCCCTGTAGATACTCGCACAAACATC  
TCCTATTCATAAATCTGCGCCTGCCTTTATACAATTAGATACAAAATTTCTTATTTTCGAA  
ACAGGAATTAAGTAGTAGATCTTTTAGCCCCTTATCGTCGTGGAGGAAAGATTGGACT  
ATTCGGGGGAGCTGGAGTGGGTAAACAGTACTCATTATGGAATTGATCAACAACATT  
GCCAAAGCTCATGGGGGTGTATCCGTATTTGGCGGAGTAGGGCAACGTACTCGTGAAG  
GAAATGATCTTTACATGGAAATGAAAGAATCTGGAGTCATTAATGAACAAATCTTGCC  
GAATCAAAGTAGCTCTAGTCTATGGTCAGATGAATGAACCGCCGGGAGCTCGTATGA  
GAGTTGGTTTGACTGCCCTAACTATGGCGGAATATTTCCGAGATGTTAATGAACAAGAC  
GTACTTCTATTTATCGACAATATCTTCCGTTTCGTCCAAGCAGGATCCGAAGTATCCGCC  
TTATTGGGTAGAATGCCTTCTGCTGTAGGTTATCAACCCACCCTTAGTACCGAAATGGG  
TTCTTTACAAGAAAGAATTACTTCTACCAAAGAAGGGTCCATAACTTCTATTCAAGCAG  
TTTATGTACCTGCGGATGATTTGACCGACCCTGCTCCTGCCACGACATTTGCACATTTAG  
ATGCTACTACCGTACTATCAAGAGGATTAGCTGCAAAAGGTATCTATCCGGCGGTAGAT  
CCTTTAGACTCAACGTCAACTATGCTCCAACCTCGGATCGTTGGTGAGGAGCATTATGA  
AACCGCGCAAAGAGTTAAGCAAACCTTTACAACGTTATAAAGAAGTTCAGGACATTATA  
GCTATCCTTGGGTTGGACGAATTATCCGAAGAGGATCGCTTAACCGTAGCAAGAGCGC  
GAAAAATTGAGCGTTTCTTATCACAACCCTTTTTTCGTAGCAGAAGTATTTACCGGTTCT  
CCGGGGAAATACGTTGGTCTAGCAGAAACAATTAGAGGGTTTAAATTGATCCTTTCCGG  
AGAATTAGATGGTCTTCTGAACAGGCCTTTTACTTAGTAGGTAACATCGATGAAGCTA  
CTGCGAAGGCTACGCAATTAGAAATGGAGAGCAAATTGAAGAAAATGACCTTAAATCT  
TTGTGACTGACTCCTAATCGAATTGTTTGGGATTCAGAAGTAAAAGAAATCATTTTATC  
TACTAATAGTGGGCAAATTGGCGTATTACCAAATCACGCGCCTATTGCCACCGCTGTAG

ATATAGGTATTTTGAGAATACGCCTTAATGACCAATGGTTAACGATGGCTCTAATGGGTG  
GTTTTGCTAGAATAGGCAATAATGAAATCACTATTTTAGTAAATGATGCCGAGAAGAGC  
AGTGACATCGATCCACAAGAAGCTCAGCAAACCTTTGAAATAGCGGAAGCTAACCTGA  
GGAAAGCTGAAGGCAAGAGACAAACAATTGAGGCAAATCTAGCTCTCAGACGAGCTC  
GGACACGAGTCGAGGCTATCAATGCGATTTTCGATGAAAAATGTAACCGATTCTTTTCGTT  
TTCTTGGGTCACTGGCCATCCGCCGGGAGTTTCGGGTTTAATACCGATATTTTAGCAAC  
AAATCCAATAAATCTAAGTGTAGTCCTTGGTGTCTTGATCTTTTTTTGGAAAGGGAGTGT  
TAAGTGATTTATTAGATAATCGAAAACAGAGGATCTTGAATACTATTCGAAATTCAGAA  
GAACTACGGGATGGGGCCATTGAACAGTTAGAAAAAGCCCGGGCTCGCTTACGCAAA  
GTGGAAATGGAGGCGGAACAGTTTCGAGTGAATGGATACTCTGAGATAGAACGAGAA  
AAATGGAATTTGATTAATTCAACTTCTAAGACTTTGGAACAATTAGAAAATTACAAAA  
TGAAACCATTAGTTTGAACAACAAAGAGCGATTAATCAAGTCCGACAACGGGTTTTTC  
CAACAAGCTTTACAAGGAGCTATAGGAACTCTGAATAGTTGTTTGAGTAACGAGTTACA  
TTTACGCACCATTAATGCTAATATTGGTATGTTTGGGGCGATGAAAGAAATAACTGATAT  
GAATCCACTGATTTCTGCCGCTTCTGTTATTGCTGCTGGGTGGCCGTTGGTCTTGCTTC  
TATTGGACCTGGAGTTGGTCAAGGTACTGCTGCGGGCCAAGCTGTGCAAGGTATCGCG  
AGACAACCTGAGGCGGAAGGAAAAATACGAGGTACTTTATTGTTAAGTCTAGCTTTTAT  
GGAAGCTTTAACAATTTATGGGCTGGTTGTAGCATTAGCGCTTTTATTTGCGAATCCTTT  
TGTTATGGATGTTATATCATGTTCCAGCAACACACTAAAA---TTATACGATATATCTGGTG  
TAGAAGTAGGCCAACATTTATATTGGCAAATAGGAGGTTTACAAGTTCATGCTCAAGTA  
CTTATTACTTCTTGGGTGTAATTGCTATCTTATTAGGTTCCGCCATTATAGCGGTTCCGCA  
ATCCACAAACCATTCCAACCTGCTGGCCAAAATTTCTTCGAATACGTCCTTGAATTCATT  
CGCGACGTGAGCAAACTCAGATTGGAGAAGAATACGGTCCATGGGTTCCCTTTTATTG  
GAACTATGTTTCTATTTATTTTGTCTTAACCTGGTCCGGTCTTTTACCTTGGAAAAT  
CATAAGTTACCTCATGGGGAGTTAGCCGCACCCACGAATGATATAAATACTACCGTTG  
CTTTAGCTTTACTCACATCAGTAGCATATTTCTATGCGGGTCTTACCAAAAAGGATTAG  
GATATTTAGTAAATACATTCAACCAACTCCAATTTCTTTACCTATTAACATCTTAGAAGA  
TTTCACAAAACCCTTATCGCTTAGTTTTTCGACTTTTTCGGAAATATATTAGCCGATGAATT  
AGTAGTTGTTGTTCTTGTCTTTTAGTACCTTTAGTGGTTCCTATACCTGTGATGTTCTT  
GGATTATTTACAAGCGGCATTCAAGCTCTTATTTTTGCAACTTTAGCTGCGGCTTATATA  
GGCGAATCTATGGAGGGTCATCATATGATTTTTTCAACATTAGAGCATATATTAATTCATA  
TATCTTTTTTCGGTCGTTTCAATTGTAATTACAATTTATTTTTTAACCTTATTAGTC---GAAA  
TTGTAGGACTGTATGATTCATCAGACAAGGGCATGATAGTTACCTTTTTTTGTATAACAG  
GCTTATTAGCCGCTCGCTGGATTTATTTCGGGACATTTTCCATTAAGTAATTTATATGAATC  
ATTAATCTTTCTTTCATGGAGTTTCTCCATTATTCATATGGTTTGCTATTTTAATAAGCATA  
AAAATAATTTAAACGCAATAACCGGGCCAAGTGCTATTTTGACCCAAGGGTTTGCTACT  
TCGGGTCTTTTAAACAAAATGTCTCAATCCGTAATATTAGTACCTGCTCTCCAATCCCAG  
TGTTAATGATGCACGTAAGTATGATGGTATTAGGCTACGCCGCTCTGTTATGTGGATCA  
TTATTATCAGTAGCTCTTCTAGTCATTACATTTGAAAAGTCATAAGAATTTTTGGTAAA  
AGC---AAAATTCATACATGAATGAAAGAAGCAATATTTTATTA-----TCTTTTCTTCTTC  
TAGAAATTTTACAGGTATCAATTGATTCAACAATTGGATCATTGGAGTTATCGTATTATT  
AGTCTTGGGTTTATTTTTTTAACCATAGGCATTCTTTCAGGAGCAGTATGGGCTAATGAG  
GCATGGGGATCGTATTGGAATTGGGACCCAAAGGAACTTGGGCCTTTATTACTTGGAC  
CATATTCGCGATTTATTTACATATTCGAACAAATATCAATTTGGGAGGTATAAATTCTGCA



ATTGTGGCTTCTATGGGTTTTCTTATAATTTGGATATGCTATTTTGGGGTCAATCTATTAG  
GAATAGGTTTACATAGTTATGGTTCATTTACATTAACAATGGCAAAAAGAAAGCATT  
ATTCCTTTTCTATATCTTGCATCTATAGTATTTTGGCCCTGGTGGATCTCTCTCTCGTGTA  
TAAAAGTCTGAAAAGTGGATTACTAATTCGTGGAATACTCGGCAATCCGAAACTTTTT  
TGAATGATATTCAAGAAAAGAGTCTTCTAGAAAATTCATACAATTAGAGGAACTCTTC  
CTGTTGGATGAAATGATAAAGGAAGACCCGAAACCCATTTACAAAAGCTTCGTATAG  
GA---CACAAAGAAACGATCCAATTCATCCAGATGTACAATGAAGATCGTATCCATACAA  
TTTTGCACTTCTCGACAAATATACTCTGTTTTGTTATTCTAAGTGGTTATTCTATTCTGGG  
TAATGAAGAACTTCTTATTATTAAGTCTTGGGTTCAAGAATTCCTATATAATTTAAGCGA  
CACAATCAAAGCTTTTTCTATTCTTTTATTAAGTATTATGTATCGGATTCCATTTCGCCT  
CACGGTTGGGAACATAATGATTGGTTATATTTACAAAGATTTTGGATTTGCTCATAACGAT  
CAAATTATATCTGGTCTTGTTCACCTTTCCAGTCATTCTAGATACAATTTTTAAATATT  
GGATCTTCCGGTATTTAAATCGTGTATCTCCATCACTTGTAGTGATTATCATTCAATAAA  
TGACATGCCTATTGGTGTTCAAAAGTGCCTTTTCGAAGTCCTGGAGAGGAAGATGCA  
TCTTGGGTTGACGTATAACAACCGACTTTATCGAGAAAGATTGCTTTTTTTAGGCCAAGA  
GGTTGATAGCGAAATCTCAAATCAACTATTGGTCTTATGGTATATCTCAGTATAGAGAG  
TGATACCAAAGATCTTTATTTGTTTATAAACTCTCCTGGCGGATGGGTAATACCTGGAGT  
GGCTATTTATGATACTATGCAATTTGTGCAACCAGATGTACAGACAATATGCATGGGATT  
GGCTGCTTCAATGGGATCTTTTATCCTAGTCGGAGGAGAAATTACTAAACGTCTAGCAT  
TCCCTCACGCTAGGGTAATGATCCATCAACCCGCTAGTTCTTTTTATGAGGCACAAGTG  
GGAGAATTTATCCTGGAAGCGGAAGAATACTGAAACTTCGCGAAACCCTCACAAAG  
GTTTATGTACAAAGAACGGGCAAGCCCTTATGGGTTGTATCTGAAGACATGGAAAGGG  
ATGTTTTTATGTCAGCAACAGAAGCCCAAGCTTATGGAATTGTTGATCTTGTAGCGGTT  
C

A

A????????????????????????????????????????????????????????????  
????????????????????????????????????????????????????????????  
????????????????????????????????????????????????????????????  
????????????????????????????????????????????????????????????  
ATGGAGGAATTTCAAGTATATTT  
AGAAGTATAGATTTTCGGCAACACGACTTCCTATACCCACTTATTTTTTCGGGAGTATAT  
TTATGCACTTGCTCATGATCATAGTTTATCTGCCAATAAATATAAATATAGTTCAGTAATT  
GTGAAACGTTTCATTTTTCGAATGTATCAACAGAATCATTGATTATTTCCGCTAATGATT  
CGAACCAAAAACAATTTTTTGGTAATAATTTGTATTATGAAATGATATCGGCGGTATTTG  
CAGTGATTGCGGAAATTCATTTTCCCTAAGATTAGTATCCTCCTTACCAGCAAAATCTC  
ATAATTTACAATCAATTCATTCAATATTTCCCTTTTTAGAGGACACATTTTCACATTTAAA  
TTATGTGTTAGATGTACTAATACCTTACCCCATCCATCTGGAAACCTTGGTTCAAACCCT  
TCGGTACTGGATAAAAGATACCTCTTCTTTGCATTTATTAAGGTTCTGTCTCTACGAGTA  
TTGTAATTGGAATTGGAAGAGTCTTAAA-----TCCATTCCAAGATTGTTCTTGTTC  
TTATATAATTCTCATGTATGTGAATACGAATCTATCTTCTTTTTTCTCCGCAACCAATCTTC  
TCATTTGCGATCAACATCTTTTGGAGTCCTTCTTGAGCGAATTTTATTCTATGGAAAAAT  
AGAACATCTTATAAAAGTCTTTGTTAATCAGGACATCTTATGGTTGGTCAAGGATCCTTT  
CATGCATTATATTAGATATCAAGGAAAATCCATTCTGGCTTCAAAGATAACGCCTCTTCT  
GATGAATAAATGGAAATATTACTTTGTGAGTTTATGGCAATGTCATTTTTATGTGTGGTCT  
CAATCACGAAGGGTACGTATAAAACAATTATCCAAAGATTATCTAGACTTTCTGGGCTAT  
TTCTCAAGTTTGCGATTTAATCCGTTAGTGGTACGGAGTCAAATGTTAGAAAATCATT  
TCTAATCGATAAT-----GCTATAAAGAAGTTCGATACAAAATTCCAATTATTCCAATGAT

TGGATCATTGGCTAAAGCGAGGTTTTGTAATGCATTAGGGCATCCCATTAGTAAGCCGG  
CCTGGGCCGATTACAGCGGATTCTGATATTATCGACCGATTTGTGCGTATATGCAGAAATC  
TTTCTCATTATTACAGCGGATCCTCCAAAAAAGAATTTGTATCGAATAAAATATATAC  
TTCGACTTTCTTGTGTTAAAACCTTGGCTCGTAAACACAAAAGTACTGTACGCACTTTT  
TTGAAAAGGGTAGGCTCGGGCTTTTTGGAAGAATTCTTTACGGAGGAAGAAGAAGTTC  
TTTCTTTGATCTTTCCAAGACATATTTGGTATTTGGATATTTTGTATCAATGATTTGGTC  
AATCATGAAATGATAATTGATACAATA---GAAGTACAAGATATCAAT--TCTTTTTCCAGA  
TTGGAATCT--TTAAAAGAGTTCTATGGAATCATATGGATGCTTGTCCCTATTTTGGCTCT  
TGTATTGGGGATCACAAACAGGTGTACTAGTAATTGTGTGGTTAGAAAGAGAAATATCTG  
CAGGGATACAACAACGTATTGGACCTGAATACGCCGGTCCTTTGGGAATTCTTCAAGCT  
CTAGCAGATGGGACAAAACACTTTTTCAAAGAGAATCTTCTTCCATCTAGAGGAAATAC  
TCGTTTATTCAGTATTGGACCGTCTATAGCAGTTATATCAATTTTACTAAGTTATTCAGTA  
ATTCCTTTTGGCAATCACCTTGTTTTAGCGGATCTCAATATCGGTATTTTTTTATGGATTG  
CCATCTCAAGTATTGCTCCTATTGGACTTCTTATGTCAGGATATGGATCAAATAATAAATA  
TTCTTTTTTAGGTGGTCTGCGAGCTGCTGCTCAATCAATTAGTTATGAAATACCATTAAC  
TCTATGTGTTTTATCAATATCTCTACTATCTAACAGTTCAAGTACAGTTGATATAGTTGAG  
GCGCAGTCAAATATGGTTTTTGGGGGTGGAATTTGTGGCGACAACCCATAGGGTTTTAT  
CATTTTTCTAATTTCTTCCCTAGCAGAATGTGAGAGGTTACCTTTTGATTTACCAGAAGC  
AGAAGAAGAATTAGTAGCAGGTTATCAAACCGAATATTCAGGTATCAAATTTGGTTTTAT  
TTTACGTTGCTTCCCTATTTAAATCTATTAGTTTCTTCGTTATTTGTAACAGTTCTATACTTG  
GGTGGTTGGAATATTTCTATTCCATACATATTCGTTCCCTGAGCTATTTGAAATG-----GA  
TGGAATCCTTGGAACAACAATCGGTATCTTTATTACATTAGCGAAAACCTATTTGTTCTT  
GTTCAATTTCTATCGCAACAAGATGGACTTTACCTAGGCTAAGAATGGACCAACTATTA  
ATCTTGATGGAATTTCTTTTACCTATTTCTCTGGGCAATCTATTATTAACAACCTTCGTC  
CCAACTCCTTTCACTCATGATCTGGCATGTACAGAATGAAAATTTCAATCTCGATTCTAC  
GAGAATTTTTATGAAAGCCTTTCAATTTGCTTCTCTTCGATGGAAGTTTGATTTCCAG  
ATGTATCCTAATTTTGGCCTAATTTCTTCTGATGATCGATTCAACCTCTGATCAAAAA  
GATATACCTTGGTTGTATTTCACTCTTCAACAAGTTTAGTAATGAGCATAACGGCCCTA  
TTGTTCCGATGGAGAGAAGAACCTATGATTAGCTTTTCCGGAAATTTCCAAACGAACAA  
TTTCAACGAAATCTTTCAATTTCTTATTTTACTATGTTCAACTCTCTGTATTCCCTCTATCC  
GTAGAGTACATTGAATGTACAGAAATGGCTATAACAGAGTTTCTGTTATTCATATTAACA  
GCTACTCTAGGAGGAATGTTTTTATGCGGTGCTAACGATTTAATAACTATCTTTGTAGCT  
CCAGAATGTTTCAGTTTATGCTCCTACCTATTATCTGGATATACCAAGAAAGATGTACGG  
TCTAATGAGGCTACTACGAAATATTTACTCATGGGTGGGGCAAGTTCTTCTATTCTGGTT  
CATGGTTTCTCTTGGCTATATGGTTCATCCGGGGGAGAGATTGAGCTTCAAGAAATAGT  
GAATGGTCTTATCAATACACAAATGTATAACTCCCCAGGAATTTCAATTTGCGCTTATATT  
CATCACTGTAGGAATTGGGTTCAAGCTTTCCCCAGCCCCTTCTCATCAATGGACTCCTG  
ACGTATACGAAGGATCTCCCACTCCAGTCGTTGCTTTTTCTTTCTGTTACTTCGAAAGTA  
GCTGCTTCAGCTTCAGCCACTCGAATTTTCGATATTCCTTTTTATTTCTCATCAAACGAA  
TGGCATCTTCTTCTGGAAATCCTAGCTATTTCTTAGCATGATATTGGGGAATCTCATTGCTA  
TTACTCAAACAAGCATGAAACGTATGCTTGCATATTCGTCCATAGGTCAAATCGGATATG  
TAATTATTGGAATAATTGTTGGAGACTCAAATGGTGGATATGCGAGCATGATAACTTATA  
TGCTGTTCTATATCTCCATGAATCTAGGAACTTTTGGCTTGCATTTGTATCATTTGGTCTACG  
TACCGGAACTGATAACATTCGAGATTATGCAGGATTATACACAAAAGATCCTTTTTTTGGC

TCTCTCTTTAGCTCTATGTCTCTTATCCCTAGGAGGTCTTCCTCCACTAGCAGGTTTTTTC  
GGAAACTCCATTTATTCTGGTGTGGATGGCAGGCAGGCCTATATTTCTTGGTTTCAATA  
GGACTCCTTACGAGCGTTCTTTCTATCTACTATTATCTAAAAATAATCAAGTTATTAATGA  
CTGGACGAAACCAAGAAATAACCCCTCACGTGCGAAATTATAGAAGATCCCCTTTAAG  
ATCAAACAATTCCATCGAATTGAGTATGATTGTATGTGTGATAGCATCTACTATACCAGG  
AATATCAATGAACCCGATTATTGCGATTGCTCAGGATACCCTTTTTATGTTTCTGCTTTAC  
GAATATGATATTTTCTGGGCATTTCTAATAATATCAAGTGCTATTCCATTTTGGCATTCT  
AATTTCCGGAGTTTTAGCTCCAATTAACAAAGGCCAGAGAAACTGTCTAGTTATGAAT  
CGGGTATAGAACCGATGGGCGATGCTTGGTTACAATTTCGAATTCGTTATTATATGTTTG  
CTCTAGTTTTTGTGTTTTTGTATGTTGAAACAGTTTTTCTTTATCCATGGGCAATGAGTT  
TCGATGTATTGGGGGTATCCGTTTTTATAGAAGCTTTAATTTTTTGTGCTTATCCTAATTGT  
TGGTTCAGTTTATGCGTGGCGAAAAGGAGCATTGGAATGGTCTACGAATTATTTTCCTT  
GGTTAACAATAATTGTAGTTTTGCGGATATCCGCAGGTTGTTAATTTTTTTTCTACCTCA  
TAGAGGAAATAAGGTGATTCCGGTGGTATAACAATATGTATATGCGTCTTAGAACTTCTTCT  
AACGACCTATGCGTTTTGTTATCATTTCATTGGACGATCCCTTAGTTCAGTTGACGGA  
AGATTATAAATGGATCAATTTTTTTGATTTTTACTGGAGATTGGGAATAGATGGACTTTCT  
ATAGGACCTATTTTACTGACAGGATTTATCTACTTTTAGCTACCTTAGCGGCTTGGCCT  
GTTACTCGAGATTCCCGATTATCCATTTTCTGATGTTAGCAATGTACAGCGGTCAAATA  
GGATCATTTTCGTCTCGAGATCTTTTACTTTTTTTCCTCATGTGGGAGTTAGAATTAATTC  
CCGTTTATCTACTTCTTTCCATGTGGGGTGGAAAGAAACGTCTGTATTTCAGCTACAAAG  
TTTTTTTTGTACACTGCGGGAGGTTCCATTTTTCTATTAATAGGAGTTTTGGGTATTGGTT  
TATATGGTTCCTACTGAACCAACATTAATTTTTGAAACATTAATAATCAATCGTATCCGA  
TCGCACTAGAAATAATATTCTATATTGGATTCTTATTGCTTTTGCTGTCAAATCACCGAT  
TATACCCTTACATACATGGTTACCAGACACCCATGGAGAGGCACATTACAGTACTTGTAT  
GCTTCTCGCCGGAATCTTATTAATAATGGGAGCATATGGATTGGTTCGAATCAATATGGA  
ATTATTACCACATGCTCATTCTCTATTTTCTCCCTGGTTGGTGGTTGTAGGTACAATGCA  
AATAATTTATGCAGCTTCAACATCTTCTGGTCAACGTAATTTAAAAAAAAGAATAGCCTA  
TTCTTCTGTATCTCATATGGGTTTCATAATTATAGGAATTGGTCTATAACCGACCCAGGA  
CTCAATGGAGCCATTTTACAAATAGTCTCTCATGGATTTATTGGCGCTGCACTTTTTTTC  
TTGGCAGGAACGAGTTATGATAGAATACGTCTTGTTTATCTCGACGAAATGGGCGGAAT  
GGCTATCTCAATGCCAAAAATATTCACAATGTTTCAGTATCTTATCGATGGCTTCCCTTGC  
ATTACCGGGCATGAGTGGGTTTGTGTCAGAATTGATAGTTTTTTTTTGAATAATTACCAG  
TCAGAAATATTTTTTAATGGCAAAAATACTAATTACTTTTTGTAATGGCAATTGGAATGATA  
TTAACTCCTATTTATTCAATTATCTATGTCACGCCAAATGTTCTATGGGTACAAGCTAATTA  
ATGCCCAAAACTTTTCTTTTTTTGATTCTGGGCGCGAGAGTTATTTGTTTCGATCTCTA  
TTCTTTTACCCGTAATAGGTATTGGTATTTATCCGGATTTCCCTTCTCTCACTATCAAGTGA  
CAAGGTTGAAGCTATTCTATCTAATTATTTTAATAGAATGCTACTCGAACATGTACTTGTT  
TTGAGTGCCTATTTATTTTCTATCGGTATTTATGGATTGATTACGAGTCGAAATATGGTTA  
GGGCCCTTATGTGCTTGAACCTATACTGAATGCGGTTAATATGAATTTTGTAACGTTTT  
CTGATTTTTTTGATAAGCGCCAATTAAGGGGGATTTTTCTCAATTTTTGTTATAGCAAT  
TGCAGCCGCTGAAGCAGCTATTGGATCAGCTATTGTTTCGTCAATTTATCGTAACAGAA  
AATCAACTCGTATCAACCAATCAACTTTGTTGAATAAGATGGAACATATATATCAATATT  
CATGGATGATCCCTTTCATTCCACTTCCAGTTCGATTTTACTAGGAATGGGACTTCTAC  
TTTTTCCGACGGCAACAAAAAATCTTCGCCGTATGTGGGCTTTTCTTAGTATTTTTTGT

TAAGTATAGTTATGATCTTTTCGATCGATCTCTCTATTCAACAAATAACTGGAAGTTCCG  
CCTATCAATATGTATGGTCTTGGACCATAAATAATGAATTTCTTTTCGAGTTTGGCAACTT  
GATTGATCCACTTACTTCTATTATGTCAATATTAATCACTACTGTTGGAATTTTGGTTCTTA  
TTTATAGTGACAGTTATATGTCTCATGATCAAGGGTATTTGAGATTTTTTGCTTATATGAG  
TTTTTCAATACTTCAATGTTGGGATTAGTACTAGTTCTAATTTGATACAAGTTTATATT  
TTTTGGGAATTAGTCGGAATGTGTTCTTATTTATTAATAGGTTTTTGGTTCACACGACCTA  
TTGCAGCAAATGCTTGTCAAAAAGCCTTTGTAACATAATCGTGTAGGGGATTTTGGTTTA  
TTATTAGGAATCTTAGGTCTTTATTGGATAACGGGTAGTTTCGAATTTCAAGGATTTGTTT  
GAAATATTCAATAAC---CAGGTTCATTTTTATTCGTTACTTTGTGTGCTTTTCTATTATTT  
GCGGGCCCAGTTGCTAAATCCGCCAATTCCCTCTTCATGTATGGTTACCTGATGCGATG  
GAAGGTCCTACTCCTATTTTCGGCTCTTATACATGCTGCTACTATGGTAGCGGCAGGAATT  
TTTCTTGTAGCTCGGCTTCTCCTCTTTTCATAGGCATACCTTACATAATGTATCTAATTT  
CTTTGATAGGTATAATAACAGTATTATTAGGAGCTACTTTAGCTCTTGCTCAAAAAGATA  
TTAAGAGAGGGTTAGCCTATTCTACAATGTCTCAATTGGGTTATATGATGTTAGCTCTAG  
GTATGGGCTCTTATCGAGCCGCTTTATTTCAATTTGATTACTCATGCTTATTCAAAGCATT  
GTTGTTTTTAGGATCCGGATCAATTATTCATTCAATGGAAGCTGTTGTTGGATATTCTCC  
AGTTAAAAGCCAGAATATGGTTCCTTATGGGTGGTTAACAAGCATGTACCAATTACAA  
AAACCACTTTTTTATTAGGTACGCTTTCCCTTTGTGGTATTCCGCCCTTGCTTGTTTTT  
GGTCCAAAGATGAAATTCTCAATGATAGTTGGTTGTATTCACCAATTTTTGCAGTAATAG  
CTTGTTCACGGCCGGATTAACCGCCTTTTATATGTTTCGGATCTATTTACTTACTTTTGA  
TGGGCATTTAAACATTCATTTTCAAATTACAGTGGCAAAAAAGTAGCTCTTTCTATT  
CAATATCTATATGGGGTAAAGAAGAAGCAAAACCAATTAACAGA---TtagTACCTTTATT  
AACAAATGAATTTTTTTTTGGGCCGTTAAACA---ACTTTCTCTTATCCCCATGAATCGGAC  
AATACTATCCTATTTCCGATGCTTATATTGGTCTATTTACTTTGTTTGTGGAGCCATAG  
GA-----TTCGATTTTGATATATTATCAAATTGTAACTCCGTCTATAAACCTTTTACATCA  
AAATTCAAAT---TTTGTAGATTGG---GAATTTTTTAAAAATGCAACCTTTTCAGTCAGTAT  
AGCTTTTTTTCGGAATATTTATAGCATTTTTTTTTATATAAGCCTGCTTATTCATCTTTACAGA  
ATTTAAACTTACTTAATTCATTTGCAATTCTGTGGGACAAAATAATCAATTTTATATATGA  
TTGGTTCGTATAATCGTGGTTACATAGATACTTTTTTATACAATATCTTTAACTGGGGGTATA  
AGAGGATTAGCGGAACATACTCATTTTTTTGATAGACGAGTAATTGATGGAATTACAAA  
TGGGGTAGGTATTACGAGTTTCTTTATAGGAGAAGGCATAAAATATGTCGGGGGAAGT--  
-CGCATCTCTTCTTATCTATTATTGTATTGTTCTATGTATTAATTTTTTTATTTACTAC  
ATGGATTTGCTTGGACCAATACATGATTTTCTTTTAGTTTTTCTGGGATCAGGTCTTATAT  
TAGGAGGTCTGGGAGTGGTATTATTTCCCAACCCAATTTATTCTGCCTTTTCATTAGGAT  
TTGTTCTTGCTTGTATATCCTTATTCTATATTCTATCAAATCCCATTTTGTAGCTGCTGCA  
CAGCTCCTTATTTACGTGGGGGCCATAAATGTTTTAATCATATTTGCTGTAATGTTTCATGA  
ATGGTTCAGAATATTACAGAGATTTAATCTCTGGACCATTTGGGGATGGGATTACTTCTCT  
TGGTTTGTACAAGTATTTTTCTTTTCGTTAATTACTACTATTCTGGATACGTCATGGTACGG  
GGTATTTGGACTACAAGATTAATCAGATTCTAGAGCAAGATTTGATAAGTAGTAGTC  
AACAAATTGGAATTCATTTATCAACAGATTTTTTTCTTCCATTTGAACTCATTTTCGATAAT  
TCTTTTAGTTGCTTTGATAGGTGCAATTGCTGTGGCTCGTCAGATGAATATAACCAGCCAC  
GGGAAAAGACTTTATGATAGTCAATATGGGACCTCACCACCCATCAATGCATGGTGTTC  
TTCGTCTAATCGTTACTCTAGATGGTGAAGATGTTATTGACTGTGAACCAATATTAGGTT  
ATTTACACAGAGGAATGGAAAAAATTGCGGAAAATCGAACAATTATACAATATCTGCCT

TATGTAACACGGTGGGATTATTTAGCTACTATGTTACACAGAAGCAATAACCGTAAATGG  
ACCAGAACAGTTGGGAAATATTCAAGTCCCTAAAAGAGCTAGCTATATTAGAGTAATTA  
TGTTGGAATTGAGTCGTATAGCTTCTCATCTGTTATGGCTTGGCCCTTTTATGGCAGATAT  
TGGTGCACAGACTCCCTTTTTCTATATTTTCAGAGAACGAGAATTAGTATATGATCTATT  
CGAAGCTGCCACCGGTATGAGAATGATGCATAATTATTTTCGTATCGGAGGAATAGCGG  
CCGATCTACCTCATGGTTGGATAGATAAATGCTTGGATTTTTGCGATTATTTTTAACAG  
GGGTTGCTGAATATCAAAAACCTTATTACACGAAATCCTATTTTTTTAGAACGAGTTGAA  
GGAGTAGGCATTATTGGTGGAGAAGAAGCAATAAATTGGGGTTTATCCGGACCAATGCT  
ACGCGCGTCTGGGATAGAATGGGATCTTCGTAAAGTTGATCATTATGAGTGTTACGACG  
AATTTGATTGGGAAGTCCAGTGGCAAAAAGAAGGAGATTCATTAGCTCGTTATTTAGTG  
CGAATCAGTGAAATGACGGAATCCATAAAAATTATTCAACAGGCTCTGGAAGGAATC  
CAGGAGGCCCTATGAGAATTTAGAAATCCGATGTTTTGATAGAAAAAAGGATCCAGA  
GTGGAATGATTTTACTATCGATTCATTAGTAAAAAACCTTCTCCTACTTTTGAATTGCC  
AAAACAAGAAGTGTATGTGAGAGTCGAAGCTCCAAAGGGGAATTGGGAATTTTTCTG  
ATAGGGGATCAAAGTGGTTTTCCCTGGAGATGGAAAATTCGCCACCGGGTTTTATTA  
TTTGCAAATCTTCTCAGCTAGTTAAAAGAATGAAATTGGCTGATATTATGACGATACT  
CGGTAGTATAGATATCATTATGGGAGAAGTTGATCGTATGTTCCCTATGGTAACTGGGTT  
CATGAATTATGGTCAACAAACAATACGAGCCGCAAGGTACATTGGGCAAGGTTTCATAA  
TTACCCTATCCCACGCAAATCGTTTACCTGTAACCTATTCAATATCCTTATGAAAAATTAAT  
AACATCGGAGCGTTTCCGTGGTCGAATCCATTTGAATTCGATAAATGCATTGCTTGTG  
AAGTATGTGTTCCGGTATGCCCTATAAATCTGCCTGTTGTTGATTGGAAATTTGAAACTG  
ATATTCGAAAGAAACGATTGCTTAATTACAGTATTGATTCGGAATCTGTATATTTGTG  
GTAACGTGTTGAGTATTGTCCAACAAATTGTTTATCAATGACTGAAGAATATGAACTTT  
CTACTTATGATCGTCACGAATTGAATTATAATCAAATTGCTTTAGGTCGTTACCAATGTC  
AGTAATTGACGATTATACAATTCGAACTATTTGAATTTCG-----  
-----ATGCAGGGCCATTTGTCTGTTTGGCTAGTCAAACACGGGCTGGTTCATAGATCTT  
TGGGCTTCGATTACCAAGGAATAGAGACTTTACAAATAAAGCCCGAGGATTGGCATTCC  
ATTGCTGTAATTTTATATGTATATGGTTACAATTATCTACGTTCCCAATGCGCCTATGATGT  
GGCACCAGGCGGACTCTTAGCCAGCGTGTATCATCTTACGAGAATAGAATATGGCGTAG  
ATCAACCGGAAGAAGTATGCATAAAAGTATTTGCTCCAAGGAGCAATCCTAGAATTCCA  
TCTGTTTTCTGGGTTTGGAAAAGTGCAGGATTTTCAAGAACGGGAATCTTATGATATGTT  
GGGAATCTCTTATGATAATCATCCACGACTGAAACGTATCTTAATGCCCGAAAGTTGGAT  
AGGGTGGCCTTTACGTAAGGATTATATTGCCCCCAATTTTTATGAAATACAAGATGCTCA  
T-----  
-----ATGAATTCCATTGAGTTCCCTTACTTG  
ATCGAACAACCCAAAATTCAGTTATTTCAACTACATTAACGATCTTTCAAATTTGGTCA  
AGACTTTCAGTTTATGGCCGCTTCTTTATGGTACCAGTTGTTGCTTCATTGAATTTGCC  
TCATTAATAGGTTACGATTTGACTTTGATCGTTATGGACTGGTACCAAGATCGAGTCCT  
AGACAGGCAGACCTAATTTAACAGCCGGCACAGTAACAATGAAAATGGCTCCTTCTT  
TAGTAAGATTGTATGAACAAATGCCCGAACCAAAGTATGTTATTGCTATGGGAGCGTGT  
ACAATTACAGGAGGGATGTTTAGTACCGATTCTTATAGTACTGTTCCGAGGGGTTGATAA  
GCTAATTCCTGTGGATGTTTATTTGCCGGGCTGTCCACCTAAACCAGAGGCAGTTATAG  
ATGCTATAACAAAACCTTCGTAAGAAAATTTCTCGAGAAATCTATGAAGATAGAATTCGA  
TCTCAACAGGGGAATCGGTGTTTTACTACCAATCACAAGTTCCTTTTTGTACGCAGTAC

GCATACTGGAAATTATGATCAAGAATTACTCTATCAACCATCATCTACTTCAGAGATCCC  
T--GAAACATTTTTCAAATACAAAAGTTCAGTCTCTTCCCGCGAATTAGTAAATATGCAA  
ACTAGAAATACCCTTTCTTGGATAAAGGAAGAGATTACTCGATCCATTTCCGTATCACTC  
ATGATATATATAATAACTTGGGCATCCATTTCAAATGCATATCCATTTTTGCGCAGCAGG  
GTTATGAAAATCCACGAGAAGCAACAGGGCGTATTGTATGTGCCAATTGCCATTTAGCT  
AATAAGCCCGTGGATATTGAAGTTCACAAGCGGTACTTCCTGATACTGTATTTGAAGC  
AGTTGTTAGAATTCCTTATGATATGCAACTGAAACAAGTTCTTGCTAATGGTAAAAAGG  
GGGGTTTGAATGTGGGAGCTGTTCTTATTTTACCGGAGGGTTTTGAATTAGCTCCCCC  
GATCGCATTTTCGCCTGAGATGAAAGAAAAGATAGGCAATCTGTCTTTTCAGAATTATCG  
CCCTACTCAAAAAAAGATTCTTGTAATAGGTCCTGTTCCGGGTGAGAAATATAGTGAAA  
TCACCTTTCCTATTCTTTCCCCAGACCCCGCTACTAATAAAGATGTTCACTTCTTAAAAT  
ATCCCATATATGTAGGCGGGAACAGGGGAAGGGGTCAGATTTATCCTGACGGGAGAAA  
AAGTAAACAATACAGTTTATAATGCTACAGCAGCGGGTATAGTAAGCAAAATTTTACGAA  
AAGAAAAGGGGGGATACGAAATAACCATAGTGGATGCATCGGATGGACGTCAAGTGGT  
TGATATTATCCCCCAGGACCAGAACTTCTTGTTTCCGAGGGCGAATCCATCAAACCTCG  
ATCAACCATTAACGAGTAATCCTAATGTGGGTGGATTTGGTCAGGGGGATGCAGAAATA  
GTACTTCAAGATCCATCACGTGTCCAAGGCCTTTTGTCTTTTTTGGCATCCGTTGTTTTG  
GCACAAATCTTTTTGGTTCTTAAAAAGAAACAGTTTGAGAAGGTTCAATTGTCCGAAA  
TGAATTTTCATGAGTAAAGTCTATGATTGGTTTCGAAGAACGTCTTGAGATTCAGGCGATT  
GCAGATGATATAACTAGTAAATACGTTCCCTCCTCATGTCAACATATTTTATTGTCTAGGA  
GGAATTACGCTTACTTGTTTTTTTAGTACAAGTAGCTACGGGATTGCTATGACTTTTTTAC  
TATCGTCCGACCGTTACTGAGGCCTTTGCTTCTGTTCAATACATAATGACTGAAGCTAAC  
TTTGGTTGGTTAATCCGATCAGTTCATCGATGGTCGGCAAGTATGATGGTCCTAATGATG  
ATCCTGCACGATTTTCGTGTATATCTCACTGGTGGTTTTAAAAAACCTCGCGAATTGACT  
TGGGTTACTGGTGTGGTTCTGGCTGTATTGACCGCATCTTTTGGTGTAACAGGGTATTC  
CTTACCTTGGGATCAAATTGGTTATTGGGCAGTCAAATTTGTAACAGGTGTACCAGAAG  
CTATTCCTGTAATAGGATCGCCCTTGGTAGAGTTATTACGCGGAAGTGCTAGTGTGGGA  
CAATCCACTTTGACCCGTTTTTATAGTTTACATACTTTTGTATTACCTCTTCTGACTGCCG  
TATTTATGTTAATGCATTTCCCTAATGATACGTAAGCAAGGTATTTCTGGTCTTTAATGGG  
AGTAAACAAAAAACCTGACTTGAATGATCCTGTATTAAGAGCTAAATTGGCTAAAGGTA  
TGGGTCATAATTATTATGGGGAACCCGCATGGCCCAATGATCTTTTATATATTTTTCCAGT  
AGTAATTCTCGGTACTATTGCCTGTAACGTAGGCTTAGCGGTTTTAGAGCCATCAATGAT  
TGGTGAACCCGCAGATCCATTTGCAACTCCTTTGGAAATATTACCTGAATGGTATTTCTT  
TCCCGTATTTCAAATACTTCGTACAGTACCCAACAAATTATTGGGTGTTCTTTTAATGGT  
TTCAGTACCCGCGGGATTATTAACAGTACCTTTTTTGGAAAATGTTAATAAATCCAAAA  
TCCATTTTCGTCGTCCAGTAGCGACAACCGTCTTTTTGATTGGTACCGCAGTGGCCCTGT  
GGTTGGGTATTGGAGCAACATTACCGATTGATAAATCCCTAACTTTAGGTCTTTTTATGA  
TTGAAGTTTTTCTATTTGGAATCGTCTTAGGTCTAATTCCTATTACTTTGGCTGGATTATT  
CGTAACTGCGTATTTACAATACAGACGTGGTGATCAGTTGGACCTTATGCCTACTATAAC  
TAGTTATTTCCGTTTTTCTACTAGCAGCTTTAACTATAACCTCAGCTCTATTTATTGGTCTA  
AGCAAGATACGGCTTATTATGGATATAGTAAGTCTCGCTGGGCTGCTTTAATGGTAGTC  
TTACATTTTCCCTTTCCTCGTAGTATGGGGAAGAAGTGGACTCATGATTATTCGTTTCG  
CCGGAACCAGAAGTAAAAATTTGGTAGATAGGGATCCATAAAAACTTCTTTCGAGG  
CATGGGCCAAACCGGGTCATTTCTCAAGAACAATAGCTAAGGGACCTGATACTACCAC

TTGGATCTGGAACCTACATGCCGATGCTCACGATTTTCGATAGCCATACGAGTGATTTGG  
AGGAGATCTCTCGAAAAGTATTTAGCGCTCATTTTCGGCCAACTCTCCATCATCTTTCTTT  
GGCTGAGTGGTATGTATTTCCACGGTGCTCGTTTTTCCAATTATGAAGCATGGCTAAGC  
GATCCTACTCACATTGGACCTAGTGCCCAGGTGGTTTTGGCCAATAGTGGGCCAAGAAA  
TCTTGAATGGCGATGTGGGCGGGGGTTTTCCGAGGAATACAAATAACCTCTGGCTTTTTT  
CAGCTTTGGCGAGCATCTGGAATAACTAGTGAATTACAACCTCTATTGTACCGCAATTGG  
TGCATTGATCTTTGCAGCCTTAATGCTTTTTTGCTGGTTGGTTCCATTATCACAAAGCGGC  
TCCAAAATTGGCTTGGTTCCAAGATGTAGAATCTATGTTGAATCACCATTTAGCGGGGC  
TACTAGGACTTGGGTCCCTTTCTTGGGCGGGACATCAAGTGCACGTATCTTTACCGATT  
AACCAATTTCTAAATGCTGGAGTAGATCCTAAAGAAATCCCACTTCCCTCATGAATTTATC  
TTGAATCGGGATCTTTTGGCTCAACTTTATCCAAGTTTTTGCTGAGGGAGCAACCCCAT  
TTTTACCTTGAATTGGTCAAATATGCGGAATTTCTTACTTTTCGTGGGGGATTAGATCC  
AGTGACCGGTGGTCTATGGCTGACCGATATTGCACACCATCATTAGCTATTGCAATTCT  
TTTCTGATAGCAGGTACATGTATAGGACCAACTGGGGTATTGGTCATGGTCTAAAAG  
ATATTTAGAGGCTCATAAAGGTCCATTTACAGGTCAAGGCCATAAAGGACTATATGAA  
ATCCTAACACATCATGGCATGCTCAATTATCTCTTAAACCTAGCTATGTTAGGCTCTTTAA  
CCATTATTGTAGCTCACCATATGTATTCCATGCCCCCTTATCCATATCTAGCTACCGACTAT  
GGTACACAACCTGTCATTGTTACACACATCACATGTGGATTGGTGGATTTCTCATAGTTGG  
TGCTGCCGCGCATGCAGCTATTTTTATGGTAAGAGACTATGATCCAACATAATCGATACAA  
CGATCTATTAGACCGTGTCTTAGGCATCGTGATGCAATCATATCACATCTCAACTGGGT  
ATGTATATTTCTAGGCTTTACAGTTTTGGTTTTGTATATTCATAATGATACCATGAGTGCT  
TTAGGGCGTCCACAAGATATGTTTTAGATAACCGCTATAACAATTACAACCTGTCTTTGCT  
CAATGGATACAAAATACTCATGCCTTAGCGCCTGGTGCAACAGCCCCTGGTGAAACAG  
CGAGCACAGTTTTGACTTGGGGGGGCGGTGATCTAGTAGCAGTGGGTGGCAAAGTTG  
CTTTGTTACCTATTCCATTAGGAACCGCGGATTTTTTGGTACATCACATTCATGCATTTAC  
GATTCATGTGACGGTATTGATACTCCTGAAAGGAGTTCTATTTGCTCGCAGCTCGCGTTT  
GATACCGGACAAAGCAAATCTTGGTTTTCGTTTTCCCTTGTGATGGGCCGGGAAGAGGG  
GGGACATGTCAAGTATCCGCTTGGGATCATGTCTTCTTAGGACTATTCTGGATGTACAAT  
TCCATTTCTGTAGTAATATTCATTTTCAGTTGGAAAATGCAGTCAGATGTTTGGGGTAGT  
ATAAACGATCAAGGAGTGGTAACTCATATCACGGGAGGAACTTTGCGCAGAGTTCCA  
CTACCATTAATGGGTGGCTACGCGATTTCTTATGGGCACAAGCATCCAGGTAATTCAG  
TCTTATGGTTCTTCATTATCTGCATATGGCCTTTTTTTCTAGGTGCTCATTTTGTATGGG  
CTTTTAGTTTAAATGTTTCTATTCAGCGGGCGTGGTTATTGGCAAGAACTTATTGAATCCA  
TCGTTTTGGGCTCATAATAAATAAAAGTTGCTCCTGCTACTCAGCCTAGAGCCTTGAGC  
ATTGTACAAGGACGTGCTGTAGGAGTAACCCATTACCTTCTGGGTGGAATTGCCACAA  
CATGGGCGTTCTTCTTAGCAAGAATTATTGCAGTAGGAATGGCATTAAAGATTTCCAAGG  
TTTAGCCAAGGCTTAGCTCAGGACCCCACTACTCGTCGTATTTGGTTTTGGTATTGCTACC  
GCACATGACTTCGAGAGTCATGATGATTAATCTGAGGAACGTCTTTATCAGAATATTTTT  
GCTTCTCACTTCGGGCAATTAGCAATAATTTTTCTGTGGACTTCCGGAAATCTGTTTCAT  
GTAGCTTGGCAAGGAAATTTTGGAGCATGGGTACAGGACCCTTACATGTAAGACCGA  
TTGCTCATGCAATTTGGGATCCTCATTTTGGTCAACCGGCTGTGGAAGCTTTTACTCGA  
GGGGTGCTCTTGGCCCAGTGAATATCGCTTATTCTGGTGTATCAGTGGTGGTATACA  
ATCGGTTTACGTAATAATGAAGATCTTTATACTGGAGCTCTTTTTCTATTATTTCTTTCTG  
CCATATCCTTAATAGGGGTTGGTTACACCTACAACCGAAATGGAAACCGAGCGTTTTCG

TGGTTCAAAAATGCCGAATCTCGTCTCAACCATCATTTGTCAGGACTTTTCGGGGTAAG  
CTCCTTGGCTTGGACAGGGCATTAGTCCATGTTGCTATTCCTGGATCCCGTGGGGAATA  
TGTTCCGGTGGGAATAATTTCTTAGATGTATTACCGCATCCCCAAGGGTTAGGCCACTTTT  
TACAGGTCAGTGGAAATCTTTATGCTCAAAACCCTGATTCAAGTAGTCATTTATTTGGTAC  
CTCCAAGGATCAGGAAGTCCATTCTAACCCTTCTTGGGGGATTCCATCCACAAACGC  
AAAGTTTATGGCTGACCGATATTGCTCATACCATTTAGCTATTGCATTTCTTTTTCTCAT  
TGCGGGTCATATGTATAGAACTAATTTTGGAAATTGGGCATAGTATAAAAGATCTTTTAGA  
AGCACATATTCCTCCGGGAGGACGATTGGGGCGTGGGCATAAGGGTCTTTATGACACA  
ATCAATAATTCGATTCATTTTCAATTAGGACTTGCTCTAGCCTCCTTAGGGGTTATTACTT  
CCTTGGTAGCTCAACACATGTATTCTTTACCTGCTTATGCGTTCATAGCGCAAGACTTTA  
CTACTCAAGCTGCATTATATAACCCATCACCAATACATCGCAGGATTCATCATGACAGGGG  
CTTTTGCTCATGGAGCTATATTTTTTATTAGAGATTACAATCCGGAACAGAATGAAGATA  
ATGTATTGGCAAGAATGTTAGATCATAAGGAAGCTATCATATCCCATTTAAGTTGGGCCA  
GCCTCTTTCTGGGGTTCACATACTTTGGGACTTTATGTCCATAATGACGTCATGCTTGCTT  
TTGGTACTCCGGAGAAACAAATCTTGATCGAACCATATTTGCCCAATGGATACAATCC  
GCTCACGGTAAACTTCATATGGATTTGATGTACTTTTATCTTCAACGACTGGCCCAGCA  
TTCAATGCGGGTCGAAGCATATGGTTGCCCGGCTGGTTAAATGCTGTTAATGAG-----AA  
TAGTAATTCATTATTCTTAACAATAGGTCCTGGAGACTTCTTGGTTCATCATGCTATTGCT  
CTAGGTTTACATACAACTACATTGATCTTAGTAAAAGGTGCTTTAGATGCACGTGGTTC  
AAGTTAATGCCAGATAAAAAGGATTTTCGGTTATAGTTTTCTTGGCATGGTCCGGGACG  
AGGTGGTACTTGTGATATTTTCGGCTTGGGACGCATTTTATTTGGCAGTTTTCTGGATGTT  
AAATACTATTGGATGGGTTACTTTTTATTGGCATTGGAAACACATCACATTATGGCAGGG  
TAACGTTTCGCAGTTTAATGAATCTTCCACTTATTTGATGGGATGGTTAAGAGATTATCT  
ATGGTTAAACTCTTCACAACTTATCAATGGATATAATCCGTTTGGTATGAATAGTTTATCA  
GTCTGGGCGTGGATGTTCTTATTTGGACATCTTGTGTTGGGCTACTGGATTTATGTTCTTA  
ATTTCCCTGGCGTGGTTATTGGCAGGAATTGATTGAAACTTTAGCATGGGCTCACGAACG  
CACACCTTTGGCAAATTTGATTTCGATGGAGAGATAAACCAGTGGCTCTTTCAATTGTCC  
AAGCAAGATTGGTTGGATTAGCCCACTTTTCTGTAGGTTATATATTCACTTATGCGGCTT  
TCTTGATTGCCTCTACATCGGGCAAATTTGGTATGTCACATTCAGTAAAAATTTATGATA  
CATGTATAGGATGTACTCAATGTGTCCGAGCATGCCCCACAGATGTATTAGAAATGATAC  
CTTGGGACGGATGTAAAGCTAAGCAAATGCTTCCGCTCCAAGAACAGAGGACTGTGT  
TGGGTGTAAGAGATGTGAATCCGCATGTCCAACGGATTTCTTGAGTGTTTCGAGTTTATT  
TAGGGCCTGAAACAATTCGAAGCATGGGTCTAGCTTATATGACA-----AACTTACCCTCT  
ATTTTTGTGCCTTTAGTGGGCCTAGTATTTCCGGCAATTGCAATGGCTTCTTTATCTCTTC  
ATGTTCAAAAAAATAAGATTGTTATGCGCGATCTAAAAACATATCTTTCCGTAGCACCG  
GTACTAAGTACTCTATGGTTCGGTTCCTTTAGCAGGTTTATTGATCGAGATTAATCGTTTAT  
TTCCAGATGCATTGACATTCCCCTTTTTTTCATTCATGACTGCAATTTTAGAGAGACGCG  
AAAGCGAAAGCCTATGGGGTCGCTTCTGTAACCTGGATAACCAGCACTGAAAACCGTCT  
TTACATTGGATGGTTTGGTGTGTTTATGATGATCCCTACCTTATTGACCGCAACTTCTGTATTT  
ATTATCGCATTCAATTGCTGCTCCTCCAGTAGATATTGATGGTATTCGTGAACCTGTTTCTG  
GATCTCTACTTTATGGAAACAATATTATTTCTGGTGCCATTATTCCTACTTCTGCAGCTAT  
AGGTTTGCATTTTACCCGATCTGGGAAGCGGCATCCGTTGATGAATGGTTATACAATG  
GCGGTCTTATGAACTAATTGTTCTACACTTCTTACTTGGTGTAGCTTGTACATGGGTC  
GTGAGTGGGAACTTAGTTTTCCGTCTGGGTATGCGTCCGTGGATTGCTGTTGCATATTCA



GCTCCTGTTGCAGCTGCTACCGCTGTTTTCTTGATCTACCCAATCGGTCAAGGAAGTTT  
TTCTGATGGTATGCCTCTAGGAATCTCTGGTACTTTCAACTTCATGATTGTATTCCAGGC  
TGAGCACAAACATTCTTATGCACCCATTTACATGTTAGGCGTAGCTGGTGTATTCCGGCG  
GCTCCCTATTTCAGTGCTATGCATGGTTCCTTGGTAACTTCTAGTTTGATCAGGGAAACC  
ACAGAAAATGAATCTGCTAATGAAGGTTACAGATTCCGGTCAAGAGGAAGAACTTATA  
ATATCGTAGCTGCTCATGGTTATTTTGGCCGATTGATCTTCCAATATGCTAGTTTCAACAA  
CTCTCGTTCTTTACATTTCTTCTTAGCGGCTTGGCCTGTAGTAGGTATCTGGTTCACTGC  
TTTAGGTATTAGCACTATGGCTTTCAACCTAAATGGTTTCAATTTCAACCAGTCTGTAGT  
TGATAGTCAAGGTCGTGTAATTAACACTTGGGCTGATATTATTAACCGTGCTAACCTTGG  
TATGGAAGTTATGCATGAACGTAATGCTCACAACCTCCCTCTAGACCTAGCGGCTGTTG  
AAGCTCCATCTACAAATGGAATGGGTTTGCCTTGGTATCGTGTCATACCGTCGTATTGA  
ATGATCCCGGCCGTTTACTTTCTGTTTCATATAATGCATACAGCTTTAGTTGCTGGTTGGG  
CCGGTTCTATGGCTCTATATGAATTAGCAGTTTTTGGATCCCTCTGACCCCGTTCTTGATC  
CAATGTGGAGACAAGGTATGTTTCGTTATAACCTTCATGACTCGTTTAGGAATAACTAATT  
CATGGGGCGGTTGGAGTATTACA---GGAGGGACTATAACGAATCCGGGTCTTTGGAGTT  
ACGAAGGTGTAGCCGGAGCGCATATCGTGTTTTCTGGCTTGTGCTTCTTGGCAGCTATC  
TGGCATTGGGTGTATTGGGATCTAGAAATATTTTGTGATGAACGTACAGGAAAACCTTC  
TTTGGATTTGCCCAAGATCTTTGGAATTCATTTATTTCTTTTCAGGAGTGGCTTGTTTTGG  
GTTTGGCGCATTTTCATGTAACAGGATTATATGGTCCTGGAATATGGGTGTCCGACCCTTA  
TGGACTAACCGGAAAGGTACAACCTGTAAATCCAGCGTGGGGCGTAGAAGGTTTTGAT  
CCTTTTGTTCAGGAGGAATAGCCTCTCATCATATTGCAGCAGGGACATTGGGCATATTA  
GCGGGCTTATTCCATCTTAGTGTCCGTCCGCCCAACGTCTATACAAAGGATTACGTATG  
GAAAATATTGAAACCGTCTTTCCAGTAGTATCGCTGCTGTCTTTTTTGCAGCTTTTGT  
GTTGCTGGAACATATGTGGTATGGTTCAGCAACTACCCCATCGAATTATTTGGTCTACT  
CGTTATCAATGGGATCAGGGATACTTCCAGCAAGAAATATATCGAAGAGTTAGTGCTGG  
GCTAGCCGAAAATCAAAGTTTATCAGAAGCTTGGTCTAAAATTCCTGAAAAATTAGCTT  
TTTATGATTACATCGGCAATAATCCGGCGAAAGGGGATTATTCAGAGCGGGTTCAATG  
GACAACGGGGATGGAATAGCTGTTGGGTGGTTAGGACACCCTATCTTTAGAGATAAAG  
AAGGGCGTGAACTTTTTGTACGTCGTATGCCTACTTTTTTTGAAACATTTCCGGTTGTTT  
TGGTAGACGGAGATGGAATTGTTAGAGCCGATGTTCCTTTTAGAAGGGCAGAATCGAA  
ATATAGTGTGAAACAAGTAGGCGTAACTGTTGAGTTCATGGCGGCGAACTTAATGGAG  
TGAGTTATAGCGATCCCGCGACTGTCAAAAAATATGCTAGACGCGCTCAATTGGGTGAA  
ATTTTTGAATTAGATCGTGCTACTTTGAAATCCGACGGTGTTTTTTCGTAGCAGTCCAAG  
AGGTTGGTTTACTTTTGGGCATGCTTCGTTTGGCTCTGCTCTTCTTCTTCGGACACATTTG  
GCATGGTGCTAGAACCCTGTTTCAGAGATGTTTTTGGCTGGTATTGATCCAGATTTGGATG  
CTCAGGTGGAATTTGGAGCATTCCAAAAACTTGGAGATCCAACCTACAAGAAGACAAGT  
AGTC-----GTGGAAACGCTCTTTAATGGAACTTTAGCTTTAGCTG  
GTCGTGACCAAGAAACCACTGGTTTCGCTTGGTGGGCGGGAATGCCGACTTATAAA  
TTTATCCGGTAAACTATTGGGAGCTCATGTAGCCCATGCCGATTAATCGTATTCTGGGC  
CGGAGCAATGAACCTATTTGAAGTGGCTCATTTTGTACCAGAAAAGCCCATGTACGAA  
CAAGGATTAATTTTACTTCCCCACCTAGCGACTCTAGGCTGGGGGGTAGGTCCTGGGGG  
AGAAGTTATAGACACCTTTCCATACTTTGTATCTGGAGTACTTCACTTAATTTCTCCGC  
AGTTTTGGGCTTTGGCGGTATTTATCATGCACTTCTGGGACCTGAGACTCTTGAAGAAT  
CTTTCCATTTTTCGGTTATGTATGGAAAGATAGAAATAAAATGACCACAATTTTGGGTA

TTCACTTAAATTTTGTTAGGTATAGGTGCTTTTCTTCTAGTATTCAAGGCTCTTTATTTTGG  
AGGCGTATATGATACCTGGGCTCCGGGAGGGGGAGATGTAAGAAAAATTACCAACTTG  
ACTCTTAGCCCAAGTGTATATTTGGTTATTTACTAAAATCGCCCTTTGGGGGAGAAGGA  
TGGATTGTAGTGTGGACGATTTGGAAGATATAATTGGAGGGCATGTATGGTTAGGTTC  
CATTTGTATCTTTGGTGGAATCTGGCATACTTAACCAAACCTTTTGCATGGGCTCGCCG  
TGCCTTGTATGGTCTGGGGAGGCTTACTTGTCTTATAGTTTAGGTGCTTTATCTGTTTT  
TGGTTTTCAATGCTTGTGCTTTGTCTGGTTCAATAATACCGCTTATCCTAGTGAGTTTTAC  
GGCCTACTGGACCAGAAGCTTCTCAAGCTCAAGCATTACTTTTCTAGTTAGAGACC  
AACGTCTTGGGGCTAACGTGGGTCTGCTCAAGGGCCTACGGGTTTAGGTAAATATTTA  
ATGCGTTCCCCTACTGGAGAAGTTATTTTTGGAGGAGAACTATGCGTTTTTGGGATCT  
GCGTGCTCCTTGGTTAGAACCTCTAAGGGGTCTAATGGTTTTGGACTTGAGTAGGTTGA  
AAAAAGACATAACCTTGGCAAGAACGTCGTTCTGCGGAATATATGACTCATGCCCT  
TTAGGTTCTTTAAATTCTGTGGGTGGCGTAGCTACCGAGATCAATGCAGTCAATTATGTC  
TCTCCGAGAAGTTGGTTAGCTACCTCTCATTTTGTCTAGGATTCTTCTATTCTGATAGT  
CATTTATGGCACGCAGGAAGGGCTCGTGCTGCTGCAGCAGGATTTGAAAAGGAATTG  
ATCGTGATCTTGAACCCGTTCTTTTCATGACCCCTCTTAACATGACTATAGCCCTTGGTA  
AATTTACCAAAGATGAAAATGATTTATTTGATATTATGGATGACTGGTTACGTAGGGACC  
GCTTCGTTTTTGTGGGTTGGTCCGGTCTATTGCTCTTTCCTTGTGCCTATTTTCGCTATAG  
GGGGTTGGTTCACAGGTACAACCTTTGTAACCTCATGGTATACTCATGGATTGGCTAGT  
TCCTATTTGGAAGGCTGCAATTTCTTAACCGCCGCAGTGTCTACTCCTGCTAATAGTTTA  
GCACATTTCTTGTGTTACTATGGGGCCCTGAAGCACAAGGAGATTTTACTCGTTGGTG  
TCAATTAGGCGGTCTGTGGACTTTTGTGCTCTGCACGGCGCTTTCGGACTAATAGGTT  
TCATGTTACGTCAATTTGAACTTGCTCGATCTGTTCAATTGCGACCTTATAATGCAATCG  
CATCTCTGGTCCAATTGCTGTTTTTGTCTGTATTCTGATTTACCCATTAGGTCAATC  
TGGTTGGTTCTTTGCGCCTAGTTTTGGTGTAGCAGCTATATTCGATTCATCCTCTTTTTC  
CAGGGGTTTCATAATTGGACATTGAACCCATTTTCATATGATGGGAGTTGCCGGTGTATTG  
GGCGCTGCTCTGCTATGCGCTATTTCATGGTGTACCGTAGAAAATACTTTATTTGAGGAT  
GGTGATGGTGCAAATACATTCCGTGCTTTTAACCCAACCTCAAGCCGAAGAACTTATTC  
AATGGTCACCGCTAACCGTTTTTGGTCCCAAATCTTTGGGGTTGCTTTTTCCAATAAAC  
GTTGGTTACATTTCTTTATGTTATTTGTACCAGTAACTGGTTTATGGATGAGTGCTCTTGG  
AGTAGTCGGTCTGGCTCTGAACCTACGTGCCTATGACTTCGTTTCCCAGGAAATCCGTG  
CAGCGGAAGATCCTGAATTTGAGACTTTCTACACCAAAAATATTCTTTTAAACGAAGGT  
ATTCGTGCTTGGATGGCGGCTCAAGATCAGCCTCATGAAAACCTTATATTCCCTGAGGA  
GGTCTACCACGTGGAAACGCTCTTATGTCTGGAAGCACAGGAGAACGTTCTTTTGTCT  
GATATTATTACCAGTATTCGATACTGGGTCATTCATAGCATTACTATAACCTTCCCTATTCAT  
TGCGGGTTGGTTATTCGTACAGCACGGGTTTAGCTTACGATGTGTTTGGAAAGCCCTCGTC  
CAAACGAGTATTTACAGAGAGCCGACAAGGAATTCATTAATAACTGGCCGTTTTGAT  
TCTTTGGACCAACTCGACGAATTTAGTAGATCTTTTATGACCATAGATCGAACCTATCCA  
ATTTTACAGTACGATGGTTGGCTGTTTCATGGATTAGCTGTACCTACCGTTTCTTTTTTG  
GGGTCAATATCAGCAATGCAGTTCATCCAACGAATGGCTACACAAACCGTTGAGGATA  
GTTCT--AGATCTGGTCCAAGACGAACGTTGTAGGGGATTTATTGAAACCATTGAATTC  
AGAATATGGTAAAGTAGCTCCTGGATGGGGAACGACTCCTTTGATGGGTGTTGCAATG  
GCTCTATTTGCAGTATTCCTATCCATTTTGGAGATTIATAATTCCTCCGTTTTACTTGA  
CGGAATTTCAATGAATATGCTTACTCTCAAACCTTTTGTTTACACCGTAGTGATATCTTT

GTTTCTCTCTTCATCTTTGGATTCCCTATCTAATGATCCAGGACGTAATCCTGGACGTGAA  
GAAATGGCTGATACTACTGGAAGGATTCCCTCTTTGGATAATAGGTACTGTAACCTGGTATT  
CCTGTGATTGGTTAATAGGTATTTTCTTTTATGGTTCATATTCTGGATTGGGTTCGTCCT  
TGATGCTTAATATATTTAATTTGATCTGTATCTGTTTTAATTCTGCCCTTTTTTCGAGTAGT  
TTTTTATTCGCCAAATTGCCCGAAGCCTACGCTTTTTTGAATCCAATCGTAGACGTGATG  
CCAGTAATACCTGTTCTCTTTTTTCTCTTAGCCTTTGTTTGGCAAGCTGCTGTAAAGTTTT  
CGAATGACACAATCAAACCCGAACGAACAAAATGTTGAATTGAATCGTACCAGTCTAT  
ACTGGGGGTTATTACTCATTTTTTGTACTTGTCTGTTTTATTTTCCAATTATTCTTCAATATG  
GAAGTAAATATTCTCGCATTATTGCTACTGCACCTTTCATTCTCGTTCCTACTGCTTTTT  
TACTTATAATTTACGTAAAAACAGTCAGTCAAAGCGATATGGAAACAGCAACCCTAGTC  
GCCATCTCTATATCTGGGTTACTTGTAAAGTTTTACGGGGTACGCCCTATATACTGCCTTTG  
GGCAACCCTCTCAACAATAAGAGATCCGTTCAAGAACACGGGGACATGGAAGCAT  
TGGTTTATACATTCCCTCTTAGTATCGACTTTAGGGATCATTTTTTTCGCTATCTTTTTTCG  
GGAACCACCTAAAGTTCCAATAAAAAACAAAATGACTATTGCTTTCCAATTGGCT  
GTTTTTGCATTAATTGCTACTTTCATCAATCTTACTGATTAGTGTACCCGTTGTATTTGCTT  
CTCCCGATGGTTGGTTCGAGTAACAAAATGTTGTATTTTCTGGTACATCATTATGGATTG  
GATTAGTCTTTTTGGTGGGTATCCTTAATTCTCTTATCTCT-----ATGTCACCA  
CAAACAGAGACTAAAGCAAGTGTGGATTCAAAGCTGGTGTAAAGATTATAAATTGA  
CTTATTATACTCCTGACTATCAAACCAAGATACTGATATCTTGGCAGCATTCCGAGTAA  
CTCCTCAACCTGGAGTTCACCTGAGGAAGCAGGGGCCGCGGTAGCTGCTGAATCTTC  
TACTGGTACATGGACAACGTGTGTGGACCGATGGGCTTACCAGCCTTGATCGTTACAAA  
GGACGATGCTACGGCATCGAGCCCGTTCCTGGAGAAGAAAGTCAATTTATTGCTTATGT  
AGCTTACCCCTTAGACCTTTTTGAAGAAGGTTCTGTTACTAACATGTTTACTTCCATTGT  
GGGTAATGTATTTGGGTTCAAAGCCCTGCGCGCTCTACGTCTAGAGGATCTGCGAATCC  
CTCCTGCTTATATTAACCTTTCCAGGGACCACCTCATGGTATCCAAGTTGAAAGAGAT  
AAATTGAACAAGTATGGTCGTCCCCTATTAGGATGTAATAAACCTAAATTGGGGTTA  
TCCGCTAAAACTACGGTAGAGCGGTTTATGAATGTCTACGCGGTGGACTTGATTTTAC  
CAAAGATGATGAGAATGTAAACTCCCAGCCATTTATGCGTTGGAGAGACCGTTTCTTAT  
TTTGTGCCGAAGCTATTTATAAAGCACAGGCTGAAACCGGTGAAATCAAAGGGCATTAT  
TTGAATGCTACTGCAGGTACATGCGAAGAAATGATCAAAGGGCTGTATTTGCCCGAG  
AATTGGGAGCTCCTATCATAATGCATGACTACTTAAACAGGGGGATTACCCGCAATACT  
AGCTTGGCTCATTATTGCCGAGATAATGGTCTACTTCTTACATCCACCGCGCAATGCAT  
GCAGTTATTGATAGACAGAAGAATCATGGTATGCACTTCCGTGTAAGTAAAGCCTT  
ACGTTTGTCTGGTGGGGATCATATTCACGCTGGGACCGTAGTAGGTAAACTTGAAGGA  
GAAAGAGACATAACTTTGGGCTTTGTTGATTTACTACGTGATGAGTTTGTGAAAAAGA  
TAGAAGCCGTGGTATCTTTTTCACTCAAGATTGGGTCTCTCTACCAGGTGTTCTGCCTG  
TGGCTTCAGGGGGTATTCACGTTTGGCATATGCCTGCTTTGACCGAGATCTTTGGAGAC  
GATCCGTACTACAATTCGGTGGCGGAACCTTLAGGACACCCTTGGGGAAATGCACCGG  
GTGCCGTAGCTAATCGAGTAGCTCTAGAAGCATGTGTACAAGCTCGTAATGAGGGGCG  
TGATCTTGCTCGTGAGGGTAATGAGATTATCCGTGAGGCTAGCAAATGGAGTCCCTGAAT  
TAGCTGCTGCTTGTGAAGTATGGAAGGAGATCAAATTTGAATTCACAGCAGTGGATACT  
ATT-----ATGGCGATACATTTATACAAACTTCTACCCCGAGCACACGCAATAGAGCCGT  
AGACAGTCAAGTAAAATCCAATCCACGAAATAATTTGATCTATGGACAGCATCGTTGTG  
GTAAAGGTCGTAATGCCAGAGGAATCATTACCGCAAGGCATAGAGGGGGAGGTCATAA

GCGTCTATACCGTAAAATCGATTTTCGACGAAATGAAAAAGACATATATGGTAGAATCG  
TAACCATAGAATACGACCCTAATCGAAATGCATACATTTGTCTCATACTATGGGGATG  
GTGAGAAGAGATATATTTTACATCCCAGAGGGGCTATAATTGGAGATACCATTGTTTCTG  
GTACAGAAGTTCCTATAAAAATGGGAAATGCCCTACCTTTGACCGATATGCCCTTAGGC  
ACGGCCATACATAACATAGAAATCACACTTGGAAAGGGTGGACAATTAGCTAGAGCAG  
CGGGTGCTGTAGCGAAACTGATTGCAAAAAGAGGGGAAATCGGCCACATTAATAATTACC  
TTCTGGAGAGGTCCGTTTGATATCCAAAACTGCTCAGCAACAGTCGGACAAGTGGGG  
AATGTTGGGGTGAACCAGAAAAGTTTGGGTAGAGCCGGATCTAAATGTTGGCTAGGTA  
AGCGTCCTGTAGTAAGAGGAGTAGTTATGAACCCTGTAGACCATCCCCATGGAGGTGG  
TGAAGGGAGGGCTCCAATTGGTAGAAAAAACCCGCAACCCCTTGGGGTTATCCTGCA  
CTTGGAAGAAGAAGTAGAAAAAGAAATAAATATAGTGATAATTTGATTCTTCGTCGCCG  
TAGTAAAATGATTCAACCTCAGACCCATTTGAATGTAGCAGACAACAGCGGGGCCCGA  
GAATTGATGTGTATCCGAATCATAGGAGCTAGT---AATCGCCGATATGCTCATATTGGTGA  
CGTTATTGTTGCTGTGATCAAGGAAGCAGTACCAAATACGCCTCTAGAAAGATCCGAA  
GTGATCAGAGCCGTAATTGTACGTA CTGTAAAGAACTCAAACGTAACAATGGGATGAT  
AATACGCTATGATGACAATGCCGCAGTTGTCATTGATCAAGAAGGAAATCCAAAAGGA  
ACTCGAATTTTTGGTGCATCCCCGGGAATTGAGACAGTTAAATTTCACTAAAATAGT  
TTCATTAGCTCCTGAGGTATTAATGCTTAGTCCAAAAAGAACCAGATTCCGTAAACAAC  
ATAGAGGAAGACTGAAAGGAATATCTTATCGAGGTAATCGTATTTGTTTCGGCCGATAT  
GCTCTGCAAGCACTTGAACCCACTTGGATCACATCTAGGCAAATCGAAGCAGGGCGAC  
GAGCAATGACACGAAATATACGCCGTGGTGGAAAAATATGGGTACGCATATTTCCAGAC  
AAACCAGTTACGCTAAGACCGACGGAACACGTATGGGTTCGGGGAAAGGATCTCCC  
GAATATTGGGTAGCTGTGCTTAAACCGGGTAGAATACTTTATGAAATGAGCGGAGTAGC  
CGAAAATATAGCTAGAAGGGCTATTTCAATAGCGGCGTCCAAAATGCCTATAAAAACTC  
AATTCATTATTTTCGGGAATGACCAGAATTAACGCGGATATATAGCTCGGAGACGTAGA  
ACAAAATTCGTTTATTTGCATCAAGCTTTTCGAGGGGCTCATTACGACTTACTCGAAC  
TATTACTCAACAGAGAATAAGAGCTTTGGTTTTCGGCTCATCGGGATAGAGGTAGGAAA  
AAAAGAGATTTTCGTCGTTTGTGGATCACTCGAATAAATGCAGTAATTCGCGGTGAT---G  
GGGTATCCTATAGTTATAATAGATTCATACACAATCTGTACAAGAAGCAGTTGCTTCTTA  
ATCGTAAAATACTTGCACAAATAGCTATATCAAATAGGAGTTGTCTTTATACCATTTCTAA  
TGAAATTCGAAAA-----ATGATAAGTAAAGTATACGCTTTAGGTCA  
ACATATACGCATGTCTGCCATAAAGCACGAAGAGTAATTGATCAGATTCGTGGACGTT  
CCTATGAAGAAACACTTATGATACTAGA ACTCATGCC TTATCGAGCATGTTACCCCATTT  
TTAAATTAGTTTATTCGGCAGCAGCAAACGCTAGTCACAATATGGGTTTCAACGAAACG  
AGTTTAGTTGTTAGTAAAGCCGAAGTAAACGAGGGTACTACTGTGAAAAAATTCAAAC  
CTCGAGCCCCGAGGACGGAGTTATCCGATAAAAAGACCCACTTGTCATATAACTATCGTA  
TTGGAAGATAACAACCGTATATGGAGGCTTATGGGACAAAAAAATGGATGGAATCAAATA  
TGCAGTATTTACAGACAAAAGTATTCGGTTATTGGGGAAAAAAT---CAATATACTTCTAAT  
GTCGAATCAGGATCAACTAGGACAGAAATAAAGCATTGGGTTCGAACTCTTCTTTGGTG  
TCAAGGTAATAGCTATGAATAGTCATCGACTCCCCGGAAAGAGTAGAAGAATGGGACC  
TATTATGGGACATACAATGCATTACAGACGTATGATCATTACGCTTCAACCGGGTTATTCT  
ATTCCACCTCTTAGAAAGAAAAGAACTATGGCAGTTCCAAAAAACGTACTTCTATATC  
AAAAAAGCGTATTCGTA AAAATCTTTGGAAAAAGAAGGGATATTGGGCAGCGTTGAAA  
GCTTTTTTCATTGGCGAAATCTCTTTCTACAGGGAATTCAAAAAGTTTTTTTTGTACGACA

AATAAATAACATGGCCAAGGGTAAAGATGCCCGAGTAACGATTATTTTGGAAATGTACCA  
GTTGT--GTTTCGAAAC-----GTTAATAAGGAATCAACGGGCATTTCCAGATATATTACTCA  
AAAAATCGACACAATACGCCAGTCGATTGGAATTGAGGAAATTCTGTCCCTATTGTT  
ACAAACATACAATTCACGGGGAGATAAAGAAAATGAAAATAAGAGCTTCTGTTTCGTAA  
AATTTGTGAAAAGTGTGCGACTAATCCGTAGGAGGGGACGAATTATAGTAATTTGTTCCA  
ACCCGAGACATAAACAAGACAAGGAATGGTTCGAGAGAAAAGTAAAAGTATCTACTC  
GGACACTACAGTGGAAGTGTGTTGAATCAAGAACAGACAGTAAGCGTCTTTATTATGG  
ACGTTTTTATTCTGTCTCCACTTATGAAAGGTCAAGCCGACACAATAGGCATTGCGATGC  
GAAGAGCTTTGCTTGGAGAAATAGAAGGAACATGTATTACACGTGCAAAATCTGAG----  
--AAAATACCACATGAATATTCTACCATAGTAGGTATTCAAGAATCAGTACATGAAATTTT  
AATGAATTTGAAAGAGATTGTATTAAGAAGTAATCTGTATGGAACTCGCGACGCCTTTA  
TTTGTGTCAAAGGTCCCGGATATGTAAGTCTCAAGACATCGTTTTTACCGCCCTCTGTG  
GAAATCGTTGATAATACACAGCATATAGCTAGCCTAACGGAGCCAATTGATTTGCGTATT  
GGATTACAAATCGAGAGAAATCGAGGATATGGTATAAAAACGCCAAATAACTTTCAA---  
GACGGA---AGTTATCCTATCGATGCTGTATTCATGCCTGTTCAAATGCGAATCATAGTAT  
TCATTCTTATGGGACTGGGAATGAAAACAAGAGATACTTTTTCTAGAAATCTGGACAA  
ATGGAAGTTTAACTCCTAAAGAAGCACTTCACGAAGCCTCCCGAAATTTGATTAATTTA  
TTTATTCTTTTTCTACATGCGGAAGAAGAA-----AAGTTCTATTTAGAGAACAATCAA---C  
ACAAGGTTACTTTACCCTTTTTTCTTTTTCATGATAGATTGGCT--AAACTAAGAAAAAA  
GAAA---ACAGAAATAGCATTTCATATATTTTTTATTGACCAATTAGAATTGCCTCCCGA  
ATCTATAATTGTCTCAAAAAGTCCAATATACATACATTATTGGACCTTTTTAAATAACAGTC  
AAGAAGACCTTATGAAAATTGAACATTTTCGCACAGAAGATGTAACAGATATTAAG  
CATTCTAGAAAAGAAA-----ATGCTCGGGGATGGAAAT--GAGGGA  
ATGTCTACAATACCTGGGTTGAATCAGATACAATTTGAAGGATTTTGTAGGTTTATTGAT  
CAGGGCTTAACGGAAGAAGCTTTATAAGTTTCCAAAATTGAAGATACAGATCAAGAAA  
TTGAATTTCAATTATTTGTGGAAACATATCAATTGGTAGAACCGTTGATAAAAAGAAAGA  
GATGCTGTATATGAATCACTCACATATTCTTCTGAATTATATGTATCCGCGGGGTTAATTT  
GGAAAACAGTAGGAATATGCAAGAACAACAATTTTTATTGGAAACATTCCTCTAATG  
AATTCCTTGGAACTTCTATAGTAAACGGACTATACAGAATTGTGATTAATCAAATATTA  
CAAAGCCCTGGTATCTATTACCGGTCAGAATTGGATCATAACGGAATTTGCGTCTATACC  
GGCACTATAATATCAGATTGGGGAGGAAGGTTAGAATTAGAGATTGATAAAAAGCAA  
GGATATGGGCTCGTGTGAGTAGGAAACAGAAAATATCTATTTTAGTTCTATCATCAGCTA  
TGGGTTTCAATCTAAGAGAAATTTCTAGAGAATGTTTGTACCCCTGAAATTTTCTTGTCT  
TTCTTAACCGATAAGGAGAAAAAAAATTGGGTCAAAGAAAATGCCATTTTGGAGT  
TTTATCAACAATTTTCTTGTGTAGGCGGAGATCCAATATTTTCTGAATCCTTATGTAAGG  
AATTACAAAAAAATTTCTTTACCAAAGATGTGAATTAGGAAGGATTGGTTCGACGAAA  
TATGAACCGGAGACTGAATCTTAATATACCTCAGAACAATACATTTTGTACCACGAGA  
TATATTGGCAGCTGCAGATCATTGATTGGAATGAAATTTGGAATGGGTACACTTGACG  
AT-----ATGAATCATTGAAAAATAAACGTATTCGTTCTGTAGCGGATCTTTACAAGACC  
AATTCGGATTGGCTCTGGTTCGTTTAGAAAATGTAGTTAAGGGAACCTATATGCGGAGCA  
ATTAGG---CATAAATTGATA---CCGACTCCTCAGAATTTGGTAACTTCAACTCCA-----  
-TTAACAACCACTTATGAATCTTTTTTTCGGATTACACCCATTATCTCAAGTTTTGGATCGA  
ACTAATCCATTGACCCAAATAGTTCATGGGAGAAAATTGAGTTATTTGGGCCCTGGAGG  
ATTAACGGGGCGAACTGCTAATTTTCGGATACGAGATATCCATCCTAGTCACTATGGGC

GCATTTGCCCCATTGACACGTCTGAAGGAATCAATGTTGGGCTTATTGGATCTTTAGCG  
ATTCATGCCCGGATTGGGGATTGGGGG---TCTCTAGAAAGTCCATTTTAT-----AAAAT  
CTTTGAGAAATCAAAAAAAGCA-----CGGATGCTTTATTTATCCCCAAGTAAGGATGAAT  
ATTATATGGTAGCGGCAGGAAATTCTTTGGCTCTGAATCAAGGTATTCAGGAAGAAGCAG  
GTTGTTCCAGCTCGATAACGCCAAGAATTCCTGACTATCGCATGGGAAGAGGTTTCATCT  
TCGAAGTATTTTTCTTTCCAATATTTTTCTATTGGAGCTTCCCTCATTCCTTTTATCGAG  
CATAATGATGCAAATCGGGCTTTAATGAGTTCTAATATGCAACGTCAAGCAGTTCCCCTT  
TCTCGGTCGGAGAAGTGCATTGTTGGAAGTGGGTTGGAACGCCAAGTGGCTCTAGATT  
CAGGGGTTCCCGCTATAGCCGAACACGAGGGAAAGATCGTTTCTACGGATACTGACAA  
GATCATTTTATCGGGCAATGGGGATACTCTAAACATTCCATTAGTTATGTATCAACGTT  
CAACAAAAATACTTGTATGCATCAAACCCCCCAAGTTCGGGGGGGGAAATGCATTA  
AAAGGACAAATTTTAGCGGACGGTGCCGCTACAGTTGGTGGCGAACTCGCTTTGGGG  
AAAAACGTATTAGTAGCTTATATGCCATGGGAAGGTTACAATTTTGAAGATGCGGTACT  
CATTAGCGAGCGTCTAGTATATGGAGATATTTATACTTCTTTTACATACGGAGATATGAA  
ATTCAGACTCATGTGACAAGCCAAGGT---CCCGAAAGGATCACTAATGAAATACCGCAT  
CTAGAAGGCCATTTACTCCGCAATTTAGACAAAAATGGAATTGTGAGGCTGGGATCTTG  
GGTCGAGACAGGCGATATTTTAGTAGGTAAATTAACGCCTCAGGTGGCGAAAGAA---TC  
ATCGTATGCTCCGGAAGATAGATTATTACGGGCCATACTTGGCATTACAGGTATCTACTTC  
AAAGGAACTTGTCTAAACTACCTATAGGTGGTAGAGGTCCGGTATTGATGTAAGAT  
GGATTCAGAAAAAAGGG---GTTCTAGTTATAATCCAGAAATGATTCGTGTATATATTT  
ACAGAAACGTGAAATCAAAGTAGGTGATAAAGTAGCTGGAAGACATGGGAATAAAGG  
TATCATTTCCAAAATTCTACCTAGACAGGATATGCCTTATTTGCAAGACGGAAGACCAG  
TTGATATGGTCTTCAACCCATTAGGAGTACCATCACGAATGAATGTAGGACAGATATTTG  
AATGTTTCGCTTGGGTTAGCAGGGAGTCTGCTAGATAGACATTATCGAATAGCACCTTTT  
GATGAGAGATATGAACAAGAGTCTTCGAGAAAAGTGTGTTTCTGAATTATATGAAGC  
CAGTAAGCAAACCGCAATCCATGGGTATTTGAACCCGAGTATCCGGGAAAAAGCAGA  
ATATTTGATGGAAGAACGGGAGATCCTTTTGAACAGCCTGTTATAATAGGGAAAGCCTTA  
TACCTTGAAATTAATTCATCAAGTTGATGATAAAATACATGGGCGTTCAGTGGACATTA  
TGCACTTGTACACAACAACCCCTTAGAGGCAGGTCCAAGCAGGGGGGGCAGCGGGT  
AGGAGAAATGGAGGTTTGGGCTCTAGAGGGATTTGGTGTGCTCATATTTTACAAGAGA  
TGCTTACTTATAAATCTGATCATATTAGAGCTCGCCAAGAAGTACTTGGTACTACGATCA  
TTGGGGGAACAATACCTAAACCCGAGGATGCTCCAGAATCCTTTTCGATTACTCGTTTCGA  
GAACTACGATCTTTGGCTCTGGAAGTGAATCATTTCCTTGTATCTGAGAAGAAGTCCA  
GATTAATAGGAAGGAAGTT-----ATGATCGATCGGTATAAACATCAACAACCTC  
CGAATTGGATTAGTTTCTCCTCAACAAATAAGTGCTTGGGCCAATAGAATCCTACCTAAT  
GGAGAGATAGTTGGAGAGGTGACAAAACCTATACTTTTCATTACAAAACCAATAAGC  
CGAAAAAAGATGGATTATTTTGTGAAAGAATTTTGGGCCATAAAGAGTGAATTTGC  
GCTTGTGGAATATCGAGTGATCGGAGATGAAAAAGAAGACCCGAAATTTTGTGAAC  
AATGCGGAGTTGAATTTGTTGATTCTCGGATACGAAGATATCAAATGGGATACATAAAA  
CTGGCATGTCCAGTAACCCATGTATGGTATTTGAAACGTCTTCCCTAGCTATATTGCGAAT  
CTTTTAGATAAACCCCTTAAAGAATTAGAGGGCCTAGTATACTGCGAT-----TTTTCTTT  
GCTAGGCC---ATAACTAAAAACCTACTTTCTTACGATTACGAGGTTTCATTGGAATATG  
AAATCCAATCCTGGAAATACAGCATCCCCCTTTTTTTACTACCCAAGGTTTCGATACAT  
TTCGAAATCGAGAAATTTCTACCGGGGCGGGTGCTATCCGAGAACAATTAGCCGATCTA

GATTTGCAAATTATTATAGATTATTTCGTTCTTAGAATGGAAAGAATTAGGAGAAGAG---G  
GTCCCACAGGGAATGAATGGGAAGATCGAAAAATTGGAAGAAGAAAGGATTTTTTATG  
TAGACGCATGGAATTAGCTAAGCATTTTATTTCGAACAAATATAGAACCAGAATGGATGG  
TTTTATGTCTCTTACCGTTCTTCCCTCCCGAGTTGAGGCCGATCATTAGATAGATGGGG  
GTAAACTAATGAGTTCAGATATTAATGAACTCTATAGAAGAGTTATCTATCGTAACAATA  
CTCTTACCGATCTATTAACAACAAGTAGATCTACGCCAGGGGAATTAGTAATGTGTGTCAG  
GAAAAATTGGTACAAGAAGCCGTGGATACACTTCTTGATAATGGAATCCGTGGACAAC  
CGATGAGGGATGGTCATAATAAGGTTTACAAGTCGTTTTTTCAGATGTAATTGAAGGAAAA  
GAGGGAAGATTTTCGTGAGACTCTGCTTGGCAAACGGGTCGATTATTCGGGGCGTTCCG  
TCATTGTGCTTGGGCCTTCACTTTCATTACATCGTTGTGGATTGCCTCGCGAAATAGCAA  
TAGAGCTTTTCCAGACATTTGTAATTCGTGGTCTAATTAGACAACATCTTGCTTCGAACA  
TGGGAGTTGCTAAGAGTAAAATTCGGGAAAAAGAGCCGATTATATGGGAAATACTTCA  
AGAAGTTATGCAGGGGCATCCTGTATTGCTGAATAGAGCGCCTACTCTGCATAGATTAG  
GCATACAGGCATTCCAACCCATTTTAGTGGAAGGACGCGCTATTTGTTTACATCCATTAG  
TTCGTAAGGGATTCAATGCAGACTTTGATGGGGATCAAATGGCTGTTTATGTGCCTTTA  
TCTTTAGAGGCTCAAGCCGAGGCTCGTTTACTTATGTTTTCTCATATGAATCTCTTGTCT  
CCAGCTATTGGGGATCCCATTTCTGTACCGACGCAAGATATGCTTATGGGGCTCTATGTA  
TTAACGAGCGGGACTCGTCGAGGTATTTGTGCAAATAGGTATAATCCATGTAATCGAAA  
AAAC-----TATCAAAATGAAAGAATTGACGATAATAACTATAAGTATACG-----AAAGA  
GCCCTTTTTTTGTAATTCCTATGATGCAATTGGAGCTTATCGGCAGAAAAGAATCAATTT  
AGATAGTCCTTTGTGGCTTCGGTGGCAACTAGATCAGCGC---GTTATTGCTTCA-----AG  
AGAAGCTCCCATCGAAGTTCCTATGAATCTTTGGGTACCTATCATGAAATTTATGGAC  
ACTATCTAATAGTAAGAAGTGTAAGAAAAGAAATTTCTTTGTATATACATTCGAACCACT  
GTTGGTCATATTTCTCTTTATCGAGAAATCGAAGAAGCTATACAAGGTTTTTTGTGCGAGC  
CTGCTCATATGATACC-----ATGGCAGAACGGGCCAATCTGGTAT  
TTCACAATAAAGTGATAGATGGAAGTCCATTAACGACTTATCAGCAGATTAATAGAT  
CGCTTCGGAATGGCATATACATCACACATCCTGGATCAAGTAAAGACTCTGGGTTTTCCA  
GCAAGCCACTGCTACATCTATTTTATTAGGAATTGATGATCTTTTAAACGATACCTTCTAA  
GGGATGGCTAGTCCAAGATGCTGAACAACAAGTTTGTATTTGGAAAAACACCATCAT  
TATGGGAATGTACACGCGGTAGAAAAATTACGCCAATCCATTGAGATATGGTATGCTAC  
AAGTGAATATTTGCGACAAGAAATGAATCCTAATTTTAGGGTGACTGACCCCTTCAATC  
CAGTCCATATAATGTCTTTTTTTCAGGAGCTCGAGGAAATGCATCTCAAGTGCACCAATTA  
GTAGGTATGAGAGGATTAATGTGCGATCCCCAAGGACAAATGATTGATTTACCCATTCA  
AAGCAATTTACGCGAAGGACTGTCTTTAACAGAATATATCATTCTTGCTACGGAGCCC  
GCAAAGGGGTTGTGGATAACCGCTGTACGAACATCAGATGCTGGATATCTTACGCGCAG  
ACTTGTGAAAGTAGTTCAACATATTGTTGTACGTAGAACAGATTGTGGCACCATCCGAG  
GGATTTCTGTGAGTCCTAAAAATAGGACGATGCCA---GAAAGAATTTTTATCCAAACATT  
AATTGGTTCGTGATTAGCAGACGATATATATATGGGCCCGCGATGTATCGCCATTTCGAAA  
TCAAGATATTGGGATTGGCCTTGTGAATCGATTCATAACC-----TTCCGAACAC  
AATCAATATCTATTTCGGACCCCTTTACTTGTAGGAGTACATCTTGGATCTGTGATTATG  
TTATGGTTCGGAGTCCCACTCATGGTGACCTGGTTGAATTGGGAGAAGCTGTAGGTATTA  
TTGCGGGTCAATCTATTGGAGAACCCGGGACTCAACTAACATTAAGAACTTTCCATACC  
GGTGGAGTATTTACAGGGGGTACTGCGGAACATGTACGATCCCCTTCTAATGGAAAAAT  
AAAATTCAATGAGGATTTGGTTCATCCTACACGTACACGCCACGGGCATCCCGCTTTTC

TATGTTATATAGACTTGTCTGTAGTTATTGAAAAGTGAAGATATTATACATAATGTGACTAT  
TCCACCAAAAAGTTTTCTTTTAGTTCAAATGATCAATATGTAGAATCAGAACAAGTAA  
TTGCTGAGATTCGCGCGGGAACATACACTTTA---AATTATAAAGAGAGGGTTCGAAAAC  
ATATTTATTCTAACTCAGAGGGGAGAA---ATGCACTGGAGTACCGATGTGTACCATGCACC  
TGAATTTACATATAGTAATGTCCATCTCTTACCAAAAACAAGCCATTTATGGATATTATCA  
GGAGGTTTCATCCAGA-----TCCAGTCTAGTTCCTTTTTTCGCTCCACAAGGATCAAGATCA  
AATGAACATTCAT-----TCTCTTTCTGTGCAACAA---GAGTCTATTTCT-----CTCGCAGTG  
AATAATGATCAA---GGGAGACACAAATTTTTTTAGTTTCGAATTTTTCTGATAAAAAA---TG  
TGGGATTCCTGATTAT---TCCGAATTTTCATCGAATCCTAGATACTGGTCATTGTAATCTCAT  
ATATTTTGCT---AGTCTTCATGAGAATTCGGAT-----TTATTAGCAAAGAGGGCGAAGAAAT  
AGATTTATCATTCCATTCCAATCGATTCAAGAACAAGAGAAAGAACTAATGCCACGT---  
GGTATCTCGATTGAGATACCCATAAAT-----GGTATTTTCCGTAGAAATAGTATTCTTGCTT  
TTTTTCGATGATCCTCGATACAGAAGAAAGAGTTCGGGAATTCCTTAAATATGGGACTATA  
GGGGCGCATTCAATCGTCAAAAAGAGGAT-----GTGATTGAGTATCGA---GGAGTCAA  
AAAATTTAAGACAAAATACATGAAAGTAGATCGCTTTTTTTTCATTCTGAGGAAGTGC  
ATATTTTACCCGAATCTTCTTCCATAATGGTACGGAACAATAGTATCATTGGAGTAGATA  
CACGGATCACTTTAAATATAAGAAGCCAAGTAGGCGGATTGGTCCGAGTGGAAGAAA  
AAAAAAAAGTATTGAACTTCAAATCTTTTCTGGAGATATTCATTTTCCGGGAAAAACAG  
ATAAGATATCCCGACACAGTGGCATCTTGATACCGCCAGGAAGGGGAAAAACA-----AA  
CTCTAAGGAATCAAAAAA-----TTGAAAATTGGATCTATGTCCAACGG-----ATCACA  
CCTACCAAGAAAAAG-----TATTTTGTTTTGGTGCACCCGTAGCCACATATGAGATAGC  
AGACGGTATAAATTTAGCGACACTCTTCCCACAAGATCTATTTCCGGAAAAGGATAATA  
TGCAACTTCGAGTTGTCAATTATATCCTTTATGGAAATGGCAAACCGGTTCCGGGGAATT  
TTTGACACAAGTATTCAATTGGTTTCGAACTTGTTTAGTCTTGAATTGGGACCAAGACAA  
C-----AAAAGTTCTTCCGTCGAAGAGGTCCGTACTTTCTTTGTGGAAGTGAGTACAAA  
TAGTCTGATTCGAGATTTCCTAAGAATCGACTTAGTGAAATCCCATATTTTCGTATATCAG  
AAAAGGAATGATCCGTCTGGTTTCAGGATTGATCTCTGAT---AATGGGTTCAGATCGCAT  
CAAT-----CCGTTTTATTACAAGGAAAGG-----ATTCAACAATCACTTAGCA  
AAAATCACGGAATTCGTACGTTGTTGAATAGA-----AATAAGGAATGCCAATCGT  
TGATAATTTTGTATCATCTAATTGTTTTCAAATGGGTCCA-----TTCAATCATGTAAATA  
TCACAAT-----GTGATAAAACAATCAGATCCTCTAATTCCAATTAGAAATTCGTTGGGC  
CCTGTAGGAACA-----GCCATTCAAATTGCAAATTTTTATTCA-----ATTTACCATTTAATA  
ACT-----CATAATCAGATCTCG---GTAACGAAATATTTTCAACTTGACAAT-----TTAAAC  
CAGATTTTGAAGTAATT-----AAG---TATTACTTAATGGATGAAACCGGGAGA-----GTTT  
ATAATCCCGATCCATGCAGTAACATCATTTTGAATCCATTCAATTTGAATTGGTATTTTCT  
CTATCAAAATTATTGTGAAGAAACATCCACAATAATTAGT---CTTGGGCAATTTATTTGTG  
AAAATGTATGTCTAGCCAAAATGGACCG-----CACCTAAAATCGGGTCAAGTTTTAA  
TTGTTCAA---GTTGACTCTGTAGTAATAAGATCAGCTAAGCCTTATTTGGCTACTCCAGG  
AGCAACTGTTTCATGGGCATTATGGAGAAATCCTTTACGAAGGAGATACATTAGTTACAT  
TTATATATGAAAATCGAGATCTGGTGATATAACACAAGGTCTTCCAAAAGTGGAACAA  
GTGTTAGAAGTGC GTTCGATTGATTCAATATCTCTAAACCTAGAAAAGAGAGTTGAGG  
GTTGGAACAAGCGTATAACAAGAATTCTTGAATTCTTGGGATTCTTGATTGGTGCT  
GAGCTAACTATAGTCCAAAGTCGTATCTTTTGGTTAATAAGATCCAAAAGGTTTATCGA  
TCCAGGGGGTGCAGATCCATAATAGGCATATAGAAATTATTGTGCGTCAAATAACATC



AAAAGTGTGGTTTCAGAA-----GAGGGAATGTCTAATGTTTTTTTACCTGGAGA  
ACTGATTGGATTGTTACGAGCAGAACGAACGGGGCGTGCTTTAGAAGAAGCGATCTGTTAT  
CGAGCCATCTTATTAGGAATAACGAGAGCATCTCTGAATACTCAAAGTTTTATATCCGAA  
GCAAGTTTTCAAGAACTGCTCGAGTTTTAGCAAAAGCTGCTCTCCGGGGTCGTATCG  
ATTGGTTGAAAGGCCTGAAAGAGAACGTTGTTCTAGGGGGGATGATTCCCGCGGGTAC  
CGGATTCAAAGGATTAGTCCACTGTTCA-----AGGCAACATACCAGCATTCTTTTGGAAA  
CAAAAAAAAAAGAATTTATATTTATTCGAGGGGGAAATGAGA-----GATATTTTCTTCCAT  
CACAGAGAATTATTTGACTCTTGCATTTCAAAGAATTTACATAATACATCCGAACGATCT  
TTTATAGGATTAATGATTCC-----ATGGCAAAAAGATATTGGAACATCAATTTG  
GAAGAGATGATGGAAGCAGGAGTTCATTTTGGTTCATGGTACTAGAAAATGGAATCCTA  
GAATGGCACCTTATATCTCCGCAAAGCGTAAAGGTATTCATATTACAAATCTGACTAGAA  
CTGCTCGTTTTTTATCAGAAGCTTGTGATTTAGTGTTTGATGCAGCAAGTAGGGGAAAA  
CAATTCTTAATTGTTGGGACCAAAAATAAAGCAGCTGATTCAGTGCGCGGGCTGCAAT  
AAGGGCTCGGTGTCATTATGTTAATAAAAAATGGCTTGGTGGTATGTTAACAATTTGGT  
CCACTACAGAAACGAGACTTCATAAGTTTAGAGACTTGAGAACAGAACAAAAGACAG  
GGAGACTCAACCGTCTTCCGAAAAGGGATGCAGCTGTGTTGAAGAGACAATTATCTCA  
CTTGCAAACATATCTAGGCGGGATTAATATATGACGGGGTTGCCTGATATTGTGATCAT  
CATCGATCAGCAAGAAGAATATACAGCTCTTCGAGAATGTATCACTTTGGGAATTC  
CAA  
CAATTTCTTTAATCGATACAAATTGTGATCCCGATCTCGCAGATATTTGATTCCAGCAA  
ATGATGACGCCATAGCTTCAATTCGATTAATTCTTAACAAATTAGTATTCGCAATTTGTG  
AGGGTCATTCTAGC---TATATACAAAATTCTATGGGACAAAAATAAATCCACTTGGTTT  
CCGGCTTGGTACAACCCAAAGTCATCATTCTCTTTGGTTTGCCCAACCAAAAAATTATT  
CTGAGGGTTTACAAGAAGATAAAAAATACGAGACTTTATCAAGAATTATGTA  
AAAA  
AAATATGAGAATATCCTCGGGT---GTCGAGGGAATCGCGCGTATCGAAATTCAAAAAAG  
AATCGATCTGATTCAGGTCATAATATATATGGGATTCCCAAAATTATTAATTGAGGATAAG  
-----CCGCAAAGAATCGAAGAATTACAGAGGAATGTACAAAAAGAACTTAATTGTG  
TGAACCGAAAACCTAACATTGCTATTATCAGAATTGCAAATCCTTATGGGCACCCTAATA  
TTCTTGCGGAATTTATAGCCGGACAATTAAGAATAGAGTTTCGTTTCGCAAAGCAATG  
AAAAAGCTATTGAATTAACCGAGCAGGCGAATACAAAAGGGATTCAAGTGCAAATTG  
CAGGGCGTATCGACGGAAAAGAAATTGCACGTGTTGAATGGATCAGAGAAGGTAGGG  
TTCTCTACAAACCATTGAGGCTAAAATAAATTATTGTTGCTATAGAGTTCGAACTATCT  
ATGGGGTATTAGGAATCAAATTTGGATATTCGTAGACGAAGAAATGTCACGTTACCGA  
GGCCTCGTTTTCAAAAAATACGCCGCTTGGGGGCTTTACCGGGACTAACTAGTCAA  
A  
GGCCTAGAGCAGGAAGCGATCTTAGAAACCAATCGCGCTCCGGAAAA---AAATCTCAA  
TATCGTATTCGTTTAGAAGAAAAACAAAATTGCGTTTTTCATTATGGTCTTACGGAACG  
ACAATTACTTAAATACGTCCGTATCGCCGGAAAAGCCAAAGGGTCAACAGGTCAGGTT  
TACTACAATTACTTGAATGCGTTTTGGATAACATCCTTTTTTCGAATGGGTATGGCGTTG  
ACTATTCCTCAAGCCCAGCAATTAGTTAACCATAGACATATTTTAGTTAATGGTCTGATA  
GTAGATATACCAAGTTATCGCTGCAAACCCCGAGATACTATTACAGTGAAGGATGAACA  
AAAATCTAGAGCTTTGATTCAAAGTTTTCTTGATTCATCCACCCAT---GAGGAATTGCCA  
AACCATTTGACTCTTCACACATTC  
CAA-----TATGAAGGATTAGTCAATCAAATAATAGAT  
AGAAAATGGGTTCGGTTTGA  
AAATAAATGAATTACTTGTCTGATAGAATATTATTCTCGTCA  
GACTATGTCACGTCGAGGTA  
CTGCAGAAAGAAAAACTGCAA  
AATCCGATCCGATTTAT  
CGTAATCGATTAGTTAACATGTTGGTTA  
ACCGTATTCTGAAACACGGAAAA  
AAATCATT

GGCTTATCAAATTATCTATCGAGCCTTGAAAAAGATTCAACAAAAGACAGAAACAAAT  
CCACTATCTGTTTTACGTCAAGCAATACGTGGAGTAACTCCCGATATAGCAGTAAAAGC  
AAGACGTGTAGGCGGATCAACTCATCAAGTTCCCATTGAAATAGGATCCACACAAGGA  
AAAGCACTTGCCATTCGTTGGTTATTAGGGGCATCCCGAAAACGTCCGGGTCGAAATAT  
GGCTTTCAAATTAAGTTCCGAATTAGTGGATGCTGCCAAAGGGAGTGGCGATGCCATAC  
GCAAAAAGGAAGAGACTCATAGAATGGCAGAGGCAAATAGAGCTTTTGCACATTTTCG  
TATGGGTAGGGACACTATTGCTGATATAATAACCTCTATACGAAATGCTGACATGAATAG  
AAAGGGAACGGTTCGGATAGCATCTACTAACATCACGAAAACATTGTTAAAATACTTT  
TAAGAGAAGGTTTTATCGAAAACGTAAGGAAACATCGGGAAAACAACAAATATTTTTT  
GGTTTTAACCCCTACGACATAGACGA-----AATAGGAAAGAACCATATAGAACT---ATT-----  
TTAAATTTAAAACGGATCAGTCGCCCTGGTCTACGAATCTATTCTAACTATCAACAAATT  
CCGAGAATTTTAGGTGGGATGGGGATTGTAATCCTTTCTACTTCTCGAGGTATAATGACA  
GACCGAGAGGCTCGACGAGAAGGAATCGGCGGAGAGATTTTGTGTTTTATATGGATGG  
CAAAGCCTATACCAAGAGTTGGTTCGCGTAAGAATGTACGCAGTGGTTCACGTAAAAA  
TGCACGTAGAATACCAAGGGAGTTATTCATGTTCAAGCAAGTTTCAACAATACCATTG  
TGA CTGTTACAGATGTACGGGGTCGGGTGATTTCTTGGTCCTCTGCCGGGACTTGTGGA  
TTCCGGGGTACAAGAAGAGGGACGCCTTTTGTGCTCAAACCGCAGCGGGAATGCTA  
TTCGAGCAGTAGTGGATCAAGGTATGCAACGAGCCGAAGTTATGATAAAAGGCCCTGG  
GCTCGGAAGAGATGCGGCATTACGAGCTATTCGTAGAAGTGGTATACTATTAAGTTTCG  
TACGGGATGTAACCCCTATGCCACATAATGGGTGTAGACCTCCTAAAAAAGACGTGTG  
ATGCCAACTATTAACAACCTTATTAGAAATACAAGACAGCCAATCAGAAATGTCACGAA  
ATCCCCCGCTCTTCGGGGATGTCCTCAGCGCCGAGGAACGTGTACTAGGGTGTATACTA  
TCACCCCAAAAAACCAACTCTGCCTTACGTAAAGTTGCCAGAGTACGATTAACCTC  
TGGATTTGAAATCACTGCTTATATACCCGGTATTGGCCATAATTCACAAGAACATTCTGT  
AGTCTTAGTAAGAGGGGGAAGGGTTAAGGATTTACCCGGTGTGAGATATCACATTGTT  
GAGGAACCCTAGATGCTGTGCGGAGTAAAGGATCGTCAACAAGGGCGTTCTAAATATGG  
GGTCAAAAAGCCAAAATGGCAAAGAAAAGTTTAATTCATAGGGAGAAGAAGAGGCA  
AAAATTGGAACAAAATATCATTTGATTCGTCGATCCTCAAAAAAAGAAATAAGC-----  
--AAAGTTCCGTCCTTGAGTGATAAATGGAAAATTCATGGAAAGTTACAATCCTCACCGC  
GTAATAGTGCACCTACACGTCTTCATCGACGTTGCTTTTTCGACCGGAAGGCCGAGAGCT  
AACTATCGAGACTTTGGGCTATCCGGACACATACTTCGTGAAATGGTTCATGCATGTTT  
GTTGCCAGGAGCAACGAGATCAAGCTGGATGATAAAAAATTCATTCATCTCA-----TTTC  
AAGAA---AAA---AAAAAGAAAATAGTGGGTCTGTTGAATTTCAAGTATTCAGTTTCAC  
CAATAAGATACGAAGACTTACTTCACATTTGGAATTGCACAGAAAAGACTATTTATCTC  
AGAGAGGTCTACGGAAAATTTGGGAAAACGTCAACGACTGCTGTCTTATTTGTCAAA  
GAAAAATAGAGTACGTTATAAAGAATTAATTAATCAGTTGGATATTCGGGAATCAAAA  
AAATTTCAATTTATGGTAAAACCTTCGTTTGAAACGATGTGGTAGAAAGCAACGAGCCGTT  
TATCGAATCGTTGCAATTGATGTTTCGATCCCGACGAGAAGGAAGGGATCTTCGGAAAG  
TGGGTTTTTATGATCCGATAAATAATCAAACCTATTTAAATGTTCCCTGCAATTTTAGATTT  
CCTTAAAAGGGTGTCTCAACCGACAGAACTGTTTATGATATTTCAAAGAAGGCGGGG  
GTTTTTATGGA ACTTAATCTTAATCAA---ACGAAAGTCAATATGGATAAATCCAAGCGAC  
TCTTTACTAAATCCAAGCGATCTTTTCGTAGGCGTTTGCCCCGATTCAATCGGGGGATC  
GAATTGATTATAGAAACATGAGTTTAATTAGTCGATTTATTAAGTGAACAAGGAAAAATAT  
TATCTAGGCGGGTGAATAGATTGACCTTAAAACAACAACGATTAATTACTATTGCTATAA

AACAAGCTCGTATTTTATCTTCGTTACCTTTTCTTAATAATGAGAAA-----CAATTTGAAA  
GAAGTGAGTCGACCACTAAAACACTGGTCTTAGAACCAGAAATAAAGTGACACGTTC  
ACTAAAAAAAATCCTTTTGTAGCAAATCATTATTAAGAAAATAGAGAAGCTTAATA  
CAAAGGCGGAAAAAAGAAATAATAAACTGGTCCCGGGCATCGACCATTATACCCAC  
AATGATCGGACATACTATCGCTATCCATAATGGAAGGGAACACTTGCCTGTTTATATAAC  
AGATCGTATGGTAGGACACAAATTGGGAGAATTTGCACCTACTATAAATTTCCGCGGAC  
ATGCAAAAAATGATAATAAATCTCGTCGTATGATTTTTAAATCTTTTATACTAGGTAATCT  
AGTATCCTTATGCATGAAGATAATCAATTCGGTCGTTGTGGTTCGGACTCTATTATGGATT  
TCTGACCACATTCTCCGTAGGGCCCTCTTATCTCTTTCTTCTCCGAGCTCGGGTTATGGA  
AGAAGGAGAAGAAGGAACCGAGAAGAAGGTATCAGCAACAACACTGGTTTTATTGCGGG  
ACAGCTCATGATGTTTCATATCGATCTATTATGCGCCTCTGCATTTAGCATTGGGTAGACCT  
CATACAATAACTGTCCTAGCTCTACCGTATCTTTTGTTCATTTCTTCTGGAACAATCAC  
AAACACTTTTTTGGATTATGGATCTACTACCAGAAATTCATGCGTAATCTTCGCATTCAA  
TGTGTATTCTGAATAATCTCATTTTTCAATTATTCAACCATTTTCAATTTTACCAAGTTCAA  
TGTTAGCCAGATTAGTCAACATTTATATGTTTCGATGCAACAACAAGATGTTATTTGTAA  
CAAGTAGTTTTGTGGTTGGTTAATTGGTACATTTTATTTCATGAAATGGGTGGATTGG  
TATTAGTCTGGATACAGCAAAATAATTCTATTAGGTCT---ATTCGATCTAATAAGTACCTT  
GTGTCAGAATTGAGAAATCTATGGCTCGAATCTTTAGTATTCTTTATTATTACCTGTG  
TCTACTATTTAGGCAGAATACCGTCACCCATTTTTACTAAGAACTAAAAGGAACCGAA  
GAAGATAAACCTTTTGTGACTCTTCTTTTTGATTATAAACGGTGGAAATCGGCCATTTCGA  
TATCTAAAAAATGATCGATTTGAAAATGCTGTAAGAAATCAAATGTCACAATATTTTTTT  
TATACATGTCAAAGTGATGGAAAAGAAAGAATATCTTTTACGTATCCACCCAGTTTGGC  
AACTTTTTTGGAAATGATACAACAAAAGATGCCTTTGTTTCACACAAGAAAAATTATCCT  
CTAATGAATTCTATAATCATTGGATTCTTACCAATGAGAAAAAAGAGAGCAAGTTAAAG  
AACGAATTTCTAAATAGAATTAAGCTTTAGAT-----CTTGCTCTGAATATACTCGAAA  
AAAGGACTCGATTTTGTAAATAATGAGACTAAAAAAGAATATTTGCCTAAAATTTATGATC  
CGTTATTATATGGATCCTATCGTGGAAGAATCATAAAT-----TTTATAGGAACGGTTTTG  
ATAAATAAGATTCATAGTATACTTTATCACGAATTTGAACAGACAAATCCCAATGATCAA  
GGA-----ATAAAAGAAATCAGTAAAAAAGTTCCTCGTTGGTCATACAAATTAATCGATTT  
AGAACAACACTGGAGGGGGAAGAAATTCGTTCAAGAAAAGCCAAACATGTAGTGATTTT  
TACTGATGCTTTGATACGTTATTCACAACAATCAGATTTTCGTCGAGACATAATCAAAGG  
ATCCATGCGTCCTCAAAGACGTAAAACAGTTACTTGGGAACTGTTTCAAGCAAATGCG  
CATCCCCCTCTTTTTTTGGACAGAATAGACAAACCCCTTTTTTTTTTTCTGCATTTGATA  
TTTCTGAACTGATGAAACGCATTTTTTAGAAATAGAGAAGAAAAAACACGAATAGAAAT  
AGCGGAAGCCTGGGATAGTCTTTTATTTGCTCAAGTTCTAAGAGGTTTCGTCCTTAGTAA  
CCCAATCGATTCTTAGAAAATATATTATATTACCTTCCCTTGATAATAGTTAAAAATATCGC  
CCGTCTGCTATTATTTCAATTTCCGAATGGTCTGAGGATTTAAAGGATTGGAATCGAGA  
AATGCATATTAATGTACCTATAATGGTGTTCATTTATCAGAAACAGAATTTCCAAAAAA  
CTGGTTAACAGACGGTATTCAGATAAAAATACTATTCCCTTTTTGCCTTAAACCTTGGA  
CAGATCGAAA---GGGGAAAAAATGATTTTTGTTTTTTAACAGTTTGGGGGATGGAAC  
TGAATTGCCTTTTGGTTCTCCCCGAAAACGGCCTTCATTTTTTGAACCTCTTTTTAAAG  
AATTGAAAAAAAATTAGAAAATTGAAAATTAAGTATTTCTGGGT---TTAAGGGTTTT  
AAAAGAAAGAGCAAAAATATTTGTAAAAGTCTCAAAGAAACAAAAAACAGGTCA  
GTACAAACCTTCTA-----TTTGTAAAAGGAATAATAAAAGAATTTTCAAACGAAACGAT

TCAAGAATTAGTAATCAGATGATTCCCGAATCG---GTTCAAATTCGATCTATGGAGTGGA  
CAAAT---TCCCTGACAGAAAACAAAATAAAAAGATTTGACTGATAGAGCAAGTACAATCA  
GAAATCAAATAGAACAAATTACAAAAGAGAAGAAAAACAGTTCTAACAAACCAAGTT  
ATCATGCTAAAATATTAGCATCATCAAAAAATATTTGGCAAATATTAATA-----AATGCTC  
GATTAATTCGTAAATCATATTATTTTATAAAATTTTTCATTGAAAGGATATATATAGATATT  
TTTCTATGTATCGTTAATATTCCAAGGATGAATACACAACCTT-----TGTAATCTAT  
CCTCCTTCTCACAAGCATATGTATTTTACAAATTATCACAAATA---GTTATTAACCTTGATA  
AGTTAAGGTCTGTCCTTCAATATACATCTTTTTTTCTTAAGAATGAAATAAAGGATTCTT  
TTGAACAAGGAATATTTGAT---CAATTAAGACATAAACCCCTTTT---TACGAAAAAAAT  
CTATGGAAAACTGGTTAAGAAGTCATTATCAATATGATTTACCTCAGATTAGATGGCCT  
AGATTAGTACCAGAAAAATGGCGAAATAGAGTCAAAGAATACTGTAGAGTTCAAATA  
AAAACAAATGGGATTCATATGAAAAAGACAAA-----TTAAGTCATTACGAAAGACAA---  
AATTTCAAAAAAAATGATAGATATGATCTTTTATCATCTAAATCTATTAATGATCATATTT  
TGATCTGGATCGAAAATATTTAGATTGGAGAATTCTCAACTTTTGTCTTAGATTTTTTGA  
TTGGATGGGAATGAATGAAGAAATACTAAGT---TGGTTCTTTCCCGAATTTGTCTTACTT  
TATAATGCATATAAGATTAAACCGTGGATCATACCAAGCAATTTACTTCTTTTTAATAGCA  
AT-----ACAGAAGCAGAACTTCATTTCTTCTAAAAGATATTTGCGTTTTCAATTGAGAT  
GGAAT-----AATGAAAGAATTATCAATAATATCAAAGTATATTGTCTCTTGCTTAGACTG  
ATAAATCCAAGAGAAATTACTATATCTTCTATTCAAAGGGGAGAACTGAGTCTAGATATC  
CTGATGATTCAGAAGGATTTAACTCTTCCAGAATTAATGAAAAAGGGAATATTGATTATC  
GAACCAAGTCCGTTTGTCTGTCAAAAACGATGGACAATTTATTATATATCAAACCATAGGT  
ATTTCAATTGGGTGATAAGAATAAGCCCCATTATGAT---TTCCTTGTCCCTGAAAATATTTT  
ATCCCCTAAATGTCGTAGAGAATTTCGAATTTCTAATTTGTTTCAGATTTCTTTGGCCCAA  
TTTTCGATTAGAAGATTTAGCTTGTATGAATCGCTATTGGTTTAATACTAATAATGGTAGT  
CGTTTCAGTATGATAAGGATACATATGTATCCGATGAAAGGACATCAATTCAAATCCTGG  
ATTTTCGAATTGAGAGAAATATTGAGAGAGATCAAGAATTTCTCACTATTTCTTAGATTCA  
TGGACCAATTCAATTCAGTGGGATCTTTCATTCACATTTTTTTCCACCAAGAACGTTTT  
ATAAACTCTTGGACCCTCGAATTTGGAGTATCCTACTTTCA---CGCAATTCA-----CAGG  
GTTCAACAAGCAATCGATATTTT-----ACGATCAAGGGTGTAGTACTATTTGTAGTAGC  
G---GTCCTTATATATCGT-----ATTAACAATCGAAATATGGTTCGAAAGAAAAAATCTC  
TATTTGACAGGGCTTCTTCT-----ATCCCTATGAATTCATTGGACCCAGAAATG  
ATACATTGGAAGAATCTTTT---GGGTCTTCCAATATCAATAGGTTGATTGTTTCG---CTCC  
TGATCTTCCAAAAGGAAAAAAGATCTCTGAGAGCTCTTTCCTGGATCCGAAAGAGAG  
TACTTGGGTTCTTCCAATAACT-----AAAAAGTGTATCATGCCTGAATCTAACTGGA  
GTTCCGCGGTGGTGGAGGAACTGGATCGGAAAAAAGAGG-----GATTCTAGTCGTAAGAT  
ATCTAAT-----GAAACCGTCGCTGGAATTGATATCTCATTCAAAGAGAAAGATATCAAA  
---TATCTGGAGTTTCTTTTTGTATATTATATGGAT-----GATCCGATCCGCAAGGGCCATGA  
TTGGGAATTGTTTGATCGTCTTCTCCAAGTAAGAGGCGAAACATAATCAACTTG-----A  
ATTCGGGACAGCTATTCGAAATCTTAGTGAAAGACTGGATTTGTTATCTCATGTTTGCTT  
TTCGTGAAAAAATACCAATTGAAGTGGAGGGT---TTCCTCAAACAACAAGGA---GCTGG  
GTCAACTATTCAATCAAATGATATTGAGCATGTTCCCAT-----CTCTTCTCGAGAAACAA  
GTGGGCTATTTCTTTGCAAATTGTGCTCAATTCATATGTGGCAATTCGCAAGATCT  
CTTCGTT-----AGTTGGGGGAAG---AATCCGCACGAATCGGATTTTTTGAGGAAC---AT  
ATCGAGAGAGAATTGGATTTGGTTAGACAATGTGTGGTTGGTAAACAAGGATCGA-----

--TTTTTTAGC-----AAGGTACGAAATGTATCGTCAAATATTCAATACGATTCC-----ACA  
AGA-----TCTAGTTTCGTTCAAGTAACGGATTCTAGCCAATTGAAAGGATCTTCT--GATC  
AATTCAGAGATCATTTCGATTCCATTAGT-----AATGAGGATTTCGGAA-----  
-----TATCACACATTGATCAATCAAAGAGAGATTCAACAATAAAAGAAAGA  
TCGATTCTT--TGGGAT-----CCTTCCTTTCTTCAAACGGAACGAACAGAGATAGAATCA  
GAC-----CAATCCCTAAA-----TGCCTTTCTGGATATTCC-----TCAATGCCCCGGCTATT  
ACG--GAACGTGAGAAGCGGATGAATAATCATCTGCTTCCGGAAGAAATCGAAGAATTT  
-----CTTGGGAATCCTACAAGACCCATTTCGTTCTTTTTTCTCTGACAGATGG-----TCAGA  
ACTTCAT--CTGGGTTTCGAATCCTACTGAGAGGTCCACTAGGGATCAG-----AAATT  
GTTGAAGAAAGAACAAGATGTTTCT--TTTGTCCCTTCCCGGCGATTCGGAA-----AA  
TAAAGAAATAGTTAATATATTCAAGATAATTACGTATTTACAAAAT-----ACCGTCTCAATT  
CATCCTATTTTCATCAGATCTGGGATGTGATATGGTTCCG--AAGGATGAACTGGAT--ATG  
GACAGTTCCAATAAGATTTTCATTCTTGAACAAAAATCCATTTTTTGATTTA-----TTTCAT  
CTATTCCATGACCGGAACAGGGGGGGATCCACGTTA-----CACCACGATTTTGAATCAG  
AA-----GAGAGATTTCAAGAAATGGCAGATCTATTCACTCTATCAATAACCGAGCCG--G  
ATCTGGTGTATCATAAGGGATTTGCCTTTTCTATTGATTCCTACGGATTGGATCAAAAAC  
AA-----TTCTTGAATGAGGTATTCAACTCCAGGGATGAATCGAAAAAGAAATCTTTA-----  
--TTGGTTCTACCTCCTATTTTTTAT-----GAAGAAATGAATCTTTTTATCGAAGGATCAG  
AAAAAATGGGTCCG--ATCTCCTGCGGGAATGATTTGGAAGATCCAAAACCAAAA  
GAGTGGTATTTGCTAGCAACAACATAATGGAGGCAGTCAATCAATATAGATTGATCCGA  
AATCTGATTCAAATCCAA-----TATAGCACCTATGGGTACATAAGAAATGTATTGAATCGA  
TTCTTTTTAATGAAT-----AGATCCGATCGCAACTTCGAATATGGAATTCAA-----AGG  
GATCAAATAGGAAATGATACTCTGAATCATAGAACTATAATGAAATATACGATCAACCAA  
CATTTATCGAATTTGAAAAAG--AGTCAGAAGAAATGGTTCGATCCT-----CTTATTTTTC  
TTTCTCGAACCGAGAGATCCATAAATCGGGATCCTAATGCATATAGATACAAATGGTCCA  
ATGGGAGCAAGAATTTCCAGGAGCATTGGAACATTTTCGTTTCTGAGCAGAAGAGCCG  
T-----TTTCAAGTAGTGTTTCGATCGATTACGTATTAATCAATATTTCGATTGATTGGTCTG  
AGGTTATTGACAAAAAGATTTGTCTAAGTCACTTCGTTTCTTTTTGTCCAAGTTACTTC  
TT-----TTTTGTCC-----AAGTTACTTCTCTTTTTGTCTAACT  
CACTTCCT--TTTTCTTTGTGAGTTTCGAGAATATCCCATTCATAGGTCTGAG--ATCC  
ACATCTAT--GAATTGAAAGGTCCGAACGATCAACTCTGCAATCAGTTGTTAGAATCAAT  
AGGTCTTCAAATCGTTCATTGAAAAAATTGAAACCTTTC-----TTATTGGAT-----GAT  
CATAATACTTCT--CAAAAATCGAAATTCTTGATCAATGGAGGAACAATATCACCATTTT  
TGTTCAATAAGATACCA--AAGTGG--ATGATTGACTCATTCCATACTAGA-----AAGAAT  
CGCAGGAAATCTTTTGATAACACGGATTCCATTTCTCAATGATATCCCACGATCAAGAC  
AATTGGCTGAATCCCGTGAAACCATTTTCATAGAAGTTCATTGATATCTTCTTTTTATAAA  
GCAAATCGACTTCGATTCTTGAATAATCCACATCACTTCTGCTTCTAT-----TGTAACAAA  
AGATTCCCTTTT-----TAT--GTGGAAAAGGCCCGTATCAATAATTATGAT-----TTTACGT  
ATGGA--CAATTCCTCAATATCTTGTTTCATTTCGCAACAAA--ATATTTCTTTGTGCGGTG  
GTA--AAAAACATGCTTTTTTTGGAG--AGAGATACTATTTACCTATCGAGTCAC  
AGGTATCTAACATATTCATATCTAACGATTTCCACAAAGTGGTGACGAAAGG--TATAA  
CTTGTAACAATCT-----TTCCATTTTGCAATTCGATCCGATCCATTAGTTCGT-----AGAG  
CTATTTACTCGATTGCAGACATTTCTGGAACACCTCTAACAGAGGGACAAATAGTCAAT  
TTTGAAGAACTTATTGTCAACCTTTTCAGATATGAATCTATCTGATTCAGAAGAGAA

GAACTTGCATCAGTATCTCAAT-----TTCAATTCAAACATGGGTTTGATTCACTCCATG  
TTCTGAGAAATATTTACCATCCGAAAAG-----AGGAAAAA-----CGGAGT  
CTTTGTCTAAAG-----AAATGTGTTGAGAAAGGGCAGATGGATAGAACCCTTCAACGAG  
ATAGTGCTTTTTCAACTCTCTCAAATGGAATCTAGTCCAAACATATATGCCATGGTCC  
TACTTCGACAGGGTACAAATATCTAAATTTGATATTTTTAGATACTTTTTCAGAC---CTA  
TTGCCGATACTAAGTAGCAGT-----CAAAAATTTGTATCCATTTTTTCATGATATTATGCATG  
GATCAGATATATCATGGCGAATTCCTCAGAAAAAATGG-----TGTCTTCCACAA  
TGGAAT--CTGATAAGTGAGATTTTCGAGTAAGTGTTTACATAAT-----CTTCTCCTGTCCG  
AAGAAATGATTCATCGAAATAATGAGTCA-----CCATTGATATCGACACATCTGAGATCG  
CCAAATGTTTCGGGAGTTC---CTCTATTCAATCCTTTTCTTCTTGTGTTGCTGGATAT--C  
TCGTTTCGTACACATCTTCTCTTTGTTTCCCGA-----GCCTATAGTGAGTTACAGACAGAG  
TTCGAAAAGGTCAAATCTTTGATGATTCCATCATACATGATTGAGTTGCGAAAACTTCT  
GGATAGGTATCCTACATCTGAACTGAATTCCTTCTGGTTAAAGAATCTCTTTCTAGTTGC  
TCTGGAACAATTAGGAGATTCTCTAGAAGAAATACGGGGTTCT-----GGCGGCAACATG  
CTATGGGGTAGTGATCCC-----GCTTATGGG---GTCAAATCAATACGTTCTAAGAA  
GAAATATTTGAATATCAATTTTCATCGATATCATCGATCTCATA---AGTATCATACCAAATCC  
CATCAATCGAATCACTTTTTTCGAGAAATACGAGACATCTAAGTCATACAAGTAAAGAGA  
TCTATTCAATTGATAAGAAAAAGAAAAACGTGAGCGGTGATTGGATTGATGATAAAATA  
GAATCCTGGGTCGCGAACAGTGATTTCGATTGATGATAAAGAAAGAGAATTCTTGGTTC  
AGTTCTCC-----ACCTTAACGGCA-----GAAAAAAGGATTGATCAAATTCTATTGAGTCTG  
ACT--CATAGTGATCATTTATCA-----AAGAATGACTCTGGTTATCAAATGATTGAA  
CAACCGGAACAATTTACTTACGATACTTAGTTGACATTCAT-----AAAAGTATCTAATG  
AATTATGAGTTCAATACATCCTGTTTAGTAGAAAGACGGATATTCCTTGCTCATTATCAG  
ACAATCACTTAT-----TCACAAACTTCGTGTGGGGCTAATAGTTTTTCATTTCCCGTCTCAT  
GGA-----AAACCCTTTTCGCTCCGCTTAGCCCTATCCCCCTCT---AGGGGTATTTTAGTG  
ATAGGTTCTATAGGAACCGGACGATCCTATTTGGTCAAATACCTAGCGACAACTCCTAT  
GTTCCTTTCATTACAGTATTTCTGAACAAGTTCTGGATAACAAGCCTAAAGGTTTTTTTT  
ATTGAT-----GATATCGAT-----GATGCTAGTGACGATATTGATGCTAGTGACGATAT  
TGATGCTAGTAACGATATTGAT-----GATAGTGACGATATCGATCGTGA  
ACTTGATACGGAGCTGGAGCTTCTAACTATGATGAATGCGCTA-----ACTATGGATATG  
ATGTCG-----GAAATAGACCGATTTTATATCACCTTCAATTCGAATTAGCAAAAGCAA  
TGTCTCCTTGATAAATATGGATTCCAACATTCATGATCTGGATGTGAATGAGTCGAATT  
ACTTATCCCTCGGTCTATTAGTGAACCTCTCTCTCC-----AGGGATTGTGAAAGATGTT  
C---ACTAGAAATATTCTTGTTATTGCTTCGACTCATATTCCCAAAAAGTGGATCCCGCT  
CTAATAGCCCCGAATAAATTAATAACATGCATTAAGATACGAAGGCTTCTTATTCCACAA  
CAACGAAAGCACTTTTTCACTCTTTCATATACTAGGGGATTTCACTTGGAAAAGAAAAT  
GTTCCATACT-----AATGGATTTCGAGTCCATAACCATGGGTTCCAATGCACGAGATCTTGT  
AGCACTTACCAATGAGGCCCTATCGATTAGTATTACACAGAAGAAATCAATTATAGACA  
CTAATACAATTAGATCTGCTCTTCATAGACAACTTGGGATTTGCGA-----TCCCAGGT  
AAGATCGGTTTCAGGATCATGGGATCCTTTTCTATCAGATAGGAAGGGCTGTTGCACAAA  
ATGTACTTCTAAGTAATTGCCCCATAGATCCTATATCTATCTATATGAAGAAGAAA-----TC  
ATGTAACGAAGGGGATTCTTATTTGTACAAATGGTACTTCGAACTTGGAACGAGCATGA  
AGAAATTAACGATACTTCTTTATCTTTGAGTTGTTCTGCCGGATCGGTCGCTCAAGAC  
CTTTGGTCTTACCC-----GGACCCGATGAAAAA---AATGGGATCACTTCTTATGGATTTCG

TTGAGAATGATTCT--GATCTAGTTCATGGCCTATTAGAAGTAGAAGGCGCTCTGGTGGG  
A-----TCCTCACGGACAGAAAAAGATTGCAGTCAGTTTGATAATGAT-----CGAGTGACA  
TTGCTTCTTCGGTCCGAACCAAGGAAT--CCCTTATATATGATGCAAAATGGATCTTGTT  
CTATCGTTGATCAGAGATTTCTCTATGAAAAA-----TACGAATCGGAGTTTGAAGAA---G  
GGGAAGGAGAAGGAGTCCTCGACCCGCAA-----CAGATAGAGGAGGAT-----T  
TATTCAATCAC-----ATAGTTTGGGCTCCT-----AGAATATGGCGCCCT-----TGGGGCTT  
TCTATTTGATTGTATCGAAAGGCCCAATGAATTGGGATTTCCC---TATTGGGCCAGGTCA  
TTTCGGGGCAAG-----CGGATCATTATGATGAAAAGGATGAGCTTCAAGCGAATGAT  
TCGGAGTTCTTGCAGAGTGGAACCGTGCAGTACCAGACACGAGATAGATCTTCCAAAG  
ACAAGGCTTTTTTCGAATAAGCCAATTCATTTGGGACCCTGCGGATCCACTCTTTTTTC  
CTATTCAA---GATCAGCCCTTTGTCTCTGTGTTTTACATCGAGAATCTTTGCAGATG  
AAGAGATGTCAAAGGGGCTTCTTACTTCCCAAACGGATCCTCCTACATCTATATATAAA  
CGCTGGTTTATC-----AGAATACGCAAGAAAAGCACTTCGAATTGTTGATTCATCGCCA  
GAGATGGCTTAGA-----ACCAATAGTTCATTATCT-----AATGGATTTTTCCGTTCTAAT--  
---ACTCCATCCGAGAGTTATCAGTATTTATCAAATCTGTTTCTATCTAAC---GGAACGCTA  
TTGGATCAAATGACAAAGACATTGTTGAGAAAAAGATGGCTTTTTCCCGGATGAAATGA  
AAATTGGATC-----ATG-----ATGCCTAGATCGCGT---ATAAATGGAAATT  
TTATTGATAAAACCTTTTCAATTGTGGCCAATATCTTATTACGAATAATCCGACAACCTC  
GGGAGAAAAAGAGGCATTTACCTATTACAGAGATGGG-----ATGTCGGCTCAATCCGAA  
GGAAATTATGCGGAAGCATTGCAGAATTATTATGAAGCTATGCGACTAGAAATTGATCC  
CTATGATCGAAGCTATATACTCTATAACATAGGCCTTATCCACACAAGTAACGGAGAACA  
TACGAAAGCTTTAGAATATTATTTTCGGGCATTAGAACGAAACCCGTTCTTACCCCAAG  
CTTTAATAATATGGCTGTGATCTGTCATTAC---CGGGGAGAACAGGCCATTTCGACAGGG  
AGATTCTGAAATTGCAGAGGCTTGGTTTGTCTCAAGCCGCCGAGTATTGGAAACAGGCT  
ATAGCGCTTACTCCTGGTAATTATATTGAAGCGCAGAATTGGTTGAAGATCACGAGACG  
TTTCGAA-----ATGAGTTGGCGATCAGAATCTATATGGATAGAATTTATAGCGGGGTCTCG  
AAAAACAAGTAATTTCTGCTGGGCCTTTATCCTTTTTTTTAGGTTTCATTAGGATTCTTATT  
GGTTGGAACCTCCAGTTATCTTGGTAGGAATTTGATATCTTTATTTCCGTCTCAGCAAAT  
AGTTTTTTTTCCGCAAGGGATTGTGATGTCTTTCTATGGGATCGCGGGTCTCTTTATTAG  
TTCCTATTTGTGGTCCACAATTTGTGGAATGTAGGTAGTGGTTATGATCGATTTCGATAG  
AAAAGAAGGAATAGTGTCTATTTTCGTTGGGGATTCCTGGAAAAAATCGTCGCATCT  
TTTTACGACTCTTTATGAAAGATATTCAGTCCATCAGAATAGAAGTTAAAGAAGGTATTT  
ATGCTCGTCGTGTCTTTATATGGACATCAGAGGCCGGGGGCTATTCTTTAACTCGTA  
CTGATGAGAAT---TTCACTACACGAGAAATTGAGCAAAAAGCTGCTGAATTGGCCTATT  
TCTTGCGTGTACCAATTGAAGTATTT

>Manihot

ATGGAAAAACGGTGGTTCAATTCGATCTTATCCCTAAGTAAATCAATGGATAGTTTCAG  
TTCTCTTGAAAATACCAGTATAAGCGAAGACCCAATTCTAAATGATACAGATAAAAAACA  
CCCATAGTTATAGTAATGTTGATCATTAGTTCGGCGTCAGGGACATTCAGAATTTCCGCG  
CCGATGAAACTTATTTAGTTAGGGATAGTAATAAGGACAGTTATTCATATATTTTGATAT  
TGAAAATAAAGTTTTTGGAGATTGACAATGATCAT-----TCTTTTCTGAGTGAACATAAAA  
GTTCTTTTTATAGTTATTGGAATTCTAGTTATCTGAATAATGGGTCTAGGAGTGGCGACT  
CCCACTCTGATCATATATGATGATACTAAATATAGTTGGAATAATTACATCAATAGTTG  
CATTGACAGTTATCTTCGC-----TCTCAAATCTGTATTGATAGTTATATTTAAGTGGTAGT

AACAATTACAGTGAAAGTTACATTTATAGTTACTTTTTGTGGTAGCGAGAGTTCCAGTCT  
AAGAACTAGCACGAGTGGTAGCGATTTAATTATAAGAGAAAGTTCTAATGATCTCGATA  
TAACTCAAAAATACAAGCATTGTGGGTTCAATGCGAAAATTGTTATGGATTA AATTATA  
AGAAATTTTTTAAGTCAAGAATGAATATTTGTGAACAATGTGGATATCATTTGAAAATG  
AGTAGTTCAGATAGAATTGAACTTTTGATTGACCTAGACACTTGGGATCCTATGGATGA  
AGACATGGTATCTCTGGATCCCATTTGAATTTTCATTCAGAAGAGGAACCTTATAAAGATC  
GTATTGATTCTTATCAAAGAAAGACAGGATTAAGTGAGGCTGTTCAAACAGGCACAGG  
TCAACTAAACGGCATTCCCGTAGCAATTGGGGTTATGGATTTTCGGTTTATGGGGGGTA  
GTATGGGATCCGTAGTAGGTGAGAAAATCACTCGTTTGATCGAGTATGCTACCAATAAA  
TTTTTACCTCTTATTTTAGTGTGTGCTTCCGGAGGAGCACGCATGCAAGAAGGAAGTTT  
GAGCTTGATGCAAATGGCTAAAATATCTTCTGCATTATATGATTATCAATCGAATAAAAA  
GTTATTTTATGTATCAATCCTTACATCTCCTACGACTGGTGGGGTGACAGCTAGTTTTGG  
TATGTTGGGGGATATCATTATTGCTGAACCTAATGCCTATATTGCGTTTGCAGGTAAAAG  
AGTAATTGAACAAACATTGAATAAGACAGTACCTGAAGGTTGCAATCGGCCGAATTT  
TTATTCCATAAAGGCTTATTTGATCTAATCGTACCGCGTAATCTTTTAAAGGGCGTTCTG  
AATGAGTTACTTCAGTTCCACGATTTCTTTCTTTGAATCATAAATCAAAG---ATGGTAA  
CCATTTCGAGCCGACGAGATTAGTAATATTATCCGCGAACGTATTGAGCAATATAATAGGG  
AAGTAAAGATTGTAAATACTGGTACCGTACTTCAAGTAGGCGACGGCATTGCTCGTATT  
TATGGTCTTGATGAAGTAATGGCAGGCGAATTAGTAGAATTTGAAGAGGGTACAATAGG  
CATTGCTCTGAATTTGGAATCAAATAATGTCGGTGTGTATTAAATGGGTGACGGTTAAT  
GATAAAGAGGGAAGCTCCGTAAAAGCAACAGGAAGAATTGCTCAGATACCTGTGAG  
TGAGGCTTATTTGGGTCGTGTTATAAATGCCCTAGCTAAACCTATTGACGGTCGAGGTG  
AAATTTACGCTTCTGAATCTCGGTTAATTGAATCTCCTGCTCCAGGTATTATTTTCGAGAC  
GTTCTGTATATGAGCCTCTTCAAACAGGACTTATTGCTATTGATTTCGATGATCCCTATAG  
GACGTGGTCAACGAGAATTAATTATTGGGGACAGACAGACTGGTAAAACAGCAGTAGC  
CACAGATACAATTCTCAATCAACAAGGACAAAATGTAATATGTGTTTATGTAGCTATTGG  
GCAAAAAGCGTCTTCTGTGGCTCAAGTAGTGACTACTTTACAGGAAAGAGGGGCAATG  
GAGTACACTATTGTGGTAGCCGAAACGGCGGATTCTCCGGCTACATTACAATACCTCGC  
CCTTATACGGGAGCGGCTCTGGCTGAATATTTTATGTACCGTGAACGACACACTTTAAT  
CATTTATGATGATCTCTCAAACAAGCGCAGGCTTATCGCCAAATGTCTCTTCTATTACG  
AAGACCACCTGGTTCGTGAAGCTTATCCAGGAGATGTCTTTTATTTGCATTCACGCCTTT  
TGAAAGAGCCGCTAAATTAAGTTCTCGTTTAGGTGAAGGAAGTATGACTGCTTTACC  
AATAGTTGAGACCCAATCAGGAGACGTTTCGGCTTATATTCTACTAATGTAATTTCCAT  
TACAGATGGACAAATATTCTTATCCGCCGATCTATTCAATGCTGGAATCAGGCCTGCTAT  
TAATGTGGGTATTTCTGTTTCCAGAGTAGGATCCGCAGCTCAAATAAAAGCTATGAAAC  
AAGTAGCTGGTAAGTTAAAATTGGAATTGGCGCAATTCGTAGAATTAGAAGCCTTTGCG  
CAATTCGCTTCTGATCTCGATAAAGCTACTCAGAATCAATTGGCAAGAGGTCAACGACT  
ACGCGAGTTGCTCAAACAATCCCAATCCGCCCTCTCACGGTGGAGGAACAGATAATG  
ACTATTTATACCGGAACGAATGGTTATCTTGATTCATTAGAAATTGGACAAGTAAGGAA  
ATTTCTCGTTGAGTTACGTACCTACTTAAAACGAATAAACCTCAGTTCCAAGAAATCA  
TATCTTCTACCAAAACATTCACCGAAGAAGCAGAAACCCTTTTGAAAGAAGCTATTCA  
GGAACAGAAGGAACGTTTTGTAATTCAGGAACAAGTAATGAGAATCAATCCTACTACT  
TCTGGTCCGGGAGTTTCCGCGCTTGAAAAAAGAACCTGGGGCGTATCGCTCAAATCA  
TCGGGCCAGTGCTAGATGTAGCTTTTCCCCGGGCAAGATGCCTAATATTTACAACGCT



CTGGTAGTTAAGGGTCGAGATACTGCCGGTCAAGAAATTAATGTGACTTGTGAAGTAC  
ACAATTATTAGGAAATAATCGAGTTCGGGCTGTAGCTATGAGTGCTACAGATGGTCTA  
ACGAGAGGAATGGAAGTGATTGACACAGGAGCCCCCTCTAAGTGTTCCAGTCGGTGGG  
GCAACTCTAGGACGAATTTTCAACGTGCTTGGAGAACCTGTTGACGATTTAGGTCTGT  
AGATACTCGCGCAACATCCCCTATTCATAGATCTGCACCTGCCTTTATACAGTTAGATAC  
AAAATTATCTATTTTTGAAACAGGAATTAAGTAGTAGATCTTTTAGCCCCCTATCGCCG  
TGGAGGAAAAATCGGGCTATTCGGGGGAGCTGGAGTGGGTAAAACAGTACTTATTATG  
GAATTAATCAATAACATTGCGAAAGCTCATGGGGGTGTATCCGTATTTGGCGGAGTAGG  
CGAACGTACTCGTGAAGGAAATGATCTTTACATGGAAATGAAAGAATCTGGAGTAATT  
AATGAAGAAAATATTGCAGAATCAAAGTGGCTCTAGTCTATGGTCAGATGAACGAAC  
CGCCGGGAGCTCGTATGAGAGTTGGTTTGACTGCCCTAACTATGGCGGAATATTTTCGA  
GATGTTAATGAACAAGACGTA CTCTATTTATCGACAATATCTTCCGTTTCGTCCAAGCA  
GGATCCGAAGTATCCGCCCTATTGGGTAGAATGCCCTCCGCTGTGGGTTATCAACCTAC  
CCTTAGTACCGAAATGGGCTCTTTACAAGAAAGAATTACTTCTACCAAAGAAGGGTCC  
ATACTTCTATTCAAGCAGTTTATGTACCTGCGGACGATTTGACTGATCCTGCTCCTGCC  
ACGACATTTGCACATTTAGATGCTACTACTGTACTATCAAGAGGATTAGCTGCTAAAGGT  
ATCTATCCAGCAGTAGATCCTTTAGATTCAACGTCAACTATGCTCCAACCTCAGATTGTT  
GGTGAGGAACATTATGAAACTGCGCAAAGAGTTAAGCAAACCTTTACAACGTTACAAAG  
AACTTCAGGACATTATAGCTATCCTTGGGTTGGACGAATTATCCGAAGAGGATCGCTTA  
ACTGTAGCAAGAGCACGAAAAATTGAGCGTTTCTTATCACAACCCTTTTTTCGTAGCAG  
AAGTATTTACCGGTTCTCCGGGGAAATATGTCGGTCTAGCAGAAACAATTAGAGGGTTT  
AAATTGATCCTTTCCGGGAGAATTAGATAGTCTCCCTGAGCAGGCCTTTTATTTGGTAGGT  
AATATTGATGAAGCTACTGCGAAGGCTACGAACTTAGAAATGGAGAACAACCTTGAAGA  
AAATGACCTTAAATCTTTGTGTACTGACCCGAATCGAATTGTTTGGGATTCAGAAGTG  
AAAGAAATCATTTTATCTACTAATAGTGGACAAATTGGCGTATTACCAAACCATGCACCT  
ATTGCCACAGCTGTCGATATCGGTATTTTGAGAATACGCCTTAATGACCAATGGTTAACG  
ATGGCTCTGATGGGTGGTTTTGCTAGAATAGGCAATAATGAGATTACTGTTTTAGTAAAT  
GATGCAGAGAAGGGTAGTGACATTGATCCACAAGAAGCTCAGCAAACCTTGAATAG  
CAGAAGCTAACTTGAGGAAAGCGGAAGGCAGGAGACAAATAATTGAGGCAAATCTAG  
CTCTCAGACGAGCTAGGGCACGAGTAGAGGCTCTCAATGAGATTTTCGATGAAAAATAT  
AACCGATTCTTTTCGTTTCCTTGGGTCACTGGCCATCCGCCGGGAGTTTCGGGTTTAATA  
CCGATATTTTAGCAACAAATCTAATAAATCTAAGTGTAGTCCTTGGTGTATTGATTTTTT  
TGGAAAGGGGGTGTAAAGTGATTTATTAGATAATCGAAAACAAAGGATTTTGGATACTA  
TTCGAAATTCAGAAAAACTACGCGAGGGGGCTATTGAACAGCTGGAAAAAGCCCGG  
CCCGCTTACGGAAAGTGGAAATAGAAGCAGATCAGTTTCGAACGAATGGATATTCTGA  
GATAGAACGAGAAAAATTGAATTTGATTAATTCAACTTATAAGACTTTGGAACAATTAG  
AAAATTACAAAAATGAAACCATTCAATTTGAACAACAACGAACGATTAATCAAGTCCG  
ACAACGGGTTTTCCACAAGCCTTACAAGGAGCTCTAGGAACTCTGAATAGTTGTTTG  
ACCAACGAGTTGCATTTACGTACCATCAATGCTAATCTTGGCATGTTTGGCGCGATAAA  
AGAAATAACTGATATGAATCCATTGATTTCTGCCGCTTCCGTTATTGCTGCTGGGTTGGC  
CGTTGGGCTTGCTTCTATTGGACCTGGGGTTGGTCAAGGTACTGCCGCGGGCCAAGCT  
GTAGAAGGTATTGCAAGACAACCCGAGGCGGAGGGAAAAATACGAGGTACTTTATTGC  
TTAGTCTGGCTTTTATGGAAGCTTTAACGATTTATGGACTGGTTGTAGCATTAGCACTGT  
TATTTGCGAATCCTTTTGTATGAATGTTCTATCATGTTCCATCAACACACTAAGGGGGT

TATATGATATATCCGGTGTGGAAGTAGGCCAGCATTCTATTGGAAAATAGGAGGTTTCC  
AAGTCCATGCCCAAGTGCTTATTACTTCTTGGGTTGTAATTGCTATCTTATTAGGTTTCGG  
CCATTGTAGCTGTTTCGGAATCCACAAACCATTCCAACCTGGAGGTCAGAATTTCTTCGAA  
TACGTCCTTGAATTCATTCGAGATGTGAGCAAAACTCAGATTGGAGAGGAATATGGCCC  
GTGGGTCCCCTTTATTGGAACATGTTTCTATTTATTTTGTTCCTAATTGGGCGGGGGC  
GCTTTTACCTTGGAAAGATCATAAGTTACCTCACGGGGAGTTAGCCGCACCTACGAATG  
ATATAAATACTACCGTTGCTTTAGCTTTACTTACGTCAATAGCATATTTTTATGCGGGTCT  
TAGCAAAAAGGATTAGGTTATTTAGTAAATACATTCAACCAACTCCAATCCTTTTAC  
CCATTAACATTTTAGAAGATTTACAAAACCTTTATCACTTAGCTTTTCGACTTTTCGGCA  
ATATATTAGCGGATGAATTAGTAGTTGTTGTTCTTGTTCCTTAGTACCTTCAGTGGTTC  
TATACCTGTCATGTTCCCTGGATTATTTACAAGTGGTATTCAAGCTCTTATTTTTGCAACT  
TTAGCTGCGGCTTATATAGGCGAATCCATGGAGGGGCATCATATGATATTCTCGACTTTA  
GAACATATATTAACACATATATCTTTTCAGTCGTGTCAATTGTAATTACAATTCATTGAT  
AACCTTATTAGCCGATGAATTCGTAGAACTATATGATTTCGTCAGAAAAGGGCATGATAA  
CTACTTTTTTTGTATAACAGGATTATTAGTTACTCGTTGGATTTTTTTGGGACATTTACC  
ATTAAGTGATTTATATGAATCATTAAATCTTTCTTTCATGGTCTTTTTCCATTATTCATATGG  
TTCCGTATTTTAAAAACATAAAAATTTTTTAAGCGCAATAACCGCGCCAAGTACTTTTT  
TTACCCAAGGGTTTGCTACTTCGGGTCTTTTAACTGACATGCATCAATCCGAAATCTTA  
GTGCCCCGCTCTCCAATCCCAGTGGTTAATGATGCACGTAAGTATGATGATATTGGGCTAT  
GCAGCTCTTTTGTGTGGATCATTATTTTCAGTAGCATTCTAGTAATCACATTTTCGAAA  
ATCATAAGAATTTTTGAT-----AAAGAGATACAATATATG-----GCGGAAAATGTTTTAAGA  
AATATTTCTTTTCTTTCTTCTAGGAATTATTACAGGTTTCAATTGATTCAACAATTAGATG  
ACTGGGGTTATCGTATTATAAGTATAGGGTTATCTTTTAAACAATAGGTATTCTTTTCGGG  
AGCAGTCTGGGCTAATGAAGCATGGGGATCGTATTGGAATTGGGACCCAAAAGAACT  
TGGGCATTTATTACGTGGACCATATTTCGCGATTTATTTCCATATTCGAACAAATAAAAA  
TTGGAGGGTTTCCATTCCGCAATTGTCGCTTCTATCGGTTTTCTTCTAATTTGGATATGCT  
ATTTTGGAGTTAATTTATTAGGAATAGGACTACATAGTTATGGTTCATTTACATTAACAAA  
ATGGAAAAAAAACATTTATTCCCCTTCTATATCTTACATCTATAGTTTTTTTTGCCCCTGG  
TGGGTCTTTTTTTATTTAATAAAAAGTTTGGAACTTTGGATTATTAATTGTTGTAATACTA  
GTAAATCCGAACTTTTTTAAATGATATCCAAGAAAAAAGTATTCTAGAAAAATTCATG  
GAATTAGAAGACCTCGTTTCGCTTAAACGAAATAATAAAGGAATACCCGGAAACACATC  
TACAAAAGTTTCGTATCGGA---CACAAAGAAACGATCCAATTGATCAAGATGCACAATG  
AGGATCGTATCCATACGATTTTGCACCTTCTCGACAAATATAATCTGTTTCATTATTCTAAG  
TGGTTATTCTATTCTAAGTAATGAAGAACTTATTATTCTTAATTCTTGGGTTCAAGAATTC  
CTATATAACTTAAGCGACACAATAAAAGCTTTTTCCATTCTTTTATTAACCGATTTATGTA  
TAGGATTCCATTACCTCACGTTGGGAACATAATGATCGGCTCTGTCTACAAAGATTTT  
GGATTTGCCATAACGATCAAATTATATCTGGCCTTGTCTTACTTTTCCAGTCATTCTCG  
ATACCATTTTTTAAATATTGGATTTTCCGTTATTTAAATCGCGTATCTCCGTCACCTGTAGT  
GATTTATCATTCAATGAATGACATGCCTATTGGTGTTCAAAAGTCCCTTTTCGAAATCC  
TGGGGAAGACGATTCAACTTGGATTGACATAAAC---CGACTTTATCGAGAAAGATTACT  
TTTTTTAGGTCAAGATGTTGATAGCGAGATCGCGAATCAACTTATTGGTCTTATGGTATA  
TCTCAGTATAGAAAACGCGACAAAAGATTTGTATTTGTTTATAAACTCTCCCGCGGAT  
GGGTAATACCCGGAATAGCTATTTATGATACTATGCAATTTGTGCGACCCGATGTACAAA  
CAGTATGCATGGGATTAGCTGCTTCAATGGGATCTTTTATTCTGGTTCGGAGGAAAAATT

ACCAAACGTTTAGCATTCCCTCATGCTAGGGTAATGATTCATCAACCTATTTCTGGTTAT  
TATGAGGCACAAATAGTAGAATTTGTCCTGGAAGCGGAAGAACTACTGAAACTGCGCG  
AAATCCTCACAAGGATTTATGCACAAAGAACGGGAAAACCTTTATGGGTTGTATCCGA  
AGACATGGAAAGAGATGTTTTATGTCAGCAACCGAAGCCCAAGCTCATGGAATTGTT  
G A T C T T G T A G C A G T T G C  
A????????????????????????????????????????????????????????????????  
????????????????????????????????????????????????????????????????  
????????????????????????????????????????????????????????????????  
????????????????????????????????????????????????????????????????  
ATGGAGGAA-----AGATATTTAG  
AATTAGATAGATCTCGAAAAACGACTTCTATACCCATTTATCTTTTCGGGAGTATATTTA  
TACATTCGCTCATGATCATAGTTTAGTAGGTTATGACAATAAATCTAGTTTATTAATTGTA  
AAACGTTTAATTACTCGAATGTATCAACAGAATCATTGATTATTTCTGCTAATGATTCTA  
ACCAAATCTATTTTTTAGGAAGAATTTGTATTATCAAATGATATCAGAGGGCTTTGCAG  
TTATTGTGGAAATTCATTTTCCCTACGATTAGTATCTTCTTTAATAGTAAAATCTCATAA  
ATTACGATCAATTCATTCAATATTTCCCTTTTTTAGAGGACAAATTTCCACATTTAAATTAT  
GTGTCAGATATATTAATACCTTACCCCATCCATCTAGAAAAATTGGTTCAAACCCTTCGC  
TATTGGGTGAAAGATCCCTCTTCTTTGCATTTATTACGACTCTTCTTCATGAGTATTGG  
AATTTGAACAGTCTTATTATTAATTTATTACTATTTTATAAAACCAAGATTTTCTTGT  
CCTATATAATTCTCATGTATATGAATACGAATCCATCTTCTTTTTTCTCCGTAACCAATCCT  
TTCATTTACGATCAATATTTTTGCGAGTCCTTCTTGAACGAATTTTTTCTATGGAAAAAT  
AGAACATTTTTCGGAAGTCTTTGCTAATCAGGCCATCTTGTGGTTGTTCAAGGATCCTT  
TCATGCATTATGTTAGATATCAAGGAAAATCAATTCGGCTTCAAAGATCGGCCTTTTC  
TGATGAAAAAATGGAAATATTACCTTGTCAACTTATGTCAATGTCATTTTTATGTCTGGT  
TTCAACCAGAAAAGATCTATATAAATTCATTATCCAAGCATTCTCTCAACTTTTTGGGCT  
ATCTTTCAAATGTACAATTAATCCTTTGGTGGTACGGAGTCAAATGTTAGAAAATTCAT  
TTATAATAGATAAAGATAGTACTATGAAGAACTCGATACAATAGTTCCAATTATTCCTTT  
AATTGGATCATTGGCAAAAACGAAATTTGTAACGCAGTAGGACATCCCATAGTAAAC  
CGATTTCGGGCGGATTTCGGCGGATTCTGATATTATCGACCGATTTGTGCGTATATGCAGAA  
ATCTTCTCATTATTATAGCGGATCCTCAAAAAAAAAGAGTTTGTATCGAATAAAATATAT  
ACTTCGACTTTCTTGTGTTAAAATTTGGCCCGTAAACACAAAAGTACTGTACGCGCTT  
TTTTGAAAAGATTAGGTTTCGGAATTATTAGAAGAGTTTTTTACGGAGGAAGAACAGATT  
CTTCTTTGATCTTTCCAAAACGTGTTTGGTATTTGGATATTATTTCTATCAATGATTTGG  
CCAATCATGAAATGATAATTGATACAACA---GAAGTACAA---GCTATCAATTCTTTTTCTA  
GATTAGAATCC---TTAAACGAGGTCTATGGAATTATATGGGTGTTTGCCTCGATTTTTATT  
CTTGTATTGGGAATCACGACAGGCATACTAGTAATTGTATGGTTAGAAAGAGAAATATC  
TGCAGGGATAACAACGATTGGACCTGAATATGCCGGTCCTTTAGGAGTCTTCAAG  
CTCTAGCGGATGGGACAAAACCTTTTCAAAGAGAATCTTTTTCCATCTAGGGGGGAT  
ATTCGTTTATTTCAGTATCGGACCATCCATAGCAGTCATATCAACTATATTAAGCTATTTCG  
TAATTCCTTTTGGCTATCACCTTGTTTAACTGATCTAAATATTGGTGTTTTTTTTATGGATT  
GCCATTTCAAGTATTGCTCCCATCGGACTTCTTATGTCAGGATATGGATCAAATAATAAA  
TATTCCTTTTTGGGTGGTTTACGAGCTGCTGCTCAATCGATTAGTTATGAAATACCATTA  
ACTCTTTGTGTGTTATCCATATCTCTATTATCTAATAGTTCAAGTACAGTTGATATAGTTG  
AGGCACAATCAAATCTGGTTTTTGGGGGTGGAATTTGTGGCGTCAACCTATAGGATTT  
ATCATTTTTTTTATTTCTTCTTAGCAGAATGTGAGAGATTACCTTTTGATTTACCAGAA  
GCAGAAGAAGAATTAGTAGCAGGTTATCAAACCGAATATTCGGGCATCAAATTTGGTTT

ATTTTATATTGCTTCCTATCTAAACTTATTAGTTTCTTCATTATTTGTAACAGTTCTTTACT  
TGGGCGGTTGGAATATCTCTATTCCGTATATATTCGTTCTGAGCTTTTT-----GAAAAAA  
TGAGCGGAGTCTTTGGAACAACAATTGGTATCTTTATTACATTGGTTAAAACCTTATTTGT  
TCTTGTTTCATTCCCTATCACAACAAGATGGACTTTACCTAGACTAAGAATGGACCAACTT  
TTAAATCTTGGATGGAAATTTCTTTTACCTATTTCTCTCGGTAATCTATTATTAACAACCT  
CTTTCGAACTTCTTTACTAATGATCTGGCATGTACAGAATGAAAACCTTCATTCTCGATT  
CTACGAGAATTTTTATGAAAGCCTTTCATTTGCTTCTCTTCGATGGAAGTTTTATTTTCC  
CAGAATGTATCCTAATTTTTGGCCTAATTCTTCTTCTGATGATCGATTCAACCTCTGATCA  
AAAAGATATACCTTGGTTATATTTTCATCTCTTCAACAAGTTTAGTAATGAGTATAACGGC  
CCTATTGTTCCGATGGAGAGAAGAACCTATGATTAGCTTTTTCGGGAAATTTCCAAACGA  
ACAATTTCAACGAAATCTTTCAATTTCTTATTTTACTATGTTCAACTCTATGTATTCTCT  
ATCCGTAGAGTACATTGAATGTACAGAAATGGCTATAACAGAGTTTCTCTTATTCGTATT  
AACAGCTACTCTAGGAGGAATGTTTTTATGCGGTGCTAACGATTTAATAACTATCTTTGT  
CGCTCCAGAATGTTTCAGTTTATGCTCCTACCTATTATCTGGATATAACCAAGAAAGATGT  
ACGGTCTAATGAGGCTACTACGAAATATTTACTCATGGGTGGGGCAAGCTCTTCTATTCT  
GGTTCATGCTTTCTTGGCTATATGGTTCGTCCGGGGGAGAGATCGAGCTTCAAGAAA  
TAGTGAATGGCCTTATCAATACACAAATGTATAACTCCCCAGGAATTTCAATTGCGCTTA  
TATTCATCACTGTAGGAATTGGGTTCAAGCTTTCCCTAGCCCCTTCTCATCAATGGACTC  
CTGACGTATACGAAGGATCTCCCACTCCAGTCGTTGCTTTTCTTTCTGTTACTTCGAAA  
GTAGCTGCTTCAGCTTCAGCCACTCGAATTTTCGATATTCCTTTTTATTTCTCATCAAC  
GAATGGCATCTTCTTCTGGAAATCCTAGCTATTCTGAGCATGATAGTGGGAATCTCATT  
GCTATTACTCAAACAAGCATGAAACGTATGCTTGCATATTCGTCCATAGGTCAAATCGGA  
TATGTAATTATTGGAATAATTGTTGGAGACTCTAATGGTGGATATGCAAGCATGATAACT  
TATATGCTCTTCTATATCTCCATGAATCTAGGAACTTTTGCTTGTATTGTATTATTTGGTCT  
ACGTACCGGAACTGATAACATTTCGAGATTATGCAGGATTATACACGAAAGATCCTTTTTT  
GGCTCTCTCTTTAGCCCTATGTCTCTTATCCCTAGGAGGTCTTCCCTCCACTAGCAGGTTT  
TTTCGGAAAACCTCATTATTTCTGGTGTGGATGGCAGGCAGGCCTATATTTCTTGGTTTT  
AATAGGACTCCTTACGAGCGTTGTTTCTATCTACTATTATCTAAAAATAATCAAGTTATTA  
ATGACTGGACGAAACCAAGAAATAACCCCTCACGTGCGAAATTATAGAAGATCCCCTT  
TAAGATCAAACAATTCCATCGAATTGAGTATGATTGTATGTGTGATAGCATCTACTATAC  
CAGGAATATCAATGAACCCGATTGTTGAAATTGCTCAAGATACCCTTTTTATGTTTCTGA  
TTTACGAATATGATATATTCTGGGCATTTCTAATAATATCAAGTGTTATTCCTATTTTAGCA  
TTTCTAATTTCCGGAGTTTTATCCCCGATTAGCAAAGGGCCGGAGAACTTTCTAGTTAT  
GAATCGGGTATAGAACCAATAGGCGATGCTTGGTTACAATTTCGAATCCGTTATTATATG  
TTTGCTCTAGTTTTTTGTTGTTTTTGATGTTGAAACAGTTTTTCTTTATCCATGGGCAATG  
AGTTTCGATGTATTGGGGTTATCCGTATTTATAGAAGCTTTAATTTTCGTGCTTATCCTAA  
TTGTTGGTTCAGTTTATGCATGGAGAAAAGGAGCATTAGAATGGTCTATGAATCTTTTC  
CTTGGTTAACAATATTTGTAGTTTTTACCGATATCCGGGGGTTCCCTTAATTTTCCTTTTCCC  
TCATAGAGGAAATAAAGTAATAAAATGGTATACTATATTTATATGCATCTTTGAGCTACTT  
TTAATGACTTATGCGTCTCTTATTATTTCCAATTGGACGATCCATTAATCCAATTAACAG  
AAGATTATAAATGGATCCAATTTTTTGTATTTTTACTGGAGATTGGGAATCGATGGATTTT  
CTTAGGACCTATTTTACTGACAGGATTTATCACCCTTTAGCTACTTTAGCGGCTCGGC  
CAATTACTCGGGATCCCCGATTATTTCAATTTCTGATGTTAGCAATGTATAGTGGTCAAAT  
AGGATTATTTCTTCTCAAGATCTTTTACTTTTTTTTTATCATGTGGGAGTTAGAATTAATT

CCCGTTTATCTACTTCTATCCATGTGGGGGGGAAAGAAACGTCTGTATTTCAGCTACAAA  
GTTTATTTTGTATACTGCGGGAGGTTCCGTTTTTTTTATTAATGGGAGCTTTGGGTATCGCT  
TTATATGGTTCTAATGAACCAAGATTCCATTTTGAACATCAGCTAATCAATCATATCCTG  
TGGCGCTAGAAATATTTTTCTATATTGGATTTCTTATTGCTTTTGCTGTCAAATCACCGAT  
TATACCCTTACATACATGGTTACCAGACACCCACGGGGAAGCACATTACAGTACTTGTA  
TGCTTCTAGCCGAATCTTATTAATAAATGGGGGCGTACGGATTGGTTCGAATCAATATG  
GAATTATTACCTCACGCTCATTCTATTTTTTCTCCCTGGTTGATAATAGTAGGCGTAATGC  
AAATAATCTATGCAGCTTCAACATCTCCTGGTCAACGAAATTTAAAAAAAAGAATAGCC  
TATTTCTGTATCTCATATGGGTTTCATAATTATAGGAATTTGCTCTATAAGTGATATGGG  
ACTCAATGGAGCCATTTTACAAATAATATCACATGGATTTATTGGTGCCGCACTTTTTTT  
CTTGGCAGGAACGGGTTATGATAGAATACGTCGTGTTTATCTTGATGAAATGGGCGGAA  
TGGCTACCTCAATGCCAAAAATATTCACGACATTCAGTATCTTATCACTAGCTTCCCTTG  
CATTACCAGGCATGAGCGGTTTTTTTTGCGGAATTGATAGTATTTTTTGGATAATTACCG  
GCCAAAAATATCTTTTAATGTCAAAAATATTAATTACTTTTTGTAATGGCAGTTGGAATGA  
TATTAACTCCTATTTATTTATTATCTATGTTACGCCAGATGTTTTATGGATAACAAGCTGTTT  
AATGCCCAAACCTTATTTTTTTGATTCTGGACCGCGGGAGCTATTTGTTTCGATCTCT  
ATCCTTCTGCCTGTAATAGGGATTGGTTTTTATCCGGATTTTCGTTTTCTCATTATCAGTTG  
ACCGGGTTGAAGCTATTCTATCTAATTATTTTTATAGAATGATGCTCGAACATGTACTTGT  
TTTGAGTGCCTATTTATTTTCTATTGGTATCTATGGATTGATCACGAGTCGAAATATGGTT  
AGAGCCCTTATGTGCCTTGAACCTTATACTGAATGCAGTTAATCTAAATTTTCGTAACATTT  
TCTGATTTTTTTGATAGTCGCCAATTAAGGAAATATTTTTTCAATTTTTGTTATAGCTA  
TCGCAGCCGCTGAAGCAGCTATTGGACCAGCTATTGTTTCGGCAATTTATCGTAATAGA  
AAATCAATCCATATCAATCAATCGAATTTGTTGAATAAGATGGAACATATATATCAATATT  
CATGGATCATACTTTTCGTTACATTGCCAGTACCTATGTTAATCGGAGCGGGACTCCTGC  
TTTTTCCGGCAGCAACAAAAAACTGCGGCGTATGTGGGCTTTTTCCAAGCGTTTTCTT  
GTTAAGTATAGTCATGATTTTTTCAATCGATTTGTCTATTCAGCAAATAAATAGTAGTTTT  
ATTTATCAATATATATGGTCGTGGACTATCAATAATGATTTTTCTTTAGAGTTTCGGACACT  
TGATTGACCCACTTACTTCTATTTTGTGAGTATTAATTAATACTACAGTTGGCATTTTGGTTCT  
TTTTTATAGTGACAATTATATGTCTCATGATCAAGGCTATTTGAGATTTTTTGCTTATATGA  
GTTTTTCACTACTTCAATGTTGGGATTAGTTACTAGTTCTAATTTGATACAAATTTATAT  
TTTTTGGGAATTGGTTGGAGTGTGTTCTTATCTATTAATAGGTTTTTGGTTACACGACC  
TATTGCATCGAATGCTTGTCAAAAAGCGTTTGTAACATAATCGCGTAGGGGATTTTGGTTT  
ATTATTAGGATTTTAGGTCTTTATTGGATAACGGGCAGTTTCGAATTTCCGGGATTTGTTT  
AAAATCTTCAATAAC---CAGGTTAATTTTTTATTTGTTACTTTGTGTGCCGTTCTATTATTT  
TCTGGCGCAATTGCTAAATCGGCGCAATTTCCCTCTTCATGTATGGTTACCGGATGCCATG  
GAAGGGCCTACTCCTATTTCCGGCTCTGATACATGCTGCTACTATGGTAGCGGGCGGGAAT  
TTTTCTTGTAGCTCGCCTTTTTCTCTTTTTCGTAATTATACTTTCATAATGAATCTAATAG  
CTTTGATAGGTATAATAACAGTATTTTTAGGAGCTACTTTAGCTCTTGCTCAAAAAGATA  
TTAAGAGAAGTTTAGCCTATTCTACAATGTCTCAATTGGGTTATATGATGTTAGCTCTAG  
GTATGGGGTCTTATCGGGCCGCTTATTTCATTTGATTACTCATGCCTATTTCGAAAGCATT  
GTTGTTTTTAGGATCTGGATCCATTATTCATTCATGGAAGCTATTCTTGGTTATTCTCCA  
GATAAGAGTCAAAATATGGTTCTTATGGGTGGTTTAAACAAAACATATTCCAATTACCAA  
AACGGCTTTTTTATTAGGAACACTTTCTCTTTGTGGTATTCCTCCCTTCGCCTGTTTTTG  
GTCCAAAGATGAAATCTTAATGATAGTTGGTTGTATTCACCTATTTTCGCAATAATAGC

CTGTTTCACAGCGGGATTAACCGCATTATATGTTTCGGGTTTATTTACTTACTTTTGAC  
GGACATTTTAATGCTCATTTCCAAAGTTACAGTGGTAAAAAAACAGTTCATTTTATTC  
AATATCTTTATGGGGTAAAGAAGGATCAAAAATGCTTAACAAA---TTATTAGCTTTATTA  
ACAATGAATTTTTTTTGGAACTAAAAGG---ATTTTTTCCTATCCCATGAATCGGATA  
ATACTATGTTATTTCCCTATGCTTATCTTAGTACTATTTACTTTGTTTATTGGAGCCATAGGA  
AATCAATTCGATATAGATATATTGTCAAACTTTTAACTCCGTCTTTAAACCTTTTGCATC  
AAAATCCAGAA---TCGGTGGATTGG---GAATTTGTAACAAATGCAACTTTTTCAGCCAG  
TATAGCTTTTTTTGGAAATTTATAGCGTCCTTTTTATATAAGCCTGTTTATTCATCGTTAC  
AAAATTTGAATTTCTTTAATTCGTTTCGCTATTTCTTTGGGACAAAATAAATAATGTGATATA  
TAATTGGTCTCTAATCGAGGTTATATAGATGCTTTTTATGCAATATCTTTTATTGGAGGT  
ATAAGAAAATTGGCTGAATTAATTCATTTTTTTGATAAACAATAATTGATGGAACCCCC  
AATGGGGTTCGGTGTACTAGTTTCTTTGTAGGAGAGGGTATAAAAAATGTAGGAAGTG  
GT--CGCATCTTTTTATCTCTTATTTATTTATTTATGCGTTAATCTTCTTATTAATTTAC  
TACATGGATTTGCCTGGACTAATTCATGATTTTCTTTTAGTCTTTCTGGGGTTAGGTCTTA  
TATTAGGAGGTCTAGGAGTAGTATTACTTACCAACCCAATTTATTCTGCCTTTTCGTTGG  
GATTGGTCTTGTGTTGTATATCTTTATCTATATTTTATCAAACCTCTCATTTTGTAGCTGCC  
GCACAGCTCCTTATTTATGTGGGAGCTATAAATGTTTTAATTATATTTGCCGTGATGTTCA  
TGAATGGTTCAGAATATTACAAAGATTTAATCTTTGGACTGTTGGAAGCGGGGTTACT  
TCCTTAGTTTGTACAAGTATTTTTGTTTCACTAATTACTATTATTCCAGATACGTCATGGT  
ACGGAATTATTTGGACTACAAAACAAATCAGATTATAGAACAAGATTTGATAAGTAAT  
GGCCAACAATTGGAATTCATTTATCAACAGATTTTTTTCTTCCATTTGAATTCATTTCA  
ATAATCTTTTAGTTGCTTTGATAGGTGCGATTGCTGTGGCTCGTCAGATGAATGTACCA  
GCTACACGAAAAGACCTTATGATAGTTAATATGGGTCCCCACCACCCATCAATGCATGG  
TGTTCTTCGACTCATCGTTACTCTAGACGGGGAAGATGTTATTGACTGCGAACCAATATT  
AGGTTATTTACACAGAGGAATGGAAAAAATTGCGGAAAATCGAACAATTATACAATATT  
TGCCCTATGTAAACACGTTGGGATTATTTGGCTACTATGTTTACAGAAGCAATAACAGTA  
AATGGTCCAGAACTGTTAGGAAATATTCAAGTGCCTAAAAGAGCTGGCTATATCAGAGT  
AATTATGTTGGAATTGAGTCGTATAGCTTCTCATTTGTTATGGCTTGGCCCTTTTATGGCA  
GATATTGGTGCACAGACTCCTTTCTTCTATATCTTTAGAGAAAGAGAGTTAGTATATGAT  
TTATTCGAAGCTGCCACTGGTATGAGAATGATGCATAATTTTTTTTCGTATCGGAGGAGTA  
GCGTCTGATCTACCTCATGGTTGGATAGATAAATGTTTGGATTTTTTGCATTATTTTTTAA  
CAGGAGTTACTGAATATCAAAACTTATTACGCGAAATCCTATTTTTTTTAGAACGAGTT  
GAGGGGGTAGGTATTGTTGGTACAGAAGAAGCAATAAATTGGGGTTTATCAGGACCAA  
TGCTACGAGCTTCTGGAGTACAATGGGATCTTCGTAAAGTTGATCATTATGAGTGTAC  
GACGAATTTGATTGGGAAATCCAGTGGCAAAAAGAAGGAGATTCTTAGCTCGTTATTT  
AGTCCGGATTGGTGAATGCTGGAATCTATAAAAATTATTCAACAGGCTCTGGAAGGAA  
TTCCGGGGGGCCCTATGAGAATTTAGAAACCCGACGCTTTGATAGAGAAAGGGATTC  
GGAATGGAACGATTTTCGAATATCGATTCATTAGTAAAAAACTTCTCCTACTTTTGAATT  
ACCGAAACAAGAACTTTATGTGAGAGTCGAAGCACCAAAGGAGAATTGGGAATTTT  
TCTGATAGGGGATCAGAGCGGTTTTCTTTGGAGATGGAAAATTCGTCCGCCAGGTTTTA  
TCAATTTGCAAATTTCTCCTGAATTAGTTAAAAGAATGAAATTGGCTGATATTATGACAA  
TACTAGGTAGTATAGATATCATTATGGGAGAAGTTGATCGTATGTTCCCATGGTAACTG  
GGTTCATGAATTATGGGCAACAACCATACGAGCTGCAAGGTACATTGGTCAAGGTTTC  
ATGATTACCTTATCTCATGCAAATCGTTTACCTGTAAGTGTCAATATCCTTATGAAAAAT

TAATCACATCGGAGCGTTTCCGCGGTCTGAATTCATTTTGAATTTGATAAATGCATTGCTT  
GTGAAGTATGTGTTTCGTGTATGTCCTATAGATCTACCTGTTGTTGATTGGAAATTGGAAA  
CTGACATTCGAAAGAAACGGTTGCTTAATTACAGTATTGATTTCGGAATCTGTATATTTT  
GTGGCAACTGTGTTGAGTATTGTCCGACAAATTGTTTATCGATGACTGAAGAATATGAG  
CTTTCTACTTATGATCGTCACGAATTGAATTATAATCAAATTGCTTTAGGTCGTTTACCAA  
TGTCAGTAGTTGACGATTATAACAATTCGAACAATTTTGAATTCACAAAAAAA-----  
-----ATGCAGGGTCGTTTGTCTGCTTGGCTAGTCAAACATGGGCTAGTT  
CATAGATTTTTGGGTTTTGATTACCAAGGAATAGAGACTTTACAAATAAAGCCCGAAGA  
TTGGCATTCCATTGCTGTCAATTTATATGTATATGGTTACAATTATCTGCGTTCGCAATGT  
GCCTATGATGTAGCACCGGGCGGGCTGTTAGCTAGTGTATATCATCTTACGAGAATAGA  
GTATGGTATAGATCAACCAGAAGAAGTATGTATAAAAGTCTTTGCCCAAGGAAAAATC  
CTAGAATTCCGTCTGTTTTCTGGGTTTGGAAAAGTGCGGATTTTCAAGAAAGGGAATCT  
TATGATATGCTGGGAATCTTTTATGATAATCATCCGCGTCTGAAACGTATCTTAATGCCGG  
AAAGTTGGATAGGGTGGCCCTTACGTAAGGATTATATTGCTCCCAATTTTATGAAATAC  
AAGATGCTCAT-----  
-----ATGAATTCCATTGAGTTT  
CCTTTACTTGATCGAACAACCTCAAATTTTCAGTTATTTCAACTACATCAAATGATCTTTCA  
AATTGGTCAAGACTCTCCAGTTTATGGCCACTTCTCTATGGTACCAGTTGTTGCTTCATT  
GAATTTGCTTCATTAATAGGCTCACGATTCGACTTTGATCGTTATGGGCTAGTACCAAGA  
TCTAGTCTAGACAAGCGGACCTGATTTTAAACAGCCGGCACAGTAACCATGAAAATGG  
CTCCTTCTTTAGTAAGATTATATGAACAAATGCCTGAACCAAATATGTTATTGCTATGG  
GGGCATGTACAATTACAGGGGGAATGTTTCAGTACCGATTCTTATAGTACTGTTTCGGGGG  
GTCGATAAGCTAATTCCTGTAGATGTCTATTTGCCAGGCTGTCCACCTAAACCGGAGGC  
GGTTATAGATGCTATAACAAAACCTTCGTAAAAAAATATCTCGAGAAATTTATGAAGATC  
GAATTAGGTCT-----GGGAAACGGTGTTTTACTACTAATCACAAGTTTAATATTGAACGC  
ACTACTCATACCGGAAATTATGATCAAGAATTACTCTATCAATCGCCGTCTACTTCAAAG  
ATCCCTCCTGAAACATTTTCAAATATAAAAGGTCAGTATCGTCTAACGAATTAGTAAAT  
ATGCAAACCTAGAAAGACCTTTTCTTGGATAAAAGAAGAGATTACTCGTTCAATTTCCGT  
ATTGCTCATGATATATATAATAACTTGGGCATCCATTTCAAATGCATATCCCATTTTTCAG  
CAGCAGGGTTATGAAAATCCACGCGAAGCAACTGGTTCGTATTGTATGTGCCAATTGTCA  
TTTAGCTAATAAACCCGTGGATATTGAGGTTCCACAAGCGGTACTTCCAGATACTGTATT  
TGAAGCAGTTGTTTCGAATTCCTTATGATATGCAACTGAAACAAGTTCTTGCTAATGGTA  
AAAAGGGGGCTTTGAACGTGGGGGCTGTTCTTATTTTACCTGAGGGGTTTGAATTAGC  
CCCTCCCGATCGTATTTCCGACAGAGATGAAAGAAAAGATGGGAAATCTGTCTTTTTCAG  
AGTTATCGCCCCACTAAAAAAATATTCTTGTGATAGGTCCTGTTCCCTGGTCAGAAATAT  
AGTGAATACCTTTTCTATTTCTCCGGACCCCGCCGCTAAGAAAGATGTTCACTT  
TTAAAATATCCCATATATGTAGGCGGAAACAGGGGAAGGGGTCAGATTTATCCCACG  
GGAGCAAGAGCAACAATACGGTTTATAATGCTACAGCAGCAGGTATAGTAAGCAAAT  
CATACGAAAAGAAAAGGGGGGTACGAAATAACCATAACGGATGCGTCAGAGGGACG  
TCAAGTGATTGATATTACCTCCAGGACCAGAACTTCTTGTTTCAGAAGGCGAATCCA  
TTAAACTTGATCAACCATTAACGAGTAATCCTAATGTGGGTGGATTTGGTCAGGGGGAT  
GCAGAAATAGTACTTCAAGACCCATTACGCGTCCAAGGCCTTTTGTTCTTCTTGGCATC  
CGTTATTTTGGCACAAATCTTTTGGTTCTTAAAAAGAAACAGTTTGGAGAAGGTTCAAT  
TGTCGAAATGAATTTTCATGAGTAAAGTCTATGATTGGTTCGAAGAACGTCTCGAGATT

CAGGCAATTGCAGATGATATAACTAGTAAATATGTTCCCTCCCATGTCAACATATTTTATT  
GTTTAGGGGAATTACGCTTACTTGTTTTTTAGTACAAGTAGCTACGGGGTTTGCTATGA  
CTTTTACTACCGTCCGACGGTACTGAGGCTTTTGCTTCTGTTCAATACATAATGACTG  
AAGCTAACTTTGGTTGGTTAATCCGCTCAGTTCATCGATGGTCGGCAAGTATGATGGTT  
TTAATGATGATCCTGCACGTATTCGTGTGTATCTCACTGGTGGCTTTAAAAACCTCGT  
GAATTGACTTGGGTTACGGGCGTGGTTCCTGCTGTATTGACCGCATCTTTGGTGTAAC  
TGGTTATTCCCTACCTTGGGACCAAATTGGTTATTGGGCGGTAAAAATTGTAACAGGCG  
TGCCGGAAGCTATTCCTGTAATAGGATCACCTTTGGTAGAGTTATTACGCGGAAGTGCT  
AGTGTAGGACAATCCACTTTGACTCGTTTTTATAGTTTACACACTTTTGTATTACCTCTT  
CTTACTGCCGTATTTATGTTAATGCACTTTCCAATGATACGTAAGCAAGGTATTCAGGC  
CCTTTAATGGGAGTAACAAAAAACCTGACTTGAATGATCCTGTATTAAGAGCTAAATT  
GGCTAAGGGAATGGGTCATAATTATTACGGAGAACCTGCATGGCCAATGATCTTTTATA  
TATTTTCCAGTAGTAATTCTAGGTAATGCATGTAATGTAGGATTAGCGGTTCTAGAA  
CCATCAATGATTGGTGAACCTGCGGATCCATTTGCAACGCCTTTGGAATATTGCCTGA  
ATGGTATTTCTTTCCCGTATTTCAAATACTTCGTACAGTACCCAATAAGTTATTAGGTGTT  
CTTTAATGGTTTCAGTACCTGCAGGATTATTAACAGTACCTTTTTTTGGAGAATGTTAAT  
AAATTCCAAAATCCATTTTCGTCCAGTTGCGACAACCGTCTTTTTTGATTGGTACTGC  
GGTAGCCCTTTGGTTAGGTATTGGAGCAACATTACCTATTGATAAATCCCTAACTTTAGG  
TCTTTTTATGATTGAAGTTTTTCTATTTGGAATCGTCTTAGGTCTAATTCCTATTACTTTG  
GCCGGATTATTCGTAACCTGCATATTTACAATACAGACGTGGTGATCAGTTGGACCTTATG  
CCTACTATAACTAGTTATTTTCGGTTTTCTACTAGCGGCTTTAACTATAACCTCAGTTCTAT  
TTATTGGTCTGAGCAAGATACGACTTATTATGGATATAGTAAGTCTCGCTTGGGCTGCTT  
TAATGGTAGTCTTTACATTTTCCCTTTCACTCGTAGTATGGGGAAGAAGTGGACTCATGA  
TTATTCGTTTCGCCGGAACCAGAAGTCAAATTTTGGTAGATAGGGATCCCATCAAACCT  
TCTTTCGAGGAATGGGCCAGACCCGGTCATTTCTCAAGAACAATAGCTAAAGGACCTG  
ATACTACTACTTGGATCTGGAACCTACATGCTGATGCTCACGATTCGATAGCCATACCA  
GTGATTTGGAGGAGATTTCTCGGAAAGTATTTAGTGCTCATTTCGGCCAACCTCTCCATC  
ATCTTCTTTGGCTGAGTGGCATGTATTTCCACGGTGCTCGTTTTTCCAACCTATGAAGCA  
TGGCTAAGCGATCCTACTCACATTGGACCTAGCGCCAAGTGGTTTGGCCAATAGTGG  
GTCAAGAAATATTGAATGGCGATGTGGGCGGGGGTTCCGAGGAATACAAATAACCTC  
CGTTTTTTTTCAGATTTGGAGAGCATCTGGAATAACTAGTGAATTACAACCTGTATTGTAC  
CGCAATTGGTGCATTGGTCTTTGCAGCCTTAATGCTTTTTGCTGGTTGGTTCCATTATCA  
CAAAGCTGCTCCAAAATTGGCTTGGTTCCAAGATGTAGAATCTATGTTGAATCACCATT  
TAGCGGGGCTACTAGGACTTGGGTCTCTTTCTTGGGCGGGACATCAAGTACATGTATCT  
TTACCAATTAACCAATTTCTAAACGCTGGAGTGGATCCTAAAGAAATCCCACTTCCTCA  
TGAATTTATCTTGAATCGGGATCTTTTGGCTCAACTTTATCCCAGTTTTGCTGAGGGAGC  
AACCCCATTTTTACCTTGAATTGGTCAAATATTCGGACTTTCTTACTTTTTCGTGGAGG  
ATTAGATCCAGTGACTGGGGTCTATGGCTGACCGATACTGCACACCATCATTTAGCTAT  
TGCAATTTCTTTCTGATAGCGGGTACATGTATAGGACTAACTGGGGCATTGGTCATG  
GTATAAAGATATTTTAGAGGCTCATAAAGGTCCATTTACAGGTCAGGGTCATAAAGGC  
CTATATGAGATCCTAACACATCATGGCATGCTCAATTATCTCTTAACCTAGCTATGTTAG  
GTTCTTTAACCATTTGTTGTAGCTCACCATATGTATTCCATGCCCCCTTATCCATATCTAGC  
TACTGATTATGGTACACAACCTGTCATTGTTACACATCACATGTGGATTGGTGGATTCT  
CATAGTTGGTGCTGCTGCGCATGCAGCCATTTTTATGGTAAGAGACTATGATCCAACACTAC



TCGATACAACGATCTATTAGATCGTGTCTTAGGCATCGCGATGCAATCATATCACATCT  
CAACTGGGTATGTATATTTTAGGCTTTCACAGTTTTGGTTTATATATTCATAATGATACCA  
TGAGCGCTTLAGGGCGCCCTCAAGATATGTTTTAGACTGCTATAACAATTACAACCTG  
TCTTTGCTCAATGGATACAAAACCCCATGCTTTAGCACCTGGTGCAACGGCTCCTGGT  
GCAACAGCAAGCACCAGTTTAACTTGGGGGGGTGGTGATTTAGTGGCAGTCGGCGGC  
AAGGTTGCTTTGTTACCGATTCCATTAGGAACCGCGGATTTTTTGGTACATCACATTCAT  
GCATTTACGATTCATGTGACGGTATTGATACTTCTGAAAGGAGTTCTATTTGCCCGCAGT  
TCTCGTTTTGATACCGGATAAAGCAAATCTTGGTTTTTCGTTTTCTTGTGATGGACCTGG  
AAGAGGGGGAACATGTCAAGTATCCGCTTGGGATCATGTCTTCTTAGGACTATTTTGG  
TGTACAATTCATTTCCGGTAGTAATATTCATTTAGTTGGAAAATGCAGTCAGATGTTT  
GGGGTAGTATAAGTGATCAAGGGGTGGTAACTCATATCACGGGAGGAACTTTGCACA  
GAGTTCCATTACTATTAATGGATGGCTCCGTGATTTCTTATGGGCACAGGCGTCCCAGGT  
AATTCAGTCTTATGGTTCTTCATTATCTGCATATGGCCTTTTTTCTAGGTGCTCATTTT  
GTATGGGCTTTTAGTTAATGTTTCTATTACGCGGTCGTGGTTATTGGCAAGA ACTTATT  
GAATCAATCGTTTGGGCTCATAATAAATTAAGTTGCTCCTGCTACTCAGCCTAGAGC  
CTTGAGCATTATAAAGGACGTGCTGTAGGAGTAACCCATTACCTTCTGGGTGGAATTG  
CCACAACATGGGCGTTCTTCTTAGCAAGAATTATTGCAGTAGGAATGGCATTAAAGATTT  
CCAAGTTTAGCCAAGGCTTAGCTCAGGACCCCACTACTCGTCGTATTTGGTTTGGTAT  
TGCTACCGCGCATGACTTCGAGAGTCATGATGATATTACGGAGGAACGTCTTTATCAGA  
ATATTTTGTCTCTCACTTCGGGCAATTAGCAATAATTTTTCTGTGGACTTCCGAAATC  
TCTTTCATGTAGCTTGGCAAGGAAATTTGAAGCATGGGTACAGGACCTTTACATGTA  
AGACCTATTGCTCATGCAATTTGGGATCCTCATTTTGGTCAACCGGCCGTGGAAGCTTT  
TACTCGAGGGGGTGTCTCCTGGCCCAGTGAATATCGCTTATTCTGGTGTTTATCAATGGT  
GGTATAAATCGGTTTACGTACTAATGAAGATCTTTATATTGGAGCTCTTTTTCTATTATT  
TCTTCTGCCCTAGCCTTACTAGGGGGTGGTTACACCTACAACCAAAATGGAAACCGA  
GCGTTTTCTGGTTCAAAAATGCCGAATCTCGTCTCAATCATTTGTGAGGACTATTC  
GGAGTAAGCTCTTTGGCTTGGACAGGACATTTAGTCCATGTCGCTATTTCCCGGCTCCC  
GGGGGAATACGTTTCGATGGAATAATTTCTTAGATGTATTACCACATCCCCAAGGGTTAG  
GCCCCTTTTTACAGGTCAGTGGAATCTTTATGCTCAAAATCCCGATTGAGGTAGTCATT  
TATTTGGTACCTCCCAAGGAGCGGGAACCTGCAATTTCTCGGGGGGTTCCAT  
CCACAAACACAAAGTTTATGGCTGACCGATATTGCACACCATCATTTAGCTATTGCATTT  
ATTTTTCTCGTTGCCGGTCATATGTATAGAACTAACTTCGGGATTGGGCATAGTATAAAA  
GATCTTTTAGAAGCGCATATTTCTCCGGGGGGCGATTGGGGCGTGACATAAGGGTCT  
TTATGACACAATCAACAATTCGCTTCATTTCAATTAGGCCTTGCTCTAGCTTCTTTAGG  
GGTTATTACTTCTTAGTGGCTCAACACATGTAATCATTACCTGCTTATGCGTTCATAGC  
GCAAGACTTTACTACTCAAGCTGCGTTATATACTCATCAACAATACATCGCAGGATTCAT  
CATGACAGGAGCTTTTGTCTCATGGAGCTATATTTTTTATTAGAGATTACAATCCGGAACA  
GAATGAGAATAATGTATTGGCAAGAATGTTAGACCATAAAGAAGCTATCATATCCCATTT  
AAGTTGGGCCAGTCTCTTTCTTGGATTCCATACTTTGGGACTTTATGTTTATAATGATGT  
CATGCTTGCTTTTGGTACTCCGGAGAAACAATCTTAATCGAACCCATATTCGCCCAAT  
GGATAAATCTGCTCACGGTAAAACCTCATATGGGTTGATGTACTTTTATCTTCAACGA  
ATAGTCCAGCCTTCAATGCAGGTCGAAGCATATGGTTGCCCGGCTGGTTAAATGCTATT  
AATGAA-----AATAGTAATTCATTATTCTTAAACAATAGGGCCTGGAGACTTCTTGGTTTCAT  
CATGCTATTGCTCTAGGGTTACATAAACCACATTGATCTTAGTAAAAGGTGCTTTAGAT

GCACGCGGTTTCGAAGTTAATGCCAGATAAAAAGGATTTTGGTTATAGTTTTCTTGTGA  
TGGTCCGGGACGCGGCGGTACTTGTGATATTTCCGCTTGGGACGCATTTTATTTGGCGG  
TTTTCTGGATGTTAAATACCATTGGATGGGTTACTTTTTATTGGCATTGGAAGCACATCA  
CATTATGGCAGGGTAATGTTTCACAGTTAATGAATCTTCCACTTATTTGATGGGATGGT  
TAAGAGATTATCTATGGTTAAACTCTTCACAACCTTATCAATGGATATAACCCTTTTGGTAT  
GAATAGCTTATCGGTCTGGGCGTGGATGTTCTTATTTGGACATCTTGTTTGGGCTACTGG  
ATTTATGTTTTTAATTTCTTGGCGCGGATATTGGCAAGAATTGATTGAACTTTAGCATG  
GGCTCATGAGCGTACACCTTTGGCTAATTTGATTTCGATGGAGAGATAAACCAGTAGCTC  
TTCCATTGTGCAAGCAAGATTGGTTGGATTAGCCCACTTTTCCGTAGGTTATATCTTCA  
CTTATGCGGCTTTCTTGATTGCCTCTACATCAGGTAAATTTGGTATGTCACATTCAGTAA  
AGATTTATGATACATGTATAGGGTGTACTCAATGTGTCCGAGCCTGCCCCACAGATGTAT  
TAGAAATGATACCTTGGGATGGATGTAAATCTAAGCAAATTGCTTCTGCTCCAAGAACA  
GAGGACTGTGTCCGTTGTAAGAGATGTGAATCCGCTGTCCAACAGATTTCTTGAGTG  
TTCGAGTTTATTTATGGCATGAAACAACCTCGAAGCATGGGTCTAGCTTATATGACAATTC  
TCAACTTACCCTCCATTTTTGTGCCTTTAGTGGGCTTAGTATTTCCGGCAATTGCAATGG  
CTTCTTTATTTCTTTATGTTCAAAAAACAAGATTTTATGCGAGATCTAAAAACATATTT  
ATCTGTAGCACCGTAATAAGTACTCTATGGTTTGGGTCTTTAGCAGGTCTATTGATAGA  
GATCAATCGTTTTTTCCAGATGCGTTGACATTCCCTTTTTTTTCATTCATGACTGCAATT  
TTAGAGAGACGCGAAAGCGAAAGCCTATGGGGTCGTTTCTGTAACCTGGATAACCAGCA  
CTGAAAACCGTCTTTACATTGGATGGTTTGGTGTTTTGATGATCCCTACTTTATTGACCG  
CAACTTCTGTATTTATTATCGCTTTCATTGCTGCCCTCCGGTAGATATTGATGGTATTCG  
TGAACCTGTTTCTGGATCTCTACTTTATGGAAACAATATTATTTCTGGTGCCATTATTCCT  
ACTTCTGCGGCTATAGGTTTGCATTTTTACCCAATATGGGAAGCGGCATCTGTTGATGAA  
TGGTTATACAATGGCGGTCTTATGAGCTAATTGTTCTACACTTCTTACTTGGTGTAGCT  
TGTTACATGGGTTCGTGAGTGGGAACCTTAGTTTCCGTCTGGGTATGCGCCCTTGGATTGC  
TGTTGCATATTCAGCTCCTGTTGCAGCTGCTACTGCTGTTTTCTTGATCTATCCAATTGG  
TCAGGGAAGCTTTTCTGATGGTATGCCTCTAGGAATCTCTGGTACTTTCAACTTTATGAT  
TGTATTCCAGGCTGAGCACAACATCCTTATGCACCCATTTACATGTTAGGCGTAGCTG  
GTGTATTCCGCGGCTCCCTATTCAGTGCTATGCATGGTTCCTTGGTAACCTCTAGTTTGA  
TCAGGGAACCACAGAAAATGAATCTGCTAATGAAGGTTACAGATTCCGGTCAAGAGG  
AAGAACTTATAATATCGTAGCTGCTCATGGTTATTTTGGCCGATTGATCTTCCAATATGC  
TAGTTTCAACAACCTCTCGTTCTTTACATTTCTTCTTAGCTGCTTGGCCTGTAGTAGGTAT  
TTGGTTCACTGCTTTAGGTATTAGCACTATGGCTTTCAACCTAAATGGTTTCAATTTCAA  
CCAATCTGTAGTTGATAGTCAAGGTCGTGTAATTAATACCTGGGCTGATATTATTAACCG  
TGCTAACCTTGGTATGGAAGTTATGCATGAACGTAATGCTCATAACTTCCCTCTAGACCT  
AGCTGCTGTGCAAGCTCCATCTACAAATGGAATGGGTTTGCCTTGGTATCGTGTTTATA  
CCGTCTGATTTGAATGATCCCGTCTGTTGCTGTCTGTCCATATAATGCATACAGCTTTGG  
TTGCTGGTTGGGCCGTTTCGATGGCTCTATATGAATTAGCAGTTTTTGGATCCCTCTGACC  
CCGTTCTCGATCCAATGTGGAGACAGGGTATGTTTCGTTATAACCTTTTATGACTCGTTTGA  
GAATAACCAATTCATGGGGTGGTTGGAGTATCACA---GGAGGAACTATAACGAATCCGG  
GTATTTGGAGTTATGAAGGCGTGGCTGGGGCGCATATTGTGTTTTCTGGCTTGTGCTTCT  
TGGCAGCTATTTGGCATTGGGTGTATTGGGATCTAGAAATATTTGCGATGAACGTACAG  
GAAAACCTTCTTTGGATTTGCCCAAGATCTTTGGAATTCATTTATTTCTCTCCGGGGTGG  
CTTGCTTTGGGTTTGGCGCTTTTCATGTAACCGGATTGTATGGTCCCTGGAATATGGGTGT

CCGACCC TTATGGACTAACCGGAAAGGTACAACCTGTAAGTCCAGCATGGGGTGTGGA  
AGGTTTTGATCCTTTTGTTCGGGAGGAATAGCTTCTCATCATATTGCAGCGGGGACAT  
TGGGCATATTAGCGGGCCTATTCCATCTTAGTGTCCGCCCGCCCAACGTTTATACAAAG  
GATTACGTATGGGAAATATTGAAACTGTCTTTCCAGTAGTATCGCGGCTGTCTTTTTTGT  
CAGCTTTTGTGTTGCTGGA ACTATGTGGTATGGTTCAGCAACTACCCCGATTGAATTAT  
TTGGTCCC ACTCGTTATCAATGGGATCAAGGATACTTCCAGCAAGAAATATATCGAAGA  
GTTAGTGTGGGCTAGCCGAAAATCAAAGTTTATCCGAAGCTTGGTCTAAAATTCCCGA  
AAAATTAGCTTTTTATGATTACATCGGCAATAATCCGGCAAAGGTGGGTTGTTTCAGAG  
CAGGCTCAATGGACAACGGGGATGGAATAGCTGTTGGGTGGTTAGGACATCCTATCTTT  
AGAGATAAAGAAGGGCGTGA ACTTTTTGTACGTTCGTATGCCTACTTTTTTTGAAACATT  
TCCGGTTGTTTTGGTAGACGGAGATGGAATTGTTAGAGCCGATGTTCCTTTTTCGAAGGG  
CGGAGTCGAAGTATAGTGTGCAACAAGTAGGTGTA ACTGTTGAGTTCATGGTGGCGA  
ACTAAACGGAGTCAGTTATAGTGATCCTGTTACTGTGAAAAAATATGCTAGACGCGCTC  
AATTGGGTGAAATTTTTGAATTAGATCGTGCTACTTTGAAATCCGATGGTGTTTTTTCGTA  
GCAGCCCAAGGGGTTGGTTACTTTTGACATGCTTCGTTTCGCTCTGCTTTTTTCTTC  
GGACACATTTGGCATGGTGTGCTGAACTTTGTTTCAGAGATGTTTTTGCTGGTATTGATCC  
AGATTTAGATGCTCAAGTGGAAATTTGGAGCATTCCAAAAACTTGGAGATCCGACTACA  
AGAAGACAAGTAGTC-----GTGGAAACGCTCTTTAATGGA ACT  
TATCTTTAGCCGGTTCGTGACCAAGAAACCACTGGTTTTCGCTTGGTGGGCCGGGAATGC  
CCGACTTATCAATTTATCCGGTAAACTATTGGGAGCTCATGTAGCTCATGCTGGATTAAT  
CGTATTCTGGGCCGGAGCAATGAACCTATTTGAAGTGGCTCATTTTGTACCGGAGAAGC  
CAATGTACGAACAAGGATTAATTTACTTCCCCACCTAGCTACTCTAGGTTGGGGGGTA  
GGTCTTGGTGGGGAAGTTATAGATACCTTTCCATACTTTGTATCCGGTGTACTTCACTTA  
ATTTCTCTGCAGTATTGGGCTTTGGCGGTATTTATCATGCACTTCTGGGTCTGAGACT  
CTTGAAGAATCTTTTCCATTTTTTGGTTATGTATGGAAAGATCGAAATAAAATGACAAC  
AATTTTAGGTATCACTTAATCTTGCTAGGTATAGGTGCTTTTCTTCTAGTATTCAAGGCT  
CTTTATTTTGGGGGCGTATATGATACCTGGGCTCCGGGGGGGGGAGATGTAAGAAAAAT  
TACCAACTTGACCCTTAGCCCAAGTGTTATTTTTGGTTATTTACTAAAATCCCCCTTTGG  
AGGAGAAGGATGGATTGTTAGTGTGGACGATTTGGAAGATATAATTGGAGGGCATGTAT  
GGTTAGGTTCCATTTGTATACTTGGTGGAACTCGGCATATCTTAACCAAACCTTTGCAT  
GGGCTCGCCGTGCACTTGTGTGGTCTGGAGAGGCTTACTTGTCTTATAGTTTAGGTGCT  
TTATCCGTTTTTGGTTTCATTGCTTGTGCTTTGTCTGGTTCATAATAACCGCGTATCCTA  
GTGAGTTTTACGGACCTACTGGACCAGAAGCTTCTCAAGCTCAAGCTTTTACTTTTCTA  
GTTAGAGATCAACGTCTTGGGGCTAACGTGGGATCCGCTCAAGGACCTACCGGGTTAG  
GTAAATATTTAATGCGTTCGCCTACCGGAGAAGTTATTTTTGGAGGCGAAACTATGCGT  
TTTTGGGATCTGCGTGTCTCTTGGTTAGAACCCTCTAAGAGGTCCAAATGGTTTGGACTT  
GAGTAGGTTGAAAAAAGACATTCAACCTTGGCAAGAACGCCGTTCCGCGGAATATATG  
ACCCATGCGCCTTAGGTTTCGTTAAATTCTGTAGGTGGCGTAGCTACCGAGATCAATGC  
AGTCAATTATGTCTCTCCTAGAAGTTGGTTAGCTACCTCTCATTTTGTCTAGGATTCTT  
CCTATTCGTAGGTCATTTATGGCATGCGGGAAGGGCTCGTGCAGCTGCAGCAGGATTTG  
AAAAAGGAATTGATCGTGATTTTGAACCTGTTCTTTCCATGACTCCTCTTAACATGACTA  
TAGCCCTTGGTAAATTTACCAAAGACGAAAATGATTTATTTGATATTATGGATGACTGGT  
TACGGAGGGACCGTTTTCGTTTTTGTAGGTGGTCCGGTCTATTGCTCTTTCCTTGTGCCT  
ATTTGCGCCGTAGGGGGTGGTTTCACAGGTACAACCTTTGTAACGTCATGGTATACCCAT

GGATTGGCCAGTTCCTATTTGGAAGGCTGCAACTTCTTAACCGCCGCAGTTTCTACTCC  
TGCTAATAGTTTAGCACATTCTTTGTTATTATTATGGGGTCCTGAAGCACAAGGAGATTT  
TACTCGTTGGTGTCAATTAGGTGGTTTGTGGACTTTTGTGCTCTCCACGGTGTCTTTG  
GACTAATAGTTTTATGTTACGTCAATTTGAACTTGCTCGATCTGTGCAATTGCGACCTT  
ATAATGCAATCGCATTCTCTGGTCCAATTGCTGTTTTTGTCTGTATTCTGATTTATCC  
ATTAGGCCAGTCTGGTTGGTTTTTTGCGCCTAGTTTTGGTGTAGCAGCTATATTTTCGATT  
CATCCTCTTTTTCCAAGGGTTTCATAACTGGACGCTGAACCCATTTTCATATGATGGGAGT  
TGCCGGCGTATTGGGCGCTGCTCTGCTATGCGCTATTCATGGTGTACTGTAGAAAATAC  
TTTATTTGAAGATGGTGATGGTGCAAATACATTCCGTGCCTTTAACCCAACTCAAGCTG  
AAGAACTTATTCAATGGTCACCGCTAACCGCTTTTGGTCTCAAATCTTTGGGGTTGCT  
TTTTCCAATAAACGTTGGTTACATTTCTTTATGTTATTTGTACCAGTAACCGGTTTATGGA  
TGAGCGCTCTTGAGTAGTCCGGTCTGGCTCTGAATCTACGTGCCTATGACTTCGTTTCT  
CAGGAAATCCGTGCAGCAGAAGATCCTGAATTTGAGACTTTCTACACTAAAAATATTCT  
CTTAAACGAAGGTATTCGTGCTTGGATGGCGGCTCAAGATCAGCCTCATGAAAACCTTA  
TATTCCTGAGGAGTTCTACCACGTGGAAACGCTCTTATGTCTGGAAGCACAGGAGA  
ACGTTCTTTTGCTGATATTATTACCAGTATTCGATATTGGGTCATTCATAGCATTACTATAC  
CTTCCCTATTCATTGCAGTTGGTTATTCGTACGTACGGGTTTAGCTTACGATGTATTTG  
GAAGTCCCTCGTCCAAATGAATATTTTACCGAAAGCCGACAAGGAATTCATTAATAACT  
GGCCGTTTTGATCCTTTGGAACAACCTCGATGAATTTAGTAAATCTTTTATGACCATAGAT  
CGAACCTATCCAATTTTTACAGTACGATGGTTGGCTGTTACCGGACTAGCTGTACCTAC  
CGTTTCTTTTTTGGGGTCAATATCAGCAATGCAGTTCATCCAACGAATGGCTACACAAA  
GCGTGGAGGGTAGTTCTAGATCTGGT--CCAAGACGAACTATTGTAGGGGATTTATTGA  
AACCGTTGAATTCGGAATACGGTAAAGTAGCTCCCGGATGGGGAACACTCCTTTGATG  
GGTGTGCAATGGCCCTATTTGCGATATTCCTATCTATTATTTTGGAGATTTATAATTCTTC  
CGTTTTACTAGATGGAATTTCAATGAATATGCTTACTCTCAAACCTTTTGTTTACACAGT  
AGTGATATTCCTTGTCTCTCTTCATCTTTGGATTTTTATCTAATGATCCAGGACGTAAT  
CCTGGACGTGAAGAAATGGCCGATACTACTGGAAGAATCCTCTTTGGATAGTAGGTAC  
TGAACTGGTATTCTTGTGATCGGTTTAAATAGGCATTTTCTTTTATGGTTCATATTCCGGA  
TTGGGTTTCATCCCTGATGTTTAAATTTTTTAGTTTAAATTTGTATCTGTTTAAATTCTGCCAT  
TTAT--AGCAATTTTTCTTTACAAAATTGCCCGAAGCCTACGCCTTTTTGAATCCAATCG  
TAGATGTTATGCCAGTAATCCCTGTACTCTTTTTTCTATTAGCCTTTGTTTGGCAAGCTGC  
TGTAAGTTTTCGAATGACACAATCAAATCCGAACGAACAAAATGTTGAATTGAATCGTA  
CCAGTCTCTACTGGGGGTATTACTCATTTTTGTACTTGCTGTTTTATTTCTAATTTATTC  
TTCAATATGGAAGTAAATATTCTTGCATTTATTGCTACTGCACTGTTTCATTCTAGTTCCTA  
CTGCTTTTTTACTTATAATATACGTAAAAACAGTTAGTCAAGGTGATATGGAAACAGCA  
ACCCTAGTCGCCATCTCTATATCTGGTTTACTTGTAAGTTTTACTGGGTATGCCTTATATA  
CTGCTTTTTGGGCAACCCTCTCAACAACATAAGAGATCCATTCGAGGAACACGGGGACAT  
GGAAGCATTGGTTTATACATTCCTTTTAGTATCAACTTTAGGAATCATTTTTTTTCGCTATC  
TTTTTTCGAGAACCGCCTAAAGTTCCAACATAAAAAGGTAAAAATGACTATTGCTTTCCA  
ATTGGCTGTTTTTGCATTAATTGCTACTTCATCAATCTTACTGATTAGTGTACCTGTTGTT  
TTTTCTTCTCCTGATGGTTGGTTCGAGTAACAAAATGTTGTATTTCCGGTACATCATT  
TGGATTGGATTAGTCTTTCTGGTAGGTATCCTTAATTCTCTCATCTCT-----AT  
GTCACCACAAACAGAGACTAAAGCAAGTGTGGATTCAAGGCTGGTGTAAAGATTAT  
AAATTGACTTATTATACTCCTGACTATCAAACCAAGATACTGATATCTTGGCAGCATT

CGAGTAACTCCTCAACCTGGAGTTCCGCCTGAGGAAGCAGGAGCTGCGGTAGCTGCT  
GAATCTTCTACTGGTACATGGACAACCTGTGTGGACCGATGGACTTACCAGTCTTGATCG  
TTATAAAGGACGATGCTACGGCCTCGAGCCCCTCCTGGAGAAGAAAATCAATATATTG  
CTTATGTAGCTTACCCATTAGACCTTTTTGAAGAAGGTTCTGTACTAACATGTTTACTT  
CTATTGTGGGTAATGTATTTGGGTTCAAAGCCCTACGCGCCCTACGTCTGGAGGATTG  
CGAGTCCCTCCTGCTTATTCTAAAACCTTTCCAAGGGCCTCCTCATGGCATCCAAGTTGA  
GAGAGATAAATTGAACAAGTATGGTCGCCCCCTATTAGGTTGTACTATTAAACCAAAT  
TGGGGCTATCCGCTAAGAATTACGGTAGAGCAGTTTATGAATGTCTTCGCGGTGGACTT  
GATTTTACCAAAGACGATGAGAATGTGAACTCCCAACCATTTATGCGTTGGAGAGACC  
GTTTCTTATTTTGTGCCGAAGCAATTTATAAAGCACAGGCTGAAACAGGTGAAATCAA  
GGGCATTATTTGAATGCTACTGCAGGTACATGCGAAGAAATGATCAAAAAGGGCTGTATG  
TGCCAGAGAATTAGGAGTTCCTATCGTAATGCATGACTACTTAACAGGGGGATTCACTG  
CAAATACTAGCTTGGCTCACTATTGCCGAGATAATGGTTTACTTCTTCACATTCACCGCG  
CAATGCATGCAGTTATTGATAGACAGAAGAATCATGGTATGCATTTTCGTGTACTAGCTA  
AGGCTTTACGTCTGTCTGGTGGAGATCATATTCACGCTGGTACCGTAGTAGGTAAACTT  
GAAGGGGAAAGAGACATTACTTTGGGCTTTGTTGATTTACTGCGTGATGATTTTATTGA  
AAAAGATCGAAGCCGCGGTATTTATTTCACTCAAGATTGGGTCTCTTACCAGGTGTTT  
TGCCTGTAGCTTCAGGGGGTATTCACGTTTGGCATATGCCTGCTCTGACCGAGATCTTT  
GGAGATGATTCCGTACTACAATTCGGTGGAGGAACTTTAGGGCACCTTGGGGAAATG  
CACCCGGTGCCGTAGCTAATCGAGTAGCTCTAGAAGCATGTGTACAAGCTCGTAATGA  
GGGACGTGATCTTGCTCGTGAGGGTAATGATATTATCCGTGAGGCTAGCAAATGGAGTC  
CTGAACTAGCTGCTGCTTGTGAAGTATGGAAGGAAATTAATTTGAATTCGCAGCAGT  
GGATACTTTGGATAAAATGGCGATACATTTATACAAAACCTTCTACCCCGAGCACACGCA  
ATGGAGCCGTAGACAGTCAAGCGAAATCCAATACACGAAATAATTTGATCTATGGACA  
GCATCGTTGTGGTAAAGGCCGTAATGCCAGAGGAATCATTACCGCAAGACATAGAGGG  
GGAGGTCATAAGCGTCTATACCGTAAAATCGATTTTCGACGGAATGAAAAAGACATATA  
TGGTAGAATCGTAACCATAGAATACGACCCTAATCGAAATGCATACATTTGTCTCATACA  
CTATGGGGATGGTGAGAAGAGATATATTTTACATCCCAGAGGGGCTATAATTGGAGATA  
CCATTATTTCTGGTACAGAAGTTCCTATAAAAATGGGAAATGCCCTACCTTTGACCGATA  
TGCCCTTAGGCACGGCCATAACATAGAAATCACACTTGGAAAGGGTGGACAATT  
AGCTAGAGCTGCAGGTGCTGTAGCGAAACTGATTGCAAAGAGGGGAAATCAGCCAC  
ATTAATAATTACCTTCTGGGGAGGTTCTGTTTAAATATCCAAAACTGCTCAGCAACAGTCG  
GACAAGTAGGGAATACTGGGGTGAACCAGAAAAGTTTGGGTAGAGCCGGATCTAAAT  
GTTGGCTAGGTAAGCGTCCTGTAGTAAGAGGAGTAGTTATGAACCCTGTAGACCACCC  
CCATGGGGGTGGTGAAGGGAGGGCCCCAATTGGTAGAAAAAAACCCGCAACCCCTTG  
GGGTTATCCTGCACTTGGAAGAAGAAGTAGAAAAAGGAATAAATATAGTGATAATTTGA  
TTCTTCGTCGCCGTAGTAAAATGATCCAATCTCAGACCCATTTGAATGTAGCGGATAAC  
AGCGGAGCTCGAGAATTGATGTGTATTTCGAATCATAGGGACTAGT---AATCGCCGATATG  
CTCATATCGGTGACGTTATTGTTGCTGTGATCAAGGAAGCAGCACCAAATTCACCTCTA  
GAAAGATCAGAAGTAATCAGAGCTGTAATTGTACGTACTTGTAAGAAGCTCAAACGTG  
ATAATGGTATGATAATACGATATGATGACAACGCTGCAGTTGTCATTGATCAAGAAGGA  
AATCCAAAGGGAACCTCGAATTTTTGGTGCAATCGCCGGGAATTGAGACAGTTAAATT  
TACTAAAATAGTTTCATTAGCACCTGAAGTGTTAATGCTTAGTCCCAAAAAGAACCCGA  
TTCCGTAAACAACATAGAGGAAGAATGAAAGGAATAGCTTTTCGAGGTAATCGTATTTG

TTTCGGCAGATATGCTCTTCAGGCACTTGAACCCGCTTGGATTACATCTAGACAAATAG  
AAGCGGGGCGACGAGCAATGACACGAAATGCACGCCGCGGTGGAAAAATATGGGTAC  
GTATATTTCCCGACAAACCAGTTACTTTAAGACCTACGGAAACACGTATGGGTTCCGGG  
AAAGGATCTCCCGAATATTGGGTAGCTGTCGTTAAACCAGGTAGAATACTTTATGAAAT  
GGCGGAGTAGCCGAAAATATAGCGAGAAAAGCTATTTCAATAGCAGCATCAAAAATG  
CCTATACGAACTCAATTCATTATTTTCAGGAATGACCAGAATTAGACGAGGATATATAGCT  
CGAAGGCGTAGAACAAAAATTCGTCTATTCGCATCAAGCTTTCGCGGGGCCATTCAA  
GACTTACTCGAACTATTATTCAACAAAAATAAGAGCTTTGGTTTCGGCCCATCGGGAT  
AGAGATAGGCAAAAAAGAAATTTTCGTCGTTTGTGGGTTACTCGGATAAATGCAGTAAT  
TCGCGAG---AGCACGGTATCCTATAGTTATAGTAGATTAATAACAATCTGTACAAGAGA  
CAGTACTTCTTAATCGTAAAATACTTGCACAAATAGCTATATTAATAGGAATTGTCTTT  
ATATGATTTCCAATGACATTCTAAAA-----ATGATAAAGGAAGTATA  
TGCTTTAGGCCAACATATATGTATGTCCCCTCACAAAGCACGAAGAATAATTGATCAGAT  
TCGTGGACGTTCTTACGAAGAAACACTTATGATACTCGAGCTCATGCCTTATCGAGCAT  
GTTATCCCATTTTTAAATTGATTTATTCCGCAGCAGCAAATGCTAGTCACAATATGGGTT  
TCAACGAAGCCAATTTAATCATTAGTAAAGCCGAAGTCAACGAAGGCACTACTGTGAA  
AAAATTAACCTCAGGCTCGAGGACGGGGTTATCCGATAAAAAGATCAACTTGTGAT  
ATATCTATTGTATTAATAAATATATCCTTA-----ATGGATGGAATCAAAATG  
CAGTATTTACAGACAAAAGTATTCGGTTATTGGGGAAAAAT--CAATATACTTTTAATGT  
CGAATCAGGATCAACTAGGACAGAAATAAAGCATTGGGTCGAACTCTTCTTTGGTGTC  
AAGGTAATAGCTATGAATAGCCATCGACTCCCGGGAAAGGGTAGAAGAATGAGACCTA  
TTATGGGACATAACAATGCATTACAGACGTATGATCATTACGCTTCAACCGGGTTATTCTA  
TTCCACCTCTTAGAAAGAAAAGAACTATGGCAGTTCCAAAAAAGCGCACTTCTATATC  
AAAAAAGCGTATTCGAAAAAATCTTTGGAAAAGAAAGGGATATTGGACAGTATTGAAA  
GCTTTTTTCATTAGCGAAATCTCTTTCTACAGGTAATTCAAAAAGTTTTTTTGTGCGACAA  
ATAAAGATATGGCCAAGGGTAAGGATATCCGAATAAGGGTTATTTTAGAATGTACCAC  
TTGT---ACTCGAAAC-----GTTAATAAGAAA-----GGCATTCTAGATATATACTCAAAG  
AATCGACACAATACGCCTAGTCGATTGGAATTGAGAAAATTCTGTGCTATTGTTACAA  
ACATACAATTCACGGGGAGATAAAGAAAATGAAAATAAGAGCTTCTGTTGTAATAATT  
TGTGAAAATGTCGACTGATACGTAGACGGGGGCGAATTATAGTAATTTGCTTCAACCC  
GAGACATAAACAAAGACAAGGAATGGTTCGAGAGAAAATAACAATATCCACTCGGAC  
ACTGCAGTGGAAATGTATTGAATCAAGAACCGATAATAAACGTCTTTATTATGGACGCT  
TTATTCTGTCTCCACTTATGAAAGGACAAGCCGACACAATAGGCATTGCGATGCGAAGA  
GCTTTGCTTGGAGAAATAGAAGGAACATGTATCACACGTGCAAAATCTGAG-----AAAA  
TACCACACGAATTTTCTACTATAGCAGGTATTCAAGAATCAATACATGAAATTTAATGA  
ATTTGAAAGAAATTGTATTAAGAAGCAATTTGTATGGAACTTGTGACGCATCCATTTGT  
GTCAAGGGTCTGGATATGTAAGTCTCAAGACATCATCTTACCGCCTTTTGTGGAAAT  
CATTGATAATACACAGCATATCGCTAGCCTAACGAAAGCAATTGATTTGTGTATTGGATT  
ACAAATCGAGAGGAATCGTGGCTATCGTATAAACCAACAAATAACTTTCAAGACGGG  
AGTTATTCT-----ATAGATGCTGTATTCATGCCTGTTTCGAAATGCGAATCATAGTGTTCATT  
CTTATGGAAATGGGAATGAAAAGCAAGAGATACTTTTTCTCGAAATATGGACAAATGG  
AAGTTTAACTCCTAAAGAAGCACTTACGAAGCCTCCCGTAATTTGATTGATTTTTTTAT  
TCTTTTTCTACATGCAGAAGAAGAAAACCTTACATTTAGAAATAGAAAAAATCAA---CA  
CAAGGTTACTTTACCCCTTTTTTGTTTTCATGATAAATTGACT---AAATTAAGAAAAAAT

AAAAAA---GAAATAGTATTGAAATACATTTTTATTGACCAATCAGAATTGACTCCTAAGA  
TCTATAATTGCCTCAAAGATCCAATATACATACATTATCGGATCTTTTGAATAAGAGTCA  
AGAAGATCTTATGAAAATTGAACATTTTCGCATAGACGATGTAAAACATATATTGGGTAT  
TCTAGAAATAGAAAAACATTTTACAATTGATTTACCAAAGAATAAAAATGCTCGGGGATG  
GAAAT--GAGGGAATGTCTACAATACCTGGATTTAATCAGATACAATTTGAAGGATTTTG  
TAGATTCATTGATCAGGGCTTAACAGAAGAACTTTATAAGTTTCCAAAAATTGAAGATA  
CAGATCAAGAAATTGAATTTCAATTATTTGTGGAAACATATCAATTAGTAGAACCCCTGA  
TAAAAGAAAAAGATGCTGTATATGAATCACTTACATATTCTTCTGAATTATATGTATCCGC  
AGGATTAATTTGGAAAACCAGTAGGGATATGCAAGAACAACAATTTTTATTGGAAACA  
TTCCTCTAATGAATTCCTGGGAACTTTTATAATAAATGGAATATACAGAATTGTGATCA  
ATCAAATATTGCAGAGTCCGGGTATCTATTACCGGTCAGAGTTGGAACATAATGGAATTT  
CGGTCTATACCGGCACCATAATATCAGATTGGGGGGGAGAGTAGAATTAGAGATTGAT  
AGAAAAGCAAGGATATGGGCTCGTGTGAGTAGGAAACAGAAAATATCTATTCTAGTTCT  
ATCATCAGCTATGGGTTTTGAATCTAAAAGAAATTTAGAGAATGTGTGCTACCCTGAAA  
TTTTCTTATCTTTCCTGAATGATAAGGAAAAAAAAAAAAAATTGGGTCAAAGGAAAATGC  
CATTTTGGAGTTTTATCAACAATTTACTTGTGTAGGCGGAGATCCAATATTTTCTGAATC  
CTTATGTAAGGAATTACAAAAGAAATTTCTTCAACAAAGATGTGAATTAGGAAAGATTG  
GTCGATTAATATGAACCGGAAACTGAATCTTGATATACCCCATACAATACATTTTTGT  
TACCACGAGATATATTGGCAGCTGCGGATCGTTTGATTGGAATGAAATTTGGAATGGGT  
ACACTTGACGAT-----ATGAATCATTTAAAAAATAAACGTATTCGTTCTGTAGCGGATCTC  
TTACAAGATCAATTCGGATTGGCTCTGATTCGTTTAGAAAATGTAGTTTCGAGGGACTATA  
TGTGGAGCAATTAGG---CATAAATTGATA---CCGACCCCTCAAATTTGGTAACTTCAAC  
TCCA-----TTAACAACCACTTATGAATCTTTTTTCGGATTACACCCATTATCTCAAGT  
TTTGGATCGAACTAATCCATTGACACAAATAGTTCATGGGAGAAAATTGAGTTATTTGG  
GTCCTGGAGGATTAACAGGACGAACTGCTAGTTTTTCGGATACGAGATATCCACCCTAGT  
CATTATGGGCGCATTTGCCCAATTGACACGTCTGAAGGAATCAATGTTGGACTTATTGG  
ATCTTTAGCAATTCATGCCAAGATTGGTTATTGGGGG---TCTTTAGAAAGCCCATTTTAT--  
-----GAAATCTCTGAGGGATCAAAA-----AAAGTACGGATGTTTTATTTATCGCCAAATA  
GAGAGGAATACTATATGGTAGCGGCAGGAAATCTTTGGCGCTGAATCGAGGTGTTCA  
GGAAGAACAGGTTGCTCCGGCTCGATATCGTCAAGAATTCCTGACTATTGCATGGGAA  
CGGGTGCATCTTCGAAGTATTTTTCCCTTCCAATATTTTTCTATTGGAGCTTCCCTCATT  
CTTTTATCGAGCATAATGATGCGAATCGGGCTTTAATGAGTTCTAATATGCAACGTCAAG  
CAGTTCCACTTTCTCGGTCCGAAAAATGCATTGTTGGAACCTGGATTGGAACGCCAAGT  
GGCTCTAGATTCAGGGGTTCTGCTATAGCCGAACACGAGGGAAAGATAATTTATACTG  
ATATTGACAAGATCATTTTATCAGGTAATGGGGATACTCTACGCATTCCATTAGTTAGGTA  
TCAACGTTCCAACAAAATACTTGTATGCATCAAAAACCCAGCTTCGGCGGGGTAAA  
TGCATTA AAAAGGACAAGTTTTAGCGGATGGTGCCGCTACAGTTGGTGGCGAAGTTG  
CCTTGGGCAAAAACGTATTAGTCGCTTATATGCCATGGGAAGGTTACAATTTTGAGGAT  
GCGGTACTCATTAGCGAGCGTCTGGTATATGAAGATATTTATACTTCTTTTACATACGG  
AAATATGAAATTCAGACTCATGTGACAAGCCAAGGA---CCTGAAAGGATCACTAACGA  
AATACCGCATCTAGAGGCCCATTTACTCCGAAATTTAGACAAAACGGAATTGTGATGC  
TAGGATCTTGGGTAGAGACGGGCGATATTTAGTAGGTAATTAACGCCTCAAATGGCG  
AAAGAA---TCATCGTATGCTCCGGAAGATAGATTATTAAGAGCCGTACTTGGTATTCAGG  
TATCTACTTCAAAGAACTTGTCTAAAACCTATAGGTGGTAGGGGTCGAGTTATT

GATGTGAGATGGATCCAGAAAAAGGGG---GGTTCCTGTTATAATCCGGAAAGGATTTGT  
GTATATATTTTACAGAAACGTGAAATCAAAGTGGGTGATAAAGTAGCTGGAAGACATGG  
AAATAAAGGCATCATTTCCAAATTTTGCCTAGACAAGATATGCCTTATTTGCAAGATG  
GAAGACCTGTTGATATGGTCTTCAACCCATTAGGAGTACCTTCACGAATGAATGTAGGA  
CAGATATTTGAATGCTCACTCGGGTTAGCGGGAGGTCTGCTAGATAGACATTATCGAAT  
AGCACCTTTGATGAGAGATATGAACAAGAGGCTTCGAGAAAACCTAGTGTTTTCTGAA  
TTATATGAAGCCAGTAAGCAAACAGCAAATCCGTGGGTATTTGAACCCGAGTATCCGGG  
AAAAAGTAGAATATTTGATGGAAGAACGGGGGATCCTTTTGAACAGCCTGTTATAATAG  
GAAAGCCTTATATCTTGAAATTAATTCATCAAGTTGATGATAAATAACATGGACGTTCCA  
GTGGACATTATGCACTTGTTACACAACAACCCCTTAGAGGAAGGGCCAAGCAAGGGG  
GACAACGGGTCGGAGAAATGGAGGTTTGGGCTCTAGAGGGGTTTGGTGTTCATAT  
TTTACAAGAAATGCTGACTTATAAATCTGATCATATTAGAGCTCGCCAAGAAGTGCTTG  
GTACTACGATCATTGGAGGAACAATACCTAAACCTGAAGATGCTCCCGAATCTTTTCGA  
TTGCTCGTTCGAGAACTACGATCTTTGGCTCTGGAACCTGAATCATTTCCTTGATCTGA  
GAAGAACTTCCAGATTACTAGGAAGGAAGCT-----ATGATTGATCGGTATAA  
ACATCAACAACCTCCGAATTGGATCAGTTTCGCCTCAACAAATAAGTGCTTGGGCCAATA  
AAATCCTACCTAACGGAGAGATTGTTGGAGAGGTGACAAAACCTATACTTTTCATTAC  
AAAACCAATAAACCTGAAAAGGATGGATTATTTTGTGAAAGAATTTTGGGCCAATAA  
AAAGTGGAATTTGTGCGTGTGGAATTATCGAGTAATCAGGAATGAAAAAGAAGACCA  
AAAATTTTGTGACAATGCGGAGTCGAATTTGTTGATTCTCGGATACGAAGATATCAAA  
TGGGCTACATCAAACCTGGCATGCCAGTAACTCATGTGTGGTATTTGAAACGTCTTCCT  
AGTTATATCGCAAATCTTTTAGATAAACCTCTTAAAGAATTAGAAGGCCTAGTATACTGC  
GATTT-----TTTGCTAGGCC---ATAGCTAAAAACCTACTTTTTTACGATTACGAGGT  
TCATTCGAATATGAAATCCAATCCTGGAAATACAGTATTCCGCTTTTTTTACTACCCAAT  
GCTTCGATACATTTGAAATCGAGAAATTTCTACAGGAGCTGGTGCTATCCGAGAACAA  
TTAGCCGATCTGGATTTGCGAATTATTATAGATTATTCATCGGTAGAATGGAAGAATTA  
GGGAAGAA---GGCCTACCGGAATGAATGGGAAGATCGAAAAGTTGGAAGAAGAA  
AGGATTTTTTGGTTAGACGTGTGGAATTAGCTAAGCATTTTATTGAAACAAATATCGAAC  
CAGAATGGATGGTTTTATGTCTATTACCAGTTCTTCCTCCCGAGTTGAGACCGATCATT  
AGATAGATGGGGGTAACTAATGAGTTCAGATATTAATGAACTCTATAGAAGAGTTATCT  
ATCGGAACAATACTCTTATTGATCTATTAACAACAAGTAGATCTACCCAGGGGAATTAG  
TAATGTGTCAGGAGAAATTGGTACAAGAAGCCGTGGATACACTTCTTGATAATGGAATC  
CGCGGACAACCAATGAGGGACGGTCATAATAAGGTTTACAAGTCGTTTTCGGATGTAAT  
TGAAGGCAAAGAAGGAAGATTTCTGTGAGACTATGCTTGGCAAACGGGTTGATTATTCG  
GGCGTTCTGTCATTGTCTAGGCCCTCACTTTCATTACATCGATGTGGATTGCCTCGC  
GAAATAGCAATAGAGCTTTTCCAGATATTTGTAATTCGTGGTCTAATTAGACAACATCTT  
GCTTCGAACATAGGAGTTGCTAAGAGTAAATTCGGGAAAAGAGCCAATTGTATGGG  
AAATACTTCACGAAGTTATGCAGGGGCATCCAGTATTACTGAATAGAGCGCCGACTCTG  
CATAGATTAGGCATACAGGCATTCCAACCCATTTAGTGGAAGGCCGCGCTATTTGTTA  
CATCCATTAGTTTGTAAAGGATTCAATGCAGACTTTGATGGGGATCAAATGGCTGTTCA  
TGTACCCTTATCGTTGGAGGCTCAAGCGGAGGCTCGTTTACTTATGTTTTCTCATATGAA  
TCTTCTGTCTCCAGCTATTGGAGATCCATTTCCGTACCAACTCAAGATATGCTTATTGG  
GCTCTATGTATTAACAAGCGGAATCGTCGAGGTATTTGTGCAAATAGGTATAATCCATG  
TAATCGCAGAAAT-----TATCAAAATAAAAGAATTGACGGT-----GATAAATATACGAAA



-----GAACCCCTTTTTCTAATTCCTATGATGCACTTGGCGCTTATCGGCAGAAAAGAAT  
CCATTTAGATAGTCCTTTGTGGCTCCGGTGGCAGCTAGATCAACGC--GCTATTACTTCA-  
----AGAGAAGCTCCCATCGAAGTTCACTATGAATCTTTGGGTACCTATCATGAGATTTAT  
GAACACTATCTAATAGTAAGAAATATAAAAAAAGAAATTCCTTTGTATATACATTCGAACT  
ACTGTTGGTCATATTTCTCTTTATCGAGAAATCGAAGAAGCTATACAAGGGTTTTGCCA  
AGCCTGCTCAGATGGTATC-----ATGGAGGTACTTATGGCCGAACGGGCCA  
ATCTGGTCTTTCACAATAAAGCGATAGATGGAAGTCCATTAAACGACTTATTAGCAGA  
TTAATAGATCATTTTGAATGGCATATACATCACACATCCTGGATCAAGTAAAGACTCTG  
GGTTTCCAGCAAGCCACCGCTACATCCATTTCAATTAGGAATTGATGATCTTTTAAACAATA  
CCTTCTAAGGGATGGCTAGTCCAAGATGCTGAACAACAAAGTTTGATTTTGGAAAAAC  
ACTATCATTATGGAAATGTACACGCGGTAGAAAAATTACGCCAATCTATTGAGATATGGT  
ATGCTACAAGTGAATATTTGCGACAAGAAATGAACCTGAATTTTAGGATGACGGAACC  
CTTTAATCCAGTCCATATAATGTCTTTTTTCGGGAGCTAGGGGAAATACATCTCAAGTACA  
CCAATTAGTAGGTATGAGAGGATTAATGTTCGGATCCACAAGGACAAATGATTGATTTAC  
CCATTCAAAGCAATTTACGCGAGGGACTGTCTTTAACAGAATATATCATTTCTTGCTATG  
GAGCCCGAAAAGGGTTGTTCGATACTGCTGTACGAACATCAGATGCTGGATATCTTACG  
CGTAGACTTGTGAAGTAGTTCAACACATTGTTGTACGTAGAACAGATTGTGGGACCG  
CCCGAGGGATCTCTGTGAGTCTCGAAATGGGATGATGCCG--GAAAGAATTTTTATT  
AACATTCATTGGTCGTGTATTAGCAGACAATATATATATGGGTCTACGATGCATTGCCAT  
TCGAAATCAAGATATTGGGATTGGGCTTGCCAATCGATTTCATAACC-----TTTC  
GAACACAAACAATATCTATTTCGAACTCCCTTTACTTGTAGGAGTACGTCTTGGATCTGT  
CGATTATGTTATGGTCGGAGTCCACTCATGGCGATCTAGTAGAATTGGGGGAAGCCGT  
AGGTATTATTGCGGGTCAATCCATTGGAGAGCCGGTACTCAACTAACATTAAGAACGT  
TTCATACCGGCGGAGTATTCACAGGGGGTACTGCAGAACATGTACGAGCCCCCTCTAAT  
GGAAAAATCAAATTTAATGAGGATTTGGTTCATCCATACGTACACGTCATGGGCATCC  
TGCTTTTCTATGTTATATAGACTTGTATGTAATTAAGAGTCAAGATATTATACATAAC  
GTGACTATTCACCAAAAAGTTTCCTTTTAGTTCAAATGATCAATATGTAGAATCAGA  
ACAAGTGATTGCTGAAATTCGGGCGGGAGCATACTTTG---AATTTTAAAGAGAAGGT  
CCGAAAACATATTTATTCCGATTCAGAAGGGGAA---ATGCACTGGAGTACTGATGTGTA  
CCATGCACCCGAATTTACATATAGTAATGTCCATCTCTTACCAAAAACAAGTCATTTATG  
GATATTATCAGGAAGTTCGTGCAGA-----TCCAGTATAGTTCTTTTTTCACTACACAAGG  
ATCAAGATCAAATGAATGTTTCAT-----TCTCTTTCTGTCAAAGA---AGATATATTTCTAGT  
CCT--TCCGTAAATAATGATCAA---GTGAAACACAAATTCCTTTAGTTTCAGATTTTTCCGGT  
AAA---GAAAGTGGGATTCCTGATTAT--TCAGAACTTAATCGAAGCATATGTACTGGTCA  
TTGTAATCTCATATATTCTACT---ATTCTCTACAAGAATTCTGAT-----TTATTGGCAAAGA  
GGCGAAGAAATAAATTCATCATTCCATTCCAATCAATTCAGAACGAGAGAAAGAACT  
AATGACCCAATCCGCTATCTCGATTGAGATACCTATAAAT-----GGTATTTTCCGTAGAAA  
TAGTGTTTTTTGCTTATTTTCGACGATCCCCAATACCGAAAAAAGAGTTCAGGAATTA  
AATATGGGGCTATAGGGGTGCATTCAATCGTCAAAAAAGAGGAT-----TTGATTGAGTAT  
CGG---GGAGTCAAAGAATTTAAGCCAAAATACACGAAAGTGGATCGCTTTTTTTTCATT  
CCCGAGGAAGTGTATATTTTACCCGAATCTTCTCCCTAATGGTACGGAACAATAGTATT  
ATTGGAGTAGATACACAAATCGCTTTAAATACAAGAAGTCGGGTGGGCGGATTGGTCC  
GAGTGGAGAGAAAAAATAAATGGAACCTTAAATCTTTTCTGGAGATATCCATTT  
TCCGGGAGAGACAGATAAAATATCCCGACACAGTGATATCTTAATACCACCAGGAACG

GTAAAAACA-----AATTCTAAGGAATCAAAAAA-----GTGAAAAATTGGATCTATATCC  
AACGA-----ATCACACCTACCAAGAAAAAG-----TATTTTGTTTTGGTTCGACCAGTAATC  
ATATATGAGATAGCGAACGGTATAAATTTAGAAACACTTTTCCCCCAGGATCTATTGCAG  
GAAAAGGATAATCTGAAACTTCGAGTTGTCAATTATATTCTTTATGGGACTGGTAAACC  
CATTCGGGGAATTTCTGACACAAGTATTCAATTAGTTCGTACTTGTTTAGTGTGAAATTG  
GGACCAAGACAAA-----AAAAGTTCTTCTATCGAAGAGGCCCGCGCTGCTTTTGTG  
AAATAAGCACAAATGGTCTGATTTCGTGATTTCCTAAGAATCAACCTAGTGAAATTCCAT  
ATTCATATATCAGAAAAAGGAATGATCCATCAGGTTCCAGAACCGATCTCT--AATAATG  
GGTCAGATCGTACCAATATTAATCCATTTTATCCCATTTATTCCAAGACAAGG-----  
GTTCAACAATCACTTAAACAAAATCAAGGAACTATTAGTACGTTGTTGAATATA-----A  
ATAAGGAATGTCAATCTTTGATAATTTGTCATCATCTAATTGTTTTCAAATGGATCCA----  
--TTCAACGATGTAAAACATCACAAT-----GTAATAAAGAATCA--CCTATAATTCCAAT  
TAGAAATTCGTTGGGCCCTTAGGA-----ACAGCCCTCAAATTGCGAATTTT-----TATTT  
ATTTTACCATTTAAAT--ATAACTCATAATCAGATCTCG--GTAACATAATTCGAAACTT  
TACAAT-----TTAAAACAGACTTTTCAAGTACTT-----AAA---TATTATTTAATGGATGAA  
AACGGGAGA-----ATTGTTAATCCCGATCCATGCAGTAACAGCGTTTTGAATCCATTCAA  
TTTGAATTGGTATTTTCTCCATCATAATTATTGTGAATCTTCTTCCACAATAATTAGC---CT  
GGGACAGTTTATTTGTGAAAATTTATGTATGGCCAAAAACGGACCA-----CATCTAAA  
ATCGGGTCAAGTTATAATTGTTTAC---ATTGACTCTGTAGTAATAAGATCCGCTAAGCCTT  
ATTTGGCCACTCCAGGAGCAACCGTTCATGGCCATTATGGAGAAATCCTTTACGAAGG  
AAATACATTAGTTACATTTATATATGAAAAATCGAGATCTGGCGATATAACGCAGGGTCT  
TCCAAAAGTGGAACAAGTGTTAGAAGTGCGTTCAATTGATTCAATATCAATAAACCTAG  
AAAAGAGAGTGGAGGGTTGGAACGAGTGATAACAAGAATCTGGGAATTCCTTGGG  
GATCTTTGATTGGTACTGAGCTAACTATAGTGCAAAGTCGTATCTCTTTAGTTAATAAGA  
TCCAAAAGGTTTATCGATCCCAAGGGGTGCAGATCCATAATAGGCATATAGAAATTATTG  
TACGTCAAATAACATCAAAGTATTGGTTTCAGAA-----GACGGAATGTCTAATGTTTT  
TTCACCCGGAGAATAATTGGATTGTTGCGAGCGGAACGAACGGGACGCGCTTTGGA  
AGAAGCCATCTGTTACGGGGCCATATTATTGGGAATAACGCGAGCATCTCTGAATACTC  
AAAGTTTCATATCCGAGGCTAGTTTTCAAGAACTACTCGCGTTTTAGCAAAGCTGCT  
CTCCGCGTTCGTATCGATTGGTTGAAAGGCCTGAAAGAAAACGTTGTTCTAGGCGGTA  
TGATACCCGTTGGTACCGGATTCAAAGGATTAGTGCAAGGCTCA-----AGGCAACATAA  
GAACATTCCTTTGAAAACCAAAAAGAAGAAT-----TTATTCGAGGGGGAATTTAGAGAT  
AGAGATATCTTATCCACCACAGAGAGTTATTTGATTCTTGCATTTCCAAAAATTTATATG  
ATACATCAGAACAATCATTTATAGGATTTAATGATTCC-----ATGATAAGAAGAT  
ATTGGAACATTAATTTGAAGAGATGATGAAAGCAGGAGTTCATTTTGGTCATGGTACT  
AGAAAATGGAATCCGAGAATGGCACCTTATATCTCTGCAAAGCGTAAAGGTATTCATAT  
TACAAATCTTACTAGAACTGCTCGTTTTTTATCAGAAGCTTGTGATTTAGTTTTTGTATGC  
AGCAAGTAGGAGAAAGCAATTCTTAATTGTTGGTACCAAAAATAAAGCAGCGGATTCA  
GTAGCGCGGGCTGCAATAAGGGCTCGGTGTCAATTATGTTAATAAAAAATGGCTCGGCGG  
TATTTTAAACGAATTGGTCCACTACAGAACTAGACTTCAAAGTTCCAGGGACTTGAGA  
ATGGAACAAAAGGCAGGTAGACTCAACCGTCTTCCGAAAGGAGATGCGGCTCGATTG  
AAGAGACAGTTAGCTCACTTGCAAACATATCTGGGCGGGATTAAATATATGACGGGGTT  
ACCCGATATTGTAATAATCGTTGATCAGCAAGAAGAATATACGGCTCTTCGGGAATGTAT  
GACTTTGGGAATTCACAATTTGTTTAATTGATACAAACTGTGACCCGGATCTCGCAG

ATATTTTCGATTCCAACGAATGATGACGCTATAGCTTCAATCCGATTAATTCTTAATAAATT  
AGTATTTGCAATTTGTGAGGGTTCGTTCT--AGCTATATACGAAATCCCATGGGACAAAAA  
ATAAATCCACTTGGTTTCAGACTTGGTACAACCCAAAGTCATCATTCTCTTTGGTTTGC  
ACAACCAAAAAATTACTCTGAGGGTCTACAAGAAGATCAAAAAATAAGAACTGTATC  
AAGAATTATGTAAAAAAAATGCGAAAATATCTTCTGGT--ATTGAAGGAATTGTACGTA  
TAGAGATTCAAAAACGAATTGATGTGATTGAGGTCATAATATATATGGGATTCCCAAAT  
TATTAATAGAAAGTAGA-----CCTAAACGAATCGAAGAATTACAGATGAATGTACAA  
AAAGAACTTAATTGTGTGAATCGAAAATCAATATTGCTATTACAAGAATTCCAAACCC  
TTACGGGCACCCTAATATTCTTGGAGAATTTATAGCCGGACAATTAATAAATAGAGTTTC  
ATTTTCGCAAAGCAATGAAAAAAGCTATTGAATTAAGTGAACAGGCCAATACAAAAGGA  
ATTCAAGTGCAAATTGCTGGGCGTCTTGACGGAAAAGAAATTGCACGCGTCGAATGGA  
TTAGAGAAGGTAGAGTTCCTCTACAAACCATTGGAGCTAAAATTGATTATTGTTTCGTATA  
CAGTTAGAACTATTTATGGGGTATTAGGCATAAAAATTTGGACATTTCCAGACAAGAAA  
ATGTCACGTTACCGAGGGCCTCGTTTCAAAAAATACGCCGTCTGGGGGCTTTGCCGG  
GACTAACTAGTAAAAGGCCTAGAGTCGGGAGCGATCTTAGAAATCAATCACGCTCCGG  
TAAA--AAATCTCAATATCGTATTCGTTTAGAAGAAAAACAAAATTGCGTTTTTCATTAT  
GGTGTACAGAACGACAATTACTTAAATACGTTTCGTATCGCCGAAAAGCCAAAGGGT  
CAACAGGTCAGGTTTTACTACAATTACTTGAAATGCGCTTGGATAACATCCTTTTTTCGAT  
TGGGTATGGCGTCAACTATTCCTCGAGCCCGCCAATTAGTTAATCATAGACATATTTTAG  
TTAATGGTCGTATAGTAGATATACCAAGTTATCGCTGCAAACCCCGAGATATTATTACAG  
CGAGGGATGAACAAAATCTAGAGCTATGATTCAAATGATCTTGATTATCATCCCCCAG  
--GAGGAATTGCCAAAACATTTGACTCTTCACCCATTCCA-----TATAAAGGATTGGTC  
AATCAAATAATAGATAGTAAATGGGTTGGCTTGAAAATAAATGAATTGCTAGTGGTGA  
ATATTATTCTCGTCAGACTATGTCACGTCGAGGTACTGCAGAAGAAAAAACTGCAAAT  
CCGATCCAATTTATCGTAATCGATTAGTTAACATGTTGGTTAACCGTATTCTGAAACACG  
GAAAAAATCATTGGCTTATCAAATTATCTATCGAGCCATGAAAAAGATTCAACAAAAG  
ACAGAAACAAATCCACTATCTGTTTTACGTCAAGCAATACGTGGAGTAACTCCCGATAT  
AGCAGTAAAAGCAAGACGTGTAGGCGGATCGACTCATCAAGTTCCCATTTGAAATAGGA  
TCCACACAAGGAAAAGCACTTGCCATTCGTTGGTTATTAGGGGCATCCCGAAAACGTC  
CGGGTCGAAATATGGCTTTCAAATTAAGTTCCGAATTAGTGGATGCTGCCAAAGGGAGT  
GGTGATGCCATACGCAAAAAGGAAGAGACTCATAGAATGGCAGAGGCAAATAGAGCT  
TTTGACATTTTTCGTATGGGTAGGGATCCTATTGCTGACATAATAACCTCTATAAGAAAT  
GCTGACATAAATAGAAAAGGAACCGTTTCGAATAGCATCTACTAACATCACTGAAAACAT  
TATTAATAACTTTTTAAGAGAAGGTTTTATTGAAAATGTCAGGAAACATCAGGAGGGCA  
ACAAAAAATTTTTGGTTTTAACCTACGACATAGAAGG-----AAGAGGAAAGGAAGAA  
CTAGT-----CTAAATTTAAAACGGATCAGCCGACCTGGTCTACGAATCTATTCTAA  
CTATCAAAAATTCCTAGAAATTTGGGCGGGATGGGCATTGTAATTCTTTCTACTTCTCG  
GGGTATAATGACAGACCGAGAAGCTCGACTCGAAAGAATAGGCGGAGAAATCTTGTGT  
TATATATGGATGGCAAAACCTTTACCAAAAATTAGTTCACGCAGAAATGGACGTATTGG  
TTCACGTAAGAATTCACGTAATAACCAAAAAGGCGTTATTTCATGTTCAAGCAAGTTTCA  
ACAATACTATTGTGACCATTACAGATGTACGGGGTTCGAGTGATTTCTTGGTCTCCGCT  
GGCACTTGTGGATTCAGGGGCACAAGAAGAGGAACGCCATTGCTGCTCAAACCGCA  
GCAGGAAATGCTATTCGGACAGTAGTGGATCAAGGTATGCAACGAGCAGAAGTCATGA  
TAAAGGGTCTGTTCTCGGACGAGATGCGGCATTAAGAGCTATTCGCAGAAGTGGTAT

ACTATTAAGTTTCGTCCGGGATGTAACCCCTATGCCACATAATGGCTGCCGACCCCTA  
AAAAAAGGCGCGTGATGCCAACTATTAACAACCTATTAGAAACACAAGACAGCCAAT  
CAGAAATGTCACCAAATCCCCGCTCTTGGGGGATGTCCTCAGCGCCGAGGAACATGT  
ACTAGGGTGTATACTATCACCCCAAAAAACCAAACCTCTGCCTTACGTAAAGTTGCCAG  
AGTACGATTAACCTCTGGATTTGAAATCACTGCTTATATACCTGGTATTGGCCATAATTA  
CAAGAACATTCTGTAGTCTTAGTAAGAGGGGGAAGGGTTAAGGATTTACCCGGTGTGA  
GATATCACATTGTTTCGAGGAACCCTAGATGCTGTTCGGAGTAAAGGATCGTCAACAAGG  
GCGTTCTAAATATGGGGTCAAAAAGCCAAAATGGCAAGGAAAAGTTTGATTCAGCGG  
GAGAAGAAGAGGCCAAAAATTGGAACAAAATATCATTGATGCGTCGATCCTCAAAA  
AAGAAATAAGC-----AAAGTTCCGTCTGTTAAGTGATAAATGGGAAATTCATGGAAAGT  
TACAATCCCACCGCGGAATAGTGCACCGACACGTCTTCATCGACGTTGTTTTTCGACT  
GGAAGACCGAGAGCTAATTATCGAGACTTTGGGCTATCCGGACACATACTTCGTGAAAT  
GGTTCATGCATGTTTGTGGCCGGGGCAACAAGATCAAGTTGGATGGTAAAAAATTCAT  
TCATTTCAGTTATTTACAAGAA---GAA---AAAGACGAAAACAAGGGATCTGTTGAATT  
TCAAATAGTAAGTTTCACTAATAAGATACGAAGACTTACTTCACATTTTGAATTGCATAG  
AAAAGACTATTTATCTCAGAGAGGTTTTCGAAAAATTCTAGGAAAACGACAACGACTG  
CTGTCTTATTTAGCAAAGAAAATAGAGTACGTTATAAAGAATTAATTAGCCGGTTGGAT  
ATTCGGGAATCAAAAACCTCGT-----ATGGTAAAACCTTCGTTTGAACGATGTGGTAGAA  
AGCAACGAACCGTTTATCGAATCGTTGCAATTGATGTTTCGATCCCGAAGAGAAGGAAG  
AGATCTTCGAAAGTGGGTTTTTATGATCCGATAAAAAATCAAACCTATTTAAACGTTT  
CTGCTATTCTATATTTCTTGA AAAAGGCGCTCAACCTACAGGAACTGTTTCGTGATATTT  
TAAGGAAGGCGGGGGTTTTTACGGAACCTTCGCCTTAATCAA---ACGCAATTTACTATGG  
ATAAATCCAAACGACTTTTTCTTAAGTCCAAGCGATCTTTTCGTAGGCGTTTGC CCCC  
ATCCAATCGGGGATCGAATTGATTATAGAAACATGAGTTTAATTAGTCGATTTATTAGT  
GAACAAGGAAAATATTATCTAGACGGGTGAATAGATTGAGTTTAAAACAACAACGAT  
TAATTACTATTGCTATAAAAACAAGCTCGTATTTTATCTTCGTTACCTTTTCTTAATAATGA  
AAAA-----CAATTTGAA-----CGAGTTGGTCGCTATGTGACACGT--C  
TAAAAAAAATCCTTTTGTAGCAAATCATTATTA AAAAAATAAATAAGCTTAATAATA  
AAGCAGAAAAAGAAATAATAGTAACGTGGTCCCGGCATCTACCATTATACCACAATG  
ATCGGCCATACTATCGCTATCCATAATGGAAAGGAACATTTACCTATTTATATAACAGATC  
GTATGGTGGGTCATAAATTGGGAGAATTTGCACCTACTCTAAATTTTCGAGGACATGCA  
AAAATGATAATAAATCTCGTCGTATGATTTTTCAATCTTTTATAACCAGGTAATCTAGTAT  
CCTTATGCATGAAGATAATCAATTCGGTCGTTGTGGTCGGACTCTATTATGGATTTCTGA  
CCACATTCTCCATGGGGCCTTCTTATCTCTTCTTCTCCGAGCTCGGGTTATAGAAGAAG  
GAGAAGAAGGAACTGAGAAGAAGGTATCAGCAACAACAGGTTTTTATTACGGGACAGC  
TCATGATGTTTCATATCGATCTATTATGCGCCTCTGCATCTAGCATTGGGTAGACCTCATA  
ATAACTGTCCTAGCTCTACCCTATCTTTGTTTTCAATTTCTTCTGGAACAATCACAAACA  
CTTTTTTGATTATGGATCTACTACCAGAAATTC AATGCGTAATCTTAGCATTCAATTTGTA  
TTCTGAATAATCTCATTTTTCAATTATTCAACCATTTCAATTTACCAAGTTCAATGTTAG  
TCAGATTAGTCAACATTTATATGTTTCGATGCAACAACAAGATGTTATTTGTAACAAGTA  
GTTTTGTTGGTTGGTTAATTGGTCAATTTTATTCATGAAATGGGTTGGATTGATATTAGT  
CTGGATACAGCAAATAATTCTATTAGATCT---TTTCGATCTAATAAGTACCTTGTGTCAG  
AATTGAGAAATTTAGGGCTCGAATCTTTAGTATTCTTTATTTATTACCTGTGTCTACTC  
TTTAGGCAGAATACCGTCACCCATTTTTACTAAGAACTGAAAGAAACCGAAGAAGAT-

----CTTGTA ACTATTCTTTTTGACTCTAAACGTTGGAATCGTCCATTTTCGATATATAAAAA  
ATGATCAGTTTGAGAATGCTGTAAGAAAAGAAATGTCACAATATTTTTTTTATACATGTC  
GGAGTGATGGAAAAGAAAGAAATATCTTTTACGTATCCACCCAGTTTGTCAACTTTTTTG  
GAAATGATACAAAAGAAAGATATCTCCGTTTACAACAGAAAAACTCTCCTCTGATGAATT  
GTATAATCGTTGGAATTATAAGAATGAACAAAAAAGAAAACCCTAAATAATGAATTTA  
TAAACAGAGTCCAGGCTCTAGATAAGGGATATCTTACTCTGAATACACTCGAAAAAAG  
GGCTGGACTATGTAATGATAAACTAAAAAAGAGTACTTACCTAAAATTTATGATCCTTT  
TTTGAGTGGGTCCTGCCGCGGGAAA---ATCCAATTTTTTTCACCCATAGAGATGCTTTG  
GATAAATAAAATTCATCTTATTCTTTATCAAGAATTTGAATCAAAAAATCCAAAAATAA  
ATCTACTGGAATAAAAGAAATAAGTAAACAAGTTCCTCGATGGTCATACAAATTAATTG  
ATTTGGAACAACAAGAA-----CAAATGCGTTCACGAAAAACCAAACGATTAGAGATTTT  
TAATAATTCTTTGCTATATTATTCACACCAACCGGACTTTTCGCCGATGCATAATAAAAGG  
ATCTGTGCGAGCACAAAGACGCAAAATAACTATTTTTGAACTGTTTCGAGCAAATGTG  
CATCTCCCTTTTTTTTTGGACAGAATAAACAATATCTTTTTTTTTTTTTTTGATATT-----G  
TCGAACTGATAAAAAAATGTTTATAAATATAGAAGAAGAAGAAGTAGAAATAGC  
CGAAGCCTGGGATGATATTCTTTTTGCTCAAATAACAAGAGGTTTTATTTTAGTAACCCA  
ATCCATTTTTAGAAAATATATTCTATTACCTTCATTAATAATAATAAAAATATCATTGTA  
TACTTTTTTAAAACTCCTGAATGGTCCGAGGATTTCAAAGATTGGAGTAGAGAAATA  
CATGTTAAATGCACCTATAATGGAGTTCAATTATCAGAAAAAGAATTTCCGAAAAACTG  
GTTAATAGAGGGGATTCAAATAAAGATCCTATTTCTTTTTCGTTTAAAACCTTCGCACAA  
ATCTAAGAAAGCACAAAAAATGATTATTTTTTTTTTAACAGTTTGGGGAACGGAAGCT  
GACCTGCCTTTTTTCGGCGAGTAGAAAAGAACTTTCACTTTTTTAAACCCATCTTTAAAAA  
ACTCAAAAAAATTTAGAAAAATGCAAAAAAATGGTTTTTCGAGTT---ATAACAATTTT  
AGAAGAAAGAAAAAACTAAATTTT-----TCAAAGAAAAAATAACTGGATCATA  
AACATTTTT-----TTTCGAAAAGAAATAATAAACAACCTTTCAAATCAAAGATTGGA  
TAATCAATAACAATACGATTCAAATAATCCACCCCAATTCGATCTATGGCTTGGACAA  
ATTATTCAGTACAGAAAAAATGAAAGATCTTTCTGCTAGAAGAAAGATAATCATA  
AATCAAATAGAAAAAATTAATAAAGAAAAGAAAAAGTCCTAACAAAATAAGTTATA  
ATGCTAAA-----AAATTAATAATCATCAATTTTCGCAGATAGTAAAAAAGAAATGCTCGA  
TTGGCGCATAAATTCATTTTTTTTATAAAAATTTTGATTGAAAGGATATACATAGATATCT  
TTTTAGGTATCATTAATATTTCCAAGGATCAATGCACAACCTTTTTATTCACTTTATTTCTG  
TGACATATCCTCCTTGTCAACAAGCTTATGTATTTTACAAATTATCACAATCAAATTTATT  
AACTTATATAAGTTAAGATCTATCTTTGAATAT---AGCCTTTTTCTGAAGAACGAAATAAA  
GGATTTTTTTGCCCAAGGGCTATTTAATTCGAATTAAGATAAAAAATTTTCGAAATTC  
TGTAATGAATCAATGGAAAAATTGGTTAAGGAGTCATTATCAATATAAATTATCTCAGAT  
TAGATGGTCTAGATTAACACCACAAAATGGCGAAATAGAATCAATCAACCCATATGC  
ATATGGTTCAAACAAAATGGAATTTATATGAAAATGAAAAGACAGATTAATTCATTAC  
AAAAAATAA---AATTTTAAAAAACAATAAGATATAATCTTTTAGCATATAAATCTATTA  
TGATGATATTATCGATGCGGATAGAAAATTTTTGATTGGAGCATTCTCAGTTTTTTGTCTT  
AGACCTTTTACTGGATGGGAATGAATGAAGAAATAAAAAATCGTTGGTTCTTTCAA  
AATTTTTGATACTTTACAACACATACAAGATAAAACCATGGGCAATACCCATCAAATTC  
TTCTTTCAATAACAAAAGTCATATGGAAGTAGAACTTGATTTCTTCTAAACGGTATT  
TATGTTTTCAATTAGAATGGAATAGT-----AATAACCAACTAATCGAGAATATCAAATCT  
ATGGTTTCTGCTTAAAGTGACAAATCCACGAAAAATTATTATATCTTCTATTCAAAGGC

AAGAAATAAATTTGAATATTATGATGGTTCGGAACAGTTTTACTCGTACAGAATTAGTG  
AAAAGGGGAATATTGATTATCGAACCTGTTCGTCTGTCAGTAAAAAATGATGGACAATT  
TATTTTGTATCAAATGATAGGTATCTTATTAGTTCATAAAAACAAACAAAATGATTATGAT  
TTACTTGTTCCTCGAAAATATTTTATCCCCTAAACGTCGGAGAGAATTAAGAATTCTT-----  
TTCATTTTTCTTTGGCCAAATTTTCGATTAGAAGATTTAGCTTGTATGAATCGTTATTGGT  
TCGATACTAATAATGCCAGTCGGTTCAGTATGGTAAGAATATATATATATCCGATGAAAG  
GACATCAATTAATAATCCTGGATTTTCGAATTGAGAGAGATATTGAGAGAGATCAAG-----  
-----TCAGTGGGATCTTTCATTCACATTTTTTTCCATCAAGAACGTT  
TTATAAACTCTTGGACTCCCGAATTTGGAGTATCTTACTTTCA---CGCAATTCA-----CA  
GGGTTCAACAAGCAATCGATATTTT-----ACGATCAAGGGTGTAGTACTATTTGTAGTA  
GTG---GTCCTTATATATCGT-----ATTAACAATCGAAAGATGGTCGAAAGAAAAAATC  
TCTATTTGACAGGGCTTCTTCTT-----ATACCTATGAATTCCATTGGACCCAGAAAT  
GATACATTGGAAGAATCCTTT---TGGTCTTCCAATATCAATAGGTTGATTGTTTCG---CTC  
CTGTATCTTCCAAAAGGAAAAAAGATCTCTGAGAGCTCTTCTCTGGATCCGAAAGAGA  
GTAATTGGGTTCTCCCAATAACT-----AAAAAGTGTATCATGTCTGAATCTAACTGG  
GGCTCGCGGTGGTGGAGGAACTGGATCGGAAAAAAGAGG-----GATTCTAGTTGTAAG  
ATATCTAAT-----GAAACCGTCGCTGGAATTGAGATCTCATTCAAAGAAAAAGATATCA  
AA---TATCTGGAGTTTCTTTTTGTATATTATATGGAT-----GATCCGATCCGCAAGGACCAT  
GATTGGGAATTGTTTGATCGTCTTCTCCGAGGAAGGGGCGAAACATAATCAACTTG----  
--AATTCGGGACAATTCGAAATCTTAGTGAAAGACTGGATTTGTTATCTCATGTTTGC  
TTTTTCGTGAAAAAATACCAATTGAAGTGGAGGGT---TTCTTCAAACAACAAGGA---GCT  
GGGTCAACTATTCAATCAAATGATATTGAGCATGTTTCCCAT-----CTCTTCTCGAGAAAG  
AAGTGGGCTATTTCTTTGCAAAATTGTGCTCAATTTCAATATGTGGCAATTCCGCCAAGAT  
CTCTTCGTT-----AGTTGGGGGAAT---AATCCGCACGAATCGGATTTTTTTGAGGAAC---A  
TATCGAGAGAGAATTGGATTTGGTTAGACAATGTGTGGTTGGTAACAAGGATCGG-----  
---TTTTTTAGC-----AAGGCACGGAATATATCGTCAAATATTCAATATGATTCC-----ACA  
AGA-----TCTAGTTTCGTTCAAGGAAGGAATTCTAGCCAATTGAAGGGATCTTCT---GAT  
CAATCCAGAGATCATTTCGATTCCATTAGT-----AATGAGGATTCGGAA-----  
-----TATCACACATTGATCAATCAAAGAAAGATTCAACAATAAAAGAAAG  
ATCGATTCTT---TGGGAT-----CCTTCTTCTTCAAACGGAACGAACAGAGATAGAATCA  
GAC-----CGATTCCCTAAA-----TGCCTTTCTGGATATTCC-----TCAATGTCCCGGCTATT  
ACG---GAAGGTGAGAAGGAGATGAATAATCATCTGCTTCCGGAAGAAATCGAAGAATT  
T-----CTTGGGAATCTACAAGATCCATTTCGTTCTTTTTTCTCTGACAGATCG-----TCAGA  
ACTTCAT---CTGGGTTTCGAATCCTACTGAGAGGTCCACTAGAAATCAG-----AAATT  
GTTGAAGAAAGAACAAGATGTTTCT---TTTGTCCCTTCCAGGCGATCGGAA-----AA  
TAAAGAAATAGTTAATATATTCAAGATAATCACGTATTTACAAAAT-----ACCGTCTCAAT  
TCATCCTATTTTCATCAGATCCGGGATGTGATATGGTTCTG---AAGGATGAACTGGAT---AT  
GGACAGTTCCAATAAGATTTCTTTCTTGAACAAAATCCATTTTTTTGATTTA-----TTTCA  
TCTATTCCATGATCGGAACGGGGGGGATACACGTTA-----CACCACGATTTTGAATCAG  
AA-----GAGAGATTTCAAGAAATGGCAGATCTATTCACTCTATCAATAACCGAGCCG---G  
ATCTGGTGTATCATAAGGGATTTACCTTTTTTATTGATTCCTACGGATTGGATCAAAAAC  
AA-----TTCTTGAATGAGGTATTCAACTCCAGGGATGAATCGAAAAAGAAATCTTTA-----  
---TTGGTTCTACCTCCTATTTTTTAT-----GAAGAGAATGAATCTTTTTTATCGAAGGATCAG  
AAAAAATGGGTCCGG---ATCTCCTGCGGGAATGATTTGGAAGATCCAAAACAAAAA

TAGTGGTATTTGCTAGCAACAACATAATGGAGGCAGTCAATCAATATGGATTGATCCTA  
AATCTGATTCAAATCCAATATAGTACCTATGGG-----TACATAAGAAATGTATTGACTCAA  
TTCTTTTAAATGAAT-----AGATCCGATCGCAACTTCGAATATGGAATTCAA-----AGG  
GATCAAATAGGAAATGATACTCTGAATCATAGAACTATAATGAAATATACGATCAACCAA  
CATTTATCGAATTTGAAACAG---AGTCAGAAGAAATGGTTCGATCCTCTTATTTTATTTT  
TCTTTCTCGAACCGAGAGATCCATGAATTGGGATCCTAATGCATATAGATACAAATGGTC  
TAATGGGAGCAAGAATTTCCAGGAACATTTGGAACATTTCAATTTCTGAGCAGAAGAGC  
CGTTTT--CTTTTCAAGTAGTGTTCGATCGATTACGTATTAATCAATATTCGATTGATTGG  
TCTGAGGTTATCGACAAAAAAGATTTGTCTAAGTCACTTCGTTTCTTTTGTCCAAGTT  
ACTTCTT-----TTTTGTCC-----AAGTTTCTTCTTTTTTGTCT  
AACTCACTTCT--TTTTCTTTGTGAGTTTCGGGAATATCCCCATTCATAGGTCCGAA---  
ATCCATATCTAT--GAATTGAAAGGTCCGAATGATCAACTCTGCAATCAGCTGGTAGAAC  
CAATAGGTCTTCAAATCGTTCATTTGAAAAAATTGAAACCCTTCTATTGTTATTGGAT--  
-----GATCATGATACTTCC---CAAAAATCGAAATTTTTGATTAATGGAGGAACAATATCAC  
CATTTTTGTTCAATAAGATACCA---AAGTGG---ATGATTGACTCATTCCATACTAGA-----A  
ATAATCGCAGGAAATCTTTTGATAACACGGATTCCATTTCTCAATGATATCCCACGATC  
AAGACAATTGGCTGAATCCCGTGAAACCATTTTCATAGAAGTTCATTGATATCTTCTTTTT  
ATAAAGCAAATCGACTTCGATTCTTGAATAATCTACATCACTTCTGCTTCTAT-----TGTA  
ACAAAAGATTCCCTTTT-----TAT--GTGGAAAAGGCCCGTATCAAGAATTATGAT-----T  
TTACGTATGGA---CAATTCCTCAATATCTTGTTCATTTCGCAACAAG---ATATTTCTTTGTG  
CGGCGGTAAA-----AAAAACATGCTTTTTTGGAG---AGAGATACTATTTACCAATCGA  
GTCACAGGTATCTAACATATTTATACCTAATGATTTTCCACAAAGTGGTAACGAAAGG---  
TATAACTTGTAACAATCT-----TTCCATTTCCAATTCGATCCGATCCATTCGTTCTG---  
-AGAGCTATTTATTCGATCGCAGACATTTCTGGAACACCTCTAACAGAGGGACAAATAG  
TCAATTTTGAAAGAACTTATTGTCAACCTCTTTCGGATATGAATCTATCTGATTCAGAAG  
GGAAGAACTGCATCAGTATCTCAAT-----TTCAATCAAACATGGGTTTGATTCACACT  
CCATGTTCTGAGAAATATTTACCATCCGAAAAG-----AGGAAAAA-----C  
GGAGTCTTTGTCTAAAG-----AAATGTGTTGAAAAAGGGCAGATGTATAGAACCCTTCA  
ACGAGATAATGCTTTTTCAACTCTCTCAAATGGAATCTATTCCAAACATATATGCCATG  
GTTCCTTACTTCGACGGGGTACAAATATCTAAATTTGATATTTTAGATACCTTTTCGGAC  
--CTATTACCGATACTAAGTAGCAGT-----CAAAAATTTTATCCATTTTTCATGATATTATG  
CATGGATCAGATATATCATGGCTAATTTTTCAGAAAAGATTG-----TGGAAGATA  
TGCCGGAAT--CTGATAAGTGAGATTTTCGAGTAAGTGTTTACATAAT-----CTTCTCTGTC  
CGAAGAAATGATTCATCGAAATAATGAGCCA-----CCATTGATATCGACACATCTGAGAT  
CGCCAAATGTTCCGGGAGTTC--CTCTATTCAATCCTTTTCTTCTTCTGTTGCTGGATAT-  
--CTCGTTTGTACACATCTTCTCTTTGTTTCCCAC-----GCCTATAGTGAGTTACAGACAGA  
GTTGAAAAGGTCAAATCTTTGATGATTCCATCATACTGATTGAGTTGCGAAAACCTTC  
TGGATAGGTATCTACATCTGAACTGAATTTCTTCTGGTTAAAGAATCTCTTTCTAGTTG  
CTCTGGAACAATTAGGAGATTTTCTAGAAGAAATGCGGGGTTCTGCTTCTGGCGGCAA  
CATGCTATGGGGTGGTGGTCCC-----GCTTATGGG---GTTAAATCAATACGTTCTA  
AGAAGAAATTTTGAATATCAAT-----CTCATCGATCTCATA---AGTATCATACCAAATC  
CCATCAATCGAATCACTTTTTCGAGAAATACGAGACATCTAAGTCATACAAGTAAAGAG  
ATTTATTCAATTGATAAGAAAAAGAAAAACGTGAACGGTGATTGGATTGATGATAAAAT  
AGAATCCTTGGTTCGCGAACAGTGATTGGATTGATGATAAAGAAAGAGAATTCTTGGTT

CAGTTCTCC-----ACCTTAACGACA-----GAAAAAAGGATTGATCAAATTCTATTGAGTCT  
GACT--CATAGTGATCATTATCA-----AAGAATGACTCTGGTTATCAAATGATTGA  
AGAGCCGGGAGCAATTTATTTACGATACTTAGTTGACATTCAT-----AAAAAGTATCTAAT  
GAATTATGAGTTCAACACACCCTGTTTAGCAGAAAGACGGATATTCCTTGCTTATTATCA  
GACAACCACTTAT-----TCACAAACCTCGTGTGGGGTGAATAGTTTTTCATTTCCCATCTCA  
TGGA-----AAACCCTTTTCGCTCCGCTTAGCCCTATCCCCCTCT--AGGGGTATTTTAGT  
GATAGGTTCTATAGGAACTGGACGATCCTATTTGGTCAAATACCTAGCGACAAACTCCT  
ATCTTCCTTTTCGTTACAGTATTTCTGAACAAGTTCCTGAATAACAAGCCTAAGGGTTTTTC  
TTATTGAT-----GATAGTGACGATATTGATGATAGTGACGATATTGATGATAGTGAC  
GATATTGATGCTAGTGACGATATTGATGTGAGTGACGATATTGATGTGAGTGAC---GACG  
ATATCGACCGTGACTTTGACTTTGATACGGAGCTGGAGTTTCTAACTACGATGGATGCG  
CTA-----ACTATTGATATGATGCCGGAA--ATAGAAATAAACCGATTTTATATCACCTT  
CAATTGCAATTAGCAAAAGCAATGTCTCCTTGCATAATATGGATTCCAAACATTCATGAT  
CTGGATGTGAATGAGTCGAATTAATCCCTCGGTCTATTAGTGAACCTATCTCTCC-----  
--AGGGATTGTGAAAGATGTTCC---ACTAGAAATATTCTTGTATTGCTTCGACTCATATTC  
CCAAAAAGTGGATCCCGCTCTAATAGCTCCGAATAAATTAATAACATGCATTAAGATAC  
GAAGGTTTCTTATTCCACAACAACGAAAGCACTTTTTTACTCTTTCATATACTAGGGGAT  
TTCACTTGGAATAAAATGTTCCATACT-----AATGGATTCCGGTCCATAACCATGGGTT  
CCAATGTACGAGATCTTGTAGCACTTACCAATGAGGCCCTATCGATTAGTATTACACAGA  
AGAAATCAATTATAGACACTAATATAATTAGATCTGCTCTTCATAGACAAACTTGGGATT  
TGCGA-----TCCCGGGTAAGATCGGTTCAAGGATCATGGGATCTTTTTCTATCAGATAGG  
AAGGGCTGTTGCACAAAATGTATTTCTAAGTAATTGCCCATAGATCCTATATCTATCTAT  
ATGAAGAAGAAA-----TCATGTAACGAAGGGGATTCTTATTGTACAAATGGTACTTCGA  
ACTTGGAACGAGCATGAAGAAATTAACGATACTTCTTTATCTTTTGAGTTGTTCTGCCG  
GATCGGTTGCTCAAGACCTTTGGTCTCTACCC-----GGACCCGATGAAAAA---AATGGGA  
TCACTTATTATGGACTTGTGAGAATGATTCT--GATCTAGTTCATGGCCTATTAGAAGTA  
GAAGGCGCTCTGGTGGGA-----TCCTCACGGACAGAAAAGATTGCAGTCAGTTTGATA  
ATGAT-----CGAGTGACATTGCTTCTTCGGCCCGAACCAAGGAGT--CCCTTAGATATGAT  
GCAAAATGGATCTTGTCTATCCTTGATCAGAGATTTCTCTATGAAAAA-----TACGAATC  
GGAGTTTGAAGAA--GGGAAGGAGAAGAAGTCCCTCGACCCGCAA-----CAGATA  
GAGGAGGAT-----TTATTCCTCAC-----ATAGTTTGGGCTCCT-----AGAATATGGCG  
CCCT-----TGGGGTTTTCTATTTGATTGTATTGAAAGGCCCAATGAATTGGGATTTCCC-  
--TATTGGGCCAGGTCATTTTCGGGGCAAG---GATGAAGAGATCATTATGATGAAGAGGA  
TGAGCTTCAAGAGAATGATTTCGGAGTCTTGCAGAGTGGAACCATGCAGTACCAGATA  
CGAGATAGATCTTCCAAAGAACAAGGCTTTTTTCGAATAAGCCAATTCATTTGGGACCC  
TGCGGATCCACTCTTTTTCTATTCAA--GATCAGCCCTTTGTCTCTGTGTTTTACATC  
GAGAATCTTTGCAGATGAAGAGATGTCAAAGGGGCTTCTACTTCCCAAACAGATCC  
TCCTACATCTATATATAAACGCTGGTTTTATC-----AGAATACGCAAGAAAAGCGCTTCG  
AATTGTTGATTCATCGCCAGAGATGGCTTAGA-----ACCAATAGTTCATTATCT-----AAT  
GGATTTTTCCGTTCTAAT-----ACTCTATCCGAGAGTTATCAGTATTTATCAAATCTGTTC  
TATCTAAC---GGAACGCTATTGGATCAAATGACAAAGGCATTGTTGAGAAAAAGATGGC  
TTTTCCCGGATGAAATGAAAATTGGATTC-----ATG-----ATGCCTAGATC  
TCGG---ATAAATGGAAATTTTATTGATAAGACTTTTTTCAGTTGTAGCCAATATCTTATTAC  
GAATAATTCCGACAACCTTCGGGAGAAAAAGAGGCATTTACTTATTACAGAGATGGT-----



ATGTCTGCTCAATCCGAAGGAAATTATGCAGAAGCTTTACAGAATTATTATGAAGCTATG  
CGGCTAGAAATTGATCCCTATGATCGAAGTTATATACTCTATAATATAGGCCTTATTCACA  
CAAGTAATGGAGAACACACAAAAGCTTTGGAATATTATTTTCGGGGCACTAGAACGAAA  
CCCCTTCTTACCACAAGCTTTAAATAATATGGCCGTGATCTGTCATTAC---CGAGGAGAA  
CAGGCCATTCGGCAGGGAGATTCTGAAATTGCGGAGGCTTGGTTCGATCAAGCCGCGG  
AGTATTGGAAACAAGCTATAGCGCTTACTCCCGGAAATTATATTGAAGCGCAGAATTGG  
TTGAAAATCACAAAGCGTTTCGAA-----ATGAGTTGGCGATCAGAACGTATATGGATAG  
AACTTATAGCGGGGTCTCGAAAACAAGTAATTTCTGCTGGGCCTTTATACTTTTTTTAG  
GTTCAATTGGGATTTTTATTGGTTGGAATTTCCAGCTATCTTGGCAGAAATTTGATATCTTT  
ATTTCCGTCTCAGCAAATAATTTTTTCCACAAGGGATCGTGATGTCTTTCTATGGGAT  
CGCCGGTCTATTTATTAGTTCTTATTTGTGGTGCAAAATTTATGGAATATAGGTAGTGGT  
TATGATCGATTTCGATAGAAAAGAAGGAATAGTGTGTATTTTTTCGCTGGGGATTTCTGG  
AAAAAATCGTCGCATCTTACTACGATTCCTTATGAAAGATATTCAGTCTATTAGAATAGA  
AGTTAAAGAGCGTATTTATGCTCGGCGTGTCTTTATATGGAAATCAGAGGCCGGGGGG  
CTATTCCTTTGACTGGTACTGATGAGAAT--TTGACTCCACGAGAAATTGAGCAAAAAG  
TAGCGGAATTGGCCTATTTTTTGCGTGTACCAATTGAAGTATTT

>Trachelium

????????????????????????????????????????????????????????????????  
????????????????????????????????????????????????????????????????  
????????????????????????????????????????????????????????????????  
????????????????????????????????????????????????????????????????  
????????????????????????????????????????????????????????????????  
????????????????????????????????????????????????????????????????  
????????????????????????????????????????????????????????????????  
????????????????????????????????????????????????????????????????  
????????????????????????????????????????????????????????????????  
????????????????????????????????????????????????????????????????  
????????????????????????????????????????????????????????????????  
????????????????????????????????????????????????????????????????  
????????????????????????????????????????????????????????????????  
????????????????????????????????????????????????????????????????  
????????????????????????????????????????????????????????????????  
????????????????????????????????????????????????????????????????  
????????????????????????????????????????????????????????????????  
????????????????????????????????????????????????????????????????  
????????????????????????????????????????????????????????????????  
????????????????????????????????????????????????????????????????  
????????????????????????????????????????????????????????????????  
???ATGGTAAACGTTTCGAGCCGACGAAATTAGTAATATTATCCGCGAACGTATTAAGCAA  
TATAATAGAGAAGTAAAGATTGAAAATACCGGTAGCGTACTTCAAGTAGGCGATGGCAT  
TGCTCGTATTCATGGTCTTGACGAAATAATGGCGGGCGAATTAGTAGAATTTGAAGAGG  
GTACAATAGGCATTGCTCTGAATTTGGAATCACATAATGTTGGTGTGTATTAAATGGGTG  
ATGGTTTTCGGGATAACAAGAAGGGAGTTCTGTAAAAGCAACAGGAAGAATTGCTCAAAT  
ACCGGTGAGTGAGGCCTATTTGGGCCGTGTTATAAACGCCCTGGCTAAACCTATTGATG  
GTAGAGGTGAAATTTCACTCTTCTGAATCTCGCTTAATTGAATCTCCCGCTCCGGGTATTA  
TTTCTCGACGTTCCGTATCTGAGCCCCTTCAAACAGGGCTTATTGCTATTGATTCAATGA  
TTCCTATAGGACGGGGTCAGCGAGAATTAATTATTGGGGACAGACAGACTGGTAAAAC  
CGCAGTCGCAACAGATACTATTCTCAATCAACAAGGCCAAAATGTAATATGTGTTTATGT  
AGCTATTGGTCAAAAAGCATCTTCAGTGGCTCAGGTAGTACTTTCAGGAAAAG

GGAGCAATGGAGTACACTATTGTGGTAGCCGAAATGGCGAATTCCCCTGCTACATTACA  
ATACCTTGCTCCTTATACAGGAGCAGCTCTAGCTGAATATTTTATGTACCGTGAACGACA  
CACTTCAATCATTATGATGATCTCTCCAAACAAGCACAAGCTTATCGCCAAATGTCTCT  
TCTATTACGAAGACCGCCAGGTGCGGAAGCTTATCCAGGGGATGTTTTTTATTTGCATTC  
ACGACTTTTGGAAAGAGCTGCTAAATTAAGTTCTCAGTTAGGTGAAGGAAGCATGACT  
GCTTTACCAATAGTTGAAACTCAATCGGGAGATGTTTCGGCTTATATTCTACTAATGTA  
ATTTGATTACAGATGGGCAAATATTCTTATCTGCCGATCTATTCAATGCTGGAATCCGA  
CCTGCTATTAATGTAGGGCTCTCGGTTTCCAGGGTTGGGTCTGCAGCTCAAATTAAGC  
CATGAAACAAGTAGTTGGCCAATTAATAATTAGATTTGGCGCAATTGACAGAATTAGAA  
ACTTTTGCACAATTTGCTTCTGATCTCGATAAAGGTACTCAGAATCAATTGGCACGAGG  
TCGACGATTACGCGAATTGCTCAAACAATCTCAATCTAACCTCTCGCAGTGGAAGAA  
CAGATAATGACTATTTATACGGGAATAAACGGTTTTCTCGATTCATTAGAAATTGGACAG  
GTAATAAATTTCTTGATAAGTTACGTAAATATTTAAAAGAAGAGAAACCGAAGTTTCA  
AGAAATCATATCTTCTACCAAGATATTCACCGAGGAAGCAGAAGACATTTTGAAAAA  
GCTATTCAAAAACAGATGGAGCTT-----ATGAGACTCAATCCTACTACTTCTG  
GTTCTGGGGTTTCGACGCTTGAAAAAATAAGCCAGGGCGTATCGGCCAAATCATTGG  
TCCGGTCTTAGATGTAGCTTTTCCGCCGGGCAAGATGCCTAATATTTATAACGCTCTGGT  
AGTTAAAGGTGCGAGATACTTTGGGCAACCAATTAATGTGACTTGTGAAGTACAGCAA  
TTATTAGGAAACAATCGGGTTAGGGCTGTAGCCATGAGTGCTACAGACGGTCTAATGAG  
AGGAATGGAAGTGATTGATACGGGCACTCCTCTAAGTGTTCGGTTCGGTGGAGCGACT  
CTCGGACGAATTTCAATGTGCTTGGAGAGCCAATTGATAATTTGGGTCTGTAGATAC  
TCGCACAACATCGCCTATTCATCGATCTGCGCCTGCCTTTATCGATTTAGATACAAAATT  
ATCTATTTTGAACCGGAATTAAGTAGTCGATCTTTTAGCCCTTATCGCCGTGGAGG  
AAAAATCGGACTATTCGGAGGAGCTGGGGTGGGAAGACAGTACTTATTATGGAATTG  
ATTAATAATATTGCCAAAGCTCACGGCGGTGTATCTGTATTTGGCGGAGTAGGTGAACG  
TACTCGTGAAGGAAATGATCTTTACAAGGAAATGAAAGACTCTGGAGTAATTAATGAA  
CAAAAGTTTGCAGAATCAAAAGTGGCTTTAGTTTATGGTCAGATGAATGAACCGCCGG  
GAGCTCGTATGAGAGTTGGTTGACTGCCCTAACTATGGCCGAATATTTCCGAGATGTT  
AATAACAAGACGTACTTCTTTATCGACAATATCTTCCGGTTTGTCCAAGCAGGATC  
TGAAGTATCCGCCTTGTGGGTAGAATGCCTTCTGCTGTGGGTTATCAACCTACCCTTA  
GTACTGAAATGGGTTCTTTACAAGAAAGAATTACTTCTACTAAAAGGGGTCTATAACG  
TCTATTCAAGCAGTTTATGTACCTGCAGACGATTTGACCGACCCGGCTCCTGCTACCAC  
ATTTGCACATTTAGATGCTACTACCGTACTATCAAGAGGATTAGCTGCCAAAGGTATATA  
TCCCGCAGTAGATCCTTTAGATTCAACGTCAACTATGCTACAACCCCGGATCGTTAGTG  
ACGAACATTATCAAACCTGCGCAAAGTGTTAAGCAAACCTTTACAACGTTACAAGAAGT  
TCAGGACATTATAACTATCCTTGGATTGGACGAATTATCCGAAGAGGATCGTTTAACCGT  
AGCAAGAGCGCGAAAAATTGAGCGTTTCTTATCACAAACCCTTTTTTGTGGCCGAAGTA  
TTCACCGGTTCTACGGGAAAATATGTTGGTCTAGTAGAAACAATTCGAGGCTTTGAATT  
AATCTTTCCGGAAAATTAGATGTTCTTCTGAACAGGCCTTTTATATGGTAGGTAACAT  
CGATGAAGCTACGGCGAAGGCTATGAACTTAGAAATGGAGAGCAATTTGAATAAAATG  
ATCTTAAATCTTTGTGTAAGTACCCTAATAGGATTTTGGGATTCGGAAGTGAAAGA  
AATTATTTTACTACTGATAGTGGACAAATTGGCGTATTACCAAATCACGCCCTATTGC  
CACAGCTGTGATATAGGTATTTTGGAGAATACGCCTTAATGACCAATGGGTAACGGTGG  
CGCTGATGGGCGTTTTGCTAGAATAGGTAATAATGAGATCACTGTTTTAGTCAATGATG

CGGAGAAGAGTCTTGACATTGATCCACAAGAAGCTCAGCAAACCTCTTGAAATAGCTAA  
AGCTAATTTGAGCAAAGCTGAAGGAAAGAGACAAACAATTGAGGCAAATCTAGCTCT  
CCGCCGGGCTAGGACACGAGTAGAGGCTATCAATGAGATTTGATGAACAATGGAACC  
GATTCGTTCTTTTCTTTGGGCCGCTGGCCATCCGCCGGGAGTTTCGGGTTCAATACCGA  
TATTTTAGCAACAAATCTAATAAATCTAAGTGTAGTGATTGGGGTATTGATCTTTTTTG  
AAAGGGAGTGTTAAGTGATTTATTAGATAATCGAAAGCAGAGAATCTTGAATAGTATTC  
AAGATTCAGAAGATTTACGCGGGGGCGGCCGTTAACCAGTTGGAAAAAGCTCGGGCTC  
GCTTACGTAAAGTAGAAATAGAAGCAGATCAGTATCGAGTTAATGAATACTCTGCGATA  
AAACGGGAAAAATTGAAGTTGATTAATTCAATTTATACAACTTTGGAACAAGAAGAAA  
ATAAGAACAATGAAACTCTTCGTTTTGAACAAGAAAGGGCAATTAATCAAGTCCAACA  
ATGGGTTTTACAACAAGCCTTACAAGGAGCTCTAGGAACTCTGAATAGTTGTTAAACA  
CCGAGTTACATTTACGTACCATCAGTGTTAATATTGGCATATTAGGGGCAATGAAAGAAA  
TAACTGATATGAATCCACTGATTTCTGCCGCTTCGTTATTGCTGCTGGATTGGCTGTCG  
GGCTTGCTTCTATTGGACCTGGAATTGGTCAAGGTACTGCTGCGGGCCAAGCTGTGCA  
AGGTATCGCAAGACAGCCCGAGGCGGAGGGAAAAATACGGGGTACTTTATTGCTGAGT  
CTAGCTTTTATGGAAGCTTTAACAATTTATGGCTTGGTTGTAGCATTAGCACTTTTATTG  
CGAATCCTTTTGTATGAATATTTTATCATGTTCCACCAACATACTAAACGGGTTCTACGA  
TATATCCGGTGTGGAAGTCGGCCAACATTTCTATTGGAAAATCGGAGGTTTCCAAGTTC  
ACGGCCAAGTACTTATTACTTCTTGGGTTGTAATTGCTATCTTATTAGGTTCTGCCGCTCT  
AGCTGTTTCGGAAACCACAAACCATTCCGACCGGCATTGAGAATTTCTTCGAATATGTCC  
TTGAATTCATTCGAGATGTGAGTAAACTCAAATTGGAGAAGAATATGGTCCTTGGGTT  
CCTTTTATTGGAAGTATCTTTCTTTTATTTTTGTTTCTAATTGGTCGGGTGCTCTTTTAC  
CTTGAAAATCATAAATTACCTCACGGGGAGTTAGCCGCACCCACGAATGATATCAAT  
ACTACTGTTGCTTTGGCTTTACTCACGTCAGTGGCCTATTTCTATGCGGGTCTTGCCAAA  
AAAGGTTTGGGTTATTTCCGGAAATATATTCAACCAACTCCAATCCTTTTACCCATTAAC  
ATCTTAGAAGATTTACAAAGCCCTTATCACTTAGTTTTTCGGCTTTTCGGAAATATATTA  
GCTGATGAATTAGTCGTTGTTGTTCTTGTCTTTAGTACCTTCAGTGGTTCCTATCCCT  
GTGATGTTCTTGGATTATTTACAAGTGGTATTCAAGCTCTTATTTTTGCAACTTTAGCC  
GCGGCTTATATAGGTGAATCTATGGAGGGCCACCATATGAAATTTTCAACCTTAGAGCAT  
ATATTAATTCATCTGTGCTTTTCGATTTGTTCAATTGTAATTACAATTCGCTTGATAAACC  
TAGTAGTTACGACAATCCTAAAACCATATGATTTCTCAGAAAAGGGCATCATAACTACAT  
TTTTATGTCTAACAGGATTTTTAGTCACTCGTTGGATTTATTCAGGCCATTTTCCACTAA  
GTAATTTATATGAATCATTAATCTTTCTTTTCATGGAGTTTCTCCCTTATTCATATAGTCGCG  
TAT-----AAAAATAAAAAT--TTAAGCAGAATAACCGCCTCAAGTACGATTTTTACCCAAG  
GCTTTGCTACTTCAGGTCTTTTAACTGAAATAAATAAATCTGGAATATTAGTACCCGCC  
TCCAATCTGAGTGGTTAATAATGCACGTAAGTATGATGATATTGAGTTATGCGGCTCTTC  
TGTGTGGATCATTATTATCAGCTGCACTTCTAGTCATTACATGTCGA-----A  
AGAAAAAATTCAATACAGGAATCAAAGAATTCATCTTTTCGGAAAGACTTAT-----G  
TTAAGAATTATTACAAGATCCAATTGGTTCAACAATTGGATTATTGGAGTTATCGTGTGA  
TTAGTCTAGGGTTTATCTTTTTAACCATGGGTATTCTTTCTGGAGCAGTATGGGCTAATG  
AAGCATGGGGATCTTATTGGAGTTGGGACCCAAAAGAACTTGGGCTTTTATTACTTGG  
ATCATCTTCGCTATTTATTTACATACTAGAACAATAAAAATTTCTGGGGTGCAAATCC  
GCAATTGTGGCAGTTATAGGCTTTTTGATAATTTGGATATGCTATTTTGGAGTAAATCTAT  
TAGGAATAGGACTACATAGTTATGGTTCATTTAAGGGAATGATGACAAAAAAGAAAGCA



AAGGGTTTGGTATTTGGATATTAGTTGTATCAATGAGTTGGCGAATCATGACATGATAAT  
TGAG---ACAACAGAAGTACAA---GCTATCAATTCCTTTTCTAGATTGGAATCC---TTAAA  
AGAGATCTATGGGATCCTATGGATGCTTGTCCCTATTTTGGACTCCTGTATTAGGAATCAC  
AATAGGTGTACTAGTAATTGTTTGGTTAGAAAGAGAAATATCTGCAGGGATAACAACAAC  
GTATTGGCCCTGAATACGCCGGACCTTTGGGAATTCTTCAAGCTCTAGCAGATGGGACA  
AAATTACTTTTCAAAGAGAATCTTCTTCCATCTAGAGGAGATAGTCGTTTATTCAAGTATC  
GGACCACCCATAGCAGTCATATCCATTTTACTAAGTTATTTAGTAATTCCTTTTGGTTATC  
ACCTTGTTCTAGGCGATCTCAGTATCGGTGTTTTTTTTATGGATTGCTATTTCAAGTATTGC  
CCCCGCCGGTCTTCTTATGTCAGGATATGGCTCAAATAATAAATATTCCTTTTLAGGTGG  
TCTACGAGCTGCTGCTCAATCAATTAGTTATGAAATACCATTAACCCTATGTGTGTTATC  
AATATCTCTACTATCTAACAGTTCAGGTACAGTTGATATAGTTGAAGCGCAGTCAAAAC  
ATGGTTTTTGGGGATGGAATTTGTGGCGTCAACCTATAGGCTTCTCGTTTTTCTCATT  
CTTCCCTAGCCGAGTGTGAGAGATTACCTTTTGATTTACCAGAAGCAGAAGAAGAATT  
AGTAGCAGGTATCAAACCGAATATTCGGGTATCAAATTTGGTTTATTTTACGTTGCTTC  
GTATCTAAATCTACTAGTTTCTTCATTATTTGTAACAGTTCTTTACTTGGGGGGTTGGAAT  
CTTCTATTCCGCACATATCCGTTCCCGGGCTTTTTGAAATAAAAAAAGCGGGTAGAGT  
CTTTGTAACACTAATTGGTATCTTTATTACATTAGCGAAAACCTATTTGTTCTTGTTCATT  
CCTATCACAACAAGATGGACTTTACCGAGGCTGAGAATGGACCAACTATTAATCTTGG  
ATGGAAATTTCTTTTACCTATTTCTCTAGGTAATCTATTATTAACAACCTTCTTCCCACTT  
CTTTCATGATGATCTGGCATGTACAGAATGACAATTCATTCTCAATTTTACGAGAATT  
TTTATGAAAGCCTTTCATTTGCCTCTCTTCGATGGAAGTTTCATTTCCAGAAATGTATC  
CTCATTTTTGGACTAATTCTTCTTCTGATGATCGATTCAACCTCTGATCAAAAAGATATA  
CCTGGTTATATTTATCTCTTCAACAAGTTTAGTAATGAGCATAATGGCCCTCTTGTTTC  
GATGGAGAGAAGAACCTATGATTAGCTTTTTCGGGAAATTTTCAAACGAACAATTTAAT  
GAAATCTTCAAGTTCTTATTTTACTATGTTCAACTCTATGTATTCCTCTATCCGTAGAGT  
ACATTGAATGTACAGAAATGGCTATAACAGAGTTTCTCTTATTTCGTATTAACAGCTACTC  
TAGGAGGAATGTTTTTATGCGGTGCTAACGATTTAATAACTATCTTTGTAGCTCCAGAAT  
GTTTCAGTTTCTGCTCCTACCTATTATCTGGATATACCAAGAAAGATGTACGGTCTAATG  
AGGCTACTATGAAATATTTACTCATGGGTGGGGCAAGCTCTTCTATTTTGGTTCATGGTT  
TCTCTTGGCTCTATGGTTTATCCGGGGGAGAGATCGAGCTTCAAGAAATAGTGAATGGT  
CTTATCAATACAAAATGTATAACTCCCCAGGAATTTCAATTGCGCTTATATTCATCACTG  
TAGGAATTGGGTCAAGCTTTCCCCAGCCCCTTCTCATCAATGGACTCCTGACGTATAT  
GAAGGATCTCCACTCCAGTCGTTGCTTTTCTTTCTGTTACTTTCGAAAGTAGCTGCTTC  
AGCTTTAGCCACTCGAATTTTGTATTTCTTTTATTTGTCATCAAACGAATGGCATCTT  
CTTCTGGAAATCCTAGCTCTTCTTAGCATGATATTGGGGAATCTCATTGCTATTACTCAA  
ACAAGCATGAAACGTATGCTGGCATATTCATCCATAGGTCAAATGGATATATAATTATTG  
GAATAATTGTTGGAGACTCAAATGATGGATATGCAAGCATGATCACTTATATGCTGTTCT  
ATATCTCCATGAATCTAGGAACTTTTGGCTTGCATTATCTTATTTGGTCTACGTACCGGAAC  
TGATAACATTCGAGATTATGCAGGATTATACACCAAGGATCCTTTTTTGGCTCTCTCTTT  
AGCCCTATGCCTCTTATCCCTAGGAGGTCTTCCCTCCACTAGCAGGTTTTTTTCGGAAAAC  
TCTATTTATTCTGGTGTGGATGGCAAGCAGGCCTATATTTCTTGGTTTTAATAGCACTCG  
TTACAAGTGTCTTTCTATCTACTATTATCTAAAATAATAAAGTTATTAATGAATGGACG  
AAACCAAGAAATAACGCCTCACGTGGGAAATTATAGAAGATCCTCTTTAAGATCAAAG  
AATCCATCGAATTCAGTATGATTGTATGTGTGATAGCATCTACTATACCAGGAATATCAA

TGAACCCGATTATTGCAATTGCTCAGGATAGCCTTTTTATGCTTCTGCTTTATGAATATGA  
TATTTTTTGGGCATTTCTAATAATATCCAGTCTTATTCCTATTTTGGCATTTTTTCTTTTCAG  
GAGTATTAGCCCCATTAGCAAAGGACCGGAAAAATTTTCTAGTTATGAATCGGGTATA  
GAACCAATAGGCGACGCTTGGTTACAATCCGAATTCGCTATTATATGTTTGCTCTAGTT  
TTTGTGTTTTTGTATGTTGAAACCGTTTTTCTTTATCCATGGTCAATGAGTTTCGATGTAT  
TGGGTGCTCTGTATTTATAGAAGCTTTTTATTTTCGTGCTTATTTTAAATTGTTGGTTTTGGT  
TTATGCATGGCGAAAGGGGGCATTGGAATGGTCTACGAATTATTTTCCTTGGTTAACAG  
TAAGTATATTTTTACCCTATCCGTGGGTTCCGTAATTTTTTTTTCTTCCCCATAGAGGAAA  
TAGGGTAATTAGGTGGTATAGTATTTGTATATGTATTTAGAACTCCTTGTAATAACCTAT  
CTATTCTGTTATCATTTCGAATCAAATGATCCATTAATACAACCTAGTTGAAGACTATAAAT  
GGATCAATTTCTTTGAATTTCAATTGGAAATTAGGAATAGATGGACTTTCTATTGGACCTG  
TTTTACTAACGGGATTTATCACTACTTTAGCTACTTTAGCAGCCTGGCCAGTTACTCGGG  
ATTCGCGATTATTTTATTTTTTGTATGTTATCAATGTATAGCGCTCAAATAGGCTCGTTTTC  
TTCTCAGGACCTTTTACTTTTTTTCATCATGTGGGAGTTAGAATTAATCCGATTTATCTA  
CTTCTATCCATATGGGGAGGAAAGAAACGCATGTACTCGGCAACCAAATTTATTTTGTA  
CACGGCGGGAGGTTCTGTTTTTCTATTAATGGGAGTTCTAGGTCTGGGTTTATATGGTTC  
GAATGAGTCAACATTGGATTTTGAAAGATTAATTAATCAGACGTATCCTATGTCCTTAGA  
AATACTATTTTATATTGGATTTTTTATTGCGTTTTGCTGTCAAATACCAAATTTTACCTCTAC  
ATACATGGTTACCAAATACCCATGGAGAAGCTCACTACAGTACGTGTATGCTTTTAGCC  
GGAATCTTATTAATAATGGGAGCATATGGATTGATTTCGAATTAATATGGAATTATTACCTC  
ACGCTCATTCTCTATTTTCTCCTTGGTTGCTCATAATAGGTACACTCCAAATAATCTATGC  
AGCTTCAACATCTTCCGCCAACCTAATTTAAAAAAAAGAATAGCCTATTCCTCAGTAT  
CTCATATGGGTTTCATACTTGTAGGAATTGGTTCTATAACCAATGCAGGGCTCAATGGAG  
CCTTTTTACAATAATCTCTCACGGATTTATTGGGGCCGCCCTTTTTTCTTGGTAGGAA  
CGAGTTATGATAGAATCCATCTTGTTTATCTCAATGAAATGGGCGGAGTAGCTATTCTAA  
TGCCAAAATATTTACGATGTTACGTACCTTTTCGATGGCTTCCCTTGCATTGCCAGGTA  
TGAGTGGTTTTTGTGAGAATTGATAGTATTGTGGGGAATAATTACCAGTCAAAAATATC  
TTGTAATGCCCAAATACTAATTACTTTTTGTAATCGCAATTGGAATAATTAACCCCTAT  
ATATTCATTATCTATGGCACGCCAGATCTTCTATGGATACAAGTTATTGAATGCCCCCAAT  
TCTTATGTCTTGGATTTTGGACCGCGCGAGTTATTTGTTTCAATCTCTATCTTTCTTCCCTG  
TAATAGGCATTGGGCTGTACCCAGATTTTATTCTTTCACTATCAATTGATAAGGTTGAGG  
TTATTTTATCTAATGTTTTTGTGGAG---ATGCTCGAACATGTACTIONTTTTGAGTGCCTAT  
TTATTTTCTGTGCGTCTATACGGATTGATCACGAGTTCGAAATATGGTTAGGGCTCTTATC  
TGTCTTGAACCTTATATTCAATGCGGTTAATATAAATTTTGTACATTTTCTGATTTTTTTGA  
TAGTCGTCACTTAAAAGGATCGATTTTCGCAATTTTTGTTATAGCTATTGCAGCCGCTGA  
AGCAGCTATTGGACTTGCTATTCTTTTTCAGCAATTTATCGGAATAGAAAGTCAATTCATAT  
CAATCAATCAAATTTATTGACTAAAATGGCACAGACATTTCAATATGCGTGTATAATACC  
TTTCTTCCACTTCCCATTCCTATATTACTAGGGGTGGGGCTTCTTATTTTTCCGGCCGCA  
ACAAAAGTCTTCGTGCTATGTGGGCTTTTCAGAGCGTTTTTATTATTAAGTCTAGTCATG  
GTTTTTTCAATCAATCTGTCTATTTCAGCAAATAAATATCAGTTTTACTTATCAATATGTTT  
GGTCTTGGATCATAAATAATGATTTTTTGTAGAAATTCGGCTACTTAATGGATCCACTTAC  
TTCTATTATGTCAATATTAATCACTACTGTTGGAATTATGGTTCTTATTTATAGTGATAATT  
ATATGTTGCATGATCGTGGATATTTGAGATTTTTTGTCTTATATGAGTTTTTTTCAGCACTT  
CATGTTGGGATTAGTTACGAGTTCTAATTTGATACAAATTTATATTTTTTGGGAATTAGTT

GGAATCTGTTTCATATCTATTAATAGGATTTTGGTTTCACACGACCTGTTGCAGCAAATGCT  
TGTCAAAAAGCGTTTGTAACTAATCGTGTCCGGTATTTTGGTTTATTATTGGGAATTTTA  
GGTTTTTATGGGTTAACGGGCAGTTTTGAATTCGGGATTTATTCCAAATATTCAATAAC  
AATGAGAGCAATCTTTTTTTTGTACTTTGTGCGCTGTTTTATTATTTCTGGTGCAGTTG  
CTAAATCAGCACAATTTCCGCTTCATGTATGGTTACCGGATGCCATGGAAGGGCCAACT  
CCTATTTCCGCTCTTATGCATGCGGCTACTATGGTAGCCGCGGGAATTTTCCCTTGATAGCT  
CGACTTCTACCTCTTTTCAGATTCATACCTCACATAATGAATTCATCTCTTTGATAGGGA  
TAATAACAGTATTTTTTGGAGCTACTTTAGCTCTTGCTCAAAAAGATATTAAGAGGGGTT  
TAGCCTATTCCACAATGTCTCAATTGGGTTATATGATGTTAGCTCTAGGTATGGGGTCTTA  
TAGAAGTGCTTTATTTCAATTTGATTACTCATGCTTATTCTAAAGCATTATTGTTTTTAGGC  
TCCGGCTCGGTTATTCATTCATGCAAATACTTGTGGCTATTCTCCAAATAAAAGTCAA  
AATATGGTTTTAATGGGCGGTTTTAAGAAAACATGTCCCAATTACTAAAATGTCTTTTTA  
GTAGGTACACTATCTCTTTGTGGTATTCCGCCTCTTGCTTGTTTTTGGTTCGAAAGATGAA  
ATTCTTAATGATAGTTGGTTATATTCACCGATTTTTGCAATAATAGCTTGGTCTACGGCAG  
GATTAACCGGATTTTATATGTTTTCGGATCTATTTACTGACTTTTGAAGGGCATTAAACG  
TTGATTTGAAAAATTACAGCGGTCAAAAAAAGATTTCTATTTATTCAGTATCTCTATGGG  
GTAAAGAACGTGAAAAAGTCAATAAGACA---TTGTTAACTTTATTAACACTTCATTTT---  
TTTTTTGGTAATAAGAATATTTTTTCATATCCTTATGAATCGGATAATAATATCTTATTTCC  
TCTCCTTGATTAGTTCTATTTACTTTGTTTTGTTGGAGTCCTGGGAATCCCTTT---TTGG  
ATATATTATCCAAATGGTTAAGACCCTCTATAAACCTTTTTTCATCAAATTCGAAG---TTA  
GCGGATTGGGCGGAATTTTTGAGAGATGGTGTGTTTTCAATCAGTATAGCCTATCTTGG  
AATAATTCTAGCATTTTTTTTTCTATAAGCCTCTTATTCATCTTTGACAAATTTGGATTCA  
TTAATTTTTTTGTTCTAGTTTATGACAAGATAATAAATGGGATATATGATTGGTCAGATAA  
TCGTGGTTATATAGACGTTTTTTTATGGAACATACTTTCTAGGGGTATAAGAAGAGTGTC  
TGACTIONTATTTTTTTGATAGAAAAGTAGTTGATGGAATTACAAATGGAGTTGGTCT  
TATGAATTTTATTTTTGGAGAGGGTATCAAATTTTTTCAGTGGGGGG---CGCATTTTCATCT  
ATCTTTTCTTGATTGTTCTTACTTCTCGATTTTTTTATTAATTTCTCTATGGATTTACCT  
GGACCAATACATGATTTTATTTTAGTCTTTCTGGGATTAGTTCTTATATTAGGGGGTCTGG  
CAGTGGTATTACTTCCCAATCCAATTTATTCTGCCTTTTCGTTGGGATTGGTTCTTGTTG  
TATATCCTTATTATATATTCTATCGAACTCTCATTTTCTAGCTGCTGCGCAGCTCCTTATTT  
ACGTAGGAGCTATAAATGTTTTAATCATTTTTTGCTGTCATGTTCCCTGAATGGTTCAGAAT  
ATTACAAAGATTTGAACCTTGGACCGTTGGAGATGGGGTTACTTCGGTGGTTTTGTACA  
AGTCTTTTTGCTTCACTAATTACTACTATTCCAGATACGTCATGGTACGGGATTATTTGGA  
CTACAAAATCAAACCAGATTATAGAGCAAGATTTGATAAATAATAGTCAAGAAATTGGG  
ATTCATTTATCAACAGATTTTTTTGATTCCATTTGAACTCATTTCAATAATTCTTTTAGTTG  
CCTTAATAGGCGCAATTGCTGTAGCTCGTCAAATGACTGTACCAGCTACAAGAAAAGA  
CCTCATGATAGTCAATATGGGACCTCACCAATCAATGCATGGTGTCTTCGACTCAT  
TGTTACTCTAGATGGTGAAGATGTTATTGACTGTGAACCAATATTGGGTTATTTACACAG  
AGGGATGGAAAAAATTGCAGAAAACCGAACAATTATACAATATTTGCCTTATGTAACAC  
GTTGGGATTATTTAGCTACTATGTTTCACAGAAGCAATAACTGTAAATGCACCAGAACAG  
TTAGGCAATATTCAAGTACCTAAAAGGGCCAGCTATATCAGAGTCATTATGTTGGAGTTA  
AGTCGTATAGCTTCGCATTTGTTATGGCTTGGCCCTTTTATGGCAGATATTGGCGCACAG  
ACCCCTTTTTCTATATTTTTTCGAGAAAGAGAATTGATATATGACCTATTCGAAGCTGCC  
ACCGGTATGCGAATGATGCATAATTTTTTTTCGTATCGGAGGAGTCGCTGCTGATTTACCT





GAGATGAAAGAAAAAATAGGCAATCTGTCTTTTCAGAGCTATCGCCCCAATCAAAAA  
ATATTCTTGTGATAGGCCCTGTTTCTGGTCAGAAATATAGTGAAATCACCTTTCCTATTCT  
TTCCCCAGACCCCGCTACTAAGAAAGATATTAACCTTCTTAAAATATCCTATATATGTAGG  
TGCAAACAGGGGAAGAGGTCAGATTTATCCCGACGGTAGCAAGAGTAATAATACAGTT  
TATAATGCTACAGCAGCTGGTATAAGTAAAGCAAATCATAACGAAAAGAAAAGGGGGGAT  
ACGAAATAAGCATAGCGGATGCATCAGATGGACGTCTAGTGGTTGATATTATCCCCCA  
GGGCCAGAACTTCTCGTTTTAGAAAGGAGAGTCTATCAAATTTGATCAACCATTGACGA  
GTAACCCTAATGTGGGCGGATTTGGTCAAGGAGATGCAGAAATAGTACTTCAAGATTC  
AGTCCGTGTCCAAGGTCTTTTGTCTTCTTGGCATCTGTTATTTTGGCACAAATCTTTTT  
AGTTCCTTAAAAGAAACAATTCGAGAAGGTTCAATTGTCCGAAATGAATTTTATGAATA  
AAGTCTATGATTGGTTTGAAGAGCGTCTCGAGATTCAGGCGATTGCAGATGATATTACT  
AGTAAATATGTTCCGCCTCATGTCAACATATTTTATTGTCTAGGAGGAATTACACTTACTT  
GTTTTTATAGTACAAGTGGCTACAGGGTTTGGCTATGACTTTTTACTATCGTCCGACCGTTA  
CTGACGCTTTTTGCTTCGGTTCAATACATAATGACTGAAGCTAATTTTGGTTGGTTAATCC  
GATCAGTTCATCGATGGTCGGCAAGTATGATGGTCCTAATGATGATTCTGCACGTATTC  
GTGTGTATCTACCGGTGGATTTAAAAACCTCGCGAATTGACTTGGGTTACCGGTGTG  
GTTTTGGCTGTATTGACCGCATCTTTTTGGCGTAACTGGTTATTCCTTACCTCGGGACCAA  
ATTGGTTATTGGGCAGTGAAAATTGTAACAGGTGTACCTGAAGCTATTCCTGTAATAGG  
ATCACCTTTGGTAGAACTATTGCGCGGAAGTACTAGTGTGGGACAATCCACTTTGACTC  
GTTTTTATAGTTTACACACTTTTTGTATTGCCGCTTCTTACTGCCGTATTTATGTTAATGCA  
CTTCCCAATGATACGTAAACAAGGGATTTCTGGTCCTTTA---GTAATAACAAAAAACC  
TGACTTGAATGATCCTGTATTAAGAGCAAATTTGGCTAAAGGTATGGGTCATAATTATTA  
TGGAGAGCCCGCATGGCCTAATGATCTTTTATATATTTTCCAGTAGTCATTCTAGGTA  
ATTGCATGTAACGTAGGACTTGCAGTTCTAGAACCATCAATGATTGGTGAACCGGCAGA  
TCCATTTGCAACTCCTTTGGAAATATTACCCGAATGGTATTTCTTCCCGTCTTTCAAAT  
ACTTCGTACAGTCCCTAATAAATTATTGGGTGTTCTTTTAATGGTTTCAGTACCTGCGGG  
ATTATTAACAGTACCCTTTTTAGAGAATGTTAATAAATTCCAAAACCCATTTTCGTCTGCC  
AGTAGCGACAACCGTCTTTTTGATTGGTACTGCAGTGGCCCTTTGGTTGGGTATTGGTG  
CAACATTACCTATTGATAAATCCCTAACTTTAGGTCTTTTTATGATTGAAGTTTTTCTATT  
TGGAATCGTGTTAGGCCTAATTCCTATTACTTTGGCTGGATTATTTGTAACCTGCATATTA  
CAATACAGGCGCGGTGATCAATTGGACCTTATGCCTACGATAACTAGTTATTTCCGGTTT  
CTACTAGCGGCTTTAACTATAACCTCAGCTTTATATATCGGGCTGAGCAAATACGCCTT  
ATTATGGATATAGTAAAGTCTCGCTTGGGCCTGCTTTWATAGTCTTTACATTTTCTTTCA  
CTCGTATTTGGGGAGGAAGGTGGTCTCTAATGATTATTCGTTCCCGGAACCAGAAGTC  
AAAATTTTGGTAGATAGGGATCCATAAAAACCTTCTTTTGAAGAATGGGCTAAACCGG  
GCCATTTCTCAAGAACAATAGCTAAAGGTCTGAAACTACCACTTGGATCTGGAACCT  
CCATGCTGATGCTCACGATTTTGATAGCCATAACCAGTGATTTGGAGGAGATCTCTCGAA  
AAGTGTTTAGTGCGCATTTCCGGTCAACTTTCCATCATCTTTCTTTGGCTGAGTGGCATGT  
ATTTCCACGGTGCTCGTTTTTTCGAATTATGAGGCATGGCTAAGCGATCCGACTCACATT  
GGGCCTAGTGCTCAGGTGGTTTGGCCAATAGTGGGCCAAGAAATATTGAATGGTGATG  
TCGGCGGGGGCTTCCGAGGAATCAAATAACCTCTGGTTTTTTTTCAGATTTGGCGAGC  
GTCTGGAATAACTAGTGAATTACAACCTCTATTGTACCGCAATTGGTGCATTGATCTTTTC  
GTCGTTAATGCTTTTTTGTGGTTGGTTTCATTATCATAAAGCTGCTCCAAAATTGACGTG  
GTTTCAAGATGTAGAATCTATGTTGAATCACCATTTAGCGGGGCTACTAGGACTTGGGT

CTCTCTCTTGGGCGGGTCATCAAGTCCATGTATCTTTACCGATTAACCAATTTCTAAACG  
CTGGAGTAGATCCTAAAGAAATACCACTTCCTCATGAATTTCTCTTGAATCGGGATCTTT  
TAGCTCAACTTTTTCCAGTTTTGCGGAGGGAGCAACCCCATTTTTACCTTGAATTGG  
TCAAAATATGCGGAATTTCTTACTTTTTCGTGGAGGATTAGATCCAGTAACTGGGGGTCTA  
TGGCTAACCGATATTGCACACCATCATTTAGCTATTGCAATTCTTTTCCTGATAGCAGGT  
CACATGTATAGGACGAACCTGGGGCATTGGTCATGGCTTAAAAGATAATTTAGAAAGCTCA  
TAAAGGTCCATTTACAGGCCAGGGCCATAAAGGCCTATATGAGATCCTAACACGTCAT  
GGCATGCTCAATTAGCTCTTAACCTAGCTATGTTAGGCTCTTTAACGATTGTTGTAGCTC  
ACCATATGTATGCCATGCCCCCTTACCCATATCTAGCTACTGACTATGGGACACAACCTTT  
CATTGTTACACATCATATGTGGATTGGTGGATTTCTCATAGTTGGTGCTGCTGCGCATG  
CAGCCATTTTTATGGTACGAGACTATGATCCGACTACTCGATAACAACGATCTATTAGACC  
GTGTTCTTCGGCACCGTGATGCAATCATATCACATCTCAACTGGGCGTGATATTTCTCG  
GCTTTCACAGTTTTGGTTTATATATTCATAATGATACCATGAGCGCTTTAGGGCGTCCTC  
AAGATATGTTTTCCGATACCGCTATCCAATTACAACCCGTCTTTGCTCAATGGATACAAA  
ACACCCATGCTTTAGCACCTGGTGCCACGGCGCCTGGTGCAACAGCAAGCACCAGTTT  
AACTTGGGGGGGCGGTGATTTAGTCGCCGTGGGTGGCAAAGTGGCTTTGTTACCTATT  
CCATTAGGAACAGCGGATTTTTTGGTACATCACATTCATGCATTTACGATTCATGTGACT  
GTATTGATCCTTCTGAAAGGTGTTCTATTTGCTCGTAGCTCACGTTAATACCGGATAAA  
GCAAATCTTGGTTTTCGTTTTCTTGTGATGGGCCTGGAAGAGGGGGGACGTGTCAAG  
TCTCGGCTTGGGACCATGTCTTCTTAGGACTATTCTGGATGTACAATGCAATTCAGTAG  
TCATATTCCATTTTAGTTGGAAAATGCAGTCCGATGTTTGGGGCAGTATAAGTGATCAA  
GGAGTAGTAACTCATATCACGGGCGGAAACTTTGGCCAGAGTTCGATTACCATTAATGG  
GTGGCTCCGCGATTTCTTATGGGCCAGGCATCCCAGGTAATTCAGTCTTATGGTTCTTC  
ATTATCGGCATATGGCCTTTTTTTCTAGGTGCTCATTTTGTATGGGCTTTTAGTTTAATG  
TTTTTATTCAGTGGACGTGGTTATTGGCAAGAACTTATTGAATCCATCGTTTGGGCTCAT  
AATAAATTAAGTTGCTCCTGCTACTCAGCCGAGAGCCTTAAGCATTGTACAAGGAC  
GTGCTGTAGGAGTAACCCATTACCTTCTGGGTGGAATTGCCACAACATGGGCGTTCTTC  
TTAGCAAGAATTATTGCAGTAGGAATGGCATTAAAGATTTCCAAGGTTTAGCCAAGGCTT  
AGCTCAGGACCCACGACTCGTCGTATTTGGTTTGGTATTGCTACCGCACATGATTTTCG  
AGAGTCATGATGATTAATGAGGAACGTCCTTATCAGAATATTTTTGCTTCGCACTTCG  
GGCAATTAGCAATAATTTTTCTGTGGACTTCCGGAATCTCTTTCATGTAGCTTGGCAA  
GGAAATTTGAGTTTTGGGTACAGGACCCTTTACATGTAAGACCTATTGCTCATGCAAT  
TTGGGATCCTCATTTTGGTCAACCGGCTGTAGAAGCTTTTACTCGAGGGGGTGCTCTTG  
GACCAGTGAATATCGCCTATTCGGGTGTTTATCAGTGGTGGTATAACAATTGGTTTGC  
CTAATGACGATCTTTATGCTGGAGCTCTTTTTCTATTATTCTTTCTGTCATATCTTTAATC  
GCGGGTTGGTTACACCTACAACCGAAATGGAAACCGAGTGTTCGTGGTTCAAAAATG  
CCGAATCGCGTCTCAATCATATTTGTACAGGACTCTTCGGCCTAAGTTCCTTGGCTTGG  
ACAGGGCATTAGTCCATGTCGCTATTCCTGCATCCAGGGGGGAATACGTTTCGATGGAA  
TAATTTCTTAGATGTCTTACCACATCCCCAAGGGTTAGGCCACTTTTTACAGGTCAGTG  
GAATCTTTATGCTCAAAATCCCGACTCAAGTAGTCATTTATTTGGTACCTCCAAGGCG  
CCGGAATGCCATTCTGACCCTTCTCGGGGGATTCCATCCACAAACCCAAAGTTTATGG  
CTGACTGATATTGCGCACCATCATTTAGCTATTGCTTTTCTTTTTCTCGTTGCTGGGCATA  
TGATAGAACTAATTCGGAATTGGGCACAGTATGAAAGATCTTTTAGATGCACATATTC  
CTCCGGGAGGGCGATTGGGTCTGGGCATAAGGGTCTTTATGACACAATCAACAATTC

AATTCATTTTCAATTAGGCCTTGCTCTAGCTTCTTTAGGGGTTATTACTTCCTTGGTAGCT  
CAACACATGTACTCTTTACCTGCGTATGCATTTATAGCCCAAGACTTTACTACTCAAGCT  
GCGTTATATACTCATCACCAATACATCGCAGGATTCATCATGACAGGAGCTTTTGCGCAT  
GGAGCTATATTTTTTCATTAGAGATTATAATCCCGAACAGAATGAGGATAATGTATTGGCA  
AGAATGTTAGACCATAAAGAAGCTATCATATCTCATTTAAGTTGGGCTAGCCTCTTTCTG  
GGTTCATACCTTGGGACTTTATGTTCAATGATGTCATGCTTGCCTTTGGTACTCCG  
GAGAAACAAATCTTGATCGAACCTATATTTGCTCAATGGATAACAATCTGCTCACGGTAA  
AACTTCATATGGCTTCGATGTACTTTTATCTTCAACGAGGGGCCCCGGCATTCAATGCCG  
GTCGAAGCATATGGTTGCCAGGCTGGTTAAATGCTATTAATGAG-----AATAGTAATTCA  
CTATTCTTAAAATAGGGCCTGGAGACTTTTTGGTTCATCATGCTATTGCTCTGGGTTTA  
CATACAACTACATTGATCTTAGTAAAAGGCGCTTTAGATGCCCGCGGTTCCAAGTTAAT  
GCCAGATAAAAAAGATTTCCGTTATAGTTTTCCGTGTGACGGACCGGGACGAGGCGGT  
ACTTGTGATAATTCGGCTTGGGACGCATTTTATTTGGCCGTTTTTTGGATGTTAAATACC  
ATCGGATGGGTTACTTTTTATTGGCATTGGAAGCACATCACATTATGGCAGGGTAATGTT  
TCGCAGTTAATGAATCTTCCACTTATTTGATGGGCTGGTTAAGAGATTATTTGTGGTTA  
AACTCTTCACACTTATCAATGGATATAACCCTTTTGGTATGAATAGTTTATCGGTCTGG  
GCATGGATGTTCTTATTTGGACATCTTGTTTGGGCTACGGGATTTATGTTCTTAATTTCT  
GGCGTGGATATTGGCAGGAATTGATTGAACTTTAGCATGGGCTCATGAACGCACACCT  
TTGGCCAATTTGATTCGTTGGCGAGATAAACCGGTGGCCCTTTCCATTGTCCAAGCAAG  
ATTGGTTGGATTAGCCCACTTTTCGGTAGGGTATATATTTACTTATGCGGCTTTCTTGATT  
GCCTCCACATCGGGTAAATTTGGTATGTCACATTCAGTCAAGATTTATGATACATGTATT  
GGGTGTACTCAATGCGTTCGAGCCTGCCCCACGGATGTATTAGAAATGATACCTTGGGA  
CGGCTGTAAAGCTAAACAAATTGCTTCTGCCCAAGAACAGAGGATTGTGTTGGTTGT  
AAGAGATGTGAATCGGCTTGTCCAACGGATTTTTTGAGTATTCGCGTTTATTTATGGCAT  
GAAACAACCTCGAAGCATGGGTCTAGCTTATATGACAATTCTAAGCTTTCCCTCTCTTTT  
GGTGCCTTTAGTAGGGCTAGTATTTCCGGCAATTGCAATGGTTTCTTTATCTCTTCATGT  
TCAAAAAATAAGATTGTTATGCGAGATCTAAAAACATATCTTTCCGTGGCACCGGTAC  
TAAGTACTCTATGGTTCGGGTCTTTAGCGGGTCTATTGATAGAGATTAATCGTTTTTTCC  
CGGATGCATTGACATTCCTTTTTTTTCATTCATGACTGCAATTTTAGAGAGACGCGAA  
AGCGAAAGCCTATGGGGTTCGCTTCTGTAACCTGGATAACCAGCACTGAAAACCGTCTTT  
ACATTGGATGGTTTGGTGTTTTGATGATCCCTACCTATTGACCGCAACTTCTGTATTTAT  
TATTGCCTTCATTGCTGCCCTCCAGTAGATATTGATGGTATTCGGGAACCTGTTTCTGG  
ATCTCTACTTTATGGAACAATATTTTCAGGTGCCATTATTCCGACTTCTGCAGCTATA  
GGTTTGCATTTTATCCAATATGGGAAGCGGCATCCGTTGATGAATGGTTGTACAATGG  
TGGTCTTATGAACAAATTGTTCTACACTTCTTACTTGGTGTGGCTTGTTACATGGGTCG  
TGAGTGGGAGCTTAGTTTCCGTTTGGGTATGCGGCCTTGGATTGCTGTTGCATATTCGG  
CTCCTGTTGCAGCTGCGACTGCTGTTTTTTTGGATCTACCAATCGGTCAAGGGAGTTTT  
TCTGATGGTATGCCTCTAGGAATCTCTGGTACTTTTAACTTCATGATTGTATTCCAGGCT  
GAGCACAACATCCTTATGCACCCATTTTCATATGCTAGGCGTAGCCGGTGTATTTCGGCGG  
CTCCCTATTTAGTGCTATGCACGGTTCCTTGGTAACTCTAGTTTGATCAGGGAAACCA  
CAGAAAATGAATCGGCTAATGAAGGTTATAGATTTCGGTCAAGAGGAAGAACTTATAAT  
ATCGTAGCCGCTCATGGTTATTTGGTCGATTGATTTCCAATATGCTAGTTTCAACAAC  
TCCGTTCTTTACATTTCTTCTAGCTGCTTGGCCTGTAGTAGGTATCTGGTTCACTGCT  
TTAGGTATCAGCACTATGGCTTCAACCTAAATGGTTTCAATTTCAACCAATCGGTTGTT

GATAGTCAAGGCCGTGTAATTAATACTTGGGCTGATATTATTAACCGGGCTAACCTTGGT  
ATGGAAGTTATGCATGAACGTAATGCTCATAACTTCCCTCTAGACCTAGCTGCTATCGAA  
TCACCATCTAAAAATGGAATGGGTTTGCCTTGGTATCGTGTTCACTATCGTATTGAAT  
GATCCCGGCCGGTTGCTTGCTGTTCAATAATGCATACAGCTCTGGTTGCTGGTTGGGC  
CGTTTCGATGGCTCTATATGAATTAGCCGTTTTTGTATCCTTCTGACCCCGTTCTTGATCC  
AATGTGGAGACAGGGTATGTTTCGTTATACCCTTCATGACTCGTTTAGGAATAATCAATTC  
ATGGGGTGGTTGGGGTATCACA---GGAGGGACTATAACATATCCGGGTATTTGGAGTTA  
CGAAGGTGTGGCCGGAGCGCATATTGTGTTTTCTGGCTTGTGCTTTTTAGCAGCTATCT  
GGCATTGGGTGTATTGGGATCTCGAAATATTTACTGATGAACGGACAGGAAAACCTTCT  
TTGGATTTGCCAAGATTTTTGGAATCCATTTATTTCTGGCGGGGGTGGCTTGCTTTGGT  
TTTGGTGCATTTTCATGTAACAGGCTTGTATGGTCCTGGAATATGGGTGTCCGATCCTTAT  
GGACTAACTGGAAAAGTACAATATGTCAATCCAGCGTGGGGCGTGGAAAGTTTTGATC  
CTTTTGTTCGGGAGGAATAGCCTCTCATCATATTGCGGCGGGAACATTGGGTATATTAG  
CAGGCCATTCCATCTTAGTGTCCGACCACCCCAACGCCTATACAAAGGATTGCGTATG  
GGCAATATTGAAACTGTGCTTTCAGTAGTATCGCGGCTGTCTTTTTTGCAGCTTTTGTT  
GTTGCCGGAACATATGGTATGGTTCAGCAACTACCCCATTTGAATTATTTGGACCTACT  
CGTTATCAATGGGATCAAGGGTACTTCCAGCAAGAGATATATCGAAGAGTTAGTACTGG  
TTTAGCCAAAAATCAAAGTTTATCAGAAGCTTGGTCTAAAATTCCGGAAAAATTAGCCT  
TTTATGATTACATCGGCAATAATCCGGCAAAGGGGGATTATTCAGGGCGGGTTCAATG  
GATAACGGGGATGGAATAGCGGTTGGATGGTTAGGACATCCTATCTTTAGAGATAAAGA  
AGGGCGTGAACTTTTTGTACGTCGGATGCCACTTTTTTTGAAACATTTCCAGTCGTTT  
TGGTAGATGGAGCGGGATTGTTTCGAGCCGACGTTCTTTTTCGAAGGGCAGAATCGAA  
GTATAGTGTGCAACAAGTAGGTGTAAGTGTGAGTTCTACGGTGGCGAACTCAATGGA  
GTCAGTTATAATGATCCCGGACTGTGAAAAAATATGCTAGACGCGCTCAATTGGGTGA  
AATTTTTGAATTAGATCGTGCGACTTTGAAATCGGACGGTGTTTTTTCGTAGCAGTCCAA  
GGGGTTGGTTTACTTTTGGACATGCTTCATTTGCTTTGCTCTTCTTCTTCGGACACATTT  
GGCACGGTGTAGAACCTCTTCAGAGATGTTTTTGTGCTGGTATTGACCCAGATTTGGAT  
GCTCAAGTTCGAATTTGGAGCATTCCAAAAACTTGGAGATCCAACATAAGAAGACAA  
GTAGTC-----GTGGAAACGCTCTTTAATGGAACTTTAGCTTTAGT  
TGGTCGTGACCAAGAAAGCACCGGGTTCGCTTGGTGGGCCGGGAATGCCCGGCTTATC  
AATTTATCCGGTAAACTACTAGGGGCTCATGTAGCCCATGCCGGCTTAATTGTATTCTGG  
GCCGGAGCAATGAACCTATTTGAAGTGGCACATTTTCGTACCAGAGAAGCCTATGTATGA  
ACAAGGATTAATTTTACTGCCCCACCTAGCCACTCTCGGTTGGGGGGTAGGTCCTGGG  
GGGGAAGTTCTAGACACTTTTCCATACTTTGTATCAGGAGTACTTCATTTAATTTCTCT  
GCAGTATTGGGCTTTGGCGGTATTTATCATGCACTTCTAGGACCTGAGACCTTGAAGA  
ATCTTTTCCATCTTCGGTTATGTCTGGAAAAGATAGAAATAAAATGACCACAATTTTAGG  
TATTCATTAATCTTGTTAGGTATAGGTGCTTTTCTTCTAGTATTCAAGGCTCTTTATTT  
GGAGGCGTATACGATACTTGGGCTCCGGGAGGAGGAGATGTACGAAAAATTTCCAAC  
TACTCTTAGCCCAAGCATTCTATTTGGTTATTTACTAAAATCTCCCTTTGGAGGTGAAG  
GATGGATTGTTAGTGTAGACGATTTGGAAGATATAATCGGAGGCCATGTAIGGTTAGGTT  
CCATTTGTATATTTGGTGAATCTGGCATATCTTAACCAAACCCTTCGCGTGGGCTCGAC  
GTGCACTTGTATGGTCTGGAGAGGCTTACTTATCTTATAGTTTAGCGGCTATATCTGTCTT  
TGGTTTTCAATGCTTGCTGTTTTGTCTGGTTCAATAATACAGCCTATCCTAGTGAGTTTA  
CGGACCCACTGGGCCAGAAGCTTCTCAAGCTCAAGCATTACTTTTTTAGTCAGAGAC

CAACGTCTTGGAGCTAACGTGGGATCCGCTCAAGGACCTACCGGTTTAGGTAAATATTT  
AATGCGTTCACCCACCGGAGAAGTCATTTTTGGTGGAGAACTATGCGTTTTTGGGATC  
TGCCTGCTCCTTGGTTAGAACCTCTAAGGGGTCCAAATGGGTTGGACTTGAGTAGGCT  
GAAAAAAGACATAACAACCTTGGCAAGAACGTCGTTCTGCCGAATATATGACTCATGCT  
CCTTTAGGTTTCGTTAAATTCCGTGGGTGGCGTAGCTACCGAGATTAATGCAGTCAATTAT  
GTCTCTCTAGAAAGTTGGTTAGCTACTTCTCATTTTTGTTCTAGGATTCTTCTTCTCGTA  
GGTCATTTGTGGCACGCGGGAAGGGCCCGTGC GGCTGCAGCGGGCTTTGAAAAAGGA  
ATTGATCGTGATTTTTGAACCTGTTCTTTCTATGACCCCTCTTAATATGACTATAGCCCTTG  
GTAAATTTACCAAAGATGAAAATGATTTATTTGATATTATGGATGACTGGTTACGGAGGG  
ACCGCTTCGTTTTTGTAGGCTGGTCCGGTCTATTGCTCTTTCCTTGTGCCTATTTTCGCTTT  
AGGGGGTTGGTTCACAGGTACAACCTTTGTAACCTCATGGTATAACCCATGGATTGGCCA  
GTTTCGTATTTGGAAGGCTGCAATTTCTTAACTGCCGCAGTTTCTACTCCTGCTAATAGTT  
TATCCCATTTCTTTGTTGTTACTATGGGGTCTGAAGCACAAGGAGATTTTACTCGTTGGT  
GTCAATTAGGCGGTCTATGGACTTTTGTGCTCTCCACGGTGCTTTCGGACTAATTGGTT  
TCATGTTACGTCAATTCGAACTTGCTCGATCTGTTCAATTGCGACCTTATAACGCAATCG  
CATCTCTGGTCCAATTGCTGTTTTTGTCTGTATTTCTGATTTATCCACTAGGCCAGTC  
TGGTTGGTCTTTTGCCTAGTTTTTGGTGTAGCCGCTATATTTTCGATTTATCCTCTTCTTT  
CAAGGATTTATAATTGGACGTTAAACCCCTTTCATATGATGGGAGTTGCCGGTGTATTG  
GGCGCTGCTTTGCTATGCGCTATTCATGGTGTACCGTAGAAAATACTTTATTTGAGGAT  
GGTGATGGCGCAAATACATTCCGTGCTTTTAAACCAACTCAAGCTGAAGAACTTATTC  
AATGGTCACCGCTAATCGCTTTTTGGTCCCAAATCTTTGGGGTTGCTTTTTTCCAATAAAC  
GTTGGTTACATTTCTTTATGTTATTTGTACCAGTAACCGGTTTATGGATGAGTGCTCTTG  
GAGTAGTCGGTCTGGCCCTGAACCTACGTGCCTATGACTTCGTTTCTCAGGAAATTCGC  
GCGGCGGAAGATCCTGAATTTGAGACTTTCTACACCAAAAATATTCTTAAACGAAG  
GTATTCGTGCTTGGATGGCAGCGCAAGATCAGCCTCATGAAAACCTTATATTCCCTGAG  
GAGGTTCTACCCCGTGGAACGCTCTTATGTCTGGAAGCACAGGAGAACGTTCTTTTG  
CTGATATTATTACCAGTATTTCGCTACTGGGTCATTCATAGCATTACTATACTTCCCTATTC  
ATTGCGGGTTGGTTATTTGTCAGCACCGGTTTAGCTTACGATGTGTTTGGAAAGCCCTCG  
GCCAAACGAGTATTTACAGAAAACCGACAAGGAATTCCAGTAATCACCGGCCGTTTT  
GATCCTTTGGAACAACCTCGATGAATTTAGTAGATCTTTTATGACCATAGATCGAACCTAT  
CCAATTTTTACAGTGCATGGTTGGCTGTTTCATGGCCTAGCTGTACCTACCGTTTCTTTT  
TTGGGGTCAATCTCAGCAATGCAGTTCATCCAACGAATGGCTACGCAAACCTGTTGAGA  
ACGATTTTCGATCTGGT---CCAAAACGAACTAATGTGGGGAGTTTATTAACCAATTGAA  
TTCGGAATATGGTAAAGTAGCTCCTGGGTGGGGAACGACTCCTTTGATGGGGGTGCGCA  
ATGGCCCTATTTGCGGTATTTCTATCTATTATTTTGGAGATTTATAATTCTTCCGTTTTATT  
GGATGGAATTTCAATGAATATGCTTACTCTCAAACCTTTTCGTTTATACAGTAGTAATCTT  
CTTTGTTTCTCTCTTTCATCTTTGGATTCTCTCTAATGACCCAAGCCGTAATCCTGGACG  
TGAAGAAATGGCCAAGACTACTGGAAGGATTCCTCTTTGGATAATAGGTAAGTAACTG  
GTATTCTTGTGATCGGTTTACTAGGTATTTCTTTTATGGTTCATATTCAGGATTGGGTTT  
ATCCCTGATGCTTAAATCTTTAGTTTGTATCTGTCTTAAATTCTACCCCTTATATGA  
GTAGTCTTTTCTTTGCCAAATTACCCGAGGCCTATGCTTTTTTTGAATCCAATTGTAGATG  
TTATGCCAGTTATACTGTGTTCTTTTTTCTTTTAGCCTTTGTTTGGCAAGCCGCGGTAA  
GTTTTCGAACGACACAATCAAACCCGAACGAACAAAATGTTGAATTGAATCGTACCAG  
CCTCTACTGGGGGTTATTACTCATTTTTGTACTTGCTGTTTTATTTTCCAATTATTTCTTCA

ATATGGAAGTAAATATTCTTGCATTTATTGCTACTGCACTATTCATTTTAGTTCCTACTGC  
TTTTCTACTTATCATTACGTAAAAACAGTCAGTCAAATAATATGGAAATAGCAACCCT  
AGTCGCTGTCTTTATACTGGTTTACTTGTAAAGTTTTACTGGGTACGCCTTATATAACCGCT  
TTTGGGCAACCTTCTCAACAATAAGGGATCCGTTTGAGGAACATGGGGACATGGAAG  
CATTGGTTTATACATTCTCTTAGTCTCAACTCTAGGAATCATTFTTTTCGCTATCTTTTT  
AGAGAACCGCCTAAAGTTCCAATAAAAA-----ATGACTCTTGCTTTCCAATTGGCTG  
TTTTTGCATTAATTGCTACTTCATCAATCTTATTGATTAGCGTACCCGTTGTATTTGCTTCT  
CCGGATGGTTGGTCAAGTAACAAAAATGTTGTATTTTCTGGTACATCGTTATGGATTGGA  
TTAGTCTTTCTGGTGGGTATCCTTAATTCTCTCATCTCT-----ATGTCACCACA  
AACAGAGACTAAAGCAAATGTTGGATTTAAGGCTGGTGTAAAGATTATAAATTAACCT  
ATTATACTCCGGACTATGAAACCAAGGATACGGATATTTTGGCAGCCTTCGAGTAACT  
CCTCAACCCGGAGTTCCCCCGGAAGAAGCAGGGGCCGAGTAGCTGCCGAATCCTCT  
ACTGGTACATGGACAACCTGTGTGGACCGATGGGCTTACGAGCCTTGATCGTTACAAAG  
GGAGATGCTATCACATCGAGCCCGTTGCCGGAGAAGAAAATCAATTTATTGCTTATGTA  
GCTTACCCATTAGACCTTTTTGAAGAAGGTTCTGTTACTAACATGTTTACTTCCATTGTG  
GGTAATGTATTTGGATTTAAAGCACTGCGTGCTCTACGTCTAGAAGATTTGCGAATCCC  
ACCTGCGTATATTAACAACTTCCAAGGCCACCTCACGGCATCCAAGTTGAGAGAGATA  
AATTGAACAAGTATGGTCGTCCCCTGTTGGGATGTACTATTAACCAAAAATTAGGGTTA  
TCCGCTAAAACTACGGCAGAGCAGTTTATGAATGTCTTCGTGGTGGACTTGATTTTAC  
TAAAGATGATGAGAACGTCAACTCCCAACCTTTATGCGGTGGAGAGATCGTTTCTTAT  
TTTGTGCCGAAGCACTTTATAAAGCACAGGCTGAAACAGGTGAAATCAAAGGACATTA  
CTTGAATGCTACTGCGGGTACATCCGAAGAAATGATTAAGGGCTGTATTTGCCAGAG  
AGTTGGGAGTTCCTATCGTAATGCATGACTACATAACAGGGGGATTCACTGCAAATACT  
AGCTTGGCGCATTATTGCCGAGATAATGGTCTACTTCTTCACATCCACCGCGCAATGCAT  
GCAGTTATTGATAGACAGAAGAATCATGGTATGCACTTTCGTGTATTAGCTAAAGCCTTA  
CGTATGTCTGGTGGAGATCATATTCCTCCGGACCGTAGTAGGTAACCTTGAAGGGGA  
AAGAGAGATCACTTTGGGCTTTGTTGATTTACTGCGCGATGATTTTGTGAAAAGATC  
GAAGTCGCGGTATTTATTTCACTCAAGATTGGGTCTCTCTACCAGGTGTTCTGCCCGTG  
GCTTCAGGCGGTATTCACGTTTGGCATATGCCTGCTCTGACCGAGATTTTTGGGGATGA  
TTCCGTACTCCAGTTCGGGGGAGGAACTTTAGGACATCCTTGGGGAAATGCACCCGGT  
GCGGTAGCTAATCGAGTAGCTCTAGAAGCATGTGTACAAGCCCGTAATGAGGGACGTG  
ATCTTGCTCGTGAGGGTAATGAAATTATCCGAAGGCGGCCAAATGGAGTCTGAGCT  
CTTTTCTGCTTGTGAGGTATGGAAAGAGATCAAATTTGAGTTTGGCGCAATGGATACTT  
TA-----ATGGCGATACATTTATACAAAACCTTCTACCCCGAGTACACGCAATGGAAGCATT  
CCACGA-----AAGAAT---TTGATCTATGGACAGCATCTTTGTGGTAAAGGTCGT  
AATGCCCGAGGAATCATTACCGCAGGGCATAGAGGGGGAGGTCATAAGCGTCTATACC  
GTAAAATAGATTTCAACGCAATGAAAAGACATATATGGGAGAATCATAACCATAGAA  
TACGACCCGAATCGAAATGCATACATTTGTCTCATACTATGGGGATGGTGAGAAGAG  
ATATATTTACATCCCAGAGGGGCTATAATTGGAGATACCATTGTTTCTGGTACAGAAGT  
TCCTATAAAAATGGGAAATGCCCTACCTTTG---AATATGCCCGTAGGAACGGCCATACAT  
AACATAGAAATCGCACTTGGAAAGGGTGGACAACCTAGCTAGAGCAGGGGGTGTGTA  
GCCAACTGATTGCAAACGAGGGGAAATCAGCCACATTAATAATTACCTTCTGGGGAGG  
TCCGTTTGATATCCAAAACTGCTCAGCAACAGTCGGACAAGTAGGGAATCTTGGTGT  
GAAACAGAAAAGTTTGGGTAGAGCCGGATCTAAGCGTTGGCTAGGTAAGCGCCCTATA



CTAGTGGGTATTCAAGAATCAGTCCATGAAATTTTAATGAATTTGAAAGAAATTGTATTA  
AGAAGTAATCTATATGGAACCTTGTGACGCGGCCATTTGTGTCAAAGGCCCTGGATATGT  
AACCGCTCAAGATATCATCTCACCGCCTTATGTAGAAATCATTGATAATACACAGCATAT  
AGCTAGCTTGACGGAACCGATTGAGTTGTGTATTGGATTACAAATTGAACGAAATCGCG  
GATATCTTATAAAAACAGCAAAG---AACTTTGATGGAAGTTAT-----CCTATAGATGCTGT  
ATTCATGCCGGTTCGAAATGTGAATCATAGTATTTATTCTTATGGGACTGGAAATGATAA  
ACACGAGATCCTCTTTCTTGAATCTGGACAAATGGAAGTTTAACTCCCAAAGAAGCA  
CTTCACGAAGCCGCTCGGAATTTAATTGATTTATTTATTCCCTTTTTACATACAGAAGAA  
GAA-----AACTTAGATTTAGAGGACAATCAA---CATATGCTTCCTTTCCGCCCTCTATCC  
TTCCTGAGAAATTTGTT---AAAATAAAA-----AATAAA---AAAATCTCATTGAAATCGATT  
TTTATTGACCAATCAGAATTGCCACCCAGGGTCTATAATTGCCTCAAAAGGTCTAATATA  
TATACATTATTAGACCTTTTGAATAACAGTCAAGAAGATCTTATGAAAATTGAACACTTT  
CGCGTAGAAGATTTAAAACGGATATTAGACATTCTAGAAAAGAAT-----TTCGGGATTGA  
TTTACCGCCAAAATAAGATGCTCCGGGATAAAAAT--GAGGGAATGTTTACAATACCTGG  
GTTTAATCAGATACAATTTGAAGGATTTTGCAGGTTTCATTGATCAGGGTTTGAGAGACG  
AACTTTCTAACTTTCCAAAATTGAAGATCCCGATCAAAAATGGAATTTCAATTATTTA  
TGGAACATATCAATTGGTAGAACCGTTGATAAAGAACGAGATGCTGTGTATGAATCA  
CTTACATATTCTTCTGAATTTTATGTATCCGCGGGACTCATTTCGAAAATCCGTAGGGGT  
ATGCAAAAACAAACAATTTATATTGGAACATTCTCTAATGAATTCTCTCGGAACTTTT  
ATAGTAAATGGAATATATAGAATTGTGATCAATCAAATAGTGCAAAGTCCTGGTATTTAT  
TTCCGTTTACAGAGTTGGACCATAACGGAATTGCGTCTTATACCGGCACCATAATATCAGAT  
TGGGGAGGAAGATCAGAATTAGAGATTGATCGAAAAGCAAGAATATGGGCTCGTGTGA  
GTAGGAAACAAAAATATCTATTCTAGTTCTATCATCAGCTATGGGTTTCGAGTCTAAGA  
GAAATTCTAGAGAATGTTTGCTATCCTGAAATATTTTTATCTTTTCTGAATGATAAGGAG  
AAAAATAAAATCGGGTCAAAGAAAATGCTATTTTGGAGTTTACAAAAATTTACTG  
GTGTCGGCGGGGATCCCATATTTTCTGAATACTTATATAAGGAATTACAAAAGAAATTCT  
TTCAACAAAGATGTGAATTAGGAAGGATTGGTCGACAAAATATGAATCGTAGACTGAA  
CCTTGCTATACCCAGAACATACATTTTTGTTACCAAGAGATATATTGGCAGCCGTGGA  
TGGTTTGATTGAAATGAAATTTGGAATGGGTAGACTTGACGAT-----ATGAATCATTGGA  
AAAATAAACGTATTCGTTCTGTAGCAGATCTTTTACAAGATCAATTTGGACTGGCCCTG  
GTTCCGTTAGAAAAGGTGGTTCGGTCAACTATATGTGGAGCACTTAGG---CATAAATTG  
AGA---CCAAGGCCTCAGAATTTGGTAACTTCACCTCTA-----TTAACAACACTATTATG  
ACTCTTTTTTTGGTTTACACCCATTATCTCAAGTTTTGGATCAAACATAATCCATTGACAC  
AAATAGTTCATGGGAGAAAATTGAGTTATTTGGGCCCCCGGGGATTGACTGGGCGAAC  
GGCTAGTTTTCGAATCCGAGATATTCATCCTAGTCACTATGGTTCGATTTTGCCCAATTGA  
CACATCTGAGGGAATAAATGTTGGACTTATTGGATCCTTAACAATTCATGTGAGAATTG  
GTCGTTGGGGA---TCTCTAGAAAGTCCATTTTAT-----GAAATTTCTAAGAGATCCAAA  
GGG-----GCGCGGATGCTTTATTTATCACCAGGTCAGGATGAATATTATATGGTAGCGTCA  
GGCAATCTTTGGCCCTGAATCAGGGTATTCAGGAAGAACAGGTTGTTCCCGCCCGAT  
ACTGTCAAGAATTCCTGACTATTGCATGGGAAGAGGTTTCATCTTCGAAGTATTTTTTCC  
TTCCAATATTTTTCTATTGGCGCTTCCCTGATTCCTTTTATTGAGCATAATGATGCGAGTC  
GGGCTTTAATGAGTTCTAATATGCAACGTCAAGCAGTTCCTCTCTCTCGGTCCGAGAAG  
TGCATTGTTGGAACCTGGATTGGAAGGCCAAGTAGCTCTAGATTCAGGGGCTCTTGCGCT  
AGCCCAACACGAGGGAAAGATCATTTATACCGATACTGACAAGATTTTTTTCTCGGGTA



ATGGCGATACTCTAAGCCTTCCGTTAGTTATGTATCAACGTTCCAACAAAAATACCTGTA  
TCCATCAAAAACCCAGGTTTCCAGCGGGTAAATGCATTA AAAAGGGACAAATTTTAGC  
GTCTGGCACTGCAACAGTTGGTGGCGAACTTGCTTTGGGGAAAACGTGTTAGTAGCT  
TATATGCCATGGGAAGGTTACAATTTTGAAGATGCAGTACTCATTAGCGAGCGCTTGGT  
ATATGAAGATATTTATACCTCTTTTACATACGTAAATATGAAATTCAGACTTATATGACA  
AGCGAAGGC---CCTGAAAAGGGTCACTAATGAAATACCGCATTTAGAAGCCTATTTACTC  
CGAAATTTAGACAAAAATGGAATTGTAATGCTTGGCTCTTGGGTGGAGGAAGGTGATAT  
TTTAGTAGGTAAATTAACGCCCCAAATGGTGAATGAA---TCGGCGTATGCTCCGGAAGA  
TAGATTGTTACGAGCCATACTTGGCATTGAGGTATCTACTTCAAAAAGAACTTGTCTAA  
AACTCCCTATAGGTGGTAGGGGTCGAGTTATTGATGTGAGATGGATCCAGAAA---AGGG  
TGGGTTCTAGTTATAATCCAGAAACGATTTCGTGTATATATTTACAGAAACGTGAAATCA  
AAGTAGGTGATAAAGTAGCTGGACGACATGGAAATAAGGGTATCATTCTAAAATTTTG  
CCTAGACAAGATATGCCGTATTTACAAGATGGCAGACCCGTTGATATGGTCTTCAACCC  
ATTAGGAGTCCCGTCCCGAATGAATGTAGGACAAATATTTGAATCTTTACTCGGGTTAG  
CAGGGGGTTTGCTAGACAGACATTATCGAATAGGGCCATTTGATGAGAGATATGAGCAA  
GAAGCTTCGAGAAAAGTAGTGTCTTCTGAATTATATGAAGCCGGTAAGCAAACATCGA  
ATCCATGGGTATTTGAACCAGAGTATCCGGGAAAAGCAAATTTTTGATGGAAGAAC  
GGGGGATCCTTTTCAACAACCTGTTATAATAGGAAAGCCTTATATCTTGAAATTAATTCA  
TCAGGTTGATGATAAAATCCATGGGCGTTCCAGTGGACATTATGCACTTGTTACACAAC  
AACCCCTTAGAGGAAGGGCCAAGCAAGGAGGACAACGGGTAGGAGAAATGGAGGTT  
TGGGCTCTAGAGGGATTTGGTGTGCTCATATTTTACAAGAGATGCTTACTTATAAATCT  
GATCATATTAAGCTCGCCAGGAAGTACTTGGTACTACGATCATTGGGGGAACAATACT  
TAATCCTGAAGATGCTCCAGAATCTTTTCGATTGCTCGTTCGAGAACTACGATCTTTGG  
CTTTGGAAGTGAATCATTCTTATATCTGAGAAGAATTTCCAGATTAATAGGAAGGAA  
GCTATGAATCAAAATTTTTCTTATATGATCGATCGATATAAACATCAACAACCTCCGAATT  
GGATTAGTTTCTCCTCAACAAATAAGTAGTTGGGCCACTAAAATCTTGCCTAATGGCGA  
GCTAGTTGGAGAGGTGACAAAACCCTCTACTTTTCATTATAAAACTAAGAAAGCAGAA  
AAAGATGGATTATTTTGTGAAAGAATTTTTGGGCCATTAAAAGTGGACTTTGTGCTTG  
TGAAATATATCGAGAAATCGGCGATAAAAAGAAGACCCGCAATTTTGTGAAGAATGC  
GGAGTCGAATTTGTTGATTCTCGGGTACGACGATATCAATGGGCTACATTAAACTCGT  
GTGCCCGTAACCCATGTATGGTATTTGAAACGCTTCCTAGTTATATTGCAAATCTTTT  
AGATAAACCTCTTAAAGAATTAGAAGGGCTAGTATACTGCGAT-----TTTTATTTGCTAG  
GCC---ATCAATAAAAAACCCACTTTCTTACGATTACGGGGTTCATTTCGAATATGAAATC  
GAATCTTGGAATAACAGTATCCCACTCTTTTTTAATACCCAAGGATTCGATACATTTCGA  
AATCGAGAGATCTCCACTGGAGCAGGTTCTATCCGAGAACAATTAGCTGATCTAGATTT  
ACGAAAAATTCGAAATCTTCAATTGTTAGAATGGAAAGAATTGTGCGAAAGAA---GGTCC  
CACAGGGAATGAATGGGAAGATCAAAGGTTAGAAGAAGAAAAGATTTTTTGGTTAG  
ACGCATGGGATTGGCTAAGCATTTTATTCGAACAAATATAGAACCAGAATGGATGGTTT  
TGTGTCTATTACCAGTTCTTCTCCTGAGTTGAGACCCATCATTGAGATAGATGGGGT  
AAATTAATGAGCTCGGATATTAATGAACTCTATAGACGAGTTATTTTTTCGGAACAATACT  
CTTATAAATCTATTAACAACAAGTAGATTTACGCCGGAGAATTAATAATGTGTCAGGAG  
AAATTGGTCCAAGAAGCCGTGGATACACTTCTTGATAATGGAGTCCGCGGACAACCAA  
CGAGGGACGGACATAATAAAGTTTATAAGTCGTTTTTCAGATGTAATTGAAGGTAAAGAG  
GGAAGATTCGCGAGACTCTGCTTGGTAAACGGGTTCGATTATTCAGGGCGTTCAGTCAT

TGTCGTGGGCCCTTCACTTTCATTACATCAATGTGGATTGCCCGCGAAATAGCAATAG  
AGCTTTTCCAGACATTTGTAATTCGTGGAATAATTAGAAAACATCTTGCTTTGAGCATAG  
GAGTTGCTAAGAGGAAAATTCGAGAAAAGAACCGATTGTATGGGAAATACTTCGGGA  
AGTTATGGAGGGGCATCCTGTATTGCTGAATAGAGCACCGACTCTGCATAGATTAGGCA  
TACAGGCATTCCAGCCATTTTAGTTGAAGGACGTGCTATTTGTTTACATCCATTAGTTC  
GTAAGGGATTCAATGCAGACTTTGACGGGGATCAAATGGCGGTTTCATGTGCCTTTATCT  
TTCGAGGCTCAAGCAGAGGCACGTTTACTTATGTTTTCTCATATGAATCTTTTGTCTCCG  
GCTATTGGGGATCCCATTTCCGTACCAACGCAAGATATGCTTATTGGACTCTATGTATTA  
ACGAGCGGGAATCAGCGGGGTATTTGTGTAAATAGGTATAATCCATGTAATCGC-----A  
GAAACTATCAAATAAAAAAATTGACAAAAAGAACTATAAGTATACGAAA-----GAACC  
CTTTTTTTCTAATTCCTATGATGCAATTAGCGCTTATCGACAAAAGGAATCAAGTTAGA  
TAGTCCTTTGTGGCTCCGGTGGCGACTAGATCAACGT--GTTATTGCTGCA-----AGAGA  
AGCTCCCATCGAAATTCATGATGAACTTTGGGTACCTATTATGAGATTTATGGGCACTA  
TCTAATAGTAAGAAGTATAAAAAAAGATATATTATATATATATATTAAGAACCACTGTTGGT  
CATATTTCTCTTTATCGAGAAATCGAAGAAGCCATCCAGGGGTTTTGTCAGGCCTGTTC  
ATATGATTCC-----ATGTCAGAACGGGCAATCTGGTCTTTTACA  
ATAAAGTGATAGACGGAAGTCTATGAAACGGCTTATTAGTAGATTAATAGATCACTTC  
GGAATGGCATATACATCACATATCTTGGATCAAGTAAAGACTCTGGGTTTCCAACAAGC  
TACTGCTACATCCATTTATTAGGAATTGATGATCTTTTAACTACCCTCTAAGAGATG  
GCTAGTTCAAGATGCTGAACAACAAAGTTTCATTTTGGGAAAACATCATAATTATGGAA  
ATGTACACGCGGTAGAAAATTACGCCAATCTATTGAAATATGGTATTCTACAAGTGAAT  
ATTTGCGACAAGAAATGAATCCCAATTTTAGGATGACCGACCCATTTAATCCAGTCCATA  
TAATGTCTTTTTTCGGGAGCTCGAGGAAATCCATCTCAGGTACATCAATTAGTAGGTATG  
AGGGGATTAATGTCGGATCCGCAAGGACAAATGATTGAGTTACCCATTCAAAGCAATTT  
CCGCGAAGGGCTCTCTTTAACAGAATATATTATTCTTGCTACGGAGCCCGTAAAGGAG  
TTGTGGATACTGCTGTACGAACAGCAGATGCTGGATATCTCACTCGCAGACTTGTTGAA  
GTAGTTCAACACATTGTTGTACGTCGAACAGATTGTGGCACCGTAAGGGGTATTTCTGT  
GAGTCTCGAACTGGGATGATGCAG--GACAGGATTTTTCTCAAACCTTAATTGGTTCG  
TGTATTAGCAGATGATATATATATAGGTTTGCATGATTGCCACTCGAAATCAAGATATT  
GGGGTTGGACTTGTCAATCGAGTCATAACC-----TTTCGCGACAATCAATATC  
TATTCGAACTCCTTTTACTTGTAGAAGTACATCTTGGATCTGTGATTATGTTATGGCCG  
AAGTCCGACTCATGGCGACCTGGTTCGAATTGGGGGAAGCTGTAGGTATTATTGCAGGT  
CAATCTATTGGGGAACAGGCACTCAATTAACATTAAGAACTTTTCATACCGGGGGAGT  
ATCACTGGAGGTACTGCCGAACATGTGCGAGCCCTTCGAATGGAAAAATCACATTC  
AATGAGGATTTAGTTCATCCGACACGTACACGTCATGGACATCCTGCTTTTCTATGTTCCG  
ATAGACGTGTATGTAATATTGAGAGTGAAGATATTATCCACAATGTGAGTATTCCGTCC  
AAAAGTTTTCTTTTAGTTCAAACGATCAATATGTAGAATCAGAGCAAGTGATTGCTGA  
GATTCGCGCGGGAACAGCCACT--TTGAGTTTGAAAGAGAAGGTTTCGAAAACATATTTA  
TTCTGATTCAGAAGGCGAA--ATGCACTGGAATACCGATGTGTATCATGCACCTGAATT  
GAAATATGGTAATGTTTCATCTTACCAAAAACAAGTCATTTATGGATATTATTAGGGGA  
GCCATGGAAA-----TCCAGTCTAGTCTGCCTTTCGATCCACAAGGATCAAGATCAAATG  
AACGCCAT-----TCTCGTTCTGGCAAGCGAAGATATATTCTAACCCCTCA-----GTA  
AATAATGAA--ATGAGACCGAAATCTTTAGTTTCGGAGTTTTCTGGGAAA--GGCGATG  
GGATTCCCGATTAT--TCAGAACTTAATCGAATCAGATGTACGGGTTCTTATAATCTCAGA

TCTACG---GCCAGTCTCGACGAGAATTCT-----GATTTATTGGCAAAGAGGCGAAGAAAT  
AGGTTTCTCATCCCCTTCAATCGATTCAAGAACTCGAGAACGACCTAAGGCCCTCTTC  
AGGTATCTCAATTGAAATACCG-----ATAAATGGGATTTTCAGAAAAAATAGTATTCTTGC  
GTATTTTCGATGATCCTCGATATAGAATAAAGAACTCGGGAATTGTGGAATATGGGACTAT  
AGAAATGGATCCAATCTTCAAAAAAGAGGAT-----TTCATTGAGTATCGAGGA---GTCCC  
GGAATTGAGGACAAAACAC---ATAGTAGATCGATTTTTTTTTCTTCCCAGGAAGTCCAT  
ATCTTACCCGAATCTTCTTCTAATGGTACGCCACAATAGTATTATTGGCGTAGATACA  
CAAATCACTTTAAAGACAAGAAGCCGAGTAGGCGGGTTGGTCCAAGTGGAGAGAAAA  
AAAAAAGAATTGAACTTAGAATTTTTCTGGAGCTATCCATTTCTGGAAAGACAGA  
TAAGATATCCCACATAGTAGCGTCTTGATACCACCAAGAACA-----GGAAAAACAAATT  
CCAAGGAATACAAAAT-----TTGAAAAATTGGCTCTCTATCCAACGG-----CTCAGACTT  
ACCAAG-----AAAAGTCTTTTGTGGTATTTCGACCTGTAGTGACATATGAAATAACGGG  
GGGGATAAATTTAGATTTACTTTTACCTATGGATCTATTGCAGGAAAAGGATAATGTACA  
ACTTCAAATTCTCAATTATATCTTTTATGCAAATGGGAATCGAATTCGGGTAATTTCCGGCT  
ACAAATATTCAATTAGTTCGGACTTGTTTAGTATTGAATTGGGACCAAGACAAAAA----  
----AGTTCTTCTAGCGACGAGGCCTGTGCTTCCTTTGTTGAAATAAGGACAAATGCTTT  
GATTAAGATTTTCTAAGAATCGATTTAGTAAAATCGACTATTTCTATACCATAAAAAG  
GAATGATTTCTCGGGTTCAGGGTTGATCTCTGAG---CCTGGATCAGATCGCACCAATATC  
AATCCCTTTTCTTCCATTTATTCCTATTCC-----AGGGCAAGGATTCAAGAACCCCTTA  
ACCAAATCAAGGAACCTATCCATACGGTGTAAATCGA-----ATAAGAAATGCCAAT  
CTTTTATAATTTTGTATCATCCAATTGTTTCGCGAATGGGTCCA-----TTCAACGATCTAA  
AATCTCCCGATGTG-----ATAAAGAATCA---CCCCAAATTCAACTAAGAAGTCGTTG  
GGCCCTTTAGGAACA-----GGTCTTCAAATTGTGAATTTTTATTCA-----TTTTACAGTTA  
----ATAACTTATAATCCGATCTTG---ATACTAATTTTCCAATTGACAATTTCAA---  
----CCGACTTTTCAAATACTTAAA-----TATTATTTAATGGATGAAAAT-----GGGAAAAT  
TGTGAATCCCGATCCGTGCAGCAACATCATTTTGAATCCATTCAATTTGAATTGGTATTT  
TTTTATTCCAATTATTGTGTTGTAAAGGCATCGACAATCATAGTCTTGGGCAGTTTAT  
TTGTGAAAATGTATGTATACCCCAAAAAGGACCGCAT---CTAAA-----TCGGGTCAAGT  
TATAATTGTTCAA---GTTGACTCTGTAATCATACGATCGGCTAAGCCTTATTTGGCTACCC  
CAGGGGCAACTGTTTCATGGTGATTATGGTAAAATCCTTTATAAAGGAGATACATTAGTTA  
CATTTATATATGAAAAATCAAGATCTGGTGATATAACGCAAGGTCTTCCAAAAGTAGAA  
CAGGTCTTAGAAGTTCGTTCAATTGATTCAATCTCAATGAATCTCAAAAACAGGGTTGA  
GGGTTGGAACAAATGTATAACAAGACTTCTAGGAATTCCTTGGGGCTTCTTGATTGGTG  
CTGAGCTAACTATAGTGCAAAGTCGTATCTCTTTAGTTAATAAGATCCAAAAGGTTTATC  
GATCCCAGGGGGTGCAGATACATAATAGGCATATCGAAATTATTGTACGTCAAATAACAT  
CAAAAGTGTGGTTTCAGAA-----GACGGAATGTCTAATGTTTTTTCACCCGGAGAAC  
TAGTTGGATTGTTGCGAGCGGAACGAATGGGACGCGCTTTGGAAGAAGCGATCTGTTA  
CCGAGCCATTTTATTGGGAATAACAAGAGCATCTCTGAATACTCAAAGTTTCATATCTG  
AAGCGAGTTTTCAGGAACTGCGCGAGTTTTAGCAAAAAGCGGCTCTCCGGGGTCGTAT  
AGACTGGTTGAAAGGCCTGAAAGAGAACGTTGTTCTGGCGGGAATGATACCTGTTGG  
GACCGGATTCAAAGCCAAAAGATTAGTGCACCCTTCAAGGCAACAGAACAATATCCG  
-----TTGGAAAGAAAAGAGAAGAATCTTTTCGAGGGGGAAATGAGA-----GATCTTTTCT  
TTCACCACAAAATATTGGATCCTGTCTTTCAACCAATTTCCATGATACATCAGAAC  
AATCATTTATAGTATTG-----AATGATTCC-----ATGACAAGAAGATATTGGAACATAA

CTTTGGACGAGATGATGGATGCGTCAGTTCATTTGGGCCATGATACTAAGCAATGGAAT  
CCTAAAATGGCACCTTATATCTTTCCAAAGCGTAAAGGTATTCATTTGACAAATCTTTTT  
ACAACCTGCTCGGTTTTTATCAGAAGCTTGTGATGTGGTTTTTAATGCAGCAAGCAGGGA  
AAACCAATTCTTAATTGTTGGCACTAAAAAAAAGCAGCGGATTCAGTATTACGGGCT  
GCAATCAGGGCTCAGTGTCAATTATGTTAATAAAAAATGGCTCAGCGGTATGTTAACGAA  
TTGGTCTACTACAGAAACGAGACTTCATAAGTTTAGAGACTTGAGAATCAAAGAAAAA  
AGAGGGAGACTGAAGCGTCTTCCGAAAAGAGATGCGGCTATCTTGAAAAGACAATTAT  
CTCACTTGCAAAGATCTCTTGGCGGGATTAAATATATGACAAAGTTACCCGATTTTGTA  
TCATCATTGATCAGCAGAAAGACTATACGGCCCTTCGGGAATGTATCAAGTTGGGAATT  
CCAACAATTTCTTAATCGATACAAATCCGACCCCGATCTTGCATCTTTGTGCGATTCCA  
GCGAATGATGACTCTAGATCTTCAATCAAAATTCATTCTTAACAAATTAGTATTGCAATT  
CGTGAGGGCCGTTATGAA---TCTATAGGAAATTCGATGGGACAAAAATAAATCCACTT  
GGTTTGAGACTTGGTACAACCCAAAGTCATCATTCACTTTGGTTTGCAAACCCAAAA  
ATTATTCTAAAGAGCTACAAGAAGATGAAAAATAAGATATTATATTAAGAATTATGTAG  
AAAAAATATGACA-----TCCAGC---GTCAGGGCACTTATACGTATTGAGATTGAAAAG  
CTGTTGATGTAACCATGAAAATCTATATAGTACCTGCACCCGTATTCAACAAACATT  
ACCGGCGA-----GAAAGCAAAAACCTTACAACCAAATCTACAAAAAAATTTGCTTC  
TGTGAACCCAAAATTTAACTTGACTCTCATCAAAATTTTTGAGCCTTATAGACATCCTAA  
TATTCTTGCAGAATTTATATCTGACCAATTACAGCAGCGAATTCCATTTGAAAAGCAAT  
GAAAAGGCGATTGAATTAGCTAAACAAGCAAATACAAAAGGAATTTCGAGTCCAAATT  
GCAGGACGTATTGGAGGAAAAGAAATCGCGCGGGTTGAATGGATCCGAGACGGTAGG  
GTTCCCCTACAAACCATTCAAGCTAAAATTGATTATTGTTGCTATCCAGTTCGAACTATC  
TATGGGGTATTAGGCATCAAAATTTGGATATTTATAGAGGGAGAAATGTCACGTTACCGA  
GGACCTTGTTCAAAAAAATCCGCCGCTGGGGGCGTTACCGGGACTAATAATAGAA  
GTCCC-----GATGATCTTAGAAAAAAGAAATCGGGTCTGTGAAAAAATCCCAATATC  
GTATTGACTAGAAGAAAAACAAAAATTGCGTTTCCATTATGGTCTTACAGAACGACAA  
TTGCTTAAATACGTTTCGTATCGCCGCAAAGGCCAAAGGTCCAACAGGTCAGGTTTTGCT  
ACAATTACTTGAAATGCGCTTGGATAACATTCTTTTTCGATTGGGTATGGCTCCGACTAT  
TCCAGGAGCTCGCCAATTAGTTAACCATAGACATATTTTAGTAAACGGTCGTCTAGTAG  
ATATACCAAGTTATCGCTGCAAACCCCGAGATACTATTACGGCAAAGGATAAACAAAA  
TCTAAAGCTCTGATTAAAAATTCTCTCGATTCAATGCCTCAGAAATTGAAAGTGCCACC  
CCATTTAACTCTGAAACGAAGGCAATAT-----AAAGGATTAGTCAACAAAATAATAGATA  
GTCAACGATTTCGGCTTGGAAATAAATGAATTGCGAGTCGTAGAATATTATTCTCGTCAG  
ACTATGTCACGTGAGGCACTGCAGAAAAAAAAGTCAAAAATCCGATCCAATTTATC  
GTAATCGATTAGTTAACATGTTGATTAACCGTATTCTGAAACACGGAAAAAAATCATTG  
GCTTATAAAATTTTCTATCGAGCCGTGCAAAAGATTTCGCCAAAAGACAGAAAAAAATC  
CACTATTGGTTTTACGGGAAGCAATATCTAAGGTAACCTCCGCGGCTAGCAGTAAAAGCA  
AGACGAAAAAGTGGATTGACTCAGCAAGTTCCCATTTGCAATAAAATCCCCACGAGGAA  
AAGTACTTGCCATTCGTTGGGTATTAGCAGCAGCCCGAAAACGTCCGGGTCGAAATAT  
GGTTTTCAAATTAAGTTCTGAATTAGTAGATGCTTCCAAAGGGCGTGGCGGTGCCATAC  
GCAAAAGGGAAGAGACTCATAGAATGGCAGAGGCAAATCAAGCTTTGGCCCATTTCC  
GTATGGGGAAGGATACTATTGCTGACATGCTAACCTCTATCCGAAATGCTGATATGGCTA  
GAAAAGAGTGGTTCGAATAGCATTTACTAATATCAGTGAAAGTATTGTGAAAATACTT  
TTACGAGAAGGTTTTATCGAAAACGTGAGAAAACATCGCGAAAACAACAAATCTTTTT

TGGTTTTAACCCCTAAAAAGGAATCGA-----ACTTATAAAAAA-----ACGTTCA  
ATTTAAAACGGATCAGTCGACCTAGTCTAAGAATCTATTCTAACTATCAACGAATTCCTA  
AAATTTTAGGCGGGATGGGGATTGTAATTTCTTCTACTTCTCGAGGGATAATGACAGAC  
CGAGAGGCTCGATTAGAAAGAATAGGCGGAGAAAAGTTTGTGTTATATCTGGATGGCAA  
AAGCTATACTGAAATTTTCGTTACGTAGAACTCGTCGTTCA-----AGGCGTATACGTAG  
AATACCAAAAAGGGCGGATTCATGTTCAAGCAGGTTTTAATAATATCATTGTGACTGTTAC  
CGATCCACAGGGTCGAGTGCTTTCTTCGTCCTCTGCCGGTAATTGTGGCTTACGGGGTA  
AACGAAAAGGGACGCCATTTGCTGGTGAAGCCGTAGCAGCAAACGCTCTTAGTTCAGT  
AGTC-----ATGAAACGAGCAGAAGTCATGATAAAAGGTCCAGGTCTCGGAAGAGACA  
CAGCATTACGAGCTATTGCAAGGAGTCGTATACGAATCACTTTGATAAGGGATGTAAC  
CCTTTACCACATAATGGCTGTAGACCTCCGAAAAAAGACGTGTGATGCCAACTATTAA  
CCAACCTATTAGAAAAACAAGACAGCCAATCAGAAATGTCACAAAATCCCCGCTCTT  
AAGAGATGCCCTCAACGTCGAGGAACGTGTACTAGGGTGTATACTATCAACCCTAAAA  
AACCAAACCTCTGCCTTACGTAAAGTTGCCCGAGTACGATTAACCTCTGGATTGAAATC  
ACTGCTTATATACCCGGTATTGGCCATTCTTTACAAGAACATTCTGTAGTCTTAGTAAGA  
GGGGGAGGGTTAAGGATTTACCCGGTGTGAGATATCACATTGTTTCGAGGAACCCTAG  
ATACTGAAAAAGTAAAGGATCGTCAACAAGGGCGTTCTAAATATGGGGTAAAAAAGCC  
AAAAATGGCAAGGAAAGGTTTGATTCAGAGGGAAAAGAGAGGCAAAAATTGGAAC  
AGAAATATCATTTGATTCGTGATCCTCAAAAAAAGAACTCAA-----AAAGTTCCG--  
-----GACAAACGGGAAGTTTATGGAAAGTTACAATCCCACCGCGAAATAGTGCACCT  
ACACGCCTTCGTGACGTTGTTCTTCGACTGGAAGGCCGCGAGCTACCTATCGAGACT  
TTGGACTATCCGGATACATACTTCGTCAAATGGTTCAGGCATGTTTGTGTCAGGGGCC  
ACAAGATCGAGTTGGATGGTCAAAAATTCATTCATTTCAATTATTTTCGCAA-----GAGGA  
AAACAAAGAAAACAGAGGGTCTGTTGAATTTCAAATAGTCAGTTTCACCAATAAGATA  
GATAGACTTACTTCACATTTGCAATTGCACAAAAAAGACTATTTATCTGAGAGAGGTCT  
GCTTAAATTTCTGGGAAAACGTCACCCGGCTGCTGGCTTATTTGTCAAAAAAACTAGA  
GTAGATTATAAAGAATTCATCGACCAGTTGGATAAAACAAAACTAGAGTAGATTATAA  
AATGGTAAAACCTCGTTTAAAACGATGTGGTAGAAAGCAACATGCGACTTATCGAATC  
GTTGCAATTGATGTTTCGATCCAGAAGAGAAGGAAGAGCTCTTCGTAAAGTGGGTTTTT  
ATGATCCGATAAATAATCAAACGTATTTAAATGCTCCTGCTATTGTATATTTCTTGAAAG  
GGGTGCTCAGCCTACCGAAACTGTTTCGGGACATTTTAAAGAAGTCGGAAGTTTTTAAAG  
AGAATTTCTCCAATCTACCCCCTTTT-----ATGGATAAATAACAAGCGACCTTTTCGTAAA  
TCCAAG---CCTTTTCATAAACGTTTGCCCCGATTCAACCGGGGGATCGAATTGATTATC  
GAAACATAAGTTTACTTTGTGCGATTTATTAGTGACCAAGGAAAAATATTATCTAGACGA  
AGAAATAAAGTGACCTTGAAACAACAACGATTAATTACTATTGCTATAAAACAAGCTCG  
TATTTTATCTTCGTTACCTTTTATTAATACT-----AAAACAGGAAAGAAGTTGGCGCA  
AGCCAGAAAGAAC---GTGAAGTCATATGGAAAGATGACACCCGCA---GAAAAAAGAC  
TTTTGTAGCAAATCATTTATTAATAAATAATAAAGATTAACACAAAAACAGAAAAAG  
AAACAATCAAAACCTGGTCCCGGCATCTACCATCATAACAATAATGATCGGACATACT  
ATTGCTATCCATAATGGAAAGGAACACTTACCTATTTATATCAATAATGAGATGATAGGC  
CACAAATTGGGAGAATTTGCACCTACTTTCAATTTTCGAGAACATACGAAAAATGATAC  
TAAATCTCGTCGG-----ATGACTTTATTACAGTTTTTCATAAAGATACTGAA  
TTCGGCAGTTGTGCTGGGCCTATATTTGGGCTGTTAACTGCATTCGATTAGACCTTC  
TTATTTTTCTCTCGTC-----GAGCCTGAGAAGAAGGGAGCAGCAAT

AACTGGTTTGATTCTGGGACAGCTCGTGAGGTTCCCTATCGATCTATAATGCGCCTCTCCA  
TCGATTATTGTGTATACCGCATGCAATAACGGCTTTCTTTGTACCCTATCTTTTGATTATT  
TTTTGTTTTGACAATTTTCACCCCTCTTTC-----ATAAGTAGCAGTAGCGCTTTCAGC-----  
-----ATTTTCCTGAATAGTTTCATTTTTCAATTATCCAACCAGATTATTTTACCAAGT  
TCACTGTTAGCCAGATTAGGCCACATTTATCTGTTTCGATGCAAGAACAAGCTGGATT  
TCTAACGGGTAATTTTGTGGTTGGTCAATTGGTCAAATTTGTTTACTTTTATGGATATAC  
AAATATCGTTTGAGGAGCGCTCAGAAGCAACTTGTGTCAAAAAAGTCTAGTAAGAAGG  
AGTGGTTTGTGTCCGAAGTCCAGTACTTGATCGAGCGGGTAATTACTATTTTCTTATATA  
TTACCTGGGTCTGTCTATGCATCTCGAATGCCGATACCCATAATAACGCATAAATTCGAGA  
GCGAATTAGAAAAAGAAACAACCTGCGCTGTCAATTTTCGAGCCTAACCGATGGGATCG  
TCCATTACGATACATAAGAAATCAGTTATTTGTGGCGGCTGTACAAGAGCGCGTCTCCC  
AATATTTTTTTGATACATGCCGAAGCGATGGAAAAGAAAGAATAGCTTTTACATATCTTC  
CTGCTTTGTCTTTTTTCAAGGAAATGATGAAAAGATCCGGATATCTTCATCCACAGAA  
AGACCTCCTTTGATGAACTAGACAAAAATTGGCTTGAAAATAACAAAGAAAAACA  
AAAACTTCAATAATGAGTTAAAAAGAGAATTGAGGCTCTAGACACGGGATT-----  
GATACTCGACAAAAGGACTCGGGTTTGTACTGATCAAACCTCTCAAACCTGCCTACC  
AACAAAGTATGATCCTTTTTTGAATGGGCCCATCGTGGAAGAATCAAAGAGGTGCCG  
TCCACTAGCGAACCGATTCCACTAGGCAAACTACTAACAGTGTTTTTAAGTCCCTCAA  
GAATGCATTATTTTCATGGTAAATCTCTTTTGAAGGAAAAAATTCGTAAAAAAGTCCCTC  
GATGGCGCTTTCTATTAGTCAAATGAATACTCTAACCATTCTGAGATTTTCTCATACC  
AATTTAAAGAACTGATTGAAGAGACTAAGTATACATATGAGTTTTTCGAACCGGGACAAT  
TATCGTCCGGGTCTAATCAAAGGTTCTATGCGCCCCCTACGGCGTAAACGCATTTCTTTA  
AGATGGATTGAACCTTTTTTTCATTCCTCTTTTTTATGACTTTATAGATAGGTTTAAAA  
TTAAAAATTTTATAGATAGGTTTAAAAGCAAATAAGCAAAAAAACAAAAAGGGAAAG  
GAAAGAAAGGAAACGAGAGATGAAGCAAGAGGAGACTCACATTGACAATGGGCTCG  
GAATACGAACTTGTCTTAAATTTTGAAGTAAATTTGAGAAAATTTGTTAGATTGCCTT  
TATTGATAATACTGAAAAATAGTTTACGTTTCTTATTAGTGAAAAGCCCGAGTGGTCTG  
AGGATTTTCGAGGACTGGCAACGCGAGGTTTATCTACTAGCCACCCATGACGGTGGTCT  
TCTACCCGAGGGAACATGGCCGGAGTATTGGTTCGAGGACGGTTTTTCAGATCAAAGTT  
ATAAATCCTTTTTCTTTGAAAGCTTGGCACACACCCGATAAGGACGACTTTGGCGATCT  
TTATATAATGCCTTTATGGTGG---CTAACTGACTATCCGTTTGGTGATCCGGTAGAGGAA  
GAACGTTTTTTTTTCGCCATTTTTGACGAACTAAAGCCAATA-----A  
ACTTTTGGATCTTCTAAGAAGGTCAAAG---ATCTATTTTGTAGTTCTAAGAAAATGTAT  
CAAGGTTCTAAGAAAATGTATCAAGGTTATAATAAAATGTATCAAGGTTATAATAAAC  
GGCTTAACGATTCTATAATCAGCAATGAG-----AAT  
TCGGAAGAACAATAAAAAATCTGATTGATAAAACAAACACAATAAAAAATCAAATCG  
AAATAATTAGAAATGAAAAATAAAA-----GGAGAATCACCAAAA  
AATATTTTGAATAATTTTCAAAGAAGAAAGGTTTCGATTAATAATAAATTGAATTATTT  
CAAAAATGTTTGATTGAAAAATATACCTAGATATCGTTCTATGTATAATTAGAATACATT  
TCATAAACAAAATTTGGGT-----CCAGATTTATCTTCCCTGTCACAAGCATATGTA  
TTTTACAAATTATCACAAAGCCAA-----AGTGATAAGTTAAGATCTGTTCTTCAATATA  
CGTCTTTTTTCTGAAGACTGAGATAAAGGAATCTTTTAGACAAGGAATCTTTCATTCC  
GAATTAAGAATAAGAACTTCGA---TTTCGAACGAATCCATGGAAAACTGGTTAAG  
AGGTCAT--CACTACACTTTATCTAAGTGGAGATGGTCTCGATTAAGCTAAATTAAGA



TATTCAAGTCCAGGGATGAATGGAAAAAGAAATCTTTA-----TTGGTTCTACCTCCTAT  
TTTTTAT-----GAAGAGAATGAATCTTTTTCTCGAAGGATCGGAAAAAATGGTTCCCC---  
ATCTGCTGCGGGAATCATTTGGCAGAGCCAAACCCCAAATAGTGGTATTTGCTAACAA  
TAAGATAATGGAGGCAGTCAATGAATATAGATTGATCCGAAATCTGCTTCAATTCCAATC  
TAGCATCTATGGG-----TCCATAAGAAATGTATTGAATCGAGTCTTTTTACTGAAT-----C  
TATCCGATCGCAATTTTGAATATGGAATTCAA-----GGGGATCAAATAGGAAAGGATAC  
TCTGAATCATAGAATTCTAATGAAATATACGATCAACCAACATTTATCGAATTTGAAAAA  
A---AGTCAGAAGAGATGGTTCACCTCCT-----CTTATTCTTATTGCTCCAACCGAGAGATCC  
ATGAATCGGGATCCTGATGCATATAGATACAAATGGTCCACTTGGTTCCAG-----  
-GAACATTTTCGTTTCTGAGCAGAAGAGCCAT-----TTTCAAGATCGCTTTAAG-----  
-----TTTTCTTTCGTTTTATCTAAC-----  
-----GCACTGCGTTTTTTCTTTGTGAGT  
TTCAGCCCC-----GA  
AATAGTTTCTTTGCAAACTTGAAACCTTTC-----TTCTTGGAT-----GATCATGAGCCT  
TGCCAAAAGATATCAACGTCG-----ATGATTGA  
CTCTTTCCATACTAGA-----AATAATCGCAGGGAATCCTTTGCTAAGACGCATTCCGATTT  
CTCAATGATATTCGACGATCCATACAATTGGCTGAATCCCGTGAAACCATTTTCATAGAAG  
TTCGTTGATATCTTCTTTTTATAAAGCGAATCGACTTCACTTCTTGAATAATTCACATCAC  
TTCTGCTTCGAT-----TGTAACAAAAGATTCCCCTTTTATGTA-----GAAAAGGCCCC  
GCTCAATAATTATTAT-----TTTATCTATCGA---CAATTCCTTAATCCTTTGTTTCATTGAAA  
CAA---AAATTTTCTTTGGGCGTCGGTCAA-----AAAACACATGCTTTTTTCGGAG---AGA  
GATATTCTTTCAGCAATCCAGTCAGAGGTATCTAGGATATTCATCTCTAAGGATTTTCGA  
CAAAGTGGGGACGAAACG---GAGAACTTGTACAAATCT-----TTCTATTTTCCAAGTC  
GATCCGATCCATTCAGTCGT-----AGAGTTCTTTACTCGATCGTAGACATTTCTGGAACA  
CCTCTAACAGAGGAACAAATAGTCAATTTGGAAAGAACTTATTGTCAACCTCTTTCAGA  
TATCAATCTAGCTGATTCAGAAGGGAAGAACTTAATTTCCCTATCTAAAT-----TTCAATTC  
AAAGACCTTTGTGATTCCCCCTTCATCGTTTGATAAATTTTTCGCATTAGAACGTAGTCG  
TAACAAACATGGTATTTTCCGAAAAGAGCAACTAAGGAGTATTTATTAAAG-----ACAT  
GCTATAAAAAAATGCGCATGGATAGGAATAAAAGGGTAGATAGGACTTTTTCAACTCGC  
TCAAAATGGAAGCTATTCAAAGATATCTGCCATGGGCCCTTACTTTCGACAGGGTTTCAG  
ATATCTAACCTTTCTATTTTATAGAGATTGTTTCAGACCTCTGGCAGAGA---ATATGGGAC  
AGCCGACGAATTCGTGTTCTTGAAATTAACCTGAGGAAATGGAGGAGGAAAACGATGA  
AATGGACGATGAAAAAAGAAAATGGAAGAGA-----AAATTCAAAAAATGGGAGA  
CGCAATTCAAAAAAGTGGATTTGACGTTTCTTAAATAGGATAAAGACCGCTTACGAG  
AAGTTTGTTCATAGGGAAACTTTTAAATGGGTCACCATTGAAATCGCCAGAGCGGAACA  
GGAGAAATCTTCGGGAGTTC---TTCATTTTCATATATTTAACTTTTCTTGTCTGTCTGT-  
--CTCGTTTCTACAGCTCTTTTCCAGATTTTAATT-----GACTTGTTTTAAATAGCGATCAA  
GTTCAAAAAGGCCCAAGCTTTGATCATGGATGAATTGGAGATTGAGTTGGAAGAACTT  
CTGGCTGAGTATCCTCCATCTCAATCGCCCGATTTCTGGTCCAAAATTTCTTTCTAGGT  
CTTCTGCAAAAGATGTTATTCCCTAAT-----  
---CCTTATGGG-----CTGCGCGTTAAGAAGAAAAGGAAATTTTTAAATATCAATCTCAGA  
CCTATCATCAATCTCATC-----AATCTCATAAGTAATGAAATCACTTTTGTGATAAAG  
ACGAGATCGATAAGTCATACAAGTAAAGATATCTATTCATTATAAGAAAAAGAAAAAC  
GGTAACGGCATATTGGAAT-----CAAATAGCCCACTGGGTCTCAAACAATTATTGGGTTG



AGAATGAAGAAAGAGAAGTCTTGATGCAGTTCGTC-----ACCTTAAGGAGA-----AAAA  
GAAGTATTTCTGAAATTTTATGGAGTCTGACTCATAGTGATGAGCATTATTA-----  
AAGGATGAGGTGCTTCCTGAAATGATTGAACAACCAGGCGAAGTGTACTTACGCAAGG  
TAATGACTTTCAT-----AAAAAGGATCTATTAATTATGAGTTCAATACATCCTCTTTAGC  
AGAAAACGGATATTCCTTGCTCTTTATCATAACAATGACTTAT-----TCACAAACCTCGTC  
TGGGGTTGATCCTTTTCCTGTCCTATCTCGTCAA-----AAACCCTTTTCGCTACGCTTA  
ACCTTAGCCCCCTCT--AAGAGTATTTTAGTGATAGGTTCTATAGGACTTGGACGATCCT  
ATTTGGTCAACTACCTCGCGAAAAACTCCTATCTTCCCTTTCATTACGATATTTGAGGATG  
ATTTGATCGATGAAGATGAGTATGACAGTGATGATGAGATCGAGGTTTTTATTGAGTCT  
CGTCTTAGTGAAGATATTCAGGCTATTGACCATCGTCATTGGTCTGAGTATCATTATTGG  
CGTGGTTTTAAAGAATTTTATCAAATATAAT-----ATAAAACCTTTTGACGAGTACGACGCG  
GATCCGGACCTGGAACCGATTTTCGATGGCTGATCAAACCTGAC-----GATATGGATACGGT  
GCTATAC-----GTAGCCACATTTTATATCTCTTCAAATCGAATTAGCAAAAGCAATGT  
CTCCTTGCCTAATATGGATTCCAAACATTCATGAGCTGGATTTTCGCGGATTCGGATTTCT  
TCTCTCTCGGTCTATTAGCGCACCTTCTTTCC-----TGGGATTGTGAAAGATCTTCG---A  
GTAGCAATAATCTTGTTATTGCTTCAACCCATATGCCTCAAAAAATGCATCCCTCTCTAA  
TAGATACGCATAGATTCAATACGTGCATTAAGGTACGAAGGCCTCTTATTTACACAACAA  
CGAAAGCACTTTTCCACTCTTTCATCTACTAGGGGATTTTCGCTTGAAAGACAAATATT  
CGAGACT--ACTCATGGATTCGAGTCTATAACCCTGGGTTCTAATGCATACGATCTTGCA  
GCACTTACCAATGAGGCCCTATCGATTAGTCTTTCACAGGGGAAATCCATTATAGACAG  
TAATACAATTAGACACGCTGTTTCATAGACAAACTTGGGATTTACGA-----GCTGAGCT  
AAGACCAATTAACAATTCTCGGATCTTTTTCTATCAGATAGGAAGGGTTGTAGCACAAT  
ATTTACTTCTACGTGATTGCCCCATAGATCCTATATCTATCTATATGAATAAGAGA-----TT  
CTGTCCGGAAAGGGATCCTTATTTGTACAGATGGTACTACCAACTTGGAAATGAGCATGA  
AGAAATTAACGATACTTATTTATGTATTGAATTGTTCTGCCGGATTGGTCGCTCAAGATC  
TTTGGTCTCGATCC-----GAACTCAATGCAAAC--AATGGGATCGCTTCGGGTAGTCTCG  
TTGATAATAATTCT--GATCTAGTTCATGGCCTATTAGAAATAGAAGGCGTTCTAGAGGG  
A-----TTCTACCAACAGAAAAAATTGCAGTAAGTTTGATAAGGAT-----CGAGTGCCA  
GTGCTTCGTCGGCCCGAACCAAGGAAT--CCCTCAGATATGATACAGAACGGATTTTGG  
TCTATGATAGATCAATCTCTGATCTATCAAAA-----GACCCATCAGCGCCGCGGATCG  
TTATAGGAGGAATCAAATCGACCTGCAGAAG-----ATGTTTCGCC  
GAT--TTCGTCTGTTGGGCTCCT-----AGAATATGGTCCCCT-----TGGGGCTTTCTATTG  
AATTGG--GTCAATGCCAATGAATTGGGATTGCCT--TATTGGTCCAGGTCATTTTTTGGC  
AAGGAGGATGATCTTAAAGAGAATGATCAAGAGGATGAAGATCAGGATGCCCTTGGAG  
AGGCGCTTTTGCAGAGTGTATAACCAGACACGAGCTAGAATTAGATCTTGCCAAGAACA  
AATTTTTTTTCGAATAAGCCGATTTATTTGGGACCCTGGAAATCCACTCTTGATCCTATC  
CGAC---GATCCGGCCATTGCCGCTATGTTTTTCATCTCGGGAATTCTTTCCAGATGTAGAT  
GAAGAGAAGTGGTTTTTTACTGCTGAAATAAAA-----TCTCTGAAAAAAGCTGGTTT  
ATC-----GATGAGACGCAAGAAAAGCACTTCGAATGGTTGATTCAGCGTCAGAGATGGC  
TTAGAAGA-----CCTAATAATTCATTATCC-----AAGGGATCGTTCCGTTTCTACT-----GCTC  
TATCCGAGAGTTATCAGTATTTATCAAATCTGTTCCCTATCTAAC---AGAACAGTAGTGAAT  
GAAATGCAAAGCTATTGGTGAGAAAAAGATGGCTTTTCCCGGATGACATGCAAATTT  
TTTTCAACGAACAATATTCTCCTGCTCAAACAGGGAAGAATATGCCTAGATCGCGG---A  
TCAATGGAAATTTTATTGACAAGACCTTTTCAATTGTAGCCAATATCTTATTACGAATAAT

TCCGACAACCTTCGGGAGAAAAAGAGGCATTTACCTATTACAGAGATGGG-----ATGTCA  
GCTCAATCCGAAGGCAATTATGCGGAAGCTTTACAAAATTATTATGAGGCTATGCGACT  
AGAAATTGATCCCTATGATCGAAGTTATATACTGTATAACATAGGCCTTATACATACAAG  
GAACGGCGAACATACGAAGGCTTTGGAATATTATTTTCGCGCCCTAGAACGAAACCCAT  
TCTTACCCCAAGCTTTTAATAATATGGCCGTGATCTGTCATTAC---CGGGGAGAACAGGC  
CATTCGACAGGGAGATTCTGAAATTGCTGAGGCTTGGTTTCGATCAAGCGGCTGAGTATT  
GGAAACAGGCTATAGCACTTACTCCCAGGAAATTATAGTCAAGCATATAATTGGGTAAAG  
CTGAAGAAGCCTTTTCGAA-----ATGAGTTGTCGATCAGAACATATATGGATAGAACCTAT  
AACGGGGTCTCGAAAACAAGTAATTTCTGCTGGACTCTTAGCCTTTTTTTTAGGTTTCAT  
TAGGATTCTTGTTGGTTGGAACCTCCAGTTATCTTGGTAGAAATTGGATATCTTTATTTC  
GTCTCAGCAAATCGTTTTTTTTTCCACAAGGGATTGTGATGGCTTTCTATGGGATTGCGG  
GTCTTTTTATTAGTTGCTATTTGTGGTGCACAATTTCTTGGAAATGTAGGGAGTGGTTATG  
ATCGATTGATCGAAAAGAAGGAATAGTGTGTATCTTTCGTTGGGGATTCCCGGAAAA  
AATCGTCGTATCTTCCCTCCGATTCCTTCTAAAGGATATTCAAGTCCATCCGAATAGAAGTT  
AAAGAGGGTCTTTCTGCTCGTCGTGCCTTTCTATGGATATCAGAGGACAGGGAGCGC  
TTCCATTGACCCGTAAGGTGAGAAT---TTGACTCCGTGGGAAATTGAACAAAAAGCTG  
CTGAATTGGCCTATTTCTTGCCTGTACCCATTGAAGTATTT

>Guizotia

ATGAAAAGATGGTGGTTCAATTCGATGTTATTTCTAAGTAAATCAACGAGCAGTCTTGG  
TCCTATTGAAAATGCCATCGAAAGTAAAGATCCGAATATAAATGATACGGATAAAAACA  
TTCAGAGTTACAGCAATGTTGATCTTTTTTTTTGGCGTCAAGGACATTCGGAATTTTCATCT  
CTGACGATACTTTTTTAGTTAAAGATAGTAATGGGGACATTTATTCTATATATTTTGATATT  
GAAAATCATATTTTTGAGATTGACAATGATCAT-----TCTTTTTGTAGTGAAGTAGAAAGT  
TCTTTTTAT-----CGGAATTCTAGTTATCTGAATAATGGATCTAAAAGTAAGAATCCCCAA  
CACGATCCTTACATGAATGATACTCAGTATACTTGAATAATCACATTAATAGTTGCATTG  
ACAGTTATCTTCAG-----TCTCAAATCTGTATTGATAGTTACATTGTAAGTGGTAGTGACA  
ATTCCAGTAACAATTACATTTCTAGTTCCATTTGTTGT-----AATAGTAGTAAAACGCGG  
ATGCCAGAACGAGTGATCAAATTATAAGAGAAAGTTCTACTGATCTGGATGTAAGTCAA  
AAATACAGGCATTTGTGGTTCAATGCGAAAATTGTTATGGATTAAATTATAAGAAATTT  
TTAAATCAAAAATGAATCTTTGTGAACAATGTGGATATCATTGAAAATGAGTAGTTC  
AGATAGAATCGAACTTTTCGATCGATCCGGGTACTTGGGAGCCTATGGATGAAGACATGG  
TCTCTCTGGATCCCATTTGAATTTCAATTCGGAGGAGGAGCCTTATAAAAATCGTATTGATT  
CTTATCAAAGAAAGACAGGATTAACCGAGGCTGTTCAAACAGGCATAGGGCAACTAGA  
CGGTATTAACGTAGCAATTGCGGTTATGGATTTTCAGTTTATGGGGGGTAGTATGGGATC  
CGTAGTCGGGGAGAAAATTACCCGTTTGATTGAATACGCTACTAAAGAATTTCTACCTC  
TTATTATAGTGTGTGCTTCCGGAGGGGCACGCATGCAAGAAGGAAGTTTGAGCTTGAT  
GCAAATGGCTAAAATATCTTCTGCTTTATATGATTATCAATCAAATAAAAAGTTATTCTAT  
GTACCAATCCTTACATCTCTACTACCGGTGGGGTGACAGCCAGTTTTGGTATGTTGGG  
GGATATCATTATTGCTGAACCAATGCCTACATTGCCTTTGCGGGTAAAAGAGTAATTGA  
ACAAACATTGAATAAAAACAGTACCCGACGGTTCACAAGCGGCTGAGTATTTATTCCAG  
AAGGGCTTATTCGATCTAATCGTACCACGTAATCCTTTAAAAGCGTTCTGAGTGAGTT  
ATTTCAACTCCACACTTTCTTTCCTTTGAATCAAAT-----ATGGTAACCATTCAAGCC  
GACGAAATTAGTAATATTATCCGTGAACGTATTGAGCAATATAATAGAGAAGTAAAGATT  
GTAAATACCGGTACCGTACTTCAAGTAGGTGATGGCATTGCTCGTATTTCATGGTCTTGAT

GAAGTAATGGCGGGTGAATTAGTAGAATTTCAAGAGGGTACAATAGGCATTGCTCTTAA  
TTTGAATCAACTAATGTTGGTGTGTATTAATGGGTGATGGTTTGGCTGATACAAGAAG  
GGAGTTCTGTAAAAGCAACAGGAAGAATTGCTCAGATACCAGTGAGTGAGGCCTATTT  
GGGTCGTGTTATAAACGCCCTGGCTAAACCTATTGATGGTAGAGGTGAAATTTTATCTTC  
TGAATATAGGTTAATTGAATCGCCTGCCCCGGGGATTATTTCTCGACGTTCTGTATATGA  
GCCTCTTCAAACAGGGCTTATTGCTATTGATTCAATGATTCCCATAGGACGTGGTCAGC  
GAGAATTAATTATTGGGGACAGACAGACCGGTAACAGCAGTAGCAACAGATACAAT  
TCTAAATCAACAAGGCCAAAATGTAATATGCGTTTATGTAGCTATTGGTCAAAAAGCAT  
CTTCTGTGGCTCAGGTAGTACTACTTTCCAGGAAAGGGGCGCGATGGAATATACTATT  
GTGGTAGCCGAAACGGCGGATTCCCTGCTACATTACAATACCTCGCTCCTTATACAGG  
AGCAGCTCTGGCTGAATATTTATGTACCGTGAACGACACACTTTAATCATTATGATGA  
TCTCTCTAAACAAGCGCAAGCTTATCGCCAAATGTCTCTTCTATTACGAAGACCACCTG  
GGCGGAGGCTTATCCAGGGGATGTTTTTTATTTACATTACGCCTTTTGGAAAGAGCT  
GCTAAATTAAGTTCTCTTTTAGGTGAAGGAAGTATGACCGCTTTACCAATAGTTGAAAC  
CCAATCGGGAGACGTTTCGGCTTATATTCTACTAATGTAATTTGATTACTGATGGACA  
AATATTCTTATCTGCCGATCTATTCAATGCTGGAATCCGACCCGCTATTAATGTGGGTATC  
TCTGTTTCCAGAGTGGGGTCTGCAGCTCAAATTAAGCTATGAAACAAGTAGCCGGTA  
AATTAAACTGGAACTGGCACAATTTCGAGAATTAGAAGCTTTTGCACAATTTGCTTCT  
GATCTCGATAAAGCTACTCAGAATCAATTAGCAAGAGGTCAACGATTACGTGAATTGCT  
TAAACAATCCCAATCCGCCCTCTCGCGGTAGAAGAACAGGTACTTACTATTTATACCG  
GAACAAACGGTTATCTCGATTATTAGAAATTGGACAGGTAAGGAAATTTCTGGTTGAG  
TTACGTACTTACTTAAAAACCAATAAACCACAGTTTCAAGAAATAATATCTTCTACCAA  
GATATTCACCGAGGAAGCGGAAGCCATTTTGAAGAAGCTATTCAGGAACAGAGGGA  
ACGTTTTATACTTCAGGAACAAGCAATGAGAATGAATCCTACTACTTCTAGTTCTGGGG  
TTGCCACGCTTGACAAAAAGAACCTGGGGCGTATCGCCCAAATCATTGGTCCGGTACT  
AGATGTAGCTTTTCCGCCAGGCAAATGCCTAATTTATAACGCTCTGGTAGTTAAGG  
GTCGAGATACTGTTGGTCAACCAATTAATGTGACTTGTGAGGTACAGCAATTATTAGGA  
ACAATCGAGTTAGAGCCGTAGCTATGAGTGCTACAGACGGTCTAACGAGAGGAATGG  
ATGTAGTTGATACGGGAGCTCCGCTAAGTGTTCCGGTCCGGTGGAGCGACTCTCGGACG  
AATTTCAACGTGCTTGGGGAGCCTATTGATAATTTAGGTCCTGTAGATAATAGCACAAAC  
ATTTCTTATTCATAGATCCGCGCTGCCTTTATAACAGTTAGATACAAAATTATCTATTTTT  
GAAACCGGAATTAAGTAGTAGATCTTTTAGCCCCTTATCGCCGTGGAGGAAAAATCG  
GACTATTCGGGGGAGCTGGCGTGGGTAAAACAGTACTCATTATGGAATTGATTAACAAT  
ATTGCCAAAGCTCACGGAGGCGTATCTGTATTTGGCGGAGTCGGTGAACGGACTCGTG  
AAGGAAATGATCTTTACATGGAAATGAAAGAATCTGGAGTCATTAATGAACAAAATATT  
GCAGAATCAAAAAGTGGCTCTAGTTTACGGTCAAATGAATGAACCGCCGGGAGCTCGTA  
TGAGAGTTGGTTTACTGCCCTAATGCGGGAATATTTCCGAGATGTTAATGAACAA  
GACGTTCTTTTATTTGTTGACAATATCTTCCGTTTTGTCCAAGCAGGATCTGAAGTATCC  
GCCTTGTTGGGTAGAATGCCTTCCGCTGTGGGTATCAACCTACCCTTAGTACCGAAAT  
GGGTTCTTTACAAGAAAGAATTACTTCTACCAAAGATGGGTCCATAACTTCTATTCAAG  
CTGTTTATGTACCTGCAGATGATTTGACCGACCTGCTCCTGCTACGACATTTGCACATT  
TAGATGCTACTACCGTACTATCAAGAGGATTAGCCGCCAAAGGTATCTATCCAGCAGTA  
GATCCTTTAGATTCAACGTCAACTATGCTACAACCCCGGATCGTTGGTGACGAACATTA  
TGAAACTGCACAACAGGTTAAGCAAACCTTACAACGTTACAAAGAAGTCAAGATATT

ATAGCTATTCTTGGATTAGACGAATTATCCGAAGAAGATCGTTTAACCGTAGCAAGAGC  
GCGAAAAATTGAGCGTTTCTTATCACAACCTTTTTTCGTAGCAGAAGTATTTACGGGTT  
CTCCGGGAAAATATGTTGGTTTAGCAGAAACAATTAGAGGCTTCAATTAATCCTTTCC  
GGAGAATTAGATGGTCTTCCCGAACAGGCCTTTTATTTGGTAGGTAACATCGATGAAGC  
TACGGCGAAGGCTATTAACCTTAGAAATGGAGAGCAATTTGAAGAAAATGACCTTAAAT  
CTTTGTGACTGACCCCTAATCGAATAGTTTGGGATTCAGAAGTGAAAGAAAATCATTTT  
ATCTACTAATAGTGGACAAATTGGCGTATTACCAAATCATGCTCCTATTGCCACAGCAGT  
AGATATAGGTATTTTGAGAATACGCCTTAACGACCAATGGCTAACGATGGCTCTGATGG  
GCGGTTTTGCTAGAAATAGGTAATAATGAAATCACTGTTTTAGTAAATGATGCAGAGAAA  
AGTAGTGACATTGATCCACAAGAAGCTCAGCAAACCTTTGAAATAGCGGAAGCTGCTT  
TGAGAAAAGCTGAAGGAAAGAGACAAACAATTGAGGCAAATCTAGCTGTCCGACGGG  
CTAGGACACGAGTAGAGGCTATCAATGCCATTTCAATGAAAAATGTAACCGATTCTTTC  
GTTTCTTTGGGCCACTGGCCATCCGCCGGGAGTTTCGGGTTAATACCGATATTTTAGC  
AACAAATCTAATAAATCTAAGTGTAGTGCTTGGGGTCTTGATCTTTTTTGGAAAGGGAG  
TGTTAAGTGATTTATTAGATAATCGAAAACAGAGAATCTTGAATACTATTAGAAATTCAG  
AAGAATTGCGCGAAGGGGCCATCGAACAGCTGGAAAAAGCCCCGGGCTCGCTTACGGA  
AAGTAGAAATAGAAGCAGATGAGTTTCGCGTGAATGGATACTCTGAGATAGAGCGAGA  
AAAATTGAATTTGATTGATTCAACTTATAAGACTTTGGAACAACCTAGAAAATTACAAA  
ATGAAACTATAAATTTTGAACAACAAAAGGCCAGTAATCAAGTCCGACAACGGGTTTT  
CCAACAAGCTTTACAAGGAGCTCTAGGAACTCTGAATAGTTGTTTAAACAACGAGTTA  
CATTTACGTACTATCAGTGCCAATATTGGCATATTGGCGGCGATGAAACAATAACGGAT  
ATGAATCCACTGATTTCTGCCGCTTCCGTTATTGCTGCTGGATTGGCTGTAGGGCTTGCT  
TCTATTGGACCTGGAGTTGGTCAAGGTAAGTCTGCTGCGGGTCAAGCTGTAGAAGGTATCG  
CGAGACAGCCCCGAGGCGGAGGGAAAAATACGAGGTACTTTATTGCTTAGTCTAGCTTT  
TATGGAAGCTTTAACAATTTATGGCCTAGTTGTAGCATTAGCACTTTTATTGCTAATCCT  
TTTGTATGAATGTTCTATCATGTTCCATCAACACACTAAATGGGTTATACGATCTATCCG  
GTGTGGAAGTAGGCCAACATTTTATTGGAATAATCGGGGTTTCCAAGTCCACGGCCA  
AGTACTTATTACTTCTTGGGTTGTAATTGCTATCTTATTAGGTTTCAGCCACTCTAGCCGTT  
CGGAACCCACAAACCATTCCGACCGGCGGTCAGAATTTCTTCGAATATGTCCTTGAATT  
TATTCGAGATGTGAGTAAACTCAAATTGGAGAAGAATATGGTCCTTGGGTTCCCTTTTA  
TTGGAACTATGTTTCTATTTATTTTTGTTTCTAATTGGTTCGGGCGCCCTTTTACCTTGGA  
AATCATACAATTACCTCATGGGGAGTTAGCCGCACCCACGAATGATATAAATACTACTGT  
TGCTTTGGCTTTACTCACGTCAGTGGCATATTTCTATGCGGGTCTTACCAAAAAAGGATT  
AGGTTATTTTCGGGAAATATATTCAACCAACTCCAATTTCTTTTACCTATTAACATCTTAGA  
AGATTTACAAAGCCCCTATCACTTAGTTTTTCGACTTTTTCGGAAAGATATTAGCCGATG  
AATTAGTAGTTGTTGTTCTTGTCTTTAGTACCTTCAGTGGTTCCTATCCCCGTCAATGTT  
CCTTGGATTATTTACAAGTGGTATTCAAGCTCTTATTTTGAACCTTTAGCCGCGGCTTAT  
ATAGGTGAATCCATGGAGGGCCACCATATGATATTTTCAACTTTAGAGCATATATTA  
CATATTTCTTTTTCTATTGTTTCAATTGTAATTACACTTCATTTGATAACCTTATTGGGCAA  
TGAAATCATAAAACCATACGATTCGTCAGAAAAGGGGATGATAGCTACTTTTTTAIGTCT  
AACAGGATTATTAATCACTCGTTGGATTTATTCAGGCCATTTCCCACTAAGTGATTTATAT  
GAATCATTCATTTTCTTTCATGGAGTTTCTCCCTTATTCATATAGTGCCTTAT-----ATAAG  
AAAAAATGATTTAACCACAATAACTGCCTCAAGTACTATTTTTACCAAGGCTTTGCTA  
CTTCGGGTCTTTTAAATGAAATACACAAACCCACAATATTAGTACCTGCTCTACAATCG

GAGTGGTTAATAATGCACGTAAGTATGATGATATTGAGCTATGCGGCTCTTCTTTGTGGA  
TCATTATTATCAGTAGCACTTCTAGTCATTACATTTAGAAAT-----ATTTTTTATAGTTCT  
AAAGAAATCCAATACAAGAATGAAAGAAACAATATTTTTCAAAAACTTAT-----GAT  
AAGAATTATTACAAGGCCAATTTATTCAACAATTGGATTATTGGAGTTATCGTGTGATT  
AGCCTAGGATTTATCTTTTTAACGATAGGTATTCTTTCAGGAGCAGTATGGGCTAATGAA  
GCATGGGGATCATATTGGAGTTGGGATCCAAAGGAAACTTGGGCCTTTATTACTTGGAT  
CGTATTCGCAATTTATTTGCATACTCGAACAAAGAAAAATTTGCAAGGAGCGAATTCCG  
CAATTGTGGCGACTCTAGGCTTTCTTATAATTTGGATATGCTATTTTGGGGTCAATCTATT  
AGGAATAGGGTTACATAGTTATGGTTCATTTACGTTAACCATGGCAAAAAAGAAAGCAT  
TCACTCCTCTTTTATATCTTGCATCTATAGTATTTTTGCCCCTGGTGGATTTCTCTCTTATTT  
CAAAAAAGTCTGGAATCGTGGGTACTAATTGGTGAATACTAGGCAATCCGAAACTT  
TTTTGAATGATATTGAAGAAAAGAGTATTCTAGAAAAATTCATAGAATTAGAGGAACTC  
CTCTTCTTAGAGGAAATGATCAAGGAATACTCGGAGACACATCTACAAAACCTTCGTAT  
A---ATTCACAAAGAAACAATCCAATTAATCAAGATACACAACGAGGGTCGTATTCATAC  
GATTTTGCACCTTCTCGACAAATATAATATGTTTCATTATTCTAAGTGGTTATTCTATTTTTG  
GTAATAAAGAACTTGTTATTCTTAACTCTTGGGCTCAGGAATTCCTATATAACTTAAAGTG  
ACACAATAAAAGCTTTTTCTCTTCTTTTATTAAGTATTATGTATCGGATTTCAATTCGCC  
CCACGGTTGGGAATTGATGATTGGCTTTGTATACAAGGATTTTGGATTTGTTCCATAATGA  
TCAAATTATATCTGGCCTTGTTTCCACTTTTCCAGTCATTCTAGATACAATTTTCAAATAT  
TGGATTTTCCGTTATTTAAATCGCGTATCTCCGTCACTTGTAGTGATTTATCATTCAATGA  
ATGACATGCCTATTGGTGTTCCAAAGTACCTTTTCGAAGTCCTGGAGAGGAAGATGCA  
TCTTGGGTTGACATATAACAACCGACTTTATCGAGAAAGATTACTTTTTTTAGGTCAAGA  
GGTTGATAGCGAGATCTCAAATCAACTTATTGGTCTTATGATATATCTCAGTATCGAGGA  
TGATACCCAAGATCTGTATTTGTTTATAAACTCTCCTGGCGGATGGGTAATACCGGGAGT  
GGCTCTTTATGATACTATGCAATTTGTGCAACCAGATGTACATAACAATATGCATGGGATC  
GGCCGCTTCAATGGGATCTTTTATCCTGGTCCGAGGAGAAATTACCAAACGTCTAGCAT  
TCCCTCACGCCAGGGTAATGATCCATCAACCTGCTGGTTCTTTTTCTGAAGTAGCAACG  
GGAGAATTCATCCTGGAAGTGGGAGAAGTGTGAAACTACGTGAAACCCTGACAAGA  
GTTTATGTACAAAGAACGGGCAAACCCCTATGGGTTGTATCCGAAGACATGGAAAGAG  
ATGTTTTTATGTCAGCAACAGAGGCCAAGCTTATGGAATTGTTGATCTTGTAGCGGTT  
GAAATGAAAGAACAATAATGGATTCATGAAGGTTAATTACTGAATCGCTTCCCAACG  
GCATGTTCCGGGTTTCGTTTAGATAATGAAGATATGATTCTAGGTTATGTTTCAGGAAAGA  
TCCGACGTAGTTTTATACGAATATTGCCAGGAGATAGAGTCAAATTTGAAGTAAGTCGT  
TATGATTCAACCAGAGGTCGTATAATTTATCGACTCCGCAACAAAGATTTCGAAAGATAT  
GGATAAATTCCAAAGCTATTTAGGG---GATAGATCT-----CACTACTTCTTATATCCACTTA  
TCTTTCAGGAGTATATTTATGTAAGTCTCATGATCATGGTTTAGCAGGTTATGACAATAA  
ATCCAGTTTACTAATTGTGAAACGTTTAAATCATTGCAATGTATCAACAGAATCATTGAT  
TCTTCTGTAAATGATTCTAAACAGACTCCATTTTTGGGGAAGAATTTTTATTTCGCAAGT  
AATGTCAGAGGTTTCTTCAACCATTATGGAAATTCATTGTCTCTGCGATTAATATCTTC  
CCTAGTAGTTAAATCCGATAATTTACGATCAATTCATTCAATATTTTCTTTTTTAGAGGAC  
AACTTTTACATTTAAATTTATGTATTAGATATACTAATACCTTACCCAGCTCATATGGAAA  
TCTTGGTTCAGGCTCTTCGCTATTGGATAAAAGATGCTTCCTCTTGCATTTATTAAGAT  
TCTTCTCCATGAGTGTACATAATTGGGATAGTCTTATTAATAAGCCGGTCTTCTTTTTTC  
AAAACACAGGCTATTCTTCTTCTATATACTTCTTATGTATGTGAATATGAATCTGGCTTC

CTCTTTCTCCGTAACCAATCTTCTCACTTACGATCAACATCTTCTGGATCCCTTATTGAA  
CGAATATATTTCTATGGAAAAATAGAGTATCTTGCAGAAGTTTTTGCTGGGGCTTTTAAT  
TTAIGGTTATTCAAAGATTCTTTCATGCATTATGTTAGGTATCAAGGAAAATCAATTCCTG  
CTTCAAAGGGACGTTTATTTTGATGAATAAATGGAAATATTACTTTGTCAATTTCTGGA  
AATCTTATTTTTACCTGTGGTCTCAACCAGGAAGGATTTATATAAACCAATTATCCAATC  
ATCCCTTGACTTTCTGGGTATCGTTCAAGTGTGCGGCTAAAGCCTTCAATGGTACGC  
GGTCAAATGCTAGAAAATACATTTTTAATCGATAATGCTATT-----AAGAAGTTTGATAGT  
ATTGTTCCAATTATGCCCTCTGGTTGGATCATTGGCTAAATCGAAATTTTGTAACGCATTG  
GGCATCCTATTGGTAAGGCGGTTTGGGCCGATTTATCAGATTCTGATATTATTGAGCGC  
TTTGCCGTATATACAGAAATCTTCTCATTATCATAGTGGATCTTCAAAAAAAAAAAGT  
TTGTATCGAGTAAAATATATACTTCGACTTTCTTGTGCTAGAACTTTAGCTCGTAAGCAT  
AAAAGTACTGTACGTGCTTTTTTGAAAAGATTTCGGTTCGCGATTATTGGAAGAGTTCTT  
TACGGAAGAAGAACAAGTTTTTTCCTTGACCTTCCAAGACGGATTTGGTATTTGGATA  
TTGTTTGTATCAATGATTTGGCCAATCATGAAATGATAATTGAT---ACAACAGAAGTACA  
A---GCTATCAATCTTTTTCTAGATTGGAATCC---TAAAAGAGGTCTATGGGATCATATG  
GGTGCTTATCCCTATTTTTACTCCTGTATTAGGAATTACAATAGGTGTACTAGTAATTGTT  
TGGTTAGAAAGAGAAATATCTGCGGTATACAACAACGTATTGGTCTGAATACGCAGG  
ACCTTTGGGAATTCTTCAAGCTCTAGCAGATGGTACCAAATTACTTTTCAAAGAGAATC  
TTCTCCATCTAGAGGAGATACTCGTTTATTTAGTATTGGACCATCTATCGCAGTCATATC  
AATTTTATTAAGTTATTTAGTAATTCCTTTTGGTTATCACCTTGTTCAGCCGATCTCAGT  
ATTGGTGTTTTTTTATGGATTGCTATTTCAAGTATTGCTCCTGTGCGCCTTCTTATGTCAG  
GATATGGCTCAAATAATAAATATCTTTTTTTAGGTGGTCTACGAGCTGCTGCTCAATCAA  
TTAGTTATGAAATACCATTAACCTATGTGTGTTATCAATATCTCTACTATCTAACAGTTC  
AAGTACAGTTGATATAGTTGAAGCGCAGTCAAATATGGTTTTTTGGGGATGGAATTTGT  
GGCGTCAACCTATAGGGTTTCTAGTTTTTCTAATTTCTTCCCTAGCCGAGTGTGAACGAT  
TACCTTTTGATTTACCAGAAGCAGAAGAAGATTAGTAGCAGGTTATCAAACCGAATAT  
TCCGGTATCAAATTTGGTTTATTTTACGTTGCTTCATATTTAAATCTACTAGTTTCTTCATT  
ATTTGTAACAGTTCTTTACTTGGGAGGTTGGAATCTTCTATTCCGTACATAATTTGTTCCC  
GAGCTTTTTGATATTACTAAAAGGGGTAGAGTCTTTGGAACAATAATTAGTATCTTTATT  
ACATTAGCTAAAACCTATTTGTTCTTGTTCATTCCCTATCGCAACAAGATGGACTCTACCG  
CGGCTGAGAATGGATCAATTATTAATCTTGGATGGAATTTCTTTTACCTATTTCTCTA  
GGTAATCTATTATTAACAACCTTCTTCCCAACTTCTTTCGCTGATGATCTGGCATGTACAG  
AATGAAAACCTTCAATCTCGATTCTACGAGAATTTTTATGAAAGCCTTTCATTTGCTTTTC  
TTCGATGGAAGTTTGATTTTCCAGAATGTATCCTAATTTTTGGCCTAATCTTCTTCTGA  
TGATCGATTCAACCTCTGATCAAAAAGATATACCTTGGTTATATTTCAATTTCTTCAACAA  
GTTTAGTAATGAGCATAACGGCCCTATTGTTCCGATGGAGAGAGGAACCTATGATTAGC  
TTTTCGGGAAATTTCAAACGAACAATTTCAACGAAATCTTTCAATTTCTTATTTTACTA  
TGTTCAACTCTATGTATTCCTCTATCCGTAGAGTACATTGAATGTACAGAAATGGCTATA  
ACAGAGTTTCTCTTATTCGTATTAACAGCTACTATAGGAGGAATGTTTTTATGCGGTGCT  
AACGATTTAATAACTATCTTTGTAGCTCCAGAATGTTTCAGTTTATGCTCCTACCTATTAT  
CTGGATATAACCAAGAAAGATGTACGGTCTAATGAGGCTACTATGAAATATTTACTCATGG  
GTGGGGCAAGCTCTTCTATTCTGGTTCATGGTTTCTTCTTGGCTATATGGTTCATCCGGGG  
GAGAGATCGAGCTTCAAGAAATAGTGAATGGTCTTATCAATACACAAATGTATAACTCC  
CCAGGAATTTCAATTGCGCTCATATTCATCACTGTAGGAATTGGGTTCAAGCTTTCCCC

AGCCCCCTTCATCAATGGACTCCTGACGTATACGAAGGATCTCCCACTCCAGTCGTTG  
CTTTTCTTTCTGTTACTTCGAAAGTAGCTGCTTCAGCTTCAGCCACTCGAATTTTCGATA  
TTCCTTTTTATTTCTCATCAAACGAATGGCATCTTCTTCTGGAAATCCTAGCTATTCTTAG  
CATGATATTGGGGAATCTCATTGCTATTACTCAAACAAGCATGAAACGTATGCTTGCATA  
TTCGTCCATAGGGCAAATCGGATATGTAATTATTGGAATAATTGTTGGAGACTCAAATGA  
TGGATATGCAAGCATGATAACTTATATGCTGTTCTATATCTCCATGAATCTAGGAACTTTT  
GCTTGCATTGTCTTATTTGGTCTACGTACCGGAACTGAGAACATTCGAGATTATGCAGG  
ATTATACACGAAAGATCCTTTTTTGGCTCTCTCTTTAGCCCTAIGTCTCTTATCCCTAGGA  
GGTCTTCTCCACTAGCAGGTTTTTTTCGGAAAACCTCTATTTATTCTGGTGTGGATGGCA  
GGCAGGCCTATATTTCTTGGTTTTAATAGGACTCCTTACAAGCGTTGTTTCTATCTACTAT  
TATCTAAAAATAATCAAGTTATTAATGACTGGACGAAACCAAGAAATAACCCCTCACGT  
GCGAAATTATAGAAGATCCCCTTTAAGATCAAACAATTCCATCGAATTGAGTATGATTGT  
ATGTGTGATAGCATCTACTATAACCAGGAATATCAATGAATCCGATTATTGCAATTGCTCA  
GGATAACCTTTTTATGTTTCTGCTTTACGAATATGATATTTTTTTGGGCATTTCTGATAATAT  
CAAGTCTTATTCCATTTTGGTATTTTTCAATTCGGGATTTTTAGCTCCGAGTAGCAAAG  
GACCGGAGAACTTTCTAGTTATGAATCAGGTATAGAACCAATAGGTGACGCTTGGTTA  
CAATTTAGAATCCGCTATTATATGTTTGTCTAGTTTTTTGTTGTTTTTGATGTGGAAACGG  
TTTTTCTTTATCCATGGGCAATGAGTTTCGATGTATTAGGTGTATCTGTATTTGTAGAAGC  
TTTAATTTTTGTGCTTATCTTAATTGTTGGTTTAGTTTATGCATGGCGAAAGGGAGCATT  
GGAATGGTCTACGAACAAATTTCCCTTGGTTAACAATAATTGTAGTTTTACCAATATTTGC  
AGGTTCCCTTCATTTTCTTTCTTCCCATAAAGGAAATAGGGTAATTAGGTGGTATACTATA  
TGTATATGCACGTTAGAACTTCTTCTAACAACCTATGCATTCTGTTATCATTCCGATTGG  
ACGATCCATTAATCCAACCTAGTAGAGGACTATAAATGGATCAATTTTTTTGATTTCCGTT  
GGAAATTAGGAATAGATGGACTGTCTATAGGACCCGTTTTATTAACAGGATTTATCACTA  
CTTTAGCTACTTTAGCGGCCTGGCCTGTTACTCGGGATTCTCGATTATCCATTTCTTGAT  
GTTAGCAATGTACAGTGGTCAAATAGGATCATTTTCTTCTCGGGACCTTTTACTTTTTTT  
CATCATGTGGGAATTAGAATTAATTCCAGTTTATCTACTTCTATCCATGTGGGGAGGAAA  
GAAACGTCTCTACTCAGCCACAAAATTTATTTTTGTACACGGCGGGGGTTCTATTTTTTC  
TCTTAATGGGAGTTCTGGGTGTGCGTTTTATATGGTTCTAATGAACCAACATTAATTTTG  
AAACATCAGTTAATCAGTCGTATCCTGTGGCTTTGGAAATCATATCTATATTGGATTTTT  
TATTGCTTTTGTGTCAAATTGCCGATTCTACCCCTACATACATGGTTACCAGATACCCA  
CGGAGAGGCGCATTACAGTACTTGTATGCTTCTAGCCGGAATTTTATTAATAATGGGAG  
CGTATGGATTGATTCCGATTAATATGGAATTATTACCACACGCTCATTCTATATTTTCTCCT  
TGGTTGATGATAGTAGGCACAATACAAATAATCTATGCAGCTTCAACATCTCTCGGCCA  
ACGTAATTTAAAAAAAAGAATAGCCTATTCTCCGTATCTCATATGGGTTTCATACTTATA  
GGAATTGCTTCGATAACCGATACGGGACTCAATGGAGCTATTTTACAAATAATCTCTCAT  
GGCTTTATTGGTGTGCACTCTTTTTCTTGGCAGGAACGAGTTATGATAGAATACGTCTT  
GTTTATCTGGATGAAATGGGCGGAGTAGCTATCCCCATGCCAAAATCTTTACGATGTT  
CAGTAGCTTTTCCATTTCTTCCCTTGCATTACCGGGTATGAGTGGTTTTGTTGCAGAAGT  
GATAGTCTTTTTAGGAATAATTACCAGCCAAAATATCTTTTAATGCCAAAATTTGTCAT  
CACTTTTGTAAATGGCAATTGGAATGATATTAACCTCTATTTATTTATTTATCTATGTCACGCC  
AGATGTTCTATGGATACAAGTTATTTAATATTCCAAACTCTTTTGTTTTTGATTCTGGACC  
GCGCGAGTTATTTGTTTCCATCTCCATTTTCTACCTGTAATAGGTATTGGTATGTACCCC  
GATTTTGTCTTTCACTATCAGTTGACAAGGTTGAAGGTATTCTATCTAATTATTTTTATA

GAATGATGCTCGAACATGTACTTGTGTTTTGAGTGCCTATTTATTTTCTTTCGTTCTATATGG  
ATTGATTACAAGTCGAAATATGGTTAGGGCTCTTATGTGTCTTGAACCTATATTAATGC  
GGTAAATCTCAATTTTGTAAACATTTTCTGATTTTTTTGATAGTCGTCAATAAAAGGAGC  
CATTTTTTCTATTTTTGTTATAGCTATTGCAGCTGCTGAAGCCGCTATTGGACTCGCTATT  
GTTTCATCAATTTATCGTAATAGAAAATCAACTCGTATAAATCAATCGAATTTATTGAATA  
AGATGGAACAGACATATCAATATGCGTGGATAATACCTTTTTCTTCCACTTCCAGTTCCTA  
TGTTAATAGGGTTGGGACTTCTTCTTTTTCCGACGGCAACAAAAAGTCTTCGTTCGTATG  
TGGGCTTTTCAGAGCGTTTTATTGTTAAGTATAGTCATGATTTTTTCTATGAATCTGTCTA  
TTCAGCAAATAAATAGCAGTTCTGTCTATCAATATGTATGGTCTTGGATTATCAATAATGA  
TTTTTCTTTAGAATTCGGATACTTGATCGATCCACTTACTTCTATTATGTCAATATTAATCA  
CTACTGTTGGAATTATGGTCTGATTTATAGTGATAATTATATGTCTCATGATCACGGATAT  
TTGAGATTTTTTGCTTATATGAGTTTTTTCAGTACTTCCATGTTGGGATTAGTTACTAGTT  
CAAATTTGATACAAATTTATATTTTTTGGGAATTGGTTGGAATGTGTTTCATATCTATTAAT  
AGGATTTTGGTTCACACGACCTGTTGCAGCAAAGGCTTGTCAAAAAGCGTTTGTAACT  
AATCGTGTGGTGATTTTTGGTTTATTATTAGGCATTTTAGGGTTTTATTGGATAACGGGG  
AGTTTCGAATTTTCGTGATTTATTCCAAATATTAATAACAATGAGGTCAATTTTGTATTTG  
TTACTTTGTGCGCTATTCTATTATTTGCCGGTGCATTGCTAAATCTGCACAATTTCCCCT  
TCATGTATGGTTACCTGATGCAATGGAAGGGCCGACTCCTATTTCCGGCCCTTATACATGC  
TGCTACGATGGTAGCAGCGGGAATTTTTCTGTAGCTCGACTTATGCCTCTTTTCATAGT  
CATACCCACATAATGAATTTTATCTCTTTGATAGGGATAATAACAGTTTTTTTCCGGAGCT  
ACTTTAGCTCTTGCTCAAAAAGACATTAAGAGGGGTTTAGCCTATTCCACAATGTCTCA  
ATTGGGTATATGATGTTAGCTCTAGGTATGGGGTCTTATCGCAGTGCTTTATTTCAATTTG  
ATTACTCACGCTTATTCCAAAGCATTGTTGTTTTTAGGATCGGGATCCGTTATTCACTCA  
ATGGAAACTCTTGTTGGATATTGTCCAAAAAAAAGTCAGAATATGGTGCTTATGGGAGG  
TTAACAACAAACATGTACCAATTACTAAGAATTCTTTTTTATTAGGTACACTTTCTCTTTGT  
GGTATTCCACCCCTTGCTTGTTTTTGGTCCAAAGATGAAATTCTGAATGATAGTTGGTTG  
TATTCACCTATTTTTGCAATAATAGCTTGGTCTACGGCGGGATTAACCGCATTTTATATGT  
GTCGGATCTATTTACTTACTTTTTGAAGGACATTTAAACGTTCATTTTCAAATACAGTG  
GAAAAAGGACTACCCCTTGATTCAATATCTCTATGGGGTAAAGAAGGTTCAAAAATA  
AGTAACAAA---TTGGTAACTTTATTAAAAATGAAGTTTTTTTCATTTGGCAATACCAAGA  
CTTATTTGTATCCTTATGAATCGGATAATACGATGTTATTCCCAATACTTATATTAATTCTAT  
TTACTTTGTTTCGTTGGATTCTTAGGAATTCCTTTC---GTGGATATATTATCCAAATGGTTA  
ACCCCGTCTATAAATCTTTTACATCAAAATTCAAAC---TCAATAGATTGGTATGAATTTTG  
TAAAGATGCAGTTTTTTCAGTCAGTATAGCCTTTTTTCGGAATATTTATAGCATTTTTTTTA  
TATAAACCTGTTTATTCACTTTTTCAAATTTGGACTTAATTAATTCATTTGTTATTTTTTC  
TGACAAAATAAAAAATGCTATATATGATTGGTCATATAATCGGGGTTACGTAGATGCCTT  
TTATGGAACATTCTTAACTGCGGGCGTGAGAAAATTGGCCGAATTCACTCATTTTTTTG  
ATAGACGAATAATTGATGGAATTCCAAATGGAGTCGGTTTTTCTGAGTTTCTTTGTAGCG  
GAGGTATTAAATCGGTAGGGGGGGGG---CGTATTTCTTCTTATTTGTTCTTTTATTTTTC  
TTAIGTATCAATTTTTTTGTTAATTTATTACATGGATTTACCTGGACTAATACATGATTTTC  
TTTTAGTCTTTCTGGGATTGGGTCTTATATTAGGGGGTCTGGGAGTAGTATTACTTGCCA  
ATCCCATTTATTCTGCCTTTTCATTGGGATTGGTTTTTGTGTTGTATATCGTTATTCTATATT  
CTAGCGAACTCCCATTTTGTAGCTGCTGCGCAGCTCCTTATTTACGTAGGAGCCATAAAT  
GTTTTAATCATTTTTGCTGTGATGTTCAAAATGGTTTCAGAATATTCCAAAGATTTCCATC



TTTGGACCGTGGGAGATGGAGTAACTTCCGTGGTCTGTACAAGTCTTTTTGTTCCTACTA  
ATTACTACTATTCCAGATACGTCATGGTACGGGATTATTTGGACTACAAAAGCAAACCA  
GATTATAGAGCAAGATCTGATCAGTAATAGTCAACAAATTGGGATTCATTTATCAACAGA  
TTTCTTTCTTCCGTTTGAATTCATTTCAATAATCTTTTAGTTGCGTTAATCGGCGCAATT  
GCCGTAGCTCGTCAAATGACTGTACCATCTACAAGAAAAGACCTCATGATAGTCAATAT  
GGGACCTCACCAACCATCAATGCATGGTGTCTTCGACTCATTGTTACTCTAGATGGTG  
AAGATGTTATTGACTGTGAACCAATATTGGGTTATTTACATAGAGGTATGGAAAAAATTG  
CGGAAAATCGAACAATTATACAATATTTGCCTTATGTAACACGTTGGGATTATTTAGCTA  
CTATGTTACAGAAGCAATAACTGTAAATGCGCCAGAGCAATTAGGCAATATTCAAGTC  
CCTAAAAGGGCCAGTTATATCAGAGTCATTATGTTGGAGTTAAGTCGTATAGCTTCGCAT  
TTGTTATGGCTTGGCCCTTTTATGGCAGATATTGGGGCACAGACTCCTTTCTTCTATATTT  
TTCGAGAAAGAGAATTGATATATGACCTATTCGAAGCTGCCACCGGTATGCGAATGATG  
CACAATTTTTTTCGTATTGGTGGAGTCGCTGCTGATTTACCTCATGGCTGGATAGATAAA  
TGTTTGGATTTTTGCGATTATTTTTTAACAGGAATTGCTGAATATCAAAGCTTATTACA  
CGAATCCCATTTTTTTAGAACGCGTTGAAGGAGTAGGCATTATTGGTGGAGAGGAAG  
CAATAAATTGGGGTTTGTCTGGGACCAATGCTACGAGCTTCCGGAATACAATGGGATCTT  
CGTAAAGTTGATCATTATGAGTGTACGATGAATTTGATTGGGAAGTCCAATGGCAAAA  
AGAGGGGGATTATTAGCTCGTTATTTAGTACGAATCAGTGAATGACAGAATCCATAA  
AAATTATTCAACAGGCCCTAGAAGGAATTCGGGGAGGGCCCTATGAAAATTTAGAAAT  
CCGCCGCTTTGATAGAGTAAAAGATACTGTATGGAATGAGTTTGACTATCGATTATTAG  
TAAAAAACCTTCTCCGACTTTTGAATTGTCCAAGCAAGAACTTTATGCGAGAGTCGAA  
GCACCAAAGGGAGAATTGGGAATTTTTCTGATAGGAGATAAGGGTGTTTTTCTTGGC  
GATATAAAATTCGGCCACCGGGATTATTAATTTGCAAATCTTCCCTCAGTTAGTTAAAA  
GAATGAAATTGGCTGATATTATGACGATACTAGGTAGTATAGATATCATTATGGGAGAGG  
TTGATCGTATGTTTCTACGGTAACTGAGTTCATGAATTATGGCCAACAAACAGTACGA  
GCCGCAAGGTATATTGGTCAAGGTTTCATGATTACCTTATCACACGCGAATCGTTTACCT  
GTA ACTATTCAATACCCCTACGAAAAATTGATCACATCCGAGCGTTTCCGCGGTGCAAT  
CCACTTTGAATTTGATAAATGCATTGCTTGTGAAGTATGTGTTTCGTGTATGTCCTATAGAT  
CTACCCGTTGTTGATTGGAAATTGGAACTGATATTAGAAAGAAACGATTGCTTAATTA  
CAGTATTGATTTCCGAATATGTATATTTTGTGGTAATTGCGTTGAGTATTGTCCAACAAAT  
TGTTTATCAATGACTGAAGAATATGAACTTTCTACTTTTGTATCGTCACGAATTGAATTAT  
AATCAAATTGCTTTGGGTTCGGTTACCAATGTCAATAATTGACGATTACACAATTCGAAC  
AATTTTAAATTTG-----ATGCAGGGTAATTTGTCTGCTTG  
GCTAGTTAAGCATGCGCTAATTCATAGATCTTTGGGCTTTGATTACCAAGGAATAGAGA  
CTTTACAAATAAAACCCGGGGATTGGCATTCCATTGCTGTCATTTTATATGTATATGGTTA  
CAATTATCTCCGCTCCCAATGTGCCTATGATGTAGCACCAGGCGGACTATTAGCTAGTGT  
GTATCATCTTACTAGAATAGAGTATGGCGTGGATCAACCAGAAGAGGTATGCATAAAAG  
TATTTGCCCGAGGAGGGATCCTAGAATTCCGTCTGTTTTCTGGGTTTGGAAAAGTGTG  
GATTTTCAAGAACGGGAATCTTATGATATGTTGGGAATCTCTTATGATAATCATCCACGT  
TTGAAACGTATCTTAATGCCTGAAAGTTGGATAGGATGGCCTTTACGTAAGGATTATATT  
GCTCCCAATTTTTATGAAATACAAGATGCTCAT-----  
-----ATGAATTCCATTGAGTTTCCCTTATTTTCATCGAACAACCCAAAATTCAGTTATTTT  
AACTACATTAATGATCTTTCAAATTGGTCAAGACTCTCTAGTTTATGGCCGCTTCTCTA

TGGTACCAGTTGTTGCTTCATTGAATTTGCTTCACTAATAGGCTCACGATTCGACTTTGA  
TCGTTATGGACTAGTACCAAGATCGAGTCCTAGACAAGCGGACCTTATTTAACAGCCG  
GAACAGTAACAATGAAAATGGCCCCTTCCTTAGTGAGATTATACGAGCAAATGCCTGA  
ACCAAAATATGTTATTGCTATGGGAGCATGTACAATTACAGGGGGGATGTTTCAGTACCG  
ATTCTTATAGTACTGTTTCGTGGAGTCGATAAGCTAATTCCTGTGGATGTCTATTTGCCGG  
GCTGTCCACCTAAACCAGAAGCAATTATAGATGCTATAACAAAACCTTCGTAAGAAAATA  
TCTCGAGAAATCTATCCAGATAGAATTCTATCTCAGCGAGAGAATCGGTGTTTTACTACC  
AATCACAAGTTTCAGGTTGGGCATAGTATTCATACTGGAAATTATGATCAAGGATTCCTT  
TATCAACCGCCATCTACCTCAGAGATTCCTCCTGAAACATTTTTCAAATACAAAAGTTC  
AGTATCTTCCCACGAATTAGTAAATATGCAAAGTAAATACTTTTTATTGGATAAAGGA  
ACAGATTACTCGATCTATTTCCGTATCGCTCATGATATATAATAACTCGTACATCCATTT  
CAAATGCATATCCCATTTTTGCACAGCAGGGTTATGAAAATCCACGAGAAGCGACTGG  
GCGTATTGTATGCGCCAATTGCCATTTAGCTAATAAACAGTGGATATTGAGGTTCCGCA  
AGCGGTACTTCCCGATACTGTATTTGAAGCAGTTGTTTGAATTCCTTATGATACGCAACT  
GAAACAAGTTCTTGCTAATGGTAAAAAGGGGGTTTGAATGTGGGGGCTGTTCTTATTT  
TACCAGAGGGTTTTGAATTAGCCCCCTCCCGATCGTATTTCCCCCGAGATAAAAGAAAAG  
ATGGGGAATCTGTCTTTTTCAGAGCTATCGCCCCAATCAAAAAAATATTCTTGTATAGG  
CCCTGTTCCCTGGTCAGAAATATAGTGAATCACCTTTCCTATTCTTTCCCCGGACCCCGC  
TACTAAGAAAGACATTCACTTCTTAAAATATCCTATATACGTAGGTGGAAACAGGGGAA  
GGGGCCAGATTTATCCTGACGGGAGCAAAGTAACAATACAGTTTATAATGCTACAGCA  
TCAGGTATAGTAAGCAAATCATAACGAAAAGAAAAGGGGGGATACGAAATAACCATAG  
CGGATGCATCGGATGGACGTCAAGTGGTTGATATTATCCCTCCGGGGCCAGAACTTCTT  
GTTTCAGAAGGCGAATCTATCAAATTGGATCAACCGTTGACAAGTAATCCTAATGTGGG  
CGGATTTGGTCAGGGAGATGCAGAAATAGTACTTCAAGATCCATTACGTGTACAAGGC  
CTTTTGTCTTCTTCGCATCTGTTATTTTGGCACAAATATTTTTGGTTCTTAAAAAGAAA  
CAGTTCGAGAAGGTTCAATTGTCCGAAATGAATTTTCATGAGTAAAGTCTATGATTGGTT  
TGAAGAGCGTCTCGAGATTCAGGCGATTGCGGATGATATAACTAGTAAATATGTTCCCTC  
CTCATGTAAACATATTTTATTGTCTAGGGGGAATTACGCTTACTTGTTTTTTTAGTACAAGT  
GGCTACAGGATTTGCTATGACCTTTTACTATCGTCCGACCGTTACTGATGCTTTTGCTTC  
TGTTCAATACATAATGACTGAAGCTAATTTTGGTTGGTTAATCCGATCAGTTCATCGATG  
GTCGGCAAGTATGATGGTCCTAATGATGATCCTACATGTATTTTCGTGTATATCTCACCGG  
TGGATTTAAAAAACCGCGCGAATTAACCTGGGTTACAGGTGTGGTTCTGGCTGTATTGA  
CTGCATCTTTTGGTGTAACCTGGTTATTCCTTACCTTGGGACCAAATTGGTTATTGGGCAG  
TGAAAATTGTAACAGGTGTACCTGACGCTATTCCTGTAATAGGATCACCTTTGGTAGAA  
TTATTGCGCGGAAGTGCTAGTGTGGGACAATCCACTTTGACTCGTTTTTATATTTTACAC  
ACTTTTGTATTGCCGCTTCTTACTGCCGATTTTATGTTAATGCACTTCCCAATGATACGTA  
ACAAGGTATTTCTGGTCCTTTAATGGGAGTAACAAAAAACCTGACTTGAATGATCCT  
GTATTAAGAGCTAAATTGGCTAAAGGTATGGGTCATAATTATTACGGGGAGCCCGCATG  
GCCAACGATCTTTTATATATTTTTCCGGTAGTAATTCTAGGTACTATTGCATGTAACGTA  
GGCTTAGCGTTTCTAGAACCATCAATGATTGGTGAACCGGCAGATCCGTTTGCAACTCC  
TTTGGAAATATTACCCGAATGGTATTTCTTTCCCGTATTTCAAATACTTCGTACAGTACCC  
AATAAATTATTGGGTGTTCTGTTAATGGTATCAGTACCCGCGGGATTATTAACAGTACCC  
TTTTTAGAGAATGTTAATAAATCCAAAATCCATTTTCGTTCGTCCAGTAGCGACAACCGTA  
TTTTTGATTGGTACCGCAGTGGCCCTTTGGTTGGGTATTGGTGCAACATTACCTATTGAT

AAATCCCTAACTTTAGGTCTTTTTATGATTGAAGTTTTTCTTTTTGGAATCGTGTTAGGT  
CTAATTCCTATTACTTTGGCTGGATTATTTGTAAGTGCATATTTACAATACAGGCGTGGCG  
ATCAGTTGGACCTTATGCCTATCATAACTAGTTATTTTCGGTTTTCTACTAACGGCTTTAAC  
TATAACCTCAGCTCTATTTATGGTCTGAGCAAGATACGACTTATTATGGATATAGTAAGT  
CTCGCTTGGGCTGCTTTAATGGTAGTCTTTACATTTTCCCTTTCCTCGTAGTATGGGGA  
AGAAGTGGACTTATGATTATTCGTTTCGCCGGAACCAGAAGTAAAAATTTTGGTAGATAG  
GGATCACATAAAAACTTCATTCGAGGAATGGGCTAGACCGGGTCATTTCTCAAGAACA  
ATAGCTAAAGGCCCTGAAACTACCACTTGGATCTGGAACCTACATGCTGATGCTCACGA  
TTTCGATAGCCATAACAGTGATTTGGAGGAGATCTCTCGAAAAGTATTTAGTGCGCATT  
TCGGTCAACTCTCCATCATCTTCCCTTTGGCTGAGTGGCATGTATTTCCACGGTGTCTGTT  
TTTCCAATTATGAAGCATGGCTAAGCGATCCGACTCACATTGGGCCTAGTGCCAGGTG  
GTTTGGCCAATAGTGGGCCAAGAAATATTGAATGGTGTATGTGGGCGGGGGCTTCCGAG  
GAATACAAATAACCTCTGGTTTTTTTTCAGATTTGGCGAGCATCTGGAATAACTAGCGAA  
TTACAACCTCTATTGTACCGCAATTGGTGCATTGATCTTTGCAGCGTTAATGCTTTTTGCT  
GGTTGGTTTCATTATCATAAAGCTGCTCCAAAAGTGGCTTGGTTTCAAGATGTAGAATC  
TATGTTGAATCACCATTAGCGGGGCTACTAGGACTTGGGTCTCTCTCTTGGGCGGGGC  
ATCAAGTACATGTATCTTTACCTATTAACCAATTTCTAAACGCTGGAGTAGATCCTAAAG  
AAATACCACTTCCCTCATGAATTTATCTTGAATCGGGATCTTTTGGCTCAACTTTATCCCA  
GTTTTGCCGAGGGAGCAACCCCATTTTTTACCTTGAATTGGTCAAAATATGCGGACTTT  
CTTACTTTTTCGTGGAGGATTAGACCCCGTAACTGGAGGTCTATGGCTAACCGATACTGC  
ACACCATCATTTAGCTATTGCAATCTTTTTTCTGATAGCGGGTCACATGTATAGGACCAA  
CTGGGGCATTGGTCATGGTCTAAAAGATATTTTAGAAGCTCATAAAGGTCCATTTACGG  
GCCAGGGCCATAAAGGCCTATATGAGATCCTAACAAACGTCGTGGCATGCTCAATTATCT  
CTTAACCTAGCTATGTTAGGCTCTTTAACCATTGTTGTAGCTCACCATATGTATGCCATGC  
CCCCTTATCCATATCTAGCTACTGACTATGGTACACAAGTGCATTGTTTACACATCATAT  
GTGGATTGGTGGATTTCTCATAGTTGGTGCTGCTGCGCATGCAGCCATTTTATGGTAAG  
AGACTATGATCCAACCTACTCGATAACAACGATCTATTAGATCGTGTCTTAGGCATCGCGA  
TGCAATCATATCACATCTCAACTGGGCATGTATATTTCTAGGCTTTCACAGTTTTGGTTT  
GTATATTCATAATGATACCATGAGCGCTTTAGGGCGTCCTCAAGATATGTTTTCAGATAC  
CGCTATCCAATTACAACCCGTCTTTGCTCAATGGATACAAAACACCCACGCTTTAGCAC  
CTGGTGCAACGGCTCCTGGTGCAACAGCAAGCACCAGTTTAACTTGGGGGGGGCGGTG  
ATTTAGTAGCAGTGGGTGGCAAGGTAGCTTTGTTACCTATTCCATTAGGAACCGCGGAT  
TTTTTGGTACATCACATTCATGCATTTACGATTCATGTGACGGTATTGATACTTCTGAAA  
GGTGTCTATTTGCTCGTAGTTCCCGTTTTGATACCGGATAAAGCAAATCTTGGGTTTTCGT  
TTTCCTTGATGGGCCTGGAAGGGGGGGGACATGTCAAGTATCAGCTTGGGACCATG  
TCTTCTTAGGACTATTCTGGATGTACAATTCATTTTCAGTAGTCATATTTCAATTCAGTTG  
GAAAAGGCAGTCAGATGTTTGGGGCAGTATAAGCGATCAAGGAGTAGTAACCTCATATC  
ACGGGAGGAAACTTTGCGCAGAGTTCTATTAATGAGGTTGGTCCGCGATTTCTT  
ATGGGCACAGGCATCCAGGAAATTCAGACTTATGGCTCTTCATTATCCGCATACGGCC  
TTTTTTTTCTAGGTGCTCATTTTGTATGGGCTTTTAGTTTAAATGTTTTTATTCAAGTGGACG  
TGTTTATTGGCAAGAACTTATTGAATCCATCGTTTGGGCTCATAATAAATTAAGTTGC  
TCCTGCTACCCAGCCGAGAGCCTTAAGCATTGTACAAGGACGTGCTGTAGGAGTAACC  
CATTACCTTCTGGGTGGAATTGCCACAACATGGGCGTTCTTCTTAGCAAGAATTATTGC  
AGTAGGAATGGCATTAAAGATTTCCAAGGTTTAGCCAAGGCTTAGCTCAGGACCCACT

ACTCGTCGTATTTGGTTTGGTATTGCTACCGCGCATGACTTTGAGAGTCATGATGATATT  
ACTGAGGAACGTCTTTATCAGAATATTTTTGCTTCTCACTTCGGGCAATTAGCAATCATT  
TTTCTGTGGACTTCCGAAATCTCTTTCATGTAGCTTTGCAAGGAAATTTGAGTCATG  
GGTAAAGGACCCCTTACATGTAAGACCTATTGCTCATGCAATTTGGGATCCTCATTTTGG  
TCAACCAGCTGTAGAAGCTTTACTCGAGGGGGTGCTCCTGGGCCAGTGAATATCGCC  
TATTCTGGTGTTTATCAGTGGTGGTATAACAATCGGTTTACGAACTAATGTAGATCTTTATA  
ATGGAGCTATTTTTCTATTATTTCTTTCTGCCATATCTTTAATAGCGGGTTGGTTACACCT  
ACAACCGAAATGGAAACCGAGCGTTTCGTGGTTCAAAAATGCAGAATCTCGTCTCAAT  
CATCATTTATCAGGACTCTTCGGCGTAAGTTCCTTGGCTTGGACAGGGCATTAGTCCAT  
GTCGCTATTCTGCATCCAGAGGGGAGGACGTTTCGATGGAATAATTTCTTAGATGTATTA  
CCACATCCCCAAGGGTTAGGCCACTTTTTACAGGTCAGTGGAATCTTTATGCTCAAAA  
TCCCGATTCAAGTAGTCATTTATTTGGTACCTCCCAAGGAGCAGGAACTGCCATTTTAA  
CCTTCTCGGGGATTCCATCCACAACCCAAAGTTTATGGCTGACTGATATGGCTCAT  
CATCATTTAGCTATTGCATTTATTTTTCTAATTGCTGGGCATATGTATAGAACTAATTTTGG  
GATTGGGCACAGTATGAAAGATCTTTTAGATGCACATATCCCTCCGGGAGGGCGATTGG  
GACGTGGGCATAAGGGCCTTTATGACACAATTAATAATTCGATTCATTTTCAATTAGGCC  
TTGCTCTAGCTTCTTTAGGGGTTATTACTTCTTTGGTAGCTCAACACATGTACTCTTTAC  
CCGCTTATGCATTTATAGCACAAGACTTTACTACTCAAGCTGCGTTATATACTCATCACC  
AATACATCGCAGGATTCATCATGACAGGAGCTTTTGCTCATGGAGCTATATTTTTTATTA  
GGGATTACAATCCGGAACAGAATGAGGATAATGTATTGGCAAGAATGTTAGAGCATAAAA  
GAAGCTATCATATCTCATTAAAGTTGGGCCAGCCTCTTTTTGGGTTTCCATACCTTGGGA  
CTTTATGTTTATAATGATGTCATGCTTGCCTTTGGTACTCCGGAGAAGCAAATCTTAATC  
GAACCTATATTTGCTCAATGGATAACAATCTGCTCATGGTAAACTTCATATGGGTTTCGAT  
ATACTTTTATCTTCAACGAATGGCCCGGCATTCAATGCGGGTTCGAAGCATATGGTTGCC  
GGGTTGGTTAAATGCTGTTAATGAG-----AATAGTAATCACTATTCTTAACAATAGGTCC  
TGGAGACTTTTTGGTTCATCATGCTATTGCTCTGGGTTTACATACAACTACGTTGATCTT  
AGTAAAAGGTGCGTTAGATGCACGTGGTTCCAAGTTAATGCCAGATAAAAAGGATTTT  
GGTTATAGTTTTCCGTGCGATGGCCCTGGACGAGGCGGTACTTGTGATATTTCCGGCTTG  
GGACGCATTTTATTTGGCAGTTTTTTGGATGTTAAATACCATTGGATGGGTTACTTTTTAT  
TGGCATTGGAAGCACATTACATTATGGCAGGGTAATGTTTCACAGTTTAAATGAATCTTCC  
ACTTATTTGATGGGCTGGTTAAGAGATTATTTATGGTTAAACTCTTCACAACCTATTAATG  
GATATAATCCTTTTGGTATGAATAGTTTATCAGTCTGGGCATGGATGTTTTTATTTGGACA  
TCTTGTGGGCTACTGGATTTATGTTTTAATTTCTTGGCGTGGATATTGGCAGGAATT  
GATTGAAACTTTAGCATGGGCTCATGAACGCACACCTTTGGCCAATTTGATTCGTTGGA  
GAGATAAACCGGTGGCACTTTCCATTGTACAAGCAAGATTGGTTGGATTAGCCCACTTT  
TCTGTAGGTTATATAATTTACTTATGCAGCTTTCTTGATTGCCTCTACATCAGGGAAATTTG  
GTATGTCGCATTACAGTAAAGATTTATGATACATGTATCGGGTGTACTCAATGTGTCCGAG  
CCTGTCTACGGATGTATTAGAAATGATACCTTTGGGACGGATGTAAAGCCAAACAATA  
GCTTCTGCTCCAAGAACAGAGGATTGTGTGCGTTGTAAGAGATGTGAATCCGCCTGCC  
CAACAGATTTCTTGAGTGTTCGAGTTTATTTATGGCATGAAACAACCCGCAGTATGGGT  
ATAGCTTATATGACAACTCTTAACTTTCCCTCTGTTTTGGTCCCTTTAGTAGGCCTAGTAT  
TTCCGGCAATCGCAATGGCTTCTTTATTTCTTCATGTTCAAAAAACAAGATTGTTATGC  
GAGATCTAAAACATATCTTTCCGTGGCACCGGTAAGTACTCTATGGTTCGGTGCT  
TTGGCAGGTTTATTGATAGAGATTAATCGTTTTTTCCCGGATGCATTGACGTTCCCTTT

TTT-----ATGACTGCAATTTTAGAGAGACGCGAAAGCGAAAGCCTATGGGGTCGCTTCT  
GTA ACTGGATA ACCAGCACCGAAAACCGTCTTTACATTGGATGGTTTGGCGTTTTGATG  
ATCCCTACCTTATTGACCGCAACTTCTGTATTTATTATCGCCTTCATTGCTGCTCCTCCAG  
TAGATATTGATGGTATTCGTGAACCTGTTTCTGGATCTCTACTTTATGGAAACAATATTAT  
TTCAGGTGCCATTATTCCTACTTCTGCAGCTATAGGTTTGCATTTTTACCCAATATGGGA  
AGCAGCATCCGTTGATGAATGGTTATA CAATGGTGGTCCTTATGAACTAATTGTTCTACA  
CTTCTTACTTGGTGTAGCTTGTACATGGGTCGTGAGTGGGAGCTTAGTTTTCCGTCTGG  
GTATGCGACCTTGGATTGCTGTTGCATATTCAGCTCCTGTTGCAGCTGCGACTGCTGTTT  
TCTTGATCTACCCAATTGGTCAAGGAAGCTTTTCTGATGGTATGCCTCTAGGAATTTCTG  
GTA CTTTCAACTTCATGATTGTATTCCAGGCTGAGCACAACATCCTTATGCACCCATTTC  
ACATGCTAGGCGTAGCTGGTGTATTCGGCGGCTCCCTATTTAGTGCTATGCATGGTTCAT  
TGGTAACCTCTAGTTTGATCAGGGAAAACACAGAAAATGAATCTGCTAACGAAGGTTA  
CAGATTCGGTCAAGAAGAAGAACTTATAATATCGTAGCCGCTCATGGTTATTTTGGCC  
GATTGATCTTCCAATATGCTAGTTTCAACA ACTCTCGTTCCTTTACATTTCTTCTAGCTGC  
TTGGCCTGTAGTAGGTATTTGGTTCACTGCTTTAGGTATCAGTACTATGGCTTTC AACCT  
AAATGGTTTCAATTTCAACCAATCGGTAGTTGATAGTCAAGGCCGTGTAATTAACACTT  
GGGCTGATATCATTAAACCGTGCTAACCTTGGTATGGAAGTTATGCATGAACGTAATGCTC  
ATAATTTCCCTCTAGACTTAGCTGCTATTGAAGCTCCATCTACAAATGGAATGGGTTTGC  
CTTGGTATCGTGTT CATACCGTTGTATTGAATGATCCCGGACGGTTGCTTTCTGTT CATAT  
AATGCATACAGCTTTGGTTGCTGGTTGGGCCGGTTCGATGGCCCTGTATGAATTAGCAG  
TTTTTGATCCTTCTGACCCTGTTCTTGATCCAATGTGGAGACAGGGTATGTTCTGTTATAC  
CCTTCATGACTCGTTTAGGAATAACCAATTCCTGGGGCGGTTGGAGTATCACG---GGGG  
GGACTACAACGAATCCGGGTATTTGGAGTTACGAAGGTGTGGCTGGAGCGCATATTATG  
TTTTCTGGGTTGTGCTTTTTTGGCAGCTATCTGGCATTGGGTATATTGGGATCTAGAAATC  
TTTTGTGATGAACGTACAGGAAAACCTCTTTGGATTTGCCCAAGATCTTTGGAATACA  
TTTATTTCTTGCGGGTGTGGCTTGCTTTGGTTTTGGTGCATTTTCATGTAACAGGCTTGTA  
TGGTCTGGCATATGGGTGTCCGATCCTTATGGGCTAACAGGAAAAGTACAATCTGTAA  
ATCCATCGTGGGGTGTGGAGGGTTTTGATCCTTTTGTCCGGGAGGAATAGCCTCTCAT  
CATATTGCGGCAGGGACTTTGGGCATATTAGCAGGTCTATTCCATCTTAGCGTCCGCCCG  
CCCCAACGTCTATACAAAGGATTGCGTATGGGCAATATTGAAACTGTCTTTCCAGTAG  
TATCGCTGCTGTCTTTTTTGCAGCTTTTGTGTTGCCGGA ACTATGTGGTATGGTTCAGC  
AACTACCCCATCGAATTGTTTTGGCCTACTCGTTATCAATGGGATCAGGGATACTTCC  
AA CAAGAAATATATAGAAGAGTTAGCGCTGGGTTAGCCGAAAATCAAAGTTTATCAGA  
AGTTTTGGTCTAAAATTCCTGAAAAATTAGCCTTTTATGATTACATCGGAAATAATCCGGC  
AAAAGGAGGATTATTCAGGGCGGGCTCAATGGATAACGGGGATGGAATAGCGGTTGGA  
TGGTTAGGACACCCTATCTTTAGAGATAAAGAAGGCCGTGAACTTTTTGTACGTCGTAT  
GCCTACCTTTTTTGAACATTTCCGGTCTTTTTGGTAGACGGAGACGGGATTGTTAGAG  
CCGATGTTCTTTTTCGAAGGGCAGAATCTAAGTATAGTGTCGAACAAGTAGGCGTAACT  
GTTGAGTTCTATGGTGGTGA ACTCAATGGAGTCAGTTATAGTGATCCTGTTACTGTCAA  
AAAATATGCTAGACGTGCTCAATTGGGGGAAATTTTTGAATTAGATCGTGCTACTTTGA  
AATCTGATGGTGTTTTTTCGTAGCAGTCCAAGGGGTTGGTTTACTTTTGGGCATGCTTCA  
TTTGCTTTGCTCTTCTTCTTCGGACACATTTGGCATGGTGCTCGAACCTTGTTTAGAGAT  
GTTTTCGCTGGTATTGACCCAGATTTGGATGCTCAAGTAGAATTTGGAGCATTCCAAAA  
ACTTGGAGATCCA ACTACAAGAAGACAAGCAGTCATGAAAACCTTATATTCCCTGAGG

AGGTTCTACCCCGTGGAAACGCTCTTTAATGGAACCTTAGCTTTAGCTGGTCGTGACCA  
AGAAACCACCGGTTTCGCTTGGTGGGCCGGGAATGCCCGGCTTATCAATTTATCCGGTA  
AACTACTAGGGGCTCATGTAGCCCATGCCGGATTAATCGTATTCTTGGCCGGAGCAATG  
AATCTATTTGAAGTAGCTCATTTTCGTACCAGAAAAGCCTATGTATGAACAAGGATTAATT  
TACTTCCCCACCTAGCTACTCTAGGTTGGGGGGTAGGTCCTGGTGGGGAAGTTATAGA  
TACTTTTCCATACTTTGTATCTGGAGTACTTCATTTAATTTCCCTCGGCAGTATTGGGCTTT  
GGCGGTATTTATCATGCACCTTTTAGGACCTGAGACGCTTGAAGAATCTTTTCCATTCTTC  
GGTTATGTATGGAAAGATAGAAAATAAAATGACTACAATTTTAGGTATTCACTTAATCTTG  
TTAGGTATAGGTGCTTTTCTTCTAGTATTCAAGGCTCTTTATTTTGGGGGCGTATATGATA  
CTTGGGCTCCGGGAGGAGGAGATGTAAGAAAAATCACCAACTTGACGCTTAGCCCGA  
GTATCATATTTGGTTATTTACTAAAATCGCCCTTTGGGGGGGAAGGATGGATTGTTAGTG  
TAGACGATTTGGAAGATATAATCGGAGGCCATGTATGGTTAGGTTCCATTTGTATACTTG  
GTGGAATTTGGCATACTTAACCAAACCCCTTCGCATGGGCTCGACGTGCACTTGTATGG  
TCTGGAGAGGCTTACTTATCTTATAGTTTAGCGGCCATATCTGTCTTTGGTTTCATTGCTT  
GTTGTTTTGTCTGGTTCAATAATACGGCTTATCCTAGTGAGTTTTATGGACCCACTGGAC  
CAGAAGCTTCTCAAGCCCAAGCATTACTTTTCTAGTTAGAGACCAACGTCTTGGAGCT  
AACGTGGGATCCGCTCAAGGGCCTACCGGTTTAGGTAAATATTTAATGCGTTCCCCAAC  
CGGAGAAGTCATTTTTGGAGGAGAACTATGCGCTTTTGGGATTTGCGTGCTCCTTGGT  
TAGAACCTCTAAGGGGTCCAAATGGGTGGACTTGAGTCGGCTGAAAAAAGACATACA  
ACCTTGGCAAGAACGTCGTTCCGCAGAATATATGACTCATGCTCCTTTAGGTTCTTTAA  
ATTCCGTGGGTGGAGTAGCTACCGAGATCAATGCAGTCAATTATGTGTCTCCTAGAAGT  
TGGTTAGCTACTTCTCATTTTTGTTCTAGGATTCTTCTTCTTCGTAGGGCATTGTGGCAC  
GCAGGAAGGGCTCGTGCAGCTGCAGCAGGATTTGAAAAAGGAATTGATCGTGATTTTG  
AACCTGTTCTTTCCATGACCCCTCTTAATATGACTATAGCCCTTGGTAAATTTACCAAAG  
ACGAAAAAGATTTGTTTGATATTATGGATGACTGGTTACGTAGGGACCGTTTCGTTTTT  
GTAGGCTGGTCCGGCCTATTGCTCTTTCCTTGTGCCTATTTCCCGTAGGGGGTTGGTTC  
ACGGGTACAACCTTTGTAACCTCATGGTATACCCATGGATTGGCCAGTTCCTATTTGGAA  
GGCTGCAATTTCTTAACCTGCCGAGTTTCTACTCCTGCTAATAGTTTAGCACATTCTTTG  
TTATTACTATGGGGTCTGAAGCACAAGGAGATTTACTCGTTGGTGTCAATTAGGCGG  
TCTGTGGACTTTTGTGCTCTCCACGGCGCTTTCGGACTAATAGGTTTCATGTTACGTCA  
ATTCGAACCTGCTCGATCTGTTCAATTGCGACCTTATAATGCAATCGCATTCTCTGGTCC  
AATTGCCGTTTTTGTCTGTATTCTTAATTTATCCACTAGGTCAGTCTGGTTGGTTCTTT  
GCGCCTAGTTTTGGTGTAGCAGCTATATTTGATTTATCCTCTTTTTTTCAAGGATTTATA  
ACTGGACATTGAACCCATTTATATGATGGGAGTTGCCGGTGTATTGGGCGCTGCTTTG  
CTATGCGCTATTCATGGTGCTACCGTAGAAAATACTTTATTTGAAGATGGTGTATGGCGCA  
AACACATTCGCTGCTTTTAACCCAACCTCAAGCTGAAGAACTTATTCAATGGTCACTGC  
TAATCGCTTTTGGTCCCAAATCTTTGGGGTTGCTTTTTTCCAATAAACGTTGGTTACATTT  
CTTTATTTTATTTGTACCAGTAACTGGTTTATGGATGAGTGCTCTTGGAGTAGTCGGTCT  
GGCCTTGAACCTACGTGCCTATGACTTCGTTTCTCAAGAAATTCGCGCGGCGGAAGAT  
CCTGAATTTGAGACTTTCTACACCAAAAATATTCTCTTAAACGAAGGTATTTCGTGCTTG  
GATGGCGGCTCAAGATCAGCCTCATGAAAACCTTATATTCCCTGAGGAGGTTCTACCCC  
GTGGAACGCTCTTATGTCTGGAAGCACAGGAGAACGTTCTTTTGTGATATTATTACC  
AGTATTCGTTACTGGGTCAATTCATAGCATTAATACTTCCCTATTCATTGCGGGTTGGT  
TATTCGTCAGCACTGGTTTAGCTTACGATGTGTTTGAAGCCCTCGGCCAAACGAGTAT

TTCACAGAGAACCGACAAGGAATTCCATTAATCACCGGCCGTTTTGATTCTTTGGAACA  
ACTCGATGAATTTAGTAGATCTTTTATGACCATAGATCGAACCTATCCAATTTTACAGT  
GCGATGGTTGGCTGTTACGGCCTAGCTGTACCTACCGTTTCTTTTTTGGGGTCAATATC  
AGCAATGCAGTTCATACAACGAATGGCTACACAAACTGTTGAGAACGGTTCTAAATCT  
GCT--CCAAGACGAACTACTGTAGGGAGTTTATTA AACCCCTTGAATTCTGAATATGGTA  
AAGTAGCTCCTGGGTGGGGAACGACCCCTTTGATGGGCGTCGCAATGGCTCTATTTGC  
GGTATTTCTATCTATTATTTTAGAGATTTATAATTCTTCCGTTTTATTGGATGGAATTTCAA  
TGAATATGCTTACTCTCAA ACTTTTCGTTTACACAGTAGTAATATTCTTTGTTTCTCTCTT  
CATCTTTGGATTCTATCCAATGATCCAGGACGTAATCCTGGACGTGAAGAAATGGCCG  
ATACTACTGGAAGAATTCTCTTTGGATAATAGGTACTGTAGCTGGTATTCTTGTGATCG  
GTTTAGTAGGCGTTTTCTTTTATGGTTCATATTCCGGATTGGGTTTCATCCCTGATGCTTAA  
TATCTTTAGTTTGATCTGT-----CTTAATTCTGCCCTTATCCGAGTAGTCTTTTCTTCGCC  
AAATTGCCCGAAGCCTATGCTTTTTTGAATCCAATCGTAGATGTTATGCCAGTCATACCC  
CTGTTCTTTTTTCTTTTAGCCTTTGTTTGGCAAGCTGCTGTAAGTTTTCGAACGACACAA  
TCAAACCCAAACGAACAAAATGTTGAATTGAATCGTACCAGCCTCTACTGGGGTTATT  
ACTCATTTTTGTACTTGCTGTTTTATTTTCCAATTATTTCTTCAATATGGAAGTAAATATTC  
TTGCATTTATTGCTACTGCACTGTTCATTTTAGTTCCTACTGCTTTTCTACTTATAATTTAT  
GTAAAACAGTCAGTCAAACGATATGGAAACAGCAACCCTAGTCGCCATCTTTATATC  
TGGTTTACTTGTAAGTTTTACTGGGTACGCCTTATATACCGCTTTTGGGCAACCTTCTCA  
ACA ACTAAGAGATCCATTCGAGGAACATGGGGACATGGAAGCATTGGTTTATACATTCC  
TCTTAGTCTCGACTCTAGGGATAATTTTTTTCGCTATCTTTTTTLAGAGAACCGCCGAAAA  
TTTCAACTAAAAA-----ATGACTCTTGCTTTCCAATTGGCTGTTTTTGCATTAATTGCTA  
CTTCATCAATCTTATTGATTAGCGTACCCGTTGTATTTGCTTCTCCTGATGGTTGGTCAA  
GTAACAAAATGTTGTATTTTCAGGTACATCATTATGGATTGGATTAGTCTTTCTGGTGG  
GTATCCTTAATTCTCTCATCTCT-----ATGTCACCACAAACAGAGACTAAAGC  
AAGTGTGGATTCAAAGCTGGTGTTAAAGATTACAAATTGACTTATTATACTCCTGAATA  
TGAAACCAAGGATACTGATATCTTGGCAGCATTTTCGAGTAACTCCTCAACCTGGAGTTC  
CGCCTGAAGAAGCAGGGGCCGAGTAGCTGCCGAATCTTCTACTGGTACATGGACAAC  
TGTATGGACCGATGGACTTACGAGCCTTGATCGTTACAAAGGCCGATGCTATGGAATCG  
AGCCTGTTCCCTGGAGAAGAAAATCAATTTATTGCTTATGTAGCTTACCCATTAGACCTTT  
TTGAAGAAGGTTCTGTACTAACATGTTTACTTCCATTGTAGGTAATGTATTTGGGTTCA  
AAGCCCTGCGTGCTCTACGTCTGGAAGATTTGCGAATCCCTACTGCGTATGTTAAACT  
TTCGACGGTCCGCCTCACGGTATCCAAGTTGAGAGAGATAAATTGAACAAGTATGGTC  
GTCCCCTGTTGGGATGTACTATTA AACCTAAATTGGGGTTATCCGCTAAAACTACGGT  
AGAGCTTGTTATGAATGTCTTCGTGGTGGCCTTGATTTACTAAAGATGATGAGAACGT  
GAACTCGCAACCATTTATGCGTTGGAGAGACCGTTTCTTATTTTGTGCCGAAGCTATTTA  
TAAAGCACAAGCTGAAACAGGTGAAATCAAAGGGCATTACTTGAATGCTACTGCGGGT  
ACATGCGAAGAAATGCTTAAAAGGGCTGTATTTGCCAGAGAATTGGGAGTTCCTATCGT  
AATGCATGACTACCTAACAGGGGGATTCACTGCAAATACTAGCTTGTCTCATTATTGCC  
GAGATAATGGTCTACTTCTTCACATCCACCGCGCAATGCATGCAGTTATTGATAGACAG  
AAGAATCATGGTATGCACTTCCGTGTACTAGCTAAAGCGTTACGTATGTCTGGTGGAGA  
TCACATTCATTCCGGTACCGTAGTAGGTA AACTTGAAGGGGAAAGAGAAATCACTTTG  
GGCTTTGTTGATTTACTGCGTGATGATTTTATTGAAAAAGATAGAAGTCGCGGTATTTAT  
TTCACCCAAGATTGGGTCTCTCTACCAGGTGTTCTTCTGATGCTTCGGGGGGTATTCA

CGTTTGGCATATGCCTGCTCTAACCGAGATCTTTGGGGATGATTCCGTGCTACAGTTCG  
GTGGAGGAACTTTAGGGCACCCCTTGGGGAAATGCACCTGGTGCCGTAGCTAATCGAGT  
AGCTCTAGAAGCATGTGTACAAGCTCGTAATGAGGGACGCGATCTTGCTACTGAGGGT  
AATGAAATTATCCGTGAGGCTACCAAATGGAGTCCTGAACTAGCTGCTGCTTGTGAAGT  
ATGGAAGGAGATCAAATTTGAGTTCAGGCAATGGATACTTTGGATACGATGGCGATAC  
ATTTATACAAAACCTTCTACCCCGAGCACACGCAATGGAACCGTAGACAGTCAAAGTAA  
ATCCAATCCACGAAATAATTTGATCTATGGACAGCATCATTGTGGTAAAGGTCGTAATGC  
CAGAGGAATCATTACCGCAGGGCATAGAGGGGGAGGTCATAAGCGTCTATAACCGTAAA  
ATAGATTTTCGACGGAATGAAAAAGACATATATGGTAGAATCGTAACCATAGAATACGA  
CCCGAATCGAAATGCATACATTTGTCTCATACTATAGGGATGGTGAGAAGAGATATAT  
TTTACATCCCAGGGGGGCTATAATTGGAGATACCATTGTTTCTGGTACAGAAGTTCCTAT  
AAAAATGGGAAATGCCCTACCTTTGACCGATATGCCCTTAGGCACGGCTATACATAACA  
TAGAAATCACACTTGGAAAGGGTGGACAATTAGCTAGAGCGGGCGGGTGTGTAGCGA  
AACTGATTGCAAAAAGAAGGGAAATCGGCCACATTAATAATTACCTTCTGGGGAGGTCG  
TTTGATATCCAAAACCTGCTCAGCAACAGTCGGACAAGTGGGGAATGTTGGGGTGAAC  
CAGAAAAGTTTGGGTAGAGCCGGATCTAAGCGTTGGCTAGGTAAGCGCCCTGTAGTAA  
GAGGAGTAGTTATGAACCCTGTAGACCATCCACATGGGGGTGGTGAAGGGAGGGCCCC  
AATTGGTAGAAAAAACCCACAACCCCTTGGGGTTATCCTGCACTTGGAAAAAGAAGT  
AGAAAAAGGAATAAATATAGTGATAATTTGATTCTTCGTCGCCGTAGTAAAATGATTCA  
ACCTCAGACCCATTTGAATGTAGCAGATAACAGCGGGGCTCGAGAATTGATGTGTATTC  
GAATCATAGGAGCTAGC---CATCGTCGATATGCTCATATTGGTGACGTTATTGTTGCTGTG  
ATCAAAGACGCAGTTCCAAACATGCCTCTAGAAAGATCAGAAGTGGTCAGAGCTGTAA  
TTGTCCGTACTTGTAAGAAGCTTAAACGTGACAACGGTATGATAATACGATATGATGAC  
AATGCTGCAGTTGTGATTGATCAAGAAGGAAATCCAAAAGGAACTCGAGTTTTTGGTG  
CGATTGCCCGAGAATTGAGACAGTTCAATTTTACTAAAATAGTTTCATTAGCTCCCGAG  
GTATTAACCTATAACCCCAAAAAGAACAGATTCCGTAAACAACATAGAGGAAGAATGA  
AGGGAATATCTTATCGAGGTAATACTATTTGTTTTGGTAAATACGCCCTTCAGGCACTTG  
AACCCGCTTGGATCACATCTAGACAAATAGAAGCAGGTCGACGAGCAATGACACGAAA  
TGCACGTCGCGGTGGAAAAATATGGGTCCGTATATTTCCAGATAAACAGTTACAGTAA  
GGCCCGCAGAAACACGTATGGGTTCAGGTAAAGGCTCTCCCGAATATTGGGTAGCTGT  
TGTTAAACCAGGTCGAATCCTTTATGAAATGGGTGGAGTAACAGAAAATATAGCCAGA  
AGGGCTATTTCAATAGCAGCGTCCAAAATGCCTATACGAGCTCAATTCATCATTTCGGG  
AATGACCAGAATTAGACGGGGATATATCGCTCGGAGACGTAGAACAAAAATTCGTTTAT  
TTGCATCAAGCTTTCGGGGGGCTCATTCAAGACTTACTCGAACTATTACTCAACAAAAA  
ATAAGAGCTTTGGTTTCGGCTCATCGGGATAGGGATAGGCAAAAAATCAATTTTCGTCG  
TTTGTGGATCACTCGAATAAATGCAGCAATTCGCGAA---AGGGGGGTATGCTATAGTTAT  
AGTAGATTAATAAATGATCTGTACAAGAGACAGCTGCTTCTTAATCGTAAATACTTGC  
ACAAATAGCTATATCAAATAGGAATTGTCTTTATATGATTTCCAATGAGATCATAAAGA  
AGTAAGTTGGAAGGAATCCACCGGT-----ATGTTAAATGAAGTATACGCTTTAGGTCAAC  
ATATATCTATGTCTGCTCACAAGCGCGAAGAGTAATTGATCAAATTCGTGGGCGTTCCT  
ACGAAGAAACACTTATTATATTAGAATCATGCCTTATCGAGCATGTTATCCCATTTTTA  
AATTAGTTTATTCTGCAGCAGCAAATGCTAGTTCCAATATGGGTTCGAATGAAGCAAAT  
TTAGTGATTAGTAAAGCCGAAGTAAATAAAGGTACTATCATGAAGAGATTAATAACATCG  
AGCTCGAGGACGTAGTTTTTGCGATACAAAACCTACCTGCCATATAACTATTGTAATGA



AAGATATATCCTTAGATGGGGGAACATGGGACAAAAAATGGATGGAATCAGGTATGC  
AGTATTTACAGACAAAAGTATTCGGTTATTGGGGAAAAAT---CAATATACTTCTAATGTC  
GAATCAGGATCAACTAGGACAGAAATAAAGCATTGGGTTCGAACTCTTCTTTGGTGTCA  
AGGTAATCGCGATGAATAGTCATCGACTTCGGGGAAAGGCTAGAAGAATGGGACCCAT  
TATGGGACAGACAATGCATTACAGACGTATGATCATTACGCTTCAACCGGGTTATTCTAT  
TCCACCTCTTAGAAAAGAAAAGAACTATGGCAGTTCCAAAAAACGTACTTCGATATCA  
AAAAAGCGTATTCGTAAAAATATTTGGAAAAGGAAAGGATATGGAGCGGGCGTTAAAAG  
CTCTGTCATTAGGGAAATCTCTTTCTACCGGAATTCAAAAAGTTTTTTTTGTACGACAA  
ACAAATAAGATGGCCAAGGGTAAAGATGTGCGAATACCGGTTCTTTTGGAAATGTACCG  
CTTGTGTTTCGAAACGGT-----GTTAATAAGGAATCAACGGGCATTTCCAGATATATTACTC  
AAAAGAACCGGCACAATACGCCTAATCGATTGGAGTTACTAAAATTCTGTCCATATTGT  
TACAAACATACGATTCACGGGGAGATAAAGAAAATGAAAATAAGAGCTTCTGTTCGTA  
AAATTTGTGAAAAATGTGCGACTAATCCGTCGTCGGGGACGAATTATAGTAATTTGTTCC  
AACCCAAGACATAAACAAAGACAAGGAATGGTTCGAGAGAAAATAACAGTATCTACTC  
GGACACTACAGTGGAAAGTGTGTTGAATCAGCAGCAGACAGTAAGCGTCTTTTGTATGG  
GCGCTTTATTCTGTCTCCGCTTATGAAAGGTCAAGCAGACACAATAGGCATTGCGATGC  
GAAGAGCTTTGCTTGGAGAAATCGAAGGAACATGTATCACACGCGCAAAATCTGAT----  
-AAAATATCACACGAATATTCTACCATAATGGGTATTCAAGAATCAGTACATGAAATTTTA  
ATGAATTTGAAAGAAATCGTATTGAGAAGTAATCTCTATGGAAC TTATGAGGCATCTATT  
TGTGTCAGGGGCCCTGGATATGTA ACTGCTCAAGATATCATCTTACCGCCTTATGTAGAA  
ATCGTCGATAATACACAGCATATAGCTAGCTTGACGGAACCCATTGAGTTGGTTATTGGA  
TTACAAATAGAGAAGAATCGTGGATATCTTATAAAAGCGCCAAAT---ACCTTTGATGGAA  
GTTAT-----CCTATAGATCCTGTATTCATGCCTGTTTCGAAATGCGAATCATAGTATTCATC  
TTATGAAAATGGTAAC-----AAAGAGATACTATTTCTCGAAATATGGACAAATGGAAGTT  
TAACTCCTAAAGAAGCACTTCACGAAGCCTCCCGGAATTTGATTGATTTATTGATTCCC  
TTTTTACATACCAAAGAAGAA-----AATTTAAATTTAGAGGACAATCAA---CACATAGTTC  
CTTTACCCCTTTTACCTTTTATGATAAATTGGCT--AACTAACAAAAAATAAAAAA---A  
AAATGGCGTTGAAATCGATTTTTATTGACCAATCAGAATTGCCTCCCAGAATCTATAATT  
GCCTCAAAGGTCCAACATATATACATTATTGGACCTTTTGAATAACAGTCAAGAAGAT  
CTTATGAAAATAGAACATTTTCGCATAGAAGATGTCAAACAAATTTTAGGGATTCTAGA  
AAAAAAT-----TTCGTAATTGATTTACCGAAAAATAAG-----ATGGCCAC  
AATACCTGGATTTAATCAGATACAATTTGAAGGATTTTGTAGGTTTCATTGATCAGGGTTT  
GGCAGAAGAGCTTTCTAAGTTTCCAAAAATTGAAGATACAAATCAAGAAATTGACTTT  
GAATTGTTTTTGGAAAGATATCAATTGGTAGAACCCCTGATAAAGGAAAGAGATGCTGT  
GTATGAATCACTCACATATTCTTCTGAATTATATGTATCCGCGAGACTCATTGGA AAAA  
CCGTAGGTATATCCAAGAACAAACAATTTTAATAGGAAAGATCCCTCTAATGACTTCTC  
TGGGAGCTTTTATAGTAAATGGAATCTATAGAATTGTGATCAATCAAATATTGCAAAGTC  
CCGGTATTTATTACCAGTCAGAATTAACGATAACGGAATTTTCGGTCTATACCGGCACCA  
TAATATCAGATTGGGGAGGAAGATTAGAATTAGAAATTGATAGAAAAGCAAGGATATGG  
GTTTCGTGTGAGTAGGCAACAAAACACTATCTATTCTAGTTCTATTATCAGCAATGGGGTT  
GAATATAAGAGAAATTCTAGAGAATGTTTGCTATCCTGAACTATTTTTGTCTTTTCTGAA  
TGATAAA-----AAAAAATAGGGTCAAAGAAAATGCTATTTTGGAAATTTATCAACAAT  
TTGCTTGTGTAGAGGGAGATCCGGTATTTTCTGAATCCTTATCTAAGGATTTACAAAA  
AAATTTCTTCAACAAAGATGTGAATTGGGAGGGATCGGTCGACGAAATATGAATCGGA

GACTAAACCTTGATATACCCCAAAAACAATACATTTTTTGTACCGCGAGATATATTGGCAG  
CCGCGGATCGTTTGATTTCGAATAAAATTTGGAATGGGTACACTTGACGAT-----ATGAAT  
CATTTGCAAATAAACGTATTTCGTTCTGTAGCAGATCTTTTACAAGAGCAATTTGGATTG  
GCCTTGGTTTCGTTTAGAAAATATGGCTCGAGGAAACATATATGCAGCACTTAAG---CATA  
ACTGGACA---CCAACCTCCTCAGA ACTTGGTAAATTCAACTCCA-----TTAACAGATA  
CTTATAAAGTTTTTTTTCCGTTTACACCCATTATCTCAAGTTTTGGATCGAACTAATCCATT  
GACACAAATAGTTCATGGGAGAAAATTGAGTTATTTGGGCCCGGGGGATTGACTGCG  
CGAACTGCTACTTTTCCAATACGAGATATTCATCCTAGTCACTATGGGCGTATTTGCCCA  
ATTGACACATCTGAAGGAATAAATGTTGGGCTTATTGGATCCTTAGCAATTCATGCGAG  
GATTGGCCGTTGGGGG---TCTCTAGAAAGTCCGTTTTAT-----AAAATTTCTGAGAGAT  
CAAAAGGG-----GCACAGATGCTTTATTTATCACCGGGTAGAGATGAATACTATATGGTA  
GCGGCAGGAAATTTCTTTGGCCTTGAATCAGGGTATTCAGGAAGAACAGGTTGTTCCAG  
CTCGATATCGTCAAGAATTCCTGACTATTGCATGGGAACAGGTTTCATCTTCGAAGTATTT  
TTGCCTTCCAATATTTTTCTATTGGAGCTTCCCTCATTCCTTTTATCGAGCATAATGATGC  
GAATCGGGCTTTAATGAGTTCTAATATGCAACGCCAAGCGGTCCCTCTTTCTCAGTCCG  
AGAAGTGCATTGTTGGA ACTGGATTGGAAGGCCAAGCGGCTCTAGATTCAAGGGGCTCT  
TGCTATAGCCGAACACGAAGGAAAGTTTTTTATACCGATACTGACAAGATCCTTTTAT  
CAGGTAATGGGGATACTCTAAGGATTCATTAGTTATGTATCAACGTTCCAACAAAATA  
CTTGTATGCATCAAAAACCCAGGTTCCGGCGGGGTAAATGCATTA AAAAGGGACAAAT  
TTTAGCGTATGGTGTCTGCTACAGTTGGTGGCGAACTCGCTTTGGGGAAAACGTATTAG  
TAGCTTATATGCCATGGGAAGGTTACAATTTTGAAGATGCAGTACTCATTAGCGAGCGC  
TTAGTATATGAAGATATTTATACTTCTTTTCACATACGTAAATATGAAATTCAGATTAAC---  
-----CAAGGC---CCCGAAAGGGTCACTAATGAAATACCGCATTTAGAAGTCCATTTACTT  
CGAAATTTAGACAAAAATGGAATTGTAATGCTGGGATCTTGGGTGGAACAGGTGATAT  
TTTAGTAGGTAAATTAACGCCCCAAATGGTGAAAGAA---TCATCGTATGCCCCGGAAGA  
TAGATTGTTACGAACCATACTTGGCATGCGGGTATATACTTCAAAAGAACTTGTCTAA  
AACTACCTATAGGCGGTAGGGGTCGGGTTATTGATGTGAGATGGGTCCAGAGTTCTAAG  
ACAGATGAGACAGAGAAAACAGAAAGTATTCGTGTATATATTTTACAGAAACGCGAAA  
TAAAAGTAGGCGATAAGGTAGCTGGAAGACATGGAATAAGGGTATCATTTCAAAAT  
TTTACCTAGACAAGATATGCCTTATTTGCAAGATGGAAGCCCCGTTGATATGGTCTTCAA  
TCCATTAGGAGTACCTTCGCGAATGAATGTAGGACAAATATTTGAATCTTCACTCGGGTT  
AGCGGGGGATTGCTAGACAGACATTATCGAATAGCGCCTTTTGATGAGAGATATGAAC  
AAGAAGCTTCGAGAAA ACTGGTGT TTTCTGAATTATATGAAGCCAGTAAGCAAACAGC  
GAATCCGTGGATATTTGAACCCGAGTCTCCAGGAAAAAGCAGAATATTTGATGGAAGA  
ACGGGGGATCCTTTTGAACAACCTGTTATAATAGGAAAGCCTTATATCTTGAAATTAATT  
CATCAAGTTGATGATAAAATCCATGGGCGTTCCAGTGGGCGTTATTCACGTCTTACACA  
ACAACCCCTTAAAGGAAGGGCCAAGAAAGGGGGGCAACGGGTAGGAGAAATGGAGG  
TTTGGGCTTTAGAAGGGTTTGGCGTTGCTTATATTTTACAAGAAATGCTTACTTATAAAT  
CTGATCATATTAGAGCTCGCCAGGAAGTACTTGGTACTATAATCTTTGGAGGAAGAATA  
CCGACTCCTGAGGATGCTCCAGAATCTTTTCGGTTGTTTCGTTTCGAGA ACTACGATCTTT  
AGCTCTGGA ACTGAATCATTTTCTTGTATCTGAGAAGACTTTCCAGCTTAATAGGAAGG  
AAGCT-----ATGATCGATCGATATACACATCAACA ACTCCGAATTGGATTAGT  
TTCTCCTCAACAAATAAGTACTTGGTCCAAAAAAATCCTGCCTAATGGCGAGATAGTTG  
GAGAGGTGACAAAACCTTATACCTTTCATTACAAAACCAATAAACCAGAAAAAGATGG

ATTATTTTGTGAAAGAATTTTTGGCCCTATCAAAAGTGGAATTTGTGCTTGTGGAAATTA  
TCGAGTAATTGGAGATGAAAAGGAAGACCCGCAATTTTGTGAACAATGCGGAGTCGA  
GTTTGTGATTCTCGGATACGAAGATATCAAATGGGCTACATCAAACCTTGCATACCCGGT  
AATGCATGTGTGGTATTTGAAACGTCTTCTAGTTATATTGTGAATCTTTTAGATAAACC  
TCTTAACGAATTAGAAGACCTAGTATACTGCGGT-----TTTTATTTTGTAGGCC---ATAG  
ATAAAAAACCCACTTTTTTACGATTACGGGGTTTATTGGAATATGAAATTC AACCTGG  
AAATACAGGATCCCAATTTTTTTTACTACCCGGAGCTTCGATACATTTTCGAAATCGAGA  
AATGTCTACCGGGGGAGGTTCTATCAGACAACAATTAGCCAATCTAGATTTACGAATGA  
TTATAGATTATTCATTGGTAGAATGGAAAGAATTGGAGGAAGAG--GAACCCACAGGGA  
ATGAATGGGAAGATCGAAAAGTTGGAAGAAGAAAAGATTTTTTGTCTAGACGCATGGA  
ATTGGCTAAGCATTTTATTTCGAACAAATATAGAACC AAAATGGATGGTTTTGTGTCTATT  
ACCAGTCTTCTCCTGAGTTGAGACCAATCTATCATATAGATGAGGATAAACTAGTGA  
CCTCGGATATTAATGAAATCTATAGAAGAATTATCTATCGGAATAATACTCTTACAGATCT  
ATTAACAACAAGTATAGCTACGCCAGAAGAATTAATAATATCTCAGGAAAAATTGCTAC  
AAGAAGCCGTGGATGCACTTCTTGATAATGGAATCTGCGGACAACCAATGAGGGATGA  
TCATAATAGAATTTACAAGTCGCTTTCAGATGTAATTGAAGGCAAAGAAGGAAGAGTT  
CGCGAGACTCTGCTTGGTAAACGAGTTGATTATTCAGGGCGGTTCAGTGATTGTCTGCG  
GCCCTTCACTTTCATTACATCGATGTGGATTGCCCTCGCGAAATTGCAATAGA ACTTTTTCC  
AGGCATTTGTAATTCGTGACCTAATTAGAAAACATCTTGCTTCGAACATAGGAGTTGCT  
AAGAGTCAAATTCGGAAAAAAAACCGATTGTATGGGAAATACTTCAGGAAATTCTGG  
ATGACCATCCTGTATTGCTGAATAGAGCGCCTACTCTGCATAGATTAGGCATACAGGCAT  
TCCTCCCCATTTTAGTGGAAGGGCGTGCTATTTGTTTACATCCATTAGTTTGTAAAGGCT  
TCAATGCAGACTTTGACGGGGATCAAATGGCTGTTTCATGTGCCCTTATCTTTAGAGGCT  
CAAGCAGAGGCACGTTTACTTATGTTTTCTCATATGAATCTTTTGTCTCCA ACTATTGGA  
GATCCCATTTCTGCACCAACTCAGGATATGCTTAGTGGACTCTATGTCTTAAACGAGTGG  
AAATCGTCGGGGTATTTGTGTAATAGGTATAATCCATGTAATCGTAGAAAC-----TATC  
AAAATGAAGAT-----AATAACTATAAGTATACAAAAAAAAGAACCCTTTTTTTGTAA  
TGCCTATGATGCAATTGGAGCTTATCGGCAAAAACGAATTCATTTAGGTAGTCCTTTGT  
GGCTGCGGTGGCGACTAGATCAACGT--GTTATTGCTGCA-----AGAGAAGCTCCTATCG  
AAATTCATGATGAATCTTTGGGGACCTATTATGAGATTTATGGACACTATCTAATAGTAA  
GAAGTATAAAAAAGAAATCTTTATATATATATTTCGAACCACTCTTGGTTCATATTTATCT  
TTATCGAGAAATAGAAGAAGCCATACAGGGGTTTTGGCAGTGTAATCTATGCTACCAG  
CGGGAATTCGAGTCTCGCCGGGTATGGAGGACTGATGGCAGAACGGCCCACTCAGGT  
CTTTCACAATAAAGTGATAGACGGA ACTGCCATGAAACGACTTATTAGTCGATTTATTG  
ATCACTATGGAATAGGATATACATCACATATCCTGGATCAAGTAAAGACTCTGGGTTTCC  
GACAAGCTACCGCCGCATCCATTTCAATTAGGAATTGATGATCTTTTAAACAATACCTTCTA  
AAAGATGGCTAGTTCAAGACGCTGAACAACAAGTTTTTATTTTGGAAAAACACCATCA  
TTATGGGAATGTACACGCGGTAGAAAAATTACGTCAATCGATCGAGATATGGTATGCCA  
CAAGTGAATATTTGAGACAAGAAATGACTCCTAATTTTCGGATGACCGATCCTTTAAT  
CCAGTCCATATAATGTCTTTTTTCGGGAGCCAGAGGAAATGCATCTCAGGTACATCAATT  
AGTAGGTATGAGAGGATTAATGTCGGATCCCAAGGACAAATGATTGATTTACCCATTC  
AAAGCAATTTACGCGAAGGACTCTCTTAAACAGAATATATTATTTCTTGCTACGGAGCC  
CGTAAAGGAGTTGTGGATACCGCTATCCGAACATCAGATGCAGGATATCTCACGCGCAG  
ACTTGTGAAGTAGTGCAACACATTGTTGTACGCCGAACAGATTGTGGAACCGTTTCGA

GGTATTTCTGTAAGTCCTCGAAATGGAATGATGGCG--GACAGGATTTTTATCCAAACAT  
TAATTGGCCGTGTATTAGCAGATGATATATATATAGGTTTCGCGATGCATTGCTACTAGAAA  
TCAAGATATTGGGGTTGGACTTGTCAATAGATTCACTA-----TTTAGAGCAC  
AACCAATCTCTATTTCGAACCCCATTTACTTGTAGGAGTACATCTTGGATTGTCAATTAT  
GTTATGGCCGGAGTCCAGCTCATGACGACCTGGTCGAATTGGGAGAAGCTGTAGGTAT  
TATTGCAGGTCAATCTATTGGAGAACCGGGCACTCAATTAACATTAAGAACTTTTCATA  
CTGGCGGAGTATTCACAGGGGGTACTGCAGAACATGTGCGAGCCCCTTCTAATGGAAA  
AATAAAATCAATGAGGATTTGGTTCATCCGACACGTACACGTCATGGACATCCTGCTT  
TTCTATGTTCTAGAGACTTGTATGTAACCTATTGAGAGTGAAGATATTATACACAATGTGT  
GTATTCCGCCAAAAGTTTTCTTTTAGTTCAAACGATCAATATGTAGAATCAGAACAA  
GTCATTGCTGAGATTCGCGCAAGAACATCCACT--TTGAATTTGAAAGAGAAGTTTCGA  
AACATATTTATTCTGACTCAGAGGGCGAA--ATGCACTGGAATACCGATGTGTACCATG  
CACCTGAATTTACATATGGTAATATTCATCTCTTACCAAAAACAAGTCATTTATGGATATT  
ATTAGGGGAGCCCTGGAGA-----TCTAGTCTAGGCCCTGTTCGATCCACAAGGATCAA  
GATCAAATGAACGCTTAT-----TCTCTTTCTGTTAAGCGAAGATATATTTCTAACCCCTCA-  
-----GTAACGAATAATCAA---GTGAGACACAAATTTTTTAGTTTCGTATTTTTCTGGTAAAA  
ATGGAGATAGGATTCCTGATTAT--TCAGAACTTAATCGAATGACATGTACTGGTCGTTG  
TAATCTCAGATATCCG---GGCATTCTCGACGGGAATTCC-----GATTTATTGGCAAAGAGG  
CGAAGAAATAGAGTCATCATCCACTCGACTCGATTCAAGAAGGCGAGAACCAACTAA  
TACCTTCTTCAGGTATATCAATTGAAATCCCC-----AGAAATGGTATTCTCCGTAGAAATA  
GTATTCTTGCTTATTTTCGACGATCCTCGATATATAAGAAAGAGCTCGGGACTTACTAAAT  
ATGAGACTAGAGAACTGAATTCAATCGTCAACGAAGAGGAT-----TTGATTGAGTATCG  
AGGA---GTAAAGGTATTTTGGCCAAAATACAAGGAAGTAAATCCATTTTTTTTTTATCCC  
GTGGAAATCCACATTTTGGCCGAATCTTCTCCATAATGGTACGGCACAATAGTATTATT  
GGGGTAGATACACAAATCACTTTAAATAGAAGAAGTCGGGTAGGCGGATTGGTCCGAG  
TGAAGAAAAAAGCAGAAAAAATTAACCTGATAATCTTTTCTGGAGATATTCATTTTCT  
GAAAAGACAAATAAGGCATTCCGG-----TTGATACCACCAGGAGGG-----GGAAAA  
AAAAATCCAAAGAATACAAAAA-----TTGAAAATTTGGCTCTATATCCAACGA-----A  
TGAAACTTTCCAGGTATGAAAAAAGTATTTTGTTTTGGTTCAACCTGTAGTCCCATATA  
AAAAACGGATGGTATAAATTTAGGA---CTTTCCCGGCGGATCTCTTGCAGGAAAGTG  
ATAATCTACAACCTTCGAGTTGTCAATTATATCCTTTATTACGACCCA-----ATTCTTGAAT  
TTGGGACACAAGTATTCAATTAGTTCGGACTTGTTTAGTGTGAATTGGGACCAAGACA  
AAAAG-----ATCGAAAAGGCCTGTGCTTCCCTTTGTTGAAATAAGGACAAATGG  
TTTGATTAGAGATTTTCTAAGAATCGACTTAGCGAAGTCACCTATTTTCATATACTGGAAA  
AAGGAACGATCTGCCGGGTTTCAGGATTGATCTATGAG---AATGGATCAGATCGCGCTAA  
TGCAATCCGTTTTTCTCCATTTATCCTCTTCC-----AAGGCAAGGATTCAAGAATCC  
CTAATCCAAATCAAGGAATTTTATACGTTGTTGAATCGA-----AATAAGGAATCGC  
AATCTTTGATAATTTTGTTCATCATCCAATTGTTCTCGAATAGGCCCA-----TTCAACGATG  
TAAAATCTCCCAATGTG-----ATAAAAGAATCA---CCCCTAATTCCAATTAGGAATTCG  
TTGGGCCCTTAGGAACA-----GGCTTTCCAATTTTCGAATTTTCGATTTA-----TTTTCCCAT  
TTA-----ATAACCATAATAAAATCTTG---GTAACCTAATTTGCAACTTGACAATTTAAA  
G-----CATATTTTCAAATACTTAAA-----TATTATTTACTGGATGAAAAT-----GGTAA  
AATTTATAATCCCTATTCATGCAGTAACATCATTTTGAATCCATTCATTTGAATTTGGTAT  
TTTCTCCATTACAATTATTGTGAAGAGACATCT--ACAATCGTTAGTCTTGGGCAGTTTC

TTTGTGAAAATGTATGTATAGCCAAAAAAGGGCCGCAT--TTAAAA-----TCAGGTCAAG  
TTCTAATTCTTCAA--GTTGACTCTGTGGTAATACGATCAGCTAAGCCTTATTTGGCTACT  
CCAGGAGCAACTGTTTCATGGACATTATGGGGAAATCCTTTACGAAGGAGATACATTAGT  
TACATTTATATATGAAAAATCAAGATCTGGTGATATAACGCAAGGTCTTCCAAAAGTGG  
AACAGGTGTTAGAAGTGC GTTCGATTGATTCAATATCGATGAATCTCGAAAAGAGGATT  
GAGGGTTGGAACAAATGTATAACAAGAATTCTTGGAATTCCTTGGGCATTCTTTATTGG  
TGCTGAGCTAACTATAGTGCAAAGTCGTATCTCTTTGGTTAATAAGGTCCAAAAGGTTT  
ATCGATCCCAGGGGGTGCAGATACATAATAGGCATATAGAAATTATTGTACGTCAAATAA  
CATCAAAGTGTTGGTTTCAGAA-----GATGAAATGTCTAATGTTTTTTTCGCCCGGAG  
AACTAATTGGATTGTTGCGAGCGGAACGAATGGGGCGCGCTTGGGAAGAAGCGATCTG  
TTACCAAGCCGTCTTATTGGGAATAACAAGAGCATCCATGAATACTCAAAGTTTCATATC  
CGAAGCGAGTTTTCAAGAAACCGCTCGAGTTTTAGCAAAGCAGCTCTCCTGGGGCGT  
ATCGATTGGTTGAAAGGCCTGAAAGAAAACGTTGTTCTGGGGGGGATGATACCTGTTG  
GTAGCGGCTTCAAACACCT--TCAAGCGAACCTAACAAACATTCTTAACAACATTGCC--  
----TTTGA ACTCAAAAAGAGAATCTATTAGAGGGGGAAATGAAA-----GATATTTTGTTC  
TACCATAGAAAATTCTTTGATTCTTGCCCTTCAAAGAATTTCCATGATACACAAGAACAA  
TCATTTTTT-----ATGACAAGAAGATATTGGAACATTAATTTAGAAG  
AGATGATGGAAGCAGGAGTTCATTTTGGCCATGGTACTAGGAAATGGAATCCTAAAATG  
GCACCTTATATCTCTGCAAACGTAAAGGTATTCATATTACAAATCTTACTAGAACTGCT  
CGTTTTTTATCAGAAGCTTGTGATTTGGTTTTTGTATGCAGCAAGTAGGGGAAAACAATT  
CTTAATTGTTGGCACTAAAATAAAGAAGCTGATTCAGTAGCATGGGCTGCAATAAGGG  
CTCGGTGTCATTATGTTAATAAAAAATGGCTCGGTGGTATGTTAACAACTGGTCCACT  
ACAGAAACGAGACTTCATAAGTTTAGAGACTTGAGA ACTGAACAAAAAACAGGGGGA  
CTCAACCGTCTTCCGAAAAGAGATGCGGCTATGTTGAAAAGACAATTATCTCATTTGCA  
AACATATCTGGGCGGGATTAAATATATGACAGGGTTACCCGATATTGTAATCATCGTTGA  
TCAGCACGAAGAATATACGCCCCTTCAAGAATGTATCACATTGGGAATTCCAACAATTT  
GTTAATCGATACAAATTGTGACCCCGATCTCGCAGATATTTGATTCCATCGAATGATT  
ACTCTATATCTTCAATCCGATTAATTCTTAACAACTAGTATTTGCAATTTGTGAGGGCC  
GTTCT--GGCTATATAAGAAATTCGATGGGACAAAAATAAATCCAATTGGTTTCAGACT  
TGGTACAACCCAAGGTCATCATTCCCTTTGGTTCGCACAACCAAAAAATTATTCTGAGG  
GTCTGCAAGAAGATCAAAAATAAAGAATTATATAAAGAATTATGTACAAAAAATATG  
AAAACATCTTCTGGG---GTCGAGGGAATTGCACGTATAGAGATTCAAAAAGAATTGA  
CCTGATCCAAATCATAATCTATATGGGATTTCCAAAATATTAATTGAAAGTCGACCCCG  
AGGAATC-----GAAGAATTACAGATGAATTTACAAAAAGAATTTCAATTCTGCAAATC  
GAAA ACTTAACATTGCTATCACACGAATTGAAAAGCCTTATGGAAACCCTAATATTCTT  
GCAGAATTTATAGCCGGACAATTA AAAAATAGAGTTTTCTTTTCGCAAAGCAATGAAA  
AGGCTATAGAATTA ACTGAACAAGCAGATACAAAAGGAATTCAAGTGCAAATTGCAGG  
ACGTATCGACGGAAAAGAAATTGCGCGTGTGAAATGGATCAGAGAGGGTAGGGTTCCA  
CTACAAACCATTGAGCTAAAATTGATTATTGTTCTTATACAGTTCGAACAATCTATGGG  
GTATTAGGCATCAAATTTGGATATTTATAGAAGGGGAAATGTCGCGTTACCGAGGTCC  
TCGTTTTCAAAAATAACGTCGCTGGGGGCTTTACCAGGGCTAACTAATAAAAGGCC  
AGAGCTGGAAGTGATCTTAGAAACCAATCGCGTTCCGGGAAA---AAATCCCAATATCGT  
ATTCGCCTAGAAGAAAAACAAAATTGCGTTTTTCATTATGGTCTTACAGAACGACAATT  
ACTTAAATACGTTCTGATCGCCGGAAAGGCAAAGGGTCAACAGGTCAGGTTTTACTA

CAATTACTTGAAATGCGCCTGGATAACATCCTTTTTTCGGTTGGGTATGGCTCCGACTATT  
CCGGGAGCTCGCCAATTAGTTAACCATAGACATATTTTAGTAAATGGTCGTATAGTAGAT  
ATACCAAGTTATCGCTGCAAACCCCGAGATACTATTGCGGCGAGGGATGAACAAAAAT  
CTAGAGCTCTAATTCAAAATTCTCTCGATTTCATCCCCTCAT--GAGGAATTGCCAAACCA  
TTGACTCTTCAACCATTCCAA-----TATAAAGGATTAGTCAATCAAATAATAGATAGTAA  
ATGGGTCGGCTTGAAAATAAATGAATTGCTAGTTGTAGAATATTATTCTCGTCAGACTAT  
GTCACGTCGAGGTACTGCAGAAGAAAAAACTGCAAAAATCCGATCCAATTTATCGTAAT  
CGATTAGTTAACATGTTGGTTAACCGTATTCTGAAACACGGAAAAAAATCATTGGCTTA  
TCAAATTATCTATCGAGCCGTGAAAAAGATTCAACAAAAGACAGAAACAAATCCACTA  
TCTGTTTTACGTCAAGCAATACATGGAGTAACTCCGGGTATAGCAGTAAAAGCAAGAC  
GTGTAGGTGGATCGACTCATCAAGTTCCCATTTGAAATAGGATCCACACAAGGAAAAGC  
ACTTGCCATTTCGTTGGTTATTAGCGGCATCCCGAAAACGTCCGGGTTCGAAATATGGCTT  
TCAAATTAAGTTCCGAATTAGTGGATGCTGCCAAAGGGAGTGGCGATGCCATACGCAA  
AAGGGAAGAGACTCATAGAATGGCAGAGGCAAATAGAGCTTTTGCACATTTTCGTATG  
GGTAGTGATACTATTGCTGACATAATAACCTCTATACGAAATGCCGATATGTATAGAAAA  
AGCGTGGTTCGAGTAGCATCTACTAATATCAGCCAAAAGTATTGTTAAAATACTTTTACGA  
GAGGGTTTTATCGAAAACGTGAGAAAACATCGAGAAAACAACAAATATTTTTTGGTTT  
TAACCCTACGACATAGAAGG-----AATAGGAAAAGGACTTAT-----CGAAATCTTTTAA  
ATTTAAAACGGATCAGTCGGCCGGGTCTACGAATCTATTCTAACTATCAAAGAATTCCT  
AGAATTTTAGGCGGGATGGGGGTTGTAATTCTTTCTACCTCTCGGGGTATAATGACAGA  
CCGAGAGGCTCGACTAGAAAGAATAGGCGGAGAAATTTTGTGTTATATATGGATGGCA  
AAAGCTATACCGAAAAGGGTTCACGT-----GGACGTATTGGTTCACGTAAGAGTATAC  
GTAAAATACCAAAGGGGGTTATTCATATTCAAGCAAGTTTCAATAATACCATTGTGACT  
GTTACAGATGTACGAGGGCGAGTGGTTTCTTGGTCTCTGCCGGTACTTGTGGCTTCGG  
AGGTACAAGAAGAGGGACGCCATTTGCTGCTCAAACCGCAGCGGCAAATGCTATTTCGT  
GCAGTAGTAGATCAAGGTATGCAACGAGCAGAAGTCATGATTAAGGTCCCGGTCTCG  
GAAGAGACGCGGCATTACGAGCTATTTCGAGAAGTGGTATACTATTAACTTTTCGTACGG  
GATGTAACCCCTATGCCACATAATGGGTGTAGACCCCGAAAAAAGACGTGTGATGC  
CAACGATTAAACAACCTTATTAGAAATACAAGACAGCCAATTAGAAATGTCACAAAATCC  
CCCGCGCTTCGGGGATGCCCTCAGCGTCGAGGAACATGTACTAGGGTGTAT--ATCACC  
CCAAAAAAACCAAACCTCTGCCTTACGTAAAGTTGCCAGAGTACGATTAACCTCTGGAT  
TTGAAATCACTGCTTATATAACCGGTATTGGCCATAATTCACAAGAACATTCTGTAGTCT  
TAGTAAGAGGGGGGAGGGTTAAGGATTTACCCGGTGTGAGATATCACATTGTTTCGAGG  
AACCTAGATGCTGTTCGGAGTAAAGGATCGTCAACAAGGGCGTTCT--AGTGCCTTG----  
-----ATGGCAAAAAAAGTTTGATTTCAGAGGGAAAAGAAGAGGCAAAAATTGGAACA  
GAAATATCATTTGATTTCGTTCGATCCTCAAAAAAAGAAATAAGC-----AAAGTTCGATC  
GTTGAGTGACAAATGGGAAATTTATGGAAAGTTACAATCCCCACCGCGGAATAGTGCA  
CCTACACGGCTTCATCGACGTTGTTTTTCAACTGGAAGGCCAAGAGCTAACTACCGAG  
ACTTTGGACTATCCGGACACATACTTCGTGAAATGGTTCATGCATGTTTGTGGCCAGGG  
GCGACAAGATCGAGTTGGATGTTAAAAAATTCATTTTTTTCAATTATTTTGAAAGAACA  
AGAAGAAAACAAAGAAAACAGAGGATCTGTTGAATTTCAAGTAGTAAGTTTCACCAAT  
AAGATACGGAACTTACTTCACACTTGAATTGCACAAAAAAGACTATTTATCTCAGA  
GAGGTCTGCGGAAAATCTGGGAAAACGTCAACGCTTGTGGCTTATTTGTCAAAAAA  
AAATAGAGCGCGTTATAAAGAATTAATAGGGCAGTTGGATATTCGAGAGAGAAAAACT

CGT-----ATGGTAAAACCTTCGTTTAAAACGATGTGGTAGAAAGCAA-----CGAATCG  
TTGCAATTGATGTTTCGATCTCGAAGAGAAGGAAGAGATCTTCGGAAAGTGGGTTTTTAT  
GATCCTATCAAGAATCAAACCTATTTAAACGTTCCCGCTATTCTCTATTTCCCTGAAAAA  
GGCGCTCAGCCTACAGGAAGTTCAGGATATTTTAAAAAAGGCAGAGGTTTTTAAGG  
AACTTTGCTCTAATCAAACGAAATTCAAT--ATGGATAAATCCAAGCGAACTTTTCTTAA  
ATCCAAGCGATCTTTTCGTAAGCGTTTGCCCCGATCCAATCGGGGGATCGAATTGATT  
ATAAAAACATGAGTTTAATTAGTCGATTTATTAGTGAACAGGGAAAAATATTATCTAGAC  
GAGTAAATAGATTGACCTTAAAACAACAACGATTAATTACTATTGCTATAAAAACAAGCT  
CGTATTTTATCTTTGTTACCTTTTCTTAATAATGAGAAA-----CAATTTGAAAGAACCGAG  
TCGACCACTAGAAGCTCCTAGTCTTAGAGCCAGAAAAAGAGTGACACGTTCACTAAAA  
AAAAATCCTTTTGTAGCGAATAATTTATTAATAAATAAATAAGCTTAACACAAAAGA  
AGAAAAAGAAATAATAAACCTGGTCCCGGGCATCTACCATTATACCCATAATGGTCG  
GCCATACTATTGCTATCCATAATGGAAAGGAACATTTACCTATTTATATAACAGATCGTAT  
GGTAGGACACAAATTTGGGAGAATTTGCACCTACTTTAAATTTCCGAGGACATGCAAAA  
AGCGATAATAGATCTCGTCGTATGATTTTGAAATCTTTTCTACTAGGTAATCTAGTATCCT  
TATGCATGAAGATAATCAATTCGGTCGTTGTGGTTCGGACTCTATTATGGATTTCTGACCA  
CATTCTCCATAGGACCCTCCTATCTCTTCTCCGAGCTCACGTTATGGAAGAAGGA  
GAAGAAGGAGCCGAGAAGAAGGTATCAGCAACAAGTGGTTTTATTACGGGACAGCTC  
ATAATGTTTCATATCGATCTATTATGCGCCTCTGCATCTAGCACTGGGTAGACCTCATAAA  
TAACTGTCCCTAGCTCTACCGTATCTTTTGTTCATTTCTTCTGCAATAATCACAAACACTT  
CTTTGATTATGGATCTACTACCAGAAATTCATGCGTAATCTCAGCATTCAATGTGTATTC  
CTGAATAATCTCATTTTTCAATTATTGAATCATTTTCAATTTTACCAAGTTCAATGTTAGCGA  
GATTAGTCAACATTTTATGTTTCGATGCAACAGCAAGATGCTATTTGTAACAAGTAGTT  
TTGTTGGTTGGATAATTTGGTCACATTTTATTCATGAAATGGATTGGATTGCTATTAGTTTG  
GATACGGCAAATAGATCTATTCGG-----GTTCAATCTAATAAGTACCTTGTGTCAGAATT  
GAAAAATTCTATGTCTGGTATCTTTGGTATTTTCTTATTAGTTACCTGTGTCTACTATTTA  
GGCAGAATACCGTCACCCATTTTACTAAGAACTGAACACGGAAGAAGAAGAAAAA  
CCTATTCTGACTTTTTTTTTTCGATTATAACCGCTGGAATCGTCCATTACGATACATAAGAA  
AGATAAAATTGAAAGGCTCTGTAAGAAAAGAAGCCTCACAATATTTTTTTTATAACATGC  
CAAAGTGATGGAAAACAAAGAATATCTTTTACATATCCTCCGAGTTTGTCAACTTTTGG  
GGAAATGATAGCAAGAAGGATATCGCTGTCCACATTAGAAAAACTCTCCCCTGATGAA  
CAATACGCCGAGTGGCTTTATACCAATAAAGAGAAAAAAAACAACCTTAAATAATGAATT  
TATAAATAGAATTGAGGCCTTAGAGACAGTATTTCTTTCTCTAAATATACTTGAAACAAA  
GACTAGATTGTATAATACTAAAAACAACAATGCCTAGTTAAAATGTACGATCCCT  
TTTTGAAT--ATGTATCGTGGGAAGAAATGAAGAAATTGTTTTCTTCTGCAGAAACAGCTG  
AACTAAATAAAATTCATGATATCCTTTCTCCAGAAAATGAACATAAAAACCCTAAACGC  
GAA-----ATAAACGAAATTGGTAAAAAACCCCTCGATGGTCATACAAATTAATCGAG  
TTGGAACAATATTTTATAAACAGCTTCGAACAAGAAAATATGAACATATAGCTTTTTTTA  
ACTCGTGGTTTTATAAGTTATTTGGAAGAACCAGATTTTCGTCGAGCCGTAATCAAAGG  
CTCTATCCGTATTCAAAGGCGTAAAATGGTTATTTGGGGACCGTCTCAAGGAAATCCCC  
ATTCCCCGCTTTTTTTGGAAAAA---ATGGAA--GATTTTCTTTTCT-----ATCTCCGA  
CCTAATGAACTTTTTTTTAAAT--ATAAAAAAAAACAACCAGGAAGAC-----TGGGA  
GAACATTCATATGCACAAAAATCAAGAAGTGTCTGTTACTAGCTCAATCAATTTTAA  
GAAGATATATTAATACCCTTATTGATAATAGCTAAGAATATTGGACGATTTTTATTACG

ACAATCTCCGGAATGGTACGAGGATTTCCAAGATTGGAATAGAGAAATTTATCTAAAGT  
GCAGCTATAATGGTCTTCAATTCTCCAAAACAGAATTTCTGAAAATTGGTTAATAGAA  
GGTTTTTCAGATAAAAATCCTATATCCTTTTCATTTGAAACCTTGGCACAGATCTAAGCAA  
CAAGATGATTTTGATTCTTGTTTTTTAACAGTTTTGGGAATGGAAACGGAATATCCTTTT  
GGTCCTCCGCGAAAAACACCTTCCTTTTTTTGAACCCATTTTTTAAAGATATAGAC-----  
-----TATAAAGAAAAAATAAGAAATTTTAGAGTTCGAATAGCT  
TTAAAAAAAATAAAAAAAAAGAAGCAAAAGCATTCTTATTTGTAAAACAAATTATAA  
AAGAACTTTTAAAAGGAAATGATTCTATAATCAGCAATCAGATAATTCATGAATCACTTA  
GTCAAATCGATCT-----ACAAATTATTCACAGGCAGAAGAAGAAATGAAACATAGAA  
TTGATAGAAGAAACACAATCAGAAATCAAATAGAAATAACGAAAAAAAATAAA-----  
-----AAGAATAATGGAGAATCACCCCAAAAATTTGGAAAATATTTAAA-----  
-----AGAAAAATATTGAATTAATCATTCAATTTTTTCATTGAAAAACATACATGGATA  
TCTTTCTATGTATCATTAAATATGCGCAGAATCGCTCTACAACTTTTT-----TTTGATT  
TATCTTACTTGTACAAAAATATGTATTTTTTAAAATTATCACAAACCCAGGTTATTAACCT  
CAATAAGTTAAGATCTATTCTTCAGTATCCGTCTTTTTTTCTTAAGAATGAAATAAAGGG  
TTTTTTTAGGCAAGGAATATTGATTCCGAAGTAAGACATAAGAACTTACAAATTATG  
GAATGAATCCATGGAAAAATGGTTAAGAGGT--TATCAATACGATTTATCTCAGATTAC  
ATGGTCTAGATTAGTCCCACAAAAATGGCGAAATGGAAAAACCAATGCCAGCCGTCT  
CAAATAAAAAGAAATGGTATTCCTATGAAAAAGACCAA-----TTCTTTGATTACAAAA  
AAAAG---AATTTAAAAAAAACCATAGATATGATCGTTTATCATATAAATATATTCATAGT  
GATATTATATATAAAGATAGAAAATATTGGGTTGGAAATTGAAT-----TCTTTTGA  
TTGGATGGGAATGAATGAAAAATTATTAATCTTCTTTTTCTTTCCAGAGTTTGTGATACT  
TTATCATAAATATAAAGAGAAACCTTGGTTTATCCCAAGCAACTTACTTCTTTTTAAT----  
-----CTAAAAATATTCTTCAAAGGAGATTTTCCTTTGCAATTAAGATGGACTGG  
ACGTTTGAATCAAAAATGATGAATAATATCCAGATATATGGTCTCCTGGTTAGCCTCAT  
AAATGTAAGAAAAATTACTATATCCTATATTCAAAGAAAAGAAATGAATCTGGATATAAT  
GAGGAGACGT-----TAAATCTTACACAATTAACCAAAGGAATATTAATTATGGAACCT  
GCCCCGTCTATCTGTAAAAACGACGGACAGTTTTTTTATGTATCAAATCATAGGTATTTCA  
TTGGTTCATAAAGTAAGCACAAAAATTATGATTTGCTTGTTCCTGAAAAAATTTTATCG  
TCTAGACGTCGTAGAGAATTGAGAATTCATAATTTCTTTCGTGTTTTTTTTGGCCTAATTAT  
CGATTAGAGGATTTAGCTTGTATGAATCGCTATTGGTTTGACACCACTAATGGGAGCCG  
CTTTAGTATGTTAAGGATATATATGTATCCCATGACAGGACATGAATCAAGTCCTGGATT  
TTAGAATTGAGAGAGATATTGAGAGAGATCAAGAATTCCTACTATTTCTTAGATTCTCTG  
GACCCAATTC AATTCAGTGGGATCTTTCATTCACATTTTTTTCCACCAAGAACGTTTTAT  
AAAACTTTTTGACTCCCGAATTTGGAGTATCCTACTTTCA---CACAATTCA-----CAGGGT  
TCAACAAGCAATCGATATTTACG-----ATCAAGGGT---GTAATACTCTTTGGAGTAGC  
GGTCCTTATATATCGT-----ATTAACAATCGAAATATGGTCGAAAGAAAAAATCTCTA  
TTTGATAGGGCTTCTTCCT-----ATACCTATGAATTCCATTGGACCCAGAAATGATA  
CATTGGAAGAATCCGTT--GGGTCTTCCAATATCAATAGGTTGATTGTTTCG--CTCCTGT  
ATCTTCCAAAAGGAAAAAAGATCTATGAGAGTTCTTTCCTGAATCCGAAAGAGAGTAC  
TTGGGTTCTCCAATAACT-----AAAAAGTGTAGCATGCCTGAATCTAACTGGGGTT  
CGCGGTGGTGGAGGGACTGGATCGGAAAAAAGAGC-----GATTCTAGTTGTAAGATATC  
TAAT-----GAAACCGTCGCTGGAATTGAGATATTATCAAAGAGAAAGATCTCAA---T  
ATCTGGAGTTTGTCTTTGTATATTATAGGGAT-----GATCCGATCCGCAAGGACCATGATT



GGGAATTTTTGATCGTCTTTCTCTGAGGAAGAGGCCAAAATAGAATCAACTTG-----AAT  
TCGGGACCACTATTCGAAATCTTAGTGAAACACTGGATTTGTTATCTCATGTCTGCTTTT  
CGTGAAAAAATACCAATTGAAGTGGAGGGT--TTTTTCAAACAACAAGGG--GCTGGGT  
CAACTATTCAATCAAATGATATTGAGCATGTTTCCCAT-----CTCTTCTCGAGAAACAAGT  
GGGCTATTCTTTGCAAATGTGCTCAATTCATATGTGGCAATTCCGCCAAGATCTCT  
TCGTT-----AGTTGGGGGAAG--AATCCCCCGAATCGGATTTTTTGAGGAAC--GTAT  
CGAGAGAGAATTTGATTTGGTTAGACAATGTGTGGTTGGTAAACAAGGATCGG-----T  
TTTTTCGC-----AAGGTACGGAATGTATCGTCAAATATTCAATATGATTCC-----ACAAG  
A-----TCTAGTTTCGTTCAAGTAAGGGATTCTAGCCAATTGAAAGGATCTTCT--GATCAA  
TTCAGAGATCATTGATTCCATTAGT-----AATGAGGATTCGGAA-----  
-----TATCACACATTGCTCAATCAAAGAGAGATTCAACAATAAAAGAAAGATCG  
ATTCTT--TGGGAT-----CCTTCCTTTCTTCAAACGGAAGGAACAGAGATAGAATCAAAC-  
----CGATTCCCGAAA-----TGCCTTTCTGGATCTTCC-----TCAATGTCCCGGCTATTACG  
--GAACGTGAGAAGCAGATGATTAATCATATGCTTCCGGAAGAAATCGAAGAATTGATT-  
----GGGAATCCTACAAGATCCGTTCTTTCTTTTCTCTGACAGATGG-----TCAGAACTT  
CAT--CTGGGTTCGAATCCTACTGAGAGGTCCACTAGAGATCAG-----AAATTGTTG  
AAGAAACAACAAGATCTTTCT--TTTCTC-----AGGCGATCGGAA-----AATAAAGAA  
ATGGTTAATCTATTCAAGATAATTACGTATTTACAAAAT-----ACCGTCTCAATTCATCCTA  
TTTCATTAGATTCGGGATGTGATATGGTTCCG--AAGGATGAACCGGAT--ATGGACAGT  
TCCAACAAGATTCATTCTTGAACAAAAATCCATTTTTTGATTTA-----TTTCATCTATTCC  
ATGACCGGAACAGGGGAGGATACACGTTA-----CACCACGATTTTGAATCAGAA-----GA  
GAGATTTCAAGAAATGGCAGATTTATTCACTCTATCAATAACCGAGCCG--GATCTGGTG  
TATCATAAGAGATTTGCCTTTTCTATTGATTCCTATGGATTGGATCCAAAACAA-----TTC  
TTGAATGGGGTATTCAACTCCAGGTATGAATGGAAAACGACATCTTTATTGGTTTTATTG  
GTTCTATTTCTATTTTTTAT-----GAAGAGAATGAATCTTTTTATCGAAGGATCAGAAAA  
AAAAGGGTCCGG--ATCTCCTGCGGGAATGATTTGGAAGAGCCAAAACCAAAAATAGT  
GGTATTTGCTAGCAACAATAGAATGGAGGCAGTCAATCAATATAGATTGATCCGAAATC  
TGATTCAAATCCAACATAGCACCCATAGG-----TACATAAGAAATGTATTGAATCGATTCT  
TTTTAATGAAT-----AGATCCGATCGCAACTTCGAATATGGA-----ATTCAAAGGGAT  
CAAATAAGAAAGGATACTCTGAATCATAGAACTCTAATGAAATATACGATCAACCAACA  
TTTATCGAATTTGAAAAAG--AGTCAGAAGAGATGGTTTCGATCCTCTT-----ATTTTTTTT  
TCTCGAACCGAGAGATCCATGAATCGGGATCCTGATGCATATAGATACAAATGGTCCAC  
TGGGAGCAATAATTTCCAGGAACATTTGGAACATTTTCGTTTCTGAGCAGAAGAGCCGT-  
-----TTTCAAGTAGTGTTCGATCGATTACGTATTAATCCATATTTCGATTGATTGGTCTGAG  
GTTATCGACAAAAAAGATTTGTCTAAGCCACTTCGTTTCTTTTTGTCCAAG-----  
-----TTGCTTCTTTTTTTGTCTAAC--TCACTTCCTTTT  
TTGTTTGTGTCAGTTTCGGGAATATCCCATTTCATAGGTCCGAG--ATCTACATCTAT--GAA  
TTGAAAGGTCCGAACGAT-----CCACAGTTTTTTAGAATCAATAGGTCTTCAAATCGTTC  
ATTTGAAAAAATTGAAACCCTTC-----TTATTGGAT-----GATCATGAGACTTGC--CAA  
AAATCGAAATCTTGATCAATGGAGGAACAATATCACCATTTTTGTTCAATAAGATACCA  
--AAGTGG--ATGATTGACTCATTCCATACTAGA-----AAGAATCGCAGGAAATCCTTTGA  
TAACACGGATTCTTATTCTCAATGATATTCCACGATCAATACAATTGGCTGAATCCCGT  
GAAATCATTTATAGAAAGTTCATTGAGATCTTCTTTTTATAAAGGAAATCAACTTCGATT  
CTTGAATAATCCACATCACTTCTGCTTCTAT-----TGTAACAAAAGATTCCCCTTTTATGT

G-----GAAAAGGCCCGTATCAAT-----AATTATGATTTTACGTATGGA---CAATTCCTC  
AATATCTTGTTCATTCGCAACAAA---ATATTTTCTTTGTGCGTCGGTAAA-----AAAAAAC  
ATGCTTTTTGGGGG---AGAGATACTATTTTCAGCAATCGAGTCACAGGTATCTAACATATT  
CATACTAAGGCTTTTCCACAAAGTGGT--GACGAAACGTATAACTTGTACAAATCT-----  
---TTCCATTTTCCAAGTCGAGCCAATCCATTCGTTCGT-----AGAGCTATTTACTCGATCG  
CAGGCATTTCTGGAACACCTCTAACAGAGGGACAAATAGTCAATTTTGAAAGAACTTA  
TTGTCAACCTCTTTCAGATATGAATCTATCTGATTCAGAAGGGAAGAACTTGTATCAGTA  
TCTCAAT-----TTCAATTCAAACATGGGTTTGATTCACTCCATGTTCTGAGAAATATTT  
ACCATCCGAAAAG-----AGGAAAAA-----CGGAGTCTTTGTCTAAAG-----  
AAATGCGTTGAGAAAGGGCAGATGTATAGAACTTTTCAACGAGATAGTGCTTATTCAAC  
TCTCTCAAATGGAATCTATTCCAAACATATATGCCATGGTTCCTTACTTCGACAGGGTA  
CAGATATCTAAAGTTTTTATTTTAGATACTTTTTCAGACCTATTG-----CCGATACTAAGT  
AGC---AGCCAAAATTTGTATCCATTTTTCATGATATTATGCATGGATCAGATATATCATG  
GCGAATTCCTCAGAAAAAATTC-----TGTCTTCCACAATGGAATCTG---ATAAG  
TGAGATTCGAGTAAGTGTTCCATAAT-----CTTCTTCTGTCCGAAGAAATGATTCATCG  
AAAT-----AATGAGTCACCATTGATATCGACACATCTGACA-----AATGTTGCGGGAGTTC---  
CTCTATGCAATCCTTTTCTTCTTCTTGTGCTGCATAT--CTCGTTTGTACACATCTTCTC  
TTTGTTTTCGGG-----GCCTCTAGTGAGTTACAGACAGAGTTTGAAAAGGTCAAATCTTT  
GATGATTCCATCATCTATGATTGAGTTGCGAAAAATTCTGGATAGGTATCCTACATCTGA  
ACCGAATCTTTCTGGTTAAAGAATCTCTTCTAGTTGCTCTGAAACAATTAGGAGATT  
CTCTA-----GGTGGCAACATGCTATTGGGTGGTGGTCCCGCT-----TA  
TGGG---GTCAAATCAATACGCTCTAAGAAGAAATATTTGAATATCAATCTCATCGATATCA  
TCGATCTCATA---AGTATCATACCAAATCCCATCAATCGAATCACTTTTTTCGAGAAATAC  
GAGACATCTAAGTCATACAAGTAAAGAGATCTATTCAATTGATAAGAAAAAGAAAAAAC  
GTGAACGGGGACTGGATTGATGATAAAATAGAATCCTGGGTTGCAAACAGTGATTCGA  
TTGATGATGAAAAAGAGAATTCTTGGTTTCAGTTCTCC-----ACCTTAACGACA-----GA  
AAAAAGGATTGATCAAATTTTATTGAGTCTGACT--CATAGTGATCATTTA-----TC  
AAAGAATGACTCTGGTTATCAAATGATTGAACAACCGGGAGCAATTTACTTACGAGAC  
TTAGTTGACATTCAT-----AAAAAGTATCTAATGAATTATGAGTTCAATACATCCTCTTTAG  
CAGAAAGACGGATATTCCCTTGCTCATTATCAGACAATCACTTAT-----TCACAAACTTCGT  
GTGGGGCTAATAGTTTTTCATTTCCCATCTCATGGA-----AAACCCTTTTCGCTCCGCTT  
GGCCTTATCTCTCTCT--AGGGGTATTTAGTGATAGGTTCTATAGGAACTGGACGATCTT  
ATTTGGTCAAATACCTAGCGAAAACTCCTATCTTCTTTCATTACGGTATTTCTGAACA  
AGTTCCTGGATAACAAGTCTCAAGGTTTTGATGATATC-----GATATTGAC---ATTG  
ATGCTAGT-----GACGATATTGATGCT-----A  
GTGACGATATC-----CTTGATATGGAGCTG---GAACTGCTAACTAGCATGAATGCGCTA  
ACTATGAATATGATGCCTGAAGAT-----GAAGACCGACTTTATATCACCTTCAATTCGAA  
TTAGCAAAGCAATGTCTCCTTGATAATATGGATTCCAAACATTCATGATCTGGATGTG  
AATGAGTCAAATTACTTCTCCCTAGGTCTATTAGTGAACCTTCTCTCCAGG-----GATT  
ATGAA-----ACTAGAAATATTCTTGTATTGCTTCGACTCATATCCCCAAAAGCGG  
ATCCCGCTCTAATAGCTCCGAATAAATTAATACGTGCATTAAGATACGAAGGCTTCTTA  
TTCCACAACAACGAAAGCACTTTTTCACTTTTCATATACTAGGGGATTTCACTTGGAA  
AAGAAAATGTTCCATACT-----AATGGATTGCGGTCCATAACCATGGGTTCCAATGCACG  
AGATCTTGTAGCACTTACCAATGAGGCCCTATCGATTAGTATTACACAGAAGAAATCAA

TTATAGATACTAATACAATTAGATCCGCTCTTCATAGACAAATTTGGGATTTACGA-----  
TCCCAGGTAAGATCGGTCCAGGATCATGGGATCCTTTTCTATCAGATAGGAAGGGCTGT  
AGCACAAAATGTACTTTTAAGTAATTGCCCCATAGATCCTATACTATCTATATGAAAA  
GAAA-----TCATGTAACGAAGTGGATTATTATTTGTACAATTGGTACTTCGAACTTGGAA  
CGAGCATGAAGAAATTAACGATACTTCTTTATCTTTTGAGTTGTTCTGCCGGATCGGTC  
ACTCAAGATCTTTGGTCTCTACCC-----GGACCCGATGAAAAA---AATGGGATCACTCCT  
TATGGACTCGTTGAGAATGATTCT--GGTCTAGTTCGTGGCCTATTAGAAGTGGAAAGC  
GCTCTGGTGGGA-----TCCTCACGG-----ACATGCAGTCAGTTTGATAAGGAT-----CGA  
GTGACATTGCTTCTTCGACCCGAACCAAGGAAT---CCCTTAGATATGATGCAAAAAGGA  
TCTTGTCTATCCTTGATCAGAGATTTCTCTATGAAAAAGAC-----GAATCGGAGTTTGA  
AGAG--GGGGAAGGAGAAGGAGCCCTCGACCGGCAACAG-----ATAGAGGAGGAT-  
-----TTATTCAATCAC-----ATAGTTTGGGCTCCT-----AGAATATGGCGCCCT-----TG  
GGGCTTTCATTTGATTGTATCGAAAGGCCAATGAATTGGGATTTCCC---TATTGGTCC  
AGGTCATTTCCGGGGCAAG-----CGGATCATTATGATGAAGAGGATGAGCTTCAAGAG  
AATGATTCCGAGTTCTTGCAGAGTGAACCGTGCAGTACCAGACACGAGATAGATCTT  
CCAAAGAACAAGGCCTTTTTCGAATAAGCCAATTCATTTGGGACCCTGCAGATCCACT  
CTTTTTCCTATTCAA---GCTCAGCCCTTTGTCTCTGTGTTTTTCACATCGAGAATTATTTG  
CAGATGAAGAGATGTCAAAGGGGCTTCTTACTCCCCAAACAATCCTCCTACATCTCTA  
TATAAACGCTGGTTTATC-----AAGAAGACGCAAGAAAAGCACTTCGAATTGTTGATTAA  
TCGCCAGAGATGGCTTAGA-----ACCAATCGTTCATTATCT-----AATGGATCTTCCGT  
TCTAAT-----ACTCTATCCGAGAGTTATCAGTATTTATCAAATCTGTTCCCTATCTAAC---GG  
AACACTATTGGATCAAATGACAAAGGCATTGTTGAGAAAAAGATGGCTTTTCCCGGAT  
GAAATGCAAATTGGATTC-----ATGGAACAGGAGAAGGATTTCCCATTCCCTATGTCTAG  
AGAGCGG---ATAAATGGAAATTTTATTGATAAAACCTTTTCAATTGTAGCCAATATATTAT  
TACGAATAATTCCGACAACCTTCAGGAGAAAAAGAGGCATTTACCTATTACAGAGATGG  
G-----ATGTCAGCTCAATCCGAAGGAAATTATGCGGAAGCTTTACAGAATTATTATGAAG  
CTATGCGACTAGAAATTGATCCCTATGACCGAAGTTATATACTCTATAACATAGGACTTAT  
CCACACAAGTAACGGAGAACACACGAAAGCTTTGGAATATTATTTTCGAGCGCTCGAA  
CGAAACCCATTCTTACCACAAGCTTTTAATAATATGGCCGTGATCTGTCATTAC---CGGG  
GAGAACAGGCCATTCGGCAGGGGATTCTGAAATTGCGGAGGCTTGGTTCCGACCAAG  
CCGCTGAGTATTGGAACAGGCTATAGCACTTACTCCTGGTAATTATATTGAAGCTCATA  
ATTGGTTGAAGATCACTAGACGTTTCGAA-----ATGAGTTGTCGATCAGAACATATATGG  
ATAGAACCTATAAAGGGGGCTCGAAAAATAAGTAATTTCTGCTGGGCTATTATCCTTTTT  
TTAGGTTTATTAGGATTCTTGTGGTTGGAACCTCGAGTTATCTTGGTAGAAATTTGATA  
TCTTTCTTTCCGTCTCAGCAAATAGTTTTTTTTCCACAAGGAATTGTGATGTCTTTCTAT  
GGGATCGCGGGTCTTTTTATTAGCTCCTATTTGTGGTGCACAATTCGTGGAATGTAGGT  
AGTGGTTATGATAGATTTGATATAAAAGACGGAATAGTGTGTATCTTTCGTTGGGGATTT  
CCTGGAAAAAATCGTCGGGTCTTCCCTCCGATTTCTTATAAAAGATATCAATCCGTCAG  
AATAGAAGTTAAAGAGGGTATTTATGCTCGGCGTGCCTTTATATGGATATCAGAGGCCA  
GGGAGCCATTCCATTGACTCGTACTGATGAGAAT---TTTACTCCACGGGAAATGGAACA  
AAAAGCTGCTGAATTGGCCTATTTCTTGCGTGTACCAATTGAAGTCTTT

>Fagopyrum

ATGGAAAAATGGTGGTTTAATTCAATGTTGTCTCTAAGTAAATCAATGGACAGTCTTGA  
TCCGATTGACAATATCAACAGCAATGAAAATATGATTCTCAATTTTACAGAAAAAAGCA

TTCATAGTTACAGTAATTTGGATCTTTTATTCAATTATCGGGGACATTCCCTAATTTAATCTCT  
GATGAGACTTTTTTAATTAGGGATCGTAAGGGGGAAACTTATTCCGTTTATTTTGATATT  
GAAAATAAGATTGTTGAGATTGACAATTATCAT-----TCTTTTTCTAAT  
TATTGGAATTCTAGTTATGGG---ACTGGATCGAAAAGTAACGATACCCATTATGATCTTTA  
CATGTACGATACTAAATCGAGTTTGAATAATCACATTAATGGTTGTATTGACAGTTATCTT  
CAT-----TCTCAAATGCGTCTTGATAATTATGTTTTACGTGATAGTGACCATTACGGCGATA  
ATTACATTTTTGAT-----ATTAAGACTACCACTAACGGT-----AGGG  
AT-----AATCTTGAGGTAACATAAAAAATACAGGAATTTGTGGATTCAATGTGAAAATTG  
TTATGAATTAATTATAAGAAATTGTTGAAGTCAAAAATGAGGATTTGTGATGAATGCG  
GATATCATTTGAAAATGAGTAGTTCAGAGAGAATCGAACTCTCGATTGATCCCGGTACT  
TGGGAGCCCATGGATGAAGACATGGTCTCAACGGATCCCATTGAATTTCAATTCGCAGG  
AGGAACCCTATAAAGATCGTATTAATTCTTACCAAAAAGAGACAGGGTTAACCGACGC  
TGTTCAAACAGGTATAGGCCAACTAAACGGTATTCCTGTAGCAATAGGGGTTATGGATT  
TTCAGTTTATGGGGGGTAGCATGGGATCCGTAGTAGGAGAGAAAATAACTCGTTTGGCT  
GAGTATGCTACCAATCAAATCTACCCCTTATTATAGTGTGTGCTTCCGGCGGGGCGCG  
AATGCAAGAAGGAAGTTTGAGCTTGATGCAAATGGCTAAAATTTTCGTGCGCTTTATTTG  
ATTATCAATCAAATAAAAAGTTATTCTATGTATCAATTCTTACATCTCCTACTACTGGAGG  
TGTGACAGCTAGTTTTGGTATGTTGGGAGATATCATTATTTCCGAACCTAGCGCCTACAT  
TGCATTTGCGGGTAAAAGAGTAATTGAAGAAACATTGAATACGACAGTACCTGAAGGT  
TCACAAGAAGCTGAATATTTATTTCGATAAGGGCTTATTTCGATCCAATTGTACCACGTAAT  
CCTTTAAAGGGCGTTCTAAGTGAGCTATTTCCGTTGCACGCTTTCTTTCCCTTTGAATCA  
AAATTCGATCGGGATGACAACCATTCGAGCTGATGAAATTTATAATATTATTCGCGAACG  
CATTGAACAATATAATAGAGAAGTCAAAATTGTAAATACAGGTACCGTACTTCAAGTGG  
GCGATGGCATTGCTCGTATTCACGGTCTTGATGAAGTAATGGCAGGCGAATTAGTAAAA  
TTTGAAGAGGGTACAATAGGCATTGCTCTGAATTTGGAATCAAATAATGTTGGTGTGTG  
ATTAATGGGTGACGGTTTGATGATACAAGAAGGAAGTTCTGTAAAAGCAACAGGAAGA  
ATTGCTCAGATACCGGTTAGTGAGGCTTATTTGGGTCGTGTTATAAATGCTCTGGCGAA  
ACCTATTGATGGTAGGGGTGAAATTTTAGCTTCGGAATTTTCGCTTAATTGAATCTCCTGC  
TCCTGGTATTTTCGAGACGTTCCGTATATGAGCCTCTTCAAACGGGGCTTATTGCCAT  
TGATTTCGATGATCCCTATAGGTCGCGGACAGCGAGAATTAATTATTGGAGACAGACAGA  
CTGGTAAAACAGCAGTAGCCACAGATACTATTCTCAATCAAAGGGGCAAAATGTAATA  
TGTGTTTATGTAGCTATTGGTCAAAAAGCATCTTCGGTGGCGCAGGTAGTAACTACTTT  
CCAAGAAAGGGGAGCAATGGAATATACTATTGTAGTAGCTGAAACTGCGGATTCTCCA  
GCTGCATTACAATATCTTGCCCCTTATACAGGGGCGGCGCTGGCTGAATTTTTTATGTAC  
CGCGAACGGCACACTTTAATCATTATGATGATCTTTCCAAACAAGCACAGGCTTATCG  
ACAAATGTCGCTTCTATTACGAAGACCACCGGGTCGTGAAGCTTATCCCGGAGATGTTT  
TTTATTTGCATTCACGCCTTTTGGAAAGAGCCGCTAAATTAAGTTCACGCTTAGGCGAA  
GGAAGTATGACCGCTTTACCAATAGTTGAGACCCAATCAGGAGATGTTTCGGCTTATAT  
TCCTACTAATGTAATTTCTATTACAGATGGACAAATATTCTTATCCGCCGATCTATTCAAT  
GCTGGAATCAGACCTGCTATTAATGTGGGGATTTCTGTTTCCAGAGTGGGATCCGCAGC  
CCAAATTAAGCCATGAAACAAGTGGCCGGCAAATTAATAAATTGGAATGGCACAATTC  
ACAGAATTAGAAGCCTTTGCACAATTTGCTTCTGATCTCGATAAAGTTACTCAAATCA  
ATTGGCAAGAGGTCAACGATTACGTGAATTGCTCAAGCAATCCCAAGCTTCCCCCTG  
GGGGTCGAAGAGCAGATAATTACTATTTATACTGGAACAAATGGTTATCTTGATTCATTA

GAAATTGGACAGGTAAGCCCGTTTCTTGATGACTTACGTAAGTACTTCAAAACGAATAA  
ACCACAGTTTCAAGAAATTTTATCTTCGACCAAGACATTCACTGAGGAAGCGGAAGCC  
CTTTTAAAAGAAGGTATTCAAGAGCAGATGGAGCGTTTTCTACTTCAG-----ATGAGA  
ATCAATCTACTACTTCTAGTCCTGGAGTTTCCACACTTGAAAAAAGTAACCTGGGGCG  
TGTCGCTCAAATAATTGGTCCAGTACTGGATGTAGCGTTTCCACCAGGCAAATGCCTA  
ATATTTACAACGCTCTGGTCATTAAGGGCCGAGATACTGCCGGTCAACCTATTAATGTAA  
CCTGTGAGGTACAACAATTATTAGGAAATAATCGAGTTAGGGCTGTAGCTATGAGTGCT  
ACAGATGGCTTAACCGGAGGAATGGAAGTGGTTGATACAGGGGCTCCTTTAAGTGTTT  
CGGTGGGCGGAGCAACTCTCGGCCGAATTTTAAATGTACTTGGGGAGCCCGTTGATAAT  
TTAGGCCCTGTAGATACTCGAACAACATCTCCTATTCATAGATCCGCACCTGCCTTTATA  
CAGTTAGATAACCAATTATCCATTTTTGAAACAGGAATTAAGTGGTAGACCTTTTAGC  
CCCCTATCGCCGTGGAGGAAAAATAGGACTATTTGGGGGAGCTGGAGTGGGTAAAACC  
GTAATCATTATGGAATTAATCAACAATATTGCAAAAAGCTCATGGAGGTGTATCCGTATTT  
GGCGGCGTAGGTGAACGTACTCGTGAAGGAAATGATCTTTACATGGAAATGAAAGAAT  
CTGGCGTTATTAATGAACAAAATATTTTTCAGAATCGAAAGTGGCCCTAGTCTACGGGCAG  
ATGAATGAACCGCCTGGAGCTCGTATGAGAGTTGGTTTACTGCCCCAACTATGGCGG  
AATATTTCCGAGATGTTAATAAACAAGATGTACTTCTATTTATTGACAATATCTTCCGTTT  
CGTCCAAGCAGGATCTGAAGTATCTGCCCTATTGGGTAGAATGCCCTCAGCAGTGGGTT  
ATCAACCTACTCTTAGTACTGAAATGGGCTCTTTACAAGAAAGAATTACTTCTACCAAA  
CAAGGGTCCATAACTTCGATTCAAGCAGTTTATGTACCCGCCGACGATTTGACGGATCC  
CGCCCCTGCCACGACATTTGCCATTTAGATGCAACTACTGTACTATCAAGAGCATTAG  
CTGCTAAAGGTATCTATCCGGCAGTAGATCCTTTAGATTCAACGTCAACTATGCTCCAAC  
CTCGAATCGTTGGTGAGGAACATTATAAACTGCGCAAAGAGTTAAGCAAACCTTTACA  
ACGTTACAAAGAACTTCAAGATATTATAGCTATCCTTGGGTTAGACGAATTATCGGAAG  
AAGATCGTTTAAACCGTAGCACGAGCACGAAAAATGGAGCGTTTCTTATCACAACCCTT  
TTTCGTTGCCGAAGTATTTACGGGTTCCGCCAGGAAAATATGTTGGTCTAGCAGAAACAA  
TTAGAGGGTTTCAATTGATACTTTCCGGAGAATTAGACGGGCTTCCCGAGCAGGCCTTT  
TATTTGGTAGGTAACATCGATGAAGCTACCCGCAAAGCTATGAACTTAGAAATGGAGAA  
TAAATTGAAGAAAATGACCTTAAATCTTTGTGTACTGACTCCTAATCGAATTGTTTTGGA  
TTCCGAAGTAAAAGAAATTATTTTATCTACGAATAGTGGACAAATCGGCGTATTACCAA  
ACCACGCCCTATTGCCACTGCTGTAGATATAGGTATAGTGAGAATACGACTTAACGAC  
CAATGGTTAATAATGGCTCTGATGGGCGTTTTGCTCGAATAGGCAATAATGAGATCAC  
AGTTTTAGTAAACGACGCTGAGAAGGGTAGTGACATTGATCCACAAGAAGCTCAGCAA  
ACTCTTGAAATTGCAGAAGCTAATTTGAGGAAAGCAGAAGGAAAGAGACAAACAATT  
GAGGCAAATCTAGCTCTCAGACGAGCTAGGACACGAGTAGAGGCTATCAATACGATTT  
CGATGAAAAATGTAACCGATTCTTTTCGTTTTCCCTGGGTCACTGGCGATCCGCCGGGAGT  
TTCGGATTTAATACCGATATTTTTGCAACAAATCCAATAAATCTAAGTGTAGTGATTGGT  
GTATTGATCTTTTTTGGAAAGGGAGTGTTTCAGTGATTTATTAGATAATCGAAAACCTGCG  
AATAGTGAATACTATTCGAAATTCAGAAGA ACTATGCGGAAGGGCCGTTGAACAGCTA  
GAAAAAGCTCGGGCTCGCTTACGGAAAGTTCGAAATGGAAGCAGATCAGTTTCGAATG  
AATGGATATTTCTGAAATAGAACGAGACAAATTGAATTTGATTAATTCAATTTATAAACT  
TTAGAACAATTAGAAAATTACAAAAACGAAACCATTCTTTTGAACAACAAAGAGTGA  
TTAATCAAGTCCGCTTGCGGGTTTTCCAACAAGCCTTACAAGGAGCTCTCGGAACCCT  
GAATAGTTGTTTGGAGCAACGAGTTACATTTACGTACCATCAATGCTAATATTGGCATGTT

TGGCGCAATGAAAGAAATAACCGACATGAATCCACTGATTTCTGCCGCGTCCGTTATTG  
CTGCTGGATTGGCTGTAGGGCTTGCTTCTATTGGCCCGGGAGTTGGTCAAGGTACTGCT  
GCAGGTCAAGCTGTAGAAGGTATTGCGAGACAGCCAGAAGCCGAGGGTAAATAACGA  
GGTACTTTATTGCTTAGTTTGGCTTTTATGGAAGCGTTAACGATTTATGGATTGGTTGTA  
GCCTTAGCTCTTTTATTTGCGAATCCTTTTGTTATGAATCTTCTATCATGTTCAATCAATA  
CACTAAGG---TTATATGATATATCCGGGGTGGAAGTCGGCCAACATTTCTATTGGCAAAT  
AGGCGGTTTTCAAGTCCACGGCCAAGTACTTATTACTTCTTGGGTTGTAATTGCTATCTT  
ATTAAGCTCAGCCGCGATAGCTGTTTCGGAATCCACAAACCATTCCGACTGACGGTCAG  
AATTTCTTTGAATATGTCCTTGAATTCATTTCGAGACGTGAGCAAAACTCAGATTGGCGA  
AGAATATCGTCCTTGGGTTCCCTTTATCGGGACTATGTTTCTATTTATTTTGTTCGAAT  
TGGTCGGGGGCTCTTTTACCTTGGAAAATAATACAGTTACCTCATGGGGAATTAGCCGC  
ACCTACGAATGATATAAATACGACTGTCGCTTTAGCTTTACTCACGTCAGTGGCATATTT  
CTATGCAGGTCTTACCAAAAAGGATTGGGTTATTTTAGTAAATACATTCAACCAACTC  
CAATTCCTTTTACCCATTAACATCTTAGAAGATTTACAAAACCTCTATCCCTTAGTTTTC  
GACTTTTTCGAAATATATTAGCCGATGAATTAGTCGTTGTTGTTCTTGTTCCTTTAGTACC  
TTTAGTAGTTCCTATAACAGTCATGTTTCTTGGATTATTTACAAGTGGTATTCAGGCTCTT  
ATTTTGTCAACTTTAGCCGCAGCTTATATAGGCGAGTCTATGGAGGGTCATCATATGATA  
TTTTTCACTTTCGAGCACCTTTTCAATCATATTTCTTTTTCGATCGTTTCAATTGTAATTA  
CAATTCATTTAATAACTTTAGTAGTCAACAAAATAGTCGAACTAGATGATTCATTAGAAA  
AGGGCATGATACTCACTTTTTCTGTATAACAGGATTATTAGTTATTTCGTTGGATTTTTGC  
GGGGCATTTCCTGTTAAGTGATTTATATGAATCATTAATCTTCTTTTCGTGGAGTTTTTAT  
ATTATTCATATGATTCCT-----TATTTCAAAAATAAA-----TTAATAACAGCTCCTGGTGC  
TATTTTTACCCAAGGCTTTGCTACGTCGGGCTTTTTTACTCAAATGAAGCAATCTACAAT  
ATTAGTACCCGCTCTCCAATCCCAGTGGTTAATGATGCATGTAAGTATGATGATATTGGC  
CTATGCAGCGCTTTTATGTGGTTCATTATTATCCGTAGCCCTTTTAGTCAATTACATTTCAA  
AACAAATAAGTCTTTTTGGTAAAAGAAAAAGATTCAATACGTAAATGAAAAAACA  
ATATTTTACAA---ACCTATCTCTTTTCTCTTATAAATTTTATAGATAACCAGTTAATTGAAC  
AATTAGATCGTTGGAGTTCCCGTGTATTAGTCTAGGATTTCTCTTTTTAACCATGGGTAT  
CCTTTCAGGAGCAGTATGGGCTAATGAAGCATGGGGATCATATTGGAATTGGGACCCAA  
AAGAAACGTGGGCATTTATTACTTGGACCATATTTCGCGATTTATTTACATATTAATAACAA  
ATATAAATTTAAAAGTGAAAATTCTGCAATTGTGGCGTCTATAGGATTTCTTATAATTTG  
GATATGCTATTTTGGGGTCAATTTATTAGGAATAGGATTACATAGTTATGGTTCATTTATAT  
TAAAAATGGCAAAAAAAAAGCATTTATCCCTTCTATTTCTTGTATCTATAGTCTTTTT  
ACCCTGGTGGAGCTTTCTAACATTTCAAAAAGTATGGAATATTGGGTTACTAATTTGT  
GGAATACCAAGCAATCCGAAACTTTTTTGAGTGATATTACAGAAAAGACTCTTCTAGAA  
AAATTCATAGAATTAGAGGAGCTCCTACTGTTAGACGATATGATAAAGGAATACCCGGA  
GAGACATCTAAAAGGGCTTCGTATAGGAATCCATAACGAAACGATTC AATTGATCAAGC  
TGCACAATGAACATTGTATCCATACAATTTGTCTTCTCGACCAATATAATCTGTTTCAT  
TATTCTAAGTGGTTATTCCATTATAGGTAATAAAGA ACTTATTATTCTTAACTCTTGGGTT  
CAGGAATTCCTATATAATCTAAGCGATAACAATAAAGCATTTTCTATTCTTTTATTAAC TG  
ATTTATGTATCGGATTCATTACCCCATGGTTGGGAACTGGTGGTTGGCTCTATCTACA  
AAGATTTTGGATTTCCATAACGATCAAATTGTATCTGGCCTTGTTC AACTTTTCCAG  
TGATTCATAGATACAATTTTGAATATTGGATCTTTCGTCATTTAACTCGCGTATCCCCATC  
ACTTGTCTGATTTATCATTCAATGAATGAAATGCCTATTGGTGTTC AAAAGTACCCTT

TCGACTTCCGGGAGATGAAGATGCAACTTGGGTTGACGTATAACAACCGACTTTATCGAT  
CAAGATTACTTTTTTTAACCCAAGAGATTACGACCGAAATCTCGAATTACCTTATTGGTC  
TTATGGTATATCTCAGTATCGAGGATCAGACCCAGGATTTTTATTGTTTTATAAATTGTCC  
TGGCGGATGGGTATTACCCGGAATAGCGATTTTTGATGCTATGCAACTTGTGCTACCAGA  
TATATATACAATATGCATGGGAATAGCCGCTTCAATGGGATCTTTTATCCTGGTCCGGAGG  
AGAAATTACCAAACGTTTTGCATTCCCTCACGCTAGGGTAATGATCCATCAACCTGCTA  
GTTCTTTTCATGAGGGATCAACGGGAGAATGTATGATGGAAGCGGAAGAACTATTGAC  
TTTGCAGAGAAACCCTCACAAAGGTTTATGCACAAAGAACAGGCCAACCTTTTGGGGTT  
CTAACCGAAGACCTGGAAAGGGATGTTTTTATGTCAGCAAGAGAAGCCCAAGCTCAC  
GGAATTATTGATCTTATAGCGAAGGAA-----ATGT  
TCCGGGTTCTGTTTAGATAATGAGGATCTGATTCTAGGTTATGTTTCAGGAAGGATACGCC  
GTAGTTTTTATACGAATCCTACCGGGGATAGAGTTAAAGTTGAAGTAAGCCGTTATGAT  
TCAACCAGAGGACGTATAATTTATAGACTCCGTAACAAGGATTTAACCGAGATGGAGG  
AATCCAAGGATATTTAGAA---AATAGATCGTGGCAAGACGATTTTTTATATCCACTTATC  
TTGCAGGAATCTATTTATGCACTTGTACATAATCAGGATTTAAAAGGTTATGACMCAA  
ATACAGTTTACTAGTTGTAACGTTTGGTTATTCGAATGTATCAACAGAATTTTGTGAT  
TCTTTCTCTTAATCATTCTAACAAAAATGCATTTTTTGTGAAAAATTTGTATTCTCAACG  
GATCTCAGAGGTATTGTCAGTTATTGCGGAAATTCCGGTTTCTATGCGAGTAATGTCTTC  
CCTACGAAAACAATATAAAAATTTACAATCAATTCATTCAATATTTCTTTTTTAGAAGA  
CAAATTTTCACGTTTAAACCATGTGTTAGACATATTGATACCTCACCTGTGCATCCGAA  
AATCTTGGTTCAAACCTATTGTTACTGCGTAAAAGATATCTCCTGTTTGCATTTATTGCA  
ATTATTGCTTTATGAGTATTGTAATAATGGTATTACTCTAAAG-----AATTTCTCAAAA  
AACAAAGATTCTTATTGTTCCCTATATAATTCCTATGTGTGTGAATGCGAATCCATCTTCGT  
TTTTCTCCGCAACCAGTCTCTCATTACGATCAACATCGTACGGAGCCTTTCTTGCAA  
GAGTCTATTTCTACTTAAAGTTAGAACATTTAAAA---GTATTTACTAACATTGTATCCTA  
CAGTTCTTCAAGGATCCTTTTATACATTATATTAGGTATCAAGGAAAATGGATTCTGGCT  
TCAAGAGGGACATTTCTTCTGATGACTAAATTTAAATATTACTTTGTCAATTTCTGGCAA  
TGTCATTTTTACCTATGGTTGCAAACAAGAAGAATCTATATCAATAAATCCTTAAATCAG  
CCCATTGACTTTATAGGTTTTCGTTTAAAGTGTCCGACTAAACCCGTCCGTGGTACGGAG  
TCAAATGTTAGAAAATGCATTCTTAATATATAATGGTATT-----AAGAAGTTTGAGACCCT  
AGTTCCAACCTATGTCTCTGATTGGATCCTTGGCTAAAGAGAAAATTTTGTAAATGTATTAGG  
ACATCCGATTAGTAAGCCAGCCTGGGCTGATTTATCGGATTCTGATATTATTCGCCGATT  
TGGTCGATGTGTCGAAATCTTTCTCATTATTACAGTGGATCCTCAAAAAGGGGGGGT  
TATATCGGATAAAGTATATCCTTCGACTTTCTTGTGCTAGAACGTTGGCTCGTAAACATA  
AAAGCACCGTGCGTGCTTTTATGAAAAGATTAGGTTTCAGAATTTTTTGAAGAATTTGTC  
TTCAAGGAAGAAAAAGTTATTTCTTTGATCTTATCAAGACCCATTTGGTATTTTGTATTT  
TTTTGTATTTCATGATTTGGCCAGTCATAATATGATAATCGATACAACCAGGGGAGTACAA  
GCTATAAAT--TCTTTGTCTATATTGGAATCC---TAAAAGAAGTTTATGGGACTATATGGA  
TGTTTCTCCCTATTTTATTCTTATTTTTGGAATCACACTAGGTGTAAGTATTGTGTG  
GTTAGAAAGACAAATATCCGCAGGAATACAACAACGATTGGACCTGAATATGCTGGCC  
CCTTTGGAATTTCTCAAGCTCTAGCAGATGGAACAAAACCTTTTCAAAGAAAACCT  
TCTTCCATCAAGAGGAGATAAAGGTTTATTTAATGTTGGACCTTCCATAGCAGTCATCTC  
AATCTACTCAGTTATTCGGTAATTCCTTTTAGCTATCGACTTATTTAGTTCGATCTCAGT  
AATGGTGTTTTTTTTATGGATCGCCATTTCCAGTATTGCTCCCATTTGGACTTCTTATGTCAG

GATATGGATCAAATAATAAATATTCCTTTTTAGGTGGTCTACGGGCTGCTGCCCAATCTAT  
TAGTTATGAAATACCATTAACTCTATGTGTGTTATCAATATCTCTAATATCTAACAGTTTA  
AGTACAGTTGATATAGTTGAGGCACAGTCCAAATATGGTTTGTGGGGATGGAATTTGTG  
GCGTCAACCGATAGGATTTCTCGTTTTCTAATTTCTTCTCTAGCCGAATGTGAAAGATT  
GCTTTTGATTTACCAGAAGCAGAGGAAGAATTAGTAGCAGGTTATCAAACAGAATATT  
CGGGTATTAATTTGGGTTATTTTATGTTGCTTCTTATCTAAATCTACTAGTTTCTTCATTA  
TTTGTAACAGTTCTTTATTTGGGAGGTTGGAATTTCTCTATTCCGTACATACCTGTTCT  
GACCCTTTTGAACATAATGCAAAGTATGGAGTCTTTGTAACAACACTTGGCATTTTTATT  
ACACTAGCAAAAACTTTTTTGTTCTTGTTCAATTTCTATCACAACAAGATGGACGTTACC  
TCGACTGAGAATGGACCAATTATTAATCTTGGATGGAAATTTCTTTTACCGATTTCTGTT  
AGGTAATTTATTATTAACAACCTTCTTCTCAACTCCTTTCACTCATGATCTGGCATGTACA  
GAATGAAAACCTCATTCTCGATTCTACGAGAATTTTTATGAAAGCCTTTCAATTTGCTTCT  
CTTCGATGGAAGTTTTATTTTCCCAGAATGTATCCTAATTTTTGGCCTAATTTCTTCTCTG  
ATGATCGATTCAACCTCTGATCAAAAAGATATACCTTGGTTCTATTTTCATCTCTTCAACA  
AGTTTAGTAATGAGCATAACGGCCCTGTTGTTCCGATGGAGAGAAGAACCCTATGATTAG  
CTTTTCGGGAAATTTCCAAACGAACAATTTCAACGAAATCTTTCAATTTCTTATTTTACT  
ATGTTCAACTCTATGTATTCCTCTATCCGTAGAGTACATTGAATGTACAGAAATGGCTAT  
AACAGAGTTTCTATTATTCGTATTAACAGCTACTCTAGGAGGAATGTTTTTATGCGGTGC  
TAACGATTTAATAACTATCTTTGTAGCTCCAGAATGTTTCAGTTTATGCTCCTACCTATTA  
TCTGGATATACCAAGAAAGATGTACGGTCTAATGAGGCTACTACGAAATATTTACTCATG  
GGTGGGGCAAGCTCCTCTATTCTGGTTCATGGTTTCTCTTGGCTATATGGTTCATCCGGG  
GGAGAGATCGAGCTTCAAGAAATAGTGAATGGTCTTATCAATACACAAATGTATAACTC  
CCCGGAATCTCAATGCGCTTATATTCATCACTGTAGGAATTGGGTTCAAGCTTTCCCC  
AGCCCCTTCTCATCAATGGACTCCTGACGTATACGAAGGATCTCCCACTCCAGTCGTTG  
CTTTCTTTCTGTTACTTTCGAAAGTAGCTGCTTCAGCTTCAGCCACTCGAATTTTCGATA  
TTCTTTTTTATTTCTCATCAAACGAATGGCGTCTTCTTCTGGAAATCCTAGCTATTCTTAG  
CATGATAGTGGGGAATCTCATTGCTATTACTCAAACAAGCATGAAACGTATGCTTGCATA  
TTCGTCCATAGGTCAAATCGGATATGTAATTATTGGAATAATTGTTGGAGACTCAAATGA  
TGGATATGCAAGCATGATAACTTATATGCTGTTCTATATCGCCATGAATCTAGGAACTTTT  
GCTTGCATTGTATCATTGGTCTACGTACCGGAACTGATAACATTGAGATTATGCAGGA  
TTATACACGAAAGATCCCCCTTTGGCTCTCTTTTAGCACTATGTCTCTTATCCCTAGGA  
GGTCTTCTCCACTAGCAGGTTTTTTTCGGAAAACCTCCATTTATTCTGGTGTGGATGGCA  
GGCAGGCCTATATTTCTTGGTTTCAATAGGACTCCTTACGAGCGTTGTTTCTATATACTAT  
TATCTAAAAATAATCAAGTTATTAATGACTGGACGAAACCAAGAAATAACCCCTCACGT  
GCGAAATTATAGAAGATCTCCTTTAAGATCAAAGAATCCATCGAATTGAGTATGATTGT  
ATGTGTGATAGCATCTACTATACTGGGAATATCAATGAACCCTATTATTGCAATTGCTCAG  
GATACCCTTTTTATGTTTCTGCTTTATGAATATGATATTTTCTGGGCATTTCTACTAATATC  
AAGTGTTATTCCGATTTTGGCATTCTACTTTCCGGAATTTTAGCTCCGATTAGAAAAGA  
CCCAGAGAACTTTCTAGTTATGAATCAGGTATAGAACCATTGGTGATGCTTGGTTAC  
AATTTCGAATCCGTTATTATATGTTTGCTTTAGTTTTTGTGTTTTTGAIGTTGAAACAGT  
TTTTCTTTATCCCTGGGCAATGAGTTTCGATGTATTGGGTGTATCTGTTTTTATAGAAGCT  
TTAATTTTCGTGCTTATCCTAATTGTTGGTTTAGTTTATGCATGGCGAAAAGGAGCATTG  
GAATGGTCTACGAATTTTTTTCTTGGTTAACCTTAATTGTAGTTTTACCTATATTTGCGG  
GTTCTTAATTTTATTTCTCCCGCATAGGGGTAATAAGGTAATTAGGTGGTATACTTTGTG



TATATGTATTTTAGAATTCCTCCTAACAACTATGTATTCTGTTATCATTTCCTCAACTAGAC  
GATCCATTAATACAACCTGGCCGAAGATTATAACTGGATTCATTTTTTTTATTTCCACTGG  
AGATTGGGAATAGACGGGCTTTCTATAGGACCCATTTTATTGACAGGATTCAATACGACT  
TTAGCCACCTTAGCGGCTTGGCCGTTACTCGGGATTCCCGATTATTCCATTTCTTGATG  
TTAGCAATGTATAGTGGTCAAATAGGATTATTTTCTTCGCGAGACCTTTTACTTTTTTTC  
TAATGTGGGAATTGGAATTAATCCAGTTTATCTACTTTTATCCATATGGGGAGGAAAGA  
AACGTCTATACTCAGCTACAAAGTTTATTTTGTACACTGCAGCGGGTTCGGTTTTTTTTGT  
TGGTGGGAGTTTTGGGTATCGGGTTATATGGTTCTAATGAACCAACATTAATTTGGAA  
ACATTAGGTAATCAATCGTATCCTGTAGCATTCGAAATACTATTCTATATTGGATTTCTTAT  
TGCTTTTGCTGTTAAATCGCCGATTATACCTCTTCATACATGGTTACCGGATACCCATGG  
AGAAGCACATTATAGTACTTGTATGCTTTTAGCCGGAATCCTATTAATAAATGGGAGCATA  
TGGGTTGGTTCGGATCAATATGGAATTATTACCTCATGCTCATTTCGATATTTTCTCCTTGG  
TTGATGATAGTCGGCACAATACAAATAATCTATGCAGCTTCAGCATCTCCGGGGCAACG  
TAATTTAAAAAACGAATAGCCTATTCCTCGGTATCTCATATGGGTTTCATAATTATAGGA  
ATTAGTTCTATAACGGATACTGGATTCAACGGAGCCATTTTACAAATAATCTCTCATGGA  
TTTATTGGTGCTGCGCTTTTTTTCCTAGCAGGAACGAGTTATGATCGAATACGTGTTGTT  
TATCTCGATGAAATTGGCGGAATCGCCATTTCAATGCCAAAAATATTCACACTCTTCAGT  
ACTTTTTCGATGGCTTCCCTCGCGTTACCGGGCATGAGTGGTTTTTTTTGCCGAATTAATG  
GTATTTTTTGAATAATTACCAGTCACAAATATTTTTTAATGGTAAAAGTCCTAATTACTT  
TTGGCATGGCAATTGGAATGATATTAACCTATTTATTTATTATCTATGTTACGCCAAAT  
GTTTTATGGATATAAGTTATTAATAATGCAAACCTTTTCTTTTTTTGATTCGGGTCCGAGA  
GAGTTATTTGTCTCACTCGCTATCTTTTTACCAGTACTAGGTATTGGCATTTACCCGGATT  
TTGTTCTCTCGCTATCAGTTGATAAGGTAGAAGCTATTCTATCTAATTTTTTTTTTA---ATGA  
TGCTCGAACATGTACTTGTTTTGAGTGCCTATTTATTTTCGATCGGCATTTATGGATTAAT  
CACAAGCCGAAATTTAGTTAGAGCTCTTATGTGTCTTGAACCTATATTGAATGCGGTAA  
TCTAAATTTTCGTAACTTTTTCTGACTTTTTTGATAGTCGTCAACTAAAAGGAAACATTTT  
CTCTATTTTTGTTATAGCTATTGCAGCCGCTGAAGCAGCTATTGGACCGGCTATTGTTTC  
GGCAATTTATCGTAACCGAAAATCAACTCGTATTAATCAATCAAATTTGTTGAATAAGAT  
GGAACATATATACCAATATACATGGATCATACCTTTTATTCCACTTACAGTCCCTTTGTTA  
ATCGGAGCAGGACTTATTATTTTTCCGACGACAACAAAAATCTTCGACGGATGTGGG  
CTTTTCCTAGTATTTTGTGTTAAGTCTAGTTATGCTTTTTTCAACTAAATGTCTATTCA  
GCAAATAAATAGCCATTATATCTATCAATCTGTATGGTCTTGGACCATCAATAATGATTTT  
TCTTTAGAGTTTCGGTACTTGGTTGATCCACTTACTTCTATTATGTCAATGTTAATCACTA  
CTGTCCGTATTCTAGTTCTTATTTATAGTGACAATTATATGGTTCATGATCAAGGATATTT  
GAGATTTTTTGCTTATCTGAGTTTTTTCAACACTTCTATGCTTGGCTTAGTTACTAGTTCA  
AATTTTATACAAATTTATATTTTTTGGGAATTAGTTGGAATGTGCTCGTATCTATTAATAG  
GCTTTTGGTTTACACGACCTATTGCAGCGAATGCTTGTCAAAAAGCGTTTGTGACTAAT  
CGTGTAGGGGATTTTGGTTTATTATTAGGAATTTTGGGTCTTTATTGGCTAACAGGCAGT  
TTTGAGTTTCGAGACTTGTTCGAAATATTCAATACC---GAAGTCCATTTTTTAGTTGGAA  
CTGTATGTACTTTTTTATTATTTGCCGGTGCAGTTGCCAAATCCGCCCAATTTCCCTTCA  
TGTATGGTTACCTGATGCTATGGAGGGCCTACTCCGATTTCCGGCTCTTATCCACGCAGC  
TACTATGGTAGCTGCAGGGATTTTTCTTGTGCTCGACTTTTTCTCTTTTGATAGTAAC  
CCCCTTCATACTAAATTTAATCGCTTTAGTAGGTATAATAACACTATTTTTAGGAGCTACT  
TTAGCCTCTTGCTCAAAAGACATTAAGAGAGGTTTAGCTTATTCTACAATGTCTCAATTG

GGGTATATGATGTTAGCTCTAGGTATGGGGTCTTATCGAGCAGCTTTATTTTCATTTGATTA  
CTCATGCTTACTCAAAAGCATTGTTGTTTTTAGGATCTGGATGCGTTATTCATTCTATGG  
AAGCTATTGTTGGGTATTCTCCAGATAAAAGCCAAAATATGGTTTTTATGGGGGGGTTA  
AAAAAACACGTTCCAATCACAAAACGGCTTTTTTATTAGGTACACTTTCTCTTTCTGG  
TATTCCACCTCTTGCTTGTTTTTGGTCCAAAGATGAAATTATTAATGACACTTGGTTGTA  
TTCACCCATTTTTGCAATCATATCCTGGGCTACAGTAGGATTCACCGCATTTTATATGTTT  
CGCATCTATTTACTTACGTTTGAAGGACATTTAAACGTTCATTTTCAAATTAACAATGGG  
AAAAAAGTAGTTCCGTCTATTCAATCTCCTTATGGGGTCACGAAGGGGCTGAAACCTAT  
TAACAAGAATTTATTCATTTGTTACCAATAAAA---TTTTATTGCGACAATAAAAAAATT  
GTGCCATATCCTCACGAATCGGGTAATACTATGTTATTCCCTCTACTTGTATTGATTATTT  
TACTGGGGTCATTGGATTCATAGGAATTCCTTTCGATTTTGATATATTGTCCAGCTGGTTA  
ACCCCATCTGTAAATCTTTTACATCTTAAATTAATAAATTCTTTTACTGGTCTGAATTTT  
TGACAAATGCAACCCCTTTCGGTAGTATAGCCTATTCTGGAATAGTTCTAGCGTCTTTTT  
TATATAAACCCATTTATTCATCTTTACAAAATTTTGCCTTAATTAATCTTTTTGCCTTTTTT  
TCGGACAAAATAAAAAATGTAATATATGATTGGGCCCATCATCGTGGTTACATAGATGCT  
TTTTATACAAGATACATAATTCGGAGTGTAAGAGGATTGTCCCAATTCATAAATTTTTTT  
GACAGACGAGTAATTGATGGAATCCAAATGGATTGGGTGTTACAAGTTTTTTTTGTAGG  
AGAAGGTCTCAAGTATGTAGGTGGGGGC---CGCATTTCTTCTTATCTTTTTTTGTATTTAT  
TATATGCGTCAATTTTTTTATTAATTTACTATATGGATTTACCCGGACCAATACATGATTTT  
CTTTTAGTTTTTTTTGGATCAGGTCTTATATTAGGAGGCCTAGGAGTGATATTATTTACCA  
ATCCCATTTTTTCTGCCTTTTCTTTGGGCTTGGTTCTTGTTGTATATCTTTATTTCTATATTA  
TAGCAAACCTCTCAATTTGTAGCTTCTGCACAACCTCCTTATTTACGTAGGGGCGATAAAT  
GTTTTAATCATATTTGCTGTAATGTTCAATGTTAGGTTAGAAATGACAAAAAATTTGCGTC  
TTTTTACTCTTGGGGACGGAATGACTTTGGTAATTTGTACCGGTATTTTTTTTTTTATTAAT  
TACTACGATTCTAAATACGTCAGGGTACGGAATTTTGGACTACAAAATTAATCAAAT  
TCTAGAACAAGATTTAATAAATAATAGTCAACAAATCGGAATTCATTTATCAACAGATTT  
TTTTCCCCCATTTGAACTCATTTCATAAATCTTTTAGTTGCTTTGATAGGTGCAATTGCC  
GTGGCCCGTCAAATGACTGGACCAATTAACAAGAAAAGATCTAATGATAGTCAATATGGG  
GCCTCAGCACCCATCAATGCATGGCGTTCTTCGACTCATTGTTACTTTAGACGGCGAAG  
ATGTTATTGACTGCGAACCCGTTTTAGGTTATTTGCACAGAGGAATGGAAAAAATTTGCC  
GAAAACCGAACAATTATACAATTTTACCTTATGTAACACGTTGGGATTATTTAGCTACT  
ATGTTTACAGAAGCAATAACTATAAATGCACCAGAACAATTAGGAAATATTCAAGTACC  
TAAAAGGGCTAGCTATATCCGAGTTATTATGTTGGAGTTGAGTCGTATAGCTTCTCATT  
ATTATGGCTTGGACCTTTTATGGCAGATATTGGCGCTCAGACCCCTTCTTCTACATTTT  
CAGAGAAAGAGAGTTGATATATGATTTATTTCGAAGCTGCCACTGGCATGAGAATGATGC  
ATAATTTTTTTTCGTATCGGAGGAATCGCTGCCGATTTACCTTACGGCTGGATAGATAAAT  
GTTTGGATTCTGTGAGTATTTTTTACCAGCAATTGCCGAATATCAAACGCTTATTACTA  
GAAATCCTATTTTTTTTAGAACGAGTCGAAGGGGTGGGCATCATTGGCGGAGAAGAGGC  
AATAAATTGGGGGTTGTCAGGTCCCATGTTACGAGCTTCCGGAATACAATGGGATCTTC  
GTAATAATTGATCATTATGAATCTTATGAAGAATTTGATTGGGAAGTTCAATGGCAGAAG  
GAGGGCGATTCATTAGCTCGTTATTTAACCCGAATTGGCGAAATGGCGGAATCCATAAA  
AATAATTCAGCAAGCTCTAGAAGGAATTCGGGGGGACCCTATGAAAATTTAGAAATC  
CGACGCTGTAATAAAGTACGAGATCCTGAGTGGAAATAATTTGAATACAGATTCATTAGT  
AAAAGGCCTTCGCCACCTTTGAGTTATCGCAACAAGAGCTTTATGTAAGAGTCAAG

CGCCAAAGGGCGAGTTGGGAATTTTTTTGATAGGAGATCGGAGTGCTTTTCCGTGGCG  
CTGGAAAATTCGCCCGCCGGGTTTTATTAATTTGCAAATTCCTCCTCAGTTAGTTAAAA  
GAATGAAATTGGCTGATATTATGACAATACTAGGTAGCATAGATATAATTATGGGAGAAA  
TTGATCGTATGTTCCCTATGGTAACTGGGTTTCTGACTTATGGTCAACAAACAGTACGA  
GCCGCTCGGTACATTGGTCAAGGTTTTCTGATTACCTTATCCCATGCGAATCGTTTACCT  
GTAAC TATTCAATACCC T TATGAAAAATTGATCACATCAGAGCGTTTTCTGTGGTCTGAATC  
CACTTTGAATTCGATAAATGCATTGCTTGTGAGGTATGTGTTCTGTATGTCCTATAGAT  
CTACCTGTTGTAGATTGGAAATTGGAACTGGTATTCGAAAGAAACGGTTGCTAAATTA  
CAGTATTGATTTTGGAACTGTATATTTTGTGGTAATTGCGTTGAGTATTGCCCAACAAA  
TTGTTTATCAATGACTGAAGAATATGAGCTTCTATGTATGATCGTCATGAATTAATTAT  
AATCAAATTGCTTTAGGCCGTTTACCAATATCAATAATTGACGATTACACAATTCGAACT  
ATCTTGAATTGG-----ATGCAGGGTCGTTTGTCTGCTTG  
GCTAGTCAAACACGGGCTAGTTCATAGATCTTTGGGCTTCGATTATCAAGGAATAGAGA  
CTTTACAAATAAAGCCCGAAGATTGGCATTCCATTGCTGTCATTTTATATGTATATGGTTA  
CAATTATCTACGTTCCAGTGTGCCTATGATGTGCAACCCGGCGGACTGTTAGCTAGTG  
TGTATCATCTGACGAGAATAGAATCTGGTGTGGATCAACCAGAAGAGGTATGCATAAAG  
GTATTTGTCCCAAGGAGGAACCCCTCGAATTCCGTCTGTTTTCTGGGTTTGGAAAAGTGT  
GGATTTTCAAGAACGGGAATCCTATGATATGTTGGGAATCTTTTATGAGAATCATCCACG  
CCTGAAACGTATTTAATGCCCGAAAGTTGGATAGGATGGCCTTTACGTAAAGATTATAT  
TGCCCCGAATTTTTATGAAATACAAGATGCTTATCTGGGCAATGAGTTTCGATGTATTGG  
GTGTATCTGTTTTTATAGAAGCTTTAATTTTCGTGCTTATCCTAATTGTTGGTTTAGTTTAT  
GCATGGCGAAAAGGAGCATTGGAATGGTCTTAGTTTCTAAATATTTAACAATCAAAT  
AAAAAAGAAAAACAATAAGATTGAACGAGTCTGAATTCGGTTGAGTTTCTCCCGC  
TTGATCGAATAACCCCAAACCTCAGTTATTTCAACTACATCAAATGATCTTTCAAATTGGT  
CAAGACTCTCTAGTTTATGGCCACTTCTCTATGGTACTAGTTGTTGCTTCATTGAATTTG  
CTTCATTAATAGGCTCGCGATTGACTTTGATCGTTATGGACTGGTACCAAGATCGAGC  
CCTAGACAAGCCGACCTCATTTTAACAGCTGGTACGGTAACAATGAAAATGGCCCTT  
CTTTAGTGAGATTATATGAGCAAATGCCTGAACCAAAATATGTTATTGCTATGGGAGCCT  
GTACAATTACAGGGGGGATGTTTCAAGTACCGATTCTTATAAGTACTGTTTCGGGGGGTCGAT  
AAACTAATTCGGTGGATGTCTATTTGCCGGGCTGTCCACCTAAACCGGAAGCTGTTAT  
AGATGCTATAACAAAGCTTCGTAAGAAAATATCTTGGGAAATTTATGAAGATAGAATTC  
AGTCG-----AAGAATCGATATTTACTATTAACACAAGTTTCGTGTTGGACGCCGATTTC  
ATACTGGAAATTATAATCAAGGATTACTTTCTAAATCGCCATCTATTTCCGAGATCCCTCC  
CGAAAAATTTTTCAAATACAGAAGTTCAGTATCTTCCCACGAATTTGTGAATATGCAAA  
CTATAAATAACCCTTTCTTGGATAAAAGAACAGATTACTCGATCCATTTCCGTATCACTCA  
TTATATATAATAACTCAGTCATCCATTTCAAATGCATATCCCATTTTTGCACAACAAGG  
TTATGAAAATCCCCGAGAAGCGACCGGTCGTATTGTATGTGCCAATTGTCATTTAGCTAA  
TAAACCGTGGATATTGAGGTTCCACAAGCGGTCCTTCCCTGATACTGTATTTGAAGCAG  
TTGTTTCAATTCCTTATGATATGCAACTAAAACAAGTTCTTGCTAATGGCAAGAAAGGG  
GGTTTGAATGTAGGAGCTGTTCTTATTTTACCCGAGGGGTTTGAGTTGGCCCCAACCGA  
GCGTATTTCTCCCGAGATGAAAGAAAAGATAGGGAATCTTTCTTTTTCAGAGCTACCGCC  
CAAATAAAAAAATATTCTTGTGATAGGCCCTGTTCCGGGGCAAAAATATAGTGAATC  
ACCTTTCTATTCTTTACCCGACCCCTGCTACTAAGAAAGATGCTCATTTTTTAAAATAT  
CCCATATTTGTAGGCGGTAACAGGGGAAGGGGGCAGATTTATCCCGACGGAAGCAAGA

GTAACAATACTGTTTATAATGCTACAGCAACAGGTATAGTAAAGACAATAATACGAAAA  
GAAAAAGGCGGATACGAAATAACCATAGGGGATGCCTCAGATGGGCGTCAAGTCGTTG  
ATATTATTCCTCCAGGGCCAGA ACTTCTTGTTCAGAGGGTGAATCTATAAACTCGAC  
CAACCATTAACGAGTAATCCTAATGTGGGTGGATTTGGTCAGGGCGATACAGAAATCGT  
ACTTCAAGACCCATTACGCGTCCAAGGCCTTTTGTCTTCTTGGCGTCGGTTATTTTAGC  
ACAAATTTTTTTGGTTCTTAAAAAGAAACAGTTCGAGAAGGTTCAATTGTCCGAAATG  
AATTCATGAGTAAAGTCTATGATTGGTTCGAAGAACGTCTCGAGATTCAGGCGATTGC  
AGATGATATACTAGTAAATATGTTCCCTCCCATGTCAACATATTTTATTGTCTAGGTGGG  
ATTACCCTTACTTGTTTTTTAGTACAAGTAGCTACGGGGTTTGCTATGACTTTTTATTATC  
GTCCA ACTGTTACTGATGCGTTTGCTTCTGTTCAATACATAATGACTGAAGCAAATTCG  
GTTGGTTAATCCGATCAGTTCATCGGTGGTCGGCAAGCATGATGGTTCTAATGATGATAC  
TGCACGTATTTGCGTGTATCTCACCGGTGGGTTTAAAAACCTCGAGAATTGACTTGG  
GTTACAGGTGTAGTTCTGGCTGTATTGACCGCGTCTTTTGGTGTA ACTGGGTATTCCTTA  
CCTTGGGACCAAGTTGGTTATTGGGCGGTCAA AATTGTAACAGGCGTCCCTGAAGCTA  
TTCCTATAATAGGATCGCCTTTGGTGGAGTTATTACGCGGAAGCGCTAGTGTGGGACAA  
TCCACTTTGACTCGTTTTTATAGTTTACACACTTTTGTATTGCCTCTTCTTACTGCTGTAT  
TTATGTTAATGCACTTCCTAATGATACGTAAACAGGGCATTCTGGTCCCTTAATGGGAG  
TAACAAAAAACCTGACTTGAAATGATCCTGTATTAAGAGCTAAATTGGCTAAAGGGATG  
GGTCATAATTATTACGGGGAGCCCGCATGGCCAAACGACCTTTTATATATTTTTCCAGTC  
GTTATTCTAGGGACTATTGCGTGTAAATGTAGGCTTAGCCGTTCTCGAACCGTCAATGATT  
GGCGAGCCTGCGGATCCATTTGCAACTCCTTTGGAATATTACCTGAATGGTATTTTTTT  
CCCGTATTTCAAATACTTCGGACAGTACCCAATAAATTATTGGGTGTTCTTTTAATGGTT  
TCAGTACCCGCGGGATTATTAACAGTCCCTTTTTTGGAGAATGTTAATAAATTCCAAAAT  
CCATTTGTCGTCCGGTCCGACACAACCGTCTTTTTGGTTGGTACCGTAGTGGCCCTTTG  
GTTAGGTATTGGAGCAACATTACCGATTGATAAATCGCTAACTTTAGGTCTTTTTATGAT  
TGAAGTACTTCTATTTGGAATCGTTTTAGGTTTGATTCCCTATTACTTTGGCTGGATTATC  
GTA ACTGCATATTTACAATATAGACGTGGCGATCAGTTGGACCTTATGCCTACTCTAACT  
AGTTATTTGCGTTTTTCTACTAGCAGCTTTAAGTACAACCTCAGCTCTATTTATTGGTCTG  
AGCAAGATACGACTTCTTATGGATATAGTAAGTCTCGCTTGGGCTGCTTTAATGGTAGTC  
TTTACATTTTCCCTTTCACTCGTAGTATGGGGGAGGAGTGGACTCATGATTATTCGTTTCG  
CCGGAACCAGAAGTAAAAATTTGGTAGATAGGGACCCATAAAAACCTCATTGAGG  
AATGGGCCAGACCAGGTCATTTTCAAGGACAATTGCTAAGGGCCCTGAAACGACCAC  
TTGGATCTGGAATCTACATGCTGATGCTCACGATTTTCGATAGCCATAACAGTGATTTGGA  
GGAGATCTCTCGAAAAATATTTAGTGCCATTTCCGGTCAACTCTCTATCATCTTTCTTTG  
GCTGAGTGGCATGTATTTCCACGGTGCTCGTTTTTCCA ACTATGAAGCATGGCTAAGCG  
ATCCTACTCACATTGGCCCTAGTGCCCAAGTGGTTTGGCCGATAGTGGGCCAAGAAATA  
TTGAATGGTGATGTAGGCGGAGGTTTCCGAGGAATCCAATAACCTCCGGGTTTTTTCA  
TATTTGGCGAGCTTCTGGAATAACTAGTGAATTACA ACTCTATTGTACCGCAATTGGTGC  
ATTGGTCTTTGCGGCGTTGATGCTTTTTGCCGGTTGGTTCCATTATCACAAAGCAGCTC  
CAA AATTGGCTTGGTTTCAAGATGTGGAATCCATGTTGAATCACCATTTAGCGGGGCTA  
CTAGGACTTGGGTCTCTTTCGTGGGCGGGGCATCAAGTACATGTATCTTTGCCGATTAA  
CCAATTTCTAAATGCTGGAGTCGATCCTAAAGAGATACCACTTCCTCATGAATTTATCTT  
GAATCGGGATCTTTTGGCTCAACTTTATCCAGTTTTGCGGAGGGAGCAACCCCATTTT  
TCACCCTGAATTGGTCAA AATACGCGGAATTTCTGACTTTTCGTGGCGGATTAGACCCA

GTAACCGGGGTTTATGGCTGAGTGATATTGCACACCATCATTAGCTATTGCAATTCTT  
TTCCTGATAGCGGGGCACATGTATAGGACCAACTGGGGTATTGGTCATGGCCTAAAAGA  
TATTTTAGAGGCTCATAAAGGCCATTACAGGCCAGGGACATAAGGGACTATATGAGA  
TCCTAACACATCATGGCATGCTCAACTAGCCCTAACCTAGCCATGTTAGGGTCTTTA  
ACCATTGTTGTAGCTACCATATGTATTCCATGCCCCCTTATCCATATCTAGCTACTGACT  
ATGGTACTCAACTGTCATTGTTTACACATCACATGTGGATTGGTGGATTTCTCATAGTTG  
GTGCTGCTGCGCACGCAGCCATTTTTATGGTAAGAGACTATGATCCAACTACTCGATAC  
AATGATCTATTAGATCGTGTCTTAGACATCGCGATGCAATCATATCACACCTCAACTGG  
GCATGTATATTTCTAGGCTTTCACAGTTTTGGTTTTGTATATTCATAATGATACCATGAGCG  
CTTAGGACGCCCTCAAGATATGTTTTCGGATACCGCTATAACAATTACAACCCATCTTGT  
CTCAATGGATACAAAACACCCATGCTTTAGCGCCTAGTGTAACGGCTCCTGGTGCAAC  
ACAAGCACCAAGTTTACTTGGGGGGTGGTGATTTAGTAGCAGTGGGTGGCAAGGT  
CGTTTTGTACCTATTCCATTAGGAACCGCAGATTTTTTAGTCCACCACATTCATGCATTT  
ACAATTCATGTGACGGTACTGATACTTCTGAAGGGTGTCTATTTGCGCGTAGCTCTCG  
TTTGATAACCGGATAAGGCAAATCTTGGTTTTTCGTTTTCTTGTGATGGTCCGGGACGCG  
GGGGACATGCCAAGTATCTGCTTGGGATCATGTATTCTTGGGGCTGTTTTGGATGTAC  
AATCAATTCGGTAGTCATATTCATTTAGTTGGAAAATGCAGTCCGATGTTTGGGGT  
AGTATAAGTGATCAAGGGGTGGTAACTCATATCACGGGTGGAACTTTGCGCAGAGTT  
CCATTACTATTAATGGCTGGCTCCGTGATTTCTTATGGGCACAAGCATCTCAGGTAATTC  
AGTCTTATGGTTCTTCATTATCTGCATATGGCCTTTTTTTCCTAGGTGCTCATTTTGTCTG  
GGCTTTTAGTTAATGTTTCTATTACAGCGGGCGCGGTTATTGGCAAGAACTTATTGAATC  
CATTGTTTGGGCTCATAATAAATAAAAGTTGCTCCTGCTACTCAGCCGAGAGCCTTGA  
GCATTGTACAAGGACGTGCTGTAGGAGTAACTCATTACCTTCTGGGTGGAATTGCCACA  
ACATGGGCATTCTTCTTAGCAAGAATTATTGCAGTAGGAATGGCATTAAAGATTTCCAAG  
GTTTAGCCAAGGCTTAGCTCAGGACCCCACTACTCGTCGTATTTGGTTTTGGCATTGCTA  
CCGCACATGATTTGAAAGTCATGATGATATTACCGAAGAACGTCTTTATCAGAATATTT  
TTGCTTCTCATTTTGGCCAATTAGCGATCATTTTTCTGTGGACTTCCGGAAATCTGTTTC  
ATGTAGCTTGGCAAGGCAATTTTGTAGTCATGGGTACAGGACCCTTACATGTAAGACCT  
ATTGCCCATGCAATTTGGGATCCTCATTTTGGTCAACCGGCCGTAGAAGCTTTTACTCG  
AGGTGGTGTCTCCTGGTCCAGTGAATATCGCTTATTCTGGTGTATCAGTGGTGGTATAC  
AATCGGTTTACGACTAATGAAGATCTTTATACTGGATCTTTTTTCTATTATTTCTTTCT  
GTCATATCTTTAATAGCGGGTTGGTTACATCTACAACCGAAATGGAACCGAGCGTTTC  
GTGGTTCAAAAATGCGGAATCCCGTCTCAATCATCATTTGTCAGGACTCTTCGGAGTAA  
GTTCTTGGCTTGGACAGGACATTTAGTTCATGTGCTATTCCCGGATCCAGGGGGGAG  
TACGTTCCGGTGGAAATAATTTCTTAGACGTATTACCGCATCCTCAAGGGTTAGCCCCACTT  
TTTACAGGCCAGTGGAAATCTTTATGCTCAAAACCCGATTCGAGTAGTCATTTATTTGGT  
ACCGCCAAGGAGCGGGAACCTGCCATTCTAACACTTCTTGGGGGATTCATCCACAAA  
CGCAAAGTTTATGGCTAACCGATATGGCCCATCATCATTTAGCTATTGCATTTATTTTTCT  
CGTTGCTGGTCATATGTATAGAACTAACTTCGGGATTGGGCACAGTATGAAAGATCTTTT  
AGAAGCACATATTCCTCCGGGAGGTTCGATTGGGGCGTGGGCATAAGGGTCTTTATGAC  
ACAATAACAATTCGATTCATTTCAATTAGGGCTTGTCTAGCCTCTTTAGGGGTATT  
ACCTCCTTGGTTGCTCAACACATGTACTCTTACCTGCTTATGCGTTCATAGCCCAAGAC  
TTTACTACTCAAGCAGCATTATATACACATCACCAATACATCGCAGGGTTCATCATGACA  
GGAGCTTTTGCACATGGGGCTATCTTTTTTCATTCGAGATTACAATCCGGAGCAGAATGA

GGATAATGTATTGGCAAGAATGTTAGAACATAAGGAAGCTATCATATCCCATTAAAGCTG  
GGCCAGCCTCTTTTTAGGGTTCCATACTTTGGGTCTTTATGTTTCATAATGATGTCATGCTT  
GCTTTTGGTACTCCGGAAAAACAAATCTTGATCGAACCCATATTTGCTCAATGGATACA  
ATCTGCTCATGGTAAACTTCATATGGCTTCGATGTACTTTTATCTTCAACAAATGGCCC  
GGCATTAAATGCAGGTCGAAGTATCTGGTTGCCTGGCTGGTTAAATGCTGTAAATGAA---  
---AAGAGTAACTCACTATTCTTAACAATAGGTCCTGGAGACTTTTTAGTTCATCATGCTA  
TTGCTCTAGGTTTACATACTACATTGATCTTAGTAAAAGGTGCTTTAGATGCACGTG  
GTTCCAAGTTAATGCCAGATAAAAAGGATTCGGTTATAGTTTTCTTGTGATGGTCCG  
GGACGGGGCGGTACTTGTGATATTTCCGGCTTGGGACGCATTTTATTTGGCAGTTTTCTG  
GATGTTAAATACCATTGGATGGGTACCTTTTATTGGCATTGAAACACATCACATTATG  
GCAGGGTAATGTTTACAATTTAATGAATCTTCCACCTATTTGATGGGATGGTTAAGAGA  
TTATCTATGGTTAAACTCTTCACTTATCAATGGATATAACCTTTTTGGTATGAATAGT  
TTATCGGTTTGGGCGTGGATGTTCTTATTTGGACATCTTGTTTGGGCTACGGGATTTATG  
TTCTTAATTTCTGGCGCGGGTATTGGCAGGAATTGATCGAAACTTTAGCATGGGCTCA  
TGAACGCACACCGTTGGCCAATTTGATTCGATGGAGAGATAAACCTGTCGCTCTTTCTA  
TTGTGCAAGCAAGATTGGTTGGATTAGCCCACTTCTCCGTCGGTTATATATTCACTTATG  
CGGCTTTCTTGATTGCCTCTACATCCGGAAAATTTGGTATGTCACATTCAGTAAAGATTT  
ATGATACATGTATAGGGTGTACTCAATGTGTACGAGCCTGCCCCACAGATGTATTAGAAA  
TGATACCTTGGGACGGGTGTAAAGCGAAACAATAGCTTCCGCCCCAAGAACAGAGG  
ACTGCGTTGGTTGTAAGAGATGCGAATCCGCCTGTCCAACCGATTTTTTGAGTGTTTCGA  
GTTTATTTATGGCATGAAACAACCTCGAAGTATGGGTCTAGCTTATATGACAGATATAAAC  
CTTCCCTCTATTTTTGTGCCTTTCTAGGCCTAGTATTTCCGGCAATTGCAATGGCTTCTT  
TATTTCTTCATGTTCAAAAAACAAGATTGTTATGCGAAATCTAAAAACATATCTCTCCG  
TGGCACCCGTGCTAAGTACTTTATGGTTCGGATCTTTAGCAGGTCTATTAATAGAAATCA  
ATCGTTTTTTCCCGGACGCTTTAACATTCCCTTTTTTTTCATTCATGACTGCAATTTTAGA  
GAGACGCGAAAGCGAAAGCCTATGGGGTCGTTTTTTGTAACCTGGATAACCAGTACTGAA  
AACCGTCTTTACATTGGATGGTTTGGCGTTTTGATGATTCCTACCTTATTGACCGCAACT  
TCCGTATTTATTATAGCCTTCATTGCTGCTCCTCCGGTAGATATTGATGGTATTCGTGAAC  
CTGTTTCTGGATCTCTTCTTTACGGAAACAATATTATCTCTGGTGCCATTATTCGACTTC  
TGCTGCTATAGGTTTGCACCTTTATCCAATATGGGAAGCTGCATCTGTTGATGAATGGTT  
ATACAATGGTGGTCTTATGAGCTAATTGTTCTGCACTTCTTACTTGGTGTAGCTTGTTA  
CATGGGTCTGAGTGGGAACCTAGCTTCCGTCTGGGTATGCGCCCTTGGATTGCTGTTG  
CGTATTCAGCTCCTGTTGCGGCTGCTACTGCTGTTTTCTTGATCTACCCAATTGGTCAAG  
GAAGCTTTTCTGATGGTATGCCTCTAGGAATTTCTGGTACTTTCAACTTCATGATTGTAT  
TCCAGGCTGAGCACAAACATCCTTATGCACCCATTCACATGTTAGGCGTAGCTGGTGTA  
TTCGGCGGCTCCCTATTCAGTGCTATGCATGGTCTTTGGTAACTCGAGTTTGATCAGG  
GAAACCACAGAAAATGAATCTGCTAATGAAGGTTACAGGTTTGGTCAAGAGGAAGAG  
ACTTATAATATCGTAGCTGCTCATGGTTATTTGGCCGATTAATCTTCCAATATGCTAGTT  
TCAACAATTCTCGTTCTTTACATTTCTTCTTAGCTGCTTGGCCTGTAGTAGGTATCTGGT  
TACTGCTTTAGGTATTAGTACTATGGCATTAAACCTAAACGGCTTCAATTTCAACCAAT  
CTGTAGTTGATAGTCAAGGTCGTGTAATTAATACTTGGGCTGATATTATTAACCGCGCTA  
ACCTTGGTATGGAAGTTATGCATGAACGTAATGCTCATAACTTCCCTCTAGACCTAGCTG  
CAACCAAGCTCCATCTATTAATGGAATGGGTTTGCCTTGGTATCGTGTTTCATACCGTTG  
TATTGAATGATCCGGGTCGGTTGATTTCTGTCCATATAATGCATACGGCTCTGGTTGCTG

GTTGGGCCGGTTCATGGCTCTATATGAATTAGCTGTTTTTGGATCCCTCTGATCCCGTTC  
TTGATCCAATGTGGAGACAGGGTATGTTTCGTTATACCCTTCATGACTCGTTTAGGAATAA  
CCAATTCCTGGGGCGGCTGGAGTATTACA---GGGGGGACGGTAACGGATCCTGGTATTT  
GGAGTTATGAAGGTGTGGCCGGGTCACATATTGTGTTTTCTGGCTTGTGCTTTTTGGCA  
GCTATTTGGCATTGGGTCTATTGGGATCTAGAAATTTTTTGTGATGAACGTACAGGAAA  
ACCTTCATTAGATTTGCCTAAGATTTTTGGAATTCATTTATTTCTTTCCGGGGTGGCTTGT  
TTTGGTTTTGGCGCATTTCATGTAACAGGCTTGTACGGTCCTGGAATATGGGTGTCTGAT  
CCGTATGGATTAACCGGAAAAGTCCAGTCAGTAAATCCCGCATGGGGCGTAGAAGGTT  
TTGATCCTTTTGTTCAGGGGAATAGCTTCTCATCATATTGCAGCAGGGACATTGGGC  
ATATTAGCGGGCTTATTCCATCTTAGTGTCCGCCCGCCCAACGTCTATACAAAGGATTA  
CGTATGGGTAATATTGAAACCGTACTTTCTAGCAGTATCGCTGCTGTCTTTTTTGCAGCT  
TTTGTAGTTGCCGGAACCTATGTGGTATGGTTCAGCAACGACTCCGATCGAATTATTTGG  
TCCACTCGTTATCAATGGGATCAGGGATACTTTCAGCAAGAAATATATCGAAGAGTTA  
GTGCTGGGCTGGCCGAAAATCAAAGTTTATCAGAAGCTTGGTCGAAAATTCCCGAGAA  
ATTAGCCTTTTATGATTACATCGGCAATAATCCGGCAAAGGGAGGGTTATTCAGGGCAG  
GTTCAATGGACAATGGGGATGGAATAGCTGTTGGATGGTTAGGACATCCAATATTTAGA  
GATAAGAAGGACGTGAGCTCTTTGTACGCCGTATGCCTACTTTTTTTGAAACATTTCC  
AGTCGTTTTGATAGACGGAGATGGGATTGTTAGAGCCGATGTTCCTTTTAGAAGAGCAG  
AATCTAAATATAGCGTCGAACAAGTAGGCGTAAACGGTTGAGTTCTATGGTGGCGAACTC  
AATGGAGTCAGTTATAGTGATCCTGCTACTGTGAAAAAATATGCTAGACGTGCTCAATT  
GGGTGAAATTTTTGAATTAGATCGTGCTACTTTGAAATCGGATGGTGTTTTTTCGTAGTAG  
TCCAAGGGGTGGTTTTACTTTTTGGACATGCTTCCTTTGCCCTGCTTTTCTTCTTCGGACA  
TATTTGGCATGGGTCGAGAACCTTATTCAGAGATGTTTTTGCTGGTATTGATCCAGATTT  
AGATTCTCAAGTAGAATTTGGAGCATTCCAAAACTAGGAGATCCAACCTACACGAAGA  
CAGGCAGTCATGAAAACCTTATATTCCCTGAGGAGGTTCTACCACGTGGAAACGCTCTT  
TAATGGAACCTTTAGCTTTAACCCAGTCGTGACCAAGAAACCACCGGTTTCGCTTGGTGG  
GCCGGGAATGCCCGACTTATCAATTTATCCGGTAAACTACTCGGAGCTCACGTAGCCCA  
TGCCGGATTAATAGTATTCTGGGCTGGAGCAATGAACCTATTTGAAGTGGCTCATTTTCGT  
ACCCGAAAAGCCAATGTATGAACAAGGATTAATTTTACTTCCCCACCTCGCTACTCTAG  
GTTGGGGAGTAGGCCCGGGTGGGGAAGTTATAGACACTTTTCCATATTTTGTATCGGGA  
GTACTTCACTTAATTTCTCGGCAGTGTGGGCTTTGGGGGGATTTATCATGCACTTCTG  
GGCCCTGAGACTCTTGAGGAATCTTTTCCATTCTTCGGTTATGTATGGAAAGATCGAAA  
TAAAATGACCACAATTTTGGGCATTCATTAATCTTGTTAGGTCTAGGGGCTTTTCTTCT  
AGTATTCAAGGCTCTTTTTTTTTGGGGGCATATACGATACCTGGGCTCCAGGAGGGGGGG  
ATGTAAGAAAATTACCAACTTGACCCTTAGCCCAAGTATTATATTTGGTTATTTACTAA  
AATCTCCTTTTGGGGGAGAAGGATGGATTGTTAGTGTGGACGATTTGGAAGATATCATC  
GGAGGACATGTATGGTTAGGTTCCATTTGTATACTTGGCGGAATCTGGCATATATTAACC  
AAACCTTTTGCCTGGGCTCGCCGCGCACTTGTATGGTCTGGAGAGGCTTATTTGTCTTA  
TAGTTTAGGTGCTTTATCTGTCTTCGGTTTCATTGCTTGTGCTTTGTCTGGTTCAATAAT  
ACCGTTATCCTAGTGAGTTTACGGTCCAACAGGGCCAGAAGCTTCTCAAGCTCAAG  
CATTTACTTTTCTAGTTCGAGACCAACGCCTTGGGGCTAACGTGGGATCCGCGCAAGG  
ACCTACTGGGTTAGGTAAGTATCTAATGCGTTCGCCAACTGGAGAAGTCATTTTGGAG  
GAGAACTATGCGTTTTTGGGATTTGCGTGCTCCTTGGTTAGAACCCCTAAGGGGTCCT  
AACGGTTTGGACTTGAGTCGGCTGAAAAAAGACATACAACCGTGGCAAGAACGGCGT

TCCGCGGAATATATGACTCATGCCCTTTAGGGTCCTTAAATTCTGTGGGTGGCGTAGCT  
ACCGAGATCAATGCAGTCAATTATGTCTCTCCTAGAAGTTGGTTAGCTACTTCTCATTTT  
GTTCTAGGCTTCTTCCCTATTCGTAGGTCATTTGTGGCACGCGGGAAGGGCTCGTGGCGC  
TGCAGCAGGATTTGAAAAAGGAATTGATCGTGATTTTGAACCTGTTCTTTTCGATGACCC  
CTCTTAATATGACTATAGCCCTTGGTAAAGTTACCAAAGATGAAAATGATTTATTTGATAT  
TATGGATGACTGGTTACGGAGGGACCGTTTTCGTTTTTGTTCGGTTGGTCCGGTCTATTGC  
TCTTTCCGTGTGCGTATTTTCGTGTAGGAGGTTGGTTTACGGGTACAACCTTTGTAACCT  
CCTGGTATACTCATGGTTTGGCCAGTTCCTATTTGGAAGGCTGCAATTTCTTAACCGCA  
GCAGTTTCGACTCCTGCTAATAGTTTAGCACACTCTTTATTTGTTACTATGGGGCCCTGAA  
GCTCAAGGAGATTTTACTCGTTGGTGTCAATTAGGCGGCCTGTGGACTTTTGTGCTCT  
CCATGGCGCTTTCGGACTAATAGGTTTTATGTTACGTCAATTCGAACTTGCTCGATCTGT  
TCAATTGCGACCTTATAATGCAATCGCATTCTCTGGCCCAATTGCCGTTTTTGTTCGGT  
GTTTCTAATTTATCCACTAGGTCAGTCTGGTTGGTTCTTTGCGCCTAGTTTTGGTGTAGC  
AGCTATATTTTCGATTCATCCTCTTTTTTCAAGGGTTTCATAATTGGACATTGAATCCATTT  
CATATGATGGGAGTGGCCGGTGTATTGGGCGCCGCTCTGCTATGCGCTATTCATGGTGCT  
ACCGTAGAAAATACTTTATTTGAAGATGGTGATGGTGCAAATACATTCCGGGCTTTTAA  
CCCAACCCAAGCCGAAGAACTTATTCAATGGTCACTGCTAACCGCTTTTGGTCCCAA  
ATCTTTGGGGTTGCTTTTTCCAATAAACGTTGGTTACATTTCTTTATGTTATTTGTACCAG  
TAACCGGTTTATGGATGAGTGCTCTTGGGGTAGTCGGTCTGGCTTTGAACCTACGCGCC  
TATGACTTCGTTTCCCAGGAAATCCGTGCCGCAGAAGATCCTGAATTTGAGACTTTCTA  
CACAAAAAATATTCTCTTAAACGAGGGTATTCGCGCTTGGATGGCGGCTCAAGACCAG  
CCTCATGAAAACCTTATATTCCCTGAGGAGGTTCTACCACGTGGAAACGCTCTTATGTC  
TGGAAGCACAGGAGAACGTTCTTTTTGCGGATATTATTACCAGTATTCGATACTGGGTCA  
TCCATAGCATTACTATACTTCCCTATTTCATTGCGGGTTGGTTATTTCGTCAGCACAGGTTT  
AGCTTACGACGTGTTTGGAAAGCCCTCGGCCAAACGAGTATTTTACAGAGAGCCGACAG  
GGAATTCCATTAATAACTGGCCGTTTTGATTCTTTGGAACAACCTCGATGAATTTAGTAGA  
TCCTTTATGACCATAGATCGAACCTATCCAATCTTTACAGTGCATGGTTGGCTGTTTAC  
GGACTTGCTGTACCTACCGTTTCTTTTTTGGGGTCAATATCCGCAATGCAATTCATCCAA  
CGAATGGCTACACAAATCGTTGAGAGTAGTTCTAAATCGCGT---CCAAGACAAACTACG  
GTAGGGGCTTTATTGAAACCATTGAATTCAGAATATGGTAAAGTAGCTCCTGGATGGGG  
AACTACTCCTTTGATGGGTGTCACAATGGCTTTATTTGCAGTATTCCTATCGATTATTTG  
GAGATTTATAATTCTTCTGTTTTACTGGATGGAATTTCCATGAATATGCTTACTCTCAAAC  
TCTTCGTTTACACAGTAGTGATATCTTTGTTTCTCTTTCATTTTTCGGATTTCTATCTAAT  
GACCCAGGACGTAATCCTGGGCGCGAAGAAATGGCCGATACTACTGGAAGGATTCCGC  
TTTGATAATAGGTACTGTAACCGGCATTCTTGTGATCGGTTTACTAGGCATTTTCTTTTA  
TGGTTCATATCCGGATTGGGTTTCATCGCTGATGCTTAATTTATTTAGTTTGATCTGTATT  
TGTCTTAATTCTGTCTTTCTTCGAGTATTTTTTTATTCGCCAAATTGCCCGAGGCTTATG  
CATTTTTGAGTCCAATCGTCGATTTTATGCCAGTCATACCTTTACTCTTTTTTCTACTAGC  
CTTTGTTTGGCAAGCTGCTGTAAGTTTTTCGAACGACACAATCAAACCCGAACGAACAA  
AATGTTGAATTGAATCGTACCAGTCTCTACTGGGGGTTATTACTCATTTTTGTACTTTGCT  
GTTTTATTTTCAAATTATTTTTTCAATATGGAAGTAAATATTCTCGCATTTATGCTACTGC  
ACTCTTCATTCTAGTTCCTACTGCTTTTTTACTTATCATATATGTAAAAACGGTCAGCCAA  
AACGATATGGAAACAGCAACCCTAGTCGCCATCTTTATATCTGGTTTACTTGTAAGTTTT  
ACCGGTACGCCTTATATAACCGCTTTTTGGGCAACCCTCTCAACAACCTAAGAGATCCGTT



CGAGGAACACGGGGACATGGAAGCATTGGTTTATACATTTCTATTAGTCTCGACCCTAG  
GGATAATTTTTTCGCTATCTTTTTTCGAGAACCGCCTAAAGTTCCAACCTAAGAAA-----  
ATGACTATAGCTTTCCAATTGGCTGTTTTTGCATTAATTGCTACTTCATCAATCTTACTGA  
TTAGTGTACCTGTCGTATTTGCGTCTCCTGATGGTTGGTCAAGTAACAAAAATTTTTTAT  
TTTCTGGTACATCATTATGGATTGGATTAGTCTTTCTGGTAGGTATTCTTAATTCTCTCAT  
CTCT-----ATGTCACCACAAACAGAGACTAAAGCAAGTGTGGATTCAAAGC  
TGGTGTAAAGAATACAAATTGACTTATTATACTCCTGACTATGAACCCCATGACCATGA  
TATCTTGGCAGCATTTCGAGTAACTCCTCAACCTGGAGTTCCACCAGAAGAAGCAGGG  
GCCGCGGTAGCTGCCGAATCTTCTACTGGTACATGGACAACCTGTGTGGACCGATGGAC  
TTACCAGCCTTGATCGTTACAAAGGACGATGCTACCACATCGAGCCTGTTCCCTGGAGA  
AGAAAACCAATTTATTGCTTATGTAGCTTACCCATTAGACCTTTTTGAAGAGGGTTCTGT  
TACTAACATGTTTACTTCCATTGTGGGGAATGTATTTGGGTTCAAAGCCCTGCGTGCTCT  
ACGTTTGGAGGATTTACGAATCCCTCCTGCTTATACGAAAACCTTCCAAGGCCCGCCTC  
ATGGTATCCAAGTTGAGAGAGATAAATTGAACAAATATGGACGTCCTTATTGGGATGT  
ACTATTAACCTAAATTGGGGTTGTCTGCTAAGAACTACGGTCGAGCAGTTTATGAATG  
TCTTCGTGGCGGACTTGATTTTACCAAAGATGATGAAAACGTGAACTCCCAACCATTTA  
TGC GTTGGCGAGATCGTTTCTTATTCTGTGCCGAAGCTCTTTTAAATCGCAAGTTGAA  
ACAGGTGAAATCAAAGGACATTACTTGAATGCTACTGCAGGTACATGCGAAGAAATGA  
TAAAAAGGGCTGTATTTGCCAGAGAATTGGGAGTTCCTATCGTAATGCATGACTACTTA  
ACAGGGGGATTACTGCAAATACTAGTTTAGCTCATTATTGCCGAGATAACGGGCTTACT  
TCTTCACATCCACCGTGCAATGCATGCAGTTATTGATAGACAGAAAAACCATGGTATAC  
ACTTCCGTGTACTAGCAAAAAGCCTTACGTCTGTCTGGTGGAGATCATATTCATTCCGGT  
ACTGTAGTAGGTAACTTGAAGGGGAAAGGGACATCACTTTAGGTTTTGTTGATTACT  
ACGTGATGACTTTGTTGAAAAAGACCGAAGTCGCGGTATTTATTTCACTCAACCTGGG  
TTCCCTACCTGGTGTATTCTGTGGCTTCCGGTGGTATTCACGTTTGGCATATGCCCG  
CTCTAACCGAGATCTTTGGGGATGATTCTGTATTACAGTTCGGTGGCGGAACTTTAGGC  
CACCCGTGGGAAATGCGCCTGGTGTCTGTGCGAATCGAGTAGCTCTAGAAGCCTGTG  
TACAAGCTCGTAACGAGGGGCGTGATCTTGCTCGTGAGGGTAACGATATTATTCGTA  
GCGGCCAAATGGAGTCCTGAACTAGCTGCCGCTTGC GAAGTATGGAAGGAAATCAAAT  
TTGAATTTCCAAGCAATGGATACTTTG-----ATGGCGATACATTTATACAAAACCTTCTACCC  
CGAACACAGGCAATAGGGCCGTAGACAGTCAAGTGAAATCCAATCCACGAAATAATTT  
GATCTATGGACAGCGTCGTTGTGGTAAAGGTCGTAATGCCAGAGGAATCATTACCGCA  
AGGCATAGAGGGGGAGGTCATAAGCGTCTATACCGTAAAATCGATTTTCGACGGAATG  
AAAAAGACATATATGGTAGAATCGTAACCATAGAATACGACCCTAATCGAAATGCATAC  
ATTTGTCTCATACACTATGGGGATGGTGAGAAGAGATATATTTTACATCCCAGAGGGACT  
CTAATTGGAGATACCATTGTTTCTGGTACAGAAGTTCCTATAAAAATGGGAAATGCCCT  
ACTTTGGACCGATATGCCCTTAGGCACGGCCATACATAACATAGAAATCACACTTGGAA  
AGGGTGGACAATTAGCTAGAGCAGCGGGTGTCTGTAGCGAAACTGATTGCAAAAAGAAG  
GAAATCAGCCACATTAATAATTACCTTCTGGGGAGGTCCGTTTGTATCCAAAAACTGC  
TCAGCAACAGTCGGACAAGTGGGGAATGTTGGAGTGAACCAGAAAAGTTTGGGTAGA  
GCCGGATCTAAGCGTTGGCTAGGTAAACGTCCTGTAGTAAGAGGAGTCGTTATGAACC  
CTGTAGACCATCCCATGGGGTGGTGAAGGGAGGGCCCAATTGGTAGAAAAAGCC  
CAACAAATAAATGGGGCTTTCCTGC ACTTGGGAAGAAGAAGTAGAAAAAGGAATAAATA  
TAGTGATAATTTGATTATTCGTGACGTAGTAAAATGATTCAACCTCAGACCTATTTGAA



ATATAGCTAACTTGACGGAACCAATAGATTTGCGTATTGAATTACAACCTGGAGAGGAAT  
CGCGGATATCGTATAAAAACGCCAAATAACTTTCAAGACGGAAGTTAT-----CCTATAGA  
TGTTGTATTTCATGCCTGTTTCGAAATGTGAATCATAGTATTCATTCGTATAGTAATGGTAAT  
GAAAAGCAAGAGATACTTTTTCTCGAAATATGGACAAATGGAAGTTTAACGCCTAAAG  
AAGCACTTTACGAAGCCTCTCGTAATTTAATTGATTTATTTATTCCTTTCTATATGCAGA  
AAAAGAAAAC-----TTCCATTTAGAGGATAATCAA---GACAGGGTTACTTTACCCCTTTT  
TTTATTTTCATGATAGATTGATT--GAACTACGAAAAAACAAAAA---AAGATAGCATTGA  
AATCCATTTTCATTGATCAATTAGAATTGCCTCCAGAAATCTATAATTGCCTCAAAAATT  
CCAATATACATACATTATTGGACCTATTGACTAACAGCCAAGACGATATTATGAAAATTG  
AGCATTTTAGCATAGAAGATGTAACAAATATTGGACTCTAGAAAAGCAT-----TTC  
GCAATTAATTTACCTAAAAGAAGATGTTCCGGGATGGAAAT---GAGGGAATGTCGACA  
ATACCTGGGCTTAATCAGATACAATTTGAAGGATTTTGTAGGTTTCATTGATCAGGGCTTG  
ACGGAAGAACTTTATAAGTTTCCCAAGATTGAAGATACGGATCAAGAAATAGAATTTCA  
ATTATTTGTGGAACATATAAATTGGTGAACCATTGCTAAAAGAAAGAGATGCTGTGT  
ATGAATCACTTACACATTCTTCTGAATTATACGTATCCGCGGGGTTAATTTGGAAAACCG  
GTAGGGATATGCAAGAGCCAACCATTTTTTATTGGAACCTTCCTCTAATGAATTTCTCTGG  
GAACTTTTATAGTAAATGGGATATACAGAATTGTGATCAATCAAATACTGCAAAGCCCC  
GGTATTTATTATCGGTCAGAATTGGACCATAACGGAATTTTCGGTCTATACCGGCACCGTA  
ATATCAGATTGGGGAGGAAGATCAGAATTAGAGATTGATAGAAAAGCAAGAATATGGG  
CTCGTGTGAGTAGGAAACAGAAAATATCTATTCTAGTTCTATCATCAGCTATGGGTTTCGA  
ATCTAAGAGAAATTCTAGAGAATGTTTGCTACCCTGAAATTTTCTGTCTTTCTGACTG  
ATAAGGAGAAAAAAAAGTTGGATCAAAGAACTGCCATTTTGGAGTTTATCAACA  
ATTTGCTTGTGTGCGGCGGGGACCCGGTATTTTCTGAATCCTTATGTAAGGAATTACAAA  
AAAAATTCTTTCAACAAAGATGCGAATTGGGAAGGATTGGTCGACGAAATATGAATCA  
GAGACTGAACCTTGATATACCTCAAAACAATACATTTTTTGTACCGCGAGATATACTGG  
CAGCTGCAGACCGTTTGATTGGAATGAAATTTGGAATGGGTACACTTGACGAT-----ATG  
AATCATTTGAAAAGAAACGTATTCGTTCTGTGGCGGATCTCTTACAAGATCAATTTGG  
GTTGGCTCTGGTTCGTTTAGAAAATGTGGTTCGAGGAACTATATCTGGAGCAATTAGG--  
-CATAAATTAATA---CCGACTCCTCAGAATTTGGTAACTTCAATTCCA-----TTAACAA  
CCACGTATGAATCTTTTTTGGGGTTACATCCACTATCTCAAGTTTTTGGATCGAACTAATC  
CATTGACGCAAATAGTTCATGGGAGGAAATTGAGTTATTTGGGCCCTGGAGGATTGAC  
AGGGCGAACTGCTAGTTTTTCGTATACGAGATATCCATCCTAGTCACTATGGGCGTATTTG  
CCCAATTGACACGTCTGAAGGAATCAATGTTGGACTTATTGGATCCTTAGCTATTCATGC  
TAGGATTGGTTCCTTGGGGG---TCTCTAGAAAGCCCGTTTTAT-----AAGATTTTGGGA  
AATCAAAA-----AGGGTACAGATGCTTTATTTATCACCAAGTAGAGATGAATACTATATGG  
TAGCGGCTGGAACCTTCTTTGGCCTTGAATCGAGGTATTCCGGAAGAGGGAATTGTCC  
AGCTCGATACCGTCAAGAATTCCTGACTAGTGCATGGGAAGAGGTTCAATTTTCAAGTA  
TTTTTCCCTTCCAATATTTTTCTATTGGAGCTTCCCTCATTCCCTTTATCGAGCATAATGA  
TGCGAATCGGGCTTTAATGAGTTCGAATATGCAACGTCAAGCCGTTCCGCTTTCTCAGT  
CCGAGAAGTGCATTGTTGGGACTGGGTTGGAACGCCAAGCGGCTCTGGATTTCGGGGG  
TTCTCGCTATAGCCGAACATGAGGGAAAGATCATTTCTACCGAGACTGACAAGATCATT  
TTATCGGGTAATGGGTATACTTTAAACATTCCATTAGTTATGTATCAACGTTCCAACAAA  
AATACTTGATGCATCAAAAAGCCCGGATTCGGCAGGGTAAATGCATTAATAAAGGGAC  
AAATTTTAGCGGACGGTGCCGCCACGGTTGGGGGCGAACTCGCTTTGGGAAAAAACG

TATTAGTAGCTTATATGCCATGGGAAGGTTACAATTTTGAAGATGCCGTA CT CATTAGTG  
AGCGTCTTGTATATGGAGATATTTATACTTCTTTTCACATACGAAAATATGAAATTCAGAC  
TCATGTGACAAGTCAAGGT--CCCGAAAGGTTAACTAACGAAATACCACATTTAGAAGC  
CCATTTACTCCGCAATTTAGACAAAAATGGGATTGTGGTGCTGGGAGCATGGGTAGAG  
GCAGGCGATATTTTGGTAGGTAAATTAACGCCGCAGATGGCAAAGAA---TCATCCGAT  
GCCCCGGAAGATAGATTATTACGAGCCATACTTGGCATT CAGGTAGCCACTTCAAAGGA  
AACTTGTCTAAA ACTGCCTATAGGTAGTAGGGGTCGAGTTATTGATGTGAGATGGATCC  
AGAAAAAAGGG---AGTTCTAGTTCTAATCCTGAAACGATTTCGTGTATATATTTTCACAGA  
AACGAGAAATAAAAGTAGGTGATAAAGTAGCTGGAAGACATGGAAATAAAGGTATCAT  
TTCAAAAATTTTACCTAGACAAGATATGCCGATTTTGCAAGATGGAAGACCTGTTGATAT  
GGTCTTTAACCCCTTAGGAGTACCTTCACGAATGAATGTAGGGCAAATTTTGAATGTT  
CACTCGGATTAGCGGGAGGTTTGCTAGGCAGACATTATCGAATAGCACCTTTTGATGAG  
AGATATGAACAAGAGGCTTCGCGAAA ACTAGTGT TTTCTGAATTATATGAGGCCAGTAA  
GCAAACAGCCAATCCATGGGTATTTGAACCCGAGTATCCGGGAAAGAGCAGAATATTT  
GACGGAAGAACAGGAGATCCTTTTGAACAACCTGTTATAATCGGAAATCCTTATATCTT  
GAAATTAATCCATCAAGTTGATGATAAAATCCACGGACGTTCTAGTGGACATTATGCAC  
TTGTTACACAACAGCCCTTAGAGGAAGGGCCAAGCAGGGGGGACAGCGGGTAGGAG  
AAATGGAAGTTTGGGCTCTCGAAGGATTTGGTGTTGCTCATATTTTACAAGAGATGCTT  
ACTTATAAATCGGATCATATTAGAGCTCGTCAGGAAGTACTTGGTACTACGATAATTGGA  
GGAACAATACCTAACCCCGAAGATGCTCCAGAATCTTTTCGATTACTCGTCCGAGA ACT  
ACGATCTTTGGCTCTGGA ACTGAATTATTTCCCTTGATCTGAGAAGAATTTGCAGATTAA  
TAGGATGGAAGCT-----ATGATAGATCAGTATAAACATCAACA ACTCCGAATT  
GGATTAGTTTCTCCCAACAATAAGTGCTTGGGCCACGAAAATCCTACCGAACGGGG  
AGATAGTTGGAGAGGTCACAAAACCTATACTTTTCATTACAAAACCAATAAACC GGA  
AAAAGATGGATTATTTTGTGAAAGAATTTTGGGCCTATAAAGAGCGGAATTTGTGCTT  
GTGGAAATTTTCGAATAATCGGGGATGAAACAGAAGAACCTAAATTTTGTGAACAATG  
CGCAGTCGAATTTGTTGATTCTCGAATACGAAGGTATCAAATGGGCTACATAAAATTGG  
CGTGTCAGTAACTCACGTGTGGTATTTGAAGCGTCTTCTAGTTATATTGCGAATTTTT  
TAGATAAACCTCTTAAAGAATTAGAGGGCCTAGTATACTGCGATTTT-----GCTTTTGCTA  
GGCC---ATAGCTAAAAAACCTACTTTTTTACGATTACGAGGTTTATTTCGAATATGAAAT  
CCAATCTTGAAATATAGCATCCCGCTTTTTTTTACTACCCAGGGCTTCGATACTTTTCG  
AAATCGAGAAATATCTACTGGAGCAAGTACTATCCGAGAACAAATTAGCCGATTTGGATT  
TGCGAACTATTCTCGATTCTTCGTTGTCAGAATGGAAAGAA-----GGGCCTACTG  
GAAATGAATGGGAAGATCGAAAAGTTAGAAGAAGAAAGGATTTTTTGGTTAGACGCAT  
GGAATTAGCTAAGCATTTCATTTCGAACAAATATAGAACCGGAATGGATGGTTTTGTGTC  
TATTACCAGTTCTTCCCTCCCGAATTGCGACCGATCATT CAGATCGATGGGGGTAAATTA  
TGAGCTCGGATATTAATGAACTCTATAGAAGAGTTATCTATCGGAACAATACTCTTACTG  
ATCTATTAACAACAAGTAGATCGACACCGGGAGAATTAGTAATGTGCCAGGAGAAATT  
GGTACAAGAAGCCGTAGATACACTTCTGGATAATGGAATACGCGGACAACCAATGAGG  
GATGGTCATAATAAGGTTTACAAATCATTTCAGATGTAATTGAAGGCAAAGAGGGGAG  
GTTTCGGGAGACTCTTCTTGGCAAACGGGTTCGATTATTCAGGGCGTTCCGTCATTGTCG  
TAGGTCCGTCACTTTCATTACATCGATGTGGATTGCCTCGTGA AATTGCAATAGA ACTTT  
TCCAGACATTTGTAATTTCGCGGTCTAATTAGACAAGATCTTGCTTCGAACATAGGAGTT  
GCTAAGAGTAAAATTTCGGGAAAACGAACCCATTGTATGGGAAATACTTCAGGAAGTTA

TGCGAGGGCATCCTGTATTGTTAAATAGAGCGCCTACTCTGCATAGATTAGGCATACAG  
GCATTCCAACCCACTTTAGTGGAAGGGCGTGCTATTTGTTTACACCCATTGGTTTGTAA  
AGGATTCAATGCAGATTTTGGATGGGGATCAAATGGCCGTTTCATGTACCTTTATCTTTGGA  
GGCCAAGCGGAGGCCCCGTTTACTTATGTTTTCTCATATGAATCTTTTGTCTCCGGCTAT  
TGGGGATCCCATTCCGTACCAACTCAAGATATGCTTATTGGGCTTTATGTATTAACGAG  
TGGAATCGTCGAGGTATTTGTGCAAATAGATATAATCCATGGAGTCGA-----AAAAA  
CTATAAAAATGAAAAATGGAACGATCATAATTATAAGTATATGAAA-----GAACCTTTTT  
TTGTAATTCCATGATGCAATTGGGGCTTATCGTCAAAAAAGAATCAATTTAGATAGTCC  
TTTATGGCTCCGGTGGCAACTAGATCACCGT---GTTGTTGCTTCA-----AGAGAAGCTCC  
CATCGAAGTTCATATGAATCTTTGGGTACCTATCATGAGATTTATGGGAACTATCTAAT  
AGTAAGAAGTGTAAAAAAAGAAATTATTTTTATATACATTCGAACAACCGTTGGTCATAT  
TTCGTTTTATCGAGAAATTGAAGAAGCTATACAAGGATTTTATCGAGCCTGCTCATATGG  
TACT-----ATGGAGGTACTIONTATGGCAAAGGGGCCAATCTGGTCTTTCACA  
ATAAAGTAATAGATGGAATTGCCATGAAACGACTTATTAGCCGATTCATAGATCATTTTG  
GAATGGCATATACATCCACATCCTGGATCAAGTAAAGACCCTGGGTTTCCAGCAAGCC  
ACTGCTACGTCTATTTTATTAGGAATTGATGATCTTTTAAACAATACCTTCTAAGGGATGG  
CTAGTCCAAGACGCTGAGCAACAAAGTTTTATTTTGGAAAAACAACATCATTATGGGA  
ATATCCACGCGGTAGAAAAATTACGGCAATCCATTGAGATATGGTATGCTACAAGTGAA  
CATTTGCGACAAGAAATGAATCCTAATTTTAGGATGACTGACCCTTATAATCCAGTTCAT  
ATGATGTCTTTTTTCAGGAGCTAGAGGAAATGCCTCTCAGGTACACCAATTGGTAGGCAT  
GAGAGGATTAATGTCGGATCCACAAGGACAAATGATTGATTTACCTATTCAAAGCAATT  
TACGCGAAGGACTCTCTTTAACAGAATATATAATTTCTTGCTACGGGGCCCGTAAAGGG  
GTTGTGGATACTGCTGTACGAACATCAGATGCTGGATATCTCACGCGAAGACTTGTGTA  
AGTAGTTCAACATGTTGTTGTACGTAGAAGAGATTGTGGCACCACCCGAGGTATTTCTG  
TGAGTCCCCAAACCGGGACTATACCG---GAAATCCTTTTTATCCAAACACTAATTGGTC  
GTGTATTAGCAGATGATATATATAAGGGCCCCGCGCTGCATTGCCGCTAGAAATCAGGATA  
TTGGGGTTGGACTTGTCAATCGATTGATAACT-----TTTCGAGTCCAAACAATA  
TCTATTCGAACCCCTTTACCTGTAGAAGTACTTCTTGGATCTGTTCGATTATGCTATGGC  
CGAAGTCCTACTCACGGTGACCTGGTTCGAATTGGGCGAAGCTGTAGGTATTATTGCGG  
GACAATCCATTGGAGAACCGGGGACTCAACTAACATTAAGAACTTTTCATACTGGCGG  
AGTATTCACCGGGGGTACTGCAGTACATGTACGAGCCCCTTCTAATGGAAAAATAAAAT  
TCAATGAGGATTTGGTTCATCCACACGTACCCGTCATGGCCATCCTGCTTTTTTTATGTT  
ATATAGACTTGGCTGTCACTATTGAGAGTGAAGATATTATACATAATGTGAATATTCCAC  
CAAAAAGTTTTCTTTTAGTTCAAAAGGATCAATATGTAGAATCAGAACAAGTGATTGCT  
GAAATTCGCGCAGGAACATCCACTTTG---AATTTTAAAGAAAAGGTTTCGAAAACATATT  
TATTCTGACTCACAGGGAGAA---ATGCACTGGAGTACCGACGTGGACCATGCACCTGA  
ATTTACATATGGTAATGTTTCATCTCTTACCAAAAACAAGTCATTTATGGATATTAGCAGG  
AAGGCCACACAAA-----TCCC GCGTGGCCACGCGTTCGCTCCACAAGGATCAAGATCA  
AACGAACGCCCAT-----TTTCTTTCTGTGCAACAAAGATATATTTCTAACTCTTCA-----GT  
GATCAATGCTTAC---ATGAGACACACATTTTTTAGTTCCGGATCTTTCTAGTACTAATGGA  
GATAGTATTTCCGATTAT---TCAGAACGGAAGCGAATCGTAAGAACTAGGCATTCTAATC  
TCATATATCCT-----GCCAAAATTCCTAT-----TTATTAGGAAAGAGGGCGTAGAAATA  
GATTCATGACTACATTTCAATCAATTCAAGAATTAGAGAAAGAATTAAGGGCCCCCTCG  
GGTATCTCGATTGACATACCCCTAAAT-----GGTAGTTTCCGCAGAAATAGTATTCTTGCT

TATTTTGATGATCCTCGATACCGAAGAGAGAGTGC GGGAATTACTAAATATGGGACTATA  
GAGGCGCATTCAATCAAAAAAAAAAGAGGGT-----TTGATTGAATATCGA---GGAGTCAA  
CGAATTTAGAGCCAAATATATGCAAGTAGATCGGTTTTTTTTTCATTCCCGAGGAAGTCCA  
TATCTTACCGCGATCTTCTGCCATAATGGTACGGAACAATAGTATCATTGGAGTAGATAC  
ACAAATTACTTTAACTACAAGAAGCCGGGTAGGCGGCTTGGTCCGAGTCGAGAAGAA  
AAAAAAAAAGATTGGACTAAAAATATTTTCGGGAAATATCCATTTTCCTGGGAAAACA  
GATAAGATATCCCGACACAGGGGCATTTTGATACCGCCGGGAAGGGGA-----CAAA  
CAAA-----TTGAAAAATTGGAGCTATGTCCAACGG-----ATCACACCTACTAA  
GAAAAGG-----TATTTTGTTTTGATTTCGACCCGCAATCACATATGAAATAACGGACGGTA  
TAAGTTTATCAACTGTTCCCTCAGGATCTGTTACAGGAAAGGGATAAAGTGCAACTT  
CGAGTTGTCAACTATATCCTTTCTGGAAATGGCAAGCCTATTCGGGGAATTTCCGGACAC  
AAGTATTCAATTAGTTCGGACTTGTTTAGTATTGAATTGGGACCACGACAAA-----AA  
AAGTTCTTCTATTGAAGAGTCGCGTGCTTCCCTTTGTTGAAGTAAAGACAAATGATATGA  
TGCAGATTTTCTAAGAATCGATTTAGTGAAATCCACAATTTTCGTATGCCGAAAAAGG  
AATGATCCATCCGGTTCAGGATTGCTTTCGGAT-----AATGAATCAGATCGTATGAATC  
CATTTTATTCGATTTACATTTATCAAAAAGCA-----AGACTTCAACAACCTTTTAGCCA  
AAATAATGAAACTGTTTCGTACGTTGTTGAATAGA-----ACGAAGGAATCCAATCTTTT  
ATCATTTTGTATCAGCCAATTGTTTTCGAATGGGTCCA-----TTCAAAGGT-----  
-----CTAAAATATTACGATCCTATAATTCCAATTAAGAATTCGTCGGGCCCTTTTGGAAC  
A-----TCCCTTCAAATCGCAAATTTTATTCA-----TTTTACCGTTTAATAACT-----CAAGA  
TAAGATCTTG---GTAACACTAATTTGCAACTTGACAAT-----TTAAAACAAACTTTTTG  
GGTAATGAAA-----TATTATTTTCATCGATGACAATAGGAAG-----ATTTATAATCCCGAC  
CCAGTAAGTAACATTGTTTTGAATTCGTTCAAATTGAATTGGTATTGTCTTCATCACAAC  
TATTATGAAGAGACTTCCGCAAGAATGGGT--CTTGGACAATTTCTTTGTGAAAATGTAT  
GTCTAGCCAAAAACGGGCCG-----CGCTTAAAGGCGGGTCAAGTTCTAATTGTTCAA-  
--GTTGACTCTGTAGTAATAAGAGCAGCTAAGCCCTATTTGGCCACCCAGGAGCAACT  
GTTACGGCCATTATGGGGAAATCATTATGAAGGAGATACATTAGTTACATTTATATATG  
AAAAATCGAGGTCTGGTGATATAACGCAAGGCCTTCCAAAGGTGGAACAAGTCTTAGA  
AGTTCGTTTCGCTTGAGTCAATATCAATGAATCTAGAAAGGAGGATTGATGCTTGGAAATG  
AACGTATAACCGGAATTCTTGGACTTCCCTTGGGGATTTCGTAGTTGGCGCCGAGCTAACT  
ATAGTACAAAAGTCGTATCTCTTTAGTTAATAAGATCCAAAAGGTTTATCGATCCCAAGGA  
GTGCAGATCCATAATAGACATTTAGAAATTATTGTACATCAAATAACATCAAAAAGTCTTG  
GTTTCAGAA-----GATGGAATGTCTAATGTTTTTTTACCAGGCGAACTAATTGGATTAT  
TGCGGGCGGAACGAACAGGGCGCGCTTTGGAAGAAGTGATCTCTTACCGAGCTGTCTT  
AGTGGGAATAACGAGAGCTTCTTTGAATACTCACAGTTTTATATCCGAAGCAAGTTTTTC  
AAGAACTGCTCGAGTTTTAGCAAAAAGCAGCTCTCCGGGGCCGTATCGATTGGTTGAA  
AGGCCTAAAAGAAAACGTGGTCTGGGAGGAAAGATACCCGTTGGTACTGGATTCAA  
AGGGTTAGTCCACCCTTCA-----AGCCAACATAAG-----AGCATTCCTTTGAAAAACAAA  
AAAAAGAATTTATTCGAGGGGGAAATAAAC-----GATATTTTGTTTTACTACAGAGAATT  
CTTTAATATTGAATCTTGTGTTTTAAAACTATCAA-----  
----ATGACAAGAAGATATTGGAACATAAATTTGGAAGAGATGATGCAAGCGGGAGTTCA  
TTTTGGCCATGGTACTAGGAAATGGAATCCTAGAATGTCACCTTATATTTCTGCAAAGCG  
TAAGGGTATTCATATTACAAATCTTACTCGAACTGCTCGTTTTTTTATCAGAAGCTTGTGA  
TTTGGTTTTTTGATGCAGCAAGTAAAGGAAAGCAATTTTTAATTGTTGGGACAAAAACTA

AAGCAGCTGATTCAGTAGCACGGGCTGCAATAAGGGCTCGGTGTCATTATGTTAATAAA  
AAATGGCTTGGGGGTATGTAAACGAATTGGTCCACCACAGAAACGCGACTTCATAAGT  
TTAGAGATTTGAGAATGGAACAAAAGGCGGGACGACTGGCCTGTCTTCCGAAGAGAG  
ATGCAGCCATGTTGAAAAGACAATTATCTCGTTTGCAAACATATCTGGGTGGGATTA  
TATATGACAGGGTTACCGGATGTTGTAATCATCGTTGATCAGCAAGAAGAATATACAGC  
CCTTCGAGAATGTATTACTTTGGGCATTCCAACGATTTGTTTAATCGATACAAATTGTGA  
CCCCGATCTTGACAGATATTTGATTCCGGCGAACGATGACGCTATAGCTTCAATCCGATT  
AATTCTCACCAAATTAGTATTCGCAATTTGTGAAGGTCGTTCT---AGCTATATACGAAATC  
TAATGGGACAAAAATAAATCCACTTGGTTTCAGACTTGGTACAAGCCAAAGTCATTAT  
TCCATTTGGTTTGACACAACCAAAAAATTATTCTGAGGGTTTACACGAAGATCAAAAAAT  
ACGGGATTGTATCAAGAATTATGCTCAACAAAATGTGCGAGCATCCTCAGGT---GTCGA  
GGGAATTGCACGTATAGAAATTCAAAAAGAATTGATCTAATCCAGGTCATAATCTATAT  
GGGATTCCCCAAGTTATTAATAGAAAATAGACCACGA-----GGTATCGAAGA  
ACTACAGATGAATGTACAAAAAAATTGAATTCGGTAAACCGAAA  
ACTCAACATTGCTATTACAAGAATTGCAAAACCTTACAGACACCCTAATATTCTTGCAGA  
ATTTATAGCCGGACAATTAAAAAATAGGGTCTCTTTTCGAAAAGCAATGAAAAAAGCT  
ATCGAACTAACCGAACAGGCTGATACAAAATTGCAAGGACGTATCGACGGAAAAGAA  
ATTGCACGTATAGAATGGATCAGAGAAGGTCGAGTTCCCCTACAAACCATTACG  
CCAAAAATTGACTATTGCGCCTATACGGTTCGAACTATATATGGGGTTTTAGGTAT  
CAAAATTTGGATATTTATAGACGAGGAAATGTCGCGTTACCGAGGGCCTCGTTT  
CAAAAAATACGACGTCTGGGGGTTTTACCAGGATTA  
ACTAATAAAAAGCCTAGA-----GATCTTAGAAACCCTTCACGTTCCGGGAAA  
---AGATCTCAATATCGTATTCGTCTAGAAGAAAAACAAAAATTA  
CGTTTTCATATGGTATTACCGAACGCCAATTACTTAAATACTTTTCGTATCGCTAG  
AAAAGCGAAAGGGTCAACAGGTCAGGTTTTACTCCAATTACTTGAAATGCGTTT  
GGACAATATCCTTTTTCGATTGGGTATGGCTCCGACTATTCTGGCGCCCGCCA  
ATTAGTTAATCATGGACATGTTTTAGTTAATGGTTCGTATAGTAGATATACCAAG  
TTATCGTTGCAAACCCAACGATATTGTTATGTCGAGGGATAAGCAAAAATCCA  
AAGCTCTCGTTCAAAATTATCTGGATCATCCCACAGC---GAGGAATTGCCAA  
AACATTTGACTCTTCACCCATTCCCA-----TATAAAGGAGTAGTCAATCA  
AATAATAGATAATAAGTGGGTCGGTTTGAAAATAAATGAATTGCTAGTTCGTAG  
AATATTATCCCGTCAA  
ACTATGTCACGTCGAGGTA  
CTGCAGAAGAAAAA  
AACTGCAA  
AATCCGATCCAATTTATCGTAATCGATTAGTTAACATGTTGGTTAACCGTAT  
TCTGAAACACGGAAAAAATCATTGGCTTATCAAATTATCTATCGATCCGTG  
AAAAAGATTCAACAAGAGACAGAAACAAATCCACTATCTGTTTTACGTCAAGCA  
ATACGTGGAGTAACTCCCGATATAGCAGTAAAAGCAAGACGTGTAAGCGGATCG  
ACTCATCAAGTTCCCATTTGAAATAGGATCCACACAAGGAAAAGCACTTGCCAT  
TCGTTGGTTATTAGGGGAATCCGAAAACGTCCGGGTCGAAATATGGCTTTCAA  
ATTAAGTTCCGAATTAGTGGATGCTGCCAAAGGGAGTGGCGGTGCCATACGCA  
AAAAGGAAGAGACTCATCGAATGGCAGAGGCAAATAGAGCTTTTGCACATTT  
TCGTATGAGTAGGGACACCATTGCTGATATAATAACCTCGATACGAAATGCTG  
ACATGAATAGAAAAGGAATCGTTTCGAATAACATCGACGAAAATCACGGAA  
ACCCTTGTTAAAATACTTTTACGAGAAGGTTTTATCGAAAACGTGAGGAAA  
CACCAGGAAAAAAACAAATATTTTTTGGTTTTAACTCTACGACATAGAAGA  
-----AATAGGCAAGGGCCATAT-----ACAAAATTTTTAAATTTAA  
ACAAGTCAGTAGCCCCGGTCTACGAATCTATTCTAACTATCAACGACTTCCT  
CGAATTTTAGGTGGAATCGGTATTCTAATCTTTCTACTTCTAGAGGGATAAT  
GACAGACCGAGAGGCTCGACTAGAAAAAATTGGC

GGAGAAATCTTATGTTATATATGGATGGCAAACCCATACCAAGAATTGGTTCACAAAG  
GAATAGGCGTATTAATTCACGTAAGAATGCACGCAAATGCCCAAAGGGGTTATTTATG  
TGCAAGCCGGTTTCAACAATACCATTGTGACTGTTACAGATGTACGAGGTCGGGGTGGTT  
TCTTGGGCCTCCGCTGGCACTTGTGGGTTCAAGGGTGCAAAAAGAGGGGACACCGTTT  
GCTGCTCAAACCGCAGCAGGAAACGCTATTCGTAAAGTAGTAGATCAAGGTATGCAAC  
GAGCAGAAGTCATGATAAAGGGTCCTGGTCTCGGAAGGGATGCAGCATTACGGGCTAT  
TCGTGCAAGTGGCATACTATTAAGTTTTCGTACGAGATGTAACCCCATGCCGCATAATG  
GCTGTGACCCCTAAAAAAGACGTGTGATGCCAACTATTAAACAGCTTATTAGAAA  
CACAAGACAGCCAATCAGAAACGTACGAAATCTCCCGCTTTCGGGGATGTCCTCAG  
CGCCGAGGAACATGTACTAGGGTGTATACTATCACACCCAAAAAACCAACTCTGCCTT  
ACGTAAAGTTGCCAGAGTACGATTAACCTCTGGATTTGAAATCACTGCTTATATACCCG  
GTATTGGCCATAATTTACAAGAACATTCTGTAGTCTTAGTAAGGGGGGAAGGGTTAAG  
GATTTACCCGGTGTGAGATATCACATTGTTTCGAGGAACCCTAGATGCTGTCTGGAGTAAA  
GGATCGTCAACAAGGGCGTTCTAAATATGGGGTCAAAAAGCCAAAAATGGCAAGTCA  
AAGTTTGATTCAGAGGGAGCAGAAGAGGAAAAAATTGGAACAGAAATATCATTGATT  
CGTCGATCTTTAAAGAAAGAAATAAGC-----AAAGTTACGTCCTTGAATGAGAAATGG  
GAAATTCATGGAAAGTTACAATCTCCACCGCGTAATAGTGCACCTACACGTCTTCATCG  
ACGTTGTTTTTTGACCGGAAGACCGAGAGCTAACTATCGAGACTTTGGATTATCCGGAC  
ACATCCTTCGTGAAATGGTTCATACATGCTTGTGGCCAGGGGCAACAAGATCAAGTTGG  
ATGAAAAAAAT-----TCGGTTATTTACAAGAA-----GAAAAG-----AAGGGATCTG  
CTGCATTTCAAGTCTTTGGTTTCACCAATAAGATACGTAGACTTAGTGCGCATTTGGAAT  
TACACAAAAAAGACTATTCCTCTCAGAGAGGTCTACGGAAAATTTTGGGAAAACGTCA  
ACGACTTCTGGCTTATTTTTCAAAAAAAATAGAGTACGTTATAAAGAATTAATCAATC  
AATTGAATATTCGAGAGATAAAAAGA-----ATGGTAAACTTCGTTTGAACGATGTG  
GTAGAACGCAACGAGCCGTCTATCGAATTGTTGCAATTGATGTTTCGGTCCCGAAGAGA  
AGGAAGAGATCTTCGGAAAGTTGGTTTTTATGATCCAATAAAAAATAAACTTATTTAA  
ATGTTCCCGCTATTATATATTTTCTTGAAAGAGGCGCTCAACCTACTGGAAGTGTATG  
ATATTTTAAAGAAGGCAGAGGTTTTTAAAGAACTTCGCCCGACTGAAACAAAATTCAC  
T--ATGGATAAATCCAAGCGATCTTTCCTTAAACCTAAGCGGCCTTTTCGTAGGCGCTTG  
CCCCCGCTCCAATCGGGGGACCGAATTGATTATAGAAACATGAGTTTAAATTAGTCGCTT  
TATTAGTGAACAGGGAAAAATATTATCTAGGCGCGTGAATAGATTGACTCTGAAACAAC  
AACGATTAATTACTATTGCTATAAAACAAGCTCGTATTCTATCTTTGTTACCCTTTCTTAA  
TAATGAGAAA-----CAATTTGAAAGAGCCAAGTCAGCCGTTAGAACTACGGGTTTTTCGA  
ACAAAAAAACAAGTGACACGTTCACTAAAAAAAATCCTTTTGTAGCGAATCATTATT  
AAGAAAACCTTGATAAGCTTAACACAAAGGAGGAAAAAGAAATAATAGTAACTTGGTCC  
CGGGCATCTACCATATCCCCACAATGATTGGCCATACTATTGCTATCCATAACGGCAGA  
GAACATTTACCAGTTTATATAACGGATCGGATGATAGGCCACAAATTGGGAGAATTTTC  
ACCTACTCTAAATTTCCGGGGACATGCAAAAACGATAATAGATCTCGTCGTTTTTTTCT  
ACCAGGT-----AACTTATGCATGAAGATAGTCAATTCGGTCGTTGTGGTTCGG  
ACTCTATTATGGATTTCTGACCACATTCTCCATAGGGCCCTCCTATCTCGTCCTTCTCCG  
AACTCTGGTTATGGAAGAAGGAGAAGAAGGAACCGAGAAGAGGGTAGCAGCAACAA  
CCGGTTTTATTATGGGACAGCTCATGATGTTTCATATCGATCTATTATACGCCTCTGCATCT  
AGCATTGGGTAGACCTCATAAATAACTTTCCTAGCTCTACCCTATCTTTTGTTTAAATTC  
TTCTGGAGCAATCAT-----TTTGA-----TCTACTACCAGAAATCAATGCGTAATCTCA



GCATTCAATGTGTATTCCTGAATAATCTCATTTTTCAATTATTCAACCATTTTCGTTTTACC  
AAGTTCAATGTTAGCCAGATTAGTCAACATTTATATGTTTCGATGCAACAACAAGATGTT  
ATTTGTAACAAGTAGCTTTGTTGGTTGGTTAATTGGTCACATTTTATTCATGAAATGTGT  
TGGCTTGGTATTAGTCTGGATACGGCAAATTTTTCTATTTCGATCGAGAATTATTCGATCT  
AAGTACTCTGTGTCAGAATTAAGTACCTTGTGTCACGAATCTTTAGTATTCTCTTATTT  
ATTAGCTGTGTCTACTCTTTAGGCAGAATGCCGTCACCCATTTTGAGTAGGAAACTGCA  
AGAAGAAGAAGATTCTAAACCCCTGTAAGTCTTCTTTTCGACTATAAACGATGGAATC  
GTCCATTGCGATATATAAAAAATTATCGATTGCAACATGCTGTAAGAAATGAAATGTCAC  
AATATTTTTTTTATACATGTCAAAGTGATGGAAAACGAAGAATTTCTTTTACATATCCATC  
CAGTTTATCAGCTTTTTTTGAAATGCTACGACAAAAAATGTATTTTTATTTTTTAAAAA  
ATTCGTCTATGATGAACTGCATAATTATTGGATTTATACCAACGAAAAAAAATGGAGGA  
ACCTAAGGAACGAGTTTAGAGATAGAATTGAAACCCTAGACAGAGGATCT-----CTGGA  
TGACTCGAAAAAAGACTCGATTATGCAATACTAAACGAAAGAAGAATACTTGCCT  
AAAATATATGATCCTCTATTAAACGGATCCTATCGTGAATAATGAATTTTTTTTTTTTAC  
CTAATTTTATAAATAAACTCAATAAAGTTCATAGTATCCTTTTTGAAGAATTGTACCAGA  
AAGATCCCATCATTCAACGAAAAAATCAATTGGAATAAATAAAAAAGTCCCCCGATG  
GTCATACAAATTATTCGAGGTAGAACAACCTCGGAAAAACTCAAATTCGCTCGAGGAAA  
GCGAAACGTATAGTTCTTTTTACGCAGAATATGATAGATTATCCCTATGAAGCGGATTT  
CGTCGAGACATAATCACAGGCTCTATGCGTGTTCAAAGACGTAAAACCCTTACGGGGA  
AATGTTTCCCTTATATCCGTATTCCCCTTTTTTTTCGACAGACTTTTTCGAACCATTTCAT  
ATTATCAGTAATTGAGATTTCCGACCTAATACAAGACATTATAAAAGGAAGCCGAATAG  
AAAGGACACGAGAAAGAATATCAGAACTCTATGATATCCTTATTTATGCTCATGGAATA  
AGAGCTTTTATTTTACTAATTCAGTCGAGGCTTAGACAATCTATTGTATTACCTTCATTGA  
TACTAGCTAAAAATATTGTCCGTTTCTTATTACGCCAAGAGTCCGAGTGGGAGCAGGAT  
ATAAGGGAGATGAATAAAGAAGTGTATGTTATATGCACCTATAATGGTATGCCATTACTA  
AAACCAGGATTTCCATAAAAACCTGGGCCACAGAGGGTATACAATAATGATACGATTTCC  
TTTCCGTCTGAAACCTTGGCACCGATCTAAGCCAAAGCAGGAAAGTCTGCTGCTTTT  
TTAACGATTTGGGGACTAGAACTGACCGTCTTTTTGGTTCTCCTCTCGTAGGATGTTA  
TTATTTGGACCCCTTTGAAAAAATCCAAAAACAATAAAATGGAGTTTTTCGA-----  
-----GTTCTAAAAAGTTTCAAAGAAAGAACAAAATTGTTTCTAAAGGTCCAAAAAGA  
ACCAAAAAAATTGAGAGAGGATTTCGAGTGAA-----ATAAAAAAGATTCT-----  
-----ATAATCAATAATCAGATTATTCATGAATCAGCCATTCAAACCCGACCTATGGAT  
TGGACAAATTATTCACTGACAGAAATCAAATGAAAGATCTGACTGATAGAACAAGCA  
CAATCAGAAATCAAATCGAAAGAATTACAAAAGACAAGAAAAAATAGTCCTAACAAAA  
CAAGTTATGGTGTTCAAAAATTAGCACCACTAAAAAAGATTTTTTTCAGATATTA AAAAGA  
AGAAATGATCGATTAATCCGTAAATCACATTTTTTTTTTAAAATGGATCGTGGAAAGGATA  
TACACGGATATCCTTCTAGAG-----AGCTTTCCATATATCATTAAATCGTCTTATT-----  
TTAAAGTTATCCCTAGTGTACAGGCCTATGTATTTTACAAATTATCACAAACCCAGGTT  
ATTA ACTTGTATAAGTTAAGATCTGTCCTTCAATATGCATCTTTATTTCTTAAGAATGAAA  
TAAAAGATTCTTTTAGACAAGGAATAATTTCTTCCGAATTAAGCATAAGAACTTCAG  
AATCTGGAATGAATCAATGGAAAAATTGGTTAAAGAGTCATTATCCGTACGATTTATCT  
GAGCGAAAATGGTCTAAATTAGTACCGCAAAAATGGCGAAATAGAGTCAATCAACATT  
GTAGGGTTGAAAATCCAATCAAACGGGATTCATCTGAAAGAGAGGAAAAGGTTTCGTT  
ATTGCTAAATAAAAAC---CATTTTCAAAAAATGTATAGATATGATCTTTTAGCATATCAAT



GAAAAAATGGCTTCGG---ATCTCCTGCGGGAATTATTTGAAAGATACAAAAGAAAA  
ATAGTGGTATTTGCTAGCAACAACATAATGGAGGCAGTCAATCAATATAGATTGATCCG  
AAATCTGATTCAAATCCAATATAGCACTTATGGG-----TACATAATAAATGTATTGAGTCG  
ATTCTTTTTTCATTTTAATAAAT--AGATCCGATCGCAACTTCGAATATGGAATTCAA-----  
AGGGATCAAATAGGAAACGATACTCTGAATCATAGAACTATAATGAAATATACGATCAA  
CCAACATTTATCGAATTTGAAAAAG---AATCAGAAGAAACGGTTTCGATTCT-----CTTATT  
TTGATTTCTCGAAGCGAGAGATCCATGAATCGGGATCCTGATGCATATAGATACAAATG  
GTTCAACGGGAGCAAAAATTTCCAGGAACAT-----TTCGTTTCTGAGCAGAAAAGCC  
AT-----CAAGTTCAAGTAGTCTTCGATCGATTACGTATTAATCAATATTGGATTGATTGGTC  
TAAGGTTATCAACAAAAAATCTTTCTAAGTCATTGTCAAAG-----  
-----CTGATTCTCTTTTTGTCTAAC--TCACTTCCTTTTT  
TCTTTGTGAGTTTAGGGAATATGCCATTATAGGTCCGAG--ATCCACATTTAT--GAAT  
TGCAAGGTCCGAATGATCAACTCTGCAATCCGTTGTTAAAATCACTAGGTCTTCCAATC  
GTTCAATTTGAAAAAATGGAAAGCGGAT-----GATCATGATACTTCC--CAA  
AATCTAAATTATTGATCAATGGAGGAACAATATCACCCTTTTTGTTCATAAAGATACCA  
--AAGTGG--ATGGTTGACTCC--CATACTAGA-----AAGAATCGCAGGAAATCCTTTGAT  
AACACGGATTCCCTACTTCTCAATGATATCCTTCGATCAAGACAATTGGCTGAATCCCGTA  
AAATCATTTCATAGAAGTTCATTGATATCTTCTTTTTCTAAAGCAAATCGACTTCGATTCT  
TGAATAATCCACATCACTTCTTCTTCTAT-----TGTAACAAAAGATTCCCTTTTTATATG---  
-----GAAAAGGCCCGTATCAAGAATTATGAT-----TTTACGTATAGA--CAATTCCTCAAT  
ATCTTGTTTCATTCGCAACAAA---CAATTTTCTTTGTGCGTCGGTAAA-----AAAAACAT  
GCTTTTTTGGAG--AGAGATACTATTTACCAATCGAGTCACAGGTATCAAACATATTCA  
TACCTAACTATTTCCACAAAGGGGTAACGAACGG---TATAACTTGTACAAATCT-----  
TTCCATTTTCCAATTCGATCCGATCTATTCGTTTCGT-----AGAACTATTTACTCGATCGCAG  
ACATTTCTGGAACACCTCTAACAGAGGAAGAAATGGTCAATTTGGAAAGAACTTATTG  
TCAACCTCTTTCAGATATGAATCTATCTGATTCAGAAAGGAAGAACTTGCATCAGTATCT  
CAAT-----TTCAATTCAAACATGGGTTTGATTACACCCCACGTTCTGAGAAATATTTACC  
ATCCGAAACGAGTAAAAAATTGCGT-----CTTTGGCGAAATTGGCTAAAG---  
--AAAGGCGTTGAGAAAGGGCAGATGGATAGAACCTTTCAACGAGATAGTGCTTTTTTCA  
ACTCTCTCAAATGGAATCTATTCCAAACATATATGCCATGGTTCTTTACTTTCGACAGGG  
TACAAATATCTAAATTTTATATTTTATAGATGCTTTTTTCAGACCTATTG-----CCGATGCTAA  
GTAGCAGT--CACAAATTTGTATCCATTTTGAATTATATTATGCACAGATCAAAGCTAAAA  
TGGCGAGCTCTTAAGCGAAAATTGTGGGGA-----TTGTGGGCACCG--ATAA  
GTGAGATTTTCATGGAAGTGTTTCCGTAGG-----CTTCTGCGGGTCGAAGAAATGATTCAT  
CGAAATAATGAGTCA-----CCGTTGATATCGACACATCTGAGCTCGCCAAATGTTTCGGGA  
GTTTCTCTGTTTCTCTAGAC-----TCTAGTGAGTTACAGACAGAGTTTCGAGAGGATAAA  
ATCTTTGACGATTCCATCATAACGATTGAGGTGTACAACTTGTGGATGGGTATCCTAA  
ACCTGAACCGAATTCTTTCTGGTTAAAGAATCTCTTTCTAGTTGCTCGGGAACAATTAG  
AAGATTTTCTAACAGAAATACTGGGTTTTGCGCGA-----TTTGGTGGTGGTCCC--  
-----GCTTATGGG-----GTCAAATTGATACAGAAGATATTTTTCAAT-----CTC  
ATCGATCTCATA---AGTATCATACCAAATCCCATCAATCGAATCACTTTTTTCGAGAAATAC  
GAGACGGCTAAGTCATACAAGTAAAGAGATCTATTCATGGATAAGAAAAGGACAA-----  
---AGGTTTCAGACTCATGATGAAATAGAATCCTGGATCGAGACCTGTGATTGGTTTTTG

GATAAAGAGAGAGTTTACTCGTTTCATTTCTCC-----ACCTTAAGGCCA-----GAAAAAG  
GGATTGATCAAATTCTCTGGAGTCTGACT--CATATTGATCATTTAGTA-----AAGA  
GTGACTATGGTTATCAAATGTTTGAACAAGCGGGAGCAATTTACTTACGATACTTAGTT  
GACATTCAT-----CAAAAGGATCTAATGAATTATGAGTTCAATACATCTGTTTAGCAGAA  
AGACGGATATTCCCTTGCTCATTATCAGACAATCACTTAT-----TCACAAACCTCGTGTGGG  
GCTAATAGTTTTCAATTTCCCATCTCATGGA---AAACCAAACCCTTTTCGTTCCGCCTAG  
CCCTATACCCCTCT---AGGGGTATTTAGTGATAGGTCTATAGGAACTGGACGATCCTAT  
TTGGTCAAATCCCTAGCGACAACTCCTATCTTCTTTTCATTACGGTATTTAAAATCGTT  
ATTGATGATCTCGATCCTGAGGACTATATGGAAGCGCTTGAT-----GATGTGGAT--ATT  
GATGATGATAGCGATCCTGCTAAGGAATATATGTATGCGCTTAAAGATGTGGACGATGTT  
GATGATCGTGAC-----TCTATTTATTCGAACTTGGACTCGGACCCGGAGCT  
GAGGGAGGAGTATACGGTGGATGATGAGATACTTAGGTATATCGTCGAGTTGGAATAG  
ACCTAGCTCCT-----ATCAACTTGCAATTCGAATTGGCAAGAACAATGTCTCCTTGCATA  
GTATGGATTCCAAACATTCATGATCTGTATGTGGATGAGTCGGAG-----TCCCTCGTTTA  
TTATTGAACTATCTCTCC-----GGGGATAGTGAAAGACGGTCC---ACTAGAGATATTCT  
TGTTATTGCTTCGACTCATATCCCCAAAAGTGGATCCCGCTCTAATAGCTCCGAATAA  
ATTAAATACATGCATTAAGATACGAAGGCTTCTTATTCCACAACAACGAAAGCACGTTT  
TCACCCTTTCATATACTAGGGGATTTCACTTGGAAAAGAAAATGTTCCATACT-----AATG  
GATTCGGGTCCATAGCCTTGGGTTACAATGCACGAGATCTTGATGCAATTACCAATGAG  
GCCCTATCGATTAGTATTACACAGAAGAAATCCATTATAGACACTAATACAATTAGATTT  
GCTCTTCATAGACAAACTTGGGAGTTGCGA-----GCCCATGTAAGACCGGTTCCGGAT  
CATGGGATCCTTTTCTATCAGATAGGAAGGGCTGTTGCACAAAATGTACTTATAAATTGC  
TGCCTTATAGATCCCATATCTATCTATACGAAGAAGCAA-----TCATGTTACGAAGGGGAT  
CCTTATTTGTACAAATGGTTCTTCGAACTTGGAAACGAGCATGAAGAAATTAACGATACT  
TCTTTATCTTTTGGGTTGTTCTGCCGGATCGGTGCTCAAGATCTTTGGTCTCTACCC----  
--GGACCCGACGAAAAA---AATTGGATCACTTCTTATAGACTCGTTGAGACGGATTCT--G  
ATCTAGTTGATGGCTTAGAAGTAGTAGAAGGCGCTCTGGTGGGA-----  
-----TCCTCGCTTCTTCGGCCCGAACCAAGGAAT--CCCTTAGAGATG  
ATGGAAAATGGATCTCGTTCTATCTTTGATCGTAGATTTCTCTATGAATCC-----GA  
GTTTAAAGAATGGGCAGAAGGC-----GCCGACCCGCAA-----CAGTTAGCGGAGG  
AT-----GTAGTCGATCAC-----ATAGTTTGGGCTCCT-----AGAATATGGCAACCT-----  
-TGGGGCTTTCTATTTGATTGGATCGAAAGGCCCAATGAATTGGAATTTCCC---TATTGG  
GCCAGGTCATTTCCGGGGCAAG-----CCGATCATTCTGATGAAGTTGATGAGCTTCAA  
GAGAATGATTGGGAGTTCTTGCAGAGTGAAACCATGGAGTACCCGGGACGAGATAGAT  
CTCCAAAGAACAAGTCTTTTTTCGAAAAGGCCAATTCATTTGGGACCCTGGAGATCC  
ACTCTTTTACATATTCAAC---GATGAGCTTTCTGTCTTTCTGTTTTACATCGAGAATTCT  
TTGCAGATGAAGAGATGTCAAAGGGGCTTCTTCTGACTTCCCAAAGG-----GAGACTCT  
ATATAACGCGGGTTTAGT-----AAGAAAGCGAAAGAAAAGTACTTTCGAATTTTTTATTA  
ATCGCCAGAGACGGAGACGGCTTAGA---ACCATTAGATCATTATAT-----AATAGATCTTT  
CCGTTCTAAT-----ATTCAATCCGCGAGTTATCAGTACTTATCAAACCTGTTCCCTATCTAAC  
--GGAAGGCTATTGGATCAAATGACAAAGACATTGTTTAGAAAAAGATGGATTTTCCC  
GATGAACTGAAAATTGGATTC-----ATG-----ATGCCTAGATCACGT--AT  
AAATGGAAATTTTATTGATAAGACCTTTTCAGTTGTGGCCAATATTTTATTACGAATAATT  
CCAACAACCTCAGGCGAAAAGGAGGCATTTACCTATTACAGAGATGGG-----ATGTGCG

CTCAATCCGAAGGAAATTATGCGGAAGCTTTACAGAATTATTATGAAGCTATGCGACTA  
GAAATTGATCCCTACGACCGAAGTTATATACTCTATAACATAGGCCTTATTCACACAAGT  
AATGGGGACCATACGAAAGCTTTAGAATATTATTTTAGGGCACTCGAACGAAATCCATT  
CTTACCCCAAGCGTTTAATAATATGGCCGTGATCTGTCATTAC---CGGGGAGAGCAGGCC  
ATTCGCCAGGGAGATTCTGAAATTGCGGAGGCTTGGTTCGATCAAGCCGCTGAGTATT  
GGAAACAGGCTATAGCGCTTACTCCTGGTAATTATATTGAAGCCATAATTGGTTGAAGA  
TCACGAGGCGTTTCGAA-----ATGAATTGGCAATCCGAACGTATATGGATAGAACTTATA  
AGGGGGTCTCGAAAAACAAGTAATTTATGCTGGGCCTTTATCCTTTTTTTTAGGTTCAGT  
AGGATTTTTATTAGTTGGAACTTCCAGCTATCTTGGTAGGAATTTGATATCTTTATTTCCC  
TCTCAACAAATCTTTTTTTTTTCCACAGGGAATCGTGATGTCTTTCTATGGGATCGCAGG  
ACTCTTTATTAGCTCCTATTTGTGGGCCACAATTTCTGGAATGTAGGTAGTGGGTATGA  
TCTATTCGATAAAAAAGAAGGAATAGTTTGCATTTTTTCGTTGGGGATTTCCGGGAAAAA  
AGCGTCGCATCTTCCTCCGATTTCTTATAAATGATATTCAGTCTATCAGAATAGAACTTA  
AAGAGGGTATTTCTCCTCGTCGTGCCTTTATCTAGAAATCAGAGGCCAGGGGGCCATT  
CCTTTGACTCGTACTGATGAGAAT--TTGACTCCACGAGAAATGGAACAAAAAGCTGCT  
GAATTGGCCTATTTCTTGC GCGTACCGATTGAAGTATTT

>Cicer

ATGGAAAAATGGTGGTTCAATTCATGCTATTTTTAAGTAAATCCATAGATAGTTTTGGT  
CCTATTGAAAAGAAG-----AGTGAAGAGCCAATTGTAAGTATAATGATAGT-----TA  
CAGTCATGTTGATTATTTAGTAGATGTCAGCAACAGACAGAATTTCTATCTGATAAAAC  
CTTTTTAGTTAGAGATCGTAATAGTTATAGTTATTCCATATTTTTTTGCTATTGAAAATAAA  
ATTTTGGAGATTGAC-----  
-----TATGATAGTCAATTTAATTGGAAAAATATCATTAAATAGTTGCATTG  
AGAATTATCTTCGT-----TCTCAAATATGTATTGATAGTGACATTTTAGATAAATAGTTCAA  
ATATAATGATAATGACGTTTATAGTTACATTTGTGGT---ACCAGTACTGATGTAATAACTAT  
TACAGAAAAAGAAAGTTTAAAT-----GATGATGACGATTTTACTCAAAAATATAAA  
CATTTGTGGGTTCAATGCGAAAGTTGTTATGGATTAATAAATTATAAGAAATTTTTTAAATCA  
AAAATGAATATTTGTGAACACTGTGGAGATCATTTGAAAATGAGCAGTTCAGATAGAAT  
CGAACTTTTGATTGATCCAGGTAATTTGGAACCCTCGAGATGAAGACATGGTATCTCTCG  
ATCCCATTGAATTTGATTCGGAAGACGAACCTTATAAAACTCGTCTTGATTCTTATCAAA  
AAAGGACAGGATTATCGGAGGCTGTTCAAACAGGCACAGGTCAAATAAACGGTATTCC  
TGTAGCAATTGGTATTATGGATTTTCAGTTTATGGGGGGTAGTATGGGATCCGTAGTGGG  
TGAGAAAATCACTCGGTTGATCGAATATGCTACCAATCAACTTTTACCCCTTATTATAGT  
ATGTGCATCTGGAGGTGCGCGTATGCAAGAAGGAAGTTTGAGCTTAATGCAAATGGCT  
AAAATTTCTTCTGCTTTATATAATTATCAAATCAATCAAAAAGTTATTCTATGTAGCGATAC  
TTACATCTCCTACTACTGGTGGGGTCACAGCTAGTTTTGGCATGTTGGGGGATATCATT  
TTGCCGAACCAATGCTTACATTGCATTTGCGGGGAAAAGGGTAATTGAACAAACGTT  
GAATACGGAAGTTCCCGAAGGTTCAATCGGCTGAATTTTTATTGAAAAAGGCTTAT  
TTGATTCAATCGTACCTCGGAATCTTTTAAAGGAGGTTTTAGGTGAGTATTTTCAGTTTC  
ATGGTTTCTTTCCTTTGACTCAAATGGAAAT---ATGGTAACCATTCTGTCAGATGAAAT  
TAGTAAAATTATCCGTGAACGTATTGAGCAATATAATACCGAAGTAAAATTTGTAATAAC  
GGGTACCGTACTTCAAGTAGGCGACGGCATTGCTCGTATTTATGGTCTTGATGAAGTAA  
TGGCAGGTGAATTAGTCGAATTTGAAGAGGGTACTGTAGGCATTGCTTTGAATTTGGAA  
TCCAAAAATGTTGGTGTGTACTAATGGGTGATGGTTTGCTGATACAAGAGGGAAGCTC

GGTAAAAGCAACAGGAAGAATTGCTCAGATACCAGTAAGTGAGGGTTATTTGGGTCGT  
GTTGTAAATGCCCTAGCTAAACCTATTGATGGTCGAGGAGAAATTCATCTTCGGAATC  
TCGGTTAATCGAATCGCCCGCCCCAGGTATTATTTTCGAGACGTTCCCGTGTATGAGCCTCT  
TCAAACGGGACTTATTGCTATTGATTCTATGATTCTATAGGGCGTGGCCAGCGAGAATT  
AATTATTGGGGACAGACAAACAGGTAAAACAGCAGTAGCCACAGATACGATTCTCAAT  
CAACAGGGACAAAATGTAATATGTGTTTATGTAGCTATTGGTCAAAAAGCATCTTCTGT  
GGCTCAAGTGGTAACTACTTTACAAGAAAGAGGAGCAATGGAATACACTATTATAGTG  
GCTGAAACCGCAAATTCTCCAGCTACATTACAATACCTTGCCCCTTATACAGGGGCTGC  
TCTGGCTGAATATTTTATGTACCGTAAACGTCACACTTTAATCATTATGACGATCCCTCC  
AAACAAGCACAGGCTTATCGCCAAATGTCTCTTATTACGAAGACCACCAGGTCGCG  
AAGCTTACCCCGGAGATGTTTTTTATTACATTCGCGTCTTTTGGAAGAGCCGCTAAA  
TTAAGTTCTCAGTTAGGTGAAGGAAGTATGACTGCTTTACCGATAGTTGAGACCCAATC  
AGGAGATGTTTCAGCTTATATTCCTACTAATGTAATTTCCATTACAGATGGCCAAATATT  
TTATCTGCCGATTTATTCAATGCTGGAATAAGACCTGCGATTAATGTAGGTATTTCCGTTT  
CCAGAGTTGGATCGGCGGCTCAAATAAAAGCAATGAAACAAGTCGCTGGTAAATTTAAA  
ATTGGAATTGGCACAATTCGCAGAATTAGAAGCTTTTGCACAATTTGCTTCTGATCTCG  
ATAAAGCTACCCAAAATCAATTGGCAAGAGGTCAGCGATTGCGTGAGTTGCTGAAACA  
ATCCCAATCAGCCCCTCTCACTGTGGAAGAACAGATAATAACTATTTATACTGGAACGA  
ACGGTTATCTTGATTCATTAGAAATTGAACAGGTAAGGAAATTTCTTGTTGAGTTACGG  
GCATATTTAAAACGAATAAACCCAAATTCAATGAAATAATATGTTCTACCAAGACATTC  
ACTGGGGAAGCAGAAACCCTTTTGAAGGAAGCTATTCAGGAACAGACGGAACCTTTTT  
TTACTTCAGGAACAAGTAATGAAAATAACTCCTACCACTTCTGATACTGAGGTTTCTGC  
ACTTGAAAAAAAATCTGGGACGTGTCGTCCAAATAATAGGTCCGGTACTAGATGTT  
GTTTTTCCACCAGGGAAGATGCCTAATATTTACAACGCTCTGATAGTTCAAGGTCGAGA  
TACTGTTGGCCAACAAATTAACGTAACCTTGTGAAGTACAGCAATTATTAGGAAATAATC  
GAATTAGAGCTGTAGCTATGAGTGCTACAGATGGGTTAAAGAGGGGGATGGAAGTTAT  
TGACACGGGAGCTCCTCTAAGTGTTCCAGTCGGCGGAGCAACTCTAGGGCGAATTTTC  
AACGTACTTGGAGAGCCTATTGATAATTTAGGTCCTGTAGATACTCGCACAACATCTCCT  
ATTCATAGATCTGCGCCTGCCTTTATACAGTTAGATACAAAATTATCCATTTTTGAAACA  
GGTATTAAGTAGTAGATCTTTTAGCTCCTTATCGGCGTGGCGGAAAAATAGGACTTTTT  
GGTGGAGCTGGGGTAGGTAAAACAGTACTCATTATGGAATTGATCAATAACATTGCCAA  
AGCTCATGGAGGTGTATCCGATTTTGGCGGAGTAGGTGAACGTACTCGTGAGGGAAAC  
GATCTTTATATGGAATGAAAGAATCTGGAGTAATTAATGAAAAAATATTGCGGAATC  
AAAAGTAGCTCTAGTCTACGGTCAAATGAATGAACCGCCCGGAGCTCGTATGAGAGTT  
GGTTAACTGCCCTAACTATGGCGGAATATTTCCGAGATGTCAATGAACAAGACGTA  
TTTATTTATCGACAATATCTTCCGCTTTGTCCAAGCAGGATCCGAAGTATCCGCCTTATT  
GGGCCGAATGCCTTCTGCTGTGGGTTATCAACCCACCCTGGGTACTGAAATGGGTTCTT  
TACAAGAAAGAATTACTTCTACCAAAGAAGGGTCTATAACTTCTATTCAAGCAGTTTAT  
GTACCTGCAGACGATTTGACCGATCCTGCTCCTGCCACGACATTTGCACATTTGGATGC  
TACTACAGTACTATCAAGAGGATTAGCTGCCAAAGGTATCTATCCAGCAGTAGATCCTTT  
AGATTCAACGTCAACTATGCTCCAACCTCGGATCGTTGGTGAAGAACATTATGAAACTG  
CGCAAAGAGTTAAAGAACTTTACAACGTTACAAGAAGTTCAGGATATTATAGCTATT  
CTTGGGTTGGACGAATTATCCGAAGAGGATCGCTTAACCGTAGCAAGAGCACGAAAAA  
TTGAACGTTTCTTATCACAAACATTTTTTCGTAGCAGAAGTATTTACAGGTTCCGACGG

AAATATGTCGCGCTAGAAGAAACAATTAGAGGGTTTAAATTGATTCTTTCTGGAGAATT  
AGATAGTCTTCCCGAACAAGCGTTTTATTTGGTGGGTAATATCGATGAAGCTACTGCGA  
AGGCTGCGAACTTAAC-----ATGACTTTAAATCTTTGTGTACTGACCCCAA  
TCGAATTGTTTGGGATTCAGAAGTGAAAGAAATTATTTTATCTACTAATAGTGGACAAAT  
TGGAGTATTAATAAACCATGCGCCTATTGCAACAGCTGTAGATATAGGTATTTTGAGAAT  
ACGCCTTAACGACCAATGGGTAACCTATGGCTCTGATGGGCGTTTTGCTAGAATAGGCA  
ATAACGAGATCACAATTTTAGTAAATGATGCAGAAAAGGGTAGTGACATTGATCCACAA  
GAAGCACAACAACTCTTAAAATAGCGGAAGCTAACTTGAATAAGGCTGAAGGCAAG  
AGACAAACAATTGAGGCAAATCTAGCTCTCAGACGAGCTAGGACACGAGTTGAGGCTA  
TCATATCAATA---ATGAAAATATAACCGATTCTTTCTTTGCTTGAGTTACTGGCCATCC  
GCGGGCAGTTTCGGGTTTGATACCGATATTTTAGCAACAAATCTAATAAATCTAAGTGTA  
GTGCTAGGTGTATTGGTTTTTTTTGGAAAGGGAGTGTTAACTGATTTATTAGATAATCGA  
AAACAGAGAATTTTGAGAACTATTCGAAATTCAGAAGAAGCTGCGGGAAGGAGCCGTT  
GAACAGCTGGAAAAGCCCGGGCCCGCTTAAGGAAAATAGAAATGGAAGCAGATCGG  
TTTCGATTGAATGGTTATTCCGAGATAGAACGAGAAAAATTGAATTTAATTAATTCATT  
TATACAACTTTGGAACAATTCGAAAATTACAAAAATGAACTATTAATTTTGAACAACA  
AAAGGCGATTAATCAAGTGCAACAGAGGGTTTTACAACAAGCATTACAAGGAGCTCTG  
GAACTCTCAATAGTTGCTTAAACAACGAGTTACATTTACGTACGATCGGGGCTAATAT  
TGGTATGTTTGGTGCATGAAAGAAAAAATAACATGAATCCAATCATTCTGCTGCTT  
CTGTTATTGCTGCTGGGTTGGCCGTTGGACTTGCTTCTATTGGACCTGGAATTGGTCAA  
GGCACAGCTGCCGACAAGCTGTAGAAGGGATTGCACGACAACCGGAAGCAGAGGA  
CAAATAAGGGGTACTTTATTACTTAGTCTGGCTTTTATGGAAGCTTTAACTATTTATGG  
GCTGGTTGTAGCATTAGCGCTTTTATTTGCCAATCCTTTTGTATGAATGTTCTATTATGT  
TCCATCAACACATTAACAGATTCTATGATATATCTGCTCTGGAAGTAGGTCAACATTC  
TATTGGCAAATAGGGGATTTCAAGTGCATGCTCAAGTACTTATTACCTCTTGGGTTGTA  
ATTGCTATCTTATTAATTTCAACTATTCTAGTTGTTAGAAATCCGCAAATTCAGC  
CCGGTCAGAATTTCTTTGAATATGTCTTGAATTCATTTCGAGACGTGAGCAAACTCAG  
ATTGGAGAAGAATATGGTCCGTGGGTTCCATTTATTGGAACCTCTGTTTCTATTTATTTT  
GTTTCGAATTGGTCAGGGGCTCTTTTGCCTTGGAATAATAAAGTTACCTCATGGAGA  
ATTAGCTGCACCCACAAATGATATAAATACTACTGTTGCATTAGCTTTACTTACGTCAGT  
AGCATATTTCTATGCGGGTATTTCAAAAAAGGGATTGGCTTATTTTGGTAAATACATCA  
ACCAACTCCAATCCTTTTACCAATTAACATCTTAGAAGATTCACAAAACCTTTATCACT  
TAGTTTTCGACTTTTCGGAAATATATTAGCTGATGAATTAGTAGTTGTTGTTCTTGTTCG  
TTAGTACCCTTAGTAATCCTATACCGGTTATGTTTCTTGGATTATTTACAAGCGGTATTC  
AAGCTCTTATTTTTGCTACTTTAGCTGCAGCTTATATAGGTGAATCCATGGAAGGGCATC  
ATATGATATTTTCAACTTTAGAGCATATATTAACCTCATATATCGTTTTCCGTCATATCCATT  
GTTATTTCAATTCATTTGATAACCCTATTAGTCAATGAAATCGTAGGATTATATGATTTGT  
CCAAAAAAGCTATGATAATAACTTTTTTCTGTGTAACGGGATTGTTAATTACTCGTTGGT  
TTTTTTCGGGCCATTTACCATTTAGTGATTTATATGAATCCTTAATCTTTCTTTTCATGGGG  
TTTTTCAATTTTTCATATAGTTCCCTGGTTTTAAAAGGATAAAAACCTTTTAAGTACAAT  
AATTGCACCAAGTGTTATTTTTACCCAAGGCTTTGCCACTTCGGGTCTTTTAAACAAAA  
TGCATCAATCCGTAATATTAGTACCAGCTCTACAATCCCATGGCTAATGATGCACGTAA  
GTATGATGATATTAGGCTATGCAGCTCTTTTATGTGGATCATTATTATCAGTGGCTATTTTA  
GTCATTACGTTTCAAGAAATCATCAAATCTTGGTAAAAGCAAGGAAATAAATAACAT

GAATCTGAATGAAAATTTTTTACGAAAACTTCTTTTTCTCTTCTATAAATTATTACAG  
GTCTCAATTTATTCAACAATTGGATCGTTGGAGTTATCGTATTATTAGTCTGGGTTTTCTC  
TTTTTAACGATAGGTATTCTTTCAGGAGCAGTATGGGCTAACGAGGCATGGGGGTCTTA  
TTGGAATTGGGATCCAAAGGAACTTGGGCCTTTATTACTTGGACCATATTCGCGATTTA  
TTACATACTCGAAAAATAAAAAATGGGAAGGTGTAAATCTTCCATAGTAGCCTCTAT  
AGGATTTCTTATAATTTGGATATGTTATTTGGGGATCAATCTTTTAGGAATAGGACTACAT  
AGTTATGGTTCATTTACATCTAATATGGCAAAAAAGAAAGCATTCCCTTCTATGT  
CTTACATCTATAGTCTTTTTGCCCCTGGTGCATCTCTTTTACATTTAAGAATAGTTTTGAAT  
CTTGGATTATTAATTGGTGGAATACGAAACAATCCGAAATTTTCGTGAATATCATTCAAG  
AAAAAGTATTTTAAAGAAATTCATAGAGTTCGAGGAACTCTTCCCTTGGATGAAATG  
CTAAAGGAATACCCGGAACACCTTTACAAAACCTTCGTATCGAA---TACAAAGAAATC  
ATCCAATTGATCAAGACGCACAACCAAGATCGTATCCATAACAATTTTTCATTTTTTTACA  
AATTCATCTGTTTGCTTATTCTAAGTGGTATTCTATTAGGGGTAATCAAGAAATCATAA  
TTCTTAACTCTTGGGTTCAAGAATTTTTATATAACTTAAAGTGACACAATAAAAGCTTTTT  
CTATTCTTTTATTAACAGATTTATGTATAGGATTCCACTCGACTCATGGTTGGGAACTAAT  
GATTGGGTCAGTCTATAAAGATTTTGGATTTACTCAGAATGATCAAATTATATCCGGTCT  
TCTTTCTACCTTTCCAGTCATTTTAGATACTTTTTTAAATACTGGATTTCCGTTATTTA  
AATCGCGTATCTCCGTCGCTTGTAGTGATTTATCATTCCATGAATGACATGCCACTTGGT  
GTACCAAAGGTACCTTTTCTCGTTCCTGGAGATGATGAGGCATCTTGGATTGACTTATA  
CAATCGACTTTTTCAAGAAAGACTACTTTTTTTAGGTCAAGAAGTAAACAGTGAAATAT  
CAAACCAACTTGTTGGTCTAATGGTATATCTAAGTTTLAGAGGACAAGAACAAAGATTTG  
TATTTGTTTATAAATCTCCGGGCGGAGAGGTAATATCTGGAATGGCAATATTTGATACTA  
TGCAATTTGTAGAAGCAGAAGTACAGACAGTATGCGTAGGATTAGCCGCTTCAATGGG  
ATCGCTTATTTGGTAGGAGGAGAAATTACCAAACGTCTAGCATTCCCTCACGCTAGGG  
TAATGATCCATCAACCTGCTACTTCTTTTTATGAGGGACAAACAGTAGAATGTATGCTGG  
AAGCGAATGAATTACTGCAAATGCGCCGAAATATCACAAATATTTATGCACAAAGAACA  
GGCAAACCTTCATGGCAGATATCCAAAGACATGGAAAGGGATCTTTTTATGTCAGCAG  
A A G A A G C T C A A G C C T A C G G A C T T G T T G A T A T G G T A G C G G A T T C  
T????????????????????????????????????????????????????????????????????  
????????????????????????????????????????????????????????????????????  
????????????????????????????????????????????????????????????????????  
????????????????????????????????????????????????????????????????????  
ATGAAGGAATATCAAGTATATTT  
AGAACGAGCTAGATCTCGCCAACAGGACTTCCTATAACCACTTATTTCCGGGAGTATA  
TTTATGGACTTGCTTATAGTCAAAATTTTTTAGGTTATGACAGTAAATATAGTTTACTAAT  
TGTAACAAATCCATTTTGGGGAAAGAATTTAATTCTCAAATAATATCAGAGGGTTT  
TGCCATCGTCGTGGAAATCCATTTTTCTTACAATCTGGCTCTTCCCTAATTATAAAATCT  
TATAATTTGCGATCAATTCATTCCGTTTTTCCCTTTTTGGAGGATAAATTTACATATTTAA  
ATTATGTGTCAGATATAAGAATACCCTATCCATCTGGAAATCTTAGTTCAAATCCT  
TCGATACTGGGTGAAAGATGCCCCTTTTTTTCATTTATTACGGTTGTTTGTATAATTTT  
TGTAATTGGAATAGTTTTATTACTAAATCGATTTATACTTTTTCAAACCAAGATTATTCT  
TGTTCCCTCTATAATTTTTATGTATGGGAATATGAATCTATCTTCCTTTTTCTACGTAATAAA  
TCCTCTCATTACGATTAAAATCTTTTAGCGTTTTTTTTGAGCGAATTTTTTTTTATGCAA  
AAAGAGAACATCTTGTAAGAATTTTTGCTAAGCCATATACTTTAAAATTTCAAGGAT  
CCTCTCATTATTATGTTAGATATCAAGGAAAATCCATTCTGGCTTCAAGGAATGCGCCT



ATTTTGATGAATAAATGGAAACATTATTTTCTCCATTTATGGCAATGTTTTTTTTGATGTTT  
GGTCTCAACCAGGAACGATTAAGATAAACCAATTATCCCAACATTCATTTTCAGCTTTTA  
GGCTATTTTTTCAAATGTGCGGCTAAATCGTTTCAGTGGTACGGAGTCCATGCTGCAAAA  
TACATTTCTAATCGAAATT-----GTTAGAAAAAACTAGATATAATAGTTCCAATTATTCCT  
CTAATTAGATCATTGGCTAAAGGGAAATTTTGTAAATGTATTAGGGCATCCCATTAGTAAG  
CCGGTCTGGGCCGATTCATCCGATTTGGATATTATTGACCGATTTTTTGCGAATATGCAGA  
AATCTTTCTCATTATTACAATGGATCCTCAAAAAAAAAAAGTTTGTATCAAATAAAATAT  
ATACTTCGGCTTTCTTGTATTAAAACCTTTGGCTTGTAACACAAAAGTACTGTACGCGC  
TTTTTTGAAAAGATCAGGTTTCAGAATTATTGGAAGAATTCCTTACAGAGGAAGAAGAG  
ATTCTTTCTTTTATTTTTCCAAGACGTATTTGGTATTTGGATATTCTTTTCAGCAACGATC  
TGGTCAATCATGAAATGATAATTGATAACAACG---GAAGTCCAAGATATAAAT--TCTTTTT  
CCGGATTGGAATCT--TTAAAAGAGGTCTATGGAATTCTATGGATACTTGTACCTATTTTG  
ATTCTTGTATTGGGAATCACAATAAGTGTACTAGCAATTGTATGGTTAGAAAAGAGAAATA  
TCTGCGGGGATACAACAGCGTATTGGACCTGAATACGCCGGTCCGTTTGGAGTTCTTCA  
AGCTCTAGCAGACGGAACAAAACACTACTATTTAAAGAGAATCTTATTCCATCTAGGGGAG  
ATATTCGTTTATTCAGTATAGGACCATCCATATCAGTCATATCAATTCTAATAAGCTATTCA  
GTAATCCCTTTGGCTATAACTTTGTTTTATCGGATTTAATATCGGTGTTTTTTTTATGGAT  
TGCTATTTTCGAGTATTGCTCCCATCGGACTTCTTATGTCAGGGTATGGATCAAATAATA  
ATATTCCTTTTTGGGTGGTCTACGAGCTGCTGCTCAATCAATTAGTTATGAAATACCATT  
AACTCTATGTGTCTTATCAATATCTCTATTATCTAACAGTTTAAGTACAGTTGATATAGTT  
GATGCGCAATCAAATATGGTTTTTTGGGGATGGAATTTGTGGCGTCAACCTATGGGTTT  
CATCGTTTTTCTAATTTCTTCCCTAGCAGAATGTGAAAGATTACCTTTTGATTTACCAGA  
AGCAGAAGAAGAATTAGTAGCGGGTTATCAAACCTGAATATTCGGGTATTAGATTTGGTT  
TATTTTACGTTGCTTCCATTTAAACCTATTAATTTCTTTCATTATTTGTAACAGTTCTTTAC  
TTGGGCGGTTCAAATATCTCTATTCCGTACATATTCGTTTCTGAATTTTTTTGAAATAAATA  
AAACATATGGAGTTTTTTGGAACACTACAATTGATCTCTTTATTACATTAGCTAAAACCTATTT  
TTTCTTATTCGTTTCGATCATAACAAGATGGTCTTTGCCTAGGCTAAGAATGGATCAATT  
ATTAAATCTTGGATGGAAGTTTCTTTTACCTATTTCTCTCGGTAATCTATTATTAACAACCT  
TCGTCTCAATTGTTTTCACTGATGATTTGACATGTACAGAATGAAAATATCATTCTCGAG  
TCTACGAGATTTTTTATGAAAGCCTTTCATTGCTTCTCTTCGATGGAAGTTTTATTTTCC  
CGGAATTCATCCTAATTTTTGGCCTAATTTCTTCTTCTGATGATCGATTCAACCTCTGATCA  
AAAAATATATCTTCGTTCTATTTTATCTCTTCAACAAGTTTAGTAATGAGCATAACGGC  
CCTGTTGTTCGGATGGCGAGAAGAACCCATGATTAGTTTTTTTCGGGAAATTTCCAACGA  
ACAATTTCAACGAAATCTTTCAATTTCTTATTTTACTATCTTCAACTCTATGTATTCTCTA  
TCCGTAGAGTACATTGAATGTACAGAAATGGCTATACCAGAGTTTCTGTTATTTCATATTA  
ACAGCTACTCTAGGAGGAATGTTTTTATGCAGCGCTAACGATTTAATAACTATCTTTGTA  
GCTCTAGAATGTTTCAGTTTATGCTCCTATCTACTATCTGGATATACCAAGAAAGATGTA  
CGATCTAATGAGGCTACTATGAAATATTTACTCATGGGTGGGGCAAGCTCTTCTATTCTG  
GTTTCATGGTTTCTCTTGGCTATATGGTTCATCCGGGGGAGAGATAGAACTTCAAGAAAT  
AGTGAATGGTCTTATCAATACACAAATGTATAACTCCCCAGGAATTTCAATTGCGCTTAT  
ATTCATTACCGTAGGAATGGGTTCAAGCTTTCCCTAGCCCCTTCTCATCAATGGACTCC  
TGACGTATACGAAGGATCTCCCACTCCAGTCGTTGCTTTTCTTTCTGTTACTTCGAAAGT  
AGCCGCTTTAGCTTCAGCCACTCGAATTTTGGATATTCTCTTTATTTCTCATCAAACGA  
ATGGCATCTTCTTCTAGAAATCCTAGCTATTCTTAGCATGATATTAGGGAATTTTCATTGCT

ATTACCCAAACAAGCATGAAACGTATGCTTGCCTATTCGTCCATAGGTCAAATAGGATAT  
GTAATTATTGGAATAATTGTTGGAGACTCAAATGGTGGATATGCAAGCATGATAACTTAT  
ATGCTTTTCTATATCGCTATGAATTTAGGAACTTTTGCCTGCATTGTGTCAATTTGGTCTAC  
GTACCGGAACTGATAACATTCGAGATTATGCAGGATTATACACGAAAGATCCTTTTTTTG  
GCTGTCTCTTTAGCCCTATGTCTCTTATCCTTAGGAGGTCTTCCTCCACTAGCAGGTTTT  
TTCGAAAACTTTATTTATTCTGGTGTGGGTGGCAAGCAGGTCTATATTTCTTGGTTTCA  
ATAGGACTTCTTACAAGCGTTGTTTCTATCTACTATTATCTAAAAATAATTAAGTTAGTAA  
TGACTGGACGAAACCAAGAAATAACTACTTACGTGCGAAATTATAGAAGGTCTCCTGT  
AAGATCCAACAATTCATCGAATTGAGTATGATTATATGTGTGATAGCATCTACTATACCA  
GGAATATCAATGAACCCATAATTGAAATTGCTCAGGATACCCTTTTTATGTTTTTGGCTTT  
ATGAATATGATATTTTTTGGACATTTCTAATAATATCGATCTTGATTCTATTTTAGCATT  
CTAATTTCTGGAATTTTAGCTCCGATTAGAAAAGGACCAGAAAACTTTCTAGTTATGA  
ATCCGGAATAGAACCGATGGGCGATGCTTGGTTACAATTTCAAATCCGTTATTATATGTT  
TGCTCTAGTTTTTGTGTTTTTGTATGTTGAAACGGTCTTTCTTTACCCATGGGCAATGAG  
TTTTGATGTATTGGGGGTATCCGTATTTATAGAAGCTTTAATCTTTGTGCTTATCCTAATT  
GTTGGTTCAGTTTATGCATGGCGAAAGGGAGCATTAGAATGGTCTACGAATAATTTTCC  
TTGGTTAACAATAGTTGTAGTTTTGCCAATAGCCGCGGGTTCCTTAATTTTATTATTTCT  
CATAGGGGAAATAAGGTAATTAGGTGGTATAGCATTGTATATGCTTAATTGATCTACTTC  
TAACAACCTATGCATTTTGTATCATTTCCAATTGGATGATCCACTTATTCAACTAACGG  
AGAATTATAAATGGATCAATTTTTTGTATTTTACTGGAGATTGGGAATAGATGGACTCT  
CTATAGGACCTATTTTACTGACGGGATTTATAACTACTTTAGCCACTTTAGCGGCTCAGC  
CGTTACTCGAGAATACCCATTATTCTATTTCTGATGTTAGCAATGTATAGCGGTCAA  
TGGGACCATTTGCTTCTCGAGACATTTTACTTTTTTTCATCATGTGGGAATTGGAATTA  
TTCCAGTTTATCTACTTTTAGCCATGTGGGGGGGAAAGAAACGTTTGTATTTCAGCTACA  
AAGTTTATTTGTACACTGCAGGAAGTTCTGTTTTTTTATTAATAGGAGTTCTGGGTATC  
GGTTTATATGGTTCTAATGAACCAACATTAATTTTGAACATTAATAATCAATCGTATC  
CCGTGGTGCTAGAAATAATATTCTATATAGGATTTCTTATTGCTTTTGTCTGTCAAATCGCC  
GATTATACCCCTACATACATGGTTACCAGATACCCACGGAGAGGCACATTACAGCACTT  
GTATGCTTTTAGCCGGAATCTTATTAATAATGGGAGCATATGGGTTGGTTCGAATTAATA  
TGGAATTTTTTCCCACGCTCATTCCATATTTGCCCTGGTTAATGATAGTAGGTTCTAT  
TCAAATAATCTATGCCGCTTTAACAGCTTTTGGTCAACGCAATTTAAAAAAGAATAG  
CTTATTCCTCGGTCTCTCATATGGGTTTCATAATTATAGGAATTGGTCTATAAGTGATAC  
TGGGCTCAACGGGGTCATTTTGCAAATAATATCTCATGGATTTATTGGGGCTGCGCTTTT  
TTTCTTGGCAGGAAGTAGTTATGATAGACTACGTCTTCTTTATCTTGACGAAATGGGCG  
GAATGGCTATCCCAATGCCAAAAATATTCACGATTTTCACTATCTTATCCATGGCTTCTCT  
TGCATTGCCGGGCATGAGCGGTTTTGTTGCAGAATTGATAGTTTTTTTTTGAATAATTAC  
TAGTCAAAAATATCTTTTCATGATGAAAATACTAATTACTTTTGTAAACAGCGATTGGAAT  
GATATTAACTCCATTTATTTATTTATCTATCTTACGGCAGATGTTCTATGGATAAAGTTTT  
TTAATACACCAAACCTTATTTTTTTGATTCTGGGCCGAGAGAATTATTTATTTTCGATTC  
TATCCTTATACCCGTAATAGGTATTGGTATTTATCCAGATTTCAATTTCTCATTCTCGGTTG  
ACAAGGTTGAAGCTATTTCTATCTAATTTT-----ATGATGCTCGAACATGTAAGTTG  
AGTGCCATTTATTTTCTATTGGTATCTATGGATTGATCACGAGTCGAAATATGGTTAGAG  
CCCTTATGTGCTTGAACCTATACTGAATGCAGTTAATATAAATCTCGTAACTTTTTCTGA  
TTTTTTTGATAATCGCCAATTAAGGAAATATTTTTTCAATTTTGTATAGCTATTGCA

GCCGCTGAAGCCGCTATCGGACTAGCTATTGTTTCCTCCATTTATCGTAACAGAAAATC  
AACCCGTATCAATCAATCGAATTTGTTGAATAAAATGGAATATACACATCAATCGTCATG  
GATTATACCTTTCATCCCTCTTCCAGTTCCTATTTTAATAGGGGTCGGACTTCTATTTTTT  
CCCACAGCAACAAAAAATATTCGCCGTATGTGGGTTTTTTCCTAGTATTTTTTTGTAAACG  
ATAGTTATGATTTTTTCGATCGATCTATCTATTCATCAAATCAACAACAGTTCGATCTATC  
AATATGTATGGTCTTGGACTATAAATAATGATCTTTCTTTAGAGTTTGGCTACTTGATCGA  
TTCACTTACTTCTATTATGTCAATATTAATCACGACAGTTGGGATTTTTGGTTCTAATTTAT  
AGTGATAGTTACATGTCTCATGATCAAAGCTATTTGAGATTTTTTACTTATTTGAGTTTTT  
TTAATACGTCAATGTTGGGATTAGTTACTAGTTCAAATTTGATACAAGTTTATATTTTTTG  
GGAATTGGTTGGAATGTGTTCTTATCTATTAATAGGTTTTTGGTTCACACGTCCTATTGC  
GGCAAATGCTTGTCAAAAAGCGTTTGTAATAATCGTGTAGGGGATTTTTGGTTTATTATT  
AGGAATTTAGGTTTTTATTGGATAACGGGTAGTTTGGAAATTCGTGATTTATTTCAAATA  
TTCAATAAC---GAGGTTAATATTTTTTTTGTACTTTGTGTGCTCTCTTGTATTTTGC GG  
CTCGGTTGCCAAATCTGCCAATTCCCTCTTCATGTATGGTTACCAGATGCTATGGAAGG  
TCCTACTCCTATTTCCGCTCTTATACATGCTGCTACTATGGTAGCAGCAGGAATTTTTCTT  
GTAGCTCGCCTTCTTCTCTTTTCATAGTTATACCCTCCATAATGAGTGGAATAGCTTTGA  
TAGGTATAATCACAGTAGTATTAGGGGCAACTTTAGCTATTGCTCAAAAAGATATTAAGA  
AAAATTTGGCCTATTCGACAATGTCTCAATTGGGTTATATGATCTTAGCTTTAGGTATGG  
GCTCTTATCGAGCCGCTTTATTTCAATTTGATTACCCATGCTTATTCAAAGCATTGTTGTT  
TTTAGGATCTGGATCCATTATTCATTCCATGGAAGCTATTGTTGGCTATTCTCCAGATAAA  
AGTCAAAATATGGTTCTTATGGGGGGGTTAACAAAACATGCACCAATTACAAAAAATG  
CTTTTTTAATAGGTACACTTTCGCTTTGTGGTATTCCACCTTTTGCTTGTTTTTGGTCAA  
GGATGGGATTTAATGATAGTTGGTTGTATTCACCAATTTTCGCAATAATAGCTTGTTT  
GACAGCAGGATTAAGTGCATTTTATATGTTTCGAATCTATTTACTTGTTTTTGAAGGATAT  
TTAAATGTTTCAATTTCAACATTTCAACGGAAAGAAAAACAGTTCATTCTATTCAATATCT  
TTATGGGGGCAA---GAAGAAAAAATAAATAAATAAAGTTATTAGCGTTATTAACAATG  
AATTTTTTTCAGGGTATTAATAAACATTGGTTTTTTTTTACCCTCAAGAATCAGACAATACT  
ATGCTATTTTCGATGCTTGTTAGTACTATTTACTTTCTTTCGTTGGGTCCGTTGGA-----T  
TCGATTTGGATATATTATCTAAATTGTTAATTCGTCTATAGACCTTTTACATCAAAACTC  
AAAA---TCTGTGGATTGG---GAATTTTTTACAAATGCAACTTTTTTTCAGTGAGTATAGCTT  
TTTTTCGGAATATTAATAGCGTCTTTTTTCTATAAACCCGTTTTTTCTTCTTTACAAAATTT  
AACTTATGTAATTTATTTCAAATTATTGCTGATAAAATAATCAATATTATATACGATTGGT  
CATATAATCGTGGTTATATAGATGCTTTTTTGGAAAGTATCTTAAATTGCGAGTGTA AAAA  
AGTTAGCTAAATTCAATTATTTTTTTGATAGACAAATAATTGATGGAATTCCAAATGGAG  
TTGGTATTTCAAGTTTTTTTATGGGAGAGGCTATAAAATATGTGGGGGGGAGGG---CGAAT  
TTCTTCGTATATTTCTTT-----TTTCTGTAAATCTTTTTTAGTAATTTGTTATATGGCTTTA  
CCTGAAACGCTACACGATTTTCTTTTAGTCTTTCTGGGATCGGGTCTTATATTAGGAAGT  
CTAGGGGTAGTATTAACCAATCCCATTTTTTCTGCTTTTTTCGTTGGGACTGGTTCTT  
GTTTGTATATCTTTATTCTATATTTTATCAAACCTCCATTTTGTAGCTGCATCACAGCTACT  
TATTTACGTGGGAGCTATTAATATTTAATAAATTTGCTGTGATGTTTCATGAATAGTTCA  
GAATATTACCAAGATTTTAATCTTTGGACCGTCGGGGATGGAATTACTTTGATAGTTTGT  
ACAAGTATTTTTGTTTCACTAGTAACTACTATTCCAGATACATCATGGTACGGAATTTT  
GGACTACAAGACCAATCAGATTATCGAGCAAGATTTGATAAGTACTAGTCAACAAAT  
GGAATTCATTTATCAACCGATTTTTTTCTTCCATTTGAACTCATTTCATAAATCTTTTAG

TTGCTTTGATAGGTACAATTGTTGTAGCTCGGCAGATGAATGTCCCAACTACAAGAAAA  
GACCTCATGATAGTCAATATGGGGCCTCAGCACCCATCAATGCATGGTGTCTTCGACTT  
ATTGTTACTCTGGATGGTGAAGATGTTATTGATTGTGAACCAATATTGGGTATTTTACAC  
AGAGGTATGGAAAAAATTGCGGAAAACCGAACAATTATAACAATATCTGCCTTATGTAAC  
ACGTTGGGATTATTTAGCTACTATGTTACAGAAGCAATAACCGTAAACGGACCAGAAC  
AATTGGGAAATATTCAAGTACCTAAAAGAGCCAGCTATATACGAGTAATTATGTTGGAG  
TTAAGTCGTATAGCTTCTCATCTACTATGGCTGGGACCTTTTATGGCAGATATTGGTGCA  
CAAACCTCTTTTTTCTATATTTTTAGAGAAAAGAGAATTAATATATGATCTATTTGAAGCTG  
CTACAGGTATGAGAATGATGCATAATTTTTTCGTATCGGAGGAGTTTCAGCTGATCTAC  
CTTATGGTTGGATAGATAAATGTTTTGATTTCTGCAATTATTTTTTAACAAGGGTTATTGA  
ATATCAAAAACCTATTACGCGAAATCCTATTTTTTTAGAACGGGTTGAGGGAGTAGGTAT  
TATTGGTAGAGAGGAAGTAATAAATTGGGGCTTATCAGGACCGATGCTTCGGGCTCCG  
GAATACAATGGGATTTACGTAAAGTTGATAATTATGAGTGTTACGAGGAGTTTGATTGG  
GAAGTTCAATGGCAAAAAGAAGGAGATTCATTAGCTCGTTATTTAGTTCCGAATTGGTGA  
AATGATGGAATCCATAAAAATTATTCAACAGGCTTTGGAAGGAATTCCTGGTGGGCCGT  
ATGAAAATTTAGAAATTCGCAGCTTTGATAGAGAAAAGGAGCCAGAATGGAATGATTT  
TGAATATCGATTCATTGGTAAAAAATCGTCTCCGACCTTTGAATTGCCAAAACAAGAAC  
TTTATGTAAGAGTTGAGGCTCCCAAGGGAGAATTAGGAATTTTTCTAATAGGAGATCAG  
AATGGTTTTCTTGGAGATGGAAAATTCGTCCACCAGGTTTTATCAATTTGCAAATCTT  
CCTCAATTAGTTAAAAGAATGAAATTGGCTGATATTATGACAATACTAGGTAGCATAGAT  
ATCATTATGGGAGAAATTGATCGTATGTTCTTATGGTAACTGGGTTTCATGAATTATGGT  
CAACAAACAGTCCGAGCTGCAAGGTACATTGGTCAAAGTTTCGTGATTATCTTATCTCA  
CGCAAATCGTTTACCTGTAACCTATTCAATATCCTTATGAAAAATTAATCACACCGGAACG  
TTTCCGCGGTGCAATCCATTTGAATTTGATAAATGCATTGCTTGTGAAGTATGTGTTCCG  
TGTATGTCCTATAGATTTACCCGTTGTTGATTGGAAACTGGAAACTGATATTCGAAAGA  
AACGATTACTGAATTACAGTATTGATTTCCGGAATCTGTATTTTTTTGTGGTAACTGTATTG  
AATATTGTCCAACAAATTGCTTATCAATGACTGAAGAATATGAACTTTCAACTTATGATC  
GTCACGAATTGAATTATAATCAAATAGCTTTGGGCCGTTTACCAATGTCTGTAATTGATG  
ATTATACAATTCGAACAATTCAAATAAAA-----ATGCAA  
GGTAATTTGTCTGCTTGGCTAGTCAAACACGGAATAGTTCATAGATCTTTGGGTTTTCGAT  
TACCAAGGAATAGAGACTTTACAATAAAGCCCGAGGATTGGCATTTCGATTGCCGTTAT  
TTTATATGTATATGGTTACAATTATCTACGTTCCCAATGTGCCTATGATGTAGCACCCGGA  
GGATTATTAGCTAGTGTCTATCATCTTACCAGAATAGAGTATAGTCTAGATCAACCAGAA  
GAGGTATGCATAAAAGTATTTGCCCAAGGAAAAATCCCAGAATTCCTTCTATTTTCTG  
GGTTTGGAAAAGTGCGGATTTTCAAGAAAGGGAATCTTATGACATGTTAGGAATATCTT  
ATGATAATCATCCGCGTCTGAAACGTATTTAATGCCAGAAAGTTGGATCGGATGGCCT  
TTGCGTAAAGATTATATCGCCCCAATTTTATGAAATACAAGATGCTCAC-----  
-----  
-----ATGAATTCATTGAGTTTCCCGTACTTGATCAAAAAA  
CCAAAAATTCAGTAATTTCTACAACATTAATGATCTTTCAAATTGGTCAAGACTATCCA  
GTTTATGGCCACTTCTCTATGGTACTAGTTGTTGCTTCATTGAATTTGCTTCTTTAATAGG  
ATCACGATTCGACTTTGATCGTTATGGACTGGTACCACGCTCTAGTCCTAGGCAGGCCG  
ACCTCATTTTAAACAGCGGGCAGTAACTATGAAAATGGCTCCTTCTTTAGTTTCGATTAT  
ATGAGCAAATGCCCGAACCTAAATATGTTATTGCTATGGGAGCCTGTACAATTACAGGA

GGTATGTTTCAGTACCGATTCTTATAGTACTGTTCCGGGGCGTTGATAAACTAATTCCTGTG  
GATGTCTATTTGCCGGGTTGTCCGCCTAAACCAGAAGCTGTTATAGATGCTATAACAAA  
ACTTCGTAAGAAAATATCTCGCGAAATCTATGAGGATCGAATTAGTTATCAA---GAGAAT  
AGATGTTTTACTACCAACCACAAATTGGATGTTGGACGCAGTACTCATACTGGCAATTAT  
AATCAAGGATTATTCTATCAACCACCATCTATTTTCAGAGATAACTACA-----TTTTTCAA  
TATAAAAAGTTCAGTATCCTAACGAAAAAGTGAATATGCAAAGTAAAGGCTTTTTTC  
TTGGATAAAGGAAGAGATTACTCGATCCATTTCCGTATTGCTCATGATATATATAATAACT  
GGAGCACCCATTTTCATATGCATATCCCATTTTTTGCCAGCAAGGTTATGAAAATCCGCGA  
GAAGCTACCGGCCGGATTGTATGTGCTAATTGTCATTTAGCTAATAAGCCCGTAGATATT  
GAGGTTCCACAACTGTACTTCCCGATACGGTATTTGAAGCTGTTGTTTCGAATTCCTTAT  
GATATGCAAGTGAAACAAGTTCTTGCTAATGGTAAAAAGGGGGCTTTGAATGTGGGGG  
CTGTTCTATTTTACCAGAGGGCTTTGAATTGGCCCCTCCTGATCGTATTTGCCCCGAGA  
TTAAAGAAAAGATAGGTAATTTGTCTTTTCAAACCTATCGTCCCACAAAAAAAATATT  
ATTGTGGTAGGCCCGTTCTTGGAAGAAATATAGTGAAATTACCTTTCCTATTCTTTCT  
CCAGATCCCTCTACTAAGAGAGATGTTCACTTCTTAAATATCCTATATACGTAGGCGGT  
AACAGAGGAAGGGGTCAGATTTATCCCGACGGGAGTAAGAGTAATAATAATGTTTATAA  
TGCTACAGCAACTGGAATAGTAAACAAAATCATAACGAAAAGAAAAGGTGGATACGA  
AATAACGATAGTGGATGCAGCGGATGGACGTGAAGTGATTGATATTATCCCTCCAGGAC  
CAGAACTTCTTGTTCAGAGGGTGAATCCATCAAACCTTGATCAACCATTAAGTAAAT  
CCTAATGTGGGTGGGTTTGGTCAGGGGGATGCAGAAATAGTCCTTCAAGATCCGTTAC  
GTGTCCAAGGTCTCCTGTTCTTTCGCATCGATTATTTTGGCACAAATCTTTTTGGTTC  
TTAAAAGAAACAATTTGAGAAGGTTCAATTGTCCGAAATGAATTTTCATGAGTAAAGT  
CTATGATTGGTTTCGAAGAACGTCTTGAGATTCAGGCGATTGCCGATGATATAACTAGTA  
AATACGTTCTCCTCATGTCAATATTTTTTATTGTTTAGGAGGGATTACACTTACTTGT  
TTAGTCCAAGTAGCTACGGGTTTTGCTATGACTTTTTTATTATCGTCCGACCGTTACGGA  
GGCTTTTGCTTCTGTTCAATATATAATGACTGAGGCTAACTTTGGTTGGTTAATCCGATC  
AGTTCATAGATGGTCCGCAAGTATGATGGTTTTAATGATGATCTTGCACGTATTTCCGCT  
GTATCTAACAGGTGGTTTTAAAAAACCTCGTGAATTGACTTGGGTTACAGGTGTAGTTT  
TGGGCGTGTTGACTGCATCCTTCGGTGTAACAGGTTATTCTTACCTTGGGACCAAATT  
GGTTATTGGGCAGTAAAAATTGTAACAGGTGTACCCGACGCTATTCCTGTAATAGGATC  
GTCTGTGGTAGAGTTATTGCGCGGAAGCGCTAGTGTGGGACAATCTACCCTGACCCGT  
TTTTATAGTTTACATACTTTTGTATTACCGCTTCTTACAGCCGTATTTATGTTAATGCATTT  
TCCAATGATACGTAAGCAAGGCATTTCTGGTCTTTAATGGGAGTAACAAAAAACCT  
GACTTGAACGATCCTGTATTAAGAGCTAAATTGGCTAAAGGGATGGGTCATAATTATTAT  
GGAGAACCCGCATGGCCTAATGATCTTTTATATATTTTTCCAGTAGTAATCTAGGTACTA  
TTGCCTGTAACGTAGGTTTAGCGGTTCTCGAACCATCAATGATTGGGGAACCCGCAGAT  
CCGTTTGAACCTCCTTTGGAAATATTGCCCGAATGGTATTTTTTTCCCGTATTTCAAATA  
CTTCGTACAGTGCCAATAAATTATTGGGCGTCTTTTAAATGGTTTCAGTACCCGCGGGA  
TTATTAACAGTCCCCTTTTTGGAGAATGTTAATAAGTTCCAAAACCCATTTGCGCGTCCA  
GTAGCAACAACCGTCTTTTTGATTGGTACCGCAGTGGCTCTTTGGTTGGGTATTGGAGC  
AACATTACCTATTGAGAAATCCCTAACTTTAGGTCTTTTTATGATTGAAGTTTTTCTATTT  
GGAATTGTGTTAGGTCTAATTCCTATTACTTTGGCTGGATTATTTGTAACGGCATATTTAC  
AATACCGACGCGGTGATCAGTTGGATCTTATGCCACTATAACCAGTTATTTCCGTTTTTC  
TACTAGCAGTTTTAACTATAACCGCAGGTCTTTTTATCAGTCTGAATAAGATACGACTTA

TTATGGATATAGTAAGTCTTGCTTGGGCTGCTTTAATGGTAGTTTTTACATTTTCCCTTTC  
CCTTGTAGTATGGGGAAGAAGTGGACTCATGATTATTCGTTCCGCCGGAACCAAAAAGTC  
AAAATTTTGGTAGATAGGGATCCATAAAAACCTTCTTTTCGAGCAATGGGCAAAACCTG  
GTCATTTCTCAAGAACAATAGCTAAGGGACCTGATACTACTACTTGGATCTGGAATCTA  
CATGCTGATGCTCATGATTTTCGATAGCCATACTAGTGATTTAGAAGAGATTTCTCGAAAA  
GTTTTTAGTGCTCATTTTCGGCCAACTCTCCATCATCTTTCTTTGGCTGAGTGGCATGTAT  
TTCCATGGTGCTCGTTTTTTCGAATTATGAAGCATGGTTAAATGATCCTACTCACATTTCGA  
CCTAGTGCCCAAGTGGTTTGGCCAATAGTAGGCCAAGAAATATTGAATGGTGATGTAGG  
CGGAGGTTTCCGAGGAATACAAATAACCTCCGGTTTTTTTTTCAGATTTGGCGAGCATCTG  
GAATAACTAGTGAATTACAACCTCTATTGTACTGCAATTGGTGCATTGGTCTTTGCAGCCT  
TAATGCTTTTTGCTGGTTGGTTTCATTATCACAAAGCTGCTCCAAAATTGGCTTGGTTC  
AAGATGTAGAATCCATGTTGAATCACCATTTGGCAGGGCTACTAGGACTTGGGTCTCTT  
TCTTGGGCGGGGCATCAAGTACATGTATCTTTACCAATTAACCAATTTCTAAATGCTGGA  
GTAGATCCCAAAGAGATCCCGCTTCCCTCATGAATTTATCTTGAATCGAGATCTTTTGGCT  
CAACTTTATCCAAGTTTTTGGCGAGGGAGCAACCCCATTTTTTACCTTGAATTGGTCAA  
ATACGCGGACTTTCTTACTTTTCGTGGAGGATTAGATCCACTAAGTGGTGGTCTATGGTT  
GACCGATATAGCACATCATCATTTAGCTATTGCAATTTCTTTTTCTCATTGCCGGTCATATG  
TATAGAACTAAGTGGGTATTGGTTCATGGTATAAAAGATATTTTAGAGGCTCATAAAGGT  
CCATTTACAGGACAGGGTCATAAAGGTCTATATGAGATCCTAACAACGTCATGGCATGC  
TCAATTATCTATTAACCTAGCTATGTTAGGCTCTTTAACCATTTATAGTAGCTCACCATATGT  
ATGCTATGCCTCCTTATCCATACCTAGCTACTGACTATGGTACACAATTGTCATTGTTTAC  
ACATCACATGTGGATTGGTGGATTTCTTATAGTTGGTGTGCTGCTGCACATGCAGCCATTTT  
TATGGTCAGAGACTATGATCCAATACTCGATAACAACGACCTATTAGATCGTGTCCCTTAG  
ACATCGCGATGCAATCATATCACATCTCAACTGGGTGTGTATATTTTTAGGCTTTCACAG  
TTTTGGTTTTGTATATTCATAATGATACCATGAGTGCTTTAGGGCGCCCTCAAGATATGTTT  
TCAGATACTGCTATAACAATTACAACCTGTCTTTGCTCAATGGATACAAAATACCCACGCT  
TTAGCACCTGGCACAACGGCCCCTGGTGAACAACAAGCACCAAGTGGTACTTGGGGA  
GGTGGTGATTTAGTGGCAGTGGGCAACAAGTAGCTTTGTTACCTATTCCATTAGGAAC  
TGCAGATTTTTTGGTACATCATATTCATGCATTTACAATTCATGTGACGGTATTGATACTC  
CTAAAAGGTGTTCTATTTGCTCGTAGCTCACGATTGATACCGGATAAAGCAAATCTTGG  
TTTTCGTTTTCCCTTGTGATGGACCCGGAAGAGGGGTACATGCCAAGTATCCGCTTGGG  
ATCACGTCTTCTTAGGATTATTTTGGATGTACAATTCAATTTCTGTAGTAATATTCCATTT  
CAGTTGGAAAATGCAGTCAGATGTTTGGGGTAGTATAAACGATCAAGGAGTAGTA  
ACTCATATCACAGGAGGAAATTTTTCGCGAGAGTTCATTACCATTAATGGGTGGCTCCGCGA  
TTTTCTTATGGGCGCAGGCATCCCAGGTAATTCAGTCTTATGGTTCTTCATTATCTGCATAT  
GGTCTCTTTTTCTTAGGTGCCCATTTTGTATGGGCTTTTAGTTAATGTTTCTATTTCAGCG  
GGCGTGGTTATTGGCAAGAACTTATTGAATCCATCGTTTGGGCTCATAATAAATTA  
AAA  
GTTGCTCCTGCTACTCAGCCTAGAGCCTTGGAGCATTGTACAGGGACGTGCTGTAGGAGT  
AACCCATTACCTTCTGGGTGGAATTGCCACAACGTGGGCATTCTTCTTAGCAAGAATTA  
TTGCAGTAGGAATGGCATTAAAGATTTCCAAGGTTTAGCCAAGGCTTAGCTCAGGACCC  
CACTACTCGTCGATTTGGTTTTGGTATTGCTACCGCACATGACTTCGAGAGTCATGATGA  
TATTACTGAGGAACGTCTTTATCAGAATATTTTGTCTCTCATTTCGGACAATTAGCAATT  
ATTTTTCTGTGGACTTCCGGGAATCTTTTCATGTAGCTTGGCAAGGAAATTTTGGAGGC  
ATGGGTACAGGATCCTTTACATGTAAGACCTATTGCTCATGCAATTTGGGATCCCCATTT

TGGTCAACCGGCTGTAGAAGCTTTTACTAGGGGGGGTGCTCTTGGCCCGGTGAATATC  
GCCTATTCGGGTGTTTATCAGTGGTGGTATAACAATCGGTTTACGTAATAATGAGGATCTT  
TATACTGGAGCCCTTTTTCTATTATTTATTTCTGTCATATCCTTACTAGCGGGCTGGTTAC  
ACCTACAACCGAAATGGAAACCTAGCGTTTCGTGGTTTAAAAATGCCGAATCTCGCCT  
CAATCACCATTTGTCAGGACTATTTGGAGTCAGTTCCTTAGCTTGGGCAGGGCATTAG  
TCCATGTGGCTATTCCGGGATCCAGAGGAGAATATGTTCGATGGAATAATTTCTTAAGTG  
TATTGCCACACCCTGAAGGATTAGGTCCACTTTTTACAGGTCAGTGGAATCTTTATGCT  
CAAAACCCCGATTCTAGTAGTCATTTATTTAGTACTTCGCAAGGGGGCGGGAAGTCCCAT  
TCTAACACTTCTCGGGGGATTCCATCCTCAAACGCAAAGTTTATGGCTGACCGATATAG  
CACATCACCATTTAGCTATTGCAATTTCTTTTCTCATTGCCGGTCATATGTATAGAATAA  
CTTCGGTATTGGCCACAGTATAAAGGATATTTTAGAAGCGCATATTCCTCCGGGGGGTA  
GATTGGGGCGTGGACATAGGGGTCTTTATGACACAATCAATAATTCAATTCATTTTCAAT  
TAGGTCTTGCTCTAGCCTCTTTAGGGGTCAATTACCTCTTTGGTAGCTCAACACATGACT  
CTTTACCTTCTTATGCATTTATCGCGCAAGATTTTACTACTCAAGCTGCGTTATATACTCA  
TCATCAATACATTGCTGGGTTTATTATGACAGGGGCTTTTGCTCATGGAGCGATATTTTT  
ATTAGAGATTACAATCCCGAACAGAATGAAGATAATGTATTGGCAAGAATGTTAGAGCA  
CAAAGAAGCTATCATATCCCATTTAAGTTGGGCCAGCCTGTTTCTGGGGTCCATACTTT  
GGGACTTTATGTCCATAATGATGTCATGCTTGCTTTTGGAACTCCGGAGAAACAAATCT  
TAATCGAACCCATATTTGCCCAATGGATACAATCTGCGCATGGTAAAACCTCATATGGAT  
TCGATGTAATTTATCTTCAACGAATAGTCCGGCGCTCAATGCGGGGCGAAGCATATGG  
TTGCCTGGTTGGTTAAATGCTATTAATGAG-----AATAGTAATTCTCTATTCTTAACAATTG  
GGCCTGGAGACTTCTTAGTTCATCATGCTATTGCTCTTGGTTTACATACAACACTACATTGA  
TCTTAGTAAAAGGTGCTTTGGATGCACGTGGTTCGAAGTTAATGCCGGATAAAAAGGA  
TTTTGGTTATAGTTTTCTTGCATGGTCCGGGACGAGGTGGTACTTGTGATATTTCCGC  
TTGGGACGCATTTTATTTGGCAGTTTCTGGATGTTAAATACCATTGGATGGGTTACTTT  
TTATTGGCATTGGAAGCACATTACATTATGGCAGGGTAATGTTTCACAATTTAATGAATC  
TTCTACCTATTTAATGGGATGGTTAAGAGATTATCTATGGTTAAATTCTTCACAACCTTATC  
AATGGATATAATCCTTTTGGTATGAATAGTTTATCAGTCTGGGCATGGATGTTCTTATTTG  
GACATCTTGTGGGCTACTGGATTTATGTTCTTAATCTCATGGCGCGGATATTGGCAGG  
AATTGATTGAACTTTAGCATGGGCTCATGAACGTACACCTTTGGCTAATTTGATTGAT  
GGAGAGATAAACCAGTAGCTCTTTCCATTGTGCAAGCAAGATTGGTTGGATTAGTCCAC  
TTTTCGGTAGGTTATATATTTACTTATGCAGCTTCTTGATTGCCTCTACGTCGGGTAAAT  
TTGGTATGTCACATTCAGTAAAGATTTATGATACATGTATAGGATGTAATGTGTCC  
GAGCCTGTCCCACAGATGTATTAGAAATGATACCCTGGGATGGATGTAAAGCCAAGCA  
AATAGCTTCTGCCCAAGAACAGAGGACTGTGTTGGTTGTAAGAGGTGTGAGTCCGCT  
TGTTCAACCGGATTTCTTAAGTGTTTCGAGTTTATTTATGGCATGAAACAACCTCGAAGTAT  
GGGTCTAGCTTATATGATA-----AACTTACCTTCTTTTTTGTTCCTTTAGTCGGCCTAGTA  
TTTTCCGGCAGTTGCAATGGCTTCTTTATTTCTTTATGTTCAAAAAATAAGATTTTTATG  
CGAGATCTAAAAACATATCTCTCTGTGGCACCAGTGGCAAGTACTCTATGGTTCGTGGC  
TCTAGCGGGTCTCTTGATAGAAATCAATCGTTTATTTCCCGGATGCATTGACATTTCCCTT  
TTTTTCATTCATGACTGCAATTTTAGAGAGACGCGATAGCGAAAACCTATGGGGTCGCT  
TCTGTAACCTGGATAACCAGCACTGAAAACCGTCTTTACATTGGATGGTTTGGTGTTTTG  
ATGATCCCTACCTTATTGACCGCAACTTCTGTATTTATTCGCTTTCATTGCTGCCCTC  
CAGTAGATATTGATGGTATTCGTGAGCCTGTTTCTGGATCTCTACTTTATGGAAACAATA

TTATTTCTGGTGCCATTATTCCTACTTCTGCGGCTATTGGTTTGCACTTTTATCCAATATG  
GGAAGCTGCATCCGTTGATGAATGGTTATAACAATGGCGGTCCATATGAACTAATTGTTCT  
ACACTTCTTACTTGGTGTAGCTTGTACATGGGTTCGTGAGTGGGAACTTAGTTTTCTGTC  
TGGGTATGCGCCCTTGGATTGCTGTTGCATATTCAGCTCCTGTTGCAGCTGCTACTGCTG  
TTTTCTTGATCTACCCAATAGGTCAAGGAAGTTTTTCAGATGGTATGCCTCTAGGAATTT  
CTGGTACTTTCAACTTTATGATTGTATTTCAAGGCTGAGCATAATATTCTTATGCACCCATT  
TCACATGTTAGGTGTAGCTGGTGTATTCGGCGGCTCCCTATTCAGTGCTATGCACGGTTC  
CTTGGTAACTTCTAGTTTGATCAGGGAAACCACAGAAAATGAATCTGCTAATGAAGGTT  
ACAGATTCGGTCAAGAGGAAGAAACCTATAATATTGTAGCTGCTCATGGTTATTTTGGC  
CGATTGATCTTCCAATATGCGAGTTTTCAACAATTCTCGTTCTTTACATTTCTTTCTAGCTG  
CTTGGCCTGTAGTAGGTATCTGGTTTACCGGTTAGGTATCAGCACTATGGCTTTCAATT  
TAAATGGTTTCAATTTTAACCAATCCGTAGTTGATAGTCAAGGTCGTGTAATTAATACCT  
GGGCTGATATTATTAACCGTGCTAACCTTGGTATGGAAGTTATGCATGAACGTAATGCTC  
ATAATTTCCCTCTAGACTTAGCTGCGGTCGAGGCTCCATCTATAAATGGAATGGGTTTGC  
CTTGGTATCGTGTTTCATACCGTTGTATTAATGATCCCGGTCGTTTACTTTCTGTCCATAT  
AATGCATACAGCTCTGGTTGCTGGTTGGGCCGGTTTCGATGGCTCTATATGAATTAGCAG  
TTTTTGATCCTTCTGACCCAGTTCTTGACCCAATGTGGAGACAGGGTATGTTTCGTTATAC  
CCTTCATGACTCGTTTAGGAATAACGAATTCATGGGGTGGTTGGAATATCACG---GGAG  
GTACTATAACAAATCCGGGTATTTGGAGTTACGAAGGTGTGGCCGGGGCACATATTGTG  
TTTTCTGGCTTGTGCTTTTTGGCGGCTATTTGGCATTGGGTCTATTGGGATCTAGAAATC  
TTTTGTGATGAACGTACTIONGAAAACCTTCTTTGGATTTGCCAAAATATTCGGAATTCA  
TTATTTCTTGCAGGGGTGGGGTGTTTTGGTTTTGGCGCATTTTCATGTAACAGGATTATT  
TGGTCTGGAATATGGGTATCCGATCCTTATGGACTAACTGGAAGGGTACAATCCGTAA  
ATCCCGCATGGGGTGTGGATGGTTTTGATCCTTTTTGTTCCAGGGGGGATAGCCTCTCAT  
CATATTGCAGCAGGGACATTGGGCATATTAGCGGGCCTTTTCCATCTTAGTGACGTCCA  
CCTCAACGTTTATACAAAGGGTTGCGTATGGGAAATATTGAAACCGTCTTTCCAGTAG  
TATCGCGGCTGTATTTTTTGCAGCTTTTGTGTTGCTGGAACTATGTGGTATGGTTCAGC  
AACTACCCCGATTGAATTATTTGGTCTACTCGTTATCAATGGGATCAGGGATACTTCCA  
ACAAGAAATATATCGAAGAGTTGGTGCTGGGCTAGCCGAAAATCAAAGTTTATCAGAA  
GCTTGGTCTAAAATTTCCCGAAAATTAGCTTTTTATGATTACATCGGAAATAATCCGGCA  
AAAGGCGGTTTGTTTAGAGCGGGCTCAATGGACAATGGCGATGGAATAGCCGTTGGTT  
GGTTAGGACATCCTATTTTTAGGGACAAAGAGGGGCGTGAACTTTTTGTACGTCGTATG  
CCTACTTTTTTTGAAACATTTCCGGTTGTTTTAGTAGATGGAGACGGAATTGTTAGAGC  
GGATGTTCTTTTTCGAAGGGCAGAATCGAAGTATAGTGTCGAACAAGTCGGTGTAACT  
GTTGAATTCTATGGTGGCGAACTCAATGGAGTCAGTTATAGTGATCCTGCTACTGTGAA  
AAAATATGCTCGACGTGCTCAATTGGGTGAAATTTTTGAATTAGATCGTGCTACTTTAA  
AATCAGATGGTGTTTTTCGTAGCAGTCCAAGGGGTTGGTTTACTTTTGGACATGTTTCG  
TTTTGCTCTGCTCTTCTTTTTTCGGGCACATTTGGCATGGTGTAGAACCTTGTTCAGAGAT  
GTTTTTGTGTTATTGATCCAGATTTAGATGCTCAAGTAGAATTTGGAGCATTCCAAAA  
ACTTGGAGATCCAAGTACAAAAAACCGGTAGTCATGAAAACCTTATATTCCCTGAGG  
AGGTTCTACCACGTGGAAACGCTCTTTAATGGAACTTTAGCTTTAACTGGTTCGTGACCA  
AGAACTACCGTTTTGCTTGGTGGGCCGGGAATGCCCGACTTATCAATTTATCTGGTA  
AACTACTGGGGGCCCATGTAGCCCATGCCGGATTAATAGTATTCTGGGCCGGAGCAATG  
AACCTATTTGAAGTCGCTCATTTCGTACCTGAGAAGCCCATGTATGAACAAGGCTTAAT



TTTACTTCCCCATCTAGCTACTCTAGGTTGGGGGGTAGGTCCTGGAGGGGAAGTAATAG  
ATACCTTTCCATACTTTGTGTCTGGAGTACTTCACTTAATTCCTCCGCAGTATTGGGCT  
TTGGCGGTATTTATCATGCACTTCTGGGACCTGAAACTCTTGAAGAATCTTTCCATTCT  
TTGGTTATGTATGGAAAGACAGAAATAAAATGACTACTATTTTAGGTATTCACTTAATAT  
TGTTAGGTATAGGGGCTTTTCTTCTAGTATTTAAGGCTTCTTATTTTGGAGGTATATATGA  
TACCTGGGCTCCAGGAGGGGGAGATGTAAGAAAAATTACAAACTTAACCCTTAGTCCA  
AGTATTATATTTCGGTTATTTACTAAAATCTCCTTTTGGGGGAGAAGGATGGATTGTTAGT  
GTGGATGATTTGGAAGACATAATTGGAGGGCATGTATGGTTGGGTTCCATTTGTATACTT  
GGTGGAATCTGGCATATATTAACCAAGCCCTTTGCGTGGGCTCGCCGTGCACTAGTATG  
GTCTGGAGAAGCTTACTTGTCTTATAGTTTAGGTGCTTTAGCCGTTTTTGGTTTTATAGC  
TTGTTGCTTTGTCTGGTTAATAATACTGCTTATCCTAGTGAGTTTTATGGTCCGACTGG  
ACCAGAAGCTTCTCAGGCTCAAGCATTACTTTTCTAGTTAGAGACCAACGTCTTGGA  
GCTAATGTAGGATCGGCTCAAGGACCTACCGTTTTGGGTAAATATCTAATGCGTTCCTCC  
GACTGGGGAAGTTATTTTTGGGGGAGAACTATGCGTTTTTGGGATCTGCGTGTCTCCCT  
GGTTAGAACCTTTAAGGGGTCCTAATGGTTTGGACTTGAGTAGACTGAAAAAAGACAT  
ACAGCCTTGGAAGAACGTCGTTCCGCGGAATATATGACTCATGCTCCTTTAGGTTCTT  
TAAATTCGTTGGTGGCGTAGCTACAGAGATTAATGCAGTCAATTATGTCTCTCCTAGA  
AGTTGGTTAGCTACTTCTCATTTTTGTTCTAGGATTCTCCTATTTCGTAGGTCATTTATGGC  
ACGCGGGAAGAGCTCGCGCAGCTGCTGCAGGATTTGAAAAAGGAATTGATCGAGATT  
TTGAGCCTGTTCTTTCCATGACTCCTCTTAATATGACTATCGCTCTTGGTAAATTTACCA  
AAGATCAAAATGATTTATTTGATATTATGGATGACTGGTTACGGAGGGACCGTTTTCGTTT  
TTGTGGGTTGGTCTGGTCTATTGCTTTTTCTTTCGCGCCTATTTCCCGTGGGGGGTTGGT  
TCACAGGTACCACCTTTGTAACCTTCATGGTATACTCATGGATTGGCAAGTTCCTATTTGG  
AAGGTTGTAACCTTCTTAACTGCTGCAGTCTCTACTCCTGCTAATAGTTTAGCACACTCTT  
TGTTGTTACTTTGGGGTCTGAAGCACAAGGAGATTTTACCCGTTGGTGTCAATTAGGT  
GGTCTGTGGACTTTTGTGCTCTCCACGGTGCTTTTCGGATTAATAGGTTTTATGTTACGT  
CAATTTGAACTTGCTCGATCTGTTCAATTGCGGCCTTATAATGCAATCGCATTCTCCGGT  
CCAATTGCTGTTTTTTGTTTCTGTATTCTTATTTATCCACTGGGTCAGTCTGGTTGGTTCT  
TTGCACCTAGTTTTGGTGTAGCAGCTATATTTGATTCATTCTCTTTTTTCCAAGGGTTTCA  
TAATTGGACATTGAACCCATTTATATGATGGGCGTTGCTGGTGTATTGGGTGCTGCCCT  
ACTATGCGCTATTCATGGTGCTACCGTAGAAAATACTTTATTTGAAGATGGTGATGGCGC  
AAATACATTCCGTGCTTTTAACCCAACGCAAGCGGAAGAACTTATTCAATGGTCACCG  
CTAACCGCTTTTGGTCCCAAATTTTTGGGGTTGCTTTTTTCCAATAAACGTTGGTTACATT  
TCTTTATGTTATTTGTACCAGTAACTGGTTTATGGATGAGTGCTCTTGGAGTAGTCGGTC  
TGGCCCTGAACCTACGTGCCTATGACTTTGTTTTCTCAAGAAATCCGCGCAGCGGAAGA  
TCCTGAATTTGAGACTTTCTACACCAAAAATATTCTTTTAAACGAAGGTATTCGTGCGT  
GGATGGCGGCTCAAGATCAGCCTCATGAAAACCTTATATTCCCTGAGGAGGTTCTACCA  
CGTGGAACGCTCTTATGTCTGGAAGCACAGGAGAACGTTCTTTTTGCTGATATTATTAC  
CAGTATTCGATACTGGATTATTCATAGCATTACTATAACCTCCCTATTCATTGCGGGTTGG  
TTATTTGTCAGCACGGGTTTAGCTTACGATGATTTGGAAGCCCCCGGCCAAACGAGTA  
TTTTACAGAAAGCCGACAAGGAATTCATTAATAACTGGCCGTTTTGATTCTTTGGAAC  
AACTCGATGAATTTAGTAGATCTTTTATGACCATAGATAGGACCTATCCCATTTTTACAGT  
ACGATGGTTGGCTGTTACGGACTAGCGGTACCCACCGTTTTCTTTTTTGGGATCGATAT  
CAGCAATGCAGTTCATCCAACGAATGGCGACACAAACCGTTGAGGGTAGTTCTAGATC

TGGT--CCAAGACGAACTGTTGTAGGAGATTTATTGAAACCATTGAATTCAGAATATGGT  
AAAGTCGCTCCGGGGTGGGGAACCTACCCCTTTGATGGCTATTGCAATGGCTCTATTTGC  
GGTATTTCTCTCCATTCTTTTAGAGATTTATAATTCGTCCATTTTACTGGACGGAATTTCT  
ATGAATATGCTTACTCTAAAACCTATTTGTTTACACGATAGTGATATTCTTTGTTTCTCTTT  
TCATCTTCGGATTCCATCTAACGATCCAGGACGTAATCCTGGACGTGAAGAAATGGCC  
GATACTACTGGAAGGATTCTCTTTGGATAATAGGTACTGTAGCTGGTATTGCCGTGATC  
GGTTTAATTGGTATTTTCTTTTATGGTTCATATTCTGGATTGGGATCATCCCTGATGCTTA  
ATATCTTTAGCTCGGTCTGTATTTGTATTGATTCTGCCCTTTATTCAAGTAGTTTTTTTATTG  
GCAAATTACCTGAAGCCTACGCTTTTTTTGAATCCAATTGTAGATTTTATGCCAGTAATA  
CCCTTACTATTTTTTCTATTAGCTTTTTGTTTGGCAAGCTGCTGTAAGTTTTTCGAACGACA  
CAATCAAACCCAAATGAACAAAATGTTGAATTGAATCGTACCAGTCTCTACTGGGGGTT  
ATTACTCATTTTTGTACTTGCTGTTTTATTTTTCAAATTATTTCTTCAATATGGAAGTAAATA  
TTCTCGCATTTATAGCTACTGCACTCTTCATTCTAGTTCCTACTGCCTTTTTACTTATAATT  
TACGTAAAAACGGTAAAGTCAAAGTGACATGGAAACAGCAACCCTAATTGCCATCTCTAT  
ATCTGGTTTAATTGTAAGTTTTACTGGGTATGCCTTATATACTGCTTTTGGGCAACCCTCT  
CAACAATAAGAGATCCATTGGAAGAACATGGAGACATGGAAGCATTGGTTTATACATT  
CCTCTTAGTCTCGACTTTAGGAATCATTTTTTTTCGCGATCTTTTTTTAGAGAACCACCTAT  
AGTTCCAATAAAAGGATAAAAATGACTATTGCTTTTTCAATTAGCCGTTTTTGCATTAAT  
TGCTACTTCATCCATTTTATTGATTAGTGTACCTGTTGTATTGCTTCTCCTGATGGTTGG  
TCAAGTAACAAAATGTTGTATTTTCCGGTACATCATTATGGATTGGATTAGTATTTCTAG  
TGGGTATTCTTAATTCTCTCATCTCT-----ATGTCACCACAAACAGAACTAA  
AGCAAGTGTGGGTTCAAAGCTGGTGTAAAGATTATAAATTGACTTATTATACTCCCG  
ACTATGAAACCAAAGATACTGATATCTTGGCAGCATTTCGAGTAACTCCTCAACCTGGA  
GTCCCGCCTGAAGAAGCAGGTGCTGCGGTAGCTGCCGAATCTCCACTGGGACATGGA  
CAACTGTGTGGACCGATGGACTTACCAGTCTTGATCGTTATAAAGGACGATGCTACCAC  
ATCGAGCCGGTTCAGGAGAAGAAAGTCAATTTATTGCTTATGTAGCTTATCCCTTAGA  
CCTTTTTGAAGAAGTTCTGTTACGAACATGTTTACCTCTATTGTAGGTAATGTATTTGG  
TTTTCAAGGCCTTGCGCGCTCTACGTCTGGAAGATTTGCGAATTCCTAATGCTTATGTTAA  
AACTTTCCAAGGCCCTCCTCACGGAATCCAAGTTGAGAGAGATAAATTGAACAAGTAT  
GGTCGTCCACTATTGGGATGTACTATTAACCTAAATTAGGTTTATCCGCTAAGAATTAT  
GGTAGAGCAGTTTATGAATGTCTGCGCGGGGACTTGATTTTACCAAAGATGATGAAAA  
TGTGAACTCCCAACCATTATGCGTTGGAGAGACCGTTTCTTATTTTGTGCAGAAGCAA  
TTTATAAATCACAGGCTGAAACAGGTGAAATTAAGGACATTATTTGAATGCTACTGCG  
GGCACATGTGAAGAAATGATAAAAAGAGCTGTGTTTGCAGAGAAATTGGGCGTTCCTA  
TCGTAATGCATGACTACTTAACAGGGGGCTTCACTGCAAATACTAGCTTGTCTCACTATT  
GTCGCGATAATGGTCTACTTCTTCATATCCACCGTGCAATGCATGCAGTTATCGATAGAC  
AGAAAATCATGGTATGCACTTTCGTGTATTAGCTAAAGCGTTACGTTTGTCTGGTGGGA  
GATCATATTCCTCTGGTACTGTAGTAGGTAACCTTGAAGGAGAAAGGGAAATTACTTT  
AGGTTTTGTTGATTTACTACGTGATGATTTTGTGAAAAAGATAGAAGTCGCGGTATTTA  
TTTCACTCAGGATTGGGTTTCTTTACCGGGTGTCTGCCTGTTGCTTCAGGGGGTATTC  
ACGTTTGGCATATGCCTGCTTTGACCGAGATCTTTGGAGATGATTCGCTACTCCAATTCG  
GTGGAGGAACTTTAGGACACCCTTGGGGAAATGCACCGGGTGCCGTAGCTAATCGAGT  
AGCTCTAGAAGCATGTGTACAAGCTCGTAATGAGGGACGTGATCTTGCTCGTGAGGGT  
AATGAAATTATCCGTGACGCTGCAAAATGGAGTCTGAATTAGCTGCTGCTTGTGAAGT

ATGGAAAGAGATCAAATTCGAATTCGAAGCAATGGATACTTTG-----ATGGCGATACATT  
TATACAAAACCT-----TCTTCACGAAAT-----CGTTTGATTATG  
GACAGCATCATTGTAGTACAGGCCGTAATGCCAGAGGAATCATTACTGCAAAGCATAGA  
GGGGGAGGGCATAAGCGTCTATACCGTAAAATTGATTTTCGACGGAATGAAAAAGACA  
TATATGGTAGAATTGTAACCTATAGAATACGACCCTAATCGAAATGCACACATTTGTCTCA  
TACACTATGGGGATGGTGAGAAAAGGTATATTTTACACCCCAAGGGGGCTGAAATTGG  
AGATACCGTTGTTTATGGTACAGAAGTTCCTATAAAAAAGGGAAATGCCCTACCTTTGA  
CCGATATGCCCTTAGGCACGGCCATACATAACATAGAAATAACACCCGGAAGGGGGTGG  
ACAATTAGCTAGAGCAGCAGGTGCTGTAGCGAACTGATTGCAAAAAGAAGGGAAATC  
GGCAACATTAATAATTACCTTCTGGAGAGGTCCGTTTGATATCCAAAATTGCTCAGCAA  
CAGTCGGACAAGTAGGGAATGTTGAGGTAAACCAGAAAAAGTTGGGTAAAGCCGGAT  
CGAAACGTTGGTTAGGTAAGCGTCCGGTAGTAAGAGGAGTAGTTATGAACCCTGTGCA  
CCATCCACATGGGGGTGGTGAAGGGAGGGCCCCAATTGGTAGAAAAAACCTTCAAC  
TCCTTGGGGTTATCCTGCACTTGAAGACGAAGTAGAAAAAGCAATAAATATAGTGATA  
ATTTGATTCTTCGTCGCCGTAATAAATGATTCAACCTCAAACCTATTTAAATGTAGCCG  
ATAATAGCGGAGCCCGAGAATTGATGTGATTTCGAATCATAGGAGCTAGT---AATCGACG  
GTATGCTTATATTGGTGACATTATTGTTGCTGTAATAAAAAAAGCAGTACCAAATACACC  
TTTCGAAAGATCTGAAGTTATCAGAGCTGTAATTGTACGTACTTGTAAGAACTTAAAC  
GTAGTAACGGGATAATAATAAAGTATGATGATAATGCGGCGGTTGTCATTGATAAAGAA  
GGAAATCCAAAAGGAACTCGAATTTTTTGTGCAATAGCCCGAGAATTGAGACAGTTAA  
ATTTCACTAAAATAGTTTCATTAGCACCCGAGGTATTAATGCTTAGTCCCAAAAAAAC  
AGATTCCGTAAACAACACCCGAGGAAGAATGAAAGGAAAAGCCTGTGAGGTAATAAA  
ATTTGCTTCGGAAAATATGCTCTTCAGGCACTTGAGCCCGCTTGGATCACATCTAGACA  
AATAGAAGCGGGGCGGCGCAATGTCACGAAATGTTTCGCCGGGGTGGACAAATATG  
GATACGTATATTTCCAGACAAACCTGTTACAGTAAGACCAACGGAAACCCGTATGGGTT  
CGGGAAAAGGATCTCCCGAATATTGGGTAGCTGTCATTAAACCCGGCAAAATACTTTAC  
GAAATGGGAGGGGTGCGAGAAAATATCGCTAGAAAGGCTATTTTCATTAGCAGCATCCA  
AAATGCCTATACGAACTCAATTCATTCTTTTAGAAATGACCAGAATTAACGAGGATCTA  
TCGCTCAAAAACGGAGGACCAAAATTCGTTTATTTACATCAAGCTTTCGCGGAGCTCAT  
TCAAACTAACTCGAACTATTGCGCAACAGAAAATAAAAGCTTTGGTTTCGTCTGATC  
GAGATAGAGATAGGAAAAAAAGAGATTTTCGCGCTTTGTGGATCAGTCGAATAAATGC  
AATAATTGGCCAGAAAAAAACGTATACTATATTTATAAGTAATTTAATGTATAATCTGTAC  
AAGAAGCAATTGCTTCTAATCGTAAAATAGTTGCACAAATAGCTATATTAAGGGAA  
TTGTTTTTTTATGATTGCCAATGATATCATAAAAAA-----  
-????????????????????????????????????????????????????????????????  
????????????????????????????????????????????????????????????????  
????????????????????????????????????????????????????????????????  
????????????????????????????????????????????????????????????????  
????????????ATGAATGGAATAAAATATGCAGTATTTACAGACAAAAGTATTCGGTTATTGG  
GGAAAAC---CAATATACTTTTAATGTCGAATCCGGATCAATTAGGACAGAAATAAAAC  
ATTGGGTGCAACTCTTCTTTGGTGTCAAGGTAATAGCGATAAATAGTCATCGACTCCCA  
ATAAAGGGTAGAAGAGTTCGA-----CCGGGACATATAATGCATTACAGACGTATGATCAT  
TACGCTTCAACCGGTTATTTCTATTCCACCTTTAGAAAAGAAAAGAACTATGGCAGTTC  
CAAAAAGCGCACTTCTATATCAAAAAAAAATTTCGAAGAATTTTTGGAAAAAAA

GGCATATACGACAGCATTGAAAGCCTTTTCATTAGCTCAATCCATTTTTACAGGTAAATC  
AAAAAGTTTTTTT-----ATGGCCAAGGGTAAAGATATCCGAATAACTGTTATTTT  
GGAATGTACCAGTTGT--GATAAAAAG-----GTTAATAAGGAA-----GGTATTTCTAGATAT  
ATTACTCAAAGAATCGACACAATACGCCTAGTCGATTGGAATTGAGAAAATTCTGTCC  
CTTTGTTGCAAACATACGATTCATGCAGAGATAAAGAAAATGAAAGTAGCAGCCTCT  
GTCGTAAAATTTGTGAAAAATGTAGATTGATCCGCAGGAGAGGTTCGAATTATCGTAAT  
TTGTTCCAATCCAAAACATAAACAAAGACAAGGAATGATTTCGAGAAAAAGTAAAAGTA  
TCTACTCGGACACTACAGTGGAAAGTGTGTTGAATCAAGGGTAGACAGTAAGCGTCTTT  
ATTATGGACGCTTTATTCTGTCTCCACTTATGAAAGGCCAAGCAGATACAATAGGCATTG  
CAATGCGAAGAATTTTGCTCGGCCGAAATAGAGGGGAACATGTATCACACGTGCAAAATC  
TGAG-----AAAATACCACATGAATATTCTACCATAGTAGGTATTCAAGAATCAATACATGA  
AATTTAATGAATTTGAAAGAAATTGTATTGAGAAGTAATCTGTATGGAACCTCGGGACG  
CGTCTATTTGTTTCAAAGGTCCTGGATCTGTAACCTGCTCAAGACATCATTTTACCACCTT  
CGGTAGAAATTTGTTGATAATACACAACATATAGCTAACCTAACAGAACCTATTAATTTGT  
GTATGGAATTAACCTTGAGAGGAATCGGGGATATCGTATAAAAACACTAAACAACATT  
CAAGATGAAAGTTAT-----ACTATAGATGCTGTATTCATGCCTGTTTCGAAATGCAATCAT  
AGTATTCATTCTTATGGGAATGGGAATGAAAAACAAGAGATACTCTTTCTGGAAATATG  
GACAAATGGAAGTTAACTCCTAAGGAAGCACTCTTTGAAGCCTCCCGGAATTTAATT  
GATTTATTTATTCCTTTTTTACATGCAGAAGAAGAT-----AAATTGAATTTAGAAAACAAT  
CAA---CAAAAAGTTACTTTACCTCTTTTTACTTTTCATGATAGATTCGTTAAGAACTAA  
GGAAAAATAAAAAA---GAAATTGCATTGAAATCCATTTTTATTGACCAATTAGAATTGCC  
TCCAGAATCTATAATTGTCTCAAAAAGTCCAATATACATACATTATTGGAACCTTTGAAT  
AAGAGTCAAGAAGAACTTATGAAAATTGAACATTTTCGCGTAGAAGATGTAAAAATA  
TATTAACCTTTTACAAATAGAAAAGCATTTTGCA-----ATGCTTGGCGTTGG  
GAAT---GAAGGAATGTCTACACTACCCGGATTGAATCAAATACAATTTGAAGGGTTTTCT  
AGATTCATTGATCGGGGCTTAACAGAAGAAGCTTTTAAAGTTTCCAAAATAGAAGATAC  
CGATCAAGAAATTGAATTTCAAGTTATTTGTGGAAACATATCAATTGGTAGAACCCGCGA  
TAAAAGAAAAAGATGCTGTATATGAATCACTTACATATTCCTCTGAATTATATATATCCGC  
GGGATTAATTTGGAAAAACAGTAGGGATATCCAAGAACAATTTTTTTATTGGAAACA  
TTCCCCTAATGAATTCCTGGGAACCTTCTATAGTAAATGGAATATACAGAATAGTAATCA  
ATCAAATATTACAAAGCCCTGGTATCTATTATCGGTCAGAATTGGACCATAACGGAATTT  
CGGTATATACTGCCACAATAATATCAGATTGGGGAGGGAGATTAGAGTTAGAGATTGAT  
AGAAAAGCAAGGATATGGGCTCGTGTAAAGTAGAAAACAGAAAATATCTATTCTAGTTCT  
ATCATCAGCTATGGGTTTCGAATTTAAGCGAAATTCTTGAGAACGTTTGCTACCCTGAAA  
TTTTCTGTCTTTTCTCAATGAAAAGGAGGAAAAAAAATAGGGTCAAAGAAAATGC  
CATTTTGGAGTTTTATCGACAATTTGCTTGTGTAGGGGGAGATCCCATATTTCTGAATC  
TTTATGTACGGAATTACAAAAAAATTTTTTCAACAAAGGTGTGAATTAGGAGGGATTG  
GTCGACGCAATATGAACCGAAGGCTGAATCTTGATATACCTCAAACAATACATTTTTG  
TTACCGCGAGATATATTGACAGCTGCCGATCATTTGATTGGAATGAAATTTGGAATGGGT  
ACACTTGATGAT-----ATGAATCATTTGAAAAATAAACGTATTTCGTTCCGTAGCAGATCTC  
TTACAAGATCAATTTGGATTGGCTCTCGTTCGTTTAGAAAATATAATTAGAGGAACTATA  
AGTGGAGCACTTAGA---TATAAATTGATA---CCGACTCCTCAGAATTTGGTGACTTCAAC  
TCCA-----TTAACAACCACTTATGAATCTTTTTTTGGATTACACCCATTATCTCAAGT  
TTTGATCGAACCAATCCATTGACGCAAATAGTTCATGGAAGAAAGTTGAGTTATTTGG

GTCCTGGAGGATTGACGGGGCGAACTGCTAGTTTTTCGGATACGAGATATTCATCCTAGT  
CACTATGGACGCATTTGCCCAATTGACACCTCTGAAGGAATCAATGTAGGACTTATTGG  
ATCTTTGGCAATTCACGCAAGGATTGGTCATTGGGGA---TCTATAGAAAGTCCATTTTAT-  
-----GAAATTTCTGACAGATCAAAAAGA-----ATACAAATGCTTTATTTATCACCAAGTA  
GAGATGAATACTATATGGTAGCGACGGGGAATTTTTTAGCACTGAATCGAGGTATTTCAG  
GAGGAACAGATTGTTCCAGCTCGATACCGTCAAGAATTTCTTACTATTGCATGGGAACA  
AGTTCATCTTCGAAGTATTTTTCCCTTTCAATATTTTTCTATTGGAGCTTCCCTCATTCT  
TTTATCGAGCATAATGATGCGAATCGCGCTTTAATGAGTTCGAATATGCAACGTCAAGC  
AGTTCCTCTTTCTCGGTCCGAAAAGTGCATTGTTGGAAGTGGATTAGAACGCCAAGTC  
GCGTTAGATTACGGAGTTCCTCGCTATAGCCGAACACGAGGGAAAGATCATTTATAACGA  
TACTGACAAGATCATTTTATATGGAAATGGGAATGCTCTAAGCATTCCATTAATTATATAT  
CAACGTTCCAACAAAAATACTTGCATGCATCAAAAATCCCAGGTTTCAGAAAGGTAAAT  
GCGTAAAAAAGGGACAAATTTAGCCGACGGTGTGCTACAGTTGGCGGTGAACTCGC  
TTTGGGAAAAAACGTATTAGTAGCTTATATGCCGTGGGAAGGTTACAATTCTGAAGATG  
CTGTACTCATTAGTGAGCGTCTGGTCTATGAAGATATTTATACTTCTTTTACATAAGGA  
AATATGAAATTCAGACTCATGTACAAAGCCACGGT---CCTGAAAGAATCACTAATAAAA  
TTCCACATCTAGAAGCCCATTTACTCCGAAATTTAGACAAAAATGGAATAGTGATCCTG  
GGATCTTGGGTAGAAACGGGAGATATTTAGTGGGTAAATTAACGCCTCAAATGGCGA  
AAGAA---TCCTCATATGCCCCGGAAGATAGATTATTACGAGCTATACTTGGGATTCAGGT  
ATCCCCCTCAAAGGAAACTTGTCTAAACTACCTGTAGGTGGTAGGGGCCGAGTTATT  
GATGTCAGATGGATCCACAAAAAAGCA---GGTCTAGCTATAATCCAGAAACGATTCAT  
ATATATATTTACAGAAACGTGAAATCAAAGTAGGTGATAAAGTGGCCGGGAGACACG  
GAAATAAAGGTATCGTTTCAAAGATTTTGTGCGAGACAAGATATGCCTTATTTGCAAGAT  
GGAAGACCCGTTGATATGGTCTTTAATCCATTAGGGGTACCCTCACGAATGAATGTAGG  
ACAGATATTTGAATGTTCACTCGGGTTAGCTGGGAGTATGCTAAATAGACATTATCGAAT  
AGCACCTTTTGACGAGAGATATGAACAAGAGGCTTCGCGAAAACTAGTGTTTTCTGAA  
TTATATGAGGCCAGTAAACAAACATCGAATCCATGGATATTTGAACCCGAGTATCCGGG  
AAAAAGCGGAATATTTGATGGAAGAACAGGGAATCGTTTTTGAACAAGCTGTTATAATA  
GGAAAGCCTTATATCTTGAAATTAATTCATCAAGTTGATGATAAAATACATGGACGTTCC  
AGTGGACATTATGCACTTGTACACAACAACCCCTTAAAGGAAGGGCCAAACAAGGA  
GGACAACGGGTAGGCGAAATGGAGGTTTGGGCTCTCGAGGGATTCCGGTGTGCTCATA  
TTTTACAAGAGATGCTGACTTATAAATCTGATCATATTAAGCTCGTCAAGAAGTACTCG  
GGACTACGATCATTGGAGGAACAATACCTAAACCCGTGGATGCTCCAGAATCTTTTCGA  
TTGCTCGTTCGAGAACTACGATCTTTGGCTCTGGAAGTGAATCATTTCCTTGTATCTGA  
GAAAGACTTCCAGATTCAAAGGAAGGAAGTT-----ATGATTGATCAATATAA  
ACATCAACACCTTCGAATTGGATTAGTTTCTCCTGAACAAATAAGTGCTTGGGCAAAA  
AAAATCCTACCTAATGGAGAGATAGTTGGGGAGGTAACAAAACCCCTATACTCTTCATTA  
CAAAACCAATAAGCCTGAAAAAGATGGATTATTTTGTGAAAGAATTTTTGGACCTATCA  
AAAGTGGGATTTGTGCTTGTGGAATTATCGAGTAATCGGAGATCAAAAAGACCAACC  
AAAATTTTGTGAACAATGCGGAGTAGAATTTGTTGATTCTCGGATACGTAGATATCAAA  
TGGGGTATATAAACTAGCATGTCCAGTAACCTCATGTGTGGTATTTGAAACGTCTTCCTA  
GTTATATCGCGAGCCTTTTAGATAAACCTCTTAAAGAATTAGAAGGTCTAGTATACTGCG  
ATTTT-----TCGTTTGTAGGCC---ATAATTAATAAAACCAACTTTCTTACGATTACGAGG  
TTCATTGCAATATGAAATCCAATCCTGGAAATATAGTATCCCACTTTTTTTGCTACTCAG

GGTTTCGATACATTTTCGAAATAGAGAAATTTCTAGTGGAGCAGGTGCTATCCGAGAACA  
ATTAGTTGATCTGGATTTAAGAATTATTATGGATTTCGTCGTTGATAGAATGGAAAGAATT  
AGGAGAAGAG---GGATCTACGGACAATGAATGGGAAGATCGAAAAGTTGGAAGAAGA  
AAGAATTTTTTGGTTTCGACGCATGGAATTAGCTAAGCATTATCCGAACAAATATAGA  
ACCAGAATGGATGGTTTTATGTCTCTTACCAGTTCTTCTCCCGAATTGAGACCCATTAT  
TCAAATAGATGGGGTAAACTAATGAGTTCGATATTAATGAACTCTATAGACGAGTTAT  
CTATAGGAACAATACTCTTATTGATCTATTAACAACAAGTAGATCTACCCCAGGGGAATT  
AGTAATGTGTCAAGAAAAATTGGTACAAGAAGCCGTGGATACACTTCTTGATAATGGA  
ATCCGCGGACAACCAATGAGGGACGGTCATAATAAAGTTTACAAATCGTTTTCAGATAT  
TATTGAGGGCAAAGAGGGGAAGATTTTCGAGAGACTCTTCTTGAAAACGAGTTGATTAT  
TCGGGGCGTTCTGTTATTGTCGTAGGTCCATCACTTTCATTACATCGATGTGGATTGCC  
CGCGAAATAGCAATAGAGCTATTTTCAGACATTTCTAATTCGTGGGTAAATTCGAAAAA  
TTGTGCTTCAAATATCGGAGTTGCTAAGAGTAAAATCCGGGAAAAAGAACCATTGTAT  
GGGAAATACTTCAAGAAGTTATGCAGGGGCATCCCGTATTGCTGAATAGAGCGCCTACT  
TTGCATAGATTGGGCATACAGGCATTCCAACCCATTTTAGTAGAAGGACGTGCTATTTGT  
TTACATCCATTAGTTTGTAAAGGGATTCAATGCAGACTTTGATGGAGATCAAATGGCTGTT  
CATGTGCCTTTATCTTTGGAGGCTCAAGCAGAAGCTCGTTTACTTATGTTTTCTCATACG  
AACCTCTTGTCTCCGGCTATTGGGGATCCCATTTCCGTACCAACTCAAGATATGCTTATT  
GGACTTTATGTATTAACAAGCGGAAATCGTCGAGGTATTTGTGCAAATAGGTATAATCCG  
TTAATTGC-----AGAAATTCTCAAATGAAAAAATTAGCGATAATAACTATAAATATAT  
TAAAAA---GAACCCTTTTTTGTCAATTCCTATGATGCAATTGGAGCTTATCGACAGAAA  
AGAATAAATTTTCGATAGTCTTTCTGGCTCCGGTGGCGAATAGATCAATGC---ATTCTGT  
CTTCA-----AGAGAAGTTCTATCGAAGTTCACTACGAATCTTTGGGTACCTATTATGAG  
ATTTATGGGCATTATTTAGTAATAAGAAGTATAAAAAAAGAAATTCGTTGTATATACATTC  
GAACCACTGTTGGTCATATTTCTTTTTATCGAGAAATCGAAGAAGCTATAACAAGGGTTT  
TCTCGGGCCTATTCATATGGTATC-----ATGGCAGAACGGGCCAA  
TCTAGTCTTTCACAATAATGTGATAGGTGGAAGTGCATTAACGACTTATTAGCAGATT  
AATAGATCATTTTGGAAATGGCATATACATCACACATCCTAGATCAAGTAAAGACTCTGGG  
GTTCCGTCAAGCTACTGCTACATCTATTTTCATTAGGAATTGACGATCTTTTAAACAATACC  
TTCTAAAGGATGGCTAGTCCAAGATGCTGAACAACAAGTTTGTATTTGGAAAAACAT  
AATCATTATGGGAATGTCCATGCGGTAGAAAATTACGCCAATCCATTGAAATATGGTAT  
ACTACAAGCGAATATTTGCGACAAGAAATGAATCCTAATTTTCGGATGACTGACCCCTT  
TAATCCAGTCCATATAATGTCTTTTTTCAGGAGCTAGAGGAAATGCATCTCAAGTGCACC  
AATTAGTAGGAATGAGAGGATTAATGTCAGATCCACAAGGACAAATGATTGATTTACCC  
ATTCAAAGCAATTTACGTGAAGGATTGTCTTTAACAGAATATATAATTTCTTGCTACGGA  
GCCCGTAAAGGGGTTGTAGATACTGCTGTACGAACATCAGATGCTGGATATCTTACACG  
TAGACTTGTGAAAGTGGTTCAACACATTGTTGTACGTGCAACAGATTGTGGTACCATT  
GCGGGATTTCTGTAAATACCCGAAATGGAATGATGATACCAGAAAGAATTTTGATACAA  
ACATTAATTGGTCGTGTAGTAGCAGACGATATATATATTGGTTCACGATGCATTGTCTGTTA  
GAAATCAAGATATTGGGATTGGCCTTATCAATCGATTCAACT-----TTTCAA  
CACCACAATATTTATTCGAACCCCTTTACCTGTAGAAATACGTCTTGGATCTGCCGAT  
TGTGTTATGGCCGGAGTCTTATTCACGGGGACTTGGTAGAATTGGGAGAAGCTGTAGGT  
ATTATTGCTGGTCAATCTATTGGAGAACCGGGAACCTCAACTAACATTAAGAACTTTTCAT  
ACTGGTGGAGTATTCACAGGGGGTACTGCAGAATATGTTTCGAGCCCCCTCGAATGGAA

AAATTAATTTAATGAGGATTTAGTTCACCCTACACGTACACGTACATGGATATCCTGCTT  
TTATATGTAATATAAACTTGTATGTAACCTATTGAAAGTGACGATATTATACATAACATGATT  
ATTCCATCAAAAAGTTTTCTATTAGTTCAAAATGATCAATATATAAAATCAGAACAAGTG  
ATTGCTGAGATCCGCGCGGGAACATATACTTTT---AATTTGAAGAAAAGGTTTCGAAAAC  
ATATTTATTCTGACTCAGAAGGGGAAATGCATTGGAGTACCGATGTGTACCATGCATCC  
GAATTTTTGTATAGTAATGTACATATTTACCAAAAACAAGTCATTTATGGATATTATCAG  
GAAAGTCGTGCAGGTCTG-----ATACAATCCATTTTTTACTTCGCAAGGATCAAGATCAA  
ATTAACAGTCATTCTC-----TTTCTACTGAAAAAAAAAAGA---TTTCTAACCTTTTTCG-----  
CAAGGAATGATCCAA---GTAAAACATAAATTATTTAGTTTCGAAACTTTTGGTACAAAA  
GAAAGAGGGATTACCGATTAT---TCAATATTTAATCAAATCATATGTACGGATTATTCTCA  
TTTGATGTATTCTGCT---ATTTTTAACAATATTTTTTAT-----TTATTGGCGAAAAGGCGAA  
GAAATAGATTTGTTATTCCATTC-----ATTCAAGAACAAAAGAACAACAACTAATGTCTCCT  
TCCGGTGTTCATTGAAATACCTATC-----AATGGTATTTTTTCATAGAAATAGTATTTTGG  
CTTATTTTCGATGATCCTCAATACAGAAGACAGAATTCTGGAATTACTAAATATAGAATA  
TAGGAATTCATTCTTTTTTCAAAAAGAAGAT-----TTAATTGAGTATCGA---GGAATCAA  
AGAATTAAGCCAAAATACAATAAAGTAGATCGATTTTTTTTTTATTCCCGAAGAAGTGC  
ATATTTTACCGGAATCTTCTTCCATAATGATACGGAATAATAGTCTCGTTGGAATAGGAA  
CACCAATCACTTTAAATATAAGAAGTCGAGTAGGTGGATTGGTCCGATTAGAAAAGAA  
AAAAAAAAAATAGAATTAATAATTTTTCTGGAAATATCCATTTTCCCGGAGAGATGG  
ATAAGATATCTCGACACAGTTCATCTTGATACCACCG---GGAACGGTAAAAAAAAAAAA  
AAAGGAAGGAAGCGAAAAAA-----ATTAACAATTGGATCTATGTCCAATGG-----ATCGC  
AACTACCAAGAAAAAG-----TATTTTGTTTTGGTTTCGACCTGTAATTCTATATGAAATACC  
GGACAGTATTCATTTGTAAAAGTGTTCCTCCCAAGATCTGTTCCAGGAAAGGGATAATC  
TGGAACCTAGAGTTCTCAATTATATTCTTTATGGAAATGGCAAATCTATTCCGGGGAATTT  
CCGACACAAGGATTCAATTAGTTCGGACTTGTTTAGTCTTGAATTGGGATCAAGGCAA  
A-----AAAAGTTCTTCTATTGAGGAGGCCCCCGCTTCCTTTGTTGAAGTAAGTACAAA  
CGTTTTGATTGAGTATTTTATAAGAATTGACTTAGTGAAA---CATATGTCATATATCAGAA  
AAAGAAACGACCCATCCGGTTTAGGATTGATCCCGGAT---AAGGAATCGGATCGGGTCA  
ATATCAATCCATTT-----TTTTCTATTCAATTCC-----AAGACAAAATTCAACAATCACTT  
ATTCAAAATCAC---ACTATTCGTATGTTGTTGAAT-----AGAAATAAGGAATGTCGATCT  
TGGATAATTTTGTCAATCTAATTGTTTT---CAAATGAGACCATTCAACAATGTAAAA  
TATCACAAT-----GGGATAAAAAAAGATATAATTCCAATTAATAATAAGAATTCGTTAGG  
CCCTTTAGGAATA-----GCCCTTCAAGTTGCAAATTATTATTCA-----TTTTATCGTTTAATA  
ACT-----CATAATCAGGTCTCA---ATAACTAATAATTTGCAACTTGACAAA-----TTAATC  
GAAATTTGTCACGTAATG-----AAA---TATTATTTAATGGACGAAAATGATAAA-----ATTT  
TTAAACCCGATCTATCCAAAATATCGTTTTAAATCCATTCCATTTGAATTGGTATTTTCT  
CCATCATAAT-----ACATTAACAATAATAAGT---CTTGGACAATTTATTTGTGAAAATA  
TATGTATAACTCAAATGAACCACAC---CTAAACTAAAATCGGGTCAAGTTCTAACTG  
TTCAA---ATGGATTCTGTAATAATAAGATCGGCTAACCCCTTATTTGGCGACTCCGGGAGC  
AACCATTTCATGGCCATTATGGAGAAATCCTTGATGAAGGAGATATTTAGTTACATTTAT  
ATATGAAAAATCGAGATCCGGTGTATATAACACAAGGTCTTCCAAAAGTGGAACAGATAT  
TAGAAATACGTTTCGATTGATTCAATATCGATGAATCTAGAAAAACGAATTGATGCTTGG  
AACGAGTGATACCAAGAATTCTCGGTATTCCTTGGGGATTCTTGATTGGTGCTGAGCT  
AACTATAGCGCAAAGTCGCATTTCTTTGGTTAATAAAAATACAAAAGGTTTATCGATCCC

AGGGAGTACACATCCATAATAGACATATCGAAATTATTGTGCGTCAAATAACATCCAAA  
GTATTGGTTTCGGAA-----GATGGAATGTCTAATGTATTTTTACCCGGGGAACCTCATTG  
GATTATTGCGAGCAGAACGAACGGGGCGTGCATTGGAAGAAGCAATTTGTTACCGAGC  
TTTATTATTGGGAATAACAAAAACATCTCTAAATACTCAAAGTTTCATATCCGAAGCGAG  
TTTTCAAGAACTGCTAGAGTTTTAGCAAAAGCCGCTCTTCGGGGTTCGTATTGATTGGT  
TGAAAGGTCTTAAAGAGAATGTTGTTTTAGGGGGAATTATAACCGGTGGGTACCGGATTC  
AAAAGAATAATGCACCGTTCACGGTCAAGGCAACATAACAAGATTACC-----TTGAAAA  
AAAAAAAAAAAA---TTATTCGAAGTAGAA---ATT---CGAAATCTTTTGTACATCACAGAA  
AATTATTTGATTTTTATCATTTCAAACAATTTATG-----  
-----ATGACAAAAGATATTGGAACATAACTTTTGAAGAGATGATGGAAGCTGGAGTTCA  
TTTTGGCCATGATACTAGGAAATGGAATCCTAGAATGGCACCTTATATATCAGCAAAGC  
GTAAGGGTATTCATATTATAAATCTTACTCGAACTGCTCGTTTTTTATCCGAAGCTTGCGA  
TTTGGTTTTTGTATGCAGCAAGCAGAGGAAAACAATTCTTAATTGTTGGTACCAAAAA  
AAAGCAGCTGATTCAGTAACACGGGCTGCAATAAGAGCTCGATGTCATTATGTTAATAA  
AAAATGGCTCGGAGGTATGTTAACGAATTGGTATACTACAGAACTAGACTTCGTAAGT  
TCAGGGACTTGAGAACGGAGCAAAGACGGGAAAACCGAACTCTCTTCCAAAAAGA  
GATGCCGCTATGTTGAAGAGACAATTATCTCATTTGGAAACATATCTGGGCGGCATTAA  
ATATATGACAAGGTTACCAGATATTGTAATAATTGTTGATCAGCAAGAAGACTATACGGC  
TCTTCGAGAATGTATCACTTTGGGAATCCAACGATTTGTTTAATCGATACAAATAGTGA  
CCCAGATCTGGCAGATATCCGATTCCAGCTAATGATGATGCTATAGCTTCAATCCGATT  
AATCTTAAACAAATTAGTTTTTGCATTTGTGAGGGTTCGTTCTAGC---TATATACGAAATC  
TTATGGGACAAAAAATACATCCGCTTGGTTTCAGACTTGGTACAACCTCAAAGTCATGAT  
TCTATTTGGTTTTGCACAACCAAGAACTATCCGAGAATCTAAAAGAAGATAAAATTAT  
ACGAGATTGTATCAAGAATTATATACAAAAACGATAAGAATATCCTCT---GGTGTGAG  
GGAATTGGACGAATAAAGATAAAAAAAGAATCGATCTGATTCAAGTCATAATCTATAT  
GGGACTTCCAAAGTTATTACTAGAGGGTAAGCCTCGA-----AGAATCGAAGAATTA  
CAGATCAATGTGAAAAAAAATTGAATTGTGTGAACCGAAAAATCAACATTGCAATTA  
CAAGAATTCCAAATGCTTATAGAGACCCGAATATTCTTGCAGAATTTATAGCCGGACAA  
TTAAAGAATAGAATTTTCGTTTCGTAAAGCAATCAAAAAAGCTATTGAATTAGCTGAACA  
GGCAGGTACAAAAGGAATTCAAGTACAAATTGCGGGACGTATCGACGGAAAAGAAAT  
TGCACGTGTGGAATGGATCAGAGAAGGTAGGGTTCTCTACAAACCATTTCGAGCTAAA  
ATTGATTATTGTTCTTATCCAGTTCGAACTATTTATGGAGTATTAGGAATCAAAGTTTGG  
TATTTCTAAACAAAGAAATGTCACGTTACAGAGGGCCTCGTTTTCAAAAAAATACGCCG  
TCTGGGGGATTTACCAGGACTAACTAGTAAAAGGCCTACAGTTGGAAGCGAACTTAGA  
AACCAATCGAGCTCCAGTAAA---AAATCTCAATATCGTATTTCGTTTAGAAGAAAAACAA  
AAATTGCGTTTTTCATTATGGGCTTACAGAACGACAATTGCTTAAATACGTTTCGTATCGCT  
GGAAAAGCGAAAGGGTCAACTGGTCAAGTTTTACTACAATTACTTGAAATGCGTTTTGG  
ATAACATACTTTTTTCGATTGGGTATGGCTTTGACTATTCTCAAGCCCGTCAATTAGTTA  
ACCACAGACATGTTTTTCGTTAATGGTCGTATAGTAGATATACCAAGTTATCGTTGCAAAC  
CTCAAGATATTATTACAGCGAAGGATGACCAAAAATCTATAACTCTGATTCAAAACTCT  
CTTGAATCATCCCCCGC---GAAGAATTGCCAAATCATTGACTCTTCATCCATCCGAA--  
----TATAAAGGATTAGTTAATCAAATAATCGATAGTAAATGGGTTGGTTTGAAAATTAATG  
AATTGCTGGTTGTAGAATATTATCTCGTCAGACTATGTCACGGCGAGGTTACTGCAGAA  
AAAAAACCGCAAAATCCGATCCAATTTATCGTAATCGATTAGTTAACATGTTGGTTAA



CCGTATTATGAAACACGGAAAAAATCATTGGCTTATCAAATTATCTATCGAGCTATGAA  
AAGGATTCAACAAAAGACAGAAACAAATCCACTATCTGTTTTACGTCAAGCAATACGT  
AGAGTAACTCCCGATATAGCAGTAAAAGCAAGACGCGTAAGCGGATCTACTCATCAAG  
TTCCGACTGAAATAGGATCCACACAAGGAAAAGCACTTGCTATTCGTTGGTTATTAGGG  
GCAGCCCGAAAACGTCCGGGTCGAAATATGGCTTTCAAATTAAGTTCTGAATTAGTGGA  
TGCTGCCAAAGGAAGTGGCGATGCCGTACGAAAAAGGAAGAGACTCATAGAATGGC  
GGAAGCAAATAGAGCTTTTTGCACATTTTCGTGGGGGTAAAGATACTATAGCTGATATAC  
TAACCTTGATACGCAATGCTGACATGACTAGAAAAAAAACAGTTCAAATACCACTTAGT  
AATATCACCGAAAAACATTGTGAAAATACTTTTACGAGAGGGTTTTGTTGAAAACGTCA  
GAAAACATCGGGAAAGCAACAATACTTTTTAGTTTTAACTCTACGG-----AGA-----AAT  
AGGAAAGGATCATATAAAAAT---TTT-----TTACATTTGAAAAGGATCAGTACACCTGGTC  
TACGAATCTATTCTAACTATCAAAAAATTCCTAGAGTTTTAGGAGGAATGGGAATTGTAA  
TTCTTTCTACTTCGAGGGGTATAATGACAGATCGAGAGGCTCGATTAGAACGAATTGGC  
GGAGAAGTTTTATGTTATATATGGATGGCAAAATCTATATCAAAAATCGGTTACACGTAAA  
AATGCACGTATTGGTTCG---AAGCAGACTCGTAAAATACCAAAGGGAGTTATTTATGTTC  
AAGCTAGTTTCAACAATACCATTGTGACTGTTACCGATGTACGGGGTCGGGTGATTTCT  
TGGTCTCTGCCGGTTCGTGTGGATTTAAGGGTACACGAAGGGGGACCCCGTTTGCCG  
CTCAAACGAGCAGCAAATGCGATTGAAACAGTAGTCGATCAAGGCATGCAACGAGC  
AGAAGTCATAATAAAAGGTCCCGGTCTCGGAAGAGATGCGGCATTAAGAGCTATTCGT  
AGAAGTGGTATACTATTAAGGTTTATACGGGATGTAACCCCTATGCCACATAATGGATGC  
AGGGCTCCTAAAAAAGACGTGTGATGCCAACTATAAAACAACCTATTAGAAAACGCAA  
GACAGCCAATCCGAAATGTCACCAAATCTCCCGCTCTTCGGGGATGCCCTCAGCGCCG  
AGGAACATGTACTAGGGTGTATACTATTACCCCTAAAAAACCAAACCTCTGCCTTACGTA  
AAGTTGCCAGAGTACGCTTAACCTCTGGATTTGAAATCACTGCTTATATACCCGGTATTG  
GCCATAATTTACAAGAACATTCTGTAGTCTTAGTAAGAGGGGGAAGGGTTAAGGATTTA  
CCCGGTGTGAGATATCACATTGTTTCGAGGAACCCTAGATGCTGTCGGAGTAAAGGATC  
GTCAACAAGGGCGTTCTAAATATGGGGCGAAAAAGCCAAAAATGGCAAAGAAAAGTT  
TGATTGAGAGGGAAAAGAAGCGGCAAAAATTGGAACAAAAATATCATTTGATTTCGGAG  
ATCTCCAAAAAACAATAAGC-----AAAGCTCAGTCGTTAAGTGAGAAATGGGAAC  
TTCATGGAAAGTTACAATCACTACCTCGTAATAGTGCACCTACGCGTCTTCGTTCGACGT  
TGTTTTTCAACCGGAAGACCGAGAGGTAATTGTCGAGACTTTGGATTATCTGGACACAT  
ACTTCGTGAAATGGTTCACGAAGGTTTGTGCCCCGGTGCAACAAGATCCAGTTGGATG  
ATAAAAAATTTATTTATACCTTTTATTTACAAAAA---AAAAAGAAGAAGAAAACCCG  
GGATCAGTTGAATTTCAAGTAGTCAATTTCACTAATAAAATACGAAAACCTTACTTCACA  
TTTTAAATTACCCCAAAGACTATTTATCTCAAAGAGGTTTACGTAAAATTCTGGGAA  
AACGGCAAGGACTACTGTCTTATTTGTTAGAGAGAGATAAAAGACGTTTTGAAAAGTT  
A A T G A G T G A G T T G A A T A C T C G G G A T T C A C A A A T T C G T - - - - -  
-????????????????????????????????????????????????????????????????????????????????????  
????????????????????????????????????????????????????????????????????????????????????  
????????????????????????????????????????????????????????????????????????????????????  
ATGGATAAATCTAAGCGACTCTTTCTTAAATCCAAACAATCTTTTCGTAGGAGTTTGTCT  
CCGATCCAATCGGGGGATCGAATTGATTATAAAAACATGAGTTTACTTTATCGATTATT  
AGTCAACAAGGAAAAATATTATCTAGACGCGTAAATAGATTGAGCTTAAAACAACAAC  
GATTAATTACGATTGCTATAAAACAAGCTCGTATTTTATCTTCATTACCTTTTGTTAATAA

TGGAAAAAAAA---AAATATGAAAAAAGGGAGTCGATCACTAGAACTACCGCAGTTCGTA  
AAAAAAAAAAAAATGGGACGT--CTAAAAAAAAATCCTTTTGTAGCGAATCATTATTA  
GAAAAATAAATAAGCTTAACACAAAAGGAGAAAAAGAAATAATAAACTTGGTCCAG  
AGCATCTACGATTATACCTACAATGATTGGGCATACCATTGCTATCCATAATGGAAGGA  
GCATTTACCTATTTATATAACAGATCGTATGGTAGGCCATAAATTAGGAGAATTTTCACCT  
ACTTTAACCTTCCGAGGATATGCGAAAAATGATACTAAATCTCGTCGTATGACGTATCGA  
TCATTTATACTAAAATATTTAGTGCCGTTCTGTCTAAAAATAATGAATTCGGCCGTTGTG  
ACCGGACTTTATTATGGATTTTTGACCACATTCTGCATAGGGCCCTCTTATCTCTTCATTA  
TTCGAGCCCGGGTTAGGAACGAAGGG-----ACCGAGATGGTAGTATCAGCAACAACC  
GGGTTTATTACGGGATACCTCATTATGTTTATATCAATCTATTATGCGCCTTTCATTAGC  
ATTGAATAGACCTCATACAATAACTGTCCTAATTCTACCATATATTTTCTTTCATTTGTA  
GAGAAAAATAATAAATACTTCTATGATCCCAGATACGATAATGCAAATTCAATACATAAA  
TTCAATATTGTTAAAGAATTCTTTACCAATTTTTTGTTCAGTTAATAAACCCCTCTCTTT  
TCCAAAGTTCAATTTTAATAAGATTACTGCAGATTTGTCTTTTCGGTCCAACAATAAAT  
TGTTATTCTTAACAAGTAGTTTTGTTGGTTGGTTAATTGGTCACATATTTTGTATGAAATT  
AATGGGATCCCAATAGTCTGGTTCCAGCAAAAAGGTTTCGATCAAATCTAAGCTAATTA  
TGGGAAAATACATTCTTTACAATTGCGATATTAT-----CAAATATTTGTAGTTTTTGTCTT  
TGTTATCTTTCTTCACTATTTAGGCAGAATACCGGCTCCTTATTTTTATGCGAAAATCGCA  
GAA-----AAACCCATTGTA ACTACTCTTTTCGATTATCAACGATGGATTTCGGCCATTG  
CGATATATAAAAAATTTGCACTTTGAAAACGTTGTAAGAGATGAAAATTCACAATTTTT  
TTTTCATATATGTAAGGTGATGGAAAAGAACGAATCTTTTCACGTATCCACCTAGTTT  
ATCTATTTTTCAGAAAATGATGGAAAAAAAATGAATCTCTTCACAAAAGATAAAATCT  
CCAATGATAATGATAATGAATTGTGGAGCTACAATCATAATGAAAAAAAAGAACTA  
ATCAATGAATTTTTTAAAAGGGCCCAATTTCTAGATAAGA ACTATAGTCTCCGGATGTA  
TTTGCAAACTCAGTTAGATTGTGTAATGATGACATGGAAAATAAATATTTAACTAAAATA  
TATGATCCTTTTTTGAATGGACGTTTTTCGCGGAGAAATCAAAAAAACTTTTCACCAAG  
AAATTCCATTTTCGTAAATAAGATTCACGGTCTCCTTGATCCAGAATTGGAACAGAAAG  
ATGAGAAGAATAAATGTA CTGAAATAAACGAAATCGAGAAAGAAGTTCCTCGATGGTC  
ATACAAGTTAATTGAAGTGCAGCAACTGACGGAAAGCGAGATTCGTTGTGCAAGAGC  
GGAACGTGTAGTTGTTTTTAGTGCTTCTCTAGTAAAATATTCACGCGAACCGGATTTCA  
ACCGAGGGATAATTAAGGATCTATGCGCCCTCAAAGGCGTAAAACAGTTACTTGGAA  
ATTCTTTCAAAGTAATGCCATTCTCCA ACTTTTTTGGAGATA---ATAGATGACTACCCG  
TTCTTTTTTGGTGAGCTTTATGATGATATATTGCAATAT--TGGAAAGAAGACGAGGCTG  
AAAGCAGAAACGAAATAGAAGAATCCTGGGAAAGCATTTTATATGGTCTAAGAATTAG  
AAGTTTTGTATTACTATTCCAATCAAATCTTAGAAAATATATTATATTACCTTCATTGATAA  
TAACGAAAAATATCATTTCGTATCCTTTTATTGCAAGACCCCGAATGGTTAGAAGATATTA  
GCGATTGGAGAAAAGAAGTGCATATAAAATGCACCTATCAGGGCGTTCAGTATCTGA  
CAAGAAATTGCCAAAAGACTGGTTTTATGACGGTATTCAGATAAGGATCTTATCTCCTT  
TTGTTCTGAAACCTTGGCACAAATCTAAGTCGACTAAAAAAAAAAAACTTATGGTTTTTA  
ACAGCTTATGGAATAGAATCGTACCTTGATTATCATGTCCCAAATCCATTT--GCATTTTT  
GGGTCCATTTTTTAAAAAATAACAAAATACAAAAAAGATTTGAAAAAGCGTTTTTTTC  
TAGTT--GCAGATGTTTTGCATCAAGGAAAAGACTGGTTTTCGAACCATGTTAGAAAACA  
TAGAAAAGTTTAAGATGGAAAGTTTTCTTAAAGTTGTCTATTTGGGGTGCAAAAAG  
CGATGAA-----TCAATAATAAGTACGAATATGATTGGGAATCACCCGTTATAATTGA



ACTGAGAGATCTACTACAAATCAG-----AAATTATTTAAAAAAGAAGAAGATGTTTC  
T--TTTGTCTTTTCGAGGCAATCGGAA-----AATAAAGAAATAGCCAATCTAGTTAAG  
ATAATTATGTATTTACAAAAT-----ACTGTCTCCATTCTTCCGATTTTCATCCGATTC AAGAT  
GTGATATGGTTGCG-----AAGGATGAACTTTATAGTTCCGATAATATTTCAATTCTTGA  
ACAAAATCTATTTTTAGGTTTA-----TTTCATCTATTCCATTACCGGAATAGGGGGGGGT  
ACTTGTTA-----CACCACGATTTAAAATCAGAA-----GAGAGATTTCAAGAAATGGCAAA  
TCTATTCAATCTATCAATAACCCAGCCG--GATCTGTTGTATCATAAGGGATTGTCTTTTT  
CTATTGATTCTTCTGGATTGTATCAAAAACAA-----TTCTTAAATGAGGTATTCAACTCCA  
AGGATGAATCAAAAAAAAAAATCCTTA-----TTGGTTTTACCTCCTCTTTTTTAT-----GA  
AGAGAATGAATCTTTTTTATTCAAGGATCATCAAAAATGGGGCCAG---ACATCTTACGG  
GAATTGTTTGGAAAGACCGAAAACCCAAAATAGTGGTATTTACT-----  
-----AAAACACATAATACAGTCAGTCAATCAATATGGA-----TTGATCCGAAATCAG  
AAGAAA-----AGGTTTGATCCT-----  
-----CTTTTTTATATTTATCGA-----  
-----GAGAGATCCATGAATAGGGATCAAATTCATATAAATACAAATGGTCCAACGGA  
AGCAAGAATTTCCAGGAACATTTGGCCCATTTTCAGTTCTGAGCAAAAATAGCCAT-----  
TTTCAAGTAGTGTTCGATCGATTCCATATTAATCCATATTCAATTGATTGGTCTAAGGTTT  
TCGACCAAAAAGATTTGTTTACTTCTTTATTTTGGTCCAAGTTTCTTCCC-----  
-----TTTTGTCTAAC--TCACTTCGTTTTTTCTTTG  
TGAGTTTTGGGAGTATCCCGGTTTCATAGGTCCGAG---ATCCACATCTCT--GAATTGAAA  
CGTCCAAATGATCCACTCGGGAATCCATTGTTAGAATCAATAGGTCTTCAAATCGTTCAT  
TTGAAAAAAAAAGAAACCCTTC-----TTTTTGGAT-----GACCATTCTACTTCC---CAAAA  
ATCTAAATTATTGATCGATGGAGGAACAATATCACCCTTTTTGTTCAATAAGATAACCATC  
A-----TTGCATAATAGAAGCAAATCATTGGAT-----AATTTCTC  
AACGATATCCCACGATCAAGACAATTGGCTGAATCCCGTGAAACCTTTTTATCGAAGTT  
CATGATATCTTCTTTTTATAAAGTAAATCGACTTCGATTCTTGAATAATAAATAACTT  
CTGTTTCGAT-----TGTAACAAAAGATTCTCTTTTTATGTG-----GAAAGATCCTGTAT  
CAAGAATTATGAT-----TTTATGTATGAA---CAATTCCTCAATACTTTGTTCAATCGAAATA  
AA--ATATTTCTTTGTGCAGTGGTAAA-----AAAAAGATGTTTTTTTGGAG---AAAGAT  
ACTATTTACCAATCGAGTTAGAGGTATCTAAGATATTGATACCTAACAATTTTCCGCAA  
AATGGTGATGAAGAA--TATACTTGTACAAATCT-----TTCCATTTTCCAACCTCGATCT  
GATCCATTGGTTCGT-----AGAGCTATTTACTCAATCGAAGACATTTCTGGAATACCTCTA  
ACAGAGGAAGAAATAGTCAATTTTGAAGAACGTATTGTGAACCTCTTTCTGATAGGA  
ATCTACCTAATTCAGAAGGGAAGAACTTGCATCAGTATCTCAAT-----TTCAATTCAAAC  
ATAGTTTTGATTGACATTCCATATTCTGAGAAATATTTACCATCCGAAAAG-----AGGAA  
AAAA-----CGCATTCGTGCAAAACAAA-----CGC---CTTGCGAAAGGATATAT  
GGATAGAGCTTTTCAAAGAAAAAAAAAAGAAAGAGGTCTTTCTCAAATGGAAACGATT  
CTACCCATATATAATATGGTTACTTACTTCGACAGGGCACATAAATAAATAAATGATATTT  
AGAGATGCTTTTTTCAGACCTATTGAGGATACTAAATAGAAATCCTAAATTTCTAAAATTG  
GTATACATTTTTAATGATATTATGTATGAATCTCGAATTCTTCGG-----GAAAAAGTGCT  
T-----CTTTTAAAACGGAATCCT--ATAAGTGCGATTTTCGAGTAAGTGGTTACA  
TAATTATATTCTGGAGTTGTGCGACAAAATTTATCATGTAAATAATGAGTCA-----CCATT  
CATATCGACACATCTGAGATCGCTAAATATTCAAGAGTTG---CAATTTTTAATTCTTTTTCT  
TTCTTCTTATTACTGGATAT--CTCATCCTGGGACATCTTATTGTTACTTCTCGA-----TTCT

CTAGTCAGTTACAGGCAGAGTTTGAACAGGTCAAATCTTTTATGATTCCATCCTACATG  
ATTGAGTTACGAAAACTTTTGGATACGTATCCTCCATCCGAACTGAATTCGTTCCGGGT  
AAAAGATATCTTTCTAGTTGCTCTGGAAGGATTAGGAAGTTTTCTAAAAGAAATACGAG  
CTTCTTATTCTGGCGGTAACATGCTAAGTGGTGGCGATCCG-----GCTTATGGG---  
GTAAATCTGTACGTTTCGAAGAAGAAATATTTTAATATCATC-----GATCTCATA  
AGTATTATAACCAATCCCATGAATCGAATCGCTTTTTTTGAGAAATACGAGACATTTAAGT  
CATAAAGTAAAATGATCTATTCCGTGATAAGAAAAAGAAAAACGTGAATAGTGATTG  
GCTTGATGATAAAATAGAATCCTGGATCTTGAACAGTGATTCATTGCTGATAAAGAAA  
GAGAATTCTTGGTTCAGTTCTCT-----ACCTAACGACA-----GAAAAAAGGATTGATCA  
AATTTTATTGAGTCTGACT---CATAGTGATCATTTATCA-----AAGAATAACTCTGG  
TTATCAAATGATTGAGCAACCGGGAACAATTTACTTACGAAATTTAATTGACATTCAT---  
--AAAAGGATCTAATGAATTATGAGTTTAATACATCCTGCTTAGCAGAAAGACGGATAT  
TCCTTGCTCATTATCAGACAATCGCTTAT-----TCAGAAACCCAGCCTGGGCCTAGTTGTT  
TAGATTTCCCATCTCAGGGG-----AAACCCTTTTCGCTCCGCTTAGACCTATCCCCTTC  
T--AGGGGTGTTTTAGTGATAGGTTTCGATAGGAACTGGACGGTCCATTTGATCAAATAT  
CTAGCGACAACTCCTATGTTCCCTTTCTTTACAATATTTATAAACAAGTTCCTGGATAAC  
TATCCTAAGGGTTTCACTATTGATCCT-----GATGAGGAG-----GATAGAGAGGGTAC  
CATTTATAGTCTTTTACCTAGTAATGAGGGTAGTTGCTATAATTACGATAGGAATGATAGT  
GACGAT-----ATCGACCGT-----AACTTTGATAGACAGTTGAAGTTTCTAAGTATGAA  
GCATCCAATATCT-----AGGGATATGAGGCCG-----GAACTAGACCTATTTTATCTCAC  
CCTTCAATTCGAATTAGCAAAGGCACTGTCTCCTTGCATAATTTGGATTCCAAACATTCA  
TGATCTGGATAGGAAGGAGTCGAATGACTTATCTCTCGGTTTATTAGTGAACATCTCTC  
C-----GGGGATTCTGAAACATGTTCT---ACTAGAAATAATCTTGTTATTGCTTCGACTCA  
TATTCCTCAAAAAGTAGATCCCCTCTAATAGCTACGAATAAATTGAATACATGCATTAA  
GATACGAAGGCTTCTTAGTCCACAACAAAGAAAGAACTTTTTCACTCTTTCATATACTA  
GGGGATTTCACTTGGAAAAGAAAATGTTCCACACT-----AATGGATTCCGGTCCATAACT  
CTGAGTTCTAATCTACGAGATCTTGTAGCACTTACCAATGAGGCCCTAACAAATTAGTATT  
ATACAAAAGAAATCGATTATAGACACTAATATAATTTCGATCTGCTCTTCATAGACAACT  
TGGGATTTTAGA-----TCTAAGATAAGATCGATTTCAGGATCATGGGATTCTTTTCTATCA  
GATAGGAAGGGCTGTTTCACAAAATTTACTTTTTAAGTAATTGCTCCCTAGATCCTATATC  
GATCTATATCAAGAAGAAA-----TCATGTCAGGGGGGGGATTCTTATTTGTACAGATTCT  
ACTTCGAACTTGAACAAGCATGAAGAAATTAACGATACTTCTATATCTTTTGAGTTGT  
TCTGCTGGATCCGTCGCTCAAGACCTTTGGTCTCTACCC-----GGACCTAATGAAAAA---  
AACGGGATCACTTCTTATAGACTCATTGAGAATGATTCT--GATCTAATTCATGGCCTATT  
AGAAGTAGAAAGCGCTCTGCTGGAA-----TCCTCACCGAAAGAAAGTCCGTTTG  
ATAATGAT-----CGAGTGATATCCCTTCTTCGGCCCAAACCAAGAAAC---CCATTAAATAT  
GATTCAAAATGGATTCGTTCTATCCGTGATGAGAGATTCTCTATGAAAAA-----TATGA  
ATCGGGTTTTGAAGAA-----GGGAAGGAGTCCCTCGACCCGGGA-----CCTCTAG  
AGGCGGAT-----TTATTCAATCAC-----ATAGTTTGGGCTCCT-----AGACTATGGCGCC  
CT-----TGGGATTTTATATTTGATTGTAGCGAAAGGTCCAATGAATTGGGATTTCCT---T  
ATTGGGAAAGGTCATTTTCGGGACAAG-----ATGATTTATGATGAAGAGGATGAGCTT  
CAAGAAAATGATTCAGAGGTCTTGCAGGATGTAACCATGCAGTACCAGACACGAGATA  
GATCTTCCAAAGAACGGGGCGTTTTTTAGAATAAGCAAATTCATTTGGGACCCGGTGGGA  
TCCACTATTTTGTCTATTCCAA--GATGATCCCTCTGTCTCTGTGTTTTACATCGAGAAT



ACCTGTAAGTGAGGGTTATTTGGGTCGTGTTGTAAATGCCCTAGCTAAACCTATTGACG  
GTCGAGGAGAAATTCAGCTTCGGAATCTCGGTTAATCGAATCTCCCGCTCCCGGTATT  
ATTTCCAGACGTTCCGTGTATGAGCCCCTTCAAACGGGACTTATTGCTATCGATTCTATG  
ATCCCTATAGGGCGCGGACAGCGAGAATTGATTATTGGGGACAGACAAACAGGTAAAA  
CAGCAGTAGCTACAGATACGATTCTCAATCAACAGGGACAAAATGTAGTATGTGTTTAT  
GTAGCTATCGGTCAAAAAGCCTCTTCTGTGGCTCAAGTGGTAACGACTTTACAAGAAA  
GAGGGGCAATGGAATACACTATTATAGTGGCTGAAACAGCAAACCTCTCCGGCTACATTA  
CAATACCTCGCGCCTTATACAGGAGCAGCTCTGGCTGAATATTTTATGTACCGTGAACG  
TCACACTTTAATCATTTATGATGATCTCTCAAACAAGCACAGGCTTATCGCCAAATGTC  
TCTTCTATTACGAAGACCGCCAGGTCGCGAAGCTTATCCCGGAGATGTTTTTTTATTACA  
TTCTCGTCTTTTGGAAAGAGCCGCTAAATTAAGTTCTCAGTTGGGTGAAGGAAGTATG  
ACTGCTTTACCGATAGTTGAGACCCAATCAGGAGATGTTTCAGCTTATATTCCTACTAAT  
GTAATTTCCATTACAGATGGCCAAATATTTTATCTGCCGATCTATTCAATGCTGGAATCA  
GACCGGCAATTAATGTGGGTATTTCCGTTTCCAGAGTTGGATCAGCGGCTCAAATTA  
GCCATGAAACAAGTAGCTGGTAAATTAATAATTGGAATTGGCACAATTTCGTAGAATTAGA  
AGCTTTTGCACAATTCTTCTGATCTCGATAAAGCTACGCAAAATCAATTGGCAAGAG  
GTCAACGATTGCGCGAGTTGCTTAAACAATCCCAATCAGCTCCTCTCACTGTGGAAGA  
ACAGATAATAACTATTTATACTGGAACGAATGGTTATCTTGATTCATTAGAAGTTGAACA  
GGTAAGGAAATTTCTCGTTGAGTTACAGTCTTATTTAAAAACAATAAACCTCAATTCA  
ACGAAATCATATCTTCTACCAAGACATTTACTGGCGAGGCAGAAGCCCTAGTGAAGGA  
AGCTATTCAGGAACATACGGAACCTTTTTTACTTCAGGAACAAGTAATGAAAGTAATTC  
CGACCACTTCTGATACTGAGATTTCTGCACTTGAAAACAAAAATCTGGGACGTATCAC  
GCAAATAATTGGTCCGGTACTCGATGTAGATTTTCCGCCAGGAAAGATGCCCTATATTTA  
CAACGCTCTGAGAGTTCAAGGTCGAGATAGTGTGGCCAACAAATTAATGTAACCTGT  
GAAGTACAGCAATTATTAGGAAATAATCGAATTAGAGCTGTAGCTATGAGTGCTACGGA  
TGGTCTAAAGAGAGGACTGGAAGTGGTTGACACGGGAGCTGCTCTAAGTGTTCAGT  
TGGTGGAGCAACCCTAGGTCGAATTTTCAACGTGCTTGGAGAGCCTATTGATAATTTGG  
GTCCTGTAGATACTCGCACAACATCTCCTATTCATAGATCTGCGCCTGCCTTTGTACAGT  
TAGATACTAAATTATCCATTTTTGAAACTGGAATTAAGTAGTCGATCTTTTAGCTCCTTA  
TCGCCGCGGCGGAAAAATAGGACTTTTCGGGGGAGCTGGGGTAGGTAAAACCTGTACTC  
ATTATGGAATTGATCAATAACATTGCCAAAGCTCATGGAGGTGTATCCGTATTTGGCGGA  
GTAGGTGAGCGTACTCGTGAGGAAATGATCTTTATATGGAAATGAAAGAATCCGGAGT  
AATTAATGAAAAAAGATTGAGGAATCAAAGTAGCTCTAGTCTACGGTCAAATGAAT  
GAACCGCCCGGAGCTCGTATGAGAGTTGGTTAACTGCCCTAACTATGGCCGAATATTT  
CCGAGATGTCAATGAACAGGACGTCTTCTATTTATCGACAATATCTTCCGTTTTGTCCA  
AGCCGGATCCGAAGTGTCCGCCTTATTGGGCCGAATGCCTTCCGCTGTGGGTATCAAC  
CTACCCTGGGGACTGAAATGGGTACTTTACAAGAAAGAATTACTTCTACCAAAGAAGG  
GTCTATAACTTCTATTCAAGCAGTTTATGTACCTGCAGACGATTTGACCGATCCTGCTCC  
TGCCACGACATTTGCACATTTGGATGCAACTACCGTACTCTCAAGAGGATTAGCTGCCA  
AAGGTATTTATCCAGCAGTAGATCCTTTAGATTCAACGTCAACCATGCTCCAACCTCGG  
ATCGTTGGGGAAGAACATTATCAAACCGCGCAAAGAGTTAAACAAACGTTACAACGGT  
ACAAAGAACTTCAGGACATTATAGCTATTCTTGGGTGGACGAATTATCCGAAGAGGAT  
CGCTTAATCGTAGCAAGAGCGCGAAAAATGAACGTTTCTTATCACAACCTTTTTTCGT  
AGCAGAAGTATTTACCGGTTCCCTCGGGGAAATATGTCGGTCTAGCAGAAACAATTAGA

GGGTTTAAATTGATTCTTTCTGGAGAATTTCGACAGTCTTCCTGAACAAGCCTTTTATTTA  
GTAGGTAATATCGATGAAGCTACTGCGAAGGCTGCGAACTTACGAAAT-----AT  
GACTTTAAATCTTTGTGTACTGACCCCTAATCGAATTGTTTGGGATTCAGAAGTGAAGG  
AAATTATTTTATCCACTAATAGTGGACAAATTGGGGTATTAATAAATCATGCGCCTATTG  
CCACAGCTTTAGATATAGGTATTTTGAGAATACGACTTAACGACCGATGGTTAACGGTG  
GCTCTGATGGGCGGTTTTGCTAGAAATAGGCAATAATGAGATCACTATTTTAGCAAATGAT  
GCGGAAAGGGGTAGTGACATTGATCCACAAGAAGCACAACAAACTCTAAAAATAGCA  
GAAGCTAACTTGAATAAGGCTAAAGGCAAGAGACAAACAATTGAGGCAAATCTAGCT  
CTCCGACGAGCTAGGACACGAGTAGAGGCTATCAATACGATCTCGATGAAAAATATAAC  
CGATTCTTTTCTTTGCTTCGTTTACTGGCCATCCGCCGAAGTTTCGGGTTTGATACCGA  
TATTTTAGCAACAAATCTAATAAATCTAAGTGTAGTGCTAGGTGTATTGATTTTTTTTGG  
AAAGGGAGTGTTAAGTGATTTATTAGATAATCGAAAACAGAGAATCTTGAGAACTATTC  
GAAATTCAGAAGAACTACGGGAAGCAGCCATTGAACAGCTGGAGACAGCACGGGCCC  
GCTTAAGGAAAGTAGAAACAGAAGCAGATCGATTCGAGTGAATGGTTATTCCGAGAT  
AGAACGAGATAAATTGAATTTAATTAATTCAATTTATACAACCTTTGGAACAATTCGAAAA  
TTACAAAAACGAAACCATTCAATTTGAACAACAAAGGGCGATTAATCAAGTTCAACAG  
AGGGTTTTACAACAAGCATTACAAGGAGCTCTGGGAACCTCTGAATAGTTGCTTAAACA  
ACGAGTTACATTTACGTACGATCAGTGCTAATATTGGTATGTTTGGTGAATGAAAGAG  
AAAAGAACATGAATCCACTGATTTCTGCTGCTTCTGTTATCGCTGCTGGGTTGGCCGT  
CGGGCTTGCTTCTATTGGACCTGGAGTTGGTCAAGGCACAGCTGCAGGGCAAGCTGTA  
GAAGGGATTGCGCGACAACCGGAAGCAGAGGACAAAATAAGAGGTACTTTATTACTTA  
GTCTGGCTTTTATGGAAGCTTTAACTATTTATGGGCTAGTTGTAGCATTAGCGCTTTTATT  
TGCGAATCCCTTTGTTATGAATGTTCTATTATGTTACATCAACACATTAACAGATTCTTT  
GATATATCTGCTGTGGAAGTAGGTCAACATTTCTATTGGCAAATAGGGGATTTTGAAGT  
GCATGCTCAAGTACTTATTACCTCTTGGGTTGTAATAGCTATCTTATTAATTTCAACCATT  
CTGGTTGTTAGAAATCCGCAAACCTATTTCCACGTCGGTCAAATTTCTTTGAATATGTC  
CTTGAATTCATTTCGAGACGTGAGCAAACTCAGATTGGAGAAGAATACGGTCCGTGGG  
TTCCGTTTATTGGAACCTCTGTTTCTATTTATTTTGTTCGAATTGGTCGGGGGCTCTTTT  
GCCTTGGAATAATATAAAGTTACCTCATGGAGAGTTAGCTGCACCCACAAATGATATAA  
ATACTACTGTTGCATTAGCTTTACTTACGTCAGTAGCCTATTTCTATGCGGGTATTTCAA  
AAAAGGATTGGCGTATTTTGGTAAATACATCCAACCAACTCCAATACTTTTACCGATTAA  
CATCTTAGAAGATTTCAAAAACCCTTATCGCTTAGTTTTTCGACTTTTCGGAAATATATT  
AGCTGATGAATTAGTAGTTGTTGTTCTTGTTCGTTAGTACCCTTAGTAGTTCCTATACCT  
GTTATGTTCCCTGGATTATTTACAAGCGGTATTCAAGCTCTTATTTTTGCTACTTTAGCCG  
CGGCTTATATAGGTGAATCCATGGAAGGACATCATATGATATTTCAACTTTAGAGCATAT  
ATTAACCTCATATATCGTTTTCCGTCATATCAATTGTTATTTCAATTCATTTAATAACCTTATT  
AGTCAATGAAATCGTAGGATTATATGATTTGTCCAAAAAAGCCATGATAATAACTTTTTT  
CTGTGTAACGGGATTGTTAATTACTCGTTGGTTTTTTTTCGGGCCATTTACCATTTAGTGA  
TTTATATGAATCTCTAATCTTTCTTTTCATGGGGTTTTTCCATTTTTCATATGGTTCCGTGTT  
TAAAAAGGAGAAAAACCTTTTAAGTACAATAATAGCACCGAGTGTTATTTTTACCCAA  
GGCTTTGCGACTTCGGGTCTTTTAAACCAAAATGCATCAATCCGTAATATTAGTCCCAGCT  
CTACAATCCCATTGGCTAATGATGCACGTAAGTATGATGATATTGGGCTATGCAGCCCTT  
TTATGTGGATCATTATTATCAGTGGCTATTTTAGTCATTACGTTTCAAGAAGTCATCCAAA  
CTGTTTCTTTTACCAAGGAAATCAAATACATGAATATGAATGAAAGTGTTTTACGCAA



ACTTCTTTTACTTCTTCTAGAAATTATTACAGGTCTCAATTTATTCAACAATTGGATCGTT  
GGGGTTATCGTATTATTAGTCTGGGTTTTCTCTTTTTAACGATAGGTATTCTTTTCGGGAGC  
GGTATGGGCTAACGAGGCATGGGGATCCTATTGGAATTGGGATCCAAAGGAACTTGG  
GCCTTTATTACTTGGACCATATTCGCGATTTATTTACATACTAGAAAACTAAAAAATA  
GAAGGTGTAAATTCTTCAATAGTGGCCTCTATTGGATTCTTATCGTTTGGATATGTTATT  
TGGGGATCAATCTATTAGGAATAGGACTACATAGTTATGGTTCATTTACATCTAATATGGC  
AAAAAAGAAAGCATTCCCTTCTATGTCTTACATCTATAGTCTTTTTTGCCTGGTG  
CATCTCTTTTACATTTAAGAAAAGTGTGGAATCTTGGATTACTAATTGGTGGAAATACGAA  
AGAATCCGAAATTTCTTGAATATTATTCAAGAAAAAGATCTTTTAAAGAAATTCATAG  
AGTTCGAGGAACTGTTCCCTCTTGGATGAAATGCTAAAGGAATACCCGAAACACGTTT  
ACAAAACCTTCGTATCGAA---TACAAAGAAACCATCCAATTGATCGAGACGAACAACC  
AAGATCATATCCATACGATTTTGTATTTCTGTACAAATATAATAGGTTTCCTTATTCTAAG  
TGGTTATTCTATTAGGAGTAATCAAGAACTCATTATTCTTAACTCTTGGGTAAAAGAATT  
TCTATATAACTTAAAGTGACACAATAAAAGCTTTTTTCGATTTCTTTATTAAGTATTTTGT  
ATAGGATTCCATTCGACTCATGGTTGGGAACTAATGATTGGGTCTGTCTATAAAGATTTT  
GGATTTACTCAGAATGAGCAAATTATATCTGGTCTTGTTCACATTTTCCAGTCATTTTA  
GATACTCTTTTTAAATACTGGATTTTCCGTTATTTAAATCGTGTATCTCCGTCGCTTGTAG  
TTATTTATCATTCAATGAATGACATGCCGGTTGGAGTTCCCAAGGTCCCCTATTTAATGC  
CGGAGGAAGATGAGGCATCTTGGGTTGATTTATACCATCTTCTTTACGAAGAAAGACTT  
TTATTTTATAGGGCAAGAAGTAAACAGTGAAATTTCAAATCAATTGAATGGTCTTATGGTA  
TATCTTAGTTTACAGGACAAGACAAAAGATTTGTATCTGTTTATAAATTCTCCGGGCGG  
AGAGCTAATGTCCGGAATGGCTATGTTTGATACTATGCAATTTGTAAAAGCCGAAGTAC  
AGACAGTATGCGTAGGAATAGCCGTTTCAATGGCATCCCTTCTTTTGCTAGGGGGAGAA  
ATTACCAAACGTCTAGCATTCTCACGCTAGGGTTCATGATGCATGAACCTGCTAGTGT  
GTTTGAAGACGATAAAACAGGCGAATGTATGCTGGAAGCGGATGAATTACTGAAAATG  
TACATAGGTATAATAAATATTTATGTACAAAGAACAGGTAAACCCGTATGGCAAATAGCC  
GTAGACATCAAAAGGGATATTTTATGTGATGATGATGATGATGATGATGATGATGATGATG  
T T G A T A T G G T A G C A G A T G C  
C????????????????????????????????????????????????????????????  
????????????????????????????????????????????????????????????  
????????????????????????????????????????????????????????????  
????????????????????????????????????????????????????????????  
ATGAAGGAATATCAAGTATATTT  
AGAACGAGCTAGATCTCGCCAACAGGACTTCCTATACCCACTTATTTTTTCGGGAGTATA  
TTTATGGACTTGCTTATAGTCATAATTGGGGAGGGTATGACAATAAATATAGTTTACTAAA  
TGTAACAAACGTTTAATTACTCGAATGTATCAACAGAATCATTTAATCATTTCGGCTAATGA  
TTCTAACAAAAATCCATTTTTTGGGAAAGAATTTTTATTCTAAAATAATATCAGAGGGTTT  
TGCCATCGTCGTGGAAATCCACTTTTCTACAATTAAGCTCTTCCTTAATCATAAAATC  
TTATAATGTGAGATCAATTCATTCCATTTTCCCTTTTTTGGAGGATAAATTTACATATTTA  
AATTATGTGTCAGATATAAGAATACCCTATCCTATCCATCTGGAAATCTTAGTTCAAATCC  
TTCGATACTGGGTGAAAGATGCCCCCTTTTTTCATTTATTACGGTTGTTTCTTTATCATT  
TTGTAATTGGAATCGTTTTTACTAAATCGATTTCTACTTTTTCAAACCAAGATTATTC  
TTGTTCCCTCTATAATTTTTATGTATGTGAATATGAATCTATCTTCCTTTTTTCTACGTAATA  
ATCCTCTCATTACGATTCAAATCTTTTAGCGTTTTTTTAGAGCGAATTTTTTTTTATGCA  
AAAAGAGAACATCTTGTAGAAGTTTTTTCTAAGTCGATCCTTTACCATTCTTCAAGGA  
TCCAACATTCATTATGTTAGATATCAAGGAAAATGCATTCTGGCTTCAAAGAATGTGCC





AGATTTTTTACTTATCTGAGTATTTTTAATACTTCAATGTTAGGATTAGTTACTAGTTCCA  
ATTTGATAACAAGTTTATATTTTTTGGGAATTGGTTGGAATGTGTTCTTATCTATTAATAGG  
TTTTTGGTTCACACGTCCTATTGCGGCAAATGCTTGTCAAAAAGCGTTTGTAACATAATC  
GTGTAGGGGATTTTGGTTTATTATTAGGAATTTTAGGTTTTTATTGGATAACGGGTAGTTT  
GGAATTTTCGGGATTTATTTCAAATATTCAATAAC---GAGGTGAATCTTTTTTTTGTACTT  
TGTGTGCCCTCTTGTATTTTTGCGGATCGGTTGCGAAATCCGCCCAATCCCTCTTCATG  
TATGGTTACCGGATGCTATGGAAGGTCCTACTCCTATTTTCGGCTCTTATACATGCTGCTA  
CTATGGTAGCAGCGGGAATTTTTCTTGTAGCTCGACTTCTTCCTCTTTTCATAGTTATAC  
CCCCCTAATGAGTGGAATAGCTTTGATAGGTATAATAACCGTAGTATTAGGAGCTACTT  
TAGCTATTGCTCAAAAAGATATTAAGAAAAATTTGGCCTATTCTACAATGTCTCAATTGG  
GTTATATGATGTTAGCTTTAGGTATGGGCTTATCGAGCCGCTTTATTTCAATTTGATTAC  
TCATGCTTATTCAAAGCATTGTTGTTTTTAGGATCTGGATCCATTATTCATTCAATGGAA  
GCTATTGTTGGATATTCTCCCGATAAAAGTCAAATATGGTTCTTATGGGTGGTTAAGA  
AAACATGCGCAATTACAAAACCGCTTTTTTAATAGGTACACTTTCTCTTTCGGGTATT  
CCACCTTTTGCTTGTTTTTGGTCTAAGGATGAGATTCTTAATGATAGTTGGTTGTATTCA  
CCAATTTTCGCAATAATAGCTTGTTCACAGCAGGATTAAGTGCATTTTATATGTTTCGA  
ATCTATTTACTTGTTTTTGAGGGATATTTAAACGTTCAATTTCAAATTTCAACGGAAAG  
AAAAATAGTTCATTCTATTCAATATCTTTATGGGGCAA---GAAGAAAAAAGAAATTA  
AAAAAGTTATTAGCTTTATTAACAATGAATTTTTTCGGGGTACTAAAAACATTCCTTTT  
TTTTATCCTCATGAATCAGACAATACTATGCTATTTCTATGCTTGTATTAGTACTCTTTAC  
TTTCTTCGTTGGATCCGTTGGA-----TTCGATTTGGATATATTATCTAAATTGTTAATTCG  
TCTATAGACCTTTTACATCAAATCAAAG---TCCGTGGATTGG---GAATTTTTTACAAAT  
GCAACTTTTTTCGGTGAATATCGCTTTTTTCGGAATATTATAGCGTCTTTTTTTTATAAAC  
CCGTTTTTTCTTCTTTACAAAATTTGAACTTATTTAATTTATTTCAAAGGATTGCTGACA  
AAATAATCAATATTCTATATGATTGGTCATATAATCGCGGTTATATAGATGATTTTTTTGAA  
GTATCTTTAATTGCGAGTGTAAGAAAGTTAGCTAAATTCATTTATTTTTTTGATAGACAA  
GTAATTGATGGAATTCCAAATGGAGTTGGTATTTCAAGTTTTTTTTATAGGAGAGTCTATC  
AAATATGTGGGGGGGGG---CGAATTTCTTCGTATATTTCTTT-----TTTGTATTAATCT  
TTTTAGTAATTTGTTATATGGATTTGCCTGAAACGCTACACGATTTTCTTTTAGTCTTTCT  
GGGATCGGGTCTTATATTAGGAAGTCTAGGGGTAGTATTACTTACCAACCCCATTTTTTC  
TGCTTTTTTCGTTGGGACTGGTTCTTGTTTGTATATCTTTATTATATATTTTAGCAAATTCG  
ATTTTGTAGCTGCATCCAGCTACTTATTTACGTGGGAGCTATTAACATTTTAATCATATT  
TGCAGTGATGTTTCGTGAATAGTTGCGAATATTACCAAGATTTTCATTTTTGGACCGTTGG  
GGATGGAATTACTTTGATAGTTTGTACAAGTATTTTTGTTTCACTAATAACTATTATTCCA  
GATACATCATGGTACGGAATTTTGGACGACAAGACCAAATCAGATTATTGAGCAAGA  
TTTGATAAGTACTAGTCAACAAATTGGAATTCATTTATCAACAGATTTTTTTCTTCCATTT  
GAACTAATTTCAATAATCTTTTAGTTGCTTTGATAGGTGCAATTGTTGTAGCTCGTCAG  
ATGAATGTCCCAGCTAGAATAAAAGACCTCATGATAGTCAATATGGGGCCTCAACACCC  
ATCAATGCATGGTGTCTTCGACTTATTGTTACTCTGGATGGGGAAGATGTTGTTGATTG  
TGAACCAATATTGGGTTATTTACACAGAGGTATGGAAAAAATTGCGGAAAACCGAACA  
ATTATACAATATCTGCCTTATGTAACACGTTGGGATTATTTAGCTACTATGTTTACAGAAG  
CAATAACCGTAAACGGACCGGAACAATTGGGAAATATTCAAGTACCTAAAAGAGCCAG  
CTATATACGAGTAATTATGTTGGAGTTAAGTCGTATAGCTTCTCATCTACTATGGCTGGGA  
CCTTTTATGGCAGATATTGGTGCACAAACCCCTTTTTTTTATATTTTTTAGAGAAAGAGAA



TATGATATGCAAGTGAAACAAGTTCTTGCTAATGGTAAAAAAGGGGCTTTGAATGTGG  
GGGCCGTTCTTATTTTACCAGAGGGTTTTGAATTGGCCCCTCCCGATCGTATTTCCGCCAG  
AGATTAAAGAAAAGATAGGTAATTTGTCTTTTCAAAGCTATCGTCCCACCAAAAAAAT  
ATTCTAGTGGTAGGCCCGTTCCCGGAAGAAATATAGTGAGATTACCTTCCCTATTCTT  
TCTCCGGATCCCGCTACTAAGAGAGATGTTCACTTCTTAAAATATCCTATATACGTAGGC  
GGAACAGAGGAAGGGGTGAGATTTATCTGACGGCAGCAAGAGTAATAATAATGTTT  
ATAATGCTACAGCAACTGGTATAGTAAACAAAATTATACGAAAAGAAAAGGGTGGATA  
CGAAATAACGATAGTGGCTCCATCAGATGGGCGTGAAGTGATTGATATTATACCGCCAG  
GACCAGAACTTCTTGTTTCAGAAGGTGAATCTATCAAACCTTGATCAACCATTAACGAGT  
AATCCTAATGTGGGTGGATTTGGTCAGGGGGATACAGAAATAGTGCTTCAAGACCCGTT  
ACGTGTCCAAGGTCTCTTGTTCTTCTTGGCATCTATTATTTTGGCACAAATCTTTTTTGGT  
TCTTAAAAGAAACAATTTGAGAAGGTTCAATTGTCTGAAATGAATTTTATGAGTAAAG  
TCTATGATTGGTTCGAAGAACGTCTTGAGATTCAGGCGATTGCCGATGATATAACTAGTA  
AATATGTTCTCCTCATGTCAATATATTTTATTGTTTAGGAGGAATTACACTTACTTGTTT  
TTAGTCCAAGTAGCGACGGGTTTTGCTATGACTTTTTTATTATCGTCCGACCGTTACGGA  
GGCTTTTGCTTCTGTCAATATATAATGACTGAGGCTAACTTCGGTTGGTTAATCCGATC  
AGTTCATCGGTGGTCGGCAAGTATGATGGTCTTAATGATGATCTTGCACGTATTTCCGCGT  
GTATCTCACCGGCGTTTTTAAAAACCTCGCGAATTGACTTGGGTTACGGGTGTAGTTT  
TAGGTGATTGACTGCATCCTTTGGGGTAACTGGTTATTCCCTTACCTTGGGACCAAATTG  
GTTATTGGGCAGTAAAAATTGTAACAGGTGTACCCGACGCTATTCCTGTAATAGGATCTT  
CGGTGGTAGAGTTATTGCGCGGAAGCGCTAGTGTGGGACAATCTACCTTGACTCGTTTTT  
TATAGTTTACATACTTTTGTATTACCTCTTCTTACTGCCGTATTCATGTTAATGCACTTTTC  
AATGATACGTAAGCAAGGCATTTCCGGTCCTTAAATGGGGATAACAAAAAACCTGAC  
TTGAATGATCCTGTATTAAGAGCAAAATTGGCTAAAGGGATGGGTCATAATTATTATGGA  
GAACCCGCATGGCCTAATGATCTTTTATATATTTTCCAGTCGTAATTCTAGGTAATTTG  
CCTGTAACGTAGGCTTAGCGGTTCTCGAACCATCAATGATTGGGGAACCCGCGGATCC  
GTTTGAACCTCCTTTGGAAATATTGCCCGAATGGTATTTTTTTCCCGTATTTCAAATACTT  
CGTACAGTACCCAATAAATTATTGGGCGTCTTTTAAATGGTTTCAGTACCCGCAGGATTA  
TTAACAGTACCTTTTTTGGAGAATGTTAATAAGTTCCAAAACCCATTTCCCGTCCGGT  
AGCAACAACCGTCTTTTTGATTGGTACCGTCGTGGCTCTTTGGTTGGGTATTGGAGCAA  
CATTACCTATTGAAAAATCCCTAACCTTAGGTCTTTTTATGATTGAAGTTTTTCTATTTGG  
AATCGTGTTAGGTCTAATTCCTATTACTTTGGCTGGATTATTTGTAACGGCATATTTACAA  
TACCGACGTGGTGATCAGTTGGATATTATGCCACTATAACCAGTTATTTCCGTTTTTCTA  
CTAGCAGTTTTTAACTATAACCGCGGGGCTTTTTATCAGTCTGAATAAGATACGACTTATT  
ATGGATATAGTAAGTCTTGCTTGGGCTGCTTTAATGGTTCGTTTTTACATTTTCTTTTCCC  
TTGTTGTATGGGGAAGAAGTGGACTCATGATTATTCGTTCCGCGGAACCAAAAGTCAA  
AATTTTGGTAGATAGGGACCCATAAAAACCTTCTTTCGAGCAATGGGCAAAACCTGGT  
CATTTCTCAAGAACAATAGCTAAGGGACCCGATACTACTTGGATCTGGAACCTACA  
TGCTGATGCTCATGATTTTCGATAGCCATACTAGTGATTTAGAGGAGATTTCCCGAAAAGT  
ATTTAGTGCTCATTTCCGGCAACTCTCCATTATCTTTCTTTGGCTGAGTGGCATGTATTT  
CATGGTGCTCGTTTTTCCAATTATGAAGCATGGCTAAATGATCCTACTCACATTCGACCT  
AGTGCCAGGTGGTTTGGCCAATAGTAGGCCAAGAAATATTGAATGGTGATGTAGGCG  
GAGGTTTCCGCGGAATACAAATAACCTCTGGTTTTTTTTTCAGATTTGGCGAGCATCTGGA  
ATAACTAGTGAATTACAACCTCTATTGTACTGCAATTGGTGCATTGGTCTTTGCAGCCTTA

ATGCTTTTTGCCGGTTGGTTTCATTATCACAAAGCTGCTCCAAAATTGGCTTGGTTCCA  
AGATGTAGAATCCATGTTGAATCACCATTTGGCAGGGCTACTAGGACTTGGGTCTCTTT  
CTTGGGGCGGGGCATCAAGTACATGTATCTTTACCCATTAATCAATTTCTAAATGCTGGAG  
TAGATCCCAAAGAGATCCCGCTTCCTCATGAATTTATCTTGAATCGAGATCTTTTGGCAC  
AACTTTATCCAAGTTTTGCCGAGGGAGCAACCCCATTTTTTACCTTGAATTGGTCAAAA  
TACGCGGACTTTCTTACCTTTCGTGGAGGATTAGATCCACTAACTGGTGGTCTATGGCT  
GACTGATATTGCACATCATCATTTAGCTATTGCAATTCTTTTTCTCATTGCCGGTCATATG  
TATAGAACTAACTGGGGTATTGGTTCATGGTATAAAAGATATTTTAGAGGCCATAAAGGT  
CCATTTACAGGCCAGGGTCATAAAGGTCTATATGAGATCCTAACACGTCATGGCATGC  
TCAATTATCTCTTAACCTAGCTATGTTAGGCTCTTTGACCATTATTGTAGCTACCATATG  
TATGCTATGCCTCCTTATCCATACCTAGCTACTGACTATGGTACACAACCTCTCATTGTTCA  
CACATCACATGTGGATTGGGGGATTTCTCATAGTTGGTGTCTGCTGCACATGCAGCCATT  
TTTATGGTAAGAGACTATGATCCAACCTACTCGATACAACGATCTATTAGATCGTGTCTT  
AGACATCGCGATGCAATCATATCACATCTCAACTGGGTGTGTATATTTTTAGGTTTTTAC  
AGTTTTGGTTTGTATATTCATAATGATACCATGAGCGCTTTAGGACGCCCTCAAGATATG  
TTTTCAGATACCGCTATACAATTACAACCTGTCTTTGCTCAATGGATACAAAATACCCAC  
GCTTTAGCACCTGGCACAACGGCCCTGGTGAACAGCAAGCACCAGTTTGACTTGG  
GGCGGCGGTGATTTAGTGGCAGTAGGCGGCAAAGTAGCTTTGTTACCTATTCCATTAGG  
AACTGCAGATTTTTTGGTACATCATATTCATGCATTTACAATTCATGTGACGGTATTGATA  
CTCCTAAAAGGTGTTCTATTTGCTCGTAGCTCACGATTGATACCAGATAAAGCAAATCT  
CGTTTTTCGGTTCCCGTGTGATGGACCTGGAAGAGGGGGGACATGCCAAGTATCCGCT  
TGGGATCATGTCTTCTTAGGATTATTTGGATGTACAATTCATTTCTGTAGTAATATTCC  
ATTTAGTTGGAAAATGCAGTCAGATGTTTGGGGTAGTATAAATGATCAAGGAGTAGTA  
ACTCATATCACAGGAGGAACTTTGCGCAGAGTTCGATTACCGTTAATGGGTGGCTCCG  
CGATTTCTTATGGGCGCAGGCATCCAGGTAATTCAGTCTTACGGTTCCTCATTATCTGC  
CTATGGTCTTTTTTCTTAGGTGCCATTTTGTATGGGCTTTTAGTTTAATGTTTCTATTC  
AGCGGGCGCGGTTATTGGCAAGAACTTATTGAATCCATCGTTTGGGCTCATAATAAATT  
AAAAGTTGCTCCTGCTACTCAGCCTAGAGCCTTGAGCATTGTACAGGGACGTGCTGTA  
GGAGTAACCCATTACCTTCTGGGTGGAATTGCCACAACGTGGGCATTCTTCTTAGCAAG  
AATTATTGCAGTAGGAATGGCATTAAAGATTTCCAAGGTTTAGCCAAGGCTTAGCTCAGG  
ACCCCACTACTCGTCGTATTTGGTTTGGTATTGCTACCGCACATGACTTCGAGAGTCAT  
GATGATATTACCGAGGAACGTCTTTATCAGAACATTTTTGCTTCTCATTTCGGACAATTA  
GCAATCATTTTTCTGTGGACTTCCGGGAATCTCTTTCATGTAGCTTGGCAAGGAAATTT  
GAGGCATGGGTACAGGATCCTTTACATGTAAGACCTATTGCTCATGCAATTTGGGATCC  
CCATTTTGGTCAACCGGCTGTGCAAGCTTTTACTCGAGGCGGTGCTCTTGGCCCCGGTG  
AATATCGCCTATTCCGGTGTTTATCAGTGGTGGTATAACAATCGGTTTACGTACTAATGAG  
GATCTTTATACAGGAGCTCTTTTTCTATTATTTCTTTCTGTCATAGCCTTACTAGCAGGCT  
GGTTACACCTACAACCGAAATGGAAACCGAGCGTTTCCTGGTTTAAAAATGCCGAATC  
CCGCCTTAATCATCATTTGTCAGGACTGTTTGGAGTCAGTTCCTTAGCTTGGGCAGGGC  
ATTTAGTCCAATGTTGCTATTCCAGGATCCAGAGGAGAACTGTTTCGATGGAATAATTTCT  
TAAGTGTATTGCCACACCCTCAAGGATTAGGTCCACTTTTTACAGGTCAGTGGAATCTT  
TATGCTCAAACCCCGATTTCGAGTAGTCATTTATTTAGTACTTCGCAAGGTGCGGGAAC  
TGCCATTCTAACACTTCTTGGGGGATTCCACCCTCAAACGCAAAGTTTATGGCTGACCG  
ATATGGCACATCATCATTTAGCTATTGCAATTCTTTTTCTCATTGCCGGTCATATGTATAG

AACTAACTTCGGGATTGGGCACAGTATAAAAGATATTTTAGAAGCGCATATTCCTCCGG  
GGGGTAGATTGGGGCGTGGACATAAAGGTCTTTATGACACAATCAATAATTCAATTCAT  
TTTCAATTAGGCCTTGCTTTAGCCTCGTTAGGGGTCATTACTTCTTTGGTAGCTCAACAC  
ATGTACTCTTTACCTGCTTATGCGTTTATAGCACAAGACTTTACCACTCAAGCTGCGTTA  
TATACTCATCATCAATACATTGCAGGATTTATTATGACAGGGGCTTTTGCTCATGGAGCTA  
TCTTTTTTATTAGAGATTACAATCCCGAACAGAATGAGGATAATGTATTGGCAAGAATGT  
TAGAGCACAAAGAAGCTATCATATCCCATTTAAGTTGGGCCAGCCTATTTCTGGGGTTC  
CATACTTTGGGACTTTATGTCCATAATGATGTCATGCTTGCTTTTGGCACTCCGGAGAAA  
CAAATCTTGATCGAACCTATATTTGCCCAATGGATACAATCTGCTCATGGGAAACTTCA  
TATGGGTTTCGATGTACTTTTATCTTCAACGAATAGTCCGGCGCTCAATGCGGGGCGAAG  
CATATGGTTGCCTGGATGGTTAAATGCTATTAATGAG-----AATAGTAATTCTCTATTCTTA  
ACAATAGGGCCTGGAGACTTCTTGTTTCATCATGCTATTGCTCTTGTTTACATACAACT  
ACATTAATCTTAGTAAAAGGTGCTTTGGATGCGCGCGGTTCCAAGTTAATGCCGGATAA  
AAAAGATTTTGGTTATAGTTTCCCTTGCGATGGTCCGGGACGAGGTGGTACTTGTGATA  
TTTCGGCTTGGGACGCATTTTATTTAGCAGTTTCTGGATGTTAAATACCATCGGATGGG  
TTACTTTTTTATTGGCATTGGAAGCACATTACATTATGGCAGGGTAATGTTTCACAATTA  
ACGAATCTTCGACCTATTTGATGGGATGGTTAAGAGATTATCTATGGTTAAATTCTTCAC  
AACTTATCAATGGATATAACCCTTTTGGTATGAATAGTTTATCAGTCTGGGCGTGGATGT  
TCTTATTTGGACATCTTGTTTGGGCTACTGGATTTATGTTCTTAATTTTCATGGCGCGGATA  
TTGGCAGGAATTGATTGAAACTTTAGCATGGGCTCATGAACGCACACCTTTGGCGAATT  
TGATTTCGATGGAGAGATAAACCAGTGGCTCTTTCCATTGTGCAAGCAAGATTGGTTGGA  
TTAGTCCACTTTTCGGTAGGTTATATATTTACTTATGCTGCTTCTTGATTGCCTCTACATC  
AGGTAAATTTGGTATGTCCCATTCAGTAAAGATTTATGATACATGTATAGGATGTACTCA  
ATGTGTCCGAGCCTGTCCACAGATGTATTAGAAATGATACCTTGGGATGGATGTAAAG  
CTAAGCAAATAGCTTCTGCCCAAGAACAGAGGACTGTGTAGGTTGTAAGAGGTGTGA  
GTCCGCTTGTCCGACGGATTTCTTAAGTGTTCGAGTTTATTTATGGAGTGAAACAACCTC  
GAAGTATGGGTCTATCGTATATGATA-----AACTTACCGTCCCTTTTTGTTCCCTTTAGTGG  
GCCTAGTATTTCCGGCAGTTGCAATGGCTTCTTTATTTCTTCATGTTCAAAAAACAAGA  
TTTTTATGCGAGATCTAAAACATATCTCTCTGTGGCACCAGTGGCAAGTACTCTATGGT  
TCGCGGCTCTAGCGGGTCTCTTGATAGAAATCAATCGTTTATTTCCGGATGCATTGACAT  
TCCCCTTTTTT-----ATGACTGCAATTTTAGAGAGACGCGATAGCGAAAACCTATGGGGT  
CGCTTCTGTAACCTGGATAACCAGCACTGAAAACCGTCTTTACATTGGATGGTTTGGTGT  
TTTGATGATCCCTACCTTATTGACCGCAACTTCTGTATTTATTATCGCTTTCATTGCTGCC  
CCTCCTGTAGATATTGATGGTATTCGTGAGCCTGTTTCTGGATCTCTACTTTACGGAAAC  
AATATAATTTCGGGTGCCATTATTCCTACTTCTGCGGCTATCGGTTTGCATTTTACCCGA  
TATGGGAAGCTGCATCCGTTGATGAGTGGTTATACAACGGCGGTCCTTATGAACTAATC  
GTTCTACACTTCTTACTTGGTGTAGCTTGTACATGGGTTCGTGAGTGGGAACTAAGTTT  
TCGTCTGGGTATGCGCCCTTGGATTGCTGTTGCATATTCAGCTCCAGTTGCAGCTGCTAC  
TGCAGTTTTCTTGATCTACCCAATTGGTCAGGGAAGCTTTTCAGATGGTATGCCTCTAG  
GAATCTCTGGTACTTTCAACTTTATGATTGTATTTACAGGCTGAGCATAATATTCTTATGCA  
TCCGTTTCACATGTTAGGTGTAGCTGGTGTATTCGGCGGCTCCCTATTAGTGCTATGCA  
CGTTTCCCTGGTAACTTCTAGTTTGTATCAGGGAACTACAGAAAATGAATCTGCGAATG  
AAGGTTACAGATTCGGTCAAGAGGAAGAAACCTATAATATTGTAGCTGCTCATGGTTAT  
TTTGGCCGATTGATCTTCCAATACGCTAGTTTCAACAACCTCTCGTTCTTTACATTTCTTC



CTAGCTGCTTGGCCTGTAGTAGGTATCTGGTTTACCGCGTTAGGTATCAGTACTATGGCT  
TTCAATTTAAATGGATTTAATTTTAACCAATCCGTCGTTGATTCTCAAGGTCGTGTAATT  
AACACCTGGGCTGATATTATTAACCGTGCTAACCTTGGTATGGAAGTTATGCATGAACGT  
AACGCTCATAATTTCCCTCTAGACCTAGCTGCGGTTGAAGCTCCATCTATAAATGGAATG  
GGTTTGCCTTGGTATCGCGTTCATAACCGTTGTATTAATGATCCCGGACGTTTACTTTCT  
GTCCATATAATGCATACAGCTCTGGTTGCTGGTTGGGCCGTTTCGATGGCCCTATATGAA  
TTAGCAGTTTTTGTATCCCTCTGACCCCGTTCTTGACCCGATGTGGAGACAGGGTATGTT  
CGTTATACCCCTCATGACTCGTTTAGGAATAACCAATTCGTGGGGTGGTTGGAATATCAC  
A--GGAGGGACTATAACGAATCCGGGTATTTGGAGTTACGAAGGGGTGGCCGCGGCAC  
ATATTGTGTTTTCGGGCTTGTGCTTTTTGGCGGCTATTTGGCATTGGGTCTATTGGGATCT  
AGAAATCTTTTGTGATGAACGTAAGTGGAAAACCTTCTTTGGATTTGCCAAAAATATTTG  
GCATTCATTTATTTCTAGCAGGGGTGGGGTGTTTTGGTTTTGGAGCATTTCATGTAACAG  
GATTGTTTTGGTCCCTGGAATATGGGTATCCGATCCTTATGGACTAACTGGAAGGGTACAAT  
CTGTCAATCCCGCATGGGGTGTGGACGGTTTTGATCCTTTTGTTCGGGTGGAATAGCC  
TCTCATCATATTGCAGCAGGGACACTGGGCATATTAGCGGGCCTTTTCCATCTTAGTGTG  
CGTCCACCTCAACGTTTATACAAGGGGCTGCGTATGGGAAATATTGAAACCGTACTTTC  
TAGTAGTATCGCTGCTGTATTTTTTGCAGCTTTTGTGTTGCTGGAACCATGTGGTATGG  
TTCAGCAACGACCCCGATTGAATTATTTGGTCCACTCGTTACCAATGGGATCAGGGAT  
ACTTCCAGCAAGAAATATATCGAAGAGTTGGTGTGCTGGGCTAGCCGAAAATCAAATTTA  
TCAGAAGCTTGGTCTAAAATTCCTGAAAAATTAGTTTTTTATGATTACATCGGCAATAAT  
CCGGCAAAGGGGGATTGTTTCGAGCGGGCTCAATGGACAATGGAGATGGAATAGCC  
GTTGGTTGGTTAGGGCATCCTATCTTTAGAGACAAGGAGGGGCGTGAACTTTTTGTACG  
TCGTATGCCTACTTTTTTTGAAACATTTCCGGTTGTTTTGGTAGACGGAGACGGAATTG  
TTAGGGCGGATGTTCCTTTTCGAAGGGCGGAATCGAAGTATAGTGTGCAACAAGTCGG  
TGTAAGTGTGAATTCTATGGTGGCGAACTCAATGGAGTCAGTTATAGTGATCCTGCTA  
CTGTGAAAAAATATGCTAGACGTGCTCAATTGGGTGAAATTTTTGAATTAGATCGTGCT  
ACTTTAAAATCGGATGGTGTTTTTTCGTAGCAGCCCAAGGGGCTGGTTTACTTTTGGACA  
TGCCTCGTTTGTCTGCTCTTCTTTTTTCGGGCACATTTGGCATGGTGCTAGAACCCTTGT  
CAGAGATGTTTTTGTGGTATTGATCCAGATTTAGATGCTCAAGTAGAATTTGGAGCATT  
CCAAAACTTGGAGATCCAACACAAAAAACAGGTAGTCATGAAAACCTTATATTCC  
CTGAGGAGGTTCTACCACGTGGAACGCTCTTTAATGGAACTTTAGCCTTAACTGGTC  
GTGACCAAGAACTACCGGTTTTGCTTGGTGGGCCGGGAATGCCGACTTATCAATTTA  
TCCGGTAAACTGCTGGGGGCCCATGTAGCCCATGCCGATTAATAGTATTCTGGGCCGG  
AGCAATGAACCTATTTGAAGTAGCTCATTTTCGTACCCGAAAAGCCCATGTATGAACAAG  
GCTTAATTTTACTTCCCCATCTAGCTACTCTAGGTGGGGGGTGGGTCCCTGGAGGGGAA  
GTTATAGACACCTTTCCATACTTTGTGCTGGAGTACTTCACTTAATTTCTCCGCGGTA  
TTGGGTTTTGGGGTATTTATCATGCACTTCTGGGACCCGAGACTCTTGAAGAATCTTT  
TCCATTCTTTGGTTATGTATGGAAGATAGAAATAAAATGACTACTATTTTAGGTATTCA  
CTTAATTTTGTAGGTATCGGGGCTTTTCTTCTAGTATTTAAGGCTTTTTATTTTGGAGGT  
ATATATGATACCTGGGCTCCGGGAGGGGGAGATGTAAGAAAAATTACTAACTTAAACCCT  
TAGTCCAAGTATTATATTTGGTTATTTACTAAAATCTCCTTTTGGCGGAGAAGGGTGGAT  
TGTTAGTGTGGACGATTTGGAAGACATAATTGGAGGGCATGTATGGTTAGGTTCCATTT  
GTATACTTGGTGAATCTGGCATATCTTAAACCAAACCTTTGCATGGGCCCGGCGTGCA  
CTAGTCTGGTCTGGAGAAGCTTACTTGTCTTATAGTTTAGCCGTTTTATCCGTTTTTGGT

TTTATAGCTTGTTGCTTTGTCTGGTTTAATAATACTGCTTATCCTAGTGAGTTTTATGGTC  
CCTTGGAGCTAATGTAGGGTCTGCTCAAGGACCTACTGGTTTAGGTAATATCTAATGC  
GTTTCGCCGACCGGAGAAGTCATTTTTGGGGGAGAACTATGCGTTTTTGGGATCTGCG  
TGCTCCTTGTTAGAACCTCTAAGAGGTCCTAATGGTTTGGACTTGAGTAGACTGAAA  
AAAGACATACAGCCGTGGCAAGAACGTCGTTCCGCAGAATATATGACTCATGCTCCCTT  
AGGTTCTTTAAATCCGTGGGTGGCGTAGCTACAGAAATTAATGCAGTCAATTATGTCT  
CTCCTAGAAGTTGGTTAGCTACTTCTCATTTTTGTTCTAGGATTCTTCCATTTCGTAGGTCA  
TTTATGGCACGCGGGAAGAGCTCGCGCAGCGGCCGAGGATTTGAAAAAGGAATTGAT  
CGAGATTTAGAGCCTGTTCTTTCCATGACTCCTCTTAATATGACTATAGCTCTTGGTAAA  
TTTACCAAAGATCAAATGATTTATTTGATATTGTGGATGACTGGTTACGGAGGGACCG  
TTTTGTTTTTGTGGGTTGGTCCGGTCTATTACTCTTTCCTTGCGCCTATTTTGCCGTGGG  
GGTTGGTTCACGGGTACCACCTTTGTAACCTTCGTGGTATACTCATGGATTGGCAAGTT  
CCTATTTAGAAGGTTGTAACCTCTTAACCTGCGGCAGTCTCTACTCCTGCTAATAGTTT  
CACATTCTTTGTTGTTACTGTGGGGTCTGAAGCACAGGGAGATTTACCCGTTGGTGT  
CAATTAGGTGGTCTGTGGACTTTTGTGCTCTTCACGGTGCTTTCGGATTAATAGGTTTT  
ATGTTACGTCAATTTGAACTTGCTCGATCTGTTCAATTGCGGCCTTATAATGCAATCGCA  
TTCTCCGGTCCAATTGCTGTTTTTGTCTGTATTCTGATTTATCCACTGGGTCAGTCT  
GGTTGGTCTTTGCACCTAGTTTTGGTGTAGCAGCTATATTCGATTCATTCTCTTTTTCC  
AAGGGTTTCATAATTGGACATTAACCCATTTTCATATGATGGGAGTTGCTGGTGTATTGG  
GCGCCGCCCTATTATGCGCTATTCATGGCGCTACCGTAGAAAATACCTTATTTGAAGATG  
GGGATGGTGCAAATACATTCCGTGCTTTTAACCCAACCCAAGCGGAAGAACTTATTC  
AATGGTCACCGCTAACCGCTTTTGGTCCCAAATCTTTGGGGTTGCTTTTTCCAATAAAC  
GTTGGTTACATTTCTTTATGTTATTTGTCCAGTAACTGGTTTATGGATGAGTGCTCTTGG  
AGTAGTCGGTCTGGCCCTGAACCTACGTGCCTATGACTTCGTTTCTCAAGAAATCCGCG  
CAGCGGAAGATCCTGAATTTGAGACTTTCTACACCAAAAATATTCTCTTAAACGAAGGT  
ATTCGTGCGTGGATGGCGGCTCAAGATCAGCCTCATGAAAACCTTATATTCCCTGAGGA  
GGTTCTACCACGTGGAAACGCTCTTATGTCTGGAAGCACAGGAGAACGTTCTTTTTGCT  
GATATTATTACCAGTATTCGATACTGGATTATTCATAGCATTACTATAACCTCCCTATTCAT  
TGCGGGTTGGTTATTTGTCAGCACGGGTTTAGCTTACGATGTATTTGGAAGCCCCCGTC  
CAAATGAGTATTTACGGAAAGCCGACAAGGAATTCATTAATAACCGGCCGTTTTGAT  
TCTTTGGAACAACCTCGATGAATTTAGTAGATCTTTTATGACTATAGATAGGACCTATCCC  
ATTTTTACAGTACGATGGTTGGCTGTTCATGGACTTGCGATACCCACCGTTTCTTTTTTG  
GGATCAATATCAGCTATGCAGTTCATCCAACGAATGGCTACACAAACCGTTGAGGGTAG  
TTCTAGATCTGGT--CCAATACGAACTGTTGTAGGAGATTTATTAACCAATTGAATTCA  
GAATATGGAAAGGTAGCTCCGGGGTGGGGAACCTACCCCTTTGATGGCGATTGCAATGG  
CTCTATTTGCAGTATTTCTCTCTATTATTTAGAGATTTATAATTCGTCCATTTACTGGAT  
CAAATTTCTATGAATATGCTTACTCTAAAACCTATTTGTTTACACGATAGTGATATTCTTTG  
TTCTCTTTTCATCTTCGGATTCTGTCTAACGACCCAGGACGTAATCCTGGACGTGAA  
GAAATGGCCGATACTACTGGAAGGATTCCTCTTTGGATAATAGGTACTGTAACCTGGTATT  
GTCGTAATGGTTTAGTTGGTATTTCTTTTATGGTTCATATTCGGATTGGGATCATCCC  
TGATGCTTAATATCTTTAGCTTGGTCTGTATTTGTATTCACTCTGCCCTTTATTCAAGTAG  
TTTTTTCTTGGCGAAATTACCTGAAGCCTACGCTTTTTTTGAATCCAATGTAGATTTTAT  
GCCAGTAATACCTTACTATTTTTTCTCTTAGCTTTTGTGGCAAGCCGCTGTAAGTTT

TCGAACGACACAATCAAACCCAAATGAACAAAATGTTGAATTGAATCGTACCAGTCTG  
TACTGGGGTTTATTACTCATTTTTGTACTTGCTGTTTTATTTCAAATATTTCTTCAATAT  
GGAAGTAAATATTCTCGCATTATAGCTACTGCCTTTCATTCTAGTTCCCTACTGCCTTT  
TTACTTATAATTTATGTAAAAACGGTAAGTCAAAGTGACATGGAAACAGCAACCCTAAT  
TGCCATCTCTCTATCCGGTTTAATTGTTAGTTTTACTGGGTATGCCTTATATACTGCTTTT  
GGGCAACCCTCTTTACAATAAGAGATCCATTGGAAGAACACGGGGACATGGAAGCAT  
TGGTTTATACATTCCCTCTTAGTCTCGACTTTAGGAATCATTTTTTTCGCTATCTTTTTTAG  
AGAACCCTCTATAGTTCCGACTAAAAAGACGAAAATGACTATTGCTTTTTCAATTAGCTG  
TTTTTGCATTAATTGTTACTTCATCCATTTTATTGATTAGTGTACCTGTTGTATTTGCTTCT  
CCTGACGGTTGGTCAAGTAACAAAATGTTGTATTTCCGGTACATCCTTATGGATTGG  
ATTAGTATTTCTAGTGGGTATTCTTAATTCTCTCATCTCT-----ATGGCACCAC  
AACAGAACTAAAGCAAAGGTTGGGTTCAAAGCTGGTGTTAAAGATTATAGGTTGAC  
TTATTACTCCTGACTATGAAACCAAAGATACTGATATCTTGGCAGCATTCCGAGTAAC  
TCCTCAACCCGGAGTTCCGCCGAAGAAGCAGGTGCAGCGGTAGCTGCCGAATCTTCC  
ACTGGGACATGGACAACCTGTGTGGACCGATGGACTTACCAGTCTTGATCGTTATAAAG  
GACGCTGCTATCACATCGAGCCTGTTGCTGGAGAAGATACTCAATTTATTGCTTATGTAG  
CTTATCCCTTAGACCTTTTTGAAGAAGGTTCTGTTACTAACATGTTTACCTCTATTGTAG  
GTAATGTATTTGGATTCAAAGCCTTGCCTGCTCTACGTCTGGAAGATTTGCGAATCCCC  
GTTGCTTATGTTAAACTTTCCAAGGTCCTCCTCACGGAATCCAAGTTGAGAGAGATAA  
ATTGAACAAGTATGGACGTCCCTATTGGGATGTACTATTAACCTAAATTGGGTTTATC  
CGCTAAGAATTATGGTAGAGCTGTTTACGAATGTCTACGCGGTGGACTTGATTTTACAA  
AAGATGATGAAAATGTGAACTCCCAACCATTATGCGTTGGAGAGACCGTTTCTTATTT  
TGTGCCGAAGCTATTTATAAATCACAGGCCGAAACAGGTGAAATCAAAGGACATTATTT  
GAATGCAACTGCGGGCACGTGTGAAGAAATGATAAAAAGGGCTGTATTTGCTAGAGAA  
TTGGGCGTTCCTATCGTAATGCACGACTACTTAACGGGTGGATTCACTGCAAATACTAC  
CTTGGCTCACTATTGCCGCGATAATGGTCTACTTCTTCATATCCACCGTGCAATGCATGC  
AGTTATCGATAGACAGAAAATCATGGTATGCACTTTCGTGTATTAGCTAAAGCGTTAC  
GTTTGTCTGGTGGAGATCATATTCACGCCGGTACTGTAGTAGGTAAACTTGAAGGAGAA  
AGGGAGATTACTTTAGGTTTTGTTGACTTACTACGTGATGATTATGTTGAAAAAGATAG  
AAGTCGCGGTATTTTTTCACTCAGGATTGGGTTTCTTTACCGGGTGTCTGCCTGTTGC  
TTCAGGAGGTATCCACGTTTGGCATATGCCCGCTCTGACCGAGATTTTTGGAGATGATT  
CTGTACTTCAATTCGGCGGAGGAACTTTAGGACACCCTTGGGGAAATGCACCAGGTGC  
CGTAGCGAATCGAGTCGCTCTGGAAGCATGTGTACAAGCTCGGAATGAGGGACGTGAT  
CTTGCTCGTGAGGGAAATGATATTATCCGTGCAGCTGGCAAATGGAGTCCTGAATTAGC  
CGCTGCTTGTGAAGTCTGGAAGGAGATCAAATTCGAATCCCAGCAATGGATACTTTG--  
---ATGGCGATACATTTATACAAAATCTTATCCCAGCACACGCAATGGAGCCGTAGAC  
AGTCAAGTGAAATCA-----AATCGTTTGATTTCGGGACAGCATCATTGTGGTAAAGGC  
CGTAATGCTAGAGGAATCATTACCGCAGGGCATAGAGGGGGGGGTCATAAGCGTCTATA  
CCGTAATAATTGATTTTCGACGGAATGAAAAAGACATATATGGTAGAATCGTAACTATAG  
AATATGACCCTAATCGAAATGCACGCATTTGTCTCATACTATGGGGATGGTGAGAAA  
GGATATATTTTACACCCAGAGGGTCTAGAATTGGAGATACCGTTGTTTATGGTACAGA  
AGTTCCGATAAAAATGGGAAATGCCCTACCTTTGACTGATATGCCCTTAGGCACGGCCA  
TACATAACATAGAATAACACTTGGAAAGGGGGGACAATTAGCTAGAGCAGCAGGTGC  
TGTAGCGAAACTGATTGCAAAGAGGGGAAATCGGCAACATTAATAATTACCTTCTGGA



GAACATGTATCACACGTGCAAAATCTGAG-----AAAATACCACATGAATATTCTACCATA  
GTAGGTATTCAAGAATCAATACATGAAATTTTAATGAATTTGAAACAAATTGTATTGAGA  
AGTAATCTGTATGGAACCTCGAGACGCGTCCATTTGTTTCAAAGGTCCTGGATATGTAAC  
TGCTCGAGACATTATTTTACCACCTTCGGTGGAAATCGTGGATAATACACAACATATAGC  
TAACCTAACAGAACCTATTAATTTGTGTATTGAATTACAAATTGAGAGGGGCGCGGGGAT  
ATCGTAAAAAACAATAGACAACATTCAAGATGGAAGTTAT-----ACTATAGATGTAGTA  
TTCATGCCTGTTATACATGCAAATTATAGTATTCAATTCTTATCTGAACGCTAATGAAAAAC  
AAGAGATACTCTTTCTCGAAATATGGACAAATGGAAGTTAACCCCTAAGGAAGCACT  
TTATGAAGCCGCCCAGAAATTTGATTGATTTGTTTATTCCTTTTTTACACGCAGAAGAAGA  
A-----AACTTTCATTTTAAAACAATCAA---CACAAAGTTACTTTACCCCTTTTTGCTTTT  
CATGATAGATTAGTTAAGAACTAAGAAAAATAAAAA---CAAATTGAATTGAAATCC  
GTTTTTATTGACCAATTAGAATTGCCTCCCAGGATTTATAATTGTCTTAAAAAGTCCGAT  
ATACATACATTATATCAACTTTTGAATAAGAGTCAAGAAGACCTTATGAAAATTGAAGAT  
TTTAGCGTAGAAGATGTAATAATATATTAACATTTTACAAATCGACCAGCATTTTGCA  
TTAATT-----ATGCATGGCGTTGGGAAT--GAAGGAATGTCTACACTACCCGGATT  
GAATCAAATACAATTTGAAGGATTTGTAGATTCATTGATCGGGGCTTAACAGAAGAAC  
TTTTGAAGTTTCCAAAAGTGAAGATACGGATCAAGAAATTGAATTTTCAAGTTATTTGTG  
GAAACATATCAATTGGTAGAACCTCGATAAAAGAAAAAGATGCTGTATATGAATCACT  
TACATATTCCTCTGAATTCTATATATCCGCGGGATTAATTTGGAAAAACAGTAGTGCTATC  
CAAGAACAAATTATTTTTATTGGAAACATTCTCTAATGAATTCTTTGGGAACCTTCTATA  
GTAAATGGAATATACAGGGTTGTAATCAATCAAATATTACAAAGCCCTGGTATCTATTAT  
CGTTCTGAATTGGACCATAACGGAATTCAGTCTATACTGCGACAATAATATCAGATTGG  
GGAGGAAGATTAGAGTTAGAAATGGATAGAAAAGCAAGGATATGGGCTCGTGTAAGTA  
GGAAACAGAAAATATCTATTCTAGTTCTATCATCAGCTATGGGTTTGAATTTAAGCGAAA  
TTCTTGAGAACGTTTGCTACCCTGAAATTTTCTTGTCTTTCCTCAATGAAAGGGAGGAG  
GAAAAAATAGGGTCAAAGAAAATGCCATTTTAGAGTTTTATCGACAATTTGCTTGTGT  
AGGCGGAGATCCCATATTCCTGAATCTTTATGTGAGGAATTACAAAAAAATTTTTTC  
AACAAAGATGTGAATTAGGAGGAATTGGTCGGCGAAATATGAACCGAAGGCTGAATAT  
TGATATACCCGAGAACAAATCCATTTTTGTTACCGCGAGATATATTGACAGCTGCAGATCA  
TTTGATTGGAATGAAATTTGGAATGGGTACACTTGACGAT-----ATGAATCATTTGAAAA  
ATAACGTATTCGTTCCGTAGCAGATCTTTACAAGATCAATTTGGGTTGGCTCTCGTTC  
GTTTAGAAAATATAATTAGAGGAACTATATCTGGAGCAATTAGA---TATAAATGGATA---C  
CGACCCCTCAGAATTTAGTGACTTCAACTCCA-----TTAACAACCACTTATGAATCT  
TTTTTTGGATTACACCCATTATCTCAAGTTTTAGATCGAACCAATCCGTTGACCCAACTA  
GTTTCATGGGAGAAAATGGAGTTATTTGGGTCCTGGGGGATTGACGGGGCGAACTGCGA  
GTTTTCGGATACGGGATATCCATCCTAGTCACTATGGGCGCATTTGTCCAATTGACACCT  
CTGAAGGAATCAATGTCGGACTTATTGGATCCTTGGCAATTCACGCAAGGATTGGTTCGT  
TGGGGG---TCCATAGAAAGTCCATTTTAT-----GAAATTTAGAGAGATCAAAAAGA---  
---ATACGAATGCTTTATTTATCACCAGTAGAGATGAATACTATATGGTAGCGACGGGAA  
ATTATTTAGCACTGAATCGAGATATTAGGAGGAGCAGATTGTTCCAGCTCGATACCGT  
CAAGAATTTCTGACTATTGCATGGGAACAGGTTTCATCTTGAAGTATTTTTCCCTTTCAA  
TATTTTTCTATTGGAGCTTCCCTCATTCCTTTTATCGAGCATAATGATGCGAATCGAGCTT  
TAATGAGTTCTAATATGCAACGTCAAGCAGTTCTCTTTCTCGGTCCGAAAAGTGCATT  
GTTGAACTGGATTGGAACGCCAAGTGGCCTTAGATTAGGAGTCCCGCTATAGCCG

AACACGAGGGAAAGATCGTTTATAAGGATACTGACAAGATCGTTTTATTGGAAATGGG  
AATGCTCTAAGCATTCCATTAATTATATATCAACGTTCCAACAAAAATACTTGCATGCAT  
CAAAAATCCCAGGTTGAAAAAGGTAAATGCGTAAAAAGGGGACAAATTTTAGCAGAT  
GGTGCTGCTACAGTTGGTGGGGAACCTCGCTTTGGGAAAAACGTATTAGTAGCTTATAT  
GCCATGGGAAGGTTACAATTCTGAAGATGCTGTACTCATTAGTGAGCGTCTGGTCTATG  
AAGATATTTTACTTCTTTTCATATACGGAAATATGAAATTCAGACTCATGTGACAAGCC  
ACGGT--CCTGAAAGAATCACTAATAAAAATTCCGCATCTAGAAGCCCATTTACTCCGACA  
TTTAGACAAAAATGGAATTGTCATTCTGGGATCTTGGGTAGAAACGGGCGATATTTTAG  
TGGGTAAATTAACGCCTCAAATGGAGAACGAA---TCCTCATATGCCCCGGAAGATAGAT  
TATTACGAGCTATACTTGGAAATTCAGGTATCCGCCTCAAAGAAACTTGTCTAAACTA  
CCCATAGGTGGTAGGGGCCGAGTTATTGATGTGAGATGGATCCACAAAAAAGAA---GCT  
TCTAGCGATCATCCAGAAACAATTCAAATATATATTTACAGAAACGTGAAATCAAAGT  
AGGTGATAAAGTGGCCGGGAGACATGGAAATAAAGGTATCGTTTTCAAAGATTTTGTCT  
AGACAGGATATGCCTTATTTGCAAGATGGAAGACCCGTTGATATGGTCTTCAATCCATTA  
GGGGTACCCTCACGAATGAATATAGGACAGCTATTGGAATGCTCACTCGGGTTAGCTGG  
GAGTAAGCTAAATAGACACTATCGAATAGCACCTTTTGATGAGAGATATGAACAAGAG  
GCTTCCAGAAAACCTTGTGTTTTCTGAATTATATGAGGCCAGTAAAGAAACATCAAATCC  
ATGGATATTTGAACCCGAGTATCCGGGAAAGAGCAGACTATTTGACGGAAGAACGGGG  
AATCCTTTTGAACAGCCTGTTATAATAGGAAAGCCTTATATCTTGAAATTAATTCATCAA  
GTTGATGATAAAATACATGGACGTTCCACCGGACATTATGCACTCGTTACACAACAACC  
TCTTAAAGGAAGGGCCAACCAAGGGGGACAACGGGTGGGCGAAATGGAGGTTTGGG  
CCCTCGAGGGATTCCGGTGTGCTCATATTTACAAGAGATGCTGACTTATAAATCCGATC  
ATATTAACGCTCGTCAAGAAGTACTCGAAACTACGATTAATGGAGGAACAATACCTAAA  
CCTGTGGATGCTCCAGAATCTTTTCGATTGCTCGTTTCGAGAACTACGATCTTTGGCTCT  
GGAACTGAATCATTTCTTGTATCGGAGAAAGACTTCCAGATGCAAAGGAAGGAAGTT-  
-----ATGATTGATCAGTATAAACATCAACACCTTCGAATTGGATCAGTTTCTCC  
TGAACAAATAAGTGCTTGGGCAAAAAAATCCTACCTAATGGAGAAATAGTTGGGGAG  
GTAACAAAACCCTATACTCTTCATTACAAAACCAATAAGCCGGAAAAAGATGGATTATT  
TTGTGAAAGAATTTTTGGGCCTATAAAAAGTGGGATTTGTGCTTGTGGAAATTATCAAG  
TAATCGAAGATAAAAAAGACCAACCAAAATTTTGTGAACAATGCGGAGTAGAATTTGT  
TGATTCTCGGATACGTAGATATCAAATGGGGTATATAAAATTAGCATGTCCAGTGACTCA  
TGTGTGGTATTTGAAACGTCTTCTAGTTATATCGCGAGCCTTTTAGATAAACCTCTTAA  
AGAATTAGAAGGTCTAGTATACTGCGAT-----TCGTTTGCTAGGTCC---GTAGTTAAAA  
AACCAACTTTCTTACGATTACGAGGTTCAATTCGAATATGAAATCCAATCCTGGAAATATA  
GTATCCCACGCTTTTTTGGT---CAAGGTTACGATACATTTGAAATAGAGAAATTTCTAG  
TGGAGCAGGTGCTATACGAGAACAATTAGTTGATCTGGATTTAAGAATTATTATGGATTCT  
CTCGTTGGTAGAATGGAAAGAATTAGGAGAAGAG---GGATCCACTAACAATGAGTGGG  
AAGATCGAAAAGTTGGAAGAAGAAAGAAATTTTTTGGTTTCGACGCATGGAATTAGCTAA  
GCATTTTATCCTTTCAAATATAGAACCAGAATGGATGGTTTTATGTCTCTTACCAGTTCTT  
CCTCCCGAATTGAGACCAATTATTCAAATAGATGGGGGTAAACTAATCAGTTCCGATATT  
AATGAACTCTATAGAAGAGTTATCGGTTCGGAACAATACTCTTATTGATCTATTAACAATA  
AGTAGAGCTACACCAGCGGAATTCGTAATGTGTCAAGAAAAATTGGTACAAGAAGCCG  
TGGATACACTTCTTGATAATGGCATCCGCGGACAACCAATGAGGGACGGTCAGAATAA  
AGTTTACAAATCATTTTCAGATATAATTGAGGGCAAAGAGGGAAGATTTTCGAGAGACTC

TGCTTGGAAAACGGGTGGATTATTCGGGGCGTTCCGTTATTGTTGTAGGTCCATCACTT  
TCATTACATCAATGTGGATTGCCCGCGAAATAGCAATAGAGCTATTTACATACATTTCTA  
ATTCGTGGTTTAATTCGAAAACATTTTGCTTCGAACATGGGAGTTGCTAAGAGTAAAAT  
CCGGGAAAAAGAACCATTGTATGGGAAATACTTCAGGAAGTTATGCGAGGGCATCCA  
GTATTGCTAAATAGAGCGCCTACTTTGCATAGATTGGGCATACAGGCATTTCAACCCATT  
TTAGTAGAAGGACGTGCTATTTGTTTACATCCATTAGTGTGTAAGGGATTCAATGCAGA  
CTTTGATGGAGATCAAATGGCTGTTTCATGTGCCCTTATCTTTGGAGGCTCAAGCAGAAG  
CTCATTTACTTAIGTTTTCTCATAACGAACCTCTTGTCTCCGGCTATTGGGGATCCCATTT  
CGTACCAACTCAAGATATGCTTATTGGACTTTACGTATTGACTAGCGGAAATCGTCGAG  
GTATTGGTGAACAGGTATAATCCGTTTAATTGC-----AGGAATTCTAAAAATGAAAA  
AATGAGAAAAATAACTCCAAGTATATGAAAAA---GAACCCTTTTTTTGCAATTCCTAT  
GATGCAATTGGAGCTTATCGACAGAAAAGAATCAATTTGATAGTCCTTTTTGGCTCCG  
ATGGCCAATAGATGAATGC---ATTATGTCTTCA-----AGAGAAGTTCCTGTTGAAATTCAC  
TATGAATCTTTAGGTACCTATTATGAGATTTATGAACATTATTTAGTAATAAGAGGTATAA  
AAAAAGAAATTCGTTGTATATACATTAGAACCACTGTTGGTCATATTTCTTTTTATCGAG  
AAATCGAAGAAGCTATACAAGGTTTTCTCGAGCCGATTCATATGCTATC-----  
-----ATGGCAGAACGGGCCAATCTAGTCTTTCACAATAACGTGATAGGTGGAAC  
TGCAATTAACGACTTATTAGCAGATTAATAGATCATTTTCGGAATGGCATATACATCACA  
CATCCTGGATCAAGTAAAGACTCTAGGGTCCGTCAAGCTACTGCTACATCTATTTTATT  
AGGAATTGATGATCTTTTAACAATACCTTCTAAAGGATGGCTAGCTCAAGATGCGGAAC  
AACAAAGTTCCATTTTGAAAAACATAATCATTATGGAAATGTACACGCGGTAGAAAAA  
TTACGCCAATCCATTGAAATATGGTATGCTACAAGCGAATATTTGCGACAAGAAATGAA  
TCTAATTTTAGGATGACCGATCCCCTTAATCCAGTTCATATAATGTCTTTTTTTCAGGAGCT  
AGAGGAAATGCATCTCAAGTGCACCAATTAGTCGGAATGAGAGGATTAATGTCAGATC  
CACAAGGACAAATGATTGATTTACCCATTCAAAGCAATTTACGTGAAGGACTGTCTTTA  
ACAGAATATATAATTTCTTGCTACGGAGCCCGTAAAGGGGTTGTAGATACTGCTGTACG  
AACATCAGATGCTGGATATCTTACACGTCGACTTGTGTAAGTGGTTCAACACATTGTTG  
TACGTGCAACAGATTGCGGTACCATCCGCGGGATTCTGTAAATACCCGAAATGGAATG  
ATGGCA---GAAAGAATTTTGATACAAACATTAATTGGTCGTGTAGTAGCAGACGATATAT  
ATATAGGTTTACGGTGCATTGTGCTTAGAAATCAAGATATTGGAATTGGACTTATCAATC  
GATTCATAACT-----TTTCAAACACAACCTATATTTGTTTGAACCCCTTTTACCT  
GTAGGAATACCTCTTGGATTTGCCGATTGTGTTATGGGCGGAGTCCTATTCATGGGGAC  
CTGGTAGAATTGGGAGAAGCTGTAGGTATTATTGCTGGTCAATCTATTGGAGAGCCGGG  
AACTCAACTAACATTAAGAACTTTTTCATACTGGTGGAGTATTCACAGGGGGTACTGCAG  
AATATGTGCGAGCCCCCTCGAACGAAAAATAAAATTTAACGAGGATTTAGTTCACCCT  
ACACGTACACGTCATGGATATCCTGCTTTTATATGTAATATAGAGTTGTATGTAACATCG  
AAAGTCACGATATTATACATAACGTGACTGTTCCACCAAAAAGTTTTCTATTAGTTCAA  
AACGATCAATATGTAATAATCAGAACAAGTGATTGCCGAGATCCGCGCGGGAACATATAC  
TTTT--AATTTGAAAGAAAGGGTTCAAAAACATATTTATTCTGACTCAGAAGGGGAA---A  
TGCATTGGAGTACCGATGTGTATCATGCATCAGAATTTATGTATAGTAATGTACATATCTT  
ACCAAAAACAAGTCATTTATGGATATTATCAGGAAAGTCGTGCAGG-----TCTGATACAA  
TCCATTTTTTACTTCGCAAGGATCAAGATCAAATTCACATTGAT-----TCTCTTTCTAATG  
GAAAAAGAAATACCTCTACTCTTTTT-----GTAAGTGATGATCAC---GTAACATAAAT  
TTTTAGTTTCAAGACTTTTGCTACAAAAGAAAAGGGGATTAGCAATTAT--TCCATATTT

AATCAAACCATATGTACAGATCGTTCTCATTTTATGGATCCTGCT--ATTTTTCACGATAC  
TTTAAAT-----TTATTGGCGAAAAGGCGAAGAAATAGATTTCTTATTCCATTTCCATTCATT  
CAAGAACGAAAGAACGAACATAATGCCCCCTCCGGTGTCTCCGTTGAAATACCTATC---  
--AATGCTATTTTTCATAGCAATAGTATTTTGTCTTATTTTCGATGATCCTCAATACAGAAG  
ACAGAGTTCGGGAATTACTAAATATGGTATTATAGGAATTGATTCCGTTTTTGAAGAA----  
-----GTAGATCAAATTTTTTTTATTCCCGAAGAA  
GTGCATATTTTACCCGAATCTTCTTCCATAATGGTACGGAATAATAGTCTCGTTGGAATA  
GGAACACCAATCACTTGCAATATAAGAAGTCGAGTGGGCGGATTGGTCCGATTAGAAA  
AGAAAAAAAAAAAAATAAAATTAATAATATTTTCTGGAAATATCCTTTTTCCCGGAGAG  
GGGTATAAGATATCCCGAGACAGTGCCATCTTGATACCAGCC---GGAACGGTAAAAAAA  
AAA---CGGAAGGAATCAAAAAA-----ATGAACAATTGGATCTACGTCCACTGG-----AT  
CACAATACTAAGAAAAAG-----TATTTTGTTTTGGTTCGACCTGTAATTTTATATGAAAT  
ACCGGACAGTATCCATTTGTAAACTTTTTCCCAAGATCTATTTTCAGGAAAGGGATA  
ATCTGGAATAAAAGTTGTCAATTATATCGTTATGGAAATGAAAAATCCATTCGGGTAA  
TTCCGACACAGGGATTCAATTAGTTCGGACTTGTTTAGTCTTGAATTGGGATCAAGGC  
AAA-----AAAAGTTCTTCGATTGAAGAGGCCCCCGCTTCTTTGTTGAAGTAAGTACA  
AACGGTTTGGTTGAGTATTTTCTAAGAATTGACTTAGTGAAA---AATACTTCATATATCC  
GAAAAAGAAATGACCCATCTGGTTTAGGATTGATCGCAGAT---AATGAATTGGATCGGA  
TCAATATCAATCCATTT-----TTTTCTATTCATTCC-----AAGGCAAAAATTCAACAATCA  
ATTAGCCAAAATCAC---ACTATTCGTATGTTGTTGAAT-----AGAAATAAGGAATCTCGA  
TCTTGGATAAATTTGTTCATCATCTAATTGTTTT-----CAAATGAGATCATTCAACAATGTAA  
AATATCACAAT-----GGGATAAAAAAAGATAGAATTCCAATTAATAATAAGAATTCGTT  
AGGCCCTTAGGAATA-----GCCCTTCAAGTTGCAAATTTGAATTCA-----CTTTACCGTT  
TCAAACT-----TATAATCAGATCTCA---ATAATTAATAAATTGCAACTTTACAAA-----T  
TAACGGAAATTTTCAAGTAATT-----AAA---TATTATTTAATGGATGAAAATGATAAA-----  
-ATTTTTAAACCGGATCCATACGGTAATATCGTTTTTGAATCCATTCATTTGAGTTGGTAT  
TTTCTCCCGAATTAT-----ACGTTTCCAATAATTAGT---CTTGGACAATTTATTTGTGA  
AAATATATGTATAGCTCAAAACGGACCCCAT---CTAAAATAAATCGGGTCAAGTTCTA  
ACCGTTCAA---ATGGATTCTGTAATAATAAGATCGGCTAACCCTATTTGGCGACTCCAG  
GAGCAACCATTTCATGGCCATTATGGGGAGATACTTTATCAAGGAGATATTTAGTTACAT  
TCCTATATGAAAAATCAAGATCCGGTGATATAACACAAGGTCTTCCAAAAGTGGAACA  
GATATTAGAAATACGTTTCGATTGATTCAATATCAATGAATCTAGAAAAAGAATTGATGC  
TTGGAACGAGTGTATAACAAGAATTCTCGGCACTCCTTGGGGATTCTTGATTGGTGCTG  
AGCTAACTATAGCGCAAAGTCGTATTTCTTTGGTTAATAAAAATCCAAAAGGTTTATCGAT  
CCCAGGGAGTACACATCCATAATAGACATATCGAAATTATTGTGCGTCAAATAACATCCA  
AAGTCTTGGTTTCAGAA-----GATGGAATGTCTAATGTATTTTTACCTGGCGAACTAAT  
TGGATTATTGCGGAGCAGAACGAACGGGACGTGCCTTGGGAAGAAGCTATTTGTTACCGA  
GCTTTATTATTGGGAATAACAAAACATCTCTGAATACTCAAAGTTTCATATCCGAAGCG  
AGTTTTCAAGAACTGCTAGAGTTTTAGCAAAAGCCGCTCTTCGGGGTCGTATCGATTG  
GTTGAAAGGTCTTAAAGAAAATGTAGTTTTAGGGGGAATGATACCCGTTGGTACCGGAT  
TCAAAAGAATAATGGACCGTTCGCGGGCAAGGCAAGAGAAGAGGATTACC-----CTGA  
AAAAAAAAAAAA-----TTATTCGAAGTAGAA---ATT---AGAAATCTTTTGTTCATCACAG  
AAAATTATTGGAT-----ATGACA  
AAAAGATATTGGAACATAACTTTGGAAGAGATGGTGAAAGCTAGAGTTCATCTTGCC



ATCGTACTAGGAAATGGAATCCTCGAATGGAACCTTTTATATTGGCAAAACGGAAAGGT  
ACTCATATTATAAATCTTCTTCGAACTGCTCGTTTTTTATCCGAAGCTTGTAATTTGGTTT  
TTGATGCAGCAAGCGGAGGAAAACAATTCTTAATTGTTGGTACGAAAAAAGTAGCAGT  
CGATTCAGTAAGACGGGCTGCAATAAGAGCTCGATGTCATTATGTTAATAAAAAAATGGC  
TCGGAGGTATGTTAACGAATTGGTATACTACAGAAACGAGACTTCGTAAGTTCAGGGA  
CTTGAGAACGGAGCAAAAAACGGGGAAAATGAACTCTCTTCCAAAAAGAGATGCCGC  
TAGGTTGAAGAGACAATTATCTCATTGGAAGATATCTGGGCGGCATAAAATATATGA  
CAGGGTTACCCGATATTGTAATAATCCTTGATCAGCAAGAAGAATATACGGCTCTTAGA  
GAATGTATCACTTTGGGAATCCAACGATTTCTTTAATCGATACAAATTCTGACCCAGAT  
CTCGCGAATTTTTCGATTCCGGCTAATGATGATTCTATAGATTCAATCCGCTTCATTCTTA  
ACAAATTAGTTTTGCAATTTGTGAGGGTTCGTTCTAGC---CAGATACGGAATTTTATGGG  
ACAAAAATACATCCGCTCGGTTTCAGACTTGGTACAACCTCAAATCATGATTCTATTT  
GGTTTGCAAAACCAAGAGATTATCCGAGAATCTAAAAGAAGATAAAATAATACGAGA  
TTGTATCAAGAATTATCTACAAAAACA-----TCCTCT--GGTGTGAGGGGAATTGGAC  
GAATAAAGATTAAAAAAGAATCGATCTGATTCAA-----ATCTATGTAGGACTTCCAAG  
TTATTCATAGAGGGGGAGCCTCGA-----AGAATCGAAGAATTACAGACTAATGTGC  
AAAAAAACTTAATTGTGTGAACCGAAAAATCAACATTGCAATTACAAGAATTCCAAA  
TGTTTATAGAGACCCTAATATTCTTGCAGAATTTATAGCTGGACAATTAAGAATAGAAT  
TCCGTTTCGTAAAGCAATCCAAAAAGCTATTGAATTAGCTGAACAGGCAGGTACAAAA  
GGAGTTCAAGTACAAATTTCCGGACGTATCGACGGAAAAGAAATTGCACGTGTGCAAT  
GGTTCAGAGAAGGTAGGGTTCCTCTACAAACCATTTCGAGCTAAAATGGATTATTGTTC  
TATCCAGTTCGAACTATTTATGGGGTATTAGGAATCAAAGTTTGGATATTTCTAAACAAC  
GACATGTCACGTTACAGAGGTCCTCGTTTCAAAAAAATACGTCGTCTGGGGGCTTTAC  
CCGGACTAAGTAAACGGCCTACAGATGGAAGCAAACCTTAGAAACCAATCGCCGCC  
CACTCAA---AAATCTCAATACCGTATTCGTTTAGAAGAAAAACAAAAATTGCGTTTTCA  
TTATGGTCTTACAGAACGACAATTGCTTAAATACGTTTCGTATCGCTGGAAAAGCCAAAG  
GGTCAACCGGTCAAGTTTTACTACAATTACTTCAAATGCGTTTGGATAACATACTTTTTC  
GATTGGGTATGGCTTCGACTATTCCTCAAGCTCGTCAATTAGTTAACCACAGGCATGTTT  
TAGTTAATGGTCGTATAGTAGATATACCGAGTTATCGTTGCAAACCCCAAGATATTATTAC  
AGCAAAGGGCGAACAAAAATCTAGAACTCTGATTCAAATTTCTCTTGAATCATCCCC  
CGC---GGAGCATTGCCAACCCATTTGACTCTTCATCCACTCAA-----TATAAAGGATTAG  
TCAATCAAATAATAGATAGTAAATGGGTTGGTTTGGAAATGAATGAATTGCTGGTTGTA  
GAATATTATTCTCGTCAGACTATGTCACGGCGAGGTAAGTGCAGAAAAAAAACCGCAA  
AATCCGATCCAATTTATCGTAATCGATTAGTTAACATGTTGGTTAACCGTATTATGAAAC  
ACGGAAAAAATCACTGGCTTATAAAATTATCTATCGAGCTTTGAAAAGGATTCAACAA  
AAGACAAAAACAAATCCACTATATGTTTTACGTCAAGCAATACGTAGGGTAACTCCCAA  
TATAGCAGTAAAAGCAAGACGCGCAAGCGGATCGACTCGGCAAGTTCCCCTTGAATA  
GGATCCACAAAAGGAAAAGCACTTGCATTCGTTGGTTATTAGGGGCATCCCGAAAAC  
GTCCGGGTGCAAATATGGCTTTCAAATTAAGTTCCGAATTAGTGGATGCTGCCAAAGGG  
AGTGGCGATGCCATACGCAAAAAGGAAGAGACTCGTAGAATGGCGGAGGCAAATAGA  
GCTTTTGCACATTTTCGTGTGGGTAAAGATACTATCGCTGATATACTAACCTTGATACG  
AATGCTGACATGAATGGAAAAGAACGGTTCAAATACCACTTACTAATATTATCGAAAC  
CATGTGAAAATTTCTTTTACAAGAGGGTTTTGTTGAAAACGTCAGAAAACATCGAGAA  
AGCAACAAAGACTTTTTAGTTTTAACTCTACGGTATAGAAGA-----AATAGGAAAAGAT







TCGATCGCAGACATTTCTGGAACACCTTTAACAGAGGAAGAGATAGTGAATTTTGAAA  
GAACTAACTGTCAGCCTCTTTCCGATATGAATCTGCCTGATTCAGAGGGGAAGAACTTG  
CATCAGTATCTCAAT-----TTCGATTCAAACATGGGTTTGATTCACACTCCATATTCTGAG  
AAATATTTACCATCCGAACAG-----AGGAAAAAA-----CATAGTTCTTGTCT  
AAAA-----AAATCCCTTGAAAAAGGGCAGGTGTATAGAACTTTAAAAGA-----CGTTTG  
TCAACTCTCTACAAATTGAAGAGATTCCGACGATATATCATATGGTTTCTTACTGGGACC  
ACGCACAAATATCTCAATTTAATATTGAGAGAGACTTTTTTCAGACCTATTGGCGATACTA  
AGGAGGAGTCCTAAATTTCAAAAATTTGTCTCCATTTTTTCATGATATTATCTATAGGCGT  
CGAATTCTTTGG-----AAAAAGTGGAGT-----CTTTCACAACGGAATCCT--  
ATAAGTAAGATTTCAAGTAAGTGTTTACATAATTTTCGTGTATCCATGTTACAATATTTT  
TTAACCCAAATAATGAGTCA-----GCATTGATATCGACACGTTTGAGATGGCTAAATATTG  
AGGAGTTC--CTCTTTTCAATCCTTCTCCTTCTTCTTGTACTGGATAT--CTCGTTCAT--  
ACACTTTCATTTGTTTCTCAA-----TTCAAT--GAGTTACAGAAAGAGTTCGAACAGGTC  
AAATCTTTTATGATTCCCTCATAATGATTGAGTTGCGAAAACCTTCTGGATAGGTATCCT  
CCATCGGAACTGAATTCTTTCGGGTAAAAAATATCTTTCTAGTCGCTCGGGAACAATT  
AAAAAATTTTCTAGAAGAAAGACGAGGTTTCGGCTTCTGGCGGCAACATGCTAAGGGG  
TGGTGGTCCC-----GCTTATGGA--GTCAA-----  
---GATCTCCTAAGTATTATACCAAATCCCGCCAATCGAATCAAGTTTTTGATAAATACGA  
GACATTTTAGTCATACAAGTAAAGCGATTTATTCCTTGATACGAAAAAGAAAATATGTG  
AAGAGTGATTTTTTTTCTGATAAAATAGAATCCTGGATCATGAAGACCGATTCGTTGCT  
GAAAAAGAAAAGAATTCTTGTTTCAGTTCTCT-----GCCTAACGACAGAA---GAAAA  
AAGGATTGATCAAATTTTATTGAGTCTGACG---AATAGTGATCATTATCA-----AA  
AAATAATTCTGGTTATCAAATGATGGAGCAACCGGGAACAATTTATTTACGATATTTAAT  
GGACATTCAG-----AAAAAGACCTAATGACTTATGAGTTCAATCCATTCTGCTTAGCAG  
AAAGACGGATATTCCTCGCTCATTGTGACACAATCACTTAT-----GTAGAAAACCTGCGT  
AGGACTAGTAGTTTGGGTTTACCATCTCGTGG-----AAACCTTTTCGCTACGCTTAA  
CCTTATCCCTCCT--AGGGGTGTTTTAGTGATAGGTTCTAGAGGAACTGGACGATCTTA  
TTTGGTCCGATATTTATCGACAAATCCCATGTTCTTTTATTACAGTTTTTTCTAAACGA  
GTTTCTGGATTACTTTCCAGAGGGTTTGGAGCTTGACTATGAT-----AATGATGAGGAT---  
--GAGAACGAGGGTACCATTTACAGTCTTTTACCTGATTTTTTCGATCGTTGCTTTAATAT  
CAATAAGTTTCGTAGTGAAGAT-----CTCGACTGTAACTTTGACTTTGATAGGGAAT  
TGGACTTTCTAAGTACGCGGGATCCAATACGT-----AAGGATACCATACACAAG---TGG  
GAACTAAAGCGATTTTTTCTCGATTTTCAAATCAAATTAGCAGAAGCAATGTCTCCTTG  
CATAATTTGGATTCCAGACATTCATGATCTAGAT-----TCGAGTGACGTATCCGTGGGT  
CTATTAGCGAACTCTCTATCC-----GAGGAGTCTGAAAAATCTTCT--AAG-----AATCT  
TATTATAGCTTCGACTCATATCCCCAAAAGTAGATCCCGCTCTAATAGCCCCGAATAA  
ATTAAATACATGCATTAAGATACGAAGCCTTCTTATTCCACAACAAAGAAAGCACTTTT  
TCACTCTTTCATATACTAAGGGATTTCACTTGAAAAAGAAAATGTTCTTTACT-----ACTG  
GATTGGGGTCCATAACTCTGGGTTCTACTGTACGAGATCTTGTAGCACTTAGCAACGAG  
GCGCTATCAATTAGTATTATACAAAAGAAATCCATTTTAGACACTAATATAATTAGATCTG  
CGCTTCATAGAAAAACTTGGGATTTTAGA-----TCTCAGATAAGATCGGTTTCAGGATCA  
TGGGATCCTTTTCTATCAGATAGGAAGGGCTGTTTCACAAAATCTACTTCTAAGTAATTG  
CTCTATAGATCCTATATCTATATGAAGAAGAAA-----TCATGTAACGGGGGGGATTC  
TTTTTTGTACAGATGGTACTACGAACTTGAACAAGCATGAAGAAATTAACGATACTTC

TGTATCTTTTGAGTTGTTCCGCTGGATCGGTCGCTCAAGACCTTTGGTCTCTACCC-----  
GGACCTAATGAAAAAAGTGATGGGATCACTTCGTATACACCCCTTGAGAATGATTAT--G  
ATCTAGTTCATGGCCTATTAGAAGTAGAAGGTGCTCTGGTGGGA-----TCCTCAC  
AGACAGGAAGTAAGTTTGATAATGAT-----GGAGTGACATTGCTTCTTCGCACCGAACG  
AAGGAAT--CCCTTAAATATGATTCAAATGGATCTCGTTCTATCCTTGATCAGAGATTTC  
TCTATGAAAAA-----TATGAATCGGGGTTCTGAAGAA-----GGGGAAGGAGTCCTCGAC  
CCGCAA-----CGGCTAGAGGAGGAT-----TTTTTCAATCAC-----ATAGTTTGGGC  
CCCT-----ACAATATGGCGCCCT-----TGGGACTTTCTATTGATTGTCTCGAAAGGTCC  
AATGAATTGGGATTTCCT--TATTGGGAAGGGTCATTTTCGGGACAAG-----GAGATC  
TATGATGAAGAGGATGAGCTTCAAGAGAATGATTTCGGAGTTCTTGCAGAATGGAACCA  
TGCAGTACGAGACACGATATAGATCTTCCCAAGAACAAGGCTTTTTTTCAAATAAGCCAA  
TTCATTTGGGCTCCCGAAGATCCACTCTTTTTGCTATTCCAA--GAGGATCCTCTTGTAT  
CCATGTTTTTACGTCGAGAATTTTTTGAGATGAAGAGATATCAAGAATATTTTTGACTT  
GCCAAACAAAATATTGGAAATATCTAAATAACCGCTGGTTTAGGAAGAATACGCAAAA  
GCAAGAAAAGAATTTTGAATTGTTGATTGATCGCCAGAGATGGTTTAGAACC-----AA  
TAGTTCATTATCA-----AATGGATTTTCACGTTCTAAT-----ACTCTATCCGAGAGTTATCAA  
TATTTATCAAATCTGTTCTTATCTAAC--GGAACCCTGGTGGCTCAAATCACAAAGACAT  
TGTTGAGAAAAAGATGGCTTTTCCCGGACGAGATGGTTCTTAGTATC-----TGGGCTAAT  
AACAAA-----ATGACTAGATCTCGG--ATAAATGGAAATTTTATTGATAAGACCTTT  
ACCATTGTAGCCAACATCTTATTACGAATAATTCCGACAACCTTCTGGAGAAAAAGAGGC  
ATTCATTATTACAGAGATGGG-----ATGTCGGCTCAATCTGAAGGAAATTATGCGGAAG  
CTTTACAGAATTATTATGAGGCTATGCGGCTGGAAATTGATCCCTATGATCGAAGTTATAT  
ACTTTATAACATAGGCCTTATACACACAAGTAACGGAGAACATACAAAAGCTTTGGAAT  
ACTATTTTCGGGCACTCGAACGAAATCCTTTCTTACCTCAAGCTTTTAAACAATATGGCC  
GTGATCTGTCATTAC--CGCGGAGAACAGGCCATTCGACAGGGAGATTCTGAAATTGCA  
GAATCTTGGTTTGATAAAGCTTCTGAATATTGGAAACAAGCTATAGCCCTTACCCCAAG  
TAATTATATTGAAGCACAGAATTGGTTGAAGATCACAGGGCGTTTTTGAA-----  
-????????????????????????????????????????????????????????????????  
????????????????????????????????????????????????????????????????  
????????????????????????????????????????????????????????????????  
????????????????????????????????????????????????????????????????  
????????????????????????????????????????????????????????????????  
????????????????????????????????????????????????????????????????  
????????????????????????????????????????????????????????????????  
????????????????????????????

>Megaleranthis

ATGGAAAAATGGTGGTTCAATTCGATGTTGTCTCTAAGTAAATCACTAGAAGGTATTGG  
TCCCCTTGAAATACCGATGGGGGTGAAGACCCTGTTATAAAT-----AATATGATTCA  
-----ATAATGTTGATCAATTTATTCGGCGTCAGCGACATTCGGAGTTTGATCTCTGATGAC  
ACTTTTTTAGTTAGGATAGTAATGGTGAAAATTATTCCATATATTGGATATTGAAAATA  
TGATTTTTGAGATTGAAGAC-----GATCATTCTTTTCTGAGTGAACCTGGAAAGTTTTTTT  
CTAGTTATCTAAATTCGAGCTATCCGAATGATGGGTCTAAGAGTGACAATCACTACTATG  
ATCATTCCATGTATGATACTCAATATAACTGGAATAATCACACTACTAGTTGCATTGAGAA  
TTATCTTCGTTCTGAAATCAAT-----ATTGATAGTCAATTTCAAGCAGTAGCGACAATTA  
CAGTAAGAGTTACATTTATCGTTACATTTGTAGTGACAGTGAGAGTCTCATACAA-----

AATGGAAGTGAT--GATATGATCGGAAAATAT--GATCTCGATATAAGTCAAAAATACAGG  
CATTTGTGGGTTCAATGCGAAAATTGTTATGGATTAATTATAAGAAATTTTTAGGTTA  
AAACTTAATATTTGTGAACAATGTGGATATCATTTGAAAATGAGTAGTTCAGAAAGAAT  
CGAACTTTTGATTGATCCAGGCACTTGGGGTGCTATGGATGAGGACATGGTTCCGTGG  
ACCCATTGAATTCATTCGGAGGAGGAACCTTATAAAGATCGTATTGATTCTTATCAA  
AAAAGACAGGGTTAACCGAGGCTGTTCAAACAGGCATAGGTCAACTAAATGGTATTC  
CCTAGCAATTGGGATTATGGATTTTCAGTTTATGGGGGCAGTATGGGATCCGTAGTAG  
GCGAGAAAATCACCCGTTTGATCGAATATGCTACTAATAGATCTCTACCTCTTATTATAG  
TGTGTGCTTCCGGAGGAGCGCGCATGCAAGAAGGAAGTTTGAGCTTGATGCAAATGG  
CTAAAATATCTTCAGCTTTATATAATTATCAATCAAATAAAAAGTTATTCTACGTATCAAT  
CCTTACATCTCCTACAACCGGTGGAGTGACCGCCAGTTTTGGTATGTTAGGAGATATCA  
TTATTGCCGAACCTAATGCCTACATTGCATTTGCGGGTAAAAGAGTAATTGAACAAACA  
TTGAATAAGACAGTCCCTGACGGTTCACAAGAAGCTGAGTATTTATCCATAAGGGCTT  
ATTCGACCCAATCGTACCACGTAATCCTTTAAAAGGTGTTCTAAGTGAGTTATTTAGCT  
TCACGGTTTCTTTCCCTTGAATAAAAATCCAATCCAGATGGCAACCCCTCGAGCCGATG  
AAATTAGTAATATTATCCGCGAACGTATTGAGCAATATAATAGAGAAGTCAAGATTGTGA  
ATACTGGTACCGTACTTCAAGTAGGCGATGGCATTGCTCGTATTATGTTGATGAAG  
TAATGGCAGGTGAATTAGTAGAATTTGAAGAGGGTACAATAGGCATTGCTCTTAATTTG  
GAATCAAATAATGTTGGTGTGTTAATGGGTGACGGTTTGATGATACAAGAGGGAAG  
TTCTGTAAAAGCAACAGGAAGAATTGCTCAGATACCAGTGAGCGAGTCTTATTTGGGG  
CGTGTATAAATGCTCTGGCTAAACCTATTGATGGTAGGGGTGAGATTTAGCTTCGGA  
ATCTAGGTTAATTGAATCGCCTGCCCCAGGTATTATTTAGAGACGTTCCGTATATGAGCC  
GATGCAAACCGGACTTATTGCTATTGATGCGATGATCCCCTATAGGACGTGGTCAGCGAG  
AATTAATTATTGGGGACAGACAGACCGGTAACAGCAGTAGCTACAGATACTATTCTC  
AATCAAAGGGTCAAATGTAATATGTGTTTATGTAGCTATTGGGCAAAAAGCATCTTC  
TGTGGCTCAGGTAGTGACTACTTTCCAGGAACAGGGGGTATGGAATACACTATTGTG  
GTAGCCGAAACGGCCGATTCCCCTGCTACATTACAATATCTCGCTCCGTATACAGGAGC  
GGCGCTGGCTGAATATTTTATGTATCGTGAACGACATACTTCAATCATTTATGATGATCCC  
TCCAAACAGGCACAAGCTTATCGCCAAATGTCTCTTCTATTACGAAGACCGCCCGGCC  
GTGAAGCTTATCCGGGAGATGTTTTTTATTTGCATTCACGCCTTTTGAAAGAGCCGCT  
AAATTAAGTTCTAGTTTAGGTGAAGGAAGTATGACTGCTTTACCAATAGTTGAGACTCA  
ATCGGGAGACGTTTCGGCTTATATTCTACTAATGTAATTTCCATTACAGATGGACAAAT  
ATCTTATCTGCCGATCTATTCAATTCTGGAATTCGACCTGCTATTAATGTGGGTATTTCC  
GTCTCCAGAGTAGGATCTGCGGCTCAAATTAAGCCATGAAACAAGTCGCTGGAAAAT  
TAAAATTGGAAGTGGCTCAATTCGCAGAGTTAGAAGCCTTTGCACAATTCGCTTCTGAT  
CTCGATAAAGCTACTCAGAATCAATTGGCAAGAGGTCAACGATTACGTGAATTGCTCA  
ACAATCCCAAGCAGCCCCTCTAACGGTGGACGAACAGATAGTGACGATTTATACCGG  
AACAAACGGGTATCTTGATTTCGTTAGAAATTGGACAAGTAAAGAAATTTCTCGTTCAAT  
TACGTACCTACTTAAAACTAATAAACCTCAGTTCCAAGAAATAATATCTTCTACCAATA  
CATCACTGAAGAAGCACAAGTCCTTTTGAAGGAAGCTATTCAGGAACAGATGGAGCG  
GTTTATACTTCAGGAACAAACAATGAGAATCAATCCTACTACTTCTGGTCTCTGGGGTTT  
CCGCACTTGAAGAAAAAACCTGGGGCGTATCGCTCAAATCATCGGTCCGGTACTGGA  
TGATCCTTTCCACTGGGCAAGATGCCTAATATTTACAACGCTTTGGTAGTTAAAGGTCA  
GGATACAGTTGGTCAGCAAATTAATGTAACCTGCGAGGTACAGCAATTATTAGGAAATA

ATCGAGTTAGAGCTGTAGCTATGAGTGCTACAGATGGTCTGATGAGAGGAATGGAAGT  
GCTTGATACGGGAGCTCCTCTAAGTGTCCAGTCGGTGGAGCGACTCTCGGACGAATT  
TTCAACGTTCTTGGAGAGCCTGTTGATAATTTGGGTCCTGTAGATACTCGCACAAATC  
CCCTATTCATAGATCTGCGCCTGCCTTTATACAGTTAGATACCAAATTTATCTATTTTTGAA  
ACGGGGATAAAAGTAGTGGATCTTTTAGCTCCTTATCGTCGGGGAGGAAAAATCGGAC  
TCTTCGGGGGGGCTGGAGTGGGTAACAGTACTCATCATGGAATTGATCAACAATATT  
GCCAAAGCTCATGGAGGTGTATCCGTATTTGGCGGAGTGGGCGAACGCACTCGTGAAG  
GAAATGATCTTTACATGGAAATGAAAGAATCTGGAGTGATTAATGAAAAAATATTGCG  
GAATCAAAAGTAGCTCTAGTCTATGGTCAGATGAACGAACCGCCGGGAGCGCGTATGA  
GAGTTGGGTTGACTGCCCTAACCATGGCGGAATATTTTCGGGATGTTAATGAACAAGAC  
GTACTIONTATTTATCGACAATATTTTTTCGTTTTTCGTCCAAGCAGGATCCGAGGTATCCGCT  
TTATTAGGAAGAATGCCTTCTGCTGTAGGTTATCAACCTACTCTTAGTACAGAAATGGGT  
TCTTTACAAGAACGAATTACTTCTACCAAAGAGGGATCCATAACTTCTATTCAAGCAGT  
TTATGTACCTGCGGACGATTTGACCGACCCGGCTCCTGCCACAACATTTGCGCATTAG  
ATGCTACTACCGTACTATCAAGAGGACTAGCCGCGAAAGGTATCTATCCAGCAGTAGAT  
CCTTTAGATTC AACGTCAACTATGCTCCAACCTCGGATCGTTGGTGAGGAACATTATGA  
AACTGCGCAAAGAGTTAAGCAAACCTTTACAACGTTACAAGAACTTCAGGACATTATA  
GCTATCCTTGGGTTGGACGAATTATCCGAAGAGGATCGTTTAACCGTAGCAAGAGCAC  
GAAAAATCGAGCGTTTCTTATCACAACCCTTCTTCGTAGCAGAAGTTTTTACCGGTTCT  
CCAGGAAAATATGTTGGTCTAACAGAAACAATTAGGGGGTTTTCAACTGATACTTTCCGG  
AGAATTAGATGGTCTTCCGGAACAGGCCTTTTATTTGGTAGGTAATATTGATGAAGCTAC  
CGCGAAGGCTATGAACTTAGATGTGGAGAGCAAATTGAAGAAAATGACCTTAAATCTA  
TGTGATTGACTCCTAATCGAATTGTTTGGGATTCAGAAGTGAAAGAAATCATTTTATCG  
ACTAATAGTGGCCAAATTGGTGTATTACCAAATCACGCACCTATTGCCACGGCTGTAGAT  
ATAGGTATTTGAGAATACGTCTTAACGACCAATGGTTAACAATAGCTCTAATGGGCGG  
TTTTCGCTAGAATAGGCAATAATGAAATAACCATTTTAGTAAATGATGCAGAGAGGGGTA  
GTGACATTGATCCGCAAGAAGCTCAACAAACTCTTGAAATAGCTGAAGCTAGCTTGAG  
TAGCGCTGAAGGAAAGAGACAAACAATTGAGGCAAATTTAGCTCTCAGACGAGCTAG  
GACTCGAGTAGAGGCTATCAATGCAATTTCAATGAAAAATGTAACCGATTCTTTTCGTTT  
CCTTGGGTCACTGGCCATCCGCCGGGAGTTTCGGATTTAATACCGATATTTTAGCAACA  
AATCCAATAAATCTAAGTGTAGTCTTGGTGTATTGATTTTTTTTTGGAAAGGGAGTGTTA  
AGTGATTTATTAGATAATCGAAAACAGAGAATCTTGAGTACTATTCGAAATTCAGAAGA  
GCTACGCGAAGGGGCCATTGAAAAGCTGGAAAAGGCCAAGGCCCGCTTACGGAAAGT  
TCAAATGGAAGCGGATGAATTTTCGAGTGAATGGATACTCCGAGATAGAACGAGAAAAA  
TTCAATTTGATTAATTC AACTTATCAGAATTTGGAACGATTAGAAAATTACAAAAATGA  
AACCATTAGTTTTGAACAACAAAGAGCGATTAATCAAGTCAGACAACGCGTTTTTTCAA  
CAAGCCTTAGAAGGAGCTCTAGGAACTCTGAATAGTTGTTTGAACAACGAGTTACATTT  
ACGCACCATCAGTGCTAATATTGGTATGTTTGGGGCGATGAAAGAAATAACTGATATGA  
ATCCACTGATTTCTGCTGCTTCCGTTATTGCTGCTGGATTGGCTGTAGGGCTGGCTTCTA  
TTGGACCTGGAGTTGGTCAAGGTACTGCTGCGGGTCAAGCCGTAGAAGGTATCGCGAG  
ACAACCAGAGGCAGAGGGTAAAATACGAGGTACTTTATTGCTTAGTCTGGCTTTTTATGG  
AAGCTTTAACAATTTATGGACTGGTCGTGGCATTAGCGCTTTTATTGCAAATCCCTTTG  
TTATGAATGTTCTACCATGTTCCATCAACACACTAAAAAGGTTATACGATATATCCGGTG  
TAGAAGTAGGCCAACATTTCTATTGGCAAATAGGAGGTTTCCAAGTCCATGCCCAAGTA



CTTATTACTTCTTGGTTCGTAATTGCTATCTTATTAGGTTTCAGCTACTATAGCTGTTTCGGA  
ATCCACAAACCATTCGACCGACGGTCAGAATTTTTTCGAATATGTCCTTGAATTCATTC  
GAGACTTGAGCAAACTCAAATTGGAGAAGAATATGGTCCCTGGGTTCCTTTTATTGG  
AACTATGTTCTTATTTATTTTTGTTTTCAAACCTGGTTCAGGGGCTCTTTTACCCTGGAAAAT  
CATACAGTTACCCCATGGGGAGTTAGCCGCACCCACGAATGATATAAATACTACTGTTG  
CTTTAGCTTTACCTACGTACGTAGCATATTTCTATGCAGGTCTTACAAAAAAAGGACTG  
GGTTATTTTCGGTAAATATATTCAACCAACTCCAATACTTTTACCAATTAACATCCTAGAA  
GATTTACAAAAACCCTTATCACTTAGTTTTTCGACTTTTTGGAAATATATTGGCTGATGAA  
TTAGTAGTTGTTGTTCTTGTCTTTAGTACCTTCAGTAGTTCCTATACCTGTCATGTTCC  
TTGGATTATTTACAAGTGGTATTCAAGCTCTTATTTTCGCAACTTTAGCCGCGGCTTATAT  
AGGGGAATCCATGGAGGGTCATCATATGATATTTTTTACTTTTAGAACATATATTAACAC  
ATTTCTTTGTCGATTGTTTCAATTGTAATTTTTATTTATTTATGAACCTATTAGTCCACGA  
AATCGTAGGACTACAAAATTCGTCGGAAAAAGGAATGGCAGCCACCTTTTTATGTATAA  
CAGGATCATTAGTTATTCGGTGGATTTATTCAGGACATTTACCTTTAAGCGATTTATATGA  
ATCATTAAATGTTCCTTTTCGTGGAGTTTTCTCCATTATTCATATGGTTCCTATTTTAGAAAC  
CATAAAAATAATTTACATGCAATAACTGCACCAAGTGCTATTTTTACCCAAGGATTTGCT  
ACTTCGGGTCTTTTAACTGAAATACATCAATCCACAATTTTAGTACCTGCTCTACAATCA  
CAGTGGTTGATGATGCACGTAAGTATGATGGTATTGAGCTATGCAGCTCTTCTGTGTGG  
ATCATTATTATCAGTAGCTCTTCTAGTCATTGCATTTTCGAAAAATATCGATATTTTTTCG  
AAATATAAAGAAATCCAATACGTGAATAAAATAAGC---GTTTTACAAAACAATTGTTTTA  
TTTTATTTAGAAATTATCGCAGGTATCGATTAATTCAGCAATTGGATTGTTGGAGTTCTC  
GTGTCATTAGTCTCGGGTTTATATTTTTAACCATAGGTATTCTTTCGGGAGCAGTATGGG  
CTAATGAGGCATGGGGATCATATTGGAATTGGGACCCAAAAGAACTTGGGCATTTATT  
ACTTGGACAATATTCGCAATTTATTTACATACTCGAACAAATGCAAATTTACAAGCCTCT  
AATTCTGCAATTGTGGCTTCTATGGGATTTTTTTTTTATTTGGATATGCTATTTTGGAGTAA  
ATCTATTAGGAATAGGGCTACATAGTTATGGTTCATTCGCATTAACAATGCTAAAAAAGA  
AAGCGCTAAAACCCTTCTATATCTTACATCTATAATCTTTTTGCCCCTGGTCGATTTCTCT  
CTCATTTAATAAAAGTATGGAATCTTTGGTTACTAATTGGTGGAAATGCTGGGCAATCTGA  
AGTTTTTTTTGAATGATATTCACGAAAAGAACGTTCTAGAAAAATTCATAGAATTAGAAG  
AACTCTTCATTTTGGACGAAATGATAAAGGAGTACCCGGATACACATATACAAAAGCTT  
CGTATAGGAATACACAAAGAAACGATACAATTGGTCAAGATGTACAATGAAGGTCATAT  
CCATACCATTTTACACTTTTCGACAAATATAATAAGTTTCGCTATTCTAAGTGGTTATTCT  
ATTTCTGGGTAATAAAGAACTTGTTATTATTAATTCTTGGGTTTCGGGAATTTATCTATAACT  
TAAGCGACACAATAAAAGCTTTTTCTATTCTTTTATTAACTGATTTATGATTGGATTCCA  
CTCGCCTCACGGTTGGGAACATAATGATTGGTTCTGTCTACAAGGATTTTGGATTTTCTCA  
TAATAATCAAATTATATCTGGCCTTGTTTTCCACCTTTCCAGTCATTCTAGATACAATTTA  
AAATATTGGATCTTCCGTTATTTAAATCGTGTATCTCCGTCACCTTGTAGTGATTTATCATT  
CAATGAATGACATGCCTATTGGTGTCCAAAAGTACCTTTTCGGAGTCTTGAGAGGA  
AGATGCGGTTTGGGTTGACGTATAC---CGACTTCATCGAGAAAGATTACTTTTTTTAGGC  
CAAGAGGTTGATAGCGAGATCTCAAACCAACTTATTGGACTTATGGTATATCTCAGCAT  
AGAGGATGAGATCAGGGATCTTTATTTGTTTATAAACTCTCCCGGCGGATGGGTAATAC  
CCGGAGTAGCCATTTATGATACTATGCAATTTGTGCCACCAGATGTACATACAATATGCA  
TGGGATTAGCCGTTCAATGGGATCTTTCATCCTGGTTGGAGGAGAAATTACCAAACGT  
ATAGCATTCCCTCACGCTAGGGTAATGATCCACCAACCTGCTAGTTCTTTTTATGAGGCT

CAAACGGGAGAATTTGTCCTAGAAGCGGAAGAACTGCTGAAACTCCGCGAAACCCTC  
ACAAGGGTTTATGTACAAAGAACGGGCAACCCCTTATGGGTTGTATCCGAAGACATGG  
AAAGGGATGTTTTTATGTCAGCAACAGAAGCCCAAGCTCATGGAATTGTTGATCTTGTA  
GCGGTGCAAATGAAAGAACAAAAATGGATTCATGAAGGTTAATTACTGAATCACTTC  
CAAATGGTATGTTTCGGGTTTCGTTTAGATAATGAGGATCTTATTCTAGGTTATGTTTCGG  
GAAGGATCCGACGTAGTTTTATACGGATACTGCCAGGTGATAGAGTAAAAATTGAAGTA  
AGTCGGTATGATTCAACCAGGGGACGCATAATTTATAGACTCCGCAATAAAGATTTCGAA  
CGATATGGAGGAATTACAAGGATATTTAAAGATAGATAGATCTAGAGAACGAGACTTCC  
TATATCCACTTCTCTTTCAGGAATACATTTATGCACTTGCTCATGATCATGGGTTAGAAAA  
TTTAGGT---AAATATAGTTCCTAATTGTTAAACGTTTAAATTATTTCGAATGTATCAACAGA  
AACATTTTTTTTATTTTGGCTAATGATTCTAATCAAATAAATTTGTTGGGAAAAATTTTTA  
TTCTCAAATGATATCAGAGGGGTTTGCAGTCATTGTGGAAATTCCATTCTCACTGCGAG  
TAGTATCTTCCCTAATAGCCAAATCTTTTAAATTTACGATCAATTCATTCCATATTTCCCTTT  
TTAGAGGAAAAATTATCACATTTAAATCATGTATTAGATATACTAATACCCTATCCTATCC  
ATCTGGAATTATTGGTTCAAACCCTTCGCTGTTGGATACAAGATGCCCCCTTTTTTACACT  
TATTGAGATTCCTTCTCTACGAGTATCATAATTGGAATAGTCTTATTACTAAAATAAATTT  
CTTTTTTTCAAACAAGATTATTCCTGTTCCCTATATAATTTTTATGTATATGAATCGGAAT  
CCATATTAGTTTTTCTCCGTAAACAATCTTCTCATTACGATCAACATCTTCTAGAGCTTT  
TCTTGATCGAACACATTTTTATGGAAAAATAGAACATTTTTTAGTAGTTTTTTCATAATGAT  
TTTATCCCGTGGTTGTTCAAGGATCCTTTCATGCATTATTTTCAGATATCAAGGAAAATCC  
ATTATGTCTTCAAAGGAACTCCCCTTCTGATGAAGAAATGGAAATATTACCTTGTA  
TTTATGGGAATGTCGTTTTTACTTTTTGGTCTCAACCGGATAGGATTCATATAAACCAATTA  
TCCATAATTTCTTGATTTTCTGGGCTATCTTCAAATGTACGACCAATCCTTCAGTG  
GTAAGAAGTCAAATGTTAGAAAATTCATTTATTATAGATATTGCTATT-----ATAAGTTTG  
ATACTATAGTCCCAATTATTCCTTTGATTGGATCATTGGCTAAAGCTAAATTTTGTA  
ACTTATCAGGGCATCCCATTAGTAAGCCGGCTTGGGCGGATTCATCAGATTCCTGATATTATCGA  
TAGATTTGGTTCGAATATGCAGAAATGTTTCTCATTATTACAGCGGATCCTCAAAAAAAA  
AGAGTTTGTATCGAATAAAGTATATACTTAGACTTTTCGTGTGCTAGA  
ACTTTGGCTCGTAAACACAAAAGTACTGTACGTTCTTTTTTGAAAAGATTGGGTTTCGGAATTCTTGGAAGA  
ATTCCTTATAGAGGAAGAACAGGTTCTTTCTTTTATTCTCCCAAGACGGGTTTGGTATTT  
TAATATTATTCGATCAATGACCTAACGAATCATTCAATGATAATTGATACAACA---AAAG  
TACAA---GCTATCAATTCTTTTTCCAGATCGGAA---TCCTTAAAAGAGATTTATGGGCTCA  
TGCGGTTACTTGTTCCTATTTTTACTCCTGTATCCGGAATCATAATAGGGGTACTAGTAAT  
TGTGTGGTTAGAAAGACAAATATCTGCAGGGGTACAACAACGTATTGGACCTGAATATG  
CGGGTCTTTGGGAATTCTTCAAGCTTTAGCAGATGGTACCAA  
ACTACTTTTTCAAAGAGGATCTTCTCCCATCTCGAGGAGATATTAGTTTATTCAGTATCGGACCATCTATAGCGGTC  
ATATCTATTTTACTCAGTTATTCAGTAATTCCTTTTGGCTATCGCCTTGTTTTGGCCGATC  
TCAGTATAGGAGTTTTTTTTATGGATTGCCATTTCCAGCATTGCTCCTATTGGACTTCTTAT  
GTCAGGATATGGATCGAATAATAAATATTCCTTTTTAGGTGGTCTACGAGCTGCTGCTCA  
ATCGATTAGTTATGAAATACCATTA  
ACTCCATGTGTGTTATCAATATCTCTACTATCTAAC  
AGTTCAAGTACAGTTGATATAGTTGAGGCGCAGTCAA  
AATATGGTTTTTTGGGGTTGGAA  
TCTGTGGCGCCAACCTATAGGATTTGCTGTTTTTTA  
ATTTCTTCCCTAGCGGAATGCGA  
GAGATTACCTTTTGATTTACCAGAAGCAGAGGAAGA  
ATTAGTAGCAGGTTATCAAACC  
GAATATTCAGGTATAAAATTTGGTTTTATTTTACGTTGCTT  
CCTATCTAAATCTACTAGTTT

CTTCATTATTTGTAACGGTTCCTTTACTTGGGTGGCTGGAATCTCTCTATTCCGTACATATT  
AATTCCTGAGCTTTTCGGAATA--GAAGTGGGCGGAGTCTTTGGAACGACAATTGGTAT  
CTTTATTACATTAGCTAAAGCTTATTTGTTCCCTGTTCAATTCCTATCACAACAAGATGGACT  
TTGCCTAGGATGAGAATGGACCAACTGTAAATCTTGGGTGGAAATTTCTTTTACCTATT  
TCTTTAGGTAATCTATTATTGACAACCTTCGTCCCAACTCTTTTCACTGATGATCTGGCAT  
GTACAGAATGAAAACCTTCATTCTCGATTCTACGAGAATTTTTATGAAAGCGTTTCATTTG  
CTTCTCTTCCATGGAAGTTTTATTTTCCCAGAATGTATCCTAATTTTGGGCCTAATTCCTC  
TTCTGATGATCGATTTAACCTCTGATCAAAAAGACATACCTTGGTTATATTTTCATCTCTTC  
AACAAAGTTTAGTAATGAGCATAGCGGCCCTATTGTTCCGATGGAGAGAAGAACCTATGA  
TTAGCTTTTCGGGAAATTTCCAAACGAACAATTTCAATGAAATCTTTCAATTTCTTATTT  
TACTATGTTCAACTCTATGTATTCCCTCTATCCGTAGAGTACATTGAATGTACAGAAATGG  
CTATAACAGAGTTTCTGTTATTCATATTAACAGCTACTCTAGGAGGAATGTTTTTATGTG  
GTGCTAACGATTTAATAACTATCTTTGTAGCTCCAGAATGTTTCAGTTTATGCTCCTACCT  
ATTATCTGGATATAACCAAGAGAGATGTACGGTCTAATGAGGCTACTACGAAATATTTACT  
CATGGGTGGGGCAAGCTCTTCTATTCTGGTTCATGGTTTCTCTTGGCTATATGGTTCATC  
CGGGGGAGAGATCGAGCTTCAAGAAATAGTGAATGGTCTTATCAATACGCAAATGTATA  
ACTCCCCAGGAATTTCAATTGCGCTTATATTCATAACTGTAGGAATTGGGTTCAAGCTTT  
CCCCAGCCCCTTCTCATCAATGGACTCCTGACGTATACGAAGGATCTCCCACTCCAGTC  
GTTGCTTTTCTTTCTGTTACTTCGAAAGTAGCTGCTTCAGCTTTAGCCACTCGAATTTTG  
GATATTCCTTTTTTATTTCTCATCAAACGAATGGCATCTTCTTCTGGAAATCCTAGCTATTC  
TTAGCATGATATTGGGGAATCTCATTGCTATTACTCAAACAAGCATGAAACGTATGCTTG  
CATATTCGTCCATAGGTCAAATCGGATATGTAATTATTGGAATAATTGTTGGAGACTCAA  
ATGATGGATATGCAAGCATGATAACTTATATGCTGTTCTATATCTCCATGAATCTAGGAAC  
TTTTGCTTGCATTGTATCATTGGTCTACGTACCGGAACTGATAACATTCGAGATTATGC  
AGGATTATACACGAAAGATCCTTTTTTGGCTCTCTCTTTAGCCCTATGTCTCTTATCCCTA  
GGAGGTCTTCCCTCCACTAGCAGGTTTTTTCGGAAAACCTCCATCTATTCTGGGTGTGCATG  
GCAGGCAGGCCTATATTTCTTGGTTTCAATAGGACTCCTTACGAGCGTTGTTTCCATCTA  
CTATTATCTAAAATAATCAAGTTATTAATGACTGGACGAAACCAAGAAATAACCCCTC  
ACGTGCGAAATTATAGAAGATCTCCTTTAAGATCAAACAATTCCATCGAATTGAGTATG  
ATTGTATGTGTGATAGCATCTACTATACCAGGAATCTCAATGAACCCAATTATTGCAATT  
GCTCAGGATAACCTTTTTTATGTTTCTGCTTCACGAATATGATATTTTCTGGGCATTTCTAA  
TAATATCAAGTGTTATTCCTATTTTGGCATTTATAATTTCCGGAGTTTGGCCCAATTAA  
CGAAGGACCAGAGAACTTTCTAGTTATGAATCGGGTATAGAACCAATGGGCGATGCT  
TGGTTACAATCCGAATCCGTTATTATATGTTTGCTCTAGTTTTTGTGTTTTTGTATGTTG  
AAACGGTTTTTCTTTATCCATGGGCGATGAGTTTCGATGATTGGGTGTATCTGTATTTAT  
AGAAGCTTTAATTTTCGTGCTTATCCTAATGTTGGTTCAAGTTTATGCATGGCGAAAAGG  
AGCATTGGAATGGTCTACGAATGATTTTCTTGGTTAACAATAATTGTTGTTTTGCCGAT  
ATTCGCAGGTACTTTTTATTTTATTTTTCCCTCATCGAGGAAATAAGGTGATTCGGTGGTAT  
ACTATTTGTATATGTCTATTAGAACTACTTCTAACGGCCTATGCATTCTGTTATTATTTCCA  
ATTGGACGACCCATTAATCCAATTAGAACAGGATTATAAATGGATTAACTTTTTTGATTT  
TCACTGGAGACTAGGAATCGATGGACTTTCCATAGGACCCATTTTACTCACGGGATTCA  
TCACTACTTTAGCTACTTTAGCGGCTTGCCAGTTACTCGAGATTCGAGATTGTTCCATT  
TCCCTCATGTAGCAATGTACAGCGGTCAAATAGGATCATTTTCTTCTCGAGATCTTTTAC  
TTTTTTTTATCATGTGGGAGTTAGAATTAATCCTGTCTATCTACTTCTATCCATGTGGGG

AGGGAAGAAACGCTTGACTCAGCTACAAAGTTTATTTTGTACACCGCAGGAGGTCC  
ATTTTCTCTTAATGGGAGTTCTAGGTATGGGTTTATATGGTTCCAATGAACCAACATTA  
AATTTTGAACATCAGCCAATCAATCGTATCCTGTGGCGTTGGAAATAATATTATATTTT  
GGATTTCTTATTGCTTATGCTGTCAAATTACCGATTATACCCCTACATACATGGTTACCAG  
ATACCCACGGAGAAGCACATTACAGTACATGTATGCTTTTAGCCGGAATCTTATTAATA  
TGGGAGCATATGGATTGGTTCGGATAAATATGGAATTATTACCCACGCTCATTCTATATT  
TTCTCCCTGGTTGATGATAGTAGGCGCAATTCAAATAATCTATGCAGCTTCAACATCTTC  
TGGTCAGCGCAATTTAAAAAAAAGAATTGCCTATTCTTCCGTATCTCATATGGGTTTCAT  
AATTATAGGAATTGGTTCATAACTGATACAGGACTCAATGGGGCCATTTTACAAATGAT  
CTCTCATGGATTTATTGGTGTGCACTTTTTTTCTTGGCAGGAACAAGTTACGATAGAAT  
ACGTCTTGTATCTCGACGAAATGGGAGGAATAGCTATCCCAATGCCAAAAATATTTA  
CAATGTTCAGTAGCTTCTCGATGGCTTCTCTTGCATTGCCTGGAATGAGTGGTTTTGTG  
CAGAATTGGTAGTCTTTTTTGGACTAATTACGAGTCAAAAATATCTTTAATGCCAAAA  
TACTAATAACTTTTGTAAACGGCAATTGGAATGATATTAACCTCTATTATTATTATCTATG  
TTACGTCAGATGTTCTATGGATACAAGCAATTTAATTCTCAAATTCTCCATTTTTGGATT  
CTGGACCGCGAGAACTTTTTATTTCAATCTGTATCTTTCTACCCGTAATAGGTATTGGTAT  
TTATCCGGATTCGTTCTCTCACTATCAATTGACAAGGTCGAAACTATTATATCTAATTAC  
TTTTATAGAATGATGCTCGAACATGTACTTGTTTGAGTTCCTATTTATTATCCATCGGTA  
TCTATGGATTGATTACAAGTCGAAATATGGTTCGAGCGCTTATGTGTCTTGAGCTTATAC  
TGAATGCAGTTAATATAAATTTGTAACATTTTCTGATTTATTTGATAGTCGCCAATTA  
AGGAGATGTTTTCTCCATTTTTGTTATAGCAATTGCAGCTGCTGAAGCAGCTATTGGATT  
AGCTATTGTTTCATCAATTCATCGTAACAGAAAATCAACTCGTATCAATCAATCTAATTT  
GTTGAATAAAATGGAACATATATCAATATGCGTGGATCATACTTTCATTCCCCTTCCA  
GTTCCATAGCAATAGGGTTGGGCCCTTCTCCTTGTTCGGCGGCAACAAAAAGTATTAG  
GCGCATATGGGCTTTTCCCTAGTGTTTTATTACTAAGTATCGTTATGCTTTTTTTCAGCCGAT  
CTGTCTATTTCAGCAAATAAACGGAAAGTCCCATCTACCAATATGTATGGTCTTGGACCATC  
AATAATGATTTTTCCCTTAGATTTTCGGACACTTTATGGACCCGCTTACTTCTATTATGTTAA  
TATTAATTACTACTGTTGGAATAATGGTTCCTTATTATAGTGACAATTATATGTCTCATGAT  
CAAGGCTATTTGAGATTTTTTCTTATATGAGTTTTTCTAATGCTTCCATGCTGGGATTAG  
TTACTAGTTCAAATTTGATACAAATTTATTTTTTTTGGGAATTGGTTGGAATGTGTTTATA  
TCTATTAATAGGTTTTTGGTTTACACGCCCTTTCGGCAAGTGCTTGTCAAAAAGCCT  
TTGTAACATAATCGTGTAGGGGATTTTGGTTTATTTTTAGGAATCTTAGGTCTTTATTGGAT  
AACGGGGAGTTTTGAATTCGGGATTTGTTCGAAATAGCCAAAAATAATGGGGCCAATT  
CCTTATTTCTAACTTTGTGTGCTTCCCTATTATTTGTTGGTGCAGTTGCTAAATCTGCGCA  
ATTCCCCCTTACGTATGGTTACCCGATGCTATGGAGGGTCCCTACTCCTATTTCGGCTCT  
TATACACGCTGCTACAATGGTAGCAGCGGAATTTTTCTTATAGCTCGCCTTCTTCTCT  
TTTTACAGTCATACCTTACATAATGTATATAATTTCTTTGGTAGGTATAATAACAATACTAT  
TAGGAGCTACTTTGGCTCTTGCTCAAAGAGATATTAAGAAGTTTAGCCTATTCTACA  
ATGTCTCAATTGGGTTATATTATGTTAGCTTTAGGCATGGGATCTTATCGGGCTGCTTTAT  
TTCATTTGATCACTCATGCCTATTCGAAAGCATTATTATTTTTAGGATCTGGATCCATTATT  
CATTCTATGGAAACCATTGTTGGATATTCTCCGATAAAAGCCAGAACATGGCTCTTATG  
GGCGGTTTAAACAAAATATGTGCCAATTACAAAACTTCATTTTTATTAGGTACACTTCT  
CTTTGTGGTTTTCCACCTCTTGCTTGTTTTTGGTCCAAAGACGAAATTCTTAATGATAGT  
TGTTGTATTACCTATTTTTGCAATAATAGCTTGTTCACAGCAGGGTTAACTGCATTT

TATATGTTTCGGATGTATTTACTTACTTTTTGAAGGGCATTAAATTTTAATTTTAAAAATT  
ACAGCGGAAAAAAAAATAATGCGTCTATTCAATATCCATATGGGGAAAAAAAAAGGACA  
AAAAGCGATAAAAAAAAA---AAAAATTTATCAACAATGAATCTTTTTTCATTTCCCAAT  
AAAAAACTTCCACGTATCCTTATGAATCGGACAATACAATGTTATTGCCACTTTTTGTA  
TTGGTCTTATTTACTTTATTTGTTGGATCCATAGGAATTCCTTTTTATTGACATATTATC  
AAAATGGTTAACTCCGTCGATAAACTTGCTACATTCAAAATCTAAC---TTTTTGATTGGT  
ATGAATTTGTGATAAATGCAATTTTTTCAGTCAGTATAGCTTATTTCCGGAATATTTATAGC  
GTCTCTTTTATATGGGCCCGCTTATTCATATTTTCAGAATTTGAACTTAATCAATTTTTTT  
GTTCTTGTCTGGGACAAAATAATAAATGTAATATATAATTGGTCATATAATCGCGGTTACA  
TAGACATTTTTTATGAAAAAATTTTCACTAGGTGTATAAGAGGATTAGCCGAACTAACT  
CAATTTTTTGATAGACAAGTAATTGATGGAATTACGAATGGTATTGGTGTACAAAGTTTC  
TTTGTAGCAGAAATTTTTAAATATCTAGGTGGGGGG---CGTATCTCCTCTTATCTCTTCTT  
TTTTTTAGTTTATGTATCAATTTTTGTATTAATTTACTACATGGATTTACCTGGACCAATAC  
ATGATTTTCTGTAGTTTTTTTTGGGATTGGGTCTTATAGTGGGGGGTCTAGGAGTGGTAT  
TACTTACCAATCCGATTTTTTCTGCCTTTTCCTTGGGATTGGTCTTGTGTTGTACATCCTT  
ATTTTCATATCCATCGAACTCCCATTTTTGTAGCTGCTGCACAGCTCCTTATTTATGTGGG  
AGCTATAAATGTATTAATTGTATTTGCTGTGATGTTTCATGAATGGTTCAGAATATTACAAC  
GATTTCCATCTTTGGACCGTTGGAGATGGAGTCACTTCACTGGTTTGTACAAGTATTTTT  
GTTTCACTAATTACTACTATCCCAGATACGTCATGGTACGGGATTATTTGGACTACAAGA  
TCAAACCAGATTTTAGAACAGGACTTGATAAATAATGGTCAACAAATTGGGATTCATTT  
ATCAACAGATTTTTTTCTTCCATTTGAACTTATTTTCGATAATTCTTTTAGTTGCCTTGATA  
GGTGCAATTGCTATGGCTCGTCAGATGACTATACCAACTACAAGAAAAGACCTCATGAT  
AGTCAATATGGGTCCCTCAACACCCGTCAATGCATGGTGTCTTCGACTCATCGTTACTCT  
AGACGGGGAAGATGTTATTGACTGTGAACCCGTATTGGGTATTATACACAGAGGAATG  
GAAAAAATTGCAGAAAATCGAACAATTATAACAATATCTTCCTTATGTAACACGCTGGGA  
TTATTTAGCGACTATGTTTACAGAGGCAATAACGGTAAATGGACCAGAACAGTTGGGA  
AATATCAAGTACCGAAAAGAGCGAGCTATCTTAGAGTAATTATGCTAGAAGTACGAGTCG  
TATAGCTTCTCATTTGTTATGGCTTGGCCCTTTTATGGCAGATATAGGTGCGCAGACTCC  
TTTCTTCTATATTTTACGAGAGAGAGAATTGATATATGACCTATTTGAATCCGCCACAGG  
TATGCGAATGATGCATAATTATTTCCGTATCGGAGGGGTTGCTGCTGATCTACCTTATGG  
CTGGATAGATAAATGTTTATGATTTCTGTGATTATTTTTTAAACGGGGGTTACTGACTATCA  
AAAATTTATTACGCGTAATCCCATTTTTTTGGAACGAGTTGAAGGAGTGGGCATTATTG  
GTGGAGAGGAAGCAATAAATTGGGGTTTATCAGGACCAATGTTACGAGCTTCTGGAAT  
TCAATGGGATCTTCGTAAAGTCGATCATTATGAGTGTACGACGAATTTGATTGGGAAG  
TACAATGGCAAAAAGAAGGAGATTCGTTAGCTCGTTATTTAGTTTCGAATCAATGAAATG  
ACGGAATCCATAAAAATTATTCAACAAGCTTTGGAAGGAATTCCGGGAGGGCCCCATG  
AGAATTTAGAGGTACGGCGCTTTGATAGAACAAAGGATTCGGAATGGAATGATTTTATG  
TATCGATTCATTAGTAAAAACCTTCGCCACTTTTGAATGTCTAAACAAGAATTTTAT  
GTGAGAGTAGAAGCCCCAAAGGGAGAATTGGGAATTTTTTTGATAGGAGATCGGAGTG  
TTTTTCCATGGAGATGGAAAATTCGTCCACCAGGTTTTATCAATTTGCAAATTTCTTCTC  
AGCTAGTTAAAAGAATGAAATTGGCTGATATTATGACAATACTAGGTAGTATAGATATTA  
TTATGGGAGAAGTTGATCGTATGTTCCCATGGTAACTGGGTTTCATGAATTATGGTAAAC  
AAACAGTACGGGCTGCAAGGTATATCGGTCAAAGTTTTATGATTACCTTATCCCATACGA  
ATCGTTTACCTGTAACCTATTCAATATCCTTATGAAAAATTGATCACATCAGAGCGTTTCC

GCGGTCTGAATTCACCTTTGAATTTGATAAATGCATTGCTTGTGAAGTATGTGTTTCGGGTAT  
GTCCTATAGATCTCCCTGTTGTTGATTGGAAATTGGAACTGATATTCGAAAGAAACGA  
TTGCTTAATTACAGTATTGATTTTGGAACTCTGTATATTTTGTGGTAACTGTGTTGAATATT  
GTCCAACAAATTGTTTATCAATGACTGAAGAATATGAACTTTCTACTTATGATCGTCACG  
AGTTGAATTATAATCAAATTGCTTTGGGTTCGGTTACCAATGTCAGTAATTGGAGATTACA  
CAATTCGAACAATTATGAATTCGAAAAAATCTGTGGCTAAACCACTTGATTCAAGAACA  
ATTACCAATTTTCATGCAGGGTCGTTTGTCTGCTTGGCTAGTCAAGCATAGGCTAGTTCAT  
AGATCTTTGGGCTTCGATTACCAAGGAATAGAACTTTACAAATAAAGCCCGAGGATTG  
GCACTCCATTGCTGTCATTTTCATATGTATATGGTTACAATTATCTACGCTCCCAGTGTGCA  
TATGATGTAGCACCAGGCGGACTGTTAGCTAGTGTGTATCATCTTACGAGAATACAGTAT  
GGTGTGGATCAACCAGAAGAGGTATGTATAAAAGTATTTGCCCAAGGAGGAATCCTA  
GAATTCGTCTGTTTTCTGGATTTGGAAAAGCGCGGATTTTCAAGAACGGGAATCTTAT  
GATATGTTGGGAATCTCTTATGATAATCATCCACGCCTGAAACGTATTTTGATGCCTGAA  
AGTTGGATAGGATGGCCTTTACGTAAGGATTATATTGCCCTAATTTCTATGAAATCCAA  
GATGCTCAT-----  
-----ATGAATTACATTGAGTTTCC  
GTTACTTGATCGAACAATCCAAAATTCAGTTATTTCAACTACATCAAACGATCTTTTCGAA  
TTGGTCCAGACTCTCCAGTTTATGGCCGCTTCTCTATGGTACCAGTTGTTGCTTCATTGA  
ATTTGCTTCATTAATAGGCTCGCGATTTCGACTTTGATCGTTATGGGCTGGTACCAAGGTC  
GAGTCTTAGGCAAGCGGACCTAATTTAACAGCGGGCACAGTAACGATGAAAATGGCT  
CCTTCTTTAGTGAGATTATATGAGCAAATGCCTGAACCAAAATATGTCATTGCTATGGGA  
GCCTGTACTATTACAGGAGGGATGTTTCAGTACCGATTCTTATAGTACTGTTTCGGGGAGT  
CGATAAGCTAATTCCTGTGCGATGTTTATTTACCGGGTTGCCCGCCGAAACCGGAGGCAG  
TTATAGACGCTATAACAAAATTCGTAAAAAGGTATCTCGAGAAATCTATGAAGATAGA  
ATTGGGTCTCAACGGGAGACTCGATGTTTTACTACCAATCACAAGTTTCATATTGGGCG  
CAGTACTCATACCGGAAATATGATCAAGGATTACTCTATCAATCGCCATCGACTTCAGA  
GATCCCTAATGAAACATTTTTAAA-----ATGCAAAATAGAAATA  
TCTTTTCTTGATA---GAGCAGATGACTCGATCCATTTCCGATCGATCATTATATTTATAA  
TAACTCGGACATCTATTTACACGCATATCCATTTTGCACAACAGAGTTATGAAAATC  
CAAGAGAAGCAACTGGGCGTATTGTATGCGCCAATTGTCATTTAGCTAATAAGCCCGTG  
GATATTGAGGTTCCACAAGCGGTACTTCCCGATACTGTATTTGAAGCAGTTGTTAGAAT  
TCCTTATGACATCCAACCTGAAACAAGTTCTTTCTAATGGTAAAAGGGGATCCTTGAATG  
TAGGGGCAGTTCTTATTTTACCTGAGGGATTTCGAATTAGCCCCCCCCGATCGTATTTCTC  
CGAAATGAAAGAAAAGATGGGCAATCTTTCTTTTTCAGAGTTATCGCCCTACTAAAAA  
AAATATTCTTGTGATAGGTCTGTTCTGGTCAGAAATATAGTGAAATCACCTTTCCTAT  
TTTGTCTCCGGACCCCGTTACTAAGAAAGAGGTTTACTTCTTAAAATATCCTATATACGT  
GGGCGGGAATAGGGGAAGGGGTCAGATTTATCCCGACGGGAGCAAGAGTAACAATAC  
AGTCTATAATGCTACAGCATCAGGTACGGTAAGCAAAATAGTACGTAAAGAAAAAGGG  
GGGTATGAAATAACCATAGCGGATGCATCGGATGGACACTCAGTCGTTGATATTATACCT  
CCGGGACCAGAACTTCTTGTTCAGAGGGTGAATCCATCAAGCTTGATCAACCATTAA  
CGAGTAATCCCAATGTGGGTGGATTTGGTCAGGGAGATGCAGAAATAGTACTTCAAGA  
CCCATCACGTGTCCAAGGTCTTTTTTTATTCTTGGCATCTGTTATTCTGGCACAAATCTT  
TTTGGTTCTTAAAAAGAAACAGTTTAAAAAGGTTCAATTGTCCGAAATGAATTTTCATGA  
GTAAAGTATATGATTGGTTTCGAAGAGCGTCTCGAAATTCAGGCGATTGCAGATGATATA

ACTAGTAAATATGTTCCCTCATGTCAACATAATTTTATTGTCTAGGGGGAATTACACTTA  
CTTGTTTTTTAGTACAAGTAGCTACGGGGTTTGCCATGACTTTTTACTATCGTCCGACCG  
TTACCGAGGCCTTTGCCTCTGTTCAATACATAATGACTGAAGCCAACCTTTGGTTGGTTA  
ATCCGATCAGTTCATCGATGGTCGGCAAGTATGATGGTCCTAATGATGATCCTGCACGTA  
TTTCGTGTGTATCTCACCGGTGGGTTTAAAAAACCTCGCGAATTAACCTGGGTTACGGG  
TGTGGTTCTGGCTGTATTGACCGCATCTTTTGGTGTAACCTGGTTATTCCTTGCCTTGGGA  
CCAAATTGGTTATTGGGCAGTCAAATTGTGACAGGCGTACCTGACGCTATTCCGGTAA  
TAGGATCGCCCGTAGTCTGAATTATTACGCGGAAGTGCTAGTGTGGGTCAATCAACTTTG  
ACTCGTTTTTATAGTTTACACACTTTTGTATTACCCCTTCTTACTGCCGTATTTATGTTAAT  
GCATTTCCCAATGATTCGTAAGCAAGGTATTTCTGGTCCTTTAATGGGAGTAACAAAGA  
AACCTGACTTGAATGATCCTGTATTAAGAGCTAAATTGGCGAAAGGGATGGGCCATAAT  
TATTATGGCGAACCCGCATGGCCCAATGATCTTTTATATATTTTTCCAGTAGTAATTCTAG  
GAACTATTGCATGTAACGTAGGTTTACGCGTTCTAGAACCGTCAATGATTGGTGAACCG  
GCAGATCCATTTGCAACTCCTTTGGAAATATTACCCGAATGGTACTTCTTTCCCGTATTT  
CAAATACTTCGTACAGTACCCAATAAATTATTGGGGGTTCTTTTAATGGTTTCAGTACCA  
GCGGGATTATTAACAGTACCTTTTTTTGGAGAATGTTAATAAATCCAAAACCCGTTTCGT  
CGTCCAGTAGCTACAACCGTCTTTTTGATTGGTACCGCAGTAGCCCTTTGGTTGGGTAT  
TGGAGCAACATTACCTATTGATAAATCTCTAACTTTAGGTCTTTTTATGATTGAAGTTTTA  
CTATTTGGAATCGTGTTAGGCCTAATTCCTATTACTTTGGCTGGATTATTCGTAACCTGCAT  
ATTTGCAATACCGACGCGGCGATCAGTTGGACCTTATGCCTACTATAACTAGTTATTTTG  
GTTTTCTACTGGCGGCTTTAACTATAACCTCAGCTCTATTTATTGGTCTGAGCAAGATAC  
GACTTATTATGGATATAGTAAGTCTTGCTTGGGCTGCTTTAATGGTAGTCTTTACATTTTC  
CCTTTCACTCGTAGTATGGGGAAGAAGTGGACTCATGATTATTCGTTCCGGGAATCAG  
AAGTTAAAATTTTGGTGGATAGGGATCCCGTAAAACTTCTTTTCGAGGAATGGGCCAG  
ACCGGGTCATTTCTCAAGAACAATAGCTAAAGGCCCGGATACTACCACTTGGATCTGG  
AACCTACATGCCGATGCTCACGATTCGATAGCCATACCAGCGATTTGGAGGAGATCTC  
TCGAAAAGTATTTAGTGCCCATTTTCGGTCAACTCTCCATCATATTTCTTTGGCTGAGTGG  
CATGATTTCCACGGTGCCCGTTTTTTCCAATTATGAAGCATGGCTAAGCGATCCTACTCA  
CATTGGGCCCAGTGCCAGGTGGTTTGGCCAATAGTGGGCCAAGAAATATTGAATGGT  
GATGTGGGCGGGGGTTTCCGAGGAATACAAATAACCTCCGGTTTTTTTCAGATTTGGCG  
AGCATCCGGAATAACTAGTGAATTACAGCTCTATTGTACTGCAATTGGTGCATTGGTTTT  
TGCAGCGTTAATGCTTTTTGCCGGTTGGTTCCATTATCACAAAGCTGCTCCAAAATTGG  
CTTGGTTCCAAGATGTAGAATCTATGTTGAATCACCACTTAGCGGGGTTACTAGGACTT  
GGGTCGCTTTCTTGGGCGGGTCACCAAGTACATGTATCTTTACCGATTAACCAATTTCTA  
GACGCTGGAGTAGATCCTAAAGAGATCCCACTTCCCTCATGAATTTATCTTGAATCGGGA  
TCTTTTGGCTCAACTTTATCCCAGTTTTGCCGAGGGAGCAACCCCATTTTTTACCTTGA  
ATTGGTCAAATATGCAGAATTTCTTACTTTTTCGTGGAGGATTAGATCCAGTAACGGGG  
GGTTTATGGCTGACCGATATTGCACACCATCATTTAGCTATTGCAATTCCTTTTTCTGATAG  
CTGGTCACATGTATAGGACCAACTGGGGCATTGGTCATGGCCTGAAAGATATTTTAGAG  
GCTCATAAAGGTCCATTTACTGGCCAGGGCCATAAAGGCCTATATGAGATCCTAACAAC  
GTCATGGCATGCTCAATTATCTCTTAACTTAGCTATGTTAGGCTCTTTAACCATTTGTGTA  
GCTCACCATATGTATTCCATGCCCCCTTATCCATATCTAGCTACTGACTATGGTACACAAC  
TTTCGTTGTTACACATCACATGTGGATCGGTGGATTTCTCATAGTTGGTGTGCTGCTGCGC  
ATGCAGCCATTTTTATGGTAAGAGACTATGATCCGACTACTCGATACAATGATCTCTTAG

ATCGTGTACTTCGGCACCGCGATGCAATCATATCACATCTCAACTGGGCATGTATTTTTTC  
TAGGCTTTCACAGCTTTGGTTTGTATATTCATAATGATACCATGAGCGCTTTAGGGCGTC  
CTCAAGATATGTTTTTCAGATACCGCTATACAATTACAACCCGCTTTTGCTCAATGGATAC  
AAAACACCCATGCTTTAGCACCTGGTGTAAACAGCTCCTGGTGCAACAACAAGCACCAG  
CTTGACTTGGGGTGGTGGTGGTTTAGTAGCAGTAGGTGGCAAAGTGGCTTTGTTACCTA  
TTCCATTAGGAACCGCAGATTTTTTGGTACATCATATTCATGCATTTACGATCCATGTGA  
CGGTATTGATATTATTGAAAGGTGTTCTATTCGCTCGTAGTTCCCGTTAATACCTGATAA  
AGCAAATCTTGGTTTTTCGTTTCCCTTGTGACGGACCCGGAAGAGGAGGAACATGTCAA  
GTATCCGCCTGGGATCATGTCTTTTTAGGTCTATTCTGGATGTACAATGCTATTTCCGGTAG  
TAATATTCCATTTAGTTGGAAAATGCAGTCAGATGTTTGGGGTAGTATAAATGATCAAG  
GGGTGGTAACTCATATCACGGGAGGAACTTTGCGCAGAGTTCCATTACTATTAATGGG  
TGGCTCCGTGATTTTTTATGGGCCAGGCATCCCAGGTAATTCAGTCTTATGGTTCGTCA  
TTATCTGCATATGGCCTTTTTTTCCTAGGTGCTCATTTTGTGTGGGCTTTCAGTTAATGT  
TTCTATTCAGCGGCCGCGGTTATTGGCAAGAACTTATTGAATCCATCGTTTGGGCTCATA  
ACAAGTTAAAAGTTGCTCCTGCTATTCAGCCTAGAGCCTTGAGCATTGTACAAGGCCGT  
GCTGTAGGAGTAACCCATTACCTTCTGGGTGGAATTGCCACAACATGGGCGTTCTTCTT  
AGCAAGAATTATTGCAGTAGGAATGGCATTACGATTTCCAAGGTTTAGCCAAGGCTTAG  
CTCAGGACCCCACTACGCGTCGTATTTGGTTTGGTATTGCTACCGCACATGACTTCGAG  
AGTCATGATGATATTACTGAGGAACGTCTTTATCAGAATATTTTTGCTTCTCACTTCGGG  
CAGTTAGCAATAATTTTTCTGTGGACTTCCGGAATCTGTTTCATGTAGCTTGGCAAGG  
AAATTTTGGATCATGGGTACAGGACCCCTTACATGTAAGACCTATTGCTCATGCAATTT  
GGGATCCTCATTTTGGTCAACCGGCTGTGGAAGCCTTTACCCGAGGGGGTGCTCTCGG  
CCCAGTAAATATCGCCTATTCTGGTGTATCAGTGGTGGTATACAATCGGCTTACGCAC  
TAATGAAGATCTTTATACTGGAGCGCTTTTTTTATTATTTCTTTCTGCCATATCCTTAATAG  
CGGGTTGGTTACACCTACAACCGAAATGGAAACCAAGCGTTTCGTGGTTCAAAAATGC  
CGAATCTCGCCTCAATCATCATTTGTGAGGACTCTTCGGAGTAAGTTCCTTGGCTTGG  
CGGGGCATTTAGTTCATGTCGCTATTCCCGCATCTAGGGGGGAGTACGTTTCGATGGAAT  
AATTTCTTAGATGTATTACCGCATCCCCAAGGGTTAGGCCCACTTTTTACAGGTCAGTG  
GAATCTTTATGCCAAAACCCCGATTCCGGTAGTCATTTATTTGGTACCTCCCAAGGAG  
GGGGAATGCCATTCTAACCTTCTCGGGGGATTTCATCCACAAACGCAAAGTTTATGG  
CTGACCGATATTGCTCATCACCATTTAGCTATTGCAATTATTTTTCTCGTTGCTGGTCATA  
TGTATAGAACTAACTTCGGGATTGGGCACAGTATAAAAGATCTTTTAGAAGCACACATT  
CCTCCGGGAGGTCGATTGGGGCGTGGACATAAGGGTCTTTATGATACAATCAATAATTC  
GATTCATTTTCAATTAGGCCTTGTCTAGCCTCTTTAGGGGTATTACTTCTTTGGTAGCT  
CAACACATGTATTCTTTACCTGCTTATGCATTCATAGCACAAGACTTTACTACTCAAGCT  
GCGTTATATACTCATCATCAATACATTGCAGGATTCATCATGACAGGAGCCTTTGCTCAT  
GGAGCTATATTTTTATTAGAGATTACAATCCGGAGCAGAATGAGGATAATGTATTGGCA  
AGAATGTTAGACCATAAAGAAGCTATCACATCCCATTTAAGTTGGGCCAGCCTATTTCT  
GGGATTCCATACCTTGGGACTTTATGTTTATAACGACGTGATGCTCGCTTTTGGTACTCC  
GGAGAAACAAATATTGATCGAACCCATATTTGCCCAATGGATACAATCTGCTCATGGTA  
AGACTTCATATGGGTTTCGATGTACTTTTATCTTCAACGAATGGCCCAGCATTCAATGCGG  
GTCGAAGCATATGGTTGCCTGGCTGGTTAAATGCTATTAATGAG-----AATAGTAATTCAT  
TATTCTTAAACAATAGGCCCCGGAGACTTTTTAGTTCATCATGCTATTGCTCTAGGTTTACA  
TACAACCTACATTGATCTTAGTAAAAGGTGCTTTAGATGCACGTGGTTCCAAGTTAATGC



CCGATAAAAAGGATTTTCGGTTATAGTTTTTCCTTGCGATGGTCCGGGACGGGGCGGTTACT  
TGTGATATTTTCGGCTTGGGACGCGTTTTATTTGGCAGTTTTCTGGATGTAAATACCATT  
GGATGGGTACTTTTTATTGGCATTGGAAGCACATCACATTATGGCAGGGTAACGTTTC  
ACAGTTTAACGAATCCTCTACTTATTTGATGGGATGGTTAAGAGATTACCTATGGTTAAA  
CTCTTCACAACCTTATCAACGGATATAACCCTTTTGGTATGAATAGTTTATCGGTATGGGC  
GTGGATGTTCTTATTTGGACATCTTGTTTTGGGCTACTGGGTTTATGTTCTTAATTTCTGG  
CGTGGATATTGGCAGGAATTAATTGAAACTTTAGCATGGGCTCATGAACGCACACCTTT  
GGCTAATTTGATTCGATGGAGAGATAAACAGTGGCTCTATCCATTGTGCAAGCAAGAT  
TGGTTGGATTAGCCCACTTTTCTGTAGGTTATATATTCACTTACGCAGCTTTCTTGATTGC  
CTCTACATCAGGCAAATTTGGTATGTCACATTCAGTAAAGATTTATGATACATGTATAGG  
GTGTAATCAATGTGTACGAGCCTGCCCCACAGATGTATTAGAAATGATACCTTGGGACG  
GATGTAAAGCTAAGCAAATTTGCTTCTGCTCCAAGAACAGAAGACTGCGTAGGTTGTAA  
AAGGTGTGAATCCGCTTGTCCAACAGATTTCTTGAGTGTCCGGGTTTATTTATGGCATG  
AGACAACCTCGTAGCATGGGTCTAGCTTATATGACAACCTTTCAACTTACCCTCTTTTTTTG  
TGCCTTTAGTGGGTCTAGTATTTCCGGCAATTGCAATGGCTTCTCTATCTCTTCATGTTT  
AAAAAACAAGATTGTCATGCGAGATCTAAAAACATATCTTTCCGTGGCACCCCGTGTTA  
AGCACTCTGTGGTTCGGGTCTTTAGCAGGTCTATTGATAGAGATCAATCGTTTATTCCCA  
GATGCGTTGACATTCCTTTTTTTTTTCAATTCATGACTGCAATTTTAGAGAGACGCGAAAG  
TGAAAGCCTGTGGGGTTCGCTTCTGTAACCTGGGTAACCAGCACTGAAAACCGTCTTTAC  
ATCGGATGGTTTTGGTGTTTTTGATGATCCCTACTTTATTGACCGCAACTTCTGTATTTATTA  
TCGCCTTCATGCTGCTCCTCCAGTAGATATTGATGGTATTCGTGAACCCGTTTCTGGGT  
CTCTACTTTATGGAAACAATATCATTCTGGTGTCTATTATCCTACTTCTGCAGCTATAGG  
GTTGCACTTTTATCCGATATGGGAAGCAGCATCTGTTGATGAATGGTTATAAATGGTGG  
TCCTTATGAACTAATTGTTCTACACTTCTTACTTGGTGTAGCTTGCTACATGGGGCGTGA  
GTGGGAACCTTAGTTTTCCGTTTAGGTATGCGCCCTTGGATTGCTGTTGCATATTCAGCTCC  
TGTTGCAGCTGCTACCGCAGTTTTCTTGATCTACCCAATTGGTCAAGGAAGCTTCTCTG  
ATGGTATGCCTCTAGGAATCTCTGGTACTTTCAACTTCATGATTGTATTCCAGGCTGAGC  
ACAACATACTTATGCACCCATTTACATGTTAGGCGTAGCTGGTGTATTCCGGCGGCTCCC  
TATTCAGTGCTATGCATGGTTCCTTGGTAACCTCTAGTTTGATCAGGGAAACCACTGAA  
AATGAATCTGCTAATGAAGGTTACAGATTCGGTCAAGAGGAAGAACTTATAATATCGT  
AGCTGCTCATGGTTATTTTGGCCGATTGATCTTCCAATATGCTAGTTTCAACAATTCTCG  
TTCTTTACACTTCTTCCCTAGCTGCTTGGCCTGTAGTAGGTATTTGGTTCACTGCTTTAGG  
TATCAGCACTATGGCTTTCAACCTAAATGGTTTCAATTTCAACCAATCTGTAGTTGATAG  
TCAAGGTCGTGTAATTAACACTTGGGCAGATATCATCAACCGCGCTAACCTTGGTATGG  
AAGTTATGCATGAACGTAATGCTCATAACTTCCCTCTAGATCTAGCTGCTGTTGAAGTTC  
CATCTACAAATGGCATGGGTTTTGCCCTTGGTATCGTGTTCATACCGTCGTATTGAATGATC  
CCGGTCGTTTGCTTGTGACATATAATGCATACAGCTCTCGTTTCTGGTTGGGCCGGTT  
CAATGGCTCTATACGAATTAGCAGTTTTTTGATCCCTCTGACCCCGTTCTTGATCCAATGT  
GGAGACAAGGTATGTTTCGTTATACCCTTCATGACTCGTTTAGGAATAACCAATTCATGG  
GGCGTTGGAGTATACA---GGAGGGACTATAACGAATCCGGGTATTTGGAGTTACGAA  
GGTGTGGCCGGGGCACATATTGTTTTTTTCAGGTTTGTGCTTCTTGGCAGCTATCTGGCA  
TTGGGTATATTGGGATCTCGAAATATTCTGCGATGAACGTACAGGAAAACCTTCTTTGG  
ATTTGCCCAAGATCTTTGGAATTCATTTATTTCTCTCAGGGTTAGCTTGCTTTGGGTTT  
GTGCATTTTCATGTAACAGGCTTGTATGGTCCCGGAATATGGGTGTCTGATCCTTATGGAC

TA ACTGGAAAAGTACAATCCGTAAATCCTGCATGGGGGGTAGAAGGTTTTGATCCTTTT  
GTTCCGGGAGGAATAGCCTCTCATCATATTGCAGCAGGTACCTTGGGGATATTGGCGGG  
TCTATTCCACCTTAGTGTCCGCCCGCCCCAACGCCTATACAAAGGATTACGTATGGGTAA  
TATTGAAACTGTCTTTCCAGTAGTATCGCTGCTGTCTTTTTTTGCAGCTTTTGTGTTGC  
TGGA ACTATGTGGTATGGCTCAGCAACTACCCCGATCGAATTATTTGGTCCCACTCGTTA  
TCAATGGGATCAAGGATACTTCCAGCAAGAAATATATCGAAGGGTTGGTGCCGGACTAT  
CCGAAAATCAGAGTTTATCAGAAGCTTGGTCTAAAATTTCCCGAAAAATTAGCTTTTTAT  
GATTACATTGGCAATAATCCAGCAAAAAGGAGGATTATTTAGAGCGGGCTCGATGGACA  
ACGGGGATGGAATAGCCGTTGGATGGTTAGGACATCCCGTCTTTAGAGATAAAGACGG  
GCGCGAGCTTTTTGTACGTCGTATGCCGACTTTTTTTGAAACATTTCCAGTAGTTTTGGT  
AGACGGAGACGGAATTGTAAGAGCCGATGTTCTTTTTAGAAAGGGCAGAATCGAAGTAT  
AGTGTGCAACAAGTAGGAGTAACTGTTGAGTTCTATGGTGGCGAACTTGATGGAGTCA  
ATTATAGTGATCCTGCTACTGTGAAAAAATATGCTAGACGTGCTCAATTGGGTGAAATTT  
TTGAATTAGATCGTGCTACTTTGAAATCTGATGGTGTTTTTTCGTAGCAGCCCAAGGGT  
TGGTTCACTTTTGGACATGCTTCGTTTGCTTTGCTCTTCTTTTTTCGGACACATTTGGCAT  
GGTGCTAGAACTTTGTTTCAGAGATGTTTTTGCTGGTATTGACCCAGATTTGGATGCTCA  
AGTGGAATTTGGAGCATTCCAAAACTTGGAGATCCA ACTACAAGGAGACAAGGAGT  
CATGAAAACCTTATATTCCCCGAGGAGGTTCTACCCCGTGAAACGCTCTTTAATGGAA  
CTTTAGCTTTAGCTGGTCGTGACCAAGAAACCACCGGCTTCGCTTGGTGGGCCGGGAA  
CGCCCGACTTATCAATTTGTCCGGTAAACTACTCGGGGCTCACGTAGCCCATGCTGGAT  
TAATCGTATTCTGGGCAGGAGCAATGAACCTATTTGAGGTGGCTCATTTCGTACCAGAA  
AAGCCCATGTATGAACAAGGATTGATTTACTTCCCCACCTAGCTACTCTAGGTTGGGG  
GATAGGCCCTGGTGGGGAAGTTATAGACACCTTTCCATACTTTGTATCTGGAGTACTTC  
ACTTAATTTCTCTGCAGTATTGGGCTTTGGCGGTATTTATCATTCACTTCTTGGACCCG  
AAACTCTTGAAGAGTCTTTTCCATTCTTCGGTTATGTATGGAAAGATAGAAATAAAATG  
ACCACAATTTTGGGTATTCACTTAATCTTGTTAGGTATAGGTGCTTTTCTTCTAGTACTCA  
AGGCTCTTTATTTTGGGGGGTATATGATACCTGGGCTCCTGGGGGGGGAGATGTAAGA  
AAAATAACCAACTTGACACTTAGCCCAAGTGTATATTTGGTTATTTACTAAAATCCCCC  
TTTGGAGGAGAGGGTTGGATTGTTAGTGTGGACGATTTAGAAGATATAATTGGAGGACA  
TGTATGGTTAGGTTCCATTTGTATATTTGGTGGAACTGCGCATATCTTAACCAAACCTTT  
GCATGGGCTCGGCGAGCGCTTGTATGGTCTGGGGAGGCTTACTTGTCTTATAGCTTAGC  
TGCTTTATCTGTTTTTGGTTTCATCGCTTGTGTTTTGTCTGGTTCAATAATACCGCTTAT  
CCTAGTGAGTTTTACGGGCCCACTGGGCCAGAAGCTTCTCAAGCTCAAGCATTCACTT  
TTCTAGTTAGAGACCAACGTCTTGGGGCTAACGTGGGATCCGCTCAAGGACCCACTGG  
TTTAGGTAAATATCTAATGCGTTCCCCGACTGGAGAGGTCATTTTTGGAGGAGAACTA  
TGCGTTTTTGGGATCTCCGTGCTCCCTGGTTGGAACCTCTAAGGGGTCCCAATGGTTTG  
GACTTGAGTAGGCTGAAAAAAGACATAACCTTGGCAAGAACGTCGTTCCGCAGAAT  
ATATGACTCATGCTCCTTTAGGTTCTTTAAATTCGGTGGGTGGTGTAGCTACCGAGATCA  
ATGCAGTCAATTATGTTTCTCCTAGAAGTTGGTTAGCTACCTCTCATTTTGTCTAGGAT  
TCTTCCTATTCGTGGGGCATTGTGTCATGCGGGAAGGGCCCGTGCAGCCGCAGCAGG  
ATTTGAAAAAGGAATTGATCGTGAATTTGGAACCTGTTCTTTTCATGACCCCTCTTAACAT  
GACTATAGCCCTTGGTAGAGTTACCAAAGACGAAAAGGATTATTTGATACTATGGATG  
ACTGGTTACGGAGGGACCGTTTCGTTTTTGTAGGTTGGTCCGGCCTATTGCTCTTTCCT  
TGTGCCTATTTGCTTTAGGAGGGTGGTTCACAGGTACAACCTTTGTAACCTTCATGGTAT

ACCCACGGATTGGCCAGTTCCTATTTGGAAGGATGCAATTTCTTAACCGCCGCAGTTTC  
TACTCCTGCTAATAGTTTAGCACATTCTTTGTTGCTACTATGGGGTCCTGAAGCACAAG  
GAGATTTTACTCGTTGGTGTCAATTAGGTGGTCTATGGACTTTTGTGCTCTCCATGGTG  
CTTTCGGACTAATAGGTTTCATGCTACGTCAATTCGAACTTGCTCGATCTGTTCAATTGC  
GACCTTATAATGCAATCGCATTCTCTGGTCCAATTGCTGTTTTTGTCTGTATTCTGAT  
TTATCCATTAGGTCAATCTGGTTGGTTCTTTGCACCTAGTTTTGGTGTAGCAGCTATAATT  
CGATTCATCCTCTTCTTCCAAGGATTCATAATTGGACGTTGAACCCATTCATATGATG  
GGAGTTGCCGGCGTATTAGGCGCTGCTCTGCTATGCGCTATTCATGGTGCTACCGTAGA  
AAATACTTTATTCGAAGATGGTGACGGTGCAAATACATTCCGTGCTTTTAACCCAACCTC  
AAGCGGAAGAGACTTATTCAATGGTCACTGCTAACCCTTTTGGTCCCAAATCTTTGGG  
GTTGCTTTTTCCAATAAACGTTGGTTACATTTCTTTATGCTATTTGTACCAGTAACCGGTT  
TATGGATGAGTGCTCTTGGAGTAGTCGGTCTAGCTCTGAACCTGCGTGCCTATGACTTC  
GTTCCCGAGGAAATCCGTGCAGCGGAAGATCCTGAATTTGAGACTTTCTACACCAAAA  
ATATTCTTTAAACGAAGGTATTCGTGCTTGGATGGCGGCTCAGGATCAGCCTCATGAA  
AACCTTATATCCCGAGGAGTTCTACCCCGTGGAAACGCTCTTATGTCTGGAAGCAC  
GGGAGAACGTTCTTTTGCTGATATTATCACCAGTATTCGATACTGGGTCATTCATAGCAT  
TACTATACCTTCCCTATTCATTGCGGGTTGGTTATTCGTCAGCACGGGTTTAGCTTACGA  
TGTGTTTGAAGTCCTCGGCCAAACGAGTATTTACAGAGAACCGACAAGGAATCCA  
TTAATAACTGGCCGTTTTGATTCTTTGGCGCAACTCGATGAATTTAGTAGATCCTTTATG  
ACTATAGATCGAACCTATCCAATTTTACAGTGAGATGGTTGGCTGTTACCGACTAGC  
TGTACCTACCGTTTCTTTTTGGGGTCAATATCAGCAATGCAGTTCATCCAACGAATGGC  
TACACAAACCGTTGAGGGTAGTTCTAGATCTGGT--CCAAGACGAACTACTGTAGGGAA  
TTTATTGAAACCTTTGAATTCGGAATATGGGAAAGTAGCTCCTGGGTGGGGGACTACCC  
CTTTGATGGGGAATCGCAATGGCTCTATTTGCGGTATTCCTATCTATTATTTGGAGATTTA  
TAATTCTTCCGTTTTGCTGGATGGAATTTCAATGAATATGCTTACTCTCAAACCTTTCGT  
TTACACAGTGGTGATATTCTTTGTTTCTCTTTCATCTTCGGATTCCTATCTAATGATCCA  
GGACGTAATCCTGGACGTGAGGAAATGGCCGATACTACTGGAAGGATTCCTCTTTGGC  
TTATAGGCACTGTAGCTGGTATTCTTGTGATCGGTTAATAGGTGTTTTCTTTTATGGTTC  
ATATTCTGGATTGGGTTTCATCTCTGATGCTTAATATCTTTAATTTGATCTGTATCTATCTTA  
ATTCTATACTTCATTCGAGTCATTTTTTCTTTGCCAAATTGCCCGAGGCTTACGCTTTTTT  
CAATCCAATCGTAGATGTTATGCCAGTCATACCTTTGTTCTTTTTTCTCTTAGCCTTTGTT  
TGGCAAGCTGCTGTAAGTTTTCGAATGACACAATCAAACCCGAACGAACAAAGTGTTG  
AATTGAATCGTACCAGTCTTTACTGGGGGTATTACTCATTTTTGTACTTGCTGTTTTATT  
TTCCAATTATTTCTTCAATATGGAAGTCAATATTCTCGCATTTATTGCTACTGCACTGTTC  
ATTCTAGTTCCTACTGCTTTTTTACTTATTATTTACGTAAAAACAGTCAGTCAAAAATGATA  
TGGAAACAGCAACCCTAGTCGCCATCTTTATATCTGGTTTACTTGTAAGTTTTACTGGGT  
ATGCCTTATATACCGCTTTTGGGCAACCCTCTCAACAATAAGAGATCCATTCGAGGAA  
CACGGGGACATGGAAGCATTGGTTTATACATTCCTCTTAGTCTCGACTCTAGGAATAATT  
TTTTTCGCTATTTTTTTTCGAGAGCCTCCTAAGGTCCGACTAAGAAA-----ATGACTATT  
GCTTTCCAATTGGCTGTTTTTGCATTAATTGCTACTTCATCAATCTTATTGATTAGTGTAC  
CCGTTGTATTTGCTTCTTCTGACGGTTGGTCAAGTAACAAAAATGTTGTATTTTCTGGTA  
CATCATTATGGATTGGATTAGTCTTTCTAGTAGCTATCCTTAATTCGCTTATCTCT-----  
-----ATGTCACCACAAACAGAGACTAAAGCAAGTGTGGCTTCAAAGCAGGTGTTAA  
AGATTACAAATTGAATTATTATACTCCGGAATATGAACCAAAAAGATACTGATACCTTAGC

GGCATTCCGAGTAACTCCTCAACCCGGAGTTCCACCTGAAGAAGCAGGGGCTGCTGTA  
GCTGCCGAATCTTCTACAGGTACATGGACAACCTGTGTGGACCGATGGACTTACCAGCC  
TTGATCGTTACAAAGGACGATGCTACCACATCGAGCCCGTTGCTGGAGAAGAAAATCA  
ATATATTTGTTATGTAGCCTATCCTTTAGACCTTTTTGAAGAAGGTTCTGTACTAACATG  
TTACTTCCATTGTGGGTAATGTATTTGGGTTCAAAGCGCTACGCGCTCTACGTCTGGA  
GGATCTGCGAATTCCTGTTGCTTATGTTAAAACTTTCCAAGGTCGGCCTCACGGCATCC  
AAGTTGAGAGAGATAAATTGAACAAGTATGGCCGTCCCCTATTGGGATGTACTATTTAAA  
CCAAAATTGGGATTATCTGCTAAGAACTACGGTAGAGCGGTTTATGAATGTCTCCGCGG  
TGGACTTGATTTTACCAAGGATGATGAGAACGTGAACTCCCAACCCTTTATGCGTTGGA  
GAGACCGTTTCCCTATTTTGTGCTGAAGCAATTTATAAAGCACAAAGCCGAAACAGGTGA  
AATCAAAGGACATTACTTGAATGCTACTGCGGGTACATGCGAAGAAATGATGAAAAGG  
GCTGTATTTGCTAGAGAATTAGGCGTACCCATCGTAATGCATGACTACTTAACGGGGGG  
ATTCACCGCAAATACTAGTTGGCTCATTATTGCCGAGATAATGGTCTACTTCTTCACAT  
CCACCGCGCAATGCATGCAGTTATTGATAGACAGAAGAATCATGGTATGCATTTTCGTG  
TACTAGCTAAAGCGTTACGTATGTCTGGTGGAGATCATATTCACGCTGGTACCGTAGTA  
GGTAAACTGGAAGGGGAAAGAGAGATCACCTTGGGTTTTGTTGATTTACTACGTGATG  
ATTATATTGAAAAAGACCGAAGTCGCGGTATTTACTTCACCCAAGATTGGGTCTCTCTG  
CCAGGTGTTCTGCCCGTTGCTTCAGGGGGTATTCACGTTTGGCATATGCCTGCTCTGAC  
CGAGATCTTTGGGGATGATTCCGTACTIONACAGTTCGGTGGAGGAACTTTAGGACACCCTT  
GGGGAAATGCACCGGGTGCCGTAGCTAATCGAGTAGCCCTAGAAGCCTGCGTACAAGC  
TCGTAATGAGGGACGTGATCTTGCTCGTGAAGGTAATGAAATTATCCGTGAGGCTTGCA  
AATGGAGCCTTGAACCTAGCCGCTGCTTGTGAGGTATGGAAGGAGATCAAATTCGAATT  
TGAAGCAATGGATACTTTG-----ACGGCGATACATTTATACAAAACCTTCTACCCCGAGCA  
CACGCAATGGAGCCGTCGGCAGTCAAGTGAATCCAATACACGAAATAATTTGATCTAT  
GGACAGCGTCGTTGTGGTAAAGGTCGTAATGCCAGAGGAATCATTACCGCAAGGCATA  
GAGGGGGAGGTCATAAGCGTCTATACCGTAAAATCGATTTTCGACGGAATGAAAAAGA  
CATATCTGGTAGAATCGTAACCATAGAATACGACCCTAATCGAAATGCATATATTTGTCT  
CATACTATGGGGATGGTGAGAAGAGATATATTTTACATCCCAGAGGGGCTATAATTGG  
AGATAACCATTGTTTCTGGTACAGAAGTTCCTATCTCAATGGGAAATGCCCTACCTTTGA  
CCGATATGCCCTTAGGCACGGCCATACATAACATCGAAATCACACTTGGAAGGGGTGG  
ACAATTAGCGAGAGCAGCGGGTGTGTAGCGAAACTGATTGCAAAAGAGGGTAAATT  
GGCCACATTAATAATTACCATCTGGGGAGGTCCGTTTGATATCCAAAACTGCTCAGCAA  
CAGTCGGACAAGTGGGTAATGTTGGGGTGAACCAGAAAAGTTTGGGTAGAGCCGGAT  
CTAAGCGTTGGCTAGGTAAGCGTCCTGTAGTAAGAGGAGTAGTTATGAACCCTGTAGA  
CCATCCCATGGGGGTGGTGAAGGGAGGGCCCCAATTGGTAGAAAAAAACCCACAAC  
CCCTTGGGGTTATCCTGCGCTTGGAAGAAGAAGTAGAAAAAGGAATAAATATAGTGAT  
AGTTTGATTCTTCGTCGCCGTAGTAAAATGATTCAACCTCAGACCTATTTAAATGTAGCA  
GATAACAGCGGGGCTAGAGAATTAATGTGTATTGCAATCATAGGAGCTAGT--AATCGCC  
GATATGCTCATATTGGTGACGTTATTGTTGCTGTAATCAAAGAAGCAGTGCCCAATATGC  
CTCTACAAAGATCAGAAGTGATCAGAGCTGTAATTGTACGTACATGTAAAGAACTCAA  
ACGTGACAATGGTATGATAATAAATATGATGACAATGCAGCAGTTGTCATTGATCAAG  
AAGGAAATCCAAAAGGAACTCGAGTTTTTGGTGCATCGCTCGGGAATTGAGACAGTT  
GAATTTTACTAAAATAGTCTCATTAGCTCCTGAGGTATTAATGCTTAGTCCAAAAAGAAC  
CAGATTTTCGTAAACAACATAGAGGAAGAATGAAGGGAATATCTTATCGAGGCAATCGA

ATTTGTTTTGGCGGATACGCCCTTCAGGCACTTGAGCCCGCCTGGATCACATCTAGACA  
AATAGAAGCGGGGCGACGAGCCATGACACGATATGCGCGCCGTGGTGGAAAAATATGG  
GTACGTATATTTCCAGACAAACCTGTTACAGTAAGACCTACCGAAACACGTATGGGTTC  
GGGGAAAGGATCTCCCGAATATTGGGTATCCGTCGTTAAACCGGGTCAATACTTTATG  
AAATGGGCGGAGTATCAGAAATTGTAGCCAGAGAAGCTATTTCTATAGCTGCGTCCAAA  
ATGCCTATACGAACTCAATTCGTTATTGCGGGAATGACCAGAATTAGACGCGGGTATATA  
GCTCGGAGACGTAGAACAAAAATTCGTTTATTTGCATCAACCTTTGAGGGGCTCATT  
AAGACTTACTCGAAGTACTATTCAACAGAAAATGAGAGCCTTGGTTTCTGCTCATCGG  
GATAGGGGCAGGCAAAAGAGAAAATTTTCGTCGTTTGTGGATCACTCGGATAAATGCAG  
CAATTCGTGAGAGT-----GTATCCCATAGTTATAGTAGATCAATACATGATCTGTACAAGA  
GGCAGTTGCTACTTAATCGTAAAATACTTGCACAAATAGCCATATCAAAATATGAATTGTC  
TTTACATGATTTCCAATAAGATCATTAAA-----ATGATAAAGGAAGT  
ATACGCTTTAGGTCAACATATACGTATGTCTGCTCATAAAGCGCGAAGAGTAATTGATCA  
GATTCGTGGACGTCCCTACGAGGAAACACTTATGATACTAGA ACTCATGCCTTATCGAG  
CATGTTATCCATTTTTAAATTAGTTTATTCTGCAGCAGCAAATGCTCGTCACAATATGG  
GTTTCAACGAAACGGCTTTAATCATTAGTCAAGCCGAAGTTAATGAGGGTACTATCATG  
AAAAAGTTAAAACCCCGAGCTCGAGGACGTAGTTATGCGATAAAAAAACCCACTTGTC  
ATATACTATTGTATTGAAAGATATATCTAAAGAAGAGGTGTTATGGGACAAAAAATG  
GATGGAATCAAATATGCAGTATTTACAGACAAAAGTATTCGGTTATTGGGGAACAAT--C  
AATATACTTCTAATGTGCAATCAGGATCAACTAGGACAGAAATAAAGCATTGGGTGCGAA  
CTCTTCTTTGGTGTCAAGGTAATAGCTATGAATAGTCATCGACTCCCGGGAAAGGGTAG  
AAGAATGGGACCCATTATGGGACATACAATGCATTACAGACGTATGATCATTACGCTTC  
AACCGGGTTATTCTATTCCACCTCTTAGAAAGAAAAGAACTATGGCGGTTCTAAAAAA  
CGTACTTCTATGTCCAAAAGCGTATTCGTA AAAATTTTTGGAAAAATAAAGCATATTG  
GGCATCAATAAAGGCTTTCTCTTTAGCCAAATCACTTTCCACCGGGAAGTCTAAAAGTT  
TTTTTGTTGACAAAACAAGTAATATGGCCAAGGGTAAGGATGTCAGAGTAAGAGTTATT  
TTGGAATGTAACAGTTGTGTCCGAAACGATATTAAT-----AAGGAATCCCGGGGCATTTC  
CAGATATATTACTCAAAGAATCGACACAATACGCCTAGTCGATTGGAATTGAGAAAAT  
TTTGCCCCATTGTTACAAGCATAACGATTCATGGGGAGATAAAAAAATGAAAATAAGG  
GCCTCCGTTTCGTA AAAATTTGTGAAAAATGTGCGCCTGATCCGTAGGCGGGGGCGAATTAT  
AGTAATTTGTTCCAACCCTAGGCATAAACAGAGACAGGGAATGCTTCGAGAGGAAGTA  
GCAGTATCTACTCGGACACTACAGTGGAAAGTGTGTTGAATCAAGAGCAGACAGTAAGC  
GTCCTTATTATGGACGTTTTATTTTGTCTCCGCTTATGAAAGGACAAGCCGATACAATAG  
GCATCGCGATGCGAAGGGCTTTGCTTGGAGAAATAGAAGGAACATGTATCACACGCGC  
AAAATCTGAA-----AAGATACCACATGAATATTCTACCATAGTAGGTATTGAAGAATCGG  
TACATGAAATTTAATGAATTTGAAAGAAATTGTATTGAGAAGTAATCTGTATGGAATC  
GCGACGCATCTATTTGCGTCAAGGGTCTGGATATGTA ACTGCTCAAGACATCATCTCA  
CCGCCTTCTGTGGAATCGTTGATATTACACAGCATATAGCTAGCCTGACGGAACCAAT  
AGATTTGTGTATTGAATTACAAATCGAGAGGAATCGCGGATATCGGATGAAAACACCAA  
ATAACGCTCAAGAAAGAAGTTAT-----CCTATAGATGCGGTATTTCATGCCTGTTTCGAAAT  
GCAAATCATAGTATTCATTCTTATGGGAATGGGAATGAAAAACAAGAGATACTTTTTCT  
CGAAATATGGACGGATGGAAGTTAACTCCTAAAGAAGCACTTTATGAAGCCTCCCGTA  
ATTTGATTGATTTATTTATTCCTTTTCTACATGCAGAAGAACA-----GACACAAAATTAG  
AGGACAATCAA---AGCAGGGTTACTTTACCTTTTTTTTACTTTTCATGATGGATTGGAT---A

AAGTAAGAAAAACAAAAA-----ATCGAATTGAAATGTATTTTTATTGACCAATCAGA  
ATTGCCTTCCAGGACCTATAATTGCCTCAAAAGGTTCAATATACATACATTATTAGACCT  
TTTGAATAAGAGTCAAGAAGATCCTTATGAAAATGGAACATTTTCGCATAGAAGATGTAA  
GACGCATATTGGGCATTATAAAAAAC-----ATTTCA-----ATGCTCCGGGAT  
GGAAAT--GAGGGAATGTCTACAATACCTGGATTTAGTCAGATACAATTTGAGGGATTTT  
GTAGATTCATTGATCAGGGATTGACGGAAGAACTTTATAAGTTTCCAAAAATTGAAGAT  
ACAGACCAAGAAATTGAATTTCAATTATTTGTGGAAACATATCAATTAGTAGAACCTTT  
GATAAAAGAAAGAGATGCTGTGTATGAATCACTCACATATTCTTCTGAATTATATGTGCC  
CGCGGGATTCATTTGAAAACCGGTAGGGACACGCAAGAACAGACCATATTTATTGGA  
AAAATTCCTCTAATGAATTCCTTGGGAACCTCTATAGTAAATGGAATATACAGAATTGTG  
ATCAATCAAATATTGCAAAGCCCCGGTATTTATTACCGTTCAGAGTTGGACCATAACGG  
AATTTCCGTCTATACCGGTACCATAATATCAGATTGGGGAGGAAGATCAGAATTAGAGA  
TTGATAGAAAAGCAAGGATATGGGCGCGTGTGAGTAGGAAACAAAAATATCTATTCT  
AGTTCCATCATCAGCTATGGGTTCTGAATCTAAGAGAAATTATAGATAATGTTTGCTACCC  
TGAAATTTCTTGTCTTTTCCGAATGATAAGGAGAAAAAAAATTGGATCAAAAGAA  
AATGCCATTTGGAGTTTTATCAACAATTTGCTTGTGTAGGTGGGGATCCGGTATTTTCT  
GAGTCTTATGTAAGGAATTACAAAAGAAATTTTTCAACAAAGATGTGAATTGGGAA  
GGATTGGTCGACGAAATATGAACCGTAGACTTAATCTTGATATACCTCAAAACATTACAT  
TTTTGTTACCACGAGATATATTGGCAGCTGCGGATCATTGATCAGAATGAAATTTGGAA  
TGGGTACACTTGACGAT-----ATGAATCACTTAAAAATAAACGTATTTCGTTCCGTAGCG  
GATTTGTTACAAGATCAATTCGGATTGGCTCTGGTTTCGTTTAGAAAATGCGGTTTCGAGG  
AACTATAGGCGGAGCAATTAGG--CATAAATTGATA---CCGACTCCTCATAATTTGGTAAC  
TTCCACTCCA-----TTAACAACCACTTATGAATCATTTTTTGGCCTACACCCCTTATC  
TCAAGTTTTGGATCGAACGAATCCATTGACACAAATAGTTCATGGGCGAAAGTTGAGTT  
ATTTGGGTCCTGGGGGGTTGACAGGGCGAACTGCTAGTTTTTCGGATACGAGATATCCAT  
CCTAGTCACTATGGACGATTTGCCAATTGACACATCTGAAGGAATCAATGTTGGACT  
CATTGGATCCTTAGCAATTCATGCGAGGATTGGTCATTGGGGG---TCTTTAGAAAGACC  
GTTTTAT-----GAAATTTCTGATAAATCAACA---AAAGAGTTACGTGTGGTTTATTTATC  
ACCAAGTAGAGATGAATACTATATGGTAGCGGCAGGTAATCTTTGGCGTTGAATCAGG  
GTATTCAGGAAGAACAAGTTGTTCCAGCTCGATATCGCCAAGAATTCCTGACTATTGCA  
TGGGAACAGATTCATCTTCGAAGCATTTTTCCCTTCCAATATTTTTCTATTGGAGCTTCT  
CTCATTCTTTTATCGAACACAATGATGCGAATCGTGCTTTAATGAGTTCTAATATGCAA  
CGCCAAGCAGTTCCACTTTCTCGATCCGAGAAGTGCATTGTTGGAACCTGGGTTGGAAC  
GTCAAGCGGCTCTAGATTCGGGGGTTTCCGCTATAGCCGAACACGAGGGAAAGATCGT  
TTATACCGATACTGACAAGATCATGTTATCAGGTAATGGGGATACTCTAAGCATTCCATT  
GGTTATGTATCAACGTTCCAACAAAAATACTTGTATGCACCAAAAAACTCGGGTTCCGC  
GGGGTAAATGTATTA AAAAGGGACAAATTTTAGCGGATGGGGCCGCTACAGTTGGTGG  
CGAGCTCGCTTTGGGAAAAACGTAGTAGTAGCTTATATGCCATGGGAGGGATAACAATT  
TTGAAGATGCGGTACTTATTAGTGAACGCCTGGTATATGGAGATATTTATACTTCTTTTCA  
CATACGGAAATATGAAATTAAGACTCATGTGACAAGCCAAGGC---CCTGAAAGAATCAC  
TAACGAAATACCACATTTAGAAGCCCACTTACTACGCAATTTAGACAGAAATGGAATTG  
TGATGCTGGGATCTTGGGTAGAAACGGGTGATATTTAGTAGGTAATTAACGCCACAA  
ATGGCGAAAGAA---TCATCATATGCCCCGGAAGATAGATTATTACGAGCCATACTTGGCA  
TTCAGGTATCCACTGCAAAGGAAACTTGTCTAAAACTACCTATAGGTGGCAGAGGTCG

AGTTATTGATGTGAGATGGATCCAGAAAAAGGGG---GGTTCCAGTTATAATCCAGAAAC  
GATTCGTGTATATATTTACAGAAACGTGAAATAAAAGTAGGTGATAAAGTAGCTGGAA  
GACATGGAAATAAAGGTATCATTTCCAAATTTTGCCTAGACAAGATATGCCTTATTTAC  
AAGATGGAACACCTGTTGATATGGTCTTCAACCCACTAGGAGTCCCTTCACGAATGAAT  
GTAGGACAGATATTTGAATGCTCGCTCGGGTTAGCGGGGATCTGCTAGACAGACATTA  
TCGAATATCACCTTTGATGAGAGATATGAGCAAGAGGCTTCGAGAAAACTAGTGTTTT  
CTGAATTATATGAAGCCAGTAAGCAAACAGCGAATCCATGGGTATTTGAACCCGAGTAT  
CCGGGAAAAAGCAGAATCTTTGATGGAAGAACGGGAGATCCTTTGCAACAACCTGTTA  
TAATAGGAAAGTCCTATATCCTGAAATTAATTCATCAAGTTGATGATAAAATCCATGGAC  
GTTCCAGTGGGCATTACGCCTCGTTACACAACAACCCCTTAGAGGAAGGGCCAAGCA  
AGGGGGACAACGGGTAGGAGAAATGGAAGTTTGGGCTCTAGAGGGATTTGGTGTTC  
TCATATTTTACAAGAGATGCTTACTTATAAATCTGATCATATTAGAGCTCGTCAGGAAGT  
ACTTGGTACTACGATCATTGGAGGAACAATATCTAACCCCGAGGATGCTCCCGAATCTT  
TTCGATTGCTCGTTTCGAGAACTACGATCTTTGGCTCTGGAACCTGAACATTTCTTGTAT  
CTGAGAAGAACTTCCAGATTAATAGGAAGGAAGCT-----ATGATTGACCGAT  
ATAAACATCAACAACCTTCGAATTGGATTAGTTTCTCCTCAACAAATAATTGCTTGGGCC  
AAGAAAACCTTACCTAATGGAGAGATGGTTGGAGAGGTGACAAAACCCCTATACTTTTC  
ATTACAAAACCAATAAACCGGAAAAAGATGGGTATTTTGTGAAAGAATTTTGGACC  
CATAAAAAGTGGAATTTGTGCTTGTGGAAATTATCGAGTAATCGGAGATGAAAAAGAA  
GACCCGAAATTTTGTGAACAATGCGGAGTCGAATTTGTTGATTCTCGGGTACGAAGATA  
TCAAATGGGATACATCAAACCTTGCCTGTCCAGTAACTCATGTGTGGTATTTGAAGCGCC  
TTCCTAGTTATATCGCGAATCTTTTAGATAAACCTCTTAAAGAATTAGAAGGCCTTGTAT  
ATTGCGAT-----TTTTCTTTGCTAGGCC---GTAGTTAAAAACCTACTTTCTTACGATTA  
CGAGGTTCAATCGAATATGAAATCCAATCATGGAAATACAGTATTCCACTTTTTTTTACT  
ACCCAAGGCTTCGATACATTCGAAATCGAGAAATATCTACTGGAGCAAGTGCTATCAG  
AGAACAATTAGCCGATCCGGATTTGCGACTTATTACAGATTCTTCGTTGTTAGAATGGA  
AAGAATTAGGTGAAGAA---GGGCCACCGTAATGAATGGGAAGATAGAAAAATTGGA  
AGAAGAAAGGATTTTTTGGTTAGACGTATGGAATTAGCTAAGCATTTTATTTCGAACAAA  
CGTAGAACAGAACGGATGGTTTTGTGCCTATTGCCGGTCTTCCTCCCGAATTGAGAC  
CGATCATTAGATAGATGGGGGTAACTAATGAGTTCGGATATTAATGAACTCTATCGAA  
GAGTTATCTATCGGAACAATACTCTTACCGATCTATTAACAACAAGTAGATCTACGCCAG  
GGGAATTGGTAATGTGTCAGGAGAAATTAGTACAAGAAGCCGTGGATACACTTCTTGAT  
AATGGGATCCGCGGACAACCAATGAGGGACGGTCATAATAAAGTTTACAAATCGTTTTC  
AGATGTAATTGAAGGAAAAGAGGGAAGATTTTCGCGAGACTCTGCTTGGTAAACGGGT  
CGATTATTCGGGGCGTTCCGTCATTGTCGTGGGCCCTTCGCTTTCATTACATCGATGTGG  
ATTGCCTCGCGAAATAGCAATAGAGCTTTTCCATACATTTGTAATTCGTGGTCTAATCAG  
ACAACACGTTGCTTCCAACATAGGAGTTGCTAAAAGTAAAATTAGGGAAAAAGCACCA  
ATTGTGTGGGAAATACTTCAAGAAGTTATGCAGGGGCATCCTGTATTGCTAAATAGAGC  
ACCCACTTTGCATAGATTAGGCATACAGGCATTCCAACCTATTTTAGTGGAAGGACGCG  
CTATTTGTTTACATCCATTAGTTTGTAAAGGATTCAATGCAGATTTTGTGATGGGGATCAA  
TGGCTGTTATACCTTTATCTTTGGAGGCTCAAGCGGAGGCTCGTTTACTTATGTTTT  
CTCATATGAATCTCTTGTCTCCAGCTATTGGGGATCCCATTTCCGTACCAACTCAAGATA  
TGCTTATGGGACTCTATGTATTAACGATCGGGAATCGTCGAGGTATTTGTGCAAAATAGGT  
ATAATCCATGGAATCACAGAAAC-----TATCAAATGAAAAATTGATGATAATAACCA

TAAGTATACA-----AAAGAACCCTATTTTTGTAGTTCCTATGATGCACTCGGAGCTTATTG  
GCAGAAACGAATCAATTTAGATAGTCCTTTGTGGCTTCGGTGGCGACTAGATCAACGC--  
-GTCATTGCACCA-----AGAGAAGTCCCATCGAAGTTCAATGTGAATCTTTTGGTACCTA  
TCATGAGATTTATGGTCACTATCTAATAGTAAGAAATGTCAAAAAAGAAATCTTTGTAT  
AGACATTCGAACCACTGTTGGCCATATTTCTTTTTATCGAGAGATAGAAGAAGCCATAC  
AAGGGTTTTGCCGGGCTTGCTCATATAGTACC-----ATGGCAGAA  
CGGGCCGATCTAGTCTTTCACAATAAAGCGATAGATGGAAGTCCATGAAACGACTTAT  
TAGCAGATTAATAGATCACTTTGGAATGGCGTATACATCACATATCCTGGATCAAGTAAA  
GACTCTGGGTTTCCAGCAAGCCACTTCTACATCTATTTCAATTAGGAATTGATGATCTTTT  
ACAATACCTTCTAAGGGATGGCTAGTACAAGATGCTGAACAACAAAGTTTAATTTTGG  
AAAAACACCATCATTATGGGAATGTACACGCGGTAGAAAAATTACGTCAATCCATTGAG  
ATCTGGTATGCTACAAGTGAATATTTACGACAAGAAATGAATCCTAATTTTAGGATGACA  
GATCCTTCTAATCCAGTCCATATAATGTCTTTTTCGGGAGCTAGAGGAAATGCATCTCAG  
GTACATCAATTAGTAGGTATGAGAGGATTAATGTCGGATCCTCAAGGACAAATGATTGA  
TTTACCCATTCAAAGCAATTTACGCGAAGGACTCTCTTTAACAGAATATATTATTTCTG  
CTACGGAGCTCGAAAGGAGTTGTCGATACTGCTGTACGAACATCAGATGCTGGATAC  
CTCACGCGCAGACTTGTGAAGTAGTTCAACACATTGTTGTACGTAGAACAGATTGTG  
GCACCGTCCGAGGTATTTCTGTGAGTCTCGAAATGGGATGATAACA---GAAAGAATTT  
TTATCCAAACATTAATTGGTCGTGTATTAGCGGACGATATATATATGGGTTTACGATGCAT  
TGCCATTAGAAATCAAGATATTGGAATTGGACTTGTCAATCGATTCATAACC-----  
--TTTCGAGCACAACCAATATCTATTAGAACCCCTTTTACTTGCAGGAGTACGTCTTGAT  
CTGTCGACTATGTTATGGCCGTAGTCCCACTCATGGCGACCTGGTTGAATTGGGAGAAG  
CGGTGGGTATTATTGCGGGTCAATCTATTGGGGAACCGGGACTCAACTAACATTAAGA  
ACTTTTCATACCGGTGGAGTATTCACAGGTGGTACTGCAGAACATGTACGAGCTCCTGA  
TAATGGAAAAATAAAATTCAATGAAGATTTGGTTCATCCCACACGTACACGTCATGGAT  
ATCCTGCTTTTCTATGTTATATAGACCTATATGTAATGAGGGTCAAGATATTCTACAT  
AATGTGAATATTCCACCAAAAAGTTTTATTTTAGTTAAAAATGATCAATATGTAGAATCA  
GAACAAGTGATTGCTGAGATTCGCGCCGAAGCATCCACCTTG---AATTTTAAAGAGAG  
GGTTCGAAAACATATTTATTCTGACTCAGAGGGAGAA---ATGCACTGGAGTACCGCTGT  
GTACCATGCACCCGAATATACATATGGTAATGTTTCATCTCTTACCAAAAACAAGTCATTT  
GTGGATATTATCAGGAGTTCCATACAGA-----TCCAGTATAGTACCTTTTTTCGCTCCACAA  
GGATCAAGATCAAATAAATATTCAC-----TCTCTTTCTTCCGAACGAAAATATATTTCTAA  
C-----CTTTCAGTGACTAATGACCAA---GTGAGGCACAAATTGTTTAGGTTCGGATCCTTC  
TGGT-----AGGGAGCGGGTCTTTATTAT--TCAGAACCTGATCGAATAATATGGAACGGC  
CATTGTAATTTATATATCCTGCC---ATTCTCGACGATAATTCTGAT-----TTATTGGCAAAG  
AGGCGAAGAAATAGATTTATCATTCCATTCCAATCTAATCAAGAAAAAGAA-----CCAAT  
ACCCCGTTCAGGTATCTCGATTGAAATACCCATAAAT-----GGTCTTTTCCGTAGAAATAG  
TATTCTTGCTTATTTTCGATGATCCCCGATACAGAAGAAAGAGTTCGGGAATTACTAAATA  
CGGGACTATAGAGGTGGATTCAATCGTCAAAAAAGAGGAT-----TTGATTGAGTATCGA  
AGA-----AAAGAATTTAGGCCAAAATACATGAAAATAGATCGATTTTTTTTCATTCCCGA  
GGAAGTACATATCTTACCCGGATCTTCTTCCATAATGGTACGTAACAATAGTATCATTGG  
AGTAGCTACACGAATTACTTTCAATATAAGAAGCCGAGTAGGCGGATTGGTCCGAGTG  
GAGAAAAAAGAAAGATTGAACTCAAAATATTTTCTGGAGATATATATTTTCTG  
AGAGACAGATAAGATATCCTGGCACAGCGGCATCTTAATACCACCAGGAACGGTAAAA



AAA-----AATTCTAAGGAATCAAAA-----ACATTGAAAAATTGGATCTATGTCCAACGG---  
--GTCACACCTACCAAAAAAAAAAG-----TATTTTGTTTTGGTTTCGACCCGTAGTCACATATG  
AACAGCGGACGGGATAAATTTAGCAACGCTTTTTCCCAGGATCCCTTGCAGGAAAG  
GGATAATGTGCAACTTCGAGTTGTCAATTATATCCTTTATGGAAATGGTAAACCAATTCG  
CGGAATTTCTCACACAAATATTCAATTAGCTCGAACTTGTTTAGTATTGAATTGGGACCA  
AGACAAAAAA-----GGTCTTCTATAGAGGAGGTTTCATGCGTCCTTTGTTGAGGTAAG  
GGTAAATGATCTGATTCGAGATTTTATAAGAATTGACTTAGTGAAGTTGCCCATTTTCGTA  
TACCAGAAAAAGGAATGATCTGGCAGGGTCAGGATTGATCTCCGCT--AACGGATCAGA  
TCGCACCAATCTCAATCCT--TTTTATTCC-----AAGGCAAGG-----ATTAAACAATT  
ACTTATCCGGCATCAAGGAACTATTCGTACGTTGTTGAATAGA-----ATAAGGAATGC  
CAATCTTTGATAACTTTGTTCATCATCTAATTGTTTTCGA-----ATAGGTCTATTCAACGGTT  
TGAAATATAACAACAACAAT--ATGACAAAAAATCAGATCCACTACTTCCAATTAGGA  
ATTTATTGGGTCCTTTAGGAATT-----GTCCCTAAAATTACTCATTTTTTTTTCA-----TTT  
CTATTTAATAACT-----CATAATCAGATCTTG--GTAAATAAACATTCGCTGATTGACAAT--  
-----TTAAAACAGACTTTCCAAGTACTTAAACTTAAA---TATTATTTAATGGATGAAAATG  
GTATA-----ATTTATAATCTCGACCCATGCAGTAACATGATTTTGAATCTATTCAATTGGAA  
TTGGTATTTTCTCCATCACGATTATTGTGAAGAAATATCGACAATAATTAGC---CTTGGAC  
AGTTTTTTTGTGAAAATGTATGTATATCTAAATATGGACCA-----CATCTAAAATCGGGT  
CAAGTTCTAATTGTTTCAT--GTTGACTCTTTAGTAATAAGATCTGCAAAGCCCTATTTGGC  
TACTCCAGGAGCAACTGTTTCATGGCCATTATGGGGAAATCCTTTACGAAGGAGATACAT  
TAGTTACATTTATATATGAAAAGTCGAGATCTGGTGATATAACGCAAGGTCTTCCAAAAG  
TAGAACAAGTGTTAGAAGTTCGTTTCGATTGATTCAATATCAATGAACTTAGAAAAACGG  
GTTGAAGGTTGGAACGAACGTATAACAAGAATTCTTGGGATTCCCTGGGGATTCTTGAT  
TGGTGCTGAGCTAACCATAGCGCAAAGTCGTATCTCTTTGGTTAATAAAAATTCAAAGG  
TTTATCGATCCCAGGGAGTGCAGATACATAATAGGCATATAGAAATTATTGTACGTCAA  
TAACATCAAAGTGTTGGTTTCAGAA-----GATGGAATGTCTAATGTTTTTTCACCCG  
GCGAATTAATTGGATTGTTGCGAGCAGAACGAACAGGGCGCGCTTTGGAAGAAGCTAT  
CTGTTACCGAGCCGTCTTATTGGGAATAACGAGGGCGTCTCTGAATACTCAAAGTTTCA  
TATCTGAAGCGAGTTTTCAAGAACTGCTCGAGTTTTAGCAAAAAGCCGCTCTACGAGG  
TCGTATCGATTGGTTGAAAGGCCTGAAAGAGAATGTTGTTCTGGGGGGTATGATACCCG  
TTGGTACCGGATTTAAAGGATTAGTGCACCGTTTA-----AGTCAACACAGCAACATTTCT-  
-----TTGGAATCGAAAAGAAGAATCTATTTCGAGGGGGCATGGGA-----GACATTTTGT  
CCACCACAAAGAATTATTGATTCTTGCACCCAAAAGAATTTCCACGATACAGCAGAA  
CAATCATTACAGGATTTACTGATTCC-----ATGACAAGAAGGTATTGGAACAT  
CAATTTGGAAGAGATGATGGAAGCAGGAGTTCATTTTGGTCATGGGACTAGGAAGTGG  
AATCCTAGAATGGCACCTTACATCTCTGCAAAGCGTAAAGGTATTCATATTACAAATCTT  
ACTCGAACTGCTCGTTTTTTATCAGAAGCCTGTGATTTAGTTTTTATGATGCAGCAAGTAG  
GGGAAAACAATTCTTAATCGTTGGTACAAAAAATAAAGCAGCTGATTCAGTAGCATCG  
GCTTCAATAAGGGCTCGATGTCATTATGTTAATAAAAAATGGCTCGGTGGTATGTTAACG  
AATTGGTCCACTACAGAAACAAGACTTCATAAGTTCAGGGACTTGAGAGCGGAACAA  
AAGACGGGAAGACTGAACCGGCTTCCGAAAAGAGATGCAGCAATGTTGAAGAGACAA  
TTATCTCACTTGCAAACATATCTGGGTGGCATCAAATATATGACGGGGTTGCCTGATATT  
GTAATCATCGTTGATCAGCAAGAAGAATATACGGCTCTTCGAGAATGTGTCATTTGGG  
AATCCAACAATTTGTTTAATCGATACAAATTGTGACCCGGATCTTGCAGATATTTTCGAT

TCCAGCCAATGATGATGCTATAGCTTCAATTCGATTAATTCTTAACAAATTAGTATCCGC  
AATTTTGGAGGGTCGTTCTAGC---TATATAAGAAATCGTATGGGACAAAAATAAATCCA  
CTCGGTTTCAGACTTGGTACAACCCAAAGCCATCATTCTGTTTGGTTTTCCACAACCCAAA  
AAGTTATTCCGAGGGGCTCCAGGAAGATCAAAAAATACAGAATTGTATCAAGAATTATG  
TACAAAAAATATGAAAATATCCTCTGGT---GTCGAGGGAATTGCACGCATAAAGATTC  
AAAAAGAATCGATCTGATTGAGGTCATAATATATATGGGATTTCCAAAATTGTTAATAG  
AGGGCAGCCACGA-----GGAATAGAAGAATTACAAATAAATGTGCAAAAAGAATT  
GAATTCTGTGACCAGAAACTTAACATTGCTATCACAAAGAGTTTTCAAACCTTATGGAC  
AACCTAATATTCTTGCGAATTTATAGCCGGACAATTAAGAATAGAGTTTCATTTGAA  
AGGCAATGAAAAAGCTATTGAATTAACCGAACAAAGCGGATACAAAAGGAATTCAAGT  
ACAAATTGCCGGGCGTATCGACGGAAAAGAAATTGCACGTGTGCAATGGATCAGAGA  
AGGTAGGGTTCCCCTACAAACCATTTCGAGCTAAAATTGATTATTGTTCTTACAGTTTCG  
AACTATCTATGGGGCATTAGGAATCAAAATTTGGATATTTACAGACGAGGAAATGTCTC  
GTTACCGAGGGCCTCGTTTCAAAAAATACGCCGTCTGGGTGTTTTACCGGGACTAACT  
AGTAAAAGGCCAACACCCGGAAGTGATCTTAGAAACCAATCGCGCTCCGGGAAA---AG  
ATCTCAATATCGTATTGCTCTAGAAGAAAAACAAAAATTGCGTTTTTATTATGGTCTGAC  
GGAGAGACAATTACTTAAATACGTTTCATATCGCCGGAAAAGCCAAAGGGTCAACAGGT  
CAGGTTTTACTACAATTACTTGAAATGCGTTTTGGATAACATCCTTTTTTCGATTAGGTATG  
GCTTCGACCATTCTGGAGCCCGACAATTAGTTAACCATAGGCATATTTTGGTTAATGGT  
CGTATAGTAGATATACCAAGTTATCGATGCAAACCCCGAGATATTACTACAAGGGAT  
GAACAAAGATCCAGAGCTCTTATTCAAAATTATCTTGATTCATCCCCCAT---GAGGAAT  
TGCCAAAACATTTGACTCTTCACTCATCCCAATAT-----AAAGGATCAGTCAATCAAATA  
ATAGATAGTAAGTGGGTTCGTTTTGAAAATAAATGAATTACTAGTCGTAGAATATTATTCC  
CGTCAGACTATGTCACGTGAGGTAAGTGCAGAAAGAAAAACTGCAAATCCGATCCAA  
TTTATCGTAATCGATTAGTTAACATGTTGGTTAACCGTATTTTGAACACGGAAAAAAT  
CATTGGCTTATCAAATTATCTATCGAGCCCTGAAAAAGATTCAACAAAAGACAGAAAC  
AAATCCACTATCTGTTTTACGTCAAGCAATACGTGGAGTAACTCCCGATATAGCAGTAA  
AAGCAAGACGTGTAGGCGGATCGACTCATCAAGTTCCCATGAAATAGGATCTACACA  
AGGAAAAGCACTTGCCATTCGTTGGTTATTAGGGGCATCCCGAAAACGTCCGGGTGCA  
AATATGGCTTTCAAATTAAGTTCCGAATTAGTGGATGCTGCAAAGGGAGTGGCGATGC  
CATACGCAAAAAGGAAGAGACTCATAAATGGCAGAGGCAAATAGAGCTTTTGCACAT  
TTTCGTATGGGTAGGGACACTATTGCCGAAATAATAACTTCTATACGAAATGCTGACATG  
GATAAAAAGGGACGGTTTCGAATAGCATCTACAAATATCACCGAAAACATTGTTAAAAT  
ACTTCTACGAGAAGGCTTTATCGAAAATGTGAGAAAACATCGAGCAAGCAAGAAATGT  
TTCTTGGTTTTAACTCTGCGACATAGAAGA-----AATAGAAAAGGACCATATCGA-----  
ACTGTTTTA-----AAACGTATCAGCCGACCCGGCCTACGAATCTATTCCAACCATCAACG  
AATTCCTAGGATTTTAGGAGGAATGGGTATTGTAATCTTTTCTACTTCTCGAGGTATAAT  
GACAGACCGAGAGGCTCGACTAGAAGGAATCGGAGGAGAAATTTTGTGTTATATATGG  
ATGGCAAAAACCATAACCAAGAATTGGCTCACGTAGGAATGGACGCATTGGTTCGCGTA  
AGAATGGACGTGCAATACCAAAAAGGGGTTATTCATGTTCAAGCAAGTTTCAACAATAC  
CATTGTAACGGTTACAGATATACGGGGTCGGGTGGTTTTCATGGTCTCAGCCGGTACTT  
GTGGCTTCAGGGGCACAAGAAGAGGGACGCCATTTGCTGCTCAAACCGCAGCCGCAA  
ACGCTATTCGTACAGTAGTGGATCAGGGTATGCAACGAGCAGAAGTCATGATAAAGGG  
TCCTGGTCTTGGAAGAGATGCAGCATTACGAGCCATTCGTAGAAGTGGTATACTATTA

GTTTTGTCAGAGACGTAACCCCTATGCCACATAATGGATGTAGACCTCCTAAAAAAGA  
CGTGTAATGCCAACTATTAACAACCTATTAGAAAACACAAGACAGCCAATAAAAAATGT  
AACAAAATCCCCGCTCTTCGGGGATGTCCTCAGCGTCGAGGAACGTGTACTAGGGTG  
TATACTATCACCCCAAAAAACCAAACCTCTGCCTTACGTAAAGTTGCCAGAGTACGATT  
AACCTCTGGATTTGAAATCACTGCTTATATACCTGGTATTGGCCATAATCACAAGAACA  
TTCTGTAGTCTTAGTAAGAGGAGGAAGGGTTAAGGATTTACCCGGTGTGAGATATCACA  
TTGTTTCGAGGAACCCTAGATGCTGTCGGAGTAAAAGATCGTCAACAAGGGCGTTCTAA  
ATATGGGGTCAAAAAGCCAAAAATGGCAAGGAAAAGTTTGATTTCAGAGGGAGACGAA  
GAGGCAGAGATTAGAACAGAAATATCATTGATTCGTCGATCCTCAAAAAAGGAAATA  
AAA-----AAAGTTCGGTCGTTGAGTGACAAATGGGAAATTCATGGAAAATTACAATCC  
TCACCACGTAATAGCGCACCCACACGCTTCATCGACGTTGTTTTTCGACTGGAAGACC  
GAGAGCTAACTATCGAGACTTTGGATTATCCGGACACATACTTCGTGAAATGGTTCATG  
CATGTTTGTACCAGGTGCAACAAGATCAAGTTGGATGGTAAAAAATTTATTCATTTCA  
GTTAGTTCGCAAGAAGAAAAAGAAGAAAATAAG-----GGGTCTGTTGAATTTCAAGTAT  
TCAGTTTCACCAATAAGATACGTAGACTTACTTCCATTTGGAATTGCACAGAAAAGAC  
TATTTATCTCAGAGAGGTCTACGGAAAATTTCTGGGAAAACGTCAACGGCTGCTGGCTTA  
TTTGTCAAAGAAAAATAGAGTACGTTATAAAGAATTAATTAGTCAATTGGATATTCGGG  
AGCCAAAACTCGT-----ATGGTAAAACCTTCGTTTAAAACGATGTGGTAGAAAGCAACG  
AGCCATCTATCGAATCGTTGCAATTGATGTTCCGGTCTCGAAGAGAAGGAAGAGATCTTC  
GGAAAGTGGGTTTTTACGATCCAATAAAGAATCAAACCTATTCAAATGTTCCCTGCTATT  
CTATATTTCTTGA AAAAGGGCGCTCAACCTACGGGAACCGTCCATGATATTTCAAAGAA  
GGCAGAGATATTTAAGGAACTTCGCTTAATTACACGAAATCAAAA---ATGGATAAATC  
CAAGCGACTTTTTCTTAAATCCAAGCGATCTTTTCGTAGGCGTTTGCCCCAATTGGGT  
CGGGGGATCGAATTGATTATAGAAACATGAGTTTAATTAGTCGATTTATTAGTGAACAA  
GGAAAAATATTATCTAGACGAGTGAATAGATTGACTTTGAAACAACAACGATTAATTAC  
TATTGCTATAAAACAAGCTCGTATTTTATCTTTGTTACCTTTTCTTAATAATGAGAAA-----  
CAATTTGAGAGAACGGAGTCGACTCCTAGA ACTACAGGTCCCTCGAACTAGAAATAAAG  
TGACACGTTCACTAAAAAAAATCCTTTTGTAGCTAATCATTATTGGGAAAAAATTCG  
AAGCTCAACATGAGGGCAGAAAAAGATACAATCGTAACTTGGTCCCGGGCATCTACCA  
TTATACCCACAATGATCGGCCATACAATTGCTATTCATAATGGAAAGGAACATTTGCCTA  
TTTATATAACAGATCGTATGGTAGGTCACAAATTGGGAGAATTTGCACCTACTCTGAATT  
TCCGGGGGCATGCGAGAAACGATAATAAATCTCGTCGTATGATTTTGAAATATTTTCTAC  
TAGGTAATCTATTATCCTTATGCATGAAGATAATCAATTCGGTCGTTGTGGTCGGACTCTA  
TTATGGATTTCTGACCACATTCTCCATAGGGCCCTCTTATCTCTTCTCTCCGAGCTCG  
GGTTATGGAAGAAGGA-----ACCGAGAAGGAGGTATCAGCAACA ACTGGTTTTATTG  
CGGGACAGCTCATGATGTTTCATATCGATCTATTATGCGCCTCTGCATCTAGCATTGGGTA  
GACCTCATACAATAACTGTCCTAGTTCTACCGTATCTTTTGTTTCATTTCTTCTGGAACA  
ATCACAACACTTTTTTTGATTATGGATCTACTACCAGAAATTC AATGCGTAATCTCAGCA  
TTCAGTGTGTATTCTTGAATAATCTCATTTTTCAATTATTCAACCATTTCAATTTACCAAG  
TTCAACGTTAGCCAGATTAGTCAACATTTATATGTTTCGATGCAACAACAAGATGTTATT  
TGTAACAAGTAGTTTTTGTGGTTGGTTAATTGGTCACATTTTATTTCATGAAATGGGTTGG  
ATTGGTATTATTCTGGATACGGCAAATAATTCTATTAGATCG-----AAGTACCTTG  
TGTCAGAAATTGAGAAATTCATGGCTCGAATTTTAGTATTCTCTTATTTATCACCTGCGT  
CTACTATTTAGGCAGAATACCGTCGCCTATTGTCACTAAGAAACTGAAAGAAACCGAA

GAAGACAAACCTCTTTTGACTCTTCTTTTCGACTATAAACGCTGGAACCGTCCGTTGCG  
ATATATCAAAAATGATCAATTTGATAACACTGTAAGAAATGAAATGTCACAATATTTTT  
TTATACATGCCAAAGTGATGGAAAACAAAGAATATCTTTTACATACCCACCCAGTTTGT  
CGACGTTTTTAAAAATGATACAGCAGAAGATGTTTTTGTGCACGATAGAAAAGCTATCC  
TCAGAAGAGCTGTATAATCGTTGGGTTTATACCAATGAAAAAAACGAAACAACCTGA  
GAAACGAACTTTTCAATCGAATCGAAGTTCTAGACAAGGGGTCTTTGCTATGGATGTA  
CTTTCAAAAAGAAGTAGATTGTGCAAT-----GATAAGCAAGAATGCTTACCTAAAATGTA  
TGATCCTCTTTTGAGCGGACCCCGTCGTGGAACAATCAAAAAATTGTATTCACGTACT---  
---CTTTGGATAAATAAACTTCACGATATCCTTTACCAAGAATTTGAACAAAAATATTCCA  
ATGATCAA-----TTAATAAATGAAATAAATAAAAAGGTTCCCTCGATGGCCATACAAATTG  
ATTGATTTGGATGACGAA-----GAAGGTATTCGTTACGAAAAGCCAAACGTATGGTAAT  
TTTTAATGAAGCTTTTATACGTTATTTGGAACAATCCGATTTTCGCCGAGATATAATCAA  
AGGAGCCATGCGTGCTCAAAGACGTAACAGTTACTTGGAAAGTGTTTCAACCAAAT  
GTGCATTCACCGCTTTTTTTTGGACAGAATAGACAAAACCTTTTTTTTTTCTTTTGATATC-  
-----TCCAGAATGCTTAATCCAATTTTTAGGAATAAAGAAGAGAATGAACGTATGACAAT  
AGCAGAAAATTGGGAAAGTATTATTTTTCGCAAACAGTAAGGAGTTCTTTGTTAGTAA  
CCCAAGCAATTCTTAGAAAATATATAGTATTGCCTTTGTTGATAATAGCAAAAAATATTG  
GACGTATGCTATTATTTCAATCCCCGGAGTGGTACGAGGATTGGCAAGAGTGGAGTCGA  
GAAAGGCATGTAAATGTACCTTTAGTGGTGTTCATTATCAGAAAAAGAATTTCTAA  
AGATTGGTTAACAAAAGGTATTCAGATAAAGATCCTATTTCTTTCTGTCTGAAACCGT  
GGCACAGATCTAAGAACAGTAAAGGGTATAATTTTTGTTTTTTAACAGTTTTTGGAAATG  
GAAACTAAACTACCTTTTGGTTTACCCATAAAACAACCTTCTTTTTTCAACCCGTTTTT  
AAAGAACTTGGAAAAAACTTAGAAACTTATA---AAGAAATGTTTTCTAGCTCGAAA  
AATTATAAAAAAAGAACAAAATGGCTTCTAAAGGTATCAAAAGAGAAAACAAGATG  
GGTTATAAAAAAAGTTCTGA-----TTAAAAAAGAATAATGAAAGAGCTTACAAAAGAA  
AAA-----ATAATAGGTAATCAGATGATTCATGAATCGTCCATTCTGAATTAGATCCATGGAT  
TGGACAAATTATTCACTGACAGAAAAAAGATGAAGGATCTAGCTGATAGGACAAGTA  
CAATCAGAAATAAATAGAAAAATCACAAAAGACAAGAAAAACAGTACTAATGAAA  
CAAGTTTTTATGATAAAAGATTAGAATCGACGAAAAATTTTTGGCAGATATTA AAAAGA  
AGAAATGCCCGACTAATACGTAAATGTCACTATTTTTTGAATTTTTTATTGAAAGGATA  
TAC--GATATCTTTTTACGTATCATTAATATCCAGAAATACTATACAAAATTTAAAAAAT  
TTTATTTTCG---GACCTCTCTCCTTGTACAGGCATATGTATTTATAAATTATCACAAAC  
CCAAGTTATTAACAAGTATCACCTGAAATCCGTATTTCAATATACAACTCCTTTTATTAAG  
GATAGAATCAAATATTTTTTTACACAAGGAATATTTCAATCCAATCAAGGTATAAGAAA  
CTTCGCAATTTTGAATGAATGAGTGGAAAAGCTGGTTAATAGGCAATTATCAATACGA  
TTTATCTCAGAATAGATGGTCTAGATTAGTATCGAAAAAATGGAGAAATAGAATAAATC  
AAAGTTTTATGGTTCAAATAAAGAAAATTTTGATTCATATGAAAAAGACCAA-----TTA  
ATTAATTACGAGAAACAAGATAAATTA AAAAAAAAAAATACAAATACGATCTTTTATCAAA  
TAAATATATTAATGATTATATTATTGATCCGGATAGAAAATATTTTGATTGGAGA ACTATTA  
ATTTTTGTCTTACA-----GAACTTTTCCAGAAATTTTTGTTAC  
TTTATAATGCATATAAGATTCAACCGTGGATCATACCAATCAATTTACTTCTTTTTAAT----  
-----GAGGAGTTATTTTTCTCCTGAAAAGAAATTTCTTTTTCAATTTTCGATGGGA  
GCCTCCTTTTAGCCAAACAATAATCAATAATATCAAGGCATATTGTCTACTGCTTAGATT  
GATAAATCCAAAGGAAATTACTATATCCTCTATTCAAAGAGGAGAAATGCGCCTGGATG

TAATGATGATTCCTAGGGTTACAAC TATTGAAAATTTGGAAAAC---ATGGGATTTTTTATT  
GAACCAGCTCGGCTATCCATAAACTGGGATGGACAATTTATCATGTACCAAAC TATAGCT  
ATTCACGGGTGCATAAGAGTAAACAAAATCATTATGATTTTATTGTTCTCTGAAAATATT  
TTATCTCCTAGACGTCGTAGAGAGTTGAGAATTCGAAATGTTTAAGATTTCTTTGGCC  
CAATTATCGATTAGAAGATTTAGCTTGTATGAATCGCTATTGGTTTGATAACCAATAATGGC  
AGTCGTTTCAGTATGTCAAGGATACATATGTATCCAGTGAAACGACATCCATTA AAAATCC  
TGGATCTTCGAATTGAGAGAGATATTGAGAGAGATCAAGAATTCTCACTATTTCTTAGA  
TTCGTGGACCAAATTCGATTCCGTGGGATCTTCACTCACATTTTTTTCCACCAAGAAC  
GTTTTATGAAACTCTTTGACCCCGAATTTGAGTATCCTACTTTCA---CGCGATTCA----  
-CGGGGTTCAACAAGCAATCGATATTTACAG-----ATCAAAGGTGTAGTACTGCTTGCA  
GTAGCG--GTCCTTATATAT-----CGTATTAACAATCGAAATATGGTTCGAAAGAAAAA  
ATCTCTATTTGATGGGGCTTCTTCCT-----ATACCTATGAATTCCATTGGACCCAGA  
AATGATACATTGGAAGAATCTTT--GGGTCTTCCAATATCAATAGGTTGATTGTTTCG---  
CTCCTGTATCTTCCAAAAGGAAAAAAGATCTCTGAGAGTTGTTTCATGGATCCGAAAG  
AGAGTACTTGGGTCTCCCAATAACT-----AAAAGTGTATCATGCCTGAATCTAAC  
TGGGGTTCGCGGTGGTGGAGGAACCGGATCGGAAAAAAGAGG-----GATTATAGTTGTA  
AGATATCT-----AATGAAACCGTAGCTGGAATTGAGATCTCATTCAAAGAGAAAGATA  
TCAA---TATCTGGAGTCTCCTTTTGTATCCTATATGGAT-----GATCCGATCCGCAAGGAC  
CATGATTGGGAATTGTTTGATCGTCTTTCTCCGAGGAAGAAGCGAAACATAATTA ACTG  
G-----AATTCGGGACAGCTATTCGAAATCTTAGTGAAACACTGGATTTGTTATCTCATGT  
CTGCTTTTCGTGAAAAAAGACCAATTGAAGCGGAGGGT--TTCTTCAAACAACAAGGA  
--GCTGGGTCAACTATTCAATCAAATGATATTGAGCATGTTTCCCAT-----CTCCTCTCGA  
GAAACAAGTGGGGTATTTCTTTGCAAAATTGTGCTCAATTTCATATGTGGCAATTCCGC  
CAAGATCTCTTCGTT-----AGTTGGGGGAAG--AATCCGCACGAATCGGATTTTTTTGAG  
GAAC--GTATCGAGAGAGAATTGTATTTGGTTAGACAATGTGTGGTTGGTAAACAAGGC  
TCGG-----TTTTTTAGC-----AAGGTACGGAATGTATCGTCAAATATGCAATATGATTCC-  
-----ACAAGA-----TCTATTTTCGTTCAAGTAACGGATTCTAGCCAATTGAAAGGATCTT  
CT--GATCAATCCAGAGATCATTTTGATTCCATTAGT-----AATGAGGATTCGGAA-----  
-----TATCACACATTGATCCATCAAAGAGAGATTCAACA ACTAAA  
GAAAGATCGATTCTT--TGGGAT-----CCTTCCTTTCTTCAAACGGAACGAACAGAGATA  
GAATCAGAC-----CGATTCCCGAAA-----TGCCTTTCTGGGGATTCC-----TCAATGTCCCG  
GCTATTCACG---GAACGTGAGACGCAGATGATTAATCATCTGCTTCCGGAAGAAATCGA  
AGAATTTCTT-----GGGAATCCTACAAGATCAATTCGTTCTTTTTTCTCTGACAGATGG----  
--TCAGAACTTCAT--CTGGGTTTCAATCCTACTGAGGGGTCCACTAGAGATCAG-----  
-AAATGGTTGAAGAAACAACAAGATTTTTCT--TTTGTCCCTTCCAGGAGATCGGAA-----  
-----AATAAAGAAATGGTTGATATATTC AAGATAATTACGTATTTACAAAAT-----ACCGTC  
TCAATTCATCCTATTTTCATCAGATCCGGGATGTGATATGGTTCCG---AAGGATGAACCGG  
AT--ATGGACAGTTCCAATAAGATTTCA TTCTTGAACCAAATTCATTTTTTTGAT-----TTA  
TTTCATCTATTCCATGACCAGAACAGGGGAGGATACACGTTG-----CACCACGATTTTGA  
ATCAGAA-----GAGAGATTTCAAGAAATGGCAGATCTATTA ACTCTATCAATAACCGAGC  
CG--GATCTGGTGTATCATAAGGGATTTGCCTTTTCTATTGATTCCACAGATTGGAT-----  
-----TTCTTGAATGAGGTATTCAACTCCAGGATGAATCGAAAAAGAAATCTTTA-----  
-TTGGTTCTACCTCCTATTTTTTAT-----GAAGAGAATGAATCTTTTTTATCGGAGGATCAGA  
AAAAAATGGGTCCGG---ATCTCCTGCGGGAATGCTTTGGAAGATCCAAAACCAAAAAT

AGTGGTATTTGCTAGCAACAACATAATGAAGGCAGTCAATCAATATAGATTGATCCAAA  
ATCTGATTCAAATCCAATATAGCACCCGTGGG-----TACATAAGAAATGTATCGAATCAAT  
TCTTTTTAATG-----AATAGATCCGATCGCAACTTCCAATATGGAATTCAA-----AGG  
GATCAAATAGGAAATGATACTCTGAATCATAGAACTATAATGAAATATAACAATCAACCAA  
CATTTATCGAATTTGAAAAAG---AGTCAGAAGAAATGGTTTCGATCCT-----CTTATTT  
CTCGAACCGAGAGATCCATGAATCGGGATCCTGATGCATATAGATACAAATGGTCCAAG  
GGGAGCAAGAATTTCCAGGAACGTTTGGAACATTTTCGTTTCTGAGCAGAAGAGCCGT--  
-----TTTCAAGTAGTGTTCGATCAATTATGT-----CAATATTCGATTGATTGGTCCGAGGTT  
ATCGACAAACAAGATTTTTCTAAGTCACTTCGTTTCTTTTTGTCC-----  
-----AAGTCGCTTCTCTTTTTGTCCAAGTCACTTCCTTTTTTC  
TTTTGTGAGTATCGGGAATATCCCATTCATAGGTCCGAG---ATCCACATCTAT--GAATTG  
AAAGGTCCGAATGATCAACTCTGCAATCAGTTGTTAGAATCAATAGGTGTTCAAATCGT  
TCATTTGAATAAATTGAAATCC-----TTCTTATTGGAT-----GATCATGATACTTCC--CAA  
AAATCGAAATTTCTTGATCAATGGAGGAAGAATATCACCATTTTTGTTCAATAAGATACC  
A---AAGTGG---ATGATTGACTCATTCCATACT-----AGAAATAATCGCAGGAAATCCTTTG  
ATAACACTGATTCCTATTTCTCAATGATATCCCACGATCGAGACAATTGGCTGAATCCCG  
CGAAACCATTTATAGAAAGTTCAATGATATCTTCTTTTTATAAAGCAAATCGACTTCGAT  
TCTTGAATAATCCACATCACTTCTGGTTCTAT-----TGTAACAAAAGATTCCTTTTTTATGT  
G-----GAAAAGGCCCGTATCAATAATTATGAT-----CTTACGTAT--GGACAATTCCTC  
AATATCTTGTTTCATTCGCAACAAA---ATATTTTCTTTGTGCGTCGGTAAA-----AAAAAC  
ATGTTTTTGGGGAG---AGAGATACTATTTACCAATCGAGTCACAGGTATCTAACATATT  
CATACCTAACGATTTTCCACAAAGTGGTGACGAAACA---TATAACTTGTACAAATCT-----  
---TTCCATTTTCCAATTCGATCCGCTCCATTCGTTTCGT-----AGAGCTCTTTACTCGATCGC  
AGACATTTCTGGAACACCTCTAACAGAGGGACAAATAGCCAATTTTGAAGAAGTAT  
TGCCAACCTCTTTCAGATATGAATCCATCTGATTCAGAAGGTAAGAAGTTCGATCAGTA  
TTTC-----AATTTCAATTCAAACATGGGTTTGATTCACTCCATGTTCTGAGAAATATTT  
ACCA-----TCCGAAAAGAGGAAAAAA-----CGGAGTCTTTGTCTAAAG-----  
-AAATGCGTTGAGAAACGGCAGATGTATAGAACCTTTCAACCAGATAGTGCTTTTTTCAA  
ATCTCTCAAATGGAATCTGTTCCAAACATATATGCCATGGTTCCTTACTTCGACAGGGT  
GCAAATATCTAAATTCACCCTTTTAGATACTTTTTCAGACCTATTG-----CCGATACTAA  
GTAGCAGT---AAAAAATTTGTATCCATTTTTCATGATATTATGAATGGATCAGATATATCA  
CGGCCAATTCCTCATAACAAATTGTGG-----GCGATT-----TGGAATCTG---ATAAG  
TGATATTTGAGTAAGTGTTTACATGAT-----CTTCTTCTGTCCGAAGAAATGATTTCGTCG  
AAATAATGAGTCACCCGTTCATTGATATGGGCACATCTGAGATACCAAATGCTCGGG  
AGTTA---CTCTATTCAATCCTTTTCTTCTTCTTGTGCTGGATAT--CTCGTTCGTACACA  
TCTTCTTTTGTTCCTCGA-----GCCTCTAGTGAGTTACAGACAGAGTTCGAAAAGATCA  
AATCTTTGATGATTCCATCATAATGATTGAGTTGCGAAAACCTTCTGGATGGGTATCCTA  
CATCTGAACTGAATTTCTTCTGGTTAAAGAATCTCTTTCTAGTTGCTCTGAAACAATTAG  
GAGATTCTCTAGAAGAAATACGAGGTTCTGCTTCTGGCGGCAACATGCTATTGGGTGGT  
GGTCCC-----GCTTATGGG---GTCAAATCAATACGTTCTAAGAAGAAATATTTGAA  
TATCAAT-----CTCATTGATCTCATA---AGTATCATACCAAATCCCATCAATCGAATCACT  
TTTTCGAGAAATACGAGACATCTAAGTCGTACAAGTAAAGAGATCTATTCATTGATACG  
AAAAAGAAAAACGTGAACGGTGATTGGATTGATGATAAAATAGAATCCTGGGTCCGCG  
AACAGTGATTTCGATTGATGATGAAGAAAGAGAATTCTTGGTTCAGTTCTCC-----ACCTT

AACGACA-----GAAAAAGGGATTGATCAAATTCTATTGAGTCTGACT--CATAGTGATCA  
TTTATCA-----AAGAATGATTCTGGTTATCAAATGATTGAACAACCGGGATCAGTT  
TACTTACGATACTTAATTGACATTCAT-----AAAAGAATCTAATGAATTATGAGTTCAAT  
AGATCCTGTTTAGCAGAAAGACGGATATTCCTTGCTCATTATCAGACAATCACTTAT-----  
TCACAAACCTCGTGTGGGGCTAATAGTTTTCATTTCCCATCTCATGGA-----AAACCCT  
TTTCGCTCCGCTTAGCCCTATCCCCCTCT--AGGGGTATTTTAGTGATAGGTTCTATAGGA  
ACTGGACGATCATATTTGGTCAAATACCTAGCGGCAAACCTCCTATGTTTCTTTCATTACG  
GTATTTCCGAACAAGTTTCTGGATGACAAGCCTAAAGGTTATCTTATTGATGATATC-----  
--GATATTGAT--ATTGATGATAGTGACGATATTGATGATAGT-----  
-----GACGATATCGATGATGACCTTGATACGGAGCTGCTAACTATG  
ACGAATGCGCTA-----ACTGTGTATAGGAAT--ATGATGCCGAAAATAGACCCATTTGA  
TATCACCCCTTCATTGCAATTAGCAAAAGCAATGTCTCCTTGCATAATATGGATTCCAAA  
CATTCATGATCTGTATGTGAATGAGTTCGAATTACTTATCCCTCGGTCTATTAGTGAACCAT  
CTCTCC-----AGGGATTGTGAAAGATGCTCC--ACTAGAAATATTCTTGTATTGCTTCG  
ACTCATATTTCCAAAAAAGTGGATCCTGCTCTAATAGCTCCGAATAAATCAAATACATGC  
ATTAAGATACGAAGGCTTCTTATTCCACAACAACGAAAGAAGCTTTTTCCTTTCATAT  
ACTAGGGGGTTTCACTTGGAAAATAAAATGTTTAAAT-----GGATTCCGGTCCATAAC  
CATGGGTTCCAATGCACGAGATCTTGTAGCACTTACCAATGAGGCCCTATCAATTAGTAT  
TACACAGAAGAAATCCATTATAGACACTAATACAATTAGATCCGCTCTTCATAAACAAA  
CTTGGGATTTGCGA-----TCCCAGGTAAGATCGGTTTCCAGGATCATGGGATCCTTTTCTA  
TCAGATAGGAAGGGCTGTTGCACAAAATGTACTTCTAAGTAATTGCCCATAGATCCTAT  
ATCTATCTATATGAAGAAGAAA-----TCATGTAAGGAAGGGGATTCTTATTTGTACAAATG  
GTAATTCGAGCTTGGAACGAGCATGAAGAAATTAACGATACTTCTTTATCTTTTGAGTT  
GTTCTGCCGGATCGGTCTCAAGATCTTGGTCTCCACCC-----GGACCCGATGAAAA  
A---AATGGGATCACTTCTTATGGATTTCGTTGAGAATGATTCT--GATCTAGTTCATGGCCT  
ATTAGAAGTAGAAGACGTTCTGGTGGGA-----TCCTCACGGACAGAAAAAGATTGCAG  
TCAGTTTGATAATGAT-----CGAGTGACATTGCTTCTTCGGTCCGAACCAAGGAAT--CCC  
TTAGATATGATGCAAAATGGATCTTGTCTATCGTTGATCAGAGATTTCTATATGAAAAA-  
----TACGAATCGGAGTTTGAAGAA--GGA-----GAAGGAGCCCTCGACCCGCAA-----  
-CAGCTAGAGGAGGAT-----TTATTCAATCAC-----ATCGTTTGGGCTCCT-----AGAAT  
ATGGCACCCCT-----TGTGGCAATCTATTTGATTGTATCGAAAGGCCCAATGAATTGGGA  
TTTCCC--TATTGGGCCAGGTCATTTCCG-----GGCAAGCGGATCATTATCATAAA--G  
ATGAGCTTCAAGAGAATGATTCGGAGTCTTGCAGAGTGGAAACCATGGAGTACCAGAC  
ACGAGATAGATCTTCAAAGAACAAGGCTTTTTTTCGAATAAGCCAATTCATTTGGGACC  
CTGCAGATCCATTCTTTTTCTTATTCAA--GATCAGCCCTTTGTCTCTGTGTTTTTACGT  
CGAGAATTCTTTGCAGATCAAGAGATGTCAAAAAGGCTTCTTACTTCCCAAACAAAAT  
CTCCTACATCTATATATAAACGCTGGTTTCGTC-----AAGAATACGCAAGAAAAGCACTTC  
GAATTGTTGATTCATCGCCAGAGATGGATTAGAACC-----AATAGTTCATTATCT-----A  
ATGGATCCTTCCGTTCTAAT-----ACTCCATCCGAGAGTTATCAGTATTTATCAAATCTGTT  
CCTATCTAAC--GGAACATTATTGGATCAAATGACAAAGACATTGTTGAGAAAGAGATG  
GCTTTTCCCGGATGAAATGAAACATTTGATT-----CATGTAACAGGAGAAAGATTTCCCA  
TTCCTATGCCTAGATCGCGG--ATAAATGGAAATTTTATTGATAAGACCTTTTCAATTGTA  
GCCAATATCTTATTACGAATAATTCCGACAACCTTCAGGAGAAAAAGAGGCATTTACCTA  
TTACAGAGATGGG-----ATGTCAGCTCAATCCGAAGGAAATTATGCGGAAGCTTTACAA

AATTATTATGAAGCTATGCGACTAGAAATTGATCCCTATGATCGAAGTTATATACTCTATA  
ACATAGGCCTTATCCACACAAGCAACGGGAGAACATACGAAAGCTTTGGAATATTATTTTC  
CGGGCACTAGAACGAAACCCATTCTTACCACAAGCTTTTAATAATATGGCCGTGATCTG  
TCATTAC---CGAGGAGAACAGGCCATTCAACAGGGAGATTCTGAAATTGCAGAGGCTT  
GGTCCGATCAAGCTGCTGAGTATTGGAAACAAGCTATAGCGCTTACTCCCGGTAATTAT  
ATTGAAGCGCATAATTGGTTGAAGATCACGAGGGCGATTTGAATTTGAAATGAACTGGC  
GATCAGAACGTATATGGATAGAACTTATACCGGGGTCTCGAAAAACAAGTAATTTCTGT  
TGGGCCCTGTATCCTTTTTTTAGGTTCACTAGGATTCTTATTGGTTGGAACCTCTAGTTAC  
CTTGGTAGGAATCTGATATCCTTATTTCTTCTCAGCAAATCCTTTTTTTTCCACAAGGG  
ATCGTGATGTCTTTCTATGGGATCGCAGGTCTGTTCATCAGCTCCTATTTGTGGTGCACA  
ATTTTCGTGGAATGTAGGCAGTGGTTATGATAGATTCGATAGAAAAAAGGAATAGTGTG  
TATTTTTCGTTGGGGATTCCCTGGAAGAAATCGTCGCATCTTCTTCGATTCCTTATGAG  
AGATATTCAGTCGATTAGAATAGAGGTTAAAGAAGGTATTTATCCTCGGCGTGTACTTTA  
TATGGAAATCAGAGGCCAGGGTTCCGTTCCCTTGACTCGTACTGATGAGAAT---TTGAC  
TCCACGAGAAATTGAACAAAAGGCTGCGGAATTGTCTACTTTTTGCGCGTACCAATT  
GAAGTATTT

>Typha

ATGGAAAAATGGTGGTTCAATTCTATGTTCTCTCTAAGTAAATCAATGGAAAGTCTTGAT  
AGTATTGGGCATACCAGTGGAAGTGAAGAACCCATTCTAAATGATACGAAGAAAAAAA  
TTCCT---TTCAATAATGTTGATTATTTATTTGATATCAGGGATATGTGGAGTTTCATCTCTG  
ATGACACTTTTTTAGTTAAGGATAAGAATGGTGACAGTTATTCTGTATATTTTGATATGG  
AAAATCTGAGTTTTGAGATTGATAATGAT-----AGTTCTTTTCTGAGTGAATTAGGAAGTT  
TTTTTCTACT-----TTTTGAATAGGGGGTCTAAGAAAAACAATCACTACTATTAT  
CATTACATGTATGATACTCAATCTAGGTGGAATAATCACATTAATAGTTGCATTGATAGTT  
ATCTTCGTTTTGAAGTC-----AGTATTAATAGTTCCATCTTAGGTGGTACTGACAATTCCA  
GCGACTGTTACATTTATAATTTCAATTTGACTGAAAGTGGAAGTTCTATAAGAACTAGTA  
AAAATGGAAGTAAGTTCAGTATAAGAGGAAGATCT---GATTTAGATATAAATAAAAAATA  
CAGACATTTATGGGTTCAATGCGAAAATTGTTATGGATTAAATTATAAAAAATTTTTTCG  
GTTAAAAATGAATATTTGTGAACAGTGTGGATATCATTTGAAAATGAGTAGTTCAGATA  
GAATCGGAGTTTTGATTGATCCGGTACTTTGGGATCCTATGGATGAAGATATGGTCTCTA  
TGGATCCCATTGAATTTCAATCAGAAGAGGAACCTTATAGAGATCGTATCGATTTTTATC  
AAAGAAAGACAGGTTTAACTGAAGCTGTTCAAACGGGCATAGGTCAATTAATGGTAT  
TTCTATAGCAATTGGGGTTATGGATTTTTCAGTTCATGGGAGGTAGTATGGGATCGGTAGT  
AGGTGAGAAAATCACCCGTTTGAATGAAATGCTACTAATCGATCTCTACCTGTCATTAT  
TGTGTGTGCTTCTGGAGGAGCACGCATGCAAGAAGGAAGTTTAAGCTTGATGCAAATG  
GCTAAAATATCTTCTGCTTTATATAATTATCAATCAACTAAAAAGTTATTCTATGTATCAAT  
CCTTACATCTCCTACAACCGGTGGAGTAACAGCTAGTTTTTGGGATGTTAGGAGATGTCA  
TTATTGCTGAACCTAATGCGTACATTGCTTTTTGCGGGTAAAAGAGTAATTGAACAAACA  
TTGAATAAGACAGTACCCGATGGTTCACAAGCGGCAGAGTATTTATTCCATAAAGGCTT  
ATTCGACCCAATCGTACCACGTAATCCTTTAAAAGGTGTTCTGAGTGAGTTATTTTCAGC  
TCCACGGCTTCTTTCCCTTGAATCAAATTTCCAAGAATATGGTAAACCTTCGAGCCGAC  
GAAATTAGTAATATTATCCGTGAACGTATTGAACAATATAGTAGAGAAGTCAAGATTGTG  
AATACCGGTACCGTACTTCAAGTAGGCGACGGCATTGCTCGTATTCATGGTCTTGATGA  
AGTAATGGCAGGTGAATTAGTAGAATTTGAAGAGGGTACAATAGGCATTGCTCTTAATT



TGGAATCAAATAATGTTGGCGTTGTATTAATGGGTGATGGGTTGATGATACAAGAGGGA  
AGCTCCGTA AAAAGCAACAGGAAGAATTGCTCAAATACCTGTAAGTGACGCTTATTTGG  
GTCGTGTTATAAATGCTCTGGCTAAACCTATTGATGGGAGAGGTGAAATTCATCTTCTG  
AATCTCGGTTAATTGAATCCCCTGCCCAAGGTATTATTTGAGACGTTCTGTATATGAGC  
CCCTTCAAACAGGGCTTATTGCTATTGATGCAATGATCCCTATAGGACGCGGTCAGCGA  
GAATTAATTATTGGGGACAGACAAAACCGGCAAAAACAGCAGTAGCCACAGATACAATTC  
TCAATCAAAAAGGGCAAAAATGTAATATGTGTTTATGTAGCTATTGGTCAAAAAGCATCT  
TCTGTGGCTCAGGTAGTACTACTTTCCAGGAGCAAGGGGCTATGGAATATACTATTGT  
CGTAGCTGAAACGGCGGATTCACCTGCTACATTACAATACCTTGCTCCTTATACGGGAG  
CGGCTCTGGCTGAACATTTTATGTATCGTGAAAACATACTTTAATAATTTATGATGATCT  
CTCCAAACAGGCACAAGCTTATCGCCAAATGTCTCTTTTATTAAGAAGACCTCCCGGTC  
GTGAAGCTTATCCAGGAGATGTTTTTTATTTGCATTCACGCCTTTTGGAAGAGCCGCT  
AAATCAAGTTCTAGTTTAGGTGAAGGAAGTATGACCGCTTTACCAATAGTTGAGACTCA  
ATCTGGAGACGTTTCAGCTTATATTCCTACTAATGTAATTTCCATTACAGATGGACAAATA  
TTCTTATCTGCTGATCTATTCAATGCTGGAATCCGACCTGCTATTAATGTGGGTATTTCTG  
TTTCTAGAGTAGGATCCGCAGCTCAAATTAAGCCATGAAACAAGTAGCTGGCAAATC  
AAAATTGGAAGTAGCGCAATTCGCAGAGTTAGAAGCCTTTGCACAATTTGCTTCTGATC  
TCGATAAAGCTACTCAGAATCAATTGGCAAGAGGTCAACGATTACGCGAGTTGCTTAA  
ACAATCTCAATCTGCCCCTCTCACAGTAGAAGAGCAGATAGCTACTATTTATAACGGAG  
CGAATGGGTATCTTGATTCGTTAGAAATTGGACAGGTAAAGAAATTTCTTGTTTCAGTTA  
CGTACCTACTTAAAAAAGAATAAACCTCAATTCCAAGAAATTATATCTTCTACCAAGAC  
ATTCAACCAACAAGCAGAAGCCATTTTGAAGGAAGCTATTCAGGAACAGATCGAACTG  
TTTTTACTGCAGGAACAAACAATGAGAATCAATCCTACTACTTCTAGTCCTGGGGGTTT  
CACACTTGAAGAAAAAAACCTAGGGCGTATCGCTCAAATTATTGGCCCAGTGCTGGAT  
GCCGTTTTTCCCCGGGCAAGATGCCTAATATTTATAACGCTTTGGTAGTTAAGGGTCG  
AGATACTCTCGGTCAGCAAATTAATGTTACTTGTGAGGTACAACAATTATTAGGAAATAA  
TCGAGTTAGAGCTGTAGCTATGAGTGCTACAGATGGTCTGATGAGAGGAATGGAAGTG  
ATTGACACGGGAGCTCCTTTAAGTGTGCCAGTCGGCGGAACTACTCTCGGACGAATTT  
TCAATGTTCTTGGGGAGCCTGTTGATAATTTAGGTCCTGTAGATACTCGCACAACATCTC  
CTATTCATAGATCTGCGCCCCTTTTATACAGTTAGATACGAAATTATCAATCTTTGAAAC  
AGGTATTAAGTGGTAGATCTTTTAGCTCCTTATCGCCGTGGAGGAAAAATCGGACTAT  
TTGGGGGAGCTGGAGTAGGTAAAACAGTACTCATCATGGAATTGATCAATAACATTGCC  
AAAGCTCATGGAGGCGTATCCGTATTTGGCGGAGTAGGGGAACGTACTCGTGAAGGAA  
ATGATCTTTACATGGAAATGAAAGAATCCGGAGTGATTAATGAAAAAATCTTGCAGAA  
TCAAAAGTAGCTCTAGTCTACGGTCAAATGAATGAACCGCCGGGAGCTCGTATGAGAG  
TTGGTTTGACTGCGCTAACTATGGCGGAATATTTCCGGGATGTTAATGAACAAGATGTG  
CTTCTATTATCGACAATATCTTTGTTTTGTTTACAGCCGGATCAGAAGTATCTGCCTTA  
TTAGGGAGAATGCCCTCTGCAGTGGGTTATCAACCCACCCCTTAGTACAGAAATGGGTTT  
TTTGCAAGAAAGAATTACTTCTACCAAAGAGGGATCTATAACTTCGATCCAAGCAGTTT  
ATGTACCTGCGGACGATTTGACTGACCCTGCTCCTGCCACGACATTTGCCCATTTGGAT  
GCTACTACCGTACTATCAAGAGGATTAGCTGCCAAAGGTATTTATCCAGCAGTGGATCC  
TTAGATTCAACGTCAACTATGTTACAACCTCGGATCGTTGGTGAGGAACACTATGAAA  
CTGCGCAAAGAGTAAAGGAACTTTACAACGTTACAAAGA ACTTCAGGACATTATAGC  
TATTCTGGGTTGGATGAATTATCCGAGGAGGATCGTTTAACTGTAGCAAGAGCACGAA

AAATTGAGCGTTTCTTATCACAACCCTTCTTCGTGGCAGAAGTATTTACTGGTTCTCCA  
GGAAAATATGTTGGTCTTGCGGAAACAATTAGGGGGTTTCAACTGATACTTTCCGGAG  
AATTAGACAGTCTGCCCGAGCAGGCCTTTTATTTGGTGGGTAACATCGATGAAGCTACC  
GCGAAAGCTATGAACTTAGAAGTGGAGAGCAAATTGAAGAAAATGACCTTAAATCTTT  
GTGTACTGACTCCTAATCGAATTATTTGGGATTCAAAGTAAAAGAAATCATTTTATCTA  
CTAATAGTGGCCAAATTGGTGTATTACCAAACCACGCCCTATTGCCACGGCTGTAGATA  
TCGGTCTTTTGAGAATACGCCGCGACGACCAATGGTTAACGGTGGCTCTGATGGGTGG  
TTTTGCTAGAATAGGTAATAATGAGATCACCATTTTAGGAAATGATGCGGAGATGAGTA  
CTGACATTGATCCGCAAGAAGCTCAACAAGCTCTTGAAATAGCTGAAGCTAACTTGAG  
TAAAGCTGAAGGTAAACGACAAGTAATTGAAGCAAATTTAGCTCTCAGACGGGCTAGG  
ACACGAGTAGAGGCTGTCAATGTTATTTCCATGAAAAATGTAACCGATTCTTTTCGTTTT  
CTTGGGCCACTGGCCATCCGCCGGGAGTTTCGGGTTTAATACCGATATTTTAGCAACAA  
ATCTAATAAATCTAAGTGTAGTGATTGGTGTATTGATTTTTTTTTGGAAAGGGAGTGTTAA  
AAGATTTATTAGATAATCGAAAACAGAGGATCTTGATTACTATTCGCAATTCGGAAGAAT  
TACGTAAAGGGGCCATTGAGCAACTCGAAAAAGCCCGGGTTCGCTTACGGAAAGTGG  
AACTAGAAGCAGATGAGTATCGAACGAATGGGTATTCTGAGATAGAACGAGAAAAAAG  
AAAATTTGATTAATGCCACTTGTGATAGTTTGGAAAGATTAGAAAATTACAAAAATGAA  
ACCCTTGATTTTGAAAAACAAAGAGCAATGAATCAGGTCCGACAACGAGTTTTCCAAC  
AAGCCTTACAAGGAGCTCTAGGAACTCTGAATAGTTGTTTGAATACCGAGTTACATTC  
CGTACTATCCGTGCGAATATTGGCATTCTCGGGGCGATGGAAGAAATAACTGATATGAA  
TCCACTGATTTCTGCCGCTTCTGTTATTGCTGCTGGATTGGCTGTAGGGCTTGCTTCTAT  
TGGACCTGGAGTTGGTCAAGGTACTGCTGCAGGCCAAGCTGTAGAAGGTATTGCGAGA  
CAACCAGAAGCAGAGGGTAAAATACGAGGTACTTTATTGCTGAGTCTAGCTTTTATGGA  
AGCTTTAACAATTTACGGACTGGTCGTGGCATTAGCACTTTTATTTGCGAATCCTTTTGT  
TATGAATGTTATACCATGTTCCATTAACAACTCAAGGGGCTATACGATATATCGGGTGT  
AGAAGTAGGCCAACATTTCTATTGGCAAATAGGAGGTTTACAAATCCATGCCCAAGTAC  
TTATCACTTCTTGTTTCGTAATTGCTATCTTGTTAGGTTTCAGCCATCATAGCTGTTCCGAA  
TCCACAAACTATTCCGACCGACGGTCAGAATTTCTTCGAATATGTCCTTGAATTTATCCG  
AGACTTGAGCAAAACCCAAATTGGAGAAGAATATGGTCCTTGGGTTCCCTTTATTGGA  
ACTATGTTCCCTATTATCTTTGTTTCTAATTGGTCAGGTGCTCTTTTACCTTGGAAAATCA  
TAGAGTTACCTCATGGGGAGTTAGCTGCGCCACGAATGATATAAATACTACTGTTGCTT  
TAGCTTTACTCACGTCAGTGGCATATTTTATGCGGGTCTTACTAAAAAAGGATTGGGT  
ATTTTCGAGAAATACATTAACCAACTCCAATACTTTTACCAATTAACATCTTAGAAGATT  
TCACAAAACCTTTATCTCTGAGTTTTTCGACTTTTCGGGAATATATTGGCTGATGAATTAG  
TAGTTGTTGTTCTTGTTTCTTTAGTCCCTTCAGTAGTTCCTATACCTGTTAIGTTTCTTGG  
ATTATTTACAAGTGGTATTCAAGCTCTTATTTTTGCAACGTTAGCCGCGGCTTATATAGG  
CGAATCCATGGAGGGGCATCATATGATATTTGCGACTTTAGAACATATATTAAGTCATATT  
TCTTTTTTCGATCATTTTAAATGTGATTCAGATTCAATTTGATGACCTTATTAGTCCACGAAA  
TTAGCGGATTACGTGATTCGTCAGAAAAGGGGATGATAGCTACTTTTTTATCGATAACTG  
GATTATTAGTTTCTCGTTGGATTCTTTCGGGACATTTTCCGTTAAGTAATTTATACGAGTC  
AGTAATCTTCTTTTCGTGTGGTTTCTCCATTATTTATATGATTCCAAAAATACGGAACCAT  
AAAAATGATTTAAGCACAATAACTGCACCAAGTACTATTTTTACTCAAGGCTTTGCCAC  
GTCGGGTCTTTTAACTGAAATGCATCAATCCGCAATATTAGTACCTGCTCTACAATCTCA  
GTGGTTAATGATGCATGTAAGTATGATGTTATTGAGCTATGCCGCTCTTTTATGCGGATCC

TTATTATCAGTCGCTCTTCTAGTCATTACATTTGAAAAAACACCACTATTTTTTGTAAA  
AACGATGAGATTGAATCTTTGAATGAAAAAGAAGTGTTTTTAAAAACACTTCTTTTCT  
TTCATTTAAAAATTATTACAAATATCAATTAACCTGAACGTTTGGATTATTGGAGTTATCGT  
GTAATTAGTCTAGGATCACCTTTTTAACCATAGGTATTCTTTGTGGAGCAGTATGGGCA  
AATGAGGCATGGGGATCCTATTGGAATTGGGACCCAAGGAACTTGGGCATTTATTAC  
TTGGACCATAATCGCAATTTATTTACATACTAGAACAAATCAAATTTGGAAAGGCACGA  
ATTCGGCACTTGTGGCTTCTATAGGATTTCTTATAATTTGGATATGCTATTTTGGTATCAAT  
TTATTAGGAATAGGTCTACATAGTTATGGTTCATTACATTAACAATGAAAAAAAAGCA  
TTGCCT--TCTTTCCCATATCTTGCATCTATAGTTTTTTTTGCCCTGGTGGGTCTCTTTCTCA  
TTAATAAATGTCTGGAACCTTGGGTTACCACTTGGTGAATACTAGGCAATCCGAAAC  
TCTCTTCAATGATATTCAAGAGAAAAACCTTCTAGAAAGATTCATAGAATTAGAAGAAC  
TCTTTCTGTTGGACGAAATGATAAAGGAGTACCCGGAGACACATATACAAAACTTCG  
GATAGGAATACACAAGGAAACGATACAATTGGTCAAAACACATAATGAATACCATCTGC  
AGATCATTTTGCATTTCTCGACAAATATAATCTGTTTCGCTATTCTAAGTGGTTATTTTAT  
TCTGGGTAATGAGGAACTTGTCAATTCTTAACTCTTGGGTTCAAGGAATCCTATATACTT  
AAGTGATACAATAAAAGCTTTTTTCGATTCTTTTATTTACTGATTTATGGATTGGATTTAC  
TCGACCCATGGTTGGGAACTCATAATAGGTTCCGGTCTACAACGATTTTGGATTGGCTCA  
TAACGATCAAATTATATCTGGTCTGTTTTCCACTTTTCCAGTTATTCTAGATACAATTGTG  
AAATATTGGATCTTCCATTATTTAAACCGTGTATCTCCTTCGCTTGTAGTCATTTATCATT  
CAATGAATGAAATGCCCATTTGGTGTTCAAAAGTACCTTTTCGGAGTCTGGAGAGGA  
AGATGCGGTTTTGGGTTGACGTAAAC---CGACTTTATCGAGAAAGATTACTTTTTTTAGG  
CCAAGAGGTTGATAGCGAGATCTCGAATCAACTGTTGGTCTCATGGTATATCTCAGTAT  
AGAAGATGATACTAGGGATCTTTATTTGTTTATAAATTCTCCCGGCGGATGGGTAATACC  
AGGAATAGCCATTTACGATACTATGCAATTTGTGCCACCTGATGTGCATACAATATGCAT  
GGGATTAGCCGCGTCAATGGGATCTTTCATTCTGGTCCGAGGAGAAATTACCAAACGT  
CTAGCATCCCTCACGCTAGGGTTATGATTCACCAACCTGCTAGTTCTTTTTATGAAGCA  
CAAGCAGGGGAATTTATCCTGGAAGCGGAAGAATTACTGAACTTCGCGAAACCTCA  
CAAAGGTTTATGTACAAAGAACGGGCAACCTTTATGGGTTGTATCCGAGGATATGGAA  
AGGGATGTTTTTATGTCAGCAACAGAAGCCCAAGCTCATGGCATTGTTGATCTTGTAGC  
GGTTCGAAATGAAAGAACAAAATTGATTCATGAAGGTTTAATTACTGAATCACTTCCCA  
ACGGTATGTTCCGGTCCGTTTAGATAATGAAGATCTAATTCTAGGATATGTTTCAGGAA  
GGATCCGCGCAGTTTTATACGGATACTACCGGGGATAGAGTTAAAATTGAAGTAAGT  
CGTTATGATTCAACCAGGGGACGTATAATTTATAGACTTCGCAACAAAGATTCGAACGA  
TATGAAACAATTACAAAAATATTTAGAAAAAGTTAGATCTCGGAAACAACACTTCCTAT  
ATCCGCTTCTTTTTAAGGAGTATATTTATGCATTTGCTCATGATTATGGTTTATTGGGTAAT  
GACAAT--TCTAGTTCAGTACTTGTGAAACGTTTAATTATTCGAATGTATCAACAGAATT  
TTTTGATTAATTCGACTAATCATTCTAACCAAAATCGATTCAATGGGTCTCGTTTTTTTTTC  
TCAGATGATATCAGAAAGTTTTGCAGTCATTATGGAAATTCGATTTTCGCTGCGATTAGT  
ATCTTCCTCCATACCACAATTTACATAATTTACGATCTATTCAATATTTCCCTTTTTAG  
AGGACAAATTTCTACATTTAACTCTATCTCGGATATACTAATACCCCATCCTATCCATTT  
GGAAATCTTGGTTCAAATCCTTCAATGTCCGATCCAAGATGTTCCATCTTTGCATTTATT  
GCGATTCTTTCTCCACGAATATCATAATTGGAATAGTCTCATTACTAAATCGATTTACGTT  
TTTTCAAAAAAAGACTATTTAGATTACTATATAATTTTTATGTATTCGAATGTGAATTTG  
TATTCGTTTTTCTTCGTAAACAATCTTCTTATTTACAATTAACATCTTTTGGAACTTTTCT

TGAGCGAATACATTTCTATGGAAAAATAGAACAT---CTAGTAGTGTATCGTAATAATAAA  
ACTTTATGGTTCTTCACAGATCCTTTTCATGCATTATGTTTCGATATCAAGGAAAAGCAATT  
CTGGCATCAAAGGGACTCATCTTTTTATGAAGAAATGGAAATGTTACCTTGTCAATTT  
CTGGCAATATTATTTTCATTTTTGGTCTCAACCGCACAGGATCCATATAAACCAATTATCA  
AACTATTCCTTCCATTTTCTGGGTATCTTTCAAGTTACTAAGAAATCCTTTGGTGGTA  
AGGAATCAAATGCTGGAAAATTCATATCTAATAGATACTGTTATG-----ACAAAATTCGAT  
ACCATAGTACCAGTTGATCCTCTCATAGGATCATTGTCTAAAGCTAAATTTTGTACCCTA  
TTAGGACATCCTATTAGTAAGCCGATCTGGACCGATTATCGGATTGTGATATTATTGATC  
GCTTTGGTTCGGATATGTAGAAATCTTTCTCATTATTATAGTGGATCCTCAAAAAACGAA  
CTTTGTATCGAATAAAGTATATACTTCGATTTTCTTGTGCGAGAACTTTGGCTCGTAAAC  
ATAAAGTACGGTACGTACTTTTATGCAAAGATTAGGTTCTGTATTATTAGAAGAATTTT  
TTACGGAAGAAGAACAAGTTCTTTCTTTGATCTTCCCAAACGTATTTGGTATTTGGATA  
TTATCCGTATCAATGACTTAGTGAACCAT---ATGATAATTGATACGACA---GAAGTACAA--  
-ACTATCAATTCTTTTTCTACATCGGAA---TTTTTAAAAGAAACCTATGGATTGATATGGA  
TT--GTACCCATTTTGACCCTTATATTGGGAATCACAATAGGAGTACTAGTAATTGTGTGG  
TTAGAAAGAGAAATTTCTGCAGCTATAACAACGTATTGGGCCTGAATATGCTGGCCC  
GTTGGGAATTTCTCAAGCTCTAGCAGATGGGACTAAACTACTTTTTAAAGAGGACCTTC  
TCCCATCTCGAGGAGATATTCGTTTTGTTTAGTGTGCGACCGGCTATAGCGGTCATATCAG  
TTCTACTAAGTTATTTAGTAATTCCTTTTGGGTATCGTCTTGTTTTAGCCGATCTCAGTAT  
AGGTGTTTTTTTTATGGATCGCCATTTCCAGTATTGCCCTATTGGCCTTCTTATGTCAGGA  
TATGGGTGCAATAATAAATATTCCTTTTTCAGGTGGTCTACGAGCTGCTGCTCAATCTATT  
AGTTATGAAATACCATTA ACTCTATGTGTGTTATCAATATCTCTATTATCTAATAGTTCAA  
GTACAGTTGATATAGTTGAAGCACAGTCAAATATGGTTTTTGGGGGTGGAATCTTTGG  
CGTCAGCCTATAGGGTTTATAGTTTTTATAATTTCTTCTCTAGCCGAATGTGAGAGATTG  
CCTTTTGATTTACCAGAGGCGGAGGAGGAATTAGTAGCAGGTTATCAAACCGAATATTC  
GGGTATAAATAACGCTTTATTTTATCTTGCTTCTTACCTAAATTTATTAGTTTCTTCATTAT  
TTGTAACAGTTCTTTACTTAGGTGGGTGGAATTTTTCTATTCCGTACATATCCATTCCTGA  
ACTTTTCGGAATAAATAAATGGCAGGAATTTTTGGAATGACAATTGGTATCTTTATTAC  
ATTA ACTAAAGCTTATTTGTTTCTTTCATTTCTATCACAACAAGATGGACTTTACCTAG  
GATGAGAATGGACCAGTTATTA AATCTTGGATGGAAATTTCTTTTACCAATTTCTCTAGG  
TAATCTGTTATTAACA ACTTCTTCCCAACTTGTTTCACTAATGATCTGGCATGTACAGAA  
TGAAA ACTTCATTCTCGATTCTACGAGAATTTTTATGAAAGCGTTTCATTTGCTTCTCTT  
CCATGGAAGTTTCATTTTCCAGAATGTATCCTAATTTTTGGCCTAATTTCTTCTTGATG  
ATCGATTCAACCTCTGATCAAAAAGATAGACCTTGGTTCTATTTTCATCTCTTCAACAAGT  
TTAGTAATAAGCATAACGGCCCTATTGTTCCGATGGAGAGAAGAACCTATAATTAGCTTT  
TCGGGAAATTTCCAAACGAACAATTTCAACGAAATCTTTCAATTTCTTATTTTACTATGT  
TCAACTCTATGTATTCCTCTATCCGTAGAGTACATTGAATGTACAGAAATGGCTATAACA  
GAGTTTCTGTTATTCATATTAACAGCTACTCTAGGAGGAATGTTTTTATGTGGTGCTAAC  
GATTAATAACTATCTTTGTAGCTCCAGAATGTTTCAGTTTATGTTCTTACCTATTATCTG  
GATATACCAAGAGAGATGTACGGTCTAATGAGGCTACTATGAAATATTTACTCATGGGTG  
GGGCAAGCTCTTCTATTCTGGTTCATGGTTTCTTGGCTATATGGTTCATCTGGGGGGG  
AGATCGAGCTTCAAGAAATAGTGAATGGTCTTATCAATACACAAATGTATAACTCCCA  
GGAATTTCAATTGCGCTTATATCCATCACTGTAGGAATGGGTTC AAGCTTTCCCAAGCC  
CCTTTTCATCAATGGACTCCTGACGTATACGAAGGATCTCCCACTCCAGTCGTTGCTTTT

CTTTCTGTTACTTCGAAAGTAGCTGCTTCAGCTTCAGCCACGCGAATTTTCGATATTCCT  
TTTTATTTCTCATCAAACGAATGGCATCTTCTTCTGGAAATCCTAGCTATTCTTAGCATGA  
TATTGGGGAATCTCATTGCTATTACTCAAACAAGCATGAAACGTATGCTTGCATATTCGT  
CCATCGGTCAAATCGGATATGTAATTATTGGAATAATTGTTGGAGACTCAAATGATGGAT  
ATGCAAGCATGATAACTTATATGCTGTTCTATATCTCCATGAATCTAGGAACTTTTGCTCG  
CATTGTATTATTTGGTCTACGTACCGGAACTGATAACATTTCGAGATTATGCAGGATTATAC  
ACGAAAGATCCTTTTTTGGCTCTCTCTTTAGCCCTATGTCTCTTATCCCTAGGAGGTCTT  
CCTCCACTAGCAGGTTTTTTTCGGAAAACCTCTATCTATTCTGGTGTGGATGGCAGGCAGG  
CCTATATTTCTTGGTTTTCAATAGGACTCCTTACGAGCGTTGTTTCTATCTACTATTATCTA  
AAAATAATCAAGTTATTAATGACTGGACGAAACCAAGAAATAACCCCTTACGTGCGAA  
ATTATAGAAGATCCCCTTTAAGATCAAACAATTCATCGAATTGAGTATGACTGTATGTG  
TGATAGCATCTACTATAACCAGGAATATCAATGAACCCAATTCTTGCAATTGCTCAGGATA  
CCTTTTTATGTTTCTGCTTCACGAATATGATATTTCTGGGCATTTCTAATAATATCAAG  
CGTTATTCCTATCTTGGCATTGTGAATTTTCAGGAGTTTTAGCCCCGTTAGAGAAGGACC  
AGAGAAGCTCTCCAGTTATGAATCGGGTATAGAACCCATGGGGGACGCTTGGTTACAA  
TTCCGAATCCGCTATTACATGTTTGTCTAGTTTTTGTGTTTTTGATGTTGAAACGGTAT  
TTCTTTATCCATGGGCAATGAGTTTCGATGTATTGGGTGTATCTGTATTTATCGAAGCTTT  
AATTTTCGTGCTTATCCCAATTGTTGGTTCAGTTTATGCATGGCGAAAGGGAGCATTGG  
AATGGTCTACGAGTTATTTTCCTTGGTTAACAATACTTGTGTTTTGCCGATATTTGCGG  
GTTCTTTAATTTCTTTTTCCCTCATAGAGGGAATAAGATGTATAGGTGGTATACTATATG  
TATATGCTTATTAGAACTCCTTCTAACGACTTATGCATTCTGTATCATTTCGAATTGGAT  
GATCCATTAATCCAATTGAAAGAAGATTTTAAATGGATAGATGTTTTTGATTTCCACTGG  
AGACTGGGAATCGACGGACTTTCCATAGGACCCATTTTACTGACAGGATTTATTACTAC  
TTTAGCTACTTTAGCGGCTTGGCCAATACTCGAAATTCGCGGTTGTTCTATTTCCCTGAT  
GCTAGCAATGTACAGCGGTCAAATAGGATTATTTTCTTCTCGCGATCTTTTACTTTTTTTC  
ATCATGTGGGAGTTAGAATTAATTCCTGTTTACTTACTTTTTATCCATGTGGGGAGGAAAG  
AAACGTCTATACTCGGCTACTAAGTTTATTTTGTACACTGCAGGAGGTTCCATTTTTTTC  
TTAATAGGTGTTCTAGGTATGGGTTTATATGGTTCCAATGAACCAACATTAGATTTTGAA  
AGATTAATTAATCAATCATATCCTGTGGCATTGGAAATAATTTTTATTTTGGCTTCCTTAT  
TGCTTATGCTGTCAAATTACCAATTATACCCCTACATACATGGTTACCGGATACCCATGG  
AGAAGCACATTACAGTACATGTATGCTTTTAGCTGGAATCTTATTAATAAATGGGAGCATA  
TGGATTGATTCGGATCAATATGGAATTATTACCCCATGCTCATTCTCTATTTTCTCCCTGG  
TTGGTGATAATAGGAACAATAACAATAATCTATGCAGCTTCAACTTCTCTTGGTCAACG  
CAATTTAAAAAAGAGAATAGCCTATTCCTCTGTATCTCACATGGGTTTCATAATTATAGG  
AATTGGTCTATAACCGACATGGGACTCAATGGAGCCATTTTACAAATGCTCTCTCATG  
GATTTATTGGTGCTGCACTTTTTTTCTTGGCGGGAACGAGTTGTGATAGAATGCGTCTT  
GTTTATCTCGAAGAAATGGGCGGATATCTATCCCAATGCCAAAATTTTACCATGTTT  
AGTAGCTTCTCGATGGCTTCTCTTGCATTACCCGGAATGAGTGGTTTTGTTGCAGAATT  
AGTAATATTTTTTGGACTAATTACTAGTCCAAAATATCTTTTAATGCCAAAATGCTAATT  
ACACTTGTAATGGCAATTGGAATGATATTAACCTCTATTTATTTATTAATCTAIGTTACGTC  
AGATGTTCTATGGATAACAAGTTTTTTAATGTTCCAAACTCGAATTTTTTAGATTCTGGAC  
CACGAGAACTCTTTCTTTCAATCTGTATCTTTTTACCCGTAATAGGGATTGGTATTTATCC  
CGATTTCGTTCTCTCATTATCAGTTGATAGGGTACAAGCTATCCTATCCAATTATTATCAT  
AGAATGATGTTTGGAGCATGTACTTTTTTTGAGTGTCTATTTATTTTCTATCGGTATCTATG

GATTGATCACAAAGTCGAAACATGGTTAGAGCACTTATGTGTCTTGAACCTATACTAAATT  
CGGTTAATATAAATCTCGTAACATTTTCTGATATATTTGATAGTCGTC AATTAAAAGGAG  
ACATTTTCTCAATCTTTATTATAGCCATTGCAGCTGCTGAAGCAGCTATTGGGCTAGCTA  
TTGTTTCGTC AATCCATCGTAATAGAAAATCAACTCGTATCAATCAATCTAATTTGTTGA  
ATAATATGGAACATACATATCAATATGCATGGATAATACCTTTTCTTCCACTTCCTGTTAC  
TATGTCAATAGGAGTTGGACTCTTACTTATTCCAACAGCAACAAAAAAATTCGTGCGCA  
TGTGGGCTTTTCTAGTGTTTTACTCTTAAGTATAGCTATGGTATTTTTCGGCCAATCTATC  
TATTCAACAAATAAATGGAAGTTTTATCTATCAATATCTATGGTCTTGGACCATCAATAAT  
GATCTTTCTTAGAGTTCGGATACTTGATTGATCCACTTACTTCTATTATGTCAATACTAA  
TTACTACGGTTGGAATCATGGTCTTATTTATAGTGACAATTATATGTCTCACGATCAAGG  
ATATTTGCGATTTTTTGGCTTATATGAGTTTTTTCAATACTTCTATGTTGGGATTGGTTACTA  
GTTCCAATTTGATACAAATTTATATTTTTTGGGAACTGGTGGGAATGTGTTCTTATTATT  
AATAGGGTTTTGGTTCACACGGCCA ACTGCAGCAAGTGCTTGTCAAAAAGCTTTTGTA  
ACTAATCGTGTAGGGGATTTTGGTTTATTGTTAGGAATATTAGGTTTTTATTGGATAACTG  
GTAGTTTTCGAATTTTCGAGATTTGTTTCGAAATATCTAAAACAATGGGGTCAATTCCTTAT  
TTGTTACTTTATGTGCTTTTTTATTATTTGTGCGGTGCAGTTGCGAAATCCGCACAATTTCC  
TCTTCACGTATGGTTACCTGATGCCATGGAAGGGCCACTCCTATTTTCGGCTCTTATACA  
TGCTGCTACTATGGTAGCAGCAGGCATTTTTCTTGTAGCTCGCCTTCTTCCTTTTTTCAT  
AGCTATACCTTATATAATGAATTTAATTTCTTTAATAGGTGTAATAACACTATTTTTAGGG  
GCTACTTTAGCTCTTGCTCAAAGAGACATTAAGAAGCTTAGCCTATTCTACAATGTC  
TCAACTGGGTATATTATGTTAGCTCTAGGTATAGGTTCTTATCGAGCTGCTTTATTCCAT  
TTGATCACTCATGCATATTCTAAAGCTTTATTGTTTTTGGGATCCGGATCTATTATTCATTC  
AATGGAACCTATTGTTGGATATTCACCAGAAAAAGTCAGAATATGGTTCCTTATGGGTG  
GTTTAAGAAGATATGTTCCAATTACAAGA ACTACTTTTTTATTGGGTACACTTTCTCTTT  
GTGGTATTCCACCTCTTGCTTGTTTTTGGTCCAAAGATGAAATCTTAATGATAGTTGGT  
TGTAATCTCCAATTTTTGCAATAATAGCTTTTTTTCACAACGGGATTAACCGCATTTTATAT  
GTTTCGGGTCTATTTACTTACCTTTGATGGGCATTTGCGTGTTCATTTTCAAATTTATAGT  
AGCACTAAAAATAGTTCGTTATATTCAATATCTTTATGGGGAAAAGAAAGACCCAGGG  
AGTCAATAGA---AATTTACTTTTATCAACAATGGGTTTTTTTTTCCAATAAAAAA-----ACT  
TCCATGTATCCTCACGAATCGGACAATACTATGTTATTTCTCTTATTGTATTAGTAATATT  
TACTTTGTTCGTTGGATCCATAGGAATTCATTTTGATTTTGATATATTATCGAAATGGTTA  
ACCCCATCAACAAATCTTTTCTATCCA ACTTCGAATTATTTCGGTAAATTCATATGAATTTT  
TTACAAATGCACTTCTTTTCAGTAAGTATAGCAAGTTTAGGACTATTCATAGCATATATTTT  
ATATGGGTCTTCTTATTCTTTTTTCCAAAATTTGGATTTAATCAATTTTTTTGTCACTTTCT  
TGGACCAAATAAAAAATGTAATATACAATTGGTTCATATAATCGTGGTTATATAGATATTTT  
TTACTAGGGTTTTTACTATAGGTATAAGAGGATTA ACTGAACTAACTCAGTTTTTTGAT  
AGACGTATAATTGATGGAATTACAAATGGGGTTGGTGTGTAAGTTTTTTTTATAGGGGA  
AGGGATTAATAT---ATGGGAGGTGGACGAATTTTCGTCTTATCTATTCTTGATTTATTTTA  
TGTATCACTTTTTTTATTAATTTTATAATGGATTTACCTGGACCAATACATGATATTCTTG  
TGGTATTTTTTGGGATTAGTTCTTGTATTAGGGGGTCTAGGGGTAGTATTACTTACCAATC  
CAATTTATTCTGCCTTTTCGTTGGGATTGGTCTTGTGTTGTATATCCTTATTCTATATTTTAT  
CGAACGCCTATTTTGTAGCTGCCGCGCAGCTCCTTATTTATGTGGGAGCCATAAATGTCT  
TGATCATATTTGCTGTAATGTTTCATGAATGGTTCAGAATATTCCAAGATTCCCTATCTTTG  
GACCATTGGAGATGGGGGCACTTCGCTGATTTGTACA ACTATTCTTTTTTCACTAATTAC

TACTATCCCAGATACGTCATGGTACGGAATTATTTGGACTACAAAATCAAACCAGATTAT  
CGAACAGGACCTAATAAATAATGTTCAACAAATTGGGATTCATTTATCAACGGATTTTTA  
TCTCCGTTTGAACCTGTTTCTATAATTCTTTTAGTTTCCCTTGATAGGTGCAATTACTATG  
GCTCGGCAAATGACTGTACCGGTTACAAGAAAAGATTTAATGATAGTCAATATGGGTCC  
TCAGCACCCATCAATGCATGGTGTCTTCGACTGATCGTTACTCTTGATGGTGAAGATG  
TTATTGACTGTGAACCTATATTGGGCTATTTACATAGGGGAATGGAAAAAATAGCGGAA  
AACCGAACAATTATACAATATCTACCCTATGTCACACGGTGGGATTATTTAGCTACTATG  
TTCACAGAGGCAATAACCGTAAATGCACCAGAACAATTGGAAAAATGTTCAAGTACCTC  
AAAGAGCCAGCTATATCAGAGTGATTATGCTGGAATTGAGCCGTATAGCTTCTCATTTGT  
TATGGCTTGGACCTTTTATGGCGGATATCGGTGCACAGACTCCTTTTTTCTATATTTTCAG  
AGAAAGAGAATTGCTATATGATCTATTCGAAGCCGCCACAGGTATGCGAATGATGCATA  
ATTATTTTCGCATCGGAGGAGTAGCTGCTGATCTACCTTATGGATGGATAGATAAATGTT  
TAGATTTCTGCGATTATTCTTTAACAGGAGTTGATGAATATCAAAACTTATTACACGGA  
ATCCCATTTTTTTGGAGCGAGTTGAAGGAGTGGGCATTATTGGTGGAGAAGAAGCAGT  
AAATTGGGGTTTATCAGGACCGATGTTACGAGCTTCTGGAATCCCATGGGATCTTCGTA  
AAATTGATTTTTATGAGTGTTACAATGAATTCAATTGGGAAGTCCAATGGCAAAAAGAA  
GGAGATTCATTAGCTCGTTATTTAGTACGAATCGGCGAAATGAGAGAATCCATAAAAAT  
TATTCAGCAGGCTCTAGAAGGAATTCCTGGAGGACCCTATGAGAATTTAGAAGTCCGA  
CGC---GATAGAGCAAAGAATTCCGAATGGAATGATTTTGAATATAGATTTATTAGTAAAA  
AACCTTCACCCAATTTTGAATTGTCGAAACAAGAACTTTATGTAAGAGTAGAGGCTCC  
AAAAGGAGAATTAGGAATTTATTTGATAGGAGATAATAGCGTTTTTCCCTGGAGATGGA  
AAATTCGTCCACCCGGTTTTATTAATTTGCAAATTCCTCCTCAGCTAGTTAAAAGAATGA  
AATTGGCTGATATCATGACAATATTAGGTAGTATAGATATCATTATGGGAGAAGTTGATC  
GTATGTTCCCTATGGTAACTGGGTTTCATGAATTATGGTCAACAAACCATACGAGCTGCA  
AGGTACATTGGTCAAAGTTTCATAATTACCTTATCCCATACAAATCGTTTACCTGTAAC  
ATTCAATATCCTTATGAAAAATCGATCACAAACAGAACGTTTCCGGGGTCGAATCCACTT  
TGAATTTGATAAATGTATTGCTTGTGAAGTATGTGTTTCGTGTATGCCCGATAGATCTACC  
CGTTGTAGATTGGAGATTTGAAAAAGATATTA AAAAGAAACAATTGCTTAATTATAGTAT  
TGATTTCCGAGTTTGTATTTTTTGTGGTAACTGTGTCGAGTATTGTCCAACAAATTGTTT  
ATCAATGACTGAAGAATATGAACTTCCACTTATGATCGTCACGAATTGAATTATAATCA  
AATTGCTTTGGGTCGGTTACCAATTTCAATAATTGGAGATTACACAATTCAAAACAGTTAT  
GAATTCGAAAATAGACAAAGATAAACCTTTTGATTCAAGAACGATTACCGATTACCAGC  
AGGATCGTTTATCTGATTGGCTAGTCAAGCATGAGCTAGTTCATAGATCTTTGGGCTTTG  
ATTACCGAGGAATAGAGACTCTACAAATAAAAACCGAGGATTGGGACTCCATTGCTGT  
CATTTCATATGTATATGGTTACAATTATTTACGCTCTCAGTGTGCCTATGATGTAGCACCA  
GGCGGATTTTTAGCTAGTGTGTATCATCTTACGAGAATACAGTATGGTATAGATAAACCA  
GAAGAGGTATGCATAAAAGTATTTGCTCCAAGGATAATCCTAGAATCCCGTCTGTTTT  
CTGGATTTGGAGAAGTGCTGATTTTCAAGAACGCGAATCTTATGATATGTTGGGAATCT  
CTTATGATAATCATCCACGCCTTAAACGTATCTTAATGCCGAAAGTTGGATAGGCTGGC  
CTTACGTAAGGATTATATCACCCCAAATTTCTATGAAATACAAGATGCTCAT-----  
-----ATGGTCTTAAC  
T--GAATATTCGGACAATAAAAAAAAAAAGGAAGGAAAAGATTACATTGAGACAGTTAT  
GAATTTGATTGAGTTCCGTTACTTGTATGAAACTACCCCAATTCAGTTATTTCAACTAC  
ATCGAATGATCTTTCAAATTGGTCAAGACTCTCCAGTTTATGGCCGCTTCTATATGGTAC

CAGTTGTTGTTTCATTGAATTTGCTTCATTAATAGGCTCGCGATTTCGACTTTGATCGTTAT  
GGATTGGTACCAAGATCAAGTCCTAGGCAAGCGGACCTAATTTAACAGCTGGCACAG  
TGACAAATGAAAATGGCTCCTTCCCTTAGTGAGATTATATGAGCAAATGCCTGAACCAAAA  
TACGTCATTGCTATGGGAGCCTGTACTATTACCGGAGGGATGTTTCAGTACTGATTCTTAT  
AGTACTGTTTCGGGGAGTCGATAAGCTAATTCCTGTGGATGTTTATTTGCCGGGCTGTCC  
ACCTAAACCAGAGGCAGTTATAGATGCTATAACAAAACCTTCGTAAGAAGATATCCCGAG  
AAATAATTGAAGATAGAACTGTATCTCAA---GAAAATCGATGTTTTACTACCAATCACAA  
GTTTTATGTTTCGACGCAGTACTCATACTGGAAATTACGATCAAGGATTGCTCTATCAATC  
ACCATCAACTTCAGAGATATCTACA-----TTTTTCAAATCCAAAAGTTCAGTATCTTCTTA  
CGAATTAGTGAATATGCAAATAGAAATACTTTTTCTTGGGTAAAGGAACAGATGACTC  
GATCCATTTCTGTATCGATCATGATATATGTAATAACTCGGGCATCTATTTCAAATGCATAT  
CCCGTTTTTTCGCGCAGCAGGGTTATGAAAACCCACGAGAAGCAACTGGACGAATTGTAT  
GTGCCAATTGCCATTTAGCTAATAAGCCCGTGGATATTGAAGTTCCGCAAGCTGTGCTT  
CCTGATACTGTATTTGAAGCAGTTGTTTGAATTCCTTATGATATGCAACTGAAACAAGTT  
CTTGCTAATGGTAAAAAAGGGGGTTTTGAATGTGGGTGCTGTTCTTATTTTACCCGAGGG  
ATTCGAATTAGCCCCCCTGATCGTATTTCTCCCGAGTTGAAAGAAAAGATAGGAAATC  
TGTCTTTTTCAGAGTTATCGTCCTAATAAAAAAAATATTCTTGTGATAGGTCCTGTTCCCG  
GTCAGAAATATAGTGAATTTGTCTTTTCTTATTTTCCCCGACCCTGCTACGAAGAAA  
GACGTTCACTTCTTAAAATATCCCATATATGTAGGTGGGAACCGAGGAAGGGGTCAGAT  
TTATCCTGATGGTAGCAAGAGTAACAATACAGTCTATAATGCTACATCAGCAGGTATAGT  
AAGCAAATAGTACGTAAAGAAAAGGGGGGATATGAAATATCCATAGTTGATGCATCG  
GATGGACGTCAAGTGGTTGATATTATACCTCGAGGGCCAGAACTTCTTGTTCGAGGG  
TGAATCCATCAAGCTTGATCAACCATTAACAAGCAATCCTAATGTAGGAGGGTTTTGGTC  
AGGGAGATGCAGAAATAGTGCTTCAAGATCCATTACGCGTTCAAGGCCTTTTGTTCTTC  
TTCGCATCTGTTATTTTGGCACAAGTTTTCTTGGTTCTTAAAAAGAAACAGTTTGAAAA  
GGTTCAATTGTACGAAATGAATTTTCATGAGTAAAGTATATGATTGGTTTTGAGGAACGTC  
TCGAGATTCAGGCGATTGCAGATGATATAACTAGTAAATATGTTCCCTCCTCATGTCAACA  
TATTTTATGTTTAGGGGGGATCACACTTACTTGTTTTTCTAGTACAAGTAGCTACAGGTT  
TTGCTATGACTTTTTTACTATCGTCCAACCGTTACAGAGGCTTTTTTCTCTGTTCAATACAT  
AATGACTGAGGCCAACTTTGGTTGGTTAATCCGATCAGTTCATCGATGGTCAGCAAGTA  
TGATGGTTCTAATGATGATATTGCACGTATTTTCGTGTGTATCTCACAGGTGGATTTAAAA  
AACCCCGCGAATTAACCTGGGTTACAGGTGTAGTTTTGGCTGTATTGACTGCATCTTTT  
GGTGAACTGGTTATTCCTTACCTCGGGACCAAATGGTTATTGGGCAGTAAAAATCGT  
GACAGGCGTACCTGAAGCTATTCCTGTAATAGGATCGCCTTTAGTAGAGTTATTACGCG  
GAAGTGCTAGTGTGGGCCAATCCACTTTGACTCGTTTTTATAGTTTACACACTTTTGTAT  
TGCCTCTTCTTACTGCCGTATTTATGTTAATGCACTTTCCAATGATACGTAAGCAAGGTAT  
TTCAGGTCCTTTAATGGGAATAACAAAGAAACCTGATTTGAACGATCCTGTATTAAGAG  
CAAAATTTGGCTAAAGGGATGGGACATAATTATTATGGAGAACCCGCGTGGCCCAATGAT  
CTTTTGTATATTTTCCAGTAGTAATCTAGGTACTATTGCATGTAATGTCGGTTTTAGCGG  
TTCTAGAACCGTCAATGATTGGTGAACCGGCGGATCCATTTGCAACTCCTTTGGAAATA  
TTACCCGAATGGTACTTCTTTCCCGTATTTCAAATACTTCGCACAGTGCCCAATAAGTTA  
TTGGGCGTTCCTTTAATGGTTTCAGTACCAACGGGATTATTGACAGTACCCTTTTTTGA  
GAATGTCAATAAATTCAAAATCCATTTTCGCCGTCCAGTAGCTACAACAGTTTTTTTTGAT  
TGGTACCGCAGTAGCTCTTTGGTTAGGTATTGGAGCAACATTACCTATTGATAAATCCCT



AACTTTAGGTCTTTTTATGATTGAAGTTTTTCTATTTGGAATCGTCTTAGGTCTAATTCCT  
ATTACTTTAGCAGGATTATTCGTGACTGCCTATTTACAATACAGACGTGGTGATCAATTG  
GACCTTATGCTTACTATACTAGTTATTTCTGGTTTTCTACTGGCTGCTTTAACTATAACCC  
TAGCTCTATTTATTGGTTTTGAACAAGATACGACTTATTATGGATATAGTAAGTCTCGCTTG  
GGCTGCTTTAATGGTAGTCTTTACATTTTTCTCTTCACTCGTAGTATGGGGAAGGAGTGG  
ACTCATGATTATTCGTTGCGCGGAACCAGAAGTGAAAATGTTGTGGATAGGGATCCTG  
TAAAAACATCTTTGAGCAATGGGCCAAACCCGGTCATTTCTCAAGAACAATAGCTAA  
GGGCCCTGATACTACCACTTGGATCTGGAACCTACATGCTGATGCTCACGATTTTCGATA  
GTCATAACCAGTGATTTAGAGGAGATTTCTCGAAAAGTATTTAGTGCTCATTTCGGTCAA  
CTCTCCATTATCTTTCTTTGGCTGAGTGGCATGTACTTCCATGGTGCTCGTTTTTCCAATT  
ATGAAGCATGGCTAAGTGATCCTACTCACATTGGACCTAGTGCTCAGGTAGTTTGGCCA  
ATAGTAGGTCAAGAAATATTGAACGGTGATGTGGGCGGGGGTTTTCCGAGGAATACAAA  
TAACCTCCGGTTTTTTTTCAGCTTTGGCGAGCATCTGGCATAACTAGTGAATTACAACCTT  
ATTGTACTGCAATTGGTGCATTGGTCTTTGCATCGTTAATGCTTTTTGCCGGTTGGTTTC  
ATTATCACAAAGCTGCCCAAATTGGCTTGGTTCCAAGATGTCGAATCTATGTTGAAT  
CACCCTTAGCGGGGTATTAGGACTTGGGTCTCTTTCTTGGGCAGGACACCAAATCCA  
TGTATCTTTACCGATTAACCAATTTCTCGACGCTGGAGTTGATCCTAAAGAGATACCACT  
TCCTCATGAATTTATCTTGAATCGGGACCTTTTGGCTCAACTTTATCCAGTTTTGCCGA  
GGGAGCAACCCCTTTTTACCTTGAATTGGTCAAATACGCGGAATTTCTGACTTTTC  
GTGGAGGATTAGATCCAATAACAGGGGGTCTATGGTTGAGTGATATTGCACACCATCAT  
TTAGCTATTGCTATTCTTTTCTGATCGCTGGTCATATGTATAGGACCAACTGGGGCATT  
GGTCATGGACTTAAAGATATTTTAGAGGCTCATAAAGGGCCATTTACAGGTCAGGGTCA  
TAAGGGTCTCTATGAAATCCTAACAACGTCATGGCATGCTCAATTATCCCTAACCTGGC  
TATGTTAGGCTCTTTAACCAATTGTTGTAGCTCATCATATGTATTCTATGCCCCCTATCCAT  
ACCTAGCTACTGACTACGGTACACAACCTTTCGTTGTTACACATCACATGTGGATTGGT  
GGATTTCTCATAGTTGGTGCTGCTGCACATGCAGCCATTTTTATGGTAAGAGACTACGAT  
CCAATACTCGATAACAACGATCTATTAGATCGTGTCTTAGGCATCGTGATGCAATCATA  
TCACATCTTAACTGGGTATGTATATTTCTAGGTTTTTACAGTTTTTGGCTTGTATATTCATA  
ATGATAACCATGAGTGCTTTAGGACGTCCCCAAGATATGTTTTTACAGATACCGCTATAAAT  
TACAACCCATCTTTGCTCAATGGGTACAAAATACCCATGCTTTAGCACCTGGCGTAACA  
GCTCCTGGTGCAACAACAAGTACCAGCTTAACTTGGGGAGGTGGTGAGTTAGTAGCAG  
TAGGCGGCAAAGTAGCTTTGTTACCTATTCCATTAGGAACCGCAGATTTCTTAGTCCATC  
ACATTCATGCATTTACGATCCATGTGACTGTATTGATACTACTGAAAGGTGTTCTATTTG  
CTCGCAGTTCCCGTCTGATACCTGATAAAGCAAATCTTGGTTTTTCGTTTTCCCTTGTGATG  
GGCCCGGACGAGGGGGGACATGTCAAGTCTCTGCCTGGGATCATGTCTTCTTAGGTCT  
ATTCTGGATGTACAATGCAATTTTCGGTAGTAATTTCCATTTTCAGTTGGAAAATGCAGTC  
GGATGTTTGGGGTACTATAAGCGATCAAGGGGTGGTAACTCATATCACAGGAGGAAAC  
TTTTGCACAAAGTCCATTACTATTAATGGATGGCTCCGAGATTTCTTATGGGCACAGGCA  
TCTCAGGTAATTCAGTCTTATGGCTCTTATTATCGGCATATGGTCTGTTTTTCTTAGGTG  
CTCATTTTGTCTGGGCTTTTCAAGTTAATGTTTCTATTTCAGTGGCCGTGGTTATTGGCAAG  
AACTTATTGAATCTATCGTTTTGGGCTCATAACAAATTTAAAAGTTGCTCCTGCTACTCAGC  
CTAGAGCCTTGAGCATTGTACAAGGACGTGCTGTAGGAGTAACCCATTACCTTCTGGGT  
GGAATTGCCACAACATGGGCATTCTTCTTAGCAAGAATTTATGCAGTAGGAATGGCATT  
AAGATTTCCGAGGTTTTAGCCAAGGCTTAGCTCAGGACCCCACTACTCGTCGATTTTGGT

TTGGTATTGCTACCGCACATGACTTTGAGAGTCATGATGATATTACTGAGGAACGTCTTT  
ATCAGAACATTTTTGCTTCTCACTTTGGGCAGTTAGCAATAATTTTTCTGTGGACGTCTG  
GAAATCTGTTTTCAITGAGCTTGGCAAGGAAATTTTGAGTCATGGATACAGGATCCTTTA  
CATGTAAGACCTATTGCTCATGCAATTTGGGATCCTCATTTTGGTCAACCAGCTGTAGA  
AGCCTTTACTCGAGGAGGTGCTACCGGCCAGTGAATATCGCTTATTCCGGTGTATTATC  
AGTGGTGGTATAACAATCGGATTACGCACCAATGAAGATCTTTATACTGGAGCTCTTTTTC  
TATTATTTCTTTCCGCTATATCCTTAATAGCGGGTGGTTACACTTACAACCCAAATGGA  
AACCAAGCGTTTCGTGGTTCAAAAATGCCGAATCTCGTCTCAATCATCATTTGTGAGGA  
CTTTTTGGAGTAAGTTCCTTAGCTTGGACAGGACATTTAGTCCATGTCGCTATTCTGCA  
TCCAGGGGAGAGTACGTCAGATGGAATAATTTCTTAGACGTATTACCATATCCCCAAGG  
GTTGGGACCCCTTCTTACGGGTGAGTGAATCTTTATGCCAAAACCCTGATTGAGTA  
GTCATTTATTTGGTACCTCCAAGGAGCGGGAAGTCCATTCTAACCTTCTTGGGGGA  
TTTCATCCACAAACGCAAAGTTTATGGCTGACTGATATGGCTCATCATCATTTAGCTATT  
GCATTTATTTTTCTCATTGCTGGTCATATGTATAGAACCAACTTCGGGATTGGGCACAGT  
ATCAAAGATCTTTTAGAAGCACATAACCCCCGGGTGGTTCGATTAGGACGTGGGCATAA  
GGGTCTTTATGACACAATCAATAATCAATTCATTTTCAATTAGGTCTTGCTCTAGCCTC  
TTTAGGGGTTATTACTTCCTTAGTAGCTCAACATATGTACTCTTACCTGCTTATGCATTC  
ATAGCACAAGACTTTACTACTCAAGCTGCCCTATATACTCATCACCAATACATCGCAGGG  
TTCATCATGACAGGAGCCTTTGCTCATGGAGCTATATTTTTTCATTAGAGATTACAATCCG  
GAACAGAATGAGGATAATGTATTGGCAAGAATGTTAGACCATAAAGAAGCTATCATATC  
TCATTTAAGTTGGGCCAGTTTGTCTGGGGTTCACATACCTTGGGCCTTTATGTTTATAA  
CGACGTCATGCTCGCTTTTGGTACTCCGGAAAAACAAATCTTGATCGAACCCATATTTG  
CCCAATGGATACAATCTGCTCATGGTAAACTTCATATGGGTTCGATGTACTCTTATCTT  
CAACGAGCGGCCCGGCGTTAATGCAGGTGCAAGCATATGGTTACCCGGATGGTTGAA  
TGCTGTTAATGAG-----AATAGTAATTCACTCTTCTTAACAATAGGCCCTGGGGATTCTT  
GGTTCATCATGCTATTGCTCTAGGTTTGCATACAACCTACATTGATTTTAGTAAAAGGTGC  
TTTAGATGCACGTGGTTCGAAATTAATGCCGGATAAAAAGGATTTCCGGTTATAGTTTCC  
TTGCGACGGCCAGGACGCGGCGTACTTGTGATATTTCTGCTTGGGACGCATTTTATT  
TGGCAGTTTTCTGGATGTTAAATACCATTGGATGGGTACTTTTTATTGGCATTGGAAC  
ACATCACATTATGGCAGGGTAACGTTTCACAATTTAATGAATCCTCCACTTATTTGATGG  
GATGGTTAAGAGATTATCTATGGTTAAACTCTTCAACTTATCAATGGATATAATCCTTT  
TGGTATGAATAGTTTATCGGTATGGGCGTGGATGTTCTTATTGACATCTTGTTTGGGC  
TACTGGATTTATGTTCTTAATTTCCCTGGCGTGGATATTGGCAGGAATTGATTGAAACTTT  
AGCATGGGCTCATGAACGCACACCTTTGGCTAATTTGATTTCGATGGAGAGATAAGCCA  
GTGGCTCTTTCCATTGTGCAAGCAAGATTGGTTGGATTAGCCCACTTTTCCGTGGGTTAT  
ATATCACTTATGCAGCTTTCTTGATTGCCTCTACATCAGGAAAATTTGGTATGTCACATT  
CAGTAAAATTTATGATACATGTATAGGGTGTACTCAATGTGTACGAGCTTGCCCCACA  
GATGTATTGGAAATGATACCTTGGGACGGATGTAAAGCCAAGCAAATTGCTTCCGCGCC  
AAGAACCGAGGACTGTGTAGGTTGTAAAAGATGTGAATCCGCCTGCCAACAGATTTT  
TTGAGTGTTCGTGTTTATTTAGGACCTGAAACAACCTCGCAGCATGGCTCTATCTTATAG  
ACAGATCTCAACTTACCCTCTATTTTTGTGCCTTTAGTAGGCCTAGTATTTCCGGCAATT  
GCAATGGCTTCTTTATCTCTTCATGTCCAAAAAATAAGATTGTCATGCGAGATATAAAA  
ACATATCTCTGTGGCACCTGTGCTAAGTACTCTATGGTTTGGGTCTTTAGCGGGTCTA  
TTGATAGAAATAAATCGTTTATTCCCCGATGCCTTGTCATTCCCTTTTTTTT-----ATGACTG

CAATTTTAGAGAGACGCGAAAGTACAAGCCTATGGGGTTCGCTTCTGCAACTGGATAAC  
CAGCACTGAAAATCGTCTTTACATTGGATGGTTCGGTGTGTTTGTATGATCCCTACCTTATT  
GACCGCAACTTCTGTATTTATTATCGCCTTCATTGCTGCTCCTCCAGTAGATATTGATGGT  
ATTCGTGAACCTGTTTCTGGTTCCTTACTTTATGGAAACAATATTATCTCTGGTGCCATTA  
TTCCAACCTTCTGCAGCTATTGGGTTGCATTTTTACCCAATATGGGAAGCAGCATCTGTTG  
ATGAGTGGTTATACAATGGTGGTCCCTTATGAACTAATTGTTCTACACTTCTTACTTGGTG  
TAGCTTGTTACATGGGTTCGTGAGTGGGAACCTTAGTTTCCGTCTGGGTATGCGTCCTTGG  
ATTGCTGTTGCATATTCAGCTCCTGTTGCAGCTGCTACTGCAGTTTTCTTGATCTACCCT  
ATTGGTCAAGGAAGTTTCTCTGATGGTATGCCTTTAGGAATTTCTGGTACTTTCAACTTT  
ATGATTGTATTCCAGGCAGAACACAACATCCTTATGCATCCATTTACATGCTAGGTGTA  
GCTGGTGTATTCGGCGGCTCCCTATTCAGTGTATGCATGGTTCCTTGGTAACCTCTAGT  
TTGATCAGGGAACTACTGAAAACGAATCTGCTAATGAAGGTTACAGATTTGGTCAAG  
AGGAAGAACTTATAATATCGTAGCTGCTCATGGTTATTTGGCCGATTAATCTTCCAAT  
ATGCTAGTTTCAACAATTCTCGTTCCTTACATTTCTTCTTGGCTGCTTGGCCTGTAGTTG  
GTATCTGGTTCAGTCTTTAGGTATTAGTACTATGGCTTTCAACCTAAATGGTTTCAACT  
TCAACCAATCTGTAGTTGACAGTCAAGGTCGTGTTATTAACACTTGGGCTGATATCATC  
AACCGTGCTAACCTTGGTATGGAAGTAATGCATGAACGTAATGCTCACAACTTCCCTCT  
AGACCTAGCTGCTGTTGAAGTTCATCTATCAATGGAATGGGTTTGCCTTGGTATCGTG  
TTCATACTGTCGTATTGAATGATCCCGGTCGATTGATTTCTGTTTATATAATGCATACAGC  
TTTAGTTGCAGGTTGGGCCGGTTCGATGGCTTTATACGAATTAGCGGTTTTTGTATCCCTC  
CGATCCCGTTCTTGATCCAATGTGGAGACAAGGTATGTTTCGTTATACCTTTCATGACTCG  
TTTAGGAATAACCAATTCGTGGGGTGGTTGGAGTATTCA---GGAGGAACTGTAACGAA  
TCCGGGTATTTGGAGTTATGAAGGTGTGGCAGGAGCACATATTGTGTTTTCTGGCTTGT  
GCTTCTTGGCAGCTATCTGGCATTGGGTATATTGGGACCTAGAAATATTCACTGATGAAC  
GTACAGGAAAACCTTCTTTGGATTGCCCCAAGATCTTTGGAATTCATTTATTTCTCTCAG  
GGGTGGCTTGTCTTGGCTTTGGCGCATTTTCATGTAACAGGTTTGTATGGTCCTGGAATAT  
GGGTGTCCGATCCTTATGGACTAACTGGA AAAAGTACAATCTGTAAATCCAGCATGGGGC  
GCAGAAGTTTTGATCCTTTTGTCCGGGAGGAATAGCCTCTCATCATATTGCAGCGGG  
TACATTGGGCATATTAGCAGGCCTATTCCATCTTAGTGTCCGTCCCTCAACGTCTATA  
CAAAGGATTACGTATGGGCAATATTGAACTGTACTTTCCAGTAGTATCGCTGCTGTTTT  
TTTTGCAGCTTTCGTTGTTGCTGGA ACTATGTGGTATGGTTCAGCAACTACCCCAATCG  
AATTATTTGGTCCTACTCGTTATCAGTGGGATCAGGGATACTTTCAGCAAGAAATATATC  
GAAGAGTTAGCGCCGGGCTAGCCGAAAATCTTAGTTTATCAGAAGCTTGGTCTAAAGT  
TCCCGAAA AATTAGCTTTTTATGATTACATTGGTAATAATCCGGCAAAAGGGGGATTATT  
CCGAGCAGGTTCAATGGACAACGGGGATGGAATAGCTGTTGGATGGTTAGGACACCCC  
GTCTTTAAAGATAAAGAAGGGCGTGAGCTTTTTGTACGTCGTATGCCTACTTTTTTTGA  
AACATTTCCGGTAGTTTTTGGTAGATGAAGACGGAATTGTGAGAGCTGATGTTCCTTTTA  
GAAGGGCAGAATCAAAGTATAGTGTGGAACAAGTAGGTGTA ACTGTGGAGTTCTATGG  
GGGTGAACTTAATGGAGTAAGTTATTCTGATCCTGCTACTGTGAAAAAATATGCTAGAC  
GTGCACAATTAGGTGAAATTTTTGAATTAGATCGAGCTACTTTGAAATCCGATGGTGTT  
TTTCGTAGTAGTCCGAGAGGTTGGTTCACTTTTGGGCATGCTACGTTTGCTTACTCTTC  
TTTTTCGGACACATTTGGCATGGTGCTAGAACCTTGTTTCAGAGATGTTTTTGCTGGTATT  
GATCCAGATTTGGATGCTCAAGTCGAATTTGGAACATTCAAAAACTTGGAGATCCAA  
CTACAAAGAGACAAGTAGTCATGAAAACCTTATATTCCCTGAGGAGGTTCTACCACGT

GGAAACGCTCTTTAATGGAACCTTAGCTTTAGCAGGTCGTGACCAAGAAACCACCGGT  
TTCGCTTGGTGGGCCGGGAATGCCAGACTTATAAATTTATCTGGTAAACTACTTGGAGC  
TCACGTAGCCCATGCCGATTAATCGTATTCTGGGCCGGAGCAATGAACCTATTTGAAG  
TGGCTCATTTTCGTACCAGAAAAACCCATGTATGAACAAGGATTAATTTTACTTCCGCAC  
CTAGCTACTCTAGGTTGGGGGGTAGGTCCGGGGGGAGAAGTTATAGACACCTTTCCATA  
CTTTGTATCTGGAGTACTTCACTTAATTTCCCTCCGCAGTCTTAGGCTTTGGCGGTATTTAT  
CATGCCCTTCTTGGACCTGAGACTCTTGAAGAATCTTTTCCATTCTTCGGTTATGTATGG  
AAAGATAGAAATAAAATGACTACAATTTTGGGTATTCACTTAATTTTGTAGGTATAGGT  
GCTTTTCTTCTAGTATTCAAAGCTCTTTAATTTTGGGGGTGTATATGATACCTGGGCCCA  
GGGGGGGGAGATGTAAGAAAAATTACCAACTTGACCCTTAGCCCAAGTGTATATTTG  
GTTATTTACTAAAATCTCCTTTTGGAGGAGAAGGATGGATTGTTAGTGTGGACGATTA  
GAAGATATAATTGGGGGACATGTATGGTTAGGTTCCATTTGTATATTTGGTGAATTTGG  
CATATCTTAACCAAACCTTCGCATGGGCTCGCCGTGCATTTGTATGGTCTGGAGAGGC  
TACTTGTCTTATAGTTTAGCTGCTTTATCTGTCTTTGGTTTCATCGCTTGTGTTTCGTC  
TGGTTCAATAATACCGCTTATCCTAGTGAGTTTACGGACCTACCGGGCCAGAAGCTTC  
TCAAGCTCAAGCATTTACTTTTCTAGTTAGAGACCAACGCCTTGGAGCTAATGTTGGAT  
CCGCCCAAGGACCTACTGGTTTAGGTAAATATCTAATGCGTTCCTCCGACTGGAGAGGTT  
ATTTTGGAGGAGAACTATGCGTTTTTGGGATCTTCGTGCTCCCTGGTTAGAACCTCT  
AAGGGGTCCAATGGTTTGGACTTGAGTAGGCTGAAAAAAGACATAACAACCTTGGCA  
AGAACGACGTTCCGCAGAAATATGACTCATGCTCCTTTAGGTTCTTTAAATCCGTGG  
GTGGCGTAGCTACCGAGATCAATGCAGTTAATTATGTCTCTCCTAGAAGTTGGTTAGCG  
ACCTCTCATTTTGTCTAGGATCTTCCTATTTGTGGGTCATTTGTGGCATGCGGGAAGG  
GCCCGTGCAGCTGCAGCGGGGTTTAAAAAGGAATCGATCGCGATTTGGAACCTGTTT  
TTCCATGACCCCTCTTAACATGACTATAGCTCTTGGTAGATTTACCAAAGAAGAAAAT  
GATCTATTTGATATTATGGATGACTGGTTACGGAGGGACCGTTTTCGTTTTTGTAGGCTGG  
TCAGGCCTATACTCTTTCCTTGTGCTTATTTTCGCTTTAGGAGGTTGGTTTACAGGTACA  
ACTTTTGTAACTCATGGTATAACCCATGGATTGGCCAGTTCCTATTTGGAAGGTTGCAAT  
TTCTTAACCGCTGCAGTTTCTACTCCTGCGAATAGTTTAGCACATTCTTTGTTGCTACTA  
TGGGGCCCTGAAGCCCAAGGAGATTTTACTCGTTGGTGTCAATTAGGCGGTCTGTGGA  
CTTTTGTGCTCTCCATGGCGCTTTCGGACTAATAGGTTTCATGTTACGTCAATTCGAAC  
TTGCTCGATCTGTTCAATTGCGACCTTATAATGCAATCGCATTCTCTGGGCCAATCGCTG  
TTTTTGTCTGTATTCTGATTTATCCACTGGGTCAATCTGGTTGGTTTTTTGCGCCTAG  
TTTTGGGGTAGCAGCTATAATTCGATTCATCCTCTTCTTCCAAGGATTCATAATTGGAC  
GTTGAACCCATTTATATGATGGGAGTTGCCGGAGTATTAGGCGCGGCTCTGCTATGCG  
CTATTCATGGTGCTACCGTAGAAAACACTTTATTTCGAAGATGGTGACGGTGCAAATACA  
TTCCGTGCTTTTAAACCAACTCAAGCCGAAGAGACTTATTCAATGGTCACTGCTAACCG  
CTTTTGGTCGCAAATCTTTGGGGTTGCTTTTCCAATAAACGTTGGTTACATTTCTTTAT  
GCTATTTGTACCAGTAACCGGTTTATGGATGAGTGCTATTGGGGTAGTCGGTCTGGCTCT  
GAACCTACGTGCCTATGATTTTCGTTTCCAAGAAATCCGTGCAGCGGAAGATCCTGAAT  
TTGAGACTTTCTACACCAAAAATATTCTTTTAAACGAAGGTATTTCGTGCTTGGATGGCA  
GCTCAGGATCAGCCTCATGAAAACCTTATATTCCTGAGGAGGTTCTACCACGTGGAAA  
CGCTCTTATGTCTGGAAGCACGGGAGAACGTTCTTTTGTGATATTATTACCAGTATTCG  
ATACTGGGTTATTCATAGCATTACTATACCTTCCCTATTCATTGCGGGTTGGTTATTCGTC  
AGTACGGGGTTAGCTTACGACGTGTTTGAAGTCTCTCGTCCAAACGAGTATTTACGG

AAAGCCGACAAGGGATTCCATTGATAACCGGCCGTTTTGATTCTTTGGAACAACCTCGAT  
GAATTTAGTAGATCCTTTATGACCATAGATCGAACTTATCCAATTTTACAGTGCGATGG  
TTGGCTGTTACGGACTAGCTGTACCTACCGTTTCTTTTTTGGGGTCAATATCAGCAATG  
CAGTTCATCCAACGAATGGCTACACAAACCGTAGAGGATAGTTCTAGATCTGGGGCAC  
CAAGACGAACTAATGTAGGGAGTTTATTGAAACCATTGAATTCAGAATATGGTAAAGTA  
GCTCCGGGCTGGGGGACTACACCACTTATGGGAGTCGCAATGGCTCTATTTGCGATATT  
CCTATCTATTATTTGGAAATTTATAACTCTTCTGTTTTACTGGATGGAATTGCTATGAGT  
ATGCTTACTCTCAAACCTCTTTGTTTACACAGTAGTGATATTCTTTGTTTCCCTATTTATTT  
TCGGATTCTTATCTAATGATCCAGGACGTAATCCTGGACGTGAGGAAATGGCCGATACT  
ACTGGAAGGATTCCTCTTTGGCTGATAGGTACTGTAACCTGGTATTCCTGTGATCGGTTTA  
ATAGGTGTTTTCTTTACGGTTCATATTCCGGGTTGGGTTTCATCTCTCATGCTTAATATCT  
TTAGTTTAATCTGTATCTGTCTTAATTCTGCCCTTTATTCAAGTAGTTTTTTCTTTGCCAA  
ATTGCCCGAAGCTTATGCCATTTCAATCCAATCGTAGATGTTATGCCTGTCCATACCTCTA  
TTCTTTTTTCTTTAGCCTTTGTTTGGCAAGCTGCTGTAAGTTTTCGAATGACACAATCA  
AACCCGAATGAACAAAGTGTGAATTGAATCGTACCAGTCTATACTGGGGTTTATTACT  
CATTTTTGTACTTGCTGTTTTATTTTTCCAATTATTTCTTCAATATGGAAGTCAATATTCTAG  
CATTTATTGCTACTGCACTGTTCAATTCTAGTTCCCTACTGCTTTTTTTACTTATTATCTACGTA  
AAAACAGTCAGTCAAATGATATGGAAACAGCAACCCTAGTCGCCATCTCCATATCTGG  
TTTACTTGTAAGCTTTACTGGGTACGCCTTATATAACCGCTTTTGGGCAACCCTCTCAACA  
ACTAAGAGATCCATTGGAAGAACACGGGGACATGGAAGCATTGGTTTATACATTCCCTTT  
TAGTCTCGACTTTAGGGATAATTTTTTTTCGCTATCTTTTTTCGAGAACCCCTAAGGTTCC  
CGACTAAAAA-----ATGACTATTGCTTTCCAATTAGCTGTTTTTGCATTAATTGCGACTT  
CATCAGTCTTACTGATTAGTGTACCCGTTGTATTTGCTTCTCCTGATGGTTGGTCAAGTA  
ACAAAATGTTGTATTTTCCGGTACATCTTTATGGATTGGATTAGTCTTTCTGGTAGCTAT  
TCTTAATTCATTAATTTCT-----ATGTCACCACAAACAGAGACTAAAGCAAGT  
GCTGGATTTAAAGCTGGTGTAAAGATTACAAATTGACTTATTATACTCCTGAATACGAA  
ACCAAGGATACTGATATCTTGGCAGCATTTCGAGTAACCTCAACCTGGAGTTCCGCC  
TGAAGAAGCAGGGGCTGCGGTAGCTGCCGAATCTTCTACTGGTACATGGACAACCTGTT  
TGGACTGATGGACTTACGAGTCTTGATCGTTACAAAGGACGATGCTACCACATCGAGC  
CTGTTGTTGGGGAAGAAAATCAATATATTGCTTATGTAGCTTATCCTTTAGACCTTTTTG  
AAGAAGGTTCTGTTACTAACATGTTTACTTCCATTGTAGGTAATGTATTTGGGTTCAAAG  
CCCTACGAGCTCTACGTCTGGAGGATCTGCGAATTCCCCCTGCTTATTCAAAAACCTTC  
CAGGGCCCCGCTCATGGTATCCAAGTTGAAAGAGATAAGTTGAACAAGTATGGTCGTC  
CCCTATTGGGATGTACTATTAACCTAAATTGGGATTATCCGCAAAGAACTACGGTAGG  
GCGGTTTATGAATGTCTACGCGGTGGACTTGATTTTACCAAAGATGATGAAAACGTGAA  
CTCACAACCATTGATGCGTTGGAGAGACCGTTTCCATTTTTGTGCCGAAGCTATTTATAA  
AGCGCAGGCCGAAACGGGTGAAATCAAAGGACACTTGAATGCTACTGCGGGTACA  
TGTGAAGAAATGATGAAAAGGGCTATATTTGCCAGAGAATTGGGAGTTCCTATCGTAAT  
GCATGACTACTTAACTGGGGGATTCAGTCAAATACTAGTTTGGCTCATTATTGTCGCGA  
TAATGGTCTACTTCTTACATCCACCGCGCAATGCATGCAGTTATTGATAGACAGAAAA  
ATCATGGTATGCATTTTCGTGTACTAGCTAAAGCATTACGTATGTCTGGTGGAGATCATAT  
TCACGCTGGTACAGTAGTAGGTAACCTGGAAGGGGAACGTGAGATGACTTTGGGTTTT  
GTTGATTTATTACGTGATGATTTTATTGAAAAAGACCGTAGTCGCGGTATTTCTTCACT  
CAAGATTGGGTCTCTATGCCAGGTGTTTTGCCCGTGGCTTCAGGGGGTATTCATGTTTG

GCATATGCCTGCTCTGACCGAAATCTTTGGAGATGATTCCGTA CTACAGTTTGGTGGAG  
GAACTTTAGGACACCCTTGGGGAAATGCACCTGGTGCAGTAGCTAATCGTGTGGCTTT  
AGAAGCGTGTGTACAAGCTCGTAATGAAGGACGTGATCTTGCTCGCGAAGGTGCTGAA  
ATTATCCGTGAAGCTTGCAAATGGAGTCCTGAACTATCCGCTGCTTGTGAAGTATGGAA  
AGAGATCAAATTCGAGTTCGACCCGGTAGATAAGCTAGATAAAAACGGCGATACATTTAT  
ACAAA ACTTCTACCCCGAGCACACGCAATGGAGCCGTAGACAGTCAAGTGAAATCCA  
ATCCACGAAATAATTTGATCTATGGACGGCATCATTGTAGTAAAGGTCGTAATGCCAGA  
GGAATCATTACCGCAGGGCATAGAGGGGGAGGTCATAAGCGTCTATACCGTAAAATCGA  
TTTTTCGACGGAATCAAAAAGACATATCTGGTAGAATCGTAACCATAGAATACGACCCTA  
ATCGAAATGCATACATTTGTCTCATACTATGGGGATGGTGAGAAGAGATATATTTTAC  
ATCCCAGAGGGGCTATAATTGGAGATACCATTGTTTCTGGTACAGAAGTTCCTATATCAA  
TGGGAAATGCCCTACCTTTGACCGATATGCCCTTAGGCACGGCCATACATAACATAGAA  
ATCACACGTGGAAAGGGTGGACAATTAGCTAGAGCAGCAGGTGCTGTAGCGAAACTG  
ATTGCAAAAAGAGGGTAAATCGGCCACATTAAGATTACCATCTGGGGAGGTCCGTTTGT  
ATCCAAA ACTGCTTAGCAACAGTCGGACAAGTGGGTAATGTTGGGGTGAACCAAAA  
AATTTTGGGTAGAGCCGGATCTAAGTGTGGCTAGGTAAGCGTCCTGTAGTAAGAGGA  
GTAGTTATGAACCCTGTAGACCATCCCCATGGGGGCGGTGAAGGGAGAGCCCCAATTG  
GTAGAAAAAAACCCACAACCCCTTGGGGTTATCTGCGCTTGGGAAGAAGAAGTAGGA  
AAAGGAAAAAATATAGTGATTGTTTTATTCTTCGTCGCCGTAAA---ATGATTCAACCTCA  
GACCCTTTTGAATGTAGCGGATAACAGCGGAGCTCGAAAATTAATGTGTATTTCGAATCA  
TAGGAGCTGGT---AATCACCGATATGCTCATATTGGTGATGTTATTGTTGCTGTAATCAAA  
GAAGCAGTTCCCAATATGCCTCTAGAAAGATCAGAAGTAATTAGAGCTGTAATTGTACG  
TACATGTAAAGA ACTCAAACGTGAAAACGGTATCATAATACGATATGATGACAATGCTG  
CAGTTGTCATTGATCAAGAAGGAAATCCAAAAGGAACTCGAGTTTTTGGTGCGATCGC  
TCGGGAATTGAGACAGTTGAATTTACTAAAATAGTTTCATTAGCTCCTGAAGTCTTAAT  
GCTTAGTCCCAAAAAGAACCAGATTTTCGTAAACAACATAGAGGAAGAATGAAGGGAATA  
TCTTGTGCGAGGCAATCATATTTCTTTTGGCAGATACGCTCTTCAGGCACTTGAACCCGC  
TTGGATCACAGCTAGACAAATAGAAGCAGGGCGAAGGGCAATGACACGATATGCGCGT  
CGCGGTGGAAAAATATGGGTACGTATATTTCCCGACAAACCTATTACACTAAGACCTGC  
AGAAACACGTATGGGTTCCGGTAAAGGATCCCCGAATATTGGGTATCCGTTGTTAAAC  
CGGGTCAATCCTTTATGAAATGGGTGGAGTATCAGAACTGTAGCTAGAGCAGCTATC  
GCAATAGCTGCGCGCAAATGCCTATACGAACTCAATTTCTTATTTTCAGGAATGACCAG  
AGTTAGACGAGGATATACAGCTCGGAGACGTGCAACAAAAATTCGTTTATTTGCATCAA  
CCTTTCGAGGGGCTCATTCAAGACTTACTCGAACGATTACTCAACAGAAAATGAGAGC  
TTTGGTTTTCTCTCATCGAGATAGAGGCAGGCAAAAAGAGGGATTTTCGTCGTTTGTGGA  
TCACTCGGATAAATGCAGTAACTCGTGAGAAT-----GTATTCTATAGTTATAGTAGATTAAT  
ACACAATCTGTACAAGAAGCAATTGCTTCTTAATCGTAAAATACTTGCGCAAATAGCTAT  
ATCAAATAAGAATTGTCTTTACATGATTTCCAATAAGATCATCAA-----  
----ATGATAAAGAAAGTTTTTA--GCTCAACATATATCT--ATGTCTGTTTTCAAAGCGCGA  
AGAGTTATTGATCAGATTCGCGGACGTTCCCTATGAGGAAACACTTATGATACTGGA ACT  
ATTGCCTTATCGAGCATCTTATCCATTTTAAAATTGGTTTATTCTGCAGCAGCAAATGCT  
AATCATAATATGGGTTTGAACGAAGCTGATTCATTATTAGTAAAGCCGAAGTCAATAA  
AGGTACTATTGTTAAAAAATTAAGACCCAGGGCTCGAGGACGTAGTTATCCGATAAAAA  
AACCCAGGTGTCATATAACAATTGTATTA AAA---AAATCGAAATCG-----ATG

GATGGAATCAAATATGCAGTATTTACAGAAAAAAGTATTTCGGTTATTGGGGAACAATCA  
A---TATACTTCTAATGTCGAATCAGGATCAACTAGGACAGAAATAAAGCATTGGGTCTGA  
ACTCTTCTTTGGTGTCAAGGTAATAGCTATGAATAGTCATCGACTACCCGAAAGGGTA  
GAAGAATGGGATCTATTATGGGACATAACAATGCATTACAGACGTATGATCATTACGCTTC  
AACGGGGTTATTCTATTCCACCTCTTATAGAGAAAAGAACTATGGCAGTTCCAAAAAAA  
CGTACTTCTATGTCAAAAAAACGTATTTCGTAGAAATATTTGGAAGAAAAAGGGATCGTT  
AGCTGCAGTAAAAGCTTTTTCTTTAGCGAAATCGGTTTCCACTGGGCATTCAAAAAGTT  
TTTTT-----CAAACAAATACTATGGCCAAGGGTAAAGATGTCAGAGTCAGAGTTATTTTG  
GAATGTACCAGTTGTGTCCGAAAC-----GGT-----AAGGAATCGCCGGGCATTTCTAGATA  
TATTACTCAAAGAATCGCCACAATACACCAGTCGATTAGAATTGAGGAAATTTTGTCTC  
GCTATTGTCACAAGCATACTATTTCATGGTGAAATAAAGAAAAATGAAAATAAGGGCTTCT  
GTTTCGTAAAATTTGTGAAAAATGTCGGCTAATTCGGAGGCGCGGACGAATTATAGTGAT  
TTGTTCCAATCCGAAACATAAACAGAGACAAGGGATGGTTTCGAGAGGAAGTAGCAGG  
ATCCACTCGAACAATACAGTGGAAGTGTGTTGAATCAAGAGTAGACAGTAAGCGTCTT  
TATTATGGTTCGTTTCATTTTGTCCCCACTTATGAAAGGTCAAGCTGATACCATCGGTATT  
GCCATGCGAAGGGCTTTACTTTGGAGAAATCGAAGGAACATGTATAACACGTGCAAAAT  
CTGAG-----AGGGTGCCGCATGAATATTCTACAATAATAGGTATTGAAGAATCAGTACAC  
GAAATTTTACTAAATTTGAAAGAAATTGTATTAAGAAGTAATCTCTATGGAGTTAGAGA  
CGCATCAATTTGCGTCAGAGGTCCTAGATATGTAACCGCTCAAGATATCATATTACCACC  
TTCCGTGGAAATAGTTGACCCGACACAACATATAGCTAACCTGACGGAACCAATTGATT  
TGTATATTGAATTACAAATCAAGAGAGATCGCGGATATCGTATGGAACCCACAAATAAC  
TCTCAAGACGGAAGTTAT-----CCTATAGATGCTGTATCCATGCCTGTTTCGAAATGCGAAT  
CATAGTATTCATTCTTATGGGAATGGGAATGAAAAACAAGAAATACTATTTCTAGAAATA  
TGGACAAATGGAAGTTTAACTCCTAAGGAAGCACTTTTATGAGGCTTCTCGTAATTTGAT  
TGATTTATTTATTCCTTTTCTACATGCAGAGGAAGAG-----GACATTAATTTCGAAGAAAA  
TAAA---AACAGGTTTACTCTACCCTTTTTAACCTTTCAAGATAGATTAAC---AATCTAAA  
GAAAAACAAAAA---GGAATTCCATTGAATTGCATTTTTATTGACCAATTAGAATTGCCT  
TCTAGGACCTATAATTGTCTCAAAGGTCCAATATACATACATTATTGGACCTTTTGAGT  
AATGGTCAAGAAGATCTTATGAGAATTGAATATCTTCGCATGGAAGATGTA AACAGAT  
ATTGGACACTCTACAGAAGAAT-----TTCGCAATTGATTTACCTAAGAATAAGATGCTCC  
GGAAT--GGAAATGAGGGAATGTCCACAATACCTGGATTTAGTCAGATACAATTTGAGG  
GATTTTGTAGGTTCAATTAATCAAGGCTTGACGGCAGAATTTTCAGAAGTTTCCAAAAATT  
GAAGATACAGATCAAGAAATTGAATTTAAATTATTTGTGGAAAGATATCAATTGGTAGA  
ACTTTGTATAAAGAAAGAGATGCTGTGTATGAATCACTCACATATTCTTCAGAATTATA  
TGTACCCGCGGGATTAATTTGGAAAACCGGTAGAGATATGCAAGAACAACCGTTTTTA  
TTGGAACATTCTCTAATGAATCCCTGGGAACCTCTATAGTAAATGGAATATACAGAA  
TTGTGATCAATCAAATATTGCAAAGTCCCGGTATTTACTACCGTTTCGGAATTGGACCATA  
ACGGAATTTCTGTTTATACGAGCACTATAATATCAGATTGGGGAGGAAGATCGGAATTA  
GAAATTGATAGAAAAGCAAGGATATGGGCCCGTGTGAGTAGGAAACAAAAAATATCTA  
TTCTAGTTCTATCATCAGCTATGGGTTCTGAATCTAAGAGAAATTCTAGATAATGTTTGT  
ACCCTGAAATTTTCTTATCTTTCCCGAATGATAAGGAGAAAAAAAAGATTGGGTCAA  
AGAAAATGCTATTTTGGAGTTTATCAACAATTTGCTTGTGTAGGCGGGGATCCGGTATT  
TTCTGAGTCCTTATGTAAGGAATTACAAAAAAATTTTTTCAACAAAGATGCGAATTAG  
GAAGGATTGGTTCGACGAAATATGAACCGGAGACTGAATCTTGATATACCTCAGAACAAT

ACATTTTTGTTACCACGAGATGTATTGGCTGCTGCGGATCATTGATCGGAATGAAATTT  
GGAATGGGTACACTTGACGAT-----ATGAATCATTGAAAAATAAGCGTATTCGTTCTGT  
AGCGGATCTGTTACAGGATCAGTTTGGACTGGCTCTTGCTCGTTTAGAAAATGCAGTTC  
GAGGAACTATATGTGGAGCAATCAGG---CATAAATTGATA---CCGACTCCTCAAATTTG  
GTAAC TTCAACTTCA-----TTAACA ACTACTTATGAATCGTTTTTTGGCCTACACCCT  
TTATCTCAAGTTTTGGATCGAACTAATCCATTGACACAAATCGTTCATGGGCGAAAATT  
GAGTTATTTGGGTCTGGAGGATTGACGGGGCGAACTGCCAGTTTTAGGATACGAGATA  
TCCATCCTAGCCACTATGGACGATTTTGTCCAATTGACACGTCCGAAGGAATCAATGTT  
GGACTTATTGGATCCTTAGCTATTCATGTGAGGATTGGTCATTGGGGA---TCTATAGAGA  
GTCCGTTTTAT-----GAAATATCTGAGAGATCAAAGAAAAAGAGTCACAGATGGTTT  
ATTTATCACC AAATAGAGATGAATATTATATGGTAGCAGCAGGAAATCTTTAGCCTTGA  
ATCGGGGTATTCAGGAAGAACAGGTTGTTCCAGCTCGATACCGTCAAGAATTCCTGACT  
ATTGCATGGGAACAGATTCATCTTAGAAGCATTTTTCCCTTCCAATATTTTTCTATTGGA  
GCTTCCCTCATTCTTTTATTGAGCATAATGATGCGAATCGGGCTTTAATGAGTTCTAATA  
TGCAGCGTCAAGCAGTTCGGCTTCTCGGTCCGAGAAGTGCATTGTTGGA ACTGGGCT  
GGAACGCCAAACGGCTCTAGATTCGGGGGTTCTGTTATAGCCGAACATGCGGGAAAG  
ATCATTTATACTGATACTCACAAGATTATTTTATCAAGTAATGAGAACACTATAAGTATTC  
CATTAGTTATGTATCAACGTTCCAACAAAATACTTGTATGCATCAAAAACCTCAGGTTT  
GGCGGGGTAAATCCATTA AAAAAGGACAAATTTTAGCGGACGGTGCAGCTACGGTTGG  
TGGGGA ACTTGCTTTAGGAAAAACGTATTAGTAGCTTATATGCCATGGGAAGGTTACA  
ATTCTGAAGACGCAGTACTAATTAGCGAACGGCTGGTATATGAAGATATTTATACTTCTT  
TTCACATCCGTAAATATGAAATTCAGACTCATGTGACAAGCCAAGGC---CCTGAAAGAA  
TCACTAAGGAAATACCGCATCTAGAGGCTCATTACTCCGCAATTTGGACAGAAATGGA  
ATTGTGATGCTGGGATCTTGGGTAGAAACAGGTGATATTTTAGTAGGTA AATTAACGCC  
TCAGACAGCGAACGAA---TCGTCTGATGCCCCGGAGGATAGATTATTACGAGCCATACT  
TGGCATT CAGGTATCCACTGCAAAAAGAACTTCTCTAAA ACTACCTATAGGTGGAAGG  
GGTCGCGTTATTGATGTGAGATGGATCCAAAAAAGGAG---GGTCCAGTTATAATTCA  
GAAATGATTCGTGTATATATTTTACAGAAACGTGAAATCAAAGTAGGTGATAAAGTAGC  
TGGAAGACATGGGAATAAAGGTATCATTTCAAAAATTTTGCCTAGACAAGATATGCCCT  
ATTTGCAAGACGGAACACCTGTTGATATGGTTTTCAACCCTTAGGAGTACCCTCACGA  
ATGAATGTGGGACAAATATTTGAATGCTCGCTTGGGTTAGCAGGGGATCTGCTAAAGAG  
ACATTATCGAATAGCACCTTTGATGAGAGATATGAGCAAGAGGCTTCGAGAAA ACTA  
GTGTTTTCTGAGTTATATGAAGCCAGTAAGCAAACAAAAAATCCATGGGTATTTGAACC  
CGAGTATCCGGGAAAAAGTAGAATATTTGATGGAAGAACAGGAGATCCTTTTGAACAG  
CCTGTTCTAATAGGAAAGTCCTATATCCTAAAATTAATTCATCAAGTTGATGATAAAATC  
CATGGCCGTTCTAGTGGACATTACGCACTTGTTACACAACAACCCCTTAGAGGAAGGG  
CTAAGCAAGGGGGACAACGAGTAGGAGAAATGGAAGTTTGGGCTCTAGAGGGATTG  
GTGTTGCTCATATTTTACAAGAGATGCTTACTTATAAATCTGATCATATTAGAGCTCGTCA  
AGAAGTACTTGGTGCTACGATCATTGGAGGAAGAGTAACTAAGCCCGAAGATGCTCCG  
GAATCGTTTCGATTGCTCGTTCGAGAACTACGATCTTTGGCTCTAGA ACTGAATCATT  
CCTTGATCTGAGAAGAACTTCCAGATTAATAGGAAGGAAGCT-----ATGAT  
CGACCAGTATAAACATCAACA ACTTCGAATTGGACCAGTTTCTCCTCAACAAATAAAG  
GCTTGGGCCAACAAAATCCTCCCTAATGGGGAGATAGTGGGAGAGGTGACAAAACCT  
ATACTTTTCATTATAAAACCAATAAACCAGAAAAAGATGGATTGTTTTGCGAAAGAATC



TCTGGACCGATAAAAAGTGGAATTTGTGCTTGTGGAAATTATCGAGTGATCGGAGCTG  
AAAAAGAAGACCCGAAATTTTGCGAACAATGCGGGGTAGAATTTGTTGATTCTCGGAT  
ACGAAGATATCAAATGGGATACATCAAACCTCGCATGTCCCGTGACTCATGTGTGGTATT  
TGAAACGTCTTCTAGTTATATCGCGAATCTTTTAGATAAACCCCTTAAGGAATTAGAAG  
GCCTAGTATACTGCGATGTGGATTTCTCTTTTGTAGGCC---ATAGCTAAAAACCTAC  
TTTCTTACGATTACGAGGTTCAATCGAATATGAAATCCAATCCCGGAAATACAGCATTCC  
ACTTTTTTTTACTACCCAGGCTTCGAGACATTTGAAATCGGGAAATCTCGACAGGAG  
CAGGTGCTATCAGAGAACAATTAGCTGATTCAGATTTGCGAATTATTATAGATAATTCAT  
TGGTAGAATGGAAGGAATTAGGAGACGAG---GGGTCCACTGGAAACGAATGGGAAGA  
TCGAAAAATTAGACGAAGAAAGGATTTTTTGGTTCGACGCATGGAATTAGCTAAACATT  
TTATTCGAACAAATGTAGAACCAGAACGGATGGTTTTTGTGCTTATTACCAGTTCTTCT  
CCCGAATTGAGACCAATCATTAGATAGATGGGGGTAAATTAATGAGTTCGGATATTAAT  
GAACTCTATCGAAGAGTTATTTATCGGAACAATACTCTTACCGATCTATTAGCAACAAGT  
AGATCTACGCCAGGGGAATTAGTAATGTGTCAGGAGAAATTGGTACAAGAAGCCGTCG  
ATACACTTCTTGATAATGGGATTCGTGGGCAACCAATGAGAGATGGTCATAATAAAGTT  
TACAAGTCATTTTCAGATGTAATTGAAGGTAAAGAAGGAAGATTTTCGTGAGACTCTGCT  
TGGTAAACGGGTCGATTATTCGGGACGTTCCGTCATTGTGTCGTGGGTCCTTCGCTTTCATT  
ACATCAATGTGGATTACCGCGAGAAATAGCAATAGAGCTTTTCCAAACATTTGTAATTC  
GTGGTCTAATCTGGCAACATGGTGCTTCTAACATAGGGATTGCTAAAAGTAAAATTCGG  
GAAAAAGAACCAATTGTATGGGAAATCCTTCAAGAAGTTATGCAGGGGCATCCTGTATT  
GTTGAATAGAGCACCACCCTGCATAGATTAGGCATACAAGCGTTCCAACCCATTTTAG  
TAGAGGGACGTGCTATTTGTTTACACCCATTAGTTTGTAAGGGTTTCAATGCAGACTTT  
GATGGGGATCAAATGGCTGTTTCATGTACCTTTATCTTTGGAAGCTCAAGCGGAGGCCCG  
TTTACTTATGTTTTCTCATATGAATCTCTTGTCTCCAGCTATTGGCGATCCCATTTCTGTA  
CCAACCCAAGATATGCTTATCGGACTCTATGTATTAACGATCGGAAATCGTCGAGGTATT  
TGTGCAAATAGGTATAATCCGTATAATTGCGGAAACTAT-----CAAATAAAACAGTTG  
ACAATAATAACTATAGGTATACGAAAGAAAAAGAACCGTATTTTTGTAGTTCCTATGATG  
CACTTGGAGCTTATCGGCAGAAACGAATTAGTTTAGATAGTCCTTTGTGGCTCCGATGG  
AAACTAGATCAACGT---GTCATTGGGTCA-----AGAGAAGTTCCCATCGAAGTTCAATAT  
GAATCTTTGGGTACTTATCATGAGATTTATGGTCACTATCTAATGGTAGGAAGTGTA  
AAA  
AAAGAAATCCGGTGTATATACATTTCGAACCACTCTGGGTTCATTTCTTTTTATCGAGAA  
ATAGAAGAAGCCATACAAGGGTTTTGTGCGGCCTACTCATACTATC-----  
-----ATGGCAGAACGGGCCGATCTGGTCTTTCACAATAAAGTGATAAATGGA  
ACTG  
CTATGAAACGACTTATTAGCAGATTAATAGATCATTTTCGGAATGGGATATACATCACATAT  
ACTGGATCAAGTAAAGACTTTAGGTTTCCATCAAGCCACTGCTACATCTATTTTATTAGG  
AATTGATGATCTTTTAAACAATACCTTCTAAGGGATGGTTAGTCCAAGACGCTGAACAAC  
AAAGTTTTATTTTGGAGAAACACCATCATTATGGGAATGTGCATGCGGTAGAAAAATTA  
CGTCAGTCCATTGAGATATGGTATGCTACAAGTGAATATTTGAGACAAGAAATGAATCC  
AAATTTTCAGATGACTGATCCTTCTAATCCAGTTTATCTAATGTCTTTTTTCGGGAGCTAG  
GGGAATGCATCTCAGATACACCAATTAGTAGGTATGAGAGGATTAATGTCAGATCCCC  
AAGGACAAATGATTGATTTACCCATTCAAAGCAATTTACGCGAGGGACTTTCTTTGACA  
GAATATATAATTCCTGCTATGGAGCCCGCAAAGGAGTTGTAGATACTGCTGTACGAAC  
ATCAGATGCTGGATATCTTACACGTAGACTTGTGGAAGTAGTTCAACACATTATTGTACG  
TAGAAGAGATTGTGGTACTATCCGAGGTATTTCCGTGAGTCCTCAAATGGGATGACGG

AA-----AAAATTTTTGTCCAAACACTAATTGGTTCGTGTATTAGCAGACGATATATATATCG  
GCCACGATGCATTGCCACTCGAAATCAAGATATTGGGATTGGACTTGTGAATCGATT  
ATAACC-----TTTCGAGCACAACCAATATATATTAGAACCCCATTTACTTGCAGG  
AGTACATCTTGGATCTGTCAATTATGTTATGGTTCGGAGTCCCACTCATGGCGATTTGGTC  
GAATTGGGAGAAGCCGTAGGTATTATTGCGGGTCAATCAATTGGGGAACCGGGGACGC  
AACTAACATTAAGAACTTTTCATACCGGTGGAGTATTCCTGTTGTTACTGCGGAACAT  
GTACGAGCTCCTTCTAATGGGAAAATCCAATTCAATGAGGATTTGGTTCATCCCACACG  
TACCCGTCATGGACACCCCTGCTTTTTTATGTTCTATAGACTTGTATGTAACATTGAGAG  
TCGAGATATTATACATAATGTGAATATTCCACCAAAAAGTTTGATTTTAGTTCAAATGA  
TCAATATGTAGAATCAGAACAAGTGATTGCTGAGATTTCGTGCTGGAACGTCTACTTTT---  
---TTTAAAGAGAGGGTACGAAAACATATTTATTCTGAATTAGAGGGAGAA---ATGCACTG  
GAGTACCGACGTCTACCATGCACCTGAATATACATATGGTAATGTTCAATTTATTACCAA  
AAAGCCATTTATGGATATTAGCAGGAGGTCCGTGCAGA-----TCCAGTATAGTGTCTT  
TTTCGCTCCACAAGGATCAAGATCAAATGAATGTTGATTCTTTTTCTGTTGAAGGAAGA  
-----TATATCTCGGACTTCTCA-----ATGACTAAT--GATCAAGTAAGACATAAATTGTTATA  
TACTTCTTAT-----GATAGGGAAATTTCTGACTATTCA---AGACCTGATCAAATCATAT  
CCAATAGTCATTGGAATTTTCATATATCCTTCT--ATTCTCCAAGAGAAT-----TCTGATTTCT  
TAGCGAAAAAGCGAAGAGATAGATTCATCATCCCATTACAATATGATCAAGAACAAGA  
GAAAGAATAATACCCTGTTTTGGTATTTTCGATTGAAATACCCATAAAT-----GGTATTTT  
ACGTAGAAAAAGTATTCTTGCTTATTTTGATGATCCACGATACAGAAGAAAC-----GGAA  
TTACTAAATAT--ACCATAGAGGTAGATTCAATCATAAAA-----AAAGAGGATTTGATTGA  
GTATCGAGGA---ACAAAAGAATTTAGTCCGAAATAC---AAAGTAGATCAGTTTTTTTTCA  
TTCTCGAAGAAGTGCATATCTTGCCGGGATCCTCATTCATAATGGTCCGGAACAATAGTA  
TCATTGGAGTAGATACACGACTCACTTTAAATACAAGAAGCCGAGTAGGTGGATTAGTC  
CGAGTGGAGAGAAAAAAAATATATTGAATTGAAAATCTTTTCTGGCGATATTCATTT  
TCCTGGCGAGACAGATAAGATATCCAGGCACAGCGGCATTTTGATACCACCAGAAACA  
GAAAAAAA-----AACTCTAAGGAA---TCAAAA---AAATTGAAAAATTGGATTTATGTT  
AACGT-----ATCACACCTACCAAGAAAAAG-----TATTTTGTTCGGTTCGACCTGTAGTC  
ACATATGAAATAGCCGATGGGATAAATTTAGCAACACTTTTCCCTCAGGATCTCTTGCA  
GGAAAAGGATAACGTCCAACCTTAGAGTTGTCAATTATATCCTTTATGGAAATGGCAAGT  
CAATTTCGAGGAATTTACCACACAAGT--CAATTAGTTCGGACTTGCTTAGTATTGAATTG  
GGACCACGAACAAAACGGTTCAGAGAA-----GAGGTTTCATGCTTCTTTGTTCAA  
GTAAGGGCAAATGATCTGATTCGCGATTTTCATAAGAATTGACTTAGTCAAGTCCACTAT  
TTCGTATACCGAAAAAGGTATGATAGGGCAAGTTCAGGATTGATCCCGAT-----TTA  
GATCGCACCAATACAAATCCTTTTTATTCCAAGGTGAAGATTCAATCA-----CTTA  
GCCAACATCGAGGAACTGTTGGT-----ACGTTGTTGAATCGAACTAAG-----GAAT  
GCCGATCTTTGCTAATTTGTATCATCAATGTTCTCGAATTGGT-----CCATTCAATAG  
TTCGAAATATAAC-----AATGTGACAAAAGAATCAGATCCCATAATACCAATT--GATTT  
ATTGGGTCCCTTAGGAACGATTGTACCT--AAAATATCGAATTTTTATTATCT--TACCAT  
TTAATAACT-----CATAATCAGATCTTGTTAAAG---AAATATTTGCTACTTGAC-----AA  
TTTCAAAGAGACTTTTCAAGTACTTCAAGTACTTAAATATTTTTTAATAGATGAAAATGG  
GAGG-----ATTTATAATCCCGATCCATGCAGTAACATCATTTTGAACCCCTTCCATTTGGA  
TTGGTGTCTTCTCCATCACGATTATTGGGAAGAGGCATCAACAATAATTAGC---CTTGGA  
CAATTTATTTGTGAAAATGTATGTCTATTTAAATACGAACCA-----CACATAAAAAAATCT

GGGCAAATTTTAATTGTTAAT---GTTGACTCTTTAGTTATAACGATCAGCTAAGCCTTATTT  
GGCCACTCCAGGAGCAACTGTTTCATGGTCATTATGGGGAAATCCTTTACGAAGGAGAT  
ACATTAGTTACATTTATATATGAAAAATCGAGATCTGGTGACATAACGCAAGGTCTTCCA  
AAAGTGGAACAAATCTTAGAAGTGCCTTCGATTGATTCAATATCGATGAACCTCGAAA  
GGAGAGTTGAAGGTTGGAACGAACGTATACCAAGAATTCTTGGGATCCCCTGGGGGTT  
CTTAATTGGAGCTGAGCTAACCATAGCTCAAAGTCGTATCTCTTTGGTTAATAAGATCCA  
AAAGGTTTATCGATCCCAGGGGGTACAGATCCATAATAGACATATAGAGATTATTGTACG  
TCAAGTAACATCAAAGTATTGGTTTCAGAA-----GATGGAATGTCTAATGTTTTTCA  
CCTGGAGAATTAATCGGATTGTTGCGAGCGGAACGCGCAGGGCGCGCTTTGAATGAAT  
CGATCTGTTATCGGGCAATCTTATTGGGAATAACAAGAGCATCTCTGAATACTCAAAGT  
TTCATATCCGAAGCAAGTTTTCAAGAACTGCTCGAGTTTTAGCAAAAAGCTGCTTTACG  
AGGTCGTATTGATTGGTTGAAAGGCCTGAAAGAGAACGTTGTTCTAGGGGGGATTATA  
CCTGTTGGTACTGGATTCCAAAAATTTGTGCATCGTTCAAGG-----CAAGACAAGAACA  
TTTAT-----TTGGAAATCAAAGAAAAAATCTATTTCGAGTTGGAAACG-----AAAGATATT  
TTGTTACACCATAGAGAATTATTTTGTCTTACGTGACAAACAATTTCCATGAAACATCA  
GAAAAATCATTATGCGATTTAATGATTCC-----ATGACAAGAAGATATTGGAA  
CATCAATTTGGAAGAGATGATGGAAGCAGGAGTTCATTTTGGTCATGGTACTAAGAAAT  
GGAATCCTAGAATGGCCCCTTACATCTCGGCAAAGCGTAAAGGTATTCATATTACAAAT  
CTCGCTAGAACCGCTCGGTTTTTATCAGAAGCCTGTGATTTAGTTTTTGTATGCAGCAAG  
TAGGGGAAAAAGCTTCTTAATCGTTGGTACCAAAAATAAAGCAGCGGATTTAGTAGCA  
TCAGCTGCAATAAGGGCTCGATGTCATTATGTTAATAAAAAATGGCTCGGTGGTATGTTA  
ACGAATTGGTCTACTACGGAACGAGACTTTCTAAGTTCAGGGATTTAAGAGCAGAAG  
AAAAGATGGGGAAACTCAACCGTCTCCCTAAAAGAGATGCAGCAATGTTGAAGAGAA  
AATTATACCTTACAAACATATCTCGGTGGGATCAAATATATGACGGGGTTGCCTGATAT  
TGTGATCATCGTTGATCAGCAAGAAGAATATACGGCTCTTCGAGAATGTGCTATTTTGG  
GGATTCCGACGATTTGTTAATCGATACAAATTGTGACCCAGATCTCGCAGATATTTCGA  
TTCCAGCCAACGATGACGCTATAGCTTCAATTTCGATTGATTCTTAACAAATTAGTATCCG  
CAATTTGTGAGGGTCGTTCTAGC---TATATAAGAAATCGTATGGGACAAAAAATAAATCC  
ACTTGGTTTCAGACTTGGTACAACCCAAAGTCATCATTCTTTTGGTTTCGCACAACCAA  
AAAATTATTCCGCGGGTCTACAGGAAGATGAAAAAATACGGAATTGTATCAAGAACTAT  
GTACAAAAGAATAGGAGAATATCCTCAGGT--TTCGAAGGAATTGCACGTATAGGAATT  
CAAAAAAATCGATTTGATCCAGGTCATAATCCATATTGGATTCCCAAATTTATTAATC  
GAGGGG-----CAAACACGA-----GGAATCGAAGAATTGCAGATAAATGTACAAAAGAG  
TTTTATTCTGTAAACCGAAGACTCAACATTGCTATCACAAAGAGTTGAAAAACCTTATGG  
ACAACCTAATATTCTTTCAGAATATATAGCTTTACAATTAAAAAATAGAGTTTCGTTTCG  
AAAAGCAATGAAAAAAGCTATTGAATTAAGTGAACAAACGGATACAAAAGGAATTCA  
AGTGCAAATTGCAGGCCGTATCGACGGAAAAGAAATTGCACGTGTGCAATGGATCAGA  
GAGGGTAGAGTTCCCTACAAACAATTCGCGCTAAAATTGATCATTGTTCTTATACAATT  
CGAACTATCTATGGAGTATTAGGCATAAAAATTTGGATATTTGTAGACGACGAAATGTCT  
CGTTACCGAGGACCTCGTTTTCAAAAAAATACGCCGTCTGGGAGCTTTACCAGGACTAA  
CTAGTAAAAGACCTAGATCCGGAAGTGATCTTAAAAACCAATTGCGTTCTGGTAAA---A  
GATCGCAATATCGTATTCGTCTAGAAGAAAAACAGAAATTGCGTTTTTCATTATGGTCTG  
ACAGAGCGACAATTAAGATATGTACATATCGCTGGAAAAGCCAAAGGGTCAACAG  
GTCAGGTTTTACTACAACACTTGAATGCGTTTTGGATAACATCCTTTTTTCGATTGGGTA

TGGCTGCGACCATTCTGGAGCCAGGCAATTAGTTAACCATAGACATATTTTAGTTAATG  
GTCGTATAGTGGATATACCAAGTTATCGTTGCAAACCCCGAGATATTACTACTACGAAGG  
ATAACCAAAAATCAAAGGTCTAATTCAAAATTCTATTGCTTCAGCTGCCACGAA-----  
TTGCCAAAACATTTGACTATTGACTCA-----TTCCAATATAAAGGAGTAGTAAATCAAAT  
AATAGATAGTAAATGGATCGGTTTGAAAATAAACGAGTTGTTAGTCGTAGAATATTATTC  
TCGTCAGACTATGTCACGTCGAGGTACTGCAGAAGAAAAAACTGCAAAAATCCGATCCA  
ATTTATCGTAATCGATTAGTTAACATGTTGGTTAACCGTATTATGAAACACGGAAAAAAA  
TCATTGGCTTATCAAATTATCTATCGAGCCGTGAAAAAGATTCAACAAAAGACAGAAAC  
AAATCCACTATCTGTTTTACGTCAAGCAATACGTGGAGTAACTCCCGATATAGCAGTAA  
AAGCAAGACGTGTAGGCGGATCGACTCATCAAGTTCCTATTGAAATAGGATCTACACA  
AGGAAAAGCACTTGCCATTCGTTGGTTATTAGGAGCATCCCGAAAGCGTCCGGGTGCGA  
AATATGGCTTTCAAATTAAGTTCGAATTAGTAGATGCTGCCAAAGGAAGTGGCGATGC  
CATACGCAAAAAGGAAGAGACTCATAGAATGGCAGAGGCAAATAGAGCTTTTGCACAT  
TTTCGTATGAGTAGAGACACTATTTCCGATCTAATAACTTCGATAAGAAATGCTGATATG  
GATAAAAAAAGAACGGTTCGAATAGCATCTACAAATATCACCGAAAACATTGTTAAAAT  
ACTTCTACGAGAAGGTTTTATTGAAAACGTTTCGGAAACATCAGGAAGGTAACAAATAT  
TTCTTGGTTTCAACTCTGCGACAT-----AGAAAGAATGGAAAAAAAATATATAGAACT---  
-----AGAACCGTTTTAAAGCGTATCAGCCGCCCGGATTACGAATTTATTCCAACATATCAA  
CGAATTCCTAAGATTTTAGGTGGAATGGGAATTGTAATTCCTTCTACTTCTCGAGGTATA  
ATGACAGATCGAGAAGCTCGACTAGAAAGAATTGGAGGAGAAATGTTGTTTTGTATAT  
GGATGACAAAAGCTATACCAAGAATTGGTTCACGTAGGAATGGGCGTATTAGTTCACGT  
AAGAATGGACGTAGAATACCAAAAGGAGTTATTCATGTTCAAGCAAGTTTTAACAATAC  
TATTATAACTGTTACAGATGTACGAGGTCGGGTGGTTTCTTGGGCTTCTGCTGGTACTTC  
TGGATTTAAAGGCACAAGAAGAGGAACACCCTATGCTGCTCAAGCCGCAGCGGTAAAT  
GCTATTCGTACAGTAGTCGATCAGGGTATGCAACGAGCAGAAGTTATGATAAAGGGTCC  
CGGTCTGGGAAGAGATGCAGCATTACGAGCCATTCGTAGAAGTGGTATACTATTAAGTT  
TTGTACGTGATGTAACACCTATGCCACATAATGGATGTGACCTCCTAAAAAAGACGT  
GTGATGCCAACTATTAACAACCTTATTAGAAACACAAGACAGCCAATACGAAATGTTAC  
GAAATCTCCCGCTCTTAGAGGGTGTCTCAGCGTCGAGGAACATGTACTAGGGTGTATA  
CTATCACCCCAAAAACCAAACCTCTGCCTTACGTAAAGTTGCCAGAGTACGATTAAC  
CTCTGGATTTGAAATCACTGCTTATATACCTGGTATTGGCCATAATTTACAAGAACATTC  
TGTAATATTAGTAAGAGGAGGAAGGGTTAAGGATTTACCCGGTGTGAGATATCACATTG  
TTCGAGGAACCCTAGATGCTGTCGGAGTAAAGGATCGTCAACAAGGGCGTTCTAAATA  
TGGGGTCAAAAAGCCAAAATGGCAAAAAAAGTTTGATTAGAGGGGAGAACAAAC  
GGCAGAAATTGGAACAGAAATATCATTTGATTCGTTCGATCCTCAAAAAAATAAG  
C-----AAAGTTTCATCGTTGAGTGAAAATGGGAAATTCATGGAAAATTGCAATCCCC  
ACCACGTAATAGTGCACCTATACGTCTTCATCGACGCTGTTTTTTGACTGGAAGACCTA  
GAGCTAACTATCGAGACTTTGGGCTATCCAGACACGTACTTCGAGAAATGGTTCATGCA  
TGTGTTTACCAGGTGCAACAAGATCAAGTTGGATGGTCAAAAATTCATTCATTTCAAT  
TATCCACAAGAAGAAAAGACGAAAACAAGAACAAGGGTTCCGTTGAATTTCAAGT  
ATTCAGTTTTACCAATAAGATACGGAGACTTACTTCCATTTGCAATTGCACAAAAAAG  
ATTTTTATCGCAAAGGGTCTACGAAAATTCTGGGAAAACGACAACGGTTGCTAGC  
TTATTTGTCAAAGAAAATAGAGTACGTTATAAGAAATTAATTGGTTCAGTTGGATATTCG  
AGAGCCAAAACCTCGT-----ATGGTAAAACCTTCGTTTTGAAACGATGTGGTAGAAAGCAA

CGTGCTATCTATCGAATCGTTGCAATTGATGTTTCGATCCCGAAGAGAAGGAAGAGATCT  
TCGAAAAGTAGGTTTTTACGATCCGATAAAAAATCAAACTTTTTTAAATGTTCCCGCTAT  
TTTATATTTTCCTTGAAAAGGGCGCTCAACCTACAGGAACGGTTTATGATATTTTAAAGA  
AGGCAGAATTTTTTAAAGAAGGAACCTCGAAT-----ATGGATAAATCCAAGCA  
ACTTTTTCGTAAATACAAGCGATCTTTTCGTAGGCGTTTGCCCCAATTGGATCGGGGG  
ATCGAATCGATTATAGAAACATGAGTTTAATTAGTCGATTTATTAGTGAACAAGGAAAA  
ATATTATCTAGACGAGTGAACAGATTAACCTTGAAACAACAACGATTAATTACTATTGCT  
ATAAAACAAGCTCGTATTTTATCTTTGTTACCTTTTCTTAATAATGAGAAA-----CAATTT  
GAGAGAGCCGAGTCGATCCCAAGAACTACTGGTCCTAGAACCAGAAATAAAGTGACA  
CGTTCACTAAAAAAAATCCTTTTGTAGCTAATCATTATCGGGAAAAATTGAAAACT  
CAACATGAGGGAGGAGAAAGAAATAATAGTAACTTGGTCTCGGGCATCTACCATTATAC  
CCACAATGATTGGCCATACAATCGCTATTCATAATGGAAAGGAACATTTACCTATTTATAT  
AACAGATCGTATGGTAGGTCACAAATTGGGAGAATTCGCCCTACTCTGACTTTCGCGA  
GACATGCAAGAAACGATAATAAATCTCGTCGTATGATTTTGAAATCTTTTCTACTAGGTA  
ATCTATTATCCTTATGCATGAAGATAATAAATTCGGTCGTTGTGGTCGGACTCTATTATGG  
ATTTCTGACCACATTTCTCCATAGGGCCCTTTATCTCTTCTTCTCCGAGCTCGGGTTAT  
GGAAGAAGGA-----ACCGAGAAGGAGGTATCAGCAACAACCTGGTTTTATTACGGGAC  
AGCTCATGATGTTTCATATCGATCTATTATGCGCCTCTGCATCTAGCATTGGGTAGACCTCA  
TACAATAACTGTCCTAGTTCTACCGTATCTTTTGTTTCATTTCTTCTGGAACAATCACAA  
AACTTTTTGGATTATGGATCTACTACCAGAAATCAATGCGTAATCTCAGCATTCAATG  
TGTATTCCTGAATAATCTCATTTTTCAATTATTCAACCATTTCATTTTACCAAGTTCAACG  
TTAGCCAGATTAGTCAACATTTATATGTTTCGATGCAACAACAAGATGTTATTTGTAACA  
AGTAGTTTTGTTGGTTGGTTAATTGGTACATTTTATTCATGAAATGGGTTGGATTGGTA  
TTATTCTGGATACGGCAAATCATTCTATTCGATCT-----ATAAGTACCTTGTGTCA  
GAATTGAGAAATTCTATGGCTCGAATTTTTAGTATTCTTATTATCACCTGTGTCTACT  
ATTTAGGCAGAATGCCGTCGCCTATTGTCACTAAGAAACTGAAAGAAACCGAAGAAGA  
CAAACCTTTTGTTACTTTTTCTTTTGATTATAAAAGATGGAATCGTCCATCGCGATATATA  
AAAAATAATCGATTTGAAAATGCTATACGAAATGAAATGTCACAATATTTTTTTTATACA  
TGCCCAAGTGATGGAAAACAAATCATATCTTTTACATATCCAAGTATTATCGACTTTT  
TATGAAATGATAGACAAAAAATGTCTTTGCATAGAACAGAAAAATTATCTCACGAAG  
ACCAG-----TATTGGGTTTATACCAATGAACAAAAAAGTACAACCTTGAACAATGAGTT  
GATAAATCGAACAAAAGCTCTAGAAAAAGAAAAGATTGCTCTAGATGTACTCGAAAAA  
AGAAGCAGATTATGCAATGATGAAAATGAACAAGAATACTTGCCCAAACGTATGACC  
CCTTTTTGAATGGACCATGTCGTGGAACAATAAAAAATACTATTCAAATATAGAAATCT  
ATTGGATAAATAAGATTTATGGACTACTTTCTAGAAAATTGAAAGATCAAGATCTAAATG  
ATCAATCTAATGGAATAGAAGAAATCAGTAAAAAGGTTTCTCGATGGTCGTACAAATTG  
AGCGATTTGGAGGAAGAGGAGGAAGAAGAAATTCGTTCAAGAAAAGCCAAACGCGT  
AGTAATTTATACTGATGCTTTGATACGTTACTCGCAACAATCTGATTATCGTCGGGATATA  
ATAAAAGGCTCCATGCGTGCTCAAAGACGTAAAACAGTTATTTGGGAAATGTTTCAAG  
CAAATGTGCATTCCCACTTTTCTTAGATCGAATAGACAAAACATTTTTTTTTTCTTCTT  
TTGAT--ATCTATGAAATGATGAATCGTATTTTTAGGGT--GAGGAAAAGGAACGGATA  
ACAATATCAGAACTTGGGATAGCATTATATTTGCTCAAACAATAAGAGGTTTAATGTTA  
GTAACCAATCTTTTCTTAGAAAATACATTGTAATTCCTTCATTGATAATAGCTAAAAATA  
TTGGCCGTATGTTATTATTCCAATTCGCCGAATGGTATGAAGATTTGAAAGATTGGAATA

GAGAAATGCATGTTAAATGCACTTATAATGGTGTTCATTATCAGAAACAGAATTTCCC  
AAAGATTGGTTAACAGACGGTATTCAGATAAAGATTCTATTTCTTTCTGCCTTCAACCT  
TGGCGAAGATCTAAAAAAGGAAAAAAGATAATTTTTGTTTTTTAACAGTTTGGGGAA  
TGGAAGCGGAACTGCCTTTTGGAAGTCCACGAAAAAGACCTTCCTTTTTTGAACCTAT  
TTATAAAGAACTCGAAAAAAAATTAGACAAGTAAAA---AAAAAATTTTTCAACTTCT  
AAAAGTTTCA-----AAAGAAAAACAAAATGGATCATCAAATAG  
TTCCA-----GTTATAAAACGAATAATGAAGGAAGTTGAAAAAGTAACTACAAAATAAA  
T---AATACAATTATTGGTGAATCGACCATTCAAATCCGATCTATGAATTGGACAAATTATT  
CACTCATAGAAAAAAAATGAAAGATCTTTCTGATCGAGCAATCACAATCAGGAATCA  
AATAGAAGAAATCACAAAAGACAAGAAAAA-----GGTAAAAGATCGGA  
ATCAGAGAAACATATTGAGCAGGTATTCAAAGAAAAAGTATCCGATTACTACGTAAAT  
CACATTATTTCTGAAATCTTTCATTGATAAAATCTATAGAGATATCTTCCTATGCATGATT  
AATATCCGAGAAAAAATCACAACCTTTCATGAACTTTTTTTCCACCGACTTATCTTCC  
TTGTCCCAAGCATATGTATTTTTTAAATTATCACAAACCCAATTACTTAAAAAGTATCAC  
TTGAAATCTCTACTTCAATATACCTATCCTTTTATTAAGGAGAAAATCAAGGATTTTTGTA  
CACGCGGAATATTTGATTCCAAATCAAGACATAAGAAAGTTGATAAGTCTGGAATAATT  
GAATGGAAAACTGGTTAAAGGGTCATTATCAATACAATTTATCTCAGACCAAATGGGT  
CCGATTAGTACCACAAAATGGCGAAATAGAATCAATCAACGTTGTACGATTCGAAAA  
AAAATTAAATTGGATTCATATAAAAAAGAAAAAACCAATTAATTCATTACGTGAAAGA  
AGAAAAATTGAAAAACACTACAGATATGATCTTTTATCACATGAATATATGAATGGATA  
TATTATTGATCTAGATAGAAAATTTTTGACTGTAGAATTCTCGGTTTTTGTCTTAGATTT  
TTTGATTGGATGGGAATGAATCAAGAAAGTGTATCGTTGGTTCTTCCAGAATTTGT  
GCTACTTTTTGATACATATAAGATTAAACCATGGATTATACCAATCAAATTGCTTCTTTTA  
AATCCAAGAAAAGCAAGGAAGCAGAACTGGATTTCTTCCTTAAAAAATATTTCTTTTT  
TCAATTAAGATGGGATGACTCCTTGAATCAAAGAATGATCAATAATATCAAGGTCTATTG  
CCTCTTACTTAGACTGATAAATCCAAAGGAAATTGCTATATCCTCGATTCAAAGAGGAG  
AGATGCATCTGGATGTAATGCTGATTAGAAAGATCTAGCTCTTCCACAATTAATAAAA  
AAAGGAATATTGATTATCGAACCAATTCGTCTATCTATAAAAAGGGATGGAAAATTTCTT  
CTCTATCAAACAATAAGTATCTCATTGGGCGAGAAGAATAAGTACAATTATTATGATTTCT  
CTGTTCTGAACATATGCTATCTCCTAGACGTCGTAGAGAATTGAGAATTTAATTTGT  
TTCAGATTTCTTTGGCCCAATTACCGATTAGAAGATTTAGCTTGTATGAATCGCTATTGG  
TTTGATACCAATAATGGCAGTCGTTTCAATATGTTAAGGATACATATGTATCCAATGAAA  
GGACATCAATTCAAATCCTGGATCTTCGAATTGAGAGAGATATTGAGAGAGATCAAGAA  
TTCTCACTATTTCTTAGATTCATGGATCAAATTCGATTAGTGGGATCTTCACTCACATT  
TTTTTCCACCAAGAACGTTTTATGAACTCTTTGACCCCGAATTTGGAGTATCCTACTT  
TCA---CGTGATTCA-----CAGGGTTCAACAAGCAATCGATATTTACG-----ATCAAAGG  
TGTAGTACTGCTTGTAGTAGCG---GTCCTTATATCT-----CGTATTAACAATCGAAAGA  
TGGTCGAAAGAAAAAATCTCTATTTGATGGGCCTTCTTCCT-----ATACCTATGAA  
TTCCATTGGACCCAGAAATGAGACATTGGAAGAATCTTTT---TGGTCTTCCAATATCAAT  
AGGTTGATTGTTTCG---CTCCTGTATCTTCCAAAAGGGAAAAAATATTTCTGAGAGTTGTT  
TCATGGATCCGCAAGAGATTACTTGGGTTCTCCAATAAAT-----AAAAAGTGTATC  
ATG-----CGGAGTTCGCGGTGGTGGAGGAACCAGATCGGAAAAAAGAGG-----GAT  
TTTTGTTGTAAGATATCT-----AATGAAACCGTAGCTGGAATTGAGATCTCATTCAAAG  
AGAAAGATAGCAA---TATCTGGAGTTTATTTTTTTATCCTATATG-----GATGATCCGATC

CGCAAGGACCATGATTGGGAATTGTTTGATCGTCTTTCTCCGAGGAAGAAGCGAAACA  
TAATCAACTTG-----AATTCGAGACAGCTATTCGAAATCTTAGGGAAAGACTTGATTTGT  
TATCTCATGTCTGCTTTTCGTGAAAAAAGACCAATTGAAGGGAAGGGT---TTCTTCAA  
CAACAAGGA---GCTGAGGCAACTATTCAATCAAATGATATTGAGCATGTTCCCAT-----C  
TCTTCTCGAGAAACAAGTGGGGTATTCTTTGCAAATTGTGCTCAATTCATATGTGG  
CAATTCGCCAAGATCTCTTCATT-----AGTTGGGGAAAG---AATCAGCACGAATCGGA  
TTTTTTGAGGAAC---GTATCAAGAGAGAATTTGATTTGGTTAGACAATGTGTGGTTGGG  
AAACAAGGATCGG-----TTTTTTAGC-----AAGGTACGGAATGTATTGTCAAATATTCAA  
TATGATTCT-----ACAAGA-----TCTATTTTCGTTCAAGTAACGGATTCTAGCCAATTGA  
AAGGATCTTCT---GATCAGTTCATAGATCATTTCGATTCCATTAGA-----AATGAGGA  
TTCAGAA-----TATCACACATTGATCGATCAAACAGAGATTCA  
GCAACTAAAAGAAAGATCGATTCTT---TGGGAT-----CCTTCCTTTCTTCAAACGGAAGG  
AACAGAGATAGAATCAGAT-----CGATTCCCGAAA-----TGCCTTTTTGGATCTTCC-----T  
CAATGTCCCGGCTATTCACG---GAACGTGAGAAGCAGATGAATAATCATCTGCTTCCGG  
AAGAAATCGAAGAATTTCTT-----GGGAATCCTACAAGATCAATTCGTTCTTTTTTCTCTG  
ACAGATGG-----TCAGAACTTCAT---CTGGGTTCGAATCCTACTGAGAGGTCCACTAGAG  
ATCAG-----AAATTTTTGAAGAAAAACAAGATGTTTCT---TTTGTCCCTTCCAGGC  
GATCGGAA-----AATAAAGAAATGGTTGATACATTCAAGATAATTACGTATTTACAA  
AAA-----ACCGTCTCAATTCATCCTATTTTCATCAGATCCGGGATGTGATATGGTTCCG---A  
AGGATGAATCGGATATGATGGACAGTTCCAATAAGATTTTCATTCTTGAACAAAATCCA  
TTTTTTGGAT-----TTATTTTCATCTATTCCATGACCGGAACAAAGGGGGATACACGTTA-----  
CACCACGATTTT---GAATCA---GAAGAGAGATTTCAAGAAATGGCAGATCTATTCACTCT  
ATCAATAACCGAGCCG---GATCTGGTGTATCATAGGGGATTTTCTTTTCTATTGATTCTT  
ACAGGTTGGATCAAAAAAAA-----TTCTTGAATGAGGTATTCAACTCCAGAGATGAATC  
GAAAAAGAAATCTTTA-----TTGGTTCTACCTCCTCTTTTTTAT-----GAAGAGAATGAA  
TCTTTTTATCGAAGGATCAGAAAAAATCGGTCCGG---ATCCACTGCGGGAATGATTTG  
GAAGATTCAAACATAAAACAGCGGTATTTGCTAGCAACAACATAATGGAGGCAGTCA  
ATCAATATAGATTGATCCGAAATCTGATTCAAATCCAATATAGCACCTATGGG-----TACAT  
AAGAAATGTATCGAATCGATTCTTTTTAATG-----AATAGATCCGATCGCAACTTCGAA  
TATGGAATTCAA-----AGGGGTCAAATAGGAAATGATACTCTGAATCATATAACTATAA  
TGAAATATACGATCAACCAACATTTATCGAATTTGAAAAAG---AGTCAGAAGAAATGGT  
TTGATCCT-----CTTATTTCTCGAACCGAGAGATCCATGAATCGGGATCCTGATGCAT  
ATAGATATAAATGGTCCAATGGGACCAAGAATTTCCAGGAACATTTGGAAGATTTCTGTT  
TCTGAACAGAAGAAG-----CGTTTTCAAGTAGTGTTCGATCGATTACGTATTAATCAAT  
ATTCGATTGATTGGTCCGAGGCTATCGACAAACAAGATTTGTCTAAGTCACTTCGTTTC  
TTTTTTGTCCAAGTCA-----CTTCTCTTTTTGTCC-----AAGTC  
ACTTCCCTTTTTG---TCCAAGTCACTTCCCTTTTTCTTTGTGAGTATCGGGAATATCCCA  
TTCATAGGTCGGAG---ATCCACATCTAT---GAATTGAAAGGTCCGAATGATCAACTCCGC  
AATCAGTTGTTAGAATCAATAGGTGTTCAAATCGTTCATTTGAATAAATTGAAACCC-----  
-TTCTTATTGGAT-----GATCATGATACTTCC---CAAAGACCGAAATTCTTGATCAATGG  
AGGAACAATATCCCATTTTTGTTCAAAAAGATACCA---AAGTGG---ATGATTGACTCAT  
TCCAGACT-----AGAAATAATCGCAGGAAATCCTTTGATAACACGGATTCCAATTTTTCA  
ATGATATCCCATGATCGAGACAATTGGCTGAATCCCGTGAAACCATTTTCATAGAAGTTC  
ATTGATATTTCTTTTTATAAAGCAAATCGACTTCGATTCTTGAATGATCCACATCACTTC

TGGTTCTAT-----TGTAACAAAAGATTCCCTTTTTATGTG-----GAAAAGACCCGTATC  
CATAATTATGAT-----CTTACATAT--GGACAATTCCTCAATATCTTGTTTCATTTCGCAACAA  
A---ATATTTTCTTTGTGCGTCGGTAAA-----AAAAACATATTTTTTTGGAG---AGAGAGA  
CTATTTCCCAATCGAGTACAGGTATCTAACATATTCATACCTAACGATTTTCCACAAA  
GTGGTGACGAAACG---TATAACTTGTACAAA-----TCTTTCCATTTTCCAATTCGATCC  
GATCCATTCGTTTCGT-----AGAGCTATTTACTCGATCGCAGACATTTCCGCAACACCTCTA  
ACAGAGGAACAAATAGTCAATTTTGAAGAAGTATTGTCAGCCTCTTTCAGATATGAA  
TCTATCTGATTCAGAAGGGAAGAAGTTCATCAGTATCTCAGT-----TTCAATTCAAACA  
TGGGTTTGATTCACACTCCATGTTCTGAGAAATATTTACCA-----TCCGGAAAGAGGAAA  
AAA-----CGGAGTCTTTGTCTAAAG-----AAATGCGTTGAGAAACGGCAGA  
TGTATAGAACCTTTCAACGAGATAGTGCTTTTTCAAATCTCTCAAATGGAATCTGTTC  
AACATATATGCCATGGTTCCTTACTTCGACAGGGTGCAAATATCTAAATTTACCCCTTT  
TAGATACTTTTTTCAGACCCATTG-----CCGATACTAAGTAGCAGT--CCAAAATTTGTATC  
CATTTTTTCATGATATTATGCATGGATCAGATATATCATGGTCAATTCCTCAGAAG-----  
-----ATTCTTCCACAACGGACTCTG---ATAAGTGAGATTTTCGAGTAAGTGTTTACAG  
AAT-----CTTCTTCTGTCCGAAGAAATGATTCATCGAAATAATGAGTCAACCCGTTCCATTG  
ATATGGACACATCTGAGATCAACAAATGCTCGGGAGTTC---CTCTATTCAATCCTTTTCC  
TTCTTCTTGTGCTGGATAT--CTCGTTCGTATACATTTTCTCTTCGTTTCCCGA-----GCCT  
CTAGTGAGTTACAGACAGAGTTAGAAAAGATAAAATCTTTGATGATTCCATCATACATG  
ATTGAGTTGCGAAAACCTTCTGGATAGGTATCCTACATCTGAACTGAATTCCTTTCTGGTTA  
AAGAATCTCTTTCTAGTTGCTCTGGAACAATTAGGAGATTCTCTGGAAGAAATACGGGG  
TTCTGCTTCTGGTGGCAACATGCTATTGGGTGGTGGTCCC-----GCTTATGGG---G  
TCAAATCAATACGTTCTAAGAAGAAATATTTGAATAGCAAT-----CTCATCGATCTCATA  
--AGTATCATACCAAATCCCATCAATCGAATCACTTTTTTCGAGAAATACGAGACATCTAA  
GTCGTACAAGTAAAGGGATCTATTCATTGATAAGAAAAAGAAAAACGTGAACGGTGA  
TTGGATTGATGATAAAATAGAATCCTGGGTTCGCGAACAGTGATTTCGATTGATGACGAAG  
AAAGAGAATTCTTGTTTCAGTTCTCC-----ACCTTAACGACA-----GAAAAAAAGATTGA  
TCAAATTCATTGAGTCTGACT--CATAGTGATCATTTATCA-----AAGAATGACTC  
TGGTTATCAAATGATTGAACAACCGGGATCAATTTACTTACGATACTTAGTTGACATTCA  
T-----AAAAGTATCTAATGAGTTATGAGTTCAATAGATCCTGTTTAGCAGAAAGACGGA  
TATTCCTTGCTCATTATCAGACAATCACTTAT-----TCACAAACCTCGTGTGGGGCTAATA  
GTTTTCATTTCCCATCTCATGGA-----AAACCCTTTTCGCTCCGCTTAGCCCTATCCCCT  
TCT--AGGGGTATTTTAGTAATAGGTTCTATAGGAACTGGACGATCCTATTTGGTCAAATA  
CCTAGCGACAAACTCCTATGTTCCTTTCATTACGGTATTTCCGAACAAGTTCCTGGATG  
ACAAGCCTAAAGGTTATCTTATTGAT-----GATATCGAT--ATTGATGATAGTGACG  
ATATCGAT-----ATTGATGATCGTGACGATATCGATATTGATGATAGTGAC-----  
-----GATATTGATGATGACCTTGATACGGAGCTGCTAACTATGACGAATGTGCTA----  
----ACTATGTATATGACG-----CCGAAAATAGACCGATTTGATATCACCCCTTCAATTCGA  
ATTAGCAAAGCAATGTCTCCTTGCATAATATGGATTCCAAACATTCATGATCTGTATGT  
GAATGAGTTCGAATTAATCCCTCGGTCTATTAGAGAAGTATCTCTCC-----AGGGAT  
TGTGAAAGATGTTCC---ACTAGAAATATTTCTGTTATTGCTTCGACTCATATTTCCCAAA  
AAGTGGATCCCGCTCTAATAGCTCCGAATAAATTAATACATGCATTAAGATACGAAGG  
CTTCTTATTCCACAACAACGAAAGCACTTTTTTCATTTTCATATACTAGGGGATTTAC  
TTGAAAAGAAAATGTTCCATACT-----AACGGATTCGGGTCCCTAACCATGGGTTCCAA



TGCACGAGATCTTGTAGCACTTATCAATGAGGCCCTATCAATTAGTATTACACAGAAGA  
AATCAATTATAGAACTAATAACAATTAGATCAGCTCTTCATAGACAACTTGGGATTTGC  
GA-----TCCCAGGTAAGATCGGTTTCAGGATCATGGGATCCTTTTCTATCAGATAGGAA  
GGGCTGTTGCACAAAATGTACTTCTAAGTAATTGCCCATAGATCCTATATCTATCTATAT  
GAAGAAGAAA-----TCATGTAAGGAAGGGGATTCTTATTTGTACAAATGGTACTTCGAA  
CTTGGAACGAGCATGAAGAAATTAACGATACTTCTTTATCTTTTGAGTTGTTCTGCCGG  
ATCGGTCGCTCAAGATCTTTGGTCTTCACCC-----GGACCCGATGAAAAA---AATTGGAT  
CACTTCTTATGGATTCTGTTGAGAATGATTCT--GATCTAGTTCATGGCCTATTAGAAGTAG  
AAGGCGCTCTGGTAGGA-----TCCTCACGTACAGAAAAAGATTGCAGTCAGTTTGATAA  
TAAT-----CGAGTGACATTACTTCTTCGGTCCGAACCAAGGAAT--CAGTTAGATATGATG  
CAAAATGGATCTTGTCTATCGTTGATCAGAGATTTCTATATGAAAAA-----TACGAATCG  
GAGTTTGAAGAA--GGGAAGGA-----GCCGTGACCCGCAA-----CAGATAGAGG  
CGGAT-----TTATTCAATCAC-----ATAGTTTGGGCTCCT-----AGAATATGGCGCCTT--  
-----TGCGGCACTCTATTTGATTGTATCGAAAGGCCACTGAATTGGGATTTCCC--TATT  
GGGCCGGGTCATTTCCG-----GGCAAGCGGATCATTTATCATAAAGAGGATGAGCTTC  
AAGAGAATGATTCGGAGTTCTTGCAAAGGGGAACCATGCAGTACCAGACACGAGATA  
GATCTTCAAAGAACAAGGCTTTTTTCGAATAAGCCAATTCATTTGGGACCTGCGGAT  
CCATTCTTTTTCTATTCAA---GATCAGCCCTTTGTCTCTGTGTTTTACGTCGAGAATT  
CTTTGCAGATGAAGAGATGTCAAAGGGGCTTATTACTTCCCAAACAATCCTCCTACAT  
CTATATATAAACGCTGGTTCATC-----AAGAATACGCAAGAAAAGCACTTCGAATTGTTG  
ATTCATCGCCAGAGATGGCTTAGAACC-----AATAGTTCATTATCT-----AATGGATCTTT  
CCGTTCTAAT-----ACTCTATCCGAGAGTTATCAGTATTTATCAAATCTGTTCCCTATCTAAC  
---GGAACGCTATTGGATCAAATGACAAAGACATTGTTGAGAAAGAGATGGCTTTTCCCG  
GATGAAATGAAACATTTGATT-----CATGTAACAGGAGAAAGATTTCCCATTCCTATGCCT  
AGATCTCGT---ATAAATGGAAATTTTATTGATAAGACCTCTTCCATTGTAGCCAATATCTT  
ATTACGAATAATCCGACAACCTTCAGGAGAAAAAAGGCATTTACCTATTACAGAGATG  
GTGCGATTATGTTGGCTCAATCCGAAGGAAATTATGCGGAAGCTTTACAGAATTATTATG  
AAGCTACGCGACCAGAAATTGATCCCTATGATCGAAGTTATATACTCTATAACATAGGCC  
TTATACACACAAGCAATGGAGAACATACAAAAGCTTTGGAATATTATTTCCGTGCACTA  
GAACGAAACCCATTCTTACCACAAGCTTTTAATAATATGGCCGTGATCTGTCAATTAC---C  
GGGGAGAGCAAGCCATTTTACAGGGTGATTCTGAAATTGCGGAGGCTTGGTCCGATCA  
AGCTGCTGAGTATTGGAAACAAGCTATAGCGCTTACTCCAGGTAATTATATTGAAGCAC  
ATAATTGGTTGAAGATCACGAAGCGCTTCGAATTCGAAATGAATTGGCGATCAGAACAT  
ATATGGATAGAACTTATAACGGGGTCACGAAAAACAAGTAATTTTTGCTGGGCCTGTAT  
CCTTTTTTTAGGTTCACTAGGATTCTTACTGGTTGGAACCTCCAGTTATCTTGGTAGGAA  
TCTGATATCCGATTTCAATCTCAGCAAATTGTTTTTTTTCCACAAGGGATCGTGATGTC  
TTTTTACGGGATTGCGGGTCTATTCAATTAGCTCCTATTTGTGGTCCACAATTTGTGGAA  
TGTAGGTAGTGGTTATGACCGATTTCGATAGAAAAGAAGGAATAGTGTGCATTTTCCGTT  
GGGGATTTCTGGAATAAATCGTCGCATCTTCCTTCGCTTTCTTATGAGAGATATCCAAT  
CAATCAGAATTGAGGTTAAAGAGGGTCTTTCTCCTCGTCGTGTCCTTTATATGGAAATC  
AGGGGCCAAGGGGCCATTCCCTTGACTCGTACTGATGAGAAT--TTGACTCCACGAGAA  
ATTGAACAAAAAGCTGCCGAATTGGCCTATTTCTTGCGCGTACCGATTGAAGTATTT

>Phoenix

ATGGAAAAATGGTGGTTCAATTCGATGTTGTCTCTAAATAAATCAATGGATAGTCTTGAT

GCTATTGGGCATACCAGTGGAAGTGAAGAACCCATTCTAAATGGTACGGAGAAAAACA  
TTCCT--TTCAGAAATGTTGATTATTTATTTGATATCAGGGATATTTGGAGTTTGATCTCTG  
ATGACACTTTTTTAGTTAGGGATAGTAATGGTGACAGTTTTTCCGTATGTTTTGATATTG  
AAAATCAGATTTTTGAGATTGACAATGAT-----AGTTCTTTTCTGAGTGAAGTAGAAAGT  
TTTTTTTCTAGT-----TATTAAATAGTGGGTCTAAGAGAAACAATCACTACTATTA  
TCATTACATATATGATACTCAATCTAGTTGGAATAATCACATTAATAGTTGCATTGATAATT  
ATCTTCGTTTTGAAGTC-----AGTATTAATAGTTCCATTTCCGGGCGGTACCGACAATTACA  
GTGACAGTTACATTTATAGTTTCATTTGTAAGTGGGAGTTCTATAAGAAGTAGTA  
AAAATGGCAGTGATTTCAATATAAGAAGAAGATCT--GATTTCCGGTAGAAATAAAAAAT  
ACAGACATTTATGGGTTCAATGCGAAAATTGTTATGGATTAATTATAAAAAATTTTTTA  
GGTCAAAAATGAATATTTGTGAACAGTGTGGATATCATTTGAAAATGAGCAGTTCAGAT  
AGAATCGAACTTTCGATTGATCCGGGGACTTGGGATCCTATGGATGAAGATATGGTCTC  
TATGGACCCCATTTGAATTTCAATCAGAGGGGGAACCCTATAGAGATCGTATCGATTCTTA  
TCAAAGAAAGATAGGTTTAACTGAAGCTGTTCAAACAGGCATAGGTCAACTAAATGGT  
ATTCCCATAGCAATTGGGGTTATGGATTTAAGTTCATGGGAGGTAGTATGGGATCCGTA  
GTAGGCGAGAAAATCACCCGTTTGATCGAGTATGCTACTAATCGATCTTTACCTGTCATT  
ATTGTGTGTGCTTCTGGAGGAGCGCGCATGCAAGAAGGAAGTTTGAGTTTGATGCAAA  
TGGCTAAAATATCTTCCGCTTCATATAATTATCAATCAAATAAAAAATTTATTCTATGTATCA  
ATCCTTACATCTCCTACAACCGGTGGAGTAACAGCCAGTTTTGGTATGTTGGGAGATGT  
CATTGTTGCTGAACCTAATGCCTACATTGCATTTGCGGGTAAAAGAGTAATTGAACAAA  
CATTGAAAAAGACAGTACCCGATGGTTCACAAGCGTCTGAGTATTTATTCCATAAAGGC  
TTATTTGACCCAATTGTACCACGTAATCCTTTAAAAGGTGTTCTGAGTGAGTTATTTAG  
CTCCACGGTTTTCTTTCCCTTGAATCAAATCAAATAATATGGTAACCCCTTCGAGCCGA  
CGAAATTAGTAATATTATCCGTGAACGTATTGAACAATATAATAGAGAAGTAAAGATTGT  
GAATACCGGTACCGTACTTCAAGTGGGCGATGGCATTGCTCGTATTCATGGTCTTGATG  
AAGTAATGGCAGGTGAATTAGTAGAATTTGAAGAGGGTACAATAGGAATTGCTCTGAAT  
TTGGAATCAAATAATGTTGGCGTTGTATTAATGGGTGATGGTTTGATGATACAAGAAGG  
AAGTTCTGTAAAAGCAACAGGAAGAATTGCTCAGATACCTGTGAGTGAGGCTTATTTG  
GGTCGTGTTATAAATGCTCTGGCTAAACCTATTGATGGGAGAGGTGAAATTTAGCTTC  
TGAATCTCGGTTAATTGAATCTCCTGCCCCAGGTATTATTTAGAGACGTTCTGTATATGA  
ACCTCTTCAAACGGGGCTTATTGCTATCGATTTCGATGATCCCTATAGGACGCGGTCAGC  
GAGAATTAATTATTGGGGACAGACAGACTGGAAAAACAGCAGTAGCTACAGATACGAT  
TCTTAACCAAAAAGGGCAAATGTGATATGTGTTTATGTAGCTATTGGTCAAATAAGCAT  
CTTCTGTGGCTCAGGTAGTACTACTTTTTCAGGAACGAGGGGCGATGGAATACACCAT  
TGTGGTAGCCGAAACGGCGGATTACCTGCTACATTACAATAACCTCGCTCCTTATACGG  
GAGCGGCTCTGGCTGAATATTTTATGTATCGTGAACGACATACTTTAATAATTTATGATGA  
TCTCTCCAAGCAGGCACAAGCTTATCGCCAATGTCTCTTCTATTAAGAAGACCCCTG  
GTCGTGAAGCTTATCCAGGAGATGTTTTTTATTTGCATTCGCGCCTTTTGGAAAGAGCC  
GCTAAATCAAATTCTCGTTTAGGTGAAGGGAGTATGACTGCTTTACCAATAGTTGAGAC  
TCAATCTGGAGACGTTTCAGCTTATATTCCTACTAATGTAATTTCCATTACAGATGGACA  
AATATTCTTATCCGCCGATCTATTCAATGCTGGAATCCGACCCGCTATTAATGTGGGTATT  
TCTGTTTCCAGAGTAGGATCCGCAGCTCAAATTAAGCCATGAAACAAGTAGCTGGCA  
AATCAAATAATGGAAGTAGCGCAATTCGCGGAGTTAGAAGCCTTTGCACAATTTGCTTCT  
GATCTCGATAAAGCTACTCAGAATCAATTGGCAAGAGGTCAACGATTACGTGAGTTGCT

TAAACAATCCCAATCAGACCCTCTCACGGTGGAAGAACAGATAGTTACTATTTATAACCG  
GAGCGAATGGATATCTTGATCCGTTAGAAATTGGACAGGTAAAGAAATTTCTCGTTCAG  
TTACGTACCTACTTAAAAAGAATAAACCTCAATTCCAAGAAATTATATCTTCTACCAAG  
ACATTCACCGAGCAAGCAGAAGCCCTTTTGAGGGAAGCTATTCAGGAACAGATCGAA  
CTGTTTTTACTTCAGGAACAAACAATGAGAATCAATCCTACCCCTTCTAGTCCTGTGGT  
TTCCACACTTGAAGAAAAAACCTAGGGCGTATCGCTCAAATTATTGGCCCAGTACTG  
GATGTCGTTTTTCCCCGGGCAAGATGCCTAATATTTATAACGCTTTGGTAGTTAAGAGT  
CGAGATACTGTCGGTCAGCAAATTAATGTGACTTGTGAGGTACAACAATTATTAGGAAA  
TAATCGAGTTAGAGCCGTAGCTATGAGTGCTACAGATGGGCTGATGAGAGGAATGGAA  
GTGATTGACACGGGAGCTCCTCTAAGTGTTCCAGTCGGCGGAGCTACTCTCGGACGAA  
TTTTCAACGTTCTTGGGGAACCTGTTGATAATTTAGGTCCTGTAGATACTCGTACAACAT  
CTCCTATTCATAGATCTGCGCCTGCCTTTATACAGTTAGATACGAAATTATCAATCTTTGA  
AACAGGGATTAAAGTGGTGGATCTTTTAGCTCCTTATCGCCGTGGAGGAAAAATCGGA  
CTATTTGGGGGAGCTGGAGTGGGTAAAACAGTACTCATCATGGAATTGATCAATAACAT  
TGCCAAAGCTCATGGAGGCGTATCCGTATTTGGCGGAGTAGGCCAACGTACTCGTGAA  
GGAATGATCTTTACATGGAAATGAAAGAATCCGGAGTGATTAATGAAAAAATATTGC  
GGAATCAAAGTAGCTCTAGTCTATGGTCAAATGAATGAACCGCCGGGAGCTCGTATG  
AGAGTTGGTTTAACTGCCCTAACCATGGCGGAATATTTCCGGGATGTTAATGAACAAGA  
CGTGCTTCTATTCATCGACAATATTTTTCGTTTTCGTCCAAGCAGGATCAGAAGTATCCGC  
CTTATTAGGGAGAATGCCTTCCGCAGTGGGTTATCAACCTACCCTTAGTACAGAAATGG  
GTTCTTTGCAAGAAAGAATTACCTCTACCAAAGAGGGATCTATAACTTCGATCCAAGCG  
GTTTATGTACCTGCGGACGATTTGACCGACCCTGCTCCTGCCACGACATTTGCACATTT  
AGATGCTACTACCGTACTATCAAGAGTATTAGCTGCTAAAGGTATTTATCCAGCAGTGGG  
TCCGTTAGATTCAACGTCAACTATGTTACAACCTCGAATCGTTGGTGAGGAACATTATG  
AAACTGCGCAAAGAGTTAAGCAAACCTTCACAACGTTACAAAGAACTTCAGGACATTAT  
AGCTATCCTTGGGTTGGACGAATTATCCGAAGAAGATCGTTTAACTGTAGCAAGAGCA  
CGAAAAATTGAGCGTTTCTTATCACAACCCTTCTTCGTGGCAGAAGTATTTACTGGTTC  
CCCAGGGAAATATGTTGGTCTTGCAGAAACAATTAGGGGATTTCAATTGATCCTTTCCG  
GAGAATTAGACGGTCTTCCCGAGCAGGCCTTTTATTTGGTGGGTAACATCGATGAAGCT  
ACCGCGAAAGCTATGAACTTAGAAGTGGAGAGCAAATTGAAGAAAATGACCTTAAATC  
TTTGTGTAAGTACTCCTAATCGAATTATTTGGGATTCAGAAGTGAAAGAAATCATTTTAT  
CTACTAATAGTGGCCAAATTGGCGTATTACCAAACCACGCCCTATTGCCACGGCTGTA  
GATATAGGTCTTTTGAAGATACGCCTCAACGACCAATGGTTAACGGTGGCTCTGATGGG  
TGGTTTTCGCTAGAATAGGTAATAATGATATCACCATTTTAGGAAATGATGCGGAGATGAG  
TACTGACATTGATCCGCAAGAAGCTCAGCAAGCTCTTGAATAGCTGAAGCTAACTTG  
AGTAGAGCTGAGGGTAAGAGACAAGCAATTGAAGCGAATCTAGCTCTCAGACGAGCT  
AGGACACGAGTAGAGGCTGTAAATGCTATTTCCATGAAAAATGTAACCGATTCTTTCCT  
TTCCTTGGGTCACTGGCCATCCGCCGGGAGTTTCGGGTTAATAACCGATATTTTAGCAA  
CAAATCCAATAAATCTAAGTGTAGTGCTTGGTGTATTAATTTTTTTTGGAAAGGGAGTGT  
TAAATGATTTATTAGATAATCGAAAACAGAGGATCTTGAGTACTATTCGAAATTCGGAA  
GAATTACGTAGAGGGGCCATTGAGCAGCTCGAAAGAGCCAGGACTCGCTTACGGAAA  
GTGGAAATAGAAGCAGATGAATATCGAATGAATGGATACTCTGAGATAGAACGAGAAA  
AAGAAAATTTGATTAATGCCACTTGTGACACTTTGGAACGATTAGAAAATTACAAAAAT  
GAAACCCTTCATTTTGAACAACAAAGAGCGATTAATCAGGTCCGACAACGAGTTTTTC

AACAAGCCTTACAAGGAGCTCTAGGCACTCTGAATAGTTGTTTGAATAGTGAGTTACAT  
TTCCGTACGATCCGTGCTAATATTGGCATTCTAGGGGCCGTGGGAGAAATAACAGATAT  
GAATCCACTGATTTCTGCCGCTTCCGTTATTGCTGCTGGATTGGCCGTAGGGCTTGCTTC  
TATTGGACCTGGAGTTGGTCAAGGTACTGCTGCAGGCCAAGCTGTAGAAGGTATTGCG  
AGACAACCAGAAGCAGAGGGTAAAATACGAGGTACTTTATTGCTTAGTCTAGCTTTTAT  
GGAAGCTTTAACAATTTATGGACTGGTCGTGGCGTTAGCGCTTTTGTGTTGCGAATCCTT  
TTGTTATGAATGTTATACCATGTTCAATTA AAAACACTCAAAGGGTTATACGATATATCGG  
GTGTAGAAGTAGGCCAACATTTCTATTGGCAAATAGGAGGTTTACAAATCCATGCCCAA  
GTACTTATCACTTCTTGGGTCGTAATTGCTATCTTATTAGGTTTCAGTCATCATAGCTGTTT  
GGAATCCACAAACCATTCCGACCGACGGTCAGAAATTTCTTCGAATATGTCCTTGAATTT  
ATTCGAGATTTGAGCAAAACTCAGATTGGAGAAGAATATGGTCCTTGGGTTCCCTTTAT  
TGGA ACTATGTTCTTATTTATTTTTGTTTCTAACTGGTCAGGTGCTCTTTTACCTTGGA  
AATCATACAATTACCTCATGGGGAGTTAGCTGCGCCTACGAATGATATAAATACTACTGT  
TGCTTTAGCTTTACCCACGTCAGCGGCATATTTTTATGCGGGTCTTACCAAAAAAGGATT  
GGGTTATTTCCGGGAAATACATTCAACCAACCCCAATACTTTTACCAATTAACATCCTAGA  
AGATTTCAAAAACCTTTATCTCTTAGTTTTCGACTTTTCCGGGAATATATTGGCTGATGA  
ATTAGTAGTTGTTGTTCTTGTCTTTAGTCCCTTCAGTAGTTCCTATACCTGTTATGCTT  
CTTGGATTATTTACAAGTGGTATTCAAGCTCTATTTTTGCAACGTTAGCCGCGGCTTATA  
TAGGTGAATCCATGGAGGGTCATCATATGATATTTGTGACTTTAGAACATATATTA ACTAA  
TATCTCTTTTTCGATCATTTC AATTGTGATTACGATTCATTTTCATGA ACTTATTAGTCTACG  
AAATCGTAGGATTACGTGATTCATCGGAAAAAGGGATGATAGCCACCTTTTTTCTCTATA  
ACAGGATTATTAGTTTCTCGTTGGATTTCCTCGGGACATTTTCCGTTAAGTAATTTATAC  
GAGTCATTAATCTTCCTTTCATGCAGTTTCTTTATTATTTCATATAATTTCCAAGAAATTGA  
ACCATAAAAATGATTTAAGCACAATAACTACCCCAAGTACTATTTTTACTCAAGGTTTCG  
CTACGTCGGGTCTTTCAACTGAAATGCATCAATCCGCAATATTAGTACCTGCTCTACAAT  
CTCAGTGGTTAATGATGCACGTAAGTATGATGTTATTGAGCTATGCAGCTCTTTTATGCG  
GATCGTTATTATCAATCGCTCTTCTAGTCAATTACATTTTCGAAACAACATCAATTTTTTTTG  
TAAAAGCAATGAGATTAATACTTGAATGAAAAAGAAGCGTTTTTAAAAACACTTCT  
TTTCTTTCAATTCGAAATTATTACAAATATCAATTGACTCAGCGTTTGGATTATTGGAGTT  
ATCGTATGATTAGTTTAGGGTTACCTTTTTAACCATAGGCATTCTTTGTGGAGCAGTAT  
GGGCTAATGAAGCATGGGGATCTTATTGGAGTTGGGACCCGAAGGAAACTTGGGCATT  
TATTACTTGGACCATATTCGCGATTTATTCACATACTAGAACAAATCAAAGTTTACAAGG  
TACGAATTCGGCACTTATAGCTTCTATAGGGTTTTTTATAATTTGGATATGCTATTTTGGG  
GTCAATCTATTAGGAATAGGTTTACATAGTTATGGTTCATTCACATTAACAGAAAAAAA  
AAAGCCCCGGGTC---TCCCTCCCATATATTTTCATCCATAATATTTTTGCCCTGGTGGGTCTC  
TCTCTCATTTAATAAATGTCTGGAACCTTGGGTTACTAATTGGTGGAATACCGGGAAATC  
CGAAACTTTTTTGAATGATATTCAAGAGAAAAATGTTCTAGAAAGATTCATAGAATTGG  
AAGAACTATTCTCTTGGATGAAATGATAAAGGAGTACCCGGAGACGCATATACAAAA  
ACTTCGTATAGGAATACACAAGGAAACGATACAATTGGTCAAAACACACAATGAATATC  
ATCTCCATATCATTTTGGATTCTCGACAAATATAATTTGTTTCGCTATTCTAAGTGGTTAT  
TTTATTCTGGGTAATGAAGAACTTGTCAATCTTAATTTCTTGGATTCAGGAATTCCTCTATA  
ACTTAAGTGACACAATAAAAGCTTTTTTGTATTCTTTTAGTTACTGATTTATGGATCGGAT  
TTCATTCGACCCATGGTTGGGAACTAATGATTGGTTCGGTCTACAACGATTTTGGATTG  
GTTCATAACGATCAAATTATATCTAGTCTTGTTCACATTTTCCAGTTATTCTAGATACAA

TTGTGAAATATTGGATCTTCTATTATTTAAATCGTGTATCTCCTTCACTTGTAGTGATTTAT  
CATTCAATGAATGAAATGCCATTGGTGTTCAAAAGTACCTTTTCGGAGTCCTGGAGA  
GGAAGATGCAGTTTGGGTTGACGTATAACAACCGACTTTATCGAGAAAGATTACTTTTTT  
TAGGCCAAGAAGTTGATAGCGAGATCTCGAATCAACTTGTTGGTCTCATGGTATATCTC  
AGTATAGAAGATGATACTAGGGATCTTTATTTATTTATAAACTCTCCCGCGGATGGGTA  
ATACCAGGAATAGCCATTTATGATACTATGCAATTTGTGCCACCCGATGTGCATACAATAT  
GCATGGGATTAGCCGCTTCAATGGGATCTTTCATTCTGGTCGGAGGAGAAATTACCAA  
CGTCTAGCATTCCCTCACGCTAGGGTTATGATTCACCAACCTGCTAGTTCTTTTTATGAA  
GCACAAGCAGGCGAATTTATCCTGGAAGCGGAAGAACTACTGAAACTTCGCGAAACC  
CTCACAAGGTTTATGTACAAAGAACGGGTAATCCTTTATGGGTTGTATCCGAAGACAT  
GGAAAGAGATGTTTTTATGTCAGCAACAGAAGCCCAAGTTCATGGCATTGTTGATCTTG  
TAGCGGTGCAAATGAAAGAACAAAAATTGATTCATGAAGGTTTAATTACTGAATCACTT  
CCTAACGGTATGTTCCGGGTCCGTTTAGATAATGAAGATCTAATTCATAGGTTATGCTTCA  
GGGAGGATCCGGCGCAGTTTTATACGGATACTACCAGGAGATAGAGTAAAAATTGAAG  
TAAGTCGTTATGATTCAACCAGAGGACGTATAATTTATAGACTTCGCAACAAAGATTTCG  
AATGATATGGAAGAATTACAAGGATATTTAGAAAAAGATAGATCTCGGCAACAACACTT  
TCTATATCCGCTTCTCTTTAAGGAGTATATTTACACATTTGTTTCATGATCGTGGTTTATTG  
GTTATGACAAT---TCTAGTTCAGTACTTGTGAAACGTTCAATTATTCTGAATGTATCAACA  
GAATTATTTGATTTATTCGGTTAATGATTCTAACCAAAATCGATTTGTTGGGTTTCATTTT  
TATTCTCAGATGATATTGGAAGGTTTTGCAGTCATTGTGGAAATTCATTCTTGCTGCGA  
TTAGTATCTTCCCTCATACCAAAATCTCAGAATTTACGATCTATTCAACATTTCCCT  
TTTTGGAGGACAAATTATCGCATTAAACTATGTGTCAGATATACTAATACCTTATCCCAT  
CCATCTGAAAATCTTGGTTCAAATCCTTCAATTCGGATCCAAGATGTTCTTCTTTACA  
TTTATTGCGATTCTTTCTTCACGAATATCATAATTGGAATAGTCTTATTACTAATTCTATTT  
TTCTTTTTTCAAAAAAAGAGTATTTCCGGTCCCATATAATTCTTATGTATCTGAATGCG  
AATTTGTATTAGTTTTTCTTCGTAAACAATCTTCTTATTTACGATTAACATCTTCTGGAGC  
TTTTCTTGAGCGAACACATTTCTATGAAAAATAGAACAT---ATAGTAGTGCGCCGTAAT  
CAGAAGACCCTATGGTCTTCAAGGATCCCTTCATGCATTATGTTTCGATATCAAGGAAA  
AGCAATTCGGTTTCAAAGGGGACTCATCTTCTGATGAAGAAATGGAAATGTTACCTTG  
TCAATTTTTGGCAATATTATTTTCACTTTTGGTCTCAACCGTACAGGATCCATATAAACC  
AATTATCAAAGTCTTCTTTCTATTTTCTAGGTTATCTTTCAAGTGTACTAATAAATCCTTC  
GGCGGTAAGGAATCAAATGCTAGAGAATTCATTTCTAATAGATACTGTTATT-----AAA  
AATTCGATACCAGAGTCCCAGTTACTCTTATTGGATCATTGTCTAAAGCTAAATTTT  
GTACCGTATTGGGGCATCCTATTAGTAAGCCGATCTGGACCGATTTATCAGATTGCGATA  
TTATTGATCGATTTGGTCGGATATGTAGAAATCTTCTCATTATCACAGTGGATCCTCAA  
AAAAACAGAGTTTGTATCGAATAAAGTATATACTTCGATTTTCGTGTGCTAGAACTTTG  
GCTCGTAAACATAAAAGTACGGTACGCGCTTTTTTGCAAAGATTAGGTTTCGGGATTATT  
AGAAGAATTTTTTATGAAAGAAGAACAAGTTGTTTCTTTGATCTTCCCAAAACGTATTT  
GGTATTTGGATATTATCCATATCAATGACCTGGTGAATTATTCAATGATAATTGATACGAC  
A---GAAGTACAA---GCTATCAATTCTTTTTCTACATTGGAA---TCCATAAAAGAAATCTAT  
GGACTCATATGGATGTTTGTATCCATTTTTACCCTTATATTTGGAATCATAATAGGGGTAC  
TAGTAATTGTGTGGTTAGAAAGAGAAATATCTGCAACAATACAACAACGTATTGGGCCT  
GAATATGCTGGTCCGTTGGGAATTCCTCAAGCTCTAGCAGATGGGACTAAATTACTTTTT  
AAGGAGGACCTACTCCATCTAGGGGGGATATTCGTTTATTTAGTGTCGGACCGTCTATA

GCGGTCATATCAATTCTACTAAGTTATTTAGTAATTCCTTTTGGGTACCGCCTTGTTTTAG  
GTGATCTCAGTATAGGTGTTTTTTTATGGATCGCCATTTCAAGTATTGCCCTATTGGGCT  
TCTTGTGTCAGGATATGGATCGAATAATAAATATTCTTTTCAGGTGGTCTACGAGCTGC  
TGCTCAATCTATTAGTTATGAAATACCATTAACCTATGTGTGTTATCAATATCTCTACTAT  
CTAATAGTTCAAGTACAGTTGATATAGTTGAAGCACAGTCAAAATATGGTTTTTGGGGG  
TGGAATCTGTGGCGTCAACCTATAGGGTTTATTGTTTTTCTAATTTCTTCTCTAGCCGAA  
TGTGAGAGATTGCCATTTGATTTACCGGAAGCAGAGGAGGAATTAGTAGCAGGTTATC  
AAACCGAATATTCAGGTATCAAATTTGGTTTATTTTATATTGCTTCTTACCTAAATCTATT  
ACTTTCTTCATTATTTGTAACAGTTCTTTACTTGGGTGGGTGGAATTTTTCTATTCCGTAC  
ATATCTATTCCCTGAACTTTTCGGAATAAATAAAATGGCCGGAGTTTTTGGGAATGACAATT  
GGTATCTTTATTACATTAGCTAAAGCTTATTTGTTTTCTGTTTATTCTATCACAACAAGAT  
GGACTTTGCCTAGGATAAGAATGGACCAACTATTAATCTTGGATGGAAATTTCTTTTAC  
CTATTTCTTTAGGTAATCTATTATTGACAACTTCTTCCCACTTGTTCACTAATGATCTG  
GCATGTACAGAATGAAACTTCATTCTCGATTCTACGAGAATTTTTATGAAAGCGTTTCA  
TTTGCTTCTTCCATGGAAGTTTCATTTTCCCAGAATGTATCCTAATTTTTGGCCTAATT  
CTTCTTCTGATGATCGATTCAACCTCTGATCAAAAAGATAGACCTTGGTTCTATTTTCATC  
TCTTCAACAAGTTTAGTAATAAGCATAACGGCCCTATTGTTCCGATGGAGAGAAGAACC  
TATAATTAGCTTTTTCGGGAAATTTCCAAACGAACAATTTCAACGAAATCTTTCAATTTCT  
TATTTTACTATGTTCAACTCTATGTATTCTCTATCCGTAGAGTACATTGAATGTACAGAA  
ATGGCTATAACAGAGTTTCTGTTATTTCGTATTAACAGCTACTCTAGGAGGAATGTTTTTA  
TGTGGTGCTAACGATTTAATAACTATCTTTGTAGCTCCAGAATGTTTCAGTTTATGTTCCCT  
ACCTATTATCTGGATATACCAAGAGAGATGTACGGTCTAATGAGGCTACTACGAAATATT  
TACTCATGGGTGGGGCAAGCTCTTCTATTCTGGTTCATGGTTTCTCTTGGCTATATGGTT  
TATCTGGGGGGGAGATCGAGCTTCAAGAAATAGTGAATGGTCTTATCAATACACAAATG  
TATAACTCCCCAGGAATTTCAATTGCGCTTATATCCATCACTGTAGGAATTGGGTTCAAG  
CTTTCCCCAGCCCCTTTTCATCAATGGACTCCTGACATATACGAAGGATCTCCCCTCC  
AGTCGTTGCTTTTTCTTTCTGTTACTTCGAAAGTAGCTGCTTCAGCTTCAGCCACGCGAA  
TTTTCGATATTCTTTTTTATTCTCATCAAACGAATGGCATCTTCTTCTGGAAATCCTAGC  
TATTTCTTAGCATGATATTGGGGAATCTCATTGCTATTACTCAAACAAGCATGAAACGTAT  
GCTTGCATATTCGTCCATCGGTCAAATCGGATATGTAATTATTGGAATAATTGTTGGAGA  
CTCAAATGATGGATATGCAAGCATGATAACTTATATGCTGTTCTATATCTCCATGAATCTA  
GGAATTTTGCTTGCATTGTATCATTGGTCTACGTACCGGAACTGATAACATTCGAGAT  
TATGCAGGATTATACACGAAAGATCCTTTTTTGGCTCTCTCTTCAGCCCTATGTCTCTTAT  
CCCTAGGGGGTCTTCTCCACTAGCAGGTTTTTTTCGGAAAACCTCCATCTATTCTGGTGT  
GGATGGCAGGCGGGCCTATATTTCTTGGTTTCAATAGGACTCCTTACGAGCGTTGTTTCT  
ATCTACTATTATCTAAAAATAATCAAGTTATTAATGACTGGACGAAACCAAGAAATAACC  
CCTTACGTGCGAAATTATAGAAGATCTCCTTTAAGATCAAACAATTCCATCGAATTGAGT  
ATGACTGTATGTGTGATAGCATCTACTATAACGGAATATCAATGAACCCAATTCTTGCA  
ATTGCTCAGGATAACCCTCTTTATGTTTTCTGCTTACGAATATGATATTTTCTGGGCATTTCT  
TGATAATATCAAGCGTTATTCCTATCTTGACATTTGTAATTTCCGGAGTTTTAGCACCGGT  
TAGTGAAGGACCGGAGAAGCTTTTCGAGTTATGAATCGGGTATAGAACCCATGGGGGAT  
GCTTGGTTACAATCCGAATCCGCTATTACATGTTTGCTCTAGTTTTTGTGTTTTTGTATG  
TTGAAACGGTCTTTCTTTATCCATGGGCAATGAGTTTCGATGTATTGGGTGTATCTGTAT  
TTATCGAAGCTTTTCATTTTCGTGCTTATCCCAATTGTTGGTTCAGTTTATGCATGGCGAA

AAGGAGCATTGGAATGGTCTACGAGTTATTTTCCTTGGTTAACAATACTTGTTGTTTTGC  
CGATATTCGCGGGTTCCTCAATTTTCTTTTTTCCTCATAGAGGAAATAAGATGTTTAGGT  
GGTATACTATTTGTATATGTTTATTAGAACTACTTCTAACAACCTATGCATTCTGTTATCAT  
TTCCAATTGGACGATCCATTAATTCAATTGGAGGAAGATTATAAATGGATAGATATTTTT  
GATTTTCACTGGAGACTGGGAATCGATGGACTTTCCATAGGACCCATTTTACTGACAGG  
ATTTATCACTACTTTAGCTACTTTAGCGGCTTGGCCAGTTACGCGAAATTCGCGATTGTT  
CTATTTCTGATGTTAGCAATGTACAGCGGTCAAATAGGATCATTTTCTTCTCGAGACCT  
TTTACTTTTTTTCATCATGTGGGAGTTAGAATTAATTCCTGTTTACTTACTTTTATCCATG  
TGGGGAGGAAAAAACGTCTCTACTCGGCTACAAAGTTTATTTTGTACACAGCAGGGG  
GTTCTATTTTTTCTCTTAATAGGAGTTCTAGGTATGGGTTTATATGGTTCCAATGAACCAAC  
ATTAGATTTTGAAAGATTAACATAATCAATCATATCCTGTGGCATTGGAATAATATTATAT  
TTTGGTTTTCTTATTGCTTATGCTGTCAAATCGCCGATTATACCCCTGCATACATGGTTAC  
CAAATACCCATGGAGAAGCACATTACAGTACATGTATGCTTCTAGCTGGAATCTTATTA  
AAATGGGGGCATATGGATTGATTCGGATCAATATGGAATTATTACCCACGCTCATTCTAT  
ATTTTCCCCCTGGTTGGTAATAGTTGGAACGATGCAAATAATCTATGCAGCTTTAATTC  
TCTCGGTCAACGCAATTTTAAAAAGAGAATAGCCTATTCCTCTGTATCTCACATGGGTTT  
TACAATTATAGGAATTGGTTCTATAACCGACATGGGACTCAATGGAGCCATTTTACAAAT  
ACTCTCTCATGGATTTATTGGTGCTGCACTTTTTTTCTTGGCGGGAACGAGTTGTGATAG  
AATACGTCTTGTATTCTCGACGAAATGGGAGGGATATCTATCCAATGCCAAAAATATT  
TACCATGTTTCTAGTATTTCTCGATGGCTTCTCTTGCATTGCCAGGAATGAGTGGTTTTGT  
TGCGGAATCAGTAGTATTTTTTGGGAATAATTAAGTCCAAAATATCTTTTAAATGCCAAA  
AATACTAATTACTTTTTGTAATGGCAATTGGAGTGATATTAACCTCTATTTATTATTATCTA  
TGTCACGTACAGATGTTCTATGGATACAAGCTATTCAATGTTCCACACTCTAATTTTTTGG  
ATTCTGGACCACGAGAATAATTTGTTTCAATTTGTATCTTTCTACCCGTAATAGGAATTG  
GTATTTATCCTGATTTCTGTTCTCTCGTTATCAGTTGACAGGGTACAACTATCCTATCTAA  
TTACTTTTATAGAATGATGTTTCGAGCATGACTTTTTTTGAGTGTCTATTTATTCTCTATCG  
GTATCTATGGATTGATCACAAGTCGAAAGATGGTTAGAGCACTTATGTGTCTTGAGCTTA  
TACTCAATTCGGTTAATATCAATCTCGTAACATTTTCTGATATATTTGATAATCGCCAATTA  
AAAGGCGACATTTTCTCAATCTTTGTTATAGCTGTTGCGGCGGCTGAAGCAGCTATTGG  
GCTGGCTATTGTTTCATCAATCCATCGTAACAGAAAATCAACTCGTATCAATCAATCGAA  
TTTGTGGAATAATATGGAACATACATATCAATATGCATGGATAATACCTTTTCTTCCACTT  
ACAGTTACTATGTCAATAGGATTTGGACTTATACTTATTCCGAAAGCAACAAAAATATT  
CGTCGTATATGGGTTTTTTCCTAGTATTTTTCTGTAAAGTATAGCTATGGGGTTTTTCGGCCA  
ATCTGTCTATTCAACAAATAAATGGAAGTTTTATTTATCAATATCTATGGTCTTGGACCAT  
AGATATTGATTTTTCTTAGAGTTTGGGTATTTGATCGATCCACTTACTTCTATTATGTCA  
ATACTAATTACTACTGTTGGAGTCATGATTCTTATTTATAGTGACAATTATATGTCTCACG  
ACCAAGGATATTTGAGATTTTTGCTTATATGAGTTTTTCCAATACTTCCATGTTGGGATT  
AGTTACTAGTTCTAATTTGATACAAATTCATATTTTTTGGGAACTAGTGGGAATGTGTTC  
ATATTTATTAATAGGGTTTTGGTTCACACGACCGATTGCCGCAAGTGCTTGTCAAAAAG  
CTTTTGTAACATAATCGTGTAGGAGATTTTGGTTTATTATTAGGAATCTTAGGTCTTTATTG  
GATAACAGGTAGTTTGGAAATTTTCGGGATTTGTTTCGAAATAGCTAATAACAATGGGGTCA  
GTTCCTTATTTGCTACTTTGTGTGCCTCTTATTATTGTTCGGTGCAGTTGCTAAATCTGC  
ACAATTTCCCCCTCCACGTATGGTTACCTGATGCCATGGAAGGACCTACTCCTATCTCGG  
CCCTTATACACGCTGCTACTATGGTAGCAGCAGGAATTTTTCTTGTAGCTCGGCTTATTC

CTCTTTTCATAGACATACCTTATATAATGAATTCATTTCTTTACTGGGTGTAATAACAGT  
ACTATTAGGAGCTACTTTTTCTCTTGCTCAAAGAGACATTAAGAAGTTTAGCCTATT  
CTACAATGCTCAATTAGGTTATATTATGTTAGCTCTAGGTATAGGTTCTTATCGAGCGGC  
TTTATTCATTTGATCACTCATGCCTATTCTAAAGCTTTATTGTTTTTGGGATCTGGATCTA  
TTATTCATTCAATGGAACCTATTGTTGGATATTCACCAGAAAAAGTCAGAATATGGTTC  
TTATGGGTGGTTTAAACAAGATATGTTCCAATTACAAGAACTACTTTTTTATTAGGTACAC  
TTTCTCTTTGTGGTATTCCACCTCTTGCTTGTTTTTGGTCCAAAGATGAAATTCTTAATG  
ATAGTTGGTTATATTCACCAATTTTTGCAATAATACCTTATTTACAATAGGATTAACCGC  
ATTTTATATGTTTCGGGTATATTTACTTACCTTTGATGGGTATTTGCGCGTTTTATTTTCAA  
ATCACAGTAGCACTAAAATAATTTGTTCTATTCAATATCTCTATGGGGAAAAGAAGCA  
CCAAAAACATTCAATAAA---AATTTACTTTTATCAACAATGAATTTTTTTTCAAATAAATA  
T-----ACTTCCACGTATCCTCATGAATCAGACAATACTATGCTATTTCCCTCTGCTTGTATTG  
GTAATAATTTACTTTGTTTCGTTGGATCAATAGGAATTTCTTTTGATTTTGATATATTATCGAA  
ATGGTTAACCCCATCCCCAAATCTTTTACATCCAAATTCGAATTATTCTGTGAATTGGTAT  
GAATTTTTTACAATTCATTTTTTTCAGTAAGTATAGCTATTTTCGGATTATTCATAGCATA  
TATTTTATATGGGCTGTTTATTCATTTTTCCAGAATTTGGACTTAATCAATTCATTTGTAA  
TTATCTTGGACCAAATAAAAAGTGTATATACAATGGTTCATATAATCGTGGTTACATAGA  
TATTTTTTATACTAGGGTTTTAGTCATGGGTATAAGAAGATTAACCGAGCTAACTCAGTT  
TTTTGATAGACATATAATTGATGGAATTACAATGGAGTTGGCCTTACAAGTTCCCTTAT  
AGGTGAAGGTATCAGATAT---ATGGGGGGGGGACGAATCTCGTCTTATTTATTTTTATATT  
TTTTTTATGTATCAATATTTTTTATTATTTTTTTTGATGGATTTACCTGGACCAATACATGATA  
TTCTTGTAGTATTTTTGGGATTAGTTCTTGTATTAGGAGGTCTGGGAGTAGTATTACTTAC  
CAATCCCATTTTTCTGCCTTTTCGTTGGGATTGGTTCTTGTTTGTATATCCTTATTCTATA  
TTCTATCGAATTCCTATTTTGTAGCTGCCGCGCAGCTCCTTATTTATGTTGGAGCCATAAA  
TGTCTTAATCATATTTGCTGTAATGTTTCATGAATGGTTCAGAATATTCCAATGATTCCTAT  
TTTTGGACCATTGGAGATGGGGTACTTCACTGGTTTGTACAAGTATTCTTTTTTACTA  
ATTACTATTATCCCAGATACGTCATGGTACGGAATTTTTTGGACTACAAGATCAAGCCAG  
ATTATAGAACAGGACCTAATAAGTAACATTCAACAAATTGGGATTCATTTATCAACAGAT  
TTTTATCTTCCGTTTGAACCTATTCCATAATTCTTTTAGTTTCCTTGATAGGTGCAATTA  
CTATGGCTCGTCAAATGACTATACCGGCTACAAGAAAAGATCTCATGATAGTAAATATG  
GGTCTCACCAACCATCAATGCATGGTGTCTTCGACTGATCGTTACTCTCGATGGTGA  
AGATGTTATTGATTGTGAACCCATATTGGGATATTTACACAGAGGGATGGAAAAAATAG  
CAGAAAACCGAACAAATTATACAATATCTTCTTATGTAACACGTTGGGATTATTTAGCTA  
CTATGTTACAGAGGCAATAACGGTAAATGCACCAGAACAATTGGAAAATGTTCAAGT  
ACCTCAGAGAGCCAGTTATATCAGAGTAATTATGCTGGAGCTGAGCCGTATAGCTTCTC  
ATTTGTTATGGCTTGGCCCTTTTATGGCGGATATCGGTGCACAGACTCCTTTTTTCTATAT  
TTTCAGAGAGAGAGAATTGTTATATGATTTATTCGAAGCCGCCACAGGTATGCGAATGA  
TGCATAATTATTTCCGCATCGGAGGAGTAGCTGCTGATCTACCTCATGGCTGGATAGATA  
AATGTTTGGATTTCTGCGATTATTCTTTAACTGGAGTTGTTGAATATCAAAACTTATTA  
CACGGAATCCCATTTTTTTGGAACGAGTTGAAAGAGTGGGCATTATTGGTGGAGAGGA  
AGCAATAAATTGGGGTTTATCAGGACCAATGTTACGAGCTTCTGGAATCCAATGGGATC  
TTCGTAAGGTTGATCATTATGAGTGTTACAATGAATTCGATTGGGAAGTCCAATGGCAA  
AAAGAAGGAGATTCATTAGCTCGTTATTTAGTACGAATAGGTGAAATGGGGGAATCTAT  
AAAAATTATTCAACAGGCTCTAGAAGGAATTCCTGGAGGTCCCTATGAGAATTTAGAA



GTCCGACGC---GATAGAGCAAAAAATTCCGAATGGAATGATTTTGAATATAGATTTATTA  
GTAAAAAACCTTCACCCAATTTTGAATTGTTCGAAACAAGAAGCTTTATGTCAGAGTAGA  
AGCCCCAAAAGGAGAATTAGGAATTTATTTGATAGGGGATAATAGCATTTTCCCCTGGA  
GATGGAAAATTCGTCCACCCGGTTTCATCAATTTGCAAATTCCTCCTCAGCTAGTTAAA  
AGAATGAAATTGGCTGATATCATGACAATACTAGGTAGTATAGATATCATTATGGGAGAA  
GTTGATCGTATGTTCTCTATGGTGACCGGGTTCATGAATTATAGTCAACAAACAATACGA  
GCTGCAAGGTATATTGGTCAAAGTTTCGTAATTACCTTATCCACACAAAATCGTTTACCT  
ATAACTATTCAATATCCTTATGAAAAATCGATCACATCAGAACGTTTCCGTGGTTCGAATC  
CACTTTGAATTTGATAAATGTATTGCTTGTGAAGTATGTGTTTCGTGTATGCCCGATAGAT  
CTACCCGTTGTTGATTGGAGATTTGAAAGAGATATTAACAAAAACAATTGCTTAATTAT  
AGTATTGATTTTGGGGTCTGTATATTTGTGGTAATTGTGTTCGAGTATTGTCCAACAAAC  
TGTTTATCAATGACTGAAGAATATGAACTTTCTACTTCTGATCGTCACGAATTGAATTAT  
AATCAAATCGCTTTGGGTCGGTTACCAATGTCAATAATTGGAGATTACACAATTCAAAC  
AGTTATGAATTCGAAAATAGACAAAGATAAACCTTTGATTCAAGAACGATTACCAATT  
ACCAGCAGGATCGTTTATCTGATTGGTTAGTCAAGCATGAGCTAGTTCATAGATCTTTG  
GGCTTCGATTGCCGAGGAATAGAGACTTTACAAATAAAAACCGAGGATTGGTACTCCA  
TTGCTGTCATTTCATATGTATATGGTTACAATTATTTACGCTCCCAGTGTGCCTATGATGT  
AGCACCAGGCGGATTTTATAGCTAGTGTGTATCATCTTACGAGAATACAATATGGTGTAGA  
TAAACCAGAAGAAGTATGCATAAAAGTATTTGTCCCAAAGAATAATCCTAGAATCTCGT  
CCGTTTTCTGGATTTGGAAAAGTGCTGATTTTCAAGAACGCGAATCTTATGATATGTTG  
GGAATCTCCTATGATAATCATCCACGCCTTAAACGTATCTTGATGCCTGAAAGTTGGATA  
GGCTGGCCCTTACGTAAGGACTATATTACCCCAAATTTTATGAAATACAAGATGCTCAT-  
-----ATGG  
TCTTAACT--GAATATTCAGACAATCAAATAAAAAGGAAGGAAAAGATTACATTGAGA  
CAGTTATGAATTTGATTGAGTTTCCACTTACCTTGACCAACAACCCCAATTACAGTTATTT  
CAACTACATCGAATGATCTTTTCGAATTGGTCAAGACTCTCTAGTTTATGGCCGCTTCTAT  
ATGGTACCAGTTGTTGTTTCATTGAATTTGCTTCATTAATAGGCTCGCGATTTCGACTTTG  
ACCGTTATGGATTGGTACCAAATCGAGTCCTAGGCAAGCGGACCTAATTTTAAACAGCC  
GGCACAGTAACAATGAAAATGGCTCCTTCTTTAGTGAGATTATATGAGCAAATGCCTGA  
ACCAAATATGTCATTGCTATGGGAGCTTGTACTATTACAGGAGGGATGTTTCAGTACTG  
ATTCTTATAGTACTGTTTCGGGGAGTCGATAAGCTAATTCCTGTGGATGTTTATTTGCCGG  
GCTGTCCACCTAAACCAGAAGCAGTTATAGATGCTATAATGAACTTCGTAAGAAGATA  
TCTCGAGAAATCTTTGAAGATAGAACTGTGTCTCAA---GAAAATCGATGTTTTTCTACC  
AATCACAAGTTTTATGTTTCGACGCAGTACTCAGACTGGAAATTACGATCAAGGATTGCT  
CTATCAATCACCATCTACTTCAGAGATGCCTACA-----TTTTTCAAATCCAAAAGTTCAAT  
ATCTTCCCACGAATTAGTGAATATGCAAAATAGAAATACTTTTTCTTGGGTAAAGGAAC  
AGATGACTCAATCGATTTCTATATCGATCATGATATATGTAATAACTCGGGCATCTATTT  
AAATGCATATCCATTTTTGCGCAGCAGGGTTATGAAAACCCACGAGAAGCAACTGGA  
CGAATTGTATGTGCCAATTGCCATTTAGCTAATAAGCCCGTGGATATTGAAGTTCCGCAA  
GCCGTGCTTCTGATACTGTATTTGAAGCAGTTGTTTCGAATCCCTTATGATATGCAACTG  
AAACAAGTTCTTGCTAATGGTAAAAAGGGGGCTTTGAATGTAGGGGCTGTTCTTATTTT  
ACCCGAGGGATTTCGAATTAGCCCCCCCCGATCGTATTTCTCCCGAGGTGAGAGAAAAG  
ATGGGAAATCTGTCTTTTCAGAGTTATCGTCCCAATAAAAAGAAATATTCTTGTGATAGGT  
CCTGTTCCCGGTCAGAAATATAGTGAAATCGCCTTTCCCATTTTCCCCCGACCCTGCT

ACGAGGAAAGACGTTCACTTCTTAAAATATCCCATATATGTAGGTGGGAACAGAGGAA  
GGGGTCAGATTTATCCTGATGGGAGCAAGAGTAACAATACAGTCTATAATGCTACATCA  
GCAGGTATAGTAAGCAAAATAGTACGTAAAGAAAAAGGAGGATATGAAATATCCATAGT  
TGATGTATCGGATGGACATCAAGTGATTGATATTATACCTCCAGGACCAGAACTTCTTGT  
TTCAGAGGGTGAATCCATCAAGCTTGATCAACCATTAACAAGCAATCCCAATGTAGGA  
GGTTTTGGTCAGGGAGATGCAGAAATAGTGCTTCAAGATCCATTACGTGTCCAAGGCC  
TTTTGTTCTTCTTGGCATCTGTTATTTTGGCACAAGTTTTTTTTGGTTCTTAAAAAGAAAC  
AGTTTGAAAAGGTTCAATTGTATGAAATGAATTTCTCAATAAGGTATATGATTGGTTTG  
AGGAACGTCTCGAGATTCAGGGCGATTGCAGATGATATAACTAGTAAATATGTTCCCTCCT  
CATGTCAACATATTTTATTGTTTAGGGGGGATCACACTTACTTGTTTTTTAGTACAAGTA  
GCTACAGGTTTTGCTATGACTTTTTACTATCGTCCAACCGTTACAGAAGCTTTTTCTCT  
GTTCAATACATAATGACTGAGGCCAATTTTGGTTGGTTAATTCGATCAGTTCATCGATGG  
TCAGCAAGTATGATGGTTCTAATGATGATCCTGCACGTATTTTCGTGTATATCTCACAGGT  
GGATTTAAAAAACCCCGCAATTAACCTTGGGTTACAGGTGTGGTTTTAGGTGTATTGAC  
TGCATCTTTTGGTGTAACCTGGTTATTCCTTACCTCGGGACCAAATTGGTTATTGGGCAGT  
AAAAATCGTGACAGGTGTACCTGAAGCTATTCCTGTAATAGGATCGCCTTTGGTAGAGT  
TATTACGTGGAAGTGCTAGTGTGGGCCAATCCACTTTGACTCGTTTTTATAGTTTACACA  
CTTTTGTATTGCCTCTTCTTACTGCCGTATTTATGTTAATGCACCTTTCCAATGATACGTAA  
GCAAGGTATTTCCGGTCCTTTAATCCCAATAACAAAGAAACCTGACTTGAATGATCCTG  
TATTAAGAGCTAAATTGGCTAAAGGAATGGGGCATAATTATTATGGAGAACCCGCATGG  
CCCAATGATCTTTTATATATTTTTCCAGTAGTAATTCTAGGTACTATCGCATGTAATGTAG  
GCTTAGCGGTTCTAGAACCGTCAATGATTGGTGAACCGGCGGATCCATTTGCAACTCCT  
TTGGAAATATTACCCGAATGGTACTTCTTTCCCGTATTTCAAATACTCCGCACAGTGCCC  
AATAAGTTATTGGGTGTTCTTTTAATGGTTTCAGTACCAACGGGATTATTGACAGTACCT  
TTTTTGGAGAATGTCAATAAATTCCAAAATCCATTTTCGTTCGTCCAGTAGCTACAACAGT  
CTTTTGGATCGGTACCGTAGTAGCTCTTTGGTTAGGTATTGGAGCAACATTACCTATTGA  
TAAATCCCTAACTTTAGGTCTTTTTATGATTGAAGTTTTTCTATTTGGAATCGTCTTAGGT  
CTAATTCCTATTACTTTGGCAGGATTATTCGTAACCTGCATATTTACAATACAGACGTGGT  
GATCAGTTGGACCTTATGCCTACTATAACTAGTTATTTTCGGTTTTCTACTGGCTGCTTTAA  
CTATAACCCAGCTCTATTGATTGGTTTGAATAAGATACGACTTATTATGGATATAGTAAG  
TCTCACCTGGGCTGCTTTAATGGTCGTCTTTACATTTTCCCTCTCACTCGTAGTATGGGG  
AGAAGTGGACTCATGATTATTCGTTCCGGGAACCAGAAGTGAAAATTGTTGTAGAT  
AGGGATCCTGTAAAAACGTCTTTTCGAGGAATGGGCCAGACCCGGCCATTTCTCAAGAA  
CAATAGCTAAGGGCCCTGATACTACCACTTGGATCTGGAACCTACATGCTGATGCTCAC  
GATTTTCGATAGTCATACCAGTGATTTGGAGGAGATCTCCCGAAAAGTATTTAGTGCTCA  
TTTTGGTCAACTCTCCATTATCTTTCTTTGGCTGAGTGGCATGTACTTCCATGGCGCCCG  
TTTTTCTAATTATGAAGCATGGCTAAGTGATCCTACTCATATTGGACCCAGTGCCCAGGT  
AGTTTGGCCAATAGTAGGTCAAGAAATATTGAATGGTGATGTGGGGCGGGGGTTCCGA  
GGAATACAAATAACCTCCGGTTTTTTTTCAGATTTGGCGAGCATCTGGAATAACTAATGA  
ATTACAACCTTATTGTACCGCAATTGGTGCATTGGTCTTTGCAICGTTAATGCTTTTTGC  
CGTTTGGTTCCATTATCACAAAGCTGCCCAAATTTGGCTTGGTTCCAAGATGTAGAAT  
CTATGTTGAATCACCCTTAGCGGGGTTACTAGGACTTGGGTCTCTCTTGGGCGGGA  
CACCAAATCCATGTATCTTTACCGATTAAACCAATTTCTCGATGCTGGAGTTGATCCTAAA  
GAGATAACCACTTCTCATGAATTTATCTTGAATCGGGACCTTTTTGGCTCAACTTTATCCC

AGTTTTGCCGAGGGAGCAACCCCTTTTTTCACCTTGAATTGGTCAAATACGCGGAATT  
CCTGAGTTTTTCGTGGAGGATTAGATCCAATAACAGGGGGCCTATGGCTGAGCGATATTG  
CACACCATCATTTAGCTATTGCTATTCTTTTTCTGATCGCTGGTCATATGTATAGGACCAA  
CTGGGGCATCGGTCATGGCCTTAAAGACATTTTAGAGGCTCATAAAGGTCCATTTACAG  
GCCAGGGCCATAAGGGCCTATATGAAATCCTAACACGTCATGGCATGCTCAATTATCT  
CTTAACCTGGCTATGTTAGGTTCTTTAACCAATTGTTGTAGCTCACCATATGTATTCCATGC  
CCCCCTATCCATACCTAGCTATTGATTATGGTACACAACCTTTTCGTTGTTACACATCACAT  
GTGGATCGGTGGATTTCTCATAGTTGGTGCTGCTGCACATGCAGCCATTTTTATGGTAAG  
AGACTATGATCCAACACTCGATAACAACGATCTATTAGATCGTGTCTTAGGCACCGCGA  
TGCAATCATATCACATCTTAACTGGGCATGTATATTTCTAGGTTTTACAGTTTTGGCTTG  
TATATTCATAATGATACCATGAGCGCTTTAGGGCGGCCCAAGATATGTTTTACAGATACC  
GCTATAACAATTACAACCCATCTTTTTCTCAATGGGTACAAAACATTCATGCTTTAGCACCT  
GGGGTAACAGCTCCTGGTGCAACAACAAGTACCAGCTTAACTTGGGGGGGTGGTGAG  
TTAGTAGCAGTAGGCGGCAAAGTAGCTTTGTTACCTATTCCATTAGGAACCGCGGATTT  
TTTGGTCCATCACATTCATGCATTTACGATCCATGTGACTGTATTGATACTACTGAAGGG  
TGTTCTATTTGCTCGCAGTTCCCGTTTTGATACCTGATAAAGCAAATCTTGGTTTTCGTTT  
CCTTGTGATGGACCTGGAAGAGGGGGGACATGTCAAGTATCCGCCTGGGATCATGTC  
TTCTTAGGTCTATTCTGGATGTACAATTCAATTCGGTAGTCATTTTCCATTTACAGTTGGA  
AAATGCAGTCGGATGTTTGGGGTACTATAAGTGATCAAGGGGTGGTAACTCATATCACA  
GGAGGAAACTTTGCACAGAGTTCCATTACTATTAATGGGTGGCTCCGAGATTTCTTATG  
GGCACAGGCATCTCAGGTAATTCAGTCTTATGGTTCTTCATTATCTGCATATGGTCTTTTT  
TTCTTAGGTGCTCATTTTATCTGGGCTTTACAGTTAATGTTTCTATTACAGTGGCCGTGGTT  
ATTGGCAAGAACTCATTGAATCCATCGTTTTGGGCTCATAACAAATTAAGTTGCTCCT  
GCTACTCAGCCTAGAGCCTTGAGCATTGTACAAGGACGTGCTGTAGGAGTAACCCATT  
ACCTTCTGGGTGGAATTGCCACAACATGGGCATTCTTCTTAGCAAGAATTATTGCAGTA  
GGAATGGCATTAAAGATTTCCGAGGTTTAGCCTCGGCTTAGCTCAGGACCCACTACTCG  
TCGTATTTGGTTTGGTATTGCTACCGCACATGACTTCGAGAGTCATGATGATATTACTGA  
GGAACGTCTTTATCAGAACAATTTTGCTTCTCATTTTGGGCAGTTAGCAATAATCTTTCT  
GTGGACGTCCGGAATCTGTTTCATGTAGCTTGGCAAGGAAATTTGAGTCATGGATAC  
AGGACCCTTTACATGTAAGACCTATTGCTCATGCAATTTGGGATCCTCATTTTGGTCAAC  
CAGCTGTAGAAGCCTTTACTCGAGGGGGTGTATCGGCCAGTGAATATCGCTTATTCC  
GGTGTATTATCAGTGGTGGTATAACAATCGGATTGCGCACCAATGAGGATCTTTATACAGG  
AGCTCTTTTTCTATTATTTCTTTCTGCTATATCCTTAATAGCGGGTTGGTTACATCTACAA  
CCCAGATGGAAACCAAGTGTTCGTGGTTCAAAAATGCCGAATCTCGTCTCAATCATCA  
TTTGTACAGGACTTTTCGGAGTAAGTTCCTTGGCTTGGGCAGGACATTTAGTTCATATCG  
CTATTCCCGGATCCAGGGGAGAGTACGTCAGATGGAATAATTTCTTAGACGTATTACCGT  
ATCCTCAAGGGTTGGGACCACTTTTTACGGGTGAGTGAATCTTTATGCTCAAACCCT  
GATTCGAGCAGTCATTTATTTGGTACTTCCCAAGGAGCCGGAACCTGCCATTTCAACCCT  
TCTTGGGGGATTCCATCCACAAACACAAAGTTTATGGTTGACCGATATTGCTCATCATCA  
TTTAGCTATTGCATTTATTTTTCTCGTTGCTGGGCATATGTATAGAATAACTTCGGAATT  
GGACACAGTATCAAAGATCTTTTAGAAACACATATTCCTCCGGGGGGTTCGATTAGGACG  
TGGGCATAAGGGTCTTTATGACACAATCAATAATTCGATTCATTTTCAATTAGGTCTTGC  
TCTAGCCTCTTTAGGGGTTATTACTTCCCTTAGTAGCTCAACACATGTAATCTTTACCTGC  
TTATGCATTCATAGCACAAAGATTTTACTACTCAAGCTGCCTTATATACTCATACCAATAC

ATCGCAGGGTTCATCATGACAGGAGCCTTTGCTCATGGAGCTATATTCTTCATTAGAGAT  
TACAATCCGGAACAGAATGAGGATAATGTATTGGCAAGAATGTTAGACCATAAAGAAG  
CTATCAAATCTCATTTAAGTTGGGCCAGCCTCTTTCTCGGGTTCATACCTTGGGCCTTT  
ATGTTCATAACGACGTCATGCTCGCTTTTGGTACTCCGGAAAAACAAATCTTGATCGAA  
CCCATATTTGCCAATGGATAACAATCCGCTCATGGTAAGACTTCATATGGGTTCGATGTA  
CTCTTATCTTCAACGAATGGTCCAGCATTCAATGCTGGTCAAAGCATATGGTTACCTGG  
CTGGTTGAATGCTGTTAATGAG-----AATAGTAATTCACTCTTCTTAACAATAGGTCCTGG  
AGATTTCTTGGTTCATCATGCTATTGCTCTAGGTTTGCATACAACACTACGTTGATTTTAGTA  
AAAGGTGCTTTAGATGCACGTGGTTCCAAGTTAATGCCAGATAAAAAGGATTTCCGGTTA  
TAGTTTTCTTGGCAGGCCCAGGGCGCGGCGGTACTTGTGATATTTCTGCTTGGGACG  
CATTTTATTTGGCAGTTTTCTGGATGTTAAATACCATTGGATGGGTTACTTTTTATTGGCA  
TTGAAACACATCACATTATGGCAGGGTAACGTTTCACAATTTAATGAATCCTCCACTTA  
TTTGATGGGATGGTTAAGAGATTATCTATGGTTAAACTCTTCACAACCTATCAATGGATAT  
AACCTTTTTGGTATGAATAGTTTATCGGTATGGGCATGGATGTTCTTATTTGGACATCTTG  
TTTGGGCTATTGGATTTATGTTCTTAATTTCTGGCGTGGATATTGGCAGGAATTGATTG  
AAACTTTAGCATGGGCTCATGAACGCACACCTTTGGCTAATTTAATTCGATGGAGAGAT  
AAGCCAGTGGCTCTTTCCATTGTGCAAGCAAGATTGGTTGGATTAGCCACTTTTCCGT  
AGGTTATATATTCACTTATGCAGCTTTCTTGATTGCCTCTACATCAGGAAAATTTGGTATG  
TCACATTCAGTAAAAATTTATGATACATGTATAGGGTGTACTCAATGTGTACGAGCCTGC  
CCAACAGATGTATTGGAAATGATACCTTGGGACGGATGTAAAGCTAAGCAAATTGCTTC  
CGCACCAAGAACCGAGGACTGTGTAGGTTGTAAGAGATGTGAATCCGCCTGCCAAC  
AGATTTTTTGAGTGTCCGTGTTTATTTATGGCATGAAACAACCTCGCAGCATGGGTCTATC  
TTATATGACAGATCTCAACTTACCCTCTATTTTTGTGCCTTTAGTGGGCCTAGTATTTCCG  
GCAATTGCAATGGCTTCTTTATCTCTTTATGTCCAAAAAATAAGATTGTCATGCGAGAT  
ATAAAAACATATCTCTCCGTGGCACCTGTGCTAACTACTCTATGGTTTGGGTCTTTAGCA  
GGTCTATTGATAGAAATTAATCGTTTATTCCCAGATGCCTTGTCAATCCCCTTTTTTTCAT  
TCATGACTGCAATTTTAGAGAGACGCGAAAGTACAAGCCTATGGGGTCGCTTCTGCAA  
CTGGATAACCAGCACTGAAAACCGTCTTTACATTGGATGGTTCCGGTGTTTTGATGATCC  
CTACCTTATTGACCGCAACTTCTGTATTCAATATCGCCTTCATTGCTGCTCCTCCAGTAGA  
TATTGATGGTATTCGTGAACCTGTTTCTGGTCTCTACTTTATGGAAACAATATTATTCT  
GGTGCCATTATTCCTACTTCTGCAGCTATCGGTTTGCATTTTTTACCCGATATGGGAAGCG  
GCATCCGTTGATGAGTGGTTATAACAATGGCGGTCCCTTATGAGCTAATTGTTCTACACTTC  
TFACTTGGTGTAGCTTGTTACATGGGTCTGAGTGGGAACTTAGTTTCCGCCTGGGTAT  
GCGTCCTTGGATTGCTGTTGCATATTCAGCTCCTGTTGCAGCTGCTACTGCTGTTTTCTT  
GATCTACCCTATTGGTCAAGGAAGTTTCTCTGATGGTATGCCTTTAGGAATATCTGGTAC  
TTTCAACTTCATGATTGTATTCCAGGCAGAACACAACATCCTTATGCATCCATTTACAT  
GTTGGGTGTAGCTGGTGTATTCGGCGGCTCCCTATTAGTGTATGCATGGTTCCTTGGT  
AACCTCTAGTTTGATCAGGGAAACCACTGAAAACGAATCTGCTAATGCAGGTTACAGA  
TTCGGTCAAGAGGGAGAACTTATAATATCGTAGCTGCTCATGGTTATTTTGGCCGATTG  
ATCTTCCAATATGCTAGTTTCAACAATTCCTGTTCCCTTACATTTCTTCTTGGCTGCTTGGC  
CTGTAGTAGGTATCTGGTTCACCGCTTTAGGTATTAGTACTATGGCTTTCAACCTAAATG  
GTTTCAATTTCAACCAATCCGTAGTTGACAGTCAGGGTCGTGTTATCAACACTTGGGCT  
GATATCATCAACCGTGCTAACCTTGGTATGGAAGTAATGCATGAACGTAATGCTCACAA  
CTTCCCTCTAGACCTAGCTGCTGTGCAAGTTCATCTACAAACGGAATGGGTTTGCCTT

GGTATCGTGTTTCATACTGTTCGTATTGAATGATCCCGGTTCGATTGCTTTCTGTCCATATAAT  
GCATACAGCTCTAGTTTCTGGTTGGGCCGGTTCGATGGCTCTATACGAATTAGCGGTTTT  
TGATCCCTCTGACCTGTTCTTGATCCAATGTGGAGACAAGGTATGTTTCGTTATAACCCTT  
CATGACTCGTTTAGGAATAACCAATTCGTGGGGTGGTTGGAGTATTTCA---GGAGGAAC  
TATAACGAATCCGGGTATTTGGAGTTATGAAGGTGTCGCAGGGGCACATATTGTGTTTT  
CTGGCTTGTGCTTCTTGGCAGCTATCTGGCATTGGGTGTATTGGGATCTAGAAATATTCT  
GTGATGAGCGTACGGGAAAACCTTCTTTGGATTTGCCAAGATCTTTGGAATTCATTTA  
TTTCTCTCAGGGGTGGCTTGGCTTTGGCGCATTTTCATGTAACAGGTTTGTATGGT  
CCTGGAATATGGGTGTCCGATCCTTATGGACTAACTGGAAAAGTACAATCTGTAAATCC  
AGCGTGGGGCGCAGAAGGTTTTGATCCTTTTGTTCGGGAGGAATAGCCTCTCATCATA  
TTGCAGCGGGTACATTGGGCATATTAGCAGGTCTATTCCATCTTAGTGTCCGTCCGCCTC  
AACGTCTATACAAAGGATTACGTATGGGAAATATTGAAACTGTACTTTCTAGTAGTATCG  
CTGCTGTTTTTTTTGCAGCTTTCGTTGTTGCTGGAACCTATGTTGGTATGGTTCAGCAACTA  
CCCCAATCGAATTATTTGGTCCCACTCGTTATCAGTGGGATCAGGGATACTTTCAGCAA  
GAAATATATCGAAGAGTTAGCGCCGGACTAGCCGAAAATCTGAGTTTATCGGAAGCTTG  
GTCTAAAATTCCCGAAAAATTAGCTTTTTATGATTACATTGGTAATAATCCGGCAAAAAGG  
GGGATTATTCAGAGCAGGCTCAATGGACAACGGGGATGGAATAGCTGTTGGATGGTTA  
GGACACCCCGTCTTTAGAGATAAAGAAGGGCGCGAGCTTTTTGTACGTCGTATGCCTAC  
TTTTTTTTGAAACATTTCCGGTAGTTTTAGTAGATGGAGACGGAATTGTGAGAGCCGATG  
TTCCTTTTAGAAGGGCAGAATCAAATATAGTGTGAAACAAGTAGGTGTAACCTGTGCGA  
GTTCTATGGTGGCGAACTCAATGGAGTTAGTTATGGTGTATCCTGCTACTGTAAAAAAT  
ACGCTAGACGTGCCCAATTAGGTGAAATTTTTGAATTAGATCGGGCTACTTTGAAATCC  
GATGGTGTTTTTCGTAGCAGTCCAAGGGGTTGGTTCACTTTTGGGCATGCTACGTTTGC  
TTTGCTCTTCTTTTTTTGGACACATTTGGCATGGTGTAGAACCTTGTTCAGAGATGTTTT  
TGCTGGTATTGATCCAGATTTGGATGCTCAAGTGGAAATTTGGAACATTTCAAAAACCTG  
GGGATCCAACCTACAAGGAGACAAGTAGTCATGAAAACCTTATATTCCCTGAGGAGGTT  
CTACCCCGTGGAAACGCTCTTTAATGGAACCTTTAGCTTTAGCTGGTTCGTGACCAAGAA  
ACCACTGGTTTTCGCTTGGTGGGCCGGGAATGCCAGACTTATCAATTTGTCCGGTAAACT  
ACTTGGAGCTCACGTGGCCCATGCCGGATTAATCGTATTCTGGGCCGGAGCAATGAAC  
CTATTTGAAGTGGCTCATTTCGTACCAGAGAAACCCATGTATGAACAAGGATTGATTTT  
ACTTCCACACCTAGCTACTCTAGGTTGGGGGGTAGGTCCGGGGGGGGAAGTTATAGAC  
ACCTTTCCATACTTTGTATCTGGAGTACTTCACTTAATTTCTCTGCAGTCTTAGGCTTT  
GGCGGTATTTATCATGCGCTTCTTGGACCTGAGACTCTTGAAGAATCTTTCCATTTTTC  
GGTTATGTATGGAAAGATAGAAATAAAATGACTACAATTTTGGGTATTCATTAATTTTG  
TTAGGTATAGGTGCTTTTCTTCTAGTACTCAAGGCTCTTTATTTTGGGGGCGTATATGATA  
CCTGGGCCCTGGGGGGGAGATGTAAGAAAAATAACCAACTTAACACTTAGCCCAA  
GTGTTATATTTGGTTATTTACTAAAATCTCCTTTTGGGGGAGAAGGCTGGATTGTTAGTG  
TGGACGATTTAGAAGATATAATTGGAGGACACGTATGGTTAGGTTCCATTTGTATACTTG  
GTGGAATTTGGCATATCTTAACCAAACCTTTGCATGGGCTCGCCGTGCATTTGTATGGT  
CTGGAGAGGCTTACTTGTCTTATAGCTTAGGTGCTTTATCTGTTTTTGGTTTCATCGCTT  
GTTGTTTTCGTATGGTTCAATAATACCGCTTATCCTAGTGAGTTTTACGGACCCACCGGGC  
CAGAAGCTTCTCAAGCTCAAGCATTTACCTTTCTAGTTAGAGACCAACGTCTTGGAGCT  
AACGTGGGATCCGCCAAAGGACCCACTGGTTTAGGTAAATATCTAATGCGTTCCTCCGAC  
CGGGGAGGTTATTTTTGGAGGAGAACTATGCGTTTTTGGGATCTTCGTGCTCCCTGGT

TAGAACCCTAAGGGGTCCCAACGGTTTGGACTTGAGTAGGCTGAAAAAAGACATAC  
AACCTTGGCAAGAACGGCGTTCGGCAGAATATATGACTCATGCTCCTTTAGGTTCTTTA  
AATTCAGTGGGTGGCGTAGCTACCGAGATCAATGCAGTCAATTATGTCTCTCCTAGAAG  
CTGGTTAGCGACCTCTCATTGTTCTAGGATTCCTCCTATTTGTGGGGCATTGTGGCA  
TGCGGAAGGGCCCGTGCAGCTGCAGCAGGGTTTGAAAAAGGAATCGATCGTGATT  
GGAACCTGTTCTTTCCATGACCCCTTAGTATGACTATAGCCCTTGGTAGATTTACCAA  
AGAAGAA--GATTTATTTGATATTATGGATGATTGGTTACGGAGGGACCGTTTCGTTTTT  
GTAGGCTGGTCTGGCCTATTGCTCTTTCCTTGTGCTTATTTTCGCTTTAGGAGGTTGGTTT  
ACAGGTACAACTTTTGTAACCTCATGGTATACCCATGGATTGGCCAGTTCCTACTTGGA  
AGGTTGCAATTTCTTGACCGCTGCAGTTCCACTCCTGCGAATAGTTTAGCACATTCT  
TGTTGCTACTATGGGGCCCTGAAGCACAAGGGGATTTTACTCGTTGGTGTCAATTAGGC  
GGTCTGTGGACTTTTGTGCTCTCCATGGTGCTTTCGGACTAATAGGTTTTATGTTACGT  
CAATTCGAACCTTGCTCGATCTGTGCAATTGCGACCTTATAATGCAATCGCATTCTGCT  
CCAATTGCTGTTTTTGTCTGTATTCCTGATTTATCCACTGGGTCAATCTGGTTGGTTCT  
TTGCGCCAGTTTTGGCGTAGCAGCTATATTCGATTCATCCTCTTCTTCCAAGGGTTTC  
ATAATTGGACGTTGAACCCATTTATATGATGGGAGTTGCCGGAGTATTAGGCGCTGCT  
CTGCTATGCGCTATTCATGGTGCTACCGTAGAAAATACTTTATTCGAAGATGGTGACGGT  
GCAAATACATTTTCGTGCTTTTAACCCAACTCAAGCCGAAGAGACTTATTCAATGGTCAC  
TGCTAACCGCTTTTGGTCCCAAATCTTTGGGGTTGCTTTTTTCCAATAAACGTTGGTTACA  
TTCTTTTATGCTATTTGTACCAGTAACCGGTTTATGGATGAGTGCTCTTGGGGTAGTCGG  
CCTGGCTCTGAACCTCCGTGCCTATGACTTCGTTTCCCAAGAAATCCGTGCAGCGGAA  
GATCCTGAATTTGAGACTTTCTACACCAAAAATATACTCTTAAACGAAGGTATTCGTGC  
TTGGATGGCGGCTCAGGATCAGCCTCATGAAAACCTTATATTCCTGAGGAGGTTCTAC  
CCCGTGAAACGCTCTTATGTCTGGAAGCACGGGAGAACGTTCTTTTGTGATATTATT  
ACCAGTATTCGATACTGGGTCATTCATAGCATTACTATACCTTCCCTATTCATTGCGGGTT  
GGTATTCGTACGTACGGGTTTAGCTTACGACGTGTTTGGAAAGTCCTCGGCCAAACGA  
GTATTTACAGAGAGCCGACAAGGTATCCGTTGATAACCGGCCGTTTTGATTCTTTGG  
AACAACTCGATAAATTTAGTAGATCCTTTATGACCATAGATCGAACCTATCCAATTTTTA  
CAGTACGATGGTTGGCTGTTACGGATTAGCTGTACCTACCGTTTTTTTCTTGGGGTCA  
ATATCAGCAATGCAGTTCATCCAACGAATGGCTACACAAACCGTTGAGGGTAGTTCTAG  
A--TCTGGGCCAAGACGAACACTACTGTAGGGAATTTATTGAAACCATTGAATTCGGAATA  
TGGTAAAGTAGCACCGGGCTGGGGGACTACACCACTTATGGGGGTCGCAATGGCTCTA  
TTTGGGATATTCCTATCTATTATTTGGAAATTTATAATTCCTCCGTTTTACTGGATGGAAT  
TTCAATGAGTATGCTTACTCTCAAACCTATTCGTTTATAACAGTAGTGATATCTTTGTTCT  
CTCTTCATCTTCGGATTTTTATCTAATGATCCAGGGCGTAATCCTGGACGTGAGGAAATG  
GCCGATACTACTGGAAGGATTCCTCTTTGGCTGATAGGTACTGTAACCGGTATTCTTGTG  
ATCGGTTTAATAGGTATTTCTTTTACGGTTCATATCCGGGTTGGGTTTCATCTCTGATGT  
TTAATATCTTTAGTTAATCTGCATCTGTCTTAATTCGTCTTTTAT--AGTAGTTTTTTCTT  
CGCCAAATTGCCGAAGCTTATGCCTTTTTAAATCCAATCGTAGATGTTATGCCTGTCAT  
ACCTGTACTTTTTTTTCTCTTAGCCTTTGTTTGGCAAGCCGCTGTAAGTTTTCGAATGAC  
ACAATCAAACCCGAATGAACAAAATGTTGAATTGAATCGTACCAGTCTATACTGGGGTT  
TATACTCATTTTTGTACTTGCTGTTTTATTTTCCAATTATTTCTTCAATATGGAAGTAAAT  
ATTCGCAATTTATTGCTACTGCACTGTTCAATCTAGTTCCCTACTGCTTTTTTACTTATCAT  
CTACGTAAAAACAGTCAGTCAAATGATATGGAAACAGCAACCCTAGTCGCCATCTCC

ATATCTGGTTTACTTGTAAGCTTTACTGGGTACGCCTTATATAACCGCTTTTGGGCAACCC  
TCTCAACAATAAGAGATCCATTCGAAGAACACGGGGACATGGAAGCATTGGTTTATA  
CATTCCTTTTAGTCTCGACTTTAGGGATAATTTTTTTCGCTATCTTTTTTCGAGAACCGCC  
TAAGGTTCCGACTAAAAA-----ATGACTATTGCTTTCCAATTAGCTGTTTTTGCATTAAT  
TGCGACTTCATCAATCTTACTGATTAGTGTACCCGTTGTATTTGCTTCTTCTGATGGTTG  
GTCAAGTAACAAAAATGTTGTATTTCCGGTACATCATTATGGATTGGATTAGTCTTTCT  
GGTAGCTATCCTTAATTCTCTCATCTCTATGAGTTGTAGGGAGGGACTTATGTCACCACA  
AACAGAGACTAAAGCAAGTGTGGATTAAAGCTGGTGTAAAGATTACAAATTGACT  
TATTATACTCCTGACTACGAAACCAAAGATACTGATATCTTGGCAGCATTCCGAGTAACT  
CCTCAACCCGGAGTTCCGCCTGAGGAAGCAGGGGCAGCGGTAGCTGCCGAATCTTCTA  
CTGGTACATGGACAACGTGTGGACTGATGGACTTACCAGTCTTGATCGTTACAAAGG  
ACGATGCTACCACATCGAAACCGTTGTAGGGGAGGAAAATCAATATATTGCTTATGTAG  
CTTATCCTTTAGACCTTTTTGAAGAAGGTTCTGTTACTAACATGTTTACTTCCATTGTGG  
GTAATGTATTTGGTTTCAAAGCCCTACGAGCTCTACGTCTGGAGGATCTGCGAATTTCC  
ACTTCTTATTCCAAAACCTTTCCAAGGCCCGCCTCATGGCATCCAAGTTGAAAGAGATAA  
GTTGAACAAGTATGGTCGGCCTCTATTGGGATGTACTATTAACCAAAAATTGGGATTATC  
CGAAAGAACTACGGTAGAGCGGTTTATGAATGTCTACGCGGTGGACTTGATTTTACCA  
AGGATGATGAAAACGTGAACTCACACCATTATGCGTTGGAGAGACCGTTTCGTATTT  
TGTGCCGAAGCGCTTTATAAAGCGCAGGCCGAAACGGGTGAAATCAAAGGACATTACT  
TGAATGCTACTGCAGGTACATGTGAAGAAATGATGAAAAGGGCCATGTGTGCCAGAGA  
ATTGGGAGTTTCTATCGTAATGCATGACTACTTAACTGGAGGATTCACTGCAAATACTA  
GCTTGGCTCATTATTGCCGCGATAACGGCCTACTTCTTACATCCATCGCGCAATGCATG  
CAGTTATTGATAGACAGAAAATCATGGTATGCATTTTCGTGTACTAGCTAAAGCATTAC  
GTATGTCTGGTGGAGATCATATTCACGCGGGTACAGTAGTGGGTAAACTGGAAGGGGA  
ACGTGAGATGACTTTGGGTTTTGTTGATTTATTACGTGATGATTTTATTGAAAAGACCG  
AAGTCGCGGTATCTTTTTTACTCAAGATTGGGTCTCTATGCCAGGTGTTTTGCCCGTGG  
CTTCAGGGGGTATTCATGTTTGGCATATGCCTGCCCTGACCGAAATCTTTGGGGATGATT  
CCGTACTACAGTTTGGCGGAGGAACTTTAGGACACCCTTGGGGAAATGCACCCGGTGC  
AGTAGCTAATCGGGTGGCTTTAGAAGCGTGTGTACAAGCTCGTAATGAGGGACGTGAT  
CTTGCTCGTGAAGGTAATGAAATTATCCGTGAAGCTAGCAAATGGAGCCCTGAACTAG  
CTGCCGCTTGTGAAGTATGGAAGGCGATCAAATTCGAATTCGAACCAGTGGATAAGCT  
GGATAA-----ATACATTTATACAAAACCTTACCCCGAGCACACGCAATGGAGCCGTAG  
ACAGTCAAGTGAAATCCAATCCACGAAATAATTTGATCTATGGACAGCATCGTTGTGGT  
AAAGGTCGTAATGCCAGAGGAATCATTACTGCAAGGCATAGAGGGGGAGGTCATAAGC  
GCCTATAACGTAAAATCGATTTTCGACGGAATGAAAAGACATATCTGGTAGAATCGTA  
ACCATAGAATACGACCCTAATCGAAATGCATACATTTGTCTCATACTATGGGGATGGT  
GAGAAGAGATATATTTTACATCCCAGAGGGGCTATAATTGGAGATACCATTGTTTCTGGT  
ACAGAAGTTCCTATATCAATGGGAAATGCCCTACCTTTGACCGATATGCCCTTAGGCAC  
GGCCATACATAACATAGAAATCACACTTGGAAAGGGTGGACAATTAGCTAGAGCAGCA  
GGTGCTGTAGCGAAACTGATTGCAAAAAGAGGGTAAATCGGCCACATTAAGATTACCAT  
CTGGGGAGGTCCGTTTGTATCCAAAACCTGCTTAGCAACAGTCGGACAAGTGGGTAA  
TGTTGGGGTGAACCAAAAAGTTTTGGGTAGAGCCGGATCTAAGTGTGGCTAGGTAAG  
CGTCCTGTAGTAAGAGGAGTAGTTATGAACCCTGTAGACCATCCCCATGGGGGCGGTG  
AAGGGAGAGCCCAATTGGTAGAAAAAACCACAAACCCTTGGGGTTATCCTGCGCT

TGGAAGAAGAAGTAGGAAAAGGAAAAAATATAGTGATAGTTTTATTCTTCGTCGCCGT  
AAA---ATGATTCAACCTCAGACCCTTTTGAATGTAGCGGATAACAGCGGAGCTCGAGAA  
TTGATGTGATTTCGAATCATAGGAGCTGGT---AATCACCGATATGCTCATATTGGTGACGT  
TATTGTTGCTGTAATCAAAGAAGCAGTGCCAAATATGCCTCTAGAAAGATCAGAAGTCA  
TTAGAGCTGTAATTGTACGTACATGTAAAGAACTCAAACGTGACAACGGTATGATAATA  
CGATATGATGACAATGCAGCGGTCGTCATTGATCAAGAAGGAAATCCAAAAGGAACTC  
GAGTTTTTGGTGCGATCGCTCGGGAATTGAGACAGTTGAATTTTACTAAAATAGTTTCA  
TTAGCTCCCGAGGTATTAAACTATAACCCCAAAGAACCAGATTTCTGTAAACAACATAG  
AGGAAGAATGAAGGGAATATCTTATCGAGGCAATCATATTTGTTTCGGCGGATACGCTC  
TTCAGGCGCTTGAACCCGCTTGGATCACAGCTAGACAGATAGAAGCGGGGCGGAGAG  
CAATGACACGATATGCGCGTCGTGGTGGAAAAATATGGGTACGTATATTTCCCGACAAA  
CCTATTACAGTAAGACCTACAGAAACACGTATGGGTTTCGGGAAAGGGATCCCCGAAT  
ATTGGGTATCCGTTGTTAAACCGGGTCGAATACTTTATGAAATGGGCGGAGTATCAGAA  
ACTATAGCCAGAGCAGCTATTGAAATAGCTGCGTGCAAAAATGCCTATACGAACTCAATT  
TGTTATTTACGAATGACCAGAGTTAGACGAGGATATACAGCTCGGAAACGTGCAACA  
AAAATTCGTTTATTTGCATCAACCTTTATTGGGGCTCATTCAAGACTTACTCGAACGACT  
ACTCAACAGAAAATGAGAGCTTTGGTTTCCTCTCATCGAGATAGAGGCAGGCAAAAAGA  
GGGATTTTCGTAGTTTGTGGATCACTCGAATAAATGCAGTAATTCGTGAGAAT-----GTAT  
TCTATAATTATAGTAGATTAATACCAAATCTGTACAAGAAGCAATTGCTTCTTAATCGTAA  
AATACTTGCCAAATATCTATATCAAATAAGAATTGTCTTTACATGATTTCCAATAAGATT  
ATCAA-----ATGATAAAGAAAGTTTTA---GCTCAACATATATGT---A  
TGTCTGTTTTAAAAGCGCAAAGAGTAATTGATCAGATTCGCGGACGTTCCCTATGAGGAA  
ACACTTATGATACTGGAACCTCATGCCTTATCGAGCATCTTATCCAATTTTACAATTGGTTT  
ATTCTGCAGCAGCAAATGCTAATCATAATATGGGTTTGAACGAAGCTGATTCATTCATTA  
GTAAAGCCGAAGTCAATAGGAGTGCTATTGTGAAAAAGTTAAGACCTCGGGCTCGGGG  
ACGTAGTTATACGATAAAAAAACCACTTGTATATAACAATTGTATTAAAG---AAATCT  
AAATCA-----ATGGATGGAATCAAATATGCAGTATTTACAGAAAAAAGTATTC  
GGTTATTGGGGAACAATCAA---TATACTTCTAATGTGCAATCAGGATCAACTAGGACAG  
AAATAAAGCATTGGGTGCAACTCTTCTTTGGTGTCAAGGTAATAGCTATGAATAGTCAT  
CGACTCCCGGAAAGGGTAGAAGAATGGGACCTATTATGGGACATACAATGCATTACA  
GACGTATGATCATTACGCTTCAACCGGGTATTCTATTCCACCTCTTATAGAGAAAAGAA  
CTATGGCAGTTCCCAAAAAACGTATTTCTATATCAAAAAACATATTCGTAGGAATATTT  
GGAAGAAAAAAGGATATTTAACTGCAGTAAAAGCTTTTTCTTTAGCGAAATCGGTTTCT  
ACCGGACATTCAAAAAGTTTTTTT-----CAAACAAATAATATGGCCAAGGGTAAAGATGT  
CAGAGTCAGAGTTATTTTGAATGTACCAGTTGTGTCCGAAAT-----GGT-----AAAGAAT  
CGCCGGGTATTTCTAGATATATTACTCAAAAAGAATCGACACAATACGTCCAGTCGATTAG  
AATTGAGAAAATTTGTCACTATTGTCACAAGCATAACGATTCATGGAGAAATAAAGAAA  
ATGAAAATAAGGACTTCTGTTTCGTAAAATTTGTGAAAAATGTCGACTGATCCGTAGGCG  
CGGACGAATTATAGTGATTTGTTCCAATCCGAGACATAAACAGAGACAAGGGATGGTT  
CGAGAGGAAGTAGTAGGATCCACTCGAACACTACGGTGGAAATGTGTTGAATCAAGA  
GTAGACAGTAAGCGTCTTTATTATGGTCGTTTCACTCTGTCCCCGCTTATGAAAGGTCAA  
GCCGATACCATAGGTATTGCCATCGAAGGGCTTTACTTGGAGAAATAGAAGGAACATG  
TATCACACGTGCAAAATCTGAG-----AAAGTAGCACATGAATATTTCTACGATAGTAGGTA  
TTGAGGAATCAGTACATGAAATTTTACTAAATTTGAAAGAAATTATATTGAGAAGTAATC



TGTATGGAGTTATAGACGCATCCATCTGCGTCAGGGGGCCTAGATACGTAACCGCTAAA  
GATATTATCTCACCACCTTACGTGGAAATAGTTGACACGACACAACATATAGCTAACCT  
GACGGAACCAATTGATTTGTGTATTGAATTACAAATCAAGAGAGATCGCGGATATCGTA  
TGAAATCCGCAAATAACTCTCAAGATGGAAGTTAT-----CCTATAGATGCTGTATCCATGC  
CTGTTTCGAAATGCGAATCATAGTATTTACTCTTATGGGAATGGGAATGAAAAACAAGAG  
ATACTTTTTCTAGAAATATGGACGAATGGAAGTTAACTCCTAAGGAAGCACTTTATGA  
AGCTTCTCGTAATTTGATTGATTTATTTATTTCTTTTTCTACATGCGGAGGAAGAG-----GA  
CATTAAATTCGAAGAAAATAAA---AACAGGTTTCTCTACCCCTTTTTACCTTTCAAGAT  
AGATTAACCT--AATCTAAAGAAAAACAAAAA---GGAATTCCATTGAAATGTATTTTTAT  
TGACCAATCAGAATTGCCTTCCAGGACCTATAACTGTCTCAAAGGGTCCAATATACATA  
CATTATCGGACCTTTTGAATAACAGTCAAGAAGATCTTATGAGAATTGAATTTTTTCGAA  
TAGAAGATGTAAAACAGATATTGGACACTCTGCAGAAGTAT-----TTCGCAATTGATTTAT  
CTAAGAATAAGATGCTCCGGAAT--GGAAATGAGGGAATGTACACAATACCTGCATTTA  
GTCAGATTCAATTTGAGGGATTTTATAGATTCATTAATCAGGGCTTGACGGAAGAATTC  
ATAAATTTCCAAAATTGAAGAT-----CAAGAAATTGAATTTAAATTATTTGTGGAAACAT  
ATAAATTTGGTAGAACCTTTGATAAAAGAAAGAGATGCTGTGTATGAATCACTCACATAT  
TCTTCTGAATTATATGTACCCGCGGGACTAATTTGGAAAACCGGTAGAGATATGCAAGA  
GCAAACCGTTTTTTATTGGAAATATTTCTCTAATGAATTCCCTAGGAACCTTTATAGTAAA  
TGGAATATACAGAATTGTGATCAATCAAATATTGCAAAGTCCCGGTATTTACTACCGTTC  
AGAATTGGACAATAACGGAATTTCTGTCTATACCAGCACTATAATATCAGATTGGGGGG  
GAAGATCGGAATTAGAAATTGATAGAAAAGCAAGGATATGGGCCCGCGTGAGTAGGAA  
ACAAAAATCTCTATTCTAGTTCTATCATCAGCTATGGGTTCGAATCTAAGAAAAATTCT  
AGATAATGTTTGTATCCTGAAATTTTCTTGTCTTTTCCGAATGATAAGGAGAAAAAAA  
AGATTGGGTCAAAGAAAATGCTATTTTGGAGTTTTATCAACAATTTGCTTGTGTAGGT  
GGGGATCCGGTATTTTCTGATTCCTTATGTAAGGAATTACAAAAGAAATTTTTTCAACA  
AAGATGTGAATTAGGAAGGATTGGTTCGACGAAATATGAACCGGAGACTGAATCTTGAT  
ATACCTCAGAACAATACATTTTTGTTACCACGAGATGTATTGGCTGCTGCGGATCATTG  
ATCGGAATGAAATTTGGAATGGGTACACTTGACGAT-----ATGAATCACTTGAAAAATAA  
ACGTATTCGTTCTGTAGCAGACCTGTTACAGGATCAATTCGGATTGGCTCTTGTTCGTTT  
AGAAAATGCGGTTTCGAGGAACCTATATGTGGAGCAATCAGG---CATAAATTAATA---CCGA  
CTCCTCAAATTTGGTAACTTCAACTTCA-----TTAACAACCACTTATGAATCGTTTT  
TTGGCCTACACCCGTTATCTCAAGTTTTGGATCGAACTAATCCATTGACACAAATCGTTC  
ATGGGCGAAAATTGAGTTATTTGGGTCTGGAGGATTGACGGGGCGAACTGCTAGTTT  
TCGGATACGAGATATCCATCCTAGCCACTATGGACGATTTTGCCCAATTGACACGTCCGA  
AGGAATCAATGTTGGACTTATTGGATCCTTAGCTATTCATGTGAGGATTGGTCATTGGGG  
A--TCTATAGAGAGTCCGTTTTAT-----GAAATATCTCAGAGATCAAAGAG-----GCAC  
AGGTGGTTTATTTATCACCAAATAGAGATGAATATTATATGGTAGCGGCGGGAAATCCTT  
TGGCCCTGAATCGGGGTATTCAGGAAGAACAGGTTGTTCCAGCTCGATATCGTCAAGA  
ATTCCTTACTATTGCATGGGAAAAGATTCATTTTAGAAGCTTTTTTCCCTTCCAATATTTT  
TCTATTGGAGCTTCCCTCATTCCTTTTATCGAGCATAATGATGCGAATCGGGCTTTAATG  
AGTTCTAATATGCAGCGCCAAGCAGTTCCGCTTTCTCGGTCCGAGAAGTGCATTGTTGG  
GACTGGGCTGGAACGCCAAACGGCTCTAGATTCGGGGGTTTCAGCTATAGCCGAACAC  
GAGGGAAAGATCATTTATACTGATCCTCACAAAATCATTTTATCAAGTAATGGGGACAC  
TATAAGTATTCCATTAGTGATGTATCAACGTTCCAACAAAAATACTTGTATGCATCAAAA

ACCTCAGGTTTCGGCGGGGTAAATACATTA AAAAAGGGACAAATTTTAGCGGACGGTGCG  
GCTACAGTTGGTGGGGA ACTCGCTTTAGGAAAAACATATTAGTAGCTTATATGCCATG  
GGAAGGTTACAATTCTGAAGACGCAGTATTAATTAGCGAACGTCTGGTATATGAAGATA  
TTTATACTTCTTTTCACATCCGGAAATATGAAATTCAGACTCATGTGACAAGCCAGGGC-  
--CCTGAAAGAATTACTAAGGAAATACCGCATCTCGAGACTCATTACTCCGAAATTTAG  
ACAGAAATGGAATCGTTATGCTGGGATCTTGGGTAGAAACAGGTGATATTTTAGTAGGT  
AAATTAACGCCTCAGACAGCGAACGAA---TCGTCGTATTC CCGGAGGATAGATTATTA  
CGAGTCATACTTGGCATT CAGGTCTCCACTGCAAAAGAACTTCTCTAAA ACTACCTAT  
AGGTGGAAGGGGTCGCGTTATTGATGTGAGATGGATTCAGAAAAAGGGG---GGTTCCA  
GTTATAATCCAGAAATGATTCGTGTATATATTTACAGAAACGTGAAATCAAAGTAGGT  
GATAAAGTAGCTGGAAGACATGGGAATAAAGGTATCATTTCAAAAATTTTGCCTAGACA  
AGATATGCCCTATTTGCAAGATGGGACACCTGTTGATATGGTCTTCAACCCATTAGGAGT  
ACCCTCACGAATGAATGTGGGACAGATATTTGAATGCTCGCTCGGATTAGCGGGGGATC  
TGCTAAAGAAACATTATAGAATAGCACCTTTTGATGAGAGATATGAACAAGAGGCTTCG  
AGAAA ACTAGTGTTTTCTGAATTATATGAAGCCTGTAAGCAAACAAAAATCCATGGGT  
ATTTGAACCCGAGTATCCAGGAAAAAGCAGAATATTTGATGGAAGAACAGGGGATCCT  
TTTGAACAACCTGTTCTAATAGGAAAGTCCTATATCCTAAAATTAATTCATCAAGTTGAT  
GATAAAATCCATGGACGTTCTAGTGGGCATTACGCAC TTGTTACACAACAACCCCTTAG  
AGGAAGGGCCAAGCAAGGGGGACAACGAGTAGGAGAAATGGAAGTTTGGGCTCTAG  
AGGGATTTGGTGTGCTCATATTTTACAAGAGATGCTTACTTATAAATCTGATCATATTAG  
AGCTCGTCAAGAAGTACTTGGTGCTACAATCGTTGGAGGAACAGTACCTAACCCCGAG  
GATGCTCCAGAATCTTTTCGATTGCTCGTTGAGAACTACGATCTTTGGCTCTAGA ACT  
GAATCATTTCCTTGATCTGAGAAGA ACTTCCAGATTAATAGGAAGGAAGCT-----  
-----ATGATCGACCGGTATAAACATCAACA ACTTCGAATTGGACCAGTTTCTCCTCAACA  
AATAAGGGCTTGGGCCAACAAAATCCTACCTAATGGAGAGATAGTTGGAGAGGTGACA  
AAACCC TATACTTTTCATTATAAAAACCAATAAACCGGAAAAAGATGGATTGTTTTGTGA  
AAGAATCTTTGGACCCATAAAAAGTAGAATTTGTGCTTGTGGAAATTATCGAGTGATCA  
GAGCTGAAAAAGAAGACCCGAAATTTTGTGAACAATGCGGGGTGGAATTTGTTGATTC  
TAGGATACGAAGATATCAAATGGGATACATCAA ACTCGCATGTCCAGTGACCCATGTGT  
GGTATTTGAAACGTCTTCTTAGTTATATCGCGAATCTTTTAGATAAACCCCTTAAAGAAT  
TAGAAGGCCTGGTATACTGC-----GATTTTTCTTTTGCTAGGCC---ATATCTAAAAAACC  
TACTTTCTTACGATTACGAGGTTCAATTCGAATATGAAATCCAATCCCGGAAATACAGCAT  
CCC ACTTTTTTTTACTACTCAAGGCTTCGAGACATTTGAAATCGAGAAATCTCTACAG  
GAGCAGGTGCTATCAGAGAACAATTATCCGATTCAGATTTGCGAATTATTATAGATAATT  
CATTGGTAGAATGGAAGGAATTAGGAGATGAG---GGGTCCACTGGAAATGAATGGGAA  
GATAGAAAAATTAGAAGAAGAAAGGATTTTTTGGTTAGACGCATGGAATTAGCTAAAC  
ATTTTATTCGAACAAATGTAGAACCAGAATGGATGGTTTTTGTGCTTATTACCAGTTCTTC  
CTCCCGAGTTGAGACCAATCATT CAGACAGATGGGGGTAAACTAATGAGTTCGGATATT  
AATGAACTTTATAGAAGAGTTATCTATCGGAACAATACTCTTACCGATCTATTAGCAACA  
AGTAGATCTACGCCAGGGGAATTAGTAATGTGTCAGGAGAAATTGGTACAAGAAGCCG  
TGGATACACTTCTTGATAATGGGATCCGGGGGCAACCAATGAGGGATGGTCATAATAAA  
GTTTACAAGTCATTTTCAGATGTAATTGAAGGCAAAGAGGGAAGATTTGCGT GAGACTCT  
ACTTGGTAAACGGGTCGATTATTCGGGACGTTCCGTCA TTGTTGTGGGTCCTTCTCTTT  
CATTACATCAATGTGGATTACCTCGAGAAATAGCAATAGAGCTTTTCCAAACATTTTAA

TTCGTGGTCTAATCAGACAACATGTTGCTTCTAACATAGGGATTGCTAAAAGTCAAATT  
CGGGAAAAAGAACCGATTGTATGGGAAATACTTCAAGAAGTTATGCGGGGGCATCCTG  
TATTGTTGAATAGAGCACCCACCTTGCATAGATTAGGCATACAGGCCTTCCAACCCATTT  
TAGTGGAGGGGCGCGCTATTTGTTTACACCCATTAGTTTGTAAAGGGTTTCAATGCAGAC  
TTTGATGGAGATCAAATGGCTGTTTCATGTACCTTTATCTTTGGAAGCTCAAGCGGAGGC  
TCGTTTACTTATGTTTTCTCATATAAATCTCTTGTCTCCAGCTATTGGGGATCCCATTTC  
GTACCAACTCAAGATATGCTTATCGGACTCTATGTATTAACGATCAGGAATCGTAGAGGT  
ATTTGTGCAAATAGGCATAATACATATAATCGCGGAAACTAT-----CAAATAATACAGT  
TGACAATAATGACTATAAGTATATGAAAGAGAAAGAACTGTATTTTTGTAGTTCCTATGA  
TGTACTTGGAGCTTATCGGCAGAAACGAATCAGTTTAGATAGTCCTTTGTGGCTCCGAT  
GGAGACTAGATCAACGT--GTCATTGGCTCA-----AGAGAAGTTCCCATCGAACTTCAAT  
ATGAATCTTTGGGTACTTATCATGAGATTTATGAGCACTATCTAATAGTAGGAAATGTCA  
AAAAAGAAATCCATTGTATATACATTCGAACCACTCTTGGTCATATTTCTTTTTATCGAG  
AAATAGAAGAAGCCATACAGGGGTTTTGCGGGGCTATTCTACGCTATC-----  
-----ATGGCAGAACGGGCTGATCTGGTCTTTCACAATAAAGTGATAAATGGAA  
CTGCTATGAAACGACTTATTAGCAGATTAATAGATCATTTTCGGAATGGCATATACATCAC  
ACATCCTGGATCAAGTAAAGACTTTGGGTTTCCAGCAAGCCACTGCTACATCTATTTCA  
TTAGGAATTGATGATCTTTTAAACAATACCTTCTAAGGGATGGTTAGTCCAAGACACTGA  
ACAACAAAGTTTTATTTTTGAAAAACACCATCATTATGGAAATGTACATGCGGTAGAAA  
AATTACGTCAATCCATTGAGATATGGTATGCTACAAGTGAATATTTGAGACAAGAAATG  
AATCCTAATTTTCGGATGACTGATCCTTCTAATCCAGTCCATCTGATGTCCTTTTCGGGA  
GCTAGAGGAAATGCATCTCAGATACATCAATTAGTAGGTATGAGAGGATTAATGTCGGA  
TCCCAAGGACAAATGATTGATTTACCCATTCAAAGCAATTTACGCGAAGGGCTTTCTT  
TGACAGAATATATAATTTCTGCTACGGAGCCCGCAAAGGAGTTGTAGATACTGCTGTA  
CGAACATCAGATGCCGGATACCTCACGCGTAGACTTGTGGAAGTAGTTCAACACATTAT  
TGTACGTAGAACGGATTGTGGTACTATCCGAGGTATTTCCGTGAGTCCTCGAAATGGGA  
TGACGGAA-----AAAATTTTTGTCCAAACACTAATTGGTTCGTGTATTAGCAGACAATATA  
TATATGGGTCTACGATGCATTGCCGCTCGAAATCAAGATATTGGGATTGGACTTGTCAAT  
CGATTCATAACC-----TTTCGGGCACAACCAATATATATTTCGAACCCCTTTACT  
TGCAAGAGTGCATCTTGGATCTGTCAATTATGTTATGGTCCGGAGTCCCACTCACGGCGA  
CCTGGTCAATTTGGGAGAAGCCGTAGGTATTATTGCGGGTCAATCAATTTGGGGAACCA  
GGGACTCAACTAACATTAAGAACTTTTCATACCGGTGGAGTATTCACAGGTGATACTGC  
CGAACATGTACGAGCTCCTTCTAATGGAAAAATAAAATTCATGAGGATTGGTATTATC  
CCACACGTACCCGTCATGGGCATCCTGCTTTTCTATGTTCTATAGACTTGTATGTAECTAT  
TGAGACTCGGGATATTATCCATAATGTGAATATTCCACCAAAAAGTTTGATTTTAGTTCA  
AAATGATCAATATGTAGAATCAGAACAAGTAATTGCTGAGATTCGTGCCGGAACGTCTA  
CTTT-----TTTAAAGAGAAGGTACGAAAACATATTTATTCTGAATCAGAGGGAGAA---A  
TGC ACTGGAGTACCGATGTCCACCATGCATCTGAATATATACATGGTAATGTTTCATCTATT  
ACCAAAAACAAGTCATTTATGGATATTAGCAGGAGGTCCGCGCGGA-----TCCAGTATAG  
TGTCTTTTTTCGCTCCACAAAGATCAAGATCAACAAATGTTTCATTCTTTTTCTTTTGAA  
GAAAGA-----TATATCTTTGACCTCTCA-----ATGACTAAT---CATCGAGTAAGACATAAAT  
TGTTGGATACTTCTGGT-----GATAGGGAAATTCTTGACTATTCA---AGACCTGATCG  
AATCATATCCAATGGTCATTGGAATTCATATATCCTTCT---ATTCTCCAAGAAAAT-----TC  
TGATTTCTTGGCGAAAAAACGAAGAAATAGATTCATTATCCATTACAATATGATCAAG

AACGAGATAAAGAACTAATGCCCTGTTTTGGTATTTTCGATTGAAATACCCATAAAT-----G  
GTATTTTACGTAGAAATAGTATTCTTGCTTATTTTGATGATCCACGATACAGAAGAAAT---  
---GGAATTACTAAATAT--ACCATAGAGGTAGATTCAATCATAAAA-----AAAGAGGATTT  
GATTGAGTATCGAGGA---GCAAAAGAATTTAGTCTGAAATAC---AAGGTAGATCGGTTTT  
TTTTTATTCTCGAAGAAGTGCATATCTTACCCGGATCCTCGTTCATAATGGTCCGTAACA  
ATAGTATCATTGGAGTAGATACACAACCTCGCTTTAAATACAAGAAGCCGGGTAGGCGGA  
TTAGTCCGAGTGGAGAGAAAAAATAATTTGAACTGAAAATCTTTTCTGGAGATA  
TTTATTTTCTGGAGAAACAGATAAGATATCCAGGCACAGCGGCATTTTGATACCACCA  
GAGACGAAAAAAAAA-----AATTCTAAGAAA---TCAAAA---AAATTGAAAAATTGGATC  
TATGTCCAACGG-----ATCACACCCACCAAGAAAAAG-----TATTTTGTTCGGTTCGGTC  
CGTAGTCACATATGAAATAGCTGATGGGATAAATTTAGCAACACTTTTCCCTCGGGATCT  
CTTGCAGGAAAAGGATAATGTCCAACCTTAGAGTTGTCAATTATATCCTTTATGGAAATG  
GCAAGTCAATTCGAGGAATTTATCACACAAGT--CAATTAGTTCGGACTTGCTTAGTATT  
GAATTGGGACCAAGAAAAAATGGTTCTATAGAA-----GAGGTTTCATGCTTCCTTT  
GTTGAGGTAAGGACAAACGATCTGATTTCGCAATTTATAAGAATTGAGTTAGTCAAGTC  
CACTATTTTCGTATACCGGAAAAAGGTATGATAGGGCAAGTTCTGTATTGATTTCCGAT---  
----TTAGATCGCACCAATATCAATCCTTTTTATTCCAAGGCGAAGATTCAATCA-----  
--CTTACCCAACATCAAGGAACTATTGGTATT-----GGTACGTTGTTGAATCGAAATAAG---  
-----GAATGCCAATCTTTGATAATTTTGTTCATCATCCAATTGTTCTCGAATTGGT-----CCAT  
TCAATGGCTCGAAATATAAC-----AATGTGACAAAAGAATCAGATCCCATAATCCAAAT  
T--GATTTGCCGGGTCCCTTAGGGACTATTGTCCCT---AAAATAGCGAATTTTTTTTCATC  
T--TACTATTTAATAACT-----CATAATCATATCTTGTTAAAG---AAATATTTGCTACTTGA  
C-----AATTTTAAACAGACTTTC-----CAAGTACTTAAATACTGTTTAAATAGATGAAAA  
TAGGAGA-----ATTTATAATCCCGATCCCTGCGGTAACATAATTTGAATCCATTCCATTT  
GAATTGGTGCTTTCTCCATCACGATTATTGTGAAGAGACATCTACAATAATTAGC---CTT  
GGACAATTTATTTGTGAAAATGTATGTCTATTCAAATACGAATCA-----CACGTAAAAAA  
ATCTGGTCAAATTTAATTGTTTCAT--GTTGACTCCTTAGTTATAAGATCGGCTAAACCCT  
ATTTGGCCACTCCAGGAGCAACTGTTTCATAGCCATTATGGAGAAATCCTTTACGAAGGA  
GATACATTAGTTACATTTGTATATGAAAATCGAGATCTGGTGACATAACGCAAGGTCTT  
CCAAAAGTGGAAACAAATCTTAGAAGTGC GTTCGATTGATTCAATATCGATGAACCTAGA  
AAGGAGAGTTGAAGGTTGGAACGAACGTATACAAAGAATTCTTGGAATTCCTGGGGA  
TTCTTGATTGGAGCTGAGCTAACCATAGCCCAAAGTCGTATCTCTTTGGTTAATAAGATC  
CAAAAGGTTTATCGATCCCAGGGGTACAGATCCATAATAGACATATAGAAATTATTGTA  
CGTCAAGTAACATCAAAAGTGTTGGTTTCAGAA-----GATGGAATGTCTAATGTTTTT  
TTACCTGGAGAATTAATCGGCTTTTTTGGCAGCGGAACGAGCAGGGCGTGCTTTGGACG  
AAGCGATCTGTTATCGGGCAATCTTATTGGGAATAACGAGGGCATCTCTAAATACTCAA  
AGTTTCATATCCGAAGCAAGTTTTCAAGAAACCGCTCGAGTTTTAGCAAAGCTGCTCT  
ACGAGGTCGTATTGATTGGTTGAAAGGCCTGAAAGAGAACGTTGTTCTGGGAGGGATT  
ATACCTGTTGGTACCGGATTCCAAAATTAGTACACCCTTCAAGG-----CAAGACAAGA  
ACATTCAT-----TTGGAAATCAAAGAAAGAATCTATTTCGAGTTGGAAATA-----AGAGAT  
ATTTTGTACACCATAGAGAATTATTTGTTCTTACGTCCAAAACAATTTCCATGAGACA  
TCAGAACAATCATTACACGATTTAATGATTCC-----ATGACAAGAAGATATTG  
GAACATCAATTTGGAAGAGATGATGGAAGCAGGAGTTCATTTTGGTTCATGGTACTAAG  
AAATGGAATCCTAGAATGGCCCTTACATCTCTGCAAAGCGTAAAGGTATTCATATTAC

AAATCTCACTAGAACTGCTCGTTTTTTTATCAGAAACCTGTGATTTAGTTTTTGGATGCAGC  
AAGTAGGGGAAAAAACTTCTTAATCGTAGGTACAAAAATAAAGCAGCGGATTCAGTA  
GCATCAGCTGCAATAAGGGGCTCGGTGTCATTATGTTAATAAAAAATGGCTTGGTGGTAT  
GTTAACGAATTGGTCCACTACGGAAACGAGACTTCACAAGTTCAGGGACTTAAGAGCA  
GAACAAAAGATGGGGAACTCAACTGTCTCTCCAAAAGAGATGCTGCAATGTTGAAG  
AGAAAATTATCTACCTTGCAAACATATCTCGGTGGGATCAAATATATGGCGGGGTTGCCT  
GATATTGTGATCATCGTTGATCAGCAAGAAGAATATACGGCTCTTCGAGAATGTGTCATT  
TTGGGGATTCCGACAATTTGTTTAATCGATACAAATTGTGACCCAGATCTCGCAGATATT  
TCGATTCCAGCAAACGATGACGCTATAGCTTCAATCCGATTGATTCTTAACAAATTAGTA  
TCTGCAATTTGTGAGGGTCGTTCTAGT---TATATAAGAAATCGTATGGGACAAAAATAA  
ATCCACTTGGTTTTAGACTTGGTACAACCCAAAGTCACCGTTCCTTTTTGGTTCGCACAA  
ACAAAAATTATTCCGTGGGTTTACAGGAAGATGAAAAATACGGAATTGTATCAAGA  
ACTATGTACAAAAAATAGGAGAATATCCTCGGGT---TTCGAAGGAATCGCACGTATAG  
GAATTCAAAAAGAATCGATTTGATCCAGGTCATAATCCATATTGGATTCCCAAATTTAT  
TAATGGAGGGC-----CAAACACGA-----GGGATAGAAGAATTACAGATGAATGTACAAA  
GGAATTCATTCTGTGAACCGGAGACTCAACATTGCTATCACAAGAATTGAAAAACCT  
TATGGACAACCAAATATTCTTGCAGAATATATAGCTTTACAGTTAAAAAATAGAGTTTCG  
TTTTGAAAGTCAATGAAAAAGCTATTGAATTAACGAAACAGATACAAAAGGAA  
TTCAAGTACAAATTGCAGGGCGTATTGACGGAAAAGAAATTGCACGTGTGCAATGGAT  
CAGAGAAGGTAGGGTTCCCCTACAAACAATTTCGCGCTAAAATTGATCATTGTTCTTATA  
CAATTCGAACTATTTATGGAGTATTAGGCATAAAAATTTGGATATTTGTAAACGAGTTTA  
TGTCTCGTTATCGAGGACCTCGTTTCAAAAAATACGCCGTCTGGGGACTTTACCAGG  
ACTAACTAGTAAAAGACCTAAATCCGGAAGTGATCTTAAAACCAATTGCGTTCTGGG  
AAA---AGATCGCAATATCGTATTTCGTCTAGAAGAAAAACAGAAATTGCGTTTTTCATTATG  
GTCTGACGGAGCGACAATTAGTTAGATATGTACATATCGCTGGAAAAGCCAAAGGGTC  
AACAGGTCAGGTTTTACTACAACACTTGGAGATGCGTTTGGATAACATACTTTTTTCGATT  
GGGTATGGCTTCGACCATTCTGGAGCTAGGCAATTAGTTAACCATAGACATATTTTAGT  
TAATGGTTCGTATAGTGGATATAACCAAGTTATCGTTGCAAACCCCGAGATATTACTACTAC  
GAAGGATAAACAAAGATCAAAGCTCTGATTCAAATTTATATTGCTTCACCCCCCCTG  
AA-----TTGCCAAAACATTTGACTATTGACTCG-----TTCCAATATAAAGGATTAGTAAATC  
AAATAATAGATAGTAAATGGATCGGTTTAAAATAAATGAGTTGTTAGTCGTAGAATATT  
ATTCCC GCCAGACTATGTCACGTCGAGGTA CTGCAGAAGAAAAAACTGCAAATCCGA  
TCCAATTTATCGTAATCGATTAGTTAACATGTTGGTTAACCGTATTATGAAACACGAAA  
AAAATCATTGGCTTATCAAATTATCTATCGAGCCGTGAAAAAGATTCAACAAAAGACAG  
AAACAAATCCACTATCTGTTTTACGTCAAGCAATACATGGAGTAACTCCCGATATAGCA  
GTAAAAGCAAGACGTGTAGGCGGATCGACTCATCAAGTTCCTATTGAAATAGGATCTAC  
ACAAGGAAAAGCACTTGCCATTCGTTGGTTATTAGGGGCATCCCGAAAACGTCCGGGT  
CGAAATATGGCTTTCAAATTAAGTTCCGAATTAGTAGATGCTGCCAAAGGGAGTGGCGA  
TGCCATACGCAAAAAGGAAGAGACTCATAGAATGGCAGAGGCAAATAGAGCTTTTGCA  
CATTTTCGTATGGGTAGGGACACTATTGCCGATATAATAACTTCTATAAGAAATGCTGAC  
ATGAATAAAAAAGGAACAGTTCGAATAGCATCTACTAATATCACCGAAAACCTTTGTAA  
AATACTTCTACGAGAAGGTTTTATTGAAAATGTTCCGAAACATCAGGAAAATAACAAAT  
ATTTCTTGGTTTTCAACCCTGCGACAT-----AGAAAGACTAGGAAAGGAATATATAGA-----  
-----ACTGTTTTAAAGTGTATCAGCCGACCCGTTTACGAATTTATTCCAACATCAAC

GAATTCCTAAGATTTTAGGTGGAATGGGAATTGTAATCCTTTCTACTTCTCGAGGTATAA  
TGACAGATCGAGAAGCTCGACTAGAAAGAATTGGAGGAGAAATTTGTGTTATATATG  
GATGACAAAAGCTATACCAAGAATTGGTTCACGTAGGAATGGACGTATTGGTTCACGTA  
AGAATGGACGTAGAATACCAAAAAGGAGTTATTCATGTTCAAGCGAGTTTCAACAATAC  
CATTGTAACGTGTTACAGATGTACGAGGTCGGGTGGTTTCTTGGGCCTCCGCGGGTACTT  
CTGGATTCAAAGGCACAAGAAGAGGTACACCCTATGCTGCTCAAGCCGCAGCGGTAAA  
TGCTATTTCGTACAGTAGTTGATCAGGGTATGCAACGGGCAGAAGTTATGATAAAAAGGCC  
CTGGTCTCGGAAGAGATGCAGCATTACGAGCCATTTCGTAGAAGTGGTATACTATTAAGT  
TTAGTACGTGATGTAACACCTATGCCACATAATGGGTGTCGACCTCCTAAGAAAAGACG  
TGTGATGCCAACTATTAACAACCTATTAGAAAACACAAGACAGCCAATAAGAAATGTC  
ACGAAATCCCCGCTCTTAGAGGATGTCCTCAGCGTCGAGGAACATGCACTAGGGTGT  
AT--ATCACCCCCAAAAACCAAACCTCTGCCTTACGTAAAGTTGCCAGAGTACGATTAA  
CCTCTGGATTTGAAATCACTGCTTATATACCTGGTATTGGCCATAATTTACAAGAACATT  
CTGTAGTATTAGTAAGAGGAGGAAGGGTTAAGGATTTACCCGGTGTGAGATATCACATT  
GTTTCGAGGAACCCTAGATGCTGTTCGGAGTAAAGGATCGTCAACAAGGGCGTTCTAAAT  
ATGGGGTCAAAAAGCCAAAAATGGCAAGAAAAAGTTTGATTTCAGAGGGAGAAAGAA  
CGGCAGAAATTGGAACAGAAATATCATTGATTTCGTGATCTTCAAAAAAAAAAATAA  
GC-----GAAGTTCATCGTTGAGTGAAAAATGGGAAATTCATGGAAAATTGCAATCCC  
CACCACGTAATAGTGCACCTATACGTCTTCATCGACGTTGTTTTTTGACTGGAAGACCT  
AGAGCTAACTATCGAGACTTTGGGCTATCTGGACACATACTTCGAGAAATGGTTCATGC  
ATGTTTGTACCAGGGCGCAACAAGATCAAGTTGGATGATCAAAAATTCATTCATCTCAG  
TTATTTACAAGAAGAAAAAGAAGAAAAC-----AAGGGTTCTGTTGAATTTCAAGTATT  
AAGTTTCACCAGTAAGATACGTAGACTTACTTCACATTTGGAATTGCACAAAAGAGATT  
TTTTATCCCAAAGAGGTCTACGAATAATTCTGGGAAAACGTCAACGGCTCCTGGCTTAT  
TTGTCAAAGAAAAATAGAGTCCGTTATAAGAAATTAATGGATCAGTTGGATATTCGGGA  
GCCAAAAACTCGT-----ATCTACCGAATCGTTGCAATT  
GATGTTTCGATCCCGAAGAGAAGGAAGAGATCTCAGAAAAGTAGGTTTTTACGATCCGG  
TAAAGAATCAAACCTATTAAATGTTTCTTATTCTATATTTCTTGAAAAAGGTGCTC  
AACCTACGGGAACGTGTTGTGATATTTAAGGAAGGCAGAATTATTTCAAGAA---AGAA  
CTTCGATTCGAGTTAAT-----ATGGATAAATCCAAGCAACCTTTTCGTAAATACAAGCGAT  
CCTTTCGTAGGCGTTTGTCCCAATTGGATCGGGGGATCGAATCGATTATAGAAACATG  
AGTTTAATTAGTCGATTTATTAGTGAACAAGGAAAAATTTATCTAGACGGGTGAATAAA  
TTGACCTTGAAACAACAACGATTAATTAATGCTATAAAACAAGCTCGTATTTTATCT  
TTGCTACCTTTTCTTAATAATGAGAAA-----CAATTTGAGAGAGCCGAGTCGATCCCAG  
AACTACTGGTCCTAGAACTAGAAATAAAGTGACACGTTCACTAAAAAAAAATCCTTTT  
GTAGCTAATCATTATCGGGAAAAATTGAAAACTCAACATGAGGGAGGAGAAAGAAA  
TAATAGTAACTTGGTCTCGGGCATCTACCATTATACCCACAATGATTGGCCATACAATCG  
CTATTCATAATGGAAAGGAAAATTTACCTATTTATATAACAGATCGTATGGTAGGTCACA  
AATTGGGAGAAATTCGCGCCTACTCTGACTTTCGCGAGACATGCAAGAAACGACAATAA  
ATCTCGTCGTATGATTTTAAATCTTTTCTACTAGGTAATCTATTATCCTTATGCATGAAG  
ATAATAAATTCGGTTCGTTGTGGTTCGACTCTATTATGGATTTCTGACCACATTCTCCATA  
GGGCCCTCTTCTCTTCTCCTTCTCCGAGCTCGGGTTATGGAAGAAGGA-----ACCGAG  
AAGGAGGTATCAGCAACAACCTGGTTTTATTACGGGACAGCTCATGATGTTTCATATCGAT  
CTATTATGCGCCTCTGCATCTAGCATTGGGTAGACCTCATAACAATAACTGTCCTAGTTCT

ACCGTATCTTTTGTTCATTTCTTCTGGAACAATCACAAAACTTTTTTTATTATGGATCT  
ACTACCAGAAATTCAATGCGTAATCTCAGCATTCAATGTGTATTCCTGAATAATCTAATT  
TTTCAATTATTCAACCATTTCATTTTACCAAGTTCAACGTTAGCCAGATTAGTCAACATT  
TATATGTTTCGATGCAACAACAAGATGTTATTTGTAACAAGTAGTTTTGTTGGTTGGTTA  
ATTGGTCACATTTTATTTCATGAAATGGGTTGGATTGGTATTATTCTGGATACGGCAAAT  
CATTCTATTTCGATCT-----AATAAGTACCTTGTGTGCAGAATTGAGAAATCTATGGCT  
CGAATCTTTAGTATTCTCTTATTTATCACCTGTGTCTACTATTTAGGCAGAATGCCGTGCG  
CTATTGTCACTAAGAACTGAAAGAAGCCGAAGAAGACAAACCTCTTGTAACCTTTTCT  
TTTCGATTATAAACGATGGAATTGTCCATTGCGATATATAAAAAATGATCGGTTTGAAAA  
TGCTGTACGAAATGAAATGTCACAATATTTTTTTTATACATGTCCAAGTAATGGGAAAA  
AAAAATATCTTTTACATATCCACCTAGTTTATCGACTTTTTTCGGAAATGATAGAACGAAA  
AATGTCTTTGTACACGACAAAAAAATTATCCCATGAAGACCTG-----TATTGGGTTTATAC  
CAATGAACAAAAAAATACTACTTGAGCAATGAATTAATAAGTTCGAATAAAAGTTCTA  
GAAAAAGAAAAATTTTCTCTAGATATGCTCGAAAAAAGGACTAGATTTTGCAATCATGA  
GAATGAACAAGAATGCTTGACCAAAACATATGATCCTTTATTGAGCGGACCATGCCGTG  
GAGCAATAAAAAAATTTGATTTACGTATAAAAAGTCTTTGGATAAATAAGATCCATGAG  
CTACTTTTACGAGAATTTGAACATCAAGATCCAAATAATCAATCTATTGGAATAGAAGA  
AATCAGTAAAAAGGTTCCCTCGATGGTCATATAAATTGACCGTTCTGGAAGAACAGGAG  
GAAGAAGAAATTCGTTCAAGAAAAGCCAAACGTGTGGTAATTTATACTGATGCTTTGAT  
ACGCTACTCGCAACAATCAGATTTTCGTAGAGATATAATAAAAGGATCCATGCGTACTC  
AAAGACGTA AACAGTTACTTGGGAAATGTTTCAAGCAAATGCGCATTCCCCACTTTT  
TTTGGATCGAATAGACAAAACATTTTTTTTTTCTTCTTTTGAT--ATCTCTGAAATGATGA  
ATCTCATTTTTAGGAAT--GAGGAAAATGAACGTATAGCAATATCAGAACTTGGGATAA  
CATTATATTTGCTCAAGCAATAAGAGGTTTCGATGTTAGTAACCCAATCCTTTCTTAGAAA  
ATACATTGTATTGCCTTCATTGATAATAGCTAAAAATATTGGTCGTATGTTATTATTCCAAT  
TCCCCGAGTGGTATGAGGATTTGAAGGAATGGAATAGAGAAATGCATGTTAAATGTACC  
TATAATGGTGTTCAATTATCGGAAACAGAATTTCCCAAAGATTGGTTAACAGACGGTAT  
TCAGATAAAGATCCTATTTCTTTCTCTTAAACCTTGGCGAAGATCTACAAAAGGAA  
AAAAAGAAAATTTTTGTTTTTTAACAATTTGGGGAATGGAAGCAGAAGTTCCTTTTGGT  
TCTCCCCGAAAACGACCTTCTTTTTTTGAACCCATTTATAAAGA ACTCCAAAAATAAT  
TAGAAAAATAATTAGAAATAATTTTTTTTTTCGTTCTAAAAGTTTTT-----  
----AAAGAAAAAAAAGATGGGTTATCAAATAGTTCTA-----GTTATAAAACAAAAAAT  
GAAGGAATTTGAAAAAATAAACTCTAAAATAAAT--AATAAGATTATTCGCGAATCGGC  
CATTTCGAATTCGATCCATGAATTGGGCAAATTACTCACTCATAGAAAAAAAATAAAGG  
ATCTTGCTGATAGGACAGTCACAATCAGGAATGAACTAGAACGAATCACAAAAGACAA  
TAAAAA-----GATAAAAAATCGGAATCACGGAAACATATTTTGCAGATAT  
TTAAAAGAAAAAAGATCCGATTTATACGTAAATTAATAATTTTTTATGAAATCATTATTG  
AAAAATATACATAGATATCTTTCTACGTATGATTACTATTTTTAGGATCAATGCACAATT  
TTTCATGAACTTTATTTTCGTATGATTTATCCTCCTTGCCCAAGCATATGTATTTACAAAT  
TATCACAAACCCAATTACTTAACAAGTATCACTTGAGATCTGTACTTCAATATACCCATT  
CTTTTATTAAGGATAAAATCAAGGATTATTGTACACGAGGAATATTTGATTCCAAATCAA  
AGCAAAGAAAATTTATAAGTCTGGGAAAAATGAATGGAAAACTGGTTAAAGGGCC  
ATTATCAATACAATTTATCTCAGACAAAATGGTCTCGATTAGTACCTCAAAAATGGCGAA  
ATAGAATCAACCAACGTTCTACGATTCAAATAAAATTAATTTGATTCACATAAAAAA

GAAAAAGACCAATTAATTCATTACATGAAACAAGAAAAATTTAAAAAACTACTACAGAT  
ATTATCTTTTATCACATAAATATATGAATGAATATATTATTGCTCTGGATAGAAAATATTT  
GATTGTAGAATTCTCCATATTTGTCTTAGATTTTTTGATTGGATGGGAATGAATCAAGAA  
AAGGTTTATCGTCGGTTCTTCCCAGAATTTGTGCCACTTTTTGATGCATATAAGATTTAAA  
CCATGGATCATAACCGATCAAATTACTTCTTTTTAATTCCAAGAAAAAGAAGGAAGCAGA  
ACTAGATTTCTTCTGAAAAAATATTTCTTTTTCAATTAAGATGGGATGACTCCTTGAA  
TCAAAGAATGATCAATAATATCAAGGTATATTGTCTCCTACTTAGACTGATAAATCCAAG  
GAAAATGCTATATCCTCGATTCAAAGAGGAGAGATGCATCTGGATGTAATGCTAATTC  
AGAAAGATCTAGCTCTTACAGAATTGATAAAAAAGGGAGTATTGATTATCGAACCGATT  
CGTTTATCTATAAAAAGGGATGGAAAATTTATTATATATCAAACCCTAGGTATTTTCATTGA  
TCGATAAAATTAAGTACAGTTATTATGATTTCTTTGTTCTGAAAATATTCTATCTCCTAG  
ACGTCGTAGAGAATTGAGAATTCTAATTTGTTTTAGATTTCTTTGGCCCAATTACCGATT  
AGAAGATTTAGCTTGTATGAATCGCTATTGGTTTAATACCAATAATGGCAATCGTTTCAG  
TATGTCAAGGATATATATGTATCCAATGAAACGACATCAATCAAATCCTGGATCTTCGA  
ATTGAGAGAGATATTGAGAGAGATCAAGAATTCTCACTATTTCTTAGATTCATGGATCA  
AATTCGATTCAGTGGGATCTTTCCTCACATTTTTTTCCACCAAGAACGTTTTATGAAAC  
TCTTTGACCCCGAATTTGGAGTATCCTACTTTCA---CGTGATTTCG-----CAGGGTTCAAC  
AAGCAATCGATATTTACG-----ATCAAAGGTGTAGTACTGCTTGTAGTAGCG---GTCC  
TTATATCT-----CGTATTAACAATCGAAAGATGGTCGAAAGAAAAAATCTCTATTTGA  
TGGGGCTTCTTCTATACCTATTCTTCTTATACCTATGAATTCCATTGGACCCAGAAATG  
AGACATTGGAAGAATCTTTT---TGGTCTTCCAATATCAATAGGTTGATTGTTTTCG---CTCC  
TGTATCTTCCAAAAGGGAAAAAGATTTCTGAGAGTTGTTTCATGGATCCGCAAGAGAG  
TACTTGGGTTCTCCCAATAAAT-----AAAAAGTGTATCATGCCTGAATCTGACCGGA  
GTTTCGCGGTGGTGGAGGAACCGGATCGGAAAAAAGAGG-----GATTCTAGTTGTAAGAT  
ATCT-----AATGAAACCGTAGCTGGAATTGAGATCTCATTCAAAGAGAAAGATAGCAA  
A---TATCTGGAGTTTCTTTTTTTATCCTATACG-----GATGATCCGATCCGCAAGGACCATG  
ATTGGGAATTGTTTATCGTCTTTCTCCGAGGAAGAAGCGAAACATAATCAACTTG-----  
AATTCGGGACAGCTATTTCGAAATCTTAGGGAAAGACTTGATTGTTATCTCATGTCTGCT  
TTTCGTGAAAAAAGACCAATTGAAGGGGAGGTT---TTCTTCAAACAACAAGGA---GCT  
GAGGCAACTATTCAATCAAATGATATTGAGCATGTTTCCCAT-----CTCTTCTCGAGAAAC  
AAGTGGGGTATTTCTTTGCAAATTTGTGCTCAATTTTCATATGTGGCAATTCCGCCAAGAT  
CTCTTCGTT-----AGTTGGGGGAAG---AATCAGCACGAATCGGATTTTTTTGAGGAAC---  
GTATCGAGAGAGAATTTGATTTGGTTAGACAATGTGTGGTTGGTAAACAAGGATCGG---  
-----TTTTTTAGC-----AAGGTACGGAATGTATTGTCAAATATTCAATATGATTCC-----AC  
AAGA-----TCTATTTTCGTTCAAGTAAGGGATTCTAGCCAATTGAAAGGATCTTCT---GAT  
CAATCCATAGATCATTTCGATTCCATTAGA-----AATGAGGATTCGGAA-----  
-----TATCACACATTGATCGATCAAACAGAGATTCAGCAACTAAAAGAAAGA  
TCGATTCTT---TTGGAT-----CCTTCTTTCTTCAAACGGAACGAACAGAGATAGAATCAG  
AT-----CGATTCCCGAAA-----TGCCTTTTTGGATCTTCC-----TCAATGTCCCGGCTATTCA  
CG---GAACGTGAGAAGCAGATGAATAATCATCTGCTTCCGGAAGAAATCGAAGAATTTCT  
TT-----GGGAATCTACAAGATCAATTCGTTCTTTTTTTCTCTGACAGATGG-----TCAGAA  
CTTCAT---CTGGGTTTCGAATCCTACTGAGAGGTCCACTAGAGATCAG-----AAATTTT  
TGAAGAAAAACAAGATGTTTCT---TTTGTCCCTTCCAGGCGATCGGAA-----AATA  
AAGAAATGGTTGATATATTCAAGATAATTACGTATTTACAAAAT-----ACCGTCTCAATTC



ATCCTATTTTCATCAGATCCGGGATGTGATATGGTTCCG---AAGGATGAACCGGAT---ATGG  
ACAGTTCCAATAAGATTTTCATTCTTGAAAAAATCCATTTTTTGGAT-----TTATTTTCATCT  
ATTCCATGACCGGAACAAAGGGGGATACACGTTA-----CACCACGATTTT--GAATCA--  
GAAGAGAGATTTCAAGAAATGGCAGATCTATTCATCTATCAATAACCGAGCCG---GAT  
CTGGTGTATCATAGGGGATTTGCCTTTTCTATTGATTCCTACGGGTTGGATCAAAAAAAA  
-----TTCTTGAATGAGGTATTCAACTCCAGAGATGAATCGAAAAAGAAATCTTTA-----  
TTGGTTCTACCTCCTCTTTTTTAT-----GAAGAGAATGAATCTTTTTTATCGAAGGATCAGA  
AAAAAATCGGTCCGG---ATCTACTGCGGGAATGATTTGGAAGATCCAAAACATAAAAC  
AGCGGTATTTGCTAGCAACAACATAATGGAGGCAGTCAATCAATATAGATTGATCCGAA  
ATCTGATTCAAATCCAATATAGCACCTATGGG-----TACATAAGAAATGTATCGAATCGAT  
TCTTTTTAATG-----AATAGATCCGATCGCAACTTCGAATATGGAATTCAA-----AGG  
GATCGAATAGGAAATGATACTCTGAATCATATAACTATAATGAAATATACGATCAACCAA  
CATTTATCGAATTTGAAAAAG---AGTCAGAAGAAATGGTTTGATCCT-----CTTATTT  
CTCGAACCGAGAGATCCATGAATCGGGATCCTGATGCATATAGATACAAATGTTCCAAT  
GGGAGCAAGAATTTCCAGGAACATTTGGAACATTTTCGTTTCTGAACAGAAGAAC-----  
-CGTTTTCAAGTAGTGTTCAATCGATTACGTATTAATCAATATTCGATTGATTGGTCCGAG  
GCTATCGACAAACAAGATTTGTCTAAGTCACTTCGTTTCTTTTTGTCCAAGTCA-----  
-----CTTCTCTTTTTGTCC-----AAGTCACTTCCCTTTTTG---TCCAAGT  
CACTTCCCCTTTTCTTTGTGAGTATCGGGAATATCCCCATTCATAGGTCCGAG---ATCCA  
CATCTAT---GAATTGAAAGGTCCGAATGATCAACTCTGCAATCAGTTGTTAGAATCAATA  
GGTGTTCAAATCGTTCATTTGAATAAATTGAAACCCTTTTTATTTTTATTGGAT-----GA  
TCATGATACTTCC---CAAAGACCGAAATTCTTGATCAATGGAGGAACAATATTACCATTT  
TTGTTCAAAAAGATACCA---AAGTGG---ATGATTGACTCATTCCATACT-----AGAAATAA  
TCGCAGGAAATCCTTTGATAACACGGATTCCATTTCTCAATGATATCCCAGGATCGAGA  
CAATTGGCTGAATCCCGTGAAACCATTTTCATAGAAGTTCATTGATATCTTCTTTTTATAA  
AGCAAATCGACTTCGATTCCTGAATGATCCACATCACTTCTGGTTCTAT-----TGTAACAA  
AAGATTCCCTTTTTATGTG-----GAAAGACCCGTATCAATAATTATGAT-----CTTAC  
ATAT---GGACAATTCCTCAATATCTTGTTTCATTCGCAACAAA---ATATTTTCTTTGTGCGTC  
GGTAAA-----AAAAACATATTTTTTTGGAG---AGGGAGACTATTTACCAATCGAGTCA  
CGGGTATCTGACATATTCATACCTAAGGATTTCCACAAAGTGGTGACGAAACG---TATA  
ACTTGTACAAA-----TCTTTCCATTTT-----CGATCCGATCCATTCGTTTCGT-----AGAGCT  
ATTTACTCGATCGCAGACATTTCTGCAACACCTCTAACAGAGGAACAAATAGTCAATTT  
TGAAAGAACTTATTGTGAGCCTCTTTCAGATATGAATCTATCTGATTCAGAAGGGAAGA  
ACTTGTATCAGTATCTCAGT-----TTCAATTCAAACATGGGTTTGATTACACTCCATGTT  
CTGAGAAATATTTACCA-----TCCGGAAAGAGGAAAAA-----CGGAGTCT  
TTGTCTAAAG-----AAATGCGTTGAGAAACGGCAGATGTATAGAATCTTTCAACGAGATA  
GTGCTTTTTCAAATCTCTCAAATGGAATCTGTTCCAAACATATATGCCATGGTTCCCTTA  
CTTCGACAGGGTGCAAATATCTAAATTTTACCCTTTTAGATACTTTTTTCAGACCCATTG---  
---CCGATACTAAGTAGCAGT---CAAAAATTTGTATCCATTTTTCATGATATTATGCATGGAT  
CAGATATATCATGGCCAATTCCTCAGAAG-----ATTCTTCCACAATGGACT  
CTG---ATAAGTGAGATTTTCGAGTAAGTGTTCACAGAAT-----CTTCTTCTGTCCGAAGAAA  
TGATTCATCGAAATAATGAGTCACCCGTTCCATTGATATGGACACATCTGAGATCAACA  
AATGCTCGGGAGTTC---CTCTATTCATCCTTTTCCCTTCTTCTTGTGCTGGATAT---CTCG  
TTCGTATACATCTTCTCTTTGTTTCCCGA-----GCCTCTAGTGAGTTACAGACAGAGTTAG

AAAAGATCAAATCTTTGATGATTCCATCATACATGATTGAGTTGCGAAAACCTTCTGGAT  
AGGTATCCTACATCTGAACTGAATTCTTTCTGGTTAAAGAATCTCCTTCTAGTTGCTCTG  
GAACAATTAGGAGATTCTCTGGAAGAAATACGGGGTTCTGCTTCTGGTGGCAACATGC  
TATTGGGTGGTGGTCCC-----GCTTATGGG--GTCAAATCAATACGTTCTAAGAAG  
AAATATTTGAATATCAAT-----CTCATCGATCTCATA---AGTATCATACCAAATCCCATCA  
ATCGAATCACTTTTTTCGAGAAATACGAGACATCTAAGTCGTACAAGTAAAGAGATCTAT  
TCATTGATAAGAAAAAGAAAAACGTGAACGGTGATTGGATTGATGATAAAATAGAAT  
CCTGGGTCGCGAACAGTGATTTCGATTGATGATGAAGAAAGAGAATTCTTGGTTCAGTT  
CTCC-----ACCTTAACGACA-----GAAAAAAGGATTGATCAAATCTATTGAGTCTGACT--  
-CATAGTGATCATTATCA-----AAGAATGACTCTGGTTATCAAATGATTGAACAAC  
CGGGATCAATTTACTTACGATACTTAGTTGACATTCAT-----AAAAAGTATCTAATGAATT  
ATGAGTTCAATAGATCCTGTTTAGCAGAAAGACGGATATTCCTTGCTCATTATCAGACAA  
TCACTTAT-----TCACAAACCTCGTGTGGGGCTAATAGTTTTCAATTTCCCATCTCATGGA--  
-----AAACCCTTTTCGCTCCGCTTAGCCCTATCCCTTCT--AGGGGTATTTAGTGATAG  
GTTCTATAGGAACTGGACGATCCTATTTGGTCAAATACCTAACGACAAACTCCTATGTTT  
CTTTCATTACGGTATTTCCGAACAAGTTCCTGGATGACAAGCCTAAAGGTTATCTTATTG  
AT-----GATATCGAT--ATTGATGATAGTGACGATATCGAT-----ATTGATGATAG  
TGACGATATCGATATTGATGATAGTGAC-----GATATTGATGATGACCT  
TGATACGGAGCTGCTAACTATGACGAATGTGCTA-----ACTATGTATATGACG-----CC  
GAAAATAGACCGATTTGATATCACCTTCAATTCGAATTAGCAAAGCAATGTCTCCTT  
GCATAATATGGATTCCAAACATTCATGATCTGTATGTGAATGAGTCGAATTACTTATCTCT  
CGGTCTATTAGAGAACTATCTCTCC-----AGGGATTGTGAAAGATGTTCC---ACTAGAA  
ATATCTTGTTATTGCTTCGACTCATATCCCCAAAAAGTGGATCCCGCTCTAATAGCTC  
CGAATAAATTAATACATGCATTAAGATACGAAGGCTTCTTATTCCACAACAACGAAAG  
CACTTTTTTCACTTTTCATATACTAGGGGATTTCACTTGGAAAAGAAAATGTTCCATACT-  
----AACGTATTCGGGTCCATAACCATGGGTTCCAATGCACGAGATCTTGTAGTACTTATC  
AATGAGGCCCTATCAATTAGTATTACACAGAAGAAATCAATTATAGAACTAATACAATT  
AGATCAGCTCTTCATAGACAAACTTGGGATTTGCGA-----TCCCAGGTAAGATCGGTT  
CAGGATCATGGGATCCTTTTCTATCAGATAGGAAGGGCTGTTGCACAAAATGTACTTCT  
AAGTAATTGCCCATGGATCCTATATCTATCTATATGAAGAAGAAA-----TCATGTAAGGA  
AGGGGATTCTTATTTGTACAAATGGTACTTCGAACTTGGAACGAGCATGAAGAAATTA  
CGATACTTCTTTATCTTTTGAGTTGTTCTGCCGGATCGGTCGCTCAAGATCTTTGGTCTT  
CACCC-----GGACCCGATGAAAAA---AATTGGATCACTTCTTATGGATTTCGTTGAGAATG  
ATTCT--GATCTAGTTCATGGCCTATTAGAAGTAGAAAGCGCTCTGGTGGGA-----TCCTT  
ACGGACAGAAAAAGATTGCAGTCAGTTTGATAATAAT-----CGAGTGACATTACTTCTTC  
GGTCCGAACCAAGGAAT--CAGTTAGATATGATGCAAAATGGATCTTGTCTATCGTTGA  
TCAGAGATTTCTATATGAAAAA-----TACGAATCGGAGTTTGAAGAA---GGGAAGGA---  
---GCCGTCGACCCGCAA-----CAGATAGAGGAGGAT-----TTATTCAATCAC-----  
ATAGTTTGGGCTCCT-----AGAATATGGCGCCCT-----TGTGGCAATCTATTTGATTGTAT  
CGAAAGGCCCACTGAATTGGGATTTCCC---TATTGGGGCGGGTCATTTCCG-----GGC  
AAGCGGATCATTTATCATAAAGAGGATGAGCTTCAAGAGAATGATTTCGGAGTTCTTGCA  
GAGTGAACCATGCAGTACCAGACACGAGATAGATCTTCCAAAGAACAAGGCTTTTTT  
CGAATAAGCCAATTCATTTGGGACCCTGCGGATCCATTCTTTTTCTATTCAA---GATC  
AGCCCTTTGTCTCTGTGTTTTACGTCGAGAATTCTTTGCAGATGAAGAGATGTCAAAG

GGGCTTACTTACCAAACAAATCCTCCTACATCTATATATAAACGCTGGTTCATC-----  
AAGAATACGCAAGAAAAGCACTTCGAATTGTTGATTCATCGCCAGAGATGGCTTAGAA  
CC-----AATAGTTCATTATCT-----AATGGATCTTCCGTTCTAAT-----ACTCTATCCGAG  
AGTTATCAGTATTTATCAAATCTGTTCCCTATCTAAC---GGAACGCTATTGGATCAAATGAC  
AAAGACATTGTTGAGAAAGAGATGGCTTTTCCCGGATGAAATGAAACATTTGATT-----C  
ATGTAACAGGAGAAAGATTTCCCATTCCTATGCCTAGATCTCGG---ATAAATGTAAATTT  
TATTGATAAGACCTCTTCAATTGTAGCCAATATTCTATTACGAATAATTCCGACAACCTTCA  
GGAGAAAAAAGGCATTTACCTATTACAGAGATGGG-----ATGTTGGCTCAATCCGAAG  
GAAATTATGCGGAAGCTTTACAGAATTATTATGAAGCTACGCGACCAGAAATTGATCCC  
TATGATCGAAGTTATATACTCTATAACATAGGCCTTATACACACAAGCAACGGAGAGCAT  
ACAAAGGCTTTGGAATATTATTTCCAGGCACTAGAACGAAACCCGTTTTTTACCACAAGC  
TTTTAATAATATGGCCGTGATCTGTCATTAC--CGGGGAGAACAGGCCATTCTACAGGGT  
GATCCGAAATTGCGGAGGCTTGGTTCGATCAAGCTGCTGAGTATTGGAACAAGCTAT  
AGCGCTTACTCCAGGTAATTATATTGAAGCACATAATTGGTTGAAGATCACGAGGCGTT  
TCGAATTCGAAATGAATTGGCGATCAGAACATATATGGATAGAACCTATAATGGGGTCTC  
GAAAAACAAGTAATTTTTCTGGGCCTGTATCCTTTTTTTTAGGTTCACTAGGATTCTTAG  
TGGTTGGAACCTCCAGTTATCTTGGTAGGAATCTGATATCCGTATTTCCATCTCAGCAA  
TTATTTTTTTTCCACAAGGGATCGTGATGCTTTCTATGGGATCGCAGGTCTATTCATTAG  
CTCCTATTTGTGGTGACAAATTCATGGAATGTAGGTAGTGGTTATGACCGATTGATAG  
AAAGGAAGGAATAGTGTGTATTTTTCGTTGGGGATTTCTTGGGAATAAATCGTCGCATCT  
TCCTTCGCTTATTTATGAGAGATATCCAATCCATCAGAATGGAGGTTAAAGAGGGTCTTT  
ATCCTCGTCGTGTCCTTTATATGGAATTAGAGGCCAAGGAGCCATTCCCTTGACTCGT  
ACTGATGAGTAT--TTTACTCCACGAGAAATTGAACAAAAAGCTGCCGAATTGGCCTAT  
TTCTTGCGGTACCAATTGAAGTATTT

>Oncidium

ATGGAAAAATGTTGGTTCAATTCAATGTTGTCTCTAAGTAAATCAATGGATAATCTTGAT  
GCTCTTGGACATAACCAGTGGAAGCGAAGAACTAAT-----GATGCGGAGAAAAAGATTC  
CTAGTTTCAGTAATATTAATTTATTTGATAGCAGGAATATTTGGAGTTTGATCTCTGA  
TCATACTTTTTTCGTTAGAAATAGTAATGGTGACACTTATTCTGTATATTTGATATTGAC  
AATCAAATTTTTGATATTGACAATGCTAGT-----TCTTTTTTGAGTGAAGTAGAGATTCTT  
TTT-----AGTTATTTGAATAATGGGTCTAATAGTAGTAAT--TATTATTAT--TCCAT  
GTATGATACTCAATCTAATTGGAATAATCACACTACTAGTTGCGTTGATAGTTATCTTCGT-  
----TTTGAAATCAGTCTGAATAGTGACATTTACAGTGGTATCAAC-----TACATTC  
TAGTTTAATTTGTACGAGTGGAATTTCTAGTATCAAACTAGTAGC-----AGTTCTTTCAA  
TATAATAGAAAAATATAATGATTTGATATAAATACAAAATACAAACATTTATGGGTTCAA  
TGTGAGAATTGTTATGGATTAAATTATAAAAAATCTTTAGTTCAAAAATGAATATTTGT  
GAACACTGCGGATATCATTTGAAAATGAGTAGTTCAGATAGAATCGAACTCTTGATTGA  
TCCCTGGCACTTGGGAGCCTATGGATAAAGATATGGTCTCTATGGACCCCATGAATTTCA  
TTCAGAGGAGGAACCTTATATAGATCGCATCTCTTTTTATAAAGAAAAACGGGTTTAA  
CTGAAGCTGTTCAAACGGGCGTAGGTCAACTAAATAGTATTTCCATAGCAATGGGAGTT  
ATGGATTTTCAGTTTATGGGAGGTAGTATGGGATCCGTAGTAGGTGAGAAAATCACCCG  
TTTGATCGAGTATGCTACTAATCGATCTCTACCTGTCATTATTGTGTGCGCTTCTGGAGG  
AGCACGCATGCAAGAAGGGAGTTTGGAGCTTGATGCAAATGGCTAAAATATCTTCTGCT  
TCATATGATTATCAATCAAATAAAAAGTTATTCTATGTATCAATCCTTACATCTCCTACAA

CTGGCGGAGTTACAGCAAGTTTTGGTATGTTGGGAGATATCATTATTGCTGAACCTAAT  
GCCTACATTGCGTTTGCGGGTAAAAGAGTCATTGAACAAACATTAATAAAGACAGTAC  
CTGACGGTTCAACAAGTGGCTGAGTATTTATTCCATAAGGGCTTATTGACTCAATCGTAC  
CACGGAATCTTTTCAAAGGTGTTCTTAATGAGTTATTTTCAGCTACACGGTTTCCTTCCCT  
TGAATCAAGAT-----ATGGGAACCCTTCGAGCTGACGAAATTAGTAATATTATACGGA  
ACGTATTGAACAATATAATAGAGAAGTAAAGATTGTGAATACCGGTACCGTACTTCAAG  
TGGGCGACGGCATTGCTCGTATTCATGGTCTTGATGAAGTAATGGCAGGTGAATTAATA  
GAATTTGAAGAGGGTACCATAGGTATTGCTCTGAATTTGGAATCAAATAATGTTGGCGT  
TGTATTAATGGGTGATGGTTTGATGATAAAAGAGGGAAGTTCTGTAAAAGCAACGGGA  
AGAATCGCTCAGATCCCTGTGAGCGAGGCTTTTTTGGGTCGTGTTATAAATGCTCTGGC  
TAAACCTATTGATGGGAGAGGTGAAATTTTCATCTTCTGAATCTCGGTTAATTGAATCTCC  
TGCCCCAGGTATTATTTGAGACGTTCCGTATATGAGCCCCTTCAAACGGGACTTATTGC  
TATTGATTCAATGATTCCCTATAGGACGCGGGCAACGAGAATTAATTATTGGAGACAGAC  
AGACTGGTAAAACAGCAGTAGCCACAGATACGATTCTCAATCAAAAAGGACAAAATGT  
GATATGTGTTTATGTAGCTATTGGTCAAAAAGCATCTTCTGTGGCTCAGGTAGTACTAC  
TTTCCAAGAAGGAGGGGCAATGGAATACACTATTGTGGTAGCCGAAACAGCAGATTCG  
CCTGCTACATTACAATATCTCGCTCCTTACACAGGAGCGGCTCTCGCTGAATATTTTATG  
TACCGTGAACGACATACTTCAATAATTTATGATGATCTTTCCAAGCAGGCACAAGCTTAT  
CGTCAAATGTCTCTTCTATTAAGAAGACCCCCAGGTCGTGAAGCTTATCCAGGAGATGT  
TTTTTATTTGCATTACGACTTTTGGAAAGAGCCGCTAAATCAAGTTCTCGTTTAGGTG  
AAGGAAGTATGACTGCTTTACCAATAGTGGAGACTCAATCTGGAGACGTTTCGGCTTAT  
ATTCCTACTAATGTAATTTCTATTACAGATGGACAAATATTCTTATCTGCCGATCTATTCA  
ATGCTGGAATTAGGCCTGCTATTAATGTAGGTATTTCTGTTTCAAGAGTAGGATCGGCAG  
CTCAAATTAAGCCATGAAACAAGTAGCTGGCAAATCAAATTTGGAAGTACTCAATT  
TGCAGAATTGGAAGCCTTTGCACAATTTCTTCTGATCTAGATAAAGCTACTCAGAATC  
AATTGGCAAGAGGTCAACGATTACGTGAGTTGCTCAAACAATCCAATCAGACCCTCT  
CGCGGTGGAAGACCAGATAGCTACTATTTACACCGGAACAAATGGATATCTTGATGCGT  
TAGAAATTGGACAGGTAAAGAAATTTCTGGTTGGGTTACGTACCTACTTAACAAAGAA  
GAAACCTAAATCCAAGAAATTTATCTTCTACCAAGATATTCACCGAAGAAGCTGAAA  
CCTTTTGAAAGAAGCTATTACAGGAACAGATTGAACTCTTTCTACTTCAGGAACAAAC  
AATGAGAAGCAATCCCACTACTTCTGATCCTGTGGTTTCTACACTGAAGAACAAAC  
CAAGGGCGTATTGCTCAAATTATTGGCCAGTGCTGGATGTCATTTTTCCACCGGGTAA  
GATGCCTAATATTTATAATGCTTTGGTAATTCAGGTCGAGATACTGTTGGTCAGCAAAT  
TAATGTAAGTGTGAAGTACAACAATTATTAGGAAATAATCGAGTTAGGGCTGTAGCTAT  
GAGTGCTACAGATGGTCTGATGAGAGGAATGAAAGTGATTGACACGGGAGCTCCTCTA  
AGTGTTCCAGTCGGGGGGGCTACTCTCGGACGAATTTTCAACGTTCTTGGAGAGCCCG  
TTGATAATTTAGGTCCTGTGATACTCGCACAACATCTCCTATTCATAGATCTGCACCCG  
CCTTCATACAGTTAGATACAAATTTATCAATCTTTGAAACAGGGATTAAAGTGGTGGATC  
TTTTAGCCCCCTATCGCCGTGGAGGAAAAATAGGACTATTTGGGGGAGCTGGAGTGGG  
TAAAACAGTACTCATTATGGAATTGATCAACAACATTGCCAAAGCTCACGGAGGCGTAT  
CCGTATTTGGCGGAGTAGGTGAACGTAAGTACTCGTGAAGGAAATGATCTCTACATGGAAAT  
GAAAGAATCCGGGGTGATTAATGAAAAAGATATTGCAGAATCAAAGTGGCTCTAGTC  
TATGGTCAAATGAATGAACCGCCAGGAGCTCGTATGAGAGTTGGCTTGACTGCCCTAA  
CCATGGCGGAATATTTTCGGGATGTTAATGAGCAAGATGTACTTCTATTTCATCGACAATA

TATTTTCGTTTTCGTTCAAGCAGGGTCCGAAGTCTCTGCCTTATTAGGTAGAAATGCCTTCTG  
CAGTGGGTTATCAACCTACCCTTAGTACGGAAATGGGTTCTTTGCAAGAAAGAATTACT  
TCTACCAAAGAAGGATCCATAACATCAATCCAAGCAGTTTATGTACCTGCGGATGATTT  
GACCGACCCTGCTCCTGCCACGACATTTGCACATTTAGATGCTACTACCGTATTATCAAG  
AGGATTAGCTGCCAAGGGTATTTATCCAGCAGTAGATCCCTTGGATTCAACGTCAACTA  
TGTTACAACCTCGGATCGTTGGCGAGGAACATTATGAAACTGCGCAAAGGGTTAAGCA  
AACTTCACAACGTTACAAAGAACTTCAGGACATTATAGCTATCCTTGGGTTGGACGAAT  
TATCCGAAGAAGATCGTTTAACTGTAGCAAGAGCACGCAAGATTGAGCGTTTTCTTATCA  
CAACCCTTCTTTGTGGCAGAAGTATTTACTGGTTCTCCAGGGAAATATGTTGGTCTCGC  
AGAAACAATTCGGGGGTTTTCAATTCATCCTTTCCGGAGAACTAGATGGTCTTCCCGAGC  
AGGCCTTTTATTTGGTGGGTAACATCGATGAAGCTACCGCGAAAGCTATAAACTTAGAA  
GAGGAGAGCAAATTGAAGAAAATGACCTTAAATCTTTGTGTACTGACTCCTAATCGAAT  
GATTTGGAATTCGAAGTTAAAGAGATTATTTTATCTACTAATAGTGGACAAATTGGGGT  
ATTACCAAACCATGCCCCATTGCTACGGCTGTAGATATAGGTCTTTTGAGAATACGGCT  
AAAC---CGATGGTTAATGGTGGCTCTTATGGGCGGTTTTGCTAGAATAAGTAATAATGAG  
ATCACCATTTTAGGAAATGGTGCAGAAATGAGTACTGACATTGATCCACAAGAAGCTC  
AACAACTCTTGAAATAGCTGAAGCTAACTTTAGTAGAGCTGAGGGTAAGAGACAAGC  
AATTGAGGCAAATCTAGCTCTCAGACGAGCTAAGACACGAGTAGAAGCTGTCAAAGC  
GATTTCCATGAAAAATATAACCGATTCTTTTGTTCGGTGGGTCACTGGCCATCCGCTGG  
TAGTTTCGAGTTTAATACCGATATTTTAGCAACAAATCCAATAAATCTAAGCGTAGTTCT  
GGGTGTATTGATTTTTTTTTGGAAAGGGAGTGTGTGCGAGTTGTGTA-----CGAAAACAG  
AGGATCTTGAGTACTATTCGAAATTCAGAAGAATTACGTAGAAGAGCCATTGAACAGC  
TTGAAAGAGCTCGGGTTAGATTACGGAAAGTGAAATCGAAGCAGATGAGTATCGAAC  
GAATGGATACTTTGAGATAGAACGAGAAAAAGTAAATTTGATTAATGCTACTTGCAATA  
GTCTGGAACGATTAGAAAATTACAAAAATGAAACTCTTTTTTTTTGAAAAACAAAGAGC  
AATTAATCAGGTCCGACAACAAGTTTTACAACAAGCCTTACAAAGAGCTCTAGGAACT  
TTGAATAGTTGTTTGAATAGCGAATTACATTTTCGTACCATTAGTGCTAATATTGGTATCC  
TCAGGTCCGTGGAAGAAATAACCGATATGAATCCACTTATTTCTGCTGCTTCCGTTATTG  
CTGCTGGATTGGCTGTAGGGCTTGCTTCTATCGGACCTGGGGTTGGTCAAGGCACTGCT  
GCGGGCCAAGCCGTAGAAGGTATTGCGAGACAACCAGAAGCTGAGGGTAAATACGA  
GGTACTTTATTGCTTAGTCTGGCTTTTTATGGAAGCTTTAACAATTTATGGACTGGTCGTG  
GCATTAGCTCTTTTATTTGCAAATCCTTTTGTATGAATGTTATAACCATGTTCCATTA  
CAACTCAAAGGGTTATACGATATATCAGGTGTAGAAGTAGGCCAACATTTATATTGGCAA  
TAGGAGGTTTACAAATTCATGCTCAAGTACTTATCACTTCTTGGGTTGTAATTGCTATTTT  
ATTAGGTTTCAGTCATCATAGCTGTTCCGGAATCCACAAACCATTCCGACCGACGGTCAGA  
ATTTCTTCGAATATGTCCTTGAATTTATTCAAGACTTGAGCAAAACTCAGATTGGAGAG  
GAGTATGGTCCTTGGGTTCTTTTATAGGAACGATGTTCCCTATTTATTTTTGTTTCTAACT  
GGTCAGGTGCTCTTTTACCTTGGAATAATCATAAAGTTACCTCATGGGGAGTTAGCTGCG  
CCCACGAATGATATAAATACTACTGTTGCTTTAGCTTTACCAACGTCAGTGGCATATTT  
TATGCGGGTATTAGCAAAAAAGGATTGGGATATTTCCGGAAATACATTCACCAACTCC  
AATACTTTTACCAATTAATATCTAGAAGATTTACCAAACTTTATCTCTTAGTTTTCGA  
CTTTTCGGGAATATATTGGCTGATGAATTAGTGGTTGTTGTTCTTGTTCCTTAGTGCCTT  
CAGTAGTTCCTATACCTGTATGTTTCTTGGATTATTTACAAGTGGTATTCAAGCTCTTAT  
TTTTGCAACTTTGGCTGCGGCTTATATAGGTGAATCCATGGAGGGTCATCATATGATATT

TGCGACCTTAGAACATATATTAACCTCATATTTCCCTTTTCGATCATCTCAATTGTGATTCTA  
ATTCATTTGATGAACTTATTAGTCTACGAAATCAAAGGATTACGTAATTCGTCAGAAAA  
AGGGATGATAGCTACTTTTTCTCTATAACAGGGTTTTAGTTATTCGTTGGAATTCCTC  
GGGACATTTTCCTTTAAGTAATTTATACGAATCATTAATCTTCCTTTCATGGAGTTTATCC  
ATTATTCATATGATTCCGTATCTTGGGAATCCTAAAAATGATTTAAGTGCAATAACTGCA  
CCAAGTGCCATTTTACCCAAGGTTTCGCCACGTCAGGTCTTCAACTGAAATGCATAA  
ACCCGAAATATTAGTACCTGCTCTACAATCTCAGTGGTTAATGATGCATGTCAGTATGAT  
GCTATTGAGCTATGCAGCTCTTTTATGCGGATCGTTATTATCAGTTGCTCTTATAATGATT  
ACATTTCAAAAAAGAATCTATTCTTTTTTGAAAAAGAATGATATGGAATATTTGAACGA  
AAAAGTAAGTGATTAAAAAATACTTCTTTCCTCTCATTTCAAAATTTTACAAACATCA  
ATTAATTCAGCGTTTGGATTATTGGAGTTATCGTGTGATTAGTTTAGGGTTTACCTTTTTA  
ACCATAGGCATTCTTCTGGAGCAGTATGGGCTAATGAAGCATGGGGTTCGTATTGGAA  
TTGGGACCCTAAGGAACTTGGGCATTTATTACTTGGACCATATTTGCAATTTATTTACA  
TACTAGAAAGAATTCAAAATTGCAAGATACAAATTCGGCATTGTAGCTTCTATAGGATT  
TCTCCTAATTTGGATATGCTATTTTGGGATCAATCTATTAGGAATCGGATTCCATAGTTAT  
GGTTCATTCCAATTAATAATGAAAAAAAAGCATTGGCT--TCCCTCCCATATCTTGTGT  
CTATACTTTTTTTGCCCTGGTGGGTTTTCTCTATCATTTAAGAAATGTCTAGAAACTTGGT  
TTCTTAATTTGGTGAATACCAGGCAATCCGAAATCCTTTTGAATGATATTCAAGAGAAA  
AATGTTCTAGAAAAATTTATGGAATTAGAAGAACTATTCTTGTGGACGAAATGATAAA  
AGAGTATTCGGAGGCACATATGCAAAGGTTTCGTATAGGAATGCACAAGGAAACAATA  
CAATTTGGTCCAAAGACAAAATGAATCTCATTTCATATCATTTCATTTCTCTACAAAC  
CTAATCTGTTTCGCTATTCTAAGTGGTTATTTTTTTCTGGGTAATGAAGAACTTTTCATTC  
TAAATCTTGGATTGAGGAATTTCTCTATAACTTAAGTGATACAATCAAAGCTTTTTTGA  
TTCTTTTAGTTACTGATTTATGGATCGGATTTCACTCGACCCATGGTTGGGAACTAATGA  
TTGGTTTCGATCTACAACGATTTTGGATTGGCTCAGAATGATCAGATTATATCTGGTCTTG  
TTCCACTTTTCCAGTGATTCTAGATACAATTTGTGAAATATTGGATCTTTCATTTTTTAAA  
TCGTGTATCTCCTTCACTTGTAGTAATTTATCATTCAATGAATGAAATGCCCATTTGGTGT  
CCAAAAGTACCTTTTTCGGAGTCTGGAGAGGAAGATGCAGCTTGGGTTGACGTATACA  
ACCGACTTCATCGAGAAAGATTACTTTTTTTAGGCCAAGAGGTTGATAGCGAGATCTCA  
AATCAACTTATTGGTCTCATGGTATATCTCAGCATAGAAGATGATACTAGGGATCTTTATT  
TGTTTATAAATCTCCAGGCGGATGGGTAATACCAGGAATAGCCATTTATGATACTATGC  
AATTTGTGTCACCGGATGTACATAACAATATGTATGGGATTAGCCGCTTCAATGGGATCTT  
TCATTCTGGTTCGGAGGAGAAATTACCAAACGCTAGCATTCCCTCACGCCAGGGTTATG  
ATTCACCAACCTGCTAGTTCTTTTTATGAGGCACAAGCAGGGGAATTTATCCTGGAAGC  
AGAAGAACTATTGAAGCTTCGCGAAACTCTCACAAAAGTTTATGTACAAAGAACGGGC  
AACCTTTATGGGTTATATCCGAAGATATGGAAAGGGATGTTTTTATGTCAGCAACAGA  
AGCCCAAGCTCATGGCATCGTTAATCTTGTAGCAGTCGAAATGAAAGAACAAAAATTG  
ATTCATGAGGGTTTAATTACTGAATCACTTCCCAACGGTATGTTCCGAGTTCGATTAGAT  
AATGAAGATCTAATCTAGGTTATATTTAGGGAGAATCCGGCGCAGTTTTATACGTATA  
CTACCCGGAGATAGGGTAAAAATCGAAATGAGTCGTTATGATTC AACCAAGGGGACGTAT  
AATTTATAGACTTCGCAAAAAAGATTCGAACGATAATGGCAGAATTATATTTAGATTTAA  
AAAAGATAGATTTTGGCAACAAAACCTTCTCTATCCGCTACTCCTTCAAGAGTATATTA  
CTCACTTGCTCATTATCATAGCTTCATTGGTTATGACAAT--TCTAGTTTAGTACTTGTA  
AACGTTTAATTACTCGAATGTATCAACAGAAACCTTTGATTTATTCGGTGAATGATTCTA







repeated text



ATCGTCTTAGGTCTAATTCCTATTACTTTAACAGGATTATTTGTAAGTGCATATTTACAAT  
ACAGGCGCGGTGATCAGTTGGACCTTATGCCTATTCTAACTAGTTATTTTGGTTTTTTAC  
TGGCTGCTTCAACTATAACCCCAGCTCTATTTATTGGTTTGAACAAGATACGACTTATTA  
TGGATATAGTAAGTCTGGCTTGGGCTGCTTTAATGGTAGTGTTTACATTTTCTCTTTTAC  
TTGTAGTATGGGGAAGGAGTGGGCTTATGATTATTCGTTTCGCCGGAACCCGAAGTGAA  
AATTGTTGTAGACAGGAATCCTATAAAAACGTCTTTCGAGGAATGGGCCAGACCAGGC  
CATTTCTCAAGAACAATAGCTAAGGGTCTGATACTACCACTTGGATCTGGAACCTACA  
TGCTGATGCTCACGATTTTCGATAGTCATAACCAGCGATTTGGAGGAGATCTCTCGAAAAG  
TCTTTAGTGCTCATTTTCGGCCAACTCTCTATTATCTTTCTTTGGTTGAGTGGCATGTACTT  
CCATGGCGCCCGTTTTTCCAATTATGAAGCATGGCTAAGTGATCCTACTCATATTGCACC  
CAGTGCCCAAGTAGTTTGGCCAATAGTAGGTCAAGAAATATTGAATGGGGATGTGGGC  
GGTGGTTTTTCGAGGAATACAAATAACCTCCGGTTTTTTTTTCAGATTTGGCGAGCATCTGG  
AATCACTAATGAATTACAACCTTATTGTACCGCAATTGGTGCATTGGTCTTTGCAGCGTT  
AATGCTTTTTGCTGGTTGGTTCCATTATCACAAAGCCGCTCCAAAATTGGCTTGGTTCC  
AAGATGTAGAATCTATGTTGAATCACCCTTAGCGGGGTTACTAGGACTTGGGTCTCTT  
TCTTGGGCGGGACACCAAATCCACGTATCTTTACCAATTAACCAATTTCTTGAGGCTGG  
AGTTGATCCTAAAGAAATACCACTTCCTCATGAATTTATCTTGAATCGGGATCTTTTGGC  
TCAACTTTATCCAAGTTTTGCCGAGGGAGCAACGCCCTTTTTTCACCTTGAATTGGGGAA  
AATATGCGGAATTTCTGAGTTTTTCGTGGAGGATTAGATCCAATAACAGGGGGTCTTTGG  
CTGAGTGATATTGCACACCATCATTAGCTATTGCGATTCTGTTCCCTGATCGCGGGTCCAT  
ATGTATAGGACTAACTGGGCCATTGGTGCATGGCCTGAAAGACATTTTAGAGGCTCATAA  
AGGTCCGTTTACGGGCCAGGGCCATAAAGGTCTCTATGAAATCCTAACAACGTCATGG  
CATGCTCAATTATCTTTGAATCTGGCTATGTTAGGTTCTTTAACCATGTTGTAGCTCACC  
ATATGTATTCCATGCCCCCTATCCATACCTAGCTATTGACTATGGTACACAACCTTTCTGTT  
GTTACACATCACATGTGGATCGGGGGATTTCTTATAGTTGGCGCTGCTGCACATGCAG  
CCATATTTATGGTAAGAGATTACGATCCAACCTACTCGATACAACGATCTATTAGATCGTG  
TCCTTAGACATCGTGATGCAATCATATCGCATCTGAACTGGGCATGTATCTTTCTAGGTT  
TTCACAGTTTTTGGCTTGTATATTCATAATGATACTATGAGCGCTTTAGGGCGTCCCAAG  
ATATGTTTTTCAGATACCGCTATAACAATTACAACCCATCTTTGCTCAATGGGTACAAAACA  
CCCATGCTTTAGCGCCTAGCGTAACAGCTCCCGGTGCAACAACAAGTACCAGCTTAAC  
TTGGGGAGGTGGTGTAGTTAGTATCAGTGGGCGGCAAAGTTGCTTTGTTACCTATCCCAT  
TAGGAACTGCAGATTTTTTGGTTCATCACATTCATGCATTTACAATTCATGTGACTGTAT  
TGATCCTACTGAAGGGTGTCTATTTGCTCGCAGTTCCTGTTGATACCTGATAAAGCA  
AATCTTGGTTTTTCGTTTCCCTTGTGATGGACCTGGTAGGGGGGGGACATGTCAAGTATC  
CGCTTGGGATCATGTATTCTTAGGTCTATTCTGGATGTACAATGCAATTTCCGGTAGTAATT  
TTCCATTTAGTTGGAAAATGCAGTCGGATGTTTGGGGTACTATAAGTGATCAAGGAAT  
AGTCACTCATATCACAGGAGGGAACCTTGCACAGAGTTCTATTACTATTAATGGATGGC  
TACGGGATTTCTTATGGGCACAGGCATCTCAAGTAATTCAGTCTTATGGTTCTTCTTAT  
CTGCATATGGTCTTTTTTTCTTAGGTGCTCATTTTGTCTGGGCTTTCAGTTAATGTTTCT  
ATTCAGTGGCCGTGGTTATTGGCAAGAACTCATTGAATCCATCGTTTGGGGCTCATAACA  
AATTAAGTTGCTCCTGCTACCCAGCCTAGAGCCTTGAGTATTGTACAAGGACGTGCT  
GTAGGAGTAACCCATTACCTTCTGGGTGGAATTGCCACAACATGGGCATTCTTCTTAGC  
AAGAATTATTGCAGTAGGAATGACATTAAGATTCCCAAGGTTTAGCCAAGGCTTAGCTC  
AGGACCCCACTACTCGTCGTATTTGGTTTGGTATTGCTACCGCACATGACTTCGAGAGT

CATGATGATATTACTGAAGAACGTCTTTATCAGAACATTTTTGCTTCGCACTTTGGACAG  
TTAGCAATAATCTTTCTGTGGACGTCCGGAAATCTGTTTCATGTAGCTTGGCAAGGAAA  
TTTTGAGTCATGGATACAGGACCCTTTACATGTAAGACCTATTGCTCATGCAATTTGGGA  
TCCTCATTGTTGGTCAATCTGCTGTAGAAGCCTTTACTAGAGGAGGCGCTATCGGTCCAG  
TGAATATCGCTTATTCTGGTGTATCAGTGGTGGTATAACAATTGGATTACGTACCAACG  
GGGATCTTTATACTGGAGCTCTTTTTCTATTACTTCTTTCTGCTATATCCTTAATAGCGAG  
TTGGTTACACCTACAACCAAATGGAAACCAAGCGTTTCTTGGTTCAAAAATGCGGAA  
TCTCGTCTCAATCATCATTTGTCAGGGCTTTTTGGAGTAAGTTCTTTGGCTTGGACAGG  
ACATTTAGTTCATGTCGCTATTCCCGGATCGAGGGGAGAGTACGTCAGATGGAATAATT  
TCTTAGACGTATTGCCGTATCCCAAGGGTTGAGCCCCCTTTTTATGGGTCAATGGAATC  
TTTATGCTCAAAACCCTGATTCCAGTAGTCATTTATTTGGTACCTCCCAAGGGGCAGGA  
ACTGCCATTCTAACCTTCTTGGGGGATTCCATCCCAACGCAAAGTTTATGGCTAAC  
CGATATTGCTCATCATCATTTAGCTATTGCATTCTTTTTCTCGTTGCTGGTCATATGTATA  
GAACTAATTTCGGGATTGGACACAGTATCAAAGATCTTTTAGAAGCACATATTCCTCCG  
GGGGTTCGATTAGGACGTGGGCATAAGGGTCTTTATGACACAATAAATAATTCGCTTCA  
TTTTCAATTGGGCCTTGCTCTAGCCTCTTTAGGGGTTATTACTTCCTTAGTAGCTCAACA  
CATGTACTCTTTACCCGCTTATGCATTCATAGCACAAAGACTTTACTACCCAAGCTGCGTT  
ATATACTCATACCAATACATCGCAGGTTTCATCATGACAGGAGCCTTTGCTCATGGGGC  
TATATTCTTCATTAGGGATTACAATCCGGAACAGAATGAGGATAATGTATTGGCAAGAAT  
GTTAGATCATAAAGAAGCTATAATATCTCATTAAAGTTGGGCCAGCCTCTTTCTGGGGTT  
TCATACCTTGGGACTTTATGTTCATAACGACGTCATGCTTGCTTTTTGGTACTCCGGAAAA  
ACAAATCTTAATCGAACCCATATTTGCCCAATGGATACAATCTGCTCATGGCAAGACTTC  
GTATGGGTTTCGATGTACTCTTATCTTCAACGAATAGCCCGGCATTCAATGCAGGTCGAA  
GCATATGGTTACCTGGCTGGTTGAATGCTATTAATGAG-----AATAGTAATTCACTTTTCTT  
AACAAATAGGGCCGGGAGATTTCTTGGTTCATTCATGCTGTGCTCTGGGTTTACATACGA  
CTACATTGATTTTAGTAAAAGGTGCTTTAGATGCGCGTGGTTCCAAGTTAATGCCAGAT  
AAAAGGATTTTCGGTTATAGTTTTCTTTCGACGGCCCCGGGCGTGGTGGCACTTGTG  
ATATTTCTGCTTGGGACGCATTTTATTTGGCAGTTTTCTGGATGCTAAATACCATTGGAT  
GGGTTACTTTTTATTGGCATTGGAAACACATAACATTATGGCAGGGTAACGTTTCACAAT  
TTAATGAATCCTCCACTTATTTGATGGGATGGTTAAGAGATTATTTATGGTTAAACTCTTC  
ACAACCTTATCAATGGATATAACCCTTTTGGTATGAATAGTTTATCGGTCTGGGCGTGGAT  
GTTCTTATTTGGACATCTTGTGTTGGGCTACTGGATTTATGTTCTTAATTCCTGGCGTGGC  
TATTGGCAGGAATTGATTGAAACTTTAGCGTGGGCTCATGAACGGACACCTTTGGCTAA  
TTTGATTTCGATGGAAAGATAAGCCAGTGGCTCTTTCCATTGTGCAAGCAAGATTGGTTG  
GATTAGCCCACTTTTCCGTAGGTTATATATTCACTTACGCAGCTTTCTTGATTGCCTCCAC  
ATCAGGAAAATTTGGTATGTCACATTCAGTAAAGATTTATGATACATGTATAGGATGTAC  
CCAATGTGTTTCGAGCTTGTCCACGGATGTTTTGGAAATGATACCTTGGGACGGATGTA  
AAGCTAAGCAAATTGCTTCTGCGCCAAGAACC GAAGATTGTGTAGGTTGTA AAAAGATG  
TGAATCCGCTTGTCCAACGGATTTTTTGGAGTGTCCGTGTTTATTTATGGCATGAAACAA  
CTCGCAGCATGGGTCTTTCTTATATGATAGATTTGAACTTTCCCTCTATTTTTGTTCCTTT  
AGTGGGCCTAGTCTTTCCGGCAATCGCAATGGCTTCTTTATTTCTTTATGTCCAAAGAAA  
TAAAATTTATATGCGAGATATAAAAACATATCTCTCAACGGCACCTGTGCTAACCACTCT  
ATGGTTGGGGTCTTTAGCAGGTCTATTGATAGAAATTAATCGTTTATTTCCAGATGCCTT  
GTCATTCCTTTTTTTTTTCATCCATGACTGCAATTTTAGAGAGACGCGAAAGTACAAGCC

TATGGGGTCGCTTCTGCAACTGGATTACCAGTACTGAAAACCGTCTTTACATTGGATGG  
TTTGGTGTTTTGATGATCCCTACTTTATTGACCGCAACTTCTGTATTTATCATTGCCTTCA  
TTGCTGCCCTCCAGTCGATATTGATGGTATTCGTGAACCTGTTTCTGGGTCTCTACTTT  
ATGGAAACAATATTATCTCAGGTGCCATTATTCCTACTTCCGCAGCTATAGGTTTGCATTT  
TTACCCAATATGGGAAGCAGCATCTGTTGATGAGTGGTTATACAATGGCGGTCCTTATG  
AACTGATTGTTCTACACTTTTTACTTGGTGTAGCTTGTACATGGGTTCGTGAGTGGGAA  
CTTAGTTTCCGTCTGGGTATGCGTCCTTGGATTGCTGTTGCATATTCAGCTCCTGTTGCG  
GCTGCTACAGCTGTTTTCTTGATCTACCCTATTGGTCAAGGAAGTTTCTCTGATGGTATG  
CCTTTAGGAATATCTGGTACTTTCAACTTCATGATTGTATTCCAGGCAGAGCACAACATT  
CTTATGCATCCATTTACATGTTAGGCGTAGCTGGTGTATTTCGGCGGCTCCCTATTCAGT  
GCTATGCATGGTTCTTTGGTAACTTCTAGTTTAATCAGGGAAACCACTGAAAACGAGTC  
TGCTAATGAAGGTTACAAATTTGGTCAAGAGGAAGAACTTATAATATTGTAGCCGCTC  
ATGGTTATTTTGGCCGATTGATCTTCCAATATGCTAGTTTCAACAATTCCTGTTTACA  
TTTCTTCTGGCTGCTTGGCCAGTAGTGGGTATCTGGTTCCTGCTTTGGGTATTAGCAC  
TATGGCGTTCAACCTGAACGGTTTCAATTTAACCAATCTGTAGTTGACAGTCAAGGTC  
GTGTTATTAACACTTGGGCTGATATCATAAATCGTGCTAATCTTGGTATGGAAGTAATGC  
ATGAACGTAATGCACACAACCTCCCTCTAGATCTAGCTTCTGTGGAAGTTCCATCTATAA  
ATGGAATGGGTTTACCTTGGTATCGTGTTTACTGTTGATTGAATGATCCCGGTCGAT  
TACTTTCTGTCCATATAATGCATACAGCTCTAGTTTCTGGTTGGGCCGGCTCGATGGCTC  
TATATGAATTAGCGGTTTTTGATCCCTCTGACCCTGTTCTTGATCCAATGTGGAGACAAG  
GCATGTTTCGTTATAACCCTTCATGACTCGTTTAGGAATAACCAATTCCTGGGGGGTGG  
AATATCTCG---GGAGGAACTATAACGAATCCAGGCATTTGGAGTTATGAAGGTGTGGCA  
GGGGCACATATTTGTTTTCTGGCTTGTGCTTCTTGGCAGCTATCTGGCATTGGGTGTAT  
TGGGACCTAGAAATATTCTGTGATGAACGTACGGGAAAACCTTCTTTGGATTGCCCCA  
GATCTTTGGAATTCATTTATTTCTCTCAGGAGTTGCTTGCTTTGGCTTTGGTGCATTCAT  
GTAACAGGCTTATATGGTCTTGGAAATATGGGTGTCTGATCCTTATGGACTAACTGGAAA  
CGTACAATCTGTAAATCCAGCGTGGGGTGCAGGAAAGGTTTTGATCCTTTTGTCCGGGTG  
GAATAGCTTCTCATCATATTGCAGCAGGTACATTGGGCATATTAGCGGGTCTATTCCATC  
TTAGTGTCCGTCCGCCTCAGCGTCTATACAAAGGATTACGCATGGGTAATATTGAACT  
GTGCTTTCCAGTAGTATTGCTGCTGTTTTTTTTGCAGCTTTCGTTGTTGCTGGAACATG  
TGGTATGGTTCAGCAACTACACCGATCGAATTATTTGGCCCCACTCGTTATCAGTGGGA  
TCAGGGTACTTCCAGCAAGAAATATATCGAAGAGTTGGGGCCGGACTAGCCGAAAAT  
CTGAGCTTATCGGAAGCTTGGTCTAAAATTCCTCGAAAAAATTAGCTTTTTACGATTACATC  
GGTAATAATCCGGCGAAAGGGGATTATTCAGAACAGGCTCAATGGATAGCGGGGATG  
GAATAGCTGTTGGTTGGTTGGGGCACCCCATATTTAGAGATAAAGAAGGGCGCGAACT  
CTTTGTACGTCGTATGCCTACCTTTTTTGAACATTTCCGGTAGTTTTGGTAGATGGAGA  
CGAATTGTGAGGGCCGATGTTCCTTTTAGAAGGGCAGAATCCAAGTATAGTGTGAA  
CAAGTAGGGGTAACCTGTTGAATTCTATGGCGGCGAACTCAATGGAGTCATTTATAGCGA  
TCCTGCTACTGTGAAAAAATATGCTAGACGTGCCCAATTAGGTGAGATTTTTGAATTAG  
ACCGGGCTACTTTGAAATCTGATGGTGTTTTTTCGTAGCAGTCCAAGGGGTTGGTTACT  
TTTTGGACATGCTACGTTTGTCTTCTTTTTTCGGACACATTTGGCACGGCGCCAG  
AACCTTGTTTCAGAGATGTTTTTGCCGGTATTGATCCAGATTTGGATGCTCAAGTGGAAT  
TTGGAACATTCAAAAAATTTGGAGATCCAACCTACAAGGAGACAAGTAGTCATGAAA  
CCTTATATTCCCTGAGGAGGTTCTACCCCGTGGAACGCTCTTTAATGGAACTTTAGCC

TTAGTTGGTCGTGACCAAGAAACCACCGTTTCGCTTGGTGGGCGCGGAATGCGAGAC  
TTATCAATTTGTCCGGTAAACTACTTGGGGCTCACGTAGCTCATGCCGGATTAATTGTAT  
TCTGGGCGGAGCAATGAACCTATTTGAAGTGGCTCATTTCGTACCAGAGAAACCCAT  
GTATGAACAAGGATTGATTTACTTCCGCACTTAGCTACTCTAGGGTGGGGAGTAGGTC  
CGGGGGGAGAAGTTATCGACACCTTTCATACTTTGTATCTGGAGTACTCCACTTAATTT  
CCTCTGCAGTCTTAGGCTTTGGCGGTATTTATCATGCACTTCTAGGACCTGAAACTCTTG  
AAGAATCCTTTCATTCTTTCGGTTATGTATGGAAAGATAGAAATAAAATGACTACAATTT  
TGGGTATTCACTTAATTTTATTAGGTATAGGTGCTTTTCTTCTAGTATTCAAGGCTCTGTA  
TTTTGGAGGCGTATATGATACTTGGGCTCCCGGAGGGGGAGATGTAAGAAAAATTA  
ACTTGACCCTTAGCCCAAGCGTGATCTTTGGTTATTTACTAAAATCTCCTTTTGGGGGA  
GAAGGATGGATTGTTAGTGTGGACGATTTAGAAGATATAATTGGAGGACATGTTTGGTT  
AGGTTCCATTTGTATACTTGGTGGAAATTTGGCATATCTTAACCAAACCTTTTGCATGGGC  
TCGCCGTGCATTTGTATGGTCTGGAGAGGCTTACTTGTATATAGTTTAGGTGCTCTATC  
TGTCTTTGGTTTTCATCGCTTGTGTTTTCGTCTGGTTCAATAATACCGCTTATCCTAGTGA  
GTTTTACGGACCCACTGGGCCAGAAGCTTCTCAAGCTCAAGCATTACTTTTCTAGTGA  
GAGACCAACGTCTTGGGGCTAACGTGGGATCCGCCCAAGGACCCACTGGTTTAGGTAA  
ATATCTAATGCGTTCTCCGACCGGAGAGGTTATTTTTGGGGGAGAACTATGCGTTTTT  
GGGATCTTCGTGCTCCCTGGTTAGAACCTCTAAGGGGTCCAAATGGTTTGGACTTGAGT  
AGGCTGAAAAAAGACATACAGCCTTGGCAAGAACGACGTTCCGGCAGAATATATGACTC  
ATGCTCCTTTAGGTTCTTTAAATTCGGTGGGTGGCGTAGCTACCGAGATCAATGCAGTA  
AATTATGTGTCTCCTAGAAGTTGGTTAGCTACCTCTCATTTTGTCTAGGATTTTTCTAT  
TTGTGGGACATTTGTGGCATGCGGGAAGGGCACGTGCAGCTGCAGCGGGGTTTAAA  
AAGGAATCGATCGTGATTTGGAACCTGTTCTTTCATGACCCCTTTTAGCATGACTATAG  
CCTTTGGTAGATTTATCAAAGAAGAAAATGATTTATTTGATATTATGGATGATTGGTTAC  
GGAGGGACCGTTTCGTTTTTGTAGGCTGGTCCGGCCTATTGCTCTTTCCTTGTGCTTATT  
TCGCTTTGGGGGTTGGTTCACAGGTACAACTTTTGTAACCTCATGGTATACCCATGGA  
TTGGCTAGTTCCTATTTGGAAGGTTGTAATTTCTTAACGGCTGCAGTTTCTACTCCTGCA  
AATAGTTTAGCACATTCTTTGTGCTACTATGGGGTCCCTGAAGCACAAGGAGATTTTAC  
TCGCTGGTGTCAATTAGGCGGTCTGTGGACTTTTGTGCTCTCCATGGTGCTTTCCGGTC  
TAATAGGTTTCATGTTACGTCAATTCGAACCTGCTCGTCTGTTCAATTGCGACCTTATA  
ATGCAATTGCATTTTCTGCTCCAATTGCTGTTTTTGTCTGTATTCTGATTTATCCACT  
GGGTCAATCTGGTTGGTTCTTTGCACCCAGTTTTGGTGTAGCAGCTATATTCGATTCAT  
CCTTTTTTTCCAAGGGTTTCATAATTGGACGTTGAATCCATTTTCATATGATGGGAGTTGC  
TGGAGTCTTAGGTGCTGCTCTGCTATGTGCTATTCATGGCGCCACCGTAGAAAATACCTT  
ATTCGAAGATGGTGATGGTGCAAATACATTCCGTGCTTTTAACCCAACTCAAGCTGAAG  
AGACTTATTCAATGGTCACTGCTAACCGTTTTTGGTCCCAAATCTTTGGGGTTGCTTTTT  
CCAATAAACGTTGGTTACATTTCTTTATGCTATTTGTGCCAGTAACCGGTTTATGGATGA  
GTGCTATTGGGGTAGTCGGTCTGGCTCTGAACCTACGTGCCTATGACTTTGTTCCCAA  
GAAATCCGTGCAGCGGAAGATCCTGAATTTGAACTTTCTACACCAAAAATATTCTCTT  
AAACGAAGGTATTTCGTGCTTGGATGGCGGCTCAGGATCAGCCTCATGAAAACCTTATAT  
TCCCTGAGGAGGTTCTACCCCGTGAAACGCTCTTATGTCTGGAAGCACGGGAGAACG  
TTCTTTT-----GTTATTACTAGTATTTCGATACTGGGTCATTCATAGCATTACTATACCTCCC  
TATTCATTGCGGGTTGGTTATTCGTACAGTACGGGTTTAGCTTACGATGTTTTTGGAAAGTC  
CTCGGCCAAATGAATATTTACAGAGAGCCGACAAGGGATTCCATTAATAACTGGCCGT

TTTGATTCTTTGGAACAACCTCGATGAATTTAGTAAATCCTTTATGACCATAGATCGAACC  
TATCCAATTTTTACAGTGCGATGGTTGGCTGTTACGGACTGGCTGTACCTACTGTTTCT  
TTTTTAGGATCAATATCAGCAATGCAGTTCATCCAACGAATGGCTACAAAACCGTTGA  
GAGTAGTTCTAGATCTGGG---ACAAGAGCAACTGGCATAGGGAGTTATTTGAAACCATT  
GAATTCGGAATATGAAAAGTAGCTCCAGGGTGGGGGACTACACCATTTATGGGAGTT  
GCAATGGCTCTATTTGCAATATTTCTGTCTATTATTTTAGAAATTTATAATTCATCTGTTTT  
ATTGGATGGAATTTCAATTAATATGCTGACTCTTAAACTATTTGTTTACACAGTAGTAATA  
TTCTTTGTTTTCTCTCTTCATCTTCGGATTCTTATCTAATGATCCGGGGCGTAATCCTGGGC  
GTGAAGAAATGACCGATACTACCGGAAGGATTCCTCTTTGGCTGATAGGTACTGTAAC  
GGTATCCCTGTGATCGGTTTAATAGGCATTTTCTTTTACGGCTCCTATTCGGGGTTGGGT  
TCATCTCTGATGTTAAATATCTTTAGTCTAATCTGTCTCTGTCTTAATTCTACCCTCTATTC  
GAGTAGTTTTTTATTCGCCAAATTGCCCGAGGCTTATGCCTTTTTCAATCCAATCATAGA  
CTTTATGCCGGTTATCCCTTTACTTTTTTTTCTTTAGCCTTTGTTTGGCAAGCTGCTGTA  
AGTTTTTCGAATGACACAATCAAACCCGAATGAACAAAATGTTGAATTGAATCGTACCA  
GTCTATACTGGGGTTTATTACTGATTTTTGTACTTGCTGTTTTATTTTCCAATTATTTCTTC  
AATATGGAAGTCAATATTTCTTGCTCTTATTGCTACTGCGCTGTTCAATTTAGTCCCACTG  
CATTTTTACTTATCATATACGTCAAACAGTCAGCCAAAATGATATGGAAACAGCAACC  
CTAGTCGCCATCTCCATATCCGGTTTACTTGTAAGCTTTACTGGGTATGCCTTATATACCG  
CTTTTGGGCAACCCTCTCAAAAATTAAGAGATCCCTTCGAAGAACATGGGGACATGGA  
AGCATTGGTTTATACATTCCTCTTAGTTTTCAACTTTAGGGATAATTTTTTTCGCTATCTTT  
TTTTCGAGAACCACCTAAAGTTCCAATAAAAAAATGAAAATGACTATTGCTTTCCAATT  
AGCTGTTTTTGCATTAATTGCAACTTCATTAATCTTACTGATTAGTGTACCCGTTGTATTT  
GCTTCTTCTGATGGTTGGTCGAGTAACAAAATTTGTATTTTCTGGTACATCATTATGG  
ATTGGATTAGTCTTTCTGGTAGCTATCCTGAATTCCTCTCATCTCT-----ATGTC  
ACCACAAACAGAACTAAAGCAAGCGTTGGATTTAAAGCTGGTGTTAAAGATTACAAA  
TTGACTTATTATACTCCTGACTACGAAACCAAGATACTGATATCTTGGCAGCATTCCGA  
GTAACCTCTCAACCGGGAGTTCCGCCCAAGAAGCGGGGGCTGCGGTAGCAGCCGAA  
TCTTCTACTGGTACATGGACAACCTGTGTGGACTGATGGACTTACCAGTCTTGATCGTTA  
CAAAGGACGATGCTACCACATCGAGGCCGTTGTTGGGGAGGAAAATCAATATATTGCTT  
ATGTAGCTTATCCTTTAGACCTTTTTGAAGAAGGTTCTGTTACTAACATGTTTACTTCCA  
TTGTGGGTAATGTATTTGGTTTTCAAAGCCCTGCGAGCTCTACGTCTGGAAGATCTGCGA  
ATTCCCACTTCTTATTCCAAAACCTTTCCAAGGTCCACCTCATGGTATCCAAGTTGAAAG  
AGATAAATTGAACAAGTACGGTCGTCCTTATTGGGATGTACTATTAACCAAAAATTGG  
GATTATCTGCAAAAAACTACGGTAGAGCGGTTTATGAATGTCTACGGGGTGGACTTGAT  
TTACTAAGGATGATGAAAACGTAAATTCACAACCATTTATGCGTTGGAGAGATCGTTT  
CTTATTTTGTGCCGAAGCACTTTTTAAAGCGCAAGCCGAAACGGGTGAAATTAAGGA  
CATTACTTGAATGCAACTGCGGGTACATGTGAAGAAATGATCAAAGAGCGGTATTGTC  
CAGAGAATTGGGAGTTCCTATCGTAATGCATGACTACTTAACCGGGGGGTTACCGCA  
AATACTAGCTTGGCTCATTATTGCCGCGACAATGGTCTACTTCTCCACATCCATCGCGCA  
ATGCATGCAGTTATTGATAGACAGAAAATCATGGTATGCATTTTCGTGTACTAGCTAAA  
GCATTACGTATGTCTGGTGGAGATCATATTCACGCTGGTACAGTAGTGGGTAAACTGGA  
GGGGGAACGTGAGATGACTTTAGGTTTTGTTGATTTGTTACGTGATGATTTTATTGAAA  
AAGATCGAAGTCGTGGTATTTTTTCACTCAAGACTGGGTCTCTATGCCAGGTGTTATA  
CCCGTGGCTTCTGGGGGTATTATGTTTGGCATATGCCCGCTCTAACCGAAATCTTTGG

GGATGATTCCGTA CTACAGTTCGGTGGAGGAACTTTAGGGCACCCCTTGGGGAAATGCA  
CCCGGTGCAGTAGCTAATCGGGTGGCTTTAGAAGCATGTGTACAAGCTCGTAATGAGG  
GACGTGATCTTGCTCGTGAAGGTAATGATATTATTCGTGAAGCTAGCAAATGGAGCCCT  
GAGCTAGCCGCTGCTTGTGAAATATGGAAAGAGATCACATTCGATTTGACCCAGTGG  
ATAAGCTAGATAAAACGGCAATACATTTATACAAAACCTTCTACCCCGAGCACACGCAAT  
GGAGCCGTAGACAGTCAAGTGAAATCCAATCCACGAAAGAATTTGATCTATGGACAGC  
ATCATTGTGGTAAAGGTCGTAATGCCAGAGGGATCATTACCGCAGGGCATAGAGGGGG  
AGGTCATAAGCGTCTATACCGTAAAATCGACTTTCGACGGAATGAAAAAGGGATATCTG  
GTAGAATCGTAACCATAGAATATGACCCTAATCGAAATGCATACATTTGTCTCATACT  
ATGGGGATGGTGAGAAGAGATATATTTTACATCCCAGAGGGGGCTATAATTGGAGATACC  
ATTGTTTCTGGTACAGAAGTTCCTATATCAATGGGAAATGCCCTACCTTTGACCCGATG  
CCCTTAGGCACGGCCATACATAACATAGAAATCACACTTGGAAAGGGTGGACAATTAG  
CTAGAGCAGCAGGGCTGTAGCGAAACTGATTGCAAAAAGAGGGTAAATCGGCCACATT  
AAGATTACCATCTGGGGAGGTCCGTTTGATATCCAAAAACTGCTTAGCAACAGTCGGA  
CAAGTGGGTAATGTTGGGGTGAACCAAAAAAGTTTGGGTAGAGCCGGATCTAAGTGTT  
GGCTAGGTAAGCGTCTGTAGTGAGAGGAGTAGTTATGAACCCTGTAGACCATCCCAT  
GGGGCGGTGAAGGGAGAGCCCAATTGGTAGAAAAAACCACAACCCCTTGGGGT  
TATCCTGCGCTTGGGAAGAAGAAGTAGGAAAAGGAACAAATATAGTGATAGTTTGATTCT  
TCGTCGCCGTAAA---ATGATTCAACCTCAGACCCTTTTGAATGTAGCGGATAACAGTGG  
AGCTCAAGAATTGATGTGTATTTCGAATCATAGGAACTGGT---AATCACCGATATGCTCAT  
ATTGGCGATGTTCTTGTTGCTGTAATCAAAGAAGCAGTGCCCAACATGCCTCTAGAAA  
GATCAGAAAGAATTAGAGCTGTGATTGTACGCACGTGTAAAGAACTCAAACGTGACAA  
CGGCATGATAATACGATATGATGACAATGCAGCGGTTATCATTGATCAAGAAGGAAATC  
CAAAGGAACTCGAATTTTTGGTGCTATTGCTCGGGAATTGCGACAGTTGAATTTTACT  
AAAATAGTTTCATTAGCACCCGAAGTCTTAATGCTCAGTCCCAAAGAACCAGATTTG  
TAAACAACATAGAGGTAGAATGAAGGGAATATCTTGTCGAGGCAATCATATTTGTTTTG  
GCAGATACGCTCTTCAGGCACTAGAACCTGCTTGGATCACAGCTAGACAAATAGAAGC  
AGGGCGAAGAGCAATGACACGATATGCGCGTTCGTGGTGGAAAGATATGGGTACGTATC  
TTCCCGACAAACCTGTTACTGTAAGACCTACAGAAACACGTATGGGTTCGGGCAAGG  
GATCCCCCGAATATTGGGTATCCGTTGTGAAACCG-----CTTTATGAAATGAGTGGAGT  
ATCAGAAACTGTAGCCAAAGCTGCTATGGAGCATGCAAAAATGCCTATACTGAACTCAATT  
TGTTATTTAGGATAGG---ATGACCAGAGTTAAACGAGGATATACAGCTCGGAGACGTC  
GAAAAAAGAATCGTTTATTTGCATCAACCTTTATGGGGGCTCATTCAAGACTTACCCGA  
ACGAATACTCAACAAAGAATGAGAGCTTTGGTTTCTCTCATCGAGATAGGAGCAGGA  
AAAAGAGAGATTTTCGTCGTTTGTGGATCACTCGAATAAATGCGGTAACCCGTGAGGAT  
-----CTATTCTATAGTTATAGCCTATTCATCCACAATCTGTACAAGAGACAATTGCTTCTG  
AATCGTAAATACTTGCAGCAATAGCCCTATCAATAAGAATTGTTTTTCTATTATTTCA  
AATAAAATCATCAATCAAAAA-----ATGATAAAGACAGTTTAA---ACTCA  
ACATATATGT---ATGTCTGTTTTCAAAGCACGAAGAGTAATTGATCAGATTCGCGGACGT  
TCTTATGAGGAAACACTCATGATACTGGAACATAATGCCTTATTGGGCATCTTATCCAATT  
TTAAAATTAGTTTATTCTGCAGCAGCAAATGCTAGTCATAATATGGGTTTGAATGAAGCT  
GATTTATTTATTAGTAAAGCTGAAGTAAATAGAGGTACTATTGTTAAAAAGTTAAAACCC  
CGGGCTCGAGGACGTAGTTATCTGATAAAAAAACTACTTGTTCATATAAAGATCTCTTT  
AAAA---AAATCTAAAATT-----ATGGATGGAATCAAATATGCAGTATTTACAG



AAAAAAGTATTCGGTTATTGGGGAACAATCAA---TATACTTCTAATGTCTGAATCAGGATC  
AACTAGGACAGAAATAAAGCATTGGGTCGAACTCTTCTTTGGTGTCAAGGTAAGAGCT  
ATGAATAGTCATCGACTCCCGGGAAAGGGTAGAAGGATGGGACCTATTATGGGACATAC  
AATGCATTACAGACGTATGATCATTACGCTTCAACCGGGTATTCTATTCCACCTCTTATA  
GAGAAAAGA ACTATGGCAGTTCCAAAAAACGTACTTCTATGTCAAAAAGACATATTC  
GTAGAAATCTTTGGAAAAAAAAGGATCTTTAGAGGCAGTAAAAGCTTTTTCTTTAGCT  
AAATCTATTTCCACCGGAAAGTCAAAAAGTTTTTTT-----CAAAAAAAGTCATGGCCA  
AGGGTAAAGATATTAGAATTATAGTGATTTTGGGAATGTACCTGTTGT--GTTCTGAAAG-----  
-GTCAATAAAGAA-----GGCATTCTAGATATATACTCAAAAGAATCGACACAATACACC  
CAATCGACTAGAATTTAGAAAATTTTGTCTGCTATTGTCAAAAGTATACAATTCATGGGG  
AAATAAAGAAAATGAAAATAAGGGCTTCTGTTCGTAAAATTTGTGAAAATGTCTGCTT  
GATTCGTAGACGGGGGCGAATTATAGTCATTTGTTCCAATCCGAGACATAAACAGAGAC  
AGGGGATGGTTCGAGAAGAAGTAGCAGGATCCACTCGAACACTACAGTGGAAATGTG  
TTGAATCAAGAGTAGACAGCAAGCGTCTTTATTATGGTCGTTTTGTTCTGTCCCCGCTTA  
TGAAAGGTCAAGCCGATACCATAGGTATTGCCATGCGAAGGGCTTTACTTGGGAGAATA  
GAAGGAACATGTATCACACGTGCAACATCTGAA-----AATGTGCTGCATGAATATTCTAT  
GATAGCAGGTATTGAAGAATCAGTACATGATATTTAATAAATTTGAAAGAGATTGTATT  
GAAAAGTAATCTATATGGAGTTAGGGACGCATCCATTTGTGTCAGGGGTCCTAAATACA  
TAACAGCTCAAGATATCATCTCACCACCTTCTGTAAAAATAGTTGATACGACACAGCAT  
ATAGCTAACCTGACAGAACCAATTGATTTGTGTATTGAATTACAAATAAAAAGAGGTCG  
CGGATATCATATGAAATCCACAAACGAATCTCACGATGGAAGTTAT-----CCTATAGATAT  
TGTATCTATGCCTGTCCGAAATGCGAATCATAGTATTCATTCTTATGGGAATGGGAATGA  
AAAACAAGAGATACTCTTTCTAGAAATATGGACGAATGGAAGTTTAACTCCTAAAGAA  
GCACTTTATGAAGCTTCTCGTAATTTGATTGATTTATTGATTCTTTTTCTACATGCAGAGG  
AAGAG-----GACATGAATTTAGAGGAAAATGAA---AAAAGATGGAATCTACCCCTTTTTT  
CCTTTCAAGACAGATTCAT---AATCTCAAGAAAAACAAAAA---GGAATTCATTGAC  
ATGTATTTTTATTGACCAATCAGAATTGTCTTCCAGGACCTATAATTGTCTCAAAAGGTC  
CAATATACATACATTATTGGACCTTTTGAATCACAGTCAAGAAGATCTTATGAAAATGGA  
ATATTTTCGCATAGAAGATGTA AACAGATATTGGGCACTCTACAAAAGCAT-----TTTGC  
AATCAATTTACCTAAGAAAAAGATGCTCCAGAAT--GAAAATGAGGGAATGTCCACAAT  
ACCTGGATTTAGTCAGATACAATTTGAGGGATTTTGTAGGTTCAATTAATCAGGGCTTGA  
CGGAAGAATTTATAAGTTTCAAAAAATTGAAGATAGAGATCAAGAAATTGAATTTCAA  
TTATTTGTGGAAACATATCAATTGGTAGAGCCCTTGATAAAAGAAAGAGATGCTGTGTA  
TGAATCACTCACATATTCTTCTGAATTATATGTACCCGCGGTCTTAATTTGGAAAACCGG  
TAGAAATATGCAAGAACAACCGTTTTTCTTGGAAACATCCCTATAATGAATCTTTTTG  
GAACCTCTATAGTAAATGGAATATACCGAATTGTGATCAACCAAATATTGCAAAGTCCC  
GGTATTTACTACCGTTCAGAATTGGAACATAACGGAATTTCTGTCTATAACCAGTACTATA  
ATATCGGATTGGGGGGGGAGGTCGGAATTAGAAATTGATAGAAAAGCAAGGATATGGG  
CCCGTGTAAGTAGAAAACAAAAAATATCTATTCTAGTTCTATCATCAGCTATGGGTTTGA  
ATATAAGAGAAATTTAGATAATGTTTGTACCCTGAAATTTTCTTGTCTTTCCCGAATG  
ATAAAGAGAAAAAAAAGATTGGGTCAAAAGAAAATGCTATTTTGGAGTTTTATCTACA  
ATTTGCTTGTGTAGGGGGGGATCCAGTATTTTCTGAGTCCTTATGCAAGGAATTACAAA  
AGAAATTTTTTCAACAAAGATGTGAATTAGGAAAGATTGGTCGACGAAATATAAACCG  
GAGACTGAATCTTGATATACCCCAAAACAATACATTTTTTGTACCACGAGATCTATTGGC

TGCTGTGGATCATTGATTAGAATGAAATTGGGAATGGGTACACTTGACGAT-----ATGA  
ATCACTTGAAAAATAAACGTATTCGTTCTGTAGCAGATCTATTACAGGATCAATTCGGAT  
TGGCTCTTGTTGTTAGAAAATACGGTTCGAGGAACCTATATGTGGAGCAATCAGG---C  
ATAAATTGATA---CCGACTCCTCAAATTTAGTAACTTCAACTTTA-----TTAACAAC  
TACTTATGAATCGTTTTTTGGCCTACACCCTTTATCTCAAGTTTTGGATCGAACTAATCC  
GTTGACACAAATCGTTCATGGGCGAAAATGGAGTTATTTGGGTCCTGGAGGATTGACG  
GGGCGAACTGCTAATTTTCGGATACGAGATATCCACCCGAGTCACTATGGACGTATTTG  
TCCAATTGACACGTCCGAAGGAATCAATGTTGGACTTATTGGATCATTAGCTATTCATGT  
GAAGGTTGGTTATTGGGGA---TCTATAGAGAGTCCGTTTTAT-----GAATTATCTGATAG  
ATCAAAGAG-----GCACAGATGGTTTATTTATCACCAAATAGAGATGAATATTATATGGT  
AGCAGCAGGAAATCTTTGGCCTTGAATCGGGGTATTCAAGAACAACAGGTTGTTCCA  
GCTCGATATCGTCAAGAATTCCTGACTATTGCATGGGAAGAGATTCGTCTTAGAAGCAT  
TTTTCCCTTCCAATATTTTTCTATTGGAGCTTCCCTCATTCCTTTTATCGAGCATAATGAT  
GCGAATCGAGCTTTAATGAGTTCTAATATGCAGCGCCAAGCAGTCCCTTTCTCGGTC  
CGAGAAGTGCATTGTTGGAAGTGGGTTGGAAGGTCAAACGGCTCTAGATTTCGGGGATT  
TCAGCTATAGCCGAACGCAAGGGAAAAATAATTTATACTGATACTCAAAAGATCATTTT  
CTCAAGTAATGGGATACTCTAAGCATTCCATTAGTTATGTATCAACGTTCCAACAAAA  
TACTTGTATGCATCAAAAACTCAGGTTTACGCGAGGTAAATACATTA AAAAGGGACAA  
ATTCTAGCGGGCGGTGTGGCTACAGCTGGTGGGGAAGTTCGCTTTAGGAAAAATGTAT  
TAGTAGCTTATATGCCATGGGAAGGTTACAATTTGAAGACGCAGTACTAATTAACGAA  
CGTCTGGTCTATGAAGATTTTATACTTCTTTTACATCCGGAAATATGAAATTCAGACT  
CATGTAACAAGCCAAGGT---CCTGAAAGAATCACTAAGGATATCCCGCATTTAGAGGCT  
CATTTACTCCGAAATTTAGACAGAAATGGAATTGTGATGCTGGGATCTTGGATAGAAAC  
AGGTGATATCTTAGTAGGTAAATTAACACCTCAGACAGCGAGCGAA---TTATCATATACC  
CCGGAGGATAGATTATTACGAGCTATACTTGGGATTTCAGGTATCCACTTCAAAGAAAC  
TTCTCTAAGACTACCTATAGGAGGAAGGGGTCGAGTGATTGATGTGAGATGGATCCATA  
GAAAGGGA---GTTTCCAATTCTAATCCAGAAAAGATTTCGTGTATATATTTACAGAAAC  
GTGAAATCAAAGTAGGTGATAAAGTAGCTGGAAGGCATGGGAATAAGGGTATAATTTCT  
AAGATTTTGCCTAGGCAAGATATGCCCTATTTGCAAGATGGAACGCCCGTTGATATGGTA  
TTCAACCCATTAGGAGTCCCCTCACGAATGAATGTGGGACAGATATTTGAATGTTTCGCT  
CGGGTTAGCGGGGGATCTGCTAAAGAAACATTATAGAATAGGACCTTTTGGATGAGAGAT  
ATGAGCAAGAGGCCTCAAGAAAAGTGTGTTTTCTGAATTATATGAAGCCAGTAAGAA  
AACAAAAATCCATGGGTATTTGAACCCGAATATCCGGGAAAAAGCAGAATATTTGATG  
GAAGAACAGGAGATCTTTTTGAACAACCTGTTCTAATAGGAAAGTCTATATCCTAAAA  
TTAATTCATCAAGTTGATGATAAATCCATGGACGTTCCAGTGGGCATTATGCACTTGTT  
ACACAACAACCCCTTAGAGGGAGGGCCAAACAAGGGGGACAAAGAGTAGGAGAAAT  
GGAAGTTTGGGCTCTAGAGGGATTTGGTGTGCTCATATTTTACAAGAGATGCTTACTTA  
TAAATCTGATCATATTAGGGCTCGTCAAGAAGTACTTGGTGCTACGATTATTGGAGCAA  
CAGTACCTAAGCCAGAGGGTGCCCCAGAATCTTTTCGATTGCTCGTTTCGAGAACTACG  
ATCTTTGTCCCTGGAAGTGAATCATTTTCTTGTATCTGAAAAGAACTTTCAGATGGACA  
GGAAGGAAGCT-----ATGATCGACCAGTATAAACATCAACAACCTTCGAATTG  
GACCAGTTTCCCCTCAACAAATCATGGTTTGGGCAAAAAAATTCTACCGAATGGAGA  
GATAGTTGGAGAGGTGACAAAACCTATACTTTTCAATTATAAAACTAATAAACCGGAGA  
AAGATGGATTGTTTTGTGAAAGAATTTCCGGACCCATAAAAAGTGGGATTTGTGCTTGT

GGAAATTACCGAGGGATTGGGACTGAAAAAGAAGACCCGAAATTTTGTGAAGAATGC  
GGGGGGGAATTTGTTGATTCTCGTATACGAAGGTATCAAATGGGATACATCAAATAAC  
ATGTCCAGTGACTIONCATGTGTGGTATTTGAAACGCTTCTCCTAGTTATATTGCGAATCTTTT  
AGATAAGTCCCTTAGAGAATTAGAGGGCCTAGTATATTGCGAT-----TTTTCTTTTGCTAG  
GCCC---ATAGCTAAAAAACCTACTTTTCTTACGATTACGAGGTTTCATTTCGAATATGAAATC  
CAATCCTGGAAATACAGCATCCCCTCTTTTTTACTACTCAAGGTTTCGAGATATTTTCGA  
AACCGAGAAATCTCTACGGGGGCAGGTGCTATCAGAGAACAATTAGCCGATTCGGATT  
TGCGAATTATTACAGATAATTCTTTGGTAGAATGGAAGGAATTAGGAGACGAA---GAGT  
CCACAGGAAATGAATGGGAAGATAAAAAAATTCGAAGAAGAAAGGATTTTTTGGTTAG  
GCGCATAGAATTAGCTAAAAATTTTCTTCGAACAAATGTAGATCCAGAATGGATGGTTT  
TGTGCCTATTACCAGTTCTTCTCCTGAGTTGAGACCAATCATTTCAGATAGACGGGGGT  
AACTAATGAGTTCGGATATTAATGAACTCTATAGAAGAGTCATCTATCGGAACAACAC  
TCTTACCGATCTATTAGCAACAAGTAGATCTACACCAGGGGAATTAATAATGTGTCAAG  
AGAAGTTGGTACAAGAGGCCGTGGATACACTTTTTGATAATGGGATCCGCGGACAACC  
CATGAGAGATGGTCATAATAAAGTTTATAAGTCATTTTCCGATGTAATTGAAGGCAAAG  
AAGGAAGATTTTCGTGAGACTCTGCTTGGGAAACGGGTCGATTATTTCGGGACGTTCCGT  
CATTGTCGTGGGTCCTTTGCTTTCATTACATCAATGTGGATTACCTCGAGAAATAGCAAT  
AGAGCTATTCCAAACATTTGTAATTCGTGGTCTAATCAGACAAGATGTTGTTTCTAACA  
CAGGGATTGCTAAAAGCAAATTCGGGAAAAAGAACCATTGTATGGGAAATCCTTCA  
AGAAGTGATGCAGGGGCATCCTGTATTGTTGAATAGAGCGCCACCCTGCATAGATTAG  
GTATACAGGCGTTTCAACCCATTTTAGTGGAGGGGCGTGCTATTTGTTTACACCCATTAG  
TTTGTAAGGGCTTCAACGCAGACTTTGATGGGGATCAAATGGCTGTTTACATACCTTTA  
TCTTTGGAAGCTCAAGCAGAAGCTCGTTTACTTATGTTTTCTCATATGAATCTTGTCT  
CCAGCTATTGGAGATCCCGTTTCCGTACCAACTCAAGATATGCTTATTGGACTCTATGTA  
TTAACGATCGGGAATCCCCGAGGTATTTGTGCAAATAGGTATAATCAATCTAATTCTAAT  
TGCAGA-----AAAAGGAAACAGTTTATAAGAATGATTTTAAGTATCCAAAA-----GAT  
CCGTATTTTTCTAGTTCTTATGATGCACTTGGAGCTTATCGGCAGAAACGAATCCATTTA  
GATAGTCTTTGTGGCTCCGGTGGAGACTAGATCAACGC---GTCGTTGGTTCA-----AGA  
GAAGTCCCATCGAAGTTCAATATGAATCTTTTGGTAATTATAATGAGATTTATAAGCAC  
TATCGAATAATAGGAAGTGTA AAAAGAGAAATTCGTTGTATATACATTTCGAACTACTGTT  
GGACATCTTTCTTTTATCGAGAAATAGAAGAAGCCATACAGGGGTTTTGGCGGGCCTA  
CTCA-----ATGGAGGTCCTTATGGCAGAACGGACCGATCTGGTCTT  
TCACAATAAGGTGATAGATGGAACCTGCTATGAAACGACTTATTAGCAGATTAATAGATCA  
TTTTGGAATGGCATATACATCACATATCCTGGATCAGGTGAAGGCTTTGGGTTTCCAGC  
GAGCCACTGCTACATCTATTTCAATTAGGAATTGATGATCTTTTAAACAATACCTTCTAAGG  
GATGGTTAGTTCAAGACGCTGAACAACAAAGTTTTCTTTTAGAGAAAAACCATCATTAT  
GGGAATGTACATGTGGTAGAAAAATTACGTCAATCCATTGAGATATGGTATGCTACAAG  
TGAATATTTGAGACAAGAAATGAATCCTAATTTTCGGATGACTGATCCCTCTAATCCAGT  
CCATCTAATGTCCTTTTCGGGGGCTAGAGGAAATGTATCTCAAGTACACCAATTAGTAG  
GTATGAGAGGATTAATGTCGGATCCTCAAGGACAAATGATTGATTTACCCATTCAAAGC  
AATTTAAGGGAAGGGCTTTCTTTGACAGAATATATAATTTCTTGCTACGGAGCCCGCAA  
AGGAGTTGTAGATACTGCTGTACGAACATCAGATGCTGGATACCTCACGCGTAGACTTG  
TTGAAGTAGTTCAACACATTTGTACGTAGAACGGATTGTGGTACTATCCGAGGTATT  
TCCGTGAGTCTCAAATGGGATGACGGAA-----AATATTTTTGTCCAAACACTAATTGG

TCGTGTATTAGCAGACGATATATATATTGGTCTACGATGCATTGCCACTCGAAATAAAGA  
TATTGGAATTGGACTTGTTAATCGATTATAACC-----TTTCGACAGCACCCAAT  
ATATATTCGAACTCCTTTTACTTGTAGGAGTACATCTTGGATCTGTCAATTATGTTATGGC  
CGGAGTCCTACTCATGGTGACCTGGTTCGAGTTGGGAGAAGCCGTAGGCATTATTGCGG  
GTCAATCGATTGGGGAACCGGGGACTCAACTAACATTAAGAAGCTTTTCATACCGGCGG  
AGTATTCACGGGTGGTACTGCCGAACATGTACGAGCTCCCTCTAATGGAAAAATAAAAT  
TTGATGAGGATTTGGTTCATCCACACGTACCCGTCATGGGCATCCTGCTTTTCTATGTT  
TTATAGACTTGTATGTAAGTATTGAAAGTCGAGATATTCTACATAATGTGAATATTCCAAA  
AAAAAGTTTGTATTTAGTTCAAATGATCAATATGTCGAATCAGAACAAGTGATTGCCG  
AGATTTCGTGCCGAACGTCCACTTTT-----TTTAAAGAGAGGGTTCAAAAACATATTTAT  
TCTGAGTCAGAAGGAGAA---ATGCACTGGAGTACTGATGGCTATCATGCGCCCGAATAT  
CCATATAGTAATGTTCAATTTATTACCAAAAACAAGTCATTTATGGATATTAGCAGGAGGT  
CTATGCAGA-----TCCAATATAGTGTCTTTTTACTCCACAAGGATCAAGATCAAATGAA  
TGCTAATCCTTTTTCTCTCGAAGAAAGA-----TATATCTTTGATCTCTCA-----CTGACTAA  
T--GATCAAGTAAGACATAAATTGTTGGATACTTTTGGT-----GATAGGGAAATTCTT  
GACTATTCA---AAATCTTATCGA-----ACCAAGGGTCATTGGAATCTCATAGAGCCTTCT--  
-ACTTATATTCGTCAA-----GATAATTCCTTGGCGAAAAAGCGAAGGAATAGATTTGTAAT  
TCCCTTACAATATGATCAAGAACAAGAAAAGAACTAATACCTGTTTTGGTATTTTCGA  
TTAAAATACCTATAAAT-----GGTATTTTACGTAGAAATAGTATTCTTGCTTATTTTGTATGAT  
CCGCGATATAGAAGAAGC-----GGAATTACTCAATAT---ATTGTGCAAGTAGATTCAATCG  
TAAAA-----AAAGAGGATTTGATTGAGTGTGAGGA---GCAAAAAGATTTATTCCGAAAT  
GC---AAAGTAGATCGATTTTTTTTTCATTCCCAGAAGAGTGCATATCTTACCCGGATCTTC  
CCCATAATGGTCCGGAACAATAGTATCATTGGAGTAGATACACGACTTGCTTTAAATAC  
AAGAAGTCGAGTAGGTGGATTAGTCCGAGTGGAGAGAAAAAAAAGAGTATGGAAT  
GAAAATCTTTTCTGGAGATATTCATTTTTCTGGAGAGGTGGATAAAATATCTAGGCACA  
GTGGCATTTTGATACCACCAGGAATGGTAAAAAGA-----AATTCTAAAGGA---TCAAAA--  
-AAATTGAAAAATTGGATCTATGTCCAACGC-----ATTACACCTACAAAAAAAAG-----T  
ATTTTGTTTTGGTTTCGGCCCGTGGTACATATGAAATAGCTGATGGAATCAATTTAGCAA  
CACTTTTCTCTCAGGATCTATTGCAGGAAAAGGATAATGTCCAACCTTCGAATTGTCAATT  
ATATACTTTATGGAATGGCAAGTCAATTCGAGGAATTTATTACACAAGT--CAATTAGTT  
CGGGCTTGCTTAGTATTGACTTGGGACCAAGAAAAAATAGTTCTATAGAAGAA-----  
GAGATTCATGCTTCTTTTGTGAAATAAGGGTAAATGATCTACTTCGTGATTCATCCGA  
ATTGAGTTAGTAAAGTCCACTATTTTGTATACCGAAAAAAGGTATGATACGGCAGGTCC  
AGGATTGATTTCCAAT-----TTAGATCGTATTATAGAAATCCTTTTGTATTCCAAGGCGA  
AGATTCAATCA-----TTTCCCAACATCAGGAACTCTTGGT-----ACATTGTT  
GAATCGAAAAAAG-----GAATCCCAATCTTTTCTAATTTTGTTCATCATCCAATTGTCT  
CGAATTGGC-----CCCTTCAATACTTCGAGATATAAG-----AATGCGACAAAAGGATCG  
GATCCCATGACTCCAATT--GATTTGTTGGGCCCTTTGGGTACTCTTGTGCCT--AAAATA  
GTCAATTTTTGTTTCATCT--TACTATTTAAGAACT-----TATAATCAAGTCGTTTTAAAG--  
-AAAGATTTTTTACTTGAA-----AAATTTCAACAGACTTTCCAAGTGCTTCAAGTACTT  
CAATACTGTTTTATAGATGAAAATAGTAGG-----ATTTATAATCCCGATCCATGCAGTAATA  
TCATTTGGAATTCATTCCATTTAAATTGGTGTCTTCCATCACGATTCTTGTGATGAGG  
CATGGACAATAATTAGT--CTTGGACAATTCCTTTGTGAAAATCTATATCTATTGAAATAC  
GGATCA-----CGCATAAAAAAATCTGGTCAAATTTTCATTGTTTCAT--GTTGACTCTTTAG

TTATAAGATCAGCTAAGCCCTATTTGGTCACTCCAGGAGCAACTGTCCATGGCCATTATG  
GGGAAACCTTTTCTGAGGGAGACACATTAATTACATTTATATATGAAAAATCGAGATCT  
GGTGACATAACGCAAGGTCTTCCAAAAGTGGAACAAATCTTAGAAGTTCGTTCAATTG  
ATTCAATATCGATGAACCTCGAAAGAAGAGTTGAAGGTTGGGACGAACGTATCCGAAG  
GATTCTCGGGATCCCCTGGGGATTCTTTATTGGAGCTGAACTAACCATAGCCCAAAGTC  
GTATCTCTTTGGTTAATAAGATCCAAAAGGTTTATCGATCCCAGGGGGTACAGATCCATA  
ATAGACATATAGAGATTATTGTACGTCAAGTAACATCAAGAGTTTTGGTTTTAGAA-----  
--GATGGAATGTCTAATGTTTTTTTACCTGGGGAATTCATTGGATTGTTGCGAGCAGAGC  
GAGCAGGGCGCGTTTTGGACGAAGCGATCTGTTATCGGGCAATCTTATTGGGAATAAC  
GAAGTCATCTCTGAATACTCAAAGTTTCATATCCGAAGCAAGTTTTCAAGAACTGCTC  
GAGTTTTAGCAAAAAGCTGCTCTACGAGGTCGTATTGATTGGTTGAAAGGACTTAAAGA  
GAACGTTGTTCTGGGGGGGATTATACCGGTTGGTACCGGATTTAACAAATTAGTACATC  
GTTCAAAG-----AAAGAAAAAATATTTCAT-----TTGAAAATCAAAGGAAGAATCTATT  
TGAGTTGGAAATG-----AGAGATATTTTGTATACCATAGAGAATTATTTTGTCTTGTGC  
CCCAAAC-----TCAGACCAATCATTATG-----ATGGGAAGAC  
GCTATTGGAACATCAATTTGGAAGAAATGATGGAAGCAGGAGTTCATTTTGGTCATGGT  
ACTAATAAATGGAATCCTAGAATGGCTCCTTACATCTCTGCAAAGCGTAAGGGTATTTCAT  
ATTACAAATCTTACTATAACTGCTCGTTTTTTATCAGAAGCTTGCGATTTAGTTTTTGATG  
CAGCGAGTAGGGGAAAAAATTCTTAATTGTTGGCACCAAAAAGAAAGCAGCGGATTT  
AGTAGCATCAGCAGCAATAAGGGCTCGATGTCATTATGTTAATAAAAAATGTCTTGGTG  
GTATGTTAACAATTGGTCTACTACAGAAACAAGACTTCAGAAGTTCAGGGACTTAAAG  
AGCAGAACAAAAAATGGGGAACTCAATTGTCTTCCCAAAGGAGATGCAGCAATGTT  
GAAGAGAAAGTTATCTACCTTGCAAGCATATCTGGGTGGAATCAAATATATGACGGGAT  
TGCCCGATATTGTAATTATCGTTGATCAGCAAGAAGAATATACAGTTCTTCGAGAATGTG  
CCATTTTGGGTATTCCGACGATTTGTTTAATCGATACAAATTGTGACCCGGATCTTGCAG  
ATATTTCTATTCCGGCCAACGATGATGCTATAGCTTCGATTTCGATTGATTCTTACCAAATT  
AGTATCTGCAATTTGTGAGGGTTCGTTCTAGT---TATATCAAAAAGGTATGGGACAAAA  
AATAAATCCACTTGGTTTTAGACTTGGAACTCAAAAGTCATCTTTTTTGGTTTCG  
CAAAACCAAAGAATTTTTCCATGGGTATACAAGAAGATGAAATAATACGTAATTGTATT  
AAGGATTATGTAATAAAGAATAATAAATATCCTCAGGT---TTCGAAGGAATTGCCATA  
TAGGAATTCAAAAAGAATAGATTTGATTCAGATCATAATCTCTATTGGATTTCTTAATT  
TCTTAATAGAAGGA-----CGGACACGG-----GGAGTCGAAGAATTACAGATGAATGTACA  
AAAAGAGTTTCATTCTGTAAACCGGAGACTCAATATTGCTATCACAAGAATTGAAAAA  
CCTTATGGACAACCTAATATTCTTGCAGAATATATAGCTTTACAATTAATAAATAGAGTC  
TCATTTGAAAGGCAATAAAAAAAGCTATTGAATTAAGTGAACAAACGGGTACAAAAG  
GAATTCAAGTGCAAATTGCAGGACGTATCGACGGAAAAGAGATTGCACGTGTCGAATG  
GATCAGAGAAGGCAGGGTTCCTTTACAACAATTCGCGCTAAAATTGATCACTGTTCC  
CATAAATTAGAACTATCTATGGAGTCTTAGGCATCAAATTTGGATATTTTTAAATCAA  
GAAATGTCTCGTTACCGAGGACCTCGTTTCAAAAAAATACGCCGGCTGGGGGCTTTAC  
CGGGACTAAGTAAATACCCAGATCCAGAAGTGATCTTCAAACCAATTGCACTCT  
GGAAAA---AAATCACAATATCGTATTCGTTTAGAAGAGAAACAGAAATTGCGTTTTTCAT  
TATGGTCTGACAGAGCGACAATTACTTAAATATGTGCATATTGCTGGAAAAGCCAAAGG  
GTCAACAGGCCAGGTTTTACTACAATTACTTGGAGATGCGTTTTGGATAACATCCTTTTTC  
GATTAGGTATGGCTTCGACCATTCTGGAGCCAGACAATTAGTTAACCATAGACACATT

TTAGTTAATGGTCGTATAGTGGATATACCAAGTTATCGTTGCAAAGCCCGAGATATTATT  
ACTACGAAGGATAAAGAAAGATCGAAAGCTCTGATTCAAATTATCTTGTTCATCCCC  
CCGTGAA-----TTGCCAAACCATTTGACTATTGACTCC-----TTACAATATAAAGGATTTAT  
AAATCAAATAATAGATAGTAAATGGATCGGTCTGAAAATCAATGAGTTGTTGGTTCGTAG  
AATATTATCCCGTCAGACTATGTCACGTTCGAGGTACTGCAGAAGAAAAAACTGCAAA  
ATCCGATCCAATTTATCGTAATCGATTAGTTAACATGTTGGTTAACCGTATTCTGAAACA  
CGGAAAAAAATCATTGGCTTATCAAATTATCTATCGAGCCGTGAAAAAGATTCAACAAA  
AGACAGAAACAAATCCACTATCTGTTTTACGTCAAGCAATACGTGGAGTAACTCCCGAT  
ATAGCAGTAAAAGCAAGACGTGTAGGCGGATCGACTCATCAAGTTCCTATTGAAATAG  
GATCTACACAAGGAAAAGCGCTTGCCATTCGTTGGTTATTAGGGGCATCCCGAAAGCG  
TCCGGGTCGAAATATGGCTTTCCGATTAAGTCCGAATTAGTAGATGCTGCCAAAGGCA  
GTGGTGATGCCATACGCAAAAAGGAAGAGACTCATAGAATGGCAGAGGCAAATAGAG  
CTTTTGCGCATTTTTCGTATGGGTAGGGACATTATTGCCGATATAATAACTTCTATAAGAAA  
TGCTGACATAGATCAAAAAGGAAAAGTTAAAATAGTATCTACTAATATCACTAAAAATA  
TTGTGAAAATACTTTTACGAGAAGGTTTTATTGAAAACGTTTCGAAAACATCAAGAAAG  
TCAAAAAAATTTCTTGGTTTTCAACCTTACGACATAGAAAAG-----ACTAGTAAAGGG-----  
-----AATAAAATAAATTTAAAGCGTATCAGCCGACCCGGTCTACGAATATATTCCAAC  
TATCAACGAATTCCTAAGATTTTAGGTGGAATGGGGATTGTAATCTTTCTACTTCTCGA  
GGTATAATGACAGATCGAGAAGCTCGACTAGAAAAAATAGGAGGAGAAATTTTGTGTT  
ATATATGGATGACAAAACCTATAGCCAAAATTGGTTTACGTAAGAATGCACGTATCGGTT  
CAAAAAAGAATGAACGTAGAATACCAAAAAGGAGTTATTCATGTTCAAGCGAGTTTCAA  
CAATACTATTGTAAGTGTACAGACGTACGAGGTTCGGGTGGTTTTCTTGGGCTTCCGCAG  
GTACTTCTGGATTCAGAGGCACAAGAAAAGGAACACCCTATGCTGCTCAAGCCGCGGC  
TTTTAATGCTATTCGTACATTAGTTGATCAGGGTATGCAACGAGCAGAAGTTATGATCAA  
GGGTCCAGGTCTCGGAAGAGATGCGGCATTGCGATCCCTTCGTAGAAATGGGATGCTA  
TTAAGTTTCGTACGTGATGTAACCCCATGCCGCATAATGGATGTCGTCGCCCTAAAAA  
AAGACGTGTGATGCCAACCATTAACAACCTTATTAGAAATGCAAGACAGCCAATAAGA  
AATGTCACGAAATATCCCGCTCTTCGGGGATGTCCTCAGCGTCGAGGAACATGTACTAG  
GGTGTATACTATCACCCCAAAAAACCAAACCTCTGCCTTACGTAAAGTTGCCAGAGTAC  
GATTAACCTCTGGATTTGAAATCACTGCTTATATACCTGGTATTGGCCATAATTCACAAG  
AACATTCTGTAGTATTAGTAAGAGGAGGAAGGGTTAAGGATTTACCCGGTGTGAGATAT  
CACATTGTTTCGAGGAACCCTAGATGCTGTCGGAGTAAAGGATCGCCAACAAGGGCGTT  
CTAAATATGGGGTCAAAAAGCCAAAATGGCAAGAAAAAGTTTGATTCAAAGGGGAGA  
AGAAACGCCAGAAATTGGAACAGAAATATTATTTGATTTCGTCGATTCTTAAAAAAGA  
AATAAGC-----AAAGTTCCTCGTTGAGAGAACAAATGGGAAATTCATGGAAAATTGC  
AATCCCCACCACGTAATAGTGCGCCATACGTCTTCATCGACGTTGTTTTTTAACCGGAA  
GACCTAGAGCGAACTATCGAGACTTTGGACTATCTGGACACATACTTCGAGAAATGTTT  
CATGCATGTTTGTACCAGGCGCAACAAGATCAAGTTGGATGGTCAAAAATTCATTCAT  
CTCAGTTATTACACAAGAAGAAAAAGAAGAAAAT-----AGTGGGTCTGTTGAATTTCAA  
GTATTCCATTTACCAGTAAGATACGGAGACTTACTTCACATTTAGAATTGAACAAAAG  
AGATTTTTTATCGCAAAGAGGTCTACGAATAATTCTAGGAAAACGTCAACGATTATTGA  
CTTATTTGTCAAAGAAAAATAAAGTGCCTTATAAGAAATTAATAGATCAGTTAGATATTC  
GAGAACCAAAAACCTCGT-----ATGGTAAAACCTTCGTTTGAAACGATGTGGTAGAAAGCA  
ACGAGTCATCTATCGAATCGTTGCAATTGATGTTTCGATCCCGAAGAGAAGGAAGAGAT







CGGAACAAAGGGGGATACGCGTTA-----CGCCACGATTTTTTTGAATCA--GAAGAGAG  
ATTCCCAGAAATGGCGGATCTATTCCTCTATCAATAACCGAGCCG--GATCTGGTGT  
CATAGGGGATTTTCTTTTCTATTGATTCCTACGGGTTGGATCAAAAAAAAA-----TTCTTG  
AATGAGGTATTCAACTCCAGAGATGAATCGAAAAAGAAA-----  
-----  
-----TCTTTTCTGATTCAAATCCAATATAGCACCTATGGG-----TAC  
ATAAGAAATGTATCGAATCAATTCTTTTAAATG-----AATAGATCCGATCGCAACTTCG  
AATATGGAATTCAA-----AGGGATCAGATAGGAAATGATACTCTGAATCATAGA  
AATGAAATATACGATCAACCAACATTTATCGAATTTGAAAAAG---AGTCAGAAGAAATG  
GTTTGATCCT-----CTTATTTCTCGAACTGAGAGATCCATGAATCGGGATCCTGATGC  
ATATAGATACAAATGGTCCAATGGGAGCAATAATTTCCAGGAACATTTGGAACATTTTCG  
TTTCTGAACAGAAGAATCCTTTTCAAGTAGTGCAAGTAGTGTTTCGATCAATTACGTATT  
AATCAATATTCGATTGATTGGTCCGAGGCTATCGACAAAGAAGATTTGTCTAAGCCACT  
TCGTTTCTTTTTGTCCAAGTCA-----CTTCTCTTTTTGTCC-----  
--AAA---TCACTTCTTTTTGTCCAAGTCACTTCCCTTTTTCTTTGTGAGTATCGGGAAT  
ATCCCATTATAGGTCGGAG---ATCCACATCTAT--GAATTGAAAGGTCCGAATGATCA  
ACTCTGCAATCAGTTGTTAGAATCCATAGGTGTTCAAATCGTTCATTTGAAGAAATTGA  
AACCC-----TTCTTATTGGAT-----GATCATGATACTTCC---CAAAGACCAA  
AATTCTTGA  
TCAATGGAGGAACAATATTACCATTTTTGTTCAAAAAGATACCA---AAGCGG--GTCATT  
GACTCATTCCATACT-----AGAAAGAATCGCAGGAAATCCTTTGATAACACGGATT  
CCTA  
TTTCTCAATGATATCCCACGATCGAGACAATGGCTGAATCCCGTGAAACCATTT  
CATA  
GAAGTTCATTGATATCTTCTTTTTATAAAGCAAATCGACTTCGATTCTTGAATGATCCAC  
ATCACTTCTGGTTCTAT-----TGTAACAAAGGATTCCCTTTGATGTG-----GAAAAG  
ACCCGATCAATAATTATGAT-----CGTACATAT--GGACAATTCCTCAATATCTTGTCCATT  
CGCAACAAA---ATCTTTTCTTTGTGCGTGGGTA  
AAA-----AAAAA-----TAT  
CTTTCACCAATCGAGTCACAGGTATCTGACATCTTCATACCTAACGATTTCCCACAAAG  
TG  
GGT  
GAT  
GAA  
ACG---TATAACTTGTACAAATCGTACAAATCTTCCATTTTCCAATT  
CGA  
TCCGATCCATTCGTT  
CGT-----GGAGCTATTTACTCGATCGCAGACATTTCTGCAACACCT  
CTAACAGAGGAACAAATAGTCAATTTGGAAAAA  
ACTTATTGTCAGCCTCTTTCGGATAT  
GAATCTATCTGATT  
CAGAAGGGAATAACTTACATCAGTATCTCAGT-----TTCAATT  
CAAA  
CATGGGTTT  
GATTCACACTCCATGTTCTGAGAAGTATTTACCA-----TCCGAAAGAGGA  
AAAAA-----CGGAGTCTTTGTCTAAAG-----AAATGCGTTGAGAAAGGGC  
AGATGTATAGAACC  
TTTCAACGAGAT-----AGTGTCTCAA  
AATGGAATCTGTTCCAA  
ACATATATGCCATGGTTCCTTACTTCGACAGGGTGCAAATATCTCAATTT  
CACCTTTTA  
GATACTCTTTCAGACCCATTG-----CCGATACTGAGTAGTAGT--CAAAAATTTGTATA  
CA  
TTTTTCATGATATGATGCATGGATCAGATATATCACGGCCATTTCTCAGAAG-----  
-----ATTCTTCCACAATGGACTCTG---ATAAGTGAGATTTCGAGTCAATGTTTACAGAA  
T-----CTTCTTCTGTCCGACGAAATGATTCATCGAAATAATGAGTCACCCGTTCCATTGAT  
ATGGGCACATCTGAGATCAACAAATGCTCGGGAGTTC---CTCTATTCCATCTTTTTCTT  
CTTCTTGTGCTGGATAT--CTCGTTCGTATACATCTTCTCTTTGTTTCCCGA-----GCCTCT  
AGTGAGTTACAGACAGAGTTAGAAAAGATCAAATCTTTGATGATTCCATC  
ATACATGAT  
GGAATTTCGAAA  
ACTTCTGGATAGGTATCCTACATCTGAACTGAATCCTTTCTGGTTAA  
AGAATCTCTTTCTAGTTGTTCTGGAACAATTAGGAGATTCTCTGGAAGAAATACGGGGT  
TTTGCTTCTGGTGGCAACATGCTATTGGGTGGTGGTCCC-----GCTTATGGG---GT

CAAATCAATACGTTCTAAGAAGAAATATTGGAAGATCAAT-----CTCATCGAT-----  
CTCATACCAAATCCCATCAATCGAATCCTTTTTTCGAGAAATACGAGACATCTAAGTCGT  
ACAAGTAAAGAGATCTATTCAATTGATAAGAAAAAGAAAAACGTGAACGGTGATTGGA  
TTGATGAGAAAATAGAATTCTGGGTGCGAACAGTGATTTGATTGATGATGAAGAAAG  
AGAATTCTTGGTTCAGTTCTCC-----ACCTTAACGACA-----GAAAAAAGGATTGATCAA  
ATTCTATTGAGTCTGACT--CATAGTGATCATTATCA-----AAGAATGACTCTGGT  
TATCAAATGATTGAACAACCGGGATCAATTTACTTACGATACTTAGTTGACATTCAT-----  
CAAAGGATCTAATGAATTATGAGTTCAATAGATCCTGTTTAGCAGAAAGACGGATATT  
CCTTGCTCATTATAAGACAATCACTTAT-----TCACAAACCTCGTGTGGGGCTAATAGTTT  
TCATTCCCCATCTCCT-----CATGGAAAACCTTTTCGCTCCGCTTAGCCCTATCCCCTTC  
T--AGAGGTATTTTAGTGATAGGTTCTATAGGAACTGGACGATCCTGTTTGGTCAAATAC  
CTAGCGACAAACTCCTATGTTCTTTTATTACGGTATTTCCGAACAAGTTCTGGATGA  
CAAGCCTAAAGGTTATCTTATTGATGAT-----ATCGAT--ATTGATGATAGTGACGAT  
ATTGAT-----GATAGT-----GATGATGACC  
TTGATATTGATACGGAGCTGCTAACTATGACGAATGTGCTA-----ACTATGTATATGACG  
-----CCGAAAATAGACCGATTGATATCACCTTCAATTGCAATTAGCAAAAGCAATGT  
CTCCTTGCATAATATGGATTCCAAACATTCATGATCTGCATGTGAATGAGTCGAATTACT  
TATCCCTCGGTCTATTAGAGAACTATCTCTCC-----AGGGATTGTGAAAGATGTTCC--  
ACTGGAAAGATTCTTGTTATTGCTTCGACTCATATCCCCAAAAGTGGATCCCGCTCT  
AATAGCTCCGAATAAATTAATACATGCATTAAGATACGAAGGCTTCTTCTTCCACAAC  
AACGAAAGCACTTTTTTATTCTTTTATATACTAGGGGATTTCACTTGGAAAAGAAGATG  
TTCCATACT-----AACGGATTTCGGGTCCATAACCATGGGTCCAATGCGCGAGATCTTGT  
AGCACTTATCAATGAGGCCCTATCAATTAGTATTACACAGAAGAAATCCATTATAGAAAT  
TAATACAATTAGATCAGCTCTTCATAGAAAACTTGGGATTTTCGA-----TCCCAGATA  
AGATCGGTTTCAGGATCATGGGATCCTTTTCTATCAGATAGGAAGGGCTGTTACACAAAA  
TGTAAGGGAGGGGATTTTTCTTTGTACAAATGGTACTTCGAACTTGGAAACGAGCATGA  
AGAAATTAACGATACTTCTTTATCTTTTGTGAGTTGTTCTGCCGGATCGGTCGCTCAAGATC  
TTTGGTCTTCATCC-----AGACACGATGAAAAA--AATTGGATCACTTCTTATGGATTCGT  
TGAGAATGATTCT--GATCTAGTTTCATGGCCTCTTAGAAGTAGAAGGCGCTCTGGCTCTG  
GCGAGATCCTCACGGACAGAAAAATATTGCAGTCAGTTTGATAATAAT-----CGAGTGAC  
ATTACTTCTTCGGTCCGAACCAAGGAAT--CAGTTAGATATGATGCAAAATGGATCTTGT  
TCTATCGTTGATCAGAGATTTCTATATGAAAAA-----TACGAATCGGAGTTTGAAGAA--G  
GGGAAGGG-----GCCCTCGATCCGCAA-----CAGATAGAGAAGGAT-----TTATT  
CAATCAC-----ATAGTTTGGGCTCCT-----AGAATATGGCGCCCT-----TGTGGCAATCTA  
TTTGATTGTATCGAAAGGCCACTGAATTGGGATTTCCC--TATTGGACTGGGTCAATTC  
GG-----GGCAAATGGATCATTATCATAAAGAGGATGAGCTTCAAGAGAATGATTTCG  
AGTTCTTGCAGAGCGGAACCATGCAGTACCAGACACGAGATAGATCTTCCAAAGAACA  
AGGCTTTTTTCGACCAAGCCAATTCATTTGGGACCTTGCGGATCCATCTTTTCCCTATT  
CAAA--GATCAGCCCTCTGTCTCTGTGTTTTACGTCGAGAATTCTTTGCAGATGAAGA  
GATGTCAAAGGGGCTTATTGCTTCCCAAACAAATCCTCCTGCATCTATATATAAGCGCTG  
GTTTCATC-----AAGAATACGCAAGAAAAGCACTTCGAATTGTTGATTCATCGCCAGAGAT  
GGTTTAGAACC-----AATAGTTTCATTATCT-----AATGGATCTTTCCGTTCTAAT-----ACT  
CTATCCGAGAGTTATCAGTATTTATCAAATCTGTTCCCTATCTAAC---AGAATGCTATTGGA

TCAAATGACAAAGACATTGTTGAGAAAGAGATGGCTTTTCCCGGATGAAATGAAACAT-  
-----ATGCCTAGATCTCGA---ATCAATGGAAATTTTATTGATAA  
AACCTCTTCAATTGTAGCCAATATTTTATTACGAATAATTCCAACAACCTTCAGGAGAAA  
AAAAGGCATTTACCTATTACAGAGATGGG-----ATGTCAGCTCAATCCGAAGGAAATTAT  
GCAGAAGCTTTACAGAATTATTATGAAGCTATGCGACCAGAAATTGATCCCTATGATCG  
AAGTTATATACTCTATAACATAGGTCCTTATACACACAAGCAACGGAGAACATACAAAAG  
CTTTGGAATATTATCTCCGAGCAATAGAACGAAATCCATTTTTACCACAAGCTTTTAATA  
ATATGGCCGTGATCTGTCATTAC---CGGGGAGAACAGGCCATTTTACAAGGTGATTTCGG  
AAATTGCGGAGGCTTGGTTCGATCAAGCTGCTGAGTATTGGAAACAAGCTATAGCGCTT  
ACTCCAGGGAATTATATTGAAGCACATAATTGGTTAAAATAACGAGGCGTTTTGAA----  
--ATGAACTGGCGATCAGAAAATATATGGATAGAATTTATAACGGGGTCTCGAAAAACAA  
GTAATTTTTGCTGGGCCTGTATCCTTTTTTTAGGTTCACTAGGATTCTTAGTGGTTGGAA  
CTTCCAGTTATCTTGGGAAAAATATGATATTCGATTTCCGTCTCAGCAAATTATTTTTTT  
CCCCAAGGGATCGTGATGTCTTTCTATGGGATCGCAGGTCTATTCATTAGTTCTTATTT  
GTGGTGCACAATTCATGGAATGTAGGTAGTGGTTATGACCGATTCGATAGAAAAGAAG  
GGATAATGTCCCTTTTTTCGTTGGGGATTTCTGGAAGAAATCGTCGCATCTTCCTTCGTT  
TCTTTCTGAAAGATATCCAATCAATCAGAATAGAGGTGAGAGAGGGTCTTTTTCTCTCGT  
CGTGTCTTTATATGGAATCAGGGGCCAAGGAGCCATTCCCTTGACCCGTA CTGATGA  
GAAT--TTGACTCCACGAGAAATTGAACAAAAGCTGCCGAATTGGCCTATTTCTTGCG  
CGTACCCATTGAAGTATTT

>Erodium

????????????????????????????????????????????????????????????????  
????????????????????????????????????????????????????????????????  
????????????????????????????????????????????????????????????????  
????????????????????????????????????????????????????????????????  
????????????????????????????????????????????????????????????????  
????????????????????????????????????????????????????????????????  
????????????????????????????????????????????????????????????????  
????????????????????????????????????????????????????????????????  
????????????????????????????????????????????????????????????????  
????????????????????????????????????????????????????????????????  
????????????????????????????????????????????????????????????????  
????????????????????????????????????????????????????????????????  
????????????????????????????????????????????????????????????????  
????????????????????????????????????????????????????????????????  
????????????????????????????????????????????????????????????????  
????????????????????????????????????????????????????????????????  
????????????????????????????????????????????????????????????????  
????????????????????????????????????????????????????????????????  
????????????????????????????????????????????????????????????????  
???ATGGTACCTATTCGAGCTGATGAAATTAGTAATATTATCCGTGAACGTATCAAGCAAT  
ATAATAGAGAAGTCAATATTGTAATATGGGTATCGTACTTCAAGTAGGTGACGGCATTG  
CTCGTATTTATGGTCTTAATGACGTAATGGCAGGCGAATTAGTAGAATTTGAAGAAGGT  
ACGACAGGCATTGCCCTGAATTTGGAATCAAATAACGTTGGTGTGTATTAATGGGTGG  
TGGTTTGAGGATACAAGAGGGGAGCTCTGTAAAAGGAACAGGAAGAATTGCCAGAT  
ACCGGTGAGTGAAGCTTATTTGGGTTCGGGTTGTAAATGCTCTGGCTAAACCTATCGACG  
GTCGGGGCGGAATTCAGCTTCGGAATCTCGGTTAATTGAATCTCCTGCTCCGGGTATT

ATTTGAGACGTTCTGTATATGAGCCTCTGCAAACAGGGCTGATTGCTATTGATTGATG  
ATTCCTATAGGACGCGGTCAGCGCAATTAATTATTGGGGACAGACAGACTGGTAAAA  
CCGCAGTAGCTACGGATACGATTCTCAATCAACGAGGAAAGGATGTAATATGTGTTTAT  
GTAGCTATTGGTCAAAAAGCATCTTCAGTGGCTCAGGTAGTGACTACTTTTCAGGAAA  
CGGGAGCGATGAAATATACTATTGTGGTAGCCGAAACGGCGGCTTCCCCGCTGCATTA  
CAATACCTCGCCCCCTATACAGGCGCGGCTCTGGCTGAATTTTTTATGTACCGTGAACG  
GCACACTTTAATAATTTATGATGATCTCTCAAAAACAAGCACAGGCTTATCGTCAAATGTC  
TCTTCTATTACGAAGACCGCCTGGTCGCGAAGCTTATCCGGGAGATGTTTTTTATTTACA  
TTCACGCCTTTTGGAAAGAGCCGCTAAATCAAGTTCTAATTTGGGTGAGGGAAGTATG  
ACTGCTTTACCAATAGTGGAGACCCAAGCGGGGATGTTTCGGCTTATATTCCTACTAA  
TGTAATTTCCATTACGGATGGTCAGATATTCTTATCCGCCGATCTATTCAACTCTGGAATC  
AGGCCTGCTATTAATGTGGGTATTTCCGTCTCCAGGGTAGGGTCCGCAGCTCAAATTA  
AGCCATGAAACAAGTAGCCGGCAAATCGAAATTGGATTTGGCGCAATTCACAGAATTA  
GAAGCCTTTGCCAATTTCGCTCTGATCTCGATAAAAACACTCAGAATCAATTAGCAAG  
AGGTCGACGATTACGTGAGTTGCTCAAACAATCCCAAGCGGAACCTCTCGAGGTCGAA  
GAGCAGATAATGACTGTTTATACAGGAACAAATGGTTATCTCGATTCAATAGAAATTGG  
ACAGGTAAGGAAATTTCTCGGTAATTTACGTGACTACTTAAAAAGTAATAAACCCAGT  
TCCAAGAAATCATATCATCTACCAAGACATTCACCGAGGAAGCGGAGACCCTTTTGAA  
AGAGGCAATTCAGGAACAGATTGAACGTTTTACGTTTCAG-----ATGAGACTCAATCC  
TACTGCTTCGAGCCTTGGGGATTCCACCCAAAACCG-----GGACGTATCACCCAAAT  
AATTGGGCCGGTATTGGATGTAGTCTTTCCCAAGGGCAAGATGCCCTATATTTATAACGC  
GCTAGTAGTCCAGGGTCGGGATACTGCCGGTCAACAAATTAACGTGACCTGTGAGGTA  
CAACAATTATTAGGAAATAATCGAGTTAGAGCTGTGCTATGAGTGCTACAGATGGTCT  
AAGTAGAGGGATGGAAGTGATTGACACGGGGGCTCCTTTGAGTGTTCCAGTCGGCGGA  
TCGACTCTAGGACGAATTTCAACGTACTGGGAGAGCCCATTGATAATTTAGGCCCCGT  
AGATACTCGGACAACGTCCCCTATTCATAGATCTGCGCCCGATTTTATTGAGTTAGATAC  
AAAATTCTCTATTTTTGAAACAGGAATTAAGTAGTGGATCTTTTAGCCCCCTATCGCCG  
TGGAGGAAAAATCGGATTATTCGGGGGGGCTGGAGTGGGTAAACAGTACTCATTATG  
GAATTGATCAACAACATTGCCAAAGCTCACGGAGGTGTATCCGTATTTGGCGGAGTAG  
GCGAGCGTACTCGTGAAGGAAATGATCTTTATAAGGAAATGAAAGAATCCGGAGTAAT  
TAATGAAGAAAATATTTTCGGAATCTAAAGTAGCTCTAGTCTACGGTCAGATGAACGAAC  
CGCCGGGAGCTCGTATGAGGGTTGGTTTACTGCCCCTAATGCGGGAATATTTCCGC  
GATGTTAATAAACAAGACGTACTTTTATTATCGACAATATCTTCCGTTTCGTCCAAGCA  
GGATCTGAAGTATCCGCTTATTGGGTAGAATGCCCTCCGCTGTGGGTATCAACCCAC  
CCTTAGTACCGAAATGGGTTCTTTACAAGAAAGAATTACTTCTACAAAAAAGGGGTCC  
ATCACTTCTATTCAAGCTGTTTATGTACCTGCGGACGATTTGACCGATCCTGCCCTGCC  
ACGACATTTGCACATTTAGATGCTACTACTGTACTATCAAGAGGATTAGCTTCCAAGGGT  
ATATATCCAGCAGTAGATCCTTTAGATTCAACCTCAACTATGCTTCAACCTCGGATCGTT  
GGCGAGGAACATTATGAAATTGCGCAAAGGGTTAAGCAAACCTTACAACGTTACAAAG  
AACTTCAGGACATTATAGCTATCCTCGGGTTGGACGAATTATCCGAAGAGGATCGCTTA  
ACCGTAGCAAGAGCACGAAAAATAGAGCGTTTCTTATCACAACCCTTTTTTGTAGCGG  
AAGTCTTTACAGGTTCTCCGGGGAAGTATGTTGGTCTGGCAGAACTATTCGAGGGTTT  
AATTTGATTCTTTCCGGAGAATTGGATGGTCTTCCCTGAGCAGGCCTTTTATTTGGTAGGT  
AACATCGACGAAGCTACTGCGAAGGCTACGAAGTTAGAAAAGGAGAGTAATTTGAAG

AAAATGACCTTAAATCTTCGTGTAAGTACTGACCCCTAAGCGAATTCTTTGGGATTCAAAGT  
CAAAGAAATCATTATCCATTGATGATGGAAAAATGGGTGTATTACCAAACCACGTCC  
CTCTTGTCACAGGATTAGATACCGGCATTTTGAAAATACGCCTAACGATCAATGGGTC  
ACGATAGCTCTGATGGGCGGTTTCGCTAGAATACGCAATAATGAGATTCTTGTTTTTCG  
ACATGATGGGGAAAAGGTTAGTGACATTGATCCACAAGAAGCTCAGCAAACCTTTCAA  
ATAGCGAAAGATAACTTGAGGGAAGCTGAGGGGAAAGAAAAACAATCGAGGCGGAT  
CAAGCTGTCAAACGAGCTGAACTACTAGTAAATGCTGTCAATGATATTTTCGATGAAAA  
TGTAACCGATTCTTTTCGTTTCCCTTAGGTCGCTGGCCATCCGCCGGGAGTTTCGGGTTA  
ATACCGATATTTAGCAACAAATCTAATAAATCTAAGTGTAGTGCTTGGTGTATTGATCTT  
TTTTGGAAAGGGAGTGTTAAACGATTTATTAGATAATCGAAAACAGAGGATCTTGAATA  
CTATTCGAAATTCAGAGGAACTTCGGGGAGGGGCCGTGCAAGAGCTGGAAAAAGCTC  
ACGCCCGTTTACGGAAAGTGAAAACAGACGTGGAGCTGTTTCGAGTGAACGAGTATT  
CGGAGGCAGAACGAAAAAGGTCCTAAGTACTTTCAGCTTATAAGGAGTTAGAACA  
AGCAGAAAGTTTAAAAAATGAAAGCATTTCGTTTTGAACAGCAAAGGGCAATTAATCAA  
GTCCGGCAATGGGTTGTCCAACAAGCCCTAGAAGGAGCTTTGGAAATTCTGAATAGTT  
CTTTGAACAAGGAGTTACATTTACGTACGATTAATGCTAATATTGGCCTCTTAGGATCCA  
TGAAAGAAAGAACTTATATGAATCCACTGATTGCTGCCGCTTCCGTTATTGCTGCTGGG  
TTGGCTGTCGGGCTTGCTTCTATTGGACCGGGTATTGGGCAAGGCACTGCTGCGGGCC  
AAGCTCTAGAAGGTATCTCAAGACAGCCCTCGGCCGAGGGAAAAATACGAGGTACCTT  
ATTACTGAGTCTAGCTTTTATGGAAGCTTTAACAATTTATGGGCTGGTTGTAGCATTAGC  
GCTTTTATTTGCGAATCCCTTTGTTATGAGTGTTTTATCATGTTCTATAAACACAATAAGT  
GGGTTATACGAGGTATCCGGTGTGGAGGTAGGTCAACATTTTATTGGCAAATAGGGGG  
GTCCAAGTCCACGGCCAAGTGCTTATTACTTCTTGGGTTGTAATTGCTATCTTATTAGG  
TTCAGCTATTCTAGCGGTTCAAATCCACAAACCATTCCGACAGATGTTTCAGAATTTCT  
TCGAATATGTCCTTGAATTCATTCGAGACGTGAGCAAACCCAGATTGGCGAAGAATA  
CGGCCCGTGGGTTCCCTTTATTGGAAGTATGTTTCTTTTTATTTTTGTTTCTAATTGGTCG  
GGGGCCCTTCTCCCTTGGAATCATAACAGTTACCGCAGGGGGAGTTAGCCGCACCCA  
CAAATGATATAAATAACAACCGTTGCTTTAGCCTTACTCACGTCAGTGGCATATTTTTATG  
CAGGTCTTTCAAAAAGGGGATTAGCCTATTTCAAAAATACATAACAACCGACTCCAATC  
CTTTACCCATTAACATCTTAGAAGATTTTACAAAGCCTTTATCACTTAGTTTTCGACTTT  
TCGGTAATATATTAGCCGATGAATTAGTAGTTGTTGTTCTGCTTTCTTTAGTACCTTTAGT  
GGTTCCTATACCCGTCATGTTTCTTGGATTATTTACAAGCGGCATTCAAGCTCTCATTTTT  
GCAACTTTAGCTGCGGCTTATATAGGCGAATCCATGGAGGGTTCATCATATGATATTTAGT  
ACTTTAGAGCATATATTTAACCATATCTTTTTTCGGTCGTTTCAATTGTAATTACAATTC  
ATTTTCTAACTTAGCAGTCGATGAAACCGTAGGACTATACGATTCTTCCGAAAAAGGC  
ATGCTTGTTTCTTTTTTCTGTCTAACAGGATTATTAATGACTCGTTGGGCTTGTTCAGGA  
GATTTCCATTAAGTGATTTCTATGATTGTTAATTTTCTTTCATGGAATTTATCCATTAT  
TAACATGCTTCCATATTTGAAAAACGAGAAAAATTATTTAAGCCCAATAAGTTACCTCA  
GTGCCCTTTTTACCCAAGGCTTTGCGACTTCGGGTCTTTTAGCGGAAATGCATCAATCC  
AAAAGATTAGTACCAGCTCTCCAATCCCAGTGGTTAATGATGCACGTAAGTATGATGCT  
ATTGAGCTACGCAGCTCTTTTGTGCGGATCATTATTATCAACAGCTCTTCTAATCATTACA  
TTTCGAAAAAGGAAAGGGGTCTTTGGTAAAAGAAATAATATGCAATACCTGAATGAAA  
AAAAG-----AACACTTCTTCTTCTTCTGTAATTTATAGGTCTCAATTGGTTC  
ACCAATTAGATTATTGGAGTTATCGTATTATTAGTCTAGGATTTCTTTTTTAACCATAGG

GATTCTTTCCGGAGCGGTCTGGGCTAATGAGGCGTGGGGTTCCTATTGGAGTTGGGAC  
CCAAAGGAAACTTGGGCATTTATTACTTGGACAGTATTTGCCATTTTTTTACATAGTAGA  
ACAAATAAAAACGTGGAAGGCATAAATTCGGCAATTGTGCTTCTATAGGCTTTTTTAT  
CATTTGGATATGCTACTTTGGAATCAATCTATTAAGAATAGGGTGCATAGTTATGGTGCA  
TTTGCAATATCGATGAAAAAAAAAAAAAGTACCCACTCCCTTCTATAACGTTGCATCCAT  
AGTATTTTTACCCTGGTGGATCTCCCTGTTATTTACTAAAAGCCTAGAATTCTTGGTTAC  
GGATTGGTGGAAATAGTAGACAATCCGACACTTCTTGGGATGAGATTGAAGAAAAAAGT  
CTGATGAAAAAATTCATAGAATTAGAGGAACTCCTTCTCTTGGACGAAATGCTAAAGG  
AATGCCCCGAAAGTATATCTAGAAAACCTTCGTATAGGACTCCACAAGGAAACGGTCCA  
ATTAATTAAGATGCACAATGAGGATCAGATCCATAGGATTTTGCACCTTCTCGCAGACTCT  
AATCTATTTTCGTTATTCTAAGCGGTTACTCTATTCTGGGTAAGGAACAACCTGTTATTCTT  
AACTCTTGGTTTCAAGAATTCTTATATAATTTAAGCGACACAATAAAAGCCCTGTGCATT  
ATTGCATTCGCTGATATTTTTTTCGGATTCATTTCGGTACACACTTGGGAATCGATAATTA  
GCTATGTCTGCAAAGGGCTTGGATGTGTTTCTACCGATCGAATCCCATCTTTTGTTCGTT  
GGATTTTGGCATCCATTTTAGATGTAGCCTGGAAATTTTGGTCCTTCCGTTATTTAAACA  
GCCTATCCCCGTCACTTTTAGCGTTATATAGTGCAATGAAGGACATGCCGTTTGGAGTTC  
CCAAAGTGCCCTTTGAATTTGAAGATGAAGTAGAAGTCACTTGGATGGACTTATATAAT  
CTACTTTTTTCGTGAAAGGGTGCTTTTTTTAGGTCGAGCAATTAACCCGGAGATCACAAA  
CCACCTCGTAAGTCTTATGGTCTTCTCACTGTAGAAAGGGATGACTGGAGTCCAATGC  
TGCTTATAAACTCTCCTGGGGGATACATATTCAACGGGTTATCTCTGTATGATACTGTGC  
GCCTTTTCGGGG-----GCAAGAACCCTATGCGTTGGAACAGCCGTTTCCATGGCATCCGT  
GATTTTGGTTCGGAGGATCTGACAATAAACGCGCAGCATTCCCTCACGCTAGGGTAATGA  
TACATCAACCTCGTATCAATAAGTTTGGAGACGAAGGCCCTGAAGTTATCATGGAAGCG  
CGTATAATGTTAGACTTGCGGCACCACATCGTAGAGATTTATGTACTAAAAACAGGCCA  
ACCTTTCTGGGTTATATCTGTAGACCTGGAAGTGGATACTTATCTGACACCCGACGGAAG  
C C A A G A T A T A C G G A C T C G T T G A T C T G A T A C T T A T C A A  
A????????????????????????????????????????????????????????????  
????????????????????????????????????????????????????????????  
????????????????????????????????????????????????????????????  
????????????????????????????????????????????????????????????  
ATGGAAGAATTC AAGAATATTT  
AGAATTCGATGGATCTCGGCAGCATGCTTTTCTATACCCACTTATCTCTCGGGAGTCTAT  
TTATGCACTTGCGCATGATCATGGTTTAGCCAATTATGACAATAAATCCAGTTCATTAATT  
GTGAAACGTTTAGTTGCTCGAATGTATCAACAGAGCCCTTGGGCATTTGTCCCAATGA  
TTCGAACCAAAATCCATTTTTTGGCAAGAATTTGTATTCTCAAACGATATCAGAGGGAT  
TTACAGAGATTGCGGAAATCCCCTTTTTCTTCAATTAGTCTCTTCTTTAATATCAAAT  
CTCTTAATTTACGATCAATACAGTCAATATTTCCCTTTTTAGAGGATGAATGCTCCCATTT  
CCATTTTGTGTCAGACGTACTAATACCCACCCTGCCATCTGGAAATCCTGGTTGAAG  
CCCTTCGTTATTGGGTGAAAGATGCTCCCTTCGTGCATTTTTTACGGTCTTTCTCTATG  
AGTGTTGG-----GCTTTAATAGTCTTGGGCCTAGTCTTTTTTTTTCAAAGCAAGATTGT  
TCCTCTTTCTATATAATTTATGTATGTGAATATGAATCCATGCTCCTTTTTCTTCGGAGT  
AAATCTTCCCATTTACGATCAACATCTTCTGCAATCTTTCTCGAGCGTATTCTTTTCTATA  
AAAAAATGGAGAGTCTTGGATGTATCTTTGCAAATGAGCGCATTCTGCTGTTTTTCAAG  
GACCCCTTCCTTCATTATGTTTCGATATCAAGGAAAATGTATTCTGATTTTAAAAGACAGG  
CCTCTTCTGATGAATAAATGGAAAGATTATCTTGTAAGTTATGGCAATGTCATTTTGAT  
GTATGGTCTCAACCAGGAAGTGTTTCATAGAAACAAATTATCCAGTATTCCCTTAACTTT

ATGGGTTATATTTTAAGTG TAGGATCAATTCCTTTGGTGATCCGGAGTCGAGCATTAGAA  
AATTCATTTCTAATAGATAAT-----GCTATGAATAAGGTGCGAAACAATAATCCAATTCCTT  
CTCTAATTCGATCGTTGGCTAAAGAAAAC TTTTGTAACCCCTTAGGGGATCCCATTAGT  
AAGCCAACCTGGGCGGACTCATCCGATTCTGATATTATTGACCGATTTGTGCGTATGTGC  
AGA ACTCTTTCTATTATCACGGCGGGTCTTCAAAAAAAAAAAGTTTGTATCGACTAAA  
ATATATACTTCGACTTTCTTGTGTTAAAAC TTTGGCTCGTAAACACAAAAGTACTGTACG  
TTCTTTTTTTGAAAAAATTAGGTT CAGCATTATTGGAAGAGTTTATTAACGAGGAAGAAC  
AAGTACTTTCTTCGATCTTCTCAAGACGGATTGGG TATTGAATATTCTTTATATGAATGA  
TCTGATCACTCAGGAAATGATAATTGATAGAAGA---GAAATACAAGATATCAAT---TCTTT  
TTCCAGATTCGAATCC---TTACAAGAAGTCTATGGGACTGTCTGGGGACTTGTCCCTATT  
TTGATCCTTGTAGTGGGAATCACAATAGGTGTATTAGTAATTGTGTGGTTAGAAAGAGA  
AATATCTGCAGGGATACAACAACGTATTGGGCCTGAATACGCCGGTCCTTTGGGAATC  
TTCAAGCTCTAGCCGATGGAACAAAAC TCTTTTCAAAGAGAATATTCTTCCATCTAGG  
GGGGATATTCGTTTGTTCAGTCTTGGCCCATCCATGGCAGTCATATCAATTCTCCTAAGT  
TATTCAGTAATTCCTTTTAGTTATCGTCTTGT TTTTAGCTGATCTAAATGTTGGTGTTTTTT  
TCTGGATTTCCATTGCAAGTATTGCTCCCATCGGACTTCTTATGTCAGGATATGGATCAA  
ATAATAAATATTCTTTTTTAGGTGGTCTACGAGCTACTGCTCAATCAATAAGTTATGAAAT  
ACCATTA ACTCTCTGCGTCTTGTCAATATCTCTACTTTCTAACAGTTCAAGTACAGTTGA  
TATAGTAGAAGCGCAGTCAAATATGGTTTTTTGGGGGTGGAATTTTTGGCGGCAACCCA  
TAGGGTTTATCGTTTTGCTAATTTCTTCCCTAGCGGAATGTGAAAGATTACCCTTCGATT  
TACCAGAAGCGGAGGAAGAATTAGTAGCAGGTATCAAACCGAATATTCAGGTATCAA  
ATTTGGTTTATTTTATATTTCTTCTATTTCAATTTATTAGTTTCTTCTTCTTTGTAACAAT  
TCTTTACTTAGGTGGTTGGAATCTCTTATTCGGGCACAGACTTTCCCTACTTATTTGA  
AAGAAATCAAGCGGGTGCTGTTTTTTCGAACAACAATCGCGCTTTTTATTACATTAGCTA  
AAACTTTTTTTTTCTTGTTCATTTCTATCACAACAAGATGGACTTTCCCTAGGCTAAGAA  
TGGACCAACTCTTAAATCTTGGGTGGAAATTCCTTTTACCGATTTCTCTCGGCAATCTAT  
TATTAACAACGTCTTCTCAACTCTTTTCGCTG-----ATTCTCGATTCTA  
CGAGAATTTTTATGAAAGCCTTTCATTGCTTCTTTTCGATGGAAGTTTTATTTTGCCAG  
AATGTAGCCTAATTTGGGTCTAATTTCTTCTGATGATCAATTCAACCTCTGATCAAAA  
AAGATATACCTTGGTTATATTTCACTCTTCAACAAGTTTAGTAATGAGCATAACGGCCC  
TATTTGTTCCGATGGAGAGAAGAACCTATGATTAGCTTTTCAGGAAATTTCCAAACGAAC  
AATTTCAACGAAATCTTTCAATTTCTTATTTACTATGTTCAACTCTATGTATTCTCTATC  
CGTAGAGTACATTGAATGTACAGAAATGGCTATAACAGAGTTTCTCTTATTCATATTAAC  
AGCTACTCTAGGAGGAATGCTTTTATGCGGTGCTAACGATTTAATAACGATCTTTGTAGC  
TGCAGAATGTTTCAGTTTATGCTCCTACCTATTATCTGGATATACCAAGAAAGATGTACG  
ATCAAATGAGGCTACTATGAAATATTTACTCATGGGTGGGGCAAGCTCTTCTATTTTGAT  
TCATGCTTTCTCTTGGTTATATGGTTCATCCGGGGGAGAGATCGAGCTTCAAGAAATAG  
TGAATGGTCTTATCAATACACAAATGTATAACTCCCCGGGAATTTCAATTGCGCTTCTAT  
TCATCACTGTAGGAATTGGGTTCAAGCTTTCCCAGCCCCTTCTCATCAATGGATTCCT  
GACGTATACGAAGGATCTCCCACTCCAGTCGTTGCTTTTCTTTCTGTTACTTCGAAAGT  
AGCTGCTTCAGCTTCAGCCACTCGAATTTTCGATATTCCTTTTTATTTCTCATCAAACGA  
ATGGCATCTTCTTCTGGAAATCCTAGCTATTCTTAGCATGATATTGGGGAATCTCATTGCT  
ATTACTCAAACAAGCATGAAACGTATGCTTGCATATTCGTCCATAGGTCAAATCGGATAT  
GTAATTATTGGAATAATTGTTGGAGACTCCAATGGTGGATATGCGAGCATGATAACTTAT

ATGCTGTTCTATATCGCCATGACCCTAGGAACTTTTTGCTTGCATTGTATTATTTGGTCTGC  
GTACCGGAACGGATACCATTTCGAGATTATGCAGGATTATACACAAAAGACCCTTTTTTG  
GCTCTCTCTTTAGCCCTATGCCTCTTATCCCTAGGAGGTATCCCCACTAGCAGGTTTT  
TTCGAAAACCTCCATTTATTCTGGTGTGGATGGCAGGCAGGCCTATCTTTCTTGGTTTC  
AATAGGACTCCTTACGAGCGTTCTTTCTATCTACTATTATATCAAATAATTAAGTTATTA  
ATGACTGGACGAAACCAAGAAATAACCCCTCACGTGCGAAATTATAGAAGATCCCCCT  
TAAGATCAACCAATTCCATCGAATTCAGTATGATTGTATGTGTGATAGCATCTACTATACC  
AGGAATCTCAATGAACCCGATTATTGCAATTGCCAGGATACCCTTTTTATGTTTCTGCT  
TTACGAATATGACATTTTCTGGGTATTTCTAATACTATCAAGTCTTATTCCTATTTTGGCAT  
TTCTAATTTTCGGGAGTTTTAGCCCAATTAGCGAAGGGCCAGAGAACTTTCTAGTTAT  
GAATCCGGTATAGAACCAATGGGCGATGCTTGGTTACAATTTCAATCCGTTATTATATG  
TTTGCTCTGGTTTTTGTGTTTTTGATGTTGAAACGGTTTTTCTTTATCCATGGGCAATG  
GGTTTTGACGTATTGGGGGTGTCCGTATTTATAGAAGCTCTCGTTTTTCGTGCTTATCCTA  
ATTATTGGTTCAGTTTATGCATGGCGAAAGGGGGCATTGGAATGGTCTACGAATTATTT  
CCTTGGTTAACAATAATTGTGATTTTTCCGATATCCGCGGGTCCCTCATTTTTTTTCTCC  
CGCATAGAGGAAATAAGGTAAGTAGATGGTACACTTTGTGCATATGTTCACTAGAACTC  
CTTCTAATGGCCTATGCATTCTATTACCATTTTCAACTGGACGATCCATTAATCCAACCTCG  
TGGATCATTATAAATGGATCCCCTTTTTTGAATTTTACTGGAGATTGGGAATAGACGGAC  
TTTCTCTCGGACCTGTTTTACTCACAGGATTTATCACCCTTTGGCTACTTTAGCTGCTT  
GGCCAGTTACTCGAAATCCCCGATTATTCTATTTCTTGATGTTAGCAATGTACAGCGGTC  
AAATAGGATCATTTCGTCTCGAGATCTTTTGCTCTTTTTTCATCATGTGGGAGTTAGAGT  
TAATTCCTGTTTATTTCTTCTATCCCTGTGGGGGGGAAGAAACGCCTGTATTCAGCTA  
CAAATTTCTTTTGTACACTGCAGGAAGTCCCTCTTTCTATTAATAGGAGTTCTAGGTA  
TCGGATTATTTGGTTCAGCGCACCAACATTCATTTTGAATATCAGCTCATCAATCCT  
ATCCTGCGGCACTGGAAATCATTCTATATTGGCTTTCTTATTGCTTTTGTGTCAAATC  
GCCGATTATACCCTTCCATACGTGGTTACCAGATACTCACGGAGAGGCACATTACAGCA  
CTTGCATGCTTCTAGCTGGAATCTTATTAATAAATGGGAGCTTATGGATTGGTTCGAATTA  
ATATGGAATTCTTGCCCCACGCGCATTCTATATTTTCTCCCTACTTGATTACAATAGGCGC  
AATCCAAATAGTCTACGCAGCTTCAACATCTCTTGGTCAGCGTAATTTAAAAAAAAGAA  
TAGCCTATTCCCTCCGTATCTCATATGGGTTTCATAATTATAGGAATTAGCTCTATAACGGA  
TACGGGGCTTAACGGAGCCATTTTACAAATAATCTCTCATGGATTTATTGGTGCTGCTCT  
TTTTTTCTTGGCAGGAACGAGTTATGATAGAATACGTCTTCTTTCTTTTGACAAAATGGG  
CGGAATGGCTGTCGCCATTCCAAAGTATTTACAATGTTTCAGTATCTTATCAATGGCTTC  
CCTTGCATTACCGGGCATGAGCGGGTTTGTGTCAGAATTGATAGTCTTTTTGGGAATAA  
TCACTAGCCCCGAAATTGCTTTTAATACCACGAATATTAATTCCTTTTGTAATGGCAATTG  
GAATGATATTAACCTCAATTTATTCATTATCTATGTTACGCCAGATGTTCTATGGCTACCG  
ACTTTTGAATGTACCAAACCCTCCCCTTTTTGATTCTGGGGCGCGGGAGTTGTTTGT  
CGTTTTCTATCCTTCTACCCGTAATAGCGGTTGGTATTTATCCCGAATTGATTCTCTCATT  
ATCGGTTGACAGGGTTGAGTTTATTCTCTCTCATTTTTTTCATAGAGATGATGCTCGAACA  
TGTACTIONTTTTGAGTGCTTTTTTATTTTCTATTGGTATCTGTGGATTGATCACCAGTCGG  
AATATGGTTAGGGCCCTTATGTGTCTTGAACCTTATGCTGAATGCGGTGAATATGAATTC  
GTAACATTTCTGATTTTTTTGATAGTCGGCAATTAAGGGGGCCATTTTTCCGTTTTT  
GTTATAGCCATTGGAGCCGCTGAAGCAGCTATTGGACCGGCCATTCTTCGTCAATTTAT  
CATAACAAAAAATCAACTCGTATTAACCAATCGAATTTGTTGAGAAAGATGGAATATAC



AAATAAATATTCATGGATTATGCCCTTCATTCCACTTCCCGTTCCTATCTTAATAGGGATG  
GGACTTCTCCTTTTTCCAACGACAACAAAACATCTTCGCCGTATATGGGCCTTTCCTAC  
TCTTTTTTTGTTAGGGATAGTTATGCTTCTTTCGGCCTATTTATCTATTGAGCAACTCAAT  
AGAAGTTATATCTATCAATATGTATGGTCTTGGACCATCAATAATGATTTTTCTTTAGAGT  
TTGGTCATTTGATAGATCCACTTACTTCTACCATGTCAATTTTAATTACTACTGTTGGACT  
TACAGTTATTTATAGCGAAAATTATATGTTTCATGATCAAGGATATTTAAGATTTTTTT  
ATTATCTGGCTTTTTTTAATGCTTCAATGTTGGGCTTAGTTACTAGTTCTAATTTAATACA  
AATTTATATTTTTTGGGAATTCGTTGGAATGTGTTCTTATCTATTAATAGGCTTTTTGGTTA  
CACGACCCCTTTCGCAAAGGCCTGCCAAAAAGCATTGTGAACAAATCGTGTGGGGGA  
TTTCGGTTTATTATTAGGAATTTTGGGTCTTTATTGGATAACGGGTAGTTTCGAATTTCGA  
GATTTGTTTCAAATATTTAAGAAC---GAAATTCCTTTTTTTCTTTTTGACTTTGTGCGCCTT  
CTTATTATTTTGGGGCGCGCTTGCTAAATCTGCGCAATTTCCCCTTCATGTATGGTTACCC  
GATGCCATGGAAGGACCTACCCCTATTTAGCTCTTATTCATGCTGCTACTATGGTAGCC  
GCAGGCATTTTTCTTGTAGCTCGGCTTCTTCTCTTTTTCTAGCCATACCTTACCTATTGA  
ATCTAATATCTTTGATAGGTATAATAACAGTCTTTTTTAGGAGCTACTTTAGCTCTTGCTCA  
AAAGGATATTAAGAAGGTTTTAGCCTATTCTACAATGTCTCAACTGGGTATATGATGTT  
AGCTCTAGGCATGGGTTCTTATCGAGCTGCTTTATTTCAATTTGATTACTCATGCTTATTCG  
AAAGCATTGTTGTTTTTAGGGTCTGGATCCATAATTCATTCAATGGAGACTATTGTTGGA  
TATTCTCCAGAAAAAGTCAGAATATGGTCTTATGGGCGGTTTAACAAAACATATGCC  
AATCACAAAACAGCCTTTTTATTAGGTACACTTTCTCTTTGTGGGATTCCACCTCTTGC  
TTGCTTTTTGGTCCAAAGATGAAATTCTTAATGAGAGTTGGTTATATTCTCCGATTTTCG  
AATAATAGCTTGTTCCACAGCAGGATTTACCGCATTTTATATGTTTCGGGTCTATTTACTT  
ACTTTTGAAGGACACTTAAATGTTCAATTTCTAAATTTTAGTGGAAAACGCAGGAGTTC  
TTTGTATTCAATATCTTTATGGGGAAATGAA---GGACTAAAACGATTCAACCCTTGAAA  
ACTTCATTAACAATGAATTTCTTTTGTGGAACATAAGAAT---ACTCTCCCTTATCCCATGA  
ATCGGAGAATACTATGCTATTCCCTATCGTTGTATTGGTCCATTTACTTTGTTTGTGGA  
GCGATCGGA-----TTCGATTTGGATATATTGTCCAAATTTTTAACCCCGTCTAGAAACCTT  
TTCCATCAAACGTCAAAT---TCTCTGGATTGG---GAATTTATAACAAATGCAACTTTGTG  
GTCAGTCTATCTTATTTGGGAATAGTTATAGCTTCTTTTTCTATAAGCCTTTTTATTATC  
TTAACAAGTTGAACTTCATGAATCTTTTTGTTATTTGGAGGGACAAAATAAGAAATC  
AAATATATGATTGGTCGTCTAATCGTGGTTACATAGACGCTTTTTACACAATATCCTTAAT  
TAAGGGTATAATAAAATTCGCTGAATTCACGCATTTTTTCGATGCGCGAGTTATTGATGG  
AATTACGAACGGGTTGGGTATTCTGAGTTTTTTTTGTAGGAGAAGGTATCAAATATGTCG  
GGGGGGGG---CGCGTCTTCTTATCTTTTATTCTATTTATCTTGTGTATTAATTTGTTTAG  
TAATTTCTTACATGGATTTGCCCGGACCAATACATGATTTTCTTTTAGTCTTTCTGGGATC  
AGGTCTTCTATTAGGGGGTCTCGGAGTGGTATTACTTACCAACCTAATTTATTCCGCCTT  
TGC GTTGGGATTGGTTTTTTATTGTATATCTTTATTTTATATTCTAGCAAACCTCCATTTG  
TAGCTGCTGCACAACCTCCTATTTACGTGGGAGCTATAAACATTTAATCCTATTTGCTG  
TGATGTTCCATAACGGTTCAGAATCTTCAAAGATTCTCGCTTTGGAACCTGTTGGGGAT  
GGGGCTACTTCACTCGTTTGTACAACCTTTTTCTTTCACTAATTTCGAATATTCTAGATA  
CATCGTGGTATCGGATTATTTGGACTACAAGAGCAACCCAGATTATAGAGAAAGACTTG  
ATAAGTAATAGTCAACAAATTGGAATTCGTTTATCAACAGACTTTTTTTCTTCCATTTGAA  
CTCATTTCTATAATCCTTTTAGTTGCTTTAATAGGTGCAATTGGAGTGGCTCGCCAGATG  
ACTATAACCAGCTACAAGAAAAGACCTCATGATAGTCAATATGGGCCCTCACCACCCATC

AATGCACGGCGTTCTTCGGCTCATCCTTACTCTAGATGGTGAAGATGTTATTGACTGTG  
AACCCATATTGGGTTATTTACACAGAGGGATGGAAAAAATTGCCGAAAATCGAACTATT  
ATACAATATCTGCCTTATGTAACACGTTGGGATTATTTGGCTACTATGTTACAGAAGGA  
ATAACTGTAAATGCGCCAGAGAAATTAGGAAATATTC AAGTACCTAAAAGGGCCAGCTA  
TATCCGAACAATTATGTTGGAATTAAGTCGTATAGCTTCTCATCTATTATGGCTTGGTCCC  
TTTATGGCAGATATTGGCGCACAAACCCCTTTTTTTATATTTTCAGAGAAAAGAGAATTA  
GTCTATGATCTATTTGAAGCAGCCACCGGTATGAGAATGATGCATAATTATTTTCGTATC  
GGAGGAGTTGCAGCTGATCTACCTCATGGTTGGATAGATAAATGTTTGGATTTCTGTGA  
TTATTTTTTAACAGGACTTGCTGAATATGAAAACTTATTACGAGGAATCCCATTTTTTT  
AGAGCGAGTAGAGGGAATAGGCATTCTTGGTAAAGAAGACGCAATAAATTGGGGTTTA  
TCAGGACCGATGCTACGAGCTTCCGGAATACAATGGGATCTTCGTAAAATCGACAATTA  
TGAATGTTACAAGGAATTTGATTGGGAAGTTCAGTGGCAAAAAGAAGGAGATTCATTA  
GCTCGTTTTTTAGTCCGAATCGGTGAAATGAGGGAATCCATAAAAATGATTCAACAGGC  
TCTGGAAGGAATTCCGGGGGGACCTTATGAGAATTTAGAAATTCGATGTTTTGATAGAG  
AAAGGTATCCAGAATGGGGTGGTTTTGAATATAGATTCATCAGTAAAAACCTTCTCCT  
ACTTTTGAATTGCCGAAACAAGAACTTTATGTGAGAGTTGAAGCCCCAAAAGGAGAAT  
TAGGCATTTTTCTGATAGGAGATCAGAGCAGTTTTCCCTGGAGATGGAAAATACGTCCA  
CCGGGTTTTATTAATTTGCAAATCTTCCCTCAGTTAGTTAAAAGAATGAAATTGGCTGAT  
ATTATGACGATACTAGGTAGCATAGATATCATTATGGGAGAGGTTGATCGTATGTTTCCTA  
TGGTAACTGGATTCATGAATTATGGTCAACAAACAGTACGAGCCGCAAGGTACATCGG  
TCAAAGTTTGATGATTACCTTATCCACGCAAATCGTTTTCCCTGTAAC TATTCAATATCCT  
TATGAAAAATTAATTACATCGGAACGTGTTTCGCGGTCGAATCCATTTTGAATTTGATAAA  
TGCATTGCTTGTGAAGTATGTGTTTCGTGTATGCCCTATAGATCTACCTGTTGTTGATTGG  
AAATTTCAAACCGATATTCGAAAGAAACGCCTCTTTAATTACAGTATTGATTTTGGAAATC  
TGTATCTTTTGTGGTAATTGCGTTGAGTATTGTCCAACAAATTGTTTAGCGATGACCGAG  
GAATATGAGCTTTCAAACCTATGATCGTCACGAATTGAATTATAATCAAATTTCTCTGGGT  
CGTTTACCAATGCCGGTAATTGAGGATTATACAATTCGAATAATTTTGAATTTCG-----  
-----ATGCAGGGTTCGGTTGTCTGCTTGGCTAGTCAAGCATGGGCT  
AATTCACAGGTCGTTGGGTTTCGATTATCAAGGAATAGAGACTTTACAAATAAAGTCCG  
AGGATTGGCATTCCATTGCTGTCAATTTATATGTATATGGTTACAATTATCTACGTTCCCA  
ATGTGCTTATGATGTAGCACCAGGCGGACTCTTGGCTAGTGTATAACCATCTTACGAGAGT  
AGAATGTGGTGTGGATCAACCGGAAGAGGTATGCATAAAAGTTTTTGTTC AAGGAAT  
AACCCGGGGATTCCGTCTGTTTTCTGGGTTTGGAAAAGTGCAGATTTTCAAGAAAGG  
AATCGTATGATATGTTGGGAATCTCTTATGATAATCATCCACGGCTGAAACGTATTTAAT  
GCCGGAAAGTTGGCTAGGATGGCCCTTACGTAAGGATTATATACTCCCAATTTTTATGA  
AATACAAGACGCTCAT-----  
-----ATGAATTCCATC  
GAGTTTGCCTTACTTGATCGAAGAACGCAAAATTCGGTTCTTTCAACTACATCAAAGGA  
TCTTTCAAATTGGTCAAGACTCTCCAGTTTATGGCCGCTTCTTTATGGTACCAGCTGTTG  
CTTCATTGAATTTGCTTCATTAATAGGCTCGCGATTTGACTTCGATCGTTATGGACTAGT  
ACCAAGATCAAGTCCTAGGCAGGCGGACCTTGTTTTAACAGCCGGCACAGTAACAATG  
AAAATGGCCCCCTCCTTAGTGAGATTATATGAACAAATGCCCGAACCAAAAATACGTTAT  
TGCTATGGGAGCATGTACAATTACAGGAGGAATGTTTCAGTACCGATTCTTATAGTACTGT  
TCGGGGAGTTGATAAGCTAATTCCTGTAGATGTTTATTTGCCGGGGTGTCCGCCTAAC

CAGAGGCAGTTATAGACGCTATAACAAAACCTTCGTAAGAAAATATCTCGAGAAATCAAT  
GAGGATCCAATTGGGTCTGGGTCTGCGAATCGCTATTTTACTACCAATCACAAGTTTCG  
TGGTGGACGCAGTATTCGTATTGGAAATTATGATCCAGGATTTTCTACCAACCACCCG  
CTAATTCGAAAATCCCCCTGCAACATTTTTCAAATACAAAAGTTCAAGACCTTCTCAC  
GAATTAGTGAATATGCAAAGTAGAAAGACCCTCTCTTGTATAACGGAAGAAATTAATCG  
ATCCATTTTCGGTCTCGCTCATGCTATATATAATAACTCAGGTATCCGTTTCAAATGCATAT  
CCCATTTTTGCGCAGCAAGGTTATGAAAATCCACGAGAAGCAACTGGGCGTATTGTATG  
CGCGAATTGCCATTTAGCTAATAAGCCAGTGGATATTGAGGTTCCCAAACGGTACTTC  
CTGATACTGTATTTGAAGCAGTTGTTTCGAATTCCTTATGATTTGCAACTGAAACAAGTTC  
TTGCTAATGGTAAAAGGGAGCTTTAAATGTGGGAGCTGTTCTTATTTTACCCGAGGGG  
TTCGAATTAGCCCCCTCCTGATCGTATTTTCGCCGAGATGAAAGAAAGGATAGGAAATTT  
ACTTTTTCAGAGCTATCGCCCCGCTAAAAAAAACATTCTTGTATAGGCCCCCGTTCTTG  
GCCAAAATATAGTGAAATCGCCTTTCCTATTCTTTCTCCGGACCCCGCTACGAATAAG  
GATACTCACTTCTTAAAATATCCCATATATGTAGGCGGGAACAGGGGAAGGGGTGAGAT  
TTATCCTGACGGGAGCAAGAGTAACAATACAGTTTATAATGCTAGAGCAGCAGGTATAG  
TAAGAAAATCATAACGAAAAGAAAGGGGGGGGTACGAAATAACCATAGCGGATACAG  
CGGATGGACGTGAAGTGGTTGATATTATCCCCCAGGACCTGAACTTCTTGTTCGGAA  
GGCGAGTCTATCAAAGTGGATCAACCGTTAACAAGTAATCCTAATGTGGGTGGGTTTG  
GTCAGGGGGATGCAGAAATAGTACTTCAAGACTCATTACGTGTTCAAGGTCTTTTGTGC  
TTCTTCGCATCTGTTATTTTGGCACAATTTTTTTGGTTCTGAAAAGAAGCAGTTTGA  
GAAAGTTCAATTGTCCGAAATGAATTTTCATGAGTAAAGTATATGATTGGTTTCGAAGAAC  
GCCTCGAGATTCAGGCGATTGCGGACGATATAACGAGTAAGTACGTGCCCCCTCATGTC  
AACATATTTTATTGTTTAGGGGGAATTACGCTTACTTGTTTTTTAGTACAAGTAGCTACC  
GGATTTGCTATGACGTTTTACTACCGCCCTACTGTTTCTGAGGCTTTTTCTTCTGTGCAA  
TACATAATGACCGAAGCCAACCTTTGGGTGGTTAATCCGATCAGTCCATCGCTGGTCAGC  
AAGTATGATGGTTCTAATGATGATCTTGCACGATTTTCGTGTATATCTTACCGGCGGTTTT  
AAAAAACCCCGCGAATTGACTTGGGTTACAGGTGTGATTCTGGGTGATTGACTGCATC  
TTTTGGTGTAACCTGGTTATTCTTACCCCGGGACCAAATTGGTTATTGGGCAGTCAAAA  
TTGTAACAGGTGTACCGGACGCTATTCTGTACTAGGAGCTCCTTTGGTAGAGTTATTG  
CGCGGAAGTGCTAGTGTGGGACAATCTACTTTGACGCGTTTTTATAGTTTACACACTTT  
TGTATTACCCCTTCTTACCGCTGTTTTTATGTTAATGCATTTCTTAATGATACGCAAGCAA  
GGGATTTCTGGTCCTTTAATGGGAGTAACAAAAAACCCGACTTGAATGATCCTGTATT  
AAGAGCTAAATTGGCTAAAGGAATGGGACATAATTATTACGGAGAACCCGCGTGGCCC  
AACGACCTTTTATACATTTTTCTGTAGTCATTTTAGGTAATTTGCATGTAACGTGGGTT  
TAGCAGTTCTAGAACCATCAATGATTGGGGAACCCGCAGACCCATTTGCAACTCCTTTG  
GAAATATTACCCGAGTGGTATTTCTTTCCCGTATTTCAAATACTTCGTACAGTACCAAAT  
AAGTTATTGGGTGTTCTTTTAAATGGCTTCAGTGCCTTTGGGATTATTAACAATACCTTTTT  
TAGAAAATGTTAATAAATTCCAAAATCCATTTTCGTCCGCCAGTAGCGACAACCGTCTTT  
TTGGTTGGTACTGTAGCTGCCCTTTGGTTGGGTATTGGAGCAACATTACCTATTGATAAA  
TCCCTAACTTTAGGTCTTTTTATGATTGAAGTTTTTCTATTTGGAATCGTTTTGGGCCTAA  
TTCTATTACTTTGGCTGGATTATTTGTAAGTGCATATTTACAATACAGACGTGGCGATCA  
GTCGGACCTTATGTCTACTATAACTAGTTATTTTCGGTTTTCTACTAGTGGCTTTAACTATA  
ACTGCAGCTCTTTTTATTGGTCTGAGCAAGATACGACTTATTATGGATATAGTAAGTCTG  
GCTTGGGCTGCTTTAATGGTAGTCTTTACATTTTCCCTTTCCTGTTAGTATGGGGAAGA

AGTGGACTCATGATTATTCGTTTCGCCGGAACCAGAAGTAAAAATTTTGGTAGATAGGGA  
TCCCGTAAAACTTCTTTTCGAGGAATGGGCTAGGCCGGGTCATTTCTCAAAAACAATA  
GCAAAGGGGCCTGATACTACTACTTGGATCTGGAACCTACATGCTGATGCTCATGATTT  
CGATAGCCATAACCAGTGATTTGGAGGAAATCTCTCGAAAAGTTTTTAGTGCCCATTTTCG  
GCCAACTTTCCATCATCTTTCTTTGGCTTAGTGGCATGTATTTCCATGGCGCTCGTTTTT  
CCAATTATGAAGCCTGGCTAAGTGATCCTACTCACATTGGACCCAGCGCTCAGGTGGTT  
TGGCCAATCGTAGGCCAGGAAATATTGAATGGTGATGTGGGTGGGGGTTTTTCGAGGAA  
TCCAAATAACCTCTGGTTTTTTTTTCAGATTTGGCGAGCCTCCGGAATAACGAGTGAATTG  
CAACTTTATTGTACCGCAATTGGTGGATTGGTCTTTGCAGTCTTAATGCTTTTTGCTGGT  
TGGTTCCATTATCACAAAGCTGCCCCAAAATTGGCTTGGTTCCAAGACGTAGAATCTAT  
GTTGAATCACCATTTAGCAGGGCTACTAGGTCTTGGGTCTCTTTCTTGGGCGGGGCATC  
AAGTACATGTAGCTTTACCAATTAACGAATTTCTAAACGCTGGAGTAGATCCTAAAGAG  
ATCCCACCTCCTCATGAGTTTATCTTGAATCGGGATCTTTTGGCTCAACTTTATCCAGT  
TTTGCCGAGGGAGCAACCCCTCTTTACCTTGAATTGGTCAAAATATGCGGAATTTCT  
GACTTTTCGTGGAGGATTAGATCCAGTAACTGGCGGTCTCTGGCTGACCGATATTGCAC  
ACCATCATTTAGCTATTGCAATCTTTTTCTGATAGCGGGTCACATGTATAGGACTAACT  
GGGGCATTGGCCATGATCTAAAAGATATTTTAGAAGCTCATAAAGGCCCTTTACTGGC  
CAGGGCCATAAAGGCTTATATGAGATTCTAACACGTCGTGGCATGCTCAATTATCCCTT  
AATTTAGCTATGTTAGGCTCGTTAACCATTGTTGTAGCTCATCATATGTATTCTATGCCCC  
CCTATCCATATCTAGCTACTGACTATGGTACCCAACCTGTCCCTGTTACACATCACATGT  
GGATTGGCGCATTCTCATAGTTGGCGCTGCTGCGCATGCAGCCATTTTTATGGTACGA  
GACTATGATCCAACCTACTCGATAACGATCTATTAGACCGTGTCCCTTAGGCATCGCGAT  
GCAATCATATCACACCTCAACTGGGTATGTATCTTTTTAGGATTTACAGCTTTGGTTTTG  
TATATTCATAATGATACCATGAGCGCTTTGGGGCGCCCCAAGATATGTTTTCTGATACC  
GCTATACAACTCCAACCTGTCTTTGCTCAATGGATACAAAACACGCACGCTTTAGCACC  
TGATAACAACGGCCCTGGTGCAACAACAAGTACCAGTTTGACTTGGGGGGGGGGGGG  
GTTAGTCGCAGTGGGTGGCAAGGTTGCTTTGTTACCTATTCCATTAGGAACCGCAGATT  
TTTTGGTACATCATATTCATGCATTTACGATTCATGTGACCGTATTGATACTCCTGAAAGG  
AGTTCTATTTGCTCGTAGTTCTCGTTTTGATACCGGATAAAGCGAATCTTGGGTTTTCGTTT  
CCCTTGATGGGCCTGGAAGAGGGGGGACATGCCAAGTATCCGCTTGGGATCATGTT  
TTCTTAGGCCTTTTTTGGATGTACAATGCTATTTTCGGTAGTAATATTCATTTACAGTTGGA  
AAATGCAGTCAGACGTTTGGGGCAGTATAAGTGAGCAAGGGGTGGTAACTCATATTAC  
GGGAGGGAACCTTTGCGCAGAGTTCATTACTATTAATGGGTGGCTCCGAGATTTCTTAT  
GGGCACAAGCATCCAGGTAATTCAGTCTTATGGTCTTTCATTATCTGCATACGGCCTTT  
TTTTCTTGGTGCGCATTTTTGTATGGGCTTTTAGTTTAATGTTTCTATTACAGCGGGCGTG  
GTTATTGGCAAGAACTTATTGAATCCATTGTTTGGGCTCATAATAAATTAAGTTGCTC  
CTGCTATTACAGCCTAGAGCCTTAAGCATTGTACAAGGACGTGCTGTAGGAGTAACCCAC  
TACCTTCTGGGTGGAATTGCCACAACATGGGCGTTCTTCTTAGCAAGAATTATTGCAGT  
AGGAATGGCATTAAAGATTCCCAAGGTTTAGCCGAGGCTTAGCCCAGGACCCCACTACT  
CGTCGTATTTGGTTTTGGTATTGCTACCGCGCACGACTTCGAGAGTCATGATGATATTACT  
GAAGAACGTCTTTATCAGAATATTTTTGCTTCTCACTTCGGACAATTAGCAATAATATTT  
CTGTGGACTTCGGGAAATCTCTTTCATGTAGCTTGGCAAGGAAATTTGAGGCATGGGT  
ACAGGACCTTTACACGTAAGACCCATTGCTCATGCAATTTGGGATCCTCATTTTTGGTC  
AACCGGCCGTAGAAGCTTTACTCGAGGGGGTGTCTTGGTCCAGTGAATATCGCCTA

CTCCGGCGTTTATCAGTGGTGGTATAACAATTGGTTTACGTACTAATGAGGACCTTTATAC  
TGGAGCTCTTTTTCTATTATTCTATCTGCCATATCCTTAATCGGGGGTTGGTTACACTTA  
CAACCGAAATGGAACCCAGCGTTTCGTGGTTCAAAAATGCCGAATCTCGTCTCAATC  
ATCATTTGTCAGGGCTATTCGGAGTAAGCTCTTTGGCTTGGACAGGGCATTTAGTCCAT  
GTCGCTATTCCTGGATCTAGGGGGGAATATGTTTCGATGGAATAATTTCTTAGATGTATTA  
CCGCACCCTCAGGGATTGGGCCATTTTTTACAGGTCAGTGGAACCTTTATGCTCAAAA  
CCCTGACTCAAGTAGTCATCTTTTTGGTACCTCTCAAGGATCGGGAAGTCCATTCTAA  
CCCTTCTTGGGGGATTCCATCCACAAACGCAAAGTTTATGGCTGACTGATATTGCTCAT  
CATCATTTAGCTATTGCATTTCTTTTTCTTGTGCTGGTCATATGTATAGAATAACTTTG  
GGATTGGGCACAGTATCAAAGATCTTTTAGAAGCCATATTCCTCCGGGGGGGCGCTTA  
GGGCGCGGACATAGGGGCCTTTATGACACAATCAATAATTCGATTCATTTCAATTAGG  
CCTTGCTCTAGCCTCTTTAGGGGTATTACTTCCTTAGTAGCTCAACACATGTAATCCTT  
ACCTGCTTATGCATTCATTGCACAAGACTTTACTACCCAAGCCGCCTTATATACCCATCA  
CCAATATATCGCAGGTTTCATCATGACAGGAGCTTTTGTCTCACGGAGCTATCTTTTTCAT  
TAGAGATTACAATCCGGAGCAGAATGAGGATAATGTATTGGCAAGAATGTTAGACCATA  
AAGAGGCTATCATATCTCATTTAAGTTGGGTCAGCCTTTTTCTTGGGTTCCATACTTTGG  
GACTTTATGTTTATAATGACGTCATGCTTGTCTTTGGGACTCCCGAGAAACAAATCTTG  
ATCGAACCTGTATTTGCCAATGGATACAATCTGCTCATGGTAAACCTCATATGGGTTT  
AACGTAATTTTATCTTCAATGAATAGCCCAGCATTCAATTGCTGGTTCGAAGCATATGGCTG  
CCGGGATGGTTAAATGCTATTAATGAG-----AATAGTAATCACTATTCTTAACAATAGGT  
CCGGGAGACTTCTTGGTCCATCATGCTATTGCTCTCGGTTTACATAACTACATTGATC  
TTAGTAAAAGGTGCTTTAGATGCACGTGGTTCOAAGTTAATGCCAGACAAAAAGGATT  
TTGGATATAGTTTTCTTGGCAGGGCCAGGTCCGGGGTGGTACCTGTGATATTTCCGGC  
TGGGACGCATTTTATTTGGCAGTTTTCTGGATGTTAAATACCATTGGATGGGTTACTTTT  
TATTGGCATTGGAAGCATATTACATTATGGCAGGGTAACGTTTACAGTTTAAATGAATCT  
TCCACTTATTTGATGGGATGGTTAAGGGATTACCTATGGTTAAATTCTTCGCAACTTATC  
AATGGGTATAACCCCTTTGGTATGAATAGTTTATCAGTCTGGGCGTGGATGTTCTTATTT  
GGACATCTTGTGGGCTACTGGATTTATGTTCTTAAATTTCTGCGTGGGATTGGCAG  
GAATTGATTGAAACCTTAGCATGGGCTCATGAGCGCACGCCCTTGGCCAATTTGATCCG  
ATGGAGAGATAAACCAGTGGCTCTGTCCATTGTGCAAGCAAGATTGGTTGGATTAGCC  
CATTTTTCCGTAGGTTATATATCACTTATGCAGCTTTCTTGGATTGCCTCCACATCGGGCA  
AATTCGGTATGTCACACTCAGTAAAGATTTATGATACATGTATCGGATGTAATCAATGTG  
TCAGGGCGTGTCCACAGACGTGTTAGAAATGATACCTTGGGATGGATGTAAAGCTAA  
GCAAATTGCTTCTGCTCCAAGAACGGAGGACTGTGTCCGGTTGTAAGAGATGTGAATCC  
GCCTGTCCAACGATTTCTTAAAGCGTTTCGAGTTTATTTATGGCATGAAACAACCTCGAAG  
CATGGGTCTAGCTTATATGACAACTCTCAACTTCCCCTCCTTTTTAGTCCCTTTAGTAGG  
CTTAGTATTTCCCGCATTTTCAATAGCTTCTTTATTTCTTCATATTGAAAAACAAGATT  
TTTATGCGAGATCTAAAAACATATCTCTCCGCGGCACCGGTAAGCACTCTATGGTTC  
GGGGCTTTGGCAGGTCTATTGATCGAGATTAATCGTTTCTTTCCGGATGCGCTGACATTT  
CCTTTTTTTCATTCATGACTGCAATTTTAGCGAGACGCGAAAGCGAAAGCCTATGGGG  
TCGCTTCTGTAAGTGGATAACTAGCACCGAAAACCGTCTTTATATTGGATGGTTTGGTGT  
TTGATGATCCCTACCTTATTGACTGCAACTTCTGTATTTATTATCGCCTTCATTGCCGCC  
CCTCCAGTAGATATTGACGGGATTCGTGAACCTGTTTCTGGATCTTACTTTATGGAAC  
AATATTATCTCTGGTGCCATTATTCCAACCTCCGACGCTATAGGTTTGCATTTTACCCAA

TATGGGAAGCGGCGTCTGTTGACGAATGGTTGTACAATGGCGGTCCGTATGAGTTAATT  
GTTCTACACTTCTACTTGGTGTAGCTTGTACATGGGCCGTGAGTGGGAACCTTAGTTT  
CCGTCTGGGTATGCGCCCTTGGATTGCTGTTGCATATTCAGCTCCTGTTGCAGCTGCTAC  
CGCAGTTTTCTTGATCTATCCAATTGGTCAAGGAAGTTTTTCTGACGGTATGCCTCTTGG  
AATCTCTGGTACTTTCAACTTCATGATTGTATTCCAGGCTGAGCACAATATCCTTATGCA  
CCCATTTACATGTTAGGTGTAGCTGGTGTATTTCGGCGGTTCACTATTAGTGTATGCA  
TGGTTCCTTGGTAACCTCTAGTTTGTATCAGGGAACTACAGAAAACGAATCCGCTAATG  
AAGGTTATAGATTCGGACAAGAAGAAGAACTTATAATATCGTGGCTGCTCATGGTTAT  
TTCGGAAGACTTATCTTCCAATATGCTAGTTTTAACAACCTCCGTTCTTTACTTCTTC  
TTGGCTGCTTGGCCTGTAGTAGGTATCTGGTTTACCGCTTAGGTATCAGCACTATGGCT  
TTCAACCTAAATGGGTTCAATTTCAATCAATCCGTAGTTGATAGTCAAGGTCGTGTAATT  
AATACCTGGGCTGATATTATTAATCGTGCTAACCTTGGTATGGAAGTTATGCATGAACGA  
AATGCTCATAATTTCCCTCTAGACTTAGCAGGTGTTGAAGTTCATCTATAAATGGAATG  
GGTTTGCCTTGGTATCGTGTTCATACTGTTGTATTGAATGATCCTGGCCGTTTGCTTCT  
GTCCATATAATGCATACGGCTCTGGTTGCTGGTTGGGCCGGTTCGATGGCTTTATATGAA  
TTGGCCGTTTTTGACCCCTCTGACCCTGTTCTTGATCCCATGTGGAGACAGGGTATGTT  
CGTTATACCTTTCATGACTCGGTTAGGAATAACCAATTCGTGGGGTGGTTGGAGTATCA  
CA---GGAGGGACTGTACAAACCCGGGTATCTGGAGTTACGAAGGTGTGGCCGGTGCA  
CATATTGTGTTTTCTGGCTTGTGCTTTTTGGCAGCTATCTGGCATTGGGTGTATTGGGAT  
CTAGAAATATTTCTGATGAACGTACAGGAAAACCTCTTTGGATTGCCCCAAGATCTT  
CGGAATTCATTTATTTCTCTCGGGGGTGGCTTGTTTTTGGTTTTGGTGCATTTTCATGTAAC  
AGGATTGTATGGTCCTGGGATCTGGGTGTCCGATCCTTACGGATTAACCGGAAGGGTAC  
AATCCGTAATCCTGCTTGGGGTGTGGACGGTTTTGATCCTTTTGTTCGGGGCGGAATA  
GCTTCTCATCATATTGCAGCGGGTACATTGGGCATATTGGCAGGTCTATTCCATCTTAGT  
GTACGTCCGCCCCAGCGTTTATATAAAGGATTACGTATGGGGAATATTGAAACCGTCCTT  
TCCAGTAGTATTGCTGCTGTCTTTTTTGCAGCTTTTGTGGTTGCTGGAACCTATGTGGTAT  
GGTTCAGCAACTACCCCAATCGAATTGTTTGGACCCACTCGTTATCAATGGGATCAGGG  
ATACTTTCAACAAGAAATATATCGAAGAGTTGGTGCGGGGCTGGGGAAAAATCAAAGT  
TTATCAGAAGCTTGGGCTAAAATCCTGAAAAATTGGCTTTTTATGATTATATTGGTAAT  
AATCCGGCAAAGGGGGGATTATTCAGAGCGGGCTCAATGGACAATGGGGATGGAATAG  
CTGTTGGGTGGTTAGGACACCCTATCTTTAGAGATAAAGAAGGGTGCGAACTTTTTGT  
CGTCGTATGCCCACTTTTTTTGAAACATTTCCCGTCGTTTTGGTCGACGGAGACGGAAT  
TGTTAGAGCCGATGTTCCTTTTCGAAGGGCAGAATCAAAGTATAGTGTGCAACAGGTA  
GGTGTAACTGTTGAGTTCTATGGTGGCCAACTCAATGGAGTCATTTATAGTATCCTGCT  
ACGGTTAAAAAATATGCTAGGCGCGCTCAATTAGGTGAAATTTTTGAGTTAGATCGTGC  
TGCTTTGAAATCCGACGGCGTTTTTCGTAGCAGCCCAAGGGGTTGGTTTACGTTTGG  
CATGCTTCGTTTGTCTTCTCTTCTTCTTCGGACACATTTGGCATGGTGTAGAACCTTG  
TTCAGAGATGTTTTCGCTGGTATTGACCCGGATTTGGATACTCAAGTAGAATTTGGGGC  
ATTCCAAAACTTGGCGATCCAACCACAAAAAGACAGGCAGTCATGAAAACCTTATAT  
TCCCTGAGGAGGTTCTGCCCGTGGAAACGCTCTTTAATGGAACCTTAGCGTTAGCTG  
GTCGTGATCAAGAAACGACCGGTTTTCGCTTGGTGGGCCGGAAATGCCCGACTTATCAA  
TTATCCGGCAAACCTGTTGGGGGCTCATGTAGCCCATGCCGGCTTAATTGTCTTCTGGG  
CGGGAGCAATGAACCTATTTGAAGTGGCTCATTTCGTCCCAGAGAAGCCTATGTATGAA  
CAAGGGTTCATTTACTTCCCCACTTAGCTACTCTAGGTTGGGGGGTAGGCCCGGGCGG

CGAAGTTATAGACACCTTTCCATACTTTGTATCTGGAGTACTTCATTTAATTCCTCCGC  
AGTATTGGGTTTTGGTGGTATTTATCATGCACTTCTTGGACCCGAGACTCTTGAAGAATC  
TTTTCCGTTTTTCGGTTAIGTGTGGAAAGATAGAAACAAAATGACCACTATTTTGGGTAT  
TCACTTGATCTTGTTAGGTATAGGCGCTTTTCTTCTAGTATTTAAGGCTCTTTCTTTTGGG  
GGTGTATATGATACCTGGGCTCCGGGGGGGGGGATGTCAGAAAGATCACCAACTTGA  
CCCTTAGCCCAAGTGTTCTATTTGGTATTTACTAAAGTCTCCGTTTGGAGGAGAGGGC  
TGGATTGTTAGTGTAGACGATTTAGAAGATATAATTGGAGGGCACGTATGGTTGGGTTC  
CATTTGCAICCTTGGGGGAATTTGGCATATCTTAAACCAAACCCTTTGCGTGGGCTCGTC  
GTGCCCTTGATGGTCGGGCGAGGCTTACCTGTCTTATAGTTTAGCTGCTTTATCTCTTT  
TTGGTTTCATCGCTTGTGCTTTGTCTGGTTCAACAATACGGCTTATCCGAGTGAGTTCT  
ACGGACCCACTGGACCAGAAGCTTCTCAAGCTCAAGCCTTTACTTTTCTAGTTAGAGA  
CCAACGCCTTGGGGCTAACGTGGGATCCGCCAAGGACCCACCGGTTTAGGTAAGTAC  
CTAATGCGTTCCCGACCGGAGAAGTCATTTTGGAGGGGAAACTATGCGCTTTTGGG  
ATCTGCGGGCTCCCTGGTTAGAGCCTCTAAGGGTCCCAATGGGTTGGACTTGAGTAG  
GCTGAAAAAAGACATAACAACCTTGGCAAGAACGACGTTTCGGCGGAATATATGACGCAC  
GCTCCGTTAGGTTCTTTAAATTCTGTAGGTGGCGTAGCTACCGAGATCAATGCAGTCAA  
TTATGTCTCTCCTAGAAAGTTGGTTAGCTACCTCTCATTTTGTCTAGGGTTCTTCCTATTC  
GTAGGTCATTTATGGCACGCGGGAAGAGCTCGTGCAGCTGCGGCAGGATTTGAAAAAG  
GAATTGATCGTGATTTTGAACCTGTCTTTTCGATGACCCCTCTTAACATGACTATTGCC  
TTGGTAAATTTACCAAAGACGAAACCGATTTATTTGATATTATGGATGACTGGTTGCGAA  
GGGACCGTTTTCGTTTTTGTAGGTTGGTTCGGGCTATTGCTATTTCTTTCGCGCCTATTTTCG  
CTTTAGGAGGTTGGTTCACAGGCACAACCTTTGTAACCTTCATGGTATAACCATGGATTG  
GCCAGCTCCTATTTAGAGGGTTGTAATTTCTTAAACGGCCGAGTTTCTACTCCTGCTAAT  
AGTTTAGCACACTCTTTGTTATTACTATGGGGTCCCGAAGCACAGGGAGATTTTACTCG  
TTGGTGCCAATTAGGTGGTCTGTGGACTTTTGTGCTCTCCACGGCGCTTTTCGGACTAA  
TAGGTTTTATGTTACGTCAATTTGAACTCGCTCGATCTGTTCAATTGCGACCTTACAATG  
CAATCGCATTCTCTGGTCCAATTGCTGTTTTTGTCTTCTGTCTTTCTGATTTATCCACTAGG  
CCAATCTGGTTGGTTCTTTGCACCTAGTTTTGGTGTAGCGGCTATATTTTCGATTCATCCTA  
TTTTTCCAAGGATTTCATAATTGGACATTGAACCCATTTTCATATGATGGGAGTTGCTGGC  
GTATTGGGCGCTGCTTTACTATGCGCTATTCACGGCGCTACCGTAGAAAATACTTTATTT  
GAAGATGGCGATGGTGCAAATACATTCCGTGCTTTTAATCCAACCTCAAGCCGAAGAAA  
CTTATTCAATGGTCACCGCTAACCGCTTTTGGTCCCAAATTTTTGGGGTTGCTTTTTCCA  
ACAAACGTTGGTTACATTTCTTTATGTTATTTGTACCAGTAACTGGTTTATGGATGAGTG  
CTCTTGGAGTAGTCGGTTTGGCTCTGAACCTACGCGCCTATGATTTTGTTCCTCCAGGAA  
ATCCGTGCGGCGGAAGATCCTGAATTTGAGACTTTTTACACCAAAAATATTCTCTTAAA  
CGAAGGTATTTCGTGCTTGGATGGCGGCTCAAGACCAGCCTCATGAAAACCTTATATTC  
CTGAGGAGGTTCTGCCCCGTGGAACGCTCTTATGTCCGGAAGCACAGGAGAACGTTCT  
TTTTGCTGATATTATCACCAGTATTCGATACTGGGTCATTCATAGCATTACTATAACCTCC  
CTATTTATTGCGGGTTGGTTATTTCGTCAGCACAGGTTTAGCTTACGATGTGTTTGGGAGC  
CCTCGCCCAAACGAGTATTTTACAGAAAGCCGACAGGGAATTCATTAATAACTGGCC  
GTTTTGATCCTTTGGAACAACCTCGACGAATTTAGTAGATCTTTTATGACCATAGATCGAA  
CCTATCCCATTTTACAGTGCGATGGTTGGCTGTTACGGACTGGCTGTACCTACCGTTT  
TTTTTTTAGGATCAATATCGGCAATGCAGTTCATCCAACGAATGGACACACAAATAGTT  
GAGGATAGTTCTAGATCCGGT---CCAAGACGAACCAATGTGGGGAGTTTATTGAAACCA

TTGAATTCGGAATATGGTAAAGTAGCTCCAGGTTGGGGAACACTCCTTTGATGGGTGT  
CGCAATGGCTCTATTTGCGATTTTCCTATCCATCCTTTTGGAGATTTACAATCCTCCGTT  
TACTGGACGGAATTTCCGGTGAATATGCTTACTCTCAAACCTTTTGTTTATACAGTAGTT  
ATTTTTTTTGTCTCTGTTCATATTCGGATTTCTATCTAATGATCCGGGGCGCAATCCTG  
GGCGTGAAGAAATGGCCGATACTACTGGAAGGATTCCCTCTTTGGATAATAGGTACTGTA  
GCTGGTATTCCTGTGATCGGTTAATAGGCATTTTCTTTTATGGTTCATATTCGGGGTTGG  
GTTTCATCCTTGATGATTAATATCTTTAGTTTAATCTGTATCTATCTAAATCTGTCTTTAT  
TCGAGTACCTTTTTCTTTGGCAAATTGCCCGAAGCCTACGCTTTTTTGAATCCAATCGTA  
GATTTTATGCCAGTGATACCTCTTTTCTTTTTTCTATTAGCCTTTGTTTGGCAAGCTGCAG  
TAAGTTTTCGAACGACACAATCAAACCCGAACGAACAAAATGTTGAATTGAATCGTAC  
CAGTCTTTACTGGGGATTATTACTCATTTTTGTACTTGCTGTTTTATTTCAAATATTTTT  
TCAATATGGAAGTCAATATTCTCGCATTTATTGCTACTGCATTGTTTATTCTAGTTCCTAC  
CGTTTTTTACTGATAATTTACGTAAAAACAGTAAGTCAAAGCGATATGGAAACAGCAA  
CCCTAGTCGCCATCTCTATATCTGGATTACTTGTGAGTTTACTGGGTATGCCTTATATAC  
TGCTTTTGGGCAACCCTCTCAACAATAAGAGATCCATTGAGGAACACGGGGACATG  
GAAGCATTGGTTTATACATTCCTCTTGGTCTCTACTCTAGGGATCATTTTTTTTTCGATCT  
TTTTTCGAGAACCGCCAAGGTTCCAACAAAAAA-----ATGACTATTGCTTTCCAATTG  
GCTATTTTTGCATTAATTGCTACTTCAGTAATCTTACTTATCGGTGTACCCGTTGTATTTG  
CTTCTCCTGAGGGTTGGTCCAGTAATAAAAATGTTGTATTTTCTGGTACATCGTTATGGA  
TTGGATTAGTCTTTCTTGTGGCTATTCTTAATTCTCTCATCTCT-----ATGTCAC  
CACAAACAGAGACTAAAGCAAGTGTGGGTTTAAAGCGGGTGTAAAGACTATAAATT  
GACTTATTATACTCCTGATTATGAAACCAAGGATACTGATATCTTGGCAGCATTCCGAGT  
AACTCCTCAACCCGGAGTTCCACCTGAGGAAGCGGGTGCCGCAGTAGCTGCTGAATCT  
TCTACTGGTACATGGACAACCGTGTGGACCGACGGGCTTACTAGTCTGGATCGTTACAA  
AGGACGCTGCTATCACATCGAGCCCGTTGCTGGAGAAGAAAATCAATATATTGCTTATG  
TAGCTTACCCCTTAGACCTTTTTGAAGAAGGTTCTGTTACTAATATGTTTACTTCCATCG  
TGGGTAATGTATTTGGGTTCAAAGCCCTTCGCGCTCTGCGTCTGGAGGATCTTCAATC  
CCTACTGCTTATGTTAAACTTTCCAGGGCCCGCCTCACGGCATCCAAGTTGAGAGAGA  
TAAATTGAACAAGTATGGACGTCCCCTATTGGGATGTACTATTAACCGAAATTGGGAT  
TGTCGGCTAAGAACTACGGTAGAGCGGTTTATGAATGTCTTCGCGGTGGACTTGATTTT  
ACTAAAGATGATGAGAACGTGAACTCCCAACCGTTTATGCGTTGGAGAGACCGTTTCT  
TATTTTGTACCGAAGCTATTTATAAATCACAGGCCGAAACAGGTGAAATCAAGGGGCAT  
TACTTGAATGCTACTGCAGGTACATGTGAAGAAATGATGAAAAGGGCTGTGTTTGCCA  
GAGAATTGGGGTTCCCTATCGTAATGCATGACTACTTAACGGGGGGATTCACTGCAAAT  
ACTAGTCTAGCTCATTATTGCCGAGATAATGGGCTCCTTCTTACATCCATCGTGCAATG  
CATGCAGTTATTGATAGACAGAAGAATCATGGTATACACTTTCGTGTACTAGCGAAAGC  
CTTACGCATGTCTGGTGGAGATCATATTCCTCCGGTACCGTAGTAGGTAACCTTGAAG  
GGGAAAGGGACATCACCCCTGGGCTTTGTTGATTTACTACGCGATGATTTTATTGAAAAA  
GACCGAAGCCGCGGTATTTATTTCACTCAAGATTGGGTCTCTCTACCGGGCGTTTTGCC  
TGTGGCTTCAGGGGGTATTCACGTTTGGCATATGCCCGCGCTAACCGAGATCTTTGGAG  
ACGATTCTGTACTACAATTCGGTGGAGGAACTTTAGGACATCCTTGGGGAAATGCGCC  
AGGTGCCGTAGCTAATCGAGTAGCCCTAGAAGCATGTGTACAAGCTCGGAATGAGGGG  
AAAGATCTTGCTACTGAGGGTAATGCAATTATCCGTAAGGCTTGCAAGTGGAGTCCTGA  
ATTGGCTGCTGCTTGTGAAGTATGGAAAGAGATCAAATTTGAGTTTGCCGCAATGGATA



CTTTG-----ATGGCAATCGATTTATACAAAACCTTATACCCCGAGCCACACAATGGAGCC  
GTAGACAGTCAAGTGAAATCCCATGCACGAAATCATTGATCCATGGACGGCATCGTTG  
TGGTAAAGGTCGTAATGCCAGAGGAATCATTACTGCAGGGCATAGAGGGGGAGGTCAT  
AAGCGTCTATACCGAAAAATAGATTTTAGACGGAACGAAAAAGGCATATACGGTAGAA  
TCGTAACCATAGAATACGACCCTAATCGAAATGCATCCATTTGTCTCATACTATGGGG  
ATGGTGAGAAGAGATATATTTTACATCCCAGAGGGGCTATCCTTGGAGATACCATTGTTT  
CTGGTACAGGAGGTCTTATAAAAATGGGAAATGCCCTACCTTTGACCAAGATACCCTTA  
GGCACGGCCATACATAATATAGAAATCGCACCTGGAAAGGGTGGACAATTAGCTAGAG  
CAGCGGGTGCTGTAGCGAACTTATGGCAAAAGAGGGGAAATCGGCCACATTAATAATT  
ACCCTCTGGGGAGGTCCGTTTGTATATCCCAAACCTGCTCAGCAACGGTCCGGACAAGTG  
GGCAATGTTGGAGTGAAGCGGAAAGATTTGGGTAGAGCCGGATCGAAACGTTGGCTA  
GGGAAGCGGCCTGTAGTAAGAGGAGTGGTTATGAACCCTGTAGACCATCCCCATGGGG  
GGGGTGAGGGGAAAGCCCCAATTGGTAGAAAAAACCCGTGACCCCTTGGGGGTATC  
CTGCACTCGGAAGAAGAACTAGAAAAAGGAAGAAATATAGCGATAATTTGATCCTTCG  
TCGCCGTAGTAAAATGATTCAAGTTCAGACCCATTTGAATGTGGCGGACAACAGCGGT  
GCCCGGAGTTGATGTGTATTCGAATCATAGGAACTAGT---AATCGACGATATGCTTATAT  
CGGGGACGTTATTGTTGCTGTGATTAAGGAAGCAGTGCCAAAAGTGTCTCTAAAAAGA  
TCAGAAGTGATCAGAGCTGTAATTGTCCGTACCTGTAAAGAACTCAAACGTGATGACG  
GTGTAATAATACGATATGATGATAATGCTGCCGTTGTCATTGATCAAAAAGGAAATCCAA  
AGGGAACCTCGCGTTTTTGGTGCAATCACCCACGAATTGAGACAGAAAAATTTACCAA  
AATAATTTACTAGCGCCTGAAGTGTTAATGCTTAGCCCCAAAAGAACCAAATTCGGAA  
AAGAACATAGAGGAAGAATGAGAGGAGTAGCCTCTCGAGGCAGTTGTATTTCTTTCGG  
TAGATATGCTCTTCAAGCACTTGAACCCACTTGGCTCACATCTCGACAAATAGAAGCAG  
GTCGGCGAGCAATGACAAGAAACGTACGCCGCGGGGGAAAAATATGGGTGCGTATATT  
TCCAGACAAACCGGTTACAGTAAGATCCGCAGAAACCCGTATGGGTTCCGGGAAAGG  
ATCCCCCGAATATTGGGTAGCTGTGCTTAAACCGGGTAGAATACTTTATGAAATGGGCG  
GGGTGGCCGAAAATATAGCCAGAAAGGCAATTTCAATAGCTGGGTCCAAAATGCCTAT  
ACGAACTCAATTCATCATTTTCGGACATGTCCAGAACTAGGCGAGGTTCTACAGCTCAG  
AAACGTTCGAGCAAAAATGCATTCCTTTGCATCAGGCGCTCTAGGAGCTCATTCGCGGC  
TACTCGAGTTATTGCTCAAGAGATAATAAGAGCGTTGGCTTCCGGCTTTTCGTGATAGA  
ACTAGGAAAAAGAGGGATTTTCGTGCTTTGTGGATCACTCGGTTAAATGGAGTAATTCG  
AAAAAT-----GTATTCAATAGTTATAGTCAACTAATATATAATCTATACAAGGAACAGTT  
GGCTCTTAATCGTAAATGCTTGACAAAATAGCTATCTCAAATAGGAATTGTTTTTACAC  
AATTTATAGCTATCTCAAACAGAAATTTTCTTTACAAAATTTCCAG-----ATGAAAG  
AAGTGTCCGGCTTTCGGTCACTCTATTTTCGATGTCTGCTAACAAAGCGAGAAGAGTGATT  
GATCAGATTCGTGGACGTTCCCTATGAAGAAACACTTATGATACTAGAACTCATGCCTTAT  
CGAGCATGTTCTGCAATTTTAAAATTAATTTATTCCGCAGCAGCAAACGGTATTCACAAT  
ATGTATTTTGACGAAAGAAGTTTAATCATTAGTAAAGCCGAAGTCAACGAGGGTTCGTAC  
TGTGAAAAAATTAACCTCGGGCCAAAGGGAGGGGTTACCCGATAAAAAGATCCAC  
TTGTCATATAACTATCGTATTAAGAGATATATCCTTACAT-----ATGGATGGAAT  
CAAATATGCAGTATTTACACACAAAAGTCGTCCGGTTATTGGGGAAAAAT--CAATATACT  
TTAATGTAGAATTAGGATCAACTAAGACAGAAATCAAATATTGGGTTCGAACTCTTCTT  
TGGTGTCAAGGTAATAGCTATGAATAGTCATCGACTACCGGGAAAGGTTAGAAGGGAG  
GGC-----CCTAGTCTGCATTACAGACGTATGATCATTACGCTTGGCCCGGTTATTCC

ATTCCACCTTTTAGAAAAGAAAAGAACTGTGGCAGTTCCAAAAAAAAGGATTTCTAGCT  
CGAAAAAGCGAATTCGTAAAAATCTCTGGAAAGGGAAAGGGTCTGGGGCTGCGCTCA  
AAGCTTTTTTCATTAGCAAAATCTCTTTCTACTGGGAATTCAAAAAGTTTTTGATAAAGA  
AATCAAAAATCTATGGCGAAGGGGAAAGATGCCCGAGTAAGGGTTGTTTTGGAATGTA  
GGAGCTGTGTTCGAAATGGT-----GTTAATAATAAAAAGAACGGCATTTCAGATATATT  
ACTCAAAAAGAATCGACACAATACGTCTAGTCAATTGGAATTGCGCAAATTCGCCCCCA  
TTGTTTCAAACATACGATTCATGGGGAGATAAGAGATATGAAAACAGGCGCCTCCGTTC  
GTAAAATTTGTGAAAAATGCCGATTGATACGTAGGAAGGGGCGACTTCGAGTAATTTGT  
TCTAACCCGAGACATAAGCAAAGACAGGGAATGATTTCGAGAAAAAGTAAGAGTCTCT  
AGTCAGAGACCCCGGTGGAAATGTGTTGAATTTAGAGCAGACGGTAAGCGTCTTTATT  
ACGGCCGCTTTATTCTCTCTCCCCTTAAGAAGGGTCAAGCGGATATAATAGGCATTGCG  
ATGCGAAGAGCTTTGCTTGGAGAAATAGAAGGAACATGTATTACATATGCAAATTTGA  
G-----AAAATACCACACGAGTATACTACTCTAGTAGGTATTCAAGAATCGGTATATGAAAT  
TGTAATGAATTTGAAAGAAATTGTATTGAGAAGTAATCTCTATGGAACTCGGGATGCAT  
CTATTTGTGTCAGGGGTCCCCGAGATGTAAGTCTCAAGACATCATTTTACCGCCTTCT  
GTGGCAATCGTTGATAATACACAGCATATAGTTACCCTAACGGAACCAATCGATTTTTGT  
GTTGGATTACAAATTGAGAGAAATCGTGGATATTCTATGAAAATTCCAATGCCAACCAA  
CCATGATGACAGAGGTTATCCTATAGATGCTGTATTTCATGCCTGTTAAAAATGTAAATCA  
TAGTATTCATGCTTATGAAAACGGGAGC-----CACGAGATGCTCTTTTTTCGAAATATGGA  
CAAATGGAAGTTTAACTCCTAAAGAAGCGCTTCGTGAAGCTTCCCGCAAGCTTATTAAT  
CTTTTTATCCCTTTTCTACATGCGGAAGAAGAA-----AACTCCATTTAGAG---AACATC  
AAAACCAACACACAGAAGAAGTGTCAATCGACTTA-----TG  
TGGATTGAAAGATATTTATATTGACCAATTAGAATTGCCTCCAAGGTTATATAACAGCCT  
CAAAGGATCGGGTATACATACAGTAATGGACCTTATGGATAAGAATACAGATGCCCTTAT  
GAAAATCCGCATTTTCGCCACGAAGATGTAGAAAAGGTGATGAACATTTTAAACAAA  
AAT-----ATTTGCAACACCTTTCCCAAAGAAGGATGCTTGACGATAGAAAT--GAAGGA  
ATGGCTGTAATACCTGGGCTTAATCAGATACAATTTGAAGGATTCTGTAGGTTTCGTTGAT  
CAGGGCTTAAGAGAAGAACTTTCTAAGTTTCCAGATATAGAAGATCTAGATATGGACGT  
ATGCTTTCAATTATTTGCGGAAACATCGAAATTGGTCGAACCGTTGATAAAGAACGAG  
ATGCTGTATATGAATCCCTCACCTATTCTTCTGAATTATATGTATCCGCGGGATTAATTTG  
GAAAAGG---TATTATATGCAAAAACAGACCATTTTGATTGGAAACATTCCTTTAATGAAT  
TCCTGGGGAGTTTTTATAGTAAACGGAATGTACAGAATGGTAGTCAATCAAATATTGCA  
AAGTCCGGGTATCTATTATCGATCAGAATTGGACCATAAAGGAATTTTGGTCTATACCGG  
CACCATAATATCAGACTGGGGAGGAAGATTAGAATTAGAGATTGATAGAAAAGGGCGT  
ATATGGGCTCGCGTAAGTAGGAAACAGAAAATATCCATTCTAGTTCTATCATCGGCTATG  
GGTTCGAATCTAAGCGAAATTCTAGAGAATGTTTGTACCCCTGAACTTTTATTGGCTTTT  
TTGTATGATAAAGAGAATGCAACAATTGGGTCAAAGAAAATGCCATTTTGGAAATTTTA  
TCAACAGTTTGTGTTGTGGGTGGAGATCCAGTATTTTCTGATTCCTTATGTAAGGAATT  
ACAAAATCAATCTTTTCGCCAAAGGTGTGAATTAGGAAGGATTGGGCGACGAAATATT  
AACCGGAGACTCAATCTTGCTATATCCCAGAATAATACGTTTTTTGTTACCGCGAGATATC  
TTGGCAGCCACAGATCATTTGATTGGAATGAAATTTGGAATGGGTACACTTGACGAT----  
-ATGAATCATTTGAAAATAAACGTATTTCGTTCTGTAGGGGATCTCTTACAAGATCAACT  
CAGATTGGCTCTGATTCGTTTTGAAAAAGTGGTTAAAAGAGCTATACGCGAAGCAATG  
AAA---GGGAAATTGATA---CCGACGCCTCAGAATTTTGTAACTTCCACCCCA-----TT

AAAAACCACTTATGAATCTTTTTTTGGATTACACCCATTATCTCAAGTTTTGGATGAAAC  
GAATCCATTGACACAAATAGTTCATGGGAGAAAATGGAGTTTTTTGGGTCCTGGGGGA  
TTGACAGGACAAACCGCGAGTTTTTCGGAGACGAGATATACATCCTAGCTACTATGGAC  
GCATTTGCACAATTGACACATCTGAAGGAATCAATGTTGGCCTTATTGGATCCTTAGCA  
ATTCATGCGAGAATTGGCGATTTTGA---TCTCTAGAAAGCCATTAT-----GAAATC  
TCCGAGAAATCAAAAAGG-----GCACGGATACTTTATTTATCATCAAGGAGAGATGAATA  
TTGTATGATAGGGATAGGCAATCTTTGGCACTTAATGAAAGTTTTTCAGGAAGAGCAGA  
TTGTTCCGGCTCGATACCGTCAAGAATTCCTGACTATTGCATGGGAACAGGTTTATCTT  
CGAAGCATTTTTCCCTTCCAATATAATTTCTATTGGAGTTTCTCTCATTCCCTTATCGAGC  
ATAATGACGCGACTCGGGCTTTAATGAGTTCGAATATGCAACGCCAAGCAGTTGCGCTT  
TCTCGGTCCGAGAAGTGCATTGTTGGAACCGGTTTGGAAAGGCCAAGTGGCTCTAGACT  
CAGGAGTTTCCCTTATAACGGAACACGCGGGAAAGATCATTCTATCCATACTGACAAG  
ATCCTTTTATCGGGCAATGGGAATACTCTAAGCATTCCATTAGTTAGGTATCAACGTTCC  
AACAAAATACTTGTATACATCAACAACCTCAGGTTAGGTGGGGCAAATGCATTA  
AGGGACAAATTTGGCAGACGGTGCCTCTACGGTTGGGGGAGAACTTGCTTTGGGGA  
AAAACCTATTAGTAGCTTATATGCCATGGGAAGGTTACAATTTTGAAGATGCGGTACTCA  
TTAGTGAGCGTCTGGTATATGAAGATATTTGACTTCTTTTCATATACGGAAATATGAAAT  
TCAGATTCATGTGACAAACCAAGGC---CCTGAAAAGGTCACTAATAAAATACCGCATCT  
AGCGCCCCATTTACTACGAAATTTAGGCAAAAACGGAGTTGTAATCTTGGGATCCTGGG  
TAGAAGCGGGGGATATTTTAGTAGGTAATAAGACCTCGGCTGGCGCAAGACGTATCC  
-----CCAGAAGATCGATTTCGTAGACGCCCTACTTGGCACTCAGATAGCCACTTCAAGG  
CCAACCTGTCTAAAAGTACCTAGAGGTGGGAGGGGCCGGGTTATTGATGTGAGATGGA  
TACGTTCTAATCCAGAAAGAGAAAGCCGAAAAGAGAAAGGATTCGTGTATATATTTT  
ACAGAAACGTGAAATCAAAGTAGGTGATAAAGTCGCCGGAAGGCATGGAAATAAAGG  
GATCATTTCCAAATTTTGCCTAGACAAGATATGCCTTATTTGCAAGACGGAAAGCCTA  
TTGATATGGTCTTCAACCCATTGGGAGTACCCTCGCGAATGAATGTAGGACAGATCTTT  
GAATGCTCGCTCGGATTGGCGGGGGCTCTGCTAGATAGACATTATCGAGTAGCACCGTT  
TGATGAGAGATATGAACAAGAGGCTTCGAGAAAAGTACTGCTTTTCTGAATTACATGAA  
GCCAGTAAGCAAACAGGAAATCCGTGGGTATTTGAACCCGAGTATCCGGGAAAAAGC  
AGAATATTTGATGGAAGAACGGGAGATCCCTTTGAGCAACCTGTTATAGTGGGACAGC  
CCTATATCTTGAATTAATTCATCAAGTTGATGATAAAATACACGGGCGTTCCACCGGTC  
ATTATACACCTCTTACACAACAACCCGTTAAGGGAAGGGCCAAGGGGGGGGGGCCA---  
-----GCGGGTAGGAGAAATGGAGGTTTGGGCTCTAGAGGGGTTTGGTGTGCGCAT  
ATTTTACAAGAGATGCTTACTTA-----

-----  
-ATGATTGATCGGTATAAACATCAACAACCTTCGAATTGGATTAGTTTCTCCTCAACAAAT  
AAGTGCTTGGGCCAATAAAACCCTGCCAACGGGAAATAGTCGGAGAGGTGACAGA  
AATCGAGCCTCTTGAGTCGGAAACCAATAAGCCAAAAAAGGGTGGATTCTTTGTGAA  
AGAATTTTGGACCTATAAAAAGCGGAGTTTGTGCTTGTGGAATTTCTGGCAAATTAGG  
AGATCAAAAAGAAAAGAGAACATTTTGCGGCGACTGCGGAGTCGAATTTGCGAATTCT  
CAGATACGAAGATATCAAATGGGCTACATCAAATGACATGCCCCGTGACTCATGTGTG  
GTATTTGAGGCGTCTTCTAGTTATATCGCGAATCTTTTAGATAAACCTCTTAAAGAACT  
AGAAGACCTAGTATACTGCGAT-----TTTGCTTTTACTAGGCCT--ATAGCTAAAAACCCC  
ACACTTTTACGATTACGAGGTTTCATTTCGAATATGAAACCAATCCTGGACACCTAGCAT

CCCTCCTTTTTTACTACCCAAGGCTTGCATACTCAC-----GAAATTTATACTGGAGCA  
GGCTCTATCCGAGAGCAATTGGGCGATCTAGATTTGCGAGTTATTATAGATTCGTCTGTTG  
GCAGAATGGAAAGAATTA---GAAGAG---GGGCTCACGGGTGATGAGTGGGAAGATCAG  
AAAAAGGAAAGAAGAAAGCGCTTTTTGGTTAGACGCATGGGATTAGCTAAGCATTTTA  
TTCAAACAATGTAAAACCCGAGTGGATGGTTTTATGTCTATTACCCGTTCTTCCCCCG  
GGTTGAGACCGGCGCTTCATCTAGATGAGTTTAAACCAATGGGTTCCGGATATTAATCA  
ACTTTATCTTAGAGTTCTTTTCGCGGAACAATGCTCTTCTCGCTTTCTTAACAATTCAACC  
TAGG---TCAGAGGACGTAATAATGTCTCAGCAGAAATTGCTACAAGAAGCTGTGGATAC  
ACTTCTTGATAATGGAGTCCGCGGACAGCCTATAAGGGATGGTCATAATAAGGTTTACA  
AGTCGTTTTTCAGATGTAATTGAAGGCAAAGAGGGGAAGGTTTCGTAAGAATCTGCTTGG  
AAAACGGGTCGATTATTCGGGACGTTCTGTCAATTGTTGTAGGCCCTCACTTTCATTACA  
TCAATGTGGATTGCCTTTTTGAAATAGCAATAGAGCTTTTCCAGCCATTTGTAATACGCGG  
TCTAGTTAGACAGCACTTTGCTCCGAACACAGCGACTGCTAAGCGTCAAATTCGGGAA  
AAAGAACGAATTCTATGGGAAATACTTAAGGAAGTTATGCAGGGACATCCCGTATTGCT  
GAATAGAGCACCTACTTTGCATAGATTAGGCATACAGGCTTTCCAACCCATTTAGTGG  
AAGGGCGCGCTATTTGTTTACATCCACTCGTTTGTAAGGATTCAACGCAGACTTCGAT  
GGGGATCAAATGGCTGTTTCATGTACCTCTATCCTTGGAGGCTCAGGCGGAGGCTCGTTT  
ACTTATGTTTTCTCATATGAATCTCTTGGCTCCGTCTATTGGGGATCCTATTTGTGTACCA  
ACTCAAGATATGCTTATTGGGCTCTATATCTTAACAAGCGGGAATCGGCAAGGTCTTTGT  
GGAAATAGGTATAATCTGTGCAATCGCAGAAAC-----TGCCAAACTGAT---ATTGACGA  
CAAGAACTCTAGGTATATGAAAGGAAAAGAACCTGTTTTTTTGAATTCCTATGATGCAA  
TTGGAGCTTATCGACAGAAAAGAATCCGTTTAGACAGCCCCTTTTGGCTCCGGTGGCG  
ACTAGATCAAGGC---CTTATTGTTTCA-----AGAGGAGTTCCTGTGCAAGTTCATTATGAA  
TCTTCGGGTACCCATCATCAGATTTACGGACACTTTTTAATAGTAAGAAGTGTAAAAAA  
AGAAATCTTTGTATATATATTCGAACACTCTTGGTCATATTTTTCTTTATCGCGAAATT  
GAAGAAGCTATACAAGGGTTTTCTCAG---GTCTCTTAC-----  
ATGCAAGAGCCGGCCAATCTGGTCTTTCAAATAAAGTAATAGATGGGGATGCTATTAA  
ACGACTTATTAATCGATTAATAGATCGCTTCGGAATGGCATATACATCCCACATCCTCGAT  
CAAGTAAAGACCCTCGGTTTCCAGCAAGCCACCGCTACATCCATTTATTAGGAATTGA  
TGATCTTTTAAACGATACCTTCTAAGGGATGGCTAGTCCAGGATGCTGAACAACAACGTT  
TTCTTTTGGAAAAACACTATCATTATGGGAATGTACACGCGGTAGAAAAATTACGCCAA  
TCCATCGAGATATGGTATGATACAAGTGCATATTTGCGACAAGAAATGAATCCCAATTTT  
AGAACCACCGACCCCTTGAATCCTGTACATATTATGCTTTTTTTCAGGAGCTAGAGGAAA  
TGCCTCTCAAGTACACCAATTACTAGGTATGAGAGGGTTAATGTCCGGATCCACAAGGAC  
AAATGATTGATTTACCCATTCAAAGCAATTTCCGCGAAGGGCTCTCCTTAACAGAATATA  
TTATTTCTAGCTATGGAGCTCGCAAAGGGGTTGTGGATACTGCTATACGAACAGCGGAC  
GCTGGGTATCTTACGCGCAGACTTGTGTAAGTAGTTCAACACGTTGTTGTACGTAGAAC  
AGATTGTGGCACCACCCGAGGGCTTTCTGTAAGTCCCCGAAACGGGGCGTTGCCG---G  
AAAGATTTGTTATGCAAACATTAATAGGTCTGTATTAGCCAACGATATTTATATGAGTG  
CGCGATGCATTGCCGTTTCGAAATCAAGATCTTGGGATTAGCCTTGTCAATCAACTCATA  
ACC-----TTTCAAATACAGCCAATATCTATCCGAACCCCTTTACTTGTAGGAGT  
ACGTCTTGGATCTGTGATTATGTTATGGTCCGAGTCTGCTCATGGCAACTTGGTTGA  
ATTGGGGGAAGCTGTAGGTATTATTGCGGGCCAATCCATTGGAGAACCGGGGACTCAG  
CTAACATTAAGAACTTTTTCATACCGGTGGAGTATTCACCGGAGGTACTGCAGAAGATGT

GCGAGCCCCTGTCAACGGAAAAATCCAATTCAATGAGGACTTGGTTCATCCCGCACGG  
ACACGCCACGGGCAGCCTGCCTTTCTATGTTCTATAGATTTTTATGTA ACTATTGAGGGG  
GAAGATATTATACATAGCGTGCCTATTCCAGCAAAGAGTTTTCTTTTAGTTCAAAATGAT  
CAATATGTAAAATCAGAACAAGTAATTGCTGAGATTCGTGCGGGAAAAATCCACTTTT---  
CCTTTGAAAGATAGAGTTCGAAAACATATTTATTCTGACTCAGAAGGAGAA---ATGCAC  
TGGAGTACCGATGTGTACCATGCACCCGAATTCCTTATAGTAATGTCCATCGCTTACCA  
AAAACAAGTCATTTATGGATCTTGTTAGGGGATTTATGTAGA-----TCTGACCCCGTTCTT  
TTTTCGATCTACAAGGATCAAGATCAAATGAGCATTCAF-----TCTCTTGCTGCCCAAGGT  
AGATATACGCCTAGCCCTTAT-----GTGAAAAATGATCAA---TTGAGACACA ACTTCTTTC  
GTTTAGGTCTTTATGGCAA---AGGATTATGATTCGTAATTAT---TCAGAGCTTAATGAAA  
GCCTATTGACTGCCCGTTGGAATCTACCCTACCCTGCT---ATTCTACGCGATAATTTTCAT-  
----TTAGTGGCGAAGAAGCGAAGAAATCGATTTCTCATTCCATTCCGATCGGAACATGG  
ACGAGAAAAAGAACTAAGACTCTGTTCCGACATCTCGATTGAAATGCCCAA-----AAT  
GGGATTTTCCGTAGAAATAGCATTCTTGCTTATTTGACGATCCTCGATACAAAAGAGG  
GGGGTCAGGAATTACAAAATATGGGCCTATAGAGGCAGATTCAATCGTCAAAAAAAG  
GATTTCCATTTTCGTTGACTATGACTATGGAGTCCAAGAATTGGAGCCAAAATACGAGGA  
AGTGGATCCCCTTTTTTTTCATTCCCGAAGAAGTGCATATTTTACCTGACTCCTCTTTGAT  
AATGGTACGGAACAATAGTCTCGTTGGAGTAAATACACAAATTACTTTAAATAAAAAGAA  
GCCGGGCAAGCGGGTTGGTCCAAGTGGATAGAAAAAAAAAAAAAAAAAATTAAGTGCAAA  
TCTTTTCTGGAGATATCCATTTTCCGGAGGGGGAAGAAAATAGATCCCTACACAGTGGC  
GTCTTGATACCAGTACCACCACGACTAAGAAAAACCCAGTCGAAAGAATCCACAAAA-  
----TGAAAAAGGGGATCTATGTCCAACGA-----ATTACACTTTCCAAGAAA-----AGT  
TTTGTTTTGTCTCGACCCGTAGTCACATATGAAATAGCGGACGCTAAAAAGTTAACAAG  
ACTTTTTTCTCAAGATCCAGTGAAGAAATCGATAATATAGA ACTTGAGGTTGGTAATT  
ATATCCGTTATGGGGATGGCAACTTGATTCCGGGCATTTCTGGCACAAGTATTCAATTAG  
TTCGACTTGTTTATTCTTGAATTGGGACCAAGAC-----GAAAAAGATTCTGATATAGA  
GGAGGCCCGCGCTTCCCTTTGTGGAAGTAAGTACAAAGGGCTTGATTTCGAGATTTCCCTA  
AAAATGCACTTAGGG-----CAGATTTTCATATATCAGAAAAAGAGAGGATCCTTCCGGTTC  
AGGATTGCCCTCTGAG---AATGGTCCAGATCGTACCAACATCAATCCCTTTTCTTCTAGT  
TATTCATTTATTCC-----AAGGCAAGGGTTCGACAGCCACTTAGCCAAAACCAA---ACT  
GCTCGTATATTGTTGAAT-----AGAAGTAAGGAATCCCAATCTTTCATAATCTTGTCTC  
ATCTAATTGTTTTCAACTAGGTCCGGTCAAGTTCAACGATCGAAAATCTCACAAT-----  
GCGAAAAAAGAATTAGACCCTATAATTATGATTAGGAATTTGTCGGGACCCCTTAGGAGC  
A-----ATTCCTCAAATTGTCAATTTTGGTGTA-----TGTTACCATTTACTAACA-----AAGAA  
TCAGATTTCC---GTAATGAAATATTTCCA ACTTGATCAT-----TTAAAACAGACCCTTCA  
AATAATT-----CAA---TATTTTTTTATGGATGAAAACCAGAGA-----ATCTATAAGCCCGAT  
CCATATAGTAACATCTTTTTGACTCCATTCAATTTGAATTGGTATTTTATACAGCATAATTA  
TTGGGAAGAAACATCCACAATAATAAAT---CTTGGGCAGTTTTTTTTCTGAAAGTGTATGT  
ATAGCCAAAACGGCCCA-----AGCCTAAAATCGGGTCAAGTTTTAATTGTCCAACAA  
GGGGGGTATCGAATAATAAGATCAGCTAAGCCCTATTTGGCTACTCCAGGAACA ACTGT  
TCATGGCCATTATGGAGAAATCCTTTCCGGGGGAGGTACATTAGTTACATTTCTATATGA  
AAAATCACGGTCTGCTGATATAACACAGGGTCTTCCAAAAGTAGAAAGGGTATTTGAA  
GTGCGTTCAATGGATTCAATATCGAGGAACCTCGAAAAGAGAATTGAGGGTTGGAACG  
AGTGGATACCAAGAATTCTTGAATTCCTGGAATTCCTGATTGGTGCCGAGCTAACA

ATAGCGCAAAGCCGTATTTCTTTGGTTAATAAGATCCAAAAGGTTTATCGATCCCAGGG  
AGTACAGATCCATAATAAGCATATAGAAATGATTGTACGCCAAATAACATCAAAAAGTCTT  
GGTTTCAGAA-----GATGGAATGTCTAATGTTTTTTTACCCGGGAGAACTTATTGGATTG  
TTACGAGCAGAACGCACGGGGCGGGCTTTGGAAGAGGGGGTCTGTTACCGCGCCGTC  
TTTTTGGGAATAACTCGCGCATCTCTAAATACTCCAAGTTTTCTATCCGAAGCAAGTTTT  
CAAGAACTGCTCGGGTTTTAGCAAAAAGCCGCTCTCCAAGGTCGTATCGATTGGTTGA  
AAGGCCTGAAAGAGCACGTTGTTCTAGGGGAGATGATCCCCGCTGGGACCGGATTCAA  
AGGATTAGTACACTCCTCA-----AGGGAACATAAGGCTCTTTCT-----CTGGAAACCAA  
AAGAAGAATTTATTCGAAGAAAAA--GCG---ATCCATTTTTTCTTCTATCATAGAGAATG  
GTTTGATTCT-----ATGACAAGAA  
GATATTGGAACATCGGGTTGGAAGAGTTGCTGGGAGAAGCAGTTCATCTTGGTCATGG  
TATTAAGAAATGGAATCCTAGAATGGCCCCTTATCTTTTGATTCTTGTAAGATAATCAT  
ATTACAAATCTTACTAGAACCGCGCGCTTTTAGCAGAAGCTTGCAATTTAGTTTTTAT  
GCAGCAAGTGAAGGAAAAAGATTCTTAATTGTTGGTACCACAAAAAAGTATCGAATT  
ACGTAGTACAGGCTGCAATAAAGGCTCGGTGCCATTATGTTAATAAAAAATGGCTCGGC  
GGTATGTTAACGAATTGGTCCACTGCGGAAACGATGCTTCGGACGTTTCAGGGACTTGA  
GAACGTACCAAAACACAGGGAGACTCGACCGTTTTCCCAAAGGGATGCAGCTATTTT  
GAAGAGACAGTTGTCTCACTTGCAAAAATATTTAGACGGGGTGCAATATATGACGGGAT  
TACCCGATATTGTAATCGTCCTTGATCAGCAAGATGGATTACGGCCCTTCTAGAATGCA  
CCGCTTTAGGAATCCAACAATTGGTTTAATCGATACAGATTGTGACCCCAATCTCGTG  
GATTTTCCGATTCCAGCAAATGATGAGTCTATCCTTTCAATCCGATTCATTCTTAACAAA  
TTAGTATTAGCAATTTGTGAGGGCCGTTCTAGCAGCTCTATACGAAATCCTATGGGACA  
AAAAATAAATCCCCTCGGTTTCAGACTTGGTACAACCCAAAATCATTACTCTATTTGGT  
TTAAACAACCAAAAAAGTATTGCGAGGGCCTACAAGAAGATCAAAAAATCCGAGATTG  
CATTACGAATTATATAGACAATCAGAGAGACGCCATGACA-----ATTCACGCATA  
CAGATTGAAAAAGGAATAGATGGCGTTAAAGTAACAATCTATATGGGAAAACCCAGT  
TCTTAACAGAAGATAAACCACCCAAAAGCGAAACAAGAATCAAAGAGTTAAAGGGAA  
ATGTCGAAAAAGTACTTCACTGCGAA--CAAAAAGTAAAATTTCTATTAGAAAAATTC  
GAAAGCCTTATGGAGACCCTAAAATTATTGCCGAATTTTTAGCCAACCAATTAAGAGC  
AGAATTTTCAATTCGCAAAGCAATGCAAAAAACTATTGAATTAGCAGCCAAAGAAGAAG  
CAAAAGGAATTCAGTACAAATAGCAGGGCGTATTGAGGGAAAAGAAATTGCCCGTGT  
CGAATGGCTTAGAAAGGGTAGAGTTTCTCTCAAACGATTTCGTAATAAAATTCATTTTT  
GTTCCACGACAGTTAGAACGATTCACGGGGTGTAGGCATCAAAATTTGGGTAAAGCAA  
A-----ATGTCGCGTTACCGAGGACCTCGTGTCAAAAAAATACGACGCCTTGGGGCTTT  
GCCGGGACTAAGTAAAATTCCT-----AAAGGCAAAAAAGAGACCCCTCGCCCT  
TTAAAAAAGCAATATCATATTCGTTTGAAGAAAAACAAAAATTCGTTTTTCAT  
TATGGTCTTACAGAACGCCAATTAATCTCAATATGTTTCGTCTCGCCGAAAAGCCAAGGG  
GCAAACAGGTCAAGTTTTACTACAATTAATGAAATGCGTTTTGGATAATACCCTCTTTC  
GATTGGGTATGGCTTCTACTATTCTCAAGCGCGCCAATTAGTTAATCATAGACATATTTT  
AGTAAATGGCCGCATAGTTGATATACCAAGTTATCGCTGCAAACCCAGAGATATTATTAC  
AGGAAGGGAGAAAGAAAAATCAAGAATCTGATTCAAATTTATCTTGATTCATCCTCC  
CGTCATTTAACTACACCAATCATTAACTACTCAACAAGGCCAACAG-----AGGGGGTT  
AGTCAATAAAATAATAGATCGGGAATCGGTTCGGTTTTGGAATAAAAGAATTGTTAGTTG  
TTGAATATTATTCTAGGCAGATTATGTCACGCCGAGGTACTGCAGAAAAAAAAGTCA

AAATCTGATCCAATTTATCGTAATCGATTAGTTAACATGTTGGTTAACCGTATTCTGAAA  
CACGGAAAAAATCATTGGCTTATCAAATTTCTATCGAGCCATGAAAAGGGTTCAAC  
AAAAGGAACAAAGAAATCCACTATCTGTTTTACGTCAAGCAATACGTCAAATAACTCC  
CGATATCGCAGTAAAAACAAGACGTAAGGGGGGATCTACTCAGCAAGTTCCCATTGAA  
ATAGGATCCACACAAGGAAAAGTACTTGCCATTCGTTGGTTATTAGAGGCAGCCCGAA  
AACGTTCCGGTCGAAATATGGCTTTCAAATTGAGTTCGGAATTAGGGGATGCTCTCAA  
GGGAAGGGCGCTGCCATACGCAAAAAGGAAGAGACTCGTAAAATGGCAGAGGCAAAT  
AGAGCTTTTGCACATTTTCGTATGAGCAAGGACACTATTTCTGACATATTAACCTGTATA  
CGCAATGCCGACATGGCTAAAAAAGAGACGGTTCGAATACGATTTACTAACATCGCCG  
AAAAGATAGTGAATACTTTTACGCGAGGGATTTATCAAAAACACAAGGGAACATCG  
GGAAAACAACAATCCTTTTTGGTTTTAACCTACGCCACAAAAGC-----AATAGGAGG  
AGCAACTATAGA ACT--CTTTTAAAT-----TTAAAACGAGTCAGTCGACCCGGTCGGCGA  
ATCTATTCTGACTACCCCAAATTCCTAGGATTTTGGGCGGGATGGGGATTGTAATCTT  
TCTACTTCTCGAGGTATAATAACAGACCGAGAGGCTAGGCTCGAAAGAGTGGGTGGAG  
AAATTTTGTGTTATATATGGATGGCAAACCTATAGGAAGATATTCTAGTCGTAAGAAAA  
GGCGCATT--TTGCGTAAGAATATACGTAAAATACGAAAAGGAATTATTCACGTTCAAGC  
AAGTTTCAACAATACAATTGTTACTGTTACCGACGTAGAGGGTCGCGTGGTTACTTGGG  
CCTCCGCCGGCGTTTTGTGGATTCAAAGGTAGAAGAAAGGGAACACCCTTTCGGCCCC  
AAACCACAACGGAAGATGCTATTGGGCCAGTGGTGGCTCAAGGTATGCACCGAGCGA  
GTGTCCTCATAAAGGGTATTGGGCTTGAAGAGATGCAGCATTACGAACTATTTGTAGA  
AGTGGCGTACGATTATACTTTATACGGGATATAACCCCTATGCCACATAACGGCTGTAGG  
CCCCCTAAAAAAGGCGTACAATGCCAACTACTCAACA ACTTATTAGAAACGCCAGAC  
AGCCAGTCAGAAATGCTACGAAAGCCCCGCTCTTAGGGGGTGCCCTCAGCGCCGAG  
GCACATGTACTAGGACGTATACTATCAACCCCAAAAAACCAA ACTCTGCCTTACGTAAA  
GTTGCCAGAGTACGATTAACCTCTGGATTTGAAATCACTGCTTTTATACCTGGTATTGAC  
CATAATTTACAAGA ACATTCTGTAGTCTTAGTAAGAGGGGGAAGGGTTAAGGATTTACC  
CGGTGTGAAATATCGCATTGTTTCGAGGAACCCTAGATGCTGTTCGAGTAAAGGGTTCGT  
CAACAAGGGCGTTCTAAATATGGGGTCAAAAAGCCCAAAGTGGCAACGAAAGGTTTG  
ATTCAGAGGGAGAAGAAGAGACAAAAATTGGAACAAAAATATCATTTCGATTCGTCGAT  
CCTTAAAAAAGAAATACGC-----GAAGTTCGGTCTTTGAGTGAGAAATGGGAAATT  
CATGGAAAGTTACAAGCCTCACCGCGCAATAGTGCACCTACCCGCTTTCGCCGACGTT  
GTTTTTCAACCGGAAGACCGAGAGCTAACTATCGAGACTTTGGACTATCCAGACACAT  
ACTTCGGGAAATGGTTCATGCATGTTTGTACCGGGGGCAACGAGATCGAGTTGGATG  
GTAAAAACTCCATCAATTCAGTGATCTCGCAAGAA-----GAAAAGAATTGGGGGT  
CCGTTGAATTTCAAGTCGTTTTTTTTAGCAATAAAATAGAAAGAATTTCTTCCCATTG  
AATTTACAGAAAGGACTATTTATCTCAGAGAGGTCTACATAAACTTTTGGCAAAACGC  
GAGCGTCTGCTGTCTTATTTGTCAAAGAAAAATTCGTAGGTTATAAAGAATTAATAATT  
AGGTTTAAATATTCGAGAGTCAAAA ACTAGTCAAATTATGGTAAA ACTTCGTTTGAACG  
CTATGGACGGAACAACGAGCCTTTTATCGAATCGTTGCAATTGATGTTTCGAGCCCGAA  
GAGAGGGAAGGGCTCTTCAAAGGTGGGTTTTTATGATCCGATAAACAATCAAACCCA  
TTTAAACGTTTCGTACTATTCTATTTTCTTGAACAAGGGGCTCAACCCACAGGAACTG  
TTCATGATATTTCAAAGAAGGCGGGGGTTTTTGGGGA ACTCCTTCTTAAGCAAAGGAC  
CTCCATTTTCTCCAAAAAAGGCGACCCTTTTTGA AAAAAAAGAGATCTTTTCGT  
CGACGTTACCCCGATTACTCCGGAGGAGCTTCTCAATTATAAAAACGTTAGTGTAAT











GTGTGGCTTGTTTATTCGATTTTCACGGTTTGTATTCTTTTCTTTACGGAAATTCCCACAT  
GGTACCTATTAGAGCTGATGAAATTAGTAATATTATCCGTGAACGTATCAAGGAATATAA  
TAGAGAGGTCAAGATTGTAAATATGGGTACCGTACTTCGAGTAGGTGACGGCATTGCTC  
GTATTTATGGTCTTAATGAAGTAATGGCAGGCGAATTGGTAGAATTTGAAGAAGGTACG  
ACAGGCATTGCCCTGAATTTGGAATCAAATAACGTTGGTGTGTATTAATGGGTGGTGG  
TTTGATGATACAAGAGGGGAGCTCTGTAAAAGCAACAGGAAGAATTGCCAGATAACCG  
GTGAGTGAAGCTTATTTGGGTCGTGTTGTAAATGCCCTGGCTAAACCTATTGATGGTGC  
AGGCGAAATTCATCTTCTGAATCTCGGTTAATTGAATCCCCTGCTCCGGGTATTATTTT  
GAGACGTTCCGTATACGAGCCTCTTCAAACGGGACTTATTGCTATTGATTCGATGATTCC  
TATAGGACGCGGTACGCGAGAATTAATTATTGGGGACAGACAGACTGGTAAAACCGCA  
GTAGCTACGGATACGATTCTAAATCAACAAGGAAAGGATGTAATATGTGTTTATGTAGCT  
ATTGGTCAAAAAGCCTCTTCAGTGGCTCAGGTAGTGACGACTTTTCAGGAAAAGGGG  
GCGATGGAATACACTATTGTGGTAGCCGAAACGGCAGCTTCCCCCGCTACATTACAATA  
CCTCGCCCCTTATACAGGCGCGGCTCTAGCTGAATTTTTTATGTACCGTGAACGGCACA  
CTTTAATCATTATGATGATCTCTCAAACAAGCGCAGGCTTATCGCCAAATGTCTCTTC  
TATTACGAAGACCACAGGTGCGGAAGCTTATCCGGGAGATGTTTTTTATTTACTCA  
CGCCTTTTGAAAGAGCCGCTAAATCAAGTTCGAATTTAGGTGAGGGAAGTATGACTG  
CTTTACCAATAGTGGAGACCCAGTCGGGCGATGTTTCGGCTTATATTCTACTAATGTAA  
TTTCCATTACAGATGGTCAGATATTCTTATCCGCCGATCTATTCAACTCTGGAATCAGGC  
CTGCTATTAATGTGGGTATTTCTGTTTCCAGGGTAGGATCCGCAGCTCAAATTAAGCCA  
TGAAACAAGTCGCCGGCAAATCAAATTGGATTTGGCGCAATTCACAGAATTAGAAGC  
CTTTGCACAATTCGCCTCTGATCTCGATCAAATACTCAGAATCAATTAGAAAGAGGTC  
GACGATTACGTGAGTTGCTCAAACAATCCCAATCGGAACCTCTCGCGGTCGAAGAGCA  
GATAATGACTGTTTATACTGGAACAAATGGTTATCTTGATTCATTAGAAATTGGACAGGT  
AAGGAAATTTCTCGGTAATTTACGCGATTACTTAAAAAGTAACAAACCGCAGTTCCAA  
GAAATCATCTCGTCTACCAAGACATTCAGCGAGGAAGCAGAGACCCTTTTGAAAGAGG  
CAATTCAGGAACAGATGGAACGCTTTCGTCTTCAG-----ATGAGACTCAATCCTACTG  
CTTCTAGCCTTGGGGATTCCACACTAAAAA-----CGGGGACGTATCGCCCAAATAA  
TTGGTCCGGTATTGGATATAGTCTTTCCCAAGGGTAAGATGCCTTATATTTATAACGCCCT  
AGTAGTCCAGGGTTCGAGATACTGTTGGTCAACAAATTTATGTGACCTGTGAGGTACAA  
CAATTATTAGGAAATAATCGAGTTAGAGCTGTAGCTATGAGTGCTACAGATGGTCTAATG  
AGAGGGATGGAAGTGATTGACACGGGGGCTCCTTTGAGTGTTCCAGTCGGCGGAGCG  
ACTCTAGGACGAATTTTCAACGTACTGGGGGAACCTATTGACAATTTAGGCCCTGTAGA  
TACTCTGACAACATCCCCTATTCATAGATCTGCACCGGATTTTATTAGTTAGATACAAA  
ATTATCCATTTTTGAAACAGGAATTAAGTAGTGGATCTTTTAGCCCCTTATCGCCGTGG  
AGGAAAAATCGGACTATTCGGGGGGGCTGGAGTGGGTAAAACAGTACTAATTATGGAA  
TTGATCAACAACATTGCCAAAGCTCACGGAGGTGTATCTGTATTTGGCGGAGTAGGCG  
AGCGTACTCGTGAAGGAAATGATCTTTACAAGGAAATGAAAGAATCCGGAGTAATTA  
TGACCAAAGATTGCGGAATCAAAGTAGCTCTAGTCTACGGTCAGATGAATGAACCG  
CCGGGAGCTCGTATGAGGGTTGGTTTACTGCCCTAACTATGGCAGAATATTTCCGCGA  
TATTAATAACAAGACGTACTCTTATTTATTGATAATATCTTCCGTTTCGTCCAAGCAGGA  
TCCGAAGTATCCGCCCTATTGGGTAGAATGCCTTCCGCTGTGGGTATCAACCCACCCT  
TGGTACGGAAATGGGTTCTTTACAAGAAAGAATTACTTCGACAAAAAAGGGGTCCATA  
ACTTCTATTCAAGCAGTTTATGTACCTGCGGACGATTTGACCGATCCTGCTCCTGCCAC

GACATTTGCACATTTAGATGCTACTACTGTACTATCAAGAGGATTAGCTTCCAAGGGTAT  
CTATCCAGCAGTAGATCCTTTAGATTCAACGTCAACTATGCTTCAACCTCGGATCGTCA  
GCGCGAACATTATGAAATTGCGCAAAGAGTTAAGGAAACCTTACAACGTTATAAAGA  
ACTTCAGGACATTATATCTATCCTCGGGTTGGACGAATTATCCGAAGACGATCGCTTAAC  
CGTAGCAAGAGCACGAAAAATTGAGCGTTTCTTATCACAACCCTTTTTTGTAGCGGAA  
GTATTTACAGGTTCTACGGGTAAGTATGTTGGTCTGGCAGAAACACTTAGAGGGTTTAA  
TTTGATTCTTTCCGGAGAATTTGATGGTCTTCTGAGCAGGCCTTTTTATTTGGTAGGTAA  
TATCGACGAAGCTACTGCGAAGGCTACGAAGTTAGAAACGGAGAGTAATTTGAAGAA  
AATGACCTTAAATCTTTGTGTACTGACCCCTAAACGAATTCTTTGGGATTCAGAAGTGA  
AAGAAATCATTATCCACTGATAGTGGACAAATTGGCGTATTACCAAACCACGTCCCT  
ATTGTAACAGGATTAGATACAGGCATTTTGAATAACGCCTTAACGACCAATGGTTCAC  
CATGGTTCTGATGGGTGGTTTTGCTAGAATCGCCAATAATGAGATTATTATTTTCGCACA  
TGATGCGGAAAAGGGTAGTGACATTGATCCACAGGAAGCGCAGCAAACCTTCAAATA  
GCGGAAGATGGCTTTAGGAAAGCTGAAGGGAAAGGGCAAACAATCGAGGTGAAGCA  
AGCTCTTACACGAGCTCAGACACGTGTCAATGCTATTTTCG-----ATGAAAAATGTAAC  
CGATTCTTTTCGTTTCTTTGGGTCGCTGTCCATTTGCCGGGAGTTTCGGGTTAATACCGA  
TATTTTAGCAACAAATCCAATAAATCTAAGTGTAGTACTTGGTGTATTGATCTTTTTTTGG  
AAAGGGAGTGTTAAACGATTTATTAGATAATCGAAAACAGAAGATCTTGAATACTATT  
AAAATTCAGAGGAACTGCGGGGAGGTGCCATCAAACAGCTGGAAAAAGCTCACGCTC  
GCTTACGGAAAGTGAAAACAGAGGTGGATCAGTTTCGAGTGAACGAGTATTCTGAAG  
CGGAACGAAAAGGTGCAACTTGATTACTTCAACTTATAAGGAGTTAGAACGCTCAGA  
AAATTTAAAAAATGAAAGCATTTCGTTTTGAACAACAAAGGGCAATTAATCAAGTCCGA  
CAACGGGTTTTCCAGCAAGCCCTACAAGGAGCTTTGGAAATTCTGAATAGTTGTTTTGA  
ACAAGGAGTTACATTTACGTACGATTAGTGCTAATATCGGCCTCTTTGGATCCATGAAA  
GAAAGAACTTATATGAATCCACTAATTGCTGCCGCTTCCGTCATTGCTGCTGGGTTGGC  
TGTCGGGCTTGCTTCTATTGGCCCCGGGATTTGGCAAGGCACTGCCGCGGGACGAGCT  
GTAGAAGGTATCTCGAGACAGCCCAGGGCGGAGGGAAAAATACGAGGTACCTTATTAC  
TGAGTCTAGCTTTTATGGAAGCTTTAACAATTTATGGGCTGGTTGTAGCATTAGCACTTT  
TATTTGCGAATCCCTTTGTTATGAATGTTCTAGCATGTTCTATAAACACACTAAAGGGGT  
TATACGAGGTATCCAGTGTGGAGGTAGGTCAACATTTTTATTGGCAAATAGGGGGGTTT  
CAAGTCCACGGCCAAGTGCTCATTACTTCTTGGATTGTAATTGCTATCTTATTAGGTTC  
GCTATTATAGCTGTTCAAATCCACAAACCATTCCGACTGATGTTTCAAGATTTCTTCGAA  
TATGTCCTTGAATTCATTCGAGACGTGAGCAAACTCAGATTGGAGAAGAATACCGCC  
CGTGGGTTCCCTTTATTGGAAGTATGTTTCTTTTTATTTTTGTTTCTAATTGGTTCGGGGC  
CCTTTTACCTTGGAAAATCATAACAGTTACCACAGGGGGAGTTAGCCGCACCCACAAAT  
GATATAAATAACAACCGTTGCTTTAGCCTTACTCACGTCAGTGGCATATTTTTATGCAGGT  
CTTACCAAAGGGGATTGGGCTATTTCAATAAATATATTCAACCGACTCCAATCCTTTTA  
CCCATTAACATCTTAGAAGATTTTACAAAACCACTATCACTTAGTTTTTCGACTTTTCGGG  
AATATATTAGCCGATGAATTAGTAGTTGTTGTTCTTCTTTCTTTAGTACCTTTAGTGGTTC  
CTATACCTGTCATGTTCCCTTGGATTATTTACAAGCGGTATTCAAGCTCTTATTTTTGCAAC  
TTTAGCTGCGGCTTATATAGGCGAGTCCATGGAGGGTTCATCATATGCTATTTTTGACTTT  
AGAGCACATATTTAACCATATCTTTTTTCGGTCGTTTCAATTGTAATTACAATTCATTTT  
ATACGCTTAGTATTCGATGAAATCGTAGGACTATTTGATTCTCAGAAAAGGGCATGCTA  
GTTTCTTTTTTCTGTATAACAGGATTATTAATAACTCGTTGGACATATTCAGGAGATTTTC



TTTAGAAGTTTTCTCGAGCGGATTCTTTTCTATAAAAAGATGGAAGTTCTTGTATCTATC  
TTTGCAAATAAGCGCATTCTGCTGTTTTTCAACGACCCTTTCATTATTATGTTAGATATC  
AAGGAAAATACATTCTAATTTTAAAAGACAGGCCTCTTCTGATGAATAAATGGAAAGAT  
TATCTTATAAAGTTATGGCAATGTTATTTTTATGTATGGTCTCAACCAGGAAGAGTCCATA  
TAAACAAATTATCCCAACACTCCCTTAACTTTATGGGTTATATTTTAAAGTGACAACCAA  
TTCCTTTGGTGGTACGCAGTCAAGTATTAGAGAATGTATTTCTAATAGATAAT-----CCTAT  
GAATAAGGTCCAAACAATAATTCCAACCTTTTTATCTAATTGGATCGTTGGTTAAAGCTAA  
ATTTTGTAATCTGTTAGGGCAGCCCATTAGTAAGCCAACCTGGGGCCGACTCATCCGATT  
CTGATATTATTGACCGATTTGTACGTATGTGCAGAAATCTTCTCATTATCACAGCGGGT  
CCTCAAAAAAAAAAAGGTTTGTATCGAGTCAAATATATACTTCGACTTTCTTGTGTTAAA  
ACTTTGGCTCGTAAACACAAAAGTACTGTACGGGCCTTTTTGAAAAAATCGGGTTTCGG  
CATTATTGGAAGAGTTTATTAACGAGGAAGAACAAGCCCTTCTTTGATTTTCTCAAGA  
CGAGTTTGGTATTTGGATATTCTTTATATCAATGATCTTATCAATCAAGAAATGATAATTG  
ATCCAAGA---GAAGTACAATATATCAAT--TCTTTTTCCAGATTTCGAATCC---TTCCAAGA  
GGTCTATGGGACTGTCTGGATCCTTGTCCCTATTTAATCCTTGTATTGGGAATCACAAAT  
AGGTGTATTAGTAATTGTGTGGTTAGAAAGAGCAATATCCGCGGGGATACAACAACGTA  
TTGGGCCTGAATACACCGGTCCTTTGGGAATTCTTCAAGCTCTAGCAGATGGGACAAA  
ACTCTTTTTCAAAGAGAATCTTCTTCCATCTCGAGGGGATATTCGTTTGTTCACTTTGG  
CCCATCCATGGCAGTCATATCAATTCTCCTAAGTTATTTCAGTAATTCCTTTTAGCTATCGT  
CTTGTTTTAGCTGATCTAAATGTTGGTGTTTTTTTTATGGATTGCAGTTGCAAGTATTGCT  
CCCATTGGACTTCTTATGTCAGGATATGGATCAAATAATAAATATTCCTTTTTAGGTGGTC  
TACGAGCTACTGCTCAATCAATTAGTTATGAAATACCACTAACTCTCTGTGTGTTGTCAA  
TATCTCTACTTTCTAACAGTTCAAGTACAGTTGATATAGTTGAAGCGCAGTCCAAATACG  
GTTTTTGGGGGTGGAATTTGTGGCGTCAACCTATAGGGTTCATCGTTTTGCTAATTTCTT  
CCTTAGCGGAATGCGAAAGATTACCTTTCGATTTACCAGAAGCAGAGGAAGAATTAGT  
AACAGGTTATCAAACCGAATATTCGGGTATAAAATTTGGTTTATTTTACGTTACTTCCTAT  
TTCAATTTATTAGTTTCTTCTTATTTGTAACAATCTTTACTTGGGTGGTTGGAATCTCT  
CTATTCCGTGGATAGACTTTCCCTCAATTATTTGAAATAAATAAGGTGGGTGCAATCTTTG  
CAACAACAATCTCGCTTTTTTATTACATTAGCTAAAACCTTTTTTTTTCTTGTTCATTTCTAT  
CACAACAAGATGGACTTTAGCTAGGCTAAGAATGGACCAACTCTTAAACCTTGGGTGG  
AAATTTCTTTTACCGATTTCTCTTGGCAATCTATTATTAACAACCTTCTTCAACTACTTT  
CGCTG-----ATTCTCGATTCTACGAGAATTTTTATGAAAGCCTTTCATT  
TGCTTCTCTTCGATGGAAGTTTTATTTTCCCAGAATGTATCTTAATTTTTGGCCTAATTCT  
TCTTCTGATGATCGATTCAACCTCTGATCAAATAGGTATACTTGGTCTATTTTCATCTCT  
TCAACAAGTTTATGTAATGAGCATAACGGCCCTATTGTTCCGATGGAGAGAAGAACCTAT  
GATTAGCTTTTTCAGGAAATTTCCAAACGAACCATTTCAACGAAATCTTCAATTTCTTAT  
TTACTATGTTCAACTCTAGCTATTCCTCTATCCGTAGAGTACATTGAATGTACAGAAAT  
GGCTATAATAGAGTTTCTGTTATTCATATTAACAGCTACTTTAGGAGGAATGCTTTTTATGC  
GGTGCTAACGATTTAATAACTATCTTTGTAGCTCCAGAATGTTTCAGTTTATGCTCCTAC  
CTATTATCTGGATATACCAAGAAAGATGTACGGTCTAATGAGGCTACTATGAAATATTTA  
CTCATGGGTGGGGCAAGCTCTTCTATTCTGGTTTCATGCTTTCTTGGCTATATGGTTCA  
TCCGGGGGAGAGGTTCGAGCTTCAAGAAATCGTGAATGGTCTTATCAATACACAAATGT  
ATAACTCCCCAGGAATTTCAATTGCGCTTGATTCATCACTGTAGGAATTGGGTTCAG  
CTTCCCCAGCCCCTTCTCATCAATGGACTCCTGACGTATACGAAGGATCTCCCACGCC

AGTCGTTGCTTTTCTTTCTGTTACGTCGAAAGTAGCTGCTTCAGCTTCAGCCACTCGAA  
TTTTTCGATATTCCTTTTTATTTCTCATCAAACGAATGGCATCTTCTTATGGAAATCCTAGC  
TATTCTTAGCATGATATTGGGGAATCTCATTGCTATTACTCAAACAACATGAAACGTAT  
GCTTGCATATTCGTCCATAGGTCAAATCGGATATGTAATTATTGGAATAATTGTTGGAGAT  
TCAAATAGTGGATATGCGAGCATGATAACTTATATGCTCTTCTATATTTTCATGAACCTAG  
GAACTTTTGCTTGCATTGTATTATTGGTCTGCGTACTGGAAGTATAACATTTCGAGATT  
ATGCAGGATTATACACAAAAGACCCTTTTTTGGCTCTCTCTTTAGCCCTGTGTCTCTTAT  
CCCTAGGAGGTCTTCCCCACTAGCTGGTTTTTTTCGGAAAACCTCTATTTATTCTGGTGTG  
GATGGCAGGCAGGCCTATCTTTATTAGTTTCAATAGGACTCCTTACGAGCGTTCTTTCTA  
TCTACTATTATCTAAAATAATCAAGTTATTAATGACTGGACGAAACCAAGAAATAACCT  
CTCACGTGCGAAATTATAGAAGATCCCCTTAAGATCAAACAATTCCATCGAATTGAGT  
ATGATTGTATGTGTGATAGCCTCTACTATAACCAGGAATCTCAATGAACCCTATTATTGCAA  
TTGCCCAGGATACCCTTTTTATGTTTCTGCTTTACGAATATGACATTTTCTGGGTATTTCT  
AATAATATCAAGTCTTATTCCTATTTTGGCATTCTAATTTTCGGGAGTTTTAGCCCCGATT  
AGCGAAGGTCCCGAGAACTTTCTAGTTATGAATCCGGTATAGAACCAATGGGCGATG  
CTTGTTACAATTTAGAATCCGTTATTATATGTTTGTCTAGTTTTTATTGTTTTTGATGTT  
GAAACGGTTTTTCTTTATCCATGGGCAATGAGTTTAGACGTATTGGGGGTATCCATATTT  
ATAGAAGCTTTTTTTTTTCGTGCTTATCCTAATTATTGGTTTCAAGTTTATGCATGGCGAAAG  
GGGGCATTGGAATGGGTTACGAATTATTTTCCCTGGTTAACAATAATTGTTATTTTTCCG  
ATATCCGCCGGTTCCTTCATTTTCTTTTTCCCTCATAGAGGAAATAAGGTAAGTACTAGATGG  
TATACTTTGTGCATATGTTCACTAGAACTCCTTCTAACGGCCTATGCATTCTGTTACCAGT  
TCCAACCTGGACGATCCATTAATTCAACTCGTCGAGAATTATAAATGGATCCATTTTTTGC  
AGTTTTACTGGAGATTGGGAATAGACGGACTTTCTCTTGGACCCATTTTACTGACAGGA  
TTTATCACCCTCTAGCTACTTTAGCGGCTTGGCCGGTACTCGAAATTCACGATTATTC  
TATTTCCCTGATGTTAGCAATGTATAGCGGTCAAATAGGATCATTTTCTTCTCGGGATCTTT  
TGCTCTTTTTTCATCATGTGGGAATTCGAGTTAATTCCTGTTTATTACTTCTATCCCTGTG  
GGGGGGGAAGAAACGCCTGTATTCAGCTACAAAATTTCTTTTGTACTGTCAGTAAGC  
TCCCTCTTTCTATTAATAGGGGTCTAAGTATCGGATTATTTGGTTCCAACGAACCAACA  
TTCCATTTTGAAATATCAGCTCATCAATCCTATCCTGCGGCACTGGAAATAATATTATATA  
TTGGCTTTCTTATTACTTTTGGCTGTCAAATCGCCGATTATACCCTTACATACATGGTTACC  
AGACTCACGGAGAGGCACATTACAGCACTTGCATGCTTCTAGCCGGAATCTTATTA  
AAATGGGAGCTTATGGATTGGTTCGGATTAATGTAGAATTCTTGACCCATGCGCATTCTA  
AGTTTTGCCCTACTTGATTACAATAGGCGCAATCCAATAGTCTACGCAGCTTCAACA  
TCTCTTGGTCAGCGTAATTTAAAAAACGAATAGCCTATTCTCTGTATCTCATATGGGT  
TTCATAATTATCGGAATTAGTTCTATAACCGATACGGGGCTTAACGGAGCCATTTTACAA  
ATAATCTCTCATGGGTTTATTGGTGTGCGCTTTTTTTCTTGGCAGGGACGAGTTATGAT  
AGAATACGCCTTGTTTCTTTTACGAAATGGGCGGAATGGCTGTGCCATTCCAAAAGT  
ATTTACGATGTTTCAATGTTTCAATGGCTCGCTTGCATTACCGGGTATGAGCGGGTT  
TGTTGCAGAATTGATAGTATTTTTTGAATAATAACCAGCCAAAATTTCTTTTAATGCC  
AAAAATAGTAATTTTGGAAATGGCAATTGGAATGATATTAACCTCCGATTTATTCATTA  
TCTATGTTACGCCAGATGTTCTATGGATACAGACTTTTGAATGCCCAACCCTCCCTTTT  
TTGATTCTGGGCCGCGAGAGTTATTTGTTTCAATTTCTATCCTTCTACCCGTAATAGGTA  
TTGGTATTTATCCCGATTTTCTTATGTCATTGTGCGGTTGACAGGGTTGAATTAATTGTATC  
TCATTTTTTTCTAGGGATGATACTCGAACATGTAAGTTGTTTTGAGTGCTTTTTTATTTTCT



ATTGGTATCGGTGGATTGATCACGAGTCGGAATATGGTTAGGGCCTTTATGTGTCTTGAA  
CTTATGCTGAATGCAGTTAATCTGAATTCGTAACATTTTCTGATTTTTTTGATAGTTGCC  
AATTAAGGGTGCCGTTTTTCCATTTTGTATAGCCATTGGAGCCGCTGAAGCAGCTA  
TTGGACCGGCCATTCTTTTCGTCAATTTATCATAACAAAAATCAACTCGTATTAATCAAT  
CGAATTTATTGAAAAGATGGAATATACAAATAAATATTCATGGATTATGCCCTTCATTCC  
ACTTCCCGTTCCTATGTTAATAGGGGTGGGACTTCTCCTTTTTTCCAACGACAACAAAGC  
ATATTCGCCGTATATGGGCCTTTCCTACTCTTTTTTTGTTAGGGATAGTTATTCTTCTTTTCG  
GCCTATTTATCTATTCAGCAACTAAATAGAAGTTATATCTATCAATATGTATGGTCTTGGA  
CCATCAATAATGATTTTTCTTTAGAGTTTGGTCATTTGATAGATCCACTTACTTCTACGAT  
GTCAATCTTAATTACTACTGTTGGACTTACAGTCTTATTTATAGCGAAAATTATATGTTT  
CATGATCAAGGATTTAAGATTTTTTTATTATATGTCTTTTTTTAATGCTTCAATGTTGGG  
CTTAGTTACTAGTTCTAATTTAATACAAATTTATATTTTTTTGGGAATTTGTCGGAATGTGT  
TCTTATTTATTAATAGGCTTTTGGTTTACACGACCCGTTGCCGCAAAGGCTTGTCAAAA  
AGCATTGTAACTAATCGTGTAGGGGATTTTCAAGTTCTTATTAGGAATTTTGGGTCTTTA  
TTGGATAACGGGTAGTTTCGAATTTTCGAGATTTGTTTTCAAATATTTAATAAC---GAAATTC  
CTTTTTTATTTTTGACTTTGTGCGCCTTCTTATTATTTGGGGGCGCGCTTGCTAAATCTGC  
GCAATTTCCCCTTCATGTATGGTTACCCGATGCCATGGAAGGACCTACTCCTATTTTCAGC  
TCTTATCCATGCTGCTACTATGGTAGCCGCAGGAATTTTTCTTGTAGCTCGGCTTCTTCC  
TCTTTTCATAGCCATACCTTCCCTATTGAATCTAATATCTTTGATAGCTATAATAACAGTCT  
TTTTAGGAGCGACTTTAGCTCTTGCTCAAAGGATATTAAGAGGGTTTTTGGCCTATTCT  
ACAATGTCTCAACTGGGTATATGATGTTAGCTCTAGGCGTGGGTCTTATCGAGCTGCT  
TTATTTCAATTTGATTACTCATGCTTATTCGAAAGCATTGTTGTTTTTAGGGTCTGGATCAA  
TAATTCATTCGATGGAGGCTCTTGTGGATATTCTCCAGAAAAAGTCAGAATATGGTT  
CTTATGGGCGGTTTAAACAAAACATATGCCAATCACAAAAACAGCCTTTTTTATTAGGTAC  
ACTTTCTCTTTGTGGGATTCCACCTCTTGCTTGTTTTTTGGTCCAAAGATGAAATTCCTAA  
TGATAGTTGGTTGTATTCCCCGATTTTCGCAATAATAGCTTTTTCCACAGCGGGATTAC  
CGCATTTTATATGTTTCGGATCTACTTACTTACTTTTGAAGGACACTTAAATGTGCATTTT  
CTAAATTATAGTGGAAAACGAAGTAGTTCTTTGTATTCAATATCTTTATGGGGAAATACA  
---GGATTA AAAACGATGAAAACTTTAAACTTCATTAACAATGAATTTTTTTTGTGGCA  
CTAAGAAT---ACTTTACCTTATCCCCATGAATCGGAGACTACTATGCTATCCCTATCGTT  
GTATTGGTCCATTTACTTTCTTTGTGGAGCTATCGGA-----TTCGATTTGGATATATTGT  
CCAAATTCCTAACCCCGTCTATAAACCTTTTACATCAAAGTCAAAT---TCTTTGGGTG  
G---GAATTTCTAACAAATGCAACTTTGTCAGTCAGTATATCTTATTTGGGAATAGTTATAG  
CTTCTTTTTTATATAAGCCTTTTTTATTTATCTTTAACAAAATTGAACTTCATTAATCTTTTT  
GTTATTTGGAGGGACAAAATAATAAATCGGATATATGATTGGTCCATAATCGTGGTTAC  
ATAGATGCTTTTTACACAATATCCTTAATTAAGGGTATAAGAAAATTCGCTGAATTGACT  
TATTTTTTTGATGCGGAGTTATTGATGCAATTACGAACGGGCTGGGTATTATGAGTTTT  
TTTGTAGGAGAAGGTATTAATATGTAGGGGGGGGGGGGCGGCTCTTCTTATCTTTTA  
TTCTATTTATCTTGTGTATTAATTTGTTTAGTAATTTCTTACATGGATTTGCCCGGACCAAT  
ACATGATTTTCTTTTAGTCTTTCTGGGATCAGGTCTTATATTAGGGGGTCTCGGAGTAGT  
ATTACTTACCAACCTAATTTATTCTGCTTTTTTCGTTGGGATTGGTTTTTTATTTGTATATCTT  
TATTTTATATTCTAGCAAACCTCCATTTGTAGCTGCTGCACAGCTCCTTATTTACGTGGG  
AGCTATAAACATTTAATCCTATTTGCTGTGATGTTCAATAATGGTTCAGAATATCCAAA  
GATTTGAACCTTGGGATTGTTAGGGATGGGGCTACTTCACTAGTTTGTACAACCTTTTTT

CTTTCAC TAATTTCAAATATTCTGGATACATCGTGGTATGGGATTATTTGGACTACAAGA  
GCAACCCAGATTGTAGAGAAAGATTTGATAAGTAATAGTCAACAAATTGGAATTCGTTT  
ATCAACAGACTTTTTTCTTCCATTTGAACTCATTCTATAATTCCTTTTAGTTGCTTTAATA  
GGTTCAATTGCCGTGGCTCGCCAGATGACTATAACCAACTACAAGAAAAGATTTTCATGAT  
AGTAAATATGGGCCCTCACCACCCATCAATGCACGGCGTTCTTCGGCTCATCCTTACTCT  
AGATGGTGAAGATGTTATTGACTGTGAACCCATATGGGTTATTTACATAGAGGGATGG  
AAAAAATTGCAGAAAACCGAACTATTATACAATATCTGCCTTATGTAACACGTTGGGATT  
ATTTGGCTACTATGTTTCACAGAAGGAATAACCGTAAATGCCCCAGAGAAATTAGGAAAT  
ATTCAAGTACCTAAAAGAGCCAATATATCAGAACAAATTATGTTGGAATTAAGTCGTATA  
GCTTCTCATCTATTATGGCTTGGTCCCTTTATGGCAGATATTGGCACACAAACCCCTTT  
TTTTATATTTTCAGAGAAAAGAGAATTAGTATATGATCTATTTGAAGCAGCCACCGGTATG  
AGAATGATGCATAATTATTTTCGTATCGGAGGAGTTGCGACTGATCTACCTTATGGTTGG  
ATCGATAAATGCTTGGATTTCTGTGATTATTTTTTAACAGGACTTGCTGAATATGAAAA  
CTTATTACAAGGAATCCATTTTTTTTAGAGCGAGTAGAGGGAATAGGCATTATTGATAAA  
GAAGAAGCAATAAATTGGGGTTTATCAGGCCCGATGCTACGAGCTTCCGGAATACAAT  
GGGATCTTCGTAAAATCGACAATTATGACTGTTACAACGAATTCGATTGGGAAGTTCAA  
TGGCAAAAAGAAGGAGATTCATTAGCTCGTTTTTTTAGTCCGAATCGGTGAAATGAGGG  
AATCCATAAAAATGATTCAACAGGCTCTGGAAGGAATTCCGGGGGGGCCCTTATGAGAA  
TTTAGAAATTCGATGTTTTGATAGAGAAAGGTATACAGAATGGGGTGGTTTTGAATATA  
GATTCGTCAGTAAAAACCTTCTCCTACTTTTGAATTACCGAAACAAGAACTTTATATG  
AGAGTTGAAGCCCCAAAAGGAGAATTGGGAATTTTTATGATAGGAGATCAGAGCAGTT  
TTCCTTGGAGATGGAAAATACGCCACCGGGTTTTATTAATTTGCAAATTCCTCCTCAGT  
TAGTTAAAAGAATGAAATTGGCTGATATTATGACGATACTAGGTAGCATCGATATCATT  
TGGGAGAGGTTGATCGTATGTTTCTTATGGTAACTGGATTCATGAATTATGGTCAACAA  
ACAGTACGAGCCGCAAGGTACATCGGTCAAAGTTTTATGATTACCTTATCCCACGCAAA  
TCGTTTCCCTGTAATCAATATCCTTATGAAAAATTAATTACATCGGAGCGTTTTTCG  
GGTCAATCCATTTTGAATTTGATAAATGCATTGCTTGTGAAGTATGTGTTTCGTGTATGC  
CCTATAGA ACTACCTGTTGTTGATTGGAAATTTGAAACCGATATTCGAAAGAAACGCCT  
GTTTAATTACAGTATTGATTTTGAATCTGTATATTTTGTGGTAATTGCGTCGAGTATTGT  
CCAACAAATTGTTTATCGATGACCGAGGAATATGAGCTTTCAACCTATGATCGTCACGA  
ATTGAATTCTAATCAAATTGCTTTAGGTCGTTTACCAATGCCGGTAATTGAGGATTATAC  
AATTCGAACAATTTGAATTCG-----ATGCAGGGTCGGT  
TGTCGGCTTGGCTAGTCAAGCATGGGCTAGTTCATAGGTCATTGGGTTTCGATTATCAA  
GGAATAGAGACTCTACAAATAAAGCCCGAGGATTGGCATTCCATTGCTGTCATTTTATAT  
GTATATGGTTTGA ACTATCTCCGTTACCAATGTGCTTATGATGTAGCACCAGGCGGACTC  
TTGGCTAGTGTATAACCATCTTACGACAGTAGAATGTGGTGTGGATCAACCGGAAGAAGT  
ATGCATAAAAGTTTTGTTCCAAGAAATAATCCTGGAATTCCTTCTGTTTTCTGGGTTTG  
GAAAAGTTCGGATTTTCAAGAAAGGGAATCTTATGATATGTTGGGAATCTCTTATGATCA  
TCATCCACGGCTGAAACGTATTTAATGCCGGAGAGTTGGATAGGATGGCCCTTACGTA  
AGGATTATGTTGCTCCAAATTTTTTTGAAATACAAGACGCTCAT-----  
-----  
-----ATGAATTCATCGAATTGCTGTACTTGATCGAAGA ACTCAAAA  
TTCAGTTCTTTCAACTACACCAATGATCTTTCAAATTGGTCAAGACTGTCCAGCTTAT  
GGCCACTTCTTTATGGTACAAGCTGTTGCTTCATTGAATTTGCTTCATTAATAGGCTCGC

GATTTGACTTCGATCGTTATGGACTAGTACCAAGATCAAGTCCTAGGCAGGCGGACCTT  
GTTTTAACGGCCGGGACAGTAACAATGAAAATGGCCCATCTTTAGTAAGATTATATGA  
GCAAATGCCCGAACCAAAATACGTTATTGCTATGGGAGCATGTACAATTACAGGGGGGA  
TGTTTAGTACTGATTCGTATAGTACTGTTGCGGGAGTTGATAAGTTAATTCCTGTAGATG  
TTTATTTGCCGGGGTGTCCGCCTAAGCCAGAAGCAGTTATAGACGCTATAACAAACTT  
CGTAAGAAAATATCTCGAGAAATCAATGAGGATCCAATTAGGTCT-----GCAAATCGCTA  
TTTTACTACCAATCACAAAGTTTCGTGTTGTACGGAGTATTCATATTGGAAATTATGATCA  
AGGATTTTTCTACCAACCACCAGTTACTTCAGAACCCCCCCTGCAACATTTTTCAAAT  
ACATAAATCAAGACCTTCTCATGAATTAGTGAATATGCAAACATAAAGACCCTCTCTT  
GTATAACGAAAGAGATTACTCGATCCATTTCTGTATCGCTCATGCTATATATAATCACTCA  
GGCATCTCTTTCCAATGCATATCCCATTTTTGCGCAGCAAGGTTATGAAAATCCACGCG  
AAGCAACTGGGCGTATTGTATGCGCGAATTGCCATTTAGCTAATAAGCCTGTGGATATTG  
AAGTTCACAAACAGTACTGCCTGATACTGTATTTGAAGCAGTTGTTTCGAATTCCTTAT  
GATATGCAACTGAAACAAGTTCTTGCTAATGGCAAAAAGGGGGCTTTAAATGTGGGAG  
CTGTTCTTATTTTACCCGAGGGGTTCAAATTAGCCCCTCCTGAGCGTATTTGCCCCGAGA  
TGAAAGAAAGGATAGGCAATCCACCTTTTCAGAGCTATCGCCCCGCTAAAAAAAACAT  
TATTGTCATAGGCCCTGTTCCCTGGTCAAAAATATAGTGAAATAACTTTTCTATTCTTTCT  
CCGGACCCCGCTACTAATAAGGGTGTTAACTTCTTAAATATCCGATATATGTAGGCGGG  
AATAGGGGAAGGGGTCAGATTTATCCTGACGGGAGCAAGAGTAACAATACAATTTCGA  
ATGCTACAGCAACAGGTATAGTAAGCAAAAATAATACGAAAAGAAAAGGGGGGCTACGA  
AATAACCATTGCGGATACATCGGATGGACGTCAAGTGGTTGATATTATCCCCCAGGAC  
CTGAACTTCTTGTTCGGAGGGGGAGTCTATCAAAGTTGATCAACCATTAACAAGTAAT  
CCTAATGTGGGGGGGTTTGGTCAGGGGGATGCAGAAATAGTACTTCAAGACTCATTAC  
GTGTTCAAGGCCTTTTTGTGCTTCTTGGCATCTGTTATTTTGGCACAAATTTTTTTGGTTC  
TTAAAAGAAGCAGTTTGAGAAAGTTCAATTGTCCGAAATGAATTTTATGAGTAAAGT  
CTATGATTGGTTCAAGAACGCCTCGAGATTCAGGCAATTGCAGACGATATAACTAGTA  
AGTACGTCCCCCTCATGTCAACATATTTTATTGTCTAGGGGGAATTACCCTTACTTGTT  
TTTTAGTACAAGTAGCTACCGGATTTGCTATGACGTTTTACTACCGCCCTACTGTTACTG  
AGGCTTTTTCTTCTGTGCAATACATAATGACCGAAGCCAACCTTTGGGTGGTTAATCCGA  
TCAGTCCACCGATGGTCAGCAAGTATGATGGTTCTAATGATGATCTTGCACGTATTTTCGT  
GTCTATCTTACTGGTGGTTTTAAAAACCTCGCGAATTGACTTGGGTACAGGTGTGGT  
TCTGGCTGTATTGACTGCATCCTTTGGTGTAACCTGGTTATTCTTTACCTCGGGACCAAAT  
TGGTTATTGGGCAGTCAAAATTGTAACAGGCGTACCGGACGCTATTCTCTGTAATAGGAT  
CGCCTTTGGTAGAGTTATTGCGCGGAAGTGCTAGTGTGGGACAATCCACTTTGACGCG  
TTTTTATAGTTTACACACTTTTGTATTACCCCTCCTTACCGCTGTTTTTATGTTAATGCATT  
TCTTAATGATACGCAAGCAAGGGATTTCTGGTCCGTTAATGGGAGTAACAAAAAACCC  
CGACTTGAATGATCCTGTATTAAGAGCTAAATTGGCTAAAGGAATGGGACATAATTATTA  
CGGAGAACCCGCGTGGCCCAATGACCTTTTATATATTTTTCCCGTAGTCATTTTAGGTAC  
TATTGCATGTAACGTGGGCTTAGCAATTCTAGAACCATCAATGATTGGGGAACCCGCAG  
ACCATTTGCAACTCCTTTGGAATATTACCTGAATGGTATTTCTTTCCCGTATTTCAAAT  
ACTTCGTACAGTACCCAATAAGTTATTGGGAGTTCTTTTAATGGTTTCAGTACCTGCGG  
GATTATTAACAGTACCTTTTTTAGAAAATGTTAATAAATTCCAAAATCCATTTTCGTCGCC  
CAGTCGCGACAACCGTCTTTTTGGTTGGTACTGTAGCGGCCCTTTGGTTGGGTATTGGA  
GCAACATTACCTATTGATAAATCTCTAACTTTAGGTCTTTTTTATGATTGAAGTTTTTCTAT

TTGGAATCGTTTTGGGTCTAATTCCTATTACTTTGGCTGGATTATTTGTAAGTGCATATTT  
ACAATACAGACGTGGCGATCAGTTGGGCCTTATGTCTACTATAACTAGTTATTTTCAGTTT  
TCTACTAGTGGCTTTAACTATAACTGCAGCTCTATTTATTGGTCTGAGTAAGATACGACT  
TATTATGGATATAATAAGTTTGGCTTGGGCTTCTTTAATGGTAGTCTTTACATTTTCCCTT  
TCACTGGTAGTATGGGGAAGAAGTGGACTCATGATTATTCGTTTCGCCGGAACCAGAAG  
TAAAAATTTTGGTAGATAGGGATCCCGTAAAAACTTCTTTTCGAGGAATGGGCTAGACCG  
GGTCATTTCTCAAAAATAATAGCCAAGGGGCCTGATACTACCACTTGGATCTGGAACCT  
ACATGCTGATGCTCACGATTTTCGATAGCCATAACCAGTGATTTGGAGGAGATCTCTCGAA  
AAGTTTTTAGTGCCCATTTTCGGCCAACCTCCATCATCTTTCTTTGGCTTAGTGGCATGT  
ATTTCCATGGGGCTCGTTTTTCCAATTATGAAGCCTGGCTAAGTGATCTACTCACATCG  
GACCCAGTGCTCAGGTGGTTTTGGCCAATAGTAGGCCAAGAAATATTGAATGGTGATGT  
GGGCGGGGGTTTTTCGAGGAATCCAAATAACCTCTGGTCTTTTTTCAGATTTGGCGAGCA  
TCTGGAATAACTAGTGAATTGCAACTCTATTGTACCGCAATCGGTGCATTGGTCTTTGC  
AGCCTTAATGCTTTTTGCTGGTTGGTTCCACTATCACAAGCTGCCCAAAATTGGCTT  
GGTTCCAAGATGTAGAATCTATGTTGAATCACCATTTAGCAGGTCTACTCGGTCTTGGG  
TCTCTTTCTTGGGCGGGGCATCAAGTACATGTATCTTTACCAATTAATCAATTTCTAAAC  
GCTGGAGTAGATCCTAAGGAGATCCCACCTCCTCATGAGTTTATCTTGAATCGGGATCT  
TTTTGGCTCAACTTTATCCAGTTTTTGTCTGAGGGAGCAACCCCCCTTTTACCTTGAATT  
GGTCAAAATATGCAGAATTTCTTACTTTTTCGTGGAGGATTAGATCCAGTAACTGGCGGT  
CTCTGGCTGACCGATATTGCACACCATCATTTAGCTATTGCAATCTTTTTCTGATAGCA  
GGTCACATGTATAGGACCAACTGGGGCATTGGACATGATCTAAAAGATATTTTAGAAGC  
CCATAAAGGGCCCTTTACAGGTGAGGGCCATAAAGGCCTATATGAGATTCTAACAACTG  
CGTGGCATGCTCAATTATCCCTTAATTTAGCTATGTTAGGCTCTTTAACCATTGTTGTAGC  
TCATCATATGTATTCCATGCCACCCTATCCATATCTAGCTACTGACTATGGTACACAACCTG  
TCGTTGTTTACACATCACATGTGGATTGGCGCATTCTCATAGTTGGCGCTGCTGCGCAT  
GCAGCCATTTTTATGGTACGAGACTATGATCCAACCTATTCGATACAACGATCTATTAGAC  
CGTGTCTTAGGCATCGCGATGCAATCATCTCACACCTCAACTGGGTATGTATATTTTA  
GGATTTACAGCTTTGGTTTTGTATATTCATAATGATACCATGAGCGCTTTGGGGCGCCCC  
CAAGATATGTTTTCTGATACCGCTATACAACTACAACCTGTCTTTGCTCAATGGATACAA  
AACACCCACGCTTTAGCACCTGGTGAACGGCCCCTGGTGAACAACAAGTACCAGTT  
TGACTTGGGGGGAGGGTGGTTTAGTCGAGTGGGTGGCAAGGTTGCTTTGTTACCTAT  
TCCATTAGGAACCGCGGATTTTTTGGTACATCATATTCATGCATTTACGATTCATGTGAC  
CGTATTGATACTCCTGAAAGGTGTTCTATTTGCTCGTAGTTCTCGTTTTGATACCGGATAA  
AGCAAATCTTGGTTTTTCGTTTCCCTTGTGATGGGCCTGGAAGAGGGGGGACATGCCAA  
GTATCCGCTTGGGATCATGTCTTCTTAGGCCTTTTTTGGATGTACAATGCTATTTTCGGTA  
GTAATATTCCATTTTCAGTTGGAAAATGCAGTCAGATGTTTGGGGTAGTCTAAGTGAGGA  
AGGGGTGGTAACCTCATATTACGGGAGGGAACCTTTCGCGAGAGTTCCATTACTATTAATG  
GGTGGCTCCGCGATTTCTTATGGGCACAAGCATCCAGGTAATTCAGTCTTATGGTTCTT  
CATTATCCGCATACGGCCTTTTTTTCCTTGGTGCTCATTTTGTATGGGCTTTTAGTTAAT  
GTTTCTATTTCAGCGGGCGTGGTTATTGGCAAGAACTTATTGAATCCATTGTTTGGGCTCA  
TAATAAATTTAAAAGTTGCTCCTGCTACTCAGCCTAGAGCCTTGAGCATTGTACAAGGAC  
GTGCTGTAGGAGTAACCCACTACCTTCTGGGTGGAATTGCCACAACATGGGCGTTCTTC  
TTAGCAAGAATTTATGCAGTAGGAATGGCATTAAAGATTCCCAAGGTTTAGCCAAGGCTT  
AGCCAGGACCCCACTACTCGTCGTATTTGGTTTTGGTATTGCTACCGCGCATGACTTCG

AGAGTCATGATGATATTACTGAAGAACGTCTTTATCAGAATATTTTTGCTTCTCACTTTG  
GACAATTAGCAATAATCTTTCTGTGGACTTCGGGAAATCTCTTTCATGTAGCTTGGCAA  
GGAAATTTTGAGGCATGGGTACAGGACCCTTTACACGTAAGACCCATTGCTCATGCAAT  
TTGGGATCCTCATTFTTGGTCAACCGGCCGTAGAAGTTTTTACTAGAGGGGGTGCTCTTG  
GTCCAGTGAATATAGCCTACTCTGGCGTTTATCAGTGGTGGTATAACAATTGGTTTACGTA  
CTAATGAAGACCTTTATACTGGAGCTCTTTTTCTATTATTGCTATCTTCCATATCCTTAATC  
GCGGGTTGGTTACACTTACAACCGAAATGGAAACCCAGCGTTTCGTGGTTCAAAAATG  
CCGAATCTCGTCTCAATCATCATTTGTCAGGGCTATTCGGAATAAGCTCTTTGGCTTGA  
CAGGGCATTAGTCCATGTCGCTATTCCTGGATCCAGGGGGGGATATGTTTCGATGGAAT  
AATTTCTTAGATGTATTACCACATCCGCAGGGATTAGGCCCGCTTTTTACAGGTCAGTGG  
AATCTTTATGCTCAAAACCCGACTCAAGTAATCATTTTTTTGGTACCTCTCAAGGATCG  
GAACTGCCATTCTAACTCTTATTGGGGGATTTTCATCCACAAACACAAAGTTTATGGCT  
GACTGATATTGCTCATCATCATTTAGCTATTGCATTTCTTTTTCTTGTTGCTGGTCATATGT  
ATAGAACTAACTTTGGGATTGGGCACAGTATAAAAGATCTTTTAGAAGCCCATATTCCT  
CCGGGGGGGCGCTTAGGGCGCGGACATAGGGGCCTTTATGACACAATCAACAATTCGA  
TTCATTTTCAATTAGGCCTTGCTCTAGCCTCTTAGGGGTTATTACTTCCTTGGTAGCTC  
AACACATGTACTCTTTACCTGCTTATGCATTCATCGCACAAGACTTTACTACCCAAGCCG  
CCTTATATACTCATACCAATATATCGCAGGATTCATCATGACAGGAGCTTTTGCCACG  
GAGCTATCTTTTTCATTAGAGATTACAATCCGGAACAGAATGAAGATAATGTATTGGCA  
AGAATGTTAGACCATAAAGAAGCTATCATATCTCATTTAAGTTGGGTCAGCCTTTTTCTC  
GGGTTCCATACTTTGGGACTTTATGTTTATAATGATGTCATGCTTGCTTTTGGTACTCCT  
GAGAAACAAATCTTGATCGAACCCATATTTGCCCAATGGATACAATCTGCTCATGGTAA  
AACCTCATAACGGGTTCAACGTACTTTTATCTTCAACGACTAGCCCAGCATTCAATTGCTG  
GTCGAAGCATATGGCTGCCTGGATGGTTAAATGCTATTAATGAG-----AATAGTAATTCAC  
TATTCTTAACAATAGGGCCGGGAGACTTCTTGGTCCATCATGCTATTGCGCTAGGGTTAC  
ATACAACACTACATTGATCTTAGTAAAAGGTGCTTTAGATGCACGTGGTTCCAAATTAATGC  
CAGACAAAAGGATTTTGGATATAGTTTTCTTGGCAGTTTTCTGGATGTTAAATACCAT  
TGATGGGTTACTTTTTATTGGCATTGGAAGCATATTACATTATGGCAGGGTAACGTTTC  
ACAGTTAATGAATCTTCCACTTATTTGATGGGATGGTTAAGGGATTACCTATGGTTAAA  
TTCTTCGCAACTTATCAATGGGTATAACCCCTTTGGTATGAATAGTTTATCAGTCTGGGC  
GTGGATGTTCTTATTTGGCCATCTTGTTTGGGCTACTGGATTTATGTTCTTAATTTCTGG  
CGGGGATATTGGCAGGAATTGATTGAAACCTTAGCATGGGCTCATGAGCGCACGCCCTT  
GGCCAATTTGATCCGATGGAGAGATAAACCTGTGGCTTTGTCCATTGTGCAAGCAAGAT  
TGTTGGATTAGCCCACTTTTCCGTAGGTTATATATTCACTTATGCAGCTTTCTTGATTGC  
CTCTACATCGGGCAAATTTGGTATGTCACACTCAGTAAAAATTTATGATACATGTATAGG  
ATGTAATCAATGTGTCAGAGCTTGTCCACAGACGTGTTAGAAATGATACCTTGGGACG  
GATGTAAAGCTAAGCAAATTGCTTCCGCTCCAAGAACAGAGGACTGTGTGCGGTTGTAA  
GAGATGTGAATCTGCCTGTCCAACGGATTTCTTAAGCATTTCGGGTTTATTTATGGCATGA  
AACAACTCGAAGCATGGGTCTAGCTTATATGACAACCTCTAAACTTACCCTCCATTTTAG  
TTCTTTAGTAGGCTTAGTATTTCCAGCATTTCATAGCTTCTTTATTTCTTCATGTTCA  
AAAAACAAGATTTTTATGCGAGATCTAAAAACATATCTCTCCGCGGCGCCGGTAATAA  
GCACTCTATGGTTCGGGGCTTTGGCAGGTCTATTGATAGAGATTAATCGTTTCTTTCCGG  
ATGCGTTAACATTCCTTTTTTTTTCATTCATGACTGCAATTTTAGAGAGACGCGAAAGT

GAAAGCCTATGGGGTCGCTTCTGTAACTGGATCACTAGCACCGAAAACCGCCTTTATAT  
TGGATGGTTTGGTGTTTTGGATGATCCCTACCTTATTGACTGCAACTTCTGTATTTATTATC  
GCCTTCATTGCCGCCCTCCAGTAGATATTGACGGGATTTCGTGAACCTGTTTCTGGATC  
TCTGCTTTATGGAAACAATATTATCTCTGGTGCCATTATTCTACGTCCGCAGCTATAGG  
GTTGCACTTTTACCCAATATGGGAAGCGGCGTCTGTTGACGAATGGTTATAACAATGGCG  
GTCCGTATGAGTTAATTGTTCTACACTTCTACTTGGTGTAGCTTGTTACATGGGCCGTG  
AGTGGGAACCTAGTTTCCGTTTGGGTATGCGCCCTTGGATTGCTGTTGCATATTCAGCTC  
CTGTTGCAGCTGCTACCGCAGTTTTCTTGATCTATCCAATTGGTCAAGGAAGTTTTTCT  
GATGGTATGCCTCTAGGAATTTCTGGTACTTTCAATTTTCATGATTGTATTCCAGGCCGAG  
CACAACATCCTTATGCACCCATTTACATGTTAGGTGTAGCTGGTGTATTCCGGCGGCTCC  
CTATTCAGTGCTATGCATGGTTCCTTGGTAACTCTAGTTTGATCAGGGAAACTACAGA  
AAACGAATCCGCTAATGAAGGTTATAGATTCGGCCAAGAGGAAGAACTTATAATATCG  
TGGCTGCTCATGGTTAATTCGGAAGACTTATCTTCCAATATGCTAGTTTTAACAACTCCC  
GTTCTTTACATTTCTTCCCTGGCTGCTTGGCCTGTAGTAGGTATCTGGTTTACCCTTTAG  
GTATCAGTACTATGGCTTTCAACCTAACGGGTTCAATTTCAACCAATCCGTAGTTGATA  
GTCAAGGCCGTGTAATTAATACTTGGGCTGATATTATTAATCGTGCTAACCTTGGTATGG  
AAGTTATGCATGAACGTAATGCTCATAATTTCCCTCTAGACTTAGCAGCTGTCAAGTC  
CCATCTATAAATGGAATGGGTTTGCCTTGGTATCGTGTTCACTGTTGTATTGAATGATC  
CTGGCCGTTTGTCTTCTGTCCATATAATGCATACGGCTCTGGTTGCTGGTTGGGCCGTT  
CGATGGCTTTATATGAATTGGCAGTTTTTGACCCTTCTGACCCTGTTCTTGATCCAATGT  
GGAGACAGGGTATGTTTCGTTATACCTTTTCATGACTCGTTTAGGAATAACCAATTCGTGG  
GGTGGTTGGAGTATCACA---GGAGAGACTATCACAACCCGGGTATTTGGAGTTACGA  
AGGTGTGGCCGGTGCACATATTGTGTTTTCTGGCTTGTGCTTTTTGGCAGCTATCTGGC  
ATTGGGTGTATTGGGATCTCGAAATATTTCTGATGAACGTACAGGAAAACCCTCTTTG  
GATTTGCCAAGATCTTCGGAATTCATTTATTTCTATCAGGGGTGTCTTGTTTTGGTTTTG  
GTGCATTTTCATGTAACAGGATTGTATGGTCTGGGATCTGGGTGTCCGATCCTTACGGAT  
TAACCGGAAGGGTACAATTCGTAAATCCAGCTTGGGGTGTGAGCGGGTTTGATCCTTTT  
GTTCCGGGAGGAATAGCGTCTCATCATATTGCAGCGGGTACATTGGGTATATTGGCGGG  
TCTATTCCATCTTAGTGTACGCCACCCCAGCGTTTATACAAAGGATTACGTATGGGCAA  
TATTGAAACCGTCCTTTCCAGTAGTATTGCTGCTGTCTTTTTTGCAGCTTTTGTGTTGC  
TGAACTATGTGGTATGGTTCAGCAACTACCCAATCGAATTATTTGGACCCACTCGTTA  
TCAATGGGATCAGGGATACTTTTTCAGCAAGAAATATATCGAAGAGTTGGTGCGGGACTG  
GTGAAAAATCAAAGTTTATCAGAAGCTTGGTCTAAAATTCCTGAAAAATTGTCTTTTA  
TGATTATATTGGTAATAATCCGGCAAAGGGCGGATTATTCAGAGCGGGTTCAATGGACA  
ATGGGGATGGAATAGCTGTTGGGTGGTTAGGACACCCTATCTTTCGAGATAAAGAAGG  
GTACGAACTTTTTGTACGTCGTATGCCACTTTTTTTGAAACATTTCCAGTAGTTTTGGT  
CGACGGAAACGGAATTGTTAGAGCCGATGTTCTTTTTAGAAAGGCAGAATCCAAGTAT  
AGTGTGTAACAGGTAGGTGTAAGTGTGAGTTCTATGGGGGTGAACTCAATGGAGTCA  
TTTATAGTGATCCCACTACTGTGAAAAAATATGCTAGGCGCGCTCAATTAGGTGAAATTT  
TTGAGTTAGATCGTGCTGCTTTGAAATCCGACGGCGTTTTTTCGTAGCAGCCCAAGGGG  
TTGGTTTACTTTTTGGACATGCTTCGTTTGTCTTCTCTTCTTCTTCGGACACATTTGGCA  
TGGTGTAGAACCTTGTTTCAGAGACGTTTTTCGCAGGTATTGACCCGGATTGGATGCTC  
AAGTAGAATTTGGGGCATTCCAAAACTTGGCGATTCAACCACAAAAAGGCAAGCAG  
TCATGAAAACCTTATATCCCTGAGGAGTTCTGCCCCGTGGAAACGCTCTTTAATGGA

ACTTTAGCTTTAGCTGGTCGTGATCAAGAACTACCGGTTTCGCTTGGTGGGCGGAA  
ATGCCCCACTTATCAATTTATCTGGCAAATTGTTGGGGGCTCATGTAGCCCATGCGGGCT  
TAATTGTCTTCTGGGCGGAGCAATGAACCTATTTGAAGTGGCTCATTTTCGTCCCAGAG  
AAGCCTATGTATGAGCAAGGATTCATTTACTTCCCCACTTAGCTACTCTAGGTTGGGG  
GATAGGTTCCGGGCGGAGAAGTTATAGACACCTTTCATACTTTGTATCTGGAGTACTTC  
ATTTAATTTCCCTCCGCAGTATTGGGTTTTGGTGGTATTTATCATGCACTTCTTGGACCCG  
AGACTCTTGAAGAATCTTTTCCGTTTTTCGGTTATGTGTGGAAAGATAGAAACAAAATG  
ACCACAATTTTGGGTATTCACTTGATCTTGTAGGTATAGGCGCTTTTCTTCTAGTATTCA  
AGGCTCTTTATTTTGGGGGTGTATATGATACCTGGGCTCCAGGGGGGGGGATGTACGA  
AAAATTACCAACTTGACCCTTAGCCCAAGTCTTCTATTTGGTTATTTACTAAAGTCCCCT  
TTTGGAGGGGAGGGCTGGATTGTTAGTGTAGACAATTTAGAAGATATAATTGGTGGACA  
CCTATGGTTGGGTTCCATTTGTATATTTGGGGGAATCTGGCATATCTTAACCAAGCCCTT  
TGCCTGGGCTCGTTCGTGCACTTGTATGGTCTGGCGAAGCTTACCTATCTTATAGTTTGG  
GTGCTTTAGCTGGTTTTGGTTTCATAGCTTGTGCTTTGTCTGGTTCAACAATACTGCTT  
ATCCGAGTGAGTTCTACGGACCCACTGGACCAGAAGCTTCTCAAGCTCAAGCATTAC  
TTTTCTAGTTAGAGACCAACGCCTTGGGGCTAACGTGGGATCCGCTCAAGGACCGACT  
GGTTTAGGTAAGTACCTAATGCGGTCCCCGACTGGAGAAGTTATTTTTGGAGGAGAAA  
CTATGCGCTTTTGGGATTTGCGGGCTCCCTGGTTAGAGCCCCTAAGGGGTCCTAATGGG  
TTGGACTTGAGTAGGCTGAAAAAGACATAAACCTTGGCAAGAACGACGTTCCGCG  
GAATATATGACACACGCTCCCTTAGGTTCTTTAAATTCTGTAGGTGGCGTAGCTACCGA  
GATCAATGCAGTCAATTACGTCTCTCCTAGAAGTTGGTTAGCTACCTCTCATTTTGTCT  
AGGATTCTTCCTATTCGTAGGTCATTTATGGCACGCGGAAGAGCTCGTGCAGCTGCGG  
CAGGATTTGAAAAAGGAATTGATCGTGATTTTGAACCTGTCTTTCTATGACCCCTCTT  
AACATGACTATTGCCCTTGGTAAATTTACCAAAGACGAAAATGATTTATTTGATGTTATG  
GATGACTGGTTACGAAGGGACCGTTTCGTTTTTGTAGGTTGGTCCGGCCTATTGCTATT  
TCCTTGCGCCTATTTTCGCTTTAGGAGGTTGGTTCACTGGGACAACCTTTGTAACCTCAT  
GGTATACTCATGGATTGGCCAGCTCCTATTTAGAAGGCTGCAATTTCTTAACCGCCGCA  
GTTTCGACTCCTGCTAATAGTTTAGCACACTCTTTGTTATTACTATGGGGTCCCGAAGCA  
CAGGGAGATTTGACTCGTTGGTGCCAATTAGGCGGTCTGTGGACTTTTGTGCTCTACA  
CGGTGCTTTCGGGCTAATAGGGTTTATGTTACGTCAATTTGAACTCGCTCGATCTGTTCA  
ATTGCGACCTTATAATGCAATCGCATTCTCTGGTCCAATTGCTGTTTTTGTCTGTATTT  
CTGATTTATCCACTGGGCCAGTCTGGTTGGTTCTTTGCACCTAGTTTTGGTGTAGCGGCT  
ATATTTTCGATTCATACTCTTTTTCCAAGGATTCATAATTGGACATTGAACCCATTTATA  
TGATGGGAGTTGCCGGTGTATTGGGCGCTGCTTTACTATGCGCTATTCATGGCGCTACCG  
TAGAAAATACTTTATTTGAAGATGGCGATGGTGCAAATACATTCCGTGCTTTTAATCCAA  
CTCAAGCCGAAGAACTTATTCAATGGTCACCGCTAACCGCTTTTGGTCCCAAATTTTT  
GGGGTTGCTTTTTCCAACAAACGTTGGTTACATTTCTTTATGTTATTTGTACCAGTAACT  
GGTTTATGGATGAGTGCTCTTGGAGTAGTCGGTCTGGCTCTAAACCTACGCGCCTATGA  
TTTCGTTTTCCAGGAAATCCGTGCGGCGGAAGATCCTGAATTTGAGACTTTTTACACCA  
AAAATATTCTCTTAAACGAAGGTATTCGTGCTTGGATGGCGGCTCAAGATCAGCCTCAT  
GAAAACCTTATATTCCCTGAGGAGGTTCTGCCCGTGGAACGCTCTTATGTCCGGAAG  
CACAGGAGAACGTTCTTTTGTGATATTATTACCAGTATTCGATACTGGGTCAATTCATAG  
CATTACTATAACCCTCCCTATTCATTGCGGGTTGGTTATTCGTCAGCACAGGTTTAGCTTA  
CGATGTATTTGGAAGCCCTCGTCCAAACGAGTATTTTACAGAAAGCCGACAAGGAATT

CCATTAATAACTGGCCGTTTTGATCCTTTGGAACAACCTCGACGAATTTAGTAGATCTTTT  
ATGACCCTAGATCGAACCTATCCAATTTTTACAGTGCGATGGTTGGCTGTTACGGACT  
AGCTGTACCTACCGTTTTCTTTTTGGGATCAATATCCGCAATGCAGTTCATCCAACGCAT  
GGCTACACAAACCGTTGCGGATAGTTCTCGATCCGGT--CCAAGACGAACTAATGTAGG  
GAGTTTATTGAAACCATTGAATTCTGAATATGGTAAAGTAGCTCCGGGATGGGGAAC  
CTCCTTTGATGGGTGGCGCAATGGCTCTATTTGCGATCTTCCTATCCATCCTTTTGGAGA  
TTTACAATTCCTCTCTTTTACTCGACGGAATTTTCGATGAATATGCTTACTCTCAA  
ACTCTTTGTTTATGCAGTAGTGCTATTTTTTTGTTTCTCTGTTTCATATTCGGATT  
TCTATCTAATGATCCGGGGCGTAATCCTGGGCGTGAAGAAATGGCCGATACTACTG  
GAAAGGATTCTCTTTGGATAATAGGTACTGTAGCTGGTATTCTGTGATCGGTTTA  
ATAGGCATTTCTTTTATGGTTCATATTTCTGGGTTAGGTTTCATCCTTGATGAT  
TAATATCTTTAGTTAATCTGTATCTATCTTAATTCTGTCCTTTATTGTAGTACCT  
TTTTCTTCGGCAAATTGCCAGAAGCCTATGCTTTTGAATCCAATTGTAGATTTT  
ATGCCAGTGATACTCTGTTCCTTTTTTCTCTTAGCCTTTGTTGGCAAGCTGCAG  
TAAGTTTTTCGAACGACACAATCAAACCCGAACGAACAAAGTGTGAATTGAATCG  
TACCAGTCTTTACTGGGGATTATTACTCATTTTTTGTACTTGCTGTTTATTTTT  
CCAATTATTTTTCAATATGGAAGTCAATATCTCGCATTTATTGCTACTGCATTG  
TTATTCTAGTTCCTACCGCCTTTTTACTGATAATTTACGTAAAAACAGTAAGT  
CAAAGCGATATGGAAACAGCAACCCTAGTCGCTATCTCTATATCTGGATTACTT  
GTAAAGTTTTACTGGGTATGCCTTATATACTGCTTTTTGGGCAACCTTCTCAACA  
ACTAAGAGATCCATTGGAACACGGGGACATGGAAGCATTGGTTTATACATTCC  
TCTTAGTCTCGACTCTAGGGATCATTTTTTTTTGCGATCTTTTTTCGAGAACCG  
CCCAAGGTTCCAACTCAAAAA-----ATGACTATTGCTTTCCAATTGGCTGTT  
TTTTGCATTAATTGCTACTTCAGTAATCTTACTTATTGGTGTACCCGTTGTAT  
TTGCTTCTCCTGAGGGTTGGTCAAGTAATAAAAAATGTTGTATTTCTGGC  
ACATCGTTATGGATTGGATTAGTCTTTCTTGTGGGTATCCTTAATTCTCTCAT  
CTCT-----ATGTCACCACAAACGGAGACTAAAGCTAGTGTTGGATT  
TAAAGCAGGTGTTAAAGATTATAAATTGACTTATTATACTCCTGATTATGAAAC  
CAAGGATACTGATATCTTGGCAGCATTCCGAGTAACTCCTCAACCCGGAGTTC  
CACCTGAGGAAGCGGGGGCCGCGGTAGCTGCTGAATCTTCTACTGGTACATGG  
ACAACCGTGTGGACTGATGGGCTTACTAGTCTGGATCGTTATAAAGGACGCTG  
CTATCACATCGAGCCCGTTGCTGGAGAAGAAAGTCAATTTATTGCTTATGTAG  
CTTACCCTTTAGACCTTTTTGAAGAAGGTTCCGTTACTAATATGTTTACTTCC  
ATCGTGGGTAATGTATTTGGGTTCAAAGCTCTTCGCGCTCTGCGTCTGGAGG  
ATCTGCGAATCCCTCCTGCTTATGTTAAACTTTCCAAGGCCCGCCTCACGG  
CATCCAAGTTGAGCGAGATAAATTGAACAAGTATGGACGTCCCCTATTGGGAT  
GTACTATTAAACCTAAATTGGGATTGTCTGCTAAGAATTACGGTCGAGCGGTT  
TATGAATGTCTTCGCGGTGGACTTGATTTTACTAAAGATGATGAGAACGTGA  
ACTCCCAGCCGTTTATGCGTTGGAGAGACCGTTTTTTTATTTGTGCCGAAG  
CAATTTATAAATCACAGGCCGAAACAGGTGAAATCAAGGGGCATTACTTGA  
ATGCTACTGCAGGTACATGTGAAGAAATGATGAAAGGGCTGTGTTGCCAG  
AGAATTGGGGGTTCCCTATCGTAATGCATGACTACTTAAACGGGGGATTCA  
CTGCAAATACTACTTTGGCTCATTATTGCCGAGATAATGGGCTACTTCTTCA  
TATCCATCGTGCAATGCATGCAGTTATTGATAGACAGAAGAATCATGGCATA  
CACTTTCTGTACTAGCGAAAGCCTTACGTATGTCTGGTGGAGATCATATTC  
ACGCCGGTACCGTAGTAGGTAACCTTGAAGGGGAAAGAGACATCACCTGGG  
CTTCGTTGATTTACTACGCGATAATTTTGTGAAAAGACCGAAGCCGCGG  
TATTTTCACTCAAGATTGGGTCTCTTACC GGCGTTTTGCCTGTGGCTT  
CAGGAGGTATTCACGTTTGGCATATGCCTGCGCTG



ACCGAGATCTTTGGAGATGATTCCGTACTIONACAATTCGGTGGAGGAACTTTAGGGCACCC  
TTGGGGAAATGCACCAGGTGCCGTAGCTAATCGAGTAGCCCTAGAAGCATGTGTACAA  
GCTCGTAATGAGGGGCTTGATCTTGCTACTGAGGGTAATGAAATTATCCGTAAGGCTTG  
CAAGTGGAGTCCTGAACTGGCTGCTGCTTGTGAAATATGGAAGGAGATAAAAATTTGAG  
TTTGCTGCAATGGATACTTTG-----ATGGCGATACATTTATACAAAACCTTATACCCCGAGC  
CCACGCAATGGAGCCGTAGACAGTCAAGTCAAATCCACGAAATAATTTGATCTA  
TGGACAGCATCGTTGTGGTAAAGGTCGTAATGCCAGAGGAATCATTACTGCAGGGCAT  
AGAGGGGGAGGTCATAAGCGTCTCTACCGTCAAATCGATTTTCGACGGAACGTATACG  
GCATATACGGTAGAATCGTAACCATCGAATACGACCCTAATCGAAATGCATCGATTTGTC  
TCATACACTATGGGGATGGTGAGAAGAGATATATTTTACATCCCGAGGGGGCTAAAATT  
GGAGATAACATTGTTTCTGGTACACGAGTTCCTATAAAAATGGGAAATGCCCTACCTTT  
GACCAGGATACCCTTAGGCACGGCCATACATAATATAGAAACCGCACCTGGAAAGGGT  
GGGCAATTAGCTAGAGCAGCGGGTGCTGTAGCGAAACTTATTGCAAAAAGAGGGGGAAA  
TCGGCCGCAATCAAATTACCTTCTGGAGAAGTCCGTTTGATCTCCAAAACCTGCTCAGC  
AACAGTCGGACAAGTGGGCAATGTTGGAGTGAAGCGGAAAGATTTGGGTAGAGCCGG  
ATCAAACGTTGGATAGGGAAACGTCCTGTAGTCAGAGGAGTGGTTATGAATCCTGTA  
GACCACCCCATGGGGGTGGTGAGGGGAGATCCCAATTGGTTCGAAAAGCACCCACA  
ACACCTTGGGGGTATCCTGCACTTGGAAAGAAGAACTAGAAAAAGGAAGAAATATAGC  
GAAAATTGGATTCTTCATCGCCGTAGTAAAATGATTCAAGCTCAAACCTATTTGAATGT  
AGCGGACAACAGCGGTGCCCGGAATTGATGTGTATTTCGAATCATAGGAACTAAT---AA  
TCGACGATATGCTCATATCGGGGACGTTATTGTTGCTGTGATTAAGGAAGCAGTGCCGA  
AAAGGTCTCTAGAAAGATCAGAAGTGATCAGAGCTGTAATTGTCCGTACTIONTGTAAAGA  
ACTCAAACGTGATGACGGTGTGATAATACGATATGATGATAATGCTGCCGTTCTCATTGA  
TAAAAAAGGAAATCCAAAAGGAACTCGCGTTTTTGGTGCAATCACCCACGAATTGAGA  
CAGTTCAATTTACCAAATAATTTCCCTAGCGCCTGAAGTATTAATGCTTAGCCCCAA  
AAGAACCAAATTCGAAAAGAACATAGAGGAAGAATGAAAGGAATAGCCTCTAAAGG  
CAGTCGTATTTCTTTCCGTAGATATGCTCTTCAAGCACTTGAACCTGCTTGGATCACATC  
TCGCCAAATAGAAGCAGGTCGGCGAGCAATTACACGAAACGTACGCCGCGGTGGAAA  
AATATGGGTGTGTATATTTCCAGACAAACCGTTACAGTAAGATCTACAGAAACCCGTA  
TGGGTTCCGGGAAAGGATCCCCGAATATTGGGTAGCTGTCGTTAAACCGGGTAGAAT  
ACTTTATGAAATGGGTGGGGTGACCGAAAATATAGCCAGAAAGGCTATTTCAATAGCTG  
GGTCCAAAATGCCTATACGAACTCAATTCATTATTGCGGACATGTCCAGAACTACACGA  
GGCTCTACAGCTCGGAAACGTCGATCAAAAATGGATTTATTTTCATCGGGGCGCTCGAGG  
GGCTCATTCAAGCCTTGCTCGAGTTATTGCTCAAGCGACAGCAAAAGCATTGGCTTCG  
GCTGATCGTGATAGAGTTAGGCAAAAGAGGGATTTTCGTCGTTTGTGGATCACTIONCGGAT  
AAATGCAGTAATTCGCAAAAAT-----GTATTCAATAGTTATAATAAATTTATATTTAATATAT  
ACAAGGAACAGTTGGTTCTTAATCGTAAAATGCTTGCACAAATAGCTATCTCAAATAGT  
AATTGTCTTTACACAATTTATAGTTATCTCAAATTGGAATTGTCTTTACAAAATTTCCAGT  
ACCAGAAT-----GAAGTATCAGCTGTGGGTGCATATATTTCTATGTCTGCTAACAAAGT  
GAGAAGAGTGATTGATCAGATTCGTGGACGTTCCCTATGAAGAAACACTTATGATACTIONCA  
ACTTCATGCCTTATCGAGCGTGTATCCAATTTTAAAATTAATTTATTCGCAGCAGCAA  
ATGGTATTCACAATATGAATTTAACAAAAAAGTTAATCATTAGTAAAGCTGAAGTC  
AATGAGGGTACTACTGTGAAAAAATTAACCTAGGGCAAAAGGACGGGGTTACCCGA  
TAAAAAGATCCACTTGTGAGATAACTIONATCGTATTAAGAGATATATCCTTAATG-----

-----ATGGAAGGAATCCAATATGCAGTATTTACAGAAAAAAGTTATCGGTTATTGGGGAA  
AAATAAC---TATACTTCTAATGTCTGAATCAGGGTCAACTAGGACA-----

-----ATGGCAGTTCCAAAAAAAAGGATTTCTAGCTCAAAAAAGCGA  
ATTCGTAAAAATATTTGGAAAGGAAAAGGGTCCGAGGCGGCGCTCAAAGCTTTGTCAT  
TAGCGAAATCTATTTCTACCGGGAATTCAAAAAGTTTTGAGTTCAAGAAGATTAAACCA  
ATGGCTAAGGGTAAAGCTGCCCGAGTAAGGGTTGTTTTGGAATGTACGAGTTGTGTTC  
GAAATGGT-----GTTAATAAAAAAATAAAGGCATTTCCAGATATATTACTCAAAGAAT  
CGACACAATACGTCTAGTCAATTGGAATTGAGAAAATTCTGCCCCATTGTTTCAAACA  
TACGATTCACGGGGAGATAAGAGATATGAAAATGGGGGCCTCCGTCCGTAAAATTTGT  
GAAAAATGCCGACTGATACGTAGGAAGGGCGAATTCGAGTAATTTGTTCTAACCCGA  
GACATAACAAAGACAGGGAATGATTCTCGAAAAAGTAAGAGTCACAACTCAGACAC  
CCCGGTGGAAATGTGTTGAATCAAGAGCAGATGGCAAGCGGCTTTATTATGGCCGCTTT  
ATTCTGTCTCCACTTAAGAAGGGTCAAGCGGATATAATAGGCATTGCGATGCGAAGAGC  
TTTGCTTGGAGAAATCGAAGGAACATGTATCACACATGCAAATTTGAT-----AAAATAC  
CACATGAGTATACTACTTAGTAGGTATTCAAGAATCAATATATGAAATTTTAATGAATTT  
GAAAGAAATTTGATTAAGAAGTCATCTGTATGGAAGTTCGCGATGCGTCCATTTGTGTCA  
GGGGTCCCCGAGATGTAACGGCTCAAGACATCATTTTGCCGACTTCCGCAACAATCGT  
TGATAATACACAACATATAGTTACCATAACGGAACCAATCGATTTTTGTGTTGGATTACA  
AATTGAGAGAAATCGTGGATATTTTATACAAATTCCAATGCTAACCAACCACGATGACA  
GAGGTTATCCTATAGATTCGGTATTCATGCCTGTTAAAAATGTAATCATAGTATTCATTC  
TTATGAAAACGGGATC-----CACGCGATGCTTTTTCTCGAAATATGGACAAATGGGAGTT  
TAACTCCTAAAGAAGCGCTTCGTGAAGCCTCCCGGAAGCTTAGTAATCTTTTTATCCCT  
TTTCTACATGCGGAAGAACA-----AACTTCCATTTGAG---ACAATCAAATGAACAC  
ACAGACGAACTACCAATAGACTTT-----TGTGCATTGAAAGA  
TATTTATATTGACCAATTAGAATTGCCTGCAAGGTTTTATAACTGCCTCAAATATCGGGT  
ATACATACAGTAATGGACCTTTTGAATAAGAATACAGAGGACCTTATGAAAATTACGCA  
TTTTCGCCAACAAGATATAGAAAAGGTGATGCACATTTTAAACAACACT-----ATTTGCG  
AATTCCTTTCCCGAAGAAGGATGCTTGCGATAGAAAT---GAAGGAATGGCTGCAATAC  
CTGGGCTTAATCAGATACAATTTGAAGGATTCTCTAGGTTCCCTGATCAGGGCTTAAGA  
GAAGAATTTATAAGTTTGGAAATATAGAGGATTTAGATATGGACGTATGCTTTCAATTA  
TTTGCGGAAACATATAAATTGGTCGAACCGTTGATAAAAGAACGAGATGCTGTATATGA  
ATCCCTCACCTATTCTTCTGAATTATATGTAGCCGCAGGTTTAAATTTGGAAAAGG---TATT  
CCATGCAAAAACAACAATTTTGATTGGAAATATTCCTTTAATGAATTCCTGGGAATTT  
TTATAGTAAATGGAATATACAGAATGGTAGTCAATCAAATATTGCAAAGTCCGGGTATCT  
ATTACCGATCAGAATTGGACCATAAAGGGTTTTTGGTCTATACCGGCACCATAATATCAG  
ATTGGGGAGGAAGATTAGAATTAGAGATTGATAGAAAAGCACGTATATGGGCTCGCGTA  
AGTAGGAAACAGAAAATATCTATTCTAGTTCTATCATCGGCTATGGGTTCTGAATCTAAGA  
GATATTATAGAGAATGTTTGCTACCCTGAAATTTTATTGGCTTTTTTGGATGATAAAGAG  
AAGGGAAAATAGGGTCAAAGAAAATGCCATTTTGGAAATTTTATCAAGAGTTTGT  
GTATAGGTGGAGATCCGGTATTTTCGGATTCCCTTATGTAAGGAATTACAAAATACATTTT  
TTAGACAAAGGTGTGAATTAGGAAAGATTGGTCGACGAAATATTAACCGGAGACTGAA  
TCTTGATATATCCCAGAATAATAAATTTTTGTTACCGCGAGATATCTTGGCAGCCACAGA  
TCATTTGATTGGAATTAATTTGGAATGGGTACACTTGACGAT-----ATGAATCATTTGAA

AAATAAACGTATTCGTTCTGTAGCGGATCTCTTACAAGATCAATTCGGATTGGCTCTAAT  
TCGTTTGAAGAAGTGATAAAAGGGGGTATACGCGGAGCAATTA---GGGGAATTGAT  
A---CCGACCCCTCAGAATTTTGTAACTCAACCCCA-----CTAAAAACCACTTATGA  
ATCCTTTTTTCGGATTACACCCATTATCTCAAGTTTTGGATGAAACGAATCCATTGACACA  
AATAGTTCATGGGAGAAAATGGAGTTTTTTGGGTCCTGGTGGATTGACAGGACAACT  
CCTAGTTTTTCGGATACGAGATATCCATCCTAGCTACTATGGACGCATTTGCACAATTGAC  
ACATCTGAAGGAATCAATGTTGGCCTTATTGGATCCTTAGCAGTTCATGCGAGAATCGG  
TCATTTTGAA---TCTCTAGAAAGCCATTTTTT-----GAAATCTCCGAAAAACCAAAG  
GG-----GCACGGCTACTTTATTTATCATCAAGGCGAGATGAATACTGTATGATAGGGACA  
GGCAATTCCTTGGCACTTAATGAAGGTTTTTCAGGAAGAACAGATTGTTCCGGCTCGATA  
CCGTCAAGAATTCCTGACTATTGCATGGGAACAGGTTTCATCTTCGAAGCATTTTTCCCT  
TCCAATATTTTTCTATTGGAACCTCTCTCATTCCCTTTATCGAGCATAATGATGCGAATCG  
GGCTTAAATGAGTTCGAATATGCAACGCCAAGCAGTTGCGCTTCTCGGTCCGAGAAG  
TGCATTGTTGGAACCTGGTTTGGAAAGGCCAGGTGGCTCTAGACTCAGCAGTTCCCCTTAT  
AACGGAACACGCGGAAAGGTCATTTCTATCCATACTGACAAGATCCTTTTATCGGGCA  
ATGGGGATACTCTAAGCATTCCATTAGTTATGTATCAAGGTTCCAACAAAAATACTTGTA  
TACATCAAAAACCGCAGGTTTCGACGGGGCAAATGCATGAAAAGGGACAAATTTTGG  
CGGACGGCGCCGCTACGGTTGGGGGAGAACTCGCTTTGGGAAAAAACCTATTAGTAGC  
TTATATGCCATGGGAAGGTTACAATTTTGAAGATGCGATACTCATTAGTGAGCGTTTGGT  
ATATGAAGATATTTATACTTCTTTTACATACGGAAATATGAAATTAAGATTCATGTGACA  
AGGCAAGGC---CCCGAAAGGGTCACTAAAAAATAACCG---CTACGGGCCCATTTACTAC  
GAAATTTAGACAAAAACGGAGTTGTAATCTTGGGATCTTGGGTAGAAGCGGGCGATAT  
TTTAGTAGGTAAATTAACACCCAGCTGGCCCAAGACTTATCC-----CCGGCAGATAA  
ATTTCTAGACGCCTTATTTAGCACTCAGCTAGCCACTTCAAGGCAAACCTTGTCTAAAAC  
TACCTAGAGGTAGGAGGGGCAGAGTTATTGATGTGAGATGGATCCGTTCTAATCCAGAA  
AGAGAA-----AGGATTCGTGTATATATTTACAGAAACGTGAAATCAAAGTAGGT  
GATAAAGTCGCCGAAGACATGGAAATAAAGGGATCATTTCAAAAATTTGCCTCGAC  
AAGATATGCCCTATTTGCAAGACGGAAAGCCTATTGATATGGTCTTCAACCCATTGGGA  
GTACCTTACGAATGAATGTAGGACAGATATTTGAATGCTCGCTCGGGTTGGCGGGGGT  
TCTGCTAGATAGACATTATCGAGTAGCGCCTTTTGATGAGAGATACGAACAAGAGGCTT  
CGAGAAAACCTGGTCTTTTTCGGAATTACATGAAGCCAGTAAGCAAACAGGGAATCCTTG  
GGTATTTGAACCCGAGTATCCGGGAAAAAGCAGAATATTTGATGGAAGAACGGGAGAT  
CCTTTTGAACAACCTGTTATAGTGGGACAGCCCTATATCTTGAAATTAATTCATCAAGTT  
GATGACAAAATACACGGGCGTTACGATGGTCTTATGCATCTGTTACACAACAACCCGT  
TAGGGGAAGGGCCAAGCGGGGGGGCCAGCGGGTAGGAGAAATGGAGGTTTGGGCCCT  
AGAGGGGTTCCGGTGTGCTCATATTTTACAAGAGATGCTTACTTATAAGTCTGATCATCT  
TAGAACTCGGACAAAATATTTGGTACTACAATCCTTGGAGGAGAAATGCCTAAA-----  
GCTGCTCCCGAATCCTTTGATTGCTCGTTCGAGAACTACGCTCTTTGGCCCTAGAACT  
GAATCATTTCCTTGTATCTGAGAAGAACTTTCAGATGAATAGGAAGGAAGCT-----  
-----ATGATTGATCGGTATAAACATCAACAACCTTCAAATTGGATTAGTTTCTCCTCAACA  
AATAAGCACTTGGGCCAATAAAACCCTGCCCAATGGAGAGATTGTCCGAGAAAGTAACA  
GAAATCGACCATGTTGAGTGGGAAACTAATAAGCCAAAAATAGGTGGATTCTTTTGTG  
AAAGAATTTTTGGACCTATAAAAAGCGGAATTTGTGCTTGTGGGTATTATGGCGAATTT  
GGAGATCAAAAAGAAAAGAGAACATTTTGGCGGCGACTGCGGAGTCGAATTTTGAAT

TGTCGGATACGAAGATATCAAATGGGCTACATCAAACCTGGCATGCCCCGTGACTCATGT  
GTGGTATTTGAGGCGTCTTCCTAGTTATATCGCGAATCTTTTAGATAAACCTCTTAAAGA  
ACTAGAAGACCTAGTATACTGCGAT-----TTTGCTTTTGCTAGGCCT--CTAGCTAAAAAA  
CCCCTATTTTACGATTACGAGGTTCAATTTGAATATGAAACCCAATCCTGGAAAGATAGC  
ATCCCTCGTTTTTTGACTATCCAAGGCTTGCATACATTTGGAAATCGCGAAATTTCTACT  
GGAGCAGGCGCTATCCGCGAACAATTGGGCGATTTAGATTTGCGAGTTATTATAGATTC  
TTCGTTGGCAGAATGGAAAGAATTA---GAAGGG---GGGCTCACGGGTGATGAATGGGA  
AGATCGGAAAATTGAAACAAGAAAGCGCTTTTTGGTTAGACGCATGGGATTGGCCAAG  
CATTTTATTCGAACAAATGTAGAACCTGAATGGATGGTTTTATGTCTATTACCAGTTCTT  
CCCCGGAGTTGAGACCGGGGGTTTCAGATAGCTGAACTTAAACTAATGGGTTCGGATA  
TTAATAAACTTTATGGTAGAGTTCTTTTCGCGAACAATGATCTTCTCCATTTATTAACAA  
TTCAATCTACG---CCAGAGGACGTCGTAATGTCTCAGGAGAGATTGGTACAAGAAGCTG  
TGGATACACTTCTTGATAATGGAATCCGCGGACAGCCAATAAGGGATGGTAATAATAAG  
GTTTATAAGTCCTTTACAGATGTAATCAAGGCAAAGAGGGAAGGTTTCGTGAGACTCT  
GCTTGGCAAACGGGTCGATTATTCGGGACGCTCCGTCATTGTTGTAGGCCCCCTCACTTT  
CATTACATCAATGTGGATTGCCTCGTGAAATAGCAATAGAGCTTTTCCAGACATTTGTAA  
TACGCGATCTAATTAGACAGCGCCTTGCTCCGAACATGGGGACTGCTAAGAGTCAAATT  
CGAGAAAAAGAACGAATTGTATGGGAAATACTTCAGGAAGTTATGCAGAGTCATCCTG  
TATTGCTGAATAGAGCACCTACTTTGCATAGATTAGGCATACAGGCCTTCCAACCCGTTT  
TAGTGGAAAGGGCGCGCTATTTGTTTACATCCACTCGTTTGTAAGGATTCAACGCAGAC  
TTCGATGGGGATCAAATGGCCGTTTCATGTACCTCTATCCTTGGAGGCTCAGGCGGAGGC  
TCGTTTACTTATGTTTTCTCATATGAATCTCTTGGCTCCGTCATTGGGGATCCCATTTGC  
GTACCAACTCAAGATATGCTTATTGGGCTCTATATCTTAACAAGCGGGAATCGTCGAGG  
TCTTTGTGTAATAGGTATAATCTGTGGAATTCATAAAC-----AGCCAACTGAGACT  
ATTGACGAAAATAACTTTAGGTATATGAAAGGAAAAGAACCCCTTTTTTGTAAATCCTAT  
GATGCAATTGGAGCTTATCGACAGAAAAGAATCCATTTAAACAGCTCCTTTTGGTTCCG  
GTGGCGATTAGATCAACGC---CTTATTGTTTCA-----AGAGGAGTTCCTGTGCAAGTTCA  
TTATGAATCTGCGGGGACCCATCATGAGATTTACGGACACTTTTTTAATAGTAAGAAGTCT  
AAAAACGAGATTATATATATATATATTAGAACTACTCTTGGTCATATTTTTTTTTATCGAG  
AAATTGAAGAAGCTATAACAAGGGTTTTATCAG---GTCTCTTCCTATGTTACC-----  
-----ATGCCAAAGCGGGCCCATCTAGTCTTTCATAATAAAGTAATAGACGGGGAT  
GTTATTAAACGGCTTATTAGTCGATTAATAGATCATTTTCGGAATGGCATATACATCACACA  
TCCCTGGATCAAGTAAAGACCCTGGGTTTCCAACAAGCCACCGCTACATCCATTTCATT  
GGAATTGATGATCTTTTAAACGATACCTTCTAAGGGATGGCTAGTCCAGGATGCTGAACA  
ACAAAGTTTTCTTTCGGAAAAACACTATCATTATGGGAATGTACACGCGGTAGAAAAAT  
TACGCCAATCCATCGAGATATGGTATGATACAAGTGAATATCTGCGACAAGAATGAAT  
CCCAATTTTAGAACCACCGACCCCTTAAACCCTGTACATATAATGTCTTTTTTTCAGGAGCT  
AGGGGAAATGCCTCTCAAGTACACCAATTAATAGGTATGAGAGGGTTAATGTCGGATCC  
ACAAGGACAAATGATTGAATTACCCATTCAAAGCAATTTACGCGAGGGGCTCTCCTTG  
ACAGAATATATTATTTCTAGCTGTGGAGCCCGCAAAGGGGTTGTGGATACTGCTATACG  
AACAGCAGACGCTGGGTATCTTACGCGCAGACTTGTGTAAGTAGTTCAACACGTTGTT  
GTACGTAGAACAGATTGTGGCACCAACCCGAGGGCTTTCTGTAAGTCCCCAAAAGGGA  
CGGTGCCG---GAAAGATTTTTTATTCAAACACTAATTGGTCGTATATTAGCGGACGATAT  
TTATATGAATGCGCGATGCATTGCCGTTTCGAAATCAAGATCTTGGGCCTAGCCTTGTTAA

TCAACTCATAACC-----TTTCAAATACAGCCAATATCTATTAGAAACCCCTTTAC  
TTGTAGGAGTACGTCTTGGATCTGTTCGATTATGTTATGGTCGCAGTGCTACTCATGGCGA  
CTTAGTTGAATTAGGGGAAGCTGTAGGTATTATTGCAGGCCAATCCATTGGAGAACCGG  
GACTCAGCTAACATTAAGAACTTTTCATACCGGGGGAGTATTCACAGGAGGTACTGC  
AGAACATGTGCGAGCCCCTTCAACGGAAAAATAAAATTCAATGAGGACTTGGTTCAT  
CCCGCACGAACACGCCACGGGCAACCTGCCTTTCTATGTTATATAGATTTTTATGTA  
ACTATTGAGAGTGAAAATATTATACATAGGGTACCTATTTCGACCAAAGAGTTTTCTTTT  
TAGTTCAAATGATCAATATGTAGAATCAGAACAAGTAATTGCCGAGATTCGTGCGGGA  
ACATCACTTTT--GCTTTGAAAGATAGAGTTCGAAAATATATTTATTCTGACTCAGAG  
GGAGAA---ATTCACTGGAGTACCGATGTGTACCATGCACCCGAATTTGTCTATACTA  
ATGTCCATCTCTTACCAAAAACAAGTCATTTATGGATATTATTAGGGGATTTATGTAG  
A-----TCGGGCCCTCTCTTTTTTCGATCTACAAGGATCAAGATCAAATGAGCATTC  
AT-----TCGCTTTCTGCCAAGGTAGATATACGCCGATCCTTTCT-----GTGAAA  
AATGATCAA---TTGAGACACAAATTCTCAGTTTTGGATCTTTATGGAAAAAGGAGG  
ATTCCGATTCCGTAATTAT---TCAGAGCTTAATCGAAGCCTATTGACTGCCCCTTGT  
AATCTACCATATCCTGCT---ATTCTACGTGAGAATTTTGAT-----TTAGTGGCG  
AAGAAGCGAAAGATGGATTTATCATTCCATTCCGGATCTGAACATGGACGAGAAAA  
AAAAACGAATACTCTGTTCCGACATCTCGATTGAAATGCCATA-----AATGGTAT  
TTTACCTAGAAATAGCATGCTTGCTTATTTTCGATGATCCTCGATACAAAAGAGGGG  
GTTTCGGGAATTACGAAATATGGGCCTATAGAGGCAGATTCAATCGTCAAAAAGAGG  
ATTTTCATTTCATAGACTATCGC---GAAGTCCAAGAATTGCAGCCAAAATACAAAG  
AAGTGGATCCGCTTTTTTTTCATTCCCGAAGAAGTACATTTTTACCTGACTTCTTT  
CATAATGGTACGGAACAATAGTATCGTTGGGGTAAATACACAAATTACTTTAAAA  
AAAAGAAGCCGAACAGGCGGGTTGGTCCAAGTGGAGAGAAAAAAGAGGGGAATTAA  
ACTTCAAATCTTTTCTGGATATATTTATTTTCCGGAGAGGGGAAGATAATATATCC  
CTACACAGTGACATCTTCATACCAATACCATCACGAATAAGAAAAACCAATTCTAA  
AGAATCGAAAAA-----TGGCAAAATTGGATCTATGTCCAACGA-----ATTAC  
ACTTAAGAAAAAGG-----CCCTTTGTTTTGCTTCGACCCGTCGTACATATGAAAT  
AGCGGACGGTAAAAAGTTAACAAGACTTTTTCTCAAGATCCATTGCAGGAAATGG  
ATAATATACTGTTATGGGGATGGATGCTTGATTCCGGGCATTTCTGGCACAAGT  
ATTC AATTAGTTCGGACTTGTTAATCTTGAATTGGGACCAAGACGAAGAC---G  
AAAAAGATTCTCTATAGAGGAGGCCGGCTCTTCCCTTTGTGGAAGTAAGTACA  
AAGGGCTTGATTCTGAGATTTCTTAAAAATTAACTTAGGGAAATCCCAGATTT  
CATATATCAGAAAAAGGGATGATCCCCGACGGG-----TTGCTCTCTGAT---  
AATGGTCCAATTGTACCAACATCAATCCCTTTCTTCGAGTTATTCCATTTAT  
TCCAAGCCCAAGGCAAGCCTTCGACAACCACTTAGCCAAAACCA---AGTATTC  
GTACATTGTGGAAT-----AGAAATAAGGAATGCCACTCGTTCTATAATTT  
ATCATCATCTAACTGTTTTCAACTAGGTCCG-----TTCAACGATGGAAAAT  
CTCACAAT-----GCGAAAAAAGAATCAGAGCCTCTACTTCTGATTAGGAAT  
TTGTACAGGCCCTATAGGAATA-----GTCTCTAAAATTGCGAATTTTGAT  
GTA-----TGTTACAATTTCTTACA-----AAGAATAAGACTTCC--GAAAT  
GAAATATTTTCAACTTGAGAAT-----TTAAACACAGACCTTTCCAGTAAT  
-----CAA---TATTTTGTAATGGATGAAAACGGGATA-----ATCTATAAG  
CCGATCCATATAGTAACATCTTTTTGAATCCATTCATTTGAATTGGTATTTTCT  
ACAGCATAATTATTGTGAAGAAACATCCACAATAAGAAAT---CTTGGGCAGT  
TTTTTTGTGAAAGTGTATGTATAGCCAAAACGGACCA-----CGCCTAAAAT  
CGGGTCAAGTTTTAGTTGTGCAA---GGCGGGTATGTAATAAAGATCAGCTAAG  
CCCTATTTGGCTACTCCAG

GAACAACCTCTTCATGGCCATTATGGAGAAATCCTTTACGAGGGAGGTACATTAGTTACA  
TTTCGATATGAAAAATCACGGTCTGCTGATATAACACAGGGTCTTCCAAAAGTGGAAA  
GGGTATTTCGAAGTACGTTCAATTGATTCAATATCGATGAACCTAGAAAATAGAGTTGAG  
GGTTGGAACGGGTATATAACAAGAATTCTTGGAATTCCTTGGGGATTCTTGATTGGTGC  
CGAGCTAACAATAGTGCAAAGCCGCATTTCTTTGGTTAATAAGATCCAAAAGGTTTATC  
GATCCCAGGGAGTGCAGATCCACAATAGGCATATAGAAAATTATTGTACGCCAAATAACA  
GCAAAAAGTCTTGTTTTAGAA-----GATGGAATGTCTAATGTTTTTTTTTACCCGGAGAA  
CTAATTGGATTGTTACGAGCAGAACGAACGGGGCGGGCTTTTGAAGAGGGGGTCTTTT  
ACCGCGCCGTCTTATTGGGAATAACTCGCGCATCTCTAAATACTCAAAGTTTTCTATCCG  
AAGCGAGTTTTCAAGAAACTGCTCGGGTTTTAGCAAAGCCGCTCTCCGAGGTGCTAT  
CGATTGGTTGAAAGGCCTGAAAGAGAACGTTGTTCTAGGGGAGATGATCCCCGTTGGG  
ACCGGATTAAGGATTAGTACAGCCTTCA-----AGGCAACATAAGACTCTTTCT-----CG  
GGAAACCAAAAAGACCAATTTATTTCGAAGAAAAAAAGCG---ATAAATTCTTTCTTCTA  
TCATAGAGAATGGTTTGATTCTTATTCTTGCAGTTCAAAGAATTTACAAGATACATCAGA  
AGAATCGTTTACAGAATTTAACGATTCC-----ATGACAAGAAGATATTGGAACATCA  
GGTTCGAAGAGTTGCTGGCAGCAGGAGTTCATTTTGGTTCATCGTATTAAGAAATGGAAT  
CCTAGAATGGCCCCTTATATTTTGATTTCTTCTAAAGGTACTCATATTACAAATCTTATTA  
GAACCGCGCACTTTTTAGCAGAAGCTTGCCATTTAGTTTTTTTATGCAGCAAGTACAGGA  
AAAAGCTTCTTAATTGTTGGTACCAAAAAAGCAGCAGCTAATTTGAGTACGGGCTG  
CAATAAAGGCTCGGTGCCATTATGTTAATAAAAAATGGCTCGCTGGTATGTTAACGAAT  
TGGTCCACTACGGAAACTAGACTTCGTAAGTTCGGGACTTGAGAGCGGCACAAAAG  
ACAGGGAAACTCGGCCGTCTTCCAAAAGAGATGCAGCTATTTTGAAGAGACAGTTG  
ACTCACTTGCAAAAATATTTAGGCGGGGTACAATATATGACGGGATTACCCGATATTGTA  
ATCATCGTTGGGCAGCACAAACGAATTTACGGCCCTTCGAGAATGTATCACGTTGGGAAT  
TCCAACAATTGGTTAATCGATACAGATTGTGACCCCGATCTCGTGGATCTTCCGATTCC  
AGCAAACGATGACTCTAGGCGTTCAATCCGATTCAATCTTAACAAATTAGTATTCGCAAT  
TTGTGAGGGCCGTTCTAGC-----ATACGAAATCTTATGGGACGAACAATAAATCCACTTG  
GTTTCAGACTTGGTACAACCCAAAATCACCCTCTATTTGGTTTGAACAACCCAAAAA  
GTATTGCCAGGGCCTACAAGAGGATGCAAAAATACGAGACCGCATTAGAATTATATAA  
ACAATCATAGATTCTCCCGTACATATATTTACGCATAATTTACGCATAGAGATTGAAA  
AAGGAAAGGGTTTTCGTTAACGTAATAATCTATATGGGATTCCCACGTTTTCTTAATAGAAG  
GTAAACCCAGCAAA-----ATCAAGGAATTGAAGTTAGATGTCAAAAAGTCCTTCA  
CTGCGGA---CGTGAACCTACTATTTCTATTAGGGAAATTGTAAATCCTTATAGCGACCCT  
AATATTCTTGCCGAATTTCTAGCCGACCAATTAAGAAGCAGAGTTTCATTTGCAAAGC  
AATGAAAAAACTATTGAATTAGCC-----GAAAAAGCAAAAGGAATTAAGTACAAATT  
GCAGGACGTATTGACGGAAAAGAAATGGCATGTGTCAAATGGCTTCGAAAGGGTAGA  
GTTCTCTCCAAACTATTTGCACTAAAATCCATTTTGTTCGACTACAGTTAGAACGATC  
CACGGGGTGTAGGCATTAAAATTTGGGTATTTACAAATAGAGAAATGTGCGGTTACCG  
AGGACCTCGTTTCAAAAAATATGCCGCCTTGGGTCTTTACCGGGATTAACTACTAAA  
GGCCT-----CCAGACAAAAGCAGTAATCCGCGC---TTTAGTAAAAAAAAGAATATCA  
GATTCGTTTAAAAGAAAAACAAAATGCGGTTTTCAATTATGGTCTTACAGAACGCCAAT  
TACTTAAATACGTTTCGTATCGCCGAAAAGCCAAGGGGCAACAGGTCCAGTTTTACT  
ACAATTACTTGAAATGCGTTTGGATAATACCCTTTTTTCGATTGGGTATGGCTTCTACTATT  
CCTCAAGCCCGCCAATTAGTTAATCATAGACATATCTTAGTAAACGGCCGCATGGTTGAT

ATACCAAGTTATCGCTGCAAACCCCGAGATATCATTACAGCAAGGGAGAAAGAAAAAT  
CAAGAACTCTGATTCAAAATTATCTTGATTCATCCCC--CATAATAAATTACCATATCAT  
TTGACCATTCACCCACTCCAATAT-----AAGGGGTTAGTCAATCAAATAATAGCTAGAGG  
ATGGGTTGGTTTGAAAATAAAGGAATTGTTGGTTGTAGAATATTATTCTCGTCAGATTAT  
GTCACGCCGAGGGACTGCAGAAGAAAAAACTCGAAAATACGATCCAATTTATCGTAAT  
CGATTAGTTAACATGTTGGTTAATCGTATTCTGAAACACGGAAAAAAATCATTGGCTTAT  
CAAATCTTTATCGAGCCATGAAAAGGGTTCAACAAAAGAAAAAAATGAATCCACTAT  
CCGTTTTACGTGAAGCAATACGTCAAATAACTCCCCGTATAGCAGTAAAAACAAGACGT  
AAAAATGGATCAGCTCGTCAAGTTCCATTGAAATAGGATCCAGACAAGGAAAAATAC  
TTGCCATTCGTTGGTTATTAGAGGCAGCCCGAACACGTCCAGGCCGAAATATGGCTTGG  
AAATTAAGTTCCGAATTAATGGATGCTCTAAAAGGGAAGGGCGCTGCCATACGCAAAA  
AGGAAGAGACTCGTAGAATGGCAGAGGCAAATAGAGCTTTTGCACATTTTCGTATGAG  
CAAGGACACTATTTCTGACATATTAACCTGTATACGAAATGCTGACATGGCTAAAAAAG  
AGACGGTTCGAATAGGATTTACTAACATCGCCGAAAAAATAGTTAAAATACTTTTACGG  
GAGGGTTTTATAAAAAACACGAGAGAACATCGGGAAAAACAACAATCCTTTTTGGTTT  
TAACCCTACGCCATAGAAGG-----AATAGGAGGGGTCCCTATAAAACT--CTTTAAAT---  
--TTAAAACGAGTCAGTCGACCCGGTCTACGAATCTATTCTAACTATCCAAAATTCCTA  
GGATTTTTGGCGGGATGGGGATTGTAATTCTTTCTACTTCTCGAGGTATAATAACAGACC  
GAGAGGCTCGGCTAGAAGGAGTGGGTGGAGAAATTTGTGTTATATATGGATGGCAAA  
ACCTATACGAAGATATTCGAATCGTAAGAATAAGCGCATT---TTGCGTAAGAATATACGT  
AAAATACCAAAAGGAATTATTCACGTTCAAGCAAGTTTCAGCAATACAATTGTTACTAT  
TACAGATGTAGAGGGTCGCGTGGTTACTTGGGCCTCCGCCGGCGCTTGTGGATTCAA  
GGTAGAAGAAGGGGGACACCATTTGCGGCCCAAACCACAACGAAAAATGCTATTACAG  
CCATTGGTGAATCAAGGTATGAAACGAGCGAATGTCCTGATAAAGGGTATTGGGCGTG  
GAAGAGATGCAGCATTACGAGCTATTGGTAGAAGTGGTGTACGATTAAACCTTATACGG  
GATATAACCCCAATCCCACATAACGGCTGTGACCCCTAAAAAAGGCGTACAATGCC  
AACTACTCAACAACCTTATTAGAAACACAAGACAGCCAATCAGAAATGCGACGAAATCC  
CCCGCTCTTAGGGGATGCCCTCAGCGTCGAGGTACATGTACTAGGACGTATACTATCAA  
CCCCAAAAACCAAACCTCTGCCTTACGTAAAGTTGCCAGAGTACGATTAACCTCTGGA  
GTTGAAATCACTGCTTTTATACCTGGTATTGACCATAATTTACAAGAACATTCTGTAGTC  
TTAGTGAGAGGGGGAAAGGGTTAAGGATTTACCCGGTGTGAAATATCGTATTGTTTCGAG  
GAACCCTAGATGCTGTGCGAGTAAAGGGTCGTCAACAAGGGCGTTCTAAATATGGGGT  
CAAAAAGCCAAAAGTGGCAACGAAAGGTTTGATTACAGAGGGAGAAGAAGAGACAAA  
AATTGGAACAAAATATCATTTGATTTCGTCGATCCTTAAAAAAGAAATATGT-----GA  
AGTTACGTCTTTGAGTGATAAATGGAAAATTCATGGAAAGTTACAATCCTCACCGCGCA  
ATAGTGACCTACGCGTCTTCGTCGACGTTGTTTTTCAACCGGAAGGCCGAGAGCTAAT  
TATCGAGATTTTGGACTATCCAGACACATACTTCGGGAAATGGTTCATGCATGTTTGTG  
CCGGGGGCAACAAGATCGAGTTGGATGGTAAAAACTCCATTAATTTAGTGATCTCGC  
AAGAA-----GAAAAGAATAGGGGGTCCGTTGAATTTCAAGTATTAAGTTTTACCAAT  
AAAATAGAAAGAATTTCTTCCCATTTAAATTTACAGAAAAGGATTATTTATCGCAGAG  
AGGTCTCCAAAAACTTTTGATAAACGCGAGCGTCTGCTGTCTTATTTGTCAAAGAAA  
AATAGAGTACGTTATAAAGAATTAATAAATTGGTTGGATATTCGAGAGTCAAAAACCTCG  
GGAATTATGGTAAAACTTCGTTTGAAACGATGTGGGCGGAAGCAACGAGCCGTTTAT  
AGAATAGTTGCAATTGATGTTTCGAGCCCGAAGAGAGGGGAAGGGATCTTCAAAAAGTG







repeated text lines for the purpose of this exercise.



????????????????????????????????????????????????????????????????????????????????????????  
????????????????????????????????????????????????????????????????????????????????????????  
????????????????????????????????????????????????????????????????????????????????????????  
???ATGGCACCTATTAGAGCTGATGAAATTAGTAATATTATCCGTGAACGTATCAAGCAA  
TATAATAGAGAAGTCAAGATTGTAAACATGGGTACCGTACTTCGAGTAGGTGACGGCAT  
TGCGCGTGTATTATGGTCTTAATGAAGTGATGGCAGGCCAATTAGTAGAATTTGAAGAGG  
GTACGGTAGGGATTGCCCTGAATTTGGAATCAAATAATGTTGGTGTTGTATTAATGGGC  
GGTGGTTTTATGATACAAGAGGGAAGCTCTGTCAAAGCAACAGGAAGAATTGCCCAGA  
TACCGGTGAGTGAAGCTTATTTGGGACGGATCGTGAATGCCCTGGCGAAACCTATTGAT  
GGTCGAGGCCAAATTCAGCTTCTGAATCTCGGTTAATTGAATCCCCGCCCCGGGTAT  
TATTTCAAGACGCTCTGTATATGAGCCTCTCAAACAGGACTTATTGCTATTGATTGAT  
GATTCCTATAGGACGCGGTCAGCGAGAATTAATTATTGGAGACAGGCAGACCGGTAAA  
ACCGCAGTAGCTACGGATACGATTCTCAACCAACGCGGAAAGGATGTAATATGCGTTTA  
CGTAGCTATTGGTCAAAGGCGTCTTCAGTGGCTCAGGTAGTGACTAACTTTCAGGAA  
AGGGGGGCGATGGAATATACTATTGTAGTCGCCGAAACGCGCGGCTTCGCCTGCTACATT  
ACAATACCTCGCTCCTTACACAGGCGCGGCTCTGGCTGAATTTTTTATGTATCGCCAAC  
GGCACACTTTAGTTATTTATGATGATCTCTCAAAGCAAGCGCAGGCTTATCGCCAAATC  
TCTCTTCTATTACGAAGACCGCCTGGTCGCGAAGCTTACCCGGGGGATGTTTTTTATTT  
GCATTCACGTCTTTTGAAAAGAGCTGCTAAATCAAGTTCGAGTTTGGGTGAGGGAAGT  
ATGACTGCTTTACCAATAGTGGAGACCCAGTCGGGGGATGTTTCGGCTTATATCCCGAC  
AAACGTGATTTCCATTACAGATGGGCAGATATTCTTATCCGCTGATCTATTCAACTCTGG  
AATCAGGCCTGCTATTAATGTGGGTATTTCCGTCTCCAGGGTAGGATCCGCAGCTCAA  
TTAAAGCCATGAAACAAGTAGCTGGCAAATTAATAATTGGACTTGGCGCAATTCACAGA  
ATTAGAGGCCTTCGCCAATTCGCCACAGATCTCGATAAAACGACTCAGAATCAATTAG  
CAAGAGGTCGACGATTACGTGAGGTAATAACAATCCCAATCGGAACCTCTCGAAGT  
CGAAGAGCAGATTATGGCCGTTTACACCGGGATAAACGGTTATCTTGATTCATTAGAAA  
TCGGACAGGTAAGGAAATTTCTCGAGAATTTACGTAAGTATTTAAAACGTAATAAACCC  
CGATTCCGAGAAATCATATTGTCTACCAAGGAATTCACCGAGGAAGCAGAAGCCCTTT  
TGAAAGAGGCGATTCAGGAACAGTCTGTCTTATATTAC-----ATGAGACTCAATC  
CTACGACTTCTAGCCTTGGGGATTCTACGCTTCAAAAAAAAAAAGCGGGGCGTATCGA  
CCAAATCATTGGTCCGGTATTGGATGTAGTCTTTCCCCGGGAAAGCTCCCTATATTTA  
TAACGCTCTAGTAGTTCAGGGTCGAGATACTGTCCGTCAACAAATTCATGTGACCTGTG  
AGGTACAACAATTATTAGGAAATAATCGAGTTAGAGCTGTAGCTATGAGTGCAGACAGAT  
GGTCTAATGAGAGGGATGGAAGTGATTGACACGGGAGCTCCTTTGAGTGTTCAGTCG  
GCGGAGCGACTCTAGGACGAATTTCAACGTAICTCGGAGAGCCCCTTGATAATTTAGG  
CCCTGTAGATACTCGGACAACATCCCTATTACAGATCTGCGCCTGCTTTTATTGAGTT  
AGATAACCAATTGTCTATTTTTGAAACAGGAATTAAGTGGTGGATCTTTTAGCCCCTTA  
TCGCCGTGGAGGAAAATCGGATTATTCGGGGGGGCTGGAGTGGGTAAAACAGTACTC  
ATTATGGAATTGATCAACAACATTGCCAAAGCTCACGGGGGTGTATCCGTATTTGGCGG  
AGTAGGCGAGCGTACTCGTGAAGGAAATGATCTTTACAAGGAAATGAAAGAATCTGGG  
GTAATTAATGACCAAAAAGCTTGCGGAATCAAAGTAGCTCTAGTCTACGGTCAGATGAA  
TGAACCGCCGGGAGCTCGTATGAGGGTTGGGTTGACTGCCCTAACTATGGCGGAGTAT  
TTTCGCGATGTTAATAAACAGGACGTAATTCTATTTATCGACAATATCTCCGTTTCGTC  
CAAGCAGGATCCGAAGTATCCGCCCTATTGGGTAGAATGCCTTCCGCTGTGGGTATCA

ACCCACCCTTAGTACCGAAATGGGCTCTTTACAAGAAAGAATTACTTCTACCAAAGG  
GGGTCCATAACTTCTATTCAAGCAGTTTATGTACCTGCGGACGATTTGACCGACCCTGC  
TCTGCCACGACATTTGCACACTTAGATGCTACTACTGTACTATCAAGAGGTTTAGCTTC  
CAAGGGTATCTATCCAGCAGTAGATCCTTTAGATTCAACGTCAACTATGCTTCAACCTC  
GGATCGTCGGTGACGAACATTATGAAATTGCGCAAAGAGTTAAGCAAACCTTTACAACG  
TTATAAAGAACTTCAGGACATTATAGCTATCCTTGGGTTGGACGAATTAACCGAAGAGG  
ATCGCTTAACCGTAGCAAGAGCACGAAAAATGGAGCGTTTCTTATCACAACCCTTCTTT  
GTAGCGGAAGTATTTACGGGTTCTACGGGAAAATATGTTGGTCTAGCAGAAACAATTCG  
AGGGTTTAAGTTGATTCTTTCCGGAGAATTAGACGGTCTTCCTGAGCAGGCCTTTTATT  
TGGTAGGTAACATCGACGAAGCTACTGCGAAGGCTACGACGTTAGACAAGGAGAGTAA  
TTTGAAGAAAATGACCTTAAATCTTTATGTAAGTACTGACCCCTAAACGAATTCCTTTGGGATTC  
AGAAGTGAAAGAAATCATTATCCACTGCTAGTGGACAAATTGGCGTATTACCAAGCC  
ACGCGCCGATTTTCACAGGATTAGATATAGGTGTTTTGAAAATACGCCTTAACGACCAA  
TGGTTCGCGATTAGTCTGATGGGCGGTTTTGCTAGAATCGTCAATAATGAGATTACTGTT  
TTAGCACATGATGGGGAAAGGAGTAGTGACATTGATCCACAAGAGGCCAGCAAACCTC  
TTGAAATAGCGCAAGATAGC-----  
-----ATGAAAATGTAACCGATTCTTTTCGTTTCCTTGGGTCGCTGGCCATCCGCCG  
GGAGTTTCGGGTTGAATACCGATATTTAGCAACAAATCTAATAAATCTAAGTGTAGTGC  
TTGGTGTATTGATCTTTTTTGGAAAGGGAGTGTTAAAGGATTTATTAGATAATCGAAAAC  
AGAGGATCTTGAATACTATTTCGAAATGCAGAGGAACTGCGGGGGGGGGCCGTCGAAG  
AGCTGGAAAAGCTCAGGACCGCTTACGGAAAAGTGAATAATGGAAGTGGATCGGTTTC  
GAGTGAACCAGTATTCTCAGGCGGAATGGGAAAATTCGGAATGGATTACAAAACTTA  
TAAGGATTTAGAACAATTGGAAAATTCGAAAATGAAAGCATTCTTTTTGAACAACAA  
AGGGCAGTTAACCAAGTTCGGCAACGGGTTTTCCAACGAGCCATACGAGGAGCTTTG  
GAAATTCTGAATAGTTGTTTGAACAAGGAGTTACATTTACGCACGATTAGTGCTAATATT  
GCCCTCTTTAGATCAATGAAAGAAATAACTGATATGAATCCACTGATTTCTGCCGCTTCC  
GTTATTGCTGCTGGGTTGGCTGTCGGGCTTGCCTCTATTGGACCTGGGATTGGGCAAGG  
TACTGCCGCGGGCCAAGCCGTGGAAGGTATTGCGAGACAGCCCCAGGCGGAGGGACA  
AATACGAGGTACCTTATTACTGAGTCTAGCTTTTATGGAAGCTTTAACAATTTATGGGCT  
GGTTGTAGCATTAGCAATCTTATTTGCGAATCCCTTTGTTATGAATGTTCTATCATGCTCT  
ATAAACACACTAAAGGGGTTATACGATGTATCTGGTGTGGAAGTAGGTCAACATTTTTA  
TTGGCAAATAGGGGGGTTCCAAGTCCACGGCCAAGTGCTTATTACTTCTTGGGTTGTAA  
TTGCTATCTTATTAGGTTTCAGCTATTTTAGCTGTTCAAATCCGCAAACCATTCGACGG  
ATGTTCAGAATTTCTTCGAATATGTCCTTGAATTCATTTCGAGACGTGAGCAAAACTCAG  
ATTGGAGAAGAATACGGCCCATGGGTTCCCTTTATTGGAACCATGTTTCTTTTTATTTTT  
GTTTCGAATTGGTCTGGGGCCCTTTTCCTTGGAAAATCATAAATTACCGCAGGGGGA  
GTTAGCCGCGCCTACAAATGATATAAATAACCGTTGCTTTAGCCTTACTCACCTCAGT  
GGCATATTTTTATGCAGGTCTTAGCAAAAAGGGATTGGGTTATTTCAATAAATACATTCA  
ACCGACTCCAATCCTTTTACCCATTAACATCTTAGAAGATTTTACAAAACCTTTATCGCT  
TAGTTTTCGACTCTTCGGGAATATATTAGCCGATGAATTAGTAGTTGTTGTTCTTCTTTCT  
TTAGTACCCTTAGTGGTTCCTATACCTGTCATGTTTCTTGGATTATTTACAAGCGGTATTC  
AAGCTCTTATTTTTGCAACTTTAGCTGCAGCTTATATAGGCGAGTCCGTGGAGGGTCAT  
CATATGATATCTTTTACCTTAGAGCACATATTTAACCATATATCTTTTTTCGGTGGTTTTCAAT  
TGTAATTACAATTCATTTACATAAATTTAGTAGTTGATGGAATCGTAGGACTCTATGATTCG



TATGTGAATATGAATCCATCCTCCTTTTTCTTCGCAATAAGTCTTCTCATTACGATCAAC  
ATCTTATGGAATCCTTCTTGAGCGGATTATTTCTATAAAAAGACGGAAGGTCTTGTAGC  
TATCTTTGCGAATGAGCGCATTCCGAGGTTTTCAAGGACCCCTCATTATTATGTTAG  
ATATCAAGGAAAATACATTCTGATTTTAAAAGACATGCCTCTTCTGATGAATAAATGGA  
GATATTATCTTTCAAGTTATGGCAATGTCATTTTTATGTATGGTCTGCACCAGGAGGGG  
TCCGTATAAACAAATTATCCCAAGATCCCCTGAACTTTATGGGTTATCTTTAAGTCTAC  
GACCACTTCCTTTGGTGGTACGGGGTCAAGTATTAGAAAATTCATTTCTAATAGACAGT-  
----GCTATGAAGAAGGTGCGAAAGCATAATTCCAATTTTTGCTCTAATTGGATCGTTGGCT  
AAAGCGAAATTTGTAACCCCGTGGGGCAGCCATTAGTAAGCCAGCTTGGGCTGATT  
CATCCGATTCTGATATTATTGACCGATTTGTGCGTATGTGCAGAAATCTTCTCATTATCA  
CAGTGGGTCTTCAAAAAAAAAAGAGTTTGTATCGACTAAAATATATACTGCGACTTTCTT  
GTGTTAAACTTTGGCTCGTAAACACAAAAGTACTGTACGTGCTTTTTTGAAAAATTA  
GGTTCGACATTATTGGAAGAGTTCCTTAAGGAGGAACAACAAGCCCTTCTTTGATCTT  
CTCAAGACGGGTTTGGTATTTAGATATTCTTTATATCAACGATCTGGCCAACCAGGAAAT  
GATAATTGATACAAGA---GAAGTACAAGATATCAAT---TCTTTTTCCAGATTCTGAATCCCA  
ATTACAAGAAGTCTATGGGACTGCCTGGATACTTGTCCTATTTGATCCTTGTATTGGG  
AATCACAATAGGTGTATTAGTAATTGTGTGGTTAGAAAGAGAAATATCCGCAGGGATAC  
AACACGTATTGGGCCTGAATACGCCGGTCTTTGGGAATTCTACAAGCTCTAGCAGAT  
GGAATAAACTCCTTTTTAAGGAGAATCTTCTTCCATCTAGAGGGGATATTCGTTTGTTT  
AGTCTTGGCCCATCCATGGCAGTCATATCAATTCTCCTAAGTTATTAGTAATTCCTTTTA  
GCTACCGTCTTGTTTTAGCTGATCTAAATCTTGGTGTTTTTTTATGGATTGCCATTGCAA  
GTATTGCTCCCGTTGGACTTCTTATGTCAGGATATGGATCAAATAATAAATATTCTTTTT  
AGGTGGTTTACGAGCTGCTGCTCAATCAATTAGTTATGAAATACCATTAACCTATGTGT  
GTTGTCAATATCTCTACTTTCTAACAGTTCAAGTACAGTTGATATAGTTGAGGCGCAGTC  
AAAATATGGTGTTTGGGGGTGGAATTTTTGGCGTCAACCTATAGGATTTATCGTTTGCT  
AATTTCTTCCCTAGCGGAATGCGAAAGATTACCCTTCGATTTACCAGAAGCAGAGGAA  
GAATTAGTGGCAGGTTATCAAACCGAATATTCGGGTATAAAATTTGGTTTATTTTACGTT  
ACTTCCATTTAAACTTATTAATATCTTCCCTATTTGTAACAATTCTTTACTTGGGGGGTT  
GGAATCTCTCTATTCCATACCTAGACTTCTTTCAATTCTTTAAAATAAAAAAAGCGGGTG  
GAATCCTTGGAAACAACAATGGCGCTTTTTATTACATTAGCTAAAACTTTTTTTTTCTTGT  
TCATTTCTATCACACAAGATGGACTTTCCTTAGGCTAAGAATGGACCAACTCTTAAAT  
CTTGGGTGGAATTTCTTTTACCTGTATCTCTCGGTAATCTATTATTAACAACCTCTTTTG  
AACTTCTTTCGCTG-----ATTCTCGATTCTACGAGATTTTTTATGAAAG  
CCTTTCATTTGCTTCTCTTCGATGGAAGTTTTCTTTTTCCAGAATGTATCCTAATTTTTGG  
CCTAATTCTTCTTCTGATGATCGATTCAACCTCTGATGAAAAAGATATACCTTGGTTATAT  
TTCATCTCTTCAACAAGCTTAGTAATGAGCATAACGGCCCTCTTGTTCGGATGGAGAGA  
AGAACCTATGATTAGCTTTTCAGGAAATTTCAAACGAACAATTTCAACGAAATCTTTC  
AATTTCTTATTTTACTATGTTCAACTCTATGTATTCTCTATCCGTAGAGTACATTGAGTG  
TACAGAAATGGCTATAACAGAGTTTCTGTTATTCATATTAACAGCTACTCTAGGAGGAAT  
GTTTTATGCGGTGCTAACGATTAATAACTATCTTTGTAGCCCAGAAATGTTTCAGTTTA  
TGCTCCTACCTATTATCTGGATATAACCAAGAAAGATGTACGGTCTAATGAGGCTACTATG  
AAATATTTACTCATGGGTGGGGCAAGCTCTTCTATTCTGGTTCATGCCTTTTCTTGGCTAT  
ATGCTTTATCCGGGGGAGAGATCGAGCTTCAAGAAATAGTGAATGGTCTTATCAATACA  
CAAATGTATAACTCCCCAGGAATTTCAATTGCGCTTATATTCATCACTGTAGGAATGGG

TTCAAGCTTTCCCAGCCCCTTCTCATCAATGGACTCCTGACGTATACGAAGGATCTCC  
CACTCCAGTCGTTGCTTTTCTTTCTGTTACTTCGAAAGTAGCTGCTTCAGCTCCAGCCA  
CTCGAATTTTGGATATTCCATTTTATTTCTCATCGAGCGAATGGCATCTTCTTCTGGAAAT  
CCTAGCTATTCTTAGCATGATATTGGGGAATCTCATTGCTATTACTCAAACAAGCATGAA  
ACGTATGCTTGCATATTCGTCCATAGGTCAAATCGGATATGTAATTATTGGAATAATTGTT  
GGCGACTCAAATGGTGGATATGCGAGCATGATAACTTATATGCTGTTCTATATCTCCATG  
AACCTAGGAACTTTTGGCTTGCATTGTATTATTTGGTCTACGTACCGGAACTGATAACATT  
CGAGATTACGCAGGATTATACACAAAAGACCCCCTTTTGGCTCTCTCTTTAGCCCTATGT  
CTCTTATCCCTAGGAGGTCTTCCCCGCTAGCGGGTTTTTTTCGGAAAACCTCACTTATTC  
TGGTGTGGATGGGAGGCAGGCCTCTCCTTCTTGGTTTTCAATAGGACTCCTTACGAGCCT  
TCTTTCTATTTACTATTATTTAAAATAATCAAGTTATTCATGACTGGACGAAACCAAGA  
AATAACCCCTCACGTGCGAAATTATAGAAGATCCCCCTTAAGATCAAACAATTCCATCG  
AATTGAGTATGATTGTATGTGTGATAGCATCTACTATAACCAGGAATCTCAATGAACCCGA  
TTATTGCAATTGCTCAGGATACCCTTTTATGTTTCTGCTTTACGAATATGATATTTTCTG  
GGTATTTCTAGTAGTCTCAAGTCTTATTCTATTTTGGCATTCTAATTTCCACAGTTTTA  
GCCCAACTCGCGAAGGGCCGGAGAACTTTCAAGTTATGAATCGGGCATAGAACCAA  
TGGGCGATGCTTGGTTACAATTTCGAATCCGTTATTATATGTTTGTCTAGTTTTTGTGT  
TTTTGATGTTGAAACGGTTTTTCTTTATCCATGGGCAATGAGTTTCGACGTACTGGGGGT  
ATCCGTATTTCTAGAAGCTTTCCTTTTCGTGCTTATCCTAATGATTGGTTCAGTTTATGCA  
TGCGGAAAGGGGGCATTGGAATGGTCGACGAATTTTTTCTTGGTTAAGCATAATTGT  
AATTTTTCCGATATCCGCGGGTTCCTTAATTTCTTCTCCCTCATAGAGGAAATAAGGT  
AACTCGATGGTATACTTTGGGCATATGTTCAATTAGAACTCCTTCTAACGGCCTATGCATT  
CTCTTACCATTTCCAACCTGGATGATCCATTAATCAACTAGCGGAAGATTTCAAATGGAT  
CCGCTTTTTTTCAGTTTGACTGGAGATTGGGAATAGACGGACTCTCTCTCGGACCCGTTT  
TACTGACGGGATTTATCACCACTTTGGCTACTTTAGCGGCTTGGCCCCCTTACTCGGAATT  
CTCGATTATTCTATTTCTGATGTTAGCAATGTATAGTGGTCAAATAGGACTGTTTTCTC  
TCGGGATCTTTTGGCTTTTTTTTATCATGTGGGAGTTAGAGTTAATCCCGTTTATTTCTT  
CTATCCCTGTGGGGGGGGAGGAAACGCCTGTATTCAGCTACAAAATTTCTTTTGTACAC  
TGCAGGAAGCTCCGTCTTTCTATTAATAGGGGTTCTAGGTATCGGATTATATGGTTCCAA  
TGAGCCAACATTAATTTGGAAATATCGGCTCATCAATCCTATCCGGAGGCACTGGAAA  
TAATATTCTATATTGGCTTTCTTATTGCTTTTGTGTCAAATCACCTATTCTACCCTTACAT  
ACATGGTTGCCAGACACTCACGGAGAGGCGCATTATAGTACTTGTATGCTTCTAGCCGG  
AATCTTGTTAAAAATGGGGGCTTATGGATTAGTTCCGATTAATGTGGAATTATTGCCCA  
TGCGCATTCTATGCTTTCTCCCTACTTGATTATAGTAGGCGCAATCCAAATAGTCTATGCA  
GCTTCAACATCTCTTGGCCAGCGTAATTTAAAAAAAAGAATAGCCTATTCCTCTGTATCT  
CATATGGGTTTTATAATTATAGGAGTTGCCTCTATAACGAATACGGGACTCGACGGAGCC  
ATTTTACAAATAATATCTCATGGATTTATTGGTACTGCCCTTTTTTTCTTGGCAGGGACGA  
GTTATGATAGAATACGTCTTCTTTCTTTTACGAAATGGGCGGAATGGCTATCGCCATTC  
CAAAAGTATTTACGATGTTCAAGTATCTTATCAATGGCTTCCCTGGCATTACCGGGCATGA  
GCGGGTTTGTGTCAGAATTGCTAGTATTTTTTGGGAATAATCACCAGCCAAAATTTATTT  
TTATGTCAAGAATACTAATTACTCTTATAATGGCAGTTGGAATGATATTAACCTCCGATTTA  
TTCATTATCTATGTTACGCCAGATGTTCTATGGCTACAGACTTTTGAATACCCTAACTCCC  
ACTTTTTTTGATTCTGGACCGCGAGAGTTATTTGTTTTGATTGCTATCCTTTTACCCGTAA  
TAGGTATTGGTATTTATCCTGATTTTCTTCTCTCATTATCGTTTTGATAGGGTTGAATTTATT



GTATCGAATTTTTTTTTTA---ATGATCCTCGAACACGTCCTTGTTTTGAGTGCCTTTTTATT  
TTCTATTGGTATCTGCGGATTGATCACCAGTCGGAATATGGTTAGGTCCCTTATGTGTCT  
TGAACCTTATGCTGAATGCGGTTAATATGAATTTTGTAACATTTTCTGATTTTTTTGATAGT  
CGCCAAC TAAGGGGTGACATTTTTTCTATTTTTGTTATAGGCATTGCCGCCGCGGAAGC  
AGCTATTGGGTCGGCTATTCTTTCGTCAATTTATCATAACAAAAAATCAACTCATATTAAT  
CAATCGAATTTATTGAATAAGTTGGAATATATAAATAAATATTCATGGGTATGCCCTTCA  
TTCCACTTCCCCTTCTATGTTAATAGGGGCGGGACTCCTCCTTTTTTCCAACGACAACA  
AAACATCTTCGCCGTATATGGGCCCTTCCTACTATTTTTTTGTTAGGTATAGTTATGCTTA  
TTTCGGCCTATTTATCTATTCAGCAACTAAATAGAGGTTCTATCTATCAATATGTATGGTC  
TTGGACTATCGATAATGATTTTTCTTTAGAGTTTGGTCATTTGATAGATCCACTGACTTC  
AACAAATGTCAATCTTAATTTCTACTGTTGGACTTTCCGTTTTTCTTTATAGCGAAAATTAT  
ATGTTTCATGATCAGGGATATTTAAGATTTTTTTATTATCTGGCTTTTTTTAATTCTTCAAT  
GTTGGGCTTAGTTACTAGTTCTAATTTAATAGAAATTTATATTTTTTGGGAATTCGTTGGA  
ATGTGTTCTTATCTATTAATAGGCTTTTGGTTTACACGACCCGTTGCCGCGGAGGCCTGT  
CAAAAAGCATTGTAACTAATCGGGTAGGGGACTTCGCTTTATTATTAGGCATTTTGGGT  
CTTTATTGGATAACGGGGAGTTTCGAATTTTCGAGATTTGTTTCAAATATTTAATAAC---GA  
AATCCCTTTTTATTTTTGACTTTGTGCGCCTTCTTATTATTTGGGGGCGCGCTTGCTAAA  
TCTGCGCAATTTCCCCTCCATGTATGGTTACCTGATGCCATGGAAGGGCCTACTCCTATT  
TCGGCTCTTATCCATGCTGCTACTATGGTAGCCGCAGGAATTTTTCTTGTAGCTCGTCTT  
CTTCCTTTTTTCATAGCCATACCTTACATATTGAATCTAATTTCTTTGATAGGTATCCTAAC  
GCTCTTTTTAGCATCTACTTTAGCTCTTGCTCAAAAGGATATCAAGAGGGTTTTTGGCCTA  
TTCTACAATGTCTCAACTGGGTTATATGATGTTAGCTCTAGGCATGGGTTCTTATCGAGC  
TTCTTTATTTCAATTTGATTACGCATGCGTATTTCGAAAGCATTGTTGTTTTTAGGGTCTGGA  
TCCATAATTCATCAATGGAGGCTCTTGTGGATATTCGCCACAAAAAAGTCAGAATAT  
GGTTCTTATGGGTGGTTTTGACAAAACATATGCCAATTACAAAAGGAGCCTTTTTTATTAG  
GTACACTTTCTCTTTGTGGAAATCCACCCCTTGCTTGTTTTTGGTCCAAAGATGAAATTC  
TTAATGAGAGTTGGCACTATCCCCCATTACGCACTAATAGCTTGTTCACAGCTGGAT  
TAACTGCATTTTATATGTTTCGAATCTATTTACTTACTTTTTGAGGGACACTTAAATGTGAA  
TTTTCTAAATTATAGTGGAAAACGAAGTAGTTCCTTGTATTCACTATCTTTGTGGGGATC  
TTTACGGGGAAATGAAGAGATTCAAAGCTTGAAAACCTCATTAAACAATGAATTTTTTTT  
GTGGCACTAAGAAG---ACTCTCCCTTATCCCATGAATCGGAGAATACTATGCTATCCC  
TATCGTTGTATTGGTTCTATTTACTTTCTTTGTTGGAGCTATCGGA-----TTCGGGTTGGAT  
ATATTGTCCAAATTTAACCCCGTCTAGAAACCTTTCCATCAAAGTCAAAT---TCTG  
TGGGTTGG---GAATTTCTAACAAATGCAACTTTATCGGTCAGTATCTCGTATTGGGGAAT  
ATTTCTAGCTTCTTTTTTCTATAAGCCCTTTTCTTTCTTTACTAAAATTGAACTTAATG  
AATCTTTTTGTTATTTGGAGGGAAAAATAAGAAATCGGATATATGATTGGTTCGTATAAT  
CGTGGTTACATAGACGCTTTTTACAGAAAATCTTTAATGAAGGGTATAAGAGAATTAGC  
GGAATTCACTCATTTTTTCGATGCGCGAGTTATTGATGGAATTACGAACGGGCTGGGTA  
TTATGAGTTTTTTTTGTAGGAGAGGGTATCAAATATGTAGGGGGGGGG---CGCGTCTCTTC  
TTAICTTTTATTCTATTTAICTTGTGTATTAATTTGTTTATTAATTTCTGACATGGATTTGCC  
CGGACCAATACATGATTTTCTTTTAGTCTTTCTGGGGTCAGGTCTTATATTAGGTGGTCT  
CGGAGTGCTATTGCTTACCAACCCAATTTTTTCCGCCTTTTCTTTAGGATTGGTTTTTATT  
TGTATATCTTTCTTTTTTATTCTAGCAAACCTGCCATTTTGTAGCTGCTGCACAGCTCCTTA  
TTTACGTGGGAGCTATAAATGTTTTAATCCTCTTTGCTGTGATGTTTCATGAACAGTTTCAG

AATATTCAAAAGATTTGCACCTTCGGACTCTTGGGGCTGGGGCTACTTCACTAGTTTGT  
ACAACCTCTTTTTCTTTCAATAATATCGAATATTCTAGATACATCGTGGTATGGGATTATTT  
GGACTACAAGAGCAAACCAGATTCTAGAGAAAGACTTAATAAGTAATAGTCAACAAAT  
TGGAATTCGTTTATCAACAGACTTTTATCTTCCATTTGAACTCATTCTATAATTCTTTTA  
GTTGCTTTAATAGGTGCAATTGCTGCGGCTCGCCAGATGACTATACCAGCTACAAGAAA  
GGACCTCATGATAGTCAATATGGGCCCTCACCCATCAATGCACGGCGTTCTTCGGC  
TCATCCTTACTCTAGATGGTGAAGATGTTATTGACTGTGAACCCGTATTGGGTTATTTAC  
ACAGAGGGATGGAAAAAATTGCCGAAAATCGAACTATTATACAATATCTGCCTTATGTA  
ACACGTTGGGATTATTTGGCTACTATGTTACAGAAGGAATAACCGTAAATGCCCCAGA  
GAAATTAGGAAATACACAAGTACCTAAGAGGGCCAGCTATATCAGAACAATTTTGTTGG  
AATTAAGTCGTATAGCTTCTCATCTATTATGGCTTGGTCCCTTTATGGCAGATATTGGCGC  
ACAAACCCCTTTTTTTATATTTTCAGAGAGAGAGAATTAGTATATGATCTATTTGAAGC  
AGCCACCGGTATGAGAATGATGCATAATTATTTTCGTATCGGAGGAGTTGCGGCTGATCT  
ACCTCATGGTTGGATAGATAAATGCTTGGATTTCTGTGATTATTTTTTAACAGGACTTGC  
TGAATATGAAAACTTATTACGAGGAATCCTATTTTTTTAGAGCGAGTAGAGGGAATAG  
GCATTATTGGTAAAGAAGAAGCAATAAATTGGGGTTTATCGGGACCGATGCTACGAGCT  
TCCGGAATACAATGGGATCTTCGTAATAATCGACAATTATGAATGTTACAACGAATTCGA  
TTGGGAAGTTCAGTGGCAAAAAGAAGGAGATTCATTAGCTCGTTTTTTAGTCCGAATT  
GGTGAAATGCGGGAATCCATCAAATATTCAACAGGCTCTGGAAGGAATTCCGGGTG  
GGCCTTATGAAAATTTAGAAATTCGATGTTTTGATAGAGAAAGGTACCCAGAATGGGGC  
GGTTTTGAATATCGATTTCGTACGTAAAAAACCTCTCCTACTTTTGAATTGCCGAAACA  
AGAACTTTATGTGAGAGTTGAGGCCCAAAGGAGAATTGGGGATTTTTCTGATAGGA  
GATCAGAGCGCTTTTCCTTGGAGATGGAAAATACGTCCACCGGGTTTTATGAATTTGCA  
AATCTTCCTCAATTAGTTAAAAGAATGAAATTTGGCTGATATTATGACGATACTAGGTAG  
CATAGATATCATTATGGGAGAAGTTGATCGTATGTTCCCTATGGTAACTGGATTTCTAAAT  
TATGGGCAACAAATAGTACGAGCCACAAGGTACATTGGTCAAAGTTTGATGATTACCTT  
ATTGCACACAAATCGTTTTCCCTATAACTATTCAATATCCTTATGAAAAATTTATTACATCG  
GAGCGTTTTTCGAGGTTCGAATCCATTTTGAATTTGATAAATGCATTGCGTGCGAAGTATG  
TGTTTCGTGTATGCCCTATAGATCTACCTCTTGTTGATTGGAAATTTGAAAGCGATATTCG  
AAAGAAAGGCTTACTTAATTACAGTATTGATTTTGGAAATCTGTATATTTTGTTGGTAATTG  
TGTTGAGTATTGCCCAACAAATTTGTTTATCGATGACCGAAGAGTATGAGCTTTCCACCT  
ACGATCGTCACGAATTGAATTATAATCAAATTGCTCTGGGTTCGTTTACCAATGCCAGTAA  
TTGAGGATTACACAATTCGAACTATTTACAATTCGTCT-----  
-ATGCAGGGTCCCTTGTCTGCTTGGCTAGTCAAACATGGGCTAGTTCATAGGTCCTTGG  
GCTTCGATTATCAAGGAATAGAGACTGTACAAATAAAGCCAGAGGATTGGCAGTCCAT  
CGCTGTTATTTTATATGTATATGGTTACAATTATCTACGTTCCCAATGTGCTTATGATGTAG  
CACCAGGCGGGCTCTTGGCCAGTGTCTACCATCTTACGAGAGTAGAATGTGGTGTGGA  
TCAGCCGGAAGAGGTATGCATAAAAGTATTTGTTCCAAGGAATAATCCTGGAATTCGTT  
CCATTTTCTGGGTTTGGAAAAGTGCGGATTTTCAAGAAAGGGAATCTTATGATATGTTG  
GGAATCTCTTATGATAATCATCCACGGCTGAGCCGATTTTAAATGCCGGAAGTTGGATA  
GGGTGGCCCTTACGTAAGGATTACCTTGCTCCTAATTTTTATGAAATACAAGACGCTCAT  
-----  
-----ATGAATTCCACTGAGTTTCCCTTACTTG  
ATCGAAGAACTCAAATTCAGTTCTTTCAACTACATCAACTGATCTTCAAATTTGGTCG

AGACTCTCTAGTTTATGGCCGCTTCTTTATGGTACCAGCTGTTGCTTCATTGAATTTGCT  
TCATTAATAGGCTCGCGCTTTGACTTCGATCGTTATGGACTAGTACCAAGATCAAGTCCT  
AGACAGGCGGACCTTGTTTTAACAGCCGGAACAGTAACAATGAAAATGGCTCCCTCTT  
TAGTAAGATTATATGAACAAATGCCCGAACCAAGTATGTTATTGCTATGGGAGCATGTA  
CAATTACAGGAGGAATGTTTCAGTACCGATTCTTATAGTACTGTTTCGGGGAGTTGATAAG  
CTAATTCCTGTAGATGTTTATTTGCCGGGGTGTCCGCCTAAGCCAGAGGCAGTTATAGA  
CGCTATAACAAAACCTTCGTAAGAAAATAGCTCGAGAAATCTACGAGGATCCAATTAGGT  
CT-----GCGAATCGCTATTTTACTAGCAATCACAAGTTTCGTGTTGGACGCAGTATTCATA  
TTGGAAATTATGATAAAGGATTCTCTATCAACCCCCGCTACTTCAGAAAGGCACCCT  
GCAACATTTTTGAAATACAAAAGCTCAAGACCTTCTCACGTCACGAATTCGATGCAAA  
CTAGAAAGACCCTCTCTTGGATAAAGGACGAGATTACTGGATCCATTCCCCTATCGCTC  
ATGCTATATATATTAATGCAGGCACCCCTTCAAACGCATATCCCCTTTTTGCGCAGCAA  
GCTTATGAAAACCCACGAGAAGCCACTGGGCGTATTGTATGTGCGAATTGCCATTTAGC  
TAATAAGCCCGTGGATATTGAGGTTCCGCAAACGGTACTTCCTGATACTGTATTTGAAG  
CAGTTGTTCGAATTCCTTATGATATGCAACTGAAACAAGTTCTTGCTAATGGTAAAAGG  
GGAGCTTTAAATGTGGGAGCTGTCCTTATTTTACCCGAGGGGTTTCGAATTAGCCCCCCC  
TGATCGTATTTTCGCCCGAGATGAAAGAAAAGATAGGCAGCCTGCCTTTTCAGAGCTAC  
CGCCCTGCTAAAAAAAACATTCTTGTGATAGGTCCGGTTCCTGGTCAAAAAGTATAGTGA  
AATCACCTTTCCTATTCTTTCTCCGGACCCCGCTACGAATAAGGGCGTTCACTTCTTAAA  
ATATCCCATATATGTAGGCGGGAACAGGGGAAGGGGTCAGATTTATCCTGACGGGAGCA  
AGAGTAACAATACAGTTTATAATGCTACAACAGCAGGTATAGTAAGCAAAATCATA CGA  
AAAGAGAGGGGGGGGTACGAAATAAGCATAGCG-----GCAGACGGACGCCAAGTGGTT  
GATAGTATCCCCCAGGACCTGAACTTCTCGTTTCGGAGGGGCGAGGCTATCAAAGCGG  
ATCAACCATTAACAAGTAATCCTAATGTGGGTGGATTTGGTCAGGGGGATGCGGAAATA  
GTA CTTC AAGATGCATTACGTGTCCAAGGCCTTTTGTTCCTTCTTGACATCCGTTATTTTG  
GCACAAATCTTTTTGGTTCTTAAAAAGAAGCAGTTTGAGAAAAGTTCAATTGTCCGAAA  
TGAATTTTCATGAGTAAAGTCTATGATTGGTTTCGAAGAGCGTCTCGAGATCCAGGCGATT  
GCGGACGATATAACTAGTAAGTACGTTCCCCCTCATGTTAACATATTTTATTGTCTAGGG  
GGGATTACGCTTACTTGCTTTTTAGTACAAGTAGCTACTGGGTTTGCTATGACGTTTTAC  
TATCGCCCTACCGTTACTGAGGCTTTTTCTTCAGTTCAATACATAATGACTGAAGCCAAC  
TTTGGGTGGTTAATCCGATCAGTCCATCGATGGTCGGCAAGTATGATGGTTCTAATGATG  
ATCTTACACGTATTTTCGTGTCTATCTTACGGGTGGTTTTAAAAGGCCTCGCGAATTGACT  
TGGGTTACTGGTGTGGTTCTGGCTGTATTGACTGCATCCTTTGGTGTA ACTGGTTATTCC  
TTACCTCGGGACCAAGTTGGTTATTGGGCAGTCAAAATTGTAACAGGCGTACCGGAAG  
CTATTCCTGTAATAGGATCGCCCTTGGTAGAGTTATTGCGCGGAAGTGCTAGTGTGGGA  
CAATCCACTTTGACGCGTTTTTATAGTTTACACACTTTTGTATTACCCCTTCTTACTGCTG  
TATTTATGTTAATGCATTTCTTAATGATACGTAAGCAAGGATTTCTGGTCCTTAATGGG  
AGTAACAAAAAACCAGCTTGAATGATCCTGTATTAAGAGCTAAATTGGCTAAAGGA  
ATGGGACATAATTATTACGGAGAACCTGCGTGGCCCAACGACCTTTTATATATTTTTCCC  
GTAGTCATTCTAGGTACTATTGCATGTAACGTTGGCTTAGCAGTTCTAGA ACCATCAATG  
ATTGGGGAACCCGCAGACCCATTTGCAACTCCTTTGGAAATATTACCCGAATGGTATTT  
CTTCCCCTATTCAAATACTTCGTACAGTACCCAATAAGTTATTGGGTGTTCTTTTAATG  
GTTTCAGTACCTGCGGGATTATTAACAGTACCCTTTTTAGAAAATGTTAATAAATTCCAA  
AATCCATTTTCGTGCGCCAGTAGCGACAACCGTCTTTTTGCTTGGTACTCTAGCGGCCCT

TTGGTTGGGTATTGGAGCAACCTTACCTATTGATAAATCCCTAACTTTAGGCCTTTTTAT  
GATTGAAGTTTTTCTATTTGGAATCGTTTTGGGTCTCGTTCCTATTACTTTGGCTGGATTA  
TTTGTAACTGCATATTTACAATACAGACGCGCGGATCAGTTGGACCTTATGTCTACTCTA  
ACTAGTTATTTTCGGGTTTCTACTAGTGGCTTTAACTATAACCGCAGCTCTATTTATTGGTC  
TGAGCAAGATACGACTTATTATGGATATGATAAGTCTGGCTTGGGCTGCTTTAATGGTAG  
TCTTTACATTTTCCCTTTTCGCTGGTAGTATGGGGAAGAAGTGGACTCATGATTATTCGTT  
CGCCGGAACCAGAAGTCAAAATTTTGGTAGATAGGGATCCCATAAAAACTTCTTTTCGA  
GGAATGGGCTAGACCGGGTCATTTCTCAAGAACAATAGCCAAGGGGGCCCGATACTACC  
ACTTGGATCTGGAACCTACATGCCGATGCTCACGATTTTCGATAGCCATAACCAGTGATTT  
GGAGGAGATCTCTCGAAAGGTTTTTAGTGCCATTTTGGCCAGCTCTCCATCATCTTTC  
TTTGGCTTAGTGGCATGTATTTCCATGGTGCTCGTTTTTCCAATTATGAAGCCTGGCTAA  
GTGATCCGACTCACATTGGACCCAGTGCTCAGGTGGTTTGGCCAATAGTAGGCCAGGA  
AATATTGAATGGTGTATGTGGGCGGGGGCTTTCGAGGAATACAAATAACCTCCGGGTTTT  
TTCAGATTTGGCGAGCATCTGGAATAACTAATGAATTACAACCTTATTGTACCGCAATTG  
GTGCATTGGTCTTTGCAGCCTTAATGCTTTTTGCCGGTTGGTTCCATTATCATAAAGCTG  
CCCCAAAATTGGCTTGGTTCCAAGATGTCGAATCTATGTTGAATCACCATTTAGGAGGA  
CTCCTAGGCCTTGGGTCTCTTTCTTGGGCGGGGCATCAAGTACATGTATCTTTACCAATT  
AACCAATTTCTAAACGCTGGAGTAGATCCTAAGGAGATCCCACTTCCTCATGAATTTCT  
CTTGAATCGGGATCTTTTGGCTCAACTTTATCCCAGTTTTGCCGAGGGAGCAACCCCC  
TCTTTACCTTGAATTGGTCCAAATATGCGGAATTTCTTACTTTTCGAGGAGGATTAGATC  
CGGTAACCTGGCGGTCTCTGGCTGACCGATATTGCACACCATCATTAGCTATTGCAATTC  
TTTTTCTGATAGCGGGTCACATGTATAGGACCAACTGGGGCATTGGCCATGATCTAAAA  
GACCTTTTAGAAGCCCATAAAGGACCCTTTACAGGCCAGGGCCATAAGGGCCTCTATG  
AGATTCTAACAACCTCATGGCATGCTCAACTATCCCTCAATTTAGCTATGTTAGGCTCTT  
TAACCATTGTTGTAGCTCATCATATGTATTCCATGCCCCCTTATCCATACCTAGCTACTGA  
CTATGGTACACAACCTCTCGTTGTTACCCATCACATGTGGATTGGCGCATTCTCATAGT  
TGCGCTGCTGCGCATGCGGCCATTTTTATGGTACGAGACTATGATCCAACCTACTCGATA  
CAACGATCTCTTAGACCGTGTCTTAGGCATCGCGATGCAATCATATCACACCTCAACT  
GGGTATGTATATTTTTAGGATTTACAGCTTTGGTTTGTATATTCATAATGATACCATGAG  
TGCTTTGGGGCGCCCCAAGATATGTTTTAGATACGGCTATACTAAGCTACAGCCTGTCT  
TTGCTCAATGGATACAAAACACCCATGCTTTAGCACCCGGAGCAACGGCCCCCTGGTGC  
ACAACAAGTAGCAGTTTGACTTGGGGGGGGGGTGGCTTAGTGGCAGTAGGTGGCAA  
GGTTGCTTTGTTACCTATCCCACTGGGAACCGCGGATTTTTTGGTCCATCATATTCATGC  
ATTTACGATTCATGTGACTGTATTGATACTCCTGAAAGGTGTTCTGTTTGTCTCGTAGTTC  
TCGTTTGTATACCGGATAAAGGCAAATCTTGGCTTTTCGTTTCCCTTGTGATGGGCCTGGTA  
GAGGGGGGACATGCCAAGTATCCGCTTGGGATCATGTCTTCTTAGGCCTTTTTTGGATG  
TACAATGCTATCTCGGTAGTAATATTCCATTTAGTTGGAAAATGCAGTCAGATGTTTGG  
GGTAGTCTAAGTGATCAAGGGGTGCTAACTCATATTACGGGGGGGAACTTTGCGCAGA  
GTTCCATTACTATTAATGGGTGGCTCCGGGATTTCTTATGGGCACAAGCATCCCAGGTAA  
TTCAGTCTTATGGTTCTTCATTATCCGCATACGGCCTTTTTTCCCTAGGTGCTCATTTTGT  
ATGGGCTTTTTAGTTTAAATGTTTCTATTCAGCGGGCGTGGTTATTGGCAAGAACTTATTGA  
ATCCATTGTTTGGGCTCATAATAAATTAAGGTTGCTCCTGCTACTCAGCCGAGAGCCT  
TGAGTATTGTACAAGGACGTGCTGTAGGAGTAACCCATTACCTTCTGGGTGGAATTGCC  
ACAACGTGGGCGTTCTTCTTAGCAAGAATTATTGCAGTAGGAATGGCATTAAAGATTCCC

AAGGTTTAGCCGAGGCTTAGCCCAGGACCCCACTACTCGTCGTATTTGGTTTGGTATTG  
CTACTGCGCATGACTTCGAGAGTCATGATGATATACTGAGGAGCGTCTTTATCAGAATA  
TTTTTGCTTCTCACTTCGGGCAATTAGCAGTAATCTTTCTGTGGACCTCAGGTAATCTCT  
TTCATGTAGCTTGGCAAGGAAATTTTGAAGCATGGGTACAGGACCTTTACACGTAAG  
ACCTATTGCTCATGCAATTTGGGATCCTCATTTTGGCCAACCGGCCGTAGAAGCTTTTAC  
TCGAGGGGGTGCTCTTGGTCCAGTGAATATCGCCTACTCTGGCGTTTACCAGTGGTGGT  
ATACAATTGGTTTACGTACTAATGAAGATCTTTATACTGGAGCTCTCTTTCTATTATTTCT  
ATCCGCCATATCCTTAATCGCGGGTTGGTTACACCTCCAACCGAAATGGAAACCCAGCC  
TTTCGTGGTTCAAAAATGCCGAATCTCGTCTCAATCATCATTTGTCAGGGCTATTCGGA  
GTAAGCTCCTTGGCTTGGACAGGGCATTAGTCCATGTCGCTATTCTGATCCAGGGG  
GGAATACGTTTCGATGGAATAATTTATTAGACGTATTACCGCATCCTCAGGGATTAGGCC  
GCTTTTTACAGGTCAGTGAATCTTTATGCTCAAAACCCTGACTCAAGTAGTCATTTTTT  
TGCTACCTCGCAAGGATCAGGAACTGCCATTCTAACCTTCTTGGGGGATTCCATCCAC  
AGACGCAAAGTTTATGGCTGACTGATATTGCTCATCATCATTTAGCTATTGCATTTCTTTT  
TCTCATTGCTGGTCATATGTATAGAATACTTTGGGATTGGGCACAGTATAAAAGATCT  
TTTAGAAGCCCATATCCCCAGGGGGCGCTTAGGGCGCGGGCATAGGGGTCTTTATG  
ACACAATCAATAATTCGATTCATTTTCAACTAGGCCTTGCTCTGGCCTCCTTAGGGGTTA  
TTACTTCTTGGTAGCTCAACACATGACTCTTTACCTGCTTATGCATTCATCGCACAAAG  
ACTTTACTACCCAAGCCGCCTTATATACCCATCACCAATATATCGCAGGATTCATCATGA  
CAGGAGCTTTTGCTCATGGAGCTATATTTTTTCATTAGAGATTACAATCCGGAGCAGAAT  
GAGGATAATGTATTGGCAAGGATCTTAGACCATAAAGAAGCTATCATATCTCATTTAAGT  
TGGGTCAGCCTTTTTCTCGGGTCCATACTCTGGGACTTTATGTTCAATGATGTCATG  
CTTGCTTTTGGGACTCCCGAGAAGCAGATCTTGATCGAACCTATATTTGCCCAATGGAT  
ACAGTCTGCTCATGGTAAAACCTCATATGGGTTCGACGTACTTTTATCTTCAACGAATAG  
CCCAGCATTCAATTGCTGGTCAAGCATATGGCTGCCTGGGTGGTTAAATGCTATTAATG  
AG-----AATAGTAATTCATATTCTTAACAATAGGTCCGGGAGACTTCTTGGTCCATCATG  
CTATTGCTCTAGGTTTACATACAACTACATTGATCTTAGTAAAAGGTGCCTTAGATGCAC  
GTGGGTCCAAGTTAATGCCAGATAAAAAGGATTTTGGATATAGTTTTCTTGGCATGGT  
CCGGGACGGGGTGGTACTTGTGATATTTCCGGCTTGGGACGCATTTTATTTGGCAGTTTT  
CTGGATGTTAAATACCATTGGATGGGTACTTTTTTATTGGCATTGGAAGCATATTACATTA  
TGGCAGGGGAACGTCTCACAGTTTAATGAATCTTCCACTTATTTGATGGGATGGTTAAG  
AGATTACCTATGGTTAAACTCTTCGCAACTTATCAACGGGTATAACCCCTTCGGTATGAA  
TAGTTTATCAGTCTGGGCGTGGATGTTCTTATTTGGACATCTTGTTTGGGCTACGGGATT  
TATGTTCTTAATTTCTTGGCGTGGGTATTGGCAGGAATTGATTGAAACTTTAGCATGGGC  
TCATGAGCGCACGCCCTTGGCCAACCTTGATCCGATGGAGAGATAAACCAGTGGCTCTT  
TCCATTGTGCAAGCAAGATTGGTTGGGTAGCCACTTTTCCATAGGTTATATATTTACT  
TATGCAGCCTTCTTGATTGCCTCCACATCGGGCAAATTCGGTATGTCACACTCAGTAAA  
GATTTATGATACATGTATAGGGTGTACTCAATGTGTCAGAGCCTGCCCCACAGATGTCTT  
AGAAATGATACCTTGGGACGGGTGTAAAGCTAAGCAAATTGCTTCCGCTCCAAGAACA  
GAGGACTGTGTTGGTTGTAAGAGATGTGAATCGGCCGTGCCAACGGATTTCTTAAGCG  
TCCGGGTTTTATTTATGGCATGAAACAACCTCGAAGCATGGGTCTAGCTTATATGACAAC  
CTCAACTTCCCTTCCGTTTTAGTGCCTTTAGTAGGCCTAGTATTTCCGGCAGTTGCAATA  
GCTTCTTTATTTCTTCATGTTCAAAAAAGAAGATTTTATGCGAGATCTAAAAACATAT  
CTCTCCGCGGCGCCGGTCCTAAGCACTCTATGCTTCGGGGCTTTAGCAGGCCTATTGAT

AGAGATTAATCGTTTATTTCCGGATGCGCTGACATTCCCCTTTTTTTCATTCATGACTGC  
AATTTTAGAGAGACGCGAAAGCGAAAGCCTATGGGGTCGCTTCTGTAAGTGGGTAAGT  
AGCACCGAAAATCGTCTTTATATTGGATGGTTTGGTGTTTTGATGATTCCCTACCTTATTG  
ACTGCAACTTCTGTATTTATTATCGCCTTCATTGCCGCCCTCCAGTAGATATTGACGGTA  
TTCGTGAACCTGTTTCTGGATCTCTTCTTTATGGAAACAATATAATCTCTGGTGCCATTAT  
TCCACTTCTGCAGCTATTGGTTTGCACCTTTACCCAATATGGGAGGGCGGGCTGTGTG  
ACGAATGGTTATACAATGGCGGTCCATATGAGTTAATTGTTCTACACTTCCACTTGGTG  
TAGCTTGTTACATGGGCCGTGAGTGGGAAGTATTGTTCCGTCTGGGTATGCGCCCTTGG  
ATTGCTGTTGCATATTCAGCTCCTGTTGCAGCTGCTACCGCAGTTTTCTTGATCTATCCA  
ATCGGTCAAGGAAGCTTTTCGGATGGTATGCCTCTAGGAATCTCTGGTACTTCAACTT  
CATGATTGTATTCCAAGCCGAGCACAAATATCCTTATGCACCCATTCCACATGTTAGGTGT  
AGCTGGCGTATTCCGGCGGCTCCCTATTCAGTGCTATGCATGGTTCCTTGGTAACTCTAG  
TTTGATCAGGGAAACGACAGAAAACGAGTCCGCTAACGAAGGCTATAGATTCGGCCAA  
GAGGAAGAACTTATAATATCGTGGCTGCTCACGGTTATTTTGGCCGACTGATCTTCCA  
ATATGCTAGTTTTAACAACTCCCGCTCTTTACATTTCTTCTGGCTGCTTGGCCTGTAGT  
AGGTATCTGGTTTACTGCTTTAGGTATCAGCACCATGGCCTTTAACCTAAACGGGTTCA  
ATTTCAACCAATCCGTAGTTGATAGTCAAGGCCGTGTAATTAATACCTGGGCTGATATTA  
TTAATCGTGCTAACCTTGGTATGGAAGTTATGCATGAGCGGAATGCTCATAATTTCCCTC  
TAGACCTAGCTGCTGTGCGAAGCCCCATCTATAAATGGAATGGGTTTGCCTTGGTATCGT  
GTTCATAACCGTTGTATTGAATGATCCCGGCCGTTTGGCTTTCTGTCCATATAATGCATACGG  
CTCTGGTTGCAGGTTGGGCCGTTTCGATGGCTTTATATGAATTGGCCGTTTTTGACCCC  
TCTGATCCCGCTCTTGACCCAATGTGGAGGCAGGGTATGTTTCGTTATACTTTTCATGACT  
CGTTTAGGAATAAGCAATTCGTGGGGTGGTTGGAGTATCACA---GGAGGGACTCTCACA  
AATCCGGGTATTTGGAGTTATGAGGGCGTGGCCGGCGCACATATTGTGTTTTCTGGCTT  
GTGCTTTTTTGGCAGCTATCTGGCATTGGGTGTATTGGGATCTAGAAATCTTTTCTGATGA  
ACGTACAGGAAAACCTCTTTGGATTTGCCCAAGATCTTTGGAAATTCATTTATTTCTATC  
AGGGGTGGCTTGCTTTGGGTTTGGTGCATTTTCATGTAACAGGATTGTATGGTCTTGGGA  
TATGGGTGTCCGATCCTTACGGATTAACCGGAAGGGTGCATTCGTAAATCCAGCTTGG  
GGTGTGGACGGTTTTGATCCTTTTGTTCGGGAGGAATAGCCTCTCATCATATTGCAGC  
GGGCACATTGGGCATATTGGCAGGCCTATTCCATCTTAGTGTACGTCCGCCCCAGCGTTT  
ATACAAAGGATTGCGTATGGGCAATATTGAAACCGTCTTTCCAGTAGTATTGCTGCTGT  
CTTTTTTGCAGCTTTTGTGTTGCTGGAAGTATGTGGTATGGTTCAGCCACTACACCAAT  
CGAATTGTTTGGACCACTCGTTATCAATGGGATCAAGGATACTTTCAGCAAGAAATAT  
ATCGAAGAGTTGGTGCAGGACTAGCCGAAAATCAAAGTTTATCAGAAGCTTGGGCTAA  
AATTCCTGAAAAATTGGCCTTTTATGATTATATTGGTAATAATCCAGCAAAGGGGGGGT  
ATTCAGAGCGGGCTCAATGGACAACGGGGATGGGATAGCTCTTGGATGGTTAGGACAC  
CCTATCTTTAGAGATAAGGAGGGGGCGGAACTCTTGTACGTCGTATGCCACTTTTTTT  
GAAACATTTCCGGTAGTTTTGGTTCGACGGAGACGGAATTGTTAGAGCCGATGTTCCCTT  
TCGAAGGGCAGAATCCAAGTATAGTGTGCGAAGAGGTAGGTGTAAGTCTTGAGTTCTAT  
GGCGGCGAACTCAATGGAGTCATTTATAGCGATCCTGCGACTGTGAAAAAATATGCCA  
GGCGCGCTCAATTAGGTGAAATTTTCGAGCTAGACCGTGCTACTTTGAAATCCGATGGC  
GTTTTTCGTAGCAGCCCGAGGGGTTGGTTTACTTTTGGACATGCTTCATTTGCTCTTCTC  
TTCTTCTTTGGACACATTTGGCATGGCGCTAGAACCCTTGTTTCAGAGACGTTTTTCGCTGG  
CATGACCCAGATTTGGATGCTCAAGTAGAATTTGGGGCATTCCAAAACTTGGCGAC

CCAACCACAAAAAACGGGCAGTCATGAAAATCTTATATTCCCTGAGGAGGTTCTACC  
CCGTGGAAACGCTCTTTAATGGAACCTTAGCCTTAGCTGGTCGGGATCAAGAACTAC  
CGTTTTCGCTTGGTGGGCCGGGAATGCCCGACTTATCAATTTATCCGGCAAACCTTGG  
GAGCTCATGTAGCCCATGCGGGCTTAATCGTCTTCTGGGCCGGAGCAATGAACCTATTT  
GAAGTGGCTCATTTCGTACCAGAGAAGCCTATGTATGAGCAAGGGTTCATTTACTTCC  
CCACTTAGCGACTCTAGGTTGGGGGGTAGGTCCGGGCGGGGAAGTTATAGACACCTTT  
CCATACTTTGTATCTGGAGTACTTCATTTAATTTCCCTCCGCAGTATTGGGCTTTGGTGGTA  
TTTATCATGCACTTCTTGGGCCCTGAGACGCTTGAAGAATCTTTTCCCTTTTTTCGGTTATG  
TGTGGAAAGATAGAAAACAAAATGACCACAATTTTGGGTATTCACTTAATCTTGTTAGGT  
ATAGGCGCTTTTTCTTAGTATTCAAGGCTCTTTATTTTGGGGTCTATATGATACCTGGG  
CTCCCGGGGGGGGGATGTCAGAAAATCACCAATTTGACCCTTAGCCCAAGTCTTAT  
CTTTGCTTATTTACTAAAATCCCCTTTTGGGGGGGAAGGCTGGATTGTTAGTGTAGACG  
ATTTGGAAGATATCATTGGAGGGCACGTATGGTTGGGTTCCATTTGTATACTTGGGGGG  
ATCTGGCATATCTTAACCAAACCCTTTGCGTGGGCTCGTCGTGCACTTGTATGGTCTGG  
CGAGGCTTACCTGTCTTATAGTTTAGGTGCTTTATCTGTTTTTGGTTTTATTGCTTGTTGC  
TTTGTCTGGTTCAATAATACTGCTTATCCGAGCGAGTTCTACGGACCTACTGGGCCAGA  
AGCTTCTCAAGCTCAAGCATTTACTTTTCTAGTTAGAGACCAACGCCTTGGGGCTAACG  
TTGGATCCGCTCAAGGACCCACTGGGTTAGGTAAGTACCTAATGCGTTCCCGACCCG  
GGAGGTCATTTTTGGAGGAGAACTATGCGTTTTTGGGACCTGCGGGCTCCCTGGTTA  
GAGCCTCTAAGGGGTCCAAATGGCTTGGACTTGAGTAGGCTAAAAAAGACATAACAAC  
CCTGGCAAGAACGACGTTTCGGCGGAATATGACTCACGCTCCCTTAGGTTCTTTAAAT  
TCGGTAGGTGGCGTAGCTACCGAGATCAATGCAGTCAATTATGTCTCTCCTAGAAGTTG  
GTTAGCTACCTCGCATTTTTGTTCTAGGATTCTTCCTATTCGTAGGTCATTTATGGCACGC  
GGGAAGAGCTCGTGCAGCTGCGGCAGGATTTGAAAAGGGAATTGATCGGGATTTTGA  
ACCTGTCCTTTCCATGACCCCTCTTAACATGACTCTAGCCCTTGGTAAATTTACTAAAGA  
CGAAAAGGATTTATTTGATATTATGGATGACTGGCTGCGTCGGGACCCGCTTCGTTTTTGT  
AGGTTGGTCCGGCCTCTTACTATTCCCTTGCGCCTATTTTCGCCTTAGGAGGTTGGTTCAC  
AGGAACAACCTTTGTGACTTCATGGTATACCCATGGATTGGCTAGCTCCTATTTAGAAG  
GCTGCAATTTCTTAACCGCTGCAGTTTCTACTCCTGCTAATAGTTTAGCGCATTCTTTGT  
TATTACTGTGGGGTCCGGAGGCACAAGGAGATTTACTCGTTGGTGCCAATTAGGCGGT  
CTGTGGACTTTTTGTTGCTCTCCACGGCGCTTTCGGACTAATAGGTTTTATGTTACGTCAA  
TTTGAACCTGCCCCGTTCTGTTCAATTGCGCCCTTACAATGCAATCGCATTCTCTGGTCCA  
ATTGCTGTCTTTGTTTCTGTATTTCTGATTTATCCACTCGGCCAGTCTGGTTGGTTCCTTG  
CACCTAGTTTTGGTGTAGCGGCTATATTTGATTACACTCTTTTTTCAAGGATTTCATAA  
TTGGACATTGAACCCTTTTCATATGATGGGAGTTGCCGGTGTATTGGGCGCCGCTTACT  
ATGCGCTATTCATGGTGCTACCGTAGAAAATACTTTATTTGAAGATGGTGATGGTGCAAA  
TACATCCGTGCTTTAATCCAACCTCAAGCCGAAGAACTTATTCAATGGTCACCGCTA  
ACCGCTTTTGGTCCCAAATTTTTGGGGTTGCTTTTTTCGAACAAGCGCTGGTTACATTTCT  
TTTATGTTATTTGTACCAGTAACTGGTTTATGGATGAGTGCTCTTGGAGTAGTTGGTCTG  
GCTCTGAACCTGCGCGCCTATGATTTTGTFTTCCAGGAAATCCGTGCGGCGGAAGATCC  
TGAATTTGAGACTTTTTACACCAAAAATATTCTCTTAAACGAAGGTATTCGTGCTTGGAT  
GGCGGCTCAAGATCAGCCTCATGAAAATCTTATATTCCCTGAGGAGGTTCTACCCCGTG  
GAAACGCTCTTATGTCCGGAAGCACGGGAGAACGTTCTTTTGCTGATATTATTACCAGT  
ATTCGATACTGGGTCATTCATAGCATTACTATACCCTCCCTATTTCATTGCGGGTTGGTTAT

TCGTCAGCACAGGGTTAGCTTACGATGTGTTTGGAAAGCCCTCGTCCAAACGAGTATTTT  
ACAGAAAGCCGACAAGGAATTCATTAATAACTGGCCGCTTTGACCCTTTGGAACAAC  
TCGACGAATTTAGTCGATCTTTTATGACCATAGATCGAACCTATCCATTTTTTACAGTGC  
GATGGCTGGCTGTTACGGACTAGCTGTACCTACCGTTTTTTTTTTGGGATCAATATCTG  
CAATGCAGTTCATCCAACGAATGGCTACACAAAGCGTTGAGGATAGTTCTCGATCCGGT  
---CCAAGACGAACATAATGTAGGGAGTTTATTGAAACCTTTGAATTCGGAATATGGTAAA  
GTAGCTCCTGGGTGGGGAACCTGCTCCTTTTATGGGTGTCGCAATGGCTCTATTTACGATA  
TTCCTATCCATCCTTTTTGGAGATTTACAATTCCTCTGTTTTACTGGACGGAATTTTCGATG  
AATATGCTTACTCTTAAACTCTTTGTTTATACAGTAGTGATCCTTTTTGTTTCTCTCTTCAT  
ATTCGGATTTCTATCTAATGATCCGGGGCGGAATCCTGGACGTGCAGAAATGGCCGATA  
CTACTGGAAGGATTCCTCTTTGGATAATAGGTACTGTAGCTGGTATTCCTGTGATCGGTT  
TAATAGGCATTTTCTTTTATGGTTCCTATTCCGGGTTGGGTTTCATCCTTGATGATGAATAC  
CTTAGTTAATCTGTATCTACCTAATTCTGCCCTTATTTCGAGTACTTTTTTCTTCGGC  
AAATTGCCGAAGCCTACGCTTTTTTGAATCCAATCGTAGATCTTATGCCAGTGATACCT  
CTTTCTTTTTTCTCTTAGCCTTTGTTTGGCAAGCTGCAGTAAGTTTTCGAACGCCACAA  
TCAAACCCGAACGAACAAAATGTTGAATTGAATCGTACCAGTCTTACTGGGGATTATT  
ACTCATTTTTGTACTTGCTGTTTTATTTCCAATTATTTTTCAATATGGAAGTCAATATTC  
TCGCATTTATTGCTACTGCATTATTTATTCTAGTTCCTACCGCCTTTTTATTGATAATTTAC  
GTAAAAACAGTAAGTCAAAGCGATATGGAAACAGCAACCCTAGTCGCCATCTCTATATC  
TGGGTTACTTGTAAGTTTTACCGGTATGCCCTATATACTGCTTTTGGGCAACCCTCTCA  
ACAATAAGAGATCCATTCGAGGAACACGGGGACATGGAAGCACTGGTTTATACATTC  
CTCTTAGTCTCGGCTCTAGGAATCATTTTTTTCGCGATCTTTTTTCGAGAACCGCCAAG  
GTTCCAATAAAAAA-----ATGACTATTGCTTTCCAATTGGCTGTTTTTGCATTAATTGCT  
ACTTCATTAATCTTACTTATCGGTGTACCCGTTGTATTTGCTTCTCCCGAGGGTTGGTCA  
AGTAATAAAAATGTTGTATTTTCTGGGACATCGTTATGGGTTGGATTAGTCTTTCTTGTG  
GGTATCCTTAATTCTCTCATCTCA-----ATGTCACCACAAACAGAGACTAAAG  
CAAGTGTGGATTAAAGCAGGTGTTAAAGACTATAAATTGACTTATTATACTCCTGATT  
ATGAAACCAAGGATACCGATATCTTGGCAGCATTCCGAGTAACCCCTCAACCTGGAGTT  
CCACCTGAGGAAGCGGGGCGCGGTAGCTGCTGAATCCTCTACTGGTACATGGACAA  
CCGTGTGGACCGACGGGCTTACTAGTCTTGATCGTTACAAGGGACGCTGCTATCACATC  
GAGCCCGTTGCTGGAGAAGAAAATCAATATATTGCTTATGTAGCTTACCCCTTAGACCT  
TTTTGAAGAAGGTTCCGTTACTAATATGTTTACTTCCATCGTGGGTAATGTATTTGGGTTT  
AAAGCCCTTCGCGCTCTGCGTCTGGAGGATCTGCGAATCCCTCCTGCTTATGTTAAAC  
TTCCAGGGCCCGCCTCATGGTATCCAAGTTGAGAGAGATAAATTAACAAGTATGGAC  
GGCCCTCTTGGGATGTACTATTAAACCGAAATTGGGACTGTCCGCTAAGAACTACGGT  
AGAGCAGTTTATGAATGTCTTCGCGGTGGGCTTGATTTTACTAAAGATGATGAGAACGT  
GAACTCCAGCATTATGCGTTGGAGAGACCGTTTTCTTATTTTGTGCCGAAGCAATTT  
ATAAAGCACAGGCCGAAACGGGTGAAATCAAGGGGCATTACTTGAATGCTACTGCGGG  
TACATGTGAAGAAATGATCAAAAGGGCTGTGTTTGCCAGAGAATTGGGGGTTCCCTATC  
GTAATGCATGACTACTTAACGGGGGGATTCACTGCAAACTAGCCTGGCTCATTATTG  
CCGAGATAATGGGCTACTTCTTACATCCATCGTGCAATGCATGCAGTTATTGATAGACA  
GAAGAATCATGGCATACTTTTCGTGTACTAGCGAAAGCCTTACGTATGTCTGGTGGAG  
ATCATATCACTCAGGTACCGTAGTAGGTAACCTTGAAGGGGAAAGAGATATCACCTTG  
GGCTTTGTTGATTTACTACGCGACGACTTTGTTGAAAAAGACCGAAGCCGCGGTATTTA



TTTCACTCAAGATTGGGTCTCTCTACCAGGCGTTTTGCCTGTGGCTTCCGGGGGTATCC  
ACGTTTGGCATATGCCCCGCGCTGACCGAGATCTTTGGAGACGATTCCGTACTACAATC  
GGCGGAGGAACTTTAGGACACCCTTGGGGAAATGCGCCGGGTGCCGTAGCTAATCGA  
GTAGCCCTAGAAGCATGTGTACAAGCTCGTAATGAGGGGCGTGATCTTGCTCGTGAGG  
GTAATGAAATTATCCGCAAGGCTTGCAAGTGGAGTCGTGAATTGGCGGCTGCTTGTGA  
AGTATGGAAGGAGATAAAATTTGAGTTTGCCGCAATGGATACTTTG-----ATGGCCATAC  
ATTCAAAAAAACTTATACCCGGCGCACACGCAATGGAGCCGTAGATAGTCAAACGAA  
AGCCAATCCGCGAAATGGTTTGATCTGTGGACAGCGTCGTTGTGATAAGGGTCGTAAT  
GCCAGAGGCATCATTACTGCAGGGCACAGAGGGGGGGCCATAAGAGGCTATATCGTA  
AAATCGATTTTCGACGGAACAAACGCGGCGTATACGGTAGAATCGTAAGCATAGAATAC  
GATCCTAATCGAAATGCATGTATTTGTCTCATACTATGGGGATGGGGAGAAGAGATAT  
ATTTTACATCCCAGAGGGGCTATAATTGGGGATACCGTTGTTTCTGGTACAAGGGTTCCT  
ATAAAAATGGGAAATGCCCTACCTTTGACCAATATTCCTTAGGCACGACCATAACATA  
CATAGAAATTACACTTGGAAAGGGTGGACAATTAGCTAGAGCAGCGGGTGTGTAGCG  
AGACTGATTGCAAAAGAGGGGAAATCGGCTACATTAAACTACCCTCTGGTGAGGTCC  
GTTTGATATCCCAAACTGCTGGGCAACACTCGGACAAGTGGGGAATGTTGGAGTGAA  
CCAGAAAGCTTTGGGTAGAGCCGGATCAAATGTTGGCTAGGGAAGCGTCCTGTAGTA  
AGAGGATCCGCGATGAACCCTGTAGACCATCCCCACGGTGGTGGTGAGGGGAAGGCC  
CCGATTGGTAGAAAAAGACCCTCAACACCGTGGGGGCGTCCTGCACTCGGAATAAAA  
ACTCGAAAAAGGAATAAATATAGCGATACTTTTATTCTTCGTCGACGTAGTAAAATGATT  
CAAGCTCAGACCTATTTGAATGTAGCGGACAACAGCGGTGCCAGAAATTGATGTGTA  
TTCGAATCATAGGAACCAAGT---GGTCGACGATATGCTCGTATTGGGGACCTTATTGTTGC  
TGTGATTAAGGACGCAGCGCCAAAAATGTCTCTAGAAAGATCCGAAGTGATCAGAGCC  
GTAATTGTCCGCACTTGTAAGAAGTCAAACGTGATGACGGTTTGGTAATACGATATGA  
CGATAATGCTGCTGTTGTCATTGATAAAAAAGGAAATCCAAAAGGAACTCGCGTTTTTG  
GTGCGATGACCTACGAATTGAGACAGAAAAATTTACCCAAAATAATTTCAATAGCACCT  
GAAGTAATAATGCTTAGCCCAAAAAGACCAAAATTCGAAAAGAACATAGAGGACGG  
ATGAGAGGAAGATCCTCTCGAGGCAGTCGTATTTCTTTTCGGTAGATATGCTCTTCAAGC  
ACTTGAACCCGCTTGGCTCACATCTCGACAAATAGAAGCAGGTCCGGCAGCACTAACA  
CGAAATGTACGTCGCGGTGGAAAAATATGGGTGCGTATATTTCCAGATAAACCGGTTAC  
AATAAGATCCACAGGAACCCGTATGGGTAAGGGGAAAGGAAACCCCGAATATTGGGTA  
GCTGTGCTTAAACCGGGTAGAATACTTTATGAAATGGGTGGGGTTGCCGAAAATCTAGC  
CAGAAGGGCTATTTCAATAGCTGGGTCCAAAATGCCTATACGAACTCAATTCCTTATTC  
GGATATGTCGAGAACAACCAGAGGACCTGTTGCGCACAGACGAAGAATAAAAGAAAA  
GTCAATCGCAGCCGGTGGGAGAGGCTCTCATTCAACACTTTCTCGAGTTATTTTCGCAG  
GAGATTTTACGAGCGTGGAATTCGGGGACTCGTGATAGGAAGAGAAAAAGAGAGAA  
TTTCGGTGCCTTTGGATGGTTAGAATCAACGGGGGACTTCGAGGAAAC---GTTGTATCC  
TTTACTTATAGTAAACTAATTTCTTTTCTACACAAGGAAGAGATTGTTCTTAATCGAAAG  
GTTCTAGCGCAGATAGGCACACTGAACGAAGCGAACTTTTCGGGCTCTTTTTGCAGGT---  
---TCT-----ATGATAAAAGAAGTATCGGCTTGGGGTAAATATATCCCA  
ATGTCCGCTAACAAAGCGAGAAGAGTGATTGATCAGATTCGTGGGCGTTCCTACGAGG  
AAACACTTATGATACTCAAATTCATGCCTTATCGAGCATGTTATCCCATTTAAAATTAAT  
TTCTTCCGCAGCAGCAAATGGTAGTTACAATATGAATTTTCGACAAAAGAAGTTAATCA  
TTAGTAAAGCCGAAGTTAACGAGGGTACTAGTGTGAAAAAATGAGACCTCGGGCAA

GGGGCGGAGTGATACGATAAAAAGACCCACTTGTCATATAACTATCGTATTAAGCGAC  
ACATCCTTAAAT-----ATGGATGGAATCCAAATTGCAGGATGGACATACAAA  
AGGGGTTCGGTTATTCAATCAAAAT---CAATATACCTTTAATGTCTGAATCAGGATTCATA  
AGGGAGAGGTAAAGTCTATCCTCGAATTCTTCTTCAAGGCCAAGGTAATAGCTATAAAT  
AGTCATCGACTCCCCGGAAGGGGAAGAGGAAGGGGACCCATTATGGGACATCGAATA  
CATTACAAACGTATGATCCTTACGATTCAACCGAAATCTTCTATAAGACCCCTTCTACAG  
AAAAAGAGAATGGCGGTGCCAAAAAAGGCATTTCTCGATCGAAAAAGCGAGTGCGG  
AAAAATATCTGGAAAGGGAAAGGGTCTGGGGCGGCGTTGAAAGCTTTTTTCATTAGCGA  
AATCGTTTTCTACCGGGAAGTCAAAAGGTTTTGTAAAAAAGAAATAAAAAAGATGGC  
TAAGGGTAAGGAGGCCCGGGTAAGGGTTATTTTGGAAATGTACGAGTTGTGTTCGCAAT  
GGT-----GTTAATAATAAA-----GGGATTTTCAGATATATTACTCAAAGAATCGACACAAT  
ACGTCTAGTCAATTGGAATTGAGAAAGTTCTGCCCTCATTGTTTCAAACATACGATTTA  
CAGGGAGATAACGAAGATGAAAGTAGGGGCCTCCGTCCGTAAAATGTGTGCAAAATGT  
CGACTGATCCGTAGGAAGAATCGACTTCGAGTAATTTGTTATAACCCGAGACATAACA  
AAGACAGCGAATGATTTCGAGAAAAGGTAAGAGTCTCCGCTCAGACACCACGGTGGAA  
ATGTGTTGAATCAAGAGCAGATGACAAGCGTCTTTTTTATGGTCGCTTCATTCTATCTCC  
ACTTAAGAAGGGTCAAGCCGATATAATAGGCATTGCGATGCGAAGAGCTTTGCTTGG  
GAAATAGAAGGAACATGTATCACACATGCAAAATTTGCG-----AAAATACCACACGAGT  
ATACTACTATAGCAGGTATTAAGAATCGATCTATGAAATCTTAATGAATTTGAAAGAAA  
TTGTATTGAGAAGCAATCTCTATGGAACCTCGTGATGCATCTATTTGTGTTCAGGGGTCCCC  
GAGATGTAAGTCTCAAGACATAATTTTACCCCTTCCACGGCAATCGTTGATAATACA  
CAGCATATATTTACCCTAACGGAACCAATCGACTTTTGTGTTGGATTA AAAATTGAGAG  
AGGTCGGGGCTATTCTATAAAAATTCCAATGCCAACCGACCACCATGACAGTGCTTATC  
CTATAGATGCTGTATTTCATGCCTGTTAGAAATGTGAATCATAGTATTCACTTATGAAAG  
GGGGAGC-----CACGAGATGCTTTTTCTCGAAATATGGACAAATGGGAGTTTAACTCCTA  
AAGAAGCGCTTCGTGAAGCCTCCCGCAAGCTTATTAATCTTTTAATGCCCTTTCTACAT  
GCGGAAGAAGAA-----AACTTCTATTTAGTAGAGAACAATCAAATCAAGACACAGAA  
GAACTGCCAATAGATTTA-----TGTGGGTTGAAAGATATTTAT  
ATTGACCAGTTAGAATTGCCCCCAAGGTTCTATAATTGCCTCAAAAGATCGGGTATACAT  
ACAGTAATGGACCTTTTAGATAAGAATAGGGACGACCTTATGAAAATGACGCATTTTCG  
CCAAGAAGACATAGAAGGGGTGATGAACATTTTAAACAACAAT-----ATTTGCAACTC  
CTTTCCCGAAGGGGTATGCTTGGCGATAAAAAT---GAAGGAATGGCTGCAATACCTGGG  
CTTAATCAGATACAATTTAAGGGGTTTTCTAGGTTTCGTTGATCAGGGCTTAAAGAGAAGA  
ACTTTCTAAGTTTCAAAGATAGAGGATCTAGATAAAGACGTAGACTTCCGATTATTTG  
CGAAACATATCAATTGGTTCGAACCCTTGATAAAGAGCGAGATGCTGTATATGAATCA  
CTCACCTATTGTTCTGAATTATATGTATGCGCGGGATTCCTTTTGTAAAGAGC---AGGCCTAT  
GCAAAAACAGACAATTTGGATTGGAAACATTCCTTTAATGAATTCAGTGGGAACCTTTC  
TAATAAATGGAATATACAGAATGGTAGTCAATCAAATATTGCAAAGTCCAGGTATCTATT  
ATCGATCAGAATTGGACCATAAGGGAATTTTGGTCTATACCGGCACCATAATATCAGATT  
GGGGAGGAAGATTAGAATTAGAGATTGATAGAAAAGCACGTATATGGGCTCGCGTAAG  
TAGGAAACAGAAAATATCTATTCTAGTTCTATCATCGGCTATGGGTTTCGAATCTAAGAGA  
AATTCTAGAGAATGTTTCGCTACCCTGAAATTTCTTGTCTTTTTTGGCTGATAAAGCGAA  
CGAAACATTTGGTCAAAAGAAAATGCCATTTTGGAAATTTTATCAACAGTTTGTGTTGTG  
TAGGTGAAGATCCATTATTTCCGATTCCTTATATAAGGAATTGCAAAAGAAATTCCTTC

GCCAAAGGTGTGAACTAGGAGGGCTTGGTCGACGAAATATTAACCGGAGACTGAATCT  
TGCTATATCCCAGAGCAAGACGTTTTTGTACCGCGAGATATATTGGCAGCTACAGATCA  
TTTGATTGGAATGAAATTTGGAATGGGTAGACTTGACGAT-----ATGAATCATTTGAAAA  
ATAAACGTATTCGTTCTGTAGCGGATCTCTTACAAGATCAATTCGGACTGGCTCTGATTC  
GTTTAGAAAGGGTGGTTACGGGGGCTATAGGGGGAGCATTGAAA---CATAAATGGATA--  
-CGGACCCCTCAGAGTTTGGTAACCCCTCCCA-----TTAGCAAGCACTTATGCAT  
CCTTTTTCGGATTACACCCACTATCTCAAGTTTGGATGGAACGAATCCATTGGCACAA  
ATAGTTCATGGGAGAAAGTGGAGTTTTTGGGTCTGGGGGGTTGACAGCGGAACCG  
CTAGTTTTCGGATACGAGATATCCATCCTAGCTACTATGGACGCATTTGCACAATTGACA  
CATCTGAAGGAATCAAGGTTGGCCTTATGGGATCCTTAGCAATTCATGCGAGAATCGGT  
CATTATGGA---TCTCTAGAGAGTCCTTTTTAT-----GAAATCCCCGAGAAATCAAAAAG  
G-----GCGCGGATGCTTTATTTATCATCAAGGAGAGATGAATACTCTATGATAGGGACAG  
GGAATCTTTGGCACTGAATCAAGGTTACCAGGAGGAGCAGATTGTTCCGGCTCGATA  
CCGTCAGGAATCCTGACTATTGCATGGGAGGAGGTTTCATCTTCGAAGCATTTTTCCCT  
TCCAATATTTTTCTATTGGAGCCTCTCTCATTCTTTTATCGAGCATAATGACGCCAATCG  
GGCTTTAATGAGTTCGAATATGCAGCGCCAAGCAGTTCCGCTTCTCGGTCCGAGAAG  
TGCATTGTTGAACTGGGTTGGAAGGACAAGTGGCTCTAGACTCAGGAGTTAGCCTTA  
TAACGGAACACGCGGAAAGCCATTTCTATCCATACTGATAAGATCCTTTTTATCGGGC  
AACGGGGATAGTCTAAGCATTCCATTAGTTATGTATGAGGGTTCCAACAAAAATACTTG  
TATACATCAAAAACCCAGGTTTCAGCGGGGTAAATGCATTAGAAGGGGACAAGTTTTA  
GCGGACGGTGCCTACGGTTGGGGGAGAAGCTCGCTTTAGGGAAAAACGTATTAGTAG  
CTTATATGCCATGGGAGGGTTACAATTTGAAGATGCGGTACTCATTAGTGAGCGTCTG  
GTATATGAAGGTATTTACTTCTTTTACATACGGAAATATGAAATTCAGATTGATGAG  
ACAAGCCAAGGC---CCCAGAGGATCACTAAAAAATACCGCATCTAGAAGCCCATTT  
ACTACGAAATTTAGACAAAACGGAGTTGTAATCTTGGGATCTTGGGTAGAGGCGGGC  
GATATTTTAGTAGGTAAATTAAGGCCCCAGCCGGCGCAGGAATCAGTC-----CCGGAA  
AATCGATTCTGAGAAGCCGTATTTGGCCCTCAGATACCCACTTCAAGGGCAGCCTGTCT  
AAAACCTATAGGTGGCAGGGGCCGCTTATTGATGTGAGATGGAGCCCGAAGGGG  
GGGCCCTCTAATCCG-----GAAAGGATTCGTGTATATATTTACAGAAACGTGAAATC  
AAAGTAGGTGATAAAGTTGCCGGAAGGCATGGAATAAGGGGGTCTTTCCAAAATTT  
TGCCTAGACAAGATATGCCCTATTTGCAAGACGGAAAGCCTGTTGATATGGTCTTCAAC  
CCCCTAGGAGTACCCTCACGAATGAATGTAGGACAGATATTTGAATGCTCCCTCGGGTT  
GGCGGGGGTTCTGCTAGATAGACATTACCGAGTAGCACCCTTTGATGAGAGATATGAAC  
AAGAGGCTTCGAGAAAACCTGGTCTTTTCGGAATTACATGAAGCCAGTAAGCAAACAG  
GGAATCCGTGGGTATTTGAACCCGAGTATCCGGGAAAAAGCGTACTATTTGATGGAAG  
AACAGGGGATCCCTTTCAACAACCTGTTATAGTGGGGCAGCCCTATATCTTGAAATTA  
TTCATCAAGTTGATGATAAAATACACGGGCGTTCCAGCGGTCCTTATGCAATTATTACAC  
AACAAACCCCTTAGGGGAAGGGCCCGGGGGGGCCAGCGGGTAGGAGAAATGGAG  
GTTTGGGCTCTAGAGGGATTTGGCGTTGCTCATATTTTACAAGAGATGCTTACTTATAAG  
TCGGATCATCTTAGAACTCGCCAAAAGTGTGGTACTACAATCATTGGAGGAGCAAT  
ACCTAAA-----GCTGCTCCAGAATCCTTTGATTGCTCGTTCGAGAACTACGATCTTTGG  
CCCTAGACCTGAACCATTTCTTCTATCTGAGAAGAAGTTTCAGATGAATAGGAAGGAA  
GCT-----ATGATCGATCGGTCTAAGCATCAACAACCTTCGAATTGGATTAGCTT  
CTCCTCAACAATAAGTGCTTGGGCCAATAAGACCCTGCCACTGGAGAGATAGTCGG

AGAGGTGACACAGGGCTTTTTTTTTGATTTCCAAACCAAGAAGCCAGAAAGGGGTGG  
ATTGTTTTGTGAAAGAATTTTGGACCTATAAAAAGCGGAATTTGTGCTTGTGGAAATT  
CTCGCCAATCGGAGATGAAAAAAGAGAGAGAATTTGCACCGAGTGCGGAGTCG  
AATTTGTTGATTCTCGGATACGAAGATATCAAATGGGCTACATCAAACCTGGCATGCCCC  
GTGGCTCATGTGTGGTATTTGAAGCGTCTTCCTAGTGATATCGCGACTCTTTTAGATAAA  
CCTCTTAAAGAACTAGAAGCCATAGTATACTGCGGT-----TTTTCTTTTGCTAGGCCG---A  
CAGCCAAAAACCTACTTTTTTACGATTGCGAGGAACATTCGAATATAAAACCCAATCC  
TGGCAAAATGGGATCCCCCTTTTTTACTACCTACGGCTTCGATACATTCGAAATCGC  
GAAATTCCTACTGGAGCGGGCGGTATCCGGGAACAGTTGGTTCGATCTAGATTTGCGAG  
TTATTAGAGATTCTTCGTTGGCAGAATGGAAAAATTA---GAAAGG---GGGCCACGGG  
TAATGTATCGAAAGACCGGAAAATGGAAACAAGAAAGCGCTTTTTGCTTAGACGCATG  
GGATTTGCGAAGCATTGATTCAAACCAATGTAGAACCTGAATGGATGGTTTTATGTCTA  
TTACCAGTCTTCCCCCGAGTTGAGACCGATGCTTTGGCTAGATGAGGATAAAGTAAT  
GGCTACAGATATTAATATCCTTTATCGTCAAGTTATTTCTCGGAACAATGCTCTTCTCAA  
GTTATTAAGAAAAGGAGAAGAGAGGACGAAGACGTAAGGAGTCATGAGGAAAT  
GGTACAAGAAGCCGTGGATACACTTCTTGATAATGGAATCCGCGGACAGCCACTAAGG  
GATGGTAATAATAGGGTTTATAAGTCATTTACAGATGTAATTGAGGGCAAAGAGGGAAAG  
ATTCCGCGAGACTCTCCTTGGCAAACGGGTTCGATTATTCAGGACGTTCTGTCAATTGTCG  
TAGGCCCTCACTCTCATTACATCAATGTGGGTTGCCTCGTGAATAGCAATAGAGCTT  
TTCCAGCCATTTGTAATTCGCGGTCTAATTAGACAGCACCTTGCTCCGACCATAGGGGC  
TGCTAAGAGTCAAATTCGGGAAGAAGAACGAATTGTATGGGAAATACTTCAGGAAGTT  
GTGCAGGGGCATCCTGTATTGCTGAATAGAGCACCCACTTTGCATAGATTAGGCATACA  
GGCCTTCCAACCCATTTTAGTGGAAGGGCGCGCTATTTGGTTACACCCACTCGTTTGTA  
AAGGATCAACGCAGACTTTGATGGGGATCAAATGGCTGTTTCATGTACCCCTATCCTTG  
GAGGCTCAGGCGGAGGCTCGTTTACTTATGTTTTCTCATATGAATCTCCTGGCTCCGTCT  
ATGGGGGATCCCATTTGCGTACCAACTCAAGATATGCTTATTGGGCTCTATATCTTAACA  
AGCGGGAATCGCCGGGGTCTTGTGTCAATAGGTATAGTCCGTGGAATCGCAGAAAC---  
-----TCCCAAACGGAT---ATTTACGACAATAGCGCTAGGTATAGGAACGGAAGGGAGCCC  
CTCTTTTGTAATCCTATGATGCAATTGGAGCTTATCGACAGAAAAGAATTCATTTAGAC  
AGCCCTTTTTGGCTCCGGTGGCGACCCTGTCAAGGC---CTTATTCTTTCA-----AGAGGA  
GTTCTGTGCAAGTTCATTATGAGTCTTTGGGTACCCATCATGAGATTTACGGACACTTT  
CTAATAGTAAAAAGTATAAAAAAAGAAATGCGTTGTATATACATTCGAACCACTCTTGG  
TCATATTTTTCTTTATCGAGAAATTGAAGAAGCTATACAAGGCTTTTCTCAG---ATCTCCC  
CCTCG-----ATGCCAGAGCGAGCCAACCTGGGCTTTCACAATA  
AAGTAATAGACGGGGCTGCTATTAACGACTTATTAGTCGATTAATAGATCACTTCGGAA  
TGGGATATACATCCCACATCCTGGATCAAGTAAAGACTCTGGGTTTCCAGCAAGCCACC  
GCTACATCCATTTCAATAGGAATTGATGATCTTTAACGATACCTTCTAAGGGATGGCTC  
GTCCAGGATGCTGAAGAACAAGCTTTCTTTTGGAAAAACACTATCATTATGGGAATGT  
ACACGCGGTAGAAAAATTACGCCAATCCGTCGAGATATGGTATGCTACAAGTGAATATC  
TGCGACAAGAAATGAATCCCAATTTTAGAACCACCGACCCCTCAATCCTGTACATGTA  
ATGTCTTTTTCGGGAGCTAGGGGAAGTCCCTCTCAAGTACACCAATTAATAGGTATGAG  
AGGGTTAATGTCAGATCCCAAGGACAAATGATTGATTTACCCATTCAAAGCAATTTAC  
GCGAGGGGCTGTCTTAACAGAATATATCAATTTCTAGCTATGGAGCCCGCAAGGGGTT  
GTGGATACTGCTGTACGAACATCAGACGCTGGGTATCTTACGCGCAGACTTGTGAAGT

AGTTCAACACCTTGTTGTACGTAGAACCGATTGTGGGACCACCCGAGGGCTCTCTGTA  
AGTCCTCCAAATGGGACGGTGTCTG--GAAAGGTTTTTTATTCAAACATTAATGGGTCGT  
GTATTAGCAGACGATATTTATCTGAGTGC GCGATGCATTGCCGTTTCGAAATCAAGATCTT  
GGGATGGGCCTTGTC AATCAACTCATAACC-----TTTCAAAGACAGCCAATATC  
GATCCGAACCCCTTTACTTGTAGGAGTACGTCTTGGATCTGTCTGATTATGTTATGGTCTG  
GAGTCTACTCATGGCGACTTGGTTCGAATTGGGGGAAGCTGTAGGTATTATTGCCGGTTC  
AATCCATTGGGAGAACCGGGGACTCAGCTAACATTAAGAACCTTTCATACCGGTGGAGT  
ATTCACAGGAGGTACGGCAGAACAGGTGCGAGCCCCTATCAACGGAAAAATAAAATTC  
AATGAGGACCTGGTTCATCCCGCACGGACACGTACGGGCAGCCTGCCCTTCTATGTTA  
TATAGATTTTTATGTA ACTATTGAGAGTGAAGATATTATACATAGCGTGCCGATTCCACCA  
AAGAGTCTTCTTTTAGTTCAAATGATCAATATGTAGAATCAGAACAAGTAATTGCCGA  
GATTCGCGCGGGAGCATCCCCCCT--CCTTTTCAAGATAGAGTTCGAAAACATATTTAT  
TCTGACTCAGAGGGAGAA--ATGCACTGGAGTACCGATGTGTACCATGCACCCAAAAA  
GCCCTCTAGTAATGTCCATCTCTTACCAAAAACAAGTCATTTATGGATATTAGTAGGC----  
----GGG-----TCGGGCTCTGCTCTTTTTTCGATCTACAAGGATCAAGATCAAATGAGCATT  
CAT-----TCTCTTCTGCCCAAGGGAGGTATACGCCTAGCCTTTCC-----GTGAAAAACGA  
TCAA---TTGAGACAAAAATTCTTTAGTTTGGGTCTTTACGGCAAAAACAGGATTAGGAT  
TCGGA ACTAT--TCAGAGCCTAATCTAAGCCTAGCGACTGCCCGTTTCGAATCCCCCATAT  
CCTGCT--ATTCTACGCGAGAATTTGGAT-----TTATTGGCGAAGAGGCGAAGAAAGAGA  
TTTCTGATTCCATTCCGATCGGAGCATGACCGAGAAAAAGAACGAATACTCTGTTCCGA  
CATCTCGATTGCAATACCATAACC---AATGGGATTTTCCCTAGAAATGGCATTCTTGCTT  
ATTTTCGATCATCCTCGATACAAAAGAGGGGGCTCGGGAATTACGAAATACGGGACTCC  
CGGGGTGGATGAAATCGTCAAAAAGAGGAT-----TGCATCGACTCTCGG---GGGGTCC  
AAGAATTGCAGCCAAAATACGGGAAAGTGGATCCTCTTTTTTTTTCATTCCAGAGGAAGT  
GCATATTTTTCCGGACTCCTCTTCCATAATGGTACGGAAACAATAGTCTCCTTGGAGTCAA  
TACACAAATTACTTTAAATCAAAGAAGCCGAGCCGGCGGGTTGGTCCGAGTGGAGAG  
AAAG-----GTTTCGACTTCAAATCTTTTCTGGGGATATCCATTTTCCGGAGGGGGCAGA  
TAATATATCCCGACATAGTGGCATCTTGATAGCACCG-----CGAATAAGAAAACCAAATT  
CTAAAGAATCCAAAAA-----TTGAAAAATTGGACCTATGTCCAACGG-----ATTCGACC  
TACCAAGAAAAAGAAAAAGTCTTTTGTTTTACTCCGACCCGTAGTACATATGAAATAG  
CGGACGGTATAAGGTTAGCAAGACTTTTTCTCAAGATCTAGTGCAGGAAATGGATAAT  
ATACA ACTTCGAGTTGTTAATTATATCCGTTTTTCGAGATGGCAGCTTTATTCCGGGTCATTT  
CTGGCACAAGTATTC AATTAGTTCCGGACTTGCTTATTCTTGAATTGGGACCAAGACAAA  
-----GGGGATTCTCTGATATGGAGGAGGCCCGCGCTTCTTTTGTGGAAGTAAGTACAA  
AGGGCCTGGTTCGAGATTTCTAAGAATTC ACTTAGGG-----CAGATTTCCGATATCAGA  
AAAAGGAATGATCCGTCGGGGTCGGGATTGCCCTCTGAG---AATGGTCCAGATCACAC  
CAACACCAATCCCTTTTATTCTAGTTAT-----TCCAAGGCAAGGGTTCGACAACCG  
CTTCGCCAAAACCAA---ACTATTCGTACGCCCGTGAAT-----CGAAATAAGGAATGCC  
AATCTTTCCTAATTTTGT CATCATCTAATTGTTTTCAACTAGGTCCA-----TTCAACGATGT  
AAAATATCACAAT-----ACGAAAAAGAATCCGACCCTCTAATCCCAATTAGGAAATT  
GTCGGGTCCTTTAGGAGCA-----GTCCCCAAAATTGCGAATTTTTCTCTA-----TGTTACC  
AGTTAATAACA-----AAGAATCAGATTTCA---GTAATGAAATATTTGCAACTTGACAAT----  
----TTAAAACAGACCTTTCAAGTAATC-----CAT---TTTTTTTTAATGGATGAAAACGGGA  
GA-----ATCTATAAGCCCGATCCATCGAGTACCATCTTTTTGAATCCATTGAATTTGAATT

GGTATTTTCTACAGCATCATTTTTGTGAAGAAACATCCACAATAATAAAT---CTTGGGCA  
GTTTCTTTGCGAAAGTTTATGTATAGCCAAAAACGGACCA-----CGCCTCAAATCGGG  
TCAAGTTTTAATTGTCCAA---GTCGGATATGTAATAATAAGATCGTCTAAGCCCTATTTGG  
CTATTCCAGGAGCAACTCTTCATGGCCATTATGGAAAAATCCTTTCCGCGGGGGATACC  
TTAGTTACATATCTATATAAAAAATCGCGGTCTAGTGATATAACACAGGGTCTTCCCAA  
GTAGAAAGGATGTTTGAAGTGCGTTCAACTGATTCAATATCGATGAACCTAAAAGAGA  
GAGCGGAGGGTTGGAACGAGTGATAACAAGAATTCTTGGAATTCCTTGGGGATTCTT  
GATTAGTGCCGAGCTAACAATGGCGCAAAGCCGTATTTCTTTGGTTAATGAGATCCAAA  
GGGTTTATCGATCCCAGGGAGTGACAGATCCAGAACAGACATATAGAAATTATTGTACGC  
CAAATAACATCAAAGTCTTGGTTTCAGAA-----GATGGAATGTCTAATGTTTTTTTAC  
CCGGAAGAACTTATTGGATTGTTACGAGCGGAACGAACGGGGCGGGCTTTGGAAGAGG  
GGGTATCTTACCGCGCCATCTTATTGGGAATAACTCGAGCATCTCTAAACTCAAAGT  
TTTATATCCGAAGCGAGTTTTCAAGAGACTGCTCGGGTTTTAGCAAATCCGCGATCCG  
AGGCCGTCTCGATTGGTTGAAAGGCCTGAAAGAGAACGTTGTTCTAGGAGAGATGATC  
CCCGTTGGGACCGGATTCAAGGGATTAGTCCACCCTTCG-----AGGCAACTTAAGACTC  
TTTCTCTGGCTCTGGAAACCAAAGGAGGAGTCTATTTGAAGGAAGAAAAGTG---AGA  
AATCTTTTTTTATATCATAGAGAGTTGGTTGATTCT-----TGCAGTTCAAAGAATTTCCAG  
GATATAGCA-----ATGACAAGAAGATATTGGAACATCAAGTT  
GGAAGAGTTGCTGCGAGCAAGAGTTCATCTTGGTCATCGTATTAAGAAATGGAATCCTA  
GAATGGCCCCTTATGTTTCTATTTACGTAAGATCGTCATATTACAAATCTTACTAGAA  
CCGCGCGCTTTTTAGCCGAAGCTTGCATTAGTTTTTTATGCCGCAAGTAAAGGAAGC  
CGATTCTTAATTGTTGGTACCACAAAAACGTAGCTAATTCAGTAGTACGGGCTGCAAT  
AAAGGCTCGATGCCATTATGTTAATAAAAAGTGGCTCGGCCGTATGTTAACGAATTGGT  
CCACTACGGAAATGAACTTCGTCAGTTAAGGGACTTGAGAAGGGCACAAAAGACGG  
GGGGATTTCGACCGTCTTCGGAAAAGAGATGCAGCCATTTCAAGAGACAATTGAAAC  
AATTGCAAAAATATCTAGGCGGGGTGCAATATATGACGGGATTGCCCGATATTGTGATCG  
TCGTTGAGCAGCAACCCGCAGTTACGGCCCTTCGAGAATGTATCACTTTGGGAATTCC  
AACAATTTGTTAATCGATACAGATTGCGACCCCGATCTCGTGGATCTTCCAATTCCAGC  
AAACGATGACTCTATCTCTTCAATCCGACTAATTCTTAACAAATTAGTATTCGCAATTTG  
TGAGGGTCGTTCCAGC-----ATACGAAATCCTATGGGACAAAAATAAATCCACTCGGTT  
TCAGGCTTGGTACAACCCAAAATCATCATCTGTGTTGGTTTGAAAAACAAAAAATTAT  
TGCGAGAGCCTAAAAGAAGATAAAAAAATACGAGACCGCATTAGAATTATATAGACA  
ACCGTAGA-----AGCGGACCCATGAAGGATATTACACGGATACAGATTGAAAAGGGA  
ATGGATTTGATTAAAGTCATAATCTATATGGGATTCCAAGAGTTATTTCATGGGAGACAAA  
CCTGCCAAAACCGAATTAAGGGTAAGGGAATTAAGTAATGTGCGAAAAGCACTTC  
ACCTGCTAAATCGGCAGTTGAAGGTTGTTATTAGAAACATTAGTAATCCTTATGGAGAC  
CCCAATATTCTTGCAGAATTTCTAGCCGACCAATTAACAAAACAGAATTTTCATTTCTGTA  
AGCAATGAAAAGAGTTATTGAATTAGCCAAAGAAGCGAATACAAAAGGAGTTAAAGTA  
CAAATCGCAGGACGTCTTGGCGGAAGAGATATTGCACGGGTGCAATGTCTTCTACAGG  
GTAGAGTCCCTCTCCACACAATTCGCGCTAAAATTGATTTCTGTTCCACTCGAGTTCAA  
ATGCTCTATGGGGTATTAGGCATCAAATTTGGATCTTTTCAGATACGGAGATGTGCGAT  
TACCGAGGACCTCGTTTCAAAAAATAAGCCGCTGGGGGCTTTACCGGGACTAACTA  
GTAGAATTCCAAAGAGTCGAAAAGTAATTCTAAGCCACCGCGCTCTAGTAGGAAAAA  
ATCTCAATATCGTATTGTTTGAAGAAAAACAAAGATTGCGTTTTTCATTATGGTCTTAC







repeated text block





TTTTGAAATCAAAAATGAATATTTGCGAACACTGTGGACATCATTGAAAATGAGTAGT  
TCAGATAGAATAGAACTTTTGATTGATCCAGGTACTTGGGTTCCCTATGGATGAAGATATG  
GTCTCTGTGGATACCATTGAATTTCCGTTGGAAGAGGAATCTTACAAAGATCGTATTGA  
TTCTTATCAAAGAAAAACAGGATTAAGTACTGAGGCTGTTCAAACAGGCACAGGTCAACTA  
AACGGTATTCCCATAGCAATTGGGGTTATGGATTTTTCAGTTTATGGGGGGTAGTATGGGC  
TCCGTAGTTGGCGAGAAGATCACTCGTTTGATCGAATATGCTACCAATCGGTTTTTGCC  
TCTTATTCTAGTGTGTGCTTCCGGAGGAGCACGCATGCAAGAAGGAAGTTTGAGCTTG  
ATGCAAATGGCTAAAATAGCTTCCGCTTTATATGATTATCAATCAAAGAAAAAGTTATTC  
TATGTATCAATCCTTACATCTCCTACTACTGGTGGGGTGACAGCCAGCTTTGGTATGTTG  
GGCGATATCATTATTGCCGAACCCAATGCCTACATTGCATTTGCGGGTAAAAGAGTAATT  
GAACAAACATTGAATACGACAGTACCTGAGGGCTCACAAACGGCTGAATATTTATTCCA  
TAAGGGCCAATTCGACCTAATCGTACCACGTAATCTTTTAAAAGACGTTCTGAGTGAGT  
TATTTTCAGCTCCACGCTTTCTTTTCTCTGAATCAAATTCATCAAGATGGTAACCCCTC  
GAGCGGATGAAATTAGTAATATTATTCGGGAACGTATTGAGCAATATAATAGAGAAGTA  
AAGGTTGTAAATACCGGTACCGTACTTCAAGTAGGCGACGGCATTGCCCGTATTTATGG  
TCTTGATGAAGTAATGGCGGGTGAATTAGTAGAATTTGAAGAGGGTACAATAGGCATTG  
CTCTGAATTTGGAATCAAATAATGTCGGTGTGTATTAATGGGTGGCGGTTTGATGATCC  
AAGAAGGAAGTTCTGTAAAAGCAACAGGAAGAATTGCTCAGATACCCGTAAGCGAGG  
CTTATTTAGGTCGTGTTATAAATGCCCTAGCGAAACCTATTGATGGTCGAGGTGAAATTT  
CAGCTTCTGAATCTAGGTTAATTGAATCACCGGCTCCTGGTATTATTTTCGAGACGTTCCG  
TATATGAGCCCCTTCAAACAGGACTTATTGCTATCGATTGATGATCCCTATAGGACGTG  
GTCAGCGAGAATTAATTATTGGGGATAGGCAGACCGGTAAAACAGCAGTAGCCACAGA  
TACGATTCTCAATCAACAAGGGCAAAATGTAATATGTGTCTATGTCGCTATTGGTCAA  
AGGCATCTTCTGTGGCTCAGGTAGTGACTACTTTACAAGAAAAGGGAGCAATGGAATA  
CACGATTGTGGTAGCCGAAACGGCGGATTCTCCGGCTACATTACAATACCTCGCTCCTT  
ATACAGGAGCAGCTCTGGCTGAATATTTTATGTACCGTAAACGACACACTTTAATCATT  
ATGATGATCCTTCCAAACAAGCACAGGCTTATCGCCAAATGTCTCTTCTATTACGAAGA  
CCGCCGGGTCGCGAAGCTTATCCAGGAGATGTTTTTTTATTGTCATTCACGACTTTTGG  
AAGAGCCGCTAAATCAGGTTTCGCGTTTAGGTGAAGGAAGTATGACTGCTTTACCAATA  
GTTGAGACCCAATCGGGAGATGTTTCAGCTTATATTCCTACTAATGTAATCTCAATTACA  
GATGGCCAAATTTTCTTATCCGCCGATTTATTCATGCTGGAATCAGACCTGCCATTAAC  
GTGGGGATTTCCGTCTCCAGAGTAGGATCTGCCGCTCAAATTAAGCCATGAAACAAG  
TAGCCGGCAAACCTAAAATTAGAATTGGCACAATTCGCAGAATTAGAAGCCTTTGCACA  
ATTCGCGTCTGATCTCGATAAAGCTACTCAGAATCAATTGGCAAGAGGTCAACGATTAC  
GCGAGTTGCTCAAACAATCTCAATCATCCCCTCTCACGGTGGAAGAACAGGTAATGAC  
TATTTATACTGGAACGAATGGTTATCTTGATTCATTAGAAATTGGACAGGTAAGAAATT  
TCTCGTTGAGTTACGGACTTATTTAAAACGAATAAACCAGTTCGAAGAAATCATAT  
CTTCTACCAAGATATTCATGAGGAAGCAGAAGCCCTTTTGAAAGACGCTATTCAAGA  
ACAAATGGAACGCTTTCTACTTCAGGAACAGGTAATGAGAATAAATCCTACTACTTCTG  
ATCCTGGGGTTTTCCGCGCTTGAAAAAAAACCTTGGGACGTATAGCTCAAATCATCGG  
TCCGGTACTGGATGTAACCTTCCCCCCCCGGAATAATTTACAACGCTCTGGT  
AGTTAAGGGTCGAGATACTGCCGGTCAACAAATTAATGTGACTTGTGAAGTACAACAA  
TTATTAGGAAATAATCGAGTTAGAGCTGTAGCTATGAGTGCTACAGATGGTCTAATGAG  
AGGAATGGAAGTGATTGACACGGGAGCTCCTTTAAGCGTTCGGTCCGGCGGAGCGAC

TTTAGGACGAATTTTCAACGTGCTTGGAGAGCCCGTTGACAATTTAGGTCCTGTAGATA  
CTCGCACAACATCCCCTATTCATAGATCTGCGCCTGCTTTTATACAGTTAGATACAAAAT  
TATCTATTTTTGAAACAGGAATTAAGTAGTAGATCTTTTAGCCCCCTATCGCCGTGGAG  
GAAAAATAGGACTATTCGGGGGAGCTGGAGTGGGTAAAACAGTACTCATTATGGAATT  
GATCAACAACATTGCCAAAGCTCATGGGGTGTATCTGTATTTGGCGGAGTAGGTGAA  
CGTACTCGTGAAGGAAATGATCTTTACATGGAAATGAAAGAATCTGGAGTAATTAATGA  
ACAAAATATTGCAGAATCGAAAGTCGCTCTAGTATATGGTCAGATGAATGAACCGCCTG  
GAGCTCGTATGAGAGTTGGTTAACTGCCCTAACCATGGCAGAATATTTCCGAGATGTT  
AATGAACAAGACGTACTTCTATTTATCGACAATATCTTCCGTTTCGTTCAAGCAGGATCC  
GAAGTATCCGCCTTATTGGGTAGAATGCCTTCCGCTGTGGGTTATCAACCCACCCTTAGT  
ACCGAAATGGGTTCTTTACAAGAAAGAATTACTTCTACCAAAGAAGGATCCATAACTTC  
TATTCAAGCAGTTTATGTGCCTGCGGACGATTTGACCGATCCTGCTCCTGCCACGACAT  
TTGCACATTTAGATGCTACTACCGTACTATCAAGAGGATTAGCTGCCAAAGGTATCTATC  
CAGCAGTCGATCCTTTAGATTCAACTTCAACTATGCTCCAACCTCGGATCGTTGGTGAA  
GAACATTATGAAACTGCGCAAAGAGTTAAACAAACTTTACAGCGGTACAAAGAACTTC  
AGGACATTATAGCTATCCTTGGATTGGACGAATTATCCGAAGAGGATCGCTTAACCGTA  
GCAAGAGCACGAAAAATTGAGCGTTTCTTATCACAACCTTTTTTTCGTAGCAGAAGTATT  
TACGGGGTCCCCGGGAAAATATGTTGGTCTATCAGAAACCATTAGAGGGTTTAAATTGA  
TCCTTTCCGGAGAATTAGATGGTCTTCCTGAACAGGCTTTTTATTTGGTAGGTAACATCG  
ATGAAGCTACTGCGAAGGCTACAACTTAGAAATGGAGAGCAAATTGAAGCAAATGA  
CCTTAAATCTTTGTGTATTGACCCCGAATCGGATTGTTTGGGATTCAGAAGTTAAAGAA  
ATAATTTTATCTACTAATAGTGGACAAATTGGCATATTACCCAATCACGCGCCTATTGCCA  
CGGCTGTAGATATAGGTATTTTGAGAATACGCCTTACTGACCAATGGCTAACGATGGCTC  
TGATGGGCGGTTTCGCTCGAATAGGTAATAATGAGATCACTGTTTTAGTAAATGATGCG  
GAAAAGGGTAGTGACATTGATCCACAAGAAGCTCAGCAAACCTTGAAGTAGCGGAA  
GCTAACTTGAGTAAAGCTGAAGGCAAGAGACAAACAATTGAGGCAAATCTAGCTCTC  
AGACGAGCTAGGACACGAGTGGAGGCTCTTAATATGATTTTCGATGAAAAATCTAACCG  
ATTCTTTCTTTCTTTGGGTTTATGGTCATCCGCCGGGAGTTTCGGGTTTAAATACCGATA  
TTTTAGCAACAAATCCAATAAATCTAAGTGTAGTGCTCGGCCTATTGATTTTTTTTGGAA  
AGGGAGTGTTAAGTGATTTATTAGATAATCGAAAACAGAGGATCTTGAAGACTATTCTA  
AATTCAGAAGAACTACGCAGGGGAGCCATTGAACAGCTGGAAAAAGCCCGGGCACGT  
TTAAGGAAAGTGGAATGGAAGCGGATCAGTTTCGGGTGAATGGATACTCTGATATAG  
AACGAGAAAAGTCGAACTTGATTAATTCAACTTATCAAACCTTGGAAACAATTGCAAATT  
TACAAAAATGAAACCATTCGTTTTGAACAACAAAGAGCGAGTAATCAAGTCCGACAAC  
GGTTTTTCCAACAAGCCTTAAAAGGAGCTCTAGGAACTCTGACTAGTTCTTTGAACAA  
CGAGTTACATTTACGTACCATCAATGCTAATATTGGCATGTTTGGGACGCTGACAGAAAT  
AATCGATATGAATCCACTGATTTCTGCCGCTTCCGTTATTGCTGCTGGGTTGGCCGTCCG  
GCTTGCTTCTATTGGACCTGGGGTTGGTCAAGGTAAGTCTGCTGCGGGCCAAGCTGTAGAA  
GGGATCGCGAGACAGCCCGAGGCGGAGGGAAAAATACGAGGTAATTTATTGCTTAGTC  
TGGCTTTTATGGAAGCTTTAACAATTTATGGACTGGTTGTAGCGTTAGCACTTTTATTG  
CGAATCCCCTTGT-----ATGAAATTATGTTATATCAACACACTAAAAGGCTTATATGATAT  
ATCCGGTGTGGAAGTCGGCCAACATTTCTATTGGAGAATAGGAGGTTTTCAAGTCCATG  
CCCAAGTAATTACTTCTTGGGTTGTAATTGCTATCTTATTAGGTTTCAGCCATTATAGC  
TGTTTCGTAATCCACAAACCATTCTACTGACAGTCAGAATTTCTTCGAATATGTTCTTGA

ATTCATTTCGAGATGTGAGCAAACTCAGATTGGCGAAGAATACGGTCCATGGGTTCCCT  
TTATTGGAAC TTTGTTTCTATTTATTTTGTTCGAATTGGTCGGGTGCTCTTTTACCTTG  
GAAAATCATA CAGTTACCTCATGGGGAATTAGCCGCGCCTACAAATGATATAAATACTAC  
TGTTGCTTTAGCTTTACTCACGTCAGTAGCATATTTCTATGCGGGTCTTAGTAAAAAAGG  
ATTAGGTTATTTGGTAAATACATTCAACCAACTCCAATCCTTTTACCCATTAATATTTA  
GAAGATTCACA AAAACCCCTATCACTTAGTTTTTCGACTTTTTCGGAAATATATTAGCTGAT  
GAATTAGTAGTTCTTGTTCTTGTTCTTTAGTACCTTCAGTGGTTCCTATAACCCGTCATGT  
TACTTGGATTATTTACAAGCGGTATTCAAGCTCTTATTTTTGCAACTTTAGCTGCGGCTTA  
TATAGGCGAATCCATGGAGGGTCATCATATGATATCTTCAATTTTAGAGCATATATTAATT  
CATATATCCTTTTCGGTCGTTTTCAATTGTAATTACAATTCGTTTACTAATCTTATTAGTT---  
GAAATCGCAGGACTATATGATTTCGTCCAAAAAAGGCATAATACTACTTTTTGTCTGTATA  
ACAGGATTATTAGTTACTCGTTGGATTATTTCGAGGCATTTACCATTAAGTGATTTATACG  
AATCATTCA TTTTCTTTCATGGAGTTTGTCCATTATTCATATGGTTCATATTTAAAAAA  
ACACAAAAACCATTTAAGTGCAATAACCGCGCCAATTGTTATTTTGACCCAAGGCTTTG  
CTACTTCTGGTTTTTTAACCGAAATGCATCAATCCAGAATATTAGTACCCGCTCTTCAAT  
CTCATTGGTTAATGATGCACGTAAGTATGATGGTATTGGGCTATGCAGCTCTTTTATGCG  
GATCATTATTATCAGTAGCACTTATTGTCATTACATTTAGAAAAATAATAAGAACTTTTGA  
TAAAAGCAATGAGATCCAATACATTAACGAAAGAAACAATGTTTTATGG-----CCTTTTA  
TTTCTTCTAAGAATTATTATAGGTCTCAATTGATTCAACAATTGGATCATTGGAGTTATCG  
TATTATTAGTCTAGGTTTTATCTTTTTAACCATGGGTATTCTTTTCGGGAGCGGTATGGGCA  
AACGAGGCATGGGGCTCATATTGGAATTGGGATCCGAAGGAACTTGGGCATTTATTAC  
TTGGACTATATTCGCGATTTATTTACATATTCGAACAAATCCAAATCTGGAAGGTGTAAA  
TTCTGCAATTGTAGCCTCCCTGGGATTTCTTATAATTTGGATATGCTATTTGGGAGTCAAT  
CTATTAGGAATAGGGCTACATAGTTATGGTACATTTACACTAACAATGGCAAAAAAGAA  
AGCATTCA TCCCTTCTATATCTTGCATCTATAGTATTTTTGCCCTGGTGGATCTCTCTCT  
CAGTTACTAAAAGTCTGGAATCTTGGGTACTAATTGGTGGGATACTAGGCAATCCGAA  
ATTTTTTTGAATGATATTCAAGAAAAGAGTATTCTAAAAAAATTCATAGAATTAGAGGA  
ACTCTTATTCTTGGACGAAATGATAAAGGAATACCCGGGAACACATCTAGAAAAGCTTC  
GTATCGGA---TACAACGAAACGATCCAATTGATCAAGATGCACAATGAAGATTGTATCC  
ATACGATTTTGC ACTTCTCGACAAATATGATCTGTTTCGTTATTCTAAGTGGTTATTCTAT  
GCTAGGTAATGAAGAACTTGTTATTCTTAACTATTGGGTTCAAGAATTTCTATATAACTT  
AAGCGACACAATCAAAGCCTTTTCCATTCTTTTAGTAACTGATTTATGTATAGGGTTCCA  
TTCGCCCCACGGTTGGGA ACTAATGATTGGATCTGTCTACAAAGATTTTGGATTTGCTC  
ATAATGATCAAATTATATCCGGTCTTGTTTCTACCTTTCCGGTCATTCTAGATACAATTTT  
AAAATATTTGATTTTCCGTTATTTAAATCGTGTATCTCCCTCACTTGTAGTGATTTATCATT  
CAATGAATGACATGCCTATTGGTGTCCAAAAGTACCTTTTCGAAGTCCTGGAGAGGA  
AGATGCATCGTGGGTTGACATAAAC---CGACTTTATCGAGCAAGACTTTTTTTTAGGC  
CAAGAGGTTGATAGCGATCTCTCGAATCAAATTATTGGTCTTATGGTATATCTCAGTCTA  
GAGGATGATAGCAAAGATCTGTATTTGTTTATAAACTCTCCCGGGGGTGGGTAATACC  
CGGAGTAGCTATTTATGATACTATGCAATTTGTACAACCAGATGTACAGACAATATGCAT  
GGGATTGGCCGCTTCAATAGGATCTTTTCTTCTGGTTCGGGGGAGAAATTACCAAACGTC  
TAGCATTCCCTCATGCTAGGGTAATGATCCATCAACCTGCTAGTTCTTTTTATGAGGCAC  
CCGCAGGAGAATTTATCCTGGAAGCGGAAGAAATGATGAAGCTGCGCGAAACCATTAC  
AGGGGTTTATGTACAAAGAACAGGCACACCTCTATGGGTTGTATCCGAAGACATGGAA



CTTGTTCAATTCCTATCACAAACAAGATGGACTTTACCTAGGCTAAGAATGGACCAACTATT  
AAATCTGGGATGGAAATTTCTTTTACCTATTTCTCTCGGCAATCTGTTATTAACAACCTC  
TTTCCAACCTCAGTTCGCTGATGATCTGGCATGTACAGAATGAAAACCTTCATTCTCGATT  
CTACGAGAATTTTATGAAAGCCTTTCATTTGCTTCTCTTCGATGGAAGTCTTATTTTCC  
CAGAATGTATCCTAATTTTGGCCTAATTCTTCTTCTGATGATCGATTCAACCTCTGATCA  
AAAAGATATACCTTGGTTATATTTTCATCTCTTCAACAAGTTTAGTAATGAGCATAACGGC  
CCTGTTGTTCCGATGGAGAGAAGAACCTATGATTAGCTTTTTCGGGAAATTTCCAAAGG  
ACAATTTCAACGAAATCTTTCAATTTCTTATTTTACTATGTTCAACTTTATGTATTCCCTC  
TATCCGTAGAGTACATTGAATGTACAGAAATGGTTATAACAGAGTTTCTGTTATTCGTAT  
TAACAGCTACTCTAGGAGGAATGTTTTTATGCGGTGCTAACGATTTAATAACTATCTTTG  
TAGCTCCAGAATGTTTCAGTTTATGCTCCTATCTATTATCTGGATATACCAAGAAAGATGT  
ACGGTCTAATGAGGCTACTATGAAATATTTACTCATGGGCGGGGCAAGCTCTTCTATTCT  
GGTTCATGGTTTCTCTTGGCTATATGGTTCATCCGGGGGAGAGATCGAGCTTCAAGAAA  
TAGTGAGTGGTCTTATCAATACACAAATGTATAACTCCCAGGAATTTCAATTGCGCTTA  
TATTCATCACTGTCGGAATTGGGTTCAAGCTTTCCCAGCCCCTTCTCATCAATGGACTC  
CTGACGTATACGAAGGATCTCCCACTCCAGTCGTTGCTTTTCTTTCTGTTACTTCGAAA  
GTAGCTGCTTCAGCTTCAGCCACTCGAATTTTCGATATTCTTTTTATTTATCATCAAAC  
GAATGGCATCTTCTTCTGGAAATCCTAGCTATTCTTAGCATGATATTGGGGAATCTCATT  
GCTATTACTCAAACAAGCATGAAACGTATGCTTGCATTCGTCCATAGGTCAAATCGG  
ATATGTAATTATTGGAATAATTGTTGGAGACTCAAATGGTGGATATGCAAGCATGATAAC  
TTATATGCTGTTCTATATCTCCATGAATCTAGGAACTTTTGCTTGCATTGTATTATTTGGTC  
TACGTACCGGAACTGAGAACATTTCGAGATTATGCAGGATTATACACGAAAGATCCTTTT  
TTGGCTCTCTTTTCGCCCTATGTCTCTTATCCTTAGGAGGTCTTCCCTCCACTAGCAGGT  
TTTTTCGGAAAACCTTCATTTATTCTGGTGTGGATGGCAGGCAGGTCTATATTTCTTGGTT  
TCAATAGGACTCCTTACGAGCGTTGTTTCTATCTACTATTATCTAAAGATAATCAAGTTAT  
TAATGACTGGAAGAAACCAAGAAATAACCCCTCACGTGCGAAATTATAGAAGATCCCC  
TTTAAGATCAAACAATTCCATCGAATTGAGTATGATTATATGTGTGATAGCATCTACTATA  
CCAGGAATATCAATGAACCCGATTATTGAAATTGCTCAGGATACCCTTTTTATGTTTCTA  
CTTTACGAATATGATATTTTCTGGGCATTTATAATAATAGCAAGTGCTATTCCTATTTTGG  
CATTTTTGATTCGGGAGTTTTAGCCCCGATTCGCAAAGGGCCGGAGAACTTTCTAGT  
TATGAATCGGGAATAGAACCAATGGGTGATGCTTGGCTCCAATTTCGAATTCGGTATTAT  
ATGTTTGTCTAGTTTTTGTGTTTTTGTATGTTGAAACGGTTTTTCTTTATCCATGGGCAA  
TGAGTTTTGATGTATTGGGTATATCTGTATTTATAGAAGCTTTCATTTTCGTGCTTATCCTA  
ATTGTTGGTTCAGTTTATGCATGGCGAAAAGGAGCATTGGAATGGTCTACGAATTATTTT  
CCTTGGTTAACAATAGTTGCCGTTTTACCAATATTCGGGGGTTCCCTTAATTTTCTTTCTCC  
CTCATAAAGGGAATAAGGTAATTAGGCTCTATACTCTATTTATATGCATCATAGAACTCCT  
TCTAACAACCTATGCATTCTATTATTATTTCCAATTGGATGATCCATTAATGCAACTCACG  
GAGGATTATAAATGGATCGATTTTTTTGATTTTTACTGGAGATTGGGAATAGATGGACTT  
TCCATAGGACCCATTTTACTGACAGGTTTATAACCACTTTAGCTACTTTAGCGGCTTGG  
CCGGTACTCGAGATTCCTGATTATTCCATTTCTGATGTTAGCAATGTATAGCGGCCAA  
ATAGGATTATTTTCTTCTCGAGACCTTTTACTTTTTTTTCATCATGTGGGAATTAGAATTA  
TTCCCGTTTATCTACTTATATCCGTGTGGGGGGGAAGAAACGCTTGTATTCAGCTACA  
AAGTTTATTTTGTACACTGCGGGAAGCTCCGTTTTTTTTTATTAAGTGGGAGTTCTGGGTATC  
GGTTTATATGCTTCCAATGAACCAACATTAATTTTGAACATCAGCTAATCAATCCTAT



CCAGTAGCACTGGAAATAATATTCTATATTGGATTTCTTATTGCTTTTGCTGTAAATCGC  
CGATTATACCTTTCCATACATGGTTACCAGACACCCATGGAGAGGCACATTACAGTACTT  
GTATGCTTCTAGCCGGAATCTTATTA AAAATGGGAGCGTATGGGTTGGTTCGGATCAATA  
TGGAATTCCTGCCCCGCGCTCATTCTATATTGCTCCCTGGTTGATGATAGTAGGCACAA  
TTCAAATAATCTATGCAGCTTCAGCATCTCCTGGTCAACGTAATTTAAAAAAAAGAATA  
GCCTATTCCCTCCGATCTCATATGGGTTTCATAATTATAGGAATTGGCTCTCTAAGCGATA  
TGGGCCTCAATGGAGCCTTTTTTACAAATAATCTCTCATGGCTTTATTGGCGCTGCACTTT  
TTTTCTTGGCGGGAACGAGTTATGATAGAATACGTCTTGTTTATCTCGACGAAATGGGC  
GGAATGGCGGTCCCGGTTCCAAAAATCTTCACGACTTTCAGTATCTTATCGATGGCTTC  
CCTTGCATTACCGGGGATGAGTGGTTTTTGTTCAGAAATTAATAGTATTTTTTTGGAATAAT  
TACCAGTCAAAATTTTTTTTTTAATACAAAAATACTAATTACATTTGTAATGGCAATAGG  
AACGATATTAACACCTATTTATTCAATTATCTATGTTACGCCAAATGTTCTATGGATACAAG  
TTTTTTAATGCCCAAACCTCTTATTTTTTTGATTCTGGACCGCGAGAGTTATTTATTTCTA  
TCTCTATCTTTTTACCTGTAATAGGTATTGGTCTTTATCCAGATTTTCGTTTTCTCACTATCA  
GTTGACAAGGTGCAAACTCTTATATCTAATTTTTTTTTTA---ATGATGCTCGAACATGTA  
TGTGTGAGTGCCTATTTATTTCTATCGGTATCTATGGCTTGATCACAAGTCGAAATATG  
GTTAGAGCCCTTATGTGTCTTGAACCTATACTAAATGCAGTTAATATAAATTTTGTAACAT  
TTTTCTGATTTTTTTGATAGTCGCCAATTAAGGAAATATTTTTTTCAATTTTTGTTATAGC  
TATTGCAGCCGCTGAAGCAGCTATTGGACCAGCTATTGTTTCCTCAATTTATCGTAACAG  
AAAATCAACTCGTATCAATCAATCGAATTTGTTGAATAAGATGGAATATACATATCAATA  
TTTATGGTTCATACCTTTTCATTCCAGTTCTAATTCCTATGTTACTAGGAGTGGGACTCCTA  
CTTTTCCCGACGGCAACAAGAAATCTTCGGCGCACGTGGGCTTTTACTAGTGTTTTTATT  
GTTAAGTATAGTTATGGTTTTTTTTCAGCCAATCTGTCTGTTTCAGCAAATAAATAACAGTTA  
TATATATCAATATGTATGGTCTTGGACTATCAATAATGACTTTTCTTTAGAGTTTGGACAA  
TTGATTGATCCACTTACTTCTATTATGTCAATCTTAATTACTACTGTTGGAATTCTCGTTC  
TTATTTATAGCGACAATTATATGTCTTATGATCAAGGATATTTAAGATTTTTTTGCTTATATG  
AGTTTTTTCAATACTTCAATGCTGGGATTAGTTACTAGTTCTAATTTTATACAAATTTATAT  
TTTTTTGGGAATTAGTTGGAGTATGCTCTTATCTATTAATAGGTTTTTTGGTTCACACGACCT  
ATCGCTGGGAATGCTTGTCAAAAAGCGTTTGTCACTAATCGTGTAGGAGATTTTGGTTT  
ATTATTAGGAATTTTAGGTTTTTTATTGGATAACGGGCAGTTTCGAATTCGGGGTTTGT  
TGAAATAGTCAATAGA---GAAGTTAATTTTTTTATTTGTTACTTTGTGTGCTCTTTTATTATT  
TTCTGGTGCAATTGCCAAATCCGCCAATTTCCCTTCATGTATGGTTACCCGATGCTAT  
GGAAGGACCTACTCCTATTTCCGGCTCTTATACATGCTGCTACTATGGTAGCAGCAGGGAT  
TTTTCTTGTAGCTCGGCTTCTCCTCTTTTCATAGTTGTACCTTACATAATGAACATAATA  
GCTTTGATAGGGATAATAACATTACTATTAGGAGCTACTTTAGCCCTTGCTCAAAAAGAT  
ATTAAGAGAGGTTTAGCCTATTCTACAATGTCTCAATTGGGTTATATGATGTTAGCTCTA  
GGTATTGGGTCTTATCGATCCGCTTTATTTCAATTTGATTACTCATGCTTATTCAAAGCAT  
TGTTGTTTTTTAGGATCCGGATCAATCATCCACTCAATGGAAGCGGTTGTTGGATATTCTC  
CAGATAAAAGTCAGAATATGGTCCTTATGGGGGGTTTAAACAAAACATGTACCAATCACA  
AAAACCTGCTTTTTTATTAGGTATACTGTCTCTTTGCGGTATTCCACCCCTTGCTGTTTTT  
GGTCCAAAGATGAAATTCCTAATTATATTTGGTTGATTACCGATTTTTTGCAATAATTGC  
TTGTTCTACAGCAGGATTAACCTGCATTTTATATGTTTCGTATTTATTTACTTACTTTTTGAA  
GGATATTTAAATGTTAATTTTCAAAATTACAATGGAAAAACAAATAACTCGTTTTATTCA  
ATGTCTCTATGGGGTAAAGAG---GGGAAAAATAAAAAAAAAAAATTTATTCTCTTTATTA

ACAATGAATTTTTTTTTGGGGCATTACGAAC---ACTTTTTTCGTATCCCCATGAATCGGATA  
GTACTATGTTATTTCCCTATGTTTGTATTAGGCATATTTACTTTTTTCGTTGGGTCCATAGGA  
AATCAATTCGATTTGGATATATTATCCAAATTGTTAACTCCAGATATAAACCTTTTACATC  
AAAATTCAAAC---TCGGTGGATTGG---GAATTTGTGAAAAATGCAGGCTTTTCGTTGAG  
TATAGCTTATCTCGGAATATTATAGCGTCTTTTTTATATAAGCCTATTTATTCATCTTTACA  
AAATTTTAACTTTCAAAATTCATTTGTTATTGTTTTTGAAAAATAAAAAATGTCATATAT  
GATTGGTCAGATAATCGTGGCTACATGGATGTTCTTTATGTAATATACTTAACTGATGCTA  
TGAGAGCATTGGCCGAATTTACTCATTTTTTTGATAGACGAATAATTGATGGAATTACAA  
ATGGGGTTGGTATTACAAGTTTTTTGTAGGAGAGGGTATCAAATATATAGGAGGTGGC-  
--CGAATTTCTTCTTATCTTTTATTGTATTTATCTTATATATTAATCTTTTTTATTAATTTAATT  
ATGGGTTTTGCCTGGACCGATACATGATTTTCTTTTAGTCTTTTTTGGGGTCAGGTCTTATA  
TTAGGAGGTATAGGAGTCGTATTACTTACCAACACAATTTATTCTGCCTTTTCGTTGGGA  
CTGGTCTTGTGTTGTATATCCTTATTCTATATTCTATCAAATCCCATTTGGTAGCTGCCGC  
ACAGCTACTTATTTACGTGGGAGCTATAAATGTTTTAATCATATTTGCTGTGATGTTTATG  
AATGGTTCAGAATATTACAAAGATTTGAATCTTTGGACTGTTGGGGATGGGGTTACTTT  
GCTGATTTGTACAATCTTTTTTGTCTATTAATGGCTACTATTTTCAGATACGTCATGGTAC  
GGGATTTTGGACTACCAGATCAAACCAGATTATAGAGCAGGATTTGATAAGTAACAG  
TCAACAAATTGGAATTCATTTATCAACAGATTTTTTCTTCCATTTGAACTCATTTTCGAT  
AATCTTTTAGCTGCTTTAATAGGCGCAATTGCTGTGGCTCGTCAAATGAATATAACAGT  
TACAAGAAAGGATCTCATGATAGTCAATATGGGCCCCACCACCCGTCAATGCATGGTG  
TTCTTCGACTCGTCGTTACTCTGGACGGCGAAGATGTTATTGACTGTGAACCAATATTG  
GGTATTTACACAGAGGGATGGAAAAAATTGCGGAAAACCGAACTATTATACAATATCT  
GCCTTATGTAACCCGTTGGGATTATTTAGCTACTATGTTACACAGAAGCAATAACTGTA  
TGGGCCAGAACGGCTAGGAAATATTCAAGTACCGAAAAGAGCTAGTTATATCAGAGTA  
ATTATGTTGGAATTGAGTCGTATAGCTTCTCATTGTTATGGCTCGGCCCTTTCATGGCA  
GATATTGGTGACAGACTCCTTTCTTCTATATTTTCAGAGAAAGAGAATTAGTATATGAT  
CTATTCGAAGCTGCTACGGGTATGAGAATGATGCATAATTATTTTCGTATCGGAGGAGTG  
GCGGCTGATCTACCTTATGGATGGATAGATAAAGGTTTGGATTTCTGCGATTATTTTTTA  
ACAGGAGTTACTGAATATCAAAACTTATTACAAGAAATCCTATTTTTTTTAGAACGAGT  
TGAGGGCGTAGGCATTATTGGTAGAGACGAAGTAATAAATTGGGGTTTATCAGGACCAA  
TGCTGCGAGCGTCCGGAATACAATGGGATCTTCGTAAAATTGATCATTATGAGTGTAC  
GACGAATTTGATTGGGAAGTACAATGGCAAAAAGAAGGGGATTCATTAGCTCGTTATTT  
AGTCCGAATTGGCGAAATGGCAGAATCCATCAAATTTCAACAGGCGCTGGAAGGA  
ATTCCGGGGGGCCCTACGAGAATTTAGAAATACGATACTTTGATAGAAAAAGGTATCC  
AGAATGGCATGATTTTGAATATCGATTCATTAGTAAAAAACCTCCCCACTTTTGAATT  
GCCGAAACAAGAACTTTATGTGAGAGTCGAAGCCCCTAAAGGGGAATTGGGAATTTTT  
CTGATAGGGGATCAGAGTGGTTTTCTTGGAGATGGAAAATTTCGACCACCTGGTTTTAT  
CAATTTGCAAATCTTCCCTCAGTTAGTTAAAAGAATGAAATTGGCTGATATTATGACAAT  
ACTAGGTAGCATAGATATCATTATGGGAGAAGTTGATCGTATGTTCCCTATGGTAACCAG  
GGTATGGATTATGGTCAACAAACAGTACGAATTGCAAGATATATTGGTCAAAGTTTCAT  
GATTACCCTATCCCATGCAAATCGTTTACCTGTAAC TATTCAATATCCTTATGAAAAATTA  
ATCACATCAGAACGTTTCCGCGGTCTGAATACACTTCGAGTTTGATAAATGCATTGCTTG  
TGAAGTATGTGTTTCGTGTATGCCCTATGGATCTACCTGTTGTTGATTGGGAACCTGGAAA  
CTAATATTCGAAAGAAACGTTTGCTTAATTACAGTATTGATTTTCGGAATCTGTATATTTG

TGGTAACTGCGTTGAGTATTGTCCAACAAATTGTTTATCCATGACTGAAGAATATGAGC  
TTTCTACTTATGATCGTCACGAATTGAATTATAATCAAATTGCCTTGGGTCGTTTACCGAT  
GTCAGTAATTGACGATTATACAATTCGAACAATTTTAAATTCA---ATAAAA-----  
-----ATGCAAGGTCGTTTGTCTGCTTGGCTAGCCAAACATGGGTAGTTCATA  
GATCTTTGGGCTTCGACTACCAAGGAATAGAGACTTTACAAATAAAGCCTGGGGATTG  
GCATTCCATTGCTGTCATTTTATATGTATATGGTTACAATTATTTACGTTCCCAATGTGCCT  
ATGATGTAGCACCGGGCGGACTGTTAGCTAGTGTGTATCATCTTACGAGAATAGCTTATG  
GTATAGATCAACCAGAAGAGGTATGTATAAAAGTATTTGCCCAAGGTGGAATCCTAGA  
ATTCCGTCGTTTTCTGGGTTTGGAAAAGTGC GGATTTTCAAGAAAGGGAATCTTATGA  
TATGTTGGGAATCTTTTATGATAATCATCCACGTCTGAAACGTATCTTAATGCCCGAAAG  
TTGGATAGGATGGCCCTTACGTAAGGATTATATTGCCCGAATTTTATGAAATACAGGA  
TGCTCAT-----  
ATGGTCTTAGCTCTTGAATATTCAGACAATAAAAATAAAGATAAAGAAAGTAAAAAAA  
AAAACATTGAAACGGTTATGAATCCATTGAGTTTCCCTTACTTGATCGAACAGCCCC  
AATTCAGTTATTTCAACTACATCAAATGATCTTTCAAATTGGTCAAGACTGTCCAGTTG  
TGGCCGCTTCTATATGGTACCAGTTGTTGTTTCATTGAATTTGCTTCATTAATAGGCTCAC  
GATTCGACTTTGACCGTTATGGGCTGGTACCAAGATCGAGTCCTAGACAGGCAGACCT  
AATTTAACTGCGGGTACAGTAACAATGAAAATGGCTCCTTCTTTAGTGAGATTATATGA  
ACAAATGCCTGAACCAAAATATGTTATTGCTATGGGAGCATGTACAATTACAGGGGGTA  
TGTTTCAGTACCATTCTTATACTACTGTTCTGGGGGGTTCGATAAGCTAATTCCTGTAGATG  
TCTATTTGCCAGGTTGTCCACCTAAACCGGAGGCAGTTATAGATGCTATAACAAAATT  
CGTAAAAAACTATCTCGAGAAATCTATGAAGATCGAATTAGGTCT-----GGGAGTCGGTG  
TTTTACTATCAACCACAAGTTTTATATTGGACGAAGTACTCATACTGGAAATTATGATCG  
AGGATTACTCGATCAACCACCATCTACTTCAGAGATCCCTCTTGAAATATTTTTCAAATA  
CAACAAGAGTGTATCTTCCCCGAATTAGTGAATATGCAAACATAAATACCTTTTCTTG  
GATAAAGGAAGAGATTACTCGATCCATTTCCGTATCGCTCATGATATATATAAATACTGG  
GGCACCCATTTCAAATGCCTATCCCATTTTTGCACAGCAGGGTTATGAAAATCCACGCG  
AAGCGACCGGCCGTATTGTATGTGCCAATTGCCATTTAGCTAATAAACCCGTGGATATTG  
AGGTTCCACAGGCGGTA CTTCCTGATACTGTATTTGAAGCGGTTGTTTCGAATTCCTTAT  
GATATGCAATTAACAAGTTCTTGCTAATGGTAAAAGGGGGCTTTGAATGTGGGGG  
CTGTTCTTATTTACCTGAAGGGTTTGAATTAGCCCCCCCCGATCGTATTTCCGCCGAGA  
TTAAAGAAAAGATGGGCAATCTGTCTTTTCAGAACTACCGCCCGACTAAAAAAAATAT  
TCTTGTGATAGGTCTGTTCCCTGGTCAGAAATATAGCGAAATCACCTTTCCTATTCTTTC  
CCCGGACCCCACTACTAAAAAAGATGTTCACTTCTTAAAATATCCCATATACGTAGGCG  
GGAACAGGGGAAGGGGTCAGATTTATCCCGACGGTAGCAAGAGTAACAATAATGTTTA  
TAATGCTACAGCAGCGGGTATAGTAAGCAAATCATACGAAAAGAAAAAGGAGGATAC  
GAAATAACCATAGTGGATGCATCGGATGGGCGTCAAGTGGTGGATATTATCCCCCTGG  
ACCTGAACTTCTGTTTCAGAAGGAGAATCCGTCCA ACTTGATCAACCATTAACGAGT  
AATCCTAATGTAGGCGGATTTGGTCAGGGGGATGCGGAAATAGTACTTCAAGATCCATT  
ACGTGTCCAAGGCCTTTTGTTTTCTTGGCATCCGTTATTTTAGCACAAATATTTTTGGT  
TCTTAAAAGAAAACAGTTTGAGAAGGTTCAATTGTCCGAAATGAATTTTCATGAGTAAA  
GTATATGATTGGTTCGAAGAACGTCTTGAGATTCAGGCGATTGCAGATGATATAACTAGT  
AAATATGTCCCTCCCCATGTGAACATATTTTATTGTTTAGGCGGAATTACACTTACTTGT  
TTTTAGTACAAGTAGCTACGGGATTTGCTATGACTTTTTACTATCGCCAACGGTACTG

AGGCTTTTGCTTCCGTTCAATATATAATGACTGAAGCTAACTTTGGTTGGTTAATCCGAT  
CAGTTCATCGATGGTCCGCAAGTATGATGGTGCTAATGATGATCCTGCACGTATTTCTGTG  
TGTATCTCACCGGTGGCTTTAAAAACCTCGTGAATTGACTTGGGTTACAGGTGTAGTT  
TTAGCTGTATTGACCGCATCTTTTGGCGTGACTGGTTATTCCTTACCCCGGGACCAAATT  
GGTTATTGGGCAGTCAAATTGTAACAGGCGTACCGGAAGCTATTCCTGTAATAGGATC  
GCCTTTGGTAGAGTTATTGCGCGGAAGTGCTAGTGTAGGACAATCCACCCTGACTCGTT  
TTTATAGTTTACACACTTTTGTATTACCTCTACTTACTGCCGTATTTATGTTAATGCACTTC  
CCAATGATACGTAAGCAAGGCATCTCTGGTCCTTTAATGGGAGTGACAAAAAACCTG  
ACTTGAACGATCCTGTATTAAGAGCTAAGTTGGCTAAAGGTATGGGTCATAATTATTATG  
GAGAACCCGCATGGCCCAATGATCTTTTATATATTTTTCCAGTAGTAATTCTAGGAAC  
TTGCATGTAACGTAGGCTTAGCGGTTCTAGAACCATCAATGATTGGTGAACCCGCGGAT  
CCATTTGCAACTCCTTTAGAAATATTGCCGAATGGTATTTCTTTCCCGTATTTCAAATAC  
TTCGTACAGTGCCCAATAAGTTATTGGGGGTTCTTTAATGGTTTTAGTACCCGCGGGTT  
TATTAACAGTACCTTTTTTGGAGAATGTTAATAAATCCAAAATCCATTTTCGTCTGTCAG  
TAGCAACAACAGTCTTTTTGATTGGTACCGCAGTAGCCCTTTGGTTGGGTTATTGGAGCA  
ACATTACCTATTGATAAATCCTTAACTTTAGGTATTTTTATGATTGAAGTTTTTCTATTTGG  
AATTGTCTTAGGTCTAATTCCTATTACTTTGGCTGGATTATTTGTAACCGCATATTTACAA  
TACAGACGCGGTGATCAGTTGGACCTTATGCTTACTATAACTAGTTATTTTCGGTTTTCTA  
CTAGCGGTTTTAACTATAACCTCAGCTCTATTTATCGGGTTGAACAAGATACGACTTATT  
ATGGATATAGTAAGTCTCGCTTGGGCTGCTTTAATGGTAGTCTTTACATTTTCTCTTTCAC  
TCGTAGTATGGGGTAGAAGTGGACTCATGATTATTCGTTTCGCCGGAACCAGAAGTAAA  
AATTTTGGTAGATAGGGATCCATAAAAACCTTCTTTTCGAGGAATGGGCCAGACCCGGCC  
ATTTCTCAAGAACAATAGCTAAAGGGCTGATACTACCACCTGGATCTGGAACCTACAT  
GCTGATGCTCACGATTTTCGACAGCCATACTAGTGATTTGGAGGAGATCTCCCGAAAAGT  
ATTTAGTGCCCATTTTCGGCCAACTCTCCATCATCTTTCTTTGGCTGAGTGGCATGTATTT  
CCACGGTGCTCGTTTTTTCCAATTATGAAGCATGGTTAAGTGATCCTACTCACATTGGAC  
CTAGTGCCAGGTGGTTTTGGCCGATAGTGGGCCAAGAAATATTGAATGGTGATGTAGG  
CGGCGGTTTTCCGAGGAATACAAATAACCTCCGGTTTTTTTTTCAGATTTGGCGAGCATCTG  
GAATAACTAGTGAATTACAACCTCTATTGTACCGCAATTGGTGCATTGGTCTTTGCAGCTT  
TAATGCTTTTTGCTGGTTGGTTCCATTACCACAAAGCTGCTCCAAAATTGGCTTGGTTC  
CAAGATGTAGAATCTATGTTGAATCACCATTTAGCAGGGCTACTAGGACTTGGGTCTCT  
TTCTTGGGCGGGGCATCAAGTACATGTATCTTTACCGATTAACCAATTTCTAAATGCTGG  
AGTGGATCCTAAAGAGATCCCACTTCCTCATGAATTTATCTTGAATCGGGATCTTTTGGC  
TCAACTTTATCCCAGTTTTGCTGAGGGAGCAACCCCATTTTTTCACCTTGAATTGGTCAA  
AATATGCGGACTTTCTTACTTTTCGTGGAGGATTAGATCCAGTAACTGGAGGTCTCTGG  
TTAACCGATATTGCACACCATCATTAGCTATTGCAATTCTTTTCCTGATAGCGGGTCCAC  
ATGTATAGGACCAACTGGGGCATTGGTCATGGTATAAAAGATATTTTAGAGGCTCATAA  
GGGTCCATTTACAGGGCAGGGACATAAAGGCCTATATGAGATCCTAACAAACGTCATGGC  
ATGCTCAATTATCTATTAACCTAGCCATGTTAGGATCTTTAACCATGTTGTAGCTCACCA  
TATGTATTCGATGCCCCCTTATCCATATCTAGCGACTGACTACGGTACCCAACTTTCATTG  
TTCACACATCACATGTGGATTGGTGGATTTCTCATAGTTGGTGCTGCTGCGCATGCAGC  
GATTTTTATGGTAAGAGACTATGATCCAACCTACTCGATACAACGACCTATTAGATCGTGT  
ACTTAGGCATCGTGATGCAATCATATCACACCTCAACTGGGTATGTATATTTTTAGGCTT  
TCACAGTTTTGGTTTTGTATATTCATAATGATACCATGAGCGCTTTAGGGCGTCCCAAGA

TATGTTTTTCAGATACGGCTATACAATTACAACCCGCTTTTGCTCAATGGATACAAAACAC  
CCATGCTTTAGCACCTGGTGCAACGGCCCCGGTGCAACAACAAGCACCAGTTTGACT  
TGGGGGGGGTGCTGATTTAGTGTGTCAGTGGGCGGAAAGGTTGCTTTGTTACCTATTCCATT  
AGGAACCGCGGATTTTTTAGTACATCACATTCATGCATTTACGATTCATGTGACGGTATT  
GATACTCCTGAAAGGTGTTCTATTTGCTCGTAGCTCGCGTTTGATACCGGATAAAGCAA  
ATCTCGGTTTTTCGTTTTCCCTTGTGATGGACCTGGAAGAGGGGGGACATGCCAAGTATCC  
GCTTGGGATCATGTCTTTTTAGGTCTATTCTGGATGTACAATGCAATTTTCGGTAGTAATAT  
TCCATTTAGTTGGAAAATGCAGTCAGATGTTTGGGGTAGTATAAGTGATCAAGGGGTA  
GTAATCATATCACGGGAGGAACTTTGCGCAGAGTTCCACTACTATTAATGGGTGGCT  
CCGCGATTTCTTATGGGCACAGGCATCCAGGTAATTCAGTCTTATGGTTCCTCATTATC  
TGCATATGGCCTCTTTTTCCCTAGGTGCTCATTTTGTATGGGCTTTTAGTTAATGTTTCTA  
TTCAGCGGACGTGGTTATTGGCAAGA ACTTATTGAATCCATCGTTTGGGCTCATAATAA  
ATTAAAAGTTGCTCCTGCTATTCAGCCTCGAGCCTTGAGCATTGTCCAAGGACGTGCTG  
TAGGAGTAGCTCATTACCTTCTGGGCGGAATTGCCACAACATGGGCATTCTTCTTAGCA  
AGAATTATTGCAGTAGGAATGGCATTAAAGATTTCCAAGGTTTAGCCAAGGCTTAGCTCA  
GGACCCACTACTCGCCGTATTTGGTTTGGTATTGCTACCGCACACGACTTCGAAAGTC  
ATGATGATATTACGGAGGAACGTCTTTATCAGAATATTTTTGCTTCTCATTTTGGGCAATT  
AGCAATAATTTTTCTGTGGACTTCCGGAAATCTGTTTCATGTAGCTTGGCAAGGAAATT  
TTGAGACATGGGTACAGGACCCTTACATGTAAGGCCTATTGCTCATGCAATTTGGGAT  
CCTCATTTTGGTCAACCGGCTGTGGAAGCTTTTACTCGGGGGGGTGCTCTTGGACCAG  
TAAATATCGCTTATTCTGGTGTATCAATGGTGGTATAACAATCGGGTTACGGACTAATG  
GAGATCTTTATACTGGAGCGCTTTTTCTATTATTTCTTCTGTGCATATCTTTAATAGCAGG  
TTGGTTACACCTACAACCGAAATGGAAACCGAGCGTTTCGTGGTTTAAAAATGCCGAA  
TCTCGTCTCAATCATCATTTGTCAGGACTATTCGGAGTAAGTTCCTTGGCTTGGACAGG  
ACATTTAGTCCATGTCGCTATTCCCTGGATCCAGGGGGGAATACGTTTCGATGGAATAATTT  
CTTAGAGGTATTGCCGCATCCTCAAGGATTAGGCCACTTTTTACAGGTACGTGGAATC  
TTTATGCTCAAACCCCGATTCGGGTAGTCATTTATTTGGTACCTCCCAAGGCGCAGGA  
ACTGCCATTCTAACCTTCTCGGGGGATTTCATCCGCAAACGCAGAGTTTATGGCTGAC  
TGATATTGCTCATCATCATTTAGCTATTGCATTTATTTTTCTCGTTGCCGGTCATATGTATA  
GAACGAACCTTCGGTATTGGGCACAGTATAAAAGATCTTTTAGAAGCACATACTCCTCCA  
GGGGGGCGATTAGGGCGTGGACATAAAGGTCTTTATGACACAATCAATAATTCGATTCA  
TTTTCAATTAGGCCTTGCTCTAGCCTCTTTAGGGGTTATTACTTCTTGGTAGCTCAACA  
TATGTA CTTTTACCTGCTTATGCGTTCATAGCACAAAGACTTTACTACTCAAGCCGCGTT  
ATATACGCATACCAATACATTGCAGGATTCATCATGACAGGAGCTTTTGCTCATGGAGC  
TATATTTTTTATTAGAGATTACAATCCGGAACAAAATGAGGATAATGTATTGGCAAGAAT  
GTTGGACCATAAGGAAGCTATCATATCCCATTTAAGTTGGGCCAGCCTTTTTTTGGGATT  
CCATACTTTGGGACTTTATGTTTATAATGATGTGCATGCTTGGCTTTTGGTACTCCCGAGAA  
ACAAATCTTGATCGAACCCATATTTGCCCAATGGATAACAATCTGCTCATGGTAAA ACTTT  
ATATGGGTTTCGATGTACTTTTATCTTCAACAAGCGGCCAGCGTTCAACGCGGGTCGAA  
GCATATGGTTGCCCGGTTGGTTAAATGCTATTAATGAG-----AATAGTAATTCACTATTTTT  
AACAAATAGGGCCTGGAGACTTCTTGGTTCATCATGCTATTGCTCTAGGTTTACATACAAC  
TACATTGATCTTAGTAAAAGGTGCTTTAGATGCACGTGGTTCCAAGTTAATGCCAGATA  
AAAAGGATTTTGGTTATAGTTTTCCCTTGCATGGTCCGGGACGAGGCGGTACTTGTGAT  
ATTCGGCTTGGGATGCATTTTATTTGGCAGTTTTTTGGATGTTAAATACCATTGGATGG

GTTACTTTTTATTGGCATTGGAAGCACATCACATTATGGCAGGGTAACGTTTCACAGTTT  
AATGAATCTTCCACTTATTTGATGGGATGGTTAAGAGATTATCTATGGTTAAACTCTTCA  
CAACTTATCAACGGATATAACCCTTTTGGTATGAATAGTTTATCAGTTTGGGCGTGGATG  
TTCTTATTTGGACATCTTGTTTGGGCTACTGGATTTATGTTCTTAATTCCTGGCGTGGAT  
ATTGGCAAGAATTGATTGAAACTTTAGCATGGGCTCATGAACGCACACCTTTGGCTAAT  
TTAATTCGATGGAGAGATAAACAGTAGCTCTTTCCATTGTGCAAGCAAGATTGGTTGG  
ATTAGCCCATTTTTCTGTAGGTTATATATTTACTTACGCGGCTTTCTTGATTGCCTCTACA  
TCGGGCAAATTTGGTATGTCACATTCAGTAAAGATTTATGATACGTGTATAGGGTGTACT  
CAATGTGTCAGAGCTTGTCACAGATGTATTAGAAATGATACCTTGGGACGGATGTAA  
AGCTAAGCAAATTGCTTCGGCTCCAAGAACAGAGGACTGTGTTGGTTGTAAGAGATGC  
GAATCCGCCTGTCCAACGGATTTCTTGAGTGTTGAGTTTATTTATGGCATGAAACAAC  
TCGAAGCATGGGCCTCGCTTAT-----ATGACAAATTTACCCTCTTTTTTTGTGCCTTTCGT  
GGGCCTAATATTGCCGGCAATTGCGATGGCTTCTTTATCTCTTCATTTCAAAAAACAA  
GATTTTTATGCGAGATCTAAAAACATATCTCTCCGTGGCGCCGGTAGTAAGTACTATATG  
GTTCCGGTTTTTTAGCAGGTCTATTGATAGAGATCAATCGTTTATTTCCGGATGCGCTGAT  
ATTCCCCTTTTTTTCATTCATGACTGCAATTTAGAGAGACGCGAAAGCGAAAGCCTAT  
GGGGTCGCTTCTGTAACCTGGATAACCAGCACTGAAAACCGTCTTTACATTGGATGGTTT  
GGCGTTTTGATGATCCCTACCTTATTGACCGCAACTTCTGTATTTATTATTGCTTTCATTG  
CTGCTCCTCCGGTGGATATTGATGGTATTCGTGAACCTGTTTCTGGATCTCTACTTTACG  
GAAATAATATTATTTCTGGTGCCATTATTCTACTTCTGCAGCTATAGGTTTGCACCTTTA  
CCCAATATGGGAAGCTGCTTCCGTTGATGAATGGTTATAAATGGCGGTCCTTATGAGCT  
AATTGTTCTACACTTCTTACTTGGTGTAGCTTGTATATGGGTCGTGAGTGGGAACTTAG  
TTCCGTCGGGATGCGCCCTTGGATTGCTGTTGCATATTCAGCTCCAGTTGCTGCTGC  
AACTGCCGTTTTCTTGATATATCCATTGGTCAAGGAAGCTTTTCTGACGGTATGCCTCT  
AGGGATTCTGGTACTTTCAACTTCATGATTGTATTCCAGGCTGAGCACAACATCCTTAT  
GCACCCATTTACATGTTAGGTGTAGCTGGTGTATTCCGGCGGTTCTCTATTCAGTGCTAT  
GCATGGTTCCTTGGTAACTTCTAGTTTGATCAGGGAAACCACAGAAAATGAATCTGCTA  
ACGAAGGTTACAGATTCGGTCAAGAGGAAGAACTTATAATATCGTAGCTGCTCATGGT  
TATTTTGGCCGATTGATTTTCCAATATGCTAGTTTCAACAATTCTCGTTCTTTACATTTCT  
TCCTAGCGGCTTGGCCTGTAGTAGGTATCTGGTTCACCGCTTTAGGTATCAGCACTATGG  
CTTTCAACTTAAATGGTTTCAATTTCAACCAATCTGTAGTTGATAGTCAAGGTCGTGTAA  
TTAATACCTGGGCTGATATTATTAATCGTGCTAACCTTGGTATGGAAGTTATGCATGAAC  
GTAATGCTCATAATTTCCCTCTAGACTTAGCTTCTGTGCAAGCTCCATCTACAAATGGAA  
TGGGTTTGCCTTGGTATCGTGTTACATACCGTCGTATTGAATGATCCGGGTCGTTTGATTT  
CTGTTTATATAATGCATACAGCTCTAGTTGCTGGTTGGGCCGGTTCGATGGCTCTATACG  
AACTGGCGATTTTTGATCCCTCTGACCCCGTTCTTGATCCAATGTGGAGACAGGGTATG  
TTTGTATACCTTCATGACTCGTTTAGGAATAACCAATTCATGGGGCGGTTGGAGTATC  
ACA---GGAGGTACTATAACGAATCCGGGTATTTGGAGTTACGAAGGTGTGGCCGGGGC  
ACATATTGTGTTTTCTGGCTTATGCTTTTTGGCAGCTATTTGGCATTGGGTGTACTGGGA  
TCTAGAAATATTTCTGATGAACGTACAGGAAAACCTTCTTTAGATTTACCTAAGATTTT  
TGGAATTCATTTATTTCTTTCAAGGTTGGCTTGTTTTGGGTTTGGCGCATTCATGTAAC  
GGGGTTGTATGGTCCTGGAATATGGGTGTCCGATCCTTATGGACTAACCGGAAGGGTAC  
AATCTGTAATCCAGCGTGGGGTGTGGAAGGTTTTGATCCTTTTTGTTCCGGGAGGAATA  
GCCTCTCATCATATTGCAGCAGGGACATTGGGCATATTAGCCGGCCTATTCATCTTAGT

GTCCGTCCGCCCAACGTCTATACAAAGGATTACGCATGGGAAATATTGAAACCGTCCT  
TTCCAGCAGTATCGCTGCTGTCTTTTTTGCCGCTTTTGTGTTGCTGGAACCTATGTGGTA  
TGGTTCAGCAACTACCCCGATTGAATTATTTGGTCCCACCTCGTTATCAATGGGATCAGG  
GATACTTCCAGCAAGAAATATATCGAAGAGTTAGCGCTGGGATAGCCGAAAATCAAAG  
TTTATCAGAGGCTTGGTCTAAAATTCCTGAAAAATTGGCTTTTTATGATTACATCGGTAA  
TAATCCGGCAAAGGGGGGATTATTCAGAGCGGGCTCAATGGACAACGGGGATGGAATA  
GCTGTTGGGTGGTTAGGACACCCTATCTTTAGAGATAAGGAAGGGCGTGAACCTTTTTGT  
ACGTCGTATGCCACTTTTTTTGAAACATTTCCGGTTGTTTTGGTAGACGGAGACGGTA  
TTGTTAGAGCCGATGTTCCGTTTCGAAGGGCAGAGTCGAAGTATAGTGTGCAACAAGT  
AGGTGTAACCTGTGGAGTTCTATGGTGGCGAAGTGAATGGAGTCAGTTATAGTATCCTG  
CTACTGTGAAAAAATATGCTCGACGCGCTCAATTGGGCGAAATTTTTGAATTAGATCGT  
GCTACTTTGAAATCCGATGGTGTTCGTAGCAGTCCAAGGGGTTGGTTTACTTTTGG  
CCATGCTTCATTTGCTCTGCTCTTCTTTCGGACATATTTGGCATGGCGCTAGAACCCT  
GTTCCGAGATGTTTTTGCCGGTATTGACCCAGATTTGGATGCTCAAGTAGAATTTGGAA  
CATTCCAAAACTTGGGGATCCGACTACAAGACGACAAGTAGTCATGAAAACCTTATA  
TTCCCTGAGGAGGTTCTACCCCGTGGAAACGCTCTTTAATGGAACTTTAGCCTTAGCCG  
GTCGTGACCAAGAAACCACAGGTTTCGCTTGGTGGGCCGGGAATGCCCGACTTATCAA  
TTTATCCGGTAAATTACTGGGAGCTCATGTAGCCCATGCCGGATTAATCGTATTCTGGGC  
CGGAGCAATGAACCTATTTGAAGTGGCTCATTTCGTACCAGAAAAGCCCATGTATGAAC  
AAGGATTAATTTTACTTCCCCACCTAGCTACTCTAGGTTGGGGGGTAGGTCCTGGTGGG  
GAAGTTATAGATACCTTTCCATACTTTGTGTCTGGAGTACTTCACTTAATTTCTCTGCA  
GTATTGGGCTTTGGCGGTATTTATCACGCACTTCTGGGACCCGAGACTCTTGAAGAGTC  
TTTTCCATTCTTCGGTTATGTATGGAAAGATAGAAATAAAATGACTACAATTTTGGGTAT  
TCACTTAATTTTGTTAGGTATAGGTGCTTTTCTTCTAGTATTCAAAGCTATTTATTTTGA  
GGCGTATATGATACCTGGGCCCCAGGAGGGGGAGATGTAAGAAAAATTACCAACTTGA  
CCCTTAGCCCAAGCGTCATATTTGGTTATTTACTAAAATCCCCTTTTGGAGGAGAGGGAT  
GGATTGTTAGTGTGGACGATTTGGAAGATATAATTGGAGGGCATGTATGGTTGGGTTCC  
ATTTGTATACTTGGTGAATCTGGCATATCTTAAACCAACCTTTTGCATGGGCGCGCCGT  
GCGCTTGTATGGTCTGGGGAGGCTTACTTGTCTTATAGTTTAGGTGCTTTAGCTGTTTTT  
GGTTTTATTGCTTGTGCTTTGTTTGGTTCATAATAACCGCTTATCCTAGTGAGTTTTACG  
GGCCCACTGGACCAGAAGCTTCTCAAGCTCAAGCATTACTTTTTCTGGTTAGAGCCCTT  
CGTCTTGGGGCTAACGTGGGGTCCGCCAAGGACCTACCGGTTTAGGTAAATATCTAAT  
GCGTTCTCCGACTGGAGAAGTAATTTTTGGGGGAGAACTATGCGTTTTTGGGATTTGC  
GTGCTCCCTGGTTAGAACCCTAAGGGGTCCCAATGGGTTGGACTTGAGTAGGCTGAA  
AAAAGACATAACCTTGGCAAGAACGACGTTCCGCGGAATATATGACTCATGCTCCTT  
TAGGTTCTTTAAATCCGTGGGTGGTGTAGCTACCGAGATCAATGCAGTCAATTATGTCT  
CTCCTAGAAGTTGGTTAGCTACCTCTCATTTTGTCTCGGATTCTTCTTATTCGTAGGTC  
ATTTATGGCATGCAGGAAGGGCTCGTGCAGCTGCAGCAGGATTTGAAAAAGGAATTGA  
TCGCGATTTGAACCTGTTCTTTCCATGACTCCTCTTAAACATGACTATAGCCCTTGGGAA  
ATTTACCAAAGACGAAAAT---TTATTTGATATTATGGATGACTGGTTACGGAGGGACCGT  
TTCGTTTTTGTAGGTTGGTCCGGTCTATTGCTCTTTCCTTGTGCTTATTTTCGCGTTAGGA  
GGTTGGTTTACAGGTACAACCTTTGTAACCTTCATGGTATACACATGGATTGGCGAGTTC  
CTATTTGGAAGGCTGCAACTTCTTAAACCGCGGCAGTTTCTACTCCTGCTAATAGTTTAG  
CACACTCTTTGTTGTTACTATGGGGTCCAGAAGCACAAAGGAGATTTTACTCGTTGGTGT

CAATTAGGCGGTCTGTGGACTTTTGTGCTCTCCACGGCGCTTTCGGACTAATAGGTTT  
CATGTTACGTCAATTTGAACTTGCTCGATCTGTTCAATTGCGACCTTATAATGCAATCGC  
ATTCTCTGCTCCAATTGCTGTTTTTGTCTGTATTCTGATTTATCCGCTAGGTCAGTCT  
GGTTGGTTCTTTGCGCCCAGTTTTGGTGTGCGCAGCTATATTTGATTCATCCTCTTTTTT  
CAAGGGTTTCATAATTGGACATTGAACCCATTCATATGATGGGGGTTGCCGGTGTATTG  
GGCGCTGCCCTTCTATGCGCTATTCATGGTGTACCGTAGAAAATACTTTATTTGAAGAT  
GGTGATGGCGCAAATACATTCCGTGCTTTTAACCCAACCTCAAGCGGAAGAACTTATTC  
AATGGTCACCGCTAACCGCTTTTGGTCCCAAATCTTTGGGGTTGCTTTTTTCCAATAAAC  
GTTGGTTACATTTCTTTATGTTATTTGTACCAGTAACTGGTTTATGGATGAGTGCTCTTGG  
AGTAGTCGGCTTGGCTCTGAACCTACGCGCCTATGACTTCGTTTCTCAGGAAATCCGTG  
CAGCGGAAGATCCTGAATTTGAGACGTTCTACACCAAAAATATTCTTTTAAATGAAGGC  
ATTCGTGCTTGGATGGCGGCTCAAGATCAGCCTCATGAAAACCTTATATCCCTGAGGA  
GGTTCTACCCCGTGGAAACGCTCTTATGTCTGGAAGCACAGGAGAACGTTCTTTTTGCT  
GATATTATTACCAGTATTTCGATACTGGGTCATTCATAGCATTACTATACTTCCCTTTTCAT  
TGCGGGTTGGTTATTCGTCAGCACGGGTTTAGCTTACGATGTATTTGGAAGCCCTCGTC  
CAAACGAGTATTTACAGAGAGTCGACAAGGAATTCATTAATAACTGGCCGTTTTGAT  
CCTTTGGAACAACCTCGATGGATTTAGTAGATCTTTTATGACCATAGATAGAACCTATCCC  
ATTTTTACAGTGCGATGGTTGGCTGTTACGGATTAGCTGTACCTACCGTTTCTTTTTT  
GGGTCAATATCAGCAATGCAGTTCATACAACGAATGGCTACACAAACCGTTGAGAATA  
GTTCTAGATCTGGT--CCAAGACGAACCATTGTAGGGGATTTATTGAAACCACTGAATTC  
GGAATATGGTAAAGTAGCTCCAGGTTGGGGAACACTCCTTTGATGGGTATTGCAATGG  
CTCTATTTGCGATATTCCTATCTATTATTTGGAGATTTATAATTCTTCCATTTACTGGAT  
GGAATTTCAATGAATATGCTTACTCTTAAACTATTTGTTTACACAGTAGTGGTATTCTTTG  
TTTCTCTTTTATCTTTCGGATTCCTATCTAATGATCCAGGACGGAATCCTGGACGTGAAG  
AAATGGCCGATACTACTGGAAGGATTCCTCTTTGGATAATAGGCACTGTAACGGGTATT  
CTTGTGATTGGTTTAAATCGGTATTTCTTTTATGGTTCATATCCGGATTGGGTTCATCCC  
TGATGCTTAATATCTTTAGTTTGTATCTGTATTTGTCTTAATTCTGCTCTTTCT--AGTAGTT  
TTTTCTTCTCAAATGCCCCGAGGCTTATGCTTTTTTTGAATCCAATCGTAGATTTTATGCC  
AGTAATACCTTTGCTCTTTTTTCTTCTTAGCTTTTGTGGCAAGCTGCTGTAAGTTTTCG  
AATGACACAATCAAACCCGAACGAACAAAGTGTGAATTGAATCGTACCAGTCTCTAC  
TGGGGGTTATTACTCATTTTTGTACTTGGCTGTTTTATTTTCCAATTTTCTTCAATATGGA  
AGTAAATATTCTCGCATTTATTGCTACTGCACTGTTTATTCTAGTTCCGACTGCTTTTTTA  
CTTATAATATACGTAAAAACGGTCAGTCAAAATGATATGGAAACAGCAACCTTAGTTGC  
CATCTCTATATCTGGTTTACTTGTAAAGTTTACTGGGTACGCCTTATATACTGCTTTTTGG  
CAACCTCTCAACAACCTAAGAGATCCATTCGAGGAACACGGAGACATGGAAGCATTGG  
TTTATACATTCTCTTAGTCTCGACTCTGGGAATAATAATTTTCGCCATCTTTTTTCGAGA  
ACCACCTAAAGTTCCAACCTAAAAGATGAAAATGACTATTGCTTCCAATTGGCTGTTT  
TTGCATTAATTGCTACTTTCAGCAATCTTACTGATTAGTGTACCTGTTGTAATTTGCTTCTCC  
TGATGGTTGGTCAAATAACAAAAATGTTGTATTTTCCGGTACATCATTATGGATTGGATT  
AGTCTTTTTGGTGGGTATCCTTAATTCTCTCATCTCT-----ATGTCACCACAAA  
CAGAGACTAAAGCAAGTGTGGATTCAAAGCTGGTGTTAAAGATTATAAATTGACTTAT  
TATACTCCTGACTATCAAACCAAAGATACTGATATCTTGGCAGCCTTCCGAGTAACTCCT  
CAACCTGGAGTTCCGCCGGAGGAAGCAGGGGCCGCGGTAGCTGCTGAATCTTCCACT  
GGGACATGGACAACCTGTGTGGACTGACGGGCTTACCAGTCTTGATCGTTACAAAGGAC



GATGCTACCACATCGAGCCGGTTGCTGGAGAAGAAAATCAATTTATTGCTTATGTAGCT  
TACCCCTTAGACCTCTTTGAAGAAGGTTCTGTTACTAACATGTTTACTTCCATTGTGGGT  
AATGTATTTGGATTCAAGGCCCTGCGCGCTCTACGCTCTGGAGGATTTGCGAATCCCTAC  
TTCTTATTCTAAAACCTTTCCAAGGTCCGCCTCATGGCATCCAAGTTGAGAGGGATAAAT  
TAAACAAGTATGGCCGCCCCCTATTAGGATGTACTATTAAACCTAAATTGGGATTATCCG  
CTAAGAATTACGGTAGAGCAGTTTATGAATGTCTCCGCGGTGGGCTTGATTTTACCAA  
GATGATGAGAACGTTAATTCCCAACCATTTATGCGTTGGAGAGACCGTTTCTATTTTGT  
GCCGAAGCAATTTATAAAGCGCAGGCTGAAACAGGTGAAATCAAGGGGCATTACTTGA  
ATGCTACTGCAGGTACATGCGAAGAAATGATCAAAGGGCTGTATTTGCCAGAGAACT  
GGGAGCTCCTATCGTAATGCATGACTACTTAACCGGGGGTTCCTGCAAATACTAGCT  
TGGCTCATTTATGCCGAGATAATGGTCTACTTCTTCACATCCATCGTGCAATGCATGCAG  
TTATTGATCGACAGAAGAATCATGGTATACACTTTCGTGTACTAGCTAAAGCATTACGTA  
TGTCTGGTGGAGATCATATTCATGCCGGTACCGTAGTAGGTAACCTGAAAGGGAAAG  
AGAAATCACTTTAGGCTTTGTTGATTTACTACGTGATGATTATATTGAAAAAGATCGAAG  
CCGCGGTATTTATTTCACTCAAGATTGGGTCTCTTTACCAGGTGTTCTGCCCGTGGCTTC  
AGGGGGTATTCACGTTTGGCATATGCCTGCTCTGACCGAAATCTTTGGAGATGATTCCG  
TACTACAATTTGGCGGAGGAACTTTGGGGCACCTTGGGGAAATGCACCTGGTGCCGT  
AGCTAATCGAGTAGCTCTAGAAGCATGTGTACAAGCTCGTAATGAGGGACGTGATCTTG  
CTCGTGAGGGTAATGAAATTATTCGTGAGGCTGCTAAATGGAGTCCTGAGCTAGCTGCT  
GCTTGTGAAGTATGGAAAGAGATCAAATTTGAATTCCCAGCAATGGATACTTTG-----AT  
GGCGATACATTTATACAAAACCTTCTACCCCGAGCACACGCAATGGAGCCGTAGACAGT  
CAAGTGAAATCCAATCCACGAAATAATTTGATCTATGGACAGCATCATTGTAGTAAAGG  
TCGTAATGCCAGAGGAATCATTACCGCAGGGCATAGAGGGGGAGGTCATAAGCGTCTAT  
ACCGTAAAATAGATTTTCGACGGAATGAAAAAGACATATATGGTAGAATCGTAACCATA  
GAATACGACCCTAATCGAAATGCATACATTTGTCTCATACTATGGGGATGGTGAGAA  
AAGATATATTTTACATCCCAGAGGGGCTATAATTGGAGATACCATTGTTTCTGGTACAGA  
AGTTCCTATAAAAATGGGAAATGCCCTACCTTTGACCGATATGCCCTTAGGCACGGCCA  
TACATAACATAGAAATCACACTTGGAAAGGGTGGACAATTAGCTAGAGCAGCAGGTGC  
TGTAGCGAAACTGATTGCAAAAGAGGGGAAATCGGCCACATTAATAATTACCTTCTGGG  
GAGGTCCGTTTGTATCCAAAACTGCTCAGCAACAGTCCGACAAGTGGGTAATGTTG  
GGGTGAACCAGAAAAGTTTGGGTAGAGCCGGATCTAAATGTTGGCTAGGTAAGCGTCC  
TGTAGTAAGAGGAGTAGTTATGAACCCTGTAGACCATCCCCATGGGGGTGGTGAAGGG  
AGGGCCCCAATTGGTAGAAAAAAACCCGCAACCCCTTGGGGTTATCCTGCACTTGGAA  
GAAGAAGTAGAAAAAGGAATAAATATAGTGATAATTTGATTCTTCGTCGCCGTAGTAAA  
ATGATTCAACCTCAAACCCACTTAAATGTAGCGGATAACAGCGGGGCCGACAATTAAT  
GTGTATTCTGAATCATAGGAGCTAGT---AATCGACGATATGCTCATATTGGTGACGTTATTG  
TTGCTGTAATCAAGGAAGCAATACCAAATACACCTCTAGAAAAATCCGAAGTGATCAG  
AGCTGTAATTGTACGTACTTGTAAAGAACTCAAACGTGACAACGGTATGATACTACGAT  
ATGATGACAATGCTGCGGTTGTTATTGATCAAGAAGGAAATCCCAAAGGAACTAGAAT  
TTTTGGTGCGATCGCACGGGAATTGAGACAGTTAAATTTCACTAAAATAGTTTCATTAG  
CACCTGAAGTATTAATGCTTAGTCCCAAAGAGCCAGATTCCGTAAACAACATAGAGG  
AGAATGAAAGGAATATCTTATCGAGGTAATCGTATTTGCTTTGGTAGATATGCTCTTCA  
GGCACTTGAACCCGCGTGGATCACGTCTAGACAAATAGAAGCAGGGCGGCGAGCAAT  
GACACGAAACGTACGCCGCGCGGAAAAATATGGGTACGTATATTTCCAGACAAACCT



--ATGCTTGGGGGTAGAAAT--GAGGGAATGTATACAATACCTGGGTTTAATCAAATACAA  
TTTGAAGGGTTTTGTAGGTTTCATTGATCAGGGCTTAACAGAAGAACTTTATAAGTTTCC  
AAAAATGGAAGATATAAATCAAGAAATTGAATTTCAATTATTTGTGGAAACATATCAATT  
GGTAGAACCGGTGATAAAAGAAAGAGATGCTGTATATGAATCGCTCACATATTCTTCTG  
AATTATATGTATCCGCGGGATTAATTTGGAAAAACAGTAGAGATATGCAAGAACAAACA  
ATTTTTATTGGAAACATTCCTCTAATGAATTCCTTGGGAACTTCTATAGTAAATGGAATAT  
ACAGAATTGTGATCAATCAAATATTGCAAAGCCCCGGTATCTATTACCTGTCAGAATTG  
GACAATACCGGAATTTTCGGTTTATACAGGCACCATAATATCAGATTGGGGGGGGGAGATT  
AGAATTAGAGATTGATCGAAAGGCAAGGATATGGGCTCGTGTGAGTAGGAAACAAAA  
AATATCTATTCTAGTTCTATCATCAGCTATGGGTTTCGAACCTAAGAGAAATTCTAGAGAA  
TGTTTGCTACCCTGAAATTTTTTTGTCTTTCCTGAATGATAAGGAGAAAAAAAAAATTG  
GGTCAAAAGAAAATGCCATTTTGGAGTTTTATCAACAATTTGCTTGTGTAGGCGGAGAT  
CCGGTATTTTCTGAATCCTTATGTAAGGAATTACAAAAGAAATTCTTTCACAAAAATG  
TGAATTAGGAAGGATTGGTCGCCGAAATATGAACCAGAGACTGAATCTTGATATACCTC  
AGAACATTCCATTTTGTACCAGGAGATATATTGGCAGCTGCGGATCATTGATTGGAA  
TGAAATTTGGAATGGGTACACTTGACGAT-----ATGAATCATTGAAAAATAAACGTATT  
CGGTCTGTAGCGGATCTCTTACAAGATCAATTCGGAGTGGCTCTGTTTCGTTTAGAAAA  
TATGATTAGAGGAECTATAGGCGGAGCAATTAGG---CATAAATTGATA---CCAACCTCCTC  
AGAATTTAGTAACTTCAACTCCA-----TTAACAACCACTTATGAATCTTTTTTTCGGAT  
TACACCCCCTATCTCAAGTTTTGGATCGAACTAATCCATTAACGCAAATAGTTCATGGGA  
GAAAATTGAGTTATTTGGGCCCTGGAGGATTGACAGGTGCAACTGCTAGTTTTTCGGATA  
CGAGATATCCATCCTAGTCACTATGGGCGCATTGCCCCAATTGACACGTCTGAAGGAAT  
CAATGTTGGACTCATTGGATCCTTAGCAATTCATGCGAGAATTGGTCATTGGGGG---TTC  
CTAGAAAGCCCATTTTAT-----GAAATCTCTGAGAGATCAAAAAAAGTG-----CGGATG  
CTTTATTTATACCAAGTCGAGACGAATACTCTATTGTAGCATCAGGAAATTCTTTGGGG  
CTGAATCGAGGTATTCAAGAAGAGCAGGTTGTTCCGGTTAGATACCGTCAAGAATTCCT  
GACCGTTGAATGGGAACGGGTACATCTTCGAAGTATTTTTACCTTCCAATATTTTTCTGT  
TGGAGCTTCCCTCATTCTTTTATCGAACATAATGATGCGAATCGAGCTTTAATGAGTTC  
TAATATGCAACGTCAGGCAGTTCCTTTCCCGGTCCGAAAAGTGTATTGTTGGAAGTGG  
GGTTGGAACGCCAAGTGGCTCTAGATTCAGGGGCTCTCGCTATAGCTGAACACGAGGG  
AAAGATCATTCTACCGATGCTGACAAGATACTTTTATCGGGCAAGGGGGATATTATAA  
GCATTCCATTAATTATGTATCAACGTTCTAACAAAAATACTTGTATGCATCAAAAACCGA  
GGTTCCGCGAGGTAATGCATCAAAAAGGGACAAATTTTAGCGGATGGTGCTGCTAC  
GGTTGGCGGCGAACTTGCTTTGGGAAAAACGTATTAGTAGCTTATATGCCATGGGAGG  
GTTACAATTCTGAAGATGCGGTAATCATTAGCGAGCGTCTAGTATATGGAGATATTATA  
CTTCTTTTACATACGGAAATATGAAATTCAGACTCATGTGACAAGCTACGGC---CCTGA  
AGAATCACTAATGAAATACCGCATCTCAAAGCCTACCTACTTCGAAATTTAGACAAAA  
ATGGAATTGTGATGCTGGGGTCTTGGGTCGAAACGGGCGATATTTTAGTAGGTAATAA  
ACGCCTCAGGTAGCAAAAAGAA---TCGTCTGATACCCCGGAGGACAGATTATTAAGAGCC  
ATACTTGGCATTAGGTATCCACTTCAAAGAACTTGTCTAAAACCTACCCATAGGTGG  
TAGGGGTCGAGTTATTGATGTGAGGTGGGTCCAGAAAAAGGGA---GTTTCCAGTTATAA  
TCCAGAAAAAATTCATGTATATATTTACAGAAACGTGAAATAAAAGTAGGCGATAAAG  
TCGCTGGAAGGCATGGAATAAGGGTATCATTTCAAAATTTTGCCTAGACAGGATATG  
CCGTATCTGCAAGATGGAAGATCCGTTGATATGGTCTTCAACCCATTAGGGGTACCTTC

ACGAATGAATGTAGGGCAGATATTTGAATGTTTCGCTCGGGTTAGCGGGGGATCTGCTAG  
GTAGACATTATCGAATAGCACCTTTTGATGAGAGATATGAACAAGAGGCTTCTAGAAAA  
CTAGTGTTTTCTGAATTATATGAAGCCAGTAAGCAAACAGCAAATCCATGGGTATTTGA  
CCCCGAGTATCCGGGAAAAAGCAGAATATTGGATGGAAGAACGGGGGATCCTTTTGGAG  
CAGCCTGTTTTAATAGGAAAGCCTTATATCTTGAAATTAATTCATCAAGTTGATGATAAA  
ATACATGGACGTTCCAGCGGACATTATGCACTTGTTACACAACAACCCCTTAGAGGAA  
GGGCTAAGCAAGGAGGACAGCGGGTAGGAGAAATGGAGGTTTGGGCTCTAGAAGGGT  
TTGGTGTGCTCATATTTTACAAGAGATGCTTACTTATAAATCTGATCATATTAGAGCTCG  
CCAAGAAATACTTGGTACTACAATCATTGGAAGAACAATACCTAAACCTGAGGATGCG  
CCAGAATCTTTTCGATTACTCGTTCGAGAACTACGATCCTTGGCTTTGGAACCTAATCAT  
TTCCTTGTATCTGAGAAGAACTTCCAGATGAATAGGAAGGAAGCT-----ATG  
ATCGATCGGTATAAACATCAACAACCTCCGAATTGGATCAGTTTCTCCTCAACAAATAAG  
TGCTTGGGCCAATAAAAATCCTACCTAATGGGGAGATAGTTGGAGAGGGTGACAAAACCG  
TATACTTTTCATTACAAAACCAATAAACCTGAAAAAGATGGATTGTTTTGTGAAAGAAT  
TTTTGGGCCGATAAAAAGTGGGATTTGCGCTTGTGGAATTATCGAGTAATCGGGGATG  
AAAAAGAAGACCCTAATTTTTGTGAACAATGCGGAGTCGAATTCGTGGATTCTCGGAT  
ACGAAGATACCAAATGGGCTATATCAAACCTGGCATGCCAGTAACCCATGTGTGGTATT  
TGAAGCGTCTTCCTAGTTATATCGCGAATCTTTTAGATAAACCTCTTAAAGAATTAGAAG  
GACTGGTATACTGCGATTAC---TTTTCTTTTGTAGGCC---ATAGCTAAAAAACCTACTT  
TCTTACGATTACGAGGTTCAATCGAATATGAAATCCAATCCTGGAATACAGCATCCCAC  
TTTTCTTTACTACCCAAGGCTTCGATGCATTTGAAATCGAGAAATGTCTACTGGAGCA  
GGTGCTATACGAGAACAATTAGCCGATCTGGATTTGCGAATTATTATAGATTATTCGTTG  
GTAGAATGGAAAGAATTAGGGGAAGAA---GGGCCCCCGGGTAATGAGTGGGAAAATAG  
AAAGGTTGGAAGAAGAAAGGATTTTTTGGTTAGACGCATCGAAATAGCTAAGCATTTT  
ATTCGAACAAATATAGAACCAGAATGGATGGTTTTATGTCTATTACCAGTTCTTCCCTCCC  
GAGTTGAGACCGATCATTAGATAGACGGGGGTAAACTAATGAGCTCGGATTAATGA  
ACTTTATAGAAGAGTTATTTATCGGAACAATACTCTTATCGATTTATTAGCAACAAGTAG  
ATCGACACCGGGGAATTAGTAATGTGCCAGGAGAAATTGGTACAAGAAGCTGTGGAT  
ACACTTCTTGATAATGGAATCCGCGGACAACCAATGAGGGACGGTCATAATAAGGTTTA  
CAAGTCGTTTTTCGGATGTAATTGAAGGCAAAGAGGGAAGATTTTCGTGAGACTCTGCTT  
GGCAAACGGGTGGATTATTCGGGTCGTTCTGTCATTGTCGTGGGTCCCTCCCTTTCATT  
ACATCAATGTGGATTGCCTCGCGAAATAGCAATAGAACTTTTCCAGCCATTTGTAATTC  
GTGGTCTAATTAGACAACATCGTGCTTCGAACATGGGAGTTGCTAAGAGTAAAATTAGG  
GAAAAAGAGTCAATTGTATGGGAAATACTTCAGGAAGTTATGCAGGGGCACCCCATAT  
TGCTGAATAGAGCACCTACTCTGCATAGATTAGGCATACAGGCATTCCACCCCATTTTAG  
TGGAAGGGCGCGCTATTTGTTTACATCCATTAGTTTGTAAAGGGATTCAATGCAGATTTT  
ATGGGGATCAAATGGCGGTTTCATGTACCTTTATCTTTGGAGGCTCAAGTGGAGGCTCGT  
TACTTATGTTTTCTCATATGAATCTATTGTCTCCATCTATTGGGAATCCAATTTCCCTACC  
AACCCAAGATATGCTTATTGGGCTCTATGTATTAACGAGCGGGAATCGCCGAGGTATTT  
GTGCAAATAGGTATAATCCATGTAATCGCATAAAT-----TATCAAATGAAAAAATGGA  
TGCCAATAGCTATAAGTATACGAAAGAAAAAGAACCCTTTTTTTGTAAATCCTATGATGC  
AATTGGAGCTTATCGTCAGAAAAGAATCAATTTAGATAGTACTTTATGGCTCCGGTGGA  
AACTAGACCAACGC---GTTATTGCTTCA-----AGAGAAGCTCCTATCGAAGTTCACTATG  
AATCTTTGGGTACTTATCATGAGATTTATGAGCACTACTTAATAGTAAGAAGTATAAAAA

AAGAAATTCTTTGTACATACATTTCGAACCACTGTTGGTCCTATTTCTCTTTATCGAGAAA  
TCGAAGAAGCTATCCAAGGGTTGTGCCGGACCTGCTCATATGGTACC-----  
ATGGAGGTACTTATGGCAGAACGGGCCAATACGGTCTTTCACAATAAAGTGATAGATGG  
AACTGCCATTAACGACTTATTAGCAGATTAATAGATCACTTCGGAATGGCATATACATC  
ACACATTCTGGATCAAGTAAAGACCCTCGGGTCCAGCAAGCCACTGCTACATCCATTT  
CATTAGGAATTGATGATCTTTTAAACAATACCTTCTAAGGGATGGTTAGTCCAAGATGCGG  
AACAAACAAAGTTTGGTTTTGGAAAAACACCATTATTATGGAAATGTACACGCAGTAGA  
AAAATTACGACAATCCATTGAGATATGGTATGCTACAAGTGAATATTTGCGACAAGAAA  
TGAATCCTAATTTTAGGATGACTGATCCTTTTAATCCAGTACATATGATGTCTTTTCGGG  
AGCTAGAGGAAATGCATCTCAAGTACACCAATTAGTAGGTATGAGAGGGTTAATGTCTG  
GATCCACAAGGACAAATGATCGATTTACCCATTCAAAGCAATTTACGTGAAGGACTGTC  
TTTAACAGAATATATAATTTCTTGCTACGGAGCCCGAAAAGGAGTTGTAGATACTGCTGT  
ACGAACATCAGATGCTGGATATCTTACACGCAGACTTGTGGAAATTGTTCAACACATTG  
TTGTACGTAGAACAGATTGTGGTACTATCCGAGGTATTTCTGTGAGTCTCAAATGGG  
ACGATACCG---GAAAGGATTTTATACAAACATTAATTGGTCGTGTATTAGCAGATGATAT  
ATATATGGGCCCGCGATGCATTGCCGTTAGAAATCAAGATATTGGGATTGGACTTGTCAA  
TCGATTTATAACC-----TTTCAAACACAACCAATATCTATTTCGAACCCCTTTTAC  
TTGTAGTAGTACATCTTGGATCTGCCAATTATGTTATGGCCGAAGTCTGCTCATGGGGG  
CCTGGTCGAATTGGGAGAAGCTGTAGGTATTATCGCGGGTCAATCTATTGGGGAACCCG  
GCACTCAACTAACATTAAGAACCTTTCATACCGGCGGAGTATTCACAGGGGGTACTGC  
AGAACATGTACGAGCCCCTTCCAATGGAAAAATTAATCAATGAAGATTTAGTTCATC  
CCACACGTACACGTATGGGCATCCCGCTTTTATATGTTATATATACTTGTATGTAECTAT  
TGAGAGTGAAGATATTCTACACAAGGTCATTTCCGCCAAAAGTTTTCTTTTAGTCC  
AAAACGATCAATATGTACAATCAGAACAAGTTATTGCTGAGATTCGCGCGGGAACCTAT  
ACGTTT---AATTTTAAAGAGAGGGTTAGAAAACATATTTATTCTAACTCAGAGGGAGAA-  
--ATGCACTGGAGTACCGATGTATACCATGCACCGGAATTTACATACAGCAATGTACATCT  
CTTACCAAAAACAAGTCATTTATGGATAGTATCAGGAGGTTTCATGCCGC-----TCTAGTG  
TAGCCTCTTTTTCGCTTCAAAGGATCAAGATAAAATTAGCGTTCAT-----TCTCTTTCTG  
CTGAAGGA---AGATCTATTTCTAGTCTG---TCAGGAAATAATGATCAA---GTAAGACAAA  
AATCTTTAGTTCAGATATCTTTGGTAAA---AAAAACAA---AGTGAGATT---CCTGATTA  
TTCAGAACTTAATCGAAGGGGTCATTGTAATTTAATATATCCTGTT--ATTCTCTACGAAA  
ATTTTTAT-----TTATTGGCAAAGAGACGAAGAAATAGATTCATCATTCCATTACAATTGA  
TTCCAGAACGAGAAAAAGGGCTAATGCCTCCTTCCGGTATTTTCGATTGAAATACCCGG  
AAAT-----GGTATTTTTCGTAAAAAAAGTATTCTTGCTTATTTTGTATGATCTTCAATACAG  
AAGAAAGAATTCAGGCATTACGAAATATGGGACTACAGGGGGGCATTCCATCCTCAAA  
AAGGAGGAT-----TTGATTGAGTATCGA---GGAGTCAAAGAATTGAAGCCAAAATACATG  
AAAATAGATCGATTTTTTTTCATTCCCAGGAAGTACATATTTTGCAGAAATCTTCTTCC  
ATAATGGTACAGAACAATAGTCTCATTGGACTAGATACACGAATCACTTTAAATACAAG  
AAGCCGAGCGGGCGGATTGGTCCGAGTGGAGAGAAAAAAAATGGATTGAACTTAA  
AATCTTTTCTGGAGATATCCATTTTCTGAGAGATGGATAAGATATCCCGACACAATGA  
TATCTTGCTCCCGCTTGGAGCGGCAAAAAAA-----AATGCTAAGGAATCAAAAAAA---A  
AATTTAAAATTTGGATCTATGTCCAATGG-----ATCCACCTAACAAGAAAAAG-----TAT  
TTTGTTTTGGCTCGACCCGTAATCATATATGAGATAGCGGACGGTATAAATTTAGTAACA  
CTTTTCTCCAGGATCTGTTGCACGAAAGGATAATATGGAACCTTAGAATTGTCAATTAT

ATCCTTTATGGCAATGGCAAACCAATTCGGGGAATTTATGGAACAAGTATTCAATTAGTT  
CGGACTTGTATTATTGTTGAATTGGAAACAAGACAAA-----AAAAGTTCTTCTGTGCGAA  
GAGGCCACGCTTCTTTTGTGAAGTAAATACAAATGGTATGAGTCGAGATTCCTGCG  
AATCGATTTAGTGAAATCCCATATTTTCGTATATCAGAAAAAGGAAAGATCCGTCAGGTT  
CAGGATTGATCTTT--GATAAGAGGCCAGACCGCACCAGTATCAATCCATTTTATTCTATT  
TCTTCCAAGGCAGGG-----ATTCAACAATCACTTAGCCAAAATCAAGTAACTATT  
CGTATGTTGTTGAAGAGG-----ATAAGGAATGCCAATCTTTTATAATTTGTGCATCATC  
TAATTGTTTTCAAATGGGTCCA-----TTCAACGATGTAAAATATTACAATGATGTA---ATAA  
AAAAGAATCA---AGTCTAATTCCAATTAGGAATTCCTTGGGACCTTTAGGATTAGGAA  
GAACCCCTCAAATTGCGCATTTT-----TATTCATTTTACCATTTAATAACT-----TATAATCA  
GATCTCG--GTAATAAATATTTACAACCTTGAC-----AAT--TTCAAACAGACTTTTCAAG  
TGCTT-----AAA---TATTATTTAATGGATGAAAATGGTAGGTCTATTTATAATAATCCCGATC  
CGCGCGGTAACATCGTTTTGAATCCATTCAATTTGAATTGGAATTTTCTCCATCATAATTA  
TTGTGAAGAAGCGTCTAGAATAATTAGC---CTTGGGCAGTTTATTTGTGAAAATTTATGT  
ATAGCCAAAACGGACCG-----CACTTAAAATCGGGTCAAGTTCTAATTGTTCAA---AT  
TGACTCTGTAGTAATAAGATCAGCTAAAGCTTATTTGGCCACTCCGGGAGCAACCGTTC  
ATGGCCATTATGGAGAAATCCTTTACGAAGGAGATACATTAGTTACATTTATATATGAAA  
AATCGAGATCTAGGGATATAACGCAAGGTCTTCCAAAAGTGGAACAAGTGTTAGAAGT  
GCGTTCGATTGATTCAATATCGATGAACCTAGAAAAGAGAATTGAGGGTTGGAACAAG  
AGTATAACAAAATTATTGGAATTCCTTGGAGATTCTTGATTGGTGCTGAGCTAACTATA  
GTGCAAGGGCGTATCTCTTTGGTTAATAAGATCCAAAAGTTTATAGATCTCAGGGGGT  
GCAGATTCATAATCGACATATAGAAATTATTGTGCGTCAAATAACATCAAAGTGTTGGT  
TTCAGAA-----GAGGGAATGTCTAATGTTTTTTCACCCGGAGAACTGATTGAATTGTT  
GCGGGCGGAACGAACAGGGCGCGCTTTGGAAGAAGCGATCTGTTACCGAGCTATCTTA  
TTGGGAATAACGAAAGCATCTCTAAATACTCAAAGTTTTATATCCGAAGCAAGTTTTCA  
AGAAACTGCTCGAGTTTTAGCAAAGCCGCTCTCCGGGGTCGTATCGATTGGTTGAAA  
GGTCTGAAAGAGAACGTTGTTCTAGGGGGGATGATACCCGTTGGTACGGGATTCAACG  
GATTAGTGCAACGTTCA-----AGGCAACATACCAACATTCCTTTGGAAACCAAAAACAA  
TAAA-----CTATTCGAGGCAGAAATGCGA-----GATATTTTGTCCACCACAGAGAATTAT  
TTATTTTTTCATTTCAAGGAATTTACACGATACACTGAGACAATCATTTTCGAGGGTTGA  
ATGATTCC-----ATGACAAGAAGATATTGGAACATCCATTTGGAAGAAATGATG  
GAAGCAGGAGTTCATTTGGTCATGGTACTAGTAAATGGAATCCTAGAATGGAACCTTA  
TATCTTCAAAGCGTAAGGGTATTCATATTATAAATCTTATTAGAACTGCCCGTTTTTTA  
TCAGAAGCTTGTGATTTAGTTTTTGTATACAGCAAGTAGGGGAAAGCAATTCTTAATTGT  
TGGTACCAAAAATAAAGCAGCCGATTCAGTAGCACGGGCTGCAATAAGGGCCCGTTGT  
CATTATGTTAATAAAAATGGCTAGGCCGGTATGTTAACGAATTGGTATACTACGGAAAC  
GATACTTCATAAGTTCAGGGACTTGAGAACGGAACAAAAGATGGGGAGACTCAATCGT  
CTTCCGAAAAGAGATTCAGCTATGTTGAAGAGACAATTATCTCACTTGCAAACATATCT  
GGGCGGGATCAAATATATGACTGGATTACCCGATATTGTAATAATCGTTGATCAGCAAGA  
AGAATATATGGCTCTTCGAGAATGTATGATTTTGGGAATCCAACGATTTGTTTAATCGA  
TACAAATTGTGACCCAGATCTCGCTGATATTCGATCCCAGCAAATGATGACGCGATAG  
CTTCAATCCGATTAATTCTTAACAAATTAGTATTTGCAATTTGTGAGGGTTCGTTCT---AGT  
TATATACGAAATCCTATGGGACAAAATAAATCCAATTGGTTTCAGACTTGGTGCAAC  
CCAAGGTCATCATTCTCTTTGGTTTGCACAACCACAAAATTATTCCGAAGGGCTACAAG

AAGATCAAAAAATCCGAGATTGGATCAAGAATTATGTACAAAAAATATTCAAATATCC  
TCTGGT--GTTGAGGGAATTGCATGCATAAAGATTCAAAAAAGAATCGATTTGATTGAG  
GTCATAATCTATATGGGATTCCCAAAATTATTACTAGAAGGTAAAGGTGGG-----CCTCGA  
AGAATCGAAGAATTGCAGATAGATGTACAAAAAGAAATTAATTGTGTAAACCGAAAAC  
TCAACATTGCTCTTACAAGAATTACAAACCCTTATGGACACCCTAATATTCTCGCCGAAT  
TTATAGCCGGACAATTAAGAATAGGGTTTCATTTCGAAAAGCAATGAAAAAGGCTATT  
GAATTAAGTGAACAAGCAGGTACAAAAGGAATTCAAGTACAAATTGCAGGACGTATCG  
ACGGAAAAGAGATTGCGCGTGTGCAATGGATCAGAGAGGGTAGAGTTCCTCTACAAA  
CCATTGAGCTAAAATTGATTATTGTTCCCTATGCAGTTGGAAGTATCTATGGGGTATTAG  
GCATCAAAATTTGGATATTTGTAGACGAGGAAATGTCGCGTTACAGAGGGCCTCGTTTC  
AAAAAATACGACGTCTGGGGGCTTTACCGGGACTAACTAGTAAAAGGCCTAAAGCCG  
GAAGCGATCTTAGAAACCAATCACGTTCCGGTAAA--AAATCTCAATATCGTATTGTTTT  
AGAAGAAAAACAAAAATTGCGTTTTTCATTATGGTCTTACAGAACGACAATTACTTAAAT  
ACGTTTCGATTGCGGAAAAGCCAAAGGGTCAACGGGTCGGGTTTTACTACAATTACT  
TGAAATGCGTTTTGGATAACATCCTTTTTTCGATTGGGTATGGCCTCGACTATTCCCAAGC  
CCGCAATTAGTTAACCATAGACATATTTAGTTAATGGTTCGTATAGTAGATATACCAAGT  
TATCGCTGCAAACCCCAAGATATTATTACAGCGAGGGATGAACAAAAATCTAGAGCTCT  
GATTCAAAATTGTCTTGATTCATCCCTCGTGATGAGGAATTACCAAAACATTTGACTTT  
TCACCCATTCCAA-----TATAAAGGATTAGTCAATCAATAATAGATAGTAAATGGGTCCG  
TTGAAAATAAATGAATTGCTAGTTGTAGAATATTATTCTCGTCAGACTATGTCACGTCG  
AGGTACTGCAGAAGAAAAAACTGCAAATCCGATCCAATTTATCGTAATCGATTAGTTA  
ACATGTTGGTTAACCGTATTCTGAAACACGGAAAAAAATCATTGGCTTATCAAATTATCT  
ATCGAGCTATGAAAAAGATTCAACAAAAGACAGAAACAAATCCACTATCTGTTTTACG  
TCAAGCAATACGTGGAGTAACTCCCGACATAGCAGTAAAAGCAAGACGTGTAGGCGGA  
TCGACTCATCAAGTTCCCATGAAATAGGATCCGCACAAGGAAAAGCACTTGCCATTC  
GTTGGTTATTAGGGGCATCCCGAAAACGCCCGGTTCGAAATATGGCTTTCAAGTTAAGT  
TCCGAATTAGTGGATGCTGCCAAAGGGAGTGGCGATGCCATACGTA AAAAGGAAGAG  
ACTCATAGAATGGCAGAGGCAAATAGAGCTTTTGCACATTTTTCGTATGGGTAAAGACAC  
TATTGCTGATATAATAACTTCTATACGCAATGCTGACATGAATAGAAAAGGAACAGTTCG  
AATACCATCTACTAACATCACCGAAAACCTTGTTAAAATACTGTTAAGAGAAGGTTTTA  
TTGAAAATGTGAGGAAACATCAGGAAAACAACAAATATTTTTTGGTTTTAACCTACG  
GCATAGAAGG-----AATAGGAAAGGTCCATGTAAAACA---GTT-----TTAAATTTAAAACG  
GATCAGTCGACCCGGTCTACGAATCTATTCTAGTTATCAACGAATTCCTAGAATTTAGG  
TGGGATGGGGATTGTAATCTTTCTACCTCTCGGGGTATAATGACGGACCGAGAGGCC  
GACTAGAAGGAATCGGCGGAGAAATTTGTGTTATATATGGATGGCAAACCCGCACC  
CAGAATCGGTTACGTAGGAATGGGCGTATTGGTTTACGT---AGTGCGCGTAGAATACC  
AAAAGGGGTTATTCATGTTCAAGCAAGTTTCAACAATACCATTGTGACTGTTACAGATG  
TACGAGGCCGGGTAATTTCTTGGTCTCCGCCGGTACTTGTGGATTCAAGGGTACAAG  
AAGAGGGACACCCTTTGCGGCACAAACCGCAGCAGGAAATGCTATTCGGACGGTAGT  
GGATCAAGGTATGCAACGAGCCGAAGTCATGATAAAAGGCCCCCGGTCTCGGACGAGAT  
GCAGCATTAAGGGCTATTCGTAGAAGTGGTGTAAATTAAGTTTCATACGGGATGTAAC  
CCCTATGCCACATAATGGCTGTAGGCCCCCTAAAAAAGGCGTGTGATGCCAACTATTA  
AACAACTTATTAGAAAGACGAGACAGCCAATCAGAAATGTTACGAAATCCCCCGCCCT  
TGGGGGATGCCCTCAGCGACGAGGAACATGTACTAGGGTGTATACTATCACCCCAA

AAACCAAACCTCTGCCTTACGTAAAGTTGCCAGAGTACGCTTAACCTCTGGATTTGAAAT  
CACTGCTTATATACCTGGTATTGGCCATAATTTACAAGAACATTCTGTAGTCTTAGTAAG  
AGGGGGAAGGGTTAAGGATTTACCCGGTGTGAGATATCACATTGTTGAGGAACCCTA  
GATGCTGTCGGAGTAAAGGATCGTCAACAAGGGCGTTCTAAATATGGGGTCAAAAAGC  
CAAAAATGGCAAGAAAAGGTTTAATTCAGAGGGAAAAGAAGAGGCCAAAATTGGAA  
CAAAAATATCATTTGATTCGTGATCCCCAAAAAAGAAATAGGT-----AAAGTTCCAT  
TGTTGAGTGAGAAATGGGAAATTCACGGAAAGTTACAATCCCCACCGCGTAATAGTGC  
ACCTACACGTCTTCATCGACGTTGTTTTCAACCGGAAGACCGAGGGGCTAACTATCGA  
GACTTTGGGTTATCCGGACACATACTTCGTGAAATGGTTCATGCATGTTTGTGCTGG  
AGCAACAAGGTCAAGTTGGATGGTACAAAACCTCATTTCATCTCGCTTATTTGCAAGAA-  
-GAA---AAAGAAGAAAACAGGGGATCTGTTGAATTTCAAGTATTTAGTTGGACCAATA  
AAATAAGAAGACTTACTTCACATTTGGAATTGCACAGAAAAGACTATTCCTCTCAAAG  
AGGTCTCCGTAATAATTCTGGGAAAACGTCAACGATTGCTGTCTTATTTGTCAAAGAAA  
AAGAGAGTACTTTATAAATACTTAATAAATCAGTTGGGTATTCGAGAATCAAAAACCTCG  
T-----ATGGTAAACTTCGTTTAAAACGATGTGGTAAAAAGCAACGTGTGGTTTATCGAA  
TCGTTGCAATTGATGCTCGATGCCGAAGAGAAGGAAGAGCTCTTCGGAAAAGTGGGCTT  
TTATGATCCGCTAAAGAATCAAACCTATTTAAATGTTCTCTGCTATTCTATATTTCTTGAA  
AGGGGCGCTCAACCTACGGGAACGTTCATGATATTTGGAAGAAGGCGGGAGTTTTTA  
TGGAACTTTGCCTTAATCAACAGATTAAATTCATATGGATAAATCCAAGCGACTCTATT  
TTAAATCCAAGCGATCTTTTCGTAGGCGTTTGCCCCGATTGGGTGCGGGGATCGAATT  
GATTATAGAAACATGAGTTTAATTAGTCGATTTATTAGTGAACAAGGAAAGATATTATCT  
AGACGGGTGAATAGATTAACTTAAAACAACAACGATTAATTACTATTGCTATCAAGCA  
AGCTCGTATTTTATCTTTGTTACCTTTCTTAATAATGAGAAA-----CAATTTGAAAGAGG  
TGAGTCGGCTGCTAGAACTGCGGGTCTTAGAATCAAAAAGGGGATGACACGCTCAATA  
AAAAAAAATCCTTTTGTAGCGAATCATTATTATAAGAAAATAAATAAGCTTAACACAAA  
AGCGGAAAAGAAATAATAAATAACTTGGTCCCGAACATCTACCATTATACCATAATGAT  
TGCCCACTATTGCTATACATAATGGAAAAGAACATTTTCCTATTTATATAACAGATCGT  
ATGGTGGGCCATAAATTAGGGGAATTCGTACCTACTATAAATTTCCGAGGACACGCAAA  
AAATGATAATAGATCTCGTCGTATGATTTTAAAATCTTTTATACTAGGTAATCCAGTATCC  
TTATGCATGAAGATAATCAATTCGGTCGTTGTGGTTGGACTCTATTATGGATTTCTGACC  
ACATTTTCCATAGGGCCCTCTTATCTCTTCTTCTCCGAGCTCGGGTTATAGAAGAAGG  
A-----ATCGAGAAGAAAGTATCAGCAACAACCTGGTTTTATTACGGGACAGCTCATGAT  
GTTTCATATCGATCTATTATGCGCCTCTGCATCTAGCATTGGATAGACCTCATACTAACT  
GTCCTAGCTCTACCGTATCTTTGTTTTCAATTTCTTCTGGAACAATCACAAACTTTTTT  
GATTATGGATCTACTACCAGAAATTCATGCGTAATCTTAGCATTCAATGTGTATTCTG  
AATAATCTCATTTTTCAATTATTCAACCATTTCAATTTTACCAAGTTCAATGTTAGTCAGAT  
TAGTCAACATTTATATGTTTCGATGCAACAACAAGATATTATTTGTAACAAGTAGTTTTG  
TTGGTTGGTTAATTGGTCACATTTTATTCATGAAATGGGTTGGATTGGTATTAGTCTGGAT  
ACAGCAAAATAATTCTATTAGATTT--ATTAGATCTAATAAGTACCTTGTGTCAGAATTGA  
GAAATTCTATGGCTCGAATCTTTAGTATTCTCTTATTTATTACCTGTGTGTAATTTAGG  
CAGAGTACCGTCACCCATTGTTACTAAGAACTGAAAGAAACCGAAGAAGATAAACCT  
CTTGTGACTATTCTTTTCGACTCTAAACGATGGAATCGTCCATTCCGATATATAAAAAAC  
GACCGATTTCAAATGCTGTAAAAAATGAAATGTCACAATCTTTTTTTCATACATGTAA  
AAGTGATGGAAAAGAAAGGATATCCTTCACGTATCCACCAAGTTTGTCAACTTTTCTGA



AAATGATACAAAGAAAGATATCTTTGTTTACAATACAAAAAATCTCCTATAATGAATTAT  
ACAATGATTGGAGTTATGCCAATGAAGAAAAAGGAACAACATAAGCAAAAAATTGAT  
ACATAGATCAGAACTTTAGAT-----CTTGCTCCGGATGTACTCGAAAAAGAATTCTA  
TTGTCTAATAATGAGACTCAAAAAGAATATTTAACTAAAATATATGATCCTTTATTGAAC  
GGACCCTATCGCGGCCAAATCAAAAATTGTTTTTATTCAGGAAGAAATTTTTGGTAAA  
TAAAATTCATGGCGTACTTAACACAGAATTTGACCAGAAAGATCCCAAGGATAAACATA  
TTGGAATAAATGAAATCAGTAAAAAAGTCCCTCGATGGTCATACAAATTAATCGAGTTG  
GAACAACAGGAAAGAGACGAAATTCGTTCAAGAAAAGCCAAACGTGTCGTAATTTTG  
ACTGATGCTTTGATCCGTTATTCACAACAATCGGATTTTCGTCGAGATATAATAAAGGGC  
TCTATGCGAGCTCAAAGGCGTAAAACAGTTATTGTGGAAGTGTGAAAGCAAATGTAC  
ATTCACCCCTTTTTTTGGATAGACTGGGCACCCCCC-----TTTTTTCTTTTGATATCC  
CCGAGCGGCTGAAAGGCATTTTTCTAAATAGAGATGAGAAAACCTCGTATAGAAATAGC  
AGAGGCCTGGGATAGCCTTATAGTTGCTCAAGTAATAAGAGGTTCCCTTATTAGTAACAC  
AATCGATTCTTAGAAAATATATTCTATTACCTTCATTGATAATAGCTAAAAATACTCTTCG  
TATACTATTATTTCAATTTCCCGAATGGTCCGAGGATTTAAAGGATTGGAATAAAGAAAT  
GCATGTTAAATGCACTTATAACGGCGTTCATTATCAGAAAAAGAATTTCCGAAAAACT  
GGTTAACAGACGGTATTCAGATAAAGATCCTATTTCTTTTTCGTTTGAAACCTTGGCAC  
AGATCTAAGAAAGGACAAAAAACGATTTTTGTTTTTAACAGTTTGGGGAATGGAAG  
CGGAACTGCCTTTTGGTTATCCCCGAAAACGGCTTTCCTTTTTTGAACCCCTTTTAAAA  
GAACTCGAAAAAAAATTTCAAATTGAAACAAAAGTGCTTTCTAGTT---ATAACGTT  
TTAAAAGAAAGAACCAAATTTTTTGTAATGTAGCAAAAAGAAACAAAAAATGGGTCA  
TCAAAGTCATTATA-----TTTCTAAAAAAAATAAGAAAAGAATTCTCAAAAATAAATAAT  
TCAACAATTCATAATCAAATGAGTCACGAATCG---ATTAAAATTCGATATATGGATTGGG  
AAACT--TCATTGACAGAAAAAAAATGAAAGATCTGATGAATAGAACAACACAATC  
ATAAATAAATAAAAACAATTA AAAAAGACAAGAGAAGAAACAAA-----ATAAGTTATG  
ACGAGAAAGGATTAGAATCACCAAAAAATTTGGGAGATATTA AAA-----AATCTTCGA  
TTACTTCGTAAATCACATTATTTTGTA AAATTATTTATTGAAAAGCTATACATGGATATCC  
TTCTATGTATCATTAATATACCTAGAATCAATGCACAGCTC-----GTGGACTTATC  
TTACTTGTCACAAGCATATGTATTTTATAAATTATCGCAAACC---GTCAATAACCTAGATA  
AGTTAAGATCCGCTTTTAAATATACATCTTTTTTTCTTAAGAATGAAATAAGGGAGTATT  
TTACGCAAGGAATATTTGATTCTGAATTCAGACATAAAAAACCTCCA---TATGGAATTA  
TGAATGGAAAAACTGGCTAAAGGGTCATTATCAATACGATTTATCTCAGATTAAATGGT  
CTAGATTAGTAACACAAAAATGGCGAACTAGGTTCAAC-----CATATGACTAAAAATAAA  
AATAAATGTGAGTCATATGAATATGAAAAACCCAATTTATTCATTACGAAAAAGCA-----  
---CAAAAACAATATAAATATGATCTTTTATCGTATAAATCTATTAATGATGATAGTCTAGA  
TTCAGATACAAAATATTTGGATTGGAAAATCCTCCATTTTTGTCTTAGATTCCTTTGATTG  
GATGGGAATGAATGAAGAAATACTAAGTCATTGGTTTTTCCCAGAATTTGTGATACTTTA  
TAATACATATAAGATTAAACCATGGGTCATACCAATCAAATTACTTTTTTTTAATACTAAC  
-----ACGGAACAGAACTTGAGTTATTCCTAAAAAGGTATTTTCATTTTCAATTGAGATG  
GGAT-----AATCAAAAATAATCAATAACATCAAAGTATATTGTCTCCTGCTTAGACTG  
AGAAATCCAAGAGAAATTGCTATATCCGCTATTCAAAGGGAAGAAATGAGTCTGGATAT  
TCTGATGGTCCGGAAGGGTTTAACTTTTACAGAATTGATGAAAAGGGAATATTGATTA  
TCGAACCAGTCCGTCTGTCTGTAAAAACGGATGGACAATTTTTTATATATCAAACCATA  
GGTATCTCATTGGTGCATAAGAGTAAGCAGAATTATGAT--TTTATTTTCTGAAAAAAT

TTTATCCCCAAGGCGTCGTAGAGAATTGAGAATTCGAATTTGTTTCAGATTTCTTTGGC  
CCAATTATCGATTAGAAGATTTATCTTGTATGAATCGCTATTGGTTTGATACCAATAATGG  
TAGTCGTTTCAGTCTGATAAGGATTCAGATATATCCGATGAAAGGACATCAATTCAAATC  
CTGGATTTTCGAATTTAGAGAGATATTGAGAGAGATCAAGAATTCTCACTATTTCTTAGA  
TTCATGGACCCAATTCAATTCAGTGGGATCTTTCATTACATTTTTTTCCATCAAGAACG  
TTTTATAAACTCTTGGACTCCCGAATTTGGAGTATCTTACTTTCA---CGCAATTCA-----  
CAGGGTTCAACAAGCAATCGATATTC-----ACGATCAAGGGTGTAGTACTATTTGTAG  
TAGTG---GTCCTTATATATCGT-----ATTAACAATCGAAAGATGGTTCGAAAGAAAAA  
TATCTATTTGACAGGACTTCTTCCT-----ATACCTATGAATTCATTGGACCCAGAA  
ATGATACATTGGAAGACTCTTTT---GGCTCTTCCAATATCAATAGGTTGATTGTTTCG---C  
TCTGTATCTTCCAAAAGGAAAAAAGATCTCTGAGAGCCTTTTCCTGGATCCGAAAGA  
GAGTACTTGGGCTCTCCAATAACT-----AAAAAGTGTATCATGCCTGAATCTAACT  
GGGGTTCGCGGTGGTGGAGGAAGTGGATCGGAAAAAAGAGG-----GATTCCAGTTGTA  
AGATATCTAATAAT-----GAAACCGTAGCTGGAATTGAGATCTCATTCAAAGAGAAAGAT  
ATCAA---TATCTGGAGTTTCTTTTGTATATTATATTGAT-----GATCCGATCCGCAAGGC  
CCATGATTGGGAATTGTTTGATCGTCTTCTCCGAGGAAGAGGGCGAAACAGAATCAAC  
TTG-----AATTCGGGACAGCTATTCGAAATCTTAGTGAAAGACTGGATTGGTTATCTCAT  
CTTTGCTTTTCGTGAAAAATACCAATTGAAGTGGAGGGT---TTCTTCAAACAACAAGT  
A---GCTGGGTCAACTATTCAATCAAATGATATTGAGCATGTTTCCTAT-----CTCTTCTCGA  
GAAACAAGTGGGCTATTTCTTTGCAAAATTGTGCTCAATTCATATGTGGCAATTCGCG  
CAAGATCTCTTCTTT-----AGTTGGGGGAAG---AATCCGCACGAATCGGATTTTTTTGAG  
GAAA---ATATCGAGAGAGAATTGGATTTGGTTAGACAATGTGTGGTTGGTAAACAAGGA  
TCGG-----TTTTTTAGC-----AAGGTACGGAATGTATCGTCAAATATTCAATATGATTCC--  
-----ACAAGA-----TCTAGTTTCGTTCAAGTAACGGATTCTAGCCAATTGAAAGGATCTT  
CT--GATCAATCCAGAGATCATTTTCGATTCCATTAGT-----AATGAGGATTCGGAA-----  
-----TATCACACATTGATCAATCAAAGAGAGATTCAACAACATAAAA  
GAAGGATCGATTCTT---TGGGAT-----CCTTCCTTTCTTCAAACGGAACGAACAGAGATA  
GAATCAGAC-----CGATTCCTAAA-----TGCTCTCTGGATATTCC-----TCAATGTCCCG  
GCTATTCACG---GAACGTGAGAAGCAGATGAATAATCATCTGCTTCCGGAAGAAATCGA  
AGAATTT-----CTTGGGAATCCTACAAGATCCATTGTTCTTTTTTCTCTGACAGATGG----  
--TCAGAACTTCAT--CTGGGTTTGAATCCTACTGAGAGGTCCACTAGAGATCAG-----  
-AAATTGTTGAAGAAAGAACAAGATGTTTCT---TTTGTCCCTTCCAGGCGATCGGAA-----  
-----AATAAGAAATAGTTAATATATTCAAGATAATTAATTATTACAAAAT-----ACCGTC  
TCAATTCATCCTATTTTCATCCGATCCGGGATGTGATATGGTTCCG---AAGGATGAACTGG  
AT--ATGGACAGTTCCAATAAGATTTCAATCTTGAACAAAAATCCATTTTTTTGATTTA-----  
TTTCGT-----GACCGGAACAGGGGGGATAACAGTTA-----CACCACGATTTTGAATCA  
GAA-----GAGAGATTTCAAGAAATGGCGGATATATTCACTCTATCAATAACCGAGCCG---  
GATCTGTCGTATCATAAGGGATTTACCTTTTCTATTGATTCTGCAGATTGGATCAAAAA  
CAA-----TTCTTGAATGAGGTATTCAACTCCAGGGATGAATCGAAAAAGAAATATTTA----  
----TTGGTTCTACCTCTATTTTTTAT-----GAAGAGAATGAATCCTTTTATCGAAGGATCA  
GAGAAAAATGGGTCCGG---ACCTCCTGCGGAATGATTTGGAAGATCCAAAACCAAAA  
ATAGTGGCATTGCTAGCAACAACATAATCGAGGCAGTCAATCAATATAAATTGATCCG  
AAATCTGATTCAAATCCAATATAACACCTGTGGG-----TACATAATAAATGTATTGAATCG  
ATTCTTTTTAATGAAT-----AGATCCGATCGCAACTTCGAATATGGAATTCAA-----AG

GGATCAAATAGGAAATGATACTCTGAATCATAGAACTATAATGAAATATACGATCAACCA  
ACATTTATCAAATTTGAAAAAG---AGCCAGAAGAAAGGGTTCGATCCT-----CGTAGTTT  
TATTTCTCGAACCGAGAGATCCATGAATCGGGATCCTAATGCATATAGATACAAATGGTC  
CAATGGGAGCAAGAATTTCCAGGAACATTTGGAACATTTCAATTTCTGAACAGAAGAGC  
CGTTTT--CATTTTCAAGTAGTGTTTCGATCGATTACGTATTAATCAATATTCGATTGATTGG  
TCTGAGGTTATCGACAAAAAAGATTTGTCTAAGTCACTTCCTTTCTTTTTGTCCAAGTT  
ACTTCTT-----TTTTGTCC-----AAGTTTCTTCTCTTTTTGTCT  
AACTCACTTCCT--TTTTCTTTGTGAGTTTCGGGAATATCCCCATTCATAGGTCCGAG---  
ATCCACATCTAT--GAATTGAAAGGTCCGAATGATCAACTCTGCAATCAGTTGTTAGAAT  
CAATAGGTCTTCAAATCGTTCATTTGAAAAAATTGAAACCCTC-----TTATTGGAT-----  
-GATCATGATACTTCC---CAGAAATCGAAATCTTGATCAACGGAGGAACAATATCACCA  
TTTTTGTTCATAAAGATACCA--AAGTGGTGGATGATTGACTCATTCCATACTAGA-----A  
ATAATCGCAGGAAATCTTTTGAGAACACGGATTCCATTTCTCAATGATATCCCACGATC  
AAGACAATTGGCCGAATCCCGCGAAACCATTTTCATAGAAGTTCATTGATATCTTCTTTTT  
ATAAAGCAAATCGACTTCGATTCTTGAATAATCCACATCACTTCTGCTTCGAT-----TGTA  
ACAAAAGATTCCCTTTT-----TAT--GTGGAAAAGGCCCGTGTCAATAATTATGAT-----T  
TTACGTATGGA---CAATTCCTCAATATCTTGTTTCATTTCGCAACAAA---ATATTTTCTTTGC  
GCGGCGGTAAA-----AAAAACATGCTTTTTTGGAG---AGAGATACTATTCACCAATCG  
AGTTACAGGTATCTAACATATTCATACCTAACGATTTTCCACAAAGTGGTGACGAAAGA  
AGGTATAACTTGTACAAATCT-----TTCCATTTTCCAATTCGATCCGATCCATTCGTTTCG  
T-----AGAGCTATTTACTCGATCGCAGACATTTTTGGAACACCTCTAACAGAGGGACAAA  
TAGTCAATTTTGAAGAAGACTTATTGTAAACCTCCTTCAGATATGAATTTATCTGATTTCAG  
AGGGGAAGAAGTTGCAGCAGTATCTCAAT-----TTCAATTCAAACATGGGTTTGATTTCG  
ACTCCATGTTCTGAGAAATATTTACCATCCGAAAAG-----AGGAAAAA-----  
---CGGAGTCTTTGTCTAAAG-----AAATGCCTTGAGAAAGGGCAGATGTATAGAACCTTT  
CAACGAGATAGTGCTTTTTCAACTCTCTCAAATGGAATCTATTCCAAACATATATGCCA  
TGGTTCCTTACTTCGACAGGGTACAAATATCTAAATTTGATATTTTATAGATACTTTTTTCAG  
AC---CTATTGCCGATACTAAGTAGCAGC-----CAAAAATTTGTATCCATTTTTTCATGATATT  
ATGCATGGATCAGATATATCATGGCGAATTCCTCAGAAAAAATTG-----TGTCTT  
CCACAATGGAAT--CTGATAAGTGAGATTTTCGAGTAAGTGTTTACATAAT-----CTTCTTCT  
GTCCGAAGAAATGATTCATCGAAATAATGAGTCA-----CCATTGATATCGACACATCTGA  
GATCGCAAATGTTTCGGGAGTTC---CTCTATTCAATCCTTTTCTTCTTCTTGTGCTGGA  
TAT--CTCGTTCGTACACATCTTCTCTTTGTTTCTCGA-----GCCTATAGTGAGTTACAGAC  
AGAATTCGAAAAGGTCAAATCTTTGATGATTCCATCATAATGATTGAGTTGCGAAAAC  
TTCTGGATAGGTATCCTACATCTGAGCTGAATTCCTTCTGGTTAAAGAATCTCTTTCTAG  
TTGCTCTGGAACAATTAGGAGATTCTATAGAAGAAATACGGGGTTATGCTTCCGGCGGC  
AACATGCTATGGGGCGGTGGGCC-----GCTTATGGG---GTCAAATCAATACGTT  
TAAGAAGAAATATTTGAATATCAATCTCATCGATCTCATG-----AGTATCATACCAA  
TCCATCAATCGAATCGCTTTTTTCGAGAAATACGAGACATCTAAGTCATACAAGTAAAG  
AGATCTATTCATTGATAAGAAAAAGAAAAACGTGAACGGTGATTGGATTGATGATCA  
AATAGAATCCTGGGTCTCGAACAGTGATTTCGATTGATGATAAAGAAAGAGAATTCTTGG  
TTCAGTTCTCC-----ACCTTAACGACA-----GAAAAAAGGATTGATCAAATCTATTGAGT  
CTGACT--CATAGTGATCATTATCA-----AAGAATGACTCTGGTTATCAAATGATT  
GAACAACCGGGAGCAATTTACTTACGATACTTAGTTGACATTCAT-----AAAAAGTATCT

AATGAATTATGAGTTCAATACATCCTGTTTAGCAGAAAGACGGATATTTCTTGCTCATT  
TCAGACAATCACTTAT-----TCACAAACCTCGTGTGAGGCTAATAGTTTTTCATTTCCCATC  
TCATGGA-----AAACCCTTTTCGCTCCGCTTAGCCCTATCCCCCTCT--AGGGGTATTTT  
AGTGATAGGTTCTATAGGAACTGGACAATCCTATTTGGTCAAATACCTAGCGGAAACT  
CCTATGTTCTTTCATTACAGTATTTCTGAACAAGTTCCTGGATAACAAGCCTAAGGGTT  
TTCTTATTGAT-----GATAGTGAC-----GATATTGAC-----  
-----CGTGACCTTGATACGGAGCTGGAGCTTCTAAC  
TATGACGAATGCGCTA-----ACTATGGATATGATGCCG-----GAAATAGACCGATTTTA  
TATCACCTTCAATTGCAATTAGCAAAAGCAATGTCTCCTTGCATAATATGGATTCCAAA  
CATTCATGATCTAGATGTGAATGAGTCGAATTACTTATCCCTCGGTCTATTAGTGAACCTAT  
CTCTCC-----AGGGATTGTGAAAGACGTTCC---ACTAGAAATATTCTTGTTATTGCTTC  
GACTCATATCCCCAAAAGTAGATCCCCTCTAATAGCTCCGAATAAATAAATACATG  
CATTAAGATACGAAGGCTTCTTATTCCACAACAACGAAAGCACTTTTTCACTCTTTCATA  
TACTAGGGGATTTCACTTGGAAAAGAAAATGTTCCATACTAATGCTAATGGATTCCGGT  
CCATAACCATGGGTTCCAATGTACGAGATCTTGTAGCACTTACCAATGAGGCCCTATCA  
ATTAGTATTACACAGAAGAAATTAATTATAGACACTAATATAATTAGATCTGCTCTTCATA  
GACAACTTGGGATTTGCGA-----TCCCAGGTAAGATCGGTTTCATGATCATGGGATCC  
TTTTCTATCAGATAGGAAGGGCTGTTGCACAAAATGTACTTCTAAGTAATTGCTCCATAG  
ATCCTATATCTATCTATATGAAGAAGAAA-----TCATGTAACGAAGGGGATTCTTATTTGT  
ACAAATGGTACTTCGAACTTGGAACGAGCATGAAGAAATTAACGATACTTCTTTACCTT  
TTGAGTTGTTCTGCCGGATCGGTCTCAAGACCTTTGGTCTTTACCC-----GGACCCGA  
TGAAAAA---AATGGGATCACTTCTTATGGACTCGTTGAGAATGATTCT--GATCTAGTTC  
ATGGCCTATTAGAAGTAGAAGGCGCCCTGGTGGGA-----TCCTCACGGACAGAAAAAGA  
TTGCATTCACTTTGATAATGAT-----CGAATGACATTGCTTCTTCGGCCCGAACCAAGGA  
AT--CCCTTAGATATGATGCAAACCTGGATCTTGTCTATCGTTGATCAGAGATTTCTCTAT  
GAACAA-----TACGAATCGGAGTTTGAAGAAGAAGGGGAACGAGAAGGAGTCCTCGA  
CCCGCAA-----CAGATAGAGGAGGAT-----TTATTCAATCAC-----ATAGTTTGGG  
CTCCT-----AGAATATGGCGCCCT-----TGGGGCTTTCTATTTGATTGTATCGAAAGGCC  
CAATGAATTGGGATTTCCC--TATTGGGCTAGGTCATTTCCGGGCAAG-----CGGATCA  
TTTATGATGAAGAGGATGAGCTTCAAGAGAATGATTCCGAGTTCCTTGCAGAGTGGAAC  
CGTGCAGTACCAGACAAGAGATAGATCTTCCAAAGAACAAGGCTTTTTTCTAATAAGC  
CAATTCATTTGGGACCCTGCGGATCCACTTTTTTTCTATTCAA---GATCCGCCCTTTG  
TCTCTGTGTTTTACATCGAGAATCTTTGCGAGATGAAGAGATGCCAAAGGGGCTTCTT  
ACTTACCAAACAGACCTTCCTACATCTATATATAAACGCTGGTTTATC-----AGAATACG  
CAAGAAAAGCACTTCGAATTGTTGATTTATCGCCAGAGATGGCTTAGA-----ACCAAT  
AGTTCATTATCT-----AATGGATTTTCCGTTCTAAT-----ACTCCATCCGAGAGTTATCAGT  
ATTTATCAAATCTGTTCCCTATCTAAC---GGAACGCTATTGGATCAAATGACAAAGACATT  
GTTGAAAAAAGATGGCTTTTCCCGGATGAAACGAAAATTGGATTC-----ATG-----  
-----ATGCCTAGATCTCGG---ATAAATGGAAATTTTATTGATAAGACCTTTTCAATTG  
TAGCCAATATCTTATTACGAATAATTCCGACAACCTCAGGAGAAAAAGAGGCATTCACC  
TATTACAGAGATGGT-----ATGTCAGCTCAATCCGAAGGAAATTATGCGGAAGCTTTACA  
GAATTATTATGAAGCTATGCGACTAGAAATTGATCCCTATGATAGAAGTTATATACTCTAT  
AACATAGGCCTTATCCATACAAGGAACGGAGAACATACGAAAGCTTTGGAATATATTT  
TAGGGCGCTAGAACGAAACCCGTTCTTACCACAAGCTTTTAATAATATGGCCGTGATCT

GTCATTAC---CGGGGAGAACAGGCCATTTCGACAGGGAAATTCTGAAATTGCGGAGGCT  
TGGTTCGATCAAGCCGCTGAGTATTGGAAACAAGCTATAACGCTTACTCCCGGGAATTA  
TATTGAGGCACAGAATTGGTTGAAGATCACAAGACGTTTCGAA-----ATGAATTGGCGA  
TCAGAACATATATGGATAGAACTTATAGCAGGGTCTCGAAAAACAAGTAATTTCTGCTG  
GGCCTTTATCCTTTTTTTAGGTTTCATTAGGGTTTTTATTAGTTGGAATTTCCAGTTATCTT  
GGTAGAAATTTGATATCTTTATTTCCGCCTACGCAAATCATTTTTTTTCCACAGGGGATC  
GTGATGTCTTTCTACGGAATTGCGGGTCTCTTTATTAGCTCTTATTTGTGGTGCACAATT  
TCGTGGAATGTAGGTAGTGGTTATGATCGGTTTCGATAGAAAAGAAGGAATAGTGTGTAT  
TTTTTCGTTGGGGATTTCTTGAAAAAATCGTCGCATCTTCCTCCAATTCTTTATGAAAG  
ACGTCCAGTCCATCAGAATAGAAGTGAAAGAGGGTATTTATGCTCGTCGTGTCCTTTAT  
ATGGAAATCAGAGGCCATGGCGCTATTCTTTGACTCGTACTGATGAGAAT---TTGACTC  
CACGAGAACTTGAGCAAAAAGCTGCTGAATTGGCTTATTTCTTGCGTGTACCAATTGA  
AGTATTT

>Prunus

ATGGAAAAATGGCGATTCCATTTCGATGTTGTTTCTAAGTAAATCAATGGACAGCCTCGG  
TCCTTTTGAA---ACCAGTGTAAGTGAAGATCCAATTATAAATGATATGGATAAAGACATT  
TTAAATTACAGTAATGTTGATCATTTAGTCAGCGACAGATACATTTCGGAATTTTCATATCT  
GCTGACACTTTTTTCGTTAGGGATAGTAATAGGGACGGCTATTCCATATATTTTGATATTG  
AAAATAAAAATTTTGAGATTGACAACGACCGT-----TCTTTTCTAAGTGAACATAAAAAGC  
TCTTTTATAGTTATCAGACTTCTAGTTATATAAATAATGCACCTAAAAGTAACGATACTC  
GCCACGATCGTTACGTGTATGATACTCATTATATTTGGAATAATCACATTAATAGTTGCAT  
TGACAGTTATCTTCGT-----TCTCAAATTTGTATTGATAGTTATATTTAAGCAATAGTGAC  
AATTACAGTGACAGCTACATTTATAGTTACATTTGTAGCAGCGAGAGTTCCAGTATAAA  
AACTAGCACAGATGGTAGTGATTTTACTATAAGT-----TCT-----GTAACATAAAAATA  
CAGGCATTTGTGGATTCAATGCGAAAATTGTTATGGATTAAATTATAAAAATTTTTTAAA  
ATTAATAATGAATATTTGTGAACAGTGTGGATGTCATTTGAAAATGAGTAGTTTCGATA  
GAATCGAACTTTTCGATTGATCCCGGTACTTGGGATCCTATGAACGAAGACATGGTCTCT  
CTGGATCCCATTTGAATTTCAATTCGGAAGAGGAACCTTATAAAAATCGTATTGATTCCTAT  
CAAAAAAATACAGGATTA ACTGAGGCCGTTCAAACAGGCACAGGCCAACTAAATGGTA  
TTCCCGTAGCAATTGGAGTTATGGATTTTTCAGTTTATGGGGGGTAGTATGGGATCTGTAG  
TGGGCGAAAAAATCACACGTTTGGCCGAGTATGCTACCAATCAATTTTTTACCTCTTATTA  
TAGTGTGTGCTTCCGGAGGAGCACGCATGCAAGAAGGAAGTTTGAGCTTGATGCAAAT  
GGCTAAAATATCTTCTGCTTTATATGATTATCAATCAAATAAAAAGTTATTTTATGTATCA  
ATCCTTACATCCCCTACCACAGGTGGGGTGACGGCCAGTTTTTGGTATGTTGGGAGATAT  
CATTATTGCCGAACCCAATGCTTACATTGCATTTGCGGGTAAAAGAGTAATTGAACAAA  
CATTGAATAAGACAGTACCTGAGGATTCACAAGTGGCTGAATATTTATTCCATAAGGGC  
TTATTCGATCCAATCGTACCACGTAATCCTTTAAAGGGCGTTCTGGGTGAGTTATTTTCGG  
CTACATGCTTTCTTTCTTTGAATCAAAAT-----ATGGTAACCATTTCGAGCAGATGAAA  
TTAGTAATATTATCCGCGAACGTATTGAGCAATATAATAGAGAAGTAAAGGTTTTAAATA  
CCGGTACTGTACTTCAAGTAGGCGATGGCATTGCTCGTATTTATGGTCTTGATGAAGTAA  
TGGCAGGTGAATTAGTAGAATTTGAAGAGGGTACGATAGGCATTGCTCTGAATTTGGAA  
TCAAATAATGTTGGTGTGTATTAATGGGTGACGGTTTGCTGATACAAGAGGGGAGTTC  
TGTAATAAGCAACAGGAAGAATTGCTCAGATACCCGTAAGCGAGGCTTTTTTAGGTCGT  
GTTATAAATGCACTGGCTAAACCTATTGATGGTTCGGGGCGAGATTTTCATCTTCTGAATCT

CGATTAATTGAATCTCCTGCTCCTGGTATTATTTTCGAGACGTTCCGTATAACGAGCCTCTT  
CAAACAGGACTTATTGCTATTGATTCTATGATCCCTATAGGGCGTGGTCAGCGAGAATTA  
ATTATTGGGGACAGACAGACCGGTAACAGCAGTAGCCACAGATACTATTCTCAATC  
AACAAAGGGCAAATGTAGTATGCGTTTATGTAGCTATCGGTCAAAAAGCATCTTCTGTG  
GCTCAGGTGGTGACTGCTTTACAGGAAAGGGGAGCAATGGAATACACTATTGTGGTAG  
CTGAAACGGCGGACTCCCCTGCTACATTACAATACCTTGCTCCTTATAACAGGAGCAGCT  
CTGGCTGAATTTTTTATGTATCGTGAACAACACACTTCAATCATTTATGACGATCCCTCC  
AAACAAGCGCAGGCTTATCGCCAAATGTCTCTTCTATTACGAAGACCGCCGGGCGCG  
AAGCTTATCCGGGAGATGTTTTTTATTTACATTCACGCCTTTTGAAAGAGCCGCTAAAT  
CAAGTTCTCGTTTAGGTGAAGGAAGTATGACTGCTTTACCAATAGTTGAGACCCAATCG  
GGAGATGTTTCGGCTTATATTCCCTACTAATGTAATTTCCATTACAGATGGACAAATATTCT  
TATCTGCCGATTTATTTAATGCTGGAATCAGACCGGCCATTAATGTGGGTATTTCTGTTTC  
CAGGGTAGGATCCGCAGCTCAAATTAAGCCATGAAACAAGTAGCTGGCAAATCAAAG  
TTGGAATTGGCACAATTTGCAGAATTAGAAGCCTTTGCACAATTCGCTTCTGATCTCGA  
TAAAGCTACTCAGAATCAATTGGCAAGAGGTCAACGATTACGTGAGTTGCTCAAACAA  
TCTCAATCATCTCCCCTTTTCGGTGGAGAACAGATACTGACTATTTATAACCGGAACGAA  
CGTTTATCTTGATTCATTAGAAATCGGACAGGTAAGGAAATTTCTTGTTGAGTTACGTA  
CTTACTTAAAAACGAATAAACCTCAGTTCCAAGAAATCATATCATCTACCAAGACATTT  
ACCGACGAAGCGGAAGCCCTTTTGAAAGAAGCTATTCAGGAACAGATGGAACGTTTT  
CTACTTCAGGAGCAAGTAATGAGAATAAATCCTACTACTTCTGGTCCCTGGGGTTCCCGC  
ACTTGAAAAAAAACCTTGGGGCGTATCGCTCAAATCATTGGTCCGGTACTGGATGTA  
GCTTTTCCACCGGGCAAATGCCTAATATTTACAACGCTCTGGTAGTTAGGGGTCGAGA  
TGCTGTTGGTCAACAAATTAATGTGACTTGTGAAGTACAGCAATTATTAGGAAATAATC  
GAGTTAGAGCTGTAGCTATGAGTGCTACAGATGGTCTAAAGAGAGGAATGGAAGTGAT  
TGACACCGGAGCTCCTCTAAGTGTTCCAGTCGGCGGAGCTACTCTAGGACGAATTTTC  
AACGTGCTTGGAGAGCCTGTTGATAATTTAGGTCTGTAGATACTCGCACAAATCTCC  
TATTCATAGATCTGCGCCTGCCTTTATACAGTTAGATACAAAATTATCTATTTTTGAAACA  
GGAATTAAGTAGTAGACCTTTTAGCCCCTTATCGCCGTGGAGGAAAAATAGGACTATT  
CGGGGGGGCTGGAGTGGGTAAAACAGTACTCATTATGGAATTGATCAACAACATTGCC  
AAAGCTCATGGGGGTGTATCCGTATTTGGCGGAGTAGGTGAGCGTACTCGTGAAGGAA  
ATGATCTTTACATGGAAATGAAAGAATCTGGAGTAATTAATGAACAAAATATTGCAGAA  
TCAAAGTGGCTCTAGTCTACGGTCAGATGAATGAACCGCCAGGAGCTCGTATGAGAG  
TTGGTTTAAACCGCCCTAACTATGGCGGAATATTTCCGAGATGTTAATGAACAAGACGTA  
CTTCTATTTATCGACAATATCTTCCGTTTTGTCCAAGCAGGATCCGAAGTATCCGCTTTAT  
TGGGTAGAATGCCCTCCGCTGTGGGTTATCAACCCACCCTTAGTACCGAAATGGGTACT  
TTACAAGAAAGAATTACTTCTACCAAGAGGGGTCCATAACTTCTATTCAAGCAGTTTA  
TGTACCTGCGGACGATTTGACCGATCCTGCTCCGGCCACGACATTTGCACATTTAGATG  
CTACTACCGTACTATCAAGGGGATTAGCTGCCAAAGGTATCTATCCAGCAGTAGATCCTT  
TAGATTCAACATCAACTATGCTCCAACCTCGGATCGTCGGTGAAGAACATTATGAAACT  
GCGCAAAGAGTTAAAGAACTTTACAACGTTACAAAGAACTTCAAGACATTATAGCTA  
TCCTTGGGTTGGACGAATTATCCGAAGACGATCGCTTAACCGTAGCAAGAGCACGAAA  
AATTGAGCGTTTCTTATCACAACCCTTTTTTCGTAGCAGAAGTATTTACCGGTTCCCAG  
GAAAATATGTTGGTCTAGCAGAAACGATTAGAGGGTTTAAATTGATCCTTTCTGGAGAA  
TTAGACGGCCTTCTGAACAGGCCTTTTATTTGGTAGGTAACATCGATGAAGCTACTGC

GAAAGCTACGACCTTAGGAACT-----ATGACCTTAAATCTTTGTGTACTGACCC  
CGAATCGAATTGTTTGGGATTCGGAAGTGAAAGAAATTATTTTATCTACTAATAGTGGA  
CAAATTGGCGTATTACCAAATCACGCGCCTGTTGCCACAGCTGTAGATATCGGTATTTTG  
AGAATACGCCTTAACGACCAATGGTTAACGATGGCTCTGATGGGTGGTTTTGCTAGAAT  
AGGAAATAATGAGATCACGGTTTTAGTAAATGATGCAGAGAAGGGTAGTGACATTGAC  
CCACAAGAAGCGCAACAACTCTTGAAATAGCGGAAGCTAACTTGAGGGAAGCTGAA  
GGCAAGAGACAAACAATTGAGGCAAATTTAGCTCTCAGACGAGCTAGGACACGAGTA  
GAGGCTATCAATGTGATGTCGATGAAAAATGTAACCGATTCTTTCCTTTCCTTGGGTTAT  
TGGCCATCCGCCGGGAGTTTCGGGTTTAATACCGATATTTTAGCAACAAATCCAATAAAT  
CTAAGCGTAGTGCTTGGTGTGTTGATTTTTTTTTGGAAAGGGAGTGTTAAGTGATTTATTA  
GATAATCGAAAACAGAGGATCTTGAAGACTATTCGAAATTCAGAAGAACTACGCGAGG  
GGGCCCTAGACCAACTGGAAAAAGCCCGGGCCCGCTTACGGAAAGTAGAAACGGAAG  
CGGATCAGTTTCGAGTGAATGGATACTCTGAAATAGAACGAGAAAAATTTAATTTGATT  
AATCCACCTATAAGACTTTGGAACAATTAGAAAATTACAAAAATGAAACCATTTCATTT  
TGAACAACAAAGAGCGATTAATCAAGTTAGACAACGGGTTTTTCAGCAAGCCTTACAA  
GGGGCTCTAGGAACTCTGAATAGTTGTTTGAACAACGAGTTACATTTACGTACCATAAG  
TACTAATATTGGTATGTTTGAACGGTGAAAGAAATAACGGATATGAATCCACTGATTTTC  
TGCCGCTTCCGTTATTGCTGCTGGGTTGGCCGTCGGGCTTGCTTCTATTGGACCTGGGG  
TTGGTCAAGGTACTGCTGCGGGGCAGGCTGTAGAAGGGATCGCGAGGCAACCAGAGG  
CGGAGGGAAAAATACGAGGTACTTTATTGCTTAGTCTGGCTTTTATGGAAGCTTTAACA  
ATTTATGGACTGGTTGTAGCATTAGCCCTTTTATTTGCGAACCCCTTTGTTATGAATGTTTC  
TATTATGTTCTATCAAAACACTAGAAGGGTTGTACGATATATCCGGTGTGGAAGTAGGCC  
AACATTTCTATTGGCAAATAGGAAGTTTCCAAGTCCATGCTCAAGTACTTATTACTTCTT  
GGGTCGTAATTGCTATTTTATTAGGTTACGCCATTATAGCTGTTCGTAATCCACAAACCA  
TTCCTACTGACGGTCAGAATTTCTTTGAATATGTCCTTGAATTCATTCGGGACGTGAGC  
AAAACCTCAGATTGGAGAAGAGTATGGTCCATGGGTTCCCTTTATTGGAACCTATGTTTCT  
ATTTATTTTTGTGTCGAATTGGTTCGGGGGCTCTTTTACCTTGGAAAATCATAACAGTTACC  
TCATGGGGAGTTAGCCGCACCCACAAATGATATAAATACTACCGTTGCTTTAGCTTTACT  
CACTTCAGTAGCATATTTCTATGCGGGCCTTACAAAAAGGGATTAGGTTATTTTCGGTAA  
ATACATTCAACCAACTCCAATCCTTTTACCCATTAACATTTTAGAAGATTTACAAAACC  
CCTATCGCTTAGTTTCCGACTTTTTCGGAAATATTTTAGCTGATGAATTGGTAGTTGTTGT  
TCTTGTCTTTTAGTACCTTCAGTAGTTCCTATACCTGTCATGTTCTTGGATTATTTACA  
AGCGGTATTCAGCTCTTATTTTTGCAACCTTAGCTGCGGCTTATATAGGCGAATCCATG  
GAAGGTCATCATATGATATTTTCAACTTTAGAGCATATATTAACCTCATATATCCTTTTCTAT  
CGTTTCAATTGTAATTACAATTCATTTGATAACTTTATTAGTC---GAAATCGTAGGACTAT  
ATGATTCGTCAGAAAAGGGTATGATAGTTACTTTTTCTGCATAACAGGATTATTAGTTA  
CTCGTTGGGTGTGTTTGGGGCATTACCATTAAGCGATTATATGAATCATTAAATTTTCT  
TTCGTGGAGTTTTTCCATTATTCATATGATTCCGTATTTTAAAAAACATAAAAACCATTA  
AGCGCAATAACCGCGCCAAGTGCTATTTTTACTCAAGGTTTTGCTACTTCGGGTCTTTT  
AACTGAAATGCATCAATCCGAAATATTAGTACCCGCGCTCCAATCCCATTGGTTAATGAT  
GCATGTAAGTATGATGGTATTGAGCTATGCAGCTCTTTTGTGTGGATCATTATTATCATT  
GCTCTTCTAGTCATTACATTTTCGAAAATTCAGAAGGATTTTTAGTAAAGGCAATGAGAT  
TCAATACGTGAACGAAAGAAACAATGTCTTACGA-----TCT---ATTCGTCTCAAAATTAT  
TACAGGTATCAATTGATTCAACAATTGGATCGGTGGAGTTATCGTATTATTAGTCTAGGG

TTTATCTTTTTAACCGTAGGTATTCTTTCGGGAGCAGTATGGGCTAATGAAGCATGGGGA  
TCATATTGGAATTGGGATCCAAAGGAGACTTGGGCATTATTACTTGGACCGTATTTCGC  
GATTTATTTACATATTAGAACAAATAAAATTTTTGAAAGTATAAATTCTGCAATTGTGGC  
CTCAATGGGCTTTCTTATAATTTGGATATGCTATTTTGGGGTTAATCTATTAGGAATAGG  
TTGCATAGTTATGGTTCATTTACATTAACAATGGCAAAAAAGAAAGTATTAATTTCCCTT  
CTATATCTTGCATCTATAGTATTTTTGCCTTGGTGGATCTCTCTCTCATTAAATAAAAGTCT  
GGAATCTTGGGTACTAATTGGTGAATACTAGGCAATCCGAAATATTTTTGAATGATAT  
TCAAGAAAAGAGTATTCTAAAAAATTCATAGACTTAGAGGAACTCCTACGTTTGGAC  
GAAATGTAAAGGAATACCCGGAAGCACATTTACAAAAGCCTCGCATCGAA---TACAA  
AGAAACGATCCAATTGATCAAGATGCACAATGAGGATCGCACGCATACAATTTTACACT  
TCTCGACAAATATAATCTGTTTCGTTATTCTAAGTGGTTATTCTATTATAGGTAATGAAGA  
ACTTGTTATTCTTAACTCTTGGGTCAAGAATTCCTATATAACTTAAGCGACACAATAAA  
AGCTTTTTCTATTCTTTTATTAAGTATTATGTATAGGATTCCATTCGCCCCACGGTTGG  
GAACTAATGATTGGCTCTGTCTACAAAGATTTTGGATTTGCTCATAATGATCAAATTATAT  
CCGGTCTTGTCTACTTTTCCAGTCATTTAGATACAATTTTTAAATATTGGATCTTTCG  
TTATTTAAATCGTGTATCTCCTTCACTTGTAGTGATTTATCATTCAATGAATGACATGCCT  
ATTGGTGTCCGAGAGTACCTTTTCGAAGTCCCGGAGAGGAAGATGCATTGTGGATTG  
ACGTATAC---CGACTTTATCGAGAAAGATTACTTTTTTTAGGACAAGGGGTTGATAGCGA  
GATCTCGAATCAACTTATTGGTCTTATGGTATATCTCAGTATAGAGGATGATACCAAAGA  
TCTTTATTTGTTTATAAAGTCTCCTGGCGGATGGGTAATACCCGAGTGGCTATTTATGAT  
ACTATGCAATTTGTGCGACCAGATATACAGACAATATGCATGGGATTAGCCGCTTCAATG  
GGATCTTTTATTCTGGTCCGAGGAGAAATTACCAAACGTCTAGCATTCCCTCACGCT---G  
TAATGATCCACCAACCTGCTGCCTCTTTTTATGAGGCACAGACGGGAGAATTTATCTTG  
GAAGCGGAAGAAGTACTGAAGCTGCGCGAAACCCTCACAAGGGTTTATGCACAAAGG  
ACAGGCAAACCCTTATGGGTTGTATCCGAAGACATGGAAAGAGATGTTTTTATGTCAGC  
A A T A G A A G C C C A A G C T C A T G G A A T T G T T G A T C T T G T A G C G A C T G A  
A????????????????????????????????????????????????????????????????????????  
????????????????????????????????????????????????????????????????????????  
????????????????????????????????????????????????????????????????????????  
????????????????????????????????????????????????????????????????????????  
ATGGAAGAATTTCAAGGATATTT  
AGAAGTATAGATATCAGCAACATGACTTCCTATACCCACTTATCTTTCGGGAGTATAT  
TTATGCACTTGCTCATGATCATGGTTTAGTAGGTTATGATAATAAATCTAGTTTACTAATT  
ATAAAACGTTTAATTAGTCGAATGTATAAACATAATCATTTTTTTTATTTCCGCTAATGCTT  
CTAACCAAAAAAAAAAATTGGGGAAAAATCTGTATTCTCAAAAAATATCGGAGGGATT  
CACCGTCATTGTGGAATTTTCGTTTTCCCTACGATTAGTATCTTCTTAACCGTAAAATC  
TTATAATTTACGATCAATTCATTCAATATTTCCCTTTTTTAGAGGACAAATTTCCACATTTA  
AATTACGTATCAGATGTACTAATACCCTACCCTATTCATCTGGAAATCTTGGTTCAAACC  
CTTCGCTATTGGGTGAAAGACGCCTCTTCTTTGCATTTATTACGACTCTTCTTCACGAG  
TATTATAATTGGAATAGTCTTATTACTAAT-----TTTTTTTTTTCAAACCACGATTATTCTT  
ACTCCTATATAATTCTCATGTATGTGAATACGAATTCATCTTACTTTTTCTTCGTAATCAAT  
CTTCTCATTTACAATTAACCTCTTCTGGGATCTTTTTTTGAGCGAATACATTTCTATGAAA  
AAATAAAATATGTAGAAGAAGTCTTTGCTAATCCGGCCATCTTATGGTTCTTCAAGGATC  
CTTTTATGCATTATGTTAGATATCAAGGAAAATCAATTCTGGCTTCGAAGGATACCCCTC  
TTCTGATGAATAAGTGGAAATATTATCTTGTCAATTTGTGGCAATGTCAATCTTATGTGTG  
GTCTCAACCGGGAAGGATTTATATAAATAAATTATCCAAGCATTCCCTTGATTTTTTTGGG



TTATTTTTCAAGTATCCGACCAAACCTTTCAGTGGTACGGAGTCAAATGCTAGAAAATT  
CATTTATAACGGATAAT-----GCTATGAAGAAGCTCGATACATTAGTTCCAATTATTCCGTT  
GATTGGATCATTGGCTAAAGTGAAATTTTGTAAACGCATTAGGGCATCCTATTAGTAAGTC  
CACCTGGGCGGATTCATCGGATTTTGATATTATCGACCGATTTCTGCGTATATGCAGAAA  
TCTTTCTCATTATTACAGCGGATCCTCAAGAAAAAGAGTTTGTATCGAATAAAATATAT  
ACTTCGACTTTCTTGTCTTAAAACCTTTGGCTCGTAAACACAAAAGTACTGTACGAACTT  
TTTTGAAAAGATTAGGTTCTAAATTATTGGAAGAATTCTTTACGGAAGAAGAACAGATT  
CTTCTTTGGTCTTCCCAAGACGGATTTGGTATTTGGATATTTTTTGCATCAATGATCTAA  
TCAATTATGAAATGATAATTGATACACCAGAA-----GTACAAGATATTGATTCTTTTTCTA  
GATTAGAGTTT---TTAAAAGAGTTTTATGGAATTATATGGGTGCTTATTCTTATTTTGACT  
CTTGTATTGGGAATCACAATAGGCGTACTGGTAATTGTATGGTTAGAAAGAGAAATATC  
CGCAGGGATACAACAACGTATTGGACCTGAATACGCCGGCCCTTTGGGAATTCTTCAA  
GCTCTAGCAGATGGGGCAAACCTGGTTTTTCAAAGAAAATCTTCTCCATCTAGGGGGG  
ATACCCGTTTATTCAGTATCGGGCCATCCATAGCAGTCATATCAATTTTAGTAAGCTATTC  
AGTAGCTCCTTTTGGCTATCACCTTGTTTTAGCGGATCTCAATATCGGTGTTTTTTTATGG  
ATTGCCATTTCTAGTATTGCTCCAATTGGACTTCTTATGTCAGGGTACGGGTCAAATAAT  
AAATATTCTTTTTAGGTGGTCTACGAGCTGCTGCTCAATCGATTAGTTATGAAATACCA  
TTAACTTTATGTGTGTTATCAATATCTCTATTATCTAACAGTTCAAGTACAATTGATATAGT  
TGAGGCGCAATCAAATACGGTTTTTTGGGGATGGAATTTGTGGCGTCAGCCTATAGGGT  
TTATCATTTTTATCATTCTTCCCTAGCAGAATGTGAGAGATTACCTTTTGATTACCCGA  
AGCAGAAGAAGAATTAGTAGCAGGTTATCAAACCGAATACTCGGGTATAAAATTTGGTT  
TATTTTATGTTGCTTCCATCTAAACCTATTAGTTTCTTCATTATTTGTAACAGTTCTTTAC  
TTGGGAGGTTGGAATATCTCTATTCCGGACATATATGTTTCTGAGCTTTTTGAAATAAAT  
AAAACATGTGGAGTTTTTGGAGCGACAATTGGTATCTTTATTACATTAGCTAAAACCTTAT  
TTGTTCTTGTTCAATCCTATCACAACAAGATGGACTTTACCGAGGCTAAGAATGGACCA  
ACTATTGAATCTTGGATGGAAATTTCTTTTACCTATTTCTCTCGGTAATCTATTATTAACA  
ACTTCTTCCCAACTCTTTTCACTGATGATCTGGCATGTACAGAATGAAAACCTTCAATCTC  
GATTCTACGAGAATTTTTATGAAAGCCTTTCATTTGCTTCTCTTCGATGGAAGTTTTATTT  
TCCCAGAATGTATCCTAATTTTTGGCCTAATCTTCTTCTGATGATCGATTCAACCTCTGA  
TCAAAAAGATATACCTTGGTTATATTTCACTCTTCAACAAGTTTAGTAATGAGCATAAC  
GGCCCTATTGTTCCGATGGAGAGAAGAACCTACGATTAGCTTTTCGGGAAATTTCCAAA  
CGAACAATTTCAACGAAATCTTCAATTTCTTATTTTACTATGTTCAACTCTATGTATTCC  
TCTATCCGTAGAGTACATTGAATGTACAGAAATGGCTATAACAGAGTTTCTGTTATTTCGT  
ATTAACAGCTACTCTAGGAGGAATGTTTTTATGCGGTGCTAACGATTTAATAACTATCTT  
TGTAGCTCCAGAATGTTTCAGTTTATGCTCCTACCTATTATCTGGATATACCAAGAAAGA  
TGACGGTCTAATGAGGCTACTACGAAGTATTTACTCATGGGTGGGGCAAGCTCTTCTA  
TTCTGGTTCACGGTTTCTCTTGGCTATATGGTTCATCCGGGGGAGAGATCGAGCTTCAA  
GAAATAGTGAATGGTCTTATCAATACACAATGTATAACTCCCCAGGAATTTCAATTGCG  
CTTATATTCATCACTGTAGGAATTGGGTTCAAGCTTTCCCCAGCCCCTTCTCATCAATGG  
ACTCCTGACGTATACGAAGGATCTCCCACTCCAGTTGTTGCTTTTCTTTCTGTTACTTCG  
AAAGTAGCTGCTTCAGCTTCAGCCACTCGAATTTTCGATATTCCTTTTTATTTCTCATCA  
AACGAATGGCATCTTCTTCTGGAAATCCTAGCTATTCTTAGCATGATATTGGGGAATCTC  
ATTGCTATTACTCAAACAAGCATGAAACGTATGCTTGCGTATTTCGTCCATAGGTCAAATT  
GGATATGTAATTATTGGAATAATTGTTGGAGACTCAAATGGTGGATATGCAAGCATGATA

ACTTATATGCTGTTCTATATCTCCATGAATCTAGGAACTTTTGCTTGCATTGTATTATTTGG  
TCTACGTACCGGAACTGATAACATTCGAGATTATGCAGGATTATACACAAAAGATCCTTT  
TTTGGCTCTCTCTTTAGCCCTAIGTCTCTTATCCTTAGGAGGTCTTCTCCACTAGCAGG  
TTTTTTCGGAAAACCTTCATTTATTCTGGTGTGGATGGCAGGCAGGCCTATATTTCTTGGT  
TTCAATAGGACTCCTTACGAGCGTTGTTTCTATCTACTATTATCTAAAAATAATCAAGTTA  
TTAATGACTGGACGAAACCAAGAAATAACCCCTCACGTGCGAAATTATAGAAGATCCC  
CTTTAAGATCAAACAATTCCATCGAATTGAGTATGATTGTATGTGTGATAGCATCTACTAT  
ACCAGGAATATCAATGAACCCGATTATTGAAATTGCTCAGGATACCCTTTTTATGTTTCT  
GCTTTACGAATATGATTTTTTCTGGGCATTTCTGATAGTATCAAGTGTTATTCCAATTTTG  
GCATTTCTAATTTCCGGAGTTTTAGCCCCGATTAGCAAAGGACCAGAAAAACTTTCGAG  
TTATGAATCGGGCATAGAACCAATGGGGGATGCTTGGTTACAATTTTGAATCCGTTATTA  
TATGTTTGCTCTAGTTTTTGTGTTTTTGTATGTTGAAACGGTTTTTCTTTATCCATGGGCA  
ATGAGTTTTCGATGTATTGGGAGTATCCGTATTTATAGAAGCTTTAATTTTCGTGCTTATCC  
TAATTGTTGGTTCAATTTATGCATGGCGAAAAGGAGCATTGGAATGGTCTATGAATTATT  
TTCCTTGGTTAACACTAGTTGTAGTTTTGCCAATATTCGCGGGTTCCTTAATTTTCTTTCT  
CCCTCATAGAGGAAATAAGGTAATCCGCTGGTATACTATATGTATATGTTAATAGAACTA  
CTTCTAACAACTATGCATTCGGTTATCGTTTTCCAATTGGATGATCCATTAATGCAACTG  
ACAGAGGATTATAAATGGATCAATTTTTTTGATTTTTACTGGAGATTGGGAATAGATGGA  
ATTTCTATAGGACCTATTTACTGACAGGATTTATCACAACTTTAGCTACTTTAGCGACT  
CGGCCGGTTACTCGAGATTCGACTATTCCATTTCTGATGTTAGCAATGTATAGCGGT  
CAAATAGGACCATTTTCTTCTCGAGACCTTTTACTTTTTTTCATCATGTGGGAGTTAGAA  
TTAATCCAGTTTATTTACTTCTATCCATGTGGGGGGAAAGAAACGTTTGTATTCAGCT  
ACAAAATTTATTTGTACTGTCAGGAAGTTCTGTTTTTTTATTAATAGGAGTTCTGGGT  
ATTGTTTATACGGCTCCAATGAACCGACATTAATTTTGAACATCAGCTAATCAATCG  
TATCCTGTAGCACTGGAAATAATATTCTATATTGGATTTCTTATTGCTTTTGCTGTCAAAT  
CACCGATCATAACCTTACATACATGGTTACCAGACTCATGGAGAGGCGCATTACAGT  
ACTTGTATGCTTTTAGCCGGAATCTTATTAATAAATGGGAGCATATGGATTGGTTCGGATC  
AATATGGAATTATTACCCACGCTCATTTCGATTTTTCTCCCTGGTTGATGATAGTAGGCA  
CAATTCAAATAATCTATGCAGCTTCAACATCTCCAGGTCAGCGTAATTTAAAAAAAAGA  
ATAGCCTATTCTTCTGTATCTCATATGGGTTTCATAATTATAGGGATTGGTTCTATAAGCG  
ATACAGGACTCAACGGAGCCATTTTACAATAATCTCTCACGGATTTATTGGCGCTGCG  
CTTTTTTCTTGGCCGGAACGAGTTATGATAGAATACGTCTTGTATCTCGACGAAATG  
GGCGGAATGGCTATCGCAATTCAAAAATATTCACGACTTTCAGTATCTTATCAATGGCT  
TCTCTTGCATTACCGGGCATGAGCGGTTTTGTTGCCGAATTGATAATTTTTTTTGGAAATA  
CTTACTAGCCAAAAATATCTTTAATGACAAAAATATTAATTACTTTTGTAAATGGCAATTG  
GAATGATATTAATCCTATTTATTCAATTATCTATGTTACGCCAGATGTTCTATGGATACAA  
GCTTTTTAATGCCCAAACCTTATTTTTTTGATTCTGGACCGCGAGAATTATTTGTTTC  
GATCTCGATCCTTTTACCTGTAATAGGTATTGGTGTATATCCCGATTCGTTTCTCATT  
TCAGTTGACAAGGTCGAAGCTATTATATCCAATTATTTTTATAGAATGATGCTCGAGCAT  
GTAATGTTTGTAGTGCTACTTATTTTCTATCGGTATCTATGGATTGATCACGAGTTCGA  
AATATGGTTAGAGCCCTTATGTGTCTTGAACCTTATACTGAATGCGGTTAATATAAATTCG  
TAACATTTTCTGATTTTTTTGATAGTCGCCAATTAAGGAAATATTTTCTCAATTTTTGT  
TATAGCTATTGCAGCCGCTGAAGCAGCTATTGGTCCGGCTATTGTTTCGTCATTTATCG  
TAACAGAAAATCAACTCGCATCAATCAATCAATTTGTTGAATAAGATGGAATATACATA

TCAATATTCATGGATTATACCTTTTCATTCCACTTCCAGTTCCAATGTAAATTGGAGCAGG  
ACTTCTACTTTTTCCAACGGCAACAAAAAATCTTCGCCGTATGTGGGCTTTTCCGAGTG  
TTTTATTGTAAAGTATAGTTATGATTTTTTCAGCCCATTTTTCTATTTCAGGAAATAAATAA  
CAATCCGTATATCAATATGTATGGTCTTGGACCATCAATAATGATTTTTATTAGAAATTTG  
GCTGCTTGGTTGATCCACTTACTTCTATTATGTCAATATTAATCACTACTGTTGGAATGAT  
GGTCTTATTTATAGTGATAATTATATGTCTCATGATCAGGGATATTTGAGATTTTTTGCTT  
ATATGAGTTTTTCCAATACTTCAATGTTGGGATTAGTTACTAGTTCTAATTTGATACAAAT  
TTATATTTTTTGGGAATTGGTTGGAATGTGTTCTTATCTATTAATAGGTTTTTGGTTCACA  
CGACCTAGTGCGGCGAATGCTTGTCAAAAAGCGTTTGTAACATAATCGTGTGCGGGGATTT  
TGGTTTATTATTAGGAATTTGGGTTTTTATTGGATAACGGGTAGTTTTGAATTCGGGAT  
TTGTTTGAGATATTTAATAAC---GAGGTAAATTTTTTATTTGTTACCTTATGCGCCTTCCTA  
TTATTTGCCGGCGCAGTTGCAAAATCCGCCCAATTTCCCCTTCATGTATGGTTACCTGAT  
GCCATGGAAGGGCCTACCCCCATTTCCGGCTCTTATACATGCCGCTACTATGGTAGCAGC  
AGGAATTTTTCTTGTAGCTCGGCTTCTTCTCTTTTTCATAGTTATACCTTACATAATAAAT  
CTAATAGCTTTGACAGGTATAATAACATTACTTTTAGGAGCCACTTTAGCTCTTGCTCAA  
AAAGATATTAAGAAAAGCTTAGCTTATTCTACAATGTCTCAATTGGGTTATATGATGTTA  
GCTCTAGGTATGGGGTCTTATCGAGTTGCTTTATTTCAATTTGATTACTCATGCCTATTGCA  
AAGCATTGTTGTTCTTAGGATCTGGATCAATTATTCATTCGATGGAAACTATTGTTGGAT  
ATTCTCCAGATAAAAAGTCAGAATATGGTTCTTATGGGCGGTTTAAGAAAACATGTACCA  
ATTACAAAACCGCTTTTTTATTAGGTACACTTTCTCTTTGTGGTATTCCACCTCTTGCTT  
GTTTTTGGTCCAAAGATGAAATTTCTTAATGATAGTTGGTTGTATTCACCGATTTTTTGCA  
TAATAGCTTGTCCACGGCAGGATTAAGTGCATTTTATATGTTTCGTATCTATTTACTTAC  
TTTTGAAGGACATTTAAATGTTTATTTTCAAATACAGCGGCAAAAAAATAGCTCGT  
TCTATTCATGTCTCTCTGGGGTAAAGAA---GGAAAAAAATTATTAACATTATTAGA  
TTTTTTAACTACGAAATTTTTAAACGGCACTAAAAAC---ACTTTCTCATATCCCCACGAG  
TCGGACAATACTATGTTATTTCCGATGCTTGTATTAGTTTTATTTACGTTGTTGTTGGGG  
CCGTAGGA---TTATTCGATTTGGATATACTATCCAAATTTCTTAAGTTCGTCTATAAACCTT  
TTACATAAAAATAGAAAC---TTGTGGATTGG---GAATTTATCACAAATGCAACCTTTTC  
CGTTAGTATAGCTTATTTCCGAATCTTATATCGTCTTTTTTATATAAGCCTGTTTATTCAT  
CTTTACAAAATTTAAATTTATTTAATTCATTTGTTATTTTGGGGGGTAAAATAATAAATGT  
GATATATAATTGGTCATATAATCGTGGTTACATAGATTTTTTTTTATGTAATATCCTTTACTA  
AAGGTATAAGAAGGTTAGCTGAACTAACTCATTTTTTTGATAGACGAGTAATTGATGGA  
ATTACGAATGGAGTCGGTATTGCGAGTTTTTTCGTAGGAGAGGTTATCAATATGTAGG  
GGGTGGT---CGAATTTCTTCTTATCTTTTAGTGTATGTATCCTATGTATTAATTTTTTTATTT  
TTTTTT---ATGGATTTGCCCGGACCAATACATGATTTTTCTTTTAGTCTTTCTGGGATCGGT  
TCTTATACTAGGAGGTATGGGAGTGGTATTATTTACCAACCCCATTTATCTGCCTTTTCA  
TTGGGACTGGTCTTGTTTGTATATCCTTATTCTATATTCTATTAAACTCCTATTTTGTAGC  
TGCTGCACAACTCCTTATTTACGTGGGAGCTATAAATGTTTTAATCGTATTTGCTGTGAT  
GTTTATGAATGGTTCAGAATATTACAAAGATTTGAATCTTTGGACCGTTGGGGATGGGG  
TACTTTGCCAGTTTGTACAAGTATTTTTGTTTTACTCATGATTACTATTACAGATACGTC  
ATGGTACGGGATTTTGGACTACAAGATCAAACCAGATTATAGAACAAGATTTGATAA  
GTAATAGTCAACAAATTGGAATTCATTTATCAACGGATTTTTTTCTTCCGTTTGAATTCG  
TTTCAATAATTTCTTTAGCCGCTTTGATAGGTGCAATTGCCGTGGCGCGACAGATGAATA  
TACCAGCTACAAGAAAAGACCTCATGATAGTCAATATGGGCCCCACCACCCATCAATG

CATGGTGTTCCTTAGACTCATCATTACTCTAGATGGTGAAGATGTTATTGATTGTGAACCA  
ATATTGGGTATTACACCGAGGGATGGAAAAAATTGCGGAAAACCGAACCAATTATACA  
ATATTTGCCTTATGTAACACGTTGGGATTATTTAGCTACTATGTTACAGAAAGCAATAAC  
CGTAAATGGACCGAACAGTTGGGAAATATTCAAGTACCTAAAAGAGCTAGCTATATCA  
GAATAATTATGTTGGAGTTGAGTCGTATAGCTTCTCATCTGTTATGGCTTGGTCCTTTTAT  
GGCGGATATTGGTGCACAAACCCCTTTTTCTATATTTTCAGAGAAAGGGAATTAGTATA  
TGATCTATTTCGAAGCTGCCACCGGTATGAGAATGATGCATAATTTTTTTCGTATCGGAGG  
AGTAGCGGCCGATCTACCTCATGGTTGGATAGATAAATGTTTGGATTCTGCGATTATTT  
TTAACAAGAGTTGCTGAATATCAAAAACCTTATTACACGAAATCCTATTTTTTTAGAACG  
AGTCGAGGGAGTAGGCATTATTGGTAGAGAGGAAGTAATAAATTGGGGTTTATCGGGA  
CCAATGCTGCGAGCTTCCGGAATACAATGGGATCTTCGTAAAGTTGATCATTATGAATG  
TTACGACGAATTTGATTGGGAGGTACAGTGGCAAAAAGAAGGAGATTCGTTGGCTCGT  
TATCTAGTCCGAATTGGTGAATGATAGAATCCATAAAAATCATTCAACAGGCTCTGGA  
AGGAATCCAGGGGGACCCATGAGAATTTAGAAATACGATACTTTGATAGGGAAAGG  
AATCCTGAATGGAATGATTTTGAATATCGATTTATTAGTAAAAGCCTTCTCCTACATTT  
GAATTGCCGAAACAAGAACTTTATGTGAGAGTCGAAGCCCCAAAGGGAGAGCTGGGA  
ATTTTTCTGATAGGGGATCAGAGTGGTTTTCTTGGAGATGGAAAATCCGCCCCCGGG  
TTTTATCAATTTGCAAATCTTCCCTCAGTTAGTTAAAAGAATGAAATTGGCTGATATTAT  
GACGATACTAGGTAGTATAGATATCATTATGGGAGAAGTTGATCGTATGTTCTCTATGGT  
AACTGGGTTCATGAATTATGGTCAACAAACAGTACGAGCTGCAAGGTACATTGGTCAA  
AGTTTCATGATTACTTTATCTCACGCAAATCGTTTACCTGTAACTATTCAATATCCTTATG  
AAAAATTAATCACCGCGGAGCGTTTCCGCGGTCTGAATCCATTTTGAATTTGATAAATGT  
ATTGCTTGTGAAGTATGTGTTCGTGTATGTCTATAGATCTACCCGTTGTTGATTGGAAA  
TTGGAAACTGATATTCGCAAGAAACGGTTGCTTAATTACAGTATTGATTTCCGGAGTCTG  
TATATTTGTGGTAATTGCGTTGAGTATTGTCCAACAAATTGTTTATCAATGACTGAAGA  
ATATGAACTTTCTACTTATGATCGTCACGAATTGAATTATAATCAAATTGCTTTGGGTCGT  
TTACCAATGTCAGTAATTGACGATTATAACAATTCGAACAATTTTTAATCCG---AAAAAAG  
TAAATCTCTTGATTAAAGAA-----ATGCAGGGTCGTTTGTCCGCTTGGTTAGTC  
AAACATGGGTAGTTCATAGATCTTTGGGTTTCGATTACCAAGGAATAGAACTTTACA  
AATAAAACCCGAGGATTGGCATTTCGATTGCTGTCAATTTATATGTATATGGTTACAATTAT  
CTACGTTCCCAATGTGCTTATGATGTAGCACCGGGCGGACTGTTAGCTAGTGTCTATCAT  
CTTACGAGAATAGAGTATGGTATAGATCAACCAGAAGAGGTATGCATAAAAGTATTTGC  
CCCAAGGAGGAATCCTAGAATCCTTCTATTTTCTGGGTTTGGAAAAGTGCGGATTTTC  
AAGAAAGGGAATCCTATGATATGTTGGGAATCTTTTATGATAATCATCCACGCCTGAAA  
CGTATCTTAATGCCTGAAAGTTGGATAGGATGGCCTTTACGTAAGGATTATATTGCCCT  
AATTTTTATGAAATACAAGATGCTTAT-----

-----AT  
GAATATTATTGAATTTCCTTTACTTGATCGAACAACCCAA---TCAGTTATTTCAACTACAT  
CAAGCGACCTTTCAAATTGGTCAAGACTCTCCAGTTTATGGCCGCTTCTCTATGGTACC  
AGTTGTTGCTTCATTGAATTTGCTTCGTTAATAGGCTCACGATTCGACTTTGATCGTTAT  
GGACTGGTGCCACGATCTAGTCTAGACAGGCAGACCTAATTTAACAGCAGGCACAG  
TAACAATGAAAATGGCCCCTTCTTTAGTGAGATTATATGAACAAATGCCTGAACCAAAA  
TACGTTATTGCTATGGGAGCATGTACAATTACAGGGGGGATGTTTCAGTACCGATTCTTAT  
AGTACTGTTCCGGGAGTTGATAAGCTAATTCCTGTGGATGTCTATTTGCCGGGCTGTCC

ACCTAAACCGGAGGCCGTTATAGATGCTATAACAAAACCTTCGTAAGAAAATATCTCGAG  
AAATCTATGAGGATCGAATTAGATCTCAACAGGAGAATCGGTGTTTTACTACCAGCCAT  
AAGTTTCGTGTTGGATGCAGTACTCATACTGGAAATTATGATCAAGAATTACTCTATCAA  
CCACCATCTACTTCAGAAATCCCTCCTGAAATATTTTTCAAATATAAAAAGT--GTAGCTTC  
CCACGAATTAGTGAATATGCAAATAAAAATACCTTTTCTTGGATAAAGAAAGAGATTA  
CTCGATACATTTCCGTATCGCTCATGATATATATAATAACCCAGGCACCCCTTTCAAATGC  
ATATCCCATTTTTGCACAGCAGGGTTATGAAAATCCACGAGAAGCGACTGGCCGTATTG  
TATGTGCCAATTGCCATTTAGCTAATAAACCCGTGGATATCGAGGTTCCACAAGCGGTA  
CTTCCTGATACTGTATTTGAAGCAGTTGTTTCGAATTCCTTATGATCTGCAACTGAAACAA  
GTTCTTGCTAATGGTAAAAAAGGAGCTTTGAATGTAGGGGCTGTTCTTATTTTACCCGA  
GGGGTTTGAATTAGCCCTCCCGATCGTATTTTGCCCGAGATTAAGAAAAGATAGGAA  
ATCTGTCTTTTCAGAGCTATCGCCCCACTAAAAAAATATTCTTGTGATAGGTCCTGTTC  
CTGGTCAGAAATATAGTGAAATCACCTTTCCTATTCTTTCCCCGGACCCCGCTACTAAG  
AAAGATGTTCACTTCTTAAAATATCCCATATACGTAGGCGGGAACAGGGGAAGGGGTC  
AGATTTATCCCGACGGGAGCAAGAGTAACAATAATGTTTATAATGCTACAGCAGCAGGT  
ATAGTAAGCAAAATCATAAGAAAAGAAAAGGGGGGTACGAAATAACCGTAGCGGGT  
GCATCGGATGGACGTCAAGTGGTTGATATTATCCCTCCAGGACCGGAACCTTCTTGTTTC  
AGAGGGCGAATCCATCCAACCTTGATCAACCATTAACGAGTAATCCTAATGTGGGGTGGAT  
TTGGTCAGGGGGATGCGGAAATAGTACTTCAAGATCCATTACGTGTCCAAGGTCTTTTG  
CTATTCTTGGCATCTGTTATTTTGGCACAATCTTTTTGGTTCTTAAAAAGAAACAGTTT  
GAGAAGGTTCAATTGTCCGAAATGAATTCATGAGTAAATCTATGATTGGTTTCGAAGA  
ACGTCTTGAGATTCAGGCAATTGCCGATGATATAACTAGTAAATATGTTCTCCTCACGT  
CAACATATTTTATTGTCTAGGAGGAATTACGCTTACTTGTTTTTTAGTACAAGTAGCTAC  
AGGGTTTGTATGACTTTTTTATTATCGTCCGACCGTTACAGAGGCTTTTTGCTTCTGTTCA  
ATATATAATGACTGAAGCTAATTTGGTTGGTTAATCCGATCGGTTTCATCGATGGTCGGC  
AAGTATGATGGTCTAATGATGATCCTGCACGTATTTTCGTGTGTATCTAACCGGCGGCTT  
TAAAAACCTCGCGAATTGACTTGGGTTACAGGTGTGGTTTTTGGGTGTATTGACCGCAT  
CTTTTGGTGTAACCTGGTTATTCCTTACCTCGGGACCAAATTGGTTATTGGGCAGTAAAA  
ATTGTAACAGGCGTACCAGACGCTATTCCTGTAATAGGCTCGCCCCTGGTAGAGTTATT  
ACGCGGAAGTGCTAGTGTGGGACAATCCACTTTGACTCGTTTTTATAGTTTACACACTT  
TTGTATTACCTCTTCTTACTGCCGTATTTATGTTAATGCACTTCCCAATGATACGTAAGCA  
AGGTATTTCTGGTCTTTAATGGGAGTAACAAAAAACCTGACTTGAATGATCCTGTGT  
TAAGAGCTAAATTGGCTAAAGGGATGGGTCATAATTATTACGGAGAGCCCGCATGGCCA  
AACGATCTTTTATATATTTTTCCAGTAGTAATTTTAGGTAATGATGTAACGTAGGCT  
TAGCGGTTCTAGAACCATCAATGATTGGTGAACCCGCGGATCCGTTTGCAACTCCTTTG  
GAAATATTGCCTGAGTGGTATTTCTTTCCCGTATTTCAAATACTTCGTACAGTGCCAAAT  
AAGTTATTGGGTGTTCTTTTAATGGTTTCAGTACCTGCGGGATTATTAACAGTACCCTTT  
TTGGAGAATGTTAATAAATCCAAAATCCATTTTCGTTCGTCCCGTAGCGACAACCGTCTT  
TTGATTGGTACTGCAGTAGCCCTTTGGTTGGGTATTGGAGCAACACTACCTATTGATAA  
GTCCTTAACTTTAGGTCTTTTTATGATTGAAGTTTTTCTATTGGAATCGTCTTAGGTCTA  
ATTCCTATTACTTTGGCCGGATTATTCGTAACCTGCATATTTACAATACAGACGTGGTGATC  
AGTTGGACCTTATGCCTACTATAACTAGTTATTTTGGTTTTCTACTAGCAGCTTTGACTAT  
CACCTCAGCTCTATTTATCGGTCTGAGCAAGATACGACTTATTTATGGATATAGTAAATCT  
CGCTTGGGCTGCTTAAATGGTAGTCTTTACGTTTTCCCTTTCCTACTAGTAGTATGGGGAAG

AAGTGGACTCATGATTATTCGTTTCGCCGGAACCAGAAAGTTAAAATTTTGGTAGATAGGG  
ATCCCGTAAAACTTCTTTTCGAGGAATGGGCCAGACCGGGTCATTTCTCAAGAACAAT  
AGCTAAGGGACCTGATACTACCACTTGGATCTGGAACCTACACGCTGATGCTCACGATT  
TTGATAGCCATAACCAGTGATTTGGAGGAGATCTCTCGCAAAGTATTTAGTGCCCATTTCC  
GGTCAACTCTCCATCATCTTTCTTTGGCTGAGTGGTATGTATTTCCATGGTGCTCGTTTT  
TCCAATTATGAAGCATGGCTAAGTGATCCTACTCACATTGGACCTAGTGCCCAGGTGGT  
TTGGCCAATAGTGGGTCAAGAAATATTGAATGGTGATGTCGGCGGGGGTTTTCCGAGGA  
ATACAAATAACCTCTGGGTTTTTTTCAGATTTGGCGAGCATCTGGAATAACTAGTGAATTA  
CAACTCTATTGTA CTGCAATTGGTGCAATTGGTCTTTGCTGCCTTAATGCTTTTTGCAGGT  
TGGTTCCATTATCACAAAGCTGCTCCGAAGTTGGCTTGGTTCCAAGATGTAGAATCTAT  
GTTGAATCACCATTTAGCAGGGCTACTAGGCCTTGGTTCTCTTTCTTGGGCGGGACATC  
AAGTACACGTATCTTTACCAATTAACCAATTTCTAAACGCTGGAGTAGATCCTAAAGAG  
ATTCCACTTCCATCATGAATTTATCTTGAATCGGGATCTTTTGGCTCAACTTTATCCCAGTT  
TTGCTGAGGGAGCAACCCCATTTTTTACCTTGAATTGGTCAAATATGCGGAATTTCTT  
ACTTTTCGTGGAGGATTAGATCCAGTAACTGGAGGTCTATGGCTGACCGATATTGCACA  
CCATCATTTAGCTATTGCAATTTCTTTTCCCTGGTAGCGGGTCACATGTATAGAACCAACTG  
GGGCATTGGTCATGGTATAAAAGATATTTTAGAGGCTCATAAAGGCCCATTTACGGGCC  
AGGGCCATAAAGGCCTATATGAGATCCTAACAACGTCATGGCATGCTCAATTATCTATTA  
ACCTCGCTATGTTAGGATCTTTAACCATTGTTGTAGCTCACCATATGTATTTCGATGCCCC  
TTATCCATATCTAGCTACTGACTATGGTACACA ACTTTTATTGTTTACACATCACATGTG  
GATTGGTGGATTTCTCATAGTTGGTGCTGCTGCGCATGCAGCCATTTTTATGGTAAGAG  
ACTATGATCCA ACTACTCGATAACAACGATCTATTAGATCGTGTCTTAGGCATCGCGATG  
CAATCATATCACATCTCAACTGGGTATGTATATTTTAGGCTTTCACAGTTTTGGTTTTGTA  
TATTCATAATGATACTATGAGCGCTTTAGGGCGCCCCCAAGATATGTTTTTTCAGATACCGC  
TATACAATTACAACCCGTATTTGCTCAATGGATACAAAACACCCATGCTTTAGCACCCA  
GTGCAACGGCCCCTGGTGCAACAACAAGCACCAGTTTGACTTGGGGGGGTGGTGATTT  
AGTGGCAGTGGGCGGCAAAGTTGCTTTGTTACCTATTCCATTAGGAACCGCAGATTTTT  
TGGTGCATCACATTCATGCGTTTACAATTCATGTGACGGTATTAATACTCCTGAAAGGTG  
TTCTATTTGCTCGGAGTTCGCGTTTGATACCAGATAAAGCAAATCTTGGTTTTCGTTTCC  
CTTGTGATGGGCCGGGAAGAGGGGGGACATGCCAAGTATCCGCTTGGGATCATGTCTT  
CTTAGGGCTATTCTGGATGTATAATGCAATTTCCGGTAGTAATATTCCATTTAGTTGGAA  
AATGCAGTCAGATGTTTGGGGTAGTATCAGTGATCAAGGAGTGGTAACTCATATCACGG  
GAGGAAACTTTGCGCAGAGTTCCATTACTATTAATGGGTGGCTCCGCGATTTCTTATGG  
GCACAGGCATCCCAAGTAATTCAGTCTTATGGTTCTTTCATTATCCGCATATGGCCTTTTT  
TTCCTAGGTGCGCATTTTTGTATGGGCTTTTAGTTAATGTTTCTATTAGCGGGCGTGGT  
TATTGGCAAGAACTTATCGAATCCATCGTTTGGGCTCATAATAAATTAAGTTGCTCCT  
GCTACTCAGCCTAGAGCCTTGAGTATTGTCCAAGGACGTGCTGTAGGAGTAACCCATTA  
CCTTCTGGGTGGAATTGCCACAACATGGGCGTTCTTCTTAGCAAGAATTATTGCAGTAG  
GAATGGCATTAAAGATTTCCAAGGTTTAGCCAAGGCTTAGCTCAGGACCCCACTACTCGT  
CGTATTTGGTTTTGGTATTGCTACCGCACATGACTTCGAGAGTCATGATGATTA TACTGAG  
GAACGTCTTTATCAGAATATTTTTGCTTCTCATTTCCGGGCAATTGGCAATAATTTTTCTGT  
GGACTTCCGGAAATCTGTTTTCATGTAGCTTGGCAAGGAAATTTGAGGCATGGGTACA  
GGATCCTTTACATGTAAGACCTATTGCTCATGCAATTTGGGATCCTCATTTTTGGTCAACC  
AGCTGTAGAAGCTTTTACTCGGGGGGGTGCTCTTGGCCCAGTGAATATCGCTTATTCTG

GTGTTTATCAGTGGTGGTATAACAATTGGTTTACGTACTAACGAGGATCTTTATACTGGCG  
CTCTTTTTCTATTATTTCTTTCTGCCATATCCTTAATAGCGGGTTGGTTACACCTACAACC  
GAAATGGAAGCCGAGCGTTTCGTGGTTTAAAAATGCCGAATCTCGTCTAAATCATCATT  
TGTCAGGACTATTCGGAGTGAGTTCCTTAGCTTGGACAGGACATTTAGTTCATGTCGCT  
ATTCCCGGATCCAGGGGAGAAAACGTTTCGATGGAATAATTTCTTAGATGTATTGCCACA  
TCCCAAGGATTAGGTCCACTTTTTACAGGTCAGTGGAATCTTTATGCTCAAAACCCCG  
ATTCAAGTAGTCATTTATTTGGTACCTCCCAAGGAGCAGGAACTGCCATTCTAACCCCT  
CTGGGGGGATTTCATCCACAAACGCAAAGTTTATGGCTGACTGATATTGCTCATCATCA  
TTTAGCTATTGCGTTTATTTTTCTGATTGCTGGTCATATGTATAGAATAATTTTCGGGATT  
GGGCACAGTATCAAAAATCTTTTAGAAGCACATATCCCCCAGGGGGGCGATTGGGTC  
GTGGACATAAGGGTCTTTATGACACAATCAATAATTCGATTCATTTTCAATTAGGCCTTG  
CTCTAGCCTCTTTGGGGTTATTACGTCCTTGGTCGCTCAACACATGTACTCTTTACCTG  
CTTATGCGTTCATAGCACAAGACTTTACTACTCAAGCTGCGTTATATACTCATACCAAT  
ACATCGCAGGATTCATCATGACAGGGGCTTTTGGTTCATGGAGCTATATTTTTTATTAGAG  
ATTACAATCCGGAACAGAATGAGGATAATGTATTGGCAAGAATGTTAGACCATAAAGAA  
GCTATCATATCCCATTTAAGTTGGGCCAGTCTCTTTTAGGGTTCCATACTTTGGGACTTT  
ATGTTCATAATGATGTCATGCTTGTCTTTTGGTACTCCGGAGAAACAAATCTTGATCGAA  
CCTATATTTGCCCAATGGATACAATCTGCTCATGGTAAAACCTTCATATGGGTTTCGATGTA  
CTTTTATCTTCAACGAATGGTCCAGCGTTCAATGCGGGTCGAAGCATATGGTTACCTGG  
TTGGTTAAATGCTGTTAATGAG-----AATAGTAATTCACTATTCTTAACAATAGGACCCGG  
AGATTTCTTGGTTCATCATGCCATTGCTCTAGGTTTACATACAACTACATTGATCTTAGTA  
AAAGGTGCTTTAGATGCACGTGGTTCCAAGTTAATGCCAGATAAAAAAGATTTTGGTTA  
TAGTTTTCTTGGCATGGTCCGGGACGAGGCGGTACTTGTGATATTTTCGGCTTGGGACG  
CATTTTATTTGGCAGTTTTCTGGATGTTAAATACGATTGGATGGGTTACTTTTTATTGGCA  
TTGGAAGCACATCACATTATGGCAGGGTAACGTTTACAGTTTAAATGAGTCTTCCACTT  
ATTTGATGGGATGGTTAAGAGATTATCTATGGTTAAACTCTTCGCAACTTATTAATGGATA  
TAATCCTTTTGGTATGAATAGTTTATCCGTCTGGGCGTGGATGTTCTTATTTGGACATCTT  
GTTTGGGCTACTGGATTTATGTTCTTAAATTCCTGGCGTGGATATTGGCAGGAATTGATT  
GAAACTTTAGCATGGGCTCATGAACGCACACCTTTGGCTAATTTGATTCGATGGAGAGA  
TAAACCGGTGGCTCTTTCCATTGTGCAAGCAAGATTGGTTGGATTAGCCACTTTTTCTG  
TCGGGTATATTTACTTATGCGGCTTTCTTGATTGCCTCTACATCGGGTAAATTTGGTAT  
GTCACATTCAGTAAAGATTTATGATACGTGTATAGGGTGCCTCAATGTGTGCGAGCCT  
GCCAACAGATGTATTAGAAATGATACCTTGGGACGGATGTAAGGCTAAGCAAATTGCT  
TCCGCTCCAAGAACAGAGGACTGTGTCGGTTGTAAGAGATGTGAATCCGCTGTCCAA  
CGGATTTCTTGAGTGTTTCGAGTTTATTTATGGCATGAAACAACCTCGAAGTATGGGTCTA  
GCTTATATGATAACTTTACGCTTCCCCTCAATTTTTGTGCCTTTAGTGGGCTTAGTATTTT  
CGGCAATTGCAATGGCTTCTTTATCTCTTTATGTTCAAAAAACAAGATTTTATGCGAG  
ATCTAAAAACATATCTCTCCGTGGCACCGGTAGTAAGTGCTTTATGGTTTCGGGTCTTTG  
GCAGGTTTATTGATAGAGATCAATCGTTTTTTTTCCGGATGCGTTGATATCCCCTTTTTTT  
CATTTATGACTGCAATTTTAGAGAGACGCGAAAGCGAAAGCCTATGGGGTTCGCTTTTTGT  
AACTGGATAACCAGCACTGAAAACCGTCTTTACATTGGATGGTTTGGTGTTTTTGATGAT  
CCCTACTTTATTGACCGCAACTTCTGTATTTATTATTGCTTTCATTGCTGCACCTCCAGTA  
GATATTGATGGTATTCGTGAACCTGTTTCTGGATCTTTACTTTATGGAAACAATATTTT  
CTGGTGCCATTATTCCTACCTCTGCAGCTATAGGTTTGCACTTTTACCCGATATGGGAAG

CGGCTTCCGTTGATGAATGGTTATACAACGGTGGTCCCTTATGAACTAATTGTTCTACACT  
TCTTACTTGGTGTAGCTTGTACATGGGTCTGAGTGGGAACTTAGTTTTCCGTCTGGGT  
ATGCGCCCCTGGATTGCTGTTGCATATTCAGCTCCTGTTGCAGCTGCTACTGCTGTTTTTC  
TTGATATATCCAATGGTCAAGGAAGCTTTTTCTGACGGTATGCCCTAGGAATCTCCGGT  
ACTTTCAACTTCATGATTGTATTCCAAGCCGAGCACAACATCCTTATGCACCCATTTAC  
ATGTTAGGCGTAGCTGGTGTATTCGGCGGCTCCCTATTCAGTGCTATGCATGGGTCCCTG  
GTAACCTCTAGTTTGATCAGGGAAACCACAGAAAATGAATCTGCTAATGAAGGTTACA  
GATTCGGTCAAGAGGAAGAAACCTATAATATCGTAGCCGCTCATGGTTATTTGGCCGA  
TTGATCTTCCAATATGCTAGTTTCAACAATTCTCGTCTTTACATTTCTTCTAGCTGCTT  
GGCCTGTAGTAGGTATCTGGTTTACCGCTTTAGGTATCAGCACTATGGCTTTCAACTTAA  
ATGGTTTTAATTTCAATCAATCTGTAGTTGATAGTCAGGGTCTGTGAATTAATACTGGG  
CTGATATTATTAACCGCGCTAACCTTGGTATGGAAGTTATGCATGAACGTAATGCCATA  
ATTTCCCTCTAGATCTAGCTGCTGTTGAAGTTCATCTATAAATGGAATGGGTTTGCCTT  
GGTATCGTGTTCATACCGTGTATTGAATGATCCCGGCCGTTTGATTGCTGTCCATATAAT  
GCATACAGCTCTGGTTGCTGGTTGGGCCGGTTCGATGGCTCTATACGAATTAGCAGTTT  
TTGATCCTTCTGATCCTGTTCTTGATCCAATGTGGAGACAGGGTATGTTCTGTTATACCTT  
TCATGACTCGTTTAGGAATAACCAATTCATGGGGCGGTTGGAGTATCACA---GGGGTA  
CTGTAACGAATCCAGGTATTTGGAGTTACGAAGGTGTGGCCGGAGCACACATTGTGTT  
TTCTGGCTTGTGCTTTTTGGCAGCTATCTGGCATTGGGTGTATTGGGATCTAGAAATATT  
TACTGATGAACGTACAGGAAAACCCTCTTTGGATTGCTTAAGATCTTTGGAATTCATTT  
ATTTCTATCCGGGGTGGCTTGCTTTGGTTTTGGTGCATTTTCATGTAACAGGATTGTATGG  
TCCTGGAATATGGGTGTCCGATCCTTATGGACTAACGGGAAGGGTACAATCCGTAAATC  
CAGCGTGGGGTGTGGAGGGTTTTGATCCTTTTGTCCGGGAGGAATAGCCTCTCATCAT  
ATTGCAGCAGGGACATTGGGCATATTGGCGGGTCTATTCCATCTTAGCGTCCGTCCACC  
TCAACGCCTATACAAAGGATTACGTATGGGAAATATCGAAACTGTCCTTTCCAGTAGTAT  
TGCTGCTGCTTTTTTTGCAGCTTTTGTAGTTGCCGGAACCTATGTGGTATGGTTCAGCAA  
CTACCCCGATTGAATTATTTGGTCCCCTCGTTATCAATGGGATCAAGGATACTTCCAAC  
AAGAAATATATCGCAGAATTGGTGTGGGTAGCTGAAAATCAAAGTTTATCTGAAGCT  
TGGTCTAAAATTCCTGAAAACTGGCTTTTTATGATTACATCGGCAATAATCCGGCAA  
GGGGGGGTTATTCAGAGCGGGCTCAATGGACAACGGGGATGGAATAGCTGTTGGGTG  
GTTAGGACATCCTATCTTTAGAGATAAAGAGGGGCGCGAACTTTTTGTACGTCGTATGC  
CTACTTTTTTTGAAACATTTCCGTTGTTTTGGTAGACGGAGACGGGATTGTTAGAGCC  
GATGTTCTTTTAGAAGGGCAGAATCAAATATAGTGTCGAACAAGTAGGTGTAAGTGT  
CGAGTTCTATGGCGGCGAACTCAACGGAGTCAGTTATAGTGATCCCGCTACTGTGAAA  
AAATATGCTAGACGCGCTCAATTGGGTGAAATTTTTGAATTAGATCGTGCTACTTTGAA  
ATCCGATGGTGTTTTTTCGTAGCAGTCCAAGGGGTTGGTTTACTTTTGGGCATGCTTCGT  
TTGCTTTGCTCTTCTTCTTCGGACACATTTGGCATGGCGCTAGAACCCTTGTTAGAGAT  
GTTTTTGCTGGTATTGATCCAGATTTAGATGCTCAAGTGGAATTTGGAGCATTCCAAAA  
ACTCGGAGATCCAACACTACAAGAAGACAAGTAGTTATGAAAACCTTATATCCCTGAGG  
AGGTTCTACCCCGTGGAAACGCTCTTTAATGGAACTTTAGCTTTAGCCGGTCTGTGACCA  
AGAAACCACTGGTTTCGCTTGGTGGGCCGGGAATGCCCGACTTATCAATTTATCCGGTA  
AACTACTGGGGGCTCATGTAGCCCATGCCGGATTAATCGTATTCTGGGCCGGAGCAATG  
AACCTATTTGAAGTGGCTCATTTTCGTACCAGAGAAGCCTATGTATGAACAAGGATTGAT  
TTTACTTCCCCACCTAGCTACTCTAGGTTGGGGGGTAGGTCCGGGTGGGGAAGTTCTAG



ACACCTTTCCATACTTTGTGTCTGGAGTACTTCACTTAATTTCCCTCTGCAGTATTGGGCT  
TTGGCGGTATTTATCATGCACTTCTGGGACCCGAGACTCTTGAAGAATCTTTCCATTCT  
TCGGTTATGTATGGAAAGATAGAAACAAAATGACTACAATTTGGGTATTCACTTAATCT  
TGTTAGGTATAGGTGCTTTTCTTCTAGTATTCAAGGCTCTTATTTTGGGGGTGTATATGA  
TACCTGGGCTCCGGGCGGGGAGATGTAAGAAAATTACCAACTTGACCCTTAGCCCA  
AGTATTGTATTTGGTTATTTACTAAAATCCCCCTTTGGCGGAGAGGGGTGGATCGTTAGT  
GTGGACGATTTGGAAGATATAATTGGAGGGCATGTATGGTTAGGTTCCATTTGTATACTT  
GGTGGAATCTGGCATATCTTAACCAAACCTTTTGCATGGGCTCGCCGTGCACTTGTATG  
GTCTGGAGAGGCTTACCTGTCTTATAGTTTAGCTGCTTTATCTGTTTTTGGTTTTATTGCT  
TGTTGCTTTGTTTTGGTTCAATAATACCGCCTATCCTAGTGAGTTTTACGGGCCCACTGGA  
CCAGAAGCTTCTCAAGCTCAAGCATTACTTTTTTGGTTAGAGACCAACGTCTTGGGG  
CTAACGTAGGATCTGCTCAAGGACCTACCGGTTTAGGTAAATATCTAATGCGTTCTCCG  
ACCGGGGAAGTTATTTTTGGAGGAGAACTATGCGTTTCTGGGATCTGCGTGCTCCCTG  
GTTAGAACCTTTAAGGGGTCTAATGGTTTGGACTTGAGTAGGCTGAAAAAAGACATA  
CAGCCTTGGCAAGAACGGCGATCTGCGGAATATATGACTCATGCTCCTTTAGGTTCTTT  
AAATTCCGTGGGTGGCGTAGCTACCGAGATCAATGCAGTCAATTATGTCTCTCCTAGAA  
GTTGGTTAGCTACTTCTCATTTTTGTTCTAGGATTCTTCCTATTTCGTAGGTCATTTATGGCA  
CGCGGGAAGGGCGCGTGCAGCTGCAGCAGGATTTGAAAAAGGAATTGATCGTGATTTT  
GAACCTGTTCTTTCCATGACTCCTCTTAACATGACTATAGCCCTTGGTAAATTTACCAAA  
GACGAAAATGATTTATTTGATATTATGGATGACTGGTTACGGAGGGACCGCTTCGTTTTT  
GTAGGTTGGTCTGGCCTATTGCTCTTTCCTTGTGCCTATTTTCGCTTTAGGGGGTTGGTTC  
ACAGGTACAACCTTTGTAACCTCATGGTATAACCCATGGATTAGCAAGTTCCTATTTGGAA  
GGCTGTAACCTCTTAACCGCCGAGTTTCCACTCCGGCTAATAGTTTAGCGCACTCTTT  
GTTGTTACTATGGGGTCTGAAGCACAAGGAGATTTTACTCGTTGGTGTCAATTAGGCG  
GTCTGTGGACTTTTGTGCTCTACACGGCGCTTTCGGACTAATAGGTTTTATGTTACGTC  
AATTTGAACTTGCTCGATCTGTTCAATTGCGACCTTATAATGCAATCGCATTCTCCGGTC  
CAATTGCTGTTTTTGTCTGTATTCTAATTTATCCGCTAGGTCAGTCTGGTTGGTTTTT  
TGCGCCAGTTTTGGTGTAGCAGCTATATTTTCGATTCATCCTCTTTTTTCCAAGGGTTTCA  
TAATTGGACATTGAACCCATTTATATGATGGGAGTTGCTGGGGTGTGGGCGCTGCTC  
TGTTATGCGCTATTCATGGTGTACCGTAGAAAATACTTTATTTGAAGATGGTGATGGTG  
CAAATACATTCCGTGCTTTTAACCAACTCAAGCTGAAGAACTTATTCAATGGTCACC  
GCTAACCGCTTTTGGTCCCAAATCTTTGGGGTTGCTTTTTTCCAATAAACGTTGGTTACAT  
TTCTTTATGTTATTTGTACCAGTAACCGGTTTGTGGATGAGTGCTCTTGGAGTAGTCGGT  
CTGGCCCTTAACCTACGTGCCTATGACTTCGTTTCTCAGGAAATCCGTGCAGCGGAAGA  
TCCTGAATTTGAGACTTTCTACACCAAAAATATTCTCTTAAACGAAGGTATTCGTGCTT  
GGATGGCGGCTCAAGATCAGCCTCATGAAAACCTTATATTCCCTGAGGAGGTTCTACCC  
CGTGAAACGCTCTTATGTCTGGAAGCACAGGAGAACGTTCTTTTTGCTGATATTATTAC  
CAGTATTCGATACTGGGTCAATCATAGCATTACTATAACCTTCTTATTTATTGCGGGTTGG  
TTATTCGTCAGCACGGGTTTAGCTTACGATGTATTTGGAAGCCCTCGTCCAAACGAGTA  
TTTTACAGAAAGCCGACAAGGAATTCATTAATAACAGGCCGTTTTGATCCTTTGGAAC  
AACTCGATGAATTTAGTAGATCTTTTATGACTATAGATAGAACCTATCCAATTTTTACAGT  
GCGGTGGTTGGCTGTTACGGACTAGCTGTACCTACCGTTTCTTTTTTAGGGTCAATATC  
AGCAATGCAGTTCATCCAACGAATGGCTACACAAACCGTTGAGGGTAGTTCTAGATCT  
GGCCGCCCAAACGAACATAATGCAGGGAGTTTATTGAAACCATTGAATTCAGAATATG

GTAAAGTAGCTCCTGGGTGGGGAACACTCCTTTGATGGGTCTCGCAATGGCTCTATTT  
GCGATATTCCTATCGATTATTTTGGAGATTTATAATTCCTCCATTTTACTGGATGGAATTC  
AATGAATATGCTTACTCTAAAACATTTGTTTACACGGTAGTGATATTCTTTGTTTCTCTC  
TTTATCTTCGGATTCTGTCTAATGATCCAGGACGTAATCCTGGACGTGAAGAAATGGC  
CGATACTACTGGAAGGATTCCTCTTTGGATAATAGGTACTGTAGCGGGTATTCTTGTGAT  
CGTTTTAATCGGATTTTCTTTTATGGTTCCATTCTGGATTAGGTTTCATCCCTGATGCTT  
AATATATTTAGTTTGTCTGT-----CTTAATTCGGCTCTTTATTCAAGTAGTTTTTTCGTCG  
CCAAATTGCCCGAGGCCTACGCTTTTTTAAATCCAATCGTAGATGTTATGCCAGTAATAC  
CCCTGTTTTTTTTTCTGTTAGCCTTTGTTTGGCAAGCTGCTGTAAGTTTTTCGAACGACA  
CAATCAAACCCGAACGAACAAAGTGTGAAATTGAATCGTACCAGTCTCTACTGGGGT  
TATTACTCATTTTTGTACTTGTGTTTTATTTTCCAATTATTTCTTTAATATGGAAGTAAAT  
ATTCTCGCATTTATTGCTACTGCACTGTTTATTCTAGTTCCTACCGCTTTTTTACTTATAAT  
ATACGTAAAACAGTCAGCCAAGGTGATATGGAAACAGCAACCCTAGTTGCCATCTTT  
TTATCCGGTTTACTTGTAAAGTTTTACTGGGTACGCCTTATATACTGCTTTTGGGCAACCC  
TCTCAACAACATAAGAGATCCATTTCGAGGAACACGGGGACATGGAAGCATTGGTTTATA  
CATTCCTTTTAGTCTCAACTCTAGGAATAATTTTTTTCGCTATCTTTTTTCGAGAACCGC  
CTAAAGTTCCAACATAAAAAGGTGAAAATGACTATTGCTTTCCAATTGGCTGTTTTTGTCA  
TTAATTGCTACTTCATTAATCTTATTGATTAGTGTACCTGTTGTATTTGCTTCTCCTGAGG  
GTTGGTCGGGTAACAAAAATGTTGTATTTCCGGTACATCATTATGGATTGGATTAGTCT  
TTCTGGTGGGTATCCTTAATTCTCTCATCTCT-----ATGTCACCACAAACAGA  
GACTAAAGCAAGTGTGGATTCAAAGCTGGTGTAAAGATTATAAATTGACTTATTATAC  
TCCTGACTATGAAACCAAAGATACTGATATCTTGGCAGCATTTCGAGTAACTCCTCAAC  
CTGGAGTTCACCTGAAGAAGCAGGGGCAGCGGTAGCTGCTGAATCTTCTACTGGTAC  
ATGGACAACCTGTATGGACTGACGGGCTTACTAGTCTTGATCGTTACAAAGGTCGATGCT  
ACCACATCGAGCCCGTTGCTGGAGAAGAAAGTCAATTTATTGCTTATGTAGCTTACCCC  
TTAGACCTTTTTGAAGAGGGTTCTGTTACTAACATGTTTACTTCCATTGTAGGTAATGTG  
TTTGGGTTCAAGGCCCTGCGCGCTCTACGTCTGGAGGATTTGCGAATCCCTCCTGCTTA  
TGTTAAACTTTCCAAGGCCCGCCTCATGGGATCCAAGTTGAGAGAGATAAATTGAAC  
AAGTATGGCCGCCCCCTATTGGGATGTACTATTAACCTAAATTGGGGTTATCCGCTAAG  
AATTACGGTAGAGCAGTTTATGAATGTCTCCGCGGTGGACTTGATTTTACCAAAGATGA  
TGAGAATGTTAATTTCCAACCATTTATGCGTTGGAGAGACCGTTTCTTATTTTGTGCCGA  
AGCAATTTATAAAGCACAGGCTGAAACAGGTGAAATCAAAGGGCATTACTTGAACGCT  
ACTGCAGGTACATGCGAAGAGATGATCAAAGAGCTGTATTTGCCAGAGAATTGGGGG  
TTCTATCGTAATGCATGATTACTTAACAGGGGGATTCACTGCAAATACTAGCTTGGCTC  
ATTATTGCCGAGATAATGGTTTACTTCTTCACATCCACCGTGCAATGCATGCAGTTATTG  
ATAGACAGAAGAATCATGGTATGCACTTTCGTGTACTAGCTAAAGCGTTACGTATGTCT  
GGTGGAGATCATATACCGCTGGTACCGTAGTAGGTAACCTTGAGGGGGAAAGGGAGA  
TCACTTTAGGCTTTGTTGATTTACTACGTGATGATTTTGTGAAAAAGATCGAAGCCGC  
GGTATTTATTTCACTCAAGATTGGGTCTCTTTGCCAGGTGTTTTGCCTGTAGCTTCAGGG  
GGTATTCACGTTTGGCATATGCCTGCTCTGACCGAGATCTTTGGAGATGATTCTGTACTA  
CAATTTGGCGGCGGAACCTTTAGGACACCCTTGGGGAAATGCACCTGGTGCCGTAGCTA  
ATCGAGTAGCTCTAGAAGCATGTGTACAAGCTCGTAATGAGGGACGTGATCTTGCTCGT  
GAGGGTAATGAAATTATTCGCGAGGCTAGTAAATGGAGTCCCTGAACTAGCTGCTGCTTG  
TGAAATATGGAAGGAGATCAAATTTGAATTCCAAGCAATGGATACTTTG-----ATGGCGA

TACATTTATACAAAACCTTCTACCCCGAGCACACGCAATGGAGCCGTAGACAGTCAA-----  
-TCCAATCCACGAAATAATTTGATCTATGGACAGCATCGTTGTGGTAAAGGTCGTAATGC  
CAGAGGAATCATTACCGCAGGGCATAGAGGGGGAGGTCATAAGCGTCTATACCGTAAA  
ATAGATTTTCGACGGAATGAAAAAGACATATATGGTAGAATCGTAACTATAGAATACGA  
CCCTAATCGAAATGCATACATTTGTCTCATACTATGGGGATGGTGAGAAAAGATATAT  
TTTACATCCCAGAGGGGCTATAATTGGAGATACCATTGTTTCTGGTACAGAAGTTCCTAT  
AAAAATGGGAAATGCCCTACCTTTGACCGATATGCCCTTAGGCACGGCCATACATAACA  
TAGAAATCACACTTGGAAAGGGTGGACAATTAGCTAGAGCAGCAGGTGCTGTAGCGA  
AACTGATTGCAAAAAGAGGGGAAATCGGCCACATTAATAATTACCTTCTGGAGAGGTCCG  
TTTGATATCCAAAACCTGCTCAGCAACAGTCCGACAAGTGGGGAATGTTGGGGTGAAC  
CAGAAAAGTTTGGGTAAAGCCGGATCTAAATGTTGGCTAGGTAAGCGTCTCTGTAGTAA  
GAGGAGTAGTTATGAACCCTGTAGACCATCCCCATGGGGGTGGTGAAGGGAGGGCCCC  
AATTGGTAGAAAAAACCCGCAACCCCTTGGGGTTATCCTGCACTTGGAAAGAAGAAGT  
AGAAAAAGGAATAAATATAGTGATAATTTGATTCTTCGTCGCCGTAGTAAAATGATTCA  
ACCTCAAACCCATTTAAATGTAGCGGATAACAGTGGAGCCCGAGAATTGATGTGTATTC  
GAATCATAGGAGCTAGT--AATCGACGATATGCTCATATTGGTGACGTTATTGTTGCTGTA  
ATCAAGGAAGCCGTACCAAATACACCTCTAGAAAGATCAGAAGTAATCCGAGCTGTAA  
TTGTACGTACTTGTAAGAAGTCAAACGCGACAACGGTATGATAATACGATATGATGAC  
AACGCTGCAGTTGTTATTGATCAAGAAGGAAATCCTAAAGGAACCCGAATTTTTGGCG  
CGATCGCCCGGAATTAAGACAGTTAAATTTCACTAAAATAGTTTTATTAGCACCCGAA  
GTATTAATGCTTAGTCCCAAAGAACCAGATTCCGTAAACAACATAGAGGAAGAATGA  
AAGGAATATCTTATCGAGGCAATCGTATTTGCTTCGGTAGATATGCTCTTCAAGCGCTTG  
AACCCGCTTGGATCACATCTAGACAAATAGAAGCAGGGCGGCGAGCAATGACACGAA  
ACGCACGCCGCGGTGGAAAAATATGGGTACGCATATTTCCAGACAAACCCGTTACAGT  
AAGACCTACAGAAACACGTATGGGTTTCGGGAAAGGATCTCCCGAATATTGGGTAGCT  
GTTGTTAAACCCGGTAGAATACTTTATGAAATGAGCGGAGTAGCAGAAAATATAGCCAG  
AAGGGCAATTTCAATAGCGGCATCCAAAATGCCTATACGAACTCAATTCATTCTTTTCGG  
GAATGACCAGAATTAACGAGGGTATATAGCTCGAAGACGTAGAACAAAATCCGTTT  
ATTTGCATCAACCTTTCGAGGGGCTCATTCAAGACTTACTCGTACTATTACTCAACAGA  
AAATAAGAGCCTTGGTTTCGGCTCATCGGGATAGAGGTAGACAAAAGAGAGATTTTCG  
TCGTTTGTGGATCACTCGGATAAATGCAGTAATTCGCGAGAAT---AAAGTATACTTTAGT  
TATAGCAAATTAATACACAATCTGTACAAGAGACAGTTGCTTCTTAATCGTAAAATACTT  
GCACAAATAGCTATATTAATAAGAGTTGTCTTTATATGATTTCCAATGAGATCATAAAA-  
-----ATGATAAAGGAAGTATATGCCTTAGGCCAACATATATGTATGTC  
CGCTCACAAAGCGAGAAGAGTAATTGATCAAATACGTGGGCGATCCTATGAAGAAACA  
CTTATGATACTAGAACTCATGCCTTATCGAGCATGTTATGCCATTTTAAAATTGGTTTATT  
CTGCAGCAGCAAATGCTACTCACAATAAGGGTTTCAACAAAACAAGTTTAATCATTAGT  
AAAGCCGAAGTCAACGAGGGCACGACTGTGAAAAAATTAAGCCTCGAGCTCGAGGA  
CGTAGTTATCCAATAAAAAGATCCACTTGTCATATAACTATTGTATTGAAAGATATATCTT  
TAGAT-----ATGGATGGAATCAAATATGCAGTATTTACAGACAAAAGTATTCG  
GTTATTGGGGAAAAT---CAATATACTTCTAATGTGCAATCAGGATCAACTAGGACAGAA  
ATAAAGCATTGGTTCGAACTCTTCTTTGGTGTCAAGGTAATAGCTATGAATAGTCATCGA  
CTCCCGGAAGGGGTAGAAGAATGGGACCTATTATGGGACATACAATGCATTACAGAC  
GTATGATCATTACGCTTCAACCGGGTATTCTATTCCACCTTTAGAAAAGAAAAGAACTA

TGGCAGTTCCAAAAAACGCACCTCTATTTCAAAAAACGGATTCGTAAAAATATTTG  
GAAAAGGAAGGGATATCGGGCAGCATTGAAAGCTTTTTTCGTTAGCGAAATCTCTTTCTA  
CCGGGAGTTCTAAAAGTTTTTTT-----GTAACAATGGCCAAGGGTAAAGATGTCCG  
AGTAACAGTTATTTTGAATGTACCAGTTGT--CTTCGAAAT-----GTTAATAAGGAATCA  
AGGGGCATTTCCAGATATATTACTCAAAGAATCGACACAATACGCCTGGTCGATTGGA  
ATTGAGAAAATTCTGTCCCTGTTGTTACAAACATACGATTCATGGGGAGATAAAGAAAA  
TGAAAATAAGGGCCTCTGTTTCGTAAAATTTGTGAAAAATGTCGATTGATCCGTAGGCGG  
GGACGAATTATAGTAATTTGTTCCAACCCGAGACATAAACAAAGACAAGGCATGGTTC  
GAGAGAAAGTAACAGTATCTACTCGGACACTACAGTGGAAGTGTGTTGAATCAAGAGC  
AGACAGTAAGCGTCTTTATTATGGACGCTTTATTCTGGCCCCACTTATGAAAGGTCAAG  
CAGATACAATAGGAATTGCGATGCGAAGAGCTTTGCTCGGAGAAATAGAAGGAACATG  
TATCACACGCGCAAAATCTGAG-----AAAATACCACATGAATATTCTACCATAATAGGTAT  
TCAAGAATCCGTACATGAAATTTAATGAATTTGAAAGAAATTGTATTGAGAAGTAATCT  
ATATGGAACCTCGTAACGCGTCTATTTGTATCAAGGGTCCTGGATATGTAACCTGCTCAAG  
ACATTATCTTACCACCTTCTGTGGAATCGTTGATAATACACAGCATATAGCTAACCTAA  
CGGAACCAATTAATTTGTGTATTGAATTACAAATCGAGAGGAATCGCGGATATCGTATAA  
AAACGCCAAATAACTTTCAAGACGGAAGTTAT-----CCTATAGATGCTGTATTGCTGCT  
GTTTCGAAATGCGAATCATAGCATTCACTTATGTGAATGGGAATGAAAAACAGGAGAT  
ACTTTTTCTCGAAATATGGACAAATGGAAGTTTAACTCCTAAAGAAGCACTTCATGACG  
CCTCCCGAATTTGATTGATTTATTTATTCCTTTTTTACATGCAGAAGAGGAA-----AACT  
TACAGTTAGAAAACAATCAA---CACAAAGTTACTTTGCCCTTTTTACTTTTCATGGTAG  
ATTGGCTAAA---CAAAGGAAAAATAAAAA---GAAATCGCATTGCAATATATTTTTATTG  
ACCAATCAGAATTGTTCCCCAGGGTCTATAATTGCCTCAAAGGTCCAATATACATACAT  
TATTGGATCTTTTGAATAACAGTCAAGAAGATCTTATGAAAATTAACATTTTCGCATAG  
AAGATGTAAAACATATATTGAACATTCTAGAAATA-----ATGCTTG  
GGGGTGAAAT---GAGGCAATATCTACAATACCTGGATTTAATCAGATACAGTTTGAAG  
GGTTTTGTAGGTTTCATTGAGCAGGGCTTAACAGAGGAACCTTTATAAGTTTCCAAAAATT  
GAAGATACAGATCAAGAAATTGAATTTCAATTATTTGTGGAAACATATCAATTGGTAGA  
ACCAGTGATAAAAGAAAGAGATGCTGTATATGAATCACTCACATATTCTTCGGAATTATA  
TGTATCCGCGGGATTAATTTGAAAAACAGTAGGGATATGCAAGAACAAACAATTTTATA  
TTGGAACATTCTTTAATGAATTCCTGGGAACCTTCTATAGTAAATGGAATATACAGAA  
TTTTAATCAATCAATATTGCAAAGCCCCGGTATCTATTACCGGTCAGAATTGGACCATA  
ACGGAATTTCCGTCTATACCGGCATCATAATATCAGATTGGGGAGGAAGATTGGAATTA  
GAGATTGATAGAAAAGCCAGGATATGGGCTCGTGTGAGTAGGAAACAAAAAATATCTA  
TTCTAGTTCTATCATCAGCTATGGGTTCAAATCTAAGAGAAATTCTAGAGAATGTTTGCT  
ACCCTGAGATTTTCTTGTCTTTCCTGAATGATAAAGAGAAAAAAAATTGGGTCAA  
AGAAAACGCCATTTTGGAGTTTATCAACAATTTGCTTGTGTAGGCGGGGATCCGGTAG  
TTTCTGAATCCTTATGTAAGGAATTACAAAAGAAATTCTTTCAACAAAGATGTGAATTA  
GGAAGGGTTGGTCGACGAAATATGAACCGAAGACTAAATCTTGATATACCTCAGAACA  
ATACATTTTTGTTACCGCGAGATATATTGGCAGCTGCGGATCATTGATTGGAATGAAAT  
TTGGAATGGGTACACTTGATGAT-----ATGAATCATTGAAAAATAACGTATTTCGTTCTG  
TAGCGGATCTCTTACAAGATCAATTAGGATTGGCTCTGGTTCGTTTAGAAAATATGGTTA  
GAGGGACTATATGCGGAGCAATTAAG---CATAAATTGATA---CCGACTCCTCAGAATTTG  
GTAACCTCAACTCCA-----TTAACAACCCTTATGAATCTTTTTTCGGATTACACCCA

TTATCTCAAGTTTTGGATCGAACAAATCCATTGACACAAATAGTTCATGGGAGAAAATC  
GAGTTATCTGGGCCCTGGAGGATTGACAGGGCGAACTGCTAGTTTTCCGATACGAGATA  
TCCACCCTAGTCACTACGGGCGCATTGCCCCATTGACACGTCTGAAGGAATCAACGTT  
GGACTTATTGGATCCTTAGCAATTCATGCGAAGATTGGTTATTGGGGG---TCTCTAGAAA  
GTCCGTTTTAT-----GAAATTTCTGAGAGATCAAAAAG-----GTAAGGATGCTTTATTT  
ATCACCAAGTAAAGATGAATACTATATGGTAGCGGCAGGAAATTCCTTGGCGTTGAATC  
GAGGTATTCAGGAAGAACAGGTTGTTCCAACCTCGATACCGTCAAGAATTCCTGACTGT  
TGAATGGGAACAGGTCATCTTCGAAGTATTTTTCCCTTCCAATATTTTTCTATTGGAGC  
TTCCCTAATTCCTTTTATCGAGCATAATGATGCGAATCGGGCTTTAATGAGTTCTAATATG  
CAACGTCAAGCAGTTCGCTTTCTCGGTCTGAAAAGTGCATTGTTGGAACCTGGGTTGG  
AACGCCAAGTGGCTTTAGATTCCGGGGTTCCTGCTATAGCCGAACATGAGGGAAAGGT  
CGTTTATACTATACTGACAAGATCGTTTTATCGGGAAATGGAGATACTCTAAACATTCC  
ATTAGTTATATATCAACGTTCCAACAAAATACTTGTATGCACCAAAACCCCCAGGTTCC  
GGCGAGGTAAATGTATTAAGGGACAAATCTTAGCGGATGGTGCTGCTACGGTTGG  
CGGCGAACTCGCTTTGGGAAAAACGTATTAGTAGCTTATATGCCATGGGAGGGTTACA  
ATTCTGAAGATGCGGTACTCATTAGTGAGCGTCTGGTATATGGAGATATTTATACTTCTTT  
TCATATACGGAAATATGAAATTCAACTCATGTGACAAGCAACGGC---CCTGAAAGAAT  
CACTAACGAAATACCGCATCTAGAAGCCATTTACTCCGCAATTTAGACAAAAATGGAA  
TTGTGAGGCTGGGGTCTTGGGTAAAGACAGGCGATATTTAGTAGGTAAATTAACACCT  
CAGATGGCGAAAGAA---TCGTCGTATGCTCCGGAAGATAGATTATTACGAGCCATACTT  
GGCATTACAGGTATCCACTTCAAAGGAACTTGTCTAAAATTACCTATAGGTGGTAGAGG  
TCGAGTTATTGATGTGAGATGGATCCAGAAAAAAGGA---GGTTCTAGTTATAATCCAGA  
AACGATTCGTGTATATATTTCAAAAAACGTGAAATCAAAGTAGGTGATAAAGTAGCTG  
GAAGACATGGAATAAGGGTATTGTTTCAAAAATTTTACCTAGACAAGATATGCCTTAT  
TTGCAAGATGGAAGACCTGTTGATATGGTCTTCAACCCATTAGGAGTGCCCTCACGAAT  
GAATGTAGGACAGATATTTGAATGCTCGCTCGGGTTAGCGGGGGTCTGCTAGATAGAC  
ATTATCGAATAGCACCTTTTGATGAGAGATATGAACAAGAGGCTTCGAGAAAACCTAGTG  
TTTTCTGAATTATATGAAGCCAGTAAGCAAACAGCTAATCCATGGGTATTTGAACCTGA  
GTATCCGGGAAAAAGCAGAATATTTGATGGAAGAACGGGAGATCCTTTTGAACAACCT  
GTTATAATAGGAAAGCCTTATATCTTGAAATTAATTCATCAAGTTGATGATAAATACATG  
GACGTTCCAGTGGACATTATGCACTTGTTACACAACAACCCCTTAGAGGAAGGGCCAA  
GCAAGGGGGACAACGGGTAGGAGAAATGGAAGTTTGGGCTCTAGAGGGATTTGGTGT  
TGCTCATATTTTACAAGAGATGCTTACTTATAAATCTGATCATATTAGAGCTCGCCAAGA  
AGTACTTGGTACTACAATCATTGGAGGAACAATACCTAAACCCGAGGATGCTCCAGAAT  
CTTTTCGATTGCTCGTTTCGAGAACTACGATCTTTGGCTCTGGAACCTGAACCATTTCTTT  
GTATCTGAGAAGAACTTCCAGATTAAGAGGAAGGAAGCT-----ATGATCGAT  
CAGTATAAACATCAACAACCTTCGAATTGGATTAGTTTCTCCTCAACAAATAAGTGCTTG  
GGCCCAAAAATCTTACCTAATGGAGAGATAGTTGGAGAGGTGACAAAACCTATACT  
TTTCATTACAAAACCAATAAACCTGAAAAAGATGGATTATTTTGTGAAAGAATTTTGG  
GCCTATAAAAGGTGGGATTTGTGCTTGTGGAAATTATCGAGTAATCGGAGATGAAAAA  
AAAGACCCGAGATTTTGTGAACAGTGTGGAGTCGAATTTGTTGATTCCCGGATACGAA  
GATATCAAATGGGCTATATCAAACCTGGCCTGCCAGTAACCCATGTGTGGTATTTGAAA  
CGTCTTCTAGTTATATCGCGAATCTTTTAGATAAACCTCTTAAAGAATTAGAAGGCCTA  
GTATATTGCGATGTG---TTTTCTTTTGTAGGCC---ATAGCTAAAAACCTACTTTCTTA

CGATTACGAGGTTTCATTTCGAATATGAAATCCAATCCTGGAAATACAGCATCCCACTTTTT  
TTTACTACCCGAGGCTTCGATACATTTTCGAAATCGAGAAATTTCTACTGGAGCGGGTGC  
TATCCGAGAACAAATTAGCCGATCTGGATTTGCGAATTATTATAGATTATTCGTTGGTAGA  
ATGGAAAGAATTAGGGGAAGAA---GGGCCACGGGTAATGAATGGGAAGATCGAAAG  
GTTGGAAGAAGAAAGGATTTTTTGGTTAGGCGCATGGAATTGGCTAAGCATTTTATTCG  
AACAAATATAGAACCAGAATGGATGGTTTTATGTCTATTACCGGTTCTTCTCCCGAGTT  
GAGACCGATCATTAGATAGATGGGGGTAAACTAATGAGCTCGGATATTAATGAACTCT  
ATAGAAGAGTTATTTATCGGAACAATACTCTTATCGATCTCTTAACAACAAGTAGATCTA  
CGCCAGGGGAATTAGTAATGTGTCAGGAGAAATTGGTACAAGAAGCTGTGGATACACT  
TCTTGATAATGGAATCCGCGGACAACCAATGAGGGACGGTCATAATAAGGTTTACAAGT  
CGTTTTTCAGATGTAATTGAAGGCAAAGAGGGAAAGATTCGTGAGACTCTGCTTGCCAA  
ACGGGTCGATTATTCGGGGCGTTCTGTCAATTGTCGTAGGTCCTTCACTTTCATTACATCG  
ATGTGGATTGCCTCGCGAAATAGCAATAGAGCTTTTCCAGACATTTGTAATTCGCGGTTT  
AATTAGACAACATTTTGTTCGAATATAGGAGTTGCTAAGAGTAAAATTCGGGAAAAAG  
AGCCGGTTGTATGGGAAATACTTCATGAAGTTATGCAAGGGCATCCCGTATTGCTGAAT  
AGGGCGCCTACTCTGCATAGATTAGGCATACAGGCGTTCCAACCCATTTTAGTAGAAGG  
ACATGCTATTTGTTTACATCCATTAGTTTGTAAAGGATTCAATGCAGACTTTGATGGTGA  
TCAAATGGCTGTTTCATGTACCCTTATCTTTGGAGGCTCAAGCGGAGGCGCGTTTACTTA  
TGTTTTCTCATATGAACCTCTTATCTCCAGCTATTGGAGATCCTATTTCCGTACCAACTCA  
AGATATGCTTATTGGGCTCTATGTATTAACGAGTGGAAATCGTCGAGGTATTTGTGCAAA  
TAGGTATAATCCATGTAATCGCAGAAAT-----TATCAAATAAAAAGAATTGACGATAAT  
AACTATAAATATACGAAAGAA---GAACCTTTTTTTTTGTAATTCCTATGATGCAATTGGAG  
CTTATCGGCAGAAAAGAATCAATTTAGATAGCCCTTTGTGGCTCCGGTGGCGACTAGAT  
CAACGC---GTTATTACTTCA-----AGAGAACTCCTATCGAAGTTCCTATGAATCTTTGG  
GTACCTATCATGAGATTTATGGGCACTATCTAATAGTAAGAAGTATAAAAAAAGAAATTA  
TTTGTATATACGTTTCGAACCACAGTTGGTCATATTTCTCTTTATAGAGAAATCGAAGAGG  
CCATCCAAGGGTTTTGCCGAGCCTACTCATATGGTACC-----ATG  
GCAGAACGGGCCAATCTGGTCTTTCACAATAAAGTGATAGATGGAAGTCTATTAAC  
GACTTATTAGGAGATTAATAGATCACTTCGGAATGGCATATACATCACACATCCTGGATC  
AAGTAAAGACTCTGGGGTTCGACAAGCCACTGCTACATCCATTTTATTAGGAATTGAT  
GATCTTTTAAACAATACCTTCTAAGGGGTGGCTAGTCCAAGATGCTGAACAACAAAGTTT  
TATTTTGGAAAAACACCATCATTATGGGAATGTACACGCGGTAGAAAAATTACGCCAAT  
CTATTGAGATATGGTATGCTACAAGTGAATATTTGCGACAAGAAATGAATCCTAATTTTA  
GGATGACCGACCCTTTAATCCAGTACATATGATGTCTTTTTCGGGAGCTAGAGGAAAT  
GCATCCCAAGTACACCAATTAGTAGGTATGAGAGGATTAATGTCGGATCCACAAGGACA  
AATGATTGATTTACCTATTCAAAGCAATTTACGTGAAGGACTGTCTTTAACAGAATATAT  
CATTTCTTGTATGGAGCCCGAAAGGGAGTTGTGGATACTGCTGTACGAACATCGGATG  
CTGGATATCTTACACGCAGACTTGTGAAGTAGTTCAACACATTGTTGTACGTAGAACA  
GATTGTGGCACCATCCGAGGCATTTCTGTGAGTCCTCGAAATGGGATGATGCCG---GAA  
AGAATTTTTATACAAACATTGATTGGCCGTGTATTAGCAGACGATATATATATAGGCCCA  
CGATGCATTGCCGTTAGAAATCAAGATATTGGTATTGGACTTGTCAATCGATTACATAACC  
-----CTTCAAACACAACCAATATCTATACGAACCCCTTTACTTGTAAGAGTAC  
ATCTTGGATCTGCCGATTATGTTATGGCAGGAGCCCACTCATGGCGACCTGGTTCGAAT  
TGGGAGAAGCTGTGGGTATTATTGCGGGTCAATCTATTGGAGAACCGGGCACTCAACT

AACATTAAGAACTTTTCATACCGGTGGAGTATTCACAGGGGGTACTGCAGAACATGTAC  
GAGCCCCTTCTAATGGAAAAATCAAATTCAACGAGGATTTGGTTCATCCCACACGTACA  
CGTCATGGGCATCCTGCTTTTCTATGTTATATAGACTTGTATGTA ACTATTGAGAGTGAA  
AATATTATACATAACGTGACTATTCCACCCAAAAGTTTGATTTTAGTTCAAATGATCAA  
TACGTAGAATCAGAACAAGTGATTGCTGAGATTCGCGCGGGAGCATACTTTA---AAT  
TTTAAAGAGAGGGTTCGAAAACATATTTATTCTGACTCAGAGGGAGAA---ATGCACTGG  
AGTACTGATGTATAACCATGCGCCGGAATTTACATATAGTAATGTACATCTTTTACCAAAA  
ACAAGTCATTTGTGGATATTATCAGGAGGTTTCGTGCAGA-----TCCAGTGCAGTCCCTTT  
TTCCTCCACAAGGATCAAGATCAAACGAACGTTTCAT-----TCTCTTTCTGCTGAAGGA--  
-AGATATATTTATAGCCTT---TCAGTAAATAATGATCAA---GTGAAACACAAA-----AGTTT  
GAATCTTTCTGGTAAA---GAAAGTACAAGTCTGATTAT--TCAGAATTAATAGAATCAT  
ATATACGGGTCGTTGTAATCTCATATTTCTGCT---ATTCTCCATGATAATTCTGAT---TTTT  
TATTGACAAAGAGGCGAAGAAATAGATTTCATCATTCCATTCCAATCGATTCAAGAACGA  
GAGAAAGAACTAATGCCCGTCCCAGTATTTGATTGAAATACCCATAAAT-----GGTAT  
TTTTTCGTAGAAATAGTATTCTTGCTTATTTTCGATGATCCTCAATACAGAAGAAAGAGTTC  
GGGAATTAATAATGGAAGTGTAGGGTTCATTCAACCCTCAAAAAGAGGAT-----T  
TAATTGAGTATCGA---GGAGTTAAAGAATTTAAGCCAAAATACATGAAAGTAGATCGAT  
TTTTTTTTCATTTCCGAGGAAGTGCATATTTACCCGAGTCTTCTTCCATAATGGTACGGA  
ACAATAGTATCATTGGGAGAGATACACGAATCACTTTAAATACAAGAAGCCGAGTAGG  
CGGATTGGTTCGAATGGAGAGAAAAAAGAAATTGAACTAAAATCTTTTCTGGA  
GATATCCATTTTCTGGAGAGATGGATAAGATATTTGACACAGCGGCATCTTGATACCA  
CCGGGAACGGTAAAAAAA-----AATCCAAGGAATCAAAAAA-----TTGAAAAATTGG  
ATTTATGTCCAATGG-----ATCACACCCACCAAGAAAAAG-----TATTTTGTTTGGTTCG  
ACCCGTAATCATATATGAAATAACGGACGGTATAAATTTAGCAACACTTTTCCCCCAGGA  
TCCATTGCGGGAAAGGATAATCTAGAACTTAGAGTTGTAAATTATATATTTTACGGAAA  
TGGTAAACCAATTCGGGGAATTTCTGGCACAAGTATTCAACTAGTTCGGACCTGTTTAA  
TGTTGAACTGGGACCAAGACAAA-----AAAAATCTTCTATTGAAGAGGCCACGCT  
TCCTTTGTTGAAGTAAGTGCAAATGGTCTGATTCAATATTTCTTAAGAATCAACTTAGTG  
AAATCCCATACTTCGTATATCCGAAAAGGAATGATCCGTTAGGTTCCGGATTGATCTCT  
---GATAATAGGTCGGGTCGTACC-----AATCCATTTTATTCTATTTATTCCAAGGAAAGG---  
-----ATTCAACAATCACTTAGCCAAAATCAAGGAATTTTTCGTACGTTATTGAATAG  
A-----AGTAAAGAATCCCAATCTTTGATAATTTGTCATCATACAATTGTTTTCAAATGA  
GTCCA-----TTCAACGATGTAAAATATTACAAC-----GGGATAAAGAATCAGATCCTCT  
AATTACAATTAGGAATTCGTTAGGCCCTTTAGGAACA-----GCCTCTCAAATTGATAATTT  
T-----TATTCATTTTACCATTTAATAACT-----CATAATCAGATTTTCG---TTAACTAAATATT  
GCAACTCAAC-----AAT---TTAAAAGTACTTTTCAAGTATTA-----AAA---TATTATTTAAT  
GGATGAAAACGGAAGA-----ATTTATAATTCCGAT-----ACGAACATACTTTTGAATCCATT  
CAATTTGAATTGGCATTCTTCCACCATGATTATTGTGAGGAAACATACACAATAATTAG  
C---CTCGGGCAGTTTATTTGTGAAAATCTATGTATAGCCAAAAAAGGATCA-----CACC  
TAAAATCGGGTCAAGTTATAATTGTTCAA---ATTGACTCTGTAGTAATAAGATCGGGCGAA  
GCCCTATTTAGCCACTCCAGGAGCAACTGTTTCATGGACATTATGGAGAAATCCTTTCCG  
AAGGAGATACATTAGTTACATTTATATATGAAAAATCTAGATCTGGTGATATAACGCAGG  
GTCTTCCAAAAGTGGAAACAAGTCTTAGAGGTGCGTTTCGATTGATTCAATATCGATGAAC  
CTAGAAAAGAGAGTTGAGGGTGGAAACGAGTGTATAACAAGAATCTTGGAAATTCCTT

GGGGATTTTTGATTGGTGCTGAGCTAACTATAGTACAAAAGTCGTATCTCTTTGGTTAATA  
AGATCCAAAAGGTTTATAGATCCCAGGGGGTGCAGATCCATAATAGACATATAGAAATT  
ATTGTACGTCAAATAACATCAAAGTGTGGTTTCAGAA-----GATGGAATGTCTAAT  
GTTTTTTCACCCGGAGAATAATTGGATTGCTACGAGCGGAACGAACGGGGCGCGCTT  
TGGAAGAAGCGATTTGTTACCGAGTCATATTATTAGGAATAACGAAAGCATCTCTAAAT  
ACTCAAAGTTTCATATCCGAAGCGAGTTTTCAAGAACTGCTCGAGTTTTAGCAAAAAG  
CCGCCCTCCGGGGTCGTATCGATTGGTTGAAAGGTTTGAAGAGAACGTTGTTCTAGG  
GGGTATGATACCCGTTGGTACCGGATTCAAAGGATTAGTGCACCGTTCA-----AGGCAA  
CATAACAACATTCTTTGGAAACCAAAAAGAAGAAT-----TTATTCGAGGGGGAAATGA  
GA-----GATATTTTGTCCACCACAGAGAGTTATTTGGTTTTTGCATT-----  
-----ATGACAAGAAGATATTGGAACATCAATTTGGAAGA  
GATGATGGAAGCAGGAGTTCATTTTGGTCATGGTACTAGAAAATGGAATCCTAGAATGG  
CACCTTATATCTCTGCAAAGCGTAAAGGTATTCATATTATAAATCTTACTAGAACTGCTC  
GGTTTTTATCAGAAGCTTGTGATTTAGTTTTTGTATGCAGCAAGTAGGGGAAAACAATTC  
TTAATTGTTGGTACCAAAAATAAAGCAGCTGATTCAGTAGCACGGGCTGCAATAAAGG  
CTCGGTGTCATTATGTTAATAAAAAATGGCTCGGTGGTATGTTAACGAATTGGTATACTA  
CAGAAACGAGACTTCATAAGTTCAGGGACTTGAGAACGGAACAAAAGACGGGGAGA  
ATCAACCGTCTTCCGAAAAGGGATGCGGCTGTGTTGAAGAGACAATTATTTCACTTGC  
AAACATATCTGGGCGGAATTAATATATGACGGGGTTACCCGATATTGTAATAATCGTTG  
ATCAGCAAGAAGAATATACGGCTCTTCGAGAATGTATCACTTTGGGAATTCCAACGATT  
TGTTTAATCGATACAAATTGTGACCCGGATCTCGCAGATATTTTCGATTCCAGCGAATGAT  
GACGCTATAGCTTCAATCCGATTAATTCTTAACAAATTAGTATTTGCAATTTGTGAGGGT  
CGTTCT--AGCTATATACGAAATTCTATGGGACAAAAATAAATCCGCTTGGTTTCAGAC  
TTGGTGGAACCAAGGTCATCATTCTCTTTGGTTTTGCGCAACCAAAAATTAATTCAGAG  
GATCTACAAGAAGATCAAAAATACGAGATTGTATCAAAAATTATGTACAAAAGAATAT  
GAAAATATCCTCTAAT--GTCGAGGGAATTGCACGTATAGAGATTCAAAAAGAATCGA  
TTTGATTCAAGTCATAATCTATATGGGATTCCCAAGTTATTAATAGAAGACAGG-----  
--ACTAGAAGAATCGAAGAATTACAGATGAATGTCCAAAAAGAACTCAATTGTGTAAAC  
CGAAAATCAACATTGCTATTAGAAGAATTTCAAATCCCTATGGGCACCCCAATATTCTT  
GCAGAATTTATAGCCGGACAATTAAGAATAGAGTTTCATTTTCGCAAAGCAATGAAAA  
AAGCTATTGAATTAAGTGAACAGGCAGGTACAAAAGGAATTCAAGTACAAATTGCAGG  
GCGTATCGACGGAAAAGAAATTGCACGTGTTGAATGGATCAGAGAAGGTAGGGTTCCT  
CTACAAACCATTCGAGCTAAAATTGATTATTGTGCCTACGCAGTTCGAACTATCTATGGG  
GTATTAGGCATCAAAATTTGGATATTTGTAGACGAGGAAATGTCGCGTTACAGAGGACC  
TCGTTTTCAAAAAATCCGTCGTCTGGGGGCTTTACCAGGGCTAACTAGTAAAAAGCCT  
AGAGCCGGAAGCGATCTTAGAAACCAATCGCGCCCCGGCAA---AAATCTCAATATCGT  
ATTCGTTTTAGAAGAAAAACAAAATTGCGCTTTCATTATGGTCTTACAGAACAACAATT  
ACTTAAATACGTTCCGGATCGCCGGAAAAGCCAAAGGGTCAACAGGTCAGGTTTTACTA  
CAATTAATTGAAATGCGTTTAGATAACATCCTTTTTTCGATTAGGTATGGCTTCGACTATTC  
CTCAAGCCCGCCAATTAGTTAACCACAGACATATTTTAGTTAATGGTCGTATAGTAGATA  
TACCAAGTTATCGCTGCAAAACCCGAGATATTATTACAGTGAGGGATGAGCAAAAATCC  
AGGGCTCTGATTCAAAATTATCTTGATTCACCCCCCGT--GAGGAATTACCAAAACATT  
TGAATCTTACCCATTCAA-----TATGAAGGATTAGTCAATCAAATAATAGATAGTAAAT  
GGGTCGGTTTTGAAAATAAACGAATTGCTAGTTGTAGAATATTACTCTCGTCAGACTATG



TCACGTCGAGGTACTGCAGAAGAAAAAACTGCAAAATCCGATCCAATTTATCGTAATC  
GATTAGTTAACATGTTGGTTAACCGTATTCTGAAACACGGAAAAAAATCATTGGCTTAT  
CAAATTATCTATCGAGCCATGAAAAAGATTCAACAAAAGACAGAAACAAATCCACTAT  
CTGTTTTACGTCAAGCAATACGTGGAGTAACTCCCGATATAGCAGTAAAAGCAAGACG  
TGTAGGCGGATCGACTCATCAAGTTCCCATGAAATAGGATCCACACAAGGAAAAGCA  
CTTGCCATTCGTTGGTTATTAGGGGCATCTCGAAAACGTCCAGGTCGAAATATGGTTTT  
CAAATTAAGTTCCGAATTAGTGGATGCTGCCAACGGGAGTGGCGATGCCATACGCAA  
AAGGAAGAGACTCATAGAATGGCAGAGGCAAATAGAGCTTTTGCACATTTTCGTATGA  
GTAAAGACACTATTGCTGACATAATAACCGCTATACGAAATGCTGACATGAATAAAAA  
AGAACAGTTCGAATACCATCTACTAACACCACTGAAAATATTGTTAAAATCCTTTTACA  
AGAAGTTTTATTGAAAACGTGAGAAAACATCAGGAAAGCAATAAATATTTTTTGGTTT  
TAACACTACGACATAGAAGA-----AATAGAAAAGGATCGTATAGAACT--GTT-----TTAA  
ATTTAAAACGGATCAGTCGACCCGGTTTACGAATATATTCTAACTATCAAAAAATTCCTA  
GAATTTTAGGCGGAATGGGGATTGTAATTTCTTACTTCTCGAGGTATAATGACAGACC  
GAAGGGCTCGAATAGAAGGAATCGGCGGAGAAATTTGTGTTATATATGGATGGCAA  
ACCTATAACCAAAAATTTGGTTCACGTAGAAATAGACGTATTGGTTCACGT---AATGCGCGT  
AGAGTACCAAAGGGAGTTATTCATGTTCAAGCAAGTTTCAATAATACGATTGTGACTGT  
TACAGATGTGCGGGGTCGAGTAATTTCTTGGTCTCCGCCGGGGCTTGTGGATTCAAG  
GGTACAAGAAGAGGTACACCATTTGCCGCTCAAACCGCAGCAGGAAATGCTATTAGGA  
CAGTAGTGGATCAAGGTATGCAACGAGCAGAAGTCATGATAAAAGGCCCGGGTCTCGG  
AAGAGATGCGGCATTAAGAGCTATTTCGTAGAAAGTGGTATACTATTAAGTTTCATACGCG  
ATGTAACCCCTATGCCACATAATGGCTGTAGGCCCCCTAAAAAAAGGCGTGTGATGCCA  
ACTATTAACAACCTATTAGAAACACAAGACAGCCAATCAGAAATGTCACGAAATCCC  
CCGCTCTTGGGGGATGTCCTCAACGACGAGGAACATGTACTAGGGTGTATACTATCACC  
CCCAAAAACCAAACTCTGCCTTACGTAAAGTTGCCAGAGTACGCTTAACCTCTGGAT  
TTGAAATCACTGCTTATATACCTGGTATTGGCCATAATTTACAAGAACATTCTGTAGTCTT  
AGTAAGAGGGGGAAGGGTTAAGGATTTACCCGGTGTGAGATATCACATTGTTTCGAGGA  
ACCCTAGATGCTGTCGGAGTAAAGGATCGTCAACAAGGGCGTTCTAAATATGGGGTCA  
AAAAGCCAAAATGGCAAGAAAAAGTTTGATTACGCGGGAGAAGAAGAGACAAAAA  
TTGGAATAAATATCATTGATTTCGTGATCCTCAAAAAAAGAAATAAGC-----AAA  
GTTCCCTCGTTGAGCGAGAAATGGGAAATTCATGGAAAGTTACAATCCCCACCACGTA  
ATAGTGCACCTACACGCCTTCATCGACGTTGTTTTTCGACCGGAAGACCGAGAGCTAA  
CTATCGAGACTTTGGGTATCCGGACACATACTTCGTGAAATGGTTCATGCATGTTTGT  
GCCCCGGGCAACAAGATCAAGTTGGATGGTAAAAAATTCATTCATCTCAGCTATTTTAC  
AAGAAGAAAAAGACGAAAACAGA-----GGATCTGCTGAATTTCAAATAGTTAGTTTAC  
CAATAGGATACGAAGACTTACTTCACATTTAGAATTACACAAAAAAGACTATTTATCTC  
AGAGAGGTTTACGTAAAATTTCTGGGAAAACGCCAACGACTGCTGTCTTATTTGTCAA  
GAAAAATAGAATATGTTATAAAGAATTAATTAATCGGTTGGATATTCGGGAGTCAAAAA  
CCCGT-----ATGGTAAAACCTTCGTTTAAAACGATGTGGTAGAAAGCAACGAGCCATTTAT  
CGAATCGTTGCAATTGATGTTTCGATCCCGACGAGAGGGAAGAGATCTTCGTAAAGTGG  
GTTTTTATGATCCGATAAAGAATCAAATCTATTTAAATGTTCTCTGCTATTCTATATTTCTT  
GAAAAAGGTGCTCAACCTACAGGAACTGTTTCATGATATTTCAAAAAAGGCGGGGGTTT  
TTACGGAGCTTCGCTTTAATCAACAAACAAAATTCATATGGATAAATCCAAGCGAATC  
CTTCTTAAATCCAAGCGATCTTTTCGTAGGCGTTTGCCTCCGATCCAATCGGGGGATCG

AATTGATTATAGAAACATGAGTTTAATTAGTTCGATTTATTAGCGAACAAAGGAAAAATATT  
ATCTAGACGGGTAAATAGGTTGACCTTAAAACAACAACGATTAATTACTATTGCTATAA  
ACAAGCTCGTATTTTATCTCTGTTACCTTTTCTTAATAAF-----AAACAATTTGAAAGA  
AGCGAG---TCAACTCGTAAGAAAAAAAAAAAAAAAAAATTGGAGAAGAAGTGACACGTTTAC  
TAAAAAAAAAATCCTTTTGTAGCGAATCATTATTAAGAAAAATAAATACACTTAACACA  
AAAGCAGAAAAAGAAATAATAGTAACCTGGTCCCGAGCGTCTACCATATACCTACAAT  
GATCGGGCATACTATTGCTATCCATAATGGAAAGGAGCATTTCCTATT-----  
-----ATGATTTTAAAATCTTTTATACTA  
GGTAATCTAGTATCCTTATGCATGAAGATAATCAATTCGGTCGTTGTGGTTCGGACTCTAT  
TATGGATTTTTGACCACATTCTCCATAGGGCCCTCTTATCTCTTCCCTTCTCCGAGCTCGG  
GTTATGGAAGAAGGAGAAGAAGGAACCGAGAAGAAAGTATCAGCAACAACCGGTTTT  
ATTACGGGACAGCTCATGATGTTTATATCGATCTATTATGTGCCTCTGCATCTAGCATTGG  
GTAGACCTCATACAATAACTGTCTAGCTCTACCGTATCTTTGTTTCATTTCTTCTGGA  
ACAATCACAAACTTTTTTGTATTATGGATCTACTACCAGAAATCAATGCGTAATCTTA  
GCATTCAATGTTTATTCTGAATAATCTCATTTTTCAATTATTCAACCATTTCATTTTACCA  
AGTTCAATGTTAGTCAGATTAGTCAACATTTATATGTTTCGATGCAACAACAAGATGTTA  
TTTGTAAACAAGTAGTTTTGTTGGTTGGTTAATTGGTCACATTTTATTTCATGAAATGGGTT  
GGATTGGTATTAGGCTGGATACAGCAAAATAATTCTATTAGATCT---ATTAGATCTAATAA  
GTACCTTGTGTCAGAATTGAGAAATTCTATGGCTCGAATCTTTAGTATTCTCTTATTATT  
ACCAGTGTCTACTATTTAGGCAGAATACCGTCACCCATTGTTACTAAGAACTGAAAGA  
AACCGAAGAAGATAAACCTATTGTGACTATTCTTTTCGATTATAAACGGTGGAAATCGCC  
CATTCGGTATATAAAAAACAATCGATTTGAAAATTATGTAAGAAATGAAATGTCACAAT  
ATTTTTTTTATACATGTCAAAGTGATGGAAAAGAAAGAAATATCTTTTACGTACCCCCCA  
GTTTGGCAACCTTTTTTGAATGATAAAAAGTAAAATGTCTCTGTTTCAGAAAAGAAAA  
ATTACCTTCTAATGAATTTTATAATCAGTGGAGTTATAGGAATGAACATAAAAAGAAAA  
AGCTAAACAATAAATTTTTAAATAGAGTAAAAGCTCTCGACAAAACCTAATTGTTCTG  
AATGTACTCGAAAAAGAAGACTAGATTGTGTAATAATAAGACTAAAAAGAATACTTAAC  
AAAAATATATGATCCTTTCTTGAATGGACCCTACCGGGGACGGATCAAAAAATTGTTTA  
CACCTATAGAAAGGGTTTGTATAAATAAAATTCATGGTATCCTTTACTTAGAATTTGAAC  
AAAAAGTTCCGAACGATAAATCTATTGAAATAAAAGAAATTAATAAAAGAGTTCCCTCG  
GTGGTCATACAAATTAATCGATTTAGAACAACAAGAGGGAGAAGAGATTCGTTCAAGA  
AAAGCCAAACGCGTAGTAATTTTACTGATGCTTTAATACGTTATTCAACAACAACCGGA  
CTTTCGTCGAGACATAATCAAAGGCTCTATGCGCGCTCAAAGGCGTAAAACAGTTACTT  
GGAAACTTTTTCAAGCAAATGTGCATTCCCCCTTTTTTTGGACCGAATAGACAAATCT-  
-----TTTTTTTTTTTTGATATTCGGCGCGTATGAAAATAATTTTTTAGAAATAGAAAGGA  
GAAAGCACGTATAGAAATAGCAGAAGCCTGGGATAGTATTTTACTTGCTCAAGTACTAA  
GAGGTTTTTTGTTAGTAACCAATCAATTCTTAGAAAATATATTATATTACCTTCATTGAT  
AATAGCTAAAAATATAGTCCGTATACTATTATTTCAATTTCTGAATGGTCTGAGGATTA  
AAGGATTGGAATAGAGAAATGCATATTAATGTACCTATAATGGCGTTCAATTATCAGAA  
AAAGAATTTCCAAAAACTGGTTAACAGACGGTATTCAGATCAAGATCCTATTTCCCTTT  
TAGTCTTAAACCTTGGCACAGATCTAAAAAGGATCAAAAAAATGATTTTTGCTTTTTAA  
CAGTTTTTGAATGGAACTGAACTACCCTTTGGTTCTCCAGAAAAAACTTTCATTT  
TTTTGAACCATTTTTAAAGAACTAAAAAAAAAAATTTAAAAAATTGAAAAAGAAATGTT  
TTATAATT--CTAAGAATTTTAAAGAACAACAAAAAAATTTGTTTCTAAATGTCTCAAAAGA

AACAAAAAACGGATCATTAAAAGCATTCTG-----TTTATAAAAGAAATAATAAAAGAA  
CTCTCAAAAATAAAC---TCGATAATTGGTAATCGGATGATTCATGAATCG---ATTCAAATT  
ATATCTCAGGGTTGGACAAAC---TCATTAACAGAAAAAAATGCAAGATCTAACTGAT  
AGAACAATAACAATCATAAATCAAATAGAAAAAATTACAAAAGAAAATAAAAAAACA  
AA-----ATAAGTTATGATGATAAAGGATCAGAATCACAAAAAATATTTGGCAGATATTA  
AAA-----AATGTTAGATTAACCCGTAAGTCACATTATTTTATAAAATATTTTCATTGAAAGG  
ATATACATAGATATCTTTCTATGTATCATTAAATATTCTTAGCATCAATACACAACCT-----  
-----TGCGACTTATCTTACTTTTCACAAGCATATGTATTTTACAAATTATCACAACT--CT  
TATTAACCTTATATAAGTTAAAATCTGTATTTCAATATATGTCTCTTTTTCTTAAGAATGAAA  
TAAAGGATTTTTTTACACAAGAACTATTTAATTCCGAATTAAGACATAAGAATCTTCGC--  
-TATGGAATGAATCAATGGACAAATTGGTTAAGGAGTCGGTATCAATTTGATGTATCTCA  
TATTAATGGTCTAGATTAGTACCACAAAAATGGCGAAATATATTCAATCAACACTGTAT  
GGCTCAAAATAAATGTGATTTATATGAA-----AAGGATCGATTAATTAACCTACGAAA  
AAAAT--AATTTTAAAAACAATATAGATATGATATTTTAGCATATAAATCTATTAATGATG  
ATATTAGAGATCCGGATAGAAAATATTTTGATTGGAGAATTTCCATTTTTGTCTTAACT  
TTTTGATTGGATGGGGATGAATGAAGAAATACTAAGTTGTTGGTTCTTCCCAGAATTGG  
GGATACTTTATAATACGTATAAAATTAACCGTGGGTTATACCAATTAATTAAGTATTTT  
AAATATCAAT-----ACAAAAGGGGAGTTTGATTTCTTCTTAAAAAGGTATTTGCATTTTCA  
ATTGAGATGGGAT-----AATAAAAAATAAGCAATAACATCAAAGTATATTGTCTCCTG  
CTTAGACTGATAAATCCAAGAGAAATTAATCTATATCCTCTATTCAAAGAGGCGAAATGAG  
TCCGGATATTCTGATGATTCAGAAAGATTTAACTCTTACAGAATTGATTAAGGGGAA  
TTTTGATTATTGAACCAATTCGTCTATCTATAAAAAATGATGGAAAATTTATTATGTATCA  
AACCATCGGTATTTTCATTAGTTCATAAAGCAAACACCATTATGAT--TTGTTTGTTCCTG  
AAAATATTTTATCACCTAGACGTCGTAGAGAATTTAGAATTCTAATTTGTTTCAGATTTCT  
TTTGGCCCAATTATCGATTAGAAGATTTGGCTTGTATGAATCGTTATTGGTTTAATACCAA  
TAATGGCAGTCGTTTCAGTATGGTAAGGGTACATATGTATCCGATGAAAGGACATCAATT  
CAAATCCTGGATTTTCGAATTGAGAGAGATATTGAGAGAGATCAAGAATTCTCACTATT  
TCTTAGATTCATGGACCAAATTCATTCAGTGGGATCTTTTATTACATTTTTTTCCATCA  
AGAACGTTTTATAAACTCTTGGACTCCCGAATTTGGAGTATCCTACTTTCA---CGCAAT  
TCACATTTACAGGGTTCAACAAGCAATCGATATTTTC-----ACGATCAAGGGTGTAGTA  
CTATTTGTAGTAGCG---GTCCTTATATATCGT-----ATTAACAATCGAAAGATGGTCGA  
AAGAAAAATCTCTATTTGACAGGGCTTCTTCTT-----ATACCTATGAATTTTCATT  
GGACCCAGAAATGATACATTGGAAGAATCTTTT--GGGTCTTCCAATATCAATAGGTTGA  
TTGTTTCG---CTCCTGTATCTTCCAAAAGGAAAAAAGATCTCTGAGAGCTGTTTCCTGG  
ATCCGAAAGAGAGTACTTGGGTTCTCCCAATAACT-----AAAAAGTGTATCATGCCT  
GAATCTAACTGGGGTTCGTGGTGGTGGAGGAACTGGATCGGAAAAAAGAGG-----GCT  
TCTAGTTGTAAGATATCTAAT-----GAAACCGTCGCTGGAATTGAGATCTCATTCAAAG  
AGAAAGATATAAAA---TATCTGGAGTTTCTTTTTGTATATTATATGGAT-----GATCCGATC  
CGAAAGGACCATGATTGGGAATTGTTTGATCGTCTTTCTCCGAGGAAGAGGCGAAACA  
TAATCAACTTG-----AATTCGGGACAGCTATTCGAAATCTTAGTGAAAGACTGGATTTGT  
TATCTCATGTTTGTCTTTTCGTGAAAAAATACCAGTTGAAGCGGAGGGT--TTCTCAAAC  
ACAAGGA---GCTGGGTCAACCATTCAATCAAATGAAATTGAGCATGTTTCCCAT-----C  
TCTTCTCGAGAAACAAGTGTGCTATG-----CAAATTGTGCTCAATTTTCATATGCGGCAA  
TTCTCCAAGATCTCTTCTTT-----AGTTGGGGGAAA---AATCCGCACGAATCGGATTT

TTTGAGGAAC---ATATCGAGAGAGAAT-----TGGTTAGACAATGTGTGGTTGTAAACAA  
GGATCGG-----TTTTTTAGC-----AAGATACGGAATGTATCGTCAAATATTCAATATGATT  
CC-----ACAAGA-----TCTAGTTTCGTTCAAGTAACGGATTCTAGCCAATTGAAAGGAT  
CCTCT--GATCAATCCAGAGATCATTTCGATTCATTAGT-----AATGAGGATTCAGA  
A-----TATCACACATTGATCAATCAAAGAGAGATTCAACA  
AAAAGAAAGATCGATTCTT--TGGGAT-----CCTTCTTTTCTTCAAACGGAACGAACAGA  
GATAGAATCAGAC-----CGATTTCTAAA-----TGCCTTTCTGGATATTCC-----TCAATGTC  
CCGGCTATTCACG--GAACGTGAGAAGCAGATGAATAAGCACCTGCTTCCGGAAGAAA  
TCGAAGAATTT-----CTTGGGAATCCTACAAGATCCATTCGTTCTTTTTTCTCTGACAGAT  
GG-----TCAGAACTTCAT--CTGGGTTTCGAATCCTACTGAGAGGTCCACTAGAGATCAG--  
-----AAATTGTTGAAGAAAGAACAAGATGTTTCT--TTTGTCCCTTCCAGGCGATCGG  
AA-----AATAAAGAAATAGTTAATATATTCAAGATAATTACGTATTTACAAAAT-----A  
CCGTCTCAATTCATCCTATTTTCATCAGATCCGGGATGTGATATGGTTCCG---AAGGATGA  
ACTGGAT--ATGGACAGTTCCAATAAGATTTTCATTCTTGAACAAAATCCATTTTTTGT  
TTA-----TTTCATCTATTCCATGACCGGAACAGGGGGGATACACGTTA-----CACCACGA  
TTTTGAATCAGAA-----GAGAGATTTCAAGAAATGGCAGATCTATTCCTCTATCAATA  
CCGAGCCG--GATCTGGTGTATCATAAGGGATTTGCCTTTTCTATTGGA-----TTGGATC  
AAAAACAA-----TTCTTGAATGAGGTATTCAACTCCAGGGATGAATCGAAAAAGAAATC  
TTTA-----TTGGTTCTACCTCCTATTTTTTAT-----GAAGAGAATGAATCTTTTTATCGAA  
GGATCAGAAAAAATGGGTCCG---ACCTCCTGCGGGAATGATTTGGAAGATCCAAA  
CCAAAATAGTGGTATTTGCTAGCAACAACATAATGGAGGCAGTCAATCAATATAGATT  
GATCCGAAATCTGATTCAAATCCAATATAGCACCTATGGG-----TACATAAGAAATGTATT  
GAATCGATTCTTTTTAATGAAT-----AGATCCGATCGCAACTTCGAATATGGAATTCAA-  
-----AGGGATCAAATAGGAAATGATACTCTGAATCATAGAACTATAATGAAATATACGAT  
CAACCAACATTTATCAAATTTGAAAAAG---AGTCAGAAGAAATGGTTTCGATCCT-----CT  
TATTTTTATTTCTCGAACCGAGAGATCCGTGAATCGGGATCCTAATGCATATAGATACAA  
ATGGTCCAATGGGAGCAAGAATTTACAGGAACATTTGGAACATTTTCATTTCTGAGCAG  
AAGAGCCGTTTT--CATTTTCAAGTAGTGTTCGATCGATTACGTATTAATCAATATTCGAT  
TGATTGGTCTGAGGTTATCGACAAAAAAGATTTGTCTAAGTCACTTCCTTTCTTTTTGTC  
CAAGTTACTTCTT-----TTTTTGTCC-----AAGTTTCTTCTCTT  
TTTGTCTAACTCACTTCT--TTTTTCTTTGTGAGTTTCGGGAATATCCCCATTCATAGGT  
CCGAG--ATCCACATCTAT--GAATTGAAAGGTCCGAATGATCAACTCTGCAATCAGTTG  
TTAGAATCAATAGGTCTTCAAATCGTTCATTTCAAAAATTGAAACCCCTC-----TTATTG  
GAT-----GATCATGAGACTTCC--CAAAAATCTAAATCCTTGATCAATGGAGGAACAAT  
ATCACCATTTTTGTTCAATAAGATACCA---AAGTGG---ATGATTGACTCATTCCATACTAG  
A-----AATAATCGCAGGAAATCTTTTGATAACATGGATTCCTATTTCTCAATGATATCCCA  
CGATCAAGACAATTGGCTGAATCCCGTGAACCATTTTCATAGAAGTTCATTGATATCTT  
CTTTTTATAAAGCAAATCGACTTCGATTCTTGAATAATCCACATCACTTCTGCTTCTAT---  
--TGTAACAAAGGATTCCCTTTT-----TAT--GTGGAAAAGGCCGTATCAATAATTATGA  
T-----TTTACGTATGGA---CAATTCCTCAATATCTTGTTCATTTCGCAAGAAA---ATATTTCT  
TTGTGCGGCGGTAAA-----AAAAAATATGCTTTTTTTGGAG---AGAGATACTATTTACCA  
ATCGAGTTACAGGTGTCTAACATATTCATACCTAACGATTTTCCACAAAATGGTGACGA  
AAGG--TATAACTTGACAAATCT-----TTCCATTTTCCAATTCGATCCGATCCATTCGTT  
CGT-----AGAGCTATTTACTCGATCGCAGACATTTCTGGAACACTTCTAACAGAGGGACA

AATAGTAAATTTTGAAGAAGAACTTATTGTCAACCTCTTTCAGATATGAATCTGTCTGATTC  
AGAAGGGAAGAAGAACTTGCATCAGTATCTCAAT-----TTCAATTCAAACATGGGTTTGATTC  
ACACTCCATGTTCTGAGAAATATTTACCATCCGAAAAG-----AGGAAAAA-----  
-----CGGGTCTTTGTCTAAAG-----AAATGCCTTGAGAAAGGGCAGATGTATAGAACCT  
TTCAACGAGATAGTGCTTTTTCAACTCTCTCAAATGGAATATATTCCAAACATATATGC  
CATGGTTCCTTACTTCGACAGGATACAAATATCTAAATTTTATATTTTATAGATACTTTTTTC  
AGAC---CTATTGCCGATACTAAGTAGCAGC-----CAAAAATTTGTATCCATTTTTTCATGATA  
TTATGCATGGATCAGATATATCATGGCGAATTCCTTCAGAAAAAATTG-----TGTC  
TTCCACAATGGAAT---CTGATAAGTGATATTTTCGAGTAAGTGTTTACATAAT-----CTTCTT  
CCGTCCGAAGAAATGATTCATCGAAATAATGAGTCA-----TCATTGATATCGACACATCT  
GAGATCGCCAAATGTTCTGGGAGTTC---CTCTATTCAATCCTTTTCCTTCTTCTTGTGCT  
GGATAT---CTCGTTCGTACACATCTTCTCTTTGTTTCTCGA-----GCCTATAGTGAGTTACA  
GACAGAGTTCGAAAGGGTCAAATCTTTGATGATTCATCATAATGATTGAGTTGCGAA  
AACTTCTGGATAGGTATCCTACATCTGAACTGAATTCTTTCTGGTTAAAGAATCTCTTTC  
TAGTTGCTCGGGAACAATTAGGAGATTCTCTAGAAGAAATACGGGGTTCGCTTCTGTC  
GGCAACATGCTATGGGGTGGTGGTCCC-----GCTTATGGG---GTCAAATCAATACG  
TTCTAAGAAGAAATATTTGAATATCAATCTCATCGATATCATA-----AGTATCATACCA  
AATCCCATCAATCGAATCGCTTTTTTCGAGAAATACGAGACATCTAAGTCATACAAGTAA  
AGAGATCTATTCAATTGATAAGAAAAAGAAAAACGTGAACGGTGATTGGATTGATGAT  
AAAATAGAATCCTGGGTCTCGAACAGTGATTTCGATTGATGATAAAGAAAGAGAATTCTT  
GGTTCAGTTCTCC-----ACCTTAACGACA-----GAAAAAAGGATTGATCAAATTCTATTGA  
GTCTGACT---CATAGTGATCATTTATCA-----AAGAATGACTCTGGTTATCAAATGA  
TTGAACAACCGGGAGCAATTTACTTACGATACTTAGTTGACATTCAT-----AAAAAGTAT  
CTAATGAATTATGAGTTCAATACATCCTGTTTAGCAGAAAGACGGATATTCCTTGCTCAT  
TATCAGACAATCACTTAT-----TCACAAACCTCCTGTGGGGCTAATAGTTTTTCATTTCCCA  
TCTCATGGA-----AAACCCTTTTCGCTCCGCTTAGCCCTATCCCCCTCT---AGGGGTATT  
TTAGTGATAGGTTCTCTAGGAACTGGACGATCCTATTTGGTCAAATACCTAGCGACAAA  
CTCCTATGTTCTTTTCATTACAGTATTTCTGAACAAGTTCCTGGATAACAAGCCCAAGG  
GTTTTCTTGTGAT-----GATAGTGAC-----GATATTGATGATAGCGACGAT  
ATTGATGATAGT-----GACGACCGTGACTTTTGATAC  
GGAGCTAGAGCTTCTAACTATGATGAATGCGCTA-----ACTATGGGTATGATGCCG-----  
---GAAATAGACCGATTTTATATCACCTTCAATTCGAATTAGCAAAGCAATGTCTCCTT  
GCATAATATGGATTCCAAACATTCATGATCTGGATGTGAATGAGTCGAATTACTTATCCC  
TCGGTCTATTAGTGAACCTATCTCTCC-----AGGGATTGTGAAAGATGTTCC---ACTAGA  
AATATTCTTGTTATTGCTTCGACTCATATTCCCAAAAAGTGGATCCCGCTCTAATAGCT  
CCGAATAAATTAATAACATGCATTAAGATACGAAGGCTTCTTATTCCACAACAACGAAA  
GCACTTTTTCACTCTTTCATATACTAGGGGATTTCACTTGGAAAAGAAAATGTTCCATAC  
T-----AATGGATTCCGGTCCATAACCATGGGTTCCAATGTACGAGATCTTGTAGCACTTAC  
CAATGAGGCCCTATCGATTAGTATTACACAGAAGAAATCAATTATAGACACTAATATAAT  
TAGATCTGCTCTTCATAGACAAACTTGGGATTTGCGA-----TCCCAAGTAAGATCGGTT  
CAGGATCATGGGATCCTTTTCTATCAGATAGGAAGGGCTGTTGCACAAAATGTACTTCT  
AAGTAATTGCTCCATAGATCCTATATCTATCTATATGAAGAAGAAA-----TCATGTAACGA  
AGGGGATTCTTATTTGTACAAATGGTACTTCGAACTTGGAACGAGCATGAAGAAATTA  
CGATACTTCTTTATCTTTTGAGTTGTTCTGCCGGATCGGTGCTCAAGACCTTTGGTCTC

TACCC-----CGACCCGATGAAAAA---AATGGGATCACTTCTTATGGACTCGTTGAGAATG  
ATTCT--GATCTAGTTCATGGCCTATTAGAAGTAGAAGGCGCTCCGGTGGGA-----TCCTC  
ACGGACAGAAAAAGATTGCAGTCAGTTTGATAATGAT-----CGAGTGACATTGCTTCTTC  
GGCCCGAACCAAGGAAT--CCCTTAGATATGATGCAAAATGGATCTTGTCTATCGTTGA  
TCAGAGATTTCTCTATGAACAA-----TACGAATCGGAGTTTGAAGAA---GGGGAAGGA---  
---GTCTCGACCCGCAA-----CGGATAGAGGAGGAT-----TTATTCAATCAC-----  
ATAGTTTGGGCTCCT-----AGAATATGGCGCCCT-----TGGGGCTTCTATTTGATTGTAT  
CGAAAGGCCCAATGAATTGGGATTTCCC---TATTGGGTCAGGTCATTTTCGGGGCAAG----  
----CGGATCATTTATGATGAAGAGGATGGGCTTCAAGAGAATGATTTCGGAGTTCTTGCA  
GAGTGAACCATGCAGTACCAGACACGAGATAGATCTTCCAAAGAACAAGGCTTTTTT  
CGAATAAGCCAATTCATTTGGGACCCTGCGGATCCACTCTTTTTTCTATTCAA---GATC  
AGCCTTTTATCTCTGTGTTTTACATCGAGAATTCTTTGCAGATGAAGAGATGTCAAAG  
GGGCTTCTTACTTCCCAAACAGATCTTCTACATCTATATATAAACGCTGGTTTTATC-----  
AAGAATACGCAAGAAAGGTACTTTCGAATTGTTGATTCATCGCCAGAAATGGCTTAGA---  
-----ACCAATAGTTCATTATCT-----AATGGATTTTCCGTTCTAAT-----ACTCCATCCGAG  
AGTTATCAGTATTTATCAAAGCTGTTCCCTATCTAAC---GGAACGCTATTGGATCAAATGA  
CAAAGACATTGTTGAGAAAAAGATGGCTTTTCCCGGATGAAATGAAAATTGGATTC-----  
-ATG-----ATGTCTAGATCTGGG---ATAAATGGAAATTTTATTGATAAAAC  
CTTTTCAATTGTAGCCAATATCTTATTACGAATAATCCGACAACCTTCGGGAGAAAAAG  
AGGCATTCACCTATTACAGAGATGGT-----ATGTCGGCTCAATCCGAAGGAAATTATGCG  
GAAGCTTTACAGAATTATTATGAAGCTATGCGACTAGAAATTGATCCTTATGATCGAAGT  
TATATACTCTATAACATAGGCCTTATCCACACAAGTAACGGGGAACATACGAAAGCTTT  
GGAATATTATTTTCGGGCCCTAGAGCGAAACCCATTCTTACCACAAGCTTTTAATAATAT  
GGCCGTTATCTGTCATTAC---CGGGGAGAACAGGCCGTTCAACAAGGGTATTCCGAAAT  
TGCGGAGGCTTGGTTCGATCAAGCCGCGAGTATTGGAACAAGCTATAGCGCTTACT  
CCTGGTAATTATATTGAAGCACAGAATTGGTTGAAGATTACGAGGCGTTTCGAA-----AT  
GAGTTGGCGATCAGAACGTATATGGATAGAACTTATAGCGGGGTCTCGAAAAACAAGT  
AATTTCTGCTGGGCCTTTATTCTTTTTTTAGGTTCAATTAGGGTTTTTATTGGTTGGAACGT  
CCAGTTATTTGGTAGGAATTTTATATCTTTATTTCTTCTCAGCAAATAATTTTTTTTCCA  
CAAGGGATCGTGATGTCTTTCTATGGGATCGCAGGTCTTTTTATTAGCTCTTATTTGTGG  
TGCACAATTTTCGTGGAATGTAGGTAGTGGTTATGATCGATTTCGATATAAAAGAGGGCGT  
AGTGTGATTTTTTCGTTGGGGATTTCTTGAAAAAATCGTCGCATATTCTCCGATTCCT  
TATGAAAGACATTCAGTCCATCAGAATAGAAATTAAGAAGGTATTTATGCTCGTCTGTG  
TCCTTTATATGGAATCAAAGGCCAGGGGCCATTCCCTTGACTCGTACTGATGAGAAT-  
--TTGACTCCACGAGAAATTGAGCAAAAAGCTGCTGAATTGGCCTATTTCTTGCGTGTAC  
CAATTGAAGTATTT

>Corynocarpus

ATGGAAAAAGGATGGTTAAATTCGATGTTGTCGCTAAGTAAATCAATTGATAGTCTTGG  
TCCTAGTGAAAATACCAGTGTAAGTGAAGGACCGATTATAAATGATATGGATAAAAACA  
TTCTAGTTATAGTACTGTTGATCATTTAGTTGGCGTCCGGGACATTCGGAATTTTCATAT  
CTGATGACACTTTTTTAGTTAGAGATAGTAATAGGGGCAGTTATTCATATATTTTGATAT  
TGAAAATCAAATTTTGAGATTGACAATGAGCAT-----TCTTTTGGAAAGTGAAGTAGAAA  
GTTCTTTTTATAGTTATCAACTCTAGTTATCTAAATAATGTATCTAAGAATGATGATTAC  
CACTATGATCATTACATGTATGATACTAAATATAGTTGGAATAATCACATTAATAGTTGCA

TTGACAGTTATCTTCGG-----TCTCAAATCTGTATTGATAGTTATATTTTTAAGTGGTAGCCA  
CAATTACAGTGACAGTTACATTTATAGTTTCATTTGTGGTAACGAGAGTTCCAGTATAAG  
AACTAGCACGGATGTTAGTGATTTAACTAGAACAGAA---AGTTCT-----ATAACTCAA  
AATACAAGCATTGTGGGTTCAATGCGAAAATTGTTATGGATTAAATTATAAGAAATTTT  
TGAAATCAAAAATGAATATTTGTGAACAATGTGGATACCATTGAAAATGAGTAGTTCA  
GATAGAATCGAACTTTCGATCGATCCAGGTACGTGGAATCCGCTGAATGAAGACATGGT  
CTCTCTGGATCCCATTGAATTCATTTCGGAAGAGGAACCTTATAAAGAGCGTATTGATTC  
TTATCAAAGAAAGACAGGATTAAGTGAAGGCTGTTCAAACAGGCACAGGTCAATTAAC  
GGTATTCCCGTAGCAATTGGTGTATGGATTTTCAGTTTATGGGGGGTAGTATGGGATCT  
GTAGTAGGTGAGAAAATCACCCGTTTGATCGAATATGCTACCAATCCATTTTTACCTCTT  
ATTTTAGTGTGTGCTTCTGGAGGAGCACGCATGCAAGAAGGAAGTTTGAGCTTGATGC  
AAATGGCTAAAATATCTTCCGCTTTATATGATTATCAATCAAATAAAAAATTATTCTATGT  
ATCAATCCTTACATCTCCTACTACTGGCGGGGTGACAGCTAGTTTTGGTATGTTGGGGG  
ATATCATTATTGCCGAACCCAATGCCTACATTGCATTTGCGGGTAAAAGAGTAATTGAAC  
AAACATTGAATAAGACAGTACCTGAAGGTTCAACAAGCGGCTGAATATTTATTCCATAAG  
GGCTTATTCGATCCAATCGTACCACGTAATCCTTTAAAAGGTGTTTTGAGTGAGTTATTT  
CAGCTCCATGCTTTCTTTCTTTGAATCAAATTCAATCAAGATGGTAACCATTTCGAGC  
AGATGAAATTAGTAATATTATACGTGAACGTATTGAGCAATATAATAGAGAAGTCAAAT  
TGTAATAACCGGTACCGTACTTCAAGTAGGAGATGGCATTGCTCGTATTTATGGTCTTGA  
TGAAGTAATGGCAGGTGAATTAGTAGAATTTGAAGAGGGTACCATAGGCATTGCTCTGA  
ATTTGGAATCAAATAATGTTGGTGTGTATTAATGGGTGACGGTTTTGATGATACAAGAG  
GGAAGTTCTGTAAAAGCAACAGGAAGAATTGCTCAGATACCAGTAAGCGAGGCTTATT  
TAGGTGCTGTTATAAATGCCCTGGCTAAACCTATTGATGGTTCGAGGTGAAATTTACAGCT  
TCTGAATCTCGGTTAATTGAATCCCCGCTCCTGGTATTATTTTCGAGACGTTCCGTATAT  
GAGCCTCTTCAAACAGGACTTATTGCTATTGATTTCGATGATACCTATAGGACGTGGTCA  
GCGAGAATTAATTATTGGGGACAGGCAGACCGGTAAAACAGCAGTAGCCACAGATACA  
ATTCTCAATCAACAAGGGCAAATGTAATATGTGTTTATGTAGCTATAGGTCAAAAAGC  
ATCTTCTGTGGCTCAAGTAGTACTACTTTACAGGAAAGGGGAGCAATGGAATACACTA  
TTGTGGTAGCCGAAACGGCGGATTCTCCGGCTACATTACAATACCTTGCCCCTTATACA  
GGAGCAGCTTTGGCTGAATATTTTATGTACCGTAACCGGCACACTTTAATCATTATGAT  
GATCCCTCCAAACAAGCACAGGCTTATCGCCAAATGTCTCTTCTATTACGAAGACCGCC  
GGGCCGCGAAGCTTATCCAGGGGATGTTTTTTATTTGCATTCACGCCTTTTGGAAGAG  
CCGCTAAATCAAGTTCGAGTTTAGGTGAAGGAAGTATGACTGCTTTACCAATAGTTGAG  
ACCAATCGGGAGATGTTTCGGCTTATATTCTACTAATGTAATTTCCATTACCGATGGA  
CAAATATTCTTATCCGCCGATCTATTCAATGCTGGAATCAGACCTGCTATTAATGTGGGTA  
TTCCGCTCCAGAGTAGGATCCGCAGCTCAAATTAAGCCATGAAACAAGTAGCTGG  
CAAATCAAATTGGAATTGGCTCAATTTCGAGAATTAGAAGCCTTTGCGCAATTTCGCTT  
CTGATCTCGATAAAGCTACTCAGAATCAATTGGCAAGAGGTCAACGATTACGTGAGTTG  
CTCAAACAATCCCAATCAGCTCCTCTCACGGTGGAAGAACAATAATGACTATTTATAC  
CGAACGAATGGTTATCTTGATTCATTAGAAATTGGACAGGTAAGGAAATTTCTCGTTG  
AGTTACGTACTTACTTAAAAACGAATAAACCCAGTTCCAAGAAATCATATCTTCCACC  
AAGACATTAACCGAAGAAGCAGAAGCCCTTTTGAAAGAAGCTATTCAGGAACAGATG  
GAACGTTTTCTACTTCAAGAACAAGTAATGAGAATAAATCCTACTACTTCCGGTCTGG  
GGTTTCCACGCTTGAAAAAAAGACTCGGGACGTATCGCTCAAATCATTGGTCCGGTA

CTGGATGTAGCTTTTCCCCGGGCAAATGCCTAATATTTACAACGCTCTGGTAGTTAA  
GGGTCGAGATACTGTCCGGTCAACAAATTAATGTGACTTGTGAAGTACAGCAATTATTAG  
GAAATAATCGAGTTAGAGCTGTAGCTATGAGTGCTACAGATGGTCTAATGAGAGGAATG  
GAAGTGATTGACACGGGAGCTCCTCTAAGTGTCCAGTTGGCGGAGCGACTCTAGGAC  
GAATTTTCAACGTGCTTGGAGAGCCTATTGATAATTTGGGTCCTGTAGATACTCGCACA  
ACATCTCTATTTCATAGATCTGCGCCTGCCTTTATACAGTTAGATACAAAATTATCTATTT  
TTGAAACAGGAATTAAGTAGTAGATCTTTTAGCCCCTTATCGCCGTGGAGGAAAAATA  
GGACTATTCGGGGGGGCTGGAGTGGGTAAAACAGTACTCATTATGGAATTGATCAACA  
ACATTGCCAAAGCTCATGGGGGTGTATCCGTATTTGGCGGAGTAGGTGAACGTACTCGT  
GAAGGAAATGATCTTTACATGGAAATGAAAGAATCCGGAGTAATTAATGAACAAAATAT  
TGCAGAATCAAAAGTGGCTCTAGTATATGGTCAGATGAATGAACCACCGGGAGCTCGT  
ATGAGAGTTGGTTAACTGCCCTAACTATGGCGGAATATTTCCGAGATGTTAATGAACA  
AGACGTGCTTCTATTTATCGACAATATCTTCCGTTTCGTCCAAGCGGGATCCGAAGTATC  
TGCCTTACTGGGTAGAATGCCTTCCGCTGTGGGTATCAACCCACTCTTAGTACCGAAA  
TGGGTTCTTTACAGGAAAGAATTACTTCTACCAAGGAAGGGTCCATAACTTCTATTCAA  
GCAGTTTATGTACCTGCGGACGATTTGACCGATCCTGCTCCTGCCACGACATTTGCACA  
TTTAGATGCTACTACCGTACTATCAAGAGGATTGGCTGCCAAAGGTATCTATCCGGCAGT  
AGATCCTTTAGATTCAACGTCAACTATGCTACAACCTCGGATCGTCCGGTGAAGAACATT  
ATGAAACTGCGCAAAGAGTTAAACAAACTTTACAACGTTACAAAGAACTTCAGGACAT  
TATAGCTATCCTTGGATTGGACGAATTATCCGAAGAGGATCGCTTAACCGTAGCAAGAG  
CACGAAAAATTGAGCGTTTCTTATCACAACCTTTTTTTCGTAGCAGAAGTATTTACTGGT  
TCCCCGGGAAATATGTTGGTCTAGCAGAAACAATTAGAGGGTTTAAATTAATCCTTTC  
CGGAGAATTAGATGGTCTTCCCTGAACAAGCCTTTTATTTGGTAGGTAACATCGATGAAG  
CTACTGCGAAGGCTACGAACTTAGAAATGGGGAGCAATTTGAAGAAAATGACCTTAAA  
TCTTTGTGTA CTGACCCCGAATCGAATTGTTTGGGATTCCGAAGTGAAAGAAATCATT  
TATCTACGAATAGTGGACAAATTGGTGTATTACCAATCACGCACCTATTGCCACAGCT  
GTAGATATAGGGATTTTGAGAATACGCCGTGATGACCAATGGTTAACGATGGCTCTGAT  
GGGTGGTTTTGCTAGAATAGGCAATAATGAGATCACTGTTTTAGTAAATGATGCGGAGA  
AGGGTAGTGACATTGATCCACAAGAAGCTCAGCAAACCTTTGAAATAGCGGAAGCTAA  
CTAAGTAAAGCTGAGGGCAAGAGACAAACAATTGAGGCAAATCTAGCTCTCAGACG  
AGCTAGGACACGAGTAGAGGCTATCAATGTGATTTTCGATGAAAAATGTAACCGATTCTT  
TCATTTCTTGGGTTACTGGCCATCCGCCGGGAGTTTCGGGTTTAAATACCGATATTTAG  
CAACAAATCCAATAAATCTAAGTGTAGTGCTTGGTGTATTGATTTTTTTTTGGAAAGGGA  
GTGTTAAGTGATTTATTAGATAATCGAAAAAATAGAATCTTGAAGACTATTCGAAATTCA  
GAAGAACTTCGTGGGGGGGCCATTGAACAGTTGGAAAGAGCCCGGTCCCGCTTACGG  
AAAGTCGAAATGGAAGCAGATCAGTTTCGAGTGAATGGATACTCTGAGATAGAACGAG  
AAAAGTTGAATTTGATTAATCAACTTATAAGACTTTGGGACAATTAGAAAATTATAAA  
AATGAACTATTCGTTTTGAACAACAAAGAGCGATTAATCAAGTACGACAACAGGTTT  
TCCAACAAGCATTACAAGGAGCTCTAGGAACTCTGAATAATTGTTTGAACAACGAGTT  
ACATTTACGTACCATCAGTGCTAATCTTGGCATGTTTGGGACGATGAAAGAAATAACTA  
ACATGAATCCACTTATTTCTGCCGCTTCCGTTATTGCTGCTGGATTGGCCGTCCGGCTTG  
CTTCTATTGGACCTGGGGTTGGTCAAGGTA CTGCTGCGGGCCAAGCTGTAGAAGGGAT  
TGCGAGACAACCCGAGGCAGAGGGAAAAATACGAGGTACTTTATTGCTTAGTCTGGCT  
TTTATGGAAGCTTTAACAATTTATGGACTGGTTGTAGCATTAGCACTTTTATTTGCGAAT



CCTTTTGTTATGAATGTTCTATTATGTTCTATCAACACACTAAAAGGGTTATACGATATAT  
CTGGTGTGGAAGTCGGCCAACATTTCTATTGGCAAATAGCGGGTTTCCAAGTCCATGCC  
CAAGTACTTATTACTTCTTGGGTTGTAATTGCTATCTTATTAGGTTTCAGCCATTATAGCTG  
TTCGTAATCCACAAACCATTCCTACTGACGGTCAGAATTTCTTCGAATATGTCCTTGAAT  
TCATTTCGAGACGTGAGCAAACTCAGATTGGAGAAGAATATGGTCCATGGGTTCCCTTT  
ATTGGAACATGTTTCTATTTATTTTTGTTTCGAATTGGTCAGGGGCTCTTTTACCTTGGA  
AAATCATAACAGTTACCTCACGGAGAGTTAGCTGCACCCACAAATGATATAAATACTACC  
GTTGCTTTAGCTTTACTCACATCAGTAGCCTATTTCTATGCGGGTCTTACCAAAAAAGGA  
TTAGGTTATTTTCGGTAAATACATTCAACCAACTCCAATCCTTTTACCCATTAACATCTTAG  
AAGATTTACAAAACCCTTATCACTTAGTTTTTCGACTTTTCGGAAATATATTAGCTGATG  
AATTAGTAGTTGTTGTTCTTGTTCCTTTAGTACCTTCAGTAGTTCCTATACCTGTTATGTT  
CCTTGGATTATTTACAAGTGGTATTCAAGCTCTTATTTTTTCAACTTTAGCTGCGGCTTAT  
ATAGGCGAATCCATGGAGGGTCATCATATGATATTTCAACTTTAGAGCATATATTAATC  
ATATATCCTTTTCGGTTCGTTCAATTGTAATTACAATTCATTTGATAACCTTATTAGTC---G  
AAATCGTAGGACTCTATACTTCGTCAGAAAAAGGCATGATAGCTACTTTTTTCTGTATAA  
CAGGATTATTAGTTACTCGTTGGATTATTTGAGGCATTTACCATTAAGTGATTATATGA  
ATCCTTACTATTTCTTTTCATGGGGTTTCTCCATTATTCATATGGTTACGTATTTCAAAAA  
AAGAAAAACCATTTTAATGTAATAACCGCGCCAAGTACTATTTTACCCAAGGTTTTGC  
TTCTTCAGGTTTTTTAACTGAAATGCATCAATCCGCAATATTAGTCCCCGCTCTCCAATC  
TCAGTGGTTAATGATGCACGTAAGTATGATGGTATTGGGTTATGCAGCTCTTTTATGTGG  
ATCCTTATTTTCAGTAGCTCTTATAGTGATTACATTTTCGAAAAGTCTTAAGGATTATTGGT  
AAAAACAATGAGATCCAATACATGAACGAACGAAACAATGTTTTAAGA-----TCTTTTTT  
TTATTCTAAGAATTATTATAAGTCTCAATTAATTCAACAATTAGATTATTGGAGTTATCGTA  
TTATTAGTCTAGGATTTCTCTTTTTAAGCATAGGTATTCTTTTCAGGAGCAGTATGGGCTAA  
TGAGGCATGGGGATCATATTGGAATTGGGATCCAAAGGAAACTTGGGCATTTATTACTT  
GGACCGTATTCGCAATTTATTTACATACTCGAACAAATAAAAATTGGGAAGGTGTAAAT  
TCCGCAATTGTGGCCTCTATGGGTTTTCTTATAATTTGGATATGCTATTTTGGGGTCAATC  
TATTAGGGATAGGGCTACATAGTTATGGTTCATTTACATTAACAATGGCAAAAAAGAAA  
GCATTCATTTCCCTTCTATATCTTGCATCTATAGTATTTTTGCCCTGGTGGATCTCTCTGTC  
ATTTAAAAAAGCCTAGAATCTTGGGTTACTAATTGGTGGAACTACTGGGCAATCCGAAA  
TTTTTTTTGAATGATCTTCAAGAAAAGAGTATTATAAAAAAAGTTATAGAATTAGAGGAA  
CTCTTCCTCTTGGACGAAATGCTAAAGGAATACCCGGAAACACATCTACAAAAGCTTC  
GTATCGGA---TACAAAGAAACGATCCAATTGATCAAGATGCACAATGAGGATCGTATCC  
ATACGATTTTGCATTTCTCGACAAATATAATCTGTTTCGTTATTCTAAGTGGTTATTCTAT  
TCTAAGTAATGAAGAACTTGGTATTCTTAACTCTTGGGTTCAAGAGTTCCTATATAACTT  
AAGCGACACAATAAAAGCTTTTTCTATTCTTTTATTAACTGATTTATGTATAGGATTCCAT  
TCGCCCCATGGTTGGGAACATAATGATTGACTCTGTCTACAAAGATTTTGGATTTGCTCAT  
AACGATCAAATTATATCCGGTCTTGTTCCTACTTTTCCAGTCATTCTAGATACAATTTTAA  
AATATTGGATCTTCCGCTATTTAAATCGCGTATCTCCGTCACTTGTAGTGATTTATCATT  
AATGAATGACATGCCTATTGGTGTTCAAAAGTACCTTTTTCGAACTCCTGGAGACGAA  
GATGCATCTTGGATTGACATATAACCGACTTTATCGAGAAAGATTACTTTTTTTTAGGC  
CAAGCGGTTGATAGCGAGATCTCGAATCAACTTATTGCTCTTATGGTATATCTCAGTACG  
GAGAGTGAAACCAAAGATCTGTATTTATTTATAAACTCTCCCGGCGGATGGGTAATACC  
CGGAGTAGCTATTTATGATACTATGCAATTTGTGCGACCAGATGTACAGACAGTATGCCT

GGGATTAGCTGCTTCAATGGGATCTTTTATTCTGGTCGGAGGAGCAATTACCAAACGTC  
TAGCACTCCCTCACGCTAGGGTAATGATCCATCAACCTTCTAGTGCTTTTTATGAGGCGC  
AAACGGGAGAATTTATCCTGGAAGCGGAAGAATACTGAAGCTACGCGAAACCTCA  
CAATGGTTTATGTACAAAGAACGGGCAAACCTTATGGGTTGTATCCGAAGACATGGA  
AAGGGATGTTTTTATGTCAGCAACAGAAGCCCAAGCTCATGGAATTGTTGATCTTGTAG  
C                    A                    G                    T                    T                    -                    -  
-????????????????????????????????????????????????????????????????????????????????????????  
????????????????????????????????????????????????????????????????????????????????????????  
????????????????????????????????????????????????????????????????????????????????????????  
ATGAAGGAATTTCAAGGATATTT  
AGAACTTGATAAATCTCGGCAACGTGACTTCCTATACCCACTTATCTTTCGGGAGTATAT  
TTATGCATTTGCTCATGATCATTFTTTAATAGGTTATGCCAATAAATCCAGTTTACTAATT  
GTAAAACGTTTAAATTACTCGAATGTATCAACATAATCATTGATTATTTCCACTAATGATT  
CTAACCAAATCCATTTTTGGGGAAAAATTTGTATGCTCAAATGCTATCCGAAGGGTTT  
GCAGTCATTGTGGAAATTCATTTTCCCTACGATTAGTATCTTCTTAATCGTAAAATCTT  
ATAATTTCCGATCAATTCATTCAATATTTCCTTTTTTAGAGGAGAAATTTCCACATTTAAA  
TTATGTGTCAGATGTATTAATACCCTACCCCTCCATCTGGAAATTTGGTTCAAATCCTT  
CGCTACTGGGTAAAAGATGCCTCTTCCCTGCATTTATTACGGGTCTTCTTTCACGAGTAT  
TCTAATTGGAATAGTCTTATTACTAAATCGATTTCTTTTTTTTCAAACGAAGATTATTCT  
TGTTCCATATAATTCTCATGTATGTGAATACGAATCATTFTTCCTTTTTCTACGTAACCAA  
TCTTCTCATTTACGATTAACATCTTCTAGGGTCCTTTTTGAGCGAATATCTTCTATGGAA  
AAATAAACATCTTGTAGATGTATTTGCTAATCCGGCTATCCTACGGGTCCGCAAGGATC  
CTTTCATGCATTATGTTAGATATCAAGGAAAATCTATTCTGGTTTCAAAGATACGCCTC  
TTCTGATGAATAAGTGGAATATTACCTTGTGAATTTATGGCAATATCATTFTTTCGCGTG  
GTCACAACCAGAAAGGATCTATATAACCAATTATCCAAGCGTTCTCTTGACTTTTTGG  
GCTATATTTCAAGTGTGCGACTAAATACTTCAGTAGTACGGAGTCAAATGCTCGAAAAT  
TCATTTCTAATAGATAAT-----GCTATGAAGAACCTCGATACACTAGTTCCAATTATTACTC  
TACTTGATCATTGGCTAAAGCGAAATTTTGTAAATGTATTAGGGCATCCATTAGTAAGC  
TGACCTGGGCTGATTTCGTCGGATTTGGATATTATCGATCGATTTGTGCGTATATGCAGAA  
ATATTTCTCATTATTACAGCGGATCCTCAAAAAAAAAAGAGTTTGTATCGAATAAAATATA  
TACTTCGACTTTCTTGTGTTAAACTTTGGCTCGTAAACACAAAAGTACTGTACGTGCT  
TTTTTGAAAAGGTTAAATTCGGAATTCCTTGGAGAATTCTTTACAGAGGAAGAACGGG  
TTCTTCTTTGATCTTCCCGAGACAAATTTGGTATTTGGATATTATTGCATCAATGATT  
GGCCGATCAGGAAATGATAATTGATAACAACAGAA-----GTACAAGAGATCCATTCTTTTT  
CCAAATTGGAATTC---TTAAAAGAGGTCTATGGAATTCTATGGGTGCTTATCCCTATTTTT  
ACTACTGTAGTTGGAATCACAATAGGCGTACTAGTAATTGTATGGTTAGAAAGAGAAAT  
ATCCGCAGGGATACAACAACGTATTGGACCTGAATATGCCGGTCTTGGGGAGTTCTTC  
AAGCTTTAGCAGATGGTACAAAATACTTTTTAAAGAGAATCTTCTTCCATCTAGAGGA  
GATACTCGTTTATTAGTATCGGACCATCCATAGCAGTCATATCAATTCTACTAAGCTATT  
CAGTAATTCCTTTTGGTTATCGCCTTGTTTTAGCCGATCTCAATATCGGTGTTTTTTTATG  
GATTGCCATTTCAAGTATTGCTCCCATTGGACTTCTTATATCAGGATATGGGTCAAATAAT  
AAATATTCCTTTTTAGGTGGTCTACGAGCTGCTGCTCAATCGATTAGTTATGAAATACCA  
TTAACTCTATGTGTATTATCAATATCTCTACTATCTAACAGTTCCAGTACAGTTGATATAG  
TTGAGGCTCAATCAAATATGGTTTTTGGGGTTGGAATTTGTGGCGTCAACCTATAGGG  
TTTATCATTFTTCTAATTTCTTCCCTTAGCAGAATGTGAGAGATTGCCTTTTGATTTACCAG





GTCAGTCAGTATAGCTTTTTTTGGGAATATCTCTAGCGTCTTTTTTATATAAGCCCGCTTAT  
TCATCTTTACAAAATTTGAACTTTTCGTAATTCAGTTGTTATCTTTTTGGAAAAATAATA  
AATGTAATATATGATTGGTCATATAATCGTGGTTATATAGATGCTTTTTATGGAAATATCTTT  
AATTGGGGGTATAAGAGGATTAGCTGAATTAACGCATTTTTTTGATAGACGAGTAATTGA  
TGGAATTACAAATCTGGTTGGTATTCTTCATTTTTTTGTAGGAGAAAGTATTAATATGT  
AGGGGGTGGT--CGAATTTTCGTCTTATATCTTATTGTATTTATCTTATGTATTAATTTTTATA  
TTAATTTACTCCATGGATTTGCCTGGACCGATACATGATTTTCTTTTAGTCTTTTTTTGGAT  
CAGGTATTATATTAGGAGGTATGGGAGTAGTATTACTTACCAACTCAATTTATTCTGCCTT  
TTCATTGGGACTGGTTCTTGTTTGTATAGCTTTATTCTATATTCTATCAAACCTCCATTTT  
GTAGCTGCTGCGCAACTCCTTATTTACGTGGGAGCTATAAATGTTTTAATCATATTTGCT  
GTGATGTTTCATGAAGGGTTCGGAATATTCCAAAGATTTTCTCTTTGGACCGTTGGGAG  
TGGAGTTACTTTGCTGGTTTGTACAAGTATTTTTGTTTCACTAATAAATACTATTCTAGAT  
ACGTCATGGTATGGGATTATTTGGACTACAAGATCAAACCAGATTCTCGAGCAAGATTT  
GATAAGTAATAGTCAACAAATTGGAATTCATTTATCAACAGATTTTTTTCTTCCATTTGA  
ACTCATTTTCGATAATTCTTTTAGTTGCTTTGATAGGCGCAATTTCCGTGGCTCGCCAGAT  
GAATGAACCAGCTACAAGAAAAGACCTCATGATAGTTAATATGGGCCCCCATCACCCAT  
CAATGCACGGTGTCTTTCGACTCATCGTTACTTTAGATGGTGAAGATGTTATTGATTGTG  
AACCAATATTGGGTTATTTACACAGAGGAATGGAAAAAATTGCGGAAAACCGAACAAT  
TATACAATATCTACCTTATGTAACACGTTGGGATTATTTAGCTACTATGTTACAGAAGCA  
ATAACCGTAAATGGACCAGAACAGTTGGGAAATATTCAAGTACCTAAAAGAGCTAGCT  
ATATCAGAGTAATTATGTTGGAGTTGAGTCGGATAGCTTCTCATCTGTTATGGCTTGGCC  
CTTTTATGGCCGATATTGGTGCACAGACTCCTTTCTTCTATATTTTCAGAGAAAGAGAAT  
TAGTATATGATCTATTTCGAAGCTGCTACCGGTATGAGAATGATGCATAATTATTTTCGTAT  
CGGGGGAGTCGCGGCTGATCTACCTTATGGCTGGATAGATAAATGTTTGGATTTTTGTG  
ATTATTTTTTGACAGGGGTTGCTGAATATGAAAACTTATTACACAAAATCCTATTTTTTT  
AGAACGAGTTGAGGGAGTAGGCATTGTTGGTGGAGAAGAAGGAATAAATTGGGGTTTA  
TCAGGACCAATGCTGCGAGCTTCCGGAATACAATGGGATCTTCGTAAAGTTGATCATT  
TGAGTGTTATGACGAATTTGATTGGGAAGTTCAGTGGCAAAAAGAGGGAGATTCATT  
GCTCGTTATTTAGTCAGACTTGGTGAATGACGGAATCCATAAAAATTATTCAACAGGC  
TTTGGAAAGGAATTCCAGGGGGACCCTATGAGAATTTAGAAATCCGATGTTTTGATCGAG  
AACTTATCCGGAATGGAATGATTTTGAATATCGATTCATTAGTAAAAAACCTTCACCCA  
CTTTTGAGTTGCCGAAACAAGAACTTTATGTGAGAGTCGAAGCCCCAAAAGGGGAATT  
GGGCATTTTTCTGATAGGGGATCAGGGTGGTTTTCTTGGAGATGGAAAATTCGCCCC  
CGGGTTTTATCAATTTGCAAATCTTCTCAGTTAGTTAAAAGAATGAAATTGGCTGATA  
TTATGACAATACTAGGTAGCATAGATATCATTATGGGAGAAGTTGATCGTATGTTCCCTAT  
GGTAACTGGGTTTCATGAATTATGGTCAACAAACAGTACGAGCTGCAAGGTACATTGGT  
CAAAGTTTCATGATTACTTTATCCCACGCAATCGTTTGCCTGTAACCTATTCAATATCCTT  
ACGAAAAATTAATCACATCGGAGCGTTTCCGAGGTGCAATACATTTTGAATTTGATAAA  
TGATTGCTTGTGAAGTATGTGTTTCGTGTATGTCCTATAGATCTACCCGTTGTTGATTGG  
AAATTGGAACTGATATTCGAAAGAAACGATTGCTTAATTACAGTATTGATTTTGGAAAT  
CTGTATATTTTGTGGTAACTGCGTTGAATATTGTCCAACAAATTGTTTATCAATGACTGA  
AGAATATGAACTTTCTACTTATGATCGTCACGAATTGAATTATAATCAAATTGCTTTGTGT  
CGTTTACCAATGTCAGTAGTTGACGATTATACAATTCGAACAATTTCAAACCTCG-----C  
AAGTAAAAAATAAG-----ATGCAGGGTCATTTGTCTGCTTGGCTAGTCAA

ACATGGGCTAGTTCATAGATCTTTGGGCTTCGATTACCAAGGAATCGAGACTTTACAAA  
TAAAGCCTGAGGATTGGCATTCCATTGCTGTTATTTTATATGTATATGGTTACAATTATCT  
ACGGTCACAATGTGCCATGATGTAGCACCGGGCGGACTGTTAGCTAGTGTGTATCATC  
TTACGAGAATAGAGTATGGTATAGATCAACCGGAAGAGGTATGCATAAAAGTATTTGTC  
GCAAGGAGGAATCCTAGAATTCCGCTGTTTTCTGGGTTTGGAAAAGTGCGGATTTTC  
AAGAAAGGAATCTTATGATATGTTGGGAATCTCTTATGATAATCATCCACGTTTGAAGC  
GTATCTTAATGCCTGAAAGTTGGGTAGGATGGCCCTTACGTAAGGATTATATTGCCCCCA  
ATTTTTATGAAATACAAGATGCTCAT-----  
-----ATG  
AATTCCATTGAGTTTCCCTTACTTGATCGAACAACCCAAACTTCGGTTATTTCAACTACA  
TCAAATGATCTTTCAAATTGGTCAAGACTCTCCAGTTTATGGCCGCTTCTCTATGGTACC  
AGTTGTTGCTTCATTGAATTTGCTTCATTAATAGGCTCACGATTCGACTTTGATCGTTAT  
GGACTGGTACCAAGATCTAGTCCTAGACAGGCCGACTTAATTTAACAGCGGGTACAGT  
AACAAATGAAAATGGCTCCTTCCCTAGTAAGATTATATGAGCAAATGCCTGAACCAAAT  
ATGTTATTGCTATGGGAGCATGTACAATTACAGGGGGTATGTTTCAGTACCGATTCTTATA  
GTAATGTTTCGGGAGTCGATAAGTTAATTCCTGTGGATGTCTATTTGCCGGGTTGTCCA  
CCTAAACCAGAGGCAGTTATAGATGCTATAACAAAACCTTCGTAAGAAAATATCTAGAGA  
AATCTATGAAGATCGAATTAAGTCT-----GAGAATCGGTGTTTTACTACCAACCACAAAT  
TTCATGTTGGACGAAGTACGCATACTGGAAATTATGATCAAGGATTACTCTATCAACCA  
CCATCTTCCGAGATCATCCCTCCTGAAACATTTTTCAAATACAAAAGTTCATTATCTTCC  
TACGAATTAGTGAATATGCAAACCTAGAAATACCTTTTTCTTGGATAAAGAAAGAGATTAC  
TCGATCCATTTCCGTATCGCTCATGATATATAATAACTGGGGCATCCGTTTCAAATGCA  
TATCCCATTTTTGCACAACAGGGTTATGAAAATCCACGAGAAGCGACTGGACGATTGT  
CTGTGCCAACTGCCATTTAGCTAATAAGCCCGTGGATATCGAGGTTCCACAAGCGGTAC  
TTCCTGATACTGTATTTGAAGCAGTTGTTTCGAATTCCTTATGATATGCAACTGAAACAAG  
TTCTTGCGAATGGTAAAAAGGGAGGGTTGAATGTAGGAGCTGTTCTTATTTTACCTGAG  
GGGTTTGAATTAGCCCCCCCCGATCGTATTTCTCCCGAGATTAAAGAAAAGATAGGCAA  
TCTGTCTTTTCAGAGTTATCGTCCCCTAATAAAAAAATATCTTGTGATAGGTCCCGCTCC  
TGGTCAGAAATATAGTGAATCACCTTTCCTATTCTTTCCCGGACCCTGCTACTAAGA  
AAGATGTTCACTTCTTAAATATCCCATATACGTAGGCGGGAACAGGGGAAGGGGTCA  
GATTTATCCCGATGGGAGTAAGAGTAATAATAATGTTTATAATGCTACAGCTGCAGGTAT  
AGTAAGCAAATCATAAGAAAAGAAAAGGAGGATATGAAATAACCATAGTGGATGCA  
TCGGATGGGCGTCAAGTGGTTGATATTATCCCTCCAGGACCAGAACTTCTTGTTCAGA  
GGGCGAATCTATCAAACCTTGATCAACCATTAACGAGTAATCCTAATGTGGGTGGATTTG  
GTCAGGGGGATGCGGAAATAGTACTTCAAGATCCATTACGTGTCCAAGGCCTTTTGGTC  
TTTTTGGCATCTGTTATTTTGGCACAAATCTTTTTGGTTCTTAAAAAGAAACAGTTTGA  
GAAGTTCAATTGTCCGAAATGAATTTTCATGAGTAAAGTGTATGATTGGTTTCGAAGAAC  
GTCTTGAAATTCAGGCGATTGCAGATGATATACTAGTAAATATGTTCCCTCCTCATGTCA  
ACATATTTTATTGTCTAGGAGGAATTACGCTTACTTGTTTTTTAGTACAAGTAGCTACGG  
GGTTTGGCTATGACTTTTTACTATCGTCCGACCGTACTGAGGCTTTTGTCTCTGTTCAAT  
ATATAATGACTGAAGCTAACTTTGGTTGGTTAATCCGATCAGTTCATCGATGGTCGGCA  
AGTATGATGGTCCTAATGATGATCCTACACGTATTTTCGTGTGTATCTCACTGGTGGCTTT  
AAAAAACCTCGCGAATTGACTTGGGTTACAGGTGTGGTTCTGGCTGTATTGACCGCAT  
CCTTTGGTGTAACCTGGTTATTCCTTACCTCGGGACCAAATTGGTTATTGGGCAGTAAAA

ATTGTAACAGGTGTACCGGAAGCTATTCCTGTAATAGGATCGCCTTTGGTAGAGTTATTA  
CGCGGAAGTGCTAGTGTGGGACAATCTACTTTGACTCGTTTTTATAGTTTACACACTTTT  
GTATTACCTCTTCTTACTGCCGTATTCATGTTAATGCACTTCCCAATGATACGTAAGCAA  
GGCATTTCGGGTCCTTTAATGGGAGTAACAAAAAACCTGACTTGAATGATCCTGTATT  
AAGAGCTAAATTGGCTAAAGGGATGGGTCATAATTATTACGGAGAACCCGCATGGCCC  
AATGATCTTTTGTATATTTTTCCAGTAGTAATTCTAGGTAATGTCATGTAACGTCGGCT  
TAGCGGTTCTAGAACCATCAATGATTGGTGAACCCGCAGATCCATTTGCAACTCCTTTG  
GAAATATTGCCGGAATGGTATTTCTTTCCTGTATTTCAAATACTTCGTACAGTGCCAAAT  
AAGTTATTGGGTGTTCTTTTAATGGTTTCAGTACCTGCGGGATTATTAACAGTACCTTTT  
TTGGAGAATGTCAATAAATTCCAAAATCCATTTTCGTTCGTCCAGTAGCGACAACCGTCTT  
TTTGATTGGTACTGCAGTAGCTCTTTGGTTGGGTATTGGAGCAACATTACCTATTGATAA  
ATCCCTAACTTTAGGTCTTTTTATGATTGAAGTTTTTCTATTTGGAATCGTATTAGGTCTA  
ATTCCTATTACTTTGGCTGGATTATTTGTAAGTGCATATTTACAATACAGACGTGGTGATC  
AGTTGGACCTTATGCCTACTATAACTAGTTATTTTCGGTTTTTCTACTAGCAGTTTTAACTAT  
AACCTCAGCTCTATTTATCGGTCTGAGCAAGATACGACTTATTATGGATATAGTAAGTCT  
CGCTTGGGCTGCTTTAATGGTAGTCTTTACATTTTCCCTTTCACTCGTAGTATGGGGAAG  
AAGTGGACTCATGATTATTCGTTCCCGGAACCAGAAGTCAAATTTTGGTAGATAGGG  
ATCCCATAAAACTTCTTTCGAGGAATGGGCCAGACCGGGTCATTTCTCGAGAACAAT  
AGCTAAGGGTCCTGATACTACCACTTGGATCTGGAACCTTCATGCTGATGCTCACGATT  
TCGATAGCCATAACCAGTGATTTGGAGGAGATCTCTCGAAAAGTATTTAGTGCCCATTT  
GGCCAACTCTCCATCATCTTTCTTTGGCTGAGTGGCATGTATTTCCACGGTGCTCGTTTT  
TCCAATTATGAAGCATGGCTAGGCGATCCTACTCACATTGGACCTAGTGCCAGGTGGT  
TTGGCCAATAGTGGGCCAAGAAATATTGAATGGTGATGTAGGCGGGGGTTTTTCGAGGA  
ATACAAATAACCTCTGGTTTTTTTTTCAGCTTTGGCGAGCATCTGGAATAACTAGTGAATTA  
CAACTCTATTGTACCGCAATTGGTGCATTAGTCTTTGCAGCCTTAATGCTTTTTGCTGGT  
TGGTTCCATTATCACAAAGGCTGCTCCAAAATTGGCTTGGTTCCAAGATGTAGAATCCAT  
GTTGAATCACCATTTAGCGGGTCTACTAGGACTTGGGTCTCTTTCTTGGGCGGGGCATC  
AAGTACATGTCTCTTTACCGATTAACCAATTTCTAAACGCTGGAGTAGATCCTAAAGAG  
ATCCCACTTCCTCATGAATTTATCTTGAATCGGGATCTTTTGGCTCAACTTTATCCTAGTT  
TTGCTGAGGGAGCAACCCCATTTTTCACTTTGAATTGGTCAAATATGCGGAATTTCTT  
ACTTTTCGTGGAGGATTAGACCCAGTAACTGGGGGTCTATGGTTAACCGATATTGCACA  
CCATCATTAGCTATTGCAATTCTTTTCTGATAGCGGGTCACATGTATAGAACCAACTG  
GGCATTGGTCATGGTATAAAAGATATTTTAGAGGCTCATAAAGGTCCATTTACAGGCC  
AGGGCCATAAAGGACTATATGAGATCCTAACACGTCATGGCATGCTCAATTATCTATTA  
ACCTAGCTATGTTAGGCTCTTTAACCATTATTGTAGCTCACCATATGTATTTCGATGCCCC  
TTATCCATATCTAGCTACTGACTATGGTACACAACCTGTCATTGTTACACATCACATGTG  
GATTGGTGGATTTCTCATAGTTGGTGCTGCTGCGCATGCAGCCATTTTATGGTAAGAG  
ACTATGATCCAACTACTCGATAACGATCTATTAGATCGTGTACTTAGGCATCGCGATG  
CAATCATATCACATCTCAACTGGGTGTGTATATTTTTAGGCTTTCACAGTTTTGGTTTGT  
TATTCATAATGATACCATGAGTGCTTTAGGGCGTCCCAAGATATGTTTTCAGATACCGC  
TATACAACTACAACCCGTCTTTGCTCAATGGATACAAAACACCCATGCTTTAGCACCTG  
GTGCAACGGCCCCTGGTGCAACAACAAGCACCAGTTTGACTTGGGGAGGTGGTGATTT  
AGTGGCAGTGGGCGGCAAAGTTGCTTTGTACCTATTCCATTAGGAACCGCAGATTTTT  
TGGTCCATCACATTCATGCATTTACGATTCATGTGACGGTATTGATACTTCTGAAAGGTG

TTCTATTTGCTCGTAGCTCGCGTTTGATACCGGATAAAGCAAATCTTGGTTTTTCGTTTCC  
CTTGTGATGGACCTGGAAGAGGGGGGACATGTCAAGTATCTGCTTGGGATCATGTCTTC  
TTAGGGCTATTCTGGATGTACAATTCCATTTCCGGTAGTAATATCCATTTTCAGTTGGAAA  
ATGCAGTCAGATGTTTGGGGTAGTATAAGTGATCAAGGGGTAGTAACTCATATCACAGG  
AGGAAACTTTTCGCAGAGTTCCATTACTATTAATGGGTGGCTCCGTGATTTCTTATGGGC  
ACAGGCATCCCAGGTAATTCAGTCTTATGGTTCCTCATTATCTGCATATGGACTTTTTTTC  
CTAGGTGCTCATTTTGTATGGGCTTTTATGTTAATGTTTCTATTTCAGCGGGCGTGTTATT  
GGCAAGAACTTATTGAATCCATTGTTTGGGCTCATAATAAATTAAGTTGCTCCTGCTA  
CTCAGCCTAGAGCCTTGAGCATTGTCCAAGGGCGTGCTGTAGGAGTAACCCATTACCTT  
CTGGGTGGAATTGCCACAACATGGGCGTTCCTTCTAGCAAGAATTATTGCAGTAGGAAT  
GGCACTAAGATTTCCAAGGTTTAGCCAAGGCTTAGCTCAGGACCCCACTACTCGTCGTA  
TTTGGTTTGGTATTGCTACCGCACATGACTTCGAAAGTCATGATGATATTACTGAAGAA  
CGTCTTTATCAGAATATTTTGTCTTCTCATTTCGGGCAATTAGCAATAATTTTCTGTGGA  
CTTCCGGAAATCTGTTTCATGTAGCTTGGCAAGGAAATTTGAAGCATGGGTACAGGA  
CCCTTTACATGTAAGACCTATTGCTCATGCAATTTGGGATCCTCATTTTGGTCAACCGGC  
TGTCGAAGCTTTTACTCGAGGGGGTGCTCTTGGCCCAGTGAATATCGCTTATTCTGGTG  
TTTATCAGTGGTGGTATAACAATCGGTTTACGTACTAATGGGGATCTTTATACTGGAGCTC  
TTTTTCTATTATTTCTTTCGGCCATATCCTTAATAGCGGGTTGGTTACACCTACAACCGAA  
ATGGAAACCGAGCGTTTCGTGGTTTAAAAATGCCGAATCTCGTCTCAATCATCATTGT  
CAGGACTATTCCGAGTAAGTTCCTTGGCTTGGACAGGACATTTAGTCCATGTGCTATT  
CCTGGAGCCAGGGGAGAATATGTTTCGATGGAATAATTTCTTAGATGTATTGCCACATCC  
CCAAGGATTAGGACCACTTTTTACAGGTCAGTGGAATCTTTATGCTCAAACCCCGATT  
CAAATAATCATTATTTGGTACTTCCCAAGGAGCAGGAACTGCCATTCTAACCTTCTC  
GGGGGATTCCATCCGCAAACACAAAGTTTATGGCTGACTGATATTGCTCATCATCATTA  
GCTATTGCATTTATTTTCTAGTTGCTGGTCATATGTATAGAACTAACTTCGGAATTGGAC  
ACAGTATAAAAGATCTTTTGAAGCACATATCCGCCGGGGGACGATTGGGGCGTGG  
ACATAAAGGTCTTTATGACACAATCAATAATTCGATTCATTTTCAATTAGGACTTGCTCT  
AGCCTCTTAGGGGTTATTACTTCCCTTGGTAGCTCAACACATGTACTCTTTACCTGCTTA  
TGCATTCATAGCACAAGACTTTACTACTCAAGCTGCGTTATATACCCATCACCAATACAT  
AGCAGGATTCATTATGACAGGAGCTTTTGTCTCATGGAGCTATATTTTTTATTAGAGATTA  
CAATCCAGAACAGAATGAGGATAATGTATTGGCAAGAATGTTAGACCATAAAGAAGCTA  
TCATATCCCATTAAAGTTGGGCCAGCCTTTTTCTGGGGTTCCATACTTTGGGGCTTTATG  
TTCATAATGATGTCATGCTTGCTTTTGGTACTCCGGAGAAACAAATCTTAATCGAACCCA  
TATTTGCCCAATGGATTCAATCTGCTCATGGTAAACTTCATATGGCTTCGATGTACTTTT  
ATCGTCAACTAATGGCCCGGCCTTCAATGCGGGTTCGAAGCATATGGTTGCCTGGTTGGT  
TAAATGCTGTTAATGAG-----AATAGTAATTCATATTCTTAACAATAGGGCCCGGAGACT  
TCTTGGTTCATCATGCTATTGCTTTAGGTTTACATACA ACTACATTGATCTTAGTAAAAG  
GTGCTTTAGATGCACGTGGTTCCAAATTAATGCCGGATAAAAAGGATTTTGGTTATAGTT  
TTCTTGCACGGTCCGGGACGAGGTGGTACTTGTGATATTTCCGCTTGGGACGCATTT  
TATTTGGCAGTTTTCTGGATGTTAAATACCATTGGATGGGTTACTTTTTATTGGCATTGGA  
AACACATTACATTATGGCAGGGTAACGTTTCACAGTTTAATGAATCTTCCACTTATTTGA  
TGGGATGGTTAAGAGATTATCTATGGTTAAACTCTTCACA ACTTATCAATGGATATAATC  
CTTTTGGTATGAATAGTTTATCAGTTTGGGCGTGGATGTTCTTATTTGGACATCTTGTTG  
GGCTACTGGATTTATGTTCCTAATTTCTTGGCGTGGATATTGGCAGGAATTGATTGAAAC



TTTGGCATGGGCTCATGAACGCACGCCTTTGGCTAATTTGATTTCGATGGAGAGATAAAC  
CAGTGGCTCTTTCCATTGTGCAAGCAAGATTGGTTGGATTGGCTCACTTTTCTGTAGGT  
TATATATTTACTTATGCGGGCTTCTTGATTGCCTCTACATCAGGCAAATTTGGTATGTCAC  
ATTCAGTAAAGATTTATGATACATGTATAGGGTGTACTCAATGTGTCCGAGCTTGCCCCA  
CAGATGTATTAGAAATGATACCTTGGGACGGATGTAAAGCTAAGCAAATTGCTTCTGCT  
CCGAGAACAGAAGACTGTGTTGGTTGTAAGAGATGTGAATCCGCTTGTCCGACGGATT  
TCTTGAGTGTTCGAGTCTATTTATGGCATGAAACAAC TAGAAGCATGGGTCTAGCTTATA  
TGCCAACTCTCAACTTACCCTCTATTTTTGTGCCTTTAGTGGGCCTAGTATTTCCGGCAC  
TTGCAATGGCTTCTTTATTTATTCATATCAAAAAACAAGATTTTATGCGAGATCTAA  
AAACATATCTCTCTGTGGCACCGGTAGTAAGTACTCTATGGTTCGGGGCTTTAGCGGGT  
CTATTGATAGAGATCAATCGTTTATCCCAGATGCGTTGATATCCCCTTTTTTTTTCATTCA  
TGACTGCAATTTTAGAGAGACGCGAAAGCGAAAGCCTATGGGGTCGTTTCTGTAAC TG  
GATAACCAGCACTGAAAACCGTCTTTACATTGGATGGTTTGGTGTTTTGATGATCCCTA  
CCTTATTGACCGCAACTTCTGTATTTATTATCGCTTTCATTGCTGCCCTCCGGTAGATAT  
TGATGGTATTCGTGAACCTGTTTCTGGATCTCTACTTTATGGAAACAATATTATTTCTGGT  
GCCATTATTCCTACTTCTGCAGCTATAGGGTTGCACTTTTACCCAATATGGGAAGCAGCT  
TCTGTTGATGAATGGTTATACAATGGCGGTCCTTATGAGCTAATTGTTCTACACTTCTTA  
CTTGGTGTAGCATGTTACATGGGTCTGAGTGGGAACCTAGTTTCCGTCTGGGTATGCG  
CCCTTGGATTGCTGTTGCATATTCAGCTCCTGTCGCAGCTGCTACTGCTGTTTTCTTGAT  
CTATCCAATTGGTCAAGGAAGCTTTTCTGACGGTATGCCTCTAGGAATCTCTGGTACTTT  
CAATTTTCATGATTGTATTCCAGGCTGAGCACAACATCCTTATGCACCCATTTACATGTT  
AGGTGTAGCTGGTGTATTCGGCGGCTCCCTATTCAGTGCTATGCATGGTTCCTTGGTAAC  
TTCTAGTTTGATCAGGGAAACCACAGAAAATGAATCTGCTAATGAAGGTTACAGATTCG  
GTCAAGAGGAAGAAACTTATAATATCGTAGCTGCTCATGGTTATTTTGGCCGATTGATCT  
TCCAATATGCTAGTTTCAACAATTCTCGTTCCTTACATTTCTTCTAGCTGCTTGGCCTGT  
AGTAGGTATCTGGTTCACCGCTTTAGGTATTAGCACTATGGCTTTCAACTTAAATGGTTT  
CAATTTCAACCAATCTGTAGTTGATAGTCAAGGTCTGTGAATTAATACCTGGGCTGATAT  
TATTAACCGTGCTAACCTTGGTATGGAAGTTATGCATGAGCGTAATGCTCACAACCTCCC  
TCTAGACCTAGCTGCTGTTGAAGCTCCATCTCTAAATGGAATGGGTTTGCCTTGGTATC  
GTGTTACATACCGTTGTATTGAATGATCCCGGTCGTTTGCTTGCTGTTTCATATAATGCATAC  
AGCTCTAGTTGCTGGTTGGGCAGGTTCAATGGCTCTATACGAATTAGCAGTTTTTTGATC  
CCTCTGATCCCGTTCTTGATCCAATGTGGAGACAAGGTATGTTTCGTTATAACCCTTCATGA  
CTCGTTTAGGAATAATCAATTCATGGGGGGGTTGGAGTATCACA---GGAGGGACTGTAA  
CGAATCCGGGTATTTGGAGTTACGAAGGTGTGGCCGGAGCACATATTGTGTTTTCTGGC  
TTGTGCTTCTTGGCAGCTATCTGGCATTGGGTGTATTGGGATCTAGAAATATTTTCTGAT  
GAACGTACAGGAAAACCTTCTTTGGATTTGCCAAAGATTTTGGAAATTCATTTATTTCTC  
TCAGGGGTGGCTTGCTTTGGTTTTGGCGCATTTTCATGTAACAGGATTGTATGGTCTCTGG  
TATATGGGTGTCCGATCCTTATGGATTAACCGGAAGGGTACAATCTGTAAATCCAGCGT  
GGGGGGTGAAGGGTTTGATCCTTTTGTCCGGGAGGAATAGCCTCTCATCATATTGCA  
GCGGGTACATTGGGTATATTAGCGGGCCTATTCCATCTTAGTGTCCGTCCGCCCAACGT  
TTATACAAAGGCTTACGTATGGGAAATATTGAAACCGTCCTTTCCAGTAGTATCGCTGCT  
GTCTTTTTTGCAGCTTTTGTGTTGCTGGAACCTATGTGGTATGGTTCAGCAACTACCCCG  
ATTGAATTATTTGGTCCCACTCGTTATCAATGGGATCAGGGATACTTCCAGCAAGAAATA  
TATCGAAGAGTTGGTGTCTGGGCTAGCCGAAAATCAAAGTTTATCAGAAGCTTGGTCTA

AAATTCCTGAAAAATTAGCTTTTTATGATTACATCGGCAATAATCCCGCAAAAGGTGGA  
TTATTCAGAGCGGGCTCCATGGACAATGGGGATGGAATAGCTGTTGGGTGGTTAGGAC  
ACCCTATTTTTAGAGATAAAGAAGGGCGTGAACTTTTGTACGTCGTATGCCTACTTTTT  
TTGAAACATTTCCAGTTGTTTTGGTAGACGGAGACGGAATTGTTAGAGCTGATGTTCT  
TTAGAAGGGCAGAATCGAAGTATAGTGTGAACAAGTAGGTGTAACCGTTGAGTTCT  
ATGGCGGTGAACTCAATGGAGTCAGCTATAGCGATCCTGCTACTGTGAAAAAATATGCT  
AGACGTGCTCAATTGGGTGAAATTTTTGAATTAGATCGTGCTACTTTGAAATCTGATGG  
TGTTTTTCGTAGCAGTCCAAGAGGTTGGTTACTTTTTGGGCAIGCTTCGTTTGCTTTGCT  
CTTCTTCTTCGGACACATTTGGCATGGTGCCAGAACCTTGTTTCAGAGATGTCTTTGCTG  
GTATTGACCCAGATTTGGATGCTCAAGTCGAATTTGGTGCATTCCAAAACTTGGAGAT  
CCAATAACAAGAAGACAAGTAGTCATGAAAACCTTATATTCCCTGAGGAGGTTCTACC  
ACGTGGAAACGCTCTTTAATGGAACCTTAGCTTTAGCTGGTCGTGATCAAGAAACCAC  
TGGTTTTCGCTTGGTGGGCCGGGAATGCCCGACTTATCAATTTATCTGGTAAACTACTGG  
GAGCTCATGTAGCTCATGCCGATTAATCGTATTCTGGGCCGGAGCAATGAACCTATTT  
GAAGTGGCTCATTTCGTACCAGAGAAGCCCATGTACGAACAAGGATTAATTTACTTCC  
CCACCTAGCTACTCTAGGTTGGGGGGTAGGTCCTGGTGGGGAAGTTATAGACACCTTTC  
CATACTTTGTGTCTGGAGTACTTCACTTAATTTCCCTCTGCAGTATTGGGTTTTGGCGGTA  
TTTATCATGCACTTCTGGGACCCGAGACCCTTGAAGAATCTTTCCATTCTTCGGTTATG  
TATGGAAAGATAGAAATAAAATGACTACAATTTGGGTATTCACTTAATTTGTTAGGTA  
TAGGTGCTTTTCTTCTAGTATTCAAAGCTCTTTATTTGGGGGCGTATATGATACCTGGG  
CTCCGGGGGGGGGAGATGTAAGAAAAATTACCAACTTGACCCTTAGCCCAAGTGTTAT  
ATTTGGTTATTTACTAAAATCCCCCTTTGGAGGAGAAGGATGGATTGTTAGTGTGGACG  
ATTTGGAAGATATAATTGGAGGGCATGTATGGTTAGGTTCCATTTGTATATTTGGTGGAA  
TCTGGCATATCTTAACTAAACCCTTTGCATGGGCTCGTCGCGCACTTGTATGGTCTGGA  
GAAGCTTACTTGTCTTATAGTTTAGGTGCTTTATCTGTTTGTGGTTTTATCGCTTGTGCT  
TTGTCTGGTTCAATAATACCGCTTATCCTAGTGAGTTTTACGGGCCCACTGGACCAGAA  
GCTTCTCAAGCTCAAGCATTACTTTTCTAGTTAGAGACCAACGTCTTGGGGCTAACGT  
AGGATCCGCTCAAGGACCTACTGGTTTAGGTAAATATCTAATGCGTTCCCCGACTGGAG  
AAGTTATTTTGGAGGAGAGACTATGCGTTTTTGGGATCTGCGTGCTCCCTGGTTAGAA  
CCACTAAGGGGTCCAATGGTTTGGACTTGAGTAGGCTGAAAAAAGACATACAACCTT  
GGCAAGAACGGCGTTCGCGGAATATATGACCCATGCTCCTTTAGGTTGTTAAATTC  
GTGGGTGGCGTAGCTACCGAAATTAATGCGGTCAATTATGTCTCTCCTAGAAGTTGGTT  
AGCTACCTCTCATTTGTTCTAGGATTCCTCCTATTCGTAGGTCATTTATGGCATGCAGG  
AAGGGCTCGTGCAGCTGCCGAGGATTTGAAAAAGGAATTGATCGTGATTTTGAACCT  
GTTCTTTCCATGACTCCTCTTAACATGACTATAGCCCTTGGTAAATTTACCAAAGACGAA  
AAAGATTTATTCGATATTATGGATGACTGGTTACGGAGGGACCGTTTCGTTTTTGTAGGT  
TGGTCCGGTCTATTGCTCTTTCCCTTGTGCCTATTTTCGCTTAGGGGGTTGGTTTACAGGT  
ACAACCTTTGTAACCTTCATGGTATAACCCATGGATTGGCAAGTTCCTATTTGGAAGGCTG  
CAACTTCTTAAACCGCCGAGTTTCTACTCCTGCTAATAGTTTACCCACTCTTTGTTGTT  
ACTATGGGGTCTGAAAGCACAAGGAGATTTTACTCGTTGGTGTCAATTAGGTGGTCTGT  
GGACTTTTTGTTGCTCTCCACGGCGTTTTCGGATTAATAGGTTTCATGTTACGTCAATTTG  
AAGTTGCTCGATCTGTTCAATTGCGACCTTATAATGCAATCGCATTCTCTGGTCCAATTG  
CTGTTTTTGTCTGTTCTGATTCCTGATTTATCCACTAGGTCAGTCTGGTTGGTTCTTTGCGCC  
TAGTTTTTGGTGTAGCAGCTATATTCGATTCATTCTTTTTTCCAAGGGTTTCATAATTGG

ACATTGAATCCATTTTCATATGATGGGAGTTGCCGGTGTATTGGGCGCTGCTCTGCTATGC  
GCTATTCATGGTGCTACCGTAGAAAATACCTTATTTGAAGATGGTGATGGTGCAAATACA  
TTCCGTGCTTTTAAACCCAACCTCAAGCTGAAGAACTTATTCAATGGTCACCGCTAACCG  
CTTTTGGTCCCAAATCTTTGGGGTTGCTTTTTCCAATAAACGTTGGTTACATTTCTTTAT  
GTTATTTGTACCAGTAACCGGTTTATGGATGAGTGCTCTTGGAGTAGTCGGTCTGGCCC  
TGAACCTACGTGCCTATGACTTCGTTTCTCAAGAAATCCGTGCAGCGGAAGATCCTGAA  
TTTGAGACTTTCTATAACCAAAAATATTCTCTTAAATGAAGGTATTTCGTGCTTGGATGGCG  
GCTCAAGATCAGCCTCATGAAAACCTTATATTCCCTGAGGAGGTTCTACCACGTGGAAA  
CGCTCTTATGTCTGGAAGCACAGGAGAACGTTCTTTTGCTGATATTATTACCAGTATTCG  
ATACTGGGTCATTCATAGCATTACTATACTTCTCTATTTCATTGCAGGTTGGTTATTCGTC  
AGCACGGGTTTAGCTTACGATGTATTTGGAAGTCCCTCGTCCAAACGAGTATTTTACAGA  
GAGCCGCCAAGGAATTCCATTAATAACTGGCCGTTTTGATCCTTTGGAACAACCTCGATG  
AATTTAGTAGATCTTTTATGACTATAGATAAACTTATCCAATTTTACAGTGCGATGGTT  
GGCTGTTACGGACTAGCTGTACCTACCGTTTTCTTTTTTGGGGTCAATATCCGCAATGC  
AGTTCATCCAACGAATGGCTACACAAACCGTTGGGGATAGTTCTAAATCTGGT---CCAA  
GACGAATAATGTAGGGAGTTTATTGAAACCATTGAATTCGGAATATGGTAAAGTAGCT  
CCTGGTTGGGGAACCTACTCCTTTGATGGGTGTGCGGATGGCTCTATTTGCGATATTCCTA  
TCGATTATTTGGAGATTTATAATTCTTCCATTTTACTGGACGGAATTTACAGTGAATATGC  
TACTCTCAAACCTATTTGTTTATACAGTAGTGATATTCTTTGTTTCTCTCTTCATTTTCGG  
ATTCCTATCTAATGACCCGGGACGTAATCCTGGACGTGAAGAAATGGCCGATACTACTG  
GAAGGATTCCTCTTTGGATAATAGGTAAGTACTGTAAGTGGTATTCCTGTGATCGGTTAATCG  
GTATTTCTTTTATGGTTCATATCCGGATTGGGTTTCATCCCTGATGCTTAATATCTTAAGT  
TTAATCTCTATCTGTCTTAATCTGTCCCTTATTCAAGTAGTTTTTCTTCGCCAAATTGC  
CCGAGGCCTACGCTTTTTTGAATCCAATAGTAGATGTTATGCCAGTAATACCTCTGTTCT  
TTTTTCTATTAGCTTTTGTGGCAAGCTGCTGTAAGTTTTCGAACGACACAATCAAAC  
CCGAACGAACAAAATGTTGAATTGAATCGTACCAGTCTCTACTGGGGGTTATTACTCAT  
TTTTGTACTTGCTGTTTTATTTCCAATTATTTCTTCAATATGGAAGTAAATATTCTCGCAT  
TTATTGCTACTGCACTCTTCATTCTAGTTCCTACTGCTTTTTTACTTATAATATACGTA  
AACAAATCAGTCAAAGTGATATGGAAACAGCAACCCTAGTTGCCATCTCTATATCTGGTT  
TACTTGTAAGTTTTACTGGGTATGCCTTATACTGCTTTTGGGCAACCCTCTCAACAAC  
TAAGAGATCCATTCGAGGAACACGGGGACATGGAAGCATTGGTTTATACATTCTCTTA  
GTCTCGACTCTAGGAATCATTTTTTTCGCTATCTTTTTTCGCGAACCCACTAAAGTTCCA  
ACTAAAAA-----ATGACTATTGCTTTCCAATTGGCTGTTTTTGCATTAATTGCTACTTCA  
TCAATCTTACTAATTAAGTGTGCCCGTTGTATTTGCTTCTCCTGATGGTTGGTTCGAGTAAC  
AAAAATGTTGTATTTCCGGTACATCATTATGGATTGGATTAGTCTTTCTGGTGGGTATCC  
TTAATTCTCTCATCTCT-----ATGTCACCACAAACAGAGACTAAAGCAAGTG  
TTGGATTCAAAGCTGGTGTTAAAGATTATAAATTGACTTATTATACTCCTGAATATGAAA  
CCAAAGATACTGATATCTTGGCAGCATTCCGAGTAACTCCTCAACCCGGAGTTCCACCT  
GAGGAAGCAGGGGCCGCTGTAGCTGCCGAATCTTCTACTGGTACATGGACAACCTGTGT  
GGACCGATGGGCTTACCAGTCTTGATCGTTACAAAGGACGATGCTACCACATCGAGCC  
TGTTGCTGGAGAAGAAAATCAATATATTGCTTATGTAGCTTATCCCTTAGACCTTTTTGA  
AGAAGGTTCTGTTACTAACATGTTTACTTCCATTGTGGGTAATGTATTTGGGTTCAAGGC  
CCTGCGCGCTCTACGTCTGGAGGATTTGCGAATCCCTCCTGCTTATGTTAAAACCTTCC  
AAGGCCACCTCATGGTATCCAAGTTGAGAGAGATAAATTGAACAAGTATGGCCGCC

TCTATTGGGATGTACTATTAACCTAAATTGGGATTATCCGCTAAGAATTACGGTAGAGC  
AGTTTATGAATGTCTCCGCGGTGGACTTGATTTTACCAAAGATGATGAAAACGTGAATT  
CCCAACCATTTATGCGTTGGAGAGACCGTTTCTATTTTGTGCGGAAGCACTTTTTAAA  
GCACAGGCTGAAACAGGTGAAATCAAGGGGCATTACTTGAATGCTACTGCAGGTACAT  
GCGAAGAAATGATCAAAAGGGCTGTATTTGCCAGAGAATTGGGAGTTCCTATCGTAAT  
GCATGACTACTTAAACAGGGGGATTCACTGCAAATACTAGCTTGGCTCATTATTGCCGAG  
ATAATGGTCTACTTCTTCACATTCATCGTCAATGCATGCAGTTATTGATAGACAGAAGA  
ATCATGGTATACACTTTCGTGTACTAGCTAAAGCGTTACGTATGTCTGGTGGAGATCATA  
TTCACGCTGGTACCGTAGTAGGTAACCTGAAGGGGAAAGAGACATCACTTTAGGCTT  
TGTTGATTTACTACGTGATGATTTTATTGAAAAGATCGAAGCCGCGGTATTTATTTTAC  
TCAAGATTGGGTCTCTCTACCAGGTGTTCTGCCGTAGCTTCGGGGGGTATTCACGTTT  
GGCATATGCCCGCTCTGACCGAGATCTTTGGAGATGATTCCGTAACAATTCGGCGGA  
GGAECTATAGGGCACCCCTTGGGGAAATGCACCCGGTGCCGTAGCTAATCGAGTAGCTC  
TAGAAGCATGTGTACAAGCTCGTAATGAGGGACGTGATCTTGCTCGTGAGGGTAATGC  
AATTATCCTTGAGGCTAGTAAATGGAGTCTGAACTAGCTGCTGCTTGTGAAGTATGGA  
AGCAAATCAAATTTGAATTTGAAGCAATGGATACTTTG-----ATGGCGATACATTTATACA  
AACTTCTACCCCGAGCACACGCAATGGAGCCGTAGACAGTCAAATGAAATCCAATCC  
ACGAAATAATTTGATCTATGGACAGCATCGTTGTGGTAAAGGTCGTAATTCAGAGGAA  
TCATTACCGCAGGGCATAGAGGGGGAGGTCATAAGCGTCTATAACCGTAAAATCGATTTT  
CGACGGAATGAAAAGACATATATGGTAGAATCGTAACCATAGAATACGACCCTAATCG  
AAATGCATACATTTGTCTCATACTATGGGGATGGTGAGAAAAGATATATTTTACATCC  
CAGAGGGGCTATAATTGGAGATACCATTGTTTCTGGTACAGAAGTTCCTATAAAAATGG  
GAAATGCCCTACCTTTGACCGATATGCCCTTAGGCACGGCCATACATAACATAGAAATC  
ACACTTGGAAGGGTGGACAATTAGCTAGAGCAGCAGGTGCTGTAGCGAAACTGATT  
GCAAAGAGGGGAAATCGGCCACATTAATAATTACCTTCTGGGGAGGTCCGTTTGATAT  
CCAAAATTGCTCAGCAACAGTCGGACAAGTGGGGAATGCTGGGGTGAACCAGAAAA  
GTTTGGGTAGAGCCGATCTAAATGTTGGCTAGGTAAGCGTCCTGTAGTAAGAGGAGT  
AGTTATGAACCCTGTAGACCATCCCCATGGGGGTGGTGAAGGGAGGGCCCCAATTGGT  
AGAAAAAACC CGCAACCCTTGGGGTTATCCTGCACTTGAAGAAGAAGTAGAAAA  
AGGAATAAATATAGTGATAATTTGATTCTTCGTGCGCGTAGTAAAATGATTCAACCTCAA  
AGCCATTTGAATGTAGCAGATAACAGCGGGGCCGAGAATTGATGTGTATTGCAATCAT  
AGGAGCGAGT---AATCGACGATATGCTCATATTGGTGACGTTATTGTTGCTGTAATCAAG  
GAAGCAGTCCCAAATACACCTCTAGAAAGATCAGAAGTGATCAGAGCTGTAATTGTAC  
GTACTTGTAAGA ACTTAAACGCGAAAACGGTATGATAATACGATATGATGACAATGCT  
GCCGTTGTTATTGATCAAGAAGGAAATCCAAAAGGAACTCGAATTTTTGGTGCGATCG  
CCAGAGAAATTAAGACAGTTAAATTTCACTAAAATAATTTATTAGCACCTGAAGTATTA  
TGCTTAGTCCCAAAGAACCAGATTTTCGTAAACACCATAGAGGAAGAATGAAAGGAAT  
ATCGTATCGAGGTAATCGTATTTGCTTCGGTAGATACGCTCTTCAGACACTTGAACCCGC  
TTGGATCACATCTAGACAAATAGAAGCGGGACGAAGAGCAATGACACGAAATGCACG  
ACGCGGTGGAAAAATATGGGTACGTATTTCCAGATAAACAGTTACAGTAAGACCCA  
CGAAACACGTATGGGATCGGGGAAAGGATCTCCCGAATATTGGGTAGCTGTCGTTAA  
ACCAGGTAGAATACTTTATGAAATGGGTGGAGTAGCAGAAAATATAGCCAGAAAAGCT  
ATTTCCATAGCGGCGTCAAAAATGCCTATACGAACTCAATTCATTATTTTCGGGAATGACC  
AGAATTAACGCGGATATATAGCTCGGAGACGTAGAAAAAAAATTCGTTTATTTGCATC

AAGCTTCCGAGGGGCTCATTCAAGACTTACTCGAACTATTACTCAACAGAAAATAAGA  
GCTTTGGTTTCAGCTTATCGGGATAGAGGTAGGCCAAAAAGAGATTTTCGTCGTTTGTG  
GATCACTCGGATAAATGCAGTAATTCGAGACAAT--AAGGTATACTACAGTTATAGTAAA  
TTAATACACAATCTGTACAAGAGGCAATTGCTTCTTAATCGTAAAATACTTGCACAAATC  
GCTATATTAATAGGAATTGTCTTTATATGATTTCCAATGAGATCATAAAA-----  
-----ATGATAAAGGAAGTATACGCTTTAGGTCAACATATATGTATGTCCGCTCACAA  
AGCGGAAGAATAATTGATCAGATTCGCGGACGTTCTACGAAGAAACACTTATGATAC  
TAGAAATCATGCCTTATCGAGCATGTTATCCCATTTTAAAATTGGTTTATTCTGCAGCAG  
CAAATGCTAGTCACAATATGGGTTTCAACGAGGCAACTTTATTCATTAGTAAAGCTGAA  
GTCAACAAAAGTACTACTATGAAAAATTAAGCCTCGAGCTCGAGGACGGAGTTATC  
CGATAAAAAGACCCACTTGTTCATCTAACTATTGTCTTTCGAGATATATCTGTAAAT--GGA  
TTATGGGACAAAAAATGGATGGAATCAAATATGCAGTATTTACAGACAAAAGTATTCG  
GTTATTGGGGAAAAAT--CAATATACTTCTAATGTGCAATCAGGATCAACTAGGACAGAA  
ATAAAGCATTGGGTGCAACTCTTCTTTGGTGTCAAGGTAATAGCTATGAATAGTCATCG  
ACTCCCGGGAAAGGGTAGAAGAATGGGACCTATTAAGGGACATACAATGCATTACAGA  
CGTATGATCATTACGCTTCAACCGGGTTATTCTATTCCACCTCTTAGAAAGAAAAGAACT  
ATGGCAGTTCCAAAAAGCGCACTTCTATATCAAAAAACGGATTCGTAATAATATTTG  
GAAAAGAAAAGGATATTGGGCAGCGTTGAAAGCTTTTTTCGCTAGCGAAATCTCTTTCT  
ACGGGAATTCAAAAAGTTTTTTTGTGCGA-----CAAATCATGGCCAAGGGTAAAGATG  
CCCGAGTAACGGTTATTTTGAATGTACTAGTTGT--GTTTCGAAAC-----GTTAATAAGGG  
ATCAATGGGGATTTCCAGATATATACTCAAAAGAATCGACATAATACACCGAGTCGATT  
GGAATTGATAAAATTCTGTCCCCGTTGTTACAAACATACGATTCATGGGGAGATAAAGA  
AAATGAAAATAAGGGCCTCCGTTTCGTAATAATTTGTGAAAAATGTGACTGATCCGTAG  
GAGGAGACGAATTATAGTAATTTGTTCTAACCCGAGACACAAACAAAGACAAGGAATG  
GTTTCGAGAGAAAATAAGAGTATCTACTCGGACACTAAAGTGGAAGTGTGTTGAATCAA  
GAGCAGACAGTAAGCGTCTTTATTATGGACGCTTTATTCTGTCTCCACTTATGAAAGGT  
CAAGCCGATACAATAGGCATTGCAATGCGAAAAGCTTTGCTTGGAGAAATAGAAGGAA  
CATGTATCACACGTGCAAAATCTGAA-----AAAATACCACACGAATACTCTACCATAGTA  
GGTATTCAAGAATCAGTACATGAAATTTTCATGAATTTGAAAGAAATTGTATTGAGAAG  
TAATCTGTATGGAACTCGTGACGCGTCTATTTGTGTCAAGGGTCCTGGATATGTAAGTGC  
TCAAGACATCATCTTACCACCTTCTGTGGAAATCGTTGATAATACACAACATATAGCTAA  
CCTAACAGAACCAATTAATTTGTGTATTGAATTACAAATCGAGAGGAATCGCGGATATC  
GTATAAAAACGCCAAATAACTTTCAAGACGGAAAGTTAT-----CCTATAGATGCTGTATTCA  
TGCCTGTTTCGAAATGCGAATCATAGTATTATTCTTATGTGAATGGGAATGAAAAACAA  
GAGATACTTTTTCTCGAAATATGGACAAATGGAAGTTTAACTCCTAAAGAAGCACTTTA  
TGAAGCCTCTCGTAATTTGATTGATTTTTTTATTCCTTTTTTACATGCGGAAGAAGAA-----  
-AACTCCATTTAAAAACAATCAA---CACAAAGTGACTTTACCCCTTTTTACTTTTCAT  
GATAGATTGGCTAAA---CTAAGGAAAAATAAAAAA---GAAATAGCATTGAAATATATTTT  
TATTGACCAATCAGAATTGCCTCCTAGGATCTATAATTGCCTCAAAGGTCCAATATACA  
TACATTATTGGACCTTTTGAATAACAGTCCAGACGACCTTATGAAAATTAACATTTTCG  
CATAGAAGACGTAAAACATATATTAGACATTCTAGAAATAGAAAAACATTTTCGCA-----  
-----ATGCTTGGGAGTGGAAT--GAGAGAATGTCTACAATACCTGGGTTTAATCAG  
ATACAATTTGAAGGGTTTTGTAGGTTTCATTGATCAGGGCTTAACAGAAGAACTTTATAA  
GTTTCCAAAAATTGAAGATACAGATCAAGAAATTGAATTTCAATTATTTGTGGAACAT

ATCAATTGGTGGAACCATGATAAAAGAAAGAGATGCTGTATATGAATCACTCACATAT  
TCTTCTGAATTATACGTATCCGCGAGATTAATTTGGAAAACCAGTAGGGATATGCAAGA  
ACAAACAATTTTTATTGGAAACATTCCTCTAATGAATTCCTTGGGAACTTCTATAGTAAA  
TGGAATATACAGAATTGTGATCAGTCAAATATTGCAAAGCCCGGTATCTATTACCGGTC  
AGAATTGGACCATAAGGGAATTCGGTCTATACCGGCACCATAATATCAGATTGGGGAG  
GAAGATTAGAATTAGAGATTGATAGAAAAGCAAGGATATGGGCTCGTGTGAGTAGGAA  
ACAGAAAATATCTATTCTAGTTCTATTATCAGCTATGGGTTCGAATTTAAGAGAAATTCT  
CGAGAATGTTTGCTACCCTGAAAATTTTTTTGTCTTTCCTGAATGATAAGGAGAAAAAAA  
AAATTGGATCAAAAAGAAAATGCCATTTTGGAGTTTTATCAACAATTTTCGTGTGTAGGC  
GGAGATCCGGTATTTTCTGAATCCTTATGTAAGGAATTACAAAAGAAATTCCTTCAACA  
AAGATGTGAATTAGGAAGGATTGGTCGACGAAATCTGAACCGGAGACTGAATCTTGAT  
ATACCTCAGAACAATACATTTTTGTTACCGCGAGATATATTGGCAGCTGCGGATCATTG  
ATTGGAATGAAATTTGGAATGGGTACACTTGACGAT-----ATGAATCATTGAAAAATAA  
ACGTATTTCGTTCTGTAGCGGATCTCTTACAAGATCAATTCGGATTGGCTCTGGTTCGTTT  
AGAAAATATGGTTAGAGGAAGTATATGTGGAGCAATTAGG---CATAAATTGATA---CCGA  
CTCCTCAGAATTTGGTAACTTCAACTCCA-----TTAACAACCACTTATGAATCTTTTT  
TCGGATTACACCCATTATCTCAAGTTTTAGATCGAACTAATCCATTGACACAAATAGTTC  
ATGGGAGAAAATCGAGTTATTTGGGCCCTGGAGGATTGACAGGGCGAACCGCTAGTTT  
TCGGATACGAGATATCCATCCTAGTCATTATGGACGCATTTGCCAATTGACACGTCTGA  
AGGAATTAATGTTGGACTTATTGGATCATTAGCAATTCATGCAAGGATTGGTCATTGGGG  
A---TCTCTAGAAAGCCCATTTTAT-----GAAATTTCCGAGAGATCAAAAAA-----GTGC  
GGATGCTTTATTTATCACCAAGTAGAGATGAATACTATATGGTAGCGACAGGAAATCTT  
TGGCACTGAATCGAGGTATTCAGGAAGAACAGGTTGTTCCAGCTCGATACCGTCAAGA  
ATTCTTGACTATTGAATGGGAACAGGTTTCATCTTCGAAGTATTTTTCCCTTCCAATTTTT  
TCTATTGGAGCTTCCCTCATTCTTTTTATCGAGCATAATGATGCGAATCGTGCTTTAATG  
AGTTCTAATATGCAACGTCAAGCAGTCCCGCTTCTCGGTCCGAAAAGTGCATTGTTGG  
AACTGGGTTGGAACGCCAAGTGGCTCTCGATTCAGGGGTTCCCGCTCTAGCCGAACAC  
GGGGGAAAGATCATTTATACCGATACTGACAAGATCGTTTTATCGGGCAATGGGTATAC  
TCGAAGCATTCCATTAGTTATGTATCAACGTTCTAACAAAAATACTTGTATGCATCAAAA  
ATCCCAGGTTTCAGCAGGGTAAATGCATTAATAAAGGACAAATTTTAGCGGACGGTGCT  
GCTACAGTTGGTGGCGAACTTGCTTTGGGAAAAACGTAGTAGTAGCTTATATGCCATG  
GGAAGGTTACAATTTTGAAGATGCGGTAATAATTAGCGAGCGTCTGGTATATGAAGATA  
TTTATACTTCTTTTCACATACGGAAATATGAAATTCAAACTCATGTGACAAGCCACGGC-  
--CCTGAAAGAATCACTAACGAAATACCGCATCTAGAAGCCCACTTACTCCGCAATTTAG  
ACAAAACCGGAATTGTGATGCTGGGATCTTGGGTGGAGACGGGCGATATTTTAGTAGG  
TAAATTAACGCCTCAGATGGCGAAAGAA---TCATCGTATGCCCCGGAAGATAGATTATTA  
CGAGCCATACTTGGCATTTCAGGTATCCACTTCAAAGAACTTGTCTAAAACCTACCTAT  
AGGCGGTAGGGGTCGAGTTATTGATGTGAGATGGATCCAGAAAAAGGGG---GGTTCCA  
GTTATAATCCCGAAATGATTCGTGTATATATTTACAGAAACGTGAAATCAAAGTAGGC  
GATAAAGTAGCTGGAAGACATGGAAATAAGGGTATCGTTTTCAAAAATTTTGCCTAGAG  
AAGATATGCCTTATTTGCAAGATGGAAGACCCGTTGATATGGTCTTCAATCCATTAGGA  
GTACCCTCACGAATGAATGTAGGACAGATATTTGAATGCTCGCTCGGGTTAGCGGGGG  
GGTTGCTAGATAGACATTATCGAATAGTACCTTTTGATGAGAGATATGAACAAGAGGCT  
TCGAGAAAACCTAGTCTTTTCTGAATTATATGAAGCCAGTAAGCAAACAGCGAGTCCAT

GGGTATTTGAACCCGAGTATCCGGGAAAAAGCAGAATATTTGATGGAAGAACGGGAAA  
TCCTTTTGAACAACCTGTTATAATAGGAAAGCCTTATATCTTGAAATTAATTCATCAAGT  
TGATGATAAAATACACGGACGTTCCAGTGGACATTATGCACTTGTTACACAACAACCCC  
TTAGAGGAAGGGCTAAGCAAGGGGGACAACGAGTGGGAGAAATGGAGGTTTGGGCT  
CTAGAGGGATTCCGGTGTGCTCATATTTTACAAGAGATGCTTACTTATAAATCTGATCATA  
TTCGAGCTCGGCAAGAAGTACTTGGTACTACGATCATTGGAGGAACAATACCTAAACC  
TGAGGATGCTCCAGAATCTTTTCGATTGCTCGTTTCGAGAACTACGATCTTTGGCTTTGG  
AACTGAATCATTTCCTTGTATCTGAGAAGAAGTCCAGATTAATAGGAAGGAAGCTATG  
AATCAGAAAATTTCTTCTATGATCGATCGGTATAAACATCAACAACCTCCGAATTGGATTA  
GTTTCTCCTCAACAAATAAGTGCTTGGGCCAATAAAATCCTACCTAATGGAGAGATAGT  
TGGAGAGGTGACAAAACCCTATACTTTTCATTACAAAACCAATAAACCTGAAAAAGAT  
GGATTATTTTGTGAAAGAATTTTGGGCCTATAAAAAGCGGGATTTGTGCTTGTGGAAA  
TTATCGAGTAATCGGAGATAAAAAAGAAGATTCGAAATTTTGTGAACAATGCGGAGTC  
GAATTTGTTGATTCTCGGATACGAAGATATCAAATGGGCTACATCAAACCTGGCATGCC  
AGTAACCCATGTGTGGTATTTGAAACGTCTTCTAGTTATATCGCGAATATTTAGATAA  
ACCTCTTAAAGAATTAGAAGGCTTAGTATATTGCGAT-----TTTTCTTTGCTAGGCC---A  
TCGCTAAAAAACCTACTTTCTTACGATTACGGGGTTCATTTCGAATATGAAATCCAATCCT  
GGAAATACAGCATCCCACCTTTTTTTTACTACCCAAGGCTTCGATACATTCGAAATCGA  
GAAATTTCTACCGGAGCAGGTGCTATCCGAGAACAATTAGCCGATCTGGATTTGCGAAT  
TATTATAGATTATTCGTTGGTAGAATGGAAAGAATTAGGGGAAGAA---GGGTCCGCGGG  
TAATGAATGGGAAGATCGAAAAGTTGGAAGAAGAAAGGATTTTTTGGTTAGACGTATG  
GAATTAGCTAAGCATTTTATTTCGAACAAATATAGAACCCGAATGGATGGTTTTATGTCTA  
TTACCAGTCTTCCCTCCCGAGTTGAGACCGATCATTTCAGATAGATGGGGGTAACCTAAT  
GAGCTCGGATATTAATGAACTCTATAGAAGAGTTATCTATCGGAACAATACTCTTATCGA  
TCTATTAACAACAAGTAGATCTACGCCAGGAGAATTAGTAATGTGTCAGGAGAAATTGG  
TACAAGAAGCCGTGGATACACTTCTTGATAATGGAATCCGCGGACAACCAATGAGGGA  
TGGTCATAATAAGGTTTACAAGTCGTTTTTCAGATGTAATTGAAGGCAAAGAGGGAAGA  
TTTTCGTGAGACTCTGCTTGGCAAACGGGTCGATTATTCAGGACGTTCTGTTATTGTCGT  
CGGTCCCTCACTTTCATTACATCGATGTGGATTGCCTCGCGAAATCGCAATAGAGCTTTT  
CCAGACATTTGTAATTCGTGGTCTAATTAGACAACATTTTGTCTCGAACATAGGAGTTG  
CTAAGAGTAAAATTCGGCAAAAAGAACCGATTGTATGGGAAATACTTCAGGAAGTTAT  
GCAGGGGCATCCCGTATTGCTGAATAGAGCGCCTACTCTGCATAGATTAGGCATCCAGG  
CCTTCCAACCTATTTTAGTGGAAGGACGTGCTATTTGTTTACATCCATTAGTTTGTAAAG  
GATTC AATGCAGACTTTGATGGGGATCAAATGGCTGTTTCATGTACCTTTATCTTTGGAG  
GCTCAAGCGGAGGCTCGTTTACTTATGTTTTCTCATATGAATCTCTTGTCTCCAGCTATT  
GGGGATCCGATTTCTGTACCAACTCAAGATATGCTTATTGGGCTCTATGTATTAACGAGC  
GGTAATCGCCGAGGTATTTGTGCAAATCGGTATAATCCATGTAATCGCAAAAAT-----C  
ATCAAAAATGAAAAAATTGACGATAATGACTATAAGTATACTAAAGAA---GAACCTTTTTT  
TTGTAATTCCTATGATGCAATTGGAGCTTATCGACAGAAAAGAATCCATTTAGATAGTCC  
TTTGTGGCTCCGATGGCGACTAGATCAACGC---GTTATTGCTTCA-----AGAGAAGCCCC  
TATCGAAGTTCATATGAATCTTTGGGTACCCATCATGAGATTTATGGGTCCTATCTAATC  
ATAAAAAGTATAAAAAAAGAAATCTTTGTATATACATTCGAACCACTGTTGGTCATATT  
TCTCTTTATCGAGAAATCGAAGAAGCTATACAAGGATTTTGCCGGGCCTGCTCATATGG  
TACC-----ATGGAGGTA CTTATGGCGGAACGGGCCGATCTGGTCTTTTACA

ATAAAGTGATAGATGGAACTGCCATTAAACGACTTATTAGAAGATTAATAGATCACTTCG  
GAATGGCATATACATCACATATCCTGGATCAAATAAAGACTCTGGGGTCCAGCAAGCC  
ACTGCTACATCCATTTTCATTAGGAATTGATGATCTTTTAAACAATACCTTCTAAGGGATGG  
CTAGTCCAAGATGCTGAACAACAAAGTTTGGATTTTGGAAAAACACCATCATTATGGAA  
ATGTACACGCAGTAGAAAAATTACGCCAGTCCATTGAGATATGGTATGCTACAAGTGAA  
TATTTGCGACAAGAAATGAATCCTAATTTTAGGATGACTGATCCTTTTAAATCCAGTCCAT  
ATAATGTCTTTTTTCGGGAGCTCGAGGAAATGCATCTCAAGTACACCAATTAGTAGGTAT  
GAGAGGATTAATGTCGGATCCACAAGGACAAATGATTGATTTACCCATTCAAAGCAATT  
TACGTGAAGGGCTGTCCTTAACAGAATATATCATTCTTGCTACGGAGCCCGTAAAGGA  
GTTGTGGATACTGCTGTACGAACATCGGATGCTGGATATCTTACACGCAGACTTGTTGA  
AGTAGTTCAACACATTGTTGTACGTAGAACAGATTGTGGCACCATCCGCGGGATTTCTG  
TGAGTCCTCGAAATGGGATGATGCCG---GAAAGAATTTTTATTCAAACATTAATTGGTTCG  
TGTATTAGCAGACAATATATATATGGGCCCGCGATGCATTGGCATTAGAAATCAAGATAT  
TGGTATTGGACTTGTCAATCGATTACATAACC-----TTTCAAACACAACCAATATC  
TATTCGTACCCCTTTACCTGTAGAAGTACATTTTGGATCTGCCGATTATGTTATGGACG  
AAGTCTACTCATGGTGACCTGGTTCGAATTGGGAGAAGCTGTAGGTATTATTGCGGGTC  
AATCTATTGGAGAACC GGCACTCAACTAACATTAAGAACTTTTCATACCGGCGGAGTA  
TTCACAGGGGGTACTGCAGAACATATACGAGCTCCTTCTAATGGAAAAATAAAATTCAA  
TGAGGATTTGGTTCATCCACACGTACACGTCATGGGCATCCTGCCTTTTTATGTTATATA  
TACTTGTATGTA ACTATTGAGAGTGAGGATATTATACATAACGTGACTATTCCACCAACA  
AGTTTTCTTTTAGTTCAAATAATCAATATGTAGAATCAGAACAAGTGATTGCTGAGATT  
CGCGCGGGAGCATCCACTTTC---AATTTTAAAGAGAGGGTTAGAAAACATATTTATTCT  
GACTCAGAGGGAGAA---ATGCACTGGAGTACTGATGTGTACCATGCACCTGAATTTACA  
TATAGTAATGTCCATCTCTTACCAAAAACAAGTCATTTATGGATATTATCAGGGGGTTCG  
TGCAGC-----TCCAGTGCAGTCCCTTTTTCTACTCTACAAGGATCAAGATCAAATTAACGT  
TCAT-----TCTCTTTCTGTGCAAGGA---AGATATATTTCTAGCCTT--TCAGTAAATAATGAT  
CAA---GTGAGACACAAATTTTTGATTTCCGATCCTTCTGGTAAA---GAA-----  
-----ATATGTACGGGTCATTGTAATCTCATATATCCTGCT---ATTTTCCACGGGAAT  
TCTGAT-----TTATTGGCAACGAGGCGAAGAAATAGATTCATCATTCAATTTGAATCACTT  
CAAGAACGAGAGAAAGAACTACTGCCCTTTCCGGTATTTTCGATTGAAATACCCATAAA  
T-----GGTATTTTTTCGTAGAAATAGTATTCTTGCTTATTTTCGATGATCCTCAATACAAAAGA  
AATAGTTCAGGAATTACTAAATATGGGACTATAGGAGTGCATTCAATCCTCAAAAAGA  
GGAT-----TTGATTGAGTATCGG---GGAGTCAAAGAATTTAAGCCAAAATACATGAAAGT  
AGATCGATTTTTTTTCATTCCCAGGAAGTGCATATTTTACCTGAATCTTCTTCCATCATG  
GTACGGAACAATAGTATCATTGGAGTAGCTACACGAATCACCTTAAGTATAAGAAGCCG  
AGTAGGCGGATTGGTCCGAGTGGAGAAAAAAAAAAAAAAAAAGGATTGAACTAAAAATATT  
TTCTGGAGATATCCATTTTCTGGAAAAATGGATAAGATATCCCACACAATGGCATCTT  
GATACCACCCGAAAGGTTAAAAAAA-----ATTTCTAAGAAATCAAAACAA-----TTGAAA  
AATTGGATTTATGTCCAATGG-----ATCACACCTAACAAGAAAAAG-----TATTTTGT  
GGTTCGACCTGTAATCATATATGAAATAGCGGACGGTATAAATTTAGTAACACTTTTCCC  
ACAGGATCTGTTGCAAGAAAGGGATAATCTGGAGCTTAGAGTTGTCAATTATATCCTTT  
ATGGAATGGCAAACCAATTCGGGGAATTTCTGGCACAAGTATTCAATTAGTTCGGACT  
TGTTTAGTCTTGAATTGGGACCAAGACAAA-----AAAAGTTCTTCTATTGAAGAAGCC  
CGCGCTTCTTTGTTGAAGTAAGTACAAATGGTCTGGTTCGAGATTCCTAAGAATCGA



CTTAGTTAAATCGCATATTTTCGTATATCAGAAAAAGGAAAGATCCGTCAGGTTTCAGGAT  
TGATCTCT---AATAATGAGTCCGATCGCACCAATATCAATCCATTTTATTCTATTTATTCCA  
AGGCAAGG-----GTTGAACAATCCCTTAGTCAAATCAAGGAACTATTTCGTACGT  
TGTTGAATAGT-----AATAAAGAACGCCAATCTTTGATAATTTTGTTCAGCATCTAATTGT  
TTTCAAATGGATCCA-----TTCAACGATGTAAAATATTATAAT-----GTGATAAAAGAAT  
CA---CCTATAATTCCAATTAGGAATTCGTTAGGTCCTTTAGGGGCA-----GTACCTCAAAT  
TGCGAATTTT-----TATTCATTTTATCAGTTAATAACT-----CATAATCAGATCGCG---GTAAA  
TAAATATTTGCAACTTGAC-----AAT---TTAAAACAGACTTTTCACCTAAAT-----AAA---TA  
TTATTTAATGGATGAAAACGGG---GGAATTTTAAATTCG---GATCCATGCAGTAATATCGT  
TTTGAATACATTCAATTTGAATTGGCATTCTCCATCATAATTATTGTGAAGAAAGACC  
CATCATAATTAGC---CTTGGACAGTTTATTTGTGAAAATGTATGTATAGCCAAAAACAGA  
CCA-----CACCTAAAATCGGGTCAAATTTAATTGTTCAA---GTTGATTCTGTAGTAATA  
AGATCAGCTAAGCCTTATTTGGCCACTTCAGGAGCAACTGTTTCATCGCCATTATGGAGA  
AATCCTTTACGAAGGAGATACGTTAGTTACATTTGTATATGAAAAATCGCGATCTGGTGA  
TATAACGCAGGGTCTTCCAAAAGTGGAACAAGTGTTAGAAGTGCGTTTCGATTGATTCA  
ATATCGATGAGCCTAGAAAAGAGAGTTGAGGGTTGGAACGAGCGTATAACAAAAATTC  
TTGGAATGCCTTGGGGATTTTTGATTGGTGCTGAACTAACTATAGTGCAAAGCCGTATT  
TCTTTGGTTAATAAGATCCAAAAGTTTATCGATCCCAGGGGGTGGCGATCCATAATAG  
ACATATAGAAATTATTGTACGTCAAATAACATCAAAAAGTGTTGGTTTCAGAA-----GAT  
GGAATGTCTAATGTTTTTTCACCTGGAGAACTAATTGGATTGTTGCGAGCAGAACGAAC  
GGGGCGTGCTTTGGAAGAAGCGATCTGTTACCGAGCCATATTATTGGGAATAACGAAA  
GCATCTCTAAATACTCAAAGTTTCATATCCGAAGCAAGTTTTCAAGAACTGCTCGAGT  
TTTAGCAAAAAGCCGCTCTCCGAGGTTCGTATCGATTGGTTGAAAGGTCTGAAAGAGAAC  
GTTGTTCTAGGAGGGATGATACCCGTTGGTACCGGATTCAAAGGATTAGCGCCCCGTT  
G-----AGGCAACATAACAACATTCCTTTGGAACCAAAAAGAAGAAT-----TTTTTCGAG  
GGGGAATGAGA-----GATATTTTGTTCACCACAGAGAATTATGTGATTTTTGCATTC  
AAAAAATTTACATGATACATCAGAACAATCATTTTTAGGATTTAATGATTCC-----  
-ATGACAAGAAGATATTGGAACATCAATTTGGAAGAGATGATGGAAGCAGGAGTTCATT  
TTGGTCATGGTACTAGGAAATGGAATCCTCGAATGGCACCCCTATATCTCTGCAAAGCGT  
AAAGGTATTCATATTATAAATCTTACTAGAAGTCTCGTTTTTTTATCAGAAGCTTGTGATT  
TAGTTTTTTGATGCAGCAAGTAGGGGAAAACAATCTTAATTGTTGGTACAAAAATAAA  
GCAGCTGATTAGTAGCACGGGCTGCAATAAGGGCTCGGTGTCATTATGTTAATAAAAA  
ATGGCTCGGTGGTATGTTAACGAATTGGTCTACTACAGAAACGAGACTTCATAAGTTCA  
GGGACTTGAGAACGGAACAAAAGACAGGGGGGCTCAACCGTCTTCCGAAAAGAGAT  
GCCGCTATGTTGAAGAGACAATTATCTCACTTGCAAACATATCTGGGTGGGATAAAATAT  
ATGACAGGGTTACCCGATATTGTAATAATCGGTGATCAGCAAGAAGAATACAGGGCTCT  
TCAAGAATGTATCACTTTGGGAATTCCAACGATTTGTTAATCGATACAAATTGTGACCC  
GGATCTCGCAGATATTTTCGATTCCAGCGAATGATGACGCTATAGCTTCAATTCGATTAAT  
TCTTAACAAATTAGTATTTGCAATTTGTGAGGGTCGTTCT--AGCTCTATACGAAATCCTA  
TGGGACAAAAATAAATCCACTCGGTTTTAGACTTGGTGCAAACCAAGGGCATCATTC  
TCTTTGGTTTTGCACAACCCCAAAAATATTCTGAGGGTCTACAAGAAGATCAAAAAATA  
CGAGATTGTATCAAGAATTATGTACAAAAAATATGAGAATATTCTCTGGT---GTTGAGG  
GAATTTACGTATAGAGATTCAAAAAAGAATTGATCTCATTACAGGTGATAATCTATATGG  
GATCCCAAAGTTATTAATAGAAGGT-----GGA-----TCTCGAAGAATCGAAGAATTACAG

ATGAATGTACAAAAAGAATTAATTTGTGTGAACCAAAAACTCAACATTGCTATTACAAG  
AATTGCAAACCCCTTATGGACACCCTAATATTCTTGCAGAATTTATAGCTGGACAATTA  
GAATAGAGTTTCATTTCGGAAAGCAATGAAAAAAGCTATTGAATTAAGTGAACAGGCA  
GGTACAAAGGGAATTCAGTACAAATTGCAGGGCGCCTAGACGGAAAAGAAATTGCA  
CGTGTGCAATGGATCAGAGAGGGTAGGGTTCCTCTACAAACCATTTCGAGCTAAAATTG  
ATTATTGTTCCCTATACAGTTCGAACTATCTATGGGGTATTAGGCATCAAAATTTGGATATT  
TGTAGACGAGGAAATGTCGCGTTACAGAGGACCTCGTTTTCAAAAAAATACGCCGCTG  
GGGGCTTTACCGGGACTAACTAGTAAAAGGCCAGAACCGGAAGCGATCTTAAAAAC  
CAATCGCGCTCTGGTAAA---AAATCTCAATATCGTATTTCGTTTAGAAGAAAAACAAAA  
TTGCGTTTTTCATTATGGTCTTACAGAACGACAATTACTAAAATATGTTTCGTATCGCTGGA  
AAAGCCAAAGGATCAACGGGTCAAGTTTTACTACAATTACTTGAAATGCGTTTTGGATA  
ACATCCTTTTTTCGATTGGGTATGGCTTCGACTATTTCTCAAGCCCGCCAATTAGTTAATC  
ATAGACATATTTTAGTTAATGGTTGTATAGTAGATATACCAAGTTATCGTTGCAAACCCCG  
CGATATTATTACAGCAAAGGATGAACAAAGATCTAGAGCGCTGATTCAAAATTATCTTG  
ATTCATCCCCCAT---GAGGAATTGCCAAAAGATTTGACTCTTCATCCAGTCCAA-----TA  
TAAAGGATTAGTCAATCAAATAATAGATAGTAAATCGGTCGGTTTTGAAAATAAATGAATT  
GTTAGTTGTAGAATATTATTCTCGTCAGACTATGTCACGTCGAGGTACTGCAGAAGAAA  
AAATTGCAAATCCGATCCAATTTATCGTAATCGATTAGTTAACATGTTGGTTAACCGTA  
TTCTGAAACACGGAAAAAATCATTGGCTTATCAAATTCTCTATCGAGCCATGAAAAAG  
ATTCAACAAAAGACAGAAACAAATCCACTATCTGTTTTACGTCAAGCAATACGTGGAG  
TAACTCCCGATATAGCAGTAAAGGCAAGACGTGTAGGCGGATCAACTCATCAAGTTCC  
CATTGAAATAGGATCCACACAAGGAAAAGCACTTGCCATTCGTTGGTTATTAGGGGCAT  
CCCGAAAACGTCCGGGTGCGAAATATGGCTTTCAAATTAAGTTCCGAATTAGTGGATGCT  
GCCAAAGGGAGTGGCGATGCCATACGTAAAAAGGAAGAGACTCATAGAATGGCAGAG  
GCAAATAGAGCTTTTGCACATTTTCGTATGGGTAAGGACACTATTGCTAACGTAATAAC  
CTCTATACGCAATGCTGACATGAATAGAAAAGGAATGGTTTCAATACCATCTACTAACA  
TCACCGAAAACATTGTTAAAATACTTTTACGAGAAGGTTTTATTGAAAACGTGAGGAA  
ACATCGAGAAAGCAACAAAGATTTTTTGGTTTTAACCTACGACATAGAAGG-----AAT  
AGGAAAGGAACATATAAACT---ATT-----TTAAATTTAAAACGGATCAGTCGACCCGGT  
CTACGAATCTATTCTAACTATCAACGAATTCCTAGAATTTTAGGAGGGATGGGGATTGTA  
ATTCTTTCTACTTCTCGGGGTATAATGACAGACCGAGAGGCTCGACTAGAAGGAATCGG  
CGGAGAAATTTTTGTTATATATGGATGGCAAACCCATACCAAGAATTAGTTCACGTA  
GGAATGGACGTATTGGTTCACGTACAAGTACGCGTAGAATACCAAAGGGAGTTATTCAT  
GTTCAAGCAAGTTTCAACAATACAATTGTAAGTGTACAGATGTACGGGGTCGAGTAAT  
TTCTTGGTCCCTCCGCCGTTACTTGTGGATTCAAAGGTACAAGAAGAGGGACACCATTT  
GCCGCTCAAACCTGCAGCAGGAAATGCTATTTCGGACAGTAGTGGATCAAGGTATGCAAC  
GAGCAGAAGTCATGATAAAGGGCCCTGGTCTCGGAAGAGATGCAGCATTAAAGAGCTAT  
TCGTAGAAGCGGTATACTATTAAGTTTCATACGGGATGTAACCCCTATGCCCCATAATGG  
TTGTAGGCCCCCTAAAAAAGACGTGTGATGCCAACTATTAACAACCTATTAGAAAC  
ACAAGACAGCCAATCATAAATTCACAAAATCGCCCCGCCCTTCGGGGATGCCCTCAGC  
GTCGGGGAACATGTACTAGGGTGTATACTATCACCCCAAAAAACCAAACCTCTGCCTTA  
CGTAAAGTTGCCAGAGTACGCTTAACCTCTGGATTTGAAATCACTGCTTATATACCTGGT  
ATTGGCCATAATTTACAAGAACATTCTGTAGTCTTAGTAAGAGGGGGGAAGGGTTAAGGA  
TTTACCCGGTGTGAGATATCACATTGTTTCGAGGAACCCCTAGATGCTGTGCGAGTAAAGG

ATCGTCAACAAGGGCGTTCTAAATATGGGGTCAAAAAGCCAAAAATGGCAAGGAAAA  
GTTTGATTGAGAGGGAGAAAAAGAGACAAGAATTGGAACAAAAATATCATTGATTGCG  
TCGATCCTCAAAAAAGAAATAAGC-----AAAGTTCCATCGTTGAGTGAGAAATGGG  
AAATTCATGGAAAGTTACAATCCCACCGCGTAATAGTGCACCTACACGTCTTCATCGA  
CGTTGTTTTTAACCGGAAGACCGAGAGCTAACTATCGAGACTTTGGGTTATCCGGACA  
CATACTTCGTGAAATGGTTCACGCATGTTTGTTCCTGGGGCAACAAGATCAAGTTGGA  
TGGTAAAAAATGCATTCATCTCAGTTATTTGCAAGAA---GAAGAAAAAAAAGAAAAC  
AGAGGGTCTGTTGAATTTCAAGTATTCAGTTTCACCAATAAGATACGAAGACTTACTTC  
ACATTTGGAATTGCACAAAAAGACTATTTATCTCAAAGAGGTCTACGTAAAATTCTGG  
GTAAACGCCAACGGTTGCTGTCTTACTTGTCAAAGAAAAATAGAATACGTTATAAAGAA  
TTAATTAATCAATTTGATATTCGGGAGTCAAAAACCTCGT-----ATGGTAAAACCTTCGTTTA  
AAACGATGTGGTAGAAAGCAACGTGCCGTTTATCGAATCGTTGCAATTGATGTTTCGATC  
CCGAAGAGAAGGAAGAGATCTTCGTAAAGTGGGTTTTTATGATCCGATAAAGAATCAA  
ACCTATTTAAATGTTCCGGCTATTCTATATTTCTTGAAAAAGGCGCTCAACCTACAGTA  
ACTGTTTCATGATATTTCAAAGAAGGCAGGGGTTTTTACGGAACCTCACCTTAATCAA----  
-----ATGGATAAATCCAAGCGACTCTTTCTTAAATCCAAACGATCTTTTCGTAGGCGT  
TTGCCCCCGATCCAATCGGGGATCGAATTGATTATAGAAACATGAGTTAATTAGTCGA  
TTTATTAGTGAACAAGGAAAAATATTATCTAGACGGGTAAATAGATTGACCTTAAACA  
GCAACGATTAATTACTATTGCTATAAAACAAGCTCGTATTTTATCTTTGTTACCTTTTCTT  
ATAATGAG-----AAACAATTTGAAAGAAGCGAGTCGACCGCTAGAACTATTGGTCTTA  
GAACCAGAACTAAAGTGACCCGTTCACTAAAAAAAATCCTTTTTTATGCAAATCATTTA  
TTAAGAAAAATAAAAAAGCTTAACACAAAGGCAGAAAAAGAAATAATAGTAACTTGG  
TCCCAGCATCTACCATTATACCCACAATGATCGGCCATACTATTGCTATTCATAATGGA  
AAGGAGCATTTGCCTATTTATATAACAGACCGTATGGTAGGTCATAAATTGGGAGAATTT  
GCGCCTACGCTAAATTTCCGAGGACACGCGAAAAATGATAATAGATCTCGCCGTATGAT  
TTTAAATCTTTTATACTAGGTAATCTAGTATCCTTATGCATGAAGATAATAAATTCGGTC  
GTTGTGGTTCGGACTCTATTATGGATTTCTGACCACATTCTCCATAGGGCCCTCTTATCTC  
TTCTTCTCCGAGCTCGGGTTATGGAAGAAGGA-----ACCGAGAAGAAAGTATCAGC  
AACAACTGGTTTTATTACGGGACAGCTCATGATGTTTCATATCGATCTATTATGCGCCTCT  
GCATCTAGCATTGGGTAGACCTCATACAATAACTGTCCTAGCTCTACCGTATCTTTTGTT  
TCATTTCTTCTGGAACAATCACAAACTTTTTTGATTATGGATCTACTACCAGAACTC  
AATGCGTAATCTTAGCATTCAATGTGTATTCCTGAATAATCTCATTTTTCAATTATTCAAC  
CATTTCATTTTACCAAGTTCAATGTTAGTCAGATTAGTGAACATTTCTATGTTTCGATGC  
AACAAACAAGATGTTATTTGTAACAAGTAGTTTTGTTGGTTGGTTAATTGGTCACATTTTA  
TTCATGAAATGGGTTGGATTGGTATTAGTCTGGATACAGCAAAATAATTATATTAGATCT--  
-ATTAGATCTAATAAGTACCTTGTGTCAGAATTGAGAAATTCTATGGCTCGAATCTTTAGT  
ATTCTCTTATTTATTACCTGTGTCTCCTATTTAGGCAGAATACCGTCACCCATTTTTACTA  
AGAACTGAAAGAAACCGAAGAAGATAAACCTCTTGTGACTATTCTTTTCGACTATAA  
ACGATGGAATCGTCCATTGCGATATATAAAAAAGGCTCAATCTTTAAATGCTGTAAGAA  
ATGAAATGTCACAATATTTTTTTTATACATGTCAAAGTGAGGGAAAAGAAAGAATATCT  
TTTACATATCCACCTAGTGTATCCACTTTTTTGGAAATGATAGAAAGAAAGATATCTCTG  
TTCACATCAGAACAATTATCTTCTGATGAATTAGATAAGCATTGGCGTCATCCCAATGAA  
CAAAAAAGAAACAATTTAAACAAGAAATTTCTAAATAGAGTCGAAATTTCTAGAT-----  
CTTGCTCTAGATGCACTAGAAAAAAGGACTCGATTATGTAATGATAAAACTAAAAAAG

AATATTTTCCAAAAACATATGATCCTTTTTTTGAAACGGACCCTACCGAGGCCGAATCAAAA  
ATTTGTTTTTCACTTAGAGAGAATACTTTTATAAATAAAAATTCATGGTATCTTTTACCAAAA  
AAATGGAACATAAAGATTACAACGATAAATCTATTGGAATAAAAAGAAATCAGTAAAAA  
AGTTCCTAGATGGTCATACAAATTAATCGATTTAGAACAAGAGCATGGAGAAGAGATTC  
GTTCAAGAAAAGCCAAACGTGTAATAATTTACACTGATGCTTTGATACGTTATTACAAA  
CTATCGGATTTTCGTCGAGACATAATCAAAGGCTCGATGCGCGCTCAAAGACGTA AAA  
CAGTTATTTGGAACTGTTTCAAGCAAATGTGCATTCTCCTCTTTTTTTTTGACAGAATAG  
ACAAACCTTTT-----TTTTTTTTTTTTGATATCCCCGGACTGCTGAAAACCTTTTTTTAAAA  
ATAGAGAAGAAAAAATACGTATAGAAATAGCGGAAACATGGGATAGCATTCCATTTGCT  
CAAGTAATAAGAGGTCCTTTGTTAGTA ACTCAATCAATTCTTAGAAAATATATTGTATTA  
CCCTCATTGATAATAGCGAAAAATATTATACGTATGCTATTTTTTTCAATTTCCCGAATGGT  
CCGAGGATTTAAAAGATTGGAAGAACGAAATGCATGTTAAATGCACCTATAATGGTGTT  
CCATTATCAGAAAATGAATTTCCGAAAAACTGGTTAACAGATGGTATTCAGATAAAGAT  
CCTATTTCTTTTTCATCTGAAACCTTGGCACAGATCTAAGCAAAAAAAAAAAAAATGATT  
TTTGTTTTTAAACAGTTTTGGGACTGGAAGCTCAACGGCCTTTTGGTTCTCCCGAAAA  
CGAATTTCAATTTTTGAACCCATTTTAAAGGAATTCGAAAAAAAAAATGATAAAATTGAA  
A-----AAGTTGCTTCGAAATATCGAAAAAGAAACAAAA  
AATGGGTCATCCAAAATATTCTC-----TTTCTAAAAGAAATAATAAAGA ACTCCCAAAA  
AGAAACGATTTGATAATCAGTAATCGAATGATTCACGGATCG---ATTCCAATTCTATCTAT  
GAATTGGGCAAATTATTCATTGAGAGAAAAAAAATGAAAGATCTGACTGATAGAACA  
AACACAATAATAAAGAAAATAGAAAAAATTAGAAAAGACAAGAAAAAGAACAAA-----  
ATAAGTTATGATGATAAAAGATTAGAATCGCAAAAAATATTTGGCAGATATTA AAA-----  
AATGTTGATTAATTCGTAATCGCATCATTTTTTAAACATTTTTTCGTTGAAAAGATATACA  
TAGATATTCTTCTATGTATGATTAATATCCCAGGATTAATGCACA ACTT-----TG  
GGACTTATCGTACTTGTTCGGAAGCATATGTATTTTACAAAATATCACAAACG---TTTATTA  
ACTTATCTAAGTTAAGACCCGTCTTTCAATATACATCTCTTTTTCTTAAAGAAATGCAATAA  
AGGATTCTTTTGCACAAGGAATATTTCAATCCGAATTAAGAGAAAAGAATCTTCCA---TC  
TGTAATGAATCAATGGAAAACTGGTTAAGAGGTCATTATCAATACGATTTATATACGAT  
TAGATGGTCCAGATTAGTACCACAAAAATGGCGAAATAGAGTCAGTCAAGGTCCTATG  
GCCAAAAATAAAAACAAATGTCATTCA-----TATGAAAAAACCTATTAATTCATTACAA  
AAAACAA---AATTTTAAAAACAATATATATATGATCTTTTATCATATAAATCTATTAATAA  
TAATATTATAGATCCGGATAGAAAATATTTTGATTGTAGAATTCTCAATTTTTGTCTAAAA  
-----ATAAGTCGTTGGTTCTTCCCAGAATTTGTGATACTTTATAATGT  
ATATAAGATTACCCCGTGGATCATAACCAATCAAGTTACTTCTTTTAAATAAAAAC-----AC  
GGAAGTGGAGCTTGATTCCTTCTAAAAGGTATTTGCGTTTTCAATTGAGATGGGAT---  
-----AATCCAAGAATAATCAATAACATCAAAGTATATTGTCTCCTGCTTAGACTGAAAAAT  
CCAAGAGAAATTGCTATATCTTCTATTCAAAGGGGAGAAATGAGTCTGGATATTCTGAT  
AGTTCAGAAGGATTTAACTCTTACAGAATTGATGCAAAGGGGAATATTGATTATCGAAC  
CAGTTCGTCTGTCTGTA AAAAATGATGGACAATTTCTTATGTATCAAACCATAGGTATTT  
CATTAGTTCGTAAGAATAAACGCCATTATGAT---TTGCTTGTTCCTGAAAATATTTTATCC  
CCTCGAGGTCGTAGAGAGTTGAGAATTCAAATTTGTTTCAGATTTCTTTGGCCCAATTA  
TCGATTAGAAGATTTAGCTTGTATGAATCGTTATTGGTTTGATACGAATAATGGCAGTCG  
TTTTAGTATGGTAAGGATACATATGTATCCAATGAAAGGACATCAATTCAAATCCTGGAT  
TTTCGAATTGAGAGAGATATTGAGAGAGATCAAGAATTCTCACTATTTCTTAGATTCATG

GACCCAATTCAATTCAGTGGGATCTTTCATTCACATTTTTTCCATCAAGAACGTTTTAT  
AAAACCTTAGACTCCCGAATTTGGAGTATCCTACTTTCA---CGCAATTCA-----CAGGG  
TTCAACAAGCAATCGATATTCACGATC---ACGATCAAGGGTGTAGTACTATTTGTAGTA  
GCG---GTCCTTATATATCGT-----ATTAACAATCGAAAGATGGTCGAAAGAAAAAATC  
TCTATTTGACAGGGTTTCTTCT---ATACCTATGAATTCATTGGACCCAGAAAT  
GATACATTGGAAGAATCTTTT---GGCTCTTCCAATATCAATAGGTTGATTGTTTCG---CTC  
CTGTATCTTCCAAAAGGAAAAAAGATCTCTGAGAGCTGTTTCTGGATCCGAAAGAGA  
GTAATTGGGTTCTCCCAATAACT-----AAAAAGTGTATCATGCCTGAATCTAACTGG  
GGTTCGCGGTGGTGGAGGAACTGGATCGGAAAAAAGAGG-----GATTCCAGTTGTAAG  
ATATCTAAT-----GAAACCGTCGCTGGAATTGAGATCTCATTCAAAGAGAAAGATATCA  
AA---TATCTGGAGTTTCTTTTTGTATATTATATGGAT-----GATCAGATCCGCAAGGACCAT  
GATTGGGAATTGTTTGATCGTCTTCTCCGAGGAAGAGGCGAAACATAATCAACTTG---  
--AATTCGGGACAGCTATTCGAAATCTTAGTGAAAGACTGGATTTGTTATCTCATGTTTGC  
TTTTCTGTAATAAATACCAATTGAAGTGGAGGGC---TTCTTCAAACAACAAGGA---GCT  
GGGTCAACTATTCAATCAAATGATATTGAGCATGTTTCCCAT-----CTCTTCTCGAGAAAC  
AAGTGGGCTATTTCTTTGCAAAATTGTGCTCAATTTTCATATGTGGCAATTCCGCCAAGAT  
CTCTTCTTT-----AGTTGGGCCAAG---AATCCACACGAATCGGATTTTTTTGAGGAAC---  
ATATCGAGAGAGAATTGGATTTGGTTAGACAATGTGTGGTTGGTAAACAAGGATCGG---  
-----TTTTTTAGC-----AAGGTACGGAATGTATTGTCAAATATTCAATATGATTCC-----AC  
AAGA-----TCTAGTTTCGTTCAAGTAACGGATTCTAGCCAATTGAAAGGATCTTCT---GAT  
CAATCCAGAGATCATTTCGATTCCATTAGT-----AATGAGGATTCGGAA-----  
-----TATCACACATTGATCAATCAAAGAGAGATTCAACAATAAAAGAAAG  
AGCGATTCTT---TGGGAT-----CCTTCTTTCTTCAAACGGAACGAACAGAGATAGAATC  
AGAC-----CGATTCCCTAAA-----TGCTTTTCTGGATATTCC-----TCAATGTCCCGGCTATT  
CACG---GAACGTGAGAAGCAGATGAATAATCATCTGCTTCCGGAAGAAATCGAAGAAT  
TT-----CTTGGGAATCCTACAAGATCCATTTCGTTCTTTTTTCTCTGACAGATGG-----TCAG  
AACTTCAT--CTGGGTTCGAATCCTATTGAGAGGTCCACTAGAGATCAG-----AAATT  
GTTGAAGAAAGAACAAGATGTTTCT---TTTGTCCCTTCCAGGCGATCGGAA-----AA  
TAAAGAAATAGTGAATATATTCAAGATAATTACGTATTTACAAAAT-----ACCGTCTCAAT  
TCATCCTATTTTCATCAGATCCGGGATGTGATATGGTTCCG---AAGGATGAACTGGAT--AT  
GGACAGTTCCAATAAGATTTTCATTCTTGAACAAAAATCCATTTTTTTGATTTA-----TTTCA  
TCTATTCCATGACCGGAACAGGAGGGGATACGCGTTA-----CACCACGATTTTGAATCAG  
AA-----GAGAGATTTCAAGAAATGGCAGATCTATTCACTCTATCAATAACCGAGCCG---G  
ATCTGGTGTATCATAAGGGATTTGCCCTTTCTATTGATTCCTACGGATTGGATCAAAAAC  
AA-----TTCTTGAATGAGGTATTCAACTCCAGGGATGAATCGAAAAAGAAATATTTA-----  
---TTGGTTCTGCCTCCTATTTTTTAT-----GAAGAGAATGAATCTTTTTTATCGAAGGATCAG  
AAAAAATGGGTCCG---ACCTCCCGCGGGAATGATTTGGAAGATCCAAAACCAAAAA  
TAGTGGTATTTGCTAGCAACAACATAATGGAGGCAGTCAATCAATATAGATTGATCCGA  
AATCTGATTCAAATCCAATATAACACCTATGGG-----TACATAAGAAATGTATTGAATCGA  
TTCTTTTTAATGAAT-----AGATCCGATCGCAACTTCGAATATGGAATTCAA-----AGG  
GATCAAATAGGAAATGATACTCTGAATCATAGAACTATAATGAAATATACGATCAACCAA  
CATTTATCAAATTTGAAAAAG---GGTCAGAAGAAATGGTTCGATCCT-----CTTATTTTTA  
TTTCTCGAACCGAGAGATCCATGAATCGGGATCCTAATGCATATAGATACAAATGGTCC  
AATGGGAGCAAGAATTTCCAGGAACATTTGGAACATTTTCATTTCTGAGCAGAAGAGTC

ATTTT--CATTTTCAAGTAGTGTTTCGATCGATTACGTATTAATCAATATTCGATTGATTGGT  
CTGAGGTTATCGACAAAAAAGATTTGTCTAAGTCACTTCCTTTCTTTTTGTCCAAGTTA  
CTTCTT-----TTTTGTCC-----AAGTTTCTTCTCTTTTTGTCTA  
ACTCACTTCCT--TTTTCTTTGTGAGTTTCGGGAATATCCCCATTCATAGGTCCGAG---A  
TCCACATCTAT--GAATTGAAAGGTCCGAATGATCAACTCTGCAATCAGTTGTTAGAATC  
AATAGGTCTTCAAATCGTTCATTTGAAAAAATGGAAACCCCTC-----TTATTGGAT-----  
GATCATGATACTTCC--CAAAAATCGAAATCTTGATCAATGGAGGAACAATATCACCAT  
TTTTGTTCACTAAGATACCA---AAGTGG---ATGATTGACTCATTCCATACTAGA-----AATA  
ATCGCAGGAAATCTTTTGATAACACGGATTCCCTATTTCTCAATGATATCCCACGATCAAG  
ACAATTGGCTAAATCCCGTGAAACCATTTCATAGGAGTTCATTGATATCTTCTTTTTATA  
AAGCAAATCGACTTCGATTCTTGAATAATCCACATCACTTCTGCTTCTAT-----TGTAACA  
AAAGATTCCCTTTTTATGTGGATTAT--GTGGAAAAGGCCCGTATCAATAATTCTGAT-----  
TTTACGTATGGA---CAATTCCTCAATATCTTGTTTCATTTCGCAACAAA---ATATTTCTTTGT  
GCGGCGGTA---AAAAACATGCTTTTTTGGAG---AGAGATACTATTTACCAATCG  
AGTCACAGGTATCTAACATATTCATACCTAACGATTTTCCACAAAGTGGTGACGAAAGG  
---TATACTTGTACAAATCT-----TTCCATTTTCCAATTCGATCCGATCCATTTCGTTCTG--  
---AGAGCTATTTACTCGATCGCAGACATTTCTGGAACACCTCTAACAGAGGGACAAAT  
AGTCCATTTTGAAAGAACTTATTGTCAACCTTTTCAGATATGAATCTATCTGATTCAGA  
GGGGAAGAACTTGCATCAGTATCTCAAT-----TTCAATTCAAACATGGGTTTGATTACA  
CTCCATGTTCTGAGAAATATTTACCATCCGAAAAG-----AGGAAAAA-----  
-CGGAGTCTTTGTCTAAAG-----AAATGCCTTGAGAAAGGGCAGATGTATAGAACCTTTC  
AACGAGATAGTGCTTTTTCAACTCTCTCAAATGGAATCTATTCCAACATATATGCCAT  
GGTTCCTTACTTCGACAGGGTACAAATATCTAAATTTGATATTTTAGATACTTTTTCAGA  
C---CTATTGCCGATACTAAGTAGCAGC-----CAAAAATTTGTATCCATTTTTCATGATATTA  
TGCATGGATCAGATATATCATGGCGAATTCTTCAGAAAAAATGG-----TGTCTT  
CCACAATGGAAT--CTGATAAGTGAGATTTTCGAGTAAAGTGTTTACATAAT-----CTTCTTCT  
GTCCGAAGAAATGATTCATCGAAATAATGAGTCA-----CCATTGATATCGACACATCTGA  
GATCGCCAAATGTTTCGGGAGTTC--CTCTATTCAATCCTTTTCTTCTTGTGTTGCTGGA  
TAT--CTCGTTCGTACACATCTTCTCTTTGTTTCTCGA-----GCCTATAGTGAGTTACAGAC  
AGAGTTCGAAAAGGTCAAATCTTTGATGATTCCATCATACTGATTGAGTTGCGAAAAA  
TTCTGGATAGGTATCCACATCTGAACTGAATCTTTCTGGTTAAAGAATCTCTTTCTAG  
TTGCTCTGGAACAATTAGGAGATTCTCTAGAAGAAATATGGGGTTATGCTTCTGGTGGC  
AACATGCTATGGGGTGGTGGTCCC-----GCTTATGGG---GTCAAATCAATACGTTT  
TAAGAAGAAAGATTGGAATATCAATCTCATCAATATCATCGATCTCATA---AGTATCATA  
CAAATCCCATCAATCGAATCGCTTTTTTCGAGAAATACGAGACATCTAAGTCATACAAGT  
AAAGAGATATATTCAATTGATAAGAAAAAAGAAAAAATGTGAACGGTGATTGGATTGATGA  
TAAAATAGAATCCTGGGTCTCGAACAGTGATTTCGATTGATGATAAAGAAAGAGAATTCT  
TGGTTCAGTTCTCC-----ACCTTAACGACA-----GAAAAAAGGATTGATCAAATTCTATTG  
AGTCTGACT--CATAGTGATCATTATCA-----AAGAATGACTCTGGTTATCAAATG  
ATTGAACAACCGGGAGCAATTTACTTACGATACTTAGTTGACATTCAT-----AAAAAGTA  
TCTAATGAATTATGAGTTCAATACATCCTGTTTAGCAGAAAGACGGACATTCCTTGCTCA  
TTATCAGACAATCACTTAT-----TCACAAACCTCGTGTGGGGCTAATAGTTTTCAATTC  
ATCTCATGGA-----AAACCCTTTTCGCTCCGCTTAGCCCTATCCCCCTCT--AGGGGTAT  
TTTAGTGATAGGTTCTATAGGAACTGGACGATCCTATTTGGTCAAATACCTAGCGACAA

ACTCCTATGTTCCCTTTCATTACAGTATTTCTGAACAAGTTCCTGGATAACAAGCCTAAGG  
GTTTTCTTATTGAT-----GATAGTGGCGATATTGATGATAGTGAAGATATTGATGAT  
AGTGGCGATATTGATGATAGTGACGAT-----ATCGACCG  
TGACCTTGATACGGAGCTGGAGCTTCTAACTATGATGAATGCGCTA-----ACTATGGAT  
ATGATGCCG-----GAAATAGACCGATTTTATATCACCCCTTCAATTCGAATTAGCAAAAG  
CAATGTCTCCTTGATAATATGGATTCCAAACATTCATGATCTGGATGTGAATGAGTCGA  
ATTACTTATCCCTCGGTCTATTAGTGAACCTATCTCTCC-----AGGGATTGTGAAAGATGT  
TCC---ACTAGAAATATTCTTGTTATTGCTTCGACTCATATCCCCAAAAGTGGATCCCG  
CTCTAATAGCTCCGAATAAATAAATACATGCATTAATAACGAAGGCTTCTTATTCCAC  
ACAACGAAAGCACTTTTTCACTCTTTCATATACTAGGGGATTTCACTTGGAAAAGAAA  
ATGTTCCATACT-----AATGGATTTCGGGTCCATAACCATGGGTTCCAATGTACGAGATCTT  
GTAGCACTTACCAATGAGGCCCTATCGATTAGTATTACGCAGAAGAAATCAATTATAGA  
CACTAATATAATTAGATCTGCTCTTCATAGACAACTTGGGATTTGCGA-----TCCCAG  
GTAAGATCGGTTTCAGGATCATGGGATCCTTTTCTATCAGATAGGAAGGGCTGTTGCACA  
AATGTACTTCTAAGTAATTGCTCCATAGATCCTATATCTATCTATATGAAGAAGAAA-----  
-TCATGTAACGAAGGGGGTTCTTATTTGTACAAATGGTACTTCGAACTTGGAACGAGCA  
TGAAGAAATTAACGATACTTCTTTATCTTTTGAGTTGTTCTGCCGGATCGGTCGCTCAA  
GACCTTTGGTCTCTACCC-----GGACCCGATGAAAAA---AATGGGATTACTTCTTATGGA  
CTCGTTGAGAATGATTCT--GATCTAGTTCATGGCGTATTAGAAGTAGAAGGGCGCTCTGG  
TGGGA-----TCCTCACGGACAGAAAAAGATTGCAGTCGATTTGATAATGAT-----CGAGT  
GACATTGCTTCTTCGGCCCGAACCAAGGAAT--CCCTTAGATATGATGCAAAATGGATCT  
TGTTCTATCGTTGATCAGAGATTTCTCTATGAACAA-----TACGAATCGGAGTTTGAAGA  
A-----GGGAAGGAGTCCTCGACCCGCGAG-----CAGATAGAGGAGGAT-----T  
TATTCAATCAC-----ATAGTTTGGGCTCCT-----AGAATATGGCGCCCT-----TGGGGCTT  
TCTATTTGATTGTATCGAAAGGCCCAATTCATTGGGATTTCCC---TATTGGGCTAGGTCAT  
TTCGGGGCAAG-----CGGATCATTATGAT-----GAGCTTCAAGAGAATGATTCCGGAG  
TTCTTGCAAGAGTGGAACCGTGCAGTACCAGACACGAGATAGATCTTCCAAAGAACAA  
GGCTTTTTTTCGAATAAGCCAATTCATTGGGATCCTGCAGATCCACTCTTTTTTCTTATTC  
AAA---GATCAGCCTTTTGTCTCTGTGTTTTACATCGAGAATTCTTTGCAGATGAAGAGA  
TGTCAAAGGGGCTTCTTACTTCCCAAACAGATATTCCTACATCTATATATAAACGCTGGT  
TTATC-----AGAATACGCAAGAAAAGCACTTCGGATTGTTGATTTCATCGCCAGAGATGG  
CTTAGA-----ACCAATAGTTCATTATCT-----AATGGATTTTCCGTTCTAAT-----ACTCC  
ATCCGAGAGTTATCAGTATTTATCAAATCTGTTCCCTATCTAAC---GGAACGCTATTGGATC  
AAATGACAAAGACATTGTTGAGAAAAAGATGGCTTTTCCCGGATGAAATGGTTGTTGC  
TATC-----TGTTACAATAACGAATCATTGGTT-----ATGCCTAGATCTAGA---ATAAATGGAA  
ATTTTATTGATAAGACCTTTTCAATTGTAGCCAATATCTTATTACGAATAATTCCGACAAC  
TTCAGGGGAAAAAGAGGCATTACCTATTACAGAGATGGT-----ATGTCGGCTCAATCC  
GAAGGAAATTATGCGGAAGCTCTACAGAATTATTATGAAGCTATGCGACTAGAAATTGA  
TCCCTATGATCGAAGTTATATACTCTATAACATAGGTCTTATCCACACAAGGAACGGAGA  
ACATACGAAAGCTTTGGAATATTATTTTCGGGCACTAGAACGAAACCCGTTCTTACCAC  
AAGCTTTTAATAATATGGCTGTGATCTGTCATTAC---CGGGGAGAACAGGCCATTTCGACA  
GGGAGATTCTGAAATTGCGGAGGCTTGGTTCAATCAAGCTGCTGAGTATTGGAAACAA  
GCTATAGCACTTACTCCCGTAATTATATTGAAGCACAGAATTGGTTGAAGATCACAAG  
GCGTTTTCGAA-----ATGAGTTGGCGATCAGAACGTATATGGATAGAATTTATAAGGGGAT













repeated text blocks

repeated text lines





















CAATCAGATTTTCGTCGCAATCTGATTAAGGATCTATGCGTGCTCAAAGACGCAAAC  
ACCTATTTGGGGACTTTTACAAATAAATGTGCATTCCCCGCTTTTTTTGGATAGACTAGA  
CAAACCTCCCTCTTTTCCCTTTTTTGAT---ATCAAGGAAGTAAAGAATTTTATTATAAGA  
AAT-----AGCGAGCAAATGAACTAATGTCGGAATGGGATAATCTTATGTTTGCTTCAA  
CAATCAGAACTTTAATTTAATAGTTCAATCTTTTCTTAGAAAATACATTCTATTGCCTTC  
ATTCATAATAATTAATAATAGTTTTTCGTATATTATTATTACAATATCCCGAATGGCACCAG  
GATTTCAAGAAATGGAATAGAGAAATACATATTAATGCACCTTATGATGGGGTTCAATTA  
TCAGAAACAGAGTTTCCCAAGATTGGTTAACAGAGGGTATTCAGATTAAAATTATACA  
TCCTTTCTATATCAAACCTTGGCAAAAATATAAGAAATATAAAAATAAAAATTTTTGTTT  
TCTAACAGTCTTTGGAATGGAAACGGAACCTCCTTTTGGTTCTCCTAGAAAACAACCC  
TCTTTTTGGGGACCAGTTTATAAAGAATTAATA-----AAAAAATTCTAAG  
AGTTATTCCATTTTTAAAGAAA-----ACAAAATGGATCATCAAAG  
TAGTTCAA-----ATTATAAAGCTCATGATGGAAAAATGTATAAATCAATGTTAAAATAA  
AT--AATGGGATTATTTGCAAATCGTCCGTTCTAATTGGACCGGTGAATTGGTTAAATTAT  
TCATTAATAGAAAGCAGAATGAAAACCTATTTCTGATAAGACAAGGAAAATTAATAATCA  
AATTGAACAAATCGCAAATATAAACAAAA-----AATAAAGAA-----  
-----TTAAAATTAAGGGCAAACCTATTCGATTAATACGTCGATTAACACTACTTTTTTA  
AAATATTTAATTGAAAAATATACATAGATATATTATTATGCACTATTAACTTTTTTAAAAA  
AAGTGTACAATTATTCAAT-----AAAAATTCATATTATATATCCCAAGCATATGTATTTT  
ACAAATTGTCACAAACCCAATTATTTTCATAAGTATAACTTAAGGCATATACTTCAGTATT  
AC-----CTTCTAAATAGTAAATTGAAAGACTATTGTATACACAGAATTTTCAATTTAATT  
CAATAGGAAATACAATATCTATGTATGTAATGAATGAATGGAAAAACTGGTTAAAAGGC  
CATTATCAATATGATCTATCAGAAGATAGA-----AAATATCACCGATTAGTGCGTCTAAAT  
ACAATTCATAAACGTTGTATGATTAATAAAGATAACAATTTTACAGATATAAAAAAAA  
CCA-----TTTATTTCTTCAATGGAAAATGTAAAATGGAAAAAAAATTACAGATATGATCTT  
CTATCATATAAATACATACACGGGTATATCATTGATTTGAATAGAAAATATTTTGATTGTA  
GATTTCTTAAACTTTGGTTTATATTTTGAATTACATAGGAATGGATCAAATAAGTTATA  
T--TGGGTTTTACCAGAATTTGTACCCTTATGAATATATATAAAATTAACCTTGGATCA  
TTCCAATAAAATCACTCTTTTTCAATCAAGGTAATAAGAAGGAATTAGAATTGGATTCCT  
TTTTAATAAGATATTTTATTTTCAATTTAAATGGACCAAT-----TCCCTTATAATGGAAA  
ATATAAGGGTATACTGCCTCCTACTTAGACTAATGAAAATAAAGGAAATTGCCATATCTT  
CAATTAGACGAGGTGAAATCAATCCAGAACAATGTTGATTCAAAAAGAAGACTAGTTTT  
TTCAGAATTGATCAGAAGAGGAATATGGATTATTGAACCAATTTTTTTTATCTATAATAAG  
GGATGGAAAGTTTATTATTTATCAAACCTATAGATATAATTCAAACGAGTAAT-----AATC  
TTAATGATTTTCTAATTCCTGAACATCTTCTATCTCCCGTACGACGGAGGAATTTGAA  
TTCAAACCTGTTTTCAAATTCCTTTGGCCAAATTATAGATTAGAAGATTTAGCTTGTATGA  
ATCGCTATTGGTTAATACCAATAACAGCAGTCGTTTCAGTATGTTAAGAATACGCATGT  
ATTCAATGAAAAACATCAATACAAATCCTGGATATTCGAATTG-----ATAGAGACC  
AGAATTATAACTATTTATTAGATTCATGGAGCAAATTTGATTCAGCGGTATCTTTTACTC  
ACATTTTTTTCCACCAAGAACGTTTTATGAAACTCTTTGACCCCCGAATTTGGAGTATCA  
TGCTTTCA--CGTGATTCA-----CAAGGTGCAATAAAT-----TTCACG-----ATCAAAG  
GTGCAGCGCTGCTTGTAGTAGCG---GTCCTTCTATCT-----CGTATTCACAATCAAAG  
GATGGTCGAAAGAAAAAATATATATCTGATGGGGCTTCTTCCT-----ATACCTATG  
AATCCATTGGACCCAGAAATGATACATTGGAAGAATCTTTT--TGGTCTTCCAATACAA



ATAGGTCGATTGTTTCG---CTCCTGCATCGGAAAAAT-----ATTTATGATCT  
GCAAGCGAGCGCTCGGGTTATCCCAATAAAG-----AAAAGGTGTATCATGCCTGAA  
TTTACCACCGGTTTCGCGGTGGTGGAGAAATCGGATCGGAAAAAAGAGG-----GATTACG  
GTTGTACAGATAGTG-----AATGAAACCATAGCTGGAATTGAGATCTCATTCAAAGAAA  
AGGATAGCAAATCTCTGAAGGAGTTTCTTTTTTTATCCTATACGGCG---GATGATCCGAT  
CCGCAAGGACCGTGATTGGGAATTGTTTCCTAGTCTTTCTCCTAGG-----  
---AATTCGGGG-----CTGCTCTTAGGGAAATACTTTATTTGTTATCTCATGTCTGCTTTT  
CGTGAAAAAATACCGATTCT-----TTCTTCAAACAACAAGGG---ACCGGACA  
ACTATGCAATCCAAT-----GAGATTTCCCAT-----CTATTCTCGAGAAACAAGCGGAGTATTT  
CTTTGCAAACCTTGTCGCAAATTTCATATGTGGCAATTCCGCCAA-----AGTTG  
G-----TCGTATTTTTGAGGAAC---GTCTCGAGA-----ATTTGGTTAGACGG  
TGTGTGGTTGGTAAACAAGGAT-----CTACGGAATGTATTGTCAAATA  
TAAATATGATCCTACTGATCCACAAGA-----TCTATCTCCGTTCAAGTAACGGATTCTA  
ACCAATGGAAAGGATCCTCTTCTGATCATTCC-----GTTAGA-----ATTGAG  
AATTCAGAA-----TATCAGGCATTTATCGATCAAACAGAGATTC  
AGCAACTAAAAGAGCGATCCATTCTT---TGGGAT-----CTTTCCTTTCTTCAAACGGAAC  
GAACAGAGAGAGAATCGGAT-----CTTGGATCTTAC-----TCCATCGAG  
AAGCTGATGCAT--GAT-----CATCTGCTTTCGGAAGAAATCGAAGAAGTTCT  
T----GGGAATCCT-----GCTTTTTTCTCTGACAGATGG-----TCAGA  
ACTTCAT--CTGGGTTTCGAATCCTACTGAGAGGTCCACCATAGATTTCG-----AAATTTT  
GTAATAAAAACAAGATGTTTCT---TTTGTCCCTTCCAGGCAAGGGGAA-----AAA  
AAGGAAATGTTCGATATATTCAAATAATTACGTATTTACAGAAT-----ACCGTCTCG  
ATTTCATCCTCCGGAACCGTATCACATCCCGGATATGGGC-----AGTTCCAATAAG  
ATTTTCATCTTTAACA  
AAAAAGACGTTCTTTTCT-----TTCTTTCATCTATTTTCATGACCGGAACAAGG  
GGGAATGCGCGTCT-----TTT---TTGGAAAGATTACCAAAAATGGCGGATC  
TATTC  
ACTCTATCAATAACCGAGCCGCGGATATGGTATAACCATAGGGGATTTGCCTTTTA  
TATCGATT  
CATACGGGTTGAATCCAAACA  
ACTCCAGTGAGGAGAATGAATCTTTTTACG  
GTAATGATTTGAAAGATCCCAA-----  
-----  
--CTTAA  
AATGGCATTGCTAGCAACGACATAATGGAG-----GCAGT  
TAATCGATGTAGCA  
CCTATGGAAATGTATTG-----AATCGATCCGATCCC-----GAATATGGAATTCAA-----A  
GGGATCAAATA-----ACTATAATGAAAGATAGGATCAACCAGCCTCTATCA  
AATTGGAAAAAT--AGTCCGAATAAATGGGTTGATCCT-----ATGATTTATCGA  
ACCGAGAGATCCGTGAATCGGGATCCTGATGCATATAGATACAAATGGTCCAACGGTAGTAAG  
TATTTACAG-----GAACATTTCTGTTTCTGAACAGAAGAATACTTTTAAAGCAGTGCAA  
GTAGTGTTCGATCGATTGCGTATTTATAAATATTTGATCGATCGGTCCGAGGCTATCGAC  
AAAGAATATTTGTCTCAGTCACTTCGTTTCTTTTTGTCCAAG-----  
-----TCACTTCCCTTTTTCTTAATGAGCATTAGGA  
ATATCCCTATTCATAAGTCCGAG--ATCCACATCTAT--GAT-----CCGAATGATCCACTC  
TGCAATCAGTTGTTAGAATTGATAGGTGTTCAAATCGTTCATTTGAAGAAA-----  
-----TTTCTGTCAA  
AAAAGATAC  
CA---AAGCGG---ATGATTGACTCATTCCAATC-----CATACT--ATAAAGAAATCCTTGG  
A  
TAACACGAATTCCTGTTTCTCCATGATATCCCACGATCAAACAATGGTGAATCCCGT  
GAAACCCTTTCATAGAAGTTCATTGATATCTTCTTTTTATAAAGCAAATAGACTTCGATT

CTTGAATGATCCGCCTCACTTCTGGTTCTAT-----TGCAACAAAAGATTACCCTTTGATGT  
G-----GAAAAGACCCGTATCAATAATTATGAC-----CTTACATAT--GGACAATTCCTA  
AATATATTGTCCATTCACAACCCA---ATCTTTTATTTGTGCGTCGATAAA-----AAAAAAG  
ATCTTTTTTTGGAG---AGAGAGGCTATTTACCAATTGAGTCACAGGTATCTGACATCTT  
CATACCTAAGGATTTCAT-----GATGAAACG---TATACTTGTACAAA-----TCATTC  
CATTTTCCAATTTCGATCCGATCCATTTCGTTTCGT-----AGAGCTATTTACTCGATCGCAGAC  
ATTTCTACAACACCTATAACAGAGGAACAA-----ATAGTCAATCGGCCCTTTC  
AGATAGGAATCTCTCTGATTCCGAAGGGAATCGCTTGCATCAGTATCTCGCT-----TTCAA  
TTCAAACAAGGGTTTGACT-----CCATGTTCTGATAAGCCTTTACCA-----TCCGGAAAGA  
GGAAAAA-----CGGAGCATTTCGTCTTAAG-----AAATGCGTTGAGAAAG  
GGCAGATGCGTAGAACCTTTCAACGAGATAGTGCTTTTTTACAATATATTCAAATGGAAT  
CTGGTCCAAACGTACATGCCGTGGTTCCTTACTTCAACGGGTTGCAGATATCTTCATCTT  
ACCCTTTTTGATACCTTTTCGGACCCATTG-----CCGATACTAAGTAGCAGT---CAAAAAT  
TTGTATCCATTTTTTCATGATATGATGCATAGATCAGATGTATCACGGCCAATCCCTCAGA  
AA-----AGCCTTCCCAATGGACTCTTCTTATCAGTGAGATTTTCGAGTCAA  
TGTTTACAGAAT-----CTATTTTGTCTGAAGAGAGGATTCATCGAAATAAC-----GTTC  
CATTGATATGGGCACATTTGGGATCAATAAATGTTTCAGGAGTTC---CTCTATTCCATATTT  
TTCTTCTTCTGTGGCCGATAT---CTCGTTCGTATGCATCTTCTAGTTGTTTTCCGG-----  
-GCCTCTAGTGAGTTACAGACAGAGTTAGAAAAGATCAAATCTTTGATGATTCCATCATA  
CATGGTGAATTTGAAAACCTTCTGGATAGGTATCCTACATCCGAACTGAATTTCTTCTG  
GTAAAGAATCTATTGATGGTGTCTGGAACGATTAGGATATTTTTTGAAGAAATATG  
CGGC-----GGCCCC-----CCCTATGGGGGGGTTAAATCAATAT  
GTTCTCAGAAGATATATTGGAAGATCAAT-----CTCATCCATATTGTA---AGTATCCTACC  
AAATCCCATCAATCCAATCATCGTCTCGATAAATACGAGACATCTCAGTCGTACAAGTA  
AAGAGATCTATTCATCGATCATAAAA---AAAAACGGGAATGGTGATCGGGTTGATTATG  
AAATAGAATTTCTGGTTAGCGAACAGTGATTTAATTGATGATGAAGAAAGAGAATTTCTTG  
GTTTCAGTTCTCC-----GCCTTAACGTCA-----GAAAGAAGGATTGATCAGATTCTATGGAA  
TCTGACT--CATAGTGATCATTATCA-----AAAAATGACTCTGGTTATCAAATGAT  
TGAACAACCGGGATCAATCTCCTTACGATACTTAGTTGACATTCAT-----AAAAAGAATC  
TAATGAATTATGAGTTTAATCAATCCTGTTTAGCAGAAAGACGGATATTCCTTGCTCATT  
ATCAGACAATTGCTTCT-----TCACAAACCTCGTGCGGGACTAATAGTTTTTCATTCCCAT  
CGACT-----AATGGAAAACCCTTTTCGCTCCGCTTAGCCCTATCCCCCTAT---AAAGGTAT  
TTTAGTGATAGTTCTATAGGAACTGGGCGATCCTGTTTGGTCAAATGCCTAGCGACAA  
ACTCCTATGTTCTTTTCATTACGGTATTTACGAACGAGTTCCTGGATTACAAACCTAAGG  
GTTATCCTATTGATGAT-----AGTGAC-----  
-----GATATCCATATTGATATGGAGCTGCTA-----  
-----ACTATGTATATGACG-----CCCAAAGAGACCGATTTGATATCACCTTCA  
ATTTGAATTAGCAAAAGCAACAACGCCTTGCATAATATGGATTCCAAACATTCATGATCT  
GCATGTGAATGAGTCGAATTACTTATCC-----AACTCTCTATCC-----AAGGATTG  
TGAAAGATGTTCC---GCCGGAAAGATTCTTGTATTGCTTCGACTCATATCCCCAAAA  
GTAGATCCCGCTCTAATAGCTCCGAATAAATTAATAACATGCATTAAGATAACGAAGGCTT  
CTTATTCCACAACAACGAAAGCACTTTTTTCATTCTTTCATATACTAGGGGATTTTCGTTTG  
GAAAAGAGGATGTTCCGTGCT-----AACGGATTCGGCCCCATAACCATGGGTTCAAATG  
CGCAAGATCTTATAACACTTATCAATGAGGCCTTATCGATCAGTATTACACAGAAGAAAT

CCATTATAGAAACTCATACAATTAGATTGGCTATTCATAAAAAAACTTGGGATTTTCGA--  
-----TCCCAGATAAGATGGGTTTCAGGATCATGGGATCCTTTTCTATCAGATAGGAAGGGC  
TGTTGCACAAAATGTA CTCTAAGTAATTGCCCTCTAGATCCTATATCTATCTACATGAA  
GAAGAAA-----TTGTGCCAGGTAGGGGATTCTTATTTGTACAAATGGTACTTCGAACTTG  
GAACGAGCATGAAGAAATTCACGATACTTCTTTATCTTTTGAGTTGTTTCGGCCGGATCG  
GTCGCTCAAGATCTTTGGTCTTCATAC-----AGACCCAATGAAAAT--AAGCGGATCACTT  
ATTATGGATTCTGTTGAGAATGATTCTTCTTATCTAGTTCATGGCTTGTTCGAAGTAGAAG  
GCGCTCCG-----GCGGAAAAAGATTGCAGTCAGTTTGATAATAAT-----CTCA  
TGACATTACTTCTTCGGTCCGAACCAAGGTGCGGAGCGTTAGATATGACGCAA-----  
----ATTGTGATCAGAGATTCTATATGAAAA-----TACGAATCGGAGGTTGAAGAA---G  
GG-----GCCCTCGATCCGCAA-----CAGATGGAGGAT-----TTATTCAATC  
AC-----ATAGTTTGGGCTCCT----AGAATATGGCGCCCT-----  
-----AGC---TATTGGACTGGGTGCAAACGG-----ATTTATCATAAAGAGG  
ATGAGCTTCAAGAGAATGATTTCGGAGTTATTGCAGAGTGAACCGCGCAATACCAAGAC  
ACGAGACGGATCTTCAAAGAACAAGTTTTTTTATACCAAGCCAATTCATTTGGGACC  
CTGCGGATTCATTTTTTTCC-----GATCAGCCCTTTGCCTCTGTGTTTTACGGCGAG  
CATTCTTTGCATATGAAGAGATGTCA-----CTTGCTTCCCAAACAGAACCTCCACATC  
TATATATAACGTTGGTTCATT-----AAGAATACGCAAGAAAAGCACTTCGAT-----CAT  
CGCCAAAGATGGTTTATAAAC-----AATAGA-----TCT-----AATGGATCTTTTCGTTCTA  
AT-----GCTCTATACGAGAGTTATCAGTATTTATCAAATCTTTTCTATCTAAC---GGAAGG  
CTAGTGGATCAAATGACAAGGGCATTGTTGAGAAAGAGATGGCTTTTCCCGGATGAAA  
T G A A C A T C - - - - -

-????????????????????????????????????????????????????????????????  
????????????????????????????????????????????????????????????????  
????????????????????????????????????????????????????????????????  
????????????????????????????????????????????????????????????????  
????????????????????????????????????????????????????????????????  
????????????????????????????????????????????????????????????????  
????????????????????????????????????????????????????????????????  
????????????????????????????????????????????????????????????????  
????????????????????????????????????????????????????????????????  
????????????????????????????????????????????????????????????????  
????????????????????????????????????????????????????????????????  
????????????????????????????????????????????????????????????????  
????????????????????????????????????????????????????????????????  
????????????????????????????????????????????????????????????????  
????????????????????????????????????????????????????????????????  
????????????????????????????????????????????????????????????????  
????????????????????????????????????????????????????????????????  
????????????????

>Hevea

ATGGA AAAATGGCGGTTCAATTTCGATCTTATCCCTAAGTAAATCAATGGATAGTTTCAGT  
TCTCTTGAAAATAACCAGTATAAGTGAAGACCCAATTCTAAATGATACAGATAAAAACAC  
CTATAGTTACAGTAATGTTGATCATTAGTTCGGTGTGACGGACATTCAGAATTCAGCGC  
CGATGAAACTTTTTTAGTTAGGGATAGTAATAGGGACAGTTATTCCATATATTTTGATATT  
GAAAATAAAGTTTTTTGAGATTGACAATGATCAT-----TCTTTTCTGAGTGA ACTAAAAG  
TTCTTTTATAGTTATTGGAATCTAGTTATCTGAATAATGGGTTTAGGAGTGGCGACTCC  
CACTATGATCATTATATGTATGATACTAAATATAGTTGGAATAATTACATCAATAGTTGCAT  
TGACAGTTATCTTCGC-----TCTCAAATCTGTATTGATAGTTATATTTAAGTGGTAGTAAC

AATTACAGCGAAAGTTACATTTATAGTTACATTTGTGGTAGCGATAGTTCCAGTCTAAGA  
ACTAGCACGAGTGGTAGCGATTTAATTATAAGAGAAAATTCTAAT--CTCGATATAACTC  
AAAAATACAAGCATTTGTGGGTTCAATGCGAAAATTGTTATGGATTA AATTATAAGAAA  
TTTTTTAAGTCAAGAATGAATATTTGTGAACAATGTGGATATCATTTGAAAATGAGTAGT  
TCAGATAGAATTGAACTTTTGATTGACCTAGGCACTTGGGATCCTATGGATGAAGACAT  
GGTATCTCTGGATCCCATTTGAATTTCAATTCAGAAGAGGAACCTTATAAAGATCGTATTGA  
TTCTTATCAAAGAAAGACAGGATTA ACTGAGGCTGTTCAAACAGGCACAGGTCAACTA  
AACGGCATTCCCGTAGCAATTGGGGTTATGGATTTTCAGTTTATGGGGGGTAGTATGGG  
ATCCGTAGTAGGTGAGAAAATCACTCGTTTGATCGAGTATGCTACCAATAAATTTTTACC  
TCTTATTTTAGTGTGTGCTTCCGGAGGAGCACGCATGCAAGAAGGAAGTTTGAGCTTG  
ATGCAAATGGCTAAAATATCTTCTGCATTATATGATTATCAATCAAATAAAAAGTTATTTT  
ATGTATCAATCCTTACATCTCCTACGACTGGTGGGGTGACAGCTAGTTTTGGTATGTTGG  
GGGATATCATTATTGCTGAACCTAATGCCTATATTGCGTTTGCAGGTAAAAGAGTAATTG  
AACAAACATTGAATAAGACAGTACCTGAAGGTTTCGCAATCGGCCGAATTTTTATTCCAT  
AAGGGCTTATTTGATCTAATCGTACCGCGTAATCTTTTAAAAGGCGTTCTGAATGAGTTA  
CTTCAGCTCCACGATTTCTTTCCTTTGAATCATAAATCAAGTAGAATGGTAACCATTTCGA  
GCCGACGAGATTAGTAATATTATCCGCGAACGTATTGAGCAATATAATAGGGAAGTAAA  
GATTGTAAATACCGGTACCGTACTTCAAGTAGGCGACGGCATTGCTCGTATTTATGGTCT  
TGATGAAGTAATGGCAGGCGAATTAGTAGAATTTGAAGAGGGTACAATAGGCATTGCTC  
TGAATTTGGAATCAAATAATGTCGGTGTTGTATTAATGGGTGACGGTTTAATGATACAAG  
AGGGAAGCTCCGTAAAAGCAACAGGAAGAATTGCTCAGATACCTGTGAGTGAGGCTTA  
TTTGGGTCGTGTTATAAATGCCCTAGCTAAACCTATTGACGGTCGAGGTGAAATTTAG  
CTTCTGAATCTCGGCTAATTGAATCCCCCGCTCCAGGTATTATTTTCGAGACGTTCTGTAT  
ATGAGCCTCTTCAAACAGGACTTATTGCTATTGATTTCGATGATCCCTATAGGACGTGGTC  
AACGAGAATTAATTATTGGGGATAGACAGACCGGTAAAACAGCAGTAGCCACAGATAC  
AATTCTCAATCAACAAGGACAAAATGTAATATGTGTTTATGTAGCTATTGGGCAAAAAG  
CGTCTTCTGTGGCTCAGGTAGTGACTACTTTACAGGAAAGAGGGGCAATGGAGTACAC  
TATTGTGGTAGCCGAAACGGCGGATTCTCCGGCTACATTACAATACCTCGCCCCTTATAC  
AGGAGCGGCTCTGGCTGAATATTTTATGTACCGTGAACGACACACTTTAATCATTATGA  
TGATCTCTCAAACAAGCGCAGGCTTATCGCCAAATGTCTCTTCTATTACGAAGACCAC  
CTGGTCTGTAAGCTTATCCAGGAGATGTCTTTTATTTGCATTCACGCCTTTTGGAAAGA  
GCTGCTAAATTAAGTTCTCGTTTAGGTGAAGGAAGTATGACTGCTTTACCAATAGTCGA  
GACCCAATCAGGAGACGTTTCGGCTTATATTCCTACTAATGTAATTTCCATTACAGATGG  
ACAAATATTCTTATCCGCCGATCTATTCAATGCTGGAATCAGGCCTGCTATTAATGTGGG  
TATTTCTGTTTCCAGAGTAGGATCCGCAGCTCAAATAAAAAGCTATGAAACAGGTAGCTG  
GTAAGTTAAAATTGGAATTGGCGCAATTCGCAGAATTAGAAGCCTTTGCGCAATTCGCT  
TCTGATCTCGATAAAGCTACTCAGAATCAATTGGCAAGAGGTCAACGACTACGCGAGT  
TGCTCAAACAATCCCAATCAGCTCCTCTCACGGTAGAGGAACAAATAATGACTATTTAT  
ACCGGAACGAATGGTTATCTTGATTCATTAGAAATCGGACAAGTAAGGAAATTTCTCGT  
TGAGTTACGTACCTACTTAAAACGAATAAACCTCAGTTCCAAGAAATCATATCTTCTA  
CCAAAACATTCACCGAAGAAGCAGAAACCCTTTTGAAAGAAGCTATTCAGGAACAGA  
AGGAACGTTTTGTAATTCAGGAACAAGTAATGAGAATAAATCCTACTACTTCTGGTCCG  
GGAGTTTCCGCGCTTGAAAAAAGAACCTGGGGCGTATCGCTCAAATTATTGGGCCAG  
TGCTAGATGTAGCTTTTCCCCGGGCAAGATGCCTAATATTTACAACGCTCTGGTAGTTA

AGGGTCGAGATACTGCCGGTCAAGAAATTAATGTGACTTGTGAAGTACAACAATTATTA  
GGAAATAATCGAGTTCGCGCTGTAGCTATGAGTGCTACAGATGGTCTAACGAGAGGAA  
TGGAAGTGATTGACACAGGAGCCCCTCTAAGTGTTCCAGTCCGGTGGGGCAACTCTAGG  
ACGAATTTTCAACGTGCTTGGAGAACCTGTTGACGATTTAGGTCTGTAGATACTCGCG  
CAACATCCCCTATTCATAGATCTGCGCCTGCCTTTATACAGTTAGATACAAAATTATCTAT  
TTTTGAAACAGGAATAAAAGTAGTAGATCTTTTAGCCCCTTATCGCCGTGGAGGAAAAA  
TCGGACTATTCGGGGGAGCTGGAGTGGGTAAAACAGTACTTATTATGGAATTAATCAAT  
AACATTGCGAAAGCTCATGGGGGTGTATCCGTATTTGGCGGAGTAGGCGAACGTACTC  
GTGAAGGAAATGATCTTTACATGGAAATGAAAGAATCTGGAGTAATTAATGAAGAAAA  
TATTGCAGAATCAAAGTGGCTCTAGTCTATGGTCAGATGAACGAACCGCCGGGAGCT  
CGTATGAGAGTTGGTTTACTGCCCTAACTATGGCGGAATATTTTCGAGATGTTAATGA  
ACAAGACGTACTTCTATTTATCGACAATATCTTCCGTTTCGTCCAAGCCGGATCCGAAGT  
ATCCGCCTTATTGGGTAGAATGCCTTCCGCTGTGGGTATCAACCTACCCTTAGTACCGA  
AATGGGCTCTTTACAAGAAAGAATTACTTCTACCAAAGAAGGGTCCATAACTTCTATTC  
AAGCAGTTTATGTACCTGCGGACGATTTGACTGACCCTGCTCCTGCCACGACATTTGCA  
CATTTAGATGCTACTACTGTACTATCAAGAGGATTAGCTGCTAAAGGTATCTATCCAGCA  
GTAGATCCTTTAGATTCAACGTCAACTATGCTCCAACCTCAGATCGTTGGTGAGGAACA  
TTATGAAACTGCGCAAAGAGTTAAGCAAACCTTTACAACGTTACAAAGAAGTTTCAGGAC  
ATTATAGCTATCCTTGGGTGGACGAATTATCCGAAGAGGATCGCTTAACTGTAGCAAG  
AGCACGAAAAATTGAACGTTTCTTATCACAAACCCTTTTTTCGTAGCAGAAGTATTTACCG  
GTTCTCGGGGAAATATGTCGGTCTAGCAGAAACAATTAGAGGGTTTAAATTGATCCTT  
TCGGGAGAATTAGATAGTCTCCCTGAGCAGGCCTTTTATTTGGTAGGTAATATTGATGAA  
GCTACTGCGAAGGCTACGAACCTAGAAATGGAGAACAACCTTGAAGAAAATGACCTTA  
AATCTTTGTGTACTGACCCCGAATCGAATTGTTTGGGATTCAGAAGTGAAAGAAATCAT  
TTATCTACTAATAGTGGACAAATTGGCGTATTACCAAACCATGCACCTATTGCCACAGC  
TGTCGATATCGGTATTTTGGAGAATACGCCCTAATGACCAATGGTTAACGATGGCTCTGAT  
GGGTGGTTTTGCTAGAATAGGCAATAATGAGATTACTGTTTTTAGTAAATGATGCAGAGA  
AGGGTAGTGACATTGATCCACAAGAAGCTCAGCAAACCTTGAATAGCAGAAGCTAA  
CTTGAGGAAAGCGGAAGGCAGGAGACAAATAATTGAGGCAAATCTAGCTCTCAGACG  
AGCTAGGGCACGAGTAGAGGCTATCAATGGGATTTTCGATGAAAAATGTAACCGATTCTT  
TCGTTTCCTTGGGTCACTGGCCATCCGCCGGGAGTTTCGGGTTTAAATACCGATATTTTAG  
CAACAAATCTAATAAATCTAAGTGTAGTCCTTGGTGTATTGATTTTTTTTTGGAAAGGGA  
GTGTTAAGTGATTTATTAGATAATCGAAAACAAAGGATTTTGGATACTATTCGAAATTC  
GAAAAACTACGCGAGGGGGCTATTGAACAGCTGGAAAAAGCCCGGGCCCGCTTACGG  
AAAGTGGAATAGAAGCAGATCAGTTTCGAACGAATGGATATTCTGAGATAGAACGAG  
AAAAATGGAATTTGATTAATTCAACTTATAAGACTTTGGAACAATTAGAAAATTACAAA  
AATGAAACCATTCATTTTGAACAACAACGAACGATTAATCAAGTCCGACAACGGGTTT  
TCCAACAAGCCTTACAAGGAGCTCTAGGAACTCTGAATAGTTGTTTGGACCAACGAGTT  
GCATTTACGTACCATCAATGCTAATCTTGGCATGTTTGGGGCGATAAAAGAAATAACTG  
ATATGAATCCATTGATTTCTGCCGCTTCCGTTATTGCTGCTGGGTGGCCGTTGGGCTTG  
CTTCTATTGGACCTGGGGTTGGTCAAGGTACTGCCGCGGGCCAAGCTGTAGAAGGTAT  
CGCAAGACAACCCGAGGCGGAGGGAAAAATACGAGGTACTTTATTGCTTAGTCTGGCT  
TTTATGGAAGCTTTAACGATTTATGGACTAGTTGTAGCATTAGCACTGTTATTTGCGAAT  
CCTTTTGTATGAATGTTCTATCATGTTCCATCAACACACTAAAGGGGTTATATGATATAT

CCGGTGTGGAAGTAGGCCAGCATTCTATTGGAAAATAGGAGGTTTCCAAGTCCATGC  
CCAAGTGCTTATTACTTCTTGGGTTGTAATTGCTATCTTATTAGGTTTCAGCCATTGTAGCT  
GTTCCGAATCCACAAACCATTCCAACAGGAGGTCAGAATTTCTTCGAATACGTCTTG  
AATTCATTGAGATGTGAGCAAACTCAGATTGGAGAGGAATATGGCCCGTGGGTCCC  
CTTTATTGGA ACTATGTTTCTATTTATTTTGTCTAATTGGGCGGGGGCGCTTTTACCT  
TGGAAGATCATA CAGTTACCTCACGGGGAGTTAGCCGCACCGACGAATGATATAAATAC  
TACCGTTGCTTTAGCTTTACTTACGTCAATAGCCTATTTTTATGCGGGCCTTAGCAAAAA  
AGGATTAGGTTATTT CAGTAAATACATTCAACCAACTCCAATCCTTTTACCCATTAACAT  
TTTAGAAGATTT CACAAAACCTTTATCACTTAGCTTTTCGACTTTTCGGCAATATATTAGC  
GGATGAATTAGTAGTTGTTGTTCTTGTCTT TAGTACCTTCAGTGGTTCCTATACCTGT  
CATGTTCCCTGGATTATTTACAAGTGGTATTCAAGCTCTATTTTTTGCAACTTTAGCTGC  
GGCTTATATAGGCGAATCCATGGAGGGGCATCATATGATATTCTCGACTTTAGAACATATA  
TTAACGCATATATCTTTTCAGTCGTGTAATTGTAATTACAATTCATTTGATAACCTTATT  
AGTCGATGAATTCGTAGAACTATATGATTCGTGAGAAAAGGGCATGATAACTACTTTTTT  
CTGTATAACAGGATTATTAGTTATTCGTTGGATTTTTTTGGGACATTTACCATTAAGTGAT  
TTATATGAATCATTAATCTTTCTTTCATGGGCTTTTTCCATTATTCATATGGTTCCGTATTTT  
AAAAACATAAAAATTTTTTAAGCGCAATAACCGCGCCAAGTACTTTTTTTTACCCAAGG  
GTTTGCTACTTCGGGTCTTTTAACTGACATGCATCAATCCGAAATCTTAGTGCCCGCTCT  
CCAATCTCAGTGGTTAATGATGCACGTAAGTATGATGATATTGGGCTATGCAGCTCTTTT  
GTGTGGATCATTATTTTCAGTAGCATTTC TAGTAATCACATTTCGAAAAATCATAAGAAT  
TGTTGAT-----AAAGAGATACAATATATG-----GCGGAAAATGTTTTAAGAAATATTTCTTT  
TCTTTCTTCTAGGAATTATTACAGGTTTCAATTGATTCAACAATTAGATGACTGGGGTTG  
TCGTATTATAAGTATAGGGTTTATCTTTTAAACCATAGGTATTCTTTCGGGAGCAGTCTGG  
GCTAATGAAGCATGGGGATCATATTGGAATTGGGACCCAAAAGAAACTTGGGCATTTAT  
TACGTGGACCATATTCGCGATTTTTTTTTCATATTCGAACAAATAAAAAATTGGAGGGTTT  
CAATTCGCAATTGTCGCTTCTATCGGTTTTCTTCTAATTTGGATATGCTATTTTGGAGTT  
AATTTATTAGGAATAGGACTACATAGTTATGGTTCATTTACATTAACAAAATGGAAAAAA  
AAAACATTTATTCCCCTTCTATATCTTACATCTATAGTTTTTTTTGCCCCTGGTGGATCTCTTT  
TTTATTTAATAAAAAGTTTTGAATCTTGGGTTATTAATTGGTGTAAATATTAGTAAATCCGAA  
ACTTTTTTAAATGATATCCAAGAAAAAAGTATTCTAGAAAAATTCATAGAATTAGAGGA  
ACTCGTTTCGCTTAGACGAAATGATAAAGGAATACCCGAAACACATCTACAAAAGTTT  
CGTATCGGA---CACAAAGAAACGATCCAATTGATCAAGATGCACAATGAGGATCGTATC  
CATA CGATTTTTACTTCTCGACAAATATAATCTCTTTCGTTATTCTAAGGGGTATTCTA  
TTCTAAGTAATGAAAACTTATTATTCTTAATTCTTGGGTTCAAGAATTCCTATATAATTT  
AAGCGACACAATAAAAGCTTTTTCCATTCTTTTATTAACCGATTTATGTATAGGATTCCAT  
TCACCTCACGGTTGGGA ACTAATGATCGGCTCCGTCTACAAAGATTTTGGATTTGCTCA  
TAACGATCAAATTATATCTGGCCTTGTTTCCACTTTTCCAGTCATTCTCGATAACCATTTTT  
AAATATTGGATTTTCCGTTATTTAAATCGTGTATCTCCGTCACTTGTAGTGATTTATCATT  
CAATGAATGACATGCCTATTGGTGTTC AAAAGTCCCTTTTTCGAAATCCTGGGGAAGAC  
GATTC AATTTGGATTGACGTAAAC---CGACTTTATCGAGAAAGATTACTTTTTTTTAGGTC  
AAGATGTTGATAGCGAGATCTCGAATCAACTTATTGGTCTTATGGTATATCTCAGTATAG  
AAAGCGAGACAAAAGATTTGTATTTGTTTATAAACTCTCCCGCGGATGGGTAATACCC  
GGAATAGCTATTTATGATACTATGCAATTTGTGCGACCCGATGTACAAACAGTATGCATG  
GGATTAGCTGCTTCAATGGGATCTTTTATTCTGGTTCGGAGGAAAATTACCAAACGTTT

AGCATTCCCTCATGCTAGGGTAATGATTCATCAACCTATTGCTGGTTTTTATGAGGCACA  
AATAGGAGAATTTGTCCTGGAAGCGGAAGAAGAACTACTGAAACTGCGCGAAATCCTCACA  
AGGATTTATGCACAAAGAACGGGCAAACCCCTTATGGGTTGTATCCGAAGACATGGAAA  
GAGATGTTTTTATGTCAGCAACCGAAGCCCAAGCTCATGGAATTGTTGATCTTGTAGCA  
G T T G C  
A????????????????????????????????????????????????????????????  
????????????????????????????????????????????????????????????  
????????????????????????????????????????????????????????????  
????????????????????????????????????????????????????????????  
ATGGAGGAA-----AGATATTTAG  
AATTAGATAGATCTCGAAAAACGACTTCCATACCCATTATCTTTTCGGGAGTATATTTA  
TACATTCGCTCATGATCATAGTTTAGTAGGTTATGACAATAAATCTAGTTTTTTAATTGTA  
AAACGTTTAATTACTCGAATGTATCAACAGAATCATTTGATTATTTCTGCTAATGATTCTA  
ACCAAATCCATTTTTTAGAAAGAATTTGTATTATCAAATGATATCAGAGGGCTTTGCAG  
TTATTGTGGAAATTCATTTTCCCTACGATTAGTATCTTCTTTAATAGTAAAATCTCATAA  
ATTACGATCAATTCATTCAATATTTCCCTTTATTAGAGGACAAATTTCCACATTTAAATTAT  
GTGTCAGATATATTAATACCTTACCCCATCCATCTAGAAAAATTGGTTCAAACCCTTCGC  
TATTGGGTGAAAGATCCCTCTTCTTTGCATTTATTACGACTCTTCTTCATGAGTATTGG  
AATTTGAACAGTCTTATTATTAATCTATTATTATTTTATAAAACCAAGATTTTCTTGT  
CCTATATAATTCTCATGTATATGAATACGAATCCATCTTCTTTTTTCTCCGTAACCAATCCT  
TTCATTTACGATCAATATTTTTGCGAGTCCTTCTTGAACGAATTTTTTCTATGGAAAAAT  
AGAACATTTTTCGGAAGTCTTTGCTAATCAGGCCACCCTGTGGTTGTTCAAGGATCCTT  
TCATGCATTATGTTAGATATCAAGGAAAATCAATTTTGGCTTCAAAAAATAGGCCTTTTC  
TGATGAAAAAATGGAAATATTACCTTGTCAACTTATGTCAATATCATTTTTATGTCTGGTT  
TCAACCAGAAAAGATCTATATAAATTCATTATCCAAGCATTCTCTCAACTTTTTGGGCTA  
TCTTTCAAGTGTACAATTAATCCTTACAGTGGTACGGAGTCAAATGTTAGAATATTCATT  
TATAATAGATAAT-----ACTATAAAGAACTCGATACAATAGTTCCAATTATCCTTTAATT  
GGATCATTGGCAAAAACGAAATTTTGTAAACGCAGTAGGACATCCCATTAGTAAACCGAT  
TCGGGCGGATTCTGTCGGATTCTGATATTCTCGACCGATTGTGCGTATATGCAGAAATCT  
TTCTCATTATTATAGCGGATCCTCAAAAAAAAAGAGTTTGTATCGAATAAATATATACT  
TCGACTTTCTTGTGTTAAACTTTGGCCCGTAAACACAAAAGTACTGTACGCGCTTTTT  
TGAAAAGATTAGGTTCCGAATTATTAGAAGAGTTTTTTACGGAGGAAGAACAGATTCTT  
TCTTTGATCTTTCCAAAACGTGTTTGGTATTTGGATATTATTTCTATCAATGATTGGCCA  
ATCATGAAATGATAATTGATAACAACA---GAAATACAA---GCTATCAATCTTTTTCTAGAT  
TAGAATCC---TTAAACGAGGCTATGGAATTATATGGGTGTTTGTCCCGATTTTATTCTT  
GTATTGGGAATCACGATAGGCATACTAGTAATTGTATGGTTAGAAAGAGAAATATCTGC  
AGGGATACAACAACGTATTGGACCTGAATATGCCGGTCCCTTAGGAGTTCTTCAAGCTC  
TAGCGGATGGGACAAAACACTTTTTCAAAGAGAATCTTTTTCCATCTAGGGGGGATATT  
CGTTTATTAGTATCGGACCATCCATAGCAGTCATATCAACTCTATTAAGCTATTCGGTAA  
TTCTTTTTGGCTATCACCTTGTTTAACTGATCTAAATATTGGTGTTTTTTTTATGGATTGC  
CATTTCAAGTATTGCTCCCATCGGACTTCTTATGTCAGGATATGGATCAAATAATAAATAT  
TCCTTTTTGGGTGGTTTACGAGCTGCTGCTCAATCGATTAGTTATGAAATACCATTAACCT  
CTTTGTGTGTTATCCATATCTCTATTATCTAATAGTTCAAGTACAGTTGATATAGTTGAGG  
CACAATCAAATCTGGTTTTTGGGGGTGGAATTTGTGGCGTCAACCTATAGGATTTATC  
ATTTTTTTTATTTCTTCTCTAGCAGAATGTGAGAGATTGCCTTTTGATTTACCAGAAGCA  
GAAGAAGAATTAGTAGCAGGTTATCAAACCGAATATTTCGGGCATCAAATTTGGTTTATT

TTATATTGCTTCCTATCTAAACTTATTAGTTTCTTCATTATTTGTAACAGTTCTTTACTTGG  
GCGGTTGGAATATCTCTATTCCGTATATATTCGTTCTGAGCTTTTT-----GAAAAAATAG  
GCGGAGTCTTTGGAACAACAATTGGTATCTTTATTACATTGGTTAAAACCTATTTGTTCT  
TGTTCAATTCCTATCACAACAAGATGGACTTTACCTAGACTAAGAATGGACCAACTTTTA  
AATCTTGGATGGAAATTTCTTTTACCTATTTCTCTCGGTAATCTATTATTAACAACCTCTT  
TCCAACCTCTTTCACTAATGATCTGGCATGTACAGAATGAAAACCTTCATTCTCGATTCTA  
CGAGAATTTTTATGAAAGCCTTTCAATTGCTTCTCTTCGATGGAAGTTTTATTTTCCCAG  
AATGTATCCTAATTTTTGGCCTAATTCTTCTCTGATGATCGATTCAACCTCTGATCAAAA  
AGATATACTTGGTTATATTTCACTCTTCAACAAGTTTAGTAATGAGTATAACGGCCCTA  
TTGTTCCGATGGAGAGAAGAACCTATGATTAGCTTTTCGGGAAATTTCCAACGAACA  
ATTTCAACGAAATCTTTCAATTTCTATTTTACTATGTTCAACTCTATGTATTCTCTATCC  
GTAGAGTACATTGAATGTACAGAAATGGCTATAACAGAGTTTCTCTTATTCGTATTAACA  
GCTACTCTAGGAGGAATGTTTTATGCGGTGCTAACGATTTAATAACTATCTTTGTAGCT  
CCAGAATGTTTCAGTTTATGCTCCTACCTATTATCTGGATATACCAAGAAAGATGTACGG  
TCTAATGAGGCTACTACGAAATATTTACTCATGGGTGGGGCAAGCTCTTCTATTCTGGTT  
CATGCTTTCTCTTGGCTATATGGTTCGTCCGGGGGAGAGATCGAGCTTCAAGAAATAGT  
GAATGGCCTTATCAATACACAAATGTATAACTCCCCAGGAATTTCAATTGCGCTTATATT  
CATCACTGTAGGAATTGGGTTCAGCTTTCCCTAGCCCCTTCTCATCAATGGACTCCTG  
ACGTATACGAAGGATCTCCCACTCCAGTCGTTGCTTTTCTTTCTGTTACTTCGAAAGTA  
GCTGCTTCAGCTTCAGCCACTCGAATTTTCGATATTCTTTTTATTTCTCATCAAACGAA  
TGGCATCTTCTTCTGGAATCCTAGCTATTCTGAGCATGATAGTGGGGAATCTCATTGCT  
ATTACTCAAACAAGCATGAAACGTATGCTTGCATATTCGTCCATAGGTCAAATCGGATAT  
GTAATTATTGGAATAATTGTTGGAGACTCAAATGGTGGATATGCAAGCATGATAACTTAT  
ATGCTCTTCTATATCTCCATGAATCTAGGAACTTTTGCTTGTATTGTATTATTTGGTCTAC  
GTACCGGAACTGATAACATTTCGAGATTATGCAGGATTATACACGAAAGATCCTTTTTTG  
GCTCTCTCTTTAGCCCTATGTCTCTTATCCCTAGGAGGTCTTCCCTCCACTAGCAGGTTTT  
TTCGAAAACCTCCATTTATTCTGGTGTGGATGGCAGGCAGGCCTATATTTCTTGGTTTTA  
ATAGGACTCCTTACGAGCGTTGTTTCTATCTACTATTATCTAAAATAATCAAGTTATTA  
TGACTGGACGAAACCAAGAAATAACCCCTCACGTGCGAAATTATAGAAGATCCCCTTT  
AAGATCAAACAATTCCATCGAATTGAGTATGATTGTATGTGTGATAGCATCTACTATACC  
AGGAATATCAATGAACCCGATTGTTGAAATTGCTCAAGATACCCTTTTTATGTTTCTGAT  
TTACGAATATGATATATTCTGGGCATTTCTAATAATATCAAGTGTTATTCCTATTTTAGCAT  
TTCTAATTTCCGGAGTTTTATCCCCGATTAGCAAAGGGCCGGAGAACTTTCTAGTTAT  
GAATCGGGTATAGAACCAATGGGTGATGCTTGGTTACAATTTCAATCCGTTATTATATG  
TTTGCTCTAGTTTTTTGTTGTTTTTGATGTTGAAACAGTTTTTCTTTATCCATGGGCAATG  
AGTTTCGATATATTGGGGTTATCCGTATTTATAGAAGCTTTCATTTTCGTGCTTATCCTAAT  
TGTTGGTTCAGTTTATGCATGGAGAAAAGGAGCATTAGAATGGTCTATGAATTCCTTTC  
CTTGGTTAACAATATTTGTAGTTTTTACCGATATCCGCGGGTTCCTTAATTTTCTTTTCCC  
TCATAGAGGAAATAAAGTAATTAAGTGGTATACTATATTTATATGTGCCTTTGAACTCCTT  
TTAATGAATTATGTGTTCTTATTATTTCCAATTGGACGATCCATTAATCCAATTAACAG  
AAGATTATAAATGGATCCAATTTTTTGAATTTTTACTGGAGATTGGGAATCGATGGATTTT  
CTTAGGACCTATTTTACTGACAGGATTTATCACTACTTTAGCTACTTTAGCGGCTCGGC  
CAATTACTCGGGATTCTCGATTATCCATTTTCTGATGTTAGCAATGTATAGTGGTCAAAT  
AGGATTATTTCTTCTCAAGATCTTTTACTTTTTTTTTATCATGTGGGAGTTAGAATTAAT



CCCGTTTATCTACTTCTATCCATGTGGGGGGGAAAGAAACGTCTGTATTTCAGCTACAAA  
GTTTATTTTGTATACTGCGGGAGGTTCCGTTTTTTTTATTAATGGGAGCTTTGGGTATCGCT  
TTATATGGTTCTAATGAACCGAGATTCCATTTTGAACATCAGCTAATCAATCATATCCTG  
TGGCGCTAGAAATATTTTTCTATATTGGATTTCTTATTGCTTTTGCTGTCAAATCACCGAT  
TATACCCTTACATACATGGTTACCAGACACCCATGGGGAAGCACATTATAGTACTTGTAT  
GCTTCTAGCCGGAATCTTATTAATAAATGGGGGCATATGGATTGGTTCGAATCAATATGGA  
ATTATTATCTCACGCTCATTCTATTTTTTCTCCCTGGTTGATAATAGTAGGCGTAATGCAA  
ATAATCTATGCAGCTTCAACATCTCCTGGTCAACGAAATTTAAAAAAAAGAATAGCCTA  
TTCTTCTGTATCTCATATGGGTTTCATAATTATAGGAATTTGCTCTATAAGTGATATGGGA  
CTCAATGGAGCCATTTTACAAATAATATCGCATGGATTTATTGGTGCCGCACTTTTTTTCT  
TGGCAGGAACGGGTATGATAGAATACGTCGTGTTTATCTTGATGAAATGGGTGGAATG  
GCTACCTCAATGCCAAAAATATTCACGACATTCAGTATCTTATCACTAGCTTCCCTTGCA  
TTACCAGGCATGAGCGGTTTTTTTGGCGGAATTGATAGTATTTTTTGGAAATAATTACCGGC  
CAAAAATATCTTTAATGTCAAAAATATTAATTACTTTTTGTAATGGCAGTTGGAATGATAT  
TAACTCCTATTTATTTATTATCTATGTTACGCCAGATGTTCTATGGATATAAGCTGTTAAT  
GCCCAAACCTTCTTTTTTTGATTCTGGACCGCGGGAGTTATTTGTTTCGATCTCTATC  
CTTCTGCCTGTAATAGGTATTGGTATTTATCCGGATTTCTGTTTTCTCATTATCAGTTGACA  
GGGTTGAAGCTATTCTATCTAATTATTTTTATAGAATGATGCTCGAACATGTACTTGT  
GAGTGCCTATTTATTTTCTATTGGTATCTATGGATTGATCACGAGTCGAAATATGGTTAGA  
GCCCTTATGTGCCTTGAACCTATACTGAATGCAGTTAATCTAAATTCGTAACATTTTCT  
GATTTTTTTGATAGCCGCAATTAAGGAAATATTTTTTTCCATTTTGTATAGCTATCG  
CAGCCGCTGAAGCAGCTATTGGACCAGCTATTGTTTCATCAATTTATCGTAATAGAAAAT  
CAACCCGTATCAATCAATCGAATTTGTTGAATAAGATGGAACATATATCAATATTCATG  
GATCATATCTTTCGTTACATTGCCAGTCCCTATGTTAATAGGAGTGGGACTCCTGCTTTT  
TCCGGCAGCAACAAAAAACTGCGTCGTATGTGGGCTTTTCCAAGCGTTTTCTTGTTA  
AGTATAGTCATGATTTTTTCAATCGATTTGTCTATTCAGCAAATAAATAGTAGTTTTATTT  
ATCAATATATATGGTCGTGGACTATTAATAATGATTTTTCTTTAGAATTCGGACACTTGAT  
TGACCCACTTACTTCTATTTTGTGAGTATTAATTACTACAGTTGGTATTTTGGTTCTTTTT  
TATAGTGACAATTATATGTCTCATGATCAAGGTTATTTGAGATTTTTTGTCTATATGAGTT  
TTTTCACTACTTCAATGTTGGGATTAGTTACTAGTTCTAATTTGATACAAATTTATATTTTT  
TGGGAATTGGTTGGAGTGTGTTCTTATCTATTAATAGGTTTTTGGTTCACACGACCTATT  
GCATCGAATGCTTGTCAAAAAGCGTTTGTAACTAATCGTGTAGGGGATTTTGGTTTATTA  
TTAGGGATTTTAGGCTTTTATTGGATAACGGGCAGTTTCGAATTTTCGGGATTTGTTCAA  
ATCTTCAATAAC---CAAGTTAATTTTTTATTTGTTACTTTGTGTGCATTTCTATTATTTCT  
GGCGCAATTGCTAAATCGGCGCAATTTCCCTCTTCATGTATGGTTACCAGATGCCATGGA  
AGGGCCTACTCCTATTTAGCTCTGATACATGCTGCTACTATGGTAGCGGCGGGAATTTT  
TCTTGATAGCTCGCCTTTTTCTCTTTTCGTAATTATACCTTTCATAATGAATCTAATAGCTT  
TGATAGGTATAATAACAGTATTTTTAGGAGTTACTTTAGCTCTTGCTCAAAAAGATATTA  
AGAGAAGTTTAGCCTATTCTACAATGTCTCAATTGGGTTATACGATGTTAGCTCTAGGTA  
TGGGGTCTTATCGGGCTGCTTTATTTCAATTTGATTACTCATGCCTATTCGAAAGCATTGTT  
GTTTTTAGGATCTGGATCCATTAATTCATTCAATGGAAGCTATTTCTGGTTATTTCTCCAGAT  
AAGAGTCAAAATATGGTTCTTATGGGTGGTTTAAACAAAACATATTCCAATTACAAAAC  
GGTTTTTTIATTAGGAACACTTTCTCTTTGTGGTATTCACCCTTCGCCTGTTTTTGGTC  
CAAAGATGAAATCTTAATGATAGTTGGTTGTATTACCTATTTTCGCAATAATAGCCTG

TTTCACAGCAGGATTAACCTGCATTTTATATGTTTCGGGTTTATTTACTTACTTTTGACGGA  
CATTTTAATGCTCATTTTAAAAATTACAGTGGTAAAAAAAACAGTTCATTTTATTCAATC  
TCTTTATGGGGTAAAGAAGGATCAAAAATGCTTAACAAA---TTATTAGCTTTATTAACAA  
TGAATTTTTTTGGTAACACTAAAAGG---ATTTTTTCTATCCCCATGAATCGGATAACT  
ATGTTATTTCTATGCTTATCTTAGTACTATTTACTTTGTTTATTGGAGCCATAGGAAATC  
AATTCGATATAGATATATTGTCAAACTTTTAAACCCCGTCTTTAAACCTTTTGCATCAAA  
ATCCAGAA---TCTGTGGATTGG---GAATTTGTAACAAATGCAATTTTTTCAGTCAGTATA  
GCTTTTTTCGGAATATTTATAGCGTCCTTTTTATATAAGCCTGTTTATTCATCGTTACTAAA  
TTTTAATTTCTTTAATTCGTTTGCTATTTTTTGGGACAAAATAATAAATGTGATATATAATT  
GGTCCTCTAATCGAGGTTATATAGATGCTTTTTATGCAATATCTTTTATTGGGGGTATAAG  
AAAATTGGTTGAATTAATTCATTTTTTTGATAAACGAATAATTGATGGAATCACCAATGG  
GGTCGGTGTTACCAGTTTCTTTGTAGGAGAGGGTATAAAATATGTAGGAAGTGGT---CG  
CATCTCTTCTTATCTCTTATTTTATTTATTTATGCATTAATTTTTTTTATTAATT-----ATGGAT  
TTGCCTGGACTAATTCATGATTTTCTTTTAGTCTTTCTAGGATTAGGTCTTATATTAGGAG  
GTCTAGGAGTGGTATTACTTACCAACCCAATTTATTCTGCCTTTTCGTTGGGATTGGTTC  
TTGTTTGTATATCTTTATCTATATTTTATCAAACCTCTCATTTTGTAGCTGCCGCACAGCTC  
CTTATTTATGTGGGAGCTATAAATGTTTTAATTATATTTGCCGTGATGTTTCATGAATGGTT  
CAGAATATTACAAAGATTTTAATCTTTGGACTGTTGGAAGCGGGGTTACTTCTTTAGTTT  
GTACAAGTATTTTTGTTTCACTAATTACTATTCTTCCAGATACGTCATGGTATGGAATTAT  
TTGGACTACAAGAACAATCAGATTATAGAACAAGATTTGATAAGTAATGGTCAACAAA  
TTGGAATTCATTTATCAACAGATTTTTTTCTTCCATTTGAATTCATTTCAATAATTTCTTTTA  
GTTGCTTTGATAGGTGCGATTGCTGTGGCTCGTCAGATGAATGTACCAGCTACACGAAA  
AGACCTTATGATAGTTAATATGGGCCCCACCACCCATCAATGCATGGTGTCTTCCGCT  
CATCGTTACTCTAGACGGGAAGATGTTATTGACTGTGAACCAATATTAGGTTATTTACA  
CAGAGGAATGGAAAAAATTGCGGAAAATCGAACAATTATACAATATTTGCCCTATGTAA  
CACGTTGGGATTATTTGGCTACTATGTTTACAGAAGCAATAACAGTAAATGGTCCAGAA  
CTGTTAGGAAATATTCAAGTGCCTAAAAGAGCTGGCTATATCAGAATAATTATGTTGGAA  
TTGAGTCGTATAGCTTCTCATTTGTTATGGCTTGGTCCCTTTATGGCAGATATTGGTGCA  
CAGACTCCTTTCTTCTATATTTTTAGAGAAAGAGAGTTAGTATATGATTTATTCGAAGCT  
GCCACTGGTATGAGAATGATGCATAATTTTTTTTCGTATCGGGGGAGTAGCGTCTGATCTA  
CCTCATGGTTGGATAGATAAATGTTTGGATTTTTTTCGATTATTTTTTAAACAGGAGTTACT  
GAATATCAAAAACCTTATTACGCGAAATCCTATTTTTTTAGAACGAGTTGAGGGAGTAGG  
TATTGTTGGTACAGAGGAAGCAAAAATTGGGGTTTATCGGGACCAATGCTACGAGCT  
TCCGGAGTACAATGGGATCTTCGTAAAGTTGATCATTATGAGTGTTACGACGAATTTGA  
TTGGGAAATCCAGTGGCAAAAAGAAGGAGATTCCCTAGCTCGTTATTTAGTCCGAATTG  
GTGAAATGATGGAATCTATAAAAATTATTCAACAGGCTCTGGAAGGAATTCCGGGGGG  
GCCCTATGAGAATTTAGAAATCCGACGTTTTGATAGAGAAAGGATTCCGGAATGGAAC  
GATTTCGAATATCGATTCATTAGTAAAAAACTTCTCCTACTTTTGAATTACCGAAACAA  
GAACTTTATGTGAGAGTCGAAGCCCCAAAAGGAGAATTGGGAATTTTTCTGATAGGAG  
ATCAGAGCGGTTTTCTTGGAGATGGAAAATTCGTCCGCCGGGTTTTATCAATTTGCAA  
ATTCTTCCCTGAATTAGTTAAAAGAATGAAATGGCCGATATTATGACAATACTAGGTAGT  
ATAGATATCATTATGGGAGAAGTTGATCGTATGTTCCCATGGTAACTGGGTTTCATGAAT  
TATGGGCAACAAACCATACGAGCTGCAAGGTACATTGGTCAAGGTTTTATGATTACCTT  
ATCTCATGCAAATCGTTTACCTGTAACCTATTCAATATCCTTATGAAAAATTAATCACATCG

GAGCGTTTCCGCGGTTCGAATTCATTTTGAATTTGATAAATGCATTGCTTGTGAAGTATGT  
GTTTCGTGTATGTCCTATAGATCTACCTGTTGTTGATTGGAAATTGGAACTGACATTCGA  
AAGAAACGGTTGCTTAATTACAGTATTGATTTCCGGAATCTGTATATTTTGTGGCAACTGT  
GTTGAGTATTGTCCGACAAATTGTTTATCGATGACTGAAGAATATGAGCTTTCTACTTAT  
GATCGTCACGAATTGAATTATAATCAAATTGCTTTAGGTCGTTTACCAATGTCAGTAGTT  
GACGATTATACAATTCGAACAATTTTGAATTCACAAAAAAAAA-----  
----ATGCAGGGTTCGTTTGTCTGCTTGGCTAGTCAAACATGGGCTAGTTCATAGATTTTGTG  
GGTTTTGATTACCAAGGAATAGAGACTTTACAAATAAAGCCCGAAGATTGGCATTCCAT  
TGCTGTCATTTTATATGTATATGGTTACAATTATCTGCGTTCGCAATGTGCCTATGATGTA  
GCACCGGGCGGGCTGTTAGCTAGTGTATATCATCTTACGAGAATAGAGTATGATATAGAT  
CAACCAGAAGAAGTATGTATAAAAGTATTTGCCCAAGGAAGAATCCTAGAATTCCGTC  
TGTTTTCTGGGTTTGGAAAAGTGCGGATTTTCAAGAAAGGGAATCTTATGATATGCTGG  
GAATCTTTTATGATAATCATCCACGCTTGAAACGTATCTTAATGCCGGAAGTTGGATAG  
GGTGGCCCTTACGTAAGGATTATATTGTTCCCAATTTTATGAAATACAAGATGCTCAT--  
-----  
-----ATGAATTCCATTGAGTTTCCTTTACTTGAT  
CGAACAACCTCAAATTTTCAGTTATTTCAACTACATCAAATGATCTTTCAAATTTGGTCAAG  
ACTCTCCAGTTTATGGCCACTTCTCTATGGTACCAGTTGTTGCTTCATTGAATTTGCTTC  
ATTAATAGGCTCACGATTCGACTTTGATCGTTATGGGCTAGTACCAAGATCTAGTCCTAG  
ACAAGCGGACCTGATTTTAAACAGCCGGCACCGTAACCATGAAAATGGCTCCTTCTTTA  
GTGAGATTATATGAACAAATGCCTGAACCAAATATGTTATTGCTATGGGGGCATGTACA  
ATTACAGGGGGGATGTTTCAAGTACCGATTCTTATAAGTACTGTTTCGGGGAGTTGATAAGCT  
AATTCCTGTAGATGTCTATTTGCCAGGCTGTCCACCTAAACCGGAGGCGGTTATAGATG  
CTATAACAAAACCTTCGTAAAAAATATCTCGAGAAATTTATGAAGATCGAATTAGGTCT-  
----GGGAAACGGTGTTTTACTACTAATCACAAGTTTAAATATTGAACGCACTACTCATACT  
GGAAATTATGATCAAGAATTACTCTATCAATCGCCGTCTACTTCAAAGATCCCTCCGGA  
AACATTTTCAAATATAAAAGGTCAGTATCGTCCAACGAATTAGTAAATATGCAAACCA  
GAAAGACCTTTTCTTGGATAAAGGAAGAGATTACTCGTTCCATTTCCGTATCGCTCATG  
ATATATATAATAACTTGGGCATCCATTTCAAATGCATATCCCATTTTGCACAGCAGGGTT  
ATGAAAATCCACGGGAAGCAACTGGTTCGTATTGTATGTGCCAATTGTCATTTAGCTAAT  
AAACCCGTGGATATTGAGGTTCCACAAGCGGTACTTCCAGATACTGTATTTGAAGCAGT  
TGTTTCGAATTCCTTATAATATGCAACTGAAACAAGTTCTTGCTAATGGTAAAAGGGGG  
CTTTGAATGTGGGGGCTGTTCTTATTTTACCTGAGGGGTTTGAATTAGCCCCCTCCCGATC  
GTATTTTCGCCAGAGATGAAAGAAAAGATGGGAAATCTGTCTTTTTCAGAGTTATCGCCCC  
ACTAAAAAATATTCTTGTGATAGGTCTGTTCTGTTCCAGAAATATAGTGAAATTAC  
CTTTCCTATTCTTTCTCCGGACCCCGCCGCTAAGAAAGATGTTCACTTTTAAATATCC  
CATATATGTAGGCGGAAACAGGGGAAGGGGTCAGATTTATCCCAGCGGAGCAAGAGC  
AACAAATACGTTTATAATGCTATAGCAGCAGGTATAGTAAGCAAATCATACGAAAAGA  
AAAAGGGGGGTACGAAATAACCATAACGAATGCGTCAGAGGGACGTCAAGTGATTGAT  
ATTATACCTCCAGGACCAGAACTTCTTGTTCAGAAAGGCGAATCCATCAAACCTTGATCA  
ACCATTAACGAGTAATCCTAATGTGGGTGGATTTGGTCAGGGGGATGCAGAAATAGTAC  
TTCAAGACCCATTACGTGTCCAAGGCCTTTTGTCTTCTTGGCATCCGTTATTTGGCAC  
AAATCTTTTGGTTCTTAAAAAGAAACAGTTTGAAGAAGTTCAATTGTCCGAAATGAAT  
TTCATGAGTAAAGTCTATGATTGGTTTCGAAGAACGTCTCGAGATTCAGGCAATTGCAGA

TGATATAACTAGTAAATATGTTCCCTCCCATGTCAACATATTTTATTGTTTAGGAGGAATT  
ACGCTTACTTGTTTTTTAGTACAAGTAGCTACGGGGTTTGCTATGACTTTTTACTACCGT  
CCGACCGTTACTGAGGCTTTTTGCTTCTGTTCAATACATAATGACTGAGGCTAACTTTGG  
TTGGTTAATCCGCTCAGTGCATCGATGGTCGGCAAGTATGATGGTTTTAATGATGATCCT  
GCACGTATTTTCGTGTATATCTCACTGGTGGCTTTAAAAAACCTCGTGAATTGACTTGGG  
TTACGGGCGTGGTTCTTGCTGTATTGACCGCATCTTTTGGTGTAAGTGGTTATTCCCTTAC  
CTTGGGACCAAATTGGTTATTGGGCGGTCAAATTGTAACAGGCGTGCCGGAAGCTAT  
TCCTGTAATAGGATCGCCTTTGGTGGAGTTATTACGCGGAAGTGCTAGTGTAGGACAAT  
CCACTTTGACTCGTTTTTATAGTTTACACACTTTTGTATTACCTCTTCTTACTGCCGTATT  
TATGTTAATGCACTTTTCAATGATACGTAAGCAGGGTATTTTCAGGTCCTTTAATGGGAGT  
AACAAAAAACCTGACTTGAATGATCCTGTATTAAGAGCTAAATTGGCTAAGGGAATG  
GGTCATAATTATTACGGAGAACCTGCATGGCCCAATGATCTTTTATATATTTTTCCAGTAG  
TAATTCTAGGTACTATTGCATGTAATGTAGGATTAGCAGTTCTAGAACCATCAATGATTG  
GTGAACCTGCGGATCCATTTGCAACGCCTTTGGAAATATTGCCTGAATGGTATTTCTTTC  
CCGTATTTCAAATACTTCGTACAGTACCCAATAAGTTATTAGGTGTTCTTTAATGGTTTC  
AGTACCTGCAGGATTATTAACAGTACCTTTTTTGGAGAATGTTAATAAATTCCAAAATCC  
ATTTTCGTTCGTCAGTTGCGACAACCGTCTTTTTGATTGGTACTGCGGTAGCCCTTTGGTT  
AGGTATTGGAGCAACATTACCTATTGATAAATCCCTAACTTTAGGTCTTTTTATGATTGA  
AGTTTTTCTATTTGGAATCGTCTTAGGTCTAATTCCTATTACTTTGGCCGGATTATTTGTA  
ACTGCATATTTACAATACAGACGTGGTGTATCAGTTGGACCTTATGCCTACTATAACTAGT  
TATTTTCGGTTTTCTACTAGCGGCTTTAACTATAACCTCAGTTCTATTTATTGGTCTGAGCA  
AGATACGACTTATTATGGATATAGTAAGTCTCGCTTGGGCTGCTTTAATGGTAGTCTTTA  
CATTTCCCTTTCACTCGTAGTATGGGGAAGAAGTGGACTCATGATTATTCGTTTCGCCG  
GAACCAGAAGTAAAAATTTTGGTAGATAGGGATCCCATCAAACCTTCTTTTCGAGGAAT  
GGCCAGACCCGGTCATTTCTCAAGAACAATAGCTAAAGGACCTGATACTACCACTTG  
GATCTGGAACCTACATGCTGATGCTCACGATTTTCGATAGCCATACCAGTGATTTGGAGG  
AGATTTCTCGGAAAGTATTTAGTGCTCATTTTCGGCCAACCTCTCCATCATCTTTCTTTGGC  
TGAGTGGCATGTATTTCCACGGTGCTCGTTTTTCCAATTATGAAGCATGGCTAAGCGATC  
CTACTCACATTGGACCTAGCGCTCAAGTGGTTTGGCCAATAGTGGGCAAGAAATATTG  
AATGGCGATGTGGGCGGGGGTTTTCCGAGGAATACAAATAACTTCCGGTTTTTTTTCAGAT  
TTGGAGAGCATCTGGAATAACTAGTGAATTACAACCTGTATTGTACCGCAATTGGTGCAT  
TGGTCTTTGCAGCCTTAATGCTTTTTGCTGGTTGGTTCCATTATCACAAAGCTGCTCCAA  
AATTGGCTTGGTTCCAAGATGTAGAATCTATGTTGAATCACCATTTAGCGGGGCTACTA  
GGACTTGGGTCTCTTTCTTGGGCGGGACATCAAGTACATGTATCTTTACCAATTAACCA  
ATTTCTAAACGCTGGAGTGGATCCTAAAGAAATCCCACTTCCTCATGAATTTATCTTGAA  
TCGGGATCTTTTGGCTCAACTTTATCCAGTTTTGCTGAGGGAGCAACCCCATTTTTTA  
CCTGAATTGGTCAAATATTTCGACTTTCTTACTTTTCGTGGAGGATTAGATCCAGTGA  
CTGGGGGTCTATGGCTGACCGATACTGCACACCATCATTTAGCTATTGCAATTTCTTTCC  
TGATAGCGGGTCACATGTATAGGACTAACTGGGCCATTGGTCATGGTATAAAAGAGATT  
TTAGAGGCTCATAAAGGTCCATTTACAGGTACGGGCCATAAAGGCCTATATGAGATCCT  
AACAAACGTACATGGCATGCTCAATTATCTCTTAACCTAGCTATGTTAGGTTCTTTAACCAT  
TGTTGTAGCTCACCATATGTATTCCATGCCCCCTTATCCATATCTAGCTACTGATTATGGT  
ACACAACGTGTCATTGTTACACATCACATGTGGATTGGTGGATTTCTCATAGTTGGTGC  
TGCTGCGCATGCAGCCATTTTTATGGTAAGAGACTATGATCCAACCTACTCGATAACAACG

ATCTATTAGATCGTGTCTTAGGCATCGTGATGCAATCATATCACATCTCAACTGGGTAT  
GTATATTTTTAGGCTTTCACAGTTTTGGTTTTATATATTCATAATGATACCATGAGCGCTTTA  
GGGCGCCCTCAAGATATGTTTTAGATATTGCTATACAATTACAACCTGTCTTTGCTCAA  
TGGATACAAAACACCCATGCTTTAGCACCTGGTGCAACGGCTCCTGGTGCAACAGCAA  
GCACCAGTTTAACTTGGGGGGTGGTGATTTAGTGGCAGTTGGTGGCAAGGTTGCTTT  
ATTACCGATTCCATTAGGAACCGCGGATTTTTTGGTACATCACATTCATGCATTCACGAT  
TCATGTGACGGTATTGATACTTCTGAAAGGAGTTCTATTTGCCCGCAGCTCTCGTTTGAT  
ACCGGATAAAGCAAATCTTGGTTTTCGTTTTCCCTTGTGATGGACCTGGAAGAGGGGGA  
ACATGTCAAGTATCCGCTTGGGATCATGTCTTCTTAGGGCTATTTTGGATGTACAATTCC  
ATTTCCGGTAGTAATATTCCATTTAGTTGGAAAATGCAGTCAGATGTTTTGGGGTAGTATA  
AGTGATCAAGGGGTGGTAACTCATATCACGGGAGGAACTTTGCACAGAGTTCCATTA  
CTATTAATGGATGGCTCCGCGATTTCTTATGGGCACAGGCATCCCAGGTAATTCAGTCTT  
ATGGTTCTTCATTATCTGCATATGGCCTTTTTTCTAGGTGCTCATTITGTATGGGCTTTT  
AGTTTAATGTTTCTATTAGCGGTCTGGTTATTGGCAAGAACTTATTGAATCAATCGTT  
TGGGCTCATAATAAATAAAGTTGCTCCTGCTACTCAGCCTAGAGCCTTGAGCATTATA  
CAAGGACGTGCTGTAGGAGTAACCCATTACCTTCTGGGTGGAATTGCCACAACATGGG  
CGTTCTTCTTAGCAAGAATTATTGCAGTAGGAATGGCATTAAAGATTTCCAAGGTTTAGC  
CAAGGCTTAGCTCAGGACCCCACTACTCGTCTGATTTGGTTTGGTATTGCTACCGCGCA  
TGACTTCGAGAGTCATGATGATATTACGGAGGAACGTCTTTATCAGAATATTTTTGCTTC  
TCACTTCGGGCAATTAGCAATAATTTTTCTGTGGACTTCCGGAAATCTCTTTCATGTAGC  
TTGGCAAGGAAATTTTGAAGCATGGGTACAGGACCTTTACATGTAAGACCTATTGCTC  
ATGCAATTTGGGATCCTCATTITGGTCAACCGGCCGTGGAAGCTTTTACTCGAGGGGGT  
GCTCCTGGCCCAGTGAATATCGCTTATTCTGGTGTTTATCAATGGTGGTATACAATCGGT  
TTACGTACTAATGAAGATCTTTATATTGGAGCTCTTTTTCTATTATTTCTTTCTGCCCTAG  
CCTTACTAGGGGGTTGGTTACACCTACAACCAAATGGAAACCGAGCGTTTCGTGGTT  
CAAAAATGCCGAATCTCGTCTCAATCATCATTITGTGAGGACTATTCGGAGTAAGCTCTT  
TGGCTTGGACAGGACATTTAGTCCATGTCGCTATTCCCGGCTCCCGGGGGGAATACGTT  
CGATGGAATAATTTCTTAGATGTATTACCACATCCCCAAGGGTTAGGCCCGCTTTTTACA  
GGTCAGTGGAATCTTTATGCTCAAATCCCGATTGAGGTAGTCATTTATTTGGTACCTCC  
CAAGGAGCGGGAACCTGCCATTCTAACCTTCTCGGGGGGTTCCATCCACAACACAAA  
GTTTATGGCTGACCGATATTGCACACCATCATTITAGCTATTGCAGTTATTTTTCTCGTTGC  
CGTTCATATGTATAGAACTAACTTCGGGATTGGGCACAGTATAAAAGATCTTTTAGAAG  
CACATATTCCTCCGGGGGGCGATTGGGGCGTGGACATAAGGGTCTTTATGACACAATC  
AACAATTCGCTTCATTTTCAATTAGGCCTTGTCTAGCTTCTTTAGGGGTTATTACTTCCT  
TAGTGGCTCAACACATGTACTCATTACCTGCTTATGCGTTCATAGCGCAAGACTTTACTA  
CTCAAGCTGCGTTATATACTCATCACCAATACATCGCAGGATTCATCATGACAGGAGCTT  
TTGCTCATGGAGCTATATTTTTTATTAGAGATTACAATCCGGAACAGAATGAGAATAATG  
TATTGGCAAGAATGTTAGACCATAAAGAAGCTATCATATCCCATTTAAGTTGGGCCAGT  
CTCTTTCTGGGATTCCATACTTTGGGACTTTATGTTTATAATGATGTCATGCTTGCTTTTG  
GTACTCCGGAGAAACAATCTTAATCGAACCCATATTTGCCCAATGGATACAATCTGCT  
CACGGTAAAACCTCATATGGGTTGATGTACTTTTATCTTCAACGAATAGTCCGGCCTTC  
AATGCGGGTCGAAGCATATGGTTGCCCGGCTGGTTAAATGCTATTAATGAA-----AATAG  
TAATTCATTATTCTTAACAATAGGGCCTGGAGACTTCTTGGTTCATCATGCTATTGCTCTA  
GGTTTACATAACAACCATTTGATCTTAGTAAAAGGTGCTTTAGATGCACGCGGTTCCGAA

GTAAATGCCAGATAAAAAGGATTTTGGTTATAGTTTTCCCTTGTGATGGTCCGGGACGCG  
GCGGTACTTGTGATATTTCCGGCTTGGGACGCATTTTATTTGGCGGTTTTCTGGATGTAA  
ATACCAATTGGATGGGTTACTTTTTATTGGCATTGGAAGCACATCACATTATGGCAGGGTA  
ATGTTTCACAGTTAATGAATCTTCCACTTATTTGATGGGATGGTTAAGAGATTATCTATG  
GTAAACTCTTCACAACCTTATCAATGGATATAACCCTTTTGGTATGAATAGCTTATCGGT  
CTGGGCGTGGATGTTCTTATTTGGACATCTTGTTTGGGCTACTGGATTTATGTTTTTAATT  
TCTTGGCGTGGATATTGGCAAGAATTGATTGAACTTTAGCATGGGCTCATGAGCGTAC  
ACCTTTGGCTAATTTGATTTCGATGGAGAGATAAACCAGTAGCTCTTTCCATTGTGCAAG  
CAAGATTGGTTGGATTAGCTCACTTTTCCGTAGGTTATATCTTCACTTATGCGGCTTTCTT  
GATTGCCTCTACATCAGGTAATTTGGTATGTCACATTCAGTAAAGATTTATGATACATGT  
ATAGGGTGTACTCAATGTGTCCGAGCCTGCCCCACAGATGTATTAGAAATGATACCTTG  
GGATGGATGTAAATCCAAGCAAATTGCTTCTGCTCCAAGAACAGAGGACTGTGTCCGT  
TGTAAGAGATGTGAATCCGCCTGTCCAACGGATTTCTTGAGTGTTTCGAGTTTATTTATG  
GCATGAAACAACCTCGAAGCATGGGTCTAGCTTATATGACAATTCTCAACTCCCCCTCCA  
TTCTTGTGCCTTTAGTGGGCTTAGTATTTCCGGCAATTGCAATGGCTTCTTTATTTCTTTA  
TATTCAAAAAACAAGATTTTTATGCGAGATCTAAAAACATATTTATCTGTAGCACCAGT  
AATAAGTACTCTATGGTTTGGGTCTTTAGCAGGTCTATTGATAGAGATCAATCGTTTTTT  
CCCAGATGCGTTGACATTCCTTTTTTTTTTCATTCATGACTGCAATTTTAGAGAGACGCG  
AAAGCGAAAGCCTATGGGGTCGTTTCTGTAACCTGGATAACCAGCACTGAAAACCGTCT  
TTACATTGGATGGTTTGGTGTTTTGTGATGATCCCTACTTTATTGACCGCAACTTCTGTATTT  
ATTATCGCTTTCATTGCTGCCCTCCGGTAGATATTGATGGTATTCGTGAACCTGTTTCTG  
GATCTCTACTTTATGGAAACAATATTATTTCTGGTGCCATTATTCCTACTTCTGCGGCTAT  
AGTTTTGCATTTTTACCCAATATGGGAAGCGGCATCCGTTGATGAATGGTTATACAATGG  
CGTCTCTTATGAGCTAATTGTTCTACACTTCTTACTTGGTGTAGCTTGTTACATGGGTCG  
TGAGTGGGAACCTTAGTTTCCGCTCTGGGTATGCGCCCTTGGATTGCTGTTGCATATTCAG  
CTCCTGTTGCAGCTGCTACTGCTGTTTTCTTGATTTATCCAATTGGTCAGGGAAGCTTTT  
CTGATGGTATGCCTCTAGGAATCTCTGGTACTTTCAACTTTATGATTGTATTCCAGGCTG  
AGCACAACATCCTTATGCACCCATTTACATGTTAGGCGTAGCTGGTGTATTCCGGCGGC  
TCCCTATTCAGTGCTATGCATGGTTCCTTGGTAACCTCTAGTTTGTATCAGGGAAACCAC  
AGAAAATGAATCTGCTAATGAAGGTTACAGATTCGGTCAAGAGGAAGAAACTTATAATA  
TCGTAGCTGCTCATGGTTATTTGGCCGATTGATCTTCCAATATGCTAGTTTCAACAACCT  
CTCGTTCTTTACATTTCTTCTAGCTGCTTGGCCTGTAGTAGGTATTTGGTTCCTGCTTT  
AGGTATTAGCACTATGGCTTTCAACCTAAATGGTTTCAATTTCAACCAATCTGTAGTTGA  
TAGTCAAGGTCGTGTAATTAATACCTGGGCTGATATTATTAACCGTGCTAACCTTGGTAT  
GGAAGTTATGCATGAACGTAATGCTCATAACTTCCCTCTAGACCTAGCTGCTGTGCAAG  
TTCCATCTACAAATGGAATGGGTTTGCCTTGGTATCGTGTTACATACCGTCGTATTGAATG  
ATCCCGGTCGTTTGTCTGTCTGTCCATATAATGCATACAGCTTTGGTTGCTGGTTGGGCCG  
GTTTCGATGGCTCTATATGAATTAGCAGTTTTTGTATCCCTCTGACCCGTTCTCGATCCAA  
TGTGGAGACAAGGTATGTTTCGTTATACCCTTTATGACTCGTTTAGGAATAACCAATTCAT  
GGGGTGGTTGGAGTATCACA---GGAGGAACCTATAACGAATCCGGGTATTTGGAGTTATG  
AAGGCGTGGCTGGGGCGCATATTGTGTTTTCTGGCTTGTGCTTCTTGGCAGCTATTTGG  
CATTGGGTGTATTGGGATCTCGAAATATTTTGCATGAACGTACAGGAAAACCTTCTTT  
GGATTTGCCCAAGATCTTTGGAATTCATTTATTTCTCTCCGGGGTGGCTTGGCTTTGGGTT  
TGCGCTTTTCATGTAACCGGATTGTATGGTCTTGGAAATATGGGTGTCCGACCCTTATGG

ACTAACTGGAAAGGTACAACCTGTAAGTCCAGCATGGGGTGTGGAAGGTTTTGATCCT  
TTTGTTCGGGAGGAATAGCCTCTCATCATATTGCAGCGGGGACATTGGGCATATTAGC  
GGGCCTATTCATCTTAGTGTCCGTCCGCCCAACGTTTATACAAAGGATTACGTATGGG  
AAATATTGAAACTGTCCTTTCCAGTAGTATCGCGGCTGTCTTTTTTGCAGCTTTTGTGT  
TGCTGGAACATATGTGGTATGGTTCAGCAACTACCCCGATTGAATTATTTGGTCCCCTC  
GTTATCAATGGGATCAAGGATACTTCCAGCAAGAAATATATCGAAGAGTTAGTGCTGGG  
CTAGCCGAAAATCAAAGTTTATCCGAAGCTTGGTCTAAAATTCCCGAAAAATTAGCTTT  
TTATGATTACATCGGCAATAATCCGGCAAAGGGTGGGTTGTTTCAGAGCAGGCTCAATGG  
ACAACGGGGATGGAATAGCTGTTGGGTGGTTAGGACATCCTATCTTTAGAGATAAAGA  
AGGGCGTGAACTTTTTGTACGTCGTATGCCTACTTTTTTTGAAACATTTCCGGTTGTTTT  
GGTAGACGGAGATGGAATTGTTAGAGCCGATGTTCCTTTTTCGAAGGGCAGAGTCGAAG  
TATAGTGTGCAACAAGTAGGTGTAAGTGTGAGTTCTATGGTGGCGAACTAAACGGAG  
TCAGTTATAGTGATCCTGCTACTGTGAAAAATATGCTAGACGCGCTCAATTGGGTGAA  
ATTTTTGAATTAGATCGTGCTACTTTGAAATCCGATGGTGTTTTTTCGTAGCAGCCCAAG  
GGTTGGTTTACTTTTGGACATGCTTCGTTTCGCTCTGCTCTTTTTCTTCGGACACATTTGG  
CATGGTGTCTGAACTTTGTTTCAGAGATGTTTTTGTGTTATTGATCCAGATTTAGATGCT  
CAAGTGAATTTGGAGCATTCCAAAACTTGGAGATCCAACACTACAAGAAGACAAGTA  
GTC-----GTGGAAACGCTCTTTAATGGAACTTTATCTTTAGCCGG  
TCGTGACCAAGAAACCACCGTTTTCGCTTGGTGGGCCGGGAATGCCCGACTTATCAAT  
TTATCCGGTAAACTACTGGGAGCTCATGTAGCTCATGCTGGATTAATCGTATTCTGGGCT  
GGAGCAATGAACCTATTTGAAGTGGCTCATTTTCGTACCGGAGAAGCCAATGTACGAAC  
AAGGATTAATTTTACTTCCCCACCTAGCTACTCTAGGTGGGGGGTAGGTCCTGGTGGG  
GAAGTTATAGACACCTTTCCATACTTTGTATCCGGGGTACTTCACTTAATTTCCCTCTGCA  
GTATTGGGCTTTGGCGGTATTTATCATGCACTTCTGGGTCCTGAGATTCTTGAAGAATCT  
TTCCATTTTTTGGTTATGTATGGAAAGATAGAAATAAAATGACAACAATTTTAGGTATT  
CACTTAATCTTGCTAGGTATAGGTGCTTTTCTTCTAGTATTCAAGGCTCTTTATTTTGGGG  
GCGTATATGATACCTGGGCTCCGGGGGGGGGAGATGTAAGAAAAATTACCAACTTGAC  
CCTTAGCCCAAGTGTTATTTTTGGTTAATTAATAAAATCTCCCTTTGGAGGAGAAGGATG  
GATTGTTAGTGTGGACGATTTGGAAGATATAATTGGAGGACATGTATGGTTAGGTCCAT  
TTGTATACTTGGTGAATCTGGCATATCTTAACCAAACCTTTTGCATGGGCTCGCCGTGC  
ACTTGTGTGGTCTGGAGAGGCTTACTTGTCTTATAGTTTAGGTGCTTTATCCGTTTTTGG  
TTTCATTGCTTGTGCTTTGTCTGGTTCAATAATACCGCGTATCCTAGTGAGTTTTACGG  
GCCTACTGGACCAGAAGCTTCTCAAGCTCAAGCTTTTACTTTTCTAGTGAGAGATCAAC  
GTCTTGGGGCTAACGTGGGATCCGCTCAAGGACCTACCGGGTTAGGTAAATATTTAATG  
CGTTCGCCTACCGGAGAAGTTATTTTTGGAGGAGAACTATGCGTTTTTGGGATTTGCG  
TGCTCCTTGGTTAGAACCTCTAAGAGGTCCAAATGGTTTGGACTTGAGTAGGTTGAAA  
AAAGACATAACCTTGGCAAGAACGCCGTTCGCGGAATATATGACCCATGCGCCTTT  
AGGTTTCGTTAAATCTGTAGGTGGCGTAGCTACCGAGATCAATGCAGTCAATTATGTCT  
CTCCTAGAAGTTGGTTAGCTACCTCTCATTTTGTCTAGGGTTCTTCCTATTCGTAGGTC  
ATTTATGGCATGCGGGAAGGGCTCGTGCAGCTGCAGCAGGATTTGAAAAAGGAATTGA  
TCGTGATTTTGAACCTGTTCTTTCCATGACTCCTCTTAACATGACTATAGCCCTTGGTAA  
ATTTACCAAAGACGAAAATGATTTATTTGATATTATGGATGACTGGTTACGGAGGGACC  
GTTTCGTTTTTGTAGGTTGGTCCGGTCTATTGCTCTTTCCCTTGTGCCTATTTCCCGTAG  
GGGGTTGGTTCACAGGTACAACCTTTGTAACCTCATGGTATACCCATGGATTGGCGAGT

TCCTATTTGGAAGGCTGCAACTTCTTAACCGCCGCAGTTTCTACTCCTGCTAATAGTTTA  
GCACATTCTTTGTTATTATTATGGGGTCCTGAAGCACAAGGAGATTTTACTCGTTGGTGT  
CAATTAGGTGGTTTGTGGACTTTTGTGCTCTCCACGGTGCCTTTTGGACTAATAGGTTTT  
ATGTTACGTCAATTTGAACTTGCTCGATCTGTGCAATTGCGACCTTATAATGCAATCGCA  
TTCTCTGCTCCAATTGCTGTTTTTGTCTGTATTCTGATTTATCCATTAGGCCAGTCTG  
GTTGGTTTTTTGCGCCTAGTTTTGGTGTAGCAGCTATATTTGATTCATCCTCTTTTTCCA  
AGGGTTTCATAACTGGACGCTGAACCCATTTATATGATGGGAGTTGCCGGCGTATTGG  
GCGCTGCTCTGCTATGCGCTATTCATGGTGTACTGTAGAAAATACTTTATTTGAAGATG  
GTGATGGTGCAAATACATTCCGTGCCTTTAACCCAACTCAAGCTGAAGAACTTATTCA  
ATGGTCACCGCTAACCGCTTTTGGTCTCAAATCTTTGGGGTTGCTTTTTCCAATAACG  
TTGGTTACATTTCTTTATGTTATTTGTACCAGTAACCGGTTTATGGATGAGCGCTCTGG  
AGTGGTCGGTCTGGCTCTGAATCTACGTGCCTATGACTTCGTTTCTCAGGAAATCCGTG  
CAGCGGAAGATCCTGAATTTGAGACTTTCTACACTAAAAATATTCTCTTAAACGAAGGT  
ATTCGTGCTTGGATGGCGGCTCAAGATCAGCCTCATGAAAACCTTATATTCCCTGAGGA  
GGTTCTACCACGTGGAAACGCTCTTATGTCTGGAAGCACAGGAGAACGTTCTTTTGCT  
GATATTATTACCAGTATTTCGATATTGGGTCATTCATAGCATTACTATACTTCCCTATTCAT  
TGCAGGTTGGTTATTCGTCAGCACGGGTTTAGCTTACGATGTATTTGGAAGCCCTCGTC  
CAAATGAATATTTTACCGAAAGCCGACAAGGAATTCCATTAATAACTGGCCGTTTTGAT  
CCTTTGGAACAACCTCGATGAATTTAGTAAATCTTTTATGACCATAGATCGAACCTATCCA  
ATTTTACAGTACGATGGTTGGCTGTTACGGACTAGCTGTACCTACCGTTTCTTTTTTG  
GGGTCAATATCAGCAATGCAGTTCATCCAACGAATGGCTACACAAAGCGTGGAGGGTA  
GTTCTAGATCTGGT--CCAAGACGAACCTATTGTAGGGGATTTATTGAAACCATTGAATC  
GGAATATGGTAAAGTAGCTCCTGGATGGGGAACACTCCTTTGATGGGTGTCGCAATGG  
CTCTATTTGCGATATTCCTATCTATTATTTGGAGATTTATAATTCTTCCGTTTTACTAGAT  
GGAATTTCAATGAACATGCTTACTCTCAAACCTCTTTGTTTACACAGTAGTGATATTCTTT  
GTTTCTCTCTTCATCTTTGGATTTTTATCTAATGATCCAGGACGTAATCCTGGACGTGAA  
GAAATGGCCGATACTACTGGAAGAATCCTCTTTGGATAGTAGGTACTGTAACCTGGTAT  
TCTTGTGATCGGTTTAAATAGGCATTTTTCTTTTATGGTTCATATTCCGGATTGGGTTTCATCC  
CTGATGCTTAATATTTTTAGTTTAAATTTTTATCTGTTTTAATTCTGCCATTTTT--AGCAATT  
TTTTCTTTACAAAATTGCCCGAAGCCTACGCCTTTTTGAATCCAATCGTAGATGTTATGC  
CAGTAATCCCTGTACTCTTTTTTCTATTAGCCTTTGTTTGGCAAGCTGCTGTAAGTTTTCT  
GAATGACACAATCAAATCCGAACGAACAAAATGTTGAATTGAATCGTACCAGTCTCTA  
CTGGGGGTATTACTCATTTTTGTACTTGTCTGTTTTATTTTCTAATTATTTCTTCAATATGG  
AAGTAAATATTCTTGCATTTATTGCGACTGCACTGTTTATTCTAGTTCCTACTGCTTTTTT  
ACTTATAATATACGTAAAAACAGTTAGTCAAGGTGATATGGAAACAGCAACCCTAGTCG  
CCATCTCTATATCTGGTTTACTTGTAAGTTTTACTGGGTATGCCTTATATACTGCTTTTTGG  
GCAACCCTCTCAACAATAAGAGATCCATTTCGAGGAACACGGGGACATGGAAGCATTG  
GTTTATACATTCCTTTTGTCTCAACTTTAGGAATAATTTTTTTTCGCTATCTTTTTTCGAG  
AACCGCCTAAAGTTCCAATAAAAAGGTAAAAATGACTATTGCTTTCCAATTGGCTGTT  
TTTGCATTAATTGCTACTTCATCAATCTTACTGATTAGTGTACCTGTTGTTTTTTCTTCTC  
CTGATGGTTGGTTCGAGTAACAAAATGTTGTATTTCCGGTACATCATTATGGATTGGAT  
TAGTCTTTCTGGTAGGTATCCTTAATTCTCTCATCTCT-----ATGTCACCACAA  
ACAGAGACTAAAGCAAGTGTGGATTCAAGGCTGGTGTAAAGATTATAAATTGACTTA  
TTATACTCCTGAGTATCAAACCAAAGATACTGATATCTTGGCAGCATTCCGAGTAACTCC



TCAACCTGGAGTTC CGCCTGAGGAAGCAGGAGCTGCGGTAGCTGCTGAATCTTCTACT  
GGTACATGGACA ACTGTGTGGACCGATGGACTTACCAGTCTTGATCGTTATAAAGGAC  
GATGCTACGGCATCGAGCCTGTTCTGGGGAAGAAAATCAATATATTGCTTATGTAGCTT  
ACCCATTAGACCTTTTTGAAGAAGGTTCTGTTACTAACATGTTTACTTCCATTGTGGGTA  
ATGTATTTGGGTTCAAAGCCCTACGCGCCCTACGTCTGGAGGATTTGCGAATCCCTCCT  
GCTTATTCTAAA ACTTTCCAAGGGCCGCTCATGGCATCCAAGTTGAGAGAGATAAAAT  
GAACAAGTATGGTCGCCCCCTATTGGGTTGTACTATTAACCAA AAATTGGGTCTATCCG  
CTAAGAATTACGGTAGAGCAGTTTATGAATGTCTTCGCGGTGGACTTGATTTTACCAA  
GACGATGAGAATGTGAACTCCCAACCATTTATGCGTTGGAGAGACCGTTTCTTATTTG  
TGCCGAAGCAATTTATAAAGCACAGGCTGAAACAGGTGAAATCAAAGGACATTATTTG  
AATGCTACTGCAGGTACATGCGAAGAAATGATCAAAGGGCTGTATTTGCCAGAGAAT  
TAGGAGTTCCTATCGTAATGCATGACTACTTAACAGGGGGATTCACTGCAAATACTAGC  
TTGGCTCATTATTGCCGAGATAATGGTTTACTTCTTCACATTCACCGCGCAATGCATGCA  
GTTATTGATAGACAGAAGAATCATGGTATGCATTTTCGTGTACTAGCTAAGGCCTTACGT  
CTATCTGGTGGAGATCATATTCACGCCGGTACCGTAGTAGGTAAACTTGAAGGGGAAA  
GAGACATTACTTTGGGCTTTGTTGATTTACTGCGTGATGATTTTATTGAAAAAGATCGAA  
GCCGTGGTATTTATTTCACTCAAGATTGGGTCTCTCTACCAGGTGTTATACCTGTAGCTT  
CAGGGGGTATTCACGTTTGGCATATGCCTGCTCTGACCGAGATCTTTGGAGATGATTCC  
GTACTACAATTCGGTGGAGGAACTTTAGGGCACCCCTTGGGGAAATGCACCCGGTGCCG  
TAGCTAATCGAGTAGCTCTAGAAGCATGTGTACAAGCTCGTAATGAGGGACGTGATCTT  
GCTCGTGAGGGTAATGATATTATCCGTGAGGCTAGCAAATGGAGTCTGAACTAGCTGC  
TGCTTGTGAAGTATGGAAGGAAATTAATTTGAATTTGAAGCAGTGGATACTTTG-----A  
TGGCGATACATTTATACAAA ACTTCTACCCCGAGCACACGCAATGGAGCCGTAGACAGT  
CAAGCGAAATCCAATACACGAAATAATTTGATCTATGGACAGCATCGTTGTGGTAAAGG  
CCGTAATGCCAGAGGAATCATTACCGCAAGACATAGAGGGGGAGGTCATAAGCGTCTA  
TACCGTAAAATCGATTTTCGACGGAATGAAAAAGACATATATGGTAGAATCGTAACCAT  
AGAATACGACCCTAATCGAAATGCATACATTTGTCTCATACTATGGGGATGGTGAGA  
AGAGATATATTTTACATCCCAGAGGGGCTATAATTGGAGATACCGTTATTTCTGGTACAG  
AAGTTCCTATAAAAATGGGAAATGCCCTACCTTTGACCGATATGCCCTTAGGCACGGCC  
ATACATAACATAGAAATCACACTTGGAAAGGGTGGACAATTAGCTAGAGCTGCAGGTG  
CTGTAGCGAACTGATTGCAAAAAGAGGGGAAATCAGCCACATTA AAATTACCTTCGGG  
GGAGGTTTCGTTAATATCCAAA ACTGCTCAGCAACAGTCGGACAAGTAGGGAATACT  
GGGGTGAACCAGAAAAATTTGGGTAGAGCCGGATCTAAATGTTGGCTAGGTAAGCGTC  
CTGTAGTAAGAGGAGTAGTTATGAACCCTGTAGACCATCCCCATGGGGGTGGTGAAGG  
GAGGGCCCCAATTGGTAGAAAAAAACCCGCAACCCCTTGGGGTTATCCTGCACTTGA  
AGAAGAAGTAGAAAAAGGAATAATATAGTGATAATTTGATTCTTCGTCGCCGTAGTAA  
AATGATCCAATCTCAGACCCATTTGAATGTAGCGGATAACAGCGGAGCTCGAGAATTGA  
TGTGTATTGCAATCATAGGGACTAGT---AATCGCCGATATGCTCATATTGGTGACGTTATT  
GTTGCTGTGATCAAGGAAGCAGCACCAAATTCACCTCTAGAAAGATCAGAAGTAATCA  
GAGCTGTAATTGTACGTACTTGTAAAGAACTCAAACGTGATAATGGTATGATAATACGAT  
ATGATGACAACGCTGCAGTTGTCATTGATCAAGAAGGAAATCCAAAGGGA ACTCGAAT  
TTTTGGTGCAATCGCCGGGAATTGAGACAGTTAAATTTTACTAAAATAGTTTCATTAGC  
ACCTGAAGTGTTAATGCTTAGTCCCAAAGAACCCGATTCGGTAAACAACATAGAGGA  
AGAATGAAAGGAATAGCTTTTCGAGGTAATCGTATTTGTTTCGGCAGATATGCTCTTCA

GGCACTTGAACCCGCTTGGATTACATCTAGACAAATAGAAGCGGGGCGACGAGCAATG  
ACACGAAATGCACGCCGCGGTGGAAAAATATGGGTACGCATATTTCCCGACAAACCGG  
TACTTTAAGACCTACGGAAACACGTATGGGTTCGGGGAAAGGATCTCCCGAATATTGG  
GTAGCTGTCGTTAAACCAGGTAGAATACTTTATGAAATGGGCGGAGTAGCAGAAAATAT  
AGCGAGAAAAGCTATTTCAATAGCAGCATCAAAAATGCCTATACGAACTCAATTCATTA  
TTTCGGGAATGACCAGAATTAGACGAGGATATATAGCTCGGAGGCGTAGAACAAAAAT  
TCGTTTATTTCGCATCAAGCTTTCGCGGGGCCATTCAAGACTTACTCGAACTATTATTCA  
ACAAAAATAAGAGCTTTGGTTTCGGCCCATCGGGATAGAGATAGGCCAAAAAAGAAAT  
TTTCGTCGTTTGTGGGTCACTCGGATAAATGCAGTAATTCGCGAG---AGTATGGTATCCT  
ATAGTTATAGTAGATTAATAACAATCTGTACAAGAGACAGTTACTTCTTAATCGTAAAA  
TACTTGCACAAATAGCTATATTAATAGGAATTGTCTTTATATGATTTCCAATGACATTCT  
AAAA-----ATGATAAATGAAGTATATGCTTTAGGCCAACATATATGTA  
TGTCCCCTCACAAAGCACGAAGAATAATTGATCAGATTCGTGGACGTTCTTACGAAGA  
AACACTTATGATACTCGAGCTCATGCCTTATCGAGCATGTTATCCCCTTTTTAAATTGATT  
TATTCTGCAGCAGCAAATGCTAGTCACAATATGGGTTTCAACGAAGTCAATTTAATCATT  
AGTAAAGCCGAAGTCAATGAAGGCACTACTGTGAAAAAATTA AACCTCAGGCTCGA  
GGACGGGGTTATCTGATAAAAAGATCAACTTGTCAATAACTATTATATTA AAAAATATAT  
CCTTA-----ATGGATGGAATCAATATGCAGTATTTACAGACAAAAGTATTC  
GGTTATTGGTGAAAAAT--CAATATACTTTTAATGTCAATCAGGATCAACTAGGACAGA  
AATAAAGCATTGGGTGCAACTCTTCTTTGGTGTCAAGGTAATAGCTATGAATAGCCATC  
GACTCCCGGGAAAGGGTAGAAGAATGAGACCTATTATGGGACATACAATGCATTACAG  
ACGTATGATCATTACGCTTCAACCGGGTTATTCTATTCCACCTCTTAGAAAAGAAAAGAA  
CTATGGCAGTTCCAAAAAAGCGCACTTCTATATCAAAAAAGCTTATTGCAAAAAATATT  
TGGAAAAGAAAGGGATATTGGACAGTATTGAAAGCTTTTTTCGTTAGCGAAATCTCTTTC  
TACAGGTAATTCAAAAAGTTTTTTTTGTGCAACAAATAAAAAGATATGGCCAAGGGTAAG  
GATATCCGAATAAGAGTTATTTTAGAATGTACCCTTGT--GCTCGAAAC-----GTTAATA  
AGAAA-----GGTATTTCCAGATATATTA CTCAAAGAATCGACACAATACGCCTAGTCGA  
TTGGAATTGAGAAAATTCTGTGCTATTGTTACAAACATACAATTCACGGGGAGATAAA  
GAAAATGAAAATAAGAGCTTCTGTTTCGTA AAAATTTGTGAAAAATGTCGACTGATACGTA  
GACGAGGGCGAATTATAGTAATTTGCTTAAACCCGAGACATAAACAAAGACAAGGAAT  
GGTTCGAGAGAAAGTAACAATATCCACTCGGACACTGCAGTGGAAATGTGTTGAATCA  
AGAACCGATAATAAACGTCTTTATTATGGACGCTTTATTCTGTCTCCTCTTATGAAAGGC  
CAAGCCGACACAATAGGCATTGCGATGCGAAGAGCTTTGCTTGGAGAAATAGAAGGA  
ACATGTATCACACGTGCAAAATCTGAG-----AAAATACCACACGAATTTTCTACTATAGC  
AGGTATTCAAGAATCAATACATGAAATTTTAATGAATTTGAAAGAAATTGTATTAAGAA  
GCAATTTGTATGGA ACTTGTAACGCATCTATTTGTGTCGAGGGTCTGGATATGTA ACTG  
CTCAAGACATCATCTTACCGCCTTTTGTGGAAATCATTGATAATACACAGCATATCGCTA  
GCCTAACGGAAGCAATTGATTTGTGTATTGGATTACAAATCGAGAGGAATCGCGGCTAT  
CGTATAAACCCAACAATAACTTTCAAGACGGAAGTTATTCT-----ATAGATGCTGTATTC  
ATGCCTGTTTCGAAATGCGAATCATAGTGTTCATTCTTATGGAAATGGGAATGAAAAGCA  
AGAGATACTTTTTCTCGAAATATGGACAAATGGAAGTTTAACTCCTAAAGAAGCACTTC  
ACGAAGCCTCCCGGAATTTGATTGATTTTTTTATTCTTTTCTACATGCAGAAGAAGAA  
AACTTACATTTAGAA-----AAAAATCAA--CACAAAGTTACTTTACCCCTTTTTACTTTTC  
ATGATAGATTGACT--AAATTAAGAAAAAATAAAAAA---GAAATAGCATTGAAATACATT

TTTATTGACCAATCAGAATTGACTCCTAAGATCTATAATTGCCTCAAAAAGGTCCAATATA  
CATACATTATCGGATCTTTTGAAAAAGAGTCAAGAAGATCTTATGAAAATTGAACATTT  
TCGCATAGACGATGTAAAACATATATTGGGTATTCTAGAAAATAGAAAACATTTTCGCAAT  
TGATTTACCAAAGAATAAAAATGCTCGGGGATGGAAAT--GGGGGAATGTCTACAATACC  
TGGATTTAATCAGATACAATTTGAAGGATTTTGTAGGTTTCATTGATCAGGGCTTAACAG  
AAGAACTTTATAAGTTTCCAAAAATTGAAGATACAGATCAAGAAATTGAATTTCAATTA  
TTTGTGGAAACATATCAATTAGTAGAACCCCTTGATAAAAAGAAAGAGATGCTGTATATGA  
ATCAATTACATATTCTTCTGAATTATATGTATCCGCAGGATTAATTTGGAAAACCAGTAGG  
GATATGCAAGAACAACAATTTTTATTGGAAACATTCCTCTAATGAATTCCTGGGAAC  
TTTTATAATAAATGGAATATACAGAATTGTGATCAATCAAATATTGCAGAGTCCCGGTAT  
CTATTACCGGTCAGAATTGGATCATAATGGAATTTCCGGTCTATACTGGCACCATAATATC  
AGATTGGGGGGGAAGAGTAGAATTAGAGATTGATAGAAAAGCAAGGATATGGGCTCGT  
GTGAGTAGGAAACAGAAAATATCTATTCTAGTTTATCATCAGCTATGGGTTTGAATCTA  
AGAGAAATTTTAGAGAATGTGTGCTACCCTGAAATTTTCTTATCTTTCCTGAATGATAAG  
GAAAAAATAAATTGGGTCAAAGGAAAATGCCATTTTGGAGTTTTATCAACAATTTA  
CTTGTGTAGGCGGAGATCCAATATTTTCTGAATCCTTATGTAAGGAATTACAAAAGAAA  
TTCTTTCAACAAAGATGTGAATTAGGAAAGATTGGTCGATTAATATGAACCGGAGACT  
GAATCTTGATATACCCCATACAATACATTTTTGTTACCACGAGATATATTGGCAGCTGC  
AGATCGTTTGATTGAAATGAAATTTGGAATGGGTACACTTGACGAT-----ATGAATCATTT  
AAAAATAAACGTATTCGTTCTGTAGCGGATCTCTTACAAGATCAATTCGGATTGGCTC  
TGATTCGTTTAGAAAATGTAGTTAGAGGGACTATATGTGGAGCAATTAGG---CATAAATT  
GATA---CCGACCCCTCAAAATTTGGTAACTTCAACTCCA-----TTAACAACCACTTAT  
GAATCTTTTTTTGGATTACACCCATTATCTCAAGTTTTGGATCGAACTAATCCATTGACA  
CAAATAGTTCATGGGAGAAAATTGAGTTATTTGGGTCTGGAGGATTAACAGGACGAA  
CTGCTAGTTTTTCGGATACGAGATATCCACCCTAGTCATTATGGGCGCATTTCGCCAATTG  
ACACGTCTGAAGGAATCAATGTTGGACTTATTGGATCTTTAGCAATTCATGCCAAGATT  
GGTCATTGGGGG---TCTTTAGAAAGCCATTTTAT-----GAAATCTCTGAGGGATCAAA  
A-----AAAGTACGGATGTTTTATTTATCGCCAAATAGAGAGGAATACTATATGGTAGCGG  
CAGGAAATTATTTGGCGCTGAATCGAGGTGTTTCAGGAAAAACAGGTTGCTCCGGCTCG  
ATATCGTCAAGAATTCCTGACTATTGCATGGGAACAGGTGCATCTTCGAAGTATTTTTCC  
CTTCCAATATTTTTCTATTGGAGCTTCCCTCATTCCTTTTTATCGAGCATAATGATGCGAAT  
CGGGCTTTAATGAGTTCTAATATGCAACGTCAAGCAGTTCCACTTTCTCGGTCCGAAA  
ATGCATTGTTGAACTGGATTGGAACGCCAAGTGGCTCTAGATTCAGGGGTTCCCTGCTA  
TAGCCGAACACGAGGGAAAGATAATTTATACTGATATTGACAAGATCATTTTATCGGGC  
AATGGGGATACTCTACGCATTCCATTAGTTATGTATCAACGTTCCAACAAAATACTTGT  
ATGCATCAAAAACCCAGCTTCGGCGGGGTAAATGCATTA AAAAGGGACAAGTTTTAG  
CAGATGGTGCCGCTACAGTTGGTGGCGAACTTGCCCTGGGCAAAAACGTATTAGTCGC  
TTATATGCCATGGGAAGGTTACAATTTTGAGGATGCGGTA CTATTAGCGAACGTCTGG  
TATATGAAGATTTATACTTCTTTTCACATACGGAAATATGAAATTCAGACTCATGTGAC  
AAGCCAAGGA---CCTGAAAGGATCACTAACGAAATACCGCATCTAGAGGCCCAATTTACT  
CCGAAATTTAGACAAAACGGAATTGTGATGCTAGGATCTTGGGTAGAAACGGGCGAT  
ATTTTAGTAGGTAAATTAACGCCTCAAATGGCGAAAGAA---TCATCGTATGCTCCAGAA  
GATAGATTATTAAGAGCCATACTTGGTATTCAGGTATCTACTTCAAAAAGAACTTGCTA  
AAACTACCTATAGGTGGTAGGGGTCGAGTTATTGATGTGAGATGGATTCAGAAAAAAG

GG---GGTTCAGTTATAATCCGGAAACGATTCGTGTATATATTTTACAGAAACGTGAAAT  
CAAAGTGGGTGATAAAGTAGCTGGAAGACATGGAAATAAAGGCATCATTTCAAAAATT  
TTGCCTAGACAAGATATGCCTTATTTGCAAGATGGAAGACCTGTTGATATGGTCTTCAA  
CCCATTAGGAGTACCTTCACGAATGAATGTAGGACAGATATTTGAATGCTCACTCGGGT  
TAACGGGAGATCTGCTAGATAGACATTATCGAATAGCACCCCTTTGATGAGAGATATGAA  
CAAGAGGCTTCGAGAAAAC TAGTGT TTTCTGAATTATATGAAGCCAGTAAGCAAACAG  
CAAATCCGTGGGTATTTGAACCCGAGTATCCGGGAAAAAGTAGAATATTTGATGGAAG  
AACGGGGGATCCTTTTTGAACAGCCTGTTATAATAGGAAAGCCTTATATCTTGAAATTAAT  
TCATCAAGTTGATGATAAAATACATGGACGTTCCAGTGGACATTATGCACTTGTTACAC  
ACAACCCCTTAGAGGAAGGGCCAAGCAAGGTGGACAACGGGTTCGGAGAAATGGAG  
GTTTGGGCTCTAGAGGGATTTGGTGT TTTCTCATATTTTACAAGAAATGCTTACTTATAAA  
TCTGATCATATTAGAGCTCGCCAAGAAGTGCTTGGTACTACGATCATTGGAGGAACAAT  
ACCTAAACCTGAAGATGCTCCAGAATCTTTTCGATTGCTCGTTCGAGAACTACGATCTT  
TGGCTCTGGAACCTGAATCATTTCCTTGTATCTGAGAAGAACTTCCAGATTAATAGGAAG  
GAAGCT-----ATGATTGATCGGTATAAACATCAACAACCTCCGAATTGGATCAG  
TTTCGCCTCAACAAATAAGTGCTTGGGCCAATAAAAATCCTACCTAACGGAGAGATTGTT  
GGAGAGGTGACAAAACCTATACTTTTCATTACAAAACCAATAAACCTGAAAAAGATG  
GATTATTTGTGAAAGAATTTTTGGGCCTATAAAAAGTGGAATTTGTGCTTGTGGAAT  
ATCGAGTAATCAGGAATGAAAAAGAAGACCAAAAATTTTGTGAACAATGCGGAGTCG  
AATTTATGGATTCTCGGATACGAAGATATCAAATGGGCTACATCAAACCTAGCATGCCCA  
GTAACCTCATGTGTGGTATTTGAAACGTCTTCCTAGTTATATCGCAAATCTTTTAGATAAA  
CCTCTTAAAGAATTAGAAGGCCTAGTATACTGCGATTTT-----TTTGCTAGGCC---ATA  
GCTAAAAAACCTACTTTTTTACGATTACGAGGTTCAATTCGAATATGAAATCCAATCCTGG  
AAATACAGTATTCCACTTTTTTTTACTACCCAAGGCTTCGATACATTCGAAATCGAGAA  
ATTTCTACAGGAGCTGGTGCTATCCGAGAACAATTAGCCGATCTGGATTTGCGAATTATT  
ATAGATTATTCATTGGTAGAATGGAAAGAATTAGGGGAAGAA---GGGCCTACCGGGAAT  
GAATGGGAAGATCGAAAAGTTGGAAGAAGAAAGGATTTTTTTGGTTAGACGTGTGGAA  
TTAGCTAAGCATT TTTATTCGAACAAATATCGAACCCAGAATGGATGGTTTTATGTCTATTA  
CCAGTTCTTCTCCCGAGTTGAGACCGATCATT CAGATAGATGGGGGTAAACTAATGAG  
TTCAGATATTAATGAACTCTATAGAAGAGTTATCTATCGGAACAATACTCTTATTGATCTA  
TTAACAACAAGTAGATCTACCCCAGGGGAATTAGTAATGTGTCAGGAGAAATTGGTAC  
AGAAGCCGTGGATACACTTCTTGATAATGGAATCCGCGGACAACCAATGAGGGACGG  
TCATAATAAGTTTTACAAGTCGTTTTTCGGATGTAATTGAAGGCAAAGAAGGAAGATTTC  
GTGAGACTATGCTTGGCAAACGGGTTGATTATTCGGGGCGTTCTGT CATTGTCTGATGGC  
CCCTCACTTTCATTACATCGATGTGGATTGCCTCGCGAAATAGCAATAGAGCTTTTCCAG  
ATATTTGTAATTCGTGGTCTAATTAGACAACATCTTGCTTCGAACATAGGAGTTGCTAAG  
AGTAAAATTCGGGAAAAAGAGCCAATTGTATGGGAAATACTTCACGAAGTTATGCAGG  
GGCATCCAGTATTACTGAATAGAGCGCCGACTCTGCATAGATTAGGCATACAGGCATTC  
CAACCCATTTTAGTGGAAGGCCGCGCTATTTGTTTACATCCATTAGTTTGTAAAGGATTC  
AATGCAGACTTTGATGGGGATCAAATGGCTGTTTCATGTACCTTTATCGTTGGAGGCTCA  
AGCAGAGGCTCGTTTACTTATGTTTTCTCATATGAATCTCTTGTCTCCAGCTATTGGGGA  
TCCATTTCCGTACCAACTCAAGATATGCTTATTGGGCTCTATGTATTAACAAGCGGGAA  
TTGTCGAGGTATTTGTGCAAATAGGTATAATCCATGTAATCGCAGAAAT-----TATCAA  
AATAAAAGAATTGACGGT-----GATAAATATACGAAA-----GAACCTTTTTTTTCTAATTCC

TATGATGCACTTGGCGCTTATCGGCAGAAAAGAATCCATTTAGATAGTCCTTTGTGGCT  
CCGGTGGCAGCTAGATCAACGC---GCTATTACTTCA-----AGAGAAGCTCCCATCGAAGT  
TCACTATGAATCTTTGGGTACCTATCATGAGATTTATGAACACTATCTAATAGTAAAAAAT  
ATAAAAAAAGAAATTCTTTGTATATACATTCGAACTACTGTTGGTCATATTTCTCTTTATC  
GAGAAATCGAAGAAGCTATAACAAGGTTTTGCCAAGCCTGCTCAGATAGTATC-----  
-----ATGGAGGTACTTATGGCCGAACGGGCCAATCTGGTCTTTCACAATAAAGTGA  
TAGATGGAAGTCCATTAAACGACTTATTAGCAGATTAATAGATCATTTTGGAAATGGCAT  
ATACATCACACATCTGGATCAAGTAAAGACTCTGGGTTTCCAGCAAGCCACTGCTACA  
TCCATTTCAATAGGAATTGATGATCTTTTAAACAATACCTTCTAAGGGATGGCTAGTCCAA  
GATGCTGAACAACAAAGTTTGATTTTGGAAAAACTATCATTATGGAAATGTACACGC  
GATAGAAAAATTACGCCAATCTATTGAGATATGGTATGCTACAAGTGAATATTTGCGACA  
AGAAATGAACCTGAATTTTAGGATGACAGAACCCTTTAATCCAGTCCATATAATGTCTTT  
TTCGGGAGCTAGGGGAAATACATCTCAAGTACACCAATTAGTAGGTATGAGAGGATTA  
TGTCGGATCCACAAGGACAAATGATTGATTTACCCATTCAAAGCAATTTACGCGAGGG  
ACTGTCTTTAACAGAATATATCATTCTTGCTATGGAGCCCGAAAAGGGGTTGTCGATAC  
TGCTGTACGAACATCAGATGCTGGATATCTTACGCGTAGACTTGTTGAAGTAGTTCAAC  
ACATTGTTGTACGTAGAACAGATTGTGGGACCACCCGAGGGATCTCTGTGAGTCCTCG  
AAATGGGATGATGTCG---GAAAGAATTTTGATTCAAACATTAATTGGTTCGTGTATTAGCA  
GACAATATATATATGGGTCTACGATGCATTGCCATTCGAAATCAAGATATTGGGATTGGG  
CTTGCCAATCGATTCAACC-----TTTTCGAACACAAACAATATCTATTTCGAACT  
CCCTTTACTTGTAGGAGTACGTCTTGGATCTGTGCGATTATGTTATGGTTCGGAGTCTACT  
CATGGCGATCTAGTAGAATTGGGGGAAGCCGTAGGTATTATTGCGGGTCAATCCATTGG  
AGAGCCGGGTACTCAACTAACATTAAGAACGTTTCATACCGGCGGAGTATTCACAGGG  
GGTACTGCAGAACATGTACGAGCCCCCTAATGGAAAAATAAAATTTAATGAGGATTT  
GGTTCATCCCATACGTACACGTCATGGGCATCCTGCTTTTCTATGTTATATAGACTTGTAT  
GTAATATTGAGAGTCAAGATATTATACATAACGTGACTATTCCACCAAAAAGTTTCCTT  
TTAGTTCAAAATGATCAATATGTAGAATCAGAACAAGTGATTGCTGAAATTCGGGCGAG  
AACATACACTTTG---AATTTTAAAGAGAAGGTCCGAAAACATATTTATTCCGATTCAGAA  
GGGGAA---ATGCACTGGAGTACTGATGTGTACCATGCACCCGAATTTACATATAGTAATG  
TCCATCTCTTACCAAAAACAAGCCATTTATGGATATTATCAGGAAGTTCGTGCGGA-----  
TCCAGTATAGTTTCTTTTTCCTACTACACAAGGATCAAGATCAAATGAATGTTTCAT-----TCT  
CTTTCTGTCAAAGA---AGATATATTTCTAGTCCT--TCCGTAAATAATGATCAA---GTGA  
AACACAAATTCTTTAGTTCAGATTTTTCGGGTAAA---GAAAGTGAGATTCCTGATTAT---T  
CAGAACTTAATCGAATCATATGTACCGGTCATTGTAATCTCATATATCCTACT--ATTCTCT  
ACGAGAATTCTGAT-----TTATTGGCAAAGAGGCGAAGAAATAAATTCATCATCCCATT  
CAATCAATTCAAGAACGAGAGAAAGAACTAATGACCCACTCCGCTATCTCGATTGAAA  
TACCTATAAAT-----GGTATTTCCGTAGAAATAGTGTTTTTGTTTATTTCGACGATCCCA  
ATACCGAAGAAAGAGTTCAGGAATTAATAATATGGGGCTATAGGGGTGCATTCAATCG  
TCAAAAAGAAGAT-----TTGATTGAGTATCGG---GGAGTCAAAGAATTTAAGCCAAAAT  
ACACGAAAGTGGATTGCTTTTTTTTCATTCCCGAGGAAGTGTATATTTTACCCGAATCTT  
CTTCCCTAATGGTACGGAACAATAGTATCATTGGAGTAGATACACAAATCGCTTTAAATA  
CAAGAAGTTCGGGTGGGCGGATTGGTCCGAGTGGAGAGAAAAGAAAAAAAATGGAA  
CTTAAAATCTTTTCTGGAGATATCCATTTCCGGGAGAGACAGATAAAATATCCCGACA  
CAGTGGTATCTTAATGCCACCAGGAACGGTAAAAACA-----AATTCTAAGGAATCAAAA

AAA-----GTGAAAAATTGGATCTATATCCAACGA-----ATCACACCTACCAAGAAAAAG---  
--TATTTTGTTTTGGTTCGACCAGTAATCATATATGAGATAGCGAACGGTATAAATTTAGA  
AACACTTTTCCCCCAGGATCTATTGCAGGAAAAGGATAATCTGAACTTCGAGTTGTCA  
ATTATATTCTTTATGGGACTGGTAAACCCATTCGGGGAATTTCTGACACAAGTATTCAAT  
TAGTTCGTACTTGTTTAGTGTGAAATTGGGACCAAGACAAA-----AAAAGTTCTTCTA  
TCGAAGAGGCCCGCGCTTTTTTTGTTGAAATAAGCACAAATGGTCTGATTCGTGATTTC  
CTAAGAATCAACCTAGTGAAATCCCATATTTTCATATATCAGAAAAAGGAATGATCCATCA  
GGTTCAGAACTGATCTCT--ATAATGGGTCAGATCGCACCAATATTAATCCATTTTATCC  
CATTTATTCCAAGACAAGG-----ATTCAACAATCACTTAAACAAAATCAAGGAAC  
TATTAGTACGTTGTTGAATAGA-----ATAAGGAATGTAAATCTTTGATAATTTTGTTCAT  
CATCTAATTGTTTTCGAATGGATCCA-----TTCAACGATGTAAAACATCACAAAT-----GG  
AATAAAAGAATCA---CCTATAATTCCAATTAGAAATTCGTTGGGCCCTTTAGGA-----ACA  
GCCCTTCAAATTTCGAATTTT-----TATTTATTTTACCATTTTAATTAATAACTCATAATCA  
GATCTCG--GTAATAAATATTCGAAACTTGACAAT-----TTAAAACAGACTTTTCAAG  
TACTT-----AAA---TATTATTTAATGGATGAAAACGGGAGA-----ATTGTTAATCCCGATCC  
ATGCAGTAACAGCGTTTTGAAATCCATTCAATTTGAATTGGTATTTTCTCCATCATAATTAT  
TGTGAAGAAAGATTCACAATAATTAGC--CTGGGACAGTTTATTTGTGAAAATTTATGTA  
TGGCCAAAAAGGGACCA-----CATCTAAAATCGGGTCAAGTTATAATTGTTTAC---ATT  
GACTCTGTAGTAATAAGATCCGCTAAGCCTTATTTGGCCACTCCAGGAGCAACCGTTCA  
TGGCCATTATGGAGAAATCCTTTACGAAGGAAATACATTAGTTACATTTATATATGAAAA  
ATCGAGATCTGGTGATATAACGCAGGGTCTTCCAAAAGTGGAACAAGTGTTAGAAGTG  
CGTTCAATTGATTCAATATCAATAAACCTAGAAAAGAGAGTGGAGGGTTGGAACGAGT  
GTATAACAAGAATTCTGGGAATTCCTTGGGGATTCTTGATTGGTACTGAGCTAACTATAG  
TGCAAAGTCGTATCTCTTTAGTTAATAAGATCAAAAAGGTTTATCGATCCCAAGGGGTG  
CAGATCCATAATAGGCATATAGAAATTATTGTACGTCAAATAACATCAAAGTATTGGTT  
TCAGAA-----GACGGAATGTCTAATGTTTTTTTACCCGGAGAACTAATTGGATTGTTG  
CGAGCGGAACGAACGGGACGCGCTTTGGAAGAAGCCATCTGTTACGGGGCCATATTAT  
TGGGAATAACGCGAGCATCTCTGAATACTCAAAGTTTCATATCCGAGGCTAGTTTTCAA  
GAACTACTCGCGTTTTAGCAAAAAGCTGCTCTCCGCGGTCGTATCGATTGGTTGAAAG  
GCCTGAAAGAAAACGTTGTTCTAGGCGGTATGATACCCGTTGGTACCGGATTCAAAGG  
ATTAGTGCAAGGCTCA-----AGGCAACATAAGAACATTCCTTTGAAAACCAAAAAGAA  
GCAT-----TTATTCGAGGGGGAATTTAGAGATAGAGATATTTTATTCCACTACAGAGAGTT  
ATTTGATTCTTGCATTTCAAAAAATTTCTATGATACATCAGAACAACCATTTATAGGATTT  
AATGATTCC-----ATGATAAGAAGATATTGGAACATTAATTTGGAAGAGATGAT  
GAAAGCAGGAGTTCATTTTGGTCATGGTACTAGAAAATGGAATCCGAGAATGGCACCT  
TATATCTCTGCAAAGCGTAAAGGTATTCATATTACAAATCTTACTAGAACTGCTCGTTTT  
TTATCAGAAGCTTGTGATTTAGTTTTTTGATGCAGCAAGTAGGAGAAAACAATTCTTAAT  
TGTTGGTACCAAAAATAAAGCAGCGGATTCAGTAGCGCGGGCTGCAATAAGGGCTCGG  
TGTCATTATGTTAATAAAAAATGGCTCGGCGGTATTTTAACGAATTGGTCCACTACAGA  
AACTAGACTTCAAAGTTCAGGGACTTGAGAATGGAACAAAAGACAGGTAGACTCAA  
CCGTCTTCCGAAAGGAGATGCGGCTCGATTGAAGAGACAGTTAACTCACTTGCAAACA  
TATCTGGGCGGGATTAATATATGACGGGGTTACCCGATATTGTAATAATCGTTGATCAG  
CAAGAAGAATATACGGCTCTTCGGGAATGTATGACTTTGGGAATCCAACAATTTGTTT  
AATTGATACAAACTGTGACCCGGATCTCGCAGATATTTGATTCCAACGAATGATGACG

CTATAGCTTCAATCCGATTAATTCTTAATAAATTAGTATTTGCAATTTGTGAGGGTCATTC  
T---AGCTATATACGAAATCCCATGGGACAAAAATAAATCCACTTGGTTTTAGACTTGGT  
ACAACCCAAAGTCATCATTCTCTTTGGTTTTGCACAACCAAAAAATTACTCTGAGGGTCT  
ACAAGAAGATCAAAAAATAAGAACTGTATCAAGAATTATGTAAAAAAAATGCGAAA  
ATATCTTCTGGT---ATTGAAGGAATTGCACGTATAGAGATTCAAAAACGAATTGATGTGA  
TTCAGGTCATAATATATATGGGATTCCAAAAATTATTAATAGAAAAGTAGA-----CCTA  
AACGAATCGAAGAATTGCAGATGAATGTACAAAAAGAACTTAATTGTGTGAATCGAAA  
ACTCAATATTACTATTACAAGAATTACAAACCCCTATGGGCACCCTACTATTCTTGCAGA  
ATTTATAGCCGGACAATTAAGAATAGAGTTTCATTTGCAAAGCAATGAAAAAGCTA  
TTGAATTAAGTGAACAGACAGATACAAAAGGAATTCAAGTGCAAATTGCGGGACGTCT  
TGACGGAAAAGAAATTGCACGCGTGAATGGATTAGAGAGGGTAGAGTTCCTCTACAA  
ACCATTGGAGCTAAAATTGATTATTGTTTCGTATACAGTTAGAACTATTTATGGGGTATTG  
GGCATAAAAATTTGGATATTTCCAGACAAGAAAATGTCACGTTACCGAGGGCCTCGTTT  
CAAAAAATACGTCGTCTGGGGGCTTTGCCGGGACTAACTAGTAAAAGGCCTAAAGTC  
GGGAGCGATCTTAGAAATCAATCACGCTCCGGTAAA---AAATCTCAATATCGTATTCGTT  
TAGAAGAAAAACAAAATTGCGTTTTTCATTATGGTCTTACAGAACGACAATTACTTAAA  
TATGTTTCGTATCGCCGAAAAGCCAAAGGGTCAACAGGTCAGGTTTTACTACAATTACT  
TGAAATGCGTTTTGGATAACATCCTTTTTTCGATTGGGTATGGCGTCAACTATTCCTCGAGC  
CCGCCAATTAGTTAATCATAGACATATTTTAGTTAATGGTCGTATAGTAGATATACCAAGT  
TATCGCTGCAAACCCCGAGATATTATTACAGCGAGAGCTGAACAAAATCTAGAGCTAT  
GATTAATAAATTATCTTGATTCATCCCCCAG---GAGGAATTGCCAAAACATTTGACTCTT  
CACCCATTCCAA-----TATAAAGGATTGGTCAATCAAATAATAGATAGTAAATGGGTTGG  
CTTGAAAATAAATGAATTACTAGTGGTAGAATATTATTCTCGTCAGACTATGTCACGTCG  
AGGTACTGCAGAAGAAAAAACTGCAAATCCGATCCAATTTATCGTAATCGATTAGTTA  
ACATGTTGGTTAACCGTATTCTGAAACACGGAAAAAAATCATTGGCTTATCAAATTATCT  
ATCGAGCCATGAAAAAGATTCAACAAAAGACAGAAAACAAATCCACTATCTGTTTTACG  
TCAAGCAATACGTGGAGTAACTCCCGATATAGCAGTAAAAGCAAGACGTGTAGGCGGA  
TCGACTCAGCAAGTTCCCATTTGAAATAGGATCCACACAAGGAAAAGCACTTGCCATT  
GTTGGTTATTAGGGGCATCCCGAAAACGTCCGGGTCGAAATATGGCTTTCAAATTAAGT  
TCCGAATTAGTGGATGCTGCCAAAGGGAGTGGTGATGCCATACGCAAAAAGGAAGAG  
ACTCATAGAATGGCAGAGGCAAATAGAGCTTTTGCACATTTTCGTATGGGTAGGGATCC  
TATTGCTGACATAATAACCTCTATAAGAAATGCTGACATGAATAGAAAAGGAATCGTTC  
GAATAGCATCTACTAACATCACCGAAAACATTATTAATAACTTTTAAGAGAAGGTTTTA  
TTGAAAATGTCAGGAAACATAAGGAGGGCAACAAAAAATTTTTGGTTTTAACCTACG  
ACACAGAAGG-----AAGAGGAAAGAAAGAACTAGT-----CTAAATTTAAAACGGA  
TCAGCCGACCTGGTCTACGAATCTATTCTAACTATCAAAAAATTCCTAGAATTTGGGC  
GGGATGGGCATTGTAATTTCTTCTACTTCTCGGGGTATAATGACAGACCGAGAAGCTCG  
ACTCGAAAGAATCGGCGGAGAAATCTTGTGTTATATATGGATGGCAAAACCTTTACCAA  
AAATTGGTTCACGAAGAAACGGACGTATTGGTTCGCGTAAGAATTCACGTAAAATACC  
AAAAGGAGTTATTCATGTTCAAGCAAGTTTTTAACAATACTATTGTGACCGTTACAGATG  
TACGGGGTTCGAGTGATTTCTTGGTCTCCGCTGGCACTTGTGGATTCAGGGGCACAAG  
AAGAGGAACGCCATTTGCTGCTCAAACCGCAGCAGGAAATGCTATTCGGACAGTAGTG  
GATCAAGGTATGCAACGAGCAGAAGTCATGATAAAGGGTCTTGGTCTCGGACGAGATG  
CGGCATTAAGAGCTATTTCGAGAAGTAGTATACTATTAAGTTTCGTCCGGGATGTAACC

CCTATGCCACATAATGGCTGCAGACCCCCTAAAAAAGGCGCGTGATGCCAACTATTAA  
ACAAC TTATTAGAAACACAAGACAGCCAATCAGAAATGTCACCAAATCCCCGCTCTT  
GGGGGATGTCCTCAGCGCCGAGGAACATGTACTAGGGTGTATACTATCACCCCAAAA  
AACCAA ACTCTGCCTTACGTAAAGTTGCCAGAGTACGATTAACCTCTGGTTTTGAAATC  
ACTGCTTATATACCTGGTATTGGCCATAATTTACAAGAACATTCTGTAGTCTTAGTAAGA  
GGGGGAAGGGTTAAGGATTTACCCGGTGTGAGATATCACATTGTTTCGAGGAACCCTAG  
ATGCTGTCGGAGTAAAGGATCGTCAACAAGGGCGTTCTAAATATGGGGTCAAAAAGCC  
AAAAATGGCAAGGAAAAGTTTGATTCAGCGGGAGAAGAAGAGGCAAAAATTGGAAC  
AAAAATATCATTGATGCGTCGATCCTCAAAAAAGAAATAAGC-----AAAGTTCCGT  
CGTTAAGTGATAAATGGGAAATTCATGGAAAGTTACAATCCCACCCGCGGAATAGTGC  
ACCGACACGTCTTCATCGACGTTGTTTTTCGACTGGAAAACCGAGAGCTAACTATCGA  
GACTTTGGGCTATCCGGACACATACTTCGTGAAATGGTTCATGCATGTTTGTGCCGGG  
GGCAACAAGATCAAGTTGGATGGTAAAAATTCATTCAATTCAGTTATTTACAAGAA--  
-GAA--AAAGACGAAAACAAGGGATCTGTTGAATTTCAAATAGTAAGTTTCTACTAATAA  
GATACGAAGACTTACTTCACATTTGGAATTGCATAGAAAAGACTATTTATCTCAGAGAG  
GTTTGCGAAAATCTAGGAAAACGACAACGACTCCTGTCTTATTTAGCAAAGAAAA  
TAGAGTACGTTATAAAGAATTAATTATCCTGTTGGATATTCGGGAATCAAAAACCTCGT---  
--ATGGTAAAACCTCGTTTGAACGATGTGGTAGAAAAGCAACGAGTCGTTTATCGAATC  
GTTGCAATTGATGTTTCGATCCCGAAGAGAAGGAAGAGATCTTCGGAAAGTGGGGTTTT  
ATGATCCGATAAAAAATCAAACCTATTTAAATGTTCCCTGCTATTCTATATTTCCCTGAAAA  
AGGCGCTCAACCTACAGGA ACTGTTTCATGATATTTTAAGAAAGGCGGGGGTTTTTACG  
GAACTTCGCCTTAATCAA---ACGCAATTTACTATGGATAAATCCAAACGACTTTTTCTTA  
AGTCCAAGCGATCTTTTCGTAGGCGTTTTGCCCCGATCCAATCGGGGGATCAAATTGAT  
TATAGAAATATGAGTTTAATTAGTCGATTTATTAGTGAACAAGGAAAAATATTATCTAGA  
CGGGTGAATAGATTGAGTTTAAAACAACAACGATTAATTACTATTGCTATAAAACAAGC  
TCGTATTTTATCTTCGTTACCTTTTTCTTAATAATGAAAAA-----CAATTTGAA-----  
-----CGAGTTGGTCACTATGTGACACGT--CTAAAAAAAATCCTTTTTGTAGCAA  
ATCATT TATTAAAAAAAATAAATAAGCTTAACAATAAAGCAGAAAAACAATAATAAAA  
ACGTGGTCCCGACATCTACCATTATACCCACAATGATTGGCCATACTATTGCTATCCAT  
AATGGAAAGGAACATTTACCTATTTATATAACAGACCGTATGGTGGGTGCATAAATTGGG  
AGAATTTTCACCTACTCTAAATTTCCAGGGACATGCAAAAATGATAATAAATCTCATC  
GTATGATTTTTCAATCTTTTATACTAGGTAATCTAGTATCCTTATGCATGAAGATAATCAAT  
TCGGTTCGTTGTGGTTCGGACTCTATTATGGATTTCTGACCACATTCTCCATGGGACCCTCT  
TATCTCTTCTTCTCCGAGCTCGGGTTATAGAAGAAGGAGAAGAAGGAACTGAGAAGA  
AGGTATCAGCAACAACAGGTTTTATTACGGGACAGCTCATGATGTTTCATATCGATCTATT  
ATGCGCCTCTGCATCTAGCATTGGGTAGACCTCATACAATAACTGTCCTAGCTCTACCCT  
ATCTTTTGTTCATTTCTTCTGGAACAATCACAAACACTTTTTTGATTATGGATCTACTAC  
CAGAAATTCAATGCGTAATCTTAGCATTCAATTTGTATTCTGAATAATCTCATTTTTTCAA  
TTATTCAACCATTTCAATTTACCAAGTTCAATGTTAGTCAGATTAGTCAACATTTATATGT  
TTCGATGCAACAACAAGATGTTATTTGTAACAAGTAGTTTTGTTGGTTGGTTAATTGGT  
CACATTTTATTCATGAAATGGGTGGATTGATATTAGTCTGGATACAGCAAAAATAATTCTA  
TTAGATCT--TTTCGATCTAATAAGTACCTTGTGTCAGAATTGAGAAATTCTATGGCTCGA  
ATCTTTAGTATCTCTTATTTATTACCTGTGTCCTACTCTTTAGGCAGAATACCGTCACCCA  
TTTTTACTAAGAACTGAAAGAAACCGAAGAAGAT-----CTTGTAAC TATTCTTTTTGAC



TCTAAACGTTGGAATCGTCCATTTTCGATATATAAAAAATGATCAGTTTGAGAATGCTGTA  
AGAAAAGAAATGTCACAATATTTTTTTTATACATGTCGGAGTGATGGAAAAGAAAGAAT  
ATCTTTTACGTATCCACCCAGTTTGTCAACTTTTTTTGGAAATGATACAAAGAAAGATATC  
TCTGTTTACAACAGAAAACTCTCCTCTGATGAATTGTATAATCGTTGGAATTATAAGAA  
TGAACAAAAAAGAAAATCCTAAATAATGAATTTATAAATAGAGTCCAGGCTCTAGATA  
AGGAATATCTTACTCTGAATACACTCGAAAAAAGGACTAGACTATGTAATGATAAACT  
AAAAAAAAGTACTTACCTAAAATTTATGATCCCTTTTTGAGTGGGTCTCGCCGCGGGAA  
A---ATCCAATTTTTTTTTTTCAATAGAGATGCTTTGGATAAATAAAAATTCATCTTATTCTTTA  
TCAAGAATTTGAATCAAAAAATCCAAAAATAAATCTACTGGAATAAAAGAAATAAGT  
AAACAAGTTCCTCGATGGTCATACAAATTAATTGATTTGGAACAACAAGAGGGGAGAAG  
AAATTCGTTACGAAAAGCCAAACGGGTAGTGATTTTTACTGATACTTTGATACATTATT  
CACAACAATCGGATTTTCGCCGAGACATAATAAAAGGATCCGTGCGCGCACAAAGACG  
CAAATAGCTATTTGGGAAGTGTTCAGCAAAATGTGCATTCTCCTCTTTTTTTGGACA  
GAATAGACAAATCTCTTTTTTTTTCTTTTGATATT-----TCCGAAGTATAAAA---ATGTTT  
ATAAATAGAGAGGAAAAAGCTCGGATAGAAATAGCCGAAGCCTGGGATAGCATTCTTT  
TTGCTCAAATAATAAGAAGTTGTGTTTTAGTAACCCAATCAATTCTTAGAAAATATATTAT  
ATTACCTTCATTAATAATAACTAAAAATATCATTCGTATACTTTTTTTTTCAAACCCCGAA  
TGGTCCGAGGATTTAAAGATTGGAGTAGAGAAATGCATGTTAAATGCACCTATAATGG  
AGTTCAATTATCAGAAAAAGAATTTCCGAAAAACTGGTTAATAGACGGGATTCAAATA  
AAGATCCTATTTCTTTTTCGTCTAAAACCTTGGTACAAATCTAAGAAAGTACAAAAAAA  
TGATTTTTTTTTTTAACAGTTTTTGGGAATGGAAGCTGAACCTTCTTTTTGGTTCTCCCCG  
AAAACGGCTTTCATTTTTGAACCCATCTTTAAAAAACTCGAAAAAAAATTAGAAAA  
ATGCAAAAAAATGGTTTTTCGAGTT---ATAACAATTTTAGAAGAAAGAAGAAAACATAAT  
TTC-----TTAAAAGAAAAAATAAACTGGATCATCAAAAACATTTTTT-----TTTCGAAAAG  
AAATAATAACAACCTTTCAAATCAAAGATTTCGATAATCAATAACAATACGATTAAA  
AAATTATCCATCCCAATTCGATCTATGACTTGGACAAATTATTCACTGACAGAAAAAAA  
AATGAAAGATCTTCTGCTAGAAGAAAGATAATCATAAATCAAATAGAAAAAATTACAA  
AAGAAAAGGAAAAAACAATAAATAAGTTATAATGCTAAA-----AAATTAATAATC  
ATCAATTTGCGAGATAGTAAAAAGAAGAAATGTTGATTAGCGCGTAAATTCATTTTT  
TTATAAAAATTTGATTGAAAAGATATACATAGATATCTTTTTA---ATCATTAAATTTCCAA  
GGATCAATGCACAGCTTTTTTATTCATTTATTTTCGTGTGACATATCCTCCTTGTACAAAG  
CTTATGTATTTTACAAATTATCACAATCAAATTTAATACTTATATAAGTTAAAATCTATC  
TTTGAATAT---AGCCTTTTTCTGAAGAATGAAATAAAGGATTTTTTTGCCCAAGGGCTAT  
TTAATCCGAATTAATAAATAAATAATTTTAGAAATCTGTAATGAATCAATGGAAAAATT  
GGTTAAGGAGTCATTATCAATATAAACTATCTCAGATTAGATGGTCTAGATTAACACCAC  
AAAAATGGCGAAATATAATCAATCAACATCAACACCATATGGTTCAAAAACAAATGGAAT  
TTATATGAA-----AAAGACCGATTAATTCATTACAAAAAAA---AATTTTAAAAAACAC  
TATAAATATAATCTTTTATCATATAAATCTATTAATGATGATATTATTGATGCGGATAGAAA  
ATATTTGATTGGAGAATTCTCAATTTTTGTCTTAGATTTTTTGATTGGATGGGAATGAAT  
GAAGAAATAAAAAATTGTTGGTTCTTTCGAAAATTTGTGATACTTTACAACACATATAA  
GATAAAACCATGGGCGATACCCATCCAATTTCTTCTTTTCAATAACAAAAGTCATATGGA  
AGTAGAACTTGATTTCTTCTAAAACGGTATTTATGTTTTCAATTAAGATGGAATGGT-----  
-AATCACAAAATAATCAATAATATCAAAGTATATTGTCTCCTGCTTAGACTGACAAATCC  
ACGAGAAATTATTATATCTTCTATTCAAAGGCAAGAAATAAGTTTGAATATTCTGATGGT

TCAGAAGGATTTAACTCTTACGGAATTAATGAAAAAGGGAATATTGATTATCGAACCTG  
TTCGTCTGTCGGTAAAAAATGATGGACAATTTATTTTGTATCAAATGGTAGGTATCCTATT  
AGTTCATAAGAACAACAAAATGATTATGATTTACTTGTTCCCTGAAAATATTTTATCCCC  
TAAACGTCGTAGAGAATTAAGAATTCTT-----TTCATTTTCTTTGGCCCAATTTTCGATT  
AGAAGATTTAGCTTGTATGAATCGTTATTGGTTCGATACTAATAATGCTAGTCGGTTCAG  
TATGGTAAGAATATATATATATCCGATGAAAGGACATCAATTCAAATCCTGGATTTTCGAA  
TTGAGAGAGATATTGAGAGAGATCAAGAATTCTCACTATTTCTTAGATTTCATGGACCCA  
ATTCAATTCAGTGGGATCTTTCATTACATTTTTTTCCATCAAGAACGTTTTATAAACT  
CTTGGACTCCCGAATTTGGAGTATCTTACTTTCA---CGCAATTCA-----CAGGGTTC AAC  
AAGCAATCGATATTC-----ACGATCAAGGGTGTAGTACTATTTGTAGTAGTG---GTCCT  
TATATATCGT-----ATTAACAATCGAAAGATGGTCGAAAAGAAAAAATCTCTATTTGAC  
AGGGCTTCTTCCT-----ATACCTATGAATTCCATTGGACCCAGAAATGATACATTG  
GAAGAATCCTTT---GGGTCTTCCAATATCAATAGGTTGATTGTTTCG---CTCCTGTATCTT  
CCAAAAGGAAAAAAGATCTCTGAGAGCTCTTTCCTGGATCCGAAAGAGAGTACTTGG  
GTTCTCCCAATAACT-----AAAAAGTGTATCATGTCTGAATCTAACTGGGGTTCGCG  
GTGGTGGAGGAACTGGATCGGAAAAAAGAGG-----GATTCTAGTTGTAAGATATCTAAT-  
-----GAAACCGTTGCTGGAATTGAGATCTCATTCAAAGAAAAAGATATCAA---TATCT  
GGAGTTTCTTTTTGTATATTATATGGAT-----GATCCGATCCGCAAGGACCATGATTGGGA  
ATTGTTTGATCGTCTTCTCCGAGGAAGGGGCGAAACATAATCAACTTG-----AATTCGG  
GACAGCTATTCGAAATCTTAGTGAAAGACTGGATTGTTATCTCATGTTTGCTTTTCGTG  
AAAAAATACCAATTGAAGTGGAGGGT---TTCTTCAAACAACAAGGA---GCTGGGTCAA  
CTATTCAATCAAATGATATTGAGCATGTTTCCCAT-----CTCTTCTCGAGAAAGAAGTGGG  
CTATTTCTTTGCAAATTTGTGCTCAATTTTCATATGTGGCAATTCCGCCAAGATCTCTTCG  
TT-----AGTTGGGGGAAT---AATCCGCACGAATCGGATTTTTTGTAGTAAC---ATATCGAG  
G-----ATTTGGTTAGACAATGTGTGGTTGGTAAACAAGGATCGG-----TTTTTTAGC--  
---AAGGCACGGAATATATCGTCAAATATTCAATATGATTCC-----ACAAGA-----TCTAG  
TTTCGTTCAAGGAAGGAATTCTAGCCAATTGAAGGGATCTTCT--GATCAATCCAGAGA  
TCATTTGATTCCATTAGT-----AATGAGGATTCGGAA-----  
TATCACACATTGATCAATCAAAGAAAGATTCAACAATAAAAGAAAGATCGATTCTT---  
TGGGAT-----CCTTCTTTCTTCAAACCGGAACGAACAGAGATAGAATCAGAC-----CGATT  
CCCTAAA-----TGCCTTTCTGGATATTCC-----TCAATGTCCCGGCTATTCACG---GAAGGT  
GAGAAGGAGATGAATAATCATCTGCTTCCGGAAGAAATCGAAGAATTT-----CTTGGGA  
ATCCTACAAGATCCATTTCGTTCTTTTTTCTCTGACAGATCG-----TCAGA ACTTTAT--CTG  
GGTTCGAATCCTACTGAGAGGTCCACTAGAGATCAG-----AAATTGTTGAAGAAAG  
ACAAGATGTTTCT---TTTGTCCCTTCCAGGCGATCGGAA-----AATAAGAAATAG  
TTAATATATTCAAGATAATCACGTATTTACAAAAT-----ACCGTCTCAATTCATCCTATTT  
ATCAGATCCGGGATGTGATATGGTTCTG---AAGGATGAACTGGAT---ATGGACAGTTCCA  
ATAAGATTTCTTTCTTGAACAAAATCCATTTTTTGTATTIA-----TTTCATCTATTCCATGA  
TCGGAACGGGGGGGATAACCGTTA-----CACCACGATTTTGAATCAGAA-----GAGAGA  
TTTCAAGAAATGGCAGATCTATTCACTCTATCAATAACCGAGCCG---GATCTGGTGTATC  
ATAAGGGATTTACCTTTTTTATTGATTCCTACGGATTGGATCAAAAACAA-----TTCTTGA  
ATGAGGTATTCAACTCCAGGGATGAATCGAAAAGAAATCTTTA-----TTGGTTCTAC  
CTCCTATTTTTTAT-----GAAGAGAATGAATCTTTTTATCGAAGGATCAGAAAAAATGG  
GTCCGG---ATCTCCTGCGGGAATGATTGGAAGATCCAAAACAAAAAATAGTGGTATTT

GCTAGCAACAACATAATGGAGGCAGTCAATCAATATGGATTGATCCTAAATCTGATTCA  
AATCCAATATAGTACCTATGGG-----TACATAAGAAATGTATTGACTCAATTCTTTTTAATG  
AAT-----AGATCCGATCGCAACTTCGAATATGGAATTCAA-----AGGGATCAAATAGG  
AAATGATACTCTGAATCATAGAACTATAATGAAATATACGATCAACCAACATTTATCGAA  
TTTGAAACAG---AGTCAGAAGAAATGGTTCGATCCT-----CTTATTTTTCTTTCTCGAACC  
GAGAGATCCATGAATTGGGATCCTAATGCATATAGATACAAATGGTCTAATGGGAGCAA  
GAATTTCCAGGAACATTTGGAACATTTCAATTTCTGAGCAGAAGAGCCGTTTT--CTTTTT  
CAAGTAGTGTTTCGATCGATTACGTATTAATCAATATTCGATTGATTGGTCTGAGGTTATC  
GACAAAAAAGATTTGTCTAAGTCACTTCGTTTCTTTTTGTCCAAGTTACTTCTT-----  
-----TTTTGTCC-----AAGTTTCTTCTTTTTGTCTAACTCACTTCCT-  
--TTTTCTTTGTGAGTTTCGGGAATATCCCATTCATAGGTCCGAA--ATCCATATCTAT--  
GAATTGAAAGGTCCGAATGATCAACTCTGCAATCAGCTGGTAGAACCAATAGGTCTTC  
AAATCGTTCATTTGAAAAAATTGAAACCCCTTCTATTGTTATTGGAT-----GATCATGAT  
ACTTCC--CAAAAATCTAAATTTTTGATTAATGGAGGAACAATATCACCATTTTTGTTC  
ATAAGATAACA---AAGTGG---ATGATTGACTCATTCCATACTAGA-----ATAATCGCAGG  
AAATCTTTTGATAACACGGATTTCCTATTTCTCAATGATATCCCACGATCAAGACAATTGG  
CTGAATCCCGTGAAACCATTTTCATAGAAGTTCATTGATATCTTCTTTTTATAAAGCAAAT  
CGACTTCGATTCTTGAATAATCTACATCACTTCTGCTTCTAT-----TGTAACAAAAGATTC  
CCTTTT-----TAT--GTGGAAAAGGCCCGTATCAAGAATTATGAT-----TTACGTATGGA-  
--CAATTCCTCAATATCTTGTTTCATTTCGCAACAAA---ATATTTCTTTGTGCGGCGGTA  
----AAAAACATGCTTTTTTTGGAG---AGAGATACTATTTACCAATCGAGTCACAGGTAT  
CTAACATATTCATACCTAATGATTTTCCACAAAGTGGTAACGAAAGG---TATAACTTGTA  
CAAATCT-----TTCCATTTTCCAATTCGATCCGATCCATTCGTTCTG-----AGAGCTATTT  
ATTCGATCGCAGACATTTCTGGAACACCTCTAACAGAGGGACAAATAGTCAATTTTGA  
AAGAACTTATTGTCAACCTCTTTTCGGATATGAATCTATCTGATTCAGAAGGGAAGA  
TGCATCAGTATCTCAAT-----TTCAATTCAAACATGGGTTTGATTCACACTCCATGTTCTG  
AGAAATATTTACCATCCGAAAAG-----AGGAAAAA-----CGGAGTCTTTG  
TCTAAAG-----AAATGTGTTGAAAAAGGGCAGATGTATAGAACCTTTCAACGAGATAAT  
GCTTTTTCAACTCTCTCAAATGGAATCTATTCCAAACATATATGCCATGGTTCCTTACT  
TCGACGGGGTACAAATATCTAAATTTGATATTTTTAGATACCTTTTTCGGAC---CTATTACC  
GATACTAAGTAGCAGT-----CAAAAATTTGTATCCATTTTTCATGATATTATGCATGGATCA  
GATATATCATGGCGAATTCCTCAGAAAAAATTG-----TGTCTTCCACAATGGAAT  
---CTGATAAGTGAGATTTTCGAGTAAGTGTTTACATAAT-----CTTCTTCTGTCCGAAGAAA  
TGATTCATCGAAATAATGAGCCA-----CCATTGATATCGACACATCTGAGATCGCCAAAT  
GTTTCGGGAGTTC---CTCTATTCAATCCTTTTCTTCTTCTTGTTGCTGGATAT--CTCGTTC  
GTACACATCTTTTCTTTGTTTCCCGA-----GCCTATAGTGAGTTACAGACAGAGTTCGAA  
AAGGTCAAATCTTTGATGATTCCATCATAATGATTGAGTTGCGAAAACCTTCTGGATAG  
GTATCCTACATCTGAACTGAATCTTTCTGGTTAAAGAATCTCTTTCTAGTTGCTCTGGA  
ACAATTAGGAGATTTTCTAGAAGAAATGCGGGGTTCTGCTTCTGGCGGCAACATGCTAT  
GGGGTGGTGGTCCC-----GCTTATGGG---GTAAATCAATACGTTCTAAGAAGAAA  
TTTTTTAATATCAAT-----CTCATCGATCTCATA---AGTATCATACCAAATCCCATCAATC  
GAATCACTTTTTCGAGAAATACGAGACATCTAAGTCATACAAGTAAAGAGATTTATTCA  
TTGATAAGAAAAAGAAAAACGTGAACGGTGATTGGATTGATGATAAAATAGAATCCT  
TGGTCGCGAACAGTGATTTCGATTGATGATAAAGAAAGAGAATTCTTGGTTCAGTTCTCC

-----ACCTTAACGACA-----GAAAAAAGGATTGATCAAATTCTATTGAGTCTGACT---CAT  
AGTGATCATTATCA-----AAGAATGACTCTGGTTATCAAATGATTGAAGAGCCG  
GGAGCAATTTATTTACGATACTTAGTTGACATTCAT-----AAAAAGTATCTAATGAATTAT  
GAGTTCAACACACCCTGTTTAGTAGAAAGACGGATATTCCTTGCTTATTATCAGACAAC  
CACTTAT-----TCACAAACCTCGTGTGGGGTGAATAGTTTTTCATTTCCCATCTCATGGA----  
-----AAACCCTTTTCGCTCCGCTTAGCCCTATCCCCCTCT---AGGGGTATTTTAGTGATAGG  
TTCTATAGGAACCTGGACGATCCTATTTGGTCAAATACCTAGCGACAAACTCCTATCTTCC  
TTTCATTACAGTATTTCTGAACAAGTTCCTGGATAACAAGCCTAAGGGTTTTCTTATTGA  
T-----GATAGTGACGATATTGATGATAGTGACGATATTGATGATAGTGACGATATTG  
ATGATAGTGACGATATTGATGTGAGTGACGATATTGATGTGAGT-----GACGATATTGACC  
GT-----GACTTTGATACGGAGCTGGAGTTTCTAACTAGGATGAATGTGCTA-----ACTAT  
GGATATGATGCCG-----GAAATAGACCGATTTTATATCACCCCTCAATTCGAATTAGCA  
AAAGCAATGTCTCCTTGCATAATATGGATTCCAAACATTCATGATCTGGATGTGAATGAG  
TCGAATTACTTATCCCTCGGTCTATTAGTGAACCTATCTCTCC-----AGGGATTGTGAAA  
GATGTTCC---ACTAGAAATATTCTTGTTATTGCTTCGACTCATATTCCCCAAAAGTGGAT  
CCCGCTCTAATAGCTCCGAATAAATTAATACATGCATTAAGATACGAAGGCTTCTTATT  
CCACAACAACGAAAGCACTTTTTTACTCTTTTCATATACTAGGGGATTTCACTTGAAAA  
TAAAATGTTCCATACT-----AATGGATTCCGGTCCATAACCATGGGTCCAATGTACGAGA  
TCTTGTAGCACTTACCAATGAGGCCCTATCGATTAGTATTACACAGAAGAAATCAATTAT  
AGACACTAATATAATTAGATCTGCTCTTCATAGACAAACTTGGGATTTGCGA-----TCC  
CAGGTAAGATCGGTTTCAGGATCATGGGATCCTTTTCTATCAGATAGGAAGGGCTGTTGC  
ACAAAATGTATTTCTAAGTAATTGCCCCATAGATCCTATATCTATCTATATGAAGAAGAA  
A-----TCATGTAACGAAGGGGATTCTATTTGTACAAATGGTACTTCGAACTTGGAACGA  
GCATGAAGAAATTAACGATACTTCTTTATCTTTTGAGTTGTTCTGCCGGATCGGTTGCTC  
AAGACCTTTGGTCTCTACCC-----GGACCCGATGAAAAA---AATGGGATCACTTATTATG  
GACTTGTTGAGAATGATTCT--GATCTAGTTCATGGCCTATTAGAAGTAGAAGGCGCTCT  
GGTGGGA-----TCCTCACGGACAGAAAAAGATTGCAGTCAGTTTGATAATGAT-----CGA  
GTGACATTGCTTCTTCGGCCCCGAACCAAGGAGT--CCCTTAGATATGATGCAAAATGGA  
TCTTGTCTATCCTTGATCAGAGATTTCTCTATGAAAAA-----TACGAATCGGAGTTTGAA  
GAA---GGGGAAGGAGAAGAAGTCCTCGACCCGCAA-----CAGATAGAGGAGGAT--  
-----TTATTCAATCAC-----ATAGTTTGGGCTCCT-----AGAATATGGCGCCT-----TGG  
GGTTTTCTATTTGATTGTATCGAAAGGCCCAATGAATTGGGATTTCCC---TATTGGGCCA  
GGTCATTTCGGGGCAAG-----CGGATCATTTATGATGAAGAGGATGAGCTTCAAGAGA  
ATGATTCGGAGTTCCTTGCAGAGTGGAACCATGCAGTACCAGATACGAGATAGATCTTCC  
AAAGAACAAGGCTTTTTTTCGAATAAGCCAATTCATTTGGGACCCTGCGGATCCACTCTT  
TTTCCTATTCAA---GATCAGCCCTTTGTCTCTGTGTTTTACATCGAGAATTCTTTGCA  
GATGAAGAGATGTCAAAGGGGCTTCTTACTTCCCAAACAGATCCTCCTACATCTATATAT  
AAACGCTGGTTTATC-----AAGAATATGCAAGAAAAGCACTTCGAATTGTTGATTTCATCG  
CCAGAGATGGCTTAGA-----ACCAATAGTTCATTATCT-----AATGGATTTTCCGTTCTA  
AT-----ACTCTATCCGAGAGTTATCAGTATTTATCAAATCTGTTCCCTATCTAAC---GGAACG  
CTATTGGATCAAATGACAAAGGCATTGTTGAGAAAAAGATGGCTTTTCCCGGATGAAAT  
GAAAATTGGATTC-----ATG-----ATGCCTAGATCTCGG---ATAACTGGAA  
ATTTTATTGATAAGACTTTTTTTCAGTTGTAGCCAATATCTTATTACGAATAATTCCGACAAC  
TTCGGGAGAAAAAGAGGCATTTACTTATTACAGAGATGGT-----ATGTCTGCTCAATCCG

AAGGAAATTATGCAGAAGCTTTACAGAATTATTATGAAGCTATGCGGCTAGAAATTGAT  
CCCTATGATCGAAGTTATATACTCTATAATATAGGCCTTATTCACACAAGTAATGGAGAA  
CACACAAAAGCTTTGGAATATTATTTTCGGTCACTAGAACGAAACCCCTTCTTACCACA  
AGCTTTAAATAATATGGCCGTGATCTGTCATTAC---CGAGGAGAACAGGCCATTTCGGCA  
GGGAGATTCTGAAATTGCGGAGGCTTGGTTTCGATCAAGCCGCGGAGTATTGGAAACAA  
GCTATAGCGCTTACTCCCGGAAATTATATTGAAGCGCAGAATTGGTTGAAAATCACAAG  
GCGTTTTCGAA-----ATGAGTTGGCGATCAGAACGTATATGGATAGAATTATAGCGGGGT  
CTCGAAAAACAAGTAATTTCTGCTGGGCCTTTATACTTTTTTTTAGGTTTCATTGGGATTTT  
TATTGGTTGGAATTTCCAGCTATCTTGGCAGAAATTTGATATCTTTATTTCCGTCTCAGC  
AAATAATTTTTTTCCACAAGGGATCGTGATGTCTTTCTATGGGATCGCCGGTCTATTTA  
TTAGTTCTTATTTGTGGTGCACAATTTTGTGGAATGTAGGTAGTGGTTATGATCGATTTCG  
ATAGAAAAGAAGGAATAGTGTGTATTTTTCGCTGGGGATTTCCGGGAAAAAATCGTCG  
CATCTTACTACGATTCCCTTATGAAAGATATTCAGTCTATTAGAATAGAAGTTAAAGAGGG  
TATTTATGCTCGGCGTGCCTTTATATGGAAATCAGAGGCCGGGGGCTATTCCTTTGAC  
TCGTACTGATGAGAAT---TTGACTCCACGAGAAATTGAGCAAAAAGTAGCGGAATTGGC  
CTATTTTTTGCGTGTACCAATTGAAGTATTT

>Jacobaea

ATGAAAAGATGGTGGTTCAATTCGATGTTATTTCTAAGTAAATCAACCGGCAGTCTTGG  
TCCTATTGAAAATGCCAGTGAAAGTAAAGATCCGAATAGAAATGATACGGAGAAAAAC  
ATTCAGAGTTACAGTAATGTTGATCTTTTTTTTTGGCGTCAAAGACATTTGGAATTTTCATC  
TCTGATGAGACTTTTTTTAGTTAAAGATAGTAATGGGGACAGTTATTCTATATATTTTTGATA  
TTGAAAATCATATTTTTTGAGATTGACAACGATCAT-----ACTTTTTCTAGTGAAGTAGAAA  
GTTCTTTTTAT-----CGGAATTCCAGTTATCTGAATAAGGGATCTAAGAGTAAGAATACCC  
ACCACGATCGTTACATGGACGATACTCAGTATACTTGGAAATAATCACATTAATAGTTGCA  
TTGACAGTTATCTTCAG-----TCTCACATCTGTCTTGATACTTACATTCTAAGTGGTAGTG  
ACAATTACAGTAACAATTACATTTCAAATTCATTTGTGGT-----AATAGTAGTAAAAACG  
AGAATGCCAGAAGG-----AAAACCTATACGAAAAAGTTATACGGATCTGGATGTAACCTCA  
AAAATATAGGCATTTGTGGATTCAATGCGAAAGTTGTTTTGGATTAAATTATAAGAAAA  
GTTTTCAATCAAAAATGAATCTTTGTGAACAATGTGGATATCATTGAAAATGAGTAGT  
TCAGATAGAATTGAACTTTTCGATCGATCCGGGTACTTGGGAGCCGATGGATGAAGACAT  
GGTCTCTCTGGATCCCATTTCAATTTTCATTCGGAGGAGGAGCCTTATAAAAAACGTATCG  
ATTCTTATCAAAGAAAAACAGGATTAACCGAGGCTGTTCAAACAGGCATAGGGCAACT  
AAACGGTATTAACGTATCAATTGCGGTTATGGATTTTCAGTTTATGGGGGGTAGTATGGG  
ATCCGTAGTGGGGGAGAAAATTACCCGTTTGATTGAATACGCTACTAAAGAATTTCTAC  
CTCTTATTATAGTGTGTGCTTCTGGAGGGGCACGCATGCAAGAAGGAAGTTTGAGCTTG  
ATGCAAATGGCTAAAATATCTTCTGCTTTATATGATTATCAATCAACAAAAAGTTATTCT  
ATGTACCAATCCTTACATCTCCTACTACCGGTGGGGTGACAGCTAGTTTTGGTATGTTGG  
GGGATATCATTATTGCCGAACCAATGCCTACATTGCCTTTGCGGGTAAAAGAGTAATT  
GAACAAACATTGAATAAAACAGTACCCGACGGTTCACAAGCGTCTGAGTATTTATTCC  
AGAAGGGCTTATTCGATCTAATCGTACCACGTAATCCTTTAAAAAGCGTTCTGAGTGAG  
TTATTTCAACTCCACACTTTCTTTCTTTGAATCAAAAT-----ATGGTAACCATTCAAGC  
CGACGAAATTAGTAATATTATCCGCGAACGTATTGAGCAATATAATAGAGAAGTAAAGA  
TTGTAATAACCGGTACCGTACTTCAAGTAGGTGACGGCATTGCTCGTATTCATGGTCTTG  
ATGAAGTAATGGCGGGTGAATTAGTAGAATTTTCAGGAGGGTACAATAGGTATTGCTCTT

AATTTGGAATCAACTAATGTTGGTGTGTATTAATGGGTGATGGTTTGCTGATACAAGA  
GGGGAGTTCTGTAAAAGCAACAGGAAAAATTGCTCAGATACCAGTGAGTGAGGCCTAT  
TTGGGTCGTGTTATAAATGCCCTGGCTAAACCTATTGATGGTAGAGGTGAAATTATATCT  
TCTGAATACAGGTTAATTGAATCGGCCGCCCGGGGATTATTTCTCGACGTTCTGTATAT  
GAGCCTCTTCAAACAGGGCTTATTGCTATTGATTCAATGATTCCCATAGGACGTGGTCA  
GCGAGAATTAATTATTGGGGACAGACAGACCGGTAAAACAGCAGTAGCAACAGATACA  
ATTCTAAATCAACAAGGCAAAAATGTAATATGCGTTTATGTAGCTATTGGTCAAAAAGC  
ATCTTCTGTGGCTCAGGTAGTTACTAATTTCCAGGAAAGGGGCGCGATGGAATATACTA  
TTGTGGTAGCCGAAACGGCGGATTCCCCTGCTACATTACAATACCTCGCTCCTTATACA  
GGAGCAGCTCTGGCTGAATATTTTATGTACCGTGAACGACACACTTCAATCATTATGAT  
GATCCCTCTAAACAAGCGCAAGCTTATCGCCAAATGTCTCTTCTATTACGAAGACCACC  
AGGGCGCGAAGCTTATCCAGGGGATGTTTTTTATTTACATTCACGCCTTTTGGAAGAG  
CTGCTAAATTAAGTTCTCTTTTAGGTGAAGGAAGTATGACCGCTTTACCAATAGTTGAA  
ACCAATCGGGAGATGTTTCGGCTTATATTCCCTACTAATGTAATTTGATTACTGATGGA  
CAAATATTCTTATCTGCCGATCTATTCAATGCTGGAATCCGACCCGCTATTAATGTGGGTA  
TCTCTGTTTCCAGAGTGGGGTCTGCAGCTCAAATTAAGCTATGAAACAAGTAGCCGG  
TAAATTAATAATTGGAAGTGGCACAATTCGCAGAATTAGAAGCTTTTGCACAATTTGCTT  
CTGATCTCGATAAAGCTACTCAGAATCAATTGGCAAGAGGTCAACGATTACGTGAATTG  
CTTAAACAATCCCAATCCGCCCTCTCGGGGTAGAAGAGCAGGTACTTACTATTTATAC  
CGAACAACGGTTATCTCGATTCAATAGAAATTGGACAGGTAAGGAAATTTCTGGTTG  
AGTTACGTACTTACTTAAAAACCAATAAACCAGAGTTTCAAGACATAATATCTTCTACC  
AAGACATTCACCGAGGAAGCAGAAGCCATTTTGAAAGAAGCTATTCAGGAACAGAGG  
GAACGTTTTATACTTCAGGAACAAGCAATGAGAATGAATCCTACTCTTTCTAATTCTGC  
GGTCCCACGCTTGACAAAACAAACCTAGGGCGTATCGCCCAAATTATTGGTCCGGTA  
CTAGATGTATCTTTTCCGCCAGGCAAATGCCTAATATTTATAACGCTCTGGTAGTTAAG  
GGTCGAGATACTCTTGGTGAACCTATTAATGTGACTTGTGAGGTACAGCAATTATTAGG  
AAATAATCGAGTTAGGGCCGTAGCTATGAGTGCTACAGACGGTCTAACGAGAGGAATG  
GATGTAATTAATACGGGAGCTCCGCTAAGTGTTCCGGTCCGGTGGAGCGACTCTCGGAC  
GAATTTTCAACGTGCTTGGCGAGCCTGTTGATAATTTGGGTCCTGTAGATAATAGCACA  
AAATTTCTTATTCATAGATCTGCGCCTGCCTTTATACAGTTAGATACAAAATTATCTATTT  
TTGAAACCGGAATTAAGTAGTAGATCTTTTAGCCCTTATCGCCGTGGAGGAAAAATC  
GGACTATTCGGGGGAGCTGGCGTGGGTAAAACAGTACTTATTATGGAATTGATTAACAA  
TATTGCCAAAGCTCACGGAGGCGTATCTGTATTTGGCGGAGTCGGTGAACGGACTCGT  
GAAGGAAACGATCTTTACATGGAATGAAAGAATCTGGAGTTATTAATGAAAAAATAT  
TGCAGAATCAAAAAGTGGCTCTAGTTTACGGTCAGATGAATGAACCACCGGGAGCTCGT  
ATGAGAGTTGGTTTGACTGCCCTAACTATGGCGGAATATTTCCGAGATGTTAATGAACA  
AGACGTACTTTTATTATTGACAATATCTTCCGTTTTGTCCAAGCAGGATCTGAAGTATC  
TGCCTTGTGGGTAGAATGCCTTCCGCTGTGGGTATCAACCTACCCTTAGTACCGAAA  
TGGGTTCTTTACAAGAAAGAATTACTTCTACCAAAGAGGGTTCCATAACTTCTATTCAA  
GCTGTTTATGTGCCTGCAGATGATTTGACCGACCCTGCTCCTGCTACGACATTTGCACA  
TTTAGACGCTACTACCGTACTATCAAGAGGATTAGCCGCCAAAGGTATCTATCCAGCAG  
TAGATCCTTTAGATTCAACGTCAACTATGCTACAACCCCGGATCGTTGGTGAAGAACAT  
TATGAAACTGCACAACCTGGTTAAGCAAACCTTTACAACGTTACAAAGAACTTCAAGATA  
TTATAGCTATTCTTGATTGGACGAATTATCCGAAGAAGATCGTTTAAACCGTAGCAAGA

GCGCGAAAAATCGAGCGTTTTTTTATCACAACCTTTTTTCGTAGCAGAAGTATTTACGGG  
TTCTCCGGGAAAATATGTTGGTTTAAACAGAAACAATTAGAGGCTTTCAATTAATCCTTT  
CCGGAGAATTAGATAGTCTTCCTGAACAGGCCTTTTATTTGGTAGGTAACATCGATGAA  
GCTACGGCGAAGGCTATTAACCTTAGAAATGGAGAGCAATGTGAAGAAAATGACCTTAA  
ATCTTTGTGTACTIONGACCCCTAATCGAATAGTTTGGGATTCGGAAGTGAAAGAAATCATT  
TTATGTAATAATAATGGACAAATTTGGCGTATTACCAAATCATGCTCCTATTGCCACAGCA  
GTAGATATAGGTATTTTTGAGAATACGCCTTAAACGACCAATGGCTAACGATGGCTCTGATG  
GGCGGTTTTGCTAGAATAGGTAATAATGAGATCACTGTTTTAGTAAATGATGCAGAGAA  
AAGTGGTGACATCGATCCAGAAGAAGCTCAGCAAACCTTTGAAATAGCGGAAGATACT  
TTTAGAAAAGCTGAAGGAAAGAGACAAACAATTGAGGCAAATCTAGCTCTCCGACGA  
GCTAGGACACGAGTAGAGGCTATCAATGCCATTTCAATGAAAAATGTAACCGATTCTTT  
CGTTTTCTTTGGGCCACTGGCCATCCGCCGGGAGTTTCGGGTTTAAATACCGATATTTTTGC  
AACAAATCTAATAAATCTAAGTGTAGTGCTTGGGGTCTTGATCTTTTTTGGAAAGGGAG  
TGTTAAGTGATTTATTAGATAATCGAAAACAGAGAATCTTGAATACTATTAGAAATTCAG  
AGAATTGCGCGAGGGGGCCATCGAACAGCTGGAAAAAGCCCGAGCTCGTTTACGAA  
AAGTAGAAATAGAAGCAGATCAATTTCTGTGTGAATGGATACTCTGAGATAGAGCGAGA  
AAAATTGAATTTGATTGATTCAACTTATAAGACTTTGGAACAACCTAGAAAATTACAAA  
ATGAAACTATAAATTTTGAACAACAAAAGGCCAGTAATCAAGTCCGACAACGGGTTTT  
CCAACAAGCCTTACAAGGAGCTCTAGGAACTCTGAATAGTTGTTTAAACAGCGAGTTA  
CATTTACGTACTIONTATCAGTGCCAATATTGGCATATTGGGGACGATGAAACAAATAACGGAT  
ATGAATCCACTGATTTCTGCCGCTTCCGTTATTGCTGCTGGATTGGCTGTAGGGCTTGCT  
TCTATTGGACCTGGAGTTGGTCAAGGTACTIONTCTGCTGCGGGTCAAGCTGTAGAAGGTATCG  
CGAGACAGCCCGAGGCGGAGGGAAAAATAAGAGGTACTTTGTTGCTTAGTCTAGCTTT  
TATGGAAGCTTTAACAATTTATGGCCTGGTTGTAGCATTAGCACTTTTATTTGCTAATCCT  
TTTGTATGAATGTTCTATCATGTTCCATCAACACACTAAATGGGTTATATGATCTATCCG  
GTGTTGAAGTAGGCCAACATTTTTATTGGAAAATCGGGGGTTTCCAAGTCCACGGCCA  
AGTACTTATTACTTCTTGGGTTGTAATTGCTATCTTATTAGGTTTCAGCCACTCTAGCCGTT  
CGGAACCCACAAACCATTCCGACCGCCAGTCAGAATTTCTTCGAATATGTCCTTGAATT  
TATTCGAGATGTGAGTAAACTCAAATTGGAGAAGAATATGGTCCTTGGGTTCCTTTTA  
TTGGAACCTATGTTTCTATTTATTTTTGTTTCTAATTGGTCCGGCGCCCTTTTACCTTGGAA  
AATAATACAATTACCTCATGGGGAGTTAGCCGCACCCACGAATGATATAAATACTACTGT  
TGCTTTGGCCTTACTCACGTCACTIONTGGCATATTTCTATGCGGGTCTTAGCAAAAAAGGAT  
TAAGTTATTTCTGGGAAATATATTCAACCAACTCCAATTTCTTTTACCTATTAACATTTTAGA  
AGATTTACAAAGCCTTTATCACTIONTAGTTTTTCGACTTTTTCGGAAATATATTAGCCGATGA  
ATTAGTAGTTGTTGTTCTTGTCTTTAGTACCTTCAGTGGTTCCTATCCCTGTAATGTTCT  
CTTGGATTATTTACAAGTGGTATTCAAGCTCTTATTTTTGCAACTTTAGCCGCGGCTTATA  
TAGGCGAATCCATGGAGGGCCACCATATGATATTTCAACTTTAGAGCATATATTAACCTC  
ATATTTCTTTTTCGATTGTTTCAATTGTAATTACAATTCATTTGATAACCTTATTGGGCAAT  
GAAATCATAAAACCATATGATTCGTCAGAAAGGGGGATGATAGCTACTTTTTTATGTCTA  
ACAGGATTATTAACCACTIONTGGATTTATTTCGGGCCATTTGCCACTAAGTGATTTATAT  
GAATCATTAATTTTTCTTTTCTGAGTTTCTCCCTGATTCACATAGTGCCTTAT-----ATAA  
GAAAAAATTATTTAACCACAATAACTIONTGCCTCAAGTACTATTTTTTACCCAAGGCTTTGCTA  
CTTCAGGTCTTTTTAAATGAAATACAAAACCCGCAATATTAGTACCCGCTCTACAATCG  
GAATGGTTAATAATGCACGTAAGTATGATGATATTAAGCTATGCGGCTCTGCTTTGTGGA

TCATTATTATCAGTAGCACTTCTAGTCATTACATTTAGAAAT-----ATTTTTTATAGTTCT  
AAAGAAATCCAATAC-----AGAAACGATATTTTTAAACGAGCTTCT-----GCTAAGAA  
TTATTATAAGGCCCAATTGATTCAACAATTAGATTATTGGAGTTATCGTGTGATTAGCCTA  
GGGTTTATCTTTTTAACTATAGGTATCTTTTCGGGAGCAGTATGGGCTAATGAAGCATGG  
GGCTCGTATTGGAGTTGGGATCCAAAGGAACTTGGGCCTTTATTACTTGGATCGTATT  
CGTATTTATTTGCATACTCGAACAAATCAAAATTTGCAGGGGGCAAATTCGCAATTG  
TGGCGACTCTAGGCTTTCTTATAATTTGGATATGCTATTTTGGGGTCAATCTATTAGGAAT  
AGGCCTACATAGTTATGGTTCATTTACGTTAACCATGGCAAAAAAGAAAGCATTCACTT  
CTCTTTTATATCTTGCATCTATAGTATTTTTGCCTTGGTGGATTTCTCTCTCATTTCAAAA  
AAGTCTGGAATCTTGGGTTTCTAATTGGTGTAACTAGGCAATCCGAACTTTTTTAA  
TGATATTGAAGAAAAGAGTATTCTAGAAAAATTTATAGAATTAGAGGAACTTCTTTTGT  
AGAGGAAATGATCAAGGAATACTCGGAGACACATCTACAAAACCTTGGTATA---ATTCA  
CAAAGAAACAATCCAATTAATCAAGATACACAACGAGGGTCATATTCATACGATTTTGA  
ACTTCTCGACAAATATAATCTGTTTCCTTATCTAAGTGGTTATTCTATTTTGGGTAATAA  
AAAACCTTTTTATTCTTAACTCTTGGGCTCAGGAATTCCTATATACTTAAGTGACACAAT  
AAAAGCTTTTTCTTCTTTTATTAAGTATTGTGTATCGGATTTTCATTCGCCGCATGGT  
TGGGAACTGCTGATTGGCTTTGTCTACAAGGATTTTGGATTTGTTTATAATGATCAAATT  
ATATCTGGCCTTGTTCCACTTTTCCAGTCATTGTAGATACAATTTCAAATATTGGATTT  
TCCGTTATTTAAATCGCGTATCTCCGTCACTTGTAGTGATTTATCATTCAATGAATGACAT  
GCCTATTGGTGTTCAAAAGTACCTTTTCGAAGTCCTGGAGAGGAAGATGCATCTTGG  
GTTGACATATAACAACCGACTTTATCGAGAACGATTACTTTTTTTTAGGTCAAGAGGTTGAT  
AGCGAGATCTCAAATCAACTTATTGGTCTTATGATATATCTCAGTATCGAGGATGAGACC  
AAAGATCTGTATTTGTTTATAAACTCTCCTGGCGGATGGGTAATACCGGGGGTGGCTCT  
TTATGATACTATGCAATTTGTGCAACCAGATATACATAAATATGCATGGGAGCAGCCGC  
TTCAATGGGATCTTTTATCCTGGTTCGGAGGAGAGATTACCAAACGTCTAGCATTCCCTC  
ACGCCAGGGTAATGATCCATCAACCTGCTGGTCTTTTTTCTGAAGTAGCAACGGGAGA  
ATTCATCCTGGAAGTGGGAGAACTGCTGAAACTGCGTGAAACCCTGACAAGGGTTTAT  
GTACAAAGAACGGGCAAACCCATATGGGTTGTATCCGAAGACATGGAAAGAGATATTT  
TTATGTCAGCAACAGAGGCCCAAGCTTATGGGATTGTTGATCTTGTAGCGGTTGAAATG  
AAAGAACAATAATGGATTGATGAAGGTTTAAATTACTGAATCGCTTCCCAACGGTATGTT  
CCGGGTTTCGTTTAGATAATGAAGATCTGATTCTAGGTTATGTTTCAGGAAAGATCCGAC  
GTAGTTTTATACGGATACTGCCAGGAGATAGAGTCAAAATTGAAGTAAGTCGTTATGAT  
TCAAGCAGAGGTCGTATAATTTATCGACTCCGCAATAAAGATTCAAAGATATGGATAA  
ATCCCAAATCTATTTAGGG---GATAGATCTCAACAACACTACTTCTTATATCCACTTATCT  
TTCAGGAGTATATTTATGTACTTGGCTCATGATCATGGTTTATGACAGGTTATGACAATAAATG  
CAGCTTACTAATTGTGAAACGTTTAAATCATTTCGAATGTATCAACAGAAC-----CTTTTT  
GTTAATGATTCTAAACAGACTCCATTTGTGGGGGAAAATTTTTATTTCGCAAGTAATGTC  
AGAGGTTTCTTCAATCATTATGGAAATTCATTTGTCTCTGCGATTAATATCTTCCCTAGTA  
GTTAAATCCAATAATTTACGATCAATTCATTCAATATTTCTTTTTTAGAGGACAACTTTT  
CACATTTAAATTATGTATTAGATATACTAATACCTTACCCAGCCCATCTGGAAATCTTGGT  
TCAGGCTCTTCGCTATTGGATAAAAGATGCTTCCCTCTTTCGATTTATTAAGATTCTTCTC  
CATGAGTGTATAATTTGGGATAGTCTTATTACTAAAGCCAGTTCTTCTTTTTCAAAAAA  
AGACTATCTTATTCCTATATACTTCTCATGTATGTGAATATGAATCTAGCTTCCATTTCT  
CCGTAACCAATCTTCTCACTTACGATCAACATCTTCTGGAGCCCTTATTGAACGAATATA



TTTCTATGGAAAAATGGAGCATCTTGCAGAGGTCTTTGCCAGGGCTTTTAATTTATGGTT  
GTTCAAAGATCCTTTCATGCATTGTGTTAGGTATCAAGGAAAATCAATTATTGCTTCAAA  
AGGGACGTTTATTTTGATGAATAAATGGAAATATTACTTTGTCAATTTCTGGAAATCCCA  
TTTTTACCTGTGGTCTCAACCAGGAAGGATTTATATAAACCAATTATCCAATCATTCCCT  
TGACTTTCTGGGTATCGTTCAAGTGTGCGGCTAAAGCCTTCAATGGTACGCAGTCAAA  
TGTTAGAAAATGCATTTCTAATTGATAATGCTATT-----AAGAAGTTTGATACCCTTGTT  
CAATTATGCCTCTGATTGGATCATTGGCTAAATCTAAATTTTGTAACGCAGTGGGGCGTC  
CTATTGGTAAGGCGATTTGGGCCGATTTCTCAGATTCTGATATTATTGAGCGCTTTGGGC  
GTATATACAGAAATCTTCTCATTATCATAAGTGGATCTTCAAAAAAAAAAGAGTTTGTATC  
GCGTAAAGTATATACTTCGACTTTCTTGTGCTAGAACTTTAGCTCGTAAGCATAAAAGTA  
CTGTACGTGCTTTTTTGAAAAGATTAGGTTGCGGAATTATTGGAAGAATTCTTTACGGAA  
GAAGAACAAGTTTTTTCCTTGACCTTTCCAAGACGGATTTGGTATTTGGATATTATTGT  
ATCAATGATTGGCCAATCATGAAATGATAATTGAT---ACAACAGAAGTACAA--GCTAT  
CAATTCTTTTTCTAGATTGGAATCC---TTAAAAGAGGTCTATGGGATCATATGGATGCTTA  
TCCCTATTTTACTCTTGTATTAGGAATCACAATAGGTGTACTAGTAATTGTTTGGTTAG  
AAAGAGAAATATCCGCGGGTATACAACAACGATTGGTCCTGAATACGCAGGACCATTG  
GGAATTCTACAAGCTCTAGCAGATGGTACCAAATTACTTTTCAAAGAGAATCTTCTTCC  
ATCTAGAGGAGATACTCGTTTATTAGTATTGGACCATCTATAGCAGTCATATCAATTTTA  
TTAAGTTATTTAGTAATTCCTTTTTGGTTATCACCTTGTTCTAGCCGATCTCAGTATCGGTG  
TTTTTTTATGGATTGCTATTTCAAGTATTGCTCCTGTGCGCCTTCTTATGTCAGGATATGG  
CTCAAATAATAAATATTCTTTTTTAGGTGGTCTAAGAGCTGCTGCTCAATCAATTAGTTAT  
GAAATACCATTAACTCTATGTGTGTTATCAATATCTCTACTATCTAACAGTTCAAGTACA  
GTTGATATAGTTGAAGCGCAGTCAAAATATGGTTTTTGGGGATGGAATTTGTGGCGTCA  
ACCTATAGGGTTTTCTGGTTTTTCTAATTTCTTCCCTAGCCGAGTGTGAACGATTACCTTT  
TGATTTACCAGAAGCAGAAGAAGATTAGTAGCGGGTTATCAAACCGAATATTCCGGTA  
TAAAATTCGGTTTATTTTACGTTGCTTCATACTTAAATCTACTAGTTTCTTCATTATTTGTA  
ACAGTTCTTTACTTGGGGGGTTGGAATCTTCTATTCCGTACATATTTGTTCCCTGAGCTT  
TTTGAAATACTAAAAAGGGTAGAGTCTTTGGAACAATAATTGGTATCTTTATTACATTA  
GCTAAAACCTATTTGTTCTTGTTCATTTCTATCGCAACAAGATGGACTTTACCGAGGCTG  
AGAATGGACCAATTATTAATCTTGGATGGAAATTTCTTTTACCTATTTCTCTAGGTAATT  
TATTATTAACAACCTTCTTCCCACTTCTTTCACTGATGATCTGGCATGTACAGAATGAAA  
ACTTCATTCTCGATTCTACGAGAATTTTTATGAAAGCCTTTCATTTGCTTCTCTTCGATG  
GAAGTTTGATTTTCCAGAAATGTATCCTAATTTTTGGCCTAATTTCTTCTGATGATCGA  
TTCAACCTCTGATCAAAAAGATATACCTTGGTTATATTTTATCTCTTCAACAAGTTTAGT  
AATGAGCATAACGGCTCTATTGTTCCGATGGAGAGAGGAACCTATGATTAGCTTTTTCGG  
GAAATTTCCAAACGAACAATTTCAACGAAATCTTTCAATTTCTTATTTTACTATGTTCAA  
CTCTATGTATTCTCTATCCGTAGAGTACATTGAATGTACAGAAATGGCTATAACAGAGT  
TTCTCTTATTCTGATTAACAGCTACTCTAGGAGGAATGTTTTTATGCGGTGCTAACGATTT  
AATAACTATCTTTGTAGCTCCAGAATGTTTCAGTTTATGCTCCTACCTATTATCTGGATAT  
ACCAAGAAAGATGTACGGTCTAATGAGGCTACTATGAAATATTTACTCATGGGTGGGGC  
AAGCTCTTCTATTCTGGTTTCATGTTTCTCTTGGCTATATGGTTCATCCGGGGGAGAGAT  
CGAGCTTCAAGAAATAGTGAATGGTCTTATCAATACACAAATGTATAACTCCCAGGAA  
TTTCAATTGCGCTCATATTCATCACTGTAGGAATTGGGTTCAAGCTTTCCCAGCCCCTT  
CTCATCAATGGACTCCTGACGTATACGAAGGATCTCCCACTCCAGTCGTTGCTTTTCTTT

CTGTTACTTCGAAAGTAGCTGCTTCAGCTTCAGCCACTCGAATTTTCGATATTCCTTTTT  
ATTTCTCATCAAACGAATGGCATCTTCTTCTGGAAATCCTAGCTATTCTTAGCATGATATT  
GGGGAATCTCATTGCTATTACTCAAACAAGCATGAAACGTATGCTTGCATATTCGTCCAT  
AGGTCAAATCGGATATGTAATTATTGGAATAATTGTTGGAGACTCAAATGATGGATATGC  
AAGCATGATAACTTATATGCTGTTCTATATCTGCATGAATCTAGGAACTTTTGCTTGCATT  
GTCTTATTTGGTCTACGTACCGGAACTGAGAACATTCGAGATTATGCAGGATTATACAC  
GAAGGATCCTTTTTTTGGCTCTCTCTTTAGCCCTATGTCTCTTATCCCTAGGAGGTCTTCC  
TCCACTAGCAGGTTTTTTTCGGAAAACCTATTATTCTGGTGTGGGTGGCAGGCAGGCC  
TATATTTCTTGGTTTTAATAGGACTCCTTACAAGCGTTGTTTCTATCTACTATTATCTAAA  
AATAATCAAGTTATTAATGACTGGACGAAACCAAGAAATAACCCCTCACGTGCGAAATT  
ATAGAAGATCCCTTTAAGATCAAACAATTCCATCGAATTGAGTATGATTGTATGTGTGA  
TAGCATCTACTATAACCAGGAATATCAATGAATCCGATTATTGCAATTGCTCAGGATACCC  
TTTTTATGTTTCTGCTTTACGAATATGATATTTTTTGGGCATTTCTGATAATATCAAGTCTT  
ATTCCTATTTTGGTATTTTTTCATTTCCGGATTTTTTAGCTCCGATTAGCAAAGGGCCGGAG  
AAACTTTCTAGTTATGAATCGGGTATAGAACCAATAGGCGACGCTTGGTTACAATTTAG  
AATCCGCTATTATATGTTTGTCTTTGTTTTTGTGTTTTTGTATGTTGAAACGGTTTTTCTT  
TATCCATGGGCAATGAGTTTTCGATGTATTAGGTGTATCTGTATTTGTAGAAGCTTTAATTT  
TCGTGCTTATCTTAATTGTTGGTTAGTTTATGCATGGCGAAAGGGGGCATTGGAATGGT  
CTACGAACAACCTTTCCTTGGTTAACAATAATTGTAGTTTTACCAATATTTGCGGGTTCCT  
TAATTTTCTTTCTTCCACATAAAGGAAATAGGACAATTAGATGGTATACTATATGTATATG  
TATGTTAGAACTTCTTCTAACAACCTATGCATTCTGTTATCATTTTTCAATTTGACGATCCA  
TTAATACAATTAGTAGAGGACTATAAATGGATCAGTTTTTTTCGATTTCCGTTGGAAATTG  
GGAATAGATGGACTGTCTATAGGACCCGTTTTATTAACAGGATTATCACTACTTTAGCT  
ACTTTAGCGGCCTGGCCTGTTACTCGGGATTCTCGATTATTCCATTTCTTGATGTTAGCA  
ATGTACAGTGGTCAAATAGGATCATTTTCTTCTCGGGACCTTTTACTTTTTTTCATCATGT  
GGGAATTAGAATTAATTCCGGTTTATCTACTTCTATGCATGTGGGGAGGAAAGAAACGT  
CTCTACTCAGCCACAAAATTTATTTTGTACACGGCGGGAGGTTCCATTTTTCTTTTAATG  
GGAGTTCTGGGTGTGGGTTATATGGTTCTAATGAACCAACATTAATTTTTGAAACATC  
AGTTAATCAGTCGTATCCTGTGGCTTTGGAAATAATATCTATATTGGATTTTTTATTGCT  
TTTGCTGTCAAATTACCTATTCTACCCCTACATACATGGTTACCAGATACCCACGGAGAG  
GCACATTACGTACTIONTGTATGCTTCTAGCCGGAATTTTATTAATAAATGGGAGCGTATGGA  
TTGATTCGGATTAATATGGAATTATTACCACACGCTCATTCTATATTTTCTCCTTGGTTGA  
TGATAGTAGGCACAATACAAATAATCTATGCAGCTTCAACATCTCCCGGCCAACGTAAT  
TTAAAAAAAAGAATAGCCTATTCCTCGGTATCTCATATGGGTTTCATACTTATAGGAATT  
GCTTCTATAACCGATACGGGACTCAATGGAGCTATTTTACAAATAATATCTCATGGCTTTA  
TTGGTGCTGCACTTTTTTTCTTGGCAGGAACAAGTTATGATAGAATACGTCTTGTTTATC  
TCGACGAAATGGGCGGAGTAGCTATCCCATGCCAAAATATTTACGATGTTACAGTAGC  
TTTTCCATGGCTTCCCTTGCATTACCGGTATGAGTGGTTTTTGTGTCAGAAGTGATAGTC  
TTTTTAGGAATAATTACCAGCCAAAATATCTTTTAATGCCAAAATTGCCATCACTTTT  
GTAATGGCAATTGGAATGATATTAACTCCTATTTATTTATTTATCTATGTCACGGCAGATGT  
TCTATGGATACAAGTTATTTAATACTCCAAACTCTTTTGTTTTTTGTATTCTGGACCGCGC  
AGTTATTTGTTTCTATCTCCATTTTTCTACCTGTAATAGGTATTGGTCTGTATCCCGATTTT  
GTTCTTTCACTATCAGTTGACAAGGTTGAAGGTATTCTATCTAATTTTTTATAGAATGA  
TGCTCGAACATGTACTTGTTTTGTAGTGCCTATTTATTTTTCTGTGCGTCTATATGGATTGAT

TACAAGTCGAAATATGGTTAGGGCTCTTATGTGTCTTGAACCTTATATTAATGCGGTAA  
TCTCAATTTTGTAACATTTTCTGATTTTTTTGATAGTCGTCAATTAAGGAGCCATTTTC  
TCCATTTTTGTTATAGCTATTGCAGCTGCTGAAGCCGCTATTGGACTCGCTATTGTTTCAT  
CAATTTATCGTAACAGAAAATCAACTCGTATAAATCAATCAAATTTGTTGAATAAGATGG  
AACAGATATATCAATATGCGTGGATAATACCTTTTCTTCCACTTCCAGTTCCTATGTTAAT  
AGGGTTGGGACTTCTTCTTTTTCCGACGGCAACAAAAAGTCTTCGTCGTATGTGGGCTT  
TTCAAAGCATTTTATTGTTAAGTATAGTCATGATTTTTTCCATGAATCTTCTATTTCAGCA  
AATAAATAGCAGTCTGTCTATCAATATGTATGGTCTTGGATTATCAATAATGATTTTTCT  
TTAGAATTCGGATACTTGATTGATCCACTTACTTCTATTATGTCAATATTAATCACTACTG  
TTGGAATTATGGTTCTTATTTATAGTGATAATTATATGTCTCATGATCACGGATATTTGAGA  
TTTTTTGCTTATATGAGTTTTTTTAGTACTTCCATGTTAGGATTAGTTACTAGTTCTAATTT  
GATACAAATTTATATTTTTTTGGGAATTAGTTGGGGTATGTTTCATATCTATTAATAGGGTTTT  
GGTTCACACGACCTGTTGCAGCAAAGGCTTGTCAAAAAGCGTTTGTAACATAATCGTGT  
GGGCGATTTTGGTTTATTATTAGGCATTTTAGGGTTTTATTGGGTAACGGGGAGTTTCGA  
ATTTTCGTGATTTATTCCAAATATTCAATAACAATGAAGTCAATTTTGTATTTGTTACTTTG  
TGCCTGTTCTATTATTTGCTGGTGCCATTGCTAAATCTGCACAATTTCCCCTTCATGTAT  
GGTTACCTGATGCAATGGAAGGGCCGACTCCTATTTCCGCTCTTATACATGCTGCTACGA  
TGGTAGCAGCGGGAATTTTTCTTGTAGCTCGGCTTATGCCTCTTTTCATAGTCATACCCC  
ACATAATGAATTTTATCTCTTTGATAGGGATAATAACAGTTTTTTTTAGGAGCCACTTTAG  
CTCTTGCTCAAAAAGACATTAAGAGGGGTTTAGCCTATTCCACAATGTCTCAATTGGGT  
TATATGATGTTAGCTCTAGGTATGGGGTCGTATCGCAGTGCTTTATTTCAATTTGATTACTC  
ATGCTTATTCTAAAGCATTATTGTTTTTAGGATCGGGATCCGTTATTCATTCAATGGAAC  
TCTTGTTGGATATTGTCCAAAAAAGTCAGAATATGGTGCTTATGGGAGGTTTAACAA  
AACATGTACCAATTAATAAAAATTCTTTTTTATTAGGTACACTTTCTCTTTGCGGTATTCC  
ACCCTTTGCTTGTTTTTGGTCCAAAGATGAAATTCTTAATGATAGTTGGTTGTATTACC  
TATTTTTGCAATAATAGCTTGGTCTACGGCGGGATTAACCGCATTTTATATGTTTCGGATC  
TATTTACTTACTTTTGAAGGACATTTAAACGTTCAATTTTCAAATACAGTGGA AAAAG  
GAATACACCATTTTATTCAATATCTCTATGGGGTAAAGAAGGTTCAAAAAAAGTAACA  
AA---TTGGTAACTTTATTA AAAATGAAGTTTTTTTTCATTTGACAATATAAAA ACTTCTTTG  
TATCCTTATGAATCGGATAATACTATGTTATTTCCAATACTTATATTAATTTCTATTTACTTTG  
TTTTGTTGGATTTTTAGGAATTCCTTTC---ATGGATATATTATCCAAATGGTAAACCCCTTCT  
ATAAATCTTTTACATAAAAATTCAAAC---TCAATAGATTGGTATGAATTTTGTAAGATGC  
AGTTTTTTTCGGTTAGTATAGCCTCTTTTCGGAATATTTATAGCATTTTTTTTTATATCAACCTG  
TTTATTCATCTTTTCAAATTTGGACTTAATTAATTCATTTGTTAATTTTTCTGACAAAAT  
AAAAATGCTATATATGATTGGTCATATAATCGAGGTTACATAGATGCCTTTTATGGAACA  
TTCTTAATTGCGGGGATGAGAAAATTAGCCGAATTCACTCATTTTTTTGATAGACGAATA  
ATTGATGGAATTCCAAATGGAGTTGGTCTTATGAGTTTCTTTGTAGCAGAGGTTATTA  
TCAGTAGGCGGTGGT---CGTATTTCTTCTTATCTGTTCTTTTATTTTTCTTATGTATTAATG  
TTCTTATTAATTTACTACATGGATTTACCTGGACTAATACATGATTTTCTTTTAGTCTTTCT  
GGGATTGGGTCTTATATTAGGGAGTCTAGGAGTAGTATTACTTCCCAATCCTAATTTATTCT  
GCCTTTTCATGGGATTGGTTTTTTGTTTGTATATCTTTATTCTATATTTCTCTCGAACTCCCA  
TTTTGTAGCTGCTGCGCAGCTCCTTATTTACGTAGGAGCCATAAATGTTTTAATCATTTTT  
GCTGTGATGTTCAAAATGGTTCAGAATATTCCAAAGATTTCCAGCTTTGGACCGTGGG  
AGATGGAGTAACTTCCGTGGTCTGTACAAGTATTTTTTTTTTCACTAATTACTACTATTCC

AGATACGTCATGGTACGGGATTATTTGGACTACAAAAGCAAACCAGATTATAGAGCAAG  
ATCTGATAAGTAATAGTCAACAAATTGGGATTCATTTATCAACAGATTTTTTTCTTCCGT  
TTGAATTTATTTCAATAATTCCTTTAGTTGCGTTAATCGGGCGCAATTGCTGTAGCTCGTCA  
AATGACTGTACCA---GCTAGAAAAGACCTCATGATAGTCAATATGGGACCTCACCACCC  
ATCAATGCATGGTGTCTTCGACTCATTGTTACTCTAGATGGTGAAGATGTTATTGACTG  
TGAACCAATATTGGGTTATTTACACAGAGGTATGGAAAAAATTGCGGAAAATCGAACA  
ATTATACAATATTTGCCTTATGTAACACGTTGGGATTATTTAGCTACTATGTTTACAGAAG  
CAATAACTGTAAATGGGCCAGAGCAATTAGGCAATATTC AAGTCCCTAAAAGGGCCAG  
TTATATCAGAGTCATTATGTTGGAGTTAAGTCGTATAGCTTCGCATTTGTTATGGCTTGGC  
CCTTTTATGGCAGATATTGGGGCACAGACTCCCTTCTTCTATATTTTTCGAGAAAGAGAA  
TTGATATATGACCTATTCGAAGCTGCCACCGGTATGCGAATGATGCACAATTTTTTTTCGT  
ATTGGCGGAGTCGCTGCTGATTTACCTCATGGCTGGATAGATAAATGTTTGGATTTTTGC  
GATTATTTTTTAAACAGGAATTGCTGAATATCAAAAAGCTTATTACACGGAATCCCATTTTT  
TTAGAACGAGTTGAAGGAGTAGGCATTATTGGTGGAGAGGAAGCAATAAATTGGGGTT  
TGTCGGGACCAATGCTACGAGCTTCCGGAATACAATGGGATCTTCGTAAAGTTGATCAT  
TATGAGTGTACGACGAATTTGATTGGGAAATCCAATGGCAAAAAGAGGGGGATTCATT  
AGCTCGTTATTTAGTACGAATCAGTGAATGACAGAATCCATAAAAATTATTCAACAGG  
CCCTAGAAGGAATCCTGGAGGGCCATATGAAAATTTAGAAATACGCCGCTTTGATAGA  
GTAAAAGATACTGTATGGAATGAGTTTACTATCGATTCATTAGTAAAAAACCTTCTCC  
GACTTTTGAATTGTCGAAACAAGAACTTTATACGAGAGTCGAAGCACCAAAGGGAGA  
ATTGGGAATTTTTCTGATAGGAGATAAGGGTGTTTTTCTTGGCGATATAAAATTCGTCC  
CCCGGGGTTTATTAATTTGCAAATCCTTCTCAGTTAGTTAAAGGAATGAAATTGGCTGA  
TATTATGACGATATTAGGTAGTATAGATATCATTATGGGAGAAGTTGATCGTATGTTCCCT  
ATGGTAACGGAGTTCATGAATTATGGACAACAAACAGTACGAGCCGCAAGGTATATTG  
GTCAAGGTTTCATGATTACCTTATCACACCGGAATCGTTTACCTGTAAC TATTCAATACC  
CCTACGAAAAATTGATCACATCCGAGCGTTTCCGCGGCCGAATCCACTTTGAATTTGAT  
AAATGCATTGCTTGTGAAGTATGTGTTTCGTGTATGTCCTATAGATTTGCCCGTTGTTGAT  
TGGAAATTGGAAACTGATATTAGAAAGAAACGATTGCTTAATTACAGTATTGATTTTGG  
AATATGTATATTTTGTGGTAATTGCGTTGAGTATTGTCCAACAAATTGTTTATCAATGACT  
GAAGAATATGAACTTTCTACTTATGATCGTACGAATTGAATTATAATCAAATTGCTTTG  
GGTCGTTTACCAATGTCAGTAATTGACGATTACACAATTCGAACAATTTTAAATTTG-----  
-----ATGCAGGGCAATTTATCTGCTTGGCTAGTTAAGCATGG  
CCTAATTCATAGATCTTTGGGCTTTGATTACCAAGGAATAGAGACTTTACAAATAAAAC  
CCGGGGATTGGCATTCCATTGCTGTCAATTTATATGTATATGGTTACAATTATCTCCGCTC  
ACAATGTGCCTATGATGTAGCACCAGGCGGACTATTAGCTAGTGTGTATCATCTTACTAG  
AATAGAGTATGGCGTGGATCAACCAGAAGAGGTATGCATAAAAAGTATTTGCCCCGAGG  
GGGGATCCTAGAATTCCGTCTGTTTTCTGGGTTTGGAAAAGTGTGGATTTTCAAGAACG  
GGAATCTTATGATATGTTGGGAATCTCTTATGATAATCATCCGCGTTTAAAACGTATCTTA  
ATGCCTGAAAGTTGGATAGGATGGCCTTTACGTAAGGATTATATTGCTCCCAATTTTTAT  
GAAATACAAGATGCTCAT-----  
-----ATGAATTCCAT  
TGAGTTTCCCTTATTTTATCGAACAACACAAAATTCAGTTATTTCAACTACATTAATGA  
TCTTTCAAATGGTCAAGACTCTCTAGTTTATGGCCGCTTCTCTATGGTACCAGTTGTTG  
CTTCATTGAATTTGCTTACTAATAGGCTCACGATTGACTTTGATCGTTATGGACTAGT

ACCAAGATCGAGTCCTAGACAAGCGGACCTTATTTTAAACAGCCGGAACAGTAACAATG  
AAAATGGCCCCCTCCTTAGTGAGATTATACGAGCAAATGCCTGAACCAAATATGTTAT  
TGCTATGGGAGCATGTACAATTACAGGGGGGATGTTTCAGTACCGATTCTTATAGTACTGT  
TCGTGGAGTTGATAAGCTAATTCCTGTGGATGTCTATTTGCCGGGCTGTCCACCTAAAC  
CAGAAGCAATTATAGATGCTATAACAAAACCTTCGTAAGAAAATATCTCGAGAAATCTAT  
CCAGATAGAATTCTATTTTCAGCGAGAGAATCGGTGTTTTACTACCAATCACAAGTTTCA  
GGTTGGGCATAGTATTCATACTGGAAATTATGATCAAGGATTCTTTTATCAACCGCCATC  
TACCTCAGAGATTCTCTGAAACATTTTTCAAATACAAAAGTTTCAGTATCTTCCCACG  
AATTAGTAAATATGCAAACCTAGAAATACTTTTTCTTGGATAAAGGAACAGATTACTCGAT  
CTATTTCCGTATCGCTCATGATATATATCATAACTCGTACATCCATTTCAAATGCATATCCC  
ATTTTTGCACAGCAGGGTTATGAAAATCCACGAGAAGCGACTGGACGTATTGTATGCGC  
CAATTGCCATTTAGCTAATAAACCGGTTCGATATTGAGGTTCCGCAAGCGGTACTTCCCG  
ATACTGTATTTGAAGCAGTTGTTTCGAATTCCTTATGATATGCAACTAAAACAAGTTCTTG  
CTAATGGTAAAAAAGGGGCTTTGAATGTGGGGGCTGTTCTTATTTTACCAGAGGGTTTT  
GAATTAGCCCCTCCCGATCGTATTTCCCCCGAGATAAAAGAAAAGATGGGCAATCTGTC  
TTTTTCAGAGCTACCGCCCCAATCAAAAAAATATTTCTTGTCATAGGCCCTGTTCTGGTC  
AGAAATATAGTGAAATAACCTTTCTTATCTTTCCCCCGACCCCGCTACTAAGAAAGAC  
ATTCACTTCTTAAATATCCTATTTACGTAGGCGGAAACAGGGGAAGGGGCCAGATTTA  
TCCTGACGGGAGCAAGAGTAACAATACAGTTTATAATGCTACAGCATCTGGTATAGTAA  
GCAAAATCCTACGAAAAGAAAAGGGGGGATACGAAATAACCATAGCGGATACATCGGA  
TGGACGTCAAGTGGTTGATATTATCCCTCGGGGGCCAGAACTTCTTATTTTCAGAAGGCG  
AATCTATCAAATTGGATCAACCGTTGACAAGTAATCCTAATGTGGGCGGATTTGGTCAG  
GGAGATGCAGAAATAGTACTTCAAGATCCATTACGTGTACAAGGCCTTTTGTCTTCTT  
CGCATCTGTTATTTTGGCACAAATCTTTTTGGTTCTTAAAAAGAAACAGTTCGAGAAGG  
TTCAATTGTCCGAAATGAATTTTCATGAGTAAAGTCTATGATTGGTTTGAAGAGCGTCTC  
GAGATTCAGGCGATTGCAGATGATATAACTAGTAAATATGTTCCCTCCTCACGTAAACATA  
TTTTATTGTCTGGGGGAATTACGCTTACTTGTTTTTTAGTACAAGTGGCTACAGGATTT  
GCTATGACCTTTTACTATCGTCCGACCGTACTGATGCTTTTGCTTCTGTCAATACATAA  
TGACTGAAGCTAATTTTGGTTGGTTAATCCGATCCGTTTCATCGATGGTCGGCAAGTATGA  
TGGTCCTAATGATGATCCTACATGTATTTTCGTGTATATCTTACCGGTGGATTTAAAAAACC  
TCGCGAATTAACCTGGGTTACAGGTGTGGTTCTGGCTGTATTGACTGCATCTTTTGGTGT  
AACTGGTTATTCCTTACCTCGGGACCAATTGGTTATTGGGCAGTGAAAATTGTAACAG  
GTGTACCTGACGCTATTCCTGTAATAGGATCACCTTTGGTAGAATTATTGCGCGGAAGT  
GCTAGTGTGGGGCAATCCACCTTGACTCGTTTTTATAGTTTACATACTTTTGTATTGCCG  
CTTCTTACTGCCGTATTTAATGTTAATGCACTTCCCAATGATACGTAAACAAGGTATTTCTG  
GTCCTTTAATGGGAGTGACAAAAAACCTGACTTGAATGATCCTGTATTAAGAGCTAAA  
TTGGCTAAAGGTATGGGTCATAATTATTACGGGGAGCCCGCATGGCCAATGATCTTTTA  
TATATTTTTCCGGTAGTAATTTCTAGGTAATTTGCATGTAACGTAGGCTTAGCGGTTCTAG  
AACCATCAATGATTGGTGAACCCGCAGATCCTTTTGCAACTCCTTTGGAAATATTACCC  
GAATGGTATTTCTTTCCCGTATTTCAAATACTTCGTACAGTACCCAATAAATTATTGGGTG  
TTCTTTTAATGGTTTCAGTACCCGCGGGATTATTAACAGTACCTTTTTTAGAGAATGTTA  
ATAAATCCAAAATCCGTTTCGTTCGTCCAGTAGCGACAACCGTATTTTTGATTGGTACC  
GCAGTGGCTCTTTGGTTGGGTATTGGTGCAACATTACCTATTGATAAATCCCTAACTTTG  
GGTCTTTTTATGATTGAAGTTTTTCTATTTGGAATCGTGTTAGGTCTAATTCCTATTACTT

TGTCTGGATTATTTGTAAGTGCATATTTACAATACAGGCGCGGCGATCAGTTGGACCTTA  
TGCCTACTATAACTAGTTATTTTCGGTTTTCTACTAACGGCTTTAACTATAACCTCAGCTCT  
ATTTATTGGTCTGAGCAAGATACGACTTATTATGGATATAGTAAGTCTCGCTTGGGCTGC  
TTAATGGTAGTCTTTACATTTTCTCTTTCACTCGTAGTATGGGGAAGAAGTGGACTTAT  
GATTATTCGTTTCGCCGAACCAGAAGTAAAAATTTGGTAGATAGGGATCACATAAAAA  
CTTCATTCGAGGAATGGGCTAGACCGGGTCATTTCTCAAGAACAATAGCTAAAGGCC  
TGAAACTACCACTTGGATCTGGAACCTACATGCTGATGCTCACGATTTTCGATAGCCATA  
CCAGTGATTTGGAGGAGATCTCTCGAAAAGTATTTAGTGCGCATTTTCGGTCAACTCTCC  
ATCATCTTCTTTGGCTGAGTGGCATGTATTTCCACGGTGCTCGTTTTTCCAATTATGAA  
GCGTGGCTAAGCGATCCAACCTCACATTGGGCCTAGTGCCAGGTGGTTTTGGCCAATAG  
TGGGCCAAGAAATATTGAATGGTGATGTGGGCGGGGGCTTCGAGGAATACAAATAAC  
CTCTGGTTTTTTTCAGCTTTGGCGAGCATCTGGAATAACTAGCGAATTACAACCTCTATTG  
TACCGCAATTGGTGCATTGGTCTTTGCAGCATTAAATGCTTTTTGCTGGTTGGTTTCATTA  
TCATAAAGCTGCCCAAAACTGGCTTGGTTTTCAAGATGTAGAATCTATGTTGAATCACC  
ATTTAGCGGGGCTACTAGGGCTTGGGTCTCTCTCTTTGGGCGGGGCATCAAGTACATGTA  
TCTTTACCGATTAACCAATTTCTAAATGCTGGAGTAGATCCTAAAGAAATACCACTTCT  
CATGAATTTATCTTGAATCGGGATCTTTTGGCTCAACTTTATCCAGTTTTGCTGAGGGA  
GCAACCCCATTTTTACCTTGAATTGGTCAAAATATGCGGACTTTCTTACTTTTTCGTGGA  
GGATTAGACCCAGTAACTGGAGGTCTATGGCTAAGTGATACTGCACACCATCATTAGC  
TATTGCAATTTCTTTTTCTGATAGCGGGTCACATGTATAGGACCAACTGGGGCATTGGTCA  
TGGTCTAAAAGATATTTTAGAAGCTCATAAAGGTCCATTTACGGGCCAGGGTCATAAAG  
GCCTATATGAGATCCTAACAACGTCATGGCATGCTCAATTATCTCTTAACCTAGCTATGTT  
AGGCTCTTTAACCATTTGTTGATGCTCACCATATGTATGCCATGCCGCTTATCCATATTA  
GCTACTGACTATGGTACACAACCTGTCATTGTTACACACCATATGTGGATTGGTGGATTT  
CTCATAGTTGGGGCTGCTGCGCATGCAGCCATTTTTATGGTAAGAGACTATGATCCAAC  
ACTCGATACAACGATCTATTAGATCGTGTCTTAGACATCGCGATGCAATCATATCACAT  
CTCAACTGGGCATGTATATTTTTAGGCTTTCACAGTTTTGGTTTTGTATATTCATAATGATA  
CCATGAGCGCTTTAGGGCGTCTCAAGATATGTTTTAGATACCGCTATCCAATTACAAC  
CCGTCTTTGCTCAATGGATACAAAACACCCACGCTTTAGCACCTGGTGCAACGGCTCC  
TGGTGAACAGCAAGCACGAGTTAACTTGGGGAGGCGGTGATTTAGTAGCAGTGGG  
CGGCAAGGTAGCTTTGTTACCTATTCCATTAGGAACCGCGGATTTTTTGGTACATCACAT  
TCATGCATTTACCATTATGTGACGGTATTGATACTTCTGAAAGGCGTTCTATTTGCTCGT  
AGCTCCCGTTTTGATACCGGATAAAGCAAATCTTGGGTTTTCGTTTTCTTGTGATGGACC  
TGGAAGGGGGGAACATGTCAAGTATCGGCTTGGGACCATGTCTTCTTAGGACTATTCT  
GGATGTACAATGCAATTTTCAGTAGTCATATTTCAATTCAGTTGGAAAATGCAGTCAGATG  
TTTGGGGCAGTATAAGCGATCAAGGAGTAGTAACCTCATATCACGGGAGGAACTTTGC  
GCAGAGTTCTATTACTATTAATGGGTGGCTCCGCGATTTCTTATGGGCACAGGCATCCCA  
GGTAATTCAGTCTTATGGTTCTTCATTATCCGCATATGGCCTTTTTTTTCTAGGTGCTCAT  
TTTGTATGGGCTTTTAGTTTAATGTTTTTATTAGTGGACGTGGTTATTGGCAAGAACTT  
ATTGAATCCATCGTTTGGGCTCATAATAAATTAAGTTGCTCCTGCTACCCAGCCGAG  
AGCCTTAAGCATTGTACAAGGACGTGCTGTAGGAGTAACCCATTACCTTCTGGGTGGAA  
TTGCCACAACATGGGCGTTCTTCTTAGCAAGAATTATTGCAGTAGGAATGGCATTAAAGA  
TTTCCAAGGTTTAGCCAAGGCTTAGCTCAGGACCCCACTACTCGTCGATTTGGTTTTGG  
TATTGCTACCGCGCATGACTTCGAGAGTCATGATGATTAATGAGGAACGTCTTTATCA

GAATATTTTTGCTTCTCACTTCGGGCAATTAGCAATAATTTTTCTGTGGACTTCCGGAAA  
TCTCTTTCATGTAGCTTGGCAAGGAAATTTGAGTCATGGGTACAGGACCCTTTACATG  
TAAGACCTATTGCTCATGCAATTTGGGATCCTCATTTTGGTCAACCGGCTGTAGAAGCT  
TTTACTCGAGGGGGTGTCTTTGGCCCAGTGAATATCGCCTATTCCGGTGTATCAGTG  
GTGGTATAACAATAGGTTTACGAACTAATGAAGATCTCTATACTGGAGCTCTTTTTCTATTA  
TTTATTTCTGCCATATCTTTAATAGCGGGTTGGTTACACCTACAACCAAAATGGAAACCG  
AGTGTTTCTTGGTTCAAAAATGCTGAATCTCGTCTAAATCATCATTATCAGGACTCTTC  
GGCGTAAGTTCCTTGGCTTGGACAGGGCATTAGTGCATGTCGCTATTCTGCATCCAG  
AGGGGAGTACGTTTCGATGGAATAATTTCTTAGATGTATTACCACATCCCCAAGGGTTGA  
GCCACTTTTTACAGGTCAGTGAATCTTTATGCTCAAATCCCGATTCAAGTAGTCATT  
TATTTGGTACCTCTCAAGGAGCAGGAACTGCCATTTTAACCCTTCTCGGGGGATTCCAT  
CCACAAACCCAAAGTTTATGGCTGACTGATATGGCTCATCATCATTAGCTATTGCATTT  
GTTTTTCTCATTGCTGGGCATATGTATAGAATAATTTGGGATTGGGCACAGTATGAAA  
GATCTTTTAGATGCACATATCCCTCCGGGAGGGCGCTTGGGACGTGGGCATAAGGGCCT  
TTATGACACAATTAATAATTCTATTCATTTTCAATTAGGCCTTGTCTAGCTTCTTTAGGG  
GTTATTACTTCTTTGGTAGCTCAACACATGTACTCTTTACCCGCTTATGCATTTATAGCAC  
AAGACTTTACTACTCAAGCTGCGTTATATACTCATCACCAATATATCGCAGGATTCATCAT  
GACAGGGGGCTTTTGCTCATGGAGCTATAATTTTTTATTAGGGATTACAATCCGGAACAGAA  
TGAGGATAATGTATTGGCAAGAATGTTAGAACATAAAGAAGCTATAATATCTCATTAAAG  
TTGGGCTAGCCTATTTTTGGGTTTCCATACCCTGGGACTTTATGTTCCATAATGATGTCATG  
CTTGCCTTTGGTACTCCGGAGAAGCAAATCTTAATCGAACCTATATTTGCTCAATGGATA  
CAATCTGCTCATGGTAAAACCTTCATATGGATTTCGATATACTTTTATCTTCAACGAATGGC  
CCAGCATTCAATGCGGGCCGAAGCATATGGTTACCAGGTTGGTTAAATGCTATTAATGA  
G-----AATAGTAATTCACTATTCTTAACAATAGGTCCTGGAGACTTTTTAGTTCATCATGC  
TATTGCTCTGGGTTTACATACAACACTACGTTGATCTTAGTAAAAGGTGCATTAGATGCACG  
TGGTTCCAAGTTAATGCCAGATAAAAAGGATTTTGGTTATAGTTTTCCGTGCGATGGCC  
CAGGACGAGGCGGTACTTGTGATATTTTCGGCTTGGGACGCATTTTATTTGGCAGTTTTT  
TGGATGTTAAATACCATTGGATGGGTTACTTTTTATTGGCATTGGAAACACATTACATTAT  
GGCAGGGTAATGTTTCGCAGTTAATGAATCTTCCACTTATTTGATGGGCTGGTTAAGA  
GATTATTTATGGTTAAACTCTTCACAACCTATTAATGGATATAATCCTTTTTGGTATGAATA  
GCTTATCAGTCTGGGCATGGATGTTTTTATTGGACATCTTGTTTGGGCTACTGGATTTAT  
GTTTTTAATTTCTGCGTGGATATTGGCAGGAATTGATTGAAACTTTAGCATGGGCTCA  
TGAACGCACACCTTTGGCCAATTTGATTCGTTGGAGAGATAAACCGGTGGCACTTTCA  
ATTGTACAAGCAAGATTGGTTGGATTAGCCACTTTTCTGTAGGTTATATATTTACTTATG  
CAGCTTTCTTGATTGCCTCTACATCAGGGAAATTTGGTATGTCGCATTACAGTAAAGATTT  
ATGATACATGTATCGGGTGTACTCAATGTGTCCGAGCCTGTCCCACGGATGTATTAGAAA  
TGATACCATGGGACGGATGTAAAGCCAAACAAATAGCTTCGGCTCCAAGAACAGAGGA  
TTGTGTCGGTTGTAAGAGATGTGAATCCGCCTGCCAACAGATTTCTTGAGTGTTCGAG  
TTTATTTATGGCATGAAACCACCCGCAGCATGGGTATAGCTTATATGACAACCTTAACT  
TTCCCTCTGTTTTGGTCCCTTTAGTAGGCCTAGTATTTCCGGCAATCGCAATGGCTTCTT  
TATTTCTTCATGTTCAAAAAACAAGATTGTTATGCGAGATCTAAAAACATACCTTTCCG  
TGGCACCGGTACTAAGTACTCTATGGTTCGCTTCTTTGGCAGGTTTATTGATAGAGATTA  
ATCGTTTTTTCCCGGATGCGTTGACGTTCCCTTTTTTTTCATTTCATGACTGCAATTTTAG  
AGAGACGCGAAAGCGAAAGCCTATGGGGTTCGCTTCTGTAACCTGGATAACCAGCACCG

AAAACCGTCTTTACATTGGATGGTTTGGTGTTTTGATGATCCCTACCTTATTGACCGCAA  
CTTCTGTATTTATTATCGCCTTCATTGCTGCTCCTCCAGTAGATATTGATGGTATTCGTGA  
ACCTGTTTCTGGATCTCTACTTTATGGAAACAATATTATTTCTGGTGCCATTATTCCTACT  
TCTGCAGCTATAGGTTTGCATTTTTACCCAATCTGGGAAGCAGCATCCGTTGATGAATG  
GTTATACAATGGTGGTCCTTATGAACTAATTGTTCTACACTTCTTACTTGGTGTAGCTTG  
TTACATGGGTCGTGAGTGGGAGCTTAGTTTCCGTCGGGTATGCGACCTTGGATTGCTG  
TTGCATATTCAGCTCCTGTTGCAGCTGCAACTGCTGTTTTCTTGATCTACCCAATTGGTC  
AAGGAAGCTTTTCTGATGGTATGCCTCTAGGAATTTCTGGTACTTTCAACTTCATGATTG  
TATTCAGGCTGAGCACAACATCCTTATGCACCCATTTACATGCTGGGCGTAGCTGGT  
GTATTCGGCGGCTCCCTATTTAGTGCTATGCATGGTTCCTTGGTAACCTCTAGTTTGATC  
AGGGAAACAACAGAAAATGAATCTGCTAATGAAGGTTACAGATTCGGTCAAGAAGAA  
GAAACTTATAATATCGTAGCCGCTCATGGTTATTTTGGCCGATTGATCTTCCAATATGCTA  
GTTTCAACAACCTCTCGTTCTTTACATTTCTTCCCTAGCTGCTTGGCCTGTAGTAGGTATCT  
GGTTCAGTCTTTAGGTATCAGCACTATGGCTTTCAACCTAAATGGTTTCAATTTCAACC  
AATCAGTAGTTGATAGTCAAGGTCGTGTAATTAACACTTGGGCTGATATCATTAAACCGT  
GCTAACCTTGGTATGGAAGTTATGCATGAACGTAATGCTCATAATTTCCCTCTAGACTTA  
GCTGCTATTGAAGCTCCATCTACAAATGGAATGGGTTTGCCTTGGTATCGTGTTCATACC  
GTTGTATTGAATGATCCCGGACGGTTGCTTGCTGTTTCATATAATGCATACGGCTTTGGTT  
GCTGGTTGGGCCGGTTCGATGGCTCTGTATGAATTAGCAGTTTTTGATCCTTCTGACCC  
TGTTCTTGATCCAATGTGGAGACAGGGTATGTTTCGTTATACCCTTCATGACTCGTTTAGG  
AATAACCAATTCATGGGGCGGTTGGAGTATCACG---GGGGGACTATAACGAATCCAGG  
TATTTGGAGTTACGAAGGTGTGGCTGGAGCGCATATTGTGTTTTCTGGGTTGTGCTTTTT  
GGCAGCTATCTGGCATTGGGTGTATTGGGATCTAGAAATATTTAGTGATGAACGTACAG  
GAAAACCTTCTTTGGATTGCCCCAAGATCTTTGGAATACACTTATTTCTTGCAGGTGTG  
GCTTGCTTCGGTTTTGGTGCATTTTCATGTAACAGGCTTGTATGGTCCTGGCATATGGGTG  
TCCGATCCTTATGGGCTAACAGGAAAAGTACAATCTGTAAATCCATTGTGGGGTGTGGA  
AGGTTTTGATCCTTTTGTTCGGGAGGAATAGCCTCTCATCATATTGCGGCAGGGACTT  
TGGGCATATTAGCGGGCTTATTCCATCTTAGCGTCCGGCCGCCCAACGTCTATACAAA  
GGATTGCGTATGGGCAATATTGAACTGTTCTTTCCAGTAGTATCGCTGCTGTCTTTTTT  
GCAGCTTTTGTGTTGCCGGAACCTATGTGGTATGGTTCAGCGACTACCCCATCGAATT  
ATTTGGTCTACTCGTTATCAATGGGATCAAGGGTATTTCCAACAAGAAATATATAGAAG  
AGTTAGTGCTGGGTTAGCGGAAAATCAAAGTTTATCAGAAGCTTGGTCTAAAATTCCTG  
AAAAATTAGCCTTTTATGATTACATCGGAAATAATCCGGCAAAAAGGGGGATTATTCAGG  
GCGGGCTCAATGGATAGCGGGGATGGAATAGCGGTTGGATGGTTAGGACATCCAATCTT  
TAGAGATAAAGAAGGACATGAACTTTTTGTACGTCGTATGCCTACCTTTTTTTGAAACAT  
TTCCGGTCGTTTTGGTAGACGGAGACGGGATTGTTAGAGCCGATGTTCCTTTTTCGAAG  
GGCAGAATCTAAATATAGTGTCGAACAAGTAGGTGTAACCTGTTGAGTTCATGGTGGTG  
AACTCAATGGAGTCAATTATAGTGATCCTGTTACTGTCAAAAAATATGCTAGGCGCGCC  
CAATTGGGGGAAATTTTTGAATTAGATCGTGCTACTTTGAAATCCGACGGTGTTTTTCGT  
AGCAGTCCAAGGGGTTGGTTTACTTTTTGGACATGCTTCATTTGCTTTGCTCTTCTTCTC  
GGACACATTTGGCATGGTGCTCGAACCTTGTTTAGAGATGTTTTTGCTGGTATTGACCC  
AGATTTGGATGCTCAAGTAGAATTTGGAGCATTCCAAAACTTGGAGATCCAACACTACA  
AGAAGACAAGTAGTCATGAAAACCTTATATTCCTGAGGAGGTTCTACCCCGTGGAAA  
CGCTCTTTAATGGAACCTTAGCTTTAGCTGGTCGTGACCAAGAAACCACCGTTTTCGCT



TGGTGGGCCCGGAATGCCCGGCTTATCAATTTATCCGGTAAACTACTAGGGGCTCATGT  
AGCCCATGCCGGATTAATCGTATTCTGGGCCGGAGCAATGAATCTATTTGAAGTAGCTC  
ATTTTCGTACCAGAGAAGCCTATGTATGAACAAGGATTAATTTTACTTCCCCACCTAGCTA  
CTCTAGGTTGGGGGGTAGGTCCTGGTGGGGAAGTTATAGATACTTTTCCATACTTTGTAT  
CTGGAGTACTTCATTTAATTTCTCTGCAGTATTGGGCTTTGGCGGTATTTATCATGCACT  
TTTAGGACCTGAGACGCTTGAAGAATCTTTTCCATTCTTCGGTTATGTATGGAAAGATA  
GAAATAAAATGACCACAATTTTAGGTATTCACCTAATCTTGTAGGTATAGGTGCTTTTC  
TTCTAGTATTCAAAGCTCTTTATTTTGGGGGCGTATATGATACTTGGGCTCCGGGAGGAG  
GAGATGTAAGAAAAATCACCAACTTGACGCTTAGCCCAAGTATCATATTTGGTTATTTA  
CTAAAATCGCCCTTTGGCGGGGAAGGATGGATTGTTAGTGTAGACGATTTGGAAGATAT  
AATCGGAGGCCATGTATGGTTAGGTTCCATTTGTATACTTGGTGGAATTTGGCATATCCT  
AACCAAACCCTTCGCATGGGCTCGACGCGCACTTGTATGGTCTGGAGAGGCTTACTTAT  
CTTATAGTTTAGCGGCTATATCTGTCTTTGGTTTCATTGCTTGTGTTTTGTCTGGTTCAA  
TAATACAGCTTATCCTAGTGAGTTTTACGGACCCACTGGACCAGAAGCTTCTCAAGCTC  
AAGCATTACTTTTTCTAGTTAGAGACCAACGTCTTGGAGCTAACGTTGGATCCGCTCAA  
GGGCCTACCGGTTTAGGTAAATATTTAATGCGTTCCCCAACCGGAGAAGTCATTTTTGG  
AGGAGAAACTATGCGTTTTTGGGATCTGCGTGCTCCTTGGTTAGAACCTCTAAGGGGTC  
CAAACGGGTTGGACTTGAGTCGGCTGAAAAAAGACATAAACCTTGGCAAGAACGCC  
GTTCCGCAGAATATATGACTCATGCTCCTTTAGGTTCTTTAAATCCGTGGGTGGAGTAG  
CTACCGAGATCAATGCAGTCAATTATGTGTCTCCTAGAAAGTTGGTTATCTACTTCTCATT  
TTGTTCTAGGATTCTTCTTCTTCGTAGGGCATTGTGGCACGCAGGAAGGGCTCGTGCA  
GCTGCAGCAGGATTTGAAAAGGAATTGATCGTGATTTTGAACCTGTTCTTTCCATGAC  
CCCTCTTAATATGACTATAGCCCTTGGTAAATTTACCAAAGACGAAAATGATTTGTTTGA  
TATTATGGATGACTGGTTACGTAGGGACCGTTTCGTTTTTGTAGGCTGGTCCGGCCTATT  
GCTCTTTCCTTGTGCCTATTTTCGCTGTAGGGGGTGGTTACGGGTACAACCTTTGTAA  
CTTCATGGTATACCCATGGATTGGCCAGTTCCTACTTGGAAAGGCTGCAACTTCTTAACT  
GCCGCAGTTTCAACTCCTGCTAATAGTTTAGCACATTCTTTGTTATTATTATGGGGTCCT  
GAAGCACAAGGAGATTTTACTCGTTGGTGTCAATTAGGCGGTTTGTGGACTTTTGTGTC  
TCTCCACGGTGCTTTCGGATTAATAGGTTTCATGTTACGTCAATTTGAACTTGCTCGATC  
TGTTCAATTGCGACCTTATAACGCAATCGCATTCTCTGGTCCAATTGCCGTTTTTGTTC  
TGTATTCTTGATTTATCCATTAGGTCAGTCTGGTTGGTTCTTTGCGCCTAGTTTTGGTGTA  
GCAGCTATATTTGATTTATCCTCTTTTTTCAAGGATTTCATAACTGGACATTGAACCCAT  
TTCATATGATGGGAGTTGCGGGTGTATTGGGGGCTGCTTTGCTATGCGCTATTCATGGTG  
CTACCGTAGAAAATACTTTATTTGAAGATGGTGATGGCGCAAATACATTCCGTGCTTTTA  
ACCAAACCTCAAGCTGAAGAACTTATTCAATGGTCAACCGCTAATCGCTTTTGGTCCCAA  
ATCTTTGGGGTTGCTTTTTCCAATAACGTTGGTTACATTTCTTTATGTTATTTGTACCAG  
TAACTGGTTTATGGATGAGTGCTCTTGGAGTAGTCGTTTTGGCCTTGAACCTACGTGCC  
TATGATTTGTTTTCTCAGGAAATTCGCGCGGCGGAAGATCCTGAATTTGAGACTTTCTA  
CACCAAAAATATTCTCTTAAACGAAGGTATTCGTGCTTGGATGGCGGCTCAAGATCAGC  
CTCATGAAAACCTTATATTCCCTGAGGAGGTTCTACCCCGTGGAAACGCTCTTATGTCT  
GGAAGCACAGGAGAACGTTCTTTTGTCTGATATTATTACCAGTATTCGCTACTGGGTCAAT  
CATAGCATTACTATACCTTCCCTATTCATTGCGGGTTGGTTATTCGTCAGCACTGGTTTAG  
CTTACGATGTGTTTGGAAAGCCCTCGGCCAAACGAATATTTACAGAGAACCGACAAGG  
AATCCATTAATACCGGCCGTTTTGATTCTTTGGAACAACCTCGATGAATTTAGTAGATC

TTTTATGACCATAGATCGAACCTATCCAATTTTTACAGTGCGATGGTTGGCTGTTACCG  
CCTAGCTGTACCTACCGTTTCTTTTTGGGGTCAATATCAGCAATGCAGTTCATAACA  
AATGGCTACACAACTGTTGAGAACGGTCTAGATCTGCT--CCAAGACGAACTAACGT  
CGGGAGTTTATTAACCCCTTGAATTCGGAATATGGTAAAGTAGCTCCTGGGTGGGAA  
CGACCCCTTTGATGGGTGTCGCAATGGCTCTTTTTGCGGTATTTCTATCTATTATTTGGA  
GATTTATAATTCTCCGTTTATTGGATGGAATTTCAATGAATATGCTTACTCTCAA  
TTTCGTTTACACAGTAGTAATATCTTTGTTTCTCTCTTCATCTTTGGCTTCTATCCA  
ATCCAGGACGTAATCCAGGACGTGAAGAAATGGCCGATACTACTGGAAGAATTCCTCT  
TTGGATAATAGGTACTGTAGCTGGTATTCTTGTGATCGGTTAGTAGGCGTTTTCTTTAT  
GGTTCATATTCCGGATTGGGTTTCATCCCTGATGCTTAATATCTTTAGTTTGATCTGT-----C  
TTAATTCTGCCCTTATCCGAGTAGTCTTTTTCTTCGCCAAATTGCCCGAAGCCTATGCTT  
TTTTGAATCCAATCGTAGATTTTATGCCAGTCATACCCCTGTTCTTTTTCTTTTAGCCTT  
TGTTTGGCAAGCTGCTGTAAGTTTTCGAACGACACAATCAAACCCAAACGAACAAAAT  
GTTGAATTGAATCGTACTAGCCTCTACTGGGGGTATTACTCATTTTTGTACTTGCTGTT  
TTATTTCCAATTATTCTTCAATATGGAAGTAAATATTCTTGCATTTATTGCTACTGCACT  
GTCATTTTAGTTCCCTACTGCTTTTCTACTTATAATTTACGTAAAAACAGTCAGTCAAAA  
CAATATGGAAATAGCAACCCTAGTCGCCATCTTTATATCTGGTTTACTTGTAAGTTTACT  
GGGTACGCCTTATATACCGCTTTTGGGCAACCTTCTCAACAATAAGAGATCCATTGGA  
GGAACATGGGGACATGGAAGCATTGGTTTATACATTCTCTTAGTCTCGACTCTAGGGA  
TCATTTTTTTTCGCTATCTTTTTTAGAGAACCCCGAAAATTTCAACTAAAAA-----ATGA  
CTCTTGCTTTCCAATTGGCTGTTTTTGCATTAATTGCCACTTCATCAATCTTATTGATTAG  
CGTACCCGTTGTATTTGCTTCTCCAGATGGTTGGTCAAGTAACAAAAATGTTGTATTTTC  
TGGTACATCATTATGGATTGGATTAGTCTTTCTGGTGGGTATCCTTAATTCTCTTATCTCT-  
-----ATGTCACCACAAACAGAGACTAAAGCGAGTGTTGGATTCAAAGCTGGT  
GTAAAGATTATAAATTGACTTATTATACTCCTGATTATGAAACCAAGGATACTGATATCT  
TGGCAGCATTTCGAGTAACTCCTCAACCAGGAGTTCCGCCTGAAGAAGCAGGGGCGG  
CAGTAGCTGCCGAATCTTCTACTGGTACATGGACAACCTGTGTGGACCGATGGACTTACG  
AGCCTTGATCGTTACAAAGGCCGATGCTATGGAATCGAGCCTGTTCTGGAGAAGAAA  
ATCAATTTATTGCTTATGTAGCTTACCCATTAGACCTTTTTGAAGAAGGTTCTGTTACTA  
ACATGTTTACTTCCATTGTAGGTAATGTATTTGGGTTCAAAGCCCTGCGTGCTCTACGTC  
TGGAAGATTTGCGAATCCCTAAGGCGTATGTTAAAACCTTCGACGGTCCACCTCACGGT  
ATCCAAGTTGAAAGAGATAAATTGAACAAGTATGGTCGTCCTCTATTGGGATGTACTATT  
AAACCTAAATTGGGTCTATCCGCTAAAACTACGGTAGAGCTGTTTATGAGTGTCTTCG  
TGGTGGCCTTGATTTTACTAAAGATGATGAAAACGTGAACTCCCAACCATTTATGCGTT  
GGAGAGACCGTTTCTTATTTTGTGCCGAAGCTATTTATAAATCACAAGCTGAAACAGGT  
GAAATCAAAGGGCATTACTTGAATGCTACTGCGGGTACATGCGAAGATATGATGAAAA  
GGGCTATATTTGCCAGAGAATTGGGAGTTCCTATCGTAATGCATGACTACCTAACAGGG  
GGATTCAGTCAAATACTAGCTTGTCTCATTATTGCCGAGATAATGGCCTACTTCTTCAC  
ATCCACCGCGCAATGCATGCAGTTATTGATAGACAGAAGAATCATGGTATGCACTTTCG  
TGTAAGCTAAAGCGTTACGTATGTCTGGTGGAGATCATATTCATCCGGTACCGTAGT  
AGGTAAACTTGAAGGGGAAAGAGAGATCACTTTGGGATTTGTTGATTTACTGCGCGAT  
GATTTTATTCCAAAAGATCGAGCTCGCGGTATTTATTTACCCAAGATTGGGTCTCTTA  
CCAGGTGTTCTGCCAGTAGCTTCAGGTGGTATTCACGTTTGGCATATGCCTGCTCTGAC  
CGAGATCTTTGGGGATGACTCCGTACTACAGTTCGGTGGAGGAACTTTAGGGCACCT

TGGGGTAATGCACCTGGTGCCGTAGCTAATCGAGTAGCTCTAGAAGCATGTGTACAAG  
CTCGTAATGAGGGACGCGATCTTGCTACTGAGGGTAATGAGATTATCCGCGAGGCTGCC  
AAATGGAGTCTGAAGTAGCTGCTGCTTGTGAAGTATGGAAGGAGATCAAATTTGAGT  
TTCAGGCAATGGATACTTTGGATGGGATGGCGATACATTTATACAAACTTCTACCCCG  
AGCACACGCAATGGAACCGTAGACAGTCAAGTGAAATCCAATTCACGAAATAATTTGA  
TCTATGGACAGCATCATTGTGGTAAAGGTCGTAATGCCAGAGGAATCATTACCGCAGGG  
CATAGAGGGGGAGGTCATAAGCGTCTATAACCGTAAAATAGATTTTCGACGGAATGAAA  
AAGACATATATGGTAGAATCGTAACCATAGAATACGACCCGAATCGAAATGCATACATTT  
GTCTCATACTATAGGGATGGTGAGAAGAGATATATTTTACATCCAGGGGGGCTATAA  
TTGGAGATACCATTGTTTCTGGTACAGAAGTTCCTATAAAAATGGGAAATGCCCTACCT  
TTGACCGATATGCCCTTAGGCACGGCCATACATAACATAGAAATCACACTTGGAAGGG  
TGGACAATTAGCTAGAGCAGCGGGTGCTGTAGCGAAACTGATTGCAAAAAGAAGGGAA  
ATCGGCCACATAAAATTACCTTCTGGGGAGGTCCGTTTGATATCCAAAACTGCTCAG  
CAACAGTCGGACAAGTGGGGAATGTTGGGGTGAACCAGAAAAGTTTGGGTAGAGCCG  
GATCTAAGCGTTGGCTAGGTAAGCGCCCTGTAGTAAGAGGAGTAGTTATGAACCCCGT  
AGACCATCCACATGGGGGTGGTGAAGGGAGGGCCCAATTGGTAGAAAAAAACCCAC  
AACCCCTTGGGGTTATCCTGCACTTGGAAAAAGAAGTAGAAAAAGGAATAAATATAGT  
GATAATTTGATTCTTCGTCGCCGTAGTAAAATGATTCAACCTCAGACCTATTTGAATGTA  
GCAGATAACAGTGGGGCTCGACAATTGATGTGTATTTCGAATCATAGGAGCTAGC---AAT  
CGTCGATATGCTCATATTGGTGACGTTATTGTTGCTGTGATCAAAGACGCAGTTCCAAA  
CATGCCTCTAGAAAGATCAGAAGTGGTCAGAGCTGTAATTGTCCGTACTTGTAAGAA  
CTTAAACGTGACAACGGTATGATAATACGATATGATGACAATGCTGCAGTTGTGATTGAT  
CAAGAAGGAAATCCAAAAGGAACTCGAGTTTTTGGTGCGATTGCGCGAGAATTGAGA  
CAGTTCAATTTTACTAAAATAGTTTCATTAGCTCCCGAGGTATTAAACTATAACCCCAA  
AGAACCAGATTCCGTAAACAACATAGAGGAAGAATGAAGGGAATATCCTCTCGAGGTA  
ATGCTATTTGTTTTGGTAAATACGCTCTTCAGGCACTTGAACCCGCTTGATCACATCTA  
GACAAATAGAAGCAGGTCGACGAGCAATGACACGAAATGCACGTCGCGGTGGA AAAA  
TATGGGTCCGTATATTTCCGGATAAACCGGTTACAGTAAGACCCGCAGAAACACGTATG  
GGTTCAGGTAAAGGCTCTCCCGAATATTGGGTAGCTGTTGTTAAACCAGGTCGAATCCT  
TTATGAAATGGGTGGAGTAACAGAAAATATAGCCAGAAGGGCTATTTCAATAGCAGCGT  
CCAAAATGCCTATACGAGCTCAATTCATCATTTTCGGGAATGACCAGAATTAGACGGGGA  
TATATCGCTCGGAGACGTAGAACAAAAATTCGTTTATTTGCATCAAGCTTTCGGGGGGC  
TCATTCAAGACTTACTCGAACTTACTCAACAAAAAATAAGAGCTTTGGTTTCGGCTC  
ATCGGGATAGGGATAAGCAAAAAATCAATTTTCGTCGTTTGTGGATTACTCGAATAAAT  
GCAGCAATTCGTGAA---AGGGGGGTATGCTATAGTTATAGTAGATTAATAAATGATCTGT  
ACAAGAGACAGTTGCTTCTTAATCGTAAATACTTGCACAAATAGCTATATCAAATAGG  
AATTGTCTTTATATGATTTCCAATGAGATCATAAAGAAGTAAGT-----ATG  
TTAAATGAAGTATACGCTTTAGGTCAACATATATCTATGTCTGCTCACAAAGCGCGAAG  
AGTAATTGATCAAATTCGTGGGCGTTCCTACGAAGAAACACTTATGATATTAGA ACTCA  
TGCCTTATCGAGCATGTTATCCATTTTTAAATTAGTTTATTCTGCAGCAGCAAATGCTA  
GTTTCAATATGGGCTCGAATGAAGCAAATTTAGTCATTAGTAAAGCCGAAGTAAATGAA  
GGTAGTATCGTGAAGAGATCAAACCCCGCGCTCGAGGGCGTAGTTTTGCGATACAAA  
AACCTACCTGCCATATAACTGTTGTAATGAAAGATATATCCTTAGATGGGGGAGCATGGG  
ACAAAAAATGGATGGAATCAGGTATGCAGTATTTACAGACAAAAGTATTCGGTTATTG

GGGAAAAAT---CAATATACTTCTAATGTCTGAATCAGGATCAACTAGGACAGAAATAAAG  
CATTGGGTCTGAACCTCTTCTTTGGTGTCAAGGTAATCGCGATGAATAGTCATCGACTTCG  
GGGAAAGGCTAGAAGAATGGGACCCATTATGGGACAGACAATGCATTACAGACGTATG  
ATCATTACGCTTCAACCAGGTTATTCTATTCCACCTCTTAGAAAAGAAAAGAACTATGGC  
AGTTCCAAAAAACGTACTIONTTCGATATCAAAAAAGCGTATCCGTAAAAATATTTGGAAA  
AGGAAAGGATATTTGGCAGCGTTAAAAGCTTTGTTCATTAGGGAAATCTCTTTCTACCGG  
GAATTCAAAAAGTTTTTTTTGTACGACAAACAAATAAGATGGCCAAGGGTAAAGATGTG  
CGAATACCGGTTCTTTTGGAAATGTACCGCTGTGTTTCGAAACGGT-----GTTAATAAGGA  
ATCAACGGGCATTTCAGATATATTACTCAAAAGAACCGGCACAATACGCCTAATCGAT  
TGGAGTTGCTAAAATTCTGTCCATATTGTTACAAGCATAACGATTCACGGGGAGATAAAG  
AAAATGAAAATAAGAGCTTCTGTTCGTAATAATTTGTGAAAAATGTGCGACTAATCCGTCG  
TCGGGGACGAATTATAGTAATTTGTTCCAACCCAAGACATAAACAAAGACAAGGAATG  
GTTTCGAGAGAAAATCACAGTACTACTCGGACACTACAGTGGAAGTGTGTTGAATCAG  
CAGCAGACAGTAAGCGTCTTTTTTATGGGCGCTTTATTCTGTCTCCGCTTATGAAAGGT  
CAAGCAGACACAATAGGCATTGCGATGCGAAGAGCTTTGCTTGGAGAAATCGAAGGA  
ACATGTATCACATGCGCAAAATCTGAG-----AAAATATCACACGAATATTCTACGATAATG  
GGTATTCAAGAATCAGTACATGAAATTTAATGAATTTGAAAGAAATCGTATTGAGAAG  
TAATCTCTATGGAACCTGTGAGGCGTCTATTTGTGTCAGGGGCCCTGGATATGTAAGTGC  
TCAAGATATAATATTACCGCCTTATGTAGAAATCGTCGATAATACACAGCATATAGCTAGT  
TTGACGGAACCCATTGAGTTGGTTATTGGATTACAAATAGAGAAGAATCGCGGATATCT  
TATAAAAGCGCCAAAT--ACCTTTGATGGAAGTTAT-----CCTATAGATCCTGTATTTCATGC  
CTGTTTCGAAATGCGAATCATAGTATTCACTTATGAAAATGGTAAC-----AAAGAGATAC  
TATTTCTCGAAATATGGACAAATGGAAGTTAACGCCTAAAGAAGCACTTCATGAAGCC  
TCCCGGAATTTGATTGATTTATTGATTCCCTTTTTACATACCAAAGAAGAA-----AATTTA  
AATTTAGAGGACAATCAA---CACATGGTTCCCTTTACCCCCTTTTACCTTTTATGAGAAAT  
TGGCT--AACTAACAAAAAAAAAAAAAAAA---AAAATGGCGTTGAAATCGATTTTTATTGA  
CCAATCAGAATTGCCTCCAGGATCTATAATTGCCTCAAAGGTCCAATATATATACATT  
GTTGGACCTTTTGAATAACAGTCAAGAAGATCTTATGAAAATGGAGCATTTCGCATAG  
AAGATGTCAAACAAATTTTAGGGGTTCTAGAAAAAAT-----TTCGTAATCGATTTACCG  
AAAAATCAG-----ATGTCCACAATACCTGGATTTAATCAGATACAATTTG  
AAGGATTTTGTAGGTTCAATTGATCGGGGTTTACAGAGAAGAACTTTCTAAGTTTCCAAA  
ATTGAAGATACAAATCAAGAAATTGACTTTGAATTATTTTGGAAAGATATCAATTGGTA  
GAACCCCTGATAAAAGAAAGAGATGCTGTGTATGAATCACTCACGTATTTCTTGAATT  
ATATGTATCCGCGAGACTCATTGGAATAATCGTAGGTATATCCAAGAACAACAATTT  
TGATAGGAAAGATTCCTCTAATGACTTCTCTGGGAGCTTTTATAGTAAATGGAATATATA  
GAATTGTTATCAATCAAATATTGCAAAGTCCCGGTATTTATTACCAGTCAGAATTGAACG  
ATAACGGAATTTTCGGTCTATACCGGCACCATAATATCAGATTGGGGAGGAAGATTAGAA  
TTAGAGATTGATAGAAAAGCAAGGATATGGGTTTCGTGTGAGTAGGCAACAAAACTAT  
CTATTCTAGTTCTATTATCAGCTATGGGGTTGAATATAAGAGAAATCTAGAGAATGTTT  
GTTATCCTGAACTATTTTTGTCTTTTCTGAATGATAAA-----AAAAAATAGGGTCAAAA  
GAAAATGCTATTTTGGAAATTTTATCAACAATTTGCTTGTGTAGAGGGAGATCCGGTATTT  
TCTGAATCCTTATCTAAGGATTTACAAAAAAATTTCTTTCAACAAGATGTGAATTGGG  
AGGGATTGGTTCGACGAAATATGAATCGAAGGCTCAACCTTGATATACCCCAAAATAATA  
CATTTTTGTTACCGCGAGATATATTGGCAGCCGCGGATCGTTTGATTTCGAATCAAATTTG





AAAACAAGTCATTTATGGATATTATTAGGGGAGCCCTGGAGA-----TCCAGTCTAGGACC  
CTGTTTCGATCCACAAGGATCAAGATCAAATGAACGCTTAT-----TCTCTTTCTGTTAAGC  
GAAGATATATTTCTAACCCCTCA-----GTAACATAATAATCAA---GCGAGACACAAATTTTT  
TAGTTCGTATTTTTCTGGTAAAAATGGAGATTGGATTCCCGATTAT--TCAGAACTTAATA  
GAATGACATGTACTGGTCGTTGTAAT-----CCG---GCCATTCTCGAGGGGAATTCT-----  
GATTTATTGGCGAAGAGGGCGAAGAAATAGAGTCATCATCCCACTCGAATCGCTTCAAG  
AAGGCGAGAACCAACTAATACCTTCTTCAGGTATCTCAATTGAAATCCCC-----AGAAAT  
GGTATTCTGCGTAGAAATAGTATTCTTGCTTATTTTCGATGATCCTCGATATATAAGAAAGA  
GCTCGGGACTTACTAAATATGAGACTAGAGAACTTAATTCAATCGTCAACGAAGAGGAT  
-----TTGATTGAGTATCGAGGA---GTCAAGGTATTTTGGCCAAAATACAAGGAAGTAAAT  
CCATTTTTTTTTTATCCCGTGGAAAGTTCACATTTTGGCCGAATCTTCGTCCATAATGGTA  
CGGCACAATAGTATTATTGGGGTAGATACGCAAATCACTTTAAATAGAAGAAGTAGGGT  
AGGCGGATTGGTTCGAGTCAAGAAAAAAGCAGAAAAAATTAACCTGATAATCTTTTCC  
GGAGATATCCATTTTCTGGAAAGACAAATAAGGCATTCCGA-----TTGATACCACC  
AGGAGGC-----GGAAAACAAAATTACAAAGAATACAAAAA-----TTGAAAATTGGCT  
CTATATCCAACGA-----ATGAAACTTTCCAGGTATGAAAAAAATATTTTGTTTGGTTCA  
ACCTGTAGTCCCATATAAAAAACGGACAGTATAAATTTAGGA---CTTTTCCCGCCGGAT  
CTCTTGCAAGAAAGTGATAATCTACAACCTCGAGTTGTCAATTATATCCTTTATTACGAC  
CCA-----ATTCTTGAAATTTGGGACACAAGTATTCAATTAGTTCGGACTTGTTTAGTGTT  
GAATTGGGACCAAGACAAAAA-----ATCGAAAAGGCCTGTGCTTCCTTTGTT  
GAAATAAGGACAAATGGTTTGATTAGAGATTTCTAAGAATCGACTTAGCAAAGTCAC  
CTATTTTCGTATACCGGAAAAAGGAACGATCTGTTCGGGTGCAGGATTGATCTCTGAG---A  
ATGGATCAGATCGCGCGAATGTCAATCCGTTTTCTTCCATTCAATCCTATTCC-----AAG  
ACAAGCATTCAAGAATCCATTAATCCAAATCAAGGGACTATTACATCGTTGTTGAATCG  
A-----ATAAGGAATCTCAATCTTTGATAATTTGTCATCATCCAATTGTTTTCGAATAG  
GTCCA-----TTCAATGATGTAATAATCTCCAATGTA-----ATAAAAGAATCA---CCCCTA  
ATTCCAATTAGTAATTCGTTGGGCCCTTAGGAACA-----GGCTTTCCAATTTCTAATTTG  
GATTTA-----TTTTCCATTTA-----ATAACCCATAATCAGATCTTA---CTAACGAACTATTT  
GCAACTTGACAATTTAAAA-----CAGAGTTTTCAAATACTTAAA-----TATTATTTACT  
GGATGAAAAA-----GGTAAAATTTATAATCCCTATTTCATGCAGTAACATTATTTGAATCC  
ATTCAATTTGAATTTGTTATTTTATCCATTACAATTATTGTGAAGAGACATCT---ACAATTG  
TTAGTCTTGGGCAGTTTCTTTGTGAAAATGTATGTATAGCCAAAAAAGGACCGCAT--TT  
CAAA-----TCGGGTCAAGTTCTAATTCTTCAA---GTTGACTCTGTGGTAATACGATCAGCT  
AAGCCTTATTTGGCTACTCCAGGAGCAACCGTTCATGGACATTATGGGGAAATCCTTTA  
CGAAGGAGATACATTAGTTACATTTATATATGAAAAATCAAGATCTGGTGATATAACGCA  
AGGTCTTCCAAAAGTGGAACAGGTGTTAGAAGTGCGTTCGATTGATTCAATATCGATG  
AATCTCGAAAAGAGGATTGAGACTTGAACAAATGTATAACAAGAATTCTTGGAAATC  
CTTGGACATTCTTGATTGGTGCTGAGCTAACTATAGTGCAAAGTCGTATCTCTTTGGTTA  
ATAAGGTCCAAAAGGTTTATCGCTCTCAGGGGGTGCAGATACACAATAGGCATATAGAA  
ATTATTGTACGTCAAATAACATCAAAGTGTGGTTTCAGAA-----GATGAAATGTCTA  
ATGTTTTTTTTGCCCGGAGAACTAATTGAATTGTTGCGAGCGGAACGAATGGGACGCGC  
TTTGAAGAAGCGATCTGTTACCAAGCCATCTTATTGGGAATAACAAGAGCATCTATGA  
ATACTCAAAGTTTCATATCCGAAGCTAGTTTTCAAGAACTGCTCGAGTTTTAGCAAAA  
GCAGCTCTCCTGGGTTCGTATCGATTGGTTGAAAGGCCTGAAAGAAAACGTTGTTTTGG

GGGGGATGATACCTGTTGGTAGCGGCTTCAAAACACCT--TCAAGCGAACCTAACAACA  
TTCCTAACAAACATTGCC-----TTTGAACCTCAAAAATAAGAATCTATTAGAGGGGGAAATG  
AAA-----GATATTTTGTCTACCACAGAAAATTATTTGATTCTTGCCTTTCAAAGAATTTA  
CATGATCCACAAGAACAATCCTTTTTTAGGATT-----ATGACAAGAAGAT  
ATTGGAACATTAATTTAGAAGAGATGATGGAAGCAGGAGTTCATTTGGACATGGTACT  
AGGAAATGGAATCCTAAAATGGCACCTTATATCTCTGCAAAACGTAAAGGTATTCATATT  
ACAAATCTTACTAGAACTGCTCGTTTTTTATCAGAAGCTTGTGATTTGGTTTTTGATGCA  
GCAAGTAAGGGAAAACAATTCTTAATTGTTGGCACTAAAAATAAAGAAGCTGATTCAG  
TAGCATGGGCTGCAATAAGGGCTCGCTGTCATTATGTTAATAAAAAATGGCTCGGTGGT  
ATGTTAACAAATTGGTCCACTACAGAAACGAGACTTCATAAGTTTAGAGACTTGAGAA  
CCGAACAAAAACAGGGGGACTCAACCGTCTCCGAAAAGAGATGCGGCTATGTTGA  
AAAGACAATTATCTCATTTGCAAACATATCTAGGCGGGATTAATATATGACAGGGTTAC  
CCGATATTGTAATCATCGTTGATCAGCACGAAGAATATACGGCCCTTCAAGAATGTATCA  
CATTGGGAATTCACAATTTGTTTAATCGATACAAATTGTGACCCGGATCTTGACAGATA  
TTTCGATTCCAGCGAATGATGACGCTATATCTTCAATCCGATTAATTCTTAACAAATTAGT  
ATTTGCAATTTGTGAGGGCCGTTCT--GGCTATATAAGAAATCCGATGGGACAAAAATA  
AATCCAATAGGTTTCAGACTTGGTACAAGCCAAGGTCATCATTCCCTTTGGTTTCGCACA  
ACCAAAAAATTATCTGAGGGTCTGCAAGAAGATCAAAAAATAAGAAATTATATCAAG  
AATTATGTACAAAAAATATGAAAACATCTTCTGGC--GTCGAGGGAATTGCACGTATA  
GAGATTCAAAACGAATCGACCTGATCCAAATCATAATCTATATGGGATTTCCAAAATA  
TTAATAGAAAGTCGACCCCGAGGAATC-----GAAGAATTACAGATGAATTTACAAA  
AAGAAATTCATTCTGTAAATAGAAACTTAACATTGCTATCACACGAATTGAAAAACCT  
TATGGAAACCCTAATATTCTTGCAGAATTTATAGCTGGCCAATTAATAAATAGAGTTTCT  
TTTCGCAAAGCAATGAAAAAGGCTATAGAATTAACCTGAACAAGCGGATACAAAGGGAA  
TTCAAGTGCAAATTGCAGGACGTATCGACGGAAAAGAAATTGCGCGTGTGAATGGAT  
CAGAGAAGGTAGGGTTCCACTACAAACCATTTCGAGCTAAAATTGATTATTGTTCTTATA  
CAGTTCGAACAATCTATGGGGTATTAGGCATAAAAATTTGGATATTTATAGACGCGGAAA  
TGTCGCGTTACCGAGGTCCTCGTTTTCAAAAAATACGTCGCCTGGGAGCTTTACCAGG  
GCTAACTAATAAAAGGCCAGAGCTGGAAGTGATCTTAGAAACCAATCGCGTTCCGGG  
AAA---AAATCCAATATCGTATTTCGCCTAGAAGAAAAACAAAATTGCGTTTTTCATTATG  
GTCTTACAGAACGACAATTACTTAAATACGTTTCGTATCGCCGGAAAGGCAAAGGGGTC  
AACAGGTCAGGTTTTACTACAATTGCTTGAATGCGCCTGGATAACATCCTTTTTCGGT  
TGGGTATGGCTCCGACTATTCCGGGAGCTCGCCAATTAGTTAACCATAGACATATTTAG  
TCAATGGTCGTATAGTAGATATACCAAGTTATCGCTGCAAACCCCGAGATACTATTGCGG  
CGAGGGATGAACAAAATCTAAAGCTCTAATTCAAAATTCTCTCGATTATCCCCTAAT-  
--GAGGAATTGCCAAACCATTTGACTCTTCAAGCATTCCA-----TATAAAGGATTAGTCA  
ATCAAATAATAGATAGTAAGTGGGTTGGTTTGAAAATAAATGAATTGTTAGTTGTAGAAT  
ATTATCTCGTCAGACTATGTCACGTCGAGGTACTTCAGAAGAAAAAACTGCAAATCC  
GATCCAATTTATCGTAATCGATTAGTTAACATGTTGGTTAACCGTATTCTGAAACACGGA  
AAAAATCATTGGCTTATCAAATTATCTATCGAGCCGTGAAAAGATTCAACAAAAGAC  
AGAAACAAATCCACTATCTGTTTTACGTCAAGCAATACATGGAGTAACTCCGGGTATAG  
CAGTAAAAGCAAGACGTGTAGGTGGATCGACTCATCAAGTTCCCGTTGAAATAGGATC  
CACACAAGGAAAAGCACTTGCCATTCGTTGGTTATTAGCGGCATCCCGAAAACGTCCG  
GGTCGAAATATGGCTTTCAAATTAAGTTCCGAATTAGTGGATGCTGCCAAAGGGAGTG



GCGATGCCATACGCAAAAGGGAAGAGACTCATAGAATGGCAGAGGCAAATAGAGCTTT  
TGCACATTTTCGTATGGGTAGTGATACTATTGCTGACATAATAACCTCTATACGAAATGC  
CGATATGTATAGAAAAAGCGTGGTTTCGAGTAGCATCGACTAATATCAGCCAAAGTATTG  
TTAAAATACTTTTACGAGAGGGTTTTATCGAAAACGTGAGAAAACATCGAGAAAACAA  
CAAATCTTTTTTGGTTTTAACCCCTACGACATAGAAGG-----AATAGGAAAAGGACTTAT--  
-----CGAAATCTTTTAAATTTAAAACGAATAAGTCGGCCGGGTCTACGAATCTATTCTAA  
CTATCAAAGAATTCCTAGAATTTTAGGTGGAATGGGGGTTGTAATTCTTTCTACCTCTCG  
CGGTATAATGACAGACCGAGAGGCTCGACTAGAAAGAATAGGCGGAGAAATTTTGTGT  
TATATATGGATGGCAAAAGCTATACCGAAAAAGGGTTCACGT-----GGACGTATTGGTTC  
ACGTAAGAGTACACGTAATAACCAAAGGGGGTTATTCATATTCAAGCAAGTTTCAATA  
ATACCATTGTGACTGTTACAGATGTACGGGGGCGAGTGGTTTCTTGGTCTCCGCCGGT  
ACTTGTGGCTTCCGAGGTACAAGAAGAGGGACGCCATTTGCTGCTCAAACCGCAGCG  
GCAAGTGCTATTTCGTGCAGTAGTAGATCAAGGTATGCAACGAGCAGAAGTCATGATTA  
AAGGTCCCGGTCTCGGAAGAGACGCAGCATTACGAGCTATTTCGAGAAAGTGGTATACT  
ATTAACTTTCGTACGGGATGTAACCCCTATGCCACATAATGGCTGTAGACCCCGAAAA  
AAAGACGTGTGATGCCAACAAATTAACAACCTATTAGAAATACAAGACAGCCAATTAG  
AAATGTCACAAAATCCCCCGCGTTTCGGGGATGCCCTCAGCGTCGAGGAACATGTACT  
AGGGTGTATACTATCACCCCAAAAAACCAAACCTCTGCCTTACGTAAAGTTGCCAGAG  
TACGATTAACCTCTGGATTTGAAATCACTGCTTATATACCCGGTATTGGCCATAATTTACA  
AGAACATTCTGTAGTCTTAGTAAGAGGGGGGAGGGTTAAGGATTTACCCGGTGTGAGA  
TATCACATTGTTTCGAGGAACCCTAGATGCTGTTCGGAGTAAAGGATCGTCAACAAGGGC  
GTTCT--AGTGCGTTG-----ATGGCAAAAAAAGTTTGATTTCAGAGGAAAAGAAG  
AGGCAAAAATTGGAACAGAAATATCATTGATTTCGTTCGATCCTCAAAAAAAGAAATAA  
GC-----AAAGTTCAATCGTTGAGTGACAAATGGGAAATTTATGGAAAGTTACAATCCC  
CACCGCGGAATAGTGCACCTACACGTCTTCATCGACGTTGTTTTTCAACTGGAAGGCC  
AAGAGCTAACTATCGAGACTTTGGACTATCCGGACACATACTTCGTGAAATGGTTCATG  
CATGTTTGTGCCAGGGGCGACAAGATCGAGTTGGATGGTAAAAAATTTATTTATTTCA  
ATTAGTTTGCAGAACAAGAAGAAAACAAAGAAAACAGAGGATCTGTTGAATTTCAA  
GTAGTAAGTTTCACCAATAAGATACGGAGACTTACTTCACATCTGGAATTGCACAAAAA  
AGACTATTTATCTCAGAGAGGTCTGCGGAAAATTCGGGAAAACGTCAACGCTTGCTG  
GCTTATTTGTCAAAAAAAGATAGACCGCGTTATAAAGAATTAATAGGGCAGTTGGGTAT  
TCGAGAAAGAAAAACTCCT-----ATGGTAAACTTCGTTTAAACGATGTGGTAGAAAG  
CAA-----CGAATCGTTGCAATTGATGTTTCGATCCCGAAGAGAAGGAAGAGATCTTC  
GGAAAGTGGGTTTTTATGATCCTATCAAGAATCAAACCTTATTTAAACGTTCCCGCGATT  
TCTATTTCTTGAAAGAGGCGCTCAGCCTACAGGAACTGTTTCAGGATATTTTAAAAAAA  
GCAGAGGTTTTTAAGGAACCTTACCCTAATCAAACGAAATACAAT--ATGGATAAATCCA  
AGCGAACTTTTCTTAAATCCAAGCGATCTTTTCGTAGGCGTTTGCCCCGATCCAATCG  
GGGGATCGAATTGATTATAAAAAACATGAGTTTAAATAGTTCGATTTATTAGTGAACAGGG  
AAAAATATTATCTAGACGAGTGAATAGATTGACCTTGAAACAACAACGATTAATTACTAT  
TGCTATAAAGCAAGCTCGTATTTTATCTTTGTTACCTTTTCTTAATAATGATAAA-----CAA  
TTTGAAAGAACTGAGTCGACCACTAGAATCCTAATCTTAGAGCCAGAAAAAGAGTG  
ACACGTTCACTAAAAAAAATCCTTTTGTAGCGAATAATTTATTAATAATAATAATAA  
GCTTAACACAAAAAGCAGAAAAAGAAATAATAAACCTGGTTCGAGGGCATCTACCATT  
ATACCATAATGGTTCGGCCATACTATTGCTATCCATAATGGAAAGGAACATTTACCTATTT



-----ATACCTATGAATTCCATTGGACCCAGAAATGATACATTGGAAGAATCCGTT--G  
GGTCTTCCAATATCAATAGGTTGATTGTTTCG---CTCCTGTATCTTCCAAAAGGAAAAAA  
GATCTATGAGAGTTCTTTCCTGAATCCGAAAGAGAGTACTTGGGTTCTCCCAATAACT--  
-----AAAAAGTGTAGCATGCCTGAATCTAACTGGGGTTCGCGGTGGTGGAGGGACTG  
GATCGGAAAAAAGAGC-----GATTCTAGTTGTAAGATATCTAAT-----GAAACCGTCGC  
CGGAATTGAGATATTATTCAAAGAGAAAGATCTCAA---TATCTGGAGTTTTTTCTTTGTA  
TATTATAGGGAT-----GATCTGATGCGCAAGGACCATGATTGGGAATTGTTTGATCGTCTT  
TCTCTGAGGAAGAGGCAAAATAGAATCAACTTG-----AATTCGGGACCACTATTTCGAAA  
TCTTAGTGAAACACTGGATTTGTTATCTCATGTCTGCTTTTCGTGAAAAAATACCAACC  
GAATCGGAT-----  
-----TTTTTGAG  
GAAC--GTATCGAGAGAGAATTTGATTTGGTTAGACAATGTGTGGTTGGTAAACAAGGA  
TCGG-----TTTTTTCGC-----AAGGTGCGGAATGTATCGTCAAATATTCAATATGATTCC-  
-----ACAAGA-----TCTAGTTTCGTTCAAGTAAGGGATTCTAGCCAATTGAAAGGATCTT  
CT--GATCAATCCAGAGATCATTTTGATTCCATTAGT-----AATGAGGATTCGGAA-----  
-----TATCACACATTGATCCATCAAAGAGAGATTCAACAACATAAAA  
GAAAGATCGATTCTT--CGGGAT-----CCTTCCTTTCTTCAAACGGAAGGAACAGAGATA  
GAATCAAAC-----CGATTCCCGAAA-----TGCCTTTCTGGATATTCC-----TCAATGTCCCG  
GCTATTACG--GAACGTGAGAAGCAGATGATTAATCATCTGCTTACGGAAGAAATCGA  
AGAATTTCTT-----GGGAATCCTACAAGATCCGTTTCGTTCTTTTTTCTCTGACAGATGG----  
--TCAGAACTTCAT--CTGGGTTCGAATCCTACTGAGAGGTCCACTAGAGATCAG-----  
-AAATTGTTGAAGAAACAACAAGATCTTTCT--TTTCTC-----AGGCGATCGGAA-----  
-AATAAAGAAATGGTTAATCTATTCAAGATAATTACGTATTTACAAAAT-----ACCGTCTCA  
ATTCATCTATTTTCATCAGATTCGGGATGTGATATGGTTCCG--AAGGATGAACCGGAT--  
AGGGACAGTTCCAACAAGATTTCAATTCTTGACCAAAAATCCATTTTTTTATTTA-----TTT  
CATCTATTCCATGACCGGAACAGGGGAGGATGCACGTTA-----AACCACGATTTTGAATT  
AGAA-----GAGAGATTTCAAGAAATGGCAGATTTATTCACTCTATCAATAACCGAGCCG--  
-GATCTGGTGTATCATAAGAGATTTGCCTTTTCTATTGATTCCCTATGGATTGGATCCAAAA  
CAA-----TTCTTGAATGGGGTATTCAACTCCAGGTATGAATGGAAAACGACATCTTTATT  
GGTTTTATTGGTTCTACTGCCTATTTTTTAT-----GAAGAGAATGAATCTTTTTTATCGAAGG  
ATCAGAAAAAAAGGGGTCCG--ATCTCCTGCGGGAATGATTTGGAAGAGCCAAAACC  
AAAAATAGTGGTATTTGCTAGCAACAACATAATGGAGGCAGTCAATCAATATAGATTGA  
TCCGAAATCTGATTCAAATCCAACATAGCACCCATAGG-----TACATAAGAAATGTATTG  
AATCGATTCTTTTTAATGAAT-----AGATCCGATCGCAACTTCGAATATGGA-----ATT  
CAAAGGGATCAAATAGGAAAGGATACTCTGAATCATCGAACTCTAATGAAATATACGAT  
CAACCAACATTTATCGAATTTGAAAAAG--AGTCAGAAGAGATGGTTTCGACCCTCTT---  
--CTTTTTTTTTCTCGAACCGAGAGATCCATGAATCGGGATCCTGATGCATATAGATACAA  
ATGGTCCACTGGGAGCAATAATTTCCAGGAACATTTGGAACATTTCTGTTTCTGAGCAGA  
AGAGCCGT-----TTTCAAGTAGTGTTCGATCGATTACGTATTAATCCATATTCGATTGAT  
TGGTCTGAGGTTATCAACAAAAAAGATTTGTCTAAGCCACTTCGTTTCTTTTTGTCCAA  
G-----TTGCTTCTTTTTTTGTCTAAC--TC  
ACTTCCTTTTTTGTGTTGTCAGTTTCGGGAATATCCCATTTCAGAGGTCCGAG--ATCTAC  
ATCTAT--GAATTGAAAGGTCCGAATGAT-----CCACAGTTTTTAGAATCAATAGGTCTT  
CAAATCGTTCATTTGAAAAAATTGAAACCCTTC-----TTATTGGAT-----GATCATGAGA

CTTGC---CAAAAATCGAAATTCCTTGATCAATGGAGGAACAATATCACCATTTTTGTTCAA  
TAAGATACCA---AAGTGG---ATGATTGACTCATTCCATACTAGA-----AATAATCGCAGGA  
AATCCTTTGATAACACGGATTCCCTATTTCTCAATGATATTCCACGATCAATACAATTGGCT  
GAATCCCGTGAAATCATTTCATAGAAGTTCATTGAGATCTTCTTTTTATAAAGCAAATCA  
ACTTCGATTCTTGAATAATCCACATCACTTCTGCTTCTAT-----TGTAACAAAAGATTCCC  
CTTTTATGTG-----GAAAAGGCCCGTATCAAT-----AATTATGATTTTACATATGGA---C  
AATTCCTCAATATCTTGTTCATTTCGCAACAAA---ATATTTCTTTGTGCGTCCGGTAAA-----  
AAAAAACATGCTTTTTGGGGG---AGAGATACTATTTTCAGCAATCGAGTCACAGGTATCT  
AACATGTTCATACCTAAGGCTTTTCCACAAAAGTGGT--GACGAAACGTATAACTTGTAC  
AAATAT-----TTCCATTTTCCAAGTCGATCCAATCCATTTCGTTTCGT-----AGAGCTATTTA  
CTCGATCGCAGACATTTCTGGAACACCTCTAACAGAGGGACAAATAGTCAATTTTGAA  
AGAACTTATTGTCAACCTCTTTCAGATATGAATCTATCTGATTTCAGAAGGGAAGAACTT  
GTATCAGTATCTCAAT-----TTCAATTCAAACATGGGTTTGATTACACTCCATGTTCTGA  
GAAATTTTTACCATCCGAAAAG-----AGGAAAAAA-----CGGAGTCTTTGT  
CTAAAG-----AAATGCGTTGAGAAAGGGCAGATGTATAGAACTTTTCAACGAGATAGTG  
CTTATCAACTCTCTCAAATGGAATCTATTCCAAACATATATGCCATGGTTACTTACTTC  
GACAGGGTACAGATATCTAAAGTTTTTATTTTATAGATACTTTTTCAGACCTATTG-----CC  
GATACTAAGTAGC---AGTCAAAAATTTGTATCCATTTTTCATGATATTATGCATGGATCAG  
ATAGATTATGGCGAATTCTTCAGAAAAAATTA-----TATCTTCCACAATGGAATC  
TG---ATAAGTGAGATTTTCGAGTAAGTGTTCATAAT-----CTTCTTCTGTCCGAAGAAAT  
GATTCATCGAAAT-----AATGAGTCACCATTGATATCGACACATCTGACA-----AATGTTCC  
GGAGTTC---CTCTATGCAATCCTTTTCCTTCTTCTTGTGCTACATAT--CTCGTTTGTACA  
CATCTTCTCTTTGTTTTCGGG-----ACCTCTAGTGAGTTACAGACAGAGTTCGAAAAGGT  
CAAATCTTTGATGATTCATCATCTATGATTGAGTTGCGAAAACCTTCTGGATAGGTATCC  
TACATCTGAACTGAATTCTTCTGGTTAAAGAATCTCTTCTAGTTGCTCTGAAACAATT  
AGGAGATTCTCTA-----GGTGGCAACATGCTATTGCGTGGTGGTCCCCT--  
-----TATGGG---GTCAAATCAATACGCTCTAAGAAGAAATATTTGAATATCAATCTCA  
TCGATATCATCGATCTCATA---AGTATCATACCAAATCCCATCAATCGAATCACTTTTTTCG  
AGAAATACGAGACATCTAAGTCATACAAGTAAAGAGATCTATTCATTGATAAGAAAAAG  
AAAAACGTGAACGGGGACTGGATTGATGATAAAATAGAATCCTGGGTTGCAAACAGT  
GATTCGATTGATGATGAAAAAAGAGAATCTTGGTTCAGTTCTCC-----ACCTAACGAC  
A-----GAAAAAAGGATTGATCAAATTTTATTGAGTCTGACT--CATAGTGATCATTTA-----  
-----TCAAAGAATGACTCTGGTTATAAAATGATTGAACAACCGGGAGCAGTTTACTTAC  
GATACTTAGTTGACATTCAT-----AAAAAGTCTCTAATGAATTATGAGTTCAATACATCCT  
CTTAGCAGAAAGACGGATATTCTTGGCTCATTATCAGACAATCACTTAT-----TCACAAA  
CTTCGTGTGGGGCTAATAGTTTTTCATTTCCCATCTCATGGA-----AAACCCTTTTCGCT  
CCGCTTAGCCTTATCCCTCTCT--AGGGGTATTTTAGTGATAGGTTCTATAGGAACTGGA  
CGATCTTATTTGGTCAAATACCTAGCGAAAAACTCCTATCTTCTTTCATTACGGTATTTT  
TGAACAAGTTCCTGGATAACAAGTCTCAAGGTTTTGATGATATC-----GATATTGA  
T--ATTGATGCTAAT-----GACGATATTGATGCT-----  
-----AGTGACGATATC-----CTTGATATGGAGCTG--GAACTAATAACTAGCATGAAT  
GCGCTAACTATGGATATGATGCCTGAAGAT-----GAAGACCGACTTTATATAGCCCTTCAA  
TTCGAATTAGCAAAAAGCAATGTCTCCTTGCATAATATGGATTCCAAACATTCATGATCTG  
GATGTGAATGAGTCAAATTACTTCTCCCTAGGTCTATTAGTGAACCTTCTCTCCAGG-----

---GATTATGAA-----ACTAGAAATCTTCTTGTTATTGCTTCGACTCATATTCCCCAAA  
AAGTGGATCCCGCTCTAATAGCTCCGAATAAATTAATACGTGCATTAAGATACGAAGG  
CTTCTTATTCCACAACAACGAAAGCACTTTTTACTCTTTTCATATACTAGGGGATTTCCAC  
TTGGAAAAGAAAATGTTCCATACT-----AATGGATTCGGGTCCATAACAATGGGTTC  
TGCACGAGATCTTGTAGCACTTACCAATGAGGCCCTATCGATTAGTATTACACAGAAGA  
AATCAATTATAGATACTAATAACAATTAGATTCGCTCTTCATAGACAAATTTGGGATTTGCG  
A-----TCCCAGGTAAGATCGGTCCAGGATCATGGGATCCTTTTTCTATCAGATAGGAAG  
GGCTGTAGCACAAAATGTACTTTTAAGTAATTGCCCATAGATCCTATATCTATCTATATG  
AAAAAGAAA-----TCATGTAACGAAGTGGATTATTATTTGTACAATTGGTACTTCGAACT  
TGGAACGAGCATGAAGAAATTAACGATACTTCTTTATCTTTTGAGTTGTTCTGCCGGAT  
CGGTCACTCAAGATCTTTGGTCTCTACCC-----GGACCCGATGAAAAA---AATGGGATCA  
CTCCTTATGGACTCGTTGAGAATGATTCT--GGTCTAGTTCGTGGCCTATTAGAAGTGGA  
AGGCGCTCTGGTGGGA-----TCCTCACGG-----GCATGCAGTCAGTTTGATAAGGAT---  
--CGAGTGACATTGCTTCTTCGACCCGAACCAAGGAAT---CCCTTAGATATGATGCAAAA  
TGGATCTTGTCTATCCTTGATCAGAGATTTCTCTATGAAAAAGAC-----GAATCGGAGT  
TTGAAGAG---GGGGAAGGAGAAGGAGCCCTCGACCGGCAACAG-----ATAGAGGA  
GGAT-----TTATTCAATCAC-----ATAGTTTGGGCTCCT-----AGAATATGGCGCCCT----  
---TGGGGCTTTCTATTTGATTGTATCGAAAGACCCAATTCATTGGGATTTCCC---TATTGG  
TCCAGGTCATTTCCGGGGCAAG-----CGGATCATTATGATGAAGAGGATGAGCTTCAA  
GAGAATGATTCCGAGTTCTTGCAGAGTGGAACCGTGCAGTACCAGACACGAGATAGAT  
CTTCCAAAGAACAAGGCCTTTTTCGAATAAGCCAATTCATTTGGGACCCTGCAGATCCA  
CTTTTTTCTATTCAA---GCTCAGCCCTTTGTCTCTGTGTTTTCACATCGAGAATTATT  
TGCAGATGAAGAGATGTCAAAGGTGCTTACTCCCCAAACAAATCCTCCTACATCTC  
TATATAACGCTGGTTTATC-----AAGAAGACGCAAGAAAAGCACTTCGAATTGTTGATT  
AATCGCCAGAGATGGCTTAGA-----ACCAATCGTTCATTATCT-----AATGGATCTTCC  
GTTCTAAT-----ACTCTATTTCGAGAGTTATCAGTATTTATCAAATCTGTTCCTATCTAAC---  
GGAACACTATTGGATCAAATGACAAAGGCATTGTTGAGAAAAAGATGGCTTTTACCGG  
ATGAAATGCAAATTGGATTC-----ATGGAACAGGAGAAGGATTTCCCATTCTTATGTCT  
AGATCGCGG---ATAAATGGAAATTTTATTGATAAACTTTTTCAATTGTAGCCAATATCTT  
ATTACGAATAATTCCGACAACCTTCAGGAGAAAAAGAGGCATTTACCTATTACAGAGATG  
GG-----ATGTCAGCTCAATCCGAAGGAAATTATGCGGAAGCTTTACAGAATTATTATGAA  
GCTATGCGACTAGAAATTGATCCCTATGACCGAAGTTATATACTCTATAACATAGGACTT  
ATCCATAACAAGTAACGGGAGAACACACGAAAGCTTTAGAATATTATTTTCGAGCCCTCGA  
ACGAAACCCATTCTTACCACAAGCTTTTAATAATATGGCCGTGATCTGTCATTAC---CGC  
GGAGAACAGGCCATTCGTCAGGGGGATTCTGAAATTGCGGAGGCTTGGTTTCGACCAA  
GCCGCTGAGTATTGGAAACAGGCTATAGCACTTACTCCTGGTAATTATATTGAAGCGCAT  
AATTGGTTGAAGATCACTAGACGTTTCGAA-----ATGAGTTGTGCATCAGAACATATATG  
GATAGAACCTATAACGGGGGCTCGAAAAACAGGTAATTTCTGCTGGGCTGTTATCCTTT  
TTTTAGGTTTCATTAGGATTCTTGTGGTTGGAACCTCGAGTTATCTTGGTAGAAATTTGA  
TATCTTTATTTCCGTCTCAGCAAATAGTTTTTTTTCCACAAGGAATTGTGATGTCTTTCTA  
TGGGATCGCGGGTCTTTTTATTAGCTCCTATTTGTGGTGCACAATTTTCGTGGAATGTAGG  
TAGTGGTTATGATCGATTTGATAGAAAAGAAGGAATAGTGTGTATCTTTCGTTGGGGATT  
TCTGGAAAAAATCGGAGGGTCTTCTCCGATTTTTTATAAAAGATATTCAAGTCCATCA  
GAATAGAAGTTAAAGAGGGTATTTATGCTCGGCGTGTCTTTTATATGGATATCAGAGGCC

AGGGAGCCATTCCATTGACTCGTACTGATGAGAAT---TTTACTCCACGGGAAATGGAAC  
AAAAAGCTGCTGAATTGGCCTATTTCTTGCGTGTACCAATTGAAGTATTT

>Nelumbolutea

ATGAAAAAATGGTGGCTCAATTCGATGTTGTTTCTAAGTAAATCAATGGACAGTCTTGG  
TCCTATTGGAAATACCAGTGGAAGTGAAGATCCCGTTATAAATGATACGGATAAAAACA  
TTCAT---TGCAGTAATGTTGATCATTATTTCGGTGTGAGAGACATTTCGGAGTTTCATCTCT  
GATGACACTTTTTTTAGTTAGGGATAGTAATGGTGACAGTTATTCCATATATTTGGATATTG  
AAAATCAGATTTTTTGGAGATTGACAATGAT-----CATTCTTTTCTGAGTGAATTCGAAAATT  
TATTTTCTAGTTATCTGAATTCTAGTTATCCAATAAATGGATCTAAGAGTGACAATCACTA  
CTATGATCGTTACATGTCTGATACTAAATATAGTTGGAATAATCACATTAATAGTTGCATT  
GACAGTTATCTTCGTTCTGAAATCCGT-----ATTGATAGTTACATTTCAAGTGATAGCGAC  
AATTACAGTGACAGTTACATTTATACTTACATTTGTAGCGACAGTGGGAGTTCATAACA  
-----ACTGGCAGTGAT---AATAAAAGAAGAAGAAAC---GATCTCGAAAAAATAAAAA  
AAGCGATATTTTGTGGGTTCAATGCGAAAATTGTTATGAATTAATTATAAGAACTTTT  
GATGTCAACAATGAATATTTGTAAACAATGTGGATATCATTGAAAATGAGTAGTTCAGA  
TAGAATCGAACGTTTCGATTGATCCGGGCACTTGGGATCCTATGGATGAAGACATGGTCT  
CTACGGACCCCATTAATTTTCATTTCGGGGGAGGAACATTATAAGAAGCGTATCGATTTTA  
ATCAAAGAAGTACAGGGTTAGCTGAGGCTGTTCAAACAGGCATAGGTCAACTAAATGG  
GATCCCGTAGCAATTGGGGTTATGGATTTTAAGTTCCTGGGGGGTAGTATGGGATCCGT  
AGTAGGCGAGAAAATCACCCGTTTGTATCGAGTATGCTACTAATAGATCTTTACCTCTTAT  
TATAGTGTGTGCTTCCGGAGGAGCGCGCATGCAAGAAGGAAGTTTGAGCTTGATGCAA  
ATGGCTAAAATATCTTCCGCTTCATATAATTATCAATCAAATAAAAAGTTATTCTATGTAT  
CAATCCTTACATCTCCTACAACCGGTGGGGTGACAGCTAGTTTTGGTATGTTGGGAGAT  
ATCATTATTGCCGAACCCAACGCCTACATTGCATTTGCGGGTAAAAGAGTAGTTGAACA  
AACATTAAAGAATACAATACCTGATAATTCACAAGCGGCTGAGTATTCATTCCATAAGG  
GCTTATTTCGATCCAATCGTACCACGTAATTTGTTAAAAGACGTTCTGAGTGAGTTATTT  
AGCTCCACGGTTTTTTTTCCCTTGAATCAAATTCATCAAGATGGTAACCATTTCGAGCC  
GACGAAATTAGTAATATTATACGTGAACGTATTGAGCAATATAATAGAGAAGTAAAGATT  
GTGAATACCGGCACTGTACTTCAAGTAGGCGACGGTATTGCTCGTATTCATGGTCTTGA  
TGAAGTAATGGCAGGTGAATTAGTAGAATTTGAAGAGGGTACAATAGGCATTGCTCTG  
AATTTGGAATCAAATAATGTTGGTGTGTATTAATGGGTGATGGTTTGATGATACAAGAG  
GGAAGTTCTGTAAAAGCAACAGGAAGAATTGCTCAGATACCTGTAAGCGAGGCTTATT  
TGGGTCTGTATAAATGCTCTGGCTAAACCTATTGATGGTAGGGGTGAAATTTTCAGCT  
TCTGAATCTCGGTTAATTGAATCTCCCGCTCCAGGTATTATTTTCGAGACGTTCCGTATAT  
GAGCCTCTTCAAACAGGGCTTATTGCTATTGATTTCGATGATCCCTATAGGACGCGGTCA  
GCGAGAATTAATTATTGGGGACAGACAGACCGGTAAAACAGCAGTAGCCACAGATACT  
ATTCTCAATCAAAAAGGGCAAATGTAATATGTGTTTATGTAGCTATTGGTCAAAAAGC  
GTCTTCTGTGGCTCAGGTAGTTACTACTTTCCAGGAAAAGGGGGCGATGGAATACACTA  
TTGTAGTAGCCGAAACGGCAGACTCACCTGCTACATTACAATACCTTGCTCCTTATACA  
GGAGCGGCTTTGGCTGAATATTTTATGTACCGTGAACAACATACTTCAATCATTATGAT  
GATCCCTCAAACAAGCACAGCTTATCGCCAAATGTCTCTTCTATTACGAAGACCGCC  
CGGTCGCGAAGCTTATCCAGGAGATGTTTTTTATTTGCATTCACGCCTTTTGGAAAGAG  
CCGCTAAATTAAGTTCTCGATTAGGTGAAGGAAGTATGACTGCTTTACCAATAGTTGAG  
ACTCAATCGGGAGATGTTTCGGCTTATATTCTACTAATGTAATTTCCATTACAGATGGA

CAAATATTCTTATCTGCCGATCTATTCAATGCTGGAATCCGACCTGCTATTAATGTGGGTA  
TTTCTGTTTCTAGAGTAGGATCCGCAGCTCAAATTAAGCCATGAAACAAGTAGCGGG  
CAAATTAATAATTGGAAGTGGCTCAATTTCGCAGAGTTAGAAGCCTTTGCACAATTTCGCTT  
CTGATCTCGATAAAGCTACTCAGAATCAATTGGCAAGAGGTCAACGATTACGTGAATTA  
CTCAGACAATCCCAATCAGCCCCTCTCACGGTGGATGAGCAGATAGTGACTATTTATAC  
CGAACGAATGGGTATCTTGATTCGTTAGAAATTGGACAGGTAAAGAAAATTTCTTGTTT  
AGTTACGTACCTACTTAAAAACGAATAAACCTCAGTTCCAAGAAATCATATCTTCTACC  
AAGACATTTACCGAGGAAGCAGAAGCCCTTTTGAAGGAAGCTATTCAGGAGCAGATG  
GAACGTTTTCTACTTCAGGAACAAACAATGAGAATGAATCCTACTACTTCTGGTCCTGG  
GGTTTCCGCACTTGAAGAAAAAACCTGGGGCGTATCGCTCAAATCATTGGTCCGGTA  
CTGGATGTAGCTTTTCCCCCGGGCAAATGCCTAATATTTACAACGCTTTGGTAATTAAG  
GGTCGAGATACTGCCGGCCAGCAAATTAATGTGACTTGTGAGGTACAGCAATTATTAGG  
AAATAATCGAGTTAGAGCTGTAGCTATGAGTGCTACAGATGGTCTGATGAGGGGAATGG  
AAGTGATTGACACGGGAGCTCCTCTAAGTGTTCCAGTCGGTGGAGCGACTCTCGGACG  
AATTTTCAACGTTCTTGGAGAACCCTGTTGATAATTTAGGTCCTGTAGATACTCGCACA  
CATCTCCTATTCATAAATCTGCGCCTGCTTTTATACAGTTAGATACCAAATATCTATTTTT  
GAAACAGGAATTAAGTAGTAGATCTTTTAGCTCCTTATCGCCGTGGAGGAAAAATCG  
GACTATTCGGGGGAGCTGGGGTGGGTAAAACAGTACTCATCATGGAATTGATCAACAA  
CATTGCCAAAGCTCATGGAGGTGTATCTGTATTTGGCGGAGTAGGCGAACGTACTCGTG  
AAGGAAATGATCTTTACATGGAATGAAGGAATCTGGAGTGATTAATGAACAAAATATT  
GCAGAATCAAAGTAGCTCTAGTCTATGGTCAGATGAATGAACCGCCGGGAGCCCGTA  
TGAGAGTTGGTTTGACTGCCCTAACCATGGCGGAGTATTTCCGGGATGTTAATGAACAA  
GACGTAATCTATTTATCGACAATATCTTCCGTTTCGTCCAAGCGGGATCGGAAGTATCT  
GCCCTATTAGGCAGAATGCCTTCTGCCGTGGGTTATCAACCTACCCTTAGTACAGAAAT  
GGGTTCTTTGCAAGAAAGAATTACTTCGACCAAAGAGGGGTCCATAACTTCTATTCAA  
GCAGTTTATGTACCTGCGGACGATTTGACTGACCCTGCTCCTGCCACGACATTTGCACA  
TTTAGATGCTACTACCGTACTATCAAGAGGATTAGCTGCCAAAGGTATCTATCCAGCAGT  
AGATCCTTTAGATTCAACGTCAACTATGCTCCAACCTCGGATCGTTGGTGAGGAACATT  
ATGAAACTGCGCAAAGAGTAAAGCAAACCTTTACAACGTTACAAAGAACTGCAGGACA  
TTATAGCTATCCTTGGGTTGGACGAATTATCCGAAGAGGATCGTTTAAACCGTAGCAAGA  
GCACGAAAAATTGAGCGTTTCTTATCACAACCCTTCTTCGTAGCAGAAGTATTTACTGG  
TTCTCCAGGAAAATATGTTGGTCTAACAGAAACAATTAGGGGGTTTCAACTGATCCTTT  
CCGGAGAATTAGATGGTCTTCTGAGCAGGCCTTTTATTTGGTAGGTAACATCGATGAA  
GCTACCGCGAAGGCTATGAACTTAGAAGTGGAGAGCAAATTGAAGAAAATGACCTTAA  
ATCTTTGTGTAAGTACTCCTAATCGAATTGTTTGGGATTCAGAAGTGAAAGAAATCATT  
TTATCTACTAATAGTGGCCAAATTGGCGTATTACCAAATCACGCCCCTATTGCCACAGCC  
GTAGATATAGGTATTTTGGAGAATCCGCCTTAAACGACCAATGGTTAACGATGGCTCTGATG  
GGCGGTTTCGTAGAAATAGGCAATAATGAGATCACCATTTTAGTAAACGATGCGGAGAA  
GGGTAGTGACATTGATCCGCAAGAAGCTCAGCGAACTCTTGAATAGCTGAAGCTAAC  
TTGAGTAGAGCTGAAGGCAAGAGACAAACAATTGAGGCGAATCTAGCTCTCAGACGA  
GCTAGGACGCGAGTAGAGGCTATTAATGTAATTTCAATGAAAAATGTAACCGATTCTTT  
CGTTTCCTTGGGTCCTGGCCGTCCGCCGGGAGTTTCGGGTTAATAACCGATATTTTAG  
CAACAAATCCAATAAATCTAAGTGTAGTGCTTGGTGTATTGATCTTTTTTGGAAAGGGA  
GTGTTAAGTGATTTATTAGATAATCGAAAACAGAGGATCTTGAGTACTATTCGAAATTC

GAAGAACTACGTGGAGGGGCCATTGAACAGCTGGAAAAAGCCCCGGGCCCGCTTACGG  
AAAGTGAAATGGAAGCAGATGAGTTTCGAGTAAATGGATACTCTGAGATAGAACGAG  
AAAAATTGAATTTGATTAATCAACTTATAAGAATTTGGAACGATTAGAAAATTACAAA  
AACGAAACTATTCATTTTGAACAACAAAGAGCGATTAATCAAGTCCGACAACGAGTTT  
TTCAACAAGCCTTACAAGGAGCTTTAGGAACTCTGAATAGTTGTTTGACCAGCGAGTT  
ACATTTACGCACCATCAGTGCTAATATTGGCATGTTTGGCACGATGAAAGAAATAACTG  
ATATGAATCCACTGATTTCTGCTGCTTCCGTTATTGCTGCTGGATTAGCCGTAGGGCTTG  
CTTCTATTGGACCTGGAGTTGGTCAAGGTAAGTCTGCTGCGGGCCAGGCCGTAGAAGGGAT  
CGCGAGACAACCAGAGGCAGAGGGTAAAATACGAGGTAATTTATTGCTTAGTCTGGCT  
TTTATGGAAGCTTTAACAATTTATGGACTGGTTGTGGCATTAGCACTTTTATTGCGAAT  
CCTTTGTATGAATGTTCTACCATGTTCCATCAACACCCTAAAAGGGTTATACGATATAT  
CCGGTGTGGAAGTTGGCCAACATTTCTATTGGCAAATAGGAGGTTTCCAAGTCCATGCC  
CAAGTACTTATTACTTCTTGGGTCGTAATTGCTATCTTATTAGGTTTCAGCCACTATAGCTG  
TTCGCAATCCACAAACCATTCCGACTGCTGGTCAGAATTTCTTCGAATATGTCCTTGAA  
TTCATTCGAGACTTGAGCAAACTCAGATTGGAGAAGAATATGGTCCTTGGGTTCCCTT  
TATTGGAATATGTTCCATTTATTTTGTTCGAACTGGTCAGGGGCTCTTTTACCTTGG  
AAAATCATAGAGTTACCTCATGGGGAGTTAGCCGCACCTACGAATGATATAAATACTAC  
TGTTGCTTTAGCTTTACCCACGTCAGTGGCATAATTTCTATGCGGGTCTTAGCAAAAAAG  
GATTGGGTTATTTGCTAAATACATTCAACCAACTCCAATCCTTTTACCAATTAACATCC  
TAGAAGATTTACAAAACCTTTATCACTTAGTTTTTCGACTTTTTCGGGAATATATTGGCTG  
ATGAATTAGTAGTTGTTGTTCTTGTTCCTTTAGTACCTTCAGTGGTTCCGATACCTGTTAT  
GTTCCCTTGGATTATTTACAAGTGGTATTCAAGCTCTTATTTTTGCAACTTTAGCCGCGGC  
TTATATAGGAGAATCCATGGAGGGCCATCATATGATATTTTTGACTTTAGAACATATATTA  
ACTCACATTTCCCTTTTCGATCGTTTTCAATTGTAATTACGATTCATTTGATGACCTTATTA  
TCGATGAAATCGTAGGACTATATGATTCGTCAGAAAAAGGCATGATAGCGACTTTTTTC  
TGATAACAGGATTCCTAGTTACTCGTTGGATTCATTCAGGGCATTTCCCGTTAAGTGAT  
TTATATGAATCATAATGTTCCCTTTCATGGAGTTTCTCCATTATTCATATGGTTCCTAAAAT  
AGGGAACCATAAAAATAATTTAAGCGAAATAACCACACCAAGTGCTATTTTTACCCAAG  
GCTTTGCCACTTCGGGTCTTTTAACTGACATGCATCAATCCGCAATATTAGTGCCTGCTC  
TTCAATCCCAGTGGTTAATGATGCACGTAAGTATGATGGTATTGAGTTATGCAGCTCTTT  
TATGTGGATCATTATTATCAATAGCTCTTCTAGTCATTACATTTGAAAAACATAGAAAA  
TTTTAGTAAAAGCAATGAGATCCAATACGTGAATAAAAAAAGCAATGTTTTACGAAAC  
ACTTCTTTTACT---TTTAGAACTATCACAGGCATCAATTGATTCAGCAATTGGATCATTG  
GAGTTATCGTGTCATTAGTCTAGGGTTTATCTTTTTAACCATAGGTATTCTTTTCGGGAGC  
AGTATGGGCTAATGAGGCATGGGGGTCGTATTGGAATTGGGACCCGAAGGAAACTTGG  
GCATTTATTACTTGGACCATATTCGCGATTTATTTACATACTCGAACAAATAAAAAATGG  
CAAGGCGCAAATTCCGCAATTGTGGCTTCTATGGGATTTCTTATAATTTGGATATGCTATT  
TTGGGGTCAATCTATTAGGAATAGGGCTACATAGTTATGGGTCATTCACATTT---ATGCCA  
AAAAAGAAAGCATTCACTCCCCTCCCATATCTTGCATCTATAGTATTTTTGCCCTGGTGG  
ATCTCTCTCTCATTTAATAAAAGTCTGGAATCTTGGGTTACTAATTGGTGGAACTACTAGG  
CAATCCGAAACTTTTTTTGAATGATATTCAGAAAAGAACGTTTTTAGAAAAATTTATAGA  
ATTAGAAGAACTATTCCTGTTGAACGAAATGATAAAGGAATACCCGGAGACACATATAC  
AAAAGCTTCATATAAGAATCCACAAAGAAACAATACAATTGGTCAAGATGTACAATGA  
GGGTCATATCCATACCATTTTGCATTTCTCGACAAATATAATCTGTTTTCGCTATTCTAAGT



GGTTATTCTATTCTGGGTAGTGAAGAAGCTTGTCAATTCTGAATTCTTGGGTTTCAGGAATTC  
CTATATAACTTAAGCGACACAATAAAAAGCTTTTTCTATTCTTTTATTAACCGATTTATGTA  
TCGGATTCCACTCGCCCCATGGTTGGGAAGCTAATGATTGGCTCTATCTACAAAGATTTTG  
GATTTGCTCATAATGAGCAAATTATATCTGGTCTTGTTCCTACTTTTCCAGTTATTCTAGA  
TACAATTTTAAAATATTGGATCTTCCGTTATTTAAATCGTGTATCTCCGTCACTTGTAGTG  
ATTTATCATTCAATGAATGACATGCCTATTGGTGTTCCAAAGTACCTTTTTCGGAGTCCT  
GGAGAGGAAGATGCAGTTTGGGTTGACGTAAAC---CGACTTCATCGAGAAAGATTACT  
TTTTTTAGGCCAAGAGGTTGATAGCGAGATCTCGAATCAACTTATTGGTCTCATGGTATA  
TCTCAGTATAGAGGATGATACCAAAGATCTGTATTTGTTTATAAACTCTCCCGGCGGATG  
GGTAATACCCGGAATCGCTATTTATGATACTATGCAATTTGTGCCACCAGATGTACATAC  
AATATGCATGGGATTAGCCGCTTCAATGGGATCTTTTATCCTGGCCGGAGGAGAAATTA  
CCAAACGTCTAGCATTCCCTCACGCTAGGGTAATGATCCACCAACCTGCTAGTTCTTTTT  
ATGAGGCACAAACAGGAGAATTTATCTTGGAAAGCGGAAGAGCTACTGAAACTCCGCG  
AAACCTCACAAGGGTTTATGTACAAAGAACGGGCAACCCCTTATGGGTTGTATCCGA  
AGACATGGAAAGGGATGTTTTTATGTCAGCAACAGAAGCCCAAGCTCATGGAATTGTT  
GATCTTGATAGCGGTCGAAATGAAAGAACAAAATGGATTCATGAAGGTTTAATTATTGA  
ATCACTTCCCAACGGTATGTTCCGGGTTGTTAGATAATGAAGATCTGATTCTAGGTTA  
TGTTTCAGGAAAGATCCGACGTAGTTTTATACGGATACTACCAGGAGATAGAGTCAAAA  
TCGAAGTAAGTCGTTATGATTCAACCAGAGGGCGTATAGTTTATAGACTCCGTAACAAA  
GATTCGAACGATATGGAGGAATTACAAAGATATTTAGAAATAGATAGATCTCGGCAACA  
AGACTTTCTATATCCACTTCTCTTTCAGGAGTATATTTATGTATTTGCTCACGATCATGGT  
TTAGAAAATTTAGGT---AAATCCAGTTCACTAATTGTGAAACGGGTCATTAATCTCGAATGT  
ATCAACGGAATCATTGATTTTTTTGGCTAATGATTCTAATCAAACCTCAATGTGTTGGAA  
AGAATTTTTATTCTCAAATGATATTAGAGGGGTTTGCAGTCATTGTGGAAATTCCATTCT  
CGCTGCGATTAGTTTCTTCCCTCATAACAAAATCTCATAATTTACGATCAATTCATTCAAT  
ATTTTCTTTTTTAGAGGACAAATTATCACGTTTAAATTATGTGTTAGATCTACTAATACCT  
TACCCCATTCATTAGAAATCTTGGTTCAAACTCTTCGCTGCTGGGTAAAGGATACCCC  
TTCTTTGCATTTATTGCGATTTTTTCTCCACGAGTATCGTAATTGGAATAGTCTTATTACT  
AAATCTAGTTCCCTTTTGAAAAACAAAGATTCTTCTTGTTCCTATATAATTCTCATGTAT  
GTGAATGCGAATCTATATTTCGTGTTTCTTCGTAAACAATCTTTTCATTTACGATCAACATC  
TTCTGGAGCCCTTCTTGAGCGAACCCATTTCTATGGAAAAATAGAACATTTTGGAGTAG  
TGTTTCGTAATGATTTTATCCTATGGTTGGTCAAGGATCCTTTCATGCATTATGTTAGATA  
TCAAGGAAAATCCATACTGGCTTCAAAGGGACTCCTCTTTTGGATGAATAAATGGAAAT  
ATCACCTTGTCATTTCTGGCAATGTCATTTTTACTTGTGGTCTCAACCCGGCAGGATCC  
ATATAACCAATTATCCAATCATTCCCTCGATTTTCTGGGTTATCTTTCAAGTGTACGACT  
AAATCCTTCACTGGTAAGGAGTCAAATGCTAGAAAATTCATATCTAATAGATATTGCTAG  
T-----AAGAAGTTCGAAACCATCGTCCCAATTATTCCTCTGATTGGATCATTGGCTAAAG  
CAAATTTTGTAAACGTATCGGGGCATCCCATTAGTAAGCCGGTCCGGGCCGATTCATCA  
GATTCTGATATTATCGATCGATTTGGGCGGATATGCAAAAATCTTTCTCATTATCACAGC  
GGATCCTCAAAAAAAAAGAGTTTGTATCGAATAAAGTATATACTTCGACTTTCGTGTGC  
TAGAACTTTGGCTCGTAAACACAAAAGTACTGTACGGGCTTTTTTTGAAAAGATTAGGTT  
CGGAATTGTTGAAAGAATTCTTTACGGAGGAAGAACAAGTTCTTTCTTTGATCCTCCCA  
AGGCGGATTTGGTATTTGGATATTCTTCGTATCAATGATCTGACCAATCCTGAAATGATA  
ATTGATACGACA---AAAGCACAA---GTTATCAATTCTTTTTCCAGATCGGAA---TCCTTAA

AAGAGGTCTATGGGCTCATATGGTTGCTTGTCCTATTTTGACTCTTATATCGGGAATCA  
CAATAGGGGTACTAGTAATTGTGTGGTTAGAAAGAGAAATATCCGCAGGGATACAACA  
ACGTATCGGACCTGAATACGCCGGCCCTTTGGGAATTCTTCAAGCTCTAGCAGATGGAA  
TCAAACACTTTTTCAAAGAGGATCTTCTCCATCTAGAGGAGATGCTCGTTTATTAGTA  
TTGGACCATCTATAGCGGTCATATCAATTCTACTTAGTTATTAGTAATTCCTTTTGGTTA  
TCGCCTTGTCTAGCCGATCTTAGTATAGGTGTTTTTTTATGGATTGCCATTTCAAGTATT  
GCTCCTATTGGACTTCTTATGTCAGGATATGGATCGAATAATAAATATTCTTTTCAGGTG  
GTCTACGAGCTGCTGCTCAATCAATTAGTTATGAAATACCATTAACCTTCATGTGTGTTAT  
CAATATCTCTACTATCTAACAGTTCAAGTACAGTTGATATAGTTGAGGCGCAGTCAAAAT  
ATGGTTTTTGGGGTTGGAATTTGTGGCGGCAGCCTATCGGGTTTGTGTTTTTCTAATTT  
CTTCCCTAGCAGAATGTGAGAGATTACCTTTTGATTTACCAGAAGCAGAGGAAGAATTA  
GTAGCAGGTTATCAAACCGAATATTCAGGTATAAAATTTGGTTTTATTTTATGTTGCTTCCT  
ATCTAAATCTACTAGTTTCTTCATTATTTGTAACAGTTCTTTACTTGGGCGGCTGGAATCT  
CTCTATTCCGTACATATTCATTCTGAGCTTTTCGGAATAAATAAAGTGGGGGGGGTCTT  
TGAAACAACAATTGGTATCTTTATTACATTAGCTAAAGCTTATTTGTTCTGTTTCTTCCT  
ATCGCAACAAGATGGACTTTACCTAGAATGCGAATGGACCAACTATTAATCTTGGGTG  
GAAATTTCTTTTACCCATTTCTCTAGGTAATCTATTATTGACAACTTCTTCCCAACTCCTT  
TCACTGATGATCTGGCATGTACAGAATGAAAACCTTCATTCTCGATTCTACGAGAATTTTT  
ATGAAAGCGTTTCATTTGCTTCTCTTCCATGGAAGTTTCATTTTCCAGAATGTATCCTA  
ATTTTGGCCTAATTCTTCTTCTGATGATCGATTCAACCTCTGATCAAAAAGATATACCTT  
GGTTCTATTTTCTCTTCAACAAGTTTAGTAATGAGCATAACGGCCCTATTGTTCCGAT  
GGAGAGAAGAACCTATGATTAGCTTTTTCGGGAAATTTCCAAACGAACAATTTCAACGA  
AATCTTTCAATTTCTTATTTTACTATGTTCAACTCTCTGTATTCTCTATCCGTAGAGTACA  
TTGAATGTACAGAAATGGCTATAACAGAGTTTCTGTTATTTCGTATTAACAGCTACTCTAG  
GAGGAATGTTTTTATGTGGTGCTAACGATTTAATAACTATCTTTGTAGCTCCAGAATGTT  
TCAGTTTATGCTCCTACCTATTATCTGGATATACCAAGAGAGATGTACGGTCTAATGAGG  
CTACTACGAAATATTTACTCATGGGTGGGGCAAGCTCTTCTATTCTGGTTCATGGTTTCT  
CTTGGCTATATGGTTCATCCGGGGGAGAGATCGAGCTTCAAGAAATAGTGAATGGTCTT  
ATCAATACACAAATGTATAACTCCCCAGGAATTTCAATTGCGCTTATATTCATCACTGTA  
GGAATTGGGTTCAAGCTTTCCCCAGCCCCTTTTCATCAATGGACTCCTGACGTATACGA  
AGGATCTCCCACTCCAGTCGTTGCTTTTTCTTTCTGTTACTTCGAAAGTAGCTGCTTCA  
CTTCAGCCACTCGAATTTTCGATATTCTTTTTATTTCTCATCAAACGAATGGCATCTTCT  
TCTGGAAATCCTAGCTATTCTTAGCATGATATTGGGGAATCTCATTGCTATTACTCAAAC  
AAGCATGAAACGTATGCTTGCATATTCGTCCATAGGTCAAATCGGATATGTAATTATTGG  
AATAATTGTTGGAGACTCAAATGATGGATATGCAAGCATGATAACTTATATGCTGTTCTAT  
ATCTCCATGAATCTAGGAACTTTTGCTTGCATTGTATCATTTGGTCTACGTACCGGAACT  
GATAACATTCGAGATTATGCAGGATTATACACGAAAGATCCTTTTTTGGCTCTCTCTTCA  
GCCCTATGTCTCTTATCCCTAGGAGGTCTTCTCCACTAGCAGGTTTTTTTCGGAAAAC  
CCATCTATTCTGGTGTGGATGGCAGGCAGGCCTATATTTCTTGGTTTCAATAGGACTCCT  
TACGAGCGTTGTTTCTATCTACTATTATCTAAAATAATCAAGTTATTAATGACTGGACG  
AAACCAAGAAATAACCCCTCACGTGCGAAATTATAGAAGATCTCCTTTAAGATCAAAC  
AATCCATCGAATTGAGTATGATTGTATGTGTGATAGCATCTACTATACCAGGAATATCAA  
TGAACCAATTATTGCAATTGCTCAGGATACCCTTTTTATGTTTTCTGCTTACGAATATG  
ATATTTTCTGGGCATTTCTAATAATATCAAGTGTATTCTATTTTGGCATTCTAATTTCC

GGAGTTTTGGCCCCGATTAGGGAAGGACCTGAGAACTTTCTAGTTATGAATCGGGTAT  
AGAACCAATGGGCGATGCTTGGTTACAATTCCGAATCCGTTATTATATGTTTGCTCTAGT  
TTTTGTTGTTTTGATGTTGAAACGGTTTTTTCTTTATCCATGGGCGATGAGTTTCGATGT  
ATTGGGTGTATCTGTATTTATAGAAGCTTTAATTTTTCGTGCTTATCCTAATTGTTGGTTCA  
GTTTATGCATGGCGAAAAGGAGCATTGGAATGGTCTATGAATTTTTTTCCTTGGTTAAC  
AATAATTGTAGTTTTTGCCGATATCCGCGGGTTCTTTAATTTTTCTTCTCCCTCATAAAGGA  
AATAAGGTGATTTCGCTGGTATACTATCAGTATATGCTTAATAGAACTCCTTCTAATGACCT  
ATGCATTCTGTTATCATTTCAAATTGGACGATCCATTAATCCAAGGAGGATTATA  
AATGGATAAATATTTTTGATTTTCACTGGAGATTAGGAATCGATGGACTTTCATAGGAC  
CCATTTTACTGACGGGGTTCATTACTACTTTAGCTACTTTAGCGGCTTGGCCAGTTACTC  
GAGATTCCCGATTGTTCCATTTCCCTGATGTTAGCAATGTATAGTGGTCAAATAGGATCAT  
TTTCTTCTCGAGACTTTTACTTTTTTTCATCATGTGGGAGTTAGAATTAATCCTGTTTA  
CCTACTTCTATCCATGTGGGGAGGAAAGAAACGTCTGTACTCCGCTACAAAGTTTATTT  
TGTACACAGCAGGGGGTTCATTTTTCTTTTACTAGGAGTTCTGGGTATGGGTTTATATG  
GTTCCAATGAACCAACATTAATTTTGAAACATCAGCTAATCAATCATATCCTGTGGCAT  
TAGAAATAATATTTCTATTTTGGATTTCTTATTGCTTATGCTGTTAAATCACCGATTATACCC  
CTACATACATGGTTACCAGATACCCACGGAGAAGCACATTACAGTACATGTATGCTTCTA  
GCCGGAATCTTATTAATAAATGGGAGCGTATGGATTGGTTCGGATCAATATGGAATTTTA  
CCCATGCTCATTCTATATTTTCTCCCTGGTTGATGATAGTAGGCACAATTCAAATAATCT  
ATGCAGCTTTAACATCTCCCGGTCAACGCAATTTAAAAAAGAGAATAGCTTATTCCTCG  
GTATCTCATATGGGTTTTCAAAATTATAGGAATTGCTTCCATAACCGATACGGGACTTAAT  
GGAGCCATTTTACAAATAATCTCTCATGGATTTATTGGTGCTGCACTTTTTTTTCTTGGCA  
GGAACGAGTTACGATAGAATACGTCTTGTATCTCGATGAAATGGGAGGAATTGCTAT  
CCCAATGCCAAAATATTTACGATGTTTACGATGCTTCTCGATGGCTTCTCTTGCATTGCC  
GGGAATGAGTGGTTTTGTTGCAGAATTGATAGTATTTTTTGGAATAATTACCAGTCCAA  
AATATCTTTTAAATGCCAAAATACTAATTACTTTTTGTAATGGCAATTGGAATGATATTAAC  
TCCTATTTATTCAATATCTATGTTACGCCAGATGTTCTATGGATAACAAGCTATTCATGCCT  
CAAACCTTATTTTTTTGATTCTGGACCAGAGAACTATTTGTTTCGATCTCTATTTTTTCT  
ACCTGTAATAGGTATTGGTATTTATCCGGATTTTCGTTCTCTCACTATCAGTTGACAAGGT  
CGAAGCTATTCTATCCAATTACTTTTCTAGAATGATGCTCGAACATGTACTTGTTTTGGAG  
TGCCTATTTATTTTCTATCGGTATTTATGGATTGATTACGAGCCGAAATATGGTTAGAGCA  
CTTATGTGTCTTGAGCTTATACTGAATGCGGTTAATATAAATTTTCGTAACATTTTCTGATT  
TTTTTGATAGTCGCCAATTAAGGAGACATTTTCTCGATTTTTGTTATAGCTATTGCAG  
CCGCTGAAGCAGCTATTGGGCCAGCAATTGTTTCGTCAATTTTTTCGTAACAGAAAATCA  
ACTCGTATCAATCAATCGAATTTGTTGAATAAAATGGAACATACATATCAATATGCATGG  
ATGATACCTTTCGTTCCACTTCCAGTTCCTATGTTAATAGGAGTGGGACTTCTCTTTGTT  
CCGATGGCAACAAAAAGCTTCGTCGTATGTGGGCTTTTCCAGTGTTTTATTGTTAAG  
TATAGTTATGATTTTTTCGGCCAATCTGGCTATTCAGCAAATAAATGGCAGTTCTATCTAT  
CAATATGTATGGTCGTGGACCATCAATAATGATTTTTCTTAGAGTTCGGCTACTTGATT  
GATCCACTTACTTCTATTATGTTAATATTAATCACTACTGTTGGAGTCAATGGTTCTTGT  
ATAGTGACAATTATATGTCTCATGATCAAGGATATTTAAGATTTTTTGCTTATATGAGTTT  
TTCCAATACTTCTATGTTGGGATTAGTTACTAGTTCGAATTTGATACAAATTTATATTTTT  
GGGAATGGTTGGAATGTGTTTCGTATCTATTAATAGGGTTTTGGTTACACGACCAATTG  
CGGCAAATGCTTGCCAAAAGCGTTTGTAACTAATCGTGTAGGGGACTTTGGTTTATTA

TTAGGAATCTTAGGTCTTTATTGGATAACGGGTAGTTTCGAATTTAAGGATTTGTTTGAA  
ATAGTCAATAACAATGGAGTCAATTCCTTTATTTGTTACTTTGTGTGCCTCCCTATTATTCG  
TCGGTGCAGTTGCTAAATCTGCACAATTCCTCCCTTCATGTATGGTTACCTGATGCCATGG  
AAGGACCTACTCCTATTTTCGGCTCTTATACACGCTGCTACTATGGTAGCGGGCGGGAATTT  
TTCTTGTAGCCCGGCTTCTTCTCTTTTTCACAGTCATACCTTACATAATGAATCTTATTTT  
TTTGATAGGTATAATAACAGTACTATTAGGAGCTACTTTGGCTCTTGCTCAAAAAGACAT  
TAAGAGAAGTTTAGCCTATTCTACAATGTCTCAATTGGGTTATATGATGTTAGCTCTAGG  
TATGGGGTCTTATCGAGCTGCTTTATTTCAATTTGATCACTCATGCCTATTCAAAAAGCCTTA  
TTGTTTTTAGGATCCGGATCAATTATCCATTCAATGGAAACCATTGTTGGATATTCTCCA  
GATAAAAGTCAGAACATGGTCTTATGGGCGGTTTAAACAAAATATATGCCAATTACAAA  
AACTGCTTTTTTTATTAGGTACACTTTCTCTTTGTGGTATTCCACCTCTTGCTGTTTTTGG  
TCAAAGATGAAATTTTAATGATAGTTGGTTGTATTCACCGATTTTCGCGATAATAGCT  
TGTTCCACAGCGGGATTAAGTGCATTTTATATGTTTCGGATATATTTACTTACCTTTGAAG  
GGCCTTTAAATGTTTCAATTTTCAAATTACAGTGGCAAAAAAATAGCTCGTTCTATTTAA  
TATCTATTTGGGGTAAAGAAGGACCGAAGACGATTAACAAAAAT--TTTCGTTTATCAAC  
AATGAATTTTTTTTTCGTTTGGCAATAAAGAAATTTTCCCATATCCCCATGAATCGGACAA  
TACTATGCTAGTGCCTCTGCTTGTATTGGTTTTTTTTACTTTGTTTCGTTGGATTATAGGA  
ATTCCTTTGATTTTGTATATATTATCGAAATGGTTAACTCCGTCGATAAACCTTTTACATC  
CAAATTGGAAC--TCCGTGGATTGGTATGCATTTGTGACAAATGCGATTTTTTTCAGTCAG  
TATAGCCTATTTCCGGAATATTTATAGCATCCCTTTTATATGGGCCTGTTTATTCTTCTTTCC  
AGAATTTGGAATTAATTAATTTCTTTGTTATTCTATGGGACAAAATAATAAATGTCATATA  
CAATTGGTCATATAATCGTGGTTACATAGATAGTTTTTATGCAAGAGCTTTTACTAGGGG  
TATAAGAGGATTAGCTGAACACTCAATTTTTTTGATAGACGAGTAATTGATGGAATTAC  
GAATGGGGTTGGTGTACAAGTTTCTTTGTAGGAGAAGGGATCAAATATGTTGGGGGC  
GGG--CGAATCTCTTCTTACCTCTTCTTGTATTTATTTTATGTATCAATTTTTTTATTAATTT  
ACTACATGGATTTACCTGGGCCAATACATGATTTTCTTTTAGTATTTCTGGGATCAGGTC  
TTATATTAGGGGGCCTAGGAGTAGTATTACTTACCAATCCAATTTATTCTGCCTTTTCATT  
AGGATTGGTTCTTGTTTGTATATCCTTATTCTATATACCATCGAACTCTCATTTTGTAGCT  
GCTGCCAGCTTCTTATTTACGTGGGAGCCATAAATGTCTTAATCATATTTGCTGTGATG  
TTCATGAATGGTTCAGAATATTACAATGATTTCCATCTTTGGACCATTGGAGATGGAGTC  
ACTTCATTGGTTTGTACAAGTATTTTTTTTACTAATTACTACTATCCTAGATACGTCAT  
GGTATGGGATTATTTGGACTACAAGATCAAACCAGATTATAGAACAGGATTTGATAAGT  
AATGGTCAACAAATTGGAATTCATTTATCAACAGATTTTTTTCTTCCATTTGAACTCATT  
TCTATAATTTCTTTAGTTGCCTTGATAGGTGCAATTGCTATGGCTCGTCAGATGACTGTA  
CCAGCTACAAGAAAAGACCTCATGATAGTCAATATGGGCCCTCACCACCCATCAATGCA  
TGGTGTCTTCGACTCATCGTTACTCTAGATGGTGAAGATGTTATTGACTGTGAACCCAT  
ATTGGGTATTTACACAGAGGGATGGAAAAAATTGCGGAAAACCGAACAATTATACAAT  
ATCTGCCTTATGTAACCTCGTTGGGATTAATTTAGCTACTATGTTTACAGAGGCAATAACTG  
TAAATGCACCAGAACAGTTGGGAAATATTCAAGTACCTAAAAGAGCCAGCTATATCAG  
AGTTATTATGTTGGAGCTGAGTCGTATAGCTTCCCATTTGTTATGGCTTGGCCCTTTTATG  
GCGGATATCGGTGCACAGACTCCTTTCTTCTATATTTTTCAGAGAGAGAGAATTAATATAT  
GATCTACTCGAAGCTGCCACAGGTATGCGAATGATGCATAATTATTTCCGTATCGGAGG  
AGTAGCTGCTGATCTACCTTATGGCTGGATGGATAAATGTTTGGATTTCTGCGATATTTT  
TTAACGGGGGTTGCTGAATATCAAAGCTTATTACGCGGAATCCATTTTTTTTGAACG

AGTTGAAGGAGTGGGCATTATTGGTGGAGAGGAAGCAATAAATTGGGGTTTATCAGGA  
CCAATGCTACGAGCTTCCGGAATCCAATGGGATCTTCGTAAAGTTGATCATTATGAGTG  
TTACGATGAATTTGATTGGGAAGTCCAATGGCAAAAAGAAGGAGATTCATTAGCTCGTT  
ATTTAGTACGAATCGGTGAAATGACGGAATCCATAAAAATTATTCAACAGGCTCTGGAA  
GGAATTCCGGGGGGGCCCTATGAGAATTTAGAAATCCGACGCTTTGCTAGAGCAAAAG  
ATTCCGAATGGAATGATTTTGAATATCGATTATTAGTAAAAAGCCTTCTCCCACCTTTG  
AATTGTCGAAACAAGAACTTTATGCGAGAGTGGAAAGCCCCAAAGGGGGAATTGGGAA  
TTTATCTGATAGGAGATCAGAGTGTTTTTCCCTGGAGATGGAAAATTCGTCCACCAGGT  
TTTATCAATTTGCAAATCTTCCTCAGCTAGTTAAAAGAATGAAATTGGCTGACATTATG  
ACGATACTAGGTAGTATAGATATCATTATGGGAGAAGTTGATCGTATGCTACCTATGGTA  
ACTGGGTTTCATGAATTATGGTCAACAAACAATACGAGCTGCAAGGTATATCGGTCAAAG  
TTTCATGATTACCTTATCCCACGCGAACCGTTTACCTGTAACCTATTCAATATCCCTATGAA  
AAATTGATCACATCAGAGCGTTTCCGCGGTGCAATCCACTTTGAATTTGATAAATGCAT  
TGCTTGTGAAGTATGTGTTTCGTGTATGTCCTATAGATCTACCCGTTGTTGATTGGAGATT  
GGAAACTGATATTCGAAAGAAACGATTGCTTAATTACAGTATTGATTTTGGAACTCTGTAT  
ATTTTGTGGTAACTGTGTCGAGTATTGTCCAACAAATTGTTTATCAATGACTGAAGAATA  
TGAACCTTCTACTTATGATCGTCACGAATTGAATTATAATCAAATTGCTTTGGGTTCGTT  
ACCAATATCAGTAATTGGAGATTCTACAATTGCAACAATTATGAATCAAAAATAGCCAC  
GGGAAAATCCCTTGATTCAAAAACAATTACCAATTACATGCAGGGTCGTTTGTCTGCTT  
GGCTAGTCAAGCATGGGCTAGTTCATAGATCTTTGGGCTTCGATTACCAAGGAATAGAG  
ACTTTACAAATAAAGCCCCGAGGATTGGCACTCCATTGCTGTCATTTTATATGTATATGGTT  
ACAATTATCTACGTTCCCAGTGTGCCTATGATGTAGCACCAGGCGGACTGTTAGCTAGT  
GTGTATCATCTTACGAGAATACAGTATGGTGTGGATCAACCGGAAGAGGTATGCATAAA  
AGTATTTGCGCCAAGGAGGAATCCTAGAATCCGTCTGTTTTCTGGATTGGAAAAGTG  
CAGATTTTCAAGAACGGGAATCTTATGATATGTTGGGAATCTCTTATGATAATCATCCAC  
GCCTGAAACGTATCTTGATGCCTGAAAGTTGGATAGGATGGCCTTTACGTAAGGATTAT  
ATTGCCCCCAATTTCTATGAAATACAAGACGCTCAT-----

-----ATGAATTCCATTAAGTTTCCGTTACTTGATCGACCAACCCAAAATTCTGTTAT  
TTCAACTACATTGAATGATCTTTCAAATTTGGTCAAGACTCTCCAGTTTATGGCCGCTTCT  
CTATGGTACCAGTTGTTGTTTCATTGAATTTGCTTCATTAATAGGCTCGCGATTTGACTTT  
GATCGTTATGGACTGGTACCAAGATCGAGTCCTAGGCAAGCAGACCTAATTTAACAGC  
CGGCACAGTAACAATGAAAATGGCTCCTTCTTTAGTGAGATTATATGAGCAAATGCCCG  
AACCAAAAATATGTCATTGCTATGGGAGCCTGTACTATTACAGGAGGGATGTTCAAGTACC  
GATTCTTATAGTACTGTTCCGGGAGTCGATAAGCTAATTCCTGTGGATGTCTATTTGCCG  
GGCTGCCCCGCTAAACCGGAGGCAGTTATAGATGCTATAACAAAATTCGTAAGAAGG  
TTTCTCGAGAAATATATGAAGACAGAATTGTGTCTCAACAGAAGAATCGATGTTTTACT  
ACCAATCACAAGTTTCATGTTGGACGCAGTACTCATACTGGAAATTATGATCAAGGATT  
ACTCTATCAATCGCCATCTACTTCAGAGATCCCTTCTGAAACATTTTCAAATACAAAA  
GTCAGTATCTTCCCACGAATTAGTGAATATGCAAAATAGAAATACCTTTTCTTGATAAA  
GGAACAGATGACTCGATCCATTTCCGTATCGATCATGATATATGTAATAACTCGGACATC  
CATTTCAAATGCATATCCCATTTTGCACAGCAGGGTTATGAAAATCCACGAGAAGCGA  
CTGGGCGTATTGTATGTGCCAATTGCCATTTAGCTAATAAGCCCGTGGATATTGAGGTTT  
CGCAAGCAGTACTTCTGATACTGTATTTGAAGCAGTTGTTAGAATCCCTTATGATATGC

AACTGAAACAAGTTCTTGCTAATGGTAAAAAAGGGGCTTTGAATGTAGGGGCTGTTCT  
TATTTTACCTGAGGGATTTCGAATTAGCTCCCCCGATCGTATTTCTCCCGAGATGAAAGA  
AAAGATAGGCAATCTTTCTTTTCAGAGTTATCGCCCCACTAAAAAAATATTCTTGTAAT  
AGGTCCGGTTCCTGGTCAGAAATATAGTGAAATTACCTTTCTATTTCTTTCCCGGACCC  
CGCTACTAAGAAAGATGTTCACTTCTTAAAATATCCTATATACGTAGGCGGGAACAGGG  
GAAGGGGTCAAATTTATCCTGATGGGAGCAAGAGTAAACAATACAGTCTATAATGCTACA  
GCAGCGGGTATAGTAAGCAAATCGTACGTAAAGAAAAAGGGGGATACGAAATAACCA  
TAGCGGATGCATCGGATGGACACCAAGTGGTTGATATTATACCTCCAGGACCCGAACCT  
CTTGTTTCAGAGGGTGAATCCATCAAGCTTGATCAACCATTAACGAGTAATCCCAATGT  
GGGTGGATTTGGTCAGGGAGATGCAGAAATAGTACTGCAAGATCCATTACGTGTCCAA  
GGCCTTTTGTCTTCTTTGCATCTGTTATTTTGGCACAAATCTTTTTGGTTCTTAAAAAG  
AACAGTTTGAGAAGGTTCAATTGTCCGAAATGAATTCATGAGTAAAGTATATGATTG  
GTTCAAGAACGCCTTGAAATTCAGGCGATTGCAGATGATATAACTAGTAAATATGTTT  
CTCCACATGTCAACATATTTTATTGTCTAGGGGGGATTACGCTTACTTGTTTTTTAGTACA  
AGTAGCTACGGGTTTGTCTATGACTTTTTACTATCGTCCGACCGTTACCGAGGCTTTTGC  
TTCTGTTCAATACATAATGACTGAAGCTAACTTTGGTTGGTTAATTCGATCAGTTCATCG  
ATGGTCGGCAAGTATGATGGTCCTAATGATGATCCTGCACGTATTTCTGTGTACCTCAC  
CGGTGGATTTAAAAAACCTCGCGAATTAACCTGGGTTACGGGTGTGATTCTGGCTGTAT  
TGACCGCATCTTTTGGTGTAACCTGGTTATTCCTTACCTTGGGACCAAATTGGTTATTGGG  
CAGTAAAAATCGTGACAGGTGTACCTGAAGCCATTCTGTAAATAGGATCACCTTGGTC  
GAGTTATTACGCGGAAGTGCTAGTGTGGGTCAATCCACTTTGACTCGTTTTTATAGTTTA  
CACACTTTTGTATTACCTCTTCTTACTGCCGTATTTATGTTAATGCACTTCCCAATGATAC  
GTAAGCAAGGTATTTCTGGTCCTTAAATGGGAGTAAACAAAGAAACCTGACTTGAATGAT  
CCTGTATTAAGAGCTAAATTTGGCTAAAGGGATGGGTCATAATTATTACGGAGAACCCGC  
GTGGCCCAATGATCTTTTATATATTTTCCAGTAGTAATCTAGGTACTATTGCATGTAAC  
GTAGGCTTAGCGGTTCTAGAACCATCAATGATTGGTGAACCAGCAGATCCATTTGCAAC  
TCCTTTGGAAATATTACCCGAATGGTACTTCTTTCCCGTATTTCAAATACTCCGTACAGT  
ACCCAATAAGTTATTGGGTGTTCTTTTAAATGGTTTCAGTACCTGCGGGATTATTGACAGT  
ACCTTTTTTGGAGAATGTTAATAAATCCAAAACCCATTTCTGTCGTCCAGTAGCTACAA  
CCGTCTTTTTGATCGGTATCGCGGTAGCCCTTTGGTTGGGTATTGGAGCAACATTACCTA  
TTGATAAATCTCTAACTTTAGGTCTTTTTATGATTGAAGTTTTTCTATTTGGAATCGTGTT  
AGGTCTAATTCCTATTACTTTGGCTGGATTATTCGTAACCTGCATATTTACAATACAGACGC  
GGTGATCAGTTGGACCTTATGCCTACTCTAACTAGTTATTTCCGGTTTTCTACTGGCAGCT  
TCAACTATAACCTCAGCTCTATTTATTGGTCTGAGCAAGATACGACTTATTATGGATATAG  
TAAGTCTCGCTTGGGCTGCTTTAATGGTAGTCTTTACATTTTCTCTTTTCGCTCGTAGTAT  
GGGGAAGAAGTGGACTCATGATTATTCGTTCCCGGAACCAGAAGTTAAAATTTTGGT  
GGATAGGGATCCCATAAAAACCTTCTTTTCGAGGAATGGGCCAGACCCGGTCATTTCTCA  
AGAACAATAGCTAAGGGCCCTGAGACTACCACTTGGATCTGGAACCTACATGCTGATG  
CTCACGATTTTCGATAGCCATAACCAGTGATTTGGAGGAGATCTCTCGAAAAGTATTTAGT  
GCCATTTTGGTCAACTCTCCATCATCTTTCTTTGGCTGAGTGGCATGTATTTCCATGGT  
GCCCCTTTTTCCAATTATGAAGCATGGCTAAGCGATCCTACTCACATTGGACCCAGCGC  
CCAGGTGGTTTGGCCAATAGTGGGCCAAGAAATATTGAATGGTGATGTGGGCGGAGGT  
TTCCGAGGAATACAAATAACCTCTGGTTTTTTTCAGATTTGGCGAGCATCTGGAATAAC  
TAGTGAATTACAACCTCTATTGTACCGCAATTGGTGCATTGGTCTTTGCAGCGTTAATGCT

TTTTGCTGGTTGGTTCCATTATCACAAAGCTGCTCCGAAATTGGCTTGGTTCCAAGATG  
TAGAATCTATGTTGAATCACCCTTAGCGGGGCTACTAGGACTTGGGTCTCTTTCTTGG  
GCGGGACACCAAGTACATGTATCTTTACCGATTAACCAATTTCTAGACGCTGGAGTAGA  
TCCTAAAGAGATCCCCTTCCCTCATGAATTTATCTTGAATCGGGACCTTTTGGCTCACT  
TTATCCCAGCTTTGCCGAAGGAGCAACCCCATTTTCACTTTGAATTGGTCAAAATATG  
CAGACTTTCTTACTTTTCGTGGAGGATTAGATCCAGTAACAGGGGGTCTATGGCTGACC  
GATATTGCACACCATCATTTAGCTATTGCAATTCTTTTCCTGATAGCCGGTCACATGTATA  
GGACCAACTGGGGCATTGGTCATAGCCTGAAAGATATTTTAGAGGCTCATAAAGGTCCA  
TTTACAGGCCAGGGTCATAAAGGCCTCTATGAGATCTTAACAACGTCATGGCATGCTCA  
ATTATCTCTTAACCTAGCTATGTTAGGCTCTTTAACCATTGTTGTAGCTCACCATATGTAT  
TCCATGCCCCCTATCCATATTTAGCTACTGACTATGGTACACAACCTTTCGTTGTTTACA  
CATCACATGTGGATTGGTGGTTTTCTCATAGTTGGTGCTGCTGCGCATGCAGCCATTTTT  
ATGGTAAGAGACTATGATCCAACCTACTCGATATAACGATCTATTAGATCGTGCCTTAGG  
CACCGCGATGCAATCATATCCCCTTAACTGGGCATGTATATTTCTAGGCTTTCACAGT  
TTTGGTTTTGTATATTCATAATGATACCATGAGCGCTTTAGGGCGTCCCCAAGATATGTTTT  
CAGATACCGCTATAACAATTACAACCTGTCTTTGCTCAATGGGTACAAAACCCCATGCT  
TTAGCACCTGGTGCAACAGCTCCTGGTGCAACAACAAGCACCAGCTTGACTTGGGGG  
GGTGGTGATTTAGTAGCAGTAGGTGGCAAAGTCGCTTTGTTACCTATTCCATTAGGAAC  
TGCAGATTTTTTGGTACATCACATTCATGCATTTACGATCCATGTGACGGTATTGATACTA  
CTGAAAGGCGTTCTATTTGCTCGTAGCTCTCGTTTTGATACCTGATAAAGCAAATCTTGG  
TTTTCGTTTTCCCTTGTGACGGACCTGGAAGAGGGGGAACATGTCAAGTATCCGCCTGG  
GATCATGTCTTCTTAGGTCTATTCTGGATGTACAATGCAATTCGGTAGTAATATTCCATT  
TCAGTTGGAAAATGCAGTCGGATGTTTGGGGTAGTATAAATGATCAAGGGGTGGTAAC  
TCATATCACGGGCGGAAACTTTGCGCAGAGTTCATTACTATTAATGGGTGGCTTCGTG  
ATTTCTTATGGGCACAAGCATCCCAGGTAATTCAGTCTTATGGTTCTTCATTATCTGCATA  
TGGCCTTTTCTTCTAGGTGCGCATTTTGTCTGGGCTTTCAGTTTAAATGTTTCTATTTAGC  
GGCCGTGGTTATTGGCAAGAACTTATTGAATCCATCGTTTTGGGCTCATAACAAATTTAA  
AGTTGCTCCTGCTACTCAGCCTAGAGCCTTGAGCATTGTACAAGGACGCGCTGTAGGA  
GTAACCCATTACCTTCTGGGTGGAATTGCCACAACATGGGCGTTCTTCTTAGCAAGAAT  
TATTGCAGTAGGAATGGCATTAAAGATTTCCAAGGTTTAGCCAAGGCTTAGCTCAGGACC  
CCACTACTCGTCGTATTTGGTTTGGTATTGCTACCGCACATGATTTGAGAGTCATGATG  
ATATTACTGAGGAACGTCTTTATCAGAATATTTTTGCTTCTCACTTCGGGCAGTTAGCAA  
TAATTTTTCTGTGGACTTCCGGAAATCTGTTTCATGTAGCTTGGCAAGGAAATTTGAG  
TCATGGGTACAGGACCCCTTACATGTAAGACCTATTGCTCATGCAATTTGGGATCCTCAT  
TTTGGTCAACCGGCTGTGGAAGCCTTACTCGAGGGGGTGCTCTCGGCCAGTGAATA  
TCGCTTATTCTGGTGTATTATCAGTGGTGGTATAACAATTGGCTTACGCACTAATGAAGATC  
TTTATACTGGATCTCTTTTTCTATTATTTCTTCTGCTTTATCCTTAATAGCGGGTTGGTTA  
CATCTACAACCGAAATGGAAACCAAGCGTTTCGTGGTTCAAAAATGCCGAATCTCGTC  
TCAATCATCATTTGTCAGGACTCTTCGGAGTAAGTTCCTTGGCTTGGACAGGACATTTA  
GTTTCATGTCGCTATTCCCGGATCCAGGGGGGAGTACGTTTCGATGGAATAATTTCTTAGAT  
GTATTACCGCATCCCCAAGGGTTAGGCCACTTTTTACAGGGCAGTGGAATCTTTATGC  
CCAAAACCCGATTCCAGTAGTCATTTATTTGGTACTTCCCAAGGGGCGGGAACCTGCGA  
TTCTAACCTTCTCGGGGGATTTTCATCCACAAACGCAAAGTTTATGGCTGACCGATATT  
GCTCATCATCATTTAGCTATTGCATTGATTTTTCTCGTTGCTGGTCATATGTATAGAACGA

ACTTCGGGATTGGGCACAGTATGAAAGATCTTTTAGAAGCACATATTCCTCCGGGGGA  
CGATTGGGACGTGGACATAAGGGTCTTTATGACACAATTAATAATTCGATTCATTTTCAA  
TTAGGCCTTGCTCTAGCCTCTTTAGGAGTTACTTCTTTGGTAGCCCAACACATGTAC  
TCTTTACCTGCTTATGCATTCATAGCACAGGACTTTACTACTCAAGCTGCGTTATATACTC  
ATCATCAATACATCGCAGGTTTCATCATGACAGGAGCCTTTGCTCATGGAGCTATATTCT  
TCATTAGAGATTACAATCCGGAGCAGAATGAGGATAATGTATTGGCAAGAATGTTAGAC  
CATAAAGAAGCTATCATATCCCATTTAAGTTGGGCCAGCCTCTTTCTGGGGTTCCATACC  
TTGGGACTTTATGTTTCATAACGACGTCATGCTCGCTTTTGGTACTCCGGAGAAACAAAT  
CTTGATCGAGCCCATATTTGCGCAATGGATACAATCTGCTCATGGTAAGACTTCATATGG  
GTTTCGATGTACTTTTATCTTCAACGACTGGCCCAGCATTCAATGCGGGTTCGAAGCATAT  
GGTTGCCTGGCTGGTTAAATGCTATTAATGAG-----AATAGTAATTCACTATTCTTAACAA  
TAGGTCCGGGAGACTTCTTGGTTCATCATGCTATTGCTCTAGGTTTACATACAACTACAT  
TGATCTTAGTAAAAGGTGCTTTAGATGCACGTGGTTCCAAGTTAATGCCAGATAAAAAG  
GATTTCCGTTATAGTTTTCTTTCGACGCTCCGGGACGAGGCGGTACTTGTGATATTC  
GGCTTGGGATGCGTTTTATTTGGCAGTTTTCTGGATGTTAAATACCATTGGATGGGTTAC  
TTTTTATTGGCATTGGAAGCACATCACATTATGGCAGGGTAACGTTTCACAGTTTAATGA  
ATCCTCCACTTATTTGATGGGATGGTTAAGAGATTATCTATGGTTAAACTCTTCACAAC  
TATCAATGGATATAACCCTTTTGGCATGAATAGTTTATCGGCTGTTGGCGTGGATGTTCT  
ATTTGGACATCTTGTTTGGGCTACTGGATTTATGTTCTTAATTTCTGGCGTGGATATTGG  
CAGGAATTGATTGAAACTTTAGCATGGGCTCATGAACGCACACCTTTGGCTAATTTGAT  
TCGATGGAGAGATAAACAGTGGCTCTTTCCATTGTGCAAGCAAGATTGGTTGGATTAG  
CCCCTTTTCTGTAGGTTATATATTTACTTATGCAGCTTTCTTGATTGCCTCTACATCAGG  
CAAATTTGGTATGTCACATTCAGTAAAGATTATGATACATGTATAGGATGTACTCAATGT  
GTACGAGCCTGCCCCACAGATGTATTAGAAATGATACCTTGGGACGGATGTAAAGCTAA  
GCAAATTGCTTCTGCTCCAAGAACAGAGGACTGTGTAGGTTGTAAGCGATGTGAATCT  
GCTTGTCCAACAGATTTCTTGAGTGTCCGGGTTTATTTATGGCATGAGACAACCTCGCAG  
CATGGGGCTAGCCTATATGACAACCTTCAACTTACCCTCTATTTTTGTGCCTTTAGTGGG  
CCTAGTATTTCCGGCAATTGCAATGGCTTCTTTATTTCTTCATGTTCAAAAAACAAGAT  
TGTCATGCGAGATATAAAAACATATCTCTCCGTGGCACCTGTGCTAAGTACTCTATGGTT  
CGGGTCTTTGGCAGGTCTTTTGATAGAGATCAATCGTTTATTTCCAGATGCGTTGGCATT  
CCCTTTTTTC-----ATGACTGCAATTTTAGAGAGACGCGAAAGCGAAAGCCTATGGGGT  
CGCTTCTGTAACCTGGATAACCAGCACTGAAAACCGTCTTTACATTGGATGGTTCGGTGT  
TTTGATGATCCCTACCTTATTGACCGCAACTTCTGTATTTATTATTGCCTTCATTGCTGCT  
CCTCCAGTAGATATTGATGGTATTCGTGAACCTGTTTCCGGGTCTACTTTATGGAAC  
AATATTATCTCTGGCGCCATTATTCTACTTCTGCAGCTATCGGTTTGCATTTTATCCGA  
TCTGGGAAGCGGCATCCGTTGATGAATGGTTATACAATGGTGGTCCTTATGAACTAATT  
GTTCTACACTCCTTACTTGGTGTAGCTTGTACATGGGTCGTGAATGGGAACCTAGTTTC  
CGTCTGGGTATGCGTCCTTGGATTGCTGTTGCATATTCAGCTCCTGTTGCAGCTGCTACT  
GCTGTTTTCTTGATCTACCCAATTGGTCAAGGAAGCTTCTCTGATGGTATGCCTCTAGG  
AATCTCTGGTACTTTCAACTTCATGATTGTATTCCAGGCTGAGCACAACATCCTTATGCA  
CCCATTTACATGTTAGGTGTAGCTGGTGTATTTCGGCGGCTCCCTATTCAGTGCTATGCA  
TGGTTCCTTGGTAACTTCTAGTTTAATCAGGGAAACCACTGAAAATGAATCTGCTAATG  
AAGGTTACAGATTCGGTCAAGAGGAAGAACTTATAATATCGTAGCTGCTCATGGTTAT  
TTTGGCCGATTGATCTTCCAATATGCTAGTTTCAACAATTCTCGTTCTTTACATTTCTTCC



TAGCTGCTTGGCCTGTAATAGGTATCTGGTTTACTGCTTTAGGTATCAGCACCATGGCTT  
TCAACCTAAATGGTTTCAATTTCAACCAATCTGTAGTTGACAGTCAAGGTCGTGTAATT  
AACACTTGGGCTGATATTATCAACCGTGCTAACCTTGGTATGGAAGTTATGCATGAACG  
TAATGCTCACAACCTCCCTCTAGACCTAGCTGCTGTTGAAGCTCCATCTACAAATGGAA  
TGGGTTTGCCTTGGTATCGTGTTACATACCGTTGTATTGAATGATCCCGGTTCGTTGCTTT  
CTGTCCATATAATGCATACAGCTCTAGTTTCTGGTTGGGCCGTTTCGATGGCTCTATACG  
AATTAGCAGTTTTTGTATCCCTCTGACCCTGTTCTTGATCCAATGTGGAGACAGGGTATG  
TTCGTTATACCCCTTCATGACTCGTTTAGGAATAACCAATTCATGGGGTGGTTGGAGTATC  
ACA--GGAGGGACTATAACGAATCCGGGTCTTTGGAGTTACGAAGGTGTGGCCGGAGC  
ACATATTGTGTTTTCTGGGTTGTGCTTTTTGGCAGCTATCTGGCATTGGGTGTATTGGGA  
TCTAGAAATATTCTGCGATGAGCGTACAGGAAAACCTTCTTTGGATTTGCCTAAGATCT  
TTGGAATTCATTTATTTCTCTCAGGGGTGGCTTGCTTCGGGTTTGGCGCATTTTCATGTAA  
CAGGTTTGTATGGTCCCTGGCATATGGGTGTCCGATCCTTATGGACTAACTGGAAAAGTA  
CAACCTGTAAATCCCGCGTGGGGTGTGGAAGGTTTTGATCCTTTTGTCCGGGAGGAAT  
AGCCTCTCATCATATTGCAGCAGGGACATTGGGCATATTAGCGGGTCTATTCCATCTTAG  
TGTCGCCCGCCTCAACGTCTATATAAAGGATTACGTATGGGCAATATTGAAACTGTCCT  
TTCCAGTAGTATTGCTGCTGTCTTTTTTGCAGCTTTTGTGTTGCTGGAACATGTGGTA  
TGGTTCAGCAACTACCCCAATCGAATTATTGGTCCCACTCGTTATCAATGGGATCAAG  
GATACTTCCAGCAAGAAATATAACGAAGAGTTGGTGCTGGGCTAGCCGAAAATCAAAG  
TTTATCAGAAGCTTGGTCTAAAATTCCCGAAAAATTAGCTTTTTATGATTACATCGGCAA  
TAATCCAGCAAAAAGGGGATTATTCAGAGCGGGCTCAATGGACAACGGGGATGGAATA  
GCTGTTGGATGGTTAGGACATCCCATCTTTAGAGATAAAGAAGGACGTGAGCTTTTTGT  
ACGTCGTATGCCTACTTTTTTTGAAACATTTCCAGTAGTTTTGGTAGACGGAGACGGAA  
TTGTGAGAGCCGATGTTCCTTTTAGAAAGAGCAGAATCGAAGTATAGTGTGCAACAAGT  
AGGTGTAACCTGTTGAGTTCTATGGGGGCGAACTCAATGGAGTCAGTTATAGTGATCCTG  
CTACTGTGAAAAAATATGCTAGACGTGCTCAACTGGGTGAAATTTTTGAATTAGATCGT  
GCCACTTTGAAATCGGATGGTGTTTTTTCGTAGCAGTCCAAGGGGTTGGTTTACTTTTTGG  
ACATGCTTCGTTTGTCTTGTCTTTTTTTGGACACATTTGGCATGGTGCTAGAACCCTT  
GTTTCAGAGATGTTTTTGTGTTATTGACCCGGATTTGGATGCTCAAGTGGAATTTGGAA  
CATTCCAAAAACTTGGAGATCCGACTACAAAGAGACAAGTAGTCATGAAAACCTTATA  
TTCCCTGAGGAGGTTCTACCACGTGGAAACGCTCTTTAATGGAACTTTAGCTTTAGCTG  
GTCGTGACCAAGAAACCACCGTTTCGCTTGGTGGGCCGGGAATGCCCGACTTATCAA  
TTTTGTCCGGTAAACTACTTGGGGCTCACGTGCCCCATGCCGGATTAATTGTATTCTGGG  
CCGGAGCAATGAACCTATTTGAAGTGGCTCATTTTCGTACCAGAGAAGCCCATGTATGAA  
CAAGGATTGATTTTACTTCCCCATCTCGCTACTTTAGGTTGGGGGGTAGGTCCTGGTGG  
AGAAGTTATAGACACCTTTCCATACTTTGTATCTGGAGTACTTCACTTAATTTCTCTGC  
AGTATTGGGCTTTGGTGGTATTATCATGCACTTCTCGGACCTGAGACTCTTGAAGAAT  
CTTTTCCATTCTTCGGTTATGTATGGAAGATAGAAATAAAATGACCACAATTTTGGGTA  
TTCATTTAATCTTGTTAGGTATAGGTGCTTTTCTTCTAGTACTCAAGGCTCTTTATTTTGG  
GGCGTATATGATACCTGGGCCCCGGGGGGGGGAGATGTAAGAAAAATAACCAACTTG  
ACCCTTAGCCCAAGTGTATATTTGGTTATTTACTAAAATCGCCCTTTGGAGGAGAAGG  
ATGGATTGTTAGTGTGGACGATTTAGAAGATATAATTGGAGGACATGTATGGTTAGGTTT  
CATTTGTATACTTGGTGGAACTTGGCATATCTTAACCAAAACCTTTGCGTGGGCTCGCCG  
CGCACTTGTATGGTCTGGAGAGGCTTACTTGTCTTATAGTTTAGGTGCTTTATCTGTCTT

TGGTTTTATCGCTTGTTGCTTTGTCTGGTTCAATAATACCGCTTATCCTAGTGAGTTTTAT  
GGGCCTACTGGGCCAGAAGCTTCTCAAGCTCAAGCATTACTTTTTCTAGTTAGAGACC  
AACGCTTGGGGCTAATGTGGGATCCGCTCAAGGACCTACTGGTTTAGGTAAATATCTA  
ATGCGTTCCCCGACCGGAGAGGTCATTTTTGGAGGAGAACTATGCGGTTTTGGGATC  
TCCGTGCTCCCTGGTTGGAACCTCTAAGGGGTCCCAATGGTTTGGACTTGAGTAGGCTT  
AAAAAAGACATAACAACCTTGGCAAGAACGTCGTTCCGCGGAATATATGACTCATGCTC  
CTTAGGTTCTTTAAATCCGTGGGTGGCGTAGCTACCGAGATCAATGCAGTCAATTATG  
TCTCTCCTAGAAGTTGGTTAGCTACCTCTCATTTTGTTCCTAGGATTCTTCTATTTCGTGG  
GTCATTTGTGGCATGCGGGAAGGGCTCGTGCAGCTGCAGCAGGATTTGAAAAAGGAAT  
TGATCGTGATTTTGAACCTGTTCTTTCCATGACCCCTCTTAACATGACTATAGCCCTTGG  
TAGATTTACCAAAGACGAAAATGATTTATTTGATATTATGGATGACTGGTTACGGAGGG  
ACCGTTTCGTTTTTGTAGGTTGGTCCGGTCTATTGCTCTTTCCTTGTGCCTATTTTCGCTTT  
AGGAGGTTGGTTCACCGGTACAACCTTTGTAACCTCATGGTATACCCATGGATTGGCTA  
GTTCTATTTGGAAGGTTGCAATTTCTTAACCGCCGAGTTTCTACTCCTGCTAATAGTT  
TAGCACATTCTTTATACTACTATGGGGTCTGAAGCACAAGGAGATTTTACTCGTTGGT  
GTCAATTAGGCGGTCTGTGGACTTTTGTGCTCTCCATGGCGCTTTCGGATTAATAGGTT  
TCATGTTACGTCAATTCGAACTTGCTCGATCTGTTCAATTGCGCCCTTATAATGCAATCG  
CATTCTCTGCTCCAATTGCTGTTTTTGTTCCTGATTATCCACTAGGTCAGTC  
TGGTTGGTCTTTTGCCTAGTTTTGGTGTAGCAGCTATATTTGATTATCCTCTTCTTC  
CAAGGGTTTCATAATTGGACGTTGAACCCATTTTCATATGATGGGAGTTGCCGGCGTATT  
GGGTGCTGCTCTGCTATGCGCTATTCATGGTGCTACCGTAGAAAATACTTTATTTCGAAGA  
TGGTGACGGTGCAAATACATTCCGTGCTTTTAACCCAACCTCAAGCTGAAGAGACTTATT  
CAATGGTCACCGCTAACCGCTTTTGGTCCCAAATCTTTGGGGTTGCTTTTTCCAATAAA  
CGTTGGTTACATTTCTTTATGTTATTTGTACCAGTAACCGGTTTATGGATGAGTGCTCTTG  
GAGTAGTCGGTCTGGCTCTGAACCTACGTGCCTATGACTTCGTTTTCCAGGAAATCCGT  
GCAGCGGAAGATCCTGAATTTGAACTTTCTACACTAAAATATTCTCTTAAACGAAGG  
GATTCGTGCTTGGATGGCGGCTCAGGATCAGCCTCATGAAAACCTTATATTCCCTGAGG  
AGGTTCTACCACGTGGAAACGCTCTTATGTCTGGAAGCACGGGAGAACGTTCTTTTGC  
TGATATTATTACCAGTATTCGATACTGGGTCATTCATAGCATTACTATAACCTTCCCTATTCA  
TTGCGGGTTGGTTATTCGTCAGCACGGGTTTAGCTTACGATGTGTTTTGGAAGCCCTCGG  
CCAAACGAGTATTTTACAGAGAGCCGACAAGGAATTCATTAATAACTGACCGTTTTGA  
TCCTTTGGCACAACCTCGATGAATTTAGTAGATCCTTTATGACCATAGATCGAACCTATCC  
AATTTTTACAGTACGATGGTTGGCTGTTACGGACTAGCTGTACCTACCGTTTTCTTTTTT  
GGGATCAATATCAGCAATGCAGTTCATCCAACGAATGGCTACACAAACTGTTGAGGGT  
AGTTCTAGATCTGGT---CCAAGACGAACTATTATAGGGGATTTATTGAAACCATTGAATT  
CGGAATATGGGAAAGTAGCTCCTGGATGGGGAACCTACCCCTTTGATGGGGGTCGCAAT  
GGCTCTATTTGCGATATCTTATCTATTATTTGGAGATTTATAATTCTTCCGTTTTACTGG  
ATGGAATTTCTATGCAAATGCTTACTCTCAAACCTTTCGTTTACACGGTAGTGATATTCT  
TTGTTTCTCTTTCATCTTCGGATTCCTATCTAATGATCCAGGACGTAATCCTGGACGTG  
AGGAAATGGCCGATACTACTGGAAGGATTCCTCTTTGGCTGATAGGTACTGTAACCTGGT  
ATTCCTGTGATCGGTTCAATAGGTATTTTCTTTTACGGTTCATATCCGGATTGGGTTTCAT  
CCCTGATGCTTAATATCTTTAGTTTGATCTGTATCTGTCTTAATTCTGCCTTTCATTCGAG  
TAGTTTTTTCTTTGCCAAATTGCCCGAGGCTTACGCTATTTTCAATCCAATCGTAGATGT  
TATGCCAGTCATACCTGTGCTCTTTTTTCTCTTAGCCCTTGTTTGGCAAGCTGCTGTAAG

TTTTCGAACGACACAATCAAACCCGAACGAACAAAATGTTGAATTAATCGTACCAGT  
CTCTACTGGGGTTATTACTCATTTTTGTACTTGCTGTTTTATTTTCCAATTATTTCTTCAA  
TATGGAAGTAAATATTCTCGCATTATTGCTACTGCACTGTTTCATTCTAGTTCCTACTGCT  
TTTTTACTTATCATCTACGTAAAAACAGTCAGTCAAATGATATGGAAACAGCAACCCT  
AGTCGCCATCTTTATATCTGGTTCACCTTGTAAGTTTTACCGGGTATGCCTTATATAACCGCT  
TTTGGGCAACCCTCTCAACAATAAGAGATCCATTTCGAGGAACATGGGGACATGGAAG  
CATTGGTTTATACATTCTTTTAGTCTCGACTCTAGGGATAATTTTTTTTCGCTATTTTTTTTT  
CGAGAACCACCTAAAGTTCCCACTAAAAAGGTGAAAATGACTATTGCTTTCCAATTGG  
CTGTTTTTGCATTAATTGCTACTTCATCAATCTTACTGATTAGTGTACCCGTTGTATTTGC  
TTCTCCTGAAGGTTGGTCAAGTAACAAAATGTTGTATTTCCGGTACAACATTATGGA  
TTGGATTAGTCTTTCTGGTAGGTATCCTTAATTCTCTCATCTCT-----ATGTCA  
CCACAAACAGAGACTAAAGCAAGTGTGGATTCAAAGCTGGTGTAAAGATTACAGAT  
TGACTTATTATACTCCTGAATATGAAACCAAAGATACTGATATCTTGGCAGCATTCCGAG  
TAACTCCTCAACCTGGAGTTCCACCTGAGGAAGCAGGGGCCGCGGTAGCTGCCGAATC  
TTCTACTGGTACATGGACAACCTGTGTGGACCGATGGACTTACCAGCCTTGATCGTTACA  
AAGGACGATGCTACCACATCGAGCCCGTTGCTGGAGAAGAAAATCAATTTATTGCTTAT  
GTAGCTTACCCTTTAGACCTTTTTGAAGAAGGTTCTGTTACTAACATGTTTACTTCCATT  
GTGGGTAATGTATTTGGGTTCAAAGCCCTACGTGCTCTACGTCTGGAGGATCTGCGAAT  
CCCTCCTGCTTATTCTAAAACCTTTCCAAGGCCACCTCATGGTATCCAAGTTGAGAGAG  
ATAAATTGAACAAGTATGGTTCGTCCTTATTGGGATGTACTATTAACCAAATTTGGGG  
TTATCCGCTAAGAACTACGGTAGAGCGGTTTATGAATGTCTACGTGGTGGACTTGATTTT  
ACCAAGGATGATGAGAACGTGAACTCCAACCATTTATGCGTTGGAGAGACCGTTTCT  
TATTTTGTGCCGAAGCAATTTACAAAGCACAAAGCCGAAACAGGCGAAATCAAAGGACA  
TACTTGAATGCTACTGCAGGTACATGTGAAGAAATGATCAAAGGGCTGTATTTGCCA  
GAGAATTGGGAGTTCCTATCGTAATGCACGACTACTTAACGGGGGGATTCACTGCAAAT  
ACTAGCTTGGCTCATTATTGCCGAGATAATGGCTACTTCTTCACATCCACCGTGCAATG  
CATGCAGTTATTGATAGACAGAAAATCATGGTATACACTTTCGTGTACTAGCTAAAGC  
GTTACGTATGTCTGGTGGAGATCATATTCCTCTGGTACAGTAGTAGTAAACTTGAAG  
GGGAAAGAGAAATCACCTTGGGCTTTGTTGATTTACTACGTGATGATTTTATTGAAAAA  
GACCGAAGTCGCGGTATTTATTTCACTCAAGATTGGGTCTCTCTACCAGGTGTTCTGCC  
CGTGGCTTCAGGGGGTATTCACGTTTGGCATATGCCTGCTCTGACCGAGATCTTTGGGG  
ATGATTCCGTACTACAGTTTGGTGGAGGAACTTTAGGACACCCTTGGGGAAATGCACC  
GGGTGCCGTAGCTAATCGAGTAGCCCTAGAAGCGTGTGTACAAGCTCGTAATGAGGGA  
CGTGATCTTGCTCGTGAAGGTAATGAAATTATCCGTGAGGCTAGCAAATGGAGCCCTGA  
ACTAGCTGCTGCTTGTGAGGTATGGAAGGAGATCAAATTCGAATTCGAAGCAATGGAT  
ACTTTG-----ACGGCGATACATTTATACAAAACCTTCTACCCCGAGCACACGCAATGGAGC  
CGTAGACAGTCAAGTGAATCCAATCCACGAAATAATTTGATCTATGGACAGCATCGTT  
GTGGTAAAGGTCGTAATGCCAGAGGAATCATTACCGCAGGGCATAGAGGGGGAGGTCA  
TAAGCGTCTATACCGTAAAATCGATTTTCGACGGAATGAAAAAAAATATCTGGTAGAA  
TCGTAACCATAGAATACGACCCTAATCGAAATGCATACATTTGTCTCATACTATGGGG  
ATGGTGAGAAGAGATATATTTTACATCCCAGAGGGGCTATAATTGGAGATACCATTGTTT  
CTGGTTCTGAAGTTCCTATAAAAATGGGAAATGCCCTACCTTTGACCGAGATGCCCTTA  
GGCACGGCCATACATAACATAGAAATCACACTTGGAAAGGGTGGACAATTAGCTAGAG  
CTGCGGGTGCTGTAGCGAAACTGATTGCAAAAAGAGGGTAAATCGGCCACATTAATAATT

ACCTTCTGGGGAGGTCCGTTTGTATCCAAAACTGCTCAGCAACAGTCGGACAAGTG  
GGTAATGTTGGGGTGAATCAGAAAAGTTTGGGTAGAGCCGGATCTAAGTGTGGCTCG  
GTAAGCGTCCTGTAGTAAGAGGAGTAGTTATGAACCCTGTAGACCATCCCCATGGGGG  
TGGTGAAGGGAGGGCCCCAATTGGTAGAAAAAACCCACAACCCCTTGGGGTTATCCT  
GCGCTTGGAAGAAGAAGTAGAAAAAGGAATAAATATAGTGATAGTTTATTCTTCGTC  
GCCGTAGTAAAATGATTCAACCTCAGACCCATTTGAATGTAGCGGACAACAGCGGGG  
TCGAGAATTGATGTGTATTTCGAATCATAGGAGCTAGT---AATCGCCGATATGCTCATATTG  
GTGACGTTATTGTTGCTGTAATCAAAGAAGCAGTGCCCAATATGCCTCTAGAAAAATCT  
GAAGTGATTAGAGCTGTAATTGTACGTACATGTAAAGAACTCAAACGTGACAACGGTA  
TGATAATACGATATGATGACAATGCAGCAGTTGTCATTGATCAAGAAGGAAATCCAAAA  
GGAACCTCGAGTTTTTTGGTGGGATCGCTCGGGAATTGAGACAGTTGAATTTTATTA  
AGTTTCATTAGCCCCTGAGGTATTAATGCTTAGTCCCAAAGAACCAGATTTTCGTAAAC  
AACATAGAGGAAGAATGAAGGGAATATCTTATCGAGGCAATCGTATTTGTTTCGGT  
TACGCTCTTCAGGCACTTGAACCCGCTTGGATCACATCTAGACAAATAGAAGCAGGGC  
GGCGAGCAATGACACGATATGCGCGTCGTGGTGGAAAAATCTGGATACGTATATTTCCA  
GATAAACCTGTTACAATAAGACCTACGGAAACACGTATGGGTTCGGGGAAAGGATCTC  
CCGAATATTGGGTATCCGTCGTTAAACCGGGTTCGAATACTTTATGAAATGGGCGGAGTA  
TCAGAAATTGTAGCCAGAGAAGCTATTTCAATAGCTGCATCCAAAATGCCTATACGAAC  
ACAATTCGTTATTGCGGGAATGACCAGAATTAACGAGGATATATAGCTCGGAGACGTA  
GAACAAAAATTCGTTTATTTGCATCAACCTTTCGAGGGGCTCATTCAAGACTTACTCGA  
ACTATTACTCAACAGAAAATGAGAGCTTTGGTTTCAGCTCATCGGGATAGGGGCAAGC  
AAAAGAGAAATTTTCGTCGTTTGTGGATCACTCGGATAAATGCAGTAATTCGTGAAAAT  
AATGGGGTATCCTATAGTTATAGTCGATTAATACACGATCTGTACAAAAGGCAGTTGCTT  
CTTAATCGTAAAATACTTGCACAACCTAGCTATATCAAATAGAAATTGTCTTTACATGATTT  
CCAATGAAATTCTCAA-----ATGATAAAGGAAGTATACGCTTTAG  
GTCAACATATACGTATGTCTGCTCACAAGCGCGAAGAGTAATTGATCAGATTCGTGGA  
CGTTCCTACGAGGAAACACTTATGATCCTAGAACTCATGCCTTACCGAGCATGTTATCC  
CATTTTTAAATTGGTTTATTCTGCAGCAGCAAATGCTAGTCACAATATGGGTCTCAACGA  
AGCGGATTCAGTTATTAGTAAAGCCGAAGTCAACGAAAGTACTACCATGAAAAGGTTA  
AAACCTCAAGCTCGAGGACGTAGTTATCCGATAAAAAGACCCACCTGTCATATAACAAT  
TGCATTGAAAGATATATCCTTAGATGGGGTGGTATGGGTCAAAAAATGGATGGAATCA  
AATATGCAGTATTTACAGACAAAAGTATTCGGTTATTGGGGAACAAT--CAATATACTTCT  
AATGTGCAATCAGGATCAACTAGGACAGAAATAAAGCATTGGGTGCAACTCTTCTTTG  
GTGTCAAGGTAATAGCTATGAATAGTCATCGACTCCCGGAAAGGGTAGAAGAATGGG  
ACCTATTATGGGACATAACAATGCATTACAGACGTATGATCATTACGCTTCAACCGGGTTA  
TTCTATTCCACCTCTTAGAAAAGAAAAGAACTATGGCGGTTCCAAAGAAACGTACTTCTA  
TATCAAAAAGCGTATTCGTAAAAATATTTGGAAAAGAAAGGGGTATTGGGCAGCGGT  
AAAAGCTTTTTCGTTAGCAAATCTCTTTCTACCGGGAATTCGAAAAGTTTTTTGTGC  
GA-----CAAATAATGGCCAAGGGTAAAGATGTCAGAGTCAGAGTTATTTTGAATGTAC  
CAACTGTGTTTCGAAACGGTGTAAAT-----AAGGAATCACCGGGCATTCTAGATATATTA  
CTCAAAGAATCGACACAATACGCCTAGTCGATTGGAATTGAGAAAATCTGTCCCTAT  
TGTTTCAAGCATAACGATTCATGGGGAGATAAAGAAAATGAAAATAAGGGCCTCCGTT  
GTAATAATTTGTGAAAATGTGCGACTGATCCGTAGGCGGGGACGAATTATAGTAATTTGT  
TCCAACCCGAGACATAAACAAAGACAAGGAATGGTTCGAGAGGAAATAGCAGTATCTA

CTCGGACACTACAGTGGAAGTGTGTTGAATCAAGAGTAGACAGTAAGCGTCTTTATTAT  
GGACGTTTTATTTTGTCTCCGCTTATGAAAGGTCAAGCCGATACGATAGGCATCGCGAT  
CGGAAGGGCTTTGCTTGGAGAAATAGAAGGAACATGTATCACACGTGCAAAATCTGAG  
-----AAGATAACCACACGAATATTCTACCATAGTAGGTATTGAAGAATCAGTACATGAAATT  
TTAATGAATTTGAAAGAAATTGTATTGAGAAGTAATCTGTATGGAACCTCGCGACGCATT  
TATTTGCGTCAGGGGTCTGGATACGTAAGTCTCAAGACATCATCTCACCACCTTCTG  
TGGAATCGTTGATACTACACAGCATATAGCTAGCCTGACAGAACCAATTGATTTGTGT  
ATTGGATTACAAATCGAGAGGAATCGCGGATATCGTATGAAAACACCAATAACTCTCA  
AGATGGAAGTTAT-----CCTATAGATGCTGTATTTCATGCCTGTTTCGAAATGCGAATCATAG  
TATTCATTCTTATGGGAATGGGAATGAGAAACAAGAGATACTTTTTCTCGAAATATGGA  
CGAATGGGAGTTAACTCCTAAAGAAGCACTTCACGAAGCCTCCCGGAATTTGATTAAT  
TTATTTATACCTTTTCTAGATGCGCAAGAAGAG-----GACATCCAATTAGAGGACAATCA  
A---ACAAGGTTACTTTACCTTTTTTTACCTTTCATGATAGATTAACT---AAACTAAGGAA  
AAACAAAAA---GAAATAGCATTGAAATGTATTTTTATTGACCAATCAGAATTGCCTCCC  
AGGACCTATAATTGCCTCAAAGGTCCAATATACATACATTATTGGACCTTTTGAATAAC  
AGTCAAGAAGATCTTATGAAAATGGAACATTTTCAGATAGAAGATGTAAAACAGATATT  
GGACATTCTACAAAAGCAT-----TTCGCAATTGATTTACCTAAGAATAAGATGCTCCGAG  
ATGGAAAT--GAGGGAATGTCTACAATACCTGGATTTAGTCAGATACAATTTGAGGGATT  
TTGTAGGTTTCATTGATCAGGGCTTGACGGAAGAACTTTATAAGTTTCCAAAAATTGAAG  
ATACAGATCAAGAAATTGAATTTCAATTATTTGTGGAAACATATCAATTGGTGAAACCCT  
TAATAAATGAAAGAGATGCTGTGTATGAATCACTCACATATTCTTCTGAATTATATGTACC  
TGCGGGATTAATTTGGAAAACCGGTAGGGATATGCAAGAACAACAATTTTTATTGGAA  
ACATTCCTCTAATGAATCCCTGGGAACCTCTATAGTTAATGGAATATACAGAATTGTGA  
TCAATCAAATATTGCAAAGCCCTGGTATTTATTACCGTTCAGAATTGGACCATAACGGAA  
TTTCGGTCTATACCGGCACCATAATATCAGATTGGGGAGGAAGATCAGAATTAGAGATT  
GATAGAAAAGCAAGGATATGGGCTCGTGTGAGTAGGAAACAAAAATATCTATTCTAG  
TTCCATCATCAGCTATGGGTTTCGAATCTAAGAGAAATTCTAGATAATGTTTGCTACCCTG  
AAATTTTCTTGTCTTTTCTGAATGATAAGGAGAAAAAAAAGATTGGGTCAAAGAAAA  
TGCTATTTTGGAGTTTTATCAACAATTTGCTTGTGTAGGCGGGGATCCGGTATTTTCTGA  
GTCCTTATGTAAAGAATTACAAAAGAAATTTTTTCAACAAGATGTGAATTAGGAAGGA  
TTGGTTCGACGAAATATAAATCGGAGACTGAATCTTGATATCCCTCAGAAAAATACATTT  
TTGTTACCGCGAGATGTATTGGCAGCTGCGGATCATTGATCGGAATGAAATTTGGAAT  
GGGTACACTTGACGAT-----ATGAATCACTTGAAAATAAACGTATTTCGTTCTGTAGCGG  
ATCTGTTACAAGATCAATTCGGATTGGCTCTGGTTCGTTTAGAAAATGCGGTTTCGAGGG  
ACTATATCTGGAGCAATTAGG---CATAAATTGATA---CCGACTCCTCAGAATTTGGTAACT  
TCAACTCCA-----TTAACAACCACTTATGAATCCTTTTTTCGGCCTACACCCCTTATCT  
CAAGTTTGGATCGAACTAATCCATTGACACAAATAGTTTCATGGGCGCAAATTGAGTTA  
TTTGGGTCTTGGAGGATTGACAGGGCGAACTGCTAGTTTTTCGGATACGAGATATCCATC  
CTAGTCACTATGGACGTATTTGCCCAATTGACACGTCTGAAGGAATCAATGTTGGACTT  
ATTGGATCCTTAGCAATTCATGCAAGGATTGGTCATTGGGGG---TCTCTAGAAAGCCCAT  
TTTAT-----GAAATATCTGAGAGATCC-----AAAGAGGTACGAATAGTTTATTTATCACC  
AAGTAGAGATGAATACTATATGGTAGCGGCGGGAAATTCTTTAGCGTTGAATCAGAGTA  
TTCAGGAAGAACAGGTTGTTCCAGCTCGATACCGTCAGGAATTCCTTACTATTGCATGG  
GAACAGGTTTCATCTTCGAGCATTTTTTCCCTTCCAATTTTTTCTATTGGAGCTTCCCTC

ATTCCTTTTATCGAGCATAATGATGCGAATCGGGCTTTAATGAGTTCTAATATGCAACGT  
CAAGCAGTTCCGCTTTCTCGGTCCGAGAAGTGCATTGTTGGAACCTGGGTTGGAATGCC  
AAGCGGCTCTAGATTCCGGGAGTTTCCGCTATAGCCGAACACGAGGGAAAGATCATTAT  
ACCGATACTGACAAGATCATTATCAGGTAATGGAGACACTCTAAGCATTCCATTGATT  
ATGTATCAACGTTCCAACAAAATACTTGTATGCATCAAAAACCCAGGTTCCGGCGGG  
GTAAATGCATTAATAAAGGGACAAATTTTAGCAGATGGTGCCGCTACAGTTGGTGCGA  
ACTCGCTTTGGGAAAAAACGTATTAGTAGCTTATATGCCATGGGAAGGCTACAATTCTG  
AAGACGCAGTACTCATTAGTGAGCGTCTGGTATATGGAGATATTTATACTTCTTTTCACA  
TACGGAAATATGAAATTCAGACTCATGTGACAAGCCAAGGA---CCTGAAAGGATCACTA  
ACGAAATACCGCATTTAGAAGCCATTTACTCCGAAATTTAGACAGAAATGGAATCGTG  
ATGCTGGGATCTTGGGTAGAAACGGGTGATATTTTAGTGGGTAAATTAACGCCTCAGAT  
GGCGAAAGAA---TCATCGTATGCCCCGGAAGATAGATTATTACGAGCCATACTTGGCATT  
CAAGTATCCACTTCAAAGAACTTGTCTAAACTACCTATAGGTGGCAGGGGTCGAG  
TTATTGATGTGAGATGGATCCAGAAAAAGGGA---GGTTCAGCTATAATCCAGAAACGA  
TTCGTGTATATATTTACAGAAACGTGAAATCAGAGTAGGTGATAAAGTAGCTGGAAGA  
CATGGGAATAAAGGTATCATTTCAAAATTTTGCCTAGACAAGATATGCCTTATTTGCAA  
GATGGAACACCTGTTGATATGGTTTTCAACCCATTAGGAGTACCTTCACGAATGAATGT  
AGGACAGATATTTGAATGCTCGCTCGGGTTAGCGGGGGATCTGCTAGACAGACATTATC  
GAATAGCACCCCTTTGATGAGAGATATGAACAAGAGGCTTCAAGAAAACCTAGTGTTTTC  
TGAATTATATGAAGCCAGTAAGCAAACAGCGAATCCATGGGTATTTGAACCTGAGTATC  
CGGGAAAAAGCAGAATATTTGATGGAAGAACGGGAGATCCTTTTGAACAACCTGTTAT  
AATAGGAAAGTCCTATATCCTAAAATTAATTCATCAAGTGGATGATAAAATCCATGGGCG  
TTCCAGTGGGCATTATGCGCTTGTTACACAACAACCCCTTAGAGGAAGAGCCAAGCAA  
GGGGGACAACGGGTAGGAGAAATGGAAGTTTGGGCTCTAGAGGGATTTGGTGTGCT  
CATATTTTACAAGAGATGCTTACTTATAAATCTGATCATATTAGAGCTCGTCAGGAAGTA  
CTTGGTACTACGATCATTGGAGGAACAATAACTAACCCCTGAGGATGCTCCAGAATCTTT  
TCGATTGCTCGTTGAGAACTACGATCTTTGGCTCTGGAACCTGAATCATTTCCTTGTATC  
TGAGAAGAACTTCCAGATTAATAGGAAGGAAGCT-----ATGATCGACCGGTA  
TAAACATCAACAACCTTCGAATTGGATCGGTTTCTCCTCAACAATAATTGCTTGGGCC  
AAAAATCCTACCTAATGGAGAGATAGTTGGAGAGGTGACAAAACCCCTATACTTTTCAT  
TACAAAACCAATAAACCGGAGAAAGATGGATTGTTTTGTGAAAGAATTTTGGACCTAT  
CAAAGTGGAATTTGTGCTTGTGGAAATTTTCGAGTAATCGGAGACGAAAAAGAAGA  
CCCGAAATTTTGTGAACAATGCGGAGTCGAATTTGTTGATTCTCGGATACGAAGATATC  
AAATGGGATACATCAAACCTGGCATGCCAGTAACCTCATGTGTGGTATTTGAAACGTCTT  
CCTAGTTATATTGCGAATCTTTTAGATAAACCTCTTAAAGAATTAGAAGGCCTAGTATAC  
TGCGAT-----TTTTCTTTGCTAGGCC---ATAGCTAAAAACCTACTTTCTTACGATTACG  
AGGTTTATTTCGAATATGAAATCCAATCCTGGAAATACAGCATCCACTTTTTTTACTAC  
CCAAGGCTTTGATACATTTGAAATCGAGAAATATCTACTGGAGCGGGTGCTATCAGAG  
ACAATTAGCCGATCTGGATTTGCGAATTATTATAGATTCTTCATTGGTAGAATGGAAAG  
AGTTAGGGGAAGAA---GGGCCACAGGTAATGAATGGGAAGATAGAAAATTGGAAG  
AAGAAAGGATTTTTTGGTTAGACGCATGGAATTAGCTAAGCATTTTATTTCGAACAAATG  
TAGAACCAGAACGGATGGTTTTGTGCCTATTACCAGTTCTTCTCCCGAGTTGAGACCG  
ATCATTAGATAGATGGGGGTAAACTAATGAGTTCCGATATTAATGAACTCTATAGAAGA  
GTTATCTATCGGAACAATACTCTTACCGATCTATTAACAACAAGCAGATCTACGCCAGG

GGAATCAGTAATGTGTCAGGAGAAATTGGTACAAGAAGCCGTGGATACACTTCTTGAT  
AATGGGATCCGCGGACAACCAATGAGGGACGGTCATAATAAAGTTTACAAGTCGTTTT  
CGGATGTAATTGAAGGCAAAGAGGGAAGATTCGTGAGACTCTGCTTGGTAAACGAGT  
CGATTATTCGGGGCGTTCCGTCATTGTCGTGGGCCCTTCGCTTTCATTACATCGATGTGG  
ATTGCCTCGCGAAATAGCAATAGAGCTTTTCCAGACATTTGTAATTCGTGGTCTAATCA  
GACAACATGTTGCTTCCAACATAGGAGTTGCTAAAAGTAAAATTCGGGAAAAAGAACC  
AATTGTGTGGGAAATACTTCAAGAAGTTATGCAGGGGCACCCGGTATTGCTGAATAGA  
GCACCCACTCTGCATAGATTAGGCATACAGGCATTCCAGCCCATTTTAGTGGAAGGACG  
TGCTATTTGTTTACATCCATTAGTTCGTAAGGGATTCAATGCAGACTTTGATGGGGATCA  
AATGGCTGTTTCATGTACCTTTATCCTTGGAGGCTCAAGCAGAGGCTCGTTTACTTATGTT  
TTCTCATAGGAATCTCCTGTCTCCAGCTATTGGAGATCCGATTTCCATACCAACTCAAGA  
TATGCTTATTGGACTCTATGTATTAACGATGGGGAATCACCGAGGTATTTGTGCCAATAG  
GTATAATCCATGGAATCGCAGAAAC-----TATCAAAATGAAAGAATTGACGATAATAAC  
TATAAGTATACGAAAGAAAAAGAACCCTATTTTTGTAGTTCCTATGATGCACTTGGAGC  
TTATCGGCAGAAACGAATCAATTTAGATAGTCCTTTGTGGCTCCGGTGGCGACTAGATC  
AACGC---GTCATTGCATCA-----AGAGAAGTTCGGATCGAAGTTCAATATGAATCTTTGG  
GTACCTATCATGAGATTTATGGGCACTATCTAATAGTAAGAAGTGTAATAAAAAAAAAATC  
CTTTGTATATACATTCGAACCACTGTTGGTCATATTTCTTTTTATCGAGAAATAGAAGAA  
GCTGTACAAGGGTTTTATCGGGCCCGCTCATACGGTACC-----ATGGAGGT  
ACTTATGGCAGAACGGGCTGATCTGGTCTTTCACAATAAAGTGATAGATGGAACCTGCCA  
TGAAACGACTTATTAGCAGATTAATAGATCACTTCGGAATGGCATATACATCACACATCC  
TGGATCAAGTAAAGACTCTGGGGTTCAGCAAGCCACTGCTACATCTATTTTCATTAGGA  
ATTGATGATCTTTTAAACAATACCTTCTAAGGGATGGCTAGTCCGAGATGCTGAACAACA  
AAGTTTGATTTTGGAAAAACACTATCATTATGGGAATGTACACGCGGTAGAAAAATTAC  
GTCAATCCATTGAAATATGGTATGCTACAAGTGAATATTTGCGACAAGAAATGAATCCTA  
ATTTTAGGATGACTGACCCTTCTAATCCAGTCCATATAATGTCTTTTTTCGGGAGCTAGAG  
GAAATGCATCTCAAGTACACCAATTAGTAGGTATGAGAGGATTAATGTCAGATCCCCAA  
GGACAAATGATTGATTTACCCATTCAAAGCAATTTACGCGAAGGACTCTCTTTAACAGA  
ATATATATTTCTGCTATGGAGCCCGCAAAGGAGTTGTAGATACTGCTGTACGAACATC  
AGATGCTGGATACCTTACGCGCAGACTTGTGTAAGTAGTTCAACACATTGTTGTTTCGTA  
GAACAGATTGTGGCACCGTCCGAGGTATTTCTGTAAGTCCTCGAAATGGGATGATGAC  
G---GAAAGAATTTTTATCCAAACATTAATGGGCCGTGTATTAGCAGACGATATATATATGG  
GTCCACGATGCATCGCTATTCGAAATCAAGATATTGGGATTGGACTTGTCAATCGATTCA  
TAACC-----TTTCGAGCACAACCAATATCTATTCGAACCCCTTTACTTGTAGG  
AGTACATCTTGGATCTGTGATTATGTTATGGTTCGGAGTCCCACTCATGGCGACTTGGTC  
GAATTGGGGGAAGCTGTAGGTATTATTGCGGGTCAATCTATTGGAGAACCAGGGACTC  
AACTAACATTAAGAACTTTTCATACCGGCGGAGTATTCACAGGAGGTACTGCAGAACA  
GGTACGAGCCCCCTTCTAATGGAAAAATAAAATTCAATGAGGATTTGGTTCATCCCACAC  
GTACACGTCATGGACATCCTGCTTTTCTATGTTATATAGACCTGTATGTAACCTATTGAGA  
GTCAGGATATTATACATAATGTGAATATTCACCAAAAAGTTTTCTTTTAGTTCAAAATG  
ATCAATATGTAGAATCAGAACAAGTGATTGCTGAGATTCGCGCGGGAACATCCACTTTG  
---AATTTAAAGAGAGGGTTCGAAAACATATTTATTCTGATTCAGAGGGAGAA---ATGCA  
CTGGAGTACCGATGTGTACCATGCACCTGAATATACATATGGTAATGTTTCATCTCTTACC  
AAAAACAAGTCATTTATGGATATTATCAGGAAGTCCGTGCAGA-----TCCAATATAGTGC

CTTTTTCGCTCCACAAGGATCAAGATCAAATGAGCGTTCAT-----TCTCTTTCTGTGCGAA  
GGAAGATATATTTCTAAC-----CTCTCAGTGAATAATGATCAA---GTGAGACACAAATTGT  
TTAGTTCGGATCCTTCCTCTTGT--GGGGAGAGGATTCTTGATTTT--TCCGGACCTGATC  
GAATCATATGCAACGGTCATTGTAATTCATATATCCTGCC---ATTCTTCATGAAAATTCT  
GAT-----TTATTGGCAAAGAGGCGAAGAAATAGATTCATCATTCCATTCCAATCTAATCAA  
GAACGGGAGAAAGAACTAATGCCCCGTGCAGGTATCTCGATTGAAATACCCATAAAT----  
--GGTATTTTCCGTAGAAATAGTATTCTTGCTTATTTTCGATGATCCCCGATACAGAAGAAA  
CAGTTCGGGAATTACTAAATATGGGACTATAGAGGTGCATTCAATCGTCAAAAAAGAAG  
AT-----TTGATTGAATATCGAAGA-----AAAGAATTTAGGCCAAAATACAAGAAAGTAGAT  
CGATTTTTTTTTCATTCCCGAGGAAGTGCATATCTTACCCGGGTCTTCTTCCATACTGGTA  
CGAAACAATAGTATCATTGGAGTAGATACACGAATCACTTTAAATACAAGAAGCCGAGT  
AGGCGGATTGGTCCGAGTGGAGAGAAAAAAAAAAAAAAGATTGAACTGAAAATCTTTTC  
TGGAGATATCCATTTTCTGGAGAAACAGATAAGATATCCCGGCATAGTGGCATCTTGAT  
ACCACCAGGAGCGGAAAAAAAA-----AATTCTAAGGAATCAAAAACA---AAATTGAAA  
AATTGGATCTATATCCAACGG-----ATTACACCTACCAAGAAAAG-----TTTTTTGTTTTG  
GTTTCGACCCGTAGTCACATATGAAATAGCAGACGGAATAAATTTAGCAACGCTTTTCCC  
TCAGGATCTGTTGCAGGAAAGGATAATGTGCAACTTCGAGTTGTCAATTATATCCTTTA  
TGGAAATGGCAAACCAATTCGAGGAATTTCTCACACAAGTATTCAATTAGTTCGGACTT  
GTTTAGTATTGAATTGGGATCAAGACAAAAA-----GGTCTTCCATAGAAGAGGTTT  
ATGCTTCCCTGTTGAAGTAAGGGCAAATGATCTGATTTCGAGATTTTCATAAGAATGGAC  
TTAGCGAAGTCCCCTATTTTCGTATATCGGAAAAAGGAATGATCCGGCGGGTTCAGGATT  
GATCTCCGAT--AATCGATCAGATCGCACCAATAGAAATCCTTTTTTAT-----TCCAAGGC  
AAGG-----ATTCAACAATCACTTAGTCAACATCAAGGAATTCGTACGTTGTT  
GAATAGA-----AATAAGGAATGCCAATCTTTGATAATTTTGTATCATCCAATTGTTCTC  
GAATAGGTATAGGTCCATTCAACGGTTTGAATATCACAAT-----GTGACAAAAGAATC  
AGATCCCCTAATTTCAATTAGGAATTCGTTTGGGCCTTTAGGGACT-----GTCCCTAAAAT  
TGCGAATTTTATTATCT--TATTACCATTTAATAACT-----CATAATCAGATCTTG---ATAA  
ATAAATATTTGCTACTTGACAAT-----TAAAACAGACTTTCCAAGTACTTAAA-----T  
ATTATTTAATAGATGAAAATGGGAGA-----ATTTTAAATCCCGATCCATGCAGTAACATCA  
TTTTTAATCCATTCAATTTGAATTGGTATTTTCTCCATCATGATTATTGTGAAGAATCATC  
CACAATAATTCGC---CTGGGACAGTTTCTTTGTGAAAATGTATGTATATCCAAAATGGA  
CCA-----CACCTAAAATCTGGTCAAGTTCTAATTGTTTCAT--GTTGACTCTTTAGTAATA  
AGATCAGCTAAGCCCTATTTGGCCACTCCAGGAGCAACCGTTCATGGCCATTATGGAGA  
AATCCTTTACGAGGGAGATACATTAGTTACATTTATATATGAAAAATCGAGATCTGGTGA  
TATAACGCAGGGTCTTCCAAAAGTAGAACAAGTGTAGAAAGTGCATTCAATTGATTCA  
ATATCAATGAACCTAGAAAAGAGGGTTGAAGACTGGAACGAACGTATAGCAAGAATTC  
TTGGAATTCCTTGGGGATTCTTGATTGGCGCTGAGCTAACCATAGCGCAAAGTCGTATT  
TCTTTGGTTAATAAAAATCCAAAAGTTTATCGATCCCAGGGAGTGCAGATCCATAATAG  
GCATATAGAAATTATTGTACGTCAAATAACATCAAAAAGTTGTGGTTTCAGAA-----GAT  
GGAATGTCTAATGTTTTTTTGCCTGGGGAATAATTGGATTGTTGCGAGCGGAGCGAAC  
GGGGCGGGCTTTGGAAGAAGCGATCTGTTACCGAGCCGTCTTATTGGGAATAACGAGG  
GCCTCTCTGAATACTCAAAGTTTCATATCCGAGGCGAGTTTTCAAGAACTGCTCGAGT  
TTTAGCAAAAAGCCGCTCTACGAGGTTCGTATCGATTGGTTGAAAGGCCTGAAAGAGAAC  
GTTGTTCTAGGGGGGATGATACCCGTTGGTACTGGATTCAAAGGATTGGTGCATCGTTC



A-----AGGCAACACAACAACATTCCT-----TTGGAAATAAAAAAGAAAAATTTATTTGAA  
GGGGAAATGAGA-----GATATTTTGTTCACCACAAAGAATTATTTTCATTTTGCATCCC  
AAAGAATTTTCATGATACATCAGAACAATCATTACCGGGATTTAATGATTCC-----  
--ATGACAAGAAGATATTGGAACATAAATTTGGAAGAGATGATGGAAGCAGGAGTGCAT  
TTTGGTCATGGTACTAGGAAATGGAATCCTAGAATGGCACCTTACATCTCTGCAAAGCG  
TAAAGGTATTTCATATTACAAATCTTACTAGAACTGCTCGTTTTTTTATCAGAAGCTTGTGA  
TTTAGTTTTTGTATGCAGCAAGTAGGGGAAAACAATTCTTAATAGTTGGTACCAAAAATA  
AAGCAGCCGATTTAGTAGCATCGGCTGCAATAAGGGCTCGGTGTCATTATGTTAATAAA  
AAATGGCTTGGTGGTATGTCAACGAATTGGTCCACTACAGAAACAAGACTTCAAAAAGT  
TCAGGGACTTGAGAGCGGAACAAAAGGCGGGGAGACTCAACCGTCTTCCGAAAAGA  
GATGCAGCAATGTTGAAGAGACAATTATTTAACTTGCAAACATATTTGGGTGGGATCAA  
ATATATGACGGGGTTACCTGATATTGTAATCATTGTTGATCAGCAAGAAGAATATACAGC  
TCTTCGAGAATGCGTCACTTTGGGAATTCCAACGATTTGTTAATCGATACAAATTGTG  
ACCCGGATCTCGCAGATATTTCAATTCCAGCGAATGATGACGCTATAGCTTCAATCCGAT  
TAATTCTTAACAAATTAATCTCTGCAATTTGTGAGGGTCTGTTCTAGC---TATATAAGAAAT  
CGTATGGGTCAAAAATAAATCCACTTGGTTTCAGACTTGGTACAACCCAGGGGCATCA  
TTCCCTCTGGTTTGCACAACCAAAAAGTTATTCTGAGGGTCTCCAGGAAGATCAAAA  
ATACGAGATTGTATCAAGAATTTGTACAAAAAATATGAGAATATCCTCAGGT---TTCG  
AGGGAATTGCACGTATAGAGATTCAAAAAGAATTGATCTGATCCAAGTCATAATCTAT  
ATGGGATTTCCAAAGTTGTTAATAGAGAGTAGACCACGA-----GGAATAGAAGAAT  
TACAGATAAATGTACAAAAGAGTTTCATTCTGTAAACCGAAAGCTCAACATTGATATC  
ACAAGAATTGCAAACCTTATGGGCAACCTAATATTCTTGCAGAATTTATAGCCGGACA  
ATTAAAGAATCGAGTTTCATTTGCAAAGGCAATGAAAAGGCTATTGAACTAACTGAA  
CAAGCAGATACAAAAGGAATTCAAATACAAATTGCAGGGCGTATCGACGGAAAAGAA  
ATTGCACGTGTGCAATGGATCAGAGAAGGTAGAGTTCCCCTACAAACCATTTCGAGCTA  
AAATTGATTATTGTTCCATCCGGTTCGAACTATCTATGGGGTCTTAGGCATCAAAATTT  
GGATATTTGTAGACGAGGAAATGTCTCGTTACCGAGGGCCTCGTTTCAAAAAAATACG  
CCGTCTGGGGACTTTACCGGGACTAACTAGTAAAAGGCCTAAAGCTGGAAGTGATTTT  
AGAAACCAAGCACGTTCCGGAAAA---AGATCTCAATATCGTATTCGTTTAGAAGAAAA  
ACAAAATTGCGTTTTTCATTATGGTCTGACAGAGCGGCAATTACTTAAATACGTTTGTAT  
CGCTAGAAAAGCCAAAGGGTCAACAGGTCAGGTTTTACTACAATTACTTGAAATGCGT  
TTGGATAACATCCTTTTTCGATTGGGCATGGCTTCGACCATTCCCGGAGCCCGGCAATT  
AGTTAACCATAGACATATTTTAGTTAATGGTTCGCATAGTAGATATACCAAGTTATCGCTG  
CAAACCCCGAGATATTATTACGACGAGGGATGAACAAAAATCTAGAGCTCTGATTCAA  
AATTATCTTGATTCATCCCCCAT--GAGGAATTGCCAAAACATTTGACTCTTCACTCATT  
CCAATAT-----AAAGGATTAGTCAATCAAATAATAGATAGTAAATGGGTTCGGTTTGA  
AAATGAGTTGCTAGTTCGTAGAATATTATCCCGTCAGACTATGTCACGTTCGAGGTACTG  
CAGAAGAAAAAACTGCCAAATCCGATCCAATTTATCGTAATCGATTAGTTAACATGTTG  
GTTAACCGTATTATGAAACACGGAAAAAATCATTGGCTTATCAAATTATCTATCGAGCC  
GTGAAAAAGATTCAACAAAAGACAGAAACAAATCCACTATCTGTTTTACGTCAAGCAA  
TACGTGGAGTAACTCCCGATATAGCAGTAAAAGCAAGACGTGTAGGCGGATCGACTCA  
TCAAGTTCCCATTTGAAATAGGATCTACACAAGGAAAAGCACTTGCCATTCGTTGGTTAT  
TAGGGGCATCCCGAAAACGTCCGGGTGCAAATATGGCTTTCAAATTAAGTTCCGAATTA  
GTGGATGCTGCCAAAGGGAGTGGCGATGCCATACGCAAAAAGGAAGAGACTCATAGA

ATGGCAGAGGCAAATAGAGCTTTTGCACATTTTCGTATGGGTAGGGACACTATTGCCGA  
CATAATAACTTCTATACGAAATGCTGACATGGATAAAAAAAGAACGGTTCGAATAACAT  
CTACTAATATTACCGAAAACATTGTGAAAATACTTCTACGAGAAGGTTTTATCGAAAAC  
GTGAGAAAACATCAGGAAAACAACAAATATTTTTTGGTTTTAACCTACGACATAGAA  
GG-----AATAGGAAAGGGCCATATAGA-----ACTATTTTAAAACGTATCAGCCGAC  
CCGGTCTACGAATCTATTCTAACCATCAACACATTCCTAAGATTTTAGGTGGAATGGGGA  
TTGTAATTCTTTCTACTTCTCGCGGTATAATGACAGACCGAGAGGCTCGACGAGAAGGA  
ATCGGAGGAGAAATTGTGTGTTATATATGGATGGCAAACCTATACCAAGAATTGGTTC  
ACGTAGAAACGGACGTATTGGTTTACGTAAGAGTGGACGTAGAATACCAAAGGGAGTT  
ATTCATGTTCAAGCAAGTTTCAACAATACCATTGTGACTGTTACAGATGTACGAGGTCG  
AGTGGTTTCTTGGTCTTCTGCCGGTACTTGTGGATTCCGGGGTACAAGAAGAGGGACA  
CCATTTGCTGCTCAAACCGCAGCAGGAAATGCTATTCGTACAGTAGTGGATCAGGGTAT  
GCAACGAGCAGAAGTCATGATAAAAGGTCCTGGTCTCGGAAGAGATGCAGCATTACG  
AGCCATTCGTAGAAGTGGTCTACAATTAAGTTTTGTACGGGACGTAACCCCTATGCCAC  
ATAATGGATGTAGACCTCCTAAAAAAGACGTGTGATGCCAACTATTAACAACCTTATT  
AGAAACACAAGACAGCCAATCAGAAATGTCACGAAATCCCCCGCCCTTCGGGGATGT  
CCTCAGCGCCGAGGAACATGTACTAGGGTGTATACTATCACCCCAAAAAACCAAAT  
CTGCCTTACGTAAAGTTGCCAGAGTACGATTAACCTCTGGATTTGAAATCACTGCTTATA  
TACCTGGTATTGGCCATAATTCACAAGAACATTCTGTAGTCTTAGTAAGAGGAGGAAGG  
GTTAAGGATTTACCCGGTGTGAGATATCACATTGTTTCGAGGAACCCCTAGATGCTGTCCG  
AGTAAAGGATCGTCAACAAGGGCGTTCTAAATATGGGGTCAAAAAGCCAAAATGGC  
AAAGAAAAGTTTGATTCAGAGGGAGAAGAAGAGGCAGAAATTGGAACAGAAATATCA  
TTTGATTCGTCGATCCTCAAAAAAAGAAATAAGC-----AAAGTTCCGTCGTTGAGTGA  
CAAATGGGAAATTCATGGAAAATTACAATCCTCACCGCGAAATAGTGCACCTACACGTC  
TTCGTCGACGTTGTTTTTCGACCGGAAGACCGAGAGCTAACTATCGAGACTTTGGGTTA  
TCCGGACACATACTTCGTGAAATGGTTCATGCATGTTTGTGCGGGGGCAACAAGATC  
CAGTTGGGTAAAAAAAATGCATTCATCTCAGTTATTTTCGCAAAAAGAAAAAGAAGAA  
AACGAAAACAGGGGATCTGTTGAATTTCAAGTATTAAGTTTCACCAATAAAATACGGA  
GACTTACTTCACATTTGGAATTGCACAGAAAAGACTATTTATCTCAAAGAGGTTTACGG  
AAAATTTTGGGAAAACGTCAACGGCTGCTAGTTTATTTGTCAAAGAAAAATAGAGTAC  
GTTATAAAGAATTAATCAGTCAATTGGATATTCGGGAGCCAAAACCTCGT-----ATGGTA  
AAGCTTCGTTTGAACGATGTGGTAGAAAGCAACGAGCCATCTATCGAATCGTTGCAA  
TTGATGTTTCGATCCCGAAGAGAAGGAAGAGATCTTCGAAAGTGGGTTTTTACGATCC  
GATAAAGAATCAAACCTTATTTAAATGTTCCCGCTATTCTATATTTCTTGAAAAAGGCGC  
TCAACCTACAGGAACAGTTCATGATATTTCAAAGAAGGCAGAGGTATTTAAAGAACTT  
CGCGTTAATCAAACGAAA-----ATGGATAAATCCAAGCGACCTTTTCTTAAATCCAAG  
CGATCTTTTCGTAGGCGTTTGCCCCAATTGGATCGGGGGATCGAATTGATTATCGAAA  
CATGAGTTTAATTAGTCGATTTATTAGTGAACAAGGAAAAATATTATCTAGACGAGTGAA  
TAGATTGACCTTGAAACAACAACGATTAATTACTATTGCTATAAAACAAGCTCGTATTTT  
ATCTTCGTTACCTTTTCTTAATAATGAGAAA-----CAGTTTGAAAGAACCGAGTCGACCT  
CTAGAACTGCTGGTCTAGAACCCAGAAATAAAGTGCCACGTTCACTAAAAAAAATCC  
TTTTGTAGCTAATCATTATTAAGCAAAATTGAGAAGCTCAACACGAGAGCGGAAAAA  
GAAATAATAGTAACTTGGTCCCGGGCATCTACCATTATACCCACAATGATCGGCCATACA  
ATTGCTATTCATAATGGAAAGGAGCATTTCCTATTATATAACGGATCGTATGGTAGGTC

ACAAATTGGGAGAATTTGCACCTACTATTAATTTCCGGGGACACGCGAAAAATGATAAT  
AGATCTCGTCGTATGATTTTCAAATCTTTTCTACTAGGTAATCTATTCTCCTTATGCATGA  
AGATAATCAATTCGGTCGTTGTGGTCCGACTCTATTATGGATTTCTGACCACATTCTCCA  
TAGGGCCCTCTTATCTCTTCCCTTCTCCGAGCTCGGGTTATGGAAGAAGGA-----ACCG  
AGAAGGAGGTATCAGCAACAACCTGGTTTTATTACGGGACAGCTCATGATGTTTCATATCG  
ATCTATTATGCGCCTCTGCATCTAGCATTGGGTAGACCTCATACAATAACTGTCCTAGTT  
CTACCGTATCTTTTGTTCATTTCTTCTGGAACAATCACAAACACTTTTTTGATTATGGAT  
CTACTACCAGAAATTCAATGCGTAATCTCAGCATTCAATGTGTATTCCCTGAATAATCTCA  
TTTTTCAATTATTCAACCATTTCAATTTACCAAGTTCAACGTTAGCCAGATTAGTCAACA  
TTTATATGTTTCGATGCAACAACAAGATGTTATTTGTAACAAGTAGTTTTGTTGGTTGGT  
TAATTGGTCACATTTTATTTCATGAAATGGGTTGGATTGGTATTATTCTGGATACGGCAAA  
ATCATTCTATTTCGATCT--AATGTACTIONTATTAAGTACCCTGTGTCAGAATTGAGAAATTCT  
ATGGCTCAAATCTTTAGTATTCTCTTATTATCACCTGTGTCCTACTATTTAGGCAGAATGC  
CGTCACCTATTTTCACTAAGAACTGAAAGAA-----AAACCTATTGTTACTCTTCTT  
TTCGATTATAAACGATGGAATCGTCCATTGCGATATATAAAAAATAATCGGTTAGAAAAG  
GCTGTAAGAAATGAAATGTCACAATATTTTTTTTATACATGCCAAAGTGATGGAAAACA  
AAGAATATCTTTTACATATCCACCTAGTTTATCAACTTTTGGAGAAATGATACAAAAAAA  
GATCTCTTTGTGCACGACAGAAAACTCTCCTCTGACGAACTATATAATCATTGGGTTTA  
TATCAATGAACAAAAAAGGATAACTTAAATAACGAGTTTAGAAATCGAATCGAAGCC  
CTAGACAAGGGATCTCTTGTTTTTGGATGTACTTGAAAAAAGGACTCGATTGTGTAATGA  
TGAAACTGAACAAAAATGCTTGCCTAAAATGTATGATCCTCTTTTGAACGGACCCTACC  
GTGGAACAATCAAAAATTTGTATTCACGCAAG-----GTTTGGATAAACAAAATTCATGGT  
ATCCTTTACCGAGAATTTGAACAAAAAGATCCAAATGATCAA-----GGAATAAAAGAAA  
TCCGTA AAAAAGTCCCTCGATGGTCATACAAATTAATCTATTTGGAACAAGAAGAGGTA  
GAAGAAATTCGTTCAAGAAAATGCAAACGAGTAATAATTTTTACTGAAGCTTTGATACG  
TTATTCACAACAATCGGATTTTCGTAGGAACCTAATCAAAGGATCCATGCGCGCTCAA  
GGCGTAAAACAATAATTGGGGAACCTGTTTCAAACAATGCACATTCCCCGCTTTTTTTTG  
GACAGAAAAGACAAAACCGTTTTTTTTTTCTTTTGATATC-----TCCAGAATTCTGAAGCT  
AATTTTTAGGAATAAAGAGGAGAATGAACGGATAAGAATAGCAGAAGCCTGGGATACT  
TTTATATTTACGCAAGCAATAAGAGGTTTTATGTTAATAACCCAATTAACTCTTAGAAAA  
TATATTGTATTGCCTTCATTGATAATAGCTAAAAATCTCTGCCGTATGTTATTATTTCAATT  
CCCCGAGTGGAACGAGGATTTGAAGGAATTGAATAGAGAAATGCATATTAATGCACC  
TATAATGGTATTCAATTATCAGAAAAAGAATTTCCAAAAAAGTGGTTAACAGACGGTAT  
TCAGATAAAGATCCTATTTTCTTTCCGCCTGAAACCTTGGCATAGATCTAAAAAAGGAA  
AAAAAGAAAATTTTTGTTTTTAAACAGTTTTTTGGAATGGAAGCGGAACTCCCTTTTGGT  
TCTCCCCGCAACAACCGTCTTTTTTTGAACCCATTTGGAAAGAAGTCTGACAAAAAAA  
TTCGAAACGTGAAA---AAGAAAAGTTTTTTAGTTCTAAGATTTTTTAAAAGAAAGAAA  
AAATGGTTTCTAAAGGTCTCAAAGAACA AAAAAGAATGGATTATAAAAAAAGTTCTA--  
---TTTATAAAAAGAATAATGAAAGAATTTACAAAAGTAACTATAACTACAATCAGGAAT  
CAGATTATTCCTGACTTATCCATTCAAATTAAGTCCACGGGTTGGACAAATTATTCCTG  
ACAGAAAAAAAATGAAGGATCTGGCTGATAGGACAAGTACAATCAGAAATCAAATA  
GAAAGAATCACAAAAGAAAAAAAATAATGCTAAGGAACTAGTTGTGATAATAAA  
AGATCAGAATCACAAAAAATATTTGGCAGATATTCAAAAGAAGAAGTGCCCGATTAAT  
ACGTAAATGGCACTTTTTTATAAAATTTTTTATTGAAAGGCTATAC--GATACCTTTTAT

GTATTATTAATATTCCAGAGTCAATGCACAACCTTTTCATTCATTTTATTTTCG---GACCTAT  
CCTCCTTATCACAAGCATATGTATTTTACAAATTATCACAAAACCAAGTTATTAATAAATA  
TCACTTGAGATCTGTACTTCAATATACATCTCTTTTTTATTAAGGATAGACTAAAGGATTAT  
TTTACACAAGGAATATTTTCATTCGGAATCAAAGCATAAAAAACTTCGGAATTCGGGAAT  
GAATGAATGGAAAAATTGGTTAAAGGGTCATTATCAATACGATTTATCTCAGACTAGAT  
GGTTTAGATTAGTACCGCAAAAATGGCGAAATAGAGTCAATCAACGTCGTACGATTCAA  
AATAAACAAAAATTGGGTTACATCGAAAAAGACCAA-----TTCATTTTTTACGAAAAAC  
AAGACAAATTTAAAAAACAACACTACAGATATGATCTTCTATCACATAAATATATTAATGATTA  
TATTATTGATCTGGATAGAAAATATTTGGATTGGAGAATTCTCCATTTTTGTCTTAAACTT  
TTTGATTGGATGGGAATGAATGAAGAAATACTAAATCGTTGGTTCCTCCAGAATTACT  
ACTACTTTATGATACATATAAGATTAACCATGGGGCATACCAATCAAATTACTTCTTTTA  
AATTTCAAGAACAACATAGAAGTGGAACCTGATTTCTTCTGAAAAACATTTGCTTTT  
TCAATTGAGACCGGATTATCCTTTGAATAAAAAAATGATCAATAATATCAAAGTATATTG  
TTTCTGCTTAGACTGAAAAATCCAAAGGAAATTGCTATATCTTCTATTCAAAGAAGAG  
AAATGAGTCTGGATGTAATGGTGATTCAGAAAGATATAACTCTTACAGAATTGATAAAA  
AAGGGGATATTTATTATCGATCCTATTCGTCTGTCTATAAAATGGGATGGGCAATTTATTA  
TGTATCAAACCATAGGTATTTCTTTGGTCCATAAGAATAAGCACAATCAGTATGATTTGC  
TTGCTCCTGAAAAATTTTTATCGCCTAGACGTCTGATAGAAAATTGAGAATTCGAATTTGTT  
TCAAATTTCTTTGGCCCAATTATCGATTAGAAGATTTAGCTTGTATGAATCGTTATTGGTT  
TGATACCAATAATGGCAGTCGTTTTAATATGTTAAGGATACATATGTATCCCATGAAACG  
ACATCAATTCAAATCCTGGATCTTCGAATTGAGAGAGATATTGAGAGAGATCAAGAATT  
CTCACTATTTCTTAGATTCATGGACCAAATTTGATTCAGTGGGATCTTCACTCACATTT  
TTTTCCACCAAGAACGTTTTATGAAACTCTTTGACCCCGAATTTGGAGTATCCTACTTT  
CA---CGCGATTCA-----CAGGGTTCAACAAGCAATCGATATTTACG-----ATCAAAGG  
TGTAGTACTGCTTGTAGTAGCG---GTCCTTATATAT-----CGTATTAACAATCGAAATA  
TGGTCGAAAGAAAAATCTCTATTTGATGGGGCTTCTT-----CCTATACCTATGAA  
TTCCATTGGACCCAGAAATGATACATTGGAAGAATCTTTT--GGGTCTTCCAATATCAAT  
AGGTTGATTGTTTTCG---CTCCTGTATCTTCCAAAAGGGAACAAGATCTCTGAGAGTTGT  
TTCATGGATCCGAAAGAGAGTACTTGGGTTCTCCCAATAACT-----AAAAAGTGTAT  
CATGCCTGAATCTAACTGGGGTTCGCGGTGGTGGAGGAACCGGATCGGAAAAAAGAG  
G-----GATTCTAGTTGTAAGATATCT-----AATGAAACCGTAGCTGGAATTGAGATCTCA  
TTCAAAGAAAAAGATATCAA---TATCTGGAGTTTCTTTTTGTATCCTATACGGAT-----G  
ATCCGATCCGCAAGGACCATGATTGGGAATTGTTTGTATCGTCTTTCTCCGAGGAAGAAG  
CGAAACATAATCAACTTG-----AATTCGGGACAGCTATTTCGAAATCTTAGTGAAACACTG  
GATTTGTTATCTCATGTCTGCTTTTCGTGAAAAAAGACCAATTGAAGTGGAGGGT--TTC  
TTCAAACAACAAGGA---GCTGAGTCAACTATTCAATCAAATGATATTGAGCATGTTTCC  
CAT-----CTCTTCTCGAGAAACAAGTGGGGTATTTCTTTGCAAATTGTGCTCAATTCAT  
ATGTGGCAATTCGCAAGATCTTTCGTT-----AGTTGGGGGAAG---AATCCGCACG  
AATCGGATTTTTTGGAGAAC---GTATCGAGAGAGAATTGGATTTGGTTAGACAATGTGT  
GGTTGGTAAACAAGGATCGG-----TTTTTTAGC-----AAGGTACGGAATGTATCGTCAA  
ATATTCAATATGATTCC-----ACAAGA-----TCTATTTTCGTTCAAGTAACGGATTCTAGC  
CAATTGAAAGGATCTTCT--GATCAATCCAGAGATCATTTCGATTCCATTACCATTAGT----  
--AATGAGGATTCGGAA-----TATCACACATTGATCAATCAAAG  
AGAGATTCAACAACATAAAGAAAGCTCGATTCTT--TGGGAT-----CCTTCTTTCTTCA

AACGGAACGAACAGAGATAGAATCAGAC-----CGATTCCCGAAA-----TGCCTTTCTGGA  
TATTCC-----TCAATGTCCCGGCTATTACG--GAACGTGAGAAGCAGATGAATAATCATC  
TGCTTCCGGAAGAAATCGAAGAATTTCTT-----GGGAATCCTACAAGATCAATTCGTTCT  
TTTTTCTCTGACAGATGG-----TCAGAACTTCAT--CTGGGTTCGAATCCTACTGAGAGGT  
CCACTAGAGATCAG-----AAATTGTTGAAGAAACAACAAGATGTTTCT--TTTGTCC  
CTTCCAGGCGATCGGAA-----AATAAAGAAATGGTTGATATGTTCAAGATAATTACG  
TATTTACAAAAT-----ACCGTCTCAATTCATCCTATTTTCATCAGATCCGGGATGTAATATGG  
TTCCG--AAGGATGAACCGGAT--ATGGACAGTTCCAATAAGATTTTCATTCTTGAACAAA  
AATCCATTTTTTGAT-----TTATTTTCATCTATTCCATGACCGGAACAGGGGGGATATACG  
TTA-----CACCACGATTTTGAATCAGAA-----GAGAGATTTCAAGAAATGGCAGATCTATT  
CACTCTATCAATAACCGAGCCG--GATCTGGTGTATCATAAGGGATTTGCCTTTTCTATTG  
ATTCCTACGGATTGGATCAAAAAAAAA-----TTCTTGAATGAGGTATTCAACTCCAGGGAT  
GAATCGAAAAGAAATCTTTA-----TTGGTTCTACCTCCTATTTTTTAT-----GAAGAGA  
ATGAATCTTTTTATCGAAGGATCAGAAAAAATCGGTCCG--ATCTCCTGCGGGAATG  
ATTTGGAAGATCCAAAACCAAAAAGAGTGGTATTTGCTAGCAACAACATAATGGAGGC  
AGTCAATCAATATAGATTGATCCGAAATCTGATTCAAATCCAATATAGAACCTATGGA----  
--TACATAAGAAATGTATCGAATCGATTCTTT-----TTAATGAATAGATCCGATCGCAACT  
TCGAATATGGAATTCAA-----AGAGATCAAATAGGAAATGATACTCTGAATCATAGAA  
CTATAATGAAATATACGATCAACCAACATTTATCGAATTTGAAAAAG--AGTCAGAAGA  
AATGGTTCGATCCT-----CTTATTTCTCGAACCGAGAGATCCATGAATCGGGATCCTG  
ATGCATATAGATACAAATGGTCCAATGGGAGCAAGAATTTCCAGGAACATTTGGAACAT  
TTCGTTTCTGAGCAGAAGAGC-----CGTTTTCAAGTAGTGTTCGATCGATTACGTATTA  
ATCAATATTCGATTGATTGGTCCGAGGTATCGACAAACAAGATTTGTCTAAGTCACTTC  
GTTTCTTTTTGTCCAAGTCA-----CTTCTTTTTTGTCC-----A  
AGTTGCTTCTTTTTTGTCTAAG--TCACTTCCTTTTTTCTTTGTGAGTTTCGGGAATATC  
CCCATTCATAGGTCCGAG--ATCCACATCTAT--GAATTGAAAGGTCCGAATGATCAACT  
CTGCAATCAGTTGTTAGAATCAATAGGTGTTCAAATCGTTCATTTGAATAAATTGAAAC  
CCTTC-----TTATTGGAT-----GATCATGATACTTCC--CAAAAATCGAAATCCTTGATCA  
ATGGAGGAACAATATCACCATTTTTGTTCAATAAGATACCA---AAGTGG--ATGATTGAC  
TCATTCCATACT-----AGAAATAATCGCAGGAAATCCTTTGATAAACAATGATTCTTATTC  
TCAATGATATCCCACGATCGAGACAATTGGCTGAATCCCGTGAAACCATTTTCATAGAAG  
TTCATTGATATCTTCTTTTTATAAAGCAAATCGACTTCGATTCTTGAATAATCCACATTAC  
TTCTGGTTCTAT-----TGTAACAAAAGATTCCCTTTTTATGTG-----GAAAAGGCCCGT  
ATCAATAATTATGAT-----CTTACGTAT--GGGCAATTCCTCAATATCTTGTTCATTTCGCAAC  
AAA---ATATTTTCTTTGTGCGTCCGTAAA-----AAAAAATATGCTTTTTTGGAG---AGAGA  
TACTATTTACCAATCGAGTCACAGGTATCTAACATATTCATACCTAACGATTTTCCACA  
AAGTGGTGACGAAACG--TATAACTTGTACAAATCT-----TTCCATTTTCCAATTTCGATC  
CGATCCATTCGTTCTG-----AGAGCTATTTACTCGATCGCAGACATTTCTGGAACACCTCT  
AACAGAGGGACAAATAGTCAATTTTGAAGAAGTATTGTCAACCTCTTTCAGATATGA  
ATCTATCTGATTCAGAAGGGAAGAACTTGCATCAGTATCTCAAT-----TTCAATTCAAACA  
TGGGTTTGATTCACACTCCATGTTCTGAGAAATATTTACCA-----TCCGAAAAGAGGAAA  
AAA-----CGGAGTCTTTGTCTAAAG-----AAATGCGTTGAGAAACGGCAGA  
TGATAGAACCTTTCAACGAGATAGTGCTTTTTCAAATCTCTCAAATGGAATCTGTTC  
AAACATATATGCCATGGTTCTTACTTCGACAGGGTGCAAATATCTAAATTCACCTTT

TAGATACTTTTTTCAGACCTATTG-----CCGATACTAAGTAGCAGT--CACAAATTTGTATCC  
ATTTTTTCATGATATTATGCATGGATCAGATATATCATGGCCAATTCCTCAGAAAAAATGG--  
-----TGTCTTCCACAATGGAATCTG--ATAAGTGAGATTTGAGTAAGTGTTTACA  
TAAT-----CTTCTTCTGTCCGAAGAAATGATTCATCGAAATAATGAGTCACCCGTTCCATT  
GATATGGACACATCTGAGATCACCAAATGCTCGGGAGTTC---CTCTATTCAATCCTTTTC  
CTTCTTCTTGTGCTGGATAT--CTCGTTCGTACACATCTTCTCTTTGTTTCCCGA-----GC  
CTCTAGTGAGTTACAGACAGAGTTCGAAAAGATCAAATCTTTGATGATTCATCATA  
TGATGGAGTTACGAAAACCTTCTGGATAGGTATCCTACATCTGAACTGAATTCCTTTCTGG  
TTAAAGAATCTCTTTCTAGTTGCTCTGGAACAATTAGGAGATTCTCTAGAAGAAATACG  
GGGTTCTGCTTCTGGCGGCAACATGCTATTGGGCGGTGGTCCC-----GCTTATGG  
G--GTCAAATCAATACGTTCTAAGAAGAAATATTTGAATATCAAT-----CTCATCGATCT  
CATA---AGTATCATACCAAATCCCATCAATCGAATCACTTTTTTCGAGAAATACGAGACAT  
CTAAGTCGTACAAGTAAAGAGATCTATTCAATTGATAAGAAAAAGAAAAACGTGAACG  
GTGATTGGATTGATGATAAAATAGAATCCTGGGTGCGGAACAGTGATTGATGATGAT  
GAAGAAAGAGAATTCCTTGTTCAGTTCTCC-----ACCTTAACGACA-----GAAAAAAGGA  
TTGATCAAATTCATTGAGTCTGACT--CATAGTGATCATTATCA-----AAGAATA  
ACTCTGGTTATCAAATGATTGAACAACCGGGATCAATTTACTTACGATACTTAGTTGACA  
TTCAT-----AAAAAGTATCTAATGAATTATGAGTTCAATAGATCCTGTTTAGCAGAAAGAC  
GGATATTCCTTGCTCATTATCAGACAATCACTTAT-----TCACAAACCTCGTGTGGGGCTA  
ATAGTTTTTCATTTCCCATCTCATGGA-----AAACCCTTTTCGCTCCGCTTAGCCCTATCC  
CCCTCT--AGGGGTATTTTAGTGATAGGTTCTATAGGAACTGGACGATCATATTTGGTCA  
AATACCTAGCGACAAACTCCTATGTTCTTTTATTACGGTATTTCCGAACAAGTTCCTGG  
ATGACAAGCCTAAAGGTTATCTTAATGATGAT-----ATCGATATTGATGATATTGATGAT  
AGTGACGATATTGAT-----GATAGTAA  
CGATATCGATGATGACCTTGATACGGAGCTGCTAACTATGACGAATGCGCTA-----ACT  
ATGTATATGACG-----CCGAAAATAGACCGATTTGATATCACCCCTTCAATTCGAATTAG  
CAAAGCAATGTTTCCTTGCATAATATGGATTCCAAACATTCATGATCTGTATGTGAATG  
AGTCGAATTACTTATCCCTCGGTCTATTAGTGAACCTATCTCTCC-----AGGGATTGTGA  
AAGATGTTCC---ACTAGAAATATTCTTGTATTGCTTCGACTCATATCCCCAAAAAGTG  
GATCCCGCTCTAATAGCTCCGAATAAATTAATACATGCATTAAGATACGAAGGCTTCTT  
ATTCCACAACAACGAAAGCACTTTTTCACTCTTTTCATATACTAGGGGATTTCACTTGG  
AAAGAAAATGTTCCATACT-----AATGGATTCGGGTCCATAACCATGGGTTCCAATGCAC  
GAGATCTTGTAGCACTTACCAATGAGGCCCTATCAATTAGTATTACACAGAAGAAATCC  
ATTATAGACACTAATAACAATTAGATCCGCTCTTCATAGACAAACTTGGGATTTGCGA-----  
---TCCCAGGTAAGATCGGTTCAAGATCATGGGATCCTTTTCTATCAGATAGGAAGGGCT  
GTTGCACAAAATGACTTCTAAGTAATTGCCCTATAGATCCTATATCTATCTATATGAAGA  
AGAAA-----TCATGTAAGGAAGGGGATTCTTATTTGTACAAATGGTACTTCGAACCTTGG  
ACGAGCATGAAGAAATTAACGATACTTCTTTATCTTTTGAGTTGTTCTGCCGGATCGGT  
CGCTCAAGATCTTTGGTCTCTACCC-----GGACCCGATGAAAAA---AATTGGATCACTTC  
TTAATGGATTCGTTGAGAATGATTCT--GATCTAGTTCATGGCCTATTAGAAGTAGAAGGC  
GCTCTGGTGGGA-----TCCTCACGGACAGAAAAAGATTGCAGTCAGTTTGATAATGAT--  
---CGAGTGACACTGCTTCTTCGGTCCGAACCAAGGAAT--CCCTTAGATATGATGCAAAA  
TGGATCTTGTCTATCGTTGATCAGAGATTTCTATATGAAAAA-----TACGAATCGGAGTT  
TGAAGAA---GGGGAAGGAGAAGGAGCCCTCGACCCGCAA-----CAGATAGAGGAG

GAT-----TTATTCAATCAC-----ATAGTTTGGGCTCCT-----AGAATATGGCGCCCT-----  
--TGTGGCAATCTATTTGATTGTATCGAAAGGCCCAATGAATTGGGATTTCCC--TATTGG  
GCCAGGTCATTTTCGG-----GGCAAGCGGATCATTATCATAAAGAGGATGAGCTTCAA  
GAGAATGATTTCGGAGTTCTTGCAGAGTGGAACCATGCAGTACCAGACACGAGATAGAT  
CTTCCAAAGAACAAGGCTTTTTTTCGAATAAGCCAATTCATTTGGGACCCTGCAGATCCA  
TTCTTTTTTCTATTCAA--GATCAGCCCTCTGTCTCTGTGTTTTACGTGCGAGAATTCTT  
TGCAGATGAAGAGATGTCAAAGGGGCTTCTTACTTCCCAAACAATCCTCCTACATCTA  
TATATAAACACTGGTTCATC-----AAGAATACGCAAGAAAAGCACTTCGAATTGTTGATT  
CATCGCCAGAGATGGCTTAGAACC-----AATAGTTCATTATCT-----AATGGATCTTTCC  
GTTCTAAT-----ACTCTATTTCGAGAGTTATCAGTATTTATCAAATCTCTTCCTATCTAAC--G  
GAACGCTATTGGATCAAATGACAAAGACATTGTTGAGAAAGAGATGGCTTTTTCCCGGA  
TGAAATGAAACATTTGATT-----CATGTAACAGGAGAAAGATTTCCCATTCCTATGCCTA  
GATCGCGG--ATAAATGGAAATTTTATTGATAAGACCTTCAATTGTAGCCAATATCTTA  
TTACGAATAATTCCGACAACCTCAGGAGAAAAAGAGGCATTTACCTATTATAGAGATGG  
T-----ATGTCAGCTCAATCCGAAGGAAATTATGCAGAAGCTTTACAGAATTATTATGAAG  
CTACGCGACTAGAAATTGATCCCTATGATCGAAGTTATATACTCTATAACATAGGCCTTAT  
CCACACAAGCAATGGAGAACATACGAAAGCTTTGGAATATTATTTCCGGGCACTAGAA  
CGAAACCCATTCTTACCACAAGCTTTTAATAATATGGCCGTGATCTGTCATTAC---CGGG  
GAGAACAGGCCATTCAACAGGGAGATTCTGAAATTGCGGAGGCTTGGTCCGATCAAG  
CTGCTGAGTATTGGAAACAAGCTATAGCGCTTACTCCAGGTAATTATATTGAAGCGCATA  
ATTGGTTGAAGATCACGAGGCGTTTCGAA-----ATGAACTGGCGATCAGAACGTATATG  
GATAGAACTTATAACGGGGTCTCGAAAAACAAGTAATTTCTGCTGGGCCTTTATCCTTT  
TTTTAGGTTCACTAGGGTTCTTATTGGTTGGAACCTCCAGTTATCTTGGTAGGAATCTGA  
TATCCTTATTTCCGTCTCAGCAAATCATTTTTTTTCCACAGGGAATCGTGATGTCTTTCTA  
TGGGATCGCAGGTCTGTTTATTAGCTCCTATTTGTGGTGCACAATTCGTGGAATGTAG  
GTAGTGGTTATGATCGATTTCGATAGAAAAGAAGGAATAGTGTGTATTTTTCGTTGGGGA  
TTCTCTGGAAAAAATCGTCGTATCTTCTTCGATTCTTATGAGAGATATCCAGTTCGATC  
AGAATAGAAGTTAAAGAGGGTATTTATCCTCGTCGTGTCTTTATATGGAAATCAGAGG  
CCAGGGAGCCATTCCCTTAACTCGCACTGATGAAAAT--TTGACTCCACGAGAAATTGA  
ACAAAAGCTGCTGAATTGGCCTATTTCTTGCGCGTACCAATTGAAGTATTT

>Olea

ATGGAAAGGTGGTGGTTTAATTCGATG-----ATAAATAAATCAATGGACAATCTTGGTCC  
TATTGAAAATACTAGTAAAAGTGAAGAT--AATAGAAAA-----GCTAAAAACATTCATAG  
TTACAGTAATGTGATCATTATTCGGCATCAAAGACATTCGGAATTTTCATCTCTGATGA  
TACTTTTTTAGTTAGAGATAGTAATGGAGACAGTTATTCT--TATTTTGATATTGAAAATC  
AGATTTTTGAAATTGACAATGAT-----CATTCTTTCTGAGTGAAGTAGAAAGTTCTTTTT  
ATAGTAATCGGAATTCTAGTTATCTGAATTCTACTAGT-----GAAGATCCCTACTACAAT----  
--ATGTATGATACTCAATATAGTTGGAATAATCACATTAATAGTTGTATTGACAGTTATCTT  
CAG-----TCTCAAATCTATATGGATTCCATTGTAAGTGATAGTAGT--AGTTAC-----AT  
TTCTAGGTGTATTTTTGGTAGCGCGAGGTCCGGTATACGAACCCACACGAAGAGTAGTG  
ATTTAACTCTAAGAGAAAGGTCTAATGATCTCGATGTAACCTAAAAATACAGGCATTTG  
TGGGTTCAATGCGAAAATTGTTATGGATTAAATTATAAGAAATTTTTGAAATCAAAAAC  
AAATATTTGTGAACAATGTGGATATCATTTGAAAATGAGTAGTTCAGATAGAATCGAAC  
TTTCGATCGATCCCGTACTTGGCATCCTATGGATGAAGACATGGTCTCTCTGGATCCCA

TTGGATTTTCATTTCGGAGGAGGAG---TATAAAGATCGTATTGATTCTTATCAAAGAAAGAC  
AGGATTAAGTGGCTGTTCAAACAGGCATAGGTCAACTAAATGGTATTTCCGTAGCAA  
TTGGGGTTATGGATTTTCAGTTTATGGGGGGTAGTATGGGATCCGTAGTCGGGGAGAAA  
ATCACCCGTTTGATTGAGTACGCTACCAATAAAATTTCTACCTCTTATTATAGTGTGCGCTT  
CCGGGGGGGCACGCATGCAAGAAGGAAGTTTGAGCTTGATGCAAATGGCTAAAATATC  
GTCTGCTTTATATGATTATCAATCAAATAAAAAGTTATTTTATGTATCAATCCTTACATCTC  
CTACTACTGGTGGGGTAACAGCTAGTTTTGGTATGTTGGGAGATATCATTATTGCTGAAC  
CCAATTCCTATATTGCATTTGCGGGTAAAAGAGTAATTGAACAAACATTGAATAAAACA  
GTACCTGAAGGTTCAACAAGCGGCTGAATATTTATTCAGAAGGGCTTATTTGACCTAAT  
TGTACCACGTAATCCTTTAAAAGCGTTCTGAGTGAGTTATTTAAGCTCCACGCTTCTT  
TCCTTTGAAT-----ATGGTAACCATTTCGAGCCGACGAAATTAGTAATATTATCCGT  
GAACGTATTGAACAATATAATAGAGAAGTAAAGATTGTAAATACTGGTACCGTACTTCA  
AGTAGGCGATGGCATTGCTCGTATTCATGGTCTTGATGAAGTAATGGCGGGTGAATTAG  
TAGAATTTGAAGAAGGTACAATAGGTATTGCTTTGAATTTGGAATCAAATAATGTTGGT  
GTTGTATTAATGGGTGATGGTTAATGATACAAGAAGGAAGTTCTGTAAAAGCAACAGG  
AAGAATTGCTCAGATACCAGTGAGCGAGGCCATTTGGGTCTGTATTATAAATGCCCTGG  
CTAAACCTATTGATGGTAGAGGTGAAATTTAGCTTCGGAATCTCGATTAATTGAATCTC  
CCGCTCCAGGTATTATTTCGCGGCGTTCCGTATATGAGCCTCTTCAAACCGGGCTTATTG  
CTATTGATTTCGATGATCCCTATAGGACGTGGTCAGCGAGAATTAATTATTGGGGACAGA  
CAGACCGGTAAAACAGCAGTAGCCACAGATACGATTCTCAATCAACAAGGTCAAATG  
TAATATGTGTTTATGTAGCTATTGGTCAAAAAGCATCTTCTGTGGCTCAGGTAGTAAC  
CTTTACAGGAAAGGGGGCGATGGAATACACTATTGTGGTAGCCGAAACGGCGGATTC  
CCCTGCTACATTACAATACCTTGCTCCTTATACAGGAGCAGCTTTGGCTGAATATTTAT  
GTACCGTAAACAACACACTTTAATCATTATGATGATCTCTCAAACAAGCCCAAGCTT  
ATCGCCAAATGTCTCTTCTATTACGAAGACCGCCTGGTCTGTAAGCTTATCCAGGGGAT  
GTTTTTTATTTGCATTCACGCCTTTTGGAAAGAGCCGCTAAATCAAGTTCTAGTTTAGGT  
GAAGGAAGTATGACCGCCTTACCAATAGTTGAAACTCAATCGGGAGATGTTTCGGCTTA  
TATTCCTACTAATGTAATTTCCATTACTGATGGACAAATATTCTTATCCGCCGATCTATTC  
AATGCTGGAATCAGACCTGCTATTAATGTGGGTATCTCCGTTTCCAGAGTAGGGTCTGC  
CGCTCAAATTAAGCCATGAAACAAGTAGCTGGTAAATTAATTAAGGAACTGGCGCAA  
TTCGCAGAATTAGAAGCCTTTGCACAATTTGCTTCGGATCTCGATAAAGCTACTCAGAA  
TCAATTGGCAAGAGGTCAACGATTACGTGAATTGGTTAAACAATCCCAAGCAGCTCCT  
CTCGCGGTAGAAGAACAGATAATGACTATTTATACCGGAACAAATGGTTATCTTGATTCA  
TTAGAAATTGGACAGGTAAGGAAATTTCTTGTGAGTTACGTACTTACTTAAAACTAA  
TAAACCTCAGTTCCAAGAAATCATATCTTCTACTAAGACATTTACCGAGGAAGCAGAAG  
TCCTTTTGAAGAAGCTATTCAGGAACAAATGGACCGGTTCTACTTTCAGGAACAAGC  
AATGAGAATTAATCCTACTACTTCTGGTCTGGGGTTTCCACGCTTGAAAAACAAAACC  
TGGGCCGTATCGTCCAAATCATCGGTCCGGTACTAGATGTAGCCTTTCCGCCGGGCAAG  
ATGCCTAATATTTATAACGCTCTGGTAGTTAAAGGTCGAGATACTGTTGGTCAAGCAATT  
AATGTGACTTGTGAGGTACAGCAATTATTAGGAAATAATCGAGTTAGAGCTGTAGCTAT  
GAGTGCTACAGATGGTCTGATGAGAGGAATGGAAGTGATTGACACAGGAGCTCCTCTA  
AGTGTTCCGGTCGGTGGAGCGACTCTGGGACGAATTTCAACGTGCTTGGAGAGCCTG  
TTGATAATTTAGGTCTGTAGATATTCGTACAACATCTCCTATTATAGATCTGCGCCTGC  
CTTTATACAGTTAGATACAAAATTATCTATTTTTGAAACAGGAATTAAGTAGTAGATCT



TTTAGCCCCATTATCGCCGTGGGGGAAAAATCGGACTATTTGGAGGAGCTGGAGTTGGT  
AAAACGGTACTCATTATGGAATTGATTAACAATATTGCCAAAGCCCATGGGGGCGTATC  
CGTATTTGGCGGAGTGGGTGAACGTAACGTAACGTAAGGAAATGATCTTTACATGGAAATG  
AAAGAATCTGGAGTGATTAATGAAGAAAATATTGCAGAATCAAAAGTGGCTCTAGTTT  
ACGGCCAGATGAATGAACCGCCTGGAGCTCGTATGAGAGTTGGTTTACTGCCCTAAC  
TATGGCGGAATATTTCCGAGATGTTAATGAACAAGACGTAACCTATTTATCGACAATAT  
CTTCCGTTTCGTCCAAGCAGGATCCGAAGTATCGGCCTTATTGGGTAGAATGCCTTCCG  
CTGTCCGTTATCAACCTACCCTGAGTACCGAAATGGGTACTTTACAAGAAAGAATTACT  
TCTACCAAAGAAGGGTCCATAACTTCTATTCAAGCAGTTTATGTACCTGCAGACGATTT  
GACCGACCCTGCTCCTGCTACGACATTTGCACATTTAGATGCTACTACCGTACTATCAA  
GAGGATTAGCTGCCAAGGGGATCTATCCAGCAGTAGATCCTTTAGATTCAACGTCAACC  
ATGCTTCAACCTCGGATCGTTGGTGAGGAACATTACGAAACTGCGCAAAGAGTTAAGC  
AAACTTTACAACGTTACAAAGAGCTTCAGGACATTATAGCTATCCTTGGGTGGACGAA  
TTATCCGAAGAGGATCGTTAACCCTAGCAAGAGCACGAAAAATTGAGCGTTTCTTATC  
ACAACCTTTTTTTGTAGCAGAAGTATTTACCGGTTCTCCAGGGAAATATGTTGGTCTAG  
CAGAAACCATTAGAGGGTTTCAATTGATCCTTTCCGGAGAATTAGATGGTCTTCCCTGAA  
CAGGCCTTTTATTTGGTAGGTAATATCGATGAAGCTACCGCGAAGGCTATGAACTTAGA  
AATGGAGAGCAATTTGAAGAAAATGACTTTAAATCTTTGTGTACTGACCCCTAATCGAA  
TTGGTTGGGATTCAGAAGTGAAAGAAATCATTTTATATACTAATAGTGGTCAAATTGGC  
GTATTACCAAATCATGCCCTATTGCTACAGCTGTAGATATAGGGATTTGAGAATACGC  
TTTAAGGACCAATGGTTAACGATGGCTCTGATGGGTGGTTTTGCTAGAATAGGAAATAA  
TGAAATCATTATTTTAGTAAATGATGCGGAAAAGGGTAGTGACATTGATCCACAAGAAG  
CTCAGAAAACCTTTGAAATAGCCGAAGCTAATTTGAGAAAAGCTGAAGGAAAGAGAC  
AAATAATTGAGGCGAATCTAGCTCTCCGACGAGCTAGGACAAGAGTAGAGGCTGTCAA  
TGTGATTTCCATGAAAAATGTAACCGATTCTTTTCGTTTCTTTGGGCCACTGGCCATCTGC  
CGGGAGTTTCGGATTTAATACCGATATTTTAGCAACAAATCCAATAAATCTAAGTGTAGT  
GATTGGTGTATTGATCTTTTTTTGGAAAGGGAGTGTTAAGTGATTTATTAGATAATCGAAA  
ACAGAGGATCTTGAATACTATTTCGAAATTCAGAAGAACTGCGTGGGGGGGCCATTGAA  
CAGCTGGAAAAAGCCCGGGCTCGCTTACGGAAAGTGGAATGGAAGCAGATCAGTTT  
CGGGTGAATGGATACTCTGAGATAGAGCGAGAAAAATGGAATTTGATTAATTCAACTTC  
TAAGACTTTGGAACAATTAGAAAATTACAAAAATGAAACGATTCAGTTTGAACAGCAA  
AGGGCGATTAATCAAGTCCGACAACGGGTTTTCCAACAAGCCTTACAAGGAGCTTTAG  
GAACTCTGAATAGTTGTTTAAACAACGAGTTACATTTACGTACCATTAGTGCTAATATTG  
GCATGTTGGGAGCGATGAAAGAAATAACTGATATGAATCCACTGATTTCTGCCGCTTCT  
GTTATTGCTGCTGGATTGGCCGTAGGGCTTGCTTCTATTGGACCTGGAGTTGGTCAAGG  
GACTGCTGCGGGTCAAGCTGTAGAGGGTATCGCGAGACAGCCCGAGGCAGAGGGAAA  
AATACGAGGTAATCTATTGCTTAGTCTAGCTTTTATGGAAGCTTTAACAATTTATGGATT  
GGTTGTAGCATTAGCACTTTTATTTGCAAATCCTTTTGTATGAATGTGTTATCATGTTC  
ATCAACACACTAAAAGGGTTATACGATATATCCGCTGTGGAAGTAGGCCAACATTTCTAT  
TGGCAAATAGGGGGTTTCCAAGTCCATGGCCAAGTACTTATTACTTCTTGGGTTGTAAT  
TGCTATCTTATTAGGTTTACGTAATAGCTGTTCGGAACCCACAAACCATTCCGACTGG  
GGGTCAGAATTTCTTTCGAATATGTTCTTGAATTCATTCGAGATGTGAGTAAACTCAA  
TTGGAGAAGAATATGGCCCTTGGGTTCTTTTATTGGAAGTATGTTTCTATTTATTTTGT  
TTCTAATTGGTCAGGAGCTCTTTTACCTTGGAAAATCATACAATTACCTCATGGAGAGTT



TTTTGTGTTAGATATACTAATACCCACCCCATCCATCTGGAAATCTTGGTTCAAACCTCT  
TCGCTATTGGGTAAGATGCCTCTTCTTTGCATTTATTACGATTCTTTCTTCACGAGTAT  
TGTAATTGGAATAGTCTTATTACTGCCAGT---TCTTCTTTTTCAAAACAAAGATTATTCTT  
CTTCTTATATAATTCTCATGTATGTGAATACGAATCTATTTTCGTCTTTCTACGTAAACAAT  
CTTCTCATTACGATCAACATCTTCTGGAGCTCTTCTTGAACGAATATATTTCTATGGAA  
AAATAGAACGTCTTGTAGACGTCTTTGTT--GATTTTAATCTATGCTTGTTCAGGATCCT  
TTCATGCATTATGTTAGGTATCAAGGAAAATCAATTCTGGCTTCAAAGGGACGCCTCT  
TTTGATGAATAAATGGAAATATTACCTTGTAACCTTTTTGGCAATGTTATTTTTCGCTGTGG  
TTTCATCCAAGAAGGATTTATCTAAACCAATTATCTAATCATTCCCTTGAATTTGTGGGCT  
ATCTTCAAGTGTGCGACTAAACGCTTACAGTGGTACGGAGCCAAATTCTAGAAAATTCA  
TTTCTAATCAATAATGCTATT-----AGAAGTTCGATACTCTTGTTCCAATTATTCCTCTGA  
TTGGATCATTGGCTAAAGCGAAATTTGTAAACGTACTAGGGTATCCATTAGTAAGCCG  
GTTCCGGCTGATTTATCAGATTCTGATATTATTGATCGATTTGGGCGTATATGCAGAAATC  
TTTCTCATTATCATAGCGGATCTTCCAAAAAAAAGAGTTTGTATCGAATAAAGTATATAC  
TTCGACTTTCTTGTGCTAGAACTTTGGCTCGGAAACACAAAAGTACTGTACGTGCTTTT  
TTGAAAAGATTAGGCTCGGAATTATTGGAAGAATTTCTTATGTGCGAAGAACAAGTTCT  
TTCTTTGACCTTCCGAAAACGGATTTGGTATTTGGATATTATTGTATCAATGATCTGATC  
AATCATAAAATGATAATTGATAATACAACAGAACTACAA---GCCATCCATTCGTTTTCCA  
GATTGGAATTC---TTAAAAGAAGTCTATGGGATCATATGGGTGCTTGTCCCTATTTTGAC  
TCTTGTATTAGGAATCACACTAGGTGTACTAGTAATTGTTTGGTTAGAAAGAGAAATATC  
TGCAGGGATACAACAACGTATTGGACCTGAATACGCCGGCCCTTGGGAATCTTCAA  
GCTCTAGCAGATGGGGTAAACTACTTTTCAAAGAGAATCTTTTTCCATCTAGAGGGGA  
TACTCGTTTATTCAGTATCGGACCATCCATAGCAGTCATATCCATTTTACTAAGTTATTCA  
GTAATTCCTTTTGGTTATCGCCTTATTCTAGCCGATCTTAGTATTGGTGTTTTTTTATGGAT  
CGCTGTTTCAAGTCTTGTCCCGTTGGACTTCTTATGTGCGGGATATGGATCAAATAATAA  
ATATTCCTTTTAGGTGGTTTAAAGAGCTGCTGCTCAATCAATTAGTTATGAAATACCATTA  
ACTCTATGTGTATTATCAATATCTCTACTATCTAACAGTTCAAGTACAGTTGATATAGTTG  
AAGCGCAGTCAAAATATGGTTTTTGGGGGTGGAATTTGTGGCGTCAACCTATAGGGTTT  
ATCGTTTTTCTAATTTCTTCTTAGCCGAGTGTGAGAGATTACCTTTTGATTTACCAGAA  
GCAGAAGAGGAATTAGTAGCAGGTTATCAAACCGAATATTCAGGTATCAAATTTGGTTT  
ATTTTATGTTGCTTCGTATCTGAATCTACTAGTTTCTTCATTATTTGTAACAGTTCTTTACT  
TGGGGGGTTGGAATCTTCTATTCCGTACATATTCGTTCTGAGCTTTTTTGAA-----AG  
AGGTAAAGTTTTTGGAAACAATAATCGGTATCTTTATTACATTAGCTAAAACCTTATTTGTT  
CTTGTTCATTTCTATTGCAACAAGATGGACTTTACCGAGACTGAGAATGGACCAACTAT  
TAAATCTTGGATGGAAATTTCTTTTACCTATTTCTCTAGGTAATCTATTATTAACAACCTC  
ATTCCAACTTCTTTCACTGATGATCTGGCATGTACAGAATGAAAACCTCATTCTCGATTC  
TACGAGAATTTTTATGAAAGCCTTTCATTTGCTTCTCTTCGATGGAAGTTTGATTTTCCC  
AGAATGTATCCTAATTTTTGGCCTAATTTCTTCTGATGATCGATTCAACCTCTGATCAA  
AAAGATATACCTTGGTTATATTTTCACTCTTCAACAAGTTTAGTAATGAGCATAACGGCC  
CTATTGTTCCGATGGAGAGAAGAACCTATGATTAGCTTTTCGGGAAATTTCCAAACGAA  
CAATTTCAACGAAATCTTTCAATTTCTTATTTTACTATGTTCAACTCTATGTATTCTCTAT  
CCGTAGAGTACATTGAATGTACAGAAATGGCTATAACAGAGTTTCTTATTTCGTATTAA  
CAGCTACTCTAGGAGGAATGTTTTTATGCGGTGCTAACGATTTAATAACTATCTTTGTAG  
CTCCAGAATGTTTCAGTTTATGCTCCTACCTATTATCTGGATATACCAAGAAAGATGTAC

GGTCTAATGAGGCTACTATGAAATATTTACTCATGGGTGGGGCAAGCTCTTCTATTCTGG  
TTCATGGTTTCTCTTGGCTATATGGTTCATCCGGGGGAGAGATCGAGCTTCAAGAAATA  
GTGAATGGTCTTATCAATACACAAATGTATAACTCCCCAGGAATTTCAATTGCGCTCATA  
TTCATCACTGTAGGAATTGGGTTCAAGCTTTCCCCAGCCCCTTCTCATCAATGGACTCC  
TGACGTATACGAAGGATCTCCCACTCCAGTCGTTGCTTTTCTTTCTGTTACTTCGAAAGT  
AGCTGCTTCAGCTTCAGCCACTCGAATTTTCGATATTCCTTTTTATTCTCATCAAACGA  
ATGGCATCTTCTTCTGGAAATCCTAGCTATTCTTAGCATGATATTGGGAAATATCATTGCT  
ATTACTCAAACAAGCATGAAACGTATGCTTGCATATTCGTCCATAGGTCAAATCGGATAT  
GTAATTATTGGAATAATTGTTGGAGACTCAAATGATGGATATGCAAGCATGATAACTTAT  
ATGCTGTTCTATATCTCCATGAATCTAGGAACTTTTGCTTGCATTGTATTATTGGTCTAC  
GTACCGGAACTGATAACATTTCGAGATTATGCAGGATTATACACGAAAGATCCTTTTTTG  
GCTCTCTTTAGCCCTATGTCTTATCCCTAGGAGGTCTTCCTCCACTAGCAGGTTTT  
TTCGAAAACCTCTATTTATTCTGGTGTGGATGGCAGGCAGGCCTATATTCCTTGGTTTTA  
ATAGGACTCCTTACAAGCGTTGTTTCTATCTACTATTATCTAAAAATAATCAAGTTATTA  
TGACTGGACGAAACCAAGAAATCACCCCTCACGTGCGAAATTATAGAAGATCTCCTTT  
AAGATCAAACAATTCCATCGAATTGAGTATGATTGTATGTGTGATAGCATCTACTATACC  
TGGAATATCAATGAACCCGATTATTGCAATTGCTCAGGATACCCTTTTTATGTTTTTGCTT  
TACGAATATGATATTTTTTGGGCATTTCTAATAATATCAAGTCTTATTCCTATTTTGGCATT  
TTTCATTTCCGGGATTTTAGCCCCGATTAGGAAAGGGCCGGAGAACTTTCTAGTTATG  
AATCGGGTATAGAACCAATGGGCGACGCTTGGTTACAATTCGAATCCGTTATTATATGT  
TTGCTCTCGTTTTTGTGTTTTTGATGTTGAAACGGTTTTTCTTTATCCATGGGCAATGA  
GTTTCGATGTATTGGGTGTATCTGTATTTATAGAAGCTTTAATTTTCGTGCTTATCTTAATT  
GTTGGTTTAGTTTATGCATGGCGAAAGGGGGCATTGGAATGGTCTACGAATCATTITCC  
TTGGTTAACAATAATTGTTATTTTGCCAATATCTGCGGGTTCCTTAATTTTCTTTCTTCCA  
CATAGAGGAAATAGGGTAATTCGTTGGTATACTATATGTATATGTATTTTAGAACTTCTTA  
TAACGACTTATGCATTCTGTTATCATTTCGAATCGGGCGATCCATTAATCCAAGTAGTGG  
AGGATTATAAATGGATCGATTTTTTTGATTTCCATTGGAGATTAGGAATAGATGGGCTTT  
CTATAGGACCCATTTACTGACGGGATTCATCACTACTTTAGCTACTTTAGCGGCTCGGC  
CAGTTACTCGGGATTCTCGACTATTTCAATTTCTTGATGTTAGCAATGTACAGTGGTCAA  
TAGGATTATTTTCTTGTGCGGGACTTTTACTTTTTTCTCATGTGGGAGTTAGAATTAAT  
TCCCGTTTATCTACTTCTATCAATGTGGGGAGGAAAAAACGTCTGTACTCAGCTACCA  
AATTTATTTTGTACACGGCGGGGGTCTGTTTTTCTTTAATGGGAGTTCTGGGTATCG  
GTTTATATGGTTCTAATGAACCAACATTAATTTAGAAATATTAGCCAATCAGTCCTATCC  
TGTGGCCTTGGAATAATATTTTATATTGGATTTTTTATTGCTTTTGTGTCAAATTGCCG  
ATTATACCCCTACATACATGGTTACCAGATACCCATGGAGAAGCGCATTATAGTACTTGT  
ATGCTTCTAGCCGGAATCTTATTAATAATGGGAGCATATGGATTAGTTCCGGATCAATATG  
GAATTATTACCCATGCTCATTCTATATTTCTCCTTGGTTGATGATAGTAGGCGCAATGC  
AAATAATTTATGCAGCTTCAACATCTTTCGGTCAACGGAATTTAAAAAAAAGAATAGCC  
TATTCCTCTGTATCTCATATGGGTTTCATAATTATAGGAATTGGTTCTATCACCGATACAG  
GGCTCAATGGAGCCCTTTTACAAATAATCTCTCATGGATTTATTGGTGTGCACTTTTTT  
TCTTGGCAGGAACGACTTATGATAGAATACGTCTTGTATTATCTTGACGAAATGGGTGGA  
ATAGCTATCCAATGCCAAAATATTCACGATGTTCAGTAGCTTTTCGATGGCCTCCCTT  
GCATTACCAGGTATGAGTGGTTTTGTTGCCGAATTAATAGTATTTTTGGGACTAATTACC  
AGTCAAAAATACCTTTAATTCAAAATACTAATTACTTTTGTAAATGGCAATTGGAATG

ATATTAACCTCCTATTTATTCAATTATCTATGTCACGCCAGATGTTCTATGGATAACAAGATATT  
TAATGCTCCAAACTCTTATTTTTTTGATTCTGGACCGCGAGAGTTATTTCTTTCAATCTCT  
ATCTTTTTACCCATACTAGGTATTGGTATGTACCCCGATTTTGTCTTTCACTATCAGTTG  
ACAAGGTCGAAGTTATTCTATCTAATTCTTTTTATAGAATGTTGCTTGAACATGTACTTG  
TTTTGAGTGCCTATTTATTTCCATCGGTATCTACGGATTGATCACAAGTCGAAATATGGT  
TAGAGCCCTTATGTGTCTTGAACCTTATAATTAATTCAGTTAATATCAATTTTGTAAACATTT  
TCTGGTTTTTTTTGATAATCGTCAATTAAGAGGAGATATTTTCTCCATTTTGTATAGCTA  
TTGCAGCCGCTGAAGCAGCTATTGGACCGGCTATTGTTTCATCAATTTATCGTAACAGA  
AAATCAACTCGTATTAACCAATCCAATTTGTTGAATAAAATGGAACAGACATATCAATAT  
GCGTGGATCATACTTTTTGTTCCACTTCCAGTTCCTATGTTAATAGGAGTCGGACTTATT  
CTTTTTCCGACGGCAACAAAAATCTTCGTCGTATGTGGGCCTTTCCGAGTATTTTATTG  
TTAAGTATAGTCATGATTTTTTCAATTAATCTGTCTATTAGCAAATAAATAGTAGTTGTA  
TCTATCAATATGTATGGTCTTGGACCATCAATAATGATTTTTCTTTAGAATTCGGCTACTT  
GATTGATCCACTTACTTCTATTATGTCAATTTAATCACTACTGTTGGAATTATGGTTCTTA  
TTTATAGTGATAATTATATGGCTCATGATCAAGGATACTTGAGATTTTTTGTCTATATGAG  
TTTTTTCAGTACTTCCATGTTAGGATTAGTTACTAGTTCCAATTTGATACAAATTTATATT  
TTTTGGGAATTGGTTGGAATGTGTTCCCTATCTATTAATAGGGTTTTGGTTCACACGACCT  
ATTGCGCAAATGCTTGTCAAAAAGCGTTTTGTAATAATCGTGTAGGGGATTTTGGTTT  
ATTATTAGGAATTTTAGGTTTTTATTGGATAACAGGTAGTTTCGAATTTAGGGATTTATTC  
GAAATATTAATAACAATAAAGTCAATTCATTGTTACTTTGTGTGCTGCTCTATTAT  
TTACCGGTGCAGTTGCTAAATCTGCACAATTTCCCTTCATGTATGGTTACCTGATGCTA  
TGGAGGGACCTACTCCTATTTCCGCTCTTATACATGCTGCTACTATGGTAGCAGCGGGAA  
TTTTTCTTGTAGCTCGCCTTCTTCCCTTTTTATAGTTATAACCTTACATAATGAATTAATC  
TCGTTTCATAGGAATAATAACAGTATTATTAGGAGCTACTTTAGCTCTTGCTCAAAAAGAC  
ATTAAGAGGGGTTTAGCCTATTTCGACCATGTCTCAATTTGGGTTATATGATGTTAGCTCTA  
GGAATGGGGTCTTATCGAAGTGCTTTATTTCAATTTGATTACTCATGCTTATTCCAAAGCA  
TTATTATTTTTAGGGTCTGGATCTATTATTCATTCAATGGAACCTATTGTTGGCTATTCTCC  
AGATAAAAGTCAGAATATGGCTCTTATGGGTGGTTTAAACAAAACATGTACCAATTACCC  
GAATTTCTTTTTTATTAGGTACAATTTCTCTTTGTGGTATTCCACCTCTTGCTTGTTTTTG  
GTCAAAAGATGAAATTCCTAATGATAGTTGGTTGTATTTCGCCGATTTTCGCAATAATAGC  
TTGGACCACAGCAGGATTAACCGCATTTTATATGTTTCGGATCTATTTACTTACTTTTTGA  
GGGGCATTAAACGTTCAATTTCAAATTTACAGTGGCAAACAAAATACCCCTTTCTATT  
CAATATCTCTATGGGGAAAAGGGGGTTCCAAAAGA-----AATTTTCGTTTATTAATA  
ATGAATTTTTTTTCATTTGAGAATAAAAAGGATTATTCCTATCCTTATGAATCCGACAATA  
CTAIGTTATTTCCCTTACTTGTATTGGGCATCTTTACTTTGTTTCGTTGGATCTCTAGGAAT  
TCCTTTTCGAATTTGGATATATTAACCAATGGTTAACTCCGTCTATAAACCTTTTACATCAA  
AAGTTGAAT---TCGATCGATTGGTATGAATTTTTGAAAGATGCCATTTTTTTCAGTCAGTAT  
AGCTTATTTTCGGAATATTTATAGCGTCCTTTTTATATAAACCCATTTATTCCTCTTTCAA  
AATTTGACTTAATAAATTTATTTGTTAGTCTTTGGGACACAATTCTAAATGGTCTATATA  
ATTGGTCAATAATCGTGCTTATATAGATGCTTTTTTATACAACATCCTTAACTGGGGCGGT  
AAGAGGATTAGCCCAATTAATCAATTTTTTTGATCGACGAGTAATTGATGGAATTACGA  
ATGGGGTTGGTGTATGAGTTTCTTTGTAGGAGAAGGTATCAAATATGTAGGGGGTGA  
---CGCATATCTTCTTATCTTTTCTTATTTATCTTGTGTATCAATATTTTTATTAGGTCTTTA  
TATGGGTTTACCTGGACCAATACATGATTTTCTTTTAGTCTTTCTGGGATCGGGTCTTATA

TTAGGAAGTCTAGGAGTAGTATTACTTCCCAATCCAATTTATTTCGGCCTTTTCGTTGGGA  
TTGGTTCTTTTTGTATATCCTTATTCTATATTCTATCGAACTCATATTTTGTAGCTGCTGC  
GCAGCTCCTTATTTATGTGGGAGCTATAAATATTTTAATCATTTTTGGCTGTGATGTTTCATG  
AGTGGTTCAGAATATTACAAAGATTTTCATCTTTGGACCGTTGGGGATGGAGTTACTTC  
AATAGTTTGTACAAGTCTTTTTATTTCACTAATTACTACTATTCCAGATACGTCATGGTAC  
GGGATTATTTGGACTACAAAATCAAACCAGATTATAGAGCAAGATTTGATAAGTAATAG  
CCAACAAATTGGAATTCATTTATCAACAGATTTTTTTCTTCCATTTGAACTCATTTC AAT  
AATCTTTTAGTCGCTTTAATAGGTGCAATTGCTATAGCTCGTCAAATGATTGCACCAAC  
TACAAGAAAAGACCTCATGATAGTCAATATGGGTCCTCACCACCCATCAATGCATGGTG  
TTCTTCGACTTATCGTTACTCTCGATGGTGAAGATGTTATTGACTGTGAACCAATATTGG  
GTTATTTACACAGAGGAATGGAGAAAATTGCGGAAAACCGAACAATTATACAATATTG  
CCTTATGTAACACGTTGGGATTATTTAGCTACTATGTTACAGAAGCAATAACCGTAAAT  
GGACCCGAACA ACTAGGCAATATCAAGTACCTAAAAGGGCTAGCTATATCAGAGCCAT  
TATGTTGGAGTTGAGTCGTATAGCTTCCATTTGTTATGGCTTGGTCTTTTATGGCAGAT  
ATTGGGGCACAACCCCTTTCTTCTATATTTTTCGAGAACGAGAATTGATATATGACCTA  
TTCGAAGCTGCCACCGGTATGCGAATGATGCATAATTATTTTCGTATTGGAGGAATAGCT  
GCTGATCTACCTCATGGATGGATAGATAAATGTTTGGATTTTTGCGATTATTTTTTAACAG  
GGGTTGCTGAATATCAAAGCTTATTACACGGAATCCTATTTTTTTTAGAACGAGTTGAG  
GGCGTAGGCATTATTGGAGGAGAAGAAGCACTAAATTGGGGTTTATCAGGACCAATGC  
TACGAGCTTCCGGAATACAATGGGACCTTCGTAAAGTTGATCATTATGAGTGTTACGAC  
GAATTTGATTGGGAGGTTCAATGGCAAAAAGAAGGGGATTCATTAGCTCGTTATTTAGT  
ACGAATCGGTGAAATGACAGAATCCATAAAAATTATCCAACAGGCTCTGGAAGGAATT  
CCAGGGGGGCCCTTTGAGAATTTAGAAATCCGACGCTTTGATAGAGTAAAAGATACTG  
AATGGAATGATTTTGAATATCGATTTATTAGTAAAAACCTTCTCCAACCTTTTGAATTGT  
CCAAACAAGAACTTTATGTAAGAGTCGAAGCACCAAAAAGGAGAATTGGGAATTTTTCT  
GATAGGAGATCAGAGTGTTTTTCTTGGAGATGGAAAATTCGCCCACCGGGTTTTATCA  
ACTTGCAAATCTGCCTCAGTTAGTTAAAAGAATGAAATTGGCTGATATTATGACGATAC  
TAGGTAGTATAGATATCATTATGGGAGAAGTTGATCGTATGTTTCCATGGTAACTGAGT  
TCATGAATTATGGTCAACAAACAATACGAGCTGCAAGGTACATTGGTCAAGGTTTCATG  
ATTACCTTGTCCCATGTGAATCGTTTACCTGTA ACTATTCAATACCCCTACGAAAAATTG  
ATCACATCGGAACGTTTCCGAGGACGAATCCACTTTGAATTTGATAAATGCATTGCTTG  
TGAAGTATGTGTTTCGTGTATGTCCTATAGATTTACCCGTTGTTGATTGGAAATTGAAAC  
GGATATTCGAAAGAAACGATTACTTAATTACAGTATTGATTTTGGAAATCTGTATATTTGT  
GGTAATTGCGTTGAGTATTGTCCAACAAATTGTTTATCAATGACTGAAGAATATGAACTT  
TCTACTTATAATCGTACGAATTGAATTATAATCAAATTGCTTTAGGTCGGTTACCGGTG  
TCAATAATTGACGATTACAAATTTCGACCAATTTCAATTCA-----  
-----ATGCAGGGTCGTTTGTCTGCTTGGCTAGTCAAGCATGGGCTAATTCATAGATC  
TTTGGGCTTTGATTATCAAGGAATAGAGACTTTACAAATAAAGCCCAAGGATTGGCATT  
CCATTGCTGTCATTTTATATGTATATGGTTACAATTATCTACGCTCCAATGTGCCTATGAT  
GTAGCACCTGGCGGACTGTTAGCTAGTGTGTATCATCTTACGAGAATAGAGTATGGTGT  
GGATCAACCAGAAGAGGTATGCATAAAAGTATTTGCCTCAAGGAGGAATCCTAGAATT  
CCGTCCGTTTTCTGGGTTTGGAAAAGTGTGGATTTTCAAGAACGAGAATCTTATGATAT  
GTTGGGAATCTCTTATGATAATCATCCACGCTTGAAACGTATCTTAATGCCTGAAAGTTG  
GATAGGATGGCCCTTACGTAAGGATTATATTGCCCCCAATTTTTATGAAATACAAGATGC



TCCAGTAGCGACAACCGTCTTTTTGATTGGTACTGCAGTCGCTCTTTGGTTGGGTATTG  
GTGCAACATTACCTATTGATAAATCCCTAACTTTAGGTCTTTTTATGATTGAAGTTTTTCT  
ATTTGGAATCGTGTAGGTCTAATTCCTATTACTTTGGCTGGATTATTCGTAAGTGCATAT  
TTACAATACAGGCGTGGTGATCAGTTGGACCTTATGCTTACTATAACTAGTTATTTCCGT  
TTTTACTAGCGGCTTTAACTATAACTTCAGCTCTATTTATTGGTCTGAGCAAGATACGA  
CTTATTATGGATATAGTAAGTCTCGCTTGGGCTGCTTTAATGGTAGTCTTTACATTTTCCC  
TTTACTCGTAGTGTGGGGAAGAAGTGGACTTATGATTATTCGTTCCGCGGAACCAGA  
AGTCAAAATTTTGGTGGATAGGGATCCCGTAAAAACTTCTTTTCGAGGAATGGGCCAGA  
CCGGGCCATTTCTCAAGAACAATAGCTAAAGGACCTGATACTACCACTTGGATCTGGA  
ACCTACATGCTGATGCTCACGATTTTCGATAGCCATAACCAGTGATTTGGAGGAGATCTCT  
CGAAAAGTATTTAGTGCCATTTCCGGTCAACTCTCCATCATCTTTCTTTGGCTGAGCGGT  
ATGTATTTCCACGGTGCTCGTTTTTCCAATTATGAAGCGTGGCTAAGTGATCCAACCTCAC  
ATTGGGCC TAGTGCCAGGTGGTTTTGGCCAATAGTGGGCCAAGAAATATTGAATGGTGA  
TGTGGGCGGGGGTTTTCCGAGGAATACAGATAACCTCTGGGTTTTTTTCAGATTTGGCGA  
GCATCTGGAATAACTAGTGAATTACA ACTCTATTGTACCGCAATCGGTGCATTGGTCTTT  
GCAGCGTTAATGCTTTTTGCTGGTTGGTTTTCAATTATCATAAAGCGGCCCAAAATTGGCT  
TGGTTTTCAAGATGTAGAATCTATGTTGAATCACCATTTAGCGGGGCTACTAGGACTTGG  
GTCTCTCTCTGGGCGGGGCATCAAGTACATGTATCTTTACCGATTAACCAATTTTTAAA  
CGCTGGAGTAGATCCTAAAGAGATACCGCTTCCTCATGAATTTATCTTGAATCGAGAAC  
TTTTGGCTCAACTTTATCCAAGTTTTGCCGAGGGAGCAACCCCATTTTTCACCTTGAAT  
TGGTCAAAATATGCGGAATTTCTTACTTTTCGTGGAGGATTAGATCCAGTAACTGGGGG  
TCTATGGCTGACCGATATTGCACACCATCATTAGCTATTGCAATTCTGTTCTGATAGC  
GGGTCACATGTATAGGACTAACTGGGGCATTGGCCATGGCCTAAAAGATATTTTAGAAG  
CTCATAAAGGTCCATTTACAGGTCAGGGTCATAAAGGCCTATATGAGATCCTAACACG  
TCATGGCATGCTCAATTATCTCTTAACCTAGCTATGTTAGGCTCTTTAACCATGTTGTAG  
CTCACCATATGTATTCATGCCCTTATCCATATCTAGCTACTGACTATGGGACCCAACT  
GTCATTGTTTACACATCACATGTGGATTGGTGGATTTCTCATAGTTGGTGCTGCTGCGCA  
TGCAGCCATTTTTATGGTAAGAGACTATGATCCA ACTACTCGATAACAACGATCTATTAGA  
TCGTGTCCTTAGACATCGTGATGCAATCATATCACATCTCAACTGGGCATGTATCTTTCT  
AGGCTTTCACAGTTTTTGGTTTTATATATTCATAATGATACCATGAGCGCTTTAGGGCGTCC  
TCAAGATATGTTTTAGATAACCGCTATAACAATTACAACCCGTTTTTTGCTCAATGGATACA  
AAACACCCATGCTTTAGCACCTGGCGCAACGGCTCCTGGTGCAACAGCAAGCACCAG  
TTAACTTGGGGGGGTGGTGATTTAGTAGCAGTGGGTGGCAAAGTGGCTTTGTTACCTA  
TTCCGTTAGGAACCGCGGATTTTTTGGTACATCACATCCATGCATTTACGATTCATGTCA  
CGGTATTGATACTCCTGAAAGGTGTTCTATTTGCTCGTAGCTCCCGTTTTGATACCGGATA  
AAGCAAATCTTGGTTTTTCGTTTTCTTGTGATGGACCTGGAAGAGGGGGTACATGTCA  
AGTATCGGCTTGGGATCATGTCTTCTTAGGACTATTCTGGATGTACAATTCATTTCCGGT  
AGTAATATTCATTTTCAGTTGGAAAATGCAGTCAGATGTTTGGGGCAGTATAAGTGATC  
AAGGGGTAGTAACTCATATCACGGGAGGAACTTCGCCCAGAGTTCTATTACTATTAAT  
GGGTGGCTCCGGGATTTCTTATGGGCACAGGCATCCAGGTAATTCAGTCTTATGGTTC  
TTCATTATCTGCATATGGACTTTTTTTCCTAGGTGCTCATTTTGTATGGGCTTTTAGTTG  
ATGTTTCTATTCAGCGGACGTGGTTATTGGCAAGAACTTATTGAATCCATCGTTTGGGCT  
CATAATAAATTTAAAGTTGCTCCTGCTACTCAGCCGAGAGCCTTGAGCATTGTACAAGG  
ACGTGCTGTAGGAGTAACCCATTACCTTCTGGGTGGAATTGCCACAACATGGGCGTCT



TCTTAGCAAGAATTATTGCAGTAGGAATGGCATTAAAGATTTCCAAGGTTTAGCCAAGGC  
TTAGCTCAGGACCCCACTACTCGTCGTATTTGGTTTTGGTATTGCTACCGCACATGACTTC  
GAGAGTCATGATGATTA TACTGAGGAACGTCTTTATCAGAAATATTTTTGCTTCTCACTTC  
GGTCAATTAGCAATAATTTTTCTGTGGACTTCCGGAATCTGTTTCATGTAGCTTGGCAA  
GGAAATTTGAATCATGGGTACAGGACCCTTTACATGTAAGACCTATTGCTCATGCAATT  
TGGGATCCTCATT TTTGGTCAACCGGCTGTGGAAGCTTTTACTCGAGGGGGTGCTCTTGG  
CCCAGTGAATATCGCTTATTCTGGTGT TTTATCAGTGGTGGTATAACAATCGGTTTACGCAC  
TAATGAAGATCTTTATACTGGAGCTCTTTTTCTATTATTTCTTTCTGCCATATCCTTAATAG  
CAGGTTGGTTACACCTACAACCGAAATGGAACCGAGCGTTTCGTGGTTCAAAAATGC  
CGAATCTCGTCTGAATCATCATTTGTCAGGACTCTTCGGCGTAAGTTCCTTGGCTTGG  
CAGGGCATTAGTACATGTCGCTATTCCTGGATCCAGAGGGGAGTATGTTTCGATGGAAT  
AATTTCTTAGAGGTATTACCGCATCCCCAAGGGTTAGGCCCACTTTTTACAGGTCAGTG  
GAATCTTTATGCTCAAAAACCTGATTCAAGTAGTCATTTATTTGGGACCTCCAAGGAG  
CAGGAACTGCCATTCTAACTCTTCTCGGGGGATTCCATCCACAAACACAAAGTTTATGG  
CTGACCGATATTGCTCATCATCTAGCTATTGCATTTATTTTTCTTGTGCTGGTCATAT  
GTATCGAACGAATTTCCGGATTGGACACAGTATCAAAGATCTTTTAGATGCACATATCC  
TCCGGGGGGACGATTGGGACGAGGGGCATAAGGGTCTTTATGACACAATCAATAATTCG  
CTTCATTTTCAATTAGGCCTTGCTCTAGCTTCTTTAGGGGTTATTACTTCCTTAGTAGCTC  
AACACATGTACTCTTTACCTGCTTATGCATTCATAGCACAAGACTTTACTACTCAAGCTG  
CATTATATACTCATCACCAATATATCGCAGGATTCATCATGACAGGAGCTTTTGCTCATGG  
AGCTATATTTTTTCATTAGAGATTACAATCCGGAGCAAATGAAGATAATGTATTGGCAAG  
AATGTTAGACCATAAAGAAGCTATCATATCTCATTTAAGTTGGGCCAGCCTCTTTCTGGG  
ATTCCATACCTTGGGACTTTATGTTCAATAATGATGTCATGCTTGCCTTTGGTACTCCAGA  
AAAGCAAATTTTGATCGAACCTATATTTGCTCAATGGATAACAATCGGCTCATGGGAAAA  
CTTCATATGGGTTTCGATGTACTTTTATCTTCAACGAGCGGTCCGGCATTCAATGCGGGTC  
GAAGCATCTGGTTGCCCGTTGGTTAAATGCTGTAAATGAA-----AATAGTAATTCATTAT  
TCTTGACAATAGGTCCTGGAGACTTTTTGGTTCATCATGCTATTGCTCTGGGTTTACATA  
CAACTACATTGATCTTAGTAAAAGGTGCTTTAGATGCACGCGGTTCCAAGTTAATGCCA  
GATAAAAAGGATTTCCGTTATAGTTTTCCGTGCGATGGCCCGGACGAGGGGGTACTT  
GTGATATTTCCGGCATGGGACGCATTTTATTTGGCAGTTTTTTGGATGTTAAATACTATTGG  
ATGGGTTACTTTTTATTGGCATTGGAAGCACATCACATTATGGCAGGGTAACGTTTCAC  
AGTTTAATGAATCTTCCACTTACTTGATGGGTTGGCTAAGAGATTATTTATGGTTAAACT  
CTTCACAACCTTATCAATGGATATAATCCTTTTGGTATGAATAGTTTATCGGTCTGGGCATG  
GATGTTCTTATTTGGACATCTTGT TTTGGGCTACTGGATTTATGTTCTTAATTTCTGGCGT  
GGATATTGGCAGGAATTGATTGAAACTTTAGCATGGGCTCATGAACGCACACCTTTGGC  
CAATTTGATTCGATGGAGAGATAAACCTGTGGCTCTTTCCATTGTCCAAGCAAGATTGG  
TTGGATTAGCCCACTTTTCTGTAGGTTATATATCACTTATGCGGCTTTTTTGATTGCCTC  
TACATCGGGGAAATTTGGCATGTCACATTCAGTAAAGATTTATGATACATGTATAGGATG  
TACTCAATGTGTCCGAGCGTGTCCCACCGATGTATTAGAAATGATACCTTGGGACGGAT  
GTAAGCTAAACAAATTGCTTCTGCCCAAGGACCGAGGACTGTGTTGGTTGTAAGAG  
ATGTGAATCCGCTGCCCAACGATTTCTTGAGTGTTTCGAGTTTATTTATGGCATGAAA  
CAACTCGCAGTATGGGTCTAGCTTATATGACAACCTTCAATTTCCCCTCTATTTTTGTGC  
CTTTAGTAGGCCTAGTATTTCCGGCAATTGCAATGGCTTCTTTATCTCTTCATGTTCAAA  
AAAACAAGATTGTTATGCGAGATCTAAAAACATATCTCTCCGTTGCACCAGTACTAAGT

ACGCTATGGTTCGGGGCTTTAGCAGGTCTATTGATAGAGATTAATCGTTTTTTCCCGGAT  
GCGTTGACATTCCCCTTTTTTTCATTCATGACTGCAATTTTAGAGAGACGCGAAAGCGA  
AAGCCTATGGGGTTCGCTTCTGTAACCTGGATAACCAGCACCGAAAACCGTCTTTACATTG  
GATGGTTTTGGTGTTTTGATGATCCCTACCTTATTGACCGCAACTTCTGTATTTATTATTGC  
CTTCATTGCTGCTCCTCCAGTAGATATTGATGGTATTCGTGAACCTGTTTCTGGATCTCT  
ACTTTACGGAAACAATAATATCTCAGGTGCCATTATTCCACTTCTGCAGCTATAGGTTT  
GCACTTTTACCCAATCTGGGAAGCGGCATCCGTTGATGAATGGTTATAACAACGGGGGTC  
CTTATGAACATAATTGTTCTACACTTCTTACTTGGTGTAGCTTGTACATGGGTCGTGAGT  
GGGAGCTTAGTTTTCCGCTCTGGGTATGCGACCTTGGATTGCTGTTGCATATTCAGCTCCT  
GTTGCAGCTGCTGCCGCTGTTTTCTTGATCTACCCAATTGGTCAAGGAAGTTTTTCTGA  
TGGTATGCCTCTAGGAATTTCTGGTACTTTCAACTTCATGATTGTATTCCAGGCTGAGCA  
CAACATCCTTATGCACCCATTTACATGTTAGGCGTAGCTGGTGTATTCCGGCGGCTCCCT  
ATTCAGCGCTATGCATGGTTCCTTGGTAACTTCTAGTTTTGATCAGGGAAACCACAGAAA  
ATGAATCTGCTAATGCAGGTTACAGATTCGGTCAAGAGGAAGAAACTTATAATATCGTA  
GCCGCTCATGGTATTTTTGGCCGATTAATCTTCCAATATGCTAGTTTTCAACAACCTCTCGT  
TCGTTACACTTCTTCTAGCTGCTTGGCCTGTAGTAGGTATCTGGTTCACTGCTTTAGGT  
ATCAGCACTATGGCTTTCAACCTAAATGGTTTTCAATTTCAACCAATCCGTAAGTTGATAGT  
CAAGGCCGTGTAATTAATACTTGGGCTGATATCATTAAACCGTGCTAACCTTGGTATGGAA  
GTTATGCATGAACGTAATGCTCATAACTTCCCTCTAGACCTAGCTTCTATCGAAGTTCCA  
TCTACAAATGGAATGGGTTTACCTTGGTATCGTGTTCATACCGTTGTATTGAATGATCCC  
GGTCGGTTGCTTTCCGTTTATATAATGCATACAGCTCTGGTTGCTGGTTGGGCAGGTTT  
GATGGCTCTGTATGAATTAGCAGTTTTTGATCCTTCTGACCCTGTTCTTGATCCAATGTG  
GAGACAGGGTATGTTTGTATACCTTTCATGACTCGTTTAGGAATAACCAATTCATGGGG  
AGGTTGGAGTATCACA---GGAGGGACTGTAACGAATCCGGGGATTTGGAGTTACGAAG  
GTGTAGCTGGGGCACATATTGTGTTTTCGGGCTTATGCTTTTTTGGCAGCTATCTGGCATT  
GGGTCTATTGGGATCTAGAAATATTTTGTGATGAACGTACAGGAAAACCTTCTTTGGAT  
TTGCCCAAGATCTTTGGAATTCATTTATTTCTCTCAGGGGTGGCTTGCTTTGGTTTTGGT  
GCATTTTCATGTAACAGGCTTGTATGGTCTTGGAAATATGGGTGTCCGATCCTTATGGACTA  
ACGGGAAAAGTACAACCTGTAAATCCGGCGTGGGGCGTGGAAGGTTTTGATCCTTTTG  
TTCCCGGAGGGATAGCTTCTCATCATATTGCAGCAGGGACATTGGGCATATTAGCGGGT  
CTATTCATCTTAGCGTCCGCCGCCACAACGTCTATACAAAGGATTACGTATGGGAAAT  
ATTGAAACCGTACTTTCCAGTAGTATCGCGGCTGTCTTTTTTGTGCTTTTTGTTGTTGCT  
GGAATATGTGGTATGGTTCAGCAACTACCCCATCGAATTTTGGGCCCACTCGTTAT  
CAATGGGATCAGGGTACTTCCAGCAAGAGATATACCGAAGAGTTAGTGCTGGGCTAG  
CAGAAAATCAAAGTTTATCAGAAGCCTGGTCTAAAATTCCTGAAAATTAGCTTTTTTAT  
GATTATATCGGCAATAATCCGGCAAAGGAGGATTATTCAGGGCAGGTTCAATGGATAA  
CGGAGATGGAATAGCGGTTGGATGGTTAGGACACCCTATCTTTAGAGATAAAGAAGGG  
CGTGAACTTTTTGTACGTCGTATGCCTACTTTTTTTGAAACATTTCCAGTCGTTTTGGTA  
GATGGCGACGGAATTGTTAGAGCTGATGTTCTTTTTAGAAAGGGCAGAATCAAAGTATA  
GTGTTGAACAAGTAGGTGTAACCTGTTGAGTTCTACGGCGGCGAACTCAATGGAGTCAG  
TTATAGTGATCCTGCTACTGTGAAAAAATATGCTAGACGCGCTCAATTGGGTGAAAATTT  
TGAATTAGATCGCGCTACTTTGAAATCCGATGGTGTTTTTCGTAGCAGTCCAAGGGGTT  
GGTTTACTTTTTGGGCATGCTTCGTTTGCTTTGCTTCTTCTTCGGACACATTTGGCATG  
GTGCTAGAACCTTGTTTCAGAGATGTTTTTGCCGGTATTGACCCAGATTTGGATGCTCAA

GTAGAGTTTGGAGCATTCCAAAACTTGGGGATCCAACGACAAGAAGACAGGTAGTC  
ATGAAAACCTTATATTCCTGAGGAGGTTCTACCACGTGGAAACGCTCTTTAATGGAAC  
TTTAGCTGTAACCTGGTCGTGACCAAGAAACCACCGGTTTTGCTTGGTGGGCCGGGAAT  
GCTCGACTTATTAATTTGTCCGGTAAACTACTAGGAGCTCATGTAGCCCACGCCGGATT  
AATCGTATTCTGGGCCGGAGCAATGAACCTATTTGAAGTGGCTCATTTCGTACCAGAGA  
AGCCTATGTATGAACAAGGATTAATTTTACTTCCCCATCTAGCTACTCTAGGTTGGGGGG  
TAGGTCCTGGGGGGGAAGTTATAGACACCTTTCCCTACTTTGTATCTGGAGTACTTCATT  
TAATTCCTCTGCAGTATTGGGCTTTGGCGGTATTTATCATGCACTTCTGGGACCTGAGA  
CACTTGAGGAATCTTTCCATTCTTCGGTTATGTATGGAAAGATAGAAATAAAATGACC  
ACAATTTTAGGTATTCACTTAATCTTGTTAGGTCTAGGTGCTTTTCTTCTAGTATTCAAGG  
CTCTTTATTTTGGGGGCGTATATGATACTTGGGCTCCGGGAGGGGGAGATGTAAGAAAA  
ATTACCAACTTGACCCTTAGCCCAAGTATTATATTTGGTTATTTACTAAAATCGCCCTTTG  
GAGGGGAAGGATGGATTGTTAGTGTGGACGATTTAGAAGATATAATCGGAGGACATGTA  
TGGTTAGGTTCCATTTGTATACTTGGTGGAACTCTGGCATACTTAACCAAACCCTTCGCA  
TGGGCTCGACGCGCTCTTGTATGGTCTGGGGAGGCTTACTTATCTTATAGTTTAGGGGC  
TTTATCCATCTTTGGTTTCACTGCTTGTGTTTTGTCTGGTTCAATAATACCGCTTATCCT  
AGCGAGTTTTACGGACCTACTGGACCAGAAGCTTCTCAAGCTCAAGCATTACTTTTCT  
AGTTAGAGACCAACGTCTTGGGGCTAATGTAGGATCTGCGCAAGGACCTACAGGTTTA  
GGTAAATATCTAATGCGTTCCCAACCGGAGAAGTCATTTTTGGAGGAGAACTATGCG  
TTTTTGGGATCTGCGTGCTCCCTGGTTAGAACCCTAAGAGGTCCAAATGGATTGGACT  
TGAGTAGGTTGAAAAAAGACATAACAACCTTGGCAAGAACGGCGTTCGCGAGAATATAT  
GACTCATGCTCCTTTAGGTTCTTTAAATTCTGTGGGTGGCGTAGCTACCGAGATTAATGC  
AGTTAATTATGTCTCTCCTAGAAGTTGGTTAGCTACCTCTCATTTTGTCTAGGATTCCTT  
TTCTTCGTAGGTCATTTGTGGCACGCGGGAAGGGCTCGTGCAGCTGCAGCAGGATTTG  
AAAAAGGAATTGATCGTGATTTTGAACCTGTTCTTTCCATGACCCCTCTTAATATGACTA  
TAGCCCTTGGTAAATTTACCAAAGACGAAAAT--TTATTTGATATTATGGATGACTGGTTA  
CGGAGGGACCGTTTTCGTTTTTGTAGGCTGGTCCGGTCTATTACTCTTTCCCTTGCGCCTAT  
TTCGCTCTAGGAGGTTGGTTCACAGGTACAACCTTTGTAACCTCATGGTATACCCATGG  
ATTGGCTAGTTCCTATTTGGAAGGCTGTAATTTCTTAACGGCCGCAGTTTCTACTCCTGC  
TAATAGTTTAGCGCATTCTTTATTGTTACTGTGGGGTCTGAAGCACAAGGAGATTTTAC  
TCGTTGGTGTCAATTAGGCGGTCTGTGGACTTTTGTGCTCTCCATGGCGCTTTCGGAC  
TAATAGGTTTCATGTTACGTCAATTCGAGCTTGCTCGATCTGTTCAATTGCGACCTTATA  
ATGCAATCGCATTCTCTGCTCCAATTGCTGTTTTTGTCTGTATTCTGATTTATCCACT  
AGGTCAGTCTGGTTGGTCTTTTGCACCTAGTTTTGGTGTAGCAGCTATATTTGATTCAT  
CCTCTTTTTTCAAGGATTTTATAATTGGACGCTAAACCCATTTTCAATGATGGGAGTTGC  
CGGTGTATGGGTGCTGCTTTGCTATGCGCTATTCATGGTGCTACCGTAGAAAATACTTT  
ATTTGAAGATGGTGATGGTGCAAATACATTCCGCGCTTTTAACCCAACCTCAAGCTGAAG  
AAACTTATTCATGGTCAACCGTAACCGCTTTTGGTCCCAAATCTTTGGGGTTGCTTTTT  
CCAATAAACGTTGGTTACATTTCTTTATGTTATTTGTACCAGTAACCGGTTTATGGATGA  
GTGCTCTTGGAGTAGTCGGTCTGGCCCTGAACCTACGCGCCTATGACTTCGTTTCTCAG  
GAAATTCGCGCAGCGGAAGATCCTGAATTTGAGACTTTCTACACCAAAAATATTCTATT  
AAACGAAGGTATTCGTGCTTGGATGGCAGCTCAAGATCAGCCTCATGAAAACCTTATAT  
TCCCTGAGGAGGTTCTACCACGTGGAAACGCTCTTATGTCTGGAAGCACAGGAGAACG  
TTCTTTTGTGATATTATTACCAGTATTCGATACTGGGTCATTCATAGCATTACTATACCTT

CCCTATTCATTGCGGGTTGGTTATTCGTCAGTACCGGTTTAGCTTACGATGTATTTGGAA  
GCCCTCGGCCAAACGAATATTTTACAGAGAGCCGACAAGGAATTCCATTAATAACTGG  
CCGTTTTGATCCTTTGGAACAACCTCGATGAATTTAGTAGATCGTTTATGACTATAGATCG  
AACCTATCCAATTTTTACAGTACGATGGTTGGCTGTTACGGCCTAGCTGTACCTACCGT  
CTTTTTTTGGGGTCAATATCAGCAATGCAGTTCATCCAACGAATGGCTACACAACTG  
TTGAGAACAGTTCTAGATCTGGT--CCAAGACGAACTACTGTAGGGAGTTTATTA AAC  
CATTGAATTCGGAATATGGTAAAGTAGCTCCCGGGTGGGGAACGACTCCTTTGATGGGT  
GTCGCAATGGCTTTATTTGCGGTATTTCTATCTATTATTTGGAGATTTATAATTCTTCCGT  
TTTATTTGGATGGAATTTCAATGAATATGCTTACTCTGAAACTCTTCGTTTATAACCGTAGTG  
ATATTTTTTGTCTCTCTTCATCTTTGGATTCCCTATCTAATGATCCAGGACGTAATCCTG  
GACGTGAAGAAATGGCCGATACTACTGGAAGGATTCCTCTTTGGATAATAGGTACTGTA  
ACTGGTATTCTTGTGATTGGTTAATAGGTATTTCTTTTATGGTTCATATTCCGGATTGG  
GTTTCATCCCTGATGCTTAATATCTTTAGTTTGATCTGTATTTGTCTTAATTCTGCCCTTAT-  
-AGTAGTTTTTTCTTCGGCAAATTGCCCGAAGCCTATGCTTTTTTGAATCCAATCGTAGA  
TGTTATGCCAGTCATACCTTTGTTTTTTTTCTCTTAGCCTTTGTTTGGCAAGCTGCTGTA  
AGTTTTTCGAATGACACAATCAAACCCGAACGAACAAAATGTTGAATTGAATCGTACCA  
GTCTCTACTGGGGTATTACTCATTTTTGTACTTGCTGTTTTATTTTCCAATTATTTCTTC  
AATATGGAAGTAAATATTCTTGCATTTATTGCGACTGCACTATTCATTCTAGTTCCTACCG  
CTTTTCTACTTATCATTACGTAAAAACAGTCAGTCAAATGATATGGAAACAGCAACC  
CTAGTCGCCATCTTTATATCTGGTTTACTTGTGAGTTTACTGGGTACGCCTTATATAACCG  
CTTTTGGGCAACCTTCTCAACAATAAGAGATCCATTTCGAGGAACATGGGGACATGGA  
AGCATTGGTTTATAACATTCCTCTTAGTCTCGACTCTAGGGATAATTTTTTTCGCTATCTTT  
T T T C G A G A A C C G C C T A A A G T T C C A A C T A A A A G A T G A A  
A????????????????????????????????????????????????????????????  
????????????????????????????????????????????????????????????  
?????????-----ATGTCACCACAAACAGAGACTAAAGCAAGTGTTGGATTCAA  
AGCGGGTGTTAAAGAGTACAAATTGACTTATTATACTCCTCAATACGAAACCAAAGATA  
CTGATATCTTGGCAGCATTCCGAGTAACTCCTCAACCTGGAGTTCGCCTGAAGAAGC  
AGGGGCTGCGGTAGCTGCCGAATCTTCTACTGGTACATGGACAACCTGTGTGGACCGAT  
GGACTTACCAGCCTTGATCGTTACAAAGGGCGATGCTACCATATTGAGCCCGTTCTCGG  
AGAAGCAGATCAATATATCTGTTATGTAGCTTACCCTTTAGACCTTTTTGAAGAAGGTT  
TGTTACTAACATGTTTACTTCCATTGTAGGTAATGTATTTGGGTTCAAAGCCCTGCGTGC  
TCTACGTCTGGAAGATCTGCGAATCCCTCCTGCTTATATTA AA ACTTTCCAAGGCCCGC  
CTCATGGGATCCAAGTTGAGAGAGATAAATTGAACAAGTATGGTCGTCCTGTTGGG  
ATGTA CTATTA AACCAA AATTGGGGTTATCTGCTAAAACTATGGTAGAGCAGTTTATGA  
ATGCTTTCGCGGTGGACTTGATTTTACCAAAGATGATGAGAACGTGAACTCCAGCCAT  
TTATGCGTTGGAGAGATCGTTTCTTATTTTGTGCCGAAGCACTTTATAAAGCACAGGCT  
GAAACAGGTGAAATCAAAGGGCATTACTTGAATGCTACTGCGGGTACATGCGAAGAAA  
TGATCAAAAGAGCTGTATTTGCTAGAGAATTGGGAGTTCCTATCGTAATGCATGACTAC  
TTAACAGGAGGATTCACTGCAATACTAGCTTGGCTCATTATTGCCGAGATAATGGACT  
ACTTCTTACATTCACCGTGCAATGCATGCAGTTATTGATAGACAGAAGAATCATGGTAT  
ACACTTCCGTGTACTAGCTAAAGCGTTACGTATGTCTGGTGGAGATCATATTCACTCTG  
GTACCGTAGTAGGTA AACTTGAAGGCGAAAGAGACATCACTTTGGGCTTTGTTGATTTA  
CTGCGTGATGATTTTATTGAAAAAGATCGAAGTCGCGGTATTTATTTCACTCAAGATTGG

GTCTCTCTACCAGGTGTTATTCCCGTGGCTTCAGGGGGTATTACGTTTGGCATATGCCT  
GCTCTGACCGAGATCTTTGGGGATGATTCCGTACTIONACAGTTCGGTGGAGGAACTTTAGG  
GCACCCCTGGGGTAATGCGCCAGGTGCCGTAGCTAACCGAGTAGCTCTAGAAGCATGT  
GTAAAAGCTCGTAATGAAGGACGTGATCTTGCTTCTGAGGGTAATGTAATTATCCGTGA  
GGCTAGCAAATGGAGTCCTGAACTAGCTGCTGCTTGTGAGGTATGGAAAGAGATCAAA  
TTTGAGTTTCAAGCAATGGATACTCTA-----ATGGCGATACATTTATACAAAACCTTCTACC  
CCGAGCACACGCAATGGAACCGTAGACAGTCAAGTGAAATCCAATCCACGAAATAATT  
TGATCTATGGACAGCATCATTGTGGTAAAGGTTCGTAATGCCAGAGGAATCATTACCGCA  
AGGCATAGAGGGGGAGGTCATAAGCGTCTATACCGTAAAATCGATTTTCGACGGAATG  
AAAAGACATATATGGTAGAATCGTAACCATAGAATACGACCCTAATCGAAATGCATAC  
ATTTGTCTCATACTATGGGGATGGTGAGAAGAGATATATTTTACATCCAGAGGGGGCT  
ATAATTGGAGATAACCATTGTTTCTGGTACAGAAGTTCCTATAAAAATGGGAAATGCCCT  
ACTTTGACCGATATGCCCTTAGGCACGGCCATACATAACATAGAAATCACACTTGGAA  
AGGGTGGACAATTAGTTAGAGCAGCGGGTGTGTAGCGAAACTGATTGCAAAGAGG  
GAAATCGGCCACATTAATAATTACCTTCTGGGGAGGTCCGTTTGATATCCAAAACCTGC  
TCAGCAACAGTCGGACAAGTGGGAATGTTGGGGCGAACCCAGAAAAGTTTGGGTAGA  
GCCGGATCTAAGCGTTGGCTAGGTAAGCGTCCTGTAGTAAGAGGAGTAGTTATGAACC  
CTGTAGACCATCCCATGGGGGTGGTGAAGGGAGAGCCCCAATTGGTAGAAAAAAC  
CCACAACCCCTTGGGGTTATCCTGCACTTGAAGCAGAAGTAGAAAAAGGAATAAATA  
TAGTGATAATTTGATTCTTCGTCGCCGTAGTAAAATGATTCAACCTCAGACCCATTTAAA  
TGTAGCAGATAACAGCGGGGCTCGAGAATTGATGTGTATTGAATCATAGGAGCTAGC--  
-AATCGTCGATATGCTCATATTGGTGACGTTATTGTTGCTGTGATCAAAGAAGCAGTACC  
AAATATGCCCCTAGAAAAATCAGAAGTAGTCAGAGCTGTAATTGTTTCGTACCTGTAAAG  
AACTTAAACGTGACAGCGGTATGATAATACGATATGATGACAATGCTGCAGTTGTGATT  
GATCAAGAAGGAAATCCAAAAGGAACTAGAATTTTTGGTGCGATCCCCCGGAATTGA  
GACAATTCATTTTACTAAAATAGTTTCATTAGCTCCCGAGGTATTAATGCTTAGTCCCA  
AAAGAACTAGATTCCGTAAACAACATAGAGGAAGAATGAAGGGAATATCTTATCGAGG  
TAATCATATTTGTTTCGGTAAATATGCTCTTCAGACACTTGAACCTGCTTGGATCACATC  
TAGACAAATCGAAGCAGGTCGACGAGCAATGACACGAAATGCACGCCGTGGTGGAAA  
AATATGGGTCGGTATATTTCCAGACAAACCGGTTACAGTAAGACCCGCTGAAACACGTA  
TGGGTTTCGGGAAAGGGATCCCCTGAATATTGGGTAGCTGTTGTTAAACCAGGTTCGAAT  
ACTATACGAAATAGGTGGAGTAACCGAAAATATAGCTAGAAGGGCTATTTCAATAGCAG  
CATCCAAAATGCCATACGAACTCAATTCATTATTTAGGAATGACCAGAATTAACGC  
GGATATATAGCTCGGAGACGTAGAACAAAATTCGTTTATTTGCATCAAGCTTTCGAGG  
GGCCATTCAAGACTTACTCGAACTATTACTCAACAGAAAATAAGAGCTTTGGTTTCAG  
CTCATCGGGATAGGGATAAGCAAAAAGAGAAATTTTCGTCGTTTGTGGATCACTCGGATA  
AACGCAGTAATTCGCGAA---AAGGGAGTATCTTATAGTTATAGTAAATTAATACATGATCT  
ATACAAGAGACAGTTGCTTCTTAATCGTAAATACTTGCACAAATAGCTATATCAAATAG  
GAATTGCTTTATATGATTTCCAACGAGATAAAAGAA---GTAGATTGGAAAGAATCCAC  
CGGAATAATTATGCGAAAGGAAGTATACGCTTTAGGTTCGACATATATCTCTATCGGCTGA  
CAAAGCAAGAAGAGTAATTGATCAAATTCGTGGATGCTCCTATGAGGAAACACTTATGA  
TACTAGAACTCATGCCCTATAGAGCATGTTATCCATTTTAAATTGGTTTACTCTGCAG  
CAGCAAATGCTAGTTACAATATGGGTTCCAACGAAGCCAATTTAGTCATTAGTAAGGCC  
GAAGTTAACGAGGGTACTACCGTGAAGAAATTCAAACCTCGAGCTCGAGGACGTAGTT

ATCCGATAAAAAGACCTACCTGTCATATAACTATTGGAGTGAAAGATATATCTTTACATG  
GGGGAGTATGGGACAAAAAATGGATGGAATCAAATATGCAGTATTTACAGACAAAAG  
TATTCGGTTATTGGGGAAAAAT--CAATATACTTCTAATGTGCGAATCAGGATCAACTAGG  
ACAGAAATAAAGCATTGGGTGCGAACTCTTCTTTGGTGTCAAGGTAATAGCTATGAATAG  
TCATCGACTTCCGGGAAAGGGTAGAAGAATGGGACCTATTATGGGACATACAATGCATT  
ACAGACGTATGATCATTACGCTTCAACCGGGTATTCTATTCCACCTCTTAGAAAAGAAA  
AGAACTATGGCAGTTCCAAAAAACGTACTTCTGCATCAAAAAAGCGTATTTCGTAAAA  
ATATTTGGAAAAGGAAAGGATACGGGACAGCGTTAAAAGCATTTCCTTAGGGAAATC  
TCTTTCTACCGGGAATTCAAAAAGTTTTTTTTGTGCGAAAAAAA-----ATGGCTAAGGGG  
AAAGATGCGCGAGTAACGGTGATTTTGGAAATGTACCAGTTGTGTCCGAAATGGT-----G  
TTAAGAAGGTATCAAGGGGCATTTCCAGATATATTACTCAAAGAACCGGCACAATACG  
CCTAATCGATTAGAATTGAGAAAATTCTGTCCCTATTGTTACAAACATATGATTCATGGG  
GAAATAAAGAAAATGAAAATAAGAGCTTCTGTTTCGTAAAATTTGTGAAAAATGTCCGC  
TAATCCGTAGGCGGGGGCGCATTATAGTAATTTGTTCCAACCCGAGACATAAACAAAGA  
CAAGGAATGGTTCGAGAGAAAGTAACAGTATCTACTCGGACACTACAGTGGAAAGTGTG  
TTGAATCAAGAGAAGACAGTAAACGTCTTTATTATGGACGCTTTATTCTGTCTCCACTTA  
TGAAAGGTCAAGCCGACACAATAGGCATTGCGATGCGAAGAGCTTTACTTGGAGAAAT  
AGAAGGAACATGTATCACACGTGTAAAATCTGAG-----AACGTCCACATGAATATTCTA  
CCATAGCGGGTATTCAAGAATCGGTCCATGAAATTTAATGAATTTAAAAGAAATTGTAT  
TGAGAAGTAATCTATATGGAACCTTGTGACGCGTCTATTTGTGTCAGAGGTCCAGGATAT  
GTAAGTGTCAAGATATCATCTTACCACCTTATGTAGAAATCGTTGATAATACACAACAT  
ATAGCTAGCTTGACAGAACCAATTGATTTGTGTATTGGATTACAAATCAAGAGAAATCG  
CGGATATCTTATCAAATGCCACAT--AACTTTGATGGAAGTTAT-----CCTATAGATGCTG  
TATTCATGCCTGTTTCGAAATGCGAATCATAGTATTCATTCTTATGGGAATGGGAATGAAA  
ACAAGAGATACTCTTTCTCGAAATATGGACAAATGGGAGTTTAACTCCGAAAGAAGC  
ACTTCATGAAGCTGCCGGAATTTGATTGATTTATTTATTCCCTTTTTACATAAGGAAGA  
AGAA-----AACTTACCTTTAGAGGACAATCAA---CACACGGTTCCTTTATCCCCTCTTAC  
CTTTCACGATAAATTGGAT--AACTCAGAAAAAACAAAAA---AAAATAGCATTGAAA  
TCGATTTTTATTGACCAATCAGAATTCTCTCCAGGGTCTATAATTGCCTCAAAGGTCC  
AATATATACATTATTGGACCTTTTGAATAACAGTCCGGAAGATCTCATGAAAATTGAA  
CATTTGCGCCTAGAAGATATAAACAGATATTGGTCATTCTAGAAAAACAT-----TTCGC  
AATTGATTTACCAAAAAGAAGATGCTCGGGGATGGA---AATGAGGGAATGTCTACAAT  
ACCTGGATTTAATCAGATACAATTTGAAGGATTTTGTAGGTTCAATTGATCAGGGTTTGAC  
AGAAGAACTTTATAAGTTTCCAAAAATTGAAGATACAGATCAAGAAATAGAATTTCAAT  
TATTTGTGGAAAGATATCAATTGGTAGAACCGTTGATAAAAGAAAGAGATGCTGTGTAT  
GAATCACTCACATATCTTCTGAATTATATGTATCCGGGGGATTAATTTGGAAAAC TAGT  
AGGGATATGCAAGAACAACCATTTTTATTGGAAACATTCCTCTAATGAATTCCTGGG  
AACTTCTATAGTAAATGGAATATATAGAATTGTGATCAATCAAATATTGCAAAGCCCCGG  
TATTTATTACCGATCAGAATTGGACCATAACGGAATTTTCGGTCTATACCGGCACCATAAT  
ATCAGATTGGGGAGGAAGATCAGAATTAGAGATTGATAGAAAAGCAAGGATATGGGCT  
CGTGTGAGTAGGAAACAAAAAATATCTATTCTAGTTCTATCATCAGCTATGGGTTCGAAT  
CTAAGAGAAATTCTAGACAATGTTTGTATCCTGAAATTTTTTTGTCTTTTCTGAATGAT  
AAGGAGAGAAAAAAATTTGGATCAAAAGAAAATGCCATTTTGGAGTTTATCAACAAT  
TTGCTTGTGTAGGTGGGGATCCGGTATTTTCTGAATCCTTATGTAAGGAATTACAAAAG

AAGTTCTTTCAACAAAGATGTGAATTAGGAAGGATTGGTCGACGAAATATGAACCGAA  
GACTGAACCTTGATATACCCAGAACAAATACATTTTTGTTACCACGAGACATATTGGCA  
GCCGCTGATCATTGATTGAACTGAAATTTGGAATGGGTACTTGGACGAT-----ATGAA  
TCATTTGAAAAATAAACGTATTCGTTCTGTAGCGGATCTTTTACAAGATCAATTCGGATT  
GGCTCTGGTTCGTTTAGAAAATGTGGTTCGAGGAACTATATGTGGAGCAATTCGG---CA  
CAAATTG--ATACCGACTCCTCAGAATTTAGTAACTTCAACTCCA-----TTAACAACC  
ACTTATGAATCTTTTTTCGGTTTACACCCCTTATCTCAAGTTTTGGATCGAACTAATCCAT  
TGACACAAATAGTTCATGGGAGAAAATTGAGTTATTTAGGCCCTGGAGGACTAACAGG  
GCGAACTGCTAGTTTTTCGGATACGAGATATCCATCCTAGTCACTATGGGCGTATTTGCC  
AATTGACACATCTGAGGGAATCAATGTTGGACTTATTGGATCCTTAGCAATTCATGCTAG  
GATTGGTCATTGGGGA---TCTCTAGAAAGCCCATTTTAT-----GAAATTTCTGAAAGAT  
CAACAGGG-----GTACGGATGCTTTATTTATCACCAGGTAGAGATGAATACTATATGGTAG  
CGGCAGGAAATCTTTGGCGTTGAATCAGGATATTCAGGAAGAACAGGTTGTTCCAGC  
TCGATACCGTCAAGAATTCCTGACTATTGCATGGGAACAGGTTTCATCTTCGAAGTATTTT  
TCCCTTCCAATATTTTTCTATTGGAGCTTCCCTCATTCTTTTATCGAACATAATGATGCG  
AATAGGGCTTTAATGAGTTCTAATATGCAACGTCAAGCAGTTCCGCTTTCTCGGCCCGA  
GAAATGCATTGTTGGAACGGGTTGGAACGACAAGCAGCTCTAGATTCAGGGGCTCTT  
GCTATAGCCGAACGTGAGGGAAAGATCATTTATACCGATACTGAAAAGATCCTTTTCTC  
AGGTAATGGAGATACTCTAAGCATTCCATTAGTTATGTATCAACGTTCCAACAAAAATAC  
TTGTATGCATCAAAAACCCAGGTTTCAGCGGGGTAAATGTATTA AAAAGGGACAAATT  
TTAGCAGATGGTGCTGCTACGGTTGGTGGCGAACTTGCTTTGGGAAAAACGTATTAGT  
AGCTTATATGCCATGGGAAGGTTACAATTCTGAAGATGCAGTACTCATTAGTGAGCGTT  
TGGTATATGAAGATATTTATACTTCTTTTCATATACGGAAATATGAGATTCAGATTCATGT  
GACAAGCCAAGGC--CCTGAAAGGATCACTAACGAAATACCACATTTTCGAAGCCCATT  
ACTCCGCAATTTAGACAAAAATGGAATTGTGATGCTGGGATCTTGGGTAGAGACGGGT  
GATATTTTAGTAGGTAATTAACGCCCAAATGGTGAAAGAA---TCGTTCGTATGCCCCG  
AAGATAGATTGTTACGAGCCATACTTGGCATTACAGGTATCTACTTCAAAGAAACTTGT  
TTAAACTACCTATAGGTGGTAGGGGCCGGGTTATTGATGTGAGGTGGATCCAGAAAA  
GGGGG--GGTTCTAGTTATAATCCAGAAACGATTTCGTATATATATTTACAGAAACGCGA  
AATTAAGTAGGCGACAAAGTAGCTGGAAGACACGGAAATAAAGGTATCATTTCAAA  
ATTTTGCCTAGACAAGATATGCCTTATCTGCAAGATGGAAGACCTGTTGATATGGTTTT  
AACCCATTAGGAGTACCTTACGAATGAATGTAGGACAGATATTTGAATGTTTCGCTCGG  
GTTAGCAGGGGGTCTGCTAGACAGACATTATCGAATAGCGCCTTTTGATGAGAGATATG  
ACAAGAAGCTTCGAGAAAACCTAGTGTCTTCTGAATTATATGAAGCCAGTAAGCAAAC  
AGCGAATCCATGGGTATTTGAACCCGAGTATCCAGGAAAAAGCAGAATATTTGATGGA  
AGGTCGGGGAATCCTTTTGAACAACCCGTTCTAATAGGAAAGCCTTATATCTTGAAATT  
AATTCATCAAGTTGATGATAAAATCCATGGACGTTCCAGTGGACATTATGCGCTTGTTAC  
ACAACAACCCCTTAGAGGAAGGGCAAACAAGGGGGGCAACGAGTAGGAGAAATGG  
AGGTTTGGGCTCTAGAAGGATTTGGTGTGCTCATATTTTACAAGAGATGCTTACTTATA  
AATCTGATCATATTAGAGCGCGCCAAGAAGTACTTGGTACTACGATCATTGGAGGAACA  
ATACCTAATCCTGAGGATGCTCCAGAATCTTTTCGATTGCTCGTTTCGAGAATTACGATCT  
TTAGCTCTGGAACCTGAACATTTCTTGTATCTGAGAAAACTTCCAGATTAATAGGAA  
GGAAGCTATGAATCAGAATTTTTCTTCTATGATCGATCGGTATAAACATCAACAGCTACG  
AATTGGATTAGTTTCTCCTCAACAAATAAGTGCTTGGGCCACTAAAATCCTGCCTAATG

GAGAGATCGTTGGAGAGGTGACAAAACCCTATACTTTTCATTACAAAACCAATAAACC  
TGAAAAAGATGGATTATTTTGTGAAAGAATTTTTGGGCCTATAAAAAGTGGAATTTGTG  
CTTGTGGAAATTATCGAGTAATCGGAGATGAAAAAGAAGACCCGAAATTTTGTGAACA  
ATGCGGAGTCGCATTTGTGCGATTCTCGCATAACGAAGATATCAAATGGGCTACATCAAAC  
TCGCATGCCAGTAACCCATGTGTGGTATTTAAAACGTCTTCCTAGTTATATTGCGAATC  
TTTTAGATAAACCTCTTAAAGAATTAGAAGGCCTAGTATACTGCGAT-----TTTTCTTTTG  
CTAGGCC---ATAACTAAAAAACCCACTTTCTTACGATTACGAGGTTTATTTCGAATATGA  
AATCAATCTTGGAAATACAGCATCCCGCTGTTTTTTACTACCCAAGGCTTCGATACATT  
TCGCAATCGAGAAATTTCTACTGGTGCAGGTGCTATCCGAGAACAATTAGCCGATCTAG  
ATTTACGAATTATTCTAGATAATTCGTTGGTAGAATGGAAAGAATTAGGGGAAGAA---G  
GACCCACAGGAAATGAATGGGAAGATCGAAAGGTTGGAAGAAGAAAGGATTTTTTTAG  
TTAGACGCATGGAATTGGCTAAGCATTTTATTTCGAACAAATATAGAACCAGAATGGATG  
GTTTTGTGTTTATTACCAGTTCTTCCTCCTGAGTTGAGACCCATCATTAGATAGATGGG  
GGTAAACTAATGAGCTCGGATATTAATGAACTCTATAGAAGAGTTATCTATCGGAACAAT  
ACTCTTACCGATCTATTAACAACAAGTAAATCCACGCCAGGAGAATTAGTAATGTGTCA  
GGAGAAATTAGTACAAGAAGCCGTGGATACACTTCTTGATAATGGAATCCGTGGACAA  
CCAATGAGGGACGGTCATAATAAAGTTTACAAGTCATTTTCAGATGTAATTGAAGGCAA  
AGAGGGAAGATTTTCGTGAGACTCTGCTGGGGAAACGGGTTGATTATTCAGGTCGTTCC  
GTCATTGTCGTGGGTCCTTCACTTTTATTACATCGATGTGGATTGCCGCGCGAAATAGC  
AATAGAGCTTTTCCAGACATTTGTAATTCGTGGTCTAATTAGACAACATCTTGCTTCGAA  
CATAGGAGTTGCTAAGAGTAAAATTCGGGAAAAAGAACCGATTGTATGGGAATACTT  
CAGGAAGTTATGCAGGGGCATCCTGTATTGCTGAATAGAGCACCCACTCTGCATAGATT  
AGGCATACAGGCATTCCAGCCGTTTTAGTGGAGGGGGCGTGCTATTTGTTTACATCCATT  
AGTTTGTAAAGGATTCAATGCAGATTTTGTATGGGGATCAAATGGCTGTTTATGTACCTTT  
ATCTTTGGAGGCTCAAGCGGAGGCCCGTTTACTTATGTTTTCTCATATGAATCTTTTGT  
TCCAGCTATTGGGGATCCCATTTCCATAACCAACTCAAGATATGCTTATTGGACTCTATGTA  
TTAACGAGCGGGAATCGTCGAGGTATTTGTGTAATAGGTATAATCCGTGGAATCGC-----  
---AGAACTATCAAATCAAAGAAGTAACAATAATAACTATAAGTATACG-----GAAC  
CCTTTTTTTCTAATCCTATGATGCAATTGGAGCTTATCGGCAGAAACGAATCAATTTAG  
ATAGTCCTTTGTGGCTCCGGTGGCGACTAGATCAACGC---GTTATTGCTTCA-----AGAG  
AAAGTCCCATCGAAGTTCATATGAATCTTTAGGTACTTATTATGAGATTTATGGACT  
ATCTAATAGTAAGAAGTATAAAAAAAGAAATCTTTTTATATACATCCGAACCACTGTTG  
GTCATATTTCTCTTTATCGAGAAATCGAAGAAGCCGTACAGGGGTTTTCTCAGGCCTGT  
TCATATGGTACCGAACTAAGT-----ATGGAGGTACTTATGGCAGAACGGGCCAAT  
CTGGTATTTTACAATAAAGTGATAGATGGAACCTGCCATGAAACGACTTATTAGTAGATTA  
ATAGATCACTTCGGAATGGCATATACATCACACATCCTGGATCAAGTAAAGACTCTGGG  
TTCCACCAAGCTACTGCTACATCCATTTTATTAGGAATTGATGATCTTTTAAACAATACC  
TTCTAAGCGATGGCTAGTTCAAGATGCTGAACAACAAGTTTGATTTTGGAAAAACAC  
CATCATTATGGGAATGTACACGCGGTAGAAAAATTACGCCAATCCATTGAAATATGGTAT  
GCTACAAGTGAATATTTGCGACAAGAAATGAATCCTAATTTTAGGATGACTGACCCCTT  
TAATCCAGTTCATATAATGTCTTTTTTCGGGAGCTAGAGGAAATGCATCTCAGGTACATCA  
ATTAGTAGGTATGAGAGGCTTAATGTGCGACCCTCAAGGACAAATGATTGATTTACCCA  
TTCAAAGCAATTTACGCGAAGGACTCTCTTTAACAGAATATATCATTTCTTGCTACGGA  
GCCCCGTAAGGGGTTGTGGATACTGCTGTACGAACATCCGATGCTGGATATCTCACGCG



CAGACTTGTTGAAGTAGTTCAACACATTGTTGTACGTCCGACAGATTGTGGCACCACC  
CGGGGTATTTCTGTGAGTCCTCGGAATGGGATGATGCCG---GAAAGGATTTTTATCCAA  
ACATTAATGGGTTCGTGTATTAGCAGATGATATATATACGGGCACACGATGTATTGCCAGT  
CGAAATCAAGACATTGGGATTGGACTTGTAAATCGATTTCATAACC-----TTTCG  
AGCACAACCAATATCTATTTCGAACTCCCTTTACTTGTAGGAGTGCGTCTTGGATCTGTC  
GATTATGTTATGGTCCGAGTCTACTCATGGCGACCTGGTTGAATTAGGAGAAGCTGTA  
GGTATTATTGCAGGACAATCGATTGGAGAACCGGGTACTCAATTAACATTAAGAACTTT  
TCATACCGGCGGAGTATTCACGGGGGGTACTGCAGAACATGTGCGGGCCCCTTCTAAT  
GGAAAAATCAAATTCATGAGGATTTGGTTCATCCGACACGTACACGTCATGGACATCC  
TGCCTTTCTATGTTCTATAGACTTGTATGTAAC TATTGAGAGTGAAGATATTCTACATAAT  
GTAAATATTCCATCCAAAAGTTTTCTTTTAGTTCAAACGATCAATATGTAGAATCAGAA  
CAAGTGATTGCTGAGATTCGCGCAGGAACATCCACT--TTGAATTTTAAAGAGAAGGTT  
CGAAAACATATTTATTCTGACTCAGACGGAGAA---ATGCACTGGAGTACTGATGTGTAT  
CATCCACCTGAATTTACATATGGTAATGTTTCATCTATTACCAAAAACAAGTCATTTATGG  
ATATTATTAGGAGGGCCGTGCAGA-----TCTAGTCTAGTCTCACTTTTCGCTCCACAAGGA  
TCAAGATCAAATAACGCGCAT-----TCTCGTTCTGTCAAGCGAAGATATACTTCTAACC  
TCTCA-----GAAACTAATGATCCG---GAGAGACAAAAACTCTTTAGTTCGTATTTTTATGG  
TAAAAAAGAAGATAGGATTTCTGATTAT---TCGGACCTTAACCGAATTAGATGTAATGGT  
CGTTGTAATCTCATATATCCG---ACCATTCTCCACCAGAATTCT-----GATTTATTCTCAA  
GAGGCGGAGAAATAGATTCATCATTCCACTCCAATCGATTCAAGAACGTGAGAACGAA  
CTAATGCCCGTTTCAGGTATCTCGATTGAAATCCCC-----CCAAATGGCATTTTCCGTAGA  
AATAGTATTCTTGCTTATTTTGATGATCCTCGATACAGAAGAAAGAGTTCGGGCATTACT  
AAATATGGGACTATAGAAATGCATTCAATCGTCAAAAAAAGAGGAT-----TTGATTGAGTA  
TCGAGGA---GTCAAGGCATTTAGGCCAAAATACATGAAAGTAGATCGGTTTTTTTTTATT  
CCCGAGGAAGTGCATATCTTACCCGGATCTTCTTCCATAATGGTACGGAACAATAGTCT  
CATTGGGGTAGATACACAAATTACTTTAAATATAAGAAGCCGAGTAGGCCGGGTTTGTCC  
GAGTGGAGAGAAAAAAGAAATTGAACTTAAAATCTTTTCTGGAGATATCCATTT  
TCCTGGAGAGACGGATAAGATATCTCGACATAGCGGCGTTTTGATACCA---CCAGGA---  
ACAGGAAAACGAAATTC AAGGAATCCAAAAA-----TGGA AAAATTGGATCTATGTT  
AACGG-----ATCACACCTAGTAAG-----AAAAGTATTTTGT TTTGGTTCGACTTGTCGTC  
ACATATGAAATAACGGACGGTATAAATTTAGCAACACTTTTTCCCCCGGATCTGTTGCA  
GGAAAGGGATAATGTGCAACTTCGAGTTGTCAATTATATCCTTTATGGAAATGGCAAAC  
CAATTTCGAGGAATTTCTGATACAGATATTCAATTAGTTTCGACTTGTTTAGTATTGAATT  
GGGACCAAGACAAAAA-----AGTTCTTCTAGTGAAGAAGCCCGTGCTTCTTTG  
TTGAAATAAGGACAAATGGTTTGATTTCGACATTTCTTAAGAATCGACTTAGTGAAATCC  
CCTATTTTCATATATCGGAAAAGGAATGATCCATCGGGTTCAGGATTGCTCTCTGAT---A  
ATGGATCAGATTGCACCAATATCAATCCGTTTTCTTCC-----ATTTAT-----TCCAAGGCA  
AGAATTCAACAATCCCTTAACCAAAATCAAGGAACTATTCATACGTTGTTGAATAGA----  
----AATACGGGATTCCAATCGTTGATAATTTGTTCATCATCCAATTGTTTTCGAATGGGTC  
CA-----TTCAACGATGTAATAAAATATCACAAT-----GTGAAAAAAGAATCAGATCCTCGA  
ATTCCAATTAAGAATTCGCTGGGGCCTTTTGGAAACA-----GCCTTTCCAATTGTGAATTT  
TTATTCA-----TTTACCATTTA-----ATAACTCATAATCAGATCTTG---GTAAATAACTATTT  
GCAACTTGACAAT-----TTAAAACAGACTTTTCAAGTAATTA A-----TATTATTTAAT  
GGATGAAAAT-----GAGAAAATTTATAACCCCGAGCCAGGCAGTAACATTATTTTGAATC

CATTCAATTTGAATTGGTATTTTCTCCATCACAAATTATTGTCAAGAAACATCT---ACAATA  
ATTAGTCTTGGACAGTTTATTTGTGAAAATGTATGTATAGCCAAAAATGCACCACAC---C  
TAAAA-----TCGGGTCAAGTTCTACTTGTTCAA---GTTGATTCTGTAGTAATACGATCAGC  
TAAGCCTTATTTGGCCACTCCAGGAGCAACTGTTCATGGCCATTATGGGGAAATCCTGT  
ATGAAGGAGATACATTAATTACATTTATATATGAAAAATCGAGATCTGGTGATATAACCC  
AGGGGCTTCCAAAAGTGGAACAGGTGTTAGAAGTGC GTTCGATTGATTCAATATCGAT  
GAATCTAGAAAAGAGGGTTGAGGGTTGGAACGAACGTATAACAAGAATTCTTGGAAATG  
CCGTGGGGCTTCTTGATTGGTGCTGAGCTAACTATAGTGCAAAGTCGTATCTCTTTGGTT  
AATAAGATCCAAAAGGTTTATCGATCCCAGGGGGTGCAGATTCATAATAGGCATATAGA  
AATTATTGTACGCCAAATAACATCAAAGTGTGGTTTCAGAA-----GATGGAATGTCT  
AATGTTTTTTCACCCGGAGAATTAATTGGATTATTGCGAGCGGAACGAATGGGGCGCGC  
TTTGAAGAAGCGGTCTGTTACCGAGCCGTCTTATTGGGAATAACAAGAGCATCTCTC  
AACTCAAAGTTTCATATCTGAAGCGAGTTTTCAAGAACTGCTCGAGTTTTAGCAA  
AGCAGCTCTCCGGGGTCGGATCGATTGGTTGAAAGGCCTGAAAGAGAACGTTGTTTTG  
GGGGTATGATACCCCTTGGTACCGATTAAAGGATTA-----GTGCCCCCTCAAACA  
AGATAACAACAGTCTT-----TTGGAAACAAAAAAAAAAATCTATTTCGAGGGGGAAATG  
AGA-----GATATTTGTTTCACCACAGAAAATTATTTGATTCTTGTCTTTCAAAGAATTC  
CATGATACATCAGAACAATCATTATAGGA-----TTAATGATTCCATGACAAGA  
AGATATTGGAACATCAATTTGGAAGAGATGATGGAGGCAGGAGTTCATTTGGCCATGG  
TGCTAGGAAATGGAATCCTAAAATGGCACCTTATATCTCTGCAAAGCGTAAAGGTATTC  
ATATTACAAATCTTACTAGAACTGCTCGTTTCTTATCCGAAGCTTGTGATTTGGTTTTTGA  
TGCAGCAAGTAGGGGAAAACAATTCTTAATTGTTGGTACCAAAAATAAAGCAGCTGAT  
TCAGTAGCATGGGCTGCGATAAAGGCCCGGTGTCATTATGTTAATAAAAAATGGCTCGG  
CGGTATGTTAACGAATTGGTCCACTACAGAAACGAGACTTCATAAGTTCAGGGACTTG  
AGAATGGAACAAAAACAGGAAGACTCAACCGTCTTCCGAAAAGGGATGCAGCTATG  
TTGAAAAGGCAATTATCTCGCTTGCAAACATATCTGGGCGGGATTAATATATGACAGG  
GTTACCCGATATTGTAATTATCGTTGATCAGCACGAAGAATATACGGCCCTGCGAGAGT  
GTATCACTTTGGGAATTCCAACAATTTGTTAATCGATACAAATTGTGACCCTGATCTTG  
CAGATATTTGATTCCAGCGAATGATGACGCTATATCTTCAATCCGCTTAATTCTTAACA  
AATTAGTATTCGCAATTTGTGAGGGTCGTTCT---AGCTATATAAGAAATCCTATGGGACA  
AAAAATAAATCCACTTGGTTTCAGACTTGGTACAACCCAAGGTCATCATTCCCTTTGGT  
TTGCACAACCAAAAAATTATTCTGAGGGTTTACAAGAAGATCAAAAAATAAGAGATTT  
TCTCAAAAATTATATACAAAAGAATATGAGAATATCCTCCGGC---GTCGAGGGAATTGCA  
CGTATAGAAATTCAAAAAGAATTGATTTGATCCAGGTCATAATCTTTATGGGATTCCCA  
AAGTTATTAATAGAAAATAGACCGCGA-----GGAATCCAAGAATTACAGATTAATCT  
AGAAAAAGAATTTCAATTATGTGAACCAAAAACTTAACGTTGCTATCACAGAATTGCA  
AAACCTTATGGAAACCCTAATATTCTTGCAGAATTTATAGCCGGACAATTAAGAATAG  
AGTTTCATTTGAAAAGCAATGAAAAAAGCTATTGAATTAACCTGAACAAGCAGATACA  
AAAGGAATTCAAGTACAAATTGCAGGACGTATCGACGGAAAAGAAATTGCACGTGTC  
GAATGGATCAGAGAAGGTAGGGTTCCCTACAAACCATTTCGAGCTAAAATTGATTATTG  
TTCTATACAGTTTCGAACTATCTATGGGGTCTTGGGTATCAAATTTGGATATTTATAGAC  
GAAGAAATGTCGCGTTACCGAGGACCTCGTTTCAAAAAAATACGCCGCCTGGGGGCTT  
TACCAGGACTAACTAATAAAAGGCCTAAAGCCGGAAGTGATCTTAGAAACCAATCACG  
TTCCGGGAAA---AAATCTCAATATCGTATTCGTCTAGAAGAAAAACACAAATTGCGTTT



GT-----ATGGTAAAACCTTCGTTTGAACGATGTGGTAGAAAGCAACGAGCCGTCTATCG  
AATCGTTGCAATTGATGTTTCGATCCCGAAGAGAAGGAAAAGATCTTCGAAAAGTGGGT  
TTTTATGATCCACTGAAGAATCAAACCTATTAAATGTTCCCTGCTATTCTATATTTCCCTG  
AAAAGGGTGCTCAACCTACAGGAAGTTCAGGATATTTAAAGAAGGCAGAAGTTTT  
TAAGGAACCTTCGACCTAATCAAACGAAATTCAAT---ATGGATAAATCCAAGCGACCTTT  
TCTTAAATCCAAGCGATCTTTTCGTAGGCGTTTGCCCCGATTCAATCGGGGGATCGAA  
TTGATTATAGAAACATGAGTTTAATTAGTCGATTTATTAGTGAACAAGGAAAAATATTAT  
CTAGACGAGTGAATAGATTGACCTTGAAACAACAACGATTAATTACTATTGCTATAAAA  
CAAGCTCGTATTTTATCTTTGTTACCTTTTCTCAATAATGAGAAA-----CAATTTGAAAGA  
ACCGAGTCGACCGCTAGAAGTACTGGTCTTAGAACAGAAATAAAGTGGCAGGTTTAC  
TAAAAAAAATCCTTTTGTAGTCAATCATTTATTAAGAAAAATTGATAAGCTTAATAAAA  
AAGCAGAAAAAGAAATAATAGTAACTTGGTCCCGGGCATCTACCATTATAACCCACAATG  
ATTGGCCATAAATTGCTATTTCATAATGGTAAGGAACATTTGCCTATTTATATAACAGATC  
GTATGGTAGGACACAAATTGGGAGAATTTGTACCTACTTTAAATTTCCGGGGACATGCA  
AAAAGCGATAATAGATCTCGGCGTATGATTTTTCAATCTTTTCTACTAGGTAATCTAGTAT  
CCTTATGCATGAAGATAATCAATTCGGTCGTTGTGGTCGGACTCTATTATGGATTTCTGA  
CCACATTCTCCATAGGGCCCTCTTATCTCTTCTTCTCCGAGCTCAGGTTATGGAAGAA  
GGA-----ACCGAGAAGAAGGTATCAGCAACAACCTGGTTTTATTACGGGACAGCTCAT  
GATGTTTCATATCGATCTATTATGCGCCTCTGCATCTAGCATTGGGTAGACCTCATAAATA  
ACTGCCCTAGCTCTACCATATCTTTTGTTTCATTTCTTCTGGAACAATCACAAACACTTT  
TTTGATTATGGATCTACTACCAGAAATTCAATGCGTAATTTACAGCATTCAATGTGTATTCC  
TGAATAATCTCATTTTTCAATTATTCAACCATTTCAATTTACCAAGTTCAATGTTAGCCAG  
ATTAGTCAACATTTATATGTTTCGATGCAACAACAAGATGTTATTTGTAACAAGTAGTTT  
TGTTGGTTGGTTAATTGGGCACATTTTATTCATGAAATGGCTTGGATTGGTATTAGTCTG  
GATACGGCAAATCATTCTATTAGATCGTACATTCGATCTAATAAGTACCTTGTGTCAGA  
ATTGAGAAATTCTATGGCTCGGATCTTAGTATTCTCTTATTTCTTACCTGTGTCTACTAT  
TTAGGCAGAATACCGTCAACCATTCTTACTAAGAAATGGAAAGAAGCCGAAGAAGATA  
AACCTCTTGTGACTCTTCTTTTTGATTCTAACCGTTGGAATAGACCATTTTCGATACATAA  
AAAATAATCGATTTGAAAACGCTGTCAGAAATGAAATGTCACAATATTTTTTTGACACA  
TGCCAAAGTGCTGGAAAGGAAAGAATATCTTTTACATATCCACCCAGTTTGTCAACTTT  
TTGGGAAATGATAAAAAGAAGGATATCTCTGGCTACACTAGAAAAATTCTCATCTAATG  
AACTCTACAATCATTGGGTTTATACCAACAAAGAAAAAAGTAAT---TTAAACAACGAAT  
TTGTAAATCGAATTCAGCTCTAGACAAAGAATCTCTTTTTTTGAAATATACTCGAAACA  
AGGACTAGGTTGTGTAATGACAATACTACAAACGAATACTTACCCAAAATATATGATCCT  
TTCTTGAACGGACCATATCGGAGAACAATAACAAAAAGCGTTTCACCTATAGAGAAAG  
TTGGGATAAATCGGATTCATGGTATCATTACCAAAAAATTGAACAGAAAGATACTAAT  
GTTCAATCTATTAGAATAAAAGAAATCAGTAAAAAAGTACCTCGCTGGTTATACAAATT  
AACCGAGTTGGAACAAGAAGCA---GGAGAAATTCGTTCAAGAAAAGCCAAACGTGTA  
GTAATTTTTACTGGTGCTTTGATACGCTATTCACAACAATCAGATTTTAGGCGAGGCATA  
ATAAAAGGTTCTATACGTGCTCAAAGGCGTAAAATAGTTATTTGGGAACTGTTTCAAGC  
AAATGTGCATTCCTCTTTTTTTGGACAGAATAAAAAAATCCCTTCTTTTTTCTTTTGA  
TATC-----TCTGGGCCAATTAACCAATTTTAGAAATAGAAAGGAGAACGCGCGAATAG  
AGATAGCAGAGGCTGGGATACCATTCATTTGCGCAAGTAATAAGGGGTTCCATGTTA  
ATAACTCAATCTTTTTTAGAAAATATATTCTATTACCTTCATTGATAATAGCGAAAAATA

TTGGACGTATGTTACTATTGCAACTTCCTGAATGGTATGAGGATTTAGAGGAATGGAATA  
GGGAGATGCATGTTAAATGTACCTATAATGGTGTTCAATTGTCCGAAACAGAATTTCCA  
CAAATTTGGTTGACAGATGGTATTCAGATAAAAATCTTATTTCTTTCTGTCTGAAACCT  
TGGCACAGATCTAAAAAAAAGAAAAAGATGATTTTTGTTTTTTAACAGTTTTGGGAA  
TGAAACCGAACTTCCTTTTGGTCTCCCCGAAAACGACCCTCTTTTTTTGAACCCATT  
TTAAGGAACTCGAAAAAAAATTGGAAAATTTCAAAGAAATATTTTCTACTT---CTA  
AAAATTTTTAAAGGAAAAATAAAATTACTTCGAAAAGTTTCAAAGAAACAAAAAAT  
GGTTATCAAAGTGTCTGTT-----TTTTTTAAAAAATAAGAAAAGAACTCTTAAAAGTA  
AATGATCCCATAATCAGCAATCAGATGATTCATAAATCATTAGTCAAATTCATCTCCA  
GATTGGACAAATCTTCATTGACAGAAAAAAAATGAAGGATCTGACTGATAGAACAA  
ATACAATTAGAAATCAAATAGAAAGATTACAAAAGAGAAAAAAAAGTCTTAACAA  
A-----ACAAGTTATAATGCTAAAAGATTAGAAAAATGGCAAATATTA AAAAGAAGA  
AATGCTCGATTAATTTCTAAATTACTTTTGTTTTTAAATTTTTTCATTGAAAGAATCTACA  
CAAATATATTTTTATCTATCATTAATATCCCAGAATGAAGAGAAAATTATTT--GAGTTTA  
TTTCGTATGACTTATCGTACTTATCACAGGCATATGTATTTTACAAATTATCACAAACCCA  
AGTTATTAACCTGTATAAATTA AAATCATTCTTCAATATATCCCTTTTTTTCTTAAGCCTG  
AAATAAAGGATCTTTTACACAAGGAATAATTCATTCTAAATTAAGGATAACAGACTT  
CCGAGTTCTGAAATGAATCAATGGAAAACTGGTTAAGAGGGCATTATCAATACGATTT  
ATCTCAGATCAGATGGTCTAGATTAATACCACAACAATGGCGGAATAGAGTTTATCAAC  
GTCGTATGGTTAAAGGAAAAGAAAATGGAATTTATATGAAAAGACCAA-----TTAATT  
GATCCAAAAAAGAAGATAATTTCAAATACTCTAAATATGATCTTTTATCATATAAAT  
CTATTAATGGCGATATTCTATATCCCGATAGGAAATATTTGGATTGGAAAATTATCAATTT  
TGATCTTAGATTTTTTGATTGGATGGGGATGAATGAAAAATACTAAAGCGTTGGTTCTT  
CCCAGAATTTTTGTTACTTTATAATACATATAAAACGAAATCTTGGTTTATACCAAGCAA  
ATTACTTCTTTTAAATTACAAAAGTAACACGGAAGCAGAACTCGATTTGTTCTGAAAC  
GTTATTTGCTTTTTCAATTGAGATGGGACGATACTTTGAATCAAAGAATGATCAATAATA  
TTAAGGTATATTGTTTCTGCTTAGGCTAATAGATCCAAGAAAAATTTCTATATCCTCGAT  
TCAAAGGGGAGAAATGAGTTTGGATATAATGCTGATTCAGAAGAATTA ACTCTTCCAG  
AATTGATGAAA---GGAATATTGATTATCGAACCCATTCGTCTGTCTGTAAAAACGACG  
GACAGTTTATTATGTATCAAACCATCGGTATTTTGTGGTTCATAAGAGTAAGCACAAATC  
ATTTTGATTTGCTTGTTCCTGAAAATATTTTCTCATTTAGGCGTCGTAGAAAATTAAGAA  
TTCTAATTTGTTTCAGATTTCTTTGGCCTAATTATCGATTAGAAGATTTAGCTTGTATGAA  
TCGCTATTGGTTTGATACCAATAATGGCAGTCGTTTCAGTATGTTAAGGATACATTTGTAT  
CCA-----

-----ATGAATTCCATTGGACCCAGAAATGATACATTGGAAGAATC  
CGTT---GGGTCTTCCAATATCAATAGGTTGATTGTTTCG---CTCCTGTATCTTCCAAAAGG  
AAAAAAGATCTCTGAGAGTTGTTTCTGAATCCGAAAGAGAGTACTTGGGTTCTCCA  
ATAACT-----AAAAGTGTAGCATGCCTGAATCTAACTGGGGTTCCGCGGTGGTGGAA  
GGA ACTGGATCGGAAAAAAGAGG-----GATTCTAGTTGTAAGATATCTAAT-----GAAA  
CCGTCGCTGGAATTGAGATCTTATTCAAAGAGAAAGATATCAA---TATCTGGAGTTTCT  
TTTTGTATATTATATGGAT-----GATCCGATCCGCAAGGACCATGATTGGGAATTGTTGAT  
CGTCTTTCTCTGAGGAAGAGGCGAAATAGAATCAACTTG-----AATTCGGGACCGCTAT

TCGAAATCTTAGTGAAACACTGGATTTCTTATCTCATGTCTGCTTTTCGTGAAAAAATAC  
CAATTGAAGTGGAGGGT--TTCTTCAAACAACAAGGG--GCTGGGTCAACTATTCAATC  
AAATGATATTGAGCATGTTTCCCAT-----CTCTTCTCGAGAAACAAGTGGGCTATTTCTTT  
GCAAATTTGTGCTCAATTTTCATATGTGGCAATCCGCCAAGATCTCTTCCTT-----AGT  
TGGGGGAAG---AATCCGCACGAATCGGATTTTTTGGAGAAC---GTATCGAGAGAGAATT  
TGATTTGGTTAGACAATGTGTGGTTGGTAAACAAGGATCGG-----TTTTTTAGA-----A  
AGGTACGGAATGTATCGTCAAATATTCAATATGATTCC-----ACAAGA-----TCTAGTTT  
CGTTCAAGTAACGGATTCTAGCCAACTGAAAGGATCTTCT--GATCAATCCAGAGATCA  
TTTGGATTCCATTAGT-----AATGAGGATTCGGAA-----TAT  
CACACATTGATCAATCAAAGAGAGATTCAACAATAAAAGAAAGATCGATTCTT--TGG  
GAT-----CCTTCCTTTCTTCAAACGGAAGGAACAGAGATAGAATCAGAC-----CGATTCCC  
GAAA-----TGCCTTTCTGGATATTCC-----TCAATGTCCCGGCTATTACG---GAACGTGA  
GAAGCAGATGATTAATCATCTGCTTCCGGAAGAAATCGAAGAATTTCTT-----GGGAATC  
CTACAAGATCCGTTCTGTTCTTTTTTCTCTGATAGATGG-----TCAGAACTTCAT--CTGGG  
TTCGAATCCTACTGAGAGGTCCACTAGAGATCAG-----AAATTGTTGAAGAAACAA  
CAAGATCTTTCT--TTTGTCCCTTCCAGGCGATCGGAA-----AATAAAGAAATGGTTA  
ATATATTCAAGATAATTACGTATTTACAAAAT-----ACTGTCTCAATTCATCCTATTTTCATC  
AGATCCGGGGTGTGATAGGGTTCCG---AAGGATGAACCGGAT--ATGGACAGTTCCAAT  
AAGATTTCAATCTTGAACAAAAATCCATTTTTTGGATTTA-----TTTCATCTATTCCATGACC  
GGAACAGGCGAGGATACACGTTA-----CACCACGATTTTGAATCAGAA-----GAGAGATT  
TCAAGAAATGGCAGATCTATTCACTCTATCAATAACCGAGCCG---GATCTGGTGTATCAT  
AAGGGATTTGCCTTTTCTATTGATTCCTACGGATTGGATCAAAAACAA-----TTCTTGAAT  
GAGGCCAGGGATGAA-----TCGAAAAAGAAATCT-----TTATTGGTTCTACCTCCTAT  
TTTTTAT-----GAAGAGAATGAATCTTTTTTCTCGAAGGATCAGAAAAAAATGGGTCCGG--  
-ATCTCCTGCGGGAATGATTTGGAAGATCCAAAACCAAAAATAGTGGTATTTGCTAGCA  
ACAACATAATGGAGGCAGTCAATCAATATAGATTGATCCGAAATCTGATTCAAATCCAAT  
ATAGTACCTATGGG-----TACATAAGAAATGTATTGCATCGATTCTTTTTTAATGAAT-----  
CGATCCGATCGCAACTTCGAATATGGA-----ATTCAAAGGGATCAAATAGGAAAGGAT  
ACTCTGAATCATAGA ACTATAATGAAATATACGATCAACCAACATTTATCGAATTTGAAA  
AAG---AGTCAG-----TTCGATCCTCTT-----ATCTTGATTTCTCGAACCGAGAAATCCAT  
GAATCGGGATCCTGATGCATATAGATACAAATGGTCCAATGGGAGCAAGAATTTCCAGG  
AACATTTGGAACATTTCTGTTTCTGAGCAGAAGAGCCGT-----TTGCAAGTAGTGTTTCG  
ATCAATTACGTATTAATCAATATTCGATTGATTGGTCTGAGGTTATCGACAAAAAAGATT  
TGTCTAAGCCACTTCGTTTCTTTTTGTCCAAG-----TCACTTCTTTTTTT  
GTCC-----AAGTGTCTTTTCTTTTTGTCTAAC---TCACTTCTTTTTTCTGTGT  
GAGTTTTCGGGAATATCCCCATTCATAGGTCCGAG---ATCTACATCTAT--GAATTGAAAGG  
TCCGAATGATCAACTCTGCAATCAGTTGTTAGAATCAATAGGTCTTCAAATTGTTTCATT  
GAAAAAATGGAAACCCTTC-----TTATTGGAT-----GATCATGATACTTCC---CGAAAAT  
CGAAATCTTGATCAATGGAGGAACAATATCACCTTTTTGTTCAATAAGATCCCA---AA  
GTGG---ATGATTGACTCATTCCATACTAGA-----AATAATCGCAGGAAATCCTTTGATAAC  
ACGGATTCCTATTTCTCAATGATATTCCACAATCAAGACAATTGGCTGAATCCCGTGAA  
ACCATTTATAGAAGTTCATTGATATCTTCTTTTTATAAAGCAAATCGACTTCGATTCTTG  
AATAATCCACATCACTTCTGCTTCTAT-----TGTAACACAAGATTCCTTTTCTGTG-----  
----GAAAAGGCCCGTATCTAT-----AATTATGATTTTACGTATGGA---CAATTCCTCAATATC

TTGTTTCATTCGCAACAAA---ATATTTTCTTTGTGCGTCGGTAAA-----AAAAAACATGCTT  
TTGGGGGG---AGAGATACTATTTACCAATCGAGTCACAGGTATCTAACATATTCATAACC  
TAACTATTTTCCACAAAGTGGT--GACGAAACGTATAACTTGTACAAATCT-----TTCCA  
TTTTCCAAGTCGATACGATCCATTCGTTTCGT-----AGAACTATTTACTCGATCGCAGACAT  
TTCTGGAACACCTCTAACAGAGGGGACAAATAGTCAATTTTGAAAGAACTTATTGTCAA  
CCTCTTTTCAGATATGAATCTATCTGATTCAGAAAGGAAGAACTTGCATCAGTATCTCAAT  
-----TTCAATTCAAACATGGGTTTGATTCACTCCATGTTCTGAGAAATATTTACCATCC  
GAAAAG-----AGGAAAAAA-----CGGAGTCTTTGTCTAAAG-----AAATGC  
GTTGAGAAAGGGCAGATGTATAGA-----AGAGATAGTGCTTTTTCAACTCTCTCAAAA  
TGGAATCTATTCCAAACATATATGCCATGGTTCCTTACTTTCGACAGGGTACAAATATCTA  
AATTTGATATTTTATAGATACTTTTTTCAGACCTATTG-----CCGATACTAAGTAGC---AGTCA  
AAAATTTGTATCCATTTTTTCATGATATTATGCATGGATCAGGTATATCATGGCGAATTCTT  
CAGAAAAAATTG-----TGTCTTCCACAATGGAATCTG---ATAAGTGAGATTTTCG  
AGTAAGTGTTTACATAGT-----CTTCTTCTGTCCGAAGAAATGATTCATCGAAAT-----AAT  
GAGTCACCATTGATATCGACACATCTGAGATCGCCAAATGTTTCGGGAGTTC---CTCTATT  
CAATCCTTTTCTTCTTCTTGTGCTGGATAT--CTCGTTCGTACACATCTTCTCTTTGTTT  
CCCGG-----GCCTCTAGTGAGTTACAGACAGAGTTCAAAAAGGTCAAATCTTTGATGAT  
TCCATCATCTATGATTGAGTTGCGAAAACCTTCTGGATAGGTATCCTACATCTGAACCGAA  
TTCTTTCTGGTTAAAGAATCTCTTTCTAGTTGCTCTGGAACAATTAGGAGATTCTCTAGA  
AGAAATACGGGGTTCTGCTTCTGGCGGCAACATGCTTGGT-----CCCGCT-----T  
ATGGG---GTCAAATCAATACGTTCTAAGAAGAAATATTTGAATATCAAT-----CTCATCG  
ATCTCATA-----CCAAATCCCATCAATCGAATCACTGTTTCGAGAAATACGAGACAT  
CTAAGTCATACAAGTAAAGAGATCTATTCATTGATAAGAAAAAGAAAAACGTGAACG  
GGGATTGGATTGATGATAAAATAGAATCCTGGGTCGCGAACAGTGATTTCGATTGATGAT  
GAAGAAAGAGAATTCTTGGTTCAGTTCTCC-----GCCTAACGACA-----GAAAAAAGGA  
TTGATCAAATTCTATTGAGTCTGACT--CATAGTGATCATTTA-----TCAAAGAATG  
ACTCTGGTTATCAAATGATTGAACAACCGGGAGCAATTTACTTACGATACTTAGTTGAC  
ATTCAT-----AAAAAGTATCTATTGAATTATGAGTTCAATACATCCTGTTTAGCAGAAAGA  
CGGGTATTCCTTGCTCATTATCAGACAATCACTTAT-----TCCCAAACCTTCGTGTGGGACT  
AATACTTTTCATTTCCCATCTCATGGA-----AAACCCTTTTCGCTCCGCTTAGCCTTATC  
CCCCTCT--AGGGGGATTTTAGTGATAGGTTCTATAGGAACTGGACGATCCTATTTGGTC  
AAATACCTAGCGACAACTCCTATGTTCTTTTCATTACGGTATTTCTGAACAAGTTCCTG  
GATAACAAGCCTAAAGGTTTTCTTATTGAT-----GATATCAATGATATTGATGATAG  
TGACAATATTGATGCTAGTGACGATATTGATGCTAGTGAC-----  
-----GATATCGATCGTGACCTTGATACGGAGCTG---GAACTGCTAACTATGATGAAT  
GCGCTAACTATGGATATGATGCCGGAA-----ATAGACCGATTTTATATCACCTTCAATT  
CGAATTAGCAAAGCAATGTCTCCTTGCATAATATGGATTCCAAACATTCATGATCTGGA  
TGTGAATGAGTCGAATTACTTATCCCTCGGTCTATTAGTGAACCATCTCTCT-----  
-GAAAGATGTTCC---ACTAGAAATATTCTTGTATTGCTTCGACTCATATCCCCAAAAAG  
TGGATCCCGCTCTAATAGCTCCGAATAAATTAATACGTGCATTAAGATACGAAGGCTTC  
TTATTCACAACAACAAGCACTTTTTTCACTCTTTCATATACTAGGGGATTTCACTTGG  
AAAAGAAAATGTTCCATACT-----AATGGATTCGGGTCCATAACCATGGGTTCCAATGCA  
CGAGATCTTGATGACTTACCAATGAGGCCCTATCGATTAGTATTACACAGAAGAAATC  
AATTATAGACACTAATACAATTAGATCCGCTCTTCATAGACAAACTTGGGATTGCGA----

----TCCCAGGTAAGATCGGTTTCAGGATCATGGGATCCTTTTCTATCAGATAGGAAGGGCT  
GTAGCACAAAATGTACTTCTAAGTAATTGCCCATAGATCCTATATCTATCTATATGAAGA  
AGAGA-----TCATGTAACGAAGGGGATTCTTATTTGTCCAAATGGTACTTCCGAACCTGGA  
ACGAGCATGAAGAAATTAACGATACTTCTTTATCTTTTGAGTTGTTCTGCCGGATCGGT  
CGCTCAAGATCTTTGGTCTCTACCC-----GGACCCGATGAAAA---AATGGGATCACTTC  
TTATGGACTCGTTGAGAATGATTCT--GATCTAGTTCATGGCCTATTAGAAGTAGAAGGC  
GCTTTGGTGGGA-----TCTTCACGGACAGAAACAGATTGCAGTCAGTTTGATAATGAT---  
--CGAGTGACATTGCTTCTTCGGCCCGAACCGAGGAAT--CCCTTAGATATGATGCAAAA  
CGGATTTTGTCTATCTTTGATCAGAGATTCTCTATGAAAAATAC-----GAATCGGAGTT  
TGAAGAA---GGGGAGGGAGAAGGAGCCCTTGACCCGCAACAG-----ATAGAGGAG  
GAT-----TTATTCAATCAC-----ATAGTTTGGGCTCCT-----AGAATATGGCGCCCT-----  
--TGGGGCTTTCTATTTGATTGTATCGAAAGGCCCAATGAATTGGGATTTCCC--TATTGG  
TCCAGGTCATTTCCGGGGCAAG-----CGGATCATTATGATGAAGAGGATGAGCTTCAA  
GAGAATGATTCGGAGTTCTTGCAGAGTGGAACCATGCAGTACCAGACACGAGATAGAT  
CTTCCAAAGAACAAGGCCTTTTTCGAATAAGCCAATTCATTTGGGACCCTGCAGATCCG  
CTCTTTTCTATTTCAA---GATCAGCCCCCTGGCTCTGTGTTTTTCACATCGAGAATTATT  
TGCAGATGAAGAGATGTCAAAGGGGCTTCTTACTTCCCAAACAGATCCTCCTACATCTA  
TATATAACGCTGGTTTATC-----AAGAATACACAAGAAAAGCACTTCGAATTGTTGATT  
AATCGTCAGAGATGGCTTAGA-----ACCAATAGTTCATTATCT-----AATGGATCTTTCC  
GTTCTAAT-----ACTCTATCCGAGAGTTATCAGTATTTATCAAATCTGTTCCCTATCTAAC---  
GGAACGCTATTGGATCAAATGACAAAGACATTGTTGAGAAAAAGATGGCTTTTCCCGG  
ATGAAATGAAAATTGGATTC-----ATG-----ATGCCTAGATCGCGG---ATA  
AATGGAAATTTTATTGATAAGACCTTTTCAATTGTAGCCAATATCTTATTACGAATAATTC  
CGACAACCTTCAGGAGAAAAAGAGGCATTTACCTATTACAGAGATGGG-----ATGTCAGC  
TCAATCCGAAGGAAATTATGCGGAAGCTTTACAGAATTATTATGAAGCTATGCGACTAG  
AAATTGATCCCTATGATCGAAGTTATATACTCTATAATATAGGTCTTATCCATACAAGTAA  
TGGAGAACATACGAAAGCTTTAGAATATTATTTTCGAGCACTAGAACGAAACCCATTCT  
TACCCCAAGCTTTTAATAATATGGCCGTGATCTGTCATTAC---CGGGGAGAACAGGCCAT  
TCGCCAGGGAGATTCTGAAATTGCGGAGGCTTGGTTTGTATCAAGCAGCTGAGTATTGG  
AAACAGGCTATAGCGCTTACTCCTGGTAATTATATTGAAGCACATAATTGGTTGAAGATC  
ACGGGGCGTTTCGAA-----ATGAGTTGGCGATCAGAAGATATATGGATAGAACTTATAAC  
GGGGTCTCGAAAATAAGTAATTTATGCTGGGCCCTTATCCTTTTTTTTAGGTTTATTAGG  
ATTCTTATTGGTTGGAACCTTCCAGTTATCTTGGTAGAAATTTGATATCTTTTTTTCCGTCT  
CAGCAAATCATTTTTTTTCCACAAGGGATCGTGATGTCTTTCTACGGGATCGCGGGTCT  
CTTTATTAGTTCCTATTTGTGGTGCACAATTCCTGGAATGTAGGTAGTGGTTATGATCG  
ATTCGATAGAAAGGAAGGGATAGTGTGTATTTTTCGTTGGGGATTTCCCTGGAAAAATC  
GTCGCATATTCCTCCGATTCTTATAAAAGATATTAGTCCGTTAGAATAGAAGTTAAAG  
AGGGTATTTATGCTCGTCGTGCCTTTATATGGATATCAGAGGCCAGGGGGCCATTCCCT  
TGACCCGTAATGATGAGAAT--TTGACTCCACGAGAAATTGAACAAAAAGCCGCCGAA  
TTGGCCTATTTCTTGCGCGTACCAATTGAAGTCTTT

>Nelumbonucifera

ATGAAAAAATGGTGGCTCAATTCGATGTTGTTTCTAAGTAAATCAATGGACAGTCTTGG  
TCCATTGGAAATACCAGTGGAAGTGAAGATCCCGTTATAAATGATACGGATAAAAAACA  
TTCAT--TGCAGTAATGTTGATCATTTATTCGGTGTGAGAGACATTCGGAGTTTCATCTCT



GATGACACTTTTTTAGTTAGGGATAGTAATGGTGACAGTTATTCCATATATTTGGATATTG  
AAAATCAGATTTTTGAGATTGACAATGAT-----CATTCTTTTCTGAGTGAATTCGAAAATT  
TATTTTCTAGTTATCTGAATTCTAGTTATCCAATAAATGGATCTAAGAGTGACAATCACTA  
CTATGATCGTTACATGTCTGATACTAAATATAGTTGGAATAATCACATTAATAGTTGCATT  
GACAGTTATCTTCGTTCTGAAATCCGT-----ATTGATAGTTACATTTCAAGTGATAGCGAC  
AATTACAGTGACAGTTACATTTATACTTACATTTGTAGCGACAGTGGGAGTTCATAACA  
-----ACTGGCAGTGAT--AATAAAAGAAGAAGAAAC---GATCTCGAAAAAATAAAAA  
AAGCGATATTTGTGGGTTCAATGCGAAAATTGTTATGAATTAATTATAAGAACTTTT  
GATGTCAACAATGAATATTTGTAAACAATGTGGATATCATTTGAAAATGAGTAGTTCAGA  
TAGAATCGAACGTTTCGATTGATCCGGGCACCTGGGATCCTATGGATGAAGACATGGTCT  
CTACGGACCCCATTAATTTTCATTCGGGGGAGGAACATTATAAGAAGCGTATCGATTTTA  
ATCAAAGAAGTACAGGGTTAGCTGAGGCTGTTCAAACAGGCATAGGTCAACTAAATGG  
GATTCTCGTAGCAATTGGGGTTATGGATTTAAGTTCCTGGGGGGTAGTATGGGATCCGT  
AGTAGGCGAGAAAATCACCCGTTTGTATCGAGTATGCTACTAATAGATCTTTACCTCTTAT  
TATAGTGTGTGCTTCCGGAGGAGCGCGCATGCAAGAAGGAAGTTTGAGCTTGATGCAA  
ATGGCTAAAATATCTTCCGCTTCATATAATTATCAATCAAATAAAAAGTTATTCTATGTAT  
CAATCCTTACATCTCCTACAACCGGTGGGGTGACAGCTAGTTTTGGTATGTTGGGAGAT  
ATCATTATTGCCGAACCCAACGCCTACATTGCATTTGCGGGTAAAAGAGTAGTTGAACA  
AACATTAAGAATACAATACCTGATAATCACAAGCGGCTGAGTATTCATTCCATAAGG  
GCTTATTTCGATCCAATCGTACCACGTAATCTGTTAAAAGACGTTCTGAGTGAGTTATTC  
AGCTCCACGGTTTTTTTTCCCTTGAATCAAATTCATCAAGATGGTAACCATTTCGAGCC  
GACGAAATTAGTAATATTATACGTGAACGTATTGAGCAATATAATAGAGAAGTAAAGATT  
GTGAATACCGGCACTGTACTTCAAGTAGGCGACGGTATTGCTCGTATTCATGGTCTTGA  
TGAAGTAATGGCAGGTGAATTAGTAGAATTTGAAGAGGGTACAATAGGCATTGCTCTG  
AATTTGGAATCAAATAATGTTGGTGTGTATTAATGGGTGATGGTTTGATGATACAAGAG  
GGAAGTTCTGTAAAAGCAACAGGAAGAATTGCTCAGATACCTGTAAGCGAGGCTTATT  
TGGGTCTGTGTTATAAATGCTCTGGCTAAACCTATTGATGGTAGGGGTGAAATTTACGCT  
TCTGAATCTCGGTTAATTGAATCTCCCGCTCCAGGTATTATTTTCGAGACGTTCCGTATAT  
GAGCCTCTTCAAACAGGGCTTATTGCTATTGATTTCGATGATCCCTATAGGACGCGGTCA  
GCGAGAATTAATTATTGGGGACAGACAGACCGGTAAAACAGCAGTAGCCACAGATACT  
ATTCTCAATCAAAGGGCAAATGTAATATGTGTTTATGTAGCTATTGGTCAAAGAGC  
GTCTTCTGTGGCTCAGGTAGTTACTACTTTCCAGGAAAAGGGGGCGATGGAATACACTA  
TTGTAGTAGCCGAAACGGCAGACTCACCTGCTACATTACAATACCTTGCTCCTTATACA  
GGAGCGGCTTTGGCTGAATATTTTATGTACCGTGAACAACATACTTCAATCATTATGAT  
GATCCCTCCAAACAAGCACAAGCTTATCGCCAAATGTCTCTTCTATTACGAAGACCGCC  
CGGTCGCGAAGCTTATCCAGGAGATGTTTTTTATTTGCATTCACGCCTTTTGAAAGAG  
CCGCTAAATTAAGTTCTCGATTAGGTGAAGGAAGTATGACTGCTTTACCAATAGTTGAG  
ACTCAATCGGGAGATGTTTCGGCTTATATTCCTACTAATGTAATTTCCATTACAGATGGA  
CAAATATTCTTATCTGCCGATCTATTCAATGCTGGAATCCGACCTGCTATTAATGTGGGTA  
TTTCTGTTTCTAGAGTAGGATCCGCAGCTCAAATTAAGCCATGAAACAAGTAGCGGG  
CAAATTAATAATTGGAAGTGGCTCAATTCGCAGAGTTAGAAGCCTTTGCACAATTTCGCTT  
CTGATCTCGATAAAGCTACTCAGAATCAATTGGCAAGAGGTCAACGATTACGTGAATTA  
CTCAGACAATCCCAATCAGCCCCCTCACGGTGGATGAGCAGATAGTGACTATTTATAC  
CGAACGAATGGGTATCTTGATTTCGTTAGAAATTGGACAGGTAAAGAAATTTCTTGTTT

AGTTACGTACCTACTTAAAAACGAATAAACCTCAGTTCCAAGAAATCATATCTTCTACC  
AAGACATTTACCGAGGAAGCAGAAGCCCTTTTGAAGGAAGCTATTCAGGAGCAGATG  
GAACGTTTTCTACTTCAGGAACAAACAATGAGAATGAATCCTACTACTTCTGGTCCCTGG  
GGTTTCCGCACTTGAAGAAAAAACCTGGGGCGTATCGCTCAAATCATTGGTCCGGTA  
CTGGATGTAGCTTTTCCCCGGGCAAATGCCTAATATTTACAACGCTTTGGTAATTAAG  
GGTCGAGATACTGCCGGCCAGCAAATTAATGTGACTTGTGAGGTACAGCAATTATTAGG  
AAATAATCGAGTTAGAAGTGTAGCTATGAGTGCTACAGATGGTCTGATGAGGGGAATGG  
AAGTGATTGACACGGGAGCTCCTCTAAGTGTTCCAGTCGGTGGAGCGACTCTCGGACG  
AATTTTCAACGTTCTTGGAGAACCTGTTGATAATTTAGGTCTGTAGATACTCGCACAA  
CATCTCCTATTCATAAATCTGCGCCTGCTTTTATACAGTTAGATAACCAAATTATCTATTTTT  
GAAACAGGAATTAAGTAGTAGATCTTTTAGCTCCTTATCGCCGTGGAGGAAAAATCG  
GACTATTCGGGGGAGCTGGGGTGGGTAAAACAGTACTCATCATGGAATTGATCAACAA  
CATTGCCAAAGCTCATGGAGGTGTATCTGTATTTGGCGGAGTAGGGCAACGTACTCGTG  
AAGGAAATGATCTTTACATGGAAATGAAGGAATCTGGAGTGATTAATGAACAAAATATT  
GCAGAATCAAAGTAGCTCTAGTCTATGGTCAGATGAATGAACCGCCGGGAGCCCGTA  
TGAGAGTTGGTTTGACTGCCCTAACCATGGCGGAGTATTTCCGGGATGTTAATGAACAA  
GACGTAATCTATTTATCGACAATATCTTCCGTTTCGTCCAAGCGGGATCGGAAGTATCT  
GCCCTATTAGGCAGAATGCCTTCTGCCGTGGGTATCAACCTACCCTTAGTACAGAAAT  
GGTTCTTTGCAAGAAAGAATTACTTCGACCAAAGAGGGGTCCATAACTTCTATTCAA  
GCAGTTTATGTACCTGCGGACGATTTGACTGACCCTGCTCCTGCCACGACATTTGCACA  
TTTAGATGCTACTACCGTACTATCAAGAGGATTAGCTGCCAAAGGTATCTATCCAGCAGT  
AGATCCTTTAGATTCAACGTCAACTATGCTCCAACCTCGGATCGTTGGTGAGGAACATT  
ATGAAACTGCGCAAAGAGTAAAGCAAACCTTTACAACGTTACAAAGAACTTCAGGACA  
TTATAGCTATCCTTGGGTTGGACGAATTATCCGAAGAGGATCGTTTAACCGTAGCAAGA  
GCACGAAAAATTGAGCGTTTCTTATCACAACCCTTCTTCGTAGCAGAAGTATTTACTGG  
TTCTCCAGGAAAATATGTTGGTCTAACAGAAACAATTAGGGGGTTTCAACTGATCCTTT  
CCGGAGAATTAGATGGTCTTCTGAGCAGGCCTTTTATTTGGTAGGTAACATCGATGAA  
GCTACCGCGAAGGCTATGAACTTAGAAGTGGAGAGCAAATTGAAGAAAATGACCTTAA  
ATCTTTGTGTAAGTACTGACTCCTAATCGAATTGTTTGGGATTCAGAAGTGAAAGAAATCATT  
TTATCTACTAATAGTGGCCAAATGGCGTATTACCAAATCACGCCCTATTGCCACAGCC  
GTAGATATAGGTATTTTGAGAATCCGCCTAACGACCAATGGTTAACGATGGCTCTGATG  
GGCGTTTTCGCTAGAATAGGCAATAATGAGATCACCATTTTAGTAAACGATGCGGAGAA  
GGGTAGTGACATTGATCCGCAAGAAGCTCAGCGAACTCTTGAAATAGCTGAAGCTAAC  
TTGAGTAGAGCTGAAGGCAAGAGACAAACAATTGAGGCGAATCTAGCTCTCAGACGA  
GCTAGGACGCGAGTAGAGGCTATTAATGTAATTTCAATGAAAAATGTAACCGATTCTTT  
CGTTTCCTTGGGTCACTGGCCGTCCGCCGGGAGTTTCGGGTTTAATACCGATATTTTAG  
CAACAAATCCAATAAATCTAAGTGTAGTGCTTGGTGTATTGATCTTTTTTTGGAAGGGA  
GTGTTAAGTGATTTATTAGATAATCGAAAACAGAGGATCTTGAGTACTATTCGAAATTC  
GAAGAACTACGTGGAGGGGCCATTGAACAGCTGGAAAAAGCCCCGGGCCCGCTTACGG  
AAAGTGGAATGGAAGCAGATGAGTTTCGAGTAAATGGATACTCTGAGATAGAACGAG  
AAAAATTGAATTTGATTAATCAACTTATAAGAATTTGGAACGATTAGAAAATTACAAA  
AACGAACTATTCATTTTGAACAACAAGAGCGATTAATCAAGTCCGACAACGAGTTT  
TTCAACAAGCCTTACAAGGAGCTTTAGGAACTCTGAATAGTTGTTTGACCAGCGAGTT  
ACATTTACGCACCATCAGTGCTAATATTGGCATGTTTGGCACGATGAAAGAAATAACTG

ATATGAATCCACTGATTTCTGCTGCTTCCGTTATTGCTGCTGGATTGGCCGTAGGGCTTG  
CTTCTATTGGACCTGGAGTTGGTCAAGGTAAGTACTGCTGCGGGCCAGGCCGTAGAAGGGAT  
CGCGAGACAACCAGAGGCAGAGGGTAAAATACGAGGTAAGTTATTGCTTAGTCTGGCT  
TTTATGGAAGCTTTAACAATTTATGGACTGGTTGTGGCATTAGCACTTTTATTTGCGAAT  
CCCTTTGTTATGAATGTTCTACCATGTTCCATCAACACCCTAAAAGGGTTATACGATATAT  
CCGGTGTGGAAGTTGGCCAACATTTCTATTGGCAAATAGGAGGTTTCCAAGTCCATGCC  
CAAGTACTTATTACTTCTTGGGTCGTAATTGCTATCTTATTAGGTTTCAGCCACTATAGCTG  
TTCGCAATCCACAAACCATTCCGACTGCTGGTCAGAATTTCTTCGAATATGTCCTTGAA  
TTCATTCGAGACTTGAGCAAACTCAGATTGGAGAAGAATATGGTCCTTGGGTTCCCTTT  
TATTGGAAGTATGTTCCATTTATTTTTGTTTCGAACTGGTCAGGGGCTCTTTTACCTTGG  
AAAATCATAGAGTTACCTCATGGGGAGTTAGCCGCACCTACGAATGATATAAATACTAC  
TGTTGCTTTAGCTTTACCCACGTCAGTGGCATATTTCTATGCGGGTCTTAGCAAAAAG  
GATTGGGTTATTTGCTAAATACATTCAACCAACTCCAATCCTTTTACCAATTAACATCC  
TAGAAGATTTACAAAACCTTTATCACTTAGTTTTTCGACTTTTTCGGGAATATATTGGCTG  
ATGAATTAGTAGTTGTTGTTCTTGTCTTTAGTACCTTCAGTGGTTCCGATACCTGTTAT  
GTTCCCTTGGATTATTTACAAGTGGTATTCAAGCTCTATTTTTGCAACTTTAGCCGCGGC  
TTATATAGGAGAATCCATGGAGGGCCATCATATGATATTTTTGACTTTAGAACATATATTA  
ACTCACATTTCCCTTTTCGATCGTTTCAATTGTAATTACGATTCATTTGATGACCTTATTA  
TCGATGAAACCGTAGGACTATATGATTCGTCAGAAAAAGGCATGATAGCGACTTTTTTC  
TGTATAACAGGATTCTTAGTTACTCGTTGGATTCAATCAGGGCATTCCCCTAAGTGAT  
TTATATGAATCATTAATGTTCCCTTTTCATGGAGTTTCTCCATTATTCATATGGTTCCTAAAAT  
AGGGAACCATAAAAATCATTAAAGCGAAATAACCACACCAAGTGCTATTTTTACCCAAG  
GCTTTGCCACTTCGGGTCTTTAACTGACATGCATCAATCCGCAATATTAGTGCCTGCTC  
TCCAATCCCAGTGGTTAATGATGCACGTAAGTATGATGGTATTGAGTTATGCAGCTCTTT  
TATGTGGATCATTATTATCAATAGCTCTTCTAGTCATTACATTTCGAAAAACATAGAAAA  
TTTTAGTAAAAGCAATGAGATCCAATACGTGAATAAAAAAGCAATGTTTTACGAAAC  
ACTTCTTTTACT--TTAGAACTATCACAGGCATCAATTGATTCAGCAATTGGATCATTG  
GAGTTATCGTGTCAATTAGTCTAGGGTTTATCTTTTTAACCATAGGTATTCTTTGCGGAGC  
AGTATGGGCTAATGAGGCATGGGGGTCGTATTGGAATTGGGACCCGAAGGAACTTGG  
GCATTTATTACTTGGACCATATTCGCGATTTATTTACATACTCGAACAAATACAAAATGG  
CAAGGCGCAAATTCGCAATTGTGGCTTCTATGGGATTTCTTATAATTTGGATATGCTATT  
TTGGGGTCAATCTATTAGGAATAGGGCTACATAGTTATGGGTCATTCACATTT--ATGCCA  
AAAAAGAAAGCATTCACTCCCCTCCCATATCTTGCATCTATAGTATTTTTGCCCTGGTGG  
ATCTCTCTCTCATTAAATAAAAGTCTGGAATCTTGGGTTACTAATTGGTGAATACTAGG  
CAATCCGAACTTTTTTTGAATGATATTCAAGAAAAGAACGTTTTTAGAAAAATTTATAGA  
ATTAGAAGAACTATTCCTGTTGAACGAAATGATAAAGGAATACCCGGAGACACATATAC  
AAAAGCTTCATATAAGAATCCACAAAGAAACAATACAATTGGTCAAGATGTACAATGA  
GGGTCATATCCATACCATTTTGCATTTCTCGACAAATATAATCTGTTTTCGCTATTCTAAGT  
GGTTATTCTATTCTGGGTAGTGAAGAACTTGTCAATTCTGAATTCTTGGGTTTCAGGAATTT  
CTATATAACTTAAGCGACACAATAAAAGCTTTTTCTATTCTTTTATTAACCGATTTATGTA  
TAGGATTCCACTCGCCCCATGGTTGGGAACTAATGATTGGCTCTATCTACAAAGATTTTG  
GATTTGCTCATAATGAGCAAATTATATCTGGTCTTGTTCCTACTTTTCCAGTTATTCTAGA  
TACAATTTTTAAATATTGGATCTTCCGTTATTTAAATCGTGTATCTCCGTCACTTGTAGTG  
ATTTATCATTCAATGAATGACATGCCTATTGGTGTTCAAAAGTACCTTTTTCGGAGTCTT

GGAGAGGAAGATGCAGTTTGGGTTGACGTAATCAACCGACTTCATCGAGAAAGATTAC  
TTTTTTTAGGCCAAGAGGTTGATAGCGAGATCTCGAATCAACTTATTGGTCTCATGGTAT  
ATCTCAGTATAGAGGATGATACCAAAGATCTGTATTTGTTTATAAACTCTCCCGGCGGAT  
GGGTAATACCCGGAATCGCTATTTATGATACTATGCAATTTGTGCCACCAGATGTACATA  
CAATATGCATGGGATTAGCCGCTTCAATGGGATCTTTTATCCTGGCCGGAGGAGAAATT  
ACCAAACGTCTAGCATTCCCTCACGCTAGGGTAATGATCCACCAACCTGCTAGTTCFTT  
TTATGAGGCACAAACAGGAGAATTTATCTTGAAGCGGAAGAGCTACTGAAACTCCGC  
GAAACCCTCACAAAGGGTTTATGTACAAAGAACGGGCAACCCCTTATGGGTTGTATCCG  
AAGACATGGAAAGGGATGTTTTTATGTCAGCAACAGAAGCCCAAGCTCATGGAATTGT  
TGATCTTGTAGCGGTGCAAATGAAAGAACAAAATGGATTTCATGAAGGTTTAATTATTG  
AATCACTTCCCAACGGTATGTTCCGGGTTTCGTTTAGATAATGAAGATCTGATTCTAGGTT  
ATGTTTCAGGAAAGATCCGACGTAGTTTTATACGGATACTACCAGGAGATAGAGTCAAA  
ATCGAAGTAAGTCGTTATGATTCAACCAGAGGGCGTATAGTTTATAGACTCCGTAACAA  
AGATTTCGAACGATATGGAGGAATTACAAAGATATTTAGAAATAGATAGATCTCGGCAAC  
AAGACTTTCTATATCCACTTCTCTTTCAGGAGTATATTTATGTATTTGCTCACGATCATGG  
TTTAGAAAATTTAGGT---AAATCCAGTTCACTAATTGTGAAACGGGTCATTACTCGAATG  
TATCAACGGAATCATTTGATTTTTTTGGCTAATGATTCTAATCAAACCTCAATGTGTTGGA  
AAGAATTTTTATTCTCAAATGATATTAGAGGGGTTTGCAGTCATTGTGGAAATTCCATTC  
TCGCTGCGATTAGTTTCTTCCCTCATAACAAAATCTCATAATTTACGATCAATTCATTCAA  
TATTTTCTTTTTTAGAGGACAAATTATCACGTTTAAATTATGTGTTAGATCTACTAATACC  
TTACCCCATTCATTAGAAATCTTGGTTCAAACCTCTTCGTTGCTGGGTAAAGGATACCC  
CTTCTTTGCATTTATTGCGATTTTTTCTCCACGAGTATCGTAATTGGAATAGTCTTATTAC  
TAAATCTAGTTCCTTTTTGAAAAACAAAGATTCTTCTTGTTCCTATATAATTCTCATGTA  
TGTGAATGCGAATCTATATTCGTGTTTCTTCGTAAACAATCTTTTCATTTACGATCAACAT  
CTTCTGGAGCCCTTCTTGGAGCGAACCATTCTATGGAAAAATAGAACATTTTGGAGTA  
GTGTTTCGTAATGATTTTATCCTATGGTTGGTCAAGGATCCTTTCATGCATTATGTTAGAT  
ATCAAGGAAAATCCATACTGGCTTCAAAGGGACTCCTCTTTTGGATGAATAAATGGAAA  
TATCACCTTGTAATTTCTGGCAATGTCATTTTTACTTGTGGTCTCAACCCGGCAGGATC  
CATATAACCAATTATCCAATCATTCCCTCGATTTTCTGGGTTATCTTTCAAGTGTACGAC  
TAAATCCTTCACTGGTAAGGAGTCAAATGCTAGAAAATTCATATCTAATAGATATTGCTA  
GT-----AAGAAGTTCGAAACCATCGTCCCAATTATTCCTCTGATTGGATCATTGGCTAAA  
GCAAATTTTGTAAACGTATCGGGGCATCCATTAGTAAGCCGGTCCGGGCCGATTATC  
AGATTCTGATATTATCGATCGATTTGGGCGGATATGCAAAAATCTTCTCATTATCACAG  
CGGATCCTCAAAAAAAAAGAGTTTGTATCGAATAAAGTATATACTTCGACTTTCGTGTG  
CTAGAACTTTGGCTCGTAAACACAAAAGTACTGTACGGGCTTTTTTGAAGATTAGG  
TTCGGAATTGTTGAAAGAATTCTTTACGGAGGAAGAACAAGTTCTTTCTTTGATCCTCC  
CAAGGCGGATTTGGTATTTGGATATTCTTCGTATCAATGATCTGACCAATCCTGAAATGA  
TAATTGATACGACA---AAAGCACAA---GTTATCAATCTTTTTCCAGATCGGAA---TCCTT  
AAAAGAGGTCTATGGGCTCATATGGTTGCTTGTCCCTATTTTGAATCTTATATCGGGAAT  
CACAATAGGGGTACTAGTAATTGTGTGGTTAGAAAGAGAAATATCCGCAGGGATACAA  
CAACGTATCGGACCTGAATACGCCGGCCCTTTGGGAATTCTTCAAGCTCTAGCAGATGG  
AATCAAACACTTTTCAAAGAGGATCTTCTCCCATCTAGAGGAGATGCTCGTTTATTCA  
GTATTGGACCATCTATAGCGGTATATCAATCTACTTAGTTATTCAGTAATTCCTTTTGG  
TTATCGCCTTGTCTAGCCGATCTTAGTATAGGTGTTTTTTTTATGGATTGCCATTTCAAGT

ATTGCTCCTATTGGACTTCTTATGTCAGGATATGGATCGAATAATAAATATTCCTTTTCAG  
GTGGTCTACGAGCTGCTGCTCAATCAATTAGTTATGAAATACCATTAAC TTCATGTGTGT  
TATCAATATCTCTACTATCTAACAGTTCAAGTACAGTTGATATAGTTGAGGCGCAGTCAA  
AATATGGTTTTTTGGGGTTGGAATTTGTGGCGGCAGCCTATCGGGTTTTGTCGTTTTTCTAA  
TTTCTTCCCTAGCAGAATGTGAGAGATTACCTTTTGATTTACCAGAAGCAGAGGAAGAA  
TTAGTAGCAGGTTATCAAACCGAATATTCAGGTATAAAAATTTGGTTTATTTTATGTTGCTT  
CCTATCTAAATCTACTAGTTTCTTTCATTATTTGTAACAGTTCTTTACTTTGGGCGGCTGGAA  
TCTCTCTATTCCGTACATATTCATTCCCTGAGCTTTTCGGAATAAATAAAGTGGGGGGGGT  
CTTTGAAACAACAATTGGTATCTTTATTACATTAGCTAAAGCTTATTTGTTCCCTGTTCAIT  
CCTATCGCAACAAGATGGACTTTACCTAGAATGCGAATGGACCAACTATTAATCTTGG  
GTGGAAATTTCTTTTACCCATTTCTCTAGGTAATCTATTATTGACAACCTTCTCCCAACTC  
CTTCACTGATGATCTGGCATGTACAGAATGAAAACCTCATTCTCGATTCTACGAGAATT  
TTTATGAAAGCGTTTCATTTGCTTCTCTTCCATGGAAGTTTCATTTCCCAAGAATGTATC  
CTAATTTTTGGCCTAATCTTCTTCTGATGATCGATTCAACCTCTGATCAAAAAGATATA  
CCTTGGTTCTATTTTATCTCTTCAACAAGTTTAGTAATGAGCATAACGGCCCTATTGTTC  
CGATGGAGAGAAGAACCTATGATTAGCTTTTCGGGAAATTTCCAAACGAACAATTTCA  
ACGAAATCTTTCAATTTCTTATTTACTATGTTCAACTCTCTGTATTCTCTATCCGTAGA  
GTACATTGAATGTACAGAAATGGCTATAACAGAGTTTCTTTTATTCGTATTAACAGCTAC  
TCTAGGAGGAATGTTTTTATGTGGTGCTAACGATTTAATAACTATCTTTGTAGCTCCAGA  
ATGTTTCAGTTTATGCTCCTACCTATTATCTGGATATACCAAGAGAGATGTACGGTCTAAT  
GAGGCTACTACGAAATATTTACTCATGGGTGGGGCAAGCTCTTCTATTCTGGTTCATGGT  
TTCTCTTGGCTATATGGTTCATCCGGGGGAGAGATCGAGCTTCAAGAAATAGTGAATGG  
TCTTATCAATACACAAATGTATAACTCCCCAGGAATTTCAATTGCGCTTATATTCATCACT  
GTAGGAATTGGGTTCAAGCTTTCCCCAGCCCTTTTCATCAATGGACTCCTGACGTATA  
CGAAGGATCTCCCACTCCAGTCGTTGCTTTTTCTTCTGTTACTTCGAAAGTAGCTGCTT  
CAGCTTCAGCCACTCGAATTTTCGATATTCCTTTTTATTTCTCATCAAACGAATGGCATC  
TTCTTCTGGAATCCTAGCTATTCTTAGCATGATATTGGGGAATCTCATTGCTATTACTCA  
AACAAGCATGAAACGTATGCTTGCATATTCGTCCATAGGTCAAATCGGATATGTAATTAT  
TGGAATAATTGTTGGAGACTCAAATGATGGATATGCAAGCATGATAACTTATATGCTGTT  
CTATATCTCCATGAATCTAGGAACTTTTGCTTGCATTGTATCATTGTTGCTACGTACCGGA  
ACTGATAACATTCGAGATTATGCAGGATTATACAGAAAGATCCTTTTTTTGGCTCTCTCT  
TCAGCCCTATGTCTCTTATCCCTAGGAGGTCTTCCCTCCACTAGCAGGTTTTTTTCGGAAA  
ACTCCATCTATTCTGGTGTGGATGGCAGGCAGGCCATATTTCTTGGTTTTCAATAGGACT  
CCTTACGAGCGTTGTTTTCTATCTACTATTATCTAAAATAATCAAGTTATTAATGACTGGA  
CGAAACCAAGAAATAACCCCTCACGTGCGAAATTATAGAAGATCTCCTTTAAGATCAA  
ACAATTCCATCGAATTGAGTATGATTGTATGTGTGATAGCATCTACTATAACCAGGAATATC  
AATGAACCAATTATTGCAATTGCTCAGGATACCCTTTTTATGTTTCTGCTTACGAATA  
TGATATTTTCTGGGCATTTCTAATAATATCAAGTGTTATTCCTATTTTGGCATTCTAATTT  
CCGGAGTTTTGGCCCCGATTAGGGAAGGACCTGAGAACTTTCTAGTTATGAATCGGG  
TATAGAACCAATGGGCGATGCTTGGTTACAATCCGAATCCGTTATTATAIGTTTTGCTCTA  
GTTTTTGTGTTTTTGTATGTTGAAACGGTTTTTCTTTATCCATGGGCGATGAGTTTCGAT  
GTATTGGGTGTATCTGTATTTATAGAAGCTTTAATTTTCGTGCTTATCCTAATTGTTGGTT  
CAGTTTATGCATGGCGAAAAGGAGCATTGGAATGGTCTATGAATTTTTTCCCTGGTTA  
ACAATAATTGTAGTTTTGCCGATATCCGCGGGTCTTTAATTTTCTTCTCCCTCATAAAG

GAAATAAGGTGATTCGCTGGTATACTATCAGTATATGCTTAATAGAACTCCTTCTAATGA  
CCTATGCATTCTGTTATCATTTCAAATTGGACGATCCATTAATCCAACCTGGAAGAGGATT  
ATAAATGGATAAATATTTTTGATTTTCACTGGAGATTAGGAATCGATGGACTTCCATAG  
GACCCATTTACTGACGGGGTTCATTACTACTTTAGCTACTTTAGCGGCTTGGCCAGTTA  
CTCGAGATTCCCGATTGTTCCATTTCTGATGTTAGCAATGTATAAGTGGTCAAATAGGAT  
CATTTTCTTCTCGAGACCTTTTACTTTTTTTCATCATGTGGGAGTTAGAATTAATTCCTGT  
TTACCTACTTCTATCCATGTGGGGAGGAAAGAAACGTCTGTACTCCGCTACAAAAGTTTA  
TTTTGTACACAGCAGGGGGTTCATTTTTCTTTTACTAGGAGTCTGGGTATGGGTTTAT  
ATGGTTCCAATGAACCAACATTAATTTTTGAAACATCAGCTAATCAATCATATCCTGTGG  
CATTAGAAATAATATTCTATTTTGGATTTCTTATTGCTTATGCTGTAAATCACCGATTATA  
CCCCTACATACATGGTTACCAGATACCCACGGAGAAGCACATTACAGTACATGTATGCT  
TCTAGCCGGAATCTTATTA AAAATGGGAGCGTATGGATTGGTTCGGATCAATATGGAATT  
TTTACCCCATGCTCATTCTATATTTTCTCCCTGGTTGATGATAGTAGGCACAATTCAAATA  
ATCTATGCAGCTTTAACATCTCCCGGTCAACGCAATTTAAAAAAGAGAATAGCTTATTC  
CTCGGTATCTCATATGGGTTTACAATTATAGGAATTGCTTCCATAACCGATACGGGACT  
TAATGGAGCCATTTTACAAATAATCTCTCATGGATTTATTGGTGCTGCACTTTTTTTCTTG  
GCAGGAACGAGTTACGATAGAATACGTCTTGTATTATCTCGATGAAATGGGAGGAATTGC  
TATCCCAATGCCAAAATAATTTACGATGTTCAAGTAGCTTCTCGATGGCTTCTCTGCATT  
GCCGGGAATGAGTGGTTTTGTTGCAGAATTGATAGTATTTTTTGGAAATAATTACCAGTCC  
AAAATATCTTTAATGCCAAAATACTAATTACTTTTTGTAATGGCAATTGGAATGATATTA  
ACTCCTATTTATTCATTATCTATGTTACGCCAGATGTTCTATGGATAACAAGCTATTCAATG  
CCTCAAACCTTATTTTTTTGATTCTGGACCACGAGAACTATTTGTTTCGATCTCTATTTT  
TCTACCTGTAATAGGTATTGGTATTTATCCGGATTTTCGTTCTCTCACTATCAGTTGACAAG  
GTCGAAGCTATTCTATCCAATTACTTTTTCTAGAATGATGCTCGAACATGTA CTTGTTTTG  
AGTGCCATTTATTTTCTATCGGTATTTATGGATTGATTACGAGCCGAAATATGGTTAGAG  
CACTTATGTGCTTTGAGCTTATACTGAATGCGGTTAATCTAAATTTTCGTAACATTTTCTGA  
TTTTTTTGATAGTCGCCAATTA AAAAGGAGACATTTTCTCGATTTTTGTTATAGCTATTGCA  
GCCGCTGAAGCAGCTATTGGGCCAGCAATTGTTTCGTCAATTTTTTCGTAACAGAAAATC  
AACTCGTATCAATCAATCGAATTTGTTGAATAAAATGGAACATACATATCAATATGCATG  
GATGATACCTTTTCGTTCCACTTCCAGTTCCTATGTTAATAGGAGTGGGACTTCTCTTTGT  
TCCGATGGCAACAAAAAAGCTTCGTCGTATGTGGGCTTTTCCCAGTGTTTTCTTGTTAA  
GTATAGTTATGCTTTTTTTCGGCCAATCTGGCTATTCAGCAAATAAATGGCAGTTCTATCTA  
TCAATATGTATGGTTCGTGGACCATCAATAATGATTTTTCCCTTAGAGTTCGGCTACTTGATT  
GATCCACTTACTTCTATTATGTTAATATTAATCACTACTGTTGGAGTCATGGTTCTTGTTT  
ATAGTGACAATTATATGTCTCATGATCAAGGATATTTAAGATTTTTTGCTTATATGAGTTT  
TTCCAATACTTCTATGTTGGGATTAGTTACTAGTTTCAATTTGATACAAATTTATATTTTTT  
GGGAATTGGTTGGAATGTGTTTCGTATTTATTAATAGGGTTTTGGTTACACGACCAATTG  
CGGCAAATGCTTGCCAAAAGCGTTTTGTA ACTAATCGTGTAGGGGACTTTGGTTTATTA  
TTAGGAATCTTAGGTCTTTATTGGATAACGGGTAGTTTTCGAATTTAAGGATTTGTTTGAA  
ATAGTCAATAACAATGGAGTCAATTCCTTATTTCGTTACTTTGTGTGCCCTCCCTATTATTCG  
TCGGTGCAGTTGCTAAATCTGCACAATTCCTTTCATGTATGGTTACCCGATGCCATGG  
AAGGACCTACTCCTATTTTCGGCTCTTATACACGCTGCTACTATGGTAGCGGCGGGAATTT  
TTCTTGTAGCCCGGCTTCTTCTCTTTTTCACAGTCATACCTTACATAATGAATCTTATTTT  
TTTGATAGGTATAATAACAGTACTATTAGGAGCTACTTTGGCTCTTGCTCAAAAAGACAT

TAAGAGAAGTTTAGCCTATTCTACAATGTCTCAATTGGGTTATATGATGTTAGCTCTAGG  
TATGGGGTCTTATCGAGCTGCTTTATTTCAATTTGATCACTCATGCCTATTCAAAAAGCCTTA  
TTGTTTTTAGGATCCGGATCAATTATCCATTCAATGGAAACCATTGTTGGATATTCTCCA  
GATAAAAGTCAGAACATGGTTCTTATGGGCGGTTTAAACAAAATATATGCCAATTACAAA  
AACTGCTTTTTTATTAGGTACACTTTCTCTTTGTGGTATTCCACCTCTTGCTTGTTTTTG  
TCAAAAGATGAAATTCTTAATGATAGTTGGTTGTATTCACCGATTTTCGCGATAATAGCT  
TGTTCCACAGCGGGATTAAGTGCATTTTATATGTTTCGGATATATTTACTTACCTTTGAAG  
GGCCTTTAAATGTTTCATTTTCAAATTACAGTGGCAAAAAAATAGCTCGTTCTATTTAA  
TATCTATTTGGGGTAAAGAAGGACCGAAAACGATTAACAAAAAT--TTTCGTTTATCAAC  
AATGAATTTTTTTTCGTTTGGCAATAAAGAAATTTCCCATATCCCCATGAATCGGACAA  
TACTATGCTAGTGCCCTGCTTGTATTGGTTTTTTTTACTTTGTTTCGTTGGATTATAGGA  
ATTCCTTTTCGATTTTGATATATTATCGAAATGGTTAACTCCGTCGATAAACCTTTTACATC  
CAAATTTGAAC---TCCGTGGATTGGTATGCATTTGTGACAAATGCGATTTTTTCAGTCAG  
TATAGCCTATTTCCGAATATTTATAGCATCCCTTTTATATGGGCCTGTTTATTCTTCTTTCC  
AGAATTTGGAATTAATTAATTTCTTTGTTATTCTATGGGACAAAATAATAAATGTCATATA  
CAATTTGGTCATATAATCGTGGTTACATAGATAGTTTTTATGCAAGAGCTTTTACTAGGGG  
TATAAGAGGATTAGCTGAACTAACTCATTTTTTTTGATAGACGAGTAATTGATGGAATTAC  
GAATGGGGTTGGTGTACAAAGTTTCTTTGTAGGAGAAGGGATCAATATGTTGGGGGC  
GGG---CGAATCTTCTTACCTCTTCTTGTATTTATTTTATGTATCAATTTTTTTATTAATTT  
ACTACATGGATTTACCTGGGCCAATACATGATTTTCTTTTAGTATTTCTGGGATCAGGTC  
TTATATTAGGGGGCCTAGGAGTAGTATTACTTACCAATCCAATTTATTCTGCCTTTTCATT  
AGGATTGGTTCTTGTTTGTATATCCTTATTCTATATACCATCGAACTCTCATTTTGTAGCT  
GCTGCCCAGCTTCTTATTTACGTGGGAGCCATAAATGTCTTAATCATATTTGCTGTGATG  
TTCATGAATGGTTCAGAATATTACAATGATTTCCATCTTTGGACCATTGGAGATGGAGTC  
ACTTCATTGGTTTGTACAAGTATTTTTTTTCACTAATTACTACTATCCTAGATACGTCAT  
GGTATGGGATTATTTGGACTACAAGATCAAACCAGATTATAGAACAGGATTTGATAAGT  
AATGGTCAACAAATTGGAATTCATTTATCAACAGATTTTTTTTCTTCCATTTGAACTCATT  
TCTATAATTTTATGTTGCCTTGATAGGTGCAATTGCTATGGCTCGTCAGATGACTGTA  
CCAGCTACAAGAAAAGACCTCATGATAGTCAATATGGGCCCTCACCACCCATCAATGCA  
TGGTGTCTTCGACTCATCGTTACTCTAGATGGTGAAGATGTTATTGACTGTGAACCCAT  
ATTGGGTATTTACACAGAGGGATGGAAAAAATTGCGGAAAACCGAACAATTATACAAT  
ATCTGCCTTATGTAACCTCGTTGGGATTATTTAGCTACTATGTTACAGAGGCAATAACTG  
TAAATGCACCAGAACAGTTGGGAAATATTCAAGTACCTAAAAGAGCCAGCTATATCAG  
AGTTATTATGTTGGAGCTGAGTCGTATAGCTTCCATTTGTTATGGCTTGGCCCTTTTATG  
GCGGATATCGGTGCACAGACTCCTTTCTTCTATATTTTTCAGAGAGAGAGAATTAATATAT  
GATCTACTCGAAGCTGCCACAGGTATGCGAATGATGCATAATTATTTCCGTATCGGAGG  
AGTAGCTGCTGATCTACCTTATGGCTGGATGGATAAATGTTTGGATTTCTGCGATTATTTT  
TTAACGGGGGTTGCTGAATATCAAAGCTTATTACGCGGAATCCCATTTTTTTTGAACG  
AGTTGAAGGAGTGGGCATTATTGGTGGAGAGGAAGCAATAAATTGGGGTTTATCAGGA  
CCAATGCTACGAGCTTCCGGAATCCAATGGGATCTTCGTAAAGTTGATCATTATGAGTG  
TTACGATGAATTTGATTGGGAAGTCCAATGGCAAAAAGAAGGAGATTCATTAGCTCGTT  
ATTTAGTACGAATCGGTGAAATGACGGAATCCATAAAAATTATTCAACAGGCTCTGGAA  
GGAATTTCCGGGGGGCCCTATGAGAATTTAGAAGTCCGACGCTTTGCTAGAGCAAAAAG  
ATTCCGAATGGAATGATTTTGAATATCGATTCATTAGTAAAAAGCCTTCTCCCACTTTTG

AATTGTCGAAACAAGAACTTTATGCGAGAGTGGAAGCCCCAAAGGGGGAATTGGGAA  
TTTATCTGATAGGAGATCAGAGTGTTTTTCCCTGGAGATGGAAAATTCGTCCACCAGGT  
TTTATCAATTTGCAAATTCCTCCTCAGCTAGTTAAAAGAATGAAATTGGCTGACATTATG  
ACGATACTAGGTAGTATAGATATCATTATGGGAGAAGTTGATCGTATGCTACCTATGGTA  
ACTGGGTTTCATGAATTATGGTCAACAAACAATACGAGCTGCAAGGTATATCGGTCAAAG  
TTTCATGATTACCTTATCCACGCGAACCGTTTACCTGTAACCTATTCAATATCCCTATGAA  
AAATTGATCACATCAGAGCGTTTCCGCGGTTCGAATCCACTTTGAATTTGATAAATGCAT  
TGCTTGTGAAGTATGTGTTTCGTGTATGCCCTATAGATCTACCCGTTGTTGATTGGAGATT  
GGAAACTGATATTCGAAAGAAACGATTGCTTAATTACAGTATTGATTTTGGAAATCTGTAT  
ATTTTGTGGTAACTGTGTCGAGTATTGTCCAACAAATTGTTTATCAATGACTGAAGAATA  
TGAACCTTCTACTTATGATCGTCACGAATTGAATTATAATCAAATTGCTTTGGGTTCGGTT  
ACCAATATCAGTAATTGGAGATTCTACAATTCGAACAATTATGAATTCAAAAATAGCCAC  
GGAAAATCCCCTGATTCAAAAACAATTACCAATTACATGCAGGGTCGTTTGTCTGCTT  
GGCTAGTCAAGCATGGGCTAGTTCATAGATCTTTGGGCTTCGATTACCAAGGAATAGAG  
ACTTTACAAATAAAGCCCGAGGATTGGCACTCCATTGCTGTCATTTTATATGTATATGGTT  
ACAATTATCTACGTTCCAGTGTGCCTATGATGTAGCACCAGGCGGACTGTTAGCGAGT  
GTGTATCATCTTACGAGAATACAGTATGGTGTGGATCAACCGGAAGAGGTATGCATAAA  
AGTATTTGCGCCAAGGAGGAATCCTAGAATTCCGTCTGTTTTCTGGATTGGAAAAGTG  
CAGATTTTCAAGAACGGGAATCTTATGATATGTTGGGAATCTCTTATGATAATCATCCAC  
GCCTGAAACGTATCTTGATGCCTGAAAGTTGGATAGGATGGCCTTTACGTAAGGATTAT  
ATTGCCCCCAATTTCTATGAAATACAAGACGCTCAT-----

-----ATGAATTCATTAAGTTTCCGTTACTTGATCGACCAACCCAAAATTCTGTTAT  
TTCAACTACATTGAATGATCTTTCAAATTGGTCAAGACTCTCCAGTTTATGGCCGCTTCT  
CTATGGTACCAGTTGTTGTTTCATTGAATTTGCTTCATTAATAGGCTCGCGATTTGACTTT  
GATCGTTATGGACTGGTACCAAGATCGAGTCCTAGGCAAGCAGACCTAATTTTAACAGC  
CGGCACAGTAACAATGAAAATGGCTCCTTCTTTAGTGAGATTATATGAGCAAATGCCCG  
AACCAAAATATGTCATTGCTATGGGAGCCTGTACTATTACAGGAGGGATGTTCAAGTACC  
GATTCTTATAGTACTGTTCCGGGAGTCGATAAGCTAATTCCTGTGGATGTCTATTTGCCG  
GGCTGCCCGCCTAAACCGGAGGCAGTTATAGATGCTATAACAAAACCTTCGTAAGAAGG  
TTTCTCGAGAAATATATGAAGACAGAATTGTGTCTCAACAGAAGAATCGATGTTTTACT  
ACCAATCACAAGTTTCATGTTGGACGCAGTACTCATACTGGAAATTATGATCAAGGATT  
ACTCTATCAATCGCCATCTACTTCAGAGATCCCTTCTGAAACATTTTCAAATACAAAA  
GTCAGTATCTTCCACGAATTAGTGAATATGCAAATAGAAATACCTTTTCTTGATAAA  
GGAACAGATGACTCGATCCATTTCCGTATCGATCATGATATATGTAATAACTCGGACATC  
CATTTCAAATGCATATCCCATTTTGCACAGCAGGGTTATGAAAATCCACGAGAAGCGA  
CTGGGCGTATTGTATGTGCCAATTGCCATTTAGCTAATAAGCCCGTGGATATTGAGGTT  
CGCAAGCAGTACTTCTGATACTGTATTTGAAGCAGTTGTTAGAATCCCTTATGATATGC  
AACTGAAACAAGTTCTTGCTAATGGTAAAAAAGGGGCTTTGAATGTAGGGGCTGTTCT  
TATTTTACCTGAGGGATTTCGAATTAGCTCCCCCGATCGTATTTCTCCCGAGATGAAAGA  
AAAGATAGGCAATCTTTCTTTTTCAGAGTTATCGCCCCACTAAAAAAAATATTCTTGTAAT  
AGGTCCGGTTCCTGGTCAGAAATATAGTGAATTACCTTTCCTATTCTTTCCCGGACCC  
CGCTACTAAGAAAGATATCACTTCTTAAAATATCCTATATACGTAGGCGGGAACAGGG  
GAAGGGGTCAAATTTATCCTGATGGGAGCAAGAGTAACAATACAGTCTATAATGCTACA



GCAGCGGGTATAGTAAGCAAATCGTACGTAAAGAAAAAGGGGGATACGAAATAACCA  
TAGCGGATGCATCGGATGGACACCAAGTGGTTGATATTATACCTCCAGGACCCGAACCT  
CTTGTTTCAGAGGGTGAATCCATCAAGCTTGATCAACCATTAACGAGTAATCCCAATGT  
GGGTGGATTTGGTCAGGGAGATGCAGAAATAGTACTGCAAGATCCATTACGTGTCCAA  
GGCCTTTTGTCTTCTTTGCATCTGTTATTTTGGCACAAATCTTTTTGGTTCTTAAAAAG  
AAACAGTTTGAGAAGGTTCAATTGTCCGAAATGAATTCATGAGTAAAGTATATGATTG  
GTTGCAAGAACGCCTTGAAATTCAGGCGATTGCAGATGATATAACTAGTAAATATGTTT  
CTCCACATGTCAACATATTTTATTGTCTAGGGGGGATTACGCTTACTTGTTTTTTAGTACA  
AGTAGCTACGGGTTTGCTATGACTTTTTACTATCGTCCGACCGTTACCGAGGCTTTTGC  
TTCTGTTCAATACATAATGACTGAAGCTAACTTTGGTTGGTTAATTTCGATCAGTTCATCG  
ATGGTCGGCAAGTATGATGGTCCTAATGATGATCCTGCACGTATTCGTGTGTACCTCAC  
CGGTGGATTTAAAAACCTCGCGAATTAACCTGGGTTACGGGTGTGATTCTGGCTGTAT  
TGACCGCATCTTTGGTGAACTGGTTATTCCTTACCTTGGGACCAAATTGGTTATTGGG  
CAGTAAAAATCGTGACAGGTGTACCTGAAGCCATTCTGTAATAGGATCACCTTGGTC  
GAGTTATTACGCGGAAGTGCTAGTGTGGTCAATCCACTTTGACTCGTTTTTATAGTTTA  
CACACTTTTGTATTACCTCTTCTTACTGCCGTATTTATGTTAATGCACTTCCCAATGATAC  
GTAAGCAAGGTATTTCTGGTCCTTAAATGGGAGTAACAAAGAAACCTGACTTGAATGAT  
CCTGTATTAAGAGCTAAATTGGCTAAAGGGATGGGTGCATAATTATTACGGAGAACCCGC  
GTGGCCAATGATCTTTTATATATTTTTCCAGTAGTAATTCTAGGTACTATTGCATGTAAC  
GTAGGCTTAGCGGTTCTAGAACCATCAATGATTGGTGAACCAGCAGATCCATTTGCAAC  
TCCTTTGGAAATATTACCCGAATGGTACTTCTTTCCCGTATTTCAAATACTCCGTACAGT  
ACCCAATAAGTTATTGGGTGTTCTTTTAAATGGTTTCAGTACCTGCGGGATTATTGACAGT  
ACTTTTTTGGAGAATGTTAATAAATTCCAAAACCCATTTTCGTTCGTCAGTAGCTACAA  
CCGTCTTTTTGATCGGTATCGCGGTAGCCCTTTGGTTGGGTATTGGAGCAACATTACCTA  
TTGATAAATCTCTAACTTTAGGTCTTTTTATGATTGAAGTTTTTCTATTTGGAATCGTGTT  
AGGTCTAATTCCTATTACTTTGGCTGGATTATTCGTAACCTGCATATTTACAATACAGACGC  
GGTGATCAGTTGGACCTTATGCCTACTCTAACTAGTTATTTTCGGTTTTCTACTGGCAGCT  
TCAACTATAACCTCAGCTCTATTTATTGGTCTGAGCAAGATACGACTTATTATGGATATAG  
TAAGTCTCGCTTGGGCTGCTTTAATGGTAGTCTTTACATTTTCTCTTTTCGCTCGTAGTAT  
GGGAAGAAGTGGACTCATGATTATTCGTTTCGCCGAACCAGAAGTTAAAATTTTGGT  
GGATAGGGATCCATAAAAACCTTCTTTTCGAGGAATGGGCCAGACCCGGTCATTTCTCA  
AGAACAATAGCTAAGGGCCCTGAGACTACCACTTGGATCTGGAACCTACATGCTGATG  
CTCACGATTTTCGATAGCCATAACAGTGATTTGGAGGAGATCTCTCGAAAAGTATTTAGT  
GCCATTTTGGTCAACTCTCCATCATCTTTCTTTGGCTGAGTGGCATGTATTTCCATGGT  
GCCCCTTTTTCCAATTATGAAGCATGGCTAAGCGATCCTACTCACATTGGACCCAGCGC  
CCAGGTGGTTTGGCCAATAGTGGGCCAAGAAATATTGAATGGTGATGTGGGCGGAGGT  
TTCCGAGGAATACAAATAACCTCTGGTTTTTTTCAGATTTGGCGAGCATCTGGAATAAC  
TAGTGAATTACAACCTCTATTGTACCGCAATTGGTGCATTGGTCTTTGCAGCGTTAATGCT  
TTTTGCTGGTTGGTTCCATTATCACAAGCTGCTCCGAAATTGGCTTGGTTCCAAGATG  
TAGAATCTATGTTGAATCACCACTTAGCGGGGCTACTAGGACTTGGGTCTCTTTCTTGG  
GCGGGACACCAAGTACATGTATCTTTACCGATTAACCAATTTCTAGACGCTGGAGTAGA  
TCCTAAAGAGATCCCACTTCCTCATGAATTTATCTTGAATCGGGACCTTTTGGCTCAACT  
TTATCCAGCTTTGCGGAAGGAGCAACCCCATTTTCACTTTGAATTGGTCAAAATATG  
CAGACTTTCTTACTTTTTCGTGGAGGATTAGATCCAGTAACAGGGGGTCTATGGCTGACC

GATATTGCACACCATCATTAGCTATTGCAATTCTTTTCTGATAGCCGGTCACATGTATA  
GGACCAACTGGGGCATTGGTCATAGCCTGAAAGATATTTTAGAGGCTCATAAAGGTCCA  
TTTACAGGCCAGGGTCATAAAGGCCTCTATGAGATCTTAACAACGTCATGGCATGCTCA  
ATTATCTCTTAACCTAGCTATGTTAGGCTCTTTAACCATTGTTGTAGCTCACCATATGTAT  
TCCATGCCCCCTATCCATATTTAGCTACTGACTATGGTACACAACCTTTCGTTGTTTACA  
CATCACATGTGGATTGGTGGTTTTCTCATAGTTGGTGGCTGCTGCGCATGCAGCCATTTTT  
ATGGTAAGAGACTATGATCCAACACTCGATATAACGATCTATTAGATCGTGTCTTAGG  
CACCGCATGCAATCATATCCCATCTTAACTGGGCATGTATATTTCTAGGCTTTCACAGT  
TTTGGTTTTGTATATTCATAATGATACCATGAGCGCTTTAGGGCGTCCCAAGATATGTTTT  
CAGATACCGCTATAACAATTACAACCTGTCTTTGCTCAATGGGTACAAAACCCCATGCT  
TTAGCACCTGGTGCAACAGCTCCTGGTGCAACAACAAGCACCAGCTTGACTTGGGGG  
GGTGGTGATTTAGTAGCAGTAGGTGGCAAAGTCGCTTTGTTACCTATTCCATTAGGAAC  
TGCAGATTTTTTGGTACATCACATTCATGCATTTACGATCCATGTGACGGTATTGATACTA  
CTGAAAGGCGTTCTATTTGCTCGTAGCTCTCGTTTTGATACCTGATAAAGCAAATCTTGG  
TTTTCGTTTTCCCTTGTGACGGACCTGGAAGAGGGGGAACATGTCAAGTATCCGCCTGG  
GATCATGTCTTCTTAGGTCTATTCTGGATGTACAATGCAATTCGGTAGTAATATCCATT  
TCAGTTGGAAAATGCAGTCGGATGTTTGGGGTAGTATAAATGATCAAGGGGTGGTAAC  
TCATATCACGGGCGGAAACTTTGCGCAGAGTTCATTACTATTAATGGGTGGCTTCGTG  
ATTTCTTATGGGCACAAGCATCCCAGGTAATTCAGTCTTATGGTTCTTCATTATCTGCATA  
TGGCCTTTTCTTCCCTAGGTGCGCATTTTTGTCTGGGCTTTCAGTTTAAATGTTTCTATTTAGC  
GGCCGTGGTTATTGGCAAGAACTTATTGAATCCATCGTTTTGGGCTCATAACAATTA  
AGTTGCTCCTGCTACTCAGCCTAGAGCCTTGAGCATTGTACAAGGACGCGCTGTAGGA  
GTAACCCATTACCTTCTGGGTGGAATTGCCACAACATGGGCGTTCTTCTTAGCAAGAAT  
TATTGCAGTAGGAATGGCATTAAAGATTTCCAAGTTTLAGCCAAGGCTTAGCTCAGGACC  
CCACTACTCGTCGTATTTGGTTTGGTATTGCTACCGCACATGATTTGAGAGTCATGATG  
ATATTACTGAGGAACGTCTTTATCAGAATATTTTTGCTTCTCACTTCGGGCAGTTAGCAA  
TAATTTTTCTGTGGACTTCCGAAATCTGTTTCATGTAGCTTGGCAAGGAAATTTGAG  
TCATGGGTACAGGACCCCTTACATGTAAGACCTATTGCTCATGCAATTTGGGATCCTCAT  
TTTGGTCAACCGGCTGTGGAAGCCTTTACTCGAGGGGGTGCTCTCGGCCAGTGAATA  
TCGCTTATTCTGGTGTATTATCAGTGGTGGTATAACAATTGGCTTACGCACTAATGAAGATC  
TTTATACTGGATCTCTTTTTCTATTTCTTTCTGCTTTATCCTTAATAGCGGGTTGGTTA  
CATCTACAACCGAAATGGAAACCAAGCGTTTCGTGGTTCAAAAATGCCGAATCTCGTC  
TCAATCATCATTGTGTCAGGACTTTCGGAGTAAGTTCCTTGGCTTGGACAGGACATTA  
GTTTCATGTCGCTATTCCCGGATCCAGGGGGAGTACGTTTCGATGGAATAATTTCTTAGAT  
GTATTACCGCATCCCCAAGGGTTAGGCCACTTTTTACAGGGCAGTGGAAATCTTTATGC  
CCAAAACCCGATTCCAGTAGTCATTTATTTGGTACTTCCCAAGGGGCGGGAACCTGCGA  
TTCTAACCTTCTCGGGGATTTTCATCCACAAACGCAAAGTTTATGGCTGACCGATATT  
GCTCATCATCATTAGCTATTGCATGATTTTTCTCGTTGCTGGTCATATGTATAGAACGA  
ACTTCGGGATTGGGCACAGTATGAAAGATCTTTTAGAAGCACATATTCCTCCGGGGGA  
CGATTGGGACGTGGACATAAGGGTCTTTATGACACAATTAATAATTCGATTCATTTCAA  
TTAGGCCTTGCTCTAGCCTCTTTAGGAGTTACTTCTTTGGTAGCCCAACACATGTAC  
TCTTACCTGCTTATGCATTCATAGCACAGGACTTACTACTCAAGCTGCGTTATATACTC  
ATCATCAATACATCGCAGGTTTCATCATGACAGGAGCCTTTGCTCATGGAGCTATATTCT  
TCATTAGAGATTACAATCCGGAGCAGAATGAGGATAATGTATTGGCAAGAATGTTAGAC

CATAAAGAAGCTATCATATCCCATTAAAGTTGGGCCAGCCTCTTTCTGGGGTTCCATAACC  
TTGGGACTTTATGTTTCATAACGACGTCATGCTCGCTTTTGGTACTCCGGAGAAACAAAT  
CTTGATCGAGCCCATATTTGCGCAATGGATAACAATCTGCTCATGGTAAGACTTCATATGG  
GTTTCGATGTACTTTTATCTTCAACGACTGGCCCAGCATTCAATGCGGGTTCGAAGCATAT  
GGTTGCCTGGCTGGTTAAATGCTATTAATGAG-----AATAGTAATCACTATTCTTAACAA  
TAGGTCCGGGAGACTTCTTGGTTCATCATGCTATTGCTCTAGGTTTACATACAACTACAT  
TGATCTTAGTAAAAGGTGCTTTAGATGCACGTGGTTCCAAGTTAATGCCAGATAAAAAG  
GATTTCCGGTTATAGTTTTCCCTTGCACGGTCCGGGACGAGGCGGTACTIONTGTGATATTC  
GGCTTGGGATGCGTTTTATTTGGCAGTTTTCTGGATGTTAAATACCATTGGATGGGTAC  
TTTTTATTGGCATTGGAAGCACATCACATTATGGCAGGGTAACGTTTCACAGTTTAATGA  
ATCCTCCACTTATTTGATGGGATGGTTAAGAGATTATCTATGGTTAAACTCTTCACAAC  
TATCAATGGATATAACCCTTTTGGCATGAATAGTTTATCGGTCTGGGCGTGGATGTTCC  
ATTTGGACATCTGTTTTGGGCTACTGGATTTATGTTCTTAATTTCCCTGGCGTGGATATTG  
CAGGAATTGATTGAAACTTTAGCATGGGCTCATGAACGCACACCTTTGGCTAATTTGAT  
TCGATGGAGAGATAAACCAGTGGCTCTTTCCATTGTGCAAGCAAGATTGGTTGGATTAG  
CCCCTTTTCTGTAGGTTATATATTTACTTATGCAGCTTTCTTGATTGCCTCTACATCAGG  
CAAATTTGGTATGTCACATTCAGTAAAGATTTATGATACATGTATAGGATGTACTCAATGT  
GTACGAGCCTGCCCCACAGATGTATTAGAAATGATACCTTGGGACGGATGTAAGCTAA  
GCAAATTGCTTCTGCTCCAAGAACAGAGGACTGTGTAGGTTGTAAGCGATGTGAATCT  
GCTTGTCCAACAGATTTCTTGAGTGTCCGGGTTTATTTATGGCATGAAACAACCTCGCAG  
CATGGGGCTAGCCTATATGACAACCTTCAACTTACCCTCTATTTTTGTGCCTTTAGTGGG  
CCTAGTATTTCCGGCAATTGCAATGGCTTCTTTATTTCTTCATGTTCAAAAAACAAGAT  
TGTCATGCGAGATATAAAAACATATCTCTCCGTGGCACCTGTGCTAAGTACTCTATGGTT  
CGGGTCTTTGGCAGGTCTTTTGATAGAGATCAATCGTTTATTTCCAGATGCGTTGGCATT  
CCCTTTTTTC-----ATGACTGCAATTTTAGAGAGACGCGAAAGCGAAAGCCTATGGGGT  
CGCTTCTGTAACCTGGATAACCAGCACTGAAAACCGTCTTTACATTGGATGGTTCCGGTGT  
TTTGATGATCCCTACCTTATTGACCGCAACTTCTGTATTTATTATTGCCTTCATTGCTGCT  
CCTCCAGTAGATATTGATGGTATTCGTGAACCTGTTTCCGGGTCTCTACTTTATGGAAC  
AATATTATCTCTGGCGCCATTATTCCCTACTTCTGCAGCTATCGGTTTGCACTTTTATCCGA  
TCTGGGAAGCGGCATCCGTTGATGAATGGTTATACAATGGTGGTCCTTATGAACTAATT  
GTTCTACACTCCTTACTTGGTGTAGCTTGTACATGGGTCGTGAATGGGAACCTAGTTTC  
CGTCTGGGTATGCGTCCTTGGATTGCTGTTGCATATTCAGCTCCTGTTGCAGCTGCTACT  
GCTGTTTTCTTGATCTACCCAATTGGTCAAGGAAGCTTCTCTGATGGTATGCCTCTAGG  
AATCTCTGGTACTTTCAACTTCATGATTGTATTCCAGGCTGAGCACAAACATCCTTATGCA  
CCCATTTACATGTTAGGTGTAGCTGGTGTATTTCGGCGGCTCCCTATTAGTGTCTATGCA  
TGGTTCCCTGGTAACTTCTAGTTTAATCAGGGAAACCACTGAAAATGAATCTGCTAATG  
AAGGTTACAGATTCGGTCAAGAGGAAGAACTTATAATATCGTAGCTGCTCATGGTTAT  
TTTTGGCCGATTGATCTTCCAATATGCTAGTTTCAACAATTCTCGTTCTTTACATTTCTTCC  
TAGCTGCTTGGCCTGTAGTAGGTATCTGGTTTACTGCTTTAGGTATCAGCACCATGGCTT  
TCAACCTAAATGGTTTTCAATTTCAACCAATCTGTAGTTGACAGTCAAGGTCGTGTAATT  
AACACTTGGGCTGATATTATCAACCGTGCTAACCTTGGTATGGAAGTTATGCATGAACG  
TAATGCTCACAACCTCCCTCTAGACCTAGCTGCTGTTGAAGCTCCATCTACAAATGGAA  
TGGGTTTTGCCTTGGTATCGTGTTCATAACCGTTGTATTGAATGATCCCGGTCCGGTTGCTTT  
CTGTCCATATAATGCATACAGCTCTAGTTTCTGGTTGGGCCGGTTCGATGGCTCTATACG

AATTAGCAGTTTTTGGATCCCTCTGACCCTGTTCTTGATCCAATGTGGAGACAGGGTATG  
TTCGTTATAACCCTTCATGACTCGTTTAGGAATAACCAATTCATGGGGTGGTTGGAGTATC  
ACA--GGAGGGACTATAACGAATCCGGGTCTTTGGAGTTACGAAGGTGTGGCCGGAGC  
ACATAATTGTGTTTTCTGGGTTGTGCTTTTTGGCAGCTATCTGGCATTGGGTGTATTGGGA  
TCTAGAAATATTCTGCGATGAGCGTACAGGAAAACCTTCTTTGGATTTGCCTAAGATCT  
TTGGAATTCATTTATTTCTCTCAGGGGTGGCTTGCTTCGGGTTTGGCGCATTTTCATGTAA  
CAGGTTTGTATGGTCCTGGCATATGGGTGTCCGATCCTTATGGACTAACTGGAAAAGTA  
CAACCTGTAAATCCCGCGTGGGGTGTGGAAGGTTTTGATCCTTTTGTCCGGGAGGAAT  
AGCCTCTCATCATATTGCAGCAGGGACATTGGGCATATTAGCGGGTCTATTCCATCTTAG  
TGCCCGCCCGCCTCAACGTCTATAAAGGATTACGTATGGGCAATATTGAAACTGTCCT  
TTCCAGTAGTATTGCTGCTGCTTTTTTTGCAGCTTTTGTGTTGCTGGAACATGTGGTA  
TGGTTCAGCAACTACCCCAATCGAATTATTTGGTCCCCTCGTTATCAATGGGATCAGG  
GATACTTCAGCAAGAAATATACCGAAGAGTTGGTGCTGGGCTAGCCGAAAATCAAAG  
TTTATCAGAAGCTTGGTCTAAAATTCCCGAAAAATTAGCTTTTTATGATTACATCGGCAA  
TAATCCAGCAAAAGGGGGATTATTCAGAGCGGGCTCAATGGACAACGGGGATGGAATA  
GCTGTTGGATGGTTAGGACATCCCATCTTITAGAGATAAAGAAGGACGTGAGCTTTTTGT  
ACGTCGTATGCCTACTTTTTTTGAAACATTTCCAGTAGTTTTGGTAGACGGAGACGGAA  
TTGTGAGAGCCGATGTTCCTTTTAGAAAGAGCAGAATCGAAGTATAGTGTGCAACAAGT  
AGGTGTAACCTGTTGAGTTCTATGGGGGCGAACTCAATGGAGTCAGTTATAGTGATCCTG  
CTACTGTGAAAAAATATGCTAGACGTGCTCAACTGGGTGAAATTTTTGAATTAGATCGT  
GCCACTTTGAAATCGGATGGTGTTTTTTCGTAGCAGTCCAAGGGGTTGGTTACTTTTTGG  
ACATGCTTCGTTTGCTTTGCTCTTCTTTTTTTGGACACATTTGGCATGGTGCTAGAACCTT  
GTTCCAGAGATGTTTTGCTGGTATTGACCCGGATTTGGATGCTCAAGTGGAATTTGGAA  
CATTCCAAAACTTGGAGATCCGACTACAAAGAGACAAGTAGTCATGAAAACCTTATA  
TTCCCTGAGGAGTTCTACCACGTGGAAACGCTCTTTAATGGAACTTTACTTTAGCTTTAGCTG  
GTCGTGACCAAGAAACCACCGGTTTCGCTTGGTGGGCGGGGAATGCCCGACTTATCAA  
TTTTGTCCGGTAAACTACTTGGGGCTCACGTGCCCCATGCCGGATTAATTGTATTCTGGG  
CCGGAGCAATGAACCTATTTGAAGTGGCTCATTTTCGTACCAGAGAAGCCCATGTATGAA  
CAAGGATTGATTTACTTCCCCATCTCGCTACTTTAGGTTGGGGGGTAGGTCCTGGTGG  
AGAAGTTATAGACACCTTTCCATACTTTGTATCTGGAGTACTTCACTTAATTTCCCTCTGC  
AGTATTGGGCTTTGGTGGTATTTATCATGCACTTCTCGGACCTGAGACTCTTGAAGAAT  
CTTTTCCATTCTTCGGTTATGTATGGAAAGATAGAAATAAAATGACCACAATTTTGGGTA  
TTCACTTAATCTTGTTAGGTATAGGTGCTTTTCTTCTAGTACTTAAGGCTCTTTATTTTGG  
GGGCGTATATGATACCTGGGCCCCGGGGGGGAGATGTAAGAAAAATAACCAACTTG  
ACCCTTAGCCCAAGTGTATATTTGGTTATTTACTAAAATCGCCCTTTGGAGGAGAAGG  
ATGGATTGTTAGTGTGGACGATTTAGAAGATATAATTGGAGGACATGTATGGTTAGGTTT  
CATTTGTATACTTGGTGGAAATCTGGCATATCTTAACCAAAACCCTTTGCGTGGGCTCGCCG  
CGCACTTGTATGGTCTGGAGAGGCTTACTTGTCTTATAGTTTAGGTGCTTTATCTGTCTT  
TGGTTTTATCGCTTGTGCTTTGTCTGGTTCAATAATACCGCTTATCCTAGTGAGTTTTAC  
GGGCTACTGGGCCAGAAGCTTCTCAAGCTCAAGCATTTACTTTTTCTAGTTAGAGACC  
AACGTCTTGGGGCTAATGTGGGATCCGCTCAAGGACCTACTGGTTTLAGGTAAATATCTA  
ATGCGTTCCCCGACCGGAGAGGTCATTTTTGGAGGAGAACTATGCGGTTTTGGGATC  
TCCGTGCTCCCTGGTTGGAACCTCTAAGGGGTCCCAATGGTTTGGACTTGAGTAGGCTT  
AAAAAAGACATAACAACCTTGGCAAGAACGTGTTCCGCGGAATATGACTCATGCTC

CTTTAGGTTCTTTAAATTCCGTGGGTGGCGTAGCTACCGAGATCAATGCAGTCAATTATG  
TCTCTCCTAGAAGTTGGTTAGCTACCTCTCATTTTGTCTAGGATTCTTCCTATTCGTGG  
GTCATTTGTGGCATGCGGGAAGGGCTCGTGCAGCTGCAGCAGGATTTGAAAAAGGAAT  
TGATCGTGATTTTGAACCTGTTCTTTCCATGACCCCTCTTAACATGACTATAGCCCTTGG  
TAGATTTACCAAAGACGAAAATGATTTATTTGATATTATGGATGACTGGTTACGGAGGG  
ACCGTTTCGTTTTTGTAGGTTGGTCCGGTCTATTGCTCTTTCCTTGTGCCTATTTGCTTT  
AGGAGGTTGGTTCACTGGTACAACCTTTGTAACCTCATGGTATAACCCATGGATTGGCTA  
GTTCCATTTTGGAAAGGTTGCAATTTCTTAACCGCCGAGTTTCTACTCCTGCTAATAGTT  
TAGCACATTTCTTATTACTACTATGGGGTCTGAAGCACAAGGAGATTTTACTCGTTGGT  
GTCAATTAGGCGGTCTGTGGACTTTTGTGCTCTCCATGGCGCTTTCGGATTAATAGGTT  
TCATGTTACGTCAATTCGAACTTGCTCGATCTGTTCAATTGCGCCCTTATAATGCAATCG  
CATTCTCTGCTCCAATTGCTGTTTTTGTCTGTATTCTGATTTATCCACTAGGTCAGTC  
TGGTTGGTCTTTTGCGCCTAGTTTTGGTGTAGCAGCTATATTCGATTCATCCTCTTCTTC  
CAAGGGTTTCATAATTGGACGTTGAACCCATTTTCATATGATGGGAGTTGCCGGCGTATT  
GGGTGCTGCTCTGCTATGCGCTATTCATGGTGTCTACCGTAGAAAATACTTTATTCGAAGA  
TGGTGACGGTGCAAATACATTCGCTTTTAACCCAACCTCAAGCTGAAGAGACTTATT  
CAATGGTCACCGCTAACCGCTTTTGGTCCCAAATCTTTGGGGTTGCTTTTTCCAATAAA  
CGTTGGTTACATTTCTTTATGTTATTTGTACCAGTAACCGGTTTATGGATGAGTGCTCTTG  
GAGTAGTCGGTCTGGCTCTGAACCTACGTGCCTATGACTTCGTTTCCCAGGAAATCCGT  
GCAGCGGAAGATCCTGAATTTGAACTTTCTACACTAAAATATTCTCTTAAACGAAGG  
GATTCGTGCTTGGATGGCGGCTCAGGATCAGCCTCATGAAAACCTTATATTCCCTGAGG  
AGGTTCTACCACGTGGAAACGCTCTTATGTCTGGAAGCACGGGAGAACGTTCTTTTGC  
TGATATTATTACCAGTATTCGATACTGGGTCAATCATAGCATTACTATACTTCCCTATTCA  
TTGCGGGTTGGTTATTCGTCAGCACGGGTTAGCTTACGATGTGTTTGGAAAGCCCTCGG  
CCAAACGAGTATTTACAGAGAGCCGACAAGGAATTCCATTAATAACTGACCGTTTTGA  
TCCTTTGGCACAACCTCGATGAATTTAGTAGATCCTTTATGACCATAGATCGAACCTATCC  
AATTTTTACAGTACGATGGTTGGCTGTTACGGACTAGCTGTACCTACCGTTTTCTTTTT  
GGGATCAATATCAGCAATGCAGTTCATCCAACGAATGGCTACACAACTGTTGAGGGT  
AGTTCTAGATCTGGT--CCAAGACGAACTATTATAGGGGATTTATTGAAACCATTGAATT  
CGGAATATGGGAAAGTAGCTCCTGGATGGGGAACCTACCCCTTGTATGGGGGTCGCAAT  
GGCTCTATTTGCGATATCTTATCTATTTTGGAGATTTATAATCTTCCGTTTTACTGG  
ATGGAATTTCTATGCAAATGCTTACTCTCAAACCTTTCGTTTACACGGTAGTGATATTCT  
TTGTTTCTCTTTCATCTTCGGATTCCTATCTAATGATCCAGGACGTAATCCTGGACGTG  
AGGAAATGGCCGATACTACTGGAAGGATTCCTCTTTGGCTGATAGGTACTGTAACCTGGT  
ATTCCTGTGATCGGTTCAATAGGTATTTTCTTTTACGGTTCATATTCGGATTGGGTTTCAT  
CCCTGATGCTTAATATCTTTAGTTTGTATCTGTCTTAATTCTGCCTTTCATTCGAG  
TAGTTTTTTCTTTGCCAAATTGCCCGAGGCTTACGCTATTTTCAATCCAATCGTAGATGT  
TATGCCAGTCATACCTGTGCTCTTTTTTCTTTAGCCCTTGTTTGGCAAGCTGCTGTAAG  
TTTTCGAACGACACAATCAAACCCGAACGAACAAAATGTTGAATTAATCGTACCAGT  
CTCTACTGGGGGTTATTACTCATTTTTGTACTTGCTGTTTTATTTTCCAATTATTTCTTCAA  
TATGGAAGTAAATATTTCTCGCATTTATTGCTACTGCACTGTTTCATTCTAGTTCCTACTGCT  
TTTTTACTTATCATCTACGTAAAACAGTCAGTCAAATGATATGGAAACAGCAACCCT  
AGTCGCCATCTTTATATCTGGTTCACCTGTAAGTTTTTACCGGGTATGCCTTATATACCGCT  
TTTGGGCAACCCTCTCAACAATAAGAGATCCATTTCGAGGAACACGGGGACATGGAA

GCATTGGTTTATACATTCCTTTTAGTCTCGACTCTAGGGATAATTTTTTTTCGCTATTTTTTT  
TCGAGAACCACCTAAAGTTCCCACTAAAAAGGTGAAAATGACTATTGCTTTCCAATTG  
GCTGTTTTTGCATTAATTGCTACTTCATCAATCTTACTGATTAGTGTACCCGTTGTATTG  
CTTCTCCTGAAGGTTGGTCAAGTAACAAAAATGTTGTATTTTCCGGTACAACATTATGG  
ATTGGATTAGTCTTTCTGGTAGGTATCCTTAATTCTCTCATCTCT-----ATGTC  
ACCACAAACAGAGACTAAAGCAAGTGTGGATTCAAAGCTGGTGTTAAAGATTACAGA  
TTGACTTATTATACTCCTGAATATGAAACCAAAGATACTGATATCTTGGCAGCATTCCGA  
GTAACTCCTCAACCTGGAGTTCCACCTGAGGAAGCAGGGGCCGCGGTAGCTGCCGAA  
TCTTCTACTGGTACATGGACAACCTGTGTGGACCGATGGACTTACCAGCCTTGATCGTTA  
CAAAGGACGATGCTACCACATCGAGCCCGTTGCTGGAGAAGAAAGTCAATTTATTGCT  
TATGTAGCTTACCCTTTAGACCTTTTTGAAGAAGGTTCTGTTACTAACATGTTTACTTCC  
ATTGTGGGTAATGTATTTGGGTTCAAAGCCCTACGTGCTCTACGTCTGGAGGATCTGCG  
AATCCCTCCTGCTTATTCTAAAACCTTTCCAAGGCCACCTCATGGTATCCAAGTTGAGA  
GAGATAAATTGAACAAGTATGGTCGTCCCCTATTGGGATGTACTATTAACCAAATG  
GGGTTATCCGCTAAGAACTACGGTAGAGCGGTTTATGAATGTCTACGTGGTGGACTTGA  
TTTTACCAAGGATGATGAGAACGTGAACTCCCAACCATTTATGCGTTGGAGAGACCGT  
TTCTTATTTTGTGCCGAAGCAATTTACAAAGCACAAGCCGAAACAGGCGAAATCAAAG  
GACATTACTTGAATGCTACTGCAGGTACATGTGAAGAAATGATCAAAGGGGCTGTATTT  
GCCAGAGAATTGGGAGTTCCTATCGTAATGCACGACTACTTAACGGGGGGATTCACTG  
CAAATACTAGCTTGGCTCATTATTGCCGAGATAATGGCCTACTTCTTCACATCCACCGTG  
CAATGCATGCAGTTATTGATAGACAGAAAAATCATGGTATACACTTTCGTGTACTAGCTA  
AAGCGTTACGTATGTCTGGTGGAGATCATATTCCTCTGGTACAGTAGTAGGTAACCTT  
GAAGGGGAAAGAGAAATCACCTGGGCTTTGTTGATTTACTACGTGATGATTTTATTGA  
AAAAGACCGAAGTCGCGGTATTTATTTCACTCAAGATTGGGTCTCTTACCAGGTGTTCT  
TGCCCGTGGCTTCAGGGGGTATTCACGTTTGGCATATGCCTGCTCTGACCGAGATCTTT  
GGGGATGATTCCGTACTIONACAGTTTGGTGGAGGAACTTTAGGACACCCTTGGGGAAATG  
CACCGGGTGCCGTAGCTAATCGAGTAGCCCTAGAAGCGTGTGTACAAGCTCGTAATGA  
GGGACGTGATCTTGCTCGTGAAGGTAATGAAATTATCCGTGAGGCTAGCAAATGGAGC  
CCTGAACTAGCTGCTGCTTGTGAGGTATGGAAGGAGATCAAATTCGAATTCGAAGCAA  
TGGATACTTTG-----ACGGCGATACATTTATACAAAACCTTCTACCCCGAGCACACGCAAT  
GGAGCCGTAGACAGTCAAGTGAATCCAATCCACGAAATAATTTGATCTATGGACAGC  
ATCGTTGTGGTAAAGGTCGTAATGCCAGAGGAATCATTACCGCAGGGCATAGAGGGGG  
AGGTCATAAGCGTCTATACCGTAAAATCGATTTTCGACGGAATGAAAAAAAAAATATCTG  
GTAGAATCGTAACCATAGAATACGACCCTAATCGAAATGCATACATTTGTCTCATACT  
ATGGGGATGGTGAGAAGAGATATATTTTACATCCCAGAGGGGCTATAATTGGAGATACC  
ATTGTTTCTGGTTCTGAAGTTCCTATAAAAATGGGAAATGCCCTACCTTTGACCGAGAT  
GCCCTTAGGCACGGCCATACATAACATAGAAATCACACTTGGAAAGGGTGGACAATTA  
GCTAGAGCTGCGGGTGTGTAGCGAAACTGATTGCAAAAAGAGGGTAAATCGGCCACAT  
TAAAATTACCTTCTGGGGAGGTCCGTTTGTATATCCAAAACTGCTCAGCAACAGTCGG  
ACAAGTGGGTAATGTTGGGGTGAATCAGAAAAGTTTGGGTAGAGCCGGATCTAAGTGT  
TGGCTCGGTAAGCGTCCTGTAGTAAGAGGAGTAGTTATGAACCCTGTAGACCATCCCCA  
TGGGGGTGGTGAAGGGAGGGCCCCAATTGGTAGAAAAAACCACAACCCTTGGGG  
TTATCCTGCGCTTGAAGAAGAAGTAGAAAAAGGAATAAATATAGTGATAGTTTGATTC  
TTCGTGCGCGTAGTAAAATGATTCAACCTCAGACCCATTTGAATGTAGCGGACAACAGC

GGGGCTCGAGAATTGATGTGTATTTCGAATCATAGGAGCTAGT---AATCGCCGATATGCTC  
ATATTGGTGACGTTATTGTTGCTGTAATCAAAGAAGCAGTGCCCAATATGCCTCTAGAA  
AAATCTGAAGTGATTAGAGCTGTAATTGTACGTACATGTAAAGAAGTCAAACGTGACA  
ACGGTATGATAATACGATATGATGACAATGCAGCAGTTGTCATTGATCAAGAAGGAAAT  
CCAAAAGGAACTCGAGTTTTTGGTGCGATCGCTCGGGAATTGAGACAGTTGAATTTTA  
TTAAAATAGTTTTATTAGCCCCTGAGGTATTAATGCTTAGTCCCAAAGAACCAGATTTT  
GTAAACAACATAGAGGAAGAATGAAGGGAATATCTTATCGAGGCAATCGTATTTGTTTC  
GGTAGATACGCTCTTCAGGCACTTGAACCCGCTTGGATCACATCTAGACAAATAGAAG  
CAGGGCGGCGAGCAATGACACGATATGCGCGTCGTGGTGGAAAAATCTGGATACGTAT  
ATTTCCAGATAAACCTGTTACAATAAGACCTACGGAAACACGTATGGGTTCCGGGAAA  
GGATCTCCCGAATATTGGGTATCCGTCGTTAAACCGGGTCAATACTTTATGAAATGGG  
CGGAGTATCAGAAATTGTAGCCAGAGAAGCTATTTCAATAGCTGCATCCAAAATGCCTA  
TACGAACACAATTCGTTATTGCGGGAATGACCAGAATTAACGAGGATATATAGCTCGG  
AGACGTAGAACAAAAATTCGTTTATTTGCATCAACCTTTTCGAGGGGCTCATTCAAGACT  
TACTCGAACTATTACTCAACAGAAAATGAGAGCTTTGGTTTCAGCTCATCGGGATAGGG  
GCAAGCAAAAGAGAAAATTTTCGTCGTTTGTGGATCACTCGGATAAATGCAGTAATTCGT  
GAAAATAAAGGGGTATCCTATAGTTATAGTCGATTAATACACGATCTGTACAAAAGGCA  
GTTGCTTCTAATCGTAAAATACTTGCACAAC TAGCTATATCAAATAGAAATTGTCTTTA  
CATGATTTCCAATGAAATTCTCAA-----ATGATAAAGGAAGTATAC  
GCTTTAGGTCAACATATACGTATGTCTGCTCACAAAGCGCGAAGAGTAATTGATCAGAT  
TCGTGGACGTTCTACGAGGAAACACTTATGATCCTAGAACTCATGCCTTACCGAGCAT  
GTTATCCCATTTTTAAATTGGTTTATTCTGCAGCAGCAAATGCTAGTCACAATATGGGTC  
TCAACGAAGCGGATTCAGTTATTAGTAAAGCCGAAGTCAACGAAAGTACTACCATGAA  
AAGGTAAAACCTCAAGCTCGAGGACGTAGTTATCCGATAAAAAGACCCACCTGTCAT  
ATAACAATTGCATTGAAAGATATATCCTTAGATGGGGTGGTATGGGTCAAAAAAATGGA  
TGGAATCAAATATGCAGTATTTACAGACAAAAGTATTCGGTTATTGGGGAACAAT--CAA  
TATACTTCTAATGTCAATCAGGATCAACTAGGACAGAAATAAAGCATTGGGTCTGAACT  
CTTCTTTGGTGTCAAGGTAATAGCTATGAATAGTCATCGACTCCCGGGAAAGGGTAGAA  
GAATGGGACCTATTATGGGACATACAATGCATTACAGACGTATGATCATTACGCTTCAAC  
CGGGTTATTCTATTCCACCTCTTAGAAAGAAAAGAACTATGGCGGTTCCAAAGAAACGT  
ACTTCTATATCAAAAAAGCGTATTCGTAATAATTTGGAAAAGAAAGGGTATTGGGC  
AGCGGTAAAAGCTTTTTTCGTTAGCAAATCTCTTCTACCGGGAATTCTAAAAGTTTTT  
TTGTGCGA-----CAAATAATGGCCAAGGGTAAAGATGTCAGAGTCAGAGTTATTTTGA  
ATGTACCAACTGTGTTGAAACGGTGTAAAT-----AAGGAATCACCGGGCATTCTAGAT  
ATATTACTCAAAGAATCGACACAATACGCCTAGTCGATTGGAATTGAGAAAATTCTGT  
CCCTATTGTTTCAAGCATAACGATTCATGGGGAGATAAAGAAAATGAAAATAAGGGCCTC  
CGTTCGTAATAATTTGTGAAAATGTGCGACTGATCCGTAGGCGGGGACGAATTATAGTAA  
TTTGTTCACCCGAGACATAAACAAGACAAGGAATGGTTTCGAGAGGAAATAGCAGT  
ATCTACTCGGACACTACAGTGGAAGTGTGTTGAATCAAGAGTAGACAGTAAGCGTCTT  
TATTATGGACGTTTTATTTTGTCTCCGCTTATGAAAGGTCAAGCCGATACGATAGGCATC  
GCGATGCGAAGGGCTTTGCTTGGAGAAATAGAAGGAACATGTATCACACGTGCAAAT  
CTGAG-----AAGATAACCACACGAATATTCTACCATAGTAGGTATTGAAGAATCAGTACAT  
GAAATTTTAATGAATTTGAAAGAAATTGTATTGAGAAGTAATCTGTATGGAACCTCGCGA  
CGCATTTATTTGCGTCAGGGTCTGGATACGTAACCTGCTCAAGACATCATCTACCAC

CTTCTGTGGAAATCGTTGATACTACACAGCATATAGCTAGCCTGACAGAACCAATTGAT  
TTGTGTATTGGATTACAAATCGAGAGGAATCGCGGATATCGTATGAAAACACCAAATAA  
CTCTCAAGATGGAAGTTAT-----CCTATAGATGCTGTATTTCATGCCTGTTTCGAAATGCGAA  
TCATAGTATTCATTCTTATGGGAATGGGAATGAGAAACAAGAGATACTTTTTCTCGAAAT  
ATGGACGAATGGGAGTTTAACTCCTAAAGAAGCACTTCACGAAGCCTCCCGGAATTTG  
ATTGATTTATTTATACTTTTTCTAGATGCGCAAGAAGAG-----GACATCCAATTAGAGGAC  
AATCAA---ACAAGGTTACTTTACCTTTTTTTTACCTTTCATGATAGATTAAC---AAACTA  
AGGAAAAACAAAAA---GAAATAGCATTGAAATGTATTTTTATTGACCAATCAGAATTG  
CCTCCCAGGACCTATAATTGCCTCAAAGGTCCAATATACATACATTATTGGACCTTTTG  
AATAACAGTCAAGAAGATCTTATGAAAATGTTCCATTTTCAGATAGAAGATGTAACA  
GATATTGGACATTCTACAAAAGCAT-----TTCGCAATTGATTTACCTAAGAATAAGATGCT  
CCGAGATGGAAAT--GAGGGAATGTCTACAATACCTGGATTTAGTCAGATACAATTTGA  
GGGATTTTGTAGGTTCAATTGATCAGGGCTTGACGGAAGAAGCTTTATAAGTTTCCAAAA  
TTGAAGATACAGATCAAGAAATTGAATTTCAATTTTGTGGAAACATATCAATTGGTAG  
AACCTTAATAAATGAAAGAGATGCTGTGTATGAATCACTCACATATTCTTCTGAATTAT  
ATGTACCTGCGGATTAATTTGGAAAACCGGTAGGGATATGCAAGAACAACAATTTTT  
ATTGGAAACATTCCCTAATGAATTCCTGGGAACCTCTATAGTTAATGGAATATACAGA  
ATTGTGATCAATCAAATATTGCAAAGCCCTGGTATTTATTACCGTTCAGAATTGGACCAT  
AACGGAATTTTCGGTCTATACCGGCACCATAATATCAGATTGGGGAGGAAGATCAGAATT  
AGAGATTGATAGAAAAGCAAGGATATGGGCTCGTGTGAGTAGGAAACAAAAATATCT  
ATTCTAGTTCATCATCAGCTATGGGTTTCGAATCTAAGAGAAATTCTAGATAATGTTTGC  
TACCCTGAAATTTTCTTGTCTTTCCTGAATGATAAGGAGAAAAAAGATTGGGTCAA  
AAGAAAATGCTATTTTGGAGTTTTATCAACAATTTGCTTGTGTAGGCGGGGATCCGGTA  
TTTTCTGAGTCCTTATGTAAGAATTACAAAAGAAATTTTTTCAACAAGATGTGAATT  
AGGAAGGATTGGTCGACGAAATATAAATCGGAGACTGAATCTTGATATCCCTCAGAAA  
AATACATTTTTGTTACCGCGAGATGTATTGGCAGCTGCGGATCATTGATCGGAATGAAA  
TTTGGAAATGGGTACACTTGACGAT-----ATGAATCACTTGAAAAATAAACGTATTTCGTT  
TGTAGCGGATCTGTTACAAGATCAATTCGGATTGGCTCTGGTTCGTTTAGAAAATGCGG  
TTCGAGGGACTATATCTGGAGCAATTAGG--CATAAATTGATA---CCGACTCCTCAGAAT  
TTGGTAACTTCAACTCCA-----TTAACAACCCTTATGAATCCTTTTTTCGGCCTACA  
CCCCTTATCTCAAGTTTTTGGATCGAACTAATCCATTGACACAAATAGTTCATGGGCGCA  
AATTGAGTTATTTGGTCTCTGGAGGATTGACAGGGCGAACTGCTAGTTTTTCGGATACGA  
GATATCCATCCTAGTCACTATGGACGATTTGCCAATTGACACGTCTGAAGGAATCAAT  
GTTGGACTTATTGGATCCTTAGCAATTCATGCAAGGATTGGTCATTGGGGG---TCTCTAG  
AAAGCCCATTTTAT-----GAAATATCTGAGAGATCC-----AAAGAGGTACGAATAGTTTA  
TTTATACCAAGTAGAGATGAATACTATATGGTAGCGGCGGGAAATCCTTTAGCGTTGAA  
TCAGAGTATTCAGGAAGAACAGGTTGTTCCAGCTCGATACCGTCAGGAATTCCTTACTA  
TTGCATGGGAACAGGTTTCATCTTCGCAGCATTTTTCCCTTCCAATATTTTTCTATTGGAG  
CTTCCCTCATTCCTTTTATCGAGCATAATGATGCGAATCGGGCTTTAATGAGTTCTAATAT  
GCAACGTCAAGCAGTTCCGCTTCTCGGTCCGAGAAGTGCATTGTTGGAAGTGGGTTG  
GAATGCCAAGCGGCTCTAGATTCCGGGAGTTTCCGCTATAGCCGAACACGAGGGAAAGA  
TCATTTATACCGATACTGACAAGATCATTTTATCAGGTAATGGAGACACTCTAAGCATT  
CATTGATTATGTATCAACGTTCCAACAAAAATACTTGTATGCATCAAAAACCCAGGTT  
CGGCGGGGTAAATGCATTA AAAAGGGACAAATTTTAGCAGATGGTGCCGCTACAGTTG



GTGGCGAACTCGCTTTGGGAAAAAACGTATTAGTAGCTTATATGCCATGGGAAGGCTAC  
AATTCTGAAGACGCAGTACTCATTAGTGAGCGTCTGGTATATGGAGATATTTATACTTCT  
TTTCACATACGGAAATATGAAATTCAGACTCATGTGACAAGCCAAGGA---CCTGAAAGG  
ATCACTAACGAAATACCGCATTTAGAAGCCATTTACTCCGAAATTTAGACAGAAATGG  
AATCGTGATGCTGGGATCTTGGGTAGAAACGGGTGATATTTAGTGGGTAAATTAACGC  
CTCAGATGGCGAAAGAA---TCATCGTATGCCCCGGAAGATAGATTATTACGAGCCATACT  
TGGCATTCAAGTATCCACTTCAAAGAAACTTGTCTAAAACCTACCTATAGGTGGCAGGG  
GTCGAGTTATTGATGTGAGATGGATCCAGAAAAAGGGA---GGTTCCAGCTATAATCCAG  
AAACGATTCGTGTATATATTTACAGAAACGTGAAATCAGAGTAGGTGATAAAGTAGCT  
GGAAGACATGGGAATAAAGGTATCATTTCAAATTTTGCCTAGACAAGATATGCCTTA  
TTTGCAAGATGGAACACCTGTTGATATGGTTTTCAACCCATTAGGAGTACCTTCACGAA  
TGAATGTAGGACAGATATTTGAATGCTCGCTCGGGTTAGCGGGGGATCTGCTAGACAG  
ACATTATCGAATAGCACCCCTTTGATGAGAGATATGAACAAGAGGCTTCAAGAAAACCTA  
GTGTTTTCTGAATTATATGAAGCCAGTAAGCAAACAGCGAATCCATGGGTATTTGAACC  
TGAGTATCCGGGAAAAAGCAGAATATTTGATGGAAGAACGGGAGATCCTTTTGAACAA  
CCTGTTATAATAGGAAAGTCCTATATCCTAAAATTAATTCATCAAGTGGATGATAAAATC  
CATGGGCGTTCCAGTGGGCATTATGCGCTTGTACACAACAACCCCTTAGAGGAAGAG  
CCAAGCAAGGGGGACAACGGGTAGGAGAAATGGAAGTTTGGGCTCTAGAGGGATTG  
GTGTTGCTCATATTTTACAAGAGATGCTTACTTATAAATCTGATCATATTAGAGCTCGTCA  
GGAAGTACTTGGTACTACGATCATTGGAGGAACAATAATTAACCCTGAGGATGCTCCAG  
AATCTTTTCGATTGCTCGTTCGAGAACTACGATCTTTGGCTCTGGAAGTGAATCATTTC  
TTGTATCTGAGAAGAACTTCCAGATTAATAGGAAGGAAGCT-----ATGATCG  
ACCGGTATAAACATCAACAACCTTCGAATTGGATCGGTTTCTCCTCAACAAATAATTGCT  
TGGGCCCAAAAAATCCTACCTAATGGAGAGATAGTTGGAGAGGTGACAAAACCTATA  
CTTTTCATTACAAAACCAATAAACCGGAGAAAGATGGATTGTTTTGTGAAAGAATTTTT  
GGACCTATCAAAAGTGGAAATTTGTGCTTGTGGAAATTTTCGAGTAATCGGAGACGAAA  
AAGAAGACCCGAAATTTTGTGAACAATGCGGAGTCAATTTGTTGATTCTCGGATACG  
AAGATATCAAATGGGATACATCAAACCTGGCATGCCAGTAACCTCATGTGTGGTATTTGA  
AACGTCTTCCTAGTTATATTGCGAATCTTTTAGATAAACCTCTTAAAGAATTAGAAGGCC  
TAGTATACTGCGAT-----TTTTCTTTTGCTAGGCC---ATAGCTAAAAACCTACTTTCTTA  
CGATTACGAGGTTTATTTCGAATATGAAATCCAATCCTGGAAATACAGCATCCCACTTTTT  
TTACTACCCAAGGCTTTGATACATTTGAAATCGAGAAATATCTACTGGAGCGGGTGC  
TATCAGAGAACAATTAGCCGATCTGGATTTGCGAATTATTATAGATTCTTCATTGGTAGA  
ATGGAAAGAGTTAGGGGAAGAA---GGGCCACAGGTAATGAATGGGAAGATAGAAAA  
ATTGGAAGAAGAAAGGATTTTTTGGTTAGACGCATGGAATTAGCTAAGCATTTTATTTCG  
AACAAATGTAGAACCAGAACGGATGGTTTTGTGCCTATTACCAGTTCTTCCCTCCCGAGT  
TGAGACCGATCATTAGATAGATGGGGGTAAACTAATGAGTTTCGATATTAATGAACTC  
TATAGAAGAGTTATCTATCGGAACAATACTCTTACCGATCTATTAACAACAAGCAGATCT  
ACGCCAGGGGAATCAGTAATGTGTCAGGAGAAATTGGTACAAGAAGCCGTGGATACAC  
TTCTTGATAATGGGATCCGCGGACAACCAATGAGGGACGGTCATAATAAAGTTTACAAG  
TCGTTTTTCGATGTAATTGAAGGCAAAGAGGGAAGATTTTCGTGAGACTCTGCTTGGTA  
AACGAGTCGATTATTCGGGGCGTTCCGTCATTGTCTGGGCCCTTCGCTTTCATTACATC  
GATGTGGATTGCCTCGCGAAATAGCAATAGAGCTTTTCCAGACATTTGTAATTCGTGGT  
CTAATCAGACAACATGTTGCTTCCAACATAGGAGTTGCTAAAAGTAAAATTCGGGAAA

AAGAACCAATTGTGTGGGAAATACTTCAAGAAGTTATGCAGGGGCACCCGGTATTGCT  
GAATAGAGCACCCACTCTGCATAGATTAGGCATACAGGCATTCCAGCCATTTTAGTGG  
AAGGACGTGCTATTTGTTTACATCCATTAGTTCGTAAGGGATTCAATGCAGACTTTGATG  
GGGATCAAATGGCTGTTTCATGTACCTTTATCCTTGGAGGCTCAAGCAGAGGCTCGTTTA  
CTTATGTTTTCTCATAGGAATCTCCTGTCTCCAGCTATTGGAGATCCGATTTCCATACCA  
ACTCAAGATATGCTTATTGGACTCTATGTATTAACGATGGGGAATCATCGAGGTATTTGT  
GCCAATAGGTATAATCCATGGAATCGCAGAAAC-----TATAAAAATGAAAGAATTGAC  
GATAATAACTATAAGTATACGAAAGAAAAGAACCCTATTTTTGTAGTTCCTATGATGCA  
CTTGGAGCTTATCGGCAGAAACGAATCAATTTAGATAGTCCTTTGTGGCTCCGGTGGCG  
ACTAGATCAACGC---GTCATTGCATCA-----AGAGAAGTTCCGATCGAAGTTCAATATGA  
ATCTTTGGGTACCTATCATGAGATTTATGGGCACTATCTAATAGTAAGAAGTGTAAAAA  
AAAAATCCTTTGTATATACATTCGAACCACTGTTGGTCATATTTCTTTTTATCGAGAAATA  
GAAGAAGCTGTACAAGGGTTTTATCGGGCCCGCTCATACGGTACC-----AT  
GGAGGTACTTATGGCAGAACGGGCCGATCTGGTCTTTCACAATAAAGTGATAGATGGA  
ACTGCCATGAAACGACTTATTAGCAGATTAATAGATCACTTCGGAATGGCATATACATCA  
CACATCCTGGATCAAGTAAAGACTCTGGGGTTCAGCAAGCCACTGCTACATCTATTTT  
ATTAGGAATTGATGATCTTTTAAACAATACCTTCTAAGGGATGGCTAGTCCGAGATGCTGA  
ACAACAAAGTTTGATTTTGGAAAAACACTATCATTATGGGAATGTACACGCGGTAGAA  
AAATTACGTCAATCCATTGAAATATGGTATGCTACAAGTGAATATTTGCGACAAGAAAT  
GAATCCTAATTTTAGGATGACTGACCCTTCTAATCCAGTCCATATAATGTCTTTTTCGGG  
AGCTAGAGGAAATGCATCTCAAGTACACCAATTAGTAGGTATGAGAGGATTAATGTCAG  
ATCCCAAGGACAAATGATTGATTTACCCATTCAAAGCAATTTACGCGAAGGACTCTCT  
TTAACAGAATATATCATTTCCTGCTATGGAGCCCGCAAAGGAGTTGTAGATACTGCTGTA  
CGAACATCAGATGCTGGATACCTTACGCGCAGACTTGTGAAGTAGTTCAACACATTGT  
TGTTTCGTAGAACAGATTGTGGCACCGTCCGAGGTATTTCTGTAAGTCCTCGAAATGGGA  
TGATGACG---GAAAGAATTTTATCCAAACATTAATGGGCCGTGATTAGCAGACGATAT  
ATATATGGGTCCACGATGCATCGCTATTTCGAAATCAAGATATTGGGATTGGACTTGTCAA  
TCGATTCATAACC-----TTTCGAGCACAACCAATATCTATTCGAACCCCTTTTAC  
TTGTAGGAGTACATCTTGGATCTGTGATTATGTTATGGTTCGGAGTCCCACTCATGGCGA  
CTTGGTTCGAATTGGGGGAAGCTGTAGGTATTATTGCGGGTCAATCTATTGGAGAACCAG  
GGACTCAACTAACATTAAGAACTTTTCATACCGGCGGAGTATTCACAGGAGGTACTGC  
AGAACAGGTACGAGCCCCTTCTAATGGAAAAATAAAATTCAATGAGGATTTGGTTCATC  
CCACACGTACACGTATGGACATCCTGCTTTTCTATGTTATATAGACCTGTATGTAECTAT  
TGAGAGTCAGGATATTATACATAATGTGAATATTCCACCAAAAAGTTTTCTTTTAGTTCA  
AAATGATCAATATGTAGAATCAGAACAAGTGATTGCTGAGATTCGCGCGGGAATATCCA  
CTTTG---AATTTTAAAGAGAGGGTTCGAAAACATATTTATTCTGATTCAGAGGGAGAA---  
ATGCACTGGAGTACCGATGTGTACCATGCACCTGAATATACATATGGTAATGTTTCATCTC  
TTACCAAAAACAAGTCATTTATGGATATTATCAGGAAGTCCGTGCAGA-----TCCAATAT  
AGTGCCTTTTTCGCTCCACAAGGATCAAGATCAAATGAGCGTTCAT-----TCTCTTTCTG  
TCGAAGGAAGATATATTTCTAAC-----CTCTCAGTGACTAATGATCAA---GTGAGACACA  
AATTGTTTAGTTCGGATCCTTCTTGT---GGGGAGAGGATTCCTGATTTT---TCCGGAC  
CTGATCGAATCATATGCAACGGTCATTGTAATTTATATATCCTGCC---ATTCTTCATGAA  
AATCTGAT-----TTATTGGCAAAGAGGGCGAAGAAATAGATTCATCATTCCAATCT  
AATCAAGAACGGGAGAAAGAACTAATGCCCGTGCAGGTATCTCGATTGAAATACCCA

TAAAT-----GGTATTTTCCGTAGAAATAGTATTCTTGCTTATTTTCGATGATCCCCGATACAG  
AAGAAACAGTTCGGGAATTACTAAATATGGGACTATAGAGGTGCATTCAATCGTCAAAA  
AAGAGGAT-----TTGATTGAATATCGAAGA-----AAAGAATTTAGGCCAAAATACAAGAA  
AGTAGATCGATTTTTTTTTCATTCCCAGGAAGTGCATATCTTACCCGGGTCTTCTTCCAT  
ACTGGTACGAAACAATAGTATCATTGGAGTAGATACACGAATCACTTTAAATACAAGAA  
GCCGAGTAGGCGGATTGGTCCGAGTGGAGAGAAAAAAAAAAAAAAGATTGAACTGAAAA  
TCTTTTCTGGAGATATCCATTTTCTGGAGAAACAGATAAGATATCCCGGCATAGTGGCA  
TCTTGATACCACCAGGAGCGGAAAAAAAA-----AATTCTAAGGAATCAAAAACA---AAA  
TTGAAAAATTGGATCTATATCCAACGG-----ATTACACCTACCAAGAAAAAG-----TTTTT  
TGTTTTGGTTCGACCCGTAGTCACATATGAAATAGCAGACGGAATAAATTTAGCAACGC  
TTTTCCCTCAGGATCTGTTGCAGGAAAGGGATAATGTGCAACTTCGAGTTGTCAATTAT  
ATCCTTTATGAAATGGCAAACCAATTCGAGGAATTTCTCACACAAGTATTCAATTAGT  
TCGGACTTGTTAGTATTGAATTGGGATCAAGACAAAAAG-----GGTTCTTCCATAGA  
AGAGGTTTCATGCTTCCCTTGTGAAAGTAAGGGCAAATGATCTGATTTCGAGATTTCATAA  
GAATGGACTTAGCGAAGTCCCCTATTTTCGTATATCGGAAAAGGAATGATCCGGCGGGT  
TCAGGATTGATCTCCGAT---AATCGATCAGATCGCACCAATAGAAATCCTTTTTAT-----  
TCCAAGGCAAGG-----ATTCAACAATCACTTAGTCAACATCAAGGAACTATTCGT  
ACGTTGTTGAATAGA-----AATAAGGAATGCCAATCTTTGATAATTTTGTGCATCATCCA  
ATTGTTCTCGAATAGGTATAGGTCCATTCAACGGTTTGAAATATCACAAT-----GTGAC  
AAAAGAATCAGATCCCCTAATTTCAATTAGGAATTCGTTTGGGCCTTTAGGGACA-----G  
TCCCTAAAATTGCGAATTTTTATTTCATCT---TATTACCATTTAATAACT-----CATAATCAGA  
TCTTG---ATAAATAAATATTTGCTACTTGACAAT-----TTAAAACAGACTTTCCAAGTAC  
TAAA-----TATTATTTAATAGATGAAAATGGGAGA-----ATTTTTAATCCCGATCCATGC  
AGTAACATCATTTTAAATCCATTCAATTTGAATTGGTATTTTCTCCATCAGATTATTGTG  
AAGAATCATCCACAATAATTAGC---CTGGGACAGTTTCTTTGTGAAAATGTATGTATATC  
CAAAAATGGACCA-----CACCTAAAATCTGGTCAAGTTCTAATTGTTTCAT--GTTGACT  
CTTTAGTAATAAGATCAGCTAAGCCCTATTTGGCCACTCCAGGAGCAACCGTTCATGGC  
CATTATGGAGAAATCCTTTACGAGGGAGATACATTAGTTACATTTATATATGAAAAATCG  
AGATCTGGTGATATAACGCAGGGTCTTCCAAAAGTAGAACAAGTGTTAGAAGTGCGTT  
CAATTGATTCAATATCAATGAACCTAGAAAAGAGGGTTGAAGACTGGAACGAACGTAT  
AGCAAGAATTTCTTGGAAATCCTTGGGGATTCTTGATTGGCGCTGAGCTAACCATAGCGC  
AAAGTCGTATTTCTTTGGTTAATAAAATCCAAAAGGTTTATCGATCCCAGGGAGTGCAG  
ATCCATAATAGGCATATAGAAATATTGTACGTCAAATAACATCAAAAAGTTGTGGTTTCA  
GAA-----GATGGAATGTCTAATGTTTTTTTGCCTGGGGAATAATTGGATTGTTGCGAG  
CGGAGCGAACGGGGCGGGCTTTGGAAGAAGCGATCTGTTACCGAGCCGTCTTATTGGG  
AATAACGAGGGCCTCTCTGAATACTCAAAGTTTCATATCCGAGGCGAGTTTTCAAGAA  
ACTGCTCGAGTTTGTAGCAAAGCCGCTCTACGAGGTCGTATCGATTGGTTGAAAGGCC  
TGAAAGAGAACGTTGTTCTAGGGGGGATAATACCCGTTGGTACTGGATTCAAAGGATT  
GGTGCATCGTTCA-----AGGCAACACAACAACATTCT-----TTGGAATAAAAAAGAAA  
AATTTATTTGAAGGGGAAATGAGA-----GATATTTTGTCCACCACAAAGAATTATTTTCAT  
TTTTGCATCCCAAAGAATTTTCATGATACATCAGAACAATCATTTACGGGATTTAATGAT  
TCC-----ATGACAAGAAGATATTGGAACATAAATTTGGAAGAGATGATGGAAG  
CAGGAGTGCATTTGGTCATGGTACTAGGAAATGGAATCCTAGAATGGCACCTTACATC  
TCTGCAAAGCGTAAAGGTATTCATATTACAAATCTTACTAGAACTGCTCGTTTTTTTATCA

GAAGCTTGTGATTTAGTTTTTGGATGCAGCAAGTAGGGGAAAACAATTCTTAATAGTTGG  
TACCAAAAATAAAGCAGCCGATTTAGTAGCATCGGCTGCAATAAGGGCTCGGTGTCATT  
ATGTTAATAAAAAATGGCTTGGTGGTATGTCAACGAATTGGTCCACTACAGAAACAAG  
ACTTCAAAAGTTCAGGGACTTGAGAGCGGAACAAAAGGCGGGGAGACTCAACCGTCT  
TCCGAAAAGAGATGCAGCAATGTTGAAGAGACAATTATTTAACTTGCAAACATATTTGG  
GTGGGATCAAATATATGACGGGGTTACCTGATATTGTAATCATTGTTGATCAGCAAGAAG  
AATATACAGCTCTTCGAGAATGCGTCACTTTGGGAATCCAACGATTTGTTTAATCGATA  
CAAATTGTGACCCGGATCTCGCAGATATTTCAATTCAGCGAATGATGACGCTATAGCTT  
CAATCCGATTAATTCTTAACAAATTAATCTCTGCAATTTGTGAGGGTCGTTCTAGC---TAT  
ATAAGAAATCGTATGGGTCAAAAATAAATCCACTTGGTTTCAGACTTGGTACAACCCA  
GGGGCATCATTCCCTCTGGTTTGCACAACCAAAAAGTTATTCTGAGGGTCTCCAGGAA  
GATCAAAAATACGAGATTGTATCAAGAATTTTGTACAAAAAATATGAGAATATCCTC  
AGGT---TTCGAGGGAATTGCACGTATAGAGATTCAAAAAGAATTGATCTGATCCAAGT  
CATAATCTATATGGGATTTCCAAAGTTGTTAATAGAGAGTAGACCACGA-----GGAA  
TAGAAGAATTACAGATCAATGTACAAAAGAGTTTCATTCTGTAAACCGAAAGCTCAA  
CATTGATATCACAAGAATTGCAAAACCTTATGGGCAACCTAATATTCTTGCAGAATTTAT  
AGCCGGACAATTAAGAATCGAGTTTCATTTGAAAGGCAATGAAAAAGGCTATTGAA  
CTAACTGAACAAGCAGATACAAAAGGAATTCAAATACAAATTGCAGGGCGTATCGACG  
GAAAAGAAATTGCACGTGTGCAATGGATCAGAGAAGGTAGAGTTCCCCTACAAACCAT  
TCGAGCTAAAATTGATTATTGTTCCCTATCCGGTTCGAACTATCTATGGGGTCTTAGGCAT  
CAAAATTTGGATATTTGTAGACGAGGAAATGTCTCGTTACCGAGGGCCTCGTTTCAAAA  
AAATACGCCGTCTGGGGACTTTACCGGGACTAACTAGTAAAAGGCCTAAAGCTGGAAG  
TGATCTTAGAAACCAAGCACGTTCCGGAAAA---AGATCTCAATATCGTATTCGTTTAGA  
AGAAAAACAAAATTGCGTTTTTCATTATGGTCTGACAGAGCGGCAATTACTTAAATACG  
TTTGTATCGCTAGAAAAGCCAAAGGGTCAACAGGTCAGGTTTTACTACAATTACTTGAA  
ATGCGTTTGGATAACATCCTTTTTTCGATTGGGCATGGCTTCGACCATTCCCGGAGCCCG  
GCAATTAGTTAACCATAGACATATTTTAGTTAATGGTCGCATAGTAGATATACCAAGTTAT  
CGCTGCAAACCCCGAGATATTATTACGACGAGGGATGAACAAAAATCTAGAGCTCTGA  
TTCAAAATTATCTTGATTCATCCCCCAT---GAGGAATTGCCAAAACATTTGACTCTTCA  
CTCATTCCAATAT-----AAAGGATTAGTCAATCAAATAATAGATAGTAAATGGGTTCGGTTT  
GAAAATAAATGAGTTGCTAGTCGTAGAATATTATTCCCGTCAGACTATGTCACGTCGAG  
GTACTGCAGAAGAAAAAACTGCCAAATCCGATCCAATTTATCGTAATCGATTAGTTAAC  
ATGTTGGTTAACCGTATTATGAAACACGGAAAAAAATCATTGGCTTATCAAATTATCTAT  
CGAGCCGTGAAAAAGATTCAACAAAAGACAGAAACAAATCCACTATCTGTTTTACGTC  
AAGCAATACGTGGAGTAACTCCCGATATAGCAGTAAAAGCAAGACGTGTAGGCGGATC  
GACTCATCAAGTTCCCATTTGAAATAGGATCTACACAAGGAAAAGCACTTGCCATTCGTT  
GGTTATTAGGGGCATCCCGAAAACGTCCGGGTGCAAATATGGCTTTCAAATTAAGTTCC  
GAATTAGTGGATGCTGCCAAAGGGAGTGGCGATGCCATACGCAAAAAGGAAGAGACT  
CATAGAATGGCAGAGGCAAATAGAGCTTTTGCACATTTTCGTATGGGTAGGGACACTAT  
TGCCGACATAATAACTTCTATACGAAATGCTGACATGGATAAAAAAGAACGGTTTCGAA  
TAACATCTACTAATATTACCGAAAACATTTGTGAAAATACTTCTACGAGAAGGTTTTATCG  
AAAACGTGAGAAAACATCAGGAAAACAACAAATATTTTTTGGTTTTAACCTACGACA  
TAGAAGG-----AATAGGAAAGGGCCATATAGA-----ACTATTTTAAAACGTATCAG  
CCGACCCGGTCTACGAATCTATTCTAACCATCAACGCATTCCTAAGATTTTAGGTGGAAT

GGGGATTGTAATTCTTTCTACTTCTCGCGGTATAATGACAGACCGAGAGGCTCGACGAG  
AAGGAATCGGAGGAGAAATTGTGTGTTATATATGGATGGCAAACCTATAACCAAGAATT  
GGTTCACGTAGAAACGGACGTATTGGTTTACGTAAGAGTGGACGTAGAATACCAAAGG  
GAGTTATTCATGTTCAAGCAAGTTTCAACAATACCATTGTGACTGTTACAGATGTACGA  
GGTCGAGTGGTTTCTTGGTCTTCTGCCGGTACTTGTGGATTCCGGGGTACAAGAAGAG  
GGACACCATTGCTGCTCAAACCGCAGCAGGAAATGCTATTCGTACAGTAGTGGATCA  
GGGTATGCAACGAGCAGAAGTCATGATAAAAGGTCTTGGTCTCGGAAGAGATGCAGCA  
TTACGAGCCATTTCGTAGAAGTGGTCTACAATTAAGTTTTGTACGGGACGTAACCCCTAT  
GCCACATAATGGATGTAGACCTCCTAAAAAAGACGTGTGATGCCAACTATTAACAA  
CTTATTAGAAACACAAGACAGCCAATCAGAAATGTCACGAAATCCCCGCCCTTCGGG  
GATGTCCTCAGCGCCGAGGAACATGTACTAGGGTGTATACTATCACCCCAAAAAACC  
AAACTCTGCCTTACGTAAAGTTGCCAGAGTACGATTAACCTCTGGATTTGAAATCACTG  
CTTATATAACCAGGTATTGGCCATAATTCACAAGAACATTCTGTAGTCTTAGTAAGAGGAG  
GAAGGGTTAAGGATTTACCCGGTGTGAGATATCACATTGTTTCGAGGAACCCTAGATGCT  
GTCGGAGTAAAGGATCGTCAACAAGGGCGTTCTAAATATGGGGTCAAAAAGCCAAAA  
ATGGCAAAGAAAAGTTTGATTCAGAGGGAGAAGAAGAGGCAGAAATTGGAACAGAA  
ATATCATTTGATTCGTGATCCTCAAAAAAAGAAATAAGC-----AAAGTTCGTCGTT  
GAGTGACAAATGGGAAATTCATGGAAAATTACAATCCTCACCGCGAAATAGTGCACCT  
ACACGTCTTCGTGACGTTGTTTTTCGACCGGAAGACCGAGAGCTAACTATCGAGACT  
TTGGGTTATCCGGACACATACTTCGTGAAATGGTTCATGCATGTTTGTTCGCCGGGGCA  
ACAAGATCCAGTTGGGTAAAAAAAATTCATTCATCTCAGTTATTTTCGCAAAAAGAAA  
AAGAAGAAAACGAAAACAGGGGATCTGTTGAATTTCAAGTATTAAGTTTCACCAATAA  
AATACGGAGACTTACTTCACATTTGGAATTGCACAGAAAAGACTATTTATCTCAAAGAG  
GTTTACGGAAAATTTTGGGAAAACGTCAACGGCTGCTAGTTTATTTGTCAAAGAAAAA  
TAGAGTACGTTATAAAGAATTAATCAGTCAATTGGATATTCGGGAGCCAAAAACTCGT---  
---ATGGTAAAGCTTCGTTTGAAACGATGTGGTAGAAAGCAACGAGCCATCTATCGAATC  
GTTGCAATTGATGTTTCGATCCCGAAGAGAAGGAAGAGATCTTCGGAAAGTGGGTTTTT  
ACGATCCGATAAAGAATCAAACCTTATTTAAATGTTCCCGCTATTCTATATTTCTTGAAA  
AAGGCGCTCAACCTACAGGAACAGTTCATGATATTTCAAAGAAGGCAGAGGTATTTAA  
AGAACTTCGCGTTAATCAAACGAAA-----ATGGATAAATCCAAGCGACTTTTCTTAA  
ATCCAAGCGATCTTTTCGTAGGCGTTTGCCCAATTGGATCGGGGGATCGAATTGATT  
ATCGAAACATGAGTTTAATTAGTCGATTTATTAGTGAACAAGGAAAAATATTATCTAGAC  
GAGTGAATAGATTGACCTTGAAACAACAACGATTAATTAATGCTATAAAAACAAGCT  
CGTATTTTATCTTCGTTACCTTTTCTTAATAATGAGAAA-----CAGTTTGAAAGAACCGAG  
TCGACCTCTAGAACTGCTGGTCTTAGAACCAGAAATAAAGTGCCACGTTCACTAAAAA  
AAAATCCTTTTGTAGCTAATCATTTATTAAGAAAAATTGAGAAGCTCAACACGAGAGCG  
GAAAAAGAAATAATAGTAACTTGGTCCCGGGCATCTACCATTATACCACAATGATCGG  
CCATACAATTGCTATTCATAATGGAAAGGAGCATTGCTTATTTATATAACGGATCGTATG  
GTAGGTCACAAATTGGGAGAATTTGCACCTACTATTAATTTCCGGGGACACGCGAAAA  
ATGATAATAGATCTCGTCGTATGATTTTGAATCTTTTCTACTAGGTAATCTATTCTCCTTA  
TGCATGAAGATAATAAATTCGGTCGTTGTGGTCGGACTCTATTATGGATTTCTGACCACA  
TTCTCCATAGGGCCCTCTTATCTCTCCTTCTCCGAGCTCGGGTTATGGAAGAAGGA-----  
---ACTGAGAAGGAGGTATCAGCAACAACCTGGTTTTATTACGGGACAGCTCATGATGTT  
CATATCGATCTATTATGCGCCTCTGCATCTAGCATTGGGTAGACCTCATACAATAACTGTC

CTAGTTCTACCGTATCTTTTGTTCATTTCTTCTGGAACAATCACAAACACTTTTTTGATT  
ATGGATCTACTACCAGAAATTCAATGCGTAATCTCAGCATTCAATGTGTATTCCTGAATA  
ATCTCATTTTTCAATTATTCAACCATTTCATTTTACCAAGTTCAACGTTAGCCAGATTAGT  
CAACATTTATATGTTTCGATGCAACAACAAGATGTTATTTGTAACAAGTAGTTTTGTGG  
TTGGTTAATTGGTCACATTTTATTTCATGAAATGGGTTGGATTGGTATTATTCTGGATACGG  
CAAATCATTCTATTCGATCT---AATGTACTTATTAAGTACCCTGTGTGTCAGAATTGAGAAA  
TTCTATGGCTCAAATCTTTAGTATTCTCTTATTTATCACCTGTGTCTACTATTTAGGCAGA  
ATGCCGTCACCTATTTTTACTAAGAACTGAAAGAA-----AAACCTATTGTTACTCT  
TCTTTTCGATTATAAACGATGGAATCGTCCATTGCGATATATAAAAAATAATCGGTTAGA  
AAAGGCTGTAAGAAATGAAATGTCACAATATTTTTTTTTTATACATGCCAAAGTGATGGAA  
AACAAAGAATATCTTTTACATATCCACCTAGTTTATCAACTTTTGGAGAAATGATACAAA  
AAAAGATCTCTTTGTGCACGACAGAAAACTCTCCTCTGACGAACTATATAATCATTGG  
GTTTATATCAATGAACAAAAAAGGATAACTTAAATAACGAGTTTAGAAATCGAATCGA  
AGCCCTAGACAAGGGATCTCTTGTGTTTGGATGTACTTGAAAAAAGGACTCGATTGTGTA  
ATGATGAACTGAACAAAAATGCTTGCCTAAAATGTATGATCCTCTTTTGAATGGACCC  
TATCGTGGAACAATCAAAAATTTGTATTCACGTAAG-----GTTTGGATAAACAAAATTCA  
TGGTATCCTTTACCGAGAATTTGAACAAAAAGATCCAAATGATCAA-----GGAATAAAA  
GAAATCCGTAAAAAAGTCCCTCGATGGTCATACAAATTAATCTATTTGGAACAAGAAGA  
GGTAGAAGAAATTCGTTCAAGAAAATGCAAACGAGTAATAATTTTTACTGAAGCTTTGA  
TACGTTATTCACAACAATCGGATTTTCGTAGGAACCTAATCAAAGGATCCATGCGCGCT  
CAAAGGCGTAAAAACAATAATTGGGGAAGTGTTCAAACAATGCACATTCCCCGCTTT  
TTTTGGACAGAAAAGACAAAACCGTTTTTTTTTCTTTTGATATC-----TCCAGAATTCTG  
AAGCTAATTTTTAGGAATAAAGAGGAGAATGAACGGATAAGAATAGCAGAAGCCTGGG  
ATACTTTTATATTTACGCAAGCAATAAGAGGTTTTATGTTAATAACCCAATTAACTCTTAG  
AAAATATATTGTATTGCCTTCATTGATAATAGCTAAAAATCTCTGCCGTATGTTATTATTC  
AATCCCCGAGTGGAACGAGGATTTGAAGGAATTGAATAGAGAAATGCATATTAATGC  
ACCTATAATGGTATTCAATTATCAGAAAAAGAATTTCCAAAAAACTGGTTAACAGACGG  
TATTCAGATAAAGATCCTATTTCCCTTTCCGCCTGAAACCTTGGCATAGATCTAAAAAAGG  
AAAAAAGAAAATTTTTGTTTTTTAACAGTTTTTGGAAATGGAAGCGGAACTCCCTTTTG  
GTTCTCCCCGCAAACAACCGTCTTTTTTTGAACCCATTTGGAAAGAACTCGACAAAAA  
AATTCGAAACGTGAAA---AAGAAAAGTTTTTTAGTTCTAAGATTTTTAAAAGAAAAGAA  
AAAAAAGGTTTCTAAAGGTCTCAAAGAACA AAAAGAATGGATTATAAAAAAAGTTCT  
A-----TTTATAAAAATAATAATGAAAGAATTTACAAAAGTAACTATAACTACAATCAGGA  
ATAATCTGATTCCTGACTTATCCATTCAAATTAAGTCCACGGGTTGGACAAATTATTCAC  
TGACAGAAAAAAAACGAAGGATCTGGCTGATAGGACAAGTACAATCATAAATCAAAT  
AGAAAGAATCACAAAAGAAAAAAAATAATGCTAAGGAAACTAGTTGTGATAATAA  
AAGATCAGAATCACAAAATAATTTGGCAGATATTCAAAGAAGAAGTGCCCGATTA  
ATACGTAAATGGCACTTTTTTATAAAATTTTTTATTGAAAGGCTATAC---GATACCCTTTTA  
TGATTATTAATATTCCCAGAGTCAATGCACAACCTTTTCATTCATTTTATTTTCG---GACCTA  
TCCTCCTTATCACAAAGCATATGTATTTACAAATTATCACAAAACCAAGTTATTAATAAAT  
ATCACTTGAGATCTGTACTTCAATATACATCTTTTTTATTAAGGATAGACTAAAGGATTT  
TTTTACACAAGGAATATTTTCATTCGAATCAAAGCATAAAAAACTTCGGAATTCGGGAA  
TGAATGAATGGAAAAATTGGTTAAAGGGTCATTATCAATACGATTTATCTCAGACTAGAT  
GGTTTAGATTAGTACCGCAAAAATGGCGAAATAGAGTCAATCAACGTCGTACGATTCAA

AATAAACAAAAATTGGGTTTCATACGAAAAAGACCAA-----TTCCTTTTTTACGAAAAAC  
AAGACAAATTTAAAAAACTACAGATATGATCTTCTATCACATAAATATATTAATGATTA  
TATTATTGATCTGGATAGAAAATATTTTGATTGGAGAATTCTCCATTTTTGTCTTAACTT  
TTTGATTGGATGGGAATGAATGAAGAAATACTAAATCGTTGGTTCTTTTCGGAATTACTA  
CTACTTTATGATACATATAAGATTAAACCATGGGGCATACCAATCAAATTACTTCTTTTAA  
ATTTCAAGAACAACATAGAAGTGGAACCTCGATTCTTCTCCTGAAAAAACATTTGCTTTTT  
CAATTGAGACCGGATTATCCTTTGAATAAAAAAATGATCAAGAATATCAAAGTATATTGT  
TTCCTGCTTAGACTGAAAAATCCAAAGGAAATTGCTATATCTTCTATTCAAAGAAGAGA  
AATGAGTCTGGATGTAATGGTGATTCAGAAAGATATAACTCTTACAGAATTGATAAAAA  
AGGGGATATTTATTATCGACCCTATTTCGTCTGTCTATAAAATGGGATGGGCAATTTATTAT  
GTATCAAACCATAGGTATTTCTTTGGTCCATAAGAATAAGCACAATCAGTATGATTTGCT  
TGCTCCTGAAAATATTTTATCGCCTAGACGTCGTAGAAAATTGAGAATTCGAATTTGTTT  
CAAATTTCTTTGGCCCAATTATCGATTAGAAGATTTAGCTTGTATGAATCGTTATTGGTTT  
GATACCAATAATGGCAGTCGTTTTAATATGTTAAGGATACATATGTATCCCATGAAACGA  
CATCAATTCAAATCCTGGATCTTCGAATTGAGAGAGATATTGAGAGAGATCAAGAATTC  
TCACTATTTCTTAGATTCATGGACCAAATTTGATTCAGTGGGATCTTTCCTCACATTTT  
TTCCACCAAGAACGTTTTATGAAACTCTTTGACCCCGAATTTGGAGTATCCTACTTTC  
A---CGCGATTCA-----CAGGGTTCAACAAGCAATCGATATTTACG-----ATCAAAGGT  
GTAGTACTGCTTGTAGTAGCG---GTCCTTATATAT-----CGTATTAACAATCGAAATAT  
GGTCGAAAGAAAAATCTCTATTTGATGGGGCTTCTT-----CCTATACCTATGAAT  
TCCATTGGACCCAGAAATGATACATTGGAAGAATCTTTT---GGGTCTTCCAATATCAATA  
GGTTGATTGTTTCG---CTCCTGTATCTTCCAAAAGGGAACAAGATCTCTGAGAGTTGTT  
TCATGGATCCGAAAGAGAGTACTTGGGTTCTCCCAATAACT-----AAAAAGTGTATC  
ATGCCTGAATCTAACTGGGGTTCGCGGTGGTGGAGGAACCGGATCGGAAAAAAGAGG-  
----GATTCTAGTTGTAAGATATCT-----AATGAAACCGTAGCTGGAATTGAGATCTCATT  
CAAAGAAAAAGATATCAAA---TATCTGGAGTTTCTTTTTGTATCCTATAACGGAT-----GAT  
CCGATCCGCAAGGACCATGATTGGGAATTGTTTGATCGTCTTTCTCCGAGGAAGAAGC  
GAAACATAATCAACTTG-----AATTCGGGACAGCTATTTCGAAATCTTAGTGAAACACTGG  
ATTTGTTATCTCATGTCTGCTTTTCGTGAAAAAAGACCAATTGAAGTGGAGGGT---TTCT  
TCAAACAACAAGGA---GCTGAGTCAACTATTCAATCAAATGATATTGAGCATGTTTCCC  
AT-----CTCTTCTCGAGAAACAAGTGGGGTATTTCTTTGCAAAATTGTGCTCAATTTATA  
TGTGGCAATTCCGCCAAGATCTCTTCGTT-----AGTTGGGGGAAG---AATCCGCACGA  
ATCGGATTTTTTGAGGAAC---GTATCGAGAGAGAATTGGATTGGTTAGACAATGTGTG  
GTTGGTAAACAAGGATCGG-----TTTTTTAGC-----AAGGTACGGAATGTATCGTCAAA  
TATTCAATATGATTCC-----ACAAGA-----TCTATTTTCGTTCAAGTAACGGATTCTAGCC  
AATTGAAAGGATCTTCT--GATCAATCCAGAGATCATTTCGATTCCATTACCATTAGT-----  
AATGAGGATTTCGGAA-----TATCACACATTGATCAATCAAAGA  
GAGATTCAACAATAAAAGAAAGCTCGATTCTT--TGGGAT-----CCTTCTTTCTTCAA  
ACGGAACGAACAGAGATAGAATCAGAC-----CGATTCCCGAAA-----TGCCTTTCTGGAT  
ATTCC-----TCAATGTCCCGGCTATTCACG---GAACGTGAGAAGCAGATGAATAATCATCT  
GCTTCCGGAAGAAATCGAAGAATTTCTT-----GGAATCCTACAAGATCAATTCGTTCTT  
TTTTCTCTGACAGATGG-----TCAGAACTTCAT--CTGGGTTCGAATCCTACTGAGAGGTC  
CACTAGAGATCAG-----AAATTGTTGAAGAAACAACAAGATGTTTCT--TTTGTCCC  
TTCCAGGCGATCGGAA-----AATAAAGAAATGGTTGATATGTTCAAGATAATTACGT

ATTTACAAAAT-----ACCGTCTCAATTCATCCTATTTTCATCAGATCCGGGATGTAATATGGT  
TCCG---AAGGATGAACCGGAT--ATGGACAGTTCCAATAAGATTTTCATTCTTGAACAAAA  
ATCCATTTTTTGGAT-----TTATTTTCATCTATTCCATGACCGGAACAGGGGGGGATATACGTT  
A-----CACCACGATTTTGAATCAGAA-----GAGAGATTTCAAGAAATGGCAGATCTATTC  
ACTCTATCAATAACCGAGCCG---GATCTGGTGTATCATAAGGGATTTGCCTTTTCTATTGA  
TTCTACGGATTGGATCAAAAAAAAA-----TTCTTGAATGAGGTATTCAACTCCAGGGATG  
AATCGAAAAAGAAATCTTTA-----TTGGTTCTACCTCCTATTTTTTTAT-----GAAGAGAA  
TGAATCTTTTTTATCGAAGGATCAGAAAAAAATCGGTCCGG---ATCTCCTGCGGGAATGA  
TTTGGAAGATCCAAAACCAAAAAGAGTGGTATTTGCTAGCAACAACATAATGGAGGCA  
GTCAATCAATATAGATTGATCCGAAATCTGATTCAAATCCAATATAGAACCTATGGA-----  
TACATAAGAAATGTATCGAATCGATTCTTT-----TTAATGAATAGATCCGATCGCAACTT  
CGAATATGGAATTCAA-----AGAGATCAAATAGGAAATGATACTCTGAATCATAGAACT  
ATAATGAAATATACGATCAACCAACATTTATCGAATTTGAAAAAG---AGTCAGAAGAAA  
TGGTTCGATCCT-----CTTATTTCTCGAACCGAGAGATCCATGAATCGGGATCCTGAT  
GCATATAGATACAAATGGTCCAATGGGAGCAAGAATTTCCAGGAACATTTGGAACATTT  
CGTTTCTGAGCAGAAGAGC-----CGTTTTCAAGTAGTGTTCGATCGATTACGTATTAAT  
CAATATTCGATTGATTGGTCCGAGGTTATCGACAAACAAGATTTGTCTAAGTCACTTCG  
TTCTTTTTGTCCAAGTCA-----CTTCTCTTTTTGTCC-----AA  
GTTGCTTCTCTTTTTGTCTAAG---TCACTTCCTTTTTTCTTTGTGAGTTTCGGGAATATCC  
CCATTCATAGGTCCGAG---ATCCACATCTAT--GAATTGAAAGGTCCGAATGATCAACTC  
TGCAATCAGTTGTTAGAATCAATAGGTGTTCAAATCGTTCATTTGAATAAATTGAAACC  
CTTC-----TTATTGGAT-----GATCATGATACTTCC---CAAAAATCGAAATCTTGATCAA  
TGGAGGAACAATATCACCAATTTTTGTTCAATAAGATACCA---AAGTGG---ATGATTGACT  
CATTCCATACT-----AGAAATAATCGCAGGAAATCCTTTGATAACACTGATTCCTATTTCT  
CAATGATATCCCACGATCGAGACAATTGGCTGAATCCCGTGAAACCATTTTCATAGAAGT  
TCATTGATATCTTCTTTTTATAAAGCAAATCGACTTCGATTCTTGAATAATCCACATCACT  
TCTGGTTCTAT-----TGTAACAAAAGATTCCCTTTTTTATGTG-----GAAAAGGCCCGTA  
TCAATAATTATGAT-----CTTACGTAT--GGGCAATTCCTCAATATCTTGTTCATTTCGCAAC  
AAA---ATATTTTCTTTGTGCGTCGGTAAA-----AAAAAATATGCTTTTTTTGGAG---AGAGA  
TACTATTTACCAATCGAGTCACAGGTATCTAACATATTCATACCTAACGATTTTCCACA  
AAGTGGTGACGAAACG---TATAACTTGTACAAATCT-----TTCCATTTTCCAATTTCGATC  
CGATCCATTCGTTTCGT-----AGAGCTATTTACTCGATCGCAGACATTTCTGGAACACCTCT  
AACAGAGGGACAAATAGTCAATTTTGAAGAAGTATTGTCAACCTCTTTCAGATATGA  
ATCTATCTGATTCAGAAGGGAAGAACTTGCATCAGTATCTCAAT-----TTCAATTCAAACA  
TGGGTTTGATTCACTCCATGTTCTGAGAAATATTTACCA-----TCCGAAAAGAGGAAA  
AAA-----CGGAGTCTTTGTCTAAAG-----AAATGCGTTGAGAAACGGCAGA  
TGTATAGAACCTTTCAACGAGATAGTGCTTTTTTCAAATCTCTCAAATGGAATCTGTTC  
AAACATATATGCCATGGTTCCTTACTTCGACAGGGTGCAAATATCTAAATTTACCCCTTT  
TAGATACTTTTTCAGACCTATTG-----CCGATACTAAGTAGCAGT--CACAAATTTGTATCC  
ATTTTTCATGATATTATGCATGGATCAGATATATCATGGCCAATTCCTCAGAAAAAATGG--  
-----TGTCTTCCACAATGGAATCTG---ATAAGTGAGATTTTCGAGTAAGTGTTTACA  
TAAT-----CTTCTTCTGTCCGAAGAAATGATTCATCGAAATAATGAGTCACCCGTTCCATT  
GATATGGACACATCTGAGATCACCAATGCTCGGGAGTTC---CTCTATTCAATCCTTTTC  
CTTCTTCTTGTGCTGGATAT--CTCGTTCGTACACATCTTCTTTTGTTCCTCGA-----GC



CTCTAGTGAGTTACAGACAGAGTTCGAAAAGATCAAATCTTTGATGATTCCATCATA  
TGATGGAGTTACGAAAACCTTCTGGATAGGTATCCTACATCTGAACTGAATTCTTTCTGG  
TAAAGAATCTCTTTCTAGTTGCTCTGGAACAATTAGGAGATTCTCTAGAAGAAATACG  
GGTTCTGCTTCTGGCGGCAACATGCTATTGGGCGGTGGTCCC-----GCTTATGG  
G---GTCAAATCAATACGTTCTAAGAAGAAATATTTGAATATCAAT-----CTCATCGATCT  
CATA---AGTATCATAACCAAATCCCATCAATCGAATCACTTTTTTCGAGAAATACGAGACAT  
CTAAGTCGTACAAGTAAAGAGATCTATTCAATTGATAAGAAAAAGAAAAAACGTGAACG  
GTGATTGGATTGATGATAAAATAGAATCCTGGGTCGCGAACAGTGATTGATTGATGAT  
GAAGAAAGAGAATTCTTGTTTCAGTTCTCC-----ACCTAACGACA-----GAAAAAAGGA  
TTGATCAAATTCTATTGAGTCTGACT--CATAGTGATCATTATCA-----AAGAATA  
ACTCTGGTTATCAAATGATTGAACAACCGGGATCAATTTACTTACGATACTTAGTTGACA  
TTCAT-----AAAAGTATCTAATGAATTATGAGTTCAATAGATCCTGTTTAGCAGAAAGAC  
GGATATTCCTTGCTCATTATCAGACAATCACTTAT-----TCACAAACCTCGTGTGGGGCTA  
ATAGTTTTCAATTCATCTCATGGA-----AAACCCTTTTCGCTCCGCTTAGCCCTATCC  
CCCTCT--AGGGGTATTTAGTGATAGGTTCTATAGGAACTGGACGATCATATTTGGTCA  
AATACCTAGCGACAAACTCCTATGTTCCCTTTCATTACGGTATTTCCGAACAAGTTCCTGG  
ATGACAAGCCTAAAGGTTATCTTAATGATGAT-----ATCGATATTGATGATATTGATGAT  
AGTGACGATATTGAT-----GATAGTAA  
CGATATCGATGATGACCTTGATACGGAGCTGCTAACTATGACGAATGCGCTA-----ACT  
ATGTATATGACG-----CCGAAAATAGACCGATTTGATATCACCTTCAATTCGAATTAG  
CAAAGCAATGTCTCCTTGCATAATATGGATTCCAAACATTCATGATCTGTATGTGAATG  
AGTCGAATTACTTATCCCTCGGTCTATTAGTGAACCTATCTCTCC-----AGGGATTGTGA  
AAGATGTTCC--ACTAGAAATATTCTTGTTATTGCTTCGACTCATATTCCTCCAAAAGTG  
GATCCCGCTCTAATAGCTCCGAATAAATCAAATACATGCATTAAGATACGAAGGCTTCTT  
ATTCCACAACAACGAAAGCACTTTTTCACTCTTTCATATACTAGGGGATTTCACTTGGA  
AAAGAAAATGTTCCATACT-----AATGGATTCGGGTCCATAACCATGGGTTCCAATGCAC  
GAGATCTTGTAGCACTTACCAATGAGGCCCTATCAATTAGTATTACACAGAAGAAATCC  
ATTATAGACACTAATACAATTAGATCCGCTCTTCATAGACAAACTTGGGATTTGCGA-----  
---TCCCAGGTAAGATCGGTTCAAGGATCATGGGATCCTTTTCTATCAGATAGGAAGGGCT  
GTTGCACAAAATGTACTTCTAAGTAATTGCCCTATAGATCCTATATCTATCTATATGAAGA  
AGAAA-----TCATGTAAGGAAGGGGATTCTTATTTGTACAAATGGTACTTCGAACTTGGA  
ACGAGCATGAAGAAATTAACGATACTTCTTTATCTTTTGAGTTGTTCTGCCGGATCGGT  
CGCTCAAGATCTTTGGTCTTACCC-----GGACCCGATGAAAAA---AATTGGATCACTTC  
TTATGGATTGTTGAGAATGATTCT--GATCTAGTTCATGGCCTATTAGAAGTAGAAGGC  
GCTCTGGTGGGA-----TCCTCACGGACAGAAAAAGATTGCAGTCAGTTTGATAATGAT--  
---CGAGTGACACTGCTTCTTCGGTCCGAACCAAGGAAT--CCCTTAGATATGATGCAAAA  
TGGATCTTGTCTATCGTTGATCAGAGATTTCTATATGAAAAA-----TACGAATCGGAGTT  
TGAAGAA--GGGAAGGAGAAGGAGCCCTCGACCCGCAA-----CAGATAGAGGAG  
GAT-----TTATTCAATCAC-----ATAGTTTGGGCTCCT-----AGAATATGGCGCCCT-----  
--TGTGGCAATCTATTTGATTGTATCGAAAGGCCCAATGAATTGGGATTTCCC---TATTGG  
GCCAGGTCATTTTCGG-----GGCAAGCGGATCATTTATCATAAAGAGGATGAGCTTCAA  
GAGAATGATTTCGAGTTCTTGCAGAGTGGAACCATGCAGTACCAGACACGAGATAGAT  
CTTCCAAAGAACAAGGCTTTTTTCGAATAAGCCAATTCATTTGGGACCCTGCAGATCCA  
TTCTTTTTTCTATTCAA--GATCAGCCCTCTGTCTCTGTGTTTTACGTCGAGAATTCTT



GGGACTAGGGGTATTGCTCTGAATTTGGAATCCAAAAATGTTGGGATTGTATTAATGGG  
CGATGGGTTGATGATAACAAGAGGGAAGTTTTGTAAAAGCAACAGGAAGAATTGCTCAG  
ATACCCGTGAGCGAGGCTTACTTGGGTTCGTGTTATAAATGCTCTGGCTAAACCTATTGAT  
GGGAGAGGCGAAATTGTAGCTTCGGAATCTCGCTTAATTGAATCTCCTGCTCCGGGTAT  
AATTTCCAGGCGTTCTGTATATGAACCCCTTCAAACAGGGCTTATTGCTATCGATTGAT  
GATCCCTATAGGTCGCGGTCAGCGAGAGTTAATTATTGGGGACAGACAGACTGGCAAA  
ACAGCAGTAGCCACAGATAACAATTCTCAATCAAAAAGGGCAAGATGTAATATGTGTTTA  
TGTGGCTATCGGTCAAAGAGCATCCTCCGTGGCTCAAGTAGTAACTACTTTCCATGAAG  
AAGGGGCCATGGAATACACTATTGTAGTAGCTGAAATGGCGGATTCACCTGCTACATTA  
CAATACCTCGCTCCTTATACGGGAGCAGCCCTGGCTGAGTATTTTATGTACCGTGAACG  
GCATACTTTAATAATTTATGATGATCTCTCAAACAGGCACAAGCTTATCGCCAAATGTC  
CCTTCTATTAAGAAGACCCCCGGACGCGAAGCTTATCCAGGGGATGTTTTTTATTTGC  
ATTCACGCCTTTTAGAAAGAGCCGCTAAATTAATTTCTTTTTAGGCGAAGGAAGTATG  
ACCGCTTTACCAATAGTTGAGACTCAATCTGGAGACGTTTCCGCCTATATTCCTACTAAT  
GTAATCTCCATTACAGATGGACAAATATTCTTATCCGCGGATCTATTCAATGCCGGAATT  
CGACCTGCTATTAATGTGGGTATTTCTGTTTCCAGAGTAGGATCCGCGGCTCAAATTA  
AGCCATGAAACAAGTAGCTGGCAAATCAAAATTGGAAGTAGCTCAATTTCGAGAGTTA  
CAAGCCTTTGCACAATTTGCCTCTGCTCTAGATAAAACAAGTCAGAATCAATTGGCAA  
GGGGTCGACGATTACGGGAATTGCTTAAACAATCTCAATCAAACCCCTCTCCCAGTGGA  
AGAGCAGATAGCTACTATTTATACCGGAACGAGAGGATATCTTGATTGCTTAGAAATTG  
GACAGGTAAAGAAATTTCTGGATGAGTTACGTAAACACCTAAAAGATACGAAACCTCA  
ATTCCAAGAAATTATATCTTCTAGCAAGACATTCACCGAGCAAGCGGAAATCCTTTTGA  
AGGAAGCTATTCAGGAACAGCTCGAACGGTTTTCCCTTCAGGAACAAACAATGAGAA  
CCAATCCTACTACTTCTCGTCCCAGGGTTTTCCACAATTGAGGAAAAAAGCACAGGTCG  
TATCGATCAAATTATTGGGCCCGTGCTGGATATCACTTTTCCCCAGGCAAGTTACCTTA  
TATTTATAACGCTTTGGTAGTCAAGAGTAGAGACACTGCCGGTAAGCAAATTAATGTGA  
CTTGTGAGGTACAACAATTATTGGGAAATAATCGAGTTAGAGCTGTAGCTATGAGTGCT  
ACAGACGGGTTGATGAGAGGAATGGAAGTGATTGACACGGGAGCTCCTCTCAGTGTT  
CCAGTCGGTGGAGCTACTCTCGGACGAATTTCAACGTTCTTGGGGAACCTATTGACA  
ATTTGGGTCCTGTAGATACTAGTGCAACATTCCTATTATAGATCTGCGCCTGCCTTTAT  
CGAGTTAGATACGAAATTATCCATCTTTGAAACAGGTATTAAGGTGGTTCGATCTTTTAC  
TCCTTATCGACGTGGGGGAAAAATCGGACTATTTGGGGGGCTGGAGTAGGGAAAACA  
GTAATCATCATGGAATTAATCAACAACATTGCTAAAGCTCATGGAGGCGTATCCGTATTT  
GGCGGAGTAGGGGAACGGACTCGTGAAGGAAATGATCTTTATATGGAAATGAAGGAAT  
CCGGAGTAATTAATGAAAAAATATTGAGGAATCAAAGGTAGCTCTAGTCTATGGCCAA  
ATGAATGAACCGCCGGGAGCTCGTATGAGAGTTGGTTTAACTGCCCTAACTATGGCAG  
AATATTTCCGAGATGTTAATAAGCAAGACGTGCTTCTATTATCGATAATATCTTTGTTT  
TGTTCAAGCAGGATCGGAGGTATCCGCTTTATTAGGGAGAATGCCCTCCGCAGTGGGTT  
ATCAACCTACTCTTAGTACAGAAATGGGTTCTTTGCAAGAAAGAATTACTTCTACCAA  
AAGGGATCTATAACTTCGATCCAAGCGGTTTATGTACCTGCGGACGATTTGACCGACCC  
TGCTCCTGCCACAACATTTGCACATTTGGATGCTACTACCGTACTTTCCAGAGGATTAG  
CTTCCAAGGGTATTTATCCAGCAGTAGATCCTTTAGATTCAACCTCAACTATGTTACAGC  
CTCGGATCGTTGGCAACGAACATTATGAAACTGCGCAAAGAGTTAAGCAAACCTTTACA  
ACGTTACAAAGAACTTCAGGACATTATCGCAATTTCTGGGTTGGATGAATTATCGGAGG

AGGATCGTTTAACTGTAGCAAGAGCACGAAAAATTGAACGTTTCTTATCACAACCGTT  
CTTTGTGGCAGAAGTTTTTACCGGTTCTGCAGGAAAGTATGTTGGTCTTGCAGAAACA  
ATTAGGGGATTTCAACTAATCCTTTCCGGAGAATTAGACGGCCTACCCGAACAGGCTTT  
TTATTTGGTGGGTAACATCGATGAAGCTAGCACGAAAGCTATAAACTTAGAAGAGGAG  
AACAAATTGAAGAAAATGAAATTAATCTTTATGTACTAACTCCTAAGCGAATTATTG  
GGATTGTGAAGTGAAAGAAATCATTTTATCTACTAATAGTGGCCAAATTGGCGTATTACC  
AAACCACGCCCCATTAACACAGCTGTAGATATGGGTCCTTTGAGAATACGCCTCAACG  
ACCAATGGTTAACGGCGGTTCTGTGGAGCGGTTTTGCGAGAATAGTTAATAATGAGATC  
ATCATTTTAGGAAATGATGCGGAACTGGGTAGTGACATTGATCCGGAAGAAGCTCAAC  
AGGCACTTGAAATAGCCGAAGCTAACTTGAGTAGAGCTGAGGGTACGAAAGAATTGG  
TTGAAGCGAAGCTAGCTCTCAGACGAGCTAGGATACGAGTCGAGGCTATCAATTGGAT  
TCCCATGAAAAATGTAACCCATTCTTTCGTTTTTTTTAGCTCACTGGCCATCCGCTGGGA  
GTTTCGGGCTTAATACCGATATTTAGCAACAAATCTAATAAATCTAACTGTAGTGGTTG  
GTGTATTGATTTTTTTTTGAAAGGGAGTGTTAAAAGATTTATTAGATAATCGAAAACAG  
AGGATCTTGAGCACTATTCGAAATTCGGAAGAATTGCGTAGAGGGACCATTGAGCAGC  
TCGAAAAAGCTCGGGTTCGATTACAGAAAGTCGAACTAGAAGCAGATGAGTATCGAAT  
GAATAGATACTCTGAGATAGAACGAGAAAAAGCAAATTTGATTAATGCTACTTCTATTA  
GTTTGGAAACAATTAGAAAAGTCTAAAAACGAAACCCTTTATTTTGAAAAACAAAGGGC  
AATGAATCAGGTCCGACAACGGGTTTTCCAACAGGCCGTGCAAGGAGCTCTAGGAAC  
TCTGAATAGTTGTTTGAATACCGAGTTACATTTCCGTACGATTTCGTGCTAATATTGGCAT  
TCTCGGGGCCATAGAATCGAAGAGA---ATGAATCCACTAATTGCTGCTGCTTCCGTTATT  
GCTGCTGGATTGGCCGTAGGGCTTGCTTCTATTGGCCCTGGAGTTGGTCAAGGTAAGTGC  
TGCAGGACAAGCTGTAGAAGGTATTGCGGAGACAGCCAGAAGCAGAAGGTAAAATACG  
AGGTACTTTATTGCTTAGTCTAGCTTTTATGGAAGCTTTAACAATTTATGGACTAGTTGT  
GGCACTAGCACTTTTATTTGCGAACCCTTTTGTTATGAATATTATACCATGTTCCATTA  
AAACTCAAGGGGTTATACGATATATCGGGTGTAGAAGTAGGCCAACACTTCTATTGGCA  
AATAGGAAGTTTCAAATTCATGCCCAAGTACTCATCACTTCTTGGGTCGTAATTACTAT  
CTTGCTAGGTTCAAGTTATCATAGCTGTTTCGGAATCCACAAACCATCCCGACCGACGGTC  
AGAATTTCTTCGAATATGTGCTTGAGTTTATTCGAGACTTGAGCAAACTCAGATTGGA  
GAAGAATATGGTCCCTGGGTTCCCTTTATTGGAAGTATGTTCCTTTTTATTTTTGTTTCGA  
ATTGGTTCGGGTGCTCTTTTACCTTGGAATAATATACAGTTACCCCATGGGGAATTAGCA  
GCGCCACGAATGATATAAATACTACTGTTGCTTTAGCTTTACTCACGTCAGCGGCATAT  
TTTTATGCGGGTCTTAGCAAAAAAGGATTGAGTTATTTTCGAGAAATATATTAACCAAC  
TCCAATCCTTTTACCAATTAACATCCTAGAAGATTTACAAAACCATTATCGCTTAGTTT  
TCGACTTTTCGGGAATATATTGGCGGATGAATTAGTCGTTGTTGTTCTTGTCTTTAGT  
CCCCTTAGTAGTCCCTATAACCGGTCATGTTTCTTGGATTATTTACAAGCGGTATTCAAGC  
TCTTATTTTTGCAACGTTAGCCGCAGCCTATATAGGTGAATCCATGGAGGGTCATCATAT  
GCTATTTGCAACTTTAGAACATATACTAACTCATATCTCTTCTCAACTATTTCAATTGTG  
ATTACGATTCATTTGATAACCTTATTAGTTTCGTGAACTTGGGGGATTACATGATTTCGTCA  
GAAAAAGGAATGATAGCAACTTTTTTATCTATAACAGGATTCTTAGTTTCTCGTTGGGCT  
TCTTCGGGACATTTTCCATTAAGTAATTTATATGAGTCATTGATCTTCTTTTCATGGGCTC  
TGTATATTCTTCATACGATTCCTAAGATACAGAACTCTAAAAATGATTTAAGCACAATAA  
CTACGCCAAGTACTATTTAACGCAAGGCTTTGCCACGTCGGGTCTTTTAACTGAAATG  
CATCAATCCACAATACTAGTACCTGCTCTACAATCTCAGTGGTTAATGATGCATGTCAGT

ATGATGTTACTAAGCTATGCAACTCTTTTGTGCGGATCCTTATTATCCGCCGCTCTTCTAA  
TCATTAAATTTGAAAGAATTTGATTTCTTTTCTAAAAAGAAAGAGATTGAATATTTCT  
ATGCAAAAAGAAGTGCTTTAAAAAACACCTCTTTTCCTTCATTTTCAAATTATTACAAAT  
ATCAATTAAGTGAAGCGTTTGGATTCTTGGAGTTATCGTGTCATTAGCCTAGGGTTTACCC  
TTTAAACCATAGGTATTCTTTGTGGAGCAGTATGGGCTAATGAGGCGTGGGGATCCTATT  
GGAATTGGGATCCTAAGGAAACTTGGGCATTTATTACTTGGACCATATTCGCAATTTATT  
TACATAGTAGAACAATCCAAATTGGAAGGGTACGAATCCGCACCTGTAGCTTCAATA  
GGATTTCTTATAATTTGGATCTGCTATTTTGGTATCAATCTATTAGGAATAGGTTTACATA  
GTTATGGTTCATTTACATTACCAATGAAAAAAAAAGAAAGCATTGCCTTCTTTCCTATATC  
TTGTATTTATCGTACTTTTGCCTGGGGGGTCTCTTTCTCTTTTAAACAATGTCTGGAAC  
TTTGGATTAAGAATTGGTGAATACCAGGCAATCCGAAACTCTCTTAACTGATATTCAA  
GAGAAAAAGGTTCTAGAAAGATTCATAGAATTAGAAGAACTTTTTCTCTTGGACGAAA  
TGATAAAGAGAAACCGAAGACACATGTACAAAAACCTCCTATAGGAATACACAAGGA  
AATAATACAATTGGCCAAAATAGATAATGAGGATCATCTCCATATCATTTTGCATTTCTCG  
ACAAATATAATCTGTTTGGCTATTCTAAGTGGTTCTTTTTTTCTGGGTAAAGAGGAACTT  
GTCATTTTGAATCTTGGGTTTCCAGGAATTCTTCTATAACTTAAATGACTCAATAAAAGCT  
TTTAGTATTCTTTTAGTTACTGATTTTTTTGTTGGATTTCACTCCACCCGCGGTTGGGAA  
CTACTAATTCGTTGGGTCTACAATGATCTTGGATGGGCTCCTAACGAGCTAATTTTCACT  
ATTTTTGTTTGTAGTTTTCCAGTGATTCTAGATACATGTTTGAATTTTGGGTCTTTTTTT  
ATTTAAACCGTCTATCTCCTTCGCTTGTAGTCATTTATCATTCAATTAGTGAAATGCCCAT  
TGGTGTTCAAAAGTACCTTACCGGATTCCCGGAGATGAAGAAGCGACTTGGGTTGAC  
TTATACAATGTTATGTATCGAGAAAGGACACTTTTTTTAGGTCAAGAGATTTCGTTGCGA  
GATCACGAATCATATTACAGGTCTCATGGTATATCTCAGTATAGAAGATGGAATTAGCGA  
TATTTTTTTGTTTATAAACTCCCCAGGCGGGTGGCTAATCTCAGGAATGGCAATTTTTGA  
TACGATGCAAACGGTGACACCAGATATATATACAATATGCCTCGGAATAGCTGCGTCCAT  
GGCATCCTTCATTCTGCTTGGAGGAGAACCACCAAGCGTATAGCATTCCCTCACGCGA  
GGATTATGCTTCACCAACCTGCTAGTGCTTATTATCGGGCAAGGACACCAGAATTTTTA  
CTAGAAGTGGAAGAGTTACACAAAGTTCGCGAAATGATCACAAGGGTTTATGCACTAA  
GAACAGGCAAGCCTTTTTGGGTTGTATCCGAAGACATGGAAAGGGATGTTTTTATGTC  
AGCAGACGAAGCCAAAGCTTATGGACTTGTGATATTGTAGGGGATGAACCGAGAGAA  
GCAAAAGTCACTTTTGAAGGTTTGTACGGAAGCCCTACCAACGGAATGTTCCGCG  
TTCGCCTAGAGAATGACACCATCATTCTGGGCTATATTTAGGAAAGATCCGGTCTAGT  
TCTATACGAATACTGATGGGGGATAGGGTCAAATTTGAAGTAAGTCGTTATGATTCAAG  
CAAGGGACGTATAATTTATAGACTTCCCCATAAGGATTCGAAGGATATGGAAAAATTCG  
AAGGGTATTCAGAAAAACAGAAATCTCGTCAACAATACTTCGTCTACCCACTTCTCTTT  
CAGGAGTATATTTATGCATTTGCCCATGATTATGGATTAGTTAGTTGTAATAACAAATTTA  
GTTCACTACTTGTGAAACGTTTAAATTATTCGAATGTATCAGCAGAATTTTTGGATTA  
CGGTTAATCATCCTAACCAAGATCGATTGTTGGATTCTGAGTTTTTATTCTCAGATTCTATC  
TGAGGGGTTTGCATCGTTGTAGAAATCCATTCTCGCTACGAGAATTATCTTGTCCGA  
CAACAAAGTTTCAGAAATTTACGATCTATTCAATATTTCCCTTTTTAGAAGACAAAT  
TTTTGCATTTACATTATCTATCACATATAGAAATACCCTATCCTATCCATTTGGAATTTTG  
GTTCAACTCCTTCAATACCGGATCCAAGATGTTCCATCTTTGCATTTATTGCGATTCTTT  
CTCAACTACTATTCGAATTGGAATAGTCTTATTACTAAATCGATTTTTCTTTTAAAAAA  
AAAAGACTATTTGATTTCTTATATAACTCTTATGTATCAGAATATGAATTTTTCTTGTGT

TTCTTCGTAAACAATCTTTTTGCTTACCATTAACATCTTCTGGAACCTTTGTGGAACGAA  
TCCACTTTTCTAGGAAGATGGAACAT-----GTAATGTACCCAGGTCGGAAAACCGTATGG  
TTCTTTATGGATCCTCTTATGCATTATGTTTCGATATCAAGGAAAGGCAATTCTTGCATCA  
AAAGGAACTCTTCTTTTGAAGAAGAAATGGAAATGTTACCTTGTCAATTTCTGGCAATA  
TTCTTTCTCTTTTGGACTCAACCGCGAAGGATCCATCTAAACCAATTAGCAAACCTCTT  
GCTTCGATTTTCTGGGGTACCTTTCAAGTGTACCAATAAATCCTTTGTAGTAAGGAATC  
AAATGCTAGAGAATTCATTTCTAATAGATACTCGAATG-----AAAAAATTCGATACCATAG  
TCCCCGCTACTCCCCTCATTGATCCTTATCAAAAGCTCAATTTTGTACTGGATCGGGGC  
ATCCTATTAGTAAACCAATTTGGACCGATTTATCAGATTGGGATATTCTTGATCGATTTGG  
TCGGATATGTAGAAATCTTTTTCATTATCATAGTGGATCTTCGAAAAAACGGACTTTGTA  
TCGACTAAAGTATATACTTCGACTTTCATGCGCTAGAACTTTAGCTCGTAAACATAAAA  
GCACGGTACGAACTTTTATGCAACGATTGGGTTCCGGTATTTTTAGAAGAATTTTTTATGG  
AAGAAGAACAAGTTTTTCTTTGATGTTACCAAACGTATTTGGTATTTGGATATTATCC  
GTATCAATGACCTGGTGAACCCTCTTATGATAATAGATAGGGTA---GAGGTAGAA---ACT  
ATCAATTTCTTTTCGAAATCGGAA---TTATTAAGAAGTCTATGGACTGATATGGATTCT  
A---CCTATTTTGACCCTCTACTGGGAATCACAATAGAAGTACTGGTAATTGTGTGGTTA  
GAAAGAGAAATATCCGCATCGATAACAACGTATTGGTCCTGAATATGCTGGCCCCCT  
GGGACTGCTTCAAGCTATAGCCGATGGAACATAAGCTCCTTTTTAAGGAGGATATCCTGC  
CATCCCCGAGGAGATATTCTTTATTTAGCATTGGACCCTCTATAGCAGTCATATCAATTTT  
ATTAAGTTTTTTAGTTATCCCTTTAGGATATCGTTTTGTTTTAGCCGATCTTAGTATTGGT  
GTTTTTTTTATGGATTGCCATTTCAAGTATTGCTCCTATTGGTCTTCTTATGGCAGGATATA  
GCTCAAATAATAAATATTCTTTTTTAGGCGGTCTACGAGCTGCTGCTCAATCTATTAGTTA  
TGAAATACCATTAACTTTTTGTGTGCTAGCAATATCTCTATTATCTAACAGTTCAAGTAC  
AGTTGATATAGTTGAAGCACAGTCAAATATGGTTTTTTTTGGATGGAATCTTTGGCGTC  
AGCCTATAGTTTTCTGGTTTTCTAATTTCTTCTTTGGCAGAATGTGAAAGATTACCCT  
TTGATTTACCAGAAGCAGAGGAAGAATTAGTAGCAGGTTATCAAACCGAATATTCCGGT  
ATCAAATATGGTTTTATTTTATCTTGTCTTACCTAAATTTATTAGTTTCTCTTTATTGTA  
ACAGTTCTCTACTTAGGCGGGTGAATTTATCTATTCCCTATATATCCTTTTTTTGGATTTT  
TCCAAATGAATAAAATGGTTGGAATTTTGGAAATGACAATGGGTATCTTTATTACATTAA  
CTAAAGCTTATTTATTTCTTCTTCAATTTCTATCACAATAAGATGGACTTTACCCAGGATGA  
GAATGGATCAGTTATTAATCTTGGATGGAAATTTCTTTTACCTATTTCCCTGGGCAATC  
TCTTATTAACAACCTTCTTCCCACTTGTTCACTAATGATCTGGCATGTACAGAATGAAA  
ACTTCATTCTCGATTCTACGAGAATTTTTATGAAAGCGTTTCATTTGCTTCTTCCATG  
GAAGTTTCATTTTCCAGAATGTATCCTAATTTTTGGCCTAATTTCTTCTTCTGATGATCGA  
TTCAACCTCTGATCAAAAAGATAGACCTTGGTTCTATTTTATCTCTTCAACAAGTTTAGT  
AATAAGCATAACGGCCCTATTGTTCCGATGGAGAGAAGAACCATAATTAGCTTTTTCGG  
GAAATTTCCAACGAACAATTTCAACGAAATCTTTCAATTTCTTATTTTATTATGTTCCA  
CTTTATGTATTCTCTATCCGTAGAGTACATTGAATGTACAGAAATGGCTATAACAGAGT  
TTCTGTTATTCGTATTAACAGCTACTCTAGGGGGAATGTTTTTATGTGGTGCTAACGATTT  
AATAACTATCTTTGTAGCTCCAGAATGTTTCAGTTTATGTTCCCTACCTATTGTCTGGATAT  
ACCAAGAGAGATCTACGGTCTAATGAGGCTACTATGAAATATTTACTCATGGGTGGGGC  
AAGCTCTTCTATTCTGGTTCATGGTTTCTTGGCTATATGGTTCATCTGGGGGGGAGAT  
CGAGCTTCAAGAAATGTGAACGGTCTTATCAATACAAAATGTATAACTCCCCAGGAA  
TTTCAATTGCGCTTATATCCATCACTGTAGGACTTGGGTTCAAGCTTTCCCCAGCCCCTT

TTCATCAATGGACTCCTGACGTCTACGAAGGATCCCCACTCCAGTCGTTGCTTTTCTT  
TCTGTTACTTCGAAAGTAGCTGCTTCAGCTTCAGCCACGCGAATTCTCGATATTCCTTTT  
TATTTCTCATCAAACGAATGGCATCTTCTTCTGGAAATCCTAGCTATTCTTAGCATGATAT  
TGGGGAATCTCCTTGCTATTACTCAAACAAGCATGAAACGTATGCTTGCATATTCGTCCA  
TAGGGCAAATCGGATATGTAATTATTGGAATAATTGTTGGAGACTCAAATGATGGATATG  
CAAGCATGATAACTTATATGCTGTTCTATATCTCCATGAATCTAGGAACTTTTGCTTGCAT  
TGTATTATTTGGTCTACGTACCGGAACTGATAACATTCGAGATTATGCAGGATTATACAC  
GAAAGATCCTTTTTTTGGCTCTCTCTTTAGCCCTATGTCTCTTATCCCTAGGAGGCCCTCC  
TCCACTAGCGGGTTTCTTCGGAAAACCTATCTATTCTGGTGTGGATGGCAAGCAGGCC  
TATATTTCTTGGTTTCAATAGGACTCCTTACGAGCGTTCTTTCTATCTACTATTATCTAAA  
AATAATCAAGTTATTAATGACTGGACGAAACCAAGAAATAACCCCTTATGTGCGAAATT  
ATAGAAGATCCCCTTTAAGATCAAACAATTCCATCGAATTGAGTATGACTGTATGTGTGA  
TAGCATCTACTATAACCAGGAATATCAATGAACCCATTGTTGCAATTGCTCAGGATACCC  
TCTTTATGTTTCTGCTTCACGAATATGATATTTTTTGGACATTTCTAATAATAGCAAGCCT  
TATTCCTATTTTGGCATTTTGGATTTTCAAGACTTTTAGCCCCGGTTAGTGAAGGACCAGA  
GAAGCTTTCTAGTTATGAATCGGGTATAGAACCCATGGGAGGGGCTTGGTTACAATTCC  
GAATACGCTATTACATGTTTTCGCTAGTTTTTGTGTTTTTGTATGTGGAAACAGTCTTTC  
TCTACCCTTGGGCAATGAGTTTCGACGTATTGGGTGTATCCGTTTTTATTGAAGCTTTCA  
TTTTCGTGCTTATCCCAGTTGTTGGTTCAGTTTATGCATGGCGAAAAGGAGCCTTGGAA  
TGGTCTATGAGTTATTTTCCCTTGGTTAACAATACTTGTGTTTTGCCGATATTTGCAGGTT  
CATTAAATTTCTTTTTACCTCATAGGGGAAACAAAATCGTTAGGTGGTATACTATATCTAT  
TTGTTTATTAGAATTCCTTCTAATGACTTATGCATTCTGTTATCATTTCGAATTGGAGGAT  
CCCTAATCCAATTAAGGAGGATTCTAAATGGATAGATGTCTTTGATTTCCACTGGAGA  
TTGGGAATCGATGGACTTTCATTAGGATCTATTTTATTGACAGGATTTATCACTACTTTAG  
CTACTTTAGCAGCTTGGCCGGTTACCCGGAATTCGCGATTATTCTATTTCTGATGCTAG  
CAATGTATAGTGGTCAAATAGGATTATTTCTTCGCGAGACCTTTTACTTTTTTTTATCAT  
GTGGGAGTTAGAATTAATCCTGTTTACTTACTTTTATCCATGTGGGGGGGAAAGAGGC  
GTCTGTATTCAGCTACAAAGTTTATTTTGTATACTGCAGGCGGTTCCATTTTTTTCTTAAT  
CGGAGTTCTAGGTATGGGCTTATATGGTTCCAACGAACCAAGATTAGATTTGGAAAGAT  
TAATTAATCGATCATAACCCTGCAACATTGGAATACTATTTTATTTGGGCTTCCCTATTGC  
TTATGCTGTCAAATTGCCAATTATACCCCTACATACGTGGTTACCAGATACCCATGGGGA  
AGCGCATTACAGTACATGTATGCTTTTAGCGGGAATCCTATTAAGATGGGAGCATAACG  
GATTGATTCGGATCAATATGGAATTGTACCTCATGCTCATTATCTATTTTCCCCTGGTT  
GGTAATAATAGGAGCGATGCAAATAATCTATGCAGCTTCAACTTCTCTTGGTCAACGAA  
ATTTCAAAAAAAGAATAGCCTATTCCTCCGTATCTCACATGGGTTTCATAATTATAGGAA  
TTGGTTCCATAACCAACATTGGACTCAATGGAGCTATTTTACAAATACTATCCCATGGAT  
TTATTGGTGTACTACTTTTTTTCTTGGCGGGAACGGCTTGTGATAGAATGCGTCTTGTTT  
ATCTCGAAGAACTGGGGGGGATATCTATCCCAATGCCGAAAATTTTTTACCATGTTTAGTA  
GCTTTTCAATGGCTTCTCTTGCCTTACCAGGAATGAGCGGTTTTTGTGCGAATTAGTA  
GTATTTTTTGGACTAATTAAGTCCCAAATTTCTGTTAATGCCAAAAATGCTAATTAATT  
TTGTAATGGCAATTGGAATGATATTAACCTCTATTTATTTATCTATGTTACGCCAGATG  
TTCTATGGATACAAGCTATTTTCATGTTCCAACGCAAATTTTGTGGATTCTGGACCGCGA  
GAACTCTTCTTTTAAATCTGTATCTTTTTTACCAGTAATAGGAATTGGTATTTATCCAGATT  
TTGTTCTCTCGCTATCCGTTGACAGGGTAGAGGCTCTCTTATCCAATTATTATCCTAAAA

TGATGTTTGAGCATGTACTTTTTTTGAGTGTCTATTTATTTTCGATTGGTATCTATGGATT  
GATCACAAGCCGAAACATGGTTAGAGCTCTAATATGTCTTGAACCTATACTGAATTCAAT  
TAATCTAAATCTCGTAACATTTTCTGATCTATTTGATAGTCGCCAATTA AAAAGGAGACAT  
TTTCGCAATTTTGTATAGCCCTTGCGGCTGCTGAAGCAGCTATTGGACTATCCATTCT  
TTCTCCATCCATCGTAACAGGAAATCAACTCGTATCAATCAATCTAATTTTTTTGAATAAT  
ATGGAACATACATATCAATATGCATGGGTAATCCCTCTTCTCCCACTTCCAGTTATTATGT  
CAATGGGGTTTGGACTTATTCTTATTCCGACAGCAACAAAAAATCTTCGTCGCATATGG  
GCTTTTCCTAGTGTTTTACTCTTAAAGTATAGCTATGGTATTCTCAGTTCACCTATCTATTC  
AACAAATAAATGGAAGTTCTATCTATCAATATCTATGGTCTTGGACCGTCAATAATGATT  
TTTCCTTAGAATTTGGACTTGTATCGACCCGCTTACTTCTATTATGTTAATACTAATTACT  
ACAGTAGGAATCCTCGTTCTTATTTATAGTGACGATTATATGTCTCACGATGAAGGATATT  
TGAGATTTTTGTTTATATAAGTTTTTTCAATACTTCCATGTTGGGATTGGTTACTAGTTC  
CAATTTGATACAAATTTATTTTTTTGGGAACTTGTGGGAATGTGTTCCATTATTGATA  
GGCTTTTGGTTTACACGGCCAATTGCAGCGAGTGCTTGTC AAAAAGCTTTTGTAACTAA  
TCGTGTAGGGGATTTTGGTCTGTTATTAGGAATTTAGGTTTTTTTTGGATAACAGGTAG  
TTTAGAGTTTCGGGATTTGTTCAAATAGCTAATAACAATGGGATTAATTCCTTACTTAC  
AACTTTGTGTGCTTTTTTATTATTCCCTTGGTGCAGTTGCAAAATCTGCACAATCCCTCT  
TCACGTATGGTTACCCGATGCTATGGAAGGACCCACTCCCATTTCGGCTCTTATACACGC  
AGCAACTATGGTTGCTGCGGGGGTTTTTCTTCTAGCTCGACTTCTTCTCTTTTCATATC  
CCTACCTTTAATAATGAGTTTCATTTCTTTAGTAGGTACAATAACACTCTTCTTAGGAGC  
TACTTTAGCTCTTGCTCAGAGAGATATTA AAAAGAAGCTTAGCCTATTCTACAATGTCTCA  
ATTGGGTTATATGATGTTAGCTCTAGGTATAGGTTCTTATCAAGCTGCTTTATTCCATTG  
ATCACTCATGCTTATTCGAAAGCTTTATTGTTCTTGGGATCCGGATCCGTTATTCAATCAA  
TGGAACCTCTTGTGGATATTCACCAGATA AAAAGTCAGAATATGGTTCTTATGGGTGGT  
TTAAGAAAATACGTTCCAATTACAAGAACGACTTTTTTATGGGGTACGCTTTCTCTTTGT  
GGTATTCCACCTCTTGCTTGCTTCTGGTCCAAAGATGAAATCCTTAGTAATAGTTGGTTG  
TATTCACCCTTTTTTGAATAATAGCCTCTTTTACTGCAGGATTA ACTGCGTTTTATATGT  
TTCGGATATATTTACTTACTTTTTGATGGGTACCTGCGTGTTCATTTTCAA AATTACAGTAG  
CACTAAAGAGGGCTCGTTGTATTCAATATCCTTATGGGGAAA AAGGATACCCAAAGGA  
GTGAATAGA---GATTTCAATTTATCAACAACGAAGTTTTTTTCAGTTAAAAAC-----CCTT  
TTGTCTATCCTCATGAAACGGGAAATACTATGCTATCCCTCTTTTTATATTACTGCTTTTT  
ACTTTGTTCAATGGATCCATAGGAATCCATTTTGAGTTAACCATATTATCAAAGTGGTTA  
ACTCCCTCAATAAGCTTTTTCCAGGAAAGTTCTAATCTTCCATAAATTCATATGAATTA  
TCACTAATGCAATTTCTTCTGTAAGTCTAGCTATGTTTGGTCTATT CATAGCATATATCTT  
CTATGGATCTGCTTATTCTTTTTTTT CAGAATTTATATTTAAAAAATTCCCTTGTATCTTTTT  
TGGATCAAGTAAAAAAAAGATATACAGTTGGTCAATAATCGTGGTTATATAGATATTT  
TCTATACTAGGGTCTTTACCCTGGGTATAAGAGGATTAACCGAACTAACGCAGTTTTTC  
GATAAGGGTGTCAATGATGGAATTACCAATGGGGTAGGTCTTGCTGGTTTTTGTATAGG  
AGAAGAGATTAATAT--GTAGGGGGAGGGCGAATATCGTCTTATTTATTCTTTTTTTTAT  
GTTATGTATCCGTGTTCTTATTCTTTTTTCTTATGGATTTACCTGGACCAATACATGAGAT  
TCTTGTGCTATTTGGGGAATTTTTCTTCTACTAGGGGGCATAGGAGTAGTATTACTTAC  
CAACCCAATTTATTCTGCCTTTTCGCTGGGATTAGTTCTTATTGTATATCCTTATTCTATA  
TTTTATTGAATTCCTACTTTGTAGCTGTGCACTTCTTATTATGTGGGAGCCATAAAA  
TGCTTTGATCATATTTGCCGTAATGTTCCATAGATGGCTCAGAATGGTCTAAAAATAAGAA



TTATTGGACTATTGGAGATGGGTTCACTTCACTCGTTTGTATAACTATTCTTTTTTCACTA  
ATGACTACTATCCCAGATACGTCATGGTATGGAATTCCTTGGACTACAAGATCAAACCA  
AATAGTAGAACAGGGTCTCATAAATAACGTTCAACAAATTGGGATTCATTTAGCAACTG  
ATTTTTATCTTCCGTTTGAACCTATTCTATAATTCTTCTAGTTTCTTTAATAGGTGCAATT  
ACTATGGCTCGGCAAATGAGTCTACCGCTTACAAGAAAAGATCTCATGATAGTCAATAT  
GGGCCCTCACCACCCATCAATGCATGGTGTCTTCGACTGATCGTTACTCTCGATGGTG  
AAGATGTTATTGATTGTGAACCCATATTAGGGTATTTACACAGAGGAATGGAAAAAATC  
GCGGAAAACCGAACTATTATAACAATACTTACCTTATGTAACACGGTGGGATTATTTAGCT  
ACTATGTTTACAGAAGCAATAACGGTAAATGCACCAGAATTCTTGGAGAATATTCAAAT  
ACCCCAAAGAGCCAGCTATATTAGGGTAATTATGTTAGAGTTGAGCCGTATAGCTTCTC  
ACTTGTTATGGCTTGGACCTTTTATGGCAGATCTCGGCGCACAGACTCCTTTTTTCTATA  
TTTTTAGAGAGAGAGAATTGATATACGATCTATTTGAAGCTGCTACAGGTATGCGAATGA  
TGCATAATTACTTTCGCATCGGAGGAGTAGCCGCCGATCTACCTTATGGATGGATCGATA  
AATGTTTAGATTTCTGTGATTATTTTTTACGAGGAGTTGTTGAATATCAACAACCTTATTAC  
ACAGAATCCCATTTTTATAGAACGAGTTGAAGGAGTCGGTTTTATTAGCGGAGAAGAA  
GCAGTAAATTGGGGCTTATCGGGACCGATGTTACGAGCTTCTGGAATACAATGGGATCT  
TCGTAAAGTTGATCCTTATGAGTCTTACAACCAATTTGATTGGAAAATCCAATGGCAA  
AAGAAGGGGATTCATTAGCTCGCTATTTAGTACGAATGGGTGAAATGAGGGAATCCATC  
AAAATTATTCAACAGGCTGTAGAGAAAATTCCTGGGGGTCCTTATGAGAATTTAGAAGT  
CCGACGC---AAGAAAGCAAAGAATCCGAATGGAATGATTTTGAATATCGATTTCTTGG  
TAAAAAACCTTCGCCCAATTTTGAATTGTCAAAGCAAGAGCTTTATGTAAGAGTGGA  
GCTCCAAAAGGTGAATTAGGAATTTATCTGGTAGGAGATGATAGTCTTTTCCCCTGGAG  
ATGGAAAATTCGTCCACCTGGTTTTATTAATTTGCAAATTCCTCCTCAACTAGTTAAAA  
AATGAAATTGGCTGATATCATGACGATATTAGGTAGTATAGATATCATTATGGGGGAAGT  
TGATCGTATGTTCCCTATGGTAACTGGGTTTCATGAGTTATGGTCAACAAACAATACGCG  
CTGCAAGGTACATTGGTCAAAGTTTCATAATTACCTTATCCACACAAATCGTTTACCTA  
TAACGATTCACTACCCTTATGAAAATCAATTACATCGGAGCGTTTCCGGGGGCGAATC  
CACTTTGAATTTGATAAATGTATTGCTTGTGAAGTATGTGTTTCGCGTATGCCCGATAGAT  
CTACCCCTTGTGGATTGGAGATTTGAAAAGGATATTTAAAAGGAAACAATTGCTTAATTA  
TAGTATTGATTTTGGAGTTTGTATATTTTGTGGTAATTGTGTTGAGTACTGTCCGACAAG  
CTGTTTATCAATGACTGAAGAATATGAACTTCTACTTATGATCGTCATGAATTGAATTA  
CAATCAAATTGCTTTGAGTCGGTTACCAATCTCCATAATGGGAGATTACACAATTCAA  
CAATTAGGAATTCGAAAATAGACGAAGAAAAATCTTTGAATTCAAGAACGATTACTAAT  
TACCAGCAGGGTTGGTTATCTAATTGGCTAGTCAAACATGAGGTGGTTCATAGATCTTT  
GGGCTTCGATCACCGAGGAATAGAGACTTTACAATAAAAGCAGGGGATTGGGATTCC  
ATTGCTGTCATTTTATATGTATATGGTTACAATTATTTACGTTCCCAATGTGCTTATGATGT  
AGCACCCGGTGGATCTTTAGCTAGCGTGTATCATCTTACGAGAATACAGTATGGTATAGA  
TAACCCAGAAGAAATATGCATAAAAGTCTTTGCCCAAAGGATAATCCTAGAATCCCGT  
CTGTCTTCTGGATTTGGAAAAGTGCCGATTTTCAAGAACGTGAATCTTATGATATGGTG  
GGAATCTCTTATGATAATCATCCACGCCTTAAACGTATCCTAATGCCTGAAAGTTGGATA  
GGCTGGCCCTTACGTAAGGACTATATAACCCCAATTTCTATGAAATACAAGATGCTCAT  
-----ATG  
GTCTTAACT--GAATATTCAGAC---AAAAAAAAAAAAAGAAGGAAAAGATTCCATTGAGA  
CAGTTATGAGTTTGGATTGAGTTTCCCTTACTTGACCAAACAAGTTCCAATTCGTTATTT

CAACTACACCAAATGATCTTTTCGAATTGGTCAAGACTCTCCAGTTTATGGCCCCCTTCTAT  
ATGGTACCAGTTGTTGTTTCATTGAATTTGCTTCATTAATAGGCTCGCGATTTCGACTTTG  
ATCGTTATGGATTGGTACCAAGATCAAGTCCTAGGCAAGCAGACCTAATTTTAAACAGCC  
GGTACGGTAAACAATGAAAATGGCTCCCTCTTTAGTGAGATTATACGAGCAAATGCCTGA  
ACCAAATATGTCATTGCTATGGGAGCCTGTACTATTACAGGGGGAATGTTTCAGTACGG  
ATTCCTATAGTACTGTTTCGGGGAGTTGATAAGTTAATTCCCTGTGGATGTCTACTTGCCAG  
GCTGCCACCTAAACCGGAGGCAGTTATAGATGCCCTAACAAAACCTTCGTAAGAAGAT  
ATCGCGAGAAATAGTTGAGGATCGAACTCTATCTCAA---AAAAATCGATGTTTTACTACC  
AGTCACAAGCTTTATGTAAGGCGCAGTACTCATACTGGAACCTTACGAGCAAGAATTGCT  
CTATCAATCACCATCTACTTTAGACATATCTACT-----TTTTTCAAATCCAAAAGTCCAGTA  
TCTTCTTACAAATTAGTGAATATGGAAAATAGAAATACTTTTTTCTTGGGTAAAGGAACA  
GATGATTTCGATCTATTTCTGTATCGATCATGATATATGTAATAACTCGGACATCTATTTCAA  
ATGCATATCCCATTTTTTGCAGCAGAGGGTTATGAAAACCCACGAGAAGCAACCGGACG  
AATTGTATGTGCCAATTGCCATTTAGCTAATAAGCCCGTGGATATTGAAGTTCCCAAGC  
TGTGCTTCCCGATACTGTATTTGAAGCAGTTCTTCGAATTCCTTATGATATGCAACTGAA  
ACAAGTTCTTGCTAATGGGAAAAAGGGAGGGTTAAATGTGGGTGCTGTTCTTATTTTTGC  
CCGAGGGATTTCGAATTAGCGCCGCCGACCGTATTTCTCCTGAGTTGAAAGAAAAGAT  
AGGAAATCTCTCTTTTCAGAGTTATCGTCCCGATAAAAAAATATTCTTGTGATAGGCC  
CTGTTCCCGGTCAGAAATATAGTGAAATCGTCTTTCCCATTTCTTTCCCGGATCCTGCTA  
CGAAGAAAGACGTTCAATTTCTTAAATATCCCATATATGTAGGGGGAAACCGAGGAAG  
GGGACAGATCTATCCTGATGGTAGTAAGAGTAACAATACGGTCTATAATGCTACGTC  
CAGGTATAGTAAGAAAAATACTACGTAAAGAAAAAGGGGGATATGAAATATCCATAGTC  
GATACATCGGATGGACGCCAAGTGATTGATATTATACCTCCCGGGCCAGAACTTCTTGT  
TTCAGAAGGGGAATCAATCAAGCTTGATCAACCATTAACAAGCAATCCTAATGTGGGA  
GGTTTTGGTCAGGGGGATGCAGAAATAGTGCTTCAGGATCCATTACGTGTCCAAGGCC  
TTTTATTCTTCTTCGCATCTGTTATTTTGGCACAAGTTTTTTTTGGTTCTCAAAAAGAAAC  
AGTTTGAAAAGGTTCAATTGTACGAAATGAATTTTCATGAGTAAAGTATATGATTGGTTT  
GAGGAACGTCTTGAGATTCAGGCAATTGCGGATGATATAACTAGTAAATATGTTCCCTCC  
TCATGTCAACATATTTTATTGTTTAGGGGGAATTACACTTACTTGTTTTCTAGTACAAGTC  
GCTACAGGTTTTGCTATGACTTTTTACTACCGCCCAACCGTTACAGAGGCTTTTTTCCCTCG  
GTTCAATACATAATGACCGAGGCCAACTTTGGTTGGTTAATCCGATCAGTTCATCGATG  
GTCAGCAAGTATGATGGTTCTAATGATGATCCTGCACGTATTTTCGTGTGTATCTCACAGG  
TGGATTTAAAAAACCCCGCAATTAACCTGGGTCACAGGTGTGGTTTTTGGCTGTATTGA  
CTGCATCGTTTGGTGTAACCTGGTTATTCTTTGCCTTGGGATCAAATGGTTATTGGGCAG  
TCAAAATTGTGACAGGTGTACCTGAAGCGATTCCGGTAATAGGATCGCCTTTAGTGGAG  
TTATTGCGTGGAAGTGCTAGTGTGGGCCAATCCACTTTGACTCGTTTTTATAGTTTACAT  
ACTTTTGTACTGCCTCTGCTTACTGCCGTATTTATGTTAATGCACTTTCCAATGATACGTA  
AGCAAGGTATTTTCGGGTCCTTAATGGGAGTAACAAAGAAACCTGACTTAAATGATCCT  
GTATTAAGAGCAAAATTAGCTAAAGGGATGGGACATAATTATTACGGGGAACCCGCGTG  
GCCAACGATCTTTTATATATTTTTCCAGTAGTAATTCTAGGTACTATTGCATGTAATGTA  
GGTTTAGCGTTCTTGAGCCGTCAATGATTGGTGAACCGGCGGATCCGTTTGCAACTCC  
TCTGGAAATATTACCCGAGTGGTACTTCTTTCCCGTGTTTCAAATACTCCGTACAGTACC  
CAATAAGTTATTGGGCGTTCTCTTAATGGTTTCTGTGCCAACGGGCTTATTGACAGTACC  
CTTTCTAGAGAATGTCAATAAATTCCAAAATCCATTTTCGTCGCCAGTAGCTACGACAG

TTTTTTTAATCGGTA CTGCGGTAGCTCTTTGGTTAGGTATTGGAGCAACATTACCCATTG  
AAAAATCCTTAAC TTTAGGTCTTTTTATGATTGAAGTTTTTCTATTTGGAATCGTCTTAG  
GCCTAATTCCTATTACTTTAGCGGGATTATTCGTGACTGCGTATTTGCAATACAGGCGTG  
GGGATCAGTTGGATCTTATGCTTACTATACTAGTTATTTTCGGTTTTCTACTGGCTGCTTT  
AACTATAACCCCAGCTCTATTTATTGGTTTGAACAAGATACGTCTTATTATGGATATAGTA  
AGTCTCGCTTGGGCTGCTTTAATGGTAGTCTTTACATTTTCTCTTTCACTAGTAGTATGG  
GGGAGGAGTGGACTCATGATTATTCGTTTCGCCGGAACCAGAAGTAAAAATTGTTGTGG  
ATAGGGATCCTGTAAAAACATCTTTTGAGGAATGGGCCAAACCCGGCCATTTCTCAAG  
ACAATAGCTAAGGGCCCTGATACTACCACTTGGATCTGGAACCTACATGCTGATGCTC  
ACGATTTTCGATAGTCATACCGGTGATTTGGAGGAGATCTCTCGAAAAGTCTTTAGTGCT  
CATTTTCGGTCAACTCTCCATTATCTTTCTTTGGTTGAGTGGCATGTACTTCCATGGTGCC  
CGTTTTTCCAATTATGAAGCATGGCTAAGTGATCCTACTCACATTGGACCCAGTGCTCA  
GGTAGTTTGGCCAATAGTAGGGCAAGAAATATTGAATGGTGATGTAGGCGGGGGTTTCC  
GAGGAATCCAAATAACCTCTGGGTTTTTTCAGATTTGGCGAGCATCTGGAATAACTAGT  
GAATTACA ACTCTATTGTACCGCAATCGGTGCATTGATTTTTGCATCGTTAATGCTTTTT  
GCTGGTTGGTTCCATTATCACAAGGCCGCTCCCAAATTGGCCTGGTTCCAAGATGTAGA  
ATCCATGTTGAATCACC ACTTAGCGGGGTTATTAGGACTTGGGTCTCTTTCTTGGGCGG  
GACACCAAATCCATGTATCTTTACCGATTAAACCAATTTCTTGACGCTGGGGTTGATCCTA  
AAGAGATA CCACTTCTCATGAATTTATCTTGAATCGCGACCTTTTGGCTCAACTTTATC  
CTAGTTTTT GCCGAAGGAGCAACCCCTTTTTTCACCTTGAATTGGTCCAAATACGCAGAA  
TTTTCTGAGTTTTTCGCGGAGGACTAGACCCAATAACCGGCGGTCTATGGTTGAGCGATAT  
TGCGCACCATCATTTAGCTATTGCTATTCTTTTCTGATCGCAGGTCATATGTATAGGACC  
AACTGGGGTATTGGTCATGGACTTAAAGATATTTTGGAGGCTCATAAGGGCCCGTTTAC  
AGGACAAGGCCATAAGGGTCTCTATGAAATCCTAACAACGTCATGGCATGCTCAATTAT  
CTCTTAACCTAGCTATGCTAGGCTCTACAACCATTGTTGTAGCTCATCATATGTATTCTAT  
GCCCCCTATCCATACCTAGCTACTGACTATGGTACACAAC TTTCTTGTTCACACACCA  
CATGTGGATTGGCGGATTTCTAATAGTCGGTGCTGCTGCACATGCAGCCATTTTTATGGT  
AAGAGACTATGATCCA ACTACTCGATAACAACGATCTATTAGATCGCGTCCTTAGACACC  
GCGATGCAATCATATCCCACCTTAACTGGGTATGTATATTTCTAGGTTTTTACAGTTTTG  
GCTTGTACATT CATAATGATAACCATGAGTGCTTTAGGCCGTCCCAAGATATGTTTTCGG  
ATACCGCCATA CAATTACAACCCATCTTTGCTCAATGGGTACAAAATATCCATGCTAACG  
CGCCTGGCGTAA CAGCTCCTGGTGCAACAACAAGTACCAGCTTAACGTGGGGAGGTG  
GCGAGTTAGTAGCAGTAGGCGGCAAGTAGCTTTGTTACCTATTCCATTAGGAACCGCA  
GATTTTTTAGTCCATCACATTACGCATTTACCATCCATGTGACTGTATTAATACTTTTTGA  
AAGGTGTTTTATTTGCTCGCAGTTCCCGTTTTGATACCCGATAAAGCAAATCTTGGTTTTT  
GCTTCCCTTGCGATGGGCCTGGGAGAGGGGGAACATGTCAAGTATCCGCCTGGGATCA  
TGTTTTCTTAGGTCTATTCTGGATGTACAATGCAATTTTCGGTAGTCATTTTCCATTTCA  
GTGGAAAATGCAGTCGGATGTTTGGGGTACTATAAGTGATCAAGGGATGGTAACTCATAT  
CACAGGGGGAAACTTTGCACAGAGTTCCATTACGATTAATGGGTGGCTCCGAGATTT  
TTGTGGGCACAGGCATCCCAAGTAATTCAGTCTTATGGTTCTTCATTATCTGCATATGGC  
CTTTTTTTCTTAGGTGCTCATTTTGTCTGGGCCTT CAGTTTAAATGTTTTTATT CAGCGGCC  
GTGGTTATTGGCAAGAACTCATTGAATCTATCGTTTGGGCTCATAACAAATTAAGTT  
GCTCCCGCTACTCAGCCTAGAGCCTTGAGCATTATACAAGGACGTGCTGTAGGAGTAA  
CCCATTACCTTCTGGGTGGAATTGCCACAACATGGGCATTCTTCTTAGCGAGAATTATTG

CAGTAGGAATGGAATTAAGATTTCCAGGTTTAGCCAAGGCTTAGCTCAGGACCCCACT  
ACTCGTCGTATTTGGTTTGGTATTGCTACCGCACATGATTTCGAAAGTCATGATGATATT  
ACTGAGGAACGTCTTTATCAGAACATTTTGTCTCTCACTTTGGGCAGTTAGCAATAAT  
CTTTCTATGGACGTCCGGAAATCTGTTTCATGTAGCTTGGCAAGGAAATTTGAATCAT  
GGATACAGGATCCTTTACACGTAAGACCTATTGCTCATGCGATTTGGGATCCTCATTTTG  
GTCAACCCGCTGTGGAAGCCTTTACTCGAGGAGGTGCTGCCGGTCCAGTGAATATCGC  
CTATTCTGGGGTTTATCAGTGGTGGTATAACAATTGGATTACGCACCAATCAAGATCTTTA  
TACTGGAGCTCTGTTTCTATTATTTCTTTCTACGCTATCCTTAATAGCAGGTTGGTTACAT  
CTACAACCCAAATGGAAACCAAGCCTTTTCGTGGTTCAAAAACGCGGAATCTCGTCTCA  
ATCATATTTGTACAGGACTTTTCGGGGTAAGTTCTTTGGCTTGGACAGGACATTTAGTT  
CATGTCGCTATTCCCGGATCCAGGGGGGAGTACGTTTCGATGGAATAATTTCTTAGATGTA  
TTACCCTATCCCCAGGGGTTGGGACCCCTTCTGACGGGTCAGTGGAATCTTTATGCCCA  
AAACCCAGATTCGAGTAATCATTATTTGGTACCGCTCAAGGAGCCGGAACCTGCCATTC  
TAACTCTTCTGGGGGATTCCATCCACAAACACAAAGTTTGTGGCTGACCGATATTGCT  
CACCATCATTAGCTATTGCATTTATTTTCTCATTGCCGGTCATATGTATCGAACTAACT  
TCGGAATTGGGCACAGTATCAAAGATCTTTTAGAAGCACATACTCCTCCGGGAGGTGCA  
TTAGGGCGTGGGCATAAGGGCCTTTACGACACAATCAATAATTCGATTCATTTTCAATTA  
GGTCTTGCTCTAGCTTCTTTAGGGGTTACTTCTTAGTAGCTCAACATATGTACTCTT  
TACCTGCTTATGCATTCATAGCACAAGACTTTACCACTCAAGCTGCTTTATATACTCATC  
ACCAATATATTGCAGGGTTCATCATGACAGGGGCTTTTGCTCATGGAGCTATTTTTTTCA  
TTAGGGATTACAATCCGGAACAGAATGAGGATAATGTATTGGCAAGAATGTTAGACCAT  
AAAGAAGCTATCATATCTCATTAAAGTTGGGCTAGCCTCTTCCTAGGATTCCATACCTTG  
GGCCTTTATGTTTACATAACGACGTCATGCTTGCTTTTGGTACTCCAGAAAAGCAAATCTT  
GATCGAACCTATATTTGCCCAATGGATACAATCTGCTCATGGTAAGACGACATATGGGTT  
CGATATACTCTTATCTTCAACGAGTGGCCCCGCTTTCAATGCGGGTTCGAACCTTATGGTT  
GCCCGGATGGTTGAATGCTGTTAATGAG-----AATAGTAATTCTCTTTTCTTAAACAATAGG  
ACCTGGGGATTTCTTGGTTCATCATGCTATTGCTCTAGGTTTGCATACAACCTACATTGAT  
TTTAGTAAAGGGTGCTTTAGATGCACGCGGTTCCAAATTAATGCCGGATAAAAAGGATT  
TTGGGTATAGTTTTCTTGTGACGGCCAGGGCGCGGCGGTACTTGTGATATTTCTGCT  
TGGGACGCGTTTTATTTGGCAGTTTTCTGGATGTTAAATACCATTGGATGGGTTACTTTT  
TATTGGCATTGGAAACACATCACATTATGGCAGGGCAACGTTTCACAATTTAATGAATC  
CTCCACTTATTTGATGGGATGGTTAAGAGATTACCTATGGTTAAACTCTTCACAACCTTAT  
CAATGGATATAATCCTTTTGGGATGAATAGTTTATCGGTATGGGCGTGGATGTTCTTATTT  
GGACATCTTGTGTTGGGCTACTGGATTTATGTTCTTAATTTCTGCGTGGATATTGGCAG  
GAATTAATTGAGACTTTAGCATGGGCTCATGAACGCACACCTTTGGCTAATTTAATTCG  
CTGGAGAGATAAGCCCGTGGCTCTTTCCATTGTGCAAGCAAGATTGGTTGGATTAGCCC  
ACTTTTCCGTGGGTTATATATTTCACTTATGCAGCTTTCTTGATTGCCTCAACATCAGGCA  
AGTTTGGTATGTACATTTCCGTAAAAATTTATGATACATGTATAGGATGCACTCAATGTG  
TACGAGCTTGTCCAACAGATGTATTAGAAATGATACCCTGGGATGGGTGTAAAGCCAAG  
CAAATTGCTTCTGCCCCGAGAACCGAAGATTGTGTGGGTTGTAAGAGATGCGAATCTG  
CCTGCCAACAGATTTTTTAAGTGTCCGCTTTATTTAGGGCCTGAAACAACCCGCAGC  
ATGGCTCTATCTTATATGACGGATTTTAACTTACCTTCTATTTTCGTGCCTTTAGTAGGCT  
TAGTATTTCCGGCAATTGCAATGGCTTCTTTATTTCTTTATGTGCAGAAAAATAAGATTG  
TCATGCGGGATATAAAAACATATCTCTCTGTAGCACCCGTGCTAAGTACTCTATGGTTTG

GGGCTTTAGCAGGTTTATTGATAGAAATTAATCGTTTATTCCCAGATGCTTTGTCATTCC  
CTTTTTTT-----ATGACTGCAATTTTAGAGAGACGCGAAAGTACAAGCCTGTGGGGTTCG  
TTCTGCAACTGGATAACTAGCACCGAAAATCGTCTTTACATCGGATGGTTCGGTGT  
GATGATCCCTACCTTATTGACCGCAACTTCCGTATTTATTATCGCCTTCATCGCAGCCCCT  
CCAGTAGATATTGATGGTATTTCGTGAGCCTGTTTCTGGTCTTTACTTTATGGAAACAAT  
ATTATCTCTGGTGCCATTATTCCTACTTCTGCGGCGATCGGATTGCACTTTTACCCAATTT  
GGGAAGCTGCATCTGTTGATGAGTGGTTATAACAATGGCGGTCTTATGAGCTAATTGTT  
CTACACTTCTTACTTGGTGTAGCTTGTATATGGGTCGTGAGTGGGAACTTAGTTTCCGT  
CTGGGTATGCGTCCTTGGATTGCTGTTGCATATTCAGCTCCTGTTGCAGCTGCTGCTGCT  
GTTTTCTTGATTTACCTTATTGGTCAAGGAAGTTTCTCTGATGGTATGCCTTTAGGAATA  
TCTGGTACTTTCAACTTTATGATTGTATTCCAGGCAGAGCACAAACATCCTTATGCATCCA  
TTTCACATGTTAGGTGTAGCTGGTGTATTTCGGCGGTTCCCTATTCAGTGCTATGCATGGT  
TCCTTGGTAACCTCTAGTTTGATCAGGGAAACCACTGAAAATGAATCTGCTAATGAGGG  
TTACAAATTTGGTCAAGAGGAAGAGACTTATAATATTGTGGCTGCTCATGGTTATTTTGG  
CCGATTAATCTTCCAATATGCTAGTTTCAACAACCTCTCGTTCTTTTACACTTCTTCTTGGC  
TGCTTGGCCTGTAGTAGGGATCTGGTTCCTGCTTTAGGTATTAGTACTATGGCTTTCAA  
CCTAAATGGTTTCAATTTCAACCAATCCGTAGTTGATAGCCAAGGTTCGCGTTATTAATAC  
TTGGGCTGATATCATCAACCGTGCTAATCTTGGTATGGAGGTAATGCACGAACGTAATG  
CTCACAACCTCCCTCTAGACCTAGCTGCTCTTGAAGTTCCATCTCTTAATGGAATGGGT  
TTGCCTTGGTATCGTGTTCATACTGTTGTATTGAATGATCCGGGTTCGATTGCTTTCGGTG  
CATATAATGCACACAGCTCTAGTTTCTGGTTGGGCCGGCTCGATGGCTTTATACGAATTA  
GCGGTTTTTGATCCCTCTGATCCTGTTCTGGATCCAATGTGGAGACAAGGTATGTTTCGT  
CATCCCTTCATGACTCGTTTAGGAATAACCAATTCGTGGGGTGGTTGGAGTATTTCA---  
GGAGGAACGTAAACGAATCCGGGTATTTGGAGTTATGAAGGTGTGGCAGGTGCGCATA  
TTGTGTTTTCTGGCTTGTGTTTCTTGGCAGCTATCTGGCATTGGGTATATTGGGACCTAG  
AAATATTCTGTGATGAGCGGACGGGAAAACCTCTTTGGATTTGCCCAAGATCTTTGGA  
ATTCATTTATTTCTTGCAGGGGTGGCTTGGCTTTGGCGCATTTTCATGTAACGGGT  
TTGTATGGTCCTGGGATATGGGTGTCCGATCCTTATGGACTAACTGGAAAAGTACAAGC  
TGTAATCCAGCGTGGGGTGTAGAAGGTTTTGATCCTTTTGTCCGGGGGGAATAGCTT  
CTCATCATATTGCTGCGGGTACATTGGGCATATTAGCGGGCCTATTCCATCTTAGTGTCC  
GTCCGCCTCAACGTCTATAAAAGGATTACGTATGGGCAATATTGAACTGTACTTTCC  
AGTAGTATCGCTGCTGTTTTTTTTTGCAGCTTTCGTAGTTGCCGGAACCTATGTGGTATGGG  
TCAGCAACTACCCCAATCGAATTTTGGGCCTACTCGTTATCAGTGGGATCAGGGATA  
CTTTCAGCAAGAAATATATCGAAGAGTTAGCGATGGATTAGCCGAAAATCTTAGTTTAT  
CAGAAGCTTGGTCTAAAATTTCCCGAAAATTAGCCTTTTATGATTATATTGGTAATAATC  
CGGCAAAGGGGGGATTATTTCAGAGCAGGCTCAATGGACAATGGGGATGGAATAGCTGT  
TGATGGTTAGGACATCCCGTCTTTAGAGATAAAGAAGGGCGGAGCTTTTTGTACGC  
CGTATGCCACTTTTTTTGAAACATTTCCGGTTGTTTTGGTAGATGAAGAGGGAATTGT  
GAGAGCGGACGTTCTTTTGAAGAGCAGAATCCAAATATAGTGTGAACAAGTAGGC  
GTAACGGTGGAGTTCTATGGTGGCGAACTTAATGGTGTAAAGTTATTCTGATCCTGCTAC  
TGTAATAAATATGCGAGGCGTTCCCAATTAGGGGAAATTTTTGAATTAGATCGGGCTA  
CTTTGAAATCGGATGGTGTTTTTTCGCAGCAGTCCAAGGGGTTGGTTCCTTTGGTCAT  
GCTACCTTTGCTTTGCTCTTTTTTCGGACACATTTGGCATGGCGCTAGAACCTTGTTT  
CGAGATGTTTTTGGTATTGATCCAGACTTGGATGCTCAAGTGGAATTTGGAACATT

CCAAAAAGTTGGAGATCCAAC TACAAGGAGACAGGCAGTCATGAAAATCTTATATTCC  
CTGAGGAGGTTCTACCACGTGGAAACGCTCTTTAATGGAAC TTTTCGTTTTAGCTGGTGC  
TGACCAAGAAACCACCGGCTTTGCTTGGTGGGCTGGGAATGCCAGACTTATCAATTTG  
TCCGGTAAACTACTTGGAGCTCACGTAGCCCATGCCGGATTAATCGTATTCTGGGCCG  
AGCAATGAACCTATTTGAAGTGGCCATTTTCGTACCAGAAAAGCCCATGTATGAACAA  
GGGTTGATTTTACTTCCGCACTTAGCTACTCTAGGTTGGGGAGTAGGGCCGGGGGAG  
AAGTTCTAGATACTTTTCCGTACTTTGTATCTGGAGTACTTCACCTAATTTCTCCGCAG  
TCTTAGGCTTCGGTGGCATTATCACGCGCTTCTGGGACCCGAGACTCTTGAAGAATCT  
TTCCATTCTTTGGTTATGTATGGAAAGATAGAAAATAAAATGACTACAATTTGGGTATT  
CACTTAATTTTGTTAGGTATAGGTGCTTTTCTTCTAGTACTCAAGGCTCTTTATTTTGGCG  
GTGTATATGATACCTGGGCCCCAGGGGGGGGAGATGTAAGAAAAATTACCAATTTGACC  
CTTAGCCCCAGTGTTATATTTGGTTATTTACTAAAATCCCCCTTTGGGGGAGAAGGGTG  
GATTGTTAGTGTGGATGATTTAGAAGATATAATTGGGGGACATGTATGGTTGGGTTTCAT  
TTGTGTATTTGGCGGAATTTGGCATACTTAACCAAACCCTTCGCATGGGCTCGCCGTG  
CATTTGTATGGTCTGGAGAAGCTTACTTGTCTTATAGTTTAGGCGCTTTATCTGTCTTTG  
GTTTTATCGCTTGTGTTTTGTCTGGTTCAATAATACGGCTTATCCGAGTGAGTTTTATGG  
ACCCACCGGGCCAGAAGCTTCTCAAGCTCAAGCATTACTTTTCTAGTTAGAGACCAG  
CGTCTTGGAGCTAATGTGGGATCTGCCCAAGGACCCACAGGTTTGGGTAAATATCTAAT  
GCGTTCCCCAACGGGAGAGGTTATTTTTGGAGGGGAAACTATGCGTTTTTTGGGACCTT  
CGTGCTCCATGGTTAGAACCTCTAAGGGGCCCAACGGTTTTGGACTTGAGTAGGTTGA  
AAAAAGACATAACCTTGGCAAGAACGACGTTCCGGCAGAATATATGACCCATGCTCC  
TTTAGGCTCTTTAAATTCCGTGGGTGGCGTAGCTACCGAGATCAATGCAGTTAATTATGT  
CTCTCCTAGAAGTTGGTTAGCGACCTCCCATTTTTGTTCTAGGATTCTTCTTTTTTGTGGG  
CCATTTGTGGCATGCAGGAAGAGCCCGGGCTGCTGCAGCAGGCTTTGAAAAGGGAAT  
CGATCGTGATTTGGAACCTGTTCTTTACATGAATCCTCTTAACATGACTATAGCCCTTGG  
TAGAGTTACTAAAGAAGAAAATGATCTATTTGATATTATGGACGACTGGTTACGAAGGG  
ACCGTTTTCGTTTTTTGTAGGATGGTCCGGCCTATTGCTCTTTCCTTGTGCTTATTTTCGCTTT  
AGGGGGTTGGTTTACAGGGACAACTTTTGTAACCTTCTTGGTATACCCATGGATTGGCTA  
GTTCCATTTGGAAGGTTGTAATTTCTTAACCGCGGCAGTTTCCACCCCTGCCAATAGTT  
TAGCACACTCTTTGTTGCTACTATGGGGCCCGGAAGCGCAAGGGGATTTTACTCGTTGG  
TGCAATTAGGGGGTCTGTGGACTTTTGTGCTCTCCATGGGGCTTTTGC ACTAATAGG  
TTTCATGTTACGTCAATTTGAACTTGTCTGGTCTGTTCAATTGCGACCTTATAATGCAAT  
TTCATTCTCTGCTCCAATCGCTGTTTTTTGTTCCGTATTCCTTATTTATCCACTGGGGCAA  
TCTGGTTGGTTCTTTGCGCCGAGTTTTGGCGTAGCAGCGATATTTGATTATCCTCTTT  
TTCCAAGGATTTCATAATTGGACGTTGAACCCATTTTCATATGATGGGAGTTGCCGGAGTA  
TTAGGCGCGGCTCTGCTATGCGCTATTCATGGGGCGACCGTAGAAAACACTCTATTTCGA  
GGATGGTGATGGTGCAAATACCTTCCGCGCTTTTAACCCAACCTCAAGCTGAAGAACT  
TATTC AATGGTCACTGCTAACCGCTTTTGGTCCCAAATCTTTGGTGTTGCTTTTTTCCAAT  
AAACGTTGGTTACATTTCTTTATGCTATTTGTACCCGTCACCGGTTTATGGATGAGTGCT  
ATTGGCGTAGTCGGCCCTGGCTCTGAACCTACGTGCCTATGACTTTCGTTTCCCAGGAAAT  
CCGTGCAGCGGAAGATCCTGAATTTGAGACTTTCTACACCAAAAATATTCTTTTTAAACG  
AGGGTATTCGTGCGTGGATGGCAGCTCAGGATCAGCCTCATGAAAATCTTATATTCCCT  
GAGGAGGTTCTACCACGTGGAAACGCTCTTATGTCTGGAAGCACGGGAGAACGTTCTT  
TTGCTGATATTATTACCAGTATTCGATACTGGGTTATTTCATAGCATTACTATACCTTCCCTA

TTCATTGCGGGTTGGTTATTTGTCAGTACGGGTTTAGCTTATGACGTGTTTGGAAAGTCCT  
CGGCCAAACGAGTATTTACGGAAAGCCGACAAGGAATCCGTTAATAACCGACCGTT  
TTGATTCTTTAGAACAACTCGATGAATTTAGTAGATCCTTTATGACCATAGACCGAACCT  
ATCCTATTTTTACAGTCCGATGGCTGGCTGTTACGGACTAGCCGTACCTACTGTTTTTT  
TCTTGGGATCAATATCAGCAATGCAGTTCATCCAACGAATGGCTACACAAACCGTTGAA  
GATAGTTCTAGACCTGGG---CCAAGACGAACTCGCGCAGGTAGTTTATTGAAACCCCTG  
AATTCGGAATATGGGAAAGTAGCTCCGGGTTGGGGGACTACTCCTTTTATGGGGGTGCG  
AATGGCTTTATTTCGCGATATTCCTATCTATCATTTTAGAAATTTATAATTCTTCTGTTTTAC  
TGGACGGAATTTAATGAATATGCTTACTCTCAAACCTTTTTGTTTATAACAGTAGTGATATT  
CTTTGTTTCCCTCTTTATCTTTGGATTCTTATCTAATGACCCAGGACGTAATCCTGGGCG  
TGAGGAGATGGCCGATACTACTGGAAGAATTCCTCTTTGGCTGATAGGTACTGTAAC TG  
GTATTCCTGTGATTGGTTAATAGGTGTTTTCTTTTACGGTTCATATTCTGGATTGGGTTC  
ATCTCTAATGCCTAATACTTAGTTTAACTGTATCTGTTTTAATTCTGTTCCTTATCCGA  
CTAGTTTTTTCTTCGCCAAATTGCCCGAAGCTTATGCCATTTTCAACCCAATCGTGGATG  
TTATGCCTGTCATACCTGTACTCTTTTTCTATTAGCCTTTGTTTGGCAAGCTGCTGTAAG  
TTTTTCGAATGACACAATCAAACCCGAATGAACAAAATGTTGAATTGAATCGTACCAGTC  
TATACTGGGGTTTATTACTCATTTTTGTACTTGCTGTTTTATTTTCCAATTACTTCTTCAAT  
ATGGAAGTCAATATTCTCGCATTTATTGCTACTGCACTGTTCAATCTAGTTCCTACTGCCT  
TTTTACTTATTATTTATGTAAAAACAGTCAGCCAAAATGATATGGAAACAGCAACTTTAG  
TCGCCATCTCCATATCTGGTTTACTTGTAAGCTTTACTGGGTATGCCTTATATACCGCGTT  
TGGGCAACCCTCTCAACAATTAAGAGATCCATTCGAAGAACACGGGGACATGGAAGCA  
TTGGTTTATACGTTCTTTTAGTTTCGACTTTAGGGATAATTTTTTTCGCTATCTTCTTCC  
GAGAACCACCTAAGGTTCCGACTAAAAAATGAAAATGACTATTGCTTTCCAATTAGCT  
GTTTTTGCATTAATTGCGACTTCCTCAGTGTTAGTAATTAGTGTACCCCTTGTATTTGCTT  
CTCCTGATGGTTGGTCAAATAATAAAAACGTTGTATTTCCGGTACATCATTATGGATTG  
GACTAGTCTTTCTGGTAGCTATTCTGAATCTCTCATTTCT-----ATGTCACCA  
CAAACAGAACTAAAGCAAGTGTGGATTAAAGCTGGTGTAAAGGATTATAAATTGA  
CTTACTACACCCCGGAGTATGAAACCAAGGATACTGATATCTTGGCAGCATTCCGAGTA  
ACTCCTCAGCCGGGGTTCCGCCCAGAAAGCAGGGGCTGCAGTAGCTGCCGAATCT  
TCTACTGGTACATGGACAACCTGTTTGGACTGATGGACTTACCAGTCTTGATCGTTACAA  
AGGACGATGCTATCACATCGAGCCCGTTGTTGGGGAGGAAAATCAATATATCGCTTATG  
TAGCTTATCCATTAGACCTATTTGAAGAGGGTTCTGTTACTAACATGTTTACTTCCATTGT  
GGGTAACGTATTTGGTTTCAAAGCCCTACGCGCTCTACGTCTGGAGGATCTGCGAATTC  
CCACTACTTATTCAAAAACCTTTCTAGGTCCGCCTCATGGTATCCAAGTTGAAAGGGAT  
AAGTTGAACAAGTACGGCCGTCCTTTTTTGGGATGTACTATTAACCAAATTTGGGATT  
ATCCGCAAAAATATGGTAGAGCGTGTATGAGTGTCTACGCGGTGGACTTGATTTTA  
CCAAAGATGATGAAAACGTAAACTCACACCATTATGCGCTGGAGGGACCGTTTTGT  
CTTTTGTGCCGAAGCTCTTTATAAAGCACAGGCCGAAACCGGTGAAATCAAGGGGCAT  
TACTTGAATGCGACTGCAGGTACATGCGAAGAAATGATTAAGAGAGCTGTATTTGCGA  
GGGAATTAGGGGCTCCTATTGTAATGCATGACTACTTAACTGGGGGATTCACTGCAAAT  
ACTAGTTTGGCTCATTATTGCCGCGACAATGGCCTACTTCTTCACATTCACCGGGCAAT  
GCATGCAGTTATTGATAGACAGAAAAATCATGGTATGCATTTTCGTGTATTAGCTAAAGC  
ATTGCGTATGCTGGGGGAGATCATATCCACGCCGGTACAGTAGTAGGTAAGTTAGAAG  
GGGAACGCGAAATGACTTTAGGTTTTGTTGATTTATTGCGCGATGATTTTATTGAAAAA

GATCGTGCTCGCGGTATCTTTTTCACTCAGGACTGGGTATCCATGCCAGGTGTTATAACCG  
GTGGCTTCAGGGGGTATTCATGTTTGGCATATGCCAGCTCTGACCGAAATCTTTGGAGA  
TGATTCTGTATTACAATTTGGTGGAGGAACTTTAGGACATCCTTGGGGAAATGCACCTG  
GTGCAGCAGCTAATCGGGTGGCTTTAGAAGCTTGTGTACAAGCTCGTAATGAAGGACG  
CGATCTTGCTCGTGAAGGTAATGAAATTATCCGAGCAGCTTGCAAATGGAGTCCTGAA  
CTAGCCGCAGCTTGTGAAGTATGGAAGGCGATCAAATTCGAGTTCGAGCCGGTAGATA  
AACTAGATAAGACGGCGAAACATTTATACAAAACACCTATCCCGAGCACACGCAAGGG  
AACCGTAGACAGGCAAGTGAAATCCAATCCACGAAATAATTTGATCCATGGACGGCAC  
CGTTGTGGTAAAGGTCGTAATTCAGAGGAATCATTACCGCAAGGCATAGAGGGGGAG  
GTCATAAGCGCCTATACCGTAAAATCGATTTTCGACGGAATCAAAAAGACATATCTGGT  
AGAATCGTAACCATAGAATACGACCCTAATCGAAATGCATACATTTGTCTCATACTAT  
GGGGATGGTGAGAAGAGATATATTTTACATCCAGAGGGGCTATAATTGGAGATACTATT  
GTTTCTGGTACAAAAGTTCCTATATCAATGGGAAATGCCCTACCTTTGACCGATATGCC  
TTAGGCACGGCCATACATAACATAGAAATCACACGTGGAAGGGGTGGGCAATTAGCTA  
GAGCAGCAGGTGCTGTAGCGAACTGATTGCAAAAAGAGGGTAAATCGGCCACTTTAA  
GATTACCATCTGGGGAGGTCCGTTTGGTATCCCAAATTGCTTAGCAACAGTCGGACAA  
GTGGGTAATGTTGGGGTGAACCAAAAAGTTTGGGTAGAGCCGGATCTAAGTGTGGC  
TAGGTAAACGCCCCGTAGTAAGAGGGGTAGTTATGAACCCTGTGGACCACCCCATGG  
GGGCGGTGAAGGGAAAGCCCCATTGGTAGAAAAAAACCCACAACCCCTTGGGGTTA  
TCCTGCGCTTGGGAAGAAGAACTAGGAAAAGGAAAAAATATAGTGATAGTTTTATTCTTC  
GTCGCCGTAAG---ATGATTCAACCTCAGACCCTTTTAAATGTAGCAGATAACAGTGGAG  
CTCGAAAATTGATGTGTATTTCGAGTCATAGGAGCTGCTAGTAATCAGCGATATGCTCGTA  
TTGGTGATGTTATTGTTGCTGTAATCAAAGACGCAGTGCCCCAAATGCCTCTAGAAAGA  
TCCGAAGTAATTCGAGCTGTAATTGTACGTACATGTAAAGAGTTCAAATGCGAAGACG  
GTATAATAATACGCTATGATGACAATGCAGCGGTTATCATTGATCAAAAAGGAAATCCA  
AAAGGAACTCGAGTTTTTTGGCGCGATCGCCGAGGAATTGAGAGAGTTGAATTTTACTA  
AAATAGTTTCATTAGCTCCTGAAGTATTAATGCTTAGTCCCAAAGAACCAGATTTTCGT  
AAACAACATAGAGGAAGAATGAAGGGAAAATCCTGCCGAGGCAATCGTATTTGTTTTG  
GTAGATATGCTCTTCAAGCACTTGAACCCGCTTGGATCACGTGAGACAGATAGAAGC  
AGGACGAAGAGCAATGACACGATATGCACGTGCTGGTGGAAAACCTATGGGTACGTATA  
TTTTCCCGACAAACCGGTTACACTAAGACCCACGGAAACACGTATGGGCTCAGGAAAG  
GGATCCCCGAATATTGGGTAGCCGTTGTTAAACCAGGTCGAATACTTTATGAAATGGG  
CGGAGTATCCGAAACTGTAGCTAGAGCAGCTATCTCCATAGCTGCCAGTAAAATGCCCA  
TACGAAGTCAATTTCTTCGATTAGAGATGACCAGAGTTCCGCGAGGATATATAGCTCGG  
AGACGACGAACAAAATGCGTTCATTTGCCTCAAACCTTTAGAGGGGGCTCATTTAAGAC  
TTAATCGAATGATTACTCAACAAGTAAGAAGAGCTTTTGTTCCTCTCATCGAGATAGA  
GGCAGGCAAAAAGAGGGATTTTCGTCGTTTGTGGATCACTCGGATAAACGCAGCAACGC  
GGATATAT-----GTATTCAATAGTTATAGTAAATTAATACACAATCTGTACAAGAAGGAATT  
GATTCTTAATCGTAAAATGCTTGCACAAGTAGCTGTATCAAATCCAAATAATCTTTACAC  
GATTTCCAATAAAAATAAAGATCATCAAT-----AGAATAAAGCGGGTTTTTC  
AAAGCACAAAACGCATCCATATGTCTGTTTTCAAAGCACAAAAGAGTTCTTGATGAGA  
TTCGCTGGCGTTACTACGAAGAACTGTTATGATACTGAACCTCATGCCTTATCGAGCA  
TCTTATCCCATCCTAAAGTTGGTTTTATTCCGGCAGCAGCAAATGCTACTCATTATAGGGAT  
TTCGACAAAAGCGAATTTATTCATCACTAAAGCCGAAGTCAGTAGGAGTACTATTATGAA



AAAATTCAGACCTCGAGCTCGAGGACGTAGTTCTCCATAAAAAAAAAACCATGTGTCAT  
ATAACAATTGTACTAAAT--GTAAAGAAATCT-----ATGGATGGAATCAAATAC  
GCAGTATTTACAGAAAAAGTCCTTCGTTTATTGGGAAAGAAT--CAATATACTTTTAATG  
TCGAATCGGGATTCACTAAGACAGAAATAAAGCATTGGGTTCGAACTCTTCTTTGGTGTT  
AAGGTAGTAGCTGTGAATAGCCATCGACTACCCAGAAAGGGTAGAAGAATGGGACCTA  
TTCTGGGACATACAATGCATTACAGACGTATGATCATTACCCTTCAACCGGGTATTCTA  
TTCCACTTCTAGATAGAGAAAAAACATGGCAGTTCCAAAAAACGTACTTCGATGTC  
AAAAAAGCGTATTCGTAAAAATCTTTGGAAGAAAAAGACTTATTTTTCCATAGTACAAT  
CTTATTCTTTAGCAAAATCATTTCAGCGGCAAACCAAAGGGTTTTTCTGGGCAACAA  
ACAAATAATATGGCCAAGGGGAAAGATGTTAGAATCAGACTTATTTGGAATGTATCAG  
TTGTGTTTCGAAAA-----GGT-----AAGGAATCGACGGGGATTTCTAGATATAGTACTCAA  
AGAATCGCCACAATACACCTGGACAATTAGAATTCAAAAAATTTGTGCTTATTGTGCG  
AAGCATACGACTCATGGCGAAATAAAAAAAAAATGAAAATAAGAGCTTCTGTTCGTA  
TTTTGTACAAAATGTCGACTGATTCGTAGGCGTGGACGAATTAGAGTCATTTGTTCCAAC  
CCGAAGCATAAACAAAGACAGGGGATGGTTCGAGAGGAGGTAGCAGGATCCACTCAA  
ACACTACAGTGGAAGTGTGTTGAATCAAGAGTAGATAGTAAGCGTCTTTATTATGGT  
TTTCATTTTGTCCCGCTTAGAAAAGGTCAAGCGGATACCGTTCGGTATTGCCTTGC  
GAGCTTTACTTGGAGAAATAGAAGGAACATGTATCACACGTGCAAAATTTGGG-----AG  
CGTGCCACACGAATATTCTACAATAGCAGGTATTGAAGAATCCGTACAAGAAATTTAC  
TAAATTTGAAAGAAATTGTATTGAGAAGTAATCTCTATGGAGTTAGAGACGCATCAATT  
TGTGTCAAAGGTCCTAGATACATACTGCTCAAGATATCATCTTACCCCTTCCGTAGAG  
ATCGTTGATATGGCACAACCTATAGCTAACTTGACAGAGCCCATTGATTTCTGTATTGAG  
TTACAGATCAAGAGAGATCGCGGATATCACACGGAACCTCAGAAAGAACTCTCAAGATG  
GAAGTTAT-----CCCATAGATGCTGTATCCATGCCTGTTTCGAAATGTGAATTATAGTATTT  
TTATTGTGGGAATGGAAATGAAAAACACGAGATACTTTTTCTAGAAATATGGACGAATG  
GAAGTTTAAACCCCTAAGGAAGCGCTTTATGAGGCTTCTCGTAATTTGATTGATTTATTT  
TTCCTTTTCTACACGCGGAGGAAGAG-----GGCACTAGTTTCGAAGAAAATAAA---AAC  
AGGTTTACTCCACCCCTTTTAAACCTTTCAAAAAAATTAACCT---AATCTAAAGAAAAAC  
AAAAA---GGAATTCCATTGAATTGTATTTTATTGATCAATTAGAATTGCCTTCTAGAA  
CGTATAATTGTCTCAAAGGGCCAATATACATACTATTGGACCTTTTGGAGTAAGACTG  
AGGAAGATCTTATGAGAATTGACAGTTTTTCGTATGGAAGATGGAAAACAGATATGGGA  
CACTCTAGAGAAGCAT-----CTCCAATTGATTTACCTAAGAATAAGATGCTCCGGAATG  
GAAAT--GAGGGAATGTCCACAATACCCGGATTTAGTCAGATCCAATTTCGAGGGATTTTT  
TAGGTTCAATTAATCAAGGCTTGGCAGAAGAACTTGAGAAGTTTCCAACAATTAAGAT  
CCAGATCACGAAATTGCATTTCAATTATTTGCGAAAGGATATCAATTGCTAGAACCCTC  
AATAAAAGAAAGGGATGCTGTGTATGAATCACTCACCTATTCTTCCGAATTATATGTATC  
TGCGAGATTAATTTTTGGTTTC-----GATGTGCAAAGCAAACCATTTCTATTGGAAACA  
TTCTATAATGAATTCCTTAGGAACCTTTATAATAAATGGAATATAACCGAATTGTGATCAA  
TCAAATATTGCTAAGTCCTGGTATTTACTACCGCTCGGAATTAGACCATAAGGGAATTC  
TATCTACACCGGGACTATAATATCAGATTGGGGAGGAAGATCGGAATTAGCAATTGATA  
AAAAAGAAAGGATATGGGCTCGCGTAAGTAGAAAACAAAAGGTATCTATTCTAGTTCTA  
TCATCAGCTATGGGTTCGAATCTAAGAGAAATTCTAGATAATGTTTCTACCCTGAAATT  
CTCTTGCTTTCCCGAATGCTAAGGAGAAGAAGAGGATTGAGTCAAAGAAAAAGCTA  
TTTTGGAGTTTTATCAACAATTTGCTTGTGTAGGTGGGGACCTGGTATTTTCGGAGTCT

TATGTGAGGAATTACAAAAGAAATTTTTTCAACAAAATGTGAATTAGGAAGGATTGGT  
CGACGAAATATGAATCGGAGACTGAATCTTGATATACCTCAGAACAATACATTCTTGTTA  
CCACGAGATGTATTGGCCGCTACGGATCATTGATTGGAATGAAATTTGGAACGGGTAT  
ACTTGACGATGACGATATGAATCACTTGAAAAATAAACGTATTCGTTCCGGTTCGGATC  
TGTTACAAGATCAATTCGGACTGGCTCTTGATCGTTTACAACATGCGGTTCAAAAAACT  
ATCCGTAGAGTATTCATACGTCAATCGAAA-----CCGACTCCACAACTTTGGTAACTCC  
AACTTCAACTTCGATTTTTATTAATACTACTTATGAGACCTTTTTTGGCACATACCCCTTA  
TCTCAAGTTTTTGGATCAAATAATCCATTGACACAACTGTTTCATGGGCGAAAAGTGA  
GTTGTTTTGGGTCTTGAGGATTGACGGGGAGGACTGCAAGTTTTCGGAGCCGAGATAT  
TCATCCGAGTCACTATGGGCGTATTTGTCCAATTGACACGTCCGAAGGAATCAATGTTG  
GACTTACTGGATCCTTAGCTATTCATGCGAGAATTGATCACTGGTGGGGATCCATAGAG  
AGTCCATTTTATGAAATATCTGAGAAAGCAAAAGAAAAAAAAGAG-----AAACAGGTG  
GTTTATTATCACCAAATAGAGATGAATATTATATGATAGCAGCAGGAAATTCTTTGTCTT  
TGAATCAGGGTATTCAGGAAGAAGAGGTTGTTCCAGCTAGATACCGTCAAGAATTCCT  
GACTATTGCATGGGAACAGATTCATGTTAGAAGTATTTTCCCTTTCCAATTTTTCTATT  
GGAGGTTCTCTCATTCTTTTATTGAGCATAATGATGCGAATCGGGCTTTAATGAGTTCT  
AATATGCAGCGCCAAGCAGTTCGCTTTCTCGGTCCGAGAAGTGCATTGTTGGAAGTGG  
GATTGGAACGCCAAACAGCTCTAGATTGAGGGTTTCCGTTATAGCCGAACGCGAGGG  
AAAGATCATTCTACTGATAGTCACAAGATCCTTTTATCAAGTAGTGGGAAGACTATAA  
GTATTCTTTTAGTTACCCATCGGCGCTCTAACAAAATACTTGTATGCACCAAAAACCT  
CGGGTTCATGGGGTAAATCCATTAATAAAGGACAAATTTTAGCAGAGGGAGCTGCTA  
CAGTTGGTGGGGAACCTTGCTTTAGGAAAAACGTATTAGTAGCTTATATGCCATGGGAA  
GGTTACAATTTGAAGACGCAGTACTAATTAGCGAACGTTTGGTATATGAGGATATTTAT  
ACTTCTTTTACATCCGAAAATATGAAATTCAGACGGATACGACAAGCCAAGGCTCCG  
CTGAAAAATCACTAAAGAAATACCACATCTAGAAGAACATTTACTCCGCAATTTGGA  
CAGAAATGGAGTTGTTAGGTTGGGATCTGGGTAGAACTGGCGATATTTAGTAGGTA  
AATTAACGCCTCAGATAGCGAGCGAA---TCGTCTATATCGCGGAAGCTGGATTATTACG  
GGCCATATTTGGTCTTGAGGTATCCACTTCAAAGAACTTCTCTCAAACCTACCTATAG  
GTGGAAGAGGGCGCGTTATCGATGTGAAATGGATCCAGAGA-----GACCCC  
ATAATGGTTCGTGTATATATTTTACAGAAACGTGAAATCAAAGTTGGGGATAAAGTAGC  
CGGAAGACACGGGAATAAGGGGATCATTTCAAAATTTTGCCTAGGCAAGATATGCCCT  
ATTTGCAAGATGGAACACCTGTTGATATGGTCTTCAATCCCTTAGGAGTACCCTCACGA  
ATGAATGTGGGACAAATATTTGAAAGCTCGCTCGGATTAGCAGGGGATCTGCTAAAGA  
AACATTATAGAATAGCACCTTTGATGAGAGATATGAGCAAGAGGCTTCAAGAAAACCT  
TGTGTTTTTCAGAATTATATGAAGCCAGTAAACAAACAAAAAATCCATGGGTATTTGAAC  
CCGAGTACCCGGGAAAAAGTAGAATATTTGATGGAAGAACAGGAGACCCCTTCGAAC  
AACCTGTTCTAATAGGGAAGTCTATATCTTAAAATTAATTCATCAAGTTGATGAAAAA  
TCCATGGACGTTCTACTGGGCCCTACTCACTTGTTACACAACAACCCGTTAGAGGAAG  
AGCCAAGCAAGGGGGACAACGAGTAGGAGAAATGGAAGTTTGGGCTTTAGAAGGATT  
TGGTGTGCTCATATTTTACAAGAGATACTTACTTATAAATCTGATCATCTTATAGCTCGC  
CAAGGAATACTTAATGCTACGATCTGGGGAAAAAGAGTACCTAATCACGAGGATCCTC  
CAGAATCTTTTCGAGTGCTCGTTGAGAACTACGATCTTTGGCTCTAGAACTGAATCAT  
TTCTTGTATCTGAGAAGAACTTCCAGGTTAATAGGGAGGAAGTT-----ATG  
ATTGACCAATATAAACATCAACAACCTCAAATTGGACTCGTTTCCCTCAACAAATAAA

GGCTTGGGCTAACAAAAACCTACCTAATGGGGAAGTCGTTGGCGAAGTCACAAGGCC  
CTCTACTTTTCATTATAAAACCGATAAACCCAGAAAAAGATGGATTGTTTTGCGAAAGAA  
TCTTTGGACCCATAAAAAGCAGAATTTGTGCTTGTGGAAATTCTCGAGCGAGCGTAGC  
TGAAAACGAAGACGAAAGATTTTGCCAAAAATGCGGGGTAGAATTTGTTGATTCTCGG  
ATACGAAGATATCAAATGGGATACATCAAACCTCGCATGTCCCGTGACTCATGTGTGGTA  
TTTGAAAGGTCTTCCTAGTTATAATTGCGAACCTTTTAGATAAACCCCTTAAGAAATTGGA  
GGGCCTAGTATACGGCGAT-----TTCTCTTTTGTAGGCC---AGCGCTAAAAAACCCAC  
TTTCTTACGATTACGAGGTTTATTTCGAAGATGAAATTTTCATCCTGTAACCACAGCATTTC  
TCCCTTTTTTTCTACCCAGGCTTTGCAACATTTGAAATCGGGAAATTGCGACAGGAG  
CAGGTGCTATTAGAGAACAATTAGCAGATTTGGATTTGCGAATTATTATAGAGAATTCCT  
TGGTCGAATGGAAGGAATTAGAAGACGAG---GGGTATAGTGGAGATGAATGGGAAGAT  
AGAAAAAGACGAATAAGAAAAGTTTTTTTTGATTAGACGCATGCAATTGGCGAAACATT  
TTATTCAAACAAATGTAGAACCAGAATGGATGGTTTTGTGCTTATTACCGGTTCTTCCTC  
CCGAATTGAGACCCATTGTTTATAGGTCTGGGGATAAAGTAGTGACTTCGGATATTAATG  
AACTTTATAAGAGAGTTATCCGTCGGAACAACAACCTTGCCTATCTATTA AAAAGAAGT  
GAATTAGCGCCAGCAGATTTAGTAATGTGCCAGGAAAAGTTGGTACAAGAAGCCGTGG  
ATACACTTCTTGATAGTGGGTCCCGCGGGCAACCAACGAGGGATGGTCACAATAAAGT  
ATACAAATCACTTTCAGATGTAATTGAAGGTAAAGAGGGAAGGTTTCGTGAGACTCTG  
CTTGGGAAACGGGTCGATTACTCGGGCGTTCTGTCAATTGTTGTGGGTCCTTCACTTTC  
ATTACATCAATGTGGATTACCTCTAGAGATAGCAATAAAGCTTTTTTCAGCTATTTGTAATT  
CGCGATTTAATCACGAAACGCGTACTTCTAATGTCAGGATTGCTAAAAGGAAAATTTG  
GGAAAAGGAACCCATTGTATGGGAAATACTTCAAGAAGTTATGCGGGGACATCCTGTA  
CTGTTGAATAGAGCACCTACCCTGCATAGATTAGGCATACAGGCCTTCCAACCCACTTT  
AGTAGAGGGGCGTACTATTTGTTTACACCATTAGTGTGTAAGGGTTTCAATGCGGACT  
TTGATGGGGATCAAATGGCTGTTCACTACCTTTATCCTTGGAAGCTCAGGCGGAAGCC  
CGTTTACTTATGTTTTCTCATATGAATCTCCTATCTCCTGCTATTGGAGATCCTATTTGCGT  
ACCGACCCAAGACATGCTTATAGGACTTTATGTATTAACGATTGGAACCCGTCGGGGTA  
TTTTGTGCAAATAGATATAATAGTTGCGGAAAC-----TATCCAAATCAAAAAGTAAG  
TTACAATAAT--AAGTATACGAAAGATAAAGAACCCCATTTTTCTAGTTCCTATGATGCA  
CTGGGAGCTTATAGACAGAAACGAATCAGTTTAGACAGTCCCTTGTGGCTCCGATGGA  
AACTAGATCAACGC---GTCATTGGGTCA-----AGAGAAGTTCCGATTGAAGTTCAATATG  
AATCTTTGGGGACTTATCATGAGATTTATGCCCACTATCTAATAGTGGGAAATAGAAAAA  
AAGAAATCCGTTCTATATACATTCGAAGCACTCTTGGTCATATTTCTTTTTATAGAGAAAT  
AGAGGAAGCCATACAAGGATTTAGTCAGGCCTATTCATACACTATC-----  
-----ATGGCGGAACGGGCCAATCTGGTCTTTCATAATAAAGAGATAGACGGAACCTGCT  
ATGAAACGACTTATTAGCAGATTAATAGATCATTTTCGGAATGGGATATACATCCCATATAC  
TGATCAAATAAAGACTCTGGGCTTTCATCAAGCCACTACTACATCGATTTTCATTAGGA  
ATCGAGGATCTTTTAACAATACCCTCTAAGGGATGGTTAGTCCAAGACGCGGAACAAC  
AGAGTTTTCTTTTGGAGAAACACTATTATTATGGGGCTGTACACGCGGTAGAAAAATTA  
CGCCAATCCGTTGAGATATGGTATGCTACAAGTGAATATTTGAAACAAGAAATGAATTC  
GAATTTTCGATAACGGATCCTTCTAATCCAGTCTATCTAATGTCTTTTTTCAGGAGCTAG  
AGGAAATGCATCTCAAGTACACCAATTAGTAGGTATGAGAGGATTAATGGCGGATCCTC  
AAGGACAAATGATTGATTTACCTATTCAAAGCAATTTACGCGAGGGACTTTCTTTGACA  
GAATATATAATTTCTGCTACGGAGCCCGTAAAGGGGTTGTAGATACTGCTGTACGAAC

AGCGGATGCTGGATATCTTACACGTAGACTTGTGGAAGTAGTTCAACATATTATTGTGCG  
TAGAAGAGATTGTGGTACTATCCGAGGTATTTCTGTGAGTCCTCAAATGGGATGACGG  
AA-----AAACTTTTTGTCCAAACACTAATTGGTTCGTGTATTAGCAGACGATATATATATCG  
GTTACGATGCATTGCCGCTCGAAATCAAGATATTGGAATTGGATTAGTCAATCGATTCA  
TAACTGCCTTTCGAGCACAACCAATTCGAGCACAACCAATATATATTAGAACCCCTTTA  
CTTGCCGGAGCACATCTTGGATCTGTCAATTATGTTATGGTTCGGAGTCCCACATCATGGC  
GATCTGGTTCGAATTAGGGGAAGCCGTAGGTATTATTGCGGGTCAATCAATTGGGGAGCC  
AGGGACTCAACTAACATTAAGAACTTTTCATACTGGTGGAGTATTCACAGGGGGTACTG  
CCGACCTTGTACGATCCCCCTTCGAATGGAAAAATCCAATTCAATGAGGATTTGGTTCAC  
CCCACACGTACCCGTCATGGGCAGCCTGCTTTTTCTATGTTATATAGACTTGCATGTA  
ACTTTCAGAGTCAGGATATTCTATATAGTGTGAATATTCCCTCAAAAAGCTTGATTCTAGT  
CAAAATGATCAATATGTAGAATCCGAACAAGTAATTGCGGAGATTCGTGCCGGAACGTC  
CACTTTG-----TTAAAGAAAGGGTACAAAAGCATATTTATTCCGAATCAGACGGGGAA-  
--ATGCACTGGAGTACTGATGTTTACCATGCGCCGAATATCAATATGGTAATCTTCGTCG  
ATTACCAAAAACAAGCCATTTATGGATATTGTCAGTAAGTATGTGCAGA-----TCCAGTAT  
AGCGTCTTTTTCGCTCCACAAGGATCAAGATCAAAATGAATACTTATTCTTTTTTCTGTTGA  
CGGAAGA-----TATATCTTTGACCTCTCA-----ATGGCTAATGATGATCAAGTAAGACATA  
GACTGTTGGATACTTTTGGT-----GATAGGGAAATTCTTGATTATTCA---ACGCCGGA  
TAGAATCATGTCCAACGGCCATTGGAATTTTGTCTATCCTTCT--ATTCTTCAAGATAAT--  
---TCGGATTTATTGGCGAAAAAGCGAAGAAATAGGTTTCGTTATTCCATTACAATATCATC  
AAGAACAAGAGAAAGAACTAATATCCTGTTTGGGGATTCTATTGAAATACCCTTTATG-  
----GGTGTTTTACGTAGAAATACTATTTTTGCTTATTTTACGATCCACGATACAGAAAA  
GAT-----GGAATTGTGAAATTTAGAAGCCAGAGGAAGATTCCATCTTAAAA-----AAAG  
AGGGTTTGATTGAGCATCGAGGA---ACAAAAGAATTTAGTCTAAAATAC---GAACTAGA  
TCGGTTTTTTTTTTCATTCTTCAAGAACTGCATATCTTGCCAGATCCTCATCCCTAAAGGT  
ACTTGATAATAGTATCATTGGAGTGGATACACAACCTCACAAAAAATACAAGAAGTCGAC  
TAGGTGGATTGGTCCGAGTGAATAGAAAAAAAAGCCATACGGAACCTCAAAATCTTTTC  
CGGAGATATTCATTTTCTGAAGAAGCAGATAAGATATTAGGT-----GGTAGTTTGATACC  
ACCAGAAAGAGAAAAGAAA-----GAATCTAAGGAA---TCAAAA---AAAAGGAAAAATT  
GGGTCTATGTTCAACGGAAAAAATTCTCAAGAGCAAGGAAAAG-----TATTTTGTTC  
GGTTCGACCTGCAGTCGCATATGAAATGGACGAAGGGAGAAATTTAGCAACACTTTTC  
CCGCAGGATCTCTTGCAAGAAGAGGATAATCTCCAACCTCGACTTGTCAATTTTCTTTC  
TCATGAAAATAGCAAGTTAACTCAAAGAATTTATCACACGAAT--CAATTTGTTCGAACT  
TGCTTAGTAGTGAATTGGGAACAAGAAGAAAAAGAGGAGGCTCGT-----GC  
TTCCCTTGTGAGGTAAGAGCAAATGATCTGATTCGTGATTCCTAAGAATTGAGTTAG  
TAAAGTCCACTATTTTCGTATACACGAAGAAGGTATGATAGGACAAGTGCAGGACCGATT  
CCCAAT-----TTAGATCGACCAATACCAATTCCTTTTATTCCAAGGCGAAGATTCAAT  
CA-----CTTAGCCAACATCAAGAAGCTATTGGC-----ACCTTGTTGAATCGAA  
ATAAA-----GAATACCAATCTTTGATGATTTTGTGTCATCCAACCTGTTCTAGAATTGGT  
-----TTATTCAAGAATTCGAAATATCCC-----AATGCGGTAAAAGAATCGAATCCTAGAA  
TTCCATT--GATATTTTGGGCCCTTAGCTGCTATTGTACCT--AGTATATCGAATTTTCT  
TCATCT--TACTATTTACTAACG-----CATAATCAGATCCTGTAAAA---AAATATTTGTT  
CCTTGAC-----AATTTGAAACAAACCTTCCAAGTACTTCAAGGGCTTAAATACTCTTT  
AATAGATGAAAATCAAAGG-----ATTTCGAATTTTCGAT-----AGTAACATCATGTTGGATC

CATTCCATTTGAATTGGCACTTTCTCCATCATGATTCTTGGGAGGAGACATCGGCAATAA  
TTCAC---CTTGGACAATTTATTTGCGAAAATGTATGTCTATTTAAATCGCACATA-----  
AAAAAATCTGGTCAAATTTTCATTGTTAAT---ATTGATTCCCTTTGTTATAAGAGCAGCTAA  
GCCTTATTTGGCCACTACAGGAGCAACTGTTTCATGGTCATTATGGAGAAATCCTTTACA  
AAGGAGATAGGTTAGTTACGTTTATATATGAAAAATCGAGATCTAGTGACATAACGCAA  
GGTCTTCCAAAAGTAGAACAAATCTTTGAAGCGCGTTCAATTGATTCACTATCGCCGAA  
TCTCGAAAGGAGAATTGAGGATTGGAATGAGCGTATACCAAGAATTCTTGGGGTCCCC  
TGGGGATTCTTGATTGGAGCTGAGCTAACCATAGCCCAAAGTCGTATCTCTTTGGTTAAT  
AAGATCCAAAAGGTTTATCGATCCCAAGGGGTACAGATCCATAATAGACATATAGAGAT  
TATTATACGCCAAGTAACATCAAAGGTGCGGGTTTCCGAA-----GATGGAATGTCTAAT  
GTTTTTTCACCTGGGGAATTAATCGGATTATTGCGAGCGGAACGAGCAGGGCGAGCTT  
TGGATGAATCGATCTATTATCGGGCAATCTTATTGGGAATAACAAGGGCTTCCCTGAATA  
CCCAAAGTTTCATATCTGAAGCAAGTTTTCAAGAACTGCTCGAGTTTTAGCAAAAAGC  
TGCCCTACGAGGTCGTATTGATTGGTTGAAAGGCCTCAAAGAAAACGTAGTTCTGGGG  
GGGATTATACCTGTTGGTACCGGATTCCAAAATTTGTGCATCGTTCCCA-----CAAGA  
CAAGAACCTTTAT-----TTCGAAATTCAAAAAATAATCTATTCGCGTCGGAAATG-----A  
GAGATATTTTGTCTCCATACAGAATTAGTTTCTTCTGATTCTGACGTAACAAAC-----  
-TCAGAACCCCATTTACCCCAATTATACGATT-----ATGACAAGAAGATATTG  
GAACATCAATTTGAAAGAGATGATAGAAGCGGGAGTTCATTTTGGTCATGGTATTAAGA  
AATGGAATCCTAAAATGGCCCCTTACATCTCGGCAAAGCGTAAAGGTAATCATATTACA  
AATCTCGCTAGAACGGCTCGCTTTTTATCAGAAGCTTGTGATTTAGTTTTTGTATGCAGC  
AAGTCAGGGAAAAAGCTTCTTAATTGTTGGTACCAAAAAAGAGCAGCGTATTTAGTA  
GCATCAGCTGCAATAAGGGCTCGTTGTCATTATGTTAATAAAAAGTGGTTCAGTGGTAT  
GTTAACGAATTGGTCGATTACGAAAAGTACTTTCTCAATTTAGAGACTTAAGAGCAG  
AAGAAAAGATGGGAAAATTCCACCATCTCCAAAAAGAGATGTGGCAATCTTGAAGA  
GAAAATTATCGACCTTGCAAAGATATCTCGGCGGGATCAAATATATGACGAGGTTGCCA  
GACATTGTGATCGTCCTCGATCAGCAAAAAGAGTATATAGCTCTTCGGGAATGTGCCAT  
TTTGGGGATTCCACTATTTCTTTAGTCGATACAAAATTGTGACCCAGATCTCGCGAATAT  
ATCGATTCCAGCCAACGATGACACTATGACTTCAATTCGATTGATTCTTAACAAATTAGT  
ATTTGCAATTTGTGAGGGCCGTTCTCTC---TATATAAGAAATCGTATGGGACAAAAATA  
AATCCACTCGGTTTCAGACTTGGTACAACCCAAAATCACCATTCTTTTGGTTTCGCACA  
ACCAAAAATTATTCTGAAGGTCTACAGGAAGATAAAAAAATACGGAATTGTATCAAG  
AACTATATACAAAAGAATAGGAAAAAAGGCTCGAATAAATAAGAAATCAATTACACATAT  
AGAAATTCAAAAAGAAATCGATACGATCCACGTAATAATCCATATTGGATTCCCAAT---  
TTATTAAAGAAAAAAGGA-----GCAATCGAAGAATTAGAGAAAGATCTACAAA  
GGAAGTTAATTCTGTAAACCAGAGACTTAATATTGCTATTGAAAAAGTTAAAGAACCTT  
ATAGACAACCTAGCATTCTTGAGAATATATAGCTTTCCAATTAATAAATAAGAGTTTCAT  
TCCGAAAGGCAATGAAAAAAGCCATTGAATTAACTCAAAAAGCAGATATAAGGGGAGT  
AAAAGTAAAAATTGCAGGTCGTCTCGCAGGGAAAGAAATTGCACGTGCCGAATGCATC  
AAAAGGGTAGACTTCCCTCCAAACAATTCGCGCTAAAATTGATTATTGCTGCTATCC  
AATTCGAACTATCTATGGAGTATTAGGTGTAATAAATTTGGATATTCATAGACGAAGAAAT  
GTCCCGTTATCGAGGACCTCGTTTTAAAAAATACGCCGTCTGGGAGCTTTACCAGGA  
CTACTAGAAAAACACCTAAATCCGGAAGTAATCTGAAAAAGAAATTCATTCTGGGA  
AA---AAAGAGCAATATCGTATTCTTCAAGAAAAACAGAAATTGCGTTTTTCATTATG

GTCTGACAGAACGACAATTA CTTAGATATGTACATATCGCTGGAAAAGCAAAAAGGTC  
AACAGGTCAGGTTTTACTACAATTA CTTGAAATGCGTTTTGGATAATATCCTTTTTTCGATT  
GGGTATGGCTTCAACCATTCC TGAGGCCCGGCAATTAGTTAACCATAGACATATTTTACTG  
TAATCGTCGTATAGTCGATATA CCAAGTTTTTCGTTGCAAACCCCGAGATATTACTACTAC  
GAAGGATAACCAAAGATCAA AATGTCTGGTTCAA AATCTATTGCTTCATCCGACCCGA  
AA-----TTGCCAAAGCATT TGACGATTGACACA-----TTGCAATATAAAGGACTAGTTAAA  
AAAATCCTAGATAGGAAGTGGGTCGGTCTCAA AATAAATGAGTTGTTAGTTGTAGAATA  
TTACTCTCGTAAGACTATGTCACGTCGAGGTA CTGCAGAAAAAAGA ACTGCAAAATCC  
GATCCAATTTTTTCGTAATCGATTAGTTAACATGGTGGTTAACCGTATTATGAAAGACGGA  
AAAAATCATTGGCTTATCAA ATTCTCTATCGAGCCGTGAAAAAGATTCAACAAAAGA  
CAGAAACAAATCCACTATTGGTTTTACGTCAAGCAATACGTAGAGTAACTCCCAATATA  
GGAGTAAAAACAAGACGTAAAAAAGGATCGACGCGGAAAGTTCCGATTGAAATAGGA  
TCTAAACAAGGAAGAGCACTTGCCATTCCGTTGGTTATTAGAAGCATCCCAAAGCGTC  
CGGGTCGAAATATGGCTTTCAA ATTAAGTTCCGAATTAGTAGATGCTGCCAAAGGGAGT  
GGGGGTGCCATACGCAAAAAGGAAGCGACTCATAGAATGGCAGAGGCAAATAGAGCT  
CTTGACATTTTTTCGTATGGGCAAGGACACTATTGCTGATTTACTAACCTCTATAAGAAAC  
GCGGACATGAATAAAAAAGGAACAGTTCGAGTAGTATCTACAAATATTACCGAAAACA  
TTGTTAAAATACTTCTACGAGAGGGTTTTATTGAAAGTGTTCGGAAACATCAGGAAAGT  
AACAGATATTTCTTGGTTTTCAACTTTGCGACATCAA AAGAGAAAGACTAGAAAAGGAA  
TATATAGA ACT-----AGAACCTTTTTAAAGCGTATCAGCCGACCCGGCTTACGAATTA  
TGCCAACTATCAAGGAATTCCTAAAGTTTTGGGCGGAATGGGAATTGCTATTCTTTCTA  
CTTCTCGAGGTATAATGACAGATCGAGAAGCTCGACTAAACAGAATTGGGGGGGAAGT  
CTTATGTTATATATGGATGACAAAAGCTATACCAAAAATTGGTTCACGTAGGAAAGTGC  
GGATTGGTTTTGCGTAAGAGTGCACGTAGAATAACAAAAGGAGTTATTTCATGTTCAAGCT  
AGTTTCAACAATACCATTATAACTGTTACAGACCCGCAGGGTTCGGGTGGTTTTCTGGTC  
CTCCGCGGGTACTTGTGGATTCAA AAGCTCAAGAAAAGCATCACCTATGCTGGTCAA  
AGAACAGCAGTAGATGCTATTTCGTACAGTGGGT-----TTGCAACGAGCAGAAGTTATG  
GTAAAGGGTGCTGGTAGTGGAAGAGATGCCGCATTACGAGCCATTGCTAAAAGTGGTG  
TACGATTAAGTTGTATACGCGATGTAACACCTATGCCGCATAATGGATGTGACCTCCTA  
AAAAAAGACGTCTGATGCCAACGGTTAAACA ACTTATTAGAAACGCAAGACAGCCAAT  
ACGAAATGCTAGAAAATCGGCCGCGCTTAAGGGATGTCCTCAGCGTCGAGGAACATGT  
GCTAGGGTGTATACTATCAACCCCAAAAACCCA ACTCTGCCTTACGTAAAGTTGCCAG  
AGTACGATTAACCTCTGGATTTGAAATCACTGCTTATATACCAGGTATTGGCCATAATTT  
ACAAGAACATTCTGTAGTATTAGTAAGAGGAGGAAGGGTTAAGGATTTACCCGGTGTG  
AGATATCGCATTATTTCGAGGAACCCTAGATGCTGTGTCGCAGTAAAGAATCGTCAACAAGG  
GCGTTCTAATATGGGGTCAAAAAGCCAAAAAATGGCAAAAAAAGTTTTGATTCAGAG  
GGAGAAGAAGCGGCAGAAATTAGAACAGAAATATCATTGATTTCGTGATCTTCAAAA  
AAAAAGATAAGAAGCAAAGTTTTCCCTTGGAGTTTGGAGTGAAAAAACGAAAATGCGA  
GAAAAATTGCAATCCCTACCACGTAATAGTGCACCTACACGCCTTAATCGACGTTGTTT  
TTTGACCGGAAGACCTAGAGCTAACTATCGAGACTTTGGACTATCCGGACACATACTTC  
GAGAAATGGTTTACGCATGTTTGTACC GGTTGCAACAAGATCCAGTTGGAAGAAAAA  
GAGAAAAATTTTTGGATTTATGGTTAAAGAAGAAAAAGAAGAAAAC-----AGGGGTTT  
TGTTGAATTTCAAGTATTCAGTTTTACCAATAAGATACGGAGACTTGCTTCACATTTGG  
AATTACACAAAAAAGATTTTTTCATCGGAAAGAGGTCTACGAAGACTTTTGGGAAAACG







repeated text block consisting of 40 lines of identical, illegible characters.



ATACAGACATTTATGGGTTTCAGTGCGAAAATTGTTATGGATTAAATTATAAAAAATTTTT  
TAGGTCAAGACTGAATATTTGTGAACACTGTGGATATCATTTGAAAATGAGTAGTTCAG  
AGAGAATCGAACTTTTAATTGATCCGGGCACCTGGGATCCTCTGGATGAGAATATGGTC  
TCGACAGACCCCATTTGAATTTTCATTAGAGGAAGAACCTTATAGAGATCGTATTGATTC  
TTATCAAAAAAGACAGGTTTAACTGAAGCTGTTCAAACAGGCATAGGTCAACTAAC  
GGTATTCCTATAGCAATTGGAGTCATGGATTTTCAGTTCATGGGAGGGAGTATGGGATC  
CGTAGTAGGCGAGAAAATCACCCGTTTGATTGAATATGCTACTAAAAAGTCTCTACCTG  
TTATTATTGTATGTGCTTCGGGAGGAGCACGCATGCAAGAAGGAAGTTTGAGCTTGATG  
CAAATGGCTAAAATATCTTCTGCTTTATATAATTACCAATTAATAAAAAAGTTATTCTATG  
TAGCTATTCTCACATCTCCGACAACCTGGTGGGGTTACAGCCAGTTTTGGTATGTTGGGA  
GATATCATTATTGCTGAACCTAATGCCTACATTGCATTTGCGGGTAAAAGAGTAATTGAA  
CAAACATTGAATAAGACAGTACCCGACGGTTCACAAGCGGCTGAGTATTTATTCCAGA  
AGGGCTTATTTGACCTAATCGTACCACGTAATCTTTTAAAGGGTGTCTGGGTGAGTTAT  
TTCAGCTGCACGGTTTCTTTCCCTTGACT-----ATGGTAACCATTTCGAGCCGACGA  
AATTAGTAATATTATCCGTGAACGTATTGAACAATATAATAGAGAAGTAAAGGTTGTGAA  
TACAGGCACCGTACTTCAAGTGGGTGACGGCATTGCTCGTGTTCATGGTCTTGATAAAG  
TAATGGCAGGCGAGTTAGTTGAATTTCAAGAGGGTACCGTAGGTATTGCTTTGAATTTG  
GAATCCAATAATGTTGGCGTTGTGTTAATGGGCGATGGTTTGCTGATACAAGAGGGAAG  
TTCTGTA AAAAGCAACCGGAAGAATTGCTCAGATACCGGTAAGTGAGGCTTATTTGGGT  
CGTGTCTAAATGCTCTAGCGAAACCTATTGATGGAAGAGGGGAAATTTTCATCTTCAGA  
ATCTCGCTTAATTGAATCTCCCGCTCCAGGTATTATTGCTAGACGTTCCGTATATGAACC  
TCTTCAAACAGGGATTATTGCTATTGATGCGATGATACCTATCGGACGCGGTCAGCGAG  
AATTAATTATTGGGGATAGACAGACTGGTAAAACAGCAGTAGCTACAGATACGATTCTA  
AATCAAAAAGGTCAAATGTAATATGTGTTTATGTAGCTATTGGTCAAAAAGCATCTTCT  
GTAGCTCAAGTAGTGACTGCTTTACAGGAACGCGGGGCTATGGAATACACTATTGTGGT  
AGCGGAAACGGCTGATTCGCTGCTACACTACAATACCTTGCTCCTTATACAGGAGCAG  
CTTTGGCTGAATATTTTATGTACCGCAAACAACATACTTTAATAATTTATGATGATCTCTC  
CAAACAGGCACAAGCTTATCGCCAAATGTCTCTTCTATTAAGAAGACCTCCAGGTCTG  
GAAGCTTATCCAGGAGATGTTTTTTATTTACATTCACGCCTTTTGGAAAGAGCGGCTAA  
ATTAAGTAATGAGTTGGGTGAAGGAAGTATGACTGCTTTACCGATAGTTGAGACTCAAT  
CGGGAGACGTTTCAGCTTATATTCTACTAATGTCATTTCCATTACAGATGGACAAATAT  
TCTTATCGGCTGATCTGTTCAATGCTGGAATACGACCTGCTATTAATGTGGGTATTTCCG  
TCTCTAGAGTAGGATCCGCGGCTCAAATAAAAGCCATGAAACAAGTAGCTGGGAAATT  
AAAACGGAACTAGCTCAATTCGCAGAATTAGAAGCCTTTGCACAATTCGCTTCTGATC  
TTGATAAAGCTACTCAGAATCAATTGGCAAGAGGCCAACGATTACGCGAATTGCTAAA  
ACAATCCCAATCTGCTCCTCTTGGGGTAGAAGAACAGATAGCTACTATTTATACTGGAG  
CAAATGGATATCTTGATTCGTTAGAAATTGCACAGGTAAGGAAATTTCTGGTTCAGTTG  
CGTACCTACTTAAAAAAGAATAAACCTCAGTTCAAAGAAATTATATCTTCCACCAAGAC  
ATCACTCAGGAAGCAGAAGCCCTTTTGAAGAGGCTATTCAGGAACAGATAGAATTG  
TTTCTACAACAGGAGCAAACCATGCAAATAAATCCTACTACTTCT---ACTGCGGTTTCCA  
AATTGGAAGAAAAAACCTAGGGCGTATTGCTCAAATTATTGGCCAGTATTGGATGTC  
GTTTTTCCCCGGGTAAAATGCCAATATTTATAATGCCTTGGTAGTTAAGGGTCAAGAT  
GCCGCTGGTCAGCAAATTAAGTGACTTGTGAGGTACAGCAATTATTAGGAAATAATCG  
AGTTAGAGCTGTAGCTATGAGTGCTACAGACGGTCTAACGAGAGGAATGGACGTGATT

GATACGGGAGCCCCTCTAAGTGTTCCAGTCGGTGGAGCCACTCTCGGACGAATTTTCA  
ACGTTCTTGGTGAGCCTGTTGATAATTTAGGTCCTGTAGATACTACCACAACATCTCCCA  
TTCATAGATCTGCACCCGCTTTATCCAGTTAGATACGAAATTATCAATCTTTGAAACAG  
GGATTAAGTAGTAGATCTTTTAGCCCCTTATCGCCGTGGAGGAAAAATAGGACTATTT  
GGGGGAGCTGGAGTGGGTAAAACAGTACTCATTATGGAATTGATCAACAACATTGCCA  
AAGCTCATGGAGGTGTATCCGTATTTGGTGGAGTAGGCGAACGTACTIONTCTGTAAGGAAA  
TGACCTTTACATGGAAATGAAAGAATCCGGAGTTATTAATGAAAAAATATTGCAGAAT  
CAAAAGTAGCTCTCGTCTATGGTCAGATGAATGAACCGCCGGGAGCTCGTATGAGAGT  
TGGTTTGACCGCCCTAACCATGGCGGAATTTTTCCGGGATGTTAATGAACAAGACGTAC  
TTCTATTCAATTGACAATATCTTTTCGATTCTTTCAAGCAGGATCCGAAGTATCTGCTTTATT  
AGGGAGAATGCCTTCTGCGGTGGGTATCAACCTACCCTTAGTACAGAAATGGGTCTT  
TGCAAGAAAGAATTACGTCTACAAAAGAGGGATCTATAACTTCTATTCAAGCAGTTTAT  
GTACCTGCAGACGATTTGACTGACCCTGCGCCTGCAACAACATTTGCACATTTAGATGC  
TACTACCGTACTATCAAGAGGATTAGCTGCTAAAGGTATTTATCCAGCAGTGGATCCTTT  
AGATTCAACGTCAACCATGCTCCAACCTGGGATCGTTGGCGAGGAACATTATGAAACT  
GCGCAAAAAGTTAAGGAAACTTTACAACGTTACAAAAGAACTGCAGGACATTATAGCTA  
TCCTTGGATTAGACGAATTATCCGAAGATGATCGTTTAAACCGTAGCAAGAGCACGAAA  
AATTGAGCGTTTCTTATCACAACCTTCTTCGTAGCGGAAGTATTTACTGGTTCTCCAG  
GGAAATATGTTGGCCTTGCAGAAACCATTAGGGGGTTTAAACTTATCCTCTCCGGAGAA  
TTAGACAGTCTTCCCGAACAGGCCTTTTATTTGGTGGGTAACATCGATGAAGCTACCGC  
GAAAGCTATAAACTTAGAAGTGGAGAGCAAATTGAAGAAAATGACCTTAAATCTTTGT  
GTACTGACCCCTAATCGAATTATTTGGGATTCAGAAGTGAAAGAAATTATTTTATCTACT  
AATAGTGGCCAAATTGGTGTATTACCAACCACGCTCCTATTGCCACAGCTGTAGATATA  
GGTCTATTGAGAATACGCCTAAATGACCAATGGGTAACGGTGGCTTTTGATGGGAGGGTT  
TGCTAGAATAGGTAATAATGAGATCACCATTCTAGGAAATGATGCAGAGATAAGTACTG  
ACATTGATCCGCAAGAAGCTCAACAAGCTCTTGAAAAAGCGGAAGATAACTTGCGTAA  
AGCAGAAGGTAAAAGACAAGCAATTGAGGCGAATCTAGCTCTGAGACGAGCTAAGAC  
ACGAGTAGAAGCTATCAATGTTATTTCCATGAAAAATGTAACCTGATTCTTTTGTTCCTT  
G---CACTGGCCATCCGCCGGGGTTTTGGGTTTAATACCGATATTTTAGCAACAAATCCA  
ATAAATCTAAGCGTAGTACTTGGTGTATTGATTTATTTTGGAAAGGGAGTGTTAAATGAT  
TTATTAGATAATCGAAAACAGAGGATCTTGAGTACTATTTCGAAATTCAGAAGAGTTACG  
TCAAGCAGCTATTGAACAGCTCGAAAAAGCCCGGGCGCGCTTACGTAAAGTGGAAC  
AGAAGCCAATGAATATCGAGTCAATGGATACTCCGAGATAGAACGAGAAAAAGAAAAT  
TTGATTAATGCTACTTCTGATAATTTGGAACGATTAGAAAATTACAAAAATGAAACCCTT  
CTTTTTGAACAACAAAGAGCGATTAATCAAGTACGACAACGAGTTTTTCCAACAAGCCT  
TACAAGGGGCTCTAGGTACTIONTCTGAATAGTTGTTG---AGTGAGTTACATTTTCGTACCAT  
CAGTGCTAATATTGGCATTCTCGGGTTATGGAAGAA-----ATGAATCCACTGATTTCT  
GCCGCTTCTGTTATTGCTGCTGGATTGGCTGTAGGGCTTGCTTCTATTGGACCTGGGGTT  
GGTCAAGGTACTGCTGCGGGTCAAGCTGTAGAAGGTATTGCGAGACAGCCAGAAGCA  
GAGGGTAAAATACGAGGTACTIONTTATTGCTAAGTCTGGCTTTTATGGAAGCTTTAACAAT  
TTATGGACTGGTTGTGGCATTAGCACTTTTATTTGCGAATCCATTTGTTATGAATGTTATA  
CCATGTTCCATTAACACACTCACAGGGCTATATGATATATCGGGTGTAGAAGTAGGCCA  
ACATTTATATTGGCAAAATAGGAGGTTTACAAGTCCATGCCCAAGTACTTATTACTTCTTG  
GGTCGTAATTGCTATCTTATTAGGTTCCGTTACCCTAGCTGTTTCGGAATCCACAAACCAT

TCCGGCTGACGGTCAGAATTTCTTCGAATATCTCCTTGAATTCATTCGAGACTTGAGTA  
AAACTCAGATTGGAGAAGAATATGGGCCTTGGGTTCTTTTATTGGAACATGTTCTTAT  
TTATTTTGTCTTAACTGGTCAGGTGCTCTTTTACCTTGGAAAATCATAGAGTTACCTC  
ATGGGGAGTTAGCTGCGCCACGAATGATATAAACACTACTGTTGCTTTAGCTTTACTC  
ACCTCAGTGGCATATTTCTATGCGGGTCTTTTCGAAAAAAGGTTTGAGTTATTTTGGGAA  
ATACATTCAACCAACTCCAATACTTTTACCAATTAACATCCTAGAAGATTCACAAAACC  
TTTATCACTTAGTTTTCGACTTTTCGGAAATATATTGGCTGATGAATTAGTCGTTGTTGTT  
CTTGTTTTCTTAGTACCTTTAGTAGTTCCTATACCTGTTATGTTTCTTGGATTATTCACAA  
GCGGTATTCAAGCTCTTATTTTGTCAACTTTAGCCGCGGCTTATATAGGTGAATCCATGG  
AGGGTCACCATATGATATTTGTAACCTTGTAGAACATATATTAACATCATATCTTTTTTCGAT  
CATTCAGTTGTAATTATCATTAGTTGCTGACCTTTTTTGTTCACGAAATCCCAGGATT  
ATCTGATTCATCGGAAAAAGGGATGATAGCTACCTTTTTGTCAATAACAGGATTATTAGT  
TATTCGTTGGATTTATTCGGGACATTTTCCATTAAGTAATTTATATGAATCCTTAATGTTCC  
TTTTCGTGGAGTTTTCGCTATAATTCATATGATTCCTAAAATATGGAAAAATAAAAAATTATTT  
AAGTGCAATAACCACACCAAGCGCTATTTTACTCAAGCCTTTGCCACTTCGGGTCTTT  
CAACAGAAATGCATCAATCGTCAATATTAGTACCTGCTCTACGGTCCCATGGTTAATGA  
TGCATGTAAGTATGATGTTGTTGAGTTATGCAGCTCTTTTAGTTGGATCTTTATTTTCAAT  
TGCTCTTCTAGTAATTACATTCGAAAAAATATCAAAATTTTTGTTGAAAACCAGCAGAT  
GGAATATTTAACTTTGAATGAAAACATTTTAGAAAATACTTCTTTTTCTTTTAAAAA  
TTATTACAAATATCAATTGATAGAAAGATTGGATTATTGGAGTTCTCGTGTATTAGTATA  
GGATTTACTTTTTTAACTATAGGTATTCTCTCTGGAGCAGTATGGGCTAATGAGGCATGG  
GGATCCTATTGGAATTGGGACCCTAAAGAACTTGGGCATTTATTACTTGGACAATATAC  
GCAATTTATTCACACACTAGAACAAACCAAAAATTGGCAAGGTGCGAATTCGGCAATAG  
TGGCTTCCATAGGATTTCTTATAATTTGGATATGTTATTTTGGGGTTAATCTATTAGGAATA  
GGACTACATAGTTATGGTTCATTCATATTAAGT-----

-----ATGCTAAAGGAGTACCCTGAGACACATCTACAAAAGCT  
TCGTATAGGAATACACAAAGAAACAGTACAATTGGTCAAATAACATAATGAATATAATTT  
ACATAGTATTTGCATTTCTCGACAAATATAATCTGTTTCGCTATTCTAAGTGGTTATTTTA  
TTCTGGGTAATGAAAACTTGTCATTCCTAATTCTTGGATTCAGGAATTCCTATATAACTT  
AAGTGACACAATAAAAGCCTTTTGTATTCTTTTAGTCACTGATTTATGGATTGGATTCCA  
CTCTCCACATGGTTGGGAACATAATGATTGGTTCGGTATAACAACGATTTTGGATTGGCAC  
ATAACGATCAAATTATATCCGGTCTTGTTCCTACTTTTCCAGTCATTCTAGATACAATTGT  
CAAATATTGGATTTTTTATTATTTAAATCGTGTATCTCCTTCACTTGTAGTCATTTATCATT  
CAATGAATGAAATGCCCATTTGGTGTTCCAAAGTACCTTTTCGGAGTCTGGAGAGGA  
AGATGCAGTTTGGGTTGACGTAAC---CGACTTTATCGAGAAAGATTACTTTTTTTAGG  
CCAAGAGGTTGATAGCGAGATCTCGAATCAACTTGTGGTCTTATGGTATATCTTAGTAT  
AGAGGATGATACTAAGGATCTTTATTTGTTTATAAACTCCCCGGTGGGTGGGTAATACC  
AGGAATAGCTATTTATGATACTATGCAATTTGTGCCACCCGATGTACATACAATATGCATG  
GGATTAGCGGCTTCAATGGGATCTTTCATTCTGGTTCGGAGGAGAAATTACCAAACGTCT  
AGCATTCCCTCACGCTAGGGTTATGATTCACCAACCTGCTAGTTCTTTTTTATGAGGCAC  
AAGCAGGGGAATTCATCCTGGAAGCAGAAGAATACTGAACTTCGTGAAACCCTCA  
CAAGGGTTTATGTGCAAAGAACCGGTAACCCCTTATGGGTTGTATCCGAAGACATGGA  
AAGGGATGTTTTTATGTCAGCAACGGAAGCCCAAGCTTATGGCATTATTGATCTTGTGG



AATCTTGGATGGAAATTTCTTTTACCTATTTCTCTAGGGAATCTATTATTGACAACCTTCTT  
CCCAACTTGTTTCACTAATGATCTGGCATGTACAGAATGAAGTTTTTCATTCTCGATTCTA  
CGAGAATTTTTATGAAAGCGTTTTCAATTGCTTCTCTTCAATGGAAGTTTTCATTTTCCCAG  
AATGTATTCTCATTTTTTGGCCTAATTTCTTCTTCTGATGATCGATTCAACCTCTGATCAAAA  
AGATAGACCTTGGTTCTATTTTCATCTCTTCAACAAGTTTAGTAATGAGCATAACAGCCCT  
ATTGTTCCGATGGAGAGAAGAACCTATGATTAGCTTTTCGGGAAATTTCCAAACGAAC  
AATTTCAACGAAATCTTTCAATTTCTTATTTTACTATGTTCAACTTTATGTATTCTCTATC  
CGTAGAGTACATTGAATGTACAGAAATGGCTATAACAGAGTTTCTGTTATTTCGTATTAAC  
AGCTACTCTAGGAGGAATGTTTTTATGTGGTGCTAACGATTCAATAACTATCTTTGTAGC  
TCCAGAATGTTTCAGTTTATGCTCCTACCTATTATCAGGATATAACCAAGAGAGATGTACG  
GTCTAATGAGGCTACTACGAAATATTTACTCATGGGCGGGGCGAGCTCTTCTATTCTGGT  
TCATGGTTTCTCTTGGCTATATGGTTTATCCGGGGGGGAGATCGAGCTTCAAGAAATAG  
TGAATGGTCTTATCAATACACAAATGTATAACTCCCCAGGAATTTCAATTGCGCTTATAT  
CCATCACTGTAGGAATTGGGTTCAAGCTTTCCCCAGCCCCTTTTCATCAATGGACTCCT  
GACGTATACGAAGGATCTCCCACTCCAGTCGTTGCTTTTCTTTCTGTTACTTCGAAAGT  
AGCTGCTTCAGCTTCAGCCACGCGAATTTTCGATATTCCTTTTTATTCTCATCAAATGA  
ATGGCATCTTCTTCTGGAAATCCTAGCTATTCTTAGCATGATATTGGGGAATCTCATTGCT  
ATTACTCAAACAAGCATGAAACGTATGCTTGCCTATTCGTCCATCGGTCAAATCGGATAT  
GTAATTATTGGAATAATTGTTGGAGACTCAAATGATGGATATGCAAGCATGATAACTTAT  
ATGCTGTTCTATATCGCCATGAATCTAGGAACTTTTGCTCGCATTGTATTATTTGGTCTAC  
GTACCGGAACTGATAACATTTCGAGATTATGCAGGATTATACACGAAAGATCCTTTTTTG  
GCTCTCTTTCAGCCCTATGTCTCTTATCCCTAGGAGGTCTTCCTCCACTAGCAGGTTTT  
TTCGAAAACCTCCATCTATTCTGGTGTGGATGGCAGGCAGGCCTTTATTTCTTGGTTTC  
AATAGGACTCCTTACGAGCGTTGTTTCTATCTACTATTATCTAAAAATAATCAAGTTATTA  
ATGACTGGACGAAACCAAGAAATAACCCCTCACGTGCGAAATTATAGAAAATCCCCTT  
TAAGATCAAACAATTCCATCGAATTGAGTATGACTGTATGTGTGATAGCATCTACTATAC  
CAGGAATATCAATGAACCAATTCTTGCAATTGCTCAGGATACCCTCTTTATGTTTTCTGC  
TTCACGAATATGATATTTTTCTGGGCATTTCTGATAATATCAAGTGTTATTCCATCTTGGC  
ATTTATTATTTCTGGAGTTTTAGCCCCGAGTAGTGAAGGACCGGAGAAGCTCTCTAGTT  
ATGAATCGGGTATAGAACCTATGGGGGATGCTTGGTTACAATCCGAATTCGCTATTATA  
TGTTTGCTCTAGTTTTTGTGTTTTTGTGTTTTTATCCATGGGCAA  
TGAGTTTTGATGTATTAGGTGTATCCGTATTTATAGAAGCTTTAATTTTTGTGCTTATCCC  
AATTGTTGGTTCAGTTTATGCATGGCGAAAAGGAGCATTGGAATGGTCT-----  
-----ATGGGTATATGTTTAT  
TAGAACTCCTTATAATGACCTATGTATTCTGTTATCATTTTCAATTGGACGATCCATTAAT  
CCAATTTGAAGATGATTTTAAATGGATAAATATTTTTGATTTTCATTGGAGACTGGGAAT  
CGATGGACTTTCCATAGGACCCATTTACTGACAGGATTTATCACTACTTTAGCTACTTT  
AGCGGCTTGGCCAGTTACTCGAGATTCTCGATTGTTTCATTTCCCTGATGTTAGCAATGTA  
TAGCGGTCAAATAGGATTATTTCTTCTCGAGATCTTTTACTTTTTTTTTATGATGTGGGAG  
TTAGAATTAATTCCAGTTTATTTACTTTTATCCATGTGGGGGGGAAAAAACGTCTGTAT  
TCAGCTACAAAGTTTATTTTATACACCGCAGGGGGTTCTATTTTTCTTTTAAATAGGAGTT  
CTAGGTATGGGCTTATATGGCTCCAATGAACCTACATTAATTTTGAACATTAGGTAAT  
CAATCGTATCCCCTAGCATTGGAAATACTATTATATTTTGGCTTCCTTATTGCTTTTGTCTG  
TCAAATCACCGATTATACCCTACATACATGGTTACCTGATACCCACGGGGAAGCCATT

ATAGTACATGTATGCTTCTAGCCGGAATCTTATTAAGATGGGAGCATATGGATTGATTC  
GTATTAATATGGAATTTTTATCCCATGCTCATTCCCTATTTTCACCATGGTTGGTAATTGTA  
GGAECTATACAAATAATTTATGCCGCTTCAACCTCTCTCGGTCAACGCAATTTAAAAAA  
AAGAATAGCGTATTTCTCCGTATCTCACATGGGTTTCAACAATTATAGGAATTGGTTGCT  
AACCAACTGGGCTTAATGGAGCTATTTTACAATTACTCTCGCATGGATTATTGGTGC  
TGCCCTATTTTCTTGGGGGAACTAGTTGTGATAGAATAAGGCTTGTTTATCTTGACGA  
AATGGGAGGAATAGCTATTTCCAATGCCAAAAATTTTACTATGTTTCAGTAGTTTCTCAAT  
GGCTTCTCTTGCAATGCCAGGAATGAGTGGTTTTGTTGCAGAATCAATAGTATTTTTGG  
GAATAATTACTAGTCAAAAATATCTTTAATGACAAAATACTAATTACTTTTGTATGGC  
AATTGGAATCATATTAACCTCTATTTATTTATTATCTATGTCACGTCAGATGTTCTATGGAT  
ACAAATTATTCAATCTTTCAAACCTCTTTCTTTGTGCGATTCTGGACCACGAGAACTATTTG  
TTCAATCTGTGTCTTTCTACCCGTAATAGCGATTGGTATTTATCCTGATTTGGTTATTTT  
ATTATCTGTTGACAAGGTACAAGCAATTCTATCTAATTATTATTATAGAATGATGTTTGAG  
CATGACTTTTTTTGAGTGCATATTTGTTTTCCATTGGTATTTATGGATTGATCACAAGTC  
GAAGCATGGTTAGAGCACTTATGTGTCTTGAGCTTATACTAAATTCGGTTAATATTAATC  
TTGTGACATTTTCTGATTTATTTGATAGTCGACAATTTAAAAGGAGATATTTTCTCAATTTT  
TGTTATAGCTATTGCAGCGGCTGAAGCAGCTATTGGTCTAGCTATTGTCTCGTCGATCTA  
TCGTAACAGAAAATCAACACGTATCAATCAATCAAATTTGTTGAATAAAATGGAACATA  
CATATCAATATGCATGGATAATACCTTTACTTCCACTACCTGTTACTATGTCAATAGGGTT  
TGGACTTCTCCTTATTTCCAACAGCAACAAAAACATTCGTTCGTATGTGGTCTTTTTCTTA  
GTGTTTTTATTGCTAAGTATAGCTATGATTTTTTCAGCCAATCTGGCTTTTTCAACAAATAAA  
TGGAAGTTTTATTTATCAATATTTATGGTCTTGGACCATCAATAATGATTTTTCTTAGAG  
TTCGGATACTTTATTGATCCACTTACTTTCGATTATGTTAATTTAATCACTACTGTTGGAA  
TTTTGGTTCTTATCTATAGTGACAATTATATGTCTCATGATCAAGGATATTTGAGATTTTTT  
GCTTATATGAGTTTTTTCAATGCTTCAATGTTGGGATTAGTTACTAGTTCTAATTTGATAC  
AAATTTATATTTTTTGGGAATTGGTAGGAATGTGTTTCGTATTTATTAATAGGTTTTTGGTT  
CACCCGACCAAGTGCAGCAAGTGCTTGCCAAAAGCTTTTGTAACCAATCGTGTAGGG  
GATTTTGGTTGTTATTAGGAATCCTAGGTTTTTATTGGATGACAGGAAGTTTCGAATTT  
CGGGATTTGTTGAAACATTTAATAAG---GAGGGCAATTCCTTATTTCCCACTCTGTGTG  
CCTTTCTATTATTCCTCGGTGCAATTGCTAAATCCGCACAATCCCCCTTCATGTATGGTT  
ACCCGATGCCATGGAGGGACCTACTCCCATTTTCGGCCCTTATACATGCTGCTACTATGGT  
AGCTGCGGGAATTTTTCTTGTGGCTAGGCTTCTCCTCTTTTTACAGGCATACCTTATATT  
ATGAATATAATTTCTTAATAGGTATAATAACACTATTTTTTAGGAGCAACTTTGGCTCTTG  
CTCAAAGAGATATTTAAAAGAAGTTTGGCTTATTCTACAATGTCTCAATTGGGTTATATTA  
TGTTAGCCCTAGGACTAGGTTCTTATCAAGCTGCTTTGTTTCATTTGATCACTCATGCCT  
ATTTCAAAGCATTATTGTTTTTGGGATCTGGATCTATTATTCATTCAATGGAACCTCTTGT  
TGGATATTCACCCGATAAAAGTCAGAATATGGTTCTTATGGGTGGTTAACAAGATATAT  
TCCAATTACAAGAACTACATTTTTATTGGGTACACTTTCTCTTTGTGGTATTCACCTCTT  
GCTTGTTTTTTGGTCTAAAGATGAAATCTTAGTGAAAGTTGGTTGTATTCACCCACTTTC  
GCAGTCATAGCTTATTTTACAGCAGGACTTACTGCATTTTATATGTTTCGGGTCTACTTAC  
TTACCTTTGAAGGGAATTTACATGTTTCAGTTTCAAATTTACAGTGGAACCTCAAATATT  
TCATCTTATTCGATATCCTTATGGGGAAAGGAAGCACCTAAGCCAGGA-----AATTTG  
TTTTCTCAACAATCAAT-----AACAAAAAAAT-----ACTTCTATGTATCCTCACGAGTCA  
GATAATACTATGTTATTTCTTTGCTTGTATTGGTAGTATTTACTTTATTCGTTGGATTTCAT



AGGAATTCCTTTAGACTTGAATTTATTATCTAAATGGTTGGCTCCATCAAAAAATCTTTT  
ACATCCAAATTCAGAAGATTCCATAGACTTGTATGAATTTTTTACAAATGCAAGTTTTTC  
AGTAAGTATAGCTTTGTTTCGGAATATTTGTAGCATCCATTTTTTATGGATCTCCTTATTCA  
TCTTTCCAAAATTTGGATTTAATCAATTCATTTGTCCTTTTTTTGGACAAAATGCAAAT  
GTTATATACAATTGGTCCTATAATCGTGGTTATATAGATTTATTCTATACAATGTAGTAAC  
TCAGAGTATAAGAGAATTAGCTAAACTAACTCATTTTTTTGATAGATACATAATTGATGG  
AATCACAAATAGTGTGGGGGTTGTAAGTTTCTTTGGAGGTGAAGCAATAAAATATTTAG  
TAGCAGGAGGGCGAATCTCGTCTTATCTCTTTTTTTTATTATCGTTTAIGTTAATTTTCAT  
TTATTTTTCGTTTATGGATTTAACTGGACCAATACATGATATTCTTGTAAGTATTCTGGGA  
TTAGTTCTTATATTAGGGGGCCTAGGAGTAGTTTTATTACCAATCCAATTTATTCTGCTT  
TTTTCTTTGGGATTGGTTCTTGTGTTGTGATCCTTATTCTATATTTTATTGAACTCCTATTTT  
GTAGCTGCTGCACAGCTCCTTATTTATGTGGGGGCTATAAATGTCTTAATCATATTTGCTG  
TAATGTTTATGAAAGGTTTCAAGATATTCCAACGATTTCCATCTTTGGACTGTGGGAGATG  
GGGTTACTTCCCTGGTTTTGTACAAGTATTCTTTTTTCTACTAATTAGTATTATCTCAGATAC  
ATCATGGTACGGGATTATTTGGACTACAAAATCAAACCACATTATAGAGCAGGACCTTAT  
AAGTAATGTTCAACAGATTGGAATTCATTTATCAACAGATTTTTTTCTTCCATTTGAACT  
CATTTCTATAATTCTATTAGTTGCCTTAATAGGTGCAATTACTATGGCTCGTCAAATGACT  
GGACCGGCTACAAGAAACGATCTTATGATAGTCAATATGGGTCTCAACACCCATCGAT  
GCATGGTGTCTTCGACTAATCGTTACTCTGGATGGTGAAGACGTTATTGACTGTGAAC  
CCATACTAGGTTATTTACATAGAGGGATGGAAAAAATTGCAGAAAACCGAACAATTGTC  
CAATATTTACCTTATGTAACGCGTTGGGATTATCTAGCTACTATGTTTACAGAAGCAATA  
ACTGTAATGCACCAGAACAATTGGGAAATATTCAAGTACCTCAAAGAGCGAGCTATAT  
CAGAGTTATTATGCTAGAGCTAAGTCGTATAGCTTCTCATTTGTTATGGCTTGGACCTTTT  
ATGGCAGATATTGGTGCACAGACTCCCTTTTTCTATATTTTTTAGAGAGAGGGAATTGATA  
TATGATCTATTTGAAGCTGCCACAGGTATGCGAATGATGCATAATTATTTCCGTATTGGC  
GGAGTAGCTGCCGATTTACCTTATGGATGGATAGATAAATGTTTAGATTTTTGCGATTATT  
TTTTAACAGTAATTGAAGAATATCAGAACTTATTACACGAAATCCCATTTTTTTTGGAAC  
GAGTTGAGGGAGTAGGGATTATTAGAGGAGAGGAAGCAATAAATTGGGGATTGTCGGG  
CCCATGTTACGAGCTTCCGGAATCTCATGGGATCTGCGTAAAGTTGATCAATATGAAT  
GTTATAATGAATTTGATTGGGAAGTCCAATGGCAAAAAGAAGGGGATTCACTAGCTCGT  
TATTTAGTACGAATGAGTGAAATGAGGGAATCAATAAAAATAATTCAACAGGCTCTAGA  
AGGAATCCGGGGGGACCCTATGAAAATTTAGAAGTCCGACGC---GATAGAACAAAAG  
ATTCCGAATGGAATGATTTTGAATATAGATTCATTAGTAAAAAACCTTCGCCCAATTTTG  
AATTGTCAAACAAGAACTTTATGTCAGAGTAGAAGCCCCAAAAGGGGAATTGGGCAT  
ATTTCTGATAGGAGATCAGAACGTTTTCCCTTGGAGATGGAAAATTCGTCCGCCAGGTT  
TTATCAATTTGCAAATTTTGCCTCAGCTAGTTAAAAGAATGAAATTGGCTGATATCATGA  
CGATACTAGGTAGTATAGATATTATTATGGGAGAAGTTGATCGTATGTTTCTATGGTGAC  
TGGATTCATGAATTATGGCCAACAACAGTACGAGCTGCAAGGTATATCGGTCAAGGTT  
TTATGATTACCTTATCCCATGCAAATCGTTTACCCGTAATTTCAATATCCTTATGAAAA  
ATTAATCACATCAGAACGTTTCCGGGGTCGGATTCATTTTGAATTCGATAAATGTATTGC  
TTGTGAAGTATGTGTTTCGTGTATGTCTATAAATCTACCCGTTGTAGATTGGAGATTGGA  
AACTAATATTA AAAAGAAACAATTGCTTAATTATAGTATTGATTTTGGGGTGTGTATATTT  
TGTGGTAATTGTGTCGAGTATTGTCCAACAACACTGTTTATCCATGACTGAGGAATATGA  
ACTTTCTGCTTATGATCGCCACGAATTGAATTATAATCAAATTGCATTGGGTCGTTTACC

AATATCCATAATGGGAGATTACGCAATTCAACCAATTATGAATTCAAAAATAGACAAGG  
ATAAACCTCTTGATTCAGGCACTATTAACAATAAGATGCAGAGTCATTTATCTGCTTGGC  
TAGTCAAGCATGAGCTTGTTTCATAGATCCTTGGGCTTCGATTACCAAGGAATAGAGACT  
TTACAAATAAAACCGGAAGATTGGGACTCCATTGCTGTCATTTTCATATGTGTATGGTTAC  
AATTACTTACGCTCTCAGTGTGCCTATGATGTCGCACCTGGTGGATTTTTAGCTAGTGTA  
TATCATCTTACGAGAATACAGTATGGGGTGGATCAACCGGAGGAAGTATGTATAAAAGT  
ATTTGCCCAAGGCAAAATCCTAGAGTCCCATCTGTTTTCTGGGTTTGGAGGAGTGCTG  
ATTTTCAAGAACGTGAATCTTATGATATGTTGGGAATTTCTTATGATAATCATCCACGCCT  
AAAACGTATTTTGATGCCTGAAAGTTGGATAGGCTGGCCTTTACGTAAGGACTATATTA  
CCCCAATTTCTATGAAATACAAGATGCTCAT-----  
-----ATGGTCTTAGCTCCTGAATATTCAAACAATAA  
AAAT-----AAAAAGATTCCATTGAGACAGTTATGAATTTGATTGAGTTCCCGTCACTT  
GACCAAACAACCCCAATTCAGTTATTTCAACTACGTTGAATGATCTTTCAAATTGGTC  
AAGACTCTCGAGTTTATGGCCGTTCTATATGGTACCAGTTGTTGTTTTATTGAATTTGC  
TGCATTAATAGGCTCACGATTTCGACTTTGATCGTTATGGATTGGTACCAAGATCAAGTCC  
TAGGCAAGCGGACCTAATTTTAAACAGCTGGCACAGTAACAATGAAAATGGCTCCTTCT  
TTAGTGAGATTATATGAACAAATGCCTGAACCAAATATGTGATTGCTATGGGAGCCTGT  
ACTATTACAGGAGGGATGTTTAGTACCGATTCTTATAGTACCGTTCGGGGAGTCGATAA  
GTTAATTCCTGTGGATGTCTATTTGCCAGGTTGCCCGCCTAAACCAGAGGCAGTTATAG  
ATGCAATAACGAAACTTCGTAAGAAGATATCTCGAGAAATATATGAAGATAGAATTGGC  
TCTCAA---GAAAATCGATGTTTTACTACCAATCACAGTTTAAATGTTTCAGCGCAGTATTC  
ATACTGGAAATTACAATCAAGAATTGCTCTATCAATCACCATCTACTTCGGAAATACCTG  
AA-----TTTTTTAGATCCAAAAGTTCAATATCTTCCACAAATTAGTGAATATGCAAAATA  
GAAATACTTTTTTGGGGGTAAAGGAGCAGATGACTCGATTTATTTCTGTATCGATCGTGA  
TATATGTAATAACTCAGACATCTATTTCAAATGCATATCCCATTTTTGCGCAGCAGGGTTA  
TGAAAATCCACGAGAAGCAACTGGACGAATTGTTTGTGCCAATTGCCATTTAGCTAGTA  
AACCCGTGGATATTGAGGTTCCGCAATCTGTGCTTCCCTGATACTGTATTTGAAGCAGTA  
GTTAGAATCCCTTATGATACGCAAGTGAAACAAGTTCTTGCTAATGGGAAAAAAGGGG  
GTTTGAATGTGGGGGCCGTTCTTATTTTACCTGAGGGATTCGAATTAGCCCCTCCCGATC  
GTATTTACCCGAGATGAAAGAAAAGATAGGCAATATTTCTTTTTCAGAGTTATGGTCCC  
ACAAAAAGAAATATTCTTGTCGTAGGTCCAGTGCCTGGTCAGAAATATAGGGAAATAGT  
CTTTCCTATTCTTTCTCCAGACCCGGCAACGAGGAAGGACGTTCACTTCTTAAAATATC  
CTATATACGTAGGCGGAAACAGGGGAAGGGGTGAGATTTATCCCAGTGGTAGCAAGAG  
TAACAATACTGTCTATAATGCTACAGCCGCAGGTGTAGTAAGCAAAATAGTACGTAAAG  
AAAAAAAGGGATATGAAATAACCATAACTGATCCATCGGATGGGCATGAAGTGGTTGAT  
ATTATACCTCCAGGACCAGAACTTCTTGTTTCAGAGGGTGAGTCTATCAAACCTTGATCA  
ACTATTAACGAGTAATCAAATGTCGGGGGGTTGGTTCAGGGAGATGCCGAGATAGTA  
CTTCAAGATCCGTTACGCGTCCAAGGTCTTTTGTCTTCTTAGCATCTGTTGTTCTAGCA  
CAAATCTTTTTAGTTCTTAAAAAGAAACAGTTTGAAAAGGTTCAATTGTTGAAATGAA  
TTTTATGAAAAAGTCTATGACTGGTTTCGAAGAGCGTCTCGAGATTCAGGCGATTGCA  
GATGATATAACTAGTAAATATGTTCCCTCACGTCAACATATTTTATTGTCTAGGGGGGA  
TCACACTTACTTGTTTTTTAGTACAAGTAGCTACGGGTTTTGCTATGACTTTTTACTATC  
GACCAACTGTTACAGAGGCCTTTGCCTCTGTTCAATACATAATGACTGAGGCGAACTTT  
GGTTGGTTAATCCGATCAGTTCATCGATGGTCAGCAAGTATGATGGTTCTAATGATGATT

TTACACGTATTTTCGTGTGTATCTGACAGGCGGATTTAAAAACCTCGCGAATTAACCTTG  
GGTTACCGGTGTAGTTCTGGGTGTATTGACTGCATCTTTCGGTGTAACCTGGTTATTCCTT  
ACCTTGGGACCAAATTGGTTATTGGGCAGTTAAATTGTGACAGGCGTACCTGATGCCA  
TTCCGGTAATAGGATCACCTTAGTAGAGTTATTACGAGGAAGTGCTAGTGTGGGTCAA  
TCCACTTTGACTCGTTTTTATAGTTTACACACTTTTGTATTACCTCTCCTTACTGCCGTAT  
TTATGTTAATGCACTTCTTAATGATACGTAAGCAAGGTATTTTCAGGTCTTTAATCCCAAT  
AACAAAGAAACCTGACTTGAATGATCCTGTATTAAGAGCTAAATTGGCTAAAGGGATG  
GGACATAATTATTACGGAGAACC CGCATGGCCCAATGATCTTTTATATATTTTTCCAGTA  
GTTATTTTGGGTACTATAGCATGTAACGTAGGTTTAGCGGTCCTAGAACCTCAATGATT  
GGTGAACCGGCAGATCCATTTGCAACTCCTTTGGAAATATTACCTGAATGGTACTTCTT  
TCCGTCTTTCAAATACTTCGCACAGTACCTAATAAGTTATTGGGTGTTCTTTAATGGT  
TTCAGTACCAGCGGGATTATTAACCGTACCTTTTTTGGAAAATGTGAATAAATTCCAAA  
ATCCATTTTCGTCGGCCAGTAGCTACAACAGTCTTTTTGATCGGTACTGTAGTAGCTCTTT  
GGTTAGGTATTGGAGCAACATTACCTATTGATAAATCTCTTACTTTAGGTCTTTTTATGAT  
TGAAGTTTTTCTATTTGGAATCGTGTTAGGTCTAATTCCTATTACTTTGGCAGGATTATTC  
GTAACGGCGTATTTACAATAACCGACGTGGTGATCAGCTGGACCTTATGCTTACTATAACT  
AGTTATTTTCGGTTTTCTATTGGCTGCTTCAACTATAACCTCAGCGCTTTTGATTGGTTTG  
AACAAGATACGACTTATTATGGATATAGTAAGTCTCGCTTGGGCTGCTTTAATGGTAGTC  
TTTACATTTTCCCTTTCACTCGTAGTCTGGGGGAGGAGTGGACTTATGATTATTAGTTTCG  
CCGGAACCAGAAGTTAAATTTTGGTGGATAGGAATCCCGTAAAAACGTCTTTTGAGC  
AATGGGCCAAACCCGGCCATTTCTCAAGAACAAATAGCTAAGGGTCTGAGACTACCAC  
TTGGATCTGGAACCTACATGCTGATGCTCACGATTTTGATAGTCATACCAATGATTTGGA  
GGAGATCTCTCGAAAAGTATTTAGTGCTCATTTTCGGTCAACTCTCCATTATCTTTCTTTG  
GCTGAGTGGCATGTACTTCCATGGCGCTCGTTTTTCTAATTATGAAGCATGGCTAAGTGA  
TCCTACTCACATTGCACCTAGTGCCAGGTGGTTTTGGCCAATAGTGGGTCAAGAAATAT  
TAAATGGTGATGTGGGCGGGGTTTTCCGAGGAATACAAATAACCTCTGGCTTTTTTTCAG  
CTTTGGCGAGCATCTGGAATAACTAGTGAATTACAACCTCTATTGTACTGCAATCGGTGC  
ATTGGTCTTTTTCAGCATTAAATGCTTTTTTTCGGGTTGGTTCCATTATCACAAAGCTGCCCC  
AAAACCTGGCTTGGTTCCAAGATGTAGAATCCATGTTGAATCACCACTTAGCGGGGTTAC  
TAGGACTTGGGTCTCTCTCTTGGGCGGGACACCAAATTCATGTATCTTTGCCGATTAAC  
CAATTTCTTAATGCTGGAGTAGATCCTAAGGAGATAACCACTTCCTCATGAATTTATCTTG  
AATCGGGATCTTTTGGCTCAGCTTTATCCTAGTTTTGCGGAGGGAGCAACCCCGTTTTTT  
ACCTTGAATTGGTCAAATACTCAGATTTTCTGAGTTTTTCGTGGAGGATTAGATCCAAT  
AACTGGGGGTCTATGGCTGAGCGATACTGCACACCATCATTTAGCCATTGCTATTCTTTT  
CCTGATAGCTGGTCATATGTATAGGACCAACTGGGGTATTGGTCATGGCTTGAAAGACA  
TTTTAGAGGCTCATAAAGGTCCATTTACCGGTCAGGGCCATAAAGGTCTCTATGAAATC  
CTAACAACGTCATGGCATGCTCAATTATCTCTTAACCTGGCTATGTTAGGCTCTTTAACC  
ATTATTGTAGCTCACCATGTACGCCATGCCCCCTTATCCATACTTAGCTACTGACTATG  
GTACACAACCTTTCATTGTTACACATCATATGTGGATTGGTGGATTCTCATAGTTGGAG  
CTGCTGCACATGCAGCCATTTTTATGGTAAGAGACTACGATCCAACCTACTCGATACAAC  
GATCTATTAGATCGTGTCTTAGGCACCGCATGCAATCATATCACATCTCAACTGGGTC  
TGTATATCCTAGGTTTTTACAGTTTCGGCTTGTATATTCATAATGATACCATGAGTGCTT  
TAGGGCGTCTCAAGATATGTTTTTACAGATACCGCTATAACAATTACAACCGATCTTTGCC  
AATGGATACAAAACCCCATGCTTTAGCACCTGGTACAACAGCTCCTGGTGCAGCAGC

AAGCACCAGCTTAACTTGGGGGGGCGGTGAATTAGTAGCAGTAGGCGGAAAAGTCGC  
TTTGTACCTATTCCATTAGGTACCGCAGACTTTTTGGTCCATCACATTCATGCATTTACG  
ATCCATGTAAGTATTGATACTACTAAAAGGTGTTCTATTTGCTCGTAGCTCCCGTTTAA  
TACCTGATAAAGCAAATCTTGGTTTTTCGTTTTCCCTTGTGATGGGCCTGGAAGAGGGGGT  
ACGTGTCAAGTATCCGCCTGGGATCATGTTTTCTTAGGTCTATTCTGGATGTACAATTCG  
ATTTTCGATAGTAATATTCCATTTTCAGTTGGAAAATGCAATCGGATGTTTGGGGTACTGTA  
AGTGATCAAGGGGTCGTAACCTCATATCACAGGAGGAAAACCTTGCACAGAGTTCCACTA  
CTATTAATGGGTGGCTTCGAGACTTTTTATGGGCACAGGCAGCTCAGGTAATTCAGTCT  
TATGGTTCTTCATTATCTGCATATGGTCTTTTTCTTCTTAGGTGCTCATTGTGATGGGCTTT  
CAGTTTAAATGTTTTCTATTCAGCGGCCGTGGTTATTGGCAAGAACTTATTGAATCTATTGT  
TTGGGCGCATAACAAATTAAGTTGCTCCTGCTACTCAGCCTAGAGCCTTGAGCATTG  
TACAAGGACGTGCTGTAGGAGTAACCCATTACCTTCTGGGTGGAATTGCCACAACATG  
GGCATTCTTCTTAGCAAGAATTATTTTCAGTAGGAATGGCATTAAAGATTTCCAAGGTTTAG  
CCAAGGTTTAGCTCAGGACCCACTACTCGTCGTATTTGGTTTTGGTATTGCTACCGCGC  
ATGACTTCGAGAGTCATGATGATATACTGAGGAACGTCTTTATCAGAACATTTTTGCTT  
CTCACTTTGGGCAGTTAGCAATAATCTTTCTGTGGACGTCCGGAAATCTGTTTCATGTA  
GCTTGGCAAGGAACTTTGAGTCATGGGTACAGGACCCTTTACACGTAAGACCCATTG  
CTCATGCAATTTGGGATCCGCATTTTGGTCAACCGGCAGTAGAAGCCTTTACTAGAGGA  
GGTGCTTCCGGCCCAGTTAACATTGCTTATTCCGGTGTTTATCAGTGGTGGTATAACAATC  
GGATTACGCACCAACGAGGATCTTTATACTGGAGCTCTTTTTCTATTATTTCTTTCTGCTA  
TATCTTTAATAGCAGGTTGGTTACACCTACAACCTAAATGGAAACCAAGTGTTCGTGG  
TTCAAAAATGCCGAATCTCGTCTTAATCATCATTTGTCAGGACTTTTCGGAGTAAGTTC  
CTTGGCTTGGGCAGGACATTTAGTTCATGTAGCAATTCCTGGATCCAGGGGGGAGTATG  
TCAGATGGAATAATTTCTTAGATGTATTACCATATCCCCAAGGGTTGGGCCACTTTTTTA  
CAGGTCAGTGAATCTTTATGCCAAAACCCGGATTCTAGTAGCCATTTATTTGGTACCT  
CCCAAGGAGCGGGAACGGCCATTTTAAACCTTCTTGGTGGATTCCATCCACAAAACGCA  
AAGTTTATGGCTCACTGATATGGCTCATCATCATTTAGCTATTGCATTCATTTTTCTGATA  
GCTGGTCATATGTATAGAATACTTTGGGATTGGGCACAGTATAAAAAGATCTTTTAGA  
AGCGCATAACCCCCGGGAGGCCGATTAGGACGTGGTCATAAAGGTCTTTATGACACA  
ATCAATAATTCGATTCATTTCAATTAGGTCTTGCTCTAGCTTCTTTAGGGGTTGTTACTT  
CTTTAGTAGCTCAACACATGTACTCCTTACCTGCTTATGCATTTATAGCCCAAGACTTTA  
CTACTCAAGCTGCGTTATACTCATCACCATAACATTGCAGGGTTCATCATGACAGGAG  
CCTTTGCTCATGGAGCTATATTCTTCATTAGAGATTACAATCCGGAACAGAATGAAGATA  
ATGTATTGGCAAGAATGTTAGCCATAAGGAAGCTATCATATCTCATTTAAGTTGGGCCA  
GCTTGTTTTTAGGATTCATACTTTAGGCCTTTATGTTTATAACGATGTCAATGCTTGCCTT  
TGGTACTCCGGAAAAACAAATCTTAATTGAACCTATATTTGCCCAATGGATACAATCCG  
CTCATGGTAAGACTTCATATGGGTTTGTATGACTCTTATCTTCAACGACAGGCCCCCGCAT  
TTAATGCCGGTAAAAGCATATGGTTACCTGGCTGGTTGAATGCTGTTAATGAG-----AGT  
AGTAATCACTCTTCTTAACGATAGGTCCTGGAGATTTCTTGGTTCATCATGCTATTGCT  
CTAGGTTTGCATACAACCTTATGATTTTAGTAAAAGGTGCTTTAGATGCACGTGGTTCT  
AAGTTAATGCCGATAAAAAGGATTTTCGGTTATAGTTTTCTTGTGACGGCCCGGGACG  
AGGTGGTACTTGTGATATTTTCGGCTTGGGACGCATTTTATTTGGCAGTTTTCTGGATGTT  
AAATACCATTGGATGGGTTACTTTTTTATTGGCATTGGAAACACATTACATTATGGCAAGG  
TAATGTTTCACAATTTAATGAATCCTCCACTTATTTGATGGGATGGTTAAGAGATTATCTA

TGGTTAAACTCTTCACAACCTTATCAATGGATATAATCCTTTTGGTATGAATAGTTTATCGG  
TCTGGGCGTGGATGTTCTTATTTGGACATCTTGTTTGGGCTACTGGATTTATGTTTTGAT  
TTCCTGGCGTGGGTATTGGCAGGAATTAATTGAAACTTTAGCATGGGCTCATGAGCGCA  
CACCTTTAGCAAATTTGATTCGATGGAGAGATAAGCCAGTGGCCCTTTCCATTGTGCAA  
GCAAGATTGGTTGGATTGGCCATTTTTCTGTAGGTTATATATTCACCTTATGCCGCTTCT  
TGATTGCCTCTACATCAGCAAAATTTGGTATGTCACATTCAGTAAAAATTTATGATACAT  
GTATAGGGTGTACTCAATGTGTTCGTGCGTGCCCTACGGATGTTTTGGAAATGATACCTT  
GGAATGGATGTAAAGCTAAGCAAATTGCCTCTGCTCCGAGAACCAGGACTGTGTGCGG  
TTGTAAGAGATGTGAAACCGCCTGTCCAACAGATTTTTTGAGTGTCCGTGTTTATTTATC  
GAATGAGACAACCTAGGAGTATGGGCCTAGGTTACATGACAGATTTCAACTTACCTCTA  
TTTTTGTGCCCTTAGTAGGCCTAGTATTTCCGGCATTGCAATGGCTTCTTTATTTCTTTA  
TGTTCAAAAAATAAGATTGTCATGCAAGATCTAAAAACATATCTCTCTGTGGCACCTG  
TACTGAGTACTCTATGGTTTGCAGTTTTAGCAGGTTTATTGATAGAAATTAATCGTTTATT  
CCCAGATGCCTTGTCAATCCCTTTTTTT-----ATGACTGCAATTTTAGAGAGACGCGAAA  
GTACAAGCCTATGGGGTCGTTTCTGCAACTGGGTAACCAGCACCGAAAACCGTCTTTA  
CATCGGATGGTTTGGTGTGTTTGGATGATCCCTACCCTATTGACTGCAACTTCTGTATTTATT  
ATCGCCTTCATTGCTGCTCCTCCAGTAGATATTGATGGTATTCGTGAACCTGTTTCTGGA  
TCTCTACTTTACGGAACAATATATTTCTGGTGCCATTATTCCTACTTCTGCAGCTATTG  
GTTTGCATTTTTATCCAATCTGGGAAGCAGCATCTGTTGATGAGTGGTTATAACAATGGTG  
GTCCTTACGAACTAATCGTTCTACACTTCTTACTTGGTGTAGCTTGCTACATGGGTCGTG  
AGTGGGAACTAAGTTTTCCGTTTGGGTATGCGTCCTTGGATTGCTGTTGCATATTCAGCT  
CCTGTAGCAGCTGCTACTGCTGTTTTCTTGATCTACCCTATTGGTCAAGGAAGTTTTTCT  
GATGGTATGCCTCTAGGAATTTCTGGTACTTTCAACTTCATGATTGATTCCAGGCAGAA  
CACAACATCCTTATGCACCCATTCCACATGTTAGGCGTAGCTGGTGTATTCGGCGGCTC  
CCTATTTAGTGCTATGCATGGTTCCTTGGTAACTTCTAGTTTGTATCAGGGAAACCACTGA  
AAACGAGTCTGCTAATGAAGGTTACAGATTCGGTCAAGAGGAAGAAACCTACAATATC  
GTAGCTGCTCATGGTATTTTTGGCCGATTGATCTTCCAATATGCTAGTTTCAACAACCTCT  
CGTTCTTTACACTTCTTCCTAGCTGCTTGGCCTGTAGTAGGTATTTGGTTTACTGCTTTA  
GGTATTAGCACAATGGCTTTCAACCTAAATGGTTTCAACTTTAACCAATCCGTAGTTGA  
CAGTCAAGGTCGTGTTATTAACACTTGGGCTGATATCATCAACCGTGCTAACCTTGGTAT  
GGAAGTTATGCATGAACGTAATGCTCACAACCTCCCTCTAGACTTAGCTGCAGTTGAAG  
CTCCATCTACCATTGGAATGGGTTTGCCTTGGTATCGTGTTTACTACTGTTGTATTGAATG  
ATCCCGGTCGATTGCTTTCTGTGCATATAATGCATACAGCTTTAGTTGCTGGTTGGGCCG  
GTTCAATGGCTCTATACGAATTAGCGGTTTTTGTATCCCTCTGACCCCGTTCTTGATCCAA  
TGTGGAGACAGGGTATGTTTCGTTATACCTTTCATGACTCGTTTAGGAATAACCAATTCAT  
GGGGCGGTTGGAGTATTACA---GGTGGAACGTGAACTAATCCAGGTATTTGGAGTTACG  
AAGGTGTGGCAGGTGCACATATTGTGTTTTCCGGCTTGTGTTTCTTGGCAGCTATCTGG  
CATTGGGTGTATTGGGATTTAGAAATATTCTGTGATGAACGTACAGGAAAACCTTCTTT  
GGATTTGCCAAAATCTTTGGAATTCATTTATTTCTTTCAGGAGTGGCTTGCTTTGGCTT  
TGGTGCATTTTCATGTAACAGGCTTGTATGGTCCTGGAATATGGGTATCTGATCCTTATGG  
ACTAACTGGAAAAGTGCAACCTGTAAGTCCAGCGTGGGGCGCAGAAGGTTTTGATCCT  
TTTGTTCAGGAGGAATAGCTTCTCATCATATTGCAGCGGGGACATTGGGCATATTAGC  
GGGTCTATTCATCTTAGTGTCCGCCCCCTCAACGTCTATACAAGGGCTTACGTATGG  
GAAATATTGAAACTGTTCTTTCCAGTAGTATCGCTGCTGTGTTTTTTGCAGCTTTCGTTG

TTGCTGGAACATATGTGGTATGGTTCAGCAACTACCCCAATTGAATTATTTGGCCCTACTC  
GTTATCAGTGGGATCAGGGATATTTTCAGCAAGAAATATATCGAAGAGTTAGTGCAGGA  
TTAGCAGAAAAATCTGAGTTTATCGGAAGCTTGGGCGAAAATTCTGAAAAATTAGCTTT  
TTATGATTACATTGGTAATAATCCGGCAAAAAGGAGGATTATTCCGAGCGGGCTCAATGG  
ACAATGGGGATGGAATAGCTATTGGATGGTTAGGACACCCTATTTTTAGAGATAAAGAA  
GGACGCGAGCTTTTTGTACGTCGTATGCCTACTTTTTTTGAAACATTTCCGGTAGTTTTG  
GTAGATGGGGATGGAATTGTGAGAGCCGATGTTCTTTTCAGAAGGGCAGAATCCAAGT  
ATAGTGTGCAACAAGTAGGTGTAAGTGTGAATTCATGGTGGCGAACTTAATGGAGTT  
AGTTACAGTGATCCTGCTACTGTGAAAAATATGCTAGACGCGCCCAATTGGGGGAAA  
TTTTTGAATTGGATCGGGCTACTTTGAAATCCGACGGTGTTTTTTCGTAGCAGTCCAAGG  
GGTTGGTTCACCTTCGGGCATGCCTCATTTGCTTTGCTGTTCTTTTTTCGGACACATTTGG  
CATGGGGCTAGAACCTTGTTCGAGATGTTTTGCTGGTATTGATCCAGATTTGGATGCT  
CAAGTGGAAATTTGGAACATTCAAAAACTTGGAGATCCAACCACAAAGAGACAGGCA  
GTCATGAAAATCTTATATTCCTGAGGAGGTTCTACCACGTGGAACGCTCTTTAATGG  
AACTTTAGCTTTAGCTGGTCGTGACCAAGAAACCACCGGTTTTGCTTGGTGGGCCGGG  
AATGCCAGACTTATCAATTTGTCCGGTAAACTACTTGGGGCTCACGTAGCCCACGCCGG  
ATTGATTGTATTTGGGCCGGAGCAATGAACCTATTTGAAGTGGCTCATTTTCGTACCGG  
AAAAGCCCATGTATGAACAAGGATTGATTTTACTTCCCCATCTAGCTACTCTAGGTTGG  
GGGGTAGGTCCGGGAGGGGAAGTTATAGACACTTTTCCATATTTTGTGTCTGGAGTACT  
TCACTTAATTTCTCTGCAGTCTTAGGCTTTGGCGGCATTTATCATGCGCTTCTGGGACC  
TGAAACTCTTGAAGAATCCTTTCCATTCTTTGGCTATGTATGGAAGATAGAAATAAAA  
TGACCACAATTTTAGGTATTCATTAATTTGTAGGTCTAGGTGCTTTCTTTTAGTGTT  
CAAAGCTCTTTATTTGGTGGTGTATATGATACCTGGGCTCCCGGAGGGGGAGATGTAA  
GAAAAATTACCAACTTGACCCTTAGCCCAAGTGTATATTTGGTTATTTACTAAAATCTC  
CTTTGGGGGAGAAGGATGGATTGTTAGTGTGGACGATTTAGAAGATATAATTGGGGGA  
CATGTATGGTTAGGTTCCATTTGTATACTTGGTGGAAATTTGGCATATCTTAACCAAGCCT  
TTTGCCTGGGCTCGCCGCGCATTTGTCTGGTCTGGAGAGGCTTACTTGTCTTATAGTTT  
AGCTGCTTTATCTATCTTTGGTTTTACAGCTTGTTGTTTTGTCTGGTTCAATAATACTGCT  
TACCCTAGTGAATTTATGGACCAACCGGACCAGAAGCTTCTCAAGCTCAAGCTTTTAC  
TTTTCTAGTTAGAGACCAACGCCTTGGGGCTAATGTGGGCTCCGCTCAAGGACCTACA  
GGTTTAGGTAAATATCTAATGCGTTCCCAACTGGAGAGATCATTTTTGGAGGGGAAAC  
CATGCGTTTTTGGGATCTCCGTGCTCCTTGGTTGGAACCTCTAAGAGGTCCAAATGGGT  
TGGACTTGAGTAGGCTGAAAAAAGACATAACCTTGGCAAGAACGCCGTTTCAGCGG  
AATATATGACTCACGCTCCTCTAGGTTCTTTAAATTCCGTGGGTGGCGTAGCTACTGAGA  
TCAATGCAGTCAATTATGTATCTCCTAGAAGTTGGTTAGCTACTTCTCATTTTGTCTAG  
GATCTTCTTTTTTGTGGGTCATTTGTGGCATGCGGGAAGGGCCCGTGCAGCTGCAGCA  
GGATTTGAAAAGGAATCGATCGTGATTGGAACCTGTTCTTTTCATGACCCCTCTTAG  
TATGACTATAGCCCTTGGTAGATTTACCAAAGAAGAA---GATTTATTTGATATTATGGATG  
ACTGGTTACGTAGGGACCGTTTTCGTTTTTGTGGGTTGGTCCGGCCTATTGCTCTTTCCTT  
GTGCTTATTTTCGCCTTAGGAGGTTGGTTCACCGGTACAACCTTTTGTAACCTCATGGTATA  
CCCATGGATTGGCGAGTTCCTATTTGGAAGGCTGCAATTTTTTAACTGCTGCAGTTTCTA  
CTCCTGCGAATAGTTTAGCACATTTCTTGTGCTACTGTGGGGACCAGAAGCCCAAGG  
AGATTTTACTCGTTGGTGTCAATTGGGTGGTCTGTGGACTTTTGTGCTCTTCATGGGG  
CTTTTGGGCTAATAGGTTTCATGTTACGTCAATTTGAACTTGCTCGATCTGTTCAATTGC

GACCTTATAATGCAATCGCATTTCCTCCGGTCCAATTGCAGTTTTTGTCTGTATTCTTGAT  
TTATCCACTTGGTCAGTCTGGTTGGTTCTTTGCACCTAGTTTTGGTGTGGCAGCTATTTT  
TAGATTCATCCTTTTCTTCCAAGGGTTTCATAATTGGACGTTGAATCCATTTTCATATGATG  
GGAGTTGCTGGAGTATTAGGCGCTGCTTTGCTATGCGCTATTCATGGTGCTACCGTAGA  
AAATACTTTATTTCGAAGATGGTGATGGTGCAAATACATTCCGTGCTTTTAACCCAACTC  
AAGCGGAAGAGACTTATTCAATGGTCACTGCTAACCGCTTCTGGTCCCAAATCTTTGG  
GGTTGCTTTTTCCAATAAACGTTGGTTACATTTCTTTATGTTATTTGTACCAGTAACTGGT  
TTATGGATGAGTGCTCTTGGAGTAGTCGGTCTGGCTCTGAACCTACGTGCCTATGACTT  
CGTTTCCAAGAAATCCGTGCAGCAGAAGATCCTGAATTTGAGACTTTCTACACCAAAA  
AATATTCTCTTAAACGAAGGTATTTCGTGCTTGGATGGCGGCTCAGGATCAGCCTCATGA  
AAATCTTATATTCCCTGAGGAGGTTCTACCACGTGGAAACGCTCTTATGTCTGGAAGCA  
CGGGAGAACGTTCTTTTGCTGATATTATTACCAGTATTTCGATACTGGGTCATTTCATAGTAT  
TACTATACCTTCCCTATTTATTGCGGGTTGGTTATTCGTCAGTACGGGTTTAGCTTATGAT  
GTGTTTGGAAAGCCCTCGGCCAAACGAATATTTTACAGAGAACCGACAAGGTATTCCATT  
AATAACTGGCCGTTTTGATTCTTTGGAACAACCTCGATGAATTTAGTAGATCCTTTATGAC  
TATAGATCGAACCTATCCAATTTTTACAGTGCGATGGTTGGCTGTTCATGGACTAGCTGT  
ACCTACCGTTTCTTTTTTGGGATCAATATCAGCAATGCAGTTCATCCAACGAATGGCTAC  
ACAAACTGTTGAGGGTAGTTCT---AGATCTGGGCCAAGACGAACCTCGTGTAGGGGATTT  
ATTGAAACCATTAAATTCAGAATATGGTAAAGTAGCTCCGGGCTGGGGGACTACTCCCC  
TTATGGGAGTCGCAATGGCTCTATTTGCGGTATTCCTATCTATAATTTTGGAGATTTATAA  
TTCTTCCGTTTTATTGGATGGAATTTTAGTGAGTATGCTTACTCTCAAACTTTTCGTTTAC  
ACAGTAGTGATATTCTTTGTTTCTCTCTTCATCTTCGGATTTTTATCTAATGATCCAGGAC  
GTAATCCTGGGCGCGAGGAAATGGCCGATACTACTGGAAGGATTCCTCTTTGGCTGATA  
GGTACTGTAGCTGGTATTCTTGTGATTGGTTCAATCGGTGTTTTCTTTTACGGTTCATATT  
CCGGATTAGGCTCATCTCTGATGCTTAATATATTGAATTTAATCTGTATCTGTCTTAATTCT  
GTCCTTTCTTCAAGTAGT---TTCTTCGGAAAATTGCCTGAGGCTTATGCAATTTTCAATC  
CAATCGTAGACATTATGCCCGTTATACCTCTATTTTTCTTCTCTTAGCATTTGTTTGGCA  
AGCTGCTGTAAGTTTTTCGAATGACACAATCAAATCCAAATGAACAAAATGTTGAATTG  
AATCGTACCAGTCTATACTGGGGATTATTACTCATTTTTGTACTTGCTGTTTTATTTCTA  
ATTATTTCTTCAATATGGAAGTAAATATTCTCGCATTTATTGCTACTGCACTGTTCATTCT  
AGTTCCTACTGCTTTTTTACTTATCATTACGTAAAAACAGTGAGCCAAAATGATATGGA  
AACAGCAACCTTAGTCGCCATCTCCATATCTGGTTTACTTGTAAGCTTTACTGGGTACGC  
CTTATATACTGCCTTTGGGCAACCCTCTCAACAATAAGAGACCATTTCGAGGAACACG  
GGGACATGGAAGCATTGGTTTATACATTCTGTTAGTCTCTACTCTGGGAATAATTTTTT  
TCGCTATCTTTTTTCGAGAACCCTCCTAAGGTTCCGACTAAAAAA-----ATGACTATTGCT  
TTCCAATTGGCTGTTTTTGCGTAAATTGCGACTTCATCAATCTTACTGATTAGTGACCT  
GTTGATTTGCTTCTTCTGATGGTTGGTCAAGTAACAAAATGTTGTATTTCTGGTACA  
TCATTATGGATTGGATTAGTCTTTTTGGTAGCTATCCTTAAATCTCTTATCTCTATGAGTTG  
TAGGGAGGGACTTATGTCACCACAAACAGAGACTAAAGCAAGTGCTGGATTCAAAGC  
TGGTGTTAAAGATTACAAATTGACTTATTATACTCCTGAGTATGAGACAAAAGATACGG  
ATATCTTGGCAGCATTCCGAGTAACTCCTCAACCTGGAGTTCACCTGAAGAAGCAGG  
GGCTGCAGTAGCTGCCGAATCTTCTACTGGTACATGGACAACCTGTGTGGACTGATGGA  
CTTACCAGCCTTGATCGTTACAAAGGACGATGCTACCATATCGAACCCGTTGTTGGAGA  
GGAAAATCAATATATTGCTTATGTAGCTTACCCTTTAGACCTTTTTGAAGAAGGTTCTGT

TACTAACATGTTTACTTCCATTGTAGGTAATGTATTTGGGTTTAAAGCTTTACGAGCTCT  
ACGTCTGGAAGATTTGCGAATTCCTCCTGCTTATTCCAAAACCTTCCAAGGCCACCTC  
ATGGGATCCAAGTTGAGAGAGATAAATTGAACAAGTATGGTCGTCCTCTATTGGGATGT  
ACCATCAAACCAAATTTGGGATTATCCGCGAAAAACTACGGTAGAGCGGTTTATGAAT  
GTCTACGTGGTGGACTTGATTTTACCAAGGATGATGAAAACGTGAACTCACAACCATT  
ATGCGTTGGAGAGACCGTTTCTTATTTTGTGCTGAAGCAATTTATAAAGCACAAGCTGA  
AACAGGTGAAATTAAGGGCATTACTTAAATGCTACTGCAGGTACTTGTGAAGAAATG  
ATCAAAGGGCTGTGTTTGCCAGAGAATTGGGAGTCCCTATTGTAATGCATGACTACTT  
GACAGGGGGATTCACTGCAAATACTAGTTTAGCACATTATTGCCGAGACAACGGCCTAC  
TTCTTACATCCACCGTGCAATGCATGCAGTTATTGATAGACAGAAAAATCATGGTATG  
CATTTCCGTGTACTAGCTAAAGCATTACGTATGTCTGGTGGGGATCATATTCACGCTGGT  
ACAGTAGTAGGTAAACTGGAAGGTGAACGTGAGATGACTTTAGGTTTTGTTGATTTATT  
ACGTGATGATTATATTGAAAAAGACCGAAGTCGTGGTATTTTCTTCACTCAAGATTGGG  
TCTCTATGCCAGGTGTTATACCTGTGGCTTCAGGGGGTATTCATGTTTGGCATATGCCTG  
CCCTGACCGAGATCTTTGGAGATGATTCCGTACTACAGTTTGGTGGCGGAACTTTAGGA  
CACCTTGGGGAAATGCACCTGGTGCAGTAGCTAACCGTGTAGCTTTAGAAGCGTGTG  
TACAAGCTCGTAATGAGGGACGTGATCTTGTCTCGTGAAGGTAATGAAATTATCCGTGAA  
GCTTGCAAATGGAGTCCGAACTAGCCGCTGCTTGTGAAGTTTGGAAAGCGATCAAAT  
TTGAGTTCGAACCAGTAGATAAGCTAGATGTTATGGCGATACATTTATACAAAACTTCTA  
CCCCGAGCACACGCAACGGAGCCGTAGACAGAAAAGTGAAATCCAATCCACGAAATA  
ATTTGATCTATGGACAGCATCGTTGTGGTAAAGGTCGTAATGCCAGAGGAATCATTACC  
GCAGGACATAGAGGGGGAGGTCATAAGCGTCTATAACCGTAAAATCGATTTTCGACGGA  
ATGAAAAAGACATATATGGTAGAATCGTAACCATAGAATACGACCCTAATCGAAATGCA  
TACATTTGTCTCATACACTATGGGGATGGTGAGAAGAGATATATTTTACATCCCAGAGGG  
GCTATAATTGGAGATACCATTGTTTCTGGTACAGAAGTTCCTATATCAATGGGAAATGCC  
CTACCTTTG---GATATGCCCTTAGGCACGGCCATACATAACATAGAAATCACACTTGGAA  
AGGGTGGACAATTAGCTAGAGCAGCAGGCGCTGTAGCGAAACTGATTGCAAAGAGG  
GTAAATCGGCCACATTAAGATTACCTTCTGGGGAGGTCCGTTTGATATCCAAAACCTGC  
TTAGCAACAGTCGGACAAGTAGGTAATGTTGGGGTGAACCAAAAAAGTTTGGGTAGA  
GCCGGATCTAAGTGTGGCTAGGTAAGCGTCCTGTAGTAAGAGGAGTAGTTATGAACC  
CTGTAGACCATCCCATGGGGGCGGTGAAGGGAGAGCACCAATTGGTAGAAAAAGAC  
CCATGACCCCTTGGGGTTATCCTGCACTTGGAAAAAGAAGTAGGAAAAAGAAAAGATA  
TAGTGATAGTTTTATTCTTCGTCGCCGTA---ATGATTCAACCTCAGACCCTTTTGAAT  
GTAGCGGATAATAGCGGGGCTCGAGAATTGATGTGTATTCTGAATCTTAGGAGCTAGT---A  
ATCGCCGATATGCTCATATTGGTGACGTTATTGTTGCTGTAATCAAAGAAGCAGTGCCA  
AATATGCCACTTGAAAGATCAGAAGTTATTAGAGCTGTAATTGTACGTACGTGTAAGA  
ACTCAAGCGTGAAAACGGTATGAGAATAAGATATGATGACAATGCGGCAGTTGTCATC  
GATCAAGAAGGAAATCCAAAAGGGACTCGAGTTTTTGGTGCAATCGCCAGGGAATTG  
AGAGAATTGAATTCACAAAATCGTCTCATTAGCTCCAGAAGTATTAACCTATAACCC  
CAAAGAACCAGATTCCGTAAACAACATAGAGGAAGAATGAAAGGAACATCTTATAGA  
GGCAATCATATAAGTTTTTGGAAAGATACGCTCTTCAGGCACTTGAACCCGCTTGGATCAC  
AGCTAGACAAATAGAAGCCGGGCGAAGAGCAATCAGCCGATATGCGCGTCGTGGTGG  
AAAAATATGGGTACGTTTATTTCCCGACAAACCCGTTACACTAAGACCTACAGAAACAC  
GTATGGGTTCCGGGAAAGGATCTCCCGAATATTGGGTATCCGTTGTTAAACCGGGTCTGA





TGGAAGAATTTAATAAGTTTCCAAAAATTGAAGATACAGATCAAGAAATTGAATTTAAA  
TTATTTGTGGAAACATATCAATTGGCAGAACCCTTGATAAAAGAAAGAGATGCTGTGTA  
TGAATCACTCACATATTCTTCTGAATTATATGTACTTGCGGGATTAATTTGGAAAACCAA  
TAGAGATATGAAAGAACAACAGTTTTTTATTGGAAACATTCCTCTGATGAATCCCTGG  
GAACCTTTATAGTAAATGGAATTTACAGAATTGTAATTAATCAAATATTGCAAAGTCCCG  
GTATTTACTACCGTTCCGAATTGGACCATAACGGAATTTCCGTCTATACCAGCACCATAA  
TATCAGATTGGGGAGGAAGATCAGAATTAGAAATTGATAGAAAAGCAAGAATATGGGC  
CCGTGTGAGTAGGAAACAAAAATCTCTATTCTCGTTCTATTATCAGCTATGGGTTTAAA  
TCTAAGAGAGATTCTAGATAATGTTTGTATCCTGAAATTTTCTTGTCTTTCCTGAATGAT  
AAGGAAAAAAAAGATCGGGTCAAAGAAAATGCCATTCTGGAGTTTATCAACAAT  
TTGCTTGTGTAGGTGGGGATCCGGTATTTTCTGAGTCCTTGTGTAAGGAATTACAAAAG  
AAATTTTTTCAACAAAGATGTGAATTAGGAAGAATTGGTCGGCGAAATATCAACCAA  
GATTGAATCTTGATATACCTCAGAACAACACATTTTTGTACCACGAGATGTGTTGGCT  
GCTGCGGATCATTGATCGGAATGAAATTTGGAATGGGTACACTTGACGAT-----ATGAA  
CCACTTGAAAATAAACGTATTTCGTTCTGTAGCAGATCTGTTGCAGGATCAATTCGGAT  
TGGCTCTTGTTCGTTTAGAAAATGCGGTTTCGAGGGACTATATCTGGAGCAATCAGG---C  
ATAAATTGATA---CCAACCTCAAATTTGGTAACTTCAACTTCA-----TTAACAAC  
CACTTATGAATCATTTTTCGGCCTACACCCTTATCTCAAGTTTTGGATCGAACTAATCC  
ATTGACACAAATTGTTTCATGGTCGAAAATTGAGTTATTTAGGTCCTGGAGGGGTGACAG  
GGCGAACTGCAAGTTTTTCGGATACGAGATATCCACCCTAGTCACTATGGACGTATTTGC  
CCAATTGACACCTCCGAAGGAATCAATGTTGGACTTATCGGATCCTTAGCTATTCATGTA  
AGGATTGGTCATTGGGGA---TCCATAGAGAGTCCATTTTAT-----GAAATCTCTGAGAG  
ATCAAAGACAAAGAAGCACGGATGGTTTATTTATCACCAAGTAGAGATGAATATTATA  
TGGTAGCGGCAGGGAATTCTTTGGCCTTAAATCGAGGTATTCAGGAAGAAGAGGTTGT  
TCCGGCTCGATACCGTCAAGAATTTCTGACTATTGCCTGGGAACAGGTTTCATCTTCGAA  
GCATTTTTCCCTTCCAATATTTTTCTATTGGAGCTTCTCTCATTCCTTTTATTGAACATAAT  
GATGCGAATAGGGCTTTAATGAGTTCTAATATGCAGCGTCAAGCAGTTCCCTTTCTCG  
GTCCGAGAAGTGCATTGTAGGAACCGGACTGGAACGCCAAGCGGCTTTAGATTCTGGA  
GTTTCAGTTATAGCCGAACACGAGGGAAAGGTCATTTCTACTGATACTACCAAATTGT  
TTTCTCAGGTAATGGAAACACTGTAATATTCCATTAGTTATGTATGAACGTTCCAACAA  
AAATACTTGTATGCACCAAAAACCTCAGGTTCAACGGGGTAAATACATTAATAAGGGA  
CAAATTTTAGCCGACGGGGCGGCTACTGTTGGTGGAGAACTCGCTTTGGGAAAAAATG  
TATTAGTAGCTTATATGCCATGGGAAGGCTACAATTTGAAGATGCGGTACTTATTAGTG  
AGCGTTTGGTATATAGCGATATTTATACTTCTTTTCACATCCGAAAATATGAAATTAAC  
TCATATGACAAGTCAGGGC---CCTGAAAGAATTACTAATGAAATACCTCATTAGAGGCT  
CATTTACTCCGCAATTTAGACAGAAATGGAATTGTGATGCTGGGATCTTGGGTGGAAC  
AGGTGATATTTAGTAGGTAATTAACCCCTCAAATAGCGAACGAA---TCGTCTGATGCC  
CCAGAGGATAGATTATTACGAGCCATACTTGGTATTCAGGTTTCCACTGCAAAGGAAAC  
TTCTCTAAACTACCTATAGGTGGAAGAGGTCGAGTAATTGATGTGAGATGGATCCAGA  
AAAAAGGG--GGTTCTAGTTATAACCCAGAAATGATTCGTGTATATATTTACAGAAACG  
TGAAATCAAAGTGGGTGATAAAGTAGCAGGAAGACATGGGAATAAAGGTATTATTTCC  
AAAATTTGCCTAGACAAGATATGCCCTATTTACAAGATGGAACCCCGTTGATATGGTC  
TTCAACCCCTTAGGAGTACCCTCACGAATGAATGTGGGACAGATATTTGAATGTTTCGCT  
CGGCTTAGCGGGAGATCTTTTAAATAGACATTATAGAATAGGCCCTTTTGTGAGAGATA

CGAGCAAGAGGCTTCGCGAAAAC TAGTGT TTTTCAGAATTATATGAAGCCAGTAAGCAA  
ACAAAAAATCCATGGGTATTTGAACCCGAATATCCAGGAAAAAGTAAAATATTTGATGG  
AAGAACTGGAGATCCTTTTGAACAACCTGTCCTAATAGGAAAGTCCTATATACTTAAAT  
TAATTCATCAAGTTGATGATAAAATCCATGGACGTTCCAGTGGACATTATGCACTTGTTA  
CACAACAACCCCTTAGAGGAAGGGCAAACAGGGGGGACAACGAGTGGGAGAAATG  
GAAGTTTGGGCTTTAGAAAGGATTTGGTGTGCTCATATTTTACAAGAGATGCTTACTTAT  
AAATCTGATCATATTAGAGCTCGTCAGGAAGTACTTGGTACTACGATTATTGGAGGAAC  
AATATTTAATCCTGAAGATGCTCCAGAATCTTTTCGATTGCTTGTTAGAGA ACTACGATC  
TTTGGCTCTGGA ACTGAATCATTTCCTTGTATCTGAGAAAAATTTTCAGATTAATAGGAA  
GGAAGCTATGAATCAGAATTTCTATTCTATGATTGACCGGTATAAACATCAACA ACTTCG  
AATTGGACCAGTTTCTCCTCAACAAATAAGTGCTTGGGCTAACAAAATTTCTACCTAATG  
GGGAGGTAGTCGGAGAGGTGACAAAACCCTACACTTTTTCATTACAAAACCAATAAACC  
AGAAAAAGACGGATTGTTTTGTGAAAGAATCTTTGGACCTATAAAAAGTGGAATTTGT  
GCTTGTGGAATTATCGAGTGATCGGAGCTGAAAAGGAAGAACCGAAATTTTGTGAAC  
AATGCGGGGTCGAATTTGTTGATTCTCGTGTACGAAGATATCAAATGGGATACATAAAA  
CTCGCATGTCCAGTGACTCATGTGTGGTATTTAAAACGCCTTCTAGTTATATCGCGAAT  
CTTTTAGATAAACCACTTAAGGAATTAGAAGGCCTAGTATACTGC-----GATTTTTCTTTT  
GCTAGGCC---ATAGCTAAAAAACCACTTTTCTTACGATTACGAGGTTTCATTCGAATAG  
AAATACAATCCTGGAAATACAGCATCCCACTTTTTTTTACTACCCAAGGCTTTGAAACA  
TTTCGAAATAGAGAAATCTCCACAGGAGCAGGTGCTATCAGAGAACAATTAGCCGATT  
CGGATTTGCGAATTATTACAGATAATTCATTGATAGAATGGAAAGAATTAGGAGATGAA-  
--GGGTCCACCGGAATGAATGGGAAGATAGAAAATTCGAAGAAGAAAGGATTTTTT  
GGTTAGACGCATGGAATTAGCTAAACATTTTATTTCGAACAAATGTAGAACCAGAATGGA  
TGGTTTTGTGCCTATTACCAGTTCTTCTCCTGAGTTAAGACCTATCATTAGATAGATG  
GGGGTAAATTAATGAGTTCGGATATTAATGAACTCTATAGAAGAGTTATTTATCGAAACA  
ATACTCTTACTGATCTACTAACACAAGTAGATCTACACCAGGTGAATTAGTAATGTGTC  
AGGAGAAATTGGTACAAGAAGCCGTAGATACACTTCTGGATAATGGTATCCGCGGACA  
ACCAATGAGGGACGGTCATAATAAAGTTTACAAATCATTTTCAGATGTAATTGAAGGCA  
AAGAGGGAAGATTCCGCGAGACTTTGCTTGGTAAACGGGTCGATTATTCGGGGCGTTC  
CGTCATTGTTGTGGGCCCTTCACTTTTTCATTACATCAATGTGGATTACCTCGAGAAATAGC  
AATAGA ACTTTTCCAGACATTTGTAATTCGTGGTCTAATAAGACAACACGTTGCTTCCA  
ACATCGGATTGCTAAAAGCAA AATTCGAGAAAAAGAGCCCATTTGTATGGGAGATACT  
CCAAGAAGTCATGCAGGGGCATCCTGTATTGCTCAATAGAGCACCGACCTGCATAGAT  
TAGGCATACAGGCGTTTCAACCCATTTTAGTGGAGGGTCGTGCTATATGTTTACATCCAT  
TAGTTTGTAAAGGGTTTTAATGCAGACTTTGATGGGGATCAAATGGCTGTTTCATGTACCG  
TTATCTTTAGAAAGCTCAAGCAGAGGCTCGTTTACTTATGTTTTCTCATATGAATCTCTTG  
TCTCCAGCTATAGGTGATCCTATTTCTGTACCAACTCAAGATATGCTAATTGGACTTTATG  
TATTAACGATCGGGAATCGTCGAGGTATTTGTGCAAATAGGTATAATTTATCTAATTGCA  
AAAACGAT-----CAAATGAAATCTTGGCAATGAGAATTATCAGTATACGAAAGAGA  
AGGAACCTATTTTCTAGTTCCCTATGATGCACTTGGAGCTTATCGTCGAAAACGAATC  
CATTTGGATAGTCTTTTGTGGCTCCGGTGGCGACTAGATCAACGTGTCAATGTTGGATC  
C-----AGGGAAGTTCCGCTCGAAGTTCAATATGAATCTTTTGGTACCTACCATGAAATTT  
ATAGACACTATTTAATAGTAAGAAGTGTA AAAAAAGAAATCCGTTGTATATACATTCGA  
ACTACTGTTGGTCATATTTCTTTTTATCGAGAAATAGAAGAAGCCATACAGGGGTTTTAT

CGAGCCTACTCGTATGCTAGC-----ATGGCAGAACGGGCCGATCT  
GGTCTTTCACAATAAAGTGATAGATGGAGCTGCCATGAAACGACTTATTAGCAGATTAA  
TAGATCACTTCGGGATGGCATATACATCACACATCCTAGATCAAGTTAAAACCTCTCGGTT  
TCCAGCAAGCCACAGCAACATCTATTTTCATTAGGAATTGATGATCTTTTAAACAATACCCT  
CTAAGGGATGGTTAGTTCAAGATGCTGAACAACAAAGTTTAATTTTGGAAAAACACCA  
TCATTATGGAAATGTACACGCGGTAGAAAAATTACGTCAATCCATTGAAATATGGTATGC  
TACCAGCGAATATTTGAGACAAGAAATGAATCCTAATTTTCGGATGACTGATCCCTCTA  
ATCCAGTCCATTTAATGTCCTTTTCGGGAGCTAGAGGAAATGCATCTCAGGTACACCAA  
TTAGTAGGTATGAGAGGATTAATGTTCGGATCCCCAAGGACAAATGATTGATTTACCCATT  
CAAAGCAATTTACGCGAAGGGCTCTCTTTGACGGAATATATAATTTCTTGTTATGGAGCC  
CGTAAAGGAGTTGTAGATACTGCTGTACGAACATCAGATGCTGGATACCTCACACGTAG  
ACTTGTAGAAGTGGTTCAACACATTATAGTACGTAGAACAGATTGTGGTACTATTCGAA  
GTATTTCCGTAAGTCCTCGAAATGGGATGCCAGAA-----CGCATTTTATCCAAACACTA  
ATTGGTCGTGTATTAGCAGACGATATATATATAGGTCCACGATGCATTGCCGCTCGAAAT  
CAAGATATTGGGATTGGACTTGTCAATCGATTCATAAGC-----TTTCGAGCACA  
ACCAATACATATTCGAACTCCATTTACTTGCAGGAGTACATCTTGGATCTGTCAATTATG  
TTATGGGCGGAGTCCACTACCGGTGACCTGGTTCGAATTGGGAGAAGCTGTAGGTATTA  
TTGCGGGTCAGTCAATTGGGGAACCTGGGACTCAACTAACATTAAGAACTTTTCATACC  
GGCGGAGTATTCACGGGCGGTACTGCCGAACATGTACGAGCTCCCTTTAATGGAAAAA  
TAAATTCATGAAGATTTAGTTCATCCCACACGTACCCGTCATGGACATCCTGCTTTTC  
TATGTTCAATAGACCTGTATGTAACCTATTGAAAGTCAGGATATTATCCATAATGTAAATAT  
TCCCCAAAAAGTTTGATTTTAGTTCAAAATGATCAATACGTAGAATCAGAGCAAGTGA  
TTGCTGAGATTCGTGCCGGAGCATCCACTTTA-----TTTAAAGAGAAGGTTGAAAACAT  
ATTTATTCTGAATCAGAAGGAGAA---ATGCACTGGAGTACCGATGTCTACCATGCACCT  
GAATATACTTATGGTAATGTGCATCTATTACCAAAAACAAGTCATTTATGGATATTAGCA  
GTAGGTACGTGCAGA-----TACAGCATTGTGTCTTTTCCCTTCACAAGGATCAAGATCA  
AATAAATGCTCATTCCCTTTCTCTCGAAGAAAGA-----TATATCTCTGATCTATCA-----GT  
AACTAAGGATCTAGGGAGAGATCCATTGTTTAGTTCCGATTCTTCTAGT-----AGGGGG  
GGGACTCTTGATTAT-----AGACCCGATCGAAGCATATCCAATGGTCATTGGAATTTACAA  
TATCCTTTT---ATTCTGCACGAAAAT-----TCTGATTTTTTGGCGAAGAGGCGAAGAAATA  
GATTTATCATTCCATTACAATATGATCAAGAACCTGATAAAGAATAATACCCCGTTTTG  
GTGTTTCGATTGAAATACCCATAAAT-----GGTATTTTACGTAGAAATAGTATTCTTGCTTA  
TTTCGACGATCCCCGATACCGA-----AGAGGAATTAATAATAT---GCTATAGAGGTAG  
ATTCCATCGTCAA-----AAAGACGATTTGATTGAATATCGAGGA---ACAAAAGAATTTA  
GTCCAAAATAC-----GTAGATCGATTTTTTTTCATTCCCGAGGAAGTGCATGTCTTACCA  
GGATCTTCGTTGATAATGGTCCGGAACAATAGTATTATAGGAGTGGATACACCCTCAC  
TTTAAATACAAGAAGCCGAGTAGGTGGATTGGTCCGAGTGGAGAGAAAAAAG  
TATTGAACTCAAATATTTTCAGGGGATATCCATTTTCTGGAGAGACAGATAAGATATC  
GAGGCACAGCGGTATCTTGATAACCACCAGGAACGGTAAAAATT-----AATTCTAAGGAA  
--TCAAAA---AAATTGAAAAATTGGATCTATGTCCAACGG-----ATCACACCTACTAAGAA  
AAAG-----TATTTTGTTCAGTTTCGACCCGTAGTCACATATGAAATAGCGGATGGGATCA  
ATTTACCAACAATTTTCCACAGGATCTTTTGCAGGAAGGGGATAACGTCCAACCTTAGA  
GTTGTCAATTATATCCTTTATGGAAATGGCAAGCCAATTCGAGGAATTTATCACACAAGT  
---CAATTAGTTCGCACTTGCTTAGTATTGAATTGGGACCAAGAACAAAATAGTTCTATAG

AA-----GGTATTCATGCTTCTTTTGTGAAATAAAGACAAATGATCTAATTTGTGATT  
TCATAAGAATTGAGTTAGCTAAGTCCCCATTTTGTATACCGGAAAAAGAAATAGTACA  
GCGGGTTCAGGATTGATTAACCAT-----TTAGATTACATCAATATTAATCCTTTTTATTCC  
AAAGCAAAGAGTCAATCA-----CGTACTAAACATAAAGGAACTGGT-----GG  
TACGTTGTTGAATCGAAATAAG-----GAATGTCAATCTTTGAAAATTTTGTATCATCC  
AACTATTCTCGAATTGGT-----CCATTCAATGGTTGAAATATAAC-----ACTGTCACAA  
ACAATCAGATCCTAGAACTCCAATT---AATTCTTTAGGACCCTTAGGTACAGTAGTATT  
C---AAAATTGCGAACTTTTATTTCATCT---TGTCATTTAATAACT-----TATAATCAA  
TGTAAAA---AAATATTTGTTACTTAAC-----AAATTTAGTCAGACTTTTCAAGTACTTA  
AA-----TATTTTTTAATAGATGAAAATAGGGGG-----ATTTATAATCCTGATCCATCCAGT  
AACATAATTTTTAATCCATTCGATTTAAATTGGCGTTTTTTTCCATCACGATTATAGTGATG  
AGACATCCACAATTCTTAGC---CTTGGACAAATTTTTTGTGAAAATGTATGTCTATTCAA  
ATACGGATCA-----CAGAAAAAATCTGGTCAAGTTCTAATTGTTTCAT--GTTGACTACTT  
AGTAATAAGATCAGCTAAGCCTTATTTGGCTACTCCAGGAGCGACGGTTCACGGTCATT  
ATGGAGAAACCCTTCATGAAGGAGATACCTTAGTTACTTTTATATATGAAAAATCAAGAT  
CTGGTGACATAACGCAAGGTCTTCCAAAAGTAGAACAAGTGTTAGAAGTGCGTTCGAT  
TGATTCAATATCGATAAATCTCGAAAAGAGGGTTAAAGCTTGAATGAACGTATATCAA  
GAATTCTTGGAACCCCTTGGGGATTCTTGATTAGCACGGAGCTAACCATCGCCCAAAG  
CCGTATTTCTTTGGTTAATAAGATCCAAAAGGTTTATCGATCTCAGGGGGTACAGATCCA  
TAATAGACATTTAGAGATTATTGTACGTCAAGTAACATCAAAGTATTGGTTTCAGAA----  
----GATGGAATGTCTAATGTTTTTTTACCCGGAGAACTCATAGGATTGTTGCGAGCGGA  
ACGAGCAGGGCGTGCTTTGGATGAAGCGATCTGCTATCGAGCAATCTTATTGGGAATAA  
CGAGGGCATCTCTTAATACTCAAAGTTTCATATCCGAAGCTAGTTTTCAAGAACTGCT  
CGAGTTTTAGCAAAGCTGCTCTACGAGGTCGTATTGATTGGTTGAAAGGCCTGAAAG  
AAAATGTTGTTCTGGGGGGAATTATACCTGTTGGTACTGGATTCAAAAAATTAGTACAT  
CATTCAAGG-----CAGCATAAAACATTCAT-----TTGGAAATCAAAAAGAAGATTTGTT  
TGAAGGAAAGATG-----AGAGATATCTTATTCACCATAGAGAATTTTTTTAGTTCTTGCAT  
CCCAAAC-----ATGACAAGAAGATATTGG  
AACATCAATTTGGAAGAGATGATGGAAGCAGGAGTTCATTTTGGTCATGGGACTAGGA  
AATGGAATCCTAGAATGGCACCTTTCATCTCCGCAAACGTAAGGTATTTCATATTACA  
AATCTTACGAGAACTGCGCGTTTTTTATCAGAGGCCTGTGATTTAGTTTTTTGATGCAGC  
AAGTAAAGGAAAACACTTTTTGATCGTTGGGACCAAAAATAAAGCAGCTGATTTAGTA  
GCATCCGCTGCAATAAAGGCTCGGTGCCATTTTGTTAATAAAAAATGGCTTGGTGGTAT  
GTTAACGAATTGGTCCACTACGGAACGAGACTTCAAAGTTCAGGGATTTAAGAGCG  
GAACAAAGGATGGGAAAACACTCAACAGTCTCCCAAAGGGATGCAGCAATGTTGAAG  
AGACAATTATCCACCCTGCAAACATATCTGGGTGGGATCAAATATATGACAGGGTTACC  
CGATATTGTAATTATTGTTGATCAGCAAGAAGAATATACGGCTCTTCGAGAATGTGTCAT  
TTTTGGGGATTCCGACGATTTGTTAATCGATACAAATTGTGACCCAGATCTCGCAGATAT  
TTCGATTCCAGCTAACGACGATGCTATTGCTTCAATCCGATTGATTCTTAACAAATTAGT  
ATCTGCAATTTGTGAAGGTCGTTCTAGC---TATATAAGAAATCATATGGGACAAAAATA  
AATCCACTTGGTTTCAGACTTGGTACAACCCAAAATCATCATTCTTTTGGTTTCGCACA  
ACCAAAAAGTTTTTCTATTGGTCTCCAGGAAGATGAAAAATACGGGATTGTATCAAG  
AATTATGTACAAAAAATATGAGAATATCCTCGGGT---TTCGAGGGAATTGCACGTATAG  
AAATACAAAAAAGAATTGATCTTATTCAGGTAGTAATTCATATTGGATTCCCTAATTTATT



?????????????ATGGCAAGAAAAAGTTTGATTCAGAGGGAGAGGAAGAGACAGAAATT  
GGAGCAGAAATATCATTGATTCGTTCGATCCTTAAAAAAGAAATAAGC-----AAAAT  
TCCGTCTGTTGAGTGAAAAATGGGAAATTCATGGAAATTCGAATCCCTACCGCGTAATA  
GTGCACCCACACGTCTCCATCGACGTTGTTTTTTGACCGGAAGACCTAGAGGTAACTAT  
CGAGACTTTGGACTATCCGGACACATACTTCGAGAGATGGTTAATACATGTTTGTACC  
GGGCGCTACAAGGTCCAGTTGGATGGTCAAAAATTCATTTATCTCAATTATTTTCGCAAG  
AAGAAAAAGAAGAAAAC-----AAAGGGTCTGTGCAATTTCAAGTATTCAGTTTCACCAA  
TAAGATACGAAGACTTACTTCCCATTGGAATTGCATAAAAAAGATTTTTCATCTCAGA  
GGGGTTTACGAATAATTCTGGGAAAACGTCAACGGCTGCTGGCGTATTTGTCAAAGAA  
AAATAGAGTACGTTATAAGAAATTAATTGGTCAGTTGGATATTCGGGAGCCAAAAACTC  
GT-----ATGGTAAAACCTTCGTTTGAAACGATGTGGTAGAAAGCAACGAGCCATCTATCG  
AATCGTTGCAATTGATGTTTCGATCCCGAAGAGAAGGAAGAGATCTTCGGAGAGTGGGT  
TTTTATGATCCGATAAAGAATCAAACCTTATTCAAATGTTCCGGCTATTCTAGATTTTCTTG  
AAAAAGGGGCTCAACCCACAAGAACTGTTTCATGATATTTTAAAGAAGGCGGAATTGTT  
T-----ATGGATAAATCCAAGCAACCCTTTCATAAACCCAAGCGAT  
CTTTTCGTAGGCGTTTGCCCCAATTGGATCGGGGGATCGAATTGATTATAGAAACATG  
AGTTTAATTAGTCGATTTATTAGTGAACAAGGAAAAATATTATCTAGACGAGTGAATAGA  
TTAACCTTGAAACAACAACGATTAATTACTATTGCTATAAAACAAGCTCGTATTTTATCT  
TTGTTACCTTTTCTTAATAATGAGAAA-----CAATTTGAGAGAACCGAGTCGATCCCTAG  
AGCTACTGGTCCTAGAACCAGAAATAAAGTGACACGTTCAATAAAAAAAAATCCTTTT  
GTAGCTAATCATTATTGGTAAAATTGAGAACTCAACATAAGGCAGGAAAAAGAAA  
TAATAGTAACTTGGTCTAGAGCATCTACGATTATACCCACAATGATTGGCCATACAATCG  
CTATTCATAATGGAAAGGAACATTTGCCGATTTATATAACAGATCGTATGGTGGGTCACA  
AATTGGGAGAATTTCGCACCTACTCGGAGTTTCGGAAGACATGCGAGAAACGATATTA  
ATCTCGTCGCATGATTTTGAAATTTTTTCTATTAGGTAATCCATTATCCTTATGCATGAAA  
ATAATTAATTCCGTTGTTATAGTTGGACTCTATTATGGATTTATGACCACGTTCTCCATAG  
GGCCCTCTTATCTCTTCTTCTTCGAGCTTGGGTTATGGAAGAAGGA-----ACCGAAA  
AGCAGATATCAGCAACAACCGGTTTTATTATGGGACAGCTTATGATTTTTATATCAATCTA  
TTATGCGCCTCTGCATTTAGCATTGGGTAAACCTCATACAATGACTGTCCTAGTTCTACC  
ATATCTTTTGTTCATTTCTTCTGGAACAATAACAAGAACTTTTTGGATTATAGATCTACT  
ACTAGAAATTCAATACGTAATTTCAACATTCAATGTATATTCCTGAATAATTTATTTTC  
AATTATTCAACCATTTCAATTTACCAAGTTCAACACTAGCCAGATTAGTCAACATTTATAT  
GTTTCGATGCAACAACAAGATGTTATTTGTAACAAGTAATTTTATTGGTTGGTTAATTGG  
TCACATTTTTTTTATTAAGTGCGTTGGATTAGTATTATTCTGGATACGGCAAAATCATTCC  
ATTCAATCT-----ATAAGTACCTTCTTTCAGAATTGAGAAATCTCTGGCTCGAATC  
TTTAGTATTCTTATTATTACTTGTGTATACTATTTAGGCAGAATGCCTTTACCTATTATT  
ACTAAAAAAGTGAAGGAAACCGAAGAAAACAAACCGCTTGTCACTTTTCTTTTCGACT  
GTAAACGATGGAATCGTCCATTTTCGATATATAAAAAATGATCGATTTGAAAATGCTGTAC  
GAAATGAAATGTCACAATATTTTTTTTATACATGTCCAAGTGATGGAAAACAAAGAATA  
TCTTTTACATATCCACCGAGTTTATCGACTTTTTTCAGAAATGATAGAACGAAAGATATCT  
TTGTACACGACCGAAAAACTATCCACGAGGAT-----TGGGTTTATACTAATGAACA  
AAAAAAGCACACCTTGAGCAATGAATTAATAAATCGAATAAAAACTCTAGAAAAAAA  
ACACTCGTTCTAGATGTGCTCGAGAAAAGAATCAGATTATGCAATGATGAAAATGAAA  
AGGAATGCTTGCCTAAAATGTACGATCCTTTTTTTGAACGGACCATATCGCGGAAAAATC

ACAAAATTATATTCACGTATAGAAATAGTCTGGATAAATAAAAATTCACGGTCTACTTCAA  
AAAGAATTTGAATATCAAGATTACAATGATCAATTTCTGGAATAGAAGAAATCAGAAA  
AGAGGTTCCCTCGATGGTCATACAAATTGACCGATTTGGAAGAACAAGAGGAAGAAGA  
AATTCGTTCAAGAAAAGCCAAACGTGTTGTAATTTATACTGATTCTTTGATACGTTACTC  
ACAACAATCGGATTTTCGTCGGGATCTAATCAAAGGATCCATGCGTGCTCAAAGACGTA  
AAACAGTTACTTGGGAAATGTTTCAAGCAAATGTGCATTCGCCACTTTTTTTGGATCAA  
ATAGACAAAACA---TTCTTTTTCTCTTTTGAT---ATCTCCGAAATGATGAATCTCGTTTTT  
AGGGGT--GAGGAAAATGAACGTATAACAATATCAGAACTTGGGATAGCATTATATTTG  
CTCAAGCAATAAGGGGTTTCGATGTTAGTAACCCAATCGATTCTTAGAAAATACATTGTAT  
TGCCTTCATTGATAATAGCTAAAAATGTTGGCCGTATGTTATTATTCCAATTCCTGAGTG  
GTACGAGGATTTGAAAGATTGGAATAGAGAAATGCATGTTAAATGCACTTATAATGGTG  
TTCAATTATCAGAAACAGAATTTCCAAAAGATTGGTTAACGGATGGTATTTCAGATAAAA  
ATTCTATTTCCCTTTCCGCTGAAACCTTGGCGAAAATCTAAAAAAGGAAAAAAAAGACA  
ATTTTTGTTTTTTAACAGTCTGGGGAAGAGAAGCGGAACTCCCCTTCGGTTCTCCTCGA  
AAACAACCTTCTTTTTTTGAACCTATTTGGAAAGAGCTAAAAAAAAAAATTAGAAAAC  
TGGAAAAATTTCTCTTTCTCTAGTTCTAAGAGTTTCTAAAAAACGAGAAAATGGTTT  
TTAAAGATTTCAAAGAAAAACAAGATGGGTTAACAAAATAGTTCTA-----GTTATAA  
AACGAATAATGAAAGAACTTGAAAAATAAACTCTATAATCAGT---ATAAGACTACCG  
ACGAATCAACCATTTCGAATTCGATCCACGAATTGGACAAAACATTCACTTATAGAAAA  
AAAATAAAGGATCTTGCTGATAGGACAACCACAATCAGGAATCAAATAGAACAATCA  
CAAAGACAAGAAAAAAGCCCTAATAAGACAAATTGTGCTGATAAAAATTCAGAATT  
GCAAAAACATATTTGGCAAATATTCAAAGAAAAAGTACCCGATTAATACGCAAATTCT  
ACTACTTTCTCAAATATTTCAATTGAAAGAATATACAGCGATATCCTTCTATGTACCATTAA  
CAGTCTTAGGACCAATGCACAGCTTTTCATTCACTTTATTTTCGTGTGACTTATCCTCTTT  
GTCACAAGCATATGTATTTTACACATTGTCACAAGTTCAAGTTAATAACAAGTATTACTT  
GAGATCTGTATTTCAATATACCCATCTTTTTCTTAAAGATAGAATCAAGGATTATTGTACA  
CGAGGACTATTTGATTCCAAACCAAAGCATAAGAAAGTTTATAAGTCTGGAATGAATGA  
ATGGAAAACTGGTTAAAGAGTCATTATCAATACAATTTATCTCAAACCTCAATGGTCTC  
GATTAGTACCACAAAATGGAGAAATAGAGTCAATCAACGTTGTACAATTCAAAAAAA  
ATAATATTGGATTCATATAAAAAAACCA-----TTAATTCATTACGTGAAACAAGAAA  
AATTAAAAAAAACTACAAATATGATCTTCTAGCACATAAATATATGAATGAATCTAGTC  
TATATTTGGATAGAAAATATTTGATTGTAGAATTCTCCGGTTTTGTTTTAGACTTTTTGA  
TTGGATGGGAATGAATAAAGAAAGGCTATATCGTTGGTTCTTCCCAGAATTTGGACTAC  
TTTATGATGCATATAAGCTTAAACCATGGATTATACCAATCCAATTTCTTCTTTTAACTT  
CAAGAGCAAGAAGGAAGCAGAACTAGATTTTTTCTGAAAAATATTCCTTTTTTCAAT  
TAAGATGGGATGATTCTTTGAATCAAAGAATGATCAACAATATCAAGGTATATTGTCTAC  
TACTTAGACTGATAAATCTAAAGGAAATTGCTATATCCTCAATTCAAAGAGGAGAGATG  
CGTCTAGATGTAATGTTGATTCAAAGGATCTATCTTACAGAATTGATAAAAAGGGG  
AATATTTATTATTGAACCGTTTCGTCTCTCTATAAAATGGGATGAAGAATTTCTTATATAT  
CAAACCATAGGTATTTCAATTGGTCAATAAGAGTAAACAAAATTATTATGATTTATTTGTTC  
CTGAAAATATTCTATCTACTAGACGTCGTAGAGAGTTGAGAATTCTCATTGTTTCGTAT  
TTCTTTGGCCCAATTATCGATTAGAAGATTTAGCTTGTATGAATCGGTATTGGTTTGATAC  
CAATAATGGTAGTCGTTTTCAGTATGTCAAGAATACAGATGTATCCAATGAAACGACATC  
AATCAAATCCTGGATCTTCGAATTCAGAGAGATATTGAGAGAGATCAAGAATTCTCAC



TATTTCTTAGATTCATGGATCAAATTCGATTCAGTGGGATCTTTCACCTCACATTTTTTTTCC  
ACCAAGAACGTTTTATGAACTCTTTGACCCCGAATTTTGAGTATCCTACTTTCA---CG  
TGATTCA-----CAGGATTCAACAAGCAATCGATATTCACG-----ATCAAAGGTGTAGT  
ACTGCTTGTAGTAGCG---GTCCTTATATCT-----CGTATTAACAATCGAAAGATGGTC  
GAAAGAAAAAATCTCTATTTGATGGGGCTTCTCCTATACCTATTCTTCCTATACGTATG  
AATCCATTGGACCCAGAAATGAGACATTGGAAGAATCTTTT---TGGTCTTCCAATATCA  
ATAGGTTGATTGTTTTCC---CTCCTGTATCTTCCAAAAGGGAAAAATATTTCTGAGAGTTG  
TTTTATGGATCCGCACGAGAGTACTTGGGTTCTCCCAATAAAT-----CAAAAGTGTA  
TCATGCCC GAATCTAACCGGGTTCGCGGTGGTGGAGTAACCGGATCGGAAAAAAGA  
GG-----GATTCTAGTTGTAAGATATCT-----AATGAAACCGTAGCTGGAATTGAGATCTC  
ATTCAAAGAGAAGGATAGCAA---TATCTGGAGTTTCTTTTTTTTATCCTATACG-----GAT  
GATCCGATCCGCAAGGACCCTGATTGGGAATTGTTTGATCGTCTTTCTCTGAGGAAGAA  
GCGAAACATAATCAACTTG-----AATTCGGGACAGCTATTCGAAATCTTAGGGAAAGAC  
TTGATTTGTTATCTCATGTCTGCTTTTCGTGAAAAAAGACCAATTGAAGGGGAGGGT---T  
TCTTCAAACAACAAGGA---GCTGAGGCAACTATTCAATCAAATGATATTGAGCATGTTT  
CCCATCTCTTTCTTCTCGAGAAACAAGTGGGGTATTTCTTTGCAAATTTGTGCTCAA  
TTTCATATGTGGCAATTCCGCCAAGATCTCTTCGTT-----AGTTGGGGGAAG---AATCG  
GCACGAATCGGATTTTTTGAGGAAC---GTATCGAGAGAGAATTTGATTTGGTTAGACAA  
TGTGTGGTTGGTAAACAAGGATCGG-----TTTTTTAGC-----AAGGTACGGAATGTATC  
GTCAAATATTCAATATGATTCC-----ACAGGA-----TCTATTTTCGTTCAAGTAACAGAT  
TCTAGCCAATTGAAAGGATCTTCT---GATCAATCCAGAGATTGTTTTGATTCCATTAGA---  
-----AATGAGGATTCAGAA-----TATCACAATGATCGATCA  
AACAGAGATTCAGCAACTAAAAGAAAGATCGATTCTT---TGGGAT-----CCTTCCTTTAG  
TCAAACGGAACGAACAGAAATAGAATCAGAT-----CGATTCCCGAAA-----TGCCTTTTT  
GGATCTTCC-----TCAATGTCCCGCTATTACAG---GAACGTGAGAAGCCGATGAATAAT  
CATCTGCTTCCGGAAGAAATCGAAGAATTTCTT-----GGGAATCCTACAAGATCAATTCG  
TTCTTTTTTCTCTGACAAATGG-----TCAGAACTTCAT--CTGGGTTCGAATCCTACTGAG  
AGGTCCACAAGAGATCAG-----AAATTTTTTAAGAAAAACAAGATGTTTCT---TTT  
GTCCCTTCCAGGCGATCAGAA-----AATAAAGAAATGGTTGATATATTCAAGATAAT  
TACGATTTTACAAAAT-----ACCGTCTCAATTCATCTATTTCATCAGATCCGGGATGTGAT  
ATGGTAGTTCCGAAGGATGAACCGGAT--ATGGACAGTTCCAATAAGATTTCAATTCTTGA  
ACAAAATCCATTTTTGGAT-----TTATTTTCTATTCTATGACCGGAACAATGGGGGAT  
ACACGTTA-----CGCCACGATTTT---GAATCA---GAAGAGAGATTTCAAGAAATGGCGGA  
TCTATTCACTCTATCAATAACCGAGCCG---GATCTGGTGTATCATAGGGGATTTGCCTTTT  
CTATTGATTCCTACGGATTGGATCAAAAAAAA-----TTCTTGAATAGG-----GACTCCAGA  
GATGAATCGAAAAAGAAATCTTTA-----TTGGTTCTACCTCCTCTTTTTTAT-----GAAG  
AGAATGAATCTTTTTATCGAAGGATCAGAAAAAATCGGTCCGG---ATCTACTGCGGGA  
ATTTTTTGGAAGATCCAAAATCAAAATAGTGGTATTTGCTAGCAACAACATAATGGAG  
GCAGTCAATAAATATAGATTGATCCAAAATATGATTCAAATCCAATATAGCACCTATGGG-  
-----TACATAAGAAATGTATCGAACCGATTCTTTTTAATG-----AATAGATCCGATCGCAA  
CTACGAATATGGAATTCAA-----AAGGATCAAATAGGAAATGATACTCTGAATCATATA  
ACTATAATGAAATATACGATCAACCAACATTTATCGAATTTGAAAAAG---AGTCAGAAG  
AAATGGTTTGATCCT-----CTTTTTTCTCGAACCGAGAGATCCATCAATCGGGATCCT  
GATGCCTATAGATACAAATGGTCCAATGGGAACAATAATTTCCAGGAACATTTGGAACA

TTTCGTTTCTGAACAGGGGAAC-----CGTTTTCAAGTAGTGTTTCGATCGATTACGTATT  
AATCAATATTCGATTGATTGGTCCAAGGCTATCGACAAACAAGATTTGTCTAAGTCACT  
TCGTTTCTTTTTGTCC-----  
----AAGACACTTCTTTTTTCTTTGTGAGTATTGGAAATATCCCCATTCATAGGTCCGAG-  
--ATCCACATCTAT--GAATTGAAAGGTACAAACGATCAACTCTGCAATCAGTTGTTAGAA  
TCCATAGGTGTTCAAATCGTTCATTTGAATAAATTGAAACCC-----TTCTTATTGGAT-----  
--GATCATGATACTTCC--CAAAGACCGAAATTCTTGATAAATGGAAGAACAATATTACCA  
TTTTTGTTCAATAAGATACCA---AAGTGG---ATGATTGACTCATTCCATACT-----AGAAAT  
AATCGCAGAAAATCCTTTGATAACACGGATTCCCTATTTCTCAATGATATCCCACGATCGA  
GACAATTGGCTGAATCCCGTGAAACCATTTTCATAGAAGTTCATTGATATCTTCTTTTTAT  
AAAGCAAATCGACTTCGATTCTTGAATAATCCACATCACTTCTGGTTCTAT-----TGTAAC  
AAAGGATTCCCCTTTTATGTG-----GAAAAGACCTGTATCAATAATTATGAT-----CTT  
ACGTAT--GGACAATTCCTCAATATCTTGTTCAATTCGCAACAAA---ATCTTTTCTTTGTGC  
GTCGGTAAAGGTAAAAAAAACATATTTTTTTGGAG--AGAGAGGCTATTTTACCAATC  
GATTCACAGGTCTCTGACATATCCATATCTAACGATTTTCCAAAAGTGGTGACGAAAC  
G--TATAACTTGTAACAAA-----TCTTTCCATTTTCCAATTCGACCCGATCCATTCGTTCCG  
T-----AGAGCTATTTACTCGATCGCAGACATTTCTGCAACACCTCTAACAGAGGAACAAA  
TAGTCAATTTTGAAAGAACTTCTTGTCAGCCTTTTTTCAGATATGAATCTATCTGATTGAG  
AAGGGAAGAACTCGCATGAGTATCTCAGT-----TTCAATTCAAACATGGGTTTGATTGAC  
ACTCCATGTTCTGAGAAATATTACCA-----TCCGGAAAGAGGAAAAAA-----  
---CAGAGTCTTTGTCTAAAG-----AAATGCGTTGAGAAACAGCAGATGTATAGAACCCTTT  
CAACGAGATAGTGCTCTTTCAAATCTCTCAAATGGAATCTGTTCCAAACATATATGCCA  
TGGTTCCCTTACTTCGACAGGGTGCAAATATCTAAATTTACCCCTTTTAGATGCTTTTTCA  
GACTCATTG-----CCGATACTAAGTAGCAGT--CAAAAATTTGTATCCATTTTTCATGATAT  
TATGCATGGATCAGATATATCATGGCCAATTCGTCAGAAAAAATGGTGG-----GCGA  
TTCTTTTACAATGGACTCCG--ATAAGTGAGATTTTCGAGTAAGTGTTTACAGAAT-----CT  
TCTTCTGTCCGAAGAAACGATTCATCGAAATAATGAGTCACCCGTTCCATTGATATGGA  
CACATCTGAGATCAACAAATGCTCGGGAGTTC--CTCTATTCAATCCTTTTTCTTTCTTCTT  
ATTGCTGGATAT--CTCGTTTCGTATACATCTTCTCTTTGTTTCCCGA-----GCCTCTAGTGA  
GTTACAGACAGAGTTAGAAAAGATCAAATCTTTGATGATTCCATCATAATGATTGAGT  
TGCGAAAATCTTGGATAGGTATCCTACATCGGAACTGAATTCCTTCTGGTTAAAGAAT  
CTCTTTCTAGTTGCTCTGGAACAATTAGGAGATTCTCTGGAAGAAATACGGGGTTCTGC  
TTCTGACGGCAACATGCTATTGGGTGGTGGTCCC-----GCTTATGGG--GTCAAAT  
CCATACGTTCTAAGAATAAATATTTGAATATCAAT-----CTCATCGATCTCATA--AGTAT  
CATACCAAATCCCGTCAATCGAATCACTTTTTTCGAGAAATACGAGACATCTAAGTCGTA  
CAAGTAAAGAAATCTATGCATTGATAAGAAAAAGAAAAACGTGAACGGTGATTGGAT  
TGATGATAAAATAGAATCCTGGGTCGCGAACAGTGATTGATTGATGATGACGAAAGA  
GAATTCCTGGTTTCAAGTTCTCC-----ACCTTAACGACA-----GAAAAAAGAATTGATCAAAT  
TCTATTGAGTCTGACT--CATAGTGATCATTATCA-----AAGAATGACTCTGGTTA  
TCAAATGATTGAACAACCGGGATCAATTTACTTACGATACTTAGTTGACATTCAT-----AA  
AAAGTATCTAATGAATTATGAGTTCAATAGATCCTGTTTACGAGAAAGACGGATATTCCT  
TGCTCATTATCAGACAATCACTTAT-----TCACAAACCTCGTGTGGGGCTAATAGTTTTTA  
TTTCCCATCTCATGGA-----AAACCCTTTTCGCTCCGCTTAGCCCTATCTCCTTCT--AG  
GGGTATTTTAGTGATAGGTTCTATAGGAACTGGACGATCATATTTGGTCAAATACCTAGC

GACAAACTCTTATGTTCCCTTTCATTACGGTATTTCCGAACAAGTTCCTGGATGACAAGC  
CTAAAGGTTATCTTATTGAT-----GATATCGAT-----  
-----ATTGATGATAGTGAC-----GATATTGATAATGACCTTGAGA  
CGGAGCTGCTAACTATGACGAATGTGCTA-----ACTATGTATATGACG-----TCGAAA  
ATAGACCGATTTGATATCACCCCTCAATTCGAATTAGCAAAAGCAATGTCTCCTTGCATA  
ATATGGATTCCAAACATTCATGATCTGTATGTGAATGAGTCGAATTACTTATCCCTCGGT  
TTATTAGTGAACCTATCTCTCC-----AGGGATTGTGAAAGAAGTTCC---ACTAGAAATAT  
TCTTGTTATTGCTTCGACTCATATTCCCCAAAAAGTGGATCCCGCTCTAATAGCTCCGAA  
TAAATCAAATACATGCATTAAGATACGAAGGCTTCTTATTCCACAACAACGAAAGCACT  
TTTTATTCTTTTCATATACTAGGGGATTTCACTTGGAAAATAAAATGTTCCATACT-----A  
ACGGATTCCGGGTCATAACCGTGGGTTCCAATGCACGAGATCTTGTAGCACTTATCAAC  
GAGGCCCTATCAATTAGTATTACACAGAAGAAATCAATTATAGAACTAATACAATTAGA  
TCAGCTCTTCATAGACAACTTGGGATTTGCGA-----TCCCAGGTCAGATCGGTTTCAG  
GATCATGGGATCCTTTTCTATCAGATAGGAAGGGCTGTTGCACAAAATGTACTTCTAAG  
TAATTGCCCCATAGATCCTATATCTATCTATATGAAGAAGAAA-----TCATGTAAGGAAAG  
GGATTCTTATTTGTACAAATGGTACTTCGAACTTGGAACGAGCATAAAGAAATTAACGA  
TACTTCTTTATCTTTTGTAGTTGTTCTGCCGGATCGGTCGCTCAAGATCTTTGGTCTCCAT  
CC-----GGACCCGATGAAAAA---AATGGGATTACTTCGTTTGGATTGTTGAGAATGATT  
CT--GATCTAGTTCATGGCCTATTAGAAGTAGAAGGCGCTCTGGTGGGA-----TTCTCAC  
GGAAAGAAAAAGATTGCAGTCAGTTTGATAATAAT-----CGAGTGACATTGCTTCTTCGG  
TCCGAACCAAGGAAT---CCGTTAGATATGATGCAAAATGGATCTTGTTCCATCGTTGATC  
AGAGATTTCTATATGAAAAA-----TACGAATCGGAGTTTGAAGAA---GGGAAGGA-----  
GCCCTCGACCCGCAA-----CAGATAGAGGAAGAT-----TTATTAATCAC-----AT  
AGTTTGGGCTCCT-----AGAATATGGCGCCT-----TGTGGCAATCTATTTGATTGTATCG  
AAAGGACCAATGAATTGGGATTTCCC---TATTGGGCCAGGTCATTTTCGG-----GGCAA  
ACGGATCATTTTTCATAAAGAGAATGAGCTTCAACAGAAGGATTCGGAGTTCTTGCAG  
AGTGGAACCATGCAGTACCAGACACGAGATAGATCTTCCAAAGAACAAGGCTTTTTTC  
GAATAAGCCAATTCATTTGGGACCCTGCCGATCCATTCTTTTTTCTATTCAA---GATCA  
GCCCTTTGTCTCTGTGTTTTACGTCGAGAATTCTTTGCAGATGAAGAGATGTCAAAGG  
GGCTTATTACTTCCCAAAAAAATCCTCCTACATCTATATATAAACGCTGGTTCATC-----A  
AAAATACGCAAGAAAAGCACTTCGAATTGTTGATTCATCGCCAGAGATGGCTTAGAAC  
C-----AATAGTTCATTATCT-----AATAGATCTTTCTGTTCTAAT-----ACTCTATCCGAGA  
GTTATCAGTATTTATCAAATCTGTTCCCTATCTAAC---GGAAGGCTATTGGATCAAATGACA  
AAGACATTGTTGAGAAAGAGATGGCTTTTCCCGATGAAATGAAACATTTGATT-----CA  
TGTAACAGGAAAAAGATTTCCCATTCCTATGCCTAGATCTCGG---ATAAATGGAAATTTT  
ATTGATAAGACCTTTTCAATTGTAGCCAATATCTTATTACGAATAATTCCGACAACCTTCA  
GGAGAAAAAGAAGCATTAGCTATTACAGAGATGGT-----ATGTCGGCTCAATCTGAAG  
GAAATTATGCGGAAGCTTTACAAAATTATTATGAAGCTACGCGACCAGAAATTGATCCT  
TATGATCGAAGTTATATACTCTATAACATAGGCCTTATACACACAAGTAATGGAGAGCAT  
ACAAAGGCTTTAGAATATTATTTTCGGGCCCTAGAACGCAATCCATTCTTACCACAAGC  
TTTTAATAATATGGCCGTGATCTGTCATTAC---CGGGGAGAACAGGCCATTCAACAGGGT  
GATTCTGAAATTGCAGAGGCTTGGTCCGATCAAGCTGCTGAGTATTGGAACAAGCTAT  
AGCGCTTACTCCGGGTAATTATATTGAAGCACATAATTGGTTGAAGATAACGAGACGGT  
TCGAA-----ATGAACTGGCGATCAGAACATATATGGATAGAACTTATAACGGGGTCTCGA

AAAACAAGTAACTTTTTCTGGGCCTGTATCCTTTTTTTAGGTTCACTAGGATTCTTAGTC  
GTTGGAACCTCCAGTTATCTTGGTAGGAATCTGATATCTGTATTTCCATCTCAGCAAATA  
TCTTTTTTCCACAGGGGATTGTAATGTCTTTCTATGGAATTGCAGGTCTATTCATTAGTT  
CCTACTTGTGGTCCACAATTTTGTGGAATGTAGGTAGTGGTTATGATCGATTTCGATAGAA  
ACGAAGGAATAGTGTGTATTTTTCGTTGGGGATTCCTGGAAAAAATCGTCGTATATTC  
CTTCGTTTCCCTTATGAGTGATGTTCAATCAATCAGAGTGGAGGTTAAAGAAGGCCTTTA  
TACTCGACGTGTCCTTTATATGGAAGTCAGGGGCCAGGGAACCTATCCCTTGACTCGTG  
CTGATGAGAAT--TCAACTCCACGAGAAATTGAACAAAAGCTGCGGAATTAGCCTATT  
TCTTGCGTGTACCGATTGAAGTTTTT

>Magnolia

ATGGAAAAATGGTGGTTCAATTCGATATTGTCTCTAAGTAAATCAATGGACAGTCTTGG  
CCCTATTGGAAATACCAGTGGAAGTGAAGACCCATTCTAAATGATACGGATAAAAACA  
TTCT--TGCAGTAATGTTGATCATTTTTAGGTGTCAGGGACATTTGGAGTTTCATCTCT  
GATGAAACTTTTTAGTTAGGGATAGTAATGGTAACAGCTATTCCGTATATTTGATATTG  
AAAATCAGATTTTTGAGATTGACAATGAT-----AGTTCTTTTCTGAGTGAAGTAGAAAGT  
TCTTTTTCT-----AGTTATCTGAATAATGGGTCTAAGAGTGACAATCGCTACTATGA  
TTGTGACATGTATGATACTAAATATAGTTGGAATAATCACATTAATAGTTGCATTGATAGT  
TATCTTCGTTCTGAAATCCGT-----ATTGAT-----AGTTACATTTATA  
GTTATATTTGTAGTGATAGTGGGAATTCTATAAGAAGTGGCGGTAATGACAGT-----GATA  
TAGGAGAAGGATCG---GATTCGATATAAATCAAAAATACAGACATTTATGGGTTCAATG  
CGAAAATTGTTATGGATTAATAAGAAATTTTTTAAGTCAAAAATGAATATTTGTGA  
ACAATGTGGATATCATTGAAAATGAGTAGTTCAGATAGAATCGAACTTTCGATTGATCC  
GGACACTTGGGATCCTATGGATGAAGACATGGTCTCTATCGACCCCATGAAATTCACT  
CGGAAGAGGAGCCTTATAGAGATCGTATCGATTTCGTATCAAAGAAAGACAGGTTAAC  
TGAGGCTGTTCAAACAGGCATAGGTCAACTAAACGGTATTCCCATAGCAATGGGGGTTA  
TGGATTTTGAGTTCATGGGGGGTAGTATGGGATCCGTAGTAGGCGAGAAAATCACCCGT  
TTGATCGAGTATGCTACTAATAGATCTTTACCTGTTATTATGGTGTGTGCTTCTGGAGGA  
GCACGCATGCAAGAAGGAAGTTTGGAGCTTGATGCAAATGGCTAAAATATCTTCCGCTTT  
ATATGATTATCAATCAAATAAAAAGTTATTCTATGTATCAATCCTTACATCTCCTACAACC  
GGTGGAGTGACAGCCAGTTTTGGTATGTTGGGAGATATCATTATTGCTGAACCCAATGC  
CTACATTGCATTTGCGGGTAAAAGAGTAATTGAACAAACATTGAATAAGACAGTACCCG  
AGGGTTCACAAGCGGCTGAGTATTCATTCCATAAGGGCTTATTTGATCCAATCGTACCA  
CGTAAACCCTTAAAAGGTGTTCTGAGTGAGTTATTTAGCTACACGGTTTCTTTCCCTT  
GACTCAAAAT-----ATGGTAACCATTTCGAGCCGACGAAATTAGTAATATTATCCGTGAA  
CGTATTGAACAATATAATCGAGAAGTCACGATTGTGAATAACCGGCACCGTACTTCAAGT  
AGGCGATGGCATTGCTCGTATTCATGGTCTTGATGAAGTAATGGCAGGGGAATTAGTAG  
AATTTGAAGAGGGTACAATAGGCATTGCTCTGAATTTGGAATCAAACAATGTTGGCGTT  
GTATTAATGGGTGACGGTTTGATGATACAAGAGGGAAGTTCTGTAAAAGCAACAGGAA  
GAATTGCTCAGATACCAGTGAGTGAGGCTTATTTGGGTCGTGTTATAAATGCTCTGGCT  
AAACCTATTGATGGGAGAGGTGAAATTCAGCTTCTGAATCTCGGTTAATTGAATCTCC  
CGCTCCAGGTATTATTTCTAGACGTTCCGTATATGAGCCTCTTCAAACGGGGCTTATTGC  
TATTGATTCGATGATCCCTATAGGGCGCGGTCAGCGAGAATTAATTATTGGGGACAGAC  
AGACCGGGAAAACAGCAGTAGCCACAGATACTATTCTCAATCAAAAAGGGCAAAATGT  
AATATGTGTTTATGTAGCTATTGGTCAAAAAGCATCTTCCGTGGCCAGGTAGTACTAA

TTTCCAGGAACAGGGGGCGATGGAATACACTATTGTGGTAGCCGAAACGGCAGATTCA  
CCTGCTACATTACAATACCTCGCTCCTTATACAGGAGCGGCTCTAGCTGAATATTTTATG  
TACCGTGAACGACATACTTCAATAATTTATGATGATCCCTCCAAACAAGCACAAAGCTTAT  
CGCCAAATGTCTCTTCTATTAAGAAGACCACCCGGTCGTGAAGCTTATCCAGGAGATGT  
TTTTTATTTGCATTCACGCCTTTTGGAAAGAGCTGCTAAATCAAGTTCTCGTTTAGGTGA  
AGGAAGTATGACTGCTTTACCAATAGTTGAGACTCAATCTGGGGACGTTTCGGCTTATA  
TTCTACTAATGTGATTTCCATTACAGATGGACAAATATTCTTATCTGCCGATCTATTCAA  
TGCTGGAATCCGTCCTGCTATTAATGTGGGTATTTCCGTCTCCAGAGTAGGATCTGCCGC  
TCAAATTAAGCCATGAAACAAGTAGCTGGCAAATTAATGGAAGTGGCTCAATTC  
GCGGAGTTAGAAGCCTTTGCCCAATTTGCTTCTGATCTCGATAAAGCCACTCAGAATCA  
ATTGGCAAGAGGTCAACGATTACGCGAGTTGCTCAAACAATCCCAATCAGCTCCTCTC  
ACGGTGGAAGACCAGATAGTTACTATTTATACCGGAGCGAATGGGTATCTTGATCCGTT  
AGAAATGGGCAGGTAAAGAAATTTCTCGTTCAGTTACGTACCTACTTAAAAACAAATA  
AACCTCAGCTCCAAGAAATCATATCTTCTACCAAGACATTCACCGAGCAGGCAGAAGC  
CCTTTTGAAGGAAGCTATTTCCGGAACAGATAGAAGTGTCTTACTTCAGGAACAAACA  
ATGAGAATCAATCCTACTACTTCTGGTCTGGGGTTCCACACTTGAAGAAAAAACCC  
TGGGACGTATTGCTCAAATCATTGGTCCGGTACTGGATGTAGCCTTTCCCCCGGGCAAG  
ATGCCTAATATTTACAACGCTTTGGTAGTTAGGGTTCGAGATACTGTCGGTCAGCAAATT  
AATGTGACTTGTGAGGTACAGCAATTATTAGGAAATAATCGAGTTAGAGCTGTAGCTAT  
GAGTGCTACAGATGGTCTGATGAGAGGAATGGAAGTGATTGACACGGGAGCTCCTCTA  
AGTGTTCAGTCGGTGGAGCTACTCTCGGACGAATTTTCAACGTTCTTGGAGAGCCTG  
TTGATAATTTAGGGCCTGTAGATACTCGCACAACATCTCCTATTCATAGATCTGCGCCTG  
CTTTTATCCAGTTAGATACCAAATTATCAATCTTTGAAACAGGGATTAAAGTGGTGGATC  
TTTTAGCTCCTTATCGCCGTGGAGGAAAAATCGGACTATTCGGGGGAGCTGGAGTGGG  
TAAAACAGTACTCATCATGGAATTGATCAACAACATTGCCAAAGCTCATGGAGGTGTAT  
CTGATTTTGGCGGAGTAGGCGAACGTACTCGTGAAGGAAATGATCTTTACATGGAAATG  
AAAGAATCTGGAGTGATTAATGAACAAAATATTGCAGAATCAAAGTGGCTCTAGTCTA  
TGGTCAGATGAATGAACCGCCGGGAGCTCGTATGAGAGTTGGTTTACTGCCCTAACCC  
ATGGCGGAATATTTCCGGGATGTTAATGAACAAGACGTACTTCTATTTATAGACAATATC  
TTCCGTTTCGTTCAAGCAGGATCAGAAGTATCCGCCTTATTAGGTAGAATGCCTTCTGC  
TGTGGGTTATCAACCTACCTTAGTACAGAAATGGGTTCTTTGCAAGAAAGAATTACTT  
CTACCAAAGAGGGATCTATAACTTCCATTCAAGCAGTTTATGTACCTGCGGACGATTTG  
ACCGACCCCGCTCCTGCTACGACATTTGCACATTTAGATGCTACTACCGTACTCTCAAG  
AGGATTAGCTGCTAAAGGTATCTATCCAGCAGTAGATCCTTTAGATTCAACGTCCACTAT  
GCTCCAACCTAGGATCGTTGGCGAGGAACATTATGAAACTGCGCAAAGAGTTAAGCAA  
ACTTCACAACGTTACAAAGAACTTCAGGATATTATAGCTATCCTTGGGTTGGACGAATT  
ATCTGAAGAGGATCGTTTAAACCGTAGCAAGAGCACGAAAAATTGAGCGTTTCTTATCA  
CAACCTTCTTCGTAGCAGAAGTATTTACTGGTTCTCCAGGAAAATATGTTGGTCTCGC  
AGAAACCATTAGGGGGTTTCAACTGATCCTTTCCGGAGAATTAGATGGTCTTCCCGAGC  
AGGCCTTTTATTTGGTAGGTAACATCGATGAAGCTACCGCGAAGGCTATGAACTTAGAA  
GTGGAGAGCAAATTGAAGAAAATGACTTTAAATCTTTGTGTAAGTACCCTAATCGAAT  
TATTTGGGATTCAGAAGTGAAAGAAATATTTTATCTACTAATAGTGGCCAAATTGGCGT  
ATTACCAAATCACGCCCTATTGCCACAGCCGTAGATATAGGTATTTTGAGAATACGCCT  
CAACGACCAATGGTTAACGATGGCTCTGATGGGTGGTTTCGCTAGAATAGGTAATAATG

AGATCACCATTTTAGTAAATGATGCGGAGAAGGGTAGTGACATTGATCCACAAGAAGC  
TCAGCGAACTCTTGAAATAGCTGAAGCTAACTTGAGTAGAGCTGAAGGCAAGAGACA  
AGCAATTGAGGCGAATCTAGCTCTCAGACGAGCTAGGACACGAGTAGAGGCTATCAAT  
GCTATTTTCGATGAAAAATGTAACCGATTCTTTTCGTTTCCTTGGGTACTGGCCATCCGCC  
GGGAGTTTCGGGTTGAATACCGATATTTAGCAACAAATCTAATAAATCTAAGTGTAGT  
GCTTGGTGTATTGATCTTTTTTGGAAAGGGAGTGTTAAGTGATTTATTAGATAATCGAAA  
ACAGAGGATTCTGAGTACTATTTCGAAATTCAGAAGAACTACGCGGAGGAGCGATTGAG  
CAGCTCGAAAAAGCCCGGGCTCGCTTACGGAAAGTGGAATGGAAGCAGATGAGTTT  
CGAGTGAATGGATACTCTGAGATAGAACGAGAAAAACAGAATTTGATTAATGCCACTTA  
TGAGAAATTTGGAACGATTAGAAAATTACAAAAATGAAACCATTCAATTTGAACAACAA  
AGAGCAATTAATCAGGTCCGACAGCGAGTTTTCCAACAAGCCTTACAAGGAGCTCTAG  
GAACTCTGAATAGTTGTTTCGAACAGCGAGTTACATTTACGCACCATCAGTGCTAATATT  
GGCATGCTCGGGGCCATGAAAGAAATAACTGATATGAATCCACTGATTTCTGCCGCTTC  
CGTTATTGCTGCTGGATTGGCCGTAGGGCTTGCTTCTATTGGACCTGGAGTTGGTCAAG  
GTACTGCTGCGGGCCAAGCCGTAGAAGGTATCGCGAGACAACCAGAAGCAGAGGGTA  
AAATACGAGGTACTTTATTGCTTAGTCTGGCTTTTATGGAAGCTTTAACAATTTACGGAC  
TGGTCGTGGCATTAGCGCTTTTATTTGCGAATCCTTTTGTATGAATGTTCTACCATGTTT  
CATCAACACACTAAAAGGGTTATACGATATATCCGGTGTGGAAGTAGGCCAACATTTCT  
ATTGGCAAATAGGGGGTTTCCAAGTCCATGCCCAAGTACTTATCACTTCTTGGGTCGTA  
ATTGCTATCTTATTAGGTTTCAGCCACTATAGCTGTTTCGGAATCCACAAACCATTCCAACC  
GACGGTCAGAATTTCTTCGAATATGTCCTTGAATTCATTCGAGACTTGAGCAAAACCCA  
GATTGGAGAAGAATATGGTCCTTGGGTTCCCTTTATTGGAAGTATGTTCTATTTATTTTT  
GTTTCGAACTGGTCAGGTGCTCTTTTACCTCGGAAAATCATAAGTTACCTCATGGGGA  
GTTAGCTGCACCGACGAATGATATAAATACTACTGTTGCTTTAGCTTTACCCACGTCAAT  
GGCATATTTCTATGCGGGTTTTACCAAAAAAGGATTGAGTTATTTTCGGTAAATACATTCA  
ACCAACCCCAATACTTTTACCAATTAACATCCTAGAAGATTTCAACAAGCCTTTATCACT  
TAGTTTTTCGACTTTTCGGGAATATATTGGCTGATGAATTAGTAGTTGTTGTTCTTGTCTT  
TTAGTACCTTCAGTAGTCCCTATACCTGTCATGTTCCCTTGGATTATTCACAAGCGGGATT  
CAAGCCCTTATTTTTGCAACTTTAGCCGCGGCTTATATAGGTGAATCTATGGAGGGTCAT  
CATATGATATTTGCGACTTTAGAACATATATTTCACTCACATCTCTTTTTTCGATCATTTC  
TGTCATTACGATTTATTTGGTGACTTTATTAGTCCATGAAATCGTAGGACTATGTGATCCG  
TCAGAAAAGGGCATTTTAGCCACTTTTTTCTGTATAACAGGATTATTAGTTACTCGTTGG  
ATTTATTCGAGACATTTCCCGTTAAGTGATTTATATGAATCATTAATGTTCCCTTTCATGGA  
GTTTCTCCATTATTCATATGGTTCCCTAAAATAGGGAACCATAAAAATGATTTAAGCGCAA  
TAACCGCGCCAAGCGCTATTTTTACCAAGGCTTTGCCACTTCGGGTCTTTCAACTGAA  
ATGCATCAATCCGCAATATTAGTGCCTGCTCTACAATCCAGTGGTTAATGATGCACGTA  
AGTATGATGTTATTGAGCTATGCAGCTCTTTTATGTGGATCGTTATTATCAGTAGCTCTTT  
TAGTCATTACATTTTCGAAAAACATAGGTATTTTTGGCAAAAAGCAATGAGATCCACTAC  
TTGAATGAAAAAAGAAATGTTTTACAAAACACTTCTTTTCTTTCATTTTCGAAATTATCA  
CAGGTATCAATTGACTCAGCGATTGGATCATTGGAGTTATCGTGTCATTAGTCTAGGGTT  
TACCTTTTTAACCATAGGTATTCTTTTCGGGAGCAGTATGGGCTAATGAGGCATGGGGATC  
TTATTGGAATTGGGACCCCAAGGAACTTGGGCATTTATTACTTGGACCATATTTGCTAT  
TTATTTACATACTAGAACAAATCGGAGTTTGCAAGGTGTGAATTCGGCAATTGTGGCTT  
CCATGGGATTTCTTATAATTTGGATATGCTATTTTGGGGTTAATCTATTAGGAATAGGACT

ACATAGTTATGGTTCATTCACATTAACAGTGACAAAAAAA---GCATTGACTCCCCTCCCA  
TATCTTGCATCTATAGTCTTTTTGCCCCTGGTGGATCTCTCTCATTTAATAAAAAGTCTGG  
AACCTTTAGTTATTAATTGGTGGGAATACAAGGCAATCCGAAACTTTTTTGAATGATATTC  
AAGAGAAGAACGTTCTAGAAAGATTCATAGAATTAGAACAACCTATTCCTGTTGGACGA  
AATGATAAAGGAGTACCCGGAGACACAGATACAAAAGCTTCGTATAGGAATTCACAAA  
GAAACAATACAATTGGTCAAAATGCACAATGAAGATCATATCCATATAATTTTGCATTTC  
TCGACAAATATAATCTGTTTTGCTATTCTAAGTGGTTATTCTATTCTGGGTAATGAAGAA  
CTTGTCATTCTTAATTCTTGGGTTTCAGGAATTCCTCTATAACTTAAGCGACACAATAAAA  
GCTTTTTCTATTCTTTTATTAAGTGAATTTATGTATCGGATTCCTACTCGCCCATGGTTGGG  
AACTAATGATTGGTTCGGTCTACAAAGATTTTGGATTTGCTCATAACAATCAAATTATAT  
CTGGTCTTGTTCCTACTTTTCCAGTCAATCTAGATACAATTTTGAATATTGGATCTTCCA  
TTATTTAAATCGTGTATCTCCTTCACTTGTAGTGGTTTATCATTCAATGAATGAAATGCC  
ATTGGTGTTCAAAAGTACCTTTTCGGAGTCCCTGGAGAGGAAGATGCAGTTTGGGTTG  
ACGTAAAC---CGACTTTATCGAGAAAGATTACTTTTTTTAGGCCAAGAGGTTGATAGCG  
AGATCTCGAATCAACTTGTGGTCTCATGGTATATCTCAGCATAGAGGATGATACCAGG  
GATCTTTATTTGTTATAAACTCTCCCGGCGGATGGGTAATACCAGGAATATCTATTTATG  
ATACTATGCAATTTGTGCCACCAGATGTGCATACAATATGCATGGGATTAGCCGCTTCAA  
TGGGATCTTTCATCTGGTTCGGAGGAGAAATTACCAAACGTCTAGCATTCCCTCACGCT  
AGGGTTATGATCCACCAACCTGCTAGTTCTTTTTATGAGGCACCCACAGGAGAATTTAT  
CCTGGAAGCGGAAGAAGTACTGAAACTCCGCGAAACCCTCACAAGGGTTTATGTACA  
AAGAACGGGCAATCCTTTATGGGTTGTATCCGAAGACATGGAAAGAGATGTTTTTATGT  
CAGCAGCAGAAGCCCAAGCTCATGGCATTGTTGATCTTGTAGCGGTCGAAATGAAAGA  
ACAAAAATTGATTCATGAAGGTTAATTACTGAATCACTTCCCAATGGTATGTTCCGGGT  
TCGTTTAGATAATGAAGATCTGATTCTAGGTTATGTTTCGGGGAGGATCCGACGAAGTT  
TTATACGGATACTACCAGGAGATAGAGTAAAAATCGAAGTAAGTCGTTATGATTCAACC  
AGGGGACGTATAATTTATAGACTTCGCAACAAAGATTCAAACGATATGGAGGAATTACA  
AGGATATTTAGAAATAGATAGATCTAGGCAACAACACTTCCTATATCCGCTTCTATTTCA  
GGAGTATATCTACGCACTTGCTCATGATCATGGTTTATTTCGGTTATGACAAT---TCCAGTT  
CACTAATTGTGAAACGTTTAATTACTCGAATGCATCAACAGAATCATTGATTCTTTCCG  
TTAATGATTCCAACGAATCTATTTTCGTTGGGAAGAATTTGTATTTCAAATGGTATCAG  
AGGGTTTTGCAGTCATTATGGAAATTCATTTCTCGCTGCGATTAGTATCTTCCCTAATAG  
CAAATCTCAT---TTACGATCTATTCATTCAATATTTCCCTTTTTCGAGGACAAATTATCA  
CATTTAAATCATGTGTCAGATATACTAATACCTCATCCCATCCATCTGGAAATCTTGGTTC  
AAACCTTCACTGCTGGATACAAGATGCCCCCTCTTTGCATTTATTGCGATTCTTTCTCC  
ACGAGTATCGTAATTCGAATAGTCTCATTACTAAATCCATTCTCTTTTTTCAAACAAA  
GATCTTCTTGTACTATATAATTCTTATGTATATGAATGTGAATCTGTATTAGTGTCTC  
CGTAAACAATCTTCTCATTTACGATCAACATCCTCTGGAACCTTTCTTGGAGCGAACACA  
TTTCTATGGAAAAATAGAACAT---GTAGTAGTGCTTCGTAATCAGAAG---CTATGGTTGTT  
CAAGGACCCTTTCATGCATTATGTCAGATATCAAGGAAAATCCATTCTGGCTTCAAAGG  
GGACTCATCTTCTGATGAAGAAATGGAAATCTCACCTTGTCCATTTTGGCAATGTCAT  
TTTTACTTGTGGTCTCTACCGGACAGGATCCATATAAACCAATTATACAATCATTCCTTAT  
ATTTCTGGGCTATCTTTCAAGTGTACGACTAAACACTTCGGTGGTAAGGATTCAAATG  
CTAGAGAATTCATTTCTAATAGATACTTCTATT-----AATAAATTCGAGACCCTAGTCCCA  
ATTATTCCTCTGATTGGATCAGTGACTAAAGCGAAATTTTGTAAACGTATCAGGGCATCCC

ATTAGTAAGTCGGTCCGGGCCGATTTCGTCAGATTTTGATATTATCAATCGATTTGGGCGG  
ATATACAGAAATCTTTCTCATTATCACAGTGGATCCTCAAAAAACAGACTTTGTATCG  
AATAAGTATATACTTCGACTTTCGTGTGCTAGAACTTTGGCTCGTAAACATAAAAGTA  
CGGTACGCGCTTTTTTGAAAAGATTAGGTTCCGGAATTCTTGGAGGAATTCCTTACAGAG  
GAAGAACAAGTTCTTTCTTTGATCTTCCAAAGACGGATTTGGTATTTGGATATTATCCGT  
ATCAATGACCTGGCTAATCATTCAATGATAATTGATACGACA---GAAGTACAA---GCTATC  
AATCTTTTTTCCAGATCGGAA---TCCTTAAAAGAGGTCTATGGCCTCGTATGGCTGCTTG  
TCCCTATTTTTACTCCTGTATTGGGAATCACAATAGGTGTA CTCTCGTGATTGTGTGGTTAG  
AAAGAGAAATATCCGCAAGGATACAACAACGTATTGGGCCTGAATATGCTGGTCCCTTG  
GGAATTCTTCAAGCTCTAGCAGATGGGACCAACTACTTTTCAAAGAGGATCTTCTACC  
ATCTAGAGGAGATATTCGTTTATTAGTATCGGCCCATCTATAGCGGTCATATCAATTCTA  
CTAAGTTATTAGTAATTCCTTTTGGCTATCGTCTTGTCTAGCCGATCTCAGTATAGGTG  
TTTTTTTATGGATCGCTATTTCCAGTATTGCTCCTATTGGACTTCTTATGTCAGGATATGG  
ATCAAATAATAAATATTCTTTTTCAGGTGGTCTACGAGCTGCTGCTCAATCTATTAGTTAT  
GAAATACCATTA ACTCCATGTGTGTTATCAATATCTCTATTATCTAACAGTTCAAGTACAG  
TTGATATAGTTGAGGCACAGTCAAATATGGGTTGGGGGGATGGAATCTGTGGCGTCA  
ACCTATAGGGTTTATAGTTTTTCTAATTTCTTCCCTAGCGGAATGTGAGAGATTACCCTTT  
GATTTACCAGAAGCAGAGGAGGAATTAGTAGCAGGTTATCAAACCGAATATTCAGGTAT  
CAAATCTGGTTTATTTTACGTTGCTTCTTACCTAAATCTACTAGTTTCTTCATTATTTGTA  
ACAGTTCTTTACTTGGGCGGATGGAATCTCTCTATTCCGTACATATTCATCCCTGAACTT  
TTCGGAATAAATAAACAGGTGGAGTCTTTGGAACGACAATTGGTATCTTTATTACATT  
AGCTAAAGCTTATTTGTTCTGTTTCTTCTATCACAACAAGATGGACTTTACCTAGGAT  
GAGAATGGACCAACTATTAATCTTGGATGGAAATTTCTTTTACCTATTTCTCTAGGTAA  
TCTATTATTGACA ACTTCTTCCCAACTCCTTTCACTGATGATCTGGCATGTACAGAATGA  
AACTTCATTCTCGATTCTACGAGAATTTTTATGAAAGCGTTTCATTTGCTTCTCTTCCA  
TGGAAGTTTCATTTTCCAGAATGTATCCTAATTTTTGGCCTAATTCTTCTTCTGATGATC  
GATTC AACCTCTGATCAAAAAGATATACCTTGGTTATATTTATCTCTTCAACAAGTTTA  
GTAATGAGCATAACGGCCCTATTGTTCCGATGGAGAGAAGAACCCTATGATTAGCTTTTC  
GGGAAATTTCCAAACGAACAATTTCAACGAAATCTTTCAATTTCTTATTTTACTATGTTT  
AACTCTATGTATTCCTCTATCCGTAGAGTACATTGAATGTACAGAAATGGCTATAACAGA  
GTTTCTGTTATTTCGTATTAACAGCTACTCTAGGAGGAATGTTTTTATGTGGTGCTAACGA  
TTCAATAACTATCTTTGTAGCTCCAGAATGTTTCAGTTTATGCTCCTACCTATTATCTGGA  
TATACCAAGAGAGATGTACGGTCTAATGAGGCTACTACGAAATATTTACTCATGGGTGG  
GGCAAGCTCTTCTATTCTGGTTCATGGTTTCTCTTGGCTATATGGTTCATCCGGGGGAGA  
GATCGAGCTTCAAGAAATAGTGAATGGTCTTATCAAGACACAAATGTATAACTCCCCAG  
GAATTTCAATTGCGCTTATATTCATCACTGTAGGAATTGGGTTCAAGCTTTCCCAGCCC  
CTTCTCATCAATGGACTCCTGACGTATACGAAGGATCTCCCACTCCAGTCGTTGCTTTT  
CTTTCTGTTACTTCGAAAGTAGCTGCTTCAGCTTCAGCCACTCGAATTTTCGATATTCCT  
TTTTATTTCTCATCAAACGAATGGCATCTTCTTCTGGAATCCTAGCTATTCTTAGCATGA  
TATTGGGGAATCTCATTGCTATTACTCAAACAAGCATGAAACGTATGCTTGCATATTCGT  
CCATAGGTCAAATCGGATATGTAATTATTGGAATAATTGTTGGAGACTCAAATGATGGAT  
ATGCAAGCATGATAACTTATATGCTGTTCTATATCTCCATGAATCTAGGAACTTTTGCTCG  
CATTGTCTCATTTGGTCTACGTACCGGAACTGATAACATTCGAGATTATGCAGGATTATA  
CACGAAAGATCCTTTTTTTGGCTCTCTTTCAGCCCTATGTCTCTTATCCCTAGGAGGTCT



TCCTCCACTAGCAGGTTTTTTTCGGAAAACCTCCATCTATTCTGGTGTGGATGGCAGGCAG  
GCCTATATTTCTTGGTTTCAATAGGACTCCTTACGAGCGTTGTTTCTATCTACTATTATCT  
AAAAATAATCAAGTTATTAATGACTGGACGAAACCAAGAAATAACCCCTCACGTGCGA  
AATTATAGAAGATCTCCTTTAAGATCAAACAATTCCATCGAATTGAGTATGATTGTATGT  
GTGATAGCATCTACTATACCAGGAATATCAATGAACCCAATTATTGCAATTGCTCAGGAT  
ACCCTCTTTATGTTTTCTGCTTACGAATATGATATCTTCTGGGCATTTCTAATAATATCAA  
GTGTTATTCTATTTTGGCATTCTAATTTCCGGAGTTTTAGCCCCGATTAGTGAAGGAC  
CAGAGAAGCTCTCTAGTTATGAATCGGGTATAGAACCCATGGGGGATGCTTGGTTACAA  
TTCCGAATCCGTTATTATATGTTTGTCTAGTTTTTGTGTTTTTGTATGTTGAAACGGTCT  
TTCTTTATCCATGGGCAATGAGTTTCGATGTATTGGGTGTATCTGTATTTATAGAAGCTTT  
AATTTTCGTGCTTATCCCAATTGTTGGTTCAGTTTATGCATGGCGAAAAGGAGCATTGG  
AATGGTCT-----ATAATTGTGGTTTTGCCGATATCTGCGGGTTCGTCAATTT  
TCTTTTTCCCTCATAGAGGAAATAAGGTGGTTCGGTGGTATACTATTTGTATCTGCTTATT  
AGAACTCCTTCTAACGACCTATGCATTCTGTTATCATTTCGAATTGGACGATCCATTAAT  
TCAATTGGAGGAGGATTATAAATGGATAAATATTTTTGATTTTCACTGGAGATTGGGAAT  
CGATGGACTTTCCATAGGACCCATTTTACTGACGGGATTCATCACTACTTTAGCTACTTT  
AGCGGCTCGGCCAGTTACTCGGGATTTCGCGATTGTTCCATTTCCATAATGTTAGCAATGT  
ACAGTGGTCAAATAGGATCATTTCCTTCTCGAGACCTTTTACTTTTTTTCATCATGTGGG  
AGTTAGAATTAATTCCTGTTTACCTACTTCTATCCATGTGGGGGGGTAAGAAACGTCTGT  
ACTCAGCTACAAAGTTTATTTGTACACTGCGGGGGGTTCTATCTTCTCTTAATGGGAG  
TTCCAGGTATGGGTTTATATGGTTCCAATGAACCAACATTAATTTTGAAACATCAGCTA  
ATCAATCGTATCCCCTGGCATTGGAAATACTATTCTATTTTGGTTTCCTTATTGCTTATGC  
TGTCAAATTGCCGATTATACCCCTACATACATGGTTACCAGATACCCATGGAGAAGCACA  
TTACAGTACATGTATGCTTCTAGCTGGAATCTTATTAATAAATGGGAGCATATGGATTGGT  
TCGGATCAATATGGAATTATTACCCCATGCCATTCTATATTTTCTCCCTGGTTGATGATA  
GTAGGAACGATTCAAATAATCTATGCAGCTTCAACTTCTTCCGGTCAAAGCAATTTAAA  
AAAGAGAATAGCCTATTCCTCCGTATCTCATATGGGTTTCACAATTATAGGGATTGGTTC  
CATAACCGATACGGGACTCAATGGAGCAATTTTACAAATAATCTCTCATGGATTATTGG  
TGCTGCACTTTTTTTCTTGGCAGGAACGAGTTACGATAGAATACGTCTTGTATTATCTCGA  
CGAAATGGGAGGAATAGCTATCCCAATGCCAAAAATATTTACCATGTTTCAGTAGCTTCT  
CGATGGCTTCTCTTGCATTGCCAGGAATGAGTGGTTTTTGTGTCAGAATCGGTAGTTTTT  
TTTGAATAATTACCAGCCCGAAATATCTTTTAATGCCAAAAATACTAATTACTTTTTGTAA  
TGGCAATTGGAATGATATTAACCTCTATTATTTCATTATCTATGTCACGCCAGATGTTCTA  
TGGATACAAGCTGTTTAATGTTCCAAACTCTTATTTTTTGGATTCTGGACCACGAGA  
ACTATTGTTTTCGATCTGTATCTTCTACCCGTAATAGGTATCGGTATTTATCTGATTTTCGTT  
TCTCGTTATCAGTTGACAAGGTAGAAGCTATTCTGGCTAATTACTTTTATAAAATGATGA  
CCGAGCATGTACTTATTTGAGTGCCTATTTATTTTCTATCGGTATTTATGGATTGATCAC  
AAGCCGAAACATGGTTAGAGCACTTATGTGTCTTGTAGCTTATACTGAATGCGGTTAATC  
TAAATCTCGTAACATTTTCTGATTTATTTGATAGTCGACAATTAAGGAGACATTTTCT  
CGATCTTTGTTATAGCTATTGACAGCCGCTGAAGCAGCTATTGGGCCAGCTATTGTTTCGT  
CGATCTATCGTAACAGAAAATCAACTCGTATCAATCAATCGAATTTGTTGAATAAAATG  
GAACATACATATCAATATGCATGGATCATACTTTTCGTTCCACTTCCAGTTACTATGTCAA  
TAGGATGGGGACTTCTGCTTGTTCGACTGCAACAAAAAATCTTCGTTCGATGTGGGCT  
TTTCTAGTGTTCATTGCTAAGTATAGTTATGGTTTTTTTCGGCCGATCTGTCTATTACG

AAATCAATGGCAGTTCTATCTATCAATTTCTATGTTCTTGGACCATCAATAATGATTTTTTC  
TTTAGAGTTCGGCCACTTGATCGACCCACTTACTTCTATTATGTCAATACTAATCACTAC  
TGTTGGAATCATGGTTCTTATTTATAGTGACAATTATAATGTCTCATGATCAAGGATATTTG  
AGATTTTTTGCTTATATGAGTTTTTCCAATACTTCTATGTTGGGATTAGTTACTAGTTCCA  
ATTTGATACAAATTCATATTTTTTGGGAACTGGTGGGAATGTGTTTCGTATCTATTAATAGG  
TTTTTGGTTCACACGACCAATTGCAGCCAATGCTTGTCAAAAAGCGTTTGTAACATAATC  
GTGTAGGGGATTTTGGTTTATTATTAGGAATCTTAGGTTTTTATTGGATAACAGGTAGTTT  
GGAATTTTCGGGATTTGTTTCGAAATCTTCAATAACAATGGGGTCAATTCCTTATTGCTAC  
TCTGTGTGCCTCCCTATTATTCCTTGGTGCAGTTGCTAAATCCGCACAATTTCCCCTTCA  
TGTATGGTTACCTGATGCCATGGAGGGGCCACTCCTATTTTCGGCTCTTATACATGCTGC  
TACTATGGTAGCAGCGGAATTTTTCTTGTGCTCGGCTTCTTCCCCTTTTCACAGTCAT  
ACCTTACATAATGAATCTCATTTCTTTGCTAGGTATAATAACGGTACTACTAGGAGCTAC  
TTTAGCTCTTGCTCAAAAAGACATTAAGAGAAGTTTAGCCTATTCTACAATGTCTCAATT  
GGGTTATATTATGTTAGCTCCAGGGATAGGTTCTTATCGAGCTGCTTTATTCCATTTAATC  
ACTCATGCCTATTCAAAAAGCATTATTGTTTTTAGGATCCGGATCAATTATTCATTCAATGG  
AACCCATTGTTGGATATTCTCCAGATAAAAGTCAGAACATGGTTCTTATGGGTGGTTTA  
ACCAAATATGTGCCAATTACAAAACACTTTTTTTATTAGGTACACTTTCTCTTTGTGGT  
ATTCCACCTCTTGCTTGTTTTTGGTCCAAAGATGAAATTCTTAATGATAGTTGGTTGTAT  
TCACCGATTTTCGCGATAATAGCCTGTTCCACAGCAGGATTAAGTGCATTTTATATGTTT  
CGGATGTATTTACTTACTTTTGAGGGGCATTTACACGTTCCGGTTTCAAATTACAGTGGC  
ACTAAAATAGCTCGTTCTTCTTCAATATCTATATGGGGAAAAGAAGGACCGAAAACAGT  
TAACAAA---AATGTACTTTTCTCAGTAATGAATAAGGGTTCCAATAAAGAC-----ACTTCC  
ATGTATCCCTGTGAATCGGACAATACTATGCTATTTCTCTACTTATATTGGTCCATTTTAC  
TTTGTGTTGTTGGGTCCATAGGAATTCCTTTCGATTTGGATATATTATCGAAATGGTTAACC  
CCATCGATAAACCTTTTACATCAAAATTCGAACTATTCTGTGGATTGGTATGAATTTGTG  
ACAAATGCAATTTATTCAGTCAGCATAGCCTATTTTCGGAATATTCATAGCGTATCTTTTAT  
ATGGGTCTGTTTATTATCATTTTTTTCAGAAATTTAGAATTAATTAATTCATTTGTTCTTTTCTTG  
GACCGAATAATAAATGTAATATAACAATTGGTTCATATAATCGTGGTTACATAGATATTTTTT  
ATGCAACATTCTTAACTAAGGGTATAAGAGGATTGGCCGAACATACTAATTTTTTTGATA  
GACGAGTAATTGATGGAATTACAAATGGTGTGGTATTGCAAGTTTCTTTGTAGGAGAA  
GGGATCAAATAT--GTGGGGGGCGGACGAATCTCTTCTTATCTTTTCGTGTATTTATCTTA  
TGTATCAACCTTTTTTATTAATTTACTATATGGATTTACCTGGATCAATACATGATATCTTT  
TAGTATTTCTAGGATCAGGTCTTATATTAGGAGGCCTAGGGGTGGTATTACTTACCAATC  
CAATTTATTCTGCCTTTTCATTAGGATTGGTCTTGTGTTGTATATCCTTATTCCATATCCA  
TCTAACTCCTATTTTGTAGCTGCTGCACAGCTCCTTATTTACGTGGGAGCCGTAAATGTC  
TTAATCGTATTTGCTGTGATGTTTCATGAATGGTTCAGAATATTACAAGGATTTATATCTTT  
GGACAGTTGGAGATGGAGTTACTTCACTGGTTTGTACAAGTATTCTTTTTTCTACTAATTA  
CTACTATCTCAGATACGTCATGGTACGGGATTATTTGGACTACAAGATCAAACCAGATTA  
TAGAGCAGGACCTGACAAGTAACGTTCAACAAATTGGAATTCATTTATCAACAGATTTT  
TATCTTCCATTTGAACTCATTCTATAATCTTTTATGTTGCTTTGATAGGTGCAATTGCTAT  
GGCTCGTCAGATGACTGTACCGGATATAAGAAAAGACTTCATGATAGTCAATATGGGTC  
CTCACCACCCATCAATGCATGGTGTCTTTCGACTCATCGTTACTCTAGATGGTGAAGAT  
GTTATTGATTGTGAACCCGATTTGGGTTATTTACACAGAGGGATGGAAAAAATTGCGGA  
AAACCGAACAATTATACAGTATCTACCTTACGTAACACGTTGGGATTATTTAGCTACTAT

GTTCACAGAGGCAATAACGGTAAATGCACCAGAACAATTGGGAAATATTCAAGTACCT  
AAAAGAGCCAGCTATATCAGAGTCATTATGCTGGAGTTGAGTCGTATAGCTTCTCATT  
GTTATGGCTTGGGCCCTTTTATGGCGGATATCGGTGCACAGACTCCTTTCTTCTATATTT  
AGAGAGAGGGAATTGCTATATGATCTATTTCGAAGCTGCCACAGGTATGCGAATGATGCA  
TAATTATTTCCGTATCGGGGGAGTAGCTGCTGATCTACCTCATGGCTGGATAGATAAATG  
TTTGGATTTCTGCGATTATTCTTTAACAGGAGTTGTTGAATATCAAAAAGCTTATTACGCG  
GAATCCCATTTTTTTGGAACGAGTTGAAGGAGTGGGCATTATTGGTGGAGAGGAAGCA  
ATAAATTGGGGTTTATCAGGACCAATGCTACGAGCTTCCGGAATACAATGGGATCTTCG  
TAAAGTTGATCATTATGAGTGTTACGATGAATTCGATTGGGAAGTCCAATGGCAAAAAG  
AAGGAGACTCATTAGCTCGTTATTTAGTACGAATCAGTGAAATGGCGGAATCCATAAAA  
ATTATTCAACAGGCTCTGGAAGGAATTCGGGGGGGCCCTATGAGAATTTAGAAGTCC  
GTCGCTTTGATAAAGCAAGGGATTCCGAATGGAATGATTTTGAATATCGATTCATTAGTA  
AAAAGCCTTCTCCCACTTTTGAATTGTGCAAAACAAGAACTTTATGTCAGAGTAGAAGC  
CCAAAAGGAGAATTGGGAATTTTTCTGATAGGAGATAATAGTGTTTTTCCCTGGAGAT  
GGAAAATTCGTCCACCCGGTTTCATCAATTTGCAAATTCCTCCTCAGCTAGTTAAAAGA  
ATGAAATTTGGCTGATATCATGACGATACTAGGTAGTATAGATATCATTATGGGAGAAGTT  
GATCGTATGTTCCCTATGGTGACCGGTTTCATGAATTATGGTCAACAAACAGTACGAGC  
TGCAAGGTACATTGGTCAAAGTTTCATGATTACCTTATCCACGCGAATCGTTTACCTGT  
AACTATTCAATATCCTTATGAAAAATCGATCACATCAGAGCGTTTCCGCGGTCTGAATCC  
ACTTTGAATTTGATAAATGCATTGCTTGTGAAGTATGTGTTTCGTGTATGCCCCATAGATC  
TACCCGTTGTTGATTGGAGATTGGAAACAGATATTAGAAAGAAACGATTGCTTAATTAT  
AGTATTGATTTCCGAATCTGTATATTTGTGGTAACTGCGTCGAGTATTGTCCAACAAC  
TGTTTATCAATGACTGAAGAATATGAACTTTCTACTTACGATCGTCACGAATTGAATTAT  
AATCAAATGCTTTGGGTCGGTTACCAATGTCAGTAATTGGCGATTACACAATTCGAAC  
AATTATGAATTCGAAAATAGCCACGGATAACCCCTTGATTCAAGAACGATTACCAATT  
ACATGCAGGGTCGTTTCATCTGCTTGGTTAGTCAAGCATGAGCTAGTTCATAGATCTTTG  
GGCTTCGATTACCAAGGAATAGAGACTTTACAAATAAAGCCCGAGGATTGGTATTCCAT  
TGCTGTCATTTATATGTATATGGTTACAATTATCTACGTTCCAGTGTGCCTATGATGTA  
GCGCCGGGCGGATTGTTAGCTAGTGTGTATCATCTTACGAAAATAGAGTATGGTGTGGA  
TCAACCCGAAGAGGTATGCATAAAAGTATTTGCCCAAGGAGGAATCCTAGAATCCCG  
TCTGTTTTCTGGATTTGGAAAAGTGCTGATTTTCAAGAACGGGAATCTTATGATATGTTG  
GGAATTTCTTATGAAAATCATCCACGCCTGAAACGTATCTTGATGCCTGAAAGTTGGAT  
AGGCTGGCCCCACGTAAGGATTATATTGCCCCCAATTTCTATGAAATACAAGATGCTTA  
T-----

-----ATGAATTCTATTGAGTTTCCGTTACTTG  
ACCGAACAACCCAAAATTCAGTTATTTCAACTACATCGAACGATCTTTCGAATTGGTCA  
AGACTCTCCAGTTTATGGCCGCTTCTCTATGGTACCAGTTGTTGCTTCATTGAATTTGCT  
TCATTAATAGGCTCGCGATTTCGACTTTGATCGTTATGGACTGGTCCCAAGATCGAGCCCT  
AGGCAAGCAGACCTAATTTAACAGCCGGCACAGTAACAATGAAAATGGCCCCTTCTT  
TAGTGAGATTATATGAGCAAATGCCTGAACCAAAATATGTCATTGCTATGGGAGCTTGTA  
CTATTACAGGAGGGATGTTTCAGTACCGATTCTTATAGTACCGTTCGGGGAGTCGATAAG  
CTAATTCCTGTGGATGTCTATTTGCCGGGTTGCCACCTAAACCAGAGGCAGTTATAGA  
TGCTATAACGAAACTTCGTAAGAAAGTATCTCGAGAAATCTCTGAAGATAGAATTTGGT  
CTCAACAGGAAAATCGATGTTTTACTACCAATCACAAGTTTCATGTTGGACGCAGTACT

CATACTGGAAATTACGATCAAGGATTACTCTATCAATCCCCCTCTACTTCAGAGATATCT  
TCTGAAACATTTTTCAAATACAAAAGTTCAGTATCTTCCCACGAATTAGTGAATATGCA  
AAATAGAAATACCTTTTTCTTGGGTAAAGGAACAGATGACTCGATTCAATTTCCGTATCGA  
TCATGATATATGTCATAACTCGGACATCTATTTCAAATGCATATCCCATTTTTGCGCAGCA  
GGGTTATGAAAATCCACGAGAAGCAACTGGGCGTATTGTATGCGCCAATTGCCATTTAG  
CTAATAAGCCCGTGGATATTGAGGTTCCACAAGCTGTGCTTCCTGATACTGTATTTGAA  
GCAGTTGTTCGAATCCCTTATGATATGCAACTGAAACAAGTTCCTTGCTAATGGGAAAAA  
GGGGGCTTTGAATGTGGGGGCTGTTCTTATTTTACCCGAGGGATTCTGAATTAGCTCCCC  
CCGATCGTATTTCTCCCGAGATGAAAGAAAAGATAGGCAATCTGTCTTTTCAGAGTTAT  
CGCCCCACTAAAAGAAATATTCTTGTGGTAGGTCTTCTTCTGGTCAGAAATATAGTGA  
AATCGTCTTTCCCATTTCTTTCCCGGACCCTGCTACTAAGAAAGACGTTCACTTCTTAA  
AGTATCCCATATATGTAGGTGGGAACAGGGGAAGAGGTCAGATTTATCCCGATGGGAAC  
AAGAGTAACAATACAGTCTATAATGCTACAGCAGCAGGTATAGTAAGCAGAATAGTACG  
TAAAGAAAAAGGGGGGTATGAAATAACCATAGCTGACACATCGGATGGACGCCAAGTG  
GTTGATATTATACCTCCAGGACCAGAACTTCTTGTTCAGAGGGTGAATCTATCAAGCT  
TGATCAACCATTAACGAGTAATCCCAATGTGGGTGGATTTGGTCAGGGAGATGCAGAA  
ATAGTACTTCAAGATCCATTACGTGTCCAAGGTTTGTGTTCTTCTTGGCATCTGTTATT  
CTGGCACAAATCTTTTTGGTTCTAAAAAAGAAACAGTTTGAGAAGGTTCAATTGTCCG  
AAATGAATTTTCATGAGTAAAGTATATGATTGGTTCGAGGAGCGTCTCGAGATTCAGGCG  
ATTGCAGATGATATAACTAGTAAATATGTTCCCTCCTCATGTCAACATATTTTATTGTCTAG  
GAGGGATCACACTTACTTGTTTTTTAGTACAAGTAGCTACCGGTTTTGCTATGACTTTTT  
ACTATCGTCCGACCGTTACAGAGGCTTTTGCCTCTGTTCAATACATAATGACTGAAGCC  
AACTTTGGTTGGTTAATCCGATCAGTTCATCGATGGTCAGCAAGTATGATGGTGCTAAT  
GATGATCCTACACGTATTTTCGTGTGTATCTCACAGGTGGATTTAAAAAACCTCGCGAAT  
TGACTTGGGTTACAGGTGTGATTTTGGCTGTATTGACTGCATCTTTTGGTGTAACTGGTT  
ATTCCTTACCTCGGGACCAAATTGGTTATTGGGCAGTAAAAATCGTGACAGGCGTACCT  
GAAGCTATTCCGTGAATAGGATCGCCTTTGGTAGAGTTATTACGTGGAAGTGCTAGTGT  
CGGTCAATCCACTTTGACTCGTTTTTATAGTTTACACACTTTTGTATTACCTCTTCTTACT  
GCCGTATTTATGTTAATGCACTTTCCAATGATACGTAAGCAAGGTATTTCAAGTCCTTTA-  
----ATAACAAAGAAACCTGATTTGAATGATCCTGTATTAAGAGCTAAATTGGCTAAAGG  
GATGGGGCATAATTATTACGGAGAACCCGCGTGGCCCAATGATCTTTTATATATTTCTCC  
AGTAGTCATTCTAGGTACTATTGCATGTAACGTAGGCCTAGCGGTTCTAGAACCATCAAT  
GATTGGTGAACCGGCAGATCCATTTGCAACTCCTTTGGAAATATTACCCGAATGGTACT  
TCTTTCCCGTATTTCAAATCCTCCGTACAGTACCCAATAAGTTACTGGGTGTTCTTTTAA  
TGTTTTCAGTACCAACGGGATTATTAACAGTACCCTTTTTGGAGAACGTTAATAAATTC  
CAAAATCCATTTTCGTCGTCCAGTAGCTACAACAGTCTTTTTGATCGGTAAGTTATAGCT  
CTTTGGTTAGGTATTGGAGCAACATTACCTATTGATAAATCTCTAACTTTAGGTCTTTTTA  
TGATTGAAGTTTTTCTATTTGGAATCGTCTTAGGTCTAATTCCTATTACTTTGGCTGGATT  
ATTCGTAAGTGCATATTTACAATACAGACGCGGTGATCAGTTGGACCTTATGCCTACTAT  
AACTAGTTATTTCCGTTTTCTACTGGCTGCTTCAACTATAACCCAGCTCTATTGATTGG  
TCTGAGCAAGATACGACTTATTATGGATATAGTAAGTCTCGCTTGGGCTGCTTTAATGGT  
AGTCTTTACATTTTCCCTTCACTCGTAGTATGGGAAGAAGTGGACTCATGATTATTCG  
TTCGCCGAACCAAGTAAAGATTGTGGTGGATAGGGATCCATAAAAACTTCTTTC  
GAGGAATGGGCCAGACCCGGCCATTTCTCAAGAACAATAGCTAAGGGCCCTGATACTA

CCACTTGGATCTGGAACCTACATGCTGATGCTCACGATTTTCGATAGCCATAACCAGTGATT  
TGGAGGAGATCTCTCGAAAAGTATTTAGTGCTCATTTCGGTCAACTCTCCATCATCTTTC  
TTTGTTGAGTGGCATGTACTTCCATGGCGCCCGTTTTTCCAATTATGAAGCATGGCTAA  
GCGATCCTACTCACATTGGACCCAGCGCCAGGTGGTTTGGCCAATAGTGGGTCAAGA  
AATATTGAATGGTGTGTGGGCGGGGGTTTTCCGAGGAATACAAATAACCTCTGGTTTTT  
TTCAGATTTGGCGAGCATCCGGAATAACTAGTGAATTACAACCTCTATTGTACCGCAATT  
GGTGCATTGGTTTTTGCAGCGTTAATGCTTTTTGCTGGTTGGTTCCATTATCACAAAGCT  
GCTCCAAAATTGGCTTGGTTCCAAGATGTAGAATCTATGTTGAATCACCACTTAGCGGG  
GTTACTAGGACTTGGGTCTCTTCTTGGGCGGGACACCAAGTACATGTATCTTTACCTAT  
TAACCAATTTCTAGACGCTGGAGTGGATCCTAAAGAGATAACCACTTCCATGAATTTAT  
CTTGAATCGGGATCTTTTGGCCCAACTTTATCCCAGTTTTTGCCGAGGGAGCAACCCCCT  
TTTTACCTTGAATTGGTCAAATAACGCGGAATTTCTGAGTTTTCGTGGAGGATTAAT  
CCAGTAACAGGGGGTCTATGGCTGACTGATATTGCACACCATCATTTAGCTATTGCAATT  
CTTTTCTGATAGCTGGTACATGTATAGGACCAACTGGGGCATTGGTCATGGTCTGAA  
AGATATTTTAGAGGCTCATAAAGGTCCATTTACAGGCCAGGGTCATAAAGGCCTTTATG  
AGATCTTAAACAACGTCATGGCACGCTCAATTATCTCTTAAACCTAGCTATGTAGGCTCTT  
CAACCATTTGTTGTAGCTCACCATATGTATTCATGCCCCCTATCCATACCTAGCTATTGA  
CTATGGTACACAACCTTTCGTTGTTACACATCACATGTGGATCGGTGGGTTTTCTCATAGT  
TGGTGCTGCTGCACATGCAGCCATTTTTATGGTAAGAGACTATGATCCAACCTACTCGATA  
CAACGATCTATTAGATCGCGTCCTTAGGCACCGGGATGCAATCATATCACATCTCAACTG  
GGCATGTATATTTCTAGGCTTTCACAGTTTTGGCTTGTATATTCATAATGATACCATGAGC  
GCTTTAGGGCGTCCCCAAGATATGTTTTCAGATACCGCTATAACAATTACAACCCATCTTT  
GCTCAATGGGTACAAAACACCCATGCTTTAGCACCTGGTGCAACAGCTCCTGGTGCAA  
CAACAAGCACCAGCTTGACTTGGGGGGGTAGTGATTTAGTAGCAGTAGGCGGCAAAG  
TCGCTTTGTTACCTATTCCATTAGGAACCGCAGATTTTTTGGTACATCACATTCATGCATT  
TACGATCCATGTGACCGTATTGATACTACTTAAAGGTGTTCTATTTGCTCGTAGCTCACG  
TTTGATACTGATAAAGCAAATCTTGGTTTTCGTTTTCCCTTGTGACGGACCTGGAAGAG  
GAGGGACATGTCAAGTATCTGCCTGGGATCATGTCTTCTTAGGTCTATTCTGGATGTACA  
ATGCAATTTGCGTAGTCATATTCCATTTAGTTGGAAAATGCAGTCAGATGTTTGGGGTA  
GTATAAGTGATCAAGGGGTGGTAACTCATATCACGGGAGGAACTTTGCACAGAGTTC  
CATTACTATTAATGGGTGGCTCCGGGATTTTTTATGGGCACAGGCATCTCAGGTAATTCA  
GTCTTATGGTTCTTCATTATCTGCATATGGCCTTTTTTTTCTGGGTGCTCATTTTGTCTGG  
GCTTTCAGTTAATGTTTCTATTACGCGGCCGTGGTTATTGGCAAGAACTCATTGAATCC  
ATCGTTTTGGGCTCATAACAAATTAAGTTGCTCCTGCTACTCAGCCAAGAGCCTTGAG  
CATTGTACAAGGACGTGCTGTAGGAGTAACCCATTACCTTCTGGGTGGAATTGCCACA  
ACATGGGCATTCTTCTTAGCAAGAATTATTGCAGTAGGAATGGCATTAAGATTTCCAAG  
GTTTAGCCAAGGCTTAGCTCAGGACCCCACTACTCGTCGTATTTGGTTTGGTATTGCTA  
CCGCACATGATTTGAGAGTCATGATGATTAATCTGAGGAACGTCTTTATCAGAACATTT  
TTGCTTCTCACTTCGGGCAGTTAGCAATAATCTTCTGTGGACTTCCGGAAATCTGTTTC  
ATGTAGCTTGGCAAGGAAATTTTGGAGTCATGGGTACAGGACCCCTTACATGTAAGACCT  
ATTGCTCATGCAATTTGGGATCCTCATTTTGGTCAACCAGCTGTAGAAGCCTTTACTCG  
AGGAGGTGCTCTCGGCCAGTGAATATCGCTTATCCGGTGTATTATCAGTGGTGGTATA  
CAATCGGCTTACGCACTAATGAAGATCTTATACTGGAGCTCTTTTTCTATTATTTCTTTC  
TGCCATATCCTTAATTGCGGGTTGGTTACACCTACAACCCAAATGGAAACCAAGCGTTT

CGTGGTTCAAAAATGCCGAATCTCGTCTCAATCATCATTTGTCAGGACTCTTTGGAGTA  
AGTTCGTTGGCTTGGACAGGACATTTAGTTCATGTCGCTATTCCCGGATCAAGGGGGGA  
GTACGTCAGATGGAATAATTTCTTAGATGTATTACCGTATCCCCAAGGGTTGGGCCACT  
TTTTACAGGTCAGTGGAATCTTTATGCCCAAACCCCGATTCCAGTAGTCATTTATTTGG  
TACCTCCCAAGGAGCGGGAAGTCCATTCTAACCTTCTCGGGGGATTCCATCCACAA  
ACGCAAAGTTTATGGCTGACCGATATTGCTCATCATCATTTAGCTATTGCATTTATTTTC  
TCGTTGCTGGTCATATGTATAGAATAACTTCGGGATTGGGCACAGTATGAAAGATCTTT  
TAGAAGCACATACTCCTCCGGGGGGTTCGATTGGGACGTGGTCATAAGGGTCTTTATGAC  
ACAATCAATAATTCGATTCATTTTCAATTAGGTCTTGCTCTAGCCTCTTTAGGGGTATTA  
CTTCCTTGGTAGCTCAACACATGTAATCTTTACCTGCTTATGCATTCATAGCACAAAGACT  
TTACTACTCAAGCTGCGTTATATACTCATACCAATACATCGCAGGATTTATCATGACAG  
GAGCTTTTGCTCATGGAGCTATATTCTTCATTCGAGATTACAATCCGGAACAGAATGAG  
GATAATGTATTGGCAAGAATGTTAGACCATAAAGAAGCTATCAAATCTCATTTAAGTTG  
GGTCAGCCTGTTTCTGGGGTTCACATACCTTAGGACTCTATGTTTATAACGACGTATGCT  
TGCTTTTGGTACTCCGGAGAAACAATCTTGATCGAACCTATATTTGCCCAATGGATAC  
AATCCGCTCATGGTAAGACTTCATATGGATTTCGATGTACTCTTATCTTCAACAAATGGCC  
CAGCATTCAATGCTGGTTCGAAGTATATGGTTACCCGGCTGGTTGAATGCTGTTAATGAG-  
----AATAGTAATCACTATTCTTAACAATAGGTCCTGGAGACTTCTTGGTTCATCATGCTA  
TTGCTCTAGGTTTGCATACAATACTACATTGATCTTAGTAAAAGGTGCTTTAGATGCACGTG  
GTTCCAAGTTAATGCCAGATAAAAAAGATTTTCGGTTATAGTTTTCTTGGCAGGGTCT  
GGACGAGGCGGTACTTGTGATATTTTCGGCTTGGGACGCATTTTATTTGGCAGTTTTCTG  
GATGTTAAATACCATTGGATGGGTACTTTTTATTGGCATTGGAAGCACATCACATTATG  
GCAGGGTAACGTTTCACAATTTAATGAATCCTCCACTTATTTGATGGGATGGTTAAGAG  
ATTATCTATGGTTAAACTCTTCACTTATCAATGGATATAACCTTTTGGTACGAATAG  
TTTATCAGTCTGGGCATGGATGTTTCTATTTGGGCATCTTGTGGGCTACTGGATTTAT  
GTTCTTAATTTCTTGGCGTGGATATTGGCAGGAATTGATTGAAACTTTAGCATGGGCTCA  
TGAACGCACGCCTTTGGCTAATTTGATTTCGATGGAGGGATAAACAGTGGCTCTTTCCA  
TTGTGCAAGCAAGATTGGTTGGATTAGCCCACTTTTCTGTAGGTTATATATCACTTATG  
CAGCTTTCTGATTGCCTCTACATCAGGCAAATTTGGTATGTCACATTCAGTAAAGATTT  
ATGATACATGTATAGGGTGTACTCAATGTGTACGAGCCTGCCCCACAGATGTATTGGAA  
ATGATACCTTGGGACGGATGTAAAGCTAAGCAAATTGCTCCTGCTCCAAGAACAGAGG  
ACTGTGTAGGTTGTAAGAGATGTGAATCTGCTTGTCCAACGGATTTCTTGAGTGTCCGG  
GTTTATTTATGGCATGAGACAATACTCGTAGCATGGGTCTAGCTTATATGACAGATTTCAAT  
TTACCCTCTATTTTGTGCCTTTAGTGGGCTAGTATTTCCGGCAATTGCAATGGCTTCTT  
TATCTCTTCATGTTCAAAAAACAAGATTGTTATGCGAGATATAAAAACATATCTCTCCG  
TGGCACCTGTGCTAACTACTCTATGGTTTGGGTCTTTAGCAGGTCTATTGATAGAGATCA  
ATCGTTTATTCCAGATGCGTTGGTATTCCCCTTTTTTTCATTCATGACTGCAATTTTAGA  
GAGACGCGAAAGCACAAAGCCTATGGGGTCGCTTCTGTAAGTGGATAACTAGTACTGAA  
AACCGTCTTTATATTGGATGGTTCGGTGTGTTTGTATGATCCCTACCTTATTGACCGCAACT  
TCTGTATTTATTATCGCCTTCATTGCTGCTCCTCCAGTGGATATTGATGGTATTTCGTGAAC  
CTGTTTCTGGGTCTTACTTTATGGAACAATATTATCTCTGGTGCCATTATTCCTACTTC  
TGCAGCTATAGGTTTGCATTTTACCCAATATGGGAAGCAGCATCCGTTGATGAATGGTT  
ATACAATGGTGGTCCTTATGAGCTAATTGTTCTACTTCTTACTTGGTGTAGCTTGTTA  
CATGGGTCGTGAGTGGGAAGTATTGTTCCGTCTGGGTATGCGCCCTTGGATTGCTGTTG

CATATTCAGCTCCTGTTGCAGCTGCTACTGCTGTTTTCTTGATCTACCCTATTGGTCAAG  
GAAGCTTCTCTGATGGTATGCCTCTAGGAATCTCTGGTACTTTCAACTTCATGATTGTAT  
TCCAGGCTGAGCACAAATCCTTATGCATCCATTTACATGTTAGGCGTAGCTGGTGTAT  
TCGGCGGCTCCCTATTCAGTGCTATGCATGGTTCCTTGGTAACCTCTAGTTTGATCAGGG  
AAACCACTGAAAATGAGTCTGCTAATGCAGGTTACAGATTTCGGTCAAGAGGAAGAAA  
CTTATAATATCGTAGCTGCTCATGGTTATTTTGGCCGATTGATCTTCCAATATGCTAGTTT  
CAACAATTCTCGTTCCTTACATTTCTTCTAGCTGCTTGGCCTGTAGTAGGTATCTGGTT  
CACTGCTTTAGGTATCAGCACCATGGCTTTCAACCTAAATGGTTTCAATTTCAACCAATC  
CGTAGTTGACAGTCAAGGTCGTGTTATTAACACTTGGGCTGATATCATCAATCGTGCTA  
ACCTTGGTATGGAAGTTATGCATGAACGTAATGCTCACAATTTCCCTCTAGACCTAGCT  
GCTGTTGAAGTTCATCTACAAATGGAATGGGTTTACCTTGGTATCGTGTCATACCGTC  
GTATTGAATGATCCCGGTCGGTTGCTTTCTGTCCATATAATGCATACAGCTCTAGTTTCT  
GGTTGGGCCGGTTCGATGGCTTTATACGAATTAGCAGTTTTTGATCCCTCTGACCCCGTT  
CTTGATCCAATGTGGAGACAAGGTATGTTTCGTTATCCCTTTCATGACTCGTTTAGGAATA  
ACAATTCATGGGGTGGTTGGAGTGTCAACA---GGAGGAACTATAACGAATCCGGGTATT  
TGGAGTTACGAAGGTGTGGCCGGGGCACATATTGTGTTTTCTGGCCTGTGCTTCTTAGC  
AGCTATCTGGCATTGGGTGTATTGGGACCTAGAAATATTCTGTGATGAACGTACGGGAA  
AACCTCTTTGGATTGCCCCAAGATCTTTGGAATTCATTTATTTCTCTCAGGGGTGGCTT  
GCTTTGGGTTTGGCGCATTTTCATGTAACAGGCTTGTATGGTCCTGGAATATGGGTGTCC  
GATCCTTATGGCCTAACCGGAAAAGTACAATCTGTAAATCCAGCGTGGGGCGCGGAAG  
GTTTTGATCCTTTTGTCCGGGAGGAATAGCCTCTCATCATATTGCAGCGGGGACATTG  
GGCATATTAGCGGGTCTATTCCATCTTAGTGTCCGCCCGCCCCAACGTCTATACAAAGGA  
TTACGTATGGGCAATATTGAAACGGTCCTTTCCAGTAGTATCGCTGCTGCTTTTTTTGCA  
GCTTTCGTTGTTGCTGGAACATGTGGTATGGTTCAGCAACTACCCCGATCGAATTATTT  
GGTCCCACCTCGTTATCAGTGGGATCAGGGATACTTCCAGCAAGAAATATATCGAAGGGT  
TGGTGCCGGGCTAGCCGAAAATCTGAGTTTGTCCGGAAGCTTGGTCTAAAATTTCCCGAA  
AAATTAGCTTTTTTATGATTACATCGGTAATAATCCGGCGAAAGGGGGATTATTCAGAGCA  
GGCTCAATGGATAGCGGGGATGGAATAGCTGTTGGATGGTTAGGACACCCCATCTTTAG  
AGATAAAGAAGGGCATGAGCTTTTTGTACGCCGTATGCCTACTTTTTTTGAAACATTTT  
CAGTAGTTTTGGTAGACGGAGACGGAATTGTGAGAGCCGATGTTCCTTTTAGAAGGGC  
AGAATCAAAGTATAGTGTGCAACAGGTAGGTGTAACCTGTTGAGTTCTATGGTGGCGAA  
CTCAATGGAGTCAGTTATAGTGATCCCGCTACTGTGAAAAAATATGCTAGACGTGCCCA  
ATTGGGTGAAATTTTTGAATTAGATCGTGCTACTTTGAAATCCGATGGTGTTTTTTCGTAG  
CAGTCCAAGAGGTTGGTTCACTTTTGGACATGCTACGTTTGTCTTGTCTTTTTCG  
GACACATTTGGCATGGCGCTAGAACCCTGTTTCAGAGATGTTTTTGTGCTGATTGACCCA  
GATTTGGATGCTCAAGTGGAAATTTGGGGCATTCCAAAACTTGGAGATCCAACCTACAA  
AGAGACAAGTAGTCATGAAAACCTTATATTCCCTGAGGAGGTTCTACCCCGTGGAAC  
GCTCTTTAATGGAACCTTATCTTTAGCTGGTTCGTGACCAAGAAACCACCGGGTTCGCTT  
GGTGGGCCGGGAATGCCGACTTATCAATTTGTCCGGTAAACTACTCGGAGCTCACGT  
AGCCCATGCCGGATTAATCGTATTCTGGGCCGGAGCAATGAACCTATTTGAAGTGGCTC  
ATTTTCGTACCAGAGAAACCCATGTATGAACAAGGATTGATTTTACTTCCCCTAGCTA  
CTCTAGGTTGGGGGGTAGGCCCGGGTGGGGAAGTTGTAGACACCTTCCATACTTTGTA  
TCTGGAGTACTTCACTTAATTTCTCTGCAGTTTTAGGCTTTGGCGGTATTTATCATGCA  
CTTCTCGGACCTGAGACTCTTGAAGAATCCTTTCCATTCTTCGGTTATGTATGGAAGAT

AGAAATAAAATGACCACAATTTTGGGTATTCACCTTAATCTTGTTAGGTATAGGCGCTTTT  
CTTCTAGTACTCAAAGCTCTTTATTTTGGGGGCGTATATGATACCTGGGCTCCCGGGGG  
GGGAGATGTAAGAAAAATTACCAACTTGACCCTTAGCCCAAGTGTTATATTTGGTTATTT  
ACTAAAATCTCCCTTTGGGGGAGAAGGATGGATTGTTAGTGTGGACGATTTAGAAGATA  
TAATTGGAGGACATGTATGGTTAGGTTCCATTTGTATACTTGGTGGAACTTGGCATATCTT  
AACCAAACCCTTTGCGTGGGCTCGCCGCGCATTTGTATGGTCCGGAGAGGCTTACTTG  
TCTTATAGTTTAGGTGCTTTATCTGTCTTTGGTTTCATCGCTTGTGTTTTGTCTGGTTCA  
ATAATACCGCTTATCCTAGTGAGTTTTACGGGCCACCGGACCAGAAGCTTCTCAAGCT  
CAAGCATTACTTTTCTAGTTAGAGACCAACGTCTTGGGGCTAACGTGGGATCCGCTCA  
AGGACCTACTGGTTTAGGTAAATATCTAATGCGTTCCTCCCGACCGGAGAGGTCATTTTCG  
GAGGAGAACTATGCGTTTTTGGGATCTCCGCGCTCCCTGGTTGGAACCTCTAAGGGG  
TCCCAATGGTTTGGATTTGAGTAGGCTGAAAAAAGACATACAACCTTGGCAAGAACGA  
CGTTCGGCGGAATATATGACTCATGCTCCTTAGGTTCTTTAAATTCCGTGGGTGGCGTA  
GCTACCGAGATCAATGCAGTTAATTATGTCTCTCCTAGAAGTTGGTTAGCTACCTCTCAT  
TTTGTCTAGGATTCTTCCTATTTCGTGGGTCATCTGTGGCATGCGGGAAGGGCCCGTGC  
AGCTGCAGCAGGATTTGAAAAAGGAATCGATCGTGATTTTGAACCTGTTCTTTCCATGA  
CCCCTCTTAACATGACTATAGCCCTTGGTAGATTTACCAAAGAAGAAAATGATTTATTTG  
ATATTATGGATGACTGGTTACGGAGGGACCGTTTCGTTTTTGTAGGTTGGTCCGGTCTAT  
TGCTCTTTCCTTGTGCTTATTTTCGCTTTAGGAGGTTGGTTCACAGGTACAACCTTTGTAA  
CTTCATGGTATACCCATGGATTGGCCAGTTCCTATTTGGAAGGCTGCAATTTCTTAACCG  
CTGCAGTTTCTACTCCTGCTAATAGTTTAGCACATTCTTTGTTGCTACTATGGGGCCCTG  
AAGCACAAGGAGATTTTACTCGTTGGTGTCAATTAGGCGGTCTGTGGACTTTTGTGCT  
CTCCATGGCGCTTTCGGACTAATAGTTTTCATGTTACGTCAATTCGAACCTTGCTCGATCT  
GTTCAATTGCGGCCTTATAATGCAATCGCATTCTCTGCTCCAATTGCTGTTTTTGTCT  
GTATTCCTGATTTATCCACTAGGTCAGTCTGGTTGGTTCTTTGCGCCCAGTTTTGGTGTA  
GCAGCTATATTTGATTCATCCTCTTCCAAAGGGTTTCATAATTGGACGTTGAACCCA  
TTTCATATGATGGGAGTTGCCGGAGTATTGGGCGCTGCTCTGCTATGCGCTATTCATGGT  
GCTACCGTAGAAAATACTTTATTCGAAGATGGTGACGGTGCAAATACATTCCGTGCTTT  
TAACCCAACTCAAGCTGAAGAGACTTATTCGATGGTCACTGCTAACCGCTTTTGGTCCC  
AAATCTTTGGGGTTGCTTTTTTCCAATAAACGTTGGTTACATTTCTTTATGTTATTTGTACC  
AGTAACCGGTTTATGGATGAGTGCTATTGGAGTAGTCGGTCTGGCTCTGAACCTACGTG  
CCTATGACTTCGTTTTCCAGGAAATCCGTGCAGCGGAAGATCCTGAATTTGAGACTTTC  
TACACCAAAAATATTCTCTTAAACGAAGGTATTCGTGCTTGGATGGCGGCTCAGGATCA  
GCCTCATGAAAACCTTATATCCCTGAGGAGGTTCTACCCCGTGGAACGCTCTTATGT  
CTGGAAGCACGGGAGAACGTTCTTTTGCTGATATTATTACCAGTATTCGATACTGGGTCA  
TTCATAGTATTACTATACTTCCCTATTCATTGCGGGTTGGTTATTCGTTAGCACGGGTTT  
AGCTTACGATGTGTTTGAAGCCCTCGGCCAAACGAGTATTTACAGAGAGCCGGCAA  
GGGATTCATTAATAACTGGCCGTTTTGATCCTTTGGCACAACCTTGATGAATTTAGTAGA  
TCCTTTATGACCATAGATCGAACCTATCCAATTTTACAGTGCATGGTTGGCTGTTTAC  
GGACTAGCTGTACCTACCGTTTTCTTTTTGGGGTCAATATCAGCAATGCAGTTCATCCA  
ACGAATGGCTACACAAACCGTTGAGGGTAGTTCTAGATCTGGG---CCAAGACGAACTAT  
TACAGGGGATTTATTGAAACCATTGAATTCGGAATATGGTAAAGTGGCTCCTGGATGGG  
GAACTACCCCTTCATGGGTGTCGCAATGGCTCTAATTTGCGATATTCCTATCTATTTTT  
GGAGATTTATAATTCTTCCGTTTTACTGGATGGAATTTCAATGAGTATGCTTACTCTCAA



ACTCTTCGTTTACACAGTAGTGATATTCCTTTGTTTCTCTCTTCATCTTCGGATTCCCTATCT  
AATGATCCAGGACGTAATCCTGGACGCGAGGAAATGGCCGATACTACTGGAAGGATTCT  
CTCTTTGGCTGATAGGTACTGTAACCTGGTATTCCCTGTGATCGGTTCAATGGGTATTTTCT  
TTTACGGTTCATATTCCGGATTGGGATCATCCCTAATGCTTAATATCTTTAGTTTGATCTG  
TATCTGTATTAATTCTGCCCTTCATTCGAGTAGCTTTTTCTTCGCCAAATTACCCGAGGCT  
TATGCTTTTTTCAATCCAATCGTAGATGTTATGCCAGTCATACCTGTACTCTTTTTTCTCT  
TAGCCCTTGTTTGGCAAGCTGCTGTAAGTTTTTCGA-----TTGAAT  
CGTACCAGTCTCTACTGGGGGTATTACTCATTTTTTGTAAGTGGTGTGTTTTATTTTCCAATT  
ATTTCTTTAATATGGAAGTCAATATTCCTCGCATTATTGCTACTGCGCTGTTCAATTCTAGT  
TCCTACTGCTTTTTTACTTATCATCTACGTAAAAACAGTCAGTCAAATGATATGGAAC  
AGCAACCCTAGTCGCCATCTCCATATCTGGTTCACTTGTAAGCTTTACTGGGTACGCCTT  
ATATACCGCTTTTGGGCAACCCTCTCAACAATAAGAGATCCATTCGAGGAACACGGG  
GACATGGAAGCATTGGTTATAATTTCTGTTAGTCTCGACTTTAGGGATCATTTTTTTCT  
GCTATCTTTTTTCGAGAACCCTAAGGTTCCGACTAAAAAGATGAAAATGACTATTGC  
TTTCCAATTGGCTGTTTTTGCATTAATTGCTACTTCATCAATCTTACTGATTAGTGTACCC  
GTTGTATTTGCTTCTTCGGATGGTTGGTCAAGTAAACAAAATGTTGTATTTCTGGTACA  
TCATTATGGATTGGATTAGTCTTTCTGGTAGCTATCCTTAATTCTCTCATCTCT-----  
-----ATGTCACCAAAAACAGAGACTAAAGCAAGTGGTGGATTCAAAGCTGGTGTTAAA  
GAGTACAAATTGACTTATTATACTCCTGAATATGAAACCAAAGATACTGATATCTTGGCA  
GCATTCCGAGTAACCTCAACCCGGAGTTCACCTGAGGAAGCAGGGGGCTGCGGTA  
GCTGCCGAATCTTCTACTGGTACATGGACAACGTGTGTGGACCGATGGACTTACCAGCCT  
TGATCGTTACAAAGGACGATGCTACCACATCGAGCCCGTTCCTGGGGAGGAAAGTCAA  
TTTATTGCTTATGTAGCTTACCCTTTAGACCTTTTTGAAGAAGGTTCTGTTACTAACATG  
TTTACTTCCATTGTAGGTAATGTATTTGGGTTCAAAGCCCTACGAGCTCTACGTCTGGAG  
GATCTGCGAATTCCTACTGCTTATGTCAAACTTTCCAAGGCCCGCCCATGGCATCCA  
AGTTGAGAGAGATAAATTGAACAAGTATGGTCGTCCACTATTGGGATGTAATAAAC  
CAAATTTGGGGTTATCCGCCAAGAACTACGGTAGGGCGGTTTATGAATGTCTCCGTGGT  
GGACTTGATTTTACCAAGGATGATGAGAACGTGAACTCCCAACCATTTATGCGTTGGAG  
AGACCGTTTCGTATTTTGTGCCGAAGCAATTTATAAAGCGCAGGCCGAAACAGGTGAA  
ATCAAAGGACATTACTTGAATGCTACTGCAGGTACATGCGAAGAAATGATGAAAAGGG  
CCATATTTGCCAGGGAATTGGGAGTTCCATATCGTAATGCATGACTACTTAACGGGGGGA  
TTCCTGCAAATACTACCTTGGCTCATTATTGCCGAGACAACGGTCTACTTCTTCACATC  
CATCGCGCAATGCATGCAGTTATTGATAGACAGAAAATCATGGTATGCACTTTCGTGT  
ACTAGCTAAAGCGTTACGTATGTCTGGTGGAGATCATATTCACGCTGGTACCGTAGTAG  
GTAAACTGGAAGGGGAACGGGACATCACTTTGGGTTTTGTTGATTTACTACGCGACGA  
TTTTATTGAAAAGACCGAAGCCGCGGTATTTATTTCACTCAAGATTGGGTCTCTTTGC  
CAGGTGTTCTGCCCGTGGCTTCAGGCGGTATTCACGTTTGGCATATGCCTGCCCTGACC  
GAGATCTTTGGGGATGATTCCGTACTACAGTTCGGTGGAGGAACTTTAGGACACCCTTG  
GGGAAATGCACCTGGTGCAGTAGCTAATCGGGTGGCGTTAGAAGCGTGTGTACAAGCT  
CGTAATGAGGGACGTGATCTTGCTAGTCAAGGTAATGAAATTATCCGTGAAGCTAGCAA  
ATGGAGCCCTGAACTAGCTGCTGCTTGTGAGGTATGGAAGGAGATCAAATTCGAATTC  
AAAGCAGTGGATACCTTG-----ATACATTTATACAAAACCTTCTACCCCGAGCACACG  
CAATGGAGCCGTAGACAGTCAAGTCAAATCCAATCCACGAAAGAATTTGATCTATGGA  
CAGCATCATTGTGGTAAAGGTCGTAATGCCAGAGGAATCATTACCGCAGGGCATAGGG

GGGGAGGTCATAAGCGTCTATAACCGTAAAATCGATTTTCGACGGAATGAAAAAGACAC  
ATCTGGTAGAATCGTAACCATAGAATACGACCCTAATCGAAATGCATACATTTGTCTCAT  
ACACTATGGGGATGGTGAGAAGAGATATATTTTACACCCCAGAGGGGGCTATAATTGGAG  
ATACCATTGTTTCTGGTACAGAAGTTCCTATATCAATGGGAAATGCCCTACCTTTGACCG  
ATATGCCCTTAGGCACGGCCATACATAACATAGAAATCACACTTGAAAGGGTGGACAA  
TTAGCTAGAGCAGCAGGTGCTGTAGCGAAACTGATTGCAAAAGAGGGTAAATCGGCC  
ACATTAAGATTACCATCTGGGGAGGTCCGTTTGATATCCAAAACTGCTCAGCAACAGT  
CGGACAAGTGGGTAAATGTTGGGGTGAACCAGAAAAGTTTGGGTAGAGCCGGATCTAA  
GTGTTGGCTAGGTAAGCGTCCTGTAGTAAGAGGAGTAGTTATGAACCCTGTAGACCATC  
CCCATGGGGGTGGTGAAGGGAGGGCCCCGATTGGTAGAAAAAACCCACAACCCCTT  
GGGGTTATCCTGCGCTTGAAGAAGAAGTAGGAAAAGGAATAAATATAGTGATAGTTT  
GATTCTTCGTCGCCGTA---ATGATTCAACCTCAGACCCATTTGAATGTAGCAGACAA  
CAGCGGGGCTCGAGAATTGATGTGTATTGAATCATAGGAGCTAGT---AATCACCGATAT  
GCTCATATTGGTGACGTTATTGTTGCTGTAATAAAGAAGCAGTGCCCAATATGCCTCTC  
GAAAGATCAGAAGTGATCAGAGCTGTAATTGTACGTACATGTAAAGAACTCAGACGTG  
ACAACGGTATGATAATACGATATGATGACAATGCAGCAGTTGTCATTGATCAAGAAGGA  
AATCCAAAAGGAACTCGGGTTTTTGGAGCGATCGCTCGAGAATTGAGACAGTTGAATT  
TCACTAAAATAGTCTCATTAGCTCCTGAGGTATTA---ATCAACCCCAAAAAGAACCGATT  
CCGTAAACAACATAGAGGAAGAATGAAGGGAATATCTTATCGAGGCAATCATATTTGTT  
TCGGTAGATATGCTCTTCAGGCACCTGAACCCGCTTGGATCACATCTAGACAAATAGAA  
GCAGGGCGACGAGCAATGACACGATATGCGCGCCGTGGTGGAAAAATATGGGTCCGTA  
TATTTCCCGACAAACCCGTTACAGTAAGACCTACGGAAACCCGTATGGGTTCGGGGAA  
GGGATCTCCCGAATATTGGGTATCTGTTGTTAAGCCGGGTCGAATACTTTATGAAATGGG  
CGGAGTATCGGAACTGTAGCCAGAGCAGCTATTAATAATAGCTGCGTGCAAAATGCCT  
ATACGAACGCAATTCATTATTCAGGAATGACCAGAGTTAGACGAGGATATATAGCTCG  
GAGACGTGCAACAAAATTCGTTTATTTGCATCAACCTTTCGAGGGGCCCATTCAGA  
CTTACTCGAACTACTACTCAACAGAAAATGAGAGCTTTGGTGTCCACTCATCGGGATAG  
AGGCAGGCGAAAGAGAGATTTTCGTCGTTTGTGGATCACTCGGATAAATGCAGTAACT  
CGTGAAAAT-----GTATCCTATAGTTATAGTCGATTAATACATGATCTGTACAAGAGGCAG  
TTGCTTCTTAATCGTAAAATACCTGCACAAATAGCTATATCAAAATAGGAATTGTCTTTAC  
ATGATTTCCAATGAGATCATCAA-----  
-????????????????????????????????????????????????????????????????????????????????????  
????????????????????????????????????????????????????????????????????????????????????  
????????????????????????????????????????????????????????????????????????????????????  
????????????????????????????????????????????????????????????????????????????????????  
????????????ATGGATGGAATCAAATATGAAGTCTTTACAGAAAAAAGTATTCGGTTATTGG  
AGAACAATCAA---TATACTTCTAATGTCGAATCAGGATCAACTAGGACAGAAATAAAGC  
ATTGGGTGCAACTCTTCTTTGGTGTCAAGGTAATAGCTATGAATAGTCATCGACTCCCC  
GGAAAGGGTATAAGAATGGGACCTATTATGGGACATACAATGCATTACAGACGTATGAT  
CATTACGCTTCAACCGGGTTATTCTATTCTAACTCTTATACAGAAAAAAGAATGGCGG  
TTCCAAAGAAACGTACTTCTATCTCAAAAAGCGTATTCGTAGAAATATTTGGAAGAAA  
AAGGGATATTGGGCGGCGGTAAGCTTTATCTTTAGCTAAATCTATTTCTACCGGGCAT  
TCAAAAAGTTTTTTTTGTGCGACAAACAAGTAATATGGCCAAGGGTAAAGATGTCAGAG  
GAATAGTTATTTGCAATGTACCAGTTGTGTCCGAAATGATTTCAAT-----AAAGAATCGC

GAGGCACTTCCAGATATATTA TACTCAAAAAGAATCGACACAATACACCTAGTCGATTGGAA  
TTGAGAAAATTCTGTCCTTATTGTTACAAGCATAACGATTCATGGGGAGATAAAGAAAAT  
GAAAATAAGGGCCTCTGTTTCGTA AAAATTTGTGAAAATGTGCGACTGATCCGTAGGGCGG  
GGACGAATTATAGTAATTTGTTTCAATCCGAGACATAAACAGAGACAAGGGATGGTTCG  
AGAGGAAGTAGCAGTATCCACTCGGACACTACAGTGGAAAGTGTGTTGAATCAAGAAC  
AGACAGTAAGCGTCTTTATTATGGCCGTTTCATTTTGGCCCCGCTTATGAAAGGCCAAG  
CAGATACTATAGGTATCGCGATGCGAAGGGCTTTACTTGGAGAAATAGAAGGAACATGT  
ATTACACGTGCAAAAATCTGAA-----AAGGTACCACATGAATATTCTACGATAGTCGGTAT  
TGAAGAATCAGTACATGCAATTTAATGAATTTGAAAGAAATTGTATTGAGAAGTCATC  
TGTATGGAACCTCGTGACGCATCCATTTGCGTCAGGGGTCTAGATACGTA ACTGCTCAA  
GATATCATCCACCACCTTCTGTGGAAATAGTTGATACTACACAGCATATAGCTAGCCTG  
ACGGAACCAATTGATTTGTGTATTGAATTACAAATCGATAGGGATCGCGGATATCGTATG  
AAAACCCCAAATAATTATCAAGATGGAAGTTAT-----CCTATAGATGCTGTATCCATGCCT  
GTTTCGAAATGCGAATCATAGTATTCAATCTTATGGGAATGGGAATGAAAAACAAGAGAT  
ACTTTTTCTCGAAATATGGACGAATGGAAGTTTAACTCCTAAAGAAGCACTTCACGAA  
GCTTCCCGTAATTTGATTGATTTATTTATTCCTTTTCTACATGCGGAGGAACAGGACATA  
AATTTA-----GAGGACAATCCA---AACCGATTTACTGTACCCTTTTTTACCTTTCATGATAT  
ATTGGCTAAT---ATAAGGAAAAACAAAAAG---GGAATTACATTGAAATGTATTTTTATTG  
ACCAATCAGAATTGCCTCCCAGGACCTATAATTGTCTCAAAGGTCCAATATACATACAT  
TATTGGACCTTTTTGAGTAACAGTCAAGAAGATCTTATGAGAATTGAACATTTTCGCATA  
GAAGATGTAAAACAAATATTGGACATTCTACAGAAGCAT-----TTCACAATTGATTTACCT  
AAGAATAAGATGCTCCGGGATGGA---AATGAGGGAATGTCTACAATACCTGGATTTAGT  
CAGATACAATTTGAGGGATTTGTAGGTTTCAATGATCAGGGCTTGACGGAAGAACTTCA  
TAAGTTTCCAAAATTGAAGATACAGATCAAGAAATTGAATTTCAATTTTGTGGAAA  
CATATCAATTGGTAGAACCTTGATAAAAGAAAGAGATGCTGTGTATGAATCACTCACA  
TATTTCTCTGAATTATATGTACCCGCGGGGTTAATTTGGAAAACCGGTAGAGATATGCAA  
GAACAAACCGTATTTATTGGAAACATTCTCTAATGAATCCCTGGGAACTTCTATAGTA  
AATGGAATATACAGAATTGTGATCAATCAAATATTGCAAAGCCCCGGTATTTATTACCGT  
TCAGAATTGGACCATAACGGAATTTCTGTCTATACTGGCACCATAATATCAGATTGGGGA  
GGAAGATCAGAATTAGAGATTGATAGAAAAGCAAGGATATGGGCCCGTGTGAGTAGGA  
AACAAAAAATATCTATTCTAGTTCTATCATCAGCTATGGGTTTCAATCTAAGAGAAATTC  
TAGATAATGTTTGCTACCCTGAAATTTCTTGTCTTTCCCGAATGATAAGGAGAAAAAA  
AAGATTGGGTCAAGGGAAAATGCCATTTTGGAGTTTTATCAACAATTTGCTTGTGTAGG  
CGGGGATCCGGTATTTTCTGAATCCTTATGTAAGGAATTACAAAAGAAATTTTTTCAAC  
AAAGATGTGAATTAGGAAGAATTGGTCGACGAAATATGAACCGGAGACTGAATCTTGA  
TATACCTCAGAACAATACATTTTTGTTACCACGAGATGTATTGGCTGCTGCGGATCATT  
GATCCGAATGAAATTTGGAATGGGCACACTTGACGAT-----ATGAATCACTTGAAAAATA  
AACGTATTCGTTCTGTAGCAGATCTGTTACAGGATCAATTCGGATTGGCTCTGGTTCGTT  
TAGAAAATGCGGTTTCGAGGAACTATATGTGGAGCAATCCGG---CATAAATTGATA---CCG  
ACTCCTCAGAATTTGGTAACTTCAACTCCA-----TTAACAACCACCTATGAATCGTT  
TTTCGGCTACACCCTTTATCTCAAGTTTTGGATCGAACTAATCCATTGACACAAATAGT  
TCATGGGCGAAAATCGAGTTATTTGGGTCCTGGAGGATTGACAGGACGAACTGCCAGT  
TTTCGGATACGAGATATCCATCCTAGTCACTATGGACGATTTGCCAATTGACACGTCC  
GAAGGAATCAATGTTGGACTTATTGGATCCTTAGCTATTCATGCGAGGATTGGTCATTGG

GGG---TCTATAGAGAGTCCGTTTTAT-----GAAATATCTGAGAGATCCAAAGAA-----GT  
ACAGATGGTTTATTTATCACCAAGTAGAGATGAATACTATATGGTAGCGGCAGGAAATC  
TTTGGCGTTGAATTGGGGTGTTCAGGAAGAACAGGTTGTTCCAGCTCGATACCGTCAA  
GAATTCCTGACTATTGCATGGGAACAGATTCATCTTGAAGCATTTCCTTCCAATAT  
TTTTCTATTGGAGCTTCCCTCATTCTTTTATCGAGCATAATGATGCGAATCGGGCTTAA  
TGAGTTCTAATATGCAGCGCCAAGCAGTTCGCTTTCTCGGTCCGAGAAGTGCATTGTT  
GGAAGTGGGTGGAATGCCAAGCGGCTCTAGATTCGGGGGTTTCAGCTATAGCCGAAC  
ACGAGGGAAAGATCGTTTCTGCCGATACTGACAAGATCGTTTTATCAGGTAATGGAAA  
CACTATAAGCATTCCATTGGTTATGTATCAACGTTCCAACAAAAATACTTGTATGCATCA  
AAAACCTCAGGTTTCGGCGGGGTAAATGCATTA AAAAGGGACAAATTTTGGCGGACGG  
TGCGGCTACAGTTGGTGGTGAAC TTGCTTTGGGAAAAAACGTATTAGTAGCTTATATGC  
CATGGGAAGGCTACAATTCTGAAGACGCGGTACTCATTAGCGAACGTCTAGTATATGGA  
GATATTTATACTTCTTTTACATCCGGAATATGAAATTCAGACTCATGTGACAAGCCAA  
GGC---CCTGAAAGAATCACTAACGAAATACCGCATTTAGAAGCTCATTTACTCCGCAAT  
TTAGACAAAAATGGAATTGTGATGCTGGGATCTTGGATAGAAACAGGTGATATTTTGT  
AGGTAAATTAACGCCTCAGACAGCGAAAGAA---TCATCGTATGCTCCGGAAGATAGATT  
ATTACGGGCCATACTTGGCATT CAGGTATCCACTGCAAAGGAAACTTGTCTAAA ACTAC  
CTATAGGGGGAAGGGGTCGAGTTATTGATGTGAGATGGATCCAGAAAAAGGGG---GGT  
TCCAGTTATAATCCAGAAATGATTCGTGTATATATTTACAGAAACGTGAAATCAAAGTA  
GGTGATAAAGTAGCTGGAAGACATGGGAATAAAGGTATCATTTCAAAAATTTTGTCTAG  
ACAAGATATGCCCTATTTGCAAGATGGAACACCAGTTGATATGGTCTTCAACCCATTAG  
GAGTACCTTCGCGAATGAATGTGGGACAGATATTTGAATGCTCGCTCGGGTTAGCGGG  
GGACCTGCTGGACAGACATTATAGAATAGCACCCCTTTGATGAGAGATATGAGCAAGAG  
GCTTCGAGAAA ACTAGTGT TTTCTGAATTATATTCAGCCAGTAAGCAAACAGCAAATCC  
ATGGGTATTTGAACCCGAGTGTCCGGGAAAAAGCAGAATATTTGATGGAAGAACAGGA  
GATCCTTTTGAACAACCTGTTATAATAGGAAAGTCCATATCCTGAAATTAATTCATCAA  
GTTGATGATAAAATCCATGGACGTTCCAGTGGACATTATGCACTTGTACACAACAACC  
CCTTAGAGGAAGGGCCAAGCAAGGGGGACAACGAGTAGGAGAAATGGAAGTTTGGG  
CTCTAGAGGGATTCGGTGTTGCTCATATTTACAAGAGATGCTTACTTATAAATCTGATC  
ATATTAGAGCTCGTCAGGAAGTACTTGGTACTACGATCATTGGAGGAACAATACCTAAT  
CCTGAGGATGCTCCAGAATCTTTTCGATTGCTCGTTCGAGAACTACGATCTTTGGCTCT  
GGAAGTGAATCATTTCCTTGTATCTGAGAAGA ACTTCCAGATTAATAGGAAAGAAGCT--  
-----ATGATCGATCGGTATAAACATCAACA ACTTTCGAATTGGATCAGTTTCTCC  
TCAACAAATAAGTGCTTGGGCCAACAAAATCCTACCTAATGGAGAGATAGTTGGAGAA  
GTGACAAAACCCTATACTTTTCATTACAAAACCAATAAACC GGAAAAAGATGGATTGTT  
TTGTGAAAGAATCTTTGGACCTATAAAAAGTGGAAATTTGTGCTTGTGGAAATTATCGAG  
TGATCGGAAATGAAAAAGAAGACCCGAAATTTTGTGAACAATGCGGAGTCAATTTGT  
CGATTCTCGGATACGAAGATATCAAATGGGATACATCAA ACTGGCATGTCCGGTGACTC  
ATGTGTGGTATTTGAAACGTCTTCTAGTTATATCGCGAGTCTTTTAGATAAACCCCTTA  
AGGAATTAGAAGGCCTAGTATACTGCGAT-----TTTTCTTTTGGCTAGGCC---ATAGCTAA  
AAAACCTACTTTCTTACGATTACGAGGTTCAATTCGAATCTGAAATCCAATCCCGGAAAT  
ACAGCATCCCACTTTTTTTTACTACCCAAGGCTTCGATACATTCGAAATAGAGAAATCT  
CTACTGGAGCAGGTGCTATCAGAGAACAAATTAGCCGATCCGGATTTGCGAATTATTACA  
GATCATTCAATTGGTAGAATGGAAGGAATTAGGGGAAGAAGGGTCCGCTGATGGGAATG

AATGGGAAGATAGAAAAATTGGAAGAAGAAAGGATTTTTTGGTTAGACGCATAGAATT  
AGCTAAGCATTTTATTCGAACAAATGTAGAACCAGAACGGATGGTTTTGTGCCTATTAC  
CAGTTCTTCCTCCCGAGTTGAGACCAATCATTAGATAGATGGGGGTAAACCAATGAGT  
TCGGATATTAATGAACTCTATCGAAGAGTTATCTATCGGAACAATACTCTTACCGATCCA  
TTAACAACAAGTAGATCTACGCCAGGGGAATCAGTAATGTGTCAGGAGAAATTGGTAC  
AAGAAGCCGTGGATACACTTCTTGATAATGGGATCCGCGGACAACCAATGAGGGACGG  
TCATAATAAAGTTTACAAGTCGTTTTTCAGATGTAATTGAAGGCAAAGAGGGAAAGATTTC  
GTGAGACTCTACTTGGTAAACGGGTTCGATTATTCGGGACGTTTCAGTTATTGTCGTGGGC  
CCTTCGCTTTCATTACATCGATGTGGATTACCTCGAGAAATAGCAATAGAGCTTTTCCAG  
ACATTTGTCATTTCGTGGTCTAATCAGACAACATGTTGCTTCTAACATAGGGATTGCTAAA  
AGTAAAATTCGGGAAAAAGAACCAATTGTATGGGAAATACTTCAAGAAGTTATGCAGG  
GGCATCCTGTATTGCTGAATAGAGCACCCACCCTGCATAGATTAGGCATACAGGCGTTC  
CAACCCATTTAGTGGAGGGACGCGCTATTTGTTTACATCCATTAGTTCGTAAGGGATT  
AATGCAGACTTTGATGGGGATCAAATGGCTGTTTCATGTACCTTTATCTTTGGAAGCTCA  
AGCGGAGGCTCGTTTACTTATGTTTTCTCATATGAATCTCTTGTCTCCAGCTATTGGAGA  
TCCATTTCCGTACCAACTCAAGATATGCTTATTGGACTCTATATATTAACGATCGGGAAT  
CGTCGAGGTATTTGTTCAAATAGGTATAATCCATGTAATCGAAGA-----AAC---TATCAA  
ATGAAACGGTTGACGATAAT-----AAGTATACGAAAGAGAAAGAACCCTATTTTTGTAGT  
TCCTATGATGCACTTGGAGCTTATCGGCAGAAACGAATCAATTTAGATAGTCCTTTGTG  
GCTCCGATGGCGACTCGATCAACGT---GTCATTGCCTCA-----AGAGAAGTTCATCGA  
AGTTCAATATGAATCTTTGGGTACCTATCATGAGATTTATGGGCACTATCTAATAGTAAG  
AAGTGTAATAAAGAAATCCTTTGTATATACATTTCGAACAACCTGTTGGTCATATTTCTTT  
TTATCGAGAAATAGAAGAAGCCATACAAGGGTTTTGTGCGGGCCTACTCATAACGATACC--  
-----ATGGAGGTACTTATGGCAGAACGGGCCGATCTGGTTTTTTCACAATAAA  
GTGATAGATGCAACTGCCATGAAACGACTTATTAGCAGATTAATAGATCACTTCGGAAT  
GGCATATACATCGCACATCCTGGATCAAGTAAAGACTCTGGGTTTCCAGCAAGCCACTG  
CTACATCCATTTATTAGGAATTGATGATCTTTTAAACAATACCTTCTAAGGGATGGCTAG  
TCCAAGATGCTGAACAACAAGTTTGATTTTAGAAAAGCACCATCATTATGGGAATGTA  
CACGCGGTAGAAAATTGCGTCAATCCATTGAGATATGGTATGCTACAAGTGAATATTT  
GAGACAAGAAATGCATCCTAATTTTAGGATGACTGATCCTTCTAATCCAGTCCATATAAT  
GTCCTTTTTCGGGAGCTAGAGGAAATGCATCTCAGGTACACCAATTAGTAGGTATGAGAG  
GATTAATGTCGGACCCCAAGGACAAATGATTGATTTACCCATTCAAAGCAATTTACGC  
GAAGGACTTTCTTTAACGGAATATATAATTTCTCTGCTACGGAGCCCGCAAAGGAGTTGT  
GGATACTGCTGTACGAACATCAGATGCTGGATACCTCACGCGTAGACTTGTGGAAGTAG  
TTCAACACATTGTTGTGCGTAGAACAGATTGTGGCACTATCCGAGGTATTTCCGTGAGT  
CCTCGAAAT-----GGGATGACGGAAAAAATTTTGATCCAAACACTAATTGGTTCGTGATT  
AGCAGACGATCTATATATGGGTCTACGATGCATTGCCACTCGAAATCAAGATATTGGTAT  
TGGACTTGTCAATCGATTCATAACC-----TTTCGAGCACAATCAATATATATTCG  
AACCCCTTTATTTGTAGGAGTACATCTTGGATCTGTAGATTATGTTATGGTTCGGAGTCC  
CACTCATGGCGACCTGGTTCGAATTGGGAGAAGCAGTAGGTATTATTGCAGGTCAATCAA  
TTGGGGAACCAGGGACTCAACTAACATTAAGAATTTTCATACCGGTGGAGTATTTACA  
GGTGGTACTGCAGAACATGTACGAGCTCCTTCTAATGGAAAAATCAAATTCATGAGG  
ATTTGGTTCATCCACACGTACACGTCATGGACATCCTGCTTTTCTATGTTATATAGACCT  
GTATGTAACCTATTGAGAGTCAGGATATTCTACATAATGTGAATATTCACCAAAAAGTTT

TCTTTTAGTTCAAACGATCAATATGTAGAATCAGAACAAGTGATTGCTGAGATTTCGCG  
CTGGAACATCCACTTTC-----TTTAAAGAGAAGGTTTCGAAAACATATTTATTCTGACTCA  
GAGGGAGAA---ATGCACTGGAGTACCGATGTGTACCATGCGCCTGAATATAGATATGGT  
AATGTTTCACTCTTACCAAAAACAAGTCATTTATGGATATTATCAGGAGGTCCG-----TGC  
AGATCCAGTATAGTCACTTTTTTCGCTCCACAAGGATCAAGATCAAATGAATGTTTCAT-----  
-TCTCTTCTGTGCGAACGGAGATATATTTCTGACCTCTCA-----GTGACTAATGATCGA---G  
TGAGACACAAATTGTTTAGTTCCGATCCTTCCAGTAAA---GGGAAGGGGATTCTTGATT  
ATTCA---GGACCTGATCGAATCATATCTAATGGTCATTGGAATTTCCCTATATCCTGCC---AT  
TCTCCACGAGAATTCTGAT-----TTATTGGCGAAAAGGCGAAGAAATAGATTCATCATCC  
CATTCCAATATGATCAAGAACGGGAGAAAGAACTAATGCCCGTTCTGGTATCTCGATT  
GAAATACCATAAAT-----GGGATTTTACGTAGAAATAGTATTCTTGCTTATTTTCGACGAT  
CCCCGATACAGAAGAAGTAGTTCAGGAATTACTAAATATGGGACCATAGAGGTGGATT  
AATCGTCAAAAAAGAGGAT-----TTGATTGAGTATCGAGGG---GCAAAAGAATTTAGGCC  
GAAATACATGAAAGTAGATCGATTTTTTTTTTTCATTCCCGAAGAAGTGCATATCTTACCCGG  
ATCTTCGTCCATAATGGTACGGAACAATAGTATCATTGGAGTAGATACACGAATTGCTTT  
AAATACAAGAAGCCGAGTAGGTGGATTGGTCCGAGTGGAGAGAAAAAAAAAAAAAAGAT  
TGAACTGAAAATCTTTTCTGGAGATATCCATTTTACTGGAGAGACAGATAAGATATCCC  
GGCACAGCGGCATCTTGATACCACCAGGAACGGGAAAATC-----AATTCTAAGGAATC  
CAAA-----AAATGGAAAAATTGGATCTATGTCCAACGG-----ATCACACCTACCAAGAAA  
AAG-----TATTTTGTTCGGTTTCGACCCGTAGTCACATATGAAATAGCTGATGGGATAAAT  
TTAGGAACGCTTTTCCCCAGGATCTGTTGCAGGAAAGGGATAATGTACAACACTACGAG  
TTGTCAATTATATCCTTTATGGAAATGGCAAACCAATTCGAGGAATTTATCACACAGGTA  
TTCAATTAGTTCGGACTTGTTTAGTATTGAATTGGGACCAAGACCGAAATGGT-----  
TCTATAGAAGAGGTTTCATGCTTCTTTGTTGAAGTAGGGGCAAATGATCTGATTTCGAGA  
TTTTATCAGAATTGATTGGTGAAGTCCCCTATTTTCGTATATCGGAAAAAGGAATGATAC  
GGCAGGTTTCAGGATTGATCCCCGAT---AATGAATCAGATCGCACCAATATCAATACTTTT  
TATCCAAGACGAGG-----ATTCAATCACTTACCCAACATCAAGGAAT  
ATTCGTACGTTTCTGAATAGA-----AATCAGGAATGCCAATCTTTTCTAATTTTGTATC  
ATCCGATTGTTCTCGAATTGGTCCA-----TTCAATGGTTCGAAATCTCACAAGGTGACA--  
-----AAAGAATCAGATCCCATGATTCCCATTAGGAATTCGTTGGGTCCCTTAGGGACT---  
--GTATCGAAAATTGCGAATTTTTATTTCATCT-----TACTATTTAATAACT-----CATAATCAG  
ATTTTGTAAAT---AAATATTTGCTACTTGACAAT-----TTAAAACAGACTTTCCAAGTA  
CTTAAATACTAT-----TTAATGGATGAAAATGGGAGG-----ATTTATAATCCCGATCCGCG  
CAGTAACATCATTTTTAATCCATTCGATTTGAATTGGTGCTTTCTCCGTCACGATTATTGT  
GAGGAGGCATCCACAATAATTAGC---CTTGGACAGTTTATTTGTGAAAATGTATGTATAT  
CCAAATATGGACCA-----CACATAAAATCTGGTCAAGTTCTAATTGTTTCAT--GTTGACT  
CCTTAGTAATAAGATCAGCTAAGCCTCATTGGCCACTCCAGGAGCAACCGTCCATGGC  
CATTATGGAGAAATCCTTTACGAAGGAGATACATTAGTTACATTTATATATGAAAAATCG  
AGATCGGGTGATATAACGCAAGGTCTTCCAAAAGTGGAACAAGTGTTAGAAGTGCGTT  
CGATTGATTCAATATCGATGAACCTAGAAAAGAGGATTGAAGGTTGGAACGGAACGTAT  
AACAGGAATTTCTGGAATTCCTTGGGGATTCTTGATTGGCGCTGAGCTAACCATAGCGC  
AAAGTCGTATCTCTTTGGTTAATAAGATCCAAAAGGTTTATCGATCCCAGGGGGTGCAG  
ATCCATAATAGGCATATAGAGATTATTGTACGTCAAATAACATCCAAAGTGTTGGTTTCG  
GAA-----GATGGAATGTCTAATGTTTTTTTACCCCGGAGAACTAATCGGATTGTTGCGA

GCGGAACGAACAGGGCGTGCTTTGGAAGAAGCGATCTGTTACCGAGCCATCTTATTGG  
GAATAACGAGGGCATCTCTGAATACTCAAAGTTTCATATCCGAAGCGAGTTTTCAAGAA  
ACCGCTCGAGTTTTAGCAAAAGCCGCTCTACGAGGTCGTATTGATTGGTTGAAAGGCC  
TGAAAGAGAACGTTGTTCTGGGGGGGATGATACCTGTTGGTACCGGATTCAAAGGATT  
AGTGCACCGTTCAAGG-----CAACACAACAACATTCCT-----TTGGAAATCAAAAAGAA  
GAATCTATTTCGAGGGGGAAATGAGA-----GATATTTGTTCCACCACAGAGAATTATTGA  
GTTCTTGCATCCCAAAGAATTTCCATGATACATCATTACGGGATTTAATGATTCC-----  
-----ATGACAAGAAGATATTGGAACATCAATTTGGAAGAGATGATGGAGGCAG  
GAGTTCATTTTGGTCATGGTACTAGGAAATGGAATCCTAGAATGGCACCTTACATCTCT  
GCAAAGCGTAAAGGTATTTCATATTACAAATCTTACTAGAACTGCTCGTTTTTTATCAGAA  
GCCTGTGATTTAGTTTTTGATGCAGCAAGTAGGGGAAAACACTTCTTAATAGTTGGTAC  
CAAAAATAAAGCAGCTGATTTCAGTAGCATCAGCTGCAATAAGGGCTCGGTGTCATTATG  
TTAATAAAAAATGGCTCGGTGGTATGTTAACGAATTGGTCCACTACAGAAACGAGACTT  
CATAAGTTCAGGGACTTGAGAGCGGAACAAAAGACGGGGAAATTCAACCGTCTCCCG  
AAAAGAGATGCAGCAATGTTGAAGAGACAATTATCTCACCTGCAAACATATCTGGGTG  
GGATCAAATATATGACGGGGTTACCTGATATTGTCATCATCGTTGATCAGCAAGAAGAAT  
ATACGGCTCTTCGAGAATGTCTGACTTTAGGAATTCCGACGATTTGTTTAATCGATACAA  
ATTGTGACCCAGATCTCGCAGATATTTTCGATTCCAGCCAACGATGACGCTATAGCCTCA  
ATCCGATTGATTCTTAACAAATTAGTATCCGCAATTTGTGAGGGTCGTTCTAGC---TCTAT  
AAGAAATCGTATGGGCAAAAAAATAAATCCCCTTGGTTTCCGACTTGGTGGGCAACAA  
AAGCATAGATCCCTTTGGTTCGCGCAACCAAAAAATTATTCCATAGGTCTCCAGGAAGA  
TGAAAAAATACGAGATTGTATCAAGAATTATGTACAAAAAATAGTAGAATATCCTCGG  
GT---TTCGAAGGAATTGCACATATAGAGATTCAAAAAAATCGATCTGATCCAGGTCAT  
AATCTATATTGGATTTCCAAATTTGTTAATAGAGGGT-----CGAACACGA-----GGAATCG  
AAGAATTACAGATCAATGTACAAAAGGATTTAATTCTGTGAACCGGAGACTTAACATT  
GCTATCACAAGAGTTGCAAAACCTTATGGACAACCTAATATTCCTTGCAGAATATATAGCT  
CTACAATTAAGAATAGAGTTTCTTTTCGAAAGGCAATGAAAAAGCTATTGAATTAAC  
TGAACAAGCGGATACAAAAGGAATTC AAGTGCAAATTCAGGACGTATCGACGGAAA  
AGAAATTGCACGTGTCGAATGGATCAGAGAAGGTAGGGTCCCCTACAAACCATTTCGA  
GCTAAAATTGATCATTGTTTCTATACAGTTCGAACTATCTATGGGGTATTAGGCATCAA  
ATTTGGATATTTGTAGACGAGCAAATGTCTCGTTACCGAGGGCCTCGTTTCAAAAAAAT  
ACGCCGTCTGGGAGCTTTACCGGGACTA ACTAGTAAAAGACCTAGACCGGGAAGTGAT  
CTTAGAAACCAATCGCGTTCCGGGAAA---AGATCTCAATATCGTATTCGTCTAGAAGAA  
AAACAAAATTGCGTTTTTATTATGGTCTGACAGAGCGACAATTGCTTAGATATGTTTCG  
TATAGCTGGAAAAGCCAAAGGGTCAACAGGGCAGGTTTTACTACA ACTACTTGAGATG  
CGTTTGGATAACATCCTTTTTTCGATTGGGTATGGCTTCGACCATTCTGGAGCCAGGCA  
ATTAGTTAACCATAGACATATTTTAGTTAATGGTCGTATAGTAGATATCCAAGTTATCGC  
TGCAAAACCCGAGATATTACTACGAGAGATGAACAAAGATCCAGAGCTTTGATTCA  
AAATTATATTGATTCATCCCCCAC---GAGGAATTGGCAAAACATTTGACTTTTCACTCA  
TCCAATAT-----AAAGGATTAGTAAATCAATAATAGATAGTAAATGGATCGGTTTGA  
AAATCAATGAGTTGCTAGTCGTAGAATATTATCTCGTCAGACTATGTCACGTCGAGGTACT  
GCAGAAGAAAAA ACTGCAAATCCGATCCAATTTATCGTAATCGATTAGTTAACATGTT  
GGTTAACCGTATTCTGAAACACGGAAAAAATCATTGGCTTATCAAATTCCTATCGAG  
CCGTGAAAAAGATTCAACAAAAGACAGAAACAAATCCACTATCTGTTTTACGTCAAGC

AATACGTGGAGTAACTCCCGATATAGCAGTAAAAGCAAGACGTGTAGGTGGATCGACT  
CATCAAGTTCCCATGAAATAGGATCTACACAAGGAAAAGCACTTGCCATTCGTTGGTT  
ATTAGGGGCATCCCGAAAACGTCCGGGTGCGAAATATGGCTTTCAAATTAAGTTCCGAAT  
TAGTGGATGCTGCCAAAGGGAGTGGCGATGCCATACGCAAAAAGGAAGAGACTCATA  
GAATGGCAGAGGCAAATAGAGCTTTTGCACATTTTCGTATGGGTAGGGACACTATTGCC  
GATATATTAACCTTCTATAAGAAATGCCGACATGGATAAAAAAGGAACGGTTCGAATAGC  
ATCTACTAATATGACCGAAAGCGTTGTTAAAATACTTCTACGAGAAGGTTTTATTGAAA  
ACGTTAGGAAACATCGGGAAAACAACAATATTTCTTGGTTTCAACCCTGCGACATAG  
AAGA-----AATAGGAAAGGAACATATAGA-----AATATTTTA-----AAGCGTATCAGCCG  
ACCCGGTCTACGAATCTATTCCAACATCAACGAATTCCTAGGATTTTAGGTGGAATGG  
GGATTGTAATCTTTCTACTTCTAGAGGTATAATGACAGATCGAGAAGCTCGACTAGAA  
GGAATTGGAGGAGAAGTTTTGTGTTATATATGGATGACAAAACCTATAACCAAGAATTGG  
TTCACGTAGGAATGGGCGTATTGGTTCACGTAAGAGTGGGCGTAGAATACCAAAAAGGA  
GTTATTCATGTTCAAGCGAGTTTCAACAATACCATTGTGACTGTTACAGATGTACTAGGT  
CAGGTGGTTTTCTTGGTCTCCGCTGGTACTTGTGGATTCAGAGGCACAAGAAGAGGGA  
CACCATTTGCTGCTCAAACCGCAGCAGGAAATGCTATTCGTACAGTAGTGGATCAGGGT  
ATGCAACGAGCAGAAGTCATGATAAAGGGTCTGGTCTCGGAAGAGATGCAGCATTAC  
GAGCTATTCGTAGAAGTGGTATACTATTAAGTTTTCGTACGTGACGTAACCCCTATGCCAC  
ATAATGGATGTAGACCTCCTAAAAAAGACGTGTGCACCCTACATGTTCTCGACGCTG  
AGGACATCCTCGAAGAGCTGGGGATTTCTGTGACATTCGGATTGGCTGTCT---TGTGTT  
TCTAATAAG---TTGTTTAATAGTTGGCATACTATCACCCCCAAAAAACCAACTCTGCCT  
TACGTAAAGTTGCCAGAGTACGATTAACCTCTGGATTTGAAATCACTGCTTATATACCTG  
GTATTGGCCATAATTCACAAGAACATTCTGTAGTCTTAGTAAGAGGAGGAAGGGTTAAG  
GATTTACCCGGTGTGAGATATCACATTGTTGAGGAACCCTAGATGCTGTCGGAGTAAA  
GGATCGTCAACAAGGGCGTTCTCAATATGGGGTCAAAAAGCCAAAAATGGCAAGAAA  
AAGTTTGATTGAGAGGGAGAGAAAAAGGCAGAAATTGGAACAGAAATATCATTGATT  
CGTCGATCCTCAAAAAAAGAAATAAGC-----AAAGTTTCATCGTTGAGTGACAAATG  
GGAAATTCATGGAAAATTGCAATCCCCACCACGTAATAGTGCACCCACACGTCTTCATC  
GACGTTGTTTTTCGACCGGAAGGCCTAGAGCTAACTATCGAGACTTTGGGCTATCCGG  
ACACATACTTCGCGAAAGGGTTCATGCATGTTTGTGTCGGGGGCAACAAGATCAAGT  
TGGATGGTGAAAAATTCATTCATCTCAGTTATTCGCAAGAAGAAAAAGAAAA-----A  
ACAAAGGGTCTCTTGAATTTCAAGTATTCAGTTTCACCAATAAGATACGGAGACTTACT  
TCACATTTGGAATTGCACAGAAAAGACTATTTATCTCAGAGAGGTCTGCGGAAAATTCT  
GGGAAAACGTCAACGTATACTGGCTTATTTGTCAAAGAAAAATAGAGTACGTTATAAAG  
AATTAATTGGTCAGTTGGATATTCGGGAACCAAAAACTCGT-----ATGGTAAAACCTTCGT  
TTGAAACGATGTGGTAGAAAGCAACGTGCCATCTATCGAATCGTTGCAATTGATGTTG  
ATCCCGAAGAGAAGGAAGAGATCTTCGTAAAGTGGGTTTTTACGATCCGATAAAGAAC  
CAAACCTTATTCAAATGTTCTGCTATTCTATAATTCCTTGAAAAAGGCGCTCAACCTACA  
GGAACCTGTTTCATGATATTTCAAAGAAGGCGGAAGTATTTAAGGAACTTCGAATTAATCA  
AACGAAATCAAATTTAATGGATAAATCCAAGCGACTCTTTCGTAAATCCAAGCGATCTT  
TTCGTAGGCGTTTGCCTTCAATTGGATCGGGGATCGAATTGATTATAGAAACATGAGT  
TTAATTAGTCAATTTATTAGTGAACAGGGAAAAATATTATCTAGACGAGTGAATAGATTG  
ACCTTGAAACAACAACGATTAATTAATGCTATAAAACAAGCTCGTATTTTATCTTCG  
TTACCTTTTCTTAATAATGAGAAA-----CAATTTGAGAAAACCGAGTCGATCCCTAGAAC



TACTGGTCCTAGAACCAGAAATAAAGTGACGCGTTCACTCAAAAAAAAAATCCTTTTGT  
GCTAATCATTATTGGGAAAAATTGAGAAGCTCAACATGAGGGAGGAAAAAGATATAAT  
AATAACTTGGTCCCGGGCATCTACCATTATACCCACAATGATCGGCCATACAATTGCTAT  
TCATAATGGAAAGGAACATTTACCTATTTATATAACAGATCGTATGGTCGGTCACAAATT  
GGGAGAATTCGCACCTACTCTGACTTTCAAGGGACACGCGAAAAACGATAATAAATCT  
CGTCGTATGATTTTGAAATCTTTTCTACTAGGTAATCTATTATCCTTATGCATGAAGATAA  
TAAATTCGGTTCGTTGTGGTCGGACTCTATTATGGATTTCTGACCACATTCTCCATAGGGC  
CCTCTTATCTCTCCTTCTCCGAGCTCGGGTTATGGAAGAAGGA-----ACCGAGAAGG  
AGGTATCAGCAACAACCTGGTTTTATTACGGGACAGCTCATGATGTTTCATATCGATCTATT  
ATGCGCCTCTGCATCTAGCATTGGATAGACCTCATAACAATACTGTCCTAGTTCTACCGT  
ATCTTTTGTTTCATTTCTTCTGGAACAATCACAACACTTTTTTTGATTATGGATCTACTAC  
CAGAAATTCAATGCGTAATCTCAGCATTCAATGTGTATTCCTGAATAATCTCATTTTTCA  
ATTATTCAACCATTTCATTTTACCAAGTTCAACGTTAGCCAGATTAGTCAACATTTATAG  
TTTTGATGCAACAACAAGATGTTATTTGTAACAAGTAGTTTTTGTGGTTGGTTAATTGGT  
CACATTTTCTTCATGAAATGGGTTGGATTGGTATTATTCTGGATACGGCAAAATAATTCTA  
TTAGATCT--ATTTCGATCTAATAAGTACCTTGTGTCAGAATTGAGAAATTCTATGGCTCGA  
ATCTTTAGTATTCTTTTATTTATCACCTGTGTCTACTATTTAGGCAGAATACCGTCGCCTA  
TTGTCACTAAGAACTGAAAGAAACCGAAGAAGACAAACCTCTTGTGACTCTTCTTTT  
CGACTATAAACGATGGAATCGTCCATTGCGATATATAAAAAACGATCGCTTTGAAAAAA  
CAGTAAGAAATGAAATGTCACAATATTTTTTTTACACATGTCCAAGTGATGGAAAAAA  
ACGAATATCTTTTACATATCCCCCTAGTTTGTGCGACTTTTGGGAAATGATACAAAGAAA  
GATGTCTTTGCGTACGAGAGAAAACTATTACTGGAGGATCTGTATAATCATTGGGTTT  
CTACCAATGAACAAAAAAGGCACAACCTGAGCAATGAGTTCGTAATCGAATAGAAGC  
CCTAGAC-----AGGCTTACTCTGGATGTGCTCGAAAAAAGGACAAGATTGTGCAATAAT  
GAGAATGAACAAGAATGCTTGCCTAAAATATATGATCCTTTTTTTGAACGGATCATATCGT  
GGAACAACCAAAAAAGTATATTCACGTATAGAAAAGTTTTGGATAAATAAGATTTCATGG  
TATCTTTTACCGAGAATTTGAACA AAAAGAT--CCAAATGATTCTATTGGAATAGAAGAA  
ATCGGTAAAAAGTTCCCTCGATGGTCATACAAATTAACCCATTTGGAAGAACAGGAGG  
AAGAAGGGATTTCGTTCAAGAAAAGCCAAACGTGTGGTAATTTATACTGATGCGTTGAT  
ACGTTACTCGCAACAATCGGATTTTCGTAGGGATCTAATCAAAGGATCCATGCGCGCTC  
AAAGACGTAAAACAGTTACTTGGGAAATGTTTCAAGCAAATGTGCATTTCCCACTTTTT  
TTGGACAGAATAGACAAAACGTTTTTTTTTTCTTTTGATATC-----TCCGGAATGATGAA  
CCTAATTTTTAGGAATAAGGAAGAGAATGAACGGATAGCAATAGCAGAAAATTGGGAT  
ACTATTCTATTTGCTCAAGCAATAAGAGGTTCTATGTTAGTAACACAATCGATTCTCAGA  
AAATACATCGTATTGCCTTCATTGATAATAGCTAAAAATCTCGGCCGTATGTTATTATTC  
AATCCCCGAGTGGTACGAGGATTGGAAGGAGTGGAATAGAGAAATGCATGTTAAATG  
CACCTATAATGGTGTTCATTATCAGAAACAGAATTTCCGAAAGACTGGCTAACAGACG  
GTATTCAAATAAAGATCCTATTTCTTTCTGTCTGAAACCTTGGCACAGATCTAAGAAA  
GGAAAAAAGAAAATTTTGGTTTTTTAACAGTCTGGGGGATGGAACTGAACTACCTT  
TTGGTTCTCCCCGAAAACGACCTTCTTTTTTTGACCCCATTTGGAAAGAAGCTCGAAAA  
AAAAATTAGAAAAGTGAAA---AAGAAATGTTTTCTAGTTCTAAGAGCTTTAGGAGAAA  
GAAAAAATGGTTTCTAAGGGTCTTAAAAGAAAAACAAGATGGATTCTCAAACAG  
TTCTA-----TTTATAAAAAGAATAATAAAGAGTTTGCAAAAGTAAAT---TCTATAATTAGT  
AATAAGATTAACCATGAATCGATCATTGAATTAGATCTGTGGATTGGACAAATTATTCA

CTGACAGAAAAAAAAAATGAAGGATCTGGCTGATAGGACAACCACAATCCGAAATAAA  
ATAGAAAGGATTACAAAAGACAAGAGAAAAAGTCCTAACGAGACAGGTTGTGATGAT  
AAAAGATCGGAATCACAGAAACATATTTGGCAGATATCAAAAAGAGGAGGTGCCCGAT  
TAATACGTAAATGGCACTATTTTATGAAATCTTTCATTGAAAGAATCTATATGGATATCTT  
TCTATGTAACATTAATATTCCCAGAATAAATGCACAACCTTTCATTCACTTTATTTTCATGT  
GACTTATCTTCCTTGTCCCAAGCATATGTATTTTACAATTTATCACAAATCAAAATTATTA  
ATAAGTATTACTTGAGATCTGTACTTCAATATGCATATCTTTTTCTTAAGGATAGAATAAA  
GGACCATTTTACACGAAGAATATTGGATGCCAAATCAAGGTCTAAGAACTTCCGAATT  
CTGGAATGAATGAATGGAAAAATTGGTTAAGGGGTCATTATCAATACAATTTATCTCAG  
ACTAGATGGTCTAAATTAGTACCGCAAAAATGGCGAAATAGAGTCAATCAACGTCGTAT  
GATTCAAAATAAAAAA---AAAGATTCATATGAAAAAGAAAAAGACCAATTAATTCATTA  
CGAGAAACAAGAAAAATTTAAAAAACAACACTACAGATATGATCTTTTATCACATAAATATAT  
TCATGGGTCTATTATTGATCCGGATAGAAAATATTTGGAGTGGAGAATTCTCAATTTTTT  
TCTTAGATTTTTTGATTGGATGGGAATGAATGAAGAAATGCTACATCGTTGGTTCTTCTC  
AGAATTTGTGCTACTTTATGATGCATATAAGATTAAACCGTGGATCATACCAATCAAATT  
ACTTATTTTCAATTCCAAGAGCAATAAGGAAGCGGAACTAGATTTCTTCCTGAAAAGGT  
ATTTGCTTTTTCAATTGAGATGGGATGATCCTTTGAATCAAAGAATGATCAATAATATCA  
AGGTATATTGTCTCCTGCTTAGGCTGATAAATCCAAGGGAAATTGCTATATCCTCTATT  
AAAGAGGAGAAATGCGCCTGGATGTAATGCTGATTCAGAAGGATCTAACTCTTACAGA  
ATTGATAAAAAGGGGAATATTGATTATCGAACCGGTTTCGTCTGTCTATAAAATGGGATG  
GACAATGGATTATGTATCAAACCATAAGTATTTTCATTGGTCCATAAGAATAAGTACAATA  
ATTATGCTTTGCTTGTTCCTGAAAATATTCCATCTCCTAGACGTCGTAGAGAATTGAGAA  
TTCTAATTTGTTGAGATTTCTTTGGCCCAATTATCGATTAGAAGATTTAGCTTGTATGAA  
TCGCTACTGTTTTGATACCAATAATGGCAGTCGTTTCAGTATGTCAAGGATACATATGTA  
TCCAATGAAACGACATCAATTCAAATCCTGGATCTTCGAATTGAGAGAGATATTGAGAG  
AGATCAAGAATTTCTCACTATTTCTTAGATTCATGGACCAAATTCGATTCAGTGGGATCTT  
TCACTCACATTTTTTTCCACCAAGAACGTTTTATGAAACTCTTTGACCCCGAATTTGG  
AGTATCCTACTTTCA---CGTGATTCA-----CAGGGTTCAACAAGCAATCGATATTTT-----  
-ACGATCAAAGGTGTAGTACTGCTTGTAGTAGCG---GTCCTTATA-----TATCGTATTA  
ACAATCGAAATATGGTCGAAAGAAAAATCTCTATTTGATGGGGCTTCTTCTATACCTA  
TTCTTCTATACCTATGAATTCCATTGGACCCAGAAATGATACATTGGAAGAATCTTTT---  
TGGTCTTCCAATATCAATAGGTTGATTGTTTCG---CTCCTGTATCTTCCAAAAGGGAAAA  
AGATCTCTGAGAGTTGTTTCATGGATCCGAAAGAGAGTACTTGGGTTCTCCCAATAACT  
-----AAAAAGTGTATCATGCCTGAATCTAACTGGGGTTCGCGGTGGTGGAGGAACC  
GGATCGGAAAAAAGAGG-----GATTCTAGTTGTAAGATATCT-----AATGAAACCGTAG  
CTGGAATTGAGATCTCATTCAAAGAGAAAGATATCAA---TATCTGGAGTTTCTTTTTGT  
ATCCTATACGGAT-----GATCCGATCCGCAAGGACCTTGATTGGGAATTCTTTGATCGTCT  
TTCTCCGAGGAAGAAGCGAAACATAATCAACTTG-----AATTCGGGACAGCTATTCGAA  
ATCTTAGTGAAACACTTGATTTGTTATCTCATGTCTGCTTTTCGTGAAAAAAGACCAATT  
GAAGTGGAGGGT---TTCTTCAAACAACAAGGA---GCTGAGGCAACTATTCAATCAAATG  
ATATTGAGCATGTTTCCCAT-----CTCTTCTCGAGAAACAAGTGGGGTATTTCTTTGCAA  
ATTGTGCTCAATTTAATATGTGGCAATTCGCAAGATCTTTCGTT-----AGTTGGGG  
GAAG---AATCAGCACGAATCGGATTTTTTGGAGGAAC---GTATCGAGAGAGAATTGGATT  
TGTTAGACAATGTGTGGTTGGTAAACAAGGATTGG-----TTTTTTAGC-----AAGGTA

CGGAATGTATCGTCAAATATTCAATATGATTCC-----ACAAGA-----TCTATTTTCGTTCA  
AGTAACGGATTCTAGCCAATTGAAAGGATCTTCT--GATCAATCCAGAGATCCTTTTCGAT  
TCCATTAGT-----AATGAGGATTTCGGAA-----TATCACACAT  
TGATCAATCAAACAGAGATTTCAGCAACTAAAAGAAAGATCGATTCTT--TGGGAT-----C  
CTTCCTTTCTTCAAACGGAACGAACAGAGATAGAATCAGAT-----CGATTCCCGAAA-----  
-TGCCTTTCTGGATATTCC-----TCAATGTCCCGGCTATTCACG--GAACGTGAGAAGCAG  
ATGAATAATCATCTGCTTCCGGAAGAAATCGAAGAATTTCTT-----GGGAATCCTACAAG  
ATCAATTCGTTCTTTTTTCTCTGACAGATGG-----TCAGAACTTCAT--CTGGGTTTCGAAT  
CCTACTGAGAGGTCCACTAGAGATCAG-----AAATTGTTGAAGAAACAACAAGATG  
TTTCT--TTTGTCCCTTCCAGGCGATCGGAA-----ATAAAGAAATGGTTGATATATT  
CAAGATAATTACGTATTTACAAAAT-----ACCGTCTCAATTCATCCTATTTTCATCAGATCCG  
GGATGTGATATGGTTCCG--AAGGATGAACCGGAT--ATGGGCAGTTCCAATAAGATTTT  
ATTCTTGAACAAAATCCATTTTTGGAT-----TTATTTTCATCTATTCCATGACCCGGAACAA  
AGGGGGATACACGTTA-----CACCACGATTTTGAATCAGAA-----GAGAGATTTCAAGAA  
ATGGCAGATCTATTCACTCTATCAATAACCGAGCCG--GATCTGGTGTATCATAAGGGAT  
TTGCCTTTTCTATTGATTCCCTACGGATTGGATCAAAAAAAAA-----TTCTTGAATGAGGTAT  
TCAACTCCAGGGATGAATCGAAAAAGAAATCTTTA-----TGGGTTCTACCTCCTATTTT  
TGAT-----GAAGAGAATGAATCTTTTTATCGAAGGATCAGAAAAAATCGGTCCCG--AT  
TTCCTGCGGGAATGATTTGGAAGATCCAAAACCAAAAATAGTGGTATTTGCTAGCAAC  
AACATAATGGAGGCGGTCAATCAATATAGATTGATCCGAAATCTGATTCAAATCCAATAT  
AGCACCTATGGG-----TACATAAGAAATGTATCGAATCGATTCTTTTTAATG-----ATA  
GATCCGATCGCAACTTCGAATATGGAATTCAA-----AGGGATCAAATCGGAAATGATA  
CTCTGAATCATCTAACTATAATAAAATATACGATCAACCAACATTTATCGAATTTGAAAA  
AG--AGTCAGAAGAAATGGTTCGAT-----CCTCTTATTTCTCGAACCGAGAGATCCA  
TGAATCGGGATCCTGATGCATATAGATACAAATGGTCCAATGGGAGCAAGAATTTCCAG  
GAACAT-----TTCGTTTCTGAACAGAAGCAC-----CGTTTTCAAGTAGTGTTCGATCG  
ATTACGTATTAATCAATATTCGATTGATTGGTCCGAGGTTATCGACAAACAAGATTTGTC  
TAAGTCACTTCGTTTCTTTTTGTCCAAGTCA-----CTTCTTTTTTGTCC-  
-----AAGTCACTT--CTCTTTTTGTCTAAGTCACTTCCTTTTTTCTTTGTGAGTA  
TCGGGAATATCCCCATTCATAGGTCCGAG--ATCCACATCTAT--GAATTGAAAGGCCCG  
AATGATCAACTCTGCAATCAGTTGTTAGAATCAATAGGTGTTCAAATCGTTCATTTGAAT  
AAATTGAAACCC-----TTCTTATTGGAT-----GATCATGATACTTCC--CAAAGATCGAAA  
TTCTTGATCAATGGAGGAACAATATCACCATTTTTGTTCAATAAGATACCA--AAGTGG--  
-ATGATTGACTCATTCCATACT-----AGAAATAATCGCAGGAAATCCTTTGATAACTGA  
TTCCTATTTCTCAATGATATCCCGCGATCGAGACAATTGGCTGAATCCCGTGAAACCATT  
TCATAGAAGTTCAATGATATCTTCTTTTTATAAAGCAAATCGACTTCGATTCCTGAATAAT  
CCACATCACTTCTGGTTCTAT-----TGTAACAAAAGATTCCCTTTTTATGTG-----GAA  
AAGACCCGTATCAATAATTATGAT-----CTTACATAT--GGACAATTCCTCAATATCTTGTTT  
ATTGCAACAAA--ATATTTTCTTTGTGCGTCGGTAAA-----AAAAACATGTTTTTTTGG  
AG--AGAGATACCATTTACCAATCGAGTCACAGGTATCTGACATATTCATACCTAACGA  
TTTTCCACAAAGTGGTGGTGAACG--TATAACTTGTACAAATCT-----TTCCATTTTCC  
AATTCGATCCGATCCATTCGTTTCGT-----AGAGCTATTTACTCGATCGCAGACATTTCTGG  
AACACCTCTAACAGAGGAACAATAGTCAATTTGAAAGAACTTATTGTCAGCCTCTTT  
CAGATATGAATCTATCTGATTTCAGAAGGGAAAAAATTGCATCAGTATCTCAGT-----TTC

AATTCAAACATGGGTTTGATTCACTCCATGTTCTGAGAAAGATTTACCA-----TCAGG  
AAAGAGGAAAAA-----CGGAGTCTTTGTCTAAAG-----AAATGCGTTGA  
GAAACGGCAGATGTATAGAACCTTTCAACGAGATAGTGCTTTTTCAAATCTCTCAAAT  
GGAATCTGTTCCAAACATATATGCCATGGTTCCTTACTTCGACAGGGTGCAAATATCTAA  
ATTCACCCTTTTAGATACTTTTCAGACCCATTG-----CCGATACTAAGTAGCAGT---CA  
AAAATTTGTATCCATTTTTCATGATATTATGCATGGATCAGATATATCATGGCCAATTCCTC  
AGAAAAAATTGTGG-----GCGATTCTTCCACAATGGAATCTG---ATAAGTGAGATTT  
CGAGTAAGTGTTTACAGAAT-----CTTCTTCTGTCCGAAGAAATGATTCATCGAAATAAT  
GAGTCACCCGTTCCATTGATATGGACACATCTGAGATCACCAAATGCTCGGGAGTTC---  
CTCTATTCAATCCTTTTCCCTTCTTCTTGTGCTGGATAT---CTCGTTCGTACACATCTTCTC  
TTTGTTCCTCGA-----GCCTTAGTGAGTTACAGACAGAGTTAGAAAAGATCAAATCTTT  
GATGATTCCATCATACTGATTGAGTTGCGAAAACCTTCTGGATAGGTATCCTACATCTGA  
ACTGAATCTTTCTGGTTAAAGAATCTCTTTCTAGTTGCTCTGGAACAATTAGGAGATTC  
TCTGGAAGAAATACGGGGTTCTGCTTCTGGCGGCAACATGCTATTGGGTGGTGGTCCC-  
-----GCTTATGGG---GTCAAATCAATACGTTCTAAGAAGAAATATTTGAATATCAAT-  
-----CTCATCGATCTCATC---AGTATCATACCAAATCCCATCAATCGAATCACTTTTTCGA  
GAAATACGAGACATCTAAGTCGTACAAGTAAAGAGATCTATTCATTGATAAGAAAAAG  
AAAAAACGTGAACGGTGATTGGATTGATGATAAAATAGAATCCTGGGTCGCGAACAGT  
GATTCGATTGATGATGAAGAAAGAGAATTCTTGGTTCAGTTCTCC-----ACCTAACGAC  
A-----GAAAAGGGGATTGATCAAATTCTATTGAGTCTGACT---CATAGTGATCATTATCA-  
-----AAGAATGACTCTGGTTATCAAATGATTGAACAACCGGGATCAATTTACTTAC  
GATACTTAGTTGACATTCAT-----AAAAAGTCTCTAATGAATTATGAGTTCAATAGATCCT  
GTTTAGCAGAAAGACGGATATTCCTTGCTCATTATCAGACAATCACTTAT-----TCACAAA  
CCTCGTGTGGGGCTAATAGTTCTCATTCCCATCTCATGGA-----AAACCCTTTTCGCT  
CCGCTTAGCCCTATCCCCTTCT---AGGGGTATTTAGTGATAGGTTCTATAGGAATTGGAC  
GATCATATTTGGTCAAATACCTAGCGACAACTCCTATGTTCTTTTATTACGGTATTTCC  
GAACAAGTTCTGGATGACAAGCCTAAAGGTTATCTTATTGAC-----GATATCGAT  
---ATTGATGATAGTGACGATATCGAT-----ATTGATGATAGTGACGATATT-----  
-----GATGATGACCTTGATACGGAGCTGCTAACTATGACGAATGT  
GCTA-----ACTATGTATATGACG-----CCGAAAATAGACCGATTTGATATCACCCCTCA  
ATTAGAATTAGCAAAAGCAATGTCCCCTTGATAATATGGATTCCAAACATTCATGATCT  
GTATGTGAATGAGTCGAATTACTTATCCCTCGGTCTATTAGTGAACATCTCTCC-----A  
GAGATTGTGAAAGATGTTC---ACTAGAAATATTCTTGTTATTGCTTCGACTCATATCCC  
CAAAAAGTGGATCCCGCTCTAATAGCTCCGAATAAATTAATACATGCATTAAGATACG  
AAGGCTTCTTATTCCACAACAACGAAAGCACTTTTTTATTCTTTTATATACTAGGGGATT  
TCACTTGGAAAAGAAAATGTTCCATACT-----AACGGATTTCGGGTCCATGACCATGGGTT  
CCAATGCACGAGATCTTGTAGCACTTACCAATGAGGCCCTATCAATTAGTATTACACAG  
AAGAAATCCATTATAGACACTAATAAATTAGATCAGCTCTTCATAGACAACTTGGGA  
TTTGCAG-----TCCCAGGTAAGATCGGTTGAGGATCATGGGATCCTTTTCTATCAGATA  
GGAAGGGCTGTTGCACAAAATGTAATCTAAGTAATTGCCCATAGATCCTATACTATC  
TATATGAAGAAGAAA-----TCATGTAAGGAAGGGGATTCTTATTTGTACAAATGGTACTT  
CGAACTTGGAACGAGCATGAAGAAATTAACGATACTTCTTTATCTTTTGTAGTTGTTCTG  
CCGGATTGGTTCGCTCAAGATCTTTGGTCTCCACCC-----GGACCCGATGAAAAA---AATT  
GGATCCCTTCTTATGGATTTCGTTGAGAATGATTCT---GATCTAGTTTCATGGCGAATTAGA

AGTAGAAGGCGCTCTGGTGGGA-----TCCTCACGGACAGAAAAAGATTGCAGTCAGTT  
TGATAATGAT-----CGAGTGACATTGCTTCTTCGGTCCGAACCAAGGAAT--CAGTTAGAT  
ATGATGCAAAATGGATCTTGTCTATCGTTGATCAGAGATTTCTATATGAAAA-----TAC  
GAATCGGAGTTTGAAGAA---GGGGAAGGAGAAGGAGCCCTCGACCCGCAA-----C  
AGATAGAGGAGGAT-----TTATTCAATCAC-----ATAGTTTGGGCTCCT-----AGAATAT  
GGCGCCCT-----TGTGGCAATCTATTTGATTGTATCGAAAGGACCAATGAATTGGGATT  
TCCC---TATTGGGCCAGGTCAATTCGG-----GGCAAGCGGATCATTTATCATAAAGAGG  
ATGAGCTTCAAGAGAATGATTCGGAGTTCTTGCAGAGTGGAAACCATGCAGTACCAGAC  
ACGAGATAGATCTTCCAAAGAACAAGGCTTTTTTCGAATAAGCCAATTCGTTTGGGAC  
CCTGCAGATCCATTCTTTTTCTATTCAA---GATCAGCCCTTTGTCTCTGTGTTTTACG  
TCGAGAATCTTTGCAGATGAAGAGATGTCAAAGGGCTTATTACTTCCCAAACAAATC  
CTCCACATCTATATATAAACGCTGGTTCATC-----AAGAATACGCAAGAAAAGCACTTC  
GAATTGTTGATTCATCGCCAGAGATGGCTTAGAACC-----AATAGTTCATTATCT-----A  
ATGGATCTTCCGTTCTAAT-----ACTCCATCCGAGAGTTATCAGTATTTATCAAATCTGTT  
CCTATCTAAC---GGAACGCTATTGGATCAAATGACAAAGGCATTGTTGAGAAAGAGATG  
GCTTTTCCCGGATGAAATGAAACATTTGATT-----CATGTAACAGGAGAAAGATTTCCCA  
TTCTATGCCTAGATCTCGG---ATAAATGGAAATTTTATTGATAAGACCTCTTCAATTGTA  
GCCAATATCTTATTACGAATAATTCCGACAACCTCAGGAGAAAAGGAGGCATTTACCTA  
TTACAGAGATGGT-----ATGTCGGCTCAATCCGAAGGAAATTATGCGGAAGCTTTACAAA  
ATTATTATGAAGCTACGCGACCAGAAATTGATCCCTATGATCGAAGTTATATACTCTATAA  
CATAGGCCTTATCCACACAAGCAACGGAGAACATACGAAGGCTTTGGAATATTATTTCC  
GGGCACTCGAACGAAACCCATTCTTACCACAAGCTTTTAATAATATGGCTGTGATCTGT  
CATTAC---CGGGGAGAACAGGCCATTCGACAGGGAGATTCTGAAATTGCGGAGGCTTG  
GTCCGATCAAGCTGCTGAATATTGGAACAAGCTATAGCGCTTACTCCAGGTAATTATAT  
TGAAGCACATAATTGGTTGAAGATCACAAGGCGGTTTCGAA-----ATGAACTGGCAATCC  
GAACGTATATGGATAGAACTTATAACGGGGTCTCGAAAAACAAGTAATTTCTGCTGGGC  
CTGTATCCTTTTTTTAGGTTCACTAGGATTCTTATTGGTTGGAACCTCCAGTTATCTTGGT  
AGGAATCTGATATCCGTATTTCCCTCTCAGGAAATCCTTTTTTTTTCCCAAGGAATCGTG  
ATGTCTTTCTATGGGATCGCTGGTCTGTTCATTAGTTCCTATTTGTGGTGCACAATTCGT  
GGAATGTAGGTAGTGGTTATGATCTTTTTGATAGAAAAGAAGGAATAGTGTGATTTTTTC  
GTTGGGGATTTCTGGAATAAATCGTCGCATCTTCTTCGATTCTTATGAGAGATATCC  
AGTCAATCAGAATGGAAGTTAAAGAGGGTCTTTATCCTCGTCGTGTCCTTTATATGGAA  
ATCAGAGGCCAGGGAGCCATTCCCTTGACTCGTACCGATGAGAAT---TTTACTCCACGA  
GAAATTGAACAAAAAGCTGCTGAATCGGCCTATTTCTTGCGCGTACCAATTGAAGTATT  
T

>Wolffia

-----ATGGATA  
AGAACGTTTCC---TTCAGTAATGTTGACCAGTTTTTTGGATATCATAGACATTTGGAGTTT  
CATTTCTGACGACACTTTTTTAGTTAGGGATAGTAACGGGGACAGTTTTTCTATATATTT  
TGATAGTGAAAATCAGATTTTTGAGATTGACAATGAG-----AGTACTTTTATCACTGAAC  
TAGAACGTTCTTTTTCTAGTTCCCGAAT---AGTTATATGAATAGTGGATCTAAAAATACT  
AGTCGATACTCTTATCGTTACATGTATGATACTCAATCTAGTTGGAATAATCATATAAATA  
GTTGCATTGATAGTTATCTGCGTTATGAAATC-----AGTAGTGAGAGTTACATTTTCAGGCG  
AGACCCATAACTACAGTGATAATTATGTTTATAATTTTATTTCTAATGAAAGTAGTAATTC

TATCAGAACTAGTATTAATGCCAGTGATTTTAATATAAGAGGAAGATCT--GATTTAGATA  
TAAATAAAAAATACCGACATTTATGGGTTTCAGTGCGAAAATTGTTATGGATTA AATTATA  
AGAAATTTTTTAGGTCAAGACTGAATATTTGCGAACACTGTGGATATCATTTGAAAATG  
AGTAGTTCAGAGAGAATCGAACTTTTGATTGATCCGGGCACCTGGGATCCTATGGATGA  
GAATATGGTCTCGACAGACCCCATTTGAATTTTCATTCAGAGGAAGAACCGTATAGAGATC  
GTATTGATTCTTATCAAAAAAGACAGGTTTAACTGACGCTGTTCAAACAGGCATAGGT  
CAACTAAACGGTATTCCTATAGCTATTGGAGTCATGGATTTTCAGTTCATGGGAGGTAGT  
ATGGGATCTGTAGTCGGTGAGAAAATCACCCGTTTGATCGAATATGCGACTAATAAGTC  
TCTACCTGTTATTATTGTATGTGCTTCTGGCGGAGCACGCATGCAAGAAGGAAGTTTGA  
GTTTGATGCAAATGGCTAAAATATCTTCTGCTTTATATAATTATCAATTAATAAAAAGTT  
ATTCTATGTACCAATTCTTACATCGCCGACAACAGGTGGGGTTACAGCCAGTTTTTGGTAT  
GTTGGGAGATATCATAATTGCTGAACCTAATGCCTACATTGCATTTGCAGGTAAAAGAG  
TAATTGAACAAACATTGAATAAGACAGTACCCGACGGTTCACAAGCAGCTGAGTATTA  
TTTCAGAAGGGATTATTTGATCTAATCGTACCACGGAATCTTTTAAAGGGTGTCTGGCT  
GAGTTATTTTCAGCTCCACGGTTTTCTTTCCTTTGACT-----ATGGTAACCATTTCGAG  
CTGACGAAATTAGTAGTATTATCCGTGAACGTATCGAACAATATACTAGAGAAGTAAAG  
GTTGTGAATACCGGTACCGTACTTCAAGTGGGTGACGGCATTGCTCGTGTTCATGGTCT  
TGATAAAGTAATGGCGGGTGAGTTAGTAGAATTTGAAGAGGGTACTGTAGGTATTGCTT  
TGAATTTGGAATCAACTAATGTTGGCGTTGTATTAATGGGGGATGGTTTGCTGATACAA  
GAGGGCAGTTCTGTAAAAGCAACAGGAAGAATTGCTCAAATACCCGTAAGTGATGGTT  
ATTTGGGTCGTGTTCTAAATGCTCTAGCGAAACCTATTGATGGAAGGGGGGAAATTGCA  
GCTTCTGAATCTCGTTTAATTGAAGCTCCTGCTCCAGGTATTATTGCTAGACGTTCCGTA  
TATGAACCTCTTCAGACAGGGATTATTGCTATTGATGCTATGATACCTATAGGACGCGGT  
CAGCGAGAATTAATTATTGGGGATAGACAGACAGGTAAAACAGCAGTAGCTACAGATA  
CCATTTTAAATCAAAAAGGTCAAAATGTAATATGTGTTTACGTAGCTATTGGTCAAAA  
GCATCTTCTGTAGCTCAAGTAGTAAGTCTTTACAGGAACGCGGAGCTATGGAATACAC  
TATTGTGGTAGCGGAAACGGCAGATTCGCCTGCTACATTACAATATCTTGCTCCATATAC  
AGGAGCAGCTTTGGCTGAATATTTTATGTACCGAAAACAACATACTTTAATAATTTATGA  
TGATCTCTCAAAACAGGCACAAGCGTATCGCCAAATGTCTCTTCTATTAAGAAGACCTC  
CGGGTCGTGAAGCTTATCCAGGAGATGTTTTTTTATTGTCATTCCCGCCTTTTGGAAGA  
GCCGCTAAATTAAGTAATGAGTTGGGTGAAGGAAGTATGACTGCTTTACCAATAGTTGA  
GACTCAATCGGGAGACGTTTCAGCTTATATTCCTACTAATGTCATTTCCATTACAGATGG  
CCAAATTTTCTTATCCGCGAATCTGTTCAATTCTGGAATCCGACCTGCTATTAATGTAGG  
TATTTCCGTGTCCCGAGTAGGATCCGCGGCTCAAATTAAGCCATGAAACAAGTCGCTG  
GTAAATTA AAACTGGA ACTAGCTCAATTTGCAGAATTAGAAGCCTTTGCTCAATTCGCT  
TCTGATCTTGATAAAGCGACTCAAATCAATTGGCAAGAGGCCAACGATTACGCGAAT  
TGCTAAAACAATCCCAATCTGCACCGCTTGGAGTGGACGAACAGATAGCTACTATTTTT  
ACTGGAGCAAATGGCTATCTTGATTCGTTAGA ACTTGGACAGGTAAGGAAATTTCTGGT  
TCAGTTGCGTACCTACTTAAAAAGAATAAACCTCAGTTCCAAGAAATTATATCTTCCA  
CCAAGACATTCATTCGGAAGCAGAAGCCCTTTTGAAAGAGGCTATTCAGGAATGCAT  
GGAATTGTTTCTACAACAGGAGCAAAACATGCAAATAAATCCTACTACTTCT--ACTGC  
GGTTTCACAATTGGAAGAAAAAACCTAGGGCGTATTGCTCAAATTATTGGCCCAGTA  
CTGGATATCGTTTTTTCCCGGGTAAAATGCCCAATATTTATAATGCCTTGGTAGTTCAA  
GGTCAAGATGCGGATGGTCAGGAAATTAAGTTACTTGTGAGGTACAGCAATTATTAGG

AAATAATCGAGTTCGAGCTGTAGCTATGAGTGCTACAGATGGTCTAACGAGAGGAATG  
GACGTGATTGATACGGGAGCTGCTCTAAGCGTTCAGTCGGTGGAGCCACTCTGGGAC  
GAATTTTCAATGTTCTTGGTGAGCCTGTTGATAATTTAGGTCCTGTAGATACTCGCACAA  
CATCTCCTATTCATAGATCCGCACCCGCCTTTATCCAGTTAGATACGAAATTAGCAATCT  
TTGAAACTGGGATTAAGTAGTGGATCTTTTAGCCCCTTATCGCCGTGGAGGAAAAATT  
GGACTATTTGGGGGAGCTGGAGTGGGTAAAACAGTCCTGATTATGGAATTGATCAACA  
ACATTGCTAAAGCTCATGGAGGTGTATCCGTATTTGGTGGAGTAGGCGAACGTACTCGT  
GAAGGAAATGACCTTTACATGGAAATGAAAGAATCCGGAGTCATTAATGAAAAAATA  
TTGCAGAATCAAAAGTAGCTCTCGTCTATGGTCAGATGAATGAACCGCCTGGAGCTCGT  
ATGAGAGTTGGTTTGACCGCTCTAACTATGGCAGGAAATTTCCGAGATGTTAATGAACA  
AGACGTACTGCTATTCATTGACAATATTTTTAGATTCTGCAAGCAGGATCCGAAGTATC  
GGCTTTATTAGGTAGAATGCCGTCTGCGGTGGGTATCAACCTACCCTTAGTACAGAAA  
TGGGTTCTTTGCAAGAAAGAATTACGTCTACAAAGGAGGGATCTATAACTTCTATTCAA  
GCAGTTTATGTACCTGCAGACGATTTGACTGACCCTGCGCCAGCAACGACATTTGCGCA  
TTTAGATGCGACTACCGTACTATCAAGAGGATTAGCTGCTAAAGGTATTTATCCAGCAGT  
GGATCCTTTAGATTCAACGTCAACCATGCTACAACCTGCAATCGTTGGTGAGGAACATT  
ATGAAACTGCGCAAAGAGTCAAGGAAACTTTACAACGTTACAAAGAACTGCAGGACA  
TTATCGCTATCCTTGGATTAGACGAATTATCCGAAGAGGATCGTTTAAACCGTAGCACGA  
GCACGAAAAATTGAGCGTTTCTTATCACAACCCTTCTTTGTAGCGGAAGTATTTACTGG  
TTCTCCAGGGAAATATGTTGGCCTTGAAGAAACCATTAGGGGCTTTAAACTTATTCTCT  
CAGGCGAATTAGACAGTCTTCTGAACAGGCCTTTTATTTGGTGGGTAACATCGATGAA  
GCTACTGCGAAAGCTATAAACTTAGAAGTGGAGAGCAATTTGAAGAAAATGACCTTAA  
ATCTTAGTGTACTGACGCCTACTCGAATTGTTGGGATTCAGAAGTTAAAGAAATAATT  
TTATCGACTAATAGTGGCCAAATTGGTATATTACCAAACCACGCTCCTATTGCCACAGCT  
GTAGATATAGGTCTATTGAGAATACGCCTAACAGACCAATGGGTAACGGTGGCTTTGAT  
GGGCGGATTTGCTAGAGTAGGTAATAATGAGATCACCATTCTAGGAAATGATGCAGAGA  
TAAGTACTGATATTGATCCGCAAGAAGCTCAAGAAGCTCTTGAAAAAGCGGAAGAAAA  
TTTGCGTAAAGCAGAAGGTAAAAGACAAGCAATTGAGGCTAATCTAGCTCTAAGACGA  
GCTAAGACACGAGTAGAGGCTATCAATGTTATTTCCATGAAAAATGTCACTGATTCCTT  
TGTTTCCTTG---CACTGGCCATCCGCCGAGGTTTTGGGTTTAATACCGATATTTTTGCA  
ACAAATCCAATAAATCTAAGCGTAGTAATTGGTGTACTCTTTTATTTGGAAAGGGAGT  
GTAAATGATTTATTAGATAATCGAAAACAGAGGATCTTGAGGACTATTGCAAATTCAG  
AAGAGTTACGTCAAGCAGCTATTGAACAGCTTGAAAAAGCCCGGGCACGCTTACGTAA  
AGTGGAACCGGAAGCCAATGACTATCGAGTCAATGGATACTCCGAGATAGAACGAGAA  
AAACAAAATTTGATTAAGGCGACTTCTGAGAATTTGGAACGATTAGAAAATTATAAAAA  
TGAAACTCTTCTTTTTGAACAACAAAGAGCGATTAATCAAGTCCGTCAACGAGTTTTC  
CAACAAGCTTTACAAGGAGCTCTAGGGACTCTGAATAGTTGTTG---AGTGAGTTACAT  
TTTCGTACCATCAGTGCTAATATTGGCATTCTAGGGGGTATGGAAGAA-----ATGAATC  
CACTGATTTCTGCCGCTTCTGTTATTGCTGCTGGATTGGCTGTAGGACTTGCTTCTATTG  
GACCTGGAGTTGGTCAAGGTAAGTACTGCAGCGGGTCAGGCTGTAGAAGGTATTGCGAGAC  
AGCCAGAAGCAGAAGGTAAAATACGAGGTACTTTATTGTTAAGTTTGGCTTTTATGGAA  
GCTTTAACAATTTATGGACTAGTTGTGGCGTTAGCACTTTTATTTGCTAATCCATTTGTTA  
TGAATGTIATACCATGTTCCATTAACACACTCAAAGGGTTATATGATATATCGGGTGTAG  
AAGTAGGCCAACATTTATATTGGCAAATAGGAGGTTTACAAGTCCATGCCCAAGTTCTT

ATTACTTCTTGGGTCGTAATTGCTATCTTATTAGGTTTCAGTTACCTTAGCTGTTTCGGAATC  
CACAAACCGTTCCGGCTGACGGTCAGAATTTCTTCGAATATCTCCTTGAATTCATTCTGA  
GACTTGAGTAAACTCAGATTGGAGAAGACTATGGTCCTTGGGTTCCCTTTATTGGAAC  
TATGTTCTTATTTATTTTGTCTTAACTGGTCAGGTGCTCTTTTACCTTGGAAAATTATA  
GAGTTACCTCATGGGGAATTAGCGGCGCCACCAATGATATAAACACTACAGTTGCTTT  
AGCTTACTGACCTCTGTGCGCCTATTTTATGCCGGTCTTAGCAAAAAAGGTTTGAGTTA  
TTTTGGTAAATACATTCAACCAACTCCAATACTTTTACCAATTAACATCCTAGAAGATTT  
CACAAAACCGTTATCACTTAGTTTTCGACTTTTCGGAAATATATTGGCTGATGAATTAGT  
CGTTGTTGTTCTTGTCTTTAGTACCTTTAGTAGTTCCTATACCTGTTATGTTTCTTGGG  
TTATTCACAAGCGGTATTCAAGCTCTTATTTTTGCAACTTTAGCCGCAGCTTATATAGGT  
GAATCTATGGAGGGTACCATATGATATTTGTAACCTTTAGAACATATATTAACCTCATATCT  
CTTTTTCAATCATTCTATAGTAATTATTATTCAGTTAATGAGCTTTTTTCGTTTCATGAAATT  
CCCGGATTATCGGATTCATTGGAAAAGGGTATGATAGCTACCTTTTTCTCGATAACGGGA  
TTATTAATAATTCGGTGGATTTATTTCAGGCCATTTCCATTAAGTAATTTATATGAATCCTT  
AATGTTCCTTTCGTGGAGTTTCGCTATAATTCATATGATTCCTAAAATATGGCAAAATGC  
AAAATTTTTAAGTGCAATAACACACCCAGCGCGATTTTTACTCAAGCTTTTGCCACTT  
CAGGTCTTCAACAGAAATGCACCAATCAGCCATATTAGTCCCTGCTCTACGATCCCAT  
TGGTTAATGATGCATGTAAGTATGATGTTGTTAAGTTATGCAGCTCTTTTAGTTGGATCTT  
TATTTTCAATTGCTCTTCTAGTAATCACTTTTCGAAAAATATAAAAAATCGTTGTTGAAA  
ACCAGCAGATGGACTGTTTAACTTTGACTCAAAAATCTAAAAAAACTACTTCTTTTTCT  
TCTTTTAAAAATTATTACAAATATCAATTACTAGAAAGATTGGATTATTGGAGTTCTCGT  
GTTATTAGTATCGGGTTACTTTTTTAAACAATAGGGATTCTATCTGGTGCAGTATGGGCTA  
ATGAAGCATGGGGATCTTATTGGAATTGGGACCCTAAAGAACTTGGGCATTTATTACT  
TGGACAATATACGCGATTTATTACACACTAGAACAAACCAAAAATTGGCAAGGTACGAA  
TTCCGCAATAGTTGCTTCCATAGGATTTTTTATAATTTGGATATGCTATTTTGGGGTTAAT  
TTATTAGGAATCGGACTACATAGTTATGGTTCATTTCATATTAAGT-----

-----ATGATAAAGGAGTACCCCGAGATAAAT  
TTACAAAAGGTTTCGTATAGGGATCCACAAAGAAACAGTACAATTGGTCAAAATGCATA  
ATGAATATAATTTAAATAGTATTTTGCATTTCTCGACAAATATAATCTGTTTCGCTATTCTA  
AGTGGTTATTTTATTCTGAGTAATAAAAAACTTGTCAATCTTAATTCTTGGATTCAGGAA  
TTCTTATATAACTTAAGTGACACAATAAAAGCCTTTTCGATTCTTTTAGTACCGGATTTAT  
GGATCGGATTCATTCACACATGGTTGGGAATTAATGATTGGTTCGGTATAACAACGATT  
TTGGATTGGCACATAATGATCAAATTATATCCGGTCTTGTTCCTACTTTTCCAGTTATTCT  
AGATACAATTGTAAAATATTGGATTTTCCATTATTTAAATCGTGTATCTCCGTCCTGGTA  
GTGATTTATCATTCGATGAATGAAATGCCATTGGTGTTCAAAAGTACCTTTTCGGAGT  
CCTGGAGAGGAAGATGCAGTTTGGGTTGACGTAAAC---CGACTTTATCGAGAAAGATT  
ACTTTTTTTAGGCCAAGAGGTTGATAGCGAGATCTCGAATCAACTTGTTGGTCTTATGG  
TATATCTTAGTATAGAGGATGATACTAAGGATCTTATTTGTTTATAAACTCCCCGGTGG  
ATGGGTAATACCTGGAATCGCTATTTACGATACTATGCAATTTGTTCCACCTGATGTACAT  
ACAATATGCATGGGATTAGCCGCTTCAATGGGATCTTTCATTCTAGTCGGAGGAGAAAT  
TACCAAACGTCTAGCATTCCCTCACGCTAGGGTTATGATTCACCAACCTGCTAGTCTTT  
TTATGAGGCACAAGCAGGCGAATTCATCCTGGAAGCAGAAGAAGTACTGAAACTTCGC  
GAAACCCTGACAAGGGTTTATGTACAAAGAACCGGTAACCCCTTATGGGTTGTATCCG





G TTCCTCTTTATTTCTATCGCAACAAGATGGACTTTACCGAGGCTGAGAATGGACCAAC  
TATTAATCTTGGATGGAAATTTCTTTTACCTATTTCTCTTGGGAATCTATTATTGACAAC  
TTCTTACCAACTTGTTCCTCATGATCTGGCATGTACAGAATGAAGTTTTTCATTCTCGA  
TTCTACGAGAATTTTTATGAAAGCGTTTCATTTGCTTCTCTTCAATGGAAGTTTTCATTTT  
ACCAGAATGTATTCTCATTTTTGGCCTAATCTTCTTCTGATGATCGATTCAACCTCTGAT  
CAAAAAGATAGACCTTGGTTCTATTTTCATCTCTTCAACAAGTTTAGTAATGAGCATAAC  
AGCCCTATTGTTCCGATGGAGAGAAGAACCTATGATTAGCTTTTCGGGAAATTTCCAAA  
CGAACAATTTCAACGAAATCTTTCAATTTCTTATTTTACTATCTTCAACTTTATGTATTCC  
TCTATCCGTAGAGTACATTGAATGTACAGAAATGGCTATAACAGAGTTTCTGTTATTCGT  
ATTAACAGCTACTCTAGGAGGAATGTTTTTATGTGGTGCTAACGATTCAATAACTATCTT  
TG TAGCTCTAGAATGTTTCAGTTTATGCTCCTACCTATTATCAGGATATACCAAGAGAGA  
TG TACGGTCTAATGAGGCTACTACGAAATATTTACTCATGGGCGGGGCGAGCTCTTCTAT  
TCTGGTTCATGGTTTCTCTTGGCTCTATGGTTTATCCGGGGGGGAGATCGAGCTTCAAG  
AGATAGTGAATGGTCTTATCAATACACAAATGTATAACTCCCAGGAATTTCAATTGCGC  
TTATATTCATCACTGTAGGAATTGGGTTCAAGCTTTCCCTAGCCCCTTTTTCATCAATGGA  
CTCCTGACGTATACGAAGGATCTCCCACTCCAGTCGTTGCTTTTTCTTTCTGTTACTTCGA  
AAGTAGCTGCTTTAGCTTTAGCCACGCGAATTTTCGATATTCCTTTTTATTTCTCATCAA  
TGAATGGCATCTTCTTCTGGAAATCCTAGCTATTCTTAGCATGATAGTGGGGAATCTCAT  
TGCTATTACTCAAACAAGCATGAAACGTATGCTTGCCTATTCGTCCATCGGTCAAATCG  
GATATGTAATTATTGGCATAATTGTTGGAGACTCAAATGATGGATATGCAAGCATGATAA  
CTTATATGCTGTTTTATATCGCCATGAATCTAGGAACTTTTGCTCGCATTGTATTGTTTGG  
TCTACGTACCGGAACTGATAACATTCGAGATTATGCAGGATTATACACGAAAGATCCTTT  
TTTGGCTCTCTTTAGCCCTATGTCTCTTATCCCTAGGAGGTCTTCTCCACTAGCAGG  
TTTTTTCGGAAAACCTCCATCTATTCTGGTGTGGATGGCAGGCAGGCCTTTTATTTCTTGGT  
TTCAATAGGACTCCTTACGAGCGTTGTTTCTATCTACTATTATCTCAAATAATCAAGTTA  
TTAATGAGTGGACGAAACCAAGAAATAACCCCTCACGTGCGAAATTATAGAAAATCCA  
CTTTAAGATCAAACAATTCCATCGAATTGAGTATGACTGTATGTGTGATAGCATCTACTA  
TACTAGGAATATCAATGAACCCAATCTTGCAATTGCTCAGGATACCCTCTTTATGTTTC  
TGCTTTACGAATATGATATTTTCTGGGCATTTCTCATAATATCAAGTGTATTCCCTATCTTG  
GCATTTCTTGTCTGGAGTTTTAGCTCCCCTTAGTGAAGGACCGGAGAAGCTATCTAG  
TTATGAATCGGGTATAGAACCTATAGGGGATGCTTGGGTACAATCCGAATTCGCTATTA  
TATGTTTGCTTTAGTTTTTGTGTTTTTGTATGTTGAAACCGTCTTTCTTTATCCGTGGGCA  
ATGAGTTTTGATGTATTAGGTGTATCCGTATTTATAGAAGCTTTAATTTTTGTGCTTATCCT  
AATTGTTGGTTTTAGTTTTATGCATGGCGAAAAGGAGCATTGGAATGGTCT-----

-----ATGTGTATAIGTTTATT  
AGAACTCCTTATAATGACCTATGTATTCTGTTATCATTTTCAATTGGACGATCCATTAATC  
CAAATTGAAGATGATTTTTAAATGGATAAATGTTTTTGATTTTCATTGGAGACTCGGAATT  
GATGGACTTTCGATAGGACCTATTTTACTTACAGGATTTATCACTACTTTAGCTACTTTAG  
CGGCTTGGCCAGTCACTCGAGATTCCAGATTGTTTCATTTCTGATGTTAGCAATGTATA  
GCGGTCAAATAGGATCATTTGCTTCCCGAGACCTTTTACTTTTTTTTTATGATGTGGGAGT  
TAGAATTAATCCAGTTTTATTTACTTTTTATGCATGTGGGGGGGAAAAACGTCTGTATT  
CAGCTACAAAGTTTTATTTTATATACTGCTGGGGGTTCTATTTTTCTTTTAAATAGGAGTTTT  
AGGTATGGGTTTATATGGCTCCAATGAACCCACTTTAAATTTTGAAACATTAGCTAATCA  
ATCATATCCCCTAGCATTAGAAATACTCTTATATTTTGGGTTCCCTATTGCTTTTGTGCTGTC

AAATTACCAATAATACCCCTACATACATGGTTACCTGATACACATGGGGAAGCACATTAC  
AGTACATGTATGCTTCTAGCCGGAATCTTATTAATAAATGGGAGCATATGGCTTGATTTCGT  
ATTAATATGGAATTCTTATCCCATGCTCATTCTCTATTTTCACCATGGTTGGTAATTGTCG  
GAACTATACAAATAATTTATGCGGCTTTAACCTCTTTCGGTCAACGAAATTTAAAAAAG  
AGAATAGCCTATTCTTCCGTATCTCACATGGGGTTCATAATTATAGGTATTGGTTCGTAA  
CCAACACAGGGCTTAACGGAGCTATTTTACAATTACTCTCCCATGGATTTATTGGTGCTG  
CCTTTTTTTTCTTGGGGGAACAAGTTGTGACAGAATACGACTTGTTTATCTTGACGAA  
ATGGGAGGAATTTCTATCCCAATGCCAAAATTTTACTATGTTTAGTAGTTTCTCAATG  
GCTTCTCTTGCAATTGCCCGGAATGAGTGGTTTTGTTGCGGAATTAATAGTATTTTTGGGA  
ATAATTAGTAGTCAAAAATATCTTTAATGACAAAATACTAATTACTTTTTGTTATGGCAA  
TTGGAATCATATTAACCTCCTATTTATTTATCTATGTTACGGCAGATGTTCTATGGATAC  
AAATTATTCAATCTTTCAAACTCTATTTTTGTAGACTCTGGCCCACGAGAACTCTTTGTT  
TCAATCTGTGTATTTCTACCCGTA TAGCGATTGGTCTCTATCCTGATTTAGTAATTTCT  
TATCTGTTGATAAGGTGCAAGAAATTGTATCCAATTACTATCGAATGATGGTTGAGC  
ATGTACTTTTTTTGAGTGCATATTTGTTTTCTCTTGGTATTTATGGATTGATAACAAGTCG  
AAACATGGTTAGAGCACTTATGTGTCTTGAGCTGATACTAAATCCGTTAATATCAATCT  
TGTCACATTTTCGGATTTATTTGATAGTCGACAATTAAGGAGATATTTTCTCCATTTTT  
GTTATAGCTATTGCAGCGGCTGAAGCAGCTATTGGTCTAGCTATTGTCTCATCGATCTAT  
CGTAACAGAACTCAACACGTATTAATCAATCCAATTTGTTGAATAAAAATGGAACATAC  
ATATCAATATGCCTGGATAATACCTCTACTTCCACTACCTATTACTATGCTTATAGGAGTT  
GGACTTCTGCTTTTTTCCAAGAGCAACAAAAACAATCGTCGTATGTGGGCTTTTTCTAG  
TATTTACTCCTAAGTATAGGGCTTATTTTTTCGGCCAATCTGGCCTTTCAACAAATAAAT  
GGAAGTTTTATTTATCAATATCTATGGTCTTGGACCATCAATAATGATTTTTCCCTAGAGT  
TTGGCTACTTTATTGATCCACTTACTTCCATTATGTTAATTTAATCACTACTGTTGGAATT  
ATGGTTCTTATCTATAGTGATAATTATATGTCTCATGATCAGGGATATTTGAGGTTTTTTCG  
TTATCTGAGTTTTTTTTAATGCTTCAATGTTGGGCTTAGTTACTAGTTCTAATTTGATACAA  
ATTTATATTTTTTGGGAATTGGTAGGAATGTGTTCAATTTATTAATTGGGTTTTGGTTCA  
CCCGACCAAGTGCAGCAAGTGCTTGCCAAAAGCTTTTATAACCAATCGTGTAGGGGA  
TTTTGGTTTTGTTATTAGGAATTTAGGTTTTTATTGGATAACGGGAAGTTTCGAATTCG  
TGATTTGTTTGAAATATTTAATAAG---CAGGAAAATTCCTTATTTCCA ACTCTGTGTGCCT  
TTCTATTATTCCTTGGTGCAATTGCTAAATCCGCACAATCCCTCTTCATGTATGGTTACC  
CGATGCTATGGAGGGTCCACTCCGATTTCCGCTCTTATACATGCTGCTACTATGGTAGC  
TGCGGGAATTTTTCTTGTGGCTAGACTTCTTCCCTCTTTTTATAGGCATACCTTATATAATG  
AATCTTATTTTCATGTATAGGTGTAATAACACTACTATTAGGAGCAACTTTGGCTCTTGCT  
CAAAGAGATATTAAGAAGTTTAGCCTATTCTACAATGTCTCAATTGGGTTATATTATG  
TTAGCCCTAGGACTAGGATCTTATAGAGCTGCTTTATTTCAATTAATAACTCATGCGTATT  
CTAAAGCATTATTATTTTTGGGCTCTGGATCTATTATTCAATCAATGGAACCTCTTGTTGG  
ATATTCACCTGAAAAAGCCAGAATATGGTTCCTTATGGGTGGTTTAAACAAGATATATTCC  
AATTACAAGA ACTACATTTTTATTAGGTACACTTTCTCTTTGTGGTGTCCACCTCTGGC  
TTGTTTTTGGTCTAAAGATGAAATTCCTTAGTGAAACTTGGCTATATTCACCCACTTTTCG  
AGTAATAGCTTATTTTACAGCAGGACTTACAGCCTTTTATATGTTTCGGGTCTACTTACTT  
ACCTTTGAGGGGAATTTGCATGTTCAATTTCAAATACAGTGGAACCTCAAATACTTC  
AGCCTATTCGATATCCCTATGGGGAAAAGCAGAACCTAAATCAGTA-----AATGTCCTT  
TTCTCAAAAATCAAGAATCAAAATAAAAAAAGT-----AATTCTATGTATCCTCATGAAGC

CGATAATACTATGTTATTTCCCTTTGCTTATAATTGGTACTATTTACTTTCTTCATTGGAGGAA  
TTGGAATCCCTTTAGACTTGAATTTATTATCCAAATGGTTAGCTCCATCACAAAATCTTTT  
ACATCCAAATTCAGAAGCGTCCATAGATTTATATGAATTTTTTACAAATGCAAGTTTTTC  
AGTAGGTATATCTTTTGGAGGAATATCTTTAGCATCCCTTTTTTACGGATCTCCTTATTCA  
CCTTTGCAAAATTTAGAATTAATGAATTCATTTCTACTCTCTTTGGACAAAATTGCCAAT  
GCTGTATAACAATTGGTCCTATAATCGCGGTTATATCGAATTTATTCTATACAAACATAGTCA  
TTCACAATGTCAGAAAATTAGCTAAATTCACTTATTTTTGGGATCGATACATAAATTGATG  
GCATTATAAACGGTGTGGCGTTGTGAGTTTCTTTGGAGGTGAAGCACTCAAATATTTA  
TTAGGAGCAGGGCGAATCTCATCTATCTCTTTTTCTCTTTATCTTCTATATTAATATTAAT  
TTCTGTCTTCTTTATGGATTTAACTGGACCAATACATGATATTCTTGTAGTATTTCTCGGA  
TTAGTTCTTATATTAGGGGGTCTCGGAGTAGTTTTATTTACCAATACAATTTATTCTGCCT  
TTTTCTTTGGGATTGGTTCTTATTTGCGTATCTCTATTCTATATTTTATTGAACTCCTATTTT  
GTAGCTGCTGCACAGCTGCTTATTTATGTGGGGGCTATAAATGTGTTAATCTTATTTGCT  
GTAATGTTTATGAAAGGCTCAGAATATCCAATGATTTACGCTTTTGGACTGTGGGAGAT  
GGGGTACTGCCCTGGTTTGTACCTGTATTCTTTTTTTACTAATTAATACTATTTTCAGATA  
CATCATGGTACGGGATTCTTTGGACTACAAAATCAAACCACATTATAGAACAGGACCTT  
ATAAGTAATGTTCAACAGATTGGAATTCATTTATCAACAGATTTTTTTCTTCCATTTGAA  
CTAATTTCTATAATCTTTTAGTTGCCTTAATAGGTGCAATTACTATGGCTCGTCAAATGA  
GTGGACCAACTAGAAGAAACGATCTTATGATAGTCAATATGGGTCCCTCAGCACCCATCG  
ATGCATGGTGTCTTCGATTAATCGTTACTTTAGATGGGGAAGATGTTATTGACTGTGAA  
CCTATACTAGGTTATTTACACAGAGGCATGGAAAAAATTGCAGAAAACCGAACAATTGT  
GCAATATTTACCTTATGTAACGCGTTGGGATTATCTAGCAACTATGTTTACAGAAGCAAT  
AACTGTAAATGCTCCCGAACAATTAGGAAATATTCAAGTACCTCAAAGAGCCAGCTATA  
TAAGAGTCATTATGTTAGAGTTAAGTCGTATAGCTTCTCACTTGTATGGCTTGGCCCTT  
TTATGGCAGATATTGGTGCACAGACTCCCTTTTTCTATATTTTTTAGAGAGAGAGAATTA  
TATATGATCTATTTGAAGCTGCTACAGGTATGCGAATGATGCATAATTATTTTCGTATTGG  
AGGAGTAGCTGCTGATTTACCTTATGGTTGGATAGATAAATGTTTAGATTTTTGTGATTAT  
TTTTTAAACAGGAATTGACGAATATGAAAACTTATTACACGAAATCCCATTTTTTTTGG  
ACGAGTGGAAGGCGTAGGTATTATTAGTGGAGAAGAAGCAATAAATTGGGGTTTGTCA  
GGACCCATGTTACGAGGTTCCGGAGTCTCCTGGGATCTCCGTAAAGTTGACCAATATGA  
ATGTTATAATGAATTTGATTGGGAAGTCCAATGGCAAAAAGAAGGAGATTCTTTAGCTC  
GTTATTTAGTACGAATGAGTGAATGAGGGAATCGATAAAAATTATTCAACAGGCTTTA  
GAAGGAATTCAGGCGGACCTTATGAAAATTTAGAAGTCCGACGT--GATAGAACAAA  
GGATTCCGAATGGAATGATTTTGAATATAGATTCATTAGTAAAAAACCTTCGCCAATTT  
TGAATTGTCAAAACAAGAACTTTATGTAAGAGTAGAAGCTCCAAAAGGAGAATTGGGC  
ATTTTTCTGATAGGCGATCAGAACGTTTTCCCTTGGAGATGGAAAATTCGTCTCCAGG  
TTTTATCAATTTACAAATTTGCCTCAGCTAGTTAAAAAGATGAAATTGGCTGATATCAT  
GACGATACTAGGTAGTATAGATATTATTATGGGAGAAGTTGATCGTATGTTTCCTATGGTG  
ACTGGATTCATGAATTATGGCCAACAACAGTACGAGCTGCAAGGTATATCGGTCAAG  
GTTTTATGATTACCTTATCTCATACAAATCGGTTACCTGTAAC TATTCAATATCCTTATGA  
AAAATCAATCACCTCAGAGCGTTTTCCGAGGTGCAATACATTTCGAATTCGATAAATGTA  
TCGCTTGTGAAGTCTGTGTTTCGTGTATGTCCTATAAATCTACCTGTTGTAGATTGGAAAT  
TGGAAACAAATATTA AAAAGAAACAATTGCTTAATTATAGTATTGATTTCCGGGGTATGTA  
TATTTTGTGGGAATTGTGTTGAGTATTGTCCAACAACACTGTTTATCGATGACTGAGGAAT

ATGAACTTTCTGCTTATGATCGCCACGAATTGAATTATAATCAAATTGCATTGGGTCGTT  
TACCAATATCTATAATGGGAGATTACTCCATTCAACCTATTATGAATTCAAAAATAGACA  
AGGATAATCCTCTTGAT-----ATGCAGAGTCATTTATCTGCTTGGCTAGTCAA  
GTATGAGCTTGTTTCATAGATCCTTGGGCTTTGATTATCAAGGAATAGAGACTTTACAAAT  
AAAACCCGAAGATTGGGATTCCATTGCTGTCATTTTATATGTGTATGGTTACAATTACTT  
ACGTTCTCAGTGTGCTTATGATGTGCGACCAGGTGGATTTTATAGCTAGTGTATATCATCT  
TACGAGAATACAGTATGGGGTTGATCAACCGGAGGAAGTATGTATAAAAGTTTTTGTCC  
CAAGGGAAAATCCTATAGTCCCATCTGTTTTCTGGGTTTGGAGGAGTGCAGATTTTCAA  
GAACGTGAATCCTATGATATGTTAGGAATTTCTTATGATAATCATCCACGCCTTAAACGTA  
TTTTGATGCCTGAAAGTTGGATAGGTTGGCCTTTACGTAAGGACTATATTACTCCCAATT  
TCTATGAAATACAAGATGCTCAT-----  
-----ATGGTCTTAGCTCATGAATATTCAAATAATAAA-----  
AAAGAGTCTATTGAGACAGTTATGAATTTGATTGAGTTGCCGTCACTTGACCAAACAAT  
ACCCAATTCAGTATTTCAACTACCTTGAATGATCTTTCAAATTGGTCAAGACTCTCGA  
GTTTATGGCCACTTTTATATGGTACCAGTTGTTGTTTTATTGAATTTGCTGCATTAATAGG  
CTCGCGATTTGACTTTGATCGTTATGGATTAGTACCAAGATCAAGTCCTAGGCAAGCGG  
ACCTAATTTAACAGCCGGCACAGTAACAATGAAAATGGCTCCTTCTTTAGTCAGATTA  
TATGAACAAATGCCTGAACCTAAATATGTCATTGCCATGGGGGCTGTACTATTACGGG  
AGGGATGTTTAGTACCGATTCTTATAGTACCGTTCCGGGAGTCGATAAGTTAATTCCAGT  
TGATGTCTATTTGCCGGGTTGCCCGCCTAAACCAGAGGCAGTTATAGATGCAATAACGA  
AACTTCGTAAGAAGATATCTCGAGAAATCTATGAAGATAGAATTGGTTATCAA---GAAA  
ATCGATGTTTTACTACCAATCATAAATTTAATGTTCAACGCAGTATTCATACTGGAAATTA  
CAATCAAGAATTGCTTTATCAATCATCATCTACTTCAGAAATAACTGAA-----TTATTTAG  
ATCCAAAAGTTCAATATCTTCACAAAAAAGAGTCAATATGCAAAATAGAAATACTTTTT  
TTTGGGTAAAGCAGCAGATGACTCGATTTATTTCTGTATCGATCGGGATATATGTAATAA  
CTCAGACATCTATTGCAAGTGCATATCCATTTTTGCGCAGCAGGGTTTTGAAAATCCA  
CGAGAAGCAACGGGACGAATTGTTTGTGCCAATTGTCATTTAGCTAGTAAACCCGTGG  
ATATTGAGGTTCCGCAATCTGTGCTTCTGATACTGTATTTGAAGCAGTAGTTAGAATTC  
CTTATGATACACAAGTGAAACAAGTTCTTGCTAATGGCAAAAAAGGTGGTTTGAATGT  
GGGGGCTGTTCTTATTTTACCTGAGGGATTTGAATTAGCCCCTGCCGATCGTATTTCTCC  
TGAGCTGAAAGAAAAGATCGGCAATATTTCTTTTCAGAGTTATAGTCCGACCAAAAAA  
AATATTATTGTCGTGGGTCCAGTGCCTGGTCAGAAAAATAGGGAAATAGTCTTCCCTAT  
TCTTTCTCCAGACCCCGCAACTAATAAGGACGCTTATTTCTTAAAATATCCTATATACGT  
AGGGGGAAACAGGGGACGGGGTCAGATTTATCCTGATGGCAGCAAGAGTAACAATAC  
TGTCTATAATGCTACATCCGCAGGTGTAATAAGCAAAATAGTACGTAAAGAGAAAAAGG  
GATATGAAATAACCATAACTGATCCATCGGATGGGCATGAAGTGATTGATATTATACCTC  
CAGGACCGGAACCTTCTGTTTTCAGAAGGTGAGTCTATTAAACTTGATCAACTATTAACG  
AGTAATCCAAATGTGGGGGGATTTGGTTCAGGCAGATGCTGAGATAGTCCTTCAAGATAC  
CGCACGCGTCCAAGGTCTTTTGTCTTCTTAGCATCAGTTGTTCTAGCACAAATCTTTTT  
AGTTCTTAAAAAGAAACAGTTTAAAAGGTTTCAGTTGTTTCGAAATGAATTTTATGAAA  
AAAGTTTATGACTGGTTTCGAAGAGCGTCTTGAGATTCAGGCGATTGCAGATGATATAAC  
TAGTAAATATGTTCCCTCACGTGAACATATTTTATTGTCTAGGGGAATCACACTTAC  
TTGTTTTTTAGTACAAGTAGCTACGGGTTTTGCTATGACTTTTTTATTATCGCCCAACTGTT  
ATAGAGGCCTTTTCTCTGTTCATAACATAATGACTGAGGTGAACTTTGGTTGGTTAATC

CGATCAGTTCATCGATGGTCAGCAAGTATGATGGTCTAATGATGATTTTACACGTATTT  
CGTGTGTATCTCACTGGTGGATTTAAAAACCTCGGGAATTAACCTGGGTAACCGGTGT  
AGTTCTGGGTGTATTGACTGCATCTTTTGGTGTAACTGGTTATTCGTTACCTTGGGACCA  
AATTGGTTATTGGGCAGTTAAAATTGTGACAGGTGTACCTGACGCCATTCCTGTAATAG  
GAGCACCGTTAGTAGAGTTATTACGAGGAAGTGCTAGTGTGGGTCAATCCACTTTGACT  
CGTTTTTATAGTTTACACACTTTTGTATTACCGCTGCTTACTGCTGTATTTATGTTAATGC  
ACTTCTTAATGATACGTAAGCAAGGTATTTCAAGTCCTTAATCCCAATAACAAAGAAA  
CCTGACTTGAATGATCCTGTATTAAGAGCTAAATTGGCTAAAGGGATGGGACATAATTAT  
TACGGAGAACCCGCATGGCCAAATGATCTTTTATATATTTTTCCAGTAGTTATTTTGGGT  
ACTATAGCGTGTAAACGTAGGCTTAGCGGTGCTAGAACCTTCAATGATTGGTGAACCGGC  
GGATCCATTTGCAACTCCTTTGGAGATATTACCTGAATGGTACTTCTTTCTGTATTTCA  
AATACTTCGCACAGTACCTAATAAGTTATTGGGTGTTCTTTAATGGCTTCAGTACCAGC  
GGGATTATTAACCGTACCTTTTTTGGAAAATGTCAATAAATTCCAAAATCCATTTTCGTCG  
ACCAGTAGCTACAACAGTCTTTTTGATTGGTACTGTAGTAGCAATTTGGTTAGGTATTGG  
AGCAACATTACCTATTGATAAATCTCTTACTTTAGGTCTTTTTATGATTGAAGTTCTTCTA  
TTTGGAAATTGTGTTAGGTCTAATTCCTATTACTTTGGCAGGATTATTTGTAACGGCGTATT  
TACAATACAGACGGGGTGATCAACTGGACCTTATGCTTACTATAACTAGTTATTTTCGGTT  
TTCTGTTGGCTGCTTCAACTATAACCTCAGCGCTTTTCATTGGTTTGAACAAAATACGTC  
TTATTATGGATATAGTAAGTCTCGCTTGGGCTGCTTTAATGGTAGTCTTTACATTTTCTCT  
TTCCTAGTAGTCTGGGGTAGGAGTGGACTTATGATTATTAGTTCGCCGGAACCAGAAG  
TTAAAATTTTGGTGGATAGGAATCCCGTAAAAACGTCTTTTGAGCAATGGGCCAAACCC  
GGCCATTTCTCAAGAACAATAGCCAAGGGCCCTGAAACTACCACTTGGATCTGGAACC  
TACATGCTGATGCTCACGATTTTGATAGTCATACCAATGATTTGGAGGAGATCTCTCGAA  
AAGTATTTAGTGCTCATTTTCGGTCAACTCTCCATTATCTTTCTTTGGCTGAGTGGCATGT  
ACTTCCATGGCGCTCGTTTTTCTAATTATGAAGCATGGCTAAGTGATCCAACCTCACATTG  
CACCTAGTGCCAGGTGGTTTGGCCAATAGTGGGTCAAGAAATATTAATGGTGATGTG  
GGCGGCGGTTTCCGAGGAATAACAATAACCTCTGGGTTTTTTCAGCTTTGGCGCGCATC  
TGGAATAACTAGTGAATTACAACCTATATTGTACTGCAATTGGTGCATTGGTCTTTTCAGC  
ATTAATGCTTTTTGCGGGTTGGTTCCATTATCACAAAGCTGCCCCAAAACCTGGCTTGGT  
TCCAAGATGTAGAATCTATGTTGAATCACCACTTAGCGGGGTTACTAGGACTTGGTCTCT  
CTCTCTTGGGCGGGACACCAAATTCATGTATCTTTGCCGATTAACCAATTTCTTAATGCT  
GGAGTAGATCCTAAGGAGATAACCACTTCCTCATGAATTTATCTTGAATCGGGATCTTTTG  
GCTCAGCTTTATCCTAGTTTTGCTGAGGGAGCAACTCCATTTTTTACCTTGAATTGGTCA  
AAATACTCAGATTTTCTGAGTTTTTCGTGGAGGATTAGATCCAGTAACAGGAGGTCTATG  
GCTGAGCGATATTGCACACCATCATTTAGCCATTGCTATTCTTTTCCTGATAGCTGGTCAT  
ATGTATAGGACCAACTGGGGTATTGGTCATGGCTTGAAAGACATTTTAGAGGCTCATAA  
AGGTCCATTTACCGGTCAGGGCCATAAAGGTCTTTATGAAATCCTAACAACGTCATGGC  
ATGCTCAATTAGCTATTAACCTGGCTATGTTAGGCTCTTTAACCATTATTGTAGCTACCA  
CATGTACGCCATGCCCCCTTATCCATACCTAGCTACTGACTATGGTACACAACCTTTCATT  
GTTACACATCATATGTGGATTGGTGGATTTCTCATAGTTGGAGCTGCTGCACATGCAG  
CCATTTTTATGGTAAGAGACTACGATCCAACCTACTCGATAACAACGATCTATTAGATCGTG  
TCCTTAGACACCGTGATGCAATCATATCACATCTGAACTGGGTCTGTATATTTCTAGGTT  
TTCACAGTTTTCGGCTTGTATATTCATAATGATACCATGAGTGCTTTAGGGCGTCCCTCAAG  
ATATGTTTTTCAGATACCGCTATAACAATTACAACCCATCTTTGCACAATGGATACAAAATA

CCCATGCTTTAGCACCTGGTACAACCGCTCCTGGTGCAACAGCAAGTACGAGCTTAAC  
TTGGGGGGGAGGTGACTTAGTAGCAGTAGGCGGAAAAGTAGCTTTATTACCTATTCCGT  
TAGGTACCGCAGACTTTTTGGTTCATCACATTCATGCATTTACGATCCATGTGACTGTAT  
TGATACTACTAAAAGGTGTTCTATTTGCTCGTAGCTCCCGTTTAATACCTGATAAAGCAA  
ATCTTGGTTTTCGTTTTCCCTTGTGATGGTCCTGGAAGAGGGGGTACATGTCAAGTATCC  
GCATGGGATCATGTTTTCTTAGGTCTATTCTGGATGTACAATTCGATTTTCGATAGTCATTT  
TCCATTTTCAGTTGGAAAATGCAATCGGATGTTTGGGGCACTGTAAGTGATCAAGGGGT  
CGTAACTCATATCACAGGCGGAAACTTTGCACAGAGTCCACTACTATTAATGGCTGGC  
TTCGAGACTTTTTATGGGCACAGGCAGTCAAGTAATTCAGTCTTATGGTTCTTCATTAT  
CTGCATATGGTCTTTTCTTCTTAGGTGCTCATTTTGTATGGGCTTTCAGCTTAATGTTTCT  
ATTCAGTGGTTCGTGGTTATTGGCAAGAACTTATTGAATCTATTGTTTGGGCACATAACA  
AATAAAAGTTGCTCCTGCTACTCAGCCTAGAGCCTTGAGTATTATAACAAGGACGTGCT  
GTAGGAGTAACCCATTACCTTCTGGGTGGAATTGCCACAACATGGGCATTCTTCTTAGC  
AAGAATTATTTAGTAGGAATGGCAGTAAGATTTCCAAGGTTTAGCCAAGGTTTAGCTC  
AGGACCCCACTACTCGTCGTATTTGGTTTGGTATTGCTACCGCGCATGACTTCGAGAGT  
CATGATGATATTACTGAGGAACGTCTTTATCAGAACATTTTTGCTTCTCACTTTGGTCAG  
TTAGCAATAATCTTTCTGTGGACGTCCGAAATTTGTTTCACGTAGCTTGGCAAGGAAA  
CTTTGAGTTATGGGGAAAGGACCCTTTACATGTAAGACCCATTGCTCATGCAATTTGGG  
ATCCTCATTTTGGTCAACCGGCTGTAGAAGCCTTTACTAGAGGAGGTGCTCTCGGCCA  
GTTAACATTGCTTATTCTGGTGTATTATCAGTGGTGGTATAACAATCGGATTACGCACCAAC  
GAGGATCTTTATACTGGAGCTCTTTTTCTATTATTTCTTTCTGCTATCTTTAATAGCAG  
GTTGGTTACACCTACAACCTAAATGGAAACCAAGTGTTCGTGGTTCAAAAATGCCGA  
ATCTCGTCTTAATCATCATTTGTCAGGACTTTTCGGAGTAAGTTCCTTGGCTTGGGCAG  
GACATTTAGTTCATGTAGCAATTCCTGCATCGAGGGGGCAATATGTCAGATGGAATAATT  
TCTTAGATGTATTACCATATCCGCAAGGGTTGGGCCCACTTTTTACAGGTCAATGGAATC  
TTTATGCCAAAACCCGGATTCTAGTAGTCATTTATTTGGTACCTCCGAAGGAGCGGGA  
ACGGCTATTTAACTCTTCTTGGTGGATTCCATCCACAACCCAAAGTTTATGGCTAACT  
GATATGGCTCATCATCATTTAGCTATTGCATTTATTTTTCTGATTGCTGGGCATATGTATAG  
AACTAACTTTGGGATTGGGCATAGTATAAAGATCTTTTAGAAGCGCATAACCCACCGG  
GAGGTGCGATTAGGACGTGGTCATAAAGGTCTTTATGACACAATCAATAATCCCTTCATT  
TTCAATTAGGTCTTGGCTCTAGCTTCTTTAGGTGTTATTACTTCTTTAGTAGCTCAACACAT  
GTACGCCTTACCTGCTTATGCATTTATAGCCCAAGACTTTACTACTCAAGCTGCGTTATAT  
ACTCATCACCAATACATCGCAGGGTTCATCATGACAGGAGCATTTGCTCATGGAGCTAT  
ATTCTTCATTAGAGATTATAATCCGGAACAGAATGAAGATAATGTATTGGCAAGAATGTT  
AGCCATAAAGAAGCGATCATATCTCATTAAAGTTGGGCCAGCTTGTTTTTAGGATTCCA  
TACTTTAGGCCTTTATGTTTATAACGACGTGATGCTTGCCTTTGGTACTCCGGAAAAAC  
AAATCTTAATTGAACCTATATTTGCCCAATGGATACAATCCGCTCATGGTAAGACTTCAT  
ATGGTTTTGATGTACTCTTATCTTCAACGACTGGCCCCGCATTTAATGCCGGTAAAAGCA  
TATGGTTACCTGGCTGGTTGAATGCTGTTAATGAG-----AGTAGTAATTCACTCTTCTTAA  
CGATAGGTCCTGGAGATTTCTTGGTTCATCATGCTATTGCTCTAGGTTTGCATACAACTA  
CCTTGATTTTAGTAAAAGGTGCTTTAGATGCACGTGGTTCTAAATTAATGCCGGATAAA  
AAGGATTCGGTTATAGTTTTCTTTCGACGGCCCGGACGAGGTGGTACTTGTGATAT  
TTCGGCTTGGGACGCTTTTTATTTGGCAGTTTTCTGGATGTTAAATACCATTGGATGGGT  
TACTTTTTATTGGCATTGGAAACACATTACACTATGGCAAGGTAATGTTTCACAATTTAA

TGAATCCTCCACTTATTTGATGGGATGGTTAAGAGATTATCTATGGTTAAACTCTTCACA  
ACTTATCAACGGATATAACCCTTTTGGTATGAATAGTTTATCGGTTTGGGCCTGGATGTT  
CTTATTTGGACATCTTGTCTGGGCTACTGGCTTTAIGTTTTTAATTCCTGGCGCGGTTAT  
TGGCAGGAATTAATTGAAACTTTAGCATGGGCTCATGAGCGCACACCTTTAGCAAATTT  
GATTCGATGGAGAGATAAACCAAGTGGCCCTTTCTATTGTCCAAGCAAGATTGGTCCGAT  
TGGCCCATTTTTCTGTAGGTTATATATTCACCTATGCGGCTTTCTTGATTGCCTCTACATC  
AGGAAAATTTGGTATGTCACATTCAGTCAAAATTTATGATACGTGTATAGGATGTACTCA  
ATGTGTCCGTGCCTGCCCTACAGATGTTTTGGAAATGATACCTGGGATGGCTGTAAAT  
CTAAGCAAATTGCTTCCGCTCCAAGAACTGAAGACTGTGTAGGTTGTAAGAGATGTGA  
ATCCGCTTGTCCAACAGATTTTTTGGAGTGTCCGGGTTATTTAGGAAGTGAGACAACTC  
GGAGTATGGCACTAGCTTACATGACAGATTTCAACTTACCCTCTATTTTTGTGCCTTTAG  
TAGGCCTAGTATTTCCGGCATTGCAATGGCTTCTTTATTTCTTTATGTTCAAAAAATA  
AGATTGTAATGCAAGATCTAAAAACATATCTCTGTGGCACCTGTACTGAGTACTCTAT  
GGTTTGCTATTTTAGCAGGCTTATTGATAGAAATTAATCGTTTATCCCGGATGCTTTGTT  
ATTCCCTTTTTTT-----ATGACTGCAATTTTAGAGAGACGCGAAAGTACAAACCTATGGG  
CTCGTTTCTGCAACTGGGTAACCAGCACTGAAAACCGTCTTTACATCGGATGGTTTGGT  
GTTTTGATGATCCCTACCCTATTGACTGCAACTTCTGTATTTATTATCGCCTTCATTGCTG  
CTCCTCCTGTAGATATTGATGGTATTTCGTGAACCTGTTTCTGGATCTCTACTTTACGGAA  
ACAACATATTTCTGGTGCCGTTATTCCTACTTCTGCAGCTATTGGTTTACATTTTTATCC  
AATCTGGGAAGCAGCATCTGTTGACGAATGGTTATACAATGGTGGTCCTTACGAACTAA  
TCGTTCTACACTTCTTACTTGGTGTAGCTTGTACATGGGTTCGTGAGTGGGAACCTTAGT  
TTCCGTTTGGGTATGCGTCCTTGGATTGCTGTTGCATATTCAGCTCCAGTAGCAGCTGCT  
ACTGCTGTTTTCTTGATCTACCCTATTGGTCAAGGAAGTTTTTCTGATGGTATGCCTCTA  
GGAATTTCTGGTACTTTCAACTTCATGATCGTATTCCAGGCAGAACACAACATCCTTATG  
CACCCATTCCACATGCTAGGTGTAGCTGGTGTATTTCGGCGGCTCCCTATTTAGTGCTATG  
CATGGTTCCCTGGTAACTTCTAGTTTGTATCAGGGAAACCACTGAAAACGAGTCTGCTA  
ACGAAGGTTACAGATTCGGTCAAGAGGAAGAACTTACAATATCGTAGCTGCTCATGG  
TTATTTTGGCCGATTGATCTTCCAATATGCTAGTTTCAACAACCTTCGTTCTTTACACTTC  
TTCTAGCTGCTTGGCCTGTAGTAGGTATTTGGTTTACTGCTTTAGGTATTAGCACTATG  
GCTTTCAACCTAAATGGTTTCAACTTTAACCAATCTGTAGTTGACAGCCAAGGCCGTGT  
TATTAACACTTGGGCTGATATCATCAACCGTGCTAACCTTGGTATGGAAGTTATGCATGA  
ACGTAACGCTCACAACCTCCCTCTAGACTTAGCTGCAGTTGAAGCTCCATCTACCATTG  
GAATGGGTTTGGCCTGGTATCGTGTTCATACTGTTGTATTGAATGATCCCGGTCGATTGC  
TTTCTGTCCATATAATGCATACAGCTTTAGTTGCTGGTTGGGCCGTTCAATGGCTCTAT  
ACGAATTAGCGGTTTTTGGATCCCTCTGACCCCGTTCTTGATCCGATGTGGAGACAAGGT  
ATGTTTCGTTATACCTTTTCATGACTCGTTTAGGAATAACCAATTCATGGGGCGGTTGGAGT  
ATTACA---GGGGAACTATAACTAATCCAGGTATTTGGAGTTACGAAGGTGTGCGAGGT  
GCACATATTGTGTTTTCCGGCTTGTGTTTCTTGGCAGCTATCTGGCATTGGGTATATTGG  
GATTTAGAAATATTCTGTGATGAGCGTACAGGAAAACCTTCTTTGGATTTACCTAAGATC  
TTTGGAAATTCATTTATTTCTTTCCGGGCGTGGCTTGTTTTTGGCTTTGGTGCATTCCATGTA  
ACAGGCTTGTATGGTCCCGGAATATGGGTGTCTGATCCTTATGGACTAACAGGAAAAGT  
TCAACCTGTAAGTCCAGCGTGGGGCGCAGAAGGTTTTGATCCTTTTGTCCAGGAGGA  
ATAGCTTCTCATATATTGCAGCGGGGACATTGGGCATATTAGCTGGTCTATTCCATCTTA  
GTGTTCCGCCACCTCAACGTCTATACAAGGGCTTACGTATGGGAAATATTGAAACTGTT



CTTTCCAGTAGTATCGCTGCTGTGTTTTTTGCAGCTTTCGTTGTTGCTGGAACTATGTGG  
TATGGTTCAGCAACTACCCCGATTGAATTATTTGGACCTACTCGTTATCAGTGGGATCAG  
GGCTATTTTCAGCAAGAAATATATCGAAGAGTTAGTGCTGGCTTAGCCGAAAATCTAAG  
TTTATCGGAAGCTTGGGCTAAAATTCCTGAGAAATTAGCTTTTTATGATTACATTGGTAA  
TAATCCGGCAAAGGAGGACTATTCCGAGCGGGCTCAATGGACAATGGAGATGGAATA  
GCTATTGGATGGTTAGGCCACCCTGTTTTTAGAGATAAAGAAGGACGCGAGCTTTTTGT  
ACGTCGTATGCCTACTTTTTTCGAAACTTTTCCGGTAGTTTTAGTAGATGGGGATGGAAT  
TGTAAGAGCCGATGTTCCTTTTAGAAGGGCAGAATCCAAGTATAGTGTGAACAAGTA  
GGTGTAAGTGTGAATTCTATGGTGGTGAACCTAATGGAGTTAGTTACAGTGATCCTGC  
TACTGTGAAAAAATATGCTAGACGTGCCCAATTGGGAGAAATTTTTGAATTGGATCGTG  
CTACTTTGAAATCCGACGGTGTTTTTCGTAGCAGTCCAAGAGGGTGGTTCACCTTCGG  
GCATGCCTCATTGCTTTGCTATTCTTTTTCGGACACATTTGGCATGGCGCTAGAACTTT  
GTTCCGAGATGTATTGCTGGTATTGATCCAGATTTGGATGCTCAAGTGGAATTTGGAA  
CATTCCAAAACTTGGAGACCCTACTACAAAGAGACAGGCAGTAATGAAAATCTTATAT  
TCCCTGAGGAGGTTCTACCACGTGGAAACGCTCTTTAATGGAACCTTAGCTTTAGCAG  
GTCGTGACCAAGAAACCACCGGTTTTGCTTGGTGGGCCGGTAATGCCAGACTTATCAA  
TTTGTCCGGTAAACTACTTGGAGCTCACGTAGCCCATGCCGGATTAATTGTATTTTGGGC  
CGGAGCAATGAACCTATTTGAAGTGGCTCATTTTCGTACCGGAAAAGCCGATGTATGAA  
CAAGGATTGATTTACTTCCCATCTAGCTACTTTAGGTTGGGGGTAGGTCCGGGAGG  
AGAAGTTATAGATACTTTTCCATACTTTGTGTCTGGAGTACTTCACTTAATTTCCCTCTGC  
AGTCTTAGGCTTTGGCGGCATTTATCATGCGCTTCTGGGACCTGAAACTCTTGAAGAAT  
CTTTTCCATTCTTTGGTTATGTATGGAAAGATAGAAATAAAATGACCACAATTTTAGGTA  
TTCACTTAATTTGTTAGGTCTAGGTGCTTTTCTTTTAGTATTCAAAGCTGTTTATTTTGG  
TGGTGTATATGATACCTGGGCTCCAGGAGGGGGAGATGTAAGAAAAATTACCAACTTG  
ACCCTTAGCCCAAGTGTTATATTTGGTTATTTACTAAAATCTCCTTTTGGAGGAGAAGGT  
TGGATTGTTAGTGTGGACGATTTAGAAGATATAATTGGCGGACATGTATGGTTAGGTTTC  
ACTTGATACTTGGTGGAAATTTGGCATATCTTAACCAAGCCTTTTGCCTGGGCTCGCCG  
CGCATTTGCTGGTCTGGAGAGGCTTACTTGTCTTATAGTTTAGCTGCTTTATCTGTATTT  
GGTTTTATAGCTTGTGTTTTGTCTGGTTCAATAATACTGCTTACCCTAGTGAATTTATG  
GTCCAACCGGACCAGAAGCTTCTCAAGCTCAAGCTTTTACTTTTCTAGTTAGAGACCA  
ACGCCTTGGGGCTAATGTGGGCTCCGCTCAAGGACCTACTGGTTTAGGTAATATCTAA  
TGCCTTCCCAACTGGAGAGATCATTTTTGGAGGGGAAACCATGCGTTTTTGGGATCTA  
CGAGCTCCTTGGTTAGAACCCTTAAGAGGTCCAATGGGTTGGACTTGAGCAGGCTGA  
AAAAAGACATAACCTTGGCAAGAACGCCGTTTCAGCGGAATATATGACTCACGCTCC  
TCTAGGTTCTTTAAATTCCGTGGGTGGCGTAGCTACCGAAATCAATGCAGTCAATTATGT  
ATCTCCTAGAAGTTGGTTAGCTACTTCTCATTTTGTCTAGGCTTCTTCTTTTTTGTGGG  
TCATTTGTGGCATGCGGGAAGAGCCCGTGCAGCTGCAGCAGGATTTGAAAAGGGAATC  
GATCGTGAATTGGAACCTGTTCTATTCATGACCCCTCTTAATATGACTATAGCCCTTGGT  
AGATTTACCAAAGAAGAA--GATTTATTTGATATTATGGATGACTGGTTACGTAGGGACC  
GTTTCGTTTTTGTGGGTTGGTCCGGCCTATTGCTATTTCCCTTGTGCCTATTTTCGCCGTAG  
GCGGTTGGTTCACAGGTACAACCTTTTGTCACTTCATGGTATAACCATGGATTGGCGAGT  
TCCTATTTGGAAGGTTGCAATTTTTTAACTGCTGCAGTTTCTACTCCTGCGAATAGTTTA  
GCTCACTCTTTATTGCTTCTGTGGGGACCAGAAGCTCAAGGAGATTTTACTCGTTGGTG  
TCAATTGGGTGGTCTGTGGACTTTTTGTTGCTCTTCATGGGGCTTTTGGGCTAATAGTTTT

CATGTTACGTCAATTTGAACTTGCTCGATCTGTTCAATTGCGACCTTATAACGCAATCGC  
TTTTCCGGTCCAATTGCAGTTTTTGTCTGTATTCTTGATTTATCCACTGGGTCAGTCT  
GGTTGGTTCTTTGCACCTAGTTTTGGTGTAGCAGCAATCTTAGATTCATCCTTTTCTTC  
CAAGGGTTTCATAATTGGACGTTGAATCCATTCATATGATGGGAGTTGCTGGAGTATTA  
GGCGCTGCTTTGCTATGCGCTATTCATGGTGCTACTGTAGAAAATACTTTATTCTGAAGAC  
GGTGACGGTGCAAATACATTCCGTGCTTTTAACCCAACCTCAGGCTGAAGAGACTTATTC  
AATGGTAACTGCTAACCGCTTCTGGTCCCAAATCTTTGGGGTTGCTTTTTCCAACAAAC  
GTTGGTTACATTTCTTTAIGTTATTTGTACCAGTAACTGGTTTATGGATGAGTGCTCTTGG  
AGTAGTCGGTCTGGCTCTGAACCTACGTGCCTATGACTTCGTTTCCCAAGAAATCCGTG  
CAGCAGAAGATCCTGAATTTGAGACTTTCTACACCAAAAATATTCTATTAATGAAGGT  
ATTCGTGCTTGGATGGCGGCTCAGGATCAGCCTCATGAAAATCTTATATCCCTGAGGA  
GGTTCTACCACGTGGAACGCTCTTATGTCTGGAAGCACGGGAGAACGTTCTTTTGCT  
GATATTATTACCAGTATTCGATACTGGGTAATTCATAGTATTACTATAACCTCCCTATTTAT  
TGCGGGTTGGTTATTCGTCAGTACGGGTTTAGCTTATGATGTGTTTGGGAAGCCCTCGGC  
CAAACGAATATTTTACAGAGAACCGACAAAGTGTTCCATTAATTACTGGACGTTTTGAT  
TCTTTGGAACAACCTCGATGAATTTAGTAGATCCTTTATGACTATAGATCGAACCTATCCA  
ATTTTACAGTGCGATGGTTGGCTGTTTCATGGACTAGCTGTACCTACCGTTTCTTTTTTG  
GGAGCAATATCAGCAATGCAGTTCATCCAACGAATGGCTACACAACTGTTGAGGGTA  
GTTCT---AAATCTGGGCCAAGACGAACTCGTGTCGGGGATTTATTGAAACCGTTAAATT  
CGAATATGGTAAAGTAGCTCCAGGCTGGGGTACTACTCCTCTTATGGGAGTCGCTATG  
GCTCTATTTGCGGTATTCCTATGTATTATTTTGGAGATTTATAACTCTTCCGTTTTATTGGA  
TGGAATTTTAGTGAGTATGCTTACTCTCAAACTTTTCGTTTACACAGTAGTGATATTCTT  
TGTTTCTCTGTTTCATCTTCGGATTTTTATCTAACGATCCAGGCCGTAATCCAGGTCGAGA  
GGAAATGGCCGATACTACTGGAAGGATTCCTCTTTGGCTGATAGGTAAGTGTAGCTGGTA  
TTCTTGTGATTGGTTTAGTTGGTCTTTTTCTTTTACGGTTCATATTCCGGATTAGGCTCATC  
TCTCATGCTTAATATATTGAATTTAATCTGTATCTGTCTTAATTCTGCTGTTTCGTCATCAA  
GTAGTTTCTTGGGAAAATTGCCTGAGGCTTATGCGATTTTTAATCCACTCATAGACATTT  
TGCCCATATAACCTTTATTTTTCTTTCTTTAGCATTTGTTTTGGCAAGCTGCTGTAAGTTT  
TCGAATGACACAATCAAATCCAAATGAACAAAATGTTGAATTAATCGTACCAGTTTAT  
ACTGGGGGTTATTACTCATTTTTGTACTGGCTGTTTTATTTTCTAATTATTCTTCAATATG  
GAAGTAAATATTCTCGCATTTATTGCTACTGCACTGTTTCATTCTAGTTCCCTACTGCTTTTT  
TACTTATCATCTACGTGAAAACAGTGAGCCAAAATGATATGGAAACAGCAACTTTAGTC  
GCCATCTCCATATCTGGTTTACTTGTAAGCTTTACTGGGTACGCCTTATATACTGCCTTTG  
GGCAACCCTCTCAACAACCTAAGAGACCCATTCGAGGAACACGGGGACATGGAAGCAT  
TGTTTTATAACATTCCTGTTAGTCTCTACTCTGGGAATAATTTTTTTTCGCTATCTTTTTTCG  
AGAGCTCCTAAGGTTCCGACTAAAAA-----ATGACTATTGCTTTCCAATTGGTTGTTT  
TTGCATTAATTGCGACTTCATCAGTCTTATTGATTAGTGTACCTGTTGTATTGCTTCTTC  
TGATGGTTGGTCAAGTAACAAAATATTTTATTTTCTGCTGCTTCATTATGGATTGGATTA  
GTTTTTTTTGGTAGCTATCCTCAATTTTCTCATCTCTATGAGTTGTAGGGAGGGACTTATG  
TCACCACAAACAGAGACTAAAGCAAGTGCTGGATTCAAAGCTGGGGTTAAAGATTAC  
AAATTGACTTATTATACTCCTGAGTATGAGACAAAAGATACTGATATCTTGGCAGCATTCT  
CGAGTAACTCCTCAACCTGGAGTTCCACCTGAAGAAGCAGGGGCTGCAGTAGCTGCG  
GAATCTTACTGGTACATGGACAACCTGTGTGGACTGATGGTCTTACCAGTCTTGACCG  
TTACAAAGGACGATGCTACCATATCGAACCTGTTGCTGGAGAAGAAAATCAATATATTG

CTTATGTAGCTTACCCATTAGACCTTTTTGAAGAAGGTTCTGTTACTAACATGTTTACTT  
CCATTGTAGGTAACGTATTTGGGTTTAAAGCTTTACGAGCTCTACGTCTGGAAGATTG  
AGAATTCCTCCTGCTTATTCCAAAACCTTTCCAAGGCCACCTCACGGGATCCAAGTTGA  
AAGAGATAAATTGAACAAGTATGGTCGTCCTCTATTAGGATGTACCATCAAACCAAAT  
TGGGATTATCTGCGAAAACTACGGTAGAGCGGTTTATGAATGTCTACGTGGTGGACTT  
GATTTTACCAAGGATGATGAAAACGTAAACTCACAACCATTTATGCGTTGGAGAGACC  
GTTTCTTATTCTGTGCTGAAGCAATTTATAAAGCACAAGCTGAAACTGGTGAATTAAA  
GGGCATTACCTAAATGCTACCGCAGGTA CTTGTGAAGAAATGATCAAGAGAGCTGTGT  
TTGCTAGAGAATTGGGTGTCCCAATTGTTATGCATGACTACTTAACTGGTGGATTCACT  
GCAAATACTAGTTTGGCACATTATTGCCGAGACAACGGTCTACTTCTTCACATTCACCG  
TGCAATGCATGCGGTTATTGATAGACAGAAAAACCATGGTATGCATTTCCGTGTACTAG  
CTAAAGCATTACGTATGTCTGGTGGTGACCATATTCACTCTGGTACCGTAGTAGGTAAG  
CTAGAAGGTGAGCGTGAGATGACTTTAGGTTTTGTTGATTATTACGTGATGATTTTATT  
GAAAAAGACAGAAGTCGTGGTATTTTCTTCACTCAAGATTGGGTATCTATGCCTGGTGT  
TATCCCTGTAGCTTCAGGTGGTATTACGTTTTGGCATATGCCTGCACTGACCGAGATCTT  
TGGAGATGATTCGGTACTACAGTTTTGGTGGCGGAACTTTAGGACACCCTTGGGGTAATG  
CACCAGGTGCAGTAGCTAACCGTGTAGCTTTAGAAGCTTGTGTACAAGCTCGTAATGA  
GGGACGTGACCTTGCTCGTGAAGGTAATGAAATTATCCGTGAAGCTTGCAAATGGAGT  
CCTGAATTAGCCGCTGCTTGTGAAGTTTTGGAAAGCGATCAAATTTGAATTCGAACCAGT  
AGATAAGCTAGATGTTATGGCGATACATTTATACAAAACCTTCTACCCCGAGCACACGCA  
ACGGAGCCGTAGACAGAAAAGTGAAATCCAATCCACGAAATAATTTGATCTATGGACA  
GCTTCGTTGTGGTAAAGGTCGTAATGCCAGAGGAATCATTACCGCAGGACATAGAGGG  
GGAGGTCATAAGCGTCTATACCGTAAAATCGATTTTCGACGGAATGAAAAAGACATATA  
TGGTAGAATCGTAACCATAGAATACGACCCTAATCGAAATGCACACATTTGTCTCATA  
ACTATGGGGATGGTGAGAAAAGATATATTTTACATCCCAGAGGGGCTATAATTGGAGAT  
ACCATTGTTTTCTGGTACAGAAGTTCCTATATCAATGGGAAATGCCCTACCTTTG---GATAT  
GCCCTTAGGCACGGTCATACATAACATAGAAATCACACTTGGAAAGGGTGGACAATTA  
GCTAGAGCAGCAGGCGCTGTAGCGAAACTGATTGCAAAAAGAGGGTAAATCGGCCACA  
TTAAGATTACCTTCTGGGGAGGTCCGTTTTGATATCCAAAAACTGCTTAGCAACAGTCGG  
CCAAGTAGGTAATGTTGGGGTGAACCAAAAAAGTTTTGGGTAGAGCCGGATCTAAGTGT  
TGGCTAGGTAAGCGTCCTGTAGTAAGAGGAGTAGTTATGAACCCTGTGACCATCCCCA  
TGGGGGCGGTGAAGGGAGAGCACCAATTGGTAGAAAAAGACCTATGACCCCTTGGGG  
TTATCCTGCACTTGGAAAAAGAAGTAGGAAAAAGAAAAGATATAGCGATAGTTTTATT  
TTCGTCGCCGTAAA---ATGATTCAACCTCAGACCCTTTTGAATGTAGCTGATAATAGCGG  
AGCTCGAGAATTGATGTGTATTTCGAATCTTAGGAGCTAGT---AATCGCCGATATGGTAAT  
ATTGGTGACGTTATTGTTGCTGTAATCAAGGAAGCAGTGCCAAATATGCCACTTGAAAG  
ATCAGAAGTTATTAGAGCTGTAATTGTACGTACGCGTAAAGA ACTCAAGCGTGAAAAC  
GGTATGAGAATAAGATATGATGACAATGCGGCAGTTGTCATTGATCAAGAAGGAAACC  
CAAAGGGACTCGAGTTTTTGGTGCAATCGCTAGGGAATTAAGAGAATTGAATTTTAC  
AAAAATCGTCTCATTAGCTCCAGAAGTATTA AACTATAACCCCAAAGAACCAGATTCC  
GTAAACAACATAGAGGAAGAATGAAAGGAACATCTTATAGAGGCAATCATATCAGTTTT  
GGAAGATATGCTCTGCAAGCCCTTGAACCTGCTTGGATCACAGCCAGACAAATAGAAG  
CCGGACGAAGAGCAATCAGCCGATATGCACGTCGTGGTGGAAAAATTTGGGTACGTTT  
ATTTCCCGATAAACAGTTACTACTAAGACCTGCAGAAACACGTATGGGTTCCGGGTA

GGATCTCCCGAATATTGGGTAGCCGTTGTAAACCGGGTCGAATACTTTATGAAATAGG  
GGGAGTATCCGAAACTGTCCGACAGCTATGTTACTAGCTTCGTCCAAAATGCCTA  
TACGAACTCAATTTATTATTGAGGGAATGACCAGAGTTAAACGGGGATATATAGCTCGT  
AGACGCCGAACAAAAATTCGTTTATTGTCATCAAGCTTTCGAGGGGCTCATTCAAGAC  
TTACTCGCACTATTACTCAACAGAAAATGAGAGCTTTAGTTTCTTCTATAGAGATAGA  
GGTAGACAAAAGAGAGATTTTCGTCGTTTGTGGATCACTCGAATAAATGCAGTAACTC  
GGGAGAAC-----GTTTCCTATAGTTATAGTAGATTGATACATAATCTGTACAAGAGGAAAT  
TGCTTCTTAATCGTAAAATACTTGCGCAAATAGCTATATTGAATAAGAATTGTTTTTCCAT  
CATTTCCGAAAAAATCATTA---ATGATTACGAAAGCTTTA---G  
CTCAAATATACAT--ATGTCTCCTTTCAAAGTACGAAGAGTAATTGACCAAATTCGCGG  
ACGTTCTTATGAGGAAACACTTATGATACTGGAAGTATGCCTTATCGAGCAGCTGTTT  
CTATTTTAAAATTGGTCTATTCTGCAGCAGCAAATGCT--ACAATCTGGGGTTGAACGA  
AGCGGATTTAGTCATTAGTAAGGCCGAAGTTAATGGGGGTACGGTCTAAAAAGGTTA  
AGACCTAGAGCTCGAGGACGGAGTTATCGAATAAAACGACCGACCTGTCATATTACAA  
TTGTGTTAAAG---AAATCGAAAAA-----ATGGATGGAATCAAATATGCAGTA  
TTTACAGAAAAAGTATTCGGTTATTGGGGAACAATCAA---TATACTTCTAATGTGCAAT  
CAGGATCAACTAGGACAGAAATAAAGCATTGGGTGCAACTCTTCTTTGGTGTCAAGGT  
AATAGCTATGAATAGTCATCGACTCCCGAGAAAGGGTAGAAAAAGGGGACCTATTATG  
GGACATACAATGCAGTACAGACGTATGATCATTACGCTTCAACCGGGTTATTCTATTCCA  
CCTCTTATAGAGAAAAGAAGTATGGCAGTCCCAAAAAACGCACTTCTATTTCAAAAA  
AACGTATTCGTAAAAGTATTTGGAAGAAAAAGCCTATGTGGCTGCGCTAAAAGCTTTT  
TCTTTAGCTAAATCGATCTCAACAGGACAGTCAAAAAGTTTTTTTGTACGACAAACAA  
GTAATATGGCCAAAGGTAAAGATGTCAGAGTCAGAGTTATTTTAGAATGTAACAGTTGT  
GGCAGAAATGAAAACGGT-----AAGGAAGTTCCGGGTGTTTCTAGATATGTTACTCAA  
AGAATCGACACAATACACCCGGTTCGATTAGAGTTAAAAAATTTGTGCGCTATTGTAAC  
AAGCATAAATTCATGTGGAAGTCAAGAAAATGAAAATAAGGGCTTCTGTTCGTAAAA  
TTTGTGAAAATGTCGACTGATCCGTAGGCGCGGACGAATTATAGTGATTTGTTCTAAT  
CCAAGACATAAACAAAGACAAGGAATGGTTCGAGAGGAAATAGCAGGGTCCACTCGA  
ACACTACAGTGGAAGTGTGTTGAATCAAGAGTAGATAGTAAACGTCTTCATTATGGGCG  
TTTCGTTCTGTCCCCGCTTATGAAAGGTCAAGGTGATACAATAGGTATTGCTATGCGAC  
GGGCTTTACTTGAAGAAATGGAAGGAACATGTATAACACGGGCAAAATTTGAA-----AA  
AGTACCACACGAATATTCTACAATAATAGGTATTGAAGAATCAGTGCATGAAATTTAAT  
GAATTTGAAAGAAATTGTATTGAGAAGTAATCTATATGGCACTCGAGACGCATCCATTT  
GCGTCAAAGGCCCAAAAACATAACAGCTGAAGATATTTCGTTACCGTCTTCTGTGGA  
AATAGTTGACACGACACAGCATATAGCTACCCTGACAGAACCCCGCGATTTGTGTATTG  
AATTACAAATTCAAAGAGATCGCGGATATCGTATAAGATCCACAAATGACTCGCAAGAT  
GGAAGTTAT-----CCTATAGATGCAGTATTTATGCCTGTTTCGAAATGCCAATCATAGTATTT  
ATTCTTATGGAAATGGGAATGAAAAACAAGAAATCCTTTTTTCTAGAAATATGGACAAAT  
GGAAGCTTAACTCCTAAAGAAGCACTCCACGAAGCTTCTCGTAATTTGATTGATTTATT  
TATCCATTCCTACATGCAGAGGAAAAG-----GATGTTAATTTAGAAGAAAATAAG---AG  
CAGATTTACTCTACCCCTTTTTACCTTTCATGATAAATTAGCT--AATGTAACGAAAAACA  
AAAAA---GAAATAGCATTGAAGTGTATTTTTATTGACCAATTAGAATTGCCTTCCAGA----  
-----GACCTA-----  
-----ATGCTCCGCGAT--GGAAATGAGGGAATGTTCA

CAATACCTGGATTTAGTCAGATACAATTTGAGGGATTTTGTAGGTTTATTAATCAGGGTT  
TAATGGAAGAATTTAATAAGTTTCCAAAAATTGAAGATACAGATCAAGAAATTGAATTT  
AAATTATTTGTGGAAACATATCAATTGGCAGAACCCTTGAGAAAAGAAAGAGATGCTG  
TGTATGAATCACTCACATATTCGTCTGAATTATATGTCCTTGCGGGATTAATTTGGAAAA  
CCAATAGAGATATGAAAGAACAAACAGTATTTATTGGAAACATTCCTATAATGAATCCC  
TCGGAACCTTTATCGTAAATGGAATTTACAGAATTGTAATTAATCAAATATTGCAAAGTC  
CTGGTATTTATTACCGTTCTGAATTGGACCATAACGGCATCTCGGTCTATAACCAGCACCA  
TAATATCAGATTGGGGAGGCAGATTAGAATTAGAAATTGATAGAAAAGCAAGGATCTGG  
GCCCCGTGTAAGTAGAAAACAAAAATCTCCATTCCTCGTTCTATTATCAGCTATGGGTTTA  
AATCTAAGAGAAATTCTAGATAATGTTTGTATCCTGAAATTTCTTGTCTTTCCTAAATG  
ATAAGGAAAAAAAAAAGATCGGGTCAAAAAGAAAATGCTATTTTGGAGTTTATCAACA  
ATTTGCTTGTGTAGGTGGGGATCCAGTATTTTCTGAGTCCTTGTGTAAGGAATTACAAA  
AGAAATTTTTCAACAAAGATGTGAATTAGGAAGAATTGGGCGGGCAAATATCAACCA  
AAGATTAAATCTTGATATACCTGAGAACAATACATTTTTGTTACCACGAGATGTATTGGC  
TGCTGCAGATCATTTGATTGGAATGAAATTTGGAATGGGTACACTTGACGAT-----ATGA  
ATCACTTGAAAAATAAACGTATTCGTTCTGTAGCAGATCTGTTGCAGGATCAATTCGGA  
CTGGCTCTTGGTCGTTTAGAAAATGCGGTTTCGAGGAACCTATATCTGGAGCAATCAGG---  
CATAAATTGATA---CCAACCTCTCAAATTTGGTAACTTCAACTTCA-----TTAACAA  
CCACTTATGAATCATTTTTCGGTCTACACCCTTATCTCAAGTTTTGGATCGAACTAATC  
CATTAAACCCAAATTGTTTCATGGTCGAAAATTGAGTTATTTAGGTCCTGGAGGGGTGACA  
GGTCGAACTGCAAGTTTTCGGATACGAGATATCCACCCTAGTCACTATGGACGTATTTG  
CCCAATTGACACCTCCGAAGGAATTAATGTTGGACTTATTGGATCCTTAGCTATTCATGT  
AAGGATTGGTCATTGGGGA---TCCATAGAGACTCCATTTTAT-----GAAATCTCTGAGA  
GATCAAAAAGAAAAGAAGCACGGATGGTTTATTTATCACCAAGTAGAGATGAATATTAT  
ATGATAGCGGCAGGCAATCTTTGGCCTTAAATCGAGGTATTCAGGAAGAACAGGTTGT  
TCTGCTCGATACCGTCAAGAATTCCTGACTATTGCCTGGGAACAGGTTTCATCTTCGAA  
GCATTTTTCCCTTTCAATATTTTTCGATTGGAGCCTCTCTCATTCCTTTTATTGAGCATAA  
TGATGCCAATAGGGCGTTAATGAGTTCTAATATGCAGCGTCAAGCAGTTCCGCTTTCTC  
GGTCCGAGAAGTGCATTGTAGGAACCGGACTAGAACGCCAAGCGGCTTTAGATTCGGG  
AGTTTCAGTTATAGCCGAACATGAGGGTAAAGTTATTTCTACGGATACTCACCAAATTG  
TTTTCTCAGGTAATGGAAACACTCTAACTATTCCATTAGTTATGTATGAACGTTTCGAACA  
AAAATACTTGTATGCACCAAAAACCTCAGGTTCAACGGGGTAAATATGTTAAAAAGGG  
ACAAATTTTAGCCGACGGGGCGGCTACCGTTGGGGGAGAACTCGCTTTGGGAAAAAA  
TGTATTAGTAGCTTATATGCCATGGGAAGGCTACAATTTTGAAGATGCGGTACTTATAAG  
TGAGCGTTTGGTCTATAGCGATATTTATACTTCTTTTCACATCCGAAAATATGAAATTCA  
AACTCATATGACAAGTCAGGGC---CCTGAAAGAATTACTAACGAAATACCTCATTTAGA  
AGCTCATTTACTCCGCAATTTAGACAGAAATGGCATCGTGCTGCTCGGATCTTGGGTGG  
AAACAGGTGATATTTTAGTAGGTAATAACGCCTCAGATAGCGAATGAA---TCGTCGTA  
TGCACCAGAGGATAGATTATTACGAGCCATACTTGGTATTCAGGTTTCCACTGCAAAGG  
AGACTTCTCTAAAACCTATAGGTGGAAGGGTTCGAGTAATTGATGTGAGATGGATC  
CAGAAAAAAGGG---GTTCCAGTTATAACCCAGAAATGATTCGTGTATATTTACAG  
AAACGTGAAATCAAAGTGGGTGATAAAGTAGCAGGAAGACATGGGAATAAGGGTATTA  
TTTTCTAAAATTTGCTTAGACAAGACATGCCCTATTTACAAGATGGAACCTCCGGTTGATA  
TGGTCTTCAACCTTTAGGAGTACCCTCACGAATGAATGTTGGACAGATATTTGAATGT

TCGCTCGGCTTAGCGGGAGATCTTTTAAATAGACATTATAGAATAGCCCCTTTTGATGAG  
AGATACGAGCAAGAGGCTTCAAGAAAAGTAGTGTTTTTCAGAATTATATGAGGCAAGTA  
AGCAAACAAAAATCCATGGGTATTTGAACCCGAATATCCAGGAAAAAGTAAATATT  
TGATGGAAGAACTGGAGATCCTTTTGAACAACCTGTCCTAATAGGCAGGTCCTATATAC  
TTAAATTAATTCATCAAGTTGATGATAAAATCCATGGACGTTCCAGTGGACATTATGCAC  
TTGTTACACAACAACCCCTTAGAGGAAGGGCAAAACAAGGTGGCCAACGAGTGGGAG  
AAATGGAAGTTTGGGCTTTAGAGGGATTTGGCGTTGCTCATATTTTACAAGAGATGCTT  
ACTTATAAATCAGATCATATTAGAGCTCGTCAGGAAGTACTTGGTACTACGATTATTGGA  
GGAACAATAGTTACTCCTGAGGATGCCCCAGAATCTTTTCGATTGCTTGTTAGAGA  
ACTACGATCTTTGGCTCTGGAACCTGAATCATTTTCTTGTATCTGAGAAAAATTTTCAGATTA  
TAGGAAGGAAGCTATGAATCAGAATTTCTATTCTATGATTGACCGGTATAAACATCAAC  
AACTTCGAATTGGACTAGTTTCTCCTGAACAAATAAGTGCTTGGGCTAACAAAATTCTA  
CCTAATGGGGAGGTAGTCGGAGAGGTGACAAAACCTACACTTTTCATTACAAAACCA  
ATAAACCAGAAAAAGACGGATTGTTTTGTGAAAGAATATTTGGACCTATAAAAAGTG  
AATTTGTGCTTGTGGAAATTATCGAGTGATCGGAGCTGAAAAGGAAGACCCAAAATTT  
TGTGAACAATGTGGAGTCGAGTTTGTGATTCTCGTGTACGAAGATATCAATGGGATA  
CATAAACTCGCCTGTCCAGTAACTCATGTGTGGTATTTAAAACGCCTTCCTAGTTATAT  
CGCGAATCTTTTAGATAAACCACTTAAGGAATTAGAGGGCCTAGTATACTGC-----GATT  
TTTCTTTTGCTAGGCCA---ATAGCTAAAAAACCTACTTTCTTACGATTACGAGGTTTATT  
CGAATATGAAATCCAATCCTGAAATACAGCATCCCACTTTTTTTTACTACCCAAGGCTT  
TGAAACATTTTCGAAATAGAGAAATCTCGACTGGCGCAGGTGCTATTAGAGAACAATTA  
GCCGATTTGGATTTACGCATTATTACAGATAATTCATTGATAGAATGGAAAGAATTAGGA  
GATGAA---GGGTCCACCGGAAATGAATGGGAAGATAGAAAAATTCGAAGAAGAAAGG  
ATTTTTTGGTTAGACGCATGGAATTAGCTAAACATTTTATTTCGAACAAATGTAGAACCA  
GAATGGATGGTTTTGTGCCTATTACCTGTTCTTCCTCCTGAGTTAAGACCTATCATTAG  
ATAGATGGGGGTAAATTAATGAGTTCGGATATTAATGAACTCTACAGAAGAGTTATTTAT  
CGCAACAATACTCTTACTGATCTACTAACAACAAGTAGATCTACACCGGGTGAATTAGT  
AATGTGTCAGGAGAAATTGGTACAAGAAGCCGTAGATACACTTCTGGATAATGGTATAC  
GTGGACAACCAATGAGGGACGGGCATAATAAAGTTTACAAATCATTTTCAGATGTAATT  
GAAGGAAAAGAGGGAAAGATTCCGCGAGACTTTGCTTGGTAAACGAGTCGATTATTTCGG  
GTCGTTCCGTCATTGTTGTAGGTCCGTCATTTCCCTTACATCAATGTGGATTACCTAGAG  
AAATAGCAATAGAATTTTCCAGACATTTGTAATTCGTGGTTAATAAGACAACACGTT  
GCTTCCAACATCGGGATTGCTAAAAGTAAAATTCGAGAAAAAGATCCCATTTGTATGGG  
AGATACTTCAAGAAGTCATGCAGGGGCATCCTGTGTTACTCAATAGAGCACCGACCTT  
GCATAGATTGGGCATACAGGCGTTTCAACCCATTTTAGTGGAAGGTCGTGCTATATGTTT  
ACATCCATTAGTTTGTAAAGGGTTTTAATGCAGACTTTGATGGAGATCAAATGGCTGTTCA  
TGTACCCTTATCGTTAGAAGCTCAAGCAGAGGCTCGGTTACTTATGTTTTCTCATATGAA  
TCTATTGTCTCCAGCTATTGGTGATCCCATTTCTGTACCAACTCAAGACATGCTAATTGG  
ACTTTATGTATTAACGCTGGGGAATCGTCGAGGAATTTGTGCAAATCGCTATAATTTCTC  
TAATTGCAAAAACGAT-----CAAAATCAAACCTTTGGCAATAATAATTCTCATGCGACG  
AAAGATAAGGAACCCTTTTTTTTCCAGTTCCTATGACGCACTTGGAGCTTATCGGCGAAA  
ACGAATCAATTTGGATAGTCCTTTGTGGCTCCGTTGGCGACTAGATCAACGTGTCATTAT  
TGGATCC-----AGGGAAGTTCCGCTGGAAGTTCAATATGAATCTTTTGGTACCTACCATG  
AAATTTATAGACACTATTTAATAGTAAGAAGTGTCAAAAAAGAAATAAGTTCTATATACA

TTCGAACCACTGTTGGTCATATTTCTTTTTATCGAGAAATAGAAGAAGCGATACAAGGA  
TTTTATCGAGCCTACTCGTATCCTAGC-----ATGGCAGAACGGGC  
CGATCTGGTCTTTTACAATAAAGTGATAGATGGAGCTGCCATGAAACGACTTATTAGCA  
GATTAATAGATCACTTCGGGATGGCTTATACATCACACATTCTAGATCAAGTGAAAACCTC  
TGGGTTTCCAGCAAGCCACTGCTACATCTATTTTCATTAGGAATTGATGATCTTTTAACAA  
TACCCTCTAAGGGCTGGTTAGTGCAAGATGCTGAACAACAAAGTTCAATTTTGAAAAA  
ACACCATCATTATGGCAATGTACACGCGGTAGAAAAATTACGTCAATCCATTGAAATAT  
GGTATGCTACCAGCGAATATTTGAGACACGAAATGAATCCTAATTTTCGGATGACTGAT  
CCCTCTAATCCAGTCTATTTAATGTCTTTTCGGGAGCTAGAGGAAATGCATCTCAGGTA  
CACCAATTAGTAGGTATGAGAGGCTTAATGTCCGATCCCCAAGGACAAATGATTGATTT  
ACCCATTCAAAGCAATTTACGGGAAGGGCTCTCTTTGACGGAATATATAATTTCTTGCTA  
CGGGGCCCGCAAAGGAGTTGTAGATACTGCTGTACGAACATCAGATGCTGGCTACCTG  
ACACGTAGACTTGTGAAAGTGGTTCAACACATTATAGTACGTAGAACAGATTGTGGTAC  
TATTCGAAGTATTTCCGTAAGTCCGAGAAAGGGGATGCCAGAA-----CGCATTTTTATCC  
AAACACTAATTGGTCGTGTTTTAGCAGACGATATATATATCGGGCCGCGATGCATTGCCG  
CCCGAAATCAAGATATTGGGATTGGACTTGTCATCGATTCAATAAGT-----TTTC  
GAGCACAACCAATACGTATTTCGAACTCCATTTACTTGTAGGAGTACCTCTTGGATCTGT  
CAATTATGTTATGGTCGTAGTCCCCTCACGGTGACCTGGTTCGAATTGGGAGAAGCGGT  
AGGTATTATTGCGGGTCAGTCAATTGGGGAACCAGGGACTCAACTAACATTAAGAAGT  
TTTCATACGGGCGGAGTATTCACGGGGGGGACTGCTGAACATGTACGAGCTCCCTTTAA  
TGAAAAAATCAAATTCACGAGGATTTAGTTCATCCACGCGTACCCGTCATGGGCATC  
CTGCTTTTCTATGTTCAACAGATCTGTATGTAATTATTGAAAGTCAGGAGATTATTCATAA  
TGTAATATTCTGCTAAAAGTTTGATTTAGTGCAAAATGATCAATACGTAGAAATCAGA  
ACAAGTGATTGCTGAGATTCGTTCCGGAGTAGCCACTTTA-----TTTAAAGAGAAGGTT  
CGAAAACATATTTATTCAGAATCAGAAGGAGAA---ATGCACTGGAGTACCGATGTCTAC  
CATGCACCTGAATATACTTATGGTAATGTGCATCTATTACCAAAAACAAGTCATTTATGG  
ATATTAGCGGTAGGTACGTCAAGA-----TACAGTATTGTTTCTTTTTCCCTTCACAAGGAT  
CAAGATCAAATAAATGCTGATTCTGTTTCTCTCGAAGAAAGA-----TATATTTCTGACCTA  
GCA-----ATAACTAAGGATCTAGCGAGACATCCATTGTTTAGTTCGGATTCTTCTAGT-----  
---AAGGGGAGGACTCGTCATTAT-----AGACCTGATCGTAGCATATCCAATGGTCAGTCG  
AATTTAGAATATCCTTTA---ATTCTGCACCAAAAT-----GCTGATTTTTTAGCCAAGAGGC  
GAAGAAATAAATTCATAATTCCAGTACAATATGATCACGAATGTGATAAAGAACTCCTA  
CCCCATTTTGGTGTTCGATTGAAATACCCATAAAT-----GGTATTTTACGTAGAAATAGTA  
TTCTTGCTTATTTTCGACGATCCCCGATACCGA-----AGAGGAATTACTAAATAT--GCTA  
TAGAGGTCGATTCAATCCTTAAA-----AAAGAGGATTTGATTGAATACCGAGGA---GCAA  
AAGAATTGAGT-----GTAGATCGATTTTTTTTCATTCCCAGGAAGTGCATGTCTT  
ACCAGGATCTTCGTTGATAATGGTCCGGAACAATAGTATTATAGGAGTGGATACACCAC  
TCACTTTAAATATAAGAAGCCGAGTAGGTGGATTGGTTCGAGTGGAGAGAAAAA  
AATAATAGAACTAAAATATTTTCTGGGGATATCCATTTTCTGGGGAGACAGATAAGAT  
ATCCAGGCATAGCGGCATCTTGATACCACCGGGAACGGGAAAAATG-----GATTCCAAG  
GAA---TACAAA---CATTTGAAAAATTGGATCTATGTCCAACGG-----ATCACACCTACTAA  
GAAAAAG-----TATTTTGTTCAGTTCGACCCGTAGTCACATATGAAATCGCGGATGGCA  
TCAATTTAGCCAAAATTTATCCACAAGATCTTTTGACAGGAAGGCGATAACATCCAATT  
AGAGTTGTCAATTATATCCTTTATGGAAATGGCAAGCCAATTCGAGACATTTCTAATACA

AGT--CAATTAGTTCGGACTTGCTTAGTATTGAATTGGGACCAAGAACAAAATAGTTCTA  
TAGAA-----GGTAGTCATGCTTCTTTTGTGAAATAAAGACAAATGATCTAATTTGC  
GATTTCATAAGAATTGAGTTAGGTAACCCCCCTTTGTACACCGGAAAAAGAAATAG  
TAAGGTGGGTTTCAGGATTGATTAGCGAT-----TTAGATTACAACAATATGAATCCTTTTT  
TTTCTAAAACAAAGATTCCATCA-----TTTCCCACACATAAAGGAACAGGC-----  
---GGTACGTTGTTGAATAGAAATAAG-----GAATCTCAATCTTTGAAAATTTTGTATC  
ATCGAACTATTCTCGAATTGGT-----CCATTCAAAGGTTTGAATCTAACACTACC---ACT  
GTGACAAAACAATCAGATCCCGTAGCTCCAATT--AATTGTTTAGGTCCTTTAGGTACAG  
TAGTATTC---AAAATTGCCAACTTTTATTCATCT--TGCCATTTAATAACT-----TATAATA  
ACACTTTGTAAAA---AAATATTTCTTACTTAAC-----AAATTTAGTCAGACTTTTGAAG  
GACTTAAA-----TTTTTTATTATAGATGAAAATAAGGGT-----ATTTATAATCCTGAGCCA  
GCCCCGTAAGATAGTTTTTAATTTATTTTCAATTTAAATTGGCATTTTTTTCCATCCCGCTTTTT  
GTGATGAAACAGCCACACTTATTAGC---CTTGGACAATTTTTTTGTGAAAATGTATCTCT  
ACTTAAATACGGATCA-----CAGAAAAAATCGGGTCAAGTTCTAATTGTTGAT--GTTG  
ACTACTTAGTTATAAGATCAGCTAAACCTTATTTGGCTACTCCAGGAGCGACGGTTCAC  
GGTCATTATGGAGAAACCCTTCATCAGGGAGATACATTGGTTACATTTATATATGAAAAA  
TCAAGATCGGGTGACATAACGCAAGGTCTTCCAAAAGTGGAACAAGTTTTAGAAGTGC  
GTTTCGATTGAGTCAATATCAAGAAATCTGGAAAAGAGGGTTAAAGCATGGAATGAACG  
TATATCAAGAATTCTGGCCACACCTTGGGGGTTCTTGATTAGTACTGAGCTAACGATCG  
CCCAAAGCCGGATCTCCTTGGTTAATAAGATCCAAAAGGTTTATCGATCCCAAGGGGTA  
CAGATCCATAATAGACATATAGAAATTATTGTACGTCAAGTAACATCAAAGTCGTGGTT  
TCAGAA-----GATGGAATGTCTAATGTTTTTTTACCCGGAGAACTTATAGGATTGTTGC  
GAGCGGAGCGAGCAGGGCGTGCTTTGGATGAAGCAATCTGTTATCGAGCAATCTTATT  
GGGAATAACGAGGGCATCTCTTAATACTCAAAGTTTCATATCTGAAGCTAGTTTTCAAG  
AAACTGCTCGAGTTTTAGCAAAAAGCTGCTTTACGAGGTCGTATTGATTGGTTGAAAGG  
GTTGAAAGAAAATGTTGTTCTAGGGGGAATTATACCTGTTGGTACCGGATTCAAAAAT  
TAGTACACCACTCAAGG-----CAGCAAAAAAACATTCAT-----TTGGAAATCAAAAATAA  
GAATTTGTTTCGAAGGAAAGATG-----ATAGATATCTTATTTACCATAGAGAATTTTTGAG  
TTCTTGATGCCAAAT-----ATGACAAGAA  
GATATTGGAACATCAATTTGGAAGAAATGCTGGAAGCAGGAGTTCATTTTGGTCATGGG  
ACTAGGAAATGGAATCCTAGAATGGCACCTTTCATATCCGCAAAACGTAAAGGTATTCA  
TATTATAAATCTTACGAGAACTGCGCGTTTTTTATCAGAAGCCTGTGATTTAGTTTTTGA  
TGCAGCAAGTAAAGGAAAACAATTTTTGATCGTTGGCACAATAAATAAAGCAGCTGAT  
TTAGTAGCATCCGCTGCAATAAAGGCTCGTTGCCATTTTGTAAATAAAAAATGGCTTGG  
TGGTATGCTAACGAATTGGTCCACTACTGAAACGAGACTTCAAAGTTCAGGGATTTA  
AGAGCGGAACAAAGGCTGGGAAAACCTGAACAGTCTCCCAAAAAGGGATGCAGCAAT  
GTTGAAGAGACAATTATCTACGCTGCAAACATATCTGGGTGGGATCAAATATATGACAG  
GGTTACCTGATATTGTAATTATTGTTGATCAGCAAGAAGAATATACGGCTCTCCGAGAAT  
GTGTCATTTGGGTATTCCGACGATTTGTTAATTGATACAAATTGTGACCCAGATCTTG  
CAGATATTTGATTCCAGCTAACGACGATGCTATCGCGTCAATCCGATTGATTCTTAACA  
AATTAGTCTCTGCAATCATTGAAGGGCGTTCTAGC---TATATAAGAAATCATATGGGACA  
AAAAATAAATCCACTTGGTTTCAGACTTGGTACAACACAAAATCATCATTCTTTTGGT  
TCGCACAGCCAAAAGTTTTTCGCTGGGTCTCCAAGAAGATGAAAAAATACGAGATTG  
TATCAAGAATTATGTACAAAAAATATGAGAACATCTTCGGGT--TTCGAAGGAATTGCA





????????????????????????????????????????????????????????????????????????????????????????  
????????????????ATGGCAAGAAAAAGTTTGATTCAGAGGGAGAGCAAGAGACAGAAATT  
GGAGCAGAAATATCATTGATTTCGTCAATCCTTAAAAAAGAAATAAGC-----CAAAT  
TCCGTCGTTGAGTGAAAAATGGGAAATTCATGGAAAATTGCAATCCCTACCACGTAATA  
GTGCACCCACACGGCTTCATCGACGTTGTTTTTTGACGGGACGACCTAGGGGTAACCTAT  
CGACACTTTGGACTATCCGGACACATACTTCGAGAAATGGTTAATACATGTTTGTTACC  
GGGCGCTACAAGGTCTAGTTGGATGGGCAAAAATTCATTTATCTCAATTATTTTCGCAAG  
AAGAAAAAGAAGAAAAC-----AAAGGGTCTGTGCAATTTCAAGTAGTCAGTTTCACCA  
ATAAGATACGAAGACTTACTTCCCATTGGAGTTGCATAAAAAAGATTTTTTCATCTCAG  
AGGGGTTTACGAATAATCCTGGGAAAACGTCACGGTTGCTGGCGTATTTGTCAAAGA  
AAAATAGAATACGTTATAAGAATTTAATTGGTCAGTTGGATATTCGGGAACCAAAAACT  
CGT-----ATGGTAAAGCTTCGTTTGAAACGATGTGGTAGAAAGCAA-----  
-----CATCTTCGGAGAGTGGGTTTTTATGATCCGATAAAGAATCAAACCT  
TTTTAAATGTTCCGGTTATTCTAGATTTTCTTGAAAAAGGGGCTCAACCCACAAGA  
GTTTCATGATATTTTAAGAAGGCGGAATTGTTTAA-----ATGGATA  
AATCCAAGCAACCCTTTCATAAAACCAAGCGATCTTTTCGTAGGCGTTTGCCCCAATT  
GGATCGGGGGATCGAATTGATTATAGAAACATGAGTTTAATTAGTCGATTTATTAGTGAA  
CAAGGCAAAATATTATCTAGACGAGTCAATAGATTAACCTTGAAACAACAACGATTAAT  
TACTATTGCTATAAAACAAGCTCGTATTTTATCTTTGTTACCTTTTCTTAATAATGAGAAA  
-----CAATTTGAGAGAACCGAGTCGATCCCTAGAGCTACTGGTCCTAGAACTCGAAATA  
AAGTGACACGTTCAATAAAAAAAAATCCTTTTGTAGCTAATCATTATTAGTAAAAATTC  
AGAACTCAATATAAGGCAGGAAAAAGAAATAATAGTAACTTGGTCTAGAGCATCTACT  
ATTATCCGACAATGATTGGTCATACAATTGCTGTTTATAATGGAAAGGAACATTTGCCT  
GTTTATATAACAGATCGTATGGTAGGTCACAAATTGGGAGAATTCGCGCCAACCTCGAAG  
TTTCGGAAAACATGTGAAAACGATATTAATCTCGTCGCATGATTTTGAAATTTTTTCT  
ATTAGGTAATCCATTATCCTTATGCATGAAAATACTAAATTCGGTTGTTATAGTTGGACTC  
TATTATGGATTTATGACCAGTTCTCCATAGGGCCCTTATCTCTTCCTTCTTCGAGCTT  
GGGTTATGGAAGAAGGA-----ACCGAAAAGCAGATATCAGCAACAACCGGTTTTATTA  
TGGGACAGCTTATGATTTTTATATCAATCTATTATGCGCCTCTGCATTTAGCATTGGGTAA  
ACCTCATACAATGACTGTCCTAGTTCTACCATATCTTTTGTTTCATTTCTTCTGGAACAAT  
AACAAAGAACTTTTTGGATTATAGATCTACTACTAGAAATTC AATACGTAATTTCAACATT  
CAATGTATATTCCTGAATAATTTGATTTTCAATTATTCAACCATTTCAATTTTACCAAGTTC  
AACACTAGCCAGATTAGTCAACATTTCTATGTTTCGATCCAACAACAAGATGTTATTTGT  
AACAAAGTAATTTTATTTGGTTGGTTAATTGGTCACATTTTTTTTTTATTAAGTGCGTTGGATTA  
GTATTATTCTGGATACGGCAAAATAATTCATTCAATCT-----AATAAGTACCTTCTTT  
CAGAATTGAGAAATTCTCTGGCTCGAATCTTTAGTATTTCTTTTTTATTACTTGTGTATA  
CTATTTAGGCAGAATGCCTTTACCTATTACTAAAAAACTGAAGGAAACCGAAGAAA  
ACAAACCGCTTGTCACTTTTCTTTTCGACTGTAAACGATGGAATCGTCCATTTTCGATATA  
TAAAAAATGATCGATTTGAAAATCCTGTACGAAATGAAATGTCACAATTTTTTTTTTTA  
CATGTCCAAGTGATGGAAAACAAAGAATATCTTTTACATATCCACCGAGTTTATCCACTT  
TTTCAGAAATGATAGAACGAAAGATATCTTTGTACACGACCGAAAAACTATCCCACGA  
GGAT-----TGGGTTTATACTAATGAACAAAAAAGCACACCTTGAGCAATGAATTA  
TAAATCGAATAAAAACTCTAGAAAAAAAACACTTGTTCATAGATGTGCTCGAGAAAAG  
AATCAGATTATGCAATGATGAAAATGAAAAGGAATGCTTGCCTAAAGTGTACGATCCTT

TTTTGAACGGACCATATCGCGGAAAAATCACAAAATTATATTCACGTATAGAAATAGTCT  
GGATAAATAAAATTCACGGTCTACTTCCAAAAGAATTTGAATATCAAGATTACAATGATC  
AATTTCTGGAATAGAAGAAATCAGAAAAGAGGTTCCCTCGATGGTCATACAAATTAAC  
AGATTTTGAAGAACAAGAGGAAGAAGAAATTCGTTCAAGAAAAGCCAAACGTGTTGT  
AATTTATACTGATTCTTTGATACGTTACTCACACAATCGGATTTTCGTCCGGATCTAATC  
AAAGGATCCATGCGTGCTCAAAGACGTAACACAGTTACTTGGGAAATGTTTCAAGCAA  
ATGTGCATTCGCCACTTTTTTTGGATCAAATAGACAAAACA---TTCTTTTTATCTTTTGAT  
---ATCTCCGAAATGATGAATCTCGTTTTTAGGGGT---GAGGAAAATGAACGTATAACAAT  
ATCAGAACTTGGGATAGCATTATATTTGCTCAAGCAATAAGGGGTTTCGATGTTAGTAA  
CCCAATCGATTCTTAGAAAATACATTGTATTGCCTTCATTGATAATAGCTAAAAATGTTG  
GCCGTATGTTATTATTCCAATTCCTGAGTGGTACGAGGATTTGAAAGATTGGAATAGA  
GAAATGCATGTTAAATGCACTTATAATGGTGTTCATTATCAGAAACAGAATTTCCAAA  
AGATTGGTTAACGGATGGTATTACAGATAAAAATTCTATTTCCCTTTCCGTCTAAAACCTTG  
GCGAAAATCTAAAAAAGGAAAAAAGACAATTTTTGTTTTTTAACAGTATGGGGAAGA  
GAAGCGGAACTCCCCTTCGGTCTCCTCGAAAACAACCTTCTTTTTTTCAACCTATTTG  
GAAAGAGCTAAAAAACAAAATTTCTAAAACCTGGAAAAATTTTCTCTTTCTCTAGTTCTA  
AGAGTTTCTAAAAAACGAGAAAAGGGTTTTTAAAGATTTCAAAGAAAAACAAGA  
TGGGTAAACAAAATAGTTCTA-----GTTATAAACGAATAATGAAAGAAGTTGAAAAAAT  
AATATCTATAATCAGT---AATAAGACTACCGACGAATCAACCATTTCGAATTCGATCCACG  
AATTGGACAAAACATTCACTTATAGAGAAAAAATAAAGGATCTTGCTGATAGGACAA  
CCACAATCAGAAATCAAATAGAACAAATCACAAAAGACAAGAAAAAAGCCCTAATA  
AGACAAATTGTGCTGATAAAAATTCAGAATTGCAAAAACATATTTGGCAAATATTCAA  
AGAAAAAGTACCCGATTAATACGCAAATTTACTACTTTATCAAATATTTTCATTGAAAGA  
ATATACAGCGATATCCTTCTATGTACCATTAACAGTCTTAGGACCAATGCACAGCTTTTC  
ATTCACTTTATTTTCGTGTGACTTATCCTCTTTGTCACAAGCATATGTATTTTACACATTGT  
CACAAGTTCAAGTTAATAACAAGTATTACTTGAGATCTGTATTTCAATATACCCATCTTTT  
TCTTAAAGATAGAATCAAGGATTATTATACACGAGGACTATTTGATTACAAACCAAAGC  
ATAAGAAAGTTGATAAGTCTGGAATGAATGAATGGAAAACTGGTTAAAGAGTCATTA  
TCAATACAATTTATCTCAAACCTCAATGGTCTCGATTAGTACCACAAAAATGGAGAAATA  
GAGTCAATCAACGTTGTACAATTCAAAAAATAATATTGGATTCATATAAAAAAAC  
CAA-----TTAATTCATTACGTGAAACAAGAAAAATTAATAAAAAAATACTACAAATATGATCT  
TCTAGCACATAAATATATGAATGAATCTAGTCTATATTTGGATAGAAAATATTTTGATTGT  
AGAATTCCTCCGGTTTTGTTTTAGACTTTTTGATTGGATGGGAATGAATAAAGAAAGGCT  
ATATCGTTGGTTCTTCCAGAATTTGGACTACTTTATGATGCATATAAGCTTAAACCATG  
GATTATACCAATCCAATTTCTTCTTTTAAACTTAAAGAGCAAGAAGGAAGCAGAAGTAG  
ATTTTTCTGAAAAATATTTCTTTTTCAATTAAGATGGGATGATTCTTTGAATCAA  
GAATGATCAACAATATCAAGGTATATTGTCTACTACTTAGACTGATAAATCTAAAGGAAA  
TTGCTATATCCTCAATTCAAAGAGGAGAGATGCGTCTAGATGTAATGTTGATTCAAAG  
GATCTATCTTTACAGAATTGATAAAAAGGGGAATATTTATTATTGAACCGGTTTCGTCTC  
TCTATAAAATGGGATGAAGAATTTCTTATATATCAAACCATAGGTATTTTCATTGGTCAATA  
AGAGTAAACAAAATTTCTTATGATTTATTTGTTCTGAAAATATTTCTATCTACTAGACGTC  
GTAGAGAGTTGAGAATTCTAATTTGTTTGGTATTTCTTTGGCCCAATTATCGATTAGAAG  
ATTTAGCTTGATGAATCGGTATTGGTTTGATACCATAATGGTAGTCGTTTCAGTATGTC  
AAGAATACAGATGTATCCAATGAAACGACATCAATTCAAATCCTGGATCTTCGAATTCA

GAGAGATATTGAGAGAGATCAAGAATTCTCACTATTTCTTAGATTTCATGGATCAAATTCG  
ATTCAGTGGGATCTTTCACCTCACATTTTTTTCCACCAAGAACGTTTTATGAAACTCTTTG  
ACCCCGAATTTTGAGTATCGTACTTTCA---CGTGATTCA-----CAGGATTCAACACGCAA  
TCGATATTTACAG-----ATAAAAGGTGTAGTACTGCTTGTAGTAGCG---GTCCTTATATC  
T-----CGTATTAACAATCGAAAGATGGTCGAAAGAAAAAATATCTATTTGATGGGGC  
TTCTTCCTATACCTATTCTTCCTATACGTATGAATTCCATTGGACACAGAAATGAGACATT  
GGAAGAATCTTTT--TGGTCTTCCAATATCAATAGGTTGATTGTTTCC---CTCCTGTATCTT  
CCAAAAGGGAAAAAGATTTCTGAGAGTTGTTTCATGGATCCGCACGAGAGTACTTGGG  
TTCTCCAATAAAT-----AAAAGTGTATCATGCCCGAATCTAACCGGGGTTTCGCGG  
TGGTGGAGTAACCGGATCGGAAAAAAGAGG-----GATTCTAGTTGTAAGATATCT-----  
AATGAAACCGTAGCTGGAATTGAGATCTCATTCAAAGAGAAGGATAGCAA---TATCTG  
GAGTTTCTTTTTTTATCCTATACG-----GATGATCCGCTCCGCAAGGACCCTGATTGGGAA  
TTGTTTGATCGTCTTTCTCTGAGGAAGAAGCGAAACATAATCAACTTG-----AATTCGGG  
ACAGCTAGTCGAAATCTTAGGGAAAGACTTGATTTGTTATCTCATGTCTGCTTTTCGTG  
AAAAAGACCAATTGAAGGGCAGGGT--TTCTTCAAACAACAAGGA---GCTGAGGCAA  
CTATTCAATCAAATGATATTCAGCATGTTCCCTCTCTTTCTTTCTCGAGAAACAAGT  
GGGGTATTTCTTTGCAAATGTGCTCAATTTTCATATGTGGCAATTCCGCCAAGATCTCT  
TCGTT-----AGTTGGGGGAAG---AATCGGCACGAATCGGATTTTTTGAGGAAC---GTAT  
CGAGAGAGAATTTGATTTGGTTAGACAATGTGTGGTTGGTAAACAAGGATCGG-----T  
TTTTTAGC-----AAGGTACGGAATGTATCGTCAAATATTCAATATGATTCC-----ACAGG  
A-----TCTATTTTCGTTCAAGTAACAGATTCTAGCCAATTGAAAGGATCTTCT---GATCAA  
TCCAGAGATTGTTTTGATTCCATTAGA-----AATGAGGATTCAGAA-----  
-----TATCACAAATTGATCGATCAAACAGAGATTCAGCAACTAAAAGAAAGATC  
GATTCTT---TGGGAT-----CCTTCCTTTAGTCAAACGGAACGAACAGAAATAGAATCAGAT  
-----CGATTCCCGAAA-----TGCCTTTTTGGATCTTCC-----TCAATGTCCCGCTATTACAG  
---GAACGTGAGAAGCCGATAAATAATCATCTGCTTCCGGAAGAAATCGAAAAATTTCTT-  
----GGGAATCCTACAAGATCAATTCGTTCTTTTTTCTCTGACAAATGG-----TCAGAACTT  
CAT---CTGGGTTTCAATCCTACTGAGAGGTCCACAAGAGATCAG-----ACATTTTTT  
CAGAAAAACAAGATGTTTCT--TTTGTCCCTTCCAGGCGATCAGAA-----AATAAA  
GAAATGGTTGATATATTCAAGATAATTACGTATTTACAAAAT-----ACCGTCTCAATTCATC  
CTATTTTCATCAGATCCGGGATGTGATATGGTAGTTCCGAAGGATGAACCGGAT--ATGGA  
CAGTTCCAATAAGATTTTATTCTTGAACAAAAATCCATTTTTGGAT-----TTATTTTCATCTA  
TTCTATGACCGGAACAATGGGGGATACACGTTA-----CGCCACGATTTT---GAATCA---GA  
AGAGAGATTTCAAGAAATGGCGGATCTATTCACCTATCAATAACGGAGCCG---GATCT  
GGTGTATCATAGGGGATTTGCCTTTTCTATTGATTCTACGGATTGGATCAAAAAAAAAA----  
--TTATTGAATAGGGTATTCAACTCCAGAGATGAATCGAAAAAGAAATCTTTA-----TTG  
GTTCTACCTCCTCTTTTTTAT-----GAAGAGAATGAATCTTTTTTATCGAAGGATCAGAAAA  
AACTCGGTCCGG---ATCTACTGCGGGAATTATTTGGAAGATCCAAAACCTCAAATAGTG  
GGATTTGCTAGCAACAACATAATGGAGGCAGTCAATAAATATAGATTGATCCGAAATAT  
GATTCAAATCCAATATAACACCTATCGG-----TACATAAGAAATGTCTCGAACCGATTCTT  
TTTAATG-----AATAGATCCGATCGCAACTACGAATATGGAATTCAA-----AAGGATC  
AAATAGGAAATGATACTCTGAATCATATAACTATAATGAAATATACGATCAACCAACATT  
TATCGAATTTGAAAAAT---AGTCAGAAGAAGTGGTTTGATCCT-----CTTTTTTCTCG  
AATCGAGAGATCCATCAATCGGGATCCTGATGCCTATAGATACAAATGGTCCAATGGGA

ACAATAATTTCCAGGAACATTTGGAACATTTTCGTTTCTGAACAGGGGAAC-----CGTT  
TTCAAGTAGTGTTCGATCGATTACGTATTAATCAATATTCGATTGATTGGTCCAAGGCTAT  
CGACAAACAAGATTTGTCTAAATCACTTCGTTTCTTTTTGTCCAAGGCA-----  
-----CTTCTCTTTTTGTCT-----AAGTCACTTCGTTTCTTTTTGTCCAAGACAC  
TTCCTTTTTTCTTTGTGAGTATTGGAATATCCCCATTCATAGGTCCGAG---ATCCACATC  
TAT--GAATTGAAAGGTACAAACGATCAACTCTGCAATCAGTTGTTAGAATCCATAGGTA  
TTCAAATCGTTCATTTGAATAAATTGAAACCC-----TTCTTATTGGAT-----GATCATGAT  
ACTTCC---CAAAGACCGAAATTCTTGATAAATGGAAGAACAATATTACCATTTTTGTTC  
ATAAGATACCA---AAGTGG---ATGATTGACTCATTCCATACT-----AGAAATAATAGCAGA  
AAATCCTTTGATAACACGGATTCCATTTCTCA-----TCCCACGATCGAGACAATTGGCT  
GAATCCCGTGAAACCATTTCATAGAAGTTCATTGATATCTTCTTTTTATAAAGCAAATCG  
ACTTCGATTCTTGAATAATCCACATCACTTCTGGTTCTAT-----TGTAACAAAGGATTCCC  
CTTTTATGTG-----GAAAAGGCCTGTATCAATAATTATGAT-----CTTACGTAT--GGAC  
AATTCCTCAATATCTTGTTCATTTCGCAACAAA---ATATTTCTTTGTGCGTCCGTA---  
AAAAACCTATTTTTTTGGAG---AGAGAGGCTATTTTACCAATAGATTACAGGTCTCTG  
ACATATTCATATCTAACGAATTTCCAAAAAGTGGTAACGAAACA---TATACTTGTACAA  
A-----TCTTTCCATTTTCCAATTCGACCCGATCCATTTCGTTTCGT-----AGAGCTATTTACT  
CGATCGCAGACATTTCTGCAACACCTCTAACAGAGGAACAAATAGTCAATTTTGAAG  
AACTTCTTGTGAGCCTTTTTTTCAGATATGAATCTATCTGATTCAGAAGGGAAGAACTCGC  
ATCAGTATCTCAGT-----TTCAATTCAAACATGGGTTTGAATTCACACTCCATGTTCTGAGA  
AATATTTACCA-----TCCGGAAGAGGAAAAA-----CAGAGTCTTTGTCT  
AAAG-----AAATGCGTTGAGAAACAGCAGATGTATAGAACCTTTGAACGAGATAGTGCT  
CTTTCAAATCTCTCAAATGGAATCTGTTCCAAACATATATGCCATGGTTCCTTACTTCG  
ACAGGGTGCAAATATCTAAATTTTACCCTTTTAGATGCTTTTTTTCAGACTCATTG-----CCG  
ATACTAAGTAGCAGT---CAAAAATTTGTATCCATTTTTTCATGATATTATGCATGGATCAGA  
TATATCATGGCCAATTCGTCAGAAAAAATGGTGG-----GCGATTCTTTCACAATGGA  
CTCCG---ATAAGTGAGATTTTCGAGTAAGTGTTCACAGAAT-----CTTCTTCTGTCCGAAGA  
AACGATTCATCGAAATAATGAGTCACCCGTTCCATTGATATGGACACATCTGAGATCAA  
CAAATGCTCGGGAGTTC---CTTTATTCAATCCTTTTTCTTCTTCTTGTGCTGGATAT--CT  
CGTTCGTATACATCTTCTCTTTGTTTCCCGA-----GCCTCTAGTGAGTTACAGACAGAGTT  
AGAAAAGATCAAATCTTTGATGATTCCATCATAATGATTGAGTTGCGAAAACCTTCTGG  
ATAGGTATCCTACATCGGAACTGAATTCCTTCTGGTTAAAGAATCTGTTTCTAGTTGCTC  
TGGAACAATTAAGAGATTCTTTGGAAGAAATACGGGGTTCTGCTTCTGACAGCAACAT  
GCTATTGGGTGGTGGTCCC-----GCTTATGGG---GTCAAATCCATACGTTCTAAGA  
ATAAATATTTGACTATCAAT-----CTCATCGATCTCATA---AGTATCATACCAAATCCCGT  
CAATCGAATAACTTTTTTCGAGAAATACGAGACATCTAAGTCGTACAAGTAAAGAAATCT  
ATGCATTGATAAGAAAAAGAAAAACGTGAACGGTGATTGGATTGATGATAAAATAGA  
ATCCTGGGTCGCGAACAGTGATTTCGATTGATGATGACGAAAGAGAATTCTTGGTTTCAG  
TTCTCC-----ACCTAACGACA-----GAAAAAGAATTGATCAAATCTATTGAGTCTGAC  
T--CATAGTGATCATTATCA-----AAGAATGACTCTGGTTATCAAATGATTGAACA  
ACCGGGATCAATTTACTTACGATACTTAGTTGACATTCAT-----AAAAAGTCTCTAATGAA  
TTATGAGTTCAATAGATCCTGTTTAGCAGAAAGACGGATATTCCTTGCTCATTATCAGAC  
AATCACTTAT-----TCACAAACCTCGTGTGGGGCTAATAGTTTTTCATTTCCCATCTCATGG  
A-----AAACCCTTTTCGCTCCGCTTAGCCCTATCTCCTTCT--AGGGGTATTTTAGTGAT

AGGTTCTATAGGAACTGGACGATCATATTTGGTCAAATACCTAGCTACAAACTCTTATGT  
TCCTTTCATTACGGTATTTCCGAACAAGTTCCTGGATGACAAGCCTAAAGGTTATCTTAT  
TGAT-----GATATCGAT-----ATTGATGA  
TAGTGAC-----GATATTGATAATGACCTTGAGACGGAGCTGCTAACTA  
TGACGAATGTGCTA-----ACTATGTATATGACG-----TCGAAAATAGACCGATTGATA  
TCACCCCTCAATTCGAATTAGCCAAAGCAATGTCTCCTTGATAATATGGATTCCAAACA  
TTCATGATCTGTATGTGAATGAGTCGAATTACTTATCCCTCGGTTTATTAGTGAACCTATCT  
CTCC-----AGGGACTGTGAAAGAAGTCC---ACTAGAAATATTCTTGTTATTGCTTCGA  
CTCATATCCCCAAAAGTGGATCCCGCTCTAATAGCTCCGAATAAATCAAATACATGCA  
TTAAGATACGAAGGCTTCTTATTCCACAACAACGAAAGCACTTTTTCATTCTTTCATATA  
CTAGGGGATTTCACTTGGAAAAGAAAATGTTCCATACT-----AACGGATTTCGGGTCCATA  
ACCGTGGGTTCCAATGCACGAGATCTTGTAGCACTTATCAACGAGGCCCTATCAATTAG  
TATTACACAGAAGAAATCAATTATAGAACTAATACAATTAGATCAGCTCTTCATAGACA  
AACTTGGGATTTGCGA-----TCCCAGGTCAGATCGGTTTCAGGATCATGGGATCCTTTT  
CTATCAGATAGGAAGGGCTGTTGCACAAAATGTACTTCTAAGTAATTGCCCATAGATC  
CTATATCTATCTATATGAAGAAGAAA-----TCATGTAAGGAAAGGGATTCTTATTTGTACA  
AATGGTACTTCGAACTTGAACGAGCATAAAGAAATTAACGATACTTCTTTATCTTTTG  
AGTTGTTCTGCCGGATCGGTCGCTCAAGATCTTTGGTCTCCATCC-----GGACCCGATGA  
AAAA---AATGGGATTACTTCGTTTGGATTTGTTGAGAATGATTCT--GATCTAGTTCATGG  
CCTTTTAGAAGTAGAAGGCGCTCTGGTGGGA-----TTCTCACGGAAAGAAAAGATTGC  
AGTCAGTTTGATAATAAT-----CGAGTGACATTGCTTCTTCGGTCCGAACCAAGGAAT--C  
CGTTAGATATGATGCAAAATGGATCTTGTCTATCGTTGATCAGAGATTTCTATATGAAA  
AA-----TACGAATCGGAGTTTGAAGAA--GGGGAAGGA-----GCCCTCGACCCGCAA-----  
-----CAGATAGAGGAAGAT-----TTATTAATCAC-----ATAGTTTGGGCTCCT-----AG  
AATATGGCGCCCT-----TGTGGCAATCTATTTGATTGTATCGAAAGGACCAATGAATTG  
GGATTTCCA---TATTGGGCCAGGTCAATTCGG-----GGCAAACGGATCATTTTTCATAA  
AGAGAATGAGCTTCAACAGAAGGATTTCGGAGTTCTTGCAGAGTGGAACCATGCAGTA  
CCAGACACGAGATAGATCTTCCAAAGAACAAGGCTTTTTTTCGAATAAGCCAATTCATTT  
GGGACCCTGCGGATCCATTCTTTTCCTATTCAA---GATCAGCCCTTGTCTCTGTGTT  
TTCACGTCGAGAATTCTTTGCAGATGAAGAGATGTCAAAGGGGCTTATTACTTCCAAA  
AAAATCCTCCTACATCTATATATAAACGCTGGTTCATC-----AAAATACGCAAGAAAAG  
CACTTCGAATTGTTGATTCATCGCCAGAGATGGCTTAGAACC-----AATAGTTCATTAT  
CT-----AATAGATCTTCTGTTCTAAT-----ACTCTATCCGAGAGTTATCAGTATTTATCAA  
TCTGTTCTATCTAAC---GGAAGGCTATTGGATCAAATGACAAAGACATTGTTGAGAAA  
GAGATGGCTTTTCCCGGATGAAATGAAACATTTGATT-----CATGTAACAGGAAAAAGAT  
TTCCATTCTATGCCTAGATCTCGG---ATAAATGGAAATTTTATTGATAAGACCTTTTCA  
ATTGTAGCCAATATCTTATTACGAGTAATTCCGACAACCTCAGGAGAAAAAGAAGCATT  
TACCTATTACAGAGATGGT-----ATGTCGGCTCAATCTGAAGGAAATTATGCGGAAGCTT  
TACAAAATTATTATGAAGCTATGCGACCAGAAATTGATCCTTATGATCGAAGTTATATAC  
TCTATAATATAGGCCTTATACACACAAGTAATGGGGAGCATACAAAAGCTTTGGAATATT  
ATTTTCGGGCACTAGAACGCAATCCATTCTTACCACAAGCATTTAATAATATGGCCGTGA  
TCTGTCATTAC---CGTGGAGAACAGGCCATTTCGACAGGGTGATTCTGAAATTGCAGAGG  
CTTGGTCCGATCAAGCTGCTGAGTATTGGAAACAAGCTATAGCGCTTACTCCAGGTAAT  
TATATTGAAGCACAAAATTGGTTGAAGATAACGAGACGGTTCGAA-----ATGAACTGGC

GATCAGACCATATATGGATAGAATTTATAACAGGGTCTCGAAAAACAAGTAATTTTTTCT  
GGGCCTGTATCCTTTTTTTAGGTTCACTAGGATTCTTAGTTGTTGGAACCTCTAGTTATC  
TTGGTAGGAATCTGATATCTTTATTTCCATCTCAGGAAATCTCTTTTTTTCCACAAGGGA  
TTGTAATGTCTTTCTATGGAATTGCGGGTCTATTTATTAGTTCCTATTTGTGGTCCACTAT  
TTTGTGGAATGTAGGTAGTGGTTATGATCGATTTCGATACAAAAGAAGGAATAGTGTCTA  
TTTTTCGTTGGGGATTTCCGGGAAAAAATCGTCGTATATTCCTTCGATTCCCTATGAGTG  
ATGTTCAATCAATCAGAGTGGAGGTTAAAGAAGGCCTTTATACTCGACGTGTGCTTTAT  
ATGGAAGTCAGGGGCCAAGGAACTATTCCCTTAACTCGGACTGATGAAAAT--TAACT  
CCACGAGAAATTGAACAAAAAGCTGCGGAATTAGCCTATTTCTTGCGCGTACCAATTG  
AAGGTTTT

>Boea

ATGGAAGATGGTGGTTTAATTCGATG-----ATAAAGA ACTCAATGGACAATCTTGTTCC  
TGTTGAAAATACTAGTGAAAGTGAAGGT--AATAGAAAAGGTAGGGCTAAAAACATTC  
ATAGTTACACTAATGTCGATCATTATTCGGCTTCAAAGACATTTGGGATTTTCTCTCTG  
ATGATACTTTTTTAGTTAGGGATAGTAATGGAGATAGTTATTCT--TATTTTGATATTGAAA  
ATCATATTTTTGAGATTGACAACGAC-----CATTCCTTTATGAGTGAAGTACGAGTCTT  
TTTATCATTATCGCAATTCTAGTTGTATGAATTCTACGAGT-----GAAGATTCCTTATCCAA  
T-----ATGTATGATACTCAATCTAGTTGGAATAATCACATTAATAGTTGCATTGACAGTTAT  
CTTCAG-----TATCAAATCTGTATTGATTCCATTGTAAGTGATAGTAGT--AGTTAC-----  
--ATTTCTAGGTGCATTTTTGATAGCGGGAGGTCCAATCTACGAACTCACGTGAAGAGTA  
GTGATTTAACTCTAAGAGAAGGGTCTAATGATCTCGATGCAACTCAAAAATACAGGCAT  
TTGTGGGTTCAATGCGAAAATTGTTATGGATTAAATTATAAGAAATTTTTGAAATCAAAA  
ATGAATATTTGTGAACAATGTGGATATCATTGAAAATGAGTAGTTCAGAAAGAATCGA  
ACTTTCGATCGATCCCGGTACTTGGGATCCTATGGATGAAGACATGGTCTCTCTGGATC  
CCATTGGATTCATTTCGGAGGAGGAG---TATAAAGATCGTATTGATTCTTATCAAAGAAA  
GACAGGATTA ACTGAGGCTGTTCAAACAGGTGTAGGTCAACTAAATGGTATTCTCGTG  
GCAATTGGGGTTATGGATTTTCAGTTTATGGGAGGTAGTATGGGATCCGTGGTGGGGGA  
GAAAATCACTCGTTTGATTGAGTACGCTACCAATCGACTTTTACCTCTTATTATAGTGTG  
TGCTTCGGGGGGGGCGCGCATGCAAGAAGGAAGTTTGAGCTTAATGCAAATGGCTAA  
AATATCATCTGCCTTATATGATTATCAATCCAATAAAAAGTTATTTTATGTATCAATCCTTA  
CATCTCCTACTACTGGTGGGGTAAACAGCTAGTTTTGGTATGTTGGGAGATATCATTATTG  
CTGAACCCAATTCCTACATTGCATTTGCGGGTAAAAGAGTAATTGAACAAACATTGAAT  
AAAACAGTACCTGAAGGTTCAACAAGCGGTGAATATTTATTCAGAAAGGTTTATTCGA  
CCTAATCGTACCACGTAATACTTTAAAAAGTGTTCTGAGTGAGTTATTTAAGCTGCACG  
CCTTTTTCCGT-----ATGGTAACCATTTCGAGCCGACGAAATTAGTAATATTATC  
CGCGAACGTATTGAACAATATAATAGAGAAGTAAAGATTGTAATAACCGGTACCGTACT  
TCAAGTGGGCGATGGTATTGCTCGTATTCATGGTCTTGATGAAGTAATGGCGGGTGAAT  
TAGTAGAATTTGAAGAAAGTACAATAGGTATTGCTCTGAATTTGGAATCAATAATGTT  
GGTGTGTTGATTAATGGGTGATGGTTTGATGATACAAGAAGGAAGTTCTGTCAAAGCAAC  
AGGAAGAATTGCTCAGATACCAGTGAGTGAGGCTTATTTGGGTCGTGTTATAAACGCC  
TGGCTAAACCTATTGATGGTAGAGGTGAAATTGCAGCTTCTGAATCTCGATTAATTGAA  
TCGCCCGCTCCAGGTATTATTTCCCGGCGTTCCGTATATGAGCCTCTTCAAACCGGGCTT  
ATTGCTATTGATTCGATGATCCCATAGGACGTGGTTCAGCGAGAATTAATTATTTGGGGAC  
AGACAGACCGGTAAAACAGCAGTAGCCACAGATACGATTCTCAACCAACAAGGTCAG

AATGTGATATGTGTTTATGTAGCTATTGGGCAAAAAGCATCCTCTGTGGCTCAGGTAGTA  
AATACTTTACAGGAAAGGGGTGCCATGGACTACACTATTGTCGTAGCCGAAACGGCGG  
ATTCCCCTGCTACATTACAATACCTCGCTCCTTATACAGGAGCAGCCCTGGCTGAATATT  
TTATGTATCGTGAAAAACACACTTTAATCATTTATGATGATCTCTCCAAACAAGCCCAAG  
CTTATCGACAAATGTCTCTTCTATTACGAAGACCACCTGGTTCGCGAAGCTTATCCAGGG  
GATGTTTTTTATTTGCATTCACGCCTTTTGGAAAGAGCCGCTAAATCAAGTTCTAGTTTA  
GGTGAAGGAAGTATGACCGCCTTACCAATAGTTGAAACTCAATCAGGGGATGTTTCGG  
CTTATATTCCTACTAATGTAATTTCCATTACCGATGGGCAAATATCCTTATCCGGTGATCT  
CTTCAATGCTGGGGTCAGACCTGCTATTAATGTGGGTATCTCCGTTTCTAGAGTGGGGT  
CTGCAGCTCAAATTAAGCCATGAAACAAGTAGCTGGTAAATTAATGGAAGTGGC  
ACAATTTGCAGAACTAGAAGCCTTTGCACAGTTTGCTTCAGATCTTGATAAAGCTACTC  
AGAATCAATTGGCAAGAGGTCAACGATTACGCGAATTGCTTAAACAATCCCAAGCAGC  
CCCTCTCACGGTAGAAGAACAGATAATGACGATTTATACCGGAACAAATGGTTATCTTG  
ATTCATTAGAAATTGGACAAGTAAGGAAATTTCTTGTGATTACGTACTTACTTAAAA  
ACAAATAAACCTCAGTTCCAAGAAATAATATCTTCTACTAAGACATTTACTGAGGAAGC  
AGAAGCCCTTTTGAAAGAAGCTATTCAGGAACATAGGGACCGGTTTCTACTTCAGGAA  
CAGGCAATGATAATTAATCCTACTACTTCTGGTCTGGGGTTTCCACGCTTGAAAAAAA  
AAACCTGGGGCGTATCGTCCAAATCATAGGTCCGGTACTAGATGTAGCCTTTCCGCCGG  
GTAAGATGCCGAATATTTATAACGCTCTGGTAGTTAAAGGTCGAGATACTGTTGGTCAA  
CCAATTAATGTGACTTGTGAGGTACAACAATTATTAGGAAATAATCGAGTTAGAGCTGT  
AGCTATGAGTGCTACAGATGGTTTGATGAGAGGAATGGAAGTGATTGATACAGGAGCT  
CCTCTAAGTGTTCCGGTTCGGTGGAAACAACCTCTGGGACGAATTTTCAATGTGCTTGGAG  
AGCCTGTTGATAATTTAGGTCCTGTAGATACTCGTACAACATTTCTTATTCATCGATCTG  
CGCCTGCCTTTATACAGTTAGATACAAAATTATCTATTTTTGAAACAGGAATTAAGTAG  
TAGATCTTTTAGCCCCTTATCGCCGTGGGGGAAAAATCGGACTATTTGGGGGAGCTGGA  
GTTGGTAAACGGTACTCATTATGGAATTGATTAACAATATTGCCAAAGCCCACGGGGG  
CGTATCGGTATTTGGCGGAGTGGGTGAACGTACTCGTGAAGGAAATGATCTTTACATGG  
AAATGAAAGAATCTGGAGTGATTAATGAAGAAAATATTGCAGAATCAAAAGTGGCTCT  
AGTTTATGGCCAGATGAATGAACCGCCGGGAGCTCGTATGAGAGTTGGTTTAACTGCC  
CTAACGATGGCGGAATATTTCCGAGATGTTAATGAACAAGACGTACTTCTATTTATCGAC  
AATATCTTCCGTTTCGTACAAGCAGGATCCGAAGTATCGGCTTTATGGGTAGAATGCCT  
TCCGCTGTCGGTTATCAACCCACTCTGAGTACCGAAATGGGTTCTTTACAAGAAAGAAT  
TACTTCTACCAAAGAAGGGTCCATAACGCTTATTCAAGCAGTTTATGTACCTGCAGACG  
ATTTGACGGATCCTGCTCCTGCTACGACATTTGCACATTTAGATGCTACTACCGTACTCT  
CAAGAGGATTAGCTGCCAAAGGTATCTATCCAGCAGTAGATCCTTTAGATTCAACTTCA  
ACCATGCTTCAACCTCGGATCGTTGGTGAGGAACATTATGAAACTGCGCAAAGAGTTA  
AGCAAACCTTTACAACGTTATAAAGAAGTTCAGGACATTATAGCTATCCTTGGGTGGAC  
GAATTATCCGAAGAGGATCGTTTAACTGTAGCAAGAGCGCGAAAAATTGAGCGTTTCT  
TATCACAACCCTTTTTTGTAGCAGAAGTATTTACCGGTTCTTTAGGTAAATATGTTGATTT  
AGCAGAAACCATTAGAGGGTTTCAATCGATCCTTTCCGGAGAATTAGATGGTCTTCCCTG  
AACAAAGCCTTTTATTTGGTAGGTAATATCGATGAAGTTACCACGAAGGCTATGAACTTA  
GAAATGGAGAGCAATTTGAAGAAAATGACCTTAAATCTTTGTGTAAGTACCCCTAATCG  
AATTGTTTGGGATTCAGAAGTGAAAGAAATCATTTTATGTACGACTAGTGGTCAAATTG  
GCATATTAGCAAATCATGCCCCGATTACTACAACCTGTAGATATAGGGATTTTGGAGAATAC



GTCTTACGGACCAATGGGTAACGATGGTTATGATGGGTGGTTTTGCTAGAATAGGCAAT  
AATCAGATCACTGTTTTAGTAAATGATGCGGAAAAGGGTAGTGATATTGATCCAGAAGA  
AGCTAAACAACTCGTGAAGTAGCAGAAGCTAATTTAGAAAAGCTGAAGGAAAGAG  
ACAAATAATTGAGGCAAATCTTGCTCTCCGCCGGGCTAGGACAAGAGTAGAGGCTGTC  
ACTATGATTTCAATGAAAAATCTAACCGATTCTTTCGTTTCTTTAGGCCACTGGCCATAT  
GCCGGGAGTTTCGGATTTAATACCGATATTTTAGCGACAAATCCAATAAATCTAAGTGTA  
GTGATTGGTGTATTGATCTTTTTTGGAAAGGGAGTGTTAAGTGATTTATTAGATAATCGA  
AAACAGAGGATCCTGAATACTATTCGAAATTCAGAAGAAGTGCAGGAGGGGGCCATTC  
AACAGCTGGAAAAGCCGGGGCCCGCTTACGGAAAGTGGAATGGAAGCCGATGAGT  
TTAGGGTGAATGGATACTCTGAGATAGAGCGAGAGAAATTGAATTTGATTAATTCAACT  
TATAATACTTTGGAACAATTAGAAAATTACAAAATGAAACCATTGAGTTTGAACAGCA  
AAGGGCGCTTTATCAAGTCCGGCAACGGGTTTTCCAACAAGCCTTACAAGGAGCTCTA  
GGAECTCTGAATAGTTGTTTGAACAACGAGTTACATTTGCGTACTATTAGCGCCAATATT  
GACATGTTGGGAGCGATGAAAGAAATAACTGATATGAATCCACTGATTTCTGCTGCTTC  
CGTTATTGCTGCTGGATTAGCCGTAGGACTTGCTTCTATCGGACCTGGAGTTGGTCAAG  
GGACTGCTGCGGGTCAAGCCGTAGAGGGTATCGCGAGACAGCCCAGGCAGAGGGAA  
AGATACGAGGTACTCTATTGCTTAGTCTAGCTTTTATGGAAGCTTTAACAATTTATGGAT  
TGGTTGTAGCATTAGCACTCTTATTTGCAAATCCTTTTGTATGAATGTGCTATCATGTT  
CATCAACACACTAAAAGGGTTATACGATATATCCGGTGTGGAAGTAGGCCAACATCTCT  
ATTGGAAGTAGGGGGTTTTCCAAGTCCATGGCCAAGTACTTATTACTTCTTGGGTTGTA  
ATTGCTATCTTATTAGGGTCAGCTACTATAGCTGTTTCGGAACCCACAACTATTTCCAACC  
GGGGTTCAGAATTTCTTCGAATATGTTCTTGAATTCATTCGAGATGTGAGTAAAACCCA  
AATTGGGGAAGAATATGGCCCTTGGGTTCTTTTATTGGAAGTATGTTTCTATTTATTTT  
GTTTCTAATTGGTCAAGGGCTCTTTTACCTTGGAAAATAATAGAATTACCTCATGGAGA  
GTTAGCCGCACCCACGAATGATATAAATACTACTGTAGCTTTGGCTTTACTCACATCAGT  
GGCATATTTCTACGCAGGTCTTACCAAAAAGGGGTAAAGTTATTTTCGGGAAATATATTCA  
ACCAACTCCAATTTCTTTTGCCTAATACATCTTAGAAGATTTACAAAGCCCTTATCACT  
TAGTTTTCGACTTTTCGGGAATATCTTAGCGGATGAATTAGTAGTTGTTGTTCTTGTTC  
TTTAGTACCTTTAGTGGTCCCATACCTGTCATGTTCCCTGGATTATTTACAAGTGGTATT  
CAAGCTCTTATTTTTGCAACTTTAGCTGCGGCTTATATAGGTGAATCCATGGAAGGCCAT  
CATATGATATTTTCAACCTTAGAGCATATATTAATCATATCTTTTTTCGCTCGTTTCAAT  
TGTAATTACAATTCATTTGATAACCTTTTTAGCCGATGAAATCGTAAAAGTATATGATTCA  
TCCGAAAAGGGCATGATAATGAATTTCTTCTATAACAGGATTATTAGTTACTCGTTGG  
ATTTATTCGGAACATTTTCCACTAAGTGATTTATATGAATCATTAATCTTTCTTTCATGGA  
GTTTTTCCCTTATTCATATAGTTCCGTAT-----AAAATAAAAATATTCTAAGCACAATAAT  
TGGCCCAAGTGCTATTTTTATCCAAGGCTTTGCTACTTCAGGTCTTTTAACTGAAATACA  
CAAATCCACAATATTAGTACCAGCTCTTCAATCTGAGTGGTTAATAATGCACGTAAGTAC  
GATGATATTAGGCTACGCTGCCCTCTTATGTGGATCATTATTATCAGTATCACTTATAGTC  
CTTACAATTAGAAAAAAGAAAAAGTTTTTTGCT-----ACGGAAATCGAATACATGAATGA  
ACGAAGTAATCTATTAATAAAT-----CTTGTTAATTATTATAGGTCCCAATTCATTC  
AACAAATTGGATTATTGGAGTTCTCGAGTTATTAGTCTAGGATTTCTATTTTTAACCATAGG  
AATCTTTCTGGAGCAGTATGGGCTAACGAAGCATGGGGGTCGTATTGGAGTTGGGAC  
CCAAAAGAACTTGGGCTTTTATTACTTGGATCGTATTCGCGATTTATTTACATACTCGA  
ACATATATCAAATTCAGGATACCAATTCAGCAATTGTGGCCTCTATTGGATTTCTTATAA



CGACTTTCTTGTGCTCGAACTTTGGCTCGGAAACACAAAAGTACTGTACGTGGTTTTTT  
GAAAAGATTAGGCTCGGAATTATTGGAAGAATTTTTATGTGCGGAAGAAGACGTTCTTT  
CTTTACTTTACCAAAACGAATTTGGTATTTGGATATTATTTCTATCAATGATCTGACCAA  
TCTCAAAATGATAATTGAT--ACAACCTGAAATACAA---ACTATCAATTCTTTTTCCAGATT  
CGAATCC---TTAAAAGAGGTTCGATGGGATCATATGGATACTTGTCCCTATTTTTACTCTTG  
TATTAGGAATCACACTAGGTGTAAGTAATTGTTTGGTTAGAAAAGAGAAATATCTGCA  
GGAATACAACAACGTATTGGACCTGAATACGCCGGTCTTTAGGAATGCTTCAAGCCTT  
AGCAGATGGTACAAAACACTTTTCAAAGAGAATCTTCTTCCATCTAGAGGCGATACTC  
GTTTATTCAGTATGGGGCCATCCATAGCGGTCATATCCATTTACTAAGTTATTCAGTAAT  
TCCTTTTAGTTATGGACTTATTCTAGCCGATCTTAGTATTGGTGTTTTTTTATGGATCGCC  
GTTTCAAGCCTTGCTCCCGTTGGACTTCTTATGTCAGGATATGGATCAAATAATAAATAT  
TCCTTTTTAGGTGGATTAAGGGCTGCTGCTCAATCAATTAGTTATGAAATACCATTA  
CTATGTGTATTATCAATATCTCTATTATCTAATAGTTCAAGTACAGTTGATATAGTTGAAG  
CGCAGTCAAAATATGGTTTTTGGGGGTGGAATTTGTGGCGGCAACCCATAGGGTTATA  
GTTTTATAATTTCTTCTCTAGCCGAGTGTGAGAGATTACCCTTTGATTTACCAGAAGCA  
GAAGAAGAATTAGTAGCAGGTTATCAAACCGAATATTCAGGTATAAAATTTGGTTTATTT  
TACGTTGCTTCGTATCTAAATCTACTTGTCTTTCATTATTTGTAACAGTTCTTTACTTTG  
GAGGTTGGAATCTTTCTATTCCATATATATTCGTTCCCTGAACTTTTTGACATTA  
AAAAACAAAGTAAGGTTCTTGGAACAATAATCGATATCTTTATTACATTAGGTAAA  
ACTTATTTGTCTTGTTCATTTCTATTGCAACAAGATGGACTTTACCGAGACTGAGA  
ATAGACCAACTTTAAATCTTGGATGGAAATTTCTTTTACCTATTTTCGCTAGGTA  
ATTTATTATTAACAACCTCGTCCCAACTTCTTTCCCTAATGATCTGGCATGTACAGA  
ATGAAAACCTTCAATTCCTCGATTCTACGAGAATTTTTATGAAAGCCTTTCATTTG  
CTTCTCTTCGATGGAAAGTTTTATTTCCAGAATGTATCCTAATTTTTGGCCTAAT  
TCTTCTCTGATGATCGATTCAACCTCTGATCAAAAAGATATACCTTGGTTATATTT  
CATCTCTTCAACAAGTTTAGTAATGAGCATAACAGCCCTATTGTTCCGATGGAGAGA  
AAGAACCTATGATTAGCTTTTTCGGGAAATTTCCAAACGAACAATTTCAACGAAAT  
CTTTCAATTTCTTATTTTACTATGTTCAACTCTATGTATTCCCTATCCGTAGAGTAC  
ATTGAATGTACAGAAATGGCTATAACAGAGTTTCTCTTATTCTGTATTAACAGCTAC  
TCTAGGAGGAATGTTTTTATGCGGTGCTAACGATTTAATAACTATCTTTGTAGCTCC  
AGAATGCTTACAGTTTATGCTCCTACCTATTATCTGGATATACCAAGAAAGATGT  
ACGGTCTAATGAGGCTACTATGAAATATTTACTCATGGGTGGGGCAAGCTCTTCTAT  
TCTGGTTCATGGTTTCTCTTGGCTATATGGTTTATCCGGGGGAGAGATCGAGCTTCA  
AGAAA TAGTGAATGGTCTTATCAATACACAAATGTATAACTCCCCAGGAATTTCAAT  
CGCGCTCATATTCATCACTGTAGGAATTGGGTTCAAGCTTTCCCCAGCCCCTTTT  
CATCAATGGACTCTGACGTATACGAAGGATCTCCCACTCCAGTCGTTGCTTTTCTTT  
CTGTTACTTCGAAA GTAGCTGCTTACAGCTTCAGCCACTCGAATTTTCGATATTC  
CTTTTATTTCTCATCAACGAATGGCATCTTCTTGGAAATCCTAGCTATTCTTAGCAT  
GATATTGGGAAATATCATTGCTATTACTCAAACAAGCATGAAACGTATGCTTGCATAT  
TCGTCCATAGGTCAAATCGGATATGTAATTATTGGAATAATTGTTGGAGACTCAAAT  
GATGGATATGCAAGCATGATAACTATATGCTGTTCTATATCTCCATGAATCTAGGA  
ACTTTTGGCTTGCATTGTATTATTTGGTCTACGTACCGGAACTGAGAACATTCGAG  
ATTATGCAGGATTATACACGAAAGATCCCTTTTTGGCTCTCTCTTTAGCCCTAT  
GTCTCTTATCCCTAGGAGGTCTTCCCTCCACTAGCAGGTTTTTCGGAAACTCTAT  
TTTATTTCTGGTGTGGATGGCAGGCAGGCCTATATTCCTTGGTTTTAATAGGACT  
CCTTACAAGCGTTGTTTCTATCTACTATTATCTAAAAATAATCAAGTTATTA

ATGACTGGACGAAACCAAGAAATCACCCCTCACGTGCGAAATTATAGAAGATCCCCTT  
TAAGATCAAACAATTCCATCGAATTGAGTATGATTGTATGTGTGATAGCATCTACTATAC  
CAGGAATATCAATGAACCCGATTATTGCAATTGCTCAGGATACCCTTTTTATGTTTTTGC  
TTTACGAATATGATATCTTTTGGGCATTTCTAATAATATCAAGTCTTATTCCTATTTTGGCA  
TTTTTCATTTCCGGGGTTTTAGCCCCGATTAGAAAGGGTCCGGAGAACTTTCTAGTTA  
TGAATCGGGTATAGAACCACTGGGCGACGCTTGGTTACAATTCGAATCCGTTATTATAT  
GTTTGTCTAGTTTTTGTGTTTTTGTATGTTGAAACGGTTTTTCTTTATCCATGGGCAAT  
GAGTTTCGATGTATTGGGTATATCGGTATTTATAGAAGCTTTAATCTTCGTGCTTATCTTA  
ATCTTTGGTTTAGTTTATGCATGGCGAAAGGGGGCATTGGAATGGTCT-----

-----  
-----

-----ATGTTAGCAATGT  
ACACTGGGCAAATAGGATTATTTTCTTCTCGGGACCTTTTACTTTTTTTCTTGATGTGGG  
AGTTAGAATTAATCCAATTTATCTACTTGTATGCATGTGGGGAGGAAAAAACGTCTG  
TACTCAGCTACAAAATTTATTTTGTACACAGCGGGCGGTTCTGTTTTTCTTTAATGGGA  
GTTATGGGGATCGGTTTATATGGTTCTAATGAGCCAACACTAAATTTTGCAATATTATCTA  
ATCAGCCCTATCCCGTAGGCTTGGAAATGATATTATATATTGGATTTTTTATGTCTTTGCT  
GTCAAATTACCAATCATAACCCTTACATACATGGTTACCAGATACCCATGGAGAAGCACAT  
TATAGTACTTGTATGCTTCTAGCCGGAATCTTATTAATAATGGGAGCGTATGGGTTAGTT  
CGAATCAATATGGAATTTTCTCATGCTCATTCTCTATTTTCTCCTTGGTTGATGATAG  
TAGGTGCAATACAAATAATCTATGCAGCTTCAACATCTCTGGGTCAACGGAATTTAAAA  
AAAAGAATAGCTTATTCCTCTGTATCACATATGGGTTTCATTATTATAGGAATAGGTTCTA  
TCACCGATATGGGGCTCAACGGAGCCCTTTTACAAATAATTTCTCACGGATTTATTGGTG  
CTGCACTATTTTTCTTGGCCGGAACACTTATGATAGAATACGTCTTGTGTATCTTGACG  
AAATGGGTGGAATAGCTATCGCAATGCCAAAAATATTCACAATGTTTCAGTAGCTTTTCG  
ATGGCCTCCCTTGCAATACCAGGTATGAGTGGTTTTTGTGCTGAATTAATAGTATTTTTT  
GGGCTACTTACTAGTCCAAAATTTTTTTAATTACAAAACACTACTAATTACTTTTGTAAATG  
GCAATTGGAATCATATTAACCTCTATTTATTTATTATCTATGTTACGCCAGATGTTCTATGG  
ATACAAGATATTTAATGTACCAACCTCTATTTTTTTGATTCGGGACCGCGAGAGTTATT  
TCTTTTGTATCTATTTTTTTACCCGTAAGTATTGGTATGTATCCTGATTTTGTTTTTT  
CACTATCAGTTGAAAAGGTTGAAGTCATTCTATCTAATCTTTTTCTGGAATGATGCTAG  
AACATGTAATGTTTTGAGTGCCTATTTATTTCTATTGGTATTTATGGATTGATAACAAG  
TCGGAATATGGTTAGAGCCCTTATGTGCTTGAACCTTATATTAATTCAGTTAATATAAAT  
TTTGTAAACATTTTCTGATATTTTGTATAATCGTCAATTAAGAGGAGACATTTTCTCAATTT  
TTGTTATAGCTATTGCAGCCGCTGAAGCAGCTATTGGACCCGCTATTTTTCATCAATTTA  
TCGTAACAGAAAATCAACTCGGATTAACCAATCAAATTTGTTGAATAAAAATGGAACAG  
ACCTATCAATATGCATGGATCATACTTTCTTCCACTTCCAGTTCCTATGTTAATAGGAA  
TAGGATTGCTTCTTTTTCCGACAGCAACAAAAGATCTTCGTGCGCATGTGGGCCTTGACG  
AGTATTTTATTGTTAAGTATAGTCATGATTTTTTCAACTAATCTGTCTATTCAGTTAATAAA  
TAGCAGTGCTATCTATCAATATGTATGGTCTTGGACTCTCGATAATGATTTTTCTTTAGAA  
TTTGGATGCTTTATCGATCCACTTACTTCTATTATGTTAATGTTAATTTCTACTGTTGGAAT  
TATGGTTCTTATTTATAGTGATAATTATATGGCTTACGATCAAGGATATTTGAGATTTTTTT  
CTTATATGAGTTTTTTTCTATGTTGGGATTAGTTACTAGTTTCGAATTTGATACA  
AATTTATATTTTTTGGGAATTGGTTGGAATGTGTTTCGTATCTATTAATAGGGTTTTGGTTT

ACACGACCTCTTGCCGGAAATGCTTGTCAAAAGGCATTTGTAAC TAATCGTGTAGGGG  
ATTTTGGTTTATTACTAGGAATTTTAGGTTTTTATTGGATAACAGGTAGTTTTGAATTCG  
GGATTTATTTCGAAATATTCAATAACAATCAAGTAAATTCTCCATTTGTTACGTTGTGTGC  
TGCTCTATTATTTGCCGGCGCAGTTGCTAAATCTGCACAATTCCTCTTCATGTATGGTTA  
CCTGATGCTATGGAGGGACCTACTCCTATTTTCAGCTCTCATA CATGCTGCTACTATGGTA  
GCAGCGGGTATTTTCTTG TAGCTCGTATCTTCTCTTTTCATAGTTATACTTATATAAT  
GAATTTGATCTCCTTGATAGGCACAATAACAGTATTTTAGGAGCTACTTTAGCTCTTGC  
TCAAAAAGACATTAAGAGAGGTTTAGCTTATTTCGACAATGTCTCAATTGGGTTATATGAT  
GTTAGCTCTAGGAATGGGGTCTTATCGAAATGCTTTATTTCA TTTGATTACTCATGCTTAT  
TCAAAAGCATTATTATTTTAGGGTCTGGATCCGTTATTCATTCCATGGAACTATTGTTG  
GCTATTCTCCGATAAAAAGTCAGAATATGGTTATTATGGGTGGTTTAAACAAAACATGTAC  
CGATTACCAAGATATCTTTTTTATTTCGGTACACTTTCTCTTTGTGGTATTCCCCCTTGC  
GTGTTTTTGGTCAAAAAGATCAAATCTTAATGATAGTTTCGTTATATTCTCCGATTTTCG  
AATAATAGCTTGGTCCACAGCAGCATTAACCGCATTTTATATGTTTCGGATCTATTTACTT  
ACTTTTCGAGGGGCATTTAAATAGTCATTTTCAA AATTACTGTACGAACAAAAACACCCT  
TTGCTATTCCATATCTTTATGGGGTAAAGAAGGATCTTCAAAAAGT-----GATTTTCATT  
TAATAAGAATGACTTTTTTTTCCACTAATAATCAAAGTTT TATTTCATATCCTTATGAATC  
CGAGAATACTATGGTATTTCTTTACTTGTATTAGTTTTCTTTACTTTGTTGTTGGATTA  
TAGGAATTCCTTTTGATTTGGATATTTAAGCAAATGGTTATCTCCATCTATCAACCTTTT  
ACATCAAAAAGACAAAC---TCAATAAATTGGTATGAATTTT TGAAGATGCAATTTTTTCA  
GTCAGTATAGCTTATTTTCGGAATATTTCTAGCATCGTTTTTATATAAACCTATTTATCTC  
TTTCCAAAATTTCGACTTAATAAATTCATTTGTTAATAGTTTCGGACAAAATAATAAATGTT  
ATATATGATTTGGTCATATAATCGTGCTTATTTAGATAGTTTTTATAGAGCATCCTTTACGGG  
GTCGATAAGGGCATTGACACAATTA ACTCTTTTTTTTTGATAAACGAGTAATTGATGGAAT  
TACGAATGGAGTTGGTGTATAAGTTTTTTTTGTAGCAGAAGGTATCAAATATATAGGGGG  
TGGC---CGCATTTCTTCTATCTTTTCTTCTATTTCTCTTGTGTATCAATTTTTTTATTTCTT  
TCTTCCATGGATTTACCTGCACCAATACATGATTTTCTTTTAGTCTTTTTGGGATCGGGTC  
TTATATTAGGAAGTCTGGGAGTAGTATTACTTCCGAATCCAATTTATTTCGGCCTTTTTCATT  
GGGATTGGTTCTTTTTTTGTATATCCTTATTCTATATTTATCGAATTCCTATTTTGTAGCTG  
CTGCGCAGCTTCTTATTATGTAGGAGCTATAAATGTTTTTAATCATTTTTGCTGTGATGTT  
CATGAATGGGTCAGAATATTATAAAGTTTTTCTCTTTGGACCGTTGGGGATGGAGTTA  
CTTCAATGGTTTGTACAAGTCTTTTTATTTCACTAATTACTACTATTCCAGATACGTCGTG  
GTATGGGATCATTGGACTACAAAATCAAACCAGATTCTAGAGCAAGATTTGATAAGTA  
ATAGTCAACAAATGGAATTCATTTATCAACAGATTTTTTTCTTCCATTTGAACTCATTT  
AATAATTCTTTTAGTTGCTTTAATAGGTGCAATTGTTATAGCTCGTCAAATGATTCCATCA  
ACTACAAGAAAAGACCTCATGATAGTCAATATGGGCCCTCACCACCCATCAATGCATGG  
TGTTCTTCGACTGATAGTTACTCTCGATGGTGAAGATGTTATTGACTGTGAACCAATATT  
GGGTTATTTACATAGAGGGATGGAGAAAATTGCGGAAAATCGAACAATTATACAATATT  
TGCCTTATGTAACGCGTTGGGATTATTTAGCTACTATGTTACAGAAAGCAATAACTGTCA  
ATGGACCGGAGCAGCTAGGCAATATTCAAGTACCTCAAAGGGCTAGCTATATCAGAGCT  
ATTATGTTGGAATTGAGTCGTATCGCTCCCATTTGTTATGGCTTGGCCCTTTTATGGCA  
GATATTGGGGCACAGACTCCTTTCTTCTATATTTTTAGAGAACGAGAATTGATATATGAC  
CTATTCGAAGCTGCCACCGGTATGCGCATGATGCATAACTATTTTCGTATCGGAGGAGTA  
GCTGCTGATCTACCTCATGGCTGGATAGATAAATGTTTGGATTTTTGCGATTTTTTTAA

CCGGGGTTGCTGAATATCAAAAGCTTATTACACGGAATCCTATTTTTTTTAGAACGAGTT  
GAAGGCGTAGGTTTTATTGGCGCAGAAGAAGCACTAAATTGGGGTTTATCAGGACCAA  
TGCTACGAGCTTCCGGAATACAATGGGATCTTCGTAAAGTTGATCGTTATGAGTGTAC  
GACGAATTTGATTGGGAGGTTCAATGGCAAAAAGAGGGGGATTTCATTAGCACGTTATTT  
AGTACGAATCAGTGAAATGACAGAATCCATAAAAATTATCCAACAAGCTCTGGAAGGA  
ATTCCAGGGGGACCCTATGAGAATTTAGAAATCCGACGCTTTGATAGAATAAAAAACCC  
TGAATGGAATGATTTTCAATATCGATTTATTAGTAAAAAACCTTCTCCAACTTTTGAATT  
GTCGAAGCAAGAACTTTATGTAAGAGTTGAAGCACCAAAAAGGAGAATTGGGAATTTTT  
ATGATAGGAGATCAGAGTGTTTTCTTGGAGATGGAAAATCCGACCACCGGGTTTTAT  
CAACTTGCAAATCTTCCCTCAGTTAGTTAAAAGAATGAAATTGGCTGATATTATGACGAT  
ACTTGGTAGCATAGATATCATTATGGGAGAAGTTGATCGTATGTTCCCTATGCTAACTGA  
GTTCTTAAATTCTAGTCAACAAACACTACGAGCTTCCAGATACATTGGTCAAGGTTTCA  
TGATTACCTTGTCCCACGCGAATCGTTTACCTGTAACCTATTCAATACCCCTACGAAAAAT  
TGATCACATCGGAACGTTTCCGAGGCCGAATACACTTTGAATTTGATAAATGCATTGCT  
TGTGAAGTATGTGTTCCGCGTATGTCCTATAGATCTCCCTGTTGTTGATTGGAAATTTGAA  
TCTAATATTCGAAAGAAACGATTACTTAATTACAGTATTGATTTTGGAAATCTGTATATTT  
GTGGTAATTGCGTTGAGTATTGTCCAACAAATTGTTTATCAATGACTGAAGAATATGAG  
CTTCCACTTATGATCGTCATGAATTGAATTATAATCAAATTGCTTTAGGTCGGTTACCG  
GTGTCAATAATTGACGATTATAACAATTCGAACAATTTCTTCGAAT-----AATGTA-----  
-----ATGCAGGGTCGTTTGTCTGTTTGGCTCGTGAAGTATGGGATAATTCAT  
AGATCTTTGGGCTTTGATTATCAAGGAATCGAGACTTTACAAATAAAGCCCGAGGATTG  
GCATTCCATTGCTGTCATTTTATATGTATATGGTTATAATTATCTACGCTCCCAATGTGCGT  
ATGATGTAGCACCTGGCGGATTGTTAGCTAGTGTGTATCATCTTACCAGAATAGAGTATG  
GTGTGGATCAACCAGAAGAGGTATGCATAAAAGTATTTGCCTCAAGAAGGAATCCTAA  
GATTCCGTCTGTTTTTTGGGTTTGGAAAAGTGTGGATTTTCAAGAACGAGAATCTTATG  
ATATGTTGGGAATCTCTTATCATAATCATCCACGCTTGAAACGTATCTTAATGCCTGAAA  
GTTGGATAGGATGGCCCTTACGTAAGGATTATATTGCTCCCAATTTTTATGAAATACAAG  
ATGCTCATATGGGCAATGAGTTTCGATGTATTGGGTATATCGGTATTTATAGAAGCTTTAA  
TCTTCGTGCTTATCTTAATCTTTGGTTTAGTTTATGCATGGCGAAAGGGGGCATTGGAAT  
GGTCTTAGCTCCTGAATATTCAGACAATAAAAAGAAAAGGGGGAAAAAAAAGATTTCA  
AAA---GTTATGAATTCCATTGAGTTTCTTTACTTGATCGAACAGCCGAAAATTCAGTTA  
TTTCAACTACATTAATGATCTTTCAAATTGGTCAAGACTCTCTAGTTTATGGCCGCTTC  
TCTATGGTACGAGTTGTTGTTTTATTGAATTTGCTTCACTGATAGGATCACGATTGACT  
TTGATCGTTATGGACTAGTACCAAGATCGAGTCCTAGACAAGCGGATCTCATTTTAACA  
GCTGGAACAGTAACAATGAAGATGGCCCCCTCCTTAGTGAGATTATATGAGCAAATGCC  
CGAACCAAATATGTTATTGCTATGGGAGCCTGTACAATTACAGGAGGTATGTTTCAGTA  
CCGATTCTTATAGTACTGTTCCGGGAGTCGATAAGCTAATTCCTGTGGATGTCTATTTGC  
CCGGTTGTCCACCTAAACCGGAAGCAGTTATAGATGCTATAACAAAACCTTCGTAAGAA  
AATATCTCGAGAAATCTATGAAGATAGGATTAGGCCTCAACAAGCAAATCGGTGTTTTA  
CAACCAATCACAAGTTTCATGTTGCACGCAGTATGAATACTGGAAATTATGATCAAAGA  
TTCTTTTATCAACCGACATCTACGTCAGAGATCCCTACTGAAACCTTTTTTCAATATAAG  
AATTCAGTATCTTCTCACGAATTAGTGAATATGCAAACCTAGAAATACTTTTTCTCGGATA  
AAGGAACAGATACTCGATCTATTTCCGTATCGCTCATGATATATATCATGACTCGAACAT  
CCATTTCAAGTGCATATCCCATTTTTGCGCAACAGGGTTATGAAAATCCACGAGAAGCG

ACCGGGCGTATTGTATGTGCCAATTGCCATTTAGCTAATAAGCCCGTGGATATTGAAGTT  
CCACAAGCAGTACTTCCTGATACTGTATTTGAAGCAGTTGTTCTGAATTCCTTATGATAAG  
CAAGTGAAACAAGTTCCTTGCTAATGGTAAGAAAGGGGGTGAATGTAGGGGCTGTTC  
TTATTTTACCGGAGGGGTTTGAATTAGCTCCTTCCGATCGGATTTCTCCCAAGATGAAA  
GAAAAGATAGGGAATTTGTCTTTTCAGAGCTACCGCCCTAATCAAAAAATATTCTTGT  
GATAGGGCCTGTCCCTGGTCAGAAATATAGCGAAATCACCTTTCCTATTCTTTCCCCCG  
ACCCCGCTACTAAGAAGGATGTTCACTTCTTAAAATATCCTATGTACGTAGGGGGAAAT  
AGGGGAAGGGGTCAGATTTATCCCGACGGAAGCAAGAGTAACAATACAGTTTATAATG  
CTACAGGAGCAGGTATAGTAAGTAAAATCATAACGAAAAGAAAAGGGGGGATACGAAAT  
AACCATAACAGATCCGTCAGATGGAGGTCAAGTGGTTGATATTATCCCTCCTGGACCAG  
AATTCTTGTTCAGAAAGGTGAATCCATCAGATTTGATCAACCATTAACGAGTAATCCT  
AATGTGGGTGGATTTGGTCAGGGAGATGCAGAAATAGTACTTCAAGATCCATTACGTGT  
CCAAGTCTTTTATTCTTCTTGGCATCTGTTATTTTGGCACAAATATTTTGGTTCTTAAA  
AAGAAACAGTTCGAGAAGGTTCAATTGGCCGAAATGAATTC-----

-----ATGACTTTTTACTATCGTCCGACCGTTACTGAAGCTTTTGCCTCTGTTCAATACAT  
AATGACGGAAGCTAACTTTGGTTGGTTAATCCGATCAGTTCATCGATGGTCGGCAAGTA  
TGATGGTCCATGATGATTCTGCATGTTTTTCGTGTGTATCTCACCGGTGGATTTAAGA  
AACCCCGCAATTGACTTGGGTTACGGGTGTGGTTCTGGCAGTATTGACCGCATCTTTT  
GGCGTAACTGGTTATTCTTTACCTTGGGACCAAATTGGTTATTGGGCGGTGAAAATTGT  
AACAGGTGTACCTGAGGCTATTCCTGTAATAGGATCCCCTTTGGTAGAATTATTGCGCG  
GAAGTGCTAGTGTGGGACAATCCACTTTGACTCGTTTTTATAGTTTACACACTTTTGTAT  
TGCCGCTTCTTACTGCTGTATTTATGTTAATGCACTTTCTAATGATACGTAAACAAGGTAT  
TTCTGGTCCTTAATCCCAATAACAAAAAACCTGATTTGAACGATCCTGTATTAAGAG  
CTAAATTGGCAAAGGGTATGGGTCATAATTATTACGGAGAGCCCGCATGGCCCAACGAT  
CTTTTATATATTTTCCAGTCGTAATTCTAGGTACTATTGCATGTAACGTGGGCTTAGCGG  
TTCTAGAACCATCAATGATTGGTGAACCAGCAGATCCATTTGCAACCCCTTTGGAAATA  
TTACCTGAATGGTATTTTTTTCCCGTATTTCAAATACTTCGTACAGTGCCCAATAAATTAT  
TGGGTGTTCTTTAATGGTTTCAGTACCTGCGGGATTATTAACAGTACCCTTTTTAGAGA  
ATGTTAATAAATTTCAAATCCATTTCTGTCGTCCAGTAGCGACAACCGTCTTTTTGATCG  
GTAAGTGCAGTCGCTCTTTGGTTGGGTATTGGTGCAACATTACCATTGATAAATCCCTAA  
CTTTGGGTCTTTTTATGATTGAAGTTTTTCTATTTGGAATCGTGTTAGGTCTAATTCCTAT  
TACTTTGGCTGGATTTATTCGTAACGATATTTACAATACAGACGTGGTGATCAATTGGA  
CCTTATGCTTACTATAACTAGTTATTTTCGGTTTTTCTACTAGTGGCTTTAACTATAACCTCA  
GCTCTATTTATTGGTTTTGAGCAAGATACGACTTATTATGGATATAGTAAGTCTCGCTTGG  
GCTGCTTTAATGGTAATCTTTACATTTTCCCTTTCACTCGTAGTGTGGGGAAGAAGTGG  
GCTCATGATTATTCGTTCCCGGAACCAGAAGTAAAATCTTGGTGGATAAGGATCCCG  
TAAAACTTCTTTTCGAGGAATGGGCCAAACCGGGTCATTTCTCAAGAACAATAGCTAA  
AGGACCTGATACTACCACTTGGATCTGGAACCTACATGCTGATGCTCACGATTTGATA  
GCCATAACAGTGATTTGGAGGAGATCTCTCGAAAAGTCTTTAGTGCTCATTTTGGTCAA  
CTCTCCATCATCTTTCTTTGGCTGAGCGGCATGATTTCCACGGTGCTCGTTTTTCCAAT  
TATGAAGCATGGCTAAGTGATCCAACCTCACATTGGGCCAAGTGCCAGGTGGTTTTGGC  
CAATAGTGGGCCAAGAAATATTGAATGGTGATGTGGGCGGAGGTTTCCGAGGAATACA  
AATAACCTCTGGTTTTTTTTCAAATTTGGCGAGCATCTGGAATAACTAGTGAATTACAAC

TCTATTGTACCGCAATTGGTGCATTGATCTTTGCAGCATTAAACGCTTTTTGCTGGTTGGT  
TTCATTATCATAAAGCGGCTCCAAAATTGGCTTGGTTTCAAGATGTAGAATCTATGTTGA  
ATCACCATTTAGCGGGGCTACTAGGGGCTTGGGTCTCTCTTGGGCGGGGCACCAAGT  
ACACGTATCTTTACCGATTAACCAATTTCTAAACGCTGGAGTAGATCCTAAAGAGATAC  
CGCTTCCTCACGAATTTATCTTGAATCGCGATCTTTTGGCTCAACTTTATCCAAGTTTTG  
CCGAGGGAGCAACCCCATTTTTACCTTGAATTGGTCAAATATGCGGAATTTCTTACT  
TTTCGTGGAGGATTAGATCCAGTAACTGGGGGTCTATGGCTGACCGATATTGCACACCA  
TCATTTAGCTATTGCTATTCTGTTCTGATAGCGGGTCATATGTATAGGACCAACTGGGG  
GATTGGTCATGGCCTAAAAGATATTTTAGAAGCTCATAAAGGTCCATTTACGGGCCAGG  
GCCATAAAGGTCTATATGAAATCCTAACACATCATGGCATGCTCAATTATCTCTTAACC  
TAGCTATGTTAGGCTCTTTAACCATTGTTGTAGCTCACCATATGTATTCCATGCCCCCTTA  
TCCATATCTAGCTACTGACTATGGTACACAACCTGTCATTGTTACACATCACATGTGGAT  
TGGTGGATTTCTCATAGTGGGTGCTGCTGCGCATGCAGCCATTTTTATGGTAAGAGACT  
ATGATCCAACAACCTCGATACAACGATCTATTAGATCGTGTCTTAGACATCGTGATGCAA  
TCATATCACATCTCAACTGGGCATGCATATTTCTGGGCTTTCACAGTTTTGGTTTGTATAT  
TCATAATGATACCATGAGCGCCTTAGGGCGTCTCAAGATATGTTCTCAGATACCGCTAT  
ACAATTACAACCCGTTTTTGTCTCAATGGATACAAAACACCCATGCTTTAGCGCCTGGTG  
CAACAGCCCCTGGTGC AACGGCAAGCACCAGTTTAACTTGGGGAGGTGGTGATTAGT  
AGCAGTGGGCGGCAAAGTGGCTTTGTTGCCTATTCCGTTAGGAACCGCGGATTTTTTG  
GTACATCACATCCATGCATTTACGATTCATGTACGGTATTGATACTCCTGAAAGGTGTT  
CTATTTGCTCGCAGCTCCCGTTTGATACCGGATAAGGCAAATCTCGGTTTTCGTTTTCT  
TGTGATGGACCTGGAAGAGGGGGTACATGCCAAGTATCAGCTTGGGATCATGTCTTCTT  
AGGACTATTCTGGATGTACAATTCATTTCCGGTAGTAATATTTCAATTCAGTTGGAAAAT  
GCAGTCAGATGTTTGGGGCGGTATAAGTGATCAAGGGGTAGTAACTCATATCACGGGA  
GGAAACTTCGCGCAGAATTCTCTTACTATTAATGGGTGGCTCCGGGATTTCTTATGGGC  
ACAGTCATCCCAGGTAATTCAGTCTTATGGTCTTCAATTATCCGCATATGGCCTTTTTTTC  
CTGGGTGCTCATTTTGTATGGGCTTTTAGTTAATGTTTCTATTTCAGTGGACGTGGTTATT  
GGCAAGAACTTATTGAATCCATCGTTTTGGGCTCATAATAAATTTAAAAGTTGCTCCTGCTA  
CTCAGCCGAGAGCCTTGAGCATTATACAAGGACGTGCTGTAGGAGTAACCCATTACCTT  
CTGGGTGGAATTGCCACAACATGGGCGTCTTCTTAGCAAGAATTATTGCAGTAGGAAT  
GGCATTAAAGATTTCCAAGGTTTAGCCAAGGCTTAGCTCAGGACCCCACTACTCGTCGTA  
TTTGGTTTGGTATTGCTACTGCACATGACTTCGAAAGTCATGATGATATACTGAGGAAC  
GCTTTTATCAGAATATTTTTGCTTCTCACTTCGGTCAATTAGCAATAATCTTTCTGTGGAC  
TTCCGGAAATCTGTTTCATGTAGCTTGGCAAGGAAATTTTGAATCATGGGTACAGGATC  
CTTACATGTAAGACCTATTGCTCATGCAATTTGGGATCCTCATTTTGGCCAACCGGCCG  
TGGAAGCTTTTACTCGAGGGGGTGTCTCCCGGCCCGTGAATATCGCTTATTCTGGTGTT  
TATCAGTGGTGGTATAAATCGGTTTACGCACTAATGAAGATCTTTATACTGGAGCTCTT  
TTTTACTATTGATTTCTGCCCTATCTTTACTAGGGGGTTGGCTCCACTTACAACCCAAA  
TGGAACCGAGCGTTTCGTGGTTCAAAAATGCCGAATCTCGTCTGAATCATCATTTGTC  
AGGACTCTTCGGCGTAAGTTCCTTGGCTTGGACAGGACATTTAGTACATGTGGCTATTC  
CTGGATCCAGAGGGGAGTACGTTTCGATGGAATAATTTCTTAGATGTATTACCACATCCCC  
AAGGGTTAGGCCCGTTTTTTACAGGTCAGTGGAATCTTTATGCTCAAACCCCTGATTCCG  
AGTAGTCATTTATTTGGGACCTCCCAAGGAGCAGGAACTGCCATTCTAACTCTTCTTGG  
AGGATTCCATCCACAAACACAAAGTTTATGGCTGACCGATATTGCTCATCATCATTTAGC



TATTGCATTTATTTTTCTTGTTGCTGGTCATATGTATAGA ACTAATTTTCGGGATTGGACAC  
AGTATCAAGGATCTTTTAGATGCACATATTCCTCCTGGGGGACGATTGGGCCGTGGGCA  
TAAGGGTCTTTATGACACAATCAATAATCACTTCATTTTCAATTAGGACTTGCTCTAGC  
TTCTTTAGGGGTTATTACTTCCTTAGTAGCTCAACACATGTACTCTTTACCTCCTTATGCA  
TTCATAGCACAAGACTTTACTACTCAAGCTGCATTATATACTCATCACCAATATATTGCA  
GGATTCAATTATGACAGGAGCTTTTGCTCATGGAGCTATATTTTTTCATTAGAGATTACAAT  
CCGGAGCAAATGAAGATAATGTATTGGCAAGAATGTTAGACCATAAGGAAGCTATCAT  
ATCGCATTTAAGCTGGGCCAGCCTCTTTCTGGGATTCCATACCTTGGGACTTTATGTTCA  
TAATGATGTGATGCTTGCTTTTGGTACTCCGGAAAAGCAAATTTTGATCGAACCATATT  
TGCTCAATGGATTCAATCGGCTCATGGTAAACTTCATATGGGTTCGACGTACTTTTATC  
TTCAACGAGTGGCCCGGCATTCAATGCGGGCCGAAGCATCTGGTTGCCCGTTGGTTA  
AGTGCTGTTAATGAA-----ATACTAATTCATTATCTTAACAATAGGTCCTGGAGACTTT  
TTGGTTCATCATGCTATTGCTCTCGGTTTACATACAACTACATTGATCTTGGTAAAAGGT  
GCTTTAGATGCACGCGGTTCCAAGTTAATGCCAGATAAAAAAGATTTTGGTTATAGTTT  
TCCGTGCGATGGCCCGGACGAGGGGGTACTTGTGATATTCGGCATGGGACGCATTTT  
ATTTGGCCGTTTTTTGGATGTTAAATACTATTGGATGGGTTACTTTTTATTGGCATTGGAA  
GCACATCACATTATGGCAGGGTAATGTTTACAGTTTAATGAATCTTCCACTTATTTGAT  
GGGCTGGTTAAGAGATTATTTATGGTTAAACTCTTCACAACTTATCAATGGCTATAACCC  
TTTTGGTATGAATAGTTTATCGGTCTGGGCATGGATGTTCTTATTTGGACATCTTGTTTTGG  
GCTACTGGATTTATGTTCTTAATCTCCTGGCGTGGATATTGGCAGGAATTGATTGAAACT  
TTAGCATGGGCTCATGAACGTACACCTTTAGCCAATTTGATTCGATGGAGAGATAAACC  
TGTGGCTCTTTCCATTGTACAAGCAAGATTGGTTGGATTAGCCCACTTTTCTGTAGGTTA  
TATATTTACTTATGCAGCTTTCTTGATTGCCTCTACATCGGGAAAATTTGGCATGTACAT  
TCAGTAAAGATTTATGATACATGTATAGGATGTACTCAATGTGTTTCGAGCATGCCCCACT  
GATGTATTAGAAATGATACCCTGGGATGGATGTAAAGCTAAACAAATCGCTTCTGCTCC  
AAGGACCGAAGACTGTGTTGGTTGTAAGCGATGTGAATCTGCCTGTCCGACCGATTC  
TTGAGTGTTCGAGTTTATTTATCGCAAGAAACAACCTCGTAGTATGGGTCTAGCTTATATG  
ACAACCTTCACTTTTCCCTCTATTTTTGTGCCTTTAGTAGGCCTAGTATTTCCGGCAATT  
GCAATGGCTTCTTTATTTCTTTATGTTCAAAAAATAAGATTGTTATGCGAGATCTAAAA  
ACATATCTCTCCGTGGCCCCAGTACTAAGTACGCTATGGTTCGGGGCTTTAGCAGGTCTA  
TTGATAGAGATCAATCGTTTTTTCCCGGATGCGTTGACATTCCCCTTTTTTTTCATTCATG  
ACTGCAATTTTAGAGAGACGCGAAAGCGAAAGCCTATGGGGTCGCTTCTGTA ACTGGA  
TAACCAGCACCGAAAATCGTCTTTACATTGGATGGTTTGGTGTGTTTATGATGATCCCTACCT  
TATTGACCGCAACTTCTGTATTTATTATTGCCTTCATTGCTGCTCCTCCAGTAGATATTGA  
TGGTATTCGTGAACCTGTTTCTGGATCTCTACTTTACGGAAACAATATTATCTCAGGTGC  
CATTATTCCTACTTCTGCAGCTATTGGTTTGCCTTTTACCCAATCTGGGAAGCAGCATC  
CGTTGATGAATGGTTATACAACGGCGGTCCTTATGAATTAATAGTTCTACACTTCTTACT  
TGGTGTAGCTTGTTACATGGGTTCGTGAGTGGGA ACTTAGTTTCCGCTGGGTATGCGAC  
CTTGGATTGCTGTTGCATATTCAGCTCCTGTTGCCGCTGCTACCGCAGTTTTCTTGATTT  
ACCCAATAGGTCAAGGAAGTTTTTCTGATGGTATGCCTCTAGGAATTTCTGGTACTTTC  
AATTTTATGATTGTATTCCAGGCTGAGCACAAATCCTTATGCACCCATTTACATGTTA  
GGTGTAGCTGGTGTATTTCGGCGGCTCCCTATTCAGTGCTATGCATGGTTCCTTGGTAACT  
TCTAGTTTGTATCAGGGAAACCACAGAAAATGAATCTGCTAATGAAGGTTACAGATTCG  
GTCAAGAGGAAGAAACTTATAATATCGTAGCCGCTCATGGTTATTTTGGCCGATTGATCT



TCTAGGATTCCTTCTTCGTAGGTCATTTATGGCACGCGGGAAGGGCTCGTGCAGCTG  
CAGCAGGATTTGAAAAAGGGATTGATCGTGATTTTGAACCTGTTCTTTCCATGACCCCT  
CTTAATATGACTATAGCCCTTGGTAAATTTACCAAAGACGAAAATGATTTATTTGATATTA  
TGGATGACTGGTTACGTAGGGACCGTTTCGTTTTTGTAGGCTGGTCCGGTCTATTGCTC  
TTTCCTTGTGCCTATTTTCGCTTTAGGGGGTGGTTCACAGGTACAACCTTTGTAACCTCA  
TGGTATACCCATGGATTGGCCAGTTCCTATTTGGAAGGCTGTAATTTCTTAACGGCCGCG  
GTTTCTACTCCTGCTAATAGTTTAGCGCATTCTTTATTGTTACTATGGGGTCTGAAGCA  
CAAGGAGATTTACTCGTTGGTGTCAATTAGGCGGTCTGTGGACTTTTGTGCTCTGCA  
TGGCGCTTTCGGACTAATAGGTTTCATGTTACGTCAATTTGAGCTTGCTCGATCTGTTCA  
ATTGCGACCTTATAATGCAATCGCATTCTTCTGGTCCAATTGCTGTTTTTGTCTGTATTCT  
CTGATTTATCCACTAGGGCAGTCTGGTTGGTCTTTTGCACCTAGTTTTGGTGTAGCAGCT  
ATATTTGATTCATCCTCTTTTTTCAAGGATTCATAATTGGACACTGAACCCATTTATA  
TGATGGGAGTTGCCGGTGATTGGGCGCTGCTTTGTTATGTGCTATTCATGGTGCTACCG  
TAGAAAATACTTTATTTGAAGATGGTGATGGTGCAAATACATTCCGTGCTTTTAACCCAA  
CTCAAGCTGAAGAACTTATTCCATGGTCACCGCTAACCGCTTTTGGTCCCAAATCTTT  
GGGGTTGCTTTTTCCAATAAACGTTGGTTACATTTCTTTATGTTATTTGTACCAGTAACC  
GGTTTATGGATGAGTGCTCTTGGAGTAGTCGGTTTGGCCCTGAACCTACGTGCCTATGA  
CTTCGTTTTCTCAGGAAATTCGCGCAGCGGAAGATCCTGAATTTGAGACTTTCTACACCA  
AAAATATTCTATTAACGAAGGTATTCGTGCTTGGATGGCGGCTCAAGATCAGCCTCAT  
GAAAACCTTATATTCCCTGAGGAGGTTCTACCACGTGGAACGCTCTTATGTCTGGAAG  
CACAGGAGAACGTTCTTTTGTGATATTATTACCAGTATTCGATATTGGGTCATTCATAG  
CATTACTATACCTTCCCTATTCATTGCTGGTTGGTTATTTGTCAGTACCGGTTTGGCTTAC  
GATGATTTGGAAGTCCTCGGCCAAACGAATATTTACAGATAGCCGCCAAGGAATTCC  
ATTAATAACAGGCCGTTTTGATCCTTTGGAACAACCTCGATGAATTTAGTAGATCATTAT  
GACTATAGATCGAACCTATCCAATTTTTACAGTACGCTGGTTGGCTGTTTCATGGTCTAGC  
TGTACCTACCGTCTTCTTTTTGGGGTCAATATCAGCAATGCAGTTCATCCAACGAATGG  
CTACACAAACTGTTGAGAACAGTTCATAGATCGGGC---CCAAGACGAACTACTGTAGGG  
AGTTTATTAATAACCAATTGAATTCAGAATACGGTAAAGTAGCTCCGGGATGGGGAACGA  
CTCCTTTGATGGGAGTTGCAATGGCTCTATTTGCGGTATTTCTATCTATTATTTGGAGAT  
T T A T A A T T C T T C T G T T T A T T A G A T G G A A T T T C A A T G A A  
T????????????????????????????????????????????????????????????  
????????????????????????????????????????????????????????????  
????????????????????????????????????????????????????????????  
ATGGCCGATACTACTGGAAGGATTCCTCTTTGGATAATAGGTA  
GTA  
ACTGGTATTCTTGTGATTGGTTTAAATAGGTAATTTCTTTTATGGTTCATATTCCGGATT  
AGGTTTCATCCCTGATGCTTAATATCATTAGTTTAAATCTGTATTTGTCTTAAT-----CCT---A  
GTAGTTTTTTCTTCGGAAAATGCCGGAAGCCTATGCTTTTTTTGAATCCAATCGTAGATG  
TTATGCCAGTGATACCTCTGTTTTTTTTCTGTAGCTTTTGTGGCAAGCTGCTGTAA  
GTTTTCGAATGACACAATCAAACCCGAACGAACAAAATGTTGAATTGAATCGTACTAG  
TCTCTACTGGGGATTACTCAATTTTGTACTTGCTGTTTTATTTTCCAATTATTTCTTCA  
ATATGGAAGTAAATATTCTTGCATTTATTGCTACTGCACTATTCACTTAGTTCCCTACCGC  
CTTTTACTTATTATTTATGTAATAACGGTTAGTCAAATGATATGGAAACAGCAACCCT  
AGTCGCCATCTTTATATCTGGTTTACTTGTAAGTTTTACCGGGTATGCCTTATATAACCGCT  
TTTGGGCAACCTTCTGAACAATAAGAGATCCATTCGAGGAACATGGGGACATGGAAG  
CATGGTTTATACATTCCTTTTATGCTCGACTCTAGGGATAATCTTTTTTCGCTATCTTTTTT  
C G A G A A C C A C C T A A A G T T C C A A C T A A A A G - - - -

-????????????????????????????????????????????????????????????????????????????????????????  
????????????????????????????????????????????????????????????????????????????????????????  
?????????-----ATGTCACCACAAACAGAACTAAAGCAAGTGTTGGATTCAA  
AGCGGGTGTAAAGAGTACAAATTGACTTATTATACTCCTGAATACAAAACCAAAGATA  
CTGATATCTTAGCAGCATTCCGAGTAACTCCTCAACCTGGAGTCCGCCTGAAGAAGCA  
GGGGCGGCGGTAGCTGCCGAATCTTCTACTGGTACATGGACAACCTGTGTGGACCGATG  
GGCTTACCAGCCTTGATCGTTACAAAGGGCGATGCTACCACATCGAGCCCGTTCCTGGC  
GAAACAGATCAATATATCTGTTATGTAGCTTACCCTTTAGACCTTTTTGAAGAAGGTTCT  
GTTACTAACATGTTTACTTCCATTGTAGGCAATGTATTTGGATTCAAAGCCCTTCGTGCT  
CTACGTCTGGAAGATCTGCGAATCCCTACTGCTTATATTA AAACTTTCCAAGGGCCGCC  
TCATGGGATCCAAGTTGAAAGAGATAAATTGAACAAGTATGGTCGTCGCCCTGTTGGGAT  
GTACCATTAAACCAAACTGGGGTTATCTGCTAAAACTACGGTAGAGCGGTTTATGAA  
TGTCTTCGCGGGCGGACTTGATTTTACCAAAGATGACGAGAACGTGAACTCCAGCCGT  
TTATGCGTTGGAGAGATCGTTTCTTATTTGTGCCGAAGCCATTTATAAAGCACAGGATG  
AAACAGGTGAAATCAAAGGTCATTACTTGAATGCTACTGCGGGTACATGCGAAGAAAT  
GATGAAAAGGGCTATATTTGCTAGAGAATTGGGAGTTCCTATCGTAATGCATGACTACTT  
AACAGGAGGATTCACTGCAAATACTAGCTTGGCTCATTATTGCCGAGATAATGGCCTAC  
TTCTTCACATTCACCGTGCAATGCATGCAGTTATTGATAGACAGAAGAATCATGGTATAC  
ACTTCCGTGTATTAGCTAAAGCGTTACGTATGTCTGGTGGAGATCACATTCCTCTGGTA  
CCGTAGTAGGTA AACTTGAAGGAGAAAGAGACATCACTTTGGGCTTTGTTGATTTACT  
GCGTGATGATTTTATTGCAAAGATCGAAGTCGCGGTATTTATTTCACTCAAGATTGGGT  
CTCTTACCAGGTGTTATTCCTGTGGCTTCAGGTGGTATTCACGTTTGGCATATGCCTGC  
TCTGACCGAGATCTTTGGGGATGATTCTGTACTACAGTTCGGTGGAGGA ACTTTAGGAC  
ACCCTTGGGGTAATGCGCCAGGTGCCGTCGTAACCGAGTAGCTGTAGAAGCATGTGT  
ACAAGCTCGTAATGAAGGACGTGATCTTGCTGCTGAGGGGAATGCAATTATCCGTGAG  
GCTAGCAAATGGAGTCCCTGAACTAGCTGCCGCTTGTGAGGTATGGAAAGAGATCAAAT  
TTGAATTTAAAGCGGTGGATACTTTGGATGAAATGGCGATACATTTATACAAACTTCTA  
CCCCGAGCACACGCAATGGAACCGTAGACAGTCAAGTGAAATCCAATCCACGAAATAA  
TTTGATCTATGGACAGCATCATTGTGGTAAAGGTCGTAATGCCAGAGGAATCATTACCG  
TAAGGCATAGAGGGGGAGGTCATAAGCGTCTATACCGTAAAATCGATTTTCGACGGAAT  
GAAAAAGACATATATGGTAGAATCGTAACCATAGAATACGACCCTAATCGAAATGCATA  
CATTTGTCTCATACTATGGGGATGGTGAGAAGAGATATATTTTACATCCAGAGGGG  
CTATAATTGGAGATACCATTGTTTCTGGTACAGAAGTTCCTATAAAAATGGGAAATGCC  
TACCTTTGACCGATATGCCCTTAGGCACGGCCATACATAACATAGAAATCACACTTGGA  
AAGGGTGGACAATTAGTTAGAGCAGCGGTTCTGTAGCGAACTGATTGCAAAAAGAG  
GGGAAATGGGCCACATTA AAATTACCTTCTGGGGAGGTCCGTTTGGTATCCAAAACT  
GCTCAGCAACAGTCGGAACAAGTGGGGAATGTTGGGGCGAACCAGAAAAGTTTGGGTA  
GAGCCGGATCCAAGCGTTGGCTAGGTAAGCGTCTGTAGTAAGAGGAGTAGTTATGAA  
CCCTGTAGACCATCCCCATGGGGTGGTGAAGGGAGAGCCCCAATTGGTAGAAAAAA  
ACCCACAACCCCTTGGGGTTATCCTGCACTTGAAGAAGAAGTAGAAAAAGGAATAAA  
TATAGTGATAATTTGATTGTTTCGTCGCCGTAGTAAAATGATTCAACCTCAGACTTATTTA  
AATGTAGCGGATAACAGCGGGGCTCGAAAATTGATGTGTATTCGAATCATAGGAGCTAG  
C---AATCGTCGATATGCTCATATTGGTGACGTTATTGTTGCTGTGATCAAAGAAGCATT  
CCAAACATGTCCCTAGAAAAATCAGAAGTAGTAAGGGCTGTAATTGTTTCGTACCTCTAA

AGAACTTAAACGTGACAGCGGTATGATAATACGATATGATGACAATGCCGCAGTTGTGA  
TTGATCAAGAAGGAAATCCAAAAGGAACTCGAATCTTTGGTGCAATCCCTCGGGAATT  
GAGACAATTAATTTTACTAAAATAGTTTTCATTAGCTCCCGAGGTATTA-----  
-----ATGAAGGGAATGTCTTATCGAGGTAATCGTATTTGTTTCGGTAAATA  
TGCTCTTCAGTCACTTGAACCTGCTTGGATCACATCTAGACAAATCGAAGCCGGTCTGA  
CGAGCAATGACACGAAATGCACGCCGTGGGGGAAAAATATGGGTGCGTATATTTCCAG  
ACAAACCTATTACCATAAGACCTGCTGAAACACGTATGGGTTTCAGGGAAAGGATCCCC  
CGAATATTGGGTAGCGGTTGTTAAATCGGGTCAATACTATATGAAATAGGTGGCGTAA  
CTGAAAATATAGCTAAAAGGGCTATTTTAATAGCAGCATCGAAAATGCCTATACGAACT  
CAATTTATTAGTTTGGGAATGACCAGAATTAACCGCGGATATATAGCTCGGAGACGTAG  
AAGAAAAATTCGTTTATTTGCATCAAGCTTTCGGGGGGCTCATTCAAGACTTACTCGAA  
CTATTACTCAACAGAAAATAAGAGCTTTAGTTTCGTCTCATCGGGATAGGGATAAGCAA  
AAGAGAGATTTTCGTGCTTTGTGGATTACTCGGATAAACCGCAGTAATTCGAGAA---ACC  
CGAGTATCCTATAGTTATAGTCAATTAATACATGATCTATAACAAGAGACAGTTGCTTCTTA  
ATCGTAAAATACTAGCACAAATAGCTATATCAAATAGGAATTGTCTTTATCTGATTTCCA  
ACGAAAAGAAGAAAAGAAGTAGATTGGAAAAGAATACACCGAAAAAATT-----  
-----ATATCTCTATCTGCTGATAAAGCAAGAAGAGTAATTGACCAAATTCGTGGACG  
TTCTTATGAGGAAACACTTATGATACTAGAACTCATGTCTTATAGAGCATGTTATCCCAT  
TTTAAATTGGTTTTTTCTGCAGCAGCAAATGCTAGTTACAGTATGGCTTCTAAAGAAGC  
CGATTTAGTAATTAGTAAGGCTGAAGTTAATGAGGGTACTACCGCGAAGAGATTAAAAC  
CTCGAGCTCGAGGACGTAGTTATGCGATAAAAAGAAATACCTGTATATACTATTGTA  
GTGAAAGATAGATCTCTAAAT-----ATGGATGGAATCAAATATGCAGTATTTA  
CAGACAAAAGTATTCGGTTATTGGGGAAAAAT---CAATATACTTCTAATGTGCAATCAGG  
ATCAACTAGGACAGAACTAAAGCATTGGGTCAACTATTCTTTGGTGTCAAGGTAATAG  
CTATGAATAGTCATCGACTTCCGGGAAAGGGTAGAAGAATGGGACCTATTATGGGACAT  
ACAATGCATTACAGACGTATGATCATTACGCTTCAACCGGGTATTCTATTCCACCTCTT  
AGAAAGAAAAGAACTATGGCAGTTCCAAAAAACGTACTTCTATATCAAAAAAGCGTA  
TTCGAAAAAATTTTTGGAAAAGGAAGGGGTATTGTGCATCGTTAAAAGCGTTTTCTTA  
GGGAGATCTCTTTCTACCGGAATTCAAAAAGTTTTTTTGTGCGACAAACAAATAAAAT  
GGCCAAGAGGAAAGATGCACGAGGAACGGTGATTTTGAATGTACCGGTTGTATTCTGA  
AATGGTGTAAATGTTAAGAAGGCATCAACGGGCATTTCCAGATATATTACTCAAAAAGAA  
CCGGCACAATACCCCTAATCGATTAGAATTGAGAAAATTCTGCCCTATTGTTACAAC  
ATATGATTCATGGGGAATAAAGAAAATGAAAATAAGAGTTTCCGTTTCGTAAAATTTGT  
GAAAAGTGTGACTAATCCGTAGACGGGGGCGCATTATAGTAATTTGCTCTAACCCAG  
ACATAAACAAAGACAAGGAATGGTTCGAGAGAAAGTCACAGTATCTACTCGGACACTA  
CAGTGGAAATGTGTTGAATCAAGAATAGACAGTAAACGTCTTCATTATGGGCGATTTAT  
TCTCTCTCCACTTATGAAAGGCCAAGCCGACACAATAGGCATTGCAATGCGAAGAGCT  
TTGCTTGGAGAAATAGAAGGAACATGTATTACACGTGTAATACTGAG-----AACGTCC  
CGCATGAATATTCTACTATAACGGGTATTCAAGAATCGGTCCATGAGATTTAATGAATT  
TGAAAGAAATTGTATTGAGAAGTAATCTATATGGGACTTGCGAAGCCTGTATTTGTGTC  
AGAGGCCCTGGATATGTAAGTCAAGATATCATCTTACCGCCTTATGTAGAAATCGTC  
GATAATACACAACATATAGCTAGCTTGACTGAACCAATTCATTTTGGTATTGAATTTGAA  
ATCGAGAGAAATCGTGGATATCTTATAAAAATGCCACAT---AACCTTGATGGAAGTTAT---  
---CCTGTGATGCTGTATTTCATGCCTGTTGAAATGTGAATCATAGTATTCATTGCTATGG

GAATCGGAATGAAAAACAAGAGATACTGTTTTTAGAACTATGGACAAATGGGAGTTTA  
ACTCCGAAAGAAGCACTTCAAGAAGCCTCCCGGAATTTGATTGATTTATTTATCCCTT  
TTTAGATAAGAAAGAAGAA-----AACATACCTTTAGAGGGACAATCAA---CACACGGTTC  
CTTTATCCCAATTTACTTTTCACGATAAATTGGAT---AAACTCAGAAAAAACAAAAA---  
AGAATAGCATTGGAATCGATTTTTATTGACCAATCCGAATTGTCTCCAGGATCTATAAT  
TGCCTCAAAAGGTCCCATATATACATTATTGGACCTTTTGAATACGAGTCAAGAAGAT  
CTTATGAAAATTAAGCATTTCATCTAGAAGATGTA AACATATATATTGGACGTTCTAGAA  
AAACAT-----TTCGCAGTTCATTACCAAAAAAGAGGATGCTCGGGGATGAA---AATGAG  
GCAATGTCTACAATACCTGGATTGAATCAGATACAATTTGAAGGGTTTTGTAGGTTTCATT  
GATCAGGGTTTTGACAGAAGA ACTTTATAAGTTTCCAAAAATTGAAGATACAGATCAG  
AAATCGAATTTCAATTATTTGTGGAACGATATCAATTGGTAGAACCGTTGATAAAGGAA  
AGAAATGCTGTGTATGAATTACTCACATATTCTTCTGAATTATATGTATCCGCAGGATTAA  
TTTGAAAACCAGTAGGGATATGGAAGAACAAGTATTTGATTGGAAACATTCCTCTA  
ATGAATTCCTCGGA ACTTCTATAGTAAATGGAATATATAGAATTGTGATCAATCAAATA  
CTGCAAAGCCCTGGCATTTATTACCGGTCAGAATTGGACCATAACGGAATTTCCGGTCTA  
TACCGGCACCATAATATCAGATTGGGGAGGAAGATTAGAATTAGAGATTGATAAAAAAG  
CAAGGATATGGGCTCGTGTAAAGTAGGAAACAAGATCTCTATTCTAGTTCTATCATCA  
GCTATGGGTTCGAATCTAAGAGAAATTCTAGACAATGTTTATTATCCTGAAATATTTTTG  
TCTTTTCTGAATGATAAGGAGAGAAAAAATTGGATCAAAGAGAATGCCATTTTTGG  
AGTTTTATCAACAATTTGCTTGTGTAGGTGGGGATCCAGTATTTTCTGAATCCTTATGTA  
AGGAATTACAAAAGAAGTTCTTTCAACAAGATGTGAATTAGGAAGGATTGGTTCGACG  
AAATATAAACCAAAGACTGAACCTTGATATACCCCAACAATAACATTTTTGTTACCAC  
GAGACATATTGGCAGCCGCTGATCATTAAATTGGGCTGAAATTTGGAATGGGTGCACTT  
GACGAT-----ATGAATCATTGAAAAATAAGCGTATTCGTTCTGTAGCGGATCTTTTACAA  
GATCAATTCGGATTGTCTCTGGTTTCGTTTAGAAAATGTGGTTCGCGGA ACTATATGTGG  
AGCAATTCGG---CATAAATTG---ATACCGACTCCTCAGAATTTGTTAACTTCAACTCCA---  
-----TTAACA ACTTATGAATCTTTTTTTGGTTTACACCCTTATCTCAAGTTTTAGA  
TCGAACTAATCCATTGACACAAATAGTTCATGGGCGAAAATTGAGTTATTTAGGTCCTG  
GAGGACTAACAGGGCGAACTGCTAGTTTTCGGATACGAGATATCCACCCTAGTCACTAT  
GGTTCGATTTGCCAATTGACACATCTGAGGGAATCAATGTAGGGCTTATTGGATCCTTA  
GCAATTCATGCGAGGATGGGTCATTGGGGA---TCTCTAGAAAGTCCCTTTTAT-----GA  
GATTTCCGAGAGATCAACAGGG-----TTACGATTGCTTTATTTATCACCAGGTAGAGATG  
AATACTATATGTTAGCGGCAGGAAATCTTTAGCGTTGAATCGGGATATTCACGAAGAA  
CAGGTGGTTCAGCTCGATATCGTCAAGAATTCCTGACTATTGCATGGGAACAGGTTCA  
TCTTCGAAGTATTTTTCCCCTTGCAATATTTTTCTATTGGAGCTTCCCTTATTCCTTTTATTG  
AACATAATGATGCGAATAGGGCTTTAATGAGTTCTAATATGCAACGTCAGGCAGTTCCG  
CTTCTCGGTCCGAGAAATGCATTGTTGGA ACTGGGTTGGAACGACAAGTAGCTCTAG  
ATTCAGGGGCTCTTGCTATAGCACAACGTGGGGGAAAGATCATTATATCGAGATTGAC  
AGGATCCTTTTCTCGGGTAATGGAGATATTCTAACCATTCCATTACTTATGTATGAACGTT  
CCAACAAGAATACTTATTTGCATCAAAAACCCAGGTTCCGGCGGGGTAAATCCATTA  
AAAGGACAAATTTTAGCAGATGGTGTGCTACGGTTGGTGGCGAACTTGCTTTGGGGA  
AAAACGTATTAGTAGCTTATATGCCATGGGAAGGTTACAATTCTGAAGATGCAGTACTC  
ATTAGTGAGCGTTTAGTATATGAAGATATTTATACTTCTTTTACATACGGAAATATGAGA  
TTCAGACTCATGCGACAAGTCAAGGC---CCTGAAAGGATCACTAACGAAATCCACATT

TAGAAGCTCGTTTACTTTCGCAATTTAGACAAAAATGGAATTGTGATGTTGGGATCTTGG  
GTAGAGACGGGTGATATTTTAGTAGGTAATTAACGCCCAAATGGTGAAAGAA---TCG  
TCGTATGCCCCGAAGATAGATTGTTACGAGCCATACTTGGCATTTCAGGTATCTACTTCA  
AAAGAACTTGTTTAAACTACCTATAGGTGGTAGGGGCGGGTTATTGATGTGAGGT  
GGATCCAGAAAAGGGGA---GGTTCTAGTTATAATCCAGAAACAATTCGTATATATATTC  
ACAGAAACGTGAAATCAAAGTAGGTGATAAAGTAGCTGGAAGACACGGAAATAAAGG  
TATCATTTCAAAGATTTTGCCTAGACACGATATGCCTTATCTGCAAGATGGAGAACCTGT  
TGATATGGTCTTCAACCCATTAGGAGTACCTTCACGAATGAATGTAGGACAGATATTTG  
AATGTTTCGCTGGGGTTAGCAGGAGGTCTACTAGACAGACATTATCGAATAGCACCTTTT  
GATGAGAGATATGAACAAGAAGCTTCGAGAAAATTAGTGTTTTCTGAATTATATGAAGC  
CAGTAAACAAACAGCAAATCCATGGGTATTTGAACCTGAGTATCCAGGAAAAAGCAGA  
ATATTTGATGGAAGGACGGGAAATCCTTTTGAACAACCCGTTATAATAGGAAAGCCTTA  
TATCTTGAAATTAATTCATCAAGTTGATGATAAAATCCATGGACGTTCCAGTGGACATTA  
TGCGCTTGTTACACAACAACCCCTTAGGGGAAGGGCAAACAGGGGGGACAACGAGT  
AGGTGAAATGGAGGTTTGGGCTCTAGAAGGATTTGGTGTTGCTCATATTTTACAAGAGA  
TGCTTACTTATAAATCTGATCATATTAGAGCACGTCAAGAAGTACTTGGTACTACGATCA  
TTGGAGGAACAATACCGAATCCGGAAGATGCTCCAGAATCGTTTCGATTGCTTGTTTCGA  
GAACTACGATCTTTAGCTCTGGAACCTGAATCATTTCTGGTATCTGAGAAAACTTCCA  
GATAAATAGGAAGGAAGCTATGAATCACAATTTTTCTTCTATGATTGATCGGTACAAACA  
TCAACAACACTACGAATTGGATTAGTTTCTCCTCAACAAATAAGCGCTTGGTCCACTAAAA  
TCTGCTAATGGAGAGATAGTTGGAGAGGTGACAAAACCTATACTTTTCATTACAAA  
ACCAATAAACCGGAAAAAGATGGATTGTTTTGTGAAAGAATTTTTGGGCCTATCAAAA  
GTGGAATTTGTGCTTGTGGAAATTATCGAGTAATCGGAGATGAAAAAGAAGACCCGAA  
TCTTTGTGAACAATGCGGAGTCGAATTTGTTGATTCTCGGATACGAAGATACCAAATGG  
GCTACATCAAACCTCGCATGCCAGTAACCCATGTGTGGTATTTAAAACGTCTTCCTAGTT  
ATATTGCGAATCTTTTAGATAAACCTCTTAAAGAATTAGAAGGCCTAGTTTACTGCGATG  
TGAATTTTTCTTTTGCTAGGCCG---ATAACGAAAAAACCCACTTTCTTGCGATTACGAGG  
TTTATTTCGAATATGAAATCCAATCTTGAAATACAGCATCCCTCTTTTTTTTACTACCCAA  
GGCTTCGATACATTTCGAAATCGAGAAATCTCTACTGGTGCAGGTGCTATTTCGAGAACA  
ATTAGCCGATCTAGATTTACGAATTATTCTAGATAATTCGTTGGTAGAATGGAAAGAATT  
AGGGGAAGAA---GGACCCACAGGAAATGAATGGGACGATCGAAAGGTTGGAAGAAGA  
AAGGATTTTTTGGTTAGACGCATGGAATTAGCTAAGCATTTTCTTCGAACAAATATAGA  
CCCAGAATGGACGGTTTTGTGTCTATTACCAGTCCTTCCTCCTGAGTTGAGACCCATCA  
TTCAGATCGATGGGGTAAATTAATGAGCTCGGATATTAATGAACTCTATAGAAGAGTTA  
TCTATCGGAACAATACTCTTACCGATCTATTAACAACAAGTAGATCTACGCCAGGAGAA  
TTAGTAATGTGTCAGGAGAAATTAGTACAAGAAGCCGTGGATACACTTCTTGATAATGG  
AATCCGGGGGCAACCAATGAGGGATGGTCATAATAAAGTTTACAAGTCATTTTCGGATG  
TAATTGAAGGCAAAGAGGGAAAGATTTTCGTGAGACTCTCCTTGGCAAACGGGTCGATTA  
TTCAGGGCGTTCGGTCATTGTCGTAGGTCTTCACTTTCATTACATCGATGCGGATTGCC  
ACGCGAAATAGCAATAGAGCTTTTCCAGACGTTTATAATTCGTGGTCTAATTAGACAAC  
ATCTTGCTTCGAACATAGGAGTTGCTAAGAGTAAAATTCGGGAAAAAGAACCGATTGT  
ATGGGAAATACTTCAGGAAGTTATGCAGGGGCATCCTGTATTGCTGAATAGAGCACCCA  
CTCTGCATAAATTAGGCATACAAGCATTCGAGCCCGTTTTAGTGGAGGGACGTGCTATT  
TGTTTACATCCATTAGTTTGTAAAGGGATTCAATGCAGATTTTGATGGGGATCAAATGGCT

GTTCATGTACCTTTATCTTTAGAGGCTCAAGCGGAGGCCCGTTTACTTATGTTTTCTCAT  
ATGAATCTTTTGTCTCCAGCTATAGGAGATCCCATTTCGGTACCAACTCAAGATATGCTT  
ATCGGACTTTATGTATTAACGAGCGGGAATCGTTCGAGGGATTGTATAAATAGGTATAAT  
CGATGGAATCAC-----AGAGACTATCAAATAAAAAGAGGTTGACAATAAGAACTATAAT  
TATACG-----GAACCCCTCTTTTCTAATTCCTATGATGCAATTGGAGCTTATCGACAGA  
AACGAATCAATTTAGATAGCCCTTTGTGGCTCCGGTGGCGATTAGATCAACGC---GTTAT  
TTCTTCA-----AGAGAAACTCCCATCGAAGTTCCTATGAATCTTTAGGAACTTATTATG  
AGATTTATGGACACTATCTAATAGTACGAAGTATAAAAAAAGAAATCTTTTTATATA  
TTCGAACCACTGTTGGTCATATTTCTCTTTATCGAGAAATCGAGGAATCCATACAGGGAT  
TTTCTCAGGCCTGTTTCATATGGTACC-----ATGGAGGTTACTTATGGCAAAA  
CGGGCCAATCTGGTATTTACAATAAAGTGATAGACGGAAGTCCATGAAACGACTTAT  
TAGTAGATTAATAGATCACTTCGGAATGGCATATACATCACACATCCTGGATCAAGTAAA  
GACTCTGGGTTTTCAACAAGCTACTGCTACATCCATTTCATTAGGAATTGATGATCTTTT  
AACAAATACCCTCGAAGAGATGGTTAGTTCAGATGCTGAACAACAAAGTTTTATTTTGG  
AAAAACACCATTATTTTGGGAATGTACACGCAGTAGAAAAATTACGCCAATCCATTGAA  
ATATGGTATGCCACAAGTGAATATTTGCGACAAGAAATGAATCCTAATTTAGGATGAC  
TGACCCCTTTAATCCAGTCCATATAATGTCTTTTTTCGGGAGCTAGAGGAAATGCATCTCA  
GGTACATCAATTAGTAGGTATGAGAGGATTAATGTTCGGATCCTCAAGGACAAATGATTG  
ATTTACCCATTCAAAGCAATTTACGTGAAGGGCTCTCTTTAACAGAATATATCATTCTT  
GCTACGGAGCCCGTAAAGGGGTTGTGGATACTGCTGTACGAACATCCGATGCTGGATAT  
CTCACGCGCAGGCTTGTGAAGTAGTTCAACACATTGCTGTACGTGCAACAGATTGTG  
GCACTATGCGTGGTATTTGTGTGAGTCCTCGGAATGGGATGATGCCA---GAAAGGATTT  
TTATCCAAACATTAATTGGCCGTGTATTAGCCGATGATATATATATGGGGACACGATGTAT  
TGCCACTATAAATCAAGACATTGGGATTGGACTTATAAATAGATTCATAACC-----  
--TTTCGAGCACAACCAATAGCTATTCGAACTCCTTTTACTTGTAGAAGTTCGTCTTTGGA  
TCTGTTCGATTATGTTATGGTTCGGAGTCCACTCATGGTGACTTAGTTGAATTGGGCGAA  
GCTGTAGGTATTATAGCAGGCCAATCGATTGGAGAACCGGGTACTCAATTAACATTAAG  
AACTTTTCATACCGGTGGAGTATTCACGGGGGGTACTGCAGAACATGTGCGAGCCCCT  
TCTAATGGAAAAATCAAATTCAATGAGGATTTGGTTCATCCGACACGTACACGCCATGG  
CCATCCTGCGTTTTCTATGTTCTATAAACTTATATGTAACCATTCAGAGTAAAGATATTCAA  
CATAATGTAAATATTCCACCCCAAAGTTTTCTTTTAGTTCAAAACGATCAATATGTAGAA  
TCAGAACAAGTGATTGCTGAGATTCGCACAAGAACCCTCCACT---TTGAATTTTAAAGAG  
AAGGTTGAAAACATATTTATTCTGACTCAGATGGAGAA---ATGCACTGGAGTACCGAT  
GTGTATCATGCACCCGAATTTACATATGGTAATGTTTCATCTATTACCAAAAACAAGTCAT  
TTATGGATATTATTAGGAGAGCCATGCAGA-----TCTAGTCTAGTCTCACTTTTCGCTCCAC  
AAGGATCAAGATCAAATGAGCACGCAT-----TCTCGTTCTGTCAAGAGAAGATCCACTT  
CTAACCTCTCA-----AGAACGAATGATCAG---TCGAGACAAAATTCTATACTTCGGCTT  
TTTTTGGTAAA---GAAGATAAGATTCCTGATTAT---TCATACCTTAATCGAATTAGATGTAC  
TGATTGTTCTAATCTCATAGATCCA---ACCATTCTCGACCAGAATTCT-----GATTTATTCT  
CAAAGAGGCGAAGAAATAGATTTCTCATTCCACTCCAATCGATTCAAGAACGCGAGAA  
GGACCTAATACCTCCTTCAGATATCTCGATTGAAATCCCC-----ATAAATGGGATTTCCG  
TAGAAATAGTATTCTTGCTTATTTGACGATCCGCGATACAGAAGAAAGAGTTCGGGTA  
TTTTCTAACTATGGGACTCTAGAAATGCATTCAATCATCAAAAAAGAGGAT-----TTGATT  
GAGTATCGAGGA---GACAAGGAATTTAGGCCAAAATATATGAAAGTGGATCGGTTTTTT



TTCATTCCCGAGGAAGTGCATATGTTACCCGGATCTTCTTCCATAATGGTACGGAACAAT  
AGTATCATTTCGGGTAGATACACAAATTACTTTAAATATAAGAAGCCGCGTAGGCCGGT  
GGTCCGAGTAGAGAAAAAAGAAATTGAACTAAAAATATTTTCTGGAGATATC  
CATTTTCCTGGAGAGACAGATAAAATATCCCGACATAGTGGCGTTTTGATACCA---CTAG  
GA---GCAGGAAAACAAAATTTCGAAGGAATCCAAAAA-----TGGAAAATTGGATCTAT  
GTTCAACGA-----ATCACACCTAGTAAA-----AAAAAGTATTTTGTTTTAGTTTCGGCCTGT  
CGTCACATATGAAATAACGGACGGTATAAATTTAGCAACGCTTTTTCCCGGATCTGTT  
GCAGGAAAGGGATAATGTGCAACTTCGAGTTGTCAATTATATACTTTATGGAAATGGTA  
AACCAATTCGAGCGATTTCTGATACAAATATTCAATTCGTTTCGAACTTGTTTAGTATTGA  
ATTGGGACCAAGACAAAAA-----AGCTCTTCTAGTGAAGAAGCCCGCGCTTCCCTT  
GTTGAAATAAGGGCAAATGGTTTGATTTCGACATTTCTACGAATCGACTTAGTGAAATC  
CCCTATTTTCATAT-----AGGAATGATTTAGCGGGCTCAGGATTGCTCTCTGAT---AATGG  
CTCAGATTGCACCAATATAAGTCCGTTTTTTTTC-----ATTTAT-----TCGAAGGCAAGA  
ATTCAACAACCCCTTAATCAA-----ATAACTATTCATACGTTGTTGAATAGA-----ATA  
CGGGATTACAATCATTGATAATTTTGTTCATCATCCAATTGTTTTCGAATGGGTCCA-----T  
TCAACGATGTA---AAATATCAAAAT-----GTGATAAAGAATCAGATCCTCTAATTTCACT  
TAAGAATCCGCTGGGTCCTTTAGGAACA-----GCCTTTCTAATTGGGAATGTTTATTCA---  
---TTTTCCATTTA-----CTAACTCATGAGCAGATTTTG---GTAAACAATTTTGCAACTT  
GACAAT-----TTAAAACAGACTTTTCAAGTAATTA---TATTATTTAATGGATGAA  
AAC-----GAGAAGATTTATAATCCCGATCTATGCAGTAACATTATTTTCACT-----TTGAA  
GTGGTATTTTCTCGATTCCAATTATTGTCAA-----ACAATACTGAGTCTTGCCAGTT  
TATTTGTGAAAATATATGTATAGCCAAAAGTGCACCACAC---CTAAA-----TCGGGTCA  
AGTTATACTTGTTCAA---GTCGATTCTGTAGTAATACGACACGCTAAGGCTTATTTGGCC  
ACTCCCGGCGCAACTGTTTCATGGCCATTATGGCAAATCCTGTACGAAGGAGATACTTT  
AATTACATTTATATATGAAAATCGAGATCTGGTGATATAACCCAGGGTCTTCCAAAAGT  
GGAACAGGTGTTAGAAGTGCATTGATTCAATATCGATGAATCTAGAAAAGCGA  
GTTGAGAGTTGGAACGAACGTATAACAAGAATTCTTGGAAATGCCGTGGGCGTTTTTGA  
TTGGTGCTGAGCTAACTATAGTGCAAAGTCGTATCTTTTAGTTAACAAGATCCAAAAG  
GTTTATCGATCCAGGGGGTGCAGATTCATAATAGGCATATAGAGATTATTGTACGTCAA  
ATAACATCAAAGGTGTTGGTTTCAGAA-----GACGGACTGTCTAATGTTTTTTCACCC  
GGAGAACTTATTGGGTTGTTGCGAGCGGAACGAATGGGGCGCGCTTGAAGAAGCG  
GTTTGTACCGAGCCATCTTATTGGGAATAACAAGAGCATCCCTAAATACTCAAAGTTT  
CATATCTGAAGCCAGTTTTCAAGAACTGCTCGAGTTTTAGCAAAGCCGCTCTCCGG  
GGTCGAATCGATTGGTTGAAAGGCCTCAAAGAGAACGTTGTTTTGGGGGGTATGATAC  
CCGTCGGTACCGGATTGAAAGGATTC-----GTGCCCCGTCAAACAACATAACAAGAG  
CCCT-----TTGCAAACAAAAAAGATAATCTATTTGAAGGGGAAATGAGA-----GATATTT  
TGTTTACCACAAAAGATTATTTGATTCTTTTCTTTCAAAGAATTTCCATGATACATCAG  
AACAAATGTTTATAGGA-----TTAATGATTCCATGATAAGAAGATATTGGAACA  
TCACCTTGAAGAGATGCTGGGGGCAGGAGTTCATTTGGCCATAGTACTAAGAAATG  
GAATCCTAAGATGGCACCTTATATCTCTGCAAAGCGTAAAGGTATTTCATATTACAAATCT  
TACTAGAACTGCGCGTTTTTTATCCGAAGCTTGCATTTGGTTTTTGTATGCAGCAAGTA  
GGGGAAAACAATTCTTAATTGTTGGTACCAAAGCTAAAGCAGCTGATTTCAGTAACATC  
GGCGGAATAAGGGCCCGGTGCCATTGTGTTAATAAAAAATGGCTCGGCGGTATGTTAA  
CGAATTGGTCCACTACAGAAACGAGACTTCATAAGTTCAGGCACTTGAGAATGGAACA

AAAAACGGGAAGACTCAACCGGCTTCCGAAAAGAGATGCGGCTATGTTGAAAAGACA  
ATTATCTCGCTTGCAAACATATCTGGGCGGGATTAAATATATGACAGGGTTACCCGATGT  
TGTAATCATCGTTGATCAGCATGAAGAATATACGGCCCTGCGAGAGTGTATCACTTTGG  
GAATTCCAACAATTTGTTAATCGATACTAATTGTGATCCCGATCTTGCAGATATTTGAT  
TCCAGCGAATGATGACGCTATATCTTCAATCCGCTTAATTCTTAACAAATTAGTATTCGC  
AATTTCTGAAGGCCGTTCT--AGCTATATAAGAAATCCTATGGGACAAAAATAAATCCA  
CTTGTTTTAGACTTGGTACAACCCAACGTCATCATTCCCTTTGGTTTTGCACAACGAAA  
AAATTATTCTAAGGGTCTACAAGAAGATCAAAAAATAAGAGATTTTATCCAAAATTATGT  
ACAAAAGAATATGAGAATATCCTCCGGT--GCCGAGGGGATTGCGCGTATAGAGATTCA  
AAAGAGAATCGATTTGATCCAGATCATAATCTGTATGGGGTTCCCAAAGTTATTAATAGA  
AAGTAGACCACGA-----GCAATCGAAGAATTACAGATGAACCTACAAAAGAATTT  
GATTATGGAAACCGAAAACCTAAACATTGCTATCACAAGAATTACAAAACCTTATGGAAA  
CCCTAATATTCTTGCAGAAATTTATAGCCGGGCAATTAAGAATAGAGTTTCTTTTTCGAAA  
AGCAATGAAAAAGGCTATTGAATTAACCTGAACAAGCAGATACAAAAGGGATTCAAGTA  
CAAATTGCAGGACGTATCGATGGAAAAGAAATTGCACGTGTGCAATGGATCAGAGAAG  
GTAGGGTCCCCCTCCAAACCATTCGAGCTAAAATTGATTATTGTTCTTATATCGTTCGGA  
CTATCTATGGGGTATTAGGTATCAAATTTGGATTTTCTAGACAAAGAAATGTCGCGTT  
ATCGAGGACCTCGTTTTCAAAAAATACGCCGCCTGGGGGCTTTACCAGGACTAACTAA  
TAAAAGGCCTAAAGCCGGAAGTGATCTTAGAAACCAATCGCGTTCCGGGAAA---AAAT  
CTCAATATCGTATTTCGCCTAGAAGAAAAACAAAATTACGTTTTCACTATGGTCTTACA  
GAACGACAATTACTTAAATACATTCGTATCGCCGAAAAGCCAAGGGGTCAACAGGTC  
AAGTTTTACTACAATTACTTGAAATGCGTTTGGATAATATCCTTTTTCGATTGGGTATGGT  
TTCGACTATTCTGCAGCCCGTCAATTAGTTAACCATAGACATATATTAGTGAATGGGCG  
CATAGTAGATATACCAAGTTATCGCTGCAAACCCCGAGATATTATTATGGCGAAAGATGA  
ACAAAATCCAGAACTCTGATTCAAATTTCTCTCGACTCATTCCCTCAC---GAGGAATT  
ACCAAACCATTTGACCCTTCATCCTTTTCGAA-----TATAGAGGATTAGTCAATCAAATAAT  
AGATACTAAATGGGTTCGGTTTGAAAATAAATGAATTGCTAGTGGTAGAATATTATTCTCG  
TCAGACGATGTCACGTGAGGTAAGTGCAGAAAGAAAAACAGCAAAATCCGATCCAATT  
TATCGTAATCGATTAGTTAACATGTTGGTTAACCGTATTCTGAAACACGGAAAAAAATC  
ATTGGCTTATCAAATTATCTATCGAGCCATGAAAAAAATTCAACAAAAGACAGAAACA  
AATCCACTATCTGTTTTACGTCAAGCAATACGTGGAGTAACTCCCGATATAGCAGTAAA  
AGCAAGACGTGTAGGTGGATCGACTCATCAAGTTCCCATTGAAATAGGATCCACACAA  
GGAAAAGCACTTGCCATTTCGTTGGTTATTAGCGGCATCCCGAAAACGTCCGGGTCGAA  
ATATGGCTTTCAAATTAAGTTCCGAATTAGTGGATGCTGCCAAAGGGAGTGGCGATGCC  
ATACGCAAAAAGGAAGAGACTCATAAAATGGCAGAGGCAAATAGAGCTTTTGCACATT  
TTCGTATGGGCAGGGACACTATTGCTGAGATAATAACCTCTATACGAAATGCTGATATGG  
ATAAAAACGAATTGTTTCGTATAGCATCTACTAATATTACCGAAAATATTGTTAAAATAC  
TTTTTCGCGAAGGTTTTATCGAAAACGTCAGAAAACATCAAGAAAAAAACAAATCTTT  
TTTGGTTTTAACCTCCGACATAGAAGA-----AATAGGAAAAAAACCTAT-----GGAAA  
CCTTTTAAATTTAAAACGGATTAGCCGCCCGGTTTACGAATATATTCTAACTCTCAACG  
AATTCCTAGAATTTTAGGTGGGATGGGGGTTGTAATCTTTCTACTTCTAGAGGTATAAT  
GACAGACCGGAAGCTCGACTAGAAAGAATCGGCGGAGAGTTGTTGTGTTCTATATGG  
ATGGCAAAAAGCTATACCGAGAATTGGTTCACGTAGGAATGCACGTATTGGTTCACGTAA  
GAGTGCACGTAGAATACCAAAGGGAGTTATTCATGTTCAAGCAAGTTTCAATAATACCA

TTGTCACGGTTACAGATGTACGGGGTCGAGTGGTTTCCTGGTCCTCCGCCGGTACTTGT  
GGATTCAAGGGTACAAGAAGAGGGACACCTTTTGCCGCTCAAACCTGCAGCAGCAAAT  
GTTATTCGTACAGTAGTTGATCAAGGTATGCAACGAGCAGAAGTCATGATAAAAGGTCC  
CGGTCTCGGAAGAGACGCAGCATTACGTGCTATTCGTAGAAGTGGTATACTATTAACCT  
TCGTACGGGATGTAACCCCTATGCCACATAATGGCTGTAGACCTCCGAAAAAAGACG  
TGTGATGCCAACTATTAACAACCTATTAGAAAATACAAGACAGCCAATTTCGAAATGTCA  
CGAAATCCCCCGCTCTTCGGGGATGTCTCAGCGTCGAGGAACATGTACTAGGGTGTAT  
GTGATCACCCCCAAAAACCAAACCTCTGCCTTACGTAAAGTTGCCAGAGTACGATTAA  
CCTCTGGATTTGAAATCACTGCTTATATACCCGGTATTGGCCATAATTCACAAGAACATT  
CTTCAGTCTTAGTAAGAGGGGGAAGGGTTAAGGATTTACCCGGTGTAGATATCACATT  
GTTTCGAGGAACCCTAGATGCTGTTCGGAGTAAAGGATCGTCAACAAGGGCGTTCT---AG  
TGC GTT G-----ATGGCAAGGAAAAGTTTGATT CAGAGGGAGAAGAAGAGGCAAAA  
ATTGGAACAGAAATATCATTGGATTCGTGGATCCTCAAAAAAAGAAATAAGA-----AA  
AGTTCCATCGTTGAGTGACAAATGGGAAATTTATGGAAAGTTACAATCCCCACCACGG  
AATAGTGCACCTACACGCCTCCATCGCCGTTGTTTTTCGACCGGAAGACCGAGAGCTA  
ACTATCGAGACTTTGGACTATCCGGACACATACTTCGTGAAATGGTTCATGCATGTTTTGT  
TGCCAGGAGCAACAAGATCGAGTTGGATGGTCAAAAATTCATT CATTTC AATTATTTCT  
CAA-----AAA-----GAAAACAAGGGGTCTGTAGAATTTCAAGTATTCGGTTTTACCACT  
AAAATAAGGAGACTTACTTTCACATTTGGAATTGCACAAAAAAGACTCTTCATCTCAGA  
AAGGTTTGCGAAAAATTTTGGGAAAACGTCAAAGGCTACTGGCTTATTTGGCAAAAA  
GAATATAGGCCGTTATAAAGAATTAATTAGTCAGTTGGCTATTCGAGAAATAAAAACTA  
GT-----ATGGTAAAACCTTCGTTTGAAACGATGTGGTAGAAAGCAACGTGCCGTCTATCG  
AATCGTTGCAATTGATGTTTCGATCCCGGAGAGAAGGAAAAGATCTTAGAAAAGTTGGG  
TTTTATGATCCAATGAAGAATCAAACCTATTTAAATGTTCTGCTATTCTATACTTCCTTG  
AAAGGGGTGCTCAACCTACAGGAACTGTT CAGAATCTTTTAAAGAAAGCGGAAGTTTT  
TAAAGAACTTCCGTCTAAT-----ATGGATAAATCCAAGCGACCCTTCTTAAGT  
CCAAGCGATCTTTTCGTAGGCGTTTGCCCCGATTCAATCGGGGGATCAAATTGATTATA  
GAAACATGAGTTTAATTAGTCGATTTATTAGTGAACAAGGAAAAATATTATCTAGGCGA  
GTGAATAGATTGACCTTGAAACAACAACGATTAATTACTATTGCTATAAAACAAGCTCG  
TATTTTATCTTTGTTACCCTTTCTCAATAATGAGAAA-----CAGTTTGAAAGAACCGAGTC  
G A C C G C T A G A A C T A C T A G T C T T A G A A T C A G A A A T A A  
A????????????????????????????????????????????????????????????????  
????????????????????????????????????????????????????????????????  
????????????????????????????????????????????????????????????????  
????????????????????????????????????????????????????????????????  
????????????ATGATTTTCAATCTTTTCTACTAGGTAATCTAGTATCCTTATGCATGAAGATA  
ATCAATTCGGTCGTTGTGGTCGGACTCTATTATGGATTTCTGAACACATTCTCCATAGGG  
CCCTCTTATCTCTTCCTTCTCCGAGCTCAGGTTATGGAAGAAGGA-----ACCGAGAAG  
AAGGTATCAGCAACAACCTGGTTTTATTACGGGACAGCTCATGATGTT CATATCGATCTAT  
TATGCGCCTCTGCATCTAGCATTGGGTAGACCTCATACAATAACTGTCCTAGCTCTACCA  
TATCTTTTGTTCATTTCTTCTGCAACAATCACAACACTTTTTTTGATTATGGATCTACTA  
CCAGAAATTC AATGCGTAATTT CAGCGTTCAATGTGTATTCTTGAATAATCTCATTTTT C  
AATTATTCAACCATTT CATTTTACCAAGCTCAATGTTAGCCAGATTAGTCAACATTTATAT  
GTTTCGATGCAACAACAAGACGTTATTTGTAACAAGTAGTTTTTGTGGTTGGTTAATTG  
GTCACATTTTATTCATGAAATGGCTTGGATTGGTATTAGTCTGGATACGACAAAATCATT

CTATTAGATCGCTTATTTCGATCTAATAAGTACCTTGTATCAGAATTGAAAGATTCTATGGC  
TCGGATCTTTAGTATTTTCTTATTTATTACCTGTGTCTACTATTTAGGCAGAATACCTTCA  
CCCATTCTTACTAAGAACTGAAAGAACTGAAGAAGATAAATATTTTTTTGATTCTTCT  
TTTTGATTTACAGCGATGGAATCGACCATTTTCGCTACATAAAAAATGATCAATTTACTAA  
ATCTATTAGAAAAGAGATGTCACAATATTTTTTTGACATATGCCAAAGTGATGGAAAAG  
AAAAATATCTTTTACATATCCCCCTAGTTTGTCAATCTTTTTGGAAAAAATAAAACAAA  
AGGTATCCCCT-----GACCTCTACAAGTCTTGGGTTTATATCAATAAACA  
AAGAGGGGAA---TTAAACAACGAATTCCTTAATAGAATTGAAGCCTTAGACAAGAAATA  
CATTTCTTTGAATATATTTGAAACAAGGATTTCGATTGTGTAACGATTATTTCTCCAAAAGA  
ATACTTATCCAAAGAGTATGATCCTTTTTTAAACGGATCATATCGGAGAACACTTCACAA  
AAATCTTTCACCATTAATCAATTTAGGATAAACCGAATTCATGGTATCCTTTTGCAAGA  
AGTTGAAGAGAAAGATACTAATGATCAATCAATTAATAAAAGAAATCATTAATAAAA  
GTTCCCTCGATGGACGTACAAATTAATCGATTTGGAACAACAATCT---GGACAAATTCGCT  
CAAGAAAAGGGAAACGTGTAGTCATTTTTACTGGTGCTTTGATGCGCTATTCACAACAA  
TCAGATTTTCGGCGAGGTATAATCAAAGGTTCTATGCGAGCTCAAAGGCGTAAAATAGT  
AATTTGGAATTCCTTCAAGCAAACGTGCAGGCGCCTCTTTTTTTGAAACAGAATGCAA  
AAATATCTTCTTTTTTCTTTTGATATC-----TCCGGGTTGATTAAAGAAATTTTGCAAATA  
GAAAGGAGAAAGGACGAATAGACATATCAGAGGCCTGGGATAGCATACCATTTACGCA  
AGTAATAAGAGGTTGCATGTTAGTAACTCAATCCATTTTTAGAAAATATATTCTATTCCCT  
TTCTTGATAATCGCGAAAAATATTGGACGTATAGTCTTATTACAACCTCCTGAATGGTCT  
GAGGATTTACAGGACTGGAATAGAGAGATGTATATTAATGTACTTATAATGGTGTTC  
TTATCAGAAACAGAATTTCCGAAAAATTGGTTGACAGACGGTATTCAGATAAAAATATT  
ATTTCCCTTTCTGTCTAAAACCTTGGCACAAATCGAAA---AAAGAAAAGATGATTTCTG  
TTTTTTAACAGTTTGGGGAATGGAAGCTGAATTTCTTTTTGGTTCACCCCGAAAACGAC  
CTTCCTTTTTTAAACCAATTTTCAAGGAACTCGAAAAAGAAATTGGAAAATTGAAAA  
GAAATATTTTCGAGTT---CTAATAGTTTTCAAAGGAAAAACAAAATTACTTCAAAAAGGC  
TTCAAAGAAACAAAAAATGGATTATAAAAAATGTTAGT-----TTTATAAAAAA---AT  
AAAAAACTTTCAAAGTAAATGATTCTATAATCAGCAATCAGATACTTCAAAAATCCG  
TTAGTAAAATTGCATCTACCAATTGGTCAAATTCCTCATTGACAGAAAAAAAAATGAAC  
GATCTGACTGATAGAACAAGTAGAATTCGAAATCAAATAGAAAGAATTACAAAAGAGA  
AAAAAAAAGTCTTAACAAA-----ATAAGTTCTAATGCTAAAAGATTAGCAAAATG  
GAAAGTCTTAAAAGAGGAAATGCTCGATTAATCTCTAAATTTTTCCCTTTTTTAACTT  
CTTCATTGAAAGAATATACACATATATATTTTTATCTATCATTAATATTTCCAGAAATTAATA  
CAGAACTCTT---CCATTTCTCTCATCTGACTTATCCTACATGTCACAAGCATATGTATTTT  
ACAAATTATCAAAAATACAAGTTAGTAACTCATATAAATTAAGATCTATTCTTAAATATAT  
CCGTTTTTTTTCTTAAGCCTGAGATAAAGGATTCTTTTATAACAAGAGATGTTTCATTGAA  
ATTAGGAGATAAAAACTGTGCGAGTTCTAAAATGAATCAATGGAAAGGTTGGTTGAAA  
GGGTATAATCAATACAATTTATCTCAGATCAGATGGTCTAGATTAATATCAGAAAAGTGG  
CGAAATAGGGTTTATCACTGTCGTATGACGAAAAAGGAAAGAAAATCACATTTATATGA  
AAAAAGCGAA-----TTAATTTATTCCAAAAACAAGATAATCTTCAAAAATACTATAGAT  
ATGATCTTTTATCATATAAATTTTTTAATATCGATATTCTAGCTGCCGATAGAAAATATTTT  
GATTGGAAAATTATAGATTTTTCTCTTATATTTTTTGATTGGATGGGAATGAATGAAAA  
ATGTTAAAGCATTGGTTCTTCCAGAAATTTGTGTTACTTTTATAATGCATATAAAACAAA  
CCTGGTTTATACCAAGTAAATTAATCTTTTTCGATTACAAAAGTAATACAGAAGCAGA

ACTAGATTTCTTCTTGAAACGTTATTTTCTTTTTCAATTGAGATGGGACGATACTTTGAA  
TCAAAAATGATCAATAATATCAAGGTATATTGTCTCCTGCTTAGACTGATAGATCCAAG  
AAAAATTATTATATCCTCAATTCAAAAGAAAGAAATGAGTTTGGATATAATGTTGATTCA  
GAAGAATTTAACTCTTACAGAATTGATGAAA--GGAGTATTGATTATAGAACCCATTCGT  
TTGCCTGGAAACGAGGATGGACAATCATTATGTATCAAATCATAGGTATTTTCGTTATTT  
CATAAGAGTAAGCACACTCATTTCCATTTGCTTGTTCCTGAAACTATTTTTTTCATTTAGAT  
ATCGTAGAAAATTGAGAATTCTAATTTCTTTCATATTTCTTTGGCCTAATTATCGATTAGA  
AGATTTAGCTTGTATGAATCGTTGTTGGTTTGATACCAACAATGGTAGTCATTTTTGTAT  
GTTAAGGATACAGATATATCCAATGAAAGGACATCAATTCAAATCCTGGATTTTCGAATT  
GAGAGAGATATTGAGAGAGATCAAGAATTCTACTATTTCTTAGATTATCGACCCAAT  
TCAATTCAGTAGGGTCTTTCATTCACATTTTTTCCACCAAGAACGTTTTCTAAAACCTCT  
TTGACCCCCGAATTTTTAGTATCCTACTTTCA---CGCAATTCG-----CAGGGTTCAACAAG  
CAATCGATATTTACG-----ATCAAGGGT--GTAATACTCTTTGTAGTAGCGGTCCTTAT  
ATATCGT-----ATTAACAATCGAAATATGGTCGAAAGAAAGAATCTCTATTTGAGGG  
GGCTTCTTCT-----ATACCTATGAATTCATTGGACCCAGAAATGATACATTGGA  
AGAATCGGTT--GGTCTTCCAATATCAATAGGTTGATTGTTTCG---CTCCTGTATCTTCC  
AAAAGGAAAAAAGATCTCTGAGAGTTGTTTCTGAATCCGAAAGAGAGTACTTGGGTT  
CTCCAATAACT-----AAAAGTGTAGCATGCCTGAATCTAACTGGGGTTCGCGGTG  
GTGGAGGAACTGGATCGGAAAAAAGAGG-----GATTCTAGTTGTAAGATATCTAAT-----  
--GAAACCATCGCTGGAATTGAGATCTTATTCAAAGAGAAAGATATCAA---TATCTGGA  
GTTTCTTTTTGTATATTATATGGAT-----GATCCCATCCGCAAGGACCATGATTGGGAATTG  
TTGATCGTCTTCTCTGAGGAAGAGGGCGAAATAGAATCCACTTG-----AATTCGGGACC  
GCTATTCGAAATCTTAGTGAAACACTGGATTTCTTATCTCATGTCTGCTTTTTCGTGAAAA  
AATACCAATTGAAGTGGAGGGT--TTCTTCAAACAACAAAGG--GCTGGGTCAACTATT  
CAATCAAAT-----GAGCATGTTTCCCAT-----CTCTTCTCGAGAAACAAGCGGGCTCTTTC  
TTTGCAAATTGTGTTCAATTTTCATATGTGGAAATTCCGCCAAGATCTCTTCGTT-----  
AGTTGGGGGAAG---AATCCGCACGAATCGGATTTTTTGAGGAAC---ATATCGAGAGAGA  
ATTTGATTTGGTTAGACAATGTGTGGTTGGTAAACAAGGATCGG-----TTTTTTAGA---  
--AAGGTACGGAATGTATCGTCAAATATTCAATATGATTCC-----ACAAGA-----TCTAGT  
TTCGTTCAAGTAACGGATTCTAGCCAACCGAAAGGATCTTCT--GATCAATCCAGAGAT  
CATTTGGATTCCATTAGT-----AATGAGGATTCGGAA-----T  
ATCACACATTGATCAATCAAAGAGAGATTCAACAACATAAAGAAAGATCGATTCTT--T  
GGGAT-----CCTTCTTTCTTCAAACGGAAGGAACAGAGATAGAATCAGAC-----CGATT  
CCCGAAA-----TGCCTTTCCGGATATTCC-----TCAATGTCCCGGCTATTACG---GAACGT  
GAGAAGCAGATGATTAATCATCTGCTTCCGGAAGAAATCGAAGAATTTCTT-----GGGAA  
TCCTACAAGATCCGTTTCGTTCTTTTTCTCTGATAGATGG-----TCAGAACTTCAT--CTG  
GGTTCGAATCCTACTGAGAGATCCACTAGAGATCAG-----AAATTGTTGAAGAAAC  
AACAAGATCCTTCT--TTTGTCCCTTCCAGGCGATTGGAA-----AAGAAAGAACTGG  
TTAATATATTCAAGATAATTACGTATTTACAAAAT-----ACTGTCTCAATTCATCCTATTTCA  
TCAGATCCGGGGTGTGATAAGGTTCTG---AAGGATGAACCGGAT--ATGGACAGTTCCA  
ATAAGATTTCAATCTTGAACAAAATCCATTTTTTGCTTTA-----TTTCATCTATTCCATGA  
CCGGAACGGGGGAGGATACACGTTA-----CACCGCATTTTGAATCAGAA-----GAGAGA  
TTTCAAGAAATGGCAGATCTATTCACTCTATCAATAACCGAGCCG---GATCTGGTGTATC  
ATAGGGGATTTCTTTTTCTATTGATTCCTACGGATTGGATCAAAAACAA-----TTCTTGA

ATGAGGCCAGGGATGAA-----TCGAAAAAGAAATCT-----TTATTGGTTCTACCTCCT  
ATTTTTTAT-----GAAGAGAATGAATCTTTTTCTCGAAGGATCAGAAAAAGATGGGTCCG  
G---ATCTCCTGCGGAATGATTTGAAAGATCCAAAACAAAAGATGGTGGTATTTTCTAG  
CAACAACACAATGGAGGCAGTCAATCAATATAGATTGATCCGAAATCTGATTCAAATCC  
AATATAGTACCTATGGG-----TACATAAGAAATGTATTGAATCGAGTCTTTTTAATGAAT----  
----AGATCCGATCGCAACTTCGAATATGGA-----ATTCAAAGGGATCAAATAGGAAAG  
GATACTCTGAATCATAGAACTATAATGAAATATACGATCACCCAACCTTTATCGAATTTG  
AAAAAG---AGTCAGAAGAAATGGTTCGATCCTCTT-----ATCTTGATCTCTCGAACCGAG  
AGATCCATGAATGGGGATCCTGATGCATATAGATACAAATGGTCCAATGGGAGCAAGAA  
TTCCAGGAAGATTTGGAACATTCGTTTCTGAGCAGAAGAGCCGT-----TTTCAAAT  
AGTGTTGATCGATTACGTATTAATCAATATTCGATTGATTGGTCTGAGGTTATCGACAA  
AAAAGATTTGTCTAAGCCACTTCGTTTCTTTTTGTCCAAG-----TCACTT  
CTTTTTTTGTCC-----AAGTGGCTTTTCTTTTTGTCTAAC---TCACTTCTTTT  
TTCTGTGTGAGTTTGGGGAAGATCCCATTCATAGGTCCGAG---ATCTACATCTAT--GAA  
TTGAAAGGTCCGAATGATCAACTCTACAATCAGTTGTTAGAATCAATAGGTCTTCAAAT  
TGTTCAATTTGAAAAAATGGAAACCCTTC-----TTATTGGAT-----GATCATGATACTTCC-  
--CGAAAATCGAAATTTCTGATCAATGGAGGAACAATATCACCTTTTTTGTCAATAAGA  
TACCA---AAGTGG---ATGATTGACTCATTCCATACTAGA-----ATAATCGCAGGAAATCC  
TTTGCTAACGCGGATTCTTCTCAATGATATCCACAATCAAGACAATTGGCTGAAT  
CCCGTGAAACCATTTTCATAGAAGTTCATTGATATCTTCTTTTTATAAAGCAAATCGACTT  
CGATTCTTGAATAATCCACATCACTTCTGCTTCTAT-----TCTAACACAAGATTCCTTTT  
CTGTG-----GAAAAGGCCCGTATCAAT-----AATTATGATTTTACGTATGGA---CAATT  
CCTCAATATCTTGTTCAATTCGCAAGAAA---ATATTTCTTTGTGCGTCCGGTAAA-----AAA  
GAACATGTTTTTTGGGGG---AGAGATACTATTTACCAATCGAGTCACAGGTATCTAAC  
ATATTCATACCTAACGATTTTCCACAAAGTGGT---GACGAAACGTATAATTTGTACAAAT  
CT-----TTCCATTTTCCAAGTCGATACGATCCATTCGTTTCGT-----AGA ACTATTTACTCG  
ATCGCAGACATTTCTGGAACACCTCTAACAGAGGGACAAATAATCAATTTTGAAAGAA  
CTTATTGTCAACCTCTTTTCAGATATGAATCTATCTGATTCAGAAGGGAAAACTTGCATC  
AGTATCTCAAT-----TCAAACATGGGTTTGATTACACTCCATGTTCTGAGAAATATT  
TACCATCTGAAAAG-----AGGAAAAA-----CGGAGTCTTTGTCTAAAAG----  
--AAATGCGTTGAGAAAGGGCAGATGTATAGAACCCTTCAACGAGATAGTGCTTTTTTCA  
ACTCTCTCAAATGGAATCTATTCCAAACATATATGCCATGGTTCCTTACTTTCGACAGGG  
TACAAATATCTAAATTTGATATTCTTAGATACTTTTTTCAGACCTGTTG-----CCGATACTAA  
GTAGC---GGTCAAAAATTTGTATCCATTTTTCATGATATTATGCATGCATCAGGTATATCAT  
GGCGAATTCTTCAGAAAAAATGG-----TGTCTTCAGCAATGGAATCTG---ATAA  
GTGAGATTTTCGAGTAAGTGTTCATAAT-----CTTCTTCTGTCCGAAGAAATGATTCATC  
GAAAT-----AATGAGTCACCATTGATATCGACACATCTGAGATCGCCAAATGTTCCGGGAG  
TTC---CTCTATTCAATCCTTTTCTTCTTCTTGTGTTGCTGGATAT--CTCGTTCGTACATATCT  
TCTCTTTCTTGCCCGG-----GCCTCTAGTGAGTTACAGACAGAGTTCGAAAAGGTCAAA  
TCTTTGATGATTCCATCATCTATGATTGAGTTGCGAAAACCTTCTGTATAGGTATCCTACAT  
CTGAACCGAATTTCTTCTGGTTAAAGAATCTCTTTCTAGTTGCTCTGGAACAATTAGGA  
GATTCTCTAGAAGAAATACGG-----GCTTCTGGCGGCAACATGCTTGGT-----CCCGCT-  
-----TATGGG---GTCAAATCGATACGTTCTAAGAAGAAATATTTGAATATCAATCTC  
ATCGATATCATCGATCTCATA-----CCAAATCCCATCAATCGAATCACTTTTTTCGAGA

AATACGAGACATCTAAGTCATACAAGTAAAGAGATCTATTCATTGATAAGAAAAAGAAA  
AAACGTGAACGGGGATTGGATTGATGATAAAATAGAATCCTGGGTCGCGAACAGTGAT  
TCGATTGATGATGAAGAAAGAGAATTCTTGGTTCAGTTCTCC-----GCCTTAACGGCA----  
--GAAAAAGGGATTGATCAAATCTATTGAGTCTGACT--CATAGTGATCATTTA-----  
--TCAAAGAATGACTCTGGTTATCAAATGATTGAACAACCAGGAGCAATTTACTTACGAT  
ACTTAGTTGACATTCAT-----AAAAGTATCTATTGAATTATGAGTTCAATACATCCTGTTT  
AGCAGAAAGACGGGTATTCCCTTGCTCATTATCAGACAATCACTTAT-----TCACAACTT  
CGTGCGGGACTAGTACTTTGCATTTCCCATCTCATGGA-----AAACCCTTTTCGCTCCG  
CTTAGCCTTATCCCCCTCT--AGGGGGATTTTAGTGATAGGTTCTATAGGAACTGGACGA  
TCCTATTTGGTCAAATACCTAGCGACAACTCCTATGTTCCTTTCATTACGGTATTTCTG  
AACAAGGTCCTGGATAACAAGCCTAAAGGTTTTCTTATTGAT-----GATATCGAT--  
ATTGATGATAGTGACGATATTGATGCTAGTGACGATATTGATGCTAGTGAC-----  
-----GATATCGATCGGGACCTTGATACGGAGCTG--GAACTGCTA  
AGTATGATGAATGCGCTAACTATGGATATGATGCCGGA-----ATAGACCGATCTTATAT  
CACCTTCAATTCGAATTAGCAAAAGCAATGTCTCCTTGCATAATATGGATTCCAACAT  
TCATGATCTGGATGTGAATGAGTCGAATTACTTATCCCTCGGTCTATTAGTGAACCATCT  
CTCT-----GAAAGATGTTCC--AATAGAAATATTCTTGTTATTGCTTCGACTCATA  
TTCCCCAAAAGTGGATCCCGCTCTAATAGCTCCGAATAAATTAATAACGTGCATTAAG  
ATACGAAGGCTTCTTATTTACAACAACGAAAGCACTTTTTCACTCTTTCATATACTAGG  
GGATTTCACTTGGAAAAGAGAATGTTCCATACT-----AACGGATTCCGGGTCATAACCAT  
GGGTTCCAATGCACGAGATCTTGTAGCACTTACCAATGAGGCCCTATCAATTAGTATTAC  
ACAGAAGAAATCAATTCTAGACACTAATACAATTAGATCCGCTCTTCATAGACAACTT  
GGGATTTGCGA-----TCCCAGGTAAGATCGGTTTCAGGATCATGGGATCCTTTTCTATCA  
GATAGGAAGGGTTGTAGCACAAAATGTACTTCTAAGTAATTGCCCCATAGATCCTATATC  
TATCTATATGAAGAAGAAA-----TCATGTAACGAAGGGGATTCTTATTTGTACAAATGGTA  
CTTCGAACTTGGAAACGAGCATGAAGAAATTAACGATACTTCTTTATCTTTTGAGTTGTT  
CTGCCGGATCGGTCTCAAGATCTTTGGTCTCTACCC-----GGACCCGATGAAAAA---A  
ATGGAATCACTTCTTATGGACTCGTTGAGAATGATTTCG--GATCTAGTTCATGGCCTATTA  
GAAGTAGAAGGCGCTCTGGTGGGA-----TCTTACGGACAGAAAAAGATTGCAGTTCG  
TTTGATAATGAT-----CGAGTTACATTGCTTCTTCGGCCCGAACCGAGGAAT--CCCTTAG  
ATATGATGAAAAATGGATCTTGTTCTATCTTTGATCAGAGATTTCTCTATGAAAAATAC--  
---GAATCGGAGTTTGAAGAA---GGGGAGGGAGAAGGAGCCCTTGACCCGCAACAG-----  
-----ATGGAGGAGGAT-----TTATTCAATCAC-----ATAGTTTGGGCTCCT-----AGAATA  
TGCGCCCT-----TGGGGCTTTCTATTTGATTGTATCGAAAGGCCCAATGAATTGGGAT  
TTCCC---TATTGGTCCAGGTCATTTCCGGGGCAAG-----CGGATCATTATAACGAAGAG  
GATGAGCTTCAAGAGAATGATTTCGGACTTCTTGCAGAGTGGAACCATGCAGTACCAGA  
CACGAGATAGATCTTCAAAGAACAAGGCCTTTTTCGAATAAGCCAATTCATTGGGAC  
CCTGCAGATCCGCTCTTTTCTATTCAA---GATCAGCCCCCGACTCTGTGTTTTTAC  
ATCGAGAATTATTTGCAGATGAAGAGATGTCAAAGGGGCTTCTTACTGCCCAAACAGA  
TCCTCCTACATCCATATATAACGCTGGTTTATC-----AAGAATACACAAGAAAAGCACT  
TCGAATTGTTGATTAATCGTCAAAGATGGCTTAGA-----ACCAACAGTTCATTATCT----  
-AATGGATCTTCCGTTCTAAT-----ACTCTATCCGAGAGTTATCAGTATTTATCAACTCTG  
TTCTATCTAAC---GGAACGCTATTGGATCAAATGACAAAGACATTGTTAAGAAAAAGA  
TGGCTTTTCCCGGATGAAATGAAAATTGGATTC-----ATG-----ATGCCTA













repeatedly repeated text across the page.





repeated text block





TCATAAGCGTCTATAACCGTAAAATCGACTTTTCGAAGGAATGAAAAAGAGATATCTGGTA  
GAATCGTAACCGTAGAATACGACCCTAATCGAAATGCATGCATTTGTCTCATACACTATA  
GGGATGGTGAGAAGAGATATATTTTACATCCCAGAGGGGCTATAATTGGAGATACCATT  
GTTTCTGGTACAGAAGTTCCTATATCAATGGGAAATGCCCTACCTTTGACCGATATGCC  
TTAGGCACGTCCATACATAACATAGAAATCACGCTTGGAAAGGGTGGACAATTAGCTAG  
AGCAGCAGGCGCTGTAGCGAAACTGATTGCAAAAAGAGGGAAAATTGGCCACATTAAG  
ATTACCATCTGGGGAGGTCCGTTTGATATCCAAAAACTGCTTAGCAACAGTTGGGCAA  
GTGGGTAATATTGGGGTGAACCAAAAAAGTTTGGGTAGAGCCGGATCTAAGTGTTGGC  
TAGGTAAGCGTCCTGTAGTAAGAGGAGTAGTTATGAACCCTGTAGACCATCCCCATGGG  
GGCGGTGAAGGGAGAGCCCCAATTGGTAGAAAAAACCCACAACCCCTTGGGGTTAC  
CCTGCGCTTGGAGAAGAAGTAGGAAAAGGAACAAATATAGTGATCGTTTTATTATCCG  
TCGCCGTAAA--ATGATTCAACCTCAAACCTTTTTAAATGTAGCGGATAACAGTGGAGC  
TAAAGAATTGATGTGTATTTCGAATCATAGGAAGTAGT--AATCGCCGATATGCTCATATTG  
GCAATGTTATTGTTGCTGTAATAAAGAAGCAGTGCCCAACATGCTTCTAGAAAAGATCA  
GAAGTAATTAGAGCTGTGATTGTACGCACGTGTAAAGAAGTCAAACGTGACAACGGCA  
TGATAATACAATATGATGACAATGCAGCGGTTATCATTGATAAAGAAGGAAATCCAAAA  
GGAACTCGGATTTTTGGTGCGATTACTCGGGAATTTAGACAGTTGAATTTACTAAAAT  
ACTTTCATTAGCACCTGAAATCTTAATGCTTAGTCCCAAAATAACCAGATTCGTAAAC  
AACATAGAGGTAGAATGAAGGGAATATCTTGCCGAGGCAATCATATTTGTTTTGGAAGA  
TATGCTATTCAGGCACTTGAACCTGCTTGGATTACAGCTAGACAAATAGAAGCAGGGCG  
AAGAGCAATGACAAGATATGTTTCGTCGCGGTGGGAAGATATGGGTACGTATCTTTCCCG  
ACAAACCTGTTACAGTAAGACCTGCGGAAACACGTATGGGTTCGGGCAAGGGATCCCC  
CGAATATTGGGTATCCGTTGTTAAACCGGGTAAAATACTTTATGAAATGAATGGAGTATC  
AGAAACTATAGCCAAAGCAGCTATGAAAATAGCTGCATGCAAAATGCCTATACGAACTC  
AATCTTTATTTTAGGCATGACCAGAGTTAAACGAGGATATACATCTCGGAGACGTCTGA  
AAAAAATTCGTTTATTTGCATCAACCTTTAAAGGTGCTCATTCAAGACTTACTCGAAT  
GACTACTCAACAGAGAATTAGAGCTTTGGTTTCTCTCATCAAGATAGGAGCAGGAAA  
AAGAGAGATTTTCGTCGTTTGTGGATAACTCGGATAAATGCAGTAACTCGCGAGGAT----  
--CTATTCTATAGCTATAGCCTATTCATACACAATATGTACAAGATACAATTGCTTATGAAT  
CGTAAAATACTTGCACAAATAGCCCTATCAAATAAGAATTGTTTTGATATGATTTCTAAT  
AAAATCATCAATCAAAA-----ATGATAAGGAAAGTGTTA---ACTCAAC  
ATATACGT--ATGTCTGTTTTTAAAGCACTAAGAGTAATTGATCATATTCGCGGACGTTCT  
TATGAGGAAACACTTATGATACTGGAACACTACTACCTTATGGGGCAGCTTATCCCATTTA  
AAATTAGTTTCTTCTGCAGCAGCAAATGCTAGTCATAATATGGGTTTGAATGAAGCTGA  
TTTATTTATTAGTAAAGCTGAAGTCCATGGAGGTAATTTGTTAAAAAGCTAAGACCCC  
GGGAGCGAGGGCGTAGTTATATTATAAAAAAACCACTTGCCATATAAAGATTGTTTTA  
AAA---AAATATAAATTA-----ATGGATGGAATCAAATATGCAGTATTTACAGA  
AAAAAGTCTTCGTTTATTGGGGAACAATCAA---TATACTTCTAATGTGCAATCAGGATCA  
ACTAGGACAGAAATAAAGCATTGGGTGCAACTCTTCTTTGGTGTCAAGGTAATAGCTAT  
GAATAGTCATCGACTCCCGGTAAAGGGTAGAAGGATGGGACCTATTATGGGACATACAA  
TGCATTACAGACGTATAATCATTACGCTTAAACCGGGTATTCTATTCCACCTTTATAAA  
GAATTATAAATGGCAGTTCCAAAAAAGCGTACTTCTATGTCAAAAAAGTATATTCGTA  
GAAATCTTTGGATAAAAAAAGGTTATTTATTGGCAGTAAAATCTTTTTCTTTAGCTAAAT  
CTGTTTCAACCGGACAGTCAAAAAGTTTTTTT-----CAAAAAAAGTATATGTCCAAAGG







GTAAACAAATTGGTCTACCACAGAAACAAGACTTCAGAAGTTCAGGGACTTAAGAGC  
AGAAAAAAGATGGGTAAACTCAACCGTCTCTCAAAGGAGATGCAGCAATTTTTAAG  
AGAAAGTTATCTACCTTGCAGACATATCTGGGTGGGATCAAATATATGACGGGATTGCC  
CGATATTGTAATTATAGTTGATCAGCAAGAAGAATATATGGTTCTTCAAGAATGTGTCAT  
TTTAGGTATTTCAACAATTTGTTTAATTGATACAAATTGTAACCCAGATCTTGCAGATATT  
TCTATCCAGCCAACGATGATGCTATAGCTTCAATTTCGATTTATTATTACAAAATTAGCAT  
ATGCAATTTGTGAGGGACATTCTAGT--TATATAAAAAATGGTATGGGACAAAAAATAAA  
TCCACTGGGTTTAAGACTTGGAACTCAAGTCATTATTCATTTTGGTTTCGAAAAC  
CAAATAATTTTTCTACGGGTCTACAAGAAGATGAAAAATAAGGAATTGTATTAAGAAC  
TATTTCAAAAATAATAAGAGAATATACTCAGAT---TTTGAAGGAATTGCCTATGTAGGGA  
TTCATAAAGAATAGATTTGATTCAGGTCATAATCTATATTGGATTTCCAAATTTATTAAT  
AGAAGGA-----CGAACAAGG-----GGAGTCAAAGAATTACAGATGAATGTACAAAAGA  
GTTTCATTCTGTAAACCGTAGACTCCACATTTCTATCACAAGAATTGAAAAGCCTTATAG  
ACAACCTAATATTCTTGCGAATATATAACTTTACAATTAATAAATAAGAGTTTCGTTTCG  
AAAGGCAATGAAAAAGCTATTGAATTAAGTGAACAAGCGGGTACAAAAGGAATTCA  
AGTGCAAATTGCAGGGCGTATTGACGGAAAAGAGATTGCACGTGTTGAATGGATAAGA  
GAAGGCAGGGTTCCACTACAAACAATTCTCGCTAAAATTGATCACTGTTCCCATACAAT  
TAGAACTATATATGGAGTCTTAGGCATCAAATTTGGATATTTGTAAACCAAGAAATGTC  
TCGTTACCGAGGACCTCGTTTCAAAAAAATACGCCGGCTGGGGGCTTTGCCGGGACTA  
ACTAGTAAAAGACCCCTATCCAAAAGTGATCTTCAAACCAAATTACGCTCTGGAAAA---  
AGATCACAATATCGTATTCGTTTAGAAGAGAAAACAAAAAATTGCGTTTTTCATTATGGTCTT  
ACAGAGAGACAATTAATATGTGCATATTGCTGGAAAAGCCAAAGGGTCAACAG  
GACAGGTTTTACTACAACACTTGGAGATGCGTTTGGATAACATTCTTTATAGATTAGGTA  
TGGCTTCAACAATACCTGGAGCCAGGCAGTTAGTTAACCATAGACACATTTTAGTTAAT  
GGTCATATAGTGAATATACCAAGTTATCGTTGCAAACCTAGAGATATTATTACTACGAAG  
GATAAAGAAAGATCAAAAAGCTATGATTAATAAATTATATTGTTTCATCTCTACACGAA-----  
TTGCCAAACCATTTGACTATTGACTCC-----TTACAATATAAAGGATTTGTAAATCAAATA  
ATAGATAGTAAATGTATTGGCCTGAAAATAAATGAGTTGTTGATTGTAGAATATTATTCTC  
GTAAGACTATGTCACGCCGAGGTAAGTGCAGAAGAAAAAACTGCAAATCCGATCCGAT  
TTATCGTAATCGATTAGTTAACATGTTGGTTAACCGTATTCTGAAACACGAAAAAAAT  
CATTGGCTTATCAAATTATCTATCGAGCCGTGAAAAAGATTCAACAAAAGACAGAAAC  
AAATCCACTATCTGTTTTACGTCAAGCAATACGTGGAGTAACTCCCGATATAGCAGTAA  
AAGCAAGACGTGTAGGCGGATCGACTCATCAAGTTCCTATTGAAATAGGATCTACACA  
AGGAAAAGCGCTTGCCATTCGTTGGTTGTTAGGGGCATCCCGAAAGCGTATGGGTGCA  
AATATGGCTTTACAATTAAGTTCTGAATTAGTAGATGCTGCCAAAGGCAGTGGCGATGC  
CATACGCAAAAAGGAAGAGACTCATAGGATGGCAGAGGCAAATAGAGCTTTTGCTCAT  
TTTAGTATGGGTAGGGACATTATTGCCAATATAATAAATTCTATAAGAAATGCTGACATG  
GATCAAAAATAGAAGAGTTCAAATATTATCTACTAATACTAAAAATATTGTGAAAATA  
CTTTTACGAGAGGGTTTTATAGAAAATGTTGAAAACATAAGGAAAGTCAAAAAAATT  
TCTTGGTTTCAACCTTGCACATAGAAAAG-----ACTCGGAAAGGG-----AATAA  
AATAAATTTAAAGCGTATCAGCCGACCTGGTCTACGAATATATTCTAACTATAAAAAGAAT  
TCCTAAGATTCTAGGTGGGATGGGAATTGGAATTATTCTACTTCTCGAGGTATAATTAC  
AGATCGAGAAGCTCGACGAGAAAAAATTGGAGGAGAAATTTGTGTTATATATGGATG  
ACAAAACCCATAGTAAAAGTTAGTTTACGTAAGAATGCACGTATTGGTTCACATAAGAA

TGAACGCAGAATACCAAAAGGAGTTATTCATGTTCAAGCGAGTTTCAACAATACTATTG  
TAACTGTTACAGATGTACGAGGTCGCGTGGTTTTCTTGGGCTTCTGCTGGTACTTCTGGA  
TTCAGAGGCACAAGAAAAGGAACACCCTATGCTGCTCAAGCAGCAGCATTTAATGCTA  
TTCGTTCAAGTCATTGAACAGGGTATGCGACGAGCAGAGGTTCTGATAAAAAGGTCCAGG  
TCTCGGAAGAGATGCGGCATTACGAGCAATTCGTAGAAGTGGGATTCTATTAAGTTTTG  
TACGTGATGTAACACCCATGCCACATAATGGATGTCGCCCCCTAAAAAAGACGTGTG  
ATGCCAACCATTAACAACCTTATTAGAAAACGCAAGACAGCCAATAAGAAATGTCACAA  
AATCTCCCGCTCTTCGAGGATGTCTCAGCGTCGAGGAACATGTACTAGGGTGTATACT  
ATAACCCCCAAAAACCAAACCTCTGCCTTACGTAAAGTTGCCAGAGTACGATTAACCT  
CTGGATTTGAAATCACTGCTTATATACCCGGTATTGGCCATAATCACAGAACATTCTG  
TAGTATTAGTAAGAGGAGGAAGGGTTAAGGATTTACCCGGTGTGAGATATCACATTGTT  
CGAGGAACCCTAGATGCTGTGCGGAGTAAAGGATCGCCAACAAGGGCGTTCTAAATATG  
GGGTCAAAAAGCCAAAAATGGCAAGAAAAAGTTTGATTCAAAGGGAGAAGAAGCGC  
TGAAATTGGAACAGAAATATTATTTGATTCGACGATCCTCAAAAAAGAAATAAGT----  
----AAAGTTCCTCATTGAAGGAAAAATGGAAAATTCATGGAAAATTGCAATCCCCCCC  
ACGTAATAGTGCATATACGTCTTCATAGACGTTGTTTTTTAACCGGAAGACCTAGAGC  
AAACTATAGAGACTTTGGGCTATCTGGACACATACTTCGAGAAATGGTTCATGCATGTT  
TGTTACCAGGTGCAACAAGATCAAGTTGG-----ATGGACCGAGTTATTACACAAG  
AAGAAAAAGATAAAAAT-----AGTGGGTCTGTTGAATTTCAAGTATTACATTTACCAGT  
AAGATACGAAGACTTACTTTACATTTAGAATTACACAAAAGAGATTTTTTATCACAAAG  
GGGTCTACGAAGAATTCTAGGAAAACGTCAACAATTATTGACTTATTTGTCAAATAAAA  
ACAAAGTTCGTTATAAGAAATTAATGTATAAGTTAGATATTTGGGAATCAAAAACCCGT--  
----ATGGTAAAACCTTCGTTTGAAACGATGTGGTAGAAAGCAACGAGCCATCTATCGAAT  
CGTTGCAATTGATATTCGATCCCGAAGAGAAGGAAGAGATATTAAAAAAGTAGGTTTCT  
ATGATCCGATAAAGAATAAAACTTATTCAAATGTTTCATGCTATTTTATATTTTCTTAAAAA  
AGGTGCTCAACCCACAGGAACCTGTTTCATGATATTTTAAGGAAGGCGGGATTATTTAA--  
- - - - -  
-????????????????????????????????????????????????????????????????????????????????????  
????????????????????????????????????????????????????????????????????????????????????  
????????????????????????????????????????????????????????????????????????????????????  
????????????????????????????????????????????????????????????????????????????????????  
GTGACACGTTCACTAAAAAAAATCCTTTT  
GTAGCTAATCATTATTGGGAAGAGTTGAAAACTCAACATGAGGGAGGATAAAGAAA  
TAATAGTGACTTGGTCTCGGGCATCTACCATTATACCCACAATGATTGGCCATACAATCG  
CTATTCATAATGGAAAGGAACATTTACCTATTTATATCACAGATAACATGGTTGGTCACA  
AATTGGGAGAATTTCGCACCTACTATCACTTTTCGTGAGACATGTGAGAAACGATAATAAA  
TTACGTCATATGATTTTGAATATTTTCTACTAGGTAACCCATTATCCTTATGCATGAAGA  
TAATAAATTCGGTCGTTGTGGTTCGGGCTATATTATGGATTCTGACCGCATTCTCCATAG  
GGCCCTCTTATATCTTCTTATACGAGCTCGTTTTATGGACGAAGGA-----ACCGAGAA  
GGAGGTAGCAGCAACAACCTGGTTTTCTTGTGGGACAGCTCATGATGTTTCATATCGATCT  
ATTATGCGCCTCTGCATATAGCATTGGATAGACCTCATACAATAACTGTACTAGTTCTACC  
GTATCTTTTGTTCATTTCTTCTGGAACAATAACAAAACCTTTTTTTTATTATGAATCTACT  
ACCATAAATTCAATGCGTAATCTAAGCATTCAATGCGTATTCCTTAATAATCTCATTTTTC  
AATTATTCAACCATTTCAATTTACCGAGTTCCACGTTAGCCAGATTAGTAAACATTTCTAT  
GTTTCGATGCAACAACAAGATTTTATTTTAAACAAGTAGTTTTGTTGGTTGGTTAATTGG

TTACATTTTCTTCATTAATGGGTTGGATTGTTACTATTCTTTATACGACAAAATCATTATA  
TTAGATCT-----AAGTATATTGTGTCAGAATTTAGAAATTATATGGTTCGAATATTA  
ATATTTTATTATTTATCACCTGTGTATACTATTTAGGCAGAATGCCGTCGCCTATTGTCACT  
AAGAACTTAAAGATACTGAAGAAAACAAAACTTTTGTCACTTTTTTTTTTGATTATAA  
ACGGTGGAAATCGTCCATTACGATATATAAAAAATGATAAATTAGAAAATGCTTTACGCAA  
TGAAATGTCACAATTTTTTTTTTTTACATGCAAAAGTGATGGTAAGCAAATAATATCCTT  
TACATATCCGCCAGTTTATATATTTTTTCAAAAATGATAGAACAAAAAATTTCTTTGTAC  
ATAATAGAAAACTATATGAATATGAAGAATATTTTTATTGGATTTATACCAATGAAAAA  
AAAAAGTTTAATTTGAAAAATGAATTTATAAGCCGAATAAAAATTATAGAAAAAATGA  
T--ATTATGGATATGCTTGAAAAAGAACCATATTATGCGATGATGAAAATAAAAAAAA  
TGCTTGCCAAAAGCATATGATCCTTTTTTCAACGGACCTTATCGAGGAACGAGAAAAA  
AATTATATTTAAGCTTAGAAATTTTTTTTATAAATAAGATTCATGATATACTT-----  
CTTGATACAAAATATCAAGGAATTGGAATAGAAGAAATCAGTAAAGAGGTTTCTAGATG  
GTCATACAAATTAACCTTGGAAGAAGAAGAAGAAGAATATATTCGTTCAAGAAGA  
GCAAAACGTGTGATAATTCGAATGATTCTTTGATAGATTACTCCCAACAATCGGATTTT  
CGTCGCAGTCTAATCAAAGGATCTATGCGCGCTCAAAGACGTAAAACAGTTATTTGGG  
GCCTTTTTCAATTC AATTC AATTC CCCC ACTTTTTTTTGATCGGCTAGACAAAACATTTT  
TTTTTTCGTTTTTTGAT--ATTAATGAAATTAAGAATATCATTTTTTAGGAATATATATAA  
TGAACAGATAGAAATATCCGAAACTGAGGATCCTTTTATATTTGCTCAAGCACTGAGAA  
GTTTTACATTATTAACCCAATCTTTTCTTAGAAAATACATTATATTGCCTTCGTTAATAATA  
GCTAAAAATATTTCCGTATTATATTATTACAATCCCCGAGTGGTATGAGGATTTCAAAG  
AATTGAATAGAGAAATACATATTATATGCACCTATAGTGGTGTCAATTATCAGAAACAG  
AATTTCCCAATATTGGTTAACAGAAGGTATTCAGATAAAGATTCTATCTCCTTTCTGTC  
TAAAACCTTGGCAAAAATATATGAAAATAAAAAAAGCTTTTGTTTTTAACAGTCTA  
TGGAATGGAAGCAAAAACCTCC---CTTTGGTTCTCCTCAAAAAGGATCTTTTTTTTTAAA  
CCTATTTTAAAAAACTCAA-----AAAACAAGGTGAAA---AAGAACTTTTTACAAAT  
TCTTAAATTATTAAGAAAGAAAAAATACTTTCTAAAAGTTCGAAAAGAAGAAATA  
AAATGGGTCATCAAAATAGTTCAA-----GTTATAAACTAATAATAAAAAACCTGGATAA  
AATCAATTTTAAAATAAAT--AATCATATTATTTGTGAATCACCAGTTTTAATTCAAATAT  
GAATTGGTTAAATTATTCATAATAGAAAAAGAATGAAAGATCTTTCTGATAAGACAA  
TCAAATAAAAAATCAAATTGAACAAATTACAAAAGACAATAAAAA-----  
--ATAAAAGGTCGGGCTCACATAAACATATTTGGAAAATATTA AAAAGTAAAAATATCC  
GATTAATGCGTAAATCACACTACTTTATAAAATCATTCAATTGAAAAATATATACATATAT  
ATTTTTATGTACCATTTCTAATATAAATATAAATTCACAACTTTTTCATTAATTTAAATTTAT  
GGAATGTATCTTCCCTGTCTCAAGCATATGTATTTACAAATTATCACAAACCAATTAC  
TTAATAAGTCTAACTTGAGATCTTTACTTAAATATCCTTTTTTATTTTTAAAGGATAAGTT  
AAAATACTATTGTATACACGGAATATTTAATCCAAAACAAGACATAATAAAATT--ACAT  
ATGTAATGAACAAATGGAAAACTGGTTAAAAAGTTATTATAAATATGATTTATATGAAA  
AAAAG--TCTATATTAGTACCTAAAAAATGGCTAAATATAATCAATAAAGGTCATTTGATT  
CAAACAAGATCAAATCTGATTTATAT-----CGCAAATGGAAA  
AAACAGTACAGATATGATCTTTTTTCATATAGATATATAAGT--TATATTATTTATTTGGATA  
GAAAATATTTTGATTGTAAAATTCTTCATCTTTGTTTTATATTTTTTGATTGCATGGGAAT  
GAATCAAGAAAGGTTCTATGATTGGCTATTCCCAGAATTTTTCTACTTTTTGATATATAT  
AATATTAACCTTGGATCATCCAATCAAATCACTCTTTTTTCATTATAAGAATGAAAAT



GAAATGGGCCTATATTCATTTTTTAAGAAATATTTAATTTTTCAAATACAATGTTCTAATT  
TCTTTAATCAAAAAATAATAAAAAATATAAAGATATATTGTCTCATGCTTAGACTGATAA  
ATACAAAGGAAATTACTATATCCTATATTCAAAGAGGTGAAATAAATATAGACAAAATGA  
TTATTCACAAGGACCCAGTTCTTTTCAGAAGTGATAATAAAAGGAATATTTTTTATTGAAC  
CCATTTGTATCTCTAAACGAAAGGGGGGAAAATTTATTATATATCAAACCTATGGATATTC  
ATTGGTCAATAATAAAAATCAAATAATTATGATTTCCCTTGTTCCTGAAAATATTCTATCT  
CACAGAAGTCGTAGAGAATTTAGAATTCGAATTTGTTTCATATTTCTTTGGCCAAATTAT  
AGATTAGAAGATGTAGCTTGTATGAATCGCTATTGGTTTGATACTAATAACAGCAGTCGT  
TTCAGTATGTCAAGAATACATATGTAT--ATGAGACGACATCAATTAATAATTCTGGATATT  
CGAATTGAGAGAGGTATTGAGAGAGATCAAGAATTCCTTATATTTATTAGATTCATGGAT  
CAAATTTGATTTAGTGGGATCTTTCCTCACATTTTTTTCCACCAAGAACGTTTTATGAA  
ACTCTTTGACCCCGAATTTGGAGTATCCTACTTTCA--CGTGATTCA-----CAGGGTGCA  
ACAAGCAATCGATATTTAACG-----ATCAAAGGTGTACTACTGCTTGTAGTAGTG--GT  
CCTTATATCT-----CGTATTAACAATCGAAAGATGATCGAAAGAAAAAATCTCTATTT  
GATGGGGCTTCTTCCT-----ATACCTATGAATTCATTGGACCCATAAATGATACAT  
TGGAAGAATCTTTT--TGGTCTTCAAATATAAATAGGTTGATTGTTTCG--CTACTGTATC  
TTCCAAAAGGAAAAAGATTTATGAGAGTTGTTTCATGGATCCGCAAGATAGTACTTGG  
GTTCTCCCAATAAAG-----AAAAGTGTATCATGCCTGAATATAACCGGGGTTCCGC  
GTGGTGGAGGAACCGGATCGGAAAAAAGAGG-----GATTCTAGTTGTCAGATATAT-----  
--AATGAAACCGTAGCTGGAATTGAGATTCATTCAAAGATAAAGATAGCAA---TATCT  
GGAGTTTATTTTTTTATCCTATACG-----GATGATCCGATCCGCAAGGACCCTGATTGGGA  
ATTATTTGATCGTCTTTCTCCGAGTAAGAAACGAAACATAATTAACCTG-----AATTCGGT  
ACAGCTATTCGAAATCTTAGGGAAAGACTTGATTTGTTATCTCATGTCTGCTTTTCATGA  
AAAAGACCAATTCAGGGGGGGAGT--TTCTTCAAGCAACAAGGA--GCCGGGGCAAC  
TATGCAATCCAATGATATCGAGCATGTTTTCCAT-----CTCTTCTCGAGAAACAAGTGGG  
GTATTTCTTTGCAAATTTGTCTCAATTTTCATATGTGGCAATTCGCCAAGATCTTTAAT  
T-----AGTTGGTGGAAAG---AATCAGCACGAATCGGATTTTTTTAGGAAC--GTCTCGAG  
AGATAATTGTATTTGGTTAGACAATGTGTGGTTGGTAAACAAGGATCGG-----TTTTTT  
AGC-----AAGGTACGGAATGTATTGTCAAATATTCAATATGATTCA-----ACAAGA-----T  
CTATTTTCGTTAAAGTAACGGATTCTAGCCAATGGAAAGGATCTTATTCTGATCAATCCA  
TAGATCATTTTGATTCCGTTATA-----AATGAGAATTCAGAA-----  
-----TATTACACATTGATTGATCAA-----  
---ACAGAGATAGAATCGGAT-----CGATTCCCAAAA-----TTCATTTTTGGATCTTCC-----T  
CCATGTCTGGCTATTC-----ATCGAAGAATTTCTT-----G  
GAAATCCTACAAGATCAATCCGTTCTTTTTTCTCTGACAGATGG-----TCAGAACTTCAT--  
-TTGGGTTCTAATCCTACTGATAGGTCCACTATAGATCAT-----AAATTGTTGAATAAA  
AAACAAGATGTTTCT--TTTGTCCCTTCCAGGCGAGCGGAA-----AATAAAGAAATG  
GTTGATATATTCAGATAATTACTTATTTAAAAAAT-----ACCGTATCAATTCATCCTTCGG  
AACCAGATCCGGGATGTTATCTGGTTCCG--AAGGATGAACCG-----  
-----GTTTTTGAT-----TTCTTTCATCTATCCCATGACCAAAACAAAAGGGGATAC  
GCGTTA-----CACCACAATTTTTTTAAATCA--GAAGATAGATTACCAGAAATGGTGGATC  
TATTCATCTATCAATAACCGAGCCG--GATCTGGTGTATCATAGGGGATTTGCCTTTTCT  
ATTTATTCCTACGGGTTGGATCAAAAAAAA-----TTCTTGAATGAGGTATTCAACTCCAG  
AGATGAATCAAAAAGAAATATTTT-----TTGGTTCTACCTCCTTTTTTTAT-----GAG

GAGAATGAATCTTTTTCTCGAAGGATCATAAAAAAATTGGTCCGG---ATCTACTGTGGG  
AATGATTTGGAAGATAACAAACTCAAAACAGCGGTATTTGCTAGCAACAACATAATGG  
AGGCAGTCAATCAATATAGATTGATCCAAAATCTGATTAATAATCCAATATAGCACCTATG  
GA-----TACATAAGAAATGTATTGTATAGATTATTTCTAATG-----AATAGATCCGATCGC  
AACTTCAAATGTGGAATTCAA-----AGGGATCAAATAGTAAATGAGACTCTTAATCATA  
TAACTCTAATGAAATATATGATCAACCAACATTTATCAAATTTGAAAAAG---AGTCAGAA  
GAAATGGTTTGATCCT-----CTTCTTTATCGAACTGAGAGATCCATGAATCGGGATCC  
TGATGCATATAGATACAAATGGTACGATGGGAGCAATAATTTTCAG-----GAACATTTCT  
TTTTCTGAACAGAATAATCCTTTTAAAGTAGTGCAAGTAGTGTTCAATCGATTACGTATT  
AATCAATATTCAATTGATTGGTCCGAGGCTATCGACAAAGAAGATTTGTCTAAGTCACT  
TCGTTTCTTTATGTCTAAGTCA-----CTT  
CGTTTATTTTTGTCCAAGTCACTTCCCTTTTTCTTTGTGAGTATTGGGAATATCTCCATTC  
ATAGGTCCGAA---ATCCACATCTAT--GAATTGAAAGGTCCGAATGATCAACTCTGCAAT  
CAGTTGTTAGAATCCATAGGTGTTCAAATCGTTCATTTGAAGAAATTGAAACCC-----TT  
CTTATTGGAT-----GATCATGATACTTCC---CAAATACCAAATTATTGATCGATGGAGG  
AACAAATATTACATTTTTGTTCAAAAAGATACCA---AAGCGG---ATGATTGACTCATTCCA  
TAAT-----AGAAATAATCGCAGGAAATCCTTTGATAACACGGATTCTTATTCTCAATGAT  
ATCACACGATCGAGACAATTGGCTGAATCCCGTGAAACCATTTTCATAGAAGTTCATTGA  
TATATTCTTTTTATAAAGCAAATCGACTTCGATTCTTGAATCATCCACATCACTTCTGCTT  
CTAT-----TGTAACAAAAGATTTCCCTTTGAGGTG-----GAAAAGACCCGTATAAATA  
ATTATGAT-----CTTACATAT--GGACAATTCCTAAATATCTTGTCCATTCGCAACAAA---AT  
CTTTTCTTTGTGCGTCCGGTAAA-----AAAAAATCTATTTATTTGGAG---ATAGAGACTATT  
TCACCAATCGAGTCACAGGTATCTGACATCTTCATACCTAATGATTTCCCGCAAAGTGG  
TGATGAAACG---TATAACTTGTACAAATTGTACAAATCTTTCCATTTTACAATTTCGATCCG  
ATCCATTCGTTCGT-----GGAGCTATTTACTCGATTGCAGACATTTCTGCAACACCTCTAA  
AAGAGGAACAAATAGTCAATTTGGAAAAAATTTATTGTTCAGCCTATTTTCAGATATGAAT  
CTATCTGATTCAGAAGGGAATAATTTGCATAAGTATCTCAGT-----TTCAATTCAAACATG  
GGTTTGATTCACACTCCATGTTCTGAGAAGTATTTACCA-----TCCGGAAAGAGTAAAAA  
A-----CGTAGTCTTTGTATAAAT-----AAATGCGTTGAGAAATGGCAGATGC  
ATAGAACCTTTCAACGAGATATTGCTTTTTCAAATCTATCAAATGGAATCTGTTCCAAA  
CATATATGCCATGGTTCTTACTTCGACAGGGTTCAAATATCTAAATTTACCCTTTTAGA  
TACTCTTTTCAGACCCATTG-----CCAATACTAAGTAGCATT--CAAAAATTTGTATCCATTT  
TTCATGATATGATGAATGGATCAGATATATCATGGCCGATTCCTCATAAG-----  
---ATTATTCCACAATGGACTCTG---ATAAGTGAGATTTTCGAGTCAATGTTTACGGAAT-----  
CTTCTTCTGGCCGAAGAAATGATTCATCGAAATAATGAGTCACCCGTTCCATTGATATG  
GGCACATCTGAGATCAACAAATGCTCGGGAGTTT--CTCTATTCAATCTTTTTCTTCTTA  
TTGTTGCTGGATAT--CTCGTTCGTATACATCTTCTCTTTGTTTCCCGA-----GCCTATAGT  
GAGTTACAGACAGAGTTAGAAAAGATCAAATCTTTGATGATTCCATCATAATGATGGA  
ATTTCAAAAATCTTGTATAGGTATCTACATCTGAACTGAATTCTTTCTGGTTCAAGAA  
TCTCTTTCTAGTTCTTATGGAACAATTAGGAGATTCTCTGGAAGAAATACGGGGTTATAT  
TTATGGTGGCAACATGCTATTGGGTGGTGGTCCC-----ACTTATGGG---GTCAAAT  
CAATACGTTCTAAGAAGAAATATTTAAGATCAAT-----CTCATCAATCTTGTA---AGTA  
TCCACCAAATCCCATCAATAGAATCATTTTTTCGAGAAATACGAGACATCTAAGTCGTA  
CAAGTAAAGAGATCTATTCATTGATAAGA-----AAAAACGTGAACGGTGATTGGATTGAT





CTTCAAACAGGACTTATTGCTATTGATTTCGATGATCCCCATAGGTCGTGGCCAACGAGA  
ATTAATTATTGGAGACAGACAAACAGGTA AAACTGCAGTCGCCACAGATAACAATTCTC  
AATCAACAGGGACAAAATGTAATATGTGTTTATGTAGCTATTGGTCAAAAAGCATCGTC  
TGTGGCTCAAGTTGTAAC TACTTTACAAGAAAGGGGAGCAATGGAATATACTATTATAG  
TAGCTGAAACGGCGGATTCTCCAGCTACATTACAATACCTCGCCCCTTATACAGGAGCA  
GCTCTGGCTGAATATTTTATGTACCGTGAAC TFCACACTTTAATTATTTATGATGATCCCT  
CCAAACAAGCACAGGCTTATCGTCAAATGTCTCTTCTATTACGAAGACCGCCAGGTCGT  
GAAGCTTATCCAGGGGATGTTTTTTTATTTGCATTTCGCGTCTTTTGGAAAGAGCTGCTAA  
ATTGAGTCCTCAGCTAGGTGAAGGAAGTATGACTGCTTTGCCAATAGTTGAAACACAA  
TCGGGAGATGTTTCAGCTTATATTCCTACTAATGTAATTTCCATTACGGATGGACAAATAT  
TCTTATCTGCCGATCTATTCAATGCTGGAATCAGACCCGCCATTAATGTCGGTATTTCCG  
TTTCCAGAGTTGGATCGGCCGCTCAAATTAAGCCATGAAACAAGTAGCTGGTAAATT  
AAAATTGGAATTGGCGCAATTCGCAGAATTAGAAGCTTTTGCACAATTCGCTTCTGATC  
TCGATAAAGCTACTCAAATCAATTGGCAAGAGGTCAACGATTGCGCGAATTGCTTAA  
ACAATCCCAATCAGCCCCTCTCACTGTAGAAGAACAGATAATAACTATTTATACCGGAA  
CGAATGGTTATCTTGATTCATTAGAAATTGTACGGGTAAAGAAATTTCTTGTTGAGTTAC  
GTGCTTACTTAAAAACGAATAAACCTCAATTCAAAGAAATCATATCTTCTACCAAGACA  
TTCACTGGGGAAGCAGAAGCTATTTTGCGGGAAGCTATTCAAGAAGAGATGGA ACTCT  
TTTTACTCCAGGACCAAGTAATGATAATGAATCCTACTACTTCTGGTCCTGAGGTTTCTG  
CACTTGAAAAAAAATCTGGGGCGTATTGCCCAAATAATTGGTCCAGTATTAGATGTA  
GCTTTTCCCCCAGGGAAGATGCCCAATTTTACAACGCTCTGGTAGTTAAGGGTTCGAGA  
TACTGTTGGTCAACAAATCAACGTGACTTGTGAAGTACAACAATTATTAGGAAATAATC  
GAGTTAGAGCTGTAGCTATGAGTGCCACAGATGGTCTAATGAGAGGAATGGAAGTGAT  
TGACACGGGAGCGCCCCTAAGTGTTCCAGTTGGTGGAGCAACTCTAGGACGAATTTTC  
AACGTGCTTGGAGAGCCTATTGATAATTTAGGCCCTGCCGATACTAGCACACATCTCC  
CATTCATAGATCTGCGCCTGCCTTTATACAATTAGATACAAAATTAGCCATTTTGA AAC  
AGGAATAAAAGTAGTAGATCTTTTAGCTCCTTATCGCCGCGGAGGAAAAATAGGACTTT  
TCGGTGGAGCTGGAGTAGGTAAAACAGTACTCATTATGGAATTAATCAATAACATTGCC  
AAAGCTCATGGAGGTGTATCTGTATTTGGCGGAGTAGGTGAACG TACTCGTGAGGGAA  
ATGATCTTTACATGGAAATGAAAGAATCCGGAGTAATTAATGAACAAAATATTGCAGAA  
TCAAAGTAGCTCTAGTATACGGTCAAATGAACGAACCGCCTGGAGCTCGTATGAGAG  
TTGGTTTAAACCGCCCTAACTATGGCAGAATATTTCCGAGATGTCAATGAACAAGACGTA  
CTTCTATTTATCGACAATATCTTCCGCTTCGTCCAAGCAGGATCTGAAGTATCCGCCTTA  
CTGGGTCGAATGCCCTCTGCTGTTCGGTTATCAACCTACCCTTAGTACTGAAATGGGTTC  
TTTACAAGAAAGAATTACTTCTACCAAAGAAGGGTCCATAACTTCTATTCAAGCAGTTT  
ATGTACCTGCAGACGATTTGACCGATCCTGCTCCTGCCACGACATTTGCACATTTAGAT  
GCTACTACTGTACTATCAAGAGGATTAGCGGCCAAAGGTATCTATCCAGCAGTAGATCC  
TTTAGATTCAACTTCAACTATGCTCCAACCTCGGATCGTTGGTGAAGAACATTATGAAA  
CTGCGCAAAGAATTAACAAACTTTACAACGTTACAAAGAACTTCAGGACATTATAGC  
TATTCTTGGGTTGGACGAATTATCCGAAGAGGATCGCTTAACCGTAGCAAGAGCACGA  
AAAATTGAGCGTTTCTTATCACAGCCTTTTTTTCGTAGCAGAAGTATTTACCGGTTCCGC  
GGGGAATATGTTGGTCTAGCAGAAACAATTAGAGGGTTTAAATTGATTCTTCTGGAG  
AATTAGATGGTCTTCTGAAACAAGCCTTTTATCTAGTAGGTAATATCGATGAAGCTACTG  
CGAAGGCTACAACTTAGAAATGGAGAGCAAATTGAAGAAAATGACTTTAAATCTTTG

TGTA CTGACCCCAATCGAATTGTTTGGGATTCAGAAGTGAAAGAAATCATTTTATCTA  
CTAATAGCGGACAAATTGGAGTATTACCAAACCATGCGCCTATTGCCACAGCTGTAGAT  
ATAGGTATTTTGAAAGTACGCCTTAACGACCAGTGGTTAACGATGGCTCTGATGGGCGG  
TTTTGCTAGAATAGGAAATAATGAGATCATTATTTTAGTAAATCATGCGGAAAAGGGTAG  
TGACATTGATCCACAAGAAGCACAGCAA ACTCTTGAAATAGCAGAAGCGAATTTGAAT  
AAAGCTCAAGGCAAGAGACAAATAATTGAGGCAAATTTAGCTCTCAGACGAGCTAGG  
ACACGAGTAGAGGCTAGCAATATGATTTGATGAAAAATATAACCGATTCTTTCTTTG  
TTGGGCTACTGGCCATCCGCCGGAAGTTTCGGGTTTAATACCGATATTTTAGCAACAAA  
TCCAATAAATCTAAGTG TAGTGTTAGGTGTATTAGTTTTTTTTGGAAAGGGAGTGTTAA  
GTGATTTATTAGATAATCGAAAACAGAGAATCCTTGAGAACTATTGCAAATTCAGAAGAA  
CTGCGGGAAGGAGCCCTTGAACAGCTGAAAAAAGCCCAGGCCCGCTTAAGGAAAGTC  
GAAACGGAAGCAGATCGGTTTCGGGTGAATGGCTATTCTGAGATAGAACGAGAAAAAT  
TGAATTTAATTAATTCAATTTATACGACTTTGGAACAATTAGAAAATTACAAAAATGAAA  
CCATTTATTTTAAACAACAAAGGGTGATTAATCAAGTTCGACATCGAGTTTTACAAAA  
GCCTTACAGGGAGCTCTAGGAACTCTGAATAGTTGTTTGAATAATGAGTTACATTTACG  
TACTGTCAATGCGAATATTGATATGTTTGGGGAGATGAAAGAAAAAATAGCATGAATC  
CACTGATTTCTGCCGCTTCCGTTATTGCTGCTGGGTTGGCTGTCGGACTTGCTTCTATTG  
GACCTGGGGTTGGTCAAGGCACCGCTGCAGGGCAAGCTGTAGAAGGGATTGCGCGAC  
AACCAGAGGCAGAGGGAAAAATACGGGGTACTTTATTGCTTAGTCTGGCTTTTATGGA  
AGCTTTAACAATTTATGGGCTGGTTGTAGCATTAGCGCTTTTATTTGCGAATCCTTTTGT  
ATGAATGTTCTATTATGTTCCATCAACACATTA AAAAGATTATATGATATGTCTGTGTGG  
AAGTAGGTCAACATTTGTATTGGCAAATAGGGGGTTCCAAGTGCATGCCCAAGTACTT  
ATTACTTCTTGGGTTGTAATTGCTATCTTATTAGTTTCAGTCATTCTAGTTGTTGCAAATC  
TGCAAACCATTCCTACTTTTAGTCAGAATTTCTTTGAATATGTTCTTGAATTCATTCGAG  
ACGTGAGCAAAAGTCAGATTGGAGAAGAATATGGTCCGTGGGTTCCATTTATTGGAAC  
TATGTTTCTATTTATTTTGTTCGAATTGGTCAGGGGCTCTTTTGCCTTGGAAAATCATA  
CAGTTACCTCATGGGGAATTAGCTGCACCCACAAATGATATAAATACTACTGTTGCATTA  
GCTTTACTTACATCAGTAGCATATTTCTATGCGGGTCTTTCAAAAAAAGGATTAGCTTAT  
TTAATAAATACATAACAACCAACTCCAATCCTTTTACCAATTAACATCTTAGAAGATTC  
ACAAAACCTTATCGCTTAGTTTTCGACTTTTCGGAAATATATTAGCTGATGAATTAGTA  
GTTGTTGTTCTTGTTCCTTTAGTACCTTTAGTAGTTCCCTATCCCTGTCATGTTCCCTGGAT  
TATTTACAAGCGGTATTCAAGCTCTTATTTTTGCTACTTTAGCTGCAGCTTATATAGGTGA  
ATCCATGGAAGGCCATCATATGATATTTTCAACTTTAGAGCATATATTA ACTCATATATCAT  
TTTCAGTCGTATCGATTTTAATTTCAATTCATTTGATAACTTTATTAGTAAATGAGATCGT  
AGTATTATATGATTCATCCAAAAGGGCATGATAATAACTTTTTTTCGGTATAACGGGATT  
GTTAGTTACTCGTTGGATTTTGTGCGGCCATTTACCATTTAGTGATTTATATGAATCATT  
ATCTTTCTTTTCATGGAATTTTCCATTTTATATGGTTCCATGGTTCAAAAAGCAAAA  
AACTATTTAAATACAATAATCACACCAAGTGTTATTTTTACCCAAGGCTTTGCTACTTCG  
GGCCTTTTAACCGAAATGCATGAATCCGTAATATTAGTACCTGCTCTACAATCCCATTGG  
TTAATTATGCACGTAAGTATGATGATATTGGGTTATGCAACTCTTTTATGTGGATCATTATT  
ATCAGTGGCTATTTTAGTCATTACATTTTCGAGAACTCATACAAATTTTTGTAAAAGCAA  
GGAAATCATGTACATGAATATGAATGAAAATGTTTTACAAAAAATTTCTTTTTCGAGA---  
---AATTATTACAGGTATCAATTTATCAACAATTGGATCGTTGGGTTTACCGTATTATTAGT  
CTAGGTTTTCTTTTTTAAACAATAGGTATTATTTTCAGGAGCAGTATGGGCTAATGAGGCC



TAATTGAAATT-----CTTATGAAAAAGCTTGAGACAATAGTTCCAATTATTGTTCTAATTA  
GATCATTAAATTAAGCGAAATTTTGTAATTTATTGGGGTATCCTATTAGTAAGTCGGTTTG  
GACCGATTTCATCCGATTTTGTATTTCTTGACCGATTTTGTGCGGATATGCAGAAATTTTCT  
CATTATTACAACGGATCCTCAAAAAGAAGGAGTTTGTATCGAATAAAATATATACTTCGG  
CTTTCTTGTATTAAACTTTGGCTCGTAAACACAAAAGTACTGTACGTGCTTTTTTTGAA  
AAGATTAGTATCCAAATTATTGGAAGAATTCTTTACAGAAGAAGAAGAGATTTTTTATTT  
GATCTTTCAAAGACGAATTTGGTATTTAGATATTCTTTTCAGCAATGATCTGATCAATCAT  
TTAATGATAATTGATAACAACA---GAAATACAAGATATCCATTTTTTTTTTTTCAGATTGGA  
ATCT--TTTAAAGAGATATATGGAATTCATGGACATTTGCTCCTATTTTTATCCTTGATT  
GGGAATTACAATAAGTGTACTAGCAATTGTATGGTTAGAAAGAGAAATATCTGCAGGGA  
TACAACAGCGTATTGGACCTGAATACGCCGGTCTTTTTGGAGTTCTTCAAGCTTTAGCA  
GACGGAACAAAACACTACTTTTCAAAGAGAATTTTATTCCATCTAGGGGAGATATTCGTTT  
ATTC AATATCGGGCCATCCATATCAGTCATATCAATTATAATAAGCTATTCAGTAATTCCTT  
TTAGCTATAACTTTGTTCTATCTGACCTCAATATCGGTGTTTTTTTTATGGATTGCTATTTCA  
AGTATTGCTCCCATTGGACTTCTTATGTCAGGATATGGGTGCAATAATAAATATTCCTTTT  
TGGGTGGTCTACGAGCTGCTGCTCAATCGATTAGTTATGAAATACCATTA ACTCTATGTG  
TGTTATCAATATCTCTACTATCTAACAGTTTAAGTACAGTTGATATAATTGATGCCCAATC  
AAAATATGGTTTTTGGGGGATGGAATTTGTGGCGTCAGCCTATAGGTTTCATCGTTTTTCT  
AATTTCTTCCTTAGCAGAATGTGAAAGATTACCTTTTTGATTTACCAGAAGCGGAAGAAG  
AATTAGTAGCAGGTTATCAAACCGAATATTCGGGTATCAAATTTGGTTTTGTTTTACATTG  
CTTCCTATTTAAACCTATTAATTTCTTCTTTGTTTGTAACTATTCTTTACTTAGGTGGTTCG  
AATATTTCTATTCCGTACATATTCGTTTCTGAATTTTTTGAATAAATAAAACATATGGAG  
TTTTTGTAACAACAATTGGTATCTTTATTACATTAGCTAAAACCTATTTGTTCTTATTTCGT  
TTCTATCACAACAAGATGGACTTTGCCTAGGTTAAGAATAGATCAATTATTAATTTTGG  
TTGGAAGTTTCTTTTACCCATTTCTCTCGGTAATCTATTATTAACAACACTTCCTTTCAGCTG  
TTTTCACTAATGATCTGACATGTACAGAATGAAAATTTCAATCTCGATTCTACAAGAATT  
TTTATGAAAGCCTTTCATTTTCTTCTTTCGATGGAAGTTTTATTTTTCCAGAATGTATCC  
TAATTTTTGGCCTAATTCTTCTTCTGATGATCGATTCAACCTCTGATCAAAAAAATATATC  
TTGGTTCTATTTATCTCTTCAACAAGTTTAGTAATAAGCATAACGGCCCTATTGTTCCGA  
TGAGAGAGAAGAACCTATGATTAGCTTTTCGGGAAATTTCCAAACGAATAATTTCAACGA  
AATCTTTCAATTTCTTATTTTACTATGTTCAACTCTATGTATTCTCTATCCGTAGAGTACA  
TTGAATGTACAGAAATGGCTATAACAGAGTTTCTGTTATTCGTATTAACAGCTGCTCTAG  
GAGGAATGTTTTTATGCGGCGCTAACGATTTAATAACTATCTTTGTAGCTCCAGAATGTT  
TCAGTTTGTGTTTCTATCTACTATCTGGATATACCAAGAAAGATGTACGGTCTAATGAGG  
CTACTACGAAATATTTACTCATGGGTGGGGCAAGCTCTTCTATTCTGGTTTATGGTTTCT  
CTTGGCTATATGGTTCATCCGGTGGAGAGATCGAGCTTCAAGAAATAGTGAATGGTCTT  
ATCAATACACAAATGTATAACTCCCCAGGAATTTAATTGCGCTTATATTCACTACTGTAG  
GAATTTGGTTCAAGCTTTCCCTAGCCCCCTTCTCATCAATGGACTCCTGACGTATACGAA  
GGATCTCCCACTCCAGTCGTTGCTTTTTCTTCTGTTACTTCGAAAGTAGCTGCTTCAGC  
TTCAGCCACTCGAATTTTCGATATTCCTTTTTATTTCTCATCAAACGAATGGCATCTTCTT  
CTGGAATCCTAGCTATTCTTAGCATGATATTGGGGAATCTTATTGCTATTACCCAAACA  
AGCATGAAACGTATGCTTGCATTCATCCATAGGTCAAATCGGATATGTAATTATTGGA  
ATAATTGTTGGAGACTCAAATGGTGGATATGCAAGCATGATAACTTACACGCTGTTCTAT  
ATCTCCATGAATCTAGGAACTTTTTGCTTGCATTGTATCATTGGTCTACGTACCGGAACT



GATAACATTCGAGATTATGCAGGATTATACACGAAAGATCCTTTTTTTGGCTCTCTCTTTA  
GCCCTATGTCTCTTATCCTTAGGAGGTCTTCCTCCACTAGCGGGTTTTTTCGGAAAACCT  
CATTTATTTTTGGTGTGGATGGCAGGCAGGCTTATATTTCTTGGTTTCAATAGGACTCCTT  
ACGAGCCTTGTTTCTATCTACTATTATCTAAAAATAATCAAGTTATTAATGACTGGACGA  
AACCAAGAAATAACTCCTCACGTGCGAAATTATAGAAGGTCCCCTTTAAGATCAAACA  
ATTCTGTGCAATTTAGTATGATTGTATGTGTGATAGCATCTACTATAACCAGGAATATCAAT  
GAACCCGATTATTGAAATTGCTCAGGATACCCTTTTTATGTTTCTGCTTTACGAATATGAT  
ATTTTTGGGCATTTCTAATAATATCAAGTTTTATTCCTATTTTTGGCATTTTTCATTTCTGG  
AATTTTAGCTCCGATTAGCAAAAAGACCAGAGAAAACCTTCTAGTTATGAATCGGGAATAG  
AACCAATAGGCGATGCTTGGTTACAATTTCGAATCCGTTATTATATGTTTGTCTAATTTT  
TGTTGTTTTTGATGTTGAAACGGTTTTTCTTTATCCATGGGCAATGAGTTTTGATGTATT  
GGGGGTATCCGTATTTATTGAAGCTTTCATATTCGTGTTTATCCTAATTGTTGGTTCAGTT  
TATGCATGGCGAAAGGGGGCATTAGAATGGTCTACGAATCATTTCCTTGGTTAACAAAT  
AATTGTAGTTTTGCCAATAGCAGGGGGTTCCTTAATTTTCTTATTTCTCATAAAGGAAA  
TAAGGTGATTAGGTGGTATACTGTTTGCATATGCTTAATAGATCTCCTTCTAATAACCTAT  
GCATTTTGTATCATTTAGAATTGGATGATCCACTAATCCAATTGATAGAGAATTATAAAT  
GGATCCATTTTTTTGACTTTTACTGGAGGTTGGGAATAGATGGACTCTCTCTAGGACCC  
ATTTTATTGACGGGATTATCACCACCTTAGCTACTTTAGCAGCTCAGCCGATTACTCGA  
GAATCTCTATTTTTTTATTTCTGATGTTAGCAATGTATAGCGGTCAAATAGGACCATTG  
TTTCTCGAGACATTTACTTTTTTTTATCATGTGGGAATTAGAATTAATCCCCTTTATCT  
ACTTTTATCTATGTGGGGGGGAAGAAACGTTTTGTATTCAGCTACAAAATTCATTTTGTA  
CACCGCGGAAGTTCTATTTTTTTATTAATGGGAATTCTGGCTATGGGTTTATATGGTTCT  
AATGAACCAACATTC AATTTTGAATCATAACTAATCAATCGTATCCCATGGCGCTGGAA  
ATAATATTCTATATAGGATTTTTTATTGCTTTTGTGTCAAATCACCAATTATACCCTTACA  
TACATGGTTACCAGACACCCACGGGGAGGCACATTACAGCACTTGTATGCTGTTAGCTG  
GAATCTTATTA AAAATGGGAGCATATGGGTTGGTTAGAATTAATATGGAATTATTATCCC  
GCGCTCATTCCATATTTGCCCCTGGTTAATGCTATTAGGTTCAATTCAAATAATCTATGC  
AGCTTCAACATCTCTTGGTCAACGTAATTTAAAAAAGAATAGCCTATTCCTCGGTAT  
CTCATATGGGTTTCTTAATTATAGGAATTGGTTCTATAAGCGATACGGGACTTAATGGGG  
TTATTTTACAAATAATCTCTCATGGATTTATTGGTGTGCTGCACTTTTTTTCTTGGCGGGAAC  
TAGTTATGATAGACTACGTCTTCTTTATCTCGACGAAATGGGCGGAATGGCTATCCCAAT  
GCCAAAATATTTACGATTTTCACTATCTTATCGATGGCTTCTCTTGGATTGCCAGGCAT  
GAGCGGTTTTGTTGCAGAATTGATAGTTTTTTTTTGGGAATAATTACCAGCCAAAATATCT  
TTTAGTGACAAAATACTAATAACTTTTTGTAACAGCAATTGGAATGATATTAACCTCTAT  
TTATTTATTATCTATCTTACGACAAATGTTCTATGGATACAAACTTTTTAATACGCCAAAC  
TCTTATTTTTTTGATTCTGGACCGGAGAAATTATTTATTTCAATTTCTATCCTTATAACCCGT  
AATATGATTGGTATTTATCCTGATTTCAATTTCTCATTTCGGCTAATAAAGTTGAGTCTA  
TTCTATCTAATTTTTTA-----ATGATGTTTCGAGCATGTACTTATTTTGGAGTGCTTATTTATTT  
TCTATAGGTATCTATGGATTAATCACGAGCCGAAATATGGTTAGAGCCCTTATATGTCTTG  
AACTTATGCTGAATGCAGTTAATAAATTTTCGTAACCTTTTCTGATTTTTTTGATAGTCG  
CCAATTA AAAAGGAAATATTTTTTCAATTTTTGTTATAGCTATTGCAGCCGCTGAAGCAGC  
TATCGGACCAGCTATCGTTTCTCAATTTATCGTAACAGAAAATCAATCCGTATCAATCA  
ATCGAATTTGTTGAATAAAAATGGAATATACACATCAATCTTCGTGGATTCTACCTTTTATT  
CTATTTTCAAGTTGCTATGTTAATAGGAGTGGGACTTTTACTTTTTTCCGACAGCAACAAA

AAATCTTCGCCGTATGTGGGCTTTTCCTAGTATTTTTTTGTTAACTATAGTTATGATTTTTT  
CGATTGATCTGTCTATTCATCAAATCAATAAGAGTTCTATCTATCAATATGTATGGTCTTG  
GACCATAAATAATGATATTTCTTTAGAGTTTGGGTATTTGATTGATTCACTTACTTCCATT  
ATGTTAATATTAATTACTACTGTTGGCATTCTGGTCTTATTTATAGTGATAATTATATGTT  
TCATGATCAAGGATATTTGAGATTTTTTGGCTTATATGACTTTTTTTAATATTTCAATGTTGG  
GCTTAGTFACTAGCTCCAATTTGATACAAATTTATAGTTTTTTGGGAATTGGTTGGAATGT  
GTTCTTATTTATTAATAGGTTTTTGGTTCACACGTCCTATTGCAGCCAATGCTTGTCAAA  
AAGCATTGTGTAACATAATCGTGTAGGGGATTTTGGCTTATTATTGGGAATTTAGGTCCTTA  
TTGGATAACGGGTAGTTTGGAAATTTGGGGATTTGTTTCAAATAATCAATAGC---GAGGTT  
AATATTTTTTTTTGTTACTTTGTGTGCCTTCTTACTATTTTTGTGGATCAATCGCTAAATCTG  
CTCAATTTCCCCTTCATGTATGGTTACCCGATGCTATGGAAGGGCCTACTCCCATTTCTG  
CTCTTATCCATGCTGCTACTATGGTAGCAGCGGAATTTTTCTTGTAGCTAGGCTTCTTC  
CTTTTTTCATAGTTCTACCTTCCATAATGAATGGAATAGCTTTGATAGGTATAATAACAGT  
AGTCTTAGGAGCTACTTTAGCTATTGCTCAAAAAGATATTAAGAAAGATTTGGCCTATTC  
CACAATGTCTCAATTGGGTATATGATGTTAGCTCTAGGTATGGGATCTTATCGAGCCGC  
TTTATTTCAATTAATTAATCATGCTTATTCAAAGCATTGTTATTTTTTAGGATCTGGATCCA  
TTATTTATTCGATGGAAGCTGTTGTTGGATATTTGCCAGCTAAGAGTCAAATATGGTCC  
TTATGGGTGGTTTAAACAAACATGTCCCAATTACAAAACACTTTTTTAATAGGTACAT  
TTTCTCTTTGCGGTATCCCACCTTTTGCCTGTTTTTGGTCCAAGGATGAGATTCTCAATG  
ATAGTTGGTTGTATTACCAATTTTCGCAATAATAGCTTGGTCCACAGCAGGATTAACCG  
CATTTTATATGTTTCGGATCTATTTACTTGTTTTTGAAGGATATTTAAACATTCATTTTTTG  
AATTGTAATGGAAAAAAGATAGTTCATTCTATTCAATATCTTTATGGGGTAAA---GAGA  
GAAAAAAAATTAATAAACTTATTAGCTTTATTAAGAATGAAATCTTTTCTGGGTACT  
AAAAAACTGCGTGTATATCCTCATGAGTCGGACAATACTATGCGATTTTCTATGCTT  
ATTTTAGTACTGTTTACTTTATTTGTTGGGACCATAGGA-----TTTGATTCCGATATATTAT  
CAAATTTATTAATTCATTTATAGACCTTTTACATCAAATTCAAA---TTTATCGATTGG-  
--GAATTTTTCACAAATGCAAGTTTTTCTGTGATTCTAACTTTTTTTCGGAATATTTCTAGC  
GTCGTTTTTTTATAAACCAGTTTTTTCGGATTTACAAAATTTGAATTTATTAATTTTTTT  
GAAATTGTTTCCGATAATATAATAAATGTCATATATGATTGGTCATATAATCGTGGGTATAT  
AGATAATTTGTATGAAATATCTTTCATTTCGAATATAAGAAAATTAGGTAAATTAATAT  
TTTTTTGATAGACAGGTAATTGATGGAATTCCAAATGGAATTGGTGTACAAGTTTTTTTT  
ATAGGAGAGACTATAAAATATATGGGAGGTGGG---CGAATTTCTTCATATATTTTATTTTT  
TATATTTTTTATATTAATCTTTTTATTAATAATTTGGATGGATTTGCCTGAACCGATACATG  
ATTTTCTTTTAGTCTTTTTGGGATCGGGTCTTATATTAGGAAGTGTAGGAGTAGTATTACT  
TATCAACCCAATTTTTTCTGCTTTTTTCATTAGGATTAGTTCTTGTGTTGTATATCCTTATTCT  
ATATTTTATCAAACCTCCATTTTGTAGCTGCATCACAGCTACTTATTTACGTCGGCGCTAT  
AAATGTTTTAATCATATTTGCTGTAATGTTTCATGAATAGTTCAGAAGATTACCAAGATTTT  
CGTTTTTGGACTGTTGGGGATGGGATTACTTTGATGGTTTGTACAAGTATTTTTTTTTTCA  
CTAATAACTACTATTATAGATACATCATGGTACGGTATTATTTGGACTACAAGACAAAATC  
AGATTATAGAGCAAGATTTGATAAGTACTAGTCAACAAATTTGGAATTCATTTATCAACA  
GATTTTTTTCTTCCATTTGAATTAATTTCAATAATCTTTTAGCTGCCTTGATAGGTGCAA  
TTATCGTGGCTCGCCAAATGAATATCCCAACTACAAGAAAGGACCTCATGATAGTAAAT  
ATGGGTCTCACCCATCAATGCATGGTGTCTTCGACTTATTTGTTACTCTCGATGGT  
GAGGATGTTATTGATTGTGAACCAATATTGGGTATTTTACACAGAGGGATGGAAAAAAT

TGCGGAAAACCGAACAATTATACAATATCTACCTTATGTAACACGTTGGGATTATTTAGC  
TACTATGTTACAGAAAGCAATAACTGTAAAAGGACCAGAACAGTTGGGAAATATTCAA  
GTACCTAAAAGAGCCAGCTATATCCGAGTAATTATGTTGGAGTTGAGTCGTATAGCTTCT  
CACCTACTGTGGTTGGGACCTTTTATGGCAGATATTGGTGCACAAAACCCCTTTCTTCTAT  
ATTTTCGGAGAAAGAGAATTAATATATGATCTATTCGAAGCTGCAACAGGTATGAGAAT  
GATGCATAATTTTTTTCGTATCGGGGGGGTAGCGGCTGACCTACCTCATGGTTGGATAGA  
TAAATGTTTTGAATTCTGCGATTATTTTTTAACAAAGATTCTTGAATATCAAAAACCTTATT  
ACACGAAATCCTATTTTTTTAGAACGGGTTGAGGGAATAGGCATTGTTGATGGAGAGG  
AAGTAATAAATTGGGGTTTATCAGGACCAATGCTTCGGGCTCCGGAATACAATGGGAT  
CTACGTAAAGTTGATAATTATGAATGTTATGATGAATTTGATTGGGAAGTTCAATGGCAA  
AAAGAAGGAGATTTCGTTGGCTCGTTATTTAGTTTGAATTGGTGAATGACGGAATCCAT  
AAAAATTATTCAACAGGCTTTGGAACGAATCCCGGGGGGCCATATGAAAATTTAGAAA  
TTCGCCGCTTTGATAGAGAAAAGGAGCGAGAATGGAATGATTTTGAATATCGATTTATT  
AGTAAAAAACCGTCTCCGACTTTTGAATTGCCGAAACAAGAACTTTATGTAAGAGTTG  
AGGCTCCCAAGGGAGAATTAGGAATTTTTCTAATAGGAGATCAAATGGTTTTCCCTTG  
AGATGGAAAATTCGTCCACCGGTTTTATCAATTTGCAAATTCCTCCTCAATTAGTTAAA  
AGAATGAAATTGGCCGATATTATGACAATACTAGGTAGCATAGACATCATTATGGGAGA  
AGTTGATCGTATGTTTTTATGATAACTGGATTCATGAATTATGGTCAACAAACAGTCCG  
AGCTGCGAGGTACATTGGTCAAAGTTTCATGATTACCTTATCTCACGCAAATCGTTTAC  
CTGTAACTATTCAATATCCTTATGAAAAATAATCACATCGGAACGTTTTCGCGGGCGAA  
TACATTTTGAATTTGATAAATGCATTGCTTGTGAAGTATGTGTTTCGTGTATGTCCATAGA  
TCTACCCGTTGTTGATTGGAACTGGAACTGATATTCGAAAGAAAGGATTGTTTAATT  
ACAGTATTGATTTCCGGAATCTGTATATTTGTGGTAACTGTATTGAGTATTGTCCAACAA  
ATTGTTTATCAATGACTGAAGAATATGAACTTTCAACTTATGATCGTCACGAATTAATT  
ATAATCAAATTGCTTTGGGCCGTTTACCGGTGTCAGTAATTGATGATTATACAATTCGAA  
CAATTCAAATAAAA-----ATGCAAGGTCGTTTGTCTGCT  
TGGCTAGTCAAACATGGACTAATTCATAGATCTTTGGGTTTTGATTACCAAGGAATAGA  
GACTTTACAAATAAAGCCCGAAGATTGGCATTCCATTGCTGTGATTTTATATGTATATGG  
TTACAATTATCTACGTTCCCAATGTGCCTATGATGTAGCACCAGGAGGACTGTTAGCTAG  
TGTGTATCATCTTACAAGAATAGAGTATGGTATAGATCAACCCGAAGAGGTATGTATAAA  
AGTATTTGTGCAAGAAAAAATCCCGAATATCTTCCATTTTCTGGGTTTGGAAAAGTG  
CGGATTTTCAAGAAAAGGAATCTTATGATATGTTAGGAATCTCTTATGATAATCACCCGC  
GTCTGAGACGATTTTAATGCCCGAAAGTTGGATAGGATGGCCTTTACGTAAAGATTATA  
TCGCCCAAATTTTTATGAAATACAAGATGCTCAC-----

-----ATGAATTCATTGAGTTTCCCTTACTTGATCGAACAACCCAAAATTCAGTTAT  
TTCAACTACATTAATGATCTTTCAAATTGGTCAAGACTATCCAGTTTATGGCCGCTTCT  
CTATGGTACCAGTTGTTGCTTCATTGAATTTGCTTCATTAATAGGATCACGATTTGACTTT  
GATCGTTATGGACTAGTACCACGATCGAGTCCTAGGCAGGCAGACTTAATTTAACAGC  
GGGCACAGTAACCATGAAAATGGCTCCTTCTTTAGTTTCGATTATACGAGCAAATGCCTG  
AACCAAAATATGTTATTGCTATGGGAGCCTGCACAATTACGGGGGGAATGTTCACTACT  
GATTCTTATAGTACTGTTCCGGGCGTGGATAAGCTAATTCCTGTAGATGTCTATTTACCG  
GGCTGTCCACCTAAGCCGGAAGCCGTTATAGATGCTATAACAAAACCTTCGTAAGAAAAT  
ATCTCGAGAAATCTATGAAGATCAAATGAGTTCTCAA---GAAAATAGATGTTTTACTACC

AACCATAAGTTTGGATGTTGGATGCAGTAATTATAACCAGCAATTATGGTAAAGGATTATTC  
TATCAACCGCCATCTACTTCAGAGATACCCACA-----TTTTTCAA-----AAAAAAATTC  
AGTACACGAAATAATGAATATGCAAAGTAAAGTCTTTTTCTTGGATAAAGGAAGAGA  
TTACTCGATCTATTTTCGATATCGATTATGATATATATAATAACTCGAGCACACATTTCAAAT  
GCATATCCCATTTTTGCACAGCAGGGTTATGAAAATCCACGAGAAGCAACTGGCCGTAT  
TGATGTGCCAATTGCCATTTAGCTAATAAGCCTGTGGATATTGAGGTTCCACAAACGGT  
ACTTCTGATACTGTATTTGAAGCAGTTGTTTCGAATTCCTTATGATATGCAAGTGAAACA  
AGTTCTTGCTAATGGTAAAAAGGGGCTTTGAATGTGGGGGCTGTTCTTATTTACCGG  
AGGGTTTTGAATTGGCTCCTTCCGATCGTATTTTCGCTGAGATTAAGAAAAGATAGGT  
AATCTGTCTTTTTCAAACCTATCGCCCTACAAAAAAATATTCTTGTGGTAGGTCCTGT  
TCTGGTCAGAAATATAATGAAATCACCTTTCTTATTTCCCCAGATCCCGCTACGAA  
GAGAGATATTCATTTCTTAAAATATCCTATATACGTAGGCGGGAACAGGGGAAGGGGTC  
AAATTTATCTTGACGGAAGCAAGAGTAATAATAATGTTTATAATGCTACAGCAGCAGGTA  
TAATCAAAAAATCATAACGAAAGGAAAAAGGGGATACGAAATAATTATAGTGGATGC  
ATCAGATGGACGTGAAGTGATTGATATTATACCTCCAGGACCAGAACTTCTTGTTCAG  
AAGGTGAATCCATCAAACCTTGATCAACCATTAACAAGTAATCCAATGTGGGTGGATTT  
GGTCAGGGGGATGCGGAAATAGTACTTCAAGATCCGTTACGTGTACAGGGTCTCTTGT  
CTTCTTGGCATCCATTTTATAGCACAAATCTTTTATGTTCTTAAGAAGAAACAATTTGA  
GAAGGTTCAATTGTCCGAAATGAATTTATGAGTAAAGTCTATGATTGGTTCGAAGAAC  
GTCTTGAGATTCAGGCGATTGTTCGATGATATAACCAGTAAATATGTTCCCTCCTCATGTGA  
ACATATTCTATTGTTTAGGAGGAATTACACTTACTTGTTTTTTATGTTCAAGTAGCGACTG  
GATTTGCTATGACTTTTTTATATCGTCCAACCGTACTGAAGCTTTTGCTTCAGTTCAATA  
TATTATGACTGAAGCAAACCTTGGGTTGGTTAATCCGATCAGTTCATCGATGGTCGGCAA  
GTATGATGGTCTTAATGATGATCCTACACGTATTTTCGTGTGTATCTCACAGGTGGTTTTA  
AAAAACCTCGCGAATTAACCTTGGATTACCGGTGTAGTTTTGGCTGTATTAACCGTATCTT  
TTGGTGTAACTGGTTATTCCTTACCTTGGGATCAAATTGGTTATTGGGCAGTAAAAATTG  
TAACAGGTGTGCCGAAGCTATTCCTGTAATAGGATCGTCTTTGGTAGAATTATTACGCG  
GAAGTTCTAGTGTGGGACAATCTACTTTGACTCGTTTTTATAGTTTGCATACTTTTGTATT  
ACCTCTTCTTACTGCCGTATTTATGTTAATGCACTTTCCAATGATACGTAAGCAAGGCAT  
TTCTGGTCTTTAATGGGAGTAACAAAAAACCTGACTTGAATGATCCTGTATTAAGAG  
CTAAATTGGCTAAAGGAATGGGGCATAATTATTATGGAGAACCTGCATGGCCCAACGAT  
CTTTTATATATATTTCCGGTAGTCATTCTGGGTACTATTGCCTGTAACGTTGGATTAGCGG  
TTCTAGAACCATCAATGATTGGGGAACCCGCGGATCCATTTGCAACCCCTTTGGAAATA  
CTACCCGAATGGTATTTCTTTCCCGTATTTCAAATACTTCGTACAGTGCCCAATAAGTTAT  
TGGGTGTTCTTTTAAATGGTTTCGGTACCTACGGGATTGTTAACAGTACCCTTTTTGGAAA  
ATGTTAATAAATTTCAAACCCATTTTCGTCTGTCAGTAGCAACAACCATTTTTTTAATTG  
GTACCATAGTGGCCCTTTGGTTAGGTATTGGAGCAACATTACCTATTGAGAAATCCCTAA  
TTTTAGGTCTTTTTATGATTGAAGTTTTCTATTTGGAATCGTGTAGGTTTAAATTCCTATT  
ACTTTGGCTGGCTTATTTGTAAGTGCATATTTACAATACCGACGAGTTGATCAGTTGGAC  
CTTATGCCTACTATAACTAGTTATTTTCGGTTTTTTACTAGCGGTTTTAACTATAACCTCAG  
TTCTATTTATTGGTCTGAATAAAATACGACTTATTATGGATATAGTAAGTCTTGGCTGGGC  
TGCTTTAATGGTAGTTTTTTTCATTTCCCTTTCCCTCGTAGTATGGGGAAGAAGTGGACT  
AATGATTATTCGTTACCGGAACCAGAAGTTAAATTTATGGTAGATAGGGATCCATAA  
AACTTCTTTTCGAGAAATGGGCAAAACCCGGTCATTTCTCAAGAACAATAGCTAAGGG

ACCTGATACTACTACTTGGATCTGGAACCTACATGCTGATGCTCACGATTTTCGATAGCCA  
TACTAGTGATTTGGAGGAGATTTCCCGAAAAGTTTTTAGTGCCCATTTTCGGGCAACTCT  
CCATCATTTTTTCTTTGGCTAAGTGGCAITGATTTTTTCATGGTGCTCGTTTTTCTAATTATGA  
GGCATGGTTAAGCGATCCTACTCACATTAGGCCTAGCGCCCAGGTGGTTTTGGCCAATAG  
TGGGTCAAGAAATATTGAATGGTGATGTAGGGGGGGGATTCCGAGGAATACAAATAAC  
CTCTGGTTTTTTTTTCAGATTTGGCGAGCATCTGGAATAACTAGTGAATTACAACCTCTATTG  
TACCGCAATTGGTGCATTGGTCTTTGCAGCCTTAATGCTTTTTGCTGGTTGGTTTCATTA  
TCACAAAGCTGCGCCAAAATTGGCTTGGTTCCAAGATGTAGAATCTATGTTGAATCACC  
ATTTGTCAGGACTCCTAGGACTGGGGTCTCTTTCTTGGGCAGGACATCAAATACATGTA  
TCTTTACCAATTAACCAATTTCTAAATGCTGCAGTAGATCCCAAAGAGATCCCACCTCCT  
CATGAATTTATACTGAATCAGGATCTTTTGGCTCAACTTTATCCGAGTTTTGCTGAGGGA  
GCAACTCCATTTTTCACGTTGAATTGGTCAAATACTCCGAATTTATAACTTTTTCGTGGA  
GGATTAGATCCAGTAACTGGAGGTCTATGGCTAACCGATATTATACATCATCACTTAGCT  
ATTGCAATTTCTTTTTTTGATAGCGGGTCACATGTATAGGACTAATTGGGGCATTGGTCAT  
GGTATAAAAGATATTCTAGAGGCCATAAAGGTCCATTTACAGGCCAGGGTCATAAGGG  
TCTATATGAAATCCTATCAACGTCATGGCATGCTCAATTATCTATTAACCTAGCTATGTTA  
GGCTCTTTAACTATTGTTGTAGCTCACCATATGTATTCTATGCCTCCTTATCCATACCTAG  
CTACTGACTATGGTACACAACCTGTCATTGTTACACATCACATGTGGATTGGTGGATTTC  
TCATAGTTGGTGCTGCTGCGCATGCAGCTATTTTTATGGTAAGAGACTATGATCCAACATA  
TTCGATACAACGATCTATTAGATCGTGTCCCTTAGACATCGCGATGCAATCATATCACATC  
TTAATTGGGTGTGTATATTTTTAGGCTTTCACAGTTTTGGTTTGTATATTCATAATGATAC  
CATGAGCGCTTTAGGGCGCCCCAAGATATGTTTTCAGATACCGCTATAACAATTACAAC  
CCGTCTTTGCTCAATGGATACAAAATACCCACGCTTTAGCACCAAGTATAACGGCCCCCT  
GGTGCAACAACAAGCACGAGTTTGACTTGGGGGGGTGATAATTTGGTGGCAGTGGGC  
GGTAAAGTTGCTTTGTTACCTATTCCATTAGGAACTGCGGATTTTTTTGGTCCATCATATT  
CATGCATTTACAATTCATGTAACGGTATTGATACTTCTAAAGGGTGTCTATTTGCTCGTA  
GCTCACGATTGATACCGGATAAAGCAAATCTAGGTTTTTCGTTTCCCTTGTGATGGACCT  
GGAAGAGGGGGAACATGCCAAGTATCCGCTTGGGATCATGCTTCTTAGGACTATTTTG  
GATGTACAATGCAATTTCCGGTAGTAATATCCATTTAGTTGGAAAATGCAATCAGATGT  
TTGGGGTAGTATAAGTGATCAAGGGATAGTAACTCATATCACAGGAGGAACTTTGCGC  
AAAGTTCCATTACTATTAATGGGTGGCTTCGCGATTTCTTATGGGCACAGGCATCCCAG  
GTAATTCAGTCTTATGGTTCCTCATTATCTGCATATGGTCTTTTTTTCTTGGGTGCCATT  
TTGTATGGGCTTTTAGTTTAATGTTTCTATTCAGCGGTCTGTGGTTATTGGCAAGAATTGA  
TTGAATCCATTGTTTGGGCTCATAATAAATAAAAGTTGCTCCTGCTACTCAGCCTAGAG  
CCTTGAGCATTGTACAGGGACGTGCTGTAGGAGTAGCCCATTACCTTCTAGGTGGAATT  
GCCACAACATGGGCATTCTTCTTAGCAAGAATTATTGCAGTAGGAATGGCATTAAAGATT  
TCCAAGATTTAGTCAAGGCTTAGCTCAGGACCCCACTACTCGTCGTATTTGGTTTTGGTA  
TTGCTACCGCACATGACTTCGAGAGTCATGATGATTAATACTGAAGAACGTCTTTATCAG  
AATATTTTTGCTTCTCATTTTGGGCAATTAGCAATAATTTTTCTGTGGACTTCCGGAAAT  
CTGTTTCATGTAGCTTGGCAAGGGAATTTTGAGGCATGGGTACAGGATCCTTTACATATA  
AGACCTATTGCTCATGCAATTTGGGATCCTCATTTTGGTCAACCGGCTGTAGAAGCTTTT  
ACTCGAGGGGGTGTCTTAGGCCAGTGAATATAGCCTATTCTGGTGTTTATCAGTGGTG  
GTATACAATCGTTTTACGTACTAATGGGGATCTTTATACTGGAGCCCTTTTTCTATTATTT  
CTTCTATCATATCTTTAATAGCGGGTTGGTTACATCTACAACCAAATGGAAACCGAGC

ATTTTCGTGGTTTAAAAATGCCGAATCCCGCCTCAATCATCATTTGTCAGGACTATTCGGA  
GTCAGTTCCTTGGCTTGGACAGGGCATTAGTCCATGTCGCTATTCCGGGATCCAGGGG  
GGAATATGTTTCGATGGAATAATTTCTTAGGTATATTGCCACACCCACAAGGATTAGGTCC  
GTTTTTTACAGGTCAGTGGAATCTTTATGCTCAAACCCCGATTCCAATAGTCATTTATT  
TGGTACCCCCCAAGGAGCAGGAACTGCTATTCTAACACTTCTCGGGGGATTCCATCCGC  
AAACACAAAGTTTATGGCTGACCGATATTGCACATCATCATTTAGCTATTGCATTTATTTT  
TCTCGTTGCTGGTCACATGTATAGAACCAACTTCGGGATTGGGCACAGTATAAAAGATC  
TTTTAGAAGCACATATTCCTCCGGGGGGTAGATTAGGACGTGGACATAAGGGTCTTTAT  
GATACAATCAATAATCACTTCATTTCAATTAGGCCTTGCTTTAGCTTCTTTAGGGGTTA  
TACTTCCTTGGTAGCTCAACACATGTACTCTTTACCTGCTTATGCGTTTATAGCGCAAG  
ATTTGACTACTCAAGCTGCGTTATATACTCATCATCAATACATCGCAGGATTCATTATGAC  
AGGGGCTTTTGCTCATGGAGCTATCTTTTTTATTTCGAGATTACAATCCAGAACAGAATG  
AGGATAATGTCTTGGCAAGAATGTTAGATCATAAAGAAGCTATCATATCCCCTTAAGTT  
GGGCTAGTCTCTTTCTGGGGTTCCATACTCTGGGACTTTATGTCCATAATGATGTCATGC  
TTGCTTTTGGCACTCCGGAGAAACAAATCTTGATCGAACCTATATTCCGCCAATGGATA  
CAATCCGCTCATGGTAAAACCTTCTATGGGTTGATGTACTTTTATCTTCAACGAACAGT  
CCGGCGTTCAATGCGGGGCGAAGCATATGGTTGCCTGGTTGGTTAAATGCTGTTAATGA  
G-----AATAGTAATTTCTTATTCTTAACAATAGGACCTGGAGACTTCTTGGTTCATCATGC  
TATTGCTCTTGGTTTACATACAACTACGTTGATCTTAGTAAAAGGTGCTTTGGATGCACG  
TGGTTCCAAGTTAATGCCGATAAAAAAGATTTTGGTTATAGTTTTCCTTGGCATGGTCC  
GGGACGAGGTGGTACTTGTGATATTTCCGGCTTGGGACGCATTTTATTTGGCAGTTTCT  
GGATGTTAAATACCATTGGATGGGTTACTTTTTTATTGGCATTGGAAACACATTACACTAT  
GGCAGGGTAATGTTTACAGTTTAAATGAATCTTCTACTTATTTGATGGGGTGGTTAAGA  
GATTATCTATGGTTAAACTCTTCACAACTTATCAATGGATATAACCCTTTTGGTATGAATA  
GTTTATCAGTCTGGGCGTGGATGTTCTTATTTGGACATCTTGTTTGGGCTACTGGATTTA  
TGTTCTTAATCTCTTGGCGCGGATATTGGCAAGAATTGATTGAAACTTTAGCATGGGCTC  
ATGAACGTACACCTTTGGCTAACTTGATTGATGGAGAGATAAACCAGTGGCTCTTTCC  
ATTGTGCAAGCAAGATTGGTTGGACTAGTTCACTTTTCCGTAGGTTATATATTTACTTAT  
GCAGCTTCTTAATTGCCTCTACATCGGGTAAATTTGGTATGTCACATTCAGTAAAGATT  
TATGATACATGTATAGGATGTACTCAATGTGTTTCGAGCCTGCCCTACAGATGTATTAGAA  
ATGATACCTTGGGACGGATGTAAAGCTAAACAAATTGCATCTGCCCAAGAACAGAGG  
ACTGTGTTGGTTGTAAGAGGTGTGAAGCCGCCTGTCCGACGGATTTCTTAAGTGTTCG  
AGTTTATTTATGGCATGAAACAACCTCGAAGCATGGGTCTAGCTTATATGATA-----AACTT  
ACCTTCTTTTTTGTGCCTTTAGTGGGCCTAATATTTCCGGCAATTGCAATGGCTTCCTT  
ATTTCTTCATGTTCAAAAAACAAGATTTTTTATGCGAGATCTAAAAACATATCTTTCCGT  
GGCACCAGTAGTAAAGTACTCTATGGTTCCGAGCTTTGGCGGGTCTCTTGATAGAGATCA  
ATCGTTTTTTCCCGGATGCATTGATATTTCTTTTTTTTCATTCATGACTGCAATTTTAGA  
GAGACGCGAGAGCGAAAGCCTATGGGGTCGCTTCTGTAACTGGATAACCAGCACTGA  
AAATCGTCTTTACATTGGATGGTTTGGTGTGTTTGGTATGATCCCTACCTTATTGACCGCAAC  
TTCTGTATTTATTATCGCTTTTATTGCTGCTCCTCCAGTAGATATTGACGGTATTCGTGAG  
CCTGTTTCTGGCTCTCTACTTTACGGAAACAATATCATTTCTGGTGCCATTATTCCTACTT  
CTGCAGCTATAGGTTTACACTTTTATCCGATATGGGAAGCGGCATCCGTTGATGAATGGT  
TATACAATGGCGGTCCTTATGAACTAATTGTTCTACACTTCTTACTTGGTGTAGCTTGTT  
ACATGGGTGCTGAGTGGGAACCTTAGTTTTTCGTCTGGGTATGCGTCCTTGGATTGCTGTT

GCATATTCAGCTCCTGTTGCAGCGGCTACTGCTGTTTTCTTGATCTATCCAATTGGTCAA  
GGAAGCTTTTCAGATGGTATGCCTCTAGGAATTTCTGGTACTTTCAATTTTATGATTGTAT  
TTCAGGCTGAGCATAATATTCTTATGCATCCATTTACATGTTAGGTGTAGCTGGTGTATT  
CGGCGGCTCCTTATTCAGTGCTATGCATGGTTCTTTGGTAACTTCTAGTTTGATTAGGGA  
AACCACAGAAAATGAATCTGCTAATGAAGGTTACAGATTCGGTCAAGAGGAGGAAAC  
CTATAATATTGTAGCTGCTCATGGTTATTTTGGCCGATTGATTTTCCAATATGCAAGTTTC  
ACAATTTCTCGTTCTTTACATTTCTTCCCTAGCTGCTTGGCCTGTAGTAGGTATTTGGTTT  
ACCGCGTTAGGTATTAGCACTATGGCTTTCAATTTAAATGGTTTCAATTTTAACCAATCC  
GTAGTTGATAGTCAAGGTCGTGTAATTAATACCTGGGCTGATATAATTAACCGAGCTAAC  
CTTGGTATGGAAGTAATGCATGAACGTAATGCTCATAACTTCCCTCTAGATCTAGCTGCG  
ATCGAAACTCCATCTATAAAAGGAATGGGTTTACCTTGGTATCGTGTTCCATACTGTTGTA  
TTAAATGATCCGGGCCGTTTGCTTTCTGTCCATATAATGCATACAGCTCTGGTTGCTGGT  
TGGGCTGGTTTCGATGGCTCTATATGAATTAGCAGTTTTTGATCCTTCTGACCCTGTTCTT  
GACCCAATGTGGAGACAGGGTATGTTTGTATACCCTTTATGACTCGCTTAGGAATAAC  
CAATTCGTGGGGCGGTTGGAATATCACA---GGAGGGACTATAACGAATCCGGGTATTTG  
GAGTTACGAAGGTGTAGCCGGGGCACATATTGTGTTTTTCGGGCTTGTGCTTTTTAGCGG  
CTATCTGGCATTGGGTTTATTGGGATTTAGGAATTTTTGTGATGAACGTACCGGAAAAC  
CTTCTTTGGATTTGCCAAAATTTTTGGAATTCATTTATTCCTTGCAGGGGTGGCTTGTT  
TTGGTTTTGGAGCATTTTCATGTAACAGGATTGTACGGTCCTGGAATATGGGTGTCCGAT  
CCTTATGGATTAACCTGGAAGGGTACAATCCGTAAATCCCGCATGGAGTGTGGAAGGTTT  
TGATCCTTTTTGTTCCGGGGGAATAGCTTCTCATCATATTGCAGCAGGAACATTGGGCAT  
ATTAGCGGGTCTTTTTTCATCTTAGTGTGCGTCCACCCCAACGTCTATACAAAGGATTGC  
GTATGGGAAATATTGAAACCGTCCTTTCCAGCAGTATTGCTGCTGTCTTTTTTGCAGCTT  
TTGTTGTTGCGGGAACCTATGTGGTATGGTTCAGCAACTACCCCATCGAATTATTTGGTC  
CCACTCGTTATCAATGGGATCAGGGATACTTCCAGCAAGAAATATATCGAAGAGTTGGT  
GCTGGGCTAGCCGAAAATCAAAGTTTATCAGAAGCTTGGTCTAAAATTTCCCGAAAAT  
TAGCTTTTTATGATTACATCGGCAATAATCCAGCAAAAGGGGGATTGTTTAGAGCAGGT  
TCAATGGACAATGGAGATGGAATAGCCGTAGGTTGGTTAGGACATCCCATCTTTAGAGA  
TAAAGAGGGGTGTGAATTTTTGTACGTCGTATGCCTACTTTTTTTGAAACATTTCCGGT  
TGTTTTGGTAGACGGAGACGGAATTGTTAGAGCCGATGTTCCTTTTCGAAGGGCAGAA  
TCAAAATATAGTGTGCAACAAGTAGGTGTAAGTGTGAGTTCTATGGTGGCGAACTCAA  
TGGAGTCAGTTATAGTGATCCTGCTACTGTGAAAAGTATGCTAGACGTGCTCAATTGG  
GTGAAATTTTTGAATTAGATCGTGCTACTTTGAAATCGGATGGTGTTTTTTCGTAGCAGTC  
CAAGGGGTGGTTTACTTTTGGACATGCTTCGTTTGTCTGCTCTTCTTTTTTCGGTCACA  
TTTGGCATGGTGTAGAACTTTGTTCCGAGATGTTTTTGTGCTGATCGATCCAGATTTGG  
ATGCTCAAGTGGAAATTTGGAGCATTCCAAAACTTGGAGATCCAACCTACAAGAAGACA  
GGTAGTCATGAAAACCTTATATTCCCTGAGGAGGTTCTACCACGTGGAAACGCTCTTTA  
ATGGAATTTAACTTTAACTGGTCGTGACCAAGAACTACCGGTTTCGCTTGGTGGGC  
CGGGAATGCCGACTTATCAATTTATCCGGTAACTACTGGGAGCCCATGTAGCCCATG  
CTGGGTTAATAGTATTCTGGGCTGGAGCAATGAATTTATTTGAAGTGGCTCATTTCGTAC  
CTGAGAAGCCTATGTATGAACAAGGTTTAAATTTTACTTCCCATTTAGCTACTTTAGGTT  
GGGGGTAGGTCCTGGGGGGGAGGTTATAGACACCTTTCCATACTTTGTGTCTGGAGT  
CCTTCATTTAATTTCTCTGCAGTATTGGGCTTTGGTGGTCTTTATCATGCACTTTTGGG  
ACCTGAGACTCTTGAAGAATCTTTTCCATTCTTCGGTTATGTATGGAAAGATAGAAATA

AAATGACTACAATTTTGGGTATTCACCTTAATCTTGTTAGGTATAGGTGCTTTTCTTCTAGT  
ATTCAAGGCTCTTTATTTTGGAGGTGTATATGATACCTGGGCTCCAGGGGGGGGAGATG  
TAAGAAAATTACCAACCTGACTCTTAGTCCAAGTATTATATTTGGTTATTTATTAATAATC  
ACTTTTGGTGGAGAAGGGTGGATTGTTAGTGTGGACGATTTAGAAGATATAATTGGAG  
GGCATGTATGGTTGGGTTCCATTTGTATACTTGGTGAATCTGGCATATCTTAACCAAAC  
CCTTTGCATGGGCTCGGCGTGCACTTGTATGGTCTGGAGAAGCTTATTTGTCTTATAGTT  
TAGGTGCTTTATCTGTTTTTGGTTTTATTGCTTGTGCTTTGTCTGGTTTAATAATACCGC  
TTATCCTAGTGAGTTTTACGGGCCCACTGGACCAGAAGCTTCTCAAGCTCAAGCATTTA  
CTTTTTTAGTTAGAGACCAACGTCTTGGGGCTAACGTAGGGTCCGCTCAAGGACCTAC  
CGTTTTAGGTAAATATCTAATGCGTTCCCCGACTGGAGAAGTCATTTTTGGGGGGGAAA  
CTATGCGTTTTTGGGATTTACGTGCTCCCTGGTTAGAACCCTCTAAGGGGTCCAAATGGT  
TTGGACTTGAGTAGACTGAAAAAGACATACAGCCTTGGCAAGAACGTCGTTCCGCG  
GAATATATGACTCATGCTCCTTTAGGTTCCCTTAAATTCGTCGGTGGTGTAGCTACAGAG  
ATCAATGCAGTCAATTATGTCTCTCCTAGAAGTTGGTTAGCTACTTCTCATTTTGTTCTA  
GGATTCTTCTATTTGTAGGTCATTTATGGCACGCGGGAAGAGCTCGCGCAGCTGCCGC  
AGGATTTGAAAAAGGAATTGATCGAGATTTTGAACCTGTTCTTTCCATGACTCCTCTTA  
ATATGACTATAGCTCTTGGTAAATTTACCAAAGATGAAAATGATTTATTTGATATTATGGA  
TGACTGGTTACGGCGGGACCGTTTTCGTTTTTGTGGGTTGGTCCGGTCTATTGCTCTTTC  
CTTGCGCCTATTTGCGCTTAGGAGGTTGGTTCACAGGTACAACCTTTGTAACCTCATGG  
TATACTCATGGATTGGCAAGTCTTATTTGGAAGGCTGTAACCTCTTAACCGCTGCAGTC  
TCTACTCCTGCTAATAGTTTAGCACATTCTTTGTTGTTACTGTGGGGTCTGAAGCACAG  
GGAGATTTTACCCGTTGGTGTCAATTAGGTGGTCTGTGGACTTTTGTGCTCTCCACGG  
TGCTTTCCGATTAATAGGTTTCATGTTACGTCAATTTGAACTTGCTCGATCTGTTCAATT  
GCGGCCCTATAATGCAATCGCATTCTCTGGTCCAATTGCTGTTTTTGTCTGTATTCTGT  
ATTTATCCACTAGGTCAGTCTGGTTGGTCTTTGCGCCTAGTTTTGGTGTAGCAGCTATA  
TTTCGATTCATCCTCTTTTTCCAAGATTTTATAACTGGACATTAACCCATTTTCATATGA  
TGGGAGTTGCTGGTGTGTTGGGTGCTGCGCTATTATGCGCTATTCATGGTGTACCGTA  
GAAAATACTTTATTTGAAGATGGTGATGGCGCAAATACATTTTCGTGCTTTTAACCCAAC  
CCAAGCTGAAGAACTTATTCAATGGTCACTGCTAACCGATTTTGGTCCCAAATCTTTG  
GGTTGCTTTTTCCAATAAACGTTGGTTACATTTCTTTATGTTATTTGTACCAGTAACTG  
GTTTATGGATGAGTGCTCTTGGAGTAGTCGGTCTAGCCCTGAACCTACGTGCTTATGAC  
TTCGTTTTCTCAAGAAATCCGCGCAGCGGAAGATCCTGAATTTGAGACTTTCTACACCA  
AAAACATTCTTTAAACGAAGGTATTCGTGCATGGATGGCGGCTCAAGATCAGCCTCAT  
GAAAACCTTATATTCCCTGAGGAGGTTCTACCACGTGGAAACGCTCTTATGTCTGGAAG  
CACAGGAGAACGTTCTTTTGTGATATTATTACCAGTATTCGATACTGGATTATTCATAGT  
ATTACTATACCTTCCCTATTCATTGCAGGTTGGTTATTTGTCAGCACGGGTTAGCTTACG  
ATGTATTTGGAAGCCCCCGCCAAACGAGTATTTTACAGAGAGCCGAAAAGGAATTCC  
ATTAATAACTGGCCGTTTTGATTCTTTGGAACAACCTCGATGAATTTAGTAGATCTTTTAT  
GACCATAGATAGGACCTATCCAATTTTACAGTACGATGGTTGGCTGTTACGGACTTG  
CAGTACCCACAGTTTTCTTTTTTGGGATCAATATCAGCGATGCAGTTCATCCAACGAATG  
ACTACACAAACCGTTGAGGGTAGTTCTAAGTCTGGT--CCAAGACGAACTGTTGTAGG  
GGATTTATTAATAACCATTAATTCAGAATATGGTAAAGTAGCTCCGGGATGGGGAACCTA  
CTCCTTTGATGGGTGTTGCAATGGCTCTATTTGCGATATTTCTATCTATTATTTGGAGAT  
TTATAATTCGTCCATTTTATTGGATGGAATTTCTATGAATATGCTTACTCTAAAACCTATTTG



TTTACACGGTAGTGATATTCTTCGTTTCTCTTTTTATATTTCGGATTCCCTATCTAACGATCC  
AGGACGTAATCCAGGGCGTGAAGAAATGGCCGATACTACTGGAAGGATTCCCTCTTTGG  
ATAATAGGTAAGTACTGTAAGTATTACTGTGATCGGTTTAAATTGGTATTTCTTTTTATGGTT  
CATATCCGGATTGGGCTCATCCCTGATGCTTAAACATCTTTAATTTGGTCTGTATTTGTAT  
TAACTCCGTCCTTTATTCAAGTAGTTTTTTCTCGGCGAAATTGCCCGAAGCCTACGCTTT  
TTTGAATCCAATTGTAGATATTATGCCAGTAATACCCGTAATCTTTTTTCTCTTAGCTTTT  
GTTTGGCAAGCTGCTGTAAGTTTTTCGAACGACACAATCAAATCCAAACGAACAAAATG  
TTGAATTGAATCGTACCAGTCTATACTGGGGGTTATTACTCATTTTTTGTAAGTGTGTTTT  
ATTTTCAAATATTCTTCAATATGGAAGTAAATATTCTCGCATTATTGCTACTGCATTG  
TTCATTCTAGTTCCTACTGCCTTTTTACTTATAATTTACGTAAAAACGGTAAGTCAAAGT  
GACATGGAAACAGCAACCCTAGTTGCCATCTCTATATCTGGTTTACTTGTAAGTTTTACT  
GGGTATGCTTTATATACTGCTTTTGGGCAACCCTCTCAACAATAAGAGATCCATTCTGA  
AGAACATGGAGATATGGAAGCATTGGTTTATACATTCTTTTAGTCTCGACTTTAGGAAT  
CATTTTTTTCGCTATCTTTTTTAGAGAACCCCTAAAGTTCCAATAAAAAGATGAAAA  
TGAATATTGCTTTCCAATTAGCTGTTTTTGCATTAATTGCTACTTCATTTATTCTATTGATT  
AGTGTACCTGTTGATTTGCTTCTCCTGATGGTTGGTCGAGTAACAAAAATGTTGTATTT  
TCCGGTACATCATTATGGATTGGATTAGTATTTCTAGTGGGTATTCTTAATTCTCTTATTT  
G-----ATGTCACCACAAACAGAGACTAAAGCAAGTGTGGGTTCAAGGCTG  
GTGTTAAAGATTATAAATTGACTTATTATACTCCTGACTATGAAACCAAAGATACTGATA  
TCTTGGCAGCATTCCGAGTAACTCCTCAACCTGGAGTTCGCGCTGAAGAAGCAGGTGC  
TGCGGTAGCTGCCGAATCTTCTACTGGTACATGGACAACGTGTGTGGACCGATGGGCTTA  
CCAGTCTTGATCGTTACAAAGGACGATGCTACCACATCGAACCCTGCTGGAGAAGA  
AAATCAATATATTGCTTATGTAGCTTATCCCTTAGACCTTTTTGAAGAAGGTTCTGTTACT  
AATATGTTTACTTCCATTGTAGGTAATGTATTTGGGTTCAAAGCCCTGCGTGCTCTACGT  
TTGGAGGATTTGCGAATCCCTAATTCTTATATTAACCTTTCCAAGGTCCACCTCATGGT  
ATCCAAGTTGAGAGAGATAAATTGAACAAGTATGGACGTCCCTTATTGGGATGTAAT  
TAAACCTAAATTGGGGTTATCCGCTAAGAATTACGGTAGAGCGGTTTATGAATGTCTAC  
GTGGGGGACTTGATTTTACCAAAGATGATGAAAATGTGAATTCCCAACCATTATGCGA  
TGGAGAGACCGTTTCTGCTTTTGTGCCGAAGCTCTTTATAAAGCACAGGCTGAAACGG  
GTGAAATCAAAGGGCATTATTTAAACGCTACTGCAGGTACATGCGAAGAAATGATAAA  
AAGAGCTGTATTTGCCAGAGAATTGGGCGTTCCTATCGTAATGCATGATTACTTAAACAG  
GGGGATTCACTGCAATACTAGCTTAGCTCATTATTGCAGAGATAATGGTCTACTTCTTC  
ATATCCATCGTGCAATGCATGCAGTTATCGATAGACAAAAGAATCATGGTATGCACTTTC  
GTGTACTAGCTAAAGCGTTACGTTTGTCTGGTGGGGATCATATTCACGCTGGTACCGTA  
GTAGGTAAACTTGAAGGGGAAAGGGATATCACTTTAGGTTTTGTTGATTTACTGCGTGA  
TGATTTTATTGAAAAAGATCGAAGTCGCGGTATTTATTTCACTCAGGATTGGGTTTCTCT  
ACCAGGTGTTCTGCCCCTGCTTCGGGGGGTATTCACGTTTGGCACATGCCTGCTCTGA  
CTGAAATCTTTGGAGATGATTCTGTACTCCAATTTGGTGGAGGAACTTTAGGACACCCT  
TGGGGAAATGCACCTGGTGCCGTAGCTAATCGAGTAGCTCTTGAAGCATGTGTACAAG  
CTCGTAATGAGGGACGTGATCTTGCTCGTGAAGGTAATGAAATTATTCGTGAGGCTAGC  
AAATGGAGTCTGAATTAGCTGCTGCTTGTGAAGTATGGAAGGAGATCAAATTTGTATT  
CCCAGCAATGGATACTTTG-----ATGGCGATACATTTATACAAAACCTTCTACCCCGAACA  
CACGCAATGGAGTCGTAGACAGTCAAGTAAAATCCAATCCACGAAATCATTTGATCTAT  
GGACAGCATCGTTGTGGTAAAGGCCGTAATACCAGAGGAATCATTACCGCAGGGCATA



ACTGTTATTTTGGAAATGTACCAGTTGT--GATCAAAAG-----GTTAATAAGGAA-----GGTA  
TTTCCAGATATATTACTCAAAAGAATCGACACAATACGCCTAGTCGATTGGAATTGAGA  
AAATTCTGTCCCTGTTGTTGCAAACATATGATTCACGCAGAAATTAAGAAAATGAAAAT  
AGGAGCTTCTGTTTCGTAAAATTTGTGAAAAATGTCGATTAATTTGCAGGCGAGGGCGA  
ATTATAGTAATTTGTTCCAATCCAAAACATAAACAAAGACAAGGAATGGTTCGAGAGA  
AAATAAGAGTATCGACTCGGACACTACAGTGGAATGTGTTGAATCAAGAGTAGACAG  
TAAACGTCTTAATTATGGACGTTTTATTCTGTCTCCTCTTATGAAAGGCCAAGCCGATAC  
AATAGGCATTGCAATGCGAAGAGTTTTGCTCGGAGAAATAGAGGGAACATGTATTACA  
CGTGCAAAACCAGAG-----AAAATACCACACGAATATTCTACCATAGTAGGTATTCAAGA  
ATCAGTACATGAAATTTTAATGAATTTGAAAGAAATTGTATTGAGAAGTAATCTGTACG  
GAACTCGGGACGCGTCTATTTGCTTCAAAGGTCCTGGATATGTAAGTCTCAAGACATC  
ATTTTACCACCTTCTGTAGAAATCGTTGATAATACACAACATATAGCCAACCTAATAGAC  
CCTATTAATTTCTGTATTGAATTAATAATCGAGAGGAATCGAGGATATCGTATAAAAAACA  
CTAAAAAACTCTCAAAACGGAAGTTAT-----CCTATAGATGCTGTATTTCATGCCTGTTCC  
AAATGTAAATCATAGTATTCAATCCTATGTGAATGGGAATGAAAAACAAGAGATACTTTT  
TATCGAAATATGGACAAATGGAAGTTAACTCCCAAGGAAGCGCTTTGTGAAGCCTCC  
CGGAATTTGATTGATTTATTTATCCCTTTTTTACATGCGGAAGAAGAT-----AACTTTAATT  
TAGAAAACAATCAA---CACAAAGTTACTTTACCCCTTTTTACTTTTTTCATGATATATTGGCT  
AAGAACTAAGGAAAAATAAAAA---GAAATAGCATTGAAATCCATTTTTATTGACCAA  
TTAGAACTGCCTCCCAGGATCTATAATTGTCTCAAAGATCCAATATTCATACATTATTAG  
AACTTTTGAATAATAGTAAAGAAGACCTTATGAAAATGGAACATTTTCGTATAGAAGAT  
GTAAAATATATATTGGATATTTTAGAAATAGAAAAGCATTTTGCA-----ATGCT  
TGGGAGTAGAAAT--GAGGGAATATCTACATTACCGGAGTTGAATCAGATACAATTTGA  
AGGGTTTTGTAGGTTCAATGATCGGGGCTTAACAGAAGGACTTTTAAAGTTTCCAAAAA  
TTGAGGATACAGATCAAGAAATGGAATTTCAATTATTTGTGGAAACATATCAATTGTTAG  
AACCTTAATAAACGAAAAAGATGCCGTATATGAATCACTTACATATTCCTCTGAATTAT  
ATGTATCCGCGGGACTCATTTTGAAAAGCAGTAGGAAAATACAAGAACAAACTATTTTT  
ATTGAAATATTCCTCTAATGAATTCCTTGGGAACTTCTATAGTAAATGGAATATACAGA  
ATTGTAATCAATCAAATATTGCAAAGTCCTGGTATATATTACCGGTCAGAATTGGACCAT  
AACGGAATTTTCGTTTTATACCGGCACGATAATATCAGATTGGGGAGGGAGATTAGAATT  
AGAAATTGATAGAAAAGCAAGGATATGGGCTCGTGTGAGTAGGAAACAGAAAATATCT  
ATTCTAGTTCTATCATCAGCTATGGGTTCGAATTTAAGTGAAATTCTAGAGAATGTTTGT  
TATCCTGAAATTTTTGTGTCTTTCTGAGTGATAAGGAGAAAAAAAATTTGGATCAAA  
AGAAAATGCCATTTTGGAAATTTTATCGACAATTTGCTTGTGTAGGTGGAGATCCAGTATT  
TTCTGAATCTTTATGTAAAGAATTACAAAAAAATTTTTTCAACAAAGATGTGAATTAG  
GAAGAATTGGTCGACAAAATATGAACCAAAAGCTGAATCTTGATATACCTCAGAACAAT  
ACATTTTTGTTACCGCGAGATATATTGACAGCTGCGGATCATTGATTGGAATGAAATTT  
GGAATGGGTACACTTGACGAT-----ATAAATCATTTGAAAATAAACGTATTCGTTCCGT  
AGCAGATCTATTACAAGATCAATTTGGATTGGCCCTGGTTCGTTTAGAAAATATGGTTAG  
AGGAAGTATATGTGGAGCAATTAGA---CATAAATTGATA---CCGACTCCTCAGAATTTGG  
TGAATTCGACTCCA-----TTAACAACACTTATGAATCTTTTTTTGGATTACATCCATT  
ATCTCAAGTTTTAGATCAAACCAATCCATTGACCCAAATAGTTCATGGGCGAAAATTGA  
GTTATTTGGGCCCTGGAGGATTGACGGGGCGAACTGCTAGTTTTTCGGATACGAGATATC  
CACCTAGTCACTATGGACGATTTTGTCCAATTGACACGTCTGAAGGAATCAATGTTGG

ACTTATTGGATCCCTAGCAATTCATGCTAGGATTGATGGTTGGGGG---TCTATAGAAAGT  
CCATTTTAT-----GAAATCTCTAAGAGATCAAAAAGA-----ATACGTATGCTTTATTTATC  
ACCAAGTAAAGATGAATATTATATGGTAGCAACCGGAAATTCCTTTGGCACTAAATCGAG  
ATATTCAGGAAGAACAGATTGTTCCAGCTCGATACCGTCAAGAATTTCTTACTATTGCAT  
GGGAACAGGTTTCATCTTCGAAGTATTTTTCCCTTCCAATATTTTTCTATTGGAGCTTCCC  
TCATTCCTTTTATCGAGCATAATGATGCGAATCGAGCTTTAATGAGTTCTAATATGCAAC  
GTCAAGCAGTTCCGCTTTCTCGGTCTGAAAAATGCATTGTTGGAACACTGGATTGGAACG  
CCAAGTTGCTTTAGATTTCAGGGATTTCGCTATAGTGGAACACGAGGGAAACATCATT  
CTATCGATACTGACAAGATCATTATTTGGAATGGGAATACTCTAAGCATTCCATTAA  
CTCTATATCAACGTTCAAACAAAATACTTGCCTGCATCAAAAACAACAGGTTTCAGCG  
AAGTAAATACATTAATAAAGGGACAAATTTAGCGGACGGTGCCGCTACAGTTGGTGGC  
GAACTTGCTTTGGGAAAAACGTATTAGTAGCTTATATGCCATGGGAAGGTTACAATTC  
TGAAGATGCTGTAATCATTAGTGAACGCTCTGGTCTATGAAGATATTTTTACTTCTTTTCA  
CATACGGAAATATGAAATTCAGACTCATATGACAAGTCATGGT--TCTGAAAGAATCACT  
AATCAAATCCACACCTAGAAGCCATTTACTCCGAAATTTAGACAAAATGGAATTGT  
GATCCTGGGATCTTGGGTCGAAACGGGTGATATTTAGTAGGTAATAAACGCCTCAA  
TGGTGAAGAA---TCCTCGTATTCCCCGGAAGATAGATTATTACGAGCTATACTTGGCAT  
TCAGGTATCCACCTCAAAGGAACTTGTCTAAAACCTATAGGCGGCAGGGGTCCG  
GTTATTGATGTGAGATGGATTCAAAAAAGGGG---GGTTCGGTTATAATCCAGAAACG  
ATTCGTATATATATTTTACAGAAACGTGAAATTAAGTAGGCGATAAAGTGGCGGGTAG  
ACATGGAAATAAAGGTATCGTTTCAAAGATTTTGTCTAGACAGGATATGCCTTATTTGCA  
AGATGGAAGACCTGTTGATATGGTTTTCAATCCATTAGGGGTACCTTCACGAATGAATG  
TAGGACAGATATTTGAATGCTCACTCGGATTAGCGGGAAGTATGCTAGATAGACATTATC  
GAATAGCACCTTTTATGAAAGATATGAACAAGAGGCTTCGAGAAAATTAGTATTTTCT  
GAATTATATGAAGCCAGTAAACAAACATCGAATCCATGGATATTTGAACCCGAGTATCC  
GGGAAAAAGTAGAATATTTGATGGAAGAACAGGGAATTCTTTTAAACAGCCTGTTATAA  
TGGGAAAACCTTATATCTTGAAATTAATTCATCAAGTTGATGATAAAATACATGGACGTT  
CCAGTGGACATTATGCACTTGTACACAACAACCCCTTAGAGGAAGGGCCAAACAGGG  
AGGACAACGAGTAGGCGAAATGGAGGTTTGGGCCCTGGAAGGATTTGGTGTGCTCAT  
ATTTTACAAGAGATGCTTACTTATAAATCTGATCATATTAAGCTCGCCAAGAAGTACTC  
GGGACTACGATCATTGGAGGAATAATACCTAAACCTACTGATGCTCCAGAATCTTTTCG  
ATTGCTCGTTCGAGAACTACGATCTTTGGTTATGGAACACTGAATCATTTCGTGTATCTGA  
GAAAACTTTCGGATTCATAGGAAGGAAGCT-----ATGATTGATCAGTATAA  
ACATCAACAACCTCAGAATTGGATCAGTTTCTCTCAACAATAAGTGCTTGGGCAACA  
AAAATCCTACCTAATGGAGAGATAGTTGGGGAGGTAACAAAACCCCTATACTTTTCATTA  
CAAACCAATAAGCCTGAAAAAGATGGATTATTTTGTGAAAGAATTTTTGGGCCTATAA  
AAAGTGGGATTTGTGCTTGTGGAAATTATCGAGTAATCAGAGATAAAATGGATGATCCA  
AAATTTTGTGAACAATGCGGAGTAGAATTTATTGATTCTCGGATACGTAGATATCAAATG  
GGCTATATAAAATTGGCATGCCTAGTAACTCATGTTTGGTATTTGAAACGTCTTCCTAGT  
TATATCGCGAATCTTTTAGATAAACCTCTTAAAGAATTAGAGGGTCTAGTATATTGCGAT  
TTT-----TCATTTGCTAGACCC---GTAGTTAAAAAACCCACTTTCTTACGATTACGAGGTT  
CATTTCGAATATGAAATCCAATCTTGGAACACAGCATAACCACTTTTTTTTACTACCAA  
GGTTTCGATATATTCGAAATCGAGAAATTTCAAGTGGAGCGGGTGCATCCGAGAACA  
ATTAGCTGATCTCGATTGAGAATCTTATTGATTCTTCGTTGATAGAACGGAAAGAATT

AGGGGAAGAG---GGATCCACGGACAATGAATGGGAAGATCGAAAAGTTGGAAGAAGA  
AAAAATTTTTTGGTTCGACGCATAGAATTAGCTAAGCATTTTATTTCGAACAAATATAGAA  
CCAGAATGGATGGTTTTATGTCTCTTACCAGTTCCTCCCGAATTAAGACCGATTATT  
CAAATAGATGGGGGTAAGCTAATGAGCTCGGATATTAATGAACTCTATAGAAGAGTTAT  
TTATCGGAATAATACTCTTATCGATCTATTAACAACAAGTGGATCTACGCCAGGAGAATT  
AGTAATATGTCAGGAAAAATTGGTACAAGAAGCCGTGGATACACTTCTTGATAATGGAA  
TACGCGGACAACCAATGAAGGACGGTCATAATAAGGTTTACAAATCGTTTTCTGATATA  
ATTGAGGGCAAAGAGGGGAAGATTCGCGGAGACTCTGCTTGGCAAACGGGTTGATTATT  
CGGGGCGTTCTGTCATTGTCGTAGGTCCATCACTTTCATTACATCGATGTGGATTACCGC  
GCGAAATAGCAATAGAACTTTTCCAGACATTTCTAATTCGTGGTCTAATTCGAAAACAT  
TTTGCTTCGAACATAGGAATTGCTAAGAGTAAAATTCGGGAAAAAGAACCGGTTGTAT  
GGGAAATACTTCAAGAAGTTATGCGGGGGCATCCCATATTGCTGAATAGAGCGCCTACT  
CTGCATAGATTAGGCATACAGGCATTCCAACCCATTTTAGTAGAAGGGCGTGCTATTTGT  
TTACATCCATTAGTTTGTAAAGGATTCAATGCAGACTTTGATGGGGATCAAATGGCTATT  
CATGTGCCTTTATCTTTGGAGGCTCAAGCAGAAGCTCGTTTACTTATGTTTTCTCATATG  
AACCTCTTCGCTCCAGCTATTGGGGATCCATTTCCGTACCAACTCAAGATATGCTTATT  
GGGCTTTACGTATTAACGAGCGGGAATCGTAGAGGTATTTGTTCAAATCGATATAATCTG  
TGTAATTGG-----ATAAATTCTAAAAATGAAAGAATTCAAGATAATAACTATAAGTATA  
CGAAAAAA---GAACCTTTTTTTTTGTAATTCCTATGATGCAATTGGAGCTTATCAACAGAA  
AAGAATAGATTTTCGATAGTCCTTTGTGGTTCGGGTGGCGACTAGATCAACGC---ATTATT  
TCGTCA-----AGAGAAATTCCTATCGAAGTTCACTACGAATCTTTAGGTACCTATCATGA  
AATTTATGGGAATTATCTAGTAGTAAGAAGTACAAAAAAGAAATTCGTTGTATATACAT  
TCGAACCACTGTTGGTCATATTTCTTTTTATCGAGAAATCGAAGAAGCTATACAAGGTT  
TTTGCCGGCCTATTCATATGATATC-----ATGGCAGAACGTGCCA  
ATCTAGTCTTTTACAATAAAGTAATAGGTGGAAGTCCCTCAAACGACTTATTAGCAGA  
TTAATAAACCACTTCGGAATGGCATATACATCACACATCCTGGATCAAGTAAAGACTTT  
GGGATTCCATCAAGCTACGGATACATCCATTTCAATTAGGAATTGATGATCTTTTACAAT  
ACCTTCCAAAGGATGGTTAGTCCAAGATGCTGAACAACAAGTTTGATTTTAGAAAAA  
CATCATCATTATGGGAATGTACATGCGGTAGAAAAATTACGCCAATCCATTGAGATATGG  
TATGCTACAAGTGAATATTTGAGACAAGAAATGAATCCTAATTTTAGGATAACCGATCCC  
TTAATCCAGTCCATATAATGTCTTTTTTCGGGAGCTAGAGGAAATGCATCTCAAGTACAC  
CAATTAGGAGGTATGAGAGGATTAATGTCGGATCCACAGGGACAAATGATTGATTTACC  
TATTCAAAGCAATTTACGCGAAGGACTGTCTTTAACAGAATATATTATTCTTGTTATGG  
AGCCCGTAAAGGGGTTGTAGATACTGCTGTACGAACATCAGATGCTGGATATCTTACAC  
GCAGACTTGTTGAAGTGGTTCAACACATTGTTGTACGTGCAACAGATTGCGGTACCATT  
CAAGGGAGTTCGGTAAATACCCAGAATGAAATGATGTCA---GAAAGAATTTTGATACAA  
ACATTAATTGGTTCGTGTGTTAGCAGACGATATATACAGAGGTTTACGATGCATTGCCGTT  
AGAAATCAAGATATTGGAATTGGACTTATCAATCGACTCAAACT-----TTTCA  
AACACAACCAATATCTATTCGAACCCCTTTACCTGTAGGAATACATCTTGGATTTGCCG  
ATTGTGTTATGGCCAAAGTTCTACTCATGGCCACTTAGTGGAATTAGGAGAAGCTGTAG  
GTATTATTGCAGGCCAATCAATTGGAGAACCGGGTACTCAACTAACATTAAGAACTTTT  
CATACCGGTGGAGTATTCACAGGGGGTACTGCAGAACATGTGCGAGCGCCTTCTAATG  
GAAAAATAAAATTCATGAGGATTTGGTTCATCCTACACGTACACGTACATGGGCATCCT  
GCTTTTCTATGTTATATAAATTTATATGTAATGAAAGTGATGATATTATACATAATGT

GACTATTCCACCAAAAAGTTTTATATTAGTTCAAATGATCAATATGTAAAATCAGAACA  
AGTGATTGCTGAGATTCGCGCGGGAACATACACTTTG---AATTTGAAAGAAAAGGTTCCG  
AAAACATGTTTATTCTGACTCAGAAGGAGAA---ATGCATTGGAGTACCGATGTGTACCA  
TGCATCAGAATTTAGATATAGTAATGTCCATATCTTACCAAAAACAAGTCATTTATGGATA  
TTATCAGGAAGGTCGTACAGA-----ACCGGTTCAGTCTCTTTTTTCATTCCGTCAGGATCA  
AGATCAAATTCATATTCAT-----TCTCCTTCTACAGGAGAGAGAAAATATTGTAATCTTTT  
A-----ATAAATAATTATCAA---GTAAGACATAAATTCTTTAGTTTTTAACCCTTCTGGTAAAA  
AAGAAAGAATGATTCCCGATTAT--TCAATATTTAATGAAATTATATGTATGGATCATTGTC  
ATTTTAAACATCCTGCT--ATTTTTCACGATACTTCAAAT-----TTATTAGCAAAGGGGCGA  
AGAAATAGATTCATCATTCCA-----TTTATTCAAGAACGAGACAAAGAATAATCTTCCC  
TTCCGGTATCTCGATTGACGTATCAATC-----AATGGTATTTTTTCGTAGAAATAGTATTCTT  
GCTTATTTTCGATGATCCTCAATACCGAACACAGAGTTCGGGAATTACTAAATATAGA  
ACTATAGGAATAAATTCTATTTTAAAAAAGAGGATTTT---TTATTTGAGTATCAA---GGAATT  
AAAGAATTTAAGCCAAAATACATCAAAGTAGATCGATTTTTTTTTTCATTCCCGAGGAAGT  
TCATATTTTACCTGAATCTTCTTCCATAATGATACGGAACAATAGTATCGCTGGAGTAGAT  
ACACCAATCACTTTAAATATAAGAAGTCGAGTAGGCGGATTAGTCCGAGTGGAAAAGA  
AAAAAAAAAAGATTGAATTAATAAATATTTTCCGGGGATATCTATTTTCTGGAGAGATG  
GATAAGATATCCCGACATAGTGCCATCTTGATTCCACCC---GAAACGGTAAAAAAAAAAA  
AATTCTAAGGAATCCAAAAA-----ATGAAAAATTGGATCTATGCCCAATGG-----ATTAC  
AATTACAAAACAAAAT-----TATTTTGTTTTGGTTTCGACCTGTAATTCTATATAAAATAGC  
GGATGGTATCAATTTAATAAAACTTTTTCCCAAGATATGTTCCAAGAAAAAATGATCT  
GGAACTTAAAGTTGTTAATTATATTCTTTCTGGAAATGGAAAATCAATTCAGGGAATTTT  
TAATACAAGGATTCAATTAGTTCGGACTTGTTAGTCTTAAATTGGGATCAAACAAA---  
-----AAAAGTTCTTCTATAGAAAATGCCCGTGCTTCTCTTGTGTAAGTACAAATGG  
TTTGATTAGAGATTTCCCTAAAATTGACTTAATGAAA---CCTATTTTCATATATCAGAAAAA  
GAAAAAATCCATCTAGTTCAGGATTTATCTCGGAT---AATGAGTCGGATCGGACCTATAT  
CAATCCATTT-----TTTTCTATTTATTCG-----AAGGCAAAAATTCAACAATCACTTGGTC  
AAAATAAC---ACTATTCGTATGTTAAAT-----GAGACATGCCGATCTTTGATAATT  
TTGTCATCATCTAATTGTTTT-----CAAATAGGACCATTCAACGATAGAAAATATTTCAAT--  
-----GGGATAAAAGAAAAGATTCTATAATTCCAATTCAAATTCGTTAGGTCCTTTAGG  
AATA-----GCCCTTCAAGTTGCAAATTTTTATTCA-----TTTTACCGTTTAATAACT-----CAT  
AATCAGATATCA---ATAAAAATATTTTAATACTTGACAAA-----TTAAGGGAAACTTTT  
CAAGTATTA-----AAA---TATTATTTAATGGACGAAAACGAGATA-----ATTTATAAACCTTA  
TATATGCAGTACTAGCATTTTAAATTCATTTTATTTGAATTGGCATTTTATCCATCATAAT--  
-----ACGTTTACAATAATTAGT--CTTGGACAATTTATTTGTGAAAATATAGGTATAGTG  
CAAAATGAACCA-----CACTTTAAATCGGGTCAAATTATAACTGTTCAA---ATGGATTC  
TGTAGGAATAAGATCGGCTAACCTTACTTGGCGACTCCAGGAGCAACTGTTTCATGGA  
CATTATGGAGAAATACTTTATGAAGGAGATATATTAGTTACATTTATATATGAAAAATCGA  
GATCTGGTGATATAACACAAGGTCTTCCAAAAGTGGAACAGGTATTAGAAGTGCGTTC  
GATTGATTCAATATCGATGAACCTAGAAAAGAGAGTTGACACTTGGAACGGGCATATAA  
CAAGAATTCTTGGCATTCTTGGGGATTCTTGATTGGTGCTGAACTAACTATAGCGCAA  
AGTCGTACTTCTTTGGTTAATAAAATTCAAAAAGTTTATCGATCCCAGGGAGTTCACAT  
TCATAATAGACATATAGAAATTATTGTACGTCAAATAACATCAAAAAGTCTTGGTTTCAGA  
A-----GATGGAATGTCTAATGTTTTTTTACCCGCGGAACTAATTGGATTGTTGCGAGCC

GAACGAGCAGGCCGTGCCCTGGACGAAGCGATTTGTTACCGAGCTCTATTATTGGGAA  
TAACAAAAACATCTCTGAATACTCAAAGTTTCATATCTGAAGCCAGTTTTCAAGAACT  
GCTAGAGTTTTAGCAAAGCCGCTCTTCGGGGTTCGTATAGATTGGTTGAAAGGTCTGA  
AGGAAAATGTTATTTTAGGAGGAATTATACCCGTTGGTACTGGATTCAAAGAATAATG  
CACCGTTCAAAGCCAAGGCAACATAACAAGATTATC-----TTGAAAACAAAAAGAATA  
ATTTATTCGAGGACGAA---ATG---AGAAATATTTGTTCCACCACAGAGAATTCCTTTTTT  
TTATTTCAAAAAATTTCTGTGATACATCAGAACAATATAGGTTT-----  
---ATGACAAAAAGATATTGGAACATAATTTGGAAGAGATGATGGAAGCAGGAGTTCAT  
TTTGGTCACGGTACTAGAAAATGGAATCCTAAAATGGCACCTTATATATCTGTAAAGCGT  
AAGGGTATTCATATTACAAATCTTACTAGAAGTCTCGGTTTTTATCAGAAGCTTGTGAT  
TTAGTTTTTGTATGCAGCAAGTAGGGGAAAACAATTCTTAATTGTTGGTACCAAAAAA  
AAGCAGCTGATTCAGTAGCGGAGCTGCAATAAGAGCTCGGTGTCATTATGTTAATAAA  
AAATGGCTTGGCGGTATGTTAACGAATTGGTATACTACAGAAACAAGACTTCATAAGTT  
CAGGGACTTGAGAACTCAACAAAAGACGGGGAGATTCAACAATTTTCCAAAAGAGA  
TGCCGCTATATTGAAGAGACAATTATCTCATTTGGAACATATCTTGGCGGCATTAATA  
TATGACAGGATTACCTGATATTGTAATAATCGTCGATCAGCAAGAAGAATATACGGCTCT  
TCGAGAATGTATAACTTTGGAATTCCAACAATTTGTTAATTGATACAAATTGTGACCC  
CGATCTCGCCGATATTTCAATTCCAGCTAATGATGATGCTATAGCTTCAATCCGATTAATT  
CTTAACAAATTCATATTTGCAATTTGTGAGGGTCGTTCTAGC---TATATACGGAATTCTAT  
GGGACAAAAATAAATCCGCTTGGTTTCAGACTTGGTACAACCTCAAAGTCATGATTCT  
CTTTGGTTTGCACAACCAACAATTATTCGAGAATCTACAAGAAGATAAAAAAATAC  
GAGATTTTATTAATAATATATACAAAAAATGTAAAAATATCCTCT---GGTATTGAAGGA  
ATTGGACGGATAAAGATTCAAAAAAGAATCGATCTGATTCAAGTCATAATCTATATGGG  
ATTTCCAAAATTATTAATAGAGGGTAAGCCTCGA-----AGAATCGAAGAATTACAAA  
CAAATATGCAAAAAAACTGAATTGTGTGAACCGAAAACCTTAATATTGCTATTACAAGA  
ATTGCAATGCTTATAAACATCCTAATATTCTTGCAGAATTTATAGCCGGACAATTAAG  
AATAGAGTTTCATTTTCGTAAAGCAATGAAAAAGCTATTGAATTAACCTGAACAAGCAG  
GTACAAAAGGAGTTCAAGTACAAATTGGCGGACGTATCGACGGAAAAGAAATTGCAC  
GTGTAGAATGGATAAGAGAAGGTAGGGTCCCTTACAAACCATTCGAGCTAAAATTGAT  
TATCTTCCCTATACAGTTTCGAACTATTTATGGAGTATTGGGGATTAAAGTTTGGATATTA  
TAAACAAAGAAATGTCACGTTATAGAGGACCTCGTTTCAAAAAAATACGCCGTCTAGG  
GTCTTTACCAGGACTAACTAGTAAAAAGCTAACAATTAAGCGAACTTAGAAACCAA  
TCGCGCTCGAGTAAA---AAATCTCAATATCGTATTCGTTTGAAGAGAAACAAAAATTG  
CGTTTTTATTATGGTCTTACAGAACGACAATTGTTTAAATACGTTTCGATTGCCGGAAAA  
GCTAAAGGATCAACGGGTCAGGTTTTATTACAATTACTTGAAATGCGCTTGGATAACAT  
ACTTTTTCGGTTGTGTATGGCTTCGACTATTCTCAAGCCCGCCAATTAATTAACCATAG  
ACATGTTTTAGTTAATGGTTCGTATAGTAGATATACCAAGTTATCGTTGCAAACCTCAAGA  
TATTATTACAGCGAAGGATGAACAAAGATCTAGAAGTCTGATTCAAATTATCTTGATTT  
AGCCCCCTCGT---GAGAAATTACCAAATCATTTAACTCTTCACCCATTGCAA-----TATAAA  
GGATTAATCAATCAAATAATAGATAATACGTGGATTGGTGTGAAAATAAATGAATTGCTG  
GTTGTAGAATATTATTCTCGTCAGACTATGTCACGGCGAGGAACTGCAGAAGAAAAA  
CCGCAAAAGCCGATCCAATTTATCGTAATCGATTAGTTAACATGTTGGTTAACCGTATTC  
TGAAACACGGAAAAAAATCATTGGCTTATCAAATTATCTATCGAGCTATGAAAAAGATT  
CAACAAAAGACAGAAACAATCCACTATCTGTTTTACGTCAAGCAATACGTGGAGTAA

CTCCCGATATAGCAGTAAAAGCAAGACGTGTAGGCGGATCAACTCATCAAGTTCCCAT  
GAAATAGGATCCACACAAGGAAAAGCACTTGCCATTCGTTGGTTATTAGGAGCATCCC  
GAAAACGTCCGGGTCGAAATATGGCTTTCAAACCTAAGTTCCGAATTAGTGGATGCTGC  
CAAAGGGAGTGGCGATGCCATACGCAAAAAGGAAGAGACTCATAGAATGGCCGAGGC  
AAATAGAGCTTTTGCACATTTTCGTATGAGTAAGGACACCATCGCTGACATAATAACCTA  
TATACGAAATGCTGACATGAATAGAAAAGGAATGGTGCAAGTACCATTTACTAACATCA  
CCGAAAACACGGTGAAAATACTTTTACGAGAAGGTTTTATTGAAAACGTCAGAAAACA  
TAGGGAAAACAACAAATATTATTAGTTTTAACTCTACGGTATAGAAGA-----AATAGGA  
AAGGAGCATATAAAAAT--TTT-----ATAAATTTAAAACGGATCAGTACACCTGGTTTACG  
AATATATTCTAATTATCAACAAATACCTAGAATTTTAGGAGGCATGGGAATTGTAATCTT  
TCAACTTCTAGAGGTATAATGACAGATCGAGAAGCTCGGTTAGAAAAAATCGGCGGAG  
AAGTTTTATGTTATATATGGATGGCAAAACCTATAACCAAAAATGGGTTTCGCGTAAA---GG  
ACGTATTGGTTCG---AGAATGCTCGTAAAATACCAAAAGGGAGTTATTCATGTTCAAGCT  
AGTTTTAAACAATACTATTGTGACTGTTACAGATGTACGGGGTCGGGTGATTTCTTGGTCC  
TCCGCCGGTACTTGTGGATTCAAGGGTACACGAAGAGGTACACCATTTGCTGCTCAA  
CCGCAGCAGGAAATGCTATTTCGAACAGTAGCGGATCAAGGCATGGAACGAGCAGAAG  
TCATGATAAAAGGTCCCGGTCTCGGAAGAGATGCAGCATTAAAGAGCTATTTCGTAGAAG  
TGGTATACTATTAAATTTTATACGGGATGTAACCTCTATGCCACACAATGGATGTAGGTC  
TCCTAAAAAAGACGTGTGATGCCAACTATGAAACAACCTATTAGAAACACAAGACAG  
CCAATCCGAAATGTCACAAAATCCCCCGCTCTTCGGGGATGCCCTCAACGACGAGGGA  
CATGCACAAGGGTGTACTATTACACCCAAAAAACCAACTCTGCCTTACGTAAAGTT  
GCCAGAGTACGCTTAACCTCTGGATTTGAAATCACTGCTTATATACCCGGTATTGGCCAT  
AATTTACAAGAACATTCTGTAGTCTTAGTAAGAGGGGGAAGGGTTAAAGATTTACCCG  
GTGTGAGATATCACATTGTTTCGAGGAACCCTAGATGCTGTCGGAGTAAAGGATCGTCA  
ACAAGGGCGTTCTAAATATGGGGCCAAAAAACCAAAAATGGCAAGGAAAAGTTTGAT  
TCAGAGGGAGAAGAAGAGACAAAATTGGAACAAAATATCATTGATTCGCCAATCC  
TTAAAAAAGAAATAAGC-----AAAGTTACGTCGTTAAGTGATAAATGGGAAATTCAT  
GGAAAGTTAGAATCACTACCGCGTAATAGTGCACCTATACGTCTTCATCGACGTTGTTT  
TTCAACCGGAAGACCGAGAGCTAATTATCGAGACTTTGGATTATCCGGGCACATACTTC  
GTGAAATGGTTCATATATGTTTGTGCTGCTGCAACAAGATCAAGTTGGTTGGTAAAA  
AATTCATTTATACCAGTTATTTACAAGCA---AAAAAAGAAGAA---AACCCGGGATCGG  
CTGAATTTCAAGTATTTAATTTAACCAATAAGATACGAAAACCTACTTCACATTTTGAAT  
TGCACCGAAAAGACTATTTATCTCAAAGAGGTTTACGTAAAATTTAGGAAAACGGCA  
ACGACTACTGTCTTACTTGTCAAGGAAAAATAGAGTACGTTATAAAAAATTAATAAATC  
AGTTTGATATTCGGGAGTCACAAATTCGT-----ATGGTAAAACCTTCGTTTGAAACGATGT  
GGTAAAAGCAACGAGCCGTTTATCGAATCGTTGCAATTGATGTTCTATCCCGAAGAGA  
GGGAAGAGATCTTCGGAAAGTGGGTTTTTATGATCCAATAAAGAATAAAACATATTTAA  
ATATTCCTGTTATTCTATATTTCTTGAGAAAAGGGGCTCAACCTACAGGAACTGTTTCAGG  
ATATTTCAAAAAAGCAGGTGTTTTTATGGAACCTAAACCTAATCAACAAACGAAATTC  
AATATGGATAAATCTAAACGACTCTTTCTTAAATCCAAGCGATCTTTTCGTAAGCGTTTG  
CCCCGATTGGATCGGGGGACCAAAATTGATTATAAAAACATGGGTTTAATTAGTCGATTT  
ATTAGTGAACAAGGAAAATATTATCTAGACGCGTGAATAGATTGACCTTAAAACAACA  
ACGATTAATTACGATTGCTATAAAAACAAGCTCGTATTTTATCTTCGTTACCTTTTCTTAAT  
AATGAAAAA-----CAATTTGAAAAAAGCGAGTCGACCACTAGAACTACTACTGCTTTTA



AAAAAAAAAAGTGACACGT---CTAAAAAAAAATCCTTTTGTAGCAAATCATTATTA  
GAAAAATAAATAAACTTAACACAAAAGCAGAAAAAGAAATAATAAACTTGGTCCAG  
AACATCTACCATTATACCCACAATGATTGGCCATACCATTGCTATCCACAATGGAAAAGA  
ACATTTACCTATTTTTATAACAGATCGTATGGTAGGCCATAAATTGGGAGAATTTTCACCT  
ACTCTAACTTTAGAGGACATACGAAAAATGATAATAGATCTCGTCGTATGATTTTTCAA  
TCTTTTATACTGGATAATCTAGTATACTTATGCATAAAGATAATTAATTCGATCGTTGTGG  
TCGGACTCTATTATGGATTTCTGACCACATTCTCCATAGGGCCCTCTTATCTCTTCTTCT  
TCGAGCTCGGGTTATGGAAGAAGGG-----ACCGAAAAGAAAGTATCAGCAACAACCTG  
GGTTTATTACGGGACAGCTCATGATGCTCATATCGATCTATTATGTACCTTTACATCTAAC  
ATTGGGTAGACCTCATAACAATACTGTCATAGCTCTACCGTATATTTTATTTTCAGTTCTTC  
GCCAATAATCGCAAAAAGTTTTTGAATTATGGATACAAGAATACAAATTC AATACGTAAT  
TTAGTATTCAAAAATATTCTTTCAAAATCTTATTTTTTCAGTTATTAACCCTTTTTTTTT  
ACCAAGTTCAATCTTAATAAGATTAATGAATATTTATCTCTTTTCGATGCAATAATAAATTA  
CTATTTTTAATAAGTAGTTTTGTTGGTTGGTTAATTGGTTACATTTTTTTTGATGAAATCGT  
TTGAATTGATATTCCTTTTCGATACAGCAA---AATAATTTGATTA---ATTCAATCGAATA  
AATACATTATGTCAGAATTTTCGAACTTAT-----CAAATCTTTCTTCTTTCCTTATTATTACC  
TGTTTATATTATTTAGGAGGAATACCACCCCTTTTTTTTAATAAATTATTAGAAATTA  
AAGATCTTAAACCTCTTATAAAGATTCTTTTCAATTATAAACGATGGAATCGTCCATTTC  
GATATATAAAAAATAATCGATTTGAAAATATCATAAAAAATGAAAATTCAGAATTTTTTT  
TTCATACATGTGAAAGTGATGGAAAAGAAAGAATATCTTTTACGTATCCACAAAACCTTA  
TCGACTTTTCATAAAATGATGGAAACAAAATTTATTTATTCACAAGA---AAAAAATTT  
ATGATGAATTGTCGAATTCTTGGAATTATACTAATGAAGAAAAAGAAAGAAACTAAG  
CAATGAATTTATAAATAGGGCAAAAATTCGATAACGAATTT-----CTGGATATATTCGA  
AAACCGAATTAGATTGTGTAATGATGAACTAAAACAAAATACTTAACTAAAATATATG  
ATCCTTTTTTGAGGGGACCATTTTCGTGGACGAATCGAAAATTGTTTTTCATTC-----GAA  
ATTTTGATAAATAAACTTCACGGTATCCTTTATACAGAATTTGAACAGAAAGATCTGAAC  
AATAAATGTATTGGAATAAAGGAAATTACTAAAAAAGTTCCTCGATGGTCATACAAATTT  
ATTGAATTAGAACAACCTCGAGGGAAAACAGATTCGTTCTAGAAAAGCTAAACGTGTAG  
TGATTTTGACTAAAGCTTTAATACGTTATTCACAACAACCGGATTTTCGGCGAGACATAA  
TCAAAGGATCTATACGTGCTCAAAGGCGTAAAACAATTACTTGGAATTTTTTTCAAAGA  
ACTGTGCATTTCCCCCTTTTCTTGACAAAATTGAAAAATCCTTGTTCTTTTTTTTTTGAT  
AATTTCAAGTCAATGAAAATTTTTTCTATATTCCAAAAGAAAGAGGAACAAAAACGTAT  
AGAAATAGCGGAAGCCTGGGACAACATTATATTGCTCAAGTAATAAGAGGTTTTTTTAT  
TAATAACCCAATCACTTATTAGAAAATATATTATATTACCTTCATTGATAATAACTAAAAT  
ATCGTTTCGTATGATATTTTTTCAATTTCCCGAATGGTCAGAAGATTATAGGGATTGGCAG  
AGAGAAATGTATATTAATGTACTTATAATGGTGTTC AATTATCCGAAAAAGAATTTCCA  
AAAAATGGCTAACAGATGGTATTCAGATAAAGATATTATTTCCCTTTCGTCTAAAACCT  
TGGCACAGATCTAAGAATTTGAAAAAATAAACTTCTGTTTTTTAACAATTTGGGGAA  
GAGAAGTTGAATTACCCTTTTCTGGTTCTTCAAAAAATTTTTTCATTTTTTGATCCTATTTT  
TAAAGAACTCAAAAAAAA-----AAAAATAT-----GTTCTAAAAGTTTTATATG  
AAAGAACAAAATTTGTTTCTAAATATCTTAAAACAAAAGCAGAATGGATTATCAAAGT  
ATTCTATTTCTAACTAAAAAATAAAAAAATAAACTCTTAAAT-----TTT-----ATTGACA  
AAAATATGATTTTTGAATCAACTATTCCAATTC AATCTATAAATTGGGAAAATTTTCATT  
GACAAAAAATAAAGATCTGAATGCTAAAACAAAACAATTATAAAACAAATA

GAAAAAATGACAAAAAAGAAAAGAAACATTCGAAGAAAACAACCTCATAATACTAAA  
AGATTAGAATTAGAAAAAATATTTTGCAGATATTACAAAGAAAAAATGTTTCGATTAAT  
TCGTAAATCCTATTCTTTTTTTAAATTT-----TTCATGAAAATAGATATTTTTCTATATATC  
ATTAATATTCCCAAGATCAATATACAACCTTTTT-----TTTTGTGACACAAGC  
ATATGTATTTTTTAAATTATCACAAACCGAA---ATTAACAAGTATAAGTTAAGATCGGTTT  
TTCAATATAGATTTTGTCTTAAAGAATGAAATAAAGAATTATTTTATACAAGGAATATT  
TCATTCCAAATTA AAAACATAAGAAACCTACC---TTGTAAATGAACCAATGGACAAATTG  
GTTAAAGGGTTCGTTATCAATATGACTTATCTCAAAGCAAATGGTCTAGATTAGTACCACA  
AAAATGGAGAAAAAGAATTAATCAACGTCGTGTGACTCAAATAAAAACCAAATGTAAT  
TTATATGACAAAACCGA-----TTCATTTTTTATAAA-----AAAATTA AAAACAATATA  
AATATGATCTTTTATCCTATAACTCTATTAATGATGTTATTATAGATCTGGATAGAAAGTAT  
TTTGATTGGATGGGAATTAAG-----GTAGAAATACTAAATCGTTCATATCA  
AATTGGTTATTTTCAAATTTTTTTTATTTCAAATGCATATAGAAGTAACCCGTGGAGC  
ATACCAATCAAATTACTTTTTTTCCAT--AAGGACAAGATGGAAGCCGAACCTAATTTGT  
TACTAAGAAAGTTTTTGAATGTTAATTTGAACTGGAAGAATTTCTTAGGTCCAAAATA  
TTGCAAAATGTAAAAGTATATTGTCTTCTGGTTAGATTGAAGAATTTAAGAGGACTTTCT  
ATAGCCTCCATTCAAAGGGGAGA ACTAGATCTAGATATCATTATGATTCAAAGGATTTT  
ACTTTTACAAGCTTGAGGAAAAATGAAATATTTATTATCGAACCAGTTCGCTTGTCTAG  
AAAAACAATCCAATTTTTTTTTGTATCAAACCATAGGTATTTCAATTAATCATAAGAAT  
AAGCACAAAATTATGATTTGCTTATTCCTGAAAATATTTTATCCACTAGACGTCGTAGA  
GAATTGAGAATTCTAATTTGTTTAAATTTCTTTGGCCGAATTATAGATTGCAAGACTTA  
ACTTGCATAAATCGTTATTGGTTAATACCATAATGGAAGCCGTTTCAGTATAATAAGG  
ATACATATGTATCCTATGAAAGGACATCAATTCAAATCCTGGATTTTCGAATTGAGAGAG  
ATATTGAGAGAGATCAAGAATTCTCGCTATTTCTTAGATTCATGGACTCAATTCAATTCA  
GCGGGATTTTTCATTCATATTTTTTCCATCAAGAGAGTTTATAAACTCTTGGACTCC  
CAAATTTGGAGTATCCTACTTTCA---CGCAATTCA-----CAGGGTTCACCAAGCAATCGAT  
ATTC-----ACGATCAAGGATGTAGTACTCTTTGTAGTAGCG---ATCCTTATATATCGT---  
-----ATTAACAATCAAAGATGGTCGAAAGAAAAATCTCTATTTGACGGGATTTCTTC  
CT-----ATACCTATGAATTCCATTGGACCCAGAAATGATACATTGGAAGAATATTTT  
---GAGTCTTCCAATATCAATAGGTTGATTGTTCCG---CTCCTGTATCTTCCAAAAGGAAA  
AAAGATCTCTGAGAGCTCTTTCTGGATCCGAAAGAGAGTACTCGGGTCTACCAATA  
ACT-----AAAAGTGTATCATGCCTGAATCTAACTGGGGTTCGCGGTGGTGGAGGA  
ACTGGATAGGAAAAAGAGG-----GATTCTAGTTGTAAGATATCTAAT-----GAAACCG  
TCGCTGGAATTGAGATCTCATTCAAAGAAAAAGATATCAA---TATCTGGAGTTCTTTT  
TGTATATTATATGGAT-----GATCCGATCCGCAAGGACCATGATTGGGAATTGTTTGATCG  
TTTTTCTCCGAGGAAGAGGCGAAACATAATCAACTTG-----AATTCGGGACAGCTTTTC  
GAAATCTTAGTAAAAGACTGGATTTATTATCTCATGTTTACTTTTTGTGAAAAAATACCA  
ATTGAAGTGGAGGGT---TTCTCAAACAACAAGGG---GCTGGGTCAACTATTCAATCAA  
ATGATATTAAGCATGTTTCCAT-----CTCTTCTTGAAAAACAAGCGGGCTATTTCTTTGC  
AAAATTGTGCTCAATTTCAATATGTGGCAATTCTGTCAAGATCTCTTCGTT-----AGTTG  
GGGAAG---AATCCGCACGAATCGGATTTTTTTGAGTAAC---ATGTCGAGAGAGAATTGG  
ATTTGGTTAGACAATGTGTGGTTGGTAAACAAGGATCGG-----TTTTTTAGC-----AAG  
GTACAGAATGTATCATCAAATATTCAATATGATTTCG-----ACGAGA-----TCTAGTTTCAT  
TCAAGTAACGGATTCTAGCCAATTGAAAGGATCTTCT--GATCAATCCAAGGATCATTTC

GATTCCATTAGG-----AATGAGGATTCGAAA-----TATCACA  
CATTGATCAATCAAAGAGAGATTCAGCAACTAAAAGAAAGATCGATTCTTTGTTGGGAT  
-----CCTTTCTTTCTTCAAACGGAACGAACAGAGATAGAATCAGAG-----CGATTCCCTA  
AA-----AGCCTTTCTGGATATTCC-----TCAATGTGCCGACTATTCATG---AAACGTGAGA  
AGGAGATGAATAATCATCTGCTTCCGGAATAAATCGAAGAATTT-----CTTTGGAATCCG  
GCAAGAGCCAATCGTTCTTTTTTCTCTGACAGATGG-----TCAGAACTTCAT--CTGGGTT  
CGAATCCTACTGAGAGGTCCACTAGATATCAG-----AAATTGTTGAAGAAAGAACA  
AGATGTTTCT--TTTGTCTTTCCAGGCGATCGGAA-----AATAAAGAAATAGTTAAT  
ATATTCAAGATAATTATGTACTTACAAAAT-----ACCGTCTCAATTCATCCTATTTTCATCAG  
ATTCGGGATGTGATATGGTTCCG---AAGGATGAACTG-----GACAGTTCCAATAAGATT  
TCATTCTTGAACAAAATCCGTTTTTTAGTTTA-----TTTCATTTATTCCATGACCGGAAC  
AGGGGGGATACACGTTA-----CACCACGATTTTGAATCAGAA-----GAGATATTTCAAG  
AAATGGCAGATCTATTCATTTATCAATAACTGAGCCG---GATCTGGTGTATCATAAGAA  
ATTTACTTTTTCGATTGATTCCTCCGATTGGAGCAAAAACAA-----TTCTTGAATGAGG  
TATTCAACTCTAGGGATGAATCGAAAATCAATCTTTA-----TTGGTTCTACCTCCTCT  
TTTTTAT-----GAAAAGAATGAATCTTTTTATCGAAGGATCATAAAAAAATGGGTCCAG---  
ACCTCTTGCGGGAATGATTTGGAAGATCCAAAACCAAAAATAGTGGTATTTGCTAGCA  
ACAACATAATAGAGGCAGTCAATCAATATAGATTGATCCGGAATCTGATTCAAATCCAAT  
ATAGCATCCCT-----GGTTACATAAGAAATGTATTGAATCGATTCATTA AAAAGAAT-----  
CGATTTCGATCGCAACTTCGAATATGGAATTCAA-----GGGTATCAAATAGGAAATGATA  
CTCTGAATCATAGA ACTATAATGAAATACACGATCAACCAACATTTATCAAATTTGAAAA  
AG---AGTCAGAAGAAATGGTTGATCTT-----CTTATTTTGATTTCTCGAACGGAGAGATC  
CATGAATCGGGATCCTAATGCATATAGATACAAATGGTCCAATGGAATAAAGAATTTCCA  
GGAACATTTGGATCATTTCAATTTCTGAGCAGAATAGCCGT-----TTTCAAGTAGTGTT  
GATCGATTACATATTAATCAATATTGATTGATTGGTCTGAGGTTATCAACAAAAAATATT  
TGTCTAAGTCACTTTGTTTCTTTTTGTCC-----  
-----AAGTTTCTTCTCTTTTTGTCTAACTCACTTCCT--TTTTCTTTGTGAGTTTCGGGA  
GTATCCCCATTCATAGGTCCGAG---ATCCATATCTAT--GAATTGAAAGGTCCGAATGATC  
CACTCTGTAATCAGTTGTTAGAATCAATAGGTATTCAAATCTTTCATTTGAAAAAATGGA  
AACCTTA-----TTATTGGAT-----GACTATGATACTTCC---CAAAAATCGAAATTTCTGA  
TCAATGAAGGAATAATATCACCATTTTTGTTCAATAAGATACCA---AAGTGG---ATGATTG  
ACTCATTCCATACTAGA-----AAGAATTGCAGGAAATCTTTTGATAACACGGATTCCTATT  
TCTCAATGATATCCCACGATCAAAA CAATTGGCTGAATCCCGTAAAACCATTTTCATCGA  
AGTTCAATTGATATCCTCTTTTTATAAAGCAAATCGACTTCGATTATTGAATAATCGATATC  
ACTTCTCTTCTAT-----TGTAACAAAAGATTTCTTTT-----TAT--GTGGAAAAGGCCT  
GTATCAATAATTATGAT-----TTTACGTATGGA---CAATTCCTCAATATCTTGTTTCATTTCGCA  
ACAAA---ATATTATATTTTTGCGGTGGTAAA-----AAAAACATGCTTTTGGGGAG---AGA  
GATACTATTTACCAATCGAGTCACAGGTATGTAACATATTGATACCTAACGATTTTTTCG  
CAAAGTGCGACGAAGGG---TATGACTTGTACAAATCT-----TTCCATTTTCCAATTCG  
ATCCGATTCATTCGTTTCGT-----AGAGCTATTTACTTGATCGCAGACATTTCTGGAACACC  
TCTACCAGAGGGACAAATAGTCAATTTTGAAAGAACTTATTGTCAACCTCTTTTCAGATA  
TGAATCTATCTGATTCAGAAGGGAAAACTTGCATCAGTATCTCAAT-----TTCAATTCA  
AACATGGGTTTGATTCACTCCATGTTCTGATAAATATTTACCATCCGAAAAG-----AG  
GAAAAAA-----TGGAGTCCTTGTTCCAAA-----AAATGCCTTGAGAAAGG

GCATATGTATAGAACCTTTCAACGAGATAGTGCTTTTTTCAACTCTCTCAAAATGGAATCT  
ATTCCAAACATATATAACCATGGTTCCTTACCTCAACAGGGTACAAATATCTAAATTCATA  
TTTTTAGATACTTTTTTCAGAC---CTATTGCCGATACTAAGTAGCAGC-----CAAAAATTTGT  
ATCTATTTTTTCATGATATTATGCATAGATCAGATATATCATATCTTACTTATCGGATTTCAAT  
G-----TGTCTTCCACAAGGGAATTTGCTGATAAGTGAGATTCCGAGTAATTGTT  
TACATAAT-----CTTTTTCTATCCGAAGAAATTATTCATCGAAAAATGAGTCA-----CTAT  
TGATATCGACACATCTGAGATCGCTAAATGTTTGGGAGTTC---CTCTATTCAATCCTTTTC  
CTTCTTCTTGTGCTGGATGT---CTCGTTCGTACACATCTTCTCTTTGTTTCTCGA-----GT  
CTATAGTGATTTACAGACAGAGTTCGAAAAGGTCAAATCTTTGATGATTCCATCATACAT  
GATTGAGTTGCAAAAATCTTCTGGATAGGTATCCTACATCTGAACTGAATCTTTCTGGTT  
AAAGAATCTCTTTCTAGTTGCTCTGGAACAATTAGGAGATTCTCTAGAAGAAATACGGG  
GTTTTGCTTCTGGTGGCAACATGCTATGGGGTGGTGGTCTC-----GCTTATGGG---  
GTCAAATCAATACGTTTTAAGAAGAAATATTGGAATCTC-----ATCGATCTCATA---  
AGTATCATACCAAATCCCATCAATCGAATCGCTTTTTTCGAGAAATACAAGACATATAAGT  
CATACAAGTAAAGCGATCTATTCCCTTGATAAGAAAAATAAAAAACGTGAATGGTGATTG  
GATTGATGATAAAATAGAATCCTGGGTCTCGAATAGTGATTTCGATTGATGATAAAGAAA  
GAGAATCTTGGTTCAGTTCTCT-----ACCTTAACGACA-----GAAAAAAGGATTGATCA  
AATCTATTGAGTCTGACT---CATAGTGATCATTATCA-----AAGAATAACTCTGG  
TTATCAAATGATTGAACAACCTGGAGCAATTTACTTACGATACTTAGTTGACATTCAT----  
-AAAAGTATCTAATGAATTATGAGTTCAATACATCCTGTTTAGCAGAAAGACGGATATT  
TCTTGCTCATTATCAGACAATTATTTAT-----TCACAAACCATGTGGGGGGCTAATAGTTT  
TCATTTGCATCTCATGGA-----AAACCCTTTTCGCTCCGCTTAGCCCTACTCCCCCT-  
--AGGGGTATTTTAGTGATAGGTTCTATAGGAACTGGACGATCCTATTTGGTCAAATACCT  
AGCGACAACTCCTATGTTTCTTTCATTACAGTATTTCTGAACAAGTTCCTGGATAACA  
AGCCTAAGGGTTTTCTTATTGAT-----GATAGTGAC-----GATAGTGACGA  
TATTGATGATAGTGACGAT-----ATCGACCGTGAC  
CTTAATATGGAGCTGGAGCTTCTAACTATGATGAATATGCTA-----ACTATGGATATGAT  
GCCG-----GAAATAGACCGATTTTATATCACCTTTCAATTCGAATTAGCAAAAGCAATG  
TCTCCTTGCATAATATGGATTCCAAACATTCATGATCTGGATGTGAATGAGTCGAATTAC  
TTATCCCTCGGTCTATTAGTGAACCTATCTCTCC-----AGGGATTGTGAAAGATGTTCC---  
ACTAGGAATATTCTTATTATTGCTTCGACTCATATTCCTCCAAAAAGTGGATCCCGCTCTA  
ATAGCTCCGAATAAATAAATACATGCATTAAGATGCGAAGACTTCTTATTCCACAACAA  
CGAAAGCACTTTTTCACTCTTTCATATACTAAGGGATTTCACTTGGAAAAGAAAATGTT  
CTATACT-----AATGGATTCCGTACCATAACTATGGGTTCCAATGTACGAGATCTTGTAGC  
ACTTACTAATGAGGCCTTATCGATTAGTATTATACAAAAAAATCCATTATAGACACTAAT  
ATAATTAGATCCGCTTTTCATAGGCAAACCTTGGGATTTGCGA-----TCTCAGGTAAGAT  
CGTTTCAGGATCATGGGATCCTTTTCTATCAGATAGGAAGGGTTGTTTCACAAAATTTA  
CTTCTAAGTAATTGCTCCATAGATCCTATATCTATCTATATGAAGAAGAAA-----TCATGTA  
ACGAGGGGGATTCTTATTTGTACAAATGGTACTTCGAACTTGGAACGAGCATGAAGAA  
ATTAACGATACTTCTTTAICTTTTTGAGTTGTTCTGCCGGATCGGTTCGCTCAAGACCTTTG  
GTCTCTACCC-----GGACCTGATGAAAAA---AATGGGATCATTCTTATGGACTCGTTGA  
GAATAATTCT--GATCTAGTTCATGGCCTATTAGAAGTAGAAAGCGCTCTGGTGGGA-----  
TCCCTACGGACAGAAAAAATTGCAGTCAGTTTGATAATGAT-----CGAGTGACATTGCT  
TCTTCGGTCCGAACCTAGGAAT--CCTTTAAATATGATTCAAATGGATCTTGTCTATCG

TTGATCAGAGATTTCTCCATGAAAAA-----TATGAATCGGAGTTTGAAGAA-----GGGG  
GAGGAGTCCTCAACCCGCAA-----CAGATAGAAGAGGAT-----TTTTCAATCA  
C-----ATTGTTTGGGCTCCT-----AGAATATGGCGCCCT-----TGGGGCTTTCTATTTGATT  
GTATCGAAAGGCCCAATGAATTGGGATTTCCC---TATTGGGCCAGGTCATTTCTGGGGCA  
AG-----CGGATCATTATGATGAAGAGGATGAGATTCAAGAAAATGATTCAGATTTCTT  
ACAGAGTGGAAACCATGCAGTACCAGACACGAGATAGATCTTCCAAAGAACAAGGCTT  
TTTTCGAATAAGTCAATTCATTTGGGACCCTGCGGATCCACTCTTTTTCTTATTCAA---  
GATCAGCCTTTTGTCTGTGTTTTACATCGAGAATCTTTGCAGATGAAGAGATGTC  
AAGGGGGCTTCTTACTTCCCAAACAGATCTTCTACATCTATATATAAACGTTGGTTTAT  
C-----AAGAATACGCAAGAAAAGCATTTTGAATTGTTGATTCATTGCCAGAGATGGCTTA  
GA-----ACTAATAATTCATTATCT-----AATGGATTTTTCTGTTCTAAT-----ATTCTATCTG  
AGAGTTATCAATATTTATCAAATCTGTTCTATCTAAC--GGAACGCTATTGGATCAAATG  
ACAAAGACATTGTTGAGAAAAAGATGGCTTTTCCCGGATGAAATGGTTGTTGCTATC----  
--TATTCCAATAACGAATCATTGGTT-----ATGCCTAGATCTCGG---ATAAATGAAAATTTTA  
TTGATAAGACCTTTTCAATTGTAGCCAATATCTTATTACGAATAATTCCGACAACCTCAG  
GAGAAAAAAGGCATTCACTTACTACAGAGATGGT-----ATGTCGGCTCAATCTGAAGG  
AAATTATGCGGAAGCTTTACAGAATTATTATGAGGCTATGCGACTAGAAATCGATCCCTA  
CGATCGAAGTTATATACTTTATAACATAGGCCTTATCCACACAAGTAACGGGAGAACATAC  
GAAAGCTTTGGAATATTATTTTCGGGCACTCGAACGAAATCCTTTCTTACCCCAAGCTT  
TAAATAATATGGCCGTGATCTGTCTATTAC---CGCGGAGAACAGGCCATTCGACAGGGGAG  
ACTCTGAAATTGCGGAATCTTGGTTAATCAAGCCGCTGAATATTGGAAACAAGCTATA  
GCCCTTACCCCTGGTAATTATATTGAAGCACAGAATTGGTTGAAGATCACAGGGCGTTT  
TGAA-----ATAGAATA---TCAGAAGATCGAATGGTATACTTTGTAAGAGGGTCTCGAAG  
AAAAAGCAATTTCTTCTGGGCTTTTATTGTTTTTTTTTGGTTCATTAGGATTGTTATTGGTT  
GGAATTTTCAGTTATCTTGGTATGGATTTTTTATTTTTGTCTGAGATTATTTATTTTCCATT  
TATTCCACAAGGGGCCACGATGTCTTTCTATGGAATCGCAGGTATCTGTATTAGTTCTTA  
TTTGTGGTGCATAATTTTATGGGATGTCTGGTGGTGGTTATGATATTTTCGATAAAAACGA  
AAAAGAAGTACGTTTTATTTCGTTGGGGATTTTCTGGAAAAAATCGTCATATTATTCTCCG  
AGTACCTATGAAAGAAATTAAGTCCATTAGACTAAAGATAGCAAAAGATATTTTACTG  
GTAACATCGCTTGTATGGATACCGTAGAACAGGGACTTATCCCTTAACTCGTCTTGAA  
GATAAT--TTGTACGTACAGCAAAGCTGTAGACAAAGCTGCAGAAATATCCAGATTCTTG  
GGTGTACCACTTTTGAATTCA

>Silene

ATGAAAAAATGGCGGTTCAATTGGATTTTGAAC-----  
-----TCTGATGATCCTT  
TTTTAGTTATAGATAGTAAGGGGGACAGTTATTCCATATATTTTGATATTGAAAATAACAT  
TTTTGATATTGATAATGACCCTGCTTTTGACTTTTTTTTAT--TTGACTTTTTTG-----  
-----TATTGTCCGAACCTCAAGAAAGCGTGACGATACCTATAATAATCATTACACGTATGA  
TACTAAATATAATTGGAATAATTACATTAATAATTCCATTGACAATTATCTTTAT-----TCTC  
AAATCAGTGTGGGAGTTCCATTCTAAGCGGTAGTGATAATTCC-----ATTTTAAAGT--  
-----GAAGGTGGAAATCTAAGAAGTATCACAAATGATAGGAATTTAACTGAAAGAG  
AAAAT-----CTTGATGTAAGTAAAAAATGAAGGATTTGTGGGTTCAATGCGACAATT  
GTTATTCCTCAAATTATAACAACCTTATATAAACCAAAAATGTACCTTTGTGAAAAGTGTG  
GATATAATTTGAAAATGAGTAGTTCAGATAGAATTGAACTTCTGATTGATCCGGAGACT

TGGAATCCTATGGATGAAGATATGGTTTCTGTGGATCCCCTCGAATTTGATTCCGGAGGA  
GGAACCTTATGAGGATCATATTAATTCTTATCAAAGACGGACAGGGTTAACTGAAGCTG  
TTCAAACAGGTATAGGTCAACTATACGGTATTCCTGTAGCAATTGGGGTTATGGATTTG  
AGTTTATGGGAGGTAGTATGGGATCGGTAGTCGGGGAAAAAATAACCCGATTGATTGAA  
TATGCTAGTAATAAATTACTACCCCTTATTATAGTATGTGCGTCTGGAGGAGCACGCATG  
CAAGAAGGAAGCTTGAGCTTAATGCAAATGGCTAAAATAGCATCTGTTTTATATGATTAT  
CAATCAAATAAAAGGTTATTCTATGTATCAATTCTTACATCTCCTACGACAGGTGGGGTA  
ACAGCCAGTTTTGGGATGTTGGGGGATATCATTATTGCCGAACCCAACGCCTACATTGC  
ATTTGCGGGTAAAAGAGTAATTGAACAAACATTGAATATTACAGTACCTGAGGGTTCAC  
AAATAGCTGAATATTTATTCCATAAGGGTTTATTTGATTCAATCGTACCACGTAAGCACTT  
AAAGGGCGTTCTAAGTGAGTTATTTCAACTGCACGGCCTTTTTCTGTAAACAAAATAA  
ATAAAGTCATGTTTACCATTCAAGCCGACGAAATTAGCAATATTATCCGCGAACGTATTG  
AAAAATATAATCGAGAAGTAAAAGTTGTAAATACCGGTACCGTACTTCAAGTGGGGTGA  
CGGCATTGCTCGTATTCACGGTCTTGATGAAGTAATGGCAGGTGAATTAGTAGAATTTG  
AAGAGAGGACAATAGGTATTGCTCTAAATTTAGAATCCAATAATGTTGGTGTGTATTAA  
TGGGTGATGGTTTGCTGATACAAGAAGGAAGTTCTGTAAAAGCAACAGGAAGAATTGC  
TCAGATACCCGTGGGTGATGCTTATCTAGGTCTGTGTTATAAATGCCTTAGCTAAACCTAT  
TGATGGTAGAGGTGAAATTTCAAGCTTCTGAATCTCGATTAATTGAATCTCCCGCTCCCG  
GTATTATTTGAGACGTTCTGTCTATGAGCCTCTTCAAACCTGGGCTTATTGCTATTGATTC  
AATGATTCCTATAGGACGAGGTGAGCGAGAATTAATTATTGGGGATAGACAGACTGGTA  
AAACAGCCGTAGCTACAGATACGATTCTCAATCAACAAGGGCAAATGTAATATGTGTA  
TATGTAGCTATTGGTCAAAAAGCATCTTCTGTGGCGCAGGTAGTTAATATGTTCCAGGA  
AAGGGGAGCAATGGAATACACTATTGTGGTAGCCGAAATGGCAGATTCCCCGCTACA  
TTACAGTACCTCGCCCCTTATACCGGAGCGGCACTGGCGGAATATTTTATGTACCGCGA  
GCGACACACTTTAATAATTTATGATGATCTTTCCAAACAAGCACAAGCTTATCGACAAA  
TGTCTCTTCTATTACGAAGACCGCCGGCCGTGAAGCGTACCCAGGAGATGTTTTTTAT  
TTGATTCAAGACTTTTGGAAAGAGCTGCTAAATTAAGTTCTTTTTTATAGGTGAAGGAAG  
TATGACCGCTTTACCAATAGTCGAAACCCAATCAGGGGATGTTTCGGCCTATATTCCTAC  
TAATGTAATTTCCATTACAGATGGACAAATATTTTTATCCGCTGATCTATTCAATGCTGGA  
ATCAGACCAGCCATTAATGTGGGTATTTCTGTTTCTAGAGTAGGGTCCGCGGCTCAAAT  
TAAAGCCATGAAACAAGTAGCTGGTAAATTAATAATAGAACTGGCACAATTCGCAGAA  
TTAGAAGCCTTTGCACAATTTGCTTCTGATCTTGATAAAGCTACTCAGAATCAATTGGC  
ACGAGGTCAACGATTACGTGAATTGCTTAAACAACCCCAATCTGCCCTCTTACGGTAG  
AAGAACAGATAATGACTATTTATACCGGAACGAACGGTTATCTTGATTATTAGAAATTG  
GGCAGGTAAGGAAATTTATTGTTGAATTACGTACTTACTTAAAAACGAACAAATCGCAA  
TTCCAAGAAATTATCTCTTCTACCAAAAACATTTACTGAGGAGGCAGAAGCCCTTTAAA  
AGAAGCTATTCAAGAACAGATGGAACGCTTTTAAATTCAGGAACAAGTAATGATAATCA  
ATCCTACCGCTTCTGGTCTGTTTCCACACGTGAAAAAAAACCCTGGGGCGTAT  
CGCTCAAATTATTGGTCCCGTACTGGACGTAGCTTTTCTCCAGGCAAAATGCCAAATA  
TTTACAACGCTCTGGTAGTTAAGGGTCGCGATACTGCTAGCCAACCAATTAACGTGACT  
TGTGAGGTACAACAATTATTAGGAAATAATCGAGTTAGAGCTGTAGCTATGAGTGCTAC  
AGATGGTCTAACGCGAGGAATGGAAGTTATTGATACAGGAGCTCCCCTAAGCGTTCCA  
GTTGGTGGAGCAACTCTTGACGAATTTTTAACGTGCTTGGGGAGCCCGTTGATAATTT  
AGGGCCTGTAGGGACTCATAACAATCCCTATTATAGATCTGCGCCCGCCTTTACTC

AGTTAGATACAAAATTATCCATTTTTGAAACAGGAATTAAGTGGTAGATCTTTTAGCCC  
CTTATCGCCGTGGAGGAAAAATAGGACTCTTCGGCGGAGCTGGAGTGGGTAAAACAGT  
ACTCATTATGGAATTGATCAACAATATTGCAAAAGCTCATGGGGGCGTATCCGTATTTGG  
TGGAGTAGGTGAACGTACTCGTGAAGGAAATGATCTTTACATGGAAATGAAAGAATCT  
GGAGTTATCAATGAACAAAATATTGCAGAATCAAAGTGGCTCTAGTCTACGGTCAAAT  
GAACGAACCTCCGGGGGCACGCATGAGGGTTGGTTTACTGCCCCTAACTATGGCGGAA  
TATTTCCGAGATGTTAATGAACAAGACGTACTTCTATTTATCGATAATATTTTTCGTTTTCG  
TTCAAGCAGGATCTGAAGTATCTGCCTTGTGGGTAGAATGCCTTCCGCTGTAGGCTAT  
CAACCTACTCTTAGTACTGAAATGGGTCTTTACAGGAAAGAATTACTTCCACAAAGGA  
AGGGTCCATAACTTCGATTCAAGCAGTTTATGTACCTGCAGATGATTTGACCGATCCCG  
CTCCTGCTACGACATTTGCACATTTAGACGCTACTACTGTACTATCAAGAGGATTAGCCG  
CCAAAGGAATCTATCCAGCGGTGGATCCGTTAGATTCAACATCAACCATGCTCCAACCT  
CGGATCGTTGGCGAAGAGCATTATGAAATTGCGCAAAGAGTTAAGGAAACCTTACAAC  
GTTACAAAGAACTTCAGGACATTATAGCTATCCTTGGGTGGACGAATTATCTGAAGAA  
GACCGTTAACCGTAGCAAGAGCGCGAAAAATTGAGCGTTTCTTATCACAACCGTTTT  
TCGTAGCAGAAGTATTTACAGGATCCCCAGGAAAATATGTTGGTCTAGCAGAAACAATT  
AGAGGATTTCAATTGATCCTTTCCGGAGAATTGGACGGTCTTCTGAGCAAGCCTTTTA  
TTTGGTAGGTAACATCGATGAAGCTACCGCGAAAGCTATGAACTTA-----A  
TGACCTTAAATCTTTGTGACTGACCCCTAATCGAATTGTTTGGAAATCAGAAGTAAAA  
GAAATTATTTTATCTACTAATAGTGGTCAAATTGGCGTATTGACAAACCACGCCCTATT  
GCCACAGCTGTAGATATAGGTATTTGAGAATACGGCTTAACGACCAATGGTTAACAAT  
GGCTCTGATGGGCGTTTTGCTCGAATAGGCAATAATGAGATCACTGTTTTAGTAAATG  
ATGCTGAGAAGGGTAGTGACATTGATCCACAAGAAGCTCAGCAAACCTTGAAATAGC  
AGAAGCTAATTTGAAGAAAGCTGAAGGAAAGAGACAAATAATTGAAGCAAATCTAGC  
TCTCAGACGAGCTAGGACACGAGTAGAGTCTATCAATCCGATTTCAATGAAAAATATAA  
CCGATTCTTTTCGTTTTATTGGGTCCTGGCCATCCGCCGAGAGTTTCGGGGTTAATACC  
GATATTTTAGCAACAAATCTAATAAATCTCAGTGCAGTGATTGGTGTATTGATCTTTTTT  
GGAAAGGGAGTGTTAAGTGATTTATTAGATAATCGAAAACAGAGGATCTTGAATACTAT  
TAGAAATTCAGAAGAACTGCGTGGAAGGGCCATTGAACAATTGGAAAAAGCCCGGGT  
TCGCTTAAGGAAAATAGAAATAGAAGCGGATCAGTTTCGAGTGAATGGATATTCCGGAA  
ATAGAACGAGAAAAAATGAATTTGATTAATTCAACTTATAAACTTTAGAACAATTAGA  
AAATTACAAAATGAAACCATTCATTTTGAACAACAAAGAGCTATTAATCAAGTCCGAC  
AACGGGTGTTCCAACAAGCTTTACAGGGAGCTTTAGGAACTCTGAATAGTTGTTTGAA  
CAACGAGTTACATTTACGTACCATCAATGCTAATATTGGAATGTTTGGGGCGCTGAACG  
AAAAAAGTATGATGAATCCACTGATTTCTGCCGCTTCCGTTATTGCTGCCGATTGGCT  
GTAGGGCTTGCTTCTATTGGACCTGGAGTTGGTCAAGGTACTGCTGCAGGCCAAGCTG  
TAGAAGGTATTGCGAGACAGCCTGAGGCAGAGGGAAAAATCCGGGGTACTTTATTACT  
TAGTTTAGCTTTTATGGAAGCTTTAACAATTTATGGATTGGTTGTAGCATTAGCCCTTTTA  
TTTGCAAATCCTTTTGTATGAATATTCTACCATATTCAATCAACACACTAAAGAAGTTAT  
ATGATATGTCTGGTGTGGAAGTAGGTCAACATTTTTATTGGCAAATAGGGGGTTTCCAA  
ATCCATGGTCAAGTACTTATAACTTCTTGGGTGTAATTGCTATCTTACTAGGTTTCAAGCT  
GCTATAGCTGCTCGTAATCCACAAACCATTCCGACAGGGGGTCAAGAAATTTTTGGAATA  
TGTCCTTGAATTTATTTCGAGACGTGAGTAAAACCAAATTGGAGAAGAATATCGCCCTT  
GGGTTCCCTTTATTGGAACCTATGTTTCTATTTATTTTTGTTTCTAATTGGTCAGGGGCCCT

TTTCCCGTGGAAAATCATAACAGTTACCTCACGGGGAGTTAGCCGCACCCACGAATGATA  
TAAATACTACTGTTGCTTTAGCCTTACTTACATCAGTAGCCTATTTCTATGCGGGTCTTAC  
AAAAAAGGGTTAGGTTATTTTAGTAAATACATTCAACCAACCCCAATTCTTTTACCCAT  
TAACATTTTAGAAGATTTACAAAACCTCTATCACTTAGTTTTCGACTTTTTGGAAATAT  
ATTAGCGGATGAATTAGTAGTTGTTGTTCTTGTTCCTTTAGTACCCTTAGTGGTTCCTATA  
CCTGTCAATGTTTCTCGGATTATTTACAAGTGGGATTACAGGCTCTTATTTTTGCAACTTA  
GCCGCAGCTTATATAGGCGAATCCATGGAGGGTCATCATATGATATTTCAACTTTAGAA  
CGTATTTTACTCATATTTGTTTTCAACGGTTTCCGTGGTAATTACACTCCATTTGATAA  
CTTTAGTAGTCAATGAAAAAGTACGGCTATCTAATTCATTAGAAAAAGGCATGATAGTT  
ACTTTTTTATCCCTAACGGGATTATTAATTACGCGTTGGGTTTATTGGAAACATTTTCCAT  
TAAGTGATCTATATGAATCGTTAATCTTCCCTTCCCTGGAGTTTTTACATTATTCATATGATT  
CCA-----TATTTTAAAAACAAAATAATTTAATAACTGCACCAAGTGCTCTTTTTGCC  
AAGGATTTGCTACTTCAGGCCTTTTAAACGGAAATGCACCAATCTTCAATATTAGTACCC  
GCTCTTCAATCCCATTGGTTAATGATGCACGTAAGTATGATGTTACTAGGTTATGCCGCT  
CTTTTATGCGGATCATTGCTATCAGTAGCACTTCTAATCATTCTATTTCAAAAAGTTATCA  
CCTTTTTGTAAAAAGAAAAGAAATTCACACATGAACGAAAAAGACAATATTTTAGA  
A--GTTTCAGCCTTGTGTGTTAAAAATTATTATAGATCTCAATTGATTGACCAACTGGAT  
CATTGGAGTTATCGTGTTATTAGTTTAGGATTTATCCTTTTAAACCATAGGTATTCTTTCAG  
GAGCAGTATGGGCAAACGAGGCGTGGGGCTCATATTGGAATTGGGACCCAAAGGAAA  
CTTGGGCATTATTACTTGGACTATATTTGCAATTTATTTGCATATTAGAACAAATAAAAA  
TTTTCAGGGTGCAAATTCTGCAATTGTAGCTTTTATAGGTTTTCTTATAATTGGATATGC  
TATTTTGGAGTCAATCTCTTAGGAATAGGGCTACATAGTTATGGTTCATTC-----TTAGA  
AAAAAGAAAAAAGTTATTACTTTTCTATATCTTGTATCTATAGTCTTTTTACCTTGGTGC  
ATCGCGTTATCATGTCAAAAAAGTCTGGAATCCTGGGTTACTAATTGGTGGAACTAA  
GAAATTGGACACTTTTTTGAATGATATTCAAGAAAAGAGTTTTCTTGAAAAATTCATGG  
AATTAGAAGAGCTGCGCTTGTGGACGAAATGGTAAAGGAATACCCGCAAACGCATCT  
ACAAGAACTTCGTATCGGAATCCACAACGAAACGATTCAATTTATCAAGATGTATAATG  
AGGATTGTATCCATATGATTTTACAATTCTCAACAAATATAATATGTTTCTTTATTCTAAGC  
AGTTATTCTATTCTGGCGAATAAAGAACTTATTCTTATTAATTCTTGGGTTCAAGAATTCC  
TATATACTTAAGTGACACAATAAAAGCTTTTTCTATTCTGTTATTAACGGATTTCTGTGT  
TGGATTTCAATTCGCACCAGGGTTGGGAATAATGATTAGCTCTATCTTCAAAGATTTTGG  
GTTTGCTCATAATGATCCAATTATATCGGTTCTTGTTCATTTTGCCAGTCATTCTTGAT  
ACAACTTTTAAATATTGTATTTTCCACTATTTAAATAGTGTATCCCATCACTTGTAGTGA  
TTTATCATTCACTGAAAAGAATGCCTCTAGGTATACCAAAGGTCAATTTTTCTTTTATAG  
AC---ACGAACTCAACTTGGACGGAAATACAGAACTTTCTTTATGAAAAAGGATACTTT  
TTATTTTCGAGGAAATTAACCCAAAGTACGCGTGAAATTACAGGTCTTCTACTATGT  
CTCAGTAACGAGAATGAGTACAAAGATTTTACTTTATTTATTAATTCTGCAGGCGGCAA  
GACAAGAGATGCTCTACCGATATACGACACGATGCAAGTAGTGGCACCTGCGGTACGT  
ACAGTAGGTATCGGGGTAGCTGCTTCAATGGGAGCGCTTATACTGCTGGGAGGAGAAA  
TGGGCAAACGGGCAGCATCCCCTAATTGTAGGATAAAGATTCATCTACCTGCTTCGAAT  
TCTGATTCTGATTCTGAATTCTGATTCTGAATTCTGATTCTGAATGAAATGTTGCGCTTGC  
GAAGAATTCTGAAAGATTTATGCAAAAAGAACACAAAACCCATATCGGTTATAGAAA  
AAGATCTAGCTAGGGGTTTTATTTATGTCATCAGAAGAAGCCAAAGCGTATGGAATTATT  
G A T A C G C T A C A T T A C A A





GGTGCTAACGATTTAATAACTATCTTTGTAGCTCCAGAATGTTTCAGTTTATGCTCCTAC  
CTATTATCTGGATATACCAAGAAAGATGTACGGTCTAATGAGGCTACTACGAAATATTTA  
CTCATGGGTGGGACAAGCTCTTCTATTCTGGTTCATGGTTTCTCTTGGCTATATGGTTCA  
TCCGGTGGAGAGATCGAGCTTCAAGAAATAGTGAACGGTCTTATCAATACACAAATGTA  
TAACTCCCCGGGAATTTCAATTGCGCTTATATTCATCACTGTAGGAATTGGGTTCAAGCT  
TTCCCCAGCCCCCTTCTCATCAATGGACTCCTGACGTATACGAAGGATCTCCCCTCCAG  
TCGTTGCTTTTCTTTCTGTTACTTCGAAAGTAGCTGCTTCAGCTTCAGCCACTCGAATTT  
TCGATATTCTTTTATTTCTCATCAAACGAATGGCATCTTCTTCTCGAAATACTAGCTAT  
TCTTAGCATGATATTGGGGAATCTGATTGCTATTACTCAAACAAGCATGAAACGTATGCT  
TGCATATTCGTCCATAGGTCAAATCGGATATGTAATTATTGGAATAATTGTTGGAGACTC  
AAATGATGGATATGCAAGCATGATAACTTATATGCTGTTCTATATCTCCATGAATCTAGGA  
ACTTTTGCTTGCATTGTATTATTTGGTCTACGTACCGGAACTGATAACATTCGAGATTAT  
GCAGGATTATACACGAAAGATCCTTTTTTGGCTCTCTCTTTAGCCCTATGTCTCTTATCC  
CTAGGCGGTCTTCTCCACTAGCAGGTTTTTTTCGGAAAACCTCTATTTATTCTGGTGTGG  
GTGGCAGGCAGGCCTATATTTATTGGTTTTAATAGGACTCCTTACGAGCGTTCCTTCTAT  
CTACTATTATCTAAAAATAATCAAGTTATTAATGACTGGACGAAACCAAGAAATAACCC  
CTCACGTGCGAAATTATAGAAGATCCCCTTTAAGATCAAAGAATTCCATCGAATTGAGT  
ATGATTGTATGTGTGATAGCATCTACTATAACCAGGAATATCCATGAACCCATTATTGCAA  
TTGCTCAGGATACCCTTTTTATGTTTATACTTTATGAATATGACATTTTCTGGGCATTTTAA  
ATAATATCAAGCGTTATTCCTATTTTAGCATTCTATTTTCCGGAATTTTAGCGCCTAGTA  
GCAAAGGTCCAGAGAACTTTCTAGCTACGAATCGGGTATAGAACCGATGGGGGATGC  
TTGGTTACAATTTAGAATCCGTTATTATATGTTTGCTCTAGTTTTTGTGTTTTTGATGTT  
GAAACAGTTTTTCTTTATCCATGGGCAATGAGTTTCGATATATTGGGCGTATCCGTATTTA  
TAGAAGCTTTAATTTTCGTGCTTATCCTAATTGTTGGTTTAGTTTATGCATGGCGAAAAG  
GAGCATTGGAATGGTCTACGAATTCTTTTCTTGGTTAACAACAATTGTCGTTTTACCCA  
TATTTGCAGGTTCTTTAATGTTAATTCCTCCCTCATAGAGGAAATAAGGCAACTCGGTGGT  
ATACAATAGGCATATCTACTCTAGAGCTACTTCTAACAACCTACGCGTTTTGTTATCATT  
TCAACCAGACGACCCATTAATCCAACCTGGCCGAAGATTATAAATGGATCAACTTTTTTG  
ATTTCCACTGGAAATTAGGAATAGATGGACTTTCGATAGGACCCGGTTTACTGACGGGA  
TTCATCACTACTTTAGCTACTTTAGCGGCTTTTCCAGTACTCGGGATTCCCGATTATTC  
ACTTTCTGATGTTAGCAATGTACAGTGGTCAAATGGGCTCATTTTCATCCCGAGATCTTT  
TACTTTTTTTCATAATGTGGGAATTAGAATTAATCCTGTTTATCTACTTTTATCCATGTGG  
GGAGGAAAGAAACGTCTCTATTTCAGCTACTAAATTTATTTGTATACGGCCGGGGGTTT  
CATTTTTCTATTAATGGGAGTTTTGGGTGTTGGTTTATATGGTTCTATTGAACCTACTTTA  
AGTTGGGAAACATTAGTTAATCAATCGTATCCCCTGGCATTAGAAATAATATTCTATATTG  
GATTTTTGTGTTTTGCTGTAAAATTACCAATTATACCTTTACATACATGGTTACCAGA  
TACCCATGGGGAAGCTCATTACAGTACTTGTATGCTTCTAGCGGGAATCTTATTAATAAAT  
GGGAGCGTATGGGTTGGTTCGGATCAATATGGAATTATTACCTCATGCTCATTTCGATATT  
TTCGCCTTGGTTGATAATAATAGGCACAGTGCAAATAATCTATGCAGCTTTAACATCTCC  
TGGACAACGCAATTTAAAAAAAAGAATAGCCTATTCTCTGTATCTCATATGGGTTTTAT  
AATTATAGGAATTAGTTCTATAACTGAAACGGGACTTAAACGGAGCCATTTTACAAATCAT  
TTCTCATGGATTTATTGGTGCTGCACTTTTTTTCTTAGCAGGAACTAGTTACGATCGAAC  
ACGTCTTGTATCTCGACGAAATGGGCGGAATTGCTATTCCAATGCCAAAAATTTTAC  
ACTATTCAGTAGTTTTTCCATGGCATCCCTTGCATTACCGGGCATGAGTGGTTTCATTGC

CGAATTAATAGTCTTTTTTTGCAATAATTACAAGCCAAAAATTACTTTTAATGCCAAAGAT  
ACTAATTTCTTTTGGAAATGGCAATTGGAATGATATTAACCTCTATTTATTCATTATCTATGT  
TACGTCAAATGTTTTATGGATACAAGTTATTTAATATTACAAACTCTATTTTTTTTGATTCT  
GGTCCACGAGAATTTTTTGTTCGACTTCTTTCTTTCTACCTGTACTAGGTGTTGGCGTT  
TACCCGGATTCGTTCTTTCATTATCCGCTGATAAGGTAGAAGCTATTTTATCAAACTTTT  
TTCTAGATATGATACTCGAACATGTAAGTTGTTTTGAGTGCTTATTTATTTTCTATCGGAAT  
CTATGGATTAGTCACGAGTCGAAATTTAGTTTCGGGCTCTGATGTGTCTTGAACCTATATT  
GAATGCAGTTAATCTAAATTTGTAAACATTTTCTGATTTTTTTTGATAGCCGCCAATTA  
AGGAAATATTTTCTCAATTTTGTATAGCTATTGCAGCCGCTGAAGCAGCAATTGGGCT  
TGCTATTGTTTCTCAATTTATCGTAACAGAAAATCAACTCGTATCAATCAATCGAATTTA  
TTGAATAAAATGGAACATATATACCAATATGCATGGATCATAACCTTCATTCCACTCCCA  
GTTCTTTCTTAATAGGAGTGGGACTTCTCCTTTTTCCAACAGCAACAAAAAGTTTTTCG  
ACGGATGTGGGCTTTTTCTAGTATTTCTTTGTTAACTATAGCTATGATTTTTTCGATGACG  
CTGGCAATCAACAAATAAATAGTAATTCATTTATCAATATGTATGGTCTTGGACTATTA  
ATAATGATTTTTCTTTTGAATTTGGCTATTTGCTCGATCCACTTACTTCTATTATGTTAGTT  
TTAATAACTACTGTTGCAATTTTGTCTTATTTATAGCGATAATTATATGTGTCATGATCA  
GGGATATTTAAGATTTTTTGCTTATATGAGTTTTTTAATACTTCCATGTTAGGATTAGTTA  
CTAGTTCAAATTTAATACAAATTTATATTTATTGGGAATTAGTTGGAATGTGTTTCGTATCT  
ATTAATAGGTTTTTGGTTTACACGCCCCATTGCCGCAAATGCTTGTCAAAAAGCGTTTG  
TGACTAATCGTGTAGGAGATTTTGGCTTATTATTAGGAATTTTAGGTCTTTATTGGGTAA  
CAGGTAGTTTCGATTTTCGCGATTTGTTTCAAATTTTACTAAC---GAAGTTAATATTTTA  
TTTTGTATTTTATGTAATTTTCTTATTTTCTGGTGCAGTTGCAAAATCTGCCCAATTC  
CTCTTCATGTATGGTTACCCGATGCTATGGAGGGGCTACCCCGATTTACAGCTCTCATA  
ATGCTGCGACCATGGTTCGAGCTGGTATTTTTTTAGTTGCTCGTCTTTTTCTCTTTTCAT  
AGTTATACCTTATATAATGTATGTAATCGCTTTTATAGGTATAATAACTTTATTTTTAGGAG  
CTACCTTAGCTCTTGCTCAAAAAGATATTAAGAGAAGTTTAGCTTATTCTACAATGTCTC  
AATTGGGTTATATGATGTTAGCCCTAGGTATGGGTTCTTATCGAGCTGCTTTATTTCAATT  
GATTACTCATGCTTATTCAAAGCTTTATTGTTTTTAGGATCCGGATCCCATTATTCATTCA  
ATGGAAACGCTTGTTGGATATTCTCCCGATAAAAATCAGAATATGGTCTTATGGGAGG  
ATTAACAAAACATATCCAATTACAAAACCTGCTTTTTTAATAGGTACGCTTTCTCTTTG  
TGGTATTCCGCCTCTTGCTTGTTTTTGGTCCAAAGATGATATTCTAATGATAGTTGGTT  
GTATTCGCCGATTTTTGCAATAATAGCTTATTTACAGCCGGATTAACCGCTTTTTATATG  
TTTCGAATCTATTTTCTTACGTTTGATGGGCATTTAAACCTTTATTGTAAAAATTATAGTG  
GAAAAAAAACATTTCTTTCTATTCAATGTCTCTGTGGGGTAAAGATGAATTGAAAA  
AATTAATAAAAATTTAGTTCCCTTATTAACAAGGAATGTTTTTAAG---CAAATAAAAA  
TTTTATACATATCCTCCTGAATCGGAGGATACTATTCTATTTCCCTCTCATTTGATTGATTGT  
GTTTACTTTTTTCATTGAATTAATTGGAATTCGTTTGGATTGGATATATTAACATAATGG  
TTAACTCCACCCATAAATCCTTTACATTCACCTTTGAATAAATTCTGTTGATTGGTATGAAT  
TTACAATAAATGCAACTTTATCAGTTAGTATAGCTTGTTTGGGAATATTTATAGCTTTTTT  
TTTATATAAACCTGTTTATTCATCGTTAAAAAATTTTTATTTAATAAATTCATTTGATTCCT  
TTTGGAAATAATCTAATAATTTTTATTTATAATTTGGTCTTCGAGCCGTGGTTATATTGATGAT  
TTTTATACAACATATTTTATTAACGGTGTAAGAGGATTGGCTGAGTTAGTTTCTTTTATTG  
ATAGACTATTAATTGATGGAATTCCAAATGCATTTGGTATTACAAGTTTTTTTTGTAGCCG  
AAAGTATTAATATATAGGAGGGGGT---CGCATCTCCTCATATCTTTTTTTGTATTTATTTT

ATGTATTTATTTTTTTTTTTTTTTTTTTTTTTTTTTTATGGATTACCTGGACCAATACATGATTTTCTTT  
TAGTCTTTCTGGGAACAGGTCTTATATTAGGCGGTCTAGGAGTAGTATTATTTAACAATA  
CAATTTTTCCGCCTTTTCGTTGGGGTTGGTTCCTTGTTTTGTATATCTTTATTTTATATTCTC  
GCCAACTCGCAGTTTGTAGCTTCTGCACAACCTCTTATTTATGTGGGAGCTATAAATGTT  
TTAATAATATTTGCTGTAATGTTTCATGAATGGGCCAGAATATGACACAAATTTACGTCTG  
TGGACGGTTGGGGATAACATTACTTCGTTGATTTGTACAAGTCTTTTTTTTTTTTTTAATAA  
TTATTACTCTAAATACCTCATGGTATGGTATTATTTGGACTACAAAATCAAACCAGATTCT  
AGAACAAGATTTGATAACTACTAGTCAACAAATTGGAATTCATTTATCAACAGATTTTTT  
TCTTCCCTTTGAACTCATTTCAATAATTCTTTTAGTTGCTTTAATAGGCGCAATTGCTATC  
GCGCGTCAAATGACTGTACCAACTACAAGAAAAGACCTCATGATAGTTAATATGGGGC  
CTCACCACCCATCAATGCATGGCGTTCTACGACTTATTGTTACTTTAGACGGCGAAGAT  
GTTATTGACTGTGAACCTATATTGGGTTATTTACACAGAGGGATGGAGAAAATTGCTGA  
AAACCGAACAATTATACAGTATCTTCCTTATGTAACACGTTGGGATTATTTAGCTACTAT  
GTTACAGAAAGCAATAACGGTAAATGGACCCGAGCAATTAGGCAATATTCAAGTACCT  
AAAAGAGCTAGCTATATCAGAGTTATTATGTTGGAGTTAAGTCGTATAGCTTCTCATTG  
TTATGGCTCGGCCCTTTTATGGCAGATATTGGGGCACAAACCCCTTCTTCTATATTTT  
AGAGAAAGAGAATTAGTATATGATTTATTTGAAGCTGCCACTGGTATGAGAATGATGCA  
TAATTTTTTCGTATTGGCGGAATAGCTGCCGATCTACCTTATGGGTGGATAGATAAATG  
TTAGACTTTTGTGATTATTTTTTAACGGGACTTACTGAATACCAGCAACTGATTACGCG  
AAATCCTATTTTTTTAGAACGAGTTGAAGGAGTTGGCTTTATTTCCGAAGAAGGGGGCAA  
TAACTGGGGCTTATCAGGACCAATGCTACGATCTTCAGGAATACAATGGGACCTTCGT  
AAAGTTGATCATTATGAGTGTTATGATGAATTTGATTGGGACGTCCAATGGCAAAAAGA  
AGGGGATTCATTAGCTCGTTATTTAGTACGAATAGGTGAAATGGCAGAATCCATCAAAA  
TTATTCAACAAGCTCTAGAAGGAATCCGGGGGGTCCCTATGAGAATTTAGAAATTCGA  
CGCTTTGATAGGATAAAATATCCTGAATGGAATGATTTTACTATCGATTATTAGTAAA  
AAACCGTCTCCTACTTTTGAATTGTCGAAACAAGAAATTTATGTAAGAGTCGAAGCCCC  
AAAGGGGGAATTGGGGATTTTTTTGATAGGGGATCAGAGTGTTTTTCTTGGAGATGG  
AAAATTCGCCCGCCCGGTTTTATCAATTTGCAAATTCCTCCTCAGTTAGTTAAAAAAT  
GAAATTGGCTGATATTATGACAATATTAGGTAGCATAGATATCATTATGGGAGAAGTTGA  
TCGTATGTTCCCTATGATAACCGGGTTCATCAATTATGGTCAACAAACAGTACGAGCGG  
CAAGGTATATAGGTCAAGGTTTTATGATTACCTTATCTCATGCCAATCGTTTACCTGTAAC  
TATTCAATATCCTTATGAAAAATTGATAACCTCAGAGCGGTTTCGTGGTCAATACACTT  
TGAGTTTGATAAATGATTGCTTGTGAAGTATGTGTTTCGTGTATGTCCAATAGATTTACC  
TGTTGTTGATTGGAAATTAGAAAAAGATATTCGAAAAAAACGATTGCTTAATTACAGCA  
TTGATTTCCGAATCTGTATATTTTGTGGTAATTGTGTTGAGTATTGTCCAACAAATTGTTT  
ATCACTGACTGAAGAATATGAGCTTTCTACTTATGATCGTCATGAATTAATTATAATCA  
AATTGCTCTGGGTCGTTTACCAATACCAATAACTGATGATTACACAATTCGAACTTTTT  
GAATTCA-----ATGCAGGGTCGTTTGTCTGCTTGGCTAG  
CCAAACATGGGCTAGTTCATAGATCTTTAGGCTTCGATTACCAAGGAATAGAGACTTTA  
GAAATTAAGCCCGAAGATTGGCATTCCATTGCTGTTATTTTATATGTATATGGTTACAATT  
ATCTACGTTCTCAATGTGCCTATGACGTAGCCCCAGGAGGGCTGTTATCTAGTGTGTATC  
ATCTTACGAGATTAGAGTATGGTGCGGATCAACCAGAAGAGGTATGCATAAAAGTCTTT  
GCTCCAAGGAGTAATCCTAGAAATCCGTCCGTGTTCTGGGTTTGGAAAAGCGCGGATT  
TTCAAGAAAGGGAATCTTATGATATGTTGGGAATTTTATATGATAACCATCCGCGCCTAA

AACGTATTTTAATGCCCGAGAGTTGGGTAGGATGGCCTTTACGTAAGGATTATATTGTAC  
CCAATTTTACGAAATACAAGATGCGTAT-----

-----  
ATGAATTCTATTGAGTTTCCACTACTTAATCAAATAACCCAAAACCTCAGTTATTTCAACT  
ACATCAAATGATTTTTCAAATTGGTCAAGACTCTCTAGTTTATGGCCGCTTCTCTATGGG  
ACCAGCTGTTGTTTCATTGAATTTGCTTCATTAATAGGCTCGCGATTTCGACTTTGATCGT  
TATGGGCTGGTACCAAGATCGAGCCCTAGACAAGCGGACCTAATTTTAACAGCCGGTA  
CAGTAACAATGAAAATGGCGCCTTCTTTAGTGAGATTATATGAGCAAATGCCCGAACCT  
AAATATGTTATTGCTATGGGAGCGTGTACAATTACCGGGGGGATGTTTCAGTACCGATTCC  
TACAGTACTGTTTCGGGGGGTTCGATAAACTAATTCCCGTGGATGTCTATTTGCCGGGCTG  
TCTCCAAAACCGGAAGCAGTTATAGATGCTATAACAAAGCTTCGTAAGAAAATATCTA  
GGGAAATTTATCAAGATAGGATTAAGTCT-----AAAAATCTATGTTTTACTATCAACCACA  
AGTTTCGGGTTGGGCGGAGTATTCATACGGGAATTATGATCAAGGATTACTTTATAAAT  
CTCCATTTACTTCAGAGATTCTTCCCGAAACATTTTTCAAATACAAAATCCAGTATCTT  
CTCAGGAATTAGTGAATATGCAAACCTATAAATACTTTTTCTTGATAAAAGAACAGATTA  
CTCGATTCATTTCCGTCCTCGTTCATGATATATATAATGACTAAGCCCTTCAGTTCAAATGC  
CTATCCCATTTTTGCCAGCAAGGCTATGAAAATCCGCGAGAAGCGACTGGACGCATT  
GTATGTGCCAATTGCCATTTAGCTAACAAGCCCGTGGATATTGAGGTTCCCAAACGAT  
TCTCCGGATACTGTATTTGAAGCAGTTGTTTCGAATTCCTTATGATATGCAATTAACA  
AGTTCTTGCTAACGGCAAGAAAGGGGGATTGAATGTCGGGGCTGTTCTTATTTTACCTG  
AGGGATTTGAATTAGCCCCAGCCGACCGTATTTCTCCAGAGATGAAAGAAAAGGTTCG  
AAATCTTTCTTTTCAGAGTTACCGTCCCAATAAAAAAATATTATTGTGATAGGTCCTGT  
TACTGGTCAAAAATATAGTGAAATCACCTTTCCTATTCTTTCCCGGACCCTGCTACTAA  
GAAAGATATTTACTTTTTAAATATCCGATATATGTAGGTGGTAACAGAGGGAGGGGTC  
AGATTTATCCTGACGGAAGCAAGAGTAATAATACGGTTTATAATGCCACAGCAACAGGT  
ATAGTAAAGACAATTTTACGAAAAGAAAAGGCGGATACGAAATAAGCATAGTGGATG  
CCTTGGATGGACGTGCAGTGGTTGATATTATCCCTCCAGGACCAGAGCTTCTTGTTTCA  
GAGGGTGAATCTATCAAACCTTGATCAACCATTAACGAGTAATCCTAATGTGGGTGGATT  
TGGTCAGGGAGACGCAGAAATAGTCCTTCAAGATCCATTACGCGTACAAGGTCTTTTG  
GTCTTCTTTGCATCTGTTATTTTGGCACAAATTTTTTTGGTTCTTAAAAAGAAACAGTTT  
GAGAAGGTTCAATTGTCCGAAATGAATTTTCATGAGTAAAGTCTATGATTGGTTTCGAAGA  
ACGCCTCGAGATTCAGGCGATTGCGGATGATATAACTAGTAAATATGTTCCCTCCGCATGT  
AAACATTTTTTATTGTCTAGGAGGAATTACGCTTACTTGTTTTTTAGTACAAGTAGCTAC  
GGGGTTTGCTATGACTTTTTACTATCGCCAACTGTTACGGAGGCTTTCGCTTCTGTTCA  
ATATATAATGACGGAAGCTAATTTGGTTGGTTAATACGATCAGTTTCATCGGTGGTCCGC  
AAGTATGATGGTTCTAATGATGATTCTACATGTATTTTCGTGTGTATCTTACCGGTGGCTTT  
AAAAACCTCGCGAATTGACTTGGGTTACAGGCGTGGTTCTGGCTGTATTGACCGCAT  
CCTTTGGTGTAACCTGGTTATTCCTTACCTCGGGACCAATTGGTTATTGGGCAGTCAAA  
ATTGTAACAGGTGTACCTGACGCTATTCCTGTAGTAGGATCGCCGTTGGTAGAGTTATTA  
CGTGGAAGTGCTAGTGTGGGACAATCCACTTTGACCCGTTTTTATAGTTTACATACTTTT  
GTATTGCCTCTTCTTACTGCCGTAATTTATGTTAATGCATTTTTTAAATGATACGTAAACAGG  
GTATTTCTGGTCCCTAATGGGAGTAACAAAAAACCGAACTTGAATGATCCCGTATTA  
AGGGCTAAATTGGCAAAAGGGATGGGTGATAATTATTATGGAGAGCCCGCATGGCCTAA  
TGATCTTTTATATATTTTTCCCGTCGTAATTTTCGGTACTATTGCATGTAACGTAGGCTTA

GCGGTTTTAGAACCATCAATGATTGGTGAGCCAGCGGATCCATTTGCAACTCCGTTGGA  
AATATTACCTGAATGGTATTTTTTTCCCGTATTTCAAATACTTCGTACAGTACCAAATAAG  
TTATTAGGCGTTCTTTTAATGGTTTCAGTACCTACGGGATTATTAACAGTTCCTTTTTTAG  
AGAATGTAAATAAATCCAAAATCCATTCGTCTGCCAGTAGCTACAACCTGCCTTTTTTG  
TTGGTACCGCGGTAGCCCTTTGGTTAGGTATTGGAGCAACATTACCTATTGATAAATCTC  
TAACTTTAGGTCTTTTTATGATTGAAGTTTTTCTATTTGGAATCGTTTTAGGTCTAATTC  
TATTACTTTGGCGGGATTATTTGTAAGTGCATATTTACAATACAGACGTGGTGATCAGTT  
GGACTTTATGCCTACTCTAACTAGTTATTTTCGGTTTTTTACTAGCGGCTTTAACTATAACT  
TCCGTTCTATTTATAGGTCTGAACAAGATACGACTTATTATGGATATTGTAAGTCTCGCTT  
GGGCTGCTTTAATGGTAGTCTTTACATTTTCTCTTTCACTTGTAGTATGGGGAAGAAGTG  
GACTCATGATTATTCGTTCGCCGGAACCAGAAGTCAAAAATTTTGGTAGATAGGGATCCC  
GTAAAACGTCTTTTGAGCAATGGGCCAGACCCGGCCATTTTTCAAGAACAATAGCTA  
AAGGCCCTGAACTACTACTTGGATCTGGAACCTACATGCTGATGCTCACGATTTTGAT  
AGCCATACCAGTGATTTGGAGGAGATTTGCGGAAAAATTTTTAGTGCCCATTTTGGTCA  
ACTCTCCATCATCTTTCTTTGGCTGAGTGGTATGTATTTCCACGGCGCTCGTTTTTCTAAT  
TATGAAGCATGGCTAAGCGATCCTACTCACATTGGACCTAGTGCCCAAGTAGTTTGGCC  
AATTGTAGGCCAAGAAATATTGAACGGTGTAGTAGGCGGAGGTTTCCGAGGAATACAA  
ATAACCTCCGGATTTTTTCAGATTTGGCGAGCATCCGGAATAACTAGTGAATTACAAC  
TTATTGTAAGTCAATTGGTGCATTAGTCTTTGCAGCATTAAATGCTTTTTGCTGGTTGGTTT  
CATTATCACAAAGCTGCTCCAAAATTGGCTTGGTTCCAAGATGTGGAATCTATGTTGAA  
TCACCATTTAGCAGGACTACTAGGACTTGGGTCTCTTTCTTTGGGCGGGGCATCAAGTAC  
ATGTATCCTTACCGATTAACCAATTTCTAAATGCTGGGGTAGATCCTAAAGAGATACCAC  
TTCCCATGAATTTATCTTGAATCGGGATCTTTTGGCGCAACTTTATCCCAGTTTTGCCG  
AAGGAGCAACCCCTTTTTTACCTTGAATTGGTCAAAAATATGCGGAATTTCTTACTTTT  
CGTGGAGGATTAGATCCAGTAACTGGGGGTCTGTGGCTGACGGATATTGCACACCATCA  
TTTAGCTATTGCAATTTCTTTCTTGATAGCGGGTCACATGTATAGAACGAATTGGGGCAT  
TGGTCATAGCCTAAAAGATATTTTAGAGGCTCATAAAGGTCCATTTACAGGCCAGGGGC  
ATAAAGGCCTATATGAGATTCTAACAACGTCATGGCATGCTCAATTATCTCTTAATCTAG  
CTATGTTAGGCTCGTTAACCATTATTGTAGCTCACCATATGTATGCGATGCCCCCTTATCC  
ATATCTAGCTACTGACTATGGTACCCAACTTTCATTGTTTACACATCACATGTGGATTGG  
TGGATTTCTCATAGTTGGTGTCTGCTGCACATGCAGCCATTTTTATGGTAAGAGATTATGA  
TCCAACCTACTCGATATAACGATCTATTAGATCGTGTCTTAGACATCGTGATGCAATCATA  
TCACATCTCAACTGGGTATGTATATTTCTAGGATTTACAGTTTTGGTTTTATATATTCATAA  
TGATACCATGAGCGCTTTAGGGCGTCCCAAGATATGTTTTTCCAGATACCGCGATAACAATT  
ACAACCCGCTCTTCGCTCAATGGATACAGAACATCCATGCTGTTGCGCCTAGCGCAACG  
GCTCCAGGCGCAACAGAGGGCACTAGTTTACTTGGGGGGGTGGTGATTTAGTAGCAG  
TGGGTGGCAAAGTAGCTTTGTTACCCATTCCTTTAGGGACCGCGGATTTTTTGGTCCAC  
CACATTCATGCTTTTACAATTCATGTAACGGTACTGATACTTTTAAAAGGTGTTCTATTT  
GCTCGTAGCTCTCGTTTGATACCGGATAAAGCTAATCTTGGGTTTCGTTTCCCTTGTGAT  
GGGCTTGGAAGAGGGGGAAACATGCCAAGTATCCGCGTGGGATCATGTATTCTTAGGGC  
TGTTCTGGATGTACAACGCAATTTTCGGTAGTAATATTTTCAATTTAGTTGGAAAATGCAGT  
CAGATGTTTGGGGTAGTATAAGTGATCAGGGGGTGGTAACTCATATCACGGGAGGAAA  
CTTTGCGCAAAGTTCCATTAATGATGGCTTCGTGATTTCTTATGGGCACAGGC  
ATCCCAGGTAATTCAGTCTTATGGTTCTTCAATATCTGCATATGGCCTCTTTTTCTAGGT

GCTCATT TTTGTATGGGCTTTTAGTTTAATGTTTCTATTTAGCGGGCGTGGTTATTGGCAA  
GAACTTATTGAATCCATCGTTTGGGCTCATAATAAATTAAGGTTGCTCCTGCTACTCAG  
CCTAGAGCCTTGAGCATTGTACAAGGACGTGCTGTAGGAGTAACCCATTACCTTCTGGG  
TGGAATTGCCACAACATGGGCATTCTTCTTAGCAAGAATTATTGCAGTAGGAATGGCAT  
TAAGATTTCCAAGGTTTAGCCAAGGCTTAGCTCAGGACCCACTACGCGTCGTATTTGG  
TTTGGTATTGCTACCGCACATGATTTTCGAGAGTCATGATGAGATTACCGAAGAACGTCT  
TTATCAGAATATTTTTGCTTCTCACTTTGGACAATTAGCAATAATTTTTCTGTGGACTTCC  
GGAACTCTGTTTCATGTAGCTTGGCAAGGAAATTTTGAGTCCTGGGTACAGGACCCTTT  
ACATGTAAGACCTATTGCTCATGCAATTTGGGACCCTCATTTTGGTCAACCGGCTGTGG  
AAGCCTTTACGCGGGGGGGTGTCTTGGCCCAGTGAATATCGCTTATTCTGGTGTTTAT  
CAGTGGTGGTATAACCATCGGGTTACGCACTAATGAGGATCTTTATACTGGAGCTCTTTTT  
CTATATTTCTTTCTGTTATATCTTTACTGGGGGGTTGGTTACATCTACAACCGAAATGGA  
AACCGAGCGTTTCGTGGTTCAAAAATGCCGAATCCCGCCTCAATCATCACTTATCCGGA  
CTCTTCGGAGTAAGCTCCTTGGCTTGGACAGGACATTTAGTTCATGTCGCTATTCCCGG  
AGCCAGGGGCGAGTACGTTTCGATGGAATAATTTCTTAGACGTATTACCACATCCTCAAG  
GATTAGGCCCCCTTTTTACAGGTCAGTGGAAATCTTTATGCTCAAAATCCCGACTCAAAC  
AGTCATTTGTTTGGTACCTCCCAAGGAGCGGGAACGGCTATTCTAACCTTCTTGGGGG  
ATTCCATCCACAACGCAAAGTTTATGGTTAACTGATATTGCTCATCATCAATTAGCTATT  
GCATTTATTTTTCTTGTGCTGGGCATATGTATAGAACGAACTTTGGGATTGGGCACAGT  
ATGAAAGATCTTTTAGAAGCACATATTCCTCCAGGAGGGCGGCTAGGGCGGGGACATA  
AGGGTCTTTATGACACAATCAACAATTCGATTCATTTTCAATTAGGACTTGCTCTAGCTT  
CTTTAGGAGTTATAACTTCTTTGGTAGCCCAACACATGTATTTTACCTTCGTATGCGTT  
CATAGCACAAGACTTTACTACTCAAGCTGCATTATATACGCATCATCAATACATCGCAGG  
ATTCATCATGACCGGAGCTTTTGGCTCATGGAGCTATATTTTTTCATTCGAGATTACAATCC  
GGAACAGAATGAGGATAATGTATTGGCAAGAATGTTAGACCATAAAGAAGCTATCATAT  
CTCATTTAAGTTGGGCCAGTCTCTTTTTAGGGTCCATACTTTAGGTCTTTATGTTCATAA  
CGATGTTATGCTTGTCTTTGGGACTCCAGAAAAACAAATTTTGATCGAACCTATATTTGC  
TCAATGGATAACAATCCGCTCATGGTAAAACCTCATATGGGTTCGACGTCCTTTTATCCTC  
ACAAGCGGCCCGGCCTTCAATGCAGGTCGAAATATATGGTTGCCTGGCTGGTTAAATG  
CTATTAATGAG-----AATAGTAATTCTTTATTCTTAAACAATAGGGCCCGGAGACTTTTTAG  
TTCATCATGCTATTGCTCTAGGTTTACATACAACTACATTGATCTTAGTAAAAGGTGCTTT  
AGATGCCCCGAGGCTCCAAGTTAATGCCAGATAAAAAGGATTCGGTTATAGTTTTCTT  
GCGATGGTCCGGGGCGGGGCGGTACTTGTGATATTTCCGGCTTGGGACGCTTTTTATTG  
GCGGTTTTTTGGATGTTAAATACTATTGGATGGGTTACTTTTTATTGGCATTGGAAGCAC  
ATCACATTATGGCAGGGTAATGTTTCACAATTTAATGAATCTTCCACTTATTTGATGGGA  
TGGTTAAGAGATTATCTATGGTTAAACTCTTCACAACTTATCAATGGATATAACCCTTTT  
GGGATGAATAGTTTATCGGTTTGGGCGTGGATGTTCTTATTCCGGCATCTTGTTTGGGCT  
ACGGGATTTATGTTCTTAATTTCTGGCGTGGATATTGGCAGGAGTTGATTGAAACTTTA  
GCATGGGCTCATGAACGGACACCTTTGGCCAATTTGATTCGATGGAGAGATAAACCGG  
TGGCTCTTTCCATTGTGCAAGCAAGATTAGTTGGATTAGCCCACTTCTCCGTAGGTTATA  
TATTCACCTATGCGGCTTTCTTGATTGCTTCTACATCGGGCAAATTTGGTATGTCACATTC  
AGTAAAGATTTATGATACATGTATAGGGTGTACTCAATGTGTTTCGAGCTTGCCCCACAGA  
TGATTAGAAATGATACCTTGGGACGGATGTAAGGCTAAACAAATAGCTTCCGCCCAA  
GAACTGAGGACTGTGTTGGTTGTAAGAGATGCGAATCCGCTTGTCCAACGGATTTTTTA

AGTGTTCCGGTTTATTTATGGCATGAAACAACGCGGAGTATGGGTCTAGCTTATATGAC  
AACTATTAACTTTCCCTCTATTCTTGTGCCTTTAGTAGGCCTAGTATTTCCGGCAATTGCA  
ATGGCTTCTTTATTTCTTCATGTTCAAAAAACAAGATTGTTATGCGAGATCTAAAAACA  
TATCTTTCCGTAGCACCGGTACTAAGTACTCTATGGTTTGGGTCTTTAGCTGGTCTATTA  
ATAGAAATCAATCGCTTTTTTCCCGATGCGTTGACATTTCTTTTTTTTCATTCATGACTG  
CAATTTTAGAGAGACGCGAAAGCGAAAGCCTATGGGGTTCGCTTCTGTAACTGGATAAC  
CAGCACCGAAAATCGCCTTTACATCGGGTGGTTTGGTGTTTTGATGATCCCTACATTATT  
GACTGCAACTTCTGTATTTATTATAGCCTTCATTGCTGCTCCTCCAGTAGATATTGATGGT  
ATTCGTGAACCTGTTTCTGGATCTCTACTTTACGGAAACAATATTATTTCTGGTGCCATTA  
TTCCTACTTCTGCAGCTATAGGGTTGCACTTTTATCCAATATGGGAAGCAGCATCTGTTG  
ATGAGTGGTTATACAATGGTGGTCCCTATGAGCTAATTGTTCTACACTTCTTACTTGGTG  
TAGCTTGTATATGGGTCGTGAGTGGGAACCTAGTTTCCGTCTGGGTATGCGTCCTTGA  
TTGCTGTTGCATATTCAGCTCCGGTTGCGGCGGCTACTGCGGTTTTCTTGATCTATCCTA  
TCGGTCAAGGAAGCTTTTTCTGATGGTATGCCTCTAGGAATTTCTGGTACTTTCAACTTCA  
TGATTGTATTCCAGGCTGAGCACAACATCCTTATGCACCCATTTACATGTTGGGTGTAG  
CTGGTGTATTCGGCGGCTCCCTATTTAGTGCTATGCATGGTTCCTTGGTAACTTCTAGTT  
TGATCAGGGAAACCACAGAAAATGAATCTGCTAATGAAGGTTACAGATTCGGTCAAGA  
GGAAGAACTTATAATATCGTAGCTGCTCATGGTTATTTTGGTTCGATTAATCTTCCAATAT  
GCTAGTTTCAATAATTCTCGTTCTTTACACTTCTTCTTAGCTGCTTGGCCGGTAGTAGGT  
ATTTGGTTTACTGCTTTAGGTATTAGCACTATGGCGTTCAACTTAAATGGTTTCAATTC  
AATCAATCTGTAGTTGATAGTCAAGGTCGTGTAATTAATACTTGGGCTGATATCATTAAC  
CGTGCTAACCTTGGTATGGAAGTTATGCATGAACGTAATGCTCATAACTTCCCTCTAGAC  
TTAGCTGCTGTTGAAGTTCCATCTACAAATGGAATGGGTTTGCCTTGGTATCGTGTTTCAT  
ACTGTCTGATTGAATGATCCCGGCCGTTGATTTCTGTCCATATAATGCATACAGCTCTG  
GTTGCCCGTTGGGCTGGTTCGATGGCTCTATATGAATTAGCCGTTTTTGGATCCCTCTGAT  
CCCGTTCTTGATCCAATGTGGAGACAGGGTATGTTTCGTTATACTTTCATGACTCGTTTA  
GGAATAACCAATTCATGGGGCGGTTGGAGTATTACA---GGAGGGACTATAACGGATCCG  
GGTATTTGGAGTTATGAAGGTGTGGCCGGAGCACATATTGTGTTTTCTGGTTTGTGCTTT  
TTAGCAGCTATTTGGCATTGGGTGTATTGGGATCTAGAAATATTTTCTGATGAACGTACA  
GGAAAACCTTCTTTGGATTTGCCTAAGATTTTTGGAATTCATTTATTTCTTTCCGGAGTG  
GCTTGTTTTGGTTTTTGGCGCATTTTCATGTAACAGGCTTGTATGGTCCCAGGAATCTGGGTA  
TCCGACCCTTATGGACTAACTGGAAAAGTACAGCCTATAAGTCCGGCATGGGGTGTGCG  
AAGGTTTTGATCCTTTTTGTTCCAGGAGGAATAGCCTCTCATCATATTGCAGCAGGGACA  
TTAGGCATATTAGCAGGTTTATTCCATCTTAGTGTCCGTCCACCTCAACGTCTATACAAA  
GGATTACGTATGGGCAATATTGAAACCGTCTTTCTAGTAGTATTGCTGCTGTCTTTTTT  
GCAGCTTTTATTGTTGCTGGAACAATGTGGTATGGTTCAGCAACTACTCCGATCGAATTA  
TTTGGTCCCACTCGTTATCAATGGGATCAGGATACTTTCAGCAAGAAATATAACCGAAG  
AGTAAGTGCTGGGCTATCTGAAAATCAAAGTTTATCTGAAGCTTGGGCAAAAATTCCTG  
AGAAATTAGTTTTTTATGATTACATCGGTAATAATCCGGCAAAAAGGAGGATTATTTAGAG  
CGGGCTCCATGGACAATGGCGATGGAATAGCTGTTGGATGGTTAGGACACCCCATTTTT  
AGAGATAAAGACGGACGTGAACTTTTTGTACGCCGTATGCCTACATTTTTTGAACATT  
TCCAGTTGTTTTGATAGATGGGAACGGAATTGTTAGAGCTGACGTTCTTTTTCGAAGAG  
CGGAATCTAAGTATAGCGTTGAACAAGTAGGTGTAAGTGTGAGTTCTATGGTGGTGAA  
CTCAACGGAGTCAGTTATAGCGATCCTGCTACTATCAAAAAATATGCTAGGCGTGCTCA



ATTGGGTGAAATTTTCGAATTAGATCGCGCTACTTTGAAATCTGATGGTGTTTTTTCGTAG  
TAGTCCAAGGGGTTGGTTTACTTTTGGACATGCTTCTTTTGCCTTACTCTTTTTCTTTGG  
ACACATTTGGCATGGGGCTAGAACTTTGTTTCAGAGATGTTTTTGCCTTACTCTTTTTCTTTGG  
ATTTGGATGCTCAGGTGGAATTTGGAGCATTCCAAAACTTGGGGATCCCACTACAAG  
AAGACAAGGAGTCATGAAAACCTTATATCCCTGAGGAGGTTCTACCCCGTGGAAACG  
CTCTTTAATGGAACCTTAGCTTTAGCCGGTCGTGACCAGGAAACCACCGGTTTCGCTTG  
GTGGGCCGGGAACGCTCGACTTATCAATTTATCCGGTAAACTACTTGGAGCTCATGTAG  
CTCATGCCGGATTAATCGTATTCTGGGCCGGAGCAATGAATCTCTTTGAAGTGGCTCAT  
TTCGTACCAGAGAAGCCGATGTATGAACAAGGATTAATTTTACTTCCCCACCTAGCTAC  
TCTAGGATGGGGGGTAGGCCCCGGCGGAGAAGTTATAGACACCTTCCATACTTTGTAT  
CTGGAGTACTTCACTTAATTTCTTCGGCAGTATTGGGCTTTGGTGGTATTTATCATGCAC  
TTCTGGGCCCTGAAACTCTTGAAGAATCTTTTCCATTCTTTGGTTATGTGTGGAAGAT  
AGAAATAAAATGACCACAATTTTGGGCATTCACTTAATCTTGTTAGGTATAGGCTCTTTT  
CTTCTAGTATTCAAAGCTCTTTATTTTGGGGCGTATATGATACCTGGGCTCCGGGAGGG  
GGGGATGTAAGAAAATTACCAACATAACCCTTAGCCCAAGTATTATATTAGGTTATTTA  
CTAAAATCGCCTTTTGGGGGAGAAGGGTGGATTGTTAGTGTAGACGATCTGGAAGATAT  
AATCGGGGGGCACGTATGGATAGGTTCCATTTGTATACTTGGTGGAAATTTGGCATACTT  
AACTAAACCTTTTGCATGGGCTCGTCGCGCACTTGTGGTGGGAGAAGCGTATTTGT  
CTTATAGTTTAGGTGCTTTATCCGTCTTTGGTTTCATTGCTTGTTGCTTTGTCTGGTTCAA  
TAATACTGCTTATCCTAGTGAGTTTACGGACCCACTGGACCAGAAGCTTCTCAAGCCC  
AAGCATTTACTTTTTTAGTTAGAGACCAACGTCTTGGCGCTAACGTGGGATCCGCTCAA  
GGACCAACTGGTTTAGGTAAGTATCTAATGCGTTCTCCGACTGGAGAAGTTATTTTTGG  
GGGAGAAACTATGCGTTTTTGGGATTTGCGCGCTCCTTGGCTAGAACCCCTTAGGGGTC  
CAAATGGTTTGGACTTGAGTCGGCTGAAAAAAGACATAACAACCTTGGCAAGAACGAC  
GTTTCAGCTGAATATATGACTCACGCTCCTTTAGGTTCTTTAAATTCTGTGGGTGGTGTAG  
CTACCGAGATCAATGCGGTCAACTATGTCTCTCCTAGAAGTTGGTTAGCCACTTCGCAT  
TTTGTTTTAGGATTCTTCTATTTGTAGGCCATTTGTGGCATGCGGGAAGGGCTCGTGCA  
GCTGCAGCAGGATTTGAAAAAGGAATTGATCGTGATTTTGAACCTGTTCTTTCAATGAC  
CCCTCTTAATATGACTATAGCCGTTGGTAAATTTACCAAAGACGAAAAAGATTTGTTTGA  
TATTATGGATGACTGGTTACGTAGAGACCGTTTCGTTTTTGTAGGTTGGTCTGGTCTATT  
GCTCTTTCCTTGCTTATTTTGTGTAGGGGGTTGGTTTACGGGTACGACGTTTGTAAAC  
GTCATGGTATACCCATGGGTTGGCCAGTTCCTATTTAGAAGGCTGCAATTTCTTAACCGC  
AGCCGTTTCTACTCCTGCTAATAGCTTAGCACACTCTTTGTTGTTGCTGTGGGGTCTCG  
AAGCACAAGGAGATTTTACTCGTTGGTGTCAATTAGGCGGCCTGTGGACTTTTGTGCT  
CTTCATGGCGCTTTCGGACTAATAGGTTTTATGTTACGCCAATTCGAACCTTGCTCGATCT  
GTTCAATTGCGCCCTTATAATGCAATCGCATTCTCTGGCCCAATTGCTGTTTTTGTCTT  
GTATTCCTAATTTATCCACTAGGCCAGTCTGGTTGGTTCTTTGCGCCTAGTTTTGGTGTA  
GCAGCCATATCCGATTCATCTCTTTTTTCAAGGGTTTCATAATTGGACGCTGAACCCT  
TTTCATATGATGGGGGTTGCTGGTGTATTGGGCGCCGCTCTGCTATGCGCTATTCATGGT  
GCTACCGTAGAAAATACTTTATTTGAAGATGGTGTATGGGGCAAATACATTCCGGGGCTTT  
TAACCCAACCAAGCTGAGGAACTTATTC AATGGTCAACCGTAACCGTTTTTGGTCCC  
AAATCTTTGGGGTTGCTTTTTCCAATAAACGTTGGTTACATTTCTTTATGTTATTTGTACC  
AGTAACCGGTTTATGGATGAGTGCTTTGGGGTAGTCGGTCTGGCCTTGAACCTACGTG  
CCTATGACTTCGTTTCCAGGAAATCCGTGCAGCCGAAGATCCTGAATTTGAGACTTTC

TACACCAAAAATATTCTCTTAAACGAAGGTATTCGTGCTTGGATGGCGGCTCAAGATCA  
GCCTCATGAAAACCTTATATTCCTGAGGAGGTTCTACCCCGTGGAAACGCTCTTATGT  
CTGGAAGCACAGGAGAACGTTCTTTTGC GGATATTATTACCAGTATTCGATACTGGGTC  
ATTCATAGTATTACTATACCTTCCCTATTCATTGCGGGTTGGTTATTCGTCAGCACAGGTT  
TAGCTTACGATGTGTTTGGAAAGCCCTCGGCCAAATGAATATTTACAGAGAACCGACA  
AGGAATTCATTAATAACAGGCCGTTTTGATTCTTTGGAACAACCTCGATGAATTTAGTA  
GATCCTTTATGACCATAGATCGAACCTATCCAATTTTTACAGTGCGATGGTTGGCTGTTC  
ACGGACTAGCTGTACCTACCGTTTTTTTTTTGGGCTCAATATCCGCAATGCAGTTCATCC  
AACGAATGGCTACACAAACCGTTGAGGGTAGTTCTAGA---TCTCGTCCAAAACCAACT  
ACCGTAGGGGTTTTATTGAAACCGTTGAATTCGGAATATGGTAAAGTAGCTCCTGGATG  
GGAACTACTCCTTTGATGGGAGTTGCAATGGCTTTATTTGCAATATTCCTATGTATTATT  
TTGGAAATTTATAACTCTTCCGTTTTATTGGATGGAATTTCAATGAATATGCTTACTCTCA  
AACTCTTTGTTTACACAGTAGTGATATTCCTTGTCTCTCTTTATTTTCGGATTTTTATCT  
AATGATCCGGGACGTAATCCTGGGCGGAAGATATGGCTGATACTACTGGAAGGATTCC  
TCTTTGGATAATAGGTAAGTACTGTAGCTGGTATTCTTGTGATCGGTTAATAGGTATTTCTTT  
TATGGTTCATATTCGGATTGGGCTCATCGCTAATGCTTAATATCTTTAGTTTGATCGGT---  
---CTTAATTCTGCTCTTTATTTCGAGTAGTTATTTCTTTGCCAAATTACCGGAGGCCTATGC  
TTTTTTGAGTCCAATTGTCGATTTTATGCCAGTCATACCTCTATTTTTTTTTCTCTTAGCC  
TTCGTTTGGCAAGCTGCTGTAAGTTTTCGAATGACACAATCAAACCCGAATGAACAAA  
ATGTTGAATTGAATCGTACCAGTCTTACTGGGGATTATTACTTATTTTTGTACTTGCTGT  
TTTTTTTTCCAATTATTTTTTCAATATGGAAGTAAATATTCCTTGCATTTATTGCTACTGCGC  
TCTTCATTCTAGTTCCTACTGCTTTTCTACTTATCATTATGTAAAAACGGTCAGCCAAA  
ATGATATGGAACAGCAACCCTAGTCGCCATCTTATATCTGGTTTACTTGTAAGTTTTA  
CTGGGTATGCCTTATATACCGCTTTTGGGCAACCCTCTCAACAATTAAGAGATCCTTTCG  
AGGAACACGGGGACATGGAAGCATTGGTTTATACATTTTTATTAGTCTCGACTCTAGGA  
ATCATTTTTTTCGCTATCTTTTTTCGGGAACCTCCTAAAGTTCCAATAAAAAGGTGAA  
AATGACTATAGCTTTCCAATTGGCTGTTTTTGCATTAATAGCTACTTCATCAATCTTACTT  
ATTAGCGTACCCGTTGTATTTGCTTCTCCTGATGGTTGGTCAAGTAACAAAAATATTTTA  
TTTTCCGGCACATCATTATGGATTGGGTTAGTTTTTCTGGTGGGGATCCTTAATTCTCTCA  
TTTCT-----ATGTCACCACAAACAGAGACTAAAGCAAGTGTGGATTTAAAG  
CTGGTGTAAAGATTACAAATTGACTTATTATACTCCTGAGTATGAAACCTAGATACTG  
ATATCTTGGCAGCATTCCGAGTAAGTCCTCAACCCGGAGTTCACCCGAAGAAGCAGG  
GGCTGCAGTAGCCGCCGAGTCTTCTACGGGTACATGGACAACCTGTATGGACCGACGGA  
CTTACCAGTCTTGATCGTTACAAAGGACGATGCTACCACATCGAGCCTGTTGCTGGAGA  
AGAAAATCAATATATTTGTTATGTAGCGTACCCCTTAGACCTTTTTGAGGAAGGCTCTGT  
TACTAACATGTTTACGTCCATTGTGGGTAATGTATTTGGGTCAAAGCCTTGCGTGCTCT  
ACGTTTTGGAGGATTTGCGAATCCCTGTTGCTTATGTAAAACTTTCTAGGCCCGCCTC  
ACGGTATCCAAGTTGAAAGAGATAAATTGAACAAGTATGGCCGTCCTTATTGGGATGC  
ACTATTAACCTAAATTGGGGTTATCTGCTAAAACTATGGCCGAGCAGTTTATGAATGT  
CTTCGCGGTGGACTTGATTTTACCAAAGATGATGAAAACGTGAACTCCCAACCATTAT  
GCGTTGGAGAGACCGTTTTCTTATTTTGTGCCGAAGCAATTTATAAAGCACAGGCTGAA  
ACAGGTGAAATCAAAGGGCATTACTTGAATGCCACTGCAGGTACATGTGAAGAAATGA  
TCAAAAGGGCTGTATTTGCCAGAGAATTGGGAGTTCCTATCGTAATGCATGACTACTTA  
ACAGGTGGATTCACTGCAAATACTAGCTTGGCCATTATTGCCGAGATAATGGTCTACTT

CTTCACATCCACCGTGCAATGCACGCCGTTATTGATAGACAGAAAAATCATGGTATGCA  
CTTCCGTGTACTAGCTAAAGCGTTACGTCTGTCTGGTGGAGATCATATTCATGCCGGTAC  
CGTAGTAGGTAACCTTGAAGGGGAAAGAGAAATCACCTTAGGCTTTGTGGATTTACTA  
CGTGATGATTTTACTGAAAAAGACAGAAGTCGCGGTATTTATTTCACTCAATCGTGGGT  
TTCTACACCAGGTGTTCTGCCCGTTGCTTCGGGAGGTATTCACGTTTGGCATATGCCCG  
CTCTAACCGAGATCTTTGGAGATGATTCCGTACTIONACAGTTTGGTGGAGGAACCCTGGG  
ACACCCTTGGGGTAATGCGCCAGGTGCTGTAGCGAATCGAGTAGCCCTAGAAGCATGT  
GTACAAGCTCGTAATGAAGGACGTGATCTTGCTCGCGAGGGTAATACTATTATTCGCGA  
GGCTTGCAAATGGAGTCCTGAGCTAGCCGCTGCTTGTGAAGTATGGAAGGAAATTA  
TTTGAATTCCAAGCAATGGATAACAATC-----ATGGCGATACATTTATACAAA  
ACTTCTACC  
CCGAGCACACGCAATGGAGCCGTAGACAATCAAGTGAAATCCAATCCACGAAATAATT  
TGATCTATGGACAGCGTCGTTGTGGTAAAGGCCGTAATGCCAGAGGAATCATTACCGCA  
AGGCATAGGGGGGGAGGTCATAAGCGTCTCTACCGTAAAATAGATTTTCGACGAAATG  
AAAAAGACATATATGGTAGAATCGTAACCATAGAATATGACCCTAATCGAAATGCATA  
TACATACTATGGGGATGGTGAAAAAGATATATTTTACATCCCCGAGGGGCTA  
TAATTGGAGATAGCATTGTTTCTGGAACAGAAGTTCCTATAAAAATGGGAAATGCCCTA  
CCTTTGACCGATATGCCATTAGGCACAGCCATACATAACATAGAAATCACACTTGGAAA  
AGGTGGACAATTAGCTAGAGCAGCGGGTGCTGTAGCGAAACTGATTGCAAAAGAGGG  
GAAATCGGCCACATTAATAATTACCTTCTGGGGAGGTCCGTTTGATATCCAAAAACTGCT  
CAGCAACAGTCGGACAAGTGGGGAAATGTTGGAGTGAACCTGAAAAGTTTGGGTAGAG  
CCGGATCTAAGCGTTGGCTAGGTAAGCGTCTGTAGTAAGAGGAATCGTTATGAACCCT  
GTAGACCATCCCCATGGGGGTGGTGAAGGGAAGGCTCCAATTGGTAGAAAACACCCC  
ACAACCCTTGGGGTTATCCTGCACTTGGAAAAAGAGGTAGAAAAAGGAATAAATATA  
GTGATAATTTTATTATTCGTCGACGTAATAAAAATGATTCAACCTCAGACCTATTTGAATGT  
AGCAGACAACAGTGGAGCTAAAAAATTGATGTGTATTTCGAATCATAGGAGCTAGC---AA  
TCGTCGATATGCTCGTATTGGCGATGTTATTGTTGCTGTGATCAAAGAAGTAATACCCGA  
TTCACCCTTAGAAAGATCAGAAGTAATAAGAGCTGTAATTGTACGTACCTGTAAAGAAC  
TCAAACGAGACAGCGGTATGATAATAAGATATGATGACAACGCTGCAGTTATCATTGAT  
CAAGATGGAAATCCAAAAGGAACTCGAGTTTTTTGGCGCAATTGCCGGCGAATTGAGAC  
AAAAC---TTTACTAAAATAGTTTCATTAGCTCCTGAAGTATTAATGCTTAGTCCAAAAAG  
AACCAGATTCGCAAACAACATCGAGGAAGATTAAGGGGATATCTTCTCGAGGAAAT  
AAAATTTGTTTTGGAAGATACGCTCTTCAGGCACTCGAACCTCTTGGATCACATCTAA  
ACAAATAGAAGCGGGGAGGCGAGCAATGACACGAAATGCGCGCCGTGGGGGAAAAAT  
ATGGGTACGTATTTTTCCAGACAAACCGTTACTACTAAGGTCTGCGGAAACCCGTATGG  
GTTCCGGGAAAGGATCTCCCGAATATTGGGTAGCTGTTGTCAAACCAGGTCAATACTT  
TATGAAATAAGCGGGGTAGCAGAAAATATAGCCGAAGGGCTATCTCAATAGCGGCATC  
TAAATGCCTATACGAACTCAATTTATTATTTTCAGGAATGACTAGAGTTACACGAGGATA  
TATAGCTCGGAGACGTAGAACAAAAACGCGTTTTCTTTGTATCAAACCTTTCGAGGGGCT  
CATTCAAACCTTACTCGAACCTTCTCAACAGACAATAAGAGCTTTATTTTCGTCTCAT  
AGGGATAGAGGTAGGCAAAAGAGAGATTTTCGGCGTTTATGGATCACTCGGATAAACG  
CAGTAATTCGCGAA---AACAGGGTATGCTATAATTATAGCAAATTTATAAATGATCTGTCC  
AATAGACAGTTGCTTCTTAATCGTAAATTACTIONTGCACAAATAGCTATATTAATAGAAAT  
TGCTTTTATATGATTTCAAATGAAATCATAAAAAAGAACTTGGAAAGAATGCCCCGA  
AAATGTT---ATGAAAGATGTATATGCTTTAGGCCAATATATATCTATGTGCGGCTCACAAAG



ATTCTGGATAATGTTTGTACCCGGAAATTTTCTTGTCTTTCTTGAATGATAAAGATAAA  
AAAATTTTGGGTCAAAGGAAAATGCCATTTTGGAGTTTATCAACAATTTGCTTGTGT  
AGGGGGGGACCCGGTATTTTCGGAATCTTTATGTAAAGAATTACAAAAAAATTTCTTTC  
AGCAAAAATGCGAATTAGGAAGGATTGGTCGACGAAATATGAACCGTCGACTGAATCT  
TGATATACCCAAAACCATACGTTTTTGTACCGCGTGATATATTGGCAGCTACGGATCA  
CTTGATTGAAATGAAATTTGGAATGGGTACACTTGATGAT-----ATGAATCATTTGAAAAA  
TAAACGTATCCGTTCTGTAGCAGATCTCTTACAAGATCAATTCGGATTGGCTCTGGTTCG  
TTTAGAAAATGTGATTCGAGGAACTATATGTGGAGCAATTCGG---CATAAATTAATA---CC  
GACTCCTCAGAATTTGGTAACTTCAACTCCA-----TTAACAACGACTTATGAATCTT  
TTTTTGGATTACACCCATTATCTCAAGTTTTGGATCGAACTAATCCATTGACACAAATAG  
TTCATGGCCGAAAATTGAGTTATTTGGGCCCGGGGGATTGACAGGGCGAACGGCTAG  
TTTTCGGATACGCGATATTCACCCTAGTTACTACGGGCGTATTTGCCCAATTGACACATC  
TGAAGGAATTAATGTTGGACTTATTGGATCCTTAGCAATTCATGCAAGAATCGGTCTTTT  
GGGG---TCTCTAGAAAGTCTTTTTTAT-----AAAATTTCTGAGAGATCGGCA-----ATGG  
TACAGATGCTTTTTTTATCGCCAAGTATTGATGAATACTATATGGTATCTACGGGCAATTC  
TTTGGCATTGAATCAAGGTATTCAGGAAGAACAGGTTATTCCAGCTCGATACCGTCAAG  
AATTCCTGACTATTGCGTGGGAACAAGTTCATCTTCGAAGTATTTTTCCCTTCCAATATT  
TTTTCTATTGGAGCTTCCCTCATTCTTTTTATCGAGCACAACGATGCAAATCGAGCTTTAA  
TGAGTTCTAATATGCAACGTCAAGCAGTTCGCTTTCTCAGTCCGAGAAATGCATTGTT  
GGAACCGGGTTGGAACGCCAAGCGGCCCTCGATTCTGGGGTTCTCGCTATAGCCGAAC  
ATGAGGGAAAGATCATTTATACCGATACTGATAAGATTATTTTTTTTAGGTAATGGGCATAT  
TCAAAGCATTCCATTAGTAATGTATCAACGTTCTAATAAAAATACTTGTATGCACCAAAA  
CCCCCGGATTCTTCGGGGTAAATGCATTA AAAAGGGACAAATTTTAGCAGATGGGGCC  
GCTACAGTTGGAGGCGAACTAGCTTTGGGAAAAACATATTAGTGGCTTATATGCCGTG  
GGAAGGCTACAATTTTGAAGATGCGGTCTCATTAGTGAGCGTCTTGTATATGAAGATA  
TTTATACTTCTTTTCACATACGGAAATATGAAATTCAAACTTATGTGACAAGTCAAGGA--  
-CCCGAAAGGGTCACGAGCGAAATACCGCACTTAGAAGCCCATTTACTCCGTAATTTAG  
ACAAAAATGGAATTGTGAGGTTGGGATCATGGGTAGAAACGGGGGATATTTTGGTAGG  
TAAATTAACACCCAGATGGCAAAGAA---TCTTCGTATGCCCCGAAGATAGATTATTA  
CGAGCCATACTTGGCATTTCAGGTATCCACATCCAAAGAACTTGTCTAAAACCTCCCTAT  
AGGTGGTAGGGTTCGAGTTATTGATGTGAGATGGATCCAGAAAAAAGGG---GGCTCTA  
GTTATAACCCAGAAACAATTCATGTATATGTTTTACAGAAACGTAAAATAAAAAGTTGGT  
GATAAAGTAGCCGGAAGACATGGAAATAAAGGTATCATTTCAAAAATTGTGCCTAGAC  
AAGATATGCCTTATTTGCAAGATGGAAGACCCGCTGATATGGTCTTTAACCATTAGGA  
GTACCTTACGAATGAATGTAGGACAGATATTTGAATGTTTCGCTCGGGTTAGCGGGAGG  
TCTGCTAGATAGACATTATCGAATCGCACCTTTTGATGAGAGATATGAACAAGAAGCTT  
CGAGAAAAC TAGTGTTTTCTGAATTATATCAAGCCAGTAAACAAACATCGGAGCCGTG  
GATCTTTGAACCCGAGTATCCGGGAAAGAGTCGAATATTTGATGGAAGAACAGGGGAT  
CTTTTGGAGCAACCTGTTATAATAGGAAATCCTTATATATTGAAATTAATTCATCAAGTTG  
ATGATAAATCCATGGACGTTCTAGTGGACATTATGCACTTGTACACAGCAACCCCTT  
CGAGGAAGAGCCAAGCAAGGAGGACAGCGGTAGGAGAAATGGAAGTTTGGGCTCT  
AGAAGGATTTGGTGTGACATATTTTACAAGAGATGCTTACTTATAAATCGGATCATAT  
TAAAGCTCGCCAGGACGTA CTTGGTACTACGATCATTGGGGGAACAATACCTAACCCC  
GAAGATGCTCCAGAATCTTTTCGACTGCTCGTTCGAGAACTACGATCTTTGGCTCTGGA

ACTGAACCATTTCCTTGTATCTGAGAAAACCTTCCAGATTAATAGGATGGAAGCT-----  
-----ATGATCGATCAGTATAAACATCAACAACCTCAGAATTGGGTTAGTTTCGCCTAA  
CCAAATAAGTGCTTGGGCCACAAAAATCCTACCTAATAGAGAGATAGTTGGAGAGGTG  
ACAAAACCTTATACTTTTCATTATAAAACCAATAAACCCGAAAAGGATGGATTATTTTGT  
GAAAGAATTTTTGGGCCGATAAAAAGCGGAATTTGTGCTTGTGGAAATTATCGAGTAAT  
CAGAAATGAAAAAGAAGACCCAAAATTTTGTGAACAATGCGGAGTCGAATTTGTTGAT  
TCTCGAATACGAAGGTATCAAATGGGATATATTAAATTGGCATGCCCCGTAACCTCACGTG  
TGGTATTTGAAACGTCTTCCCTAGTTATATCGCGAATTTTTTTAGATAAACCTCTTAAAGAA  
TTAGAAGGCCTAGTATACTGCGATTTT-----TCATTTGCTAGGCC--ATAGCAAAAAAAC  
CTACTTTTTTACGATTACGGGGTTTAGTCGAATATGAAATTCAATCTTGTAATACAGCA  
TCCCTCTTTTTTTTACTACCCAAGGTTTTGATGCATTTCGAAATAGAGAAATATCTACTG  
GAGCAGGTGCTATTCGAGAACAATTAGCAGAGTTGGATTTGCGAACTATTATCGATTAT  
TCATTCGCAGAATGGAAAGAGTTAGGAGAAGAA---GACCCACAGGGAATGAATGGG  
AAGACCGAAAAGTTGGAAGAAGAAAAGATTTTTTTAGTTAGACGCATGGAATTAGCTAA  
GCATTTTATTGGAACAAATATAGAACCAGAATGGATGGTTTTATCTCTATTACCAGTTCT  
TCTCCCGAATTGCGACCAATCATTAGATAGATGGAGGAAAATTAATGAGTTCCGGATA  
TTAATGAACTCTATAGAAGAGTTATCTATCGGAATAATACTCTCACCGATCTATTAACAA  
CAAGTAGATCGACGCCCGGAGAATTAGTAATGTGTCAAGAGAAATTGGTACAAGAAGC  
CGTGGATACACTTCTTGATAATGGAATTCGCGGGCAACCAATGAGGGACGGTCATAATA  
AAGTTTACAAGTCATTTTCGGATGTAATTGAAGGTAAGAGGGACGATTTCCGCGAGAC  
TTTACTTGGTAAACGGGTCGATTATTCCGGTTCGTTCCGTCATTGTCGTAGGTCCTTCGCT  
TTCATTACATCGGTGTGGATTGCCTCGTGAAATTGCAATAGAGCTCTTCCAGACATTTAT  
AATTCGTGATTTAATTAGACAACATCTTGCTTCGAACATAGGAGTTGCTAAACGTAAAA  
TTCGGGAAAAGAACCTATTATATGGAAAATACTTCAGGAAGTTATGCAAGGGCCTCCT  
ATATTGTTAAATCGCGCGCCTACTCTGCATCGATTAGGCATACAGGCGTTCCAACCCATT  
TTAGTAGAAGGGCGCGCATTTGTTTACATCCATTAGTTTGTAAGGATTCAACGCAGA  
CTTTGATGGGGATCAAATGGCGGTTTCATGTACCTTTATCCTTAGAGGCTCAAACAGAGG  
CTCGTTTACTTATGTTTTCTCATATGAATCTTTTGTGCGCCAGCTATTGGAGATCCTATTT  
CGTACCAACGCAAGATATGCTTATTGGACTCTATATATTAACAAGTGGGACTCGTCGAG  
GTATTTGTGCAAATAGATATAATCCATGGAATCGC-----AAAACGACCAAAATGAAA  
GAATTGACGATAAGAATTATAAGTATATGGTA-----GAACCCTTTTTTTGTAATTCCTACG  
ATGCAATTGGAGCTTATTGTCAGAAAAGAATCCATTTAGATAGTCCTTTGTGGCTCCGG  
TGGCGACTAGATCAACGT---ATTATTGCTTCA-----AGAGAAGCTCCTGTGCAAGTTCAC  
TATGAATCCTTGGGCACCTATCATGAGATTTATGCACACTATCTAATAATAAGAAATATAA  
AAAAAGAAATTATTTATATATATATTCGAACTACTGTTGGTCATATTTATCTTTATCGAGA  
GATTGAAGAAGCTATACAAGGATTTTCTCGAGCCTGCTCATATAGT-----  
ATGGAGGTACTTATGGCAGAACGGGCTAATTTGGTCTTTCACAATAAATCGATAGATGG  
AACTGCCATGAAACGACTTATTAGCAGATTAATAGATCACTTTGGAATGGCATATACAG  
CACACATACTAGATCAAGTAAAGACTCTGGGTTTCCAGCAAGCCACTGCTACATCTATT  
TCATTAGGAATTGATGATCTTTTAAACAATACCTTCTAAGGGATGGCTAGTTCAAGATGCT  
GAACAGCAAAGTTTGATTTTAGAAAAACACCATCATTACGGAAATGTCCATGCAGTAG  
AAAAATTACGCCAATCCATCGAGATATGGTATTCTACAAGTGAATATTTGCGACAAGAG  
ATGAATCCTAATTTTAGAATGACTGACCCTTATAATCCAGTCCATATAATGTCTTTTTTCGG  
GAGCTAGAGGAAATGTCTCTCAAGTACATCAATTAGTAGGTATGAGAGGATTAATGTCC

GATCCACAAGGACAAATGATTGATTTACCTATTCAAAGCAATTTACGCGAAGGACTCTC  
TTAACAGAATATATAATTTTCGTGCTACGGAGCCCGCAAAGGGGTTGTGGATACCGCTG  
TACGAACATCAGATGCGGGATATCTTACGCGCAGGCTTGTCTGAAGTAGTTCAACATATT  
GTTGTACGTAGGACAGATTGTGGCACCATTTCGGGGTATTTCTGTAAGTCCTAGAAACGG  
CAGGATGCCG---GAAAGAATTTTTACCCAAAGATTAATAGGTTCGCGTATTAGCAGACGA  
TATATATCTGGGTTACGATGCATTGCGACTCGCAATCAAGATATCGGGGTTGGGCTTGT  
AAATAGATTCATAACC-----TTTCGAACCCAACCAATAGCCATTTCGAACTCCTT  
TACTTGTAGGAGTACGTCTTGGATTGTGTCGATTATGTTATGGCCAAAGTCCTACTCAG  
GCGACCTGGTTCGAATTAGGAGAAGCTGTAGGTATTATTGCAGGTCAATCCATTGGGGA  
GCCTGGTACTCAATTAACATTAAGAACTTTTCATACGGGCGGAGTATTCACAGGGGGTA  
CTGCAGAACATGTACGAGCCCCCTTATACTGGCAAATAAATTCAATGAGGAGTTGGTG  
CATCCCACACGTACACGTACATGGACACCCTGCCTTTCTATGTTATATAGACTTGTATGTC  
ACTATTGAGAGCGAAGGTAGTCTACATAATGTGAATATTCCTCCAAAAGTTTTCTTTTA  
GTTCAAAATGATCAATATGTTGAATCCGAACAAGTTATTGCTGAAATTCGTGCGGAGGC  
ATCAACTCTG---AATTTTAAGGAAAAGTTCGAAAACATATTTATTCTGATTCAGAAGGC  
GAA---ATGCACTGGAGTACCGATGTGTATCATGCACCCGAATTTACATATGGTAATGTTT  
ATCTCTTACCAAAGCAAGCCGTTTATGGATATTGTTCGGGAAGACCATATAGA-----TCC  
CGCGTAGTCGCCTTTTCACTCCACAAGGATCAAGATCAAACAAGCGGGAAT-----TCTC  
TTTCTTTTGAACAAATA---ATTTATAACTTATCA-----ATGACTAATGATCAA---GTACAAA  
ATAAATTTTTGGATCCT---TATATTAATAAATCTGAACATAGGAGTTTCGAATTAT---TCAG  
AACTTAATGGGATGGGT-----CATTGTAATCATATATATCCT-----GCAAAAACTTC  
GAT-----TTATTGGCAAAGAGGCGAAAAAATAGATTAATCATTCCATTTCAATTTAGTCAA  
GAACGAGAAAAAGAATTAATGTCCCTTTCCGGTATCTCGATTGAAATACCCATAAAT-----  
-GGTATTTTCCGTAGAAATAGTATTTTGTCTTATTTCAATGATCCTCGATACCGAACAAAG  
AGTTCGGGAATTTCTAAATATGAGACTATAGAAATGCATTCCAGCGTTAAAAAAGAGGA  
C-----TTGATTGAGTATCGA---GGAGTCAAAGAATTTTCGACCAAATAACATGAAAGTCGA  
TCGGTTTTTTTTTTCATTTTACAGGAAGTACATATTTTACCCGGATCTTCTTCCATAATGGTA  
CGGAACAATAGTATCATTGGAGTAGATACACAAATTACTTTAAATATAAGAAGCCGCGT  
AGGCGGAGTGGTTCGGGTGGAGAGAAAAAAAAAAAAAGATTGAACTTATAATTTTTTCT  
GGAGATATCTATTTTCTGGGAAACAGATAAGATATCCCGACACAGCGGCATTTTGAT  
ACCACCAGGAAAGACA-----AATTACAAGGAATCAAAAAAT-----TTTAAAAATTGG  
CTCTATGTTCAACGG-----ATCACCCCTACTAAGAAAAAG-----TCTTTTGTTTTGGTTCG  
ACCCGTAGTACATATGAAATTACGGACGGTATCAATTTAGCACCACTTTTCCCTCAGG  
ATCTGTTGCAAGAAAGGAGTAATGTGCAACTTCGAGTTTTCAATTATATCCTTTATGGA  
AATGGCAAAGGCACTCGGGGAATTTATGACACAAGTATTCAATTAGTACGTACTTGT  
AGTATTGAATTGGAATCAAGACAAA-----AAAGATTCTTCTATCGAAGAGGCCCGTGC  
TTCATTTGTTGAAGTAAGGACAAATGGTATAATTCGATATTCCTAAAGATCGGTTTGT  
GAATAGGGCTCTTTCGTATATCGGTAAAGAAATAATCCCTCC---CTTTTTTCTGATGATG  
AC-----TTAGAGTATACCAATATGAATCCATTTTTTTCCATTTATTCAAAGCCAAAA-----  
-----CTTGAACAAGGATTTAACCCAAATCAAGGAACTGTTTCGTATGTTGGTGGGTA  
-----AATAAGGAATGTCAGTCTTTTATAATTTTGTATCATCTAATTGTTTTTTCGAATGG  
TCCA-----TTCACACTCAACAAT-----GTAAAATATCCCGATCGTCTAATTCTA  
ATTAAGAATTCATTCCGTCTTTAGGAACA-----GTCTTCATTTTTCGAATTTTTTTTT--  
---TTTTACCATGTAATAACT-----CATAATCAGATCCTG---GTAAATAATTATTTACAAC

GACAAT-----TTAAAACAAACCTGTCAAGTCCTTAAATATCAA---TATTATTTAATGGAT  
GAAAATGGAATA-----ATTTATAATCCCGATTTTTGTAGTAATATAATTTTGAATCCATTCA  
ATTTGCATTGGGATTTTCTTCATTACAATTTTTGTGACGAGACATCTACAAAAATGCGT---  
CTTGACAATTTATTTGTGAAAATATATGTATAAAAAAAAATGGACTG-----CACTTAA  
AACCGGGTCAAATTATAATTGTTCAA---TTTGATTTCGGTAGTAATAAGATCGGCTAAGCC  
CTATTTGGCTACCCCAGGAGCAACAGTTCATGGGCATTATGGAGAAATCATTATGAAG  
GGGATACCCTAGTTACATTTATATATGAAAAATCGAGGTCTGGTGATATAACGCAAGGTC  
TGCCAAAAGTGGAACAAGTCTTAGAAGTTCGTTTCGGTTGAGTCAATATCCATGAATCTC  
GAAAAGAGGATTAATGGTTGGAACGGACGTATAAAAAAAATTCTTGGAATTCCGTGGG  
GATTCTTGGTTGGGGCTGAGCTAACTATAGCGCAAAGTTCGTATCTCTTTGGTTAATAAG  
ATCCAAAAGGTTTATCGATCCCAGGGGGTGCAGATTCATGATCGGCATATTGAAATTATT  
GTACGGCAAATAACATCTAAAGTCCTGGTTTCAGAG-----GATGGAATGTCTAATATTT  
TTTTGCCCCGAGAATAAGGATTGTTTCGAGCAGAACGAACGGGGCGCGCTTTGGA  
AGAAGCGATCTGTTACCGAACGATCTTATTGGGAATAACGAGAGCATCTCTGAATACTC  
AAAGTTTATATCCGAAGCAAGTTTTCAAGAACTGCTCGAGTTTTAGCAAAGCTGC  
TCTCCGAGGTTCGATTGATTGGTTGAAAGGATTAAGAAACGTTGTTCTGGGGGGG  
ATGATACCCGTTGGTACTGGATTCAAGGGATTTCGTACACCGATCA-----AATCACCATAA  
GAGCATTAGCATTCTTTGAAAAAAAAGCAAGAATAGACTCGAGGGAGAAATGAG  
A-----GATATTTGTTTTACCACAGAGAATTGTTGGATTCTTTTTTT-----  
-----ATGACAAGAAGATATTGGAACATCAATTTGGAAGAGA  
TGATGGAGGCGGGAGTTCATTTTGGGCATGGTATTCGAAAATGGAATCCCCGAATGTCA  
CCTTATATCTCTGCAAATGTAAGGGTATTCATATTATAAATCTTACCAGAACTGCGCGTT  
TTTTATCAGAGGCTTGTGATTTAGTTTTTGATGCAGCAAGTAGGGGAAAAACAATTTTA  
ATTGTTGGGACAAAAGGAAAGCAGCTGATTACAGTAGCATGGGCTGCAATAAGGGCTC  
GATGTCATTATGTTAATAAAAAGTGGCTTGGGGGTACGTTAACGAATTGGTCCACTACA  
GAAACAAGACTTCATAAATTCAGGGACTTACGAATAGAACAAAAGGCGGGGCGACTC  
GCTCGTCTTCCGAAGAGAGATGCCGCGGTGGTAAAGAGACAATTATCTCACTTGCAAA  
CATATCTGGGCGGGATTAAATATATGACAGAATTACCTGATATTGTAATCATTCTTGATCA  
ACCAAAGACTATACAGCTCTTCGAGAATGTATTACTTTGGGAATCCAACGATTTGTTT  
AATCGATACAACTGTGACCCGAATCTCGCCGATTTTCGATTCCGGCAAACGATGATG  
CTATATCTTCAATCCGATTAATTCTTACCAAGTTAGTATTTGCAATTTGTGAAGGTCGTT  
T--AGCTATGTAAGAAAGACTATGGGACAAAAAATAAATCCACTTGGTTTCCGACTTGG  
TACAACCCAAAGTCATTATTCCCTTTGGTTTGCAAAACGAAAAAATCTGAAAGGTC  
TACAAGAAGATCAAAAATACGGGATTATATAAAAAATTTTGTAAAAAAAAATACAAA  
AGCATCGTCGGGT--GTCGAAGGAATTGCACGCATAGAAATTAAGAAATCGATCT  
GATACAGGTAATAATCTATATGGGATTCCTCAAAGTTATTAATAGAAAATAGACCACGA----  
-----GGAATCGAAGACCTAAAAGTAAATTTACAAAAGAATTAATTTGTGTGAGCCGA  
AAACTCAACATTGCTATTTACGAATTGCAAAACCTTATGGGCACCCTAAAATTCTTGC  
TGAATTTATAGCTGGCCAATTAATAATAGGGTATCATTAGAAAAGCCATGAAAAAGG  
CTATTGAATTAACCGAACAGCGGATACAAAAGGAATTCAAATACAAATAGCAGGCCG  
GATCGATGGAAAAGAAATTGCCCGTATTGAATGGATAAGAGAGGGAAGAGTTCCCTA  
CAAATATTCGCGCGAAAATTGATTATTGTGCCTATCCATTTCGAACTATTTATGGGGTA  
TTAGGTATCAAAATTTGGATATTTATAGATGCAAAAATGTTCGCGTTACCGAGGACCTCGT  
TTCAAAAAATACGACGTTTAGGGGCTTTGCCTGGACTAACAAATAAAAGGCCTAGAA



CCGGAAGTGATCTTAGAGCCCAATCACGTTCTGGGAAA---AAATCTCAATATCGTATTC  
GTCTAGAAGAAAAACAAAAATTGCGTTTTATTACGGTATTACAGAACGACAATTACTT  
AAATACGTTTCGTATCGCAAGAAAAGCCAAAGGGTCAACAGGGCAGGTTTTACTACAAT  
TACTTGAAATGCGTTTGGATAACATCCTTTTTTCGATTGGGCATGGCTCCGACTATTCTG  
GAGCCCGCCAATTAGTTAATCATCGACATATTTTAGTTAATGGCCGTATAGTCGATATACC  
GAGTTATCGTTGCAAACCCCAAGATACTATTACAGCAAAGGATGAACAAAAATCCAGA  
GCTCTAATTCAAAATTTTATTGATTTCAGCCCCCCT--GAGGAAGTGCCCAAACATTTGA  
CTCTTGACCCATTTCCG-----TATAAAGGATTAATCAATCAAATAATAGATAGTAAGTGGG  
TCGGTTTGAAAATAAATGAATTACTTGTGGTAGAATATATTCTCGTCAGACTATGTCAC  
GTCGAGGTACTGTAGAAGAAAAACTTTAAAATCCGATCCAATTTATCGTAATCGATTA  
GTAAACATGTTGGTTAACCGTATTCTGAAACACGGAAAAAAATCATTGGCTTATCAAAT  
TATCTATCGAGCCGTGAAAAAGATTCAACAAAAAACAGAAAAAAATCCACTATCTGTT  
TTACGTCAAGCAATACGTGGAGTAACCTCCGATATAGCAGTAAAAACAAGACGTGTAA  
GCGGATCGACTCATCAAGTTCCATTGAAATAGGATCCACACAAGGAAAAGCACTTGC  
CATTCGTTGGTTATTAGGGGCAGCCCGAAAACGTCCGGGTGCAAATATGGCTTTCAAAT  
TAAGTTCCGAATTAGTGGATGCTGCCAAAGGGAGTGGCGATGCCATACGAAAAAGGA  
AGAGACTCATAGAATGGCAGAGGCAAGTAGAGTTTTTGCACATTTTCGTATGGGTAGG  
GACACTATTGCTGATATAATAACCGCGATACGAAATGCTGACATGAATAGAAAAGGAAC  
AGTTCGAATACCATCGACTAACATCACCGAAAACATTGTTAAAATACTTTTACGAGAAG  
GCTTTATTGAAAACGTGAGAAAACATCAAGAAGGAAACAATACTTTTATGTTTTAAC  
TCTGCGACATAGAAGA-----AATAGGAAAGGCCCATATCGAAAT-----ACCTTATATTTA  
AAAAGAGTCAGTCGACCTGGTTTACGAATCTATTCTAACTCGCAAGGAATTCCTAAAAT  
TTTAGGCGGAATAGGAATTGTAATCTTTCTACCTCTCGCGGTATAATGACAGATCGGGA  
GGCTCGACGAGAAGGAGTTGGGGGAGAAATTTTATGTTATATATGGATGGCAAAACCTA  
TACGAAAAATTAGTTCACGTAGAACTGGACGTATTCTGTTACGTAAAAGTGTACGTAAA  
ATACAAAAGGCATTATCCATGTTCAAGCAGGTTTCAACAATACGATTGTAACGTGTTAC  
AGATGTACGGGGTCAGGTTGTTTCTGGGCTTCCGCGGGTACTTGTGGCTTTAAAGGTC  
CAAAAAGGGGGACGCCATTTGCGGCTCACGCCGCGCAATAAATGCTATTTCGTAGAGT  
GGTGGAACAGGGCATGCAACGAGCAGAAGTCATGATAAAGGGTCCCGGTCTCGGAAG  
AGATGCAGCATTACGAGCTATTTCGTGAAGCGGTATATTATTAAGTTTCGTGCGGGACGT  
AACCCCTATGCCACATAATGGCTGTAGGCTCTTAAAAAAGACGTGTGATGCCAACTA  
TTAAACAACCTTATTAGAAACACAAGACAGCCAATCAGAAATGTCACGAAATCCCCGC  
TCTTCGGGGATGTCCTCAGCGCCGAGGAATATGTACTAGGGTGTATACTATCACCCCA  
AAAAACCAAACCTCTGCCTTACGTAAAGTTGCCAGAGTACGATTAACCTCTGGATTTGA  
AATCACTGCTTATATACCCGGTATTGGCCATAATTTACAAGAACATTCTGTAGTCTTAGT  
AAGAGGGGGAAGGGTTAAGGATTTACCCGGTGTGAGATATCACATTGTTTCGAGGAACC  
CTAGATGCTGTTGGAGTAAAGGGTCGTCAACAAGGGCGTTCTAAATATGGGGTCAAAA  
AGCCAAAAATGGCAAAGAAAAGTTTAATTCAAAGGGAGAAGAAAAGGCAAAAATTG  
GAACAAAAATATCATTGATTCGTGATCCTCAAAAAAAGAAATAAGC-----AAAGTT-  
--TCGGTGAGTGATAAATGGGAAATTCATGGAAAGTTACAGTCTCTACCCGTAATAGCG  
CACCTACGCGTCTTCATCGACGTTGTTTTTAAACCGGAAGGTCGAGAGCGAACTATCGC  
GACTTTGGGTTATCCGGACACATACTTCGTGAAATGGTTAACACATGTTTGTGCCGGG  
GGCAACAAGATCAAGTTGGATGAATAAAAATGCATTTATATCCTCGATTTACATGAA---  
---AAAAAGAGGAAAACAGGGGATCTGTTGAATTTCAAGTTTTATGTTTTACCACCAAG

ATACGAAGACTTACTTTACATTTGGAATTACATAAAAAAGATTATTCATGTCAGACAGGT  
CTACGAAAAAGTATAGGAAAACGTCAACGCCTACTGCTTTATTTATCAAAGAAAAATAG  
AGTACGTTATACAAAATTAATCAGTGAATTGAACATTAGAGAGCTAAAAACCCGT-----A  
TGGTAAAACCTTCGTTTTGAAACGATGTGGTAGAAAGCAACGAGCCGTCTATCGAATCGT  
TGCAATTGATGTTCCGGTCCCGAAGAGAGGGAAGAGATCTGCAGAAAGTAGGTTTTTAT  
GATCCGATAAAAAATCAAACCTTATTTAAATGTTCCCTGCTATTCTAGATTTTATTCAAAAA  
GGCGCTCAACCTACAGAACTGTTTATGATATTTTAAAGAGGGCGGAGGTTTTTAAAGA  
ATTCGATTT-----ATGGATAAATCCAAGAGACCCTTTATTAAATCTAAGCAG  
TCTTTTCGTAGGCGTTTTGCCCCAAATCCAACCGGGGGATCGAATTGATTATAGAAACAT  
GAGTTTAATTAGTCGATTTATTAGTGAACAAGGAAAAATTTTATCTAGGCGAGTAAATA  
GATTAACCTTGAAACAACAACGATTAATTACTATTGCTATAAAAAAAGCTCGTATTTTAT  
CGTTGTTACCTTTTCTTAATAATGAGAAA-----CAATTTGAA-----TCGACTACTAGAAC  
TTCTAGTTTTAGAACCAAAAAGAAAGTGTCACGTTCA-----AAAAATCCTTTTGTAGCC  
AATCATTTATTAAAAAAATGATAAGATTAACCAAAAAACGGAAAAAGAAATAATATT  
AACTTGGTCTCGGGCATCTACCATTATACCTAGCATGATTGGACATACAATTGCTATCCAT  
AATGGTAGGGAATACTTACCTATTTACATAACGGATCTTATGATAGGTCATAAATTAGGA  
GAATTCGCACCAACTCGAAATTATAGCGAATATGCAAAAAACGATAATAAATCTCGCCG  
TATGAATTTTAAATCT-----TTGTTAGTATCCTTATGCATGAAGATAAGCAATTCCGGTC  
GTTGTGGTCGGACTTTATTATGGATTTCTGACCACACTCTCCATAGGGCCCTCTTATCTC  
TTCCTTCTCCGAATGATGGATCTGCAAACCGGAGAAGAAGCAGCCGAGAAGAAGGTA  
GCAGCAATAACTGGTTTTATTATGGGACAGCTCGTGACATTCATATCGATCTATTATACG  
CCTCTGTATCTAGCATTGGATAGACCTCATACAATGAGTTGCCTGGCTCTAACCTACCTT  
TTATTTTTTTTCTTCTGGAACAATAGCCAAGACTTTTTTAAATTATGAATCTCCTCGTGGA  
AAGTCAATGCGA-----AATCTCCGCGTATTCTGAATAATCTCATTTTTTCAATTATTA  
CCATTCGTTTTGCCAAGTTCAACGTTAAACAGATTAGTAAACATTTATATGTTTCGATG  
CAACAACAAGATATTATTTGTAACAAGTAGTTTGGTTGCTTGGTTAATTGGTCAAATTTT  
ATGGATTA---GTTGAGTGGGGAATAGTTGGATACAGCAAATTATCATTCTATTAGC  
CTTATTAGATCGAATAAATATCTCTTGTTCGAATTTATAGATTATATGCATCAAATCTTTAT  
TCTGATAGTATTTGTCACGTGTGGTTACTCTTTAGGCCGAATGTCGTCAGCCTTTTTTAC  
T-----TTATTTAATCCTACTGCTTACAGATCCCTTCATTCTCGTCTTTTCGACTATCACTCT  
TGGCATCGTCCAATGCGATATATAAAAAACGATAAATTAGAAAATGCCGTAAGAGATGA  
AATGTCACAATATTTTTTTTATACATGTCAAAGCGATGGAAAAAAGAATTGCTTTTAC  
ATTTCCACCCAGTTTATCACTTTTCTGGGAAATGCTACAAAGCAATCTTTCTTTGTCTAC  
AACAGAAAATTTATTA---GATGAACTATACAATTCTTGGATTTCTATCAATGAACAAAA  
AAAAATAACTTAAGCAATGAATTTGCTAATAGAATTGCAGTTCTAGACAAAGGACGTTT  
TTATATAGATGGACTCGATAAAAAAATCAATTATGCAAG---AAAATAAAAAAGAATAT  
TTACCAAAAATAAACGATCCTTTCTTAAATGGACCCTATCGTGGAATAAAAAA  
AAATGTAGTCATAGATGGAAGTCTTATAAATAAATTTATAGTATTCTT-----ATTGATC  
CA---GAAATAAAAGAAATA---AGTGAAATAAAAGAAATTAGTAAAACAGTTCCATACTG  
GCCATACAAATTAATTGATTATGATGTAGACGACGGACAACAATTGAGTCAAGAGAG  
TTAAACGTCTCGTTCTTTTTGATGCTAGTGTGATAGATTATCCAAGCGAAACTGATTTT  
GCTCGAGACGTAATAATAGGTTCCGCGCGGTCTCAAAGACGTAAAGTAGTTATTTTTGA  
AATATTAATAGGAAGTGCACATTCAATCCTTTTTTTAGACAGATTAATATAGTAATATTA  
TCACCATACATTAATTTTACCATTAATTAACCGATTTTAAAAAATCAAGAAGAA





GAAAAG-----AGGAAAAAA-----CGGAGTCTTTATCTAAAG-----AAATGCT  
TTGATAAAGGGCAGATGTATAGAAGTCTAAATAAAGATAGCGCTTTTTCAATTCGCTCA  
AAATGGAATCTAGTCAAATGTATATCCCGTGGTTCCTTACTTCGACAGGGTACAAATAT  
ATAACTTCTCTATTTTTAGATATTTTTTCAGACCTATTGAAGATCCTAATTAGC-----  
AAATTTTTATCTATTTTTTTGAGATTAGGCACCGATCCGATATATCATGGCTAATTCTTC  
AGAAAAAATAT-----TATCTTCCAGAATTTAAGTCGATAAGAAGTGAGATTTTCG  
AAAAAGTGTTTACATAAT-----CTTCTTTTATCCGAAGAAATGATTCATCGAAAT-----  
CATGAGTTGATATGCACATATCTGGTATCGCCAAATGTTTGGGAGTTC---TTATATTCAAT  
CTTTTTTCTTCTTCTGGTTATTGGATAT--TTCGTTTATACACATCTTATCGTTGTTTTCCG  
A-----GTCTCTAGTGAGTTACACAGAGAGTTTCGAAGAGGTCAAAGCTTTGATGACGCCA  
TCATATATAACTGAGTTGAGAAAACCTTCTGTATACGTATCCTATATGGGAATCGGATTTCT  
TTTGGTTAAATGATCTCTTTCTGGTTGTTCTGAACCGATTAGGAGATTCCCTAGAAGCAA  
TATTAGGTTCTTCTTTGGTGGT-----CCC-----GCTTATAGG---GTCAA  
ATCAATACGCTCTAAGAAAAAAAATTTTATTATGGAT-----CTCATAAATATCATA-----  
---CAAATCCCATCGATCGAATCACTTTTTTCGAGAAATACGCGATATCTAAGTCATATAA  
GTAAAGAGATCTATTCATCGATAATAAAGACGAAATTGGGGGCGATGATTGGATGGAG  
GATAGAATAGAATTCTGGTTCTCGCTCAGTGATTGGATTGATCCAGAAGAAAGAAAATT  
TTTGGTTCAGTTCTCT-----GCTTTAACAACCGAAAAAGAAAAAGGATTGATCAAATTC  
TATGGAGTCTGACT--CATAGTGATGATCATTTA-----TTAAATAATGACTCTGGTTAT  
CAAATGATTGAACAACCGGGAGTCATTTACTTACGATATTTAATTGACATTCAT-----AAA  
AAGTATCTAATGAATTATCAGTTCAATACATCTTGTTTAGCAGAAAGACGGGTATTCCCT  
GCGAATTATCACACAATCACTTAT-----TCACAAATCTCGTGTGGAGCTAATAGGTTTGAT  
TTCCCATCTCATGGA-----AAACCCTTTTCGCTGCGCTTAGCCTTATCCCCCTCT--AGG  
GGTATTTTAGTTATAGGTTTCGATAGGAATTGGACGAGCCTATTTGGTCAAATACCTAGCG  
ACAAACTCCTATGTTCCTTTTATTACGGTATTTTTGACCCAGTTCATGGATAGGAGTTTT  
AGTTTTTTTATTGATGTTGGTGGCAGTGACGGTGACGATGACAAGATTGCTGGTAGTAA  
GGATATTGATCTTGATGTTAGTGACCATATCGATCGG-----  
-----GACCTTGATAGGGATATGGAGGTGGATATGGATATGGAGCTGCAAACCTTGCTGG  
ATGAGGTAAGTGAGATGATGCCG-----AAACAGTTTTATATCACCTTCAATTCCA  
ATTAGCAAAGCAATGTCTCCTTGCATAATATGGATTCCAAACATTCATGATCTGGATAT  
GAATACGTCGAATTACTTATCCCTCGGCCTCTTAGTGAACCTCTCTCTCC-----AGGGAT  
TGTGAAAGAGGTTCC---ACTAGAAATAGTCTTGTTATTGCTTCGACTCATATTCCTCAA  
AAGTGGATCCCGCTCTAATATCCCCGGATAAATTAAGTACTTGTATTAAGATACGAAACC  
TTCTATTCCACACCAACGAAAGCACTTTTTCACTCTTTCATATACTAGAGGATTTCACT  
TGAAAAGAAAATGTTTCGATACT-----AATGGATTCCGGTCCACAACGATGGGTTCCAAT  
GTACGAGATCTTGCAGCACTTAATAATGAGGTCCATCGATTAGTATTTACAAAAGAA  
ATCAATTATAGACACTAATACACTTAGATTAGCTCTTCATAGACAACTTGGGATTTGCG  
C-----GCCCGGGTAAGATCGGTTTCAGGATCATGGGATCCTTTTCTATCAGGTAGGAAG  
GGCTGTTGCACAAAATGTACTTTTAAGTAATTGCTCTATAGATCCTATATCTATCTATCTG  
AAGATGAAA-----TTATGTGACGAAGGGTTTTCTTCTTTGTACCAATGGTACCTCGAACT  
TGGAACGAGCATGAAGAAATTAACGATACTTCTTTATCTTTTGAGTTGTTCTGCCGGAT  
TGGTCGCTGAAGATCTTTGGTCTCTACTCGGA---TCCAATGGAGAAAAG-----GGGATCA  
CTTCTTATCAACTCGTTGAGAATGATTTCT--GATGTAGTTCAGGGTCTATTAAGTAGA  
AGGCTCTCTGGTGGGA-----TCCTCATGGACAGAAAAAGATTGCAGTAAGTTTGATAAT

GAT-----CGAGTGACATTGTTTCTTCGGCCCGAAATAAGGAAT---CCCTTAGATATGATGC  
AAAATGGATCTTGTTCTATCCTTGATCATAGTAATAGATTTCTCTCT-----GAA  
CAG-----GGAGCCCTCGATCCGCAC-----CAGATAGAGGAGGAT-----TTA  
GTCAATTCC-----ATAGTTTGGGCTCCT-----AGAATGTGGACCCCC-----TGGAGC  
TTTTCTTGATCGAAAGGCCCAATTCATTGGGATTTCTCT---TATTGGGCCCCGGTCAGTGT  
GGGGCAAG-----CGTTTCGCTTATGATGAAGAG-----CTTCAAGAGAATGATTCGGAGT  
TCTTGCAGAGTGGAACCACGCAGGACCAGATAAAAAGAGCGGGTC-----TTTTTT  
CGAATAAGCCAATTTATTTGGGACCCCGGAGATCCACTCTTTTTCTATCCGAT---GATC  
AGCCCTTTGCATCTGTGTTTTACATCGAGAATTCTTTGCAGATGAAGAGATTCCAAAG  
AGGCTTTTTACTACCAAAAATGATACTCCTACATCTATGTATAAACGCTTTTTTTTTCTGA  
TTCCGCAAGAAAAGAAAAAGCACTATGAGTTCATGATTAATCGCCAGAGATGGTTTAG  
AACCATTAGAACCGCTAGTTCATTATCA-----ACTGGATCTGTCCGTTCTAAT-----ACTCT  
ATGCGAGAGTTATCAGTATTTATCAAATCTGTTCCCTATCTAAT---GCAACACTATTGCATC  
AAATGACAAAGACATTGTTGAGAAAAAGCTGGATTTTCCCGGATGAAATGAAAATA----  
-----ATGTCTAGATCGCGA---ATAAATGGAAATTTATTGATAAG  
ACTTTTCAATTGTGGCCAATATTTTATTACGAATCATTCCGACAACCTTCGGGAGAAAA  
GGAGGCATTTACTTATTATAGAGATGGG-----ATGTCAGCTCAATCCGAAGGAAATTATG  
CGGAAGCTTTACAGAATTATTATGAAGCTATGCGACTAGAAATCGACCCCTACGATCGA  
AGTTATATACTATATAATATAGGCCTTATTCACACAAGTAATGGGGAACATACGAAAGCT  
TTAGAATATTATTTCCGGGCACTAGAACGAAACCCATTCTTACCCCAAGCTTTTAATAAT  
ATGGCAGTGATCTGTCAATAC---CGGGGAGAACAGGCCATCCGACAGGGAGATTCTGA  
AATTGCAGAGGCTTGGTTTGATCAAGCCGCCGAGTATTGGAAACAAGCTATAACACTT  
ACTCCTGGGAATTATATTGAAGCGCATAATTGGTTGAAGATCACGGGACGTTTCGAA----  
--ATGAATTGTCGATCAGAACGTATATGGATAGAACTTATAACAGGATCTCGAAAAATAA  
GTAATTTCCGGCTGGGCCATTCTCCTTTTTATAGGCTCATTAGGATTCGTATTGGTTGGAAT  
TTCTAGTTATCTCGGTAGGAATTTTATATCCTTATTTCCCCCCAGCAAATTTGTTTTTTTT  
CCACAAGGGATCGTGATGTCTTTCTATGGAATCGCCGGCCTCTTTATTAGCTCCTATTTG  
TGGTGTACAATTTGTTGAATGTAGGTAGTGGTTATGATTTTTTTTCGATAAAAAAGAAGG  
AATAGTATGTATTTTTCGTTGGGATTTCTGGAAAAAACCGTCGCATCTGTCTCCGATT  
TCTTATAAAAGATATTCAGTCTATTAGAATAGAATTTAAAGAGGGCATTATACTCGTCG  
TGTCCTTTATCTCGAAATAAGAGGCCAGGGGGCCATTCTTTGACCCGTACGGATGAAA  
AT--TTGACTCCACGAGAAATTGAACAAAAAGCTGCTGAATTGGCCTATTTCTTGCGTG  
TACCAATTGAAATTTTT

>Brassica

ATGGAAAAATCGTGGTTCAATTTGATGTTTTCTCTAAGTAAAGCAATGGATAGT---TTTC  
CTATTGAAAAGACTACTATAAGTAAAGACCGGTTTATATATGATATGGATAAAAACTTTT  
ATGGTTACAATAATGTTGATCTTTTAGTTAACTCCAAGGACATTCGGAATTCATATCGG  
ATGACACCTTTTTGTTAGGGATAGTAATAAAAATAGTTATTCTATATATTTTGATATAAA  
AAAGAAAAAATTTGAGATTAACAATGAT-----TTGAGTGACCTAGAAATTTTTTTTT  
TATAGTTATTGTAGTTCTAGTTATCTGAATAATAGATCTAAAGGTGACAAC---CACTATGA  
TCCTTACATTAAGGATACTAAATATAATTGTAATAATCACATTAATAGTTGCATTGACTCT  
TATTTTCGT-----TCTCACATCTGTATTAATAGTCACTTTTTAAGCGATAGTAATAATTCCA  
ATGAAAGTTACATTTATAATTTCAATTTGTAGTAGCAAAAATGACAAGATAAGAATAATA  
GTAATCGTAATAATTTAATGAGT-----TCTAAG---TTCGATATAACTAAAACTACAATC

AATTGTGGATTCAATGCGACAATTGTTATGGATTAATGTATAAG-----AAAGTCGAAAT  
GAATGTTTGTGAAGAATGTGGACATTATTTGAAAATGACCAGTTCAGAGAGAATTGAG  
CTTTCGATTGATCCGGGTACTTGGAAATCCTATGGATGAAGACATGGTCTCTGCGGATCC  
CATTAAATTTTCATTTCGAGGGAGGAACCTTATAAAAAGCGTATTGCCTCTGCTCAAAAAA  
AGACAGGGTTGACTGACGCTATTCAAACAGGTACAGGTCAATTAACGGTATTCCGGT  
AGCTCTTGGGGTTATGGATTTTCAGTTTATGGGGGGTAGTATGGGATCCGTAGTAGGCG  
AAAAAATAACTCGTTTGTATCGAGTATGCTACCAATCAATGTTTACCTCTTATTTTAGTGT  
GTTCTTCCGGAGGAGCACGAATGCAAGAAGGAAGTTTAAGTTTGATGCAAAATGGCTAA  
AATTTCTTCGGTTTTATGTGATTATCAATCAAGTAAAAAGTTATTTCTATATATCAATTCTTA  
CATCTCCTACTACCGGTGGGGTGACAGCAAGTTTTGGTATGTTGGGGGATATCATTATTG  
CCGAACCCTATGCCTATATTGCATTTGCGGGTAAAAGAGTAATTGAACAAACATTGAAA  
AAAGCCGTGCCTGAAGGTTCAACAAGCAGCTGAATCTTTATTACGTAAGGGCTTATTGGA  
TGCAATTGTACCACGTAATCCTTTAAAAGGTGTTGTGAGTGAGTATTTTCAGCTCCATG  
CTTTTTTTCTTTGAACAAAAATGAAATCAAATGGTAACCATTAAAGCCGATGAAATT  
AGTAATATTATCCGTGAACGTATTGAGCAATATAATAGAGAAGTGACGATTGTAAATACC  
GGTACCGTACTTCAAGTGGGCGACGGCATCGCTCGGATTTATGGTCTTGATGAAGTAAT  
GGCAGGTGAATTAGTAGAATTTGAGGAGGGTACTATAGGTATTGCCCTTAATTTAGAAT  
CAAATAATGTTGGTGTTGTATTAATGGGTGACGTTTTGATGATCCAAGAAGGAAGTTCA  
GTCAAAGCTACGGGAAAAATTGCTCAGATACCCGTGAGTGAGGCTTATTTGGGGCGTG  
TTATAAACGCCTTGGCTAACCTATTGATGGTCGAGGTAAGATTTTCAGCTTCTGAATCTC  
GGTTAATTGAATCTCCTGCCCCAGGTATTATTTTCGAGACGTTCTGTATATGAGCCTCTTC  
AACAGGACTTATTGCTATTGATTCCATGATCCCTATAGGACGCGGCCAGCGGGAATTA  
ATTATTGGTGACAGACAGACCCGGTAAAACAGCAGTAGCCACAGATACAATTCTCAATC  
AACAAAGGTCAAATGTAATATGTGTTTATGTGGCTATTGGTCAAAAAGCTTCTTCCGTG  
GCTCAGGTAGTGACTAGTTTACAGGAACGAGGGGCAATGGACTACACTATTGTGGTAG  
CTGAAACGGCTGATTCCCCAGCTACGTTACAATACCTCGCGCCTTATACAGGAGCCGCC  
TTGGCTGAATATTTTATGTACCGTGAACAACACACTTTAATCATTATGATGATCTTTCCA  
AACAAAGCACAAAGCTTATCGACAAATGTCTCTTCTATTACGAAGACCCGCCCGGGCGTGA  
AGCTTATCCAGGAGATGTTTTTTATTTACATTCACGTCTTTTAGAAAGAGCCGCTAAATT  
AAGCTCTGAATTAGGTGAAGGAAGTATGACTGCCTTACCAATCGTCGAGACCCAGTCA  
GGAGATGTTTCAGCTTATATTCCACTAATGTAATTTCCATTACAGATGGACAAATATTCT  
TATCCGCTGATCTTTTTAATGCTGGAATTAGACCTGCTATTAATGTAGGGATTTCTGTCTC  
GAGAGTAGGATCTGCCGCTCAAATTAAGCTATGAAACAGGTAGCTGGAAAATTAATAA  
TTGGAATTGGCTCAATTCGCGGAATTAGAAGCCTTTTCCCAATTTTCTTCTGATCTCGAT  
AAAGCTACTCAGAATCAATTGGCAAGAGGTCAACGATTGCGTGAGTTACTGAAACAAT  
CCCAATCAGCCCTCTCACAGTGGAAGAACAGATAATGACCATTTATACCGGAACAAAT  
GGTTATCTGGATGGATTAGAAATTGGACAAGTAAGAAAATTTCTCGTTCAGCTACGCAC  
TTATTTAAAAACAATAAACCTGAGTTCCAAGAAATAATAGCCTCTACCAAGACATTAA  
CCGCTGAAGCAGAAAGCTTTTTGAAAGAAGGTATTAAGAGCAACTGGAACGTTTTCT  
ACTTCAGGAGAAATTAATGAGAATAAATCCTACTACTTCGGATCCAGCGGTTTCAATAC  
GTGAAAAAACAACCTGGGACGTATTGCCCAAATCATTGGTCCGGTACTGGATGTAGC  
CTTCCCCCGGGCAAGATGCCTAATATTTACAATGCTCTGGTGGTTAAGGGTTCGAGATA  
CGCTTGGTCAAGAAATTAATGTGACTTGTGAAGTACAGCAATTATTAGGAAACAACCG  
AGTTAGAGCTGTAGCTATGAGCGCGACCGAGGGTTTTAAAGAGAGGGATGGACGTGGTT

GATATGGGAAATCCTCTAAGTGTTCCAGTCGGCGGAGCGACTCTAGGACGAATTTTCAA  
TGTA CT TGGGGAACCTGTTGATAATTTAGGTCCTGTGATACTCTCACAACATCTCCTAT  
CCATAAATCCGCGCCTGCTTTTATAGACTTAGATAAACCTTATCTATTTTTGAAACAGG  
AATTAAGTAGTAGATCTTTTGGCCCTTATCGTCGTGGGGGAAAAATCGGACTATTCG  
GTGGGGCTGGCGTGGGTAAAACAGTACTAATTATGGAATTGATCAACAACATTGCCAA  
AGCTCATGGTGGTGTATCCGTATTTGGTGGAGTAGGCGAACGAACTCGTGAAGGAAAT  
GATCTTTACATGGAAATGAAAGAATCTGGAGTCATTAATGAACTAAACCTTGCGGACTC  
CAAAGTAGCCCTAGTCTACGGTCAGATGAATGAACCGCCGGGAGCTCGTATGAGAGTT  
GGTCTGACTGCCTTAACTATGGCAGAATATTTCCGAGATGTTAATGAGCAAGACGTA CT  
TCTATTTATCGACAATATCTTCCGTTTTGTACAAGCAGGATCCGAGGTATCCGCTTTATTG  
GGTAGAATGCCTTCTGCTGTGGGTTACCAACCCACCCTTAGTACCGAAATGGGTTCTTT  
ACAAGAAAGAATTA CT TCTACGAAAAAAGGGTCCATAACCTCTATTCAAGCAGTTTATG  
TACCTGCAGACGATTTGACTGACCCTGCTCCTGCCACCACATTTGCACATTTAGATGCG  
ACTACCGTACTATCAAGAGGATTAGCTGCTAAAGGTATCTATCCAGCGGTAGATCCTTTA  
GATTCAACGTCAACTATGCTACAACCTCGAATCGTTGGCGAGGAACATTATGAAACTGC  
GCAACAAGTAAAGCAAACCTTTACAACGTTACAAGGAGCTTCAGGACATTATAGCTATC  
CTGGGGTTGGACGAATTATCCGAAGAGGATCGCTTAACCGTCGCAAGAGCACGAAAGA  
TTGAGCGTTTTCTTATCACAACCTTTTTTTCGTAGCAGAAGTATTTACAGGTTCTCCGGGA  
AAATATGTTGGGCTAGCGGAAACAATTAGAGGGTTTAATTTGATCCTTTCCGGAGAATT  
TGATTCTCTTCCTGAACAGGCCTTTTACTTAGTGGGTAACATCGATGAAGCTACTGCGA  
AGGCTACGAACTTAGAAATGGAGAGTAAATTGAAGAAAATGACCTTAAATCTTTGTGT  
ACTGACTCCGAATCGAATTGTTTGGGATTCAGAAGTAAAAGAAATCATTTTATCTACTA  
ATAGTGGACAAATTGGCGTATTACCAAATCACGCGCCGATTGCCACAGCTGTTGATATA  
GGTATTTTTGAAAATACGCCTTAATAACCAATGGTTAACAATGGCTCTGATGGGCGGTTTT  
GCTAGAATAGGCAATAATGAAATTACTATTTTAGTAAATGATGCAGAGAAGAATAGTGA  
CATTGATCCACAAGAAGCTCAGCAAACCTTGAATAGCAGAGGCGAACTTGAGAAA  
AGCTGAAGGCAAGAGACAAACAATTGAGGCTAATCTAGCTCTCAGACGAGCTCGGAC  
ACGCGTCGAGGCTCTCAATACGATT---ATGAAAAATTTAACCGATTCTTTCGTTTACTTG  
GGTCACTGGCCATCCGCCGGGAGTTTCGGGTTTAATACCGATATTTTAGCAACAAATCC  
AATAAATCTAAGTGTAGTCTTCGGTGTATTGATCTTTTTTGGAAAGGGAGTGTTAAATGA  
TTTATTAGATAACCGAAAGCAGAGGATATTAATACTATTCGAAATTCAGAAGA ACTAC  
GTGAAGGAGCTATTCAACAATTAGAAAACGCCCGAGCTCGCCTGCGTAAAGTAGAAAT  
GGAGGCGGATCAGTTTCGCGTAAATGGATACTCTGAAATCGAACGAGAAAAAGTAAAT  
TTGATTAATTCAACTTCTAGGACTTTGAAACAATTAGAAAATTACAAAAACGAAACCAT  
TCTTTTTGAGCAACAAAGAACAATTAATCAAGTCCGTGAACGGGTTTTCCAACAAGCT  
TTACAGGGAGCTATAGGAACCCTAAATAGTTGTTTGGAGTAATGAGTTACATTTACGTA CT  
ATTAATGCAAATATTGGTATGTTTGGTACGATGAAAGAAATTACTGATATGAATCCACTG  
GTTTCTGCTGCTTCGGTTATTGCTGCTGGGTTGGCTGTTGGGCTTGCTTCTATTGGACCT  
GGGGTTGGTCAAGGTACAGCTGCGGGTCAAGCTGTCGAAGGTATCGCGAGACAACCT  
GAGGCAGAAGGAAAAATACGAGGTACTTTATTGCTTAGTTTGGCTTTTATGGAAGCTTT  
AACAAATTTATGGCCTAGTTGTAGCATTAGCGCTTTTATTTGCGAATCCTTTTGTATGAAT  
GTTTTATCATGTTCCATCAATACACTAATAAAATTATATGAGATATCTGGTGTAGAAGTAG  
GCCAACATTTCTATTGGCAAATAGGGGGGTTCCAAGTCCATGCGCAAGTCCTTATTACT  
TCTTGGGTTGTAATTGCTATCTTATTAGGTTCCGCAGCTCTAGCGGTTGCAATCCACAA



ACCATTCCAACCTGGCGGCCAAAACCTTCTTTGAATTTGTCCTTGAATTCATTCGAGATGT  
GAGTCAAACCCAGATTGGAGAAGAATACGGTCCATGGGTTCCTTTATTGGAACCCCTG  
TTTTTATTTATTTTTGTTTCTAACTGGTCAGGAGCCCTTTTACCGTGGAAAATTATCCAGT  
TACCTCAAGGGGAGTTAGCAGCACCAACGAATGATATAAATACGACGGTTGCTTTAGCT  
TACTCACATCAGTAGCATATTTTTATGCGGGTCTTAGCAAAAAGGATTAGGGTATTC  
AGTAAATACATTCAACCAACTCCAATTTTACCCATTAACATCTTAGAAGATTTTACA  
AAACCCCTATCACTGAGTTTTTCGACTTTTTCGGAAATATATTAGCCGATGAATTAGTAGTT  
GTTGTTCTTGTTTTCTTTAGTACCTTTAGTGGTTCCCTATACCTGTCATGTTCTTGGATTAT  
TTACAAGCGGGATTCAAGCTCTCATTTTTGCCACTTTAGCTGCGGCTTATATAGGTGAAT  
CCATGGAGGGTCATCATATGATTTTTTCAATTTTAGAGCATATATTAACATATATCTTTT  
TCGGTTCGTTTCAATTGTACTACTAATTTATTTTTTAACTTTATTAGTTAATGAAATCATAG  
GATTTTTTGATTCATCAGATAAAGGAATCGTAATTACGTTTTTTGGTATAACAGGATTATT  
ATTTACGCGTTGGATTATTTCAGGACATTTTCCATTAAGCAATTTATATGAATCATTAAAT  
TTTTTTTCATGGGCTTTTGCAATTATTCATATAGTTTCCCTATTTTAATAAAAAAAAAAATC  
ACTTAAACGCAATAACTGCGCCAAGTGCTATTTTTATTTCAGGGTTTTGCTACTTCAGGTC  
TTTTAAACAACATGCCTCAGTCTGCAATATTAGTACCAGCTCTCCAGTCCCAGTGGTTA  
ATGATGCACGTAAGTATGATGATATTAGGCTATGGCGCTCTGTTATGCGGATCATTATTAT  
CAATAGCTCTTCTAGTCATTACATTTTCGCAAGGTCCGATCTACTTTTTGGAAAAGAAT  
GTACTTTACTACATAAATGAAAGAAATTCTATTTTACTAAATATTAATTTTAGTTTTTCTA  
GAAATTATTATAGGTATCAATTGATTGAACAATTAGATTATTGGAGTTTTCGTATTATTAG  
TCTCGGATTTATCTTTTTAACCCTCGGCATTTCTTTCAGGAGCTGTATGGGCTAATGAAAC  
ATGGGGTTCATATTGGAATTGGGATCCGAAAGAAACCTGGGCATTTATTACTTGGACCA  
TCTTCGCAATTTATTTACATATTAACAAATAGGAATGCTCGAGGTATAAATTCTGCAA  
TTGTGGCTTCGCTAGGTTTTCTTTTTAATTTGGATATGCTATTTTGGCGTCAATCTTTTAGG  
AATAGGTTTACATAGTTATGGTTCATTTACATCGAATATGGCAAAAAGAAAGCATTTCAT  
TCTTTTTTTTTATTTTACATCTATAGTCTTTTTGCCCTGGTTGATCTCTCTCTGCTGTAATA  
AAAGTTTAAAACCTTGATTACTAATTGGTGGAAACTAGACAATGCGAAACCTTTCTTG  
AATGATATTCAAGAAAAAGTGTCTAGAAAAATTCATACAATTAGAGGAACCTATTCCA  
GCTGGATGAAATGATAAAGGAATACCCAGAAACCGATTTACAACAATTTTCGTCTAGGA-  
--CACAAAGAAACGATCCAATTCATCAAATAACACAATGAGTATCGTATCCATACAATCT  
TGCATTTCTCGACAAATCTAATATCTTTCGTTATTCTAAGTGGTTATTCCTTTTGGGGTAA  
GGAAAAGCTTTTTATTCTCAATTCCTGGGTTCAAGAATTCCTATATAATTTAAGTGATAC  
AATTAAGCTTTTTTCGATTCTTTTATTAACCTGATTTATGTATCGGATTCATTCGCCTCAC  
GGTTGGGAACATAATGATTGGTTATATTTACAAAGATTTTGGGTTTGGCTCATTATGAGCAA  
ATTTTATCTGGTCTAGTTTCTACCTTTCCAGTCATTCTTGATACAATTTTTAAATATTGGAT  
CTTTCGTTATTTAAATCGTGTATCTCCGTCACTTGTAGTGATTTATCATGCAATAAATGAC  
ATGCCTATTGGCGTTCCAAAAGTACCTTTTTCGAAGTCCCTGGAGAAGGAGATACATCTTG  
GGTTGACATAATCAACCGACTTTATCGAGAAAGATTGTTTTTTTTTAGGCCAAGAGGTTG  
ATACCGAAATCTCGAATCAACTTATTAGTCTTATGATATATCTCAGTATAGAAAAGGATA  
CCAAAGATCTTTATTTGTTTTATAAACTCTCCTGGTGGATGGGTAATATCTGGAATGGCTA  
TTTTATGATACTATGCAATTTGTGCGACCCGATGTACAGACAATATGCATGGGATTGGCCG  
CTTCAATAGCATCCTTTATCCTAGTCGGAGGAGAAATTACCAAACGTATAGCATTCCCTC  
ACGCT--GTAATGATCCATCAACCCGCTAGTTCGTTTTATGAGGCACAAACGGGAGAAG  
TTATCTTGGAAGCGGAAGAACTACTAAAACCTTCGCGAAACCATCACAAGGGTTTATGT

ACAAAGAACGGGCAAACCTATATGGGTTGTATCCGAAGACATGGAAAGGGATGTTTTT  
ATGTCAGCAACAGAAGCCCAAGCTCATGGCATTGTTGATCTTGTAGCGGTTCA  
A????????????????????????????????????????????????????????????  
????????????????????????????????????????????????????????????  
????????????????????????????????????????????????????????????  
????????????????????????????????????????????????????????????  
ATGGAGAAATTTCAAGGATATTT  
AGAGTTCGATGGGGCTCGTCAACAGAGTTTTCTATATCCACTTTTTTTTTTCGGGACTATAT  
TTATGTACTTGCTTATGATCACGGTTTAGCGGATTATGACAAAAAATATAGTTCACTAATT  
GTGAAACGCTTAATTTTGCGAATGTACGAACAGAATCGTTTGATTATCCCACTAAGGA  
TTTGAACAAAAAT-----CTGGGGAATAATTTCTATTATCAAATGATATCTGTTTTATTTGCA  
GTGATTGTAGAAATTCATTTTCCCTAAGGTTGGGATCCTCTATCGTAAAAAAATCTTAC  
AATTTACAATCACTTCATTCAATATTTCCCTTTTTTAGAAGACAAACTCTCACATTTTAATT  
ATGTATTAGATGTACTAATACCTTACCCCATCCATCTAGAAATCTTGGTTCAAACCCTAC  
GTTACCGGGTAAAAGATGCCTCTTCTTTGCATTTTTTTTCGGTTCTGTCTATACGAGTATT  
GC-----AATTGGAAGAATTTTAAA-----TCAATTCCAAGATTTTTATTGTTCTTATAT  
AATTCTCATGTATGTGAATACGAATCCATCTTTTTTTTTCTACGCAAGCAGTCTTCTCATT  
TACGATCGACATCTTATGACGTCTTTTTTGAGCGAATTTTATTCTATGGAAAAATACAAC  
ATTTTTTAAAAGTCTTTGTTAATTCGGCGCTCTTAGGGTTGCTCAAGGATCCTTTCCTAC  
ATTATGTTAGATATCATGGAAAATACATTCTGGCAACAAAGGATACGCCACTTCTGATGA  
ATAAATGGAAATATTATTTTGTAAATTTATGGCAATGTTATTTTTCCGTATGGTTTCAATCG  
CAAAGGTTAATAAATCAATTATCTAAAGATAATTTAGAATTTCTGGGTTATCTATCAA  
GTTTGCGACTAAACCCTTTAGTGGTACGTAGTCAAATGCTAGAAAATCATTCTAATA  
GATAAT-----GTTCAATAAAAATTGGATAGCAACATTCCAATTTCTTCTATTATTGGGTCGT  
TGGCTAAAGATAAATTTTGTAAATGATTAGGGCATCCGATTAGTAAAGCGACCTGGACG  
GATTCATCAGATTCTGATATTCTCAACCGATTTGTGCGTATATGCAGAAATATTTTCGCATT  
ATTACAGCGGATCTTCAAACAAAAAGAATTTGTATCGAATAAAATATATACTTTCGTCTTT  
GTTGTGTTAAACTTTGGCTCGTAAACACAAAAGTACTGTACGCGCTTTTTTAAAAAAG  
GTTGGGCTCGGGTTTATTAGAAGAATTCCTTACGGGGGAAGACCAAGTTCTTTCTTTAA  
TCTTCCAAGACGGGTTTGGTATTTGGATATTCTTTATCTTAATGATTTAGTCAATCATGA  
AATGATAATTTATGCAACA--GAAGTACAAACAATAAAT--TCTTTTCTTAGATTGGAATC  
T--TTAAAAGAGGTCTATGGACTCATATGGATATTTGTCCCTATATTTTCTCTTGTATTGGG  
AATCATAACTGGTGTACTAGTAATTGTGTGGTTAGAAAGAGAAATATCTGCAGGGATAC  
ACAACGTATTGGACCTGAATACGCCGCCGTTAGGAATCTTCAAGCTTTAGCCGAC  
GGGACAAAATACTTTTTCAAAGAAGATCTTCGTCCATCTAGAGGAAATACTCCTTTATT  
TAGTATTGGACCATCTATAGCAGTTATCTCTATTTTACTAAGTTATTCAGTAATTCCTTTTA  
GCAATCACCTTGTTTTAGCGGATCTCAATATCGGTATTTTTTTTATGGATTGCCATCTCAAG  
TGTTGCTCCGATCGGACTTCTTATGTCAGGATATGGATCAAATAATAAATATTCTTTTTTA  
GGTGGTCTGCGAGCTGCTGCTCAAGCGATTAGTTATGAAATACCATTAACTCTATGTGTT  
TTATCAATATCTCTATTATCTAACAGTTAAGTACAGTTGATATAGTTGAGGCACAATCAA  
AATATGGTTTTTTGGGGATGGAATTTGTGGCGTCAACCTATAGGTTTTATCATTTTTCTAAT  
TTCTTCCCTAGCAGAATGCGAGAGGTTACCTTTTGATTTACCAGAAGCGGAAGAAGAA  
TTAATAGCAGGTTATCAAACCTGAATATCCGGTATCAAATTTGGTTTATTTTATGTTGCTT  
CTTATCTAAATCTATTAATTTCCCTCATTATTTGTAACAGTTCTATACTTAGGCGGTTGGAAT  
ATTTCTATTCCGTATATATCTATGCTGGAGCTATTTGAAAAG-----GATCAAATTTTTGG  
ACAACAATTGGTATCTTTATTACATTAGCTAAAACCTTATTTGTTCTTGTTCATTTCTATC

GCAACCAGATGGACTTTACCTAGGCTAAGAATGGATCAACTATTAATCTTGGATGGAA  
ATTTCTTTTACCGATTTCCCTTGGTAATCTATTATTAACAACCTTCTTTCCAACCTTTTTCA  
CTCATGATCTGGCATGTACAGAATGAAAATTTCAATCTCGATTCTACGAGAATTTTTATG  
AAAGCCTTTCAATTTGCTTCTCTTCGATGGAAGTTTTATTTTCCAGAATGTATCCTAATTT  
TTGGCCTAATCCTTCTTCTGATGATCGATTCAACCTCTGATCAAAAAGATATACCTTGGT  
TATATTTTCATCTCGTCAACAAGTTTCGTAATGAGCATAACGGCCCTATTGTTCCGATGGA  
GAGAAGAACCTATGATTAGCTTTTCAGGAAATTTCCAAACGAACAATTTCAACGAAAT  
CTTTCAATTTCTTATTTTACTATGTTCAACTCTCTGTATTCCTCTATCCGTAGAGTACATTG  
AATGTACAGAAATGGCTATAACAGAGTTTCTGTTATTCGTATTAACAGCTACTCTAGGAG  
GAATGTTTTTATGTGGTGCTAACGATTTAATAACTATCTTTGTAGCTCCAGAATGTTTCA  
GTTTATGCTCCTACCTATTATCTGGATATACCAAGAAAGATGTACGATCTAATGAAGCTA  
CTATGAAATATTTACTCATGGGTGGGGCAAGCTCTTCTATTCTGGTTCATGGTTTTCTCTT  
GGCTATATGGTTCATCCGGGGGAGAGATTGAGCTTCAAGAAATAGTGAATGGTCTTATC  
AATACACAAATGTATAACTCCCCAGGAATTTCAATTGCGCTTATATTCATCACTGTAGGA  
ATTGGGTTCAAGCTTTCCCTAGCCCCTTCTCATCAATGGACTCCTGACGTATACGAAGG  
ATCTCCCCTCCAGTCGTTGCTTTTTCTTTCTGTTACTTCGAAAGTAGCTGCTTCAGCTTT  
AGCCACTCGAATTTTCGATATTCCTTTTTATTTCTCATCAAATGAATGGCATCTTCTTCTG  
GAAATCCTAGCTATTCTTAGCATGATATTGGGGAATCTCATTGCTATTACTCAAACAAGC  
ATGAAACGTATGCTTGCATATTCGTCCATAGGTCAAATCGGATATGTAATTATTGGAATAA  
TTGTTGGAGACTCAAATGGTGGATATGCGAGCATGATAACTTATATGCTGTTCTATATCT  
CCATGAATCTAGGAACTTTTGCTTGCATTATATTATTTGGTCTACGTACCGGAACTGATA  
ACATTCGAGATTATGCAGGATTATACACAAAAGATCCTTTTTTTGGCTCTCTCTTTAGCTC  
TATGTCTCTTATCCCTAGGAGGCTTTCCTCCACTAGCAGGTTTTTTTTGGAAAACCTCCATT  
TATTCTGGTGTGGATGGCGGGCAGGCCTATATTTCTTGGTTTCAATAGGACTCCTTACGA  
GCGTTCTTTCTATCTACTATTATCTAAAAATAATCAAGTTATTAATGACTGGACGAAACC  
AAGAAATAACCCCTCACGTGCGAAATTATAGAATATCCCCTTTAAGATCAACCAATTCC  
ATCGAATTGAGTATGATTGTATGTGTGATAGCATCTACTATAACCAGGAATATCAATGAAC  
CCGATTATTGCGATTGCTCAGGATACCCTTTTTATGTTTTCTGCTTTACGAATATGATATTT  
TCTGGGCATTTTTAATAATATCAAGTGCTATTCCTGTTTTGGCATTCTAATTTCCGGGGT  
TTTATCTCCAATTACGAAGGGGCCGGAGAACTTTCTAGTTATGAATCAGGTATAGAAC  
CGATCGGGGATGCTTGGTTACAATTTAGAATCCGTTATTATATGTTTGCTCTAGTTTTTGT  
TGTTTTTGATGTTGAAACCGTTTTTCTGTATCCGTGGGCAATGAGTTTCGATGTACTAGG  
GGTATCCGCTTTTATAGAAGCTTTCATTTTCGTGCTTATCCTAATTCTTGGTTTAGTTTAT  
GCATGGCGAAAAGGAGCGTTGGAATGGTCTACGAATGATTTTCCTTGGTTAACAATAAT  
TGTTGTTTTTCCAATATCTGCCGGTTCATTAATGTTATTTCTCCCGCATAGGGGAATAA  
AGTTAATAAGTGGTATACTATATGCATTTGTATCTTAGAACTTCTTCTAACGACTTACGCT  
TTTTGTTATAATTTAAACTGGACGATCCATTAATTCAACTGTCCGAAGATTATAAATGG  
ATCAATCTTTTTGATTTTTTATTGGAGACTGGGAATAGATGGACTTTCTATAGGAACGATT  
TACTGACCGGATTTATTACTACTTTAGCTACTTTAGCGGCTTTTCCAGTTACTCGGGAT  
TCCCGATTATTTCTATTTCTGATGTTAGCAATGTACAGCGGCCAAATAGGATCGTTTTCT  
TCTCGGGATATTTTACTTTTTTTCATCATGTGGGAATTAGAATTAATTCCCGTTTTATCTCC  
TTTTATCCATGTGGGGTGGAAAGAAACGTTTGTATTCAGCTACAAAATTTATTTTATACA  
CTGCAGGAAGTTCTATTTTTTTATTAATAGGAGTTTTAGGTATAAGTTTATATGGTTCGAA  
CGAACCAACATTAATTTAGAACTATTAGGGAATCAAGCCTATCCGGTCACACTCGAAA

TACTCTTTTATATTGGATTTCTTATTGCTTTTTGCCGTCAAATCACCGATTATACCTTTACAT  
ACTTGGTTACCTGACACCCACGGCGAGGCACATTACAGTACCTGTATGCTTCTCGCTGG  
AATCTTATTAATAATGGGAGCATATGGATTGGTTCGAATCAATATGGAATTATTACCTCA  
CGCTCATTCTATGTTTTCTCCTTGGTTGATGGTAGTCGGTACAATCCAAATAATTTATGCA  
GCTTCAACATCTCCCGGTCAACGTAATTTAAAAAAGAGAATAGCCTATTCTTCTGTATCT  
CATATGGGTTTTATAATTATAGGTATTGGTTCTATAACGGATCCTGGGCTTAATGGAGCTA  
TTTTACAAATAATCTCTCATGGATTTATTGGCGCTGCACTTTTTTTTCTTGGCAGGAACTA  
GTTATGATAGAATCCGGCTTGTATTCTTGATGAAATGGGTGGAATGGCTATCTCCATTC  
CAAAGATATTTACAATGTTCACTATCTTATCGATGGCTTCCCTTGCATTACCGGGCATGA  
GTGGTTTTGTTGCCGAATTAATCGTTTTTTTTTGGAAATAATTACCAGCCAAAAATATTTCTT  
AATTTCAAAAATTTTAATTATTTTTGTAATGGCAATTGGAATGATATTAACTCCTATATATT  
TATTATCTATGTCACGTCAAATGTTCTATGGATAACAAGTTAATTAATGCCAAAAACTTTTC  
TTTTTTTGATTCTGGACCCCGAGAGTTATTTCTTTCAATCTCTATTCTTCTACCCATAATT  
GGTATTGGGATTTATCCTGATTTTGTGCTCTCATTAGCAAGTGACAAGGTGCAATCCATT  
TTATCTAATTATTTTTATGGAATGATACTCGAACATGTACTTGTTTTGAGTGCCTATTTATT  
TTTGATTGGTCTTTATGGATTGATCACGAGTCGAAATATGGTTAGGGCTCTTATGTGCCT  
TGAACTTATACTCAATGCAGTTAATATGAATCTCGTAACATTTGCTGATTTTTTTTGATAAT  
TCCCAACTAAAAGGGGATATTTTCTGCATTTTTGTTATAGCAATTGCAGCCGCTGAAGC  
AGCTATTGGATTAGCTATAGTCTCGTCAATTTATCGTAACAGAAAATCAACTCGCATCAA  
CCAATCGACCTTATTAATAAGATGGAACATACATATCAATATTCATGGATCATCCCTTTC  
ATTCCACTTCCAGTACCTATTTTACTCGGAGCTGGACTTCTACTTTTTTCCGACAGCAAC  
AAAAACCTTCGACGTATGTGGACGTTTCTGAGTATTTTTTTGTTAAGTATAGTTATGAT  
CTTTTCGCTCTATCTATCTATTCAACAAATTTTTCTAAGTTGCATTCATCAAAATGTATGG  
TCTTGGACCATAAATAATGAATTTTCTTTTGTGAGTTCGGTTACTTTATTGATCCACTTACTT  
CTATTATGTCAATATTAATTACAACACTGTTGGAATTTTGGTTCTGATTTATAGTGATAATTAT  
ATGTCTCATGATCAAGGATATCTGAGGTTTTTTGCTTATATGGGTTTTTTTAATACTTCAA  
TGTTAGGATTAGTTACTAGTTCTAATTTGATCCAAGTTTATTTTTTTTTGGGAATTAGTTGG  
AATGTGTTTCGTATTTATTAATAGGTTTTTGGTTCACACGACCTATTGCAGCGAATGCCTG  
TCAAAAAGCTTTTGTAAACCAATCGTGTAGGGGATTTTGGTTTATTATTAGGAATTTTAGG  
TCTTTATTGGATAACTGGCAGTTTTCGAATTTCAAGATTTGTTTCGAAATATTCAATAAT--A  
GAATAAATCTCTTATTCTTACTTTGTGTGCATTTCTATTATTTGTGGGTCTTATTGCTAAA  
TCTGCACAATTTCTCTTCATGTATGGTTGCCGGATGCCATGGAGGGCCCTACTCCTATT  
TCGGCTCTTATACATGCTGCTACTATGGTAGCAGCGGAATTTTTCTTGTAGCTCGTCTT  
CTTCCTCTTTTTATAGTTATCCCTTCTATAATGTATATAATATCTTTGATAGGTATAATAACA  
GTA CTCTTAGGAGCCACTTTAGCTCTTGCTCAAAAAGATATTAAGAGAGGTTTLAGCCTA  
TTCTACAATGTCTCAACTGGGTTATATGATGTTAGCTCTAGGTATGGGGTCTTATAGATCC  
GCTTTATTTCAATTTGATTACTCATGCTTATTCGAAAGCTTTGTTGTTTTTAGGATCTGGAT  
CCATTATTCATTCATGGAAGCTATAGTTGGCTATTCTCCTGATAAAAGTCAGAATATGA  
TTCTTATGGGTGGTTTGACAAAACATGTGCCGATTACAAAAACTGCCTTTTTAGTAGGA  
ACACTCTCACTTTGTGGTATCCCCCCTTGCTTGTTTTTGGTCTAAAGATGAAATCTT  
AATGATAGTTTGTATTTCGCAATTTTTGCAATAATAGCTTGTTC AACAGCGGGATTA  
ACCGCATTTTATATGTTTCGGATTTATTTACTTACTTTTGAAGGCCATTTAAACACTTATT  
TTATAAATTATAGTGGAAAAAAAAGTAGCTCCTTCTATTCAATTTCTTTATGGGGTAAAG  
AAGAAGATAAAAAACTTAATAGG---T TAGTACCATTATTAACAATGAATTTTTTTGGCGG

ACTTAATACAAGAACTTTCTATTATCCCCATGAATCAGACAATACTATTCTATTTCCCTATG  
CTTGTATTGCTTTTATTTACTTTGTTTATTGGAGCCATAGGA-----TTCGACTTTGATATATT  
ATCAA AATTATTAACGCCGTCGATAAACCTTTTGCATACCAATTCAGAA---TTTGTAGAT  
TGG---GAATTTTGA AAAAATGCAATTTTTCAGTCAGTATAGCTTTGTTTGG AATATTTAT  
AGCATACTGTTTATATAAGCCTTTTATTCATCTAGATTAAATTTAACTTTACTTAATTCAT  
TTCAAATTAGGTGGGAAAAACCAATAAATTTTGTATATAATTGGTCATATAATCGTGGTT  
ACATAGATACTTTTTTTAAAAAATCTTTAACTGAAAGTATAAGAAAATTAGCAAAAACAA  
ACGAATTTTTTTGATAAACGAATCATTGATGGAATTACAAATGGAGTAGGTATTACAAGT  
TTCTTTGTAGGAGAAGTAACAAAATATATAGGTGGAAGT--CGCATCTCTTCTTATCTGT  
TCTTGTATTTGTGCTATGTATTGATTTTTTTAAACGATCCTCTTTATGGATTTGCCTGGACC  
AATACATGATTTTCTTTTAGTTTTTCTGGGATCTGGTCTTCTAGTAGGAGGTCTGGGAGT  
GGTATTACTTCCTAACCCAATATTTTCAGCCTTTTCCTTAGGATTTGTTCTTGTTTGTATAT  
CTTTATTGTATATTCTAGCAAATTTCCCATTTTGTAGCTGCTGCACAACCTCCTATTTACGT  
GGGAGCCATAAATGTTTTAATCATAATTTGCTGTGATGTTTCATGAATGATTCCGAATATTCC  
ATAGATTTCAATCTGTGGACTGTTGGGAATGGGATTACTTCAGTGGTTTGTACAACCTATT  
CTTTTTTCATTAATTTCTACTATTCTCGATACGTCATGGTACGGGGTTATTTGGACTACAA  
GATTA AACAGATTTTAGAACAAAGATTTAATAAGTAATAGTCAACAAATAGGAATTCATT  
TATCAACAGATTTTTTTCTTCCATTTGAACTCATTTCATAAATTTCTTTTAGTTGCTTTGAT  
AGGTGCAATTTCTGTGGCTCGTCAAATGAAGAGACCAGTTACAGGAAAAGATCTTATG  
ATAGTCAATATGGGACCTCACCACCCATCCATGCACGGTGTCTTCGCTTAATTGTTACT  
CTAGACGGTGAGGATGTTGTTGATTGTGAACCCATATTGGGTTATTTACACAGAGGAAT  
GGAAAAAATTGCAGAAAACCGAGCAATTATACAATATTTACCTTATGTAACGCGGTGGG  
ATTATTTAGCTACTATGTTTACAGAAGCAATAACAGTAAACGGACCCGAACAATTAGGA  
AATATTCAAGTTCCTAAAAGAGCCAGCTATATCAGAGTAATTATGCTAGAATTGAGTCGT  
ATAGCTTCTCATCTGTTATGGCTTGGCCCTTTTATGGCAGATATTGGGGCACAGACTCCC  
TTTTTCTATATTTTCAGAGAACGAGAATTTGTATATGATCTATTTCGAAGCTGCCACCGGT  
ATGAGAATGATGCATAATTTTTTTTCGTATTGGAGGAATAGCGGCGGATTTACCTTATGGT  
TGGATAGATAAATGCTTGGATTTTTGTGATTATTTTTTAAACAGAGGTTGTTGAATATCAA  
AACTTATTACACGAAATCCTATTTTTTTTAGAACGAGTTGAAGGCGTTGGGATTATTGGT  
GGGGAAGAAGCAATAAATTGGGGTTTATCCGGACCAATGTTACGCGCATCCGGAATAC  
CATGGGATCTTCGTAAAGTTGATCGTTATGAGTCTTACGATGAATTTGAATGGGAAATTC  
AGTGGCAAAAACAAGGAGATTCATTAGCTCGTTATTTAGTACGACTTAGCGAAATGAC  
AGAATCCATCAA AATTATTCAACAGGCTCTGGAAGGACTTCCGGGGGGTCCCTATGAA  
AATTTAGAAAGCAGAGGCTTTGATAAAAAAAGGAATCCAGAGTGGAATGATTTTGAAT  
ATCGATTCATTAGTAAAAACCTTCCCCTACTTTTGAATTATCGAAACAAGAACTTTACG  
TAAGAGTTGAAGCTCCAAAAGGGGAATTGGGAATTTTTTCTCATAGGAGATCAAAGTGG  
TTTTCTTGGAGATGGAAAATCCGACCGCCGGGTTTTATTAATTTGCAAATCTTCTCCTGA  
ACTAGTTAAAAGAATGAAATTGGCTGATATTATGACGATACTCGGTAGCATAGATATAAT  
TATGGGAGAAGTTGATCGTATGCTTCCTATGATAACCGGGTTCATGAATTATGGTCAACA  
AACCTACGAGCTGCAAGGTATATTGGTCAGGGTTTCATGATTACCTTATCCCACACAA  
ATCGTTTACCTGTAACCTATTCAATATCCCTATGAAAAATTAATAACATCAGAACGTTTCC  
GCGGTGCAATCCATTTGCAATTTGATAAATGCATTGCTTGTGAAGTATGTGTTTCGAGTAT  
GTCCTATAGATCTGCCGGTTGTTGATTGGAAATTGGAAACTAATATTCGAAAAAAACGA  
TTGCTTAATTACAGTATTGATTTTGGAAATTTGTATATTTTGTGGTAATTGTGTTGAGTATT

GTCCAACAAATTGTTTTGTCAATGACTGAAGAATATGAGTTTTCAACTTATGATCGTCAC  
GAGTTGAATTATAATCAAATCGCTTTGGGGCGTTTACCAATGTCAGTAATTGACGATTAT  
ACTATTCGAACAATTTTGAATTCA-----GGG-----ATGCAGGGC  
ACTTTGTCCGTTTGGCTAGCCAAACGCGGGCTGGTTCATAGATCGTTGGGCTTCGATTA  
CCAAGGAATAGAGACTTTACAAATAAAGCCC GAAGATTGGCATTCTATTGCTGTAATTT  
TATATGTATATGGTTACAATTATTTACGTTCCCAATGTGCCTATGATGTGGCACCAGGTGG  
CCTCTTAGCCAGTGTGTATCATCTTACGAGAATAGAATATGGTGTCAATCAAGCGGAAG  
AAGTTTGCATAAAAGTATTTACTCACAGGAGTAATCCCAGAATTCATCTGTTTTCTGG  
GTTTGGAAAAGTACGGATTTTCAAGAACGGGAATCTTATGATATGTTAGGAATCACTTA  
TGATAGCCATCCGCGGCTGAAACGGATCTTAATGCCC GAAGTTGGATAGGGTGGCCTT  
TACGTAAGGATTATATTGCCCCCAATTTTTTATGAAATACAAGATGCTTAT-----

-----ATGAATTCCATTAAGTTTCCCGTACTTGATCGAACAAACA  
AAAAACTCAGTTATTTCAACTACGTTAAATGATCTTTCAAATTGGTCAAGACTTTCCAG  
CCTATGGCCGCTTCTTTATGGTACCAGTTGTTGTTTTATTGAATTTGCCTCATTATAGGC  
TCCCGATTTGACTTTGATCGTTATGGGCTAGTACCAAGATCAAGTCCTAGACAGGCGGA  
CCTTATTTTAAACAGCAGGTACAGTAACAATGAAAATGGCTCCTTCTTTAGTGAGATTATA  
TGAACAAATGCCTGAACCAAAGTATGTTATTGCTATGGGAGCGTGTACAATTACAGGGG  
GGATGTT CAGTACCGATTCTTATAGTACTGTTTCGAGGGGTTGATAAGCTAATTCCTGTAG  
ATGTCTATTTGCCGGGTTGTCCACCTAAACCAGAGGCTGTTATAGACGCTATAACAAAG  
CTTCGTAAGAAAATAGCTAGAGAAATCTATAAGGATCGAATTAGACCTCAACGGGGTAA  
TCGGTGT TTTACTACCAATCACAAGTTTTTTGTTGTACGCAGTACACAGACTGGAAATT  
ATGATCAAGAATTACTCTATCCACCATCATCTACTTCAGAGATCTCT--GAAACATTTTTT  
AAATACAAAAGCCCAGTATCTTCCCACGAATTAGTGAATATGCAA ACTAGAAATACCTT  
TTCTTGGATAAGGGAAGAGATTACTCGCTCCATATCTGTCTCACTCATGATATATATAATA  
ACTTGGGCATCCATTTCAAGTGCATATCCAATTTTTGCCCAGCAGAATTATGAAAATCCA  
CGAGAGGCAACTGGGCGTATTGTATGTGCCAATTGCCATTTAGCTAGTAAGCCCGTGGA  
TATTGAGGTTCCACAAGCGGTACTTCCTGATACTGTATTTGAAGCAGTTGTTAAAATTCC  
TTATGATATGCAGCTAAAACAAGTTCTAGCTAATGGTAAAAAAGGAGCTTTGAATGTGG  
GAGCTGTTCTTATTTTACCGGAGGGGTTTGAATTAGCCCCCCCCGATCGTATTTACCCG  
AGATGAAAGAAAAGATAGGAAATCTGTCTTTT CAGAATTATCGCCCCAATAAAAAAAT  
ATTCTTGTGATAGGTCCTGTTCCCTGGTCAAAAATATAGTGAAATAACCTTTCCTATTCTT  
GCCCCAGACCTGCTACTAATAAAGATGTTCACTTCTTAAAATATCCTATATACGTAGGT  
GGAAATAGGGGAAGGGGTCAGATTTATCCTGATGGTAGCAAAAGTAACAATACAGTTT  
ATAATGCTACGGCAGGAGGGATAATAAGTAAAATTTTACGAAAAGAAAAAGGGGGATA  
CGAAATAACCATAGTGGATGCATCGAATGAACGCCAAGTAATTGATATTATCCCTCGAG  
GCCTAGA ACTTCTTGTTTT CAGAGGGCGAATCCATTAAACTCGATCAACCATTAACAAGC  
AATCCTAATGTGGGTGGGTTTGGTCAGGGGGATGCGGAAATAGTACTTCAAGATCCATT  
ACGTGTCCAAGGCCTTTTGTCTTCTTAGGATCTGTTGTTTTGGCACAATCTTTTTGGT  
TCTTAAAAGAAACAGTTTGAGAAGGTTCAATTATCCGAAATGAATTTTATGAGT--GTT  
TATGATTGGTTCGAAGAACGTCTTGAGATTCAAGCGATTGCAGACGATATAACTAGTAA  
ATATGTTCCCTCCGCATGTCAACATATTTTATTGTCTAGGAGGAATTACCCTTACTTGTTTT  
TTAGTACAAGTAGCTACGGGATTTGCTATGACTTTTTTATTACCGTCCA ACTGTTACTGAG  
GCTTTTGCTTCTGTTCAATATATAATGACTGAAGCTAACTTTGGTTGGTTAATCCGATCA

GTTTCATCGATGGTTCGGCAAGTATGATGGTCCTAATGATGATCCTGCACGTATTTTCGTGTA  
TACCTCACCGGTGGTTTTAAAAACCTCGCGAATTAACCTGGGTACTGGTGTGGTTCT  
GGGTGTATTGACCGCATCTTTTGGGTGTAACAGGTTATTCTTTACCTTGGGATCAAATTGG  
CTATTGGGCAGTCAAATTGTAACAGGTGTACCTGACGCTATTCCGGTAATAGGATCGC  
CTCTTGTAGAATTATTACGCGGAAGTGCTAGTGTGGACAATCCACTTTGACTCGTTTTT  
ATAGTTTACACACTTTTGTATTACCTCTTCTTACGGCTGTATTTATGTTAATGCATTTCTTA  
ATGATACGTAAGCAAGGTATTTCTGGTCCCTTAATGGGAGTAACAAAAAACAGATTT  
GAATGATCCTGTATTACGAGCTAAATTAGCTAAAGGTATGGGTCATAATTATTACGGAGA  
GCCCCGATGGCCCAATGATCTTTTATATATTTTCCAGTAGTCATCTTGGTACCATTGCC  
TGTAACGTAGGCTTAGCGGTTTTAGAACCATCAATGATTGGTGAACCTGCGGATCCTTT  
TGCAACTCCTTTGGAAATATTACCTGAATGGTATTTCTTTCCCTGTATTTCAAATACTTCGT  
ACAGTGCCTAACAAATTATTGGGTGTTCTTTTAATGGCTTCAGTACCGGCGGGATTATTA  
ACCGTACCCTTTTTGGAAAATGTTAATAAGTTCCAAAATCCATTTTCGTTCGTCCAGTCGC  
GACAACCGTCTTTTTGATTGGCACCGTGGTGGCCCTGTGGTTAGGTATTGGAGCAACAT  
TACCAATTGATAAATCTCTAACTTTAGGTCTTTTTATGATTGAAGTTTCTTTATTTGGAAT  
CGTCTTAGGTCTAATTCCTATTACTTTGGCTGGATTATTCGTAACCTGCTTATTTACAATAC  
AGACGTGGTGATCAGTTGGACTTTATGCCTACTATAACTAGTTATTTTCGGTTTTCTACTA  
GCAGCTTAACTATAACCTCAGTTCTATTTATTGGTCTAAGCAAATACGACTTATTATG  
GATATAGTAAGTCTCGCATGGGCTGGTTAATGGTAGTTTTTACATTTTCCCTCTCTCTC  
GTAGTGTGGGAAGAAGTGGACTCATGATTATTCGTTTCGCCGAACCAGAAGTCAAAA  
TTTTGGTAGATAGGATCCATAAAAACCTTCTTTTCGAGGAATGGGCTAAACCCGGTCAT  
TTCTCAAGAACAATAGCTAAGGGACCTGATACTACCACTTGGATCTGGAACCTACATGC  
TGATGCTCACGATTTTGATAGTCATACCAGTGATTTGGAGGAAATCTCTCGAAAAGTAT  
TTAGTGCCATTTTGGCCAACCTCTCTATCATCTTTCTTTGGCTGAGTGGCATGTATTTCC  
ACGGTGCTCGTTTTTCCAATTATGAAGCATGGCTGAGTGATCCTACTCACATTGGACCT  
AGTGCTCAGGTGGTTTTGGCCAATAGTGGGCCAAGAAATCCTGAATGGAGATGTGGGCG  
GAGGCTTCCGAGGAATACAAATAACCTCTGGCTTTTTTTCAGCTTTGGCGAGCATCTGGA  
ATAACTAGTGAATTACAACCTTTATTGTACCGCAATTGGCGCATTGGTCTTCGCAGCCTTA  
ATGCTTTTTGCTGGTTGGTTCCATTATCACAAAGCAGCTCCAAAATTGGCTTGGTTCCA  
AGATGTAGAATCTATGTTGAATCACCATTTAGCAGGGCTACTAGGACTTGGGTCCCTTT  
CGTGGGCAGGACATCAAGTACATGTATCTTTACCGATTAACCAATTTCTAAATGCTGGA  
GTAGATCCTAAAGAAATACCACTTCCTCATGAATTTATCTTGAATCGGGATCTTTTGGCT  
CAACTTTATCCAAGTTTTGCTGAAGGAGCAACCCCTTTTTTACCTTGAATTGGTCAA  
ATACTCAGACTTTCTTACTTTTCGTGGTGGATTAGATCCAGTGACCGGGGGTCTATGGTT  
AACCGATACAGCACATCATCATTTAGCTATCGCAATTCTTTTCTAATAGCAGGTCATAT  
GTATAGGACCAACTGGGGTATTGGTCATGGTCTAAAAGATATTTTAGAGGCTCATAAAG  
GTCCATTTACAGGCCAAGGCCATAAAGGTCTATATGAAATCTAACAACATCATGGCAT  
GCTCAATTATCTTTAACCTGGCTATGTTAGGCTCTTTAACTATTGTTGTAGCTCACCATA  
TGATTCCATGCCCCCTTATCCATATCTAGCTACTGACTATGCTACACAACCTATCATTGTT  
CACACATCACATGTGGATTGGTGGATTTCTCATAGTTGGTGTGCTGCTGCGCATGCAGCCA  
TTTTTATGGTAAGAGACTATGATCCAATAATCGATACAACGATTTATTAGATCGTGTCC  
TGAGGCATCGCGATGCAATCATATCACACCTCAACTGGGTATGTATATTTCTAGGCTTCC  
ACAGTTTTGGTTTTGTATATTCATAATGATACCATGAGTGCTTTAGGGCGTCCACAAGATA  
TGTTTTCAGATACTGCTATAACAATTACAACCAGTCTTTGCTCAATGGATACAAAATACCC

ATGCTTTAGCACCTGGTGTAACAGCCCCTGGTGAAACAGCGAGCACCAGTTTGACTTG  
GGGGGGCGGTGAGTTAGTAGCAGTGGGTGGCAAAGTAGCTTTGCTACCTATTCCATTA  
GGAACGGCCGACTTTTTGGTACATCATATTCATGCATTTACAATTCATGTGACGGTATTG  
ATACTGTTGAAAGGTGTTTTATTTGCTCGTAGCTCGCGGTTAATACCAGATAAAGCAAA  
TCTTGGTTTTCGTTTTCCCTTGTGATGGGCCTGGAAGAGGAGGAACGTGTCAAGTATCTG  
CTTGGGATCATGTCTTCTTAGGACTATTCTGGATGTACAATTCATTTTCGGTAGTAATATT  
CCATTTCAAGTTGGAAAATGCAGTCAGATGTTTGGGGTAGTATAAGCGATCAAGGGGTG  
GTAACTCATATTACCGGAGGAAACTTTGCACAGAGTTCCATTACTATTAATGGGTGGCT  
CCGCGATTTCTTATGGGCACAAGCATCTCAGGTAATTCAATCTTATGGTTCTTCGTTATC  
TGCATATGGTCTTTTTTTCCCTAGGTGCTCATTTTGTATGGGCTTTCAGTTAATGTTTCTA  
TTCAGCGGGCGTGGTTATTGGCAAGAACTTATTGAATCCATTGTTTGGGCTCATAATAAA  
TTAAAAGTTGCTCCTGCTACTCAGCCTAGAGCCTTGAGCATTGTACAAGGACGTGCTGT  
AGGAGTAACCCATTACCTTCTGGGTGGAATTGCCACAACATGGGCGTTCCTTCTTAGCAA  
GAATTATTGCAGTAGGAATGGCATTAAAGATTTCCAAGGTTTAGCCAAGGCTTAGCTCAG  
GACCCCACTACTCGTCGTATTTGGTTTGGTATTGCTACCGCACATGACTTCGAGAGTCA  
TGATGATATTACTGAAGAACGTCTTTATCAGAATATTTTTGCTTCTCATTTTCGGGCAATTA  
GCAATAATTTTTCTGTGGACTTCCGGAAATTTGTTTCATGTAGCTTGGCAAGGAAATTTT  
GAGACATGGATACAAGACCCTTTACATGTAAGACCGATTGCTCATGCTATTTGGGATCC  
TCATTTTGGTCAACCGGCTGTGGAAGCATTACTCGAGGAGGTGCTCTTGGCCCGGTG  
AATATAGCTTATTCTGGTGTATCAGTGGTGGTATAACAATCGGTTTACGTACTAATGAA  
GATCTTTATACTGGAGCTCTTTTTCTATTATTTCTTTCTGCCCTATCCTTAATAGGGGGTT  
GGTTACACCTACAACCAAATGGAAACCAAGAGTTTCATGGTTCAAAAATGCTGAATC  
TCGTCTGAATCATCATTTGTCAGGACTATTCGGGGTAAGCTCCTTGGCTTGGACAGGTC  
ATTTAGTACATGTCGCTATTCTGCATCCAGGGGGGAATATGTTTCGATGGAATAATTTCT  
TAAGTGTATTACCGCATCCCCAAGGGTTAGGCCCACTTTTTACGGGTCAGTGGAATCTG  
TATGCTCAAAACCCCGATTCAAGTAGTCATTTATTTGGTACCTCCCAAGGATCAGGAAC  
TGCCATTCTAACCTTCTTGGGGGATTCCATCCACAAACGCAAAGTTTATGGCTAACCG  
ATATGGCACATCATCATCTAGCTATCGCAATCTTTTTCCCTCATTGCGGGTCATATGTATAG  
AACTAACTTTGGAATCGGACACAGTATAAAAGATCTTTTAGAAGCACATATTCCTCCGG  
GAGGACGGTTGGGGCGTGGGCATAAGGGTCTTTATGACACAATCAATAATTCGATTCAT  
TTTTCAATTAGGCCTTGCTCTAGCCTCCTTAGGAGTTATTACTTCCTTGGTAGCTCAACAC  
ATGTACTCTTTACCTGCTTATGCGTTCATAGCGCAAGATTTTACGACTCAAGCTGCGTTA  
TATACCCATCACCAATACATTGCAGGATTCATCATGACAGGAGCTTTTGCTCATGGAGCT  
ATATTTTTTATTAGAGATTACAATCCAGAACAGAATGAGGATAACGTATTGGCAAGAATG  
TTAGACCATAAAGAAGCTATCATATCCATTTAAGTTGGGCCAGCCTCTTTCTAGGGTTC  
CATACTTTGGGACTTTATGTTTATAATGACGTCATGCTTGTCTTTGGTACTCCCGAAAAA  
CAAATCTTGATCGAACCCATATTTGCCAATGGATAACAATCCGCTCATGGGAAAACCTC  
ATATGGATTTGATGTACTTTTATCTTCGACAAATGGCCAGCATTTAATGCGGGTTCGAAG  
CATATGGTTGCCCGGCTGGTTAAATGCTATTAATGAG-----AATAGTAATTCATTATTCTTA  
ACAATAGGTCTTGAGATTTCTTGGTTTCAICATGCTATTGCTTTAGGTTTACATACAACT  
ACATTGATCTTAGTAAAAGGTGCTTTAGATGCACGTGGTTCCAAGTTAATGCCAGATAA  
AAAGGATTTCCGGTATAGTTTTCTTGGCATGGTCCGGGACGAGGTGGTACTTGTGATA  
TTTCGGCTTGGGACGCATTTTATTTGGCAGTTTTTTGGATGTTAAATACTATTGGATGGG  
TTACTTTTTATTGGCATTGGAACACATCACATTATGGCAAGGTAACGTTTCACAGTTTA



ATGAATCTTCCACTTATTTGATGGGATGGTTAAGAGATTATCTATGGTTAAACTCTTCAC  
AACTTATCAATGGATATAACCCGTTTGGTATGAATAGTTTATCAGTCTGGGCATGGATGT  
TCTTATTTGGGCATCTTGTGGGCTACTGGATTTAIGTTCTTAATTTCCCTGGCGTGGTTA  
TTGGCAGGAATTGATTGAAACTTTAGCATGGGCTCATGAACGTACACCTTTGGCAAATT  
TGATTTCGATGGAAAGATAAACCAGTAGCTCTTCAATTGTGCAAGCAAGATTGGTTGGA  
TTAGCTCACTTTTCTGTAGGTTATATATTCACCTTATGCGGCTTTCTTGATTGCCTCCACGT  
CGGGCAAATTCGGTATGTCACATTCAGTAAAAATTTATGATACCTGTATAGGATGTACTC  
AGTGTGTCCGAGCATGTCCTACAGACGTATTAGAAATGATACCTTGGGATGGATGTAAA  
GCTAAGCAAATAGCTTCTGCCCCAAGAACCGAGGATTGTGTTGGTTGTAAGAGATGTG  
AATCTGCCTGTCCAACGGATTTTTTGAGCGTTCGAGTTTATTTATGGCATGAAACAAC  
CGAAGCATGGGTCTAGCTTATATGACAACCTTCAACTTACCCTCTATTTTTGTGCCTTTA  
GTAGGCCTAGTCTTCCGGCACTTGCAATGGCTTCTTTATTTCTTCATATTCAAAAAAT  
AAGATTTTTATGCGAGATCTAAAAACATATCTTCCGTAGCACCGGTACTAAGTACTCTA  
TGGTTCGTTTCGTTAGCAGGTTTATTAATAGAGATTAATCGTTTATTTCCAGATGCATTA  
CATTCCCTTTTTTTCATTCATGACTGCAATTTAGAGAGACGCGAAAGCGAAAGCCTA  
TGGGGTCGCTTCTGTAACGGATACTAGTACTGAAAACCGTCTTACATTGGATGGTT  
TGGTGTTTTGATGATCCCTACCTTATTGACCGCAACTTCCGTTTTTATTATCGCATTCA  
GCTGCTCCTCCAGTAGATATTGATGGTATTCGTGAACCTGTTTCTGGATCTCTTTTAC  
GGAAACAATATTATTTCAAGGTGCCATTATCCTACTTCTGCAGCTATTGGTTTGCATTTTT  
ACCCGATCTGGGAAGCTGCATCCGTTGATGAATGGCTATAACAACGGTGGTCCTTATGAA  
CTAATTGTTCTACACTTTTTACTTGGTGTAGCTTGTATATGGGTCGTGAGTGGGAAC  
AGTTTCCGTCTGGGTATGCGTCCTTGGATTGCTGTTGCATATTCAGCTCCTGTTGCAGCT  
GCTACTGCTGTTTTCTTGATCTACCCAATTGGTCAAGGAAGTTTTTCTGATGGTATGCCT  
CTAGGAATCTCTGGTACTTTCAACTTTATGATTGTATTCCAGGCTGAGCACAACTTCTT  
ATGCACCCATTTACATGTTAGGTGTAGCTGGTGTATTTCGGCGGCTCCCTATTTAGTGCT  
ATGCATGGTTCTTTGGTAACTTCTAGTTTGATCAGGGAAACCACAGAAAATGAATCTGC  
TAATGAAGGTTACAGATTCGGTCAAGAAGAAGAACTTACAACATTGTAGCTGCTCAC  
GGTATTTTTGGCCGATTGATCTTCCAATATGCTAGTTTCAACAATTCTCGTTCTTTACATT  
TCTTCTTAGCGGCTTGGCCGGTAGTAGGTATTTGGTTTACTGCTTTAGGTATTAGTACTAT  
GGCTTTCAACCTAAATGGTTTCAATTTCAACCAATCAGTAGTTGATAGTCAAGGACGTG  
TTATTAATACTTGGGCTGATATTATTAACCGTGCTAACCTTGGTATGGAAGTTATGCATGA  
ACGTAATGCTCACAACCTCCCTCTAGACCTAGCTGCTGTTGAGGCTCCATCTATAAATG  
GAATGGGTTTGGCCTGGTATCGTGTTTCATACTGTTGTATTGAATGATCCCGGTCGTTTGC  
TTTCGGTTCATATAATGCATACTGCTCTGGTTGCTGGTTGGGCCGTTCCATGGCTCTAT  
ATGAATTAGCTGTTTTTGATCCCTCCGACCCTGTTCTTGATCCAATGTGGAGACAAGGT  
ATGTTTCGTTATACCTTTCATGACTCGTTTAGGAATAACCAATTCATGGGGCGGTTGGAAT  
ATTACA---GGAGGGACTATAACGAATCCGGT-----TACGAAGGGGTAGCCGCAGCAC  
ATATCGTGTTTTCTGGCTTGTGCTTCTTGGCAGCTATTTGGCATTGGGTATATTGGGATCT  
AGAAATTTTTGTGATGAACGTACAGGAAAACCTTCTTTGGATTTGCCAAGATTTTTG  
GAATTCATTTATTTCTTTCAGGAGTGGCTTGTCTTTGGTTTTGGCGCATTTCAATGTAACAG  
GATTATATGGTCCCTGGAATATGGGTATCCGACCCTTATGGACTAACCGGAAAGGTCCAA  
CCCGTAAATCCGGCGTGGGGCGTGGAGGGTTTTGACCCTTTTGTTCG-----  
-----GCGTTGGGTATATTAGCGGGCTTATCCATCTTAGTGTTTCGTCGCTCAACGT  
CTATACAAAGGATTACGTATGGGAAATATTGAAACCGTCCTTTCCAGTAGTATTGCTGCT

GTCTTTTTTGCAGCTTTTATTGTTGCTGGAACATATGTGGTATGGTTCTGCAACTACTCCC  
ATCGAATTATTTGGTCCTACTCGTTATCAATGGGATCAGGGATACTTTCAACAAGAAATA  
TATCGAAGAGTTAGTGCCGGACTAGCTGAAAATCAAAGTGTATCAGAAGCTTGGTCTA  
AAATTCCTGAAAAATTAGCTTTTTTATGATTATATTGGTAATAATCCAGCAAAAAGGGGGAT  
TATTCCGAGCGGGTTCAATGGACAATGGGGATGGAATAGCTGTTGGATGGTTAGGACA  
CCCCGTCTTTAGAAATAAAGAAGGGCGTGAACCTTTTTGTACGCCGTATGCCTACTTTTT  
TTGAAACATTTCCGGTTGTTTTGGTAGACGGAGACGGAATTGTTAGAGCCGACGTCCC  
GTTTAGAAGGGCAGAATCTAAATATAGTGTGCAACAAGTAGGTGTAACGTGTTGAGTTTT  
ATGGTGGTGAACCTCAATGGAGTAAGTTATAGTGATCCCGCAACTGTGAAAAAATATGCT  
AGACGGGCTCAATTGGGTGAGATTTTTGAATTAGATCGTGCTACTTTGAAATCCGATGG  
TGTTTTTCGTAGCAGTCCAAGAGGTTGGTTACTTTTTGGGCATGCTTCGTTTGCTCTACT  
TTCTTCTTTGGACACATTTGGCATGGTTCTAGAACCCTCTTCAGAGATGTTTTTGCTGG  
TATTGATCCAGATTTGGATGCTCAGGTGGAATTTGGGGCATTCCAAAACTTGGAGATC  
CAACTACAAAAAGACAAGCAGTCATGAAAACCTTATATTCCCTGAGGAGGTTCTACCA  
CGTGGAACGCTCTTTAATGGAACCTTAGCTTTAGCTGGTCGTGACCAAGAAACCACT  
GGTTTCGCTTGGTGGGCCGGGAATGCCCCACTTATCAATTTATCTGGTAAACTATTGGG  
AGCTCATGTAGCCATGCCGGATTAATCGTATTCTGGGCCGGAGCAATGAACTTATTTG  
AAGTGGCTCATTTTGTACCTGAAAAGCCCATGTATGAACAAGGATTGATTTACTTCCC  
CACCTAGCCACTTTAGGCTGGGGGGTAGGTCCTGGGGGAGAAGTTATAGACACCTTTC  
CATACTTTGTATCTGGAGTACTTCACTTAATTTCTTCTGCAGTTTTTGGGCTTTGGCGGTA  
TTTATCATGCACTTCTGGGACCCGAAACTCTTGAAGAATCTTTTCCATTTTTCGGTTATG  
TATGAAAGATAGAAATAAAATGACCACCATTTTGGGTATTACTTAATTTTGTAGGTG  
TAGGTGCTTTTCTTCTAGTATTCAAGGCTCTCTATTTTGGGGGGCGTATATGATACCTGGG  
CTCCAGGAGGGGGGGATGTAAGAAAAATTACAAACTTGACTCTTAGCCCAAGTGTTAT  
ATTTGGTTATTTACTAAAATCTCCCTTTGGGGGAGAAGGATGGATTGTTAGTGTGGACG  
ATTTGGAAGATATAATTGGAGGGCATGTATGGTTAGGTTCCATTTGTATATTTGGTGGAA  
TCTGGCATATCTTAACCAAACCTTTTGCATGGGCTCGCCGCGCACTTGTATGGTCTGGG  
GAGGCTTACTTGTCTTATAGTTTAGCTGCTTTATCTGTTTGTGGTTTTCATTGCTTGTTGTT  
TTGTCTGGTTTAATAATACTGCTTACCCTAGTGAGTTTTACGGACCTACAGGGCCAGAA  
GCTTCTCAAGCTCAAGCATTACTTTTCTAGTTAGAGACCAACGTCTTGGAGCTAACGT  
GGGGTCTGCTCAAGGACCTACAGGTTTAGGTAATACTTAATGCGTTCCCCGACTGGA  
GAAGTTATTTTTGGAGGAGAAACAATGCGTTTTTGGGATCTGCGTGCTCCCTGGTTAGA  
ACTTTAAGGGGTCTAATGGTTTGGACTTAAGTAGGTTGAAAAAAGACATACAACCT  
TGGCAAGAACGACGTTCTGCAGAATATATGACTCATGCTCCTTTAGGTTCTTAAATTCT  
GTAGGGGGCGTAGCTACTGAGATCAATGCAGTCAATTACGTCTCTCCGAGAAGTTGGTT  
ATCTACCTCTCATTTTGTCTAGGATTCTTCCTATTCGTGGGTCATTTATGGCACGCGGG  
AAGAGCTCGGGCAGCGGCAGCAGGATTTGAAAAGGAATTGATCGTGATTTGAACCT  
GTTCTTTCTATGACTCCTCTTAACATGACTATAGCCCTTGGTAAATTTACCAAAGACGAA  
AAAGATTTATTTGATATTATGGATGACTGGTTACGGAGGGACCGCTTCGTTTTTGTAGGT  
TGGTCTGGTCTATTGCTCTTTCCTTGTGCCTATTTTCGCTTTGGGGGGTTGGTTCACAGGT  
ACAACCTTTGTAACCTTCATGGTATACTCATGGATTGGCTAGTTCCTATTTAGAAGGTTGC  
AATTTTTTAACCGCTGCAGTTTCTACTCCTGCTAATAGTTTACGCGCATTCTTTGTTGTAC  
TGTGGGGTCTGAAGCACAAGGAGATTTTACTCGTTGGTGTCAATTAGGCGGTCTGTG  
GGCTTTTGTGCTCTCCACGGTGCTTTCGCATTAATAGGTTTTATGTTACGTCAATTTGA

ACTTGCTCGATCTGTTCAATTGCGACCTTATAATGCAATCGCATTCTCTGGTCCAATTGC  
TGTTTTTGTCTGTCTTTCTAATTTATCCACTAGGTCAATCTGGTTGGTTCTTTGCGCCT  
AGTTTTGGTGTAGCGGCTATATTTTCGATTCATCCTCTTTTTCCAAGGGTTTCATAATTGG  
ACATTGAACCCATTTTCATATGATGGGAGTCGCTGGTGTACTGGGCGCGGCTCTGTTATG  
CGCTATTCATGGTGTACTGTAGAAAATACTTTATTTGAAGATGGTGTGGTGCAAATAC  
ATCCGTGCTTTTAACCCAACCTCAAGCCGAAGAACTTATTCAATGGTCACCGCTAACC  
GCTTTTGGTCACAAATCTTTGGGGTTGCTTTTTCCAATAAACGTTGGTTACATTTCTTTA  
TGTTATTTGTACCAGTAACTGGTTTATGGATGAGTGCTCTTGGAGTAGTCGGTCTAGCTT  
TGAACCTACGTGCCTATGACTTCGTTTCCCAGGAAATCCGTGCAGCGGAAGATCCGGA  
ATTTGAGACTTTCTATACTAAAAATATTCTTTTAAACGAAGGTATTCGCGCTTGGATGGC  
GGCTCAAGATCAGCCTCATGAAAACCTTATATCCCTGAGGAGGTTCTACCACGTGGAA  
ACGCTCTTATGTCTGGAAGCACAGGAGAACGTTCTTTTGCTGATATTATTACCAGTATTC  
GATACTGGGTCAATTCATAGCATTACTATAACCTTCCCTATTCATTGCGGGCTGGTTATTCGT  
CAGCACCGGTTTAGCTTACGATGTGTTTGGGAGCCCTCGTCCAAACGAGTATTTTACAG  
AGAGCCGACAGGGCATTCCATTAATAACAGGCCGTTTGGATTCTTTGGAACAACCTCGA  
CGAATTTAGTAGATCTTTTATGACTATAGATAGGACCTATCCAATTTTACAGTGCGCTG  
GTTGGCTGTTTCATGGACTAGCTGTACCTACCGTTTCTTTTTGGGGTCAATATCAGCAAT  
GCAGTTCATCCAACGAATGGCTACACAACTGTTGAAGATAGTTCTAGATCTGGT---CC  
AAGAAGCACTACTGTAGGGAAGTTATTGAAACCGTTGAATTCTGAATATGGTAAAGTA  
GCTCCTGGATGGGGAACGACCCCTTTGATGGGTGTTGCAATGGCACTATTTGCGGTATT  
CCTATCTATTATTTGGAGATTATAATTCCTCTGTTCTACTGGATGGAATTTCAATGAATA  
TGCTTACTCTCAAACCTTTTGTATACACTGTAGTTATATTCTTTGTTTCTCTCTTCATATTT  
GGATTCCTATCTAATGATCCAGGACGTAATCCGGGACGTGAAGAAATGGCTGATACTAC  
TGGAAGGATTCTCTTTGGGTAATAGGTACTGTAGCTGGTATTCTTGTGATCGGTTAAT  
AGGTATTTTCTTTTATGGTTCATATTCAGGATTAGGTTTCATCCCTGATGCTTAATATATTTA  
ATTTGATCTGTATTTGTTTTAATTCGGCCCTTTTTTCAAGCACTTTTTTAGTCGCCAAATT  
GCCGGAGGCCTACGCCTTTTTGAATCCAATCGTAGATGTTATGCCCGTAATACCTCTTTT  
CTTCTTCTCTTAGCCTTTGTTTGGCAAGCAGCTGTAAGTTTTTCGAATGACACAATCAA  
ATCCGAACGAACAAAATGTTGAATTAATCGTACCAGTCTCTATTGGGGGTTATTACTCA  
TTTTTGTACTTGCTGTTTTATTTTCAAATTATTTCTTCAATATGGAAGTCAATATTCTTGCA  
TTTATTGCTACTGCACTCTTCATTCCTCGTTCCTACTGCTTTTTTGGCTTATAATTTACGTAA  
AAACGGTTAGTCAAATAATATGGAACAGCAACTCTAGTCGCCATCTTTATATCTGGG  
TTACTTGTAAGTTTTACTGGGTATGCTCTATATACTGCCTTTGGGCAACCCTCTCAACAA  
CTAAGAGATCCATTCGAGGAACACGGGGACATGGAAGCATTGGTTTATACATTTCTCTT  
AGTATCGACTTTAGGGATCATTTTTTTCGCTATTTTTTTTTCGGGAACCGCCTACAATTC  
AACTAAAAA-----ATGACTATTGCTTTTCAATTGGCTGTTTTTGCATTAATTATTACTTCA  
TCAATCTTACTGATTAGTGTACCCGTTGTATTTGCGTCTCCTGATGGGTGGTTCGAGTAAC  
AAAAATGTTGATTTTCTGGTACATCTTTATGGATTGGATTAGTCTTCTTGGTGGGTATCC  
TTAATTCTCTTATCTCT-----ATGTCACCACAAACAGAGACTAAAGCAAGTGT  
TGGATTCAAAGCTGGTGTAAAGAGTATAAATTGAATTATTATACTCCTGAATATGAAAC  
CAAGGATACTGATATCTTGGCAGCATTCCGAGTAACTCCTCAACCCGGAGTCCACCTG  
AGAAGCAGGGGCTGCGGTAGCTGCTGAATCTTCTACTGGTACATGGACAACCTGTGTG  
GACCGATGGGCTTACCAGCCTTGACCGTTACAAAGGACGATGCTACCACATCGAGCCC  
GTTCCAGGAGAAGAACTCAATTTATTGCGTATGTAGCTTACCCATTAGACCTTTTTGA

AGAAGGGTCTGTTACTAACATGTTTACCTCAATTGTGGGTAACGTATTTGGGGTCAAAG  
CCCTGGCTGCTCTACGTCTAGAGGATCTGCGAATCCCTCCGGCTTATACTAAAACCTTC  
CAGGGACCACCTCATGGTATCCAAGTTGAAAGAGATAAATTGAACAAGTATGGACGTC  
CCCTATTAGGATGTACTATTAACCTAAGTTGGGGTTATCCGCGAAGAAGTATGGTAGA  
GCAGTTTATGAATGTCTACGTGGTGGACTTGATTTTACCAAAGATGATGAGAATGTGAA  
CTCTCAACCATTATGCGTTGGAGAGACCGTTTCTTATTTTGTGCCGAAGCTATTTATAA  
ATCACAGGCTGAAACAGGTGAAATCAAAGGACATTATTTGAATGCTACTGCGGGTACA  
TGCGAAGAAATGATGAAAAGAGCTATATTTGCCAGAGAATTGGGAGTTCCTATCGTAAT  
GCATGACTACTTAACAGGGGGATTACCCGCAAATACTAGTTTGGCTCATTATTGCCGAG  
ATAATGGCCTACTTCTTACATCCACCGTGCAATGCACGCTGTTATTGATAGACAGAAG  
AATCATGGTATGCACTTCCGTGTACTAGCTAAAGCTTTACGTCTATCGGGTGGAGATCAT  
GTTACGCGGGTACAGTAGTAGGTAACCTTGAAGGAGACAGGGAGTCAACTTTGGGC  
TTTGTGATTACTGCGCGATGATTATGTTGAAAAAGACCGAAGTCGTGGTATCTTTTTTC  
ACTCAAGATTGGGTCTCACTACCAGGTGTTCTACCTGTGGCTTCAGGGGGTATTACGT  
TTGGCATATGCCTGCTTTGACCGAGATCTTTGGAGATGATTCCGTACTACAATTTGGTGG  
CGAACTTTAGGCCACCTTGGGGAAATGCACCGGGTGCCGTAGCTAACCGAGTAGCT  
CTAGAAGCATGTGTACAAGCTCGTAATGAGGGACGTGATCTTGCAGTCGAGGGTAATG  
AAATTATCCGTGAGGCTTGCAAATGGAGTCCTGAACTAGCTGCTGCTTGTGAAGTATGG  
AAGGAGATCACATTTAACTTCCCAACCATCGATAAATTAGATGGCATGGCGATACATTTA  
TACAAAACCTTACCCCGAGCACACGCAATGGAGCCGTAGACAGTCAAGTGAAATCCA  
ATCCACGAAATAATTTGATCTATGGGCAGCATCATTGTGGTAAAGGTCGTAATGCCAGA  
GGAATCATTACCGTAAGGCATAGAGGGGGAGGTCATAAGCGTCTATACCGTAAAATAGA  
TTTTTCGACGAAATACAAAAGACATATATGGTAGAATCGTAACCATAGAATACGACCTA  
ATCGAAATGCATACATTTGTCTCATACTATGGGGATGGTGAGAAGAGATATATTTTAC  
ATCCCAGAGGGGCTATAATTGGAGATACCATTGTTTCTGGTACAGAAGTTCCTATAAAA  
ATGGGAAATGCCCTACCTTTGACCGATATGCCCTTAGGCACGGCCATACATAATATAGAA  
ATCACACTTGGAAGGGTGGACAATTAGCTAGAGCAGCGGGTGTGTAGCGAAACTGA  
TTGCAAAAAGAGGGGAAATCGGCCACATTAATAATTACCTTCTGGAGAGGTCCGTTTGAT  
ATCCAAAACTGCTCAGCAACAGTCGGACAAGTGGGAAATGTTGGGGTAAACCAGAA  
AAGTTTGGGTAGAGCCGGATCGAAATGTTGGCTAGGTAAACGTCCTGTAGTAAGAGGA  
GTAGTTATGAACCTGTGACCACCCCATGGAGGTGGTGAAGGGAGGGCTCCAATTG  
GTAGAAAAAAACCCGTAACCCCTGGGGTTATCCTGCGCTTGGGAAGAAGAACTAGAA  
AAAGGAAAAAATATAGTGAGACTTTGATTCTTCGTCGCCGTAGTAAAATGATTCAACCA  
CAAACCTATTTGAATGTAGCAGACAACAGCGGGGCTCGAAAATTGATGTGTATTGGAAT  
AATAGGAGCTAGT---AATCGCCGCTATGCTCATATTGGTGACGTTATTGTTGCTGTAATCA  
AGGAAGCAATCCCAAATACTACTCTAGAAAGATCAGAAGTGGTCAGAGCTGTAATTGT  
ACGTACTTGTAAGAAGTCAAACGTAAGAATGGGACGATAATACGATATGACGACAAT  
GCCGCAGTTGTCATTGATCAAGAAGGAAATCCAAAAGGAACTCGCGTTTTTGGGGCGA  
TCCCACGGGAATTGAGACAATTAACCTTTACTAAAATAGTTTCATTAGCTCCTGAAGTA  
TTAATGCTTAGTCCAAAAGAACCAAAATTTTCGTAAACAACATCGAGGAAGACTAAAAG  
GAATATCCTCTCGTGGGAATCGTATTTGTTTTGGCAGATATGCTCTTCAAACACTTGAAC  
CCGCTTGGATTACATCTAGACAATAGAAGCAGGGCGACGAGCAATGACACGAAATAT  
ACGACGTGGTGGAAAAATTTGGGTACGTATATTTCCAGACAAGCCAGTTACAGTAAGA  
CCCGCGGAAACGCGTATGGGTTCTGGGAAAGGATCCCCAGAGTACTGGGTAGCTGTGG

TTAAACCAGGTAAAATCCTTTATGAAATGGGTGGTGTACCAGAAAATATAGCCAGAAA  
AGCTATTTCAATCGCGGCATCAAAAATGCCTATAAAAACCCAATTCATTATTTCTGAAAT  
GACTAGAATTAACGCGGATATATAGCTCGGAGGCGTAGAACAAAACCTTCGTTTATTG  
CATCAAGCTTTCAAGGGGCTCATTACGACTTACACGAACTATGACTCAACAGAGAAT  
AAGAGCTTTAGTTTCGGCTCGTCGGGATAGGGGTAAAAGAAAAAGAGATTTTCGTCGT  
TTATGGATCACTCGAATAAATGCCGTAATTCACGAAACG---GAGGTATTCTATAGTTATA  
ACCGATTCATACACAATCTGTACAAGAAGCAATTACTTCTTAATCGAAAAATACTTGCA  
CAAATAGCTCTATTAATAGGAGTTGTCTTTATACGATTTCAAATGAGATCAAAAAA-----  
-----ATGATAAAGTCCGTATATGCTTTAGGGCAATATATATCTATGTCTGC  
CCACAAAGCACGGAGAGTTATTGATCAGATCCGTGGACGTTCCCTACGAAGAAGCACTT  
ATGATATTAGAACTTATGCCGTATCGAGGATGTTATCCCATTTTTAAATTAGTTTATTCTG  
CAGCAGCAAATGCTAGTCATAATAAGGGTTTCAAAGAAACCAATTTAGTCATTAGTAAA  
GCTGAAGTGAATCAAGGAAATACGGTGAAAAAATTAACCTCGGGCACGAGGACGG  
AGTTACCAATAAAAAGATCCACTTGTCAATAACTATCGTATTGGAAGATATATCCTTAT  
ATGGAGGCCCATGGGACAAAAAATGGATGGAATCAAATATGCAGTATTTACAGACAA  
AAGTATTCGGTTATTGGGGAAAAAT---CAATATACTTTTAATGTCGAATCAGGATCAACT  
AGGACAGAAATAAAGCATTGGGTGCAACTCTTCTTTGGTGTCAAGGTAATAGCTATGAA  
TAGTCATCGACTCCCCGAAAGGTTAAAAGAATGGGACCTATTCTGGGACATACAATG  
CATTACAGACGTATGATCATTACGCTTCAACCGGGTTATTCTATTCCACCTCTTAGAAAG  
AAAAGA ACTATGGCAGTTCCAAAAAACGTACTTCTATCTCGAAAAAGCGTATTCGTA  
AAAAAATTTGGAAAAGGAAGGGATATTGGACATCGTTGAAAGCTTTTTCTTAGGGAA  
ATCGCTTTCTACAGGTAATTCAAAAAGTTTTTTTTGTACAACAAAATAAA---ATGGCCAA  
AGGTAAGATGTTTCGAGTAACAATTATTTTGGAAATGTACCAGTTGTGTTTCGAAATGATAT  
T-----AAGAAAGAATCGGCTGGAATTTCCAGATATATTACTCAAAGAATCGGCATAACA  
CTCCTAGTCGATTGGAATTGAGAAAATTCTGTCCCTATTGTTATAAACATACAATTCATG  
GGGAAATTAAGAAAATGAAAATAAGGGCTTCCGTTTCGTAAAATTTGTGAAAAGTGTCTG  
GCTAATCCGTAGGAGGGGACGAATTATAGTAATTTGTTCCAACCCGAGGCATAAACAAA  
GACAAGGAATGGTTCGAGAGAAAGTCAAAGTATCTACTCGGACACTACAGTGGAAGT  
GTGTTGAATCAAGAAGAGACAGTAAGCGTCTTTATTATGGACGCTTTATTCTGTCTCCA  
CTTATGAAAGGTCAAGCCGACACAATAGGCATTGCGATGCGAAGAGCTTTACTTGGCG  
AAATAGAAGGAACATGTATTACACGTGCAAAATCTGAG-----AACATACCACATGACTAT  
TCTAACATAGTCGGTATTCAAGAATCAGTACATGAAATTTAATGAATTTGAACGAGATT  
GTATTA AAAAGTAATCTATATGGAACGCGCAACGCGCTTATTTGTGTCCAAGGTCCCCG  
ATATATAACTGCTCGAGACATAGTTTTTACCGCCCTCTGTGGAAATCGTTGATAATACACA  
GCATATAGCTACCTTAACGGAACCAATAAATTTGTGTATTGGATTAAAAATCGAGAGGA  
ATCGCGGATATAGTTTTAAAATGTCAAATAACTTTGAA---GACCGA---AGTTATCCTATAG  
ATGCTGTATTCATGCCTGTTCAAATGCGAATCATAGTATTCATTCTTATGGGAATGGGA  
ATGAAAAACAAGAGATTCTTTTTCTAGAAATATGGACAAATGGAAGTTTAACTCCTAAA  
GAAGCACTTCATGAAGCCTCCCGGAATTTGATTAATTTATTTATTCCTTTTCTACATGTAG  
AAGAAGAA-----ACGTTCTATTTAGAGAACAAATCAA---CATCAAGTTACTTTACCCCTTT  
TTCTTTTTCATAATAGATTAGTT---AACCTAAGAAAAA-----AAAGAACTAGCGTTT  
CAATATATTTTTATTGACCAATTAGAATTGCCTCCAGAACTATAATTGTCTCAAAAAGT  
CCAATATACATACATTATTGGATCTTTTGAATAACAGTCAAGAAGACCTTATCAAATGG  
AACATTTTCACATAGAAGATGTAAAAAAGATATTAGACATTTTAGAAAAA-----

-----ATGCTCGGGGATGGAAAA--GAGGGAACATCTACAATACCCGGATTTA  
ATCAGATACAATTTGAAGGGTTTTATCGGTTTATTGATCAGGGTTTAATAGAAGAACTTT  
CGCAATTTCCAAAAATTGAAGATATAGATCACGAAATTGAATTTCAATTATTTGTGGAA  
ACATATCAATTGGTAGAACCTCTGATAAAAAGAACGAGATGCTGTCTATGAATTACTTACA  
TATTCTTCTGAATTATATGTATCCGCGGGATTAATTTGGAAAACCAATAGGAATATGCAA  
GAACAAAGAATTTTTATTGGAAACATTCCTTAATGAATTCCTTGGAACCTTCTATAGTA  
AACGGAATATACCGAGTTGTGATCAATCAAATATTACAAAGTCCTGGTATCTATTACCAG  
TCAGAATTGGATCATAACGGGATTTCTGGTCTATACCGGCACCATAATATCAGATTGGGGG  
GGCAGGCTAGAATTAGAGATTGATAAAAAAGCAAGAATATGGGCTCGTGTGAGTAGGA  
AACAGAAAATATCTATTCTAGTTCTATCATCAGCTATGGGTTCTGAATCTAAGAGAAATTC  
TAGAGAATGTTTGCTACCCTGAAATTTTCTTATCTTTCTTAACCGATAAGGAGAAAAAA  
AAAATTGGGTCAAAGAAAATGCTATTTTGGAGTTTTATCAACAATTTTCTTGTGTAGG  
TGGGGATCCAATATTTTCTGAATCCTTATGTAAGGAATTACAAAAAAATTTCTTTCACCA  
AAGGTGTGAATTGGGGAGGATTGGTCGCCGAAATATTA ACTGGAGACTTAATCTTAATA  
TACCTCAGAACAATATATTTTTGTTACCACGAGATATATTAGCAGCTGCCGATCTACCCA  
TTCCAAATTTTCATCCAATCAAACACTTGATGAT-----ATGAATCATTTGAAAAATAAAC  
GTATTTCGCTCTGTAGCGGATCTTTTACAAGACCAGCTCGGGTTGGCTCTGGCTCGTTTA  
GAAAATGTAGTTAAGGGA ACTATAGGCGGAGCAATTAGG---CATAAATTGATA---CCTAC  
TCCTCAGAATTTGGTAACTTCAACTCCG-----TTAACA ACTACTTATGAATCCTTTTT  
CGGATTACATCCATTATCTCAAGTTTTGGATCGCACTAATCCATTGACACAAATCGTTCA  
TGGGAGAAAGTTGAGTTATTTGGGCCCTGGCGGATTAACAGGGCGAACTGCTAATTTT  
CGAATACGAGATATCCATCCTAGTCACTACGGGCGTATTTGCCCCATTGACACGTCTGA  
AGGAATCAATGTGGGACTTATTGGATCTTTATCAATTCATGCCAGGATTGGTGATTGGG  
GG---TCGTTAGAAAGTCCGTTTTAT-----GAACTCGTTGAGAAATCAAAAAAGGCGCG  
GATACGGATGCTTTTTTTATCACCAAGTCAAGATGAATATTATATGATAGCGGCAGGAAA  
TTCTTTGGCTCTTAATCGGGGCATTCAAGAAGAACAGGCTGTACCAGCTCGATACCGCC  
AAGAATTTTTGACTATCGCATGGGAAGAGGTTTCATCTTCGAAGCATTTTTCCCTTTCCAAT  
ATTTTTCCATTGGAGCTTCCCTAATTCCTTTTATCGAACATAATGATGCGAATCGAGCTTT  
AATGAGTTCTAATATGCAACGTCAAGCAGTTCCACTTTCTCGGTCCGAAAAGTGCATTG  
TTGGA ACTGGATTGGAACGCCAAGTGGCTTTAGATTCCGGGGTTCCCGCTATAGCCGA  
ACACGAGGGAAAAATCCTTTATACTGACACTGAGAAGATAATTTTATCGGGAAATGAG  
AATACTTTAAGTATTCCATTAATTATGTATCAACGCTCAAACAAAAATACTTGTATGCATC  
AAAAACCTCAGGTTCCGCGGGGTAATGTATTA AAAAGGGACAGATTTTAGCAGATGG  
TGCTGCTACAGTTGGTGGGGA ACTCGCCTTGGGGAAAAATATATTAGTGGCTTATATGC  
CATGGGAAGGATACAATTTTGAAGATGCGGTACTCATTAGTGAGTGTCTAGTATATGGT  
GATATTTATACTTCTTTCCACATACGGAAATATGAAATTCAGACGCATGTGACAACCCAA  
GGT---CCTGAAAGGATCACTAAGGAAATACCGCATCTAGAGGGCCGTTTACTCCGAAAT  
TTAGACAAAAATGGAATTGTGATGCTAGGATCGTGGGTTGAAACGGGTGATATTTTAGT  
AGGTAAATTAACGCCTCAGATGGCGAAAGAA---TCCTCGTATGCTCCGGAAGATAGATT  
ATTACGGGCCATACTTGGCATT CAGGTATCGACTTCAAAGAAACTTGTTTAAAATTGC  
CCATAGGTGGTAGAGGTCGAGTTATTGATGTGAGATGGGTT CAGAAAAAGGGG---GGT  
TCAAGTTATAACCCCGAAATAATTCGTGTATATATTTACAGAAACGTGAAATCAAAGTA  
GGTGATAAAGTAGCCGGAAGACATGGAAATAAAGGTATCATTTC AAAATTTGCCTAG  
ACAGGATATGCCTTATTTGCAAGACGGGAGACCCGTGGATATGGTCTTCAACCCATTAG

GAGTACCCTCACGCATGAATGTAGGACAGATATTTGAATGCTCGCTTGGGTTAGCGGGA  
AGTTTGCTAGATAGACATTATCGAATAGCCCCTTTTGATGAGAGATATGAACAAGAGGC  
TTCGAGAAAACCTCGTATTTTCTGAATTATATGAAGCTAGTAAGCAAACAGCCAATCCAT  
GGGTATTTGAACCCGAGTATCCAGGAAAAAGCCGCATTTTGGATGGAAGAACGGGAGA  
TCCTTTTGAACAGCCTGTGATAATAGGAAAGCCCTATATCTTGAAATTAATTCATCAGGT  
TGATGATAAAATACACGGACGTTCTAGTGGACATTATGCACTTGTTACACAACAACCCC  
TTAGAGGCCGTTCTAAGCAGGGGGGGCAGCGGGTAGGCGAAATGGAGGTTTGGGCTC  
TAGAGGGGTTTTGGTGTGCTCATATTTTACAAGAGATGCTTACTTATAAATCTGATCATAT  
TAGAGCTCGCCAAGAAGTACTTGGTACCACTATCATTGGAGGAACAATACCTAAACCA  
GAAGATGCTCCAGAATCTTTTCGATTACTTGTTCGAGAACTACGATCTTTGGCTCTGGA  
ACTGAATCATTTCTTGTATCTGAGAAGAATTTCCAGATTAATAGGAAGGAAGTT-----  
-----ATGATCGATCGGTATAAACATCAACAACCTCCGAATTGGATTAGTTTCTCCTCAG  
CAAATAAGTGCTTGGGCCACTAAAAAATACTAATGGAGAGATAGTTGGAGAGGGTGA  
CAAAACCCTATACTTTTCATTACAAAACCAATAAACCGGAAAAAGATGGATTATTTTGT  
GAAAGGATTTTTGGGCCTATAAAGAGTGGAATTTGCGCTTGTGGAAATTATCGAGTGAT  
CGGAGATGAAAAAGAAGACTCGCAATTTTGTGAACAATGTGGAGTTGAATTTGTTGAT  
TCTCGGATACGAAGATATCAAATGGGATACATAAACTGACATGTCCTGTAACCTCATGTA  
TGGTATTTGAAACGTCTTCCCTAGTTATATTGCGAATCTTTTAGATAAACCTCTTAAAGAA  
TTAGAAGGTCTAGTATACTGCGAT-----TTTTCTTTTGCTAGGCC--ATAACGAAAAAAC  
CTACTTTCTTACGATTACGAGGTTTCAATTTGAATATGAAATTCATCCTGGAAATACAGCA  
TCCCCTTTTTTTTACTACTCAAGGTTTCGATATATTTAGAAATCGAGAAATTTCTACTG  
GGGCGGGTGCTATCCGAGAACAATTAGCCGATTTAGATTTGCGAATTATTATAGAAAATT  
CGTTGGTAGAATGGAAACAATTAGGAGAAGAA---GGTCCCACGGGGAAATGAATGGGAA  
GATCGAAAAATTGTAAGAAGAAAAGATTTTTTAGTTAGACGTATGGAATTAGCTAAGCA  
TTTTATTGAAACAATATAGAACCGGAATGGATGATTTTATGTCTCTTACCGGTTCTGCC  
TCCCGAGTTGAGACCCATCATTAGATAGAAGGGGGTAAACTGATGAGTTCAGATATTA  
ATGAACTCTATAGAAGAGTTATCTATCGGAACAATACTCTTACTGATCTATTAACAACAA  
GTAGATCTACACCAGGGGAATTAGTAATGTGTCAGGAAAAATTGGTACAAGAAGCCGT  
GGATACACTTCTTGATAATGGAATCCGTGGACAACCCATGAGGGATGGTCATAATAAGG  
TTTACAAGTCATTTTCAGATGTAATTGAAGGAAAAGAGGGAAAGATTTTCGCGAGACTCT  
GCTTGGCAAACGGGTCGATTATTCGGGGCGTTTCGGTGATTGTCGTTGGACCCTCACTTT  
CATTACATCGCTGTGGATTGCCTCGCGAAATAGCAATAGAGCTCTTCCAGACATTTGTA  
ATTCGTGGTCTAATTAGACAACATCTGGCTTCGAACATAGGAGTTGCTAAGAGTCAAAT  
TCGTGAAAAAAGCCGATTGTCTGGGAAATCCTTCAAGAAGTTATGCAGGGGCATCCC  
GTATTACTGAATAGAGCACCTACTCTACATAGATTAGGCATACAGTCATTCCAACCCATT  
TTAGTGGAAGGACGCACTATTTGTTTACATCCATTAGTTTGTAAAGGGTTCAATGCAGA  
CTTTGATGGGGATCAAATGGCTGTTTCATGTGCCTTTATCTTTAGAAGCTCAAGCAGAGG  
CTCGTTTACTTATGTTTTCTCATATGAATCTTATCTCCAGCTATTGGAGATCCCATTCT  
GTACCGACTCAAGATATGCTGATTGGACTCTATGTATTAACGAGCGGCACTCGTCGAGG  
TATTTGTGCAAACAGATATAATCCATGTAATCGAAAAAAC-----TATCAAATGAAAGA  
ATTTACGAAACAACTATAAGTATATG-----AAAGAACCCTTTTTTTGCAATTCCTATGAT  
GCAATTGGAGCTTATCGGCAGAAAAGAATCAATTTAGATAGTCCTTTGTGGCTTCGGTG  
GCAATTAGATCAACGC---GTTATTGCTTCA-----AAAGAAGTTCCTATCGAAGTTCAT  
GAATCTTTTGGTAACTATCATGAGATTTATGCACACTATCTGATAGTAAGAAGTGTA AAA

AAACAAACTTTTTGTATATATATTCGAACCACAGTTGGTCATATTTCTTTTTATCGAGAAA  
TCGAGGAAGCTATAACAAGGTTTTCTCAAGCTTGTTTCATATGATACC-----  
-----ATGGCGGAACGGGCCAATCTGGTATTTACAATAAAGTGATAGATGGAAGTGC  
TATTAACGACTTATTAGCCGATTAATAGATCACTTCGGGATGGCATATACATCACACAT  
CCTAGATCAAGTAAAGACTCTGGGTTTCCAGCAAGCAACTGCTACATCCATTTCATTAG  
GAATTGATGATCTTTTAAACGATACCTTCTAAGGGCTGGCTTGTCCAAGATGCTGAACAA  
CAAAGTTTGATTTTGGAAAAACACCATCATTATGGGAATGTACATGCGGTAGAAAAATT  
ACGCCAATCTATTGAGATATGGTATGCTACAAGTGAATATTTGCGACAGGAAATGAATC  
CTAATTTTAGGATGACGGACCCTTCAATCCAGTCCATATGATGTCTTTTTCGGGAGCTA  
GAGGAAATGCATCTCAAGTACATCAATTAGTAGGTATGAGAGGATTAATGTCGGATCCC  
CAAGGACAAATGATTGATTTACCTATTCAAAGCAATTTACGCGAAGGACTGTCTTTAAC  
AGAATATATTATTTCTTGCTATGGAGCCCGTAAAGGAGTTGTAGATACTGCGGTCCGCAC  
ATCAGATGCTGGATATCTTACGCGTCGACTTGTGGAAGTAGTTCAACATATTGTTGTACG  
TCGAACGGATTGTGGCACTATCCGAGGGATTTCTGTGAGTCCTAAAAGTCGGATGATGT  
CA---GAAAGAATTTTTATCCAAACATTAATTGGTCGTGTCTTAGCAGACGATATATATA  
GGTTCCCGATGTGTGCGCTTTTCGAAATCAAGATCTTGGGATTGGACTTGTCAATCGATT  
CATAACC-----TTTGAACACAATCAATATCTATTCGAACTCCCTTTACTTGTGCG  
GAGTACATCTTGGATCTGTGCGATTATGTTATGGCCGGAGTCCCACTCATGGTGACCTAGT  
TGAATTGGGGGAAGCTGTAGGTATTATTGCGGGTCAATCTATTGGCGAACCGGGGACTC  
AACTAACATTAAGAACTTTTCATACCGGTGGAGTATTTACAGGAGGTACTGCCGAACAT  
GTACGAGCCCCTTATAATGGAAAAATCAAATTTAATGAGGATTTGGTTCATCCTACACGT  
ACACGTCACGGGCATCCTGCCTTTCTATGTTATATAGACTTGTCTGTAATTATTGAGAGC  
GAAGATATTACATAGCGTACTATTCCACCAAAAAGTTTTCTTTTAGTTCAAAAATGAT  
CAATATGTGGAATCAGAACAAGTGATTGCTGAGATTCGCGAGGGAACATCCACTTTT--  
CATTTTAAAGAGAGGGTTAGAAAATATATTTATTCTGACTCCGAGGGCGAA---ATGCATT  
GGAGTACTGATGTATCCCATGCACCCGAATTTACATATAGTAATGTCCATCTTTTACCAA  
AAACAAGTCATTTATGGATATTATCAGGAGGTTCTTGTGGA-----TCTAGTCTAATCTTT  
TTTCGATCCACAAAGATCAAGATCAAATGAACATACCC-----TTTCTTTCCGTCGAAAGA  
---AAATCTATTTCT-----CTCTCAGTGAATAATGATCAA---GTGAGCAAAAATTTTTCAGT  
TCAGATTTTCTGATAAAAAA---TCTGGGATTCCCAATTAT--TCAGAATTGAATGGAATC  
GTAGGTACTAGTCATTATAATTTTCATATATTCTGCT--ATTTTTCATGAGAATTCGGAT-----  
TTATTAGCAAAAAGGCGAAGAAATAGATTTCTCATTCCATTCCAATCGATTCAAGAGCA  
AGCGAAAGAGTTTCATACCACAT--GGTATCTCGATTGAAATACCCATAAAT-----GGTATT  
TTCCGTAGAAACAGTATTTTTGCTTTTTTTGATGATCCTAGATACAGAAGAAAGAGTTC  
CGGAATCTTAAATATGGAAGTCTAAAGGCGGACTCAATCGTCCAAAAAGAGGAT-----  
ATGATTGAGTATCGA---GGAGTCCAAAAATTTAAGACAAAATACATGAAAGTAGATCGC  
TTTTTTTTTCAATCCTGAGGAAGTGCATATTTTACCCGAATCCTCCGCCATAATGGTACAG  
AACTATAGTATCATTGGAGTCGATACACGAATCACTTTAAATATAAGAAGCCAAGTCCG  
CGGGTTGATCCGAGTGGAGAGAAAAAAAAAAAAAGGATTGAACTCAAATATTTTCGGG  
GGATATCCATTTCCGGACAAGACAGATAAGATATCCCGACATAGTGGCATCTTGATACC  
GCCAGGAAGGGGAAAAACA-----AACTCTAAAGAATCAAAAAAT-----TTAAAAAATTG  
GATTTATGCCCAACGG-----ATCACACCAACCAAGAAAAAG-----TTTTTTGTTTTGGTGC  
GGCCCGTAGCTACCTATGAGATAATGGACAGTATAAATTTAGCAACACTCTTCCCACAA  
GATCTCTTTCGGGAAAAGGATAATATTCAACTTCGAGTTTTCAACTATATCCTTTATGGA



AATGGTAAACCAACTCGAGGAATTTCTGACACAAGTATTCAATTGGTTCGCACTTGT  
AGTCTTGAATTGGGACCAAGACAAC-----AAAAATTCTTCCCTCGAGGAGGTCCGCG  
CTTTCGTTGTTGAAGTAAGTACAAAGGGTTTGATTTCGAGATTCATAAGAATTGGCTTA  
GTGAAATCCCATATTTTCGTATATAAGAAAAAGAAATAATCCGCCGATTTCGGGATTGATC  
TCT-----GCAGATTCCGTGAAT-----CCGTTTTATTTCGCTTTCTCCCAAGGCTGGCATT-  
-----CTTCAACAATCGCTTAGACAAAATCATGGAACTATTTCGTATGTTTCAGAAAT-----  
-----AAGGAATCCCAATCTTTGTTAATTTTATCATCTCTAATTGTTTTAGAAATCGGTCC  
A-----TTAATCATGTAAAATATCACAAAT-----GTTATAAACCAATCAAACCTCTAATTA  
CAATTCAAATTCGTCGGGCCCTTAGGAACA-----GCCATTCAAATTCGAATTTTTATT  
CA-----TTTTGCCTTTACTAACT-----TATAATCAGATCTCT--GTAATTAATATTTGCAAC  
TTGATAAC-----TTCAAATATATTTTTCAAATAATT-----CAC---TCTTATTTAATAGATGA  
AAACGGAAGA-----ATTTTTAATCTAGATCCATACAGTAACCTTGTTTTGAATCCATTCAA  
ATTGAATTGGTATTTTCTTCATCAAATATTATTGTGAGGAAACGTCCACAATAATAAGT--C  
TTGGACAATTTTTTTGTGAAAATCTATGTATAGCCAAAAAGAACCA-----TACCTAAA  
ATCGGGTCAAGTTTTAATTGTTCAA---AGGGATTCTGTAGTAATAAGATCCGCTAAGCCC  
TATTTGGCTACTCCGGGAGCAAAAGTTCACGGGCATTATAGAGAAATCTTTACGAAGG  
GGATACATTAGTTACATTTATATATGAAAAATCGAGATCCGGTGATATAACCCAAGGTCT  
TCCAAAAGTAGAACAGGTGTTAGAAGTCCGCTCGATTGATTCAATATCACTGAACTTAG  
AAAAGCGGATTAAGGGTTGGAACAGGTGTATAACAAGAATTCTTGGAATTCCTTGGGG  
ATTCTTGATTGGTGTCTGAGCTAACTATAGTGCAAAGTTCGTATTTCTTTGGTTAATAAGAT  
TCAAAGGTTTATCGATCCAGGGGGTGCAGATTCATAATAGGCATATCGAAATTATTGT  
ACGTCAAATAACATCAAAGTTTTGGTTTCAGAA-----GAGGGAATGTCTAATGTTTT  
TTTACCTGGAGAATTGATTGGATTGTTACGAGCAGAACGCACGGGGCGTGCTTTAGAA  
GAAGCAATCTGTTATCGAGCCGTTTTATTAGGAATAACTCGAGCATCTTTGAATACTCAA  
AGTTTTATATCCGAAGCAAGTTTTCAAGAACTGCTAGAGTTTTAGCAAAGCTGCTCT  
TCGGGGTCGTATCGATTGGTTGAAAGGCCTGAAAGAAAATGTTGTTCTAGGGGGTGTG  
ATCCCCGCCGGGACCGGGTTCAAAGGATTGGTGCATTGTTCA-----CGGCAACATACCA  
ATATTCTTTTTGAAAAAAAACAAAGAATTTATCTTTATTAGAGGGAGATATGAGA-----  
GATATTTATTTTATCACAGGGAATTTGTGACTCTTCTATTTACAAATCTGCCTTTTCTA  
GAATTGAA-----ATGACAAAAGATATTGGAACATCGATT  
TGGAAGAGATGATGAGAGCAGGAGTTCATTTGGGCATGGTACTAGGAAATGGAATCC  
TAGAATGGCACCTTATATTTCTGCAAAGCGTAAAGGTATTTCATATTATAAATCTGACTAG  
AACTGCTCGTTTTTATCAGAAGCTTGTGATTTAGTTTTTGGATGCAGCAAGTAGGGGAA  
ACAATTTCTAATTGTTGGGACAAAAAATAAAGCAGCTGATTTAGTGTGCGGGGCTGC  
AATAAGGGCTCGGTGTCATTATGTTAATAAAAAGTGGCTCGGCGGCATGTTAACAAT  
GGTCTACTACAGAAAAAGACTTCATAAGTTTAGGGACTTGAGAACTGAACAAAAGA  
CAGAGGGATTCAACCGTCTTCCGAAAAGGGATGCAGCTGTGTTGAAGAGACAATTATC  
TCGCTTGGAACATATCTAGGCGGGATTAAATATATGACGGGATTGCCTGATATTGTAAT  
CATCATCGATCAGCAAGAAGAATATACGGCTCTTCGAGAATGTATAACTTTGGGAATTC  
CAACCATTTCTTAATCGATACAAATTGTAATCCCGATCTCGCGGATATTTCTATTCCAGC  
AAATGATGACGCTATAGCTTCAATTCGATTCATTCTTAACAAATTAGTATTCGAATTTGT  
GAGGGTCGTTCTAGC---TATATACAAAATCTATGGGACAAAAAATAAATCCACTTGGTT  
TCAGACTTGGTACAACCCAAAGTCATCATTCTATTTGGTTTGCACAACCAAAAAAGTAT  
TCTGAAGGTTTAGAAGAAGATAAAAAAATACGAGACTGTATTAATAAATTATGTCCAAA

AAAATATAAGAATATCCTCTGGT---ATGGAGGGAATTGCACGTATCGAAATTCAAAAAA  
GAATCGATCTCATTTCAGATCATAATCTATATGGGATTTCTAAATTATTAATTGAAGATAA  
A-----CCCCGAAGAATCGAAGAATTACAGATGAATGTTCAAAAAGAACTTAATTGT  
GTCAATAGAAAACCTCAACATTGCTATTACCCGAATTTCCAATCCGTATGGGCATCCTAAT  
ATTCTTGCAGAATTTATAGCTGGCCAATTA AAAAATCGCGTTTCTTTTCGAAAAGCAAT  
GAAAAAAGCTATTGAATTA ACTGAACAGGCGAATACAAAAGGAATTCAAGTACAAATT  
GCAGGACGTATCGACGGAAAAGAAATTGCACGTGTTGAATGGATCAGAGAAGGCAGA  
GTTCCTTTACAAACAATTGAAGCTAAAATTGATTATTGTTCCCTATACAGTTCGAACTATT  
TATGGGGTTTTAGGAATAAAAATTTGGATATTCGTAGACGAAGAAATGTCACGTTACCG  
AGGGCCTCGTTTTAAAAAATACGCCGTCTGGGGGCTTACCGGGACTAACTAGTAAA  
AGGCCTAGGGCAGGAAGCGATCTTAGAAACCAATCACGCTCCGGAAAA---AAATCTCA  
ATATCGTATTCGTTTAGAAGAAAAACAAAATTGCGTTTTATTATGGTCTTACAGAAC  
GCCAATTACTTAAATATGTTTCGTATCGCCGAAAAGCTAAGGGGTCAACGGGTCAAGTT  
TTATTACAATTACTTGAATGCGTTTTGGATAACATCCTTTTTTCGGTTGGGTATGGCTTTG  
ACTATTCCTCAAGCGCGCCAATTAGTTA ACCATGGGCATATTTTAGTTAATGGTCGTATA  
GTTGATATACCAAGTTATCGATGCAAACCCGAGATATTATTACAGTGAAGGATGAACA  
AAACTCTAGA ACTTTGGTTCAAATCTTCTTGAGTCATCTGCCCCC---GAGGAATTGCC  
AAACCATCTGACTCTTCACACATTCCA-----TATGAAGGGTTAGTCAATCAAATAATAG  
ATAGGAAATGCGTCGGTTTTGAAAATAAATGAATTGCTTGTTCGTAGAATATTACTCTCGCC  
AGACTATGTCACGTCGAGGTACTGCAGAAGAAAAACTGCAAATCCGATCCAATTTA  
TCGTAATCGATTAGTTAACATGTTGGTTAACCGTATTCTGAAACACGGAAAAAATCAT  
TGGCTTATCAAATTATCTATCGAGCCTTGAAAAAGATTCAACAAAAGACAGAAACAAA  
TCCACTATCTGTTTTACGTCAAGCAATACGTGGAGTAACTCCCGATATAGCAGTAAAAG  
CAAGACGTGTAGGCGGATCAACTCATCAAGTTCCCATTTGAAATAGGATCCACGCAAGG  
AAAAGCACTTGCCATTCGTTGGTTATTAGGGGCATCCCGAAAACGTCCGGGTTCGAAATA  
TGGCTTTCAAATTAAGTTCCGAATTAGTGGATGCTGCCAAAGGGAGTGGCGATGCCATA  
CGAAAAAGGAAGAGACTCATAGAATGGCAGAGGCAAATAGAGCGTTTGCACATTTTC  
GTATGGGGAAAGACACTATTGCTGATATAATAACCTCTATACGAAATGCTGACATGAATA  
GAAAAGGAACAGTTCGGATAGGATCGACTAACATCACCGAAAGCATTGTTAAAATACT  
TTTACGAGAGGGTTTTATCGAAAACGTAAGGAAACATCGCGAAAACAATCAATATTTTT  
TGATTTTAAACCCTAAGACATAGACGA-----ATAAGAAAGAATCCTATAAA-----ACGA  
TTTTAAATTTAAAGAGAATAAGCCGACCGGGTCTACGAATCTATTCTAACTCTCAACGA  
ATTCCACGAATTTTAGGCGGAATAGGAATTGTAATCCTTTCAACTTCTCAAGGTATAATG  
ACAGATCGAGAAGCTCGACTAAAAGAATCGGCGGAGAAATTTTGTGTTATATATGGAT  
GGCAAACCTATATTAAGAATTGGTTCACGTAAAATACCCGTAGTGGTTCACGTAAAA  
ATGTACGTAGAATACCAAAGGGAGTTATTCATGTTCAAGCAAGTTTCAACAATACCATT  
GTGACCGTTACAGATGTACGGGGTCGGGTGATTTCTTGGTCTCCGCGGGTACTTGTGG  
ATTCAGGGGTACAAGAAGAGGAACACCTTTTTGCTGCTCAAACCGCAGCAGGAAATGC  
TATTCGAGCAGTAGTGGATCAAGGTATGCAACGAGCTGAAGTAAGGATAAAAGGCCCT  
GGACTAGGAAGAGATGCAGCATTACGAGCTATTCGTAGAAGCGGTATACTTTTAAAGTTT  
CGTACGAGATGTAACCCCTATGCCACATAATGGTTGTAGACCCCTAAAAACGACGTG  
TAATGCCAACCATTAACA ACTTATTAGAAATACAAGACAGCCAATCCGAAATGTCACA  
AAATCCCAGCGCTTCGGGGATGCCCTCAGCGACGAGGAACATGCACT-----ATCA  
CCCCAAAAAACCAACTCTGCCTTACGTAAAGTTGCCAGAGTACGATTAACCTCGGG

ATTTGAAATCACTGCTTATATACCTGGTATTGGCCATAATTTACAAGAACATTCTGTAGTC  
TTAGTAAGAGGGGGAAGGGTTAAGGATTTACCCGGTGTGAGATATCACATTGTTTCGAG  
GAACCTAGATGCTGTCTGGAGTAAAGGATCGTCAACAAGGGCGTTCTAAATATGGGGT  
CAAAAAGCCAAAATGGCAAAGAAAAGTTTGATTTATAGGGAGAAGAAGAGGCAAAA  
ATTAGAACAAAATATCATTGATTCGTGATCCTTAAAAAAGGAAATAAGT-----GAG  
ATTCCGTCGCTAAGTGAGAAGTGGAAAATTCATGGAAAATTACAATCCCCACCGCGTAA  
TAGTGCACCTACACGTCTTCATCGACGTTGCTTCTCGACCGGAAGACCGAGAGCTAAC  
TATCGAGACTTTGGACTATCTGGACACATCCTTCGGGAAATGGTTCAGGCATGTTTATT  
GCCAGGGGCAACAAGATCAAGCTGGATGATAAAAAATACATTCATTCA-----TTTCAA  
GAA---AAA---AAAGAAGAAAGCAAGGGATCTGTTGAATTTCAAGTAGTCAGTTTCACT  
AATAAGATACGAAGACTTACTTCACATTTGGAATTGCACAGAAAAGATTATTTATCTCA  
GAGAGGTCTACGAAAAATTCTGGGAAAACGTCAACGACTGCTGGCTTATTTGTCAAAA  
AAAAATAGAGTACGTTATAAAGAATTAATTAATCAGTTGAATATTCGGGAATTA AAAAC  
TCGT-----ATGGTAAAACCTTCGTTTAAAACGATGTGGTAGAAAAGCAACGTGCGATTATC  
GAATCGTTGCAATTGATGTTTCGATCCCGAAGAGAAGGAAGAGATCTTCGGAAGGTGGG  
GTTTTATGATCCGATAACTAATCAAACCTTATTTAAATCTTCCTGCTATTCTCGATTTCCTT  
AAAAAGGGCGCTCAACCAACAAGAACAGTTCATGATATTTCAAAGAAGGCAGGGATT  
TTTACGGAATTAAGTCTTAATAAA---ACGAAATTGAATATGAATAAATCTAAGCGACCTT  
TACTAAATCCAAGCGATCTTTTCGTGCGGCTTTGCCCCCGATCCAATCGGGGGATCGA  
ATTGATTATAGAAACATGAGTTTAATTAGTCGATTTATTAGTGAACAAGGAAAAATATTA  
TCTAGACGGGTGAATAGAGTAACTTTAAAACAACAACGATTAATTACTATTGCTATAAA  
ACAAGCTCGTATTTTATCTTTGTTACCTTTTCTTAATAATCAG-----AAACAATTTGAAAG  
AAGTGAGTCGACCCCTAGAACTACTAGCCTTAGAACCAGAAAAAAGTGACACGTTT  
ACTAAAAAAAATCCTTTTGTAGCAAAGCATTATTAAGAAAAATAGAGAAGCTTAATA  
CAAAGGCGGAAAAAGAAATCATAATAACTTGGTCCCGGGCATCTACTATTATACCCACA  
ATGATTGGCCATACTATCGCTATACATAATGGAAGGGAACACTTACCCGTTTATATAATC  
GACCTTATGGTAGGACATAAATTGGGAGAATTTTCACCTACTATAAATTTAGAGGACA  
CGCGAAAAATGATAATAGATCTCGTCGTATGGTTTTTCAATCTTTTATACTAGGTAATCTA  
GTATCCTTATGCATGAAGATAATCAATTCGGTCGTTGTGGTCGGACTCTATTATGGATTC  
TGACCACATTCTCCATAGGGCCCTCTTATCTCTTCCCTTCTCCGAGCTCGGGTTATGGACG  
AAGGAGAAGAAGGAACCGAGAAGAAAGTATCAGCAACAACCTGGTTTTTATTGCGGGAC  
AGCTCATGATGTTTCATATCGATCTATTATGCGCCTCTGCATTTAGCATTGGGTAGACCTCA  
TACAATAACTGTCTAGCTCTACCGTATCTTTTGTTCATTTCTTCTGGAACAATCACAA  
ACACTTTTTTGATTATGGATCTACTACCAGAAATGAAATGCGTAATCTTCGCATTCAATG  
TGTATTCCTGAATAATTCATTTTTTCAATTATTCAACCATTTCATTTTACCAAGTTCAATG  
TTAGCCAGATTAGTCAACATTTATATGTTTCGATGCAACAACAAGATGTTATTTGTAACA  
AGTAGTTTTGTTGGTTGGTTAATTGGTACATTTTATTTCATGAAATGGGTTGGATTGGTA  
TTAGTCTGGATACAGCAAAATAATCTATTAGGTCT---ATTAGATCTAATAAGTTCCTTGT  
GTCAGAATTGAGAAATCTATGACTCGAATCTTTAGTATTATCTTATTTATTACCTGTGTC  
TACTATTTAGGCAGAATCCCATCACCCATTTTTACTAAGAACTAAAAGGAACCGAAGA  
AGCTAAACCTTTTGTAACTCTAGTTTTTCGATTATAAAAAGATGGAATAGACCAAATCGATA  
TATAAAAATGATAAAATTGAAAATACTGTAAGAAATGAAATGTCACAATATTTTTTTTA  
TACATGCCAAAGTGATGGAAAAGAACGAATATCTTTTACATATCCCCCAACCTTTCAA  
CTTTTTTTGAAATGATACAAAAAAGATCCCTTCATTTACAACAGAAAAAAAACCTC

GGATCAAGTTTATACTTGTTGGAGTTTGGTCAATGAAGAAAAAAGGAAAATTTAAAA  
AACGAATTTTTAAATAGAATTGAAGCTTTAGAT-----TCTATTGAAAATATACTGGAAA  
AAACAACCTCGATTTTGTGCATAACGAACTCAAAAAGAATATTTACCTAAAATTTATGAT  
CCATTTTTACATGGGATTTTCGCGCGGAAGAATCAAAAATTATCTCCGTTCATAAGAGG  
ATCTTGGATAAACAAAATTCATGCTATACTTTCTCAAAAATTTGAGCAAACATATAATAA  
TGATCAAGAT-----TTCCATGAAATCAATAAACAAAGTTTCCCTCAATGGTCATACAAATTA  
CAGAATTGGAAGAATTGGAAGCTGAAGGAATTCGTTCAAGAAAAGCAAAACGTGTAG  
TGGTTTTTACTGATGCTTTGATCCGTTATTCACAACAATCTGATTTTCGTTCGAGAGATAA  
TTAAAGGATCCATGCGTTCCCAAAGGCGTAAACTGTTATTTGGGAATTTTTCGCAAGCA  
AAAGCACATTTCGCCCTTTTTTTTTGATAGAATAGATAAA-----TTTTTTTTTTTTTCGTTTG  
ATATATGGGGGCTAAAAAATAAATTCTTAGAAATAAAGAAGAACAAGACGTATAGA  
AATTGCGGAACTTGGGATAGCTTCTTATTTGCTCAAATAATAAGAGGTTTTATTTTAGT  
AACTCAATCTATTCTTAGAAAATATATTATTTACCTTTATTGATAATAATTAATAATAGCA  
TCCGTATCGTATTATTTCAACTTCCCGAGTGGGAAGAGGATTTAAAGGAGTGGAACGT  
GAAATGCATGTTAAATGTACTTATAATGGGGTTCAACTATCCGAAACAGAATTTCCACG  
AAACTGGTTAACGGATGGTATTCAGATAAAAATCCTATTTCCGTTTTATCTTAAACCTTG  
GCATAAATATAAA--GGAGAAAAAATGATTTTCGTTTTTAAACAGTTTGGGGGCTGGA  
AACTGACCTACCTTTTGGTTCTACCAAACCAAAGCCTTCTTTTTTAAACCTATTTTAA  
AGAATTAATAAAGAATCAAAAATCCAAAACGAAGTCTTTTCCGGTT--TTAAGGAT  
TTTCAAAGAAAGAGCAACAATTTTCTAAAAGTCGAAAAAGAAATTAATAACTGGATT  
ATAAAAACTTGCTT-----TTTCTAAAAGAAAAAATAAATCCTTTCAAACGAAATG  
ATTCAATAATGAGTAATCAGATGATTCATGAACTA---GTTCAAAAAAATCGACGGAGT  
GGCCAAAT---TCACTCAGCGAAAAACAAAATAAAAAATGTGATTGATAAAATAAAGACAA  
TCAGAAATCAAACGAAAAAATTTCAAAGAAAAAGAAAAAAGTTGTAACAACTGT  
GTTATGATTCTAAAATAATTGAGTCATCAAAAAAAGTTGGCAGACATTAATAA-----AAA  
ACTCGATTAATTCGTAAATCTTTTTTTTTTTTTCAATTTTGCGTTGAACAACCTGTCTATTT  
CTATTTTCTAGGTATTATTAATATTCCAAAGAATTACTACACAACCTT-----TATGA  
CTTATGCTCTTTATCACAAGCATATGTATTTTACAAATTATCACAATTT--GTTAGTAACTT  
TTCTAAATTAAGTCTTTTTTTTGAATATACATCCTTTTTTTGTTAAGAATCAAATAAAGAT  
TTTTTTGAACAAGGAATCTTTCAT--GAATGGAAAGATAAAACCCTTTTA---TCCGAAAT  
AAATCAATGGAAAAACTGGTTACGAAGTCATTCTCAATATAATTTACCTCAGATTGCAT  
GGGCTAGATTAGTAACCCAAAAATGGAAAAAAAATAAACCAGACTCTCTAGTTCT  
AAATCCAAACAAAGTGGATTCATACGAAAAAAAATT-----TTTGATAATTACAAAAA  
CAA---AATTTCAAAAAGGATTCTATATATAATCTTTTTTGTACAAATCTATTCATTATAAT  
ATTCGCAGTTTGCATAGAAAATATTTGGATTGGAGAATTCTCAACTTTTGGTTTAGATTT  
TTTGATTGGATGGGAATGAATGAAGAAATACTAAATCCTTTTTTCTTTCCAGAATTTTTC  
TTATTTTCTAGTACATATAAAATGAAACCGTGGGTCATACCAATTAATCACTTCTTTTCA  
ATAGCAAT-----ACCGAAGCGGAACTTGACTTATTTCTCAAAAGGTATTCGCGTTTTCAA  
TTGCGATGGAAT-----AATCAAAAAATCCTCAATAATGTAAAAGCATACTGTCTCTTGG  
TTAGACTAAAAAATCCAACCGAGATAACGATATCTTGTATTGAAAGAGGAGAGATGAG  
CTTAGATATTCTAATGATTGAGAAGAATTTCACTTTTTTCAAATTAATGAAAAAAGGAAT  
ATTGATTGTTGAACCTGTTTCGTTTGTCTGTAAAAACGACGGCCAACCTTATTATATATAG  
AACCATCGGGATTTCAATTGGTTCATAAAAATAAACAAAGTTTAAAT---TTCTTTGTCCCT  
GAAACTATTCTATCCCCTAAACGACGTAAAGAATTTCAATTTCTAATTTGTTTCAGATTT

CTTTGGCCCAATTTTCGATTAGAAGATTTAGCTTGTATGAATCGCTATTGGTTTAATACG  
ACTAATGGAAATCATTTCAGTATGATAAGAATACACATGTATACGATGAAAGGACATCAA  
TTCAAATCCTGGATTTTCGAATTGAGAGAAATAGTGAGAGAGATCAAGAATTCTCACTA  
TTTCTTAGATTCATGGACCCAAATCAATTCAGTGGGATCTTTCATTCATATTTTTTCCAC  
CAAGAACGTTTTAGAAAACCTCTGGACCCTCGAATTTTTAGTATCCTACTTTTTG---CGCA  
ATTCA-----CAGGGTTCAACAAGCAATCGATATTTTC-----ACGATCAAGGGTGTAGTAC  
TATTTGTAGTAGCG--GCCCTTCTATATCGT-----ATTAACAATCGAAATATGGTCGAA  
AGCAAAAATCTCTATTTGAAAGGGCTTCTTCCT-----ATACCTATGAATTCCATTG  
GACCCAGAAATGATACATCGGAAGAATCTTTT--GGGTCTTCCAATATCAATAGGTTGAT  
TGTTTCG---CTCCTGTATTTTACAAAAGGAAAAAAGATCTCTGAGAGCTGTTTCCGGGA  
TCCGAAAGAGAGTACTCGGGTTCTCCCAATAACT-----AAAAAGTGTATCATGCCTG  
AATCTAACTGGAGTTCGCGGTGGTGGAGGAACTGGATCGGAAAAAAGAGG-----GATT  
TTTGTGTGAAGATATCTAAT-----GAAACCGTCGCTGGAATTGATATCTCATTAAAGA  
GAAAGATATCAAA---TATCTGGAGTTTCTTTTTGTATATTATATGGAT-----GATCCGATCC  
GCAAGGGCCATGATTGGGAATTGTTTGATCGTCTTTCTCCGAATAAGAGGGCGAAACATA  
ATCAACTTG-----AATTCGGGACAGCTATTCGAAATCTTAGTGAAAGACTGGATTTGTTA  
TCTCATGTTTGCTTTTCGTGAAAAAATACCAATTGAAGTGGAGGGT--TTCTTCAAACA  
ACAAGGA---GCTGGGTCAACTATTCAATCAATGATATTGAGCATGTTTCCCAT-----CTC  
TTCTCGAGAAACAAGCGGGCTATTTCTTTGCAAAATTGTGCTCAATTCATATGTGGCA  
ATTCCACCAAGATCTCTTCGTT-----AGTTGGGGGAAG---AATCCGCACGAATCGGATT  
TTTTGAGGAAA---ATATCGAGAGAGAATTGGATTTGGTTAGACAATGTGTGGTTGGTAA  
ACAAGGATAGA-----TTTTTTAGC-----AAGGTACGAAATGTATCGTCAAATATTCAATA  
TGATTCT-----ACAAGA-----TCTAGTTTCGTTCAAGTAACGGATTCTAGCCAATTGAAC  
GGATCTTCT--GATCAATTCATAGATCCTTTTCGATTCCATTAGT-----AATGAGGATTC  
GGAATATCAC-----TATCACACATTGATCAATCAAAGAGAGATTCAA  
CAACTAAAAGAAAGATCGATTCTT--TGGGAT-----CCTTCCTTTATTCAAACGGAAGGA  
AGAGAGATAGAATCAGAC-----CGATTCCCTAAA-----TACCTTTCTGGATATTCC-----TC  
AATGCCCGGCTATTCACG--GAACGTGAAAAGCGAATGAATAATCATCTGCTTCCGGA  
AGAAAGCGAAGAATTT-----TTTTGGAATTCTACAAGAGCCATTCTGTTCTTTTTTCTCTG  
ACAGATGG-----TCAGAACTTCAT--CTGGGTTTCAATCCTACTGAGAGGTCCACTAGGG  
ATCAG-----AAATTGTTGAAGAAAGAACAAGATGTTTCT--TTTGTCCCTTCCAGGC  
GATCGGAA-----AATAAAGAAATAGTTAATATATTCAAGATAATTACGTATTTACAAA  
AT-----ACCGTCTCAATTCATCCTATTTTCATCAGATCTGGGATGTGATACGGTTCCG---AA  
GGATGAACTGGAT--ATGGACAGTTCCAATAAGATTTTCATTCTTGAACAAAAATCCATTT  
TTTTATTTA-----TTTCATCTATTCCATGAACGGAAGAGGGGGGATAACCGTTA-----CGC  
CACGATTTTGAGTCAGAA-----GAGAGATTTCAAGAAATGGCAGATCTATTCACTCTATC  
AATAACCGAGCCG---GATCTGGTGTATCATAAGGGATTTGCCTTTTCTATTGATTCCCTACG  
GATTGGATCAAAGACAA-----TTCTTGAAGGAGGTTTTCAACTCCAGGGATGAATTGAA  
AAAGAAATCTTTA-----TTGGTTCTACCTCCTATTTTTTAT-----GAAGAAAATGAATCTT  
TTTATCGAAGGATCAGAAAAAATGGGTCCGG---ATCTCCTGCGGGAATTTTTTTGAAG  
ATCCAAAACCAAAAAGAGTGGTATTTGCTAGCAACAACATAATGGAGGCAGTCAATCA  
ATATAGATTGATCCGAAATCTGATTCAAATCCAATTCGAATATAGTCCCTATGGGTACATA  
AGAAATGTATTGAATCGATTCTTTTTAATGAAG-----AGACCTGATCGCAACTTCGAAT  
ATGGAATTCAA-----AGGGATCTAATAGGAAATGATACTCTGAATCATAGAACTATAAT

GAAAGATACGATCAACCAACATTTATCGAATTTGAAAAAG---AGTCAGAAGAAATGGTT  
CGATCCT-----CTTATTTTTCTTTCTCGAACCGAGAGATCCATAAATCGGGATCCTAATGC  
ATATAGATACAAATGGTCCAATGGGAGCAAGAATTTCCAGGAGCATTGAAACATTTTCG  
TTTCTGAGCGGAAGAGCCGT-----TTTCAAGTAGTGTTTCGATCGATTATGTATTAATCA  
ATATTGATTGATTGGTCTGAGGTTATTGATAAAAAAGATTTGTCTAAGTCACTTCGTTT  
CTTTTTGTCCAAGTACTTCGT-----TTTTGTCC-----AAGTT  
ACTTCTCTTTTTGTCTAACTCACTTCCT--TTTTCTTTGTGAGTTTCGAGAATATCCCCA  
TTCATAGGTCCTGAG---ATCCACATCTAT--GAATTGAAAGGTCCGAACGATCAACCCTGC  
AATCAGTTGTTAGAATCAATAGGTCTTCAAATCGTTCATTTAAAAAATTGAAACCCTTT  
-----TTATTGGAT-----GATCATAATACTTCT--CAAAAATCGAAATCCTTGATCAATGGA  
GGAACAATATCACCATTTTTGTTCATAAAGATACCA---AAGTGG---ATGATTGACTCATT  
CATACTAGA-----AAGAATCGCAGGAAATCTTTTGATAACACGGATTTCCTATTTCTCAATC  
GTATCCACGATCAAGACAATTGGCTGAATCCCGTGAAACCATTTCAGAGAAGTTCATT  
GATATCTTCTTTTTCTAAAGCAAATCGACTTCGATTCTTGAATAATCCACATCACTTCTG  
CTTCTAT-----TGTAACAAAAGATTCCCTTTT-----TAT--GTGGAAAAGGCCCGTCTCAA  
TAATTCTGAT-----TTTACGTATGGA--CAATTCCTCACTATCTTGTTCAATCACAACAAA--  
-ATATTTCTTCGTGTGGTGGTAA-----AAAAACATGCTTTTTTGGAG---AGAGATACT  
ATTTACCTATCGAGTCACAGGTATCTAACATATTCATATCTAACGATTTCCACAAAGT  
GGTGACGAAAGG---TATAACTGTACAAATCT-----TTCCATTTCCAATTCGATCCGAT  
CCATTAGTTCGT-----AGAGCTATTTACTCGATTGCAGACATTTCTGGAACACCTCTAATA  
GAGGGACAAAGAGTAAATTTGGAAAGAACGTATTGTCAAACCTTTTCAGATATGAATC  
TATCCGATTCAGAAGAGAAGAGCTTGCATCAGTATCTCAAT-----TTCAATTCAAACGTG  
GGTTTGATTCACACTCCATGTTCTGAGAAATATTTACAG-----AGGAAAAA-----  
-----CGGAGTCTTTGCCTAAAA-----AAATGCGTTGACAAAGGGCAGATGGATA  
GAACCTTTCAACGAGATAGTGCTTTTTCAACTCTCTCAAATGGAATCTATTCCAAACA  
TATATGCCATGGTTCTTTACTTCGACAGGGTACAAATATCTAAATTTGATATTTTTAGATA  
TTTTTTCAGAC---CTATTGCGGATACTAAGTAGCAGT-----CAAAAATTTGTATCCATTTTT  
CATGATATTATGTATGGATTAGATATATCATGGCGAATTCCTTCAGAAAAAATTG-----  
---TGTCTTCCACAAAGGAAT--CTGATAAGTGAGATTTTCGAGTAAGTCTTTACATAAT----  
-CTTCTTCTGTCCGAAGAAATGATTCATCGAAATAATGAGTCA-----TCGTTGATATCGAC  
ACATCTGAGATCGCCAAATGTTTCGTGAGGTC---CTCTATTCAATCCTTTTCCTTCTTCTG  
TTGCTGGATAT---ATCGTTCGTACACATCTTCTCTTTGTTTCCCGA-----GCCTATAGTGAG  
TTACAGACAGAGTTCGAAAAGATCAAATCTTTGATGATTCCATCATAATGATTGAGTT  
GCGAAAACCTTCTGGATAGGTATCCTACATCTGAACAGAATTCCTTCTGGTTAAAGAATC  
TTTTTCTAGTTGCTCTGGAACAATTAGGAGATTGTCTAGAAGAAATACGGGGTTCT-----  
GGCGGCAACATGCTATGGGGTGGTGATCCC-----GCTTATGGG---GTCAAATCAAT  
ACGTTCTAAGAAGACAGATTTGAAAATAAACTTCATCGATATCATCGATCTCATA---AGT  
ATCATAACCAAATCCCATCAATCGAATCACTTTTTTCGAGAAATACGAGACATCTAAGTCAT  
ACAAGTAAAGACATCTATTCATTGATAAGAAAAAGAAAAACGTGAGCGGTGATTGGA  
TTGATGATAAAATAGAATCCTGGGTCGCGAACAGTGATTTCGATTGATGATAAAGAAAGA  
GAATTCCTGGTTTCAGTTCTCC-----ACCTTAAGGGCA-----GAAAAAAGGATTGATCAAA  
TTCTATTGAGTCTGACT---CATAGTGATCATTATCA-----AAGAATGACTCTGGTT  
ATCAAATGATTGAACAACCGGGAACAATTTACTTACGATACTTAGTTGACATTCAT-----A  
AAAAGTATCTAATGAATTATGAGTTCAATACATCCTGTTTAGCAGAAAGACGGATATTC

TTGCTCATTATCAGACAATCACTTAT-----TCACAAACTTCGTGTGGGGCTAATAGTTTTTC  
ATTTCCCGTCTCATGGA-----AAACCCTTTTCGCTCCGCTTAGCCCTATCCCCCTCT---A  
GGAGTATTTTAGTGATAGGTTCTATAGGAACCGGACGATCCTATTTGGTCAAATACCTAG  
CGACAAACTCCTATGTTCTTTTCATTACAGTATGTCTGAACAAGTTCCTGGATAACAAG  
CCGAAAGGTTTTTTTTCTTGAT-----GATATCGAT-----GATGATAGTGACGATATTGA  
TGCTAGTAAC-----GATATTGATCGTGAAC  
TTGATACGGAGCTGGAGCTTCTAACTATGATGAATGCGCTA-----ACTATGGATATGAT  
GTCG-----GAAATAGACCGATTTTATATCACCTTCAATTGCAATTAGCAAAAAGCAATG  
TCTCCTTGATAATATGGATTCCAAACATTCATGATCTTGATGTGAATGAGTCGAATTAC  
TTAGCCCTCGGTCTCTTGGTGAACCTCTCTCTCC-----AGGGATTGTGAAAGATGTTGCG-  
--ACTAGAAATAGTCTTGTTATTGCTTCGACTCATATCCCCAAAAAGTGGATCCCGCTCT  
AATAGCCCCGAATAAATTAATACATGCATTAATAAAGAAGGCTTCTTATTCCACAACA  
ACGAAAGCACTTTTTCACTCTTCTATACTAGGGGATTTCACTTGGAAAAGAAAATGT  
TCCATACT-----AATGGATTTCGAGTCCATAACCATGGGTTCCAGTGCACGAGATCTTGTA  
GCACTTACCAATGAGGCCTTATCAATTAGTATTACACAGAAGAAATCAATTATAGACACT  
AATACAATTAGATCTGCTCTTCATAGACAAACTTGGGATTTGCGA-----TCCCAGGTAA  
GATCGGTTTCAGGATCATGGGATCCTTTTCTATCAGATAGGAAGGGTTGTTGCACAAAAT  
GTAATAAGTAATTGCCCATAGATCCTATATCTATATGAAGAAGAAA-----TCAT  
GTAACGAAGGGGATTCTTATTTGTACAAATGGTACTTCGAACTTGGAACGAGCATGAA  
GAAATTCACGATACTTCTTTATCTTTTGTAGTTGTTCTGCCGGATCGGTCGCTCAAGACCT  
TTGGTCTCTACCC-----GGACCCGATGAAAAA---AATAGGATCACTTCTTATGGATTCATT  
GAGAATGATTTCG---GATCTATTTTCATGGCCTATTAGAAGTGCAAGGCGCTTTGGTGGGA-  
----TCCTCACGGACAGAAAAAGATTGCAGTCAGTTTGATAATGAT-----CGAGTGACATT  
GCTTTTTTCGCTCCGAACCAAGGGAT--CCCTTATATATGATGCAAGATGGATCTTGTCTA  
TCGTTGATCAGAGATTTCTCTATGAAAAA-----TACGAATCGGAGTTTGAAGAA---GGGG  
AAGGAGAAGCAGTCCTCGACCCGGAA-----CAGATAGAGGAGGAT-----TTATT  
CAATCAC-----ATAGTTTGGGCTCCT-----AGAATATGGCGCCCT-----CGGGGCTTTCTA  
TTTGATTGTATCGAAAGGCCTAATGAATTGGGATTTCCC---TATTTGGCCGGGTCATTTC  
GGGGCAAG-----CGGATCATTATGATGAAAAGTATGAGCTTCAAGAGAATGATTTCGG  
AGTTCTTGACAGAGCGGAACCATGCAGTACCAGAGACGAGATAGGTCTTCCAAAGAAC  
AAGGCTTTTTTAGAATAAGCCAATTCATTTGGGACCCCGCAGATCCACTCTTTTTCTAT  
TCAA---GATCAGCCCTTTGTCTCTGTGTTTTACATCGAGAATCTTTGCAGATGAAG  
AGATGTCAAAGGGGCTTCTTACTTCCAAACAGATCCTCTACATCTATATATAAACGCT  
GGTTTATC-----AAGAATACGCAAGAAAAGCACTTCGAATTGTTGATTTCAGCGCCAGAG  
ATGGCTTAGA-----ACCAATAGTTCATTATCT-----AATGGATTTTCCGTTCTAAT-----A  
CTCTATCCGAGAGTTATCAGTATTTATCAAATCTGTTCCCTATCTAAC---GGAACGCTAGTG  
GATCGAATGACAAAGACATTGTTGAAAAAAGATGGCTTTTTCCGGATGAAATGAAAA  
TAGGATTC-----ATG-----ATGCCAAGATCGCGT---ATAAATGGAAATTTTA  
TTGATAAACCTTTACAATTGTAGCCGATATCTTATTACGAGTCATTCCGACAACCTCCG  
GAGAAAAAGAGGCATTTACTTATTACAGAGATGGT-----ATGTCGGCTCAATCTGAAGG  
AAATTATGCGGAAGCATTACAGAATTATTATGAAGCTATGCGACTAGAAATTGACCCCTA  
TGATCGAAGTTATATACTCTATAATATAGGCCTTATCCACACAAGTAATGGGGAACATAC  
CAAAGCTTTAGAATATTATTTTCGGGCATTAGAACGAAACCCCTTTTTTACCACAAGCTTT  
TAATAATATGGCTGTGATCTGTCATTACCGT---GGAGAACAGGCCATTCAACAAGGAGAT

TCTGAAATGGCGGAGGCTTGGTTTGGCTCAAGCCGCCGAGTATTGGAAACAGGCTATAA  
CGCTTACTCCTGGTAATTATATTGAAGCACAGAATTGGTTGACGATCACGAGGCGCTTC  
GAA-----ATGAGTTGGCGATCAGAATCTCTATGGATAGAATTTATAACGGGGTCTCGAAA  
AACAAAGTAATTTCTGCTGGGCCTTTATCCTATTTTTAGGTTTCATTGGGATTCTTATTGGTT  
GGAAGTTCCAGTTATCTTGGTAAAAATTTTATATCGTTAGTTGCATCTCAGGAAATCCTT  
TTTTTTCCACAAGGGATTGTGATGCTTTCTATGGGATCGCGGGTCTCTTTATTAGTTGC  
TATTTGTGGTGCACACTATTTTGTGGAATGTGGGTAGTGGTTATGATCTTTTCGACCGAAAA  
GAAGGGATAGTACGGATTTTTCGTTGGGGATTTCCTGGAAAAAGCCGTCGCATCTTTTT  
ACGATTCCCTTATGAAAGATATTCAGTCGATCAGAATCGAAGTTAAAGAGGGTGTTCCTG  
CCCGGCGTGTCTTTATATGGAAATTAGAGGTCAAGGGGCTATTCCTTTAATTCGTACTG  
ATGAGAAT---TTTACTACACGAGAAATTGAGCAAAAAGCTGCTGAATTGGCTTACTTCT  
TGCCTGTACCAATTGAAGTATTT

>Rcinus

ATGGAAAAACGGCGGTTCAATTCGATCTTATCCCTAAGTCAATCGATAGATAGTTTCAG  
TCCTCTTGAAAATACCAGTGTAAGCGAAGACCCGATTCTAAATGATACAGATAAAAACA  
CCCGTAGTTACAGTAATGTTGATCGTTTAGTCGGCGCCAGAGACATTCGGAATTCGGC  
GCTGATGAACTTTTTTAGTTAGGGATAATAATAGGGACAGTTATTCCATATATTTTGATA  
TTGAAAATCAAGTTTTTGAGATTGACACTGATCAT-----TCTTTTCTGAGTGAATTAGAA  
AGTTATTTTTATAGTTATTGGAATTCTAGTTCTCTGAATAATGGGTCTAGGAGTGGCGATT  
CCTACTATGATCATTATATGTATGATACTAAATATAGTTGGAAGAATTACATCAATAGTTG  
CATTGACAGTTATCTTCGT-----TCTCAAGTCTGTATTGATATTTATATTTAACTGGCAGT  
TACAATTACGGCGAAAGTTCCATTTATAGTTACATTTGTGGTAGCGAGAGTTCCAGTCTA  
AGAAGTAGTACGAATGGTAGCGATTTAACTAGAAGAGAAAAGTTCTAATGATATAACTAT  
AACTCAAAAATACAAGCATTTGTGGGTTCAATGCGAAAATTGTTATGGATTA AATTATA  
AGAAATTTTTTAAGTCAAGAATGAATATTTGTGAACAATGTGGATATCATTGAAAATG  
AGTAGTTCAGATAGAATTGAACTTTTCGATTGACCTAGGCACTTGGGATCCTATGGATGA  
AGATATGGTATCTCTGGATCCCATTGAATTTCAATCAGAAGAGGAACCTTATAAAGATCG  
TATTGATTCTTATCAAAGAAAGACAGGATTAACCGAGGCCGTTCAAACAGGCACAGGT  
CAACTAAACGGCATTCCCGTAGCAATTGGGGTTATGGATTTTCAGTTTATGGGGGGTAG  
TATGGGATCCGTAGTAGGCGAGAAAATCACTCGTTTGTATCGAGTATGCTACCAATAAAT  
TTTTACCTCTTATTTTAGTGTGTGCTTCCGGAGGAGCGCGCATGCAAGAAGGAAGTTTG  
AGCTTGATGCAAATGGCTAAAATATCTTCTGCTTTATATGATTATCAATCGAATAAAAAG  
TTATTTTATGTATCAATCCTTACATCTCCTACAACAGGCGGGGTGACGGCTAGTTTTGGT  
ATGTTGGGGGATATCATTATTGCTGAACCTAACGCCTATATTGCATTTGCAGGTA AAGA  
GTAATTGAACAAACATTGAATAAGACAGTACCTGAAGGTTCACAATCAGCCGAATTTTT  
ATTCCATAAGGGCTTATTCGATTCAATCGTACCACGTAATCCGTTAAAAGGCGTTCTGAA  
TGAGTTACTTCAGCTCCACGATTTCTTTCCTTTGAATCATAAATCAAGTAGAATGGTAAC  
CATTCGAGCCGACGAGATTAGTAATATTATCCGCGAACGTATTGAGCAATATAATAGGGA  
AGTAAAGATTGTAAATACGGGTACCGTACTTCAAGTAGGCGACGGCATTGCTCGTATTT  
ATGGTCTTGATGAAGTAATGGCAGGTGAATTAGTAGAATTTGAAGAGGGTACAATAGGC  
ATTGCTCTGAATTTGGAATCAAATAATGTCGGTGTCTGTTTAAATGGGTGACGGTTAATG  
ATACAAGAGGGAAGTTCCGTAAAAGCAACAGGAAGGATTGCTCAGATACCGGTGAGT  
GAGGCTTATTTGGGTGCTGTTATAAATGCCCTGGCTAAACCTATTGACGGTTCGAGGTGA  
AATTCAGCTTCTGAATCGCGTTAATTGAATCTCCCGCTCCTGGTATTATTTTCGAGACG



TTCCGTATACGAGCCTCTTCAAACAGGACTTATTGCTATTGATTTCGATGATCCCCATAGG  
ACGCGGTCAGCGGGAATTGATTATTGGGGACAGACAGACCGGTAAAACAGCAGTAGC  
CACAGATACAATTCTCAATCAACAAGGACAAAATGTAATATGTGTTTATGTAGCTATTGG  
GCAAAAAGCGTCTTCTGTGGCTCAGGTAGTGACTACTTTACAGGAAAGAGGGGCAATG  
GAGTACACTATTGTGGTAGCCGAAACGGCGGATTCTCCGGCTACATTACAATACCTCGC  
TCCTTATACAGGAGCAGCTCTGGCTGAATATTTTATGTACCGTGAACGACACACCTTAAT  
CATTTATGATGATCTCTCAAACAAGCGCAGGCTTATCGCCAAATGTCGCTTCTATTACG  
AAGACCACCTGGTTCGTGAAGCTTATCCCGGAGATGTCTTTTATTTGCATTCACGCCTTT  
TGAAAGAGCTGCTAAATCAAGTTCCCGTTTAGGTGAAGGAAGTATGACTGCTTTACC  
AATAGTCGAGACCCAATCAGGAGACGTTTCGGCTTATATTCTACTAATGTAATTTCCAT  
TACAGATGGACAAATATTCTTATCCGCCGATTTATTCAATGCTGGAATCAGGCCTGCTAT  
TAATGTGGGTATTTCCGTTTCCAGAGTAGGATCCGCTGCTCAAATTAAGCTATGAAAC  
AAGTAGCTGGTAAGTTAAAATTGGAATTGGCGCAATTCGCAGAATTAGAAGCCTTTGC  
GCAATTCGCTTCGGATCTTGATAAAGCTACTCAGAATCAATTGGCAAGAGGTCAACGAT  
TACGCGAGTTGCTCAAACAATCCAATCAGCTCCTCTCACGGTGGAGGAACAGATAAT  
GACTATTTATACCGGAACGAATGGTTATCTTGATTCATTAGAAATTGGACAAGTAAGGA  
AATTTCTCGTTGAGTTACGTACCTACTTAAAAACGAATAAACCTCAGTTCCAAGAAATC  
ATATCTTCTACCAAACATTCACTGAAGAGGCGGAAACCTTTTGAAAGAAGCTATTCA  
GGAACAGAAGGAACGTTTTCTACTTCAGGAACAAGTCATGAGAATCAATCCTACTACT  
TCTGGTCCGGGAGTTTCCACACTTGAAAAAAGAACCTGGGGCGCATCACTCAAATCA  
TTGGGCCGGTGCTAGATGTAGCTTTTCCCCGGGAAAGATGCCTAATATTTACAACGCT  
CTGGTAGTTAAGGGCCGGGATACTGTTGGTCAAGAAATTAATGTGACTTGTGAAGTAC  
AACAAATTATTAGGAAATAATCGAGTTCGGGCTGTAGCTATGAGTGCTACAGACGGTCTA  
ATGAGAGGAATGGAAGTGATTGACACGGGAGGTCCTCTCAGTGTTCCAGTCGGCGGA  
GCGACTCTAGGACGAATTTCAACGTGCTTGGAGAACCTGTTGATGATTTAGGTCCTGT  
AGATACTCGCGCAACATCCCCTATTCATAGATCTGCACCTGCCTTTATACAGTTAGATAC  
AAAATTATCTATTTTTGAGACAGGAATTAAGTAGTAGATCTGTTAGCCCCTTATCGCCG  
TGAGGAAAAATCGGACTATTCGGGGGAGCTGGAGTAGGTAAAACAGTACTTATTATG  
GAATTAATCAACAACATTGCGAAAGCTCATGGGGGCGTATCCGTATTTGGCGGAGTAGG  
CGAACGTACTCGTGAAGGAAATGATCTTTACATGGAAATGAAAGAATCTGGAGTAATT  
AATGAAGAAAATATTGCAGAATCAAAGTAGCTCTAGTCTATGGTCAGATGAACGAAC  
CCCCGGGAGCTCGTATGAGAGTTGGCTTAACTGCCCTAACTATGGCGGAATATTTCCGA  
GATGTTAATGAACAGGACGTACTTCTATTTATCGACAATATCTTCCGTTTCGTCCAAGCA  
GGATCCGAAGTATCCGCCTTATTAGGTAGAATGCCTTCCGCTGTGGGTATCAACCTACC  
CTTAGTACCGAAATGGGTTCTTTACAAGAACGAATTACTTCTACAAAAGAAGGGTCCAT  
AACTTCTATTCAAGCAGTTTATGTACCTGCGGACGATTTGACTGACCCTGCTCCTGCCA  
CGACATTTGCACATTTAGATGCTACTACTGTACTATCAAGAGGATTAGCTGCTAAAGGG  
ATCTATCCAGCAGTAGATCCTTTAGATTCAACGTCAACTATGCTCCAACCTCAGATCGTT  
GGTGAGGAACATTATGAAACTGCGCAAAGAGTTAAGCAAACCTTTACAACGTTACAAAG  
AACTTCAAGACATTATAGCTATCCTTGGGTTAGACGAATTATCCGAAGAGGATCGCTTA  
ACTGTAGCAAGAGCACGAAAAATTGAGCGTTTCTTATCACAACCCTTTTTTTGTAGCAG  
AAGTATTTACGGGTTCGCCGGGAAATATGTCGGTTTAGCAGAACTATTAGAGGATTT  
AAATTGATCCTTTCCGGAGAATTAGATAGTCTACCTGAGCAGGCCTTTTATTTGGTAGGT  
AATATTGATGAAGCTACTGCGAAGGCTACGAATTTAGAAATGGAGAACAACCTTGAAGA

AAATGACCTTAAATCTTTGTGTACTGACCCCAAATCGAATTGTTTGGGATTGAGAAGTG  
AAAGAAATCATTTTATCTACTAATAGTGGACAAATTGGCGTATTATCAAATCATGCGCCT  
ATTGCCACAGCAGTCGATATCGGTATTTTGAGAATACGCCTTAATGACCAATGGTTAAC  
GATGGCTCTGATGGGCGGTTTTGCTAGAATAGGCAATAATGAGATTACTATTTAGTAAA  
CGATGCAGAGAAGGGTAGTAACATTGATCCACAAGAAGCTCAGAAAAATCTTGAAATA  
GCAGAAGCTAACTTGAGAAAGGCGGAAGGCAGGAGACAAATAATTGAGGCAAATCTA  
GCTCTCAGACGAGCTAGGGCACGCTAGAGGCTATCAATGTGATTTGATGAAAAATG  
TAACCGATTCTTTCGTTTCCTTGGGTCACTGGCCATCCGCCGGGAGTTTCGGATTAAATA  
CCGATATTTAGCAACAAATCCAATAAATCTAAGTGTAGTCCTTGGTGTATTGATTTTTTT  
TGAAAGGGGGTGTAAACGGATTTATTAGATAATCGAAAACAAAGGATTTTGGATACTA  
TTCGAAATTCAGAAGAACTACGTGAGGGGGCCATTGAACAGCTGGAAAAAGCCCGGG  
CCCGCTTACGGAAAGTGGAATAGAAAGCAGATCAGTTTCGAATGAATGGATACTCTGA  
GATAGAACGAGAAAAGTTGAATTTGATTAATTCAACTATAAACTTTGAAACAATTAG  
AAAATTACAAAAATGAAACCATTCAATTTGAACAACAAAGAACGATTAATCAAGTCCG  
ACAACGGGTTTTCCAACAAGCCTTACAGGGAGCTCTAGGAACTCTGAATAGTTGTTTG  
ACCAACGAGTTACATTTACGTACCATCAATGCTAATCTTGGCATGTTTGGGGCGATAAA  
AGAAATAACTGATATGAATCCATTGATTTCTGCCGCTTCCGTTATTGCTGCGGGTTTGGC  
CGTTGGGCTTGCTTCTATTGGACCTGGGGTTGGTCAAGGTACTGCCGCGGGCCAAGCT  
GTAGAGGGTATCGCAAGACAACCTGAGGCGGAGGGAAAAATACGAGGTACTTTATTGC  
TTAGTCTGGCTTTTATGGAAGCTTTAACAATTTATGGACTAGTTGTAGCATTAGCACTTT  
TATTTGCGAATCCTTTTTGTT-----GTGGAAGTAGG  
CCAGCATTCTATTGAAAATAGGAGGTTTCCAAGTCCATGCCCAAGTACTTATTACTTC  
TTGGGTTGTAATTGCTATCTTATTAGGTTCCGCCATTGTAGCTGTTCCGGAACCCACAAAC  
CATTCCGACTGGCGGTCAGAATTTCTTCAATATGTTCTTGAATTCATTGAGATGTGAG  
CAAACTCAGATTGGAGAGGAATACGGTCCATGGGTCCCCTTTATTGGAACATGTTTC  
TATTTATTTTTGTTTCTAATTGGGCGGGGGCGCTTTTACCTTGGAAGATCATAGAATTAC  
CTCATGGGGAGTTAGCCGCACCTACGAATGATATAAATACTACCGTTGCTTTAGCTTTAC  
TTACGTCAATAGCATATTTTTATGCGGGCCTTAGCAAAAAAGGATTAGGTTATTTCCGTA  
AATACATTCAACCAACTCCAATCCTTTTACCCATTAACATTTTAGAAGATTTACAAAAC  
CTTATCGCTTAGCTTTTCGACTTTTCGGAAATATATTAGCGGATGAATTAGTAGTTGTTGT  
TCTTGTCTTTAGTACCTTTAGTGGTTCCATACCTGTCATGTTTCTTGGATTATTTACA  
AGTGGTATTCAAGCTCTTATTTTGCAACTTTAGCTGCGGCTTATATAGGCGAATCCATG  
GAAGGGCATCATATGATATTTCAACTTTAGAACATATATTAATCATATATCTTTTTTTCAG  
TCGTGCTACTTGTAATTACAATTCATTTGATAACTTTAGTAGTCGATGAATTCGTTGAAC  
TATATGATTCGTCAGAAAAGGGCATGATAACCACTTTTTTCTGTATAACAGGATTATTAG  
TTACTCGTTGGATTTCTGGGGGACATTTACCATTAAGCGATTTATATGAATCATTAACTT  
TCTTTCATGGGCTTTTTCCATTATTCATATGGTTCGGTATTTTAAAAAACATAAAAATTAT  
TTAAGCGCAATAACCGCCCAAGTACTTTTTTTTACCCAAGGGTTTGCTACTTCAGGCCT  
TTAACTAACACGCATCAATCCAAAATCTTAGTGCCTGCTCTCCAATCCCAGTGGTTAAT  
GATGCACGTAAGTATGATGATATTGGGCTATGCAGCTCTTTTGTGTGGATCATTATTATCA  
GTAGCATTTCTAGTAATCACATTTGAAAAATCATAAGAATTGTTGATGTTGATAAAGG  
ATACAATATATG-----ATGGAATGTTTTAAAAAATATTTCTTTTCTTCTTAGGAATT  
ATTACAGGTTTCAATTGATTCAACAATTAGATGACTGGGGTTATCGTATTATAAGTATAG  
GGTTTATCTTTTTAACCATAGGTATTCTTTCGGGAGCAGTCTGGGCTAATGAAGCATGGG

GATCATATTGGAATTGGGACCCCAAGGAACTTGGGCATTTATTACGTGGACCATATTC  
GCAATTTATTTTCATACTCGAACAAATAAAAATTTTGAGGGTTTAAATTCCGCAATTGTC  
GCTTCTATTGGTTTTCTTATAATTTGGATATGCTATTTTGGAGTTAATTTATTAGGAATAGG  
ACTACATAGTTATGGTTCATTTACATTAACA---ATGAAAAAAAAAACATTTATTCCCTTTC  
TATATCTTACAGCTATAGTTTTTTTTGCCCTGGTGGATCTCTTTTTTATTTAATAAAAGTTT  
GGAATCTTGGGTATTAAATTGGTGTAACTAGTAAATCCGAACTTTTGTAATGATAT  
TCAAGAAAAAAGTATTCTAGAAAAGTTCATAGAATTAGAGGAACTCGTTCGCTTGGAC  
GAAATGATAAAGGAATATCCGGAAACACATCTACAAAAGTTTCGTATCGGA---CACAAA  
GAAACAATCCAATTGATCAAGATGCACAATGAGGATTATATCCATACGATTTTGCCTTC  
TCGACAAATATAATCTGTTTTCGTTATTCTAAGTGGTTATTCTATTTTAAGTAATGAAGAAC  
TTATTATTCTTAATTCTTGGGTCAAGAATTCCTATATAATTTAAGCGACACAATAAAAGC  
TTTTTTCATTCTTTTATTAACCGATTTATGTATAGGATTCCATTCACCCCATGGTTGGGAA  
CTAATGATTGGCTCGGTCTACAAAGATTTTGGGTTTGCTCATAATGATCAAATTATATCT  
GGCCTTGTTCCTTTCCAGTCACTCCTCGATACAATTTTAAATATTTGATTTTCCGTT  
ATTTAAATCGCGTATCTCCGTCCTTGTAGTGATTATCATTCAATGAATGACATGCCTAT  
TGGTGTTCCAAAGTCCCTTTTCGAAATCCTGGGGAAGACGATTCCATTTGGATTGACG  
TAAAC---CGACTTTATCGAGAAAGATTACTTTTTTTTAGGTCAAGATGTTGATAGCGAGAT  
CTCGAATCAACTTATTGGTCTTATGGTATATCTCAGTATAGAGAGCGAGACTAAAGATTT  
GTATTTGTTTATAAACTCTCCTGGGGGATGGGTAATACCCGGAATAGCTATTTATGATACT  
ATGCAATTTGTGCGACCAGATGTACAAACAGTATGCATGGGATTAGCTGCTTCAATGGC  
ATCTTTTATCCTAGTTGGAGGAAAAATTACCAAACGTTTAGCATTCCCTCATGCTAGGGT  
AATGATTCATCAACCTATTGCTGGTTTTTATGAGGCCCAAATAGGAGAATTTGTCCTGGA  
AGCAGAAGAACTACTGAAACTGCGCGAAATCCTCACAAGGATTTATGCACAAAGAAC  
GGGAAAACCTTTATGGGTTGTATCCGAAGACATGGAAAGAGATGTTTTTATGTCAGCAG  
C A G A A G C C C A A G C T C A T G G A A T T G T T G A T C T T G T A G C A G T T G C  
A????????????????????????????????????????????????????????????????  
????????????????????????????????????????????????????????????????  
????????????????????????????????????????????????????????????????  
????????????????????????????????????????????????????????????????  
????????????????????????????????????????????????????????????????  
ATGGAGGAATATCAAAGATATTT  
AGA ACTAGATAGATCTCGAAAAATAACTTCCTATACCCATTTATCTTTCCGGGAGTATAT  
TTATACATTTGCTCATGATCACAGTTTATTAGGTTATGACAATAAATCTAGTCTATTAATT  
GTAAAACGTTTAATTACTCGAATGTATCAACAGAACCATTTGATTATTTCTGCTAATGAT  
TCTAATCAAATCCATTTTTTAAGAAGAATTTATATTATCAAATGATATCAGAGGGCTTTG  
CAGTTATTGTGGAAATTCATTTTCCCTACGATTAGTATCTTCTTTAATAGTAAAATCTCA  
TAAATTACGATCAATTCATTCAATATTTCTTTTTTAGAGGACAAATTTCCACATTTAAAT  
TATGTGTCAGATGTATTAATACCTTACCCCATCCATCTAGAAAAATTGGTTCAAATCCTT  
CGCTATTGGGTGAAAGATCCCTCTTCTTTGCATTTATTACGACTCTTCTTCATGAGTATT  
GGAATTGGAACAGTTTTATTATTAATCAATTTCTATTTTTACAAAACCAAGATTTTTCG  
TGTTCCCTATATAATCTCATGTATATGAATATGAATCCCTCTTCTTTTTTCTCCGTAACCAA  
TCCTTTCATTTACGATCAACATTTTCTCGAGTACTTCTTGAACGAATTTTTTCTATGGA  
AAAATAGAACATTTTGCGGAAGTCTTTGCTAATCAGGCCATCCTATGGTTGTTCAAGGA  
CCCTTTCATGCATTATGTTAGATATCAAGGAAAATCTGTTTTGGCTTCAAAGATGGGCC  
TCTTCTGATGAAAAAATGGAATATTACCTTGTCCATTTATGTCAATGTCATTTTTATGTG  
TGGTTTTCAACCGGAAAAGATCTATATAAATTCATTATCTAAGCATTCTCTCAACTTTTTG  
GGCTATCTTCAAATGTACAATTTAATCCTTCGTTGGTACGGAGTCAAATGATAGAAAAT

TCATTTATAATAGATAAAGATAATACTATGAAGAACTCGATAACAATAGTTCCAATTATTC  
CTTTAATTAGATCATTGGCAAAAATGAAATTTTGTAACGCAGCAGGACATCCCATTAGT  
AAACCGACCTGGGCGGATTCGGCAGATTCTGAGATTATCGACCGATTTGTGCGTATATA  
CAGAAATCTTTCTCATTATTATAGCGGATCCTCAAAAAAACGAATTTGTATCGAATAAA  
ATATATACTTCGACTTTCTTGTGTTAAAACCTTTGGCTCGTAAACACAAAAGTAGTGTACG  
CGCTTTTTTGAAAAGATTAGGTTCCGAATTTTTAGAGAATTTTTTACGGAGGAAGAAC  
AGATTCTTTTTTTGATCTTCCCAAGACGGATTTGGTATTTGGATATTATTTCTATCAATGA  
TTTGGCCAATCATGAAATGATAATTGATAACA---GAAGTACAC---GCTATCAATTCCTT  
TTCTAGATTAGAATCC---TTAAACGAGGTCTATGGAATTATATGGGTGTTTGTCCCTATTT  
TGATTCTTGTATTGGGAATCACGACAGGCATACTGGTAATTGTATGGTTAGAAAGAGAA  
ATATCTGCAGGGATAACAACGTATTGGACCTGAATATGCCGGTCCCTTAGGAATTCCT  
CAAGCTCTAGCGGATGGCACA AAACTACTTTTTAAAGAGAATCTTTTTCCCTCTAGGGG  
GGATACTCGTTTATTTCAGTATCGGACCATCCATAGCAGTCATATCAACTCTATTAAGCTAT  
TCAGTAATTCCTTTTTGGCTATCACCTTGTTTTAACTGATCTAAATATTGGTGTTTTTTTAT  
GGATTGCCATTTCAAGTATTGCTCCCATTGGACTTCTTATGTCAGGATATGGATCAAATA  
ATAAATATTCTTTTTTTGGGTGGTCTACGAGCTGCTGCTCAATCGATTAGTTATGAAATAC  
CATTAACTCTTTGTGTGTTATCCATATCTCTATTATCTAACAGTTCAAGTACAGTTGATAT  
AGTTGAGGCACAATCAAAATCGGGTTTTTTGGGGTGGAATTTGTGGCGTCAACCTATA  
GGATTTATCATTTTTTTTTATTCTTCTCTAGCAGAATGTGAGAGATTACCTTTTGATTTAC  
CAGAAGCAGAAGAAGAATTAGTAGCAGGTTATCAAACCGAATATTCAGGTATCAAATTT  
GGTTTATTTTATATTGCTTCCCTATCTAACTTATTAGTTTCTTCATTATTTGTAACAGTTCT  
TTACTTGGGCGGTTGGAATATCTCTATTCCATATATATTCGTTCCCTGAGCCTTTT-----GAA  
AAAATAGGTGGAGTTTTTTGGAACAACAATCGGTATCTGTATTACATTGGTTAAAACCTTAT  
TTGTTCTTGTTCATTCCCTATCACAACAAGATGGACTTTACCTAGACTAAGAATGGACCA  
ACTTTTAAATCTTGGATGGAAATTTCTTTTACCTATTTCTCTCGGCAATCTCTTATTAACA  
ACCTCTTTCCAACTCCTTTTCGCTAATGATCTGGCATGTACAGAATGAAAACCTTCATTCTC  
GATTCTACGAGAATTTTTATGAAAGCCTTTCATTTGCTTCTCTTCGATGGAAGTTTTATTT  
TCCCAGAATGTATCCTAATTTTTGGCCTAATCTTCTTCTGATGATCGATTCAATCTCTGA  
TCAAAAAGATATACCTTGGTTATATTTTATCTCTTCAACAAGTTTAGTAATGAGTATAAC  
GGCCCTATTGTTCCGATGGGGAGAAGAACCTATGATTAGCTTTTCGGGAAATTTCCAAA  
CGAACAATTTCAACGAAATCTTTCAATTTCTTATTTTACTATGTTCAACTCTATGTATTCC  
TCTATCCGTAGAGTACATTGAATGTACAGAAATGGCTATAACAGAGTTTCTCTTATTCGT  
ATTAACAGCTACTCTAGGAGGAATGTTTTTATGCGGTGCTAACGATTTAATAACTATCTT  
TGTAGCTCCAGAATGTTTCAGTTTATGCTCCTACCTATTATCTGGATATACCAAGAAAGA  
TGTACGGTCTAATGAGGCTACTATGAAATATTTACTCATGGGTGGGGCAAGCTCTTCTAT  
TCTGGTTCATGCTTTCTCTTGGCTATATGGTTCGTTCCGGGGGAGAGATCGAGCTTCAAG  
AAATAGTGAATGGCCTTATCAATACACAAATGTATAACTCCCCAGGAATTTCAATTGCGC  
TTATATTCATCACTGTAGGAATTGGGTTCAAGCTTTCCCCAGCCCCTTCTCATCAATGGA  
CTCCTGACGTATAACGAAGGATCTCCCACTCCAGTCGTTGCTTTTCTTTCTGTTACTTCGA  
AAGTAGCTGCTTCAGCTTCAGCCACTCGAATTTTCGATATTCCTTTTTTATTCTCATCAA  
ACGAATGGCATCTTCTTCTGGAATCCTAGCTATTCTGAGCATGATAGTGGGGAATCTCA  
TTGCTATTACTCAAACAAGCATGAAACGTATGCTTGCATATTCGTCCATAGGTCAAATCG  
GATATGTAATTAATTGGAATAATTGTTGGAGACTCAAATGGTGGATATGCAAGCATGATAA  
CTTATATGCTCTTCTATATCTCCATGAATCTAGGAACCTTTTGCTTGTATTGTATTATTTGGT

CTACGTACCGAACTGATAACATTCGAGATTATGCAGGATTATACACGAAAGATCCTTTT  
TTGGCTCTCTCTTTAGCCCTATGTCTCTTATCCCTAGGAGGTCTTCCTCCACTAGCAGGT  
TTTTTCGGAAACTCCATTTATTCTGGTGTGGATGGCAGGCAGGCCTATATTTCTTGGTT  
TTAATAGGACTCCTTACGAGCGTTGTTTCTATCTACTATTATCTAAAAATAATCAAATTAT  
TAATGACTGGACGAAACCAAGAAATAACCCCTCACGTGCGAAATTATAGAAGATCCCC  
TTAAGATCAAACAATTCCATCGAATTGAGTATGATTGTATGTGTGATAGCATCTACTATA  
CCAGGAATATCAATGAACCCAATTATTGAAATTGCTCAAGATACCCTTTTTATGTTTCTG  
ATTTACGAATATGATATATTCTGGGCATTTCTAATAATATCAAGTGTTATTCCTATTTTACG  
ATTTCTAATTTCCGGAGTTTTATCCCCAATTAGCAAAGGGCCGGAGAACTTTCTAGTTA  
TGAATCGGGGATAGAACCAATGGGCGATGCTTGGTTACAATTTCGAATCCGTTATTATAT  
GTTTGCTCTAGTTTTTTGTTGTTTTTGATGTTGAAACGGTTTTTTCTTTATCCATGGGCAAT  
GAGTTTCGATGTATTGGGGTTATCCGTATTTATAGAAGCTTTAATTTTCGTGCTTATCCTA  
ATAGTTGGTTCAGTTTATGCATGGAGAAAAGGAGCATTAGAGTGGTCTACGAATTCCTT  
TCCTTGGTTAACAATATTTGTAGTTTTACCGATATCTGCGGGTTCCTTAATTTCTTTTTTC  
CCCCATAGAGGAAATAAGGTAATTAGGTGGTATACTTTGTTTATATGTATTTTAGAACTC  
CTTTAATGACTTATGCGTTCCTTATTATTTCCAATTGGACGACCCATTAATCCAATTA  
CAGAAGATTATAAATGGATCCAATTTTTTGATTTTTACTGGAGATTGGGAATAGATGGAT  
TTTTTTAAGCCCTATTTTACTGACAGGATTATCACCCTTTAGCTACTTTAGCGGCTT  
GGCCAATTACTCGTGATTCCCGCTTATTTAATTTCTGATGTTAGCAATGTATAGTGGTCA  
AATAGGATTATTTCTTCTCAAGATCTTTTGCTTTTTTTTATCATGTGGGAGTTAGAATTA  
ATTCCCATTTATCTACTTCTATCCATGTGGGGGGGAAAGAAACGCTCTGTATTCAGCTACA  
AAGTTTATTTGTATACTGCCGGGGTTCGGTTTTTTTATTAATGGGAGCTTTGGGTATC  
GCTTTATATGGTTCCAATGAACCAAGATTCAATTTGAAACATCAGCCAATCAATCATAT  
CCTGTGGCGCTAGAAATATTTTTTATATTGGATTTCTTATTGCTTTTGCTGTCAAATTAC  
CGATTATACCCTTACATATATGGTTACCAGACACCCATGGGGAAGCACATTACAGTACTT  
GTATGCTTCTAGCCGGAATCTTATTAATAATGGGGGCGTATGGGTTGGTTCGAATCAATA  
TGGAATTATTACCTCATGCTCATTCTATCTTTTCTCCCTGGTTGATAATAGTAGGCGTCAT  
GCAAATAATCTATGCAGCTTCAACATCTCCTGGTCAACGAAATTTAAAAAAGAATAG  
CCTATTCTTCTGTATCTCATATGGGTTTCATAATTATAGGAATTTGCTCTATAAGTGATATG  
GGACTCAATGGAGCCATTTTACAAATAATATCACATGGGTTTATTGGCGCTGCACTTTTT  
TTCTTAGCAGGAACGGGTTATGATAGAATACGTCGTGTGTATCTTGATGAAATGGGCGG  
AATGGCTACACTAATGCCAAAATATTCACGACATTCAGTATCTTATCACTAGCTTCCCT  
TGCATTACCAGGCATGAGCGGTTTTTTTGGCGAATTGGCAGTATTTTTTGAATAATTAC  
CGGCCAAAATATCTTTTAATGTCAAAAATAGTAATTACTTTTGAATGGCAGTTGGAAT  
GATATTAACCTCCTATTTATTTATCTATGTTACGCCAGATGTTTTATGGATAACAAGCTGT  
TTAATGCTCCAACTCTTATTTTTTTGATTCTGGACCGAGGGAGTTATTTGTTTCGATCT  
CTATCCTTCTGCCTGTAATAGGTATTGGTATTTATCCGGATTCCTTTTTTTCATTATCAGTT  
GACAGGGTTCGAAGCTCTTCTATCTAATTATTTTTATAGAATGATGCTCGAACATGTACTC  
GTTTTGAGTGCCTATTTATTTTCTATCGGTATCTATGGATTGATCACGAGTAGAAATATGG  
TTAGAGCCCTTATGTGCCTTGAACCTTAACTGAATGCAGTTAATATAAATTCGTAACATT  
TTCTGATTTTTTTGATAGTCGCCAATTAAGGGAAATATTTTTTCAATTTTTGTTATAGCT  
ATTGCAGCCGCTGAAGCAGCTATTGGACCAGCTATCGTTTCGTCAATTTATCGTAACAG  
AAAATCAATCCGTATCAATCAATCGAATTTGTTGAATAAGATGGAACATATATATCAATAT  
TCATGGATCATACTTTTGTACATTCCCAGCTCCTATGTTAATAGGAGCGGGACTCCTA

CTTTTTCCGGCGGCAACAAAAAACTTCGTCGTATGTGGGCTTTTTCCAAGCCTTTTCTT  
GTAAAGTATAGTCATGATTTTTTCAATCGACTTGTCTATTCACCAAATAAATAGCAGTTTT  
ATTTATCAATATATATGGTCGTGGACTATCAATAATGATTTTTCTTTAGAAATTCGGACACT  
TGATTGACCCACTTACTTCTATTTTGTTCAGTATTAATTACTACAGTTGGAATTATGGTCT  
TTTTTATAGTGACAATTATATGTCTCATGATCAAGGCTATTTGAGATTTTTTGCTTATATGA  
GTTTTTCAATACTTCAATGTTGGGATTAGTTACTAGTTCTAATTTGATACAAATTTATAT  
TTTTTGGGAGTTGGTTGGAATGTGTTCTTATCTATTAATAGGGTTTTGGTTCACACGACC  
TATTGCATCGAATGCTTGTCAAAAAGCCTTTGTAACATAATCGTGTAGGGGATTTTGGTTT  
ATTATTGGGAATTTTGGGCATTTATTGGATAACGGGCAGTTTCGAATTCGGGATTTGTT  
CAAAATATTGAATAAC---CAGGTTCATTTTTTTATTGTTACTTTGTGTGCCTTTCTAGTATT  
TTCTGGCGCAATTGCTAAATCGGCGCAATTTCTCTCCATGTATGGTTACCGGATGCCAT  
GGAAGGGCCTACTCCTATTTCCGCTCTAATACATGCTGCTACTATGGTAGCGGCAGGAA  
TTTTTCTTGTAGCTCGACTTTTTCTCTTTTTGTAGTCATACCTTACATAATGAATCTAAT  
AGCTTTGATAGGTATAATAACAGTATTTTTAGGAGCTACTTTAGCTCTTGCTCAAAAAGA  
TATTAAGAGAAGTTTAGCCTATTCTACAATGTCTCAATTAGGTTATATGATGTTAGCTCTA  
GGTATGGGGTCTTATCGAGTCGCTTTATTTCAATTTGATTACTCATGCCTATTCGAAAGCAT  
TATTGTTTTTAGGATCTGGATCCATTATTCATTCAATGGAAGCTATTGTTGGTTATTCTCC  
AGATAAGAGTCAAAATATGATTCTTATGGGTGGTTAAACAAAACATATTCCAATTACAA  
AACTGCTTTTTTTTTTAGGAACACTTTCTCTTTGTGGTATTCCACCCTTCGCCTGTTTTT  
GGTCCAAAGATGAAATTCCTAACGATAGTTGGTTGTATTCACCGGTTTTCGCAATAATAG  
CTTGTTTTACGGCCGGATTAAGTGCATTTTATATGTTTCGGGTTTATTTACTTACTTTTTGA  
AGGACATTTAAATGTTCAATTTAAAAAATTACAGTGGTAAAAAAAACAGTTCATTTTATT  
CAATATCTTTATGGGGTAAAGAAGGATCAAAAATGCTTAAACGAA---TTATTACCTTTCTT  
AACAAACGAATTTTTTTTTGGAACACTAAAAGG---ATTTTTGCCTATCCTCATGAATCGGAT  
AATACTATGTTATTTCTATGCTTGTCTTGGTACTATTTGCTTTGTTTATTGGAGCCATAG  
GAAATCAAATGAGGTGGATATATTGTCAAAACTGTTAACTCCGTCTTTAAACCTTTTG  
CATCAAAATTCAAAG---TCTGTGGATTGG---GAATTTGTAACAAATGCAATTTTTTCAGT  
CAGTATAGCTTTTTTCGGAATATTTATAGCGTCTCTTTATATAAGCCTGTTTATTATCGT  
TACAAAATTTGAATTTCTTGAATTCGCTCGCTATTTCTTTGGGACAAAATAATAAACGTCA  
TATATAACTGGTCCCTATAATCGAGGTTACATAGATGCTTTTTTATGAAATATCTTTTATTGG  
AGGTATAAGAAAATTAGCTGAATTAATTCATTTTTTTGATAAACGAATAATTGATGGAAT  
TACCAATGGAGTTGGTGTACCAGTTTCTTTGTAGGAGAGGGTATAAAATATGTAGGAA  
GCGGT---CGCATCTCTTCTTATCTCTTATTATATTTATTTTATGCATTAATCTTTTTATTAATT  
TATTCTATGGATTTGCCTGGACTAATACATGATTTTCTTTTATTTTTTATGGGATTAGGTCT  
TATATTAGGAGGTCTAGGAGTGGTATTACTTACCAACCCAATTTATTCTGCCTTTTCATTG  
GGATTGGTTCTTGTTTGTATATCTTTATCTATATTTTATCAAACCTCTCATTTTGTAGCTGC  
TGCGCAGCTCCTTATTTATGTGGGAGCCATAAACGTTTTAATTATATTTGCCGTGATGTTT  
ATGAATGGTTCAGAATATTACAAAGATTTTAATCTTTGGACTGTTGGAACCGGAGTTAC  
TTCCTTAATTTGTACAAGTATTTTTGTTTCACTAATTACTATTATTCCAGATACGTCATGGT  
ACGGGATTTATTGGACTACAAAACAAATCAGATTATAGAACAAGATTTAATAAGTAAT  
GGTCAACAAATTGGAATTCATTTATCAACAGATTTTTTTCTTCCGTTCCGAATTCATTTCA  
ATAATTCTTTTAGTTGCTTTGATAGGTGCGATTGCTGCGGCTCGTCAGATGAATGTATCA  
GCTACACGAAAAGACCTTATGATAGTCAATATGGGTCCCAACCCATCAATGCATGG  
TGTTCTTCGACTCATCGTTACTCTAGACGGTGAAGATGTTATTGACTGCGAACCAATTTT

AGGTTATTTACACAGAGGGATGGAAAAAATTGCGGAAAATCGAACAATTATACAATATT  
TGCCCTATGTAACACGCTGGGATTATTTGGCTACTATGTTACAGAAGCAATAACAGTA  
AATGGTCCAGAAGCTGTTAGGAAATATTCAAGTGCCTAAAAGAGCTAGCTATATCAGAGT  
AATTATGTTGGAATTGAGTCGTATAGCTTCTCATTTGTTATGGCTTGGTCCGTTTATGGCG  
GATATTGGTGACAGACTCCTTTCTTTTATATTTTTAGAGAAAGAGAGTTAGTATATGAT  
TTATTCGAAGCTGCCACCGGTATGAGAATGATGCATAATTATTTTCGTATCGGGGGAGTA  
GCGGCCGATCTACCTCATGGATGGATAGATAAATGTTTGGATTTTTGCGATTATTTTTTAA  
CAGGAATTGCTGAATATCAAAAACCTATTACGCGAAAATCCTATTTTTTTAGAACGAGTTG  
AAGGAGTAGGTATTGTTGGTGCAGAGGAAGCAATAAATTGGGGTTTATCCGGACCAAT  
GCTACGAGCTTCCGGAGTACAATGGGATCTTCGTCAAGTTGATCATTATGAGTGTTACG  
ACGAATTTGATTGGGAAGTCCAGTGGCAAAAAGAAGGAGATTCATTAGCTCGTTATTTA  
GTCCGAATCGGTGAAATGATGGAATCTATAAAAATTATTCAACAGGCTCTGGAAGGAAT  
CCCGGGGGGGCCCTATGAGAATTTAGAAACCCGACGTTTTGAAAGG-----GATCCAGAA  
TGGAACGATTTTGAATATCGATTCATTAGTAAAAAACTTCTCCTACTTTTGAATTACCG  
AAACAAGAACTTTATGTGAGAGTTCGAAGCCCCAAAAGGAGAATTGGGGATTTTTCTGA  
TAGGGGATCAGAGTGGTTTTCTTGGAGATGGAAAATTCGCCCGCCGGGTTTTATCAAT  
TTGCAAATCTTCCCGAATTAGTTAAAAGAATGAAATTGGCCGATATTATGACAATACTA  
GGTAGTATAGATATCATTATGGGAGAAGTTGATCGTATGTTTCCCATGGTAACTGGGTTC  
ATGAATTATGGGCAACAAACCATACGAGTTGCACGGTATATTGGTCAAAGTTTCATGATT  
ACCTTATCCCATGCAAATCGTTTACCTGTAACCTATTCAATATCCTTATGAAAAATTAATCA  
CATCGGAGCGTTTCCGCGGTTCGAATCCATTTTGAATTTGATAAATGCATTGCTTGTGAA  
GTATGTGTTCCGGTATGTCCTATAGATCTACCTGTTGTTGATTGGAAATTGGAAACTGAC  
ATTCGAAAGAAACGGTTGCTTAATTACAGTATTGATTTCCGGAATCTGTATATTTGTGGC  
AACTGTGTTGAGTATTGTCCAACAAATTGTTTATCAATGACTGAAGAATATGAACTTTC  
CACTTATGATCGTCACGAATTGAATTATAATCAAATTGCTTTAGGTCGTTTACCAATGTC  
AGTAGTCGACGATTATACAATTCGAACAATTTTGAATTCGAAGAAACAAAAAAGATAAC  
CCGCTT-----ATGCAGGGTTCGTTTGTCTGCTTGGCTAGTCAAACACGGACT  
GGTTCATAGATCTTTGGGTTTTGATTACCAAGGAATAGAGACTTTACAAATAAAGCCCG  
CAGATTGGCATTCCATTGCTGTCATTTTATATGTATATGGTTACAATTATCTGCGTTGCA  
ATGTGCCTATGATGTAGCGCCGGGGCGGGCTGTTAGCTAGCGTATATCATCTTACGAGAAT  
AGAGTATGGTATAGATCAACCAGAAGAAGTATGTATAAAGGTATTTGCCCAAGGAAGA  
ATCCTAGAATTCCGTCTGTTTTCTGGGTTTGGAAAAGTGCAGATTTTCAAGAAAGGGAA  
TCTTATGATATGTTGGGAATCCTTTATGATAATCATCCGCGTCTGAAACGTATCTTAATGC  
CGGAAAGTTGGATAGGGTGGCCCTTACGTAAAGATTATATTGCTCCTAATTTTTATGAAA  
TACAAGATGCTCAT-----  
-----  
-----ATGGGCAAT-----GAGTTTCGATGTATTGGG-----  
-----GTTATCCGTATTTATAGAAGCTTTAAT-----  
-----TTTCGT-----GCTTAT-----CCT--AATAGTTGGTTCAGTTTATGCA  
TGGAGAAA-----AGGAGCATTAGAGTGGTCTTAGCTCTT-----GAATATTCTGCAAAAATA  
ATGAAAAAATA-----AAA-----ATAACATTGAGACAGTTA-----  
-----ATGCA  
AACTAGAAAGACCTTTTCTTGGATAAAGCAAGAGATTACTCGTTCATTTCCTGATCGC

TCATGATATATATAATAACTTGTGCATCCATTTCAAATGCATATCCCATTTTTGCACAGCA  
GGGTTATGAAAATCCGCGCGAAGCAACTGGCCGTATTGTATGTGCCAATTGTCATTTAG  
CTAATAAACCCGTGGATATTGAAGTTCCACAAGCGGTA CTTCCTGATACTGTATTTGAA  
GCAGTCGTTCGAATTCCTTATGATATGCAACTGAAACAAGTTCTTGCTAATGGTAAAAA  
GGGGCTTTGAATGTGGGGCTGTTCTTATTTTACCTGAGGGGTTGAATTAGCCCTC  
CTAATCGTATTTCCGAGAGATGAAAGAAAAGATGGGAAATCTGTCTTTTCAGAGTTAT  
CGCCCCACAAAAAAAATATTCTTGTGATAGGTCCTGTTCTGTCAGAAATATAGTGA  
AATTACCTTTCTATCCTTTCTCCGGACCCCGCCACTAAGAAAGATGTTCACTTTTTCAA  
ATATCCCATATATGTAGGCGGAAACAGGGGAAGGGGTCAGATTTATCCCGACGGGAGC  
AAGAGTAAACAATACGGTTTATAATGCTACAGCAGCAGGTATAGTAAGCAAAATCATACG  
AAAAGAAAAGGGGGGTACGAAATAACCATAACGGATGCGTCAGAGGGACGTCAAGT  
GATTGATATTATACCTCCAGGACCAGAACTTCTTGTTCAGAAGGCGAATCCATCAAAC  
TTGATCAACCATTAACGAGTAATCCTAATGTGGGTGGATTTGGTCAGGGGGATTAGAA  
ATAGTACTTCAAGACCCATTACGTGCCAAGGCCTTTTGTCTTCTTGGCGTCGGTTATT  
TTGGCACAATCTTTTTGGTTCTTAAAAAGAAACAGTTTGAGAAGGTTCAATTGTCCG  
AAATGAATTTCTCAATAAAGTTTATGATTGGTTCGAAGAACGTCTCGAGATTCAGGCG  
ATTGCAGATGATATAACTAGTAAATATGTTCTCCACGTCAACATATTTTATTGTTTAG  
GAGGAATTACGCTTACTTGTTTTTTAGTACAAGTAGCTACGGGGTTTGCTATGACTTTTT  
ACTACCGTCCGACCGTTACTGAGGCTTTTGTCTTCTGTTCAATACATAATGACTGAAGCT  
AACTTTGGTTGGTTAATCCGATCAGTTCATCGATGGTCGGCAAGTATGATGGTTTTAATG  
ATGATCCTGCACGTATTTCTGTGTATCTCACTGGTGGCTTTAAAAAACCTCGTGAATTG  
ACTTGGGTACAGGTGTGGTTCTTGCTGTATTGACCGCATCTTTTGGCGTAACTGGTTAT  
TCCTTACCTTGGGACCAAATTGGTTATTGGGCAGTAAAAATTGTAACAGGCGTGCCAG  
AAGCTATTCCTGTAATAGGATCGCCTTTGGTAGAGTTATTACGTGGAAGTGCTAGTGTA  
GGACAATCCACTTTGACTCGTTTTTATAGTTTACACACTTTTGTATTACCTCTTCTTACTG  
CCGTATTTATGTTAATGCACTTTCCAATGATACGTAAGCAAGGTATTTAGGCCCTTTAA  
TCCAATAACAAAAAACCTGACTTGAATGATCCTGTATTAAGGGCTAAATTGGCTAAG  
GGAATGGGTCATAATTATTACGGAGAACCCGCATGGCCCAATGATCTTTTATATATTTTTC  
CGGTAGTAATTCTAGGTA CTATTGCATGTAATGTAGGATTAGCGGTTCTAGAACCATCAA  
TGATTGGTGAACCTGCGGATCCATTTGCAACTCCTTTGGAAATATTGCCTGAATGGTATT  
TCTTTCTGTATTTCAAATACTTCGTACAGTACCCAATAAGTTATTGGGTGTTCTTTAAT  
GGTTTCAGTACCTGCAGGATTATTAACAGTACCCTTTTTGGAGAATGTTAATAAATTCCA  
AAATCCATTTCTGTCGTCCAGTTGCGACAACCGTCTTTTTGGTTGGTACTGCAGTAGCCC  
TTTGGTTAGGTATTGGAGCAACATTGCCTATTGATAAATCCCTAACTTTAGGTCTTTTTAT  
GATTGAAGTTTTTCTATTTGGAATCGTCTTAGGTCTAATTCCTATTACTTTGGCCGGATTA  
TTCATAACTGCATATTTACAATACAGGCGTGGTGATCAGTTGGACCTTATGCTTACTATA  
ACTAGTTATTTCCGTTTTCTACTAGCGGCTTAACTATAACCTCAGTTCTATTTATTGGTC  
TGAGCAAGATACGACTTATTATGGATATAGTAAGTCTCGCTTGGGCTGCTTTAATGGTAG  
TCTTTACATTTCCCTTTCTGCTCGTAGTATGGGGAAGAAGTGGACTTATGATTATTCGTT  
CGCCGGAACCAGAAGTAAAAATTTGGTAGATAGGGATCCCGTCAAAACTTCTTTTCGA  
GGAATGGGCTAGACGGGTCATTTCTCAAGAACAATAGCTAAAGGACCAGATACTACC  
ACTTGGATCTGGAACCTACATGCTGATGCTCACGATTTTCGATAGCCATAACCAGTGATTG  
GAGGAGATTTCTCGAAAAGTATTTAGTGCTCATTTTCGGCCA ACTCTCAATCATCTTTCTT  
TGGCTGAGTGGCATGTATTTCCACGGTGCTCGTTTTTCCAATTATGAAGCATGGCTAAG



TGATCCTACTCACATTGGACCTAGTGCCCAAGTGGTTTTGGCCAATAGTGGGCCAAGAA  
ATATTGAATGGTGATGTGGGGGGGGGGTTCCGAGGAATACAAATAACCTCCGGTTTTTT  
TCAGATTTGGAGAGCATCTGGAATAACTAGTGAATTACAACCTGTATTGTACCGCAATTG  
GTGCATTGGTCTTTGCAGCCCTTATGCTTTTTGCGGTTGGTTCCATTATCACAAAGCTG  
CGCCAAAATTGGCTTGGTTCCAAGATGTAGAATCTATGTTGAATCACCATTTAGCGGGG  
CTACTAGGACTTGGGTCTCTTTCTTGGGCAGGGCATCAAGTACATGTCTCTTTACCAATT  
AACCAGTTTCTAAACGCTGGAGTGGATCCTAAAGAAATCCCACCTCCTCATGAATTTAT  
CTTGAATCGGGATCTTTTGGCTCAACTTTATCCCAGTTTTGCTGAGGGAGCAACCCCAT  
TTTTACCTTGAATTGGTCAAAATATTCGGAATTTCTTACTTTTCGTGGAGGATTAGATC  
CAGTGACTGGGGGTCTATGGCTGACCGATATTGCACACCATCATTAGCTATTGCAATTC  
TTTTCTGGTAGCTGGTCACATGTATAGGACTAACTGGGGTATTGGTCATGGTATAAAAG  
ATATTTTAGAGGCTCATAAAGGCCATTTACAGGTCAGGGCCATAAAGGCCTATATGAG  
ATCCTAACACGTCGTGGCATGCTCAATTATCTCTAACCTAGCTATGTTGGGTTCTTTA  
ACCATTGTTGTAGCTACCATATGTATTCCATGCCTCCTTATCCATATCTAGCTACTGACT  
ATGGTACACAACCTGTCATTGTTACACATCACATGTGGATTGGTGGATTCTCATAGTTG  
GTGCTGCTGCGCATGCAGCCATTTTATGGTAAGAGACTATGATCCAACCTACTCGATAC  
AACGATCTATTAGATCGTGTCTGAGGCATCGCGATGCAATCATATCACATCTCAATTGG  
GTATGTATATTTTAGGCTTTCACAGTTTTGGTTTATATATTCATAATGATACCATGAGTGC  
TTTAGGGCGCCCTCAAGATATGTTTTAGATACTGCTATAACAATTACAACCCGTCTTTGC  
TCAATGGATACAAAACACCCATGCTATTGCACCGGGTGCAACGGCTCCTGGTGAATA  
GCAAGCACCAGTTTGACTTGGGGGGGTGGCGATTTAGTGGCAGTGGGTGGCAAGGTT  
GCTTTGTTACCGATTCCATTAGGAACCGCGGATTTTATGGTACATCACATTCATGCATTT  
ACGATTCATGTGACAGTATTGATACTTCTGAAAGGAGTTCTATTTGCCCGTAGCTCTCGT  
TTGATACCGGATAAAGCAAATCTTGGTTTTCGTTTTCCCTTGTGATGGACCTGGAAGAGG  
GGGAACATGTCAAGTATCCGCTTGGGATCATGTCTTCTTAGGGCTGTTTTGGATGTACA  
ATTCATTTTCGGTAGTAATATTCATTTTCAGTTGGAAAATGCAGTCAGATGTTTGGGGTA  
GTATAAGTGATCAAGGGGTGGTAACTCATATCACGGGAGGAACTTTGCACAGAGTTC  
CATTACTGTTAATGGGTGGCTCCGCGATTTCTTATGGGCACAGGCATCCCAGGTAATTC  
AGTCTTATGGTTCTTCATTATCTGCATATGGCCTTTTTTTTCTAGGCGCTCATTTTGTATG  
GGCTTTTAGTTAATGTTTCTATTTCAGTGGTTCGTGGTTATTGGCAAGAACTTATTGAATC  
AATCGTGTGGGCTCATAATAAATTAAGGTTGCTCCTGCTACTCAGCCTCGAGCCTTGA  
GCATTATAAAGGACGTGCTGTAGGAGTAACCCATTACCTTCTGGGTGGAATTGCCACA  
ACATGGGCGTTCTTCTTAGCAAGAATTATTGCAGTAGGAATGGCATTAAAGATTTCCAAG  
GTTTAGCCAAGGCTTAGCTCAGGACCCCACTACTCGTCGTATTTGGTTTGGTATTGCTA  
CCGCGCATGACTTCGAGAGTCATGATGATATTACGGAGGAACGTCTTTATCAGAATATTT  
TTGCTTCTCACTTCGGACAATTAGCAATAATTTTTCTGTGGACTTCCGGAAATCTCTTTC  
ATGTAGCTTGGCAAGGAAATTTGAAGCATGGGTACAGGACCCTTACACGTAAGACC  
TATTGCTCATGCAATTTGGGATCCTCATTTTGGTCAACCGGCCGTGGAAGCTTTTACTCG  
GGGGGTGCGCCTGGCCCAGTGAATATCGCTTATTCTGGTGTATCAATGGTGGTATAC  
AATCGGTTTACGTACTAATGAAGATCTTTATATCGGAGCTCTTTTCTATTATTTCTTTCT  
GCCCTAGCCTTACTAGCGGGTTGGTTACACCTACAACCAAATGGAAACCGAGCGTTT  
CGTGGTTCAAAAATGCTGAATCTCGTCTCAATCATCATTTGTCAGGACTATTTCGGAGTA  
AGCTCTTTAGCTTGGACAGGACATTTAGTCCATGTCGCTATTCTGGCGCTAGGGGAGA  
ATACGTTTCGATGGAATAATTTCTTAGATGTATTACCACATCCCCAAGGATTAGGCCACT

TTTTACAGGTCAGTGGAATCTTTATGCTCAAAATCCCGATTCCGGTAATCATTTATTTGG  
TACCTCCCAAGGAGCAGGAACTGCCATTCTAACCTTCTCGGGGGTTCATCCACAA  
ACACAAAGTTTATGGCTGACCGATATTGCACACCATCATTTAGCTATTGCATTTATTTTC  
TCGTTGCCGGTCATATGTATAGAATACTTCGGGATTGGGCACAGTATAAAAGATCTTT  
TAGAAGCGCATATTCCTCCGGGAGGGCGATTGGGGCGTGGACATAAGGGTCTTTATGA  
CACAATCAACAATTCACTTCATTTTCAATTAGGCCTTGCTCTAGCTTCTTTAGGGGTAT  
TACTTCCTTAGTAGCTCAGCACATGTACTCATTACCTGCTTATGCGTTCATAGCGCAAGA  
CTTACTACTCAAGCTGCGTTATATACTCATACCAATACATCGCAGGATTCATCATGAC  
AGGAGCTTTTGCTCATGGAGCTATATTTTTATTAGAGATTACAATCCGGAACAGAATGA  
GAATAATGTATTGGCAAGAATGTTAGACCATAAAGAAGCTATCATATCCCATTTAAGTTG  
GGCCAGCCTCTTTTTGGGATTCCATACTTTGGGACTTTATGTTTCATAATGACGTCATGCT  
TGCTTTTGGTACTCCGGAGAAACAAATCTTGATCGAACCCATATTTGCCCAATGGATAC  
AATCTGCTCACGGTAAACTTCATATGGGTTTCGATGTACTTTTATCTTCAACGAATAGTC  
CAGCCTTCAATGCAGGTCGAAGCATATGGTTGCCCGGCTGGTTAAATGCTATTAATGAA-  
----AATAGTAATTCATTATTCTTAACAATAGGGCCCGGAGACTTCTTGGTTCATCATGCTA  
TTGCTCTAGGATTACATACAACCACATTGATCTTAGTAAAAGGTGCTTTAGATGCACGT  
GGTTCAAAGTTAATGCCAGATAAAAAGGATTTTGGTTATAGTTTTCTTGCATGGTCC  
AGGACGCGGCGGTACTTGTGATATTTGGGCTTGGGACGCATTTTATTTGGCGGTTTTCT  
GGATGTTAAATACCATTGGATGGGTACTTTTTATTGGCATTGGAAGCACATCACATTAT  
GGCAGGGTAATGTTTACAGTTTAATGAATCTTCCACTTATTTGATGGGATGGTTAAGA  
GATTATCTATGGTTAAACTCTTCGCAACTTATCAATGGATATAACCCTTTTGGTATGAATA  
GCTTATCGGTCTGGGCGTGGATGTTCTTATTTGGACATCTTGTTTGGGCTACTGGATTA  
TGTTTTTAATTTCTTGGCGTGGATATTGGCAGGAATTGATTGAAACTTTAGCATGGGCCC  
ATGAACGTACACCTTTGGCTAATTTGATTTCGATGGAGAGATAAACCAGTAGCTCTTTCC  
ATTGTGCAAGCAAGATTGGTTGGATTAGCCCACTTTTCTGTAGGTTATATCTTCACTTAT  
GCGGCTTTCTTGATTGCCTCTACATCAGGTAAATTTGGTATGTTCGCATTCAGTAAAGATT  
TATGATACATGTATAGGGTGTACTCAATGTGTCCGAGCCTGCCCCACAGATGTATTAGAA  
ATGATACCTTGGGATGGGTGTAATCTAAGCAAATCGCTTCTGCTCCAAGAACAGAAG  
ACTGTGTTGGTTGTAAGAGATGTGAATCCGCCTGTCCAAGTATTCTTGAGTGTTGGA  
GTTTATTTATGGCATGAAACAACCCGAAGCATGGGTCTAGCTTATATGACAATTCTCAGC  
TTACCCTCCATTTTTGTGCCTTTAGTAGGCTTAGTATTTCCGGCAATTGCGATGGCTTCC  
TTATCTTTCATGTTCAAAAAACAAGATTTTATGCGAGATCTAAAAACATATCTATCT  
GTGGCACCGGTAATAAGTACTCTATGGTTTGCCTTTTATAGCAGGTCTATTGATTGAGATC  
AATCGTTTTTTCCCGGATGCGTTGACATTCCCCTTTTTTTTTCATTCATGACTGCAATTTAG  
AGAGACGCGAAAGCGAAAGCTTATGGGGTTCGTTTCTGTAAGTGGATAACCAGCACTGA  
AAACCGTCTTTACATTGGATGGTTTGGTGTGTTTGGATGATCCCAACTTTATTGACCGCAAC  
TTCTGTATTTATTATCGCTTTCATTGCTGCCCTCCGGTAGATATTGATGGTATTTCGTGAA  
CCTGTTTCTGGATCTTACTTTATGGAAACAATATTATTTCTGGTGCCATTATTCCTACTT  
CTGCAGCTATAGGTTTGCATTTTTACCCAATATGGGAAGCGGCGTCTGTTGATGAATGG  
TTATACAATGGCGGTCCTTATGAGCTAATTGTTCTACACTTCTTACTTGGTGTAGCTTGT  
ACATGGGCCGTGAGTGGGAGCTTAGTTTCCGCTGGGTATGCGCCCTTGGATTGCTGTT  
GCATATTCAGCTCCTGTTGCAGCTGCTACTGCTGTTTTCTTGATCTATCCAATCGGTCAA  
GGGAGTTTTTCTGATGGTATGCCTCTAGGAATTTCTGGTACTTTCAACTTTATGATTGTAT  
TCCAGGCTGAACACAACATCCTTATGCACCCATTTTCATATGTTAGGCGTAGCTGGTGTAT

TCGGCGGCTCCCTATTCAGTGCTATGCATGGTTCCTTGGTAACCTCTAGTTTGATCAGGG  
AAACCACAGAAAATGAATCTGCTAATGAAGGTTATAGATTCGGTCAAGAGGAAGAAAC  
TTATAATATCGTAGCTGCTCATGGTATTTTTGGCCGATTGATCTTCCAATATGCTAGTTTC  
AACAACTCTCGTTCTTTACACTTCTTCCTAGCTGCTTGGCCTGTAGTAGGTATTTGGTTC  
ACTGCTTTAGGTATTAGCACTATGGCTTTCAACCTAAATGGTTTTCAATTTCAACCAATCT  
GTAGTTGATAGTCAAGGTCGTGTAATTAATACCTGGGCTGATATTATCAACCGTGCTAAC  
CTTGGTATGGAAGTTATGCATGAACGTAATGCTCATAACTTCCCTCTAGACCTAGCTGCT  
GTCGAAGCTCCATCTACAAATGGAATGGGTTTGCCCTGGTATCGTGTTTCATACCGTCGTA  
TTAAATGATCCCGGTCGTTTGCTGTCTGTCCATATAATGCATACAGCTTTAGTTGCTGGT  
TGGGCCGTTTCGATGGCTCTTTATGAATTAGCAGTTTTTGGATCCCTCTGACCCCGTTCTC  
GATCCAATGTGGAGACAAGGTATGTTGTTTATACCCTTCATGACTCGTTTAGGAATAAC  
CAATTCATGGGGTGGTTGGAGTATCACA--GGAGGAACTATAACGAATCCGGGTATTTG  
GAGTTATGAAGGCGTGGCTGGGGCGCATATTGTGTTTTCTGGCTTGTGCTTCTTGGCAG  
CTATTTGGCATTGGGTGTATTGGGATCTAGAAATATTTTGGCGATGAACGTACAGGAAAA  
CCTTCTTTGGATTTGCCAAAGATCTTTGGAATTCATTTATTTCTCTCAGGGGTGGCTTGC  
TTTGGGTTTGGCGCTTTTCATGTAACCGGGTGTATGGTCCCTGGAATATGGGTGTCCGAT  
CCTTATGGACTAACTGGAAAGGTACAACCCGTAAGTCCAGCATGGGGTGTGGAAGGGT  
TTGATCCTTTTGTTCGGGAGGAATAGCCTCTCATCATATTGCAGCGGGTACATTGGGTA  
TATTAGCGGGCCTATTCCATCTTAGTGTGCGTCCACCCCAACGTTTATACAAAGGATTAC  
GTATGGGAAATATTGAAACTGTCTTTCCAGTAGTATCGCTGCTGTCTTTTTTGCAGCTT  
TTGTTGTTGCTGGAAGTATGTGGTATGGTTCAGCAACTACTCCGATTGAATTATTTGGTC  
CCACTCGTTATCAATGGGATCAAGGATACTTCCAGCAAGAAATATATCGAAGAGTTAGT  
GCTGGGCTGGCCGAAAATCAAAGTTTATCTGAAGCTTGGTCTAAAATTCCCGAAAAATT  
AGCTTTTTATGATTATATCGGCAATAATCCGGCAAAAGGTGGATTGTTTCAGAGCAGGCT  
CAATGGACAATGGAGATGGAATAGCTGTTGGGTGGTTAGGACATCCTATCTTTAGAGAT  
AAAGAAGGGCGTGAGCTTTTTGTACGTCGTATGCCTACTTTTTTTGAAACATTTCCAGT  
TGTTTTGGTAGACGGAGATGGAATTGTTAGAGCCGATGTTCCCTTTTCGAAGGGCAGAG  
TCAAAGTATAGTGTCGAACAAGTAGGTGTAACCATTGAGTTCATGGTGGCGAACTAAA  
TGGAGTCAGTTATAGTGATCCTGCTACTGTGAAAAAATATGCTAGACGCGCTCAATTGG  
GTGAAATTTTTGAATTAGATCGCGCTACTTTGAAATCCGATGGTGTTTTTTCGTAGCAGTC  
CAAGGGGTTGGTTTACTTTTGGACATGCTTCGTTTCGCTCTGCTTTTTTTTTTCGGACACA  
TTTGGCATGGTGTCTCGAACTTTGTTTCAGAGATGTTTTTGGCTGGCATTGATCCAGATTTAG  
ACGTTCAAGTGGAATTTGGAGCATTCCAAAAAATTGGAGATCCGACTACAAGAAGACA  
GGTAGTCATGAAAACCTTATATTCCCTGAGGAGGTTCTACCACGTGGAAACGCTCTTTA  
ATGGAACCTTTATCTTTAGCCGGTCGTGACCAAGAAACCACCGTTTTCGCTTGGTGGGC  
TGGGAATGCCCGACTTATCAATTTATCCGGTAAACTACTGGGAGCCCATGTAGCCCATG  
CTGGATTAATCGTATTCTGGGCCGGAGCAATGAACCTATTGGAAGTGGCTCATTTTCGTA  
CCAGAGAAGCCAATGTATGAACAAGGATTAATTTTACTTCCCCACCTAGCTACTCTAGG  
TTGGGGGGTAGGCCCTGGTGGGGAAGTTATAGACACCTTTCCATACTTTGTATCTGGCG  
TACTTCACTTAATTTCCCTCCGCAGTATTGGGCTTTGGCGGTATTTATCATGCACTTCTGG  
GTCCTGAGACTCTTGAAGAATCTTTTCCATTTTTTGGTTATGTATGGAAAGATAGAAATA  
AAATGACAACAATTTTAGGTATTCATTAATCTTGCTAGGTATAGGTGCTTTTCTTCTAG  
TATTC AAGGCTCTTTATTTTGGGGGCGTATATGATACCTGGGCTCCGGGGGGGGGAGAT  
GTAAGAAAAATTAATAACTTAACCCTTAGCCCAAGTGTTATTTTCGGTATTTACTAAAA

TCCCCTTTTGGAGGAGAAGGATGGATTGTTAGTGTGGACGATTTGGAAGATATAATTGG  
AGGGCATGTATGGTTAGGTTCCATTTGTATACTGGGTGGAATCTGGCATATCTTAACCAA  
ACCCTTTGCATGGGCTCGCCGTGCACTTGTATGGTCTGGAGAGGCTTACTTGTCTTATA  
GTTTAGGTGCTTTATCCGTTTTTGGTTTTTCATTGCTTGTGCTTTGTCTGGTTCAATAATAC  
CGCTTACCCTAGTGAGTTTTACGGGCCTACTGGACCAGAAGCTTCTCAAGCTCAAGCT  
TTACTTTTTCTAGTTCGAGATCAACGTCTTGGGGCTAACGTGGGATCTGCTCAAGGACC  
TACCGGGTTAGGTAAATATTTAATGCGTTCGCCTACCGGAGAAGTTATTTTTGGAGGCG  
AAACTATGCGTTTTTTGGGATCTGCGTGCTCCTTGGTTAGAACCTCTAAGAGGTCCAAAT  
GGTTTGGACTTGAGTAGGTTGAAAAAGACATAACAACCTTGGCAAGAACGCCGTTCC  
GCAGAATATATGACCCACGCGCCTTTAGGTTTCGTTAAATTCTGTAGGTGGCGTAGCTAC  
CGAAATCAATGCAGTCAATTATGTCTCTCCTAGAAGTTGGTTAGCTACCTCTCATTTTTGT  
TCTAGGGTTCTTCTATTCGTAGGTCATTTATGGCACGCGGGAAGGGCTCGTGCAGCTG  
CAGCAGGATTTGAAAAGGGAATTGATCGTGATTTTGAACCCGTTCTTTCCATGACTCCT  
CTTAACATGACTATAGCCCTTGGTAAATTTACCAAAGACGAAAATGATTTATTTGATATT  
ATGGATGACTGGTTACGGAGGGACCGTTTCGTTTTTGTAGGTTGGTCCGGTCTATTGCT  
CTTTCCTTGTGCCTATTTTCGCCGTAGGGGGTTGGTTCACAGGTACAACCTTTGTAACCT  
CATGGTATACCCACGGATTGGCCAGTTCCTATTTGGAAGGTTGCAACTTCTTAACCGCC  
GCAGTTTCTACTCCTGCTAATAGTTTAGCACATTCTTTGTTATTACTATGGGGTCTGAA  
GCACAAGGAGATTTTACTCGTTGGTGTCAATTAGGTGGTTTGTGGACTTTTTGTTGCTCT  
CCACGGTGCTTTCGGGCTAATAGTTTTATGTTACGTCAATTTGAACTTGCTCGATCTGT  
GCAATTGCGACCTTATAATGCAATCGCATTCTCTGGTCCAATTGCTGTTTTTGTTCGTGA  
TTCCTGATTTATCCACTAGGTCAGTCTGGTTGGTTTTTTTGCGCCTAGTTTTTGGTGTAGCA  
GCTATATTTTCGATTCATCTCTTTTTCCAAGGGTTTCATAACTGGACGCTGAACCCATTT  
CATATGATGGGAGTTGCCGGCGTATTGGGCGCTGCTCTGCTGTGCGCTATTCATGGTGCT  
ACTGTAGAAAATACTTTATTTGAAGATGGTGATGGTGCAAATACATTCCGTGCTTTTAAAC  
CCAACCTCAAGCTGAAGAACTTATTCAATGGTCACCGCTAACCGCTTTTGGTCTCAAAT  
CTTTGGGGTTGCTTTTTTCCAATAAACGTTGGTTACATTTCTTTATGTTATTTGTACCCGTA  
ACCGGTTTATGGATGAGCGCTCTTGGAGTAGTCGGTCTGGCTCTGAATCTACGTGCCTA  
TGACTTCGTTTCTCAGGAAATTCGTGCAGCGGAAGATCCTGAATTTGAGACTTTCTACA  
CTAAAAATATTCTCTTAAACGAAGGTATTCCGGGCTTGGATGGCGGCTCAAGATCAGCCT  
CATGAAAACCTTATATCCCTGAGGAGGTTCTACCACGTGGAACGCTCTTATGTCTGG  
AAGCACAGGAGAACGTTCTTTTGTGATATTATTACCAGTATTCGATATTGGGTCATTCA  
TAGCATTACTATACCTTCCCTATTCATTGCAGGTTGGTTATTCGTCAGCACGGGTTTAGC  
TTATGATGTATTTGGGAGCCCTCGTCCAAATGAATATTTTACAGAGAGCCGACAGGGAA  
TTCCATTAATAACTGGCCGTTTTGATCCTTTGGAACAACCTCGATGAATTTAGTAAATCTT  
TTATGACCATAGATCGAACCTATCCAATTTTTACAGTACGATGGTTGACTGTTACGGAC  
TAGCTGTACCTACCGTTTTTTTTTTGGGGTCAATATCAGCAATGCAGTTCATCCAACGAA  
TGGCTACACAAAGCGTAGAGGGTAGTTCTAGATCTGGT--CCAAGACGAACTGTTGTAG  
GGGATTTATTGAAACCATTGAATTCGGAATATGGTAAAGTAGCTCCTGGATGGGGAAC  
ACTCCTTTGATGGGTGTGCAATGGCTCTATTTGCGGTATTCCTATCTATTTTGGAGA  
TTTATAATTCTTCCGTTTTACTAGACGGAATCTCAATGAATATGCTTACTCTCAAACCTTT  
TGTTTACACAGTAGTGATATTCTTTGTTTCTCTATTTCATCTTTGGATTTTTATCTAATGATC  
CAGGACGTAATCCCGGACGTGAAGAAATGGCCGATACTACTGGAAGAATCCCCTTTG  
GATAATAGGTACTGTAACCTGGTATTCTTGTGATCGGTTTAAATAGGCATTTTCTTTTATGGT

TCATATCCGGATTGGGTTTCATCCCTGATGCTTAATATTTTTAGTTTAAATTTGTATCTGTCT  
TAATTCTGCCCTTTAT--AGCAATTTTTTCTTCACAAAATTGCCCGAAGCCTACGCCTTTT  
TGAATCCAATCGTAGATGTTATGCCAGTAATCCCTGTACTCTTTTTTCTATTAGCCTTTGT  
TTGGCAGGCTGCTGTAAGTTTTTCGAATGACACAATCAAACCCGAACGAACAAAATGTT  
GAATTGAATCGTACCAGTCTCTACTGGGGTTATTACTCATTTTTGTACTTGCTGTTTTAT  
TTTCTAATTATTTCTTCAATATGGAAGTAAATATTCTTGCCTTTATTGCTACTGCCCTGTT  
CATTCTAGTTCCTACTGCTTTTTTACTTATAATTTACGTAAAAACGGTTAGTCAAAGTGA  
TATGGAAACAGCAACCCTAGTCGCCATCTTTATATCTGGTTTACTTGTAAGTTTTACTGG  
GTATGCCTTATATACTGCTTTTGGGCAACCCTCTCAACAATAAGAGATCCATTCGAGG  
AACACGGGGACATGGAAGCATTGGTTTATACATTCCTTTTAGTCTCAACTTTAGGAATC  
ATTTTTTTCGCTATCTTTTTTCGCGAACCCACTAAAGTTCCAATAAAAAGATAAAAAT  
GACTATTGCTTTCCAATTGGCTGTTTTTGCATTAATTGTTACTTCATCAATCTTATTGATT  
AGTGTACCCGTTGTTTTTCTTCTCCTGATGGTTGGTCGAGTAATAAAAATGTTGTATTT  
TCCGGTACATCATTATGGATTGGATTAGTTTTTTTTGGTAGGTATCCTTAATTCTCTCATCT  
CT-----ATGTCACCACAAACAGAGACTAAAGCAAGTGTGGGTTCAAGGCT  
GGTGTAAAGATTATAAATTGACTTATTATACTCCTGAATATGAAACCAAAGATACTGAT  
ATCTTGGCAGCATTCCGAGTAACCTCAACCTGGAGTTCGCCTGAGGAAGCAGGAG  
CTGCAGTAGCTGCTGAATCTTCTACTGGTACATGGACAACCTGTGTGGACCGATGGGCTT  
ACCAGTCTTGATCGTTATAAAGGACGATGCTACCACATTGAGCCCGTTGCCGGAGAAG  
AAAATCAATTTATTGCTTATGTAGCTTACCCCTTAGACCTTTTTGAAGAAGGTTCTGTTA  
CTAACATGTTTACTTCCATTGTGGGTAATGTATTTGGGTTCAAAGCCCTACGCGCCCTAC  
GTCTGGAGGATTTGCGAATCCCTCCTGCTTATACAAAACTTTCCAAGGGCCGCCTCAT  
GGCATCCAAGTTGAGAGAGATAAATTGAACAAGTATGGTCGCCCTCTATTGGGTTGTAC  
TATTAACCTAAATTGGGGCTATCCGCTAAGAATTACGGTAGAGCAGTTTATGAATGTCT  
ACGCGGTGGACTTGATTTTACCAAAGATGATGAGAACGTGAACTCCAACCATTATGC  
GTTGGAGAGACCGTTTCTTATTTGTGCCGAAGCAATTTATAAAGCACAGGCTGAAAC  
AGGTGAAATCAAAGGACATTATTTGAATGCTACTGCAGGTACATGCGAAGAAATGATC  
AAAAGGGCTGTATTTGCCAGAGAATTAGGAGTTCCTATCGTAATGCATGACTACTTAAC  
AGGGGGATTCACTGCAAATACTACCTTGGCTCATTATTGCCGAGATAATGGTTTACTTCT  
TCACATTCACCGCGCAATGCATGCAGTTATTGATAGACAGAAGAATCATGGTATGCATTT  
TCGTGTACTAGCTAAGGCGTTACGTATGTCTGGTGGAGATCATATTCACGCTGGTACCGT  
AGTAGGTAACTTGAAGGGGAAAGAGACATCACTCTGGGCTTTGTTGATTTATTGCGT  
GATGATTTTATTGAAAAAGATCGAAGCCGCGGTATTTATTTCACTCAAGATTGGGCTCTCT  
CTACCTGGTGTCTGCCTGTAGCTTCAGGGGGTATTCACGTTTGGCATATGCCTGCTCTG  
ACCGAGATCTTTGGAGATGATTCCGTACTACAATTCGGTGGAGGAACTTTAGGGCACCC  
TTGGGGAAATGCACCCGGTGCCTAGCTAATCGAGTAGCTCTAGAAGCATGTGTACAA  
GCTCGTAATGAGGGACGTGATCTTGCTCGCGAGGGTAATGAAATTATCCGCGAAGCTG  
GCAAATGGAGTCCTGAATTAGCTGCTGCTTGTGAAGTATGGAAGGAGATTAATTTGAA  
TTCCCAGCAATGGATACTTTG-----ATGGCGATACATTTATACAAAACTTCTACCCCGAGC  
ACACGCAATGGAGCCGTAGACAGTCAAGTGAATCCAATACACGAAATAATTTGATCTA  
TGGACAGCATCGTTGTGGTAAAGGCCGTAACGCCAGAGGAATCATTACCGCAAGGCAT  
AGAGGGGGAGGTCATAAGCGTCTATACCGTAAAATCGATTTTCGACGGAATGAAAAAG  
ACATATATGGGAGAATCGTAACCATAGAATACGACCCTAATCGAAATGCATACATTTGTC  
TCATACACTATGGGGATGGTGAGAAGAGATATATTTTACATCCCAGAGGGGCTATAATTG

GAGATACCATTATTTCTGGTACAGAAGTTCCTATAAAAATGGGAAATGCCCTACCTTTG  
ACCGATATGCCCTTAGGCACGGCCATACATAACATAGAAATCACATTTGGAAAGGGTGG  
ACAATTAGCTAGAGCTGCAGGTGCTGTAGCGAAACTGATTGCAAAAAGAGGGGAAATC  
GGCCACATTAATAATTACCTTCTGGGGAGGTTTCGTTAATATCCAAAACTGCTCAGCAA  
CAGTCGGACAAGTAGGGAATACTGGGGTGAACCAGAAAAGTTTGGGTAGAGCCGGAT  
CTAAATGTTGGCTAGGTAAGCGTCTGTAGTAAGAGGAGTAGTTATGAACCTGTAGAC  
CATCCCCATGGGGGTGGTGAAGGGAGGGCCCCAATTGGTAGAAAAAACCCGCAACC  
CCTTGGGGTTATCCTGCACTTGAAGAAGAAGTAGAAAAAGGAATAAATATAGTGATA  
ATTTGATTCTTCGTCGCCGTAGTAAAATGATCCAATCTCAGACCCATTTGAATGTAGCAG  
ATAACAGCGGAGCCCGAGAATTAATGTGTATTTCGAATCATAGGGACTAGT---AATCGCC  
GATATGCTCATATTGGTGACGTTATTGTTGCTGTGATCAAGGAAGCGGCACCAAATTCA  
CCTCTAGAAAGATCAGAAGTAATCAGAGCTGTAATTGTACGTACTTGTAAGAAGTCA  
AACGTGATAACGGTATGATAATACGATATGATGACAATGCTGCAGTTGTCATTGATCAAG  
AAGGAAATCCAAAGGGAAGTTCGAATTTTTGGTGAATCGCCGAGAATTGAGACAGTT  
AAATTTTACTAAAATAGTTTTATTAGCGCCTGAAGTATTA-----  
-----ATGAAAGGAATAGCTTTTTCGAGGTAATCGTATTTGTTTCGGCAAATATGCTCTTCA  
GGCACTTGAACCCGCTTGGATTACATCTAGACAAATAGAAGCGGGACGACGGGCAATG  
ACACGAAATGCACGCCGCGGTGGAAAAATATGGGTACGCATATTTCCCGACAAACCAG  
TTACTTTAAGACCTACGGAAACACGTATGGGTTCGGGGAAAGGATCTCCTGAATATTGG  
GTGGCTGTTCGTTAAACCAGGTAGAATACTTTATGAAATGAGTGGAGTAGCAGAAAATAT  
AGCAAGAAGGGCTATTTCAATAGCAGCATCAAAAATGCCTATACGAACTCAATTCATTA  
TTTCGGGAATGACCAGAATTAGACGAGGATATATAGCTCGGAGGCGTAGAACAAAAAT  
TCGTTTATTCGCATCAAGCTTTCGCGGGGGCTCATTCAAGACTTACTCGAACTATTATTCA  
ACAAAAATAAGAGCTTTGGCTTTGGCCATCGGGATAGAGATAGGCAAAAAAGAAAT  
TTTCGTCGTTTGTGGGTCACTCGGATAAATGCAGTAATTCGTGAG---AATAGGGTATCCT  
ATAGTTATAGTATATTAATAAATAATCTGTACAAGAGACAGTTGCTTCTTAATCGTAAAAT  
ACTTGCACAAATAGCTATATTAATAGGAATTGCCTTTATATGATTTCCAATGACATTATC  
AAA-----ATGATAAATGAAGTATATGCTTTAGGCCAACATATATGTAT  
GTCCACTCACAAAGCACGAAGAATAATTGATCAGATTCGTGGACGTTCTTATGAAGAA  
ACACTTATGATACTCGAGCTTATGCCTTATCGAGCATGTTATCCCATTTTAAAATTAATTT  
ATTCTGCAGCAGCAAACGCTCGCCACAATATGGGTTTCAACGAAGCCAATTTAATCATT  
AGTAAAGCCGAAGTCAACGAAGGTGCTACTGTGAAAAAATTAACCTCAGGCTCGA  
GGCGGGGGTTATCTGATAAAAAGATCGACCTGTATATAACTATTGTATTAATAAATAATA  
TCTTTATAT-----ATGGATGGAATCAAATATGCAGTATTTACAGACAAAAGTAT  
TCGGTTATTGGGGAAAAAT---CAATATACTTTTAATGTCGAATCAGGATCAACTAGGACA  
GAAATAAAGCATTGGGTGCAACTCTTCTTTGGTGTCAAGGTAATAGCTATGAATAGCCA  
TCGACTCCCGGAAAGGGTAGAAGAATGAGACCTATTATGGGACATACAATGCATTAC  
AGACGTATGATCATTACTCTTCAACCGGGTTATTCTATTCCACCTCTTAGAAAGAAAAG  
AACTATGGCAGTTCCAAAAAGCGCACTTCTAGATCAAAAAGCGTATTCGAAAAAAT  
ATTTGGAAAAAAAAGGGATATTGGGCAGTATTGAAAGCTTTTTTCATTAGCGAAATCTCT  
TTCTACAGGTAATTCAAAAGTTTTTTTTGTGCAACAAATAAAAAATATGGCCAAGGGTA  
AAGATGTCCGAGTAAGGGTTATTTTAGAATGTACTAGTTGT---GTTCAAAC-----GTAA  
TAAAAA-----GGTATTTCCAGATATATTACTCAAAAAGAATCGACATAATACGCCTAGTCG  
ATTGGAATTGAGAAAATTCTGTCCCTATTGTTACAAACATACAATTCACGGAGAGATAA

AGAAAATGAAAATAAGAGCTTCTGTTTCGTAAAATTTGTGAAAATGTGCGACTGATACGT  
AGACGGGGGCGAATTATAGTAATTTGCTTTAACCCGAGACATAAACAAAGACAAGGAA  
TGATTTCGAGAGAAAGTAACAATATCTACTCGGACACTGCAGTGGAAATGTGTTGAATC  
AAGAACTGACAATAAGCGTCTTTTTTATGGACGCTTTATTCTGTCACCACTTATGAAAG  
GCCAAGCCGACACAATAGGCATTGCGACGCGAAGAGCTTTGCTTGGAGAAATCGAAG  
GAACATGTATCACACGTGCAAAATCTGAG-----AAAATACCACACGAATTTTCGACTATA  
GCAGGTATTCAAGAATCAATACATGAAATTTAATGAATTTGAAAGAAATTTGTATTGAG  
AAGCAATTTGTATGGAACCTGTGACGCGTCTATTTGTGTCAAGGGTCCTGGATATATAAC  
TGCTCAAGACATCATTACCACCTTTTGTAGAAATCATTGATAATACACAGCATATCGC  
TAGCCTAACGGAACCAATTGATTTGTGTATTGGATTACAAATCGAGAGAAATCGCGGCT  
ATCGTATAAACCGACAAATAACTTTACGAGGGAAAGTTATCCT-----ATAGATGCTGTAT  
TTATGCCTGTTCGAAATGCGAATCATAGTGTTTATTCTTATGGAAATGGGAATGAAAAG  
CAAGAGATACTTTTTCTCGAAATATGGACAAATGGGAGTTTAACTCCTAAAGAAGCACT  
TCATGAAGCCTCCCGGAATTTGATTGATTTATTTATTCCTTTTCTACATGCAGAAGAAGA  
AAACTTCCATTTAGAA-----AAAATCAA---CACAAAGGTTACTTTACCTCTTTTACCTTT  
TATGATAGATTGACT---AAATTAAGAAAAATCAAAAC---GAAATAACATTAATAACGT  
TTTTATTGACCAATCAGAATTGACTCCTAAGATCTATAATTGCCTCAAAGATCCAATAT  
ACATACATTATCGGACCTTTTGAATAAGAGTCAAGAAGATCTTATGAAAATTGAACATT  
TTCGTATAGACGATGTAAAACATATATTGGGTATTCTAGAAATAGAAAAAATTTTCGCAA  
TT-----ATGCTCGGGGATGGAAAT---GAGGGAATGTCTACAATACCTGGATTGAA  
TCAGATACAATTTGAAGGATTTTGTAGGTTTATTGATCAGGGCTTAACAGAAGAACTTT  
ATAAGTTTCCAAAATTGAAGATACAGATCAAGAAATTGAATTTCAATTATTTGTGGAA  
ACATATCAATTAGTAGAACCGTTGATAAAAGAAGGAGATGCTGTATATGAATCACTTACA  
TATTCTTCTGAATTATATATATCCGCGGGATTAATTTGGAAAAGTAGTAGGGATATGCAAG  
AACAAACTATTTTTATTGGAAACATTCCTCTAATGAATTCCTGGGAACTTTTATAATAA  
ATGGAATATACAGAATTGTGATCAATCAATATTGCAAAGTCCCGGTATCTATTACCGGT  
CAGAATTGGATCATAACGGAATTTCCGGTCTATACCGGCACCATAATATCAGATTGGGGG  
GGGCGAGTAGAATTAGAGATTGATAGAAAAGCAAGGATATGGGCTCGTGTAAGTAGGA  
AACAGAAAATATCTATTCTAGTTCTATTATCCGCTATGGGTTTGAATCTAAGAGAAATTT  
AGAGAATGTGCGCTACCCTGAAATTTTCTTATCTTTTCTGAAATGATAAGGAAAAA  
AAATTGGGTCAAAGGAAAATGCCATTTTGGAGTTTATCAACAATTTACTTGTGTAGGC  
GGAGATCCGGTATTTTCTGAATCCTTATGTAAGGAATTACAAAAGAAATTTCTTTCAACA  
AAGATGTGAATTAGGAAGGATTGGTTCGATTAAATATGAACCGGAGACTGAATCTTGATA  
TACCTCATAACAATACATTTTTGTTACCGCGAGATATATTGGCAGCTGCGGATCATTGTA  
TTGGAATGAAATTTGGAATGGGTACACTTGACGAT-----ATGAATCATTAAAAAATAAA  
CGTATTCGTTCTGTAGCGGATCTTTTACAAGATCAATTCGGATTGGCTCTGATTCGTTTA  
GAAAATGTGGTTAGAGGGACTATATGTGGAGCAATTAGG---CATAAATTGATA---CCGAC  
TCCTCAAACCTTTGGTAACTTCAACTCCA-----TTAACAACCACTTATGAATCTTTTTT  
CGGGTTACACCCATTATCTCAAGTTTTGGATCGAACTAATCCATTGACACAAATAGTTCA  
TGGGAGAAAATCGAGTTATTTGGGTCTGGAGGATTGACAGGGCGAACTGCTAGTTTT  
CGGATACGAGATATCCACCCTAGTCACTATGGGCGGATTTGCCAATTGACACATCTGA  
AGGAATCAATGTTGGACTTATTGGATCTTTAGCAATTCATGCCAAGATTGGTCATTGGG  
GG---TCTTTAGAAAGCCATTTTAT-----GTAATCTCTGAGGAATCAAAA-----AAAGTA  
CGGATGTTTTATTTATCACCAAATAGAGAGGAATACCATATGGTAGCGGCAGGAAATTC

TTTGGCGCTAAATCGAGGTGTTTCAGGAAGAAGCAGGTTGCCCCAGCTCGATATCGTCAA  
GAATTCCTGACTATTGCATGGGAACAAGTGCATCTTCGAAGTATTTTTCCCTTCCAATAT  
TTTTCTATCGGAGCTTCCCTCATTCTTTTATCGAGCATAATGATGCGAATCGGGCTTTAA  
TGAGTTCTAATATGCAACGTCAAGCAGTTCCTACTTTCTCGGTCCGAAAAATGCATTGTT  
GGGACTGGATTGGAACGCCAAGTGGCTCTAGATTGAGGGTTCCCGCTATAGCCGAAC  
CGAAGGAAAGATAATTTATACTGATATTGACAAGATCATTATCGGGCAATGGGGATA  
CTCTACGCATTCCATTAGTTATGTATCAACGTTCCAACAAAAATACTTGTATGCATCAA  
AACCCAGGTTCCGCGGGGTAAATGCATTA AAAAGGGACAAGTTTTAGCGGATGGTGC  
CGCTACAATTGGTGGCGAACTCGCCTGGGGCAAAAACGTATTAGTGGCTTATATGCCGT  
GGGAAGGTTACAATTTGAGGATGCGGTACTCATTAGCGAACGTCTGGTATATGAAGAT  
ATTTATACTTCTTTTCACATACGGAAATATGAAATTCAGACTCATGTGACAAGCCAAGG  
A--CCTGAAAGGATCACTAATGAAATACCGCATCTAGAAGCCATTTACTCCGAAATTTA  
GACAAAATGGAATTGTGATGCTAGGATCTTGGGTAGAGACGGGCGATATTTTAGTAGG  
TAAATTAACGCCTCAAATGGCGAAAGAA--TCATCGTATGCTCCCGAAGATAGATTATTA  
AGAGCCATACTTGGTATTCAGGTATCTACTTCAAAGGAACTTGTCTAAAACCTACCTAT  
AGGTGGTAGGGGGCGAGTTATTGATGTGAGATGGGTCCAGAAAAAGGGG--GGTTCCA  
GTTATAATCCGGAACGATTCGTATATATATTTTACAGAAACGTGAAATCAAAGTGGGTG  
ATAAAGTCGCTGGAAGACATGGAATAAAGGCATCATTTC AAAATTTTGCCTAGACA  
AGATATGCCTTATTTGCAAGATGGAAGGCCTGTTGATATGGTCTTCAACCCATTAGGAGT  
ACCTTCACGAATGAATGTAGGACAGATATTTGAATGCTCACTCGGGTTAGCGGGAGGTC  
TGCTAGATAGACATTATCGAATAGCACCTTTGATGAGAGATATGAACAAGAGGCCTCG  
AGAAAACCTTGTATTTTCTGAATTATATGAAGCCAGTAAGCAAACAGCAAATCCGTGGGT  
ATTTGAACCCGAATATCCGGGAAAAAGTAGAATATTTGATGGAAGAACGGGGGATCCC  
TTTGAGCAGCTGTTATAATAGGAAAGCCTTATATCTTGAAATTAATTCATCAAGTTGAT  
GATAAATAACATGGACGTTCCAGTGGACATTATGCACTTGTACCCAACAACCCCTTAG  
AGGAAGGGCCAAGCAAGGGGGACAACGAGTCGGAGAAATGGAGGTTTGGGCTCTAG  
AAGGATTTGGTGTCTTCATATTTTACAAGAAATGCTTACTTATAAATCTGATCATATTAG  
AGCTCGCCAAGAAGTGCTTGGTACTACAATCATCGGAGGAACAATACCTAAACCTGAA  
GACGCTCCAGAATCTTTTCGATTGCTCGTTCGAGAACTACGATCTTTGGCTCTGGAAC  
GATCATTTCCTTGTATCTGAGAAGA ACTTCCAGATGAATAGGAAGGAAGCT-----  
-----ATGATTGATCGGTATAAACATCAACA ACTCCGAATTGGATCAGTTTCGCCTCAACA  
AATAAGTGCTTGGGCCAAAAAATCCTACCTAATGGGGAGATTGTTGGAGAAGTGACA  
AAACCCATACTTTTCATTACAAAACCAATAAACCTGAAAAAGGTGGATTGTTTTGTGA  
AAGAATTTTTGGGCCTATAAAAAGTGGAATTTGTGCTTGTGGAAATTATCGAGTAATCA  
GAAATGAAAAAGAAGACCAAAAATTTTGTGAACAATGCGGAGTCGAATTTGTTGATTC  
TCGGATACGAAGATATCAAATGGGCTACATCAA ACTGGCATGCCAGTA ACTCATGTGT  
GGTATTTGAAACGTCTTCCTAGTTATATCGCAAATCTTTTAGATAAACCTCTTAAAGAAT  
TAGAAGGCCTAGTATATTGCGATGTG-----  
-----AAATACAGTATTCCACTTTTTTTTACTGCCCAAGGCTTCGATACATTTCG  
AAATCGAGAAATTTCTACAGGAGCTGGTGTCTATCCGAGAACAAATTAGCCGATCTAGATT  
TGCGAATTATTATAGATTATTCATCGGTAGAATGGAAAGAATTAGGGGAAGAA--GGGC  
CTACGGGGAATGAATGGGAAGATCGAAAAGTTGGAAGAAGAAAGGATTTTTTGGTTC  
GACGCGTGGAATTAGCTAAGCATTTTATTTCGAACAAATATAGAACCAGAATGGATGGTT  
TTATGTCTATTACCAGTTCTTCCTCCCGAGTTGAGACCGATCATTAGATAGATGGGGGT



AAACTAATGAGTTCAGATATTAATGAACTCTATAGAAGAGTTATCTATCGGAACAATACT  
CTTATTGATCTATTAACAACAAGTAGATCTACGCCAGGAGAATTAGTAATGTGTCAGGA  
AAAATTAGTACAAGAAGCCGTGGATACACTTCTTGATAATGGAATCCGCGGACAACCA  
ATGAGAGACGGTCATAATAAGGTTTACAAGTCGTTTTTCGGATGTAATTGAAGGCAAAG  
AAGGAAGATTTTCGTGAGACTATGCTTGAAAACGGGTTGATTATTCGGGGCGTTCTGT  
CATTGTCGTAGGCCCTCACTTTCATTACATCGATGTGGATTGCCTCGCGAAATAGCAAT  
AGAACTTTTCCAGATATTTGTAATTCGTGGTCTAATTAGACAACATCTTGCTTCGAACAT  
AGGAGTTGCTAAGAGTAAAATTCGGGAAAAAGAGCCAATTGTATGGGAAATACTTCAG  
GAAGTTATGCAGGGGCATCCGGTATTACTGAATAGAGCGCCGACTTTGCATAGATTAGG  
CATAAGGCATTCCAACCCATTTTAGTGGAAGGCCGCGCTATTTGTTTACATCCATTAGT  
TTGTAAGGGATTCAATGCAGACTTTGATGGGGATCAAATGGCTGTTTCATGTACCTTTATC  
GTTGGAGGCTCAAGCGGAGGCTCGTTTACTTATGTTTTTCTCATATGAATCTCTTATCTCC  
AGCTATTGGAGATCCCAATTCGGTACCAACTCAAGATATGCTTATTGGGCTCTATGTATTA  
ACAAGCAGGAATCGCCGAGGTATTTGTGCAAATAGGTATAATCCATGTAATCACAGAAA  
T-----TATCAAATGAAAGAATTTACGAT-----AATCAATATACGAAA-----GAATCCTTT  
TTTTCTAATTCCTATGATGCAATTGGTGCTTATCGGCAGAAAAGAATCAATTTAGATAGT  
CCTTTGTGGCTCCGTTGGCAACTAGATCAACGC--GCTATTGCTTCA-----AGAGAAGCT  
CCCGTCGAAGTTCACTATGAATCTTTGGGTACCTATCATGAGATTTATGAACACTATCTA  
ATAGTAAGAAATATAAAAAAAGAAATTTCTTTGTATATACATTCGAACTACTGTTGGTCAT  
ATTTCTCTTTATCGAGAAATCGAAGAAGCTATACAAGGGTTTTGCCAAGCCGGCTCAGA  
TGGTATC-----ATGGAGGTACTIONTATGGCCAAACGGGCCAATCTGGTCTTTC  
ACAATAAAGTGATAGATGGAAGTCCATTAACGACTTATTAGCAGATTAATAGATCATT  
TTGGAATGGCATATACATCACACATCTGGATCAAGTAAAGACTCTGGGTTTTCCAGCAA  
GCCACTGCTACATCCATTTTATTAGGAATTGATGATCTTTTAAACAATACCTTCTAAGGGA  
TGGCTAGTTCAAGATGCTGAACAACAAAGTTTGATTTTGGAAAAACACTATCATTATGG  
AAATGTACACGCGGTAGAAAAATTACGCCAATCTATTGAGATATGGTATGCTACAAGTG  
AATATTTGCGACAAGAAATGAATCTTAATTTTAGGATGACGGAACCCTTTAATCCAGTC  
CATATAATGTCTTTTTTCGGGAGCTAGGGGAAATGTATCTCAAGTACACCAATTAGTAGGT  
ATGAGAGGATTAATGTCGGATCCACAAGGACAAATGATCGATTTACCTATTCAAAGCAA  
TTTACGCGAAGGACTATCTTTAACAAGAATATATCATTTCTTGCTACGGAGCCCGCAAAG  
GGGTTGTCGATACCGCTGTACGAACATCAGATGCTGGATATCTTACGCGTAGACTTGTT  
GAAGTAGTTCAACACATTGTTGTACGTAGAACAGATTGTGGCACCACCCGAGGGATT  
CTGTGAGTCCTCAAATGGGATGATGTGC--GAAAGAATTTTTATTCAAACATTAATTGG  
TCGTGTATTAGCAGACAATATATATATGGGTCTACGATGCATTGCCATTGCAAATCAAGAT  
ATTGGGATTAGACTTGCCAATCGATTCATAACC-----TTTCGAACACAAACAAT  
ATCTATTGCAACTCCCTTTACTTGTAGGAGTACGTCTTGGATCTGTGCGATTATGTTATGG  
CCGGAGTCTACTCATGGCGATCTAGTGGAATTGGGGGAAGCCGTAGGTATTATTGCAG  
GTCAATCCATTGGAGAGCCGGTACTCAACTAACATTAAGAACATTTTCATACCGGCGGA  
GTATTCACAGGGGGTACTGCAGAACATGTACGAGCCCCCTCTAATGGAAAAATAAAATT  
TAACGAGGATTTGGTTCATCCCATACGTACACGTCATGGGCATCCTGCTTTTCTAIGTTA  
TATAGACTTGTATGTAACATTTGAAAGTCACGATATTATACATAACGCTACTATTCCACCA  
AAGAGTTTCCTTTTAGTTCAAACAATCAATATGTAGAATCAGAACAAGTGATTGCTGA  
AATTCGGGCGGGAACATACACTTTG---AATTTTAAAGAGAAGGTTGAAAACATATTTA  
TTCCGATTCAGAAGGGGAA---ATGCACTGGAGTACTGATGTATACCATGCACCTGAATTT

ACATATAGTAATGTCCATCTCTTACCAAAAACAAGTCATTTATGGATATTATCAGGAAAT  
TCGTGCAGA-----TCCAGTATAGTTCCTTTTTTCGCTCCATAAGGATCAAGATCAAATGAA  
CGTTCAT-----TCTCTTCTATCAAAAAGA---AGATATATTTCTAGTCCTAATTCGTAATA  
ATGATCAA---GTAAACCCAAATTCTTTAGTTCAGATTTTTTCGGGTA---CCAAGTAGG  
ATTCCTTATTAT---TCAGAACTTAATCGAATCGTATGTACTGGTCATTGTAATCTCATATAT  
CCCGCG---ATTCTCTACGAGAATTCTGAT-----TTATTGGCAAAGAGGGCAAGAAATAAA  
TTCATCATCCCATCCAATCAATTCAAGAACAAGAAAAAAACTAATGACCCGCTCCGC  
TATCTCGATTGAAATACCGCTAAAT-----GGTATTTTCCGTAGAAATAGTGTTTTTGCTTAT  
TTTGACGATCCCAATACCGAAGAAAGAGTTCGGGAATTACTAAATATGGGGCTATAGG  
GGTGCATTCAATCGTCAAAAAGAAGAT-----TTGATTGAGTATCGG---GGAGTCAAAGA  
ATTTAAGCCAAAATACATGAAGGTAGATCGCTTTTTTTTCATTCCCGAAGAAGTGTATAT  
TTTACCCGAATCTTCTTCCCTAATGGTACGGAACAATAGTATCATTGGAGTAGATACACC  
AATCACTTTAAATACAAGAAGTCGGGTGGGCGGATTGGTCCGAGTGGAGAGAAAAAA  
AAAAAAATTGAGCTTAAAATCTTTTCTGGAGATATCCATTTTCCGGGAGAGACAGATA  
AAATATCCCGACACAGTGGTATCTTGATACCACCAGGAATGGTAAAAACA-----AATTCT  
AAGGAATCAAAAAA-----CAGAAAACTGGATCTATATCCAACGA-----ATCGCACCTA  
CCAGGAAAAG-----TATTTTGTTTTGGTTCGACTAGTAATCATATATGAGATAGCGAAC  
GGTATAAATTTAGAAACACTTTTCCCCCGGATTTATTGCAGGAAAAGGATAATCTGAA  
ACTTCGAGTTGTCAATTATATTCTTTCTGGAAATGGTAAACCGATTTCGAGGAATTTCTGA  
CACAAGTATTCAATTAGTTCGTACTTGTTTAGTGTGAATTGGGACCAAGAAAA-----  
-AAAAGTTCTTCTATCGAAGAGGCCCGCTTCTTTGTTGAAGTAAACACAAATGGTC  
TGATTTCGTGATTTCTTAAGAATCAACCTAGTGAAATCCCATATTTTCATATATCAGAAAA  
GGAATGATCCATCGGGTTCAGGGCCGATCTCT---ATAATGGGGCAAATCACACCAATAT  
TAATCCATTTTATCCCATCTATTTCAAGACAAGG-----ATTCAACAATCACTTAAA  
CAAATCAAGGAATATTAGTACGTTGTTGAATAGA-----AATAAGGAATGTCAATCTT  
TGATAATTTTGTATCATCTAATTGTTTTCGAATGGATCCC-----TTCAACGATGTAAAC  
ATCACAAT-----GTAATAAAAGAATCA--CCTATAATTCCAATTAGAAATTCGTTGGGCC  
CTTTAGGA-----ACAGCCCTTCAAATTGCGAATTTG-----TATTTATTTTACCATTTAAAT--  
ATAACTCATAATCGGATCTCA---GTAATAAATATTTGAAACTTGACAAT-----TTAAA  
CAGACTTTTCGAGTACTT-----AAA---TATTATTTAATGGACGAAAACGGGAGA-----GTT  
GTTAATCCCGATCCATGCAGTAACAGTGTTTTGAATCCATTCAATTTGAATTGGTATTTT  
CTCCATCATAATTATTGTGAAGAAAGCTTACAATAATTAGC---CTGGGACAGTTTATTT  
GCGAAAATGTCTGTATGGCCAAAACGGACCA-----CATCTAAAATCGGGTCAAGTTA  
TAATTATTCAC---ATTGGCTCTGTAGTAATAAGATCCGCTAAGCCTTATTTGGCCACTCCG  
GGAGCAACCGTTCATGGCCATTATGGAGAAATCCTTTACGAAGGAGATACATTAGTTAC  
ATTTATATATGAAAAGTCGAGATCTGGTGATATAACGCAGGGTCTTCCAAAAGTAGAAC  
AAGTGTTAGAAGTGC GTTCAATTGATTCAATATCGATAAACCTAGAAAAGAGAGTTGG  
GGGTTGGAACGAATGTATACCAAGAATTCTTGAATTCCTTGGGGATTCTTGATTGGTA  
CTGAGCTAACTATAGTGCAAAGTCGCATCTCTTTGGTTAATAAGATCCAAAGGGTTTAT  
CGATCCCAAGGGGTGCAGATCCATAATAGGCATATAGAAATTATTGTACGTCAAATAACA  
TCAAAGTATTGGTTTCAGAA-----GACGGAATGTCTAATGTTTTTTTACCCGGAGAA  
CTAATTGGATTGTTGCGAGCGGAACGAACGGGACGTGCTTTGGAAGAAGCCATCTGTT  
ACCGAGCCATATTATTGGGAATAACGAGAGCATCCCTGAATACTCAAAGTTTCATATCC  
GAGGCCAGTTTTCAAGAACTGCTCGTGTTTTAGCAAAAAGCCGCTCTCCGCGGTCGTA

TCGATTGGTTGAAAGGCCTGAAAGAAAACGTTGTTCTAGGCGGTATGATACCCGTTGG  
TACCGGATTCAAAGGATTAGTACAAGGTTCA-----AGGCAATATAAGAACATTCCTTTGA  
AAACCAAAAAGAATAAT-----TTATTCGGGGGGGAATTTAGAGATAGAGATATTTTATTCC  
ACCACAGAGAGTTATTTTATTCTTGCATTTCAAAAAATTTCTACGATACATCAGAACAAT  
CATTTATAGGATTTAATGATTCC-----ATGATAAGAAGATATTGGAACATTAATTT  
GGAAGAGATGATGAAAGCAGGAGTTCAATTTGGTCATGGTACTAGAAAATGGAATCCG  
AGAATGGCACCTTATATCTCTGCAAAGCGTAAGGGTATTTCATATTACAAATCTTACTAGA  
ACTGCTCGTTTTTTATCAGAAGCTTGTGATTTAGTTTTTGTATGCAGCAAGTAGGAGAAA  
ACAATTCTTAATTGTTGGTACCAAAAATAAAGCGGCGGATTCAGTAGCACGAGCTGCA  
ATAAGGGCTCGGTGTCATTATGTTAATAAAAAATGGCTCGGCGGATTTTAAACGAATTG  
GTCCACTACAGAACTAGACTTCAAAAGTTCAGGGACTTGAGAATGGAACAAAAGAC  
AGGTAGACTCAACCGTCTTCCGAAAGGAGATGCGGCTCGGTTGAAGAGACAGTTAGC  
TCACTTGCAAACATATCTGGGTGGGATTAATATATGACGGGGTTACCCGATATTGTAAT  
AATCGTTGATCAGCAAGAAGACTATACGGCTCTTCGGGAATGTATCACTTTGGGAATCC  
CAACGATTTGTTTAATTGATACAACTGTGACCCGGATCTCGCAGATATTTGATTCCAG  
CGAATGATGACGTATAGCTTCAATCCGACTAATCTTAATAAATTAGTATTTGCAATTTG  
TGAGGGTCGTTCT--AGCTATATACGAAATCCCATGGGACAAAAATAAATCCACTAGG  
TTTCCGACTTGGTACAACCCAAAGTCATTATTCTCTTTGGTTTGCTCAACCAAAAAATT  
ACTCTGAGGGTCTACAAGAAGATCAAAAAATAAGAACTGTATCAAGAATTATGTAAA  
AAACAATACAAAATATCTTCTGGT---GTTGAGGGAATTGCATGTATAGAGATTCAAAA  
AAGAATTGATGTGATTCAAGTAATAATATATATGGGATTCACAAAATTATTAATAGAAAG  
TAAA-----CCTAAACGAATCGAGAAATTACAGATAAATGTACAAAAGAATAAAT  
TGTGTGAACCGAAAACCTCAATATTGCTATTACAAGAATTTCAAACCCTTATGGGCACCC  
TAATATTCTTGCAGAATTTATAGCCGGACAATTAAGAATAGAGTTTCATTTCCGAAAGC  
AATGAAAAAAGCTATTGAATTAACCTGAACAGGCGGATACAAAAGGAATTCAAGTACAA  
ATTGCGGGGCGTCTTGACGGAAAAGAAATTGCACGCGTCGAGTGGATTAGAGAGGGT  
AGGGTTCCTCTACAAACCATTTCGGGCTAAAATTGATTATTGTTTCATATACAGTTAGAACC  
ATTTATGGGGTATTAGGCATAAAAATTTGGACATTTCTAGACAAAAAATGTCACGTTA  
CCGAGGGCCTCGTTTCAAAAAATACGCCGTCTGGGGGCTTTACCGGGACTCACTAGT  
AAAAGGCCTAGGGCTGGGAGCGATCTTAGAAATCAATCACGCTCCGGTAAA---AAATC  
TCAATATCGTATTCGTTTAGAAGAAAAACAAAAATTACGTTTTTCATTATGGTCTTACAGA  
ACGACAATTACTTAAATACGTTTCGTATCGCCGCAAAGCCAAAGGGTCAACAGGTCAG  
GTTTTACTACAATTACTTGAAATGCGTTTGGATAACATCCTTTTTTCGATTGGGTATGGCG  
TCAACTATTCCCCGAGCCCGCCAATTAGTTAATCATAGACATATTTTAGTTAATGGTCGTA  
TAGTAGATATACCAAGTTATCGCTGCAAACCCCGAGATATTATTACAGCGAGGGATGAA  
CAAAAATCCAGAGCTATGATTCAAAATTATCTTGAGTCATCCCCCAG---GAGGAATTG  
CCAAAACATTTGACTCTTGACCCATTTCAA-----TATAAAGGATTGGTCAATCAATAAT  
AGATAATAAATGGATCGGCTTGAAAATAAACGAATTGCTAGTGGTAGAATATTATTCTCG  
TCAGACTATGTCACGTCGAGGTAAGTGCAGAAGAAAAAACTGCAAAATCCGATCCAATT  
TATCGTAATCGATTAGTTAACATGTTGGTTAACCGTATTCTGAAACACGGAAAAAAACC  
ATTGGCTTATCAAATTATCTATCGAGCCATGAAAAAGATTCAACAAAAGACAGAAACA  
AATCCACTATCTGTTTTACGTCAAGCAATACGTGGAGTAACTCCCGATATAGCAGTAAA  
AGCAAGACGTGTAGGCGGATCGACTCATCAAGTTCCCGTTGAAATAGGATCCACACAA  
GGAAAAGCACTTGCCATTGCTTGGTTATTAGGGGCATCCCGAAAACGTCCGGGTCGAA

ATATGGCTTTCAAATTAAGTTCCGAATTAGTGGATGCTGCCAAAGGGAGTGGTGATGCC  
ATACGCAAAAAGGAAGAGACTCATAGAATGGCAGAGGCAAATAGAGCTTTTGCACATT  
TTCGTATGGGCAGGGATCCTATTGCTGAGATAATAACCTCTATACGAAATGCTGACATGA  
ATAGAAAAGGAACCGTTCGAATAGCATTACTAACATCACTGAAAACATTATTAATA  
CTTTTACGAGAAGGTTTTATTGAAAATGTCAGGAAACACCAGGAAGGCAACAAAAAAT  
TTTTGGTTTTAACCTACGACATAGAAGG-----AAGAGGAAGGGAAGAACTAGT-----  
----CTAAATTTAAAACGGATTAGCCGACCTGGTCTACGAATCTATTCTAACTATCAAAAA  
ATTCCTAGAATTTTGGGCGGGATGGGTATTGTAATTCTTTCTACTTCTCGGGGTATAATG  
ACCGACCGAGAAGCTCGACTAGAAAGAATCGGTGGAGAAATCTTGTGTTATATATGGA  
TGGCAAAACCTTTACCAAGAATTGGTTCACGCAGGAATGGACGTATTGGTTCACGTAA  
GAGTGCGCATAAAATACCAAAAGGAGTTATTCATGTTCAAGCAAGTTTCAACAATACTA  
TTGTGACCGTTACAGATGTACGGGGTCGAGTGATTTCTTGGTCCTCCGCCGGCACTTGT  
GGATTACGGGGCACAAGAAGAGGAACGCCATTTGCAGCTCAAACCGCAGCAGGAAAT  
GCTATTCGAACAGTAGTGGATCAAGGTATGCAACGGGCAGAAGTCATGATAAAAGGTC  
CTGGTCTCGGGCGAGATGCAGCATTAAAGAGCTATTTCGCAGAAGTGGTATATTATTAAGC  
TTCGTCCGGGATGTAACCCCTATGCCACATAATGGCTGCAGGCCCCCTAAAAAAGGC  
GTGTGATGCCAACTATTAACAACCTTATTAGAAACACAAGACAGCCAATCAGAAATATC  
ACCAATCCCCGCTCTCGGGGGATGTCCTCAGCGCCGAGGAACATGTACTAGGGTGA  
CT--ATCACCCCCAAAAACCAAACTCTGCCTTACGTAAAGTTGCCAGAGTACGATTAA  
CCTCTGGATTTGAAATCACTGCTTATATACCTGGTATTGGCCATAATTCACAAGAACATT  
CTGTAGTCTTAGTAAGAGGGGGAAGGGTTAAGGATTTACCCGGTGTGAGATATCACATT  
GTTTCGAGGGACCCTAGATGCTGTTCGGAGTAAAGGATCGTCAACAAGGGCGTTCT--AG  
TGC GTT-----ATGGCAAGAAAAAGTTTGATTCAGCGGGAGAAGAAGAGGCAAAA  
ATTGGAACAAAAATATCATTGATTCGTGATCCTCAAAAAAAGAAATAAGC-----AA  
AGTTCCGTCGTTGAGTGATAAATGGGAAATTCATGGAAAGTTACAATCCCCACCGCGA  
AATAGTGCACCGACACGTCTTCATCGACGCTGTTTTTCGACTGGAAGACCGAGAGCTA  
ACTATCGAGACTTTGGACTATCCGGACACATACTTCGTGAAATGGTTCATGCATGTTTGT  
TACCGGGGGCAACAAGATCGAGTTGGATGGTAAAAAATTCATTCATTTAGTTATTTCA  
CAAGAA---GAA---AAAGACGAAAACAAGGATCTGTTGAATTTCAAATAGTAAGTTTC  
ACTAATAAGATACGAAGACTTACTTCACATTTGGAATTGCATAGAAAAGACTATTTATCT  
CAGAGAGGTTTTCGGAAAATTCTAGGAAAACGGCAACGACTGCTGTCTTATTTAGCAA  
AGAAAAATAGAGTACGTTATAAAGAATTAATTAGCCGGTTGGATATTCGGGAGTCAAAA  
ACTCGT-----  
----GTGGGTTTTTATGATCCTTTAAAAAATCAAACCTATTTAAATGTTCTACTATTCTATA  
TTTCCTTGAAAAAGGCGCTCAACCTACGGGAACGTTCATGATATTTTAAAGCAAGGCG  
GGGGTTTTTACGGAACCTTCGTCTTAATCAA---ACG-----ATGGATAAATCCAAACGGCC  
TTTTCTTAAGTCCAAGCGATCTTTTCGTAGGCGTTTGCCCCGATCCAATCGGGGGATC  
GAATTGATTATAGAAACATGAGTTTAAATTAGTCGATTTATTAAGTGAACAAGGAAAAATAT  
TATCTAGACGGGTGAATAGATTGAGTTTAAACAACAACGATTAATTACTATTGCTATAA  
ACAAGCTCGTATTTTATCTTCGTTACCTTTTCTTAATAATGAAAAA-----CAATTTGAA---  
-----CGAGCTGGTCACTATGTGACACGT---CTAAAAAAAATCCTTTT  
GTAGCAAATCATTATTAAAAAAATAAATAAGCTTAACACAAAAGCAGAAAAAGAAA  
TAATAGTAACGTGGTCCCAGGCATCTACCATATACCCACAATGATCGGCCATACTATTG  
CTATCCATAATGGAAAGGAGCATTACCTATTTATATAACAGATCGTATGGTGGGCCATA

AATTGGGAGAATTTGCACCTACTCTAAATTTCCGGGGACATGCAAAAAATGATAATAAA  
TCTCGTCGTATGATTTTTAAATCTTTTATACTAGGTAATCTAGTATCCTTATGCATGAAGAT  
AATCAATTTGGTTCGTTGTGGTCCGACTCTATTATGGATTTCTGACCACATTCTCCATGGG  
GCCCTCTTATCTCTTCTTCTCCGAGCTCGGGTTATAGAAGAAGGAGAAGAAGGAACT  
GAGAAGAAGGTATCAGCAACAACAGGTTTTATTACGGGACAGCTCATGATGTTTCATATC  
GATCTATTATGCGCCTCTGCATCTAGCATTGGGTAGACCTCATAACAATAACTGTCCTAGC  
TCTACCCTATCTTTTGTTTTCAATTTCTTCTGGAACAATCACAAACACTTTTTTGATTATGGA  
GCTACTACCAGAAATCAATGCGTAATCTTAGCATTCAATTTGTATTCTGAATAATCTCA  
TTTTTCAATTATTCAACCATTTCAATTTACCAAGTTCAATGTTAGTCAGATTAGTCAACAT  
TTATATGTTTTCGATGCAACAACAAGATGTTATTTGTAACAAGTAGTTTTGTTGGTTGGTT  
AATGGTCCACATTTTATTCATGAAATGGGTTGGATTGATATTAGTCTGGATAACAACAAA  
TAATTCTATTAGATCT--TTTCGATCTAATAAGTACCTTGTGTCAGAATTGAGAAATTCTA  
TGGCTCGAATCTTTAGTATTCTCTTATTATTACCTGCGTCTACTCTTTAGGCAGAATACC  
GTCACCCATTTTTACTAAGAACTGAAAGAAACCGAAGAAGAT-----CTTGTAACTATTC  
TTTTTGACTCGAAACGTTGGAATCGTCCATTACGATATATAAAAAATGATCAGTTTGAG  
AATGCTGTAAGAAATGAAATGTCACAATATTTTTTTTATAACATGTCGAAGTGATGAAA  
AGAAAGAATATCTTTCACGTATCCGCCAGCTTGTCAACTTTTTTTGAAATGGTACAGA  
AAAAGATTTTTCTGTTACAACAGAGAACTCTCCTCTGATGAATTGTATAATCATTGG  
AATTATAAGAATGAACAAAAAAGAAAAATCTAAGTAATGAATTTATAACAGAGTCC  
AGGCTCTAGATAAGGGATATCTTGTCTGAATACACTCGAAAAAAGGACTAGATTATGT  
AATGATAAAACGAAAAAAGAGTACTTACCAAAAATATATGATCCCTTATTGAGTGGGTC  
CTACCGTGGAAGA---ACAAAATTTTTTTTTTCAACGGAGATGGTTTGGATAAATAAAATT  
CATCTTATTCTTTATATAGAATTTGAACCAAAAAATTCAAAAATAAATCTCTTGGAATA  
AAAGAAATAAATAAACAAGTTCCTCATTGGTCATACAAATTAATTGATTTGGAACAACA  
AGAGGGAGAAGAAATTCGTTACGAAAAGCCAAACGTGTAGTAATTTTTTACCGATACT  
TTGATCCGTTATTCGCAACAATCAGACTTTCGTCGAGACATAATAAAGGATCCACGCG  
AGCACAAAGACGCAAAATAGCTATTTTTGAACTGTTTCAAGCAAATGCGCATTGCCCC  
CTTTTTTTGGACAGAATAGACAAATCTTTTTTTTTCTTTTTGATATT-----TTCGAACTGA  
TAAA---ATGTTTATAAATAGAGAGGAAAGAACTCGGATAGAAATAGCTGAAGCCTGGG  
ATAGCATTCTTTTTGCTCAAATAATAAGAGGTTGTATTTTAGTAACCCAATCGATTCTTAG  
AAAATATATTATATTACCTTTATTAATAATAGCTAAAAATTCATTTCGTATACTATTTTTTC  
AAATTCGGAATGGTTCGAGGATTTAAAGGATTGGAGTAGAGAAATGCATATTAATGC  
ACTTATAATGGAGTTCAATTATCAGAAAAAGAAATTTCCGAAAAACTGGTTAACAGACG  
GGATTCAAATAAAGATCCTATTTCTTTTTCTGCTAAAACCTTGGCACAGATCTAAGAAA  
GTACAAAGAAATGATTTTTGTTTTTTAACAGTTTTGGGGATGGAGGCTGAACTGCCTTT  
TGGTTTTCCCCGAAAACGGCTTTCACTTTTTGAACCCATCTTTAAAAAATTGAAAA  
AAAATTATAAAATGAAAAAAAGGGTTTTTCGAATT---AGAAGAACTTTAGAAGAAAG  
AAGAAAATAAATTTA-----TCAAAGAAAAAGCAAACCTGGGTCATCCAAAACCTTTTT  
-----TTTCGAAAAGACATAATAAACAAAATAAACAAATCAAAGATTCGCTAATCAATAA  
GAATGCGAGTCAGAAAATGTCCACCTCAACGCGATCTATGGTTTGGACAAATTTTTTAC  
TGACAGAAAAAAAATGAAAGATCTTCTGCTAGACGAAAGATAATCTTAAATCAAAT  
AGAAAAAATTCAAAAGAAAAGGAAAA---CCTAACAAAATAAGTTATAATGCTAAAA  
CATTAATAAATCAATTTTACAGATATTAAGAAAGAAATGCGCAATTAGCG  
CATAAATTCATTTTTTTTATAAAATTTTGATTGAAAGGATATACATAGATATCTTTTTA---

ATCATTAATATTCCGAGGATCAATGCACAGCTTTTTATTCACTTTATTTTCGTGCGACATAT  
CCTCCTTGTCAACAAGCATATGTATTTTACAAATTATCACAAATCAAATTATTAACCTTATA  
TAAGTTAAGATCTATCCTTCAATAT--GGACTTTTTTTAAAGAATGAAATAAAGGATTATT  
TTGTCCAAGGGCTATTTAATTTTCGAATTAAGAGAAAAAAATGTTAGAAATCTGTAATG  
AATCAATGGAAAACTGGTTAAGGAGTCATTATCAATATAAATTATCTCAGATTAGATGG  
TCTAGATTAATACCACAAAAATGGCGAAATAGAATCAATCAATACCAACACCCTATGGT  
TCAAAACAAATGGAATTTATATGAA-----AAAGACAAATTAATTCATTACGAAAAAAA-  
--AATTTTAAAAAACACTATAAATATAATCTTTTTATCATATAAATCTATTAATGATGATATTA  
TCGATCCAGATAGAAAATATTTGATTGGAAAATTCTCAATTTTTGTCTTAGA-----  
-----AAC  
AAAAGTCATACGGAAGTAGAACTTGATTTCTTTCTAAAACGATATTTATATTTTCAATTA  
AGATGGAATGGT-----AATCAAAAAATAATCAATAATATCAAAGTATATTGTCTCCTGCTT  
AAACTGACAAATCCACGCGAAATTATTATATCTTCTATTCAAAGGCAAGAAATAAGTCT  
GAATATTTTGATGATTCAGAAGGATTTAACTCTTACAGAATTGATGAAAAAGAGAATAT  
TACTATCGAACCTATTCGTCTATCGGTAAAAATAATGGACAATTTCTTTTGTATCAAA  
CCATAAGTATCTTATTATTTTATAAAGAACAAACAAAATGGTTATGATTTACTTGTTCCTG  
AAAATGTTTTATCCCCGAAACGTCGTAGAGAATTAAGAATTCTAATTTCTTTTCAATTTTC  
TTTGCCCCATTTTCGATTAGAAGATTAGCTTGTATGAATCGTTATTGGTTTCGACACTA  
ATAATTCCAGCCGGTTCGGTATGGTAAGGATATGTATCTATCCGATGAAAGGACATCAAT  
TCAAATCCTGGATTTTCGAATTGAGAGAGATATTGAGAGAGATCAAGAATTCTCACTAT  
TTCTTAGATTCATGGACCCAATCAATTCCGTGGGATCTTTCATTACATTTTTTTCCATC  
AAGAACGTTTTATAAACTCTTGGACTCCCGAATTTGGAGTATCTTACTTTCA---CGCAA  
TTCA-----CAGGGTTCAACAAGCAATCGATATTC-----ACGATCAAGGGTGTAGTACT  
ATTTGTAGTAGTG--GTCCTTATATATCGT-----ATTAACAATCGAAAGATGGTCGAA  
AGAAAAAATCTCTATTTGACAGGGCTTCTTCCT-----ATACCTATGAATTCCATTG  
GACCTAGAAATGATACATTGGAAGAATCCTTT--TGGTCTTCCAATATCAATAGGTTGAT  
TGTTTCG--CTCCTGTATCTTCCAAAAGGAAAAAAGATCTCTGAGAGCTCTTTCCTGGA  
TCCGAAAGAGAGTACTTGGGTCTCCCAATAACT-----AAAAAGTGATCATGTCTG  
AATCTAACTGGGGTTCGCGGTGGTGGAGGAACTGGATCGGAAAAAAGAGG-----GATT  
CTAGTTGTAAGATATCTAAT-----GAAACCGTTCGCTGGAATTGAGATCTCATTCAAAGA  
AAAAGATATCAAA--TATCTGGAGTTTCTTTTTGTATATTATATGGAT-----GATCCGATCC  
GCAAGGACCATGATTGGGAATTGTTTGATCGTCTTCTCCGAGGAAGGGGCGAAACAT  
AATCAACTTG-----AATTCGGGACAGCTATTCGAAATCTTAGTGAAAGACTGGATTTGTT  
ATCTCATGTTTGCTTTTTCGTGAAAAAATATCAATTGAAGTGGAGGGT--TTCTTCAAACA  
ACAAGGA---GCTCGGTCAACTATTCAATCAAATGATATTGAGCATGTTTCCCAT-----CTC  
TTCTCGAGAAAGAAGTGGGCTATTTCTTTGCAAAATTGTGCTCAATTTCATATGTGGCA  
ATTCCGCCAAGATCTTTCGTT-----AGTTGGGGGAAT--AATTCGCACGAATCGGATT  
TTTTTAGGAAC---ATATCGAGAGAGAATTGGATTTGGTTAGACAATGTGTGGTTGGTAA  
ACAAGGATCGG-----TTTTTTAGT-----AAGGCACGGAATATGTCGTCAAATATTCAATA  
TGATTCC-----ACAAGA-----TCTAGTTTTCGTTCAAGGAAGGAATTCTAGCCAATTGAA  
GGGATCTTCT--GATCAATCCAGAGATCATTTTCGATTCCATTAGT-----AATGAGGATT  
CGGAA-----TATCACACATTGATCAATCAAAGAAAGATTCAAC  
AACTAAAAGAAAGATCGATTCTT--TGGGAT-----CCTTCCTTTCTTCAAACGGAACGAA  
CAGAGATAGAATCAGAC-----CGATTCCCTAAA-----TGCCTTTCTGGATATTCC-----TCA

ATGTCCCGGCTATTCACG---GAAGGTGAGAAGGAGATGAATAATCATCTGCTTCCGGAA  
GAAATCGAAGAATTT-----CTTGGGAATCCTACAAGATCCATTCGTTCTTTTTTCTCTGAC  
AGATCG-----TCAGAACTTCAT--CTGGGTTCGAATCCTACTGAGAGGTTCACTAGAGAT  
CAG-----AAATTGTTGAAGAAAGAACAAGATGTTTCT--TTTGTCCCTTCCAGGCGA  
TCGGAA-----AATAAAGAAATAGTTAATATATTCAAGATAATCACGTATTTACAAAAT-  
----ACCGTCTCAATTCATCCTATTTACCCAGATCCGGGATGTGATATGGTTCTG---AAGGA  
TGAACTGGAT--ATGGACAGTTCCAATAAGATTTCTTTCTTGAACAAAAATCCATTTTTT  
GATTA-----TTTCATCTATTCATGATCGGAACGGGGGGGATAACAGTTA-----CACCG  
CGATTTTGAATCAGAA-----GAGAGATTTCAAGAAATGGCGGATCTATTCACTCTATCAA  
TAACCGAGCCG---GATCTGGTGTATCATAAGGGATTTACCTTTTTTATTGATTCCTACGGA  
TTGGATCAAAAACAA-----TTCTTGAATGAGGTATTCAACTCCAGGGATGAATCGAAAA  
AGAAATCTTTA-----TTGGTTCTACCTCCTATTTTTTAT-----GAAGAGAATGAATCTTTT  
TATCGAAGGATCAGAAAAAATGGGTCCGG---ATCTCCTGCGGGAATGATTTTGAAGAT  
CCAAAACAAAAAATAGTGGTATTTGCTAGCAACAACATAATGGAGGCAGTCAATCAATA  
TGGATTGATCCTAAATCTGATTCAAATCCAATATAGTACCTATGGG-----TACATAAGAAA  
TGATTGACTCAATTCCTTTTTAATGAAT-----AGATCCGATCGCAACTTCGAATATGGAA  
TTCAA-----AGGGATCCAATAGGAAATGATACTCTGAATCATAGAACTATAATGAAATA  
TACGATCAACCAACATTTATCGAATTTGAAACAG---AGTCAGAAGAAATGGTTCGATCC  
T-----CTTATTTTTCTTTCTCGAACCGAGAGATCCATGAATTGGGATCCTAATGCATATAGA  
TACAAATGGTCTAATGGGAGCAAGAATTTCCAGGAACATTTGGAACATTTCAATTTCTGA  
GCAGAAGAACCGTTTT--CTTTTTCAAGTAGTGTTCGATCGATTACGTATTAATCAATATT  
CGATTGATTGGTCTGAGGTTATCGACAAAAAAGATTTGTCTAAGTCACTTCGTTTCTTT  
TTGCCCAAGTACTTCTT-----TTTTGTCC-----AAGTTTCTT  
CTCTTTTTGTCTAACTCACTTCCT--TTTTCTTTGTGAGTTTCGGGAATATTCCCATTCAT  
AGGTCCGAA---ATCCATATCTAT--GAATTGAAAGGTCCGAATGATCCACTCTGCAATCA  
GCTGTTAGAATCAATAGGTCTTCAAATCGTTCATTTGAAAAAATGGAAACCCTTC-----T  
TATTGGAT-----GATCATGATACTTCC--CAAAAATCGAAATTTTTGATTAATGGAGGAA  
CAATATCACCATTTTTGTTCAATAAGATACCA---AAGTGG---ATGATTGACTCATTCCATA  
CTAGA-----AATAATCGCAGGAAATCTTTTGATAACACGGATTCCTTTTTCTCAATGATAT  
CCCAGGATCAAGACAATTGGCTGAATCCCGTGAAACCATTTTATAGAAGTTCATTGATA  
TCTTCTTTTTATAAAGCAAATCGACTTCGATTCTTGAATAATCTACATCACTTCTGGTTCT  
AT-----TGTAACAAAAGATTCCCTTTT-----TAT--GTGGAAAAGGCCCGTATCAAGAATT  
ATGAT-----TTTACGTATGGA---CAATTCCTCAATATCTTGTTCATTTCGCAACAAA---ATATT  
TTCTTTGTGCGGCGGTAAA-----AAAAACATGCTTTTTTGGAG---AGAGATACTATTTT  
ACCAATCGAGTCACAGGTATCTAACATATTCATACCTAATGATTTTCCACAAAGTGGTAA  
CGAAAGG---TATAACTTGTACAAATCT-----TTCCATTTTCCAATTTCGATCCGATCCATT  
CGTTCAT-----AGAGCGATTTATTCGATCGCAGACATTTCTGGAACACCTCTAACAGAGG  
GACAAATAGTCAATTTTGAAGAAGTATTGTCAACCTCTTTTCGGATATGAATCTATCTG  
ATTCAGAAGGGAAGAACTTGCATCAGTATCTCAAT-----TTCAATTCAAACATGGGTTTG  
ATTCACACTCCATGTTCTGAGAAATATTTACCATCCGAAAAG-----AGGAAAAAG-----  
-----CGGAGTCTTTGTCTAAAG-----AAATGTGTTGAAAAAGGGCAGATGTATAGA  
ACTTTTCAACGAGATAGTGCTTTTTTCGACTCTCTCAAATGGAATCTATTCCAACATAT  
ATGCCATGGTTCCTTACGTTCGACAGGGTACAAATTTCTAAATTTGCTATTTTTAGATACC  
TTTTCGGAC---CTATTACCGATACTAAGTAGCAGT-----CAAAAATTTGTATCCATTTTTCA

TGATATTATGCATGGATCAGATATATCATGGCGAATTCTTCAGAAAAAATTG-----  
-TGTCTTCCACAATGGAAT--CTGATAAGTGAGATTTTCGAGTAAGTGTTTACATAAT-----C  
TTCTTCTGTCCGAAGAAATGATTCATCGAAATAATGAGCCA-----CCATTGATATCGACA  
CATCTGAGATCGCCAAATGTTCCGGGAGTTC--CTCTATTCAATCCTTTTCTTCTTCTTGT  
TGCTGGATAT--CTCGTTCGTACACATCTTCTCTTTGTTTCCCGA-----GCCTATAGTGAGT  
TACAGACAGAGTTCGAAAAGGTCAAATCTTTGATGATTCCATCATAATGATTGAGTTG  
CGAAAACCTTCTGGATAGGTATCCTACATCTGAACTGAATTCTTTCTGGTTAAAGAATCT  
CTTCTAGTTTCTCTGGAACAATTAGGAGATTTTCTAGAAGAAATGCGGGGTTCTGCCT  
CTGGCGGCAACATGCTATGGGGTGGTGGTCCC-----GCTTATGGG--GTAAATCA  
ATACGTTCTAAGAAGAAATTTTTGAATATCAAT-----CTCATCGATCTCATA--AGTATCA  
TACCAAATCCCATCAATCGAATCACTTTTTTCGAGAAATACGAGACATCTAAGTCATACA  
AGTAAAGAGATTTATTCAATTGATAAGAAAAAGAAAAACGTGAACGGTGATTGGATTG  
ATGATAAAATAGAATCCTTGGTTCGCGAACAGTGATTTCGATTGATGATAAAGAAAGAGAA  
TTCTTGGTTCAGTTCTCC-----ACCTTAACGACA-----GAAAAAAGGATTGATCAAATTCT  
ATTGAGTCTGACT--CATAGTGATCATTATCA-----AAGAATGACTCTGGTTATCA  
AGTGATTGAAGAGCCGGGAGCAATTTATTTACGATACTTAGTTGACATTCAT-----AAAA  
AGTATCTAATGAATTATGAGTTCAATACACCCTGTTTAGCAGAAAGACGGATTTCTTG  
CTTATTATCAGACAACCACTTAT-----TCACAAACCTCGTGTGGGGTGAATAGTTTTTCAAT  
TCCCATCTCATGGA-----AAACCCTTTTCGCTCCGCTTAGCCCTATCCCCCTCT--AGGG  
GTATTTTAGTGATAGGTTCTATAGGGACTGGACGATCCTATTTGGTCAAATACCTAGCGA  
CAAACCTCCTATCTTCTTTTATTACAGTATTTCTGAACAAGTTCCTGGATAACAAGCCTA  
AGGGTTTTCTTATTGAT-----GATAGTGACGATATTGATGATAGTGACGATATTGAT  
GTGAGTGACGATATCGACCGT-----GACTT  
TGATACGGAGCTGGAGTTTCTAACTAGGATGAATGCGCTA-----ACTATGGATATGATG  
CCG-----GAAATAGACCGATTTTATATCACCTTCAATTCGAATTAGCAAAGCAATGT  
CTCCTTGCATAATATGGATTCCAAACATTCATGATCTGGATGTGAATGAGTCGAATTA  
TATCCCTCGGTCTATTAGTGAACCTATCTCTCC-----AGGGATTGTGAAAGATGTTCC---A  
CTAGAAATATCTTGTATTGCTTCGACTCATATTTCCAAAAAAGTGGATCCCGCTCTAA  
TAGCTCCGAATAAATTAATACATGCATTAAGATACGAAGGCTTCTTATTCCACAACAAC  
GAAAGCACTTTTTTACTCTTTCATATACTAGGGGATTTCACTTGAAAAAGAAAATGTT  
CATACT-----AATGGATTCGGGTCCATAACCATGGGTCCAATGTACGAGATCTTGTAGCA  
CTTACCAATGAGGCCCTATCAATTAGTATTACACAGAAGAAATCAATTATAGACACTAAT  
ATAATTAGATCTGCTCTTCATAGACAACTTGGGATTTGCGA-----TCCCAGGTAAGAT  
CGGTTTCCAGGATCATGGGATCCTTTTCTATCAGATAGGACGGGCTGTTGCACAAAATGTA  
TTTCTAAGTAATTGCCCATAGATCCTATATCTATCTATATGAAGAAGAAA-----TCTTGTA  
ACGAAGGGGATTCTTATTGTACAAATGGTACTTCGAACTTGGAACGAGCATGAAGAA  
ATTAACGATACTTCTTATCTTTTGTAGTTGTTCTGCCGGATCGGTTGCTCAAGACCTTTG  
GTCTCTACCC-----GGACCCGATGAAAAA--AATGGGATCACTTATTATGGACTTGTTGA  
GAATGATTCT--GATCTAGTTCATGGCCTATTAGAAGTAGAAAGCGCTCTGGTGGGA-----  
TCCTCACGGACAGAAAAAGATTGCAGTCAGTTTGATAATGAT-----CGAGTGACATTGCT  
TCTTCGGCCCGAACCAAGAAGT--CCCTTAGATATGATGCAAAATGGATCTTGTCTATC  
CTTGATCAGAGATTTCTCTATGAAAAA-----TACGAATCGGAGTTTGAAGAA--GGGGAA  
GGAGAAGAAGTCCTCGACCCGCAA-----CAGATAGAGGAGGAT-----TTATTCA  
ATCAC-----ATAGTTTGGGCTCCT-----AGAATATGGCGCCCT-----TGGGGCTTTCTATTT



GATTGTATCGAAAGGCCCAATGAATTGGGATTTCCC---TATTGGGCCAGGTCATTTCCGGG  
GCAAG-----CGGATCATTTATAATGAAGAGGATGAGCTTCAAGAGAATGATTCGGAGT  
TCTTGCAGAGTGGAGCCATGCAGTACCAGATACGAGATAGATCCTCCAAAGAACAAGG  
CTTTTTTCGAATAAGCCAATTCATTTGGGACCCTGCAGATCCACTCTTTTTCTATTCAA  
A---GATCAGCCCCTTGTCTCTGTGTTTTACATCGAGAATTCTTTGCAGATGAAGAGAT  
GTCAAAGGGGCTTCTTACTTCCCAAACGGATCCTCCTACATCTATATATAAATGCTGGTT  
TATC-----AAGAATACGCAAGAAAAGCACTTCGAATTGTTGATTCATCGCCAGAGATGG  
CTTAGA-----ACCAATAGTTCATTATCT-----AATGGATTTTTCCGTTCGAAT-----ACTCT  
ATCCGAGAGTTATCAGTATTTATCAAATCTGTTCTATCTAAC---GGAACGCTATTGGATC  
AAATGACAAAGGCATTGTTGAGAAAAAGATGGCTTTTCCCGGATGAAATGAAAATTGG  
ATTC-----ATG-----ATGCCTAGATCCCGG---ATAACTGGAAATTTTATTGA  
TAAGACCTTTTTCAATTGTAGCCAATATCTTATTACGAATAATTCCGACAACCTTCGGGAGA  
AAAAGAGGCATTTACTTATTACAGAGATGGTGTG---ATGTCTGCTCAATCCGAAGGAAA  
TTATGCAGAAGCTTTACAGAATTATTATGAAGCTATGCGGCTAGAAATTGATCCCTATGA  
TCGAAGTTATATACTCTATAATATAGGCCTTATTCACACAAGTAATGGAGAACATACAAA  
AGCTTTGGAATATTATTTTCGGGCACTAGAACGAAACCCCTTCTTACCACAAGCTTTAA  
ATAATATGGCCGTGATCTGTCATTAC---CGAGGAGAACAGGCCATTTCGGCAGGGAGATT  
CTGAAATTGCGGAGGCTTGGTTCGATCAAGCCGCAGAGTATTGGAAACAAGCTATAGC  
GCTTACTCCCGGAAATTATATTGAAGCGCAGAATTGGTTGAAGATCACAAGGCGTTTTG  
AA-----ATGAGTTGGCGATCAGAACGTATATGGATAGAACTTATAGCGGGGTCTCGCAA  
ACAAGTAATTTCTGCTGGGCCTTTATACTTTTTTTAGGTTTATTGGGATTTTTATTGGTTG  
GAATTTCCAGTTATCTTGGCAGAAATTGGATATCTTTATTTCCGTCTCAGCAAATAATTT  
TTTTCCACAAGGGATCGTGATGTCTTTCTATGGGATCGCCGGTCTATTTATTAGTTCCTAT  
TTGTGGTGACAATTTTGTGGAATGTAGGTAGTGGTTATGATCGATTTCGATAGAAAAGA  
AGGAATAGTGTGTATTTTTCGCTGGGGATTCCCTGGAAAAAATCGTCGCATCTTCCTCC  
GATTCCTTATGAAGGATATTCAGTCTATTAGAATAGAAGTGAAAGAGGGTATTTTTGCTC  
GGCGTGCCTTTATATGGAACCAGAGGCCGAGGGTCCATTCTTTGACTCGTACTGAT  
GAGAAT---TTGACTCCACGAGAGATTGAGCAAAAGGTAGCGGAATTGGCCTATTTTTTG  
CGTGTACCAATTGAAGTATTT

>Colocasia

ATGGAAAAGTGGTGGTTCAATTCGATGTTCTTTCTAAGTAAATCGATGGATAGTCTTGG  
TCCTATTAGATATAGCAGTGGAAAGCGAAGACCCTGTTATAAATGATATGGATAAAAACG  
TTTCC---TTCAGTAGTGTGAGCATTTTTTTGATATCATAGACATTTGGAGTTTCATCTCT  
GATGAAACTTTTTAGTTAGAGATAGTAATGGGGACAGTTATTCTATATATTTTGATATTG  
AAAATCAGATTTTTGAGATTGACAATGAT-----AGTACTTTTCTGAATGAACTAGAAAGT  
TCTTTTTCTAGTTATCTGAAT---AGTTATATGAGTAATGGATCTAAAAGTAGTAGTCGCTA  
CTATTATCATTACATGTATGATACTCAATCCAGTTGGAATAATCACATTAATAGTTGCATT  
GATAGTTATCTGCGTTCTGAAATC-----AGTATTGATAGTTACATTTAGGCGGGACCCAT  
AATTACAGTGACAGTTATGTTTATACTTTCATTACAAATGAAAGTAGAAATTATATGAGA  
ACTAGTGTTAATAGCACTGATTTCAATATAAGAGGAAGATCT--GATTTAGATATAAATAA  
AAAATACAGACATTTATGGGTTTCAAGTGCAGAAAATTGTTATGGATTAAATTACAAAAAAT  
TTTTTAAGTCAAACTGAATATTTGTGAACAGTGTGGATATCATTGAAAATGAGTAGT  
TCAGAGAGAATCGAACTTTTGATTGACCCAGGTACTTGGGATCCTCTGGATGAGAGTAT  
GGTCTCGACAGACCCCATTTGAATTTTATTTCAGAGGAGGAACCTTATAGAGATCGTATTG

ATTTTTATCAAAGAAAGACAGGTTTAACTGAAGCTGTTCAAACAGGCATAGGTCAACT  
AAATGGTATTCCCGTAGCAATTGGGGTCATGGATTTTCAGTTCATGGGAGGAAGTATGG  
GATCCGTAGTCCGGTGAGAAAATCACCCGTTTGATCGAATATGCTACTAATCAATCTCTAC  
CTGTTATTATTGTATGTGCTTCTGGAGGAGCACGCATGCAAGAAGGAAGTTTGAGCTTG  
ATGCAAATGGCTAAAATATCTTCGGCCTTATATAATTATCAATTCTATAAAAAGTTATTCT  
ATGTATCAATTCCTTCATCTCCTACAACCGGTGGAGTTACAGCCAGTTTTGGTATGTTGG  
GAGATATCATTATTGCTGAACCTAATTCCTACATTGCATTTGCGGGTAAAAGAGTAATTG  
AACAAACATTGAATAAGACAGTACCCGACGGTTCACAAGCGGCTGAGTATTCATTCCAT  
AAGGGCTTATTCGATCCAATCGTACCACGTCATCTTTTAAAAGGTGTTCTGGGTGAGTT  
ATTCAGCTCCATGGTTTCCTTCCCTTGACT-----ATGGTAACCATTTCGAGCCGAC  
GAAATTAGTAATATTATCCGTGAACGTATTGAACAATATAATAGAGAAGTAAAGTTGTG  
AATACCGGCACCGTACTTCAAGTAGGTGACGGAATTGCTCGTATTCATGGTCTTGATGA  
AGTAATGGCAGGTGAATTAGTAGAATTTGAAGAGGGTACAATAGGTATTGCTTTGAATT  
TAGAATCAAATAATGTTGGCGTTGTATTAATGGGCGATGGTTTGATGATACAAGAGGGA  
AGTTCTGTAAAAGCAACAGGAAAAATTGCTCAGATACCGGTAAGTGAGGGTTATTTGG  
GTCGTGTTATAAATGCTCTAGCAAAACCTATTGATGGAAGAGGGGAAATTCAGCTTCT  
GAATCTCGCTTAATTGAATCTCCCGCTCCAGGTATTATTTCTAGACGTTCCGTATATGAG  
CCTCTTCAAACAGGGCTTATTGCTATTGATGCGATGATACCTATAGGACGTGGTCAGAG  
AGAATTAATTATTGGAGATAGACAGACTGGTAAAACAGCAGTAGCTACAGATACGATTC  
TAAATCAAAAAGGTCAAATGTAATATGTGTTTATGTAGCTATTGGTCAAAAAGCATCTT  
CCGTAGCTCAAGTGGTAACTACTTTTCAGGAACGGGGGGCTATGGAATACACTATTGTG  
GTAGCGGAAACGGCGGATTCACCTGCTACATTACAATACCTCGCTCCTTATACAGGAGC  
GGCTTTGGCTGAATATTTTATGTACCGCGGACAACATACTTCAATAATTTATGATGATCC  
CTCCAAACAGGCACAAGCTTATCGCCAAATGTCTCTTCTATTAAGAAGACCCCAAGTCT  
GTGAAGCTTATCCAGGAGATGTTTTTTATTTGCATTCACGCCTTTTGGAAAGAGCCGCT  
AAATTAATCTGCTTTGGGTGAAGGAAGTATGACTGCTTTACCAATAGTGGAGACTCA  
ATCGGGAGACGTTTCAGCTTATATTCTACTAATGTTATTTCCATTACAGATGGACAAATA  
TTCTTATCTGCCGATCTGTTCAATGCTGGAATACGACCTGCTATTAATGTGGGTATTTCC  
GTCTCTAGAGTAGGATCTGCGGCTCAAATTAAGCCATGAAACAAGTAGCCGGCAAAT  
TAAAATTGGAAGTAGCTCAATTCGAGAATTAGAAGCCTTGCACAATTCGCTTCTGAT  
CTTGATAAAGCTACTCAGAATCAATTGGCAAGAGGCCAACGATTACGTGAGTTGCTCA  
ACAATCCCAATCGGCCCTCTCGCGGTGGAAGAGCAGATAGTTACTATTTATACCGGA  
GCAAATGGATATCTTGACCAGTTAGAAATTGGACAGGTAAAGAAATTTATCGTTTCAGTT  
ACGTGCCTACTTAAAAAAGAATAAACCTCAGTTCCAAGAAATTATATCTTTACCAAGA  
CATTTACCGAGGAAGCAGAAGCCCTTTTGAAGGAGGCTATTCAGGAACAGATCGAATT  
GTTTCTACTTCAGGAGCAAACCATGAAAATAAATCCTACTACTTCC---CCTGCGGTTTCC  
ACACTTGAAGAAAAAACCTAGGGCGTATTGCTCAAATTATTGGCCAGTACTGGATG  
TCGCTTTTCCCCCGGGCAAATGCCAAATATTTATAATGCTTTGGTAGTCAAGGGGCGA  
GATACCGCCGGTCAGCAAATTAAGTTACTTGTGAGGTACAACAATTATTAGGAAATAA  
TCGAGTTAGAGCTGTAGCTATGAGTGCTACAGACGGTCTAACGAGAGGAATGGAAGTG  
ATTGACACGGGAGCTCCTCTAAGTGTTCCAGTTGGTGGAGCAACTCTCGGACGAATTT  
TCAATGTTCTTGGCGAGCCTGTTGATAATTTAGGTCCTGTAGATACTCGCACAAACATCTC  
CTATTCATAGATCCGCACCCGCCTTTATACAGTTAGATACGAAATTATCAATCTTTGAAA  
CAGGGATTAAAGTGGTGGATCTTTTAGCCCCTTATCGCCGTGGAGGAAAAATCGGACTA

TTTGGGGGAGCTGGAGTGGGTAAAACAGTACTCATTATGGAATTGATCAACAACATTG  
CTAAAGCTCATGGGGGTGTATCCGTATTTGGTGGAGTAGGCGAACGTACTCGTGAAGG  
AATGATCTTTACATGGAAATGAAAGAATCCGGAGTGATTAATGAACAAAATATTGCAG  
AATCAAAAGTAGCTCTCGTCTATGGTCAGATGAATGAACCACCGGGAGCTCGTATGAG  
AGTTGGTTTAACCGCCCTAACCATGGCGGAATATTTCCGGGATGTTAATGAACAAGACG  
TACTTCTATTCAATTGACAATATCTTTGATTTCGTCCAAGCAGGATCAGAAGTATCTGCCT  
TATTAGGGAGAATGCCTTCTGCAGTGGGTATCAACCTACCCTTAGTACAGAAATGGGT  
TCTTTGCAAGAAAGAATTACGTCTACAAAAGAAGGATCTATAACTTCTATTCAAGCAGT  
TTATGTACCTGCAGACGATTTGACTGACCCTGCTCCTGCCACGACATTTGCACATTTAG  
ATGCTACTACCGTACTATCAAGAGGATTAGCTGCCAAAGGCATTTATCCAGCAGTAGAT  
CCTTTAGATTCAACGTCAACTATGCTCCAACCTCGGATCGTTGGCGAGGAACATTATGA  
AACTGCGCAAAAAGTAAAGCAAACCTTACAACGTTACAAGAAGTGCAGGACATTATA  
GCTATCCTTGGATTAGACGAATTATCCGAAGAGGATCGTTTAAACCGTAGCAAGAGCACG  
AAAATGAGCGTTTCTTATCACAAACCCTTCTTTGTAGCAGAAGTATTTACTGGTTCTCC  
AGGGAAATATGTTGGCCTCGCAGAAACAATTAGGGGGTTTCAACTGATCCTCTCCGGA  
GAATTAGACAGTCTTCCCAGCAGGCCTTTTATTTAGTGGGTAACATCGATGAAGCTAC  
CGCGAAAGCTATGAACTTAGAAGTGGAGAGCAAATTGAAGAAAATGACCTTAAATCTT  
TGTGTACTGACCCCTAATCGAATTATTTGGGATTCAGAAGTGAAAGAAATCATTTTATCT  
ACTAATAGTGGCCAAATTGGTGTATTACCAAACCACGCCCTATTGCCACAGCTGTAGA  
TATAGGTCTTTTGAGAATACGCCTAAATGGCCGATGGCTAACGGTGGCTTTGATGGGGG  
GTTTCGCTAGAATAGGTAATAATGAGATCACCATTTTAGGAAATGATGCAGAGATAAGT  
ACTGACATTGATCTGCAAGAAGCTCAGCAAGCTCTTGAAAAAGCGGAAGCTAACTTG  
AGTAAAGCAGAAGGTAAAGACAAGCAATTGAGGCGAATCTAGCTCTCAGACGAGCT  
AGGACACGAGTAGAGGCTATCAATGCTAGTTCATGAAAAGTGTAACCGATTCTTTTGT  
TTCCTTG---CACTGGCCATCCGCCGGGGGTTTTGGGTTGAATACCGATATTTTAGCAACA  
AATCCAATAAATCTAAGTGTAGTACTTGGTGTATTGATTTATTTTGGAAAGGGAGTGTTA  
AATGATTTATTAGATAATCGAAAACAGAGGATCTTGAGTACTATTCGAAATTCAGAAGA  
ATTACGTAAAGGAGCTATTGAGCAACTCGAAAAAGCCCGGGCACGTTTACGTAAAGTG  
GAAACGGAAGCAAATGAATATCGAGTGAATGGATACTCCGAGATAGAACGAGAAAAA  
GAAAATTTGATTAATGCCACTTGTGATAATTTGGAACGATTAGAAAATTACAAAATGA  
AACCTTCTTTTTGAACAACAAAGAGCGATTAATCAAGTCCGACAGCGAGTTTTCCAA  
CAAGCCTTACAAGGAGCTCTAGGTACTCTGAATAGTTGTTTG---AGTGAGTTGCATTT  
CGTACCATCAGTGCTAATATTGGCATTCTTGGGGCTATGGAGGAA-----ATGAATCCAC  
TGATTTCTGCCGCTTCCGTTATTGCTGCTGGATTGGCCGTAGGGCTTGCTTCTATTGGAC  
CTGGGGTTGGTCAAGGTAAGTACTGCTGCAGGTCAAGCTGTAGAAGGTATTGCGAGACAGCC  
AGAAGCAGAGGGTAAAATACGAGGTAATTTATTGCTAAGTTTGGCTTTTATGGAAGCTT  
TAACAATTTATGGACTGGTCGTGGCATTAGCACTTTTATTTGCGAATCCATTTGTTATGA  
ATGTTATACCATGTTCCATTAACACATTTAAAGGGCTATATGATATATCGGGTGTAGAAGT  
GGGCAACATTTATATTGGCAAATAGGAGGTTTACAAGTCCATGCCAAGTACTTATCA  
CTTCTTGGGTGCGTAATTGCTATCTTATTAGGTTTCAAGTACCATAGCTGTTCCGGAATCCAC  
AAACCATTCCGGCCGGCAGGTCAGAATTTCTTGAATATATCCTTGAATTCATTCGGGAC  
TTGAGTAAACTCAGATTGGAGAAGAATATGGTCCTTGGGTTCTTTTATTGGAAGTAT  
GTTCTTATTTATTTTGTTCCTAACTGGTCAGGTGCTCTTTTACCTCGGAAAATCATA  
GTTACCTCATGGGGAGTTAGCTGCGCCCACGAATGATATAAACACTACTGTTGCTTTAG



TAGAAAAGAGTAGATCTATACAACAACACTTCCTATATCCGCTTCTCTTTCAAGAGTATA  
TTTACGCACTTGCTCATAATCATGGTTTATCAGGTTATGACAAT--TTAGCTCATTACTT  
GTGAAACGTTTAATTACTCGAATGTACCAACAGAATTATTTGATCAATTCTGTAAATGAT  
TCTAACCAAAATAGATTTCGTTGGGAAGAATTTTTATTCTCAAATGATATTAGAGGGTTTT  
GCTGTCATTGTGGAAATTCCTCTCTCATTGCGATTAGTATCCTCCCTCATAACCAAATCT  
CAGAATTTACGATCTATTCATTCAATATTTCCATTTTTTGAGGACAAATTATCACATTTAA  
ATTGTGTATCAGATATACTAATACCCATCCCGTACATCTAGAAATCTTGGTTCAAATTCT  
ACAATGCTGGATACAAGATGTTCCCTTCTTTACATTTATTACGATTCTTTTTTCACGAATAT  
TATAATTGGAATAATCTCATTACTAAATCTAACTATTATTTTTCGAAACCAAGACTTTTTT  
TGTTCCATATAATTCTTATGTAGTTGAATGCGAATCCATATTAGTTTTTCTCCGTAAACA  
ATCCTCTTATTTACAATCAACATCTTCTGGAACCTTCTTGAGCGAACACATTTCTATGA  
AAAAATAGAACAAGTA---GTACTTTGTTGTAATCAGAAAACCCTATGGTTGTTCAAGGA  
TCCTTTCATACATTATGTTAGATATCAAGGAAAATCAATTCTGGCTTCAAAGGGACTCA  
TCTTCTGATGAAGAAATGGAATCTTACTTTGTCAATTTTTGGCAATGTCATTTTCACTT  
TTGGTCTCAACCCAGTAGGATCCACATAAGCCAATTCTCCAATTTTTCTTTCTATTTTCT  
GGTTTATCTTTCAAGTGTACCAATAAATCCTTCAGCGGTAAAGAGTCAAATGCTAGAGA  
GTTCTTTTTTAATAGATACTGTTACT-----AAAAAATTCGAAACTATAGTTCCAATTATTCC  
AATGATTGGATCATTGTCAAAGCTAAATTTTGTAAACGTATCGGGGAATCCTATTAGTAA  
GCCAGTTTGGACCGATTTGTCAGATTCTGATATTATTGATCGATTTGGTCGGATATGTAG  
AAATCTTTCTCATTATTACAGTGGGTCTTCAAAAAACAAAGTTTGTATCGAATAAAGT  
ATATACTTCGACTTTTCATGCGCTAGAACTTTGGCCCGTAAACATAAAAGTACGGTACGC  
GCTTTTTTGCAAAGATTAGGTTTCAGAATTTTTAGAAAGATTCTTTACGGAAGAAGAAAA  
AGTGCTTTCTTTAATCTTACCAAGACGCATTTGGTATTTGGATATTATTCGTATAAATGAT  
TTGGTGAACCATTTAATGATAATTGATATAACA---GAAGTACAA---ACTATCAATTTCTTT  
TCTGGATCGGAA---TTCTTAAAAGAGGTTTATGAACTTATATGGCTCTTTGTCCCTATTTT  
CATCCTGATATTGGGAATCATAATAGGTGTACTAGTAATTGTGTGGTTAGAAAGAGAAAT  
ATCCGCAGGGATACAACAACGTATTGGACCTGAATATGCCGGTCCGTTAGGAATTCTTC  
AAGCTTTAGCGGATGGTACCAAGCTACTTTTTAAAGAGGATCTCCTACCCTCTAGAGGG  
GATAGTCGTTTGTTCAGTGCCGGGCCAGCAATCGCGGTCATCTCTATTTTACTAAGTTAT  
TTAGTAATTCCTTTTGGGTATCGCCTTGTCTAGCCGATCTCAGTATAGGTGTTTTCTTAT  
GGATCGCCATTTCAAGTATTGCTCCTATTGGACTTCTTATGTCAGGATATGGGTCTGAATA  
ATAAATATTCTTTTTCAGGTGGTTTACGAGCTGCTGCTCAATCTATTAGTTATGAAATACC  
ATTAACTCTATGTGTGTAGCAATATCTCTACTATCTAATAGTTCAAGTACAGTTGATATA  
GTTGAGGCACAGTCAAATATGGTTTTTGGGGGTGGAATCTGTGGCGTCAGCCTATAG  
GGTTTATAGTTTTTTAATTTCTTCTCTAGCAGAATGTGAGAGATTGCCTTTTGATTTACC  
AGAAGCAGAGGAGGAATTAGTAGCAGGTTATCAAACCGAATATTCAGGTATCAAATAC  
GGTTTGTTTTACGTCGCCTCTTATCTAAATTTATTAGTTTTCTTCATTATTTGTAACAGTTCT  
TTACTTAGGGGGGTGGAATTTCTCTCTTCCATACATATTTCTTCCCTGAACTTTTCGGAAT  
AAATAAAATAGGAGGGATCTTTGGAATGACAATTGGTATCTTCATTACATTAGCTAAAG  
CCTATTTGTTCCCTGTTTATTCTATCGCAACAAGATGGACTTTGCCTAGGATGAGAATGG  
ACCAACTATTAATCTTGGATGGAAATTTCTTTTACCTATTTCTCTAGGTAATCTATTATT  
GACAACTTCTTTCCAACCTGTTTCACTAATGATCTGGCATGTACAGAATGAAGTTTTCAT  
TCTCGATTCTACGAGAATTTTTATGAAAGCGTTTCATTTGCTTCTCTTCAATGGAAGTTT  
CATTTCCAGAAATGATTCTAATTTTTGGCCTAATTCTTCTTCTGATGATCGATTCAACC

TCTGATCAAAAAGATAGACCTTGGTTCTATTTTCATCTCTTCAACAAGTTTAGTAATGAGC  
ATAACAGCCCTATTGTTCCGATGGAGAGAAGAACCTATGATTAGCTTTTCGGGAAATTT  
CCAAACGAACAATTTCAACGAAATCTTTCAATTTCTTATTTTACTATGTTCAACTTTATGT  
ATTCCTCTATCCGTAGAGTACATTGAATGTACAGAAATGGCTATAACAGAGTTTCTGTTA  
TTCGTATTAACAGCTACTCTAGGAGGAATGTTTTTATGTGGTGCTAACGATTCAATAACT  
ATCTTTGTAGCTCCAGAATGTTTCAGTTTATGTTCTACCTATTATCAGGATATACCAAGA  
GAGATGTACGGTCTAATGAGGCTACTACGAAATATTTACTCATGGGCGGGGCGAGCTCT  
TCTATTCTGGTTCATGGTTTCTCTTGGCTATATGGTTTATCCGGGGGGGAGATCGAGCTT  
CAAGAAATAGTGAATGGTCTTATCAATACACAAATGTATAACTCCCCAGGAATTTCAATT  
GCGCTTATATCCATCACTGTAGGAATTGGGTTCAAGCTTTCCCCAGCCCCTTTTCATCAA  
TGGACTCCTGACGTATACGAAGGATCTCCACTCCAGTCGTTGCTTTTCTTTCTGTACT  
TCGAAAGTAGCTGCTTCAGCTTCAGCCACGCGAATTTTCGATATTCTTTTTATTTCTCA  
TCAAATGAATGGCATCTTCTTCTGGAAATCCTAGCTATTCTTAGCATGATATTGGGGAAT  
CTCATTGCTATTACTCAAACAAGCATGAAACGTATGCTTGCATATTCGTCCATCGGTCAA  
ATCGGATATGTAATTATTGGAATAATTGTTGGAGACTCAAATGATGGATATGCAAGCATG  
ATAACTTATATGCTGTTCTATATCTCCATGAATCTAGGAACTTTTGCTCGCATTGTATTATT  
TGGTCTACGTACCGAACTGATAACATTCGAGATTATGCAGGATTATACACGAAAGATC  
CTTTTTGGCTCTCTTTCAGCCCTATGTCTCTTATCCCTAGGAGGTCTTCCCTCCACTAG  
CAGGTTTTTTTCGGAAAACCTCTATCTATTCTGGTGTGGATGGCAGGCAGGCCTTTATTTCT  
TGGTTTCAATAGGACTCCTTACGAGCGTTGTTTCTATCTACTATTATCTAAAATAATCA  
AGTTATTAATGACTGGACGAAACCAAGAAATAACCCCTCACGTGCGAAATTATAGAAA  
ATCCCCTTTAAGATCAAACAATTCCATCGAATTGAGTATGACTGTATGTGTGATAGCATC  
TACTATAACCAGGAATATCAATGAACCCAATTCTTGCAATTGCTCAGGATACCCCTCTTTAT  
GTTTCTGCTTACGAATATGATATTTTCTGGGCATTTCTGATAATATCAAGTGTTATTCTT  
ATCTTGGCATTATCGTTTCTGGAGTTTTAGCCCCGATTAGTGAAGGACCAGAGAAGCT  
CTCTAGTTATGAATCGGGTATAGAACCCATGGGGGATGCTTGGTTACAATTCCGAATTCG  
CTATTATATGTTTGTCTAGTTTTTGTGTTTTTGTGTTGAAACGGTCTTTCTTTATCCG  
TGGGCAATGAGTTTTGATGTATTGGGTGTATCCGTATTTATAGAAGCTTTCATTTTTGTGC  
TTATTCCAATTGTTGGTTTATGTTTATGCATGGCGAAAAGGAGCATTGGAATGGTCTACG  
AGTTATTTTCTTGGTTAACAATAATTGTTGTTTTTCTTATATTTCGCGGGCTCTTCCATTT  
TTTTTCTCCCGCATAGGGGAAATAAGGTAGTGCCTGGTATAACAATAGGTATATGTTTAT  
TGAACTTCTTATAACGACCTATGCATTCTGTTATCATTTTCAATTGGACGATCCGTTAAT  
CCAATTAGAAGAGGATTTTAAATGGATAAATATTTTTGATTTTCACTGGAGACTGGGGAT  
CGATGGACTTTTCGATAGGACCTATTTTATTGACAGGATTTATCACTACTTTAGCTACCTTA  
GCGGCTTGGCCAGTTACTCGAGATTTCGCGATTGTTTCATTTTCTGATGTTAGCAATGTAC  
AGTGGTCAAATAGGATCATTCTTCTCGAGACCTTTTACTTTTTTTTATCATGTGGGAG  
TTAGAATTAATCCTGTTTATTTACTTTTATCCATGTGGGGGGGAAAAACGTCTGTAC  
TCGGCTACAAAGTTTATTTTATACACTGCGGGGGGTTCCATTTTTCTTTTAAATAGGAGTT  
CTAGGTATGGGTTTATACGGTTCCAATGAACCAACATTAATTTTGAAACATTAGCTAAT  
CAATCGTATCCCGTAGCATTGGAAATAATATTATATTTTGGCTTCCTTATTGCTTATGCTGT  
CAAATCACCGATTATACCCCTACATACATGGTTACCAGATACCCATGGGGAAGCACATTA  
CAGTACATGTATGCTTCTAGCCGGAATCTTATTAATAAATGGGAGCATATGGATTGATTCTG  
GATCAATATGGAATTTTTATCCACGCTCATTCCATATTTTACCATGGTTGGTAATAGTG  
GGAACAATACAAATAATTTATGCCGCTTCAACCTCTCTCGGTCAACGCAATTTAAAAAA

GAGAATAGCCTATTCTTCCATTTCTCACATGGGTTTCACAATTATAGGAATTGGTTCGAT  
AACCAACACAGGACTTAATGGAGCTATTTTACAATTACTCTCTCATGGATTTATTGGTGC  
TGCCCTTTTTTTCTTAGGGGGAACAAGTTGTGATAGAATACGTCCTGTTTATCTTGACGA  
AATGGGAGGGATATCTATTCCAATGCCAAAAATCTTTACTATGTTTCAGCAGTTTCTCAAT  
GGCTTCTTGCATTGCCTGGAATGAGTGGTTTTGTTGCGGAATCAGTAGTATTTTTTGG  
AATAATTACCAGTCCAAAATACCTTTTAATACCAAAAATACTAATTACTTTTTGTAATGGC  
AATTGGAATGATATTAACCTCTATTTATTCATTATCTATGTCACGCCAGATGTTCTATGGAT  
ACAAGTTATTCAATCTTCCAAACTCTTTTTTTGTGGATTCTGGACCACGGGAACCTATTTA  
TTTCGATTTGTATCTTTTTCCCCGTAATAGCGATTGGTTTTGTATCCTGATTTGGTTATTTCA  
TTATCAGTTGACAAGGTACAAGCTATTCTATCTAATTATTACGATAGGATGATGTTTGAG  
CATGTACTTTTTTTGAGTGCATATTTGTTTTCTATCGGTATTTATGGATTGATCACAAGTC  
GAAGCATGGTTAGAGCACTTATGTGTCTTGAGCTTATACTAAATTCGGTTAATATTAATC  
TTGTTACATTTTCTGATTTATTTGATAATCGACAATTAAGGAGATATTTTTTCGATCTT  
TGTTATAGCTATTGCAGCGGCTGAAGCAGCTATTGGTCTAGCTATTGTTTCATCGATCTAT  
CGTAACAGAAAATCAACGCGTATTAATCAATCAAATTTGTTGAATAAAATGGAACATAC  
ATATCAATATGCATGGATAATACCTTTTCTTCCACTCCCTGTTACTATCTCAATAGGACTT  
GGACTTCTACTTGTCCAACAGCAACAAAAAATATTCGTCGTATGTGGGCTTTTCCTAG  
TGTTTTACTGCTAAGTATAGCTATGTTTTTTTCGGTCAATTTGTCTATTCAACAAATAAAT  
GGAAGTCTTATTTATCAATATCTATGGTCTTGGACCATCAATAATGATTTTTCTTAGAGT  
TCGGATACTTTATTGATCCGCTTACTTCTATAATGTTAATATTAATCACTACTGTTGGAATT  
ATGGTTCTTATTTATAGTGACAATTATATGTCTCACGATCAAGGATATTTGAGATTTTTTG  
CTTATATGAGTTTTTCCAATGCTTCAATGTTGGGATTAGTTACTAGTTCCAATTTGATACA  
AATTTATATTTTTTGGGAGTTGGTAGGAATGTGTTCGTATTTATTGATAGGTTTTTGGTTT  
ACACGACCAATTGCAGCAAGCGCTTGCCAAAAAGCTTTTGTAAACCAATCGTGTAGGGG  
ATTTTGGTTTGTATTGGGAATCTTAGGTTTTTATTGGATAACAGGAAGTTTTGAATTC  
GGGATTTGTTGCAAACATTTAATAAGAATGAGGTTAATTTTTTATTGCTACTCTGTGTG  
CCTTCCTATTATTCCTCGGTGCAGTTGCTAAATCTGCGCAATCCCTCTTACATATGGTT  
ACCTGATGCCATGGAGGGGCTACTCCCATTTCCGGCTCTTATACATGCTGCTACTATGGT  
AGCGGCGGGAATTTTTCTTGTGGCTCGGCTTCTTCTCTTTTACAAGCATACTTACAT  
AATGAATCTCATTTCTTTGATAGGTGTAATAACACTATTATTAGGAGCTACTTTGGCTCTT  
GCTCAAAGAGATATTAAGAAGTTTAGCCTATTTCGACAATGTCTCAATGGGTTATATG  
ATGTTAGCCCTGGGTTAGGTTCTTATCGAGCTGCTTTATTTCAATTTGATTACTCATGCCT  
ATTCGAAAGCATTATTGTTTTTGGGGTCCGGATCTATTATTCATTCAATGGAACCCCTTG  
TTGGATATTCACCCGATAAAAGTCAGAATATGGTTTTTATGGGCGGTTTAAACAAGATATG  
TTCCAATTACAAGAACTACGTTTTTATTAGGTACACTTTCTCTTTGTGGTATTCCACCTC  
TTGCTTGTTTTTGGTCCAAAGATGAAATCTTAGCGAAAGTTGGTTGTATTACCAATTT  
TTGCAGTAATAGCTTGTTTTACAGCAGGACTAACCGCATTTTATATGTTTCGGGTGTATT  
TACTTACCTTTGAAGGGTATTTACATGTAAATTTTCAAATTTATAGCGGAGCTCAAATA  
ACTCATTTTATTCAATATCTTTATGGGGAAAAGAGGTACCTAAGGCGATCAACAAA---AA  
TTTACTTTTCTCAACGACAATG-----AGTAAAAAATAT-----ACTTCTATGTATCCCCACGA  
ATCGGACAATACTATGTTATTTCTTTGCTTATATTGGTAGTATTTACTCTGTTTGTGGAT  
TCATAGGAATTGCTTTTGAATTTGGATCTATTATCGAAATGGTTGGCTCCATCGAAAAATC  
TTTTACATCCAAATTCGGATTATTCATAGACTGGTATGAATTTTTGACAAATGCATCTTT  
TTCAGTAAGTATAGCATTTTTTCGGAATATTTGTAGCATCCATTTTTTATGGGTCTGCTTAT

TCATCTTTCAAAAATTTGGACTTAATCAATTCATTTACTTTTTTTGGACAAAATAGTAA  
ATATTATATATAATTGGTCGTATAATCGTGGTTATATAGATTTTTTCTACACAAGGGTTGTA  
ATCCGGAGTATAAGAGGATTAGCTAAACTAACTCATTTTTTTGATAGATGCATAATTGAT  
GGAATTACAAACAGTGTGGGGTTATAAGTTTCTTTGCGGGTGAAGTAATTAATATTTA  
GTAGGGGGCGGACGAATCTCGTCTTATCTCTTTTTGTATTTATCTTTTGTATTAATCTTTT  
TATTAATTTGTTTTATGGATTTAACTGGACCAATACATGATATTCTTGTAGTATTTCTGGG  
ATCAGCTCTTATATTAGGGAGTCTAGGAGTAGTCTTATTTACCAATCCAATTTATTCTGCC  
TTTTCTTTGGGATTGGTTCTTGTTTGTATATCCTTATTCTATATTCTCTTGAACCTCATT  
TG TAGCTGCTGCACAGCTCCTTATTTATGTAGGAGCTATAAATGTATTAATTATATTTGCT  
GTGATGTTTATGAAGGGGTCAGAATATTCCAATGATTTCTATCTTTGGACTGTGGGAGAT  
GGGGTACTTCGCTGGTTTGTACAAGTATTCTTTTTTTACTAATTACTACTATCTCAGATA  
CATCATGGTATGGGATTATTTGGACTACAAAATCAAACCACATTATAGAGCAGGACCTTA  
TAAGTAATGTTCAACAAATGGGATTCATTTATCAACAGATTTTTTTCTCCATTTGAAC  
TCATTTCTATAATTTCTTTTAGTTGCCTTGATAGGTGCAATTACTATGGCTCGTCAAATGAC  
TGTACCGGCTACAAGAAAAGATCTTATGATAGTCAATATGGGTCTCACCACCCATCAA  
TGCATGGTGTCTTCGACTGATTGTTACTCTTGATGGTGAAGATGTTATTGACTGTGAAC  
CTATACTAGGTTATTTACACAGAGGAATGGAAAAAATTGCGGAAAACCGAACAATTGT  
ACAATATTTGCCTTATGTAACGCGTTGGGATTATCTGGCTACTATGTTACCGAAGCAAT  
AACAGTAAATGCACCAGAACAATTGGGAAATATTCAAGTACCTCAAAGAGCCAGCTAC  
ATCAGAGTAATTATGCTAGAGCTGAGTCGTATAGCTTCTCATTGTTATGGCTTGGCCCT  
TTTATGGCAGATATTGGTGCACAGACTCCCTTTTTCTATATTTTCAGAGAAAGGGAATTG  
ATATATGATCTATTTGAAGCTGCCACAGGTATGCGAATGATGCATAATTATTTTCGTATCG  
GAGGAGTAGCTGCTGATTTACCTCATGGCTGGATAGATAAATGTTTGGATTTTTGCGATT  
ATTTTTTAACAGGAGTTGACGAATATCAAAACTTATTACACTAAATCCATTTTTTTGG  
AACGAGTTGAAGGAGTAGGCATTATTGGGGGAGAGGAAGCAATAAATTGGGGCTTATC  
GGGCCAATGTTACGAGCTTCCGGAATCCAATGGGACCTTCGTAAAGTTGATCAATATG  
AGTGTTACAATGAATTCGATTGGGAAATCCAATGGCAAAAAGAAGGAGACTCATTAGC  
TCGTTATTTAGTACGAATCGGTGAAATGTCAGAATCCATAAAAATTATTCAACAGGCTCT  
AGAAGGAATTCGGGGGGACCTTATGAAAATTTAGAAGTCCGACGC--GATAGAGCAA  
AAGATTCCGAATGGAATGATTTTGAATATAGATTCATTAGTAAAAACCTTCGCCCAATT  
TTGAATTGTCAAAAACAAGAACTTTACGTCAGAGTAGAAGCCCCAAAAGGGGAATTGG  
GCATTTTTCTTATAGGAGATCAGAGTGTTCCTTGGAGATGGAAAATTCGTCCGCCT  
GGTTTCATCAATTTGCAAATTTGCCTCAGCTAGTTAAAAGAATGAAATTGGCTGATATC  
ATGACGATACTAGGTAGTATAGATATTATTATGGGAGAAGTTGATCGTATGTTTCCTATGG  
TGA CTGGATT CATGAATTATGGTCAACAAACAGTACGAGCTGCAAGGTATATTGGTCAA  
GGTTTTATGATTACCTTATCTCATGCAAATCGTTTACCCGTA ACTATTCAATATCCTTATG  
AAAAATCAATCACATCAGAGCGTTTCCGGGGT CGAATCCATTTGAATTTGATAAATGT  
ATTGCTTGTGAAGTATGTGTTTCGTGTATGCCCTATAGATCTACCCGTTGTGGATTGGAGA  
TTGGAAGCAGATATTA AAAAGAAACAATTGCTTAATTATAGTATTGATTTTGGGGTTTGT  
ATATTTTGTGGTAACTGTGTCGAGTATTGTCCAACAAACTGTTTATCAATGACTGAAGA  
ATATGAACTTTCGGCTTATGATCGCCACGAATTGAATTATAATCAAATTGCATTGGGTCG  
GCTACCAATATCAATAATAGGAGATTACACAATTCAAACAGTTATGAATTCAAAA--GAA  
AAGAATAAACCTCTTCATTCAAGGACAGTTACCAAT--ATGCAGAGTCATTTATCTGCTT  
GGCTAATCAAGCATGAGCTAGTTCATAGATCCTTGGGCTTCGATTACCAAGGAATAGAG



ACTTTACAAATAAAAACCCGAAGATTGGGACTCCATTGCTGTCATTTTCATATGTGTATGGT  
TACAATTACTTACGCTCTCAGTGTGCCTATGATGTCGCACCTGGTGGATTTTTAGCTAGT  
GTATATCATCTTACGAGAATACAGTATGGTGTGGATCAACCGGAGGAAGTATGTATAAA  
AGTATTTGCCTCAAGGAAGAATCCTAGAATACCATCTGTTTTCTGGGTTTGGAGAAGTG  
CTGATTTTCAAGAACGGGAATCTTATGATATGTTAGGAATTTCTTATGATAATCATCCAC  
GCCTTAAACGTATCTTGATGCCTGAAAGTTGGATAGGCTGGCCTTTACGTAAGGACTAT  
ATTACCCCAATTTCTATGAAATACAAGATGCTCAT-----  
-----ATGGTCTTAGCTCCTGAATATTCAGACA  
ATAAAAATAAAAAAGAAGGAAAAGATTACCTTGAGACAGTTATGAATTTGACCGAGTT  
CCCGTTACTTGATCAAACAACCCCAATTCAGTTATTTCAACTACGTGCAATGATCTTTC  
GAATTTGGTCAAGACTCTCCAGTTTATGGCCGCTTCTCTATGGTACCAGTTGTTGTTTTAT  
TGAATTTGCTTCCTTAATAGGCTCACGATTCGACTTTGATCGTTATGGATTGGTACCAAG  
ATCAAGTCCTAGACAAGCGGACCTAATTTAACAGCTGGCACAGTAACAATGAAAATG  
GCTCCTTCTTTAGTGAGATTATATGAACAAATGCCTGAACCAAATATGTCATTGCTATG  
GGGGCCTGTACTATTACAGGAGGGATGTTCAGTACCGATTCTTATAGTACCGTTCGGGG  
AGTCGATAAGTTAATTCCTGTGGATGTCTATTTGCCGGGCTGCCCGCCTAAACCAGAGG  
CAGTTATAGATGCAATAACGAACTTCGTAAGAAGATATCTCGAGAAATATATGAAGAT  
AGAGTTGGCTCTCAA---GAAAATCGATGTTTTACTACCAATCACAAGTTTCATGTTTCGG  
CGCAGTACTCATACTGGAAATTACAATCAAGAATTGCTCTATCAATCACCATCTACTTCG  
GAAATACCTGCA-----TTTTTTAGATCCAAAAGTTCAATATCTTCCCACGAATTAGTGAAT  
ATGCAAAATAGAAATACTTTTTCTTGGGTAAAGGAGCAGATGACTCGATTTATTTCTGTA  
TCGATCGTGATATATGTAATAACTCAGACATCTATTTCAAATGCATATCCTATTTTTGCGC  
AGCAGGGTTATGAAAATCCACGAGAAGCAACTGGACGAATTGTGTGTGCCAATTGCCA  
TTTAGCTAATAAGCCCGTGGATGTTGAGGTTCCGCAATCTGTGCTTCTGATACTGTATT  
TGAAGCAGTTGTTAGAATCCCTTATGATACGCAACTGAAACAAGTTCTTGCTAATGGCA  
AGAAAGGGGGTTTGAATGTAGGGGCTGTTCTTATTTTACCCGAGGGATTTCGAATTAGCC  
CCTCCCGATCGTATTTCCCCGAGATGAAAGAAAAGATAGGCAATCTTTCTTTTCAGAG  
TTATCGTCCCATAAAAAAATATTCTTGTGGTAGGTCTGTTTCTGCTCAGAAATATAG  
GGAAATAGTCTTTCTTATTCTTTCCCCGACCCTGCTACGAGGAAGGACGTTCACTTCT  
TAAAATATCCATATATGTAGGCGGAAACAGGGGAAGGGGTCAGATTTATCCCGATGGG  
AGCAAGAGTAACAACACTGTCTATAATGCCACATCCGCAGGTATAGTAAGCAAAATAGT  
ACGTAAAGAAAAGGGCGGATATGAAATAACCATAACTGATCCATCGGATGGGCATCAA  
GTGGTTGATATTATACCTCCAGGACCGGAACTTCTTGTTCAGAGGGTGAGTCTATCAA  
GCTTGATCAACTATTAACAAGTAATCCCAATGTGGGGGGGTTTGGTCAGGGAGATGCC  
GAGATAGTGCTTCAAGATCCGTTACGTGTTCAAGGTCTTTTGTCTTCTTAGCATCTATT  
ATTCTAGCACAAATCTTTTTGGTTCTTAAAAAGAAACAGTTTGAAAAGGTTCAATTGTA  
CGAAATGAATTTTATGAAAAAGTATATGACTGGTTTCGAAGAGCGTCTCGAGATTCAGG  
CGATTGCAGATGATATAACTAGTAAATACGTTCTCCTCACGTCAACATATTTTATTGTTT  
AGGGGGGATCACACTTACTTGTTTTTTAGTACAAGTAGCTACGGGTTTTGCTATGACTT  
TTACTATCGACCAACTGTTACAGAGGCCTTTTCTCTGTTCAATACATAATGACTGAGG  
CCAATTTGGCTGGTTAATCCGATCAGTTCATCGATGGTCAGCAAGTATGATGGTTCTAA  
TGATGATTTTGCACGTATTTTCGTGTGTATCTCACAGGCGGATTTAAAAAACCTCGCGAA  
TTAATTTGGGTTACGGGTGTAGTTCTCGCTGTATTGACTGCATCTTTTGGGTGTAAGTGGT  
TATTCCTTACCTTGGGACCAAATTGGTTATTGGGCAGTCAAATTTGTGACAGGCGTACC

TGAAGCTATTCCTGTAATAGGATCGCCTTTGGTAGAGTTATTACGCGGAAGTGCTAGTG  
TGGGTCAATCCACTTTGACTCGTTTTTATAGTTTACACACTTTTGTATTGCCTCTTCTTAC  
TGCTGTATTTATGTTAATGCATTTCTCAATGATACGTAAGCAAGGTATTTACAGGTCTTTA  
ATGGGAGTAACAAAGAAACCTGACTTGAATGATCCTGTATTAAGAGCTAAATTGGCTAA  
AGGGATGGGACATAATTATTACGGAGAACCCGCATGGCCCAATGATCTTTTATATATTTT  
TCCAGTAGTTATTTTGGGTACTATAGCATGTAACGTAGGCTTAGCGGTCTAGAACCCCTC  
AATGATTGGTGAACCGGCAGATCCATTTGCAACTCCTTTGGAAATATTACCCGAATGGT  
ACTTCTTTCCCGTATTTCAAATACTTCGCACAGTACCCAATAAGTTGTTGGGTGTTCTTT  
TAATGGTTTCAGTACCTGCGGGATTATTAACAGTACCTTTTTTGGAGAATGTCAATAAAT  
TCCAAAATCCATTTTCGTTCGTCAGTAGCTACAACAGTCTTTTTTGATCGGTACCGCAGTA  
GCTCTTTGGTTAGGTATTGGAGCAACATTACCTATTGATAAATCCCTTACTTTAGGTCTTT  
TTATGATTGAAGTTCTTCTATTTGGAATCGTGTTAGGTCTAATTCCTATTACTTTGGCAGG  
ATTATTCGTAACCTGCGTATTTACAATACAGACGCGGTGATCAGCTGGAGCTTATGCCTAC  
TATAACTAGTTATTTTCGGTTTTCTACTGGCTGCTTCAACTATAACCCAGCGCTTTTGATT  
GGTTTGAACAAGATACGACTTATTATGGATATAGTAAGTCTCGCTTGGGCTGCTTTAATG  
GTAGTCTTTACATTTTCCCTTTCCTTGTAGTATGGGGAAGGAGTGGACTTATGATTATT  
AGTTCGCCGGAACCAGAAGTTAAAATTTTGGTGGATAGGAATCCCGTAAAAACGTCTT  
TTGAGGAATGGGCCAGACCCGGCCATTTCTCAAGAACAATAGCCAAGGGCCCTGATAC  
TACCACTTGGATCTGGAACCTACATGCTGATGCTCACGATTTTGATAGTCATACCAGTGA  
TTTGGAGGAGATCTCTCGAAAAGTATTTAGTGCTCATTTCGGTCAACTCTCCATTATCTT  
TCTTTGGCTGAGTGGCATGTACTTCCATGGCGCTCGTTTTTCTAATTATGAAGCATGGCT  
AAGTGATCCTACTCACATTGCACCCAGTGCCAGGTTGTTTGGCCAATAGTAGGGCAA  
GAAATATTAATGGTGATGTGGGCGGGGTTTCCGAGGAATACAAATAACCTCTGGGTT  
TTTTCAGATTTGGCGAGCATCTGGAATAACTAGTGAATTACAACCTCTATTGTAAGTCAAT  
CGGTGCATTGGTCTTTGCAGCATTAAATGCTTTTTGCGGTTGGTTCCATTATCACAAAGC  
TGCCCCAAAACCTGGCTTGGTTCCAAGATGTAGAATCCATGTTGAATCACCCTTAGCAG  
GGTACTAGGACTTGGGTCTCTTTCTTGGGCGGGACACCAAATCCATGTATCTTTGCCG  
ATTAACCAATTTCTCAACGCTGGAGTGGATCCTAAAGAGATAACCACTTCCCTCATGAATT  
TATCTTGAATCGGGATCTTTTGGCTCAGCTTTATCCCAGTTTTGCCGAGGGAGCAACCC  
CTTTTTTACCTTGAATTGGTCAAATACGCAGACTTTCTGAGTTTTCGTGGAGGATTA  
GATCCAATAACTGGGGTCTATGGTTGAGCGATATTGCACACCATCATTTAGCCATTGCT  
ATTCTTTTCTGATAGCTGGTCATATGTATAGGACCAACTGGGGGATTGGTCATGGCTTG  
AAAGACATTTTAGAGGCTCATAAAGGTCCATTTACCGGTCAGGGACATAAAGGCCTATA  
TGAAATCCTAACAAACATCATGGCATGCTCAATTATCTCTTAACCTGGCTATGTTAGGCTC  
TTAACCATTGTTGTAGCTCACCACATGTAATGCCCCCTTATCCATACTTAGCTATT  
GACTATGGTACACAACCTTTCATTGTTTACACACCATATGTGGATTGGTGGATTTCTCATA  
GTCGGGGCTGCCGCACATGCAGCCATTTTATGGTAAGAGACTACGATCCAACCTACTCG  
TTACAACGATCTATTAGATCGTGTCTTAGGCACCGCGATGCAATTATATCACATCTCAA  
CTGGGCCTGTATATTTCTAGGTTTTTACAGTTTTCGGCTTGTATATTCATAATGATACCATG  
AGCGCTTTAGGGCGTCTCAAGATATGTTTTTACAGATACCGCTATAACAATTACAACCCATC  
TTTTGCCAATGGATACAAAACACCCATGCTTTAGCGCCTGGTACAACAGCTCCTGGTGC  
AACAGCAAGCACCAGCTTAACTTGGGGAGGAGGTGAGTTAGTAGCAGTAGGCGGCAA  
AGTCGCTTTGTTACCTATTCCATTAGGTACCGCAGACTTTTTGGTCCATCACATTCATGC  
ATTTACGATCCATGTAACCTGTATTGATACTACTAAAAGGTGTTCTTTTTGCTCGTAGTCC

CGTTTAATACCTGATAAAGCAAATCTTGGTTTTTCGTTTTCCCTTGTGATGGGCCTGGAAG  
AGGGGGGACATGTCAAGTATCCGCCTGGGATCATGTCTTCTTAGGTCTATTCTGGATGT  
ACAATGCAATTTTCGGTAGTCATATTCCATTTTCAGTTGGAAAATGCAATCGGACGTTTTGG  
GGTACTGTAAGTATCAAGGGGTCGTAACATCATACAGGAGGAACTTTGCACAGA  
GTTCCACTACTATTAATGGGTGGCTCCGAGATTTTTTATGGGCACAGGCATCTCAGGTAA  
TTCAGTCTTATGGTTCTTCATTATCTGCATATGGTCTTTTTTTCTTAGGTGCTCATTTTTGTA  
TGGGCTTTCAGTTAATGTTTCTATTACGCGGTCGTGGTTATTGGCAAGAACTTATTGAA  
TCTATTGTTTGGGCGCATAACAAATTAAGTTGCTCCTGCTACTCAGCCTAGAGCCTT  
GAGTATTGTACAAGGACGTGCTGTAGGAGTAACCCATTACCTTCTGGGTGGAATTGCCA  
CAACATGGGCATTCTTCTTAGCAAGAATTATTGCAGTAGGAATGGCATTAAAGATTTCCA  
AGGTTTAGCCAAGGCTTAGCTCAGGACCCACTACTCGTCGTATTGGTTGGTATTGC  
TACCGCGCATGACTTCGAGAGTCATGATGATATTACTGAGGAACGTCTTTATCAGAACA  
TTTTTGCTTCTCACTTTGGGCAGTTAGCAATAATTTCTGTGGACGTCCGGAATCTGT  
TTCATGTAGCTTGGCAAGGAAATTTTGGAGCATGGGTACAGGACCTTTACACGTAAG  
ACCCATTGCTCATGCAATTTGGGATCCTCATTTTGGTCAACCAGCTGTAGAAGCCTTA  
CTAGAGGAGGTGCTCTCGGCCAGTGAACATTGCTTATTCTGGTGTATTATCAGTGGTGG  
TATACAATCGGATTACGCACCAATGGGGATCTTTATACTGGAGCTTTTTTCTATTATTC  
TTTTCTGCTATATCTTTAATAGCAGTTGGTTACACCTACAACCAAAATGGAAACCAAGT  
GTTTCGTGGTTCAAAAACGCCGAATCTCGTCTTAATCATCATTTGTCAGGACTTTTCGG  
AGTAAGCTCCTTGGCTTGGGCAGGACATTTAGTTCATGTAGCAATTCCTGGATCCAGGG  
GGGAGTATGTCAGATGGAATAATTTCTTAGATGTATTGCCGTATCCCCAAGGGCTGGGC  
CCACTTTTTGCGGGCCAGTGAATCTTTATGCCAAAATCCGGATTCCAGTAGTCATTTA  
TTTGGTACCTCCCAAGGAGCAGGAACGGCCATTTAACTCTTCTTGGGGGATTCCATCC  
ACAAACGCAAAGTTTATGGCTAACTGATATTGCTCATCACCATTTAGCTATTGCATTTAT  
TTTTCTCATTGCTGGTCATATGTATAGAATACTTTGGGATTGGGCACAGTATAAAAGA  
TCTTTTAGAAGCGCATATCCCTCCGGGGGGTCGATTAGGACGTGGGCATAAAGGTCTTT  
ATGACACAATCAATAATTCGATTCATTTTCAATTAGGTCTTGCTCTAGCATCTTTAGGGG  
TTATTACTTCTTTAGTAGCTCAACACATGTAATCTTTACCTGCTTATGCATTTATAGCACA  
AGACTTTACTACTCAAGCTGCGTTATATACTCATCACCATAACATCGCAGGGTTCATCAT  
GACAGGAGCCTTTGCCATGGAGCTATATTCTTCATTAGAGATTACAATCCGGAACAGA  
ATGAAGATAATGTATTGGCAAGAATGTTAGCGCATAAGGAAGCTATCATATCTCATTTAA  
GTTGGGCTAGCTTGTTTTTAGGATTCCATACTTTAGGCCTTTATGTTTATAACGACGTCA  
TGCTCGCCTTTGGTACTCCTGAAAAGCAAATCTTAATTGAACCCATATTTGCCCAATGG  
ATACAATCCGCTCATGGTAAGACTTCATATGGGTTTCGATGTACTTTTATCTTCAACGGAT  
GGCCCGGCATTTAATGCCGGTAAAAGCATATGGTTACCTGGATGGTTGAATGCTGTTAA  
TGAG-----AATAGTAATTCACCTCTTCTTAACGATAGGTCTGGAGATTTCTTGGTTCATCA  
TGCTATTGCTCTAGGTTTGCATACAACTACCTTGATTTTAGTAAAAGGTGCTTTAGATGC  
ACGTGGTTCTAAATTAATGCCGGATAAAAAAGATTTTCGGTTATAGTTTTCTTGGCAGC  
GGCCGGGACGAGGTGGTACTTGTGATATTTTCGGCTTGGGACGCATTTTATTTGGCAGTT  
TTCTGGATGTTAAATACCATTGGATGGGTTACTTTTTATTGGCATTGGAAGCACATTACA  
TTATGGCAAGGTAATGTTTACAATTTAATGAATCTTCCACTTATTTGATGGGATGGTTA  
AGAGATTATCTATGGTTAAACTCTTCACAACTTATCAATGGATATAACCCTTTTGGTATG  
AATAGTTTATCGGTCTGGGCGTGGATGTTCTTATTTGGACATCTTGTTTGGGCTACTGGG  
TTTATGTTTTTAATTTCTGCGTGGGTATTGGCAGGAATTAATTGAAACTTTAGCATGG

GCTCATGAGCGCACACCTTTGGCCAATTTGATTTCGATGGAGAGATAAGCCAGTGGCCC  
TTCCATTGTGCAAGCAAGATTGGTTGGATTGGCCCACTTTTCTGTAGGTTATATATTCA  
CTTATGCCGCTTTCTTGATTGCCTCCACATCAGGAAAATTTGGTATGTCACATTCAGTAA  
AGATTTATGATACATGTATAGGGTGTACTCAATGTGTACGGGCCTGCCCTACGGATGTTT  
TGAAATGATACCTTGGCAGGGATGTAAGGCTAAGCAAATTGCCTCCGCTCCAAGAAC  
CGAGGACTGTGTAGGTTGTAAGAGATGTGAATCCGCCTGTCCAACAGATTTTTTGAGT  
GTCCGTGTTTATTTATGGCATGAGACAACCTCGCAGTATGGCCCTAGCTTATATGACAGAT  
TTCAACTTACCCTCTATTTTTGTGCCTTTAGTGGGCCTAGTATTTCCGGCAATTGCAATG  
GCTTCTTTATTTCTTTATGTCCAAAAATAAGATTGTCATGCGAGATATAAAAAACATAT  
CTCTCTGTGGCACCTGTGCTAAGTACTCTATGGTTTGGGTCTTTAGCAGGTTTATTGATA  
GAAATTAATCGTTTATTTCCCGGATGCCTTGTCAATTTCTTTTTTTT-----ATGACTGCAATTT  
TAGAGAGACGCGAAAGTACAAGCCTATGGGGTCGCTTCTGCAACTGGATTACTAGCAC  
CGAAAACCGCCTTTACATTGGATGGTTTGGTGTTTTGATGATCCCTACCTTATTGACTGC  
AACTTCTGTATTTATTATCGCCTTCATTGCTGCTCCTCCAGTAGATATTGATGGTATTCGT  
GAACCTGTTTCTGGGTCTCTACTTTACGGAAACAATATTATTTCTGGTGCCATTATTCCT  
ACTTCTGCAGCTATAGGTTTGCATTTTTACCCGATATGGGAAGCAGCATCTGTTGATGAG  
TGGTTATAACAACGGCGGTCTTATGAGCTAATTGTTCTACACTTCTTACTTGGTGTGGCT  
TGCTACATGGGTCTGAGTGGGAACCTAGTTTCCGTCTGGGTATGCGTCCCTGGATTGC  
TGTTGCATATTCAGCTCCTGTTGCAGCTGCTGCTGCTGTTTTCTTGATCTACCCTATTGG  
TCAAGGAAGTTTTTCTGATGGTATGCCTCTAGGAATATCTGGTACTTTCAACTTCATGAT  
TGTATTCCAGGCAGAACAACATCCTTATGCACCCATTCCACATGTTAGGCGTAGCTG  
GTGTATTCGGCGGCTCCCTATTTAGTGCTATGCATGGTTCCTTGGTAACTTCTAGTTTGA  
TCAGGGAAACCACTGAAAACGAGTCTGCTAATGCAGGTTACAGATTCCGGTCAAGAGG  
AAGAACTTACAATATCGTAGCTGCTCATGGTATTTTTGGCCGATTGATCTTCCAATATG  
CTAGTTTCAACAACCTCTCGTTCCTTACACTTTTTCTAGCTGCTTGGCCTGTAGTAGGTA  
TTTGGTTTACTGCTTTAGGTATTAGTACTATGGCTTTCAACCTAAATGGTTTCAACTTTA  
ACCAATCCGTAGTTGACAGTCAGGGTCGTGTTATCAACACTTGGGCTGATATCATCAAC  
CGTGCTAACCTTGGTATGGAAGTAATGCATGAACGTAATGCTCACAACCTTCCCTCTAGA  
CTTAGCTGCTGTTGAAGTTCCATCTACAAATGGAATGGGTTTGCCTTGGTATCGTGTTCA  
TACCGTTGTATTGAATGATCCCGGTCGGTACTTTCTGTCCACATAATGCATACAGCTTT  
AGTTTCTGGTTGGGCCGCTCAATGGCTCTATACGAATTAGCGGTTTTTTGATCCTTCTGA  
CCCCGTTCTTGATCCAATGTGGAGACAGGGTATGTTTCGTTATAACCCTTCATGACTCGTTT  
AGGAATAACCAATTCATGGGGTGGTTGGAGTATTACA---GGGGGAACATAACGAATCC  
GGGTCTTTGGAGTTACGAAGGTGTGGCAGGTGCACATATTGTGTTTTCCGGCTTGTGCT  
TCCTGGCGGCTATCTGGCATTGGGTGTATTGGGACCTAGAAATATTCTGTGATGAACGT  
ACGGGAAAACCCTCTTTGGATTTGCCAAGATTTTTGGAATTCATTTATTTCTTTACGGG  
GTAGCTTGTTTTGGTTTTGGTGCATTTTCATGTAACAGGCTTGTATGGTCCCTGGAATATGG  
GTGTCCGATCCTTATGGACTAACTGGAAAAGTACAACCTGTAAATCCAGCGTGGGGCG  
CGGAAGGTTTTGATCCTTTTGTTCAGGAGGCATAGCTTCTCATCATATTGCAGCGGGG  
ACATTAGGCATATTAGCAGGTCTATTCCATCTTAGTGTCCGTCCGCCTCAACGTCTATAC  
AAAGGATTACGTATGGGAAATATTGAAACTGTCTTTCCAGTAGTATCGCTGCTGTATTT  
TTTGCAGCTTTCGTTGTTGCTGGAACCTATGTGGTATGGTTCAGCAACTACCCCGATTGA  
ATTATTTGGCCCACTCGTTATCAGTGGGATCAGGGATATTTTCAGCAAGAAATATATCG  
AAGAGTTGGTGTGACTAGCTGAAAATCTGAGTTTATCGGAAGCTTGGTTCGAAAATT

CCTGAAAAATTAGCTTTTTATGATTACATTGGTAATAATCCGGCAAAGGGAGGATTATTC  
AGAGCGGGCTCAATGGACAATGGGGATGGAATAGCTGTTGGATGGTTAGGACACCCTA  
TCTTTAGAGATAAAGAAGGACACGAGCTTTTTGTACGTCGTATGCCTACTTTTTTTGAA  
ACATTTCCAGTAGTTTTGGTAGATGGAGATGGAATTGTGAGAGCCGATGTTCCTTTTAG  
AAGGGCAGAATCAAAGTATAGTGTGCAACAAGTAGGTGTAAGTGTGAATTCTATGGT  
GGCGAACTTAATGGAGTTAGTTACAGTGATCCAGCTACTGTGAAAAAATATGCTAGACG  
CGCTCAGTTGGGGGAAATTTTTGAATTGGATCGGGCTACTTTGAAATCCGACGGTGT  
TTCGTAGCAGTCCAAGGGGTTGGTTCACCTTCGGGCATGCTTCATTTGCTTTGCTTTTCT  
TTTTCGGACACATTTGGCATGGCGCTAGAACCTTGTTCGGGATGTTTTTGCTGGTATT  
GATCCAGATTTGGATGCTCAAGTGGAAATTTGGGACATTCCAAAAAATTGGAGATCCAA  
CCACAAGGAGACAGACAGTCATGAAAACCTTATATCCCTGAGGAGGTTCTACCACGT  
GGAAACGCTCTTTAATGGAACCTTAGCCTTAGCTGGTTCGTGACCAAGAAACCACGGT  
TTTGCTTGGTGGGCTGGGAATGCCAGACTTATCAATTTGTCCGGTAAACTACTTGGGGC  
TCACGTAGCCCACGCCGATTAATTGTATTCTGGGCCGGAGCAATGAACCTATTTGAAG  
TGGCTCATTTTCGTACCGGAAAAGCCCATGTATGAACAAGGATTGATTTTACTTCCACAT  
CTAGCTACTCTAGGTTGGGGGGTAGGTCCGGGAGGGGAAGTTATAGACACTTTTCCATA  
CTTTGTGTCTGGGGTACTTCACTTAATTTCCCTCTGCAGTCTTAGGCTTTGGCGGCATTTA  
TCATGCGCTTCTTGGGCCTGAGACTCTTGAAGAATCCTTTCCATTCTTTGGTTATGTATG  
GAAAGATAGAAAATAAAATGACCACAATTTTAGGTATCACTTAATTTTGTAGGTATAGG  
TGCTTTTCTTCTAGTATTCAAAGCTCTTTATTTTGGTGGTGTATATGATACCTGGGCTCCC  
GGAGGGGGAGATGTAAGAAAAATTACCAACTTGACTCTTAGCCCAAGTGTATATTTGG  
TTATTTACTAAAATCTCCTTTTGGGGGGGAAGGGTGGATTGTTAGTGTGGACGATTTAG  
AAGATATAATTGGAGGACATGTATGGTTAGGTTCCATTTGTATACTTGGTGGAAATTTGGC  
ATATCTTAACCAAGCCTTTTTCGTGGGCTCGCCGCGCATTTGTCTGGTCTGGAGAGGCT  
TACTTGTCTTATAGTTTLAGGTGCTTTATCCGTCTTTGGTTTTATAGCTTGTGTTTTCGTCT  
GGTTCAATAACTGCTTACCCTAGTGAATTTATGGGCCGACCGGACCAGAAGCTTCT  
CAAGCTCAAGCTTTTACTTTTCTAGTTAGAGACCAACGCCTTGGGGCTAATGTGGGGTC  
CGCTCAAGGACCTACTGGTTTLAGGTAAATATCTAATGCGTTCCCCGACTGGAGAGATAA  
TTTTTGGAGGGGAAACTATGCGTTTTTGGGATCTCCGTGCTCCTTGGTTGGAACCTCTA  
AGAGGTCCAAATGGGTTGGACTTGAGTAGGCTGAAAAAAGACATAACAACCGTGGCAA  
GAACGCCGTTTCGGCGGAATATGACTCACGCTCCTCTAGGTTCTTTAAATTCCGTGGG  
TGGCGTAGCTACCGAGATCAATGCAGTCAATTATGTATCTCCTAGAAGTTGGTTAGCTAC  
CTCTCATTTTGTCTAGGATTCTTCTTTTTTGTGGGTCATTTGTGGCATGCGGGAAGGGC  
CCGTGCAGCTGCAGCAGGATTTGAAAAGGGAATCGATCGTGATTTGGAACCTGTTCTT  
TCCATGACCCCTCTTAGCATGACTATAGCCCTTGGTAGATTTACTAAAGAAGAA---GATT  
TATTTGATATTATGGATGACTGGTTACGGAGGGACCGTTTCGTTTTTGTGGGTTGGTCCG  
GCCTATTGCTCTTCCCTTGTGCCTATTTTGTCTTAGGGGGTTGGTTCACCGGTACAACCT  
TTGTAACCTTCATGGTATACCCATGGATTGGCCAGTTCTTATTTAGAAGGCTGCAATTTCT  
TAACTGCTGCAGTTTCTACTCCTGCGAATAGTTTAGCACATTCTTTGTTGCTACTGTGGG  
GTCCTGAAGCACAAGGAGATTTTACTCGTTGGTGTCAATTGGGTGGTCTGTGGACTTTT  
GTTGCTCTTCATGGGGCTTTTGCCTAATAGGTTTCATGTTACGTCAATTTGAACTTGCT  
CGATCTGTTCAATTGCGACCTTATAATGCAATCGCATTTTCCGCTCCAATTGCTGTTTTT  
GTTTCTGTATTCTTGATTTATCCATTGGGTGAGTCTGGTTGGTTCCTTGCACCTAGTTTTG  
GTGTAGCAGCTATATTTGATTTATCCTCTTTTTTCCAAGGGTTTCATAATTGGACGTTGAA

TCCATTTTCATATGATGGGAGTTGCCGGAGTATTAGGCGCTGCTTTGCTATGCGCAATTCA  
TGGTGCTACCGTCGAAAATACTTTATTTCGAAGATGGTGACGGTGCAAATACATTCCGTG  
CTTTAAACCCAACTCAAGCGGAAGAGACTTATTCAATGGTCACTGCTAACCGCTTTTGG  
TCCCAAATCTTTGGGGTTGCTTTTTTCCAATAAACGTTGGTTACATTTCTTTATGTTATTTG  
TACCAGTAACTGGTTTATGGATGAGTGCTCTTGGAGTAGTCGGTCTGGCTCTGAACCTA  
CGTGCCATGACTTCGTTTCCCAAGAAATCCGTGCAGCAGAAGATCCTGAATTTGAGA  
CTTTCTACACCAAAAATATTCTCTTAAACGAAGGTATTCGTGCTTGGATGGCGGCTCAG  
GATCAGCCTCATGAAAACCTTATATTCCCTGAGGAGGTTCTACCACGTGGAAACGCTCT  
TATGTCTGGAAGCACGGGAGAACGTTCTTTTGGCTGATATTATTACCAGTATTCGATACTG  
GGTCATTCATAGCATTACTATAACCTTCCCTATTTATTGCAGGTTGGTTATTTCGTCAGTACG  
GGTTTAGCTTACGATGTGTTTGGAAAGCCCTCGGCCAAACGAATATTTACAGAGAACC  
GACAAGGAATTCCTTTAATAACTGGCCGTTTTGATTCTTTGGAACAACCTCGATGAATTT  
AGTAGATCCTTTATGACTATAGATCGAACCTATCCAATTTTTACAGTGCGATGGTTGGCT  
GTTTCATGGACTAGCTGTACCTACCGTTTCTTTTTTGGGGTCAATATCAGCAATGCAGTTC  
ATCCAACGAATGGCTACACAACTGTTGAGGGTAGTTCT--AGATCTGGGCCAAGACG  
AACTCTTGTAGGGGATTTATTGAAACCGTTGAATTCGGAATATGGTAAAGTAGCTCCGG  
GCTGGGGTACTACTCCTCTCATGGGAGTCGCAATGGCTCTATTTGCGGTATTCCTATCTA  
TTATTTTGGAGATTTATAATTCTTCCGTTCTATTGGATGGAATTTCAAGTATGCTTAC  
TCTCAAACCTTCGTTTATACAGTAGTGATATTCTTTGTTTCTCTCTTCATTTTTGGATTC  
TTATCTAATGATCCAGGACGTAACCCTGGGCGCGAAGAAATGGCCGATACTACTGGAA  
GGATTCCTCTTTGGCTAATAGGTACTGTAACCTGGTATTCTGTGATCGGTTCAATTGGTA  
TTTTCTTTTACGGTTCATATCCGGATTAGGCTCATCTCTGATGCTTAATATCTTTAGTTTA  
ATCTGTATCTGTCTTAATTCTGCCCTTCTTCAAGCGGT--TTCCTCGGGAATTTGCCCGA  
AGCTTATGCTCTTTTCAATCCAATCGTAGACATTATGCCCGTCATACCTGTACTTTTCTTT  
CTCTTAGCCTTTGTTTGGCAAGCTGCTGTAAGTTTTTGAATGACACAATCAAATCCAAA  
TGAACAAAATGTTGAATTGAATCGTACCAGTCTATACTGGGGATTATTACTCATTTTTGT  
ACTTGCTGTTTTATTTTCCAATTATTTCTTCAATATGGAAGTAAATATTCTCGCATTTATTG  
CTACTGCATTGTTTATTCTAGTTCCCTACTGCTTTTTTACTTATCATCTATGTA AAAACAGT  
CAGTCAAATGATATGGAAACAGCAACCTTAGTCGCCATCTCCATATCTGGTTTACTTGT  
AAGCTTTACAGGGTACGCCTTATATACTGCTTTTTGGGCAACCCTCTCAACA ACTAAGAG  
ACCCATTCGAGGAACACGGGGACATGGAAGCATTGGTTTATACATTCCTGTTAGTCTCT  
ACTCTAGGGATAATTTTTTTCGCTATCTTTTTTTCGAGAACCTCCTAAGGTTCCGACTAAA  
AAA-----ATGACTATAGCTTTCCAATTGGCTGTTTTTGCATTAATTGCGACTTCATCAATC  
TACTGATTAGTGTACCTGTTGTATTTGCTTCTTCTGATGGTTGGTCAAGTAACAAAAAT  
GTTGTATTTTCTGGTACATCATTATGGATTGGATTAGTCTTTCTGGTAGCTATCCTTAATT  
CTCTCATCTCT-----ATGTCACCACAAACAGAGACTAAAGCAAGTGCTGGAT  
TCAAAGCTGGTGTTAGAGATTACAAATTGACTTATTATACTCCTGACTATGAGACAAA  
GATACTGATATCTTGGCAGCATTCCGAGTAACTCCTCAACCCGGAGTTCCGCCTGAAGA  
AGCAGGGGCTGCAGTAGCTGCCGAATCTTCTACTGGTACATGGACA ACTGTGTGGACT  
GATGGACTTACCAGTCTTGATCGTTACAAAGGACGATGCTACCACATCGAAGCCGTTCC  
TGGGGAGGAAAATCAATATATTGCTTATGTAGCTTACCCTTTAGACCTTTTTGAAGAAG  
GTTCTGTTACCAACATGTTTACTTCTATTGTAGGTAATGTTTTTGGGTTTAAAGCTTTAC  
GAGCTCTACGTCTAGAGGATTTGCGAATTCCTCCCGCTTATTCCAAAACCTTTCCAAGGC  
CCGCCTCACGGTATCCAAGTTGAAAGAGATAAATTGAACAAGTATGGTCGTCCCTATT

GGGATGTACGATTAACCAAATTTGGGATTATCCGCGAAAACTACGGTAGAGCGGTTT  
ATGAATGTCTCCGCGGTGGACTTGATTTTACCAAGGATGATGAAAACGTGAACTCACA  
ACCATTTATGCGTTGGAGAGACCGTTTCTTGTTTTGTGCCGAAGCACTTTTTAAAGCAC  
AGTCCGAAACAGGTGAAATAAAAGGGCATTACTTGAATGCTACTGCAGGTACGTGTGA  
AGAAATGATGAAAAGGGCTGTGTTTGCCAGAGAATTGGGAACCCCTATCGTAATGCAT  
GACTACTTAACAGGGGGATTCACTGCAAATACTACTTTAGCTCATTATTGCCGAGACAA  
TGGTCTACTTCTTCACATCCACCGCGCAATGCATGCAGTTATTGATAGACAGAAGAATC  
ATGGTATGCATTTTCGTGTACTAGCTAAAGCATTACGTATGTCTGGTGGGGATCATATTC  
ACGGTGGTACAGTAGTAGGTAAGTGAAGGTGAACGTGAGATGACTTTAGGTTTTGT  
TGATTTATTACGTGATGATTATATTGAAAAGACCGAAGTCGTGGTATTTTCTTCACTCA  
AGATTGGGTCTCTATGCCAGGTGTTATCCCTGTAGCTTCAGGGGGTATTCATGTTTGCCA  
TATGCCTGCCCTGACTGAGATCTTTGGGGATGATTCCGTAACAGTTCCGGCGGAGGAA  
CTTTAGGACACCCTTGGGGAAATGCACCTGGTGCAGTAGCAAATCGGGTAGCTTTAGA  
AGCGTGTGTACAAGCTCGTAATGAGGGACGTGATCTTGCTCGTGAAGGTAATGAAATTA  
TCCGTGAAGCTAGCAAATGGAGTCCTGAACTAGCTGCTGCTTGTGAGGTTTGGAAAGA  
GATCAAATTCGAATTCGAACAGTAGATAAGCTAGATGTTACGGCGATACATTTATACAA  
AATTCTACCCGAGCACACGCAACGGAGCCGTAGACAGAAAAGTCAAATCCAATCC  
ACGAAATAATTTGATCTATGGACAGCATCGTTGTGGTAAAGGTCGTAATGCCAGAGGAA  
TCATTACCGCAGGACATAGAGGGGGAGGTCATAAGCGTCTATAACCGTAAAATCGATTTT  
CGACGGAATGAAAAGACATATATGGTAGAATCGTAACCATAGAATACGACCCTAATCG  
AAATGCATACATTTGTCTCATACTATGGGGATGGTGAAGAGATATATTTTACATCC  
CAGAGGGGCTATAATTGGAGATAACCATTTGTTTCTGGTACAGAAGTTCCTATATCAATGG  
GAAATGCCCTACCTTTG---GATATGCCCTTAGGCACGGCCATACATAATATAGAAATCAC  
ACTTGGAAGGGTGGACAATTAGCTAGAGCAGCAGGCGCTGTAGCGAAACTGATTGC  
AAAAGAGGGTAAATCGGCCACATTAAGATTACCTTCTGGGGAGGTCCGTTTGATATCCA  
AAAAGTGTAGCAACAGTCGGACAAGTAGGTAATGTTGGGGTGAACCAAAAAGTT  
TGGGTAGAGCCGGATCTAAGTGTGGCTAGGTAAGCGTCCTGTAGTAAGAGGAGTAGT  
TATGAACCCTGTAGACCATCCCCATGGGGGCGGTGAAGGGAGAGCACCAATTGGTAGA  
AAAAGACCCATGACCCCTTGGGGTTATCCTGCGCTTGAAGAAGAAGTAGGAAAAAG  
AAAAGATATAGTGATCGTTTTATTCTTCGTGCGCCGTA---ATGATTCAACCTCAGACCC  
TTTTAAATGTAGCGGATAATAGCGGGGCTCGAGAATTGATGTGTATTGCAATTTTAGGA  
ACTAGT---AATCGCCGATATGCTCATATTGGTGACGTTATTGTTGCTGTAATCAAAGAAG  
CAGTGCCAAATATGCCGCTCGAAAGATCAGAAGTTATTAGAGCTGTAATTGTACGTACG  
TGTAAGAAGACTCAAGCGTGAAAACGGTATGAGAATACGATATGATGACAATGCAGCAG  
TTGTCATTGATCAAGAAGGAAATCCAAAAGGGACTCGAGTTTTTGGTGAATTGCCAG  
GGAATTGAGAGAATTCAATTTACAAAAATCGTCTCATTAGCTCCTGAAGTATTAATGC  
TTAGTCCCAAAGAACCAGATTCCGTAAACAACATAGAGGAAGAATGAAAGGAATGTC  
TTATAGAGGCAATCATATTTGTTTTGGAAGATACGCTCTTCAGGCACTTGAACCCGCTT  
GGATCACAGCTAGACAAATAGAAGCGGGGCGAAGAGCAATGACCCGATATGCACGTC  
GTGGGGGAAAATATGGGTACGTATATTTCCCGACAAACCTGTTACAGTAAGACCTACA  
GAAACACGTATGGGTTCCGGGAAAGGGTCTCCCGAATATTGGGTATCTGTTGTTAAACC  
GGGTCGAATACTTTATGAAATGGGCGGAGTATCCGAAACTGTGGCCAGAGCAGCTATT  
GAAATAGCTGCGTGCAAATGCCTATACGAACTCAATTTATTATTGCGGAAATGACCAG  
AGTTAGACGAGGATATACAGCTCGGAGACGCCGAACAAAATTCGTTTATTGTCATCA

AGCTTTCGAGGGGCTCATTCAAGACTTACTCGAACTATTACTCAACAGAAAATGAGAG  
CTTTGGTTTCCGCTTATAGAGATAGAGGTAGGCAAAAGAGAGATTTTCGTCGTTTGTGG  
ATCACTCGGATAAATGCAGTAACTCGTGAGAAC-----GTTTCCTATAGTTATAGTAGATTG  
ATACATAATCTGTACAAGAGGCAATTGCTTCTTAATCGTAAAATACCTGCGCAAATAGCT  
ATATTAAATAAGAATTGTTTTTGCATTATTTACAAAAAGATTATCAAA-----  
-----ATGGTAAACGAAAGCTTTA---GCTCAAAATATACAT---ATGTCTGTTTTCAAGGCAC  
GAAGAGTAATTGATCAAATTCGCGGACGTTCCCTATGAAGAAACACTTATGATACTGGAA  
CTCATGCCTTATCGAGCATCCTTTCCTATTTTAAAATTGGTTTATTCTGCAGCAGCTAATG  
CT--AACGATCTGGGTTTGAACGAAGCGGATTCATTCATTAGTAAAGCCGAAGTTAATG  
GGGGTACCCTTGTA AAAAGGTTGAGACCTAGGGCTAGAGGGCGCAGTTATCTAATAAA  
ACGACCTACCTGTACATAACAATTGTATTGAAG---AAATCTAAAAA-----A  
TGGATGGAATCAAATATGCAGTATTTACAGAAAAAAGTATTCGGTTATTGGGGAACAAT  
CAA---TATACTTCTAATGTCGAATCAGGATCAACTAGGACAGAAATAAAGCATTGGGTC  
GAACTCTTCTTTGGTGTCAAGGTAATAGCTATGAATAGTCATCGACTCCCGAGAAAGGG  
TAGAAGA-----ATGGGACATACAATGCATTACAGACGTATGATCATTACGCTTCAAC  
CGGGTTATTCTATTCCACCTCTTATAGAGAAAAGAACTATGGCAGTTCCAAAAAACGT  
ACTTCTATGTCAAAAAACGTATTCGTAAAAGTATTTGGAAGAAAAAAGGATATTTGGC  
TGCCTAAAGGCTTTTTCTTTAGCTAAATCAGTATCCACAGGACATTCAAAAAGTTTTT  
TTGTGCGACAAACAAGTAATATGGCAAAAGGTAAAGATGTCAGAGTCAGAGTTATTTT  
GGAATGTACCAGTTGTGTCCGAAAT-----GGT-----AAAGAATTTCCGGGCATTTCTAGAT  
ATATTACTCAAAGAATCGACACAATACCCAGTCGATTAGAATTA AAAAATTTTTGT  
CGCTATTGTA AAAAGCATAACAATTCATGGGGAAGTAAAGAAAATGAAAATAAGGGCTT  
CCGTTTCGTAAAATTTGTGAAAATGTCGACTGATCCGTAGGCGCGGACGAATTATAGTG  
ATTTGTTCTAATCCAAGACATAAACAGAGACAAGGAATGGTTTCGAGAGGAAATAGCAG  
GATCCACTCGAACACTACAGTGGAAGTGTGTTGAATCAAGAATAGACAGTAAGCGTCT  
TTATTATGGGCGTTTCGTTCTGTCCCGCTTATGAAAGGTCAAGCCGATACCATAGGTAT  
CGCTATGCGACGGATTTTACTTGAAGAAATAGAAGGAACATGTATAACACGTGCAAAAT  
CTGAA-----AAAGTACCACATGAATATTCTACGCTAGTGGGTATTGAAGAATCAGTACAT  
GAAATTTAATGAATTTGAAAGAAATTGTATTGAGAAGTAATCTATATGGCACTCGAGA  
CGCATCCATTTGCGTCAAAGGCCCCAGATACATAACAGCTCAAGATATTATCCTACCAC  
CCTCTGTAGAAATAGTTGACTACTACAGCATATAGCTACCCTAACAGAGCCTCTTGAT  
TTGTGTATTGGATTACAAATCCAAGAGATCGTGGATATCGTATGAGACCCACAAATAA  
CTCTCAAGATGGAAGTTAT-----CCTATAGATGCTGTATCCATGCCTGTTCGAAATGCGAA  
TCATAGTATTTATTCTTATGGGAATGGAATGAAAAACAAGAGATCCTTTTTCTAGAAAT  
ATGGACAAATGGAAGTTTAACTCCTAAAGAAGCACTCCACGAAGCTTCTCGTAATTTG  
ATTGATTTATTTATTCCTTTTTCTACATGCAGAGGAAAAG-----GACATTAATTTCGAAGAA  
AATAAA---AGCAGATTTACTTTACCCCTTTTTACCTTTCATGATAGATTAGCT--AATCTAA  
AGAAAAACAAAAA---GAAATTGCATTGAAATGTATTTTTATTGACCAATCAGAATTGC  
CTCCAGGACCTATAATTGTCTCAAAGGTCCAATATACATACATTATTGGACCTTTTGA  
GTAACAGTCAAGAAGATCTTATGAAAATTGAATATTTTCGGATAGAAGATGTAAAACAG  
ATAGTGGACATTCTACAGAAGCAT-----TTCACAATTAATTTACCTAAGACTAAGATGCTC  
CGGGAT---GAAAATGAGGGGATGTTCAACAATACCTGGATTTAGTCAGATTCAATTTGAG  
GGATTTTGTAGGTTTATTAATCAGGGCTTAATGGAAGAATTTGATAAGTTTCCAAAAATT  
GAAGATACAGATCAAGAAATTGAATTTCAATTATTTGTGGAAACATATCAATTGGCAGA



ACCCTTGATAAAAGAAAGAGATGCTGTGTATGAATCGCTCACGTATTCTTCTGAATTATA  
TGTA CT TGCGGGATTAATTTGGAAAACCGATAGAGATATGAAAGAACAAACAGTATTTA  
TTGGAAACATTCTCTAATGAATTCCCTGGGAACCTTTATAGTAAACGGAATTTACAGA  
ATTGTGATTAATCAAATATTGCAAAGTCCCGGCATTTACTACCGTTCAGAATTGGACCAT  
AACGGAATGTCTGTCTATAACCAGCACCATAATATCGGATTGGGGAGGAAGATCAGAATT  
AGAAATTGATAGAAAAGCAAGGATATGGGCCCGTGTGAGTAGGAAACAAAAAATATCT  
ATTCTAGTTCTATCATCAGCTATGGGTTTGAATCTAAAAGAAATTCTAGATAATGTTTGT  
ATCCTGAAATTTTCTTGTCTTTCCCGAATGATAAGGAAAAAAGATCGGGTCAAA  
AGAAAATGCCATTCTGGAGTTTATCAACAATTTGCTTGTGTAGGTGGGGATCCGGTAT  
TTTCTGAGTCCTTGTGTAAGGAATTACAAAAAATTTTTTCAACAAAGATGTGAATTA  
GGAAGAATTGGTCGGCGAAATATCAACCGGAGATTGAATCTTGATATACCTCAGAACAA  
TACATTTTTGTTACCGCGAGATGTATTGGCTGCTGCGGATCATTGATCGGAATGAAATT  
TGGAATGGGTACGCTTGACGAT-----ATGAATCACTTGAAAAATAAACGTATTCTGTTCTG  
TAGCAGATCTGTTGCAGGATCAATTCGGATTGGCTCTTGTTCGTTTAGAAAATGCGGTT  
CGAGGAACTATATCTGGAGCAATCAGG---CATAAATTGATA---CCA ACT CCTCAA AATTT  
GGTAACTTCAACTTCA-----TTAACAACCACTTATGAATCATTTTTTCGGCCTACACC  
CTTTATCTCAAGTTTTGGATCGAACTAATCCATTGACACAAATTGTTTCATGGGCGAAAA  
TTGAGTTATTTAGGTCCTGGAGGGGTGACGGGGCGAACTGCTAGTTTTTCGGATACGAG  
ATATCCATCCTAGTCACTATGGACGATTTGCCCAATCGACACCTCCGAAGGAATCAATG  
TTGGACTTATAGGATCCTTAGCTATTTCATGTGAGGATTGGTCATTGGGGA---TCTATAGA  
GAGTCCATTTTAT-----GAAATATCTGAAAGATCAAAGAAAAAGAGGCACAGATGGT  
TTATTTATCCCAAGTAGAGATGAATATTATATGGTAGCGGCGGGAAATTCTTTGGCCTT  
GAATCGGGGTATTCAGGAAGAACAGGTTGTTCCGGCTCGATACCGTCAAGAATTCCTG  
ACTATTGCATGGGAGCAGGTTTCATCTTCGAAGCATTTTTCCCTTCCAATTTTTTCTATTG  
GAGCCTCCCTCATTCCTTTTATCGAGCATAATGATGCGAATAGGGCTTTAATGAGTTCTA  
ATATGCAGCGTCAAGCAGTTCCGCTTTCTCGGTCCGAGAAGTGCATTGTTGGAACCGG  
ACTGGAACGCCAAGCGGCTCTCGATTCCGGGGTTTCAATTATAGCCGAACACGAAGGA  
AAGGTAATTTCTACTGATACTACCAAATTGTTTTCTCAGGTAATGGAAACACTATAAAT  
ATTCCATTAGTTATGTATCAACGTTCCAACAAAAATACTTGTATGCACCAAAAACCTCG  
GGTCCGCGGGGTAAATACATTA AAAAGGGACAAATTTTAGCGGACGGTGC GGCTACC  
GTTGGTGGGAACTCGCTTTGGGAAAAAATGTATTAGTAGCTTATATGCCATGGGAAGG  
CTACAATTTTGAAGATGCGGTACTCATTAGTGAGCGTTTGGTATATAGTGAGATTTATAC  
TTCTTTTACATCCGAAAATATGAAATTC AAACCCATATGACAAGTCAGGGA---CCTGA  
AAGAATTACTAACGAAATACCACATTTAGAGGCTCATTTACTCCGCAATTTAGACAGAA  
ATGGAATCGTGATGCTGGGATCTTGGGTGGAAACAGGTGATATTTTAGTAGGTAAATTG  
ACGCCTCAGACAGCGAACGAG---TCGTCTGATGCTCCAGAGGATAGATTATTACGAGCC  
ATACTTGGCATTAGGTATCCACCGCAAAGGAACTTCTCTAAAATTACCTATAGGCGG  
AAGGGGTGAGTTATTGATGTGAGATGGATCCAAAAAAGGGGG---GGTCCAATTATCA  
CCCAGAAATGATTCGTGTATATATTTACAGAAACGTGAAATCAAAGTGGGTGATAAGG  
TGGCTGGAAGACATGGGAATAAGGGTATTATTTCAAAAATTTTGCCTAGACAAGATATG  
CCCTATTTACAAGATGGAACACCGGTTGATATGGTTTTCAACCCCTTAGGAGTACCTC  
ACGAATGAATGTGGGACAGATATTTGAATGTTTCGCTCGGGTTAGCGGGAGATCTTTTAA  
ATAGACATTTATAGAATAGCCCCCTTTGATGAGAGATACGAGCAAGAGGCTTCGAGAAA  
ACTAGTGTTTTCGGAATTATATGAAGCCAGTAAGCAAACAAAAAATCCATGGGTATTTG

AACCCGAATATCCGGGAAAAAGTAAAATATTTGATGGAAGAACTGGAGATCCTTTTGA  
ACAACCTGTTCTAACAGGAAAGTCCTATATACTTAAATTAATTCATCAAGTTGATGATAA  
AATACATGGACGTTCCAGTGGACATTACGCACCTGTTACACAACAACCCCTTAGGGGA  
AGGGCCAAACAGGGGGGACAACGAGTGGGAGAAATGGAAGTTTGGGCTTTAGAGGG  
ATTTGGTGTGCTCATATTTTACAAGAAATGCTTACTTATAAATCTGATCATATTAGAGCT  
CGTCAGGAAGTACTTGGTACTACGATTATTGGAGGAACAATATCTAATCCTGAAGATGC  
TCCAGAATCTTTTCGATTGCTTGTTCGAGAACTACGATCTTTGGCTCTGGAAGTGAATC  
ATTTCCCTTGATCTGAGAAAACTTCCAGATTAATAGGAAGGAAGCTATGAATCAGAAT  
TTCTATTCTATGATTGACCGGTATAAACATCAACAACCTTCGAATTGGACCAGTTTCTCCT  
CAACAAATAAGTGCTTGGACTAACAAAATTCTACCGAATGGGGAGGTAGTTGGAGAGG  
TAACAAAACCTTACACTTTTTCATTACAAAACCAATAAACCCAGAAAAAGACGGATTGTT  
TTGTGAAAGAATCTTTGGACCTATAAAAAGTGAATTTGTGCTTGTGGAAATTATCGAG  
TGATCGGAGCTGAAAAGGAAGACCAAAAATTTTGTGAACAATGCGGAGTCGAATTTGT  
TGATTCTCGTGTACGAAGATATCAAATGGGATACATAAACTCGCATGTCCAGTGACTC  
ATGTGTGGTATTTGAAACGCCTTCCTAGTTATATCGCGAATCTTTTAGATAAACCACTTA  
AGGAATTAGAAGGCCTAGTATACTGC-----GATTTTCTTTTGGCTAGGCC---ATAGCTAA  
AAAACCCACTTCTTACGATTACGAGGTTCAATTCGAATATGAAATCCAATCCTGGAAAT  
ACAGCATCCCGCTTTTTTTTACTATCCAAGGCTTCGAGACATTCGAAATAGAGAAATC  
TCTACTGGAGCAGGTGCTATCAGAGAACAATTAGCCGATTCCGATTTACGAATTATTAC  
AGATAATTCATTGATAGAATGGAAGGAATTAGGAGATGAA---GGGTCCACCGGAAATGA  
ATGGGAAGATAGAAAAATTCGAAGAAGAAAGGATTTTTTGGTTAGACGCATGGAATTA  
GCTAAACATTTTATTTCGAACAAATGTAGAACCAGAACGGATGGTTTTTGTGCCTATTACC  
AGTTCTTCCTCCTGAGTTAAGACCCATCATTTCAGATAGATGGGGGTAAATTAATGAGTT  
CGGATATTAATGAACTTTATAGAAGAGTTATCTATCGGAACAATACTCTTACTGATCTACT  
AACAAACAAGTAGATCTACACCGGGGAATTAGTAATGTGTCAGGAGAAATTGGTACAA  
GAAGCCGTAGATACACTTCTTGATAATGGTATCCGCGGACAACCAATGAGGGATGGTCA  
TAATAAAGTTTACAAATCATTTTCAGATGTAATTGAAGGCAAAGAGGGGAAGATTCCGTG  
AGACCTTGCTTGGTAAACGGGTTGATTATTCGGGGCGTTCCGTCATTGTTGTGGGCCCT  
TCACTTTCATTACATCAATGTGGATTACCTCGAGAAATAGCAATAGAACTTTTCCAGACA  
TTTGTAAATTCGTGGTCTAATCAGACAACACGTTGCTTCCAACATAGGGATTGCTAAAAG  
TAAAATTCGAGAAAAAGAACCATTGTATGGGAGATACTTCAAGAAGTCATGCAGGGA  
CATCCTGTATTGCTGAATAGAGCGCCTACCCTGCATAGATTGGGCATACAGGCGTTCCA  
ACCATTTTAGTGGAGGGGCGTGCTATATGTTTACATCCATTAGTTTGTAAAGGGCTTTAA  
TGCAGACTTTGATGGGGATCAAATGGCTGTTTCATGTACCTTTATCCTTAGAAGCTCAAG  
CAGAGGCTCGTTTACTTATGTTTTTCTCATATGAATCTCCTGTCTCCAGCTATTGGAGATC  
CTATTTCTGTACCAACTCAAGATATGCTAATTGGACTCTATGTATTAACGATCGGGAATC  
GTCGAGGTATTTGTGCAAATAGGTATAATTTATCTAATTGCAAAAACGAT-----CAAAA  
TCAAACCTGTTGGCAATAATAATTATCAGTATACGAAAGAGAAGGAACCATATTTTTGTA  
GTTCCCTATGATGCACTTGGAGCTTATCGTCGAAAACGAATCCATTTAGATAGTCCTTTGT  
GGCTCCGATGGCGACTAGATCAACGTGTCATTATTGGCTCA-----AGGGAAGTTCCCATC  
GAAGTCCAATATGAATCTTTTGGTACCTACCATGAAATTTATAGACACTATTTAATAGTA  
AGAAGTGTAaaaaaaAGAAACCGTTGTATATACATTTCGAACCACCGTTGGCCATATTC  
TTTTTATCGAGAAATAGAAGAAGCCGTACAGGGGTTTTGTTCGAGCTTACTCATACTA  
GC-----ATGGCAGAACGGGCCGATCTGGTCTTTCACAATAAAGT

GATAGATGGAGCTGCCATGAAACGACTTATTAGCAGATTAATAGATCACTTCGGGATGG  
CATATACATCACACATCCTGGATCAAGTTAAAACCTTTGGGTTTCCAGCAAGCCACTGCT  
ACATCCATTTTCATTAGGAATTGATGATCTTTTAAACAATACCTTCTAAGGGGTGGTTAGTC  
CAAGATGCTGAACAACAAAGTTTAAATTTTGGAAAGACACCATCATTATGGGAATGTACA  
TGCGGTAGAAAAATTACGTCAATCCATTGAAATATGGTATGCTACCAGCGAATATTTGA  
GACAAGAAATGAATCCTAATTTTCGGATGACTGATCCCTCTAATCCAGTCCATTTAATGT  
CCTTTTCAGGAGCTAGGGGAAATGCATCTCAGGTCCACCAATTAGTAGGTATGAGAGG  
ATTAATGTCGGATCCCCAAGGACAAATGATTGATTTACCCATTCAAAGCAACTTACGCG  
AAGGACTTTCTTTGACGGAATATATAATTTCTTGCTATGGAGCCCGTAAAGGAGTTGTA  
GATACTGCTGTACGAACATCAGATGCTGGATACCTCACACGTAGACTTGTGAAGTAGT  
TCAACACATTATTGTACGCAGAACGGATTGTGGTACTATTTCGAAGTATTTCCGTAAGTCC  
TCGAAATGGGATGACGGAA-----CGCATTTTATCCAAACACTAATTGGTCGTGTATTAG  
CAGACGATATATATATAGGTCTACGATGCATTGCCGCCCGAAATCAAGATATTGGGATTG  
GACTTGTCAATCGATTCCATAACC-----TTTCGAGCACAACCAATATATATTCGAA  
CTCCATTTACTTGCAGGAGTACATCTTGGATCTGTCAATTATGTTATGGTCGGAGTCCCA  
CTCACGGTGACCTGGTCAATTGGGAGAAGCTGTAGGTATTATTGCGGGCCAGTCAATT  
GGGGAACCAGGGACTCAACTAACATTAAGAACTTTTCATACTGGCGGAGTATTCACGG  
GCGGTACTGCAGAACACGTACGAGCTCCCTTTAATGGAAAAATCAAATTC AATGAGGA  
TTTGGTTCATCCCACACGTACCCGTCATGGGCATCCTGCTTTTCTATGTTCTATAGACCT  
GTATGTA ACTATTGAAAGTCAGGATATTATCCATAATGTAAATATTC CCCCCAAAAGTTT  
GATTTTAGTTCAAATGATCAATACGTAGAATCAGAACAAGTGATTGCTGAGATTCGTG  
CCGGAGCATCCACTTTA-----TTTAAAGAGAAGGTTTCGAAAACATATTTATTCTGAATCA  
GAGGGAGAA---ATGCACTGGAGTACCGATGTCTACCATGCACCTGAATATACTTATGGT  
AATGTTTCATCTATTACCAAAAACAAGTCATTTATGGATATTAGCAGTAGGTACGTGCAGA  
-----TCTAGTATTGTCTGTTTTTCTCTCCACAAGGATCAAGATCAAATAAATGTTCAATCT  
TTTTCTCTCGAAGAAAGA-----TATATCTCTGACCTATCA-----GTA ACTAATGATCCAACG  
AGACATAAATTGTTTAGTTTTGGATTCTTCTAGT-----AAGGAGGGGGCTCTTGATTAT---  
---AGACCTGATCGAAGCATATCCAATGGTCATCGGAATTTAAAATATCCTTCT---ATTCTC  
CACGAATAT-----TCTGATTTTTTGGCGAAGAGGCGAAGAAATAGATTGATCATTCCATTA  
CAATATGATCAAGAGCGCGAGAAAGAACTAATACCCCGTTTTGGTGTTCGATTGAAAT  
ACCCATAAAT-----GGTATTTTACGTAGAAATAGTATTCTTGCTTATTTTCGACGATCCCCGA  
TACCGA-----AGAGGGATTACTAAATAT---ACTGTAGAGGTTCGATTCAATCGTCAA----  
--AAAGAAGATTGATTGAATATCGAGGA---GCAAAAAGAATTTAGTCCAAAATAC-----GT  
AGATCGATTTTTTTTCATTCCCAGGAAGTGCATGTCTTACCTGGATCTTCGTTGATAAT  
GGTCCGGAACAATAGTATTATTGGAGTGGATACACCACTCACTTTAAATACAAGAAGCC  
GAGTAGGTGGATTGGTCCGAGTGGAGAGAAAAAAAAAAGTATTGAACTCAAATATT  
TTCTGGGGATATCCATTTTCTGAGAGACAGATAAGATATCCAGGCACAGCGGCATCT  
TGATAACCACCGGAACGGGAAAAAAA-----AATCTAAGGAA---TCAACA---AAATTGA  
AAAATTGGATCTATGTCCAACGG-----ATCACACCTACTAAGAAAAAG-----TATTTTGTT  
TCGGTTCGACCCGTAGTCACATATGAAATAGCGGATGGGATCAATTTAGCAACATTTTT  
CCCCAGGATCTTTTGCAGGAAGGGGATAATGTCCAACCTTAGAGTTGTTAATTATATCCT  
TTATGAAATGGCAAGCCAATTCGAGGACTTTATCACACAAGC---CAATTAGTTCGGAC  
TTGCTTAGTATTGGATTGGAACCGAACGAAATGGTTCTATAGAG-----GGGGTTC  
GTGCTTCTTTTGTGAAATAAGGACAAATGATCTAATTTGCAATTCATAAGAATTGAGG

TAGTCAAGTCCCCTATTCCGTATAACCGGAAAAAGAAATTGTACGGTGAGTTCAGGATTG  
ATTAACCAT-----TTAGATTACACCAATATTAATCCTTTTTATTCCAAGGCAAAGATTCA  
ATCA-----CTTATCAAACATAAAGGAACTAGT-----GGTACGTTGTTGAATCAA  
AATAAG-----GAATGCCAATCTTTGAAAATTTGTTATCATCCAACCTATTCTCGAATTG  
GT-----CCATTCAATGGTTTGAAATATAAC-----AATGCGACAAAAGAATCAGATCCTAT  
AATCCAATT--AATTCGTTAGGCCCTTAGGTACAGTAGTACTC---AAGATTGCAAATTT  
TTATTCATCT--TACCATTTAATAACT-----TATAATCAGATTTTGTTAAAG---AAATATTT  
GTTACTTAAAC-----AAATTTAGTCAGACTTTCCAAGTACTTAAA-----TATTTTTTAAT  
AGACGAAAATAGGGGG-----ATTTCTAATCCCGATCCGTGCAGTAACATCATTTTGAATC  
CATTCGATTTAAATTGGCGTTTTCTCCACCACGATTATTGTGATGAGACGTCCACAATTA  
TTAGC---CTTGGACAATTTTTTTGTGAAAATGTATGTCTATTCAAATACGGATCA-----C  
AGAAAAAATCTGGTCAAGTTCTAATTGTTTCAT--GTTGACTACTTAGTAATAAGATCAGC  
CAAGCCCTATTTGGCTACTCCAGGAGCAACGGTTCATGGTCATTATGGGGAAATCCTTC  
ACGAGGGAGATACATTAGTTACATTTATATATGAAAAATCAAGATCTGGTGACATAACGC  
AAGGTCTTCCAAAAGTGGAACAAGTGTTAGAAGTGCGTTCGATTGATTCAATATCGATA  
AATCTCGAAAAGAGGGTTAAAGGTTGGAATGAACGTATATCAAGAATTCTTGGAATCC  
CTTGGGGATTCTTGATTAGCACGGAACCTAACCATCGCCCAAAGCCGTATCTCTTTGGTT  
AATAAGATCCAAAAGGTTTATCGATCTCAGGGGGTACAGATCCATAATAGACATATAGA  
GATTATTGTCCGTCAAGTAACATCAAAAAGTGTTGGTTTCAGAA-----GATGGAATGTCT  
AATGTTTTTTCACCCGGAGAGCTAATCGGATTGTTGCGAGCGGAACGAGCAGGGCGTG  
TTTTGGATGAAGCGATCTGTTATCGAGCAATCTTATTGGGAATAACGAGGGCATCTCTTA  
ATACTCAAAGTTTCATATCCGAAGCTAGTTTTCAAGAACTGCTCGAGTTTTAGCAAAA  
GCTGCTCTACGAGGTCGTATTGATTGGTTGAAAGGCCTGAAAGAAAATGTTGTTCTAG  
GGGGAATTATACCTGTTGGTACCGGATTCAAAAAATTAGTACATCATTCAAAG-----CAA  
CACAAAACATTCAT-----TTGGAAATCAAAAAGAAGAATTTGTTTGAAGGAAAGATG--  
---AGAGATATCTTATTTACCATAGAGAATTTTTGAGTTCTTGCCTCCCAAAC-----  
-TCAGAACAATCATTGACACGATTTAATGATTCC-----ATGGCAAGAAGATATTG  
GAACATTAATTTGGAAGAAATGATGGAAGCAGGAGTTCATTTTGGTCATGGTACTAGGA  
AATGGAATCCTAGAATGGCACCTTTCATCTCCGCAAAACGTAAAGGTATTCATATTACA  
AATCTTACAAGAAGTGCAGCTTTTTTATCAGAGGCCTGCGATTTAGTTTTTGTATGCAGC  
AAGTAGAGGAAAACACTTTTTAATCGTTGGTACAAAAAATAAAGCAGCTGATTAGTA  
GCATCCGCTGCAATAAAGGCTCGGTGCCATTATGTTAATAAAAAATGGCTTGGTGGTAT  
GTTAACGAATTGGTCCACTACGGAAACGAGACTTCAAAGTTTCAGGGATTAAAGAGCC  
GAACAAAGGATGGGGAAACTCAACCGTCTCCCCAAAAGGGATGCAGCAATGTTGAAG  
AGACAATTATCCACCTTGCAAACATATCTGGGTGGGATCAAATATATGACAGGGTTACC  
CGATATTGTAATTATCGTTGATCAGCAAGAAGAATATACGGCTCTTCGAGAATGTGTCAT  
TTTGGGGATTCCAACGATTTGTTAATCGATACAAATTGTGACCCAGATCTCGCAGATAT  
TTCGATTCCAGCCAACGATGATGCTATCGCATCAATCCGATTGATTCTTAACAAATTAGT  
ATCCGCAATTTGTGAAGGCCGTTCTAGT--TATATAAGAAATCATATGGGACAAAAAATA  
AATCCACTTGGTTTCAGACTTGGTACAACCCAAAATCATCATTCTTTTGGTTTCGCACA  
ACCAAAAAGTTTTTCCATGGGTCTCCAGGAAGATGAAAAAATACGAGATTGTATCAAG  
AATTATGTACAAAAAATATGAGAATATCCTCGGGT--TTCGAAGGAATTGCGCGTATAG  
AAATTCAAAAAGAATCGATCTTATTCAGGTCATAATCCATATTGGATTCCCAAATTTATT  
AATAGAGGGT-----CGAAGACGA-----GGAATCGAAGAATTACAAACAAATGTACAAA

AGAGTTGAATTCTGTAAACCGGAGACTCAACATTGCTATCACAAGAGTTGAAAAACCT  
TATGGACAACCTAATATTCTGGCAGAATACATAGCTTTACAGTTAAAAAATAGAGTTTCG  
TTTCGAAAAGCAATGAAAAAGCTATTGAATTAACCTGAGCAAACAGATACAAAAGGAA  
TTCAAATACAAATTGCAGGGCGTATCGACGGAAAAGAAATTGCACGTGTGAATGGAT  
CAGAGAAGGTAGGGTTCCCCTACAAACGATTTCGCGCTAAAATTGATCATTGTTCTATA  
CAGTTCGAACTATCTATGGAGTATTAGGCATAAAAATTTGGATATTTGTAGACGGAAAA  
TGTCTCGTTACCGAGGACCTCGTTTCAAAAAAATACGCCGTCTGGGGGCTTTGCCAGG  
ACTGACTAGTAAAAGACCTAGATCCGGAAGTGATCTTAAAAATCAATTGCGCTCTGGTA  
AA---AGATCACAATATCGTATTCGTCTAGAAGAAAAACAGAAATTGCGTTTTATTATGG  
TCTGACAGAGCGACAATTACTTAGATATGTGCATATCGCTGGAAAAGCCAAAGGATCA  
ACAGGTCAGGTTTTACTACAATACTTGAATGCGTTTGGATAACATCCTTTTTTCGATTG  
GGTATGGCTTCGACCATTCTGGAGCCAGGCAATTAGTTAACCATAGACATATTTTAGTT  
AATGGTCGTATAGTAGATATACCAAGTTATCGTTGCAAACCCCGGGATATTATTGCTACA  
AAGGATAAGCAAAGATCGAAAGCTCTGATTCAAATAATATTGCTTTATCCTCTCACGA  
G-----GTGCCGAAACATTTGACTATTGACTCA-----TTCCATAATAAAGGATTAGTAAATC  
AAATAATAGATAGTAAATGGATCGGTTTGAATAAATGAGCTCTTAGTCGTAGAATATT  
ATTCTCGTCAGACTATGTCACGTGAGGTAAGTGCAGGAAAAAAACTGCAAAATCCGA  
TCCAATTTATCGTAATCGATTAGTTAATATGTTGGTTAACCCTATTCTGAAACACGGAAA  
AAAATCATTGGCTTATCAAATTATCTATCGAGCCGTGAAAAAGATTCAACAAAAGACAG  
AAACAAATCCACTATCTGTTTTACGTCAAGCAATACGTGGAGTAAGTCCCGATATAGCA  
GTAAGCAAGACGTGTAGGCGGATCGACTCATCAAGTTCCTATTGAAATAGGATCTAC  
ACAAGGAAAAGCACTTGCCATTCGTTGGTTATTAGGAGCATCCCGAAAACGTCCGGGT  
CGAAATATGGCTTTCAAATTAAGTTCCGAATTAGTAGATGCTGCAAAAGGGAGTGGCGA  
TGCCATACGCAAAAAGAAGAGACTCATAAAATGGCAGAGGCAAATAGAGCTTTTGCA  
CATTTTCGTATGGGTAGGGACACTATTGCCGAAATAATACTTCTATAAGAAATGCTGAC  
ATGAAAAAAAAGGAACGGTTTCGAATAGCATCTACAAATGTCACCGAAAACATTGTTA  
AAATACTTCTACGAGAGGGTTTTATTGAAAACGTTAGAAAACATCGAGAAAGTAATAA  
AAATTTCTTGGTTTCAACCCTGCGA-----CATAAAGAAGTGGGAAAGAATATATAAAA  
CA-----ATTTAAAGCGTATCAGCCGACCTGGTCTACGAATCTATTCCAACCTACCA  
ACGAATTCCTAGGATTTTAGGCGGAATGGGGATTGCTATTCTTTCTACTTCTCAAGGTAT  
AATGACAGATCGAGAAGCTCGCTTAGAAGGAGTTGGGGGAGAAATTTGTGTTATATAT  
GGATGACAAAACCTATAACCAAGAATTAGTTCACGTAGAAATGGACGTATTGGTTCGCGT  
AAGAGTGGACGTAGAATTCCAAAAGGAATTATTTCATGTTCAAGCGAGTTTCAACAATA  
CCATTGTAAGTGTACAGATGTACGAGGGCGGGTGGTTTCGTGGTCTCCGCGGGTACT  
TCTGGATTCAAAGGCGCAAAAAGAGGAACACCTTTTGCTGCTCAAGCCGCCGACAGCA  
AATGCTATTTCGTACAGTAGTTGATCAAGGTATGCAACGCGCAGAAGTAATGATAAAGG  
TCCTGGTCCGGACGAGATGCAGCATTACGAGCTATTTCGTGCAAGTGGTATACTATTAA  
GTTTCGTACGTGATGTAACCTCCTATGCCACATAATGGATGTAGACCCCTAAAAAAGA  
CGTGTAATGCCAACTATTAACAACCTATTAGAAATGCAAGACAGCCAATCAGAAATGT  
CACGAAATCTCCCGCTCTTCGAGGATGCCCTCAGCGTCGAGGAACATGTACTAGGGTG  
TATACTATCACCCCAAAAACCAAACCTCTGCCTTACGTAAAGTTGCCAGAGTACGATT  
AACCTCTGGATTTGAAATCACTGCTTATATACCTGGTATTGGCCATAATCACAAGAACA  
TTCTGTAGTATTAGTAAGAGGAGGAAGGGTTAAGGATTTACCCGGTGTGAGATATCACA  
TTGTTTCGAGGAACCCTAGATGCTGTCCGAGTAAAGGATCGTCAACAAGGGCGTTCTAA

ATATGGGGTCAAAAAGCCAAAAATGGCAAAAAAAGTTTGATTTCAGAGGGAGAGGAA  
GAGACAGAAATTGGAACAGAAATATCATTGATTTCGTCGATCCTTAAAAAAGAAATA  
AGC-----AAAATTCCGTCGTTGAGTGAAAAATGGGAAATTCATGGAAAATTGCAATCC  
CTACCGCGTAATAGTGCACCCACACGTCTTCATCGACGTTGTTTTTCGACCGGAAGACC  
AAGAGGTAACTATCGAGACTTTGGGCTATCCGGACACATACTTCGAGAAATGGTTCATA  
CATGTTTGTACCGGGCGCAACAAGGTCCAGTTGGATGGTCAAAAATTCATTTATCTCA  
ATTATTTACAAGAAGAAAAAGAGGAAAAC-----AAGGGGTCCGCCGAATTTCAAGTAT  
TCAGTTTCACCAATAAGATACGAAGACTTACTTCACATTTAGAATTGCATAAAAAAGAT  
TTTTTATCCCAGAGGGGTTTACAAATAATTCTGGGAAAACGTCAACGGCTGTTGGCGTA  
TTTGTCAAAGAAAAATAGAGTACGTTATAAGAAATTAATTGGTCAGTTGGATATTCGAG  
AGCCAAAAACTCGT-----ATGGTAAACTTCGTTTGAAACGATGTGGTAGAAAGCAACG  
AGCCATCTATCGAATCGTTGCAATTGATGTTTCGATCCCGAAGAGAAGGAAGAGATCTTC  
GGAGAGTGGGTTTTTATGATCCGATAAAGAATCAAACCTTATTTAAATGTTCCGGCTATTT  
TATATTTCTTGAAAAAGGAGCTCAACCCACAAGAAGCTGTTTCATGATATTTTAAAGAAA  
GCGGAATTAATTGTC-----ATGGATAAATCCAAGCAATCTTTCCATA  
AACCCAAGCGATCTTTTCGTAGGCGTTTGCCCCAATTGGATCGGGGGATCGAATTGAT  
TATAGAAACATGAGTTTAATTAGTCGATTTATTAGTGAACAAGGAAAAATATTATCTAGA  
CGAGTGAATAGATTAACCTTGAAACAACAACGATTAATTACTATTGCTATAAAAAACAAGC  
TCGTATTTTATCTTTGTTACCTTTTCTTAATAATGAGAGA-----CAATTTGAAAGAACCGA  
GTCGATCTCTAGAGCTACTGGTCCTAGAACCAGAAATAAAGTGACACGTTCAACAAAA  
AAAAATCCTTTTGTAGCTAATCATTATTGGTAAAAATTGAGAACTCAACATAAGGGA  
GGAAAAAGAAATAATAGTAACTTGGTCTAGGGCATCCACCATTATACCCATAATGATTG  
GCCATACAATCGCTATTCATAACGGAAAAGAACATTTACCCATTTATATAACAGATCGTA  
TGGTAGGTCACAAATTGGGAGAATTTGCACCTACTCGAACTTATGGGAGACATGCCCG  
AAACGATAATAGATCGCGTCGCATGATTTTCAAATTTTTCTATTAGGTAATCCATTATCC  
TTATGCATGAAGATAATTAATTCCGTTGTTATAGTTGGACTTTATTATGGATTTATAACCA  
CGTTCTCCATAGGGCCCTCTTATCTCTTCTTCTTCGAGCTTGGGTTATGGAAGAAGGA-  
-----ACCGAAAAGCGGATATCCGCAACAACCGGTTTTATTATGGGACAGCTTATGATAT  
TTATATCAATCTATTATGCGCCTCTGCATTTAACATTGGGTAAACCTCATACAATAACTGT  
CCTAGTTCTACCATATCTTTTATTTTCAATTTCTTCTGGAACAACAAGAAGAACTTTTTAGA  
TTATGGATCTACTACTAGAAATTCATAACGTAATTTCAACATTCAATGTATATTCTTGAAT  
AATTTGATTTTCAACTATTCAACCATTTTTTTTTTACCAAGTTCAACACTAGCCAGATTA  
GTCAACATTTATATGTTTCGATGCAACAACAAGATGTTATTTGTAACGAGTAGTTTTATT  
GGTTGGTTAATTGGTCACATTTTTTTTTATTAAGTGGGTTGAATTAGTTGTATTATGGATAC  
GGCAAAATCATTCCATTCAATCT-----AATAAGTACCTTCTTTCAGAATCGAGAAATT  
CTCTGGCTCGAATCTTTAATATCTCTTATTTATCACTTGTGTATACTATTTAGGCAGAAT  
GCCTTTACCTATTATTACTAAAAAACTCAAGGAAGCCGAAGAAAATAAACCCTTGTCA  
CTTTTCTTTTCGACTGTAAACGATGGAATCGTCCATCTCGATATATAAAAAATGAGCGAT  
TTGAAAATGCTGTACGAAATGAAATGTCACAATATTTTTTTTATACATGTCCAAGTGATG  
GAAAACAAAGAATATCTTTTACCTATCCGCCGAGTTTATCAACTTTTTTCAGAAATGATAG  
AACGAAAGATATCTTTGTACACGACCGAAAAACTATCCACGAGGAT-----TGGGT  
TTATACTAATGAACAAAAAAGCACACCTTGAGCAATGAATTAATAAATCGAATAAAAA  
CTCTAGAAAAAAAACACTTGTCTAGATGTGCTCGAGAAAAGAACCAGATTATGCAA  
TGATGAAAATGAAAAGGAATGCTTGCCTAAAATGTACGATCCTTTTTTAAACGGACCAT

ATCGCGGAAAAATTAAAAAATTATATTCACGTATAGAAATAGTCTGGATAAATAAAATTC  
ACGGTCTACTTAAAAAAGAATTTGAATATCAAGATCACAATGATCAATTTCTGAAATA  
GAAGAAATAAGAAAGGAGGTTCCCTCGATGGTCATACAAATTGACCGATTTAGAAGAAC  
AAGAGGAAGAAGAAATTCGTTCAAGAAAAGCCAAACGTGTTGTAATTTATACTGATTC  
TTTGATACGTTACTCACAACAATCGGATTTTCGTCTGGGATCTAATCAAAGGATCCATGC  
GGGCTCAAAGACGTAAAACAGTTACTTGGGAAATGTTTCAAGCAAATGTGCATTCGCC  
ACTTTTTTTGGATCAAATAGACAAAACA---TTTTTCTCTCTTTTGAC---ATTTCCGAAAT  
GATGAATCTCGTTTTTAGGGAT---GAGGAAAATGAGCGTATAACAATATCAGAAACTTG  
GGATAGCATTATTTTTGCTCAAGCAATAAGAGGTTCAATGTTAGTAACCCAATCGATTCT  
TCGAAAATACATTGTATTGCCCTCATTGATAATAGCTAAAAATGTCTGGCCGTATGTTATTA  
TTCCAATTCCCCGAATGGTACGAGGATTTGAAAGATTGGAGTAGAGAAATGCATGTAA  
ATGTACCTATAATGGTGTTCAATTATCAGAAACAGAATTTCCAAAAGATTGGTTAACGG  
ATGGTATTCAAATAAAAATTCTATTTCCCTTCCGTCTGAAACCTTGGCGA---ACTAAAGG  
GGGAAAAGAGGACAATTTTTGTTTTTTAACAGTCTGGGGAAGAGAAGCGGAACTCCC  
CTTCGGTTCTCCTCGAAAACAACCTTCTTTTTTTGAACCTATTTTAAAAGAGTTCAAAA  
AAAAAATTAGAAAAGTGGAAAAATTTCTCTTTCTCTAGTTCTAAAAGTTTTTAAAAAA  
ACGAGAAAATGGTTTTTAAGGATTTCAAAGAAAAACAAGATGGGTTAACAAAATAG  
TTCTA-----GTAAAAAACGAATAATGAAAGAACTTGAAAAATAAACTCTATAATCAGT  
---ATAAGATTACCGACGAATCAATCATTCTGAATTCGATCTACCAATTGGACAAAACGTT  
CACTTATAGAAAAAAAATAAAAAGATCTTGCTGATAGGACAACCACAATCAGGAATCA  
AATAGAACAAATCACAAAAGACAAGAAAAAAAGTTCTAACAAGACAAATTCTGCTGA  
TAAAAATTCAGAATTGCAAAAACATATTTGGCAAATATTCAAAGAAAGAGTACCCGAT  
TAATACGTAAATTATACTACTTTCTCAAATATTTCAATTGAAAAATATACAGCGATATCCT  
TCTATGTACCATTAACATTCTTAGGACCAATGCACAACCTTTTCATTCACTTTATTTCTGAT  
GACTTATCCTCTTTGTCACAAGCATATGTATTTTATACATTATCACAAATTCAGTTAATA  
ACAAATATTACTTGAAATCCGTACTTCAATATATCCGTCTTTTTCTTAAAGATAGAATCAA  
AGATTTTTGTACACGAGGACTATTTGATTCCACCTCAAAGCATAAGAAATTTTATAAGTC  
TGGAATGAATAAATGGAAAACTGGTTAAAGAATCATTATCAATACAATTTATCTCAATC  
TCAATGGTCTCGATTAGTACCACAAAATGGAGAAATAGAGTCAATCAACGTTGTACA  
ACTCAAAAAAAAAGAATATTGGATTCATATAAAAAAACCAA-----TTAATTCATTACGT  
GAAACAAGAAAAATTCAAAAAAATTACAAATATGATCTTCTAGCACATAAATATGTGA  
ATGAATCTAGTCCATATCTAGATAGAAAATACTTTGATTGTAGAATTCTCCGGTTTTGTTT  
TAGACTTTTTGATTGGATGGGAATGAATAAAGAAAGGCTATATCGTTGGTTCTTCCCAG  
AATTTAGACTACTTTATGATGCATATAAGCTAAAACCGTGGATTATACCAATCCAATTTCT  
TCTTTTAACTTCAAGAGTAAGAAAGAAGCAGAACTAGATTTATTCCTGAAAAAATATT  
TTCTTTTTCAATTAAGATGGGATGATTCTTTGAATCAAAGAATGATCAACAATATCAAGG  
TATATTGTTTACTTAGACTGACAAATATAAGGGAAATTGCTATATCCTCAATTCAAAG  
AGGAGAGATGCGCCTAGATGTAATGTTGATTCAAAAAGATCTATCTTTACAGAATTGA  
TAAAAGAGGAATATTTATCATTGAACCAGTTCGTCTCTCTAAAAAATGGGATGAAGAA  
TTTTTTATATATGAAACCGTAGGTATTTCAATTGATCAATAAGAGTAAACAAAATAATTATG  
ATTTTTTTGTTCCCTGAAAATATTCTATCTACTAGACGTCGTAGAGAGTTGAGAATTCTAA  
TTTGTTTCGTATTTCTTTGGCCCAATTATCGATTAGAAGATTTAGCTTGTATGAATCGGTA  
TTGGTTTGATACCAATAATGGTAGTCGTTTCAGTATGTCAAGAATACAGATGTATCCAAT  
GAAACGACATCAATCAAATCCTGGATCTTCTGAATTCGAGAGAGATATTGAGAGAGATC

AAGAATTCTCACTATTTCTTAGATTCATGGATCAAATTCGATTCAGTGGGATCTTTCAC  
CACATTTTTTCCACCAAGAACGTTTTATGAAACTCTTTGACCCCGAATTTGAGTATC  
CTACTTTCA---CGTGATTCA-----CAGGGTTCAACAAGCAATCGATATTCACG-----AT  
CAAAGGTGTAGTACTGCTTGTAGTAGCG---GTCCTTATATCT-----CGTATTAACAATC  
GAAAGATGGTCGAAAGAAAAAATCTCTATTTGATGGGGCTTCTTCCTATACCT-----  
--ATGAATTCCATTGGACCCAGAAATGAGACATTGGAAGAATCTTTT---TTGTCTTCCAAT  
ATCAATAGGTTGATTGTTTCC---CTCCTGTATCTTCCAAAAGGGAAAAAGATTTCTGAGA  
GTTGTTTCATGGATCCGCACGAGAGTACTTGGGGTCTCCCAATAAAT-----CAAAG  
TGTATCATGCCCGAATCTAACCGGGGTTCTGTGGTGGTGGAGTAACCGGATCGGAAAA  
AGAGG-----GATTCTAGTTGTAAGATATCT-----AATGAAACCGTAGCTGGAATTGAGAT  
CTCATTCAAAGAGAAGGATAGCAA---TATCTGGAGTTTCTTTTTTTATCCTATACG-----  
GATGATCCGATCCGCAAGGACCCTGATTGGGAATTGTTTGATCGTCTTTCTCCGAGGAA  
GAAGCGAAACATAATCAACTTG-----AATTCGGGACAGCTATTCGAAATCTTAGGGAAA  
GACTTGATTTGTTATCTCATGTCTGCTTTTCGTGAAAAAAGACCAATTGAGGGGGAGGG  
T--TTCTTCAAACAACAAGGA---GCTGAGGCAACTATTCAATCAAATGATATTGAGCATG  
TTTCCCATCTCTTTCTTCTCGAGAAACACGTGGGGTATTTCTTTGCAAATTTGTGCTC  
AATTCATATGTGGCAATTCCGCCAAGATCTCTTCGTT-----AGTTGGGGGAAG---AAT  
CGGCACGAATCGGATTTTTTTGAGGAAC---GTATCGAGAGAGAATTTGATTTGGTTAGAC  
AATGTGTGGTTGGTAAACAAGGATCGG-----TTTTTTAGC-----AAGGTACGGAATGTA  
TCGTCAAATATTCAATATGATTCC-----ACAGGA-----TCTATTTTCGTTCAAGTAACGG  
ATTCTAGCCAATTGAAAGGATCTTCT---GATCAATCCAGAGATTGTTTTGATTCCATTAG  
AATTAGA-----AATGAGGATTCAGAA-----TATCACAAATTGATC  
GATCAAACAGAGATTCAGCAACTAAAAGAAAGATCGATTCCT---TTGGAT-----CCTTCC  
TTTAGTCAAACGGAACGAACAGAAATAGAATCAGAT-----CGATTCCCGAAA-----TGCC  
TTTTTGGATCTTCC-----TCAATGTCCCGGCTATTCACG---GAACGTGAGAAGCAGATGA  
ATAATCATCTGCTTCCGGAAGAAATCGAAGAATTTCTT-----GGGAATCCTACAAGATCA  
ATTCGTTCTTTTTTCTCTGACAAATGG-----TCAGAACTTCAT--CTGGGTTCGAATCCTA  
CTGAGAGGTCCACAAGAGATCAG-----AAATTTTTGAAGAAAAACAAGATGTTTC  
T--TTTGTCCCTTCCAGGCGATCGGAA-----AATAAAGAAATGGTTGATATATTCAAG  
ATAATTACGTATTTACAAAAT-----ACCGTCTCAATTCATCCTATTTTCATCAGATCCGGGAT  
GTGATATGGTTGTTCCGAAGGATGAACCGGAT--ATGGACAGTTCCAATAAGATTTCAAT  
CTTGAACAACAATCCATTTTTGGAT-----TTATTTTCATCTATTCTATGACCGGAACAATGG  
GGGATATACGTTA-----CGCCACGATTTT--GAATCA---GAAGAGAGATTTCAAGAAATGG  
CGGATCTATTCATCTATCAATAACCGAGCCG---GATCTGGTGTATCATAGGGGATTTGC  
CTTTTCTATTGATTCCTACGGATTGGATCAAAAAAAAA-----TTCTTGAATAGGGTATTCAA  
CTCCAGAGATGAATCGAAAAAGAAATCTTTA-----TTGGTTCTACCTCCTTTTTTTAT-  
----GAAGAGAATGAATCTTTTTATCGAAGGATCAGAAAAAATCGGTCCGG---ATCTAC  
TGCGGGAATTTATTTGGAAGATCCAAAAATAAAAATAGTGGTATTTGCTAGCAACAACAT  
AATGGAAGCAGTCAATAAATATAGATTGATCCGAAATCTGATTCAAATCCAATATAACAC  
CTATGGG-----TACATAAGAAATGTATCGAACCGATTCTTTTTAATG-----AATGGATCC  
GATCGCAACTACGAATATGGAATTCAA-----AAGGATCAAATAGGAAATGATACTCTG  
AATCATATAACTATAATGAAATATACGATCAACCGACATTTATCGAATTTGAAAAAG---A  
GTCAGAAGAAATGGTTTGATCCT-----CTTTTTTCTCGAACCGAGAGATCCATGAAT  
CGGAATCCTGATGCATATAGATACAAATGGTCCAACGGGAGCAATAATTTCCAGGAACA



TTTGGAACATTTTCGTTTCTGAACAGAGGAAC-----CGTTTTCAAGTAGTGTTTGATCG  
ATTACGTATTAATCAATATTCGATTGATTGGTCCAAGGCTATCGACAAACAAGATTTGTC  
TAAGTCACTTCGTTTCTTTTTGTCCAAGGCA-----CTTCTCTTTTTGTCT--  
-----AAGTCACTTCGTTTCTTTTTGTCCAAGACACTTCCTTTTTTCTTTGTGAG  
TATTGAAATATCCCCATTCATAGGTCCGAG---ATCCACATCTAT--GAATTGAAAGGTAC  
AAACGATCAACTCTGCAATCAGTTGTTAGAATCAATAGGTGTTCAAATCGTTCATTTGA  
ATAAATTGAAACCC-----TTCTTATTGGAT-----GATCATGATACTTCC---CAAAGACCGA  
AATCTTGATCAATGGAAGAACAATATTACCATTTTTGTTCATAAAGATACCA---AAGTG  
G---ATGATTGACTCATTCCATACT-----AGAAATAATCGCAGAAAATCCTTTGATAACACG  
GATTCCTATTTCTCAATGATATCCACGATCGAGACAATTGGCTGAATCCCGTGAAACCA  
TTTCATAGAAGTTCATTGATATCTTCTTTTTATAAAGCAAATCGACTTCGATTCTTGAATA  
ATCCACATCACTTCTGGTTCTAT-----TGTAACAAAGGATTCCCTTTTTATGTG-----G  
AAAAGACCCGTATCAATAATTATGAT-----CTTACGTAT--GGACAATTCTCAATATCTTG  
TTCATTCGCAACAAA---ATATTTTCTTTGTGCGTCGACAAAGGTAAAAAAAACATATTT  
TTTTGGAG---AGAGAGGCTATTTACCAATCGATTCACAGGTATCTGACATATTCATATCT  
AACGATTTTCCAAAAGTGGTGACGAAACG---TATAACTTGTACAAA-----TCTTTCCA  
TTTTCCAATTCGACCCGATCCATTTCGTTTCG-----AGAGCTATTTACTCGATCGCAGACAT  
TTCTGCAACACCTCTAACAGAGGAACAAATAGTCAATTTTGAAAGAACTTCTTGTCAG  
CCTTTTTTCAGATATGAATCTATCTGATTCAGAAGGGAAGAACTCGCATCAGTATCTCAGT  
-----TTCAATTCAAACATGGGTTTGATTACACTCCATGTTCTGAGAAATATTTACCA-----  
TCCGGAAGAGGAAAAA-----CGGAGTCTTTGTCTAAAG-----AAATGC  
GTTGAGAAACAGCAGATGTATAGAACCTTTCAACGAGATAGTGCTCTTTCAAATCTCTC  
AAAATGGAATCTGTTCCAAACATATATGCCATGGTTCCTTACTTCGACAGGGTGCAAAT  
ATCTAAATTTACCCTTTTAGATGCTTTTTTCAGACTCATTG-----CCGATACTAAGTAGCA  
GT---CAAAAATTTGTATCCATTTTTTCATGATATTATGCATGGATCAGATATATCATGGCCAA  
TTCTCAGAAAAAATTGTGG-----GCGATTCTCCACAACGGACTCTG---ATAAGTG  
AGATTTTCGAGTAAGTGTTTACAGAAT-----CTTCTTCTGTCCGAAGAAACGATTCATCGA  
AATAATGAGTCACCCGTTCCATTGATATGGACACATCTGAGATCAACAAATGCTCGGGA  
GTTC---CTCTATTCAATCCTTTTCTTTCTTCTTGTGCTGGATAT--CTTGTTTCGTATACATC  
TTCTCTTTGTTTCCCGA-----GCCTCTAGTGAGTTACAGACAGAGTTAGAAAAGATCAAA  
TCTTTGATGATTCCATCATAATGATTGAGTTGCGAAAACCTTCTGGATAGGTATCTTACA  
TCGGAACGGAATTCCTTCTGGTTAAAGAATCTCTTTCTAGTTGCTCTGGAACAATTAGG  
AGATTTCTGGAAGAAATACGGGGTTCTACTTCTGGCGGCAACATGCTATTGGGTGGTG  
GTCCC-----GCTTATGGG---GTCAAATCCATACGTTCTAAGAAGAAATATTTGAATA  
TCAAT-----CTCATCGATCTCATA---AGTATCATACCAAATCCCATCAATCGAATCACTTT  
TTCGAGAAATACGAGACATCTAAGTCGTACAAGTAAAGAGATCTATGCATTGATAAGAA  
AAAGAAAAACGTGAACGGTGATTGGATTGATGATAAATAGAATCCTGGGTGCGGAA  
CAGTGATTCGATTGATGATGAAGAAAGAGAATCTTGGTTCAGTTCTCC-----ACCTTAA  
CAACA-----GAAAAAGAATTGATCAAATTCTATTGAGTCTGACT--CATAGTGATCATT  
ATCA-----AAGAATGACTCTGGTTATCAAATGATTGAACAACCGGGATCAATTTA  
CTTAGGATACTTAGTTGACATTCAT-----AAAAGTATCTAATGAATTATGAGTTCAATAG  
ATCCTGTTTAGCAGAAAGACGGATATTCCTTGCTCATTATCAGACAATCACTTAT-----TC  
ACAAACCTCGTGTGGGGCTAATAGTTTTTCATTTCCCATCTCATGGA-----AAACCTTT  
TCGCTCCGCTTAGCCCTATCTCCTTCT---AGGGGTATTTTAGTGATAGGTTCTATAGGAAC

TGGACGATCATATTTGGTCAAATACCTAGCGACAAACTCTTATGTTTCCTTTCATTACGGT  
ATTTCCGAACAAGTTCCTGGATGACAAGTCTAAAGGTTATCTTATTGAT-----GAT  
ATCGAT--ATTGATGATAGTGACGATATTGAT-----ATTGATGATAGTGACGATATCGAT  
ATTGATGATAGTGAC-----AATATTGATAATGACCTTGAGACGGAGCT  
GCTAACTATGACGAATGTGCTA-----ACTATGTATATGACG-----TCGAAAATAGACC  
GATTTGATATCACCCCTCAATTCGAATTAGCAAAAAGCAATGTCTCCTTGCATAATATGGA  
TTCCAAACATTCATGATCTGTATGTGAATGAGTTCGAATTACTTATCCCTCGGTCTATTAGT  
GAACTATCTCTCC-----AGGGATTGTGAAAGATGTTCC---ACTAGAAATATTCTTGTTAT  
TGCTTCGACTCATATTCGCCAAAAGTGGATCCCGCTCTAATAGCTCCGAATAAATCAA  
ATACATGCATTAAGATACGAAGGCTTCTTATTCCACAACAACGAAAGCACTTTTTCATT  
CTTTCATATACTAGGGGATTTCACTTGGAAGAAAATGTTCCATACT-----AACGGATTC  
GGGTCCATAACCGTGGGTTCCAATGCACGAGATCTTGTAGCACTTATCAACGAGGCCCT  
ATCAATTAGTATTAGACAGAAGAAATCAATTATAGAACTAATACAATTAGATCAGCTCT  
TCATAGACAAACTTGGGATTTGCGA-----TCCCAGGTCAGATCGGTTCCAGGATCATGG  
GATCCTTTTCTATCAGATAGGAAGGGCTGTTGCACAAAATGTAAGTCTAAGTAATTGCC  
CCATAGATCCTATATCTATCTATATGAAGAAGAAA-----TCATGTAAGGAAAGGGATTCTT  
ATTTGTACAAATGGTACTTTCGAACCTTGAACGAGCATGAAGAAATTAACGATACTTCTT  
TATCTTTTGAGTTGTTCTGCCGGATCGGTCGCTCAAGATCTTTGGTCTCCATTC-----GGA  
CCCGATGAAAAA---AATGGGATTACTTCGTTTGGATTTGTTGAGAATGATTCT--GATCTA  
GTTTCATGGCCTATTAGAAGTAGAAGGCGCTCTGGTGGGA-----TCCTCGCGGAAAGAAA  
AGGATTGCAGTCAGTTTGATAATAAT-----CGAGTGACATTGCTTCTTCGGTCCGAACCA  
AGGAAT--CCGTTAGATATGATGCAAAATGGATCTTGTCTATCGTTGATCAGAGATTTCT  
ATATGAAAAA-----TACGAATCGGAGTTTGAAGAA---GGGGAAGGA-----GCCCTCGACC  
CGCA-----CAGATAGAGGAAGAT-----TTATTAAATCAC-----ATAGTTTGGGCT  
CCT-----AGAATATGGCGCCCT-----TGTGGCAATCTATTTGATTGTATCGAAAGGCTCA  
ATGAATTGGGATTTCCC---TATTGGGCCAGGTCATTTCGG-----GGCAAACGGATCATT  
TTTCATAAAGAGAATGAGCTTCAAGAGAAGGATTCGGAGTTCTTGCAGAGTGGAACCA  
TGCAGTACCAGACACGAGATAGATCTTCCAAAGAACAAGGCTTTTTTTCGAATAAGCCA  
ATTCATTTGGGACCCTGCGGATCCATCTTTTTTCTATTCAA---GATCAGCCCTTTGTCT  
CTGTGTTTTACGTCGAGAATTCTTTGCAGATGAAGAGATGTCAAAGGGGCTTATTACT  
TCCCAAACAATCCTCCTACATCTATATATAAACGCTGGTTCATC-----AAAATACGCAA  
GAAAAGCATTTCGAATTGTTGATTCATCGCCAGAGATGGCTTAGAACC-----AATAGT  
TCATTATCT-----AATATATCTTCCGTTCTAAT-----ACTCCATCCGAGAGTTATCAGTATTT  
ATCAAATCTGTTCCCTATCTAAC--GGAAGGCTATTGGATCAAATGACAAAGACATTGTTG  
AGAAAGAGATGGCTTTTCCCAGATGAAATGAAACATTTGATT-----CATGTAACAGGAG  
AAAGATTTCCCATTCCTATGCCTAGATCTCGG---ATAAATGGAAATTTTATTGATAAGACC  
TCTTCGATTGTAGCCAATATCTTATTACGAATAATTCCGACAACCTTCAGGAGAAAAAGA  
AGCATTACCTATTACAGAGATGGG-----ATGTCAGCTCAATCTGAAGGAAATTATGCGG  
AAGCTTTACAAAATTATTATGAAGCTACGCGATCAGAAATTGATCCCTATGATCGAAGTT  
ATATACTCTATAACATAGGCCTTATACACACAAGTAATGGAGAGCATAACGAAGGCTTTG  
GAATATTATTTTCGGGCACTAGAGCGGAATCCATTCTTACCACAAGCTTTTAATAATATG  
GCCGTGATCTGTCATTAC---CGGGGAGAACAGGCCATTCGACAGGGTGATTCTGAAATT  
GCGGAGGCTTGGTCCGATCAAGCTGCTGAGTATTGGAAACAAGCTATAGCGCTTACTC  
CGGGTAATTATATTGAAGCACATAATTGGTTGAAGATAACGAGGCGGTTTCGAA-----ATG

AACTGGCGATCAGAACATATATGGATAGAACTTATAACGGGGTCTCGAAAAACAAGTAA  
TTTTTCTGGGCCTGTATCCTTTTTTTAGGTTCACTAGGATTCTTAATCGTTGGAAGTCC  
AGTTATCTTGGTAGGGATCTGATATCCGTATTTCCATATCAGCAAATATCTTTTTTCCAC  
AAGGGATTGTGATGTCTTTCTATGGAATTGCGGGTCTATTCATTAGCTCCTATTTGTGGT  
GCACAATTTGTGGAATGTAGGTAGTGGTTATGATCGATTTCGATAGAAAAGAAGGAATA  
GTGTGATTTTTCTGTTGGGGATTTCTGGAATAATCGTCGTATCCTCTTCGCTTCCTT  
ATGAGTGATATTCAGTCAATCAGAATGGAGGTTAAAGAGGGCCTTTATACTCGACGTGT  
CCTTTATATGGAAGTCAGGGGCCAGGGAAGTATTCCCTTGACTCGTACTGATGAGAAT--  
TTAACTCCACAAGAAATTGAACAAAAAGCTGCGGAATTAGCCTATTTCTTGCGCGTACC  
AATTGAAGTATTT

>Ginkgo

TTGAAAGAGTGGTTT-----ATAAGTGGATTAATCGAAGAT-----CTGATCGGAAA  
G-----GCTAGTAAAGACTATATCGTCAATGAGATGGACAAGAAAAAGAAT-----

-----CTAA

AGGTTGATTCCAAT-----

-----

-----AACAGATTATGGGTTCAATGCGATAATCGTGAGAACTTGCTCTATATTA

AATATTTGAGACAGAATAAGAGTGTTTGTGAAGGATGTGGATATCATTGCAAATGAGT

AGTTCGGATAGAAATCGAACTTTTAATTGATCATGGCACTCGGCATCCTATGGATGAGGA

CATGGCCGCCCTGGATCTTATTCAATTTTCAT-----GATGAACTCCATATAGATCGTACT

TTCTATCAAATAAGGACAGGTTTAACTGATGCTATTCAAACAGGCATAGGTTCGGCTAAA

TGGTATTCCCATCGCAATTGGAGTTATGGATTTTAAAGTTCATGGGAGGTAGTATGGGCTC

CGTAGTAGGTGAGAAAATGACCCGTCGATCGAGCACGCTACCAAGGAATCTCTTCCA

TTAATTACGGTTTGTGCTTCTGGAGGAGCACGCATGCAAGAAGGAAGTTTCAGTTAAT

GCAAATGGCTAAAATATCTTCTGCGTTGTACATTCATCAATTGGAGAAGAATTTGTTATA

CGTATCGATCCTTACATATCCACAACCGGTGGAGTGACTGCTAGTTTTTGGTATGTTGGG

AGATATCATCATCGCTGAACCTAAAGCGTACATTGCATTTGCCGGTAAAAGAGTAATCG

AACAGACATTAGGTCAGAAAGTACCTGACGGTTCGCAAGTGGCTGAACATTTATTTGA

TCATGGTTTATTTGATCTGATCGTTCCGCGTAGTCTTTTAAAAGGTGTTCTGAGTGAGCT

ACTTCAACTTTATGGTATTCATTGTAAAAAGAACGAACATTCAGTATGGTAACTATTCG

ACCCGACGAAATTAGTAGTATTATCCGCAAACAGATTGAGCAATATAATCAAGAGGTAG

AGGTTGCTAATATTGGTACCGTACTTCGAGTAGGAGATGGCATTGCTCGTATCCATGGTC

TTGATGAAGTAATGGCAGGTGAATTAGTGGAAATTTGTAGATGGTACAGTAGGCATTGCT

CCAAATCTAGAATCGAACGATGTTGGAGTTGTATTAATGGGTGATGGCTTGATGATACA

AGAAGGCAGTTCCGTAAGGGCAACGGGAAAAATTGCTCAGATACCAGTAAGTGATGCT

TATTTGGGCCGTGTTGTAAATGCTCTAGCCCAACCTATTGATGGCAGAGGTCAAATTC

AGCTTCCGAATCTCGACTGATTGAATCTTCTGCTCCAGGTATTATTTTGGAGACGTTCCGT

ATATGAACCTCTTCAAACGGGGCTTATTGCTATTGATTCTATGATCCCTATAGGGCGCGG

TCAGCGAGAATTAATTATTGGGGACAGGCAGACCGGTAACAGCAGTAGCTACAGAT

ACTATTATCAACCAAAAAGGTCAAGATGTAATATGTGTTTATGTAGCTATTGGCCAAAAA

GCCTCTTCCGTGGCTCAGGTAGTTAATACTTCCCAAGAACGTGGCGCAATGGAATACAC

CATCGTGGTGGCAGAACTGCAGATTCCTCCGCTACATTACAATATCTCGCTCCTTATAC

AGGGGCGGCTTTGGCCGAATACTTCATGTACCAGGAACAACATACTCCAATAATTTATG

ATGATCCCTCCAAACAGGCGGAGCTTATAGACAAATGTCTCTTCTATTAAGAAGACCA  
CCTGGTCGGGAAGCTTATCCGGGAGATGTTTTCTACTTGCATTCCCGTCTTCTGGAAG  
AGCAGCTAAATTAAGTTCTCAGTTAGGTGAAGGGAGTATGACTGCTTTACCAATAGTTG  
AAACTCAAGCTGGGGATGTTTCGGCTTATATTCCGACCAATGTAATTTCCATTACCGATG  
GACAAATCTTCTTATCGGCTGATCTATTCAATGCCGGGATCCAACCTGCCATTGATGTGG  
GTATTTCTGTATCTAGAGTAGGATCCGCAGCTCAGATTAAGCTATGAAACAAGTAGCT  
GGAAAATTAATAATTGGAGTTAGCTCAATTTGCAGAGTTAGAAGCCTTCGCGCAATTCG  
CTTCTGATCTTGATAAAGCTACTCAAATCAATTGGCAAGAGGTCAACGATTACGTGAG  
TTGCTCAAACAGTCTCAATCAGCTCCTTTGACAGTGGAGGAACAAATAGCTACTATTTA  
TACTGGAGCGAATGGATATCTAGATATATCAGAGATCGTACAGGTGAGAAAATTTCTCG  
TTCAGTTACGCGAATATTTAATAACTAATAAACCGCAGTTCGGAGAAATTATACGTTCTA  
CTAGGACATTCACTGAACAAGCAGAAGCCCTTTTGAAAGAGGCTATTAAGGAACATAT  
CGAAATTTTTTTGACTTCGAGAACAGAA-----ATTGCTCTT-----GTTCCACAC  
TTGTGGAAAAGAATGTGGGACGTATTGCTCAAATCATTGGCCCGGTACTGGATGTAAC  
TTCCCCCGGGCAATATGCCTAATATTTTCAATCTTTGATAGTGAAGGGTCAAGATACA  
GCTGGTCAGGAAATTCATGTTACTTGTGAGGTACAACAATTATTAGGAAATAATAGAGT  
TAGAGCTGTAGCTATGAATGCTACAGATGGTCTGATGAGAGGAATGAAAGTGATTGAC  
ACAGGAGCTCCTCTGAGTGTCCAGTTGGTGGAGCTACTCTTGGACGAATTTTCAATGT  
TCTTGGAGAACCTGTGATAATTTAGGTCCTGTAGATGCTCGCACAACATCCCCTATTCA  
TAGACCTGCTCCTGCCTTTACGCAGTTGGATACCAAATTATCAATCTTCGAAACAGGCA  
TTAAAGTGGTGGATCTTTTAGCTCCTTATCGACGTGGAGGAAAGATCGGACTATTCGGG  
GGAGCTGGAGTGGGTAAAACAGTACTCATCATGGAGTTAATCAACAACATTGCTAAGG  
CTCATGGAGGTGTATCTGTATTTGGCGGAGTAGGGGAACGTACTCGTGAAGGGAATGA  
TCTTTACGTGGAAATGAAAGAATCAGGAGTAATTAATGAGCAAAACATCTCAGAATCA  
AAAGTAGCTCTGGTCTATGGTCAGATGAATGAACCACCAGGAGCTCGTATGAGAGTTG  
GTTAACTGCCTTAACCATGGCTGAATATTCGAGATGTCAATGAGCAAGACGTACTC  
TTATTTATCGACAATATCTTCCGCTTTGTCCAAGCAGGATCAGAAGTATCCGCCTTATTA  
GGTAGAATGCCTTCTGCTGTGGGTTATCAGCCAACTCTTAGCACGGAAATGGGTTCTTT  
GCAAGAGAGAATTACTTCTACTAAAGAGGGATCTATAACCTCCATTCAAGCAGTTTATG  
TACCTGCGGACGATTTGACCGACCCTGCTCCTGCTACGACATTTGCACATTTAGATGCT  
ACTACCGTACTATCGAGAGGATTAGCTTCCAAAGGTATCTATCCAGCAGTAGATCCTTTA  
GATTCAACGTGACTATGCTCCAACCTTGGATTGTGGGCGAGGAACATTACGAAACCG  
CACAAGGAGTTAAGCAAACCTTCAACGTTATAAAGAACTTCAAGACATTATAGCTATT  
CTTGGACTGGACGAATTATCAGAAGAAGATCGTTTAAACCGTAGCAAGAGCACGAAAAA  
TTGAACGTTTTTTATCACAACCCTTTTTTCGTAGCAGAGGTCTTCACCGGTTCCCCGGGC  
AAATATGTCAGTCTCGTAGAAACAATTAGAGGTTTTTAAAATGATCCTTTCTGGAGAATT  
AGATGGTCTCCCCGAACAGGCTTTTTATTTGGTAGGTAACATTGATGAAGCTACCGCGA  
AGGCTATGAACTTCAAAGTGGAGAGT-----ATGACCCTAAATCTTCGTGTACTGACT  
CCTAATCGAGTTGTTTGGGATTCGGAAGTGGAAGAAATCATCTCATCTACCAATAGTGG  
TCAAATTTGGCGTATTACCAAACCACTACACTTGTACAGCTGTAGATATAGGAATTAT  
GAAAATACGTCTCAATGGGCAGTGGTCAACTATGGCTTTGATGGGCGGTTTTGCCAGG  
ATAGGCAACGATCAAATTACCGTATTGGTAAATAATGCAGAGAAAGGTATCGACATCGA  
TCCTCGAGAGGCTCGGGAAGCTTTTCAAATAGCTGAAGCTGACCTAGCTCGAGCTGAA  
GGCAAGAGACAAGCGATTGAGGCTAATGTAGCTCTCAAAGAGCTAGAACACGATTA

GAGGCTGTCACTTCCGTCTCTATGGAAAATGGAATTGATTCTTCTATCTTCTTGAGTTAT  
TGGCCTTCTGCTGGAGGTTTCGGTTTTAATACCAATATTTTAGGAACAAATCTAATAAAT  
CTAAGTGTGGTGCCTGGTGTACTGATCTATTTTGGAAAGGGAGTGTTAAGTAATTTATTA  
GATAACCGCAAGCAGAAAATATTGAATACTATTCGCAATTCGGAAGAAGACTATGTAAAGG  
AGCTACCGATCAGCTCGAAAAAGCTAGGACTCGCTTACGCGAAGTAGAAAGAAGAGC  
GGGCGAGATCCGAGTCAATGGATACTCCCAAATAGAACGAGAAAAAGAGGATCTGATC  
AATGCTGCTTATGAAAATTTGGAACGATTAGAGGATCCTAAAAATGAGACCGTTCACTT  
TGAACAACAAAGAGCAATTGACCAGGTCCGACAACAGGTTTCTCGTCAAGCTTTGCG  
AAGAGCTCTAGGAACTCTGAATAGTCGTTTGAATAGCGAGTTACACCTACGTACGATCA  
ATCATAGTATCGGCTTGCTCAGAGCCATGAGAAACACAAGTATGATATGAATCCCTTGATT  
TCTGCTGCTTCCGTTATTGCTGCTGGATTAGCCGTAGGCCTCGCTTCTATCGGACCTGGT  
GTTGGTCAAGGCACTGCTGCGGGCCAAGCTGTAGAAGGTATTGCAAGACAACCAGAA  
GCAGAGGGTAAAATACGAGGTACCTTACTGCTAAGTCTAGCTTTTATGGAAGCTTTAAC  
TATTTATGGACTAGTTGTAGCGCTAGCACTTTTATTTGCAAATCCCTTCGTTATGGATATT  
GTACAATCTCCTATTAGCACACTAAATCATTCTACGAGAAATCTGGCGTGGAAGTGGG  
TCAACATTTCTATTGGCAAATAGGGGGTTTTCAAGTTCATGCACAGGTAATAACTTC  
CTGGGTTGTAATTGCTATCTCATTAGGTTCCGGCTACTATAGCTGTTCCGGGATCCACAAAC  
CATCCGACCGATGGTCAAATTTGTGCAATATGTTCTCGAATTCGTTCCGGACTTGA  
CCAGAACTCAGATTGGGGAAGAATATGGTCCCTGGGTTTCTTTTATCGGAACTATGTTT  
CTATTTATTCTTATTTCTAACTGGTCAGGTGCCCTCCTCCCTTGGAATGATCCAATTAC  
CTCATGGGGAGTTAGCTGCACCTACAAATGATATTAATACTACTGCTGCCCTAGCTTTGC  
TCACGTCAGTAGCATATTTCTACGCAGGTTTGCAAAGAGGGGGTTAGGTTATTTCCGGC  
AAATATATTCAACCAACCCAGTACTTTTACCAATTAACATATTAGAGGATTTTACGAAA  
CCTTTTACTTAGTTTTTCGACTTTTTTGGGAATATATTAGCCGATGAACTGGTAGTTGCC  
GTTCTTGTCTCTAGTACCTTTGGTGATTCCCTATACCTGTAATGTTTCTAGGATTATTTA  
CAAGCGCTATTCAAGCTCTGATCTTTGCAACTTTAGCCGCAGCTTATATAGGCGAATCTA  
TGGAGGGTTCATCATATGATATTCACAACCTTTAGAACATATATCAGCTCACATCTCTTTTC  
TCTCGTGTCTGTTGCACTCTCGCTTATTGGGGAACC---TTGGTCTATCAAATTGAAGCA  
CTAAGTCGTTCCGGAGGAAGAGGCATGATAGTGATTTCTGTCTGTATAACGGGATTGTT  
AATTACTCGTTGGCTTTCTTCGGGACATTTACCGTTAAGTAATTTGTATGAATCCTTCAT  
GTTCTTTTCGTGGAGTTCATCTGTGATTCATATAGTTCTAGAAGTACGGAGCCAAAATAA  
TTGGTTAGGCGCAATCACTGCACCAAGTGCTATGTTAACTCATGGTTTTGCTACTTTGG  
GTCCTCCGGAGGAAATGCAACAATCTACAATGTTAGTACCTGCTCTACAATCTCATTGG  
TCAATGATGCATGTAAGTATGATATTGCTTGGCTATGCAACCCTTTTATGCGGATCCCTAT  
TATCAATAGCTTTTTTTGGTCATTACATTTCGAATTAATAGGAGGATTATCCCCCCCCCTAG  
TAATAGTTGGTATTTACACGAACAAAAAATGATTTGCAAGACACTTTTTCTTGTATT  
CATGAATTATCGTAGGTGTCAATTGACTCAACAATTAGATCATTGGAGTTATCGTGCTAT  
TGGTCTAGGTTTTCTTCTTTTAACTATAGGTATTCTTCTGAGCAGTATGGGCTAATGA  
AGCATGGGGATCTTATCGGAGCTGGGACCCAAAAGAGACCTGGTCATTAATTACTTGG  
ACTATATTTGCAATTTATCTGCATTCTAGAATGAATAAAGGTTGGCAAGGTGAGAAACC  
GGCAATTGCGGCTTCTCTAGGATTTTTTATAATTTGGATCTGTTATTTGGGGGTGATCTA  
TTAGGAATAGGTTTGCACAGCTATGGATGGTTGATTCAGCATGTGGCCAAAAAA---GTA  
TCAGCTTCCCTACAATATCTCGCATTTTTTAGTATCCTGCCCTGGGGGATCTCGATTTTCAT  
TCCAGGAAGGTTTGGGACCTTGGGTTACGAATTGGTGGAAATACTGGTCAGTCAAAAAT

TTTTTTTTCTTATCTTCAAGAGGAAAATGCCCTAGAAAGATTCCGGAGAGATAGAAGAAC  
TATTCCTATTGGAAAGAATGGTGGAAAGATTCTTCGGAAACACATTCACAAGATCTTCGT  
ATAGAGATTCACAGAAAAACAATCCAATTAGTGAAAATGTACAATAAAGATTGTATCCA  
GATCATCTCGCATTTATTGACAAATATGATATGTTTCGCTATTTCAAGTGCTTATTTCAATTA  
TGAGTAAGAAAAAACTTACCGTTCTCAATTCTTGGATCCAAGAATTATTCTATAGCCTG  
AGCGATACGATGAAAGCTTTTTCTATTATTCAGTCACCGATCTATGTATTGGGTTTCATT  
CGACTCATGGTTGGGAACCTGATGATCGATTCGATCTCTGAAAATTATGGATTTGTCCATA  
ACGAACAAATAATATCTGGTCTTGTCCAACTTTTCCAGTCATCTCAGATACGATTTTCA  
AATATTGGATCTTCCGTCATTTCAATCGTATATCCCCTCCACTTGTAGTAATTTATCATTC  
GATGAATGAAATGCCCATTTGGTGTTCAAAAGTTCCTTTTCGGATCCCTGGAGAGGAA  
GATGCAGTTTGGGTCGACGTAAAC---CGACTTCATCGGGAGAGATTACTTTTTCTGGGT  
CAGCAGGTCGATGACGAGATCGCGAATCAACTCATTGGTATCATGATGTATCCGAATGG  
AGAAGATGAGAATAAAGATATATATACATATATTAATTCTCCCAGTGGAACAGTAATACC  
GGGAATCTCTCTTTATGATGCTATGCAATTTGTAGTACCAGATGTGCATAAATATGCAT  
GGGGTTAGCTGCTTCGATGGGATCTTCTGTCTCAACTGGAGGGGAAATTACTAAACGTA  
TAGCATTACCTCACGCT-----ATGATCCACCAACCTGCTAGTTCTTATTATGACGGACAAG  
CAGGAGAATGTATCATGGAAGCAGAAGAGGTATTGAAACTTCGCGATAGCATTACGAA  
TGTTTATGTACAAAGAACAGGCAAACCTTTATGGGTCAATTCGAGGACATGGAAAGA  
GATATTTTTATGTCAGCGGCAGAAGCCCAAGCCTATGGCATTGTTGATCTCGTAGCGGT  
AGATATGAACAAACAAAATTTGATCGATGAAGGTTCCGGTACTGAATCACTTCCCAATG  
GTATGTTCCGAGTTCGTTTCAGATAACGGATGCCAGGTTTTAACTTATATTCGGGGGGGA  
TTCGACGTAATTATATACGAATACTACCAGGAGATAGAGTCAGGGTTCGAATTAAGTCCTT  
ATGATTTAACCAAAGGACGTATAATTTATCGACTTCGCAACAAATCTTCAAATGATATGG  
ATAAGTTCAAAGAGACGGAGAAGAATATATATCCTATCAACGACGTTTTTTTATATCCAC  
TCCTTTTTTCAGGAGGATCTTTACGCAATTGCTTATGATCATTATTTCTCAAGTTCCAACG  
ATCGATTTAGTTTCCTAACTGTAAAACGTTTGATTAGTTCGAATACATCAACAGAATGATT  
TAATCATTTTCAATTTTGAATCAAATCCA-----TTTGTGGTAGCAGTTTCTATTCTGAATT  
GGTACTAGAAGGTCCGACAGTGGTTCTGGAAGTTCGGTCTTGATGCGA-----TCGAAA  
CTA---AATGAATGGAAGAGTTTCCGATCTATTCATTTCGATATTTTCTTTATGGAGGACA  
AATTTCCACATCCCAATTCGATCTCGGATATGCGAATACCCCACTCTATTCATTTCGGAAA  
TTTTTATTCGAACCTTTTCGTCGCTGGGTTTCGAGATGCTCCTTCTTTACACTTATCACGAT  
CTGTTCTCCACGAACATCGGAAT-----AGTTCGGAGAATATTCTCATCGCTCCGGAAGGA  
AATACAAAGTTCTTTCTGTTTCTGTGGAATTATTATGCTTATGAATGTGAATCTCTCCTAG  
TTCCCCTTCGGAAACGATCTTCTCATTACGATTGTTGTCCTATGGAGCTTTTCTCGAGC  
AAATTCATTCTTATCGAAAGATCGAACAT---ATTGTCATATTTCCCCTAATTTAAGTATCT  
GGTCTTTGAAGGATTCTTCCATTTCTTATGTAAGGTATGGGGAAAGATCTATTATGGCTC  
TGAAGGGTGCTCACTCCCAGTCAGGAGATGGAGATATTATCTTTCAATTTTGGCGA  
TGTTATTTCCATTTCTGGTCCCAACCGTATAGGATACGGATCGATGAATTATCCAATAATT  
GTTCTTCTTTTTAGGCTATTTCTGGGCGTTCGAATGAATACTTCCGTGGTTAGGATCA  
AAATGCTAGATGATTTATTCATTACCGATCTTATTACC-----AATGAATTTGATTCAATAGC  
TCCGATTATACCTCTGATTGGATTATTGGCTAAAGAAAGGTTTTGTGACATTTACGGGCG  
TCCAATTAGTAAATTGGCTTGGACCGGTCTAAAAGATGATGATATTCTTGATCGATTCTGA  
TCGAATTTGTAGAAACATTTATTGATTACTACAGTGGATCTTTCAATAAAGATGGTTCATA  
TCGGATGAAGTATATACTCCGACTTCCATGTGCTAAAACCTTTAGCCTGTAGACATAAAA

GTACGATACGTGTAGTTTGGGAAGAATTCGGTTCGGAACTATTTACGAAATCGTTCCCC  
AAAGAGGGAGAATTAATCTCTCCGTTCTTCTCA--CGAATTTGGCATTTCAGATATTCTCC  
GGATAAATCTCCCGGCCAATTTTTGG-----  
ATTGAGGAGCCGTAT-----GAAGC  
TAAAGTTTCACGT-----A  
CGTTTTGGAAAAGAGA-----  
-----  
-----TTAGAATGTTGTTCTCATCGACTACAATTA---CCCAAT  
AGTTTGAGTACGGTTGATATAATTGAGGCACAGTCTAGATATGGTTTTTGGGGATGGAA  
TTTGTGGCGTCAACCTATAGGTTTTATAGCTTTCTTCATCTCTTCTCTAGCAGAATGTGA  
AAGATTGCCTTTCGATCTACCAGAAGCGGAAGAGGAATTGGTAGCGGGTCATCAAACC  
GAATATTCCGGTATAAAATTTGGTTTATTCTACGTTGCTTCTCATCCGAATCTATTAGTTT  
CTTCATTATTTGTAACAGTTCTTTACTTGGGCGGATGGAATTTTTCCATCCCAGCTATAACC  
AATTTCCGGAACATTTGCAACGAGATGGAATTAGTGAGGTTTTCGACATAACGATGGGGA  
TCCTTATTCTATTAGCTAAAGCTTATTTGTTCTTGTTCCTTTCTATCACGACAAGATGGAC  
CTTGCCTAGAATGAGGATGGACCAATTATTGGATCTTGGTTGGAAATTTCTTTTACCTAT  
TGCTCTGGGTAATCTATTACTAACAGCTTCTTTCCAATTCTTCTATTGATGATCAGACAT  
GTACAAAATGAAAATTTATTTTCAATTATAACC-----ATGAAAGAGTTTCATTTGCTTC  
TCTCCCGTGGAAAGTTCGATTTTCCCAGAATGTATCCTAATTTTTGGCCTAATTCTTCTTCT  
GATGATTGATTTACCTCTGATCAAAAAGATACACCTTGGTCCTATTTTCATCTCTTTAAC  
AAGTTTAGTGATGAGCATAACGGTCTTATTATTTTCGATGGAGAGAAGAACCTATGATTA  
GCTTTTTGGGTAATTTCCAAACGAACAATTTCAACGAAATATTTTCGATTTCTCATTTTAC  
TATGTTCAACTCTATGTATTCCTCTATCCGTGGAGTACATCCAATGTACAGAAATGGCTAT  
AACAGAGTTTCTGTTATTCGTATTAACAGCTACTCTAGGAGGAATGTTTTTATGTGGTGC  
TAATGATTTAGTAACTATCTCTGTAGCTTTAGAATGTTTCAGTTTATGTTCTTATCTATTAT  
CTGGATATAACCAAGAGAGATGTACGGTCTAATGAGGCTACTATGAAATATTTACTTATGG  
GTGGGACAAGCTCTTCTATTCTGGTTTATGGTCTTTCTTGGCTATATGGTCTATCCGGGG  
GAGAGATTGAGCTTCAAGAAATAGTAAATGGTCTTATCAATACACAAATGTATAACTCT  
CCGGGAATTTTGATTGCGCTTATATCCATAACTGTAGGAATTGGATTCAAGCTTTCTCTA  
GTCCCTTTTCATCAATGGACCCCTGACGTATATGAAGGATCTCCCACTCCAGTCGTTGC  
TTTTCTCTCTGTTACTTCGAAAGTAGCTGCTTTAGCTTTAGCCACTCGAATTTTCGATAT  
TCTTTTCTATTTTTCATCGAACGAATGGCATCTTCTTTGGAAATCTTAGCTATTCCTAGC  
ATGATATTAGGTAATTTAATTGCTACTACTCAAACAAGCATGAAACGTATGCTTGCATAT  
TCGTCCATAGGTCAAATTGGATATATCATTATTGGAATAATTGCTGGAGACTCAAATGAT  
GGATATGCAAGCATGATGACTTATATGCTGCTCTATATTTTCATGAATTTAGGAACTTTTG  
CCTGCATTGTATTATTTGGTCTACGTACAGGAACTGATAACATCCGAGATTATGCAGGAT  
TATATACGAAAGATCCTTTTTTCAGCTTTCTCTTTAGCTTTATGTCCACTATCTCTAGGAGG  
TATTCCTCCATTAGCAGGTTTTTTTTGGAAAATTTATCTATTCTGGTGTGGGTGGCAGGC  
AGGCTCCTATTTCTTGGTTTCGATAGGACCCTTTATGAGCGTTATTTCTATATACTATTATC  
TAAAAATAATCAAGTTATTAATGACTGAACGAAACGAAGAAATAACTCCTCACGTGCA  
AAATTATAGAATATCTCCATCTTCTTTAAAAAATTCCATCGAATTGAGTATGATTGTATGT  
GTAATAGCATCTACTATACTGGGAATAGTAATGAACCCAATTATTGCAATTGCTCAGGAT  
ACCTTATTTATGTTTCTACTTCCCGAATATGATACTTTTTGGATCTTTTTACTAATATCTAG  
CCTTATTCCTATTCTGACATTCCAAATTTCCAGAGCCTTGGCCCCCATTCGTAAAGGACC

GGAGAAGCTCACTAGTTACGAATCGGGTATAGAACCAACGGGAGATGCTTGGATCCAA  
TTTCGGATTCGTTATTATATGTTTCGCTCTAGTTTTTGTATTGATGTTGAAACAGTCT  
TCCTTTATCCATGGGCTATGAGTTTCAATGTATTGGGTATATCTACCTTTATAGAAGTTTT  
GATTCTCGTGCTTATCTCAATTGTTGGTCCAGTTTATGCATGGCGAAAAGGAGCATTGG  
AATGGTCTATGAACAATTTACCCCGGTTAACAATAATTGTTATTTGCCCCATATCTGCGG  
GTTCCCTAATTCATCATTCCCTCATAAAGGGAATAAGATGATTGATGTTTACTCTAG  
GTATTTGCTTGTGGAACTCCTTTTAATGACCCATACATTTTCGTTATCATTTTCGTTTCGA  
TGAGCCATTGATCCAATTGGAAGAAGATTATAACTGGATAGATCTCATCGATTTTCATTG  
GAGACTAGGAATTGATGGACTCTCCGTTGGACTTATTACATTGACGGGATTTGTTACTA  
CTTAGCTACTTTATCCGCTTGGCCAGTTACTCGAAATCCGCGATTGTTGCATTTTTTGA  
TGTTGGCGATGTACAGTGGCCAAGCAGGATCATTGCTTCTCGAGATATTCTACTTTTTCT  
TTCTCATGTGGGAGCTAGAACTAATCCCGTTTACTTACTTCTATCTATGTGGGGAGGAA  
AAAGACGTCTATACTCGGCTACAAAGTTCATTTGTACACTGCAGGTGGTTTCGATTTTTA  
TCTTAATGGTAGCTTCGAGTATGGGTCTCTAT--TCTGATGGACCAACATTAGATCTCCA  
AACCTTGGCTAATAAATATTATCCCGTAGCACTGGAAATAGTATTTTATTCAGGATCTTT  
ATCGCTTATGCCATTAATGCCAATTTTTCCCTTACATACCTGGTTACCGGATACTCATG  
GGGAAGCGCATTATAGTACATGTATGCTTTTGGCCGGAATTCCACTTAAAATGGGAGGA  
TATGGATTGATTGCAATTAATATGGAATTATTCTCTCATACTCATTCTCTATTTTTCGCCATG  
GTCGGTAATAATAGGAGCGGTTCAAATAATCTATGCAGCTCTAACTTCTCTGGGTCAAC  
GTAATTCGAAGAGGAGAATAGCCTATTCATCAGTATCTCATATGGGTTTTGTAATTATAG  
GAATCGGTTCCATGACAGATACAGGTCTTAATGGGGCCATTTTGCAAATGATTTCTCAT  
GGATTAATTGGTGCTGCACTTTCCTTCTCGGCGGGAACAAGTTACGATAGGATACGTAC  
TCCTTTTCTTGACAAAATGGGAGGAATGGCTATACCGATGCCAAAAATATCTACTATGTT  
CAGTAGCTTTTCAATGGCTTCTCTCGCATTGCCAGGAATGAGTGGTTCTGTAGCAGAAT  
CTATGGTATTTTGGGGAATAATGACTAGTCATAAATATTCTTCGACTTTTAAAATAGTTAT  
TACCGCAATAGCGGCAATTGGTATGATATTAACTCCTACTCATTGTTATCTATGTTACGT  
CGAATGTTTTATGGATATAAGTTGTTAAATGTCCCAAAATATTATTTACGGATTCTGGA  
CCACGAGAAATTTTTATTTTGATCTGTCTTTTTATTCCAGTAGTAGTTATCGGTCTTTATC  
CTGATCTAGTTCTATCTCTGTGGAATAATAAGGTAGAAGCTATTCTATTTAGACTTTTCCA  
CGAA---ATGCTCGAATATACTATTTCAGGCGCTTATTCGTTATCTATCGGTCTTTATG  
GATTAATCACAAGTCGAAACATGGTTAGAGCACTTATGTGTCCTGAGCTAATACTGAAT  
GCGGCTAATGCGAATCTTGTAACATTCTCCAATTCTTTTGATAGTCGGCAAGTAAAGGG  
AAACATCTTCTCGATCTTTGTTATAGCTATTGCAGCCGCTGAAGCAGCTATTGGATTAGC  
TATTGTTCCAGCAATATATCATAACAGAAAATCAACTCGTATCAATCAACTTAATTTGTTA  
AAATGGATGGAACCTATATATAAATATGCTCGGATCGTGCCTTTTCTTCCGTTTTTCAGCCT  
CTGTGCCAATAGGATCGGGATTGTTCCTTTTCCAGAGACAACCGAGAGTCTTCGTCGT  
ATATGGGCTCTTATTAGCATTTCCTCGTTAAGTACAGCTATGTTTTTATCATCCGATCTGT  
TATTGCAGCAAATTACCGGCGGTCTTATTCATCAATATTTATGGTCCTGGACCATTAATAA  
TAATTTTTCTCAGAGTTGGGCTATTTGATCGATCCACTTACTTCCATTATGCCAGTATCA  
GTTACGACTGTCGGAACCTATGGTTATGATCTACAGCGATAATTATAATGCTCATGACCAA  
GGATATGTGAGGTTCTTCGCTTATCTCAGTCTTTTCAATGCTTCTATGCTGGGACTAGTT  
ATTAGTCTGATCTAGTACAAATCTACATTTTTTGGGAATTAGTAGGAATGTGTTCTTATT  
TATTAATAGGTTTCTGGTTTACCCGACCTAGTGCAGCCAATGCCTGTCAAAAAGCATTTA  
TAACTAATCGTGTAGGGGACTTCGGACTCCTATTAGGAATCCTGGTTTTTTTATTGGATAA



CAGGTAGTTTCGAATTTTCGAGATTTATCGGAAATATTTAACAAA---GAAGTTAGCTTATT  
TCTCGCTACTCTGTGTGCTTTTCTCTCATTTTCAGGTCCAGTAGCTAAATCTGCACAATT  
TCCACTTCATGTACGGTTACCTGATGCTATGGAGGGACCTACTCCTATTTTCAGCCCTTAT  
ACATGCCGCTACTATGGTAGCAGCAGGAATTTTTCTCGTAGCTAGATTGTTCCCTCTTTT  
CAAAGCTCTACCTTTCATAATGAATCTCATCTCTTGGATAGGTGGAATAACGGCTCTATT  
GGGATCTACTATGGCTCTCGCTCAAAAAGATCTTAAAAGAGGTTTAGCTCATTCTACCA  
TGTCTCAATTGGGTTATATGATGTTAGCTCTAGGTATAGATTCTTACCGAGCTGCTCTGTT  
CCATCTGATTACACATGCCTATTCTAAAGCATTATTGTTTCTAGGATCTGGATCAGTGATC  
CATTCTATGGAACCTATTGTTGGATATTGTCCTAGCAGAAGTCAAAATATGGCTCTTATG  
GGTGGTTTGAGGAAATATATGCCAATTACAGGAACAACTTTTCTCTTAGGTACACTTTC  
TCTTTGTGGTATTCCACCTTTTGCTCGTTTCTGGTCCAAAGATGAAATTCTCAGCGATAG  
TTGGCGATATCCCCCATTCTTGGAGGGATAGCTTGGTTTACAGCGGGATTAAGTGCATT  
TTACATGTCTCGTATGTATTTCCCTACTTTTGAAGGGGACTTCCGCGCAAATTTATAT--C  
ATTTATATAACGACTCTATTTCACTCTATCCAACCTCTATATGGGGAAAGAAAGAATCTGA  
TACATTCACCAAACTATATCACAATTACTTAGGAAAAA-----  
-----CTATTTTCA-----ATTTTCGGA  
GAAGATGGAACGATT-----  
-----  
-----  
-----ATGAATTTACCTGAACCGATATGTAATATTCTTTTGGTCCCTTTAGGGCTAGGTCT  
CATATTAGGAGGTCTGGGAGTAGTATTACCTACCAATATAATTTATTCTGCCCTTTCATTG  
GGATCGGTTCTTGTGTTGTATATCCCTTTTATATATTCTATTGAACGCGGATTTTCGTAGCTG  
CTGCACAGATCCTGATCTACGTAGGAGCTATAAATGTCTTGATCGTATTTGCTGTAATGT  
TAATGAATAACCGAAATAT--CCTAATTCTCCTCCCTGGACCGTCCGAGATGGTATCAC  
TTCAGTAGTTTGTATGAGTCTTTTTTGTTCATTAATTAATTAATCCTGAACACATCATGG  
TCCGTAATATCTCTGACTACAGAGTTGAATCAATTTTTAGAACAGGACTTAACAAACAA  
CATTCAACGTATTGGGGTTCATTTATCAACTGATTTTATCCTTCCATTCGAACCTATTCT  
ATAATTCTTCTAATTACCCTCGTAGGAGCAATTAATCTATGGCTCGTCGA-----ATGCTTGCT  
ACAGAAAAAGATCCTATGATGGTAAGTATGGGTCCCTCATCATCCATCGATGCATGGTGT  
TCTTCGACTTATTGTTACTCTAGATGGTGAAGATGTTATTGATTGTGAACCTATATTAGGT  
TATTTGCATAGGGGGATGGAAAAAATTGCTGAGAATCGAACAAATTGTACAATATCTCCC  
CTATGTAACACGATGGGATTATTTAGCTACTATGTTACAGAGGCAGTAACGGTAAATG  
CACCGGAAAGATTAGGAAATATTCAAATACCTAGAAGGGCTAGCTATATCAGGGTGATT  
ATGCTAGAGTTGAGTCGTATAGCTCCTCATTATTATGGCTTGGACCTTTCATGGCTGATA  
TTGGTGACAGACCCCTTCTTTTATATTTCTAGAGAGAGGGGAAATTATATATGATTTATT  
CGAAGCTGCCACGGGTATGCGAATGATGCATAATTATTTTCGTATCGGAGGAGTAGCTG  
TAGATCTACCCTACGGTTGGATAGATAAATGCTTAGATTCTGCGATTATTTCCCTACCAA  
AAGTGGCTGAATATGAAAGGCTTATTACGCACAATCCCATATTTTTAGAACGAGTTGAG  
GGAGTAGGCATTATTAGTAGAGAAGAAGCAATAAGTTGGAGTTTATCAGGACCCATGCT  
ACGAGCTTCTGGAATACAATGGGATCTTCGTAAAGTTGATCATTATGAATGTTACGATG  
AATTTGATTGGGAGGTCCAATGGCAAGAAGAAGGAGATTCATTAGCTCGTTATTTAGTA  
CGAATTGGGGAAATGACAGAATCTATAAAAATTATTCGACAGGCTTTAAAAGTAATTC  
GGGAGGACCTTATGAGAATTTAGAGGCCCGCGCCTGGATAAAGGTAAAGATTCCGAA

TGGAATGATTTTGAATTCGATTTATTAGTAAAAACCTTCCCCTACCTTTGAGTCATCG  
AAACAAGAACATTATGTAAGAGTAGAAGCTCCAAAAGGAGAATTAGGAATTTTTTTAG  
TTGGAGATGATAGTATTTTCCCTTGGAGGTGGAAAATTCGCCCATCTGGTTTTATTAATT  
TGCAAATCCTCCTCAACTGGTGAAAAATATGAAATTGGCCGATATCATGACAATTTTG  
GGTAGTATAGATATCATTATGGGAGAGGTTGATCGT-----ATGGTGACTGGGTTCATAA  
ATTATAGTAAACAAGCAATACAAGCTGCGAGATACATTGGTCAAGGTTTTATAGTTACC  
CTATATCATATGAATCGTTTACCTATGACTATTC AATATCCCTATGAGAAATTGATCCCATC  
AGAACGATTTTCGTGGACGGATCCATTTCGAATTTGATAAATGTATTGCTTGTGAAGTATG  
CGTCCGTGTATGTCCAATCAATCTACCCGTTGTTGATTGGAAATTTGGAGAAGATATTGG  
AAAAAACGATTAGAAAATTATAGTATTGATTTTCGGAATTTGTATATTTTGTGGTAATTG  
TGTTGAGTATTGTCCACAAATTGTCTGTGATGACTGAGGAATATGAACTTTCGACCT  
ATGATCGTCATGAATTAATTATGATCAGATCGCTTTAGGACGTTTACCGATATCGGTGA  
TTGGAGATTCATAATTCGGACAATTTGAGTTCA-----ACTACGAGCGGACATTATGATC  
CAGGAACTGTTACCAGTTCTATGCAGGGTAGATTATCCGCTTGGCTAGCCAAGCATAAG  
TTAGCTCATAGACCTCTGGGTTTTGATTACCAAGGCATAGAAATTTTACAGATCAAATAT  
GAAGATTGGGCCTCTATAGCTGTGCTTTTATATGTTTATGGTTTCAATTATCTCCGTTCTC  
AGTGTGCCTATGATGTAGCGCCAGGGGATCGTTGGCTAGTGTATATCATCTTACGAAA  
ATACAGGATAATGCGGATCAACCCGAAGAGGTATGTATAAAAGTTTTTGTCCCGAGGAA  
AGATCCCAGAATCCCGTCTGTTTTCCGTATTTGGAAAAGTGCTGATTTTCAGGAACGGG  
AATCTTATGATATGTTGGGAATCCTCCATGAAAGTCATCCACGTTTCAAACGTATATTGA  
TGCCTGAGAGTTGGATTGGTTGGCCTTTACGCAAAGATTATATTGCACCTCATTCTATG  
AGATAACAAGATGCTCAT-----ATGGGCTATGAGTTTCAATGTATTGGGTATATCTACCTTTA  
TAGAAGTTTTGATTCTCGTGCTTATCTCAATTGTTGGTCCAGTTTATGCATGGCGAAAAG  
GAGCATTGGAATGGTCTCAGCTTCCGGGTATTTGGGTGGTAGAGAGGAAGTGGAAAAT  
TTCATAAAGCCAATGAGGAATCCTATAGAGTCACCTTTACCTAATCGAACA ACTCCAAA  
TTCAGTTATTTCAACCACCCGAATGATATGTCAAATTGGGCCAGACTCACCAGTTTAT  
GGCCACTCCTTTATGGTACTAGTTGTTGTTCCATCGAATTTGCTTCATTAATAGGTTTCG  
GATTCGACTTTGATCGTTACGGTCTGGTACCAAGATCTAGTCCTAGACAAGCCGACCTC  
ATCATAACAGCTGGCACTGTGACCATGAAAATGGCTCCTTCTTTAGTGAGATTATATGA  
ACAAATGCCCGAACCGAGATATGTAATTGCTATGGGAGCATGTACTATTACAGGAGGAA  
TGTTCAAGTACAGATTCTTATAGTACCGTTCGTGGAGTGGATAAGTTAATTTCCGTTAGATG  
TCTATTTGCCGGGTTGCCACCTAAACCAGAGGTTATTATAGATGCTATAACAAA ACTTC  
GTGAGAAGATAGCTCGAGAAATATATGAAGATAGGACCGAGCCCCAACAAGTGAAGA  
GATATTTTCGCTAGAAATCATAGGTTTTGTGTGCGGCATACTTTCAAGATACCCTCCGGAA  
CATTTGGA-----GAGAGTTCGGTACAAGAATCGAGGAATGAGGAATCGTTAGTGGAG  
AATAACGAACAGGAAATTAATTTTCAAAAATTCATATGCAAAATAGAAATATTTATGAC  
TGGGTAAAAAAGTGGATGACTCGATCAATTTCCATCTTGATCATGATACATATAATAACT  
CGGACATCTATTTCGAATGCATATCCCATTTTTGACACAGCAGGGTTATGAAAATCCCCGA  
GAAGCAACCGGGCGTATTGTATGTGCCAATTGTCACCTTGGCTAAAAAGCCTGTGGATAT  
CGAGGTTCCACAGTCCGTGCTTCCCGATACCGTATTTGAAGCAGTTGTTAAAATCCCCT  
GCGATATGCAAATGAAACAAGTTATTGCTAACGGTAAAAAAGGGACTTTGAATGTAGG  
AGCTGTTCCAATTTTACCTGAGGGCTTTGAATTAGCCCCCCCCGATCGTATTTCTCCTAA  
GATTAAGGAAAAGATAGGTAATCTTTATTTTTCAGAACTATCGCCCCAATCAAAAAATA  
TTCTTGTAATAGGTCCTGTTCCCTAGTAAAAAATATAGTGA AATTGTGTTCCCATCCTTT

CACCGAATCCTGCTACTAATAAAGAAGCTCACTTCCTTAAATATCCCATCTATGTGGGTG  
GTAATAGAGGAAGAGGACAAATTTATCCCGACGGGAGCAAGAGCAACAATACAGTCTA  
TAATGCTTCAGCAACAGGTAGAGTAAGCAAAATCCTACGTAAAGAAAAGGGTGGATAT  
GAAATCACTATTGAGAATACATCAGATGGTCATCAAGTGGTCGATATTGTACCTCCGGG  
ACCGGAACCTTCTCGTTTCAGAAGGCGAATTCATCAAGGTTGATCAGCCGCTAACGAAT  
AATCCTAATGTAGGTGGATTTGGCCAGGGAGATGCAGAAATAGTACTTCAAGATCCATT  
ACGTGTTCAAGGTCTTTTATTCTTCTGGCATCTGTTATTTTGGCACAGGTATTTCTGGT  
CCTTAAAAAGAAACAATTTGAGAAGGTTCAATTGGTTCGAGATGAATCTTCTCGATAAA  
GTATACGATTGGTTTCGAAGAGCGTCTCGAGATTCAGGCGATTGCGGATGATATAACTAG  
TAAATATGTTCCCTCCTCATGTCAATCTATTTTATTGTCTGGGGGAGTCACTGACCTG  
TTTTTTGGTACAAGTAGCTACTGGTTTTGCTATGACTTTTTTACTATCGTCCGACCGTTAC  
AGAAGCTTTCGCCTCTGTTCAATACATAATGATCGAAGTAACTTTGGTTGGCTAATTC  
GATCAGTCCATCGATGGTCGGCAAGTATGATGGTTCTAATGATGATCCTGCACGTATTCC  
GTGTTTATCTCACAGGTGGGTTTTAAAAACCTCGTGAATTAACCTGGGTTACAGGTGTC  
ATTCTGGCTGTACTGACCGTATCTTTCGGTGTAACTGGTTATTCCTTGCCCTGGGATCAA  
ATTGGTTATTGGGCAGTAAAAATTGTGACCGGTGTGCCTGAGGCTATTCTGTGATAGG  
ATCTCCTTTGGTAGAGTTATTGCGCGGAAGTATTAGTGTGGGTCAATCCACCTTGACTC  
GTTTTTATAGTTTACACACTTTCGTATTACCCCTTCTTACTGCTGTATTTATGTTAATGCA  
CTTCCTAATGATCCGTAAGCAAGGTATTCCAGGTCCTTTA-----  
-----ATGGGACATAATTCTTATGGAGAACCTGCTTGGCCTAACGATCTTTTA  
TATATTTTTCCAGTAGTAATTCAGGTACTATTGCATGTACCATAGGTTTAGCGGTTCTAG  
AACCATCAATGATTGGTGAACCAGCAGATCCATTTGCAACTCCTTCGGAAATATCGCCC  
GAATGGTATTTTTTCCCGTATTCCAATACTTCGTACAGTACCTAATAAATTATTGGGTG  
TCCTTCTAATGGCCTCAGTACCCGCGGGATTATTGACGGTACCTTTTTTCGGAGAATGTTA  
ATCAATTTCAAATCCATTTTCGTTCGTCCAGTAGCCACAATAGTATTCTTAATCGGTACTG  
CAGTAGCCCTTTGGTTAGGTATTGGAGCAGCGTTACCTATCGATGAATCTTTAACTTTAG  
GTCTTTTCATGATTGAAGCTTTGCCATCCGGAATTGTGTTAGGTCTAATTCCTATCACTT  
TGGCCGGATTATTCGTAACCTGCGTATTTACAATAACCGACGTGGTGATCAATTGGATATTA  
CGCCTACTATAACTAGTTATTTTCGGTTTTCTATTGGCTTCTTTCATTTCAACCTTAGCCTT  
ATTTATTGGTTTGGAGCAGGATACGACTTATTATGGATATAATCAGTATCGCCTGGGCTGCT  
CTAATGGTAGTTTTTACATTTTCTCTTTCCTACTCGTAGTATGGGGAAGAAGTGGACTAATG  
ATTATTCGTTACCCGGAACCAGAGGTCAAGATCGTGGTGGAGAGGGATCCTATAAAAA  
CCTCTTTTGAGAAATGGGCCAAACCTGGTCAATTTCTCAAGGACGCTAGCTAAGGGACC  
TAATACTACCACTTGGATCTGGAACCTACATGCTGATGCTCACGATTTTGATAGCCATAC  
CAATGATTTGGAAGAGATCTCTCGCAAAGTATTTAGCGCTCATTTCGGTCAACTAGCCA  
TCATATTGATTTGGCTAAGTGGGATGTACTTCCATGGCGCTCGTTTTCTCCAATTATGAAG  
CATGGCTGAGTGATCCTACTCGCATCAAACCCAGTGCTCAGGTGGTTTGGCCGATAGTA  
GGTCAAGAAATCTTGAATGGGGATGTAGGTGGGGTTTTTCGAGGAATACAAATAACCT  
CTGGTTTTTTTCAAATTTGGCGAGCATCTGGAATAACTAGTGAATTACAACCTTACTGC  
ACCGCAATTGGTGCATTGATCTTTGCAGCTTTAATGCTTTTTTGTGGTTGGTTCCATTAT  
CACAAAGCTGCTCCAAAATTGGCTTGGTTCCAAGATGTAGAATCCATGTTGAACCACC  
ATTTAGCAGGGTTACTAGGACTTGGGTCTCTATCTTGGGCAGGACACCAAGTACACGTC  
TCTTTACCCATTAATCAACTCCTAGATGCTGGAGTGGATCCCAAGGAGATAACCACTTCC  
TCATGAATTTATTTCAAATCGCGATCTTGTAGCTCAACTTTATCCTAGTTTTGCTAAGGG

ATTAACCCCATTTTTTGGCCCTGAATTGGTCGGAATATTCAGAATTTTTGACCTTTCGTGG  
AGGACTAAATCCAGTAACGGGGGGTCTGTGGCTGACCGATACTGCGCATCATCATTGG  
CTATTGCAATCCTTTTCTGATAGCTGGTCATATGTATAGGACCAATTGGGGCATTGGCC  
ATAGCCTCAAAGAAATTTTGGAAAGCTCATAAAGGTCCGTTTACGGGTGAGGGTCATAA  
AGGTATTTACGAGATCTTAACTACCTCATGGCATGCTCAATTAGCTCTTAACTAGCTAT  
GTTAGGCTCTTAACTATTGTTCGTAGCTCACCACATGTATTCGATGCCCCCTTATCCATAC  
CTAGCTATTGACTACGGTACCCAACCTCTCTCTGTTACACATCACATGTGGATCGGGGG  
GTTTCTTATAGTTGGCGCTGCTGCACATGCAGCCATTTTTATGGTAAGGGACTACGATCC  
AACTATTCAATATAACAATCTATTAGATCGTGTCTTAGACATCGTGATGCGATCGTATCA  
CACCTCAACTGGGCATGTATATTCTTAGGCTTTCATAGTTTTGGTCTGTATATTCATAATG  
ATACTATGAGCGCTTTAGGACGTCCTCAAGATATGTTTTTCAGATACTGCCATAACAATTAC  
AACCTATCTTTGCTCAATGGATACAAAACACTCATGCTTCAGCACCTAGTTCAACAGCT  
CCTGGTGCAGCAGCGAGCACCAGCTTAACTGGGGAGGTGGTGATTACTAGCAGTAG  
GTGGCAAAGTGGCTTTGTTACCAATTCATTAGGAACCGCGGATTTTTTGGTACACCAC  
ATTCATGCATTTACTATTCATGTGACTGTATTAATACTACTGAAAGGTGTTTTATTTGCC  
GTAGCTCCCGTTTAAACCTGATAAAGCGAATCTTGGTTTTCGTTTTCCCTGCGATGGAC  
CTGGGAGAGGAGGGACGTGCCAAGTATCTGCCTGGGATCATGTTTTCTGGGTTTATTC  
TGGATGTACAATGCGATTTTCAGTAGTAATATTCATTTTCAGCTGGAAGATGCAGTCCGAT  
GTTTGGGGTAGTATAAGTGATCGGGGAGTGGTAACCCATATCACGGGAGGAACTTTG  
CACAGAGTTCCATTACCATTAACGGGTGGCTCCGTGACTTTTTATGGGCACAAGCCTCT  
CAAGTGATCCAATCTTATGGTTCTTCATTATCTGCATATGGTCTTTTTCTTTTTAGGTGCTC  
ATTTTGTGGGCCTTTAGTTTAAATGTTCTTATTTAGTGGTCGTGGGTATTGGCAGGAAC  
TCATCGAATCTATCGTTTGGGCCATAACAAATTTAAAGTCGCTCCTGCTATCCAGCCC  
AGAGCCTTGAGCATTGTACAAGGACGTGCTGTAGGAGTAGCTCATTACCTCCTGGGTG  
GAATCGCCACAACATGGGCGTTCTTCTTAGCAAGAATTCTTGCAGTAGGAATGGCATC  
AAGATTTCCAAAGTTCAGCCAAGGCTTAGCCCAGGACCCAACTACTCGTCGTATTTGG  
TTTGGTATTGCTACCGCACATGACTTCGAGAGTCATGATGATTAATGGAAGAACGCCT  
TTATCAGAAGATTTTTGCTTCTCATTTTTGGTTCAGTTAGCAATAATTTTTCTGTGGACCTC  
TGGTAATTTGTTTCACGTAGCTTGGCAAGGCAATTTTCGAAACATGGGTACACGACCCTT  
TACACGTAAGACCTATTGCTCATGCAATTTGGGATCCTCATTTTCGGTCAACCGGCTGTA  
GAAGCCTTACCCGAGGAGGTGCTTCCGGTCCGGTTAATATTGCTTATTCCGGCGTTTA  
TCAATGGTGGTATAACAATTGGCTTGCACCAATGAAGATCTTTATACTGGAGCTCTTTT  
CTTGTTATTTCTTTCTGCCATTTTTCTAGTAGCAGGTGCTTACATTTACAACCTAGATGG  
AAACCGAGTGTTTCATGGTTCAAAAATGCTGAATCTCGTCTCAATCATCATTTGTCAGG  
ACTCTTTGGAGTAAGTTCTTTGGCTTGGACGGGACATTTAGTTCATGTCGCTATTCCCTG  
AATCAAGGGGGGAGCACGTCAGATGGGATAATTTCTCAAATGTATTACCGTATCCCCAA  
GGTCTAGGACCGTTTCTTACAGGTCAGTGAATCTTTATGCTCAAATCCTGATTCTAGT  
AGTCACTTATTCGGTACTTCTCAAGGGGGCGGAACTGCTATTCTAACTCTTCTCGGAGG  
ATTCCATCCACAACTCGAAGTTTATGGCTGACTGATATCGCTCATCATCATTTAGCTAT  
TGCATTTGTTTTTTTCATCGCTGGTCATATGTATAGAATAATTTTCGGGATTGGGACAG  
TATAAAAGATATTTTAGAAGTACATATTCCTCCAGGAGGCCTATTAGGACGCGGACATAA  
GGGTCTTTATAACACAATCAATAATTTCTTCACTTCCAACCTAGGTCTTGCTCTAGCTTC  
TTTGGGGGTTATCACTTCTTGGTAGCTCAACACATGTATTTTACCTGCTTATGCATTC  
ATAGACAAGACTTCACTACCCAAGCTGCACTATATACTCATCATCAATACATTGCCGGG

TTCATTATGACAGGGCCTTTGCTCATGGAGCTATATTCTTCATTAGGGATTATAATCCAG  
AACAAAATAAGGACAATGTATTGGCGAGAATGTTAGAGCATAAGGAAGCTATAATATCT  
CATCTGAGTTGGGCTAGTTTATTCCCTAGGTTTCCATACCTTGGGACTTTATGTCCATAAC  
GATGTTATGCTTGCTTTTGGTACTCCAGAAAAACAAATATTGATCGAGCCCATATTTGCT  
CAGTGGATAACAATCTGCTCATGGTAAGGCCTTATATGGTTTTGATGTACTCTTATCTTCA  
ACAAATGGTCCGGCATTCAATGCTGGTCAAAGCATATGGTTACCTGGTTGGTTGAATGC  
TATTAATGAT-----AATAGCAATTCATATTCCATAACAATTGGTCCTGGAGACTTTTTGGT  
TCATCATGCTATTGCTTTAGGTTTGCATACAACCTACGTTGATCTTAGTAAAAGGTGCTTT  
AGATGCGCGTGGTTCTAAGCTAATGCCAGATAAGAAAGATTTTGGTTATAGTTTCCCCT  
GCGATGGTCCAGGACGAGGCGGTACTTGTGATATTCGGCCTGGGATGCTTTTTACTTG  
GCAGTTTTTTGGATGTTGAATACCATTGGATGGGTTACTTTCTACTGGCATTGGAAGCAT  
ATCACCTTATGGCAGGGTAATGTAGCGCAATTTAATGAGTCTTCCACTTATTTAATGGGA  
TGGTCAAGAGATTATCTCTGGTTAAACTCCTCACAACCTATTAATGGATAACAATCCTTTC  
GGTATGAACAGTTTATCTGTCTGGGCGTGGATGTTCTTATTCGGGCATCTTGTTTGGGCT  
ACTGGATTTATGTTTCTGATTTCTGGCGTGGATATTGGCAAGAACTGATAGAACTCTA  
GCATGGGCCACGAGCGCACACCTTTGGCTAATTTAGTTTCGATGGAGAGACAAGCCAG  
TAGCTCTTCCATCGTTCAAGCACGATTAGTTGGATTAGCTCATTTTTCCGTAGGTTATAT  
ATTCACTTATGCAGCTTTCTTAATCGCCTCTACATCAGGCAAATTTGGTATGGCGCATT  
AGTAAAAATTTATGATACGTGTATTGGTTGTACCCAATGTGTACGAGCTTGTCCACAGA  
TGTATTGGAAATGATACCCTGGGAAGGATGTAAAGCTAAGCAAATTGCTTCTGCTCCAA  
GAACAGAAGACTGCGCAGGTTGCAAGAGGTGTGAATCTGCTTGCCAACAGATTTCTT  
GAGTGTACGTGTTTATTTGTGGCATGAGACAACCTCGCAGTATGGGTCTAGCTTATATGA  
CAGATCCCAACTTACCTTCTATTTTTGTGCCTTTAGCGGGCTTATTATTTCCGGCAATTGC  
AATGGCTTTTTTGTATTTCTATGTTCAAAGAAAAAGATTGTAATGCGAGATATAAAGAT  
ATATCTTCCGTGGCACCTGTGCTAGCTACTTTATGGTTCGGGTCTTTAGCCGGTCTATT  
GATAGAGATCAATCGTTTTTTCCCGGATGCTCTGGCTTCTCCCTTCTCCTCATTCATGAC  
TGCAACTTTAGAAAGACGCGAAAGCGCAAGCCTATGGGGTCGCTTTTTCGATTGGATT  
ACCAGCACCGAAAACCGCCTTACATTGGATGGTTCCGGTGTCTTAATGATCCCTACACT  
ATTGACCGCAACCTCTGTATTCATCATCGCTTTCATTGCAGCTCCTCCAGTAGATATTGA  
TGGTATTTCGCGAGCCTGTTTCTGGTCTCTTCTTTATGGAAACAATATTATCTCCGGTGC  
TATTATCCCACCTCTGCAGCTATTGGTTTGCACCTTCTACCCCATTTGGGAAGCAGCTTC  
CACCGATGAATGGCTATAACAACGGTGGTCCCTATGAGCTAATCGTTCTACACTTCTACT  
TGGTGTAGCTTGTTACATGGGTTCGTGAGTGGGAACCTTAGCTTCCGCTTAGGTATGCGCC  
CTTGGATTGCTGTTGCATACTCAGCTCCTGTCGAGCTGCTACTGCTGTTTTCTTGATTT  
ACCCCATCGGTCAAGGAAGCTTCTCCGACGGTATGCCTCTAGGAATTTCTGGTACTTTC  
AATTTTATGATTGTATTCCAGGCTGAGCACAATATCCTTATGCATCCATTCCACATGTTAG  
GTGTAGCTGGCGTATTCGGCGGCTCTCTATTTCAGTGTATGCATGGTTCCTTAGTAACCT  
CTAGTTTGATCAGAGAACTACCGAGAATGAGTCTGCTAATGCAGGTTACAAATTCGGT  
CAGGAGGAAGAAACCTATAATATCGTAGCTGCTCACGGTTATTTTGGACGATTGATCTT  
CCAATATGCTAGTTTCAATAACTCCCGTTCCCTACATTTCTTCTTAGCTGCTTGGCCTGT  
AGTAGGTATTTGGTTTACTGCTCTGGGTATTAGCACTATGGCTTTCAACTTAAATGGGTT  
CAATTTCAACCAATCTGTAGTTGATAGTCAAGGTCGTGTAATTAACACTTGGGCTGATAT  
AATTAATCGTGCTAACCTTGGTATGGAAGTTATGCACGAACGTAACGCTCACAACCTCC  
CTTTGGATCTAGCCGCTGTTGAAGCTCTTCTATAGCTGGAATGGGTTTACCTTGGTATC

GTGTCCATACCGTCGTATTGAATGATCCTGGCCGGTTACTCTCTGTACATATAATGCATAC  
AGCTCTAGTTTCTGGTTGGGCCGGTTCAATGGCTTTGTACGAATTAGCAGTCTTTGATC  
CATCCGATCCTGTTCTTGATCCAATGTGGAGACAAAGTATGTTTCGTTATACCTTTTATGA  
CTCGTTTAGGAATAAAGGATTCGTGGGGTGGGTGGAGTATCACT--GGAGAAACTGTAA  
CCAATCCAGGTATTTGGAGTTATGAAGGTGTGGCCGGGGCACATATCGTGTTTTCTGGC  
TTGTGCTTTTTGGCAGCTATCTGGCATTGGGTATATTGGGATCTAGACATATTCTGCGAT  
GAACGTACGGGAAAACCTTCTCCAGATTTGCCCAAGATCTTTGGAATTCATTTATTCCTA  
TCAGGAGTAGCTTGTTTCGGATTTCGGAGCATTTTCATGTAACGGGTTTGTATGGTCCTGG  
AATATGGGTGTCTGATCCTTATGGACTAACTGGGAAAATACAACCTGTAAATCCAGCGT  
GGGGAGCTGAGGGTTTCGATCCTTTTCGTTCCAGGAGGAATAGCTTCTCATCATATTGCA  
GCAGGTATATTGGGTATATTAGCAGGTCCATTCCATCTTAGTGTTTCGTCCTCCCAACGT  
TTATACAAAGGATTACGTATGGGCAATATTGAAACTGTCTTATCCAGCAGTATCGCCGCT  
GTGTTTTTTGACAGCTTTCATTGTCGCTGGAACCATGTGGTATGGCTCCGCAACTACCCC  
GGTCGAATTATTTGGTCCTACTCGTTACCAGTGGGATCAGGGATACTTCCAACAAGAAA  
TAGATCGACGGGTTTCGTGCCGGTCTGGCTGAAAATCGAAGTTTATCGGAAGCTTGGTC  
CAAATTTCCCGAGAAACTCGCTTTTTATGACTACATTGGTAATAATCCAGCTAAAGGGG  
GGTTATTCAGAGCGGGTGCATGGACAATGGAGATGGAATAGCTGTTGGTTCGGTTAGG  
ACACCCTATCTTAAAGATAAAGAAGGACACGAGCTTTTTGTACGTCGTATGCCTACCT  
TTTTTGAACATTTCCAGTAGTTCTGGTAGATGAAGAAGGAATTGTGAAAGCCGATGTT  
CCTTTCAGGAGAGCAGAATCGAAGTATAGTGTTGAACAAGTAGGCGTAACTGTTGAGT  
TCTATGGGGGTGAACTTGATGGGGTTAGTTTTGGTGATCCCGCCACAGTGAAAAAATAT  
GCTAGACGTGCTCAATTAGGGGAAATTTTTGAATTAGATCGTGCTACTTTGAAATCAGA  
TGGTGTTTTCCGCAGTAGTCCAAGGGGTTGGTTACTTTTTGGACATGCTACATTTGCTC  
TTCTTTTCTTTTCCGGACACATTTGGCATGGTGCTAGAACCTTGTTTCAGAGATGTTTTG  
CTGGTATCGACCCGGATTTAGATGCCCAAGTCGAATTTGGAGCATTCCAAAAACTGGG  
AGATCCAATACTAAAAGACAAGTGGTAATGAAAACCTTATATTCCCGAGGAGGTTCT  
ACCCCGTGGAACGCTCTTTAATGGAACCTAGCTTTAGCTGGTTCGTGACCAAGAAAC  
CACAGGTTTCGCTTGGTGGGCCGGGAATGCTCGACTTATCAATTTGTCCGGTAAATTAC  
TCGGGGCTCACGTGGCTCATGCCGGATTAATTGTATTCTGGGCCGGAGCAATGAACCTA  
TTTGAAGTGGCTCATTTTCGTACCCGAAAAGCCTATGTATGAACAAGGATTGATTTTACT  
TCCCATCTAGCTACTCTAGGATGGGGAGTAGGTCCTGGTGGGGAAATCGTGGACACT  
TTCCATACTTTGTATCTGGGGTACTCCACTTAATTTCTCTGCAGTTTTAGGTTTTGGTG  
GTATTTATCACGCACTTATAGGACCCGAAACTTTGGAGGAATCCTTCGCATTTTTTGGTT  
ATGTATGGAAAGATAGGAACAAAATGACCACAATTTTGGGTATTCACCTAATCCTGCTA  
GGTGTGGTGTCTTTTCTCCTAGTGCTCAAGGCTTTGTATTTTGGAGGTGTATATGATACC  
TGGGCCCTGGTGGTGGAGATGTAAGAAGAATTACGAACCTGACTCTTGACCCAAGTG  
TTCTATTTGGTTATTTGCTTAAGTCCCCCTTTGGTGGAGAGGGATGGATTGTTAGTGTGG  
ACAATCTAGAAGATATAATCGGAGGACATGTATGGTTAGGTTCCATTTGTATCTTCGGCG  
GTATCTGGCACATCTTAACCAAACCTTTTGCATGGGCTCGTCGTGCGTTTGTATGGTCC  
GGAGAAGCTTACTTGTCCCTATAGTTTAGGAGCCCTAGCTGTGTTTGGTTTCATTGCTTGT  
TGTTTTGTCTGGTTCAACAATACAGCTTATCCAGTGAATTCATGGGCCTACCGGCC  
AGAAGCCTCTCAAGCTCAAGCGTTACTTTTTCTAGTTAGAGACCAACGTCTCGGAGCT  
AATGTGGGGTCTGCCCAAGGACCTACCGGTTTAGGTAAATACCTTATGCGTTCTCCTAC  
CGGAGAAATTATCTTCGGAGGAGAAACAATGCGTTTTTTGGGATCTTCGTGCTCCCTGGT

TGGAACCTCTAAGGGGTCCTAATGGTTTGGACCTGAGTAAGTTGAAAAAAGACATACA  
GCCCTGGCAAGAACGACGTTTCGGCGGAATATATGACTCATGCTCCTTTAGGTTCTTTGA  
ATTCCGTGGGTGGTGTAGCTACTGAGATCAATGCGGTAAATTATGTCTCTCCCCGAAGT  
TGGTTAGCTACCTCTCATTTTGTCTAGGAATTTTCTCTTTGTAGGTCATTTGTGGCAT  
GCGGGAAGGGCTCGTGCAGCTGCAGCAGGATTCGAGAA-----AGGAAT-----  
-----ATGGATGACTGGCTGCGGAGAGAC  
CGTTTCGTTTTTGTAGGTTGGTCCGGTCTATTGCTCTTTCCTTGTGCCTATTTGCCCCTA  
GGTGGATGGTTCACGGGTACAACCTTTGCAACTTCGTGGTATACCCATGGATTGGCCAG  
TTCTTATTTGGAGGGCTGTAATTTCTTAAGTCCGCGAGTTTCTACTCCTGCTAATAGTTT  
AGCGCATTCTTTGTTGTTATTATGGGGTCCCGAAGCACAAGGAGATTTTACTCGTTGGT  
GCCAATTAGGTGGTCTATGGACCTTCGTTGCTCTTCATGGTGCTTTTGGTCTAATAGGCT  
TCATGTTACGACAATTTGAACTTGTCTGATCTGTACAATTGCGACCTTATAATGCAATTG  
CATTCTCTGCTCCAATTGCTGTTTTTGTCTGTATTCTTGATCTATCCATTAGGCCAGTC  
TGGCTGGTTCCTTCGCACCTAGTTTTTGGTGTAGCAGCTATCTCCGATTTATCCTCTTTTT  
CAAGGTTTTATAATTGGACCTTGAACCCATTTTCATATGATGGGAGTTGCCGGAGTATTG  
GGTGCTGCTCTTTTATGTGCTATTCATGGTGCTACTGTGGAAAATACTTTATTGGAAGAT  
GGTGATGGTGCAAATACGTTCCGTGCTTTTAACCCAATCTGAAGAGACTTATTC  
CATGGTCACTGCTAACCGTTTCTGGTCCCAAATTTTGGGGTTGCTTTTTCCAATAAAC  
GTTGGTTACATTTCTTTATGTTATTTGTGCCAGTGACCGGTTTGTGGATGAGTGCCATTG  
GAGTAGTTGGCCTAGCTCTAAACCTACGTGCATATGACTTTGTTTCCCAAGAGATCCGT  
GCAGCAGAAGATCCCGAATTTGAGACTTTCTACACCAAAAATATTCTCTTGAACGAAG  
GTATTCGTGCTTGGATGGCGGCTCAGGATCAGCCTCATGAAAACCTTATATTCCCCGAG  
GAGGTTCTACCCCGTGGAACGCTCTTATGTCTGGGAATACGGGAGAACGCTCCTTTG  
CTGACATTATTACCAGTATTCGATACTGGGTTATCCATAGCATTACTATACTTCCCTATT  
ATTGCAGGTTGGTTATTTGTCAGCACAGGTTTGGCTTATGATGTGTTTCGGGAGCCCTCG  
GCCGAACGAGTATTTACAGATAGCCGACAGGAGGTTCCATTAATAACTGGCCGTTTCG  
ATCCGTTAGAACAACCTCGACGAATTTACTAGATCTTTTATGACTATAGATAGAACCTATC  
CAATTTTTACAGTTAGATGGTTGGCCGTTACGGACTAGCTGTACCTACAGTTTCTTTCT  
TGGGATCAATATCAGCAATGCAGTTCATCCAACGAATGGCTACACAGACCATTGATGAT  
ACTTCC---GGATCCGGGCCAAGACGAACTGTTATAGGAAATTTATTAACCACTTAATT  
CAGAATATGGTAAAGTAGCTCCTGGATGGGGAATACTCCTTTTATGGGTGTTGCAATG  
GCTCTATTTGCAGTATTCTTATCTATTATCCCGGAGATTTATAATTCTTCCGTTTTATTAGA  
TGGAATTTCCCGTGAAGTATGCTTACTCTTAAGCTGTTTCGTTACACAGTAGTGATTTTT  
CGTTTTTCTTCTTATCTTCGGATTCCCTATCAAACGATCCTGGACGTAATCCTGGACGTAA  
AGAAATGGCCGATACCACTGGAAGGATCCCTCTTTGGCTGATAAGTACTGTAACCTGGTA  
CTCTTGTGATTGGTTAATGGGTATCTTTTTCTACGGTTCATATTCTGGATTAGGGTCATC  
CCTAATGCCAGCTATG-----CCCAATATTTGTCTAGATAATGTA---TTTTATGATCCCTTC-  
--TTGGCTAAATTACCCGAGGCGTATGCTATTTCCGATCCAATTGTAGATGTAATGCCAAT  
TATCCCCGATTTTTTCTTCTTTTAGCCTTTGTTTGGCAAGCTGCTATAAGTTTTCGAATG  
ACACAATCAAACCCGAACGAACAGAATGTTGAATTGAATCGTACCAGCCTCTACTGGG  
GGTTGTTACTCATTTTTGTACTTGCCGTTTTATTCTCTAATTACTCTTTCAATATGGAAGT  
AAATATCCTTGCATTTATTGCTATTGCACTGTTCAATTCAGTTCCTACTGCTTTTCTACTTA  
TCATTTACGTAAAAACGGTTGGTGAAGCAATATGGAAACTGCAACCTTAGTCGCCATC  
TCCATATCTCGTTCACTTGTGAGCTTTACTGGTTACGCTCTGTATACCGCCTTTGGACAA

CCCTCCGAACAACCTTAGGGATCCTTTTCGAGGAACACGAAGACATGGAAGCATTGGTTT  
ATACATTCTGTTGGTATCGACCTTAGGGATAATATTTTCGCTATTTCTTCCGAGACCC  
A C C T A A A G T T C C G A A T G A A G G G A G G A A  
A????????????????????????????????????????????????????????????  
????????????????????????????????????????????????????????????  
?????????-----ATGTCACCAAAAACAGAGACTAAAGCAAGTGTCGGATTAA  
AGCTGGTGTTAAAGATTACAGATTGACTTATTATACTCCTGAATATCAAACCAAAGATAC  
TGATATCTTGGCAGCATTCCGAGTAACTCCTCAACCTGGAGTGCCACCTGAGGAAGCG  
GGAGCTGCAGTAGCTGCCGAATCTTCCACTGGTACATGGACCACTGTTTGGACCGATG  
GACTTACCAGTCTTGATCGTTACAAGGGAAGATGCTATGACATCGAGCCCGTTCCTGGG  
GAGGAAAATCAATTTATTGCCTATGTAGCTTACCCTTTGGATCTTTTCGAGGAAGGTTCT  
GTTACTAACCTGTTCACTTCCATTGTAGGGAATGTATTTGGATTCAAAGCCCTACGAGCT  
CTACGTCTGGAAGATCTGCGAATTCCTCCTGCTTATTCCAAAACCTTCCAGGGTCCACC  
TCATGGTATCCAAGTTGAAAGGGATAAATTGAATAAATATGGCCGTCCCCTATTGGGATG  
TACTATCAAGCCAAAATTGGGTTTATCTGCCAAAATTATGGTAGAGCAGTTTACGAAT  
GTCTTCGTGGTGGACTTGATTTTACTAAAGATGATGAGAACGTAAATCCCAACCATT  
ATGCGCTGGAGAGATCGTTTCTTGTTTTGTGCAGAAGCAATTTATAAAGCTCAGACCGA  
GACGGGTGAAATTAAGGGACATTACTTGAATGCTACTGCAGGTACATGCGAAGAAATG  
ATGAAAAGGGCAGTATTTGCCAGAGAATTGGGAGTTCCTATCGTCATGCATGACTATCT  
GACGGGAGGTTTTACTGCAAACTAGCTTGGCTCATTATTGCCGAGACAATGGCCTAC  
TTCTTACATTCACCGCGCAATGCATGCAGTTATTGACAGACAAAGAAATCATGGTATG  
CATTTCCGTGTACTAGCTAAAGCATTGCGTATGTCTGGTGGAGATCATATTCACGCCGGT  
ACTGTAGTAGGTAACTTGAAGGAGAACGAGAAGTCACTCTGGGTTTTGTTGATCTAC  
TGCCTGATGATTTTATTGAAAAGACCGAAGTCGTGGTATTTATTTCACTCAAGATTGG  
GTATCTATGCCAGGTGTTCTGCCCGTAGCTTCCAGGGGTATTACGTCTGGCATATGCCT  
GCTCTGACCGAGATCTTTGGGGATGATTCTGTACTACAGTTTGGTGGGGAACTTTGGG  
ACACCTTGGGGAAATGCACCTGGTGCAGTAGCTAATCGGGTCGCCCTAGAAGCTTGT  
GTACAAGCTCGTAATGAAGGACGTGATCTTGCTCGTGAAGGTAATGAAGTGATCCGTG  
AAGCTAGTAAATGGAGTCCCGAAGTAGCCGCTGCTTGTGAAGTATGGAAGGAGATCAA  
ATTTGAATTTGATACGGTTGATGTCTTG-----ATGGCCATCCGCTCATAAGAACTTCTAC  
TCCAGGTACACGTAATAGATCCGTATCAGGTAATAATGCAGTCTGATACCGGAATAAAT  
TGACCTCTGGACAGCACCATTGTGGGAAAGGTCGTAATGACAGAGGAATTATTACCGC  
AAGACATAGAGGAGGAGGTCACAAGCGCCTATATCGTTCGAATTGATTTTAGGCGAGAT  
GAAAAAGACATATCTGGAAAAATTGTAACCATAGAATACGACCCCAATCGAAGTGAT  
ACTTTGTCTCGTACACTACGGGGATGGTGAGAAGAAATATATTTTGCATCCCAGAGGA  
GTCATAATCGGAGATACTATTATTTCCGGCCCGAGAGCTCCTATATCAGTGGGAAATGCC  
CCACCT--ACCGATATGCCTTTAGGCACGGCTATACATAACATAGAAATAACACTTGGAA  
GGGGTGGACAATTAGTTAGAGCAGCGGGTGCTGCTGCAGAACTGATCGCAAAAAGAAG  
GTCGATCGGCCACATTGAGATTACCATCTGGGGAGGTTGTTAATATCTGGGAACTGC  
TCAGCAACAATCGGACAGGTAGGTAATGTTAATGCGAATAATAGAATTTAAGTAAAGC  
TGGATCTAAACGTTGGCTGGGTAAACGTCCTAGGGTAAGAGGAGTAGTTATGAACCC  
GTAGACCATCCTCATGGAGGTGGTGAGGGAAGAACCCCAATTGGTAGAAAAAACCC  
GCGACCCCTGGGGCTATACTGCGCTTGGAGGGAAGAGTCGGAAAAAGAATAGATATA  
GCGATGCTTCAATCCTTCGTCGGCGTAAG--ATGATTCGACCTCAAACCTTATTTGAATGT



GGCGGACAACAGCGGAGCCCGAAAATAATGTGTATTTCGAGTTCTAGGAGTTAGT---AA  
TCGCCAATACGCTCATATTGGGGACGTTATCATTGCTATAAGTAAAGAAGCAATACCAA  
ATATGCCCCCTCAAAGAATCAGAAATAGTTAGAGCCGTAGTTGTACGCACCTGTAAAGA  
ACTTGAACGTGACAATGGGATGGTAATACGATCCGATGACAATGCAGCAGTTGTCATTG  
ATCAGGAAGGAAATCCGAAAGGAACTCGAGTTTTTGGTTCAGTTGCTCGAGAATTGAG  
ACAATTTAATTTACAAAAATAGTTCCATTGGCTCCCGAAGTATTAGACTACAACCCCA  
AAAGAACAAAATTTTCGTAAACAACATAGGGGAAGAATGAAGGGAATATCTCATCGGGG  
CAATCGTATTTGTTTTGGTAGATTTCGCTCTTCAGGCACCTTGAACCCGCTTGGATTACATC  
TGAACAAATAGAAGCGGGACGACGAGCAATTAATCGCTATGCCCCGTCGTGGCGGAAA  
GATATGGGTACGTATATATCCCGACAAACCTATTACAATGAGACCTGCAGAAACACGTAT  
GGGTTTCGGGGAAAGGATCTACCGAATACTGGGTATCTGTCGTCAGGCCAGGTCGAATA  
CTTTATGAAATAGGCGGAGTATCAGAGACTGTAGCTAGAGCAGCTATTCGAATAGCTGC  
ATACAAAATGCCTATACATACTCAATTTGTTACTGCTTCGATGACCAGAGTTAGACGTGG  
ATATATAGCTCGGAAACGTTCGGAAAAATATTCTTGCATTTGCATCCGGTTACCGAGGGG  
CTCATTCGAAACTTTTTCGAACTGCTAACCAACAAAAAATTAGAGCTTTAGTTTCCGCT  
CACCGTGATAGAGGTAAGCGAAAGAGAAGTCTTCGTTGTTTGTGGATTACTCGTATCAA  
TGCATCAGCCCGTGATAAT-----GTCTCTTATAACAGATTCATCCTATATTTATGCAGG  
AGACGTTTGCTTCCGAATCGTAAATACTTGCACAAATAGCTATATTAGATAGTAATTGC  
TTCTCCACGATCTTGAACAAGATTATCGAA-----ATGAAGAAAGAG  
ATACGAGCTTTAGCTAAACATATGCATATGTCTGCTCATAGAGCACGCAGAGTAATTAAT  
CAAATTCGTGGTCGTTTCATATGAACAAGCACTTATGATACTGGAACCTCATGCCCTATCG  
AGCATGTTATCCCATATTTCAATTAATTCATTCTGCAGCGGCAAATGCTAATCACAATATG  
GGTTTGAACAAAGCCAATTTATTTGTCAGTAGAGCCGAAGTAAATGAGGGTGTGTTTT  
AAAAGATTTCAACCTCGAGCCCAAGGACGTGGTTATCCGATACAAAAACCTACTTGTG  
ATATCACTATTGTATTGGAAGGATCCATCCAGATCG-----  
-----ATGGGACATCCAATACGTTATAAACGTATGATT  
ATTACACTTCAGACGGTTTATTCTATTCCACTTCCCTCCAAAGGAA-----ATGGCAGTTCC  
GAAGAAACGTACTTCTAAATCCAGAAAACGAATTCGTAGAAATGTTTGGAAAGGAAA  
AGCGAATCTGACCGCAATAAAAGCTTTTTCTTTGGCTGAGTCTATATCAACTGGTCATT  
CAAAAAGTTTTTAT-----ACAAATAATGAGATGGCCAAGGGTGGAGATGTAAGAGTAAC  
AATTACCTCGGAATGTACTAGTTGTAACCAGGATAGC-----GTTGATAAAAAATTCCCGG  
GTGTTTCTAGATATACTACTAGAAAAAATCGCCGCAATACACCTATTCGATCGGAATTGA  
AGAAATTTGTCCCTATTGCTACAAGCATAACCATTCACGGAGAGATAAAGAAAATGAAA  
ATCCGTGCTTCTGTTTCGTAAATTCGTGAAAAGTGTGCGACTAATTCGTAGGCGGGGACG  
AGTTATGGTAATTTGTTCCAATCCGAGACATAAGCAGAGACAAGGGATGATTCGGGATG  
AAATATCAGTCTCCATTGAGACTACGGTGGAAATGCATTGAATCCAGAGTAAACGGT  
AAGCGTCTTCATTATGGTCGCTTCGCTCTATCTCCGCTTCAGAAAGGTCAAGCTAATAC  
AATAGGCATCGCGATGCGAAGAGCTTTACTTGGGGAAGTAGAAGGAACATGTATCACA  
CATGCGAAATTTGAG-----AATATGACGCATGAATATTCTGCGATAATGGGGATTGAAGA  
ATCAGTACATGATATTTCAATCAATCTGAGAGGAATTGTACTTCAAAGTGATCCGTACG  
GAATTAGAGAAGCATCTATCTATAGCGTTGGACCCAGAGATGTAACCGCTCAAGATATC  
ATATTACCACCTTCTGTGAGAATAATTGATACTACACAACATATAGCTAGCCTTAAAGAA  
TCAATTACTTCAGATATAAGATCACAGATCGGAAAAGATCGTGGATATCGTATACAGAG

TCCGAATAATTCTCGGGATGGGATTTTT-----TCTACAGATGCTGTATCTATGCCTGTTTCG  
AAACGCAAATTATAGTATTCATTCCTATGGGAACGGGAATGAGATGCAAGAAATACTTT  
TTTCCGAAATATGGACGAATGGAAGTTTAGCTCCTGGAGAAGCACTTTACGAAGCTTC  
CCGAAATTTGATTGACTTATTCATTCCTTTTATGCGTGCAGAGGAACAG-----AACATCG  
ATGGAATAGACAATTGG---AATGGGTATAATATGTCTCTCTTCCCCTTTTCCCATATATCG  
ACTGAT---GAGAAAATGGAGGAAGAA-----ATTGCATTCAAACATATCTTTATCGACCAA  
TCAGAATTACCTCCCAGGGTCTATAACTGCCTCAAAAGGGTCAATATACATACATTATCG  
GACCTCTTGAATTACAGTCGAGACGATCCAACGAGAATCGAAAACCTTTGGGAATCAAT  
CTGTGCAACAAATATTGGAAGTTCTACAGAAACGT-----TTTGCAATTGATCTACCCAAG  
AAGAAGATGCTATTAGATGAAAAT---AAGGGAACGTCTACAATTCCTGGATTGGTCAA  
ATACAATTCGAGGGATTCTGTGCTTTTATTGATCAAGGCTTAATTGAGGAACTTTCTAAT  
TTTCCGGAAATTGAGTATACAGATCAAGAAATTGAATCTCGACTCTCTGGGAAAAAATA  
TAAATCAGCGGAACCTTTGATCGAAGAGAGAAATGCTGTGTATCAGTCCCTTACATATT  
CTTCTGAATTGTATGTACCAGCAAGATTGATTCAGAAGAATAGGAGAAAGATACAGAA  
ACAAACTGTATTTCTTGGAATATTCCCTTGATGAATTCCCGAGGAACTTTTGTAGTGAA  
TGGAATTTCCAGAATCGTGGTTCGATCAAATATTACGAAGTCCCGGTATTTATTACAGTTC  
GGAACCAGGCCATAATGGAATCGCTATATATACTGGCACTATAATTTTCAGATTGGGGAGG  
AAGACCAAATAGAGATCGATGGAAAAACAAGGATATGGGCTCGTGTGAGCAGAAA  
ACAGAAAGTATCTATTCCAGTTCTATTATCAGCCATGGGTCAAATTTCAAGAGATCCT  
AGACAATGTTTGCTACCCCGAAATATTCTTATCT---GGGAGGCAGAAGCGAAAAAATA  
TCTCCGGTTCGAGGAAAATGCCATTTTGGAGTTTCATAAGAACTGTATTGTGTAGGTG  
GCGATTTGGTATTTTCCGAGTCTCTATGTAAGGAATTGCAGAAAAAATCTCTTCAACAA  
AGATGTGAATTAGGAAGGATTGGTCGACGAAATCCGAATCAAAAACCTGAATCTTGATAT  
ACCCGAGAATGAGATTTTTTTCATTACCACAAGATGTATTGGCTGCTGCGGATTATTCGAT  
CAGAGTGAAATTTGGAATGGGTACACTCGATGAT-----ATGGATCATCTAAAAAATAAAC  
GTATTCGTTCTGTAGCAGATTTGTTACAAAATCAATTCGGATTAGCTCTGGGTCGTCTGG  
TAAATTCAGTTCGAAGAACTATACGCAGAGCAACTAAGTGTAATGTTTA-----CCAAC  
CCTAAGAATTTGGTAACTTCAACTCCA-----TTAACAACCACTTTTCAAGATTTTTTT  
GGTTTACACCCCTTATCTCAATTTTTGGATCAAATAATCCATTGACAGAAGCAGTTCAT  
AGGCGAAAATTAAGTTATTTGGGTCCCTGGGGATTGACAAGGCGAACTGCTAGTTTTTC  
GGATACGGGATATTCATCCCAGTCATTATGGGCGTATTTGTCCGATTGAGACGTCCGAA  
GGAATAAATGCTGGACTTGTTGCATCATTAGCTATTCATGCAAAGATTGGTCATTGCGGT  
---TCTTTACGAAGTCCATTCCAT-----AAAATATCTGAGGGATCGAAAGAA-----GAACA  
TATGGTTTATCCATCACCGGGAGAAGATGAA-----CGAATAGCTACAGGGAATTCTCTGG  
CATTGAATCAAGGATTTCAGGAGGAACAAGTTACTCCAGCTCGATATCGACAGGAATT  
TTTAGCTATTGCACGGGAACAAATTCATTTCCGAAGTATTTTTCTTTTCAATATTTCTCC  
GTTGGAGTTTCCCTTATTCTTTTCTCGAACATAATGATGCGAATCGTGCTTTAATGGGT  
TCTAATATGCAGCGTCAAGCAATTCACTTTTTCAACCTGAGAAGTGCATTACCGGAAC  
TGGGTTAGAAGGTCAAGTAGCTCTAGATTCAGGAAGTGTAACCTATAGCCATACAAGAG  
GGAAGGATCGAGTATACCGATGCCGAAAATATAACTTTCTCGTTTAATGGAGACACTAT  
AGGAACAGAATTAGTTCTATATCAACGTTCTAATAAAAATACTTGTATGCATCAAAAACC  
TCGAGTTCGCCAAGGGGAATGTGTGAAGAAGGGACAAATTCTGGCAGACGGTGCGGC  
TACAGTAGAGGGAGAACTCTCTCCGGGAAAAAACATCTTAGTAGCTTATATGCCATGGG  
AGGGATACAATTTCAAGACGCAATACTCATTAGCGAACGTCTAGTATACGAAGATATT

TATACCTCTTTTCATATCGAAAGACATGGAATTAGAACCTGTATGACAAGCCAGGGC---C  
CTGAGAGAATCACTAAAGAAATACCTCATTAGATGCTCATTACTCCGTCATTAGACG  
AAAATGGCCTTGTAATGCTAGGATCTTGGATAGAAACAGGTGATGTTTTAGTGGGTAAA  
TTAACGCCTCAAAAAGAAGAAGAA---TCATTGTGTGCCCGGAAGGGAGATTATTACG  
AACCATATTTGGTATTCAGGTATCCACTGCAAGAGAAAGTTGTCTCCGAGTACCTATCG  
GCGGAAGAGGTTCGAGTTATTGATGTGAGATGGATCCATGAAGAAGAG---AATCCGGT  
GATAATGCAGAAACAGTCCATGTATATATTTTACAAAAACGTAAAATACAAGTGGGCGA  
TAAAGTAGCCGGAAGGCATGGTAATAAAGGTATTATTTTGAAGGTTTTGCCAGACAA  
GATATGCCTTATTCGCAAATGGAACACCAGTTGATATGGTATTCAATCCATTAGGGGTA  
CCTTCACGAATGAATGTAGGACAGATCTTTGAATGTTTACCCGGTTTTAGCAGGGAATCC  
GATGAACAAACATTATAGAATAACACCTTTTCGGCGAAAGATACGAGCGAGAAGCTTCG  
AGAAAAGTAGTGTTCCTGAGCTCTATAGGGCTAGTGAGCAAACAGCCAATCCATGGG  
TATTTGAACCTGATCATCCTGGAAAAAATAGGTTAATTGATGGAAGAACAGGAGATCTT  
TTCGAACAACCCGTTACAATAGGAAAAGCTTATATACCGAAATTAATTCATCAAGTTGA  
TGATAAAATCCATGCACGTTCCAGTGGACCTTATGCACTTGTACACAACAACCTCTTA  
GAGGAAAATCCAAACGAGGGGGTCAACGAGTAGGAGAAATGGAAGTTTGGGCTCTAG  
AAGGTTCTGGTGTGCTTATATCTCGCAGGAGATGCTTACTCTGAAATCTGACCATATTA  
TAGCTCGTCATGAAGTACTTGGTGCCATTATCACTGGAGAACCAATACCTAAACCGGGC  
ACTGTTCCAGAATCTTTTCGATTGCTCGTTCGAGAACTACGATCTTTAGCTCCAGAATT  
GAACCATGCTATTATATCTGAGAAAGACTTTCAGATAGATAAGAAGGAAGTT-----  
-----ATCGCCCGAGATAAGCATCAACAACCTCGAATTGGATTAGCTTCTCCTGAGAAG  
ATTTGTGCTTGGTCCGAAAAAATTTTACCTAATGGAGAGATAGTTGGACAGGTGACTAA  
ACCCCATACTTCACATTATAAACTAATGAACCAGAAAAAGATGGATTGTTCTGTGAAA  
GAATCTTTGGACCTATCAAAGTGGAGTTTGTGCTTGTGGAAATTCTCGAGTGATCAGA  
AATGAGAAGGAAGACTCCAAATTTGCGAACAATGTGGAGTTGAATTTGTTGATTCCC  
GAAGTCGAAGATATCGAATGGGATACATTAACCTGGCATGTCCAGTGGTTCACGTATGG  
TATTCAAAACGTCTTCCCAGTTATATCGCGAATCTATTAGCGAAACCTCTTAAAGAATTA  
GAAGGCCAGTATACTGCGATGTGAATCTTTTTATTGCTAGGCC---ATAGCTAACAAAC  
CAACTTCATTACGATCACGAGGTACATTCAAATATGATATTCAATCCTGGGGAGATATTC  
TCCCTCATTATCTCTCTGCT---GGCTTTGGGGCATTTCAAAATAGAGAAATAGCTACTGG  
GGGAGATGCTATCAGGGAACAACCTAGCTGGTCCGATTTGCGAATTCTTATGGCTAATT  
CGTATATGGAATGGAAA-----TTAGAGGAACAAAAATCGACTGGGAATGAATGGGAAGA  
TGAAAAAATTCAAAGAAGGAAGGATTTTCAGTTAGACGCATGGAATTAGCTAAACAT  
TTCATCCAAACAAATATAGAACCAGAATGGATGGTTTTTATGCCTATTACCAGTTCTTCCT  
CCCGAACCGAGACCAATCGTTCAATTAAGTGAAGGTGAACCTAATTACTTCAGATCTAAA  
TGAACCTTATCGAAAAGTTATCCATCGGAATAATACTCTTACCAATTTATCAGCAAGAAG  
TGGATCTGCGCCAGGGGATTAGTTATTTGTCAAAGAAATTGGTCCAAGAAGCTGTA  
GATGCACTTCTCGATAATGGCATCCGTGGACAACCAATGAAGGACAGTTCGTGATAGAC  
CCTATAAATCGTTTTTTCAGATGTGATCGAAGGCAAAGAAGGAAGATCTCGTGAGAATTA  
CTTGGGAAACGAGTCGATTATTCAGGTCGTTCTGTCAATTGTGGTGGGTCCCTCCCTTCC  
ATTGCATCAATGTGGATTACCCCGAGAAATAGCAATAGAGCTTTTTTCAAGCATTGTAAAT  
TCGTGGTCCGATTGGACGACATCTTGCTCCCAACCTAAGAGCCGCTAAAAGTATAATTC  
GAGATAAAGAACCCGTTATATGGAAAGTACTTCAAGAAGTTTTTACAAGGGCATCCCGTA  
TCGTTAAATCGAGCACCTACTTCACACAGATTAGGCATACAAGCGTTCCAACCTATTTT

AGTAGAAGGACGTGTCATTCGTTTACATCCATCGGTTTGTGGAGGATTTAATGCGGACT  
CCGACGGAGATCAAATGGCTGTTTCATGTACCTCTATCTCTGGAAGCTCAGGCAGAAGC  
TCGTTTACTTATGTTTTCTCATACAAATCTATTGTATCCAGCTATTGGAGATCCTATTTCTG  
TACCAACTCAGGATATGCTTCTTGGACTTTATATATTAACGGTCGAAAATAATCAAGGTA  
TTTATGGGAATAGGTACCACCCATATAACTCC-----AATAAGAAGATA-----  
-TTTTACTGCAAGAAA-----CTTTCCTTTTCTAGTTATGATGATGCGCTCAGAGCTTATC  
GGCAAAAACGAATTCACCTTATACAGCCCTTTATGGCTCCGGTGGCGGGTAGATCTACGT  
---ATTACTACCTCAGTAAACCGAGAAGCCCCTATAGAGGTTCAATATGAATCTTTGGGTA  
CCTTCCGTGAAATCCATGAACATTATAGAATAATCAGAAGTATGATGGGAGAAATACTT  
AGTATATATATCCGGACAACCTGTTGGTTCGTATTTCGTTTCAATCGGGAAATAGAAGAAGC  
CATACAAGGCTTTTCTCGGGAACACCCGAATAAATCACTAAAAGCTATCAGAATA-----  
-----ATGACAGAACGGGCTAAATTGCTCTTTCAT---AAAGTGATGAATAGAATTGCCA  
CGAAACAACCTATTAGCAGATTAATAGATCACTTCGGAATGACATATACATCGCATATCT  
CGGATCAACTTAAGGCTTCAGGTTTCCAACAAGCTACTGATGCAGCTATTTTCGTTAGGA  
ATTGATGATCTATTAACAGCACCATCCAGAGGATGGCTCGTCCGAGATGCGGAACAAC  
AAGGTTCTATTTTCGGAACAAACATCATTATGGGAATGTATATGCAGTGGAAAAATTAC  
GTCAATCGATCGAGACATGGTATGCTACAAGTGAATATTTGAGACAAGAAATGAATCCT  
AATTTTGGAAATGACTGATCCTTCTAATCCAGTACATATGATGTCCTTCTCGGGAGCTAGA  
GGAAATACATCTCAGGTTACCAATTAGTAGGTATGAGAGGATTAAGTGTGAGATCCTCA  
AGGACAAATCATTGATTTACCTATTCAAAGGAATTTCCGCGAAGGACTCTCTTTGACAG  
AATATATTATTTCTGCTATGGCGCTCGTAAAGGGGTTGTGGATACTGCTGTGCGAACAT  
CAGATGCTGGATACCTCACGCGCAGACTTGTGAAGTAGTTCAACACATCGTTGTACGT  
AGAGCAGATTGTGGCACTATTCGAGGTATTTCCGTAAGTCCCCGAGAGAGGATCAAAA  
AGGAATTTGTTCTGCAACA-----CTAATTGGTTCGTGTGTTAGCGGACGATGTCCATATA-  
--AAGAGATGCATTGCCACGCGCAATCAAGATATCGGGGTTGGACTTGCCGATCAATTAA  
GAACC-----CTTCGAACACAACCAATATATATACGAACCCCTCCTACTTGCAAG  
AGTCTATCTCGGATTTGTGCGATTATGTTATGGTTCGGAGTCCTACTCATAGTAACTTGATC  
GAATTAGGAGAGGCAGTAGGCATTATTGCGGGCCAATCAATTGGAGAACCAGGAACCT  
AACTAACACTAAGAACTTTTCATACCGGAGGGGTATTTACAGGTGATATTGCAGAACAT  
GTACGAGCTCCTTTCAATGGAAAGATTCAATTCAATGAAAATTTGGTTCATCCTACACG  
TACACGTCACGGACATCCTGCTTCTATATGCCATAACGAATTATCTATCACTATTGATGGT  
CAAGATCAGGTACATAGTTTAACCATTCCATCACAAAGTTTGCTTTTGGTTCAGAATGA  
TCAATATGTGGAATCGGAACAAGTTATTGCCGAAGCTCGTGCTAGAACATCTCCTTCA--  
-----AAGGAAAAAGTTATGAAACATATCTATTCCGACTTAGAGGGGAGAA---ATGCACTG  
GAGTACCAATGTGTGTCATGCACCTGAAAATGTACATGGTAATGTTTCATCTCATACTCA  
GGACAAGTTATTTATGGGTATTATCGGGAGGTCTGTACGAA-----TCCGGTGTAGTACCC  
TTTCCACTTTATAAAGATCAAGATCAAGTGAATATTCAA-----TTTCTCTTGCCAAACAT  
AAATCACTTTCTGATCTTTCG-----GTGAATCAAGATCGA---GTGAAACACAAATCAGTT  
GACTCAAACCTTCTCTGGAAAA---GAAGAAAAAATATCAGGTTATTCA---GGAATTGATC  
GGATTATGTCCAATGAGCATTGGGACTCCATATATTCTACC---ATTCCTTTTGATAACTGC  
AAG-----ATTTTAGGCAAAAAGCAAAGAAATAGATTAATCGTCCCATTGCGATACGATAA  
AGAACGAGAAAAGAGAAGAATACCTTGTCTAATTCTATTCTTAGAATACCCAGAAAT--  
----TTTCTTTTTCAGAGAAATCACATTTTAGCCGTTTTGGATGACCCTCAATACAGAGTT  
GATAGTTCAGGAATTCTAAAATATGGAAACATAAGAATTGATTCAATCGAGAAAAAAGA

TGAT-----TTTCTCGAAGATCAAGGA---TCAAGAGGATCCAGACCGAAATATATTGAAGG  
AGGTCGCTTCCTTTTCATCCCCGAAGAAGTGCATATCCTACACGAATCTTCGTCGATAAT  
GGTACGAAATGGTAGTATTATTTCGAACAGGTACACAAATCACTTTCAATATCGAAAGCC  
AAGTAGGCGGATTAGTTCGGATAGAAAGAATGAGAAAAAAGATTGAAGTGAGAATATT  
GCCTGGAGATATCTATTTCCCCGGGGAGATACATGAAATATCTCGGCACAACGGCACTT  
TAATACCACCGGGAAAAATCATCTTT-----GATGAATFCCAATCTGTAAATTG  
GATCTATTTCCAATGG-----ATCACACCTCATAAGGAGAAG-----CCTTTTGTTCGGTCC  
GATCTGCCGCGGAATAT--ATACACGATGGGTCAAATAGAACAGCACCCTTTACCTAGA  
TCTATTGGGGGAAGAGGACAACCTTGCAAGTCAAGTTGGCAATTATATCCTTTATGGAG  
ATGGTGAACAAATCAAGTAATTAGTGACACAAGTATCCAATTAGTTCGAACCTTGTTTCG  
GTATTGAATFGGGAACAAAAGAT-----ATGGAG--GAGGCTTATGCCTTTCTTA  
CTGAAGTAAGAATAAATGAGGTAGTTAGAACTTTCTTCAAATTAGTTTGATGAAATAC-  
-----GGAAAAAGGAAGAATGTAACAGGTTCCAAATTTCTGTTCAT--AACAGATC  
GGATCAAACATAACT-----TTTTCTTCCAATAGGGGTAGT-----CAATTC  
TTTAGTAAGCATCAAGGGACTATTTCGTACATTACCTAATGAG-----GAGAAAGAAGGT  
GGATCGTTCGCGGTTTTGTTCGCCATCTGACTGTTCTCGAACTGTTCTG-----TTCAGTGG  
TTCGAAATATTATGATACG-----GTAAAGAGATCAGATCCCATGATGCAAATCATTGAA  
TTGTTCGGGTCTATTGGGTAAT-----TTAAGTATCGCTAACCGTTTCCCATCC-----CCTCA  
TTTGATAACT-----TATAATAAGGTCTTATCAAAT--AAACATTCAATTTCCGACAAT-----  
TCCGGAAAAGTTTCCCAAGTATCTAAA-----TGTTATTTTATGGGTGGAAATACGGGA--  
----ATTTTGAATTTTCGATTCATGCAGGAACATAATTTTCAATCTATTCAATTCGAATTGGT  
GTTCTCCCCTATCCAATTTTTGCAAAAAAAACTTCCAGCAGTTAGC---CTTGGACAAT  
TGATTTCGCGAAAGTGTATGTATATCCGAGGATAAACCA-----CTCTCCGGATCTGGTCA  
AATTATAGCCGTTTCAT--GAGGAATATTTAGTAATTCGATCAGCTAAACCCTATTTGGCTA  
CTCGGAGGGCAGCTGTTTCATGGTCATTATGGAGAATTTCTTGACGAAGGAGATACGTTG  
ATAACATTGATATATGAAAGATCCAAATCCGGTGATACAATTCAAGGTCTTCTAAAGTT  
GAACAATTATCAGAAGCTCGTTTCGATTAATCCAATACCGAGGAATCTGGAAGAAAGTTT  
CGAAGATTGGAACGAAGATATGACAAGATCCCTTGGAAAGCCTTTGGGGTTTATTCATCA  
GCGCTAGGATAACTATGGAGCAAAGTCAGATCCATCTGGTCAATCAAATTCAAAAGGTT  
TACCGATCCCAAGGAGTGCGAATTTATGATAAGCATATAGAGATTATTGTACGCCAAATG  
ACGTCGAAAGTGTTTCATTTCCGGGA-----GATGGAATGGCTGATGTTTTTTTACCCGGG  
GAACTAATCGAATTATCACGAGCACAAAGAATGAATCGTGCTCTGGAAGAGGCAATCT  
ACTATCGAACTGTGTTATTGGGAATAACGAGGGCATCTCTGGATACTCAAAGTTTTATAT  
CAGGAGCGAGTTTTTCAGGAAACTGCTCGGGTCTTGGCTAAAGCTGCTCTCCGAGGTCG  
TATTGATTGGTTGAAAGGCTTGAAGGAAAATGTTATTCTCGGGGGGATAATACCTGCCG  
GTACTGGGTTCAAGCGGTTTCTTCGCCATTCGGAG-----GAACGGAACAAAATTGAT----  
-TCGAGAACGGGAAATAAGAATCTATTTAACAACAAAGTGAAA-----GATATTTTCTCCC  
ATCATGGAAAAGTATCTGTTTCTCCCATCAAGGATAATTATCACAATACATTGAAACAAC  
CATTATGCGAAAATAGTGTTGATAAA-----ATGACAAAAGGATATTGGAACATTAA  
TTTGGAAGAGATGATGGAAGCAGGAGTTCATTTCCGGTCATCAAGCTAGGAAATGGAAT  
CCCAGAATGTCACCTTACATTTCTACAGAGCGTAGAGGTATTCATATTATCAATCTGGCT  
AAAACCTGCTCGTTCCTTATCAGAAGCCTGCGATTTTCGTGTTTGATGCAGCAGGTAAAG  
GAAAACAATFCCAATAGTTGGTACGAAATATCAAGCGGCGGATTTAGTAGCATCAGCT  
GCTATAGGAGCTCGATGTCATTATGTAAATAAAAAATGGCTTGGTGGTATGTTAACTAAT

TGGTCCACTACAGAAACAAGACCTCAGAAGTTCAAAGATTTGAAGAAAGAACGAGAT  
ACGGGACGATTCAATCGACCTCCAAAGAAAGAGACAGCAATGCTCAAGGGACAATTG  
TCCCAATTGCAAAAATATCCAGGTGGGATTAATAACATGACAAGTTTACCTGATATTGTA  
ATAATTGTCGATCAACAAGAAGAATACACTGCTATCGGGGAATGCATAATTTGGGTATT  
CCAACAATTTGCTTAGTCGATACGGATTGTGATCCCGATCTCATAGATGTCCCAATTCCT  
GCCAATGATGATGCTAGAGCTTCAATCCGATTGATCTTGAACAAATTAACGTCAGCAAT  
TTGCGAAGGTTCGACAT-----AGCGTT-----ATGGGACAGAGAATTAATCCACTTGGTTTT  
AGACTTGGTGTAAACCCAAAATCATCGTTCCCATTGGTTTTGCACAAAAAAATATTATTC  
CGAAGATCTCCAAGAGGATGAAGAAATACGTAATTGCATTGAAAATTATGTACGAAGA  
CATATGAAGAACTATTCGAAT-----ATTGCACGTGTAGAGATTCGAAGAAAATCGA  
TTTGATTCAAGGTTCGAAATCCACATTGGATTTCCCTAACTTGTTAATAGAAGATCGGGGT----  
-----CGAGGAATTGAACAATTAAGAACCGATGTACGAAATATGCTCAATTCTGCGAACC  
GAAAACCTAACATTTCTATAGCAAAAGTTGCGAAACCTTATGGAGTACCTAATATTCTTG  
CGGAATATATTGCCCTACAACCTAGAGGATAGAGTTTCATTTCAGAAAAACAGTGAAAAA  
AGCTATTGAACTGGCTGAACAGGCAGATATAAGAGGTATTCAAATACAAATTGCAGGA  
CGTCTCGACGGAAATGAAATTGCCCGTGTGAATGGGCCAGAGGAGGTAGGGTTCCCC  
TACAGACCATTTCGAGCTAGAATTGATCATTGCTATTATCCGGCTAAAACCATTATGGAG  
TATTAGGGATCAAAATTTGGATCTTCGGGGATGAGGAAATGTCCCGCTATCGAGGACCT  
CGTTTAAAAATAATACGTCGTCTGAGAGCTTTACCAGGACTAACTAGTAAAAGACCCA  
AATCCGGAAATGATCCCATCAATCGATCTTCTTCTGGAAAA---ATATCTCAATATCGCATT  
CGTCTAGAAGAAAAACAAAATTCGTTTTTCATTATGGACTGACAGAGCGACAATTAC  
TGAAATATGTTTCGTATTGCTAGAAAAGCCAAAGGATCAACGGGCCAGGTCCTATTGCAA  
TTACTTGAAATGCGTTCGGATAATATTATTTTCGATCGGGTATGGCCCTTACCATTCTG  
GAGCCAGACAATTAGTTAACCATAGACATCTCCTGGTCAATGATCGTGTGGTAGATATA  
CCAAGTTATCGTTGCAAACCCCAAGATGTTATTACTATAAGAGATCAACAAAGATCGAG  
AGCTATAATCAAAAACAATATCAATTTGTCCCAGAGG---GATAAAATGCCAAATCATTG  
ACTCTTCATTTCGTACAA-----TATAAAGGATTAGTCAATCGAATAATAGATAGTAAATGG  
ATCAATTTGAAGATTAATGAATTGCTGGTTCGTAGAATATTATTCCCGTTCGAGCTATGTCA  
CGCCGAAGTACTGCAGAAAAAGAACTGCAAAATCCGATCCAATTTATCGTAATCGATT  
CATTAAACATGTTGGTTAACCGTATTCTTAAACACGGAAAAAAATCATTGGCTTATCGAAT  
TCTTTATCGAGCCATGAAAAAGATTCAACAAAAGACGGGAAAAAAATCCACTATCTGTT  
TCACGCCAAGCAATACGTGGAGTAACTCCCGATGTAACAGTAAAAGCAAGACGTGTAG  
GTGGATCGACTTATCAAGTTCCCATTGAAATCAGATCTACACAAGGAAAAGCACTTGC  
CATTCGTTGGTTATTAGGGGCATCTCGAAAACGTCCGGGTCGAAATATGGCTTTCAAAT  
TGAGTTACGAATTAATGGATGCTGCCAGAGAGAATGGCAATGCTATACGCAAGAAGGA  
AGAGACTCATAGAATGGCAGAGGCCAATAGAGCTTTTGCACATTTCCGTACGGGTAAC  
GATGCTATCGCCAATCTAATTACTTCTATAAGAAACGCTGACATGGTAAAAAAAAGAGC  
AGTTCGGGTACCAGCTACTAATATCACCAGAAACATTGGAAGGATCCTTCTACGAGAA  
GGTTTTATAGAAGATGTTAGAGAACATCGGGAAGGTTCGAAAATATCTTTTGATTATAAC  
TCTAAGATATAGAGGA-----AGGAAGGGAACATATATAACC-----ACTTCGGAAC  
GTACTAGTAAACCTGGTTCGGAGGATCTATTCTAATTATCAAGAGGTTCTTAAAGTTTTG  
GGTGGGATGGGGGTCGTAATTGTTTCTACTTCTCAAGGAATTATGACGGATCGAGAGGC  
TCGACGAAAAGGAATTGGGGGGGAAATATCCGCTATGTATGGATGTCAAAACCTACA  
AGAAGAATTGGTTCGCGTAGAAAT-----GAACGTAGAATACCCAAAGGAG







AATAGCTAAAATTGAGATGTCATTGAAAGAGAAAGATGTAGAA---TATCCGAAATTTTT  
TTTTGAATTCTACATTGAT-----GATCTAATCTGCAAAGACTATGATTGGGAATATAATTC  
GATCGTGTTTTTATGAAAGAGAAGCATAAAACGATCAAC---TTGAACTCGAAGCAGCA  
AGTAAAAATATTAGGTAATAATCTAATTTGTTACCTCATGTCTGCTTTTTGTGAAAAAAT  
TCTATTTGAAGTAGAGGGTCCATTCAAACAGCAAAAATCT-----GAGTCAACTATTCAAT  
CGGATAAATATTGAGCATTTTTTCCCATCTTCGATTATCCTATAAAGATAAAGGGTATCTTTC  
TTTCCAAAATTATGTTGAATTTTATATATGGCAATTCTACAAAGATTCTTTTGTTAATTGG  
GAGAAGGATCGGCAGAAATTGAATTTTTCGAAGAACATCTTCAAAGAGCAATTCATTC  
AGTTGAATGATGTGAACAATGATCATCTTTTGAGCTCTAGCCAATCAAAAAGATCCTTAT  
AATCGATTCATAGATCATTTCGACCCCATAGTGAAAATTCAGAATATGACACAAAC---A  
CGAACAAAAAGGATGAGATAATCTCAGAGAATCGAAGACCAACCCTCGGGAAACTC  
CTTCGGAGAAGGATGATAAATGTATCGATTCTGAAGATCGATTGACTCTCAATCTAGTG  
GAAAATAAGTATTGGGAACCTGAAAAAGATCTTTGCGAATGGATTTTGACAAACGACT  
CTATAAATAAAACAGAGATTGAGCAACTAAAGGAAGGATCAATCTTTGGGATCTT-----  
TCTTCTCCTATTCAAATAAAACAAACAAAAATCGAATCAGAT-----TTGTCCTCGAAG-----  
-TGTTTCTCAGAAGATTTTCCAATCTCTTGGACGAAAGAACTATTTACGGAAGATAAAA  
AGTATATAATAGAG---TTTTTCCAAAAGAAAGGAAAGGATTCATC-----ATAATTTGAC  
AAAATCAATTTCGTTATTCTTTTTTTGACATATTGTCAATAGATGAACCGTGTATGGGG---T  
TTAGTGCTACTAAGAAGCTTATTGAAAATTTA-----AAATCTTAAAAAAGCAACAG  
GATGTTTTT---TTTGATATTTTCAGGGGATCAGAA-----AGGAATAGCATAGTTGATC  
CATGGGAGATAAGAACATATTTACGA-----AATCCTTCTCAAATTTGTGCTATTTTCATCAT  
ATCCCGGATGTAATATTCTTTTAAATAATCAGAGGGATAGA-----AACAAATTC AATTGTA  
TTCTATTTATGAATCGAAGTTCGTCTTGG AATCGA-----TTTTCTTCATTCTGTTATCAA  
ACAAAGAACAATACATATCA-----CACACAATTTCCGA-----TTGAAAAAATAGTTATA  
GAAAGAACAGATAAATTCATTCTATCAATAACTAAGCCT---AATCAGGTTTATGATAATA  
CATTTGCCCTGAT---CGATTCTATGAACTGAACAAGAATAGATTATTG-----AATCGAAT  
CTTCAACCACAGAGATCAATTGAAGAATCAATCTTTA-----TTGATCCTACTCGATATT  
ACTGAT-----AAAGAGAATGAATATTCGATCGAATAATCGAAAAAAATTGACTCAA---  
ATCGATTCAAAAATCGTTTAGGAATAGAAAACCCT-----CTTAACAATTACAGA  
ACTGAAACTTCAAATTGGTACAAA-----TTGATTCAATATAATATTGATGGG-----  
CATTTTGAAAATGCATTAATCAATTCTATTTTCATGAAC-----AGGTCTAGTCGCAATTT  
AAAGGATCAAATTCGA-----ATCAATTGGATAGAAAATGAAAGTTTGAATAAT-----GT  
GACGAAAGATACAATTAACCGACATTCATCAAATTGGAGAAAA---GGTCAAAAAGAAT  
GGGTTTATCATTCT-----ATTATTCGAACTGATCAATATATAAGTCGAAAATTGAATGT  
GTACAAATGGTCC-----AATCAGACCGAATACCTGACAAAATGTTTGAACATTTTCGTTT  
CTAAACAAAACGAT-----TTTAAAATCGTGTTTCGATCCGATTGAAAAA-----GATTCA  
ATTGGTTGGTCTGGAAGTCCCAACAAGAAAGATTCTTCTAAATTCTATTTCTTCTCCTGA  
AAATACT-----GTGAAGATCTTCATCTCT  
AAG-----TTTTCTATTTCCATTTTCGAATTTCTATATTTTCATTTCCAAG---TTTTTCAT  
TTAT---AAGTTAAAAAGTCTGAATGATCGACTATTCAATAAGTTGTTAAAATCGATCGGT  
GTTTCGAATCGTTCATTCGGAAATATTA AAAACCATT-----ATTTTGGAT-----GACCATGA  
TCTTTCA---CAAAGATCGAAATTATTGATCGATGAAAGAACAATAGCACAATTTGCTTTG  
AATGAGATACCGGTTAATCAAATTTTATTGACTTCTTTGAGAATGAA-----ATAAATTGC  
ATTAAATTGTTTCGAGAACACTGAT-----TTTTCGACGATATCCAACGATCAAGACAACCTG

GTTTAATCCCGTAAAACACTAGCTAATCGAAGCTCATTGAGAGCTTCTTTTTACGAAGCAA  
ATACACTCAAATTTTTGGATTATTCACATCAGCACCGGTCAAAT-----TATGAAAAAAGAT  
TACCTCCTCATATG-----GGAAGGATTCATATCAAAAAGAAGAAT-----CTTACATATG  
GA---CAATTCTTCAATATTTTGCCCATCCACAACAAT--CTATTTTTTTGTCCATTAGTGA  
A-----ATAAGACCTGTTCACTCGGAG---AAAGAGACTATTTACTAATCAAGTCACAAGT  
ATCTAACATATTATTACCTAAATATTTACAACAAAGCGATGACCAAACGTTTGTATTAATC  
TATGACTTGTACAAATCCTTCAATTTACTAATTCGATTGAATCCATTTGTTTCATGACGGA  
AGAGAGATTTCTCGATCGAAGATATTTCTACAACGTTTTTAACAAGAGAACAATAGC  
CAATTTTGAAACAACCTTCTTACCATCCTTTT-----TTAAATGGATCCGATTTAGGAGAAAA  
CAATTTGATCAGCACCTTAAAAAGGGTTCCAGTTCAAACATAGGTCTTCTTCAAACCTC  
AATCTTATCAAGATGATTTACTATCCGAACATCGAATTCGAGATCGGTTTGTAATAATA  
GTTTCACAGAAAGTTCAAAAAACAGAATTGAAAATAAAGCCATAGATAAGAGAAGCA  
CCCTTCTTAATTTATCTAAAAACAAGAGATGTATAGAATTTCTAAATGGGATTTGTTTC  
GAACATATACGCCGTGGTTTTTTACTTCTACATGGTGAAATATATTGAG---CTACTTCTA  
GATACTTTCCGGAGATATTGCTAAAT-----AGCAGTGAT-----CAATTCATATATATTTG  
---GAGATTATGCATAAATCAAATATCTCGTGGGCACTTTCTCATCAATTATGGGCACTT---  
-----CAATGGAATTTTGAACGAAG-----ATTTTGGATAAGTTTTTTTCT  
TCATGGAATCTTTGTAAAATGATTGATCAA---TCATCAGTTTCATTTCGTATGGGCACATCT  
GAGATTACTAAATGCTCGGGAGTAT--GAATATTCGATCATTATTATTTTTTCGTCCTTGG  
ATAT--TTCGTTCTTCGATATTCTTTCATCGTTTCCTTA-----GTCTTTATCGAGTTACAGAT  
ACATTTTAAACGCATTAAGATTTTCATGGATCCGTCATACGTGATCGAGTTGCAAAAAC  
TGATGGATCGTCCTTTGCCT-----  
-----  
-----GGTCTGCCTTTATCTATGAATATGAGGAACATATCCA  
TCTATTTTCTGAACAAATCAATTTATTATATGAAGAATAGAAAGCTTTATTCACCTATAGG  
A-----AAAAGTTGAACAGATCGTGCTTTAGCATGGATATCTCTGAAAAAGAGAGAGAA  
TTACTAGTTCAGTTTCTA-----ATAACA-----GAAAAAACATTTCGAAAATTGGATC  
GAATTTTACT--TACAGTCAGAATTTATTC-----AATAATGAATTTGGTTATCAAATC  
ACTGAACAGCCGGGACTTATTTACTTACGATATTTAGCCGACACTTAT-----CAAAAAGA  
TCTAATGAATTACGAGTTCGATCAATTTTCGTTTAGCAGAAAGATGGGTCTTCTCCTCGCTTT  
TTGTCAGAAGATTACCTTT-----TCACAAATCTTGTGTCGAGCTAAGAGTTTGAACCTCG  
CATTTTCATGGA-----AAACCTTTCTCACTCCACTTAGGATCATTCTTTCC---AGAGGG  
ATTTTACTGATAGGTTCTATGGTAACCGGACGATCCTATTTGGTCAAAAAGCCTAGCAGC  
AGACTCCTACGTTCTTTAATAAGAATA--CTAAAAAAGTTATTGTATGACAAAGGTGAA  
-----  
-----TATTCCAATTTCTTGATATACGAAGTATGAAT-----G  
ATGTGATGCAAAAATGCAT-----CAGTTCAATCTTACCTTCGAATTGGCA  
AAAAGAATGTCTCCTTGCATAATATGGATTCCAAACATTCATGAACTGAATGTCAATCA  
CTTAACTCACTTTTTTCTTAGTTTATTAGTGAACCATCTCTCT-----AGAGATGATGAGA  
AATATTCC---ACTAGAAATATTCTTGTATTGCTTCGACTCATATTACTAAAAAAGTGGAT  
CCAGCTTCAATAGCTCCAAATCGATTGGATAGATCAATAAATATTCGAATGCTTCTCTATC  
TCACAACGGCAGAAAGAATTTCTATTCTTTACGTAGCAAAGGGTTTTACCTAGAAAA  
AGAGTTGTCCTGTCCT-----GATGAATTTGGATCTAGAACCGCAGGTTTTAATGCACGAG  
ATCTAGCAGCACTTGCCAATGAAACCTTATCAATTCATATTACCCAAAAGAAATCAGCTA

TAGACACTGATACAATTAGATTAGCTCTTTATAGACAACTTGGGGTTTGCAATCTATAG  
ATAATCAGGTTGGGTTCCGGTCAAATTACGAAATACTTCCCTATAAGGTAGGAAAGGCT  
GTTATACGAAATACGCTTAGGAGGAATTCCTTCTATGAATCCTCTATCTATTAAGAATGAA  
TTATGGAAG-----AAAAGGTTTCATTATTTGTCCGAATGGTATTTAGAACCCTTCTACA  
ACTATGAAGGAATTGACTGTGCTCCCCCTATTTTGGATTGCTTGGCCGGATCAGCAGC  
TCGAGATTCTTGGTTTATATCG-----GAACAAAATAGAGAG---AATTGGGTTCTCTCGAT  
AGATTGCTGAGCATGATTC---AACCTAGCTTCTAGT-----CTTTTAGAAAGTATTCTGG  
TGGAG-----TTTCCATGGTTAGGAATATGTGCGAGGTAAGTCTGATAAGAAT-----CAAATA  
ACATTTGCTCCTCAGTACAAAACGAGAAAT---CATCTCAATATGATGCGAAAGGGGTTTT  
ATTCTACGATCAATAAAATGTTTGTATATGAAGAATATGAATTGAAC-----TTT  
CAACAAGAACTCCTGACGCAAAA-----AAAATGGAT-----GAAGAATTAGTCA  
ATAAC-----ATAGTTTGGGCTCCT-----AGAATCTGGCGTCTTAATTTTCTTCGCAGTAATC  
GATTTGATCGTATAAAAAGACCCAATGAATTGGGATTTTCATATCAGTTCGAATTGTTTC  
GAGAAGAGCAGTCCAACACAAGACAAAAGAATCTACAACATATATCATTACAAGAGTT  
CGAAATGTTAGGAATATTTCAATTTTCTATACAATATAAAATGCAATATCAATCTTCTAAA  
AAACCAATGCTTTTTCTAGGAAGACGATTTCTTCGGGATCCC-----GGTTTCTTATTTAAA  
GATCAG-----CACCTTGTGTTTTACGTCGGGAATTTTTTGCAAATGAAGCAATG  
CTTAAAAGGTTTTATATACTTACGGTTCAACTCCTACATTTCTATATCAACGTTGGTTGA  
TTGAAAATCCGCAAAAAAAGGTTGATCGCTTCGAATTGTTGATTCATCGCCAAAGATG  
GCTTGAAACC-----AATAGTTCATTATTC-----AATGAATTTTTTATTATAAT-----ACTCT  
ATCCGATAGTTATCAATATTTATCAAATTTGTTCCATCTAAC---AGAATGTTATTGAATCA  
AATGACAAAGACATTGTTGAGAAATAGATGGCTTTTTCCGAATGAAATTGAACACTTAA  
TTTATACAACGAAA-----ATGCCTAGATCTCAG---AGAAATGACAATTTTCAT  
CGATAAAACCTTACAATTGTAGCGGATATCTTGTGCAAATAATTCCGACAGCTCCAG  
GGGAGAAAGAGGCATTTACCTATTACAGAGATGGTGTG---ATGTCAGCCCAATCCGAAG  
GAGAATATGCGGAAGCTTTGCAAATTTATGAAGCTATGCGGCCGGAATTTGACCCT  
TATGATCGAAGTTATATAACCCTATAATATAGGTCTTATCCACACGAGTAATGGGGAACAT  
GCCAAGGCTTTGGAATATTATTTTTCAGGCATTAGAACGAAATCCATCCTTACCACAAGC  
TCTGAATAATATGGCCGTGATCTGCCATTAC---CGGGGAGAACAGGCCATCCGACAGGG  
AGATCCTGAAACTGCGGAGGCTTGGTCCAATCGAGCTGCTGAGTATTGGAACAAGCT  
ATAACGCTTGTCCAGGCAATTACATTGAAGCACAAAATCGGTTAAATATTACAGGACG  
CTTTGGAGAA---ATGAATTGGCGATCCGAATGGCTCTGGATAGAACCCTATAACAGGGTC  
TCGAAAAACAAGTAATTTTTGCTGGGCCCGTATTCTTTTTTTTTGGTTCACTAGGATTTCT  
CTTGGTCCGAATTTTCGAGTTATCTTGGTAGGAATCTTATACCCCTATTGTGGTCTCAACA  
AATCCTTTTTGTTCCACAAGGAATTGTAATGTGTTTTTATGGTATTGCAGGTCCGTTTCAT  
CAGCTCTTATTTGTGGTGTACAATTTTCGTGGGATGTGGGTAGTGGTTACAATAAGTTTGA  
TGAGAAAGAAGGAATCGTATGTCTCTTTTCGTTGGGGATTTCCCGGAGGAAATCGTCGTA  
TTTTTCTCCGATTTTTGATAAAGGATATCCAGGCGATCAAATGGAAGTTCAAGGAGGT  
ATTTATCCCCGGCGTGTCTTTTATATGGAAATAAAAGGCCAGCAATACATTCCCTTAACT  
CGTACTGATGATAAT--TTGACCCACGGGAAATGGAGCAAAAAGCTGCTGAATTAGCC  
CGTTTCTTGCCTGTATCGATTGAAGGATTT

>Elaeis

ATGGAAAAATGGTGGTTCAATTCGATGTTGTCTCTAAATAAATCAATGGATAGTCTTGAT  
GCTATTGGACATAACCAGTGGAAGTGAAGAACCCATTCTAAATGGTACGGAGAAAAACA

TTCT--TTCAGAAATGTTGATTATTTATTTGATATCAGGGATATTTGGAGTTTGATCTCTG  
ATGACACTTTTTTAGTTAGGGATAGTAATGGTGACAGTTTTCTGTATGTTTTGATATTG  
AAAATCAGATTTTTGAGATTGACAATGAT-----AGTTCTTTCTGAGTGAAGTAGAAAGT  
TTTTTTCTAGT-----TATTTAAATAATGGGTCTAAGAGAAAACAATCACAACCTATTA  
TCATTACATATATGATACTCAATCTAGTTGGAATAATCACATTAATAGTTGCATTGATAATT  
ATCTTCGTTTTGAAGTC-----AGTATTAATAGTTCCATTTCCGGTGGTACCGACAATTACA  
GTGACAGTTACATTTATAGTTTCATTTGTACTGAAAGTGGAAGTCTATAAGAAGTAGTA  
AAAATGGCAGTGATTTCAATATAAGAAGAAGATCT--GATTTCCGGTAGAAAAAAAAT  
ACAGACATTTATGGATTCAATGCGAAAATTGTTATGGATTAAATTATAAAAAATTTTTTA  
GGTCAAAAATGAATATTTGTGAACAGTGTGGATATCATTTGAAAATGAGCAGTTCAGAT  
AGAATCGAACTTTCGATTGATCCGGGGACTTGGGATCCTATGGATGAAGATATGGTCTC  
TATGGACCCCATTTGAATTTCAATCAGAGGGGAAACCCTATAGAGATCGTATCGATTCTTA  
TCAAAGAAAGACAGGTTAACTGAAGCTGTTCAAACAGGCATAGGTCAACTAAATGGT  
ATTCCCATAGCAATTTGGAGTTATGGATTTTAAAGTTCATGGGAGGTAGTATGGGATCTGTA  
GTAGGCGAGAAAATCACCCGTTTGATCGAGTATGCTACTAATCGATCTCTACCTGTCATT  
ATTGTGTGTGCTTCTGGAGGAGCGCGCATGCAAGAAGGAAGTTTGAGTTTGATGCAAAA  
TGGCTAAAATATCTTCCGCTTACATAATTATCAATCAAATAAAAAATTATTCTATGTATC  
AATCCTTACATCTCTACAACCGGTGGAGTAACAGCCAGTTTTGGTATGTTGGGAGATG  
TCATTGTTGCTGAACCTAATGCCTACATTGCATTTGCGGGCAAAAAGAGTAATTGAACAA  
ACATTGAATAAGACAGTACCCGATGGTTCACAAGCGGCTGAGTATTTATTCCATAAAGG  
CTTATTTGACCCAATTGTACCAGTAATCCTTTAAAAAGTGTCTGAGTGAGTTATTTCA  
GCTCCACGGTTTCTTTCCCTCGAATCAAATCAAATAATGGTAACCCTTCGAGCCA  
ACGAAATTAGAAATATTATCCGTGAACGTATTGAACAATATAATAGAGAAGTAAAGATT  
GTGAATACCGGTACCGTACTTCAAGTGGGCGATGGCATTGCTCGTATCCATGGTCTTGA  
TGAAGTAATGGCAGGTGAATTAGTAGAATTTGAAGAGGGTACAATAGGAATTGCTCTG  
AATTTGGAATCAAATAATGTTGGCGTTGTATTAATGGGTGATGGTTTGATGATACAAGAA  
GGAAGTTCTGTAAAAGCAACAGGAAGAATTGCTCAGATACCTGTGAGTGAGGCTTATT  
TGGGTCTGTTATAAATGCTCTGGCTAAACCTATTGATGGGAGAGGTGAAATTTAGCT  
TCTGAATCTCGGTTAATTGAATCTCCTGCCCCAGGTATTATTTAGAGACGTTCTGTATAT  
GAACCTCTTCAAACGGGGCTTATTGCTATCGATTTCGATGATCCCTATAGGACGCGGTCA  
GCGAGAATTAATTATTGGGGATAGACAGACTGGAAAAACAGCAGTAGCTACAGATACG  
ATTCTTAACCAAAAAGGGCAAATGTGATATGTGTTTATGTAGCTATTGGTCAAAAAGC  
ATCTTCTGTGGCTCAGGTAGTACTTTTCAGGAACGAGGGGCGATGGAATACACC  
ATTGTGGTAGCCCAAACGGCGGATTACCTGCTACATTACAATACCTCGCTCCTTATACG  
GGAGCGGCTCTGGCTGAATATTTTATGTACCGTAAAAAACATACTTTAATAATTTATGAT  
GATCTCTCCAAGCAGGCACAAGCTTATCGACAAATGTCTCTTCTATTAAGAAGACCC  
TGGTCTGTAAGCTTATCCAGGAGATGTTTTTTATTTGCATTTCGCGCCTTTTGAAAGAG  
CCGCTAAATCAAATCTCGTTTAGGTGAAGGGAGTATGACTGCTTTACCAATAGTTGAG  
ACTCAATCTGGGACGTTTCAGCTTATATTCCACTAATGTAATTTCCATTACAGATGGA  
CAAATATTCTTATCCGCCGATCTATTCAATGCTGGAATCCGACCCGCTATTAATGTGGGTA  
TTTTCTGTTCCAGAGTGGGATCCGCAGCTCAAATTAAGCCATGAAACAAGTAGCTGG  
CAAATCAAATTTGGAAGTAGCGCAATTCGCAGAGTTAGAAGCCTTTGCACAATTCGCT  
TCTGATCTCGATAAAGCTACTCAGAATCAATTGGCAAGAGGTCAACGATTACGTGAGTT  
GCTTAAACAATCCCAATCAGACCCTCTCACGGTGAAGAACAGATAGTTACTATTTATA

CCGGAGCGAATGGATATCTTGATCCGTTAGAAATTGGACAGGTAAAGAAATTTCTCGTT  
CAGTTACGTACCTACTTAAAAAGAATAAACCTCAATTCCAAGAAATTATATCTTCTACC  
AAGACATTCACCGAGCAAGCGGAAGCCCTTTTGAGGGAAGCTATTCAGGAACAGATC  
GAACTGTTTTTACTTCAGGAACAAGCGATGAGAATCAATCCTACTCCTTCTAGTCCTGT  
GGTTTCCACACTTGAAGAAAAAACCTAGGGCGTATCGCTCAAATTATTGGCCCAGTA  
CTGGATGTCGTTTTTCCCCGGGCAAGATGCCTAATATTTATAACGCTTTGGTAGTTAAG  
GGTCGAGATACTGTCGGTCAGCAAATTAATGTGACTTGTGAGGTACAACAATTATTAGG  
AAATAATCGAGTTAGAGCTGTAGCTATGAGTGCTACAGATGGTCTGATGAGAGGAATGG  
AAGTGATTGACACGGGAGCTCCTCTAAGTGTTCAGTCGGCGGAGCTACTCTCGGACG  
AATTTTCAACGTTCTTGGGGAACCTGTTGATAATTTAGGTCTGTAGATACTCGCACAA  
CATCTCCTATTCATAGATCTGCGCCTGCCTTTATACAGTTAGATACGAAATTATCAATCTT  
TGAAACAGGGATTAAGTGGTGGATCTTTTAGCTCCTTATCGCCGTGGAGGAAAAATC  
GGACTATTTGGGGGAGCTGGAGTGGGTAAAACAGTACTCATCATGGAATTGATCAATA  
ACATTGCCAAAGCTCATGGAGGCGTATCCGTATTTGGCGGAGTAGGCGAACGTACTCG  
TGAAGGAAATGATCTTTACATGGAAATGAAAGAATCCGGAGTGATTAATGAAAAAAT  
ATTGCGGAATCAAAGTAGCTCTAGTCTATGGTCAAATGAATGAACCGCCGGGAGCTC  
GTATGAGAGTTGGTTTAACTGCCCTAACCATGGCGGAATATTTCCGGGATGTTAATGAA  
CAAGACGTGCTTCTATTCATCGACAATATTTTTCGTTTCGTCCAAGCAGGATCAGAAGT  
ATCCGCCTTATTAGGGAGAATGCCTTCCGCAGTGGGTATCAACCTACCCTTAGTACAG  
AATGGGTTCTTTGCAAGAAAGAATTACCTCTACCAAAGAGGGATCTATAACTTCGATC  
CAAGCGGTTTATGTACCTGCGGACGATTTGACCGACCCTGCTCCTGCCACGACATTTGC  
ACATTTAGATGCTACTACCGTACTATCAAGAGTATTAGCTGCTAAAGGTATTTATCCAGC  
AGTGGATCCGTTAGATTCAACGTCAACTATGTTACAACCTCGAATCGTTGGTGAGGAAC  
ATTATGAAACTGCGCAAAGAGTTAAGCAAACCTCACAAACGTTACAAAGAACTTCAGGA  
CATTATAGCTATCCTTGGGTTGGACGAATTATCCGAAGAAGATCGTTTAACTGTAGCAA  
GAGCACGAAAAATTGAGCGTTTCTTATCACAAACCCTTCTTCGTGGCAGAAGTATTTACT  
GGTCTCCAGGGAATATGTTGGTCTTGCAGAAACAATTAGGGGGTTTCAATTGATCCT  
TTCCGGAGAATTAGACGGTCTTCCCGAGCAGGCCTTTTATTTGGTGGGTAACATCGATG  
AAGCTACCGCGAAAGCTATGAACTTAGAAGTGGAGAGCAAATTGAAGAAAATGACCTT  
AAATCTTTGTGTACTGACTCCTAATCGAATTATTTGGGATTCAGAAGTGAAAGAAATCA  
TTTTATCTACTAATAGTGGCCAAATTGGCGTATTACCAAACCACGCCCTATTGCCACGG  
CTGTAGATATAGGTCTTTTGAAGAATACGCCTCAACGACCAATGGTTAACGGTGGCTCTG  
ATGGGTGGTTTTCGCTAGAATAGGTAATAATGAGATCACCATTTTAGGAAATGATGCGGA  
GATGAGTACTGACATTGATCCGCAAGAAGCTCAGCAAGCTCTTGAAATAGCTGAAGCT  
AACTTGAGTAGAGCTGAGGGTAAGAGACAAGCAATTGAAGCGAATCTAGCTCTCAGA  
CGAGCTAGGACACGAGTAGAGGCTGTAATGCTATTTCCATGAAAAATGGAACCGATT  
CTTTCCTTTCTTGGGTCACTGGCCATCCGCCGGGAGTTTCGGGTTAATACCGATATTT  
TAGCAACAAATCCAATAAATCTAAGTGTAGTGCTTGGTGTATTGATTTTTTTTTGGAAAG  
GGGGTGTTAAATGATTTATTAGATAATCGAAAACAGAGGATCTTGAGTACTATTCGAAA  
TTCGGAAGAATTACGTAGAGGGGCCATTGAGCAGCTCGAAAGAGCCAGGACTCGCTTA  
CGAAAGTAGAAATAGAAGCAGATGAGTATCGAATGAATGGATACTCTGAGATAGAAC  
GAGAAAAAGAAAATTTGATTAATGCTACTTGTGACACTTTGGAACGATTAGAAAATTAC  
AAAAATGAAACCCTTCATTTTGAACAACAAAGAGCGATTAATCAGGTCCGACAACGAG  
TTTTTCAACAAGCCTTACAAGGAGCTCTAGGAACTCTGAATAGTTGTTTGAATAGTGAG

TTACATTTCCGTACGATCCGTGCTAATATTGGCATTCTAGGGGCCATGGAAGAAATAACA  
GATATGAATCCACTGATTTCTGCCGCTTCCGTTATTGCTGCTGGATTGGCCGTAGGGCTT  
GCTTCTATTGGACCTGGAGTTGGTCAAGGTACTGCTGCAGGCCAAGCTGTAGAAGGTA  
TTGCGAGACAACCAGAAGCAGAGGGTAAAATACGAGGTACTTTATTGCTTAGTCTAGC  
TTTTATGGAAGCTTTAACAATTTATGGACTGGTCGTGGCGTTAGCGCTTTTGTGCGAA  
TCCTTTTGTTATGAATGTTATACCATGTTCCATTAACACTCAAAGGGTTATACGATATA  
TCGGGTGTAGAAGTAGGCCAACATTTCTATTGGCAAATAGGAGGTTTACAAATCCATGC  
CCAAGTACTTATCACTTCTTGGGTGCTAATTGCTATCTTATTAGGTTTACATCATAGCT  
GTTCCGAATCCACAAACCATTCCGACCGACGGTCAGAATTTCTTCGAATATGTCCTTGA  
ATTTATTTCGAGATTTGAGCAAACTCAGATTGGAGAAGAATATGGTCCTTGGGTTCCCT  
TTATTGGAAGTATGTTCTTATTTATTTTTGTTTTCTAACTGGTCAGGTGCTCTTTTACCTTG  
GAAAATCATACAATTACCTCATGGGGAGTTAGCTGCGCCTACGAATGATATAAATACTAC  
TGTTGCTTTAGCTTTACCCACGTCAGCGGCATATTTTTATGCGGGTCTTACCAAAAAG  
GATTGGGTTATTTCCGAAAATACATTCAACCAACCCCAATACTTTTACCAATTAACATCC  
TAGAAGATTTACAAAACCTTTATCTCTTAGTTTTCGACTTTTCCGGAATATATTGGCTG  
ATGAATTAGTAGTTGTTGTTCTTGTCTTTAGTCCCTTCAGTAGTTTCTATACCTGTTAT  
GCTTCTTGGATTATTTACAAGTGGTATTCAAGCTCTTATTTTTGCAACGTTAGCCGCGGC  
TTATATAGGTGAATCCATGGAGGGTCATCATATGATATTTGTAGCTTTAGAGCATATATTA  
ACTCATATCTCTTTTTCGATCATTCAATTGTAATTACGATTCATTTATGAACCTATTAGT  
CTACGAAATCGTAGGATTACGTGATTCATCGGAAAAAGGGATGATAGTCACCTTTTTCT  
CTATAACAGGATTATTAATTTCTCGTTGGATTTCTTCGGGACATTTTCCGTTAAGTAATTT  
ATACGAGTCATTAATCTTCCTTTCATGTAGTTTATTTATTATTATATAATTTCCAAGAAAT  
CGAACCATAAAAATAATTTAAGCATAATAACTACCCCAAGTACTATTTTTACTCAAGGTT  
TCGCTACGTCGGGTCTTTCAACTGAAATGCATCAATCCGCAATATTAGTACCTGCTCTAC  
AATCTCAGTGGTTAATGATGCACGTAAGTATGATGTTATTGAGCTATGCAGCTCTTTTAT  
GCGGATCGTTATTATCAATTGCTCTTCTAATCATTACATTTTCGAAACAACATACATTTTTT  
TTGTAAGAAAAGAGATTAATACTTGAATGAAAAAAGAAGGGTTTTTAAAAACCCT  
TCTCTTTTTTCATTTTCGAAATTATTACAAATATCAATTGACTCAGCATTGGATTATTGGA  
GTTATCGTATGATTAGTTTAGGGTTTACTTTTTTAACCATAGGCATTCTATGTGGAGCAGT  
ATGGGCCAATGAAGCATGGGGATCTTATTGGAGTTGGGATCCGAAGGAACTTGGGCA  
TTTATTACTTGGACCGTATTCGCGATTTATTTACATACTAGAACAATCAAAGTTTACAA  
GGTACGAATTCGGCACTTATAGCTTCTATAGGATTTTTTATAATTTGGATATGCTATTTG  
GGGTCAATCTATTAGGAATAGGTTTACATAGTTATGGTTCATTCACATTAACAGAAAAA  
AAAAAGCCTTGGTC--TCCCTCCCATATATTTTCATCCATAATATTTTTGCCCTGGTGGGTC  
TCTCTCTCATTTAATAAATGTCTGGAACCTTGGGTTACTAATTGGTGAATACCGGGAAA  
TCCGAACTTTTTTGAATGATATTCAAGAGAAAAACGTTCTAGAAAGATTCATAGAATT  
GGAAGAATCTTCTTGGATGAAATGATAAAGGAGTACCCGGAGACGCATATACAA  
AACTTCGTATAGGAATACACAAGGAAACGATACAATTGGTCAAAAACACACAATGAAT  
ATCATCTCCATATCATTGTTGATTTCTCGACAAATATAATTTGTTTCGCTATTCTAAGTGG  
TTATTTTATTCTGGGTAATGAAGAACTTGTCATTCTTAATCTTGGATTACAGGAATTCCTC  
TATACTTAAGTGACACAATAAAAGCTTTTTTGAATCTTTTAGTTACTGATTTATGGATCG  
GATTTCAATTCGACCCATGGTTGGGAACTAATGATTGGTTCGGTCTACAACGATTTTGGAT  
TGGTTCATAACGATCAAATATATCCAGTCTTGTTCCTTTCCACTTTTCCAGTTATTCTAGATAC  
AATTGTGAAATATTGGATCTTCTATTATTTAAATCGTGTATCTCCTTCACTTGTAGTTATTT

ATCATTCAATGAATGAAATGCCCATTTGGTATTCCAAAAGTACCTTTTTCGGAGTCCTGGA  
GAGGAAGATGCAATTTGGGTTGACGTATAACAACCGACTTCATCGAGAAGGATTACTTTT  
TTTAGGCCAAGAAGTTGATAGCGAGATCTCGAATCAACTTGTGGTCTCATGGTATATC  
TCAGTATAGAAGATGATACTAGGGATCTTTATTTATTTATAAACTCTCCCGCGGATGGG  
TAATACCAGGAATAGCCATTTATGATACTATGCAATTTGTGCCACCCGATGTGCATACAA  
TATGCATGGGATTAGCCGCTTCAATGGGATCTTTCATTCTGGTTCGGAGGAGAAATTACC  
AAACGTCTAGCACTCCCTCACGCTAGGGTTATGATTCACCAACCTGCTAGTTCTTTTTAT  
GAGGCACAAGCAGGCGAATTTATCCTGGAAGCGGAAGAAGTACTGAAACTTCGCGAA  
ACCCTCACAAAGGTTTATGTACAAAGAACGGGTAATCCTTTATGGGTTGTATCCGAAGA  
CATGGAAAGAGATGTTTTTATGTCAGCAACAGAAGCCCAAGTTCATGGCATTGTTGATC  
TTGTAGCGGTTCGAAATGAAAGAACAAAAATTGATTCATGAAGGTTTAATTACTGAATCA  
CTTCCCAACGGTATGTTCCGGGTCCGTTTAGATAATGAAGATCTAATTCTAGGTTATGCT  
TCAGGGAGGATCCGGCGCAGTTTATACGGATACTACCAGGAGATAGAGTAAAAATTG  
AAGTAAGTCGTTATGATTCAACCAGAGGACGTATAATTTATAGACTTCGCAACAAAGAT  
TCGAACGATATGGAAGAATTACAAGGATATTTAGAAAAAGATAGATCTCGGCAACAAC  
ACTTTCTATATCCGCTTCTCTTAAAGGAGTATATTTACACATTTGCTCATGATCGTGGTTT  
ATTTGGTTATGACAAT--TCTAGTTCAGTACTTGTGAAACGTTCAATTATTTCGAATGTATC  
AACAGAATTATTTGATTTATTCGGTTAATGATTCTAACCAAAATCGATTCGTTGGGTTTC  
ATTTTTATTCTCAGATGATATTGGAAGGTTTTGCAGTCATTGTGGAAATTCCAATCTTGC  
TGCGATTAGTATCTTCCCTCATACCAAAATCTCAGAATTTACGATCTATTCAATCAATATT  
TCCCTTTTTGGAGGACAAATTGTCGCATTTAAATTATGTGTCAGATATACTAATACCTTAT  
CCCATCCATCTGAAAATCTTGGTTCAAATCCTTCAATGCTGGATCCAAGATGTTCCCTTCT  
TTACATTTATTGCGATTCTTCTTTCACGAATATCATAATTGGAATAGTCTTATTACTAATTC  
TATTTTT--TTTTCAAAAAAAGACTATTTCCGTTCCCATATAATTCTTATGTATCTGAATG  
CGAATTTGTATTAGTTTTTCTTCGTAAACAATCTTCTTATTACGATTAACATCTTCTGGA  
GCCTTTCTTGAGCGAACACATTTCTATGGAAAAATCGAACAT--ATAGTAGTGCGCCGTA  
ATCAGAAGACCCTATGGTTCTTCAAGGATCCCTTCATGCATTATGTTTCGATATCAAGGAA  
AAGCAATTCTGGTTTCAAAGGGGACTCATCTTCTGATGAAGAAATGGAAATGTCATCTT  
GTCAATTTCTGGCAATATTATTTTCACTTTTGGTCTCAACCGTACAGGATCCATATAAAC  
CAATTATCAAGCTGTTCTTTCTATTTTCTAGGTTATCTTTC AAGTGTACTAATAAATCCTT  
CGGCGGTAAGGAATCAAATGCTAGAGAATTCATTTCTAATAGATACTGTTATT-----AAAA  
AATTCGATACCAGAGTCCCTGTTATTCTCTTATTGGATCATTGTCTAAAGCTAAATTTG  
TACCGTATCGGGGCATCTATTAGTAAGCCGATCTGGACCAATTTATCAGATTGCGATAT  
TATTGATCGATTTGGTTCGGATATGTAGAAATCTTCTCATTATCACAGTGGATCCTCAA  
AAAACAGAGTTTGTATCGAATAAAGTATATACTTCGATTTTCGTGTGCTAGAACTTTGGC  
TCGTAAACATAAAAGTATGGTACGCGCTTTTTTGCAAAGATTAGGTTCCGGGATTATTAG  
AGAATTCCTTACGGAAGAAGAACAAGTTGTTTCTTTGATCTTCCCAAACGTATTTGG  
TATTTGGATATTATCCGATCAATGACCTGGTGAATTATTCAATGATAATTGATACGACA---  
GAAGTACAA--GCTATCAATTCTTTTCTACATCGGAA---TCCATAAAAGAAATCTATGGA  
TTCATATGGAIGTTTGTATCCATTTTTACCCTTATATTTGGAATCATAATAGGGGTACTAGT  
AATTGTGTGGTTAGAAAGAGAAATATCTGCAACGATACAACAACGTATTGGGCCTGAAT  
ATGCTGGTCCGTTGGGAATTCTTCAAGCTCTAGCGGATGGGACTAAATTACTTTTTAAG  
GAGGACCTATTCCCATCTAGAGGAGATATTCGTTTGTGTTAGTGTTCGGACCGTCTATAGCG  
GTCATATCAATTCTACTAAGTTATTTAGTAATTCCTTTTGGATACCGCCTTGTTTTAGGTG

ATCTCAGTATAGGTGTTTTTTTTATGGATCACCATTTCAAGTATCGCCCCTATTGGGCTTCT  
TATGTCAGGATATGGATCGAATAATAAATATTCTTTTTTCAGGTGGTTTACGAGCTGCTGC  
TCAATCTATTAGTTATGAAATACCATTAACCTCTATGTGTGTTATCAATATCTCTACTATCTA  
ATAGTTCAAGTACAGTTGATATAGTTGAAGCACAGTCAAAATATGGTTTTTTGGGGGTGG  
AATCTGTGGCGTCAACCTATAGGGTTTATTGTTTTTTCTAATTTCTTCTCTAGCCGAATGT  
GAGAGATTGCCATTTGATTTACCGGAAGCAGAGGAGGAATTAGTAGCAGGTTATCAAAA  
CCGAATATTCAGGTATCAAATTCGGTTTATTTTATATTGCTTCTTACCTAAATCTATTACTT  
TCTTCATTATTTGTAACAGTTCTTTACTTAGGTGGGTGGAATTTTTCTATTCCGTACATAT  
CTATTCCTGAACTTTTCGGAATAAATAAAATGGCCGGAGTTTTTGGAAATTACAGTTGGTA  
TCTTTATTACATTAGCTAAAGCTTATTTGTTTCTGTTTCATTCCCTATCACAACAAGGTGGA  
CTTTGCCTAGGATAAGAATGGACCAGCTATTAATCTTGGATGGAAATTTCTTTTACCTA  
TTTCTTTAGGTAATCTATTATTGACAACTTCTTCCCAACTTGTTTCACTAATGATCTGGCA  
TGACAGAATGAAAACCTCATTCTCGATTCTACGAGAATTTTTATGAAAGCGTTTCATTT  
GCTTCTCTTCCATGGAAGTTTCATTTTCCAGAATGTATCCTAATTTTTGGCCTAATTTCTT  
CTTCTGATGATCGATTCAACCTCTGATCAAAAAGATAGACCTTGGTTCTATTTTCATCTCT  
TCAACAAGTTTAGTAATAAGCATAACGGCCCTATTGTTCCGATGGAGAGAAGAACCTAT  
AATTAGCTTTTCGGGAAATTTCCAAACGAACAATTTCAACGAAATCTTTCAATTTCTTAT  
TTTACTATGTTCAACTCTATGTATTCTCTATCCGTAGAGTACATTGAATGTACAGAAATG  
GCTATAACAGAGTTTCTTATTTCGTATTAACAGCTACTCTAGGAGGAATGTTTTTATGT  
GGTGCTAACGATTTAATAACTATCTTTGTAGCTCCAGAATGTTTCAGTTTATGTTCCCTAC  
CTATTATCTGGATATACCAAGAGAGATGTACGGTCTAATGAGGCTACTACGAAATATTTA  
CTCATGGGTGGGGCAAGCTCTTCTATTCTGGTTCATGGTTTCTCTTGGCTATATGGTTTA  
TCTGGGGGGGAGATCGAGCTTCAAGAAATAGTGAATGGTCTTATCAATACACAAATGTA  
TAACTCCCCAGGAATTTCAATTGCGCTTATATCCATCACTGTAGGAATTGGGTTCAAGCT  
TTCCCCAGCCCCTTTTCATCAATGGACTCCTGACATATACGAAGGATCTCCCACTCCAG  
TCGTTGCTTTTCTTTCTGTTACTTCGAAAGTAGCTGCTTCAGCTTCAGCCACGCGAATT  
TTCGATATTCCTTTTTATTTCTCATCAAACGAATGGCATCTTCTTCTGGAAATCCTAGCTA  
TTCTTAGCATGATATTGGGGAATCTCATTGCTATTACTCAAACAAGCATGAAACGTATGC  
TTGCATATTCGTCCATCGGTCAAATCGGATATGTAATTATTGGAATAATTGTTGGAGACT  
CAAATGATGGATATGCAAGCATGATAACTTATATGCTGTTCTATATCTCCATGAATCTAGG  
AACTTTTGCTTGCATTGTATCATTGGTCTACGTACCGGAACTGATAACATTCGAGATTA  
TGCAGGATTATACACGAAAGATCCTTTTTTTGGCTCTCTCTTCAGCCCTATGTCTCTTATC  
CCTAGGGGGTCTTCCCTCCACTAGCAGGTTTTTTTCGGAAAACCTCCATCTATTCTGGTGTG  
GATGGCAGGCAGGCCTATATTTCTTGGTTTTCAATAGGACTCCTTACGAGCGTTGTTTCTA  
TCTACTATTATCTAAAAATAATCAAGTTATTAATGACTGGACGAAACCAAGAAATAACCC  
CTTACGTGCGAAATTATAGAAGATCTCCTTTAAGATCAAACAATTCCATCGAATTGAGTA  
TGACTGTATGTGTGATAGCATCTACTATAACCAGGAATATCAATGAACCAATTCTTGCAA  
TTGCTCAGGATAACCCTTTTATGTTTCTGCTTCACGAATATGATATTTTCTGGGCATTTCT  
GATAATATCAAGCGTTATTCTATCTTGACATTTGTAATTTCCGGAGTTTTAGCACCGGTT  
AGTGAAGGACCAGAGAAGCTTTTCGAGTTATGAATCGGGTATAGAACCCATGGGGGATG  
CTTGGTTACAATTCCGAATCCGCTATTACATGTTTGTCTAGTTTTTTGTTGTTTTTATGATG  
TGAAACGGTCTTTCTTTATCCGTGGGCAATGAGTTTCGATGTATTGGGTGTATCTGTATT  
TATCGAAGCTTTCAATTTTCGTGCTTATCCCAATTGTTGGTTCAGTTTATGCATGGCGAAA  
AGGAGCATTGGAATGGTCTACGAGTTATTTTCTTGGTTAACAATACTTGTAGTTTTGCC



GATATTCGCGGGTTCCTCAATTTCTTTTTTCCTCATAAAGGAAATAAGATGTTTAGATG  
GTATACTATTTGTATATGCTTATTAGA ACTCCTTCTAAC AACCTATGCATTCTGTTATCATT  
TCCAATTGGACGATCCATTAATCCAATTGGAAGAAGATTATAAATGGATAGATATTTTTG  
ATTTTCACTGGAGACTGGGAATCGATGGACTTTCCATAGGACCCATTTTACTGACAGGA  
TTTATCACTACTTTAGCTACTTTAGCAGCTTGGCCAGTTACGCGAAATTCGCAATTGTTT  
TATTTCTGATGTTAGCAATGTACAGCGGTCAAATAGGATCATTCTTCTCGAGACCTT  
TACTTTTTTTCATCATGTGGGAGTTAGAATTAATTCCTGTTTACTTACTTTTATCCATGT  
GGGGAGGAAAAAACGTCTCTACTCGGCTACAAAGTTATTTTGTACACGGCAGGGGG  
TTCTATTTTTCTCTTAATAGGAGTTCTAGGTATGGGTTTATATGGTTCCAATGAACCAACA  
TTAGATTTTGAAAGATTAGCTAATCAATCATATCCTGTGGCATTGGAAATAATATTATATT  
TTGGTTTCTTTATTGCTTATGCTGTCAAATCGCCGATTATACCCCTGCATACATGGTTACC  
AAATACCCATGGAGAAGCACATTACAGTACATGTATGCTTCTAGCTGGAATCTTATTTAAA  
AATGGGAGCATAACGGATTGATTCGGATCAATATGGAATTATTACCCACGCTCATTCTAT  
ATTTTCTCCCTGGTTGGTAATAGTTGGAACGATGCAAATAATCTATGCAGCTTTAATTTCT  
TCTCGGTCAACGCAATTTTAAAAAGAGAATAGCCTATTCCTCTGTATCTCACATGGGTTT  
TACAATTATAGGAATTGGTTCTATAACCGACATGGGACTCAATGGAGCCATTTTACAAAT  
ACTCTCTCATGGATTTATTGGTGCTGCACTTTTTTTCTTGGCGGGAACGAGTTGTGATAG  
AATACGTCTTGTATTATCTCGACGAAATGGGAGGGATATCCATCCAATGCCAAAAATATT  
TACCATGTTTCAAGTAGTTTCTCGATGGCTTCTCTTGCATTGCCAGGAATGAGTGGTTTTGT  
TGCGGAATCAGTAGTATTTTTTTGGAATAATTACTAGTCCAAAATATCTTTTAAATACAAA  
AATACTAATTACTTTTTGTAATGGCAATTGGAGTGATATTA ACTCCTATTTATTATTATCTA  
TGTCACGTCAGATGTTCTATGGATACAACTATTCAATGTTCCACACTCTAATTTTTTTG  
ATTCTGGACCACGAGAACTATTTGTTTCAATTTGTATCTTTCTACCCATAATAGGGATTG  
GTATTTATCCTGATTTTCGTTCTCTCGTTATCAGTTGACAGGGTACAAGCTATCCTATCTAA  
TTACTTTTATAGAATGATGTTTCGAGCATGTA CTTTTTTTGGAGTGTCTATTTATTCTCTATCG  
GTATCTATGGATTGATCACAAGTCGAAAGATGGTTAGAGCACTTATGTGTCTTGAGCTTA  
TACTCAATTCGGTTAATATCAATCTCGTAACATTTTCTGATATATTTGATAGTCGCCAATT  
AAAAGGCGACATTTTCTCAATCTTTGTTATAGCTGTTGCGGCTGCTGAAGCGGCTATTG  
GGCTAGCTATTGTTTCATCAATCCATCGTAACAGAAAATCAACTCGTATCAATCAATCGA  
ATTTGTTGAATAATATGGAACATACATATCAATATGCATGGATAATACCTTTTCTTCCACT  
TACAGTTACTATGTCAATAGGATTTGGACTTATACTTATTCCGACAGCAACAAAAAATAT  
TCGTCTGATATGGGCTTTTCTAGTATTTTTTTGTTAAGTGTAGCTATGGGATTTTCGGCC  
AATCTGTCTATTCAACAAATAAATGGAAGTTTTATTATCAATATCTATGGTCTTGGACCA  
TAGATATTGATTTTCTTAGAGTTTGGATATTTGATCGATCCACTTACTTCTATTATGTCA  
ATACTAATTACTACTGTTGGAGTCGTGATTCTTATTTATAGTGACAATTATATGTCTCAG  
ACCAAGGATATTTGAGATTTTTGCTTATATGAGTTTTTCCAATACTTCCATGTTGGGATT  
AGTTACCAGTTCTAATTTGATACAAATTCATATTTTTTTGGGAACTAGTGGGAATGTGTTT  
CTATTTATTAATAGGGTTTTGGTTTACACGACCGATTGCCGCAAGTGCTTGTCAAAAAG  
CTTTTGTA ACTAATCGTGTAGGAGATTTTGGTTTATTATTAGGAATCTTAGGTCTTTATTG  
GATAACAGGTAGTTTGGAAATTTTCGGGATTTGTTTCGAAATAGCTAATAACAATGGGGTCA  
GCTCCTTATTTGCTACTTTGTGCGCCTCTTTATTATTTGTCTGGTGCAGTTTCTAAATCTGC  
ACAATTCCCCCTCCACGTATGGTTACCTGATGCCATGGAAGGACCTACTCCTATCTCGG  
CCCTTATACACGCGGCTACTATGGTAGCAGCAGGAATTTTTCTTGTAGCTCGGCTTATTC  
CTTTTTTCATAGACATACCTTATATAATGAATTCATTTCTTTAATAGGTGTAATAACAGT

ACTATTAGGAGCTACTTTTTCTCTTGCTCAAAGAGACATTAAAAGAAGTTTAGCTTATTC  
TACAATGTCTCAATTAGGTTATATTATGTTAGCTCTAGGTATAGGTTCTTATCGAGCGGCT  
TTATTCATTTGATCACTCATGCCTATTCTAAAGCTTTATTGTTTTGGGATCTGGATCTAT  
TATTCATTCAATGGAACCTATTGTTGGATATTCACCAGAAAAAAGTCAGAATATGGTTCT  
TATGGGTGGTTTAAACAAGATATGTTCCAATTACAAGAACTGCTTTTTTATTAGGTACACT  
TTCTCTTTGTGGTATTCCACCTCTTGCTTGTTTTTGGTCCAAAGATGAAATTCTTAATGAT  
AGTTGGTTATATTCACCAATTTTTGCAATAATACCTTATTTACAATAGGATTAACCGCAT  
TTTATAATGTTTTCGGGTATATTTACTTACCTTTGATGGGTATTTGCGCATTATTTTTCAAAT  
CACAGTAGCACTAAAAGTAACTCGTTCTATTCAATATCTCTATGGGGAAAAGAAGCACC  
AAAAACAGTCAATAAAA---AATTTACTTTTATCAACAATGAATTTTTTTTTCAAATAAATAT--  
---ACTTCCATGTATCCTCACGAATCAGACAATACCATGCTATTTCCCTCTGCTTGTATTGGT  
ACTATTTACTTTGTTTCGTTGGATCAATAGGAATTTCTTTTGATTCTGATATATTATCGAAA  
TGGTTAACCCCATCCCAAATCTTTTCCATCCAAACTCGAATTATTCTGTGAATTGGTAT  
GAATTTTTTACAAATTCATTTTTTTCAGTAAGTATAGCCTTTTTTGGATTATTCATAGCATA  
TATTATATATGGGTCTGTTTATTCATTTTTCCAGAATTTGGACTTAATCAATTCATTTGTAA  
TTATCTTGGACCAAATAAAAAATATTATATACAATTTGGTCATATAATCGTGGTTACATAGA  
TATTTTTTATACTAGAGTTTTAGCCATGGGTATAAGAGGAATAACCGAGCTAACTCAGTT  
TTTTGATAGACATATAATTGATGGAATTACAAACGGAGTTGGTCTTACAAGTTCCCTTAT  
AGGTGAAGGGATCAGATAT--ATGGGGGGGGGGCGAATCTCATCTTATTTATTCTTATATT  
TTTTTTATGTATCAATATTTTTTATTATTTTTTTTGGATTTACCTGGACCAATACATGATA  
TTCTTGATGATTTTTTTGGATCAGTTCTTATATTAGGAGGTCTGGGAGTAGTATTACTTAC  
CAATCCCATTTTTTCTGCCTTTTCGTTGGGATTGGTTCTTGTTTGTATATCCTTATTCTATA  
TTCTATCGAATTCCTATTTTGTAGCTGCCGCACAGCTCCTTATTTATGTTGGAGCTATAAA  
TGTCTTAATCATATTTGCTGTAATGTTTCATGAATGGTTCAGAATATTCCAATGATTCCTAT  
TTTTGGACCATTGGAGATGGGGTCACTTCACTGGTTTGTACAAGTATTCTTTTTTCACTA  
ATTACTATTATCCCAGATACGTCATGGTACGGAATTTTTTGGACTACAAGATCAAGCCAG  
ATTATGGAACAGGACCTAATAAGTAACATTCAACAAATTGGTATTCATTTATCAACAGAT  
TTTTATCTTCCGTTTGAACCTAATTCATAAATCTTTTAGTTTCCTTGATAGGTGCAATTA  
CTATGGCTCGTCAAATGACTATAACGGCTACAAGAAAAGATCTCATGATAGTCAATATG  
GGCCCTCACCACCCATCAATGCATGGTGTCTTCGACTGATCGTTACTCTCGATGGTGA  
AGATGTTATTGATTGCGAACCCATATTGGGATATTTACACAGAGGAATGGAAAAAATAG  
CAGAAAACCGAACAAATTATAACAATATCTTCTTATGTAACACGTTGGGATTATTTAGCTA  
CTATGTTACAGAGGCAATAACGGTAAATGCACCAGAACAATTGGAAAATGTTCAAGT  
ACCTCAGAGAGCCAGTTATATCAGAGTAATTATGCTGGAGCTGAGTCGTATAGCTTCTC  
ATTTGTTATGGCTTGGACCTTTTATGGCAGATATCGGTGCACAGACTCCTTTTTTCTATAT  
TTTCAGAGAGAGAGAATTGTTATATGACCTATTCGAAGCCGCCACAGGTATGCCAATGA  
TGCATAATTATTTCCGCATCGGAGGAGTAGCTGCTGATCTACCTCATGGCTGGATAGATA  
AATGTTTTGGATTTCTGCAATTATCTTTAACAGGAGTTGTTGAATATCAAAAACCTTATTA  
CACGGAATCCCATTTTTTTGGAACGAGTTGAAAGAGTGGGCATTATTGGTGGAGAGGA  
AGCAATAAATTGGGGTTTATCAGGACCAATGTTACGAGCTTCTGGAATCCAATGGGATC  
TTCGTAAGGTTGATCATTATGAGTGTACAATGAATTCGATTGGGAAGTCCAATGGCAA  
AAAGAAGGAGATTCATTAGCTCGTTATTTAGTACGAATAGGTGAAATGGGGGAATCTAT  
AAAAATTATTCAACAGGCTCTAGAAGGAATTCCTGGAGGTCCCTATGAGAATTTAGAA  
GTCCGACGC---GATAGAGCAAAAAATTCCGAATGGAATGATTTTGAATATAGATTTATTA

GTAAAAAACCTTCACCCAATTTTGAATTGTCGAAACAAGAACTTTATGTCAGAGTAGA  
AGCCCCAAAAGGAGAATTAGGAATTTATTTGATAGGGGATAATAGCATTTTCCCCTGGA  
GATGGAAAATTCGTCCACCCGGTTTCATCAATTTGCAAATTCCTCCTCAGCTAGTTAAA  
AGAATGAAATTGGCTGATATCATGACGATACTAGGTAGTATAGATATCATTATGGGAGAA  
GTTGATCGTATGTTCTCTATGGTGACTGGGTTTCATGAATTATAGTCAACAAACAATACGA  
GCTGCAAGGTATATTGGTCAAAGTTTCGTAATTACCTTATCCCACACAAATCGTTTACCT  
ATAACTATTCAATATCCTTATGAAAAATCGATCACATCAGAGCGTTTCCGTGGTTCGAATC  
CACTTTGAATTTGATAAATGTATTGCTTGTGAAGTATGTGTTTCGTGTATGCCCGATAGAT  
CTACCCGTTGTAGATTGGAGATTTGAAAGAGATATTAACAAAAACAATTGCTTAATTAT  
AGTATTGATTTTGGGGTCTGTATATTTTGTGGTAATTGTGTGCGAGTATTGTCCAACAAC  
TGTTTATCAATGACTGAAGAATATGAACTTTCCACTTCTGATCGTCACGAATTGAATTAT  
AATCAAATTGCTTTGGGTCGGTTACCAATGTCAATAATTGGAGATTATACAATTCAAACA  
GTTATGAATTCGAAAATAGACAAAGATAAACCCTTTGATTCAAGAACGATTACCAATTA  
CCAGCAGGATCGTTTATCTGATTGGTTAGTCAAGCATGAGCTAGTTCATAGATCTTTGG  
GCTTCGATTGCCGAGGAATAGAGACTTTACAAATAAAAACCGAGGATTGGTACTCCATT  
GCTGTCAATTCATATGTATATGGTTACAATTATTTACGCTCCAGTGTGCCTATGATGTAG  
CACCAGGCGGATTTTATAGCTAGTGTGTATCATCTTACGAGAATACAATATGGTGTAGATA  
AACCAGAAGAAGTATGCATAAAAGTATTTGTCCCAAGGAATAATCCTAGAATCTCGTCT  
GTTTTCTGGATTTGGAAAAGTGCTGATTTTCAAGAACGCGAATCTTATGATATGTTGGG  
AATCTCTTATGATAATCATCCACGCCTTAAACGTATCTTATGATGCCTGAAAGTTGGATAGG  
CTGGCCCTTACGTAAGGACTATATTACCCCAAATTTCTATGAAATACAAGATGCTCAT-----  
-----ATGGTC  
TTAACT--GAATATTCAGACAATCAAATAAAAAGGGAAGGAAAAGATTATATTGAGACA  
GTTATGAATTTGATTGAGTTTCCATTACTTGACCAAACAACCCCAATTCAGTTATTTCA  
ACTACATCGAATGATCTTTTCGAATTGGTCAAGACTCTCTAGTTTATGGCCGCTTCTATAT  
GGTACCAGTTGTTGTTTCATTGAATTTGCTTCATTAATAGGCTCGCGATTTCGACTTTGAT  
CGTTATGGATTGGTACCAAATCGAGTCCCTAGGCAAGCGGACCTAATTTTAACAGCCGG  
CACAGTAACAATGAAAATGGCTCCTTCTTTAGTGAGATTATATGAGCAAATGCCTGAAC  
CAAATATGTCATTGCTATGGGAGCTTGTACTATTACAGGAGGGATGTTTCAGTACTGATT  
CTTATAGTACTGTTCCGGGGAGTCGATAAGCTAATTCCTGTGGATGTCTATTTGCCGGGCT  
GTCCACCTAAACCAGAAGCAGTTATAGATGCTATAATGAAACTTCGTAAGAAGATATCT  
CGAGAAATCTTTGAAGATAGAACTGTGTCTCAA---GAAAATCGATGTTTTTCTACCAAT  
CACAAGTTTTATGTTTCGACGCGACTCATACTGGAAATTACGATCAAGGATTGCTCTAT  
CAATCACCATCTACTTCAGAGATGCCTACA-----TTTTTCAAATCCAAAAGTTCAATATCT  
TCCCACGAATTAGTGAATATGCAAATAGAAATACTTTTTCTTGGGTAAAGGAACAGAT  
GACTCAATCGATTTCTGTATCGATCATGATATATGTAATAACTCGGGCATCTATTTCAAAT  
GCATATCCCATTTTTGCGCAGCAGGGTTATGAAAACCCACGAGAAGCAACTGGACGAA  
TTGTATGTGCCAATTGCCATTTAGCTAATAAGCCCGTGGATATTGAAGTTCCGCAAGCCG  
TGCTTCCTGATACTGTATTTGAAGCAGTTGTTTCGAATCCCTTATGATATGCAACTGAAAC  
AAGTTCTTGCTAATGGTAAAAAGGGGGCTTTGAATGTAGGGGCTGTTCTTATTTTACCC  
GAGGGATTTCGAGTTAGCCCCCCCCGATCGTATTTCTCCCGAGGTGAGAGAAAAGATGG  
GAAATCTGTCTTTTCAGAGTTATCGTCCCAATAAAAGAAATATTCTTGTGATAGGTCTTG  
TTCCCGGTCAGAAATATAGTGAAATCGCCTTTCCCATCTTTCCCCCGACCCTGCTACG  
AGGAAAGACGTTCACTTCTTAAAATATCCCATATATGTAGGTGGGAACAGAGGAAGGG

GTCAGATTTATCCTGATGGGAGCAAGAGTAACAATACAGTCTATAATGCTACATCAGCA  
GGTATAGTAAGCAGAATAGTACGTAAAGAAAAAGGAGGATATGAAATAACCATAGTTG  
ATGCATCGGATGGACATCAAGTGGTTGATATTGTACCTCCAGGGCCAGAACTTCTTGTT  
TCAGAGGGTGAATCCATCAAGCTCGATCAACCATTAACAAGCAATCCCAATGTAGGAG  
GGTTTGGTCAGGGAGATGCAGAAATAGTGCTTCAAGATCCATTACGTGTCCAAGGCCT  
TTTGTCTTCTTGGCATCTGTTATTTTGGCACAAGTTTTTTTTGGTTCTTAAAAAGAAACA  
GTTTGAAGAGTTCAATTGTATGAAATGAATTCCTCAATAAGGTATATGATTGGTTTGA  
GGAACGTCTCGAGATTCAGGCGATTGCGGATGATATAACTAGTAAATATGTTCCCTCCTCA  
TGCAACATATTTTATTGTTTAGGGGGGATCACACTTACTTGTTTTTAGTACAAGTAGC  
TACAGGTTTTGCTATGACTTTTTACTATCGTCCAACCGTTACAGAAGCTTTTTCTCTGT  
TCAATACATAATGACTGAGGCCAATTTGGTTGGTTAATTCGATCAGTTCATCGATGGTC  
AGCAAGTATGATGGTTCTAATGATGATCCTGCACGTATTCGTGTATATCTCACAGGTGG  
ATTTAAAAACCCCGCGAATTAACCTTGGGTTACAGGTGTGGTTTTAGCTGTATTGACTG  
CATCTTTTTGGTGTAACCTGGTTATTCCTTACCTCGGGACCAAATTGGTTATTGGGCAGTAA  
AAATCGTGACAGGTGTACCTGAAGCTATTCCTGTAATAGGATCGCCTTTGGTAGAGTTA  
TTACGTGGAAGTGCTAGTGTGGGCCAATCCACTTTGACTCGTTTTTATAGTTTACACAC  
TTTTGTATTGCCTCTTCTTACTGCCGTATTTATGTTAATGCACTTTCCAATGATACGTAAG  
CAAGGTATTTCCGGTCTTTAATGGGAGTAACAAAGAAACCTGACTTGAATGATCCTGT  
ATTAAGAGCTAAATTGGCTAAAGGAATGGGGCATAATTATTATGGAGAACCCGCATGGC  
CCAATGATCTTTTATATATTTTCCAGTAGTAATTCTAGGTA CTCTCGCATGTAATGTAGG  
CTTAGCAGTTCTAGAACCGTCAATGATTGGTGAACCGGCGGATCCATTTGCAACTCCTT  
TGGAATATTACCCGAATGGTACTTCTTTCCCGTATTTCAAATACTCCGCACAGTGCCCA  
ATAAGTTATTGGGTGTTCTTTAATGGTTTCAGTACCAATGGGATTATTGACAGTACCTT  
TTTTGGAGAATGTCAATAAATTCCAAAATCCATTTCTGTCGTCCAGTAGCTACAACAGTC  
TTTTTGATCGGTACCGTAGTAGCTCTTTGGTTAGGTATTGGAGCAACATTACCTATTGAT  
AAATCCCTAACTTTAGGTCTTTTTATGATTGAAGTTTTTCTATTTGGAATCGTCTTAGGTC  
TAATTCCTATTACTTTGGCAGGATTATTCGTAACCTGCATATTTACAATACAGACGTGGTGA  
TCAGTTGGACCTTATGCCTACTATAACTAGTTATTTCCGGTTTTCTACTGGCTGCTTTAACT  
ATAACCCAGCTCTATTGATTGGTTTGAATAAGATACGACTTATTATGGATATAGTAAGTC  
TCACTTGGGCTGCTTTAATGGTAGTCTTTACATTTTCCCTCTCGCTCGTAGTATGGGGAA  
GAAGTGGACTCATGATTATTCGTTCCGCCGAACCGAAGTGAAAATTGTTGTAGATAG  
GGATCCTATAAAAACGTCTTTCGAGGAATGGGCCAGACCCGGCCATTTCTCAAGAACA  
ATAGCTAAGGGCCCTGATACTACCACTTGGATCTGGAACCTACATGCTGATGCTCACGA  
TTTCGATAGTCATAACAGTGATTTGGAGGAGATCTCCCGAAAAGTATTTAGTGCTCATT  
TGGTCAACTCTCCATTATCTTTCTTTGGCTGAGTGGCAITGACTTCCATGGCGCCCGTTT  
TTCCAATTATGAAGCATGGCTAAGTGATCCTACTCATATTGGACCCAGTGCCAGGTAG  
TTTGGCCAATAGTAGGTCAAGAAATATTGAATGGTGATGTGGGCGGGGGTTTCCGAGG  
AATACAAATAACCTCCGGTTTTTTTCAGATTTGGCGAGCATCTGGAATAACTAGTGAATT  
ACA ACTCTATTGTACCGCAATTGGTGCATTGGTCTTTGCATCGTTAATGCTTTTTGCCGG  
TTGGTTCCATTATCACAAAGCTGCCCAAATTGGCTTGGTTCCAAGATGTAGAATCTA  
TGTTGAATCACCACTTAGCGGGGTTACTAGGACTTGGGTCTCTCTCTTGGGCGGGACA  
CCAAATCCATGTATCTTTACCGATTAACCAATTTCTCGATGCTGGAGTTGATCCTAAAGA  
GATAACCACTTCTCATGAATTTATCTTGAATCGGGACCTTTTGGCTCAACTTTATCCCAG  
TTTTGCCGAGGGAGCAACCCCTTTTACCTTGAATTGGTCAAATAACGCGGAATTCC

TGAGTTTTTCGTGGAGGATTAGATCCAATAACAGGGGGCCTATGGCTGAGCGATATTGCA  
CACCATCATTTAGCTATTGCTATTCTTTTCCTGATCGCTGGTCATATGTATAGGACCAACT  
GGGGCATCGGTCATGGCCTTAAAGACATTTTAGAGGCTCATAAAGGTCCATTTACAGGC  
CAGGGCCATAAGGGCCTATATGAAATCCTAACAACGTCATGGCATGCTCAATTATCTCTT  
AACCTGGCTATGTTAGGTTCTTTAACCAATTGTTGTAGCTCACCATATGTATTCCATGCCC  
CCCTATCCATAACCTAGCTATTGATTATGGTACACAACCTTTCGTTGTTACACATCACATGT  
GGATCGGTGGATTTCTCATAGTTGGTGCTGCTGCACATGCAGCCATTTTTATGGTAAGA  
GACTATGATCCAACACTACTCGATAACAACGATCTATTAGATCGTGTCTTAGGCACCGCGAT  
GCAATCATATCACATCTTAACTGGGCATGTATAATTTCTAGGTTTTACAGTTTTGGCTTGT  
ATATTCATAATGATACCATGAGCGCTTTAGGGCGGCCCAAGATATGTTTTTCAGATACCG  
CTATACAATTACAACCCATCTTTTCTCAATGGGTACAAAACATTCATGCTTTAGCACCTG  
GGATAACAGCTCCTGGTGCAACAACAAGTACCAGCTTAACTTGGGGGGGGGTGAGTT  
AGTAGCAGTAGGCGGCAAAGTAGCTTTGTTACCTATTCCATTAGGAACCGCAGATTTTT  
TGGTCCATCACATTCATGCATTTACGATCCATGTGACTGTATTGATACTACTGAAAGGTG  
TTCTATTTGCTCGCAGTTCCCGTTTGATACCCGATAAAGCAAATCTTGGTTTTCGTTTCC  
CTTGTGATGGACCTGGAAGAGGGGGGACATGTCAAGTATCCGCTGGGATCATGTCTT  
CTTAGGTCTATTCTGGATGTACAATGCAATTTCCGGTAGTCATTTTCCATTTAGTTGGAA  
AATGCAGTCGGATGTTTGGGGTACTATAAGTGATCAAGGGGTGGTAACTCATATCACAG  
GAGGAAACTTTGCACAGAGTTCCATTACTATTAATGGGTGGCTCCGAGATTTCTTATGG  
GCACAGGCATCTCAGGTAATTCAGTCTTATGGTTCTTCATTATCCGCATATGGTCTTTTTT  
TCTTAGGTGCTCATTTTATTTGGGCTTTCAGTTTAAATGTTTCTATTTCAGTGGCCGTGGTTA  
TTGGCAAGAACTCATTGAATCCATCGTTTGGGCTCATAACAAATTAAGTTGCTCCTG  
CTACTCAGCCTAGAGCCTTGAGCATTGTACAAGGACGTGCTGTAGGAGTAACCCATTAC  
CTTCTGGGTGGAATTGCCACAACATGGGCATTCTTCTTAGCAAGAATTATTGCAGTAGG  
AATGGCATTAAAGATTTCCGAGGTTTAGCCTCGGCTTAGCTCAGGACCCACTACTCGTC  
GTATTTGGTTTGGTATTGCTACCGCACATGACTTCGAGAGTCATGATGATTAATCTGAGG  
AACGTCTTTATCAGAACATTTTTGCTTCTCATTTTGGGCAGTTAGCAATAATCTTTCTGT  
GGACGTCCGAAATCTGTTTCATGTAGCTTGGCAAGGAAATTTTGAGTCATGGATACAG  
GACCCCTTACATGTAAGACCTATTGCTCATGCAATTTGGGATCCTCATTTTGGTCAACCA  
GCTGTAGAAGCCTTTACTCGAGGGGGTGTATCGGCCAGTGAATATCGCTTATTCCGG  
TGTTTATCAGTGGTGGTATAACAATCGGATTGCGCACCAATGAGGATCTTTATACAGGAG  
CTTTTTTCTATTATTTCTTTCTGCTATATCCTTAATAGCGGGTTGGTTACATCTACAACCC  
AAATGGAAACCAAGTGTTCGTGGTTCAAAAATGCCGAATCTCGTCTCAATCATCATTT  
GTCAGGACTTTTCGGAGTAAGTTCCTTGGCTTGGGCAGGACATTTAGTTCATATCGCTA  
TTCCCGGATCCAGGGGAGAGTACGTCAGATGGAATAATTTCTTAGACGTATTACCGTAT  
CCTCAAGGGTTGGGACCACTTTTTACGGGTGAGTGGAAATCTTTATGCTCAAAACCCCTGA  
TTCGAGTAGTCATTTATTTGGTACTTCCCAAGGAGCCGGAACCTGCCATTCTAACCCCTC  
TTGGGGGATTCCATCCACAACGCAAAGTTTATGGTTGACCGATATTGCTCATCATCATTT  
TAGCTATTGCATTTATTTTTCTCGTTGCTGGTCATATGTATAGAATAACTTCGGAATTGG  
ACACAGTATCAAAGATCTTTTAGAAACACATATTCCTCCGGGGGGTTCGATTAGGACGTG  
GGCATAAGGGTCTTTATGACACAATCAATAATTCGATTCATTTTCAATTAGGTCTTGCTC  
TAGCCTCTTTAGGGGTTATTACTTCCTTAGTAGCTCAACACATGTAATCTTTACCTGCTTA  
TGCGTTCATAGCACAAGACTTTACTACTCAAGCTGCCTTATATACTCATCCAATAACAT  
CGCAGGGTTCATCATGACAGGAGCCTTTGCTCATGGAGCTATATTCTTCATTAGAGATTA

CAATCCGGAACAGAATGAGGATAATGTATTGGCAAGAATGTTAGACCATAAAGAAGCTA  
TCAAATCTCATTAAAGTTGGGCCAGCCTCTTTCTCGGGTTCATACCTTGGGCCTTTATG  
TTCATAACGACGTCATGCTCGCTTTTGGTACTCCGGAAAAACAAATCTTGATCGAACCC  
ATATTTGCCCAATGGATAACAATCCGCTCATGGTAAGACTTCATATGGGTTTCGATGTACTC  
TTATCTTCAACGAATGGTCCAGCATTCAATGCTGGTCAAAGCATATGGTTACCTGGCTG  
GTTGAATGCTGTAAATGAG-----AATAGTAATTCGCTCTTCTTAACAATAGGTCCTGGAGA  
TTTCTTGGTTCATCATGCTATTGCTCTAGGTTTGCATACAACACTACATTGATTTTTAGTAAAA  
GGTGCTTTAGATGCACGTGGTTCCAAGTTAATGCCAGATAAAAAGGATTTTGGTTATAG  
TTTTCTTGGCAGCTTTCTGGATGTTAAATACCATTGGATGGGTTACTTTTTATTGGCATTG  
GAAACACATCACATTATGGCAGGGTAACGTTTACAATTTAATGAATCCTCCACTTATTT  
GATGGGATGGTTAAGAGATTATCTATGGTTAAACTCTTCACAACCTTATCAATGGGTATAA  
CCTTTTGGTATGAATAGTTTATCGGTATGGGCGTGGATGTTCTTATTTGGACATCTTGTT  
TGGGCTATTGGATTTATGTTCTTAATTTCTGGCGTGGATATTGGCAGGAATTGATTGAA  
ACTTTAGCATGGGCTCATGAACGCACACCTTTGGCTAATTTAATTCGATGGAGAGATAA  
GCCAGTGGCTCTTTCCATTGTGCAAGCAAGATTGGTTGGATTAGCCCCTTTCCGTAG  
GTTATATATTCACTTATGCAGCTTTCTTGATTGCCTCTACATCAGGAAAATTTGGTATGTC  
ACATTCAGTAAAAATTTATGATACATGTATAGGGTGTACTCAATGTGTACGAGCCTGCC  
CACAGATGTATTGAAATGATACCTTGGGACGGATGTAAAGCTAAGCAAATTGCTTCCG  
CACCAAGAACCGAAGACTGTGTAGGTTGTAAGAGATGTGAATCCGCCTGCCCAACAGA  
TTTTTTGAGTGTCCGTGTTTATTTATGTGATGAAACAACTCGCAGCATGGGTCTATCTTA  
TATGACAGATCTCAACTTACCCTCTATTTTTGTGCCTTTAGTGGGCCTAGTATTTCCGGC  
AATTGCAATGGCTTCTTTATCTCTTCATGTCCAAAAATAAGATTGTGCATGCGAGATAT  
AAAAACATATCTCTCCGTGGCACCTGTGCTAACTACTCTATGGTTTGGGTCTTTAGCAG  
GTCTATTGATAGAAATTAATCGTTTATTCCCAGATGCCTTGTCAATCCCTTTTTTTTCATT  
CATGACTGCAATTTTAGAGAGACGCGAAAGTACAAGCCTATGGGGTCGCTTCTGCAAC  
TGATAACCAGCACTGAAAACCGTCTTTACATTGGATGGTTCGGTGTTTTGATGATCCC  
TACCTTATTGACCGCAACTTCTGTATTCAATATCGCCTTCATTGCTGCTCCTCCAGTAGAT  
ATTGATGGTATTCGTGAACCAGTTTCTGGTTCTCTACTTTATGGAAACAATATTATCTCTG  
GTGCCATTATCCGACTTCTGCAGCTATCGGTTTGCATTTTTATCCGATATGGGAAGCGG  
CATCTGTTGATGAGTGGTTATAACAATGGCGGTCCTTATGAGCTAATTGTTCTACACTTCT  
TACTTGGTGTAGCTTGTTACATGGGTCGTGAGTGGGAACTTAGTTTCCGCCTGGGTATG  
CGTCCTTGGATTGCTGTTGCATATTCAGCTCCTGTTGCAGCTGCTACTGCTGTTTTCTTG  
ATCTACCCTATTGGTCAAGGAAGTTTCTCTGATGGTATGCCTTTAGGAATATCTGGTACT  
TTCAACTTCATGATTGTATTCCAGGCGGAACACAACATCCTTATGCATCCATTTACATG  
TTGGGTGTAGCTGGTGTATTCGGCGGCTCCCTATTCAGTGCTATGCATGGTTCCTTGGTA  
ACCTCTAGTTTGATCAGGGAAACCACTGAAAACGAATCTGCTAATGCGGGTTACAGAT  
TCGGTCAAGAGGAAGAACTTATAATATCGTAGCTGCTCATGGTTATTTTGGCCGATTGA  
TCTTCCAATATGCTAGTTTCAACAATTCTCGTTCCTTACATTTCTTCTTGGCTGCTTGGCC  
TG TAGTAGGTATCTGGTTCACTGCTTTAGGTATTAGTACTATGGCTTTCAACCTAAATGG  
TTTTCAATTTCAACCAATCTGTAGTTGACAGTCAGGGTCGTGTTATCAACACTTGGGCTG  
ATATCATCAATCGTGCTAACCTTGGTATGGAAGTAATGCATGAACGTAATGCTCACAAC  
TCCCTCTAGACCTAGCTGCTGTGCAAGTTCATCTACAAATGGAATGGGTTTGCCTTGG  
TATCGTGTTACTACTGTCGTATTGAATGATCCCGGTCGATTGCTTTCTGTCCATATAATGC

ATACAGCTCTAGTTTCTGGTTGGGCCGGTTCGATGGCTCTATACGAATTAGCGGTTTTTG  
ATCCCTCTGACCCTGTTCTTGATCCAATGTGGAGACAAGGTATGTTTCGTTATAACCCTTCA  
TGA CT CGTTTAGGAATAACCAATTCGTGGGGTGGTTGGAGTATTTCA--GGAGGA ACTA  
TAACGAATCCGGGTATTTGGAGTTATGAAGGTGTCGCAGGGGCACATATTGTGTTTTCT  
GGCTTGTGCTTCTTGGCAGCTATCTGGCATTGGGTGTATTGGGATCTAGAAATATTCTGT  
GATGAGCGTACGGGAAAACCTTCTTTGGATTGCCGAAGATCTTTGGAATTCATTTATT  
TCTCTCAGGGGTGGCTTGTCTTTGGCTTTGGCGCATTTTCATGTAACAGGTTTGTATGGTC  
CTGGAATATGGGTGTCCGATCCTTATGGACTAACTGGAAAAGTACAATCTGTAAATCCA  
GCGTGGGGCGCGGAAGGTTTTGATCCTTTTGTTCGGGAGGAATAGCCTCTCATCATAT  
TGCAGCGGGTACATTAGGCATATTAGCAGGTCTATTCCATCTTAGTGTCCGTCCGCCTCA  
ACGTCTATACAAAGGATTACGTATGGGAAATATTGAAACTGTACTTTCTAGTAGTATCGC  
TGCTGTTTTTTTTGCAGCTTTCGTTGTTGCTGGA ACTATGTGGTATGGTTCAGCAACTAC  
CCCAATCGAATTATTTGGTCCC ACTCGTTATCAGTGGGATCAGGGATACTTTCAGCAAG  
AAATATATCGAAGAGTTAGCGCCGACTAGCCGAAAATCTGAGTTTATCGGAAGCTTGG  
TCTAAAATTC CCGAAAAATTAGCTTTTTATGATTACATTGGTAATAATCCGGCAA AAGGG  
GGATTATTCAGAGCAGGCTCAATGGACAACGGGGATGGAATAGCTGTTGGATGGTTAG  
GACACCCCGTCTTTAGAGATAAAGAAGGGCGCGAGCTTTTTGTACGTCGTATGCCTACT  
TTTTTTGAAACATTTCCGGTAGTTTTAGTAGATGGAGACGGAATTGTGAGAGCCGATGT  
TCCTTTTAGAAGGGCAGAATCAAAGTATAGTGTGAACAAGTAGGTGTA ACTGTCGAG  
TTCTATGGTGGCGAACTCAATGGAGTTAGTTATAGTGATCCTGCTACTGTAAAAAATA  
CGTAGACGTGCCCAATTAGGTGAAATTTTTGAATTAGATCGGGCTACTTTGAAATCCG  
ATGGTGTTTTTTCGTAGCAGTCCAAGGGGTTGGTTC ACTTTTGGGCATGCTACGTTTGCT  
TTGCTCTTCTTTTTTGGACACATTTGGCATGGCGCTAGAACCTTGTTTCAGAGATGTTTTT  
GCTGGTATTGATCCAGATTTGGATGCTCAAGTAGAATTTGGAACATTTCAAAAAATTGG  
GGATCCA ACTACAAGGAGACAAGTAGTCATGAAAACCTTATATTCCCTGAGGAGGTTCT  
ACCCCGTGGAACGCTCTTTAATGGAACTTTAGCTTTAGCTGGTCGTGACCAAGAAAC  
CACTGGTTTCGCTTGGTGGGCCGGGAATGCCAGACTTATCAATTTGTCCGGTAAACTAC  
TTGGAGCTCACGTAGCCCATGCCGATTAATCGTATTCTGGGCCGGAGCAATGAACCTA  
TTTGAAGTGGCTCATTTTGTACCAGAGAAACCCATGTATGAACAAGGATTGATTTTACT  
TCCACACCTAGCTACTCTAGGTTGGGGGGTAGGTCGGGGGGGGAAGTTATAGACACC  
TTTCCATACTTTGTATCTGGAGTACTTCACTTAATTTCCCTCTGCAGTCTTAGGCTTTGGC  
GGTATTTATCATGCGCTTCTTGGACCTGAGACTCTTGAAGAATCTTTTCCATTTTTCGGT  
TATGTATGGAAGATAGAAATAAAATGACTACAATTTGGGTATTC ACTTCATTTTGTTA  
GGTATAGGTGCTTTTCTTCTAGTACTCAAGGCTCTTTATTTTGGGGCGTATATGATACCT  
GGGCCCTGGGGGGGGAGATGTAAGAAAATAACCAACTTAACTTAGCCCAAGTG  
TTATATTTGGTTATTTACTAAAATCTCCTTTTGGGGGAGAAGGATGGATTGTTAGTGTGG  
ACGATTTAGAAGATATAATTGGAGGACATGTATGGTTAGGTTCCATTTGTATACTTGGTG  
GAATTTGGCATACTTAAACCAAACCTTTGCATGGGCTCGCCGTGCATTTGTATGGTCTG  
GAGAGGCTTACTTGTCTTATAGCTTAGGTGCTTTATCTGTTTTTGGTTTCATCGCTTGTT  
GTTTCGTAIGGTTCAATAATACCGCTTATCCTAGTGAGTTTTACGGACCCACCGGGCCA  
GAAGCTTCTCAAGCTCAAGCATTTACCTTTCTAGTTAGAGACCAACGTCTTGGAGCTAA  
CGTGGGGTCCGCCCAAGGACCTACTGGTTTAGGTAAATATCTAATGCGTTCCCGACCG  
GGGAGGTTATTTTTGGAGGAGAACTATGCGTTTTTGGGATCTTCGTGCTCCCTGGTTA  
GAACCCCTAAGGGGTCCCAATGGTTTGGACTTGAGTAGGCTGAAAAAAGACATAACAAC

CTTGGCAAGAACGACGTTTCGGCAGAATATATGACTCATGCTCCTTTAGGTTCTTTAAAT  
TCAGTGGGTGGCGTAGCTACCGAGATCAATGCAGTCAATTATGTCTCTCCTAGAAGCTG  
GTTAGCGACCTCTCATTGTTCTAGGATTCTTCCTATTTGTGGGGCATTGTGGCATGC  
GGGAAGGGCCCGTGCAGCTGCAGCAGGGTTTGAAAAAGGAATCGATCGTGATTTGGA  
ACCTGTTCTTTCCATGACCCCCCTTAGCATGACTATAGCCCTTGGTAGATTTACCAAAGA  
AGAA---GATTTATTTGATATTATGGATGATTGGTTACGGAGGGACCGTTTCGTTTTGTAG  
GCTGGTCTGGCCTATTGCTCTTTCCTTGTGCTTATTCGCTTTAGGAGGTTGGTTTACAG  
GTACAACCTTTGTAACTTCATGGTATAACCCATGGATTGGCCAGTTCCTATTTGGAAGGTT  
GCAATTTCTTGACCGCTGCAGTTTCCACTCCTGCGAATAGTTTAGCACATTCCTTGTTG  
CTACTATGGGGCCCTGAGGCACAAGGGGATTTTACTCGTTGGTGTCAATTAGGCGGTCT  
GTGGACTTTTGTGCTCTCCATGGTGTTCGACTAATAGGTTTTATGTTACGTCAATT  
CGAACTTGCTCGATCTGTGCAATTGCGACCTTATAATGCAATCGCATTCTCTGCTCCAAT  
TGCTGTTTTGTTTCTGTATTCCCTGATTATCCACTGGGTCAATCTGGTTGGTTCTTTGCG  
CCCAGTTTTGGCGTAGCAGCTATATTCGATTCATCCTCTTCTTCCAAGGGTTTCATAAT  
TGGACGTTGAACCCATTTATATGATGGGAGTTGCCGGAGTATTAGGCGCTGCTCTGCT  
ATGCGCTATTCATGGTGCTACCGTAGAAAATACTTTATTCGAAGATGGTGACGGTGCAA  
ATACATTCGTGCTTTTAACCCAACCTCAAGCCGAAGAGACTTATTCAATGGTCACTGCT  
AACCGCTTTTGGTCCCAAATCTTTGGGGTTGCTTTTTCCAATAAACGTTGGTTACATTC  
TTTATGCTATTTGTACCAGTAACCGTTTATGGATGAGTGCTCTTGGGGTAGTCGGCCTG  
GCTCTGAACCTCCGTGCCTATGACTTCGTTTCCCAAGAAATCCGTGCAGCGGAAGATC  
CTGAATTTGAGACTTTCTACACCAAAAATATCCTCTTAAACGAAGGTATTCGTGCTTGG  
ATGGCGGCTCAGGATCAGCCTCATGAAAACCTTATATCCCTGAGGAGGTTCTACCCCG  
TGGAAACGCTCTTATGTCTGGAAGCACGGGAGAACGTTCTTTTGCTGATATTATTACCA  
GTATTCGATACTGGGTCATTCATAGCATTACTATACTTCCCTATTCATTGCGGGTTGGTT  
ATTCGTCAGTACGGGTTTAGCTTACGACGTGTTTGGAAAGTCCTCGGCCAAACGAGTATT  
TCACAGAGAGCCGACAAGGGATTCCATTGATAACCGGCCGTTTTGATTCTTTGGAACA  
ACTCGATAAATTTAGTAGATCCTTTATGACCATAGATCGAACCTATCCAATTTTACAGTA  
CGATGGTTGGCTGTTACGGATTAGCTGTACCTACCGTTTTTTTCTTGGGGTCAATATCA  
GCAATGCAGTTCATCCAACGAATGGCTACACAAACCGTTGAGGGTAGTTCTAGA---TCT  
GGGCAAGACGAACACTACTGTAGGGAATTTATTGAAACCATTGAATTCGGAATATGGTAA  
AGTAGCACCGGGCTGGGGGACTACACCACTTATGGGGGTCGCAATGGCTCTATTTGCG  
ATATTCCTATCTATTATTTGGAAATTTATAATTCTTCCGTTTTACTGGATGGAATTTCAAT  
GAGTATGCTTACTCTCAAACATTTTCGTTTATACAGTAGTGATATTCTTTATTTCTCTCTC  
ATCTTCGGATTTTTATCCAATGATCCAGGGCGTAATCCTGGACGTGAGGAAATGGCCGA  
TACTACTGGAAGGATTCTCTTTGGCTGATAGGTAAGTACTGTAACCGGTATTCTTGTGATCGG  
TTTAATAGGTATTTCTTTTACGGTTCATATTCCGGGTGGGTTTCATCTCTGATGCTTAAT  
ATCTTTAGTTAATCTGCATCTGTCTTAATTCTATCTTTTAT---AGTAGTTTTTTCTTCGCC  
AAATTGCCCGAAGCTTATGCCTTTTTAAATCCAATCGTAGATGTTATGCCTGTCATACT  
GTACTTTTTTTCTCTTAGCCTTTGTTTGGCAAGCTGCTGTAAGTTTTCGAATGACACAA  
TCAAACCCGAATGAACAAAATGTTGAATTGAATCGTACCAGTCTATACTGGGGTTTATT  
ACTATTTTTGTACTTGCTGTTTTATTTCCAATATTTCTTCAATATGGAAGTCAATATTC  
TCGCATTTATTGCTACTGCACTGTTCAATTCTAGTTCCTACTGCTTTTTTACTTATTATCTAC  
GTA AAAACAGTCAGTCAAATGATATGGAAACAGCAACCCTAGTCGCCATCTCCATATC  
TGTTTTACTTGTAAGCTTTACTGGGTACGCCTTATATACCGCTTTTGGGCAACCCTCTCA



ACA ACTAAGAGATCCATTTCGAAGAACACGGGGACATGGAAGCATTGGTTTATACATTC  
CTTTTAGTCTCGACTTTAGGGATAATTTTTTCGCTATCTTTTTTCGAGAACCGCCTAAG  
GTTCCGACTAAAAAATGAAAATGACTATTGCTTTCCAATTAGCTGTTTTTGCATTAATT  
GCGACTTCATCAATCTTACTGATTAGTGTAACCGTTGTATTTGCTTCTTCTGATGGTTGG  
TCAAGTAACAAAAATGTTGTATTTCCGGTACATCATTATGGATTGGATTAGTCTTTCTG  
GTAGCTATCCTTAATTCTCTCATCTCTATGAGTTGTAGGGAGGGACTTATGTCACCACAA  
ACAGAGACTAAAGCAAGTGTGGATTAAAGCTGGTGTAAAGATTACAAATTGACTTA  
TTATACTCCTGACTACGAAACCAAAGATACCGATATCTTGGCAGCATTCCGAGTAACTC  
CTCAACCCGGAGTTCCGCCTGAGGAAGCAGGGGCAGCGGTAGCTGCCGAATCTTCTAC  
TGGTACATGGACAACACTGTGTGGACTGATGGACTTACCAGTCTTGATCGTTACAAAGGA  
CGATGCTACCACATCGAAACCGTTGTCTGGGGAGGAAAATCAATATATTGCTTATGTAGC  
TTATCCTTTAGACCTTTTTGAAGAAGGTTCTGTTACTAACATGTTTACTTCCATTGTGGG  
TAATGTATTTGGTTTTCAAAGCCCTACGAGCTCTACGTCTGGAGGATCTGCGAATTCCTC  
CTTCTTATTCCAAACTTTCCAAGGCCCGCCTCATGGTATCCAATCTGAAAGAGATAAG  
TTGAACAAGTATGGTCGTCCTCTATTGGGATGTACTATTAACCAAATTTGGGATTATCC  
GCAAAGAACTACGGTAGAGCGGTTTATGAATGTCTACGCGGTGGACTTGATTTTACCAA  
GGATGATGAAAACGTGAACTCACAACCATTTATGCGTTGGAGAGACCGTTTTCTTATTTT  
GTGCCGAAGCAATTTATAAAGCGCAGGCCGAAACGGGTGAAATCAAAGGACATTACTT  
GAATGCTACTGCGGGTACATGTGAAGAAATGATCAAAGGGCCGTATTTGCCAGAGAA  
TTGGGAGCTCCTATCGTAATGCATGACTACTTAACTGGGGGATTCACTGCAAATACTAG  
CTTGGCTTATTATTGCCGCGATAACGGCCTACTTCTTACATCCATCGCGCAATGCATGC  
AGTTATTGATAGACAGAAAAATCATGGTATGCATTTTCGTGTACTAGCTAAAGCATTACG  
TATGTCTGGTGGAGATCATATTCACGCGGGTACAGTAGTGGGTAAACTGGAAGGGGAA  
CGTGAGATGACTTTGGGTTTTGTTGATTTATTACGTGATGATTTTATTGAAAAAGACCGA  
AGTCGCGGTATCTTTTTACTCAAGATTGGGTCTCTATGCCAGGTGTTATACCCGTGGCT  
TCAGGGGGTATTCATGTTTGGCATATGCCTGCCCTGACCGAAATCTTTGGGGATGATTC  
CGTACTACAGTTTGGCGGAGGAACTTTAGGACACCCTTGGGGAAATGCACCCGGTGCA  
GTAGCTAATCGGGTGGCTTTAGAAGCGTGTGTACAAGCTCGTAATGAAGGACGTGATC  
TTGCTCGTGAAGGTAATGAAATTATCCGTGAAGCTAGCAAATGGAGCCCTGAACTAGC  
TGCCGCTTGTGAAGTATGGAAGGAGATCAAATTCGAATTCGAACCAGTAGATAAGCTG  
GATAGAACGGCGATACATTTATACAAAATTTCTACCCCGAGCACACGCAATGGAGCCGT  
AGACAGTCAAGTGAAATCCAATCCACGAAATAATTTGATCTATGGACAGCATCGTTGTG  
GTAAAGGTGCGTAATGCCAGAGGAATCATTACCGCAAGGCATAGAGGGGGAGGTCATAA  
GCGCCTATACCGTAAAATCGATTTTCGACGGAATGAAAAAGACATATCCGGTAGAATCG  
TAACCATAGAATAACGACCCTAATCGAAATGCATACATTTGTCTCATACTATGGGGATG  
GTGAGAAGAGATATATTTTACATCCCAGAGGGGCTATAATTGGAGATACCATTGTTTCTG  
GTACAGAAGTTCCTATATCAATGGGAAATGCCCTACCTTTGACCGATATGCCCTTAGGC  
ACGGCCATACATAACATAGAAATCACACTTGGAAAGGGTGGACAATTAGCTAGAGCAG  
CAGGTGCTGTAGCGAAACTGATTGCAAAAAGAGGGTAAATCGGCCACATTAAGATTACC  
ATCTGGGGAGGTCCGTTTGATATCCAAAATGCTTAGCAACAGTCCGACAAGTGGGT  
AATGTTGGGGTGAACCAAAAAAGTTTTGGGTAGAGCCGGATCTAAGTGTGGCTAGGTA  
AGCGTCCTGTAGTAAGAGGAGTAGTTATGAACCCTGTAGACCATCCCATGGGGGCGG  
TGAAGGGAGAGCCCAATTGGTAGAAAAAACCACAACCCCTTGGGGTTATCCTGC  
GCTTGAAGAAGAAGTAGGAAAAGGAAAAAATATAGTGATAGTTTTATTCTTCGTGCG

CGTAAA---ATGATTCAACCTCAGACCCTTTTGAATGTAGCGGATAACAGCGGAGCTCGA  
GAATTGATGTGTATTCTGAATCATAGGAGCTGGT--AATCACCGATATGCTCATATTGGTGA  
CGTTATTGTTGCTGTAATCAAAGAAGCAGTGCCAAATATGCCTCTAGAAAGATCAGAAG  
TCATTAGAGCTGTAATTGTACGTACATGTAAAGAACTCAAACGTGACAACGGTATGATA  
ATACGATATGATGACAATGCAGCGGTCGTCATTGATCAAGAAGGAAATCCAAAAGGAA  
CTCGAGTTTTTGGTGCGATCGCTCAGGAATTGAGACAGTTGAATTTTACTAAAATAGTT  
TCATTAGCTCCCGAGGTATTAATGCTTAGTCCCAAAGAACCAGATTTTCGTAAACAACA  
TAGAGGAAGAATGAAGGGAATATCTTGTGCGAGGCAATCATATTTGTTTCGGCGGATACG  
CTCTTCAGGCACTTGAACCCGCTTGGATCACAGCTAGACAGATAGAAGCGGGGCGGA  
GAGCAATGACACGATATGCGCGTCGTGGTGGAAAAATATGGGTACGTATATTTCCCGAC  
AAACCTGTTACAGTAAGACCTACCGAAACACGTATGGGTTTCGGGAAAGGGATCCCCG  
AATATTGGGTATCTGTTGTTAAACCGGGTCGAATACTTTATGAAATGGGCGGAGTATCA  
GAAACTGTAGCCAGAGCAGCTATTTCAATAGCTGCGTACAAAATGCCTATACGAACTCA  
ATTTGTTATTTACGAATGACCAGAGTTAGACGAGGATATACAGCTCGGAAACGTCGAA  
CAAAAATTCGTTTATTTGCATCAACCTTTATTGGGGCTCATTCAAGACTTACTCGAACG  
ACTACTCAACAGAAAATGAGAGCTTTGGTTTCTCTCATCGAGATAGAGGCAGGCAAA  
AGAGGGATTTTCGTAGTTTGTGGATCACTCGAATAAATGCAGTAATTCGTGAGAAT-----  
GTATTCTATAATTATAGTAGATTAATACCAATCTGTACAAGAAGCAATTGCTTCTTAATC  
GTAAAATACTTGCGCAAATATCTATATCAAATAAGAATTGTCTTTACATGATTTCCAATCA  
GATTATCAA-----ATGATAAAGAAAGTTTTA---ACTCAACATATATG  
T--ATGTCTGTTTTAAAAGCGCAAAGAGTAATTGATCAGATTCGCGGACGTTCCCTATGAG  
GAAACACTTATGATACTGGAACCTATGCCTTATCGAGCATCTTATCCAATTTTACAATTA  
GTTTATTCTGCAGCAGCAAACGCTAATCATAATATGGGTTTGAACGAAGCTGATTCATTC  
ATTAGTAAAGCCGAAGTCAATAGGAGTGCTATTGTGAAAAGGTTAAGACCTCGGGCTC  
GGGGACATAGTTATCCGATAAAAAAACCCTTGTATATAACAATTGTATTAAG---AA  
ATCTAAATCA-----ATGGATGGAATCAAATATGCAGTATTTACAGAAAAAAGT  
ATTCGGTTATTGGGGAACAATCAA---TATACTTCTAATGTGCAATCAGGATCAACTAGGA  
CAGAAATAAAGCATTGGGTGCAACTCTTCTTTGGTGTCAAGGTAATAGCTATGAATAGT  
TATCGACTCCCGGAAAGGGTAGAAGAATGGGACCTATTATGGGACATACAATGCATTA  
CAGACGTATGATCATTACGCTTCAACCGGGTATTCTATTCCACCTCTTATAGAGAAAAG  
AACTATGGCAGTTCCAAAAAAATGTATTTCTATGTCAAAAAACATATTCGTAGGAATAT  
TTGGAAGAAAAAAGGATATTTAACTGCAGCAAAAGCTTTTTCTTTAGCGAAATCGGTTT  
CTACCGGACATTCAAAAAGTTTTTTT-----CAAACAATAATATGGCCAAGGGTAAAGAT  
GTCAGAGTCAGAGTTATTTTGGAAATGTACCAGTTGTGTCCGAAAT-----GGT-----AAAGA  
ATCGCCGGGTATTTCTAGATATATTAATCAAAAGAATCGACACAATACATCCGGTTCGATT  
AGAATTGAGAAAATTTTGTGCTATTGTCAACAAGCATAACGATTCATGGGGAAATAAAGA  
AAATGAAAATAAGGACTTCTGTTCTGTAATAATTTGTGAAAATGTGCGACTGATCCGTAGG  
CGCGGACGAATTATAGTGATTTGTTCCAATCCGAGACATAAACAGAGACAAGGAATGG  
TTCGAGAGGAAGTAGTAGGATCCACTCGAACACTACGGTGGAAATGTGTTGAATCAAG  
AGTAGACAGTAAGCGTCTTTATTATGGTTCGTTTCATTCTGTCCCCGCTTATGAAAGGTCA  
AGCCGATACCATAGGTATTGCCATGCGAAGGGCTTTACTTGGAGAAATAGAAGGAACAT  
GTATCACACGTGCAAAATCTGAG-----AAAGTAGCACATGAATATTCTACGATAGTAGGT  
ATTGAAGAATCAGTACATGAAATTTTACTAAATTTGAAAAGAAATTATATTGAGAAGTAAT  
CTGTATGGAGTTATAGACGCATCCATCTGCGTCAGGGGGCCTAGATACGTAACCGCTCA

AGATATCATCTCACCACCTTACGTGGAAATAGTTGACACGACACAACATATAGCTAACC  
TGACGGAACCAATTGATTTGTGTATTGAATTACAAATCAAGAGAGATCGCGGATATCGT  
ATGAAATCCGCAAATAACTCTCAAGATGGAAGTTAT-----CCTATAGATGCTGTATCCATG  
CCTGTTTCGAAATGCGAATCATAGTATTCATTCTTATGGGAATGGGAATGAAAAACAAGA  
GATACTTTTTCTAGAAATATGGACGAATGGAAGTTAACTCCTAAGGAAGCACTTTATG  
AAGCTTCTCGTAATTTGATTGATTTATTTATTCCTTTTTCTACATGCGGAGGAAGAG-----G  
ACATTAATTTTCGAAGAAAATAAA---AACAGGTTTCTCTACCCCTTTTTACCTTTCAAAA  
TAGATTAACT--AATCTAAAGAAAAACAAAAAA---GGAATTCATTGAAATGTATTTTTA  
TTGACCAATCAGAATTGCCTTCCAGGACCTATAACTGTCTCAAAGGGTCCAATATACAT  
ACATTATCGGACCTTTTGAGTAACAGTCAAGAAGATCTTATGAGAATTAATTTTTTCG  
AATAGAAGATGTA AACAGATATTGGACACTCTACAGAAGTAT-----TTCGCAATTGATTT  
ATCTAAGAATAAGATGCTCCGGAAT--GGAAATGAGGGAATGTCCACAATACCTGGATTT  
AGTCAGATTCAATTTGAGGGATTTTGTAGATTCATTAATCAGGGCTTGACAGAAGAATT  
TCATAAATTTCCAAAAATTGAAGAT-----CAAGAAATTGAATTTAAATTTTGTGGAAAC  
ATATAAATTGGTAGAACCTTGATAAAAGAAAGAGATGCTGTGTATGAATCACTCACAT  
ATTCTTCTGAATTATATGTACCCGCGGACTAATTTGGAAAACCGGTAGAGATATGCAA  
AAACAAACCGTTTTTTATTGGAAACATTCTCTAATGAATTCCTTAGGAACCTTTATAGTA  
AATGGAATATACAGAATTGTGATCAATCAAATATTGCAAAGTCCCGGTATTTACTACCGT  
TCAGAATTGGACAATAACGGAATTTCTGTCTATACCAGCACTATAATATCAGATTGGGGG  
GGAAGATCGGAATTAGAAATTGATAGAAAAGCAAGGATATGGGCCCGCGTGAGTAGGA  
AACAAAAAATATCTATTCTAGTTCTATCATCAGCTATGGGTTTCGAATCTAAGAAAAATTC  
TAGATAATGTTTGTATCCTGAAATTTCTTGTCTTTTCCGAATGATAAGGAGAAAAAAA  
AGATTGGGTCAAAGAAAATGCTATTTTGGAGTTTTATCAACAATTTGCTTGTGTAGGT  
GGGGATCCGGTATTTTCTGAGTCCTTATGTAAGGAATTACAAAAGAAATTTTTTCAACA  
AAGATGTGAATTAGGAAGGATTGGTCGACGAAATATGAACCGGAGACTGAATCTTGAT  
ATACCTCAGAACAATACATTTTTGTTACCACGAGATGTATTGGCTGCTGCGGATCATTTG  
ATCGGAATGAAATTTGGAATGGGTACACTTGACGAT-----ATGAATCACTTGAAAAATAA  
ACGTATTCGTTCTGTAGCAGACCTGTTACAGGATCAATTCGGATTGGCTCTTGTTTCGTTT  
AGAAAATGCGGTTTCGAGGA ACTATATGTGGAGCAATCAGG--CATAAATTAATA---CCGA  
CTCCTCAAATTTGGTAACTTCAACTTCA-----TTAACAACCACTTATGAATCGTTTT  
TTGGCCTACACCCGTTATCTCAAGTTTTGGATCGAACTAATCCATTGACACAAATCGTTC  
ATGGGCGAAAATTGAGTTATTTGGGTCTGGAGGATTGACGGGGCGAACTGCTAGTTT  
TCGGATACGAGATATCCATCCTAGCCACTATGGACGATTTTGTCCAATTGACACGTCCGA  
AGGAATCAATGTTGGGCTTATTGGATCCTTAGCTATTCATGTGAGGATTGGTCATTGGGG  
A---TCTATAGAGAGTCCGTTTTAT-----GAAATATCTCAGAGATCAAAGAG-----GCAC  
AGGTGGTTTTATTTATCACCAAATAGAGATGAATATTATATGGTAGCGGCAGGAAATCTT  
TGGCCCTGAATCGGGGTATTAGGAAGAACAGGTTGTTCCAGCTCGATATCGTCAAGA  
ATTCCTTACTATTGCATGGGAACAGATTCATCTTAGAAGCTTTTTTCCCTTCCAATTTTT  
TCTATTGGAGCTTCCCTCATTCTTTTTATCGAGCATAATGATGCGAATCGGGCTTTAATG  
AGTTCTAATATGCAGCGCCAAGCAGTCCCGCTTCTCGGTCCGAGAAGTGCAATTGTTGG  
AACTGGGCTGGAACGCCAAACGGCTCTAGATTCGGGGGTTTCAGCTATAGCCGAACAT  
GAGGGAAAGATCATTTATACTGATCCTCACAAAATAATTTTATCAAGTAATGGGGACAC  
TATAAGTATTCCATTAGTGATGTATCAACGTTCCAACAAAAATACTTGTATGCATCAAAA  
ACCTCAGGTTTCGGCGGGGTAAATACATTA AAAAGGGACAAATTTTAGCGGATGGTGCG

GCTACAGTTGGTGGGGAACCTCGCTTTAGGAAAAACATATTAGTAGCTTATATGCCATG  
GGAAGGTTACAATTCTGAAGACGCAGTATTAATTAGCGAACGTCTGGTATATGAAGATA  
TTTATACTTCTTTTCACATCCGGAAATATGAAATTCAGACTCATGTGACAAGCCAGGGC-  
--CCTGAAAGAATTACTAAGGAAATACCGCATCTAGAGACTCATTTACTCCGAAATTTAG  
ACAGAAATGGAATCGTTATGCTGGGATCTTGGGTAGAAACGGGTGATATTTAGTAGGT  
AAATTAACGCCTCAGACAGCGAACGAA---TCGTTCGTATTCCTCCGGAGGATAGATTATTA  
CGAGTCATACTCGGCATTCAGGTATCCACTGCAAAAGAACTTCTCTAAAACCTACCTAT  
AGGTGGAAGGGGTCGCGTTATTGATGTGAGATGGATCCAGAAAAAGGGG---GGTTCCA  
GTTATAATCCAGAAATGATTCGTGTATATATTTACAGAAACGTGAAATCAAAGTAGGT  
GATAAAGTAGCTGGAAGACATGGGAATAAAGGTATCATTTCAAAAATTTTGCCTAGACA  
AGATATGCCCTATTTGCAAGATGGGACACCTGTTGATATGGTCTTCAACCCATTAGGAGT  
ACCCTCACGAATGAATGTGGGGCAGATATTTGAATGTTTCGCTCGGATTAGCGGGGGATC  
TGCTAAAGAAACATTATAGAATAGCACCTTTTGATGAGAGATATGAACAAGAGGCTTCG  
AGAAAACCTAGTGTTTTCTGAATTATATGAAGCCTGTAAGCAAACAAAAAATCCATGGGT  
ATTTGAACCCGAGTATCCAGGAAAAGCAGAATATTTGATGGAAGAACAGGGGATCCT  
TTTGAACAACCTGTTCTAATAGGAAAGTCCTATATCCTAAAATTAATTCATCAAGTTGAT  
GATAAATCCATGGACGTTCTAGTGGGCATTACGCACCTTGTACACAACAACCCCTTAG  
AGGAAGGGCCAAGCAAGGGGGCCAACGAGTAGGAGAAATGGAAGTTTGGGCTCTAG  
AGGGATTTGGTGTGCTCATATTTTACAAGAGATGCTTACTTATAAATCTGATCATATTAG  
AGCTCGTCAAGAAGTACTTGGTGCTACAATCGTTGGAGGAACAGTACCTAACCCCGAG  
GATGCTCCAGAATCTTTTCGATTGCTCGTTGAGAACTACGATCTTTGGCTCTAGAACT  
GAATCATTTCCTTGTATCTGAGAAGAACTTCCAGATTAATAGGAAGGAAGCT-----  
-----ATGATCGACCCGGTATAAACATCAACAACCTTCGAATTGGACCAGTTTCTCCTCAACA  
AATAAGGGCTTGGGCCAACAAAATCCTACCTAATGGAGAGATAGTTGGAGAGGTGACA  
AAACCCCTATACTTTTCATTATAAAACCAATAAACCCGAAAAAGATGGATTGTTTTGTGA  
AAGAATCTTTGGACCCATAAAAAGTAGAATTTGTGCTTGTGGAAATTATCGAGTGATCA  
GAGCTGAAAAAGAAGACCCGAAATTTTGTGAACAATGCGGGGTGGAATTTGTTGATTCT  
TAGGATACGAAGATATCAAATGGGATACATCAAACCTCGCATGTCCAGTGACTCATGTGT  
GGTATTTGAAACGTCTTCCTAGTTATATCGCGAATCTTTTAGATAAACCCCTTAAAGAAT  
TAGAAGGCCTGGTATACTGC-----GATTTTTCTTTTGTAGGCCC---ATATCTAAAAAACC  
TACTTTCTTACGATTACGAGGTTCAATTCGAATATGAAATCCAATCCCGGAAATACACCAT  
CCCCTTTTTTTTACTACTCAAGGCTTCGAGACATTTGAAATCGAGAAATCTCTACAG  
GAGCAGGTGCTATCAGAGAACAATTATCCGATTCAGATTTGCGAATTATTATAGATAATT  
CATTGGTAGAATGGAAGGAATTAGGAGATGAG---GGGTCCACTGGAAATGAATGGGAA  
GATAGAAAAATTAGAAGAAGAAAGGATTTTTTGGTTAGACGCACGGAATTAGCTAAAC  
ATTTTATTCGAACAAATGTAGAACCAGAATGGATGGTTTTTGTGCTTATTACCAGTCTTC  
CTCCCGAGTTGAGACCAATCATTACAGACAGATGGGGGTAAACTAATGAGTTCGGATATT  
AATGAACTCTATAGAAGAGTTATCTATCGGAACAATACTCTTACCGATCTATTAGCAACA  
AGTAGATCTACGCCAGGGGAATTAGTAATGTGTCAGGAGAAATTGGTACAAGAAGCCG  
TGGATACACTTCTTGATAATGGGATCCGGGGACAACCAATGAGGGATGGTCATAATAAA  
GTTTACAAGTCATTTTCAGATGTAATTGAAGGCAAAGAAGGAAGATTTTCGTGAGACTC  
TGCTTGGTAAACGGGTGATTATTCGGGACGTTCCGTCATTGTTGTGGGTCTTCTCTTT  
CATTACATCAATGTGGATTACCTCGAGAAATAGCAATAGAGCTTTTCCAAACATTTTAA  
TTCGTGGTCTAATCAGACAACATGTTGCTTCTAACATAGGGATTGCTAAAAGTCAAATT

CGGGAAAAAGAACTGATTGTATGGGAAATACTTCAAGAAGTTATGCGGGGGGCATCCTG  
TATTGTTGAATAGAGCACCCACCTTGCATAGATTAGGCATACAGGCCTTCCAACCCATTT  
TAGTGGAGGGGCGCGCTATTTGTTTACACCCATTAGTTTGTAAAGGGTTTCAATGCAGAC  
TTTGATGGAGATCAAATGGCTGTTTCATGTACCTTTATCTTTGGAAGCTCAAGCGGAGGC  
TCGTTTACTTATGTTTTCTCATATAAATCTCTTGTCTCCAGCTATTGGGGATCCCATTTC  
GTACCAACTCAAGATATGCTTATCGGACTCTATGTATTAACGATCAGGAATCGTAGAGGT  
ATTTGTGCAAATAGGCATAATCCATATAATCGCGGAAACTAT-----CAAATAATACAGT  
TGACAATAATGACTATAAGTATACGAAAGAGAAAGAACTGTATTTTTCTAGTTCCTATGA  
TGTACTIONGGAGCTTATCGGCAGAAACGAATCAGTTTAGATAGTCCTTTGTGGCTCCGAT  
GGAGACTAGATCAACGT--GTCATTGGCTCA-----AGAGAAGTTCCCATCGAAGTTCAAT  
ATGAATCTTTGGGTACTTATCATGAGATTTATGAGCACTATCTAATAGTAGGAAGTGTA  
AAAAGAAATCCATTGTATATACATTCGAACCACTCTTGGTCATATTTCTTTTTATCGAG  
AATAGAGAAGCCATACAGGGGTTTTGTGCGGGCCTATTCATACGCTATC-----  
-----ATGGCAGAACGGGCTGATCTGGTCTTTCACAATAAAGTGATAAATGGAAC  
TGCTATGAAACGACTTATTAGCAGATTAATAGATCATTTTCGGAATGGCATATACATCACA  
CATCCTGGATCAAGTAAAGACTTTGGGTTTTCCAGCAAGCCACTGCTACATCTATTTTATT  
AGGAATTGATGATCTTTTAAACAATACCTTCTAAGGGATGGTTAGTCCAAGACACTGAAC  
AACAAAGTTTTATTTTTGAAAAACACCATCATTATGGAAATGTACATGCGGTAGAAAA  
TTACGTCAATCCATTGAGATATGGTATGCTACAAGTGAATATTTGAGACAAGAAATGAAT  
CCTAATTTTCGGATGACTGATCCTTCTAATCCAGTCCATCTGATGTCCTTTTCGGGAGCT  
AGAGGAAATGCATCTCAGATACACCAATTAGTAGGTATGAGAGGATTAATGTCGGATCC  
CCAAGGACAAATGATTGATTTACCCATTCAAAGCAATTTACGCGAAGGGCTTTCTTTGA  
CAGAATATATAATTTCTGCTACGGAGCCCGCAAAGGAGTTGTAGATACTGCTGTACGA  
ACATCAGATGCCGATACCTCACGCGTAGACTTGTGGAAGTAGTTCAACACATTATTGT  
ACGTAGAACGGATTGTGGTACTATCCGAGGTATTTCCGTGAGTCCTCGAAATGGGATGA  
CGGAA-----AAAATTTTTGTCCAAACACTAATTGGTTCGTGTATTAGCAGACAATATATA  
TGGGTCTACGATGCATTGCCGCTCGAAATCAAGATATTGGGATTGGACTTGTCAATCGA  
TTCATAACC-----TTTCGGGCACAACCAATATATATTCGAACCCCTTTACTTGC  
AAGAGTGCATCTTGGATCTGTCAATTATGTTATGGTCCGAGTCCCACTCACGGCGACCT  
GGTCCGAATTGGGAGAAGCCGTAGGTATTATTGCGGGTCAATCAATTGGGGAACCAGGG  
ACTCAACTAACATTAAGAACTTTTCATACCGGTGGAGTATTCACAGGTGATACTGCCGA  
ACATGTACGAGCTCCTTCTAATGGAAAAATAAAATTCAATGAGGATTTGGTTTATCCCA  
CACGTACCCGTATGGGCATCCTGCTTTTCTATGTTCTATAGACTTGTATGTAATATTGA  
GACTCGGGATATTATCCATAATGTGAATATTCCACCAAAAAGTTTGATTTTAGTTCAAAA  
TGATCAATATGTAGAATCAGAACAAGTGATTGCTGAGATTCGTGCCGGAACGTCTACTT  
TT-----TTTAAAGAGAAGGTACGAAAACATATTTATTCTGAATCAGAGGGAGAA--ATGC  
ACTGGAGTACCGATGTCCACCATGCATCTGAATATACACATGGTAATGTTTCATCTATTAC  
CAAAAACAAGTCATTTATGGATATTAGCAGGAGGTCCGTGCAGA-----TCCAGTATAGTG  
TCTTTTTCGCTCCACAAAGATCAAGATCAAATGAATGTTTCATTCTTTTTCTTTTGAAGA  
AAGA-----TATATCTTTGACCCCTCA-----ATGACTAAT--CATCGAGTAAGACATAAATTG  
TTGGATACTTCTGGT-----GATAGGGAAATCTTGACTATTCA--AGACCTGATCGAA  
TCATATCCAATGGTCATTGGAATTCATATATCCTTCT--ATTCTCCAAGAAAAT-----TCTG  
ATTTCTTGGCGAAAAAACGAAGAAATAGATTCATTATCCCATTACAATATGATCAAGAA  
CGAGATAAAGAATAATGCCCTGTTTTGGTATTTTCGATTGAAATACCCATAAAT-----GGT

ATTTTACGTAGAAATAGTATTCTTGCTTATTTTGATGATCCACGATACAGAAGAAAT-----  
GGAATTACTAAATAT--ACCATAGAGGTAGATTCAATCATAAAA-----AAAGAGGATTTGA  
TTGAGTATCGAAGA--GCAAAAAGAAATTTAGTCCGAAATAC--AAAGTAGATCGGTTTTTT  
TTCATTCTCGAAGAAGTGCATATCTTACCCGGATCTTCGTTTATAATGGTCCGGAACAAT  
AGTATCATTGGAGTAGATACACAACCTCGCTTTAAATACAAGAAGCCGGGTAGGCGGATT  
AGTCCGAGTGGAGAGAAAAAAGTATTGAACTGAAAATCTTTTCTGGAGATATT  
CATTTTCTGGAGAAACAGATAAGATATCCAGGCACTGCGGCATTTTGATACCACCAGA  
GACGGAAAAAAA-----AATTCTAAGAAA--TCAAAA--AAATTGAAAAATTGGATCTAT  
GTCCAACGG-----ATCACACCCACCAAGAAAAAG-----TATTTTGTTCGGTTCGGTCCG  
TAGTCACATATGAAATAGCTGATGGGATAAATTTAGCAACACTTTTCCCTCGGGATCTCT  
TGCAGGAAAAGGATAATGTCCAACCTAGAGTTGTCAATTATATCCTTTATGGAAATGGC  
AAGTCAATTCGAGGAATTTATCACACAAGT--CAATTAGTTCGGACTTGCTTAGTATTGA  
ATTGGGACCAAGAAAAAATGGTTCTATAGAA-----GAGGTTTATGCTTCTTTTGT  
GAGGTAAGGACAAATGATCTGATTCGCGATTTTATAAGAATTGAGTTAGTCAATTCCAC  
TATTTCTGATACCGGAAAAAGGTATGATAGGGCAAGTTCGGTATTGATTTCCGAT-----T  
TAGATCGCACCAATATCAATCTTTTATTCCAAGGCGAAGATTCAATCA-----CT  
TACCCAACATCAAGGAACCTATTGGTATT-----GGTACGTTGTTGAATCGAAATAAT-----  
GAATGCCAATCTTTGATAATTTTGTATCATCCAATTGTTCTCGAATTGGT-----CCATTCA  
ATGGTTCGAAATATAAC-----AATGTGACAAAAGAATCAGATCCCATAATCCAAATT--  
GATTTGCTGGGTCCCTTAGGGACTATTGTCCCT--AAAATAGCGAATTTTTTTTTCATCT--T  
ACTATTTAATAACT-----CATAATCATATCTTGTAAAA--AAATATTTGTTACTTGAC-----  
---AATTTTAAACAGACTTTC-----CAAGTACTTAAATACTGTTTAAATAGATGAAAATAG  
GAGG-----ATTTATAATCCCGATCCATGCGGTAACATAATTTGAATCCATTCCATTTGAAT  
TGGTGCTTTCTCCATCACGATTATTGTGAAGAGACATCTACAATAATTAGC---CTTGGAC  
AATTTATTTGCGAAAATGTATGTCTATTCAAATACGAATCA-----CACGTAAAAAATCTG  
GTCAAATTTAATTGTTTCAT--GTTGACTCCTTAGTTATAAGATCAGCTAAACCCTATTTG  
GCCACTCCAGGAGCAACTGTTTATAGCCATTATGGAGAAATACTTTACGAAGGAGATAC  
ATTAGTTACATTTATATATGAAAAATCGAGATCTGGTGACATAACGCAAGGTCTTCCAAA  
AGTGGAACAAATCTTAGAAGTGC GTTCGATTGATTCAATATCGATGAACCTAGAAAGG  
AGAGTTGAAGGTTGGAACGAACGTATACAAAGAATTCTTGAATCCCCTGGGGATTCT  
TGATTGGAGCTGAGCTAACCATAGCCCAAAGTCGTATCTCTTTGGTTAATAAGATCCAA  
AAGGTTTATCGATCCCAGGGGTACAGATCCATAATAGACATATAGAAATTATTGTACGT  
CAAGTAACATCAAAAAGTGTGGTTTCAGAA-----GATGGAATGTCTAATGTTTTTTTAC  
CTGGAGAATTAATCGGCTTTTTGCGAGCGGAACGAGCAGGGCGTGCTTTGGACGAAGC  
GATCTGTTATCGGGCAATCTTATTGGGAATAACGAGGGCATCTCTAAATACTCAAAGTTT  
CATATCCGAAGCAAGTTTTCAAGAAACCGCTCGAGTTTTAGCAAAGCTGCTCTACGA  
GGTTCGATTGATTGGTTGAAAGGCCTGAAAGAGAACGTTGTTCTGGGGGGGATTATAC  
CTGTTGGTACCGGATTCCAAAAATTAGTACACCCTTCAAGG-----CAAGACAAGAACAT  
TCAT-----TTGGAATAAGA-----GATATTTTGTACACCATAGAGA  
ATTATTTGTTCTTACGCCAAAACAATTTCCATGAGACATCAGAACAATCATTTACGCG  
ATTTAATGATTCC-----ATGACAAGAAGATATTGGAACATCAATTTGGAAGAGA  
TGATGGAAGCAGGAGTTCATTTTGGTCATGGTACTAAGAAATGGAATCCTAGAATGGCC  
CCTTACATCTCTGCAAAGCGTAAAGGTATTCATATTACAAATCTCACTAGAAGTGTCTCGT  
TTTTTATCAGAAACCTGTGATTTAGTTTTTGTATGCAGCAAGTAGGGGAAAAAATCTTCT

AATCGTTGGTACAAAAATAAAGCAGTGGATTAGTAGCATCAGCTGCAATAAGGGCT  
CGGTGTCATTATGTTAATAAAAAATGGCTTGGTGGTATGTTAACGAATTGGTCCACTACG  
GAAACGAGACTTCACAAGTTCAGGGACTTAAGAGCAGAACAAAAGATGGGGAAACTC  
AACTGTCTCTCCAAAAGAGATGCAGCAATGTTGAAGAGAAAATTATCTACCTTGCAAA  
CATATCTCGGCGGGATCAAATATATGACGGGGTTGCCTGATATTGTGATCATCGTTGATC  
AGCAAGAAGAATATACGGCTCTTCGAGAATGTGTCAATTTGGGGATTCCGACAATTTGT  
TTAATCGATACAAATTGTGACCCAGATCTCGCAGATATTTTCGATTCCAGCAAATGATGAC  
GCTATAGCTTCAATCCGATTGATTCTTAACAAATTAGTATCTGCAATTTGTGAGGGTCGT  
TCTAGC---TATATAAGAAATCGTATGGGACAAAAATAAATCCACTTGGTTTCAGACTTG  
GTACAACCCAAAGTCATCGTTCCTTTTGGTTTCGCACAAACAAAAAATTATTCCGTGGGT  
TTACAGGAAGATGAAAAAATACGGAATTGTATCAAGAACTATGTACAAAAAATAGGA  
GAATATCCTCAGGT--TTCGAAGGAATCGCACGTATAGGAATTCAAAAAGAATCGATT  
TGATCCAGGTCATAATCCATATTGGATTCCCAAATTTATTAATAGAGGGC-----CAAACAC  
GA-----GGAATAGAAGAATTACAGATGAATGTACAAAAGGAACTTCATTCTGTGAACCG  
GAGACTCAACATTGCTATCACAAGAATTGAAAAACCTTATGGACAACCAAATATTCTTG  
CAGAATATATAGCCTTACAGTTAAAAAATAGAGTTTTCGTTTCGAAAGTCAATGAAAAA  
GCTATTGAATTAACTGAACAAACAGATACAAAAGGAATTCAGTACAAATCGCAGGGC  
GTATCGACGAAAAGAAATTGCACGTGTGCAATGGATCAGAGAAGGTAGGGTTCCTT  
ACAAACAATTCGCGCTAAAATTGATCATTGTTCTTATACAATTCGAACTATTTATGGAGT  
ATTAGGCATCAAATTTGGATATTTGTAAACGAGTTTATGTCTCGTTATCGAGGACCTCG  
TTTCAAAAAAATACGCCGTCTGGGGACTTTACCAGGACTAACTAGTAAAAGACCTAAA  
TCCGGAAGTGATCTTAAAACCCAATTGCGTTCCTGGGAAA---AGATCGCAATATCGTATTC  
GTCTAGAAGAAAAACAGAAATTGCGTTTTTCATTATGGTCTGACGGAGCGACAATTAGTT  
AGATATGTACATATCGCTGGAAAAGCCAAAGGGTCAACAGGTCAGGTTTTACTACA  
ACTTGAGATGCGTTTGGATAACATCCTTTTTTCGATTGGGTATGGCTTCGACCATTCTTG  
AGCTAGGCAATTAGTTAACCATAGACATATTTTAGTTAATGGTCATATAGTGGATATACCA  
AGTTATCGTTGCAAACCCCGAGATATTACTACGAAGGATAAACAAAGATCGAAAGC  
TCTGATTCAAATATATTGCTTCACCCCCCCCCGAA-----TTGCCAAAACATTTGACTAT  
TGACTCA-----TTCCAATATAAAGGATTAGTAAATCAAATAATAGATAGTAAATGGATCGG  
TTGAAAATAAATGAGTTGTTAGTCGTAGAATATTATCCCAGACTATGTCACGTCG  
AGGTACTGCAGAAGAAAAAATGCAAAATCCGATCCAATTTATCGTAATCGATTAGTTA  
ACATGTTGGTTAACCGTATTATGAAACACGGAAAAAATCATTGGCTTATCAAATTATCT  
ATCGAGCCGTGAAAAAGATTCAACAAAAGACAGAAAACAAATCCACTATCTGTTTTACG  
TCAAGCAATACATGGAGTAACTCCCGATATAGCAGTAAAAGCAAGACGTGTAGGCGGA  
TCGACTCATCAAGTTCCTATTGAAATAGGATCTACACAAGGAAAAGCACTTGCCATTCTG  
TTGGTTATTAGGGGCATCCCGAAAACGTCCGGGTCGAAATATGGCTTTCAAATTAAGTT  
CCGAATTAGTAGATGCTGCCAAAGGGAGTGGCGATGCCATACGCAAAAAGGAAGAGA  
CTCATAGAATGGCAGAGGCAAATAGAGCTTTTGCACATTTTCGTATGGGTAGGGACACT  
ATTGCCGATATAATAACTTCTATAAGAAATGCTGACATGAATAAAAAAGGAACGGTTCG  
AATAGCATCTACTAATATCACCGAAAACATTGTTAAAATACTTCTACGAGAAGGTTTTAT  
TGAAAATGTTTCGAAACATCAGGAAAATAACAAATATTTCTTGGTTTCAACCCTGCGAC  
AT-----AGAAAGACTAGGAAAGGAATATATAGA-----ACCGTTTTAAAGTGTATCA  
GCCGACCCGGTTTACGAATTTATTCCAATCAACGAATTCCTAAGATTTTAGGTGGAA  
TGGAATTGTAATCTTTCTACTTCTCGAGGTATAATGACAGATCGAGAAGCTCGACTA

GAAAGAATTGGAGGAGAAATTTTGTGTTATATATGGATGACAAAAGCTATAACCAAGAAT  
TGGTTCACGTAGGAATGGACGTATTGGTTCACGTAAGAATGGACGTAGAATACCAAAA  
GGAGTTATTCATGTTCAAGCGAGTTTCAACAATACCATTGTAAGTGTACAGATGTACG  
AGGTCGGGTGGTTTCTTGGCCTCCGCAGGTACTTCTGGATTCAAAGGCACAAGAAGA  
GGTACACCGTATGCTGCTCAAGCCGCAGCGGTAAATGCTATTTCGTACAGTAGTCGATCA  
GGGTATGCAACGGGCAGAAGTTATGATAAAAGGCCCTGGTCTCGGAAGAGATGCAGCA  
TTACGAGCCATTTCGTAGAAGTGGTATACTATTAAGTTTAGTACGTGATGTAACACCTATG  
CCACATAATGGGTGTGACCTCCTAAAAAAGACGTGTGATGCCAACTATTAACAAC  
TTATTAGAAACACAAGACAGCCAATAAGAAATGTCACGAAATCTCCCGCTCTTAGAGG  
ATGTCCTCAGCGTCGAGGAACATGCACTAGGGTGTAT---ATCACCCCAAAAAACCAA  
CTCTGCCTTACGTAAAGTTGCCAGAGTACGATTAACCTCTGGATTGAAATCACTGCTT  
ATATACCTGGTATTGGCCATAATTTACAAGAACATTCTGTAGTATTAGTAAGAGGAGGAA  
GGGTTAAGGATTTACCCGGTGTGAGATATCACATTGTTTCGAGGAACCCTAGATGCTGTC  
GGAGTAAAGGATCGTCAACAAGGGCGTCTCAATATGGGGTCAAAAAGCCAAAAATG  
GCAAGAAAAGTTTGATTTCAGAGGGAGAAGAAGCGGCAGAAATTGGAACAGAAATAT  
CATTTGATTTCGTGATCTTCAAAAAAAAAAATAAGC-----GAAGTTCCATCGTTGAGT  
GAAAAATGGGAAATTCATGGAAAATTGCAATCCCCACCACGTAATAGTGCACCTATACG  
TCTTCATCGACGTTGTTTTTTGACTGGAAGACCTAGAGCTAACTATCGAGACTTTGGGC  
TATCTGGACACATACTTCGAGAAATGGTTCATGCATGTTTGTACCGGGCGCAACAAGA  
TCAAGTTGGATGATCAAAAATTCATTCATCTCAGTTATTTCAACAAGAAGAAAAGAAG  
AAAAC-----AAGGGTCTGTTGAATTTCAAGTATTAAGTTTCACCAGTAAGATACGTAGA  
CTTACTTCCCATTTGGAATTGCACAAAAGAGATTTTTTATCCCAAAGAGGTCTACGAAT  
AATCTGGGAAAACGTCAACGGCTCCTGGCTTATTTGTCAAAGAAAATAGAGTCCGT  
TATAAGAAATTAATGGATCAGTTGGATATTCGGGAACCAAAAACCTCGT-----ATGGTAAA  
ACTTCGTTTGAACGATGTGGTAGAAAGCAACGAGCCATCTACCGAATCGTTGCAATT  
GATGTTTCGATCCCGAAGAGAAGGAAGAGATCTTAGAAAAGTAGGTTTTTACGATCCGA  
TAAAGAATCAAACCTTATTTAAATGTTCCCTCTTATCTATATTTCCCTGAAAAGGTGCTC  
AACCTACGGGAACCTGTTTGTGATATTTTAAGGAAGGCAGAATTATTTCAAGAA---AGAA  
CTTCGATTCGAGTTAAT-----ATGGATAAATCCAAGCAACCTTTTTCGTAAATACAAGCGAT  
CCTTTCGTAGGCGTTTGTCCCAATTGGATCTGGGGATCGAATCGATTATAGAAACATG  
AGTTTAATTAGTCGATTTATTAGTGAACAAGGAAAAATATTATCTAGACGGGTGAATAAA  
TTGACCTTGAACAACAACGATTAATTAATGCTATAAAACAAGCTCGTATTTTATCT  
TTGTTACCTTTTCTTAATAATGAGAAA-----CAATTTGAGAGAGCCGAGTCGATCCCCAG  
AACTACTGGTCCTAGAACCAGAAATAAAGTGACACGTTCACTAAAAAAAAAATCCTTTT  
GTAGCTAATCATTAGCGGGAAAAATTGAAAAACTCAACATGAGGGAGGAGAAAAGAA  
ATAATAGTAACTTGGTCTCGGGCATCTACCATTATACCCACAATGATTGGCCATAACAATC  
GCTATTATAATGGAAAGGAAAATTTACCTATTTATATAACAGATCGTATGGTAGGTCAC  
AAATTGGGAGAATTCGCGCCTACTCTGACTTTCGCGAGACATGCAAGAAACGACAATA  
AATCTCGTCGTATGATTTTGAATCTTTTCTACTAGGTAATCTATTATCCTTATGCATGAA  
GATAATAAATTCGGTCGTTGTGGGCGGACTCTATTATGGATTTCTGACCACATTCTCCAT  
AGGGCCCTCTTCTCTTCTTCTCCGAGCTCGGGTATGGAAGAAGGA-----ACCGA  
GAAGGAGGTATCAGCAACAACCTGGTTTTATTACGGGACAGCTCATGATGTTTCATATCGA  
TCTATTATGCGCCTCTGCATCTAGCATTGGGTAGACCTCATAACAATAACTGTCCTAGTTCT  
ACCGTATCTTTTGTTCATTTCTTCTGGAACAATCACAAAACCTTTTTTTTATTATGGATCT



ACTACCAGAAATTCAATGCGTAATCTCAGCATTCAATGTGTATTCCTGAATAATCTAATT  
TTTCAATTATTCAACCATTTTCATTTTACCAAGTTCAACGTTAGCCAGATTAGTCAACATT  
TATATGTTTCGATGCAACAACAAGATGTTATTTGTAACAAGTAGTTTTGTTGGTTGGTTA  
ATTGGTCCCATTTTATTTCATGAAATGGGTTGGATTGGTATTATTCTGGATACGGCAAAAT  
CATTCTATTTCGATCT-----ATAAGTACCTTGTTTCAGAATTGAGAAATTCTATGGCT  
CGAATCTTTAGTATTCTCTTATTTATCACCTGTGTTTACTATTTAGGCAGAATGCCGTCGC  
CTATTGTCACTAAGAACTGAAAGAAGCCGAAGAAGACAAAACCTCTTGTGACTTTTCT  
TTTCGATTATAAACGATGGAATTGTCCATTGCGATATATAAAAAATGATCAGTTTGAAAA  
TGCTGTACGAAATGAAATGTCACAATATTTTTTTTATACATGTCCAAGTAATGGGAAACA  
AAAAATATCTTTTACATATCCACCTAGTTTATCGACTTTTTTCGGAAATGATAGAACGG-----  
-TCTTTGTACACGACAAAAAATTATCCCATGGAGACCTG-----TATTGGGTTTATACCAA  
TGAACAAAAAATAACAACCTGAGCAATGAATTAATAAGTCGAATAAAAGCTCTAGAA  
AAAGAAAACTTTCTCTAGATATGCTAGAAAAAAGGACTAGATTTTGCAATCATGAGA  
ATGAACAAGAATGCTTGATCAAAACATATGATCCTTTATTGAGCGGACCATGCCGTGGA  
GCAATAAAAAAATTGGATTTACGTATAAAAAGTCTTTGGATAAATAAGATCCATGAGCT  
ACTTTTCCGAGAATTTGAACATCAAGATCCAAATGATCAATCTATTGGAATAGAAGAAA  
TCAGTAAAAAAGTTTCTCGATGGTCATATAAATTGACCGTTTTGGAAGAACAGGAGGA  
AGAAGAAATTCGTTCAAGAAAAACCAAATATGTGATAATTTATACTGATGCTTTGATAC  
GCTACCCGCAACAACCGGATTTTCGTAGGGATATAATAAAAGGATCCATGCGTACTCAA  
AGACGTAAACAGTTATTTGGCAAATGTTTCAAGCAAATGCGCATTCCCCCCTTTTTT  
GGGTGCAATAGACAAAACATTTTTTTTTTCTTCTTTTGAT---ATCTCTGAAATGATGAATC  
TCATTTTTAGGAATAAAGAGGAAAATGAACGGATAGCAATTTTCAGAACTTGGGATAA  
CGTTCTATTTGCTCAAGTAATAAGAAGTTCAATGTTAGTAACCCAATCTTTTCTTAGAAA  
ATACATTGTATTGCCTTCATTGATAATAGCTAAAAATATTGTCCGTATTTTATTATTCCAAT  
CGCCCGAGTGGTATGAGGATTTGAAGGAATGGGATAGAGAAATACATGTTAAATGCAC  
CTATAATGGTGTTCATTTATCGGAAACGGAATTTCCAAAAAATTGGTTAACAGACGGTA  
TTCAGATAAAGATTCTATTTCCCTTTCTTTCTTAAACCTTGGCGAAGATCTAAAAAAGGA  
AAAAAAGAAGATTTTTGTTTTTTAACAATTTGGGGAATGGAAGCAGAAGTTCCCTTTG  
GTTCTCCCCGAAAACGACCTCTTTTTTTTAAACCTATTTATAAAGAACTCAAAAAAAA  
ATTAGAAAAGTAAAA-----GTTCTAAAAGTTTTT-----AAA  
GAAAAAAAAGATGGGTTATCAAATAGTTCTA-----GTTATAAAACAAAAAATGAAGG  
AATTGAAAAAGTAACTCTAAAATAAAT---ATAAGATTATTCGCAAATCAACCATTCG  
AATTCGATCCATGAATTGGGCAAATTACTCACTCATAGAAAAAAAATAAAGGATCTTG  
CTGACAGGACAGTCACAATCAGGAATGAACTAGAACGAATTAGAAAAGACAAGAAAA  
AA-----GATAAAAAATCGGAATCACAGAAACATATTTTGCAGATATTTAAA  
AGAAAAAAGATCCGATTTATACGTAAATTAATTTATTTTATGAAATCATTATTGAAAA  
ATATACATAGATATCTTTCTACGTATGATTACTATTTTATAGGATCAATGCACAACCTTTTCAT  
GAACTTTATTTTCGTATGATTTATCCTCTTTGTCCCAAGCATATGATTTTACAAATTATCAC  
AAACCAATTACTTAACAAGTATCACTTGAGATCTGTACTTCAATATACCCATTCCTTTAT  
TAAGGATAAATCAAGGATTATTGTACACGAGGAATATTTGATTCCAAATCAAAGCAA  
AGAAAATTTATAAGTCTGGAAAAAATGAATGGAAAACTGGTTAAAGGGCCATTATCA  
ATACAATTTATCTCAGACAAAATGGTCTCGATTAGTACCTCAAAAATGGCGAAATAGAA  
TCAACCAACGTTCTATGATTCAAAATAAATTAATTTGATTCACATAAAAAAGAAAA  
GACCAATTAATTCATTACATGAAGCAAGAAAAATTTAAAAAACACTACAGATATTATCT

TTTATCACATAAATATATGAATGAATATATTATTGCTCTGGATAGAAAATATTTTGATTGTA  
GAATTCTCCATATTTATCTTAGATTTTTTTGATTGGATGGGAATGAATCAAGAAAAGGTTT  
ATCGTCCGTTCCCTCCAGAATTTGTGCCACTCTTTGATGCATATAGGATTAACCATGGA  
TCATACCAATCAAATTTCTTCTTTTAAATTCCAAGAAAAAGAAGGAAACAGAATTCAT  
TTCTTCCCGAAAAAATATTTCTTTTTTCAATCAAGATGGAATGACTCCTTGAATCAAAG  
AATGATCGATAATATCAAGGTATATTGTCACCTACTTAGACCGATAAATCCAAGTAAAAT  
TGCTATATCCTCGATTCAAAAAGGAGAGATAAATCTGGGTGGAATGCTAATTCATAAAG  
ATCCAACTCTTAGAGAATTGATAAAAAAAGGAATATTGATTGTCGAACCGATTCTGTTTA  
TCTATAAAAGGGGATGGAAAATTTATTATATATCAAACCCTAGGTATTTTCATTGATCGATA  
AAATTAAGCACAGTCATTATGATTTCTTTGTTCTGAAAATATTCTATCTCCTAGACGTC  
GTAGAGAATTGAGAATTCTAATTTGTTTTAGATTTCTTTGGCCCAATTACCGATTAGAAG  
ATTTAGCTTGTATGAATCGCTATTGGTTTAATACCAATAACGGCAGTCGTTTCAGTATGT  
CGAGGATATATATGTATCCAATGAAAGGACATCAATTCAAATCCTGGATCTTCGAATTGA  
GAGAGATATTGAGAGAGATCAAGAATTCTCACTATTTCTTAGATTCATGGATCAAATTCG  
ATTCAGTGGGATCTTTCACTCACATTTTTTTCCACCAAGAACGTTTTATGAAACTCTTTG  
ACCCCGAATTTGGAGTATCCTACTTTCA---CGTGATTCA-----CGGGGTCAACAAGCA  
ATCGATATTTACAG-----ATCAAAGGTGTAGTACTGCTTGTAGTAGCG---GTCCTTATAT  
CT-----CGTATTAACAATCGAAAGATGGTCGAAAGAAAAAATCTCTATTTGATGGGG  
CTTCTTCTATACCTATTCTTCTATACCTATGAATTCCATTGGACCCAGAAATGAGACAT  
TGGAAGAATCTTTT---TGGTCTTCCAATATCAATAGGTTGATCGTTTCG---CTCCTGTATC  
TTCCAAAAGGGAAAAAGATTTCTGAGAGTTGTTTCATGGATCCGCAAGAGAGTACTTG  
GGTTCTCCCAATAAAT-----AAAAAGTGTATCATGCCTGAATCTAACCGGAGTTTCG  
GGTGGTGGAGGAACCGGATCGGAAAAAAGAGG-----GATTCTAGTTGTAAGATATCT----  
---AATGAAACCGTAGCTGGAATTGAGATCTCATTCAAAGAGAAAGATAGCAA---TATC  
TGGAGTTTCTTTTTTTATCCTATACG-----GATGATCCGATCCGCAAGGACCATGATTGGG  
AATTGTTTGATCGTCTTTCTCCGAGGAAGAAGCGAAACATAATCAACTTG-----AATTCG  
GGACAGCTATTCGAAATCTTAGGGAAAGACTTGATTTGTTATCTCATGTCTGCTTTTCGT  
GAAAAAAGACCAATTGAAGGGGAGGTT---TTCTTCAAACAACAAGGA---GCTGAGGCA  
ACTATTCAATCAAATGATATTGAGCATGTTTCCCAT-----CTCTTCTCGAGAAACAAGTGG  
GGTATTTCTTTGCAAATTTGTGCTCAATTTTCATATGTGGCAATTCGCAAGATCTCTTC  
GTT-----AGTTGGGGGAAG---AATCAGCACGAATCGGATTTTTTTGAGGAAC---GTATCG  
AGAGAGAATTTGATTTGGTTAGACAATGTGTGGTTGGTAAACAAGGATCGG-----TTT  
TTTAGC-----AAGGTACGGAATGTATTGTCAAATATTCAATATGATTCC-----ACAAGA---  
---TCTATTTTCGTTCAAGTAAGGGATTCTAGCCAATTGAAAGGATCTTCT--GATCAATCC  
ATAGATCATTTCGATTCCATTAGA-----AATGAGGATTCGGAA-----  
-----TATCACACATTGATCGATCAAACAGAGATTCAGCAACTAAAAGAAAGATCGATT  
CTT--TTGGAT-----CCTTCTTTCTTCAAACGGAACGAACAGAGATAGAATCAGAT-----C  
GATTCGCGAAA-----TGCTTTTTTGGATCTTCC-----TCAATGTCCCGGCTATTACAG---GA  
ACGTGAGAAGCAGATGAATAATCATCTGCTTCCGGAAGAAATCGAAGAATTTCTT-----G  
GGAATCCTACAAGATCAATTCGTTCTTTTTTCTCTGACAGATGG-----TCAGAACTTCAT--  
-CTGGGTTCGAATCCTACTGAGAGGTCCACTAGAGATCAG-----AAATTTTTGAAGA  
AAAAACAAGATGTTTCT--TTTGTCCCTTCCAGGCGATCGGAA-----AATAAAGAAA  
TGGTTGATATATTCAGATAATTACGTATTTACAAAAT-----ACCGCCTCAATTCATCCTAT  
TTCATCAGATCCGGGATGTGATATGGTTCG---AAGGATGAACCGGAT--ATGGACAGTT

CCAATAAGATTTTCATTCTTGAAAAAATCCATTTTTTGAT-----TTATTTTCATCTATTCCA  
TGACCGGAACAAAGGGGGATACACGTTA-----CACCACGATTTT--GAATCA--GAAGAG  
AGATTTCAAGAAATGGCAGATCTATTCACTCTATCAATAACCGAGCCG--GATCTGGTGT  
ATCATAGGGGATTTGCCTTTTCTATTGATTCCTACGGGTTGGATCAAAAAA-----TTCT  
TGAATGAGGTATTCAACTCCAGAGATGAATCGAAAAAGAAATCTTTA-----TTGGTTC  
TACCTCCTCTTTTTTAT-----GAAGAGAATGAATCTTTTTATCGAAGGATCAGAAAAAAT  
CGGTCCGG---ATCTACTGCGGGAATGATTTGGAAGATCCAAAACATAAAAACAGCGGTAT  
TTGCTAGCAACAACATAATGGAGGCAGTCAATCAATATAGATTGATCCGAAATCTGATT  
CAAATCCAATATAGCACCTATGGG-----TACATAAGAAATGTATCGAATCGATTCTTTTTA  
ATG-----AATAGATCCGATCGCAACTTCGAATATGGAATTCAA-----AGGGATCGAAT  
AGGAAATGATACTCTGAATCATATAACTATAATGAAATATACGATCAACCAACATTTATC  
GAATTTGAAAAAG---AGTCAGAAGAAATGGTTTGATCCT-----CTTATTTCTCGAAC  
CGAGAGATCCATGAATCGGGATCCTGATGCATATAGATACAAATGTTCCAATGGGAGCA  
AGAATTTCCAGGAACATTTGGAACATTTCTGTTTCTGAACAGAAGAAC-----CGTTTTC  
AAGTAGTGTTCATCGATTACGTATTAATCAATATTCGATTGATTGGTCCGAGGCTATCG  
ACAAACAAGATTTGTCCAAGTCACTT--CTCTTTTTGTCCAAG-----  
-----TCACTTCCCTTTTTG---TCCAAGTCACTTCCCCTTTTCTTTG  
TGAGTATCGGGAATATCCCATTCATAGGTCCGAG---ATCCACATCTAT--GAATTGAAAG  
GTCCGAATGATCAACTCTGCAATCAGTTGTTAGAATCAATAGGTGTTCAAATCGTTCAT  
TTGAATAAATTGAAACCCTTTTTATTATTTTATTGGAT-----GATCATGATACTTCC---CAA  
GACCGAAATTCTTGATCAATGGAGGAACAATATTACCATTTTTGTTCAAAAAGATACCA-  
--AAGTGG---ATGATTGACTCATTCCATACT-----AGAAATAATCGCAGGAAATCCTTTGAT  
AACACGGATTCCATTTCTCAATGATATCCAGGATCGAGACAATTGGCTGAATCCCGT  
GAAACCATTTTCATAGAAGTTCATTGATATCTTCTTTTTATAAAGCAAATCGACTTCGATT  
CCTGAATGATCCACATCACTTCTGGTTCTAT-----TGTAACAAAAGATTCCTTTTTTATGT  
G-----GAAAAGACCCGTATCAATAATTATGAT-----CTTACATAT--GGACAATTCCCTCA  
ATATCTTGTTTCATTCGCAACAAA---ATATTTTCTTTGTGCGTCCGTAAA-----AAAAACA  
TATTTTTTTGGAG---AGGGAGACTATTTACCAATCGAGTCACGGGTATCTGACATATTC  
ATACCTAAGGATTTCCACAAAGTGGTGACGAAACG--TATAACTTGTACAAA-----TC  
TTTCCATTTT-----CGATCCGATCCATTCGTTCTG---AGAGCTATTTACTCGATCGCAGA  
CATTTCTGCAACACCTCTAACAGAGGAACAATAGTCAATTTTCAAAGAACTTATTGTC  
AGCCTCTTTCAGATATGAATCTATCTGATTGAGAAGGGAAGAACTTGTATCAGTATCTCA  
GT-----TTCAATTCAAACATGGGTTTGATTACACTCCATGTTCTGAGAAATATTTACCA--  
---TCCGGAAAGAGGAAAAA-----CGGAGTCTTTGTCTAAAG-----AAAT  
GCGTTGAGAAACGGCAGATGTATAGAATCTTTCAACGAGATAGTGCTTTTTTCAAATCTC  
TCAAATGGAATCTGTTCCAAACATATATGCCATGGTTCCTTACTTCGACAGGGTGCAA  
ATATCTAAATTTTACCCTTTTAGATACTTTTTCAGACCCATCG-----CCGATACTAAGTAGC  
AGT--CAAAAATTTGTATCCATTTTTTCATGATATTATGCATGGATCA-----GCATGGCCAAT  
TCCTCAGAAG-----ATTCTTCCACGATGGACTCTG---ATAAGTGAGATTC  
GAGTAAGTGTTTACAGAAT-----CTTCTTCTGTCCGAAGAAATGATTCATCGAAATAATG  
AGTCACCCGTTCCATTGATATGGACACATCTGAGATCAACAAATGCTCGGGAGTTC---C  
TCTATTCAATCCTTTTCTTCTTCTTGTGCTGGATAT--CTCGTTCGTATACATCTTCTCT  
TTGTTTCCCGA-----GCCTCTAGTGAGTTACAGACAGAGTTAGAAAAGATCAAATCTTTG  
ATGATTCATCATAATGATTGAGTTGCGAAAACCTTCTGGATAGGTATCCTACATCTGAA

CTGAATTCTTTCTGGTTAAAGAATCTCCTTCTAGTTGCTCTGGAACAATTAGGAGATTCT  
CTGGAAGAAATACGGGGTTCTGCTTCTGGTGGCAACATGCTATTGGGTGGTGGTCCC---  
-----GCTTATGGG---GTCAAATCAATACGTTCTAAGAAGAAATATTTGAATATCAAT--  
-----CTCATCGATCTCATA---AGTATCATACCAAATCCCATCAATCGAATCACTTTTTTCGAG  
AAATACGAGACATCTAAGTCGTACAAGTAAAGAGATCTATTCATTGATAAGAAAAAGA  
AAAAACGTGAACGGTGATTGGATTGATGATAAAATAGAATCCTGGGTGCGGAACAGTG  
ATTCGATTGATGATGAAGAAAGAGAATTCTTGGTTCAGTTCTCC-----ACCTTAACGACA  
-----GAAAAAAGG-----CAAATTCTATTGAGTCTGACT--CATAGTGATCATTATCA-----  
-----AAGAATGACTCTGGTTATCAAATGATTGAACAACCGGGATCAATTTACTTACGATA  
CTTAGTTGACATTCAT-----AAAAGTATCTAATGAATTATGAGTTCAATAGATCCTGTTT  
AGCAGAAAGACGGATATTCCTTGCTCATTATCAGACAATCACTTAT-----TCACAAACCT  
CGTGTGGGGCTAATAGTTTTTCAATTTCCCATCTCATGGA-----AAACCCTTTTCGCTCCG  
CTTAGCCCTATCCCCTTCT--AGGGGTATTTTAGTGATAGGTTCTATAGGAACTGGACGAT  
CCTATTTGGTCAAATACCTAACGACAAACTCCTATGTTTCTTTTATTACGGTATTTCCGA  
ACAAGTTCCTGGATGACAAGCCTAAAGGTTATCTTATTGAT-----GATATCGAT--A  
TTGATGATAGTGACGATATCGAT-----ATTGATGATAGTGACGATATCGATATTGATGA  
TAGTGAC-----GATATTGATGATGACCTTGATACGGAGCTGCTAACTAT  
GACGAATGTGCTA-----ACTATGTATATGACG-----CCGAAAATAGACCGATTGATAT  
CACCTTCAATTCGAATTAGCAAAAGCAATGTCTCCTTGCATAATATGGATTCCAAACAT  
TCATGATCTGTATGTGAATGAGTCGAATTACTTATCCCTCGGTCTATTAGAGAACTATCT  
CTCC-----AGGGATTGTGAAAGATGTTCC--ACTAGAAATATTCTTGTTATTGCTTCGAC  
TCATATTCCCCAAAAGTGGATCCCGCTCTAATAGCTCCGAATAAATTAATACATGCAT  
TAAGATACGAAGGCTTCTTATTCCACAACAACGAAAGCACTTTTTTCAATCTTTCATATAC  
TAGGGGATTCCACTTGGAAGAAAGAAATGTTCCATACT-----AACGTATTCGGGTCCATAA  
CCATGGGTTCGAATGCACGAGATCTTGTAGTACTTATCAATGAGGCCCTATCAATTAGTA  
TTACACAGAAGAAATCAATTATAGAACTAATACAATTAGATCAGCTCTTCATAGACAA  
ACTTGGGATTTGCGA-----TCCCAGGTAAGATCGGTTTCAGGATCATGGGATCCTTTTCT  
ATCAGATAGGAAGGGCTGTTGCACAAAATGTACTTCTAAGTAATTGCCCATAGATCCT  
ATATCTATCTATATGAAGAAGAAA-----TCATGTAAGGAAGGGGATTCTTATTTGTACAAA  
TGGTACTTCGAACTTGGAACGAGCATGAAGAAATTAACGATACTTCTTTATCTTTTGGAG  
TTGTTCTGCCGGATCGGTGCTCAAGATCTTTGGTCTTCACCC-----GGACCCGATGAAA  
AA---AATTGGATCACTTCTTATGGATTCGTTGAGAATGATTCT--GATCTAGTTCATGGCC  
TATTAGAAGTAGAAAGCGCTCTGGTGGGA-----TCCTTACGGACAGAAAAAGATTGCAG  
TCAGTTTGATAATAAT-----CGAGTGACATTACTTCTTCGGTCCGAACCAAGGAAT--CAG  
TTAGATATGATGCAAAATGGATCTTGTCTATCGTTGATCAGAGATTTCTATATGAAAAA-  
----TACGAATCGGAGTTTGAAGAA--GGGGAAGGA-----GCCGTCGACCCGCAA-----  
-CAGATAGAGGAGGAT-----TTATTCAATCAC-----ATAGTTTGGGCTCCT-----AGAAT  
ATGGCGCCCT-----TGTGGCAATCTATTTGATTGTATCGAAAGGCCCACTGAATTGGGA  
TTTCCC---TATTGGGGCGGGTCATTTCCG-----GGCAAGCGGATCATTATCATAAAGA  
GGATGAGCTTCAAGAGAATGATTCCGAGTTCTTGCAGAGTGGAACCATGCAGTACCAG  
ACACGAGATAGATCTTCCAAAGAAGAAGGCTTTTTTTCGAATAAGCCAATTCATTTGGG  
ACCCTGCGGATCCATTCTTTTCTATTCAA--GATCAGCCCTTGTCTCTGTGTTTTCA  
CGTCGAGAATCTTTGCAGATGAAGAGATGTCAAAGGGGCTTATTACTTACCAAACAA  
ATCCTCCTACATCTATATATAAACGCTGGTTCATC-----AAGAATACGCAAGAAAAGCAC

TTCGAATTGTTGATTCATCGCCAGAGATGGCTTAGAAC-----AATAGTTCATTATCT---  
--AATGGATCTTTCCGTTCTAAT-----ACTCTATCCGAGAGTTATCAGTATTTATCAAATCTG  
TTCCTATCTAAC---GGAACGCTATTGGATCAAATGACAAAGACATTGTTGAGAAAGAGA  
TGGCTTTTCCCGGATGAAATGAAACATTTGATT-----CATGTAACAGGAGAAAGATTTCC  
CATTCCTATGCCTAGATCTCGG---ATAAATGTAAATTTTATTGATAAGACCTCTTCAATTG  
TAGCCAATATTCTATTACGAATAATTCCGACAACCTTCAGGAGAAAAAAGGCATTTACC  
TATTACAGAGATGGG-----ATGTTGGCTCAATCCGAAGGAAATTATGCGGAAGCTTTACA  
GAATTATTATGAAGCTACGCGACCAGAAATTGATCCCTATGATCGAAGTTATATACTCTAT  
AACATAGGCCTTATACACACAAGCAACGGAGAGCATACAAAGGCTTTGGAATATTATTT  
CCAGGCACTCGAACGAAACCCATTTTACCACAAGCTTTTAATAATATGGCCGTGATCT  
GTCATTAC---CGGGGAGAACAGGCCATTCTACAGGGTGATTCCGAAATTGCGGAGGCTT  
GGTCCGATCAAGCTGCTGAGTATTGGAAACAAGCTATAGCGCTTACTCCAGGTAATTAT  
ATTGAAGCACATAATTGGTTGAAGATCACGAGGCGTTTCGAATTTCGAAATGAATTGGCG  
ATCAGAACATATATGGATAGAACTTATAATGGGGTCTCGAAAAACAAGTAATTTTTCTG  
GGCCTGTATCCTTTTTTTAGGTTTCGCTAGGATTCTTAGTGGTTGGAAGTTCCAGTTATCT  
TGGTAGGAATCTGATATCCGTATTTCCATCTCAGCAAATTTTTTTTTCCACAAGGGAT  
CGTGATGTCTTTCTATGGGATCGCCGGTCTATTCATTAGCTCCTATTTGTGGTGCACAAT  
TTCATGGAATGTAGGTAGTGGTTATGACAGATTCGATAGAAAAGAAGGAATAGTGTGTA  
TTTTTCGTTGGGGATTCCTGGAATAAATCGTCGCATCTTCCTTCGCTTACTTATGAAAG  
ATATACAATCAATCAGAATGGAGGTTAAAGAGGGTCTTTATCCTCGTCGTGTCCTTTATA  
TGGAATCAGAGGCCAAGGAGCCATTCCCTTGACTCGTACTGATGAGTAT---TTTACTC  
CACAAGAAATTGAACAAAAAGCTGCCGAATTGGCCTATTTCTTGCGCGTACCAATTGA  
AGTATTT

>Erycina

ATGGAAAAATGTTGGTTCAATTCAATGTTGTTTCTAAGTAAATCAATGGATAATCTTGAT  
GCTCTTGGACATACCATTAGAAGCGAAGAAACTAAT-----GATGCGGAGAAAAAGATTC  
CTAGTTTAAGTAATATTAATTCTTTATTTGATAGCAGGAATATTTGGAGTTTGATCTCTGA  
TCATACTTTTTTAGTTAGAAATAGTAATGGTGACATTTATTCTGTATATTTGATATTGACA  
ATCAAATTTTTGATATTGACAATGCTAGT-----TCTTTTTTGAGTGACCTAGAAATCTTTT  
T-----AGTTCTTTTAATAATGAATCTACTAGTAGTCAT--TATTATTAT--TCCATGT  
CTAATACTGAATCTAATTGGAATAATCACATTAATAGTTGCGTTGATAGTTATCTTCGT----  
-TTGGAAATCAGTCTGAATAGTGACATTTACAGTGGTATCAAC-----TACATTTCTA  
GTTAATTTGTCCGAGTGGAATTTAGTATCAAAGCTAATAGC-----AATTATTTCAATAT  
AATAGAAAAATCTAATAATTTGATAGAAATACAAAATACAAACATTTATGGGTTCAATG  
TGAGAATTGTTATGGATTAATAATATAAAAAATTCTTTAGTTCAAAAATGAATATTTGTGA  
ACACTGCGGATATCATTGAAAATGAGTAGTTCAGATAGAATCGAACTATTGATTGATCC  
TGGCACTTGGGAGCCTATGGATAAAGATATGGTCTCTATGGACCCCATGAATTTCAATC  
AGAGGAGGAACCTTATATAGATCGCATCTTTTTATAAAAAAAAAAACGGGTTAACTG  
AAGCTGTTCAAACGGGCGTAGGTCAACTAAATAGTATTCCCATAGCAATGGGAGTTATG  
GATTTTCAGTTTATGGGAGGTAGTATGGGATCCGTAGTAGGTGAGAAAATAACCCGTTT  
GATCGAGTATGCTACGAATCGATTTCTACCTGTCATTATTGTGTGTGCTTCTGGAGGAGC  
ACGCATGCAAGAAGGGAGTTTGAGCTTGATGCAAATGGCTAAAATATCTTCTGCTTTAT  
ATGATTATCAATCAAATAAAAAGTTATTCTATGTATCAATCCTTACATCTCCTACAACCTGG  
CGGAGTTACAGCAAGTTTTGGTATGTTGGGAGATATCATTATTGCTGAACCTAATGCCTA

CATTGCGTTTGC GGGTAAAAGAGTAATTGAACAAACATTAAAAAAGACAGTACCTGAC  
GGTTCACAAGTGGCGGAGTATTTATTCCATAAGGGCTTATTTCGACCCAATCGTACCACG  
AAATATTTTAAAAGGTGTTCTTAATGAGTTATTTAAGCTACACGGTTTTTTTCCCTTGAA  
TCAAGAT-----ATGGGAACCCCTTCGAGCTGACGAAATTAGTAATATTCTACGCGAACGT  
ATTGAACAATATAATCGAGAAGTAAAGATTGTGAATACCGGTACCGTACTTCAAGTGGG  
CGACGGCATTGCTCGTATTCATGGTCTTGATGAAGTAATGGCAGGTGAATTAATAGAAT  
TTGAAGAGGGTACTATAGGTATTGCTCTTAATTTGGAATCAAATAATGTTGGCGTTGTAT  
TAATGGGTGATGGTTTGATGATAAAAAGAGGGGAAGTTCTGTAAAAGCAACGGGAAGAAT  
CGCTCAGATCCCTGTGAGCGAGGCTTTTTTGGGTCGTGTTATAAATGCTCTGGCTAAAC  
CTATTGATGGGAGAGGTGAAATTTTCATCTTCTGAATTTTCGGTTAATTGACTCTCCTGCC  
CAGGTATTATTTTCGAGACGTTCCGTATATGAGCCCCTTCAAACGGGACTTATTGCTATTG  
ATTCAATGATTCCTATAGGACGCGGGCAACGAGAATTAATTATTGGAGACAGACAGACT  
GGTAAAACAGCAGTAGCCACAGATACGATTCTCAATCAAAAAGGACAAAATGTGATAT  
GTGTTTATGTAGCTATTGGTCAAAAAGCATCTTCTGTAGCTCAGGTAGTACTACTTTCC  
AAGAAGGAGGGGCAATGGAATACACTATTGTGGTAGCCGAAACAGCAGATTTCGCCTGC  
TACATTACAATATCTCGCTCCTTATACAGGAGCGGCTCTTGCTGAATATTTTATGTACCGT  
GAACGACATACTTCAATAATTTATGATGATCTTTCCAAACAGGCACAAGCTTATCGTCA  
AATGTCTCTTCTATTAAGAAGACCCCCAGGTCTGAAGCTTATCCAGGAGATGTTTTTT  
ATTTGCATTCACGACTTTTGGAAAGAGCCGCTAAATCAAGTTCTCGTTTAGGTGAAGG  
AAGTATGACTGCTTTACCAATAGTGGAGACTCAATCTGGAGACGTTTCGGCTTATATTC  
CTACTAATGTAATTTCTATTACAGATGGACAAATATTCTTATCTGCCGATCTATTCAATGC  
TGGAATTAGGCCTGCTATTAATGTAGGTATTTCTGTTTCAAGAGTAGGATCGGCAGCTC  
AAATTAAGCCATGAAACAAGTAGCTGGCAAATCAAATTTGGAACCTTGCTCAATTTGC  
AGAATTGGAAGCCTTTGCACAATTTGCTTCTGATCTAGATAAAGCTACTCAGAATCAAT  
TGGCAAGAGGTCAACGATTACGTGAGTTGCTCAAACAATCCCAATCAGACCCTCTCGC  
GGTAGAAGACCAGATAGCTACTATTTACACCGGAACAAATGGATATCTTGATGCGTTAG  
AAATTGGACAGGTAAAGAAATTTCTTATTGGGTTACGTACCTACTTAACAAAGAAGAA  
ACCTAAATTTAAAGAAATTTCTATCTTCTACCAAGATATTCACCAAGAAGCTGAAACCC  
TTTTGAAAGAAGCTATTCAGGAACAGATTCAACTCTTTCTACTTCAGGAACAAACAAT  
GAGAAGCAATCCTACTACTTCTGATCCTGTGGTTTCTACACTTGAAGAACAAAACCTAG  
GGCGTATTGCTCAAATTTGGCCCAGTTCTGGATGTCATTTTTCCACCGGGTAAGATGC  
CTAATATTTATAATGCTTTGGTAATTCAAGGTCGAGATACTGTTGGTCAGCAAATTAATG  
TAACTTGTGAAGTACAACAATTATTAGGAAATAATCGAGTTAGAGCTGTAGCTATGAGT  
GCTACAGATGGTCTGATGAGAGGAATGAAAGTGATTGACACGGGAACTCCTCTAAGTG  
TTCCAGTTGGGGGGGCTACTCTCGGACGAATTTTCAACGTTCTTGGAGAGCCCGTTGAT  
AATTTAGGTCCTGTGATACTCGCACAAATCTCCTATTCATAGATCTGCACCCGCCTTC  
ATACAGTTAGATACAAATTTATCAATCTTTGAAACAGGGATTAAGTTCGTAGATCTTTTA  
GCCCCCTATCGCCGTGGAGGAAAAATAGGACTATTTGGGGGAGCTGGAGTGGGTAAAA  
CAGTACTCATTATGGAATTGATCAACAACATTGCCAAAGCTCACGGAGGCGTATCCGTA  
TTTGCGGAGTAGGTGAACGTACTCGTGAAGGAAATGATCTCTACATGGAAATGAAAG  
AATCCGGGGTGATTAATGAAAAAATATTGCAGAATCAAAGTGGCTCTAGTCTACGGT  
CAAATGAATGAACCGCCAGGAGCTCGTATGAGAGTTGGCTTACTGCCCCTAACCATGG  
CGGAATATTTTCGGGATGTTAATGAGCAAGACGTACTTCTATTTATCGATAATATATTTTCG  
TTTCGTTCAAGCAGGGTCCGAAGTCTCTGCCTTATTAGGTAGAATGCCTTCTGCAGTGG

GTTATCAACCTACCCTTAGTACGGAAATGGGTCTTTTGCAAGAAAGAATTACTTCTACC  
AAAGAAGGATCCATAACATCAATCCAAGCAGTTTATGTACCTGCGGATGATTTGACCGA  
CCCTGCTCCTGCCACGACATTTGCACATTTAGATGCTACTACCGTATTATCAAGAGGATT  
AGCTGCCAAAGGTATTTATCCAGCAGTAGATCCCTTGGATTCAACGTCAACTATGTTAC  
AACCTCGGATCGTTGGCGAGGAACATTATGAAATTGCGCAAAGGGTTAAGCAAACCTC  
ACAACGTTATAAAGAACTTCAGGACATTATAGCTATCCTTGGGTGGACGAATTATCCG  
AAGAAGATCGTTAACTGTAGCAAGAGCACGCAAGATTGAGCGTTTCTTATCACAACC  
CTTCTTTGTGGCAGAAGTATTTACTGGTTCTCCAGGGAAATATGTTGGTCTCGCAGAAA  
CAATTCGGGGGTTTCAATTCATCCTTTCCGGAGAATTAGACGGTTTTCCCGAACAAAGCT  
TTTTATTTGGTGGGTAACATCGATGAAGCTACCACGAAAGCTATAAACTTAGAAGAGGA  
GAGCAAATTGAAGAAAATGACCTTAAATCTTTGTGTATTGACCCCTAATCGAATGATTT  
TGAATTCCGAAGTTAAAGAGATTATTTTATCTACTAATAGTGGACAAATTGGGGTATTAC  
CAAACCATGCCCCATTGCTACGGCTGTAGATATAGGTCTTTTGAGAATACGGCTAAAC-  
-CGATGGGTAATGGTGGCTCTTATGGGCGGTTTTGCTAGAATAAGTAATAATGATATCAC  
CATTTTAGGAAATGGTGCAGAAATGAGTACCGACATTGATCCACAAGAAGCTCAACAA  
ACTCTTGAAATAGCTGAAGCTAACTTCAGTAGAGCTGAGGGTAAGAGACAAGCAATTG  
AGGCAAATCTAGCTCTCAGACGAGCTAAGACACGAGTAGAAGCTGTAAAAGCAATTC  
CATGAAAATATAAACGATTCTTTTGTTCGTTGGGTCACTGGCCAGCCGCTGGTAGTT  
TCGAGTTAATACCGATATTTTAGCAACAAATCCAATAAATCTAAGCGTAGTTCTGGGTG  
TATTGATTTTTTTTTGGAAAGGGAGTGTTAAATGATTTATTAGATAAGCGAAAACAGAGG  
ATCTTGAGTACTATTCGAAATTCAGAAGAATTACGTAGAGGAGCTATTGAACAGCTTGA  
AAGAGCTCGGGTTAGATTACGGAAAGTGAAAATCGAAGCAGATGAGTATCGAACGAAT  
GGATACTTTGAGATAGAACGAGAAAAAGTAAATTTGATTAATGCGACTTGCAATAGTCT  
GGAACGATTAGAAAATTACAAAATGAACTCTTTTTTTTGAAAAACAAAGAACAATT  
AATCAGGTCCGACAACAAGTTTTACAACAAGCCTTACAAAGAGCTCTAGGAACGCTGA  
ATAGTTGTTTGAATAGCGAATTACATTTTCGTACCATTAGTGCTAATATTGGTATCCTCAG  
GTCTGTGGAAGAAATAACCGATATGAATCCACTTATTTCTGCTGCTTCCGTTATTGCTGC  
TGGATTGGCTGTAGGGCTTGCTTCTATCGGACCTGGGGTTGGTCAAGGCACTGCTGCC  
GGCCAAGCCGTAGAAGGTATTGCGAGACAACCAGAAGCTGAGGGTAAAATACGAGGT  
ACTTTATTGCTTAGTCTAGCTTTTATGGAAGCTTTAACAATTTATGGACTGGTCGTGGCA  
TTAGCTCTTTTATTTGCAAATCCTTTTGTATGAATGTTATACCATGTTCCATTAACAC  
TAAAAGGGTTATACGATATATCAGGTGTAGAAGTAGGCCAACATTTATATTGGCAAATAG  
GAGGTTTACAAATTCATGCCCAAGTACTTATCACTTCTTGGGTATAATTGCTATTTTATT  
AGGTTTCTCATCATAGCTGTTTCGGAATCCACAAACCATTCCGACCGACGGTCAGAATT  
TCTTCGAATATGTCCTTGAATTTATTCAAGACTTGAGCAAACTCAGATTGGAGAGGAG  
TATGGTCTTGGGTTCCTTTTATAGGAACGATGTTCCCTATTTATTTTTGTTTCTAACTGGT  
CAGGTGCTCTTTTACCTTGGAAAATAATAAAGTTACCTCATGGGGAATTAGCTGCGCCC  
ACGAATGATATAAATACTACTGTTGCTTTAGCTTTACCCACGTCAGTGGCATAATTTCTATG  
CGGGTATTAGCAAAAAGGATTGGGATATTTCCGGAAATACATTCAACCAACTCCAATA  
CTTTTACCAATTAATATTCTAGAAGATTTACCAAACCTTTATCTCTTAGTTTTCGACTTT  
TCGGGAATATAATTGGCTGATGAATTAGTGGTTGTTGTTCTTGTCTTTAGTGCCTTCAG  
TAATTCCTATACCTGTCATGTTTCTTGGATTATTTACAAGTGGTATTCAAGCTCTATTTTT  
GCAACTTTGGCTGCAGCTTATATAGGTGAATCCATGGAGGGTCATCATATGATATTTGCA  
ACCCTAGAACATATATTAACCTCATATTTCTTTTTCGATCATCTCAATTGTGATTCTAATTCA

TTTGATGAACTTATTAGTCGACGAAATAAAAGAATTACGTAATTCGTTAGAAAAAGGGA  
TGATAGCTACGTTTTTCTCTATCACAGGGTTTTTAGTTATTCGTTGGAATTCCTCGGGAC  
ATTTCCCTTAAGTAATTTATACGAATCCTTAATCCTTCCTTCATGGAGTTTTTCCATTATT  
CATATGATTCCGTATCTTGGGAATCCGAAAAATGATTTAAGTGCAATAACTGCACCAAG  
TGCCATTTTTACCCAAGGTTTCGCCACGTCAGGTCTTCAACTGAAATACATAAAGCTG  
AAATATTAGTACCTGCTCTACAATCTCAGTGGTTAATGATGCATGTCAGTATGATGCTATT  
GAGCTATGCAGCTCTTTTATGCGGATCATTATTATCAGTTGCTCTTATAATGATTACATTT  
CAAAAAAGAATGGATTCTTTTTTTTCAAAAAATGATATGGAAGATTTGAACGAAAAA---  
AGTGTATTA AAAACTACTTCTTTCTCTCATTTCAAATTTTTACAAACATCAATTAATTC  
AGCGTTTGGATTATTGGAGTTATCGTGTGATTAGTTTAGGTTTTACCTTTTTAACCATAG  
GGATTCTTTCTGGCGCAGTATGGGCTAATGAAGCATGGGGTTCGTATTGGAATTGGGAC  
CCTAAGGAACTTGGGCATTTATTACTTGGATAATATTTGCAATGTATTTACATACTAGA  
AAAAATGAAAAATTGCAAGATACAAATTCGGCATTGTAGCTTCTATAGGATTTATCCTA  
ATTTGGATATGCTTTTTTGGAAATCAATCTATTAGGAATCGGATTACATAGTTATGGTTCAT  
TCCAATTCATAATGAAAAAAAAGCATTGGCT--TACCTACCATATCTTGTGTCTATACTT  
TTTTTGCCTTGGTGGGTTTTCTCTATCATTTAATAAATGTCTAGAAACTTGGTTTATTAATT  
GGTGAATACCAGACAATCCGAAATCCTTTTGAATGATATTCAAGAGAAAAATGTTCTA  
GAAAAATTTATGCAATTAGAAGAACTATTCTTGTTGGACGAAATGATAAAAGAGTATTC  
GGAGGCACATATGCAAAGGTTTCGTATAGGAATGCACAAGGAAACAATACAATTGGTT  
CAAAGACAAAATGAATCTCATTTCATATCATTTTGCATTTCTCTACAAACCTAATCTGT  
TTCGCTATTCTAAGTGGTTATTTTTTTCTGGGTAATCAAGAACTTTTCATTCTAAATCTT  
GGATTCAGGAATTTTTCTATAACTTAAGTGATACAATCAAAGCTTTTTTGTATTCTTTTAG  
TACTGATTTATGGATCGGGTTTCACTCGACCCATGGTTGGGAACTAATGATTGGTTTTGA  
TCTACAACGATTTTGGATTGCTCAGAATGATCAGATTATATCTGGTCTTGTTCACCTT  
TTCCAGTTATTCTAGATACAATTGTTAAATATTGGATCTTTCATTTTTTAAATCGTGTATCT  
CCTTCACTTGTAGTAATTTATCATTTCAATGAATGAAATGCCATTGGTGTTCAAAAGTC  
CCTTTTCGGAGTCCTGGAGAGGAAGATGCAGCTTGGGTTGACGTA-----CGACTTCATC  
GAGAAAGATTACTTTTTTTAGGCCAAGAGGTTGATAGCGAGATCTCAAATCAACTTATT  
GGTCTCATGGTATATCTCAGCATAGAAGATAATACTAGGGATCTTTATTTATTTATAAATT  
CTCCAGGCGGATGGGTAATACCAGGAATAGCCATTTATGATACTATGCAATTTGTGTCAC  
CGGATGTCCATACAATATGTATGGGATTAGCCGCTTCAATGGGATCTTTCATTCTGGTGC  
GAGGAGAAATTACCAAACGTCTAGCATTCCCTCACGCTAGGGTTATGATTCACCAACCT  
GCTAGTTCTTTTTATGAGGCACAAGCAGGGGAATTTATCCTGGAAGCAGAAGAACTATT  
GAAGCTTCGCGAAAATCTTACAAAAGTTTATGTACAAAGAACAGGCAACCCTTTATGG  
GTTATATCCGAAGATATGGAAAGGGATGTTTTTATGTCATCAACAGAAGCCCAAGCTCA  
TGGCATCGTTGATCTTGTAGCAGTTGAAATGAAAGAACAAAATGATTGATGAGGGTT  
TAATTAATGAATCACTTCCCAACGGTATGTTCCGAGTTCGATTAGATAATGAAGATCTAA  
TTCTAGGTTATATTTAGGCAGAATCCGGCGCAGTTTTTATACGTATACTACCCGGCGATA  
GGGTAAAAATCGAAATGAGTCGTTATGATTCAACCAAGGGACGTATAATTTATAGACTT  
CGAAAAAAGATTTCGAACGATAATAGCAGAATTATATTTAGATTGAAAAAAGATAGATT  
TTGGCAACAAAACCTTCTCTATCCGCTACTCCTCAGGAGTATATTTACTCACTTGCTCA  
TTATCATAGCTTCATTGGTTATGACAAT--TCTAGTTTCGTACTTGTAACGTTTAATTAC  
TCGAATGTATCAACAGAAACCTTTGATTTATTCAGGGAATGATTCTAACCAAAAAGATAG  
TTTGGGGTTCTCATTTTTATTCTCAAATGGTATCAGAAGGTTTTGGAGTTATTTTTGAAA





repeated text lines

متن بسیار نامشخص و غیرقابل خواندن است.



GAGTGGGCTTATGATTATTCGTTTCGCCGGAACCCGAAGTGAAAATTGTTGTAGACAGG  
AATCCTATAAAAACGTCATTCGAGGAATGGGCCAGACCAGGCCATTTCTCAAGAACAA  
TAGCGAAGGGTCTGATACTACCACTTGGATCTGGAATCTACATGCTGATGCTCACGAT  
TTCGATAGTCATAACCAGCGATTTGGAGGAGATCTCTCGAAAAGTCTTTAGTGCTCATT  
CGGCCAACTCTCTATTATATTTCTTTGGCTTAGTGGCATGTACTTTCATGGCGCCCGTTTT  
TCCAATTATGAAGCATGGCTAAGTGATCCTACTCATATTGCACCCAGTGCTCAAGTAGTT  
TGGCCAATAGTAGGTCAAGAAATATTGAATGGGGATGTGGGCGGTGGTTTTTCGAGGAA  
TACAAATAACCTCCGGTTTTTTTCAGATTTGGCGAGCATCTGGAATCACTAATGAATTAC  
AACTTTATTGTACCGCAATTGGTGCATTGGTCTTTGCAGCGTTAATGCTTTTTGCTGGTT  
GGTTTCATTATCACAAAGCCGCTCCAAAATTGGCTTGGTTCCAAGATGTAGAATCTATG  
TTGAATCACCCTTAGCGGGGTTACTAGGACTTGGGTCTCTTTCTTGGGCGGGACACC  
AAATCCACGTATCTTTACCAATTAACGAATTTCTTGAGGCTGGAGTTGATCCTAAAGAA  
ATACCACTTCCTCATGAATTTATCTTGAATCGGGATCTTTTGGCTCAACTTTATCCAAGT  
TTTGCCGAGGGAGCAACGCCTTTTTACCTTGAATTGGGGAAAATATGCGGAATTTCT  
GAGTTTTCGTGGAGGATTAGATCCAATAACAGGGGGTCTTTGGCTTAGTGATATTGCAC  
ACCATCATTTAGCTATTGCAATCTGTTCCCTGATCGCAGGTTCATATGTATAGGACTAACT  
GGGCCATTGGTCATGGCCTTAAAGACATTTTAGAGGCTCATAAAGGTCCGTTTACAGGC  
CAGGGCCATAAAGGTCTCTATGAAATCCTAACAACGTCATGGCATGCTCAATTATCTTT  
GAATCTGGCTATGTTAGGTTCTTTAACCATTGTTGTAGCTCACCATATGTATTCCATGCC  
CCCTATCCATACCTAGCTATTGACTATGGTACACAACCTTTTCGTTGTTACACATCACATG  
TGGATCGGGGGATTTCTTATAGTTGGCGCTGCTGCACATGCAGCCATCTTTATGGTAAG  
AGACTACGATCCAACCTACTCGATAACAACGATCTATTAGATCGTGTCTTAGACACCGTG  
ATGCAATCATATCACATCTGAACTGGGCATGTATCTTTCTAGGGTTTACAGTTTTGGCT  
TGTATATTCATAATGATACTATGAGCGCTTTAGGGCGTCCCCAAGATATGTTTTAGATA  
CGCTATAACAATTACAACCCATCTTTGCTCAATGGGTACAAAACACCCATGCTTTAGCGC  
CTAGCGTAACAGCTCCCGGTGCAACAACAAGTACCAGCTTAACTTGGGGAGGAAGTG  
AGTTAGTATCAGTGGGCGGCAAAGTTGCTTTGTTACCTATCCATTAGGAACTGCAGAT  
TTTTTGGTTCATCACATTCATGCATTTACAATTCATGTAAGTATTGATCCTACTGAAGG  
GTGTTCTATTTGCTCGCAGTTCCCGTTTGATACCTGATAAAGCAAATCTTGGTTTTCGTT  
TCCCTTGTGATGGACCTGGTAGGGGGGAACATGTCAAGTCTCCGCCTGGGATCATGTA  
TTTTTAGGTCTATTTGGATGTACAATGCAATTCGGTAGTCATTTTCCATTTAGTTGGA  
AAATGCAGTCGGATGTTTGGGGTACTATAAGTGATCAAGGAATAGTCACTCATATCACA  
GGAGGGAACTTTGCACAGAGTTCCATTACTATTAATGGATGGCTACGGGATTTCTTATG  
GGCACAGGCATCTCAAGTAATTCAGTCTTATGGTTCTTCTTATCTGCATATGGTCTTTT  
TTTCTTAGGTGCTCATTTTGTCTGGGCGTTCAGTTAATGTTTCTATTAGTGGCCGTGG  
TTATTGGCAAGAACTCATTGAATCCATCGTTTGGGCTCATAACAATTAAGTTGCTC  
CTGCTACCCAGCCTAGAGCCTTGAGTATTGTACAAGGACGTGCTGTAGGAGTAACCCAT  
TACCTTCTGGGTGGAATTGCCACAACATGGGCATTCTTCTTAGCAAGAATTATTGCAGT  
AGGAATGACATTAAGATTCCCGAGGTTTAGCCAAGGTTTAGCTCAGGACCCACTACT  
CGTCGTATTTGGTTTTGGTATTGCTACCGCACATGACTTCGAGAGTCATGATGATATTACT  
GAAGAACGTCTTTATCAGAACATTTTTGCTTCGCACTTTGGACAGTTAGCAATAATCTT  
TCTGTGGACGTCCGGAAATTTGTTTCATGTAGCTTGGCAAGGAAATTTGAGTCATGGA  
TACAGGACCCCTTACATGTAAGACCTATTGCTCATGCAATTTGGGATCCTCATTTTGGTC  
AATCTGCTGTAGAAGCCTTTACTAGAGGAGGCGCTATCGGTCCAGTTAATATCGCTTATT

CTGGTGTTTATCAATGGTGGTATAACAATTGGATTACGTACCAATGGGGATCTTTATACTG  
GAGCTCTTTTTCTATTACTTCTTTCTGCTATATCCTTAATAGCGAGTTGGTTACACCTACA  
ACAAAATGGAAACCAAGCGTTTCTTGGTTCAAAAATGCGGAATCTCGTCTCAATCAT  
CATTTGTCAGGGCTTTTTGGAGTAAGTTCTTTGGCTTGGACAGGACATTTAGTTCATGT  
CGCTATTCCCGGATCGAGGGGAGAGTACGTACAGATGGAATAATTTCTTAGACGTATTGC  
CGTATCCCCAAGGGTTGAGCCCCCTTTTTATGGGTCAGTGGAATCTTTATGCTCAAAAC  
CCTGATTCCAGCAGTCATTTATTTGGTACCTCCCAAGGGGCAGGAACTGCCATTCTAAC  
CCTTCTTGGGGGATTCCATCCCCAAACGCAAAGTTTATGGCTAACCGATATTGCTCATCA  
TCATTTAGCTATTGCATTCCTTTTTCTCGTTGCTGGTCATATGTATAGA ACTA ACTTCGGG  
ATTGGACACAGTATCAAAGATCTTTTAGAAGCGCATCTTCCTCCAGGGGGTTCGATTAGG  
ACGTGGACATAAGGGTCTTTATGACACAATAATAATTCGCTTCATTTTCAATTGGGCCT  
TGCTCTAGCCTCTTTAGGGGTTATTACTTCCTTAGTAGCTCAACACATGTACTCTTTACC  
CGTTATGCATTCATAGCACAAAGACTTTACTACCCAAGCTGCGTTATATACTCATACCA  
ATACATCGCAGGTTTCATCATGACAGGAGCCTTTGCTCATGGGGCTATATTCTTCATTAG  
GGATTACAATCCGGAACAGAATGAGGATAATGTATTGGCAAGAATGTTAGATCATAAAG  
AAGCTATAATATCTCATTTAAGTTGGGCCAGCCTCTTTCTGGGGTTTCATACCTTGGGAC  
TTTATGTTCATAACGACGTATGCTTTGCTTTTGGTACTCCAGAAAAACAATATTAATCG  
AACCCATATTGCCCCAATGGATACAATCTGCTCATGGCAAGACTTCGTATGGGTTTCGATG  
TACTCCTATCTTCAACGAATAGCCCCGGCATTCAATGCAGGTCGAAGTATATGGTTACCTG  
GCTGGTTGAATGCTATTAATGAG-----AATAGTAATTCACTTTTCTTAACAATAGGGCCGG  
GAGATTTCTTGGTTCATCATGCTATTGCTCTGGGTTTACATACGACTACATTGATTTTAGT  
AAAAGGCGCTTTAGATGCGCGTGGTTCCAAGTTAATGCCAGATAAAAAGGATTTCCGT  
TATAGTTTTCTTGGCATGGCCCTGGGCGTGGTGGTACTTGTGATATTTCTGCTTGGGAC  
GCTTTTTATTTGGCAGTTTTCTGGATGCTAAATACCATTGGATGGGTTACTTTTTATTGGC  
ATTGAAACACATCACATTATGGCAGGGTAACGTTTCACAATTAATGAATCCTCCACTT  
ATTTGATGGGATGGTTAAGAGATTATTTATGGTTAAACTCTTCACA ACTTATCAATGGAT  
ATAACCCTTTTGGTATGAATAGTTTATCGGTCTGGGCGTGGATGTTCTTATTTGGACATC  
TTGTTTGGGCTACTGGATTTATGTTTTTAATTTCTGGCGTGGCTATTGGCAGGAATTGA  
TTGAAACTTTAGCGTGGGCTCATGAACGGACACCTTTGGCTAATTTGATTCGATGGAAA  
GATAAGCCAGTGGCTCTTTCCATTGTGCAAGCAAGATTGGTTGGATTAGCCCACTTTTC  
TGTAGGTTATATATTCACTTACGCAGCTTTCTTGATTGCCTCCACATCAGGAAAATTTGG  
TATGTCACATTCAGTAAAGATTTATGATACATGTATAGGATGTACCCAATGTGTTTCGAGC  
TTGTCACCGATGTTTTGGAAATGATACCTTGGGACGGATGTAAAGCTAAGCAAATTG  
CTTCTGCGCCAAGAACCGAAGATTGTGTAGGTTGTAAAAGATGTGAATCCGCTTGTCC  
AACAGATTTTTTGGAGTGTCCGTGTTTATTTATGGCATGAAACA ACTCGTAGCATGGGTC  
TTTCTTATATGATAGATTTGAACTTTCTTCTATTTTTGTTCTTTAGTAGGTCTAGTCTTT  
CCGGCAATCGCAATGGCTTCTTTATTTCTTTATGTCCAAGAAATAAAATTTAATGCGA  
GATATAAAAACATATCTCTCAACAGCACCTGTGCTAACCACTCTATGGTTTGGATCTTTA  
GCAGGTCTATTGATAGAAATTAATCGTTTATTTCCAGACGCCTTGTCAATCCCTTTTTTTT  
CATCCATGACTGCAATTTTAGAGAGACGCGAAAGTACAAGCCTATGGGGCCGCTTCTG  
CAACTGGATTACCAGTACTGAAAACCGTCTTTACATTGGATGGTTTGGTGTTTTGATGA  
TCCCTACTTTATTGACTGCAACTTCTGTATTATAATTGCCTTCATTGCTGCCCTCCAGT  
CGATATTGATGGTATTTCGTGAACCTGTTTCTGGGCTCTACTTTATGGAAACAATATTATC  
TCAGGTGCCATTATTCCCACTTCCGCAGCTATAGGTTTGCATTTTTACCCAATATGGGAA

GCAGCATCGGTTGATGAGTGGTTATACAATGGTGGTCCTTATGAACTGATTGTTCTACA  
CTTTTACTTGGTGTAGCTTGTACATGGGTCGTGAGTGGGAACTTAGTTTCCGTCTGG  
GTATGCGTCCTTGGATTGCTGTTGCATATTCAGCTCCTGTTGCGGCTGCTACAGCTGTTT  
TCTTGATCTACCCTATTGGTCAAGGAAGTTTCTCTGATGGTATGCCTTTAGGAATATCTG  
GTACTTTCAACTTCATGATTGTATTCCAGGCAGAGCACAATATTCTTATGCATCCATTTC  
ACATGTTAGGCGTAGCTGGTGTATTCGGTGGCTCCCTATTCAGTGCTATGCATGGTTCTT  
TGGTAACTTCTAGTTAATCAGGGAAACCACTGAAAACGAGTCTGCTAATGAAGGTTA  
CAAATTTGGTCAAGAGGAAGAACTTATAATATTGTAGCTGCTCATGGTTATTTTGGCC  
GATTGATCTTCCAATATGCTAGTTTCAACAATCCCGTTCTTTACATTTCTTTCTGGCTGC  
TTGGCCAGTAGTAGGTATCTGGTTCAGTCTTTGGGTATTAGCACAAATGGCGTTCAACC  
TGAACGGTTTCAATTTAACCAATCTGTAGTTGACAGTCAAGGTCGTGTTATTAACACT  
TGGGCTGATATCATAAATCGTGCTAATCTTGGTATGGAAGTAATGCATGAACGTAATGCA  
CACAATTTCCCTCTAGATCTAGCTTCTGTGGAAATCCATCTATAAATGGAATGGGTTA  
CCTTGGTATCGTGTTCACTGTTGTATTGAATGATCCCGGTCGATTACTTTCTGTCCATA  
TAATGCATACCGCTCTAGTTTCTGGTTGGGCCGGCTCGATGGCTCTATATGAATTAGCGG  
TTTTTGATCCCTCTGACCCTGTTCTTGATCCAATGTGGAGACAAGGTATGTTTCGTTATAC  
CCTTCATGACTCGTTTAGGAATAACCAATTCCTGGGGGGGTTGGAATATCTCG---GGAG  
GAACTATAACGAATCCAGGCATTTGGAGTTATGAAGGTGTGGCAGGGGCACATATTTG  
TTTTCTGGCTTGTGCTTCTTGGCAGCTATTTGGCATTGGGTGTATTGGGACCTAGAAATA  
TTTTGTGATGAACGTACGGGAAAACCTTCTTTGGATTTGCCCAAGATTTTTGGAATTCA  
TTTATTTCTCTCAGGAATTGCTTGGCTTTGGCTTTGGTGCATTTTCATGTAACAGGCTTATAT  
GGTCCTGGAATATGGGTGTCTGATCCTTATGGACTAACTGGAAACGTACAATCTGTAAA  
TCCAGCGTGGGGTGGGGAAGTTTTGATCCTTTTGTCCGGGGGGGATAGCTTCTCATC  
ATATTGCAGCAGGTACATTGGGCATATTAGCGGGTCTATTCCATCTTAGTGTCCGTCCGC  
CTCAGCGTCTATACAAAGGATTACGCATGGGTAATATTGAAACTGTGCTTTCCAGTAGTA  
TTGCCGCTGTTTTTTTTGCGGCTTTCGTTGTTGCTGGAACCTATGTGGTATGGTTCAGCAA  
CGACACCAATCGAGTTATTTGGCCCCACTCGTTATCAGTGGGATCAGGGGTACTTCCAG  
CAAGAAATATATCGAAGAGTTGGGGCCGGACTAGCCGAAAATCTGAGCTTATCGGAAG  
TTTGGTCTAAAATTTCCCGAAAAATTAGCTTTTTATGATTACATCGGTAATAATCCAGCGA  
AAGGAGGTTTATTCAGAACAGGATCAATGGATAGTGGGGATGGAATAGCTGTTGGTTG  
GTTGGGGCACCCGATATTTAGAGATAAAGAAGGGCGCGAACTCTTTGTACGTCGTATGC  
CTACCTTTTTTGAACATTTCCGGTAGTTTTGGTAGATGGAGACGGAATTGTGAGGGCC  
GATGTTCTTTTAGAAGGGCAGAATCTAAGTATAGTGTGAAACAAGTAGGGGTAAGTGT  
TGAATTCTATGGCGGCGAACTAAATGGAGTCATTTATAGTATCCTGCTACTGTGAAAA  
AATATGCTAGACGTGCCCAATTAGGTGAGATTTTTGAATTAGACCGAGCTACTTTGAAA  
TCTGATGGTGTTTTTTCGGAGCAGTCCACGGGGTTGGTTTACTTTTGGACATGCTACGTT  
TGCTTTGCTCTTCTTTTTTCGGACACATTTGGCACGGTGCCAGAACCTTGTTTCAGAGATG  
TTTTTGCTGGTATTGATCCAGATTTGGATACTCAAGTGAATTTGGAACATTCCAAAAA  
CTTGGAGATCCTACTACAAGGAGACAAGTAGTC-----

-----ATGAACCTATTTGAAGTGGCTCATTTCGTACCAGAGAAACCCAT  
GTATGAACAAGGATTGATTTACTTCCGCACTTAGCTACTCTAGGGTGGGGAGTAGGTC  
CGGGGGGAGAAGTTATCGACACCTTTCCATACTTTGTATCTGGAGTACTCCATTTAATTT  
CCTCTGCAGTCTTAGGCTTTGGCGGTATTTATCATGCACTTCTAGGACCTGAAACTCTTG

AAGAATCCTTTCCATTTTTTCGGTTATGTATGGAAAGATAGAAATAAAATGACTACAATTT  
TGGGTATTCACCTTAATTTTATTAGGTATAGGTGCTTTTCTTCTAGTATTCAAGGCTCTGTA  
TTTTGGAGGCGTATATGATACTTGGGCACCCGGAGGGGGAGATGTAAGAAAAATTACTA  
ACTTGACCCTTAGCCCAAGTGTGATCTTTGGTTATTTACTAAAATCTCCGTTTGGAGGA  
GAAGGATGGATTGTTAGTGTGGACGATTTAGAAGATATAATTGGAGGACATGTTTGGTT  
AGGTTCCATTTGTATACTTGGTGGAATTTGGCATATCTTAACCAAACCTTTTGCATGGGC  
TCGCCGTGCATTTGTATGGTCTGGAGAGGCTTACTTGTCAATAGTTTAGGTGCTCTATC  
TGTCTTTGGTTTTATCGCTTGTGTTTCGCTCTGGTTCAACAATACCGCTTATCCTAGTGA  
GTTTTACGGACCCACTGGGCCGGAAGCTTCTCAAGCTCAAGCATTACTTTTTCTAGTGA  
GAGACCAACGTCTTGGGGCTAACGTGGGATCCGCCAAAGGACCCACTGGTTTAGGTAA  
ATATCTAATGCGTTCTCCGACCGGAGAGGTTATTTTTGGTGGAGAACTATGCGTTTTTG  
GGATCTTCGTGCTCCCTGGTTAGAACCTCTAAGGGTCCAAATGGTTTGGACTTGAGTA  
GGCTGAAAAAAGACATACAGCCTTGGCAAGAACGACGTTTCAGCAGAATATATGACTCA  
TGCTCCTTTAGGTTCTTTAAATCCGTAGGTGGCGTAGCTACCGAGATCAATGCAGTAA  
ATTATGTGTCTCCTAGAAGTTGGTTAGCTACCTCTCATTTTGTCTAGGATTTTTCTTATT  
TGTGGGACATTTGTGGCATGCGGGAAGGGCGCGTGCAGCTGCAGCGGGTTTTGAAAA  
AGGAATCGATCGTGATTTGGAACCTGTTCTTTCCATGACTCCTCTTAGCATGACTATAGC  
CTTTGGTAAAATTAGAAAAGAAGAACTGATTTATTTGATATTATGGATGATTGGTTACG  
TAGGGACCGTTTCGTTTTTGTAGGCTGGTCCGGCCTATTGCTCTTTCCTTGTGCTTATTT  
CGTTTTGGGGGGTTGGTTCACAGGTACAACCTTTTGTAACTTCATGGTATACCCATGGAT  
TGGCTAGTTCCTATTTGGAAGGTTGTAATTTCTTAACGGCTGCAGTTTCTACTCCTGCAA  
ATAGTTTATCACATTCTTTGTTGTTACTATGGGGTCTGAAGCACAAGGAGATTTTACTC  
GCTGGTGTCAATTAGGCGGTCTGTGGACTTTTGTGCTCTCCACGGTGCTTTCGGTCTA  
ATAGGTTTCATGTTACGTCAATTCGAACTTGCTCGTTCTGTTCAATTGCGACCTTATAAT  
GCAATTGCATTTTCTGCTCCAATTGCTGTTTTTGTTCGGTATTCCTGATTTATCCACTGG  
GTCAATCTGGTTGGTTCTTTGCACCCAGTTTGGTGTAGCAGCTATATTTGATTCATCC  
TTTTTTTCCAAGGGTTTCATAATTGGACGTTGAATCCATTCATATGATGGGAGTTGCTG  
GAGTCTTAGGCGTCTGCTATGTGCTATTCATGGCGCCACCGTAGAAAATACCTTAT  
TTGAAGATGGTGATGGTGCAAATACATTCCGTGCTTTTAACCCAACTCAAGCTGAAGA  
GACTTATTCAATGGTCACTGCTAACCGTTTTTGGTCCCAAATCTTTGGGGTTGCTTTTTC  
CAATAAACGTTGGTTACATTTCTTTATGCTATTTGTGCCAGTAACCGTTTTATGGATGAG  
TGCTATTGGGGTAGTCGGTCTGGCTCTCAACCTACGTGCCTATGACTTTGTTTCCAAG  
AAATCCGTGCAGCGGAAGATCCTGAATTTGAACTTTCTACACCAAAAATATTCTCTTA  
AACGAAGGATTCGTGCTTGGATGGCGGCTCAGGATCAGCCTCATGAAAACCTTATATT  
CCCTGAGGAGGTTCTACCCCGTGGAACGCTCTTATGTCTGGAAGCACGGGAGAACGT  
TCTTTTGTGATATTACTAGTATTCGATACTGGGTCATTCATAGCATTACTATACCTTC  
CCTATTCATTGCGGGTTGGTTATTCGTGAGTACGGGTTTACGTTACGATGTTTTTGGAAAG  
TCCTCGGCCAAATGAATATTTACAGAAAAGCCGACAAGGGATTCCATTAATAACTGGAC  
GTTTTGATTCTTTGGAACAATTTCGATGAATTTAGTAAATCCTTTATGACCATAGATCGAA  
CCTATCCAATTTTACAGTGCATGGTTGGCTGTTACGGACTGGCTGTACCTACTGTT  
TCTTTTTTAGGATCAATATCAGCAATGCAGTTCATCCAACGAATGGCTACAAAAACCGT  
TGAGAGTAGTTCTAGATCTGGG---ACAAGATCAACTGGCATAGGGAGTTATTTGAAACC  
ATTGAATTCGGAATATGGAAAAGTAGCTCCAGGGTGGGGAACTACACCATTTATGGGA  
GTTGCAATGGCTCTATTTGCAATATTTCTGTCTATTATTTTAGAAAATTATAATTCATCTGT



TTTATTGGATGGAATTTCAATTAATATGCTTACTCTTAAACTATTTGTTTACACAGTAGTA  
ATATTCCTTTGTTTCTCTCTTCATCTTCGGATTCTTATCTAATGATCCGGGGCGTAATCCTG  
GGCGTGAAGAAATGACCGATACTACCGGAAGGATTCTCTTTGGCTGATAGGTACCGTA  
ACTGGTATCCTTGTGATTGGTTAATAGGCATTTTTTTTTATGGCTCCTATTCCGGGTTGG  
GTTTCATCTCTGATGTTAATAGTTTTAGTATAATCTGTCTCTGTCTTAATTCTACCCTATAT  
TCGAGTAGTTTTTTATTCGCCAAATTGCCCGAGGCTTATGCCTTTTTCAATCCAATCATA  
GACTTTATGCCGGTTATCCCTTTACTTTTTTTCTCTTAGCCTTTGTTTGGCAAGCTGCTG  
TAAGTTTTCGAATGACACAATCAAACCCGAATGAACAAAATGTTGAATTGAATCGTACC  
AGTCTATACTGGGGTTTATTACTGATTTTTGTACTTGCTGTTTTATTTTCCAATTATTTCTT  
CAATATGGAAGTCAATATTCTTGCTCTTATTGCTACTGCGCTGTTCATTTTAATCCCCT  
GCATTTTTACTTATCATATACGTCAAACAGTCAGCCAAAATGATATGGAAACAGCAAC  
CCTAGTCGCCATCTCCATATCCGGTTTACTTGTAAGCTTTACTGGGTATGCCTTATATACC  
GCTTTTGGGCAACCCTCTCAAAAATTAAGAGATCCCTTCGAAGAACATGGGGACATGG  
AAGCATTGGTTTATACATTCTTTTAGTTTCAACTTTAGGAATAATTTTTTTTGTATCTT  
TTTTCGAGAACCGCCTAAAGTTCCAACTAAAAAATGAAAATGACTATTGCTTTCCAAT  
TAGCTGTTTTTGCATTAATTGCAACTTCATTAATCTTACTGATTAGTGTACCCGTTGTATT  
TGCTTCTTCTGATGGTTGGTCGAGTAACAAAATTTTGTCTTTTCTGGTACATCATTATG  
GATTGGATTAGTCTTTCTGATAGCTATCCTAAATTCTCTCATCTCT-----ATGT  
CACCACAAACAGAACTAAAGCAAGCGTTGGATTTAAAGCTGGTGTAAAGATTACAA  
ATTGACTTATTATACTCCTGACTACGAAACCAAGATACTGATATCTTGGCAGCATTCCG  
AGTAACTCCTCAACCGGGAGTTCGCCCCGAAGAAGCGGGGGCTGCGGTAGCAGCGGA  
ATCTTCTACTGGTACATGGACAACGTGTGGACTGATGGACTTACCAGTCTTGATCGTT  
ACAAAGGACGATGCTACCACATCGAGGCCGTTGTTGGGGAGGAAAATCAATATATTGC  
TTATGTAGCTTATCCTTTAGACCTTTTTGAAGAAGGTTCTGTTACTAACATGTTTACTTCC  
ATTGTGGGTAATGTATTTGGTTTCAAAGCCCTGCGAGCTCTACGTCTGGAAGATCTGCG  
AATCCCCTTCTTATTCAAAACCTTTCCAAGGCCACCTCATGGTATCCAAGTTGAAA  
GAGATAAATTGAACAAGTACGGTTCGTCCTTATTGGGATGTACTATTAACCAAATG  
GGATTATCTGCAAAAAACTACGGTAGAGCGGTTTATGAATGTCTACGGGGTGGACTTGA  
TTTTACTAAAGATGATGAAAACGTAAATTCACAACCATTTATGCGTTGGAGAGATCGTT  
TCTTATTTTGTGCCGAAGCAATTTATAAAGCGCAAGCCGAAACGGGTGAAATTAAGG  
ACATTACTTGAATGCAACTGCGGGTACATGTGAAGAAATGATCAAAGAGCGGTATTT  
GCCAGAGAATTGGGAGTTCCTATCGTAATGCATGACTACTTAACCGGGGGTTCACCGC  
AAATACTAGCTTGGCTCATTATTGCCGGGACAACGGTCTACTTCTACACATCCATCGCG  
CAATGCATGCAGTTATTGATAGACAGAAAAATCATGGTATGCATTTTCGTGTACTAGCTA  
AAGCATTACGTATGTCTGGTGGAGATCATATTCACGCTGGTACAGTAGTGGGTAAACTG  
GAGGGGGAACGTGAGATGACGTTAGGTTTTGTTGATTTGTTACGTGATGATTTTATTGA  
AAAAGATCGAAGTCGTGGTATTTTTTTCACTCAAGACTGGGTCTCTATGCCAGGTGTTA  
TACCCGTAGCTTCTGGGGTATTATGTTTGGCATATGCCCGCTCTAACTGAAATCTTTG  
GGGATGATTCCGTACTACAGTTCGGTGGAGGAACTTTAGGGCACCCCTGGGGAAATGC  
ACCCGGTGCAGTAGCTAATCGAGTGGCTTTAGAAGCATGTGTACAAGCTCGTAATGAG  
GGACGTGATCTTGCTCGTGAAGGTAATGATATTATTCGTGAAGCTAGCAAATGGAGTCC  
TGAGCTAGCCGCTGCTTGTGAAATATGGAAAGAAATCACATTCAATTCGACCCAGTG  
GATAAGCTAGATAAA-----ATACATTTATACAAAACCTTCTACCCCGAGCACACAAATGG  
AGCCGTAGACAGTCAAGTGAATCCAATCCACGAAAGAATTTGATCTATGGACAGCAT

CATTGTGGTAAAGGTCGTAATGCCAGAGGGATCATTACCGCAGGGCATAGAGGGGGAG  
GTCATAAGCGTCTATAACCGTAAAATCGACTTTCGACGAAATGAAAAAGGGATATCTGGT  
AGAATCGTAACCATAGAATATGACCCTAATCGAAATGCATACATTTGTCTCATACTAT  
GGGGATGGTGAGAAGAGATATATTTTACATCCCAGAGGGGCTATAATTGGAGATACCAT  
TGTTTCTGGTACAGAAGTTCCTATATCAATGGGAAATGCCCTACCTTTGACCGATATGCC  
CTTAGGCACGGCCATACATAACATAGAAATCACACTTGGAAAGGGTGGACAATTAGCT  
AGAGCAGCAGGCGCTGTAGCGAAACTGATTGCAAAAAGAGGGTAAATCGGCCACATTA  
AGATTACCATCCGGGGAGGTCCGTTTGTATCCAAAACTGCTTAGCAACAGTCGGAC  
AAGTGGGTAATGTTGGGGTGAACCAAAAAAGTTTGGGTAGAGCCGGATCTAAGTGTTG  
GCTAGGTAAGCGTCCTGTAGTAAGAGGAGTAGTTATGAACCCTGTAGACCATCCCCATG  
GGGGCGGTGAAGGGAGAGCCCCAATCGGTAGAAAAAAACCCACAACCCCTTGGGGTT  
ATCCTGCGCTTGAAGAAGAAGTAGGAAAAGGAACAAATATAGTGAGAGTTTTATTCT  
TCGTCCCGTAAA---ATGATTCAACCTCAGACCCTTTTGAATGTAGCGGATAACAGTGG  
AGCTAAAGAATTGATGTGTATTTCGAATCATAGGAACTGGT---AATCATCGATATGCTCATA  
TTGGAGATGTTATTGTTGCTGTAATCAAAGAAGCAGTGCCCAATATGCCTCTAGAAAGA  
TCAGAAATAATTTCGAGCTGTGATTGTACGAACATGTAAAGAATTCAAACGTGAGAACG  
GCATGAGAATACGATATGATGACAATGCAGCGGTTATCATTGATCAAGAAGGAAATCCA  
AAAGGGACTCGAATTTTTGGTTCGATTGCTCGAGAATTGCGACAGTTGAATTTACTAA  
AATAGTTTCATTAGCACCCGAAGTCTTAATGCTCAGTCCCAAAAAGAACCAGATTTCTGTA  
AACACATAGAGGTAGAATGAAGGGAATATCTTGTGCGAGGCAATCATATTTGTTTTGGC  
AGATACGCTCTTCAGGCACTCGAGCCGGCTTGGATCACAGCGAGGCAAATAGAAGCA  
GGGCGAAGAGCAATGACACGATATGTGCGTCGTGGTGGAAAAATATGGGTACGTATCT  
TTCCCGACAAACCTGTTACTGTAAGACCTACAGAAACACGTATGGGTTCGGGCAAAGG  
ATCCCCGAATATTGGGTATCCGTTGTAAACCGGGCCGAATACTTTATGAAATGAGTG  
GGATATCAGAACTGTAGCCAAAGCAGCTATGGAAATAGCTGCATGCAAAATGCCTATA  
CGAACTCAATTTGTTATTTTCAGGAATGACTAGAGTTAAACGAGGATATACAGCTCGGAG  
ACGTCGAAAAAAGATTTCGTTTATTTGCATCAACCTTTATGGGGGCTCATTCAAGACTTA  
CTCGAACGAATACTCAACAAAGAATGAGAGCTTTGGTTTCTCTCATCGAGATAGGAG  
TAGGAAAAAGAGAGATTTTCGTCGTTTGTGGATCACTCGAATAAATGCGGTAACCCGT  
AAGAAT-----CTATTCTATAGTTATAACCTATTTATCCACAATCTGTACAAGAGACAATTGC  
TTCTGAATCGTAAATACTTGCGCAAATAGCCCTATCAAATAAAAAATTGTTTTTCTATTAT  
TTCAAATAAAATCATAAATCAAAAAAA-----ATGATAAAGAAAGTGTTA--  
-AGACAACATATATTT--ATGTCTGTTTTAAAAGCACAAAGAGTAATTGATCAGATTTCG  
GGACGTTCTTATGAGGAAACACTCATGATACTGGAACATAATGCCTTATCGGACATCTTAT  
CCCATTTTAAATTTAGTTTATTCTGCAGCAGCAAATGCTAGTCAGAATATGGGTTTGAAT  
AAAGCTGATTTATTCATTAGTAAAGCTGAAGTAAATAGAGGTACTATTGTGAAAAAGCT  
AAAACCCCGAGCTCGAGGACGTAGTTATCTTATAAAAAAACTACTTGTTCATATAAAGA  
TTTTTTTAAA---AAATCTAAAATT-----ATGGATGGAATCAAATATGCAGTAT  
TTACAGAAAAAAGTATTCGGTTATTGGGGAACAATCAA--TATACTTCTAATGTCGAATC  
AGGATCAACTAGGACAGAAATCAAGCATTGGGTGCAACTCTTCTTTGGTGTCAAGGTA  
AGAGCTATGAATAGTCATCGACTCCCGGAAAGGGTAGAAGGATGGGACCTATTATGG  
GACATACAATGCATTACAGACGTATGATCATTACGCTTCAACCGGGTTATTCTATTCCAC  
CTCTTATAGAGAAAAAGAACTATGTCAAGTTCCAAAAAAACGTACTTCTATGTCAAAAA  
GCATATTCGTAGAAATCTTTGGAAAAAAAAGGATCTTTAGAGGCAGTAAAAGCTTTTT

CTTTAGCTAAATCTATTTCCACCGGAAAGTCAAAAAGTTTTTTTT-----CAAAAAAAGTA  
ATGACCAAGGGTAAAGATATTAGAATTCTAGTCATTTTGGAAATGTACCTGTTGT--GTTC  
GAAAG-----GTAATAAAGAA-----GGCATTCTAGATATATTACTCAAAAAGAATCGACAC  
AATACACCCAATCGACTAGAATTTAGAAAATTTTGTGCTATTGTCAAAAAGTATAACAATT  
CATGGGGAAATAAAGAAAATGAAAATAAGGGCTTCTGTTTCGTAAAATTTGTGAAAAT  
GTCGCTTGATTCGTAGACGGGGGCGAATTATAGTCATTTGTTCTAATCCGAGACATAAA  
CAGAGACAGGGAATGGTTCAAGAAAAAGTAGCAGGATCCACTCGAACACTACAGTGG  
AAATGTGTTGAATCAAGAGTAGACAGCAAGCGTCTTCTTATGGTTCGTTTTGTTCTGTC  
CCCGCTTCTGAAAGGTCAAGCCGATACGATAGGTATTGCCATGCGAAGGGCTTTACTTG  
GAGAAATAGAAGGAACATGTATCACACGTGCAACATCTGAA-----AATGTGCTGCATGA  
ATATTCTATGATAGCAGGTATGGAAGAATCAGTACATGATATTTTACTAAATTTGAAAGA  
GATTGTATTGAAAAGTAATCTCTATGGAGTTAGAGACGCATCCATTTGTGTCAGGGGTC  
CTAATACATAACAGCTCAAGATATAATCTCACCACCTTCTGTAAAAATAGTTGATACGA  
CACAGCATATAGCTAACCTGACAGAACCAATTGATTTGTGTATTGAATTACAAATAAAA  
AGAGGTCGCGGATCTCATATGAAATACACAAACGAATCTCACAATGGAAGTTAT-----CC  
TATAGATATTGTATCTATGCCTGTCCGAAATGCGAATCATAGTATTCATTCTTATGGGAAT  
GGGAATGAAAACAAGAGATACTCTTTCTAGAAATATGGACGAATGGAAGTTTAACTC  
CTAAAGAAGCACTTTATGAAGCTTCTCGTAATTTGATTGATTTATTGATTCCTTTTCTACA  
TGCAGAGGAAGAG-----GACATGATTTTAGAAGAAAATGAA---AAAAGATGGAATCTAC  
CCTTTTTTTCTTTCAAGACAGACTACT---AATCTCAAGAAAAACAAAAA---GGAAT  
TCCATTAACATGTATTTTTTATTGACCAATCAGAATTGTCTTCCAGGACCTATAATTGTCTC  
AAAAGGTCCAATATACATACATTATTGGACCTTTTGAATCACAGTCAAGAAGATCTTATG  
AAAATGGAAGATGTTTCGCATAGAAGATGTAACACAGATATTGGGCACTCTACAAAAGC  
AT-----TTTGAATCAATTTACCTAAGAAAAAGATGCTCCAGAAT--GAAAATGAGGGAA  
TGCCACAATACTGGATTTAGTCAGATACAATTTGAGGGATTTTGTAGGTTTCATTAATC  
AGGGCTTGACGGAAGAATTTAATAAGTTTCAAAAATTTGAAGATAGAGATCAAGAAAT  
TGAATTTCAATTTTTGTGGAACATATCAATTTGGTAGAGCCCTTGATAAAAGAAAAAG  
ATGCTGTGTATGAATCACTCACATATTCTTCTGAATTATATGTACCCGCGGTTTTAATTTG  
GAAAACCGGTAGAAATATGCAAGAACAACCGTTTTTATTGGAACATCCCTATAATGA  
ATCTTTTTGGAACCTCTATAGTAAATGGAATATACCGAATTGTTATCAACCAAATATTGC  
AAAGTCCCGGTATTTACTACCGTTCAGAATTGGAACATAACGGAATTTCTGTCTATACC  
AGTACTATAATATCGGATTGGGGGGGAGGTTGGAATTAGAAATTGATAGAAAAGCAA  
GGATATGGGCTCGTGTAAGTAGAAAACAAAAAATATCTATTCTAGTTCTATCATCAGCTA  
TGGGTTTGAATCTAAGAGAAATTTTAGAGAATGTTTGTACCCTGAAATTTTCTTGTCTT  
TCCCGAATGATAAAGAGAAAAAAGATTGGGTCAAAAAGAAAATGCTATTTTGGAGTT  
TTATCAACAATTTACTTGTGTAGGGGGGGATCCGGTATTTTCTGAGTCCCTTATGCAAGGA  
ATTACAAAAGAAATTTTTTCAACAAAGATGTGAATTAGGAAAGATTGGTTCGACGAAATA  
TAAACCGGAGACTTAATCTTGATATACCCCAAAAACAATACATTTTTTGTACCACGAGATC  
TATTGGCTGCTGTGGATTTTTTGTATTAGAATGAAATTGGGAATGGGTACACTTGACGAT--  
----ATGAATCACTTGAAAATAAACGTATTTCGTTCTGTAGCAGATCTATTACAGGATCAAT  
TTGGATTGGCTCTTGTTCGTTTAGAAAATACGGTTCGAGGAACTATATGTGGAGCAATC  
AGG---CATAAATTGATA---CCGACTCCTCAAAATTTAGTAACTTCAACTTCA-----TT  
AACTACTTATGAATCGTTTTTTGGACTCCACCCTTATCTCAAGTTTTTGGATCGAAC  
TAATCCGTTGACACAAATCGTTCATGGGCGAAAATGGAGTTATTTGGGTCTGAGGAT

TGACGGGGCGAAATGCTAGTTTTTCGGATACGAGATATCCACCCGAGTCACTATGGACGT  
ATTTGTCCAATTGACACGTCTGAAGGAATCAATGTTGGACTTATTGGATCATTAGCTATT  
CATGTGAAGGTTGGTTATTGGGGA---TCTATAGAGAGTCCGTTTTAT-----GAATTCTCT  
GATAGATCAAAAGAG-----GTACAGATGGTTTATTTATCACCAAATAGAGATGAATATTAT  
ATGGTAGCAGCAGGAAATTCCTTGGCCTTGAATCGGGGTATTCAAGAACAACAGGTTG  
TTCCATCTCGCTATCGTCAAGAATTCCTGACTATTGCATGGGAAGAGATTCTGTCTTAGA  
AGCATTTTTCCCTTCCAATATTTTTCTATTGGAGCTTCCCTCATTCTTTTTATCGAGCATA  
ATGATGCGAATCGAGCGTTAATGAGTTCTAATATGCAGCGCCAAGCAGTTCCTTTCT  
CGGTCCGAGAAGTGCATTGTTGGAAGTGGGTTGGAAGGTCAAACGGCTCTAGATTCCG  
GGATTTACAGCTATAGCCGAATGCAAGGGAAAATAAGTTATACTGATACTCAAAGATA  
ATTTTATCAAGTAATGGGAATACTCTAAGCATTCCATTAGTTATGTATCAACGTTCCAAC  
AAAATACTTTTATGCATCAAAAACGCAGGTTACAGCGAGGTAAATACATTA AAAAGG  
GACAGATTCTAGCGGGCGGTGTGGCTACAGCTGGTGGGGAAGTTCGCTTTAGGAAAAAA  
TGTATTAGTAGCTTATATGCCATGGGAAGGTTACAATTTTGAAGACGCAGTGCTAATTA  
TGAACGTCTAGTCTATGAAGATATTTATACTTCTTTTACATCCGGAAATATGAAATTCA  
GACTCATGTAACAAGCCAAGGT---CCTGAAAGAATCACTAAGGATATCCCGCATTTAGA  
GGCTCGTCTACTCCGAAATTTAGACAGAAATGGAATTGTTATGCTAGGATCTTGGATAG  
AAACAGGTGATATCTTAGTAGGTAATAACACCTCAGACATCGAGCGAA---TTATCATA  
TACCCAGAGGATAGATTATTACGAGCTATACTTGGCATTACAGGTATCCACTTCAAAG  
AACTTCTCTAAGACTACCTATAGGAGGAAGGGTTCGAGTTATTGATGTGAGATGGATC  
CATAGAAAGGGA---GTTTCCAACCTAATCCAGAAAAGATTCGTGTATATATTTACAGAA  
AACGTGAAATAAAAGTAGGTGATAAAGTAGCTGGAAGGCATGGGAATAAGGGTATAAT  
TTCTAAGATTTTGCCTAGACAAGATATGCCCTATTTGCAAGATGGAACGCCTGTTGATAT  
GGTATTCAACCCATTAGGAGTCCCTCACGAATGAATGTGGGACAGATATTTGAATGTT  
CGCTCGGGTTAGCGGGGGTCTTTTAAATAAACATTATAGAATAGGACCTTTTGATGAG  
AGATATGAGCAAGAGGCCTCAAGGAACTAGTCTTTTCTGAATTATATGAAGCCAGTAA  
GAAAACAAAAAATCCATGGGTTTTTGAACCCGAATATCCGGGAAAAAGCAGAATATTT  
GATGGAAGAACAGGAGATCTTTTTGAACAACCTGTTCTAATAGGAAAGTCCATATCCT  
AAAATTAATTCATCAAGTTGATGATAAAATCCATGGACGTTCCAGCGGACATTATGCAC  
TTGTTACACAACAACCCCTTAGAGGGGAGGACCAAACAAGGGGGACAAAGAGTAGGAG  
AAATGGAAGTTTGGGCTCTAGAGGGATTTGGTGTGCTCATATTTTACAAGAGATGCTT  
ACTTATAAATCTGATCATATTAGGGCTCGTCAAGAAGTACTTGGTGCTACGATTAGTGGA  
GCAACAGTACCTAAGCCAGAGGGTGCCCCAGAATCTTTTCGATTGCTCGTTTCGAGAAA  
TACGATCTTTGTCCCTGGAAGTGAATCATTTCCTTGTATCTGAAAAGAAGTTCAGATG  
GACAGGAAGGAAGCT-----ATGATCGACCAGTATAAACATCAACAACCTTCGA  
ATTGGACCAGTTTCCCCTGAACAAATCATGGTTTGGGCAAAAAAATTCTACCGAATG  
GAGAGATGGTTGGAGAGGTGACAAAACCCTATACTTTTCATTATAAAACTAATAAACCG  
GAGAAAGATGGATTGTTTTGTGAAAGAATTTCCGGACCAATAAAAAGTGGGATTTGTG  
CTTGTGGAATTACCGAGGGATTGGGACTGAAAAAGAAGATCCGAAATTTTGTGAAGA  
ATGCGGGGTGGAATTTGTTGATTCTCGTATACGAAGGTACCAAATGGGATACATCAAC  
TAACATGTCCAGTACTCATGTGTGGTATTTGAAACGTCTTCTTAGTTATATTGCGAATC  
TTTTAGATAAGTCCCTTAGAGAATTAGAAGGCCTAGTATATTGCGATTAT---TTTTATTTG  
CTAGGCC---GTAGCTAAAAACCTACTTTCTTACGATTACGAGGTTCAATTCGATTATGA  
AATCCAATCCTGGAAATACAGCATCCCACTCTTTTTTACTACTCAAGGTTTCGAGATAGT

TCGAAACCGAGAAATCTCTACGGGGGCAGGTGCTATCAGAGAACAATTAGCCGATTTCG  
GATTTGCGAATTATTACAGATAATCTTTGATAGAATGGAAGGAATTAGAAGACGAA---G  
AGTCCATAGGAAATGAATGGGAAGATAAAAAAATTAGAAGAAGAAAGGATTTTTTGGT  
TAGGCGTATAGAATTAGCTAAAAATTTCTTCGAACAAATGTAGATCCAGAATGGATGG  
TTTTGTGCCTTTTACCAGTTCTTCCTCCTGAGTTGAGACCAATCATTAGATAGACGGG  
GGTAAACTAATGAGTTCGGATATTAATGAACTCTATAGAAGAGTCATCTATCGTAACAAT  
ACTCTTACCGATTTATTAGCAACAAGTAGATCTACACCAGGGGAATTAATAATGTGTCA  
AGAGAAGTTGGTACAAGAGGCTGTGGATACACTTTTTGATAATGGGATCCGCGGACAA  
CCAATGAGAGATGGTCATAATAAAGTTTATAAGTCATTTTCCGATGTAATTGAAGGCAA  
AGAAGGAAGATTTTCGTGAGACTCTGCTTGGGAAACGGGTTCGATTATTCGGGACGTTCC  
GTGATTGTCGTGGGTCTTTGCTTTCATTGCATCAATGTGGATTACCTCGAGAAATAGC  
AATAGAGCTCTTCCAAACATTTGTAATTCGTGGTCTAATCAGACAAGATGTTGTTTCTA  
ACACAGGGATTGCTAAAAGAAAAATTCGGGAAAAGAACCCATTGTATGGGAAATCCT  
TCAAGAAGTGATGCAGGGGCATCCTGTATTGTTGAATAGAGCGCCACCCTGCATAGAT  
TAGGTATACAGGCGTTCCAACCCATTTTAGTGGAGGGACGTGCTATTTGTTTACACCCA  
TTAGTTTGTAAAGGGCTTCAACGCAGACTTTGATGGGGATCAAATGGCTGTTCACATACC  
TTTATCTTTGGAAGCTCAAGCAGAAGCTCGTTTACTTATGTTTTCTCATATGAATCTCTT  
GTCTCCAGCTATTGGAGATCCCGTTTCCCTACCAACTCAAGATATGCTTATTGGACTTTA  
TGATTAACGATCGGGAATCCCCGAGGTATTTGTGCAAATAGGTATAATCAATCTAATTC  
TAATTGCAGA-----AAAAGGAAACAGTTTCTAAGAATGATTTTCAGTATACAAA----  
--GATCCGTATTTTTCTAGTTCTTATGATGCACTTGGAGCTTATCGGCAGAAACGAATCCA  
TTAGATAGTCCTTTGTGGCTCCGGTGGAGACTAGATCAACGC---GTCATTGGCTCA-----  
-AGAGAAGTTCCCGTTCGAAGTTCAATATGAATCTTTTTGGTAATTATAATGAGATTTATAA  
GCACTATCGAATAATAGGAAGTGTA AAAAGAGAAATTCGTTGTATCTACGTTCGAACTA  
CTGTTGGTCATCTTTATTTTTATCGAGAAATAGAAGAAGCCATACAGGGATTTTGGCGG  
GCCTACTCA-----ATGGAGGTCTTATGGCAGAACGGACCGATCTG  
GTCTTTAACAATAAGGTGATAGATGGAAGTCTATAAAACGACTTATTAGCAGATTAATA  
GATCATTTTGGAAATGGCATATACATCACATATCCTGGATCAGGTGAAGACTTTGGGTTTC  
CAGCGAGCCACTGCTACATCTATTTATTAGGAATTGATGATCTTTTAAACAATACCTTCT  
AAGGGATGGTAGTTCAAGACGCTGAACAACAAAGTTTCTTTTAGAGAAAAACCATC  
ATTATGGGAATGTACATGTGGTAGAAAAATTACGTCAATCCATTGAGATATGGTATGCTA  
CAAGTGAATATTTGAGACAAGAAATGAATCCTAATTTTCGGATGACTGATCCCTCTAAC  
CCAGTCCATCTAATGTCCTTTTCGGGGGCTAGAGGAAATGTATCTCAAGTACATCAATTA  
GTAGGTATGAGAGGATTAATGTTCGGATCCTCAAGGACAAATGATTGATTTACCCATTCA  
AAGTAATTTAAGGGAAGGGCTTTCTTTGACAGAATATATAATTTCTTGCTACGGCGCTC  
GCAAAGGAGTTGTAGATACTGCTGTACGAACATCAGATGCTGGATACCTCACGCGTAG  
ACTTGTGAAGTAGTTCAACACATTCTTGTACGTAGAACGGATTGTGGTACTATCCGAG  
GTATTTCCGTAAGTACTCAAAATGGGATGACAGAA-----AAGATTTTTGTGCAAACACTC  
ATTGGTCGTGTATTAGCAGACGATATCTATATTGGTCTACGATGTATTGCCACTCGAAATA  
AAGATATTGGAATTGGACTTGTTAATCGATTCATAACC-----TTTCGAACACAC  
CCAATATATATTCGAACTCCTTTTACTTGTAGGAGTACATCTTGGATCTGTCAATTATGTT  
ATGGCCGAGTCCACTCATGGTGACATGGTTCGAGTTGGGAGAAGCCGTAGGCATTATT  
GCGGGTCAATCTATTGGGGAACCGGGGACTCAACTAACATTAAGAAGTTTCATACCG  
GCGGAGTATTCACGGGTGGTACTGCCGAACATGTACGAGCTCCCTGTAATGGAAAAAT

AAAATTTGATGAGGATTTGGTTCATCCCACACGTACCCGTCATGGGCATCCTGCTTTTCT  
ATGTTTTATAGACTTGTATGTA ACTATTGAAAGTCGAGATATTATACATAATGTGAATATT  
CCAAAAAAGTTTGTATTTAGTTCAAATGATCAATATGTAGAATCAGAACAAGTGAT  
TGCTGAGATTCGTGCCGGAACGTCCACTTTT-----TTGAAAGAGAGGGCTCAAAAACAT  
ATTTATGCTGAGTCAGAAGGAGAA---ATGCACTGGAGTACTGATGGCTCTCATGCGCCC  
GAATATACATATAGTAATGTTCAATTTATTACCAAAAACAAGTCATTTATGGATATTAGCAG  
GAGGTCTATGCAGA-----TCCAATATAGTGTCTTTTTTCACTCCACAAGGATCAAGATCAA  
ATGAATACTAATCCTTTTTCTCTTGAAGAAAGA-----TATATCTTTGATCTCTCA-----CTC  
ACTAAT--GATCAAATAAGACATAAATTGTTGAATACTTTTGGTAATTTTGGT--GATAGG  
GAAATTCGTGACTATTCA---AAATCTTATCGA-----ACCAAGGGTCATTGGAATCTCATAG  
AGCCTTCT--ACTTATATTCGTCAA-----GATAATTCCTTGGCGAAAAAGCGAAGGAATAG  
ATTTGTACTTCCTTTACAATATGATCAAGACCAAGAAAAGAACTAATACCTTGTTTTG  
GTATTTGATTCAAATACCTAAAAAT-----GGTGTTTTACATACAAATAGTATTCTTGCTTA  
TTTTGATGATCTGCGATATAGAAGAAGC-----GGAATTATTCAATAT--ATTGTGAAGTA  
GATTCAATCGTAAAA-----AAAGAGGATTTTATTGAGTATCGAGGA---GCAAAGAATTG  
AATCCGAAATAC---AAAGTAGATCGATTTTTTTTTCATTCCCGAAGAAATGCATATCTTAC  
CCGGATCTTCGCCATAATGGTCCGGAACAATAGTATCATTGGAGTAGATACACGACTT  
ACTTTAAATACAAGAAGTCGAGTAGGTGGATTAGTCCGAGTGGAGAGAAGAAAAAAA  
AGTATGGAAGTAAAAATTTTTCTGGAGATATTCATTTTTCTGGAGAGGTGGATAAAATA  
TCTAGGCACAGTGGCATTGATACCACCAGGAATGGGAAAAAAA-----AATTCTAAAG  
GA---TCAAAA---AAATTGAAAAATTGGATCTATGTCCAACGC-----ATTACACCTACAAA  
AAAAAAG-----TATTTTGTTTTGGTTCGGCCCGTAGTCACATATGAAATAGCTGATGGAA  
TCAATTTAGCAACACTTTTCTCTCAGGATCTCTTGCAGGAAAAAAGATAATGTCCAACCT  
CGAATTGTCAATTATATACTTTATGGAAATGGCAAGTCAATTCGAGGAATTTATCACACA  
AGT---CAATTAGTTCGGGCTTGCTTAGTAGTAACTTGGGACCAAGAAAAAATAGTTCT  
ATAGAAGAA-----GAGATTCATGCTTCTTTTGTGAAATAAGGGTAAATGATCTACTTC  
GTGATTTTCATCCGAATTGAGTTAGTAAAGTCCACTATTTTGTATACCGAAAAAAGGTATG  
ATACGGCAGGTCCAGGATTTCTTTCCAAT-----TTAGATTGTATTCATAGAAATCCTTTT  
GATTCCAAGGTGAAAATTCAATCA-----TTTCCCAACATAAGGAAACTCTTGGT-  
-----ACATTGTTGAATCGAAAAAAG-----GAATCCCAATCTTTCTTAATTTTGTTCAT  
CATCCAATTGTTCTCAAATTGAC-----CCCTTCAATACTTCGAGATATAAG-----AATGC  
GACAAAAGGATGGGATCCCACGACTCCAATT--GCTTTTTTGGGTCTTTTGGTACTCTT  
GTGCCT--AAAATAGGAAATTTTGTTCATCT--TACTATTTAATAACT-----TATAATCAA  
GTCGTTTTAAAG---AAATATTTTTTACTTGAA-----AAATTTCAACAGATTTTCCAAGTG  
CTTCAAGTACTTCAATACTTTTTTACAGATGAAAAGAGTAGG-----ATTTATAATCCCGAT  
CCATGCAGTAATATCATTTGGAATTCATTCCATTTAAATTGGTGTTTTCTCCATCACGATT  
CTTGTGATGAGGCACGGACAATAATTAGT---CTTGGACAATTACTTTGTGAAAATCTATA  
TCTATTTCAATATGGATCA-----CGCATCAAAAAATCTGGTCAAATTTTTCATTGTTTCAT--A  
TTGACTCTTTAGTTCTAAGATCAGCTAAGCCCTATTTGGTCACTCCAGGAGCAACTATC  
CATCGCCATTATGGGGAAACTTTTTCTGAGGGAGACACATTAATTACATTTATATATGAA  
AAATCGAGATCTGGTGACATAACGCAGGGTCTTCCAAAAGTGGAAACAATCTTAGAAG  
TTCGTTCAATTGATTCAATATCGATGAATCTCGAAAGAAGAATCGAAGGTTGGGACGAA  
CGTATTCGAAGGATTCTTGGGATCCCCTGGGGATTCTTTATTGGAGCTGAACTAACCAT  
AGCCCAAAGTCGTATCTCTTTGGTTAATAAGATCCAAAAGGTTTATCGATCCAGGGGG

TACAGATCCATAATAGACATATAGAGATTATTGTACGTCAAGTAACATCAAGAGTTTTGG  
TTTCAGAA-----GATGGAATGTCTAATGTTTTTTTACCTGGGGAATTCATTGGATTGTT  
GCGAGCAGAGCGAGCAGGACGTGTTTTGGACGAAGCGATCTGTTATCGGGCAATCTTA  
TTGGGAATAACGAAGTCATCGCTAAATACTCAAAGTTTCATATCCGAAGCAAGTTTTCA  
AGAACTGCTCGAGTTTTAGCAAAGCTGCTCTACGAGGTCGTATTGATTGGTTGAAA  
GGACTTAAAGAGAACGTTGTTATGGGGGGGATTATACCGGTTGGTACCGGATTCAACA  
AAGTAGTGCATCATTCAAAG-----CAAGAAAAAAATATTCAT-----TTGAAAAGCAAAG  
GAAGAATCTATTTGAGTTGGAAATG-----CGAGATATTTGTTAGACCATAGAGAATTATT  
TTTGTCTTGTACCCCAAAT-----TCAGACCAATCATTATG-----  
--ATGGGAAGACGTTATTGGAATATCAATTTAGAAGAAATGATGGAAGCAGGAGTTCATT  
TTGGTCATGGTACTAATAAATGGAATCCTAGAATGGCTCCTTACATCTCTGCAAAGCGTA  
AGGGTATTCATATTACAAATCTTACTATAACTGCTCGTTTTTTTATCAGAAGCTTGCGATTT  
AGTTTTTGATGCAGCGAGTAGGGGAAAAAATTTTTAATTGTTGGCACCAAAAATAAA  
GCAGCGGATTTAGTAGCATCAGCAGCAATAAGGGCTCGATGTCATTATGTTAATAAAAA  
ATGTCTTGGTGGTATGTTAACAAATTGGTCTACTACAGAAACAAGACTTCAGAAGTTCA  
GGGATTTAAGAGCAGAACAAAAAATGGGGAAAAATAAATTGTCTCCCAAAGGAGATG  
CAGCAATGTTGAAGAGAAAGTTATCTACCTTGCAAGCCTATCTGGGTGGGATTAATAT  
ATGACGGGATTGCCCGATATTGTAATTATCGTTGATCAGCAAGAAGAATATACGGTCTT  
CGAGAATGTGCCATTTTGGGGATTCCGACGATTTGTTTAATCGATACAAATTGTGACCC  
GGATCTTGCAGATATTTCTATTCCGGCCAACGATGATGCTATAGCTTCGATTTCGATTGATT  
CTTACCAAATTAGTTTCTGCAATTTGTGAGGGTCGTTCTAGT--TCTATCAAAAAGGTA  
TGGGACAAAAATAAATCCACTTGGTTTCAGACTTGGAACAACCTCAAATCATCATTCT  
TTTTGGTTCGCAAACCAAGAATTTTTCCATGGGTATAACAAGAAGATGAAATAATACG  
GAATTGTATTAAGGACTATGTAATAAAAAATAAGAACTCTTCTCAGGT--TTCGAAGG  
AATTGCCCATATAGGAATTCAAAAAGAATAGATTTTCTTCAAATCATAATCTCTATTGG  
ATTTCCATAATTTCTTAATAGAAGGA-----CGGACACGG-----GGAGTTGAGGAATTACAGA  
TGAATATACAAAAAAGTTTCATTCTGTAAACCGGAGACTCAATATTGCTATCATAAGA  
ATTGAAAAACCTTATGGACAACCTAATATTCTTGCAGAATATATAGCTTTACAATTA AAA  
AATAGAGTCTCATTTCGAAAGGCAATAAAAAAAGCTATTGAATTA ACTGAACAAACAG  
GTACAAAAGGAATTC AAGTGCAAATTGCAGGACGTATCGACGGAAAAGAGATTGCAC  
GTGTTGAATGGATCAGAGAAGGCAGGGTTCCTTTACAAACAATTTGCGCTAAAATTGA  
TCACTGTTCCATAAAATTAGAACTATCTATGGAGTCTTAGGCATCAAATTTGGATATT  
TG TAGACCAAGAAATGTCTCGTTACCGAGGACCTCGTTTCAAAAAATACGCCGGCTG  
GGGGCTTTACCGGGACTA ACTAGTAAAATACCCAGATCCAGAAGTGATCTTCAAACCC  
AATTACACTCTGGAAAA---AAATCACAATATCGTATTCGTTTAGAAGAGAAACAGAAAT  
TGC GTTTTTATTATGGTCTGACAGAGCGACAATTACTTAAATATGTGCATATTGCTGGAA  
AAGCCAAAGGGTCAACAGGCCAGGTTTTACTACAATTACTTGAGATGCGTTTGGATAA  
CATCCTTTTTCGATTAGGTATGGCTTCGACCATTCTGGAGCCAGACAATTAGTTAACCA  
TAGACACATTTTAGTGAATGGTTCGTATAGTGGATATACCAAGTTATCGTTGCAAAGCCCG  
AGATATTACTACGAAAGATAAAGAAAGATCGAAAGCTCTGATTA AAAATTTCTCTTG  
TTTCATCCCCCGTGAA-----TTGCCAAACCATTTGACTATTGAATCC-----TTACAATATA  
AAGGATTTATAAATCAAATAATAGATAGTCAATGGATCGGTCTGAAAATAAATGAGTTGT  
TGGTCGTAGAATATTATCCCGTCAGACTATGTCCCGTCGAGGTA CTGCAGAAGAAAA  
ACTGCAAATCCGATCCAATTTATCGTAATCGATTAGTTAACATGTTGGTTAACCGTATT

CTGAAACACGGAAAAAATCATTGGCTTATCAAATTATCTATCGAGCCGTGAAAAAGAT  
TCAACAAAAGACAGAAACAAATCCACTATCTGTTTTACGTCAAGCAATACGTGGAGTA  
ACTCCCGATATAGCAGTAAAAGCAAGACGTGTAGGCGGATCGACTCATCAAGTTCCTAT  
TGAAATAGGATCTACACAAGGAAAAGCGCTTGCCATTCGTTGGTTATTAGGGGCATCCC  
GAAAGCGTCCGGGTCGAAATATGGCTTTCGATTAAGTTCGAATTAGTAGATGCTGCC  
AAAGGCAGTGGTGATGCCATACGCAAAAAGGAAGAGACTCATAGAATGGCAGAGGCA  
AATAGAGCTTTTTCGTCATTTTCGTATGGGTAGGGACATTATTGCCGATATACTAACTTCTA  
TAAGAAATGCTGACATAGATCAAAAAGGAAAAGTTAAAATAGTATCTACTAATATCACT  
CAAAATATTGTGAAAATACTTTTACAAGAAGGTTTTATTGAAAACGTTCGAAAACATCA  
AGAAAGTCAAAAAAATTTCTTGTTTTCAACCTTACGACATAGAAAG-----ACGAGTAAA  
GGG-----AATAAAATAAATTTAAAGCGTATCAGCCGACCCGGTCTACGAATCTA  
TTCCA ACTATCAACGAATTCCTAAGATTTTAGGTGGAATAGGGATTGTAATCCTTTCTAC  
TTCTCGAGGTATAATGACAGATCGAGAAGCTCGACTAGAAAAAATTGGAGGAGAAATT  
TTGTGTTATATATGGATGACAAAACCTATAGCTAAAATTGGTTTACGTAAGAATGCACGT  
ATTGGTTCAAAAAAGAATGAACGTAGAATACCAAAAGGAGTTATTCATGTTCAAGCGA  
GTTTCAACAATACTATTGTAACGTGTACAGACGTACGAGGTTCGGGTGGTTTTCTGGGCT  
TCTGCCGTACTTCTGGATTCAGAGGCACAAGAAAAGGAACGCCCTATGCTGCTCAAG  
CCGCAGCTTTTAATGCTATTCTGTACATTAGGTGATCAGGGTATGCAACGAGCAGAAGTT  
ATGATAAAGGGTCCAGGTCTCGGAAGAGATGCGGCATTGCGATCCCTTCGTGCAAATG  
GGATGCTATTAAGTTTCGTACGTGATGTAACACCCATGCCGCATAATGGATGTCGTCCCC  
CTAAAAAAGACGTGTGATGCCAACCATTAACAACCTATTAGAAATGCAAGACAGCC  
AATAAGAAATGTCACGAAATCTCCCGCTCTTCGGGGATGTCCTCAGCGTCGAGGAACA  
TGACTAGGGTGTATACTATCACCCCAAAAAACCAA ACTCTGCCTTACGTAAGTTGC  
CAGAGTACGATTAACCTCTGGATTTGAAATCACTGCTTATATACCTGGTATTGGCCATAA  
TTCACAAGAACATTCTGTAGTATTAGTAAGAGGAGGAAGGGTTAAGGATTTACCCGGT  
GTGAGATATCACATTGTTTCGAGGAACCC TAGATGCTGTTCGGAGTAAAGGATCGCCAAC  
AAGGGCGTTCTAGATATGGGGTCAAAAAGCCAAAAATGGCAAGAAAAAGTTTGATTC  
AAAGGGAGAAGAAACGCCAGAAATTGGAACAGAAATATTATTGATTCGTCAATTCTT  
AAAAAAGAAATAAGC-----AAAGTTCCTCGTTGAGAGAGCAATGGGAAATTCATG  
GAAAATTGCAATCCCACCACGGAATAGTGCACCTATACGTCTTCATCGACGTTGTTTT  
TTAACCGGAAGACCTAGAGCAAATTATCGAGACTTTGGGCTATCTGGACACATACTTCG  
AGAAATGTTTCATGCATGTTTGTACCAGGCGCAACAAGATCAAGTTGGATGATCAAA  
AATTCATTCATATCAGTTATTACACAAGAAGAAAAAGAAGAAAT-----AGTGGGTCTGT  
TGAATTTCAAGTATTCCATATCACCAGTAAGATACGCAA ACTTACTTCACATTTAGAATT  
AAATAAAAAAGATTTTTTATCGCAAAGAGGTCTACGAATAATTCTAGGAAAACGTCAAC  
GATTATTA ACTTATTTGTCAAAGAAAAATAAAGTTTCGTTATAAGAAATTAATAGATCAGT  
TAGATATTCGGGAACCAAAAAATCGT-----ATGGTAAA ACTTCGTTTGAAACGATGTGGT  
AGAAAGCAA-----CTCTATCGAATCGTTGCAATTGATGTTTCGATCCCGAAGAGACGGAA  
GAGATCTTCAAAGGTGGGTTTTTATGATCCGATAAAGAATCAA ACTTATTCAAATGTT  
CCTGTTATTTTAGATTTCTTGAAAAGGTGCTCAACCCACAGGAACTGTTTATGATATT  
TTAAAGAAGACAGAATTCTTTCAAGAATTTCGAAATTCTTTTGGATTTGAAAGTAAAAT  
GGATAAATCCAACAACCTTTTCGTAAATCCAAGCGGTCTTTTCGTAGACGTTTACCCG  
CAATTGGATCGGGGATCGAATCGATTATAGAAACATGAGTTTAATTAGTCGATTTCTTA  
GTGAACAAGGAAAAATATTATCTAGACGAACAAATAGATTAACCTTGAAACAACAACG







-TACATAAGAAATGTATCGAATCAATTCTTTTTAATG-----AATAGATCCGATCGCAACT  
TCGAATATGGAATTCAA-----AGGGATCAGATAGGAAATGATACTCTGAATCATAGAA  
CTATAATGAAATATACGATCAACCAACATTTATCGAATTTTAAAAAG---AGTCAGAAGAA  
ATGGTTTGATCCT-----CTTATTTATCGAACTGAGAGATCCATGAATCGGGATCCTGA  
TGCATATAGATACAAATGGTCCAATGGGAGCAAGAATTTCCAGAAACATTTGGAACATT  
TCGTTTCTGAACAGAAGAATCCTTTTCAAGTAGTGCAAGTAGTGTTCGATCAATTACGT  
AGTAATCAATATTCGATTGATTGGTCCGAGGCTATCGACAAAGAAGATTTGTCTAAGCC  
ACTTCGTTTCTTTTTGTCCAAG-----T  
CACTTCTTTTTGTCCAAATCACTTACCTTTTTCTTTGTGAGTATCGGGAATATCCCAT  
TCATAGGTCCGAG---ATCCACATCTAT--GAATTGAAAGGTCCGGATGATCAACTCTGCA  
ATCAGTTGTTAGAATCCATAGGCGTTCAAATCGTTCAATTTGAAGAAATTGAAACCC-----  
TTCTTATTGAAT-----GATCATGATACTTCC---CAAAGACCAAATTATTGATCAATGGA  
GGAACAATATTACCATTTTTGTTCAAAAAGATACCA---AAGCGG---GTCATTGACTCATT  
CCATACT-----AGAAAGAATCGCAGGAAATCCTTTGATAACACGGATTCCTATTTCTCAA  
TGATATCCCACGATCGAGACCATTGGCTGAATCCCGTGAAACCATTTCATAGAAGTTCA  
TTGATATCTTCTTTTTATAAAGCAAATCGACTTCGATTCTTGAATGATCCACATCACTTCT  
GGTTCTAT-----TGTAACAAAAGATTCCCCTTTGATGTG-----GAAAAGACCCGTATC  
AATAATTATGAT-----CGTACATAT--GGACAATTCCTCAATATCTTGTCCATTTCGCAACAA  
A--ATCTTTTCTTTGTGCGTGGGTAAA-----AAAAA-----TATCTTTCACCA  
ATCGAGTCACAGGTATCTGACATCTTCATACCTAACGATTTCCCACAAAGTGGTGATGA  
AACG---TATAACTTGTAACAA-----TCTTTCCATTTTCCAATTTCGATCCGATCCATTTCGT  
TCGT-----GGAGCTATTTACTCGATCGCAGACATTTCTGCAACACCTCTAACAGAGGAA--  
-----AATTTGGAAAAACTTATTGTCAGCCTCTTTCAGATATGAATCTATCTGATTCAGA  
AGGGAAGAACTTGCATCAGTATCTCAGT-----TTCAATTCAAACATGGGTTTGATTCACA  
CTCCATGTTCTGAGAAGTATTACCA-----TCCGGAAAGAGGAAAAA-----  
-CGGAGTCTTTGTCTAAAG-----AAATGCGTTGAGAAAGGGCAGATGTATAAAGCCTTTC  
AACGAGAT-----AGTGTCTCAAATGGAATCTGTTCCAACATATATGCCATGGTTC  
CTTACTTCGACAGGGTGCAAATATCTCAATTTACCCTTTTAGATACTCTTTCAGACCCA  
TTG-----CCGATACTGAGTAATAGT--CAAAAATTTGTATACATTTTTTCATGATATGATGCA  
TGGATCAGATATATCAAGGCCATTTCCCTCAGAAG-----ATTCTTCCACGAT  
GGACTCTG---ATAAGTGAGATTTTCGAGTCAATGTTTACATAAT-----CTTCTTCTGTCCGA  
CGAAATGATTCATCGAAATAATGAGTCACCCGTTCCATTGATATGGGCAAATCTGAGAT  
CAACAAATGCTCGGGGGTTC---CTCTATTCATCTTTTTCTTCTTCTTGTGTTGCTGGATAT-  
-CTCGTTTCGTATACATCTTCTCTTTGTTTCCCGA-----GCCTCTAGTGAGTTACAGACAGA  
GTTAGAAAAGATCAAATCTTTGATGATTCCATCATAATGATGGAATTTGAAAACCTTCT  
GGATAGGTATCCTACATCTGAACTTAATCCTTTCTGGTTAAAGAATCTCTTTCTAGTTGT  
TCTGGAACAATTAGGAGATTCTCTGGAAGAAATACGGGGTTTTGTTTCTGGTGGCAAC  
ATGCTATTGGGTGGTGGTCCC-----GCTTATGGG---GTCAAATCAATACGTTCTAA  
GAAGAAATCTTGGAAGATCAAT-----CTCGTCGAT-----ATCATACCAAATCCCATC  
AATCGAATCCTTTTTTCGAGAAATACGAGACATCTAAGTCGTACAAGTAAAGAGATCTA  
TTCATTGATAAGAAAAATAAAAAACGTGAACGGTGATTGGATTGATGAGAAAATAGAA  
TTCTGGGTCGCGAACAGTGATTTGATTGATGATGAAGAAAGAGAATTCTTGGTTCAGTT  
CTCC-----ACCTTAACGACA-----GAAAAAAGGATTGATCAAATTCATTGAGTCTGACT--  
-CATAGTGATCATTTATCA-----AAGAATGACTCTGGTTATCAAATGATTGAACAAC

CGGGATCAATTTACTTACGATACTTAGTTGACATTCAT-----CAAAGGATCTAATGAATT  
ATGAGTTCAATAGATCCTGTTTAGCAGAAAGACGGATATTCCTTGCTCATTATAAGACAA  
TACTTAT-----TCACAAACCTCGTGTGGGGCTAATAGTTTTCATTCCCCATCTCCT-----CA  
TGGAACCCCTTTTCGCTCCGCTTAGCCCTATCCCCTTCT---AGAGGTATTTTAGTGATA  
GGTTCTATAGGAACTGGACGATCCTGTTTGGTCAAATACCTAGCGACAACTCCTATGT  
TCCTTTCATTACGGTATTTCCGAACAAGTTCCTGGATGACAAGCCTAAAGGTTATCTTAT  
TGATGATGAT-----GATATCGAT--ATTGATGATAGTGACGATATTGAT-----GATAGT-  
-----GATGATGACCTGGAGATTGATACGGAGC  
TGCTAACTATGACGAATGTGCTA-----ACTATGTATATGACGTATATGACGCCGAAAAT  
AGACCGATTTGATATCACCTTCAATTCGAATTAGCAAAAGCAATGTCTCCTTGCATAAT  
ATGGATTCCAAACATTCATGATCTGCATGTGAATGAGTCGAATTACTTATCCCTCGGTCT  
ATTAGAGAACTATCTCTCC-----AGGGATTGTGAAAGATGTTCC--ACTGGAAAGATTC  
TTGTTATTGCTTCGACTCATATTTCCCAAAAAGTGGATCCCGCTCTAATAGCTCCGAATA  
AATCAATACATGCATTAAGATACGAAGGCTTCTTCTTCCACAACAACGAAAGCACTTT  
TTCATTCTTTCATATACTAGGGGATTTCACTTGGAAGAAGATGTTCCATACT-----AAC  
GGATTCCGGGTCCATAACCATGGGTTCCAATGCGCGAGATCTTGTAGCACTTATCAATGA  
GGCCCTATCAATTAGTATTACACAGAATAAATCCATTATAGAAATGAATACAATGAGATC  
AGCTCTTCATAGAAAACTTGGGATTTTCGA-----TCCCAGATAAGATCGGTTTCAGGA  
TCATGGGATCCTTTTCTATCAGATAGGAAGGGCTGTTACACAAAATGTACTTCTAAGTAA  
TTGCCCCATAGATCCTATATCTATCTATATGAAGAAGAAA-----TCATGTAAGGGAGGGGA  
TTTTTCTTTGTACAAATGGTACTTCGAACTTGGAACGAGCATGAAGAAATTAACGATAC  
TTCTTTATCTTTTGAGTTGTTCTGCCGGATCGGTCGCTCAAGATCTTTGGTCTTCATCC---  
---AGACACGATGAAAAA---AATTGGATCACTTCTTATGGATTCGTTGAGAATGATTCT--G  
ATCTAGTTCATGGCCTCTTAGAAGTAGAAGGCGCTCTGGCTCTGGCGAGATCCTCACGG  
ACAGAAAAATATTGCAGTCAGTTTGATAATAAT-----CGAGTGACATTACTTCTTCGGTCC  
GAACCAAGGAAT--CAGTTAGATATGATGCAAAATGGATCTTGTCTATCGTTGATCGGA  
GATTTCTATATGAAAAA-----TACGAATCGGAGTTTGAAGAA---GGGGAAGGG-----GCC  
CTCGATCCGCAA-----CAGATAGAGAAGGAT-----TTATTCAATCAC-----ATAGT  
TTGGGCTCCT-----AGAATATGGCGCCCT-----TGTGGCAATCTATTTGATTGTATCGAG  
AGGCCACTGAATTGGGATTTCCC---TATTGGACTGGGTCAATTCGG-----GGCAAATG  
GATCATTTATCATAAAGAGGATGAGCTTCAAGAGAATGATTTCGGAGTCTTGCAGAGCG  
GAACCATGCAGTACCAGACACGAGATAGATCTTCCAAAGAACAAGGCTTTTTTCGACC  
AAGCCAATTCATTTGGGACCTTGCGGATCCATTCTTTCCCTATTCAA---GATCAGCCC  
TCTGTCTCTGTGTTTTACGTCGAGAATTCTTTGCAGATGAAGAGATGTCAAAGGGGCT  
TATTGCTTCCCAAACAATCCTCCTGCATCTCTATATAAGCGCTGGTTCATC-----AAGAA  
TACGCAAGAAAAGCACTTCGAATTGTTGATTCATCGACAGAGATGGTTTGAACC-----  
--AATAGTTCATTATCT-----AATGGATCTTTCCGTTCTAAT-----ACTCTATCCGAAAGTTAT  
CAGTATTTATCAAATCTGTTCCCTATCTAAC---AGAATGCTATTGGATCAAATGACAAAGA  
CATTGTTGAGAAAGAGATGGCTTTTCCCGGATGAAATGAAACATTTGATT-----CATGTC  
ACAGGAGAAAGATTCCCCATTCCTATGTCTAGATCTCGA---ATCAATGGAAATTTTATTG  
ATAAACCTCTTCAATTGTAGCCAATATTTATTACGAATAATTCGACAACCTCAGGAG  
AAAAAAGGCATTTACCTATTACAGAGATGGT-----ATGTCAGCTCAATCCGAAGGAAAT  
TATGCAGAAGCTTTACAGAATTATTATGAAGCTATGCGACCAGAAATTGATCCCTATGAT  
CGAAGTTATATACTATATAACATAGGTCTTATACACACAAGCAATGGAGAACATACAAAA

GCTTTGGAATATTATTTACGAGCAATAGAACGAAATCCATTTTTACCACAAGCTTTTAAT  
AATATGGCCGTGATCTGTCATTAC---CGGGGAGAACAGGCCATTTTACAAGGTGATTCG  
GAAATTGCGGAGGCTTGGTTCGATCAAGCTGCTGAGTATTGAAACAAGCTATAGCGC  
TACTCCAGGGAATTATATTGAAGCACAGAATTGGTTAAAAATAACAAGACGTTTTGAA  
-----ATGAACTGGCGATCAGAAAATATATGGATAGAATTTATAACGGGGTCTCGAAAAAC  
AAGTAATTTTTGCTGGGCCTTTATCCTTTTTTTAGGTTTCATTAGGATTCCTAGTGGTTGG  
AACTTCCAGTTATCTTGGTAAAAATATGATATCCGTATTTCCGTCTCAGCAAATATTTTT  
TTCCCCAAGGTATCGTGATGTCTTTCTATGGGATCGCAGGTCTATTCATTAGTCTTATT  
TGTGGTGCACAATTCATGGAATGTAGGTAGTGGTTATGACCGATTTCGATAGAAAAGAA  
GGGATAATGTCCCTTTTTCGTTGGGGATTTCTGGAATAAATCGTCGCATCTTCCTTCGT  
TTCTTTCTGAAAGATATCCAATCAATCAGAATGGAGGTGAGAGAGGGTCTTTTTCTCG  
TCGTGTCTTTATATGGAAATCAGGGGCCAAGGAGCCATTCCCTTGACCCGTAAGTATG  
AGAAT---TTGACTCCACGAGAAATTGAACAAAAAGCTGCCGAATTGGCTTATTTCTTGC  
GCGTACCCATTGAAGTATTT

>Elodea

ATGGAAAAATGGTGGTTCATTCGATGTCTCTCTAAATAAATCAATGTATAGTCTTGAT  
CCCATTGGAGATACTAGTGAAAATGAGGATCCCATTCTAAATGATATAGATAAAAACATT  
TCC---TCTAGTAATGTTGAGCGCTTATTTGATATTAGGGGCATTTGGAGTTTGATTTCTGA  
TGACACCTTTTTAGTTAGAGATAGTAACGGTGATAGTTATTCCGTATATTTTGATATTGAA  
AATGAAATTTTAGAGATTGAGAATGAT-----AGTTCTTTTCTGAATGAACTAGAAAATAM  
TTTTTCTAAT-----TATCTGAATTCGAATTGTAGATCGAAAAGTAAGAATCGCTACT  
ATTATGTGTATGATACTAAATCTAATTGGAATAATCATATTAATAGTTGCATTGATAGTTAT  
CTTCATTTTGAAATC-----AGTATTGATAGTTACATTTTCAGGGGGTACTGAGAATTACAAT  
GACAATTATATCTATCGTTTCATTTGTAAT---AGTAGAAGTTCTATGAGAAGTAGTAGTAA  
TGGCGATGATTTGAATATAAGGGGAGGGTCT---GATCTTGATATAAATCAAAAATACAGA  
CATTTATGGGTTCAATGCGAAAATTGTTATGGATTAATATAAAAAATTTTTTAGATCA  
AAAATGAATATTTGTGAACAATGTGGATATCATTTGAAAATGAGTAGTTCAGATAGAAT  
CGAACTTTCGATTGATTCCGGGCACTTGGGATCCGATGAATGAAGATATGGTCTCTACGG  
ACCCTATTGAATTTCAATCAGAGGAGGAACCTTATAAGGATCGTATCGATTCTTATCAA  
GAAAGACAGGTCTAACGGAAGCTGTTCAAACGGGTATAGGTCAATTAATGGTATTAC  
CATAGCAATTGGGGTTATGGACTTTCAGTTCATGGGGGGTAGTATGGGATCCGTTGTAG  
GCGAGAAAATAACCCGTTTGATCGAATATGCTACCGATCGATCTCTACCTCTTATTATTG  
TGTGTGCCCTCTGGTGGAGCGCGTATGCAAGAAGGAAGTTTGAGCTTGATGCAAATGGC  
GAAAATATCTTCTGCTTCATATAATTATCAATTCAATAAAAAATTATTCTATGTATCAATCC  
TACTTCTCTACAACAGGAGGGGTTACAGCAAGTTTTGGTATGTTGGGAGATGTCATT  
ATTGCTGAACCTAATGCCTACATCGCATTTCAGGTAAAAGAGTAATTGAACAAACATT  
GAATAAACAGTACCTGATGGTTCACAAGCAGCTGAGTATTTATTTTCATMAGGGTTTAT  
TTGATTCAATTGTACCACGTAATCCTTTAAAAGGTGTTCTGAGTGAGTTATTTTCAGCTCC  
ATGGTTTTCTTCCTTTGAATCAAATTCNAAAAATATGGTAACCACTCGAGCCGACGAA  
ATTAGTAATATTATTGGGGAACGCATTAACAATATAATAGAGAAAATAAAGGTTCGTGAAT  
ACTGGTACCGTACTTCAAGTGGGTGATGGGATTGCTCGTATTCATGGTCTTGATGAAGT  
AATGGCAGGTGAATTAGTAGAATTTGAAGAGGGTACGACGGGTATTGCTCTGAATTTG  
GAATCAAATAATGTTGGTGTGTTATTAATGGGTGATGGTTTGATGATACAGGAGGGAAG  
TTCTGTAAAAGCAACACGAAAAATTGCTCAGATACCGGTGAGCGATGCTTATTTGGGTC

GTGTTGTAATGCTTTGGCTAAACCCATTGATGGTAGAGGTGAAATCCAGCTTCTGAA  
TCTCGCTTAATTGAATCTCCTGCCCCCGGTATTATTTTCGAGACGTTCCGTATATGAACCT  
CTTCAAACGGGTCTTATTGCTATTGATTTCGATGATTCCGATAGGGCGCGGTACAGCGAGA  
ATTAATTATTGGGGACAGACAAACAGGTAAAACAGCAGTAGCCACGGATACGATTCTT  
AATCAAAAAGGGCAAATGTAATATGTGTTTATGTAGCTATCGGTCAAAAAGCATCCTC  
CGTAGCTCAGGTAGTGACGACTTTACAGGAACGAGGGGCTATGGAATACACTATTGTG  
GTAGCCGAAACGGCGGATTCACCTGCTACATTACAATATCTCGCTCCTTATACAGGGGC  
GACTCTGGCTGAATATTTTATGTACTIONTGTGAACGACATACTTTGATAATTTATGATGATCTA  
TCCAAACAGGCCCAAGCTTATCGTCAAATGTCTCTTCTATTAAGAAGACCCCTGGGCG  
TGAAGCTTATCCGGGAGATGTTTTTTTATTGTCATTACCGTCTTTTAGAAAGAGCTGCTAA  
ATTAAGTTCKAAGTTAGGTGAAGGAAGTATGACCGCTTTACCAATAGTGGAAACTCAAT  
CCGGAGACGTTTCAGCGTATATTCCACTAATGTTATTTCTATTACAGACGGACAAATAT  
TCCATCCGCCGATCTATTCAATGCTGGAATACGGCCTGCTATTAATGTCGGTATTTCTGT  
CTCCAGAGTAGGATCCGCCGCTCAAATTAAGCCATGAAACAAGTAGCCGGCAAATTA  
AAATTGGAATTAGCTCAATTCGCGGAGTTAGAAGCCTTTGCACAATTCTCTTCTGATCT  
TGATAAAGCTACTCAGAATCAATTGGCAAGAGGTCAACGATTACGTGAGTTGCTTAAA  
CAATCCCAAGCAAATCCTCTTACGGTCGATGAACAAATAGCTACTATTTATACCGGAAC  
GAACGGATATCTTGATTTCGTTAGAAATTGGACAGGTAAAGAAATTTCTTGTTACGTTAC  
GTACCTACTTAAAAAAGAATAAACCTCAATTCCAAGAAATTATATCTTCTACCAAAACA  
TTCACAGGGGAAGCAGAAGCTATTTTGAAGGAAGCTATTCAAGAACAGATGGAAGTGT  
TTCTACTTCAGGAACAAGCA-----ATGAATCCTACTTCTTCG-----AATCCTGCGGTTTC  
CAAAAAAACGTAGGACGAGTCACTCAAATTATTGGCCCAGTACTGGATGTTGCTTTTT  
CTCCGGGTAAGATGCCTAATATTTATAACGCTTTGGTAGTTAAGGGTCGAGATACTCTCG  
GTCAGCAAATTGATGTGACTTGTGAGGTACAACAATTATTAGGAAATAATCGAGTTAGA  
GCGGTAGCTATGAGTGCTACAGATGGTCTGACGAGAGGAATGGAAGTGATTGACACGG  
GAGCTGCTCTAAGTGTTCAGTTGGTGGGGCTACTCTCGGACGAATTTTCAACGTTCTT  
GGGGAACCCGTTGATAATTTAGGTCCTGTAGATACCCGCACAACATCCCCTATTCATAGA  
TCTGCCCCCGCTTTTATAAGTTAGATACGAAATTATCCATCTTTGAAACGGGGATAAAA  
GTGGTAGATCTTTTAGCTCCTTATCGTCGTGGAGGAAAATAGGGCTTTTCGGAGGAGC  
TGGAGTGGGTAAAACAGTACTCATCATGGAATTGATCAACAACATTGCTAAAGCTCATG  
GAGGCGTATCCGTTATTTGGTGGAGTAGGCGAACGTACTIONTGTGAAGGAAATGATCTTTAC  
ATGGAATGAAAGAATCCGGAGTGATTAATGAAAAAATATTGCGGAATCAAAAGTGG  
CTCTAGTCTACGGTCAGATGAATGAGCCACCAGGAGCTCGTATGAGAGTTGGTTTGAC  
TGCCCTAACTATGGCGGAATATTTCCGGGATGTTAATGAGCAAGACGTACTIONTCTATT  
CGACAATATCTTTGATTTCGTTCAAGCAGGATCTGAGGTATCCGCCTTATTAGGGAGAA  
TGCCTTCCGCGGTGGGTATCAACCTACCCTTAGTACGGAAATGGGATCTTTGCAAGAA  
AGAATTACGTCTACCAAAGAAGGATCCATAACCTCCATTCAAGCTGTTTATGTACCTGC  
AGACGATTTAACCGACCCCGCTCCTGCCACGACATTTGCACATTTAGATGCTACTACCG  
TACTATCAAGAGGATTAGCTGCTAAAGGTATTTATCCAGCGGTGGACCCTTTGGATTCA  
ACGTCAACTATGCTCCAACCTGGAATCGTTGGCGAGGAACATTATGAAACTGCGCAA  
GAGTTAAGCAAACCTTACAACGTTACAAAGAGCTTCAGGACATTATAGCTATCCTTGA  
TTGGACGAATTATCCGAAGAGGATCGTTTAAACCGTGGCAAGAGCACGAAAAATTGAAC  
GTTTCTTATCACAACCCTTCTTCGTAGCAGAAGTATTACAGGCTCTCCGGGGAAATAT  
GTTGGTCTCGCAGAAACAATTAGGGGGTTTCAACTGATCCTTTCCGGAGAATTAGACA

GTCTTCCCGAGCAGGCCTTTTATTTGGTGGGTAACATCGATGAAGCTACCGCGAAAGCT  
ATGAACTTAGAAGTGGAGAGCAAATTGAAGAAAATGACCTTAAATCTTTGTGTACTGA  
CCCCTAATCGAATTGTTTGGAAATCAGAAGTGAAAGAAATCATTTTATCTACTAATAGTG  
GCCAAATTGGTGTATTACCAAACCACGCCCCATTGCTACAGCTCTAGATATAGGTCTTT  
TGAGAATACGCCTCAACGACCGATGGTTAACAGTGGCTCTTATGGGTGGTTTCGCTAGA  
ATAGGTAATAATGAGATCACCATTTTAGGAAATGATGCGGAACTGAGTACTGACATTGA  
TCCGCAAAAAGCTCAGCAAGCTCTTGAAATAGCTGAAGCTAACTTGAGTAAAGCGGA  
AGGTAAGAGACAAATAATTGAAGCGAATCTAGCTCGCAGACGAGCTATTACGCGAGTA  
GAGGCTAGTAATACTATTTCCATGAAAAATGTAACCGATTCTTTCGTTTCCTTG---CATTG  
GCCATCCGCCGGGAGTTTTGGGTTTAATACCGATATTTTAGCAACAAATCCAATAAATCT  
AAGCGTAGTGCTTGGTGTGTTGATTKATTTTGGAAAGGGAGTGTTAACGGATTTATTAG  
ATAATCGAAAACAGAGGATTTTGAGTACTATTCGAAATTCAGAAGAATTACGTAGAAGC  
GCCATTGAGCAGCTTGAAAAAGCCGAGACCGCTTAAGTAAAGTAGAAACAGAAGCG  
GCTGAATATCGAGTGAATGGATATTCTGAGATAGAACGAGAAAAAGCGAATTTGATTAA  
TGCTACTTCGAATAGTTTGGAAACAATTAGAAAATTACAAAAATGAGACCCCTTCGTTTTG  
AACAAACAAGAGCTATTAATCAGGTTTCGACAACAAGTTTTTCAACAAGCCTTAGAGGG  
GGCTCTGGGGACTCTAAATACTTGTTG---AGTGAATTACATTTTCGTACCATCAGTGCT  
AATATTGGCCTCCTAGGGACCATGGAAGAAATAACTAATATGAATCCACTGATTTCTGCC  
GCTTCCGTTATTGCTGCTGGATTAGCCGTAGGGCTTGCTTCTATTGGACCTGGAGTTGG  
GCAAGGTACTGCTGCAGGACAAGCTGTAGAAGGTATTGCGAGACAGCCAGAAGCAGA  
AGGTAATAACGAGGTACTTTATTAAGTTTGGCTTTCATGGAAGCTTTAACAATTTA  
CGGATTGGTCGTGGCATTAGCACTTTTATTTGCAAATCCTTTTGTATGAATGTTATACCA  
TGTTCCATTAACACACTCAAAGGATTATACGATATATCGGGTGTAGAAGTAGGCCAACA  
TTTATATTGGCAAATAGGGGATTTACAAGTACACGCTCAAGTACTTATCACTTCATGGGT  
CGTAATTGCTATCTTATTAGGTTTCGGTCACTATAGCTGTTTCGGAATCCACAAACCATTCC  
GACCGACGGTCAAATTTCTTTGAATATATCCTTGAATTCATTTCGAGACTTAAGCAAAA  
CTCAGATTGGGGAAGGATATGGTCCTTGGGTTCCCTTTATTGGAACAATGTTCCCTATTTA  
TTTTTGTTCCTCAACTGGTTCGGGCGCGCTTTTACCTTGGAAACTCATAGAGTTACCCAC  
GGAGAGTTAGCTGCGCCAACGAATGATATAAATACTACTGTTGCTTTAGCTTTACCCAC  
GTCAGTGGCATAATTTCTATGCGGGTCTTACCAAAAAGGATTGAGTTATTTTCGGGAAAT  
ATATTCAACCAACTCCAATCCTTTTACCAATTAACATTTTAGAAGATTTCAAAAACCTT  
TATCACTTAGTTTTCGACTTTTTGGGAATATATTAGCTGATGAATTAGTAGTAGTTGTTCT  
TGTTTCTTTAGTACCTTTGGTAGTTCCCTATACCTGTTATGTTTCTTGGGTTATTTACAAGT  
GGTATTCAAGCTCTTATTTTTGCAACTTTAGCTGCGGCTTATATAGGTGAATCCATGGAG  
GGTCATCATATGATATTTGTGACTCTAGAACATATATTAACATATCTCTTTTTCGATTAT  
TTCTGTTGTTATATGATTCATTTGATGAATTTATTAGTTAACGAAATCGCAGGACTATGT  
GATTCATCAGAAAAGGGGATGATAGCTACTTTTTTATCTATAACAGGGTTATTAGTTATT  
CGTTGGATTTATTCGGGACATTTCCGTTAAGTAATTTATACGAATCATTAATGTTCCCTTT  
CGTGGAGTTTTCTTATTATTCATATGATTCTGTATTTAAAAAAAATAAAAATTATTTAAG  
CGAATAACGGCGCCAAGTGCTGTTTTTACCCAAGGTTTTGCCATTTCTGGTTTTTTTTCGA  
CTGGAATGCATCAATCCGCAATATTAGTACCTGCTCTGCAATCTCAGTGGTTGATGATGC  
ACGTAAGTATGATGTTATTGAGCTATGCAGCTCTTTTATTTGGATCCTTATTTCAATTGC  
TCTTTTAGTCATTACATTTGAAAAAACATCAACACTTTTTATAAGGATAAGGCGATTCA  
A-----TTGAATGATAATGCTTTACAAAATACTGCTTTTCTTTCATTTAAAAACTATTATA

AATATCAATTGACTCAAAGATTAGATTATTGGAGTTATCGTGTCATTAGTCTAGGGTTTA  
CCTTTTTAACCATAGGCATACTTTCTGGAGCAGTATGGGCTAATGAAGCATGGGRATCTT  
ATTGGAATTGGGATCCTAAAGAAACATGGGCGTTTATTACTTGGACTACATATGCAATTT  
ATTTACATAACCAGAACAAACCAAAAATTTCAAGGTATTAATTCGGCAATTGTAGCTTCTA  
TAGGATTTCTTATAATTTGGATATGTTATTTGGGGTTAATTTATTAGGAATAGGTTTACAT  
AGTTATGGTTCATTC-----AGTGAAAAAAAAGCATTGACT---TCTCTTCCTTATCTTGCA  
TCTATAGTATTTTTGCCCCTGGTGGATTTCTCTATTTTTTAATAAATGTTTGGAACCTTGG  
TTACAAATTGGTGGAAATACCCGGCAATCCGAAACTTTTTTGAATGATATCAAGAGAAG  
AACGTTCTAGAAAAATTTATAGAATTAGAAGAACTATTACTGTTGGACGAAATAATAAA  
GGAGTATCCGGGGTACATATACAAAACCTTCTATAGGAATTCACAAAGAAACGATGC  
AATTGGTCAAAACACACAATGAATATCATCTACATATTATCTTGCAATTTCTCAACAAATAT  
CATATGTTTTACTATTCTAAGTGGTTATTTTATTTTGCCTAATCAAGAGCTTGCCATTCTT  
AATCTTGGATTCAGGAATTCCTTTATAACTTAAGTGACACAATAAAAGCTTTTTCCATT  
CTTTTAGTACTGATTTATGGATCGGGTTTCACTCGCCCCATGGTTGGGAACTCATGATT  
GGTTCGGTCTACAACGATTTTGGGTTGGCTCATAATGATCAAATTATATCTGGTCTTGTT  
TCTACTTTTCCAGTCATTCTAGATACAATTGTGAAATATTGGATTTTCCATTATTTAAATC  
GTGTATCTCCTTCACTTGTAGTTATTTATCATTCAATGAATGAAATGCCATTGGTGTTC  
AAAAGTACCTTTTTCGGAGTCTGGAGAGGAAGATGCGGTTTGGGTTGACGTAAAC---C  
GACTTTATCGAGAAAGATTACTTTTTCTTAGGACAAGAAGTTGATAGCGAGATCTCGAAT  
CAACTTGTGGTCTTATGGTATATCTTAGTATAGAGGATAATACTAAGGATCTTTATTTGT  
TTATAAACTCCCCCGGAGGATGGGTAATACCAGGAATAGCTATTTACGACACTATGCAAT  
TTGTCCCACCAGATGTACATACAATCTGCATGGGATTAGCCGCTTCAATGGGATCCTTTA  
TTCTGGTTCGGGGGGGAAATTACCAAACGTTTAGCATTCCCTCACGCTAGGGTTATGATT  
CACCAACCCGCTAGTTCTTTTTATGAAACACAAACGGGGGAATTTATCCTGGAAGCGG  
AAGAGCTACTGAGACTTCGCGAAACCCTTACAAAGGTTTACGTACAAAGAACGGGAA  
ACCCTTTATGGGTTATATCCGAAGACATGGAAAGGGATGTTTTTATGTCAGCAGCCGAA  
GCCAAAGCTTATGGCATTGTTGATCTTGTAGCAGTCGAAATGAAAGAACAAAAATTGAT  
TCATGAGGGTTAATTACTGAATCGCTTCCAATGGTATGTTCCGGGTCCGTTTAGATAA  
TGAGGATCTAATTCTAGGTTATGTTTCCGGGAGGATCCGACGCAGTTTTATACGCATACT  
ACCGGGGGATAGAGTCAAATCGAAGTAAGTTCGTTATGATTCAACCAGAGGACGTATA  
ATTTATAGACTTCGCAACAAAGATTCGAGCGATATGGAAGAATTAATAAAGATATTTAGA  
AAAAGATAGATATCGGCAACAACATTTCTATATCCGCTTTTATTTCAAGAATATATCTAC  
GCACTTGCTCATGATCATGGTTTATCAGGTTATGATAAT---TTCAGTTTAGTACTTGTGAA  
ACGTTTAATTATTCGAATGTATCAACAGAGTTATTTGATTAATTCGTTAATGATTCTAAT  
CTAAATCGATTTGTTGGAAATCATCTTTTTTCTCAAATGATATCAGGGGGTTTTGCAGTT  
ATFGTGGAAATTCCTTTCTCCCTGCCATTTTTT-----CTTATACCAAATATCAGAATTTAC  
GATCTATTCAATCGATATTTCTTTTTTAGAGGACAAATTTTCCATTTAAATTATGTGTC  
AGATATAGTAATACCCTATCCTATTCATCTCGAAATCTTGATTCAAATTTCTACAATCCTGG  
ATAAAAGATGTTCCCTCTTTGCATTTATTGCGATTTTTTCTATATGAA-----AATGGGAATA  
GTTTCATTAATAAATCG---ATTTCTTTTCAAACAAAGACTATTTTCGGTTCCCTATATAAT  
TCTTACGTATCTGAATATGAATTAGTATTTTGTCTTCTCCGTAGACATTCCTCTTATTTACT  
ATCAACATCTTCTGGAGACTTTATTGAGAGAACACATTTCTATGGAAAAATAGGA---GT  
A---GTAGTTTGTGCTAATCAGAAAAGCTTACAGTTGTTTCGAGGATCCTTGCATGCATTAT  
GTTAGATATCAAGGAAAATCAATTCTCGCTTCAAAGGAACCTATCTTCTGATGAACAA



ATGGAAATGTTACTTTGTCCATTTTTGGCAATCTAATTTTTACTTTTGGTCTCAACCATAT  
AGGATTCATATAAACCAATTATCAAATAATTCTTTTCGATTTTTTGGGTTATCTTTCAAGTG  
TATTAATAAATCCTTTGGCAGTAAGAAGTAAAATGCTAGAGTATTCATTTCTAATAGACA  
TAGGTACT-----AAGAAATTCGATACTATAGTCCCAGTTATTCTTCTTATTGGCTCGTTGTC  
TAAAGCTAAATTTTGTAAATGTATCTGGGCATCCCATAGTAAGCCGATTTGGACTGATTT  
ATCTGATTCTGATATTATTGATCGATTTGGTCGGATATGTAGAAAATCTTTCTCATTATTATA  
GTGGATCCTCAAAAAACAGAGTTTGTATCGAATGAAGTATATACTGCGACTTTCATGT  
GCTAGAACCTTGGCTCGTAAGCATAAACTACAGTACGTGCTTTTTTACAAAGATTAGG  
TTCAAGGTTTTTAGAAGAATTCTTTACAGAAGAAGAACAAGCTCTTTCTTTGGTCTTGC  
CAAAACGTGTTTGGTATTTGGATATTGTTTCGTATCAGTGACTTGGTAAATCATTTAATGC  
TAATCGATAACAAGC---GAAGTACAA---GCTATAAATTCGTTTTCTGAATCGGAA---TTATT  
AAAAGAGATCTATGAACTCATATGGATCCTTATCCCATTTTTATCTTGCTATTAGGAATT  
ACGATAGGAGTACTAGTAATTGTGTGGTTAGAAAGAGAAAATATCCGCGGGGATACAAC  
AACGTATTGGGCCCTGAATACGCCGGCCATTAGGAATTCCTCAAGCTCTAGCAGATGGA  
ACAAACTACTTTTTAAAGAGGATATCCTTCCTTATAGAGGAGATATTTCGATTATTCAGT  
GTGGGACCGGCTATAGCAGTCATATCAACCCTACTAAATTATTTAGTAATTCCTTTTGGGA  
TATCATCTTGTTTTATCCGATCTCAGTATAGGTGTTTTTTTTATGGATCGCCATTTCTAGTAT  
TGCTCCGATTGGACTTCTTATGTCAGGGTATGGGTCAAATAATAAATATTCTTTCTCAGG  
TGGTCTACGAGCTGCTGCTCAATCCATTAGTTATGAAATACCATTAECTATGTGTGTT  
ATCAATATCTCTATTATCTAATAGTTCAAGTACAGTTGATATAGTTGAGGCGCAGTCCAA  
ATATGGTTTTTTGGGATGGAATATTTGGCGCCAACCTATTGGGTTTATAGTTTTTCTAATT  
TCTTCTCTAGCCGAGTGTGAAAGATTACCTTTCGATTTACCAGAAGCAGAGGAAGAATT  
AGTAGCAGGTATCAAACCGAATATTCAGGTATCAAATATGGTTTATTCTATATTGCTTCT  
TACCTAAATCTATTAGTTTTCTTCATTATTTGTAACAGTTCTTTACTTAGGTGGATGGAATT  
TATCTATTTTACCTATATTATTATTGATATTTTTGGAATAGATAAAAATAGGTGGGGTCTTT  
GGAATGATAATTGGTATTCTTATTACATTAGTTAAAGCTTATTTGTTCCCTGTTTATTCTAT  
TACAACAAGATGGACTTTACCGAGGATGAGAATGGACCAACTATTAATCTTGGATGG  
AAATTTCTTTTACCTATTTCTTTGGGTAATCTATTATTGACAACCTCTTCCCAACTTGTTT  
CACTAATGATCTGGCATGTACAGAATGAAACTTCATTCTCGATTCTACGAGAATTTTTTA  
TGAAAGCGTTTCATTTGCTTCTCTTCCATGGAAGTTTCATTTTCCCAGAATGTATCCTAA  
TTTTTGGCCTAATTCTTCTTCTGATGATCGATTCAACCTCTGATCAAAAAGATAGACCTT  
GGTTCTATTTTCATCTCTTTAACAAGTTTAGTAATGAGCATCACGGCCCTATTGTTCCGAT  
GGAGAGAAGAACCTATGATTAGCTTTTCGGGAAATTTCCAAACGAACAATTTCAACGA  
ACTCTTTCAATTTCTTATTTTACTATGTTCAACTCTATGTATTCTCTATCCGTAGAGTACA  
TTGAATGTACAGAAATGGCTATAACAGAGTTTCTGTTATTTCGTATTAACAGCTACTCTAG  
GAGGAATGTTTTTATGTGGCGCTAACGATTCAATAACTATCTTTGTAGCTCCAGAATGTT  
TCAGTTTATGTTCCCTACCTATTATCTGGATATGCCAAGAGAGATGTACGGTCTAATGAGG  
CTACTACGAAATATTTACTCATGGGCGGGGCAAGCTCTTCTATTCTGGTTCATGGTTTCT  
CTTGGCTATATGGTTTATCCGGGGGGGAGATCGAGCTTCAAGAAATAGTGAATGGTCTT  
ATCAATACACAAATGTATAACTCCCCGGGAATTTCAATTGCGCTTATATCCATCACTGTA  
GGAATTGGGTTCAAGCTTTCCCAGTCCCTTTTCATCAATGGACTCCTGACGTATACGA  
AGGATCTCCCACTCCAGTCGTTGCTTTTTCTTTCTGTTACTTCAAAGTAGCTGCTTCAG  
CTTCAGCCACGCGAATTTTCGATATTCCTTTTTTATTTCTCATCAAACGAATGGCATCTTC  
TTCTGGAAATCCTAGCTATTCTTAGCATGATATTGGGGAATCTCATTGCTATTACTCAA

CAAGCATGAAACGTATGCTTGCATATTCGTCCATCGGTCAAATCGGATATGTAATTATTG  
GAATAATTGTTGGAGACTCAAATGATGGATATGCAAGCATGATAACTTATATGCTGTTCT  
ATATCTCCATGAATCTAGGAACTTTTGCTTGCATTGTATTATTTGGTCTACGTACCGGAA  
CTGATAACATTCGAGATTATGCAGGATTATACACGAAAGATCCTTTTTTTGGCTCTCTCCT  
CAGCCCTATGTCTCTTATCCCTAGGAGGTCTTCCTCCACTAGCAGGTTTTTTTCGGAAA  
ATCTATCTATTCTGGTGTGGATGGCAGGCGGGCCTATATTTCTTGGTTCAATAGGACTC  
CTTACGAGCGTTGTTTCTATCTACTATTATCTAAAAATAATCAAGTTATTAATGACTGGAC  
GAAACCAAGAAATAACCCCTCACGTGCGAAATTATAGAAGATCCACTTTAAGATCAAA  
CAATTCATCGAATTGAGTATGACTGTATGTGTGATAGCATCTACTATAACCAGGAATAGC  
AATGAACCAATTCTTGAATTGCTCAGGATACCCTTTTTATGTTTCTGCTTCATGAATAT  
GATATTTTCTGGGCATTTCTAATAATATCAAGTGTATTCTTATCTTGGCATTGTAAATTC  
CGGGATTTAGCCCCGATTAGTGAGGGAACAGAGAAGTTCTCTAGTTATGAATCAGGTA  
TAGAGCCCATGGGGGATGCTTGGGTACAATCCGAATTCGCTATTACATGTTTGCTCTAG  
TTTTTGTCGTTTTTGATGTTGAAACAGTCTTTCTTTATCCATGGGCAATGAGTTTTGATG  
TATTGGGTGTATCCGTATTTATAGAAGCTTTAATTTTTGTGCTTATCCCAATTGTTGGTTC  
AGTTTATGCATGGCGAAAAGGGGCATTGGAATGGTATACGAGTGATTTTCTTGGTTAA  
CAATAATTGTGGTTTTGCCGATATTTGCGGGTTCCTTACTTTTTTTTTCTCCCCATAGAG  
GAAATAAGGTGATTCGCTGGTATAACCATAGGTATATGTGTTTTAGAACTCCTTCTAACGA  
CCTATGTATTTTGTATCATTTCOAATTGGACGATCCATTAACACAATTGGGAGAGGATTA  
TAAATGGATAAATCTTTTTGATTTTCACTGGAGATTGGGAATCGATGGACTTTCTATAGG  
ACCCATTTTATTAACAGGGTTTATTACTACTTTAGCGACTTTAGCGGCTTGGCCAGTTAC  
TCGAGATTCACGATTGTTTTATTTCTGATGTTAGCAATGTACAGCGGCCAAATAGGATC  
ATTTCTCTCGGGACCTTTTACTTTTTTTTATTATGTGGGAGTTAGAATTAATCCCGTT  
TACTTACTTTTATCCATGTGGGGGGGTAAAAACGCTTTTATTAGCTACAAAGTTTATT  
TTATACACTGCAGGGGGCTCCCTTTTTCTCTTAATAGGGGTTTTGGGTATAGGTTTATAT  
GGTCCGACGGACCCATATTGAATTTTGAACATTAGCTAATCAATCATATCCCATAGTT  
TTGGAATTCATTATATTTTTGGCTTTCTTATTGCTTATGCTGTCAAATTACCGATTATACC  
CCTACATACATGGTTACCAGATACTCACGGAGAGGCACATTACAGTACATGTATGCTTCT  
AGCTGGAATCTTATTAATAATGGGAGCATATGGATTGATCCGGATAAATATGGAATTTTT  
ACCCACGCTCATTCTCTATTTTCTCCATGGTTTCGTGATAGTGGGAACGATACAAATAAT  
TTATGCAGCTTCAACCTCTTTCGGTCAACGTAATTTAAAAAAGAGAATAGCCTATTCCT  
CTGTATCTCATATGGGGTTTATAATTATAGGAATTGGGTCTATAACTAACGCGGGACTCA  
ATGGAGCCGTTTTACAATTAATCTCTCATGGATTCAATTGGTGCTGCGCTTTTTTTCTTAG  
GGGGAACAGGCTGTGATAGAACTCATCTTGTTTATCTTGACGAAATGGGGGGGGTATCC  
ATCCCAATGCCAAAATTCTTTACCTTGTTACAGTAGTTTCTCGATGGCCTCTCTTGCATTG  
CCGGGAATGAGTGGTTTTGTTGCGGAATTAGTAGTATTTTTTGAATAATTACCAGTCCA  
AATATCTTTAATGCCAAAATACTAATTACTTTTTATAATGGCAATTGGAATGATATTA  
CTCCTATTTATTTATTTATCTATGTTACGTCAAATGTTCTATGGATACAAATATTTAATGTT  
CAAAAGTCTTATTTTGTGGATTCTGGGCCACGAGAACTATTTGTTTCGATTTGTATCTTT  
TTGCCCGTACTAGCAATTGGTATTTATCCTGATTTTGTTTTCTCGCTATCCGTTGATAAGG  
TACAAGCTATTGTATCGAATTTTTCATAGAATGATGTTTGAGCATGCACTTTTATTGAG  
TGCCTATTTATTTCTATCGGTATCTATGGATTGATCACAAGTCGAAACATGGTTAGAGC  
ACTTATGTGCTTGAACCTATACTAAATTCGGTTAATATCAATCTTGTAACATTTTCTGAT  
TTATTCGATAGCCGTCAATTAATAAGGAGACATTTTCTCGATCTTTGTTATAGCCATTGCA

GCCGCAGAAGCTGCAATTGGACTAGCTATTGTTTCATCAATCCATCGTAACAGAAAATC  
AACTCGCATCAATCAATCAAATTTGTTGAATAAAATGGAACATACATATCAATATGCTTG  
GATAATACCTTTCCTTCCACTGCCTGTCACTATGTTAATAGGATTTGGACTTCTGCTTGTT  
CCAACAGCAACAAAAAATCTTCGTCTGATATGGGCTTTTTATAGTATTTTATTCTAAGTA  
TAGCTATGGTTTTTTCCGTCAATTTAGCTATTCAGCAAATAAATGGAAGTTTTATCTATCA  
ATATCTATGGTCTTGGACTATTAATAATGATTTTTCCCTTAGAATTCGGATACTTAATCGATC  
CACTTACTTCTATTATGTCAATATTGATCACTACCGTTGGAATCATGGTTCCTTATTTATAGT  
GATAATTATATGTCTCATGATCAAGGATATTTGAGATTTTTTGCTTATATGAGTTTTTTCAA  
TGCTTCCATGTTGGGATTAAGTACTAGTTCTAATTTGATACAAATTTATATTTTTTGGGAA  
CTAGTAGGGGTGTGCTCCTATTTATTAATAGGTTTTTGGTTTACACGACCAATTGCATCA  
AGTGCTTGTCAAAAAGCTTTTTGTAACATAAGGGTAGGGGATTTTGGTTTATTATTAGGA  
ATCTTGGGTTTTTATTGGATGACAGGTAGTTTCGAATTTCTAGATTTGTTTCGAAACATTT  
ACTAAGAATGGGGTAAATACCTTATTTGCTACTCTATGTGCTTTCCTGTTGTTTCGCCGGT  
GCAATTGCTAAATCTGCGCAATTCCTTCCATGTATGGTTACCTGATGCTATGGAGGGA  
CCCCTCCTATTTCCGGCTCTTATACATGCTGCTACTATGGTAGCAGCGGGAATTTTTCTT  
GTAGCTAGGCTTGTTCCTCTTTTACGGTTATACCTTATATAATGAATTTCAATTTCTTAAT  
AGGTGTAATAACGTTACTATTAGGAGCAACTTTGGCTCTTGCCCAAAGAGACATTAAGA  
GAGGTTTAGCCTACTCTACAATGTCTCAATTTGGTTTATATTATGTTAGCTCTAAGTATAGG  
TTCGTATCGGGCTGCTTTATTTCAATTTGATTACTCATGCCTATTCAAAGCATTATTGTTT  
TTAGGATCCGCGTCCATTACCCATTCAATGGAACCCGTTGTTGGATATTCACCTGATAAA  
AGTCAGAATATGGCTCTTATGGGCGGTTAACGAGATATGTTCCAATTACAAAACTAC  
TTTTTTATTGGGCACACTTTCTCTTTGTGGTATTCCACCTCTTGCCTGTTTTTGGTCCAA  
AGATGAAATTTAATGATACTTGGTTGTATTCACCGATTTTTGCAATAATAGCAACTTT  
CACAGCTGGATTAACCGCATTTTATATGTTTCCGGCTATATTTACTTACTTTTCGACGGATAT  
TTCCATGTTTCAATTAAGAATTACAGTGGAATTAATAAATTCTTCTCTATATTCATATCTT  
TATGGGGCAAAAAGCACCAAAATTGATAAAGAAA---AATTTACTTTTATCACCAACGA  
AT-----ACAAAATGC-----ACTTCTATCCATCCACATGAATCGGATAATACTATGCTATTT  
CCACTGCTTATATTGGTAGTATTTACTTTATTCATTGGATTTCATTGGGATTCCTTTTGATTT  
GGATCTATTATCCAAATGGTTGACTCCACCAGAAAATTTTTCCATGCAGATTCTCATCA  
TTCTGAAAATTGGTATGAATTTATAACAAATGCAATTTATTCAGTCGGGATAGCCTCTTT  
CGGAATATGCATAGCATACTTTTATGGGTCCGTTTATTCATCTTTCCAAAATTTTTAT  
TTCAGAAATTCCTTTCTGATTTTATTGGACCCTATAGTAAATGCGATATAACAATTGGTCAT  
ATAATCGGGGCTATATAGATTTTCTTTATATAACAGTGTTAACAAGGAGTATCAGAATATT  
CTCGGAACTAACTTCTTTTTTTGATAGCTGTGTAATTGATGGAATTATAAACGGTATTGG  
TATTGGCACTTTTCTTATAGCAGAAGGATTAATAATATATTGCAAGTGA---CGGTTTTCAT  
TTTATCTTCTCTTATATTTATTCTATTATGTATTACTTTTTTTACTAATTCATATGGGTTTAA  
CTGGACCAATACATGATATTCTTGTAGTATTTTGGGATCCGTTCTTATATTAGGAAGTCT  
GGGAGTCGTTTTTATTTACCAATCCTATTTTTTCCGCCTTTTCATTGGGATTGGTTCTTGTT  
TGTATATCCTTATTATACATTTTATCGAACTCCTATTTTCGTAGCTGCTGCGCAGCTCCTTAT  
TTAIGTGGGGGCTATAAATGTTTTAATCATATTTGCTGTGATGTTACAAAATAGTTCCGAA  
TATTATAATGATTTCCATCTTTGGACTATTGGAGATGGGGTTACTTCTTAGTCTGTACAA  
GTATTCTTTTTTCACTAATTACTACTATCCTAGAGACATCATGGTATGGGATTATTGGAC  
TACAAGATCAAATCAAATTATAGAGCAGGATCTAATAAGTAATGTTCAACAAATTGGTAT  
TCATTTATCAACGGACTTTTTTCTTCCATTTGAATTAATTTCCCTAATTTCTTTTAGTTGCA

TTAATAGGTGCAATTAGTATGGCTCGTCAAATGACTGTACCGGCTACAAGAAAGGATCT  
CATGATAGTCAATATGGGTCCCCAACACCCATCAATGCATGGCGTTCCTCGACTGATCG  
TGA CTCTTGACGGTGAAGATGTTATTGACTGTGAGCCCATATTGGGTATTACACAGA  
GGGATGGAAAAAATTGCGGAAAACCGAACCAATTATACAATATCTCCCTTATGTAACACG  
TTGGGATTATTTAGCTACTATGTTTACAGAAGCAATAACTGTAAATGGGCCAGAACTATT  
GGGAAATATTCAGGTACCTCAAAGAGCCAGCTATATCAGAGTAATTATGCTAGAGCTGA  
GTCGTATAGCTTCTCATTTATTATGGCTTGGGCCCTTTATGGCGGATATTGGCGCGCAGA  
CTCCTTTTTTCTATATTTTCAGAGAGAGAGAATTGATATATGATCTATTTCGAAGCTGCCA  
CAGGCATGCGAATGATGCATAATTATTTCCGTATCGGAGGAATAGCTGCTGATCTACCTT  
ATGGCTGGATAGATAAATGTTTGGATTCTGCGATTATTTTTTAACGGCAGTTACCGAAT  
ATCAAAAACCTTACTACTCGCAATCCATTTTTTTTGGAACGAGTTGAAGGAATAGGTATT  
ATTGGTGGGGAAGAAGCAATAAATTGGGGTTTGTGAGGACCAATGTTACGAGCTTCTG  
GAATACAATGGGATCTTCGGAAAAGTTGATGATTATGAGTGTTACAATGAATTCGATTGG  
GAAGTTCAATGGCAAAAAGAAGGAGATTCATTAGCTCGTTATTTAGTACGAATTGGTGA  
AATGATAGAATCTATAAAAATTATTCAACAAGCTCTGGAAGGAATTCCTGGGGGGCCCT  
ATGAAAATTTAGAAGTAAGACGT--GATAAGACAAAAAATTCGGAATGGAATGATTTTG  
AATACAGATTCATTAGTAAAAAACCTTCACCCAATTTTGAATTATCGAAACAAGAACTT  
TATGTTAGAGTAGAATCCCCAAAGGGAGAATTAGGAATTTTTCTAATGGGAGATCAGAG  
TGTTTTTCCTTGGAGATGGAAAATCCGTCCGCCTGGTTTTCATCAATTTGCAAATTCCTCC  
TCAACTAGTGAAAAGAATGAAATTGGCTGATATCATGACAATACTAGGTAGTATAGATAT  
CATTATGGGGGAGGTTGATCGTATGTTTCCCTATGGTAACTGGATTCATGAATTATGGTCA  
ACAAACAGTACGAGCCGCAAGGTATATCGGTCAAGGTTTCATGATTACCTTATCCATA  
CAAATCGTTTACCTGTA ACTATTCAATATCCTTATGAAAAATTAATTACATCGGAACGTTT  
CCGTGGTCAATCCATTTTGAATTTGATAAATGTATTGCATGTGAAGTGTGCGTTTCGTGT  
ATGTCCTATAGATCTTCCCGTTGTTGATTGGAGATTGAAAACAGATATTA AAAAGAAAC  
AATTGCTTAATTATAGTATTGATTTTGGGGTATGTATATTTTGTGGTAACTGTGTGAGTA  
TTGCCCAACAACTGTTTATCAATGACTGAAGAATATGAACTTTCGCTTATGATCGTC  
ACGAATTGAATTACAATCAAATTGCTTTGGGTGCGTTACCTATGTCCGTAATTGGGGATT  
ACACAATTCAAGCAATTGGTAATTCAAAAATAGACAAAGATAAATCTTTTGATTCAAAA  
TCAATTAATAATTATATGCAAGGTCGTTTATCCGCCTGGCTAGCCAAGCATGAGCTAGTT  
CATAGATCTTTGGGCTTCGATTACCAAGGAATAGAACTTTACAAATAAAGCCTGAGGA  
TTGGGACTCCATTGCTGTKATTTTATATGTATATGGTTACAATTATTTACGATCTCAGTGT  
GCTTATGATGTATCACCGGGTGGATTTTTAGCTAGTGTGTATCATCTTACGAGAATACAA  
TATGGTGTGATCAACCAGAAGAGGTATGCATMAAAGTATTTACCCCAAGGAAGAATC  
CKCAAATTCCTTCCGTTTTCTGGATTTGGAAAAGTGCGGATTTTCAAGAACGGGAATCT  
TATGATATGTTGGGAATTTCTTATAATAAYCATCCGCGCCTTAAACGTATCTTGATGCCGG  
AAAGTTGGATAGGATGGCCTTTACGTAAGGACTATATACTCCCAATTTCTATGAAATAC  
AAGATGCTTAT-----  
-----ATGGTATTAGCTCCTGAATATTCAGACAATCWAATMAAAAGAAAGGAAAA  
GATAACATTGAGACAATTATGAATTTGATTGAGTTTCCATTAGTTGACCAAGCAATCTCC  
AATCCGTTATTTCAACCACATTGAATGATCTTTCCAATTGGTCAAGACTCTCCAGTTTA  
TGCCACTTTKATATGGTACTAGTTGTTGTTTTATTGAATTTGCTGCATTAATAGGCTCCC  
GATTTGACTTTGATCGGTATGGATTGGTACCAAGATCGAGTCCTAGGCAAGCAGACCTT  
ATTTAACAGCTGGTACAGTAACAATGAAAATGGCCCCCTTTTAGTGAGATTATATGA

GCAAATGCCTGAACCAAAATATGTCATTGCTATGGGTGCCTGTACTATTACAGGGGGTA  
TGTTTCAGTACCGATTCTTATAGTACCGTTTCGAGGAGTCGATAAGCTAATTCCTGTAGATG  
TGTATTTACCGGGCTGCCACCTAAGCCAGAGGCTGTTATAGATGCTATAACGAACTT  
CGTAAGAAGATATCTCGAGAAATCTCTGAAGATAGAATTGGATCTCAA---GAAAATCGA  
TGTTTTACTATCAATCACAAGTTTCATGTTTCGACGTAGTATTCATACTGGAAATTACAAT  
CAAAAATTGCTCTATCAATCACCACGTACTTCAGAAATATCTCCA-----TTTTTCAAATCC  
AAAAATTC AATATCTTCTCAGGAATTGGCGAATATGCAAATAGAAATACTCTTCTTGG  
GATAAAGGAACAGATGACTCGATTTATTTCCGTATCAATAATGATATATATAATAACTCAG  
ACATCTATTTCAAACGCGTATCCCATTTTTGCGCAGCAGGGTTATGAAAATCCACGCGA  
AGCGACTGGACGAATTGTATGCGCCAATTGCCATTTAGCGAATAAACAGTGGATATTG  
AAGTTCCCAAGCTGTACTTCCTGATACTGTATTCGAAGCAGTTGTTAGAATCCCTTATG  
ATATGCAACTGAAACAAGTTCTTGGTAATGGTAAAAAAGGGGATTTGAATGTGGGGGC  
TGTTCTTATTTTACCCGAAGGATTCGAATTAGCTCCTCCCGATCGTATTTCTCCTGAGAT  
GAAAGAAAAGATAGGCAATTTATCTTTTCAGAGTTATCGTCCCACTAAAAAAAATATTC  
TTGTGATAGGTCTCTGTTCTGTTCAAAAATATAGTGAAATTGTCTTTCCGATTCTTTCTC  
CAGACCCTGCTACGAAAAAAGATGCTCATTCTTAAATATCCCATATATGTAGGTGGG  
AACAGGGGAAGGGGGCAGATTTATCCCGATGGGAGAAAAAGTAACAATACAGTCTATA  
ACGCTTCATCGACGGGTATAGTCACTAAAATTGTACGTAAAGAAAAGGGCGGATACGA  
AATAACCATAGCTGATACATCGGATGGGCGCCAAGTGGTTGATATTATACCTCGAGGAC  
CAGAGCTTCTTGTTCAGAGGGGGAATCCATCAAACCTTGATCAACCATTAACAAGTAAT  
CCCAATGTGGGGGGCTTTGGTCAGGGGGATGCTGAGATAGTGCTTCAAGATCCATTAC  
GTGTACAAGGTCTTTTATTCTTCTTCGCATCCGTTATTTTGGCACAAATCTTTTATGTTCT  
TAAAAAGAAACAGTTTGAAAAGGTTCAATTGTACGAAATGAATTTTCATGAGTAAAGTAT  
ATGATTGGTTTGAAGAACGTCTAGAGATTCAGGCGATTGCAGATGATATAACTAGTAAA  
TATGTTCCCTCCTCATGTCAACATATTTTATTGCTTAGGGGGAATCACACTCACTTGTTTTT  
TAGTACAAGTAGCTACAGGTTTTGCTATGACTTTTTACTACCGTCCAACCGTTACAGAG  
GCTTTTTCTTCTGTTCAATACATAATGACTGAGGTCAACTTTGGTTGGCTAATTCGATCA  
GTTTCATCGATGGTCGGCAAGTATGATGGTTCTAATGATGATTTTGCACGTATTTTCGTGTAT  
ATCTCACGGGTGGGTTTTAAAAACCCCGCGAATTAACCTTGGGTTACGGGTGTAGTTTTG  
GGTGTATTAACCTGCATCTTTTGGTGTAACTGGTTATTCCTTACCTTGGGACCAAATTGGT  
TATTGGGCAGTAAAAATTGTAACAGGTGTACCTGAAGCTATTCCTGTAATAGGATCGCC  
TTTGGTAGAATTATTGCGTGGAAGTGCTAGTGTAGGTCAATCCACTTTAACCCGTTTTTA  
TAGTTTACACACTTTTGTATTGCCCTTCTTACTTCCGTATTTATGTTAATGCATTTCCCTAA  
TGATACGTAAGCAGGGTATTTCCGGTCTTTAATGGGAGTAACAAAGAAACCAGATTTG  
AATGATCCTGTATTAAGAGCTAAATTGGCTAAAGGAATGGGACATAATTATTACGGGGA  
ACCGGCGTGGCCTAATGACCTTTTATATATTTTTCCGGTAGTAATTTTAGGTACTATAGCA  
TGTAACGTAGGCTTAGCAGTTCTAGAACCGTCAATGATTGGTGAACCCGCGGATCCTTT  
TGCAACTCCTTTGGAAATATTACCCGAATGGTACTTCTTTCCTGTATTTCAAATACTTCG  
TACAGTACCAAATAAGTTATTAGGTGTTCTTTAATGGCTTCAGTACCATTAGGATTATT  
GACAGTACCCTTTTTGGAGAATGTCAATAAATCCAAAATCCGTTTCGTTCGTCAGTAG  
CTACAACCTGTTTTTTGATTGGTACTGCAGTCGCACTTTGGTTAGGTATTGGGGCAACA  
TTACCTATTGATAAATCTTTGACTTTAGGTCTTTTTATGATTGAAGTTTTTCTATTTGGAA  
TCGTGTTAGGTCTAATTCCTATTACTTTGGCAGGATTATTCGTAACCTGCATATTTACAATA  
CAGACGCGGTGATCAGTTGGATCTTATGCTTACTATAACTAGTTATTTCCGTTTTTCTACT

GGCTGCTTCAACTATAACTTCAGCTCTATTCATTGGTTTGAACAAGATCCGACTTATTAT  
GGATATAGTAAGTCTCGCTTGGGCTGCTTTAATGGTAGTCTTTACCTTTTCCCTTTCACT  
CGTAGTATGGGGAAGAAGTGGACTTATGATTATTCGTTTCGCCGGAACAAGAAGTGAAA  
ATTGTCGTGGATAGGGATCCCGTAAAAACGTCTTTTCGAGCAATGGGCCAAACCGGGAC  
ATTTCTCAAAAACAATAGCTAAGGGCCCTGATACTACTACTTGGATCTGGAACCTACAT  
GCTGATGCTCACGATTTTCGATAGTCATACCGATGATTTAGAGGAAATCTCTCGAAAAGT  
ATTTAGTGCTCATTTTCGGTCAACTCTCCATTATCTTTCTTTGGCTGAGTGGCATGTACTT  
CCACGGTGCTCGTTTTTTCTAATTATGAAGCATGGCTAAGCGATCCTACTCACATTCGACC  
TAGTGCTCAAGTAGTTTGGCCAATCGTGGGTCAAGAAATATTGAATGGTGATGTTGGCG  
GGGGTTTCCGAGGAATACAAATAACCTCTGGTTTTTTTCAGATTTGGCGAGCATCCGGA  
ATAACTAGTGAATTACAACCTTTATTGTACCGCAATTGGTGCATTGGTTTTTTCGGCCTTA  
ATGCTTTTTGCCGGTTGGTTCCATTATCACAAAGCTGCCCCAAAATTGGCTTGGTTCCA  
AGATGTAGAATCCATGTTGAATCACCATTTAGCGGGGTTACTGGGACTTGGATCTCTTT  
CTTGGGCGGGACACCAATCCATGTATCTTTACCGATTAACCAATTTCTCGACGCTGGA  
GTGGACCCTAAGAGATAACCACTTCCTCATGAATTTATCTTAAATCGGGATCTTTTGGCT  
CAACTTTATCCTAGTTTTGCTGAGGGAGCAACTCCCTTTTTTACCTTGAATTGGTCAA  
ATACGCGGATTTTTCTTACTTTTCGCGGAGGATTAGATCCAATAACAGGGGGTCTGTGGT  
TGAGCGATACTGCTCACCATCATTTAGCTATTGCAGTTCTTTTCCTGATAGCGGGTCATA  
TGTATAGGACCAATTGGGGTATTGGTCATGGCCTGAAAGACATTTTAGAGGCTCATAAG  
GGTCCGTTTACAGGTCAGGGTCATAAGGGCCTTTATGAAATCCTAACAACGTCATGGCA  
TGCTCAATTATCGCTTAACCTGGCTCTGTTTCGGTCTTTAACCATTGTGGTAGCTCACC  
TATGTATTCCATGCCCCCTTATCCATATTTAGCTATTGACTATGGGACACAACCTTTCTTG  
TTCACACATCACATGTGGATCGGTGGATTTCTCATAGTTGGTGTCTGTCACACGCAGC  
TATTTTTATGGTAAGAGACTACAACCCAACTACTCGATAACAACGATCTTTTAGATCGTGT  
TCTTAGACACCCGCGATGCAATTATATCGCATCTCAATTGGGCATGTATATTTCTAGGTTTT  
CATAGTTTCGGCTTGATATTCATAATGATACCATGAGTGCTTTAGGGCGCCCTCAAGAT  
ATGTTTTCAGATACCGCTATAACAATTGCAACCCATCTTTGCTCAATGGATACAAAACACT  
CATGCTTTAGCACCTGGTACAACAGCTCCTGGCGCAGCAGCAAGCACCAGCTTAACTT  
GGGAGGTGGTGAGTTAGTAGCAGTAGGTGGCAAAGTAGCTTTGTTACCGATTCCATT  
AGGAACTGCAGACTTTTTGGTACATCACATTCATGCTTTTACGATCCATGTGACTGTATT  
GATTCTACTGAAAGGTGTCCTATTTGCTCGCAGCTCACGTTTGATACCTGATAAAGCAA  
ATCTTGGTTTTTCGTTTTCCCTTGCGATGGGCCTGGAAGAGGAGGAACATGTCAAGTATCT  
GCTTGGGACCATGTTTTCTTAGGTCTATTCTGGATGTACAATGCAATTCGGTAGTAATA  
TTCCATTTAGTTGGAAAATGCAATCAGATGTTTGGGGTACTGTAAGTGATAAAGGGGT  
GGTAACTCATATCACAGGAGGAACTTTGCACAGAGTTCCATTACTATTAATGGGTGGC  
TTCGAGATTTCTTATGGGCACAGGCGTCTCAGGTAATTCAGTCTTATGGTTCTTCATTAT  
CTGCGTATGGTCTCTTTTTCTTGGGTGCTCATTTTGTCTGGGCTTTTAGTTAATGTTTCT  
ATTCAGCGGACGTGGTTATTGGCAAGAACTTATTGAATCCATTGTTTGGGCTCATAACA  
AATAAAAGTTGCTCCTGCTACTCAGCCTAGGGCCTTGAGCATTGTACAAGGACGTGCT  
GTAGGAGTAACCCATTACCTTCTGGGTGGAATTGCCACAACATGGGCGTTCTTCTTAGC  
AAGAATTATTGCAGTAGGAATGGCATTAAAGATTTCCAAGGTTTAGCCAAGGCTTAGCTC  
AGGACCCCACTACTCGTCGTATTTGGTTTTGGTATTGCTACCGCGCATGACTTCGAGAGT  
CATGATGATACTGAGGAACGTCTTTATCAGAACAATTTTTGCTTCTCACTTTGGGCAG  
TTAGCAATCATCTTTCTGTGGACGTCTGGAAACCTCTTTCATGTAGCTTGGCAAGGAAA

TTTTGAGTCATGGGTACAGGACCCTTTACACGTAAGACCCATTGCTCATGCAATTTGGG  
ATCCCCATTTTGGTCAACCCGCTGTAGAAGCCTTTACTCGGGGTGGTGCTCTTGGACCG  
GTGAATATTGCTTATTCCGGTGTATTATCAGTGGTGGTATAACAATCGGATTACGCACTAAT  
GAGGATCTTTATACTGGCGCTCTTTTTCTATTATTTCTTTCTGCTATATCTTTGATAGCGG  
GTTGGTTACACCTACAACCCAAATGGAAACCAAGCGTTTCGTGGTTCAAAAATGCCGA  
ATCTCGTCTTAATCATCATTTGTCCGGACTTTTCGGAGTAAGTTCTTTGGCTTGGACAGG  
ACACTTAGTTCATGTCGCTATTCCCAGGATCCAGGGCGAGTACGTTAGATGGAATAATT  
TCTTAGATGTATTACCGTATCCTCAAGGGTTGGGTCCACTTTTTACAGGTCAGTGGAGT  
CTTTATGCACAAAACCCCGATTCCAGTAGTCATTTATTTGGTACCTCGCAAGGAGCGGG  
AACTGCTATTTAACTCTTTTGGGGGGTTCCACCCACAAACGCAAAGTTTATGGTTAA  
CTGATATTGCTCATCATCATTTAGCTATTGGATTTATTTTCCTGATAGCGGGTCATATGTAT  
AGAACCAACTTCGGGATTGGGCACAGTATAAAAGATCTTTTAGAAGCACATATTCCTCC  
GGGAGGTCGATTAGGGCGTGGACATAAAGGTCTTTATGACACAGTCAATAATTCGCTTC  
ATTTTCAATTAGGTCTTGCTCTAGCCTCTTTAGGGGTTATTACTTCTTTAGTAGCGCAAC  
ATATGTACGCTTTACCTTCTTATGCATTCATAGCACAAGACTTTACCACGCAAGCTGCGT  
TATATACTCATCACCATAACATCGCAGGGTTCATCATGACAGGAGCGTTTGCTCATGGA  
GCTATATTTTTTATTAGAGATTACAATCCGGAACAGAATGAAGATAATGTATTGGCAAGA  
ATGTTAGACCATAAAGAAGCTATCATATCTCATTTAAGTTGGGCCAGCCTGTTTCTGGGG  
TTCCATACCTTAGGACTTTATGTTTATAACGACGTCATGCTCGCGTTCGGTACTCCTGAA  
AAACAAATCTTGATCGAACCCATTTTGGCCAATGGATACAATCTGCACACGGTAAAAC  
TTCATATGGATTGATGACTCTTATCCGCAACGGATGGACCAGCATTCAATGCGGGTGC  
CAGCATATGGTTACCGGGATGGTTGAATGCTGTTAATGAG-----AGTAATAATCACTCTT  
CTTAACAATAGGTCCTGGGGATTCTTGGTTCATCATGCTATTGCTCTAGGGTTACATAC  
AACTACATTGATTTTAGTAAAAGGTGCTTTAGATGCGCGCGGTTCCAAGCTAATGCCAG  
ATAAAAAGGATTCGGTTATAGTTTTCTTGGCAGCGTCCAGGGCGGGGCGGTACTTGT  
GATATTTCTGCTTGGGACGCATTTTATTTGGCAGTTTCTGGATGTTAAATACTATTGGAT  
GGGTTACTTTTTTATTGGCATTGGAAGCACATCACATTATGGCAGGGTAACGTTGCCCAA  
TTAATGAATCCTCCACTTATTTGATGGGATGGTTAAGAGATTATCTGTGGTTAAACTCT  
TCACAACCTGATCAATGGGTATAACCCTGTGGGTATGAATAGCTTATCGGTCTGGGCGTG  
GATGTTCCATTTGGACACCTTGTTTGGGCTACTGGATTTATGTTTTTAATTTCTTGGCGT  
GGATATTGGCAGGAATTGATTGAAACTTTAGCATGGGCTCATGAACGCACACCTTTGGC  
TAATTTAATTAGATGGAGAGACAAGCCAGTGGCTCTTCCATTGTGCAAGCAAGATTGG  
TTGGATTAGCCCACTTTTCTGTAGGTTATATATCACTTATGCAGCTTTCTTGATTGCTTC  
TACATCAGGAAAATTCGGTATGTCACATTACAGTAAAATTTATGATACATGTATAGGATG  
TACTCAATGTGTACGAGCTTGCCCTACGGATGTGTTGGAAATGATACCTTGGGACGGAT  
GTAAAGCTAAGCAAATTGCTTCCGCACCAAGAAGTGGAGTGTGTGGGTTGTAAGAG  
ATGTGAATCCGCTTGCCAACTGATTTTTTGAAGTGTTCGTGTTTATTTATGGCATGAGAC  
AACCAATAGTATGGGTCTAGCTTATATGACAGATCTKAACTTACCCTCTATTTTTGTGCC  
TTTAGTAGGTCTAGTATTTCCGGCAATTGCAATGGCTTCTTTATCTCTTCATGTTCAAAA  
AAATAAGATTGTCATGCGAGATATAAAAACATATCTCTCTGTGGCACCCGTGCTAAGTA  
CTATATGGTTGTCATCTTTAGCGGGTCTATTGATAGAAATTAATCGTTTCTTCCCAGACG  
CCTTGTCATTC-----ATGACTGCAATTATAGATAGACGCGAAAGTACAAACCTATG  
GGGTCGCTTCTGCAACTGGATAACTAGCACTGAAAACCGTCTTTATATTGGATGGTTG  
GTGTTTTGATGATCCCTACCTTATTGACCGCAACTTCTGTATTTATTATCGCCTTCATTGC

TGCGCCTCCAGTCGATATTGATGGTATTCGTGAACCTGTTTCTGGGTCTCTACTTTACGG  
AAACAATATTATCTCTGGTGCAATTGTTCCCTACTTCTGCAGCTATAGGTTTACATTTTTAT  
CCAATATGGGAAGCAGCATCCGTTGATGAATGGTTATACAATGGTGGTCCTTATGAGCT  
AATTGTTCTACATTTCTTACTTGGGTAGCTTGCTACATGGGTCGTGAGTGGGAACTTAG  
TTCCGTTTGGGTATGCGTCCTTGGATTGCTGTTGCATATTCCGCTCCTGTTGCAGCTGC  
TACTGCTGTTTTCTTGATCTACCCTATTGGTCAAGGAAGTTTTTCTGATGGTATGCCTCT  
AGGAATATCAGGTACTTTCAACTTTATGATTGTATTCCAGGCGGAACACAATATCCTTAT  
GCATCCATTCACATGTTAGGCGTAGCTGGTGTATTCCGGCGGCTCCCTATTTAGTGCTAT  
GCATGGTTCCTTGGTAACTTCTAGTTTAATCAGGGAAACCACTGAAAACGAGTCTGCTA  
ATGAAGGTTACAGATTCGGTCAAGAGGAAGAACTTATAACATCGTAGCCGCTCATGG  
TTATTTTGGCCGATTGATCTTCCAATATGCTAGTTTTAACAACCTCTCGTTCCTTACACTTT  
TTCTTAGCTGCTTGGCCTGTAGTAGGTATCTGGTTCCTGCTTTAGGTATTAGTACTATG  
GCTTTCAACCTAAATGGTTTTCAATTTAACCAATCTGTAGTTGACAGCCAAGGTGCTGT  
TATTAACACTTGGGCTGATATCATCAACCGTGCTAACCTTGGTATGGAAGTKATGCATGA  
ACGTAATGCTCACAACTTCCCTCTAGACCTAGCTGCTGTTGAAGCTCCATCTACAAACG  
GAATGGGTTTGCCTTGGTATCGTGTTCATACGGTTGTTTTGAATGATCCCGGTCCGGTAC  
TTTCTGTCCATATAATGCATACAGCTTTAGTTGCTGGTTGGGCCGTTCAATGGCTCTAT  
ACGAATTAGCGGTTTTTGGACCCCTCTGACCCCTGTTCTTGATCCGATGTGGAGACAGGGT  
ATGTTTGTATACCTTTTCATGACTCGTCTAGGAATAACTAATTCATGGGGCGGTTGGAGT  
ATTACA---GGGGGACTGTMACAAATCCGGGTATTTGGAGTTACGAAGGTGTGGCAGG  
GGCACATATTGTGTTTTCTGGTTTTGTGCTTTTTGGCAGCTATCTGGCATTGGGTGTATTG  
GGACCTAGAAATATTCTGCGATGAACGTACAGGAAAACCCTCTTTAGATTTGCCAAAAA  
TCTTTGGAATTCATTTATTTCTTTTCAGGAGTCGCTTGCCTCCGTTTTGGCGCATTTCATGT  
AACCGGTTTTGTATGGTCCCTGGAATATGGGTATCAGATCCTTATGGGCTAACTGGAAAAG  
TACAACCTGTAAATCCTGCGTGGGGCGCGGAAGGTTTTGATCCCTTTGTTCCCTGGGGG  
AATAGCTTCTCATCATATTGCAGCGGGTACATTGGGCATATTAGCGGGCCTATTCCATCTT  
AGTGTCCGTCCGCCTCAACGTTTATACAAAGGATTACGTATGGGAAATATTGAAACCGT  
ACTTTCCAGTAGTATCGCAGCTGTCTTTTTTGCAGCTTTCGTTGTTGCTGGAACGATGT  
GGTATGGTTCAGCAACTACCCCGATCGAATTATTTGGTCCGACTCGTTATCAGTGGGAT  
CAGGGATATTTCCAGCAAGAAATATATCGAAGAGTTGGCGCTGGGTTGGCCGAAAATC  
TGAGTTTATCAGAAGCTTGGTCTAAAATTTCCGAAAAAATTAGCTTTTTATGATTATATCG  
GTAATAATCCAGCAAAAGGGGATTATTTCAGAGCCGGCTCAATGGACAATGGAGATGG  
AATAGCTGTTGGTTGGTTAGGGCATCCCGTCTTTCGAGATAAAGAAGGCCACGAGCTTT  
TTGTACGTCGTATGCCTACTTTTTTTGAAACATTTCCGGTAGTTTTGGTAGACGGAGAC  
GGAATTGTGAGAGCCGATGTTCCCTTTAGAAGGGCAGAATCAAAATATAGTGTGCAAC  
AAGTAGGTGTAACGTTGAGTTCTATGGTGGCGAACTCAATGGAGTCAGTTATAGCGAT  
CCGGCTACTGTGAAAAAATATGCTAGACGCGCTCAATTGGGGGAAATTTTTGAATTGGA  
TCGGGCTACTTTGAAATCGGATGGTGTTTTTTCGTAGTAGTCCAAGGGGCTGGTTCACTT  
TTGGGCATGCTACATTTGCTTTGCTCTTCTTTTTTGGACACATTTGGCATGGTGCTAGAA  
CCTTGTTCCGAGATGTTTTTGTGCTGATTGATCCAGATTTGGATGCTCAAGTGGAATTTG  
GAACATTTCAAAAACCTTGGGGATCCAATAAAGAGACAGGCAGTCATGAAAACCT  
TATATCCCTGAGGAGGTTCTACCACGTGGAAACGCTCTTTAATGGAACCTTAACTTTA  
GCTGGCCGTGACCAAGAAACCACCGTTTTCGCCTGGTGGGCCGGAATGCCAGACTTA  
TCAATTTGTCCGGTAGACTACTTGGAGCCCACGTGGCCCATGCCGGATTAATTGTATTTT



GGGCTGGAGCAATGAACCTATTTGAAGTGGCTCATTTTCGTACCAGAGAAGCCCATGTAT  
GAACAAGGATTGATTTTACTACCCCATCTAGCTACTCTGGGTTGGGGAGTAGGTCCGGG  
GGGAGAAGTTATAGACACTTTTCCATACTTTGTGTCTGGAGTACTTCACTTAATTTCCCTC  
CGCAGTCTTAGGTTTTGGCGGTATTTATCATGCACTTCTTGGACCTGAAACTCTTGAAG  
AATCTTTTCCATTCTTTGGTTATGTATGGAAAGATAGAAATAAAATGACCACAATTTTAG  
GTATTCATTTAATTTGTAGGTATAGGTGCTTTTCTTCTCGTATTTAAAGCTCTTTATTTT  
GGTGGTGTATATGATACCTGGGCTCCCGGAGGAGGAGATGTAAGAAAAATTACCAACTT  
AACTCTTAGCCCAAGTGTATATTTGGTTATTTATTAATAATCCCTTTTGGGGGAGAAGG  
ATGGATTGTTAGTGTGGACGATTTAGAAGATATAATTGGAGGGCATGTATGGTTAGGTTT  
CATTTGTATACTAGGTGGAATTTGGCATATCCTAACCAACCTTTTGCATGGGCTCGCCG  
TGCACCTGTATGGTCTGGGGAGGCTTACTTGTCTTATAGTTTAGCTGCTTTAGCTATCTT  
TGGTTTCACTGCTTGTGTTTTGTCTGGTTCAATAATACTGCTTATCCTAGTGAATTTAT  
GGCCTACTGGACCGGAAGCTTCTCAAGCTCAAGCATTACTTTTCTAGTTAGAGATCA  
ACGTCTTGGGGCTAACATAGGATCCGCTCAAGGGCCTACTGGTTTAGGTAAATACCTAA  
TGC GTTCTCCTACTGGAGAGGTCATTTTTGGTGGGGAAACTATGCGTTTTTGGGATCTC  
CGCGCTCCTTGGTTGGAACCTCTAAGGGGTCCAATGGTTTGGACTTGAGCAGGCTGA  
AAAAAGATATACAACCTTGGCAAGAACGACGTTTCGGCAGAATATATGACTCACGCTCC  
TTTAGGTTCTTTAAATTCTGTAGGTGGCGTAGCTACCGAGATTAATGCAGTCAATTATGT  
CTCTCCTAGAAGTTGGTTAGCTACTTCTCATTTTGTCTAGGATTCTTCTATTTGTGGGT  
CATTTATGGCATGCGGGAAGGGCTCGCGCAGCTGCAGCAGGGTTTGAAAAGGAATCG  
ATCGTGATTTGGAACCTGTTCTTTCCATGACCCCTCTTAATATGACTATAGCCCTTGGTA  
GATTTACCAAAGAAGAAAATGATTTATTCGATATTATGGATGACTGGTTACGTAGGGAC  
CGTTTCGTTTTTGTGGGTTGGTCCGGCCTATTGCTCTTTCCTTGCGCTTATTTTCGCTTA  
GGAGGTTGGTTCACGGGTACAACCTTTTGTAACTTCATGGTATACTCATGGATTGGCTAG  
TTCTTATTTGGAAGGCTGCAATTTCTTAAGTCTGCGGTTTCTACCCCTGCGAATAGTTT  
AGCGCATCTTTGTGTACTATGGGGTCCCGAAGCACAAGGGGATTTTACTCGTTGGT  
GTCAATTGGGGGGTCTGTGGACTTTTGTGCTCTTCATGGAGCTTTCGGGCTAATAGGT  
TTTATGTTACGTCAATTTGAACTTGCTCGATCCGTTCAATTGCGACCTTATAATGCAATC  
GCATTTTCTGGTCCAATTGCTGTTTTTGTCTGTATTCTTGATTTATCCACTAGGTCAGT  
CTGGTTGGTTTTTTCGCGCTAGTTTTGGTGTAGCAGCCATATTTGATTTATTCTCTTTTT  
CCAAGGATTTCATAATTGGACCTTGAACCCGTTTCATATGATGGGAGTTGCCGGAGTATT  
AGGTGCAGCTCTACTATGCGCTATTCATGGTGCTACTGTGGAAAATACTTTATTCGAAGA  
TGGTGACGGTGCAAATACATTCCGTGCTTTTAAACCAACTCAGGCAGAAGAGACTTATT  
CAATGGTCACTGCTAACCGTTTTTGGTCCCAAATTTTTGGGGTTGCTTTTTCCAATAAA  
CGTTGGTTACATTTCTTTATGTTATTTGTACCAGTAACCGTTTTGTGGATGAGTGCTATT  
GGAGTAGTCGGTCTGGCTCTGAACCTACGTGCCTATGACTTCGTTTCTCAGGAAATCCG  
TGCAGCGGAGGATCCTGAATTTGAGACTTTCTACACCAAAAATATTCTTAAACGAGG  
GTATTCGTGCTTGGATGGCGGCTCAGGATCAGCCTCATGAAAACCTTATATTCCCTGAG  
GAGGTTCTACCACGTGGAAACGCTCTTATGTCTGGAAGCACGGGAGAACGTTCTTTTG  
CTGATATCATTACCAGTATTCGATACTGGGTCATTCATAGCATTACTATAACCTTCCCTATT  
ATTGCGGGTTGGTTATTCGTCAGTACGGGTTTAGCTTACGATGTGTTTGGAAAGCCACG  
GCCAAATGAGTATTTACAGAGAGCCGACAAGGGATTCCATTAATAACTGGCCGTTTTG  
ATTTCTTTGGAACAACCTCGATGAATTTAGTAAATCCTTTATGACCATAGATCGAACCTATC  
CAATTTTTACAGTGCGATGGTTGGCTGTTTCATGGACTAGCTGTACCTACCGTTTTCTTTTT

TGGGGTCAATATCAGCAATGCAGTTCATCCAACGAATGGCTACACAAAGCGTTGAGGG  
CAGTTCTAGGTCTGGA--CCAAGACGAACTGTTGTAGGGGATTTATTGAAACCATTGAA  
TTCCGAATATGGTAAAGTAGCTCCGGGGCTGGGGGACTACTCCATTTATGGGGGTTGCAA  
TGGCTTTATTTGCAGTATTCCTATCTATTATTTTGGAAATTTATAATTCTTCCGTTTTATTG  
GATGGAATTTCAAGTGAATATGCTTACTCTGAAACTCTTTGTTTACACAGTAGTGATATTC  
TTGTTTTCTCTGTTTTATTTTTGGATTCTTATCTAATGATCCAGGGCGTAATCCTGGACGTG  
AAGAAATGGCCGATACTACTGGAAGGATTCTCTTTGGCTGATAGGTACTGTAGCTGGT  
ATTCTTGTGATCGGTTCAATAGGTGTTTTCTTTTACGGTTCATATCCGGATTGGGCTCAT  
CCCTGATGCTTAATATCTTTAGTTTCATCTGGATCTGTCTTAATTCTAGCCCTTATTCGGG  
TAGTTTTTTCTTCGCCAAATTGCCTGAGGCTTATGCCATTTTCAATCCAATTGTGGATATT  
ATGCCTGTAATACCCCTATTTTTCTTCTTTTAGCCTTTGTTTGGCAAGCTGCTGTAAGTT  
TTCGAATGACACAATCAAACCCGAATGAACAAAATGTTGAATTGAATCGTACCAGTCTA  
TACTGGGGATTATTACTCATTTTTGTACTTGGCTGTTTTATTTTCCAATTATTTCTTCAATAT  
GGAAGTAAATATTCTCGCATTTATTGCTACTGCACTCTTTATTCTAGTTCCTACTGCCTTT  
TACTTATCATTACGTAAAACAGTCAGCCAAAATGATATGGAAACAGCAACTCTAGT  
CGCCATCTTCATATCTGGTTTACTTGTAAGTTTTKACTGGGTATGCCTTATATACCGCTTTT  
GGGCAACCCTCTCAACAATAAGAGATCCATTCGAGGAACACGGAGACATGGAAGCA  
TTGGTTTATACATTTCTGTTAGTCTCTACTTTAGGGATAATTTTTTTTCGCTATCTTTTTTCG  
AGAACCACCTAAGGTTCCAATAAAAAA-----ATGACTATTGCTTTCCAATTGGCTGTTT  
TTGCATTAATTGCAACCTCATCAATCCTATTAATTAGTGTACCCGTTGTATTGCTTCTTC  
TGATGGTTGGTCAAGTAACAAAATATTGTCTTTTCTGGTACATCGTTATGGATTGGATT  
AGTCTTTCTGGTAGCTATCCTTAATTCTCTGATCTCT-----ATGTCACCACAAA  
CAGAGACTAAAGCAGGTGTTGGATTCAAAGCWGGTGTAAAGATTACAAATTGACTTA  
TTATACTCCTGAATATGAAACCAAAGATACTGATATCTTGGCAGCATTCCGAGTATCTCC  
ACAACCTGGAGTTCACCTGAAGAAGCAGGGGCCGAGTAGCTGCCGAATCCTCTACT  
GGTACATGGACAACCTGTGTGGACTGATGGACTTACTAGYCTTGATCGKTACAAAGGAC  
GATGCTACCACATCGAGCCTGTTGCTGGGGAGGAAGATCAATATATTGCTTATGTAGCTT  
ATCCTTTAGACCTTTTTGAAGAAGGTTCTGTTACCAACCTGTTTACTTCCATTGTGGGTA  
ATGTATTTGGATTCAAAGCTCTACGAGCTCTACGCTTGGAGGATCTGCGAATCCTCCT  
GCTTATTCCAAAACCTTTCCAAGGTCCACCTCATGGAATCCAAGTTGAAAGAGATAAATT  
GAACAAATATGGTCGTCTCTATTGGGATGTAATAAACCAAAATTGGGATTATCCGC  
GAAAACTACGGTAGAGCCGTTTATGAATGTCTACGTGGTGGACTTGATTTTACCAAAG  
ATGATGAAAACGTAAACTCACAGCCATTTATGCGTTGGAGAGACCGTTTCCATTTTTGT  
GCCGAAGCAATTTATAAATCGCAATCCGAAACAGGTGAAATCAAAGGACACTACTTGA  
ATGCTACTGCGGGTACGTGTGAAGAAATGATGAAAAGGGCGGTATTTGCCAGAGAATT  
GGGAGTCCCTATCGTAATGCACGACTACTTAACAGGGGGAKTCACWGCAAATACTAGC  
TTGGCTCATTATTGCCGAGACAACGGCTKACTTCTTCACATTCACCGTGCWATGCATGC  
AGTTATTGATAGACAGAAGAATCATGGTATACATTTTTCGTGTACTAGCTAAAGCGTTACG  
TATGTCTGGTGGAGATCACATTCCTCCGGTACAGTAGTAGGTAAACTGGAAGGCGAA  
CGTGAGATGACTTTAGGTTTTGTTGATTTACTACGCGACGATTATATTGAAAAAGATAGA  
AGCCGCGGTATTTCTTCACTCAAGATTGGGTCTCTATGCCAGGTGTTCTGCCGGTGGC  
TTCAGGCGGTATTCATGTTTGGCATATGCCTGCCTTGACCGAGATCTTTGGGGATGATTC  
CGTACTACAGTTCCGGCGGAGGAACTTTGGGACACCCTTGGGGAAATGCACCTGGTGCA  
GTAGCTAATAGGGTGGCTTTAGAAGCGTGTGTACAAGCTCGTAATGAAGGGCGTGATTT

AGCTAGTGAAGGTAATGAAATTATCCGTGAAGCTGCTAAATGGAGCCCTGAACTTGCC  
GCTGCTTGTGAAGTGTGGAAAGAAKSA AATTCGAATTC AAACCGGTAGATACCTTGG  
ATAACATGGCGATACATTTATACAAA ACTTCTACCCCGAGCACACGCAACGGAGCCGTA  
GACAGG-----AAATCCAATCCACGAAATAATTTGATTTATGGACAGCATCGTTGTGGTAA  
AGGTCGTAATGCCAGAGGAATCATTACCGCAAGGCATAGAGGGGGAGGTCATAAGCGT  
CTATATCGTAAAATCGATTTTCGACGGAATGAAAAGACATATCTGGTAGAATCGTAAC  
CATAGAATACGACCCTAATCGAAATGCATACATTTGTCTCATACTATGGGGATGGTGA  
GAAGAGATATATTTTACATCCCAGAGGGGCTATAATTGGAGATACCATTATTTCTGGTAC  
AGAAGTTCCTATAGCAATGGGAAATGCCCTACCTTTGACCGATATGCCCTTAGGCACGG  
CCATACATAACATAGAAATCACACTTGGAAAGGGTGGACAATTAGCTAGAGCAGCAGG  
TGCTGTAGCGAAACTGATTGCAAAAGAGGGTAAATCGGCCACATTAAGATTACCATCT  
GGAGAGGTCCGTTTAATATCCAAA ACTGCTTAGCAACAGTCGGACAAGTGGGTAATG  
TTGGGGTGAACCAAAAAGTTTGGGTAGAGCCGGATCTAAGTGTTGGCTAGGTAAACG  
TCCTGTAGTAAGAGGAGTCGTTATGAACCCTGTAGACCACCCCATGGGGGCGGTGAA  
GGGAGAGCCCAATTGGTAGAAAAAACCTATGACCCTTGGGGTTATCCTACACTTG  
GAAGAAGAAGTAGGAAAAGGAAAAAATATAGTGATCGTTTTATTCTTCGTCGCCGTAA  
A--ATGATTCAACCTCAGACCCTTTTGAATGTAGCGGATAACAGCGGGGCTAGAGAATT  
GATGTGATTTCGAATCTTAGGGGCTAGT---AATCGCCAATATGCTCATATTGGTGACGTTA  
TTGTTGCTGTAATTAAGGAAGCAGTACCCAATATGCCTCTAGAAAGATCAGAAGTAATT  
AGAGCTGTAATTGTACGTACACGTAAAGAACTTAAACGTGACAACGGTATGATAATACG  
ATATGATGACAATGCAGCAGTTGTCATCGATCAAGAAGGAAACCCAAAGGGGACTCGG  
GTTTTTGGTGCGATTGCTCGAGAATTGAGACAGTTGAATTTACAAAAATAGTCTCATT  
AGCCCCGAGGTATTAATGCTTAGTCCCAAAAGAACCAGATTCCGTAAACAACATAGA  
GGAAGAATGAAAGGAATATCTTCCCGAGGCAATCGTATTAGTTTCGGAAGATATGCTCT  
TCAGGCACTTGAACCCGCTTGGATTACAGCTAGACAAATAGAAGCAGGGCGAAGAGC  
AATGACACGATATGCACGCCGCGGGGAAAAATATGGGTACGCATATTTCCCGACAAA  
CCTGTTACACTAAGACCAGCAGAAACACGTATGGGTTTCGGGGAAGGGGTCCCCGAAT  
ATTGGGTAAGCGTTGTTAAACCTGGTTCGAATACTTTATGAAATGGTTGGAGTATCAGAA  
ACCGTAGCTAAAGCAGCTATGTCAATAGCTGCGTGCAAAATGCCTATACGAACTCAATT  
TGTTATTGCGCGAATGACCAGAGTGAAACGAGGATATATAGCTCGGAGACGTCGAACA  
AAAACCCGTTTATTTACATCAACCTTTTCGAGGGGCTCATTCAAGACTTACTCGAACAAT  
GACTCAACAAAAACGAAAGCCTTGGTTTCCAGCCATCGAGATAGAGGAAGGAAAAA  
GAGAGATTTTCGTCGTTTGTGGATTACTCGGATAAATGCAGTAACTCGTGAGAAT-----C  
TCTCCTATAGTTATAGTAGATTAATACATGATCTGTATAAGAGGCAAGTAGTTCTTAATCG  
TAAATACTTGCGCAAATAGCTATATCAAATAAAAATAGTCTTTACATGATTTCCAATAA  
GATTATCAA-----ATGATAAAGAAAGTTTTA---GCTCAACATATACA  
T--ATGTCTGTTTTCAAAGCCCGAAGAGTAATTGATCAAATTCGCGGGCGTTCCTATGAA  
GAAACACTTATGATACTGGAACCTCATGCCTTATCGAGCCTCTTATCCATTTTAAAATTG  
GTTTATTCTGCAGCAGCAAATGCTAGTCATAATATGGGTTTGAACGAAGCTGATTTATTT  
ATTAGTAAAGCCGAAGTCAATGGGGGCCCTATTCTGAAAAGGTTAAGACCCCGGGCTC  
GAGGACGTAGTTATCCAATAAAAAAACCCACATGTCATATAACAATTGTACTGAAG---A  
AATCTAAA-----ATGGATGGAATCAAATATGCAGTATTTACAGAAAAAAGT  
ATTCGGTTATTGGGGAACAATCAA---TACTTCTAATGTGCAATCAGGATCAACTAGGA  
CAGAAATAAAGCATTGGGTGCAACTCTTCTTTGGTGTCAAGGTAATAGCTATGAATAGT

CATCGACTCCCCGGAAAGGGTAGAAGAATGGGACCTATTATGGGACATACAATGCATTA  
CAGACGTATGATCATTACGCTTCAACCGGGTTATTCTATTCCACCTCTTATAGAGAAAAG  
AACTATGGCAGTTCCAAAAAACGTA CTCTATATCAAAAAACGTATTTCGTAAAAATA  
TTTGGAAAGAAAAAGGATATTTGGCTGCAGTTAAAGCTTTTTCTTTAGCTAAATCGGTT  
TCGACAGGAAATTCAAAAAGTTTTTCGTGCGGCAAACA---AACATGGCGAAGGGTAA  
AGATGTTAGAGTAAGAGTGATTTTGGAAATGTACCAGTTGTGCCCGAAAC-----GGT-----  
AAAGAATCGCCGGGAATTTCTAGATATATTACTCAAAAAGAATCGACACAATACACCCGG  
TCGATTAGAATTGAGAAAATTTTGTCTGTTATTGTTACAAGCATAACGATTCATGGGGAAAT  
AAAGAAAATGAAAATAAGAGCTTCTGTTTCGTAAAATTTGTGAAAAATGTGCGACTGATT  
CGTAGGAGAGGGGCGCATTATAGTGATTTGTTCCAATCCGAAACATAAACAGAGACAAG  
GAATGGTTTCGAGAGGAAGTAGCAGGATCCACTCGAACACTACAGTGGAAGTGCGTTG  
AATCAAGAATAGACAGTAAACGTCTTTATTATGGGCGTTTCATTCTGTCCCCACTTATGA  
AAGGCCAAGCCGATACTATAGGTATTGCTATGCGAAGGGTTTTACTTTGGAGAAATAGAA  
GGGACGTGTATCACACATGCAAAAATTTGAG-----AAGGTACCACATGAATATTCGACGAT  
ACCGGGTATTGAAGAATCTGTAAATGAAATTTTACTAAATTTGAAAGAAATTGTATTGA  
GAAGTAATTTGTATGGAGTTTCGAGACGCATTCATTTGCGTCAAAGGTCCAAAATGCGTA  
ACTGCTCAAGATATCATCTCACCGCCGTCTGTGGAAGTAGTTGACACTACACAACATAT  
AGCTAACCTCACGGAACCCGTTGAGTTGCGTATTGAATTACAAATCAAGAGAGATCGT  
GGATATCGTATAAAATCCACAAATCACTCCCAAGATGGAAGTTAT-----CCTATAGATGCT  
GTATCCATGCCTGTTGAAATGTGAATCATAGTATTTATTCTATGGAAATGGGAATGAA  
AAACAAGAGATCCTTTTTCTCGAAATATGGACAAATGGGAGTTTCACTCCAAAAGAAG  
CACTTTATGAGGCTTCTCGTAATTTGATTGATTTATTTATTCCTTTTTCTACATGCGGAGGA  
GGAA-----AACACTAATTTTGAGGAAAATAAA---AACAAATTTACTTTACCCCTTTTTCC  
CTTTCATGATAGATTATCT--AATCTAAAGAAAAATCAAAA---GGAAGTGCATTGAAAT  
ATATTTTTATTGATCAATTAGAATTGCCTCCAGAACCTATAATTGTCTCAAAAGATCCAA  
TATACATACATTATTGGACCTTTTGAGTAACAGTCAAGAAGATCTTCTGAAAATGGAATA  
TTTTCGCCAGAAAGATGTAAGAAATATTGAGTATTCTACAAAAGCGT-----TTCGCAA  
TTCATTTACCTAAAATAAAATGCTCTGTAATGGAAAT--GAGGAAATGTCCACAATACC  
TGGATTTAGCCAGATACAATTTGAGGGATTTGTAGGTTTATTAATCAGGGCTTGGCAG  
AAGAGTTTCATAAATTTCCAAAATTGAAGATACAGATCACGAAATTGAATTTAAATTA  
TTTGTGGAAACATATCAATTGGTGGAACTTTGATAAAAGAAAGAGATGCTGTGTATGA  
ATCACTCACATATTCTTCTGAATTATATGTACCCGCGGATTAATTTGGAAA---AGTATAG  
ATATGCAAGAACAACCGTATTTATTGGAAACATTCCTCTAATGAGTTCCCTGGGAACC  
TTTATAGTAAATGGAATTTACCGAGTTGTGATCAATCAAATATTGCAAAGCCCGGGTATT  
TACTACCGTTCAGAATTGGACCATAACGGAATTTCTATTTATAACCAGCACTATAATATCA  
GATTGGGGAGGAAGATCAGAATTAGAAATTGATCGAAAAGCACGAATATGGGCCCGCG  
TGAGTAGGAAACAAAAAATATCTATTCTAGTTCTATTATCAGCTATGGGTTCGAATCTAA  
GAGAAATTCTAGATAATGTTTGTACCCTGAGATTTTCTTGTCTTTTCCAAATGATAAGG  
AGAAAAAAAAGATTGGCTCAAAGGAAAATGCCATTTTGGAGTTTATCAACAATTTGC  
TTGTGTAGGCGGTGACCCAGTATTTTCTGAGTCTTATGTAAGGAATTACAAAAGAAAT  
TTTTTCAACAAGATGTGAATTAGGAAGGATTGGTTCGACGAAATATGAATCGAAGACT  
CAATCTTGATATACCTCAGAACAATACATTTTTGTTACCACGAGATGTATTGGCTGCTGC  
CGATCATTTGATCGGAATGAAATWGGAAATGGGTACACTTGACGAT-----ATGAATCATT  
TGAAAATAAACGTATTTCGTTCTGTAGCAGATCTTACAGGATCAATTTGGATTAGCCC

TTGTTTCGTTT TAGAAAATGCAGTTCGAGGAACTATATCTGGGGCAATCCGG---CATAAATT  
GATA---CCAACCTCCTCAAAATTTAGTAACTTCAACTTCA-----TTAACAAGCACTTAT  
GAATCGTTTTTTGGTCTACATCCTTTATCTCAAGTTTTGGATCGAACTAATCCATTGACA  
CAAAGCGTTTCATGGGCGAAAATTAAGTTATTTGGGTCCTGGAGGAGTGACAGGGCGAA  
CTGCTAGTTTTTCGGATACGAGATATCCATCCTAGTCACTATGCACGTATTTGCCCAATTG  
ACACGTCTGAGGGAATCAATGTTGGACTTATTGGATCTTTAGCTATTCATGTGAGGATTG  
GTCATTGGGGA---TCAATAGAGAGTCCCTTTTAT-----CAAATATCTGAAAGATCAAAA  
GAA-----GGACAGATAGTTTATTTACCACCAAGTAGAGATGAATATTATATGATAGGAGC  
AGGAAATTCCTTGGCCTTAAATCAGGGTATTCAGGAAGAACAAGTTGTTCCAGCTCGAT  
ACCGTCAAGAGTTCCTAACTATTGCATGGGAACAGATTTCATCTTCGAAGCATTTTTCT  
TTCCAATATTTTTCTATTGGAGCCTCCCTCATTCTTTTTATTGAGCATAATGATGCAAATC  
GGGCTTTAATGAGCTCTAATATGCAACGTCAAGCAGTTCGGCTTTCTCAGTCCGAGAAG  
TGCATTGTTGGAACCTGGGCTGGAACGCCAAGCGGCCCTAGATTCCGGGAGTTTCGGCTA  
TAGCCGAACACGCGGGAAAGATCATTTATACTGATACTCACAAGATGATTTTAGCAAAT  
AACGGGAACACTATAAGCATTCCATTAGTTATGTATCAACGTTTCGAACAAAATACTTG  
TATGCACCAAAAACCTCGGGTCCCCTGGGTAAATACATTA AAAAAGGGCAAATTTTA  
GCGGACGGCGCGGCTACCGTTGATGGAGA ACTCGCTTTGGGAAAAAATGTATTAATAG  
CTTATATGCCATGGGAAGGTTACAATTTTGAAGATGCAGTACTTATTAGTGAACGTCTAG  
TATATAACGATATTTATACTTCTTTTCACATACGAAAGTATGMAATTCAGACTCATATGAC  
AAGTCAAGGT---CCGGAAAGAATCACTAGGGAAATACCGCATTTAGAAGATCATTACT  
CCGCAATTTAGACAGAAATGGAATTGTGATGTTGGGAGCTTGGGTGGAACAGGTGAT  
ATTTTAGTAGGTA AATTAACGCCTCAGGCAACGAATGAA---TCATCCTATGCTCCGGAG  
GATAGATTATTACGAGCCATACTTGGCATT CAGGTATCTACTGCGAAAGAACTTCCCTA  
AAATTACCTATAGGTGGAAGGGGCGGTTATTGATGTAAGATGGGTACAGAAAAAAG  
GG---GGTTCAGCTATAATCCAGAAATGATTTCGTATATATATTTACWAAAACGTGAAAT  
CAAAGTGGGTGATMAAGTAGCTGGAAGACATGGGAATAAGGGTATTATTTCCWAAGTT  
TTGCCAGACAAGATATGCCCTATTTGCAAGACGGAACACCGGTTGATATGGTCTTCAA  
CCCATTAGGAGTACCCTCACGAATGAACGTGGGGCAGATATTTGAATGTTCACTCGGGT  
TGGCGGGGGATTTGCTAAAGAGACATTATAGAATAGCGCCTTTTGATGAGAGATACGAG  
CAAGAGGCTTCAAGAAA ACTAGTGT TTTCTGAATTATATGAGGCTAGTAAGCAAACAA  
CAAATCCATGGGTATTTGAACCAGAGTATCCGGGAAAAAGCAGAATATTTGATGGAAG  
AACAGGGGATCCTTTTCGAACAACCTGTTCTAATAGGAAAGTCTTATATCCTTAAATTA  
CTCATCAAGTTGATGATAAAATCCATGGGCGCTCCAGTGGACATTACGCCCTTGTTACG  
CAACAACCTCTTAGAGGAAGGGCCAAGCAAGGGGGGCAACGAGTGGGAGAAATGGA  
AGTTTGGGCTTTAGAGGGATTTGGTGTGCTCATATTTTACAAGAGATGCTTACTTATAA  
ATCTGATCATATTAGAGCTCGCCAAGAAGTACTTGGTACTACGATTGTTGGAGGAACAA  
TACCTAGCCCCGAGGATGCTCCAGAATCTTTTCGATTACTCGTTCGAGA ACTACGATCT  
TTAGCTCTGGAAC TGAACCATTTCTTGTATCTGAGAAGA ACTTTCAGATTAATAGGAA  
GGAAGCT-----ATGATCGATCGGTATAAACATCAACA ACTTCGAATTGGACC  
AGTCTCTCCTGAACAAATAAGTCTTGGGCCAACAAAATTCTACCTAATGGGGAAAGTW  
GTTGGAGAGGTGACAAAACCTATACTTTTCATTACAAAACCAATAAACCAGAAAAAG  
ATGGCTTGTTTTGTGAAAGAATCTTTGGACCTATAAAAAGCGGAATTTGTGCTTGTGGA  
AATTATCGGGTGATCGGAGCTGAAAAGGAAGACACGAAATTTTGTGAACAATGTGGGG  
TCGAATTTGTTGATTCTCGGATACGAAGATATCAAATGGGATACATTA AACTCGCATGTC

CAGTGA CT CATGTGTGGTATTTGAAACGTCTTCTAGTTATATCGCGAATCTTTTAGATA  
AACCCCTTAAGGAATTAGAGGGCCTAGTATATTGCGATATAGATTTTTCTTTTGCTAGGC  
CC---ATAACTAAAAACCCACTTTCTTACGATTACGAGGTTTATTTCGAATATGAAATCCA  
ATCCTGGAAATACAGCATCCCACTTTTTTTTTACTACCCAAGGTTTCGAGACATTCGAA  
ATCGAGAAATCTCGACCGGAGCAGAGGCTATCAGAGAGCAGTTAGCCGATTTGGATT  
GCGAATTATTATCGATAATTCATTAGTAGAGTGGAAGGAATTAGGAGACGAA---GAATC  
AACTGGAATGAATGGAAGATAGAAAAATTCGAAGAAGAAAAGATTTTTTGGTTAGA  
CGTATGGAATTAGCTAAACATTTTATTTCGAACAAATGTAGAACCAGAATGGATGGTTCT  
GTGTCTATTACCGTCTTCCCCCTGAGTTAAGACCCATTATTTCAGATAGATGGGGGTAA  
ACTAATGAGTTCCGATATTAATGAACTCTATCGAAGAGTTATTTATCGGAATAATACTCTT  
ACTGATTTATTAACAACAAGTAGATCGACACCAGGGGAATTAGTAATGTGTCAGGAAA  
AACTAGTACAAGAAGCTGTGGATACGCTTCTTGATAATGGGATCCGTGGACAACCAAT  
GAGGGACGGTCATAATAAAGTTTACAAGTCTTTTCAGATGTAATTGAAGGCAAAGAG  
GGGAGATTCCGTGAGACTCTCCTCGGTAAACGAGTTGATTATTCGGGGCGCTCCGTTAT  
TGTCGTGGGCCCTTCCCTTTCATTACATCAATGTGGATTACCTCGAGAAATAGCAATAG  
AACTTTTCCAGACATTTGTAATTCGTGGTCTAATCAGACAACATGTTGCTTCCAATATAG  
GTATTGCTAAAAGTAAAATTCGAGAAAAGGAACCAATTGTATGGGAAATACTTCAAGA  
AGTTATGCAGGGACATCCTGTATTGCTGAACAGAGCACCCACCCTGCATAGATTAGGAA  
TACAGGCATTTCAACCCATTTTAGTGGAGGGACGCGCTATTTGTTTACACCCATTAGTTT  
GTAAGGGCTTTAATGCAGACTTTGACGGAGATCAAATGGCCGTTTCATGTGCCTTTATCC  
TTGGAAGCTCAAGCCGAGGCCCGCTTACTTATGTTTTCTCATATGAATCTTTTGTCTCCA  
GCTATTGGGGACCCCATTTCCGTACCAACTCAAGATATGCTTATTGGACTCTATGTATTA  
ACGATTGGGAACCGCCGAGGTATTCGTGCAAATAGGTATAATACATGGAATTGCAGAAA  
CTAT-----CAAATAAAAATAGTTGACAATAATACTATAAATATACGAAAGAAAAAGAA  
CCCTATTTTTCTAGTTCTTATGATGCACCTGGAGCGTATCGTCGAAAACGAATCAATTTG  
GATAGCCCCTTGTGGCTCCGATGGCGATTAGATCAACGT---GTCATTGGCTCA-----AAG  
GAAGTTCCCATGGAAGTTCAATATGAATCCTTGGGTACTTATCATGAGATTTATGGGAAC  
TATCTAATAGTAAGAAGCATAAAAAAAGAAATCTGTTGTATATATATTTCGAACTACTATT  
GGTCATATTTCTTTTTATCGAGAAATAGAAGAAGCCATACAGGGGTTTTGTGGGCCTA  
CTCATACACCAGC-----ATGGCAGAACGGGCGAATCTGGTCTTTC  
ACAATAAAGTGATAGATGGAGCTGCCATGAAACGACTTATTAGCAGATTAATAGATCAC  
TTTGGAAATGGCATATACATCACACATCCTGGATCAAGTGAAAACCTTAGGTTTCCAACA  
AGCCACTGCTACATCTATTTCTTTAGGAATTGATGATCTTTTAACAATACCTTCTAAGGG  
GTGGTTAGTCCAAGATGCTGAACAACAAGTTTGTATTTGGAGAAACATCATCATTATG  
GGAATGTACACGCAGTCGAAAAATTACGTCAATCCATAGAGATATGGTATGCTACGAGC  
GAATATTTGAGACAAGAAATGAATCCTAATTTTCGAATGACCAATCCTTCTAATCCAGTC  
TATTTAATGTCTTTTTCAGGGGCTAGAGGAAATGCATCTCAGGTACACCAATTAGTAGG  
AATGAGAGGATTAATGTCGGACCCACAAGGACAAATGATTGATTTACCCATTCAAAGC  
AATTTACGCGAGGGGCTTTCTTTAACGGAATATATCATTTCCTGTTACGGAGCCCGTAAA  
GGGGTTGTAGATACTGCTGTACGAACATCAGATGCCGGATACCTCACACGTAGACTTGT  
TGAAGTAGTTCAACACATTATTGTACGTAGAACGGATTGTGGTACTATCCGAGGTATTTCT  
CGTGAGTCCTCAAACGGGATGACCGAA-----AGCATTTTTAGCCAAACACTGATGGGT  
CGCGTATTAGCAGACGATATATATATGGGTCCACGGTGCAATTGCCGCTCGGAATCAAGAT  
ATTGGGATTGGACTTATCAATCGATTCACT-----TTTCGAGCACGATCCATA

TATATTGAACTCCTTTTACTTGCAGAAGTACATCTTGGATCTGCCAATTATGTTATGGCC  
GGAGTCCCACCCATGGCGACCTGGTTCGAATTGGGGGAAGCCGTAGGTATTATTGCGGG  
TCAATCAATTGGAGAGCCGGGTACTCAATTAACATTAAGAACTTTTCATACCCGGTGGAG  
TATTTACGGGCGGTACTGCTGAACATGTACGAGCTCCCTATAATGGAAAAATCAAATC  
AATGAGGATTTGGTTCATCCCACACGTA CTGTCACGGGCATCCTGCTTTTCTATGTTCT  
ATAGACCTATATGTA ACTATTGAAAGTCAGGATATTATACATAATGTGAATATTCCACCAA  
AAAGTTTGATTTTAGTTCAAATGATCAATATGTA AATCAGAACAAGTGATTGCTGAA  
ATTCGTGCCGGAGCATCCACTTTG-----TGTAAGAGAGGGTCCGAAAACATATTTATTC  
TGAATCGGAAGGAGAA---ATGCACTGGAGTACCAATGTCTATCATGCGCCTGAATATAC  
ATATGGTAATGTTTCATCTATTACCAAAAACAAGTCATTTATGGGTATTAGCAGTGAATAC  
GTGTAGA-----CCCAGTATAGTGTCTTTTTTCGCTTACACAAGGATCAAGATCAAATCAATG  
CTCATTTTTTTTCTATCGAAGAAAAA-----TATATCTCTGACCCCTCA-----ATGACTAATA  
GTGGAGTGGGACATAAATTGTCTAGTTCAGATCCCTCTTAT-----AAGAGTGGGGTTTT  
TCATTAT-----AGATCTGATCAAATGATATCTAAGGGCAGTGGAATTTTCATATACCCCTCT  
---CTTCCCAAGAAAAAAT---TTGGATTTATTGGGAAAGAGTCGAAGAAATAGATTCAT  
AATCCATTACAATATGATAAAGAGCGAGAGAAAGAATTAATACCTTGTTTTGGTATTTC  
GATTGAAATACCCAGAAAT-----GGTATTTTACGTAGAAATAGTATTCTTGCTTATTGCGA  
CGATTCCCGATACAGA-----AGAGGGATTATTAATAT---ACGATAGAGGTGGATTCCAT  
TGCCAAA-----AAGGAGGATTTGATTGAGTATCGAGGA---ACAAAAGAATTTAATTCGA  
AATAT-----GTAGATCGATTTTTTTTCATCCCGAGGAAGTACATATCTTACCCGGATCCTC  
ACTCATAATGGTCCGAAACAATAGTATTATTGGAGTCGATACACAAATCACTTTAAATAT  
AAGAAGTCGAGTAAGCGGATTGGTACGAGTGGAGAGAAAAAAAAAAGTATGGA ACT  
AAAAATTTTTTCGGGGAATATCCATTTTCTGGGGAGACAGATAAGATATCCAGACACA  
GTGGCATTTTAATACCTCCAGGAGCAGGAAAAA-----GATTCTAAGGAA---TCTAAA--  
-CAATTGAAAAATTGGATCTATGTCCAACGG-----ATTACACCCACCAAGAAAAA-----T  
ATTTTGTTTTGGTTCGGCCCGTAGTACATATAAAATAGCTGATGGGGTCAATTTACCAA  
CATTTTTCCCACGGGATCCCTTGCGGGAAAGGAAAATGTCCA ACTTAGAGTTGTCAA  
TTATATCCCTTATGGAAATGGTAAGCCAATTTCGAGGAATTTATCACACAAGT---CAATTA  
GTTTCGGACTTGCTTAGTATTGAATTGGGACCAAGAAAGAAATGGTTCTATAGAA-----  
--GAGATTCATGCTTCCTTTGTTGAAATAAGGACAAACGATCTGATTCGCGATTTCATAA  
AAATGGAGTTAGTCCAATCCCCTATTTCTGATACTGTAAAAAGGAAGGATACGGCGGGT  
TCGGGGTTTCTTTGT CAT-----TTAGATTGCACCAATATCAATCCCTTTTATTCCAAGGC  
GAAGATTCAGCCA-----CTTATCCAATATAAGGAAACTCCCGATACT---ATTGGTA  
CGTTGTTGAATCGAAATAAG-----GAATGCCAATCTTTGATAATTTTGT CATCATCAA  
CTGTTCTCGAATCGGC-----CCATTAATGGTTCAAATATAAC-----AATGTAACAAAA  
GAACCAGACCTCACAATTCCAATT--AATTCGTTGGGCCCTTGGGTATTACTGTACCAA  
AAAAATCACGAATTTTATCCATCT--TACCATTTAATAACT-----CATAATCAAATATT  
GGTAAAG---AAATATTTACTACTTGGC-----AATTTTAAACAACTTTCCAAGTACTTA  
AA-----TATTGTTAATGGACGAAAATAGGAAG-----ATTTATAATCCCGATTCAAGCAA  
TAACATCATTTTGAATCCGTTGGATTTGAATTGGCACCTTTTACATCATGATTATTGTGAG  
GAATCATTTCCAATAATTATT--CTTGGGCAGTTTATTTGTGAAAATGTATGTTTATTCAA  
TATGGACCA-----CATATAAATCCGGTCAAGTTCTAATTGTTAAT--GCGGACTATTTA  
GTAATAAGATCTGCTAAACCTTATTTGGTCACCCAGGAACAACAGTTCATGGTCATTAT  
GGGGAAATCCTTTACGAAGGGGATACGTTAGTTACATTTATATATGAAAAATCAAGATCT

CGTGACATAACGCAGGGTCTTCCAAAAGTAGAACAAGTCTTAGAAGTGCGTTCGATTG  
ATTCAATATCAATGAACCTCGAAAAAGGGTTAAAGGTTGGAATGAACGTATACCAAG  
AATTCTTGGAATTCCTTGGGGATTCTTCATTGGTGCTGAGCTAACCATAGCCCAAAGTC  
GTATCTCTTTGGTTAATAAGATCCAAGAGGTTTATCGATCCCAGGGGTACAAATCCATA  
ATAGACATATAGAGATTATTGTACGTCAAATAACATCAAAGTGCTGGTTTCAGAA-----  
--GATGGAATGTGCAATGTTTTTCCACGGGAGAACTAATCGGGTTGTTGCGAGCGGAA  
CGAGCAGGGCGTGCTCTGGATGAAACAATCTGTTATCGGACAATCTTATTAGGAATAAC  
TAGAGCATCCTTGAATACTCAAAGTTTCATATCCGAAGCTAGTTTTCAAGAACTGCTC  
GAGTTTTAGCAAAAGCTGCTCTACGGGTCGTATTGATTGGTTGAAAGGTCTGAAAGA  
AAACGTTGTTCTGGGGGAATTATACCTGCCGGCACCGGATTCAAAAATTAGTACAC  
CGCTCAAAG-----CAACAAAGGAACATTCAT-----TTGGAAATCAAACGAAGAATTTAT  
TTAAGGGAAAGATG-----AGAGATATTTTGTTCATCATAGAGAATTAGTTTGTCTTGTG  
TCCAAAAC-----TCAGAACTATTATTTAGACAATTTAATGATCTC-----AT  
GACAAGAAGATATTGGAACATCAATTTGGAAGAGATGATGGAAGCAGGAGTCCATTTT  
GGTCATGGTACTAGGAAATGGAATCCTAAGATGGCACCGTATATTTCCGCAAAGCGTAA  
AGGTATTCATATTACAAATCTCACTAGAAGTCTCGCTTTTTATCAGAAGCCTGTGATTT  
AGTTTTTGATGCGCAAGTAGAGGAAAACATTTTTTAATAGTTGGTACCAAAAATAAAG  
CAGCAGACTTAGTAGCATCAGCTGCAAGAAGGGCTCGGTGTCATTATGTTAATAAAAAA  
TGGCTCGGTGGTATGTTAACGAATTGGTCCACTACAGAAACGAGACTTCATAAATTCAG  
GGACTTAAGAGCAGAGCAAAAATGGGTAAATTCAACCGTCTCCCAAAAAGAGATGC  
AGCAATGTTGAAGAGACAATTATCTACTTTGCAAACATATTTAGGTGGGATCAAATATAT  
GACGGAGTTACCTGATATTGTAATTATTATTGATCAGCAGGAAGAATATACAGCTCTTCG  
AGAATGTATTATTTTAGGGATTCCGACGATTTGTTAATCGATACAAATTCTGACCCCGA  
TCTTGCGGATATTTGATCCCAGCTAACGATGACGCTATAGCTTCAATACGGTTGATTCT  
TAACAAATTAGTATCCGCTATTTGTGAAGGTAGTTCTAGC---TATATAAGAAACCCTATGG  
GACAAAAATAAATCCACTCGGTTTCAGACTTGGTACAACCTCAAAGTCATCATTCCTTT  
TGGTTTCGCACAACCAAAAACCTTTCCGCGGGTCTCCAAGAGGATGAAAAATACGA  
GACTGTATCAAGAATTATGTGCAAAAAAATATGAGAATATCCTCGGGT---TTTGAAGGAA  
TTGCCCGTATAGGAATTCAAAAAGAATAGATTTAATCCAGGTCACAATCTATATCGGGT  
TTCCAAATTTACTAGAGAGC-----CGAACGGGA-----GGAATTGAAGAATTACAGAC  
AAATGTACAAAATAAGTTAAATTCTGTGAACCGAAGGCTCAACATTGCTATCACACGAA  
TTGAAAAACCTTATGGACAACCTAATATTCTTGCAGGAATATATAGCTTTACAGTTAAAAA  
ATAGAGTTTCCTTTCGAAAAGCAATGAAAAAGCTATTGAATTAAGTGAACAAACAGA  
TACAAAAGGAATTCAAATACAAATCGCAGGGCGTATTGACGGAAAAGAAATTGCTCGT  
GTTGAATGGATTAGAGAGGGAAGAGTTCCCTACAGACCATTTCGTGCTAAAATTGATTA  
TTGTTCCCTATACAGTTCGAACTATCTATGGAGTGTTGGGCATCAAATTTGGATATTTGT  
AGACGAAGAAATGTCTCGTTACCGAGGACCTCGTTTTCAAAAATAACGCCGTCTGGGG  
GCTTACCAGGACTAACTAGTAAAAGACCTAGATCCGGAAGTGATCTGAAAAACCAAT  
TACGCTCTGGAAAA---AGATCACAATATCGTATTCGTCTAGAAGAAAAACAGAAATTGC  
GTTTTTATTATGGTCTGACAGAACGACAATTAAGTATGATATGTCATATTGCTGGAAAGG  
CAAAGGATCAACAGGACAGGTTTTACTGCAACTACTTGAATGCGTTTTGGATAACAT  
TCTTTTTCGATTGGGCATGGCTTCGACCATTCTGGAGCCCGGCAATTAGTTAACCATA  
GACATATTTTAGTTAATGGTCGTATAGTAGATATACCAAGTTATCGTTGCAAACCCCGAG  
ATATTACTACGAAAGAGAAACAAGATCGAAAACCTCTGGTTCAAAGTTATATTGCT



TCGTCCTCCCGCGAA-----TTACCAAAACATTTGACTGTTGACTCA-----TCCCAACATAA  
AGGATTAGTAAATCAAATAATAGACAGTCAAAGTGTTGGTTTGAAAATTAATGAGTTGT  
TAGTCGTAGAATATTATTCTCGTCAGACTATGTCACGTTCGAGGTACTGCAGAAGAAAA  
ACTGCAAAATCCGATCCAATTTATCGTAATCGATTAGTTAACATGTTGGTTAACCGTACT  
CTGAAACACGGAAAAAATCATTGGCTTATCAAATTATCTATCGAGCCGTGAAAAAGAT  
TCAACAAAAGACAGAAACAAATCCACTATCTGTTTTACGTCAAGCAATACGTGGAGTA  
ACTCCCGATATAGCAGTAAAAGCAAGACGTGTAGGCGGATCAACTCATCAAGTTCCTAT  
TGAAATAGGATCTACACAAGGAAAAGCACTTGCCATTCGTTGGTTATTAGGAGCATCCC  
GAAAACGTCCGGGTCGAAATATGGCTTTCAAATTAAGTTCGAATTAGTAGATGCTGCC  
AAAGGGAGTGGCGATGCTATACGCAAAAAGGAAGAGACTCATAAAATGGCAGAGGCA  
AATAGAGCTTTTGCACATTTTCGTATGGGTAGAGACACTATTGCCGAGATAATAACCTC  
GATAAGAAATGCTGATATGGATAAAAAGGAAACGGTTCGAATAACGTCTACCAATATAA  
CGGAAAACATTGTTAAATACTTCTACAAGAGGGTTTTATTGAAAACGTTAGAAAACAT  
CGAGAAAATAACAAATATTTCTTGGTTTTCAACCCTACGA-----CATAAAAGGACTAGGA  
AAGGTATACATAAACT-----ATTTTAAAACGTATCAGCCGACCCGGTCTACGAAT  
TTATTCTAACTATCAACGAATTCCTAAGATTTTAGGTGGAATGGGAATTGCAATTCCTTC  
CACTTCTCAAGGTATAATGACAGATCGAGAAGCCCGACTAAAACGAATTGGGGGAGAA  
ATGTTGTGTCATATATATATGACAAAACCTATACCAAGAATTGGTTCACGTGGGAATGGA  
CGTATTGGTTCGCGTAAAAATGGACGTAGAATACCAAAGGGAGTTATTCATGTGCAAGC  
GAGTTTCCATAATACCATTGTAAGTGTACAGATGTACGAGGCCGGGTGGTTTCTTGGT  
CCTCCGCCGGTACTTCTGGATTCAAAGGCACAAGAAGGGGGACACCCTTTGCCGCTCA  
AGCTGCAGCAATAAACGCTATTCGTAAGTGTGGTGGATCAGGGTATGCAACGAGCAGAA  
GTTATGATAAAGGGCCCCGGTCTCGGAAGAGATGCAGCATTACGAGCTATTCGTAGAA  
GTGGTATACTATTAAGTTTTGTACGCGATGTAACCCCTATGCCACACAATGGATGTAGAC  
CCCCTAAAAAAGGCGTGTAAATGCCAACTATTAACAACCTATTAGAAAGACAAGACA  
GCCAATCCGAAATGTTACGAAATCTCCCGCTCTTCGAGGATGCCCTCAGCGTCGAGGA  
ACATGTACTAGGGTGTATACTATCACCCCCAAAAAACCAAACCTCTGCCTTACGTAAAGT  
TGCCAGAGTACGATTAACCTCCGGATTTGAAATCACTGCTTATATACCTGGTATTGGCCA  
TAATTCACAAGAACATTCTGTAGTATTAGTAAGAGGAGGAAGGGTTAAGGATTTACCTG  
GTGTGAGATATCACATTGTTTCGAGGAACCCTAGATGCTGTCCGAGTAAAGGATCGTCA  
ACAAGGGCGTTCTAAATATGGGGTCAAAAAGCCAAAAATGGCAAGAAAAAGTTTGAT  
TCAGAGGGAGAGTAAGAGGCAAAAATTGGAACAGAAATATCATTGATTTCGTTCGATCC  
TCAAAAAAAGAAATAAAC-----AAAGTTTCATCGTTGAGTGAAAAATGGGAAATTCA  
TGGAATTTGCAATCCTCACCGCGTAACAGTGCACCCACACGTCTTCATCGACGTTGTT  
TTTCGACTGGGAGACCCAGAGCTAACTATCGAGACTTTGGGCTATCCGGACACATACTT  
CGAGAAATGGTTCATGCATGTTTGTACCAGGAGCAACAAGATCAAGTTGGATGGTCA  
AA-----TCATTTATTTCAATTCCTCCACAAGAAAACGAAGAAAAC-----AGGGGATCCGT  
CGAATTTCAAGTATTCAGCTTCACTAATAAGATACGGAAACTTACTTTACATCTCGAATT  
GCACAAAAAAGATTTTTTATCTCAGAGGGGTCTTCGAATCATTCTGGGAAAACGACAA  
CGATTACTAGCTTATTTAGCAAAGAAAAATAAAGTACGTTATAAAAAATTAATAGGACA  
ACTAGATATTCGAGAGCAAAAAACCCGT-----ATGGTAAAACCTCGTTTGAAACGATGT  
GGTAGAAAGCAACGAGCCATCTATCGAATCGTTGCCATTGATGTTTCGATCCCGAAGAG  
AAGGAAGAGATCTTCGGAAAGTGGGTTTTTACGATCCGATAAGGAATCAAACCTATTTA  
AATGTTCTGCAATTCCTCATTCTTGTAAAAGGGAGCTCAACCTACCGAAACAGTTAA

TGCTATTTTTAAGAAGGCAGAATTATTTAAAGAATTGCAAATTCATCAAAAAATAAGTG  
AATCGATGGATAAATCCAAACAACCTTTTCATAAATCCAAGCGATCTTTTCGTAGGCGT  
TTGCCCCCAATTGGATCGGGGGATCGAATTGATTATAGAAACATGAGTTAATTAGTCGA  
TTTATTAGTGAACAAGGAAAAATATTATCTAGACGAGTAAATAGATTGACCTTGAAACA  
ACAACGATTAATTACTATTGCTATAAAACAAGCTCGTATTTTATCTTTGTTACCTTTTCTT  
AATAATGAGAAA-----CAATTTGAGAGAGCAGAGTCGATTCCTAGAAATACGGGTTTTC  
GAACCAGAAATAAAGTGGCACGTTCACTAAAAAAAATCCTTTTGTGGCTAATCATTTA  
TTGGGAAAAATTGAAAACTTAATATGAAGGAGGAAAAAGAAATAATAGTAACTTGGT  
CCAGAGCATCCACCATTATACCCACAATGATCGGGCATAAATTGCTATTCATAATGGAA  
AAGAGCATTTACCCATTTATATAACAGATCGTATGGTAGGTCATAAATTGGGAGAATTCG  
CGCCTACTCGCACTTTTGGTAGACATGCAAAAAACGATAATAAATCTCGTCGTATGATTT  
TTCCATCTTTTCTACCAGGT--CTAGGTAATTTATGCATTAGGATAATCAATTCGGTCGTT  
GTGGTCGGACTCTATTATGGATTTCTGACCGTATTCAGCATAGGGCCCTCTTCTCTCTC  
CTTCTCCGAGCTCGGGTTATCGAAGAAGGA-----ACCGAGGAGGAGATATCAGCAAC  
AACAGGTTTTATTACGGGACAGCTCATGATGTTTCATATCGATCTATTATGCGCCTCTGCA  
TCTAGCATTGGGTAGACCTCATAAATAACTGTCCTAGTTCTACCCTATCTTTTGTTCAT  
TTGTTCTGGAACAATCAAAGAACCCTTTTACATTGCTGGACGACTACCAGAAATTCAAT  
GCGTAATCTCAGCATTCAATGTGTATTCTGAATAATCTAATTTTTCAATTATTCAACCAT  
TTCATTTTACCAAGTTCAACATTAGCCAGATTAGTAAACATTTATATGTTTCGGTGCAAC  
ACAAGATATTATTTCTAACAAGTAGTTTTCTTGGTTGGTTAATCGGTCAGATTTTATTCA  
TTAAATGGGTTGAGTTCCTATTATTCTGGATACGGAAAAAGTATTCTATTCAATCT-----  
---AATAAATACCTTGCGGTAGAATTCAATAATTTGATAGCTCGAATCTTTAGTATTCTTTT  
ATTTATCACTTGTCTTTACTACTTAGGCAGAACGCCGTTACCCATTGTGACTAAGAACT  
GAAAGATTCTGAA-----AAACCCCTTGTGACTTCTGTATTTCGATTATAAACGATGGAATC  
GTCCATTACGATATCTAAAAAATGATCTATTTGAAAATGCTGTACGAAATGAAATGTCAC  
AATATTTCTTTAATTCGTGCCCAAGTGATGGAAAACAAAGAATATCTTTTACATACCCAC  
CTAGCTTATCCGCTTTTTTTAGAAATGATACAGAAAAA-----TTGGACACGACAGAAAA  
AGTATCTCATGAAAACAAAAATGGTTATTGGGTTGATGCTAATGAACAAAAAAAAGCG  
AACCTGAACTGGGAATTGAGAAATCGAATCAATGTTCTAGAAACACAAAAACGTGTTT  
CAGATGTGCTAGAAAAAAGAATCAGATTATAAATGATGAAAAGAAAGGATATTT  
GCCTACAAAATATGATCCTCTTCTTTCTGAAGCATCTCGCTGGAACTTAAACAATTA  
GTTTCATGTGAGAATGTGATTTGGCTAAATAAAATTCATAATCTACTT--CGAGAAGTTGA  
AGATAAAGATGAAACAATTCGA---AATCAATTAGAAGACATTAACAAAATAGTTCCCTCG  
ATGGTCATACAAATTAACCTTGAAGAACAGGCACAAGAAGACCAAATTCGTTCAAGA  
AAAGGCAAACGCGTGGTAATTTTCACTGATTCTTTGATGCGTTACTCACAACAATCTGA  
TTTTTCTCGGGACTTAATCAAAGGATCCATGCGTGCTCAAAGGCGTAAACAGTTATTT  
CGAAATGTTTCAAGCAAATGTGCACTCGCCACTTTTTTTTGGAT-----CAAATACCATT  
TTTATTTTCTTTTGGAT--TTCTCCGAAATGATGAATCTTTTTTCTGGAAAT-----GACAAC  
AATATAGCAATATCAGAAGCCTGGGATACCATTCTATTTGCTCAAGCAATAAGGGGTTTG  
CTGTTACTAACCCAATCCTTTTTTCAGAAAATACATTAATTTGCCTTTCTTAATAATAGCTA  
AGAATATTGGACGTATGTTATTATACGAATCCCCGAGTGGAACGAGGATTGGAGAGAT  
TGGAATAGAGAAATTCATATTAATGCACTTATAACGGTGTTCATTATCAGAAACAGA  
ATTTCCAAAAAATTGGTTAATGGATGGTATTCAGATAAAAATTCATTTCCCTTTCCGTCT  
GAAACCTTGGCAAGGGTCTAAG-----CTAGAAAATTTTTCTTTTTTAACAATTTGGGG

GACAGAAGTAGAAGCTCCATTTGGTTCTCAACGAGAACAGCCTTCTTTTTTTAAACCC  
ATTTTTAAGGAATTCAAAAAAAAATATATAAAAGTAAAA---AAGAAAAATTTTCTAGTT  
CTAAAAGTTTTAAAAAAAAAAAAACAAAATGGTTTATAAGAACTTTTAAAGAAAAACAA  
AATGGATTCAAAAAATAGTTTTA-----GTTATAAAAGGAATAATAAAAGAATTGCAAAAA  
AGAACTCCATAATTAGTAGTAATAAGAATAACCAGGAATTGATCATTCCAATTCAATCC  
ATAAATTGGAAAAATTATTCACCTTATGGAAAAACAAAATGAAAGATCTTATTGATAGGAC  
AATCACGATCAAGAATGAAATAGAACAGATCAAAAAGGAAAAAAACAAAAGTCCTAA  
TAAGAGAAATTTGTATGATAAAATATCCAAATTGTGGAAACATATTTGGCTAATAGTCAA  
AAGAAGAAAGAGCCGATTAATACGTAAATTACATTATTTTATAAAATCCTTCGTTGAAA  
GAATATACACCGATATCTTCGTATATAGTATTAACATTTTCAGGCTCAATGTACAATTTTT  
CATCCCTTTATTTTGTGTGATTTATCCTCTTTGTGCGCAAGCATATGTATTTTACAAAATAT  
CACAACTCAAGCTAGTAACAAATATCACCTGAGATCTGTACTTCAATATACTCATCTTT  
TTCTTAAGAATAAAATTAAGAATTATTGTACACAAGGGCTATTTGATTCC-----AAATC  
AAAAGTGAATAAGTCTAGAATAAATAAATGGAAAAGCTGGTTAAAAAGCCATTATCAAT  
ACAATTTATCTCAGACTAAATGGTCTCGATTAGTATCTAAAAAATGGCGAAATGAAGTC  
AATCGACGTTGTATCATTGAAAATGAGATGAAATTGAATTCATATAAAGAAGAAAAGGA  
TCCATTAATTTCTTATGTAAAACCAGAAAAATTTAAAAGAACTGTAGATATGATCTCTT  
ATTACATAAATATATAAACGAATATTATATATACTGGAGAAAAAATATTTCAATTGTAAAA  
TTTTCGATTTTTTTTATTAGATTTTTTTGATTGGATGGGAATGAATAAAGAAAAGTTATATG  
GCGAGTTCTTCCCAGAATTCGGAATACTTTATGATGCATATAAGATTAACCATGGATCA  
TACCAATCAAATTACTTCTTAAT---TACAAGAGCAAGAAAGAAGCAGAATTGGATTTATT  
CCTGAAAAAATATCTTCTTTTTCAATTAAGATGGGATGATCCTTTGAATGAAAGAATGAT  
CAATAATATCAAGGTATATTGTCTCTACTTAGATTGGTCAATCCAAAGGAAATTACTATA  
TCCTCGATTGAAAGAGGAGAGATGAGTTTAGACATAATGGTGATTGAGAAGGATCTAG  
CTCTTACAGAATTGATAAAAAATGGAATATTGATTATCGAACCTCTTCGTCCATCTATAA  
AATGGGATGCAAAATTTATTATGTATCAAATCATAGGTATTTTCGTTGGTCAATAAGAATA  
AATAC-----TATGATTTTCTTATTCTGAACAGATTCTATCTACTCGACATCGTAGAAAGT  
TGAGAATTCTAATGTGTTTTGAGTTTATTTGGCCAAATTATCGATTAGAGGACTTAGCTT  
GTATGAATCGATATTGCTTTAATACCAATAATGGAAGTCGTTTTACTATGTCAAGGATACA  
TATGTATCCGATGAAACGACATCAATCAAACCCTGGATCCTCGAATTGAGAGAGATAT  
TGAGAGAAATCAAGAATTCTCACTATTTCTTAGATTGATGATCAAATCCATTCAGTGG  
GATCTTTCCTCCATTTTTTTCCACCAAGAACGTTTTATGAAACTCTTTGACCCCGAA  
TTTTAAGTATCCTACTTTCA---CGCGATTCA-----CAGGGTTCAACAAGCAATCCATTT  
CACG-----ATCAAAGGTGTAGTACTGCTTGTAGTAGCG---GTCCTTATATCT-----CG  
TATTAACAATCGAAAGATGGTCGAAAGAAAAAATCTCTATTTGATGGGGCTTCTTCCTAT  
ACCT-----ATGAATTCATTGGACCCAGAAATGAGACATTGGAAGAATCTTTT---T  
GGTCTTCCAATATCAATAGGTTGATTGTTTCG---CTCCTGCATCTTCCAAGGGGAAAAA  
GATTTCTGAGAGTTCTTTCATGGATCCGCAAGAGAGTACTTGGGTTCTCCAATAAATA  
AAAGAAAT--CCAAAGTGTATCATGCCTGAATCTAACCAGGGTTTCGCGGTGGTGGAGG  
AACCGGGTTCGAAAAAAGAGG-----GATTCTAGTTGTAATATATCG-----AATGAAACC  
GTAGCTGGAATTGAGATCTCATTCAAAGAGAAAGATAGCAAA---TCTATGGAGTTTCTT  
TTTTTATCTTATACG-----GATGATCCGATCCGCAAGGACCATGATTGGGAATTGTTGGAT  
CGTCTTTCTCCGAGGAAG-----

-----AATCAGC  
ACGAATCGGATTTTTGAGGAAG---GTATCGAGAGAGAATTGGATTGGTTAGACAATG  
TGTGGTTGGTAAACAAGGATCCA-----TTTTTAGC-----AAGGTACGGAATGTATCGT  
CAAATATTCAATATGATTCC-----ACAGGA-----TCCATTTTCGTTCAAGTAACGGATTC  
TAGCCAATTGAAAGGATCTTCT--GATCAATCCAGAGATCATTTCGATTCCATTAGA-----  
----AATGAGGATTCAGAA-----TATCACAAATTGATCGATCAAAA  
CCGAGATTCTGCAACTAAAAGAAAGATCGATTCTT--TGGGAT-----CCTTCCTTTCTTCA  
AACGGAACGAACAGAAATAGAATCAGAT-----CGATTCCCGAAA-----TTCCTTTTTGGAT  
CTTCC-----TCAATGTCTCAGCTATTCACG---GAAGGTGAGAAGCAGATGAATAATCATC  
CGTTCCGGAAGAAACCGAAGAATTTCTT-----CGGAATCCCACAAGATCAATTCGTTCT  
TTTTTCTCTGACAAATGG-----TCAGAACTTCAT--CTGGGTTCGAATCCTACTGAGGGGT  
CCACTAGAGATCAG-----AAATTTTTGAAGAAAAACAAGATGTTTCT--TTTGTC  
CTTTCAGGCGATCGGAA-----AATAAAGAAATGGTTGATATATTCAAGATAATTACGT  
ATTTACAAAAT-----ACCGTCTCAATTCATCCTATTTTCATCAGATCGGGGATGTGATATGG  
TTCCG---AAGGATGAACTAGAT--ATAGAGAGTTCCAATAAGATTTTCATTCTTGAACAAA  
AATCCATTTTTGGGT-----TTCTTTCATCTATTCATGACCGGAACAAAGGGGGATACAC  
GTTA-----CGCCACGATTTG---GAATCA---GAAGAGAGATTTCAAGAAATGGCAGATCTA  
TTCACTCTATCAATAACCGAGCCG---GATCTGGTGTATCATAGGGGATTCGCCTTTTCTAT  
TGATTCTACGGATTGGATCAACAAAAA-----TTATTGAATGGG-----TCCAGAGATGA  
ATCGAAAAGAAATCTTTA-----TTGGTTCTACCCCTCTTTTTTAT-----GAAGAGAAT  
GAATCTTTTTATCGAAGGATCAGAAAAAAGGGGTCCGG---ATCCACTGTGGGAATGAT  
TTGGAAGATCCAAAACGAAAATAGTGCTATTTGCTAGCAACAAGATCATGGAGGCAG  
TCAATCAATATGGATTGATCCGAAATCTGATTCAAATCCAATATAGCACCGGTGAA-----T  
ACATAAGAAATGTATCGAATCGATTCTTTTTAATG-----AATCGATCC-----TTCGAAT  
ATGGAATTCCA-----AGGGATCGGATAGGAAATGATACTCTGAATCATATAACTATAAT  
GAAATATACGATCAACCGACATTTATCGAATTTGAAAAAG---AGTCAGAAGAAATGGTT  
TGATCCT-----CTTATTTCTCGAACCGAGAGATCCATGAATCGGGATCCTGATGCATA  
TAGATACAAATGGTCCAATGGGAGCAAGAATTTCCAGGAACATTTGGAACATTTTCGTTT  
CTGAACAGAAGAAC-----CGTTTTCAAGTAGTGTTTCGATCGATTACGTATTAATCAATA  
TTCGATTGATTGGTCCGAGGCTATCGACAAAGAAGATTTGTCTAAGTCACTTCGTTTCT  
TTTTGTCTAAGTCA-----CTTCTCTTTTTGTCC-----AAGTCA--  
-CTTCTTTTTGTCCAAGTCACTTCCTTTTTTCTTTGTGAGTATCGGAAATATTCCCATT  
CATAGGTCCGAG---ATTCAGATCTAT--GAATTGAAAGACCCGAATGATCAACCCCGCAA  
TCAGTTATTAGAATCAATAGGTGTTCAAATTGTTCAATTTGAATAAATGGAAACCC-----TT  
ATTATTGGAT-----GATCATGATACTTCC---CAAAGACCGAAATTCTTGATCAATGGAGG  
AACAAATATTACCATTTTTGTTCAATAAGATACCA---AAGTGG---ATGATTGACTCATTCCA  
TACT-----AGAAATAATCGCAGGAAATCCTTTGATAACACGGATTCCATTTCTCAATGAT  
ATCCACGATCGAAACAATTGGTTGAATCCCGTGAAACCATTTTCATAGAAGTTCAATGA  
TATCTCTTTTTATAAAGCAAATCGACTTCGATTTTTGAATAATCCACGTCACCTCTGGTT  
CCAT-----TGTAACAAAGGATTCCTTTTTATGTG-----GAAAAGACCCGTATCAATAA  
TTATGAT-----CTTACATAT--GGACAATTCCTCAATATCTTGTTTCATTTCGCAACAAA---CTA  
TTTTCTTTGTGTGTCGGTAAA-----AGAAAACCTATTTTTTTGGAG---AGAGAGACTATTT  
CACCAATCGAGTTACAAGTATCTGACATATTCCTATCTAACGATTTTCCACAAAGTGGTG  
ACGGAACG---TATAACTTGACAAA-----TCTTTCATTTTCCAATTCGATTCGATCCAT

TCGTTTCGT-----AGAGCTATTTATTTCGATCGCAGACATTTTCGGAAACACCTCTAACAGAG  
CAACAAATAGTCAATTTGGAAAGAACTTATTGTCAGCCTTTTTCCGATATGAATCTATCT  
GATTCAGAAGGGAAGAACTTGCATCAGTATCTCAGT-----TTCAATTCAAACATGGGTTT  
GATTCACACTCCATGTTCTGAGAAATATTTACCA-----CCCGGAAAGAGGAAAAAA-----  
-----CGGAGTCTTTGTCGAAAG-----AAATGCGTTGAGAAATGGCAGATGTATAG  
AACCTTTCAAGGAGATAGTGCTTTTTCAAATCTCTCAAATGGAATCTGTTCCAAACAT  
ATATGCCATGGTTCCTTACTTTCGACAGGGTGC AAATATCTAAATTTACCCTTTTAGATA  
CCCTTGCAAACCTCATTG-----CCGATACTAAGTAGCAGT---CCAAAATTTGTATCTATTTTT  
CATGATATTATGCACGGATCGGGTATATCACGGCGAATTCGTCAGAAAATAGTGTGT-----  
-----GTGATTCGTCCACAATGGAATCTT---ATAAGTGAGATTTTCGAGGAAGTGTTTACAG  
AAT-----CTTTTTCTGTCCGAAGAAATGATTCATCGAAATAACGAGTCACCCCTTCCGTT  
GCTATGGACACGTCTGAAATCAACAAATGCTTGGGAGTTC---CTCTATTCAATCCTTTTC  
TTTCTTCTTGTGCTGGATAT---TTCCTTCGTATACATCTTCTCTTTGTTTCCCGA-----GCC  
TCTAGTGAATTACAGACAGAGTTAGAAAAGATCAAATCTTTGATGATTCCATCATAAC  
GATTGAGTTGCAACAACCTTCTGGATAGGTATCCTACATCGGAACGTAATCTTTCTGGTT  
AAAGAATCTATTTCTAGTTGCTCTGGGACAATTAGTAAATCTCTGGAAGAAATATGGG  
GTTATGCTTCT-----GGG---GTCAAATCAAGACGTTCT  
AAGAAGAAATATTTGCATAGCAAT-----CTCATCAATCTCATA---AGTATCATACCAAAT  
CCCATCAATCGAATCACTTTTTTCGAGAGATACGAGACATCTAAGTCGTACAAGTAAAGA  
GATCTATTATGAGATAAGAAAAAGAAAAAGCGTGAACGCTGATTGGATTGAGGATCAA  
ATAGAATCCTGGGTCGCGAACAGTGATTGATGATCAAGAAAGACAATTCATAGT  
TCAGTTCTCC-----ACCCTAACGACA-----GAAAAAAGAATGGATCAAATTCTATGGAGT  
CTGACT--CATAGTGATCATTATCA-----AAGAATGACTCTGGTTATCAAATGATT  
GAACAACCAGGATCAATTTACTTACGAAACGTAGTTGACACTCAT-----AAAAAGTATCT  
AATGAATTATGAGTTCAATAGATCCTCTTTAGCAGAAAGACGTATATTTCTTGCTCATTAT  
CAGACAATTAATTAT-----TCACAAACCTCGTGTGGGGCTAATAGT-----TCATCTCATG  
GA-----AAACCCTTTTCGCTCCGCTTAGCCCTATCCCCTTCT---AGGGGTATTTTAGTGA  
TAGGTTCTATAGGAACTGGACGATCATATTTGGTCAAATACCTAGCGACAAACTCCTATG  
TTCTTTTCATTACGGTATTTCCGAACCCGTTCCCGGATAACAGGCCTCGAGGTTTGCTTT  
TTGATATC-----GATATTGAT--GAT-----AGTAACGATATC  
CATATTGATGATAGTAAGGATATC-----CATATTGATGATGACCTTGATACG  
GAGCTGCTAACTATGACGAATATGCTACCA-----GCTATATATAGGATG-----CCGAAA  
TAGACCCATTTGATATCACCTTCAATTCGAATTAGCAAAGCAATGTCTCCTTGCATAA  
TATGGGTTCCAAACATCCATGATTTGTATGTGAATGAGTCGAATTATTTATCCCTCGGTCT  
AGTAGTGAACCTATCTCTCC-----AGGGATTCTGAAAGATGTTCC---ACTAGAAATATTC  
TTGTTATTGCTTCGACTCATATTCCCCGAAAAGTGGATCCCGCTTTAATAGCTCCGAATA  
AATTAATACATGCATTAAGATACGAAGGCCTCTTATTCCACAACAACAAAACACTTT  
TTCATTCTTTTCATATACTAGGGGATTTCACTTGGAAAAGAAAATGTTCCATACG-----AAC  
GGATTGGGGTCCATAACCCTGGGTTCCAATGCACGAGATCTTGTAGGACTTCTCAATGA  
GGCCCTATCAATTAGTATTACACAGAAGAAATCAATTCTAGAAACGAATACAATTAGAT  
CAGCTCTTCATAGACAACTTGGGATTTGCGA-----TCCGAGGTAAGATCAGTTCCGG  
ATCATGAGATACTTTTCTATCAGATAGGAAGGGCTGTTGCACAAAATCTACTTCTAAGTA  
ATTGCCCTTTAGATCCTATATCTATATGAAGAAGAGA-----TCATGTAAGGAAAGGG  
AATTTTCTTTGTACAGATGGTACTTCGAACTTGGAACGACCATGAAGAAATTAACGATA

CTTCTTTATCTTTTGAGTTGTTCTGCCGGATCGGTCGCTCAAGATCTTTTGTCTCCACTC-  
----GGA CTGATGAAAA--ATGAGGATCGCTTCTTATGGATCCCTTGAGAATGATTCT--  
GATCTAGTTCATGGCCTATTAGAAGTAGAAGGCGCTCTGGTGGGA-----TCCTCACGGA  
CAGAAAAAGATTGCAGTCAGTTTGATAATAAT-----CGAGTGACATCGCTTCTTCGGCCC  
GAACCAAGGAAT--CAGTTAGATATGATCCAAAATGGATGTCATTCT-----ATCT  
ATGAAAA-----TACGAATCGGAGTTTGAAGAA--GGA-----GCTGTGACCCGCAA  
GAGATA-----CAGATAGAGGACGAT-----TTATTAATCAC-----ATAGTTTGGGCTCC  
G-----AGACTATGGCGCCCT-----TGTGACAATCGATTGATTATATCGAAAGGCCAAT  
GAATGGGGATTTTC--TATTTAGCCAGGTCCTTTTCGG-----AGCAAGGAGATCATTTA  
TCATCAAGAGGATGAGCTTCAAGAGAATGATTCGGAGTTCTTGCAGAGTGGAAACCATG  
CAGTACCAGACACGA-----TCTTCCAAAGAACAA--TTTTTTCGAATAAGCCAATTCATT  
TGGGACCCTGTGGATCCATTGTTTTTCTATTCAA--GATCAGCCCTTTGAATCTGTGT  
TTTCACATCGAGAATTCTTTGCAGATAAAGAGATGTCAAAGGGGCTTTTACTTCCCTA  
AGAAAACCTTCCACATCTATGTATAAACGCTGGTTCAGC-----AAGAATAGGAAAGAAA  
AGCACTTGGAAATTGTTGATTCATCGCAAAGATGGCTTAGAACC-----AATAGCTCAT  
TCTAT-----AATGGGTCTTTCCGTTCTAAT-----ACTCTATCCGAGAGTTATCAGTATTTATT  
AAATCTGTTCCCTATCTAAT--GGAACGCTATTGGATCAAATGACAAAGACATTGTTGAGA  
AAGAAATGGCTTTTCCCGGATGAAATGAAACATTTGATT-----CATGTAACAGGAGAAA  
GATTTCCCATTCCTATGCCTAGATCTCGG--ATAAATGGAAATTTTATTGATAAGACCTTT  
TCAATTGTAGCCAATATCTTATTACGAATAATTCCGACAACCTCAGGAGAAAAGGAGGC  
ATTTACCTATTATAGAGATGGC-----ATGTCAGCTCAATCCGAAGGAAATTATGCGGAAG  
CTTTACAGAATTATTATGAAGCTATGCGACTAGAAATCGATCCTTATGATCGAAGTTATAT  
ACTCTATAACATAGGACTTATCCATACAAGCAACGGGGAACATACAAAGGCTTTGGAAT  
ATTATTTCCGGGCACTAGAACGAAACCCATTCTTACCCCAAGCTTTTAATAATATGGCCG  
TGATCTGTCATTAC--CGAGGAGAACAGGCCATTTCGACAGGGTGATTCTGAAATTGCAG  
AGGCTTGGTTTCGATCAAGCTGCTGAGTATTGGAAACAAGCTATAGCGCTTACTCCAGGT  
AATTATATTGAAGCACACAATTGGTTGAAGATCACAGGGCGATTTCGAA-----ATGAACTG  
GCGATCAGAAAATATATGGATAGAACTCATAAGGGGATCTAGAAAAACAAGTAATTTTT  
GCTGGGCCTGTATCCTTTTTTTGGGTTTCGCTAGGATTTTTAGTGGTTGGAACCTTCTAGTT  
ATCTTGGTAGGAATCTGATATCCGTATTCCCCGATCAGGAAATCATTTTTTTTCCACAAG  
GAATTGTAATGTCTTTCTATGGAATCGCAGGTCTATTATTAGCTCCTATTTGTGGTGCA  
CAATTTTCGTGGAATATAGGTAGTGGTTATGATCGATTCGATAGAAAAGAGGGAATAGTC  
TCTATTTTTTCGTTGGGGATTCCCTGGAAAAAATCGTCGCATCTTCCTTCGCTTCTTTATA  
AGAGATATTCAGTCAATCAGAATGGAGGTTAAAGAGGGTCTTTATTCTCGTCGTATTCT  
CTATATGGAAATCAGAGGCCAGGGGGCCATTCCCTTACTCGTACTGATGAGAAT--TT  
GACTCCACGAGAAATGGAACAAAAAGCTGCGGAATTGGCCTATTTCTTGCGTGTACCA  
ATTGAAGTATTT

>Capsicum

ATGGAAGATGGTGGTTTAATTCGATGTTGTTTCTAAATAAATCAATGGGCAGTCTTGG  
TCCTATTGAAAATACCAGTGAA-----GATCCAAATCGAAAA-----GTGAAAACATTCCT--  
-TGCAGTAATGTTGATTATTTATTCGGCGTTAAAGACATTCGGAATTCATCTCTGATGAC  
ACTTTTGTAGTTAGTGATAGGAATGGAGACAGTTATTCCATCTATTTGATATTGAAAAT  
CAGATTTTTGAGATTGACAACGATCAT-----TCTTTTCTGAGTGAAGTAGAAAGTTCTTTT  
TATAGTTATCGAAACTCGAGTTATCTGAATAATGGATTTAGGGGCGAAGATCCCTACTAT

AATTCTTACATGTATGATACTCAATATAGTTGGAATAATCACATTAATAGTTGCATTGATA  
ATTATCTTCAG-----TCTCAAATCTGTATAGATACTTCCATTATAAGTGGTAGTGAGAATTA  
CAGT-----TACATTTATAGGGCCGTTTGTGGTAACGAGGGTTCCAGTATACAACTCGCA  
CAAAGGGCAGTGATTTAACTATAAGAGAAAGTTCTAATGATCTCGAGGTAAC TCAAAA  
ATACAGGCATTTGTGGGTTCAATGCGAGAATTGTTATGGATTAATTATAAGAAATTTTT  
TAAATCAAAAATGAATATTTGTGAACAATGTGGATATCATTGAAAATGAGTAGTTTCGG  
ATAGAATTGAACTTTTGGTCGATCCGGGTA CTTGGGATCCTATGGATGAAGACATGGTC  
TCTCTGGATCCCATTTGAATTTTCATTCGGAAGAGGAGCCTTATAAAGATCGTATTGATTCT  
TATCAAAGAAAGACAGGATTAACCGAGGCTGTTCAAACAGGCATAGGCCAAATAAACG  
GCATTCCCGTAGCAATTGGGGTTATGGATTTTCAGTTTATGGGGGGTAGTATGGGATCCG  
TAGTCGGAGAGAAAATCACCCGTTTGATTGAACACGCTGCCAATCAAATTTTACCTCTT  
ATTATAGTGTGTGCTTCTGGGGGGGCGCGCATGCAGGAAGGAAGTTTGAGCTTGATGC  
AAATGGCTAAAATATCGTCTGCTTTATATGATTATCAATTAATAAAAAATATTTTTATGTA  
TCAATCCTTACATCTCCGACA ACTGGTGGAGTGACAGCTAGTTTTTGGTATGTTGGGGGA  
TATCATTATTGCCGAACCCAATGCCTACATTGCATTTGCAGGTAAAAGAGTAATTGAAC  
AAACATTGAATAAACAGTACCCGAAGGTTCA CAAGTAGCTGAATACTTATTCCAGAA  
GGGTTTATTTCGACCTAATTGTACCACGTAATCTTTTAAAAGCGTTCTGAGTGAGTTATT  
TAAGCTCCACGCCTTTTTTTCTTTGAATCAAAAGTCAAGCAAATGGTAACCATTCGAG  
CTGACGAAATTAGTAATATTATCCGTGAACGTATTGAACAATATAATAGAGAAGTAAAGA  
TTGTAAATACCGGTACCGTACTTCAAGTAGGCGATGGCATTGCTCGTATTCACGGTCTT  
GATGAAGTAATGGCGGGTGAATTAGTAGAATTTGAAGAGGGTACAATAGGCATTGCTCT  
GAATTTGGAATCAAATAATGTTGGTGTGTACTAATGGGCGATGGTTTGTGATACAAG  
AAAGAAGTTCTGTAAAAGCAACGGGAAGAATTGCTCAGATACCCGTGAGTGAGGCTTA  
TTTGGGTCGTGTTGTAAATGCCCTGGCTAAACCTATTGATGGTAGAGGTGAAATTTTCA  
CTTCTGAATTTTCGATTAATTGAATCTGCCGCCCGGGTATTATTTTCGCGCCGTTCTGTATA  
TGAGCCTCTTCAAACCGGGCTTATTGCTATTGATTTCGATGATCCCTATAGGACGTGGTCA  
GCGAGAATTAATTATTGGGGACAGACAGACCCGGTAAAACAGCAGTAGCCACAGACAC  
CATTCTCAATCAACAAGGTCAAATGTAATATGTGTTTATGTAGCTATTGGGCAAAAAG  
CGTCTTCTGTGGCCCAGGTAGTAACGACTTTACAGGAAAGGGGAGCGATGGAATACAC  
TATTGTGGTAGCCGAAACGGCGGATTCCCCTGCTACATTACAATACCTTGCTCCTTATAC  
AGGAGCAGCTCTGGCTGAATATTTTATGTATCGTGAACGACACACTTTAATCATTATGA  
TGATCTCTCAAACAAGCGCAAGCTTATCGCCAAATGTCTCTTCTATTACGAAGACCGC  
CCGGTCGTGAAGCTTATCCAGGAGATGTTTTTTATTTGCATTCACGCCTTTTGGAAAGA  
GCCGCTAAATTAAGTTCTAGTTTAGGTGAAGGAAGTATGACCGCCTTACCAATAGTTGA  
AACTCAATCGGGAGATGTTTCGGCTTATATTCCTACTAATGTAATTTCCATTACTGATGG  
ACAAATCTTCTTATCCGCCGACCTATTCAATTCTGGAATCAGACCTGCTATTAATGTGGG  
TATCTCCGTTTCCAGAGTGGGGTCCGCAGCTCAAATAAAAGCCATGAAACAAGTAGCT  
GGTAAATTAATAAGTAAGTAGCGCAATTCGCAGAATTAGAAGCCTTTGCACAATTTGC  
TTCTGATCTCGATAAAGCTACTCAGAATCAATTGGCAAGAGGTCAACGATTACGTGAAT  
TGCTTAAACAATCCCAATCGGCTCCTCTCACGGTAGCAGAGCAGATAATGACTATTTAT  
ACCGGAACAAACGGCTATCTTGATTCATTAGAAGTTGGACAGGTAAAGGAAATTTCTTGT  
TGAGCTACGTA CTTACTTAAAACTAATAAACCTCAGTTCCAAGAAATCATATCTTCTAC  
CAAGAAATTTACCGAGGAAGCAGAAGCCTTTTGAAAAGAAGCTATTCAGGAACAAAT  
GGACCGTTTTTACTTTCAGGAACAAGCAATGAGAATCAATCCTACTACTTCTGGTTCTG

GGGTTTCCACGCTTGAAAAAAAAAACCTGGGGCGTGTCGTCCAAATCATCGGTCCGGT  
ACTAGATGTAGCCTTTCCCCGGGCAAGATGCCGAATATTTATAACGCTCTCGTAGTTCA  
AGGTCGAGATAGTGTGATCAACCAATTAATGTGGCTTGTGAGGTACAGCAATTATTAG  
GAAATAATCGAGTTAGAGCTGTAGCTATGAGTGCTACAGACGGTTTAACGAGAGGAAT  
GGAAGTGATTGACACAGGAGCTCCTATAAGTGTTCCGGTCGGGGGGGCGACTCTGGG  
ACGAATTTTAAACGTGCTCGGAGAGCCTGTTGATAATTTAGGGCCTGTAGATACTAGTA  
CAACGTCTCCTATTCATAGATCTGCGCCCGCCTTTATACAGTTGGATACAAAATTATCTAT  
TTTTGAAACAGGAATTAAGTAGTAGATCTTTTAGCCCCTTATCGCCGTGGAGGAAAAA  
TCGGACTATTCGGGGGGGCTGGAGTGGGTAAAACAGTACTCATTATGGAATTGATTAAC  
AATATTGCTAAAGCTCACGGGGGCGTATCCGTATTTGGCGGAGTGGGTGAACGTACTCG  
GGAAGGAAATGATCTTTACATGGAAATGAAAGAATCTGGAGTGATTAATGAAGAAAAT  
ATTGCAGAATCAAAAGTGGCCCTAGTTTACGGTCAGATGAATGAACCACCAGGAGCTC  
GTATGAGAGTTGGTTTACTGCCCCTAATGAGGCGGAATTTCCGAGATGTTAATGAG  
CAAGACGTACTTCTATTTATTGACAATATCTCCGTTTCGTCCAAGCAGGATCCGAAGTA  
TCGGCCTTATTGGGTAGAATGCCCTCCGCTGTGGGTATCAACCGACCCTAAGTACTGA  
AATGGGTCTTTACAAGAAAGAATTACTTCTACCAAAGAAGGGTCCATAACCTCTATTC  
AAGCAGTTTATGTACCCGCAGACGATTTGACCGACCCTGCTCCTGCTACGACATTTGCA  
CATTTAGATGCTACTACCGTACTATCAAGAGGATTGGCTGCCAAAGGTATTTATCCAGCA  
GTAGATCCTTTAGATTCAACGTCAACCATGCTTCAACCTCGGATCGTTGGTGAGGAACA  
TTACGAAACCGCCCAACGAGTTAAGCAAACCTTTACAACGTTACAAAGAAGTTTACAGGAC  
ATTATAGCTATCCTTGGATTGGACGAATTATCCGAAGAGGATCGTTTACTCGTAGCAAGA  
GCGCGAAAAATTGAGCGTTTCTTATCACAACCCTTTTTTCGTAGCAGAAGTATTTACCGG  
TTCTCCAGGGAAATATGTTGGTCTAGCAGAAACAATTCGAGGATTTCAATTGATCCTTT  
CCGGAGAATTAGATGGTCTTCTGAAACAGGCCTTTTATTTGGTAGGTAATATCGATGAA  
GCTACCGCGAAGGCTATGAACTTAGAAATGGAGAGCAATTTGAAGAAAATGACCTTAA  
ATCTTAGTGTACTGACTCCTAATCGAATTGTTTGGGATTCAGAAGTGGAAGAAATCGTG  
TTATCTACTAATAGTGGTCAAATGGCATATTACCAAATCACGCCCTATTGCCACAGCT  
GTAGATATAGGGATTTTGCGAATACGCCTTAAACAACCAATGGTTAACGATGGCTCTGAT  
GGGTGGTTTTGCTAGAATAGGCAATAATGAGATCACTGTTTTAGTAAATGATGCGGAGA  
AGGGTAGTGACATTGATCCACAAGAAGCTCAGCAAACCTTTGAAATAGCGGAGGCTAA  
TGTGAAAAAGGCTGAAGGAAGGAGACAAAAAATTGAGGCAAATCTAGCTCTCCGACG  
AGCTAGAACACGGGTGGAGGCTATCAATCCGATTTCAATGAAAAACGTAACCGATTCT  
TTCGTTTCT--GGCCACTGGCCATCTGCCGGGAGTTTCGGGTTAATACCGATATTTTAG  
CAACAAATCCAATAAATCTAAGTGTAGTGCTTGGTGTATTGATTTTTTTTTGGAAAGGGA  
GTGTTAAGTGATTTATTAGATAATCGAAAACAGAGGATCTTGAATACTATTGAAATTCA  
GAAGAAGTGCCTGGAGGGGCTATTGAACAACCTCGAAAAAGCTCGTTCTCGCTTACGG  
AAAGTAGAAACCGAAGCCGAGCAGTTTCGACTGAATGGATACTCCGAGATAGAACGA  
GAAAAATTGACTTTGATTAATTCAACTTATAAGACTTTTGGAAACAATTAGAAAATTACAA  
AAACGAAACGATTCAGTTTGAACAGCAAAGGGCGATTAATCAAGTCCGACAACGGGT  
TTTCCAACAAGCCTTACGAGGAGCTCTAGGAACTCTGAATAGTTGTTTGAACAACGAG  
TTACATTTACGTACCATTAGTGCCAATATTGGCATGTTGGGAACAATTAAGAAATAACT  
GATATGAATCCACTGATTTCTGCCGCTTCCGTTATTGCTGCTGGATTGGCCGTAGGGCTT  
GCTTCTATTGGACCTGGAGTTGGTCAAGGGACTGCCGCGGGTCAAGCTGTAGAGGGTA  
TCGCGAGACAGCCTGAGGCAGAGGGAAAAATACGAGGTACGCTATTACTTAGTCTAGC



TTTTATGGAAGCTTTAACAATTTATGGACTGGTTGTAGCATTAGCACTTTTATTTGCAAA  
TCCTTTTGTATGAATGTTCTATCATGTTCTATCAATACTCTAAAGGGGTTATAACGATATAT  
CCGGTGTGGAAGTAGGCCAACATTTCTATTGGCAAATAGGGGGTTTCCAAGTACATGG  
CCAAGTACTTATTACTTCTTGGGTTGTAATTGCTATCTTATTAGGTTTCAGCCACTATAGCT  
GTTCCGGAACCCACAAACCATCCCGACCGGGGGTTCAGAATTTCTTCGAATATGTTCTTGA  
ATTCATTTCGAGATGTGAGTAAAACCTCAAATTGGAGAAGAATATGGGCCCTGGGTTCCCT  
TTATTGGCACTATGTTTTTATTTATTTTTGTTTTCTAATTGGTCAGGAGCTCTTTTACCTTG  
GAAAATCATAACAATTACCTCATGGGGAGTTAGCCGCACCCACGAATGATATAAATACTA  
CTGTTGCTTTGGCTTTACTCACATCAGTGGCATATTTCTATGCGGGTCTTACAAAAAAG  
GGATTAGGTTATTTTCGAAAATATATTCAACCAACCCCAATCCTTTTACCCATTAACATC  
TTAGAAGATTTACAAAACCCCTTATCACTTAGTTTTCGACTTTTCGGGAATATCTTAGCT  
GATGAATTAGTAGTTGTTGTTCTTGTCTTTAGTACCCTTAGTAGTTCCTATACCTGTCA  
TGCTCCTTGGATTATTTACAAGTGGTATTCAAGCTCTTATTTTTGCAACTTTAGCCGCGG  
CTTATATAGGTGAATCCATGGAGGGCCATCATATGATATTTTCAACCTTAGAGCATATATT  
AACTCACATTTCTTTTCGATCGTTTCAATTGTAATTACAATTCATTTGATAACCTTTTAA  
GTCGATGAAATCGTAAAGCTATACGATTCGTCAGAAAAGGGCATAATAGTTACTTTTTT  
CTGTATAACAGGATTATTAGTTACTCGTTGGATTTCTTCGGGACATTTCCCACTAAGCGA  
TTTATATGAATCATTAAATTTTCTTTTCATGGAGCTTCTCCCTTATTCATATAATTCCGAT---  
---AAAATGTTTTAATTTTAAAGTAAAATAACGGGGCCAAGTGCTATTTTTTACCCAAGGCT  
TTGCTACTTCAGGTATTTTAACTGAAATACACCAATCTGGAATATTAGTACCTGCTCTTC  
AATCTGAGTGGTTAATAATGCACGTAAGTATGATGATATTGGGCTATGCAGCCCTTTTAT  
GTGGATCGTTATTATCAGTAGCACTTCTAGTGATTACATTTTCGAAAAACAGAAAGCTT  
TTTTAT-----AAGGAAAATGTTTTAGAAAATACTTCGTTT-----GCTAAA  
AATTATTACAGGTCCCAATTGATTCAACAATTGGATTATTGGAGTTATCGGGTTATTAGTT  
TAGGATTTACTTTTTTAACCATAGGAATCCTTTTCGGGAGCGGTATGGGCTAATGAAGCG  
TGGGGGTCGATTGGAATTGGGACCCAAAAGAACTTGGGCATTTATTACTTGGATCGT  
ATTTGCAATTTATTACATACTCGAACACATAGAAATTTGCGGGGTGCAAAATCTGCAAT  
TGTAGCGTCTATAGGCTTTCTTATAATTTGGATATGCTATTTTGGGGTCAATCTATTAGGA  
ATAGGGTTACATAGTTATGGTTCTTTTCCATCAACAATGGCAAAAAGAAAGCATTAC  
CCCTCTTTTCTATCTTGCATATATAGTATTTTTTGCCCTGGTGGATTCTTTTCTCAGTTAATA  
AATGTCTGGAATCTTGGGTTACTAATTGGTGGAACTGGGCAATCCGAAATTTTCTTG  
AATACTATTCAAGAAAAGAGTCTTCTAGAAAATTCATAGAATTAGAGGAACTCCTCTT  
CTTGGACGAAATGATCAAGGAATACTCGGAAACACATCTCGAAGAGTTTGGGATA---AT  
CCATAAAGAAACGATCCAATTAATCAAGATGCAAAATGAGAATCGTATCCATACGATTT  
TGCATTTCTCAACAAATATCATCTGTTTTATTATTCTAAGCGGGTATTCAATTTTGGGTAA  
TGAAAAACTTGTTATTCTTAACTCTTGGGCTCAGGAATTCCTATATAACGTAAGTGACA  
CAGTAAAAGCTTTTTCTATTCTTTTATTAAGTATTATGTATCGGATTCCATTCACCCCG  
CGGTTGGGAATTAATTATTGGCTCTATCTATAAAGATTTTGGGTTTGTTCATAATGATCAA  
ATTATATCTGGTCTTGTTCACCTTCCCAGTCATTCTCGATACAATTTTTAAATATTGGA  
TTTTCCGTTAATTTAAATCGTCTGTCTCCGTCACCTTGATGTTATTTATCATTCAATGAATGA  
CATGCCTATTGGTGTTCGAAAGTTCCTTCCGAGGTCCTGGAGAGGCAAATCCACTTT  
GGGTTGACGTATACAACCGACTTTATCGAGAAAGATTACTTTTTTTAGGCCAAGGTATT  
AATAGCGAGATTTGCAATCAACTTATTGGTCTTATGGTATATCTCAGTATCGAGGATGAG  
ACCAAAGAGCTGTATTTGTTTATAAACTCTCCTGGGGGCTGGGTAATACCTGGGGTGGC

TATTTATGATACTATGCAATTTGTGCGACCAGATGTCAATACAGTATGCATGGGATTAGC  
CGCTTCAATGGGATCTTTTATCCTGGTTCGGAGGAGAAATTACCAAACGTCTAGCATTCC  
CTCACGCTAGGGTAATGATGCATCAACCTGCTAGTGGTTTTTATATGGCACAAGTAACC  
GAATGTGTCGTGGAAGCGGAAGAAGTCTGAAACTGCGTGAAACCCTCACAGGGGTT  
TATGTACAACGAACGGGCAAACCCTTCTGGGTTGTATCCGAAGATATGGAAAGAGATG  
TTTTTATGTCAGCAACAGAAGCACAAAGCTTATGGAATTGTTGATCTTGTAGCGATTCA  
A????????????????????????????????????????????????????????????  
????????????????????????????????????????????????????????????  
????????????????????????????????????????????????????????????  
????????????????????????????????????????????????????????????  
ATGGAAGAAATCCAAAGATATT  
TACAG--GATAGCTCGCAACAACAACACTTCCTATATCCACTTATCTTTCAGGAGTATATT  
TATGCACTTGCTCATGATCATGGTTTACCGGGTTATAACAATAAATTTAGTTTCCTAATTG  
TGAAACGTTTAATTACTCGAATGTATCAACAGAATCATTTTCTTATTTCTACTAATGATTC  
TAACAAAATCCATTTTGGAGAAGAGTTTGTATTCTCAAATGATATCAGAGGGATTG  
TATTTATTGTGGAAATTCGTTTTCTCTACGATTAATATCTTCTTTAATTTTAAAATCTTAT  
AATTTACGATCAATTCATTCAACATTTCTTTTTTAGAGGACAATTTTTCACATCTAAATT  
ATGTATTAGATATACTAATACCTACCCCGTTCATCTGGAAATCTTGGTTCAAACCTCTTCG  
CTATTGGGTAAGAGATGCCTCTTCTTTACATTTATTACGATTCTTCTCCACGAATATTGG  
AATTTGAATAGTCTTATTACTCCCGGT--TACTCCTTTTCAAACAAAGATTCTTCTTCTT  
TTTATATAATTTTATGTATATGAATGCGAATCCACTTTCGTCTTCTACGGAACCAATCT  
TTTCATTTACGATCAACATCTTTTGGAGCCCTTCTTGAACGAATATATTTCTATGGAAA  
ATAGAACGTCTTGTAGAAGTCTTTGCT--GATTTTACCTTATGGTTATTCAAGGATCCTTT  
CATGCATTATGTTAGGTATCAAGGAAAATCAATTCTGGCTTCAAACGGGACGTTTCTTTT  
GATGAATAAATGGAAATTTATCTTGTCAATTTTGGAAATGTCAATTTTCTCTGTGCTTT  
CACACAGGAAGGATCCATATAACCAATTATCCAACCATTCCCGTGACTTTATGGGCTAT  
CTTCAAGTGTGCGACTAAATCATTCAACGGTACGTAGTCAAATGTTAGAAAATTCATT  
TCTAATAAATAATGCAATT-----AAAAGTTCGATACCCTTGTTCCAATTATTCTTTGATT  
GGATCATTAGCTAAAGCACACTTTTGTACCGTATTAGGACATCCATTAGTAAACCGGTT  
TGGTCCGATTTATCAGATTCTGATATTATTGACCGATTGGGGCGTATATGCAGAAATCTTT  
TTCATTATTTAGCGGATCTTCCAAAAAACGACTTTATATCGAATAAAGTATATACTTCG  
ACTTTCTTGTGCTAGAACTTTAGCTCGGAAACACAAAAGTACTGTACGCACTTTTTTGA  
AAAGATCGGGCTCGGAATTATTGGAAGAATCTTAAACGTCGGAAGAACAAGTTCTTTC  
TTTGACCTTCCCACGACGGATTTGGTATTTGGATATTTTCTATCAACGATCTGGCGAA  
TTATCAAATGATAATTGAT---ACAACAGAAATAGAG---ACTATCAATTTCTTTTCCAAATT  
GGAATCC---TTAAAAGAAGCCTATGGGATCATATGGATGCTTGTCCCTATTTTGACTCTT  
GTGTTAGGAATCACAATAGGTGTACTAGTAATTGTTTGGTTAGAAAGAGAAATATCTGC  
GGGAATACAACAACGTATCGGACCTGAATATGCCGGCCCTTTAGGAATTCTTCAAGCTT  
TAGCAGATGGGACAAAACACTACTTTTGAAGAGAACCTTATTCCATCTACAGGAGATACT  
CGTTTATTAGTATCGGACCATCCATAGCAGTAATATCTATCTTTCTAAGTTATTAGTAA  
TTCTTTTATAGCGATCACCTTGTCTAGCCGATCTTAGTATTGGTGTTTTTTTATGGATTGC  
CATTTCAAGTATTGCTCCCGTTGGACTTCTTATGTCGGGATATGGATCAAATAATAAATAT  
TCCTTTTATAGGTGGTTTACGGGCAGCTGCCAATCAATTAGTTATGAAATACCATTAGCT  
CTATGTGTGTTATCAATATCTCTACTATCTAACAGTTCAAGTACAGTTGATATAGTGGA  
GCGCAGTCAAATATGGTTTTTGGGGGTGGAATTTGTGGCGTCAACCCATCGGGTTTAT  
CGTTTTTCTAATTTCTTCTCTAGCCGAGTGTGAAAGATTACCTTTTGATTTACCAGAAGC

AGAAGAAGAATTAGTAGCAGGGTATCAAACCGAATATTCAGGTATCAAATTTGGTTTAT  
TTTACATTGCTTCATATCTGAATCTACTAGTTTCTTCATTATTTGTAACAGTTCTTTACTTG  
GGAGGTTGGAATCTTTCTATTCGGTACATATTTGTTCCCTGAGCTATTTGGCATAAATAAA  
AGGGGTAAAGTCTTTGGAACACTAATTGGTATCTTTATCACATTAGCCAAAACCTTATTTG  
TTTTTGTTCAATCCTATTGCAACAAGATGGACTTTACCGAGGCTGAGAATGGACCAACT  
ATTAAATCTTGGGTGGAAATTTCTTTTACCTATTTCTCTAGGTAATCTATTATTGACAACC  
TCGTCCCAACTTCTTTCACTGATGATCTGGCATGTACAGAATGAAAACCTTCATTCTCGAT  
TCTACGAGAATTTTTATGAAAGCCTTTCAATTTGCTTCTCTTCGATGGAAGTTTTATTTTCC  
CAGAATGTATCCTAATTTTTGGCCTAATTCTTCTTCTGATGATCGATTCAACCTCTGATCA  
AAAAGATATACCTTGGTTATATTTTCATCTCTTCAACAAGTTTAGTAATGAGCATAACGGC  
CCTATTGTTCCGATGGAGAGAAGAACCTATGATTAGCTTTTTCGGGAAATTTCCAACGA  
ACAATTTCAACGAAATCTTTCAATTTCTTATTTTACTATGTTCAACTCTATGTATTCTCT  
ATCCGTAGAGTACATTGAATGTACAGAAATGGCTATAACAGAGTTTCTCTTATTCTGTATT  
AACAGCTACTCTAGGGGGAATGTTTTTATGCGGTGCTAACGATTTAATAACTATCTTTGT  
AGCCCCAGAATGTTTCAGTTTATGCTCCTACCTATTATCTGGATATACCAAGAAAGATGT  
ACGGTCTAATGAGGCTACTATGAAATATTTACTCATGGGTGGGGCAAGCTCTTCTATTCT  
GGTTCATGGTTTCTCTTGGCTATATGGTTCATCCGGGGGAGAGATTGAGCTTCAAGAAA  
TAGTAAACGGTCTTATCAATACACAAATGTATAACTCCCCAGGAATTTCAATTGCGCTCA  
TATTCATTACCGTAGGAATTGGGTTCAAGCTTTCCCCAGCCCCTTCTCATCAATGGACTC  
CTGACGTATACGAAGGATCTCCCCTCCAGTCGTTGCTTTTCTTTCTGTTACTTCGAAA  
GTAGCTGCTTCAGCTTCAGCCACTCGAATTTTCGATATTCCTTTTTTATTTCTCATCAAC  
GAATGGCATCTTCTTCTGGAAATCCTAGCTATTCTTAGCATGATATTGGGAAATCTCATT  
GCTATTACTCAAACAAGCATGAAACGTATGCTTGCATATTCGTCCATAGGCCAAATCGG  
ATATGTAATTATTGGAATAATTGTTGGAGACTCAAATGATGGATATGCAAGCATGATAAC  
TTATATGCTGTTCTATATCTCCATGAATCTAGGAACTTTTGCTTGCATTGTATTATTTGGTC  
TACGTACCGGAACTGATAACATTCGAGATTATGCAGGATTATACACAAAAGATCCTTTTT  
TGGCTCTCTTTAGCCCTATGTCTCTTATCCCTAGGAGGTCTTCCCTCCACTAGCAGGTT  
TTTTTCGAAAACCTCTATTTATTCTGGTGTGGATGGCAGGCAGGCCTATATTTCTTGGTTT  
TAATAGGACTCCTTACAAGCGTTGTTTCTATCTACTATTATCTAAAAATAATCAAGTTATT  
AATGACTGGACGAAACCAAGAAATAACCCCTCACGTGCGAAATTATAGAAGATCCCCT  
TTAAGATCAAACAATTCATCGAATTGAGTATGATTGTATGTGTGATAGCATCTACTATAC  
CAGGAATATCAATGAACCCGATTATTGCAATTGCTCAGGATAGCCTTTTTATGTTTCTGC  
TTTACGAATATGATTTTTTTTTGGGCATTTCTAATAATATCCATCCTTGTTCCATTTTTGGCA  
TTTTTCATTTCCGGAGTGTTAGCCCCGATTAGCAAAGGGCCGGAGAACTTTCTACTTA  
TGAGTCGGGTATAGAACCAATGGGTGATGCTTGGTTACAATTTCGAATCCGTTATTATAT  
GTTTGCTCTAGTTTTTTGTTGTTTTGATGTTGAAACGGTTTTTTCTTTATCCATGGGCAAT  
GAGTTTCGACGTATTGGGTGTATCTGTATTTATAGAAGCTTTGATTTTTCGTGCTTATCTTA  
ATTATTGGTTTAGTTTATGCATGGCGAAAGGGGGCATTGGAATGGTCTACGAATTATTTT  
CCTTGGTTAACAATAATTGTTGTTTTTCCGATATTTGCGGGTTCTTTAATTTTCTTTCTTC  
CCCATAAAGGAAATCGGGTAATTAGGTGGTATACTCTATGTATATGTATTTTAGAACTCCT  
TCTAACGACTTATGCATTTTGTATCATTTCCAATCGGATGATCCATTAATAACAAGTAGTG  
GAGGATTATAAATGGATCGATTTTTTTGATTTCCATTGGAAATTAGGAATAGATGGACTT  
TCTATAGGACCCATTTTATTAACAGGATTTATCACTACCTTAGCGACTTTGGCGGCTTGG  
CCAGTTACTCGAGATTCTCGATTATTCCATTTTCTCATGTTAGCAATGTACAGTGGCCAA

ATTGGATCATTTTCGTCTCGGGACCTTTTACTTTTTTTCATCATGTGGGAGTTAGAATTA  
TTCTGTATTACTACTTCTAGCCATGTGGGGAGGAAAGAAACGTCTGTACTCAGCTACA  
AAATTTATTTTGTACACGGCGGGGGTCTGTTTTTCTCTTAATGGGAGTTTGGGTGTT  
GCTTTATATGGTTCTAATGAACCAACATTAATTTTGAACATCAGTTAATCAGTCATAT  
CCTGTGGTTTTAGAAATAATCTTCTATATTGGATTTTTTATTGCTTTTGCTGTCAAATCGC  
CCATTATCCCCCTACACACATGGTTACCAGATACCCATGGAGAAGCACATTACAGTACT  
TGTATGCTTCTAGCCGGAATCTTATTAATAATGGGAGCGTATGGATTAATTAGAATCAAT  
ATGGAATTATTACCTCATGCCCATTTCTATATTTCTCCTTGGTTGATGATAATAGGTACAAT  
ACAAATAATCTATGCAGCTTCAACATCTCTTGGCCAACGGAATTTAAAAAAGAATAG  
CCTATTCCTCTGTCTCTCATATGGGTTTCATAATTATAGGAATTAGTTCTCTAACCGATAC  
GGGACTTAATGGAGCCCTTTTACAAATAATCTCTCATGGATTTATTGGTGCTGCACTTTT  
TTCTTGGCGGGAACGACTTATGATAGAATCCGCCTTGTTTATCTTGACGAAATGGGCG  
GAATAGCTATTCCAATGCCAAAAATGTTACAGATGTTACAGTAGCTTTTCGATGGCTTCCC  
TTGCATTACCAGGTATGAGTGGTTTTGTTGCCGAATTGATAGTATTTTTTGAATAATTA  
CCGGCCAAAAATATCTTTTAATTCCAAACTACTAATTACTTTTGTAAATGGCAATTGGAA  
TGATATTAACCTATTTTATTCATTATCTATGTCACGCCAGATGTTCTATGGATACAAGCTA  
TTAATGCCCGAAGGATCTTTTTTTGATTCTGGACCCCGAGAGTTATTTCTTTTCGATC  
TCCATCTTTTTACCCGTAATAGGTATTGGTATATACCCCGATTTTCGTTCTTTCATTAGCAA  
TTGACAAGGTGCAAGTTATTCTATCTAATTTTTTTTATAGAATGATTCTCGAGCATGTACT  
TGTTTTGAGTGCCTATTTATTTTCTATCGGTATCTATGGATTGATCACAAGTCGAAATATG  
GTTAGAGCCCTTATGTGTCTTGAACCTATATTGAATGCGGTTAATATAAATTTGTAAAT  
TTCTGATTTTTTTGATAATCGTCAATTAAGGAGACATTTTCTCAATTTTTGTTATAGC  
TATTGCAGCTGCTGAAGCAGCCATTGGACTGGCTATTGTTTCATCAATTTACCGTAACA  
GAAAATCAACTCGTATCAACCAATCAAATTTGTTGAATAATATGGAACAGACATATGAAT  
ATGCGTGGATCATACTTTTCAATCCACTTCCAGTCCCTATGTTAATAGGAGCGGGACTTA  
TTCTTTTTCCAACGGCAACAAAAAGTTTTTCGCCGATGTGGGCTTTTCAAAGTGTTTTA  
TTGTTAAGCATAGTCATGATTTTTTCAATCTACCTGTCTATTTCAGCAAATAAATAGCAGT  
TCTTTTTCTCAATATGTATGGTCTTGGATCATTAATAATGATTTTTCTTTAGACTTCGGATA  
CTTGATCGACCCACTTACTTCTATTATGTTAATATTAATCACTACTGTTGGGATTATGGTT  
CTTATTTATAGTGATAATTATATGGCTCATGATCAAGGCTATTTGAGATTTTTTGCTTATAT  
GAGTTTTTTCAGTACTTCCATGTTGGGATTAGTTACTAGTTCGAATTTGATACAAATTTAT  
ATTTTTTGGGAATTGGTTGGTCTGTGTTCCCTATCTATTAATAGGATTTGGTTTACACGAC  
CTGTTGCGGCAAATGCTTGTCAAAAAGCCTTTGTAACATAATCGTGTGGGGATTTTGGT  
TTATTATTAGGAATTTTAGGTTTTTATTGGATAACGGGGAGTTTCGAATTTAGGGATTTAT  
TCGAAATATTCAATAACAATGAGGTTAATTTTTTATTTGTTACTTTATGCGCTGTTCTCTT  
ATTTGTCGGTGCAGTTGCTAAATCCGCCAATTCCCCCTTCATGTATGGTTACCTGATGC  
CATGGAGGGGCCTACTCCTATTTCCGGCTTTATACATGCTGCTACTATGGTAGCGGCGGG  
GATTTTTCTGTAGCTCGGCTTCTTCTCTTTTTCAGAGTTATACCTTACATAATGTATTTG  
ATCTCGATTATAGGAATAATAACAGTATTATTAGGAGCTACGTTAGCTCTTGCTCAAAA  
GACATTAAGAGAGGTTTAGCCTATTCTACAATGTCTCAATTGGGTTATATGATGTTAGCT  
CTAGGTATGGGGTCTTATCGAAGCGCTTTAATTTCAATTTGATTACTCATGCTTATFCAAAG  
CATTATTATTTTAGGATCCGGATCCATTATTCAATGGAACCTATTGTTGGATATTCT  
CCAGCTAAAAGCCAGAATATGGGTCTTATGGGAGGTTTAAAGAAAACATGTACCAATTAC  
CAAAATCACATTTTTATTAGGTACACTTTCTCTTTGTGGTATTCCACCTCTTGCTTGT

TGGTCCAAAGATGAAATTCTTAATGATAGTTGGTTGTATTTCGCCAATTTTCGCAATAATA  
GCTTGGGCCACGGCGGGATTAACCGCATTATATGTTTCGGATCTATTTACTTACTTTT  
GAAGGGCATTAAACGTTCAATTTTCAAATTTATGGTGGGAAACACAAAACCCCTTTCTA  
TTCAATATCTCTATGGGGTAAA-----AACGGAATTAAGAAA---TTATTAACA-----ATG  
AATTTTTTTTCATTTGAGCATAAAGCGGTTTATTCTATCCTTATGAATCGGACAATACTA  
TGCTATTCCCAATATTTGTATTAGGACTCTTTACTTTGTTTGGTGGATCGATAGGAATTCC  
TTTCAATTTGGATATATTATCGAAATGGTTAGCTCCATCTATAAATCTTTTGCATCAAAAG  
TCGAAT--TCGATGGATTGGAATGAATTTTTAAAGGATGCGGTTCTTTTCAGTCAGTATAG  
CTTATTTCCGGAATATTTATAGCATCCTTTTTATATAAACCCATTTATTCTTCTTTAAAAAAT  
TTGGAGTTAATTAATTTTTTTGTTATTCTGTGGGACAAAATTATAAATGGCATATATGATT  
GGTCATATAATCGTGCTTACATAGATGCTTTTTTATACAAGATTCTTAGTTGGTGGGATAA  
GAGGCTTAGCTGAATTTACTCATTTTTTTGTATCGACGAGTAATTGATGGGATGACTAAC  
GGGGTTGGGGTTATTAGTTTCATTGTAGGAGAAGGTATCAAATATATAGGGGGCGGA---C  
GCATCTCTTCTTATCTCTTCTTGTATTTAGCTTATGTTTCCGTCTTTTTTATTAGTTTATTACA  
TGGATTTATCTGAACCAATACATGATTTTCTTTTAGTCTTTCTAGGATCGGGTCTTATATT  
AGGGGGTCTAGGAGTGGTATTACTTCCCAATCCAATTTATTCTGCCTTTTCCCTGGGGTT  
GGTCTTTTTTGTACATCGTTATTCTATATTCTATCTAACTCCTATTTTGTAGCTGCTGCGC  
AGCTACTTATTTACGTAGGAGCTATAAATGTTTTAATCATTTTTTGCTGTGATGTTTCATGAA  
TGGTTCAGAATATTACAAAGATTTTCATCTTTGGACCGTAGGAGATGGAATTACTTCGAT  
GGTTTGTATAAGTCTTTTTATTTCACTAATTACTACTATTTTCAGATACGTCATGGTACGGT  
ATTATTTGGACTACAAGATCAAACCAGATTATAGAGCAAGATTTTCTAAGTAATAGTCAA  
CAAATTGGAATTCATTTATCAACAGATTTTTTTCTTCCATTTGAACTTATTTCAATAATCC  
TTTTAGTTGCTTTAATAGGTGCAATTGCTGTAGCTCGGCAAATGACTGCACCAACTACA  
AGAAAAGACCTCATGATAGTCAATATGGGGCCTCAGCACCCATCAATGCACGGTGTCT  
TCGACTCATCGTTACTCTAGATGGTGAAGATGTTGTGCGACTGCGAACCAATATTGGGTT  
ATTTACATAGAGGGATGGAGAAAATTGCGGAAAACCGAACCAATTATACAATATTTACCT  
TATGTAACACGTTGGGATTATTTAGCTACTATGTTTACAGAAAGCAATAACCATAAATGGA  
CCCGAACCAATTAGGCAATATTCAAGTACCTAAAAGGGCTAGCTATATCAGAGTCATTAT  
GTTGGAGTTGAGTCGGATCGCTTCTCATTGTTATGGCTCGGTCCTTTTATGGCGGATAT  
TGGTGCAGACCCCTTTCTTCTATATTTTTCGAGAAAGAGAATTGATATATGACCTATT  
CGAAGCTGCTACCGGTATGCGAATGATGCATAATTATTTTCGTATTGGAGGAGTGGCTG  
CCGATCTACCCTATGGCTGGGTAGATAAATGTTTGGATTTTTGCGATTATTTTTTAACAG  
GGGTTGCTGAGTATCAAAAACCTTATTACCCGGAATCCTATTTTTTTTAGAACGAGTTGAA  
GGCATAGGCATTATTGGGCAAGACGAGGCATTAATTTGGGTTTATCGGGACCAATGCT  
ACGAGCTTCCGGAATAGAATGGGATCTTCGTAAAGTTGATCATTATGAGTCTTACGACG  
AATTTGATTGGCAGGTTCAATGGCAACGAGAAGGGGATTCATTAGCTCGTTATTTAGTA  
CGAATCGGTGAAATGACAGAATCCATAAAGATTATTCAACAGGCTCTGGAAGGAATTC  
CAGGAGGGCCTTACGAAAATTTAGAAATCCGACGTTTTGACAGATTAAAAGATCCTGA  
ATGGAATGATTTTGAATATCGGTTTATTAGTAAAAAACCTTCTCCAACCTTTGAATTGTC  
GAAACAAGAACTTTATGTGAGAGTTGAAGCCCCAAAAGGAGAATTGGGAATTTTTATC  
ATAGGAGATCAGAGCGTTTTTCTTGGAGATGGAAAATTCGCCACCAGTTTTTATCAA  
TTTGCAAATTCTTCCCTCAGTTAGTTAAAAGAATGAAATTGGCTGATATTATGACAATACT  
AGGTAGCATAGATATCATTATGGGAGAAGTTGATCGTATGCTCCCTATGATAACTGAATT  
CATAAATTATGGTCAACAAACAATACGAGCCGCCAGATACATCGGCCAAGGTTTCATGA

TTACCCTGTCCACGCAAATCGTTTACCTGTAAC TATTCAATACCCCTACGAAAAATTGA  
TCACACCGGAACGTTTCCGAGGCCGAATACACTTTGAATTTGATAAATGCATTGCTTGT  
GAAGTATGTGTGCGTGTATGTCCTATAGATTACCCGTTGTTGATTGGAAGTTGGAACT  
GATATTCGAAAGAAACGATTGCTTAATTACAGTATTGATTTTGGAACTGTATATTTTGTG  
GTAATTGCGTTGAGTATTGCCCAACAAATTGTTTATCAATGACCGAAGAATATGAACTTT  
CTACTTATGATCGTCACGAATTGAATTATAATCAAATCGCTTTGGGTCGCTTACCAATGT  
CAGTAATTGATGATTACACAATTCGAACAGTTTCGAATTTA-----  
-----ATGCAGGGTCGTTTGTCTGCTTGGCTAGTCAAGCATGGGCTAATTCATAGATCT  
TTGGGCTTTGATTACCAAGGAATAGAGACTTTACAAATAAAGCCCAGGATTGGCATTTC  
CATTGCTGTCAATTTTTTATGTATATGGGTACAATTATCTCCGCTCTCAATGTGCCTATGAT  
GTAGCGCCTGGCGGGCTGTTAGCTAGTGTGTATCATCTTACGAGAATAGAGGATGGTGT  
GGATCAACCAGAAGAGGTATGCATAAAAGTCTTTGCCTCCAGGAGGAATCCTAGAATT  
CCGTCTGTTTTCTGGGTTTGGAAAAGCGTGGATTTTCAAGAACGAGAATCATATGATAT  
GTTGGGAATCTCTTATGATAATCATCCACGCTTGAAACGTATCTTAATGCCTGAAAGTTG  
GATAGGATGGCCCTTACGTAAGGATTATATTGCCCCCAATTTTTATGAAATACAAGATGC  
TCATATGGGCAATGAGTTTCGACGTATTGGGTGTATCTGTATTTATAGAAGCTTTGATTTT  
CGTGCTTATCTTAATTATTGGTTTATGTTTATGCATGGCGAAAGGGGGCATTGGAATGGTC  
TTAGCTCCTGAATATTCAGACAATAAAAAGAAAAACGGAAAAAATAAGATTGAGACA--  
-GTTATGAATTCATTCAAGTTTCCCTTACTTGATCGAACAGCCCCAAATTCAGTTATTTCA  
ACTACATTAATGATCTTTCAAATTGGTCAAGACTCTCTAGTTTATGGCCGCTTCTCTAT  
GGTACCAGTTGTTGCTTCATTGAATTTGCTTCACTAATAGGCTCACGCTTCGACTTTGAT  
CGTTATGGACTAGTACCAAGATCGAGTCCTAGACAAGCGGATCTAATTTTAAACGGCTGG  
AACAGTAACAATGAAAATGGCCCCCTCTTTAGTGAGATTATATGAGCAAATGCCTGAAC  
CAAATATGTTATTGCTATGGGAGCCTGTACAATTACAGGCGGGATGTTCAGTACCGATT  
CTTATAGTACTGTTCCGGGGAGTCGATAAGCTAATTCCTGTAGATGTATATTTGCCAGGTT  
GCCACCTAAACCGGAAGCGGTTATAGATGCTATAACAAAACCTTCGTAAGAAAATATCT  
CGAGA ACTCTATGAAGATCGAATTAGGTCTCAACGAGTGAATCGGTGTTTTACTACCAA  
TCACAAGTTTCATGTTTCGACGCAGTATTCATACGGGAAATTATGATCAAAGAGTTCTTTA  
TCAACCACCATCTACTTCAGAGATCCCTACGGAAATCTTTTCAAATACAAAAATTCAG  
TATCTTCCCCGAATTAGTGAATATGCAA ACTAGAAATGCTTTTTCTTGGCTAAAGAAA  
CAGATTACTCGATCTATTTCCGTATCGCTCATGATATATATCTTAACTCGGACATCCATTC  
AAGTGCATATCCCATTTTTGCACAGCAGGGTTATGAAAATCCACGAGAAGCGACTGGG  
CGTATTGTATGTGCCAATTGCCATTTAGCTAATAAGCCCGTGGAGATTGAGGTTCCACA  
AGCGGTACTTCCTGATACTGTATTTGAAGCAGTTGTTTCAATTCCTTATGATATGCAACT  
GAAACAGGTTCTTGCTAATGGTAAAAAGGGGGGGTTGAACGTGGGGGCTGTTCTTATT  
TTACCGGAGGGGTTTGAATTAGCTCCTCCCGATCGTATTTCTCCCGAGATGAAAGAAAG  
GATTGGCAATTTGTCTTTTTCAGAGCTATCGCCCAATAAAAAAATATTCTTGTGGTAG  
GCCCTGTCCCTGGTAAAAAATATAGTGAAATAACCTTCCCTATTCTTTCCCGGACCCCTG  
CTACTACGAAGGATGTTCACTTCTTAAAATATCCTATATACGTAGGCGGTAACAGGGGA  
AGGGGTCAGATTTATCCCGACGGCAGCAAGAGTAAGAATACAGTTTCTAATGCTACAG  
CAGCAGGTATAGTAAGCAAATCATAAGAAAAGACAAAGGGGGATATGAGATAACCAT  
AACGGATGCGTCGGAGGGACGTCAAGTGGTTGATATTATCCCTCCCGACCAGAACTT  
CTTGTTCGAGGGCGAATCTATCAAATTTGATCAACCATTAACGAGTAATCCTAATATA  
GGCGGATTTGGTCAGGGAGATGCAGAAATAGTACTTCAAGATCCATTACGTGTCCAAG

GACTTTTGGTTCTTCTTGGCATCTGTTATTTTGGCACAAATCTTTTTGGTTCTTAAAAAGA  
AACAGTTTGAGAAGGTTCAATTGGCCGAAATGAATTCATGAGTAAAGTATATGATTGG  
TTCGAAGAACGTCTCGAGATTCAAGCAATTGCGGATGATATAACTAGTAAATACGTTCC  
CCCCACGTCAATATAATTTTATTGTTTAGGGGAATTACGCTTACTTGTTTTTAGTACAA  
GTAGCTACTGGGTTTGCTATGACTTTTTACTACCGCCGACCGTTACTGAGGCTTTTGCT  
TCTGTTCAATACATAATGACTGAAGCCAACCTTTGGTTGGTTAATCCGATCAGTTCATCGA  
TGGTCGGCAAGTATGATGGTCCTAATGATGATCCTGCATGTATTTTCGTGTGTATCTCACC  
GGCGGATTTAAAAAACCTCGCGAATTGACTTGGGTTACAGGTGTGGTTCTGGCTGTATT  
AACCGCATCTTTTGGCGTAACTGGTTATTCCTTACCTCGGGACCAAATTGGTTATTGGG  
CAGTGAATAAGTAACAGGTGTCCCTGACGCTATTCTGTAAATAGGATCACCTTTGGTC  
GAATTATTGCGCGGAAGCGCTAGTGTGGGACAATCTACTTTGACTCGTTTTTATAGTTTA  
CACACTTTTGTATTGCCACTTCTTACTGCCGTATTTATGTTAATGCACTTTCCAATGATAC  
GTAAACAGGGTATTTCTGGGCCTTTAATGGGAGTAACAAAAAACCTGACTTGAATGA  
TCCTGTATTAAGAGCTAAATTGGCTAAAGGTATGGGTCATAATTATTATGGAGAGCCCGC  
ATGGCCCAATGATCTTTTATATATTTTCCAGTAGTAATTCTAGGTACTATTGCATGTAAT  
GTAGGCTTAGCCGTTTTAGAACCATCAATGATTGGTGAACCGGCAGATCCATTTGCAAC  
CCCTTTGGAAATCTTACCTGAATGGTATTTCTTTCCTGTATTTCAAATACTTCGTACAGT  
GCCCAATAAATTGTTGGGGGTTCTTTAATGGTTTCAGTACCTGCGGGATTATTAATAGT  
ACCTTTTTTAGAGAATGTTAATAAATTCCAAAATCCATTTCCCGTCCAGTAGCGACGA  
CTGTCTTTTTGATTGGTACCGCAGTCGCCCTTTGGTTGGGCATTGGTGCAACATTACCTA  
TTGATAAATCCCTAACTTTAGGTCTTTTTATGATTGAAGTTTTTCTATTTGGAATCGTGTT  
AGGTCTAATTCCTATTACTTTGGCTGGATTATTCGTAAGTGCATATTTACAATATAGGCGT  
GGTGATCAGTTGGACCTTATGCTTACTATAACTAGTTATTTCCGGTTTTCTATTAGCGGCTT  
TAACTATAACCTCAGCTCTATTTATTGGTCTGAGCAAGATACGACTTATTATGGATATAGT  
AAGTCTTGCTTGGGCTGCTTTAATGGTAGTCTTTACTTTTTCCCTTTCACTCGTAGTGTG  
GGGAAGGAGTGGACTCATGATTATTCGTTCCGCCGAACAGAAAGTTAAAATTTTGGTA  
GATAGGGATCCCGTAAAAACTTCTTTCGAGGAATGGGCCAGACCGGGTCATTTCTCAA  
GAACAATAGCTAAAGGGCCTGATACTACCCTTGGATCTGGAACCTACATGCTGATGCT  
CACGATTCGATAGCCATAACAGTGATTTGGAGGAGATCTCTCGAAAAGTATTTAGTGC  
ACATTTCCGGTCAACTCTCCATCATCTTTCTTTGGCTGAGCGGCATGATTTCCACGGTGC  
TCGTTTTTCTAATTATGAAGCGTGGCTAAGTGATCCAACCTCACATTGGGCCTAGTGCC  
AGGTGGTTTGGCCAATAGTGGGCCAAGAAATATTAATGGTGACGTAGGCGGGGGTTT  
CCGAGGAATACAAATAACCTCTGGTTTTTTTCAGATTTGGCGAGCATCTGGAATAACTA  
GTGAATTACAACCTCTATTGTACAGCAATTGGGGCATTGGTCTTTGCAGCGTTAATGCTTT  
TTGCTGGTTGGTTTCATTATCATAAAGCGGGCGCCAAAATTGGCTTGGTTTTCAAGATGTA  
GAATCTATGCTGAATCACCATTTGGCAGGGCTACTAGGACTTGGGTCTCTCTTTGGGC  
GGGCATCAAGTACACGTATCTTACCATTAAACCAATTTCTAAACGCTGGAGTAGATC  
CTAAAGAGATAACACTTCCATCATGAATTTATCTTGAATCGAGATCTTTTGGCTCAACTTT  
ATCCCAGTTTTGCCGAGGGAGCAACCCATTTTTACCTTGAATTGGTCAAAAATATGCG  
GACTTTCTTACTTTTCGTGGAGGATTAGATCCAGTAACTGGGGGTCTGTGGCTGACTGA  
TATTGCCCATCACCATTTAGCTATTGCAATTTCTTTCCCTGATAGCGGGTACATGTATAAG  
ACCAACTGGGGTATTGGTCATGGACTAAAAGATATTTAGAAAGCCATAAAGGTCCATT  
TACAGGTCAGGGCCATAAAGGCCTATATGAGATCCTAACAACGTCATGGCATGCTCAAT  
TATCTTAACTTAGCTATGTTAGGCTCTTTAACCATTGTTGTAGCTCATCATATGTATTC

CATGCCCCCTTATCCATATCTAGCTACTGACTATGGTACACAACCTGTCATTGTTACACACA  
TCACATGTGGATTGGTGGATTTCTCATAGTTGGTGCTGCCGCGCATGCAGCCATTTTTAT  
GGTAAGAGATTATGATCCAACACTACTCGGTACAACGATCTATTAGATCGTGTCCCTTAGGCA  
TCGTGATGCAATCATATCCCATCTCAACTGGGCATGTATATTTCTAGGCTTTCACAGTTTT  
GGTTTGTATATTCATAATGATACCATGAGCGCTTTAGGGCGTCCTCAAGATATGTTTTCA  
GATACCGCTATAACAATTACAACCCGTTTTTGGCTCAATGGATACAAAACACCCATGCTTTA  
GCACCTGGTGAACGGCTCCTGGTGCAACAGCAAGCACCAGTTTAACTTGGGGGGGT  
GGTGATTTAGTGGCAGTGGGTGGCAAGGTGGCTTTGTTGCCTATTCCATTAGGAACCGC  
CGATTTCTTGGTACATCACATTCATGCATTTACGATTCATGTGACGGTATTGATACTCTTG  
AAAGGTGTTCTATTTGCTCGCAGTTCTCGTTTTGATACCGGATAAGGCCAAATCTTGGTTTT  
CGTTTTCTTGTGATGGACCTGGAAGAGGGGGTACATGTCAAGTATCGGCCTGGGATCA  
TGTCTTCTTAGGACTATTCTGGATGTACAATTCAATTCGGTAGTAATATTCCATTTCACT  
TGGAAAATGCAGTCAGATGTTTGGGGTAATGTAAGTGATCAAGGGGTAGTAACTCATAT  
CACGGGAGGAAACTTTGCGCAGAGTTCTATTACTATTAATGGGTGGCTCCGCGATTTCT  
TATGGGCACAGGCATCCCAGGTAATTCAGTCTTATGGTTCTTCATTATCTGCATATGGCC  
TTTTTTTCTAGGCGCTCATTTTGTCTGGGCTTTTAGTTAATGTTTCTATTACAGCGGAC  
GTGGTTATTGGCAAGAACTTATTGAATCCATCGTTTGGGCTCATAATAAATTTAAAGTTG  
CTCCTGCTACTCAGCCGAGAGCCTTGAGCATTATAACAAGGACGTGCTGTAGGAGTAAC  
CCATTACCTTCTGGGTGGAATTGCCACAACATGGGCATTCTTCTTAGCAAGAATTATTGC  
AGTAGGAATGGCATTACGATTTCCAAGGTTTAGCCAAGGCTTAGCTCAGGACCCCACTA  
CTCGTTCGATTTGGTTTGGTATTGCTACCGCACATGACTTCGAGAGTCATGATGATATTA  
CTGAGGAACGTCTTTATCAGAATATTTTTGCTTCTCACTTCGGTCAATTAGCAATAATTT  
TTCTGTGGACTTCCGGAAATCTGTTTCATGTAGCTTGGCAAGGAAATTTTGAGTTCGTGG  
GTACAGGACCCTTACATGTAAGACCTATTGCTCATGCAATTTGGGATCCTCATTTTGGT  
CAACCGGCCGTGGAAGCTTTTACTCGAGGGGGTGGCTCTTGGCCCAGTGAATATCGCTTA  
TTCTGGTGTATTCAGTGGTGGTATAACAATCGGTTTACGCACTAATCAAGATCTTTATAC  
TGCGCTCTTTTTCTATATTTCTTTCTGCCATATCCTTAATAGCAGGTTGGTTACACCTA  
CAACCGAAATGGAACCGAGCGTTTCTGGTTCAAAAATGCCGAATCTCGTCTGAATC  
ATCATTGTGACAGGACTTTTTGGCGTAAGTTCCTTGGCTTGGACAGGGCATTTAGTCCAT  
GTTGCTATTCTGCATCCAGAGGGGAGTACGTTCCGGTGGAAATAATTTCTTAGATGTATTA  
CCGCATCCCCAAGGGTTAGGCCACTTTTTACAGGTCAATGGAATCTTTATGCTCAAAA  
CCCCGATTCAAGTAGTCATTTATTTGGTACCGCCCAAGGGGCGGGAAGTCCATTCTAA  
CTCTTCTCGGGGATTCCATCCACAACGCAAAGTTTATGGTTGACTGATATTGCCCAT  
CACCATTTAGCTATTGCATTTATTTTTCTCGTTGCTGGTCATATGTATAGAACCAATTTG  
GGATTGGGCACAGTATGAAAGATCTTTTAGATGCACATATTCTCCGGGGGGGCGATTG  
GGGCGTGGACATAAGGGTCTTTATGACACAATCAACAATTCGCTTCATTTCAATTAGG  
CCTTGTCTAGCTTCTTAGGGGTTACTTCTTTGGTAGCTCAACACATGTACTCTTT  
ACCTGCTTATGCATTCATAGCACAGGACTTCACTACTCAAGCTGCATTATATACCCACCA  
CCAATATATCGCAGGATTCATCATGACAGGAGCTTTTTGCTCATGGAGCTATATTTTTTATT  
AGAGATTACAATCCGGAGCAAATGAAGATAATGTATTGGCAAGAATGTTAGATCATAA  
AGAAGCTATCATATCTCATTTAAGTTGGGCCAGCCTCTTTCTGGGATTCCATACCCTGGG  
ACTTTATGTTTATAATGATGTCATGCTTGCCTTTGGCACTCCGGAGAAGCAAATCTTGAT  
TGAACCTATATTTGCTCAATGGATACAATCCGCTCATGGTAAAACCTTCATATGGGTTTCA  
TGACTTTTTATCGTCAACGAGTGGCCCAGCATTCAATGCGGGTCAAGCATCTGGTTGC



CGGGTTGGTTAAATGCTGTTAATGAA-----AATAGTAATTCATTATTCTTAACAATAGGTC  
CTGGAGACTTTTTAGTTCATCATGCTATTGCTCTTGGTTTACATACA ACTACATTGATCTT  
AGTAAAAGGTGCTTTAGATGCACGTGGTTCCAAGTTAATGCCAGATAAAAAGGATTTC  
GGTTATAGTTTTCCGTGCGATGGCCAGGACGAGGTGGTACTTGTGATATTCGGCATG  
GGACGCGTTTTATTTGGCAGTTTTTTGGATGTTAAATACTATTGGATGGGTTACTTTTTAT  
TGGCATTGGAAGCACATCACATTATGGCAGGGTAACGTTTCACAGTTTAAATGAATCTTC  
CACTTATTTGATGGGCTGGTTAAGGGATTATTTATGGTTAAACTCTTCACA ACTTATCAA  
TGGATATAACCCCTTTGGTATGAATAGTTTATCGGTTTGGGCATGGATGTTCTTATTTGGA  
CATCTTGTTTGGGCTACTGGATTTATGTTCTTAATTTCTTGGCGTGGATATTGGCAAGAA  
TTGATTGAAACTTTAGCATGGGCTCATGAACGCACACCTTTGGCCAATTTGATTTCGCTG  
GAGAGATAAACAGTGGCCCTTTCCATTGTACAAGCAAGATTGGTTGGATTAGCTCACT  
TTTCTGTAGGTTATATATTTCACTTATGCAGCTTTCTTGATTGCCTCTACGTCGGGCAAATT  
TGGTATGTCACATTCAGTAAAGATTTATGATACGTGTATAGGATGTACTCAATGTGTCCG  
AGCCTGCCCCACCGATGTATTAGAAATGATACCTTGGGACGGTTGTAAGGCTAAACAAA  
TTGCTTCTGCTCCACGAACAGAGGACTGTGTTGGTTGTAAGAGATGTGAATCCGCTTG  
TCCAACAGATTTCTTGAGTGTCCGAGTTTATTTATGGCATGAAACA ACTTCGCAGTATGG  
GTCTAGCTTATATGACAAATTTGAACCTTCCATCTATTTTTGTGCCGTTAGTAGGCCTAG  
TCTTTCCGGCAATTGCAATGGCTTCTTTATTTATTCATGTTCAAAAAACAAGATTGTTA  
TGCGAGATCTAAAAACATATCTCTCTGTGGCACCAGTACTAAGTACGCTATGGTTCGGG  
GCTTTAGCAGGTCTATTGATAGAGATTAATCGTTTTTTCCCGGATGCGTTGACATTCCCC  
TTTTTTTTCATTCATGACTGCAATTTTAGAGAGACGCGAAAGCGAAAGCCTATGGGGTCG  
CTTCTGTAACTGGATAACTAGCACTGAAAACCGTCTTTACATTGGATGGTTTGGTGTTT  
TGATGATCCCACCTTATTGACGGCAACTTCTGTATTTATTATTGCCTTCATTGCTGCTCC  
TCCAGTAGACATTTGATGGTATTCGTGAACCCGTTTCAGGGTCTCTACTTTACGGAAACA  
ATATTATTTCCGGTGCCATTATTCCTACTTCTGCAGCTATAGGTTTACATTTTTACCCAATC  
TGGGAAGCGGCATCCGTTGATGAATGGTTATAACAACGGTGGTCCTTATGAACTAATTGT  
TCTACACTTCTTACTTGGCGTAGCTTGTACATGGGTCGTGAGTGGGAGCTTAGTTTCC  
GTCTGGGTATGCGACCTTGGATTGCTGTTGCATATTCAGCTCCTGTTGCAGCTGCTACC  
GCAGTTTTCTTGATCTACCCAATCGGTCAAGGAAGTTTTTCTGATGGTATGCCTCTAGG  
AATCTCTGGTACTTTCAATTTTCATGATTGTATTCCAGGCTGAGCACAACATCCTTATGCA  
CCCATTTACATGTTAGGCGTAGCTGGTGTATTCGGCGGCTCCCTATTAGTGTATGCA  
TGGTTCCTTGGTAACTTCTAGTTTGATCAGGGAAACCACAGAAAATGAATCTGCTAATG  
AAGGTTACAGATTCGGTCAAGAGGAAGAACTTACAATATCGTAGCCGCTCATGGTTAT  
TTTGGCCGATTGATCTTCCAATATGCTAGTTTCAACA ACTCTCGTTCGTTACACTTCTTC  
CTAGCTGCTTGGCCTGTAGTAGGTATCTGGTTTACCGCTTTAGGTATCAGCACTATGGCT  
TTCAACCTAAATGGTTTCAATTTCAACCAATCTGTAGTTGACAGTCAAGGTCGTGTAAT  
TAACACTTGGGCGGATATCATTAACCGTGCTAACCTTGGTATGGAAGTTATGCATGAAC  
GTAATGCTCATAACTTCCCTCTAGACTTAGCTGCTATCGAAGCTCCATCTACAAATGGAA  
TGGGTTTGCCTTGGTATCGTGTTACATACCGTTGTATTGAATGATCCCGGTCGGTTGCTTT  
CTGTTACATATAATGCATACAGCTCTGGTTGCTGGTTGGGCCGGTTCGATGGCTCTGTATG  
AATTAGCGGTTTTTGTATCCTTCTGATCCTGTTCTTGATCCAATGTGGAGACAGGGTATGT  
TCGTTATACCCTTCATGACTCGTTTAGGAATAACCAATTCATGGGGCGGTTGGAGTATCA  
CA---GGGGGACTGTAACGAATCCGGGTATTTGGAGTTATGAAGGTGTAGCGGGAGCA  
CATATTGTGTTTTCTGGCTTATGCTTTTTTGGCAGCTATCTGGCATTGGGTGTATTGGGATC

TAGAAATATTTTGTGATGAACGTACAGGAAAACCCTCTTTGGATTTGCCAAAGATCTTT  
GGAATTCATTTATTTCTCTCAGGGGTAGCTTGCTTTGGTTTTGGTGCATTTCATGTAACA  
GGCTTGATGGTCCCGGAATATGGGTGTCCGATCCTTATGGACTAACGGGAAAAGTACA  
ACCTGTAAATCCAGCGTGGGGCGTGAAGGTTTTGATCCTTTTGTTCAGGAGGAATA  
GCCTCTCATCATATTGCAGCAGGAACATTGGGCATATTAGCGGGCCTATTCCATCTTAGC  
GTCCGTCCACCACAACGTCTATACAAAGGATTGCGTATGGGAAATATTGAAACCGTCCT  
TTCCAGTAGTATTGCTGCTGTCTTTTTTGCAGCTTTTGTGTTGCCGGAACATGTGGTA  
TGTTTCGGCAACTACCCCGATTGAATTATTTGGGCCCACTCGTTATCAATGGGATCAGG  
GGTACTTCCAGCAAGAAATATATCGAAGAGTTAGTGCTGGGCTAGCAGAAAATCAAAG  
TTTATCAGAAGCCTGGTCTAAAATTCCTGAAAAATTAGCTTTTTATGATTACATCGGCAA  
TAATCCGGCAAAGGAGGATTATTCAGAGCAGGTTCAATGGATAACGGGGATGGAATA  
GCGGTTGGATGGTTAGGACACCCTATCTTTAGAGATAAAGAAGGGCGTGAACTTTTTGT  
ACGTCGTATGCCTACTTTTTTTGAAACATTTCCGGTCTTTTTAGTAGACGGCGATGGAAT  
TGTTAGGGCCGATGTTCTTTTTAGAAGGGCAGAATCGAAGTATAGTGTTGAACAAGTA  
GGTGTAAGTGTGAGTTCTACGGCGGTGAACTCAACGGCGTCAGTTATAGTGATCCTGC  
TACTGTGAAAAAATATGCTAGACGTGCTCAATTGGGTGAAATTTTCGAATTAGATCGTG  
CTACTTTGAAATCCGATGGTGTTTTTTCGTAGCAGTCCAAGGGGTGGTTTACTTTTGGG  
CATGCTTCGTTTGCTTTGCTCTTCTTCTTCGGACACATTTGGCATGGTGCTAGAACCCTG  
TTCAGAGATGTTTTTGCTGGTATTGACCCAGATTTAGATGCTCAAGTCGAATTTGGGGC  
ATTCCAAAACCTGGAGATCCAACCTACAAAAGACAGGCAGCC-----  
-----GTGGAAACGCTCTTTAATGGAACTTTAGCCTTAGCTGGTCTGTGACCAAGAAACCA  
CTGGTTTCGCTTGGTGGGCCGGGAATGCCCGACTTATCAATTTATCCGGTAAACTACTA  
GGGGCTCATGTAGCCCATGCTGGATTAATCGTATTCTGGGCCGGAGCAATGAACCTATT  
TGAAGTAGCCATTTTCGTACCCGAGAAGCCTATGTATGAACAAGGATTGATTTTACTTC  
CCCACCTAGCTACTCTAGGTTGGGGGGTAGGCCCTGGGGGCGAAGTTATAGACACCTT  
TCCATACTTTGTATCTGGAGTACTTCATTTAATTTCTTCTGCAGTATTGGGCTTTGGCGGC  
ATTTATCATGCACTTCTGGGACCTGAGACACTTGAAGAATCTTTTCCCTTCTTTGGTTAT  
GTCTGGAAAGATCGAAATAAAATGACCACAATTTTAGGTATTCATTAATCTTGTTAGG  
TCTAGGTGCTTTTTCTTCTAGTATTCAAGGCTCTTTATTTTGGGGCGTATATGATACCTGG  
GCTCCGGGAGGGGGAGATGTAAGAAAAATTACCAACTTGACCCTTAGCCCGAGTATCA  
TATTTGGTTATTTACTAAAATCCCCTTTTGGGGGGGAAGGATGGATTGTTAGTGTGGAC  
GATTTAGAAGATATAATCGGAGGACATGTATGGTTAGGTTCCATTTGTATACTTGGTGGA  
ATCTGGCATATCTTAACCAAACCCTTCGCATGGGCTCGACGCGCACTTGTATGGTCTGG  
AGAGGCTTACTTATCTTATAGTTTAGGGGCTTTAGCCGTCTTTGGTTTTATTGCTTGTG  
TTTTGTCTGGTTCAATAATACCGCTTATCCTAGTGAATTTTACGGACCTACTGGACCAGA  
AGCTTCTCAAGCTCAAGCATTTACTTTTCTAGTTAGAGACCAACGCCTTGGGGCTAACG  
TGGGATCCGCTCAAGGACCTACTGGTTTAGGTAATATCTAATGCGTTCCCAACCGGA  
GAAGTCATTTTTGGAGGAGAACTATGCGTTTTTGGGATCTGCGTGCTCCATGGTTAGA  
GCCTCTAAGGGGTCCAAATGGGTAGACTTGAGTAGGTTGAAAAAGACATACAACCT  
TGGCAGGAACGGCGTTCCGCGGAATATGACTCATGCTCCTTTAGGTTCTTTAAATTC  
CGTGGGTGGTGTAGCTACCGAGATCAATGCAGTCAATTATGTCTCTCCTAGAAGTTGGT  
TAGCTACCTCTCATTTTGTCTAGGATTCTTCTTCTTCGTAGGTCATTTGTGGCACGCGG  
GAAGGGCTCGTGACGCTGCAGCAGGATTTGAAAAAGGAATTGATCGTGACCTTGAAC  
CTGTTCTTTTCATGACCCCTCTTAATATGACTATAGCCATTGGTAAGTTTACCAAAGACG

AAAGTGATTTATTTGATATTATGGATGACTGGTTACGGAGGGACCGTTTCGTTTTTGTAG  
GCTGGTCCGGTCTATTGCTCTTTCCTTGTGCCTATTTTCGCTTTAGGGGGTTGGTTCACAG  
GTACAACCTTTGTAACCTTCATGGTATAACCATGGATTGGCCAGTTCTTATTTGGAAGGCT  
GCAATTTCTTAACTGCCGCGGTTTCTACTCCTGCTAATAGTTTAGCACATTCGTTGTTGT  
TACTATGGGGTCTGAAGCACAAGGAGATTTTACTCGTTGGTGTCAATTGGGGGGTCTG  
TGGACTTTTGTGCTCTCCATGGAGCTTTTGGCCTAATAGGTTTCATGTTACGTCAATTC  
GAGCTTGCTCGATCTGTTCAATTGAGACCTTATAATGCAATCGCATTCTCTGGTCCAATT  
GCTGTTTTTGTCTGATTTCTGATTTATCCACTAGGTCAGTCTGGTTGGTCTTTTGCAC  
CTAGTTTTGGTGTAGCAGCTATATTTTCGATTCATCCTATTTTTTCAAGGGTTTCATAATTG  
GACCTTGAACCCCTTTCATATGATGGGAGTTGCCGGTGTATTGGGCGCTGCTTTGCTAT  
GCGCCATTCATGGTGCTACCGTAGAAAATACTTTATTTGAAGACGGTGATGGTGCAAAT  
ACATTCCGTGCTTTTAACCCAACCTCAAGCCGAAGAACTTATTCAATGGTCACCGCTAA  
CCGCTTTTGGTCCCAAATCTTTGGGGTTGCTTTTTCCAATAAACGTTGGTTACATTTCTT  
TATGTTATTTGTACCAGTAACCGGTTTATGGATGAGTGCTCTTGGAGTAGTCGGTCTAGC  
CCTGAACCTACGTGCCTATGACTTCGTTTCTCAGGAAATTCGCGCAGCGGAAGATCCTG  
AATTTGAGACTTTCTACACCAAAAATATTCTCTTAAACGAAGGTATTCGCGCTTGGATG  
GCGGCTCAAGATCAGCCTCATGAAAACCTTATATTCCCTGAGGAGGTTCTACCACGTGG  
AAACGCTCTTATGTCTGGAAGCACAGGAGAACGTTTCGTTTGCTGATATTATTACCAGTA  
TTCGATACTGGGTCATTCATAGCATTACTATAACCTTCCCTATTCATTGCGGGTTGGTTATT  
TGTCAGCACCGGTTTAGCTTACGATGTGTTTGGAAAGCCCTCGGCCAAACGAGTATTTTA  
CAGAGAGCCGACAAGGAATTCCATTAATAACTGGCCGTTTTGATCCTTTGGAACAACCT  
CGATGAATTTAGTAGATCGTTTATGACTATAGATCGAACCTATCCAATTTTTACAGTACGA  
TGGTTGGCTGTTACCGCCTAGCTGTACCTACCGTCTTTTTTTTTGGGATCAATATCAGCA  
ATGCAGTTCATCCAACGAATGGCTACACAACTGTTGAGAACAGTTCT--AAATCTGGT  
CCAAGACGAACCTGTAGTAGGAGATTTATTAACCATTGAATTCGGAATATGGTAAAGT  
AGCTCCTGGGTGGGGAACCTACTCCTTTGATGGGTGTGCGCAATGGCCTTATTTGCGGTAT  
TTCTATCTATTTTGGAGATTTATAATTCTTCCGTTTTATTGGATGGAATTTCAATGAAT  
ATGCTTACTCTAAAACCTTTCGTTTACACAGTAGTGATATTTTTGTCTCTCTTCATCT  
TTGGATTCCTATCTAATGATCCCGGACGTAATCCTGGACGTGAAGAAATGGCCGATACT  
ACTGGAAGGATTCCTCTTTGGATAATAGGTACTGTAGCTGGTATTCTTGTAATCGGTTTA  
ATAGGTATTTCTTTTATGGTTCATATTCGGATTGGGTTTCATCCCTGATGCTTAATACCT  
TTAGTTTGATCGGTATCTGTCTTAATTCGACCCTTATTTCGAGTAGTTTTTTCTTCGGCAA  
ATTGCCCGAGGCCTATGCTTTTTTGAATCCAATCGTAGATATTATGCCAGTCATACCTCT  
GTTCTTTTTTCTCTTAGCCTTTGTTTGGCAAGCTGCTGTAAGTTTTCGAACGACACAAT  
CAAACCCGAACGAACAAAATGTTGAATTGAATCGTACCAGTCTCTACTGGGGGTTATTA  
CTCATTTTTGTACTTGCTGTTTTATTTTCCAATTATTTCTTCAATATGGAAGTAAATATTCT  
TGCATTTATTGCTACTGCACTATTTATTCTAGTTCCCTACCGTTTTCTACTTATCATTTACG  
TAAAAACAGTCAGTCAAAACGATATGGAAACAGCAACCCTAGTCGCCATCTTTATATCT  
GGTTTACTTGTAAGTTTTACTGGGTACGCCTTATATACCGCTTTTGGGCAACCTTCTCAA  
CAACTAAGAGATCCATTCGAGGAACATGGAGACATGGAAGCATTGGTTTATACATTCT  
CTTAGTCTCGACTCTAGGGATAATTTTTTTCGCTATCTTTTTTTCGAGAACCGCCTAAAGT  
TCCAACATAAAAAGAAC---ATGACTCTTGCTTCCAATTGGCTGTTTTTGCATTAATTGCT  
ACTTCATTAATCTTATTGATTAGCGTACCCGTTGATTTGCTTCTCCTGATGGCTGGTCAA  
GTAACAAAAATGTTGTATTTCTGGTACATCCTTATGGATTGGATTAGTCTTTCTGGTGG

GTATCCTTAATTCTCTCATCTCT-----ATGTCACCACAAACAGAGACTAAAGC  
AAGTGTGGATTCAAAGCTGGTGTAAAGAGTACAAATTGACTTATTATACTCCTGAGT  
ACCAAACCAAGGATACTGATATATTGGCAGCATTCCGAGTAACTCCTCAACCTGGAGTT  
CCACCTGAAGAAGCAGGGGCCGCGGTAGCTGCCGAATCTTCTACTGGTACATGGACAA  
CTGTATGGACCGATGGACTTACCAGTCTTGATCGTTACAAAGGGCGATGCTACCGCATC  
GAGCGTGTGTTGGAGAAAAAGATCAATATATTGCTTATGTAGCTTACCCTTTAGACCTT  
TTTGAAGAAGGTTCCGTTACCAACATGTTTACTTCCATTGTAGGTAATGTATTTGGGTTC  
AAAGCCCTGCGCGCTCTACGTCTGGAAGATCTGCGAGTCCCTACTGCTTATATTA AAC  
TTTCCAAGGTCCGCCTCATGGGATCCAAGTTGAAAGAGATAAATTGAACAAGTACGGT  
CGTCCCCTGTTGGGATGTACTATTAACCTAAATTGGGGTTATCTGCTAAAACTACGGT  
AGAGCTGTTTATGAATGTCTTCGCGGCGGACTTGATTTTACCAAAGATGATGAGAACGT  
GAACTCACAACCATTTATGCGTTGGAGAGATCGTTTCTTATTTGTGCCGAAGCACTTT  
TAAAGCACAGACTGAAACAGGTGAAATCAAAGGGCATTACTTGAATGCTACTGCAGG  
TACATGCGAAGAAATGATGAAAAGAGCTGTATTTGCTAGAGAATTGGGCGCTCCGATC  
GTAATGCATGACTACTTAACGGGGGGATTACCGCAAATACTAGCTTGGCTCATTATTG  
CCGAGATAATGGTCTACTTCTTCACATCCACCGTGCAATGCATGCGGTTATTGATAGACA  
GAAGAATCATGGTATGCACTTCCGGGTATTAGCAAAGCGTTACGTATGTCTGGTGGAG  
ATCATATTCACGCTGGTACCGTAGTAGGTA AACTTGAAGGTGAAAGAGACATAACTTTG  
GGCTTTGTTGATTTATTGCGTGATGATTTTGTGAAACAAGATCGAAGTCGCGGTATTTAT  
TTCACTCAAGATTGGGTCTCTTTACCAGGTGTTCTACCTGTGGCTCAGGAGGTATTCA  
TGTTTGGCATATGCCCTGCTCTGACCGAGATCTTTGGGGATGATTCCGTACTACAGTTCG  
GTGGAGGAACTTTAGGACATCCTTGGGGTAATGCGCCAGGTGCCGTAGCTAATCGAGT  
AGCTCTAGAAGCATGTGTA AAGCTCGTAATGAAGGACGCGATCTTGCTCGGGAAGGT  
AATGAGATTATTCGCGAGGCTTCCAATGGAGCCCGGAACTAGCTGCTGCTTGTGAGG  
TATGAAAGAGATCGTATTTAATTTTGCAGCAGTGGACGTTTTGGATAAGATGGCGATA  
CATTTATACAAA ACTTCTACCCCGAGCACACGCAATGGAACCGTAGACAGTCAAGTGA  
AATCCAATCCACGAAATAATTTGATCTATGGACAGCGTCGTTGTGGTAAAGGTCGTAAT  
GCCAGAGGAATCATTACCGCAAGGCATAGAGGGGGAGGTCATAAGCGTCTATACCGTA  
AAATCGATTTTCGACGGAATGAAAAGACATATATGGTAGAATCGTAACCATAGAATAC  
GACCCTAATCGAAATGCATACATTTGTCTCATACTATGGGGATGGTGAGAAGAGATAT  
ATTTTACATCCCAGAGGGGCTATAATTGGAGATACCATTGTTTCTGGTACAGAAGTTCCT  
ATAAAAATGGGAAATGCCCTACCTTTGACCGATATGCCCTTAGGCACGGCCATACATAA  
CATAGAAATCACACTTGGAAAGGGTGGACAATTAGCTAGAGCAGCGGGTGTGTAGCG  
AAACTGATTGCAAAAAGAGGGGAAATCGGCCACATTA AATACCTTCTGGGGAGGTCC  
GTTTGATATCCAAA ACTGCTCAGCAACAGTCCGACAAGTGGGGAATGTTGGGGTGAA  
CCAGAAAAGTTTGGATAGAGCCGGATCTAAGCGTTGGCTAGGTAAGCGTCTGTAGTA  
AGAGGAGTAGTTATGAACCCTGTAGACCATCCCCATGGGGTGGTGAAGGGAGAGCCC  
CAATTGGTAGAAAAAA ACCACAACCCCTTGGGGTTATCCTGCACTTGGAAAGAAGAA  
GTAGAAAAGGAATAAATATAGTGATAATTTGATTCTTCGTCGCCGTAGTAAAATGATTC  
AACCTCAGACCCATTTAAATGTAGCAGATAATAGCGGGGCTCGAGAATTGATGTGTATT  
CGAATCATAGGAGCTAGC---AATCGTCGATATGCTCATATTGGTGACGTTATTGTTGCTGT  
GATCAAAGAAGCAGTACCAAATATGCCCTAGAAAGATCAGAAGTAGTCAGGGCTGTA  
ATTGTGCGTACCTGTAAAGAACTCAAACGTGACAACGGGATAATAATACGATATGATGA  
CAATGCTGCGGTTGTTATTGATCAAGAAGGAAATCCAAAAGGAACTCGAATTTTTGGT

GCAATCGCCCGGAATTGAGAGAATTAATTTTACTAAAATAGTTTCATTAGCTCCCGA  
GGTATTAATGCTTAGTCCCAAAAAGAACCAGATTCCGTAACAACATAGAGGAAGAATG  
AAGGGAATATCTTATCGAGGTAATCATATTTCTTTCGGTAAATATGCTCTTCAAGCACTT  
GAACCTGCTTGGATTACATCTCGACAAATAGAAGCAGGCCGACGAGCAATGACACGAA  
ATGCACGTCGTGGTGGAAAAATATGGGTACGTATATTTCCAGACAAACCAGTTACACTA  
AGACCCGCAGAAACACGTATGGGTTTCAGGAAAAGGATCCCCTGAATATTGGGTAGCTG  
TTGTTAAACCGGGGCGAATACTTTATGAAATGGGTGGAGTAACAGAAAATATAGCCAG  
AAGGGCTATTTCACTAGCAGCATCCAAAATGCCTATACGAACTCAATTCATTATTTTCG---  
ATGACCAGAATTAACGGGGATATATAGCTCGGAGACGTAGAACAATAATTCGTTTATT  
TGCATCAAGCTTTTCGAGGGGCTCATTCAAGGCTTACTAGAACTATTACTCAACAGAAAA  
TAAGAGCTTTAGTTTCGGCTGATCGGGATAGGGGTAGGAAAAAGAGAGATTTTCGTCG  
TTTGTGGATCACTCGGATAAACGCAGCAATTCGCAAAGGG--GGAGTCTCCCATAGTTA  
TAGTAAATTAATACACAATCTGTACAATAGACGGTTGCTTCTTAACCGTAAATACTTGC  
ACAAATAGCTATATCAAATAGGAATTGTCTTTATATGATTTTGAACAAAATCAACCCGGA  
GTCTTTACCGGAGTCTTTACCGGAGTCTTTAATGCTAAAGGAAGTATATGCTTTAGGTCA  
ACATATATCTATGTCTGCTGACAAAGCACGAAGAGTAATTGATCAAATCCGCGGACGTT  
CCTATGAGGAAACGCTTATGATACTAGAACTCATGCCCTATCGAGCATGTTATCCCATT  
TGAAATTGGTTTATTCTGCAGCAGCAAATGCTAGTTACAATATGGGTTCCAGCGAAACC  
AATTTAGTCATTAGTAAAGCCGAAGTCAATGGAGGTACTACGGTGAAGAAATTGAAAC  
CTCGAGCTAGAGGACGTAGTTTTCCGATAAAAAGATCGACCTGTCATATAACTATTGTA  
ATGAAAGATATATCTTTAGATGGGGGATTATGGGACAAAAAATGGATGGAATCAAATA  
TGCAGTATTTACAGACAAAAGTATTCGGTTATTGGGGAAAAAT---CAATATACTTCTAAT  
GTCGAATCAGGATCAACTAGGACAGAAATAAAACATTGGGTGCAACTCTTCTTTGGTG  
TCAAGGTAATAGCTATGAATAGTCATCGACTTCCGGGAAAGAGTAGAAGAATGGGACC  
TATTATGGGACATACAATGCATTACAAACGTATGATCATTACGCTTCAACCGGGTTATTCT  
ATTCCACCTCTTAGAAAGAAAAGAACTATGGCAGTTCCAAAAAACGCCTTCGAGAT  
CAAAAAACGTATTCGTAAAAATATTTGGAAAAGGAAGACATATTGGATAGCATTAAAG  
GCTTTTTTCGTTAGCGAAAGCTATTTCTACTGGGGAGTCAAAGGTTTTTTTTGTACGCCA  
AACAAAAATAATGGCCAAGGGGAAAGATGTCCGAGTAACGGTGATTTTGGAAATGTA  
AGTTGTGTCCGAAACAGTGTGAT-----AAGGTATCAAGAGGTATTTCCAGATATAGTAC  
TCAAAGAACCAGCACAATACGCCTAATCGATTAGAATTGAAAAAATCTGTCCCTATT  
GTTACAAACATACGATTCATGGGGAGATAAAAAAATGAAAATAAGAGCTTCCGTTTCGT  
AAAATTTGTGAAAAATGTGCGACTAATTCGCAGGCGGGGACGAATTATAGTAATTTGTTC  
CAACCCGAGACATAAACAAGACAGGGAATGGTTTCGAGAGAAAGTAACAGTATCTAC  
TCGGACACTACAGTGAAGTGTGTTGAATCAAGAACAGACAGTAAACGCCTTTATTAT  
GGACGCTTTATTCTGTCTCCACTTATGAAAGGCCAAGCCGACACAATAGGCATTGCGAT  
GCGAAGAGCTTTACTTGGAGAAATAGAAGGAACATGTATCACACGTGTAATCTGAG  
-----AAAGTCCCACATGAATATTCTACCATAACGGGCATTCAAGAATCGGTACATGAAAT  
TTAATGAATTTGAAAGAAATTGTATTGAGAAGTAATCTATATGGAACCTTCTGACGCGTC  
TATTTGTGTCAAGGGTCTTGATATGTAAGTCTCAAGATATCATCTTGCCGCTTATGT  
AGAAACCGTTGATAATACACAACATATAGCTAGTTAACAGAACCAATTGATTTTTGTAT  
TGGATTACAAATAGAGAGAAATCGTGGATATCTTATAAAAACGCCACAT---AACTTTGAT  
GGAAGTTAT-----CCTATAGATGCTGTATTCATGCCTGTTTCGAAACGCGAATCATAGTATT  
CATTCTTATGGGAATGGAATGAAAAACAAGAGATACTTTTTATCGAAATATGGACAAA

CGGAAGTTTAACTCCGAAAGAAGCACTTCATGAAGCATCCCGAAATTTAATTGATTTAT  
TTATTCCCTTTTTACATATGGAGGAAGAC-----AATTTATATTTACAGGACAATCAA--CAC  
ACGGTTCCTTTATCCCCTTTTACCTTTTCATGATAAATTGGCT---AAACTCATAAAAAACA  
AAAAA---AAAATAGCATTGAAATCGATTTTTATTGACCAATCAGAATTGCCTTCCAGGAT  
CTATAATTGCCTCAAATGTCCAATATATACATTATTGGACCTTTTGAATAACAGCCAA  
GAAGATCTTATGAAAATTGAACATTTTCGTAGCGAAGATATAAAACAGATATTGGGCAC  
TTTAGAAAAATAT-----TTCGTAATTGATTTAGCAAAAAATAAGATGCTCTGGGATGGA---  
AATGAGGGAATATCTACAATACCTGGATTTAATCAGATACAATTTGAAGGATTTTGTAGG  
TTCATTGATCAAGGTTTGACGGAAGAACTTTATAAGTTTCCAAAAATTGAAGATACAGA  
TCAAGAAATTGAATTTCAATTATTTGTGGAAACATATCAATTGGTTCGAACCCCTTGATAAA  
GGAAAGAGATGCTGTGTATGAATCACTCACATATTCTTCTGAATTATATGTATCCGCGGG  
ATTAATTTGGAAAAACAGTAGGGATATGCAAGAACAACAATTTTATCGGAAACATTC  
CTCTAATGAATTCCTGGGAACTTCTATAGTCAATGGAATATATAGAATTGTGATCAATC  
AAATATTGCAAAGTCCCGGTATTTATTACCGATCAGAATTGGACCATAACGGAATTTTCGG  
TCTATACCGGCACCATAATATCAGATTGGGGAGGAAGATCAGAATTAGAAATTGATAGA  
AAAGCAAGGATATGGGCTCGTGTAAGTAGGAAACAAAAAATATCTATTCTAGTTCTATC  
ATCAGCTATGGGTTTGAATCTAAGAGAAATTCTAGAGAATGTTTGCTATCCTGAAATTTT  
TTTGTCTTTTCTGAGTAATAAGGAGAGAAAAAAAATTGGGTCAAAGAAAATGCCATT  
TTGGAGTTTTATCAACAATTTGCTTGTGTAGGTGGCGATCCGGTATTTTCTGAATCCTTA  
TGTAAGGAATTACAAAAGAAATTCTTTCAACAAAGATGTGAATTAGGAAGGATTGGTC  
GACGAAATATGAACCGAAGACTGAACCTTGATATACCCAGAACAAATACATTTTTGTTA  
CCACGAGATATATTGGCAGCCCGCATCATTGATTGGGCTGAAATTTGGAATGGGTGC  
ACTTGACGAT-----ATGAATCATTGAAAAATAACGTATTCGTTCTGTAGCAGATCTTTT  
ACAAGATCAATTCGGATTGGCTCTGGTTCGTTTAGAAAATGTGGTTCGGGGGACTATAT  
GTGGAGCAATTCGG---CATAAATTG---ATACCGACACCTCAGAATTTGGTAACCTCAACT  
CCA-----TTAACAATACTTATGAATCCTTTTTTCGGTTTACACCCATTATCTCAAGTT  
TTGGATCGAACTAATCCATTAACACAAATAGTTCATGGGAGAAAATTAAGTTATTTGGG  
CCCTGGAGGACTGACAGGTCGCACTGCTAGTTTTTCGGATACGAGATATCCATCCTAGTC  
ACTATGGACGTATTTGCCAATTGACACATCTGAAGGAATCAATGTTGGACTTATTGGAT  
CCTTAGCAATTCATGCGAGGATTGGTCATTGGGGA---TCTCTAGAAAGCCCTTTTTAT----  
---GAAATTTCTGAGAGGTCAACCGGG-----GTACGGATGCTTTATTTATCACCAGGTAGA  
GATGAATACTATATGGTAGCGGCAGGAAATTTCTTAGCCTTAAATCAGGATATTCAGGAA  
GAACAGGTTGTTCCAGCTCGATACCGTCAAGAATTTCTTACTATTGCATGGGAACAGG  
TTCATCTTCGAAGTATTTTTCCTTTTCAATATTTTTCTATTGGAGCTTCCCTCATTCTTTTT  
ATCGAACATAATGATGCGAATCGAGCTTTAATGAGTTCTAATATGCAACGTCAAGCAGT  
TCTCTTTTCTCGCTCCGAGAAATGCATTGTTGGAACCTGGGTTGGAACGACAAGCAGCT  
CTAGATTCCGGGGCTCTTGCTATAGCCGAACGCGAGGGAAGGGTCGTTTATACCAATAC  
TGACACGATTCTTTTAGCGGGTAATGGAGATATTCTAAGCATTCCATTAGTTATATATCAA  
CGTTCCAATAAAAATACTTGTATGCATCAAAAACCCAGGTTCTCCTCGGGGTAAATGCAT  
TAAAAAGGGACAAATTTTAGCGGATGGTGCTGCTACGGTTGGTGGCGAACTTGCTTTG  
GGGAAAAACGTATTAGTAGCTTATATGCCGTGGGAGGGTTACAATTTCTGAAGATGCAGT  
ACTTATTAGCGAGCGTTTGGTATATGAAGATATTTATACTTCTTTTACATACGGAAATAT  
GAAATTCAGACTCATGTGACAAGTCAAGGC---CCTGAAAAAGTAACTAATGAAATACC  
GCATTTAGAAGCCATTTACTCCGCAATTTAGACAAAAATGGAATTGTGATGCTGGGAT

CTTGGGTAGAGACGGGTGATATTTTAGTAGGTAAATTAACACCCCAGGTCGTGAAAGA  
A--TCGTCTGATGCCCCGGAAGATAGATTGTTACGAGCTATACTTGGTATTCAGGTATCT  
ACTTCAAAGAACTTGTCTAAAATTACCTATAGGTGGCAGGGGGCGGGTTATTGATGT  
GAGGTGGATCCAGAAAAGGGGT--GGTTCTAGTTATAATCCCGAAACGATTCATGTATAT  
ATTCACAGAAACGTGAAATCAAAGTAGGCGATAAAGTAGCCGGAAGACACGGAAAT  
AAGGGTATCATTTCAAAAATTTTGCCTAGACAAGATATGCCTTATTTACAAGATGGAAG  
ATCCGTTGATATGGTCTTTAACCATTAGGAGTACCTTCACGAATGAATGTAGGACAGAT  
ATTTGAATGTTCACTAGGGTTAGCAGGGAGTCTGCTAGACAGACATTATAGAATAGCAC  
CTTTTGATGAGAGATATGAACAAGAAGCTTCGCGAAAAGTAGTGTTTTCTGAATTATAT  
GAAGCCAGTAAGCAAACATCGAATCCATGGGTATTTGAACCCGAATATCCAGGAAAAA  
GCAGAATATTTGATGGAAGGACGGGGAATCCTTTTGAACAACCCGTTATAATAGGAAA  
GCCTTATATCTTGAAATTAATTCATCAAGTTGATGATAAAATCCATGGGCGTTCCAGTGG  
ACATTATGCGCTTGTACACAACAACCCCTTAGAGGAAGAGCCAAACAGGGGGGACA  
GCGGGTAGGAGAAATGGAGGTTTGGGCTCTAGAAGGGTTTGGGGTTGCTCATATTTTA  
CAAGAGATGCTTACTTATAAATCGGATCATATTAGAGCTCGCCAGGAAGTACTTGGTACT  
ACGATCATTTGGGGAAACAATACCGAATCCCGAAGATGCTCCAGAATCTTTTCGATTGCT  
CGTTCGAGAACTACGATCTTTAGCTCTGGAGCTGAATCATTTCCCTGTATCTGAGAAGA  
ACTTCCAGATTAATAGGAAGGAAGCTATGAATAATAATTTTCTTCTATGATCGATCGATA  
TAAACATCAACAGCTCCGAATTGGATCAGTTTCTCCTCAACAAATAAGTGCTTGGGCCA  
CAAAAATCCTGCCTAATGGAGAGATAGTTGGAGAGGTAACAAAACCCCTATACTTTTCAT  
TACAAAATAATAAACCGGAAAAAGATGGATTATTTTGTGAAAGAATTTTGGTCCTAT  
AAAAAGCGGAATTTGTGCTTGTGGAATTATCGAGTAATCGGAGATGAAAAAGAAGAC  
CCGAAATTTTGTGAACAATGTGGAGTCGAATTTGTTGATTCTCGGATACGAAGGTATCA  
AATGGGCTATATCAAACCTCGCATGCCAGTAACCCATGTGTGGTATTTAAAACGTCTTCC  
TAGTTATATTGCGAATCTTTTAGATAAACCTCTTAAAGAATTAGAAGGCCTAGTATACTG  
CGAT-----TTTTCTTTTGGCTAGGCC---ATAACTAAAAAGCCACTTTCTTACGATTACGA  
GGTTTATTGCAATATGAAATCCAATCTTGGAAATACAGCATCCCACTTTTTTTTACTACC  
CAGGGTTTCGATACATTCGCAATCGAGAAATCTCTACTGGTGCAGGTGCTATCCGAGA  
ACAATTAGCCGATCTAGATTTACGAATTATTATAGAGAATTCGTTGGTGGAATGGGAAG  
AATTGGGGGAAGAA---GGGCACACAGGGAATGAATGGGAAGATCGAAAGGTTGGAAG  
AAGAAAGGACTTTTTGGTTAGACGCGTGGAAATGGCTAAGCATTTTATTTCGAACAAATA  
TAGAGCCAGAATGGATGGTTTTGTGTCTATTACCAGTTCTTCCCTCCTGAGTTGAGACCG  
ATCATTCAGATAGATGGGGGTAACTAATGAGCTCAGATATTAATGAACTCTATAGAAG  
AGTTATCTATCGGAACAATACCCTTACCGATCTATTAACAACAAGTAGATCTACGCCAGG  
AGAATTAGTAATGTGTCAGGAGAAATTAGTACAAGAAGCCGTGGATACACTTCTTGATA  
ATGGAATCCGGGGACAACCAATGAGGGACGGTCATAATAAAGTTTACAAGTCGTTTTT  
TGATGTAATTGAAGGCAAAGAGGGAAGATTTCTGTGAGACTCTGCTTGGCAAACGAGTT  
GATTATTCAGGACGTTCTGTCAATGTCGTGGGTCCTTCACTTTCATTACATCGATGTGGA  
TTGCCTCGTGAATAGCAATAGAACTTTTCCAGACATTTGTAATTCGTGGTCTAATTAGA  
CAACATCTTGCTTCGAACATAGGAGTTGCTAAGAGTAAAATTTCGAGAAAAGAGCCGA  
TTGTATGGGAATCCTTCAAGAAGTTATGCAGGGACATCCTGTATTGCTGAATAGAGCA  
CCCCTCTGCATAGATTAGGCATACAGGCATTCCAGCCCGTTTTAGTGGAGGGGGCGCGC  
TATTTGTTTACATCCATTAGTTTGCAGGGATTCAATGCCGATTTTGATGGAGATCAAAT  
GGCTGTTTCATGTACCTTTATCCTTGGAGGCTCAAGTAGAGGCCCGTTTACTTATGTTTTT

TCATATGAATCTTTTGTCTCCGGCTATTGGGGATCCCATTTCCGTACCAACGCAAGATAT  
GCTTATTGACTCTATGTATTAACGAGCGGAAATCATCGAGGTATTTGTGTAAATAGATA  
TAATCCATGTAATCGC-----AGAAACTATCAAAATCAAAAAGAAAGTGACAATAGTTA  
TAAGTATACG-----GAACCCTTTTTTTTCGAATTCCTATGATGCAATTGGGGCTTATCGGC  
AGAAACGAATCAATTTAGATAGTCCTTTGTGGCTCCGGTGGCGACTAGATCAACGC---G  
TTATTGCTTCA-----AGAGAACTCCCATCGAAGTTCCTATGAATCTTTAGGTACTTTTT  
ATGAGATTTATGGACTATCTAATAGTAAGAAGTCTAAAAAAACAAATCCTTTTTTATAT  
ACATTCGAACCCTGTTGGTCATATTGCTCTTTATCGAGAAATCGAAGAAGCTATACAG  
GGGTTTTCTCGAGCCTATTCATATGGTACC-----ATGGAGGTACTTATGGCA  
GAACGGGCCAATCTGGTCTTTCACAATAAAGCGATAGACGGAAGTCCCATGAAACGAC  
TTATTAGTAGATTAATAGAGCACTTCGGAATGGCATATACATCACATATCCTGGATCAAG  
TAAAACTCTGGGGTTCCAACAAGCTACTGCTACATCCATTTATTAGGAATTGATGAC  
CTTTTAACAATACCTTCTAAGGGATGGCTCGTTCAAGATGCTGAACAACAAAGTTTGAT  
TTTGAAAAACACCATCATTATGGGAATGTACACGCGGTAGAAAAATTACGTCAATCCA  
TTGAAATATGGTATGCTACAAGTGAATATTTGCGACAAGAAATGAATCCGAATTTTAGG  
ATGACTGACCCTTTTAATCCAGTTCATATAATGTCTTTCTCGGGAGCTAGAGGAAATGCA  
TCTCAGGTACATCAATTAGTAGGTATGAGAGGATTAATGTCGGATCCTCAAGGACAAAT  
GATTGATTTACCTATTCAAAGCAATTTGCGCGAAGGACTCTCTTTAACAGAATACATCAT  
TTCTTGCTACGGAGCCCGTAAAGGAGTTGTGGATACTGCTGTACGAACATCAGACGCT  
GGATATCTCACTCGCAGACTTGTGAAGTAGTTCAACACATTGTTGTCCGTGCAACGGA  
TTGTGGCACCGCCGGGGTATTTCTGTGAGTCTCGGAATGGGATGATGCCG---GAAAG  
GATTTTTAGTCAAACATTAATTGGCCGTGTATTAGCAGATGATATATACATGGGTTCGCG  
ATGTATTGCCACTAGAAATCAAGACATTGGCATTGGACTTGTAATCGATTCATAACC----  
-----TTTCGGGCACAACCAATCTCTATTCGAAGTCCCTTTACTTGTAGGAGTACAT  
CTTGGATTTGTGATTATGTTATGGCCGGAGTCTACTCATGGCGACCTGGTTGAGTTG  
GGGGAAGCTGTAGGTATTATTGCAGGTCAATCGATTGGAGAACCGGGTACTCAATTAAC  
ATTAAGAACTTTTCATACCGGAGGAGTATTCACGGGGGTACTGCAGAACATGTGCGA  
GCCCCATCTAATGGAAAAATAAAATTCATGAGGATTTGGTTCATCCGACACGTACACG  
TCATGGGCATCCCGCCTTTCTATGTTCTATAGACTTGTATGTAATATTGAGAGTGAAGA  
TATTCTACATAATGTGAATATTCCACCCAAAAGTTTGCTTTTAGTTCAAAACGATCAATA  
TGTAGAATCAGAACAAGTAATTGCTGAGATTCGCGCAGGAATATCCACT--TTGAATTTT  
AAAGAGAAGGTTGAAAACATATTTATTCTGATTCAGACGGAGAA---ATGCACTGGAGT  
ACCGATGTCTATCATGCACCCGAATTTACATACGGTAATGTTTCATCTATTACCAAAAACA  
AGTCATTTATGGATATTATTAGGAGGGCCGTGCAGG-----TCCAGTCTAGTCTACCTTTTCG  
ATCCACAAGGATCAGGATCAAATGAATGCGCAT-----TCTCTTTCTGGCAAGCGAAGATA  
TACTTCTAACCTCTCA-----GTAACCGATGATCAG---GCGAGGCAGAAATTTTAGTTCG  
GATTTTTATGTTAAA---GAAGATAGGATTCCTGATTAT--TCAGACCTTAATCGAATCATAT  
GTAATGGTCAAGTATAATCTCGTATAATTCG---CCTATTCTCCACGAGAATTCT-----GATTTAT  
TGTCAAAAGGCGAAGAAATAAATTCATCATTCCACTACATTGATTCAAGAAGTTCGA  
GAATCAACTAATGCCCTGTTCAAGGTATCTCGATTGAAATCCCT-----GTAATGGTATTTT  
CCGTCGAAATAGTATTCTTGCTTATTTTCGATGATCCTCGATACAGAAGAAAGAGTTTCG  
GCATTATTAATATGGGACTATAGAAACGCATTCAGTCATCAAAAAGAGGAT-----TTG  
ATTGAGTATCGAGGA---GTCAAGGAATTTTCGGTCAAATAACATGAAAGTAGATCGATTT  
TTTTTCATTCCTGAAGAGGTGCATATCTTGCCCGGATCTTCTTCTATAATGGTACGGAAC



AACAGTATCGTTGGGGTAGATACACAAATCACCTTAAATCTAAGAAGCCGAGTCGGTG  
GGTTGGTCCGGGTGGAGAGAAAAACAAACGAATTGAACTTAAAATCTTTTCTGGAGA  
TATCCATTTTCCCGGAGAGACAGATAAGATATCCAGACATACCGGCGTTTTGATACCA---  
TCAGGA---ACAGGAAAAAGAAATTCCAAGGAATCCAAAAA-----GTAAAAATTGGGT  
CTATGTCCAACGG-----ATTACACCTAGTAAG-----AAAAGGTTTTTTGTTTTAGTTCGAC  
CTGTCGTCACATATGAAATAACGGACGGTATAAATTTAGCAACCCTTTTTCCACCGGATC  
CATTGCAGGAAAGGGATAATGTGCAACTTCGAATTGTCAATTATATCCTTTATGGAAATG  
GCAAACCGATTTCGAGGAATTTCTGACACAAGTATTCAATTAGTTCGGACTTGTTTTAGTA  
TTGAATTGGAACCAAGACAAAAA-----AGTTCTTCTTGCGAAGAAGCCCGTGCTTC  
TTTTGTTGAAATAAGCACAAATGGTTTGATTTCGACATTTCCCTAAGAATTAACCTAGTGA  
AATCCCCTATTTTCGTATATCGGAAAAAGGAATGATCCGTCGGGGTCAGAATTGCTCTCT  
GAT--AATGGATCAGATTGTACCAATATCAACCCTTTTCTTCCATTTATTCCTAT-----T  
CCAAGGCAAAAATTCAACAATCTCTTAACCAACCTCAAGGAACCTATTCATACGTTGTTG  
AATAGA-----AATAAGGAATGTCAGTCGTTGATAATTTTGTGAGCAGCCAATTGTTCTC  
GAATGGGGCCA-----TTCAAGGATGTAAAATATCACAGTGTG-----ATAAAGAATCA--  
-CCCCTAATTCCAATTAGGAATTCGTTGGGCCCTTTAGGAACA-----TGCCTTCCAATTGA  
GAATTTTTATTCA-----TCTTACCATTTA-----ATAACTCATAATCAGATCTTA---GTAAC  
ACTATTTGCAACTTGAAAAT-----TTAAACCAGACCTTTCAAGTGATTAAATTTAAA---T  
ATTATTTAATGGATGAAAAT-----GGAAAAATTTTAAATCCCGATCCATGTCGTAACATTAT  
TTAAATCCATTCAATTTGAATTGGTTCGTTTCTCCATCACAATTATTGTGAAGAGACATC  
T--AAAATAATTAGTCTTGGACAGTTTATTTGTGAAAATGTATGTATAGCCAAAAATGGA  
CCGCC---CTCAA-----TCGGGTCAAGTTATACTTGTTCAA---GTTGACTCGATAGTGAT  
ACGATCAGCTAAGCCTTATTTGGCCACCCCGGAGCAACCGTTCATGGCCATTATGGCG  
AAACCTTTACGAAGGAGATACATTAGTTACATTTATATATGAAAAATCGAGATCTGGTG  
ATATAACACAGGGTCTTCCAAAAGTAGAACAGGTGTTAGAAGTGCGTTTCGATTGATTC  
AATATCCATGAATCTAGAAAAGAGGGTTGAGGGTTGGAACAAATGTATAACAAGAATT  
CTTGGAATTCCTTGGGGATTCTTGATTGGTGTCTGAGCTAACTATAGCGCAAAGCCGAAT  
CTCTTTGGTTAATAAAATCCAACAGGTTTATCGCTCCAGGGGGTGCAGATTCATAATA  
GGCATATAGAAATTATTGTACGTCAAATAACATCAAAGTGTTGGTTTCAGAA-----GA  
TGGACTGTCTAATGTTTTTTACCCCGGAGAACTTATTGGATTGTTGCGAGCAGAACGAA  
TGGGTGCGCCTTTGGAAGAGGCGATCTGTTACCGAGTCGCTTATTGGGAATAACAAG  
AGCATCTCTCAATACTCAAAGTTTCATATCTGAAGCGAGTTTTCAAGAACTGCTCGAG  
TTTTAGCAAAAGCGGCTCTCCGGGGTCGTATCGATTGGTTGAAAGGCCTGAAAGAGAA  
CGTTGTTTTGGGGGGGGTGTATCCCGTTGGTACCGGATTCAAGGGATTA-----GTGCACC  
CTTCAAACAACATAACAACATTCCT-----TTGGAAACAAAAAAGAATCTATTCGA  
GGGGGAGATGAGA-----GATATTTTGTCCACCACAGAAAATTATTTGATTCTTGTCTTT  
CAAAAAAATTCACGACATACCCGAACAATCATTATAGGA-----TTAATGAT  
TCCATGACAAGAAGATATTGGAACATAAATTTGGAAGAGATGATGGAGGCAGGAGTTC  
ATTTTGGTCATGGTACTAGGAAATGGAATCCTAAAATGGCGCCTTATATCTCTGCAAAGC  
GTAAGGGTATTCATATTACAAATCTTACTAGAAGTCTCGTTTTTTTATCAGAAGCTTGTG  
ATTTAGTTTTTGTGACGCAAGTAGGGGAAAACAATTTCTTAATTGTTGGTACCAAAAAT  
AAAGCAGCTGATTCAGTAGAGTGGGCTGCAATAAGGGCCCGGTGTCATTATGTTAATAA  
AAAATGGCTTGGCGGTATGTTAACGAATGGTCCACTACAGAAACAAGACTTCATAAG  
TTCAGGGACTTGAGAATGGAACAAAAACAGGGAGACTCAACCGTCTCCCGAAAAGA

GATGCAGCTATGTTTAAAAGACAATTATCTCGCTTGCAAACATATCTGGGCGGGATTAA  
ATATATGACAGGGGTACCCGATATTGTAATCATCGTTGATCAGCACGAAGAATATACGGC  
CCTGCGAGAGTGTATTACTTTAGGAATTCCAACAATTTGTTTAAACCGATACAAATTGTG  
ACCCCGATCTCGCAGATATTTCAATTCCAGCGAATGATGACGCCATATCCTCAATCCGAT  
TAATTCTTAATAAATTAGTATTCGCAATTTGTGAGGGTTCGTTCT---AGCTATATAAGAAAT  
CCTATGGGACAAAAATAAATCCACTTGGTTTCAGACTGGGTACAACCCAAGGTCATC  
ATTCCCTTTGGTTTTTCAAACCAAAAAATTATTCTGAAGGTTTACAAGAAGATCAAAAA  
ATAAGAGATTGTATCAAGAATTATGTACAAAAGAATATGAGAACGTCTCTGGC---GTC  
GAAGGAATTGCACGTATAGAGATTCAAAAAGAATCGATCTGATCCAGGTCATAATCTT  
TATGGGATTCCCAAATTATTAATAGAAAGTTCGACCGCGC-----GGAATCGAAGAAT  
TACAAATGACCTTACAAAAAGAATTTAATTGTGTAAACCGAAAACCTGAACATTGCTGT  
GACAAGAATTGGAAAACCTTACGGAAACCCTAATATTCTTGCAGAATTTATAGCTGGAC  
AATTAAGAATAGAGTTTCATTTGAAAAGCAATGAAGAAGGCTATTGAATTAACAGA  
ACAAGCAGATACAAAAGGAATTCAAATACAAATTGCGGGGCGTATCGACGGAAAAGA  
AATTGCACGTGTCGAATGGATCAGAGAAGGTAGAGTTCCCTACAAACGATTCGAGCT  
AAAATTGATTATTGCTCTTATACAGTTTCGAACTATCTATGGAGTATTGGGCATCAAAATT  
TGGATATTTCTAGACGAGGAAATGTCGCGTTACCGAGGACCTCGTTTCAAAAAAATAC  
GACGCTGGGGGCTTTACCAGGACTAATAATAAAAAGCCTAGGACCGGAAATGATCT  
TAGAAACCAATCGCGTTCCGGAAAA---AAATCTCAATATCGTATTCGCTAGAAAGAAA  
ACAAAATTGCGTTTTTCATTATGGTCTTACAGAACGACAATTACTTAAATACGTTTCGTAT  
CGCCAGAAAAGCCAAGGGGTCAACAGGTCAAGTTTTACTACAATTACTTGAAATGCGC  
TTGGATAACATCCTTTTTTCGATTGGGTATGGCTTCAACTATTCCTCGCAGCCCGTCAATTA  
GTTAACCATCGACATATTTAGTTAATGGTCGTATAGTAGATATACCGAGTTATCGCTGCA  
AACCCCAAGATAGTATTACGGCAAAGGATGAACAAAAATCCAGAGCTCTGATTCAAAT  
TTCTCTAGATTCATCCCCTCAT---GAGGAATTACCAAATCATTGACCCTTCACCCATTCC  
AA-----TATAAAGGATTAGTCAATCAAATAATAGATAGTAAATGGGTTCGTTTTGAAAATA  
AATGAATTGCTAGTCGTAGAATATTATTCTCGTCAGACTATGTCACGTGAGGTACTGCA  
GAAAAAAAACAGCAAAATCCGATCCAATTTATCGTAATCGATTAGTTAACATGTTGGT  
TAACCGTATTCTGAAACATGGAAAAAATCATTGGCTTATCAAATTATCTATCGAGCCGT  
GAAAAAGATTCAACAAAAGACAGAAACAAATCCACTATCCGTTTTACGTCAAGCAATA  
CGTGGAGTAACTCCCGATATAACAGTAAAAGCAAGACGTGTAGGTGGATCGACTCATC  
AAGTTCCATTGAAATAGGATCCACACAAGGAAAAGCACTTGCCATTGTTGGTTATTA  
GCGGCATCCCGAAAACGTCCGGGTGCAAATATGGCTTTCAAATTAAGTTCCGAATTAGT  
GGATGCTGCCAAAGGGAGTGGCGATGCCATACGAAAAAGGAAGAGACTCATAAAAT  
GGCAGAGGCAAATAGAGCTTTTGCACATTTTCGTATGGGCAGGGACACTATTGCTGAG  
ATAATAACTTCTATACGAAATGCTGATATGGATCGAAAAAGGGTGGTTCCGATAGCATCT  
ACAAATATTACCGAAAATATTGTTCAAATACTTTTACGAGAGGGTTTTATCGAAAACGT  
GAGAAAACATCGAGAAAACAACAATATTTTTTGGTTTTTAAACCCTGCGACATAGAAGG-  
----AATAGGAAAAGACCCTAT-----AGAAATATTTTAAATTTAAAACGAATAAGTCGAC  
CTGGTCTACGAATCTATTCTAATTATCAACGAATTCGAGAATTTTAGGTGGAATGGGTA  
TTGTAATTTCTTCTACTTCTCGAGGTATAATGACAGACCGAGAGGCTCGACTAGAAGGA  
ATAGGTGGAGAAATTTGTGTTATATCTGGATGGCAAAGCTATAACCGAAAATTAGTTC  
GCGTAGGAATGGACGTATTGGTTCACGTAAGGGTGCACGTAGAATACCAAAGGGAGTT  
ATTCATGTTCAAGCAAGTTTCAAATAATACCATTGTCACTGTTACAGATGTACGGGGTCG

AGTAGTTTCTTGGTCCTCCGCTGGTACTTCTGGATTCAAAGGTACGAGAAGAGGAACA  
CCGTTTGCTGCTCAAACCGCAGCAGCAAACGCTATCCGTACCGTAGTGGATCAAGGTA  
TGCAACGAGCAGAAGTCATGATAAAAGGTCCCGGTCTCGGAAGAGATGCAGCATTACG  
AGCTATTCGTCGAAGTGGTATACTATTAACCTTTCGTACGGGATGTAACCTCTATGCCACA  
TAATGGCTGTAGACCTCCGAAAAAAGACGTGTGATGCCAACTATTAACAACCTATTA  
GAAATACAAGACAGCCAATCAGAAATGTCACGAAATCCCCGCTCTTCGGGGGTGCC  
TCAGCGTCGAGGAACATGTACTAGGGTGTATACTATCACCCCAAAAAAACCAAACCTCT  
GCCTTACGTAAAGTTGCCAGAGTACGATTAACCTCTGGATTTGAAATCACTGCTTATATA  
CCCGGTATTGGCCATAATCACAAGAACATTCTGTAGTCTTAGTAAGAGGGGGAAGGGT  
TAAGGATTTACCCGGTGTGAGATATCACATTGTTTCGAGGAACCCTAGATGCTGTCCGAG  
TAAAGGATCGTCAACAAGGGCGTTCTAAATATGGGGTAAAAAAGCCAAAAATGGCAA  
AGAAAAGTTTGATTAGAGGGAGAAGAAGAGGCCAAAAATTGGAACAGAAATATCATT  
CGATTTCGTCGATCCTCAAAAAAAGAAATAAGC-----AAGGTTCCGTCGTTGAGTGAC  
AAATGGGAAATTTATGGAAAGTTACAATCCCTACCACGGAATAGTGCACCTACACGCCT  
TCATCGACGTTGTTTTTTGACCGGAAGGCCGAGAGCTAACTATCGAGATTTTGGACTAT  
CTGGACACATACTTCGTGAAATGGTTCATGCATGTTTGTGTTGCCAGGAGCAACAAGATCA  
AGTTGGATGGTAAAAAATTCTGTCAATTCAGTTATTTCTCAAGAA-----GAAAAG-----  
AGAGGATCTGTTGAATTTCAAGTATTCAATTTACCAATAAGATACGGAGACTTACTTC  
ACATTTAGAATTGCACAAAAAAGACTATTTATCTCAGAGAGGTTTGAAGAAAATTTTGG  
GAAAACGTCAACGACTGCTAGCTTATTTGGCAAAAAAATAGAGTACGTTATAAAGA  
ATTAATTAATCAGTTGGACATTCGAGAGACAAAAACTCGT-----ATGGTAAAACCTCGTT  
TGAAACGATGTGGTAGAAAGCAACGAGCCGTCTATCGAATCGTTGCAATTGATGTTTCG  
ATCCCGAAGAGAAGGAAAAGATCTTCGGAAAGTGGGTTTTTATGATCCGATAAAGAAT  
CAAACCTATTTAAATGTTCTGCTATTTTATATTTCTTGAAAAGGGGGCTCAACCTACA  
GGAACCTGTTGAGGATATTTTAAAGAAGGCGGAGGTTTTTAAGGAACTTCGTCCTAATCA  
ACCAAAATTCAT--ATGGATAAATCCAAGCGACCTTTTCTTAAATTCAGCGATCTTTT  
CGTAGGCGTTTTGCCCGATTCAATCGGGGGATCGAATTGATTATAGAAACATGAGTTT  
AATTAGTCGATTTATTAGTGAACAAGGAAAAATATTATCAAGACGCGTGAATAGATTGA  
CCTTGAAACAACAACGATTAATTACTCTTGCTATAAAACAAGCCCGTATTTTATCTTTGT  
TACCTTTTCTCAATAATGAGAAA-----CAATTTGAAAGAACCAGTTCGACCGCTAGAAC  
TACTGGTTTTAAAGCCCGAAATAAAGTGACACGTTCACTAAAAAAAATCCCTTTGTA  
GCCAATCATTATTAAAAAAATTGATAAGCTTAACACAAAAGCAGAAAAAGAAATAAT  
AGTAACTTGGTCCCGGGCATCTACCATTATACCCACAATGATCGGTCATACTATTGCTAT  
CCATAATGGAAAAGAGCATTGCTTATTTATATAACGGATAGTATGGTAGGCCACAAATT  
GGGAGAATTTGCACCTACATTAATTTTAGAGGACATGCAAAAAGCGATAATAGATCTC  
GTCGTATGATTTTTCAATCTTTTCTACTAGGTAATCTAGTATCCTTATGCATGAAGATAAT  
CAATTCGGTCGTTGTAGTCGGACTCTATTATGGATTTCTGACCACATTCTCCATAGGGCC  
CTCTTATCTCTTCCTTCTCCGAGCTCTGGTTATGGAAGAAGGA-----ACCGAGAAGAA  
GGTATCAGCAACAACCTGGTTTTATTACGGGACAGCTCATGATGTTTCATATCGATCTATTA  
TGCGCCTCTGCATCTAGCATTGGGTAGACCTCATACAATACTGTCCTAGCTCTACCATA  
TCTTTTGTTCATTTCTTCTGGAACAATCACAACACTTTTTTGTATTATGGATCTACTACC  
AGAAATTCATGCGTAATCTCAGCATTCAATGTGTATTCTGAATAATCTCATTTTTCAAT  
TATTCAACCATTTCAATTTACCAAGTTCAATGTTAGCCAGATTAGTCAACATTTATCTCTT  
TCGATGCAACAACAAGATCTTATTTGTAACAAGTGGTTTTGTTGGTTGGTTAATTGGTC

ACATTTTATTCATGAAATGGCTTGGATTGGTATTAGTCTGGATACGGCAAATCATTCTAT  
TAGATCGTACATTCGATCTAATAAGTACCTTGTGTTAGAATTGAGAAATTCTATGGCTCG  
GATCTTTAGTATTCTTTATTTATTACCTGTGTCTACTATTTAGGCAGAATACCCTCACCC  
ATTCTTACTAAGAACTGAAAGAGACTGAAGAAGATAAACCTCTTGTGAGTATTCTTTT  
CGATTATAATCGGTGGAATCGACCATTTGCTACATAAAGAATAATCGATTTGACCAAGC  
CGTAAAAACTGAAATGTCACAATATTTTTTTGACACATGTAAAAGTGATGGAAAAACAA  
AGAATATCTTTTACATACCCGCCAAGTTTATCAACTTTTTTTGAAAATGATAAAAAGAAA  
GATACCCCTATTGTCACTCCAAAAACGCTCCCTCATGAACTGGACAATCAGTGGGTTT  
CTACCAACAAAGAAAAAAGTAAT--CTGAATAAGGAATTTTTAAATCGACTTGAAGTTC  
TAGACAAGGAATCTCTTTCTCTGGATATACTTGAACAAGGACTAGATTGTGTAATGAT  
GATACTAAAAAGAATACATGCCTAAAATGTACGATCCTTTGTTAAATGGACCATATCGA  
GGAACAATCAAAAAGGGGTTTCACCTAAAGAGAGAGTTAGACTAAATAGGATTCATA  
CTATCTTTTACCAAGAATTTGAACAAAAAGATCCTAATGAGACATCGATTGGAATAAAC  
GAAATCAGTAAAAAAAACCTCGCTGGTCATGTAAATTAATCGAATTGGACCAACAAT  
TG---GGTCAAATTCGTTTAAGAAAATTCAAACGTGTAGTTATTTTTACTGCCCTTTAAT  
AATCTATTCGCAACAATCCGATTTTCGGCGAGGTATAATTACAGGCTCTATGCGGGCTCA  
AAGGCGAAAAACAGTTATTTGGAACTATTTCAAGCAAATGCGCATTCCCCCTTTTTA  
TCGACAGAATAACCCCCCCCCGCTTTTTTCTTTTGATATC-----TCTGGACTGATTAAC  
CAATTTTTCGAAATAGAAAGGAAAAAGCACGGCTAGCGGTAGCAGAAGCCTGGGATA  
ACATTCTTTGTGCGCAAATAATAAGAGGTTACATGTTAATAACTCAATCAATTCTTCGAA  
AATATGTTGTATTACCTTCATTGATAATAGCCAAAAATCTCGGGCGTATGTTATTCTTGCA  
ACTTCCTGAATGGTCTGAGGATTTGCAGGAATGGAATAGAGAAATGCATATTAATGTA  
CTTATAATGGTGTTCAATTATCAGAAACAGAATTTCCACAAAATTGGTTGAGCGATGGG  
ATTCAGATCAAAATTTTATTTCTTTTTGTCTGAAACCTTGGCATATATCTAAAAA  
CAAAAAGATGATTTTTGTTTTTTAACAGTTTTTGGGAATGGAAGCTGAACTTCCCTTTGG  
TTCTCCCCGAAAGCGCCCTTCTTTTTTGAGCCCATTTTTAAGGAACTCGAAAAA  
TTGGAATTTAAAAAGAAATATTTATAACTACTCGAAAAGTTTTAAAAGGAAAAAC  
AAAATTATTTGAAAGATTTCAAAGAAACCAAAAAATGGCTTATAAAAAATATTCTA--  
---TTTCTAAAAAATAAAAAAGAACTTTCAAACATAAATGATTATCTAATTAGTAATC  
AAATAATTAACGAATCATTAGTCAAATGAACTGGAAATTGGCCAAATCTTCACTGA  
TAGAAACCAAAATGAAGGATTTGACTGATAGAACAAGTACAATAAAAAATCAAATAGA  
AGAATTACAAAAGAGAAAAAGAAAAGTCCT-----AAATCGCCAAA  
AAATATTTTCCAAATATTAAAAAAAGAAACTCGATTAATATGTCAATTCCATTATTTT  
AGAAAATTATTCATTCAAAGATTATACATCGATCTATTTTTATCTATCATTAATATTACAAG  
AATTAATACACAACCTCCGT--ATCTTTATTTGTTTATTTATCTTACTTGTGTCACAAGCATA  
TGTATTTTACAAATTATCACAAACCCAAGTTATTAATTTGTCTAAATTTAAATCTGTCTT  
CAATATACGTCTTTTTTCTTAAAGACTAAATAAAGGACTATTTTACACTAGGAATATTT  
CATTCTGAATTAACATAAAAAACCTCAGAGTTATAGAATCAATCAATGGAAAAACTG  
GTTAAGACGGCATTATCAATACGATTTATCTAAGATTAGATGGTCTAGATTAATGCCAAA  
AAAATGGAGAACTGGGGTTAATCAAAGTTGTATGGCTCAAATAAAAAACAAATGGAAT  
TCATATGAAAAAGACCAA-----TTAATTCATTACAAAAAAGAA---AATTTAAAAAATGT  
TATAGATATGATCTTTTATCATATAAATCGATTAATGGCAATCTTCTACATCTCGATAGAA  
AATATTTTGATTGGAAAATTCTCCATTTTTCTGTTAGATTTTTTGATTGGATGGGAATGAA  
TGAAAAAATATTTAATCGTTGGTTCTTCCAGAATTTGTACTACTTTATAATGTATATAAA

ATAAAACCGTGGATTATACCAAGCAAATTA CTCTTTTAAATTACAAAAGCAACACGGA  
AGCAGAACTAGATTTGTTCTTGAAACGTTATTTGCTTTTTCAATTGAGATGGAACGATA  
CTTTGAATCAAAGAATAATCGAAAATGTAAAGGTATATTGTCTCCTGCTTCGACTGATAA  
ACCCAAACAAAATTGCTATATCGTCAATTCAAAGGAGAGAAATGAGTTTGGATATAATG  
CTGATTCAGGCGAATTTACCTCTTACAGAATTGATGAAG---GGGTTATTGATTATCGAAC  
CTATTCGATTGTCTGTAAAAATAATGGACAATTTATTATGTATCAAACCGTAGGTATTTT  
ATTGGTTCATAAAAGTAAACAC---CATTTTGATTTGCTTGTTCCTGAAAATATTTTATGGT  
CTAGACGTCGTAGAGAATTGAGAATTCGAAGTTTTTTTAGATTTCTTTGGCCTAATTATC  
GATTAGAAGATTTAGCTTGTATGAATCGTTATTGGTTTGATACCAACAATGGTAGCCGTT  
TCAGTATCTTAAGGATACATATGTATCCAATGAGAGAACATCAATTCAAATCCTGGATTT  
TCGAATTTAGAGAGATATTGAGAGAGATCAAGAATTCTCACCATTCTTAGATTCATGG  
ACCCAATTCAATTCAGTGGGATCCCTCATTACATTTTTTTCCACCAAGAACGTTTTCTA  
AAACTCTTTGACCCCGAATTTGGAGTATCCTACTTTCA---CGCAATTCA-----CAGGGTT  
CAACAAGCAATCGATATTTACG-----ATCAAGGGT---GTAATACTCTTTGTAGTAGCG  
GTCCTTATATATCGT-----ATTAATAATCGAAATGTGGTCGAAAGAAAAAATCTCTAT  
TTGATAGGGCTTCTTCCT-----ATACCTATGAATTCCATTGGACCCAGAAATGATAC  
ATTGGAAGAATCCGTT---GGGTCTTCCAATATCAATAGGTTGATTGTTTCG---CTCCTGTA  
TCTTCCCAAAGGAAAAAAGATCTCTGAGAGTTGTTTCTGAATCCGAAAGAGAGTACT  
TGGGTTCTCCCAATAACT-----AAAAGTGTAGCATGCCTGAATCTAACTGGGGTTC  
GCGTTGGTGGAGGAACCTGGATCGGAAAAAAGAGG-----GATTCTAGTTGTAAGATATCT  
AAT-----GAAACCGTCGCTGGAATTGAGATCTTATTCAAAGAGAAAGATCTCAAA---TA  
TCTGGAGTTTCTTTTTGTATATTATATGGAT-----TATCCGATCCGCAAGGACCATGATTGG  
GAATTGTTGATCGTCTTTCTCTGAGGAAGAGTCAAATAGAATCAACTTG-----AATTC  
GGGACCGCTATTCGAAATCTTAGTGAAACACTGGATTTCTTATCTCATGTCTGCTTTTTCG  
TGAAAAAATACCAATTGAAGTGGAGGGT---TTCTTCAAACAACAAGGG---GCTGGGTCA  
ACTATTCAATCAAATGATATTGAGCATGTTTCCCAT-----CTCTTCTCGAGAAACAAGTGG  
GCTATTTCTTTGCAAAACTGTGCTCAATTTATATGTGGCAATTCGCAAGATCTCTTC  
GTT-----AGTTGGGGGAAG---AATCCGCCCGAATCGGATTTTTTTGAGGAAC---GTATCG  
AGAGAGAATTGGATTTGGTTAGACAATGTGTGGTTGGTAAACAAGGATCGG-----TTT  
TTTAGC-----AAGGTACAGAATGTATCGTCAAATATTCAATATGATTCC-----ACAAGA---  
---TCTAGTTTCGTTCAAGTAACGGATTCTAGCCA ACTGAAAGGATCTTCT---GATCAATC  
CAGAGATCATTGGATTCCATTAGT-----AATGAGGATTCCGAA-----  
-----TATCACACATTGATTAATCAAAGAGAGATTCAACAACGAAAAGAAAGATCGA  
TTCTT--TGGGATTGGGATCCTTCTTTCTTCAAACGGAACGAAAAGAGATAGAATCAG  
GC-----CGATTCCCGAAA-----TGCCTTTCTGGATATTCC-----TCAATGTCCCGGCTATTCA  
CG---GAACGTGAGAAGCAGATGATTAATCATCTGTTTCCGGAAGAAATCGAAGAATTC  
TT-----GGGAATCCTACAAGATCCGTTCTGTTCTTTTTCTCTGATAGATGG-----TCAGAAC  
TTCAT--CTGGGTTTCAATCCTACTGAGAGGTCCACTAGAGATCAG-----AAATTGTT  
GAAGAAACAACAAGACCTTTCT--TTTGTCCCTTCCAGGCGATCGGAA-----AATAA  
AGAAATGGTTAATATATTCAAGATAATTACGTATTTACAAAAT-----ACCGTCTCAATTCAT  
CCTATTTTCATCAGATCTGGGATGTGATATGGTTCCG---AAGGATGAACCGGAT--ATGGA  
CAGTTCCAATAAGATTTCAATCTTGAACAAAATCCATTTTTTGATTTA-----TTTCATCTA  
TTCCATGACCGGAACAGGGGAGGATACACGTTA-----CACTACGATTTTGAATCAGAA---  
---GAGAGATTTCAAGAAATGGCAGATCTATCACTCTATCAATAACCGAGCCG---GATCT

GGTGTATCATAAGGGATTTGCCTTTTCTATTGATTCCTGCGGATTGGATCAAAAACAA----  
--TTCTTGAATGAGGCCAGGGATGAA-----TCGAAAAAGAAATCT-----TTATTGGTTC  
TACCTCCTATTTTTTAT-----GAAGAGAATGAATCTTTTTCTCGAAGGATCAGAAAAAAT  
GGGTCCGG--ATCTCCTGCGGGAATGATTTGGAAGATCCAAAACCAAAAATAGTGGTAT  
TTGCTAGCAACAACATAATGGAGGCAGTCACTCAATATAGATTGATCCGAAATCTGATT  
CAAATCCAATATAGTACCTATGGG-----TACATAAGAAATGTATTGAATCGATTCTTTTTAA  
TGAAT-----AGATCTGATCGCAACTTCGAATATGGA-----ATTCAAAGGGATCAAATA  
GGAAAGGATACTCTGAATCATAGAACTATAATGAAATATACGATCAACCAATATTTATCG  
AATTTGAAAAAG---AGTCAGAAGAAATGGTTCGAGCCTCTT-----ATTTTGATTTCTCGA  
ACCGAGAGATCCATGAATCGGGATCCTGATGCATATAGATACAAATGGTCCAATGGGAG  
CAAGAATTTCCAGGAACATTTGGAACAGTCCGTTTCGGAGCAGAAGAGCCGT-----T  
TTCAAGTAGTGTTTCGATCGATTACGTATTAATCAATATTCGATTGATTGGTCTGAGGTTAT  
CGACAAAAAATATTTGTCTAAGCTACTTCGTTCTTTTTGTCCAAG-----  
TCACCTCTTTTTTTGTCC-----AAGTTGCTTTTATTTTTGTCTTAC--GCACTTC  
CTTTTTCTGTGTGAGTTTCGGAAATATCCCATTACTAGGTCCGAG---ATCTACATCTAT-  
--GAATTGAAAGGTCCGAATGATCAACTCTGCAATCAGTTGTTAGAATCAATAGGTCTTC  
AAGTTGTTCAATTTCCAAAATTGAAACCCTTC-----TTATTGGAC-----GATCATGATAC  
TTCC---CAAAAATCGAAATTTCTTGATCAATGGAGGAACAATATCACCATTTTTGTTCAAT  
AAGATACCA---AAGTGG--ATGATTGACTCATTCCATACTAGA-----ATAATCGCAGGAA  
ATCCTTTGATAACCCGGATTCCCTATTTCTCAATGATATTCACGATCAAGACAATTGGCT  
GAATCCCGTGAAACCATTTTCATAGAAGTTCATTGATATCTTCTTTTTATAAAGCAAATCG  
ACTTCGATTCTTGAATAATCCCAGCACTTCTGCTTCTAT-----TGGAACACAAGATTCCC  
CTTTTCTGTG-----GAAAAGGCCCGTATCAAT-----AATTCTGATTTTACGTATGGA---  
CAATTCCTCAATATCTTGTTCATTTCGCAACAAA--ATATTTCTTTGTGCGTCCGGTAAA---  
--AAAAACATGCTTTTTGGGGG---AGAGATACTATTTACCAATCGAGTCACAGGTATC  
TAACATATTCATACCTAACGATTTCCACAAAGTGGT--GACGAAACGTATAACTTGTAC  
AAATCT-----TTCCATTTTCCAAGTCGATCCGATCCATTCGTTTCGT-----AGAGCTATTTA  
CTCGATCGCAGACATTTCTGGAACACCTCTAACAGAGGGGCAAATAGTCAATTTTGAA  
AGAACTTATTGTCAACCTCTTTCAGATATGAATCTATCTGATTCAGAAGGGAAGAACTT  
GCATCAGTATCTCAAT-----TTCAATTCAAACATGGGTTTGATTCACTCCATGTTCTGA  
GAAAGATTTATCATCCGAAAAG-----AGGAAAAAA-----CGGAGTCTTTGT  
CTAAAG-----AAATGCGTTGAGAAAGGGCAGATGTATAGAACCTTTCAACGAGATAGTG  
CTTTTTCAACTCTCTCAAATGGAATCTATTCCAAACATATATGCCATGGTTCCTTACTTC  
GACAGGGTACAAATATCTAAATTTGATATTTTATAGATACTTTTTTCAGACCTATTG-----CC  
AATACTAAGTAGC---GGTCAAAAATTTGTATCCACTTTTCCTGATATTATGCATGGATCAG  
GTATATCATGGCGAATTCTTCAGAAAAAATTG-----TGTCTTCCACAATGGAAT  
CTG---ATAAGTGAGATCTCGAGTAAGTGTTCACATAAT-----CTTCTTCTGTCCGAAGAAA  
TGATTCATCGAAAT-----AATGAGTCACCATTGATATCGACACATCTGAGATCGCCAAATG  
CTCGGGAGTTC--CTCTATTCAATCCTTTTCTTCTTCTTGTGCTGGATAT--CTCGTTTCG  
TACACATCTTCTTTTGTTCCTCCGG-----GCCTCTAGTGAGTTACAGACAGAGTTCCGAAA  
GGGTCAAATCTTTGATGATTCCATCATCTATGATTGAGTTGCGAAAACCTTCTGGATAGGT  
ATCCTACATCTGAACCGAATCTTTCTGGTTAAAGAATCTTTTCTAGTTGCTCTGGAAC  
AATTAGGAGATTCTCTAGAAGAAATATGGGGTTCTGCTTCTGGCGGCAACATGCTTGGT  
-----CCCCT-----TATGGG--GTCAAATCAATACGTTCTAAGAAGAAAGATTGG

AATATCAATCTCATCGAGATCATCGATCTCATA-----CCAAATCCCATCAATCGAATC  
ACTTTTTCGAGAAATACGAGACATCTAAGTCATACAAGTAAAGAGATCTATTCATTGAT  
AAGAAAAAGAAAAACGTGAACGGGGATTGGATTGATGAGAAAATAGAATCCTGGGT  
CGCGAACAGTGATTTCGATTCATGATGAAGAAAGAGAATTCTTGGTTCAGTTCTCC-----A  
CCTTAACGACA-----GAAAATAGGATTGATCAAATTCTATTGAGTCTGACT--CATAGTGA  
TCATTTA-----TCAAAGAATGACTTTGGTTATCAAATGATTGAACAACCGGGAGC  
AATTTACTTACGATACTTAGTTGACATTCAT-----AAAAAGCATCTAATGAATTATGAGTT  
CAATCCATCCTGTTTAGCAGAAAGACGGATATTCCTTGCTCATTATCAGACAATCACTTA  
T-----TCACAAACTTCGTGTGGGGAAAATAGTTTTCAATTCCCATCTCATGGA-----AAA  
CCTTTTTCGCTCCGCTTAGCCTTATCCCCCTCT--AGGGGTATTTTAGTGATAGGTTCTAT  
AGGAACTGGACGATCCTATTTGGTCAAATACCTAGCGACAAACTCCTATGTTCCTTTCA  
TTACGGTATTTCTGAACAAGTTCCTGTATAACAAGCCTAAAGGTTTTCTTCTTGAT-----  
-----GAGATCGAT--ATTGATGATAGTGACGATATTGATGATAGTGACAATCTTGATGCTA  
GTGAC-----GATATCGATCGTGACCTTGATACGGAG  
CTG--GAACTGCTAACTAGGATGAATGGGCTAACTGTGGATATGATGCCGGAA-----AT  
AGACCGATTTTATATCACCTTCAATTCGAATTAGCAAAAGCAATGTCTCCTTGATAAT  
ATGGATTCCAAACATTCATGATCTGGATGTGAATGAGTCGAATGACTTATCCCTCGGTCT  
ATTAGTGAACCATCTCTCCAGG-----GATTGTGAAAGATGTTCT--ACTAGAAATATTCT  
TGTTATTGCTTCGACTCATATTCCCCAAAAAGTGGATCCCGCTCTAATAGCTCCGAATAA  
ATTAAATACGTGCATTAAGCTACGAAGGCTTCTTATTCCACAACAACGAAAGCACTTTT  
TCACTCTTTCATATACTAGGGGATTTCACTTGGAAAAGAAAATGTTCCATACT-----AAC  
GGATTCCGGTCCATAACCATGGGTCCAATGCACGAGATCTTGTAGAACTTACCAATGA  
GGTCCTATCGATTAGTATTACACAGAAGAAATCAATTATAGACACTAATACAATTAGATC  
CGCTCTTCATAGACAAACTTGGGATTTGCGA-----TCCCAGGTAAGATCGGTTTCAGGA  
TCATGGGATCCTTTTCTATCAGATAGGAAGGGCTGTAGCACAAAATGTACTTCTAAGTA  
ATTGCCCATAGATCCTATATCTATATGAAGAAGAAA-----TCATGTAACGAAGGGG  
ATTCTTATTTGTACAAATGGTACTTCGAGCTTGGAACGAGCATGAAGAGATTAACGATA  
CTTCTTTATCTTTTGAGTTGTTCTGCCGGATCGGTCGTTCAAGATCTTTGGTCTTTATCC-  
----GGACCCGATGAAAAA---AATGGGATCACTTCTTATGGACTCGTTGAGAATGATTCT--  
-GATCTAGTTCATGGCCTATTAGAAGTAGAAGGCGCTCTGGTGGGA-----TCTTCACGGA  
CAGAAAAAGATTGCAGTCAGTTTGATAATGAT-----CGAGTGACATTGCTTCTTCGGCCC  
GAACCGAGGAAT--CCCTTAGATATGATGCAAAAGGGCTCTTGGTCTATCCTTGATCAG  
AGATTTCTCTATGAAACG-----GAGTTTGAAGAA---GGGGAGGGAGAAGGAGCC  
CTTGACCCGAG-----GAGGAT-----TTATTCAATCAC-----ATAGTTTGGG  
CTCCT-----AGAATATGGAGCCCT-----TGGGGCTTTCTATTTGATTGTATCGAAAGGCC  
CAATGAATTGGGATTTCCC--TATTGGTCCAGGTCATTTCCGGACAAG-----CGGATCA  
TTTATGATGAAGAGGATGAGCTTCAAGAGAATGATTCGGGGTCTTGCAGAGTGGAAC  
CATGCAGTACCAGACACGAGATAGATCTTCCAAAGAACAAGGCCTTTTTCGAATAAGC  
CAATTCATTTGGGACCCTGCAGATCCACTCTTTTTCTATTCAA---GATCAGCCCCCTG  
GCTCTGTGTTTTACATCGAGAATTATTTGCAGATGAAGAGATGTCAAAGGGGGCTTCTT  
ACTTCCCAAACAGATCCTCCTACATCTATATATAAACGCTGGTTTATC-----AGAATACG  
CAAGAAAAGCACTTCGAATTGTTGATTAATCGTCAGAGATGGCTTAGA-----ACCAAT  
AGTTCATTATCT-----AATGGATCTTCCGTTCTAAT-----ACTCTATCCGAGAGTTATCAGT  
ATTTATCAAATCTGTTCCCTATCTAAC---GGAACGCTATTGGATCAAATGACAAAGACATT

GTTGAGAAAAAGATGGCTTTTCCCGGATGAAATGAAAATTGGATTC-----ATG-----  
-----ATGCCTAGATCACGT--ATAAATGGAAATTTTATTGATAAGACCTTTTCAATTG  
TAGCCAATATCTTATTACGAGTAATTCCGACAACCTCAGGAGAAAAAGAGGCATTTACC  
TATTACAGAGATGGG-----ATGTCGGCTCAATCCGAAGGAAATTACGCGGAAGCTTTGC  
AGAATTATTATGAAGCTATGCGACTAGAAATTGATCCCTATGATCGAAGTTATATACTCTA  
TAATATAGGGCTTATCCACACAAGTAATGGAGAACATACGAAAGCTTTGGAATATTATTT  
TCGAGCACTAGAACGAAACCCATTCTTACCACAAGCTTTTAATAATATGGCCGTGATCT  
GTCATTAC---CGGGGAGAACAGGCCATTCAACAGGGAGATTCTGAAATTGCAGAGGCT  
TGGTTCGATCAAGCCGCTGAGTATTGGAAACAGGCTATAGCGCTTACTCCCGGTAATTA  
TATTGAAGCGCATAATTGGTTGAAGATCACGAGACGTTTCGAA-----ATGACTTGGCGAT  
CAGAACATATATGGATAGAACTTATAACGGGGTCTCGAAAAATAAGTAATTTCTGCTGG  
GCCTTTATCCTTTTTTTTAGGTTTATTAGGCTTCTTATTAGTTGGAACCTCCAGTTATCTTG  
GTAGAAATTTGATATCTTTTTTTCCGCCTCAGCAAATCATTTTTTTTCCACAAGGAATCG  
TGATGTCTTTCTACGGAATTGCGGGTCTCTTTATTAGCTCTTATTTGTGGTGCACAATTT  
CCTGGAATGTAGGTAGTGGTTATGATCGATTTCGATATAAAGGAAGGAATAGTCTGTATTT  
TTCGTTGGGGATTTCCGGGAAAAAATCGTCGCATATTCCTCCGATTCCCTATAAAAGATA  
TTCAGTCCGTTAGAATAGAAGTTAAAGAGGGTATTTATGCTCGTCGTGTTCTTTATATGG  
ACATCCGAGGCCAGGGGTCCATTCCCTTAACCCGTAAGTATGAGAAT---TTGACTCCAC  
GAGAAATTGAACAAAAGGCTGCTGAATTAGCCTATTTCTTGC GTGTACCAATTGAAGTA  
TTT

>Fragaria

ATGGAAAAACAGTGGTTTGGTTCGCTCTTGTCTTAAGTAAATCAATGGCCGGTTTTGG  
TCCTTTTGAAAATACCGGTATAAGTGAAGATCCAATTATAGATGATATGGATAAAGACGT  
GTCTAATTCCAGTAATGTTGATCATTTAGTCGGCGGCGGATCCCTTCGGAATTTAATATC  
GGATGAGACTTTTTTCGTTATGGATAGTAATAAGGACGGTTATTCCATATATTTTGATATT  
GAAAATAAAATTTTGAGATTGACACCGACCGT-----TCTTTTCTAAGTGAATAAAAAG  
TTCGTTTTATAGTTATCAGACTTCGAGTTATATGAATAATGCAACTAAAAGTGACGATAA  
TCGCTACGACCATTACGTGTATGATACTAATTATAGTTGGAATAATCACATTACTAGTTGC  
ATTGACAGTTATCTTCGG-----TCTCAAATTTGTCTTGATAGTTATATTTAAGCAATAGTG  
ACAATTACAGTGATAGTTACATTTATAGTTACATTTGTGGCAGCGGGAGTTCCAGTATCA  
AAACTAGCAAGGATGGTAGTGATTTAACTATAAGA-----TCT-----GTA ACTCAAAA  
TACAGGCATTTGTGGATTCAATGTGAAAATTGTTATGGATTAATTATAAGAAATTTTA  
AAATCCAAAATGAATATTTGTGAACAGTGTGGATGTCATTTGAAAATGAGTAGTTTCGA  
TAGAATCGAACTTTCGATTGATCCGGGTACTTGGGATCCTATGAATGAAGACATGGTCT  
CTCTGGATCCCATTGAATTTTCAATTCGGAAGAGGAACCTTATAAAGATCGTATTGATTCTT  
ATCAAAAAAATACAGGATTA ACTGAGGCTGTTCAAACAGGCACAGGTCAATTAATGG  
CATCCCCGTAGCAATTGGGGTTATGGATTTTTCAGTTTATGGGGGGTAGTATGGGATCCGT  
AGTAGGTGAAAAAATCACACGTTTGGCTGAGTATGCTACCAATAAACTTTTACCTCTTA  
TTCTAGTGTGTGCTTCCGGAGGAGCCCGCATGCAAGAAGGAAGTTTGAGCTTAATGCA  
AATGGCTAAAATATCTTCCGTTTTATATGATTATCAATCAAATAAAAAATTATTTTATGTC  
GCAGTTCTTACATCCCCTACCACGGGTGGGGTGACGGCTAGTTTTGGTATGTTGGGAGA  
TATCATTATTGCTGAACCCAACGCTTACATTGCATTTGCAGGTAAAAGAGTAATTGAAC  
AAACATTGAATAAGACAGTACCCGAGGATTCACAAGTGGCTGAATATTTATTCCATAAG  
GGCTTATTCGATCCAATCGTACCACGTAATCCTTTAAAGGACGTTCTGAGTGAATATTT



CGACTACATGCTTTCTTTCTTTGGATCAAACCT-----ATGGTAACCCCTTCGAGCAGATG  
AAATTAGTAATATTATCCGCGAACGTATTGAGCAATATAACCGAGAGGTAAGGTTTTA  
AATACGGGTACTGTGCTTCAAGTAGGAGACGGCATTGCTCGTATTTATGGTCTTGATGA  
AGTAATGGCGGGTGAATTAGTAGAATTTGAAGAGGGTACGATAGGAATTGCTCTGAATT  
TGGAATCAAATAATGTTGGTGTGTATTAATGGGTGACGGTTTGATGATACAAGAGGGG  
AGTTCTGTAAAAGCAACGGGAAGAATTGCTCAGATCCCAGTAAGCGAGGGCCTTTTATG  
GTCGTGTTGTAAATGCACTGGCTAAACCTATCGATGGTTCGGGGTGAAATTCATCCTCT  
GAATCCCGGTTAATTGAGTCTCCTGCTCCTGGTATTATTTTCGAGACGTTCCGTATACGAG  
CCCCTTCAAACAGGACTTATTGCTATTGATTTCGATGATCCCTATAGGGCGCGGCCAGCG  
GGAATTGATTATTGGGGACAGACAGACCGGTAAAACAGCAGTAGCTACAGATACGATT  
CTCAATCAACAAGGGCAAATGTAATATGTGTTTATGTAGCGATTGGTCAAAAAGCATC  
GTCTGTGGCTCAGGTGGTGACTGCTTTACAGGAAAGGGGGCAATGGAATACACTATT  
GTGGTAGCTGAAACGGCGGATTCTCCGGCTACATTACAGTACCTTGCTCCTTATACAGG  
AGCAGCCCTGGCTGAATATTTTCATGTACCGCGAGCAACACACTTTAATCATTATGACG  
ATCTCTCAAACAAGCGCAGGCTTATCGCCAAATGTCTCTTCTATTACGAAGACCGCCG  
GGCCGCGAAGCGTATCCGGGAGATGTTTTTATCTACATTCACGCCTTTTGAAAAGAGC  
CGCGAAATTAGGTTCTCTTTTAGGTGAAGGAAGTATGACTGCTTTACCAATAGTTGAGA  
CCCAATCGGGGGATGTTTCGGCTTATATTCCTACTAATGTAATTTCCATTACAGATGGAC  
AAATATTCTTATCTGCTGATTTATTCAATGCTGGAATCAGACCAGCTATTAATGTGGGTAT  
TTCTGTTTCCAGAGTAGGATCGGCAGCTCAAATTAAGCCATGAAACAAGTAGCTGGT  
AAATTAATTTGGAATTGGCGCAATTTGCAGAATTAGAAGCCTTTGCACAATTTGCTTC  
TGATCTCGATAAAGCTACTCAGAATCAATTGGCAAGAGGTCAACGATTACGTGAGTTGC  
TCAAACAATCTCAATCCGCCCCCTTGCGGTGGAAGAACAGATATTGACTATTTATACC  
GGAACGAACGGTTATCTTGATTATTAGAAATTGGACAGGTAAGGAAATTTCTTGTTGA  
GTTACGTACTIONTAAAAACGAATAAACCCAGTTCCAAGAAATCATATCTTCTACCA  
AGACATTTACCGAGGAAGCGGAAACCCTTTTGAAAGAAGCTATTACAGGACCAATGG  
AACGTTTTCTACTTCAGGAACAGGTAATGAAAATAAATCCTACTACTTCTGGTCCTGGG  
GTTCCGCACTTGAAAAAAAACCTGGGGCGTATTGCTCAAATCATTGGTCCGGTACT  
AGATGTATCTTTTCCACCCGGCAAGATGCCTAATATTTACAACGCTCTGGTAGTTAAGG  
GTCGAGATACCGCTGGTCAACAAATTAATGTGACTTGTGAAGTACAGCAATTATTAGGA  
AATAATCGAGTTAGAGCGGTAGCTATGAGTGCTACAGATGGTCTAACGAGAGGAATGG  
AAGTAATTGATACAGGAGCTCCTTTAAGTGTTCCAGTCGGCGGAGCGACTCTAGGACG  
AATTTTTAACGTACTTGGAGAGCCTGTGGATAATTTAGGTCCTGTAGATACTCGTACAAC  
ATCTCCTATTCATAGATCTGCGCCTGCCTTTATACAGTTAGATACAAAATTATCCATTTTT  
GAAACAGGAATTAAGTCGTAGATCTTCTAGCCCCCTATCGTCGTGGAGGAAAAATCG  
GACTTTTTGGGGGAGCTGGAGTAGGTAACAGTACTCATTATGGAATTGATCAACAA  
CATTGCCAAAGCTCATGGGGGCGTATCCGTATTTGGCGGAGTGGGTGAACGTACTCGG  
GAAGGAAATGATCTTTACATGGAAATGAAAGAATCCGGCGTAATTAATGAACAAAATAT  
TGCCGAATCAAAGTGGCTCTAGTCTATGGTCAGATGAATGAACCGCCCGGAGCTCGT  
ATGAGGGTTGGTTAAACCGCCCTAACTATGGCGGAATATTTCCGAGATGTTAATGAACA  
AGACGTACTTCTATTTATCGACAATATCTCCGTTTTGTCCAAGCAGGATCCGAAGTATC  
CGCTTTATTGGGCAGAATGCCTTCCGCTGTGGGTATCAACCCACCCTTAGTACCGAAA  
TGGGCTCTTTACAAGAAAGAATTACTTCTACTAAAGAAGGGTCCATAACTTCTATTCAA  
GCAGTTTATGTACCTGCGGACGATTTGACCGATCCTGCTCCGGCCACGACATTTGCACA

TTTAGATGCTACTACCGTACTATCAAGAGGATTAGCTGCCAAAGGTATCTATCCAGCAGT  
GGATCCTTTAGATTCAACATCAACTATGCTCCAACCTCGGATTGTTGGTGAAGAACATT  
ATGAAACTGCGCAAAGAGTTAAAGAACTTTACAACGTTACAAAGAAGCTTCAGGACAT  
TATAGCTATCCTTGGGTAGACGAATTATCCGAAGACGATCGCTTAACCGTAGCAAGAG  
CACGAAAAATTGAGCGTTTCTTATCACAACCCTTTTTCGTAGCAGAAGTATTTACAGGT  
TCCCCAGGAAAATATGTTGGTCTAGCAGAAACAATTAGAGGTTTTAAATTGATCCTTTC  
TGGAGAATTAGATGGTCTTCTGAGCAGGCCTTTTATTTAGTAGGTAACATCGATGAAG  
CTACTGCGAAAGCTACGACCTTAGAACT-----ATGACCTTAAATCTTTGTGTA  
CTGACCCCGAATCGCATTGTTTGGGATTCGGAAGTGAAAGAAATTATTTTATCTACTAAT  
AGTGGACAAATTGGTGTATTACCAAATCACGCGCCTATTGCCACAGCTGTAGATATCGG  
TATTTTGAGAATACGCCTTAACGACCGATGGTTAACGATGGCTCTGATGGGCGGTTTTG  
CTAGAATAGGCAATAATGAGATCACGGTTTTAGTAAATGATGCGGAGAAGGGTAGTGA  
CATTAAATCCACAAGAAGCTCAACAACTCTTGAAATTGCGGAAACTAACTTGAGGAAA  
GCGGAAGGCAAGAGACAAACAATTGAGGCAAATTTAGCTCTCAGACGAGCTAGGACA  
CGAGTCGAGGCTATCAATGTGATGTCAATGAAAAATGTAACCGATTCTTTCCTTTCCTT  
GGGTTATTGGCCATCCGCCGGAAGTTTCGGGTTAATACTGATATTTTGAACCAATCT  
AATAAATCTAAGCGTAGTGCTTGGTGTGTTGATTTTTTTTTGGAAGGGGGGTGTTAAGTG  
ATTTATTAGATAATCGAAAACAGAGGATCTTGAAGACTATTCAAATTCAGAAGAATTA  
CGCGAGGGGGCCCTAAACCAGTTAGAAAAAGCCCGGGCCCGCTTACGGAAAGTAGAA  
ATAGAAGCGAATCAGTTTCGAATGACTGGATACTCTGAAATAGAGCGAGAAAAATTA  
ATTTGATTAATGCAACTTCTAAGACTTTGGAACAGTTAGAAAATTACAAAAATGAAACC  
ATTCATTTTGAACAACAAAGAGCAATTAATCAAGTTCGACAACGGGTTTTTCAACAAG  
CCTTACAGGGGGCTTTAGGAACTCTCAATAGTTGTTTGAACAACGAATTACATTTACGT  
ACCATCAGTACTAATATTGGCATGTTTGGAACGGTGAAAGAAATAACGGATATGAATCC  
ACTGATTTCTGCCGCTTCCGTTATTGCTGCTGGATTGGCTGTCGGGCTTGCTTCTATTGG  
ACCTGGGGTTGGTCAAGGTACTGCTGCGGGACAGGCTGTAGAAGGGATCGCGAGACA  
ACCAGAGGCGGAAGGAAAAATACGGGGTACTTTATTGCTTAGTCTAGCTTTCATGGAA  
GCTTTAACAATTTATGGGCTGGTTGTAGCATTAGCTCTTTTATTTGCGAATCCTTTTGTTA  
TGAATGTTCTATTATGTTCTATCAAAACACTAAAAGGTTTATACGATATATCCGGTGTGG  
AAGTAGGCCAACATTTCTATTGGCAAATAGGAAGTTTCCAAGTCCATGCCCAAGTACTT  
ATTACTTCTTGGGTGCGTAATTGCTATTTTATTAGTTTCAGCCATTATAGCTGTTTCGTAATC  
CACAAACCATTCTACTGACGGTCAGAATTTCTTTGAATATGTCCTTGAATTCATTCGAG  
ACGTGAGCAAACTCAAATTGGAGAAGAATATGGTCCATGGGTTCCCTTTATTGGA  
ATGTTTCTATTTATTTTGTTCAAATTGGTCAGGGGCTCTTTTACCCTGGAACTTATCC  
AGTTACCTCACGGAGAGTTAGCCGCACCCACAAATGATATAAACACGACCGTTGCTTTA  
GCTTTACTCACGTCAGTAGCCTATTTTATGCGGGCCTTACAAAAAGGGGTTGGGTTA  
TTTCGGTAAATATATTCAACCAACCCCAATCCTTTTACCTATTAACATTTTAGAAGATTTC  
ACAAAACCGTTATCGCTTAGTTTTCGACTTTTCGGAAATATTTTAGCTGATGAATTAGTA  
GTTGTTGTTCTTGTTCCTTTAGTACCTTTAGTAGTTCCTATACCTGTCATGTTCTTGGAT  
TATTTACAAGCGGTATTCAAGCTCTTATTTTGAACCCCTAGCTGCGGCTTATATAGGCG  
AGTCCATGGAAGGTCATCATATGATATTTCAACTTTAGAGCATATATTA  
ACTCATATATCCTTTTCGATCATTCAATTGTAATTACAATCCATTTGATAACTTTATTTGTC---GAAATCGT  
AGGACTATATGATTCATCAGAAAAGGGGATGATCGCTACTTTTTTCTGCATAACAGGATT  
ATTAGTTACTCGTTGGGTTTATTTTGGGCATTTACCATTAAGCGATTTATATGAATCATT

ATTTTCTATCGTGGGGTTTTTCCATTATTCATATGATTCCGTATTTTAAAAACAGCAA  
CCCATTTAAGCGCAATAACGGCGCCAAGTGTTATTTTACCCAGGGTTTCACTACTTCA  
GGTCTTTTAAATGAAATGCATCAATCCGCAATATTAGTACCGGCTCTCCAATCGCATTGG  
TTAATGATGCACGTAAGTATGATGGTGTGGGCTATGCAGCTCTTTTGTGTGGATCATT  
TTATCACTAGCTCTTCTAGTTATTACATTTTCGAAAATTCATAAGGATTTTGTAGTAAAGC  
AATGAGATTCAATACGTGAATGAAAGAAACAATGCGTTACAA-----TCTTTGATTTCTTC  
TCAGAATTATTACAGATATCAATTAATTCAACAATTGGATCGCTGGAGTTATCGTATTATT  
AGTTTAGGGTTTATACTTTTAAACCATAGGTATTCTTTCGGGAGCAGTATGGGCTAATGAA  
GCGTGGGGATCTTATTGGAATTGGGATCCAAAAGAGACTTGGGCATTTATTACTTGGAC  
CGTATTTGCGATTTATTTACATATTTCGAACAAATAAAAATTACGAACTGTAAATTCTGC  
AATGTGGCCTCAATGGGCTTTCTTATAATTTGGATATGCTATTTTGGGGTTAATCTATTA  
GGAATAGGGTTGCATAGTTATGGTTCATTTATACTACCAATGGCAAAAAAGAAAGTATT  
AATTTCCCTTCTATATCTTGCATTTATAGTATTTTGCCTTGGTGGATCTCTCTCATTTA  
AAAAAGTCTGGAATCTTGGATTACTAATTGGTGGGATATTAAGCAATCCGAAATTTTT  
TTGAATGATATTCAAGAAAAGAGTATTCTAAAAAATTCATAGACTTAGAGGAACTCCT  
TCGTTTGGAGGAAATGATAAAGGAATACCCAGAAACGCATTTACAAAAGCTTCGCGTC  
GAA--TACAAAGAAACGACCCAGTTGATCAAGATGCACAATGAGGATCGTATCCATACA  
ATTTTACACTTCTCGACAAATATAATCTGTTTCGTTATTCTAAGTGGTTATTCTATTCTAG  
GTAATGAAGAACTTGTTATTCTTAACTCTTGGGTTCAAGAATTCCTATATACTTAAGCG  
ACACAATAAAAGCTTTTTCTATTCTTTTATTAAGTATTATGTATAGGATTCCATTCGCC  
CCACGGTTGGGAATTAATGATTGGCTCTGTCTACAAAGATTTTGGATTTGCTCATAATGA  
TCAAATTATATCCGGTCTTGTCTTACTTTTTCCAGTCATTTTAGATACAATTTTTAAATATT  
GGATCTTTCGTTATTTAAATCGTGTATCTCCTTCACTTGTGGTGATTATCATTCAATGAA  
TGACATGCCTATTGGTGTTCGAAGAGTACCCTTTCGAAGTCCTGGAGAGGAGGATGCA  
GTGTGGATTGACGTAAAC---CGACTTTATCGAGAAAGATTGCTTTTTTTTAGGCCAAGGG  
GTTGATAACGAGATCTCGAATCAACTTATTGGTCTTATGGTATATCTCAGCATAGAGGAT  
GAGACCAAAGATCTGTATTTGTTTATAAACTCTCCTGGCGGGTGGGTAATACCCGGAGT  
AGCTATTTATGATACTATGCAATTTGTGCGACCCGATATACAGACAGTATGCATGGGATT  
AGCCGCTTCGATGGGATCTTTTATTCTTGTGCGAGGGGAAATTACCAAACGTCTAGCAT  
TCCCTCACGCTAGGGTAATGATCCATCAACCTGCTAGTTCTTTTTATGAGGCACAGACG  
GGAGAATTTGTCTGGAAGCGGAAGAGCTGCTGAAGCTGCGCGAAACCATCACAAAG  
GTTTATGCACAAAGGACAGGCAAACCCTTATGGGTTGTATCCGAAGACATGGAAAGAG  
ATGTTTTTATGTCAGCAACAGAAGCCCAAGCTCATGGAATTGTTGATCTTGTAGCAACT  
G

A

A????????????????????????????????????????????????????????????  
????????????????????????????????????????????????????????????  
????????????????????????????????????????????????????????????  
????????????????????????????????????????????????????????????  
ATGGAAGAATTTCAAGGATATTT  
CGAATTATATAGATCTCCGCAATATGACTTCCCTATACCCACTTATCTTTCGGGAGTATATTT  
ATGCCCTTGCTCATGATCGTGGTTTAGTAGGTTATGACAAGAAATCTAGTTTACTAATTA  
TAAAACGTTTAAATTAGTTCGAATGTATCAACAGAATCATTTTCTTATTTCCGTTAATGATTC  
TAATCAAATAAATTTTTGGGGAAAAATTTGTATTCTCAAATGATATCGGAGGGATTTGC  
AGTCATTGTGGAAATTCGGTTTTCCCTACGATTAGTATCTTCTTAAGCATAAAATCTTAT  
AATTTACGATCAATTCATTCAATATTTCCCTTTTTTCGAGGACAAATTTCCACATTTAAATT  
ATGCATCAGATGTACTAATACCCTACCCCATTCATCTGGAATTTTGGTTCAAACCCTCC

GCTACTGTGTGAAAGATCCCTCTTCTTTGCATTTATTACGGCTCTTTCTTCACGAGTATTA  
TAGTTGGAATACTCTTATTACTAAA-----TCCATTTTTGCAAAACAAAGATTATTCTTGCT  
CCTATATAATTCTTATGTATATGAATATGAATCCATTTTACTTTTTCTCCGTAACCAATCTA  
ATCATTTACGATTAACCTCTTCTGGAATCTTTTTTGAGCGAATACGTTTTTATGAAAAA  
TAAAATATGTGGAAGAAGTCCTT-----CCGGCTACCTTATGGTTCTTCAAGGATCCTTTTA  
TACAGTATGTTAGCCATCAAGGAAAATTGATTCTGGCATCAAAAGATACTCCTCTTCTG  
ATGAATAAGTGGAATATTATCTTGTCAATTTTTGGCAATGTCATTTTTATGTATGGTCTC  
AACCAGGAAGAATCCATCTAAACCAATTATCCAAGCATTCTTTGATTTTTGGGTATC  
TTTCAAGCATAACGGCCGAATATTTCAAGTGGTACGGAGTCAATTGCTAGAAAATACATATT  
TAATGTATAAT-----GCTATGAAGAAGCTTAATACACTGTTTTCCAATTATTCCAATGATAGG  
ATCGTTGGCTAAAGTGAAATTTTGTAAACACATTAGGGCATCCTATTAGTAAGTCCAGCT  
GGGCGGATTCGTCAGATTCTGATATTATCGACCGATTTGTGCGTATAGTCGGAAATATTT  
CTCATTATTATAGCGGATCTTCAAAAAAAAAGAGTTTGTATCGAATAAAATATATACTTC  
GACTTTCTGTGTGTTAAACTTTAGCTCGTAAACACAAAAGTACTGTACGCACTTTTTTG  
AAAAGATTAGGTCCTAAATTATTGGACGAATTCTTTACGGAAGAAGAACAGATTTTTTC  
TTTGCTCTTTCCAAGACCGATTTGGTATTTGGATATTTTGTGTATCAATGATCTAGTTAAT  
CATGAAATGATAATTGATACA-----CTAGAAATCGATTCTTTTTCTAGACTGGAAT  
TT--TTAAAAGGGGTTTATGGAATTATATGGTTACTTATTCTATTTTGACTCTTGTATTGG  
GAATTACACTAGGCGTACTGGTAATTGTATGGTTAGAAAGAGAAATATCCGCGGGAATA  
CAACAACGTATTGGACCTGAATACGCCGGCCCTTTGGGAGTTCTTCAAGCTCTAGCAG  
ATGGGACAAAACCTTCTTTTCAAAGAAAATCTTTTTCCATCTAGAGGGGATACTCGTTTA  
TTCAGTATCGGTCCATCCATAGCAGTTATATCCATTTTAGTAAGCTTTTTAGTAGTTCCAT  
TTGGTTATCGCCTTGTTTTAGCGGATCTCAATATTGGGGTTTTTCTATGGATTGCCATTC  
AAGTATTGCTCCCATTGGACTTCTTATGTCAGGATACGGGTCAAATAATAAATATTCCTT  
TTAGGTGGTCTACGAGCTGCTGCTCAATCAATTAGTTATGAAATACCATTAACCTTATG  
TGTGTTATCAATATCTCTATTATCTAACAGTTCAAGTACAATTGATATAGTTGAGGCGCAA  
TCAAATATGGTTTTGGGGGGTGAATTTGTGGCGTCAACCTATAGGGTTTTATCATTTTT  
CTCATCTCTTCCCTAGCAGAATGTGAGAGATTACCTTTTTGATTTACCAGAAGCAGAAGA  
AGAATTAGTAGCAGGTTATCAAACCGAATACTCGGGTATCAAATTTGGTTTTATTTATGT  
TGCTTCTTATCTAAACCTATTAGTTTCTTCATTATTTGTAACAGTTCTTTACTTCGGGGGT  
TGGAATATCTTTATTCCAGACATATATGTTTCTGAGTTTTTTGAAATAAATAAACTGGGT  
GGAGTCTTTGGAGCGACGATTGGTATATTAATTACATTAATAAAACGTATTTGTTCTTA  
TTCATTCTATCACAACAAGATGGACTTTGCCGAGGCTAAGAATGGACCAACTATTTAA  
TCTTGATGGAAATTTCTTTTACCGATCTCTCTCGGTAATCTATTATTAACAACCTCTTTC  
CAACTATTTTCGCTGATGATCTGGCATGTACAGAATGAAAACCTCATTCTCGATTCTACG  
AGAATTTTTATGAAAGCCTTTCATTTGCTTCTCTTCGATGGAAGTTTTATTTTCCAGAA  
TGTATCCTAATTTTTGGCCTAATCTTCTTCTGATGATCGATTCAACCTCTGATCAAAA  
GATATACCTTGGTTATATTTTCATCTCTTCAACAAGTTTATGTAATGAGCATAACGGCCCTAT  
TGTTCCGATGGAGAGAAGAACCTACGATTAGCTTTTTCAGGAAATTTCAAACGAACAA  
TTTCAACGAAATCTTTCAATTTCTTATTTTACTAIGTTCAACTCTATGTATTCCTCTATCCG  
TAGAGTACATTGAATGTACAGAAATGGCTATAACAGAGTTTCTTTTATTCGTATTAACAG  
CTACTCTAGGAGGAATGTTTTTATGCGGCGCTAACGATTTAATAACTATCTTTGTAGCTC  
CAGAATGTTTTCAGTTTATGCTCCTACCTATTATCTGGATATACCAAGAAAGATGTACGGT  
CTAATGAGGCTACTACGAAGTATTTACTCATGGGTGGGGCAAGCTCTTCTATTCTGGTTC

ACGGTTTCTCTTGGCTATATGGTTCATCCGGGGGGGAGATCGAGCTTCAAGAAATAGTG  
AATGGTCTTATCAATACACAAATGTATAACTCCCCAGGAATTTCAATTGCGCTTATATTCA  
TCACTGTAGGAATTGGGTTCAAGCTTTCCCTAGCCCCTTCTCATCAATGGACTCCTGAC  
GTATACGAAGGATCTCCCACTCCAGTTGTTGCTTTTTCTTTCTGTTACTTCGAAAGTTGCT  
GCTTCAGCTTTAGCCACTCGAATTTTCGATATTCCTTTTTATTCTCATCAAACGAATGG  
CATCTTCTTCTGGAAATCCTAGCTATTCTTAGCATGATATTGGGGAATCTCATTGCTATTA  
CTCAAACAAGCATGAAACGTATGCTTGCATTCGTCATAGGTCAAATTGGATATGTAA  
TTATTGGAATAATTGTTGGAGACTCAAATGGTGGATATGCAAGCATGATAACTTATATGC  
TGTTCTATATCTCCATGAATCTAGGAACCTTTGCTTGCATTGTATCATTGGTCTACGTAC  
CGAACTGATAACATTCGAGATTATGCAGGATTATACACAAAAGATCCTTTTTTGGCTCT  
CTCTTTAGCCCTATGTCTTATCCTTAGGAGGTCTCCTCCACTAGCAGGTTTTTTTCGG  
AAAACCTAATTTATTCTGGTGTGGATGGCAGGCAGGCCTATATTTCTTGGTTTCAATAGG  
ACTCCTTACAAGCGTTGTTTCTATCTACTATTATCTAAAATAATCAAGTTATTAATGACT  
GGACGAAACCAAGAAATAACCCCTCACGTGCGAAATTATAGAAGATCCCCTTTAAGAT  
CAAACAATTCCATCGAATTGAGTATGATTGTATGTGTGATAGCATCTACTATAACCAGGAA  
TATCAATGAACCCGATTATTGAAATTGCTCAGGATACCCTTTTTATGCTTCTGCTTTACG  
AATATGATTTTTTCTGGGCATTTCTGATAGTCTCAAGTGTATTCTATTTTTGGCATTFTT  
CATTTCCGGAGTTTTAGCCCCGATTAGCAAAGGGCCAGAAAACTTTTCGAGTTATGAAT  
CGGGAATAGAACCGATGGGAGATGCTTGGTTACAATTTAGAATCCGTTATTATATGTTTG  
CTCTAGTTTTTGTGTTTTTGTATGTTGAAACAGTTTTTCTTTATCCATGGGCAATGAGTT  
TCGATGTATTGGGAGTGTCCGTATTTATAGAAGCTTTAATTTTCGTGCTTATCCTAGTTGT  
TGGTTCAATTTATGCATGGCGAAAAGGGGCATTGGAATGGTCTATGAATAATTTTCTTG  
GTTAACGCTAATTGTAGTTTTGCCAATATCCGCGGGTTCCCTTAATTTTCTTTCTTCCCTCAT  
CGAGGAAATAAGGTAATACGGTGGTATACTTTATGTATATGCATAATAGAACTCCTTCTA  
ACAACCTATGCATTCAGTTATCGTTTCCAATTGGATGATCCGTTAATGCAACTAACGGAG  
AATTATAAATGGATCAATTTTTTTGATTTTTACTGGAGATTGGGAATAGATGGAATTTCTA  
TAGGACCCATTTTACTGACAGGATTTATTACAACCTTAGCTACTTTAGCGGCTTGGCCCG  
TTACTCGAGATTCCCGACTATTCCATTTCCATAATGTTAGCAATGTATAGCGGTCAAATAG  
GACCATTTTCTTCTCAAGACCTTTTACTTTTTTTCATCATGTGGGAGTTAGAATTAATTC  
CCGTTTATCTACTTCTATCCATGTGGGGGGGAAAGAAACGTTTGTATTCAGCTACAAAA  
TTTTTTTTGTACACTGCCGGAGGTTCTGTTTTTTTTATTAATAGGAGTTCTGGGTATTGGTT  
TATACGGCTCCAATGAACCGACATTAATTTTTGAAACATCAGCGAATCAATCATATCCTG  
TAGCACTGGAATAATATTCTATATTGGATTTCTTATTGCTTTTGCTGTCAAATCACCGAT  
CATACCCCTACACACATGGTTACCAGACACCCATGGAGAGGCACATTATAGTACTTGTGTA  
TGCTTTTAGCCGGAATCTTATTAATAAATGGGAGCGTATGGGTTGATTCTGAATCAATATGG  
AATTATTACCCACGCCATTCTATATTTTCTCCCTGGTTGATGATAGTCGGCACAATTCA  
AATTATCTATGCAGCTTTAACATCTCCTGGCCAGCGTAATTTAAAAAAAAGAATAGCCTA  
TTCTTCTGTATCTCATATGGGTTTTATAATTATAGGAATTGGTTCTATAAGCGATACAGGG  
CTCAATGGGACTATTTTACAAATAATTTCTCACGGATTTATTGGCGCTGCGCTTTTTTTCT  
TGGCCGGAACGAGTTATGATAGAATACGACTTGTTTATCTCGACGAAATGGGCGGAATG  
GCTATCTCAATTCAAAAATATTCACGACTTTCAGTATCTTATCAATGGCTTCGCTTGCA  
TTACCGGGCATGAGCGGTTTTGTTGCCGAATTGATAGTTTTTTTTTGAATACTTACTAGC  
CAAAAATATCTTTAATGACAAAAATATTAATTACTTTTTGTAATGGCAATTGGAATGATAT  
TAACTCCTATTTATTCATTATCTATGTTACGCCAGATGTTCTATGGATACAAGCTTTTTAAT

GCCCCAAATTCTTATTTTTTTTGATTCTGGACCGCGAGAGTTATTTATTTTCGATTTCTATCC  
TTTTACCTGTAATAGGTATTGGTATTTATCCCGATTTTCGTTTTCTCATTATCAGTTGACAA  
GGCCGAAGCTATTCTATCAAATTTTTTTTATAGAATGATGCTCGAGCATGTACTTGT  
GAGTGCCTACTTATTTCTATCGGTATCTATGGCTTGATCACTAGCCGAAATATGGTTAG  
AGCCCTTATGTGTCTTGAACCTATACTAAATGCAGTTAATATTAATTTTCGTAACATTTCT  
GATTTTTTTGATAGCCGGCAATTAAGGAAATATTTTCTCAATTTTTGTTATAGCTATTG  
CCGCCGCTGAAGCAGCTATTGGACTGGCTATTGTTTCGTCATTTATCGTAACAGAAAA  
TCAACTCGTATCAATCAATCGAATTTGTTGAATAAGATGGAATATACATATCAATATTCAT  
GGATCATAACGTTTCATCCACTCCAGTTCCTATGTTAATAGGAGCAGGGCTTCTACTTT  
TTCCAACGGCAACTAAAATCTTCGCCGTATGTGGGCTTTTCCGAGTGTTTTATTATTA  
GTATAGTTTTGCTTTTTTTCAGCCCATTTCTTTATTCAGCAACTAAATAACAATTCTGTCTA  
TCAATATGTATGGTCTTGGACCATCAATAATGATTTTTCTTTAGAGTTCGGCTCCTTGGTT  
GATCCACTTACTTCTATTATGTCAATATTAATCACTAGTGTGGGGTTATTGTTCTTATTTA  
TAGTGACAATTATATGTCTCATGATCGGGGATATGTGAGATTTTTTGTATATGAGTTTT  
TTCAACACTTCAATGTTGGGATTAGTACTAGTCTAATTTAATACAAATTTATATTTTTT  
GGGAATTGGTTGGAATGTGTTCTTATCTATTAATAGGTTTTTGGTTCCACCCGACCCAGCG  
CGGCAAATGCTTGTCAAAAAGCGTTTGTAACTAATCGTGTTCGGGGATTTGGGTTATTA  
TTAGGAATTTTAGGTTTTTATTGGATAACAGGTAGTTTTGAATTTTCGAGATTTGTTTGAA  
ATATTCAATAAT--GAAGTTAATACTTTATTTGTTACTTTCTGTGCCTTCCTTTTATTTGCC  
GGCGCAGTTGCTAAATCTGCTCAATTTCCCCTTCATGTCTGGTTACCCGATGCCATGGA  
AGGGCTACCCCTATTTTCGGCTCTTATACATGCTGCTACCATGGTAGCAGCAGGGATTTT  
TCTTGTAGCTAGGCTTCTTCCTCTTTTCATAGTTATAACCTTACATATTAATATAATATCTT  
TGATAGGTATAATAACATTATTTTTTAGGAGCTACTTTAGCTCTTGCTCAAAAAGATATTA  
GAGAGGTTTAGCTTATTCTACAATGTCTCAATTGGGTTATATGATGTTAGCTTTAGGTATG  
GGTTCTTATCGAGCTGCTTTATTTCAATTTGATTACTCATGCTTATTTCGAAAGCATTGTTGT  
TTTTAGGATCTGGATCTATTATTCATTCGATGGAAGCTATTGTTGGATATTCTCCAGATA  
AAGTCAAAATATGGTTCTTATGGGTGGTTTAAGAAAACATGTACCAATTACAAAAACGT  
CTTTTTTATTAGGTACACTTTCTCTTTGTGGTATTCCACCTCTGGCTTGTTTTTGGTCCAA  
AGATGAAATTTAATGATAGTTGGTTGTATTCACCAATTTTTGCAATAATAGCTTATTCT  
ACGGCAGGATTAACCGCTTTTTTATATGTTTCGGATCTATTTACTTACTTTTGAAGGACAT  
TTAAACGTTTATTTTCAAATACAGTGGCAAAAAAAGCAGCTCATTCTATTCAATGTC  
TCTATGGGGTAAAGAA---GGACCTAAAATTATGAAAAAATTATTCGATTTATTAATGATG  
AAATTTTTAAACAGCACAAAAAAA---ACTTTCTCATATCCCTATGAGTCGGACAACACT  
ATGCTATTTCCCATGCTTGTATTGGTTTTATTTACGTTATTTCGTTGGGGCCGTAGGA---TT  
CTTCGGGTAGATATATTATCCAAATTATTAACCTCCGTCCATAAACCTTTTACATCAAAAC  
CGAACC---TCTGTGCGATTGG---GAATTTCTTATAAACGCAGTTTTTTTCAGTCAGTATAGCT  
TATTGCGGAATACTTATAGCGTCTTTTTTATATAAGCCTGTTTATTATCTTTACAAAATTT  
GAATTTATTTAATTCATTTGTTGTTTTGGGAGGGAAATAATAAATGTGATATATGATTGG  
TCATATAATCGCGTTACATAGATGTTTTTTATACAATCTCCTTAACTAAGTGTATAAGAA  
AATTAGCCGAATTAACCTATTTTTTTGATAGACGAGTAATCGATGGAATTACGAATGGAG  
TAGGTATTGTAAGTTTTTTTCGTAGGAGAATGTATCAAATATGTAGGGGGCGGT---CGAAT  
TTCTTCTTATCTTTTAGTGTATGTATCTTATGTTTTAATTTTTTTAGTGATTTTTTTTTATGGA  
TTTGCCTGGACCAATACATGACTTTCTTTTAATCTTTCTGGGATCGGGTCTTATACTAGG  
GGGTATAGGTGTGGTATTATTTACCAACCCCATTTATTCTGCCTTTTCGTTGGGACTGGT

TCTTGTTTGTATATCCTTATTCTATATCTTTTAAACTCTTATTTTGTAGCTGCTGCACAAT  
TTCTTATTTACGTGGGAGCTATAAATGTTTTAATTGTATTTGCTGTGATGTTTATGAATGG  
TTCAGAAATATTACAAAGATTTTAATCTTTGGACTGTGGGGGCTGGGATTACTTTGCCTGT  
TTGTACAAGTATTTTTGTTTTACTAATGATTACTATTACGGATACGTCATGGTACGGGATT  
ATTTGGACTACAAGATCAAACCAGATTATAGAGCAAGATTTGATAAGTAATAGTCAACA  
AATTGGAATTCATTTATCAACAGATTTTTTTCTTCCATTTGAATTCATTTGATAATTCCT  
TTAGTCGCTTTAATCGGCGCAATTGCCGTAGCGCGCCAGATGAATATAACCAGCTACAAG  
AAAAGACCTCATGGTAGTCAACATGGGTCCCCACCACCCATCAATGCATGGTGTCTTC  
GACTTATCATTACTCTAGATGGTGAAGATGTTATTGACTGTGAACCAATATTGGGTTATTT  
ACACCGAGGGATGGAAAAAATTGCGGAAAACCGAACAATTATACAATATTTGCCTTATG  
TAACACGTTGGGATTATTTAGCTACTATGTTACAGAAAGCAATAACGGTAAATGGACCG  
GAACAGCTGGGAAATATTCAAGTACCTAAAAGAGCCAGCTATATCAGAATAATTATGTT  
GGAGTTGAGTCGTATAGCTTCTCATCTGTTATGGCTTGGCCCTTTTATGGCGGATATTGG  
TGCGCAGACTCCCTTTTTCTATATTTTCAGAGAAAGAGAATTAGTATATGATCTATTTCGA  
AGCTGCCACCGGTATGAGAATGATGCATAATTATTTTAGGATCGGAGGGGTAGCGGCTG  
ATCTTCCTCATGGCTGGATAGATAAATGTTTGGATTTTTGCGATTATTTTTTAATAAGGGT  
TGCTGAATATCAACAACCTTATTACACGCAATCCTATTTTTTTTAGAACGAGTCGAGGGGG  
TAGGCATTATTGGTCGAGAGGAAGTAATAAATTGGGGTTTATCAGGACCAATGCTGCGA  
GCGTCCGGAATACGATGGGATCTTCGTAAAGTTGATCAGTATGAGTGTTATGACGAATT  
TGATTGGGAAGTACAGTGGCAAAAAGAAGGGGATTCAATTGGCTCGTTATCTAGTACGA  
ATTGGTGAATGACGGAATCCATAAAAATTATTCAACAGGCTCTTGAAGGAATTCCGGG  
GGGACCATATGAGAATTTAGAAATCCGATACTTTGATAGAGAAAGGAATCCAGAATGG  
AATGATTTTGAATATCGCTTTATTAGTAAAAAACCTTCTCTACATTTGAATTGCCGAAA  
CAAGAACTTTATGTACGAGTCGAAGCTCCAAAAGGAGAATTGGGGATTTTTCTGATAG  
GGGACCGGAGTGGTTTTCTTGGAGATGGAAAATTCGACCGCCGGGTTTTATTAATTG  
CAAATCTTCCTCAGTTAGTTAAAAGAATGAAATTGGCTGATATTATGACAATACTAGGT  
AGTATAGATATCATTATGGGAGAAGTTGATCGTATGTTTTCTATGGTAACTGGGTTTCATG  
AATTATGGTCAACAAACAGTACGGGCTGCAAGGTACATTGGTCAAAGTTTCATAATTAC  
TTTATCTCACGCAAATCGTTTACCCGTAACCTATTCAATATCCTTATGAAAAATTAATCACC  
GCGGAGCGTTTCCGTGGTTCGAATTCATTTTGAATTTGATAAATGTATTGCTTGTGAAGTA  
TGTGTTCCGGTATGTCCTATAGATCTACCCGTTGTTGATTGGAAATTGGAAACAGATATT  
CGAAAGAAACGATTACTTAATTACAGTATTGATTTGGAATCTGTATATTTTGTGGTAAT  
TGTGTTGAGTATTGTCCAACAAATTGTTTATCAATGACTGAAGAATATGAACTTTCTACT  
TATGATCGTCACGAATTAATTATAATCAAATTGCTTTAGGTCGTTTACCAATGTCAGTAA  
TTGACGATTATACAATTCGAACAATTTTTAATTTCG---ATAAAAATAAG-----  
-----ATGCAGGGTCGTTTGTCTGCTTGGTTAGTCAAACATGGGTTAATTCATAGATCTT  
TGGGTTTCGATTACCAAGGAATAGAACTTTACAAATAAAGCCCGAGGATTGGCATTTCG  
ATTGCCGTGATTTTATATGTATATGGTTACAATTATCTACGTTCCCAATGTGCTTATGATGT  
AGCACCAGGCGGGCTGTTAGCTAGTGTGTACCATCTTACTAGAATAGAGTATGGTATAG  
ATCAACCGGAAGAGGTATGCATAAAAGTATTTGCCCAAGGAGGAATCCTAGAATTCCA  
TCTGTTTTCTGGGTTTGGAAAAGTGCGGATTTTCAAGAAAGGGAATCTTATGATATGCT  
GGGAATCTTTTATGATAATCATCCACGCCTGAAACGTATCTTAATGCCTGAAAGTTGGAT  
AGGCTGGCCTTTACGTAAGGATTATATGCCCCAATTTTTATGAAATACAAGATGCTCA  
C-----

-----ATGAATATTATTGAATTTTCCTTTACTTG  
ATCGAACAACCCAA--TCAGTTATTTCAACTACATCAAGTGATCTTTCAAATTTGGTCAA  
GACTCTCCAGTTTGTGGCCGCTTCTCTATGGTACCAGTTGTTGCTTCATTGAATTTGCTT  
CATTAAATCGGCTCACGATTCGACTTTGATCGTTATGGACTGGTGCCACGATCTAGTCCG  
AGACAGGCGGACCTCATTTTAACAGCGGGTACTGTAACAATGAAAATGGCTCCTTCTTT  
AGTGAGATTATATGAGCAAATGCCTGAACCAAATATGTTATTGCTATGGGAGCATGTAC  
AATTACAGGAGGAATGTTTCAGTACCGATTCTTATAGTACTGTTTCGGGGGGTTGATAAGC  
TAATTCCTGTGGATGTCTATTTGCCGGGCTGTCCACCTAAACCGGAGGCAGTTATAGAT  
GCTATAACAAAACCTTCGTAAGAAAATCTCTCGAGAAATCTATGAAGATCGAATTCGATC  
TCAACAGGGAAATCGGTGTTTTACTACCAGTCAACAAGTTTCGTCTTGGACGTAGTACTC  
ATACCGGAAATTATGATCAAGGATTGCTCTATGAACCACCCTCGACCTCAGAGATCCCT  
CCTGAAATATTTTTCAAATATAAAAGT--GTATCTTCCCACGAATTAGTGAATATGCAAAC  
TAAAAAAACCTTTTCGTCGATAAAGAAAGAGATTACTCGATCCATTTCCCTATCGCTCA  
TCATATATATAATAACTCAGGCACCCATTTCAAATGCCTATCCCGTTTTTGCACAGCAGG  
GTTATGAAAATCCACGAGAAGCAACGGGCCGTATTGTATGTGCCAATTGCCATTTAGCT  
AATAAACCCGTGGATATCGAGGTTCCACAAGCGGTACTTCCGGATACTGTATTTGAAGC  
AGTTGTTTCGAATTCCTATGATCTGCAAGTGAAACAAGTTCTTGCTAATGGTAAAAAAG  
GAGCTTTAAATGTGGGGGCTGTTCTTATTTTACCCGAGGGATTGAACTAGCCCCGCC  
GATCGTATTTTCGCCCAGATTAAAGAAAAGATAGGAAATCTGTCTTTTCAAAGTTACCG  
CCCTACTAAAAAAATATTCTTGTGATAGGTCTGTTCCTGGTCAGAAATATAGTGAAAT  
CACCTTTCTATTCTTTCCCGGACCTGCTACTAATAAAGATGTTCACTTCTTAAATA  
TCCCATATACGTAGGCGGGAACAGAGGAAGGGGTCAGATTTATCCCGACGGGAGCAAG  
AGTAACAATAATGTTTATAATGCTACAGCAGCGGGTATAATAAGCAAATATACGAAA  
AGAAAAGGGGGGATACGAAATAACCATAGTGGAGGCATCGGACGGGCGTCAAGTGGT  
TGATATTATCCCTCCAGGGCCGGAACCTTCTTGTCTGAGGGCGAATCCATCAAACCTTG  
ATCAACCATTAACGAGTAATCCTAATGTGGGCGGATTTGGTCAGGGGGATGCAGAAGT  
AGTACTTCAAGATCCATTACGTGTCCAAGGCCTTTTGCTCTTCTTGGCATCTGTTATTT  
GGCACAAATCTTTTTGGTTCTTAAAAAGAAACAGTTTGAGAAGGTTTCAGTTGGCCGAA  
ATGAATTTTCATGAGTAAAATCTATGATTGGTTTCGAAGAACGTCTTGAGATTCAGGCAAT  
TGCAGATGATATAACTAGTAAATATGTTCCCTCCTCACGTCAACATATTTTATTGTCTAGGA  
GGAATTACGCTTACTTGTTTTTTAGTACAAGTAGCTACGGGGTTTGGCTATGACTTTTTATT  
ATCGTCCGACCGTTACAGAGGCTTTTGTCTTCTGTTCAATATATAATGACTGAAGCGAAC  
TTTGGTTGGTTAATCCGATCAGTTCATCGATGGTCGGCAAGTATGATGGTCCTAATGATG  
ATTCTACACGTATTTTCGTGTATATCTCACTGGGGGTTTTAAAAAACCCCGTGAATTGACG  
TGGGTTACAGGTGTGGTTCTGGGTGTATTGACCGCATCTTTTGGTGTAACCTGGTTATTCC  
TTACCTTGGGACCAAATTGGTTATTGGGCAGTAAAAATTGTAACGGGCGTGCCTGATGC  
TATTCCTGTAATAGGATCGCCCCTGGTAGAGTTATTACGCGGAAGTGCTAGTGTGGGAC  
AATCTACTTTGACCCGTTTTTATAGTTTACACACTTTTGTATTACCTCTTCTTACTGCCGT  
ATTTATGTTAATGCACTTCCTAATGATACGTAAACAAGGTATTTTCGGGCCCTTTAATGGG  
AGTGACAAAAAACCTGACTTGAACGATCCTGTGTTAAGAGCTAAATTTGGCTAAAGGG  
ATGGGTCATAATTATTATGGAGAGCCTGCATGGCCAAATGATCTTTTATATATTTTTCCAG  
TAGTAATTTTAGGTAATGTCATGTAACGTAGGCTTAGCTGTTTTAGAACCATCAATGA  
TTGGTGAACCCGCGGATCCGTTTGCAACTCCTTTGGAAATATTGCCTGAATGGTATTTT  
TTCCCGTATTTCAAATACTTCGTACAGTGCCAAATAAGTTATTGGGTGTTCTTTTAAATG



GTTTCAGTACCCGCGGGATTATTAACAGTACCTTTTTTTGGAGAATGTTAATAAAATTCCAA  
AATCCATTTTCGTCGTCCCGTAGCAACAACCGTTTTTTTTGATTGGTACTGTAGTAGCTCTT  
TGGTTGGGTATTGGAGCAACACTACCTATTGATAAGTCCCTAACTTTAGGTCTTTTTATG  
ATTGAAGTTTTTTCTATTTGGAATTGTCTTGGGTCTAATTCCTATTACTTTGGCTGGATTAT  
TTGTAAGTGCATATTTACAATACAGACGTGGTGATCAGTTGGAAGTTATGCCTACTATAA  
CTAGTTATTTTCGGTTTTCTACTAGCAGCTTTGACTATAACCTCAGCTCTATTTATCGGACT  
GAGCAAGATACGACTTATTATGGATATAGTAAATCTCGCTTGGGCTGCTTTAATGGTAGT  
CTTACATTTTCCCTTTCCTACTCGTAGTATGGGGAAGAAGTGGACTCATGATTATTCGTTT  
GCCGGAACCAGAAGTTAAAATTTTGGTCGATAGGGATCCCGTAAAACTTCTTTTCGAG  
GAATGGGCCAGACCCGGTCATTTCTCAAGAACAATAGCTAAGGGGCTGATACTACCA  
CTTGATCTGGAACCTACACGCTGATGCTCACGATTTTCGATAGCCATACTAGTGATTTG  
GAGGAGATCTCTCGAAAAGTATTTAGTGCCCATTTTCGGTCAACTCTCCATCATCTTTCTT  
TGGCTGAGTGGGATGTATTTCCACGGCGCTCGTTTTTCCAATTATGAAGCATGGCTAAG  
TGATCCTACTCACATTTGGACCTAGTGCCAGGTGGTTTGGCCAATAGTGGGTCAAGAAA  
TATTGAATGGTGATGTAGGCGGGGGTTTTCCGAGGAATACAAATAACCTCTGGGTTTTTT  
CAGCTTTGGCGAGCATCTGGAATAACTAATGAATTACAACCTCTATTGTAAGTCAATTGG  
CGCATTGGTCTTTGCTGCCTTAATGCTTTTTTGCGGGTTGGTTCCATTATCACAAAGCTGC  
TCCGAAATTGGCTTGGTTCCAAGATGTAGAATCCATGTTGAATCACCATTTAGCAGGGC  
TATTAGGCCTTGGGTCTCTTGGTTGGGCGGGGCATCAAGTACACGTATCGTTACCAATT  
AACCAATTTCTAAACGCTGGAGTAGATCCTAAAGAGATTCCACTTCCCTCATGAATTTAT  
CTTGAATCGGGATCTTTTTGGCTCAACTTTATCCCAGTTTTTGTGAGGGAGCGACCCCAT  
TTTTCACCTTGAATTGGTCAAAATATGCGGAATTTCTGACTTTTTCGTGGAGGATTAGATC  
CAGTAAGTGGAGGTCTATGGCTGACCGATATTGCACACCATCATTAGCTATTGCAATTC  
TTTTCTGGTAGCGGGTCACATGTATAGGACCAATTGGGGGATTGGTTCATGGTATAAAA  
GATATTTTAGAGGCTCATAAAGGCCCATTTACCGGCCAGGGCCATAAAGGCCTATATGA  
GATCCTAACAAACATCATGGCATGCTCAATTATCTCTTAACCTAGCTATGTTAGGATCTTTA  
ACCATTATTGTAGCTCACCATATGTATGCGATGCCCCCTTATCCATATCTAGCTACTGACT  
ATGGTACACAACCTTTCATTGTTACACACCATATGTGGATTGGTGGATTCTCATAGTTG  
GTGCTGCTGCGCATGCAGCCATTTTTATGGTAAGAGACTATGATCCAACACTACTCGATAC  
AACGATCTATTAGATCGTGTCCCTTAGGCATCGCGATGCGATCATATCACATCTCAACTGG  
GTATGTATATTTTTAGGCTTTCACAGTTTTGGTTTTGTATATTCATAATGATACCATGAGCG  
CGTTAGGGCGTCCCAAGATATGTTTTCAGATACCGCTATAACAATTACAGCCCGTCTTTG  
CTCAATGGATACAAAACACCCACGCTTTAGCACCCGGCGCAACGGCCCCTGGTGCAAC  
AACAAGCACAGTTTGACTTGGGGTGGTGGTGATTTAGTGGCAGTGGGCGGCAAAGT  
TGCTTTGTTACCTATTCCATTAGGAACCGCAGATTTTTTGGTACATCACATTCATGCATTT  
ACAATTCATGTGACGGTATTAATACTCCTGAAAGGCGTTCTATTTGCTCGTAGTTTCGCGT  
TTGATACCAGATAAAGCAAATCTTGGTTTTTCGTTTTCTTGTGATGGGCCCGGAAGGGG  
GGGGACATGCCAAGTATCCGCTTGGGATCATGTCTTCTTAGGGCTATTCTGGATGTATAA  
TGCAATTTTCGGTAGTAATATTCATTTAGTTGGAAAATGCAATCAGATGTTTGGGGTAG  
TATAAGTGATCAAGGAGTGGTAACCTCATATCACGGGCGGAACTTTGCGCAGAGTTCC  
ATTACTATTAATGGGTGGCTCCGCGATTTCTTATGGGCACAGGCATCCCAAGTAATTCAG  
TCGTACGGTTCTTCATTATCTGCATATGGCCTTTTTTTCTAGGGCGCTCATTTTGTATGGG  
CTTTTAGTTTAAATGTTTCTATTCAGCGGACGTGGTTATTGGCAAGAAGTTATTGAATCCA  
TTGTTTGGGCTCATAATAAATAAAAGTTGCTCCTGCTACTCAGCCTAGAGCCTTGAGTA

TTGTCCAAGGACGTGCTGTAGGAGTAACCCATTACCTTCTGGGTGGAATTGCCACAAC  
ATGGGCGTTCCTTCTTAGCAAGAATTATTGCAGTAGGAATGGCATTAAAGATTTCCAAGGT  
TTAGCCAAGGCTTAGCTCAGGACCCCACTACTCGTCGTATTTGGTTTGGTATTGCTACC  
GCACATGACTTCGAGAGTCATGATGATATTACTGAGGAACGTCTTTATCAGAATATTTTT  
GCTTCTCATTTCGGGCAATTAGCAATAATTTTTCTGTGGACTTCCGGAAATCTGTTTCAT  
GTAGCTTGGCAAGGAAATTTTGAGGCATGGGTACAGGATCCTTTACATGTAAGACCTAT  
TGCTCACGCAATTTGGGATCCTCATTTTGGTCAACCAGCTATAGAGGCTTTTACTCGTG  
GAGGTGCTCTTGGCCCGGTGAATATCGCTTATTCTGGTGTTTATCAGTGGTGGTATAACGA  
TTGGGTTACGTACTAATGAGGATCTTTATACTGGAGCTCTTTTTCTATTAATTTCTTTCTGC  
CATATCCTTAATAGCGGGTTGGTTACACCTACAACCCAAATGGAAACCGAGCGTTTCGT  
GGTTTAAAATGCCGAATCTCGTCTCAACCATCATTTGTCAGGACTTTTCGGAGTAAGT  
TCCTTGGCTTGGACAGGACATTTAGTTCATGTCGCTATTCCTGGATCCAGGGGAGAAAA  
CGTTCGGTGGAAATAATTTCTTAGATGTATTGCCACATCCCCAAGGATTAGGCCCTCTTTT  
TACAGGTCAGTGAATCTTTATGCTCAAACCCGGATTCAAGTAGTCATTTATTTGGTAC  
CTCCAAGGGGCAGGAAGTCTATTTAACCCTTCTCGGAGGATTCCACCCACAAACG  
CAAAGTTTATGGCTTACTGATATGGCCATCATCATTTAGCTATTGCATTTATTTTTCTGA  
TTGCTGGTCATATGTATAGAACGAATTTTCGGGATTGGGCACAGTATAAAAAATCTTTTAG  
AAGCGCATATTCCTCCAGGGGGACGATTAGGGCGTGGGCATAAGGGTCTTTATGACAC  
AATCAACAATTCGATTCATTTTCAATTAGGCCTTGCTCTAGCCTCTTTGGGGGTTATTAC  
GTCTTTGGTCGCTCAACACATGTATTCTTTACCTGCTTATGCGTTCATAGCGCAAGACTT  
TACTACTCAAGCTGCGTTATATACTCATCACCATAACATCGCAGGATTCATTATGACAGG  
GGCTTTTGCTCACGGAGCTATATTTTTTATTAGAGATTACAACCCGGAACAAAATGAGG  
ATAATGTATTGGCAAGAATGTTAGACCATAAAGAAGCTATCATATCCCATTTAAGTTGGG  
CCAGTCTCTTTTTAGGGTTCCATACTTTGGGCCTTTATGTTTATAATGATGTCATGCTTGC  
TTTTGGTACTCCAGAGAAACAAATCTTGATCGAACCTATATTTGCTCAATGGATAACAATC  
TGCTCATGGTAAAACCTGCATATGGGTTCGATGTACTTTTATCTTCAACAAACGGTCTCTGC  
GTTCAATGCGGGTTCGAAGCATATGGTTACCCGGTTGGTTAAATGCTGTTAATGAG-----A  
ATAGTAATTCACTATTCTTAACAATAGGACCTGGAGACTTCTTGGTTCATCATGCTATTG  
CTCTAGGTTTACATACAACTACATTGATCTTAGTAAAAGGTGCTTTAGATGCACGTGGTT  
CCAAGTTAATGCCAGATAAAAAAGATTTTGGTTATAGTTTTCCCTGCGATGGTCCGGGA  
CGAGGCGGTACTTGTGATATTTTCGGCTTGGGACGCATTTTATTTGGCAGTTTTCTGGATG  
TTAAATACCATTGGATGGGTTACTTTTTATTGGCACTGGAAGCACATCACATTATGGCAG  
GGTAACGTTTACAGTTTAAATGAGTCTTCCACTTATTTGATGGGATGGTTAAGAGATTAT  
CTATGGTTAAACTCTTCCCAACTTATTAATGGATATAACCCTTTTGGAAATGAATAGTTTAT  
CGGTCTGGGCGTGGATGTTCTTATTTGGACATCTTGTGTTGGGCTACTGGATTTATGTTCT  
TAATTTCTTGGCGGGGTTATTGGCAGGAATTGATTGAAACTTTAGCTTGGGCTCATGAA  
CGCACACCTTTAGCTAATTTGATTTCGATGGAGAGATAAACCGGTCGCTCTTTCTATTGTA  
CAAGCGAGATTAGTTGGATTAGCCCACTTTTCTGTGGTTATATATTTACTTATGCAGCTT  
TCTTGATTGCCTCTACATCGGGCAAGTTTGGTATGTCACATTCAGTAAAGATTTATGATA  
CGTGTATAGGGTGTACTCAATGTGTGCGAGCTTGCCCAACCGATGTATTAGAAATGATA  
CCTTGGGACGGATGTAAAGCTAAGCAAATCGCTTCTGCTCCAAGAACAGAGGACTGTG  
TCGGTTGTAAGAGATGTGAATCCGCCTGTCCAACGGATTTCTTGAGTGTTTCGCGTTTAT  
TTATGGCATGAAACAACCTCGCAGTATGGGTCTAGCTTATATGATAACTCTCAACTTTCCC  
TCCATTTTTGTGCCTTTAGTGGGCTTAGTATTTCCGGCAATTGCAATGGTTTCTTTATCTC

TTCATGTTCAAAAAACAAGATTTTTATGCGAGATCTAAAAACATATCTCTCTGTGGCA  
CCGGTAGTAAGTACTCTATGGTTCGGATCTTTAGCAGGTTTATTGATAGAGATCAATCGT  
TTTTTCCGGATGCGTTGATATCCCCTTTTTT-----ATGACTGCAATTTTAGAGAGACGC  
GAAAGCGAAAGCCTATGGGGTCGTTTTGTAATTGGATAACCAGCACCGAAAACCGTC  
TTTACATTGGATGGTTTGGTGTTTTATGATGATCCCTACTTTATTGACCGCAACTTCTGTATT  
TATTATTGCTTTTCATTGCTGCACCTCCGGTAGATATTGATGGTATTCGTGAACCTGTTTCT  
GGATCTTTACTTTACGGAAACAATATTATTTCCGGTGCCATTATCCCTACTTCTGCAGCTA  
TAGGTTTGCACCTTTACCCAATATGGGAAGCGGCTTCTGTTGATGAATGGTTATACAAC  
GGTGGCCCTTATGAGCTAATTGTTCTACACTTCTTACTTGGTGTAGCTTGTATATGGGT  
CGTGAGTGGGAACCTAGTTTCCGTCTGGGTATGCGCCCTTGGATTGCTGTTGCATATTC  
AGCTCCTGTTGCAGCTGCTACTGCTGTTTTCTTGATCTACCCAATTGGTCAAGGAAGCT  
TTTCTGACGGTATGCCTCTAGGAATCTCTGGTACTTTCAACTTCATGATTGTATTCCAAG  
CTGAGCACAACATCCTTATGCACCCATTTACATGCTAGGTGTGGCTGGTGTATTTGGC  
GGTCCCTATTCAGTGCTATGCATGGTTCTTTGGTAACCTCTAGTTTGATCAGGGAAACC  
ACAGAAAATGAATCTGCTAATGAAGGTTACAGATTCCGGTCAAGAGGAAGAAACCTATA  
ATATCGTAGCCGCTCATGGTTATTTTGGCCGATTGATCTTCCAATATGCTAGTTTCAACAA  
TTCTCGTTCTTTACACTTCTTCTTAGCTGCTTGGCCTGTAGTAGGTATCTGGTTCACCGC  
TTTAGGTATCAGCACTATGGCTTTCAACTTAAATGGTTTTAATTTCAATCAATCTGTAGTT  
GATAGTCAAGGTCGTGTAATTAATACTTGGGCTGATATTATCAACCGCGCTAATCTTGGT  
ATGGAAGTTATGCATGAACGTAATGCTCATAATTTCCCTCTAGACCTAGCTGCTGTTGAA  
GTTCCGCTATCAATGGAATGGGTTTGCCTTGGTATCGTGTTTCATACCGTCGTATTGAAT  
GATCCCGGTCGTTTGATTTCTGTCCATATAATGCATACAGCTCTGGTTGCTGGTTGGGCC  
GGTTCGATGGCTCTATACGAATTAGCCGTTTTTGATCCCTCTGATCCTGTTCTTGATCCA  
ATGTGGAGACAGGGTATGTTTCGTTATAACCCTTCATGACTCGTTTAGGAATAACGAATTC  
GTGGGGCGGTTGGAGTATCACA---GGGGGACTGTAAGCAATCCGGGTATTTGGAGTT  
ACGAAGGTGTGGCCGGGGCACATATTGTGTTTTCTGGCTTGTGTTTTTTGGCAGCTATC  
TGGCATTGGGTGTATTGGGATCTAGCAATATTTACTGATGAACGTACAGGAAAACCCCTC  
TTTTGGATTTGCCTAAGATCTTTGGAATTCATTTATTTCTCTCAGGGGTGGCTTGCTTTGG  
TTTTGGTGCATTTTCATGTAACAGGATTGTATGGTCCTGGAATATGGGTGTCCGATCCTTA  
TGGACTAACCGGAAGGGTACAGGCCGTAAATCCAGCGTGGGGTGTGGAGGGTTTTGAT  
CCTTTTGTTCGGGAGGAATAGCTTCTCATCATATTGCAGCAGGGACCTTAGGCATATTG  
GCAGGTCTATTTTCATCTTAGTGTTCGTCCACCCCAACGCCTATACAAAGGATTACGTATG  
GAAAATATTGAAACCGTCCTTTCCAGTAGTATTGCTGCTGTCTTTTTTGCAGCTTTTGT  
GTTGCTGGAACCTATGTGGTATGGTTCAGCAACTACCCCGATTGAATTGTTTGGTCCCAC  
GCGCTATCAATGGGATCAAGGATACTTCCAACAAGAAATATATAGAAGAATTGGTGCTG  
GCTTAGCCGAAAATCAAAGTTTATCCGAAGCTTGGTCGAAAATTCCTGAAAAACTGGC  
TTTTTATGATTACATCGGCAATAATCCGGCAAAGGGGGATTATTCAGAGCGGGCTCAA  
TGGACAGCGGGGATGGAATAGCTGTTGGGTGGTTAGGACATCCTATCTTTAGAGATAAA  
GAGGGGCATGAACTTTTTGTACGTCGTATGCCTACGTTTTTTGAAACATTTCCAGTTGTT  
TTGGTTCGATGGGGACGGAATTGTTAGAGCCGATGTTCCTTTTAGAAGGGCCGAATCAA  
AATATAGTGTGCAACAAGTAGGTGTAACGTTGAGTTCTATGGCGGCGAACTGAATGG  
GGTCAGTTATAGCGACCCTGCTACTGTGAAAAAATACGCTAGACGTGCTCAATTGGGTG  
AAATTTTTGAATTAGATCGTACTTTGAAATCTGATGGTGTTTTTTCGTAGCAGTCCAA  
GGGGTTGGTTTACCTTTGGGCATGCTTCGTTTGCTTTGCTTCTTCTTCGGACACATTT

GGCATGGTGCTAGAACCTTGTTTAGAGATGTTTTTGCTGGTATTGATCCGGATTTAGATG  
CTCAAGTGGAATTTGGGGCATTCCAAAACTTGGAGATCCAAC TACAAAAAGACAGGT  
AGTTATGAAAACCTTATATTCCTGAGGAGGTTCTACCCCGTGGAAACGCTCTTTAATG  
GAACTTTAGCTTTAGCTGGTCGTGACCAAGAAACCACCGGTTTCGCTTGGTGGGCCG  
GAATGCCCGACTTATTAATTTATCCGGTAAATTACTGGGGGCCATGTCGCCCATGCCG  
ATTAATTGTATTCTGGGCCGGAGCAATGAACCTATTTGAAGTGGCTCATTTTCGTACCAG  
AGAAGCCTATGTATGAACAAGGATTAATTTTACTTCCCCACCTAGCTACTCTAGGTTGG  
GGGTAGGTCCGGGTGGGAAGTTCTAGACACCTTTCATACTTTGTGTCTGGAGTAC  
TTCACTTAATTTCTCTGCAGTATTGGGCTTTGGCGGTATTTATCATGCACTTCTGGGAC  
CCGAGACTCTTGAAGAATCTTTTCCATTTTTCGGTTATGTATGGAAAGATAGAAATAAA  
ATGACTACAATTTGGGTATTCACTTAATCTTGTTAGGCATAGGCGCTTTTCTTCTAGTAT  
TCAAGGCTCTTTATTTGGGGGTGTATATGATACTTGGGCTCCCGGTGGGGGAGATGTA  
CGAAAATTACCAACCTAACCTTAGCCCAAGTATTGTATTTGGTTATTTACTAAAATCC  
CCTTTTGGCGGAGAAGGGTGGATCGTTAGTGTGGACGATTTGGAAGATATAATCGGAG  
GGCATGTATGGTTAGGTTCCATTTGTATACTTGGTGGAATCTGGCATATCTTAACCAAC  
CTTTTGCATGGGCTCGTCGTGCACTTGTATGGTCTGGAGAGGCTTACTTGTCTTATAGTT  
TAGGCGCTTTAGCTGTTTTTGGTTTTATTGCTTGTGCTTTGTTTGGTTCAATAATACCGC  
CTATCCGAGTGAGTTTTACGGGCCCACTGGACCCGAAGCTTCTCAAGCTCAAGCATTTA  
CTTTTTGGTTAGAGACCAACGTCTTGGGGCTAACGTAGGATCCGCTCAAGGACCTAC  
CGTTTTAGGTAAATATCTAATGCGCTCTCCGACTGGGGAAGTTATTTTTGGAGGAGAAA  
CTATGCGTTTTCTGGGATCTGCGTGCCCCCTGGTTAGAACCTCTAAGGGGTCTAATGGT  
TTGGACTTGAGTAGGCTGAAAAAGACATACAGCCTTGGCAAGAGCGGCGTTCTGCG  
GAATATATGACTCATGCTCCTTTAGGTTCTTTAAATTCGTTGGGTGGCGTAGCTACCGAG  
ATCAATGCAGTCAATTATGTCTCTCCTAGAAGTTGGTTAGCTACTTCTCATTTTGTTCTA  
GGATTCTTCCTATTTCGTAGGTCATTTATGGCATGCAGGAAGGGCTCGTGCAGCTGCTGC  
CGGATTTGAAAAAGGAATTGATCGTGATTTTGAACCTGTTCTGTCCATGACTCCTCTTA  
ACATGACTATAGCCCTTGGTAAATTTACCAAGACGAAAATGATTTATTTGATATTATGG  
ATGACTGGTTACGGAGGGACCGTTTCGTTTTTGTAGGTTGGTCTGGCCTATTGCTCTTT  
CCTTGTGCCTATTTTCGCTTTAGGGGGTTGGTTCACAGGTACAACCTTTGTAACCTCATG  
GTATACCCATGGATTAGCAAGTTCCTATTTGGAAGGTTGTAACCTCTTAACCGCCGCAG  
TTTCCACCCCTGCTAACAGTTTAGCACACTCTTTGTTGTTACTATGGGGTCTGAAGCA  
CAAGGAGATTTTACTCGTTGGTGTCAATTGGGCGGTCTGTGGACCTTTGTGCTCTGCA  
CGGCGCTTTCGGACTAATAGGTTTCATGTTACGTCAATTTGAACCTTGCTCGATCTGTTCA  
ATTACGACCTTATAATGCAATTGCATTCTCCGGTCCAATTGCTGTTTTTGTCTGTATTCT  
CTGATTTATCCGCTAGGTCAGTCTGGTTGGTCTTTTTCGCGCCAGTTTTGGTGTAGCAGCT  
ATATTTTCGATTCATCCTCTTTTTCCAAGGGTTTCATAATTGGACATTGAACCCATTTATA  
TGATGGGAGTTGCTGGGGTGTGGGCGCTGCTCTGTTATGCGCTATTATGGTGCTACC  
GTAGAAAATACTTTATTTGAAGATGGTGATGGTGCAAATACATTCCGTGCTTTTAAACCA  
ACTCAAGCTGAAGAACTTATTCATGGTCAACCGCTAACCGCTTTTGGTCCCAAATCTT  
TGGGGTTGCTTTTTCCAATAAACGTTGGTTACATTTCTTTATGTTATTTGTACCAGTAAC  
CGTTTTATGGATGAGTGCTCTTGGAGTAGTCGGTCTGGCCCTGAACCTACGTGCCTATG  
ACTTCGTTTCTCAGGAAATCCGCGCAGCGGAAGATCCTGAATTTGAGACTTTCTACACC  
AAAAATATCTCTTAAACGAAGGTATTTCGTGCTTGGATGGCGGCTCAAGATCAGCCTCA  
TGAAAACCTTATATTCCTGAGGAGGTTCTACCCCGTGGAAACGCTCTTATGTCTGGAA

GCACAGGAGAACGTTCTTTTGCTGATATTATTACCAGTATCCGATACTGGGTCATTCATA  
GCATTACTATAACCTTCCCTATTTATTGCGGGTTGGTTATTCGTCAGCACTGGTTTAGCTTA  
CGATGTATTTGGAAGCCCCCGTCCAAATGAGTATTTTACAGAAAGCCGACAAGGAATTC  
CCTTAATAACTGGCCGTTTTGATCCTTTGGAACAACCTCGATGAATTTAGCAGATCTTTTA  
TGA CTATAGATAGAACCTATCCGATTTTTACAGTACGATGGTTAGCGGTTACG GACTAG  
CTGTACCTACCGTTTTTTTTTTAGGGTCAATATCCGCAATGCAGTTCATCCAACGAATGG  
CTACACAAACCGTTGAGGGTAGTTCTAGATCTGGCCGCCAAAACGAACTAGGGCCGG  
GGGTTTATTGAAACCATTGAATTCAGAATATGGTAAGGTAGCTCCTGGTTGGGGA ACTA  
CTCCTTTGATGGGTCTCGCAATGGCTCTATTTGCAGTATTTCTATCTATTATTTGGAGAT  
TTATAATTCGTCCATTTTACTGGATGGAATTTCAATGAATATGCTTACTCTCAA ACTATTT  
GTTTACACGGTAGTGATATTCTTTGTTTCTCTTTATCTTCGGATTCTGTCTAATGATC  
CAGGACGTAATCCTGGACGTGAAGACATGGCCGATACTACTGGAAGGATTCCTCTTTG  
GATAATAGGTACTGTAACCGGTATTGTTGTAATTGGTTTACTTGGTATTTTCTTTTATGGT  
TCATATCCGGATTAGGTTTCATCTCTGATGCTTAATATTTTTAGTTTGATCTGTATATACCT  
TAATCCTGCTCTTTATTCCAGTAGTTTTTTTCGTCGCCAAATTGCCCGAAGCTTACGCTTT  
TTTGAATCCAATTGTAGATGTTATGCCAGTAATACCCCTGTCTTTTTTCTCTTAGCCTTT  
GTTTGGCAAGCTGCTGTAAGTTTTCGAATGACACAATCAAACCCGAACGAACAAAGTG  
TTGAATTGAATCGTACCAGTCTCTACTGGGGGTTATTACTCATTTTTG TACTTGCTGTTTT  
ATTTTCCAATTATTTCTTTAATATGGAAGTAAATATTCTCGCATTTATTGCTACTGCACTGT  
TTATTCTAGTTCCTACCGCTTTTTTACTTATAATATACGTAAAAACAGTCAGCCAAGGTG  
ATATGGAAACAGCAACCCTAGTTGCCATCTTTTTATCTGGTTTACTTGTAAGTTTTACTG  
GGTACGCCTTATATACTGCGTTTGGGCAACCCTCTCAACA ACTAAGAGATCCGTTTCGAG  
GAACACGGGGACATGGAAGCATTGGTTTATACATTCCTTTTAGTCTCAACTCTAGGAAT  
AATTTTTTTTCGCTATCTTTTTTCGCGAACCGCCTAAAGTTCCAACCAAAAAG-----ATGA  
CTATTGCTTTCCAGCTGGCTGTTTTTGCATTAATTGCTACTTCATTAATCTTACTGATTAG  
TG TACCTGTTGATTTGCTTCTCCTGAGGGTTGGTCGGGTAACAAAAATGTTGTATTTTC  
CGGTACATCATTATGGATTGGATTAGTCTTTCTGGTGGGTATCCTTAATTCTCTCATCTCT-  
-----ATGTCACCACAAACAGAGACTAAAGCAAGTGTTGGATTCAAAGCTGGT  
GTAAAGATTATAAATTGACTTATTATACTCCGGACTATGAAACCAAAGATACTGATATAT  
TGGCAGCATTTTCGAGTA ACTCCTCAACCTGGAGTTCCGCCTGAGGAAGCAGGGGCAG  
CGGTAGCTGCGGAATCTTCTACTGGTACATGGACA ACTGTATGGACTGACGGGCTTACC  
AGTCTTGATCGTTACAAAGGGCGATGCTACCACATCGAACCTGTTCTG GAGAAGAAA  
GTCAATTTATTGCTTATGTAGCTTACCCCTTAGACCTTTTTGAAGAGGGTTCCGGTACTA  
ACATGTTTACTTCGATTGTAGGTAATGTGTTTGGGTTCAAGGCCTTGCGCGCTCTACGT  
CTGGAGGATTTACGAATCCCTACTGCTTATGTTAAA ACTTTCCAAGGCCCGCCTCACGG  
GATCCAAGTTGAAAGAGATAAATTGAACAAGTATGGCCGCCCCCTATTGGGATGTACTA  
TTAAACCTAAATTGGGGTTATCCGCTAAGAATTACGGTAGAGCAGTTTATGAATGTCTCC  
GCGGTGGACTTGATTTTACCAAAGATGATGAGAATGTTAATTCCAACCATTTATGCGTT  
GGAGAGACCGTTTCTTATTTTGTGCCGAAGCAATTTATAAATCGCAGGCTGAAACAGGT  
GAAATCAAAGGGCATTATTTGAATGCTACTGCAGGTACATGCGAAGATATGATGAAAAG  
AGCCG TATTTGCCAGAGAATTGGGAGTTCCTATCGTAATGCATGATTACTTAACGGGGG  
GAT TCACTGCAAATACTACCTTGGCTCATTATTGCCGAGACAACGGTCTACTTCTTCACA  
TCCACCGTGCAATGCATGCTGTTATTGATAGACAGAAGAATCATGGTATGCACTTTTCGT  
GTACTAGCTAAAGCATTACGTATGTCTGGTGGAGATCATATACACGCTGGTACCGTAGTA

GGTAAGCTTGAGGGGGAAAGAGAAATAACTTTAGGCTTTGTTGATTTACTACGTGATGA  
TTTTATTGAAAAGGATCGAAGCCGCGGTATTTATTTCACTCAAGATTGGGTTTCTTTACC  
GGGTGTTTTACCGGTGGCTTCCGGCGGTATTCACGTTTGGCATATGCCTGCTCTGACCG  
AGATCTTTGGAGATGATTCTGTACTACAATTCGGTGGAGGAACTTTAGGACACCCTTGG  
GGAAATGCACCTGGTGCCGTAGCTAATCGAGTAGCTCTAGAAGCATGTGTACAAGCCC  
GTAATGAGGGACGTGATCTCGCTCGTGAGGGTAATGACATTATTCGTGAGGCTTGTA  
TGGAGTCCTGAACTAGCTGCTGCTTGTGAAGTATGGAAAGAGATCAAATTTGAATTCG  
AAGCAATGGATACTTTG-----ATGGCGATACATTTATACAAAACCTTCTACCCCGAGCACA  
CGCAATGGAGCCGTAGACAGTCAAGTGAAATCCAATCCACGAAATAATTTGATCTATGG  
ACAGCATCGTTGTAGTAAAGGTCGTAATGCCAGAGGAATCATTACCGCAGGGCATAGA  
GGGGGAGGTCATAAGCGTCTATACCGTAAAATCGATTTTCGACGGAATGAAAAAGACA  
TATATGGTAGAATCGTAACTATAGAATACGACCCTAATCGAAATGCATACATTTGTCTCAT  
ACACTATGGGGATGGTGAGAAAAGATATATTTTACATCCCAGAGGGGGCTATAATTGGAG  
ATACCATTGTTTCGGGTACAGAAGTTCCTATAAAAATGGGAAATGCCCTACCTTTGACC  
GATATGCCCTTAGGCACGGCCATACATAACATAGAAATCACACTTGGAAAGGGTGGAC  
AATTAGCTAGAGCAGCAGGTGCTGTAGCGAAACTGATTGCAAAAAGAGGGGAAATCGG  
CCACATTAATAATTACCTTCTGGGGAGGTCCGTTTGATATCCAAAACCTGCTCAGCGACA  
GTCGGACAAGTGGGGAATGTTGGGGTGAACCAGAAAAGTTTGGGTAAAGCCGGATCG  
AAATGTTGGCTAGGTAAGCGTCCTGTAGTAAGAGGAGTAGTTATGAACCCTGTAGACCA  
TCCCCATGGGGGTGGTGAAGGGAGGGCCCAATTGGTAGAAAAAACCCGCAACCCC  
TTGGGGTTATCCTGCACCTTGAAGAAGAAGTAGAAAAAGGAATAAATATAGTGATAATT  
TGATTCTTCGTCGCCGTAGTAAAATGATTCAGCCTCAAACCCATTTGAATGTAGCGGAC  
AACAGCGGGGCCGAGAAATTGATGTGTATTTCGAATCATAGGAGCTAGT---AATCGACGA  
TATGCTCGTATCGGTGACGTTATTGTTGCTGTAATCAAAGAAGCAGTACCAAATACACC  
TCTAGAAAGATCAGAAGTGATCCGAGCTGTAATTGTACGTACTIONGTAAAGAACTCAA  
CGCGACAACGGTATGATAATACGATATGATGACAATGCTGCTGTTGTTATTGATCAAGAA  
GGGAATCCAAAGGGAACCCGAATTTTGGCGCGATCCCCGGGAATTAAGACAGTTAA  
ATTTCACTAAAATCGTTTCATTAGCACCTGAAGTATTAATGCTTAGTCCCAAAAAGAACC  
AGATTCCGTAAACAACATAGAGGAAGAATGAAAGGAATATCTTATCGAGGTAATCGTAT  
TTGCTTTGGTAGATATGCTCTTCAAGCACTTGAACCCGCTTGGATCACGTCTAGACAAA  
TAGAAGCGGGGCGGCGAGCAATGACACGAAATGCACGCCGCGGCGGAAAAATCTGGG  
TACGTATATTTCCAGACAAACCAGTTACAGTAAGACCTACAGAAACACGTATGGGTTTCG  
GGAAAGGATCTCCCGAATATTGGGTAGCTGTTGTTAAACCCGGCAGAATACTTTATGA  
AATGAGCGGAGTGGCAGAAAATATAGCCAGAAAGGCTATTTCAATAGCGGCATCAAAA  
ATGCCTATACGAACTCAATTCATTCTTTCGGTAATGACCAGAATTAACGAGGGTATATA  
GCTCGAAGACGTAGAACAAAATCCGTTTATTTGCATCAACTTTTCGAGGGGGCTCATTC  
AAGACTTACTCGGACTATTACTCAACAGAAAATAAGAGCTTTGGTTTCGGCTCATCGGG  
ATAGGAGTAGACAAAAGAGAGATTTTCGTCGGTTGTGGATCACTCGTATAAATGCAGTA  
ATTCGAGATAAT--AAAGTATACTTTAGTTATTGTAAATTAATACACAATCTGTACAAGAA  
ACAGTTGCTTCTAATCGTAAAATACTTGCACAAATAGCTATATTAATAAGAGTTGTCT  
TTATATGATTTCCAATGAGATCATAAAA-----ATGGAGAAAGAAGTA  
GCCGCTTCAAGCCAACATATATGTATTTCTGCTCACAAGCGAGAAGAGTAATTGATCA  
AATTCGTGGGCGTTCCTATGAAGAAACACTTATGATCCTAGAACTCATGCCTTATCGAG  
CATGTTATGACATTTAAAATTGGTTTATTCTGCAGCAGCAAACGCTAATCACAATAAAG

GTTTGAATGAAACAAGTTTAATCATTAGTAAAGCTGAAGTCAACGAGGGCACGACCGT  
GAAAAAATTAACCCCGAGCTCGAGGGCGGGGTTATCCGATAAGAAGATCGACCTGT  
CATATAACTATTGTGTTGAAAGATATATCTGTAGAT-----ATGGATGGAATCAA  
ATATGCAGTATTTACAGACAAAAGTATTCGGTTATTGGGGAAAAAT--CAATATACTTCTA  
ATGTCTGAATCAGGATCAACTAGGACAGAAATAAAGCATTGGGTCTGAACCTCTTCTTTGG  
TGTC AAGTAATAGCTATGAATAGTCATCGACTCCCGGGAAAAGGGTAGAAGAATGGGA  
CCTACTATGGGACATACAATGCATTACAGACGTATGATCATTACGCTTCAACCGGGTAT  
TCTATTCCACCTCTTAGAAAGAAAAGAAGTATGGCAGTTCACAAAAAGCGCACCTCGA  
GTTCAAAAAACGTATTCGTAAAAATTTGGAAAAGGAAAGGGTATTGGGCAGCATT  
GAAAGCTTTTTTCGTTAGCGAAATCGCTTTCTACCGGTAACCTCAAAAAGTTTTTTT-----  
---GTGACAATGGCCAAGGGTAAAGATGTCCGAGTAACGGTGATTTTGGAAATGTACCAGT  
TGT--GTTTCGAAAT-----CTTAATAAGGAATCAACGGGCATTTCCAGATATATTACTCAA  
AGAATCGACATAATACGCCTAGTCGATTGGAGTTGAGAAAATTCTGTCCCTGTTGTTAT  
AAACATACGATTCACGGGGAGATAAAGAAAATGAAAATAAGGGCCTCTGTTCGTAAAA  
TTTGTGAAAATGTCGATTAATACGTAGGCGGGGACGAATTATAGTAATTTGTTCCAAC  
CCGAGACATAAACAAAGACAAGGAATGGTTCGAGAGAAAAGTAACAGTATCTACTCGG  
ACACTACAGTGGAATGTGTTGAATCAAGAGCAGACAGTAAGCGTCTTTATTATGGAC  
GCTTTATTCTGGCCCCACTTATGAAAGGCCAAGCCGATACAATAGGCATCGCGATGCGA  
AGAGCTTTACTCGGAGAAATAGAAGGAACATGTATTACACGTGCAAAATCTGAG-----A  
AAATACCACACGAATATTCTACCTTTGTAGGTATTCAAGAATCTGTACATGAAATTTTAA  
TGAATTTGAAAGAAATTGTATTGAGAAGTAATCTGTATGGAACCTCGTAACGCGTCTATT  
TGTGTCAAGGGTCCTGGATATGTAAGTCTCAAGACATTATTTTACCACCTCTATAGAA  
ATCGTTGATAATACACAGCATATAGCTAACCTAACAGAACCAATTAATTTGTGTATTGAA  
TTACAAATCGAGAGGAATCGTGGATATCGTATAAAAACGCCAAATAACTTTCAAGAAG  
GTAGTTAT-----CCTATAGATGCTGTATTTCATGCCCGTTGAAATGCGAATCATAGTATTCA  
TTCTTATGTGAATGGGAATGAAAAACAAGAGATACTTTTTATCGAAATATGGACAAATG  
GAAGTTAACTCCTAAAGAAGCACTTCATGAAGCCTCTCGGAATTTGATTGATTTATTTA  
TTCCCTTTTTACATGCAGAAGAAGAA-----AACTTACATTTGAAAACAATCAA---CACA  
AAGTTACTTTACCCCTTTTTACTTTTCATGGTAAATTGGCTAAT--CCAAAGAAAATTA  
AAAA---GAAAACACATTGAAATATATTTTTATTGACCAATCAGAATTGCCCCCCAGGGTC  
TATAATTGCCTCAAAGGTCCAACATACATATTATTGGACCTTTTGAATAACAGTCAA  
GAAGATCTTATGAAAATTAACATTTGCGCATAGAAGATGTAACATATATTGAATATT  
CTAGAAATAAAAAAGCATTTTCGAA-----ATGCTTGGGGGTGGAAAT--GAGG  
CAATATCTACAATACCCGGATTGAATCAGATACAATTTGAAGGGTTTTGTAGGTTTCATTG  
ATCAGGGCTTAACAGAGGAACCTTTATAAGTTTCCAAAAATTGAAGATACAGATCAAGA  
AATTGAATTTCAATTATTGGGGAAACATATCAATTGGTAGAACCAATTGATAAAAAGAAA  
GAGATGCTGTATATGAATCACTCACATATTCTTCGGAATTATATGTATCCGCGGGATTAAT  
TTGGAAAACAGTAGGGATATGCAAGAACAACAATTTTTATTGGAAATATTCCCCTAA  
TGAATTCCTGGGAACCTTCTATAGTAAACGGAATATACAGAATTGTGATCAATCAAATAT  
TACAAAGCCCTGGTATCTATTACCGGTCAGAAATTGGACCATAACGGAATTTCACTCTATA  
CCGGCATCATAATATCAGATTGGGGGGGGAGATTAGAATTAGAGATTGATAGAAAAGCA  
AGGATATGGGCTCGTGTGAGTAGGAAACAAAAAATATCTATTCTAGTTCTATCATCAGCT  
ATGGGTTTCGAATCTAAGAGAAATCTCGAGAATGCTCGCTACCCCGAAATTTTCTTGTG  
TTTTCTGAATGATAAGGAGAAAAAAAATAGGGTCAAAAGAAAATGCCATTTTGGAG

TTTTATCAACAATTTGCTTGTGTAGGCGGGGATCCGGTAGTTTCTGAATCCTTATGTAAA  
GAATTACAAAAAATTCCTTCAACAAAGATGTGAGTTAGGGAGGATTGGTCGACGAA  
ATATGAACCGAAGGCTGAATCTTGATATCCCTCAGAACAACACATTTTTGTTACCGCGA  
GATATATTGGCAGCTGCGGATCATTGATTGGAATGAAATTTGGAATGGGTACACTTGA  
CGAT-----ATGAATCATTGAAAAATAACGTATTCCGGTCTGTTCGCAGATCTTTTACAAG  
ACCAATTTGGATTGTCCCTGGTTCGTTTAGAAAATATGGTTAGAGGGACTATATGCGGA  
GCAATTAAG---CATAAATTGATA---CCCACTCCTCAGAATTTGGTAACCTTCAACTCCA-----  
-----TTAACAACCACTTATGAATCTTTTTTTGGATTACACCCATTATCTCAAGTTTTGGAT  
CGAACTAATCCATTGACCCAAATAGTTCATGGGAGAAAATCGAGTTATCTGGGCCCTGG  
AGGATTGACAGGGCGAACTGCTAGTTTTCCGGATACGAGATATTCACCCCAGTCACTACG  
GACGCATTGCCCCTATTGACACGTCTGAAGGAATCAATGTTGGACTTATTGGATCCTTA  
GCAATTCATGCGAAGATTGGTTATTGGGGG---TCTCTAGAAAGTCCGTTTTAT-----GA  
AATTTCTGAGAGATCAAAAAA-----GTACGGATGCTCTATTTATACCAAGTAAAGATG  
AATACTATATGATAGCGGCAGGAAATCTTTGGGCTTGAATCGAGGTATTCAGGAAGAA  
CAGGTTGTTCCAGCTCGATACCGTCAAGAATTCCTGACTGTTGAATGGGAACAGGTTT  
ATCTTCGAAGTATTTTTCCCTTCCAATATTTTTCTATTGGAGCTTCCCTGATTCCTTTTATT  
GAGCATAATGATGCGAATCGAGCTTTAATGAGTTCTAATATGCAACGTCAAGCAGTTC  
GCTCTCTCGGTCTGAAAAGTGCATTGTTGGAACGGGTTGGAACGCCAAGTGGCTTTA  
GATTCGGGGGTTACTGCTATAGCCGAACATGAGGGAAAAATCATTTATAACCGATACTGA  
CAAGATAATTTATCGGGCAATGGGGATACTCTAAACATTCCATTAGTTATATAACCAACG  
TTCCAACAAAAATACGTGTATGCACCAAAAACCCAGGTTTCAGCGAGGTAAATGTATT  
AAAAAGGGACAAGTTTTAGCGGACGGTGCTGCTACGGTTGGTGGCGAACTCGCTTTG  
GGAAAAAATGTATTAGTAGCTTATATGCCGTGGGAGGGTTACAATTCTGAAGATGCGGT  
ACTTATTAGTGAGCGTCTGGTATATGGAGATATTTATACTTCTTTTCACATAAGGAAATAT  
GAAATTCAGACTCATGTGACAAGCAACGGT---CCTGAAAGAATCACTAATGAAATACCA  
CATCTAGAAGCCCATTTACTCCGCAATTTAGACAAAAACGGAATTGTGAGGCTGGGGT  
CTTGGGTAAAGACGGGTGATATTTTAGTAGGTAAATTAACGCCGCAGATGGCGAAAGA  
A---TCGTCAATGCTCCGGAAGATAGATTATTACGAGCCATACTTGGCATTTCAGGTATCC  
ACTTCAAAGGAACTTGTCTAAAATTACCGATAGGTGGTAGAGGTCGAGTTATTGATGT  
AAGATGGATCCAGAAAAAGGGG---GGTTCTAGTTATAATCCAGAAACGATTCGTGTATA  
TATTTACAAAAACGTGAAATCAAAGTAGGTGATAAAGTAGCTGGAAGACATGGAAAT  
AAGGGTATCGTTTCAAAAATTTTACCTCGACAAGATATGCCTTATTTGCAAGATGGAAG  
ACCTGTTGATATGGTCTTCAACCCATTAGGAGTGCCCTTCGCGAATGAATGTAGGACAGA  
TATTTGAATGCTCACTCGGGTTAGCGGGAGGTCTGCTAGATAGACATTATCGAATAGCA  
CCTTTTGATGAGAGATATGAACAAGAGGCTTCAAGAAAACCTGGTGTTTTCTGAATTATA  
TGAAGCTAGTAAGCAAACAGCGAATCCATGGGTATTTGAACCTGAGTATCCGGGAAAA  
AGCAGAATATTTGATGGAAGAACGGGGGATCCTTTTGAACAACCTGTTATAATAGGAA  
AGCCTTATATCTTGAAATTAATTCATCAAGTTGATGATAAAAATACATGGACGTTCCAGCG  
GACATTATGCACTTGTACACAACAACCCCTTAGAGGAAGGGCCAAGCAAGGGGGAC  
AGCGGGTAGGAGAAATGGAAGTTTGGGCTCTAGAGGGATTGGTGTGCTCATATTTTA  
CAAGAAATGCTTACTTATAAATCGGATCATATTAGAGCTCGTCAAGAAGTACTTGGTACT  
ACAATCATTGGAGGGACAATACCTAAACCCGCGGATGCTCCCGAATCTTTTAGATTGCT  
CGTTTCGAGAACTACGATCTTTGGCTCTGGAACCTGAACCATTTCTTGTATCTGAGAAGA  
ACTTCCAGATTAATAGGAAGGAAGCT-----ATGATCGATCGCTATAAACATCA



ACAACCTTCGGATTGGATTAGTTTCTCCCAACAAATAAGCGCTTGGGCACACAAAATC  
CTACCTAATGGAGAGATAGTTGGGGAGGTGACAAAACCCTATACTTTTCATTACAAAAC  
TAATAAACCTGAAAAAGATGGATTGTTTTGTGAAAGAATTTTTGGGCCTATAAAAAGCG  
GTATTTGTGCTTGTGGAAATTATCGAGTAATCGGAGATGAAAAAAAAGACCCGAGATTT  
TGTGAACAGTGTGGGGTTGAATTTGTTGATTCTCGGATACGAAGATATCAAATGGGCTA  
CATCAAACCTGGCATGCCAGTAACCCACGTATGGTATTTGAAACGTCCTCCTAGTTATAT  
CGCGAATCTTTTAGATAAGCCTCTTAAAGAATTAGAAGGCCTAGTATATTGTGAT-----TT  
TTCTTTTGCTAGGCC---ATCGCTAAAAAACCCACTTTCTTACGATTACGAGGTTTCATTC  
GAATACGAAATCCAATCTTGGAAATACAGTATCCCCTTTTTTTTACTACCCCAGGCTTC  
GATACATTTAGAAATCGAGAAATTTCTACTGGAGCGGGTGCTATCCGAGAACAAATTAGC  
CGATCTGGATTTGAGAATTATTATAGATTATTCGTTGTTAGAATGGAAAGAGTTGGGGGA  
AGAA--GGGTCCACGGGAATGAATGGGAAGATCGAAAGATTGGAAGACGAAAGGAT  
TTTTTGTTAGACGCATGGAGTTGGCTAAGCATTTTATTTCGAACAAATATAGAACCAGA  
ATGGATGGTTTTATGTCTATTACCAGTTCTTCCGCCGAGTTGAGACCAATCATTAGAT  
AGACGGGGGTAACTAATGAGCTCGGATATTAATGAACTCTATAGAAGAGTTATTTATC  
GGAACAATACTCTTATCGATCTCTTAAACAACAAGTAGATCTACGCCAGGAGAATTAGTC  
ATGTGTCAGGAGAAATGGTACAAGAAGCTGTGGATACGCTTCTTGATAATGGAATCCG  
TGGACAACCAATGAGGGACGGTCATAATAAGGTTTACAAGTCGTTTTTACAGATGTAATTG  
AAGGAAAAGAGGGAAGATTCCGTGAGACTCTGCTTGGCAAACGGGTCGATTATTCGG  
GGCGTTCTGTCAATGTTGTAGGCCCTTACTTTTATTACATCGATGTGGATTGCCTCGCG  
AAATAGCAATAGAGCTTTTCCAGACATTTGTAATTCGTGGTTTAAATTAGGCAGCATTTTG  
CCTCGAATATAGGAGTGGCTAAGAGTAAAATTCGGGAAAAGAGCCGGTTGTATGGGA  
AATACTTCAGGAAGTAATGCAAGGGCATCCCGTATTGCTGAATAGGGCGCCTACTCTGC  
ATAGATTAGGCATACAGGCGTTCCAGCCATTTTAGTAGAAGGGCATGCTATTTGTTTAC  
ATCCATTAGTTTGTAAAGGGATTTAACGCAGACTTTGATGGGGATCAAATGGCTGTTTCAT  
GTACCTTTATCTTTGGAGGCTCAGGCGGAGGCCGTTTACTTATGTTTTCTCATATGAAT  
CTCTTGTCTCCAGCTATTGGGGATCCTATTTCCGTACCAACCCAAGATATGCTTATCGGG  
CTCTATGTATTAACGAGCGGGAATCGCCGAGGTATTTGTGCAAATAGGTATAATCCATGT  
AATCGCACAAAT-----TCTAAAATGAAAGGATTGCCGATAATAATTATAAATATACGA  
AC-----GAACCTTTTTTTTGTAAATCCTATGATGCAATTGGAGCTTATCGGCAGAAAAGA  
ATCCATTTAGATAGTCCCTTGTGGCTCCGATGGCAGCTAGATCAACGT--GTTATTACTTC  
A-----AGAGAACTCCCATCGAAGTTCATATGAATCTTTGGGTACCTCTCATGAGATTT  
ATGGGCACTATGTAATAGTAAGAAGTATAAAAAAGAAGTTCTTTGTATATATGTTTCGAA  
CCACAGTCGGTCATATTTCTCTTTATCGAGAAATCGAAGAAGCTATCCAAGGGTTTTGC  
CGAGCCTACTCGTATGGTACC-----ATGGCAGAACGGGCCAGTC  
TGGTTTTTCAACAATAAAGTGATCGATGGAACCGCTATTAACGACTTATTAGTAGATTAA  
TAGATCACTTCGGAATGGCATATACATCACACATCTTGGATCAAGTAAAGACTCTGGGA  
TTCCGACAAGCCACTGCTACATCCATTTCAATTAGGAATTGATGATCTTTTAAACAATACCT  
TCTAAGGGGTGGCTAGTCCAAGATGCCGAACAACAAGTTTGATTTTGGAAAAACACC  
ATCATTATGGTAATGTACACGCGGTAGAAAAATTACGCCTCTCTATTGAGATATGGTATG  
CTACAAGTGAATATTTGCGACAAGAAATGAATCCTAATTTTAGGATGACGGACCCCTTT  
AACCCAGTCCATATGATGTCGTTTTTCGGGAGCTAGAGGAAATGCATCTCAAGTACACCA  
ATTAGTAGGTATGAGAGGGTTAATGTCAGATCCACAAGGACAAATGATTGATTTACCTA  
TTCAAAGCAATTTACGTGAAGGGCTGTCTTTAACAGAATATATCATTCTTGTACGGAG

CCCGCAAAGGCGTTGTGGATACTGCTGTACGAACGTCGGATGCTGGATATCTTACACGC  
AGACTTGTTGAAGTAGTTCAACACATTGTTGTACGTAGAACAGATTGTGGCACCACCC  
GAGGCATTTCTGTGAGTCCTCGAAATGGGATGATGCCG---GAAAGGATTTTATCCAAA  
CATTGATTGGCCGTGTATTAGCAGACGATATATATAGGAACGCGATGCGTTGCCATTC  
GAAATCAAGATATTGGAATTGGACTTGTCAATCGATTCATAACC-----TTTCAA  
ACACAACCAATACCTATTCGAACCCCTTACTTGTAAGAGTACATCTTGGATCTGCCG  
ATTATGTTATGGCCGGAGCCCTACTCATGGCGACCTGGTTCGAATTGGGGGAAGCTGTAG  
GCATTATTGCAGGTCAATCTATTGGAGAACCGGGTACTCAATTAACATTAAGAACTTTTC  
ATACCGGTGGAGTATTCACAGGGGGTACTGCAGAACATGTGCGAGCCCCCTTCTAATGG  
AAAAATAAAATTTAATGAGTATTTGGTTCATCCACACGTACACGTCATGGGCATCCTG  
CTTTTCTATGTTATATAGACTTGTATGTAAGTATTGAAAGTGAAAATATTATACATAACGT  
GACTATTCCACCCAAAAGTTTGATTTTAGTGCAAAATGACCAATACGTAGAATCAGAGC  
AAGTGATTGCTGAGATTCGCGCGCGAGCATACTTTT---AATTTTAAAGAGAGGGTTC  
GAAAACATATTTATTCTGACTCAGAGGGGAGAG---ATGCACTGGAGTACCGATGTATACC  
ATGCGCCAGAATTTACATATAGTAATGTACATCTTTTACCAAAAACAAGTCATTTGTGGA  
TATTATCAGGAGGTTTCGTGCAGA-----TTCAGTGCAGCCCCCCCCCTCACTCCACAAGGAT  
CAAGATCAAACGAACGTTTCAT-----TCTCTTTTGACTGAAGGA--CGATATTTTCTAGTC  
TT--TCAGTAAATAATGATCAA---GTGAAACACAAATTTTTTGGTTTAAATCTTTCTGATA  
AA---GAAAGCTGTATTCCTGATTAT--TCAGAATTGAATCAAATCATATATACGAGTTATT  
GTAATCTCACATTTCCCTACT---ATTCGCCATGATAAT-----TTTTATTGACAAAGAAGC  
GAAGAAATAGATTCATCATTCCATTCCAATCGATTCAAGAACAAGAGAAAGAACGGAT  
GCCCCGTCCCGGTATTTTCGATTGAAATACCTATAAATATAAATGGTATTTTTTCGTAGAAAT  
AGTATTCTTGCTTATTTTCGACGATCCTCAATACAGAAGAAAGAGTTTCGGGAATTACTAA  
ATATGGAACCGTAGGGTTCATTCAATCCTCAAAAAAGAGGAT-----TTAATTGAGTACC  
GA---GGAGTCAAAGAATTTAAGCCAAAATACACGAAATTAGATCGATTTTTTTTCATTCC  
TGAGGAAGTGCATATTTTACCCGAGTCTTCTTCCATAATGGTACGGAACAATAGTATCAT  
TGGGATAGATACACGAATCACTTTAAATACAAGAAGCAGAGTCGGTGGCTTGGTCCGA  
ATGGAGAGAAAAAAAAGGATTGAACTTAAATCTTTTCTGGAGATATCCATTTTCC  
CGGAGAGATGGATAAGATATTCCGACACAATGGCATCTTGATACCGCCAGGA-----AC  
A-----AATTCTAAGGAATCAAAAAAG-----CGGAAAAATTGGATTTATGTCCAATGG-----  
ATCACACCCACCAGGAAAAAG-----TATTTTGTTTTGGTTCGACCCGTAATCATATATGA  
AATTGCGGATGGTATAAATTTAGCAACACTTTTCCCTCAGGATCCATTGCGGGAAAGGG  
ATAATCTAGAGCTTCGAGTTGTAAATTATATACTGTATGGAAATGGCAAACCAATTCGGG  
GAATTTCTGGCACGGGTATTCAACTAGTTCGGACCTGTTTAAATCTTGAAGTGGGACAAC  
AACAAA-----AAAAGTCTTCTATCGAAGAGGCCCGCGCTTCCTTTGTTGAAGTAAGT  
GCAAATGGTCTGATTCAAGATTTCCCTCAGAATCAACTTAGTGAAATCCCATACTCCGTAT  
ATTCGAAAAAGGAATGATCCGTTAGGTTTCAGGATTGATCTCT--GATAATAGGTCGGGTC  
GTACCAATATCAATCCATTTTATTCTATTTATTCCAAGGAAAGG-----ATTCAACAA  
TCGCTTAGCCAAAATCAAGGAACTTTTTCGTACGTTGTTGAATAGA-----AGTAAGGAA  
TCCAATCTTTGATAATTTTGTGCATCATATAATTGTTTTCAAATGAGTCCA-----TTCAACG  
ATGTAATAATATTACGAT-----GGGATAAAGAATCAGATTCCCTAATTCAAATTAGAAA  
TTTGTTAGGCCCTTTAGGAACA-----GCCTCTCAAAGTGATCTTTTT-----TATCCGTTT  
CCATTTACTAACT-----CATAATCATATTTCT--TTAACTAAATATTTATATTGCAACCCGA  
CAAT--TTAAACAGACTTTTTCAAGTATTT-----AAG--TATTATTTAATGGATGAAAACGG

GAGA-----ATTTGGAATTCCGATCCGTGCAGTAGCATGCTTTTTGAATCCATTTAACTTGAA  
TTGGCATTCTCTCGACCAT--TATTGTGAGGAAACATCCACAATAATTAGT--CTCGGGCA  
GTTTATTTGTGAAAATCTATGTATAGCCAAAAAAGGATCG-----ACCCTAAAATCGGGT  
CAAGTTATAGTTGTTTAC--CTTGACTCTTTAGTAATAAGATCGGCGAAGCCTTATTTAG  
CTACTCCGGGAGCAACAGTTCATGGACATTATGGAGAAATACTTTCCGAAGGAGATACA  
TTAGTTACATTTATATATGAAAAATCTAGATCTGGTGATATAACGCAAGGCCTTCCAAAA  
GTAGAACAGGTTTTAGAGGTACGTTCCATTGATTCAATATCGATGAACCTAGAAAAGAG  
AGTTGACGGTTGGAATGAGTGTATAACAAGAATTCCTTGGAAATTCCTTGGGGATTCTTGA  
TTGGTGCTGAGCTCACTATAGCGCAAAGTCGTATCTCTTTGGTTAATAAGATCCAAAAG  
GTTTATAGATCCCAGGGGGTACAGATCCATAATAGGCATATCGAAATCATTGTACGTCAA  
ATAACATCAAAAAGTGTGGTTTCAGAA-----GATGGAATGTCTAATGTTTTTTTCACCCG  
GAGAACTAATTGGGTTGTTGCGAGCTGAACGAACGGGGCGTGCTTTAGAAGAAGCTAT  
TTGTTACCGAGCCATATTATTAGGAATAACGAAAGCATCTCTAAATACTCAAAGTTTCAT  
ATCCGAAGCAAGTTTTCAAGAACTGCTCGAGTTTTAGCAAAGCTGCCCTCCGGGGT  
CGTATCGATTGGTTGAAAGGTCTGAAAGAGAACGTTGTTCTAGGAGGGATGATACCCG  
TCGGTACCGGATTCAAAGGATTCGTGCACCGTTCA-----AGGCAACATAACAACATTTCT  
TTGGAACCAAAAATAAGAGT-----TTATTGAGGGGGAAATGAGA-----GATATTTTGGT  
CCACCACAGAGAATTATTTGATTTTTGCATTTCAAAAAATTTACATGATACATCAGAACA  
ATCTTTTTTCGGATTTAATGATTCC-----ATGACAAGAAGATATTGGAACATCAA  
TTTGGAAAGAGATGATGGAAGCAGGAGTTCATTTTGGTCATGGTACTAGGAAATGGAAT  
CCTAGGATGGCACCTTATATCTCTGCAAAGCGAAAAGGTATTTCATATTATAAATCTTACT  
AGAACTGCTCGGTTTTTATCAGAAGCTTGTGATTTAGTTTTTGTATGCAGCAAGTAGGGG  
AAAACAATTCTTAATTGTCGGTACAAAAAATAAAGCGGGCTGATTCAGTAGCGCGGGCT  
GCAATAAGGGCCCGGTGTCATTATGTTAATAAAAAATGGCTCGGCGGTATGTTAACGAA  
TTGGTATACTACAGAAACGAGACTTCATAAGTTCAGGGACTTGAGAACGGAACAAAAG  
ACGGGGAGACTTAACCGTCTTCCGAAAAGGGATGCGGCTGTGTTGAAGAGACAATTAT  
TTCACTTGCAAACATATCTGGGCGGAATAAAATATATGACGGGGTTACCCGATATTGTAA  
TAATCGTTGATCAGCAAGAAGAATATACGGCTCTTCGAGAATGTATCACTTTGGGAATT  
CCAACGATTTGTTAATCGATACAAATTGTGACCCGGATCTCGCGGATATTTCGATTCCA  
GCCAACGATGACGCTATAGCTTCAATCCGATTAATTCTTAACAAATTAGTATTTGCAATT  
TGTGAGGGTCTGTTCT--AGCTATATACGAAATTCTATGGGACAAAAAATAAATCCACTTG  
GTTTCAGACTTGGTGCAACTCAAGGTCATCATTCTGTTTGGTTTGCACAACCAAAGAAT  
TATCCGAAGATCTACAAGAAGATCAAAAAATACGAGATTGTATCAAAAAATTATGTACA  
AAAAAATCTGAAAATATCCTCTAAT--GTCGAGGGAATTGCACGTATAGAGATTCAAAA  
AAGAATTGATTTGATTCAAGTCATAATCTATATGGGATTCCCCAAGTTATTAATAGAAGA  
AAGG-----ACTCGCAAAATCGAAGAATTACAGTTCAATGTACAAAAAGAACTCAAT  
TGTGTAACCGAAAACCTAACATTGCTATTACAAAAATTGTAAACCCTTATAGCCACCC  
CAATATTCTTGCGGAATTTATAGCCGGGCAATTAATAAATAGAGTTTCATTTTCGCAAAG  
CAATGAAAAAAGCTATTGAATTAAGTGCAGCAGGCAGGTACAAAAGGAATTCAGTACA  
AATAGCAGGGCGTATCGACGGAAAAGAAATTGCACGTGTGCAATGGATCAGAGAAGGT  
AGGGTTCCTCTACAAACCATTCGAGCCAAAATAGATTATTGTTCTACGCAGTTCGAAC  
TATCTACGGGGTATTAGGTATCAAATTTGGATATTTGTAGACGAAGAATGTCGCGTTA  
CAGAGGACCTCGTTTTCAAAAAAATTCGCCGTCTGGGGGCTTTACCGGGGCTAACTAGT  
AAAAAGCCTAGAGCCGGAAGCGATCTTCGAACCAATCACGCCCCGGCAAA---AAATC

GCAATATCGTATTCGCTTAGAAGAAAAACAAAATTGCGCTTTCATTATGGTCTTACGG  
ACAACAATTACTTAAATACGTTTCGTATCGCCGAAAAGCCAAAGGGTCAACGGGTCA  
GGTTTTACTACAATTACTTGAAATGCGTTTAGATAACATCCTTTTTTCGATTGGGTATGGC  
TTCGACTATTCCTCAAGCCCAGCAATTAGTTAACCACAGGCATATTTTAGTTAATGGTCG  
TATAGTAGATATACCAAGTTATCGATGCAAACCCAGAGATATTATTACGGTGAGAGATGA  
GCAAAAATCTAAGGCTCTGATTCAAATATCTTGGTTCATCCCCCCT--GAGGAATTA  
CCAAAACATTTGACTCTTGACCCATTCAA-----TATAAAGGATTAGTCAATCAAATAATA  
GATAGTAAGTGGGTCGGTTTGAAAATAAATGAATTGCTAGTTGTAGAATATTACTCTCGT  
CAGACTATGTCACGTTCGAGGTACTGCAGAAGAAAAAACTGCAAAATCCGATCCAATTT  
ATCGTAATCGATTAGTTAACATGTTGGTTAACCGTATTCTGAAACACGGAAAAAAATCA  
TTGGCTTATCAAATTATCTATCGAGCCATGAAAAAGATTCAACAAAAGACAGAAACAA  
ATCCACTATCTGTTTTACGTCAAGCAATACGTGGAGTAACTCCGGATATAGCAGTAAAA  
GCAAGACGTGTAGGCGGATCGACTCATCAAGTTCCCATTGAAATAGGATCCACACAAG  
GAAAAGCACTTGCCATTCGTTGGTTATTAGGGGCATCTCGAAAACGTCCAGGTGCGAAA  
TATGGTTTTCAAATTAAGTTCCGAATTAGTGGATGCTGCCAACGGGAGTGGCGATGCCA  
TACGCAAAAAGGAAGAGACTCATAGAATGGCAGAGGCAAATAGAGCTTTTGCACATTT  
TCGTATGAGTAAAGACACTATTGCTGACATAATAACCTCTATACGAAATGCTGACATGAA  
TGAAAAAAGAACAGTTCGAATACCATCTACTAACATCACTGAAAATATTGTTAAAATCC  
TTTTACGAGAAGGTTTTATTGAAAACGTGAGAAAACATCAGGAAAGCCGTAATTTTTTT  
TTGGTTTTAACCTACGACATAGGAGA-----AATAGGAAAGGACCGTATAGAACT--GTT-  
----TTAAATTTAAAACGGATCAGCCGGCCCGCCTACGAATCTATTCTAACTATCAACGA  
ATTCCGAGAATTTTAGGCGGAATGGGAATTGTAATTTCTTCTACTTCTCGAGGGATAATG  
ACAGACCGAGAGGCTCGAATAGAAGGAATCGGCGGGGAAATTTTGTGTTATATATGGA  
TGGCAAAACCTATACCAAAAATTGGTTCGCGTAGAAATAGACGTATTGGTTCACGT---A  
ATGCGCGTAGAATACCAAAGGGAGTTATTCATGTTCAAGCAAGTTTCAACAATACCATT  
GTGACTGTTACAGATGTACGGGGTCGAGTAATTTCTTGGTCGTCTGCCGGTACTTGTGG  
ATTCAAGGGTACAAGAAGAGGGACACCATTTGCCGCTCAAACCGCAGCGGGAAATGC  
TATTCGGACAGTGGTGGATCAAGGTATGCAACGAGCAGAAGTCATGATAAAGGGCCCG  
GGTCTCGGGAGAGATGCGGCATTAAGAGCTATTCGTAGAAGCGGCATACTATTAAGTTT  
CGTACGGGATGTAACCCCTATGCCACATAATGGCTGTAGGCCTCCCAAAAAAAGACGT  
GTGATGCCAACTATTAAACAACCTATTAGAAATACAAGACAGCCAATCAGAAATGTCAC  
GAAATCCCCCGCTCTTGGAGGATGTCCTCAGCGACGAGGAACATGTACTAGGGTGTAT  
ACTATACCCCCAAAAAACCAACTCTGCCTTACGTAAAGTTGCCAGAGTACGCTTAA  
CCTCTGGATTTGAAATCACTGCTTATATACCTGGTATTGGCCATAATTTACAAGAACATT  
CTGTAGTCTTAGTAAGAGGGGGGAGGGTTAAAGATTTACCCGGTGTGAGATATCACATT  
GTTTCGAGGAACCCTAGATGCTGTTCGGAGTAAAGGATCGTCAACAAGGGCGTTCTAAAT  
ATGGGGTCAAAAAGCCAAAAATGGCAAGAAAAAGTTTGATTAGAGGGGAGAAGAAG  
AGACAAAATTGGAAAAAAAATATCATTTGATTTCGTGATCCTCAAAAAAAGAAATAA  
GC-----AAAGTTCCGTCGTTGAGCGAGAAATGGGAAATTCATGGAAAGTTACAATCTC  
CACCACGTAATAGTGCACCTACACGCCTTCATCGACGTTGTTTTTCGACCGGAAGACCG  
AGAGCTAACTATCGAGACTTTGGGTTATCCGGACACGTACTTCGCGAAATGGTTCATGC  
ATGTTTGTGCCCCGGGGCAACAAGATCAAGTTGGATGGTAAAAAATTCATTCATCTCAG  
TTATTTCAACAAGAAGAAAAAGAAGAAAACAGG-----GGTTCTGTTGAATTTCAAATATT  
TAGTTTCACCAATAGGATACGAAGACTTACTTCACATTTACAATTACACAAAAAAGACT

ATTTATCTCAGAGAGGTCTGCGTAAAATTTTGGGAAAACGCCAACGACTGCTATCTTAT  
TTGTCAAAGAAAAATAGAATAGGTTATAAAGAATTAATTAATCGGTTGGATATTCGGGA  
ATCAAAAACCTCGT-----ATGGTAAAACCTTCGTTTAAAACGATGTGGTAGAAAGCAACGT  
GCCATTTATCGAATAGTTGCAATTGATGTTTCGAGCTCGACGAGAGGGAAGAGATCTTCG  
GAAAGTGGGTTTTTATGATCCGATAAAGAATCAAATTTATTTAAATGTTCTGCTATTCTA  
TACTTCCTTGAAAAAGGCGCTCAACCTACAGGAACTGTTTCATGATATTTAAAAAAGGC  
GGGGTTTTTACGGAACCTTCACCTTAATCAACAAACAAAATTCAATATGGATAAATCCA  
AGCGAATCTTTCTTAAATCCAAGCGATCTTTTCGTAGGCGTTTGCCTCCGATCCAATCG  
GGGGATCGAATTGATTATAGAAACATGAGTTAATTAGTCGATTTATTAGCGAACAAGG  
AAAAATATTATCTAGACGGGTGAATCGATTGACCTTAAAACAACAACGATTAATTACTAT  
TGCTATAAAACAAGCTCGTATTTTATCTCCGTTACCTTTTCTTAATAATGAGAAA-----CA  
ATTTGAAAGAAGCGAGTCAACCGCTAGAACTCCAGGTCTTAGAACCAGAAAAAAAGT  
GACACGT---CTAAAAAAAACCCTTTTGTAGCGAATCATTATTAAGAAAAATAAATAA  
ACTTAACACAAAAGCAGAAAAGGAAATAATAAATACTTGGTCTCGAGCGTCTACCATTA  
TACCTACAATGATCGGGCATACTATTGCTATCCATAACGGAAAGGAGCATTTGCCTATTT  
ATATAACAGATCGTATGGTAGGACATAAATTGGGAGAATTTTCACCGACTCTAAATTTCC  
GGGGGCATGCGAAAAATGATAATAGATCTCGGCGTATGATTTTAAAATCTTTTATACTAG  
GGAATCTAGTATCCTTATGCATGAAGATAATCAATTCGGTCGTTGTGGTCGGACTCTATT  
ATGGATTTCTGACCACATTCTCCATAGGGCCCTCTTATCTCTTCCTTCTCCGAGCTCGGG  
TTATGGAAGAAGGAGAAGAAGGAACCGAGAAGAAAGTATCAGCAACAACCGGTTTTTA  
TTACGGGACAGCTCATGATGTTTCATATCGATCTATTATGCGCCTCTGCATCTAGCATTGG  
GTAGACCTCATAACAATAACTGTCCTAGCTCTACCGTATCTTTTGTTTCATTTCTTCTGGA  
ACAATCACAAACACTTTTTTGATTATGGATCTACTACCAGAAATTCATGCGTAATCTTA  
GCATTCAATGTTTATTCTGAATAATCTCATTTTTCAATTATTCAACCATTTTCATTTTACCA  
AGTTCAATGTTAGTCAGATTAGTCAACATTTATATGTTTCGATGCAACAACAAGATGTTA  
TTTGTAACAAGTAGTTTTTGTGGTTGGTTAATTGGTCCACATTTTATTCATGAAATGGGTT  
GGGTTGGTATTAGGCTGGATACATCAAATAATTCTATTAGATCT--ATTAGATCAAATAA  
GTACCTTGTGTCAGAATTGAGAAATTCTATGGCTCGAATCTTTAGTATTCTCTTATTATT  
ACCTGTGTCTACTATTTAGGCAGAATACCGTCACCCATTGTTACTAAGAACTGAAAAA  
AACCGCAGAAGATAAACCGGTTGTAGCTATTCTTTTCGACCCTAAACGATGGAAGCGC  
CCCTTACGATATATAAAAAACAATCGATTTGAAAATGCTGTAAGAACTGAAATGTCACA  
ATATTTTTTTTATACATGTCAAAGTGATGGAAAAGAAAGAATAGCTTTTACGTACCCCC  
CAGTTTGGCAACTTTTTTGGAAATGATGCAAAGAAAGACATCTCTGTTCCCAAAGGAA  
AAAGCCCCCTCTAATGAATTTTATAATCAGTGGAGTTATACCAATGAACATAAACAGAA  
AAATATAAGCAAAAATTTTATAAATATAAGTAAAACCCTAGATAAAAACCTAGTTGTTTT  
GAATGTACTCGAAAAAAGAACTCGGTTGTGTAATGATAAGACTAAAAAAGAATATTTA  
CCAAAATATACGATCCTTTCTTAAATGGACCCTATCGTGGACGAATCAAAAATTTGTT  
TTCACTAATGGAAAGGTTTTTGATAAATAAGATTCATAGTATCCTTCGCCTAGAATTTGA  
ACAAAACTTCAAATGAGAAATCTATTGCACTAAAAGAAATCCATAAAAAAGTCCCT  
CGATGGTCATACAAATTAATTGATTTGGAACAACAGGAGGGGAGAACAGATTCGCTCAA  
GAAAAGCAAAACGTGTAGTTATTTTACTGATGCTTTGATACGTTATTCACAACAATCG  
GATTTTCGTCGAGACCTAATCAAAGGCTCTGTGCGTGCTCAAAGACGTAAAATAGTTAC  
TTGGAATTTCTTTGAGGCAGATGTGCATTCCCCCCTTTTTTGGACC GAATAGATAAAT  
CCCC-----ATTTTTTCTTTTGATATTTCCGAACGTATAAACCTAATTTTGGAGAAATAGAA

AGGAAAAGGTACGTATAGAAATAGCGGAAGCCTGGGATAGTATTTTACTTGCTCAAGTA  
ATAAGAGGTTTTTTGTTAGTAACCCAATCGATTCTTAGAAAATATATTATATTGCCTTCAT  
TGATAATAGTTAAAAACACCGCCCGTATGCTATTGTTTCAATTTCCCGAATGGTCCGAGG  
ATTTTAAAGATTGGAATCGAGAAATGTATGTTAAATGCACCTATAACGGTGTTCAATTAT  
CAGAAAAAGAATTTCCAAAAACTGGTTAACAGACGGTATTCAGATTAATAATCCTATTT  
CCTTTTCGTCGTGAAACCTTGGCATAAGATCTAACAAAAGATTCAAAAAATGATTCTTGTTT  
TTTAAACAATTTTTGGAATGGAAGCGGAATTCCTTTTGATTCTCCCAGAAAAACAACATT  
CATTTTTTGAACCCATTTTTAAAGAACTCAAAAAGAAAAATTAGAAAATTGAAAAATAAA  
TTCTTTCTAATT--CTAAAAATTTTTAAAGAAAAAACAAAATTGTTTCTAAATGTTTCAA  
AAGAAATAAAAAAATGGGTCATTAAGGATTCTA-----TTTTTAAAGAAATAAAAA  
AGAACTCTCAAAAATAAAT--TTGATAATAAGTAATCTGATGATTGATGAAATCGTCCATTG  
AACTATACCTCAGAATTGGACAAAT--TCGTTGACAGAAAAAAAAAATGCAGGATCTAA  
CAGATAGAACAACACGATCATAAATCAAATAGAAAAAATTACAAATGAAAAAAGGG  
CAACAAAAACAAAATAAGTGATGATGATAAAAGGTTGGAATCACAAAAAATATTTGG  
CAGATAGTAAAA-----AATGCTCGACTAATACGCAAATCACATTTTTTTATAAAATTTTC  
AGTGAAAGGATATACACAAATATCTTTCTGTGGATCATTCATAGTCCTAGGATCAATACA  
CAACCA-----TGTGACTTATCCTACTTTTACAAAGCCTATGTATTTTACAACTT  
TCACAAACC---TTTCTTAATTTTTATAAGTTAAATCTGTCTTTCAATATGCAGCCCCATT  
TATTAAGAATGAAATAAGGGGTTATTTTACACAAGAACTTTTTCTTTCTCAATTAAGACA  
TAAGAATCGTCAG---TCTGGAATAAGTCAATGGATAAATTGGTTAAGGAATCATTATCAA  
TATGATATATCTCACATTAGGTGGTCTAGACTAGTACCACAAAAATGGCGAAATAGATTC  
AATCACCCTGGATGAATCAAATAAGGGCAACTCATCTAAA-----AAAATGAAAT  
TTAGTCACTACGAAAAACGA---AATTTTAAAAACAATATAGATATGATCGGTTAGCATA  
TAAATCTATTAATGATGGTATTAGAGATCTGGATAGAAAATATTTTGATTGGAGAATTATC  
CATTTTTGTCTTAGATTTTTGGATTGGATGGGAATGAATGAAGAAATATTAATCACTGG  
TTCTTCCCAGAATTTTTGATATTTTATAATTTGTATAAACTAAACCGTGGGTTATACCAA  
AAAAATTACTTCTTTTAGATAACAATACAAAAACAAAAGCGGAGTTTGATTTCTTACTA  
AAAAGGTATTTTCATTTTCAATTGCGATGGGAT-----AATAAAAAATAATCAATAACA  
TCAAAGTATATTGTCTCCTGCTTAGACTGATAAATCCACGAGAAATAACTATATCCTCTA  
TTCAAAGGGGAGAAATGAGTCTTGATATTCTGATGATTCAAAAAAATTTAACTCTTACG  
GAATTCATCAAAAGAGGAATTTTGATTATTGAACCAATTCGTCTATCTATAAAAAATGAT  
GGGCAATTTATTATGTATCAAACCATTGGTATTTCAATTGGTTCATCAAAGTAAACACAAT  
TATGAT---TTGTTTGTTCCTGAAAATCTTTTATCACCGAGACTTCGGAGAGAATTTAGAA  
TTCTAATTTGTTTCAAATTTCTGTGGCCCAATTATCGATTAGAAGATTTAGCTTGTATGAA  
TCGGTATTGGTTTGATAGCAATAACGGCAGTCGTTTCGGTATGGTAAGGATACACATGTA  
TCCGATGAAAGGACATCAATTCAAATCCTGGATTTTCGAATTGAGAGAGATATTGAGAG  
AGATCAAGAATTCCTACTATTTCTTAGATTCATGGACCAATTCAATTCAGTGGGATCTT  
TCATTCACATTTTTTTCCATCAAGAACGTTTTATAAACTTTTTGGACTTCCGAATTTGGA  
GTATCCTATTTTCA---CGCAATTCACATTTACAGGGTTCAACAAGCAATCGATATTTT-----  
---ACGATCAAGGGTGTAGTACTATTTGTAGTAGTG---GTCCTTATATATCGT-----ATTA  
ACAATCGAAAGATGGTCGAGAGAAAAAATCTCTATTTGACAGGGCTTCTTCCT-----  
---ATACCTATGAATTTCAATTGGACCCAGAAATGATACAGTGGAAGAATCTTTT---GGGTC  
TTCCAATATCAATAGGTTGATTGTTTCG---CTCCTTTATCTTCCAAAAGGAAAAAAGATC  
TCTGAGAGCTGTTTCCCGGATCCGAAAGAGAGTCCTTGGGTTCTCCAATAACT-----

--AAAAAGTGTATCATGCCTGAATCTAACTGGGGTTCGCGGTGGTGGAGGAACTGGATC  
GGAAAAAAGAGG-----GATTCTCGTTGTAAGCTATCTAAT-----GCAACCGTCGCTGGA  
ATTGAGATCTCATTCAAAGAGAAAGATATCAA---TATCTGGAGTTTCTTTTTGTATATTA  
TATGGAT-----GATCCGATTTCGCAAGGACCATGATTGGGAATTGTTTGATCGTCTTTCTCC  
GAGGAAGAGGGCGAAACATACTCAACTTG-----AATTCGGGACAGCTATTTCGAAATCTTA  
GTGAAAGACTGGATTTGTTATCTCATGTTTGCTTTTCATGAAAAAATACCAATTGAAGC  
GGAGGTT--TTCTTCAAACAACAAGGA--GCTGGGTCAACTATTCAATCAAATGAAATT  
GAGCATGTTTCCCAT-----CTCTTCTCGAGAAACAAGTGGGCTATG-----CAAATTGTGC  
TCAATTTTCATATGTGGCAATTCCGCCAAGATCTCTTCTTT-----AGTTGGGGGAAG---A  
ATCCGCATGAATCGGATTTTTTGAGGAAC---ATATCGAGAGAGAAT-----TGGTTAGACAA  
TGTGTGGTTGGTAAACAAGGATCGG-----TTTTTTAGC-----AAGGTACGGAATGTATC  
GTCAAATATTCAATATGATTCC-----ACAAGA-----TCTAGTTTTGTTCAAGTAACGGAT  
TCTAGCCAATTGAAAGGATCCTCT--GATCAATCCAGGGATCGTTTCGATTCCATTAGT--  
-----AATGAGGATTCAGAA-----TATCACACATTGATCAATCA  
AAGAGAGATTCAACAATAAAAAGAAAGATCGATTCTT--TGGGAT-----CTTTCTTTTCTT  
CAAACGGAACGAACAGAGATAGAATCAGAC-----CGACTCCCTAAA-----TGCCTTTCTG  
GATATTCC-----TCAATGTCCCGGCTATTACAG--GAACGTGAGAAGCAGATGAATAAGC  
ATCTGCTTCCGGAAGAAATCGAAGAATTT-----CTTGGGAATCCTACAAGATCCCTTCGT  
TCTTTTTTCTCTGACAGATGG-----TCAGAACTTCAT--CTGGGTTCGAATCCTACTGAGA  
GGTCCACTAGAGATCAG-----AAATTGTTGAAGAAAGAACAAGATGTTTCT--TTTG  
TCCCTTCCAGGCGATCGGAA-----AATAAAGAAATAGTTAATATATTCAAGATAATTA  
CGTATTTACAAAAT-----ACCGTCTCAATTCATCCTATTTTCATCAGATCCGGGATGTGATAT  
GGTTCCA---AAGGAT-----GAA---CTGGACAGTTCCAATAAGATTTCAATTCTTGAACAAA  
AATCCATTTTGTGATTTA-----TTTCATCTATTCCATGACCGGAACAGGGGGGGGATACAG  
TTA-----CACCACGATTTTGAATCAGAA-----GAGAGATTTCAAGAAATGGCAGATCTATT  
CACTCTATCAATAACCGAGCCG---GATCCGTTATATCATAAGGGATTTGCCTTTTCTATTG  
ATTCTTACGGATTGGATCAAAAACAA-----TTCTTGAATGAGGTATTCAACTCCAGGGAT  
GAATCGAAAAAGAAATCTTTA-----TTGGTTCTACCTCCTATTTTTTAT-----GAAGAGA  
ATGAATCTTTTTATCGAAGGATCAGAAAAAATGGGTCCGG---ACCTCCTGCGGGAATG  
ATTTGGAAGATCCAAAACCAAAAATAGTGGTATTTGCTAGCAACAACATAATGGAGGC  
AGTCAATCAATATAGATTGATCCGAAATCTGATTCAAATCCAATATAGCACCTATGGG-----  
-TACATAAGAAATGTATTGAATCGATTCTTTTTAATGAAT-----AGATCCGATTGCAACT  
TCGAATATGGAATTCAA-----AGGGATCAAATAGGAAATGATACTCTGAATCATAGAA  
CTATAATGAAATATACGATCAACCAACATTTATCAAATTTGAAAAAG---AGTCAGAAGA  
AATGGTTCGATCCT-----CTTATTTTTATTTCTCGAACCGAGAGATCCATGAATCGGTATC  
CTAATGCATATAGATACAAATGGTCCAATGGGAGCAAGAAGTTACAGGAACATTTGGAA  
CATTTCAATTTCTGAGCAGAAGAGC-----CATTTTCAAGTAGTC---GATCGATTACGTATT  
AATCAATATTGATTGATTGGTCTGAGGTTATCGACAAAAAAGATTTGTCTAAGTCACTT  
CCTTTCTTTTTGTCCAAGTTACTTCTT-----TTTTTGTCC-----  
AAGTTTCTTCTTTTTTGTCTAACTCACTTCCT--TTTTTCTTTATGAGTTTCGGGAATATC  
CCCATTATAGGTCCGAG---ATCCACATATAT--GAATTGAAAGGTCCGAATGATCAACTC  
TGCAATCAGTTGTTAGAATCAATAGGTCTTCAAATCGTTCATTTGAAAAAATTGAAACC  
CTTC-----TTATTAGAT-----GATCATGATACTTCC---CAAAAATCAAATTTCTTGATCAA  
CGGAGGAACAATATCACCGTTTTTGTTCATAAGATACCA---AAGTGG---GTGATTGACT

CATTCCATACTAGA-----AATAATCGCAGTAAATCTTTTGATAACATGGATTCTTATTTCTC  
AATGATATCCCACGATCACGACAATTGGCTGAATCCCGTGAAACCATTTTCATAGAAGTT  
CATTGATATCTTCTTTTTATAAAGCAAATCGACTTCGATTCTTGAATAATCCACATCACTT  
CTGCTTCTAT-----TGTAACAAAGGATTCCCTTTT-----TTT--GTGGAAAAGGCCCGTAT  
CAATAATTATGAT-----TTACATATGGA---CAATTCCTCAATATCTTGTTCATTTCGCAACA  
AA---ATATTTTCTTTGCGCGGCGGTAAA-----AAAAAATATGCTTTTTTTGGAG---AGAGAT  
ACTATTTACCAACTGAGTTACAGGTGTCTAACATATTCATACCTAACGATTTTCCACAA  
AATGGTGACGAAAGG---TATAACTTGTACAAATCT-----TTTCATTTTCCGATTTCGATCC  
GATCCATTTCGTTTCGT-----AGAGCTATTTACTCGATCGCAGACATTTCTGGAACACTTCTA  
ACAGAAGGACAAATAGTCAGTTTTTCAAAGAACTTATTGTCAACCCCTTTCAGATATGAA  
TCTGTCTGATTTCAGAAGGGAAGAAGTTGCATCAGTATCTCAAT-----TTCAATTCAAACA  
TGGGTTTGATTACACTCCATGTTCTGAGAAATATTTACCATCCGAAAAG-----AGGAAA  
AGG-----CGGGGTCGTTGTCTAAAG-----AAATGCTTTGAGAAAGGGCAGA  
TGTATAGAACCTTTCAACGAGATAGTGCTTTTTCAACTCTCTCAAATGGAATATATTC  
AAACATATATGCCATGGTTCCTTACTTCGACAGGATACAAATATCTAAATTTGATATTTTT  
AGATACTTTTTTCAGAC---CTATTGCCGATACTAAGTAGCAGC-----CAAAAATTTTATCC  
ATTTTTCATGATATTATGCATGGATCAGGTATATCATGGCGAATTCCTTCAGAAAAAATTG--  
-----TGTCTTCCACAATGGAAT--ATGATAAGTGATATTTTCGAGTAAGTGTTTACAT  
AAT-----CTTCTTCTGTCCGAAGAAATGGTTCATCGAAATAATGAGTCA-----CCATTGATA  
TCGACACATCTGAGATCGCCAAATGTTTCGGGAGTTC---CTCTATTCAATCCTTTTCCCTC  
TTCTTATTGCTGGATAC---GTCGTTTCGTACACATCTTCTCTTTGTTTCTCGA-----GCCTAT  
AGTGAGTTACAGACAGAGTTCGAAAGGTTCAAATCTTTGATGATTCCATCATAATGAT  
TGAGTTGCGAAAACCTTCTGGATAGGTATCCTCCATCTGAACTGAATTCCTTCTGGTTAA  
AGAATCTCTTTCTAGTTGCTGTGGAACAATTAGGAGATTCTCTAGAAGAAATACGGGGT  
TCCGCTTCTGGCGGCAACATGCTATGGGGTGGCGGTCCC-----ACTTATGGG---GT  
CAAATCAATACGTTCTAAGAAGAAATATTTGAATATAAATCTCATCGATATCATCGATTTC  
ATA---AGTATCATACCAAATCCCATCAATCGAATCGCTTTTTTCGAGAAATACGAGACATC  
TAAGTCATACAAGTAAAGAGATCTATTATTGATAAGAAAAAGAAAAACGTGAACGG  
TGATTGGATTGATGATAAAATAGAATCGTGGGTCTCGAACAGTGATTTCGATTGGTGATA  
AAGAAAGAGAATTCTTGGTTCAGTTCTCC-----ACCTTAACGACA-----GAAAAAAGGAT  
TGATCAAATTCATTGAGTCTGACT--CATAGTGATCATTATCA-----AAGAATGA  
CTCTGGTTATCAAATGATTGAACAACCGGGAGCAATTTACTTACGATACTTAGTTGACAT  
TCAT-----AAAAAGTATCTAATGAATTATGAGTTCAATACATCCTGTTTAGCAGAAAGGC  
GGATATTCCTGCTCATTATCAGACAATCACTTAT-----TCACAAACCTCCTGTGGGGCTA  
ATAGTTTTTCATTTCCCATCTCATGGA-----AAACCCTTTTCGCTCCGTTTAGCCCTATCC  
CTCTCT--AGGGGTATTTTAGTGATAGGTTCTATAGGAACTGGACGATCCTATTTGGTCA  
AATACCTAGCGACAAACTCCTATGTTCTTTTCATTACAGTATTTCTGAACAAGTTCCTGG  
ATAACAAGCCCAAGGGTTTTCTTGTGAT-----GATAGTGAC-----GATAT  
TGATGATAGTGACGATATCGGC-----CGTG  
ACCTTGATACGGAGCTGGAGCTTCTAACTATGATGAATGCGCTA-----ACTATGGATAT  
GATGCCG-----GAAATAGACCTATTTTATATCACCTTCAATTCGAATTAGCAAAAAGCA  
ATGTCTCCTTGATAATATGGATTCCAACATTTCATGATCTGGATGTGAATGAGTCGAAT  
TACTTATCCCTCGGTTTATTAGTGAAGTATCTCTCC-----AGGGATTGTGAAAGATGTT  
C---ACTAGAAATATTCTTGTATTGCTTCGACTCATATTCCTCCAAAAGTGGATCCCGCT



CTAATAGCTCCGAATAAATTAATACATGCATTAAGATACGAAGGCTTCTTATTCCACAA  
CAACGAAAGCACTTTTTCACTCTTTCATATACTAGGGGATTTCACTTGGAAAAGAAAAT  
GTTCTATACT-----AATGGATTTCGGGTCCATAACCATGGGTCCAATGTACGAGATCTTGT  
AGCACTTACCGATGAGGCCCTATCGATTAGTATTACACAGAAGAAATCAATTATAGACA  
CTAATATAATTAGATCTGCTCTTCATAGACAACTTGGGATTTGCGA-----TCCCAAGT  
AAGATCGGTTTCAGGATCATGGGATCCTTTTCTATCAGATAGGAAGGGCCGTTGCACAAA  
ATGTACTTCTAAGTAATTGCTCCATAGATCCTATATCTATCTATATGAAGAAGAAA-----TC  
ATGTAACGAGGGGGGTTCTTATTTGTACAAATGGTACTTCGAACTTGGAACGAGCATGA  
AGAAATTAACGATACTTCTTTATCTTTTGAGTTGTTCTGCCGGATCGGTCTCAAGAC  
CTTTGGTCTTACCC-----GGACCCGATGAAAA---AACGGGATTACTTCTTATGGACTC  
GTTGAGAATGATTCT--GATCTAGTTCATGGCCTATTAGAAGTAGAAGGGCGCGCCGGTG  
GGA-----TCCTCCCGGACAGAAAAAGATTGCAGTCAGTTTGATAATGAT-----CGAGTGA  
CATTGCTTCTTCGGCCCGAACCAAGGAAT--CCCTTAGATATGATGCAAAATGGATCTTG  
TTCTATCGTTGATCAGAGATTTTCTATGAACAA-----TACGAATCGGAGTTTGAAGAA---  
GGGGAAGGAGAAGTAGTCCTCGACCTGCAA-----CGGATAGAGGAGGGT-----  
TTATTCAATCAC-----ATAGTTTGGGCTCCT-----AGAATATGGCGCCCT-----TGGGGCT  
TTCTATTTGATTGTATCGAAAGGCCCAATGAATTGGGATTTCCC--TATTGGGTCAGGTC  
ATTTACAGGGCAAG-----CGGATCATTATGATGAAAAGGATGGGCTTCAAGAGAATGA  
TTCGGAGTTCTTGCAGAGT-----CAGTACCAGACACGAGATAGATCTTCCAAAGAACA  
AGGCTTCTTTTGAATAAGCCAATTCGTTTGGGACCCTGCGGATCCACTCTTTTTCCTATT  
CAAA---GATCCGCCTTTTATCTCTGTGTTTTACATCGAGAATTCTTTGTAGATGAAGAG  
ATGCCAAAGGGGCTTCTTACTTCCCAAACAGATCTTCTACAACCTCTATATAAACGCTG  
GTTTATC-----AGAATACGCAAGAAAGGCACTTCGAATTGTTGATTTCATCGCCAGAGAT  
GGCTTAGA-----ACCAACAGTTCATTATCT-----AATGGATTTTCCGTTCTAAT-----ACT  
CCATCCGAGAGTTATCAGTATTTATCAAAGCTGTTCTATCTAAC---GAAACGCTATTGG  
ATCAAATGACAAAGACATTGTTGAGAAAAAGATGGCTTTTCCCGGATGAAATGAAAAT  
TGGATTC-----ATG-----ATGGCTAGATCTGGG---ATAAATGGAAATTTTAT  
TGATAAAACCTTTTCAATTGTAGCCAATATCTTATTACGAATAATTCCGACAACCTTCAGG  
AGAAAAAGAGGCATTCACCTATTACAGAGATGGT-----ATGTCGGCTCAATCCGAAGGA  
AATTATGCGGAAGCTTTACAGAATTATTATGAAGCTATGCGACTGGAAATTGATCCTTAT  
GATCGAAGTTATATACTTTATAACATAGGCCTTATCCATACAAGGAACGGAGAACATACA  
AAAGCTTTAGAATATTATTTTCGGGCACTAGAACGAAACCCGTTCTTACCACAAGCTTT  
TAATAATATGGCCGTGATCTGTCATTAC---CGGGGAGAACAGGCCGTTTCAGCAAGGAGA  
TTCGGAATTGCGGAGGCTTGGTTCGATCAAGCCGCCGAGTATTGGAAACAAGCTATA  
GCGCTTACTCCTGGTAATTATATTGAAGCACAGAATTGGTTGAAGATTACAAGGCGGTT  
TGAA-----ATGAGTTGGCGATCAGAACGTATATGGATAGAACTTATAGCGGGATCTCGAA  
AAATAAGTAATTTTCGGTTGGGCCCTCATTCTTTTTTTAGGTTTATTAGGGTTTGTATTGG  
TTGGAACCTCCAGTTATTTTGGTAGGAATTTTATATCTTTATTTCCCTTCTCAGCAAATAAA  
TTCTTTCCGCAGGGGATCGTGATGTCTTTCTATGGGATCGCGGGTCTCTTTATTAGCTC  
CTACTTGTGGTGCACAATTTTGTGGAATGTAGGTAGTGGTTATGATCGATTTCGATATAAA  
AGAGGGCATAGTGTGATTTTTTCGTTGGGGATTTCTTGGAAAAAACCGTCGCATATTCC  
TGCGATTCCTTATGAAAGATATTCAGTCCATCAGAATAGAAAATAAAGAAGGTCTTTTT  
GCTCGTCGGGTCTTTTATATGGAAATCAGAGGCCAGGGGGCCATTCCCTTGACGCGTAC  
TGATGAGAAT--TTGACTCCACAAGAAATTGAACAAAAAGCTGCTGAATTGGCCTATTT

CTTGCGCGTACCAATTGAAGTATTT

>Heliconia

ATGGGAAAATGGCGGTTCAATTCGATGTTGTCTCTAAGTAAATCAATGGATAGTCTTGA  
TGGTATTGGACATAACCAGTAGAAGTGAACAACCTATTCTAAACGATACGGGGAAAAAG  
GTTCCCT---TTCACTAATGTTGATTATTTATTTGATATCAGGGATATTTGGAGTTTGATCTCT  
GATGACACTTTTTTTAGTTAGGGATAGTAATGGTGACAGTTACTCTGTATATTTTGATATTG  
AAAATCAGATTTTTGAGGTTTACAATAAT-----AGTTCTTTTCTGAGTGAAGTAGAAAA  
AAACTTTCTAGT-----TATTTGAATAGGGGGTCTAAGAAAAAGAATCACTACTATT  
ATCATTACAGGTATGATACTCAATCTAGTTGGAATAATCGCATTAATAGTTGCATTGATAG  
TTATCTTCGTTTTGAAGTC-----AGTATTAATCGTTCTATTTTCGGGTAGTACCAACAATTAC  
AGTGACAGTTACATTTATAATTTCAATTTGTAAGTGGTAGTTCTATAAGAGGTAGT  
TCTAGTATAAGAGGTAGTTCTAGTATAAGAACTAGG---AATTTCAATATAAAGAAAAAAT  
ACAGACATTTATGGGTTCAATGCGAAAATTGTTATGGATTAATATAGAAAAATTTT  
GGTCAAAAATGAATATTTGTGAACAGTGTGGATATCATTGAAAATGAGTAGTTT  
AGAAATTGAACTTTTCGATTGATCCCGGAACTTGGGATCCTATGGATGAAGATATGATATCT  
ATGGACCCCATTCATTTCAATTCAGAAAGAGGAACCTTATAGAAATCGTATGGATTCTTAT  
CAAAGAAAGACAGGTTTAACTGAAGCTGTTCAAACAGGCATAGGTCAACTAAATGGTA  
TTCCCGTAGCAATTGGCGTTATGGATTTTCAGTTTATGGGGGGTAGTATGGGATCCGTAG  
TAGGCGAGAAAATTACTCGTTTGGTCGAGTATGCTAATAATCGATCTCTACCTGTCGTTA  
TTGTGTGTGCTTCTGGAGGAGCACGCATGCAAGAAGGAAGTTTGAGCTTGATGCAAAT  
GGCTAAAATATCTTCTGCTTCATATAATTATCAATCAGATAAAAAGTTATTCTATGTATCA  
ATTCTTACATCTCCTACAACCGGTGGAGTAACAGCCAGTTTTGGTATGTTGGGAGATAT  
CATTATTGCTGAACCTAATGCCTACATTGCATTTGCGGGTAAAAGAGTAATTGAACAAA  
CATTGAATAAGATAAATACCTGATGGTTCACAAGCGTCTGAGCATTATTCCATAAAGGTT  
TATTCGACCCAATAGTACCACGTAATCTTTTAAAAGGTGTTTTGGGTGAGTTATTTTCAGC  
TCCACGGTTTTCTTTCCCTTGAATCCAAGTTCAAAAATATGGCAACTCTTCGAGCCGAC  
GAAATTACTAATATTCTCCGTGAACGTATTGAACAATATAATAGAGAAGTAAAGATTGTG  
AATACCGGTACCGTACTTCAAGTAGGCGACGGAATTGCTCGTATTCATGGTCTTGATGA  
AGTAATGGCAGGTGAATTAGTAGAGTTTGGAGAGGGTACGATAGGCATTGCTCTGAATT  
TGGAATCAAATAATGTTGGCGTTGTATTAATGGGTGATGGTTTGATGATACAAGAGGGA  
AGTTCTGTAAAAGCAACAGGACGAATTGCTCAGATACCCGTGAGTGAGGGTTATTTGG  
GTCGTGTTATAAATGCTCTGGCTAAACCTATTGATGGGAGAGGTGAAATTTTCAGCTTCT  
GAATCTCGGTTAATTGAATCTCCTGCCCCAGGTATTATTTTCGAGACGCTCTGTATATGAG  
CCTCTTCAAACGGGGCTTATTGCTATTGATTTCGATGATCCCTATAGGACGCGGTCAACG  
AGAATTAATTATTGGGGACAGACAGACCGGCAAAACAGCAGTAGCCACGGATACGATT  
CTCAATCAAAAAGGTCAAAATGTAATATGTGTTTATGTAGCTATTGGCCAAAAGCATC  
TTCTGTGGCTCAGGTAGTACTACTTTCCAGGAACGGGGGGCGATGGAATACACTATT  
GTGGTAGCCGAAACGGCGGATTCACCTGCTACATTACAATACCTCGCTCCTTATACGGG  
AGCGGCTCTGGCTGAATATTTTATGTATCGTGGACGACATACTTTAATAATTTATGATGAT  
CTCTCCAAACAGGCACAAGCTTATCGCCAAATGTCCTCTTCTATTAAGAAGACCTCCCGG  
TCGTGAAGCTTATCCAGGAGATGTTTTTTTATTTGCATTCACGACTTTTGGAAAGAGCCG  
CTAAATCAAGTTCTAGTCTAGGTGAAGGAAGTATGACCGCTTTACCGATAGTTGAGACT  
CAATCTGGAGACGTTTTAGCTTATATTCCTACTAATGTAATTTCTATTACGGATGGACAA  
ATATTCTTATCTGCCGATCTATTCAATGCTGGAATCCGACCTGCGATTAATGTGGGTATTT

CTGTTTCCAGAGTAGGATCCGCAGCTCAAATTAAGCCATGAAACAAGTAGCCGGCAA  
ATCAAAATTGGAAGTAGCGCAATTCGCAGAGTTAGAAGCCTTTGCACAATTTGCTTCTG  
ATCTCGATAAAGCTACTCAGAATCAATTGGCAAGAGGTC AACGATTACGCGAGTTGCTT  
AAACAATCCAATCAGACCCTCTCGCGGTGGAAGAACAGATAGCTACTATTTATACTGG  
AGCGAATGGATATCTTGATCCGCTAGAAATTGGACAGGTAAAGAAATTTCTCGCTCAGT  
TACGTAAGTACTTAAAAAGAATAAACCTCAATTTCAAGAAATTATATCTTCTACCAAG  
ACATTCACCGAGGAAGCGGAATCCCTTTTGAAGGAAACTATTCTGGAGCAGATCGAAC  
TGTTTTTACTTCAGGAACAAACAATGAGAATCAATCCTACCCCTTCTAGTCTGCGGTT  
TCCACACTTGAAGAACAAAACCTAGGGCGTATCGCTCAAATTATTGGCCCAGTACTGG  
ATGTTGTTTTTCCCTCCGGGCAAGATGCCTAATATTTATAACGCTTTGGTAGTTAAGGGTC  
GAGATACTGTTCGGTCAGCAAATTAATGTGACTTGTGAGGTACAACAATTATTAGGAAAT  
AATCGAGTTAGAGCTGTAGCTATGAGTGCTACAGATGGACTGACGAGAGGAATGGGAG  
TGATTGACACGGGAGCTCCTCTAAGCGTTCCAGTCGGCGGAGCTACCCTCGGACGGAT  
TTTCAACGTTCTTGAGAGCCTGTTGATAATTTAGGTCCTGTAGATACTAGCACAAACAT  
CTCCTATTCATAGACCTGCACCTGCCTTTATACAGTTAGATACGAAATTCTCAATCTTTG  
AAACAGGAATTAAGTAGTGGATCTTTTAGCCCCTTATCGCCGTGGAGGAAAAATCGG  
ACTATTTGGGGGAGCTGGAGTGGGTAAAACAGTACTCATTATGGAATTGATCAACAACA  
TTGCCAAAGCTCATGGAGGCGTATCCGTATTTGGCGGAGTAGGCGAACGTAAGTCTGTA  
AGGAAATGATCTTTACATGGAAATGAAAGAATCCGGAGTAATTAATGAAAAAATATTG  
CAGAATCAAAGTAGCTCTAGTCTATGGTCAAATGAATGAACCGCCGGGAGCTCGTAT  
GAGAGTTGGTTTACTGACCTAACCATGGCGGAATATTTCCGGGATGTTAATGAACAAG  
ACGTACTTCTATTCATCGACAATATCTTTGTTTCGTCCAAGCAGGATCAGAAGTATCCG  
CCTTATTGGGGAGAATGCCTTCTGCAGTGGGTTATCAACCTACCCTTAGTACAGAAATG  
GGTCTTTTGCAAGAAAGAATTACTTCTACCAAAGAGGGATCTATAACTTCGATCCAAGC  
CGTTTATGTACCTGCGGACGATTTGACCGACCCTGCTCCTGCCACGACATTTGCACATT  
TAGATGCTACTACCGTACTATCAAGAGGATTAGCTGCCAAAGGTATTTATCCAGCAGTG  
GATCCTTTAGATTCAACGTCAACTATGTTACAACCTCGGATCGTTGGCGAGGAAACATTA  
TGAAACTGCGCAAAGAGTTAAGCAAACCTTCACAACGTTATAAAGAAGTTCAGGACATT  
ATAGCTATTCTTGGGTTGGACGAATTATCCGAAGAAGATCGTTTAACTGTAGCAAGAGC  
ACGAAAAATTGAGCGTTTCTTATCACAAACCTTCTTCGTGGCAGAAGTATTTACTGGTT  
CTCCAGGAAAATATGTTGGTCTTGCAGAAACAATTAGGGGGTTTCAACTGATCCTTTCC  
GGAGAATTAGACAGTCTTCCCAGCAGGCCTTTTATTTGGTGGGTAACATCGATGAAGC  
TACCGCGAAAGCTATGAACTTAGAAGGGGAGAGCAAATTGAAGAAAATGACCTTAAAT  
CTTTGTGACTGACTCCTAATCGAATTATTTGGGATTCAGAAGTGAAGAAAATCATTTTA  
TCTACGAATAGTGGCCAAATTGGCGTATTACCAAACACGCCCCTATTGCCACTGCTGT  
AGATATAGGTCTTTTGAGAATACGCCTCAACGACCAATGGTTAACGGTGGCTCTGATGG  
GTGGTTTCGCTAGAATAGGTAATAATGAGATCACCATTTTAGGAAATGATGCGGAAATG  
AGTACTGACATTGATCCGCAAGAAGCTCAACAAGCTCTTGAATAGCTGAAGCTAACT  
TGAGTAGAGCTGAGGGTAAGAGACAAGCAATTGAAGCGAATCTAGCTCTCAGACGAG  
CTAGGACACGAGTAGAGGCTGTCAATGTTATTTCCATGAAAAATGTAATCGATTCTTTC  
GTTTCCTTGGGACACTGGCCATTCGCCGGGAGTTTCGGGTTAATACCGATATTTTACG  
AACAAATCCAATAAATCTAAGTGTAGTGCTCGGTGATTGATTTATTTTGGAAAGGGAG  
TGTTAAATGATTTATTAGATAATCGAAAACAGAGGATTTTGGAGTACTATTGAAAATTCG  
AAGAATTACGTAAAGGGGCCATTGAGCAGCTCGAAAGAGCCCAGGCTCGCTTACGTAA

AGCTGAAATGGAAGCAGATGAGTATCGAATGAATGGATACTCTGAAATGGAACGAGAA  
AAAGAAAATTTGATTAATGCCACTAGTGATAGTTTGGAAAAATTAGAAAATTACAAAA  
TGAAACCCTTCATTTTGAACAACAAAGAGCGATTAATCAGGTCGACAACGAGTTTTC  
CAACAAGCCTTACAAGGAGCTCTAGGAACTCTGAATAGTTGCTTGAATAGCGAGTTAC  
ATTTCCGTACGATCCGTGCTAATATTGGCATTCTCGGGGCCATGCAAGAAATAACTGATA  
TGAATCCACTGATTTCTGCCGCTTCCGTTATTGCTGCTGGATTAGCCGTGGGGCTTGCTT  
CTATTGGACCTGGAGTTGGTCAAGGTACTGCTGCAGGTCAAGCTGTAGAAGGTATTGC  
GAGACAACCAGAAGCAGAGGGTAAAATACGAGGTACTTTATTGCTTAGTCTAGCTTTTA  
TGGAAGCTTTAACAATTTACGGACTGGTCGTGGCATTAGCGCTTTTATTTGCGAATCCTT  
TTGTTATGAATGTTATACCATGTTCCATTAACAACTCAAAGGATTATACGATATATCAGG  
TGTAAGAAGTAGGCCAACATTTCTATTGGCAAATAGGAGGTTTACAAATCCATGCCCAAG  
TACTTATCACTTCTTGGGTAGTAATTGCTATCTTATTAGGTTTCAGTCATCATAACTGTTTCG  
GAATCCACAAACCATTCCGACCGACGGTCAGAATTTCTTCGAATATGTCCTTGAATTTA  
TTCGAGACTTGAGCAAAAACCCAGATTGGAGAAGAATATGGGCCTTGGGTTCCCTTTATT  
GGAACTATGTTCCATTTATTTTTGTTTCTAACTGGTCAGGTGCTCTTTTACCTCGGAAA  
ATTATACAGTTACCTCATGGGGAGTTAGCTGCGCCACGAATGATATAAATACTACTGTT  
GCTTTAGCTTTACTCACGTCAGTCGCATATTTTTATGCGGGTCTTAGCAAAAAGGATTG  
GGTTATTTTGGGAAATACATTCAACCAACTCCAATACTTTTACCAATTAACATCCTAGAA  
GATTTACAAAACCTTTATCTCTTAGTTTTCGACTTTTTCGGGAATATATTGGCTGATGAA  
TTAGTAGTTGTTGTTCTTGTCTTTAGTCCCTTCAGTAGTTCCTATACCTGTCATGTTTC  
TTGGATTATTTACAAGTGGTATTCAAGCTCTATTTTTGCAACGTTAGCCGCGGCTTATAT  
AGGTGAATCCATGGAGGGTCATCATATGATATTTACGACTTTAGAACATATATTAACATCAT  
ATCTCTTTTTCGATAATTTCAATTGTGATTACGATTCATTTGATGACCTTATTAGTCCACG  
AAATCGTGGGATTGCGTGATTCATCGGAAAAAGGAATGATAGCCACTTTTTTCTCTATA  
ACAGGATTATTAGTTTCTCGTTGGATTTCTTCGGGGCATTTCGTTAAGTAATTTATACG  
AGTCATTAATCTTCTTTCGTGTAGTTTCTCCATTATTCATATGATTTCCAAGGTGGGGA  
ACCATAAAAATGATTTAAGCACATAACCGCACCAAGTACCATTTTACACAAGGCTTT  
GCCACGTCGGGTCTTTAACTGAAATGCATCAATCTGCAATATTAGTACCTGCTCTCCAA  
TCTCAGTGGTTAATGATGCACGTAAGTATGATGTTATTAAGCTATGCAGCTCTTTTATGC  
GGATCGTTATTATCAGTCGCTCTTCTAGTCATTACATTTTCGAAAAACATTGACATTTTT  
TGTAAGATAAAGAGATTAATATTTGAATGAGAAAAGAAGTTTTTTTAAAAAACTTC  
TTTTCTTTCAATTCGAAATTATTATAAATATCAATTGACTCAACGTTTGGATTATTGGAGT  
TATCGTGTCAATAGTTTAGGGTTTACCTTTTTAACCATAGGCATTCTTTGTGGAGCAGTAT  
GGGCCAATGAGGCATGGGGATCTTATTGGAATTGGGACCCCAAGGAAACTTGGGCATT  
TATTACTTGGACCATATTCGCGATTTATTTACATACTAGAACAATCAAAGTTTGGCAAGG  
TACGAATTCAGCACTTGTGGCTTCTATAGGATTTCTTATAATTTGGATATGCTATTTTGG  
ATCAATCTATTAGGGATAGGTCTACATAGTTATGGTTCATTACATTAACAATGAAAAAA  
AAAGCATTGGCC---TCCCTCCCATATCTCGCATCTATAGTATTTTTGCCCTGGTGGGCTC  
TTTCTCATTTAATAAATGTCTGGAACCTTGGGTACTAATTGGTGGAAATACCAGGCAATC  
CGAAACTTTTTTGAATCATATTTCAAGAGAAAAACGTTCTAGAAAAGATTCATAGAATTAG  
AAGAACTATTCCTATTGGATGAAATGATAAAGGAGTACCCGAAACACATATACAAAA  
CTTCATATAGGAATACACAAGGAAACGATACAATTGGTCAAAGCACACAATGAATATGA  
TCTCCATATCATTTTGCATTTCTCGACAAATATAATCTGTTTTCGCTATTCTAAGTGGTTATT  
TTATTCTGAGTAATGAAGAACTCATCATTTCTTAATTCTTGGGTTTCAGGAATTCCTCTATA

ACTTAAGTGACACAATAAAAAGCTTTTTTCGATTCTTTTAGTTACTGATTTATGGATCGGAT  
TTCACCTCGACCCATGGTTGGGAACATAATGATTGGTTCGGTCTACAACGATTTTGGATTA  
GATCATAACGATCAAATTATATCTGGTCTTGTTCCTACTTTTCCAGTTATTCTAGATACAA  
TTGTGAAATATTGGATCTTCCATTATTTAAATCGTGTATCTCCTTCGCTTGTAGTAATTTAT  
CATTCAATCAATGAAATGCCATTGGTGTTCCTAAAAGTACCTTTTCGGAGTCCTGGAGA  
GGAAGATGCAGTTTGGGTTGACGTATACAACCGACTTCATCGAGAAAGATTACTTTTTT  
TAGGCCAAGAGGTTGATAGCGAGATCTCGAATCAACTTGTGGTCTCATGGTATATCTC  
AGTATAGAAGATGATACTAGGGATCTTTATTTGTTTATAAACTCTCCCGGCGGATGGGTA  
ATACCAGGAATAGCCATTTATGATACTATGCAATTTGTGCCACCCGATGTGCATACAATAT  
GCATGGGATTAGCCGCTTCAATGGGATCTTTCATTCTGGTCGGAGGAGAAATTACCAA  
CGTCTAGCATTCCCTCACGCTAGGGTTATGATTCATCAACCTGCTAGTTCTTTTTATGAA  
GCACAAGCAGGGGAATTTATCCTGGAAGCGGAAGAACTACTGAAACTTCGCGAAACC  
CTCACAAGGTTTATGTACAAAGAACGGGCAAGCCTTTATGGGTTGTATCCGAAGACA  
TGGAAAGGGATGTTTTTATGTCAGCAACAGAAGCCCAAGCTCATGGCATTGTTGATCTT  
GTAGCAGTCGAAATGAAAGAACAATAATTGATTCATGAAGGTTTAATTACTGAATCACT  
TCCCAACGGTATGTTCCGGGTCCGTTTAGATAATGAAGATGTAATTCTAGGTTATGTTT  
GGGGAGGATCCGGCGCAGTTTTATACGATACTACCCGGGGATAGAGTCAAAATCGAA  
GTAAGTCGTTATGATTC AACAGGGGACGTATAATTTATAGACTTCGCAACAAAGATTC  
GAACGATATGGAAGAATTACAAGGATATTTAGAAAAAGATAGATCTCGGCAACAACAC  
TTTCTATATCCACTTCTCTTTCAGGAGTATATTTACGTATTTGCTTATGATCACGGTTTAG  
GGGGTTATGACAAT---TCTAGTTCAGTACTTGTGAAACGTTTAATTATTCGAATGTACCA  
ACAAAATTATTTGATTTATTCGGTTAATGATTCTTACCAAATCGATTCGTTGGGTCCCAT  
TTTTTTTCTCAGATGATATCAGAAGGTTTTGCAGTCATTGTGGAAATTCCATTCTCGCTG  
CAATTAGTATCTTCCCTTATACCAAATCTCACAATTTACAATCTATTCAATATTTCC  
TTTTTTAGAGGATAAATTATCGCATTAAATTATCTGTCAGATATACTAATACCCCATCCC  
ATCCATATGGAAATCTTGGTCCAAATCCTTCAATCCTGGATCCGGGATGTTCCCTCTTTG  
CATTTATTGCGGTTCTTCTCCATGAATATTATAATTGGAATAGTCTCATTACTAAATCTAT  
TTACGTTTTTTTCAAAAAAAGACTATTTTGGTCTTATATAATCTTATGTATCTGAATGC  
GAATTTGTATTAGTTTTTATTCGTAAACAATCTTCTTATTTACGATTAACATCTTCTGGAG  
TCTTCTTGAGCGAACACATTTTTATGGAAAATAGAACAT-----GTAGTGTGCCGAAAT  
CAGAAGACTCTATGGGTCTTCAAGGATCCTTTCATGCATTATGTTTCGATATCAAGGAAA  
AGCGATTCTGGGTTCAAGGGGGACTCATTCTGATGAAGAAATGGAAATGCCACCTT  
GTAATTTCTGGCAATATTTATTTTCATTTTTGGTCTCAACCGTACAGGATCCATATAAACC  
AATTATCAAATATTCCCTTCTTTTTTCTGGGTTATCTTCAAGTGTACTAATAAATCTTC  
GGCGGTAAGGAATCAAATGCTAGAGAATTCATTTCTAATGGATACTCTTACT-----AATAA  
ATTCGATACCATAGTCCCATTTATTCCTTATTCGATCATTGTCTAAAGCTAAATTTTGT  
ACCGTATCCGGGCATCCTATTAGTAAGCCGATTTGGACTGATTTATCAGATTGTGATATTA  
TTAATCGATTTGGTTCGGATATGTAGAAATCTTCTCATTATCACAGTGGATCCTCAAAAA  
AACAGAGTTTGTACCGAATAAAGTATATACTTCGACTTTCGTGTGCTAGAACTTTGGCC  
CGTAAACATAAAAGTACAGTACGCAATTTTTTGCAAAGATTAAGTTTCGGGATTATTAGA  
AGAATTTCTTACGGAAGAAGAACAAGTTCTTCTTTGATCTTCCCCAACGTATTTGGT  
ATTTGGATATTATCCGTATCAATGACCTGGTAAATAATTTAATGATAATTGATACGACA---  
GAAGTACAA---ACTATCAATCTTTTTCTACATCGGAA---TCCTTAAAAGAAGTATATGG  
ACTCATATGGATCTTTGTACCCATTTTGACCCTTATATTGGGAATTACAATAGGGGTACTA

GTAATTGTGTGGTTAGAAAGAGAAATATCTGCAGCGATAACAACAACGTATTGGGCCTGA  
ATATGCTGGCCCCCTGGGAATTCTTCAAGCTCTAGCAGATGGAACATAACTACTTTTTA  
AAGAGGACCTTCTCCCGTCTAGAGGAGATGTTTCGTTTGTAGTATTGGACCGTCTATA  
GTGGTCATATCAATTATACTAAGTTATTTAGTAATTCCTTTTGGGTATCGCCTCATTTTAG  
CCGATCTCAGTATAGGTGTTTCTTTATGGATCGCCATTCAAGTATTGCTCCTATTGGGCT  
TCTTATGTCAGGATATGGATCGAATAATAAATATTCTTTTTTCAGGTGGTCTACGAGCTGC  
TGCTCAATCTATTAGTTATGAAATACCATTAACCTCTATGTGTGTTATCAATATCTCTACTAT  
CTAACAGTTCAAGTACAGTTGATATAGTTGAAGCACAGTCTAAATATGGGTTTTTGGGG  
TGGAATCTGTGGCGTCAGCCATAGGATTTATAGTTTTTCATAATTTCTTCTCTAGCTGAA  
TGTGAGAGATTGCCCTTTGATTTACCAGAAGCAGAGGAGGAATTAGTAGCAGGTTATC  
AAACCGAATATTCAGGTATCAGATTTGGTTTATTTTATCTTGCTTCTTACCTAAATCTATT  
AGTTTCTTCATTATTTGTAACGGTCTTTACTTAGGCGGGTGGAAATTTCTCTATTCCGTAC  
ATATCCATTCCTGAACTTTTCGGAATAAAAAAATAGCTGGAGTCTTTGGAATGACAAT  
TGGTATCTTTATTACATTAGCTAAAGCTTATTTGTTTCTGTTCAATTTCTATCACAAACA  
TGGACTTTACCTAGGATGAGAATGGACCAGCTATTAATCTTGGATGGAAATTTCTTTTA  
CCTATTTCTTTGGGTAATCTATTATTGACAACCTTCTTCCCAACTTGTTTCACTAATGATCT  
GGCATGTACAGAATGAAAACCTTCATTCTCGATTCTACGAGAATTTTATGAAAGCGTTT  
CATTTGCTTCTTCCATGGAAGTTTCATTTCCAGAATGTATCCTAATTTTTGGCCTAA  
TTCTTCTTCTGATGATCGATTCAACCTCTGATCAAAAGGATAGACCTTGGTTCTATTTCA  
TCTCTTCAACAAGTTTAGTAATAAGCATAACGGCCCTATTGTTCCGATGGAGAGAAGAA  
CCTATAATTAGCTTTTTCGGGAATTTCCAAACGAACAATTTCAACGAAATCTTTCAATTT  
CTTATTTACTATGTTCAACTCTATGTATTCCTCTATCCGTAGAGTACATTGAATGTACAG  
AATGGCTATAACAGAGTTTCTGTTATTCGTATTAACAGCTACTCTAGGAGGAATGTTTT  
TATGTGGTGCTAACGATTTAATAACTATCTTTGTAGCTCCAGAATGTTTCAGTTTATGTT  
CTACCTATTATCTGGATATACCAAGAGAGATGTACGGTCTAATGAGGCTACTACGAAATA  
TTACTCATGGGTGGGGCAAGCTCTTCTATTCTGGTTCATGGTTTCTTGGCTATATGG  
TTCATCTGGGGGGGAGATCGAGCTTCAAGAAATAGTGAATGGTCTTATCAATACACAAA  
TGATAACTCCCCGGGAATTTCAATTGCGCTTATATCCATCACTGTAGGAATTGGGTTCA  
AGCTTTCCCCAGCCCCTTTTCATCAATGGACTCCTGACGTATACGAAGGATCTCCCACT  
CCAGTCGTTGCTTTTCTTTCTGTTACTTCGAAAGTAGCTGCTTCAGCTTCAGCCACGCG  
AATTTTCGATATTCCTTTTTATTTCTCATCAAACGAATGGCATCTTCTTCTGGAATCCTA  
GCTATTCTTAGCATGATATTGGGGAATCTCATTGCTATTACTCAAACAAGCATGAAACGT  
ATGCTTGCATATTCGTCCATCGGTCAAATCGGATATGTAATTATTGGAATAATTGTTGGAG  
ACTCAAATGATGGATATGCAAGCATGATAACTTATATGCTGTTCTATATCTCCATGAATCT  
AGGAACTTTTGGCTTGCATTGTATTATTTGGTCTACGTACCGGAACTGATAACATTTCGAGA  
TTATGCAGGATTATACACGAAAGATCCTTTTTTGGCTCTCTCTTCAGCCCTATGTCTCTTA  
TCCCTAGGAGGTCTTCCCTCCACTAGCAGGTTTTTTTCGGAAAACCTCCATCTATTCTGGTG  
TGGATGGCAGGCAGGCCTATATTTCTTGGTTTCAATAGGACTCCTTACGAGCGTTGTTT  
CTATCTACTATTATCTAAAAATAATCAAGTTATTAATGACTGGACGAAATCAAGAAATAA  
CCCCTTACGTGCGAAATTATAGAAGATCTCCTTTAAGATCAAACAATTCATCGAATTG  
AGTATGACTGTATGTGTGATAGCATCTACTATAACCAGGAATATCAATGAACCCAATTTCTT  
GCAATTGCTCAGGATACCCTCTTTATGTTTCTGCTTACGAATATGATATTTTCTGGGCAT  
TTCTAATAATATCAAGCGTATTTCCTATCTTGGCATTGTTCATTTCCGGAGTTTTAGCCCC  
GGTTAGTGAAGGACCAGAGAAGCTCTCTAGCTATGAATCGGGTATAGAACCCATGGGG

GATGCTTGGTTACAATCCGAATCCGCTATTACATGTTTGCTCTAGTTTTTGTGTTTTTG  
ATGTTGAAACGGTCTTTCTTTATCCATGGGCAATGAGTTTCGATGTATTGGGTGTATCTG  
TATTTATCGAAGCTTTAATTTTCGTGCTTATCCCAATTGTTGGTTCAGTTTATGCATGGCG  
AAAAGGAGCATTGGAATGGTCTACGAATTATTTTCTTGGTTAACAATACTTGTGTTTT  
GCCGATATTCGTCGGCTCTTCCATTTTCTTCTTCTCATAGAGGAAATAAGATGTTTAG  
ATGGTATACTATATGTATATGCTTATTGGAACCTCTTCTAACGACTTATGTATTCTGTTATC  
ATTTCCAATTGGACGATCCATTAATCCAATTGGAGGAAGATTTTAAATGGATAGATATTT  
TTGATTTTCACTGGAGACTGGGAATCGACGGACTTTCCATAGGACCTATTTTACTGACA  
GGATTTATCACTACTTTAGCTACCTTAGCAGCTTGGCCAGTTACTCGAAATTCGCGATTG  
TTCTATTTCTCATGCTAGCAATGTACAGCGGTCAAATAGGATCATTTTCTTCTCGAGAC  
CTTTTACTTTTTTTCATGATGTGGGAGTTAGAATTAATTCCTGTTTATTTACTTTTTATCCAT  
GTGGGGAGGAAAGAAACGTCTCTACTCGGCTACAAAGTTTATTTTGTACACTGCGGGG  
GGCTCCATTTTTCTCTTAATAGGAGTTCTAGGTATGGGTTTATATGGCCCTAATGAACCC  
ACATTAGATTTTGAAAGATTAGCTAATCAATCATATCCTGTGGCATTGGAAATAATATTAT  
ATTTTGGCTTCCTTATTGCTTATGCTGTCAAATCGCCGATTATACCCCTACATACGTGGTT  
ACCAGATACCCATGGAGAAGCACATTACAGTACATGTATGCTTCTAGCTGGAATCTTATT  
AAAATGGGAGCATATGGACTTATTCGGGTCAATATGGAATTATTACCCACGCTCATTCT  
TATATTTTCTCCCTGGTTGGTAATAGTGGGAACGATTCAAATAATCTATGCAGCTTCAAC  
CTCTCTCGGTCAACGGAATTTAAAAAGAGAATAGCCTATTCCTCTGTATCTCACATGG  
GTTTACAATTATAGGAATTGGTTCTATAACCGGAATGGGACTCAACGGTGCCATTTTAC  
AAATACTCTCTCATGGATTTATTGGTGCTGCACTTTTTTTTCTTGGCGGGAACGAGTTGTG  
ATAGAATACGTCTTGTTTATCTCGACGAAATGGGAGGGGTATCGATCCCAATGCCAAA  
CTATTTACCATGTTTACAGTAGTTTTTTCGATGGCTTCTCTTGCATTGCCAGGAATGAGTGGT  
TTTGTGCGGAATCATTAGTTTTTTTTTGAATAATTATTAGTCCAAAATATCTTTAATGC  
CAAAAATGCTAATTACTTTTGTAATGGCAATTGGAATGATATTAACCTCTATTTATTATT  
ATCTATGTTACGTTCAGATGTTCTATGGATATAAGCTATTCATGTTCCAAATTCTAATTTT  
GCGGATTCTGGACCACGAGAACTATTTATTTCAATCTGTATCTTTCTACCCGTAATAGGG  
ATTGGTATTTATCCTGATTTTCGTTCTCTCGCTATCAGTTGACAGGGTACAAGCTATCCTAT  
CTAATTACTTTCATCGAATGATGTTTCGAGCATGTACTTTTTTTGAGTGTCTATTTATTTTC  
TATCGGTCTCTATGGATTGATCACAAGTCGAAACATGGTTAGAGCACTTATGTGTCTTG  
AGCTTATACTAAATTCGGTTAATATCAATCTCGTAACATTTTCTGATATATTTGATAGTCG  
CCAATTAAGGAAACATTTTCTCAATCTTTATTATAGCCGTTGCAGCTGCTGAAGCAG  
CTATCGGGCTGGCTATGTTTTCGTCGATTCATCGAAACAGAAAATCAACTCGTATCAATC  
AATCGAATTTGTTGAATAATATGGAACATACATATCAATATGCATGGATAATGCCTTTTCT  
TCCACTTCCAGTTACTATGTCAATAGGATTTGGACTTCTACTTATTCGACAGCAACAAA  
AAATATTCGTCGTATATGGGCTTTTCTTAGTGTTTTACTGTAAAGTATAGCTATGGGGTTT  
TCAGCCAATTTATCTATTCACAAATAAATGGAAGTTCTATCTATCAATATCTATGGTCTT  
GGACCATCAATAATGATTTTTCTTAGAATTCGGATACTTGATCGATCCACTTAGTTCTAT  
TATGTCAATACTAATTACTACTGTTGGAATCATGGTTCTTATTTATAGTGACAATTATATGT  
CTCATGATCAAGGATATTTGAGATTTTTTGCTTATATGAGTTTTTTCAATGCTTCCAIGTT  
GGGATTAGTTACCAGTTCCAATTTGATACAAATTTACATTTTTTGGGAACTAGTGGGAAT  
GTGTTCTACTTATTAATAGGATTTGGTTCACACGACCGACTGCAGCAAGTGCTTGTC  
AAAAGCTTTTTGTAATAATCGTGTAGGGGATTTTGGTTTATTATTAGGAATCTTAGGTC  
TTTATTGGATAACAGGTAGTTTTCGAATTTTCGGGATTTGTTTCGAAATAACTAATAACAATG

GGGTTAGTTCCTTTATTTGCTACTTTGTGTGCCTCTTTATTATTTCGTCGGTGCAGTTGCTAA  
ATCCGCACAATCCCCCTTCACGTATGGTTACCTGATGCCATGGAAGGACCCACTCCTA  
TCTCGGCTCTTATACACGCTGCTACTATGGTAGCAGCAGGAATTTTCTTGTAGCTCGAC  
TTCTGCCTCTTTTCATAGCCATACCTTACATAATGAATTTCAATTTCTTTAATAGGTGTAAT  
AACAGCACTATTAGGAGCTACTTTGGCTCTTGCTCAAAGAGATATAAAAAGAAGTTTAG  
CCTATTCTACAATGTCTCAATTGGGTATATATGTTAGCTCTAGGTATAGGTCTTATCG  
AGCTGCCTTATTCCATTTGATCACTCATGCCTATTCTAAAGCTTTATTGTTTTTGGGATCC  
GGATCTATTATTCATTCAATGGAACCCATTGTTGGATATTCACCAGATAAAAGTCAGAAT  
ATGGTTCTTATGGGTGGTTTAAGAAGATATGTTCCAATTACAAGAATACTTTTTTATTA  
GGTACACTTTCTATTTGTGGTATTCCACCTCTTGCTTGTTTTTTGGTCCAAAGATGAAATT  
CTTAATGATAGTTGGTTGTATTACCAATTTTCGCAATAATAGCTTGTTCACAGCGGGA  
TTAACCGCATTTTATATGTTTCGGGCGTATTTACTTACCTTTGATGGGCATTTGCGTGTTT  
ATTTTAAAAATTACAGTAGCACCCAAAATAGCTCGTTCATTCAATATCTCTATGGGGAA  
AGGAAGTACCCAAAGCAGTCAATAGA---AATTTACTTTTATCAACAATGGATTTTTTTTC  
AAAAAAGTAC-----ACTTCCATGTATCCTCACGAATCGGACAATACTATGCTATTTTCTTT  
GCTTGTATTGGTACTATTTACTTTGTTCGTTGGATCAATAGGAATTCATTTTGATTTGGAT  
ATATTATCCAAATGGTTAACTCCATCGACAAACCTTTTCCATCCAAATTCGAGTTATTCT  
GTGGATTGGTATGAATTTTTTACAAATGCAATTTTTTCTGTAAGTATAGCTATTTTCGGAC  
TATTTATAGCATATATTTTATATGGATCTGTTTATTCATTTTTCCAGAATTTGGACTTCATC  
AATTCATTTGTAATTCCTCTTGGACCAAATCAAAAATGGGATATACAATTGGTCATATAAT  
CGTGGTTACATAGATATTTTTTATACTAGGGTTTTTACCATGGGTATAAGGGGATTAACCG  
AACTAACTCAGTTTTTTGATAGACATATATTGATGGAATTACAATGGGGTTGGTGTG  
CAAGTTTCTTTATAGGGGAAGGAATCAAATCT---ATGGGAGGTGGACGAATCTCTTCTTA  
TCTATTTTTGTATTTATTTTATGCATCAATATTTTTATTTCAGTTTTTTAATGGATTTACCTGG  
ATCAATACATGATATTCTTGTAGCATTCTGGGATCAGTTCTTGTATTAGGGGGTCTGGG  
GGTAGTATTACTTACCAATCCTATTTATTCTGCTTTTTTCGTTGGGATTGGTTCTTGTGTG  
ATATCCTTATTCTATATTCCATCGAACTCCTTTTTTGTAGCTGCCGCACAGCTCCTTATTTA  
TGTGGGAGCCATAAATGTCTTAATCATATTTGCGGTAATGTTTCATGAATGGTTCAGAATA  
TTCCAATGATTCGTATTTTTGGACCATTGGAGATGGAGTCACTTCACTGGTTTGTACAA  
GTATTCTTTTTTCACTAATTACTACTATAACCAGATACGTCATGGTACGGAATTATTTGGAC  
TACAAGATCAAACCAGATTATAGAACAGGACCTAATAAGTAACGTTCAACAGATTGGG  
ATTCATTTATCGACAGATTTTTATCTTCCCTTTGAACTAATTTCTATAATCTTTTTAGTTTC  
CTTGATAGGTGCAATTACTATGGCTCGCCAAATGACTGTACCGGTTACAAAAAAGATT  
TCATGATAGTTAATATGGGTCTCACCACCCATCAATGCATGGTGTCTTTCGACTGATCG  
TACTCTCGATGGTGAAGATGTTATTGACTGTGAACCCATATTGGGCTATTTACACAGAG  
GGATGGAAAAAATAGCGGAAAACCGAACAAATTATACAATATCTGCCTTATGTAACACGT  
TGGGATTATTTAGCTACTATGTTTACAGAGGGCAATAACGGTAAATGCACCAGAACAACT  
GGAAAATATTCAAGTACCTAAAAGGGCTAGCTATATCAGAGTAATTATGCTGGAGCTGA  
GCCGTATAGCTTCTCATTTGTTATGGCTTGGACCTTTTATGGCGGATATCGGCGCGCAGA  
CTCCCTTTTTCTATATTTTCAGAGAGAGGGGAATTGATATATGATTTATTTGAAGCCGCCA  
CAGGTATGCGAATGATGCATAATTTTCCGCATCGGAGGAGTAGCTGCCGATCTACCTT  
ATGGCTGGATAGATAAATGTTTGGATTTTTGCGATTATTTTTTAGCAGGAATTGTTGAATA  
TCAAAAACCTTATTACGCGAAATCCCATTTTTTTGGAGCGAGTTGAAGGAGTGGGCATTA  
TTGGTGGAGAAGAAGCAATAAATTGGGGTTTATCAGGACCGATGTTACGAGCTTCCGG



AATACAATGGGATCTTCGTAAAATTGATAATTATGAGTGTTACAATGAATTTGATTGGGA  
AGTCCAATGGCAAAAAGAAGGAGATTCATTAGCTCGTTATTTAGTACGAATCGGTGAAA  
TGAGGGAATCTATAAAAATTATTCAACAGGCTCTAGAAGGAATTCCTGGAGGACCCTAT  
GAGAATTTAGAAGTCCGACGC--GATAGAGCAAAAATTCGAATGGAATGATTTTGAA  
TATAGATTTATTAGTAAAAACCTTCACCCAATTTTGAATTGTCGAAACAAGAACTTTAC  
GTGAGAGTGGAAGCCCCAAAGGGAGAATTAGGAATTTACTTGATAGGAGATAATAGCG  
TTTTCCCTTGAGATGGAAAATTCGTCCACCCGGTTTCATAAATTTGCAAATTCCTCCTC  
AGCTAGTTAAAAGAATGAAATTGGCTGATATAATGACGATACTAGGTAGTATAGATATCA  
TTATGGGAGAAGTTGATCGTATGTTCCCATGGTGACTGGGTTTCATGAATTATGGTCAA  
CAAACAATACGGGCTGCAAGGTACATTGGTCAAAGTTTCATAATTACCTTATCCCACAC  
AAACCGTTTACCTGTAACCTATTCAATATCCTTATGAAAAATCAATTACGTCAGAGCGTTT  
TCGCGGTTCGAATTCACTTTGAATTTGATAAATGTATTGCTTGCGAAGTATGTGTTTCGTGT  
ATGCCCAATAGATCTACCCGTTGTTGATTGGAGATTGGAAAGAGATATGAAAAAGAAA  
CAATTGCTTAATTATAGTATTGATTTTGGGGTCTGTATATTTTGTGGTAACTGTGTGAGT  
ATTGTCCAACAACACTGTTTATCAATGACTGAAGAATATGAACTTTCTACTTATGATCGTC  
ACGAATTGAATTATAATCAAATTGCTTTGGGTTCGGTTACCAATGTCAGTAATTGGAGATT  
ACACAATTCAAACAGTTATGAATTCGAAAATAGATAAAGATAGACCCTTTGATTCAAGA  
ACGATTACCAATTACCAGCAGGATCGTTTATCTGATTGGTTAGTCAAACATGAGCTAGTT  
CATAGATCTTTGGGCTTCGATTGCCGAGGAATAGAACTTTACAAATAAAAACCGAGGA  
TTGGGATTCCATTGCTGTCAATTCATATGTATATGGTTACAATTATTTACGCTCCCAGTGT  
GCCTATGATGTAGCACCAGGCGGATTTTGTAGCCAGTGTGTATCATCTTACGAGAATACA  
GTATGGTATAGATAAACCAGAAGAGGTATGCATAAAAGTATTTGCCCAAGGAATAATC  
CTAGAATCCCGTCCGTTTTCTGGATTGGGAGAAGTGCTGATTTTCAAGAACGCGAATCT  
TATGATATGTTGGGAATCTCTTATGATAATCATCCACGCCTTAAACGTATTTTGTGCCGG  
AAAGTTGGATAGGTTGGCCCCTACGTAAGGACTATATTACCCCAATTTCTATGAAATAC  
AAGATGCTCAT-----  
-----ATGGTCTTAACT--GAATATTCAGACAATCAAATAAAAAGGAAGAAAAAGA  
TTACATTGAGACAGTTATGAATTTAATTGAGTTTCCCTTACTTGACAAAACAACACTACCAA  
TTCAGTTATTTCAACTACATTGAATGATCTTTCGAATTGGTCAAGACTTTCCAGTTTATG  
GCCGCTTCTATATGGTACCAGTTGTTGTTTCATTGAATTTGCTTCATTAATAGGCTCGCGA  
TTCGACTTTGATCGTTATGGATTGGTACCAAGATCGAGTCCTAGGCAAGCGGACCTTAT  
TTAACAGCCGGCACAGTAACAATGAAAATGGCTCCTTCTTTAGTAAGATTATATGAGC  
AAATGCCTGAACCAAAATATGTCATTGCTATGGGAGCTTGTACTATTACAGGAGGGATG  
TTCAGTACTGATTCTTATAGTACTGTTTCGTGGAGTCGATAAGCTAATTCCTGTGATGTC  
TATTTGCCGGGCTGCCACCTAAACCAGAGGCAGTTATAGATGCTATAACGAACTTCG  
TAAGAAGATATCTCGAGAAATCTTTGAAGATAGAAGTGTGTCTCAA--GAAAATCGATG  
TTTTACTACCAATACAAGTTTATGTTTCGACGCAGTACTCATACTGGAAATTACGATCA  
AGAATTGCTCTATCAATCACCATCTACTTCAGAGATACCTACA-----TTTTTCAAATCCAA  
AAGTTCAGTATCTCCCCACGAATTAGTGAATATGCAAATAAAAATACTTTTTCTTGGGT  
AAAGGAAGAGATGACTCGATCCATTTCTGTATCGATCATGATATATGTAATAACTCGGGC  
ATCTATTTCAAATGCATATCCATTTTTCGCGCAGCAGGGTTATGAAAACCCGCGAGAAG  
CAACGGGACGAATTGTATGTGCCAATTGCCATTTAGCTAATAAACCCGTGGATATTGAA  
GTTCCGCAAGCTGTGCTTCCTGATACTGTATTTGAAGCAGTTGTTTCGAATCCCTTATGAT  
AAGCAACTGAAACAAGTTCTTGCTAATGGTAAAAAGGGGGCTTTGAATGTAGGGGCTG

TTCTCATTTTACCCGACGGATTCTGAATTAGCCCCCTGATCGTATTTCTCCCGAGTTGA  
AAGAAAAGATAGGAAATCTGTCTTTTCAGAGTTATCGTCCCAATAAAAGAAATATTATT  
GTGATAGGTCCTGTTCCCGGTCAGAAATATAGTGAAATCGTCTTTCCCATCTTTCCCC  
GACCCTGCTACGAAGAAAGACGTTCACTTCTTAAATATCCCATATATGTAGGTGGGAA  
CAGAGGAAGGGGTCAGATTTATCCTGATGGTAGCAAAGTAACAATACAGTCTATAATG  
CTACATCAGCAGGTATAGTAAGCAGAATAGTACGTAAAGAAAAGGGGGGATATGAAAT  
AACCATAGTTGATGCATCGGATGGACATCAAGTGGTTGATATTATACCTCCAGGACCAG  
AACTTCTTGTTTCAGAGGGTGAATCCATCAAGCTTGATCAACCATTAACAAGCAATCCT  
AATGTGGGAGGCTTTGGTCAGGGAGATGCAGAAACAGTGCTTCAAGACCCATTACGG  
GTCCAAGGCCTTTTGTTCTTCTTGGCATCTGTTATTTTGGCACAAGTTTTTTGGTTCTT  
AAAAAGAAACAGTTTGAAAAGGTTCAATTGTACGAAATGAATTTCTCAATAAAGTATA  
TGATTGGTTTGAGGAACGTCTCGAGATTCAGGCGATTGCAGATGATATAACTAGTAAAT  
ATGTTCCCTCCTCATGTCAACATATTTATTGTTTAGGGGGGATCACACTTACTTGTTTTT  
AGTACAAGTAGCTACAGGTTTTGCTATGACTTTTTACTACCGTCCAACCGTTACAGAGG  
CTTTTCTCTGTTCAATACATAATGACCGAGGCCAACTTTGGTTGGTTAATCCGATCAG  
TTCATCGATGGTCAGCAAGTATGATGGTTCTAATGATGATCCTGCACGTATTTCTGTGT  
ACCTTACAGGTGGATTTAAAAAACCCCGCAATTAACCTGGGTTACAGGTGTGGTTTTG  
GCTGTATTGACGGCATCTTTGGTGAACTGGTTATTCCTTACCTCGGGACCAAAATTGGT  
TATTGGGCAGTAAAAATTGTGACAGGCGTACCTGAAGCTATTCCTGTAATAGGATCGCC  
TTTGGTAGAGTTATTACGTGGAAGTGCTAGTGTGGGCCAATCCACTTTGACGCGTTTTT  
ATAGTTTACACACTTTTGTATTGCCTCTTCTTACTGCCGTATTTATGTTAATGCATTTTCC  
AATGATACGTAAGCAAGGTATTTCTGGTCTTTAATGGGAGTAACAAAGAAACCTGAC  
TTGAACGATCCTGTATTAAGAGCTAAATTGGCTAAAGGGATGGGGCATAATTATTATGGA  
GAACCCGCATGGCCAATGATCTTTTATATATTTTTCCAGTAGTAATTCTGGGTACTATTG  
CATGTAATGTAGGTTTAGCGGTTCTAGAACCGTCAATGATTGGTGAACCGGCGGATCCA  
TTTGCAACTCCTTTGGAAATATTACCCGAATGGTACTTCTTTCCCGTATTTCAAATACTC  
CGCACAGTACCCAATAAGTTATTAGGTGTTCTTTAATGGTTTTAGTACCAATGGGATTA  
TTGACAGTACCTTTTTTGGAGAATGTTAATAAATCCAAAATCCATTTCTGTCGTCCAGTA  
GCTACAACAGTCTTTTTGATCGGTACCGCAGTAGCTCTTTGGTTAGGTATTGGAGCAAC  
ATTACCTATTGATAAATCCCTAACTTTAGGTCTTTTTATGATTGAAGTTTTTCTATTTGGA  
ATCGTCTTAGGTCTAATTCCTATTACTTTAGCAGGATTATTCGTAACCGCATATTTACAAT  
ACAGACGTGGTGATCAGTTGGACCTTATGCTTACTATAACTAGTTATTTCTGGTTTTCTAC  
TGGCTGCTTTAACTATAACCCCGACTTATTCATTGGTTTTGAACAAGATACGACTTATTA  
TGGATATAGTAAGTCTCGCTTGGGCTGCTTTAATGGTAGTCTTTACATTTTCCCTCTCAC  
TCGTAGTATGGGAAGGAGTGGACTCATGATTATTCGTTTCGCCGGAACCAGAAGTGAA  
AATTGTTGTAGATAGGGATCCTATAAAAACGTCTTTTCGAGGAATGGGCCAGACCCGGCC  
ATTTCTCAAGAACAATAGCTAAGGGCCCTGATACTACCACTTGGATCTGGAACCTACAT  
GCTGATGCTCAGATTTTCGATAGTCATAACAGTGATTTGGAGGAGATCTCTCGAAAAGT  
ATTTAGTGCTCATTTCTGGTCAACTCTCCATTATCTTTCTTTGGCTGAGTGGCATGTACTT  
CCATGGCGCCCGTTTTTCCAATTATGAAGCATGGCTAAGTGATCCTACTCACATTGCGCC  
CAGTGCCAGGTAGTTTGGCCAATAGTAGGTCAAGAAATATTGAATGGTGTATGGGT  
GGGGTTTTCCGAGGAATACAAATAACCTCCGGTTTTTTTTTCAGATTTGGCGAGCATCTGG  
AATAACTAATGAATTACAACCTATTGTACCGCCATTGGCGCATTTGGTCTTTGCATCGTT  
AATGCTTTTTGCCGGTTGGTTCCATTATCACAAAGCCGCCCAAATTTGGCTTGGTTCC

AAGATGTAGAATCTATGTTAAATCACCACTTAGCGGGGTTACTAGGGCTTGGGTCTCTT  
TCTTGGGCGGGACACCAAATCCATGTATCTTTACCGATTAACCAATTTCTCGACGCTGG  
AGTTGATCCTAAAGAGATACCACTTCCTCATGAATTTATCTTGAATCGGGACCTTTTGGC  
TCAACTTTATCCCAGTTTTGCCGAGGGAGCAACCCCTTTTACCTTGAATTGGTCAA  
AATACGCGGAATTTCTTACTTTTCGTGGAGGATTAATCCAATAACAGGTGGTCTATGG  
CTGACCGATATTGCACACCATCATTAGCTATTGCAATTCCTTTTCTGATCGCTGGTCATA  
TGTATAGAACCAACTGGGGCATTGGTCATGGCCTTAAAGACATTTTAGAGGCTCATAAA  
GGTCCATTTACAGGCCAGGGCCATAAGGGACTCTATGAAATCCTAACAACGTCGTGGC  
ATGCTCAATTATCTCTTAACTGGCTATGTTAGGTTCTTTAACCATTGTTGTAGCTCACCA  
TATGTATTCCATGCCTCCCTATCCATACCTAGCTATTGACTATGGTACACAACCTTTTCGTTG  
TTCACACATCACATGTGGATCGGTGGGTTTTCTCATAGTTGGTGCTGCTGCGCATGCAGC  
AATTTTTATGGTAAGAGACTACGATCCAACACTCGATAACGATCTATTAGATCGTGT  
CCTTAGACACCGCGATGCAATCATACATCTTAACTGGGCATGTATATTTCTAGGTTT  
TCACAGTTTTGGCTTGTATATTCATAATGATACCATGAGCGCTTTAGGGCGTCCACAAGA  
TATGTTTTTCAGATACCGCTATAACAATTACAACCCATCTTTGCTCAATGGGTACAAAACAC  
CCATGCTTTAGCACCTGGCATAACAGCTCCTAGTGCAACAGCAAGTACCAGCTTAACTT  
GGGGAGGTGGTGAGTTGGTAGCAGTAGGCGGCAAAGTAGCTTTGTTACCTATTCCATT  
AGGAACCGCAGACTTTTTAGTCCATCATATTCATGCATTTACGATCCACGTGACTGTATT  
GATACTACTGAAAGGTGTTCTATTTGCTCGAAGTTCCCGTTTGATACCTGATAAAGCAA  
ACCTTGGTTTTTCGTTCCCTTGTGATGGACCCGGAAGAGGGGGGACATGTCAAGTATCT  
GCCTGGGATCATGTCTTCTTAGGTCTATTCTGGATGTACAATGCAATTTAGTAGTGATT  
TTCCATTTAGTTGGAAAATGCAGTCGGATGTTTGGGGTACTATAAGTGATCAAGGGT  
AGTAACTCATATTACAGGAGGAACTTTGCGCAGAGTTCCATTACTATTAATGGGTGGC  
TCCGAGATTTCTTATGGGCACAGGCATCTCAGGTAATTCAGTCTTATGGTTCTTCATTAT  
CTGCATATGGTCTTTTTTTCTTAGGTGCTCATTGTTGCTGGGCTTTCAGTTAATGTTTCT  
ATTCAGTGGCCGTGGTTATTGGCAAGAACTCATTGAATCTATCGTTTTGGGCTCATAACA  
AATAAAAGTTGCTCCTGCTACTCAGCCTAGAGCCTTGAGCATTGTACAAGGACGTGCT  
GTAGGAGTAACCCATTACCTTCTGGGTGGAATTGCCACAACATGGGCATTCTTCTTAGC  
AGAATTATTGCAGTAGGAATGGCATTAAAGATTTCCGAGGTTTAGCCAAGGCTTAGCTC  
AGGACCCCACTACTCGTCGTATTTGGTTTTGGTATTGCTACCGCACATGACTTCGAGAGT  
CATGATGATATTACTGAGGAACGTCTTTATCAGAACATTTTTGCTTCTCACTTTGGGCAG  
TTAGCAATAATCTTTCTGTGGACGTCCGAAATCTCTTTCATGTAGCTTGGCAAGGAAA  
TTTTGAGTCATGGATAAAGACCCTTACATGTAAGACCTATTGCTCATGCAATTTGGGA  
TCCTCATTTTGGTCAACCAGCTGTAGAAGCCTTTACTCGAGGAGGTGCTACCGGTCCA  
GTGAATATCGCTTATTCCGGTGTTTATCAGTGGTGGTATAACAATCGGATTACGCACTAAT  
GAAGATCTTTATACTGGAGCTCTTTTTCTATTATTTCTTTCTGCTATATCCTTAATAGCGG  
GTTGGTTACACCTACAACCAAATGGAAACCAAGCGTTTCGTGGTTCAAAAATGCCGA  
ATCTCGTCTAAATCATCATTTGTCAGGACTTTTCGGAGTAAGTTCTTTGGCTTGGACAG  
GACATTTAGTTCATGTCGCTATTCCAGGATCCAGGGGACAGTACGTCAGATGGAATAAT  
TTTTTAGACGTATTACCCTATCCTCAAGGGTTGGGACCACTTTTTACGGGTGAGTGGAA  
TCTTTATGCCAAAACCTGATTCGAGTAGCCATTTATTTGGTACTTCCAAGGAGCAG  
GAACTGCCATTCTAACCCTTCTCGGTGGATTCCATCCACAACGCAAAGTTTATGGCTG  
ACCGATATTGCTCATCATCATTAGCTATTGCAATTTTCTGATCGCTGGCCATATGTA  
TAGAACTAACTTCGGGATTGGGCACAGTATCAAAGATCTTTTAGAAAACACATATTCCTC

CAGGGGGTCGATTAGGACGTGGGCATAAGGGTCTTTATGACACAATCAATAATTCGCTT  
CATTTTCAATTAGGTCTTGCTCTAGCCTCTTTAGGGGTTATTACTTCTTTAGTAGCTCAAC  
ACATGTACTCTTTACCTGCTTATGCATTCATAGCACAAAGACTTTACTACTCAAGCTGCGT  
TATATACTCATCACCATAACATTGCAGGGTTTATCATGACAGGAGCCTTTGCTCATGGAG  
CTATATTCTTCATTAGAGATTACAATCCGGAACAGAATGAGGATAATGTATTGGCAAGAA  
TGTTAGACCATAAAGAAGCTATCATATCTCATTAAAGTTGGGCCAGCCTCTTTCTTGGGT  
TCCATAACCTTGGGCCCTTTATGTTTCATAACGATGTCATGCTCGCTTTTGGTACTCCGGAAA  
AACAAATCTTGATCGAACCTATATTTGCCCAATGGATAACAATCTGCTCATGGTAAGACTT  
CATATGGGTTTCGATGTACTCTTATCTTCAACGAATGGCCCAGCATTCAATGCAGGTCTGA  
AGCATATGGTTACCGGGCTGGTTGAATGCTGTTAATGAG-----AATAGTAATCACTCTTC  
TTAACAATAGGTCTGGGGACTTCTTGGTTCATCATGCTATTGCTCTAGGTTTGCATACA  
ACTACATTGATTTTAGTAAAAGGTGCTTTAGATGCACGTGGTTCCAAGTTAATGCCAGA  
TAAAAGGATTTTCGGTTATAGTTTTCCTTGGCGACGGCCCAGGGCGCGGGCTACTTGTG  
ATATTTCTGCTTGGGACGCATTTTATTTGGCAGTTTTCTGGATGTTAAATACCATTGGATG  
GGTACTTTTTTATTGGCATTGGAAACACATCACATTATGGCAGGGTAACGTTTCACAATT  
TAATGAATCTTCCACTTATTTGATGGGATGGTTAAGAGATTATCTATGGTTAAACTCTTC  
ACAACCTTATCAATGGATATAACCCTTTTGGTATGAATAGTTTATCCGTATGGGCGTGGAT  
GTTCTTATTTGGACATCTTGTTTGGGCTACTGGGTTTATGTTCTTAATTTCTTGGCGTGGGA  
TATTGGCAGGAATTGATTGAAACTTTAGCATGGGCTCATGAACGCACACCTTTGGCTAA  
TTTGATTTCGATGGAGAGATAAGCCAGTGGCTCTTTCCATTGTGCAAGCAAGATTGGTTG  
GATTAGCCACTTTTCCGTAGGTTATATATTCACTTATGCAGCTTTCTTGATTGCCTCTAC  
ATCAGGAAAATTTGGTATGTCACATTCAGTAAAAATTTATGATACATGTATAGGGTGTAC  
TCAATGTGTACGAGCCTGCCCCACAGATGTATTGGAAATGATACCTTGGGATGGATGTA  
AAGCTAAGCAAATTTGCTTCCGCACCAAGAACCGAGGACTGTGTGGGTTGTAAGAGAT  
GTGAATCCGCCTGCCCCAACAGATTTTTTTGAGTGTCCGTGTTTATTTAGGCTTTGAAACA  
ACTCGCAGCATGGGTCTAGCTTATATGACAGATCTCAACTTACCCTCTATTTTTGTGCCT  
TTAGTGGGCCTAGTATTTCCGGCAATTGCAATGGTTTCTTTATTTCTTCATGTCCAAAAA  
AATAAGATTGTCATGCGAGATATAAAAACATATCTCTCCGTGGCACCTGTGCTAAGTACT  
CTATGGTTTGGGTCTTTAGCAGGCCTATTGATAGAAATTAATCGTTTATTCCCGGATGCC  
TTGTCAATCCCTTTTTT-----ATGACTGCAATTTTAGAGAGACGCGAAAGTACAAGCCT  
ATGGGGTCGCTTCTGCAACTGGATAACCAGCACTGAAAACCGTCTTTACATTGGATGGT  
TCGGTGTTTTGTATGATCCCTACCTTATTGACCGCAACTTCCGTATTTATTATCGCCTTCAT  
TGCTGCTCCTCCAGTAGATATTGATGGTATTTCGTGAACCTGTTTCTGGTTCTTTACTTTAT  
GGAAATAATATTATCTCTGGTGCCATTATTCCTACTTCTGCAGCTATAGGTTTGCATTTTT  
ACCAATCTGGGAAGCAGCATCTGTTGATGAGTGGTTATACAATGGCGGTCCTTATGAG  
CTAATTGTTCTACTTCTTACTTGGTGTAGCTTGTACATGGGTTCGTGAGTGGGAACCT  
AGTTTCCGTCTGGGTATGCGTCCTTGGATTGCTGTTGCATATTCAGCTCCTGTTGCAGCC  
GCTGCTGCTGTTTTTCTTGATCTACCCTATTGGTCAAGGAAGTTTCTCTGATGGTATGCCT  
TTAGGAATATCTGGTACTTTCAACTTCATGATTGTATTCCAGGCAGAACACAACATCCTT  
ATGCACCCATTTACATGTTAGGTGTAGCTGGTGTATTTCGGCGGCTCCCTATTCAAGTGT  
ATGCATGGTTCCTTGGTAACCTCTAGTTTGTATCAGGGAAACCACTGAAAACGAATCTGC  
TAACGCAGGTTACAGATTCGGTCAAGAAGGGGAGACTTATAATATCGTAGCTGCTCATG  
GTTATTTTGGCCGATTGATCTTCCAATATGCTAGTTTCAACAACCTCTCGTTCTTTACATTT  
CTTCTTGGCTGCTTGGCCTGTAATTGGTATCTGGTTCAGTCTTTAGGTATTAGCACTAT

GGCTTTCAACCTAAATGGTTTCAATTTCAACCAATCCGTAGTTGACAGTCAGGGTCGTG  
TCATTAACACTTGGGCTGATATCATCAACCGTGCTAACCTTGGTATGGAAGTAATGCATG  
AACGTAATGCTCACAACCTCCCTCTAGACCTAGCTGCTGTCGAAGTTTCATCTACAAAT  
GGAATGGGTTTGCCTTGGTATCGTGTTCACTGTCGTATTGAATGATCCCGGTCGATTG  
CTTTCTGTCCATATAATGCATACAGCCCTAGTTGCTGGTTGGGCTGGTTTCGATGGCTTTA  
TACGAATTAGCGGTTTTTGATCCCTCTGACCCGCTCTTGATCCAATGTGGAGACAAGG  
TATGTTTCGTTATAACCCTTCATGACTCGCTTAGGAATAACCAATTCGTGGGGTGGTTGGAG  
TATTTCA--GGAGGAACTGTAACGAATCCGGGTATTTGGAGTTATGAAGGTGTGGCAGG  
GGCACATATTGTGTTTTCTGGCTTGTGCTTCTTGGCAGCTATCTGGCATTGGGTGTATTG  
GGACCTAGAAATATTCTGTGATGAGCGTACGGGCAAACCATCTTTGGATTTGCCTAAGA  
TCTTTGGAATTCATTTATTTCTCTCAGGGTTGGCTTGTCTTTGGCTTTGGCGCATTTTCATGT  
AACAGGTTTGTATGGTCTGGAATATGGGTGTCCGATCCTTATGGACTAACTGGAAAAG  
TACAACCTGTAAGTCCAGCGTGGGGCGCGGAAGGCTTTGATCCTTTTGTTCGCGGAGG  
AATAGCCTCTCATCATATTGCAGCGGGTACATTGGGCATATTAGCAGGCTTATTCCATCTT  
AGTGTCCGTCCGCCTCAACGTCTATACAAAGGATTACGTATGGGCAATATTGAAACTGT  
ACTTTCCAGTAGTATCGCTGCTGTTTTTTTTGTCAGCTTTTCGTTGTTGCTGGAACATATGTG  
GTATGGTTCAGCAACTACCCCAATCGAATTATTTGGTCCCACTCGTTATCAGTGGGATCA  
GGGATACTTTCAGCAAGAAATATATCGAAGAGTTAGCGCCGGACTAGCGGAAAATCTG  
AGTTTATCGGAAGCTTGGTCTAAAATTCCCGAAAAATTAGCTTTTTTATGATTACATTGGT  
AATAATCCGGCAAAGGGGGATTATTTCAGAGCGGGGTCAATGGACAACGGGGATGGAA  
TAGCTGTTGGATGGTTAGGACACCCCGTCTTTAGAGATAAAGAAGGGCGCGAGCTTTT  
TGTACGTCGTATGCCTACTTTTTTTGAAACATTTCCGGTAGTTTTGGTAGATGGAGACGG  
AATTGTGAGAGCCGATGTTCCTTTTAGAAGGGCAGAATCAAAGTATAGTGTGAACAA  
GTAGGTGTAACCTGTTGAGTTCTATGGTGGCGAACTCAATGGAGTCAGTTATAGTGATCC  
TGCGACTGTGAAAAATATGCTAGACGTGCCCAATTAGGTGAAATTTTTGAATTAGATC  
GGGCTACTTTGAAATCTGATGGCGTTTTTCGTAGCAGTCCAAGGGGTTGGTTCACTTTT  
GGCCATGCTACGTTTGCTTTGCTCTTCTTTTTTCGGACACATTTGGCATGGCGCTAGAAC  
CTTGTTTCAGAGATGTTTTTGGTGGTATTGATCCAGATTTGGATGCTCAAGTGAATTTGG  
AACATTCCAAAAAATTGGAGATCCAACCTACAAGGAGACAAGTAGTCATGAAAACCTTG  
TATTCCTGAGGAGGTTCTACCACGTGGAAACGCTCTTTAATGGAACCTTAGCTTTAGC  
TGGTCGTGACCAAGAAACCACCGTTTTTCGCTTGGTGGGCCGGGAATGCCAGACTTATT  
AATTTGTCCGGTAAACTACTTGGAGCTCACGTAGCCCATGCCGGATTAATCGTATTCTG  
GGCCGGAGCAATGAACCTATTTGAAGTGGCTCATTTTCGTACCAGAGAAACCTATGTATG  
AACAAGGATTGATTTTACTTCCGCACCTAGCTACTCTAGGTTGGGGGTAGGTCCGGGG  
GGGGAGGTTATAGACACCTTTCCATACTTTGTATCTGGAGTACTTCACTTAATTTCTCT  
GCAGTCTTAGGCTTTGGTGGTATTTATCATGCGCTTCTTGGACCCGAAACTCTTGAAGA  
ATCTTTCCATTCTTCGGTTATGTATGAAAGATAGAAATAAAATGACTACCATTTGGG  
TATTCACTTAATTTTGTTAGGTCTAGGTGCTTTTCTTCTAGTACTCAAGGCTCTTTATTTT  
GGGGGCATATATGATACCTGGGCCCTGGGGGGGAGATGTAAGAAAAATTACCAACT  
TGACCTTAGCCCAAGTGTATATTTGGTTATTTACTAAAATCTCCTTTTGGGGGGGAAG  
GATGGATTGTTAGTGTGGATGATTTAGAAGATATAATTGGGGGACATGTATGGTTAGGTT  
CTATTTGTATACTTGGTGGAAATTTGGCATACTTAACCAAACCCTTTGCATGGGCTCGCC  
GTGCATTTGTATGGTCTGGAGAGGCTTACTTGTCTTATAGTTTAGGTGCTTTATCTGTCT  
TTGGTTTCATCGCTTGTGTTTCGTCTGGTTAATAATACCGCTTATCCTAGTGAGTTTTA

CGGACCTACCGGGCCAGAAGCTTCTCAAGCTCAAGCATTACCTTTCTAGTTAGAGAC  
CAACGTCTTGGAGCTAACGTGGGATCCGCCCAAGGACCTACTGGTTTAGGTAAATATCT  
AATGCGTTCCTCCGACCGGAGAGATTATTTTTGGAGGAGAACTATGCGTTTTTGGGATC  
TTCGTGCTCCCTGGTTAGAACCTCTAAGGGTCCCAATGGTTTGGACTTGAGTAGGCTG  
AAAAAAGACATAACAACCTTGGCAAGAACGACGTTTCGGCAGAATATATGACTCATGCTC  
CTTTAGGTTCTTTAAATTCCTGGGTGGCGTAGCTACCGAGATCAATGCAGTCAATTATG  
TCTCTCCTAGAAGTTGGTTGGCGACCTCCCATTTTTGTTCTAGGATTCTTCTTTTTTGTGG  
GGCATTGTGGCATGCGGGAAGGGCCCGTGCAGCTGCAGCAGGCTTTGAAAAAGGAA  
TTGATCGTGATTTGGAACCTGTTCTTTCCATGACCCCTTTCGTATGACTATAGCCATTG  
GTAAAATTACCAAAGAAGAAAATGATCTATTTGATATTATGGATGATTGGTTACGGAGG  
GACCGTTTCGTTTTTGTAGGTTGGTCCGGCCTATTGCTCTTTCCTTGTGCTTATTTGCT  
TTAGGAGGTTGGTTTACAGGTACAACTTTTGTAAC TTCATGGTATAACCCATGGATTGGC  
GAGTTCCTATTTGGAAGGTTGCAATTTCTTAACCGCTGCAGTTTCCACTCCTGCGAATA  
GTTTAGCACATTCTTTGTTGCTACTATGGGGTCTGAAGCACAAGGAGATTTTACTCGT  
TGGTGTCAATTAGGCGGTTTGTGGACTTTTTGTTGCTCTCCATGGTGCTTTTCGGACTAATA  
GGTTTCATGTTACGTCAATTCGAACTTGCTCGATCTGTTCAATTGCGACCTTATAATGCA  
ATCGCATTCTCTGCTCCAATTGCTGTTTTTGTTCCTGATTATCCGCTGGGTC  
AATCTGGTTGGTTCTTTGCACCTAGTTTTGGCGTAGCAGCTATAATTCGATTCATCCTCT  
TCTTCCAAGGGTTTCATAATTGGACGTTGAACCCATTTTCATATGATGGGAGTTGCCGGA  
GTATTAGGCGCTGCTCTGCTATGCGCTATTCATGGTGCTACCGTAGAAAATACTTTATTC  
GAAGATGGTGACGGTGCAAATACATTTTCGTGCTTTTAAACCCA ACTCAAGCCGAAGAAA  
CTTATTCAATGGTCACTGCTAACCGCTTTTGGTCCCAAATCTTTGGGGTTGCTTTTTCCA  
ATAAACGTTGGTTACATTTCTTTATGCTATTTGTACCAGTAACTGGTTTATGGATGAGTG  
CTATTGGGGTAGTCGGTCTGGCTCTGAATCTACGTGCCTATGACTTCGTTTCCCAAGAA  
ATCCGTGCAGCGGAAGATCCTGAATTTGAGACTTTCTACACCAAAAATATTCTCTTAAA  
CGAAGGTATTTCGTGCTTGGATGGCGGCTCAGGATCAGCCTCATGAAAACCTTGATTCC  
CTGAGGAGGTTCTACCACGTGGAACGCTCTTATGTCTGGAAGCACGGGAGAACGTTCT  
TTTTGCTGATATTATTACCAGTATTTCGATACTGGGTCATTCATAGCATTACTATACCTTCCC  
TATTTATTGCGGGTTGGTTATTCGTCAGTACGGGTTTAGCTTACGACGTGTTTGGAAAGTC  
CTCGGCCAAACGAGTATTTACAGAGAGCCGACAAGGGATTCCATTGATAACCGGCCG  
TTTTGATTCTTTGGAACAACCTCGATGAATTTAGTAAATCCTTTATGACCATAGATCGAAC  
CTATCCAATTTTACAGTGCGATGGTTGGCTGTTACGGACTAGCTGTACCTACCGTTTC  
TTTTTTGGGGTCAATATCAGCAATGCAGTTCATCCAACGAATGGCTACACAAACCGTTG  
AGGATAGTTCT--AGATCTGGGCCAAGACGAACTACTGTAGGGGATTTATTGAAACCAT  
TGAATTCGGAATATGGTAAAGTAGCTCCGGGCTGGGGGACTACACCACTAATGGGGGT  
CGCAATGGCCCTATTTGCGGTATTCCTATCTATTTTTGGAAATTTATAATTCTTCCGTTT  
TACTGGATGGAATTACAATGAGTATGCTTACTCTGAAACTCTTTGTTTACACAGTAGTGA  
TATTTCTTTGTTTCTCTCTTCATCTTCGGATTCTTATCTAATGATCCAGGACGTAATCCTGG  
ACGTGAGGAAATGGCCGATACTACTGGAAGGATTCTCTTTGGCTGGTGGGTACTGTA  
ACTGGTATTCCTGTGATCGGTTAATAGGTGTTTTCTTTTACGGTTCATATTCTGGGTTGG  
GTTTCATCTCTCATGCTTAATATCTTTAGCTTAATCTGTATCTGTCTTAATCTGTTCTTTAT  
TCGAATAGTTTTTTCTTTGCCAAATTGCCTGAAGCTTATGCTGTTTTCAATCCAATCGTA  
GATGTTATGCCTGTCATACCTCTCCTCTTTTTTCTTTAGCCTTTGTTTGGCAAGCTGCT  
GCAAGTTTTTCGAATGACACAATCAAACCCGAATGAACAAAATGTTGAATTGAATCGTA

CCAGTCTATACTGGGGTTTATTACTCATTFTTTGTACTTGCTGTTTTATTTTCCAATTATTTTC  
TTCAATATGGAAGTCAATATTCTCGCATTATTGCTACTGCGCTGTTCAATTCTAGTTCCTA  
CTGCTTTTTTACTTATTATCTACGTA AAAACAGTCAGTCAA AATGATATGGAAACAGCA  
ACCCTAGTCGCCATCTTTATATCTGGTTTACTTGTAAGCTTTACCGGGTACGCCTTATATA  
CCGCTTTTGGGCAACCCTCTCAACA ACTAAGAGATCCATT CGAAGAACACGGGGACAT  
GGAAGCATTGGTTTATACATTCCTTTTAGTCTCGACTTTAGGGATAATTTTTTTTCGCTATC  
TTTTTTTCGAGAACC GCCTAAGGTTCCA ACTAAAAAATGAAAATGACTATTGCTTTCCA  
ATTAGCTGTTTTTGCATTAATTGCGACTTCATCAGTCTTACTGATTAGTGTACCCGTTGTA  
TTTGCTTCTTCTGATGGTTGGTCAAGTAATAAAAATATTGTATTTTCCGGTACATCATTAT  
GGATTGGATTAGTCTTTCTGGTAGCTATCCTTAATTCTCTCATCTCTATGAGTTGTAGGG  
AGGGACTTATGTCACCACAAACAGAGACTAAAGCAAGTGTTGGATTAAAGCTGGTGT  
TAAAGATTACAAATTGACTTATTATACTCCTGACTACGAAGTCAAAGATACTGATATCTT  
GGCAGCATTCCGAGTAACTCCTCAACCTGGAGTTCGCCCCGAAGAAGCAGGGGCTGC  
GGTAGCTGCCGAATCTTCTACTGGTACATGGACA ACTGTGTGGACTGATGGACTTACCA  
GTCTTGATCGTTACAAAGGGCGATGCTACCACATCGAGGCCGTTGTTGGGGAGGATAAT  
CAATATATTGCTTATGTAGCTTATCCTTTAGACCTTTTTGAAGAAGGTTCTGTTACTAACA  
TGTTTACTTCCATTGTGGGTAATGTATTTGGTTTCAAAGCCTTACGAGCTCTACGTCTGG  
AGGATCTGCGAATCCCACTTCTTATTCCAAA ACTTTCCAAGGCCCGCCTCACGGCATT  
CAGGTTGAAAGAGATAAGTTGAACAAGTATGGTCGTCCCCTATTGGGATGTACTATTAA  
ACCAA AATTGGGATTATCTGCAAAAAACTACGGTAGAGCGGTTTATGAATGTCTACGTG  
GTGGACTTGATTTTACCAAAGATGATGAAAACGTGAACTCACAACCATTTATGCGTTGG  
AGAGACCGTTTCGTATTTTGTGCCGAAGCACTTTATAAAGCGCAGGCCGAAACAGGGG  
AAATCAAAGGACATTACTTGAATGCTACTGCGGGTACATGTGAAGAAATGATGAAAAG  
GGCCATATTTGCCAGAGAATTAGGAGTTCCTATCGTAATGCATGACTACTTAACTGGTG  
GATTCACTGCAAATACTAGCTTGGCTCATTATTGCCGTGACAACGGCCTACTTCTTCACA  
TCCATCGCGCAATGCATGCAGTTATTGATAGACAGAAAAATCATGGTATGCATTTCCGTG  
TACTAGCTAAAGCATTACGTATGTCTGGTGGAGATCATATTCACGCCGGTACAGTAGTA  
GGTAAACTGGAAGGGGAACGTGAGATGACTTTAGGTTTCGTTGATTTATTACGTGATGA  
TTATATTGAAAAGACCGAAGTCGCGGTATTTTCTTCACTCAAGATTGGGTCTCTATGC  
CAGGTGTTATCCCCGTGGCTTCAGGGGGTATTCATGTTTGGCATATGCCTGCTCTGACC  
GAAATCTTTGGGGATGATTCCGTACTACAGTTTGGCGGAGGAACTTTAGGACACCCTTG  
GGGAAATGCACCTGGTGCAGTAGCAAATAGGGTGGCTTTAGAAGCGTGTGTACAAGCT  
CGTAATGAGGGACGTGATCTTGCTCGTGAAGGTAATGAAATTATCCGTGAAGCTAGCA  
AATGGAGCCCTGAACTAGCCGCTGCTTGTGAAGTATGGAAAGCGATCAAATTCGAATT  
CGAACCAGTAGATAAGTTAGATAAA-----ATACATTTATACAAA ACTTCTACCCCCGAGCA  
CACGCAATGGAGCCGTAAACAGTCAAGTGAAATCCAATCCACGAAATAATTTGATCTAT  
GGACAGCATCGTTGTAGTAAAGGTCGTAATGCCAGAGGAATCATTACCGCACGGCATA  
GAGGGGGAGGTCATAAGCGTCTATACCGTAA AATCGATTTTCGACGGAATGAAAAAGA  
CATATCTGGTAGAATCGTAACCATAGAATACGACCCTAATCGAAATGCATACATTTGTCT  
CATACACTATGGGGATGGTGAGAAGAGATATATTTTACATCCCAGAGGGGGCTATAATTGG  
AGATAACCATTGTTTCTGGTACAGAAGTTCCTATATCAATGGGAAATGCCCTACCTTTGAC  
CGATATGCCCTTAGGCACGGCCATACATAACATAGAAATCACACTTGGAAAGGGTGGAC  
AATTAGCTAGAGCAGCAGGTGCTGTAGCGAAACTGATTGCAAAAAGAGGGGTAAATCGGC  
CACATTAAGATTACCATCTGGGGAGGTCCGTTTGATATCCAAA ACTGCTTAGCAACAG

TCGGACAAGTGGGTAATGTTGGGGTGAACCAAAAAAGTTTGGGTAGAGCCGGATCTA  
AGTGTGGCTAGGTAAGCGTCCTGTAGTAAGAGGAGTAGTTATGAACCCTGTAGACCAT  
CCCCATGGGGGCGGTGAGGGGAGAGCCCCAATTGGTAGAAAAAACCCACAACCCCT  
TGGGGTTATCCTGCGCTTGAAGAAGAAGTAGGAAAAGGAAAAAATATAGTGATAGTT  
TTATTCTTCGTCGCCGTA---ATGATTCAACCTCAGACCCTTTTGAATGTAGCGGATAA  
CAGCGGAGCTCGAGAATTGATGTGATTGAATCATAGGAGCTGGT---AATCATCGATAT  
GCTCATATTGGTGACGTTATTGTTGCTGTAATCAAAGAAGCAGTGCCCAATATGCCACT  
AGAAAGATCAGAAGTAATTAGAGCTGTAATTGTACGTA---TGTAAAGAACTCAAACGT  
GACAACGGTATGATAATACGATATGATGACAATGCTGCGGTTGTCATTGATCAAGAAGG  
AAATCCAAAAGGAACTCGAGTTTTTGGTGCATCGCTCGGGAATTGAGACAGTTGAAT  
TTTACTAAAATAGTTTCATTGGCTCCCGAGGTATTAATGCTTAGTCCCAAAAAGAACCG  
ATTCGTAAACAACATAGAGGAAGAATGAAGGGAATATCTTGTGAGGCAATCATATTT  
GTTTCGGCAGATACGCTCTTCAGGCACTTGAACCCGCTTGGATCACAGCTAGACAAAT  
AGAAGCAGGGCGAAGAGCAATGACACGATATGCGCGTCGTGGTGGACAAATATGGGT  
ACGTATATTTCTGACAAACCTGTTACAGTAAGACCTGCAGAAACACGTATGGGTTTCGG  
GGAAGGGATCCCCGAATATTGGGTATCCGTTGTTAAGCCAGGTCGAATACTTTATGAA  
ATGGGCGGAGTATCAGAACTGTAGCCAGAGCAGCTATTTCACTAGCTGCGTCCAAAA  
TGCCTATACGAACTCAATTTGTCAGGATGGGGATGACCAGAGTTAGACGGGGATATA  
GCTCGGAGACGTCGAACAAAAATTCGTTTATTTGCATCAACCTTTAGAGGGGCTCATT  
AAGACTTACTCGAACGATTACTCAACAGAAAATGAGAGCTTTGGCTTCTCTCATCGA  
GATAGAGGCAGGCAAAAGAGAGATTTTCGTCGTTTGTGGATCACTCGGATAAATGCAG  
TAACTCGTGAGAAT-----GTATTGTATAGTTATAGTAGATTAATACACAATCTGTACAAGA  
AGCAATTGCTTCTTAATCGTAAATACCTGCACAAATAGCTATATCAAATAAGAATTGTC  
TTTACATGATTTCCAACAAGATCATCAA-----ATGATAAAGAAAGT  
TGTA---GCTCAACATATATGTAGTATGTCTGTTTCAAAGCGCGAAGAGTAATTGATCAG  
ATTCGCGGGCGTTCCTATGAGGAAACACTTATGATACTGGAACCTCATGCCTTATCGAGC  
ATCTTATCCATTTTAAAATTGGTTTATTCTGCAGCAGCAAATGCTAGTCATAATAAGGG  
TTTGAACGAAGCTGATTCATTCATTAGTGAAGCCAAAGTTAATAGGAGTACTATTGTGA  
AAAAATTAAGACCTCGGGCTCGAGGACGTAGTTATCCGATAAAAAGACCTACTTGTGAT  
ATAACAATTGTATTAAAG---AAATCTAAATTA-----ATGGATGGAATCAAATAT  
GCAGTATTTACAGAAAAAGTATTCGGTTATTGGGGAACAATCAA---TATACTTCTAATG  
TCGAATCAGGATCAACTAGGACAGAAATAAAGCATTGGGTGCAACTCTTCTTTGGTGT  
CAAGGTAATAGCTATGAATAGTCATCGACTCCCGGGAAAGGGTAGAAGAATGGGACCT  
ATTATGGGACATACAATGCATTACAGACGTATGATCATTACGCTTCAACCGGGTTATTCT  
ATTCCACCTCTTATAGAGAAAAGAACTATGGCAGTCCCCAAAAACGTACTTCTATGTC  
AAAAAACGTATTCATAGAAATATTGGAAAGAAAAAGGATATTTAGCTGCAGTAAAG  
GCTTTTTCTTTAGCGAAATCGGTTTCCACCGGGCGCTCAAAAAGTTTTTTT-----CAAAC  
AAATAATATGGCCAAGAGTAAAGATGTCAGAGTCATAGTTATTTTGGAAATGTACCAGTT  
GTGCCCGAAAT-----GAT-----AAAGAATCGCCGGGTATTTCTAGATATATTA  
AATCGACACAATACGCCTGGTCGATTAGAATTGAGAAAATTTTGTGCTATTGTACAA  
GCATACGATTCATGGGAAATAAAGAAAATGAAAATAAGGGCTTCTGTTTCGTAAAATTT  
GTGAAAATGTGCGACTGATCCGTAGGCGCGGACGAATTATAGTATTTGTTCCAATCCG  
AGACATAAACAGAGACAAGGAATGGTTCGAGAGGAAGTAGCAGGATCCACTCGAACA  
CTACAGTGGAGGTGTGTTGAATCAAGGGTAGACAGTAAGCGTCTTTATTATGGTCTGTTT



CATTCTGTCCCCGCTTATGAAAGGTCAAGCCGATACCATAGGTATTGCCATGCGAAGGG  
CTTTACTTGGAGAAATAGAAGGAACATGTATCACACGTGCAAAATCTGAG-----AAGGT  
GCCGCATGAATATTCTACGATAGTAGGTATTGAAGAATCGGTACATGAAATTTTACTAAA  
TTTGAAAGAAATTGTATTGAGAAGTAATATATATGGAGTTAGAGACGCATCCATTTGCGT  
CAGGGGCCCTAAATACGTAACCGCTCAAGATATCATCTCACCACCTTCCGTGGAAATAG  
TTGACACAACACAACATATAGCTAACCTGACGGAACCAATTGATTTGTGTATTGGATTA  
CAAATCAGGAGAGATCGCGGATATCGTACGAAATCGACAACCTACTCTCAAGATGGAT  
GTTAT-----CCTATAGATGCTGTATCTATGCCTGTTTCGAAATGCGAATCATAGCATTTCATC  
TTATGGGAATGGGAATGAAAAACAAGAGATACTTTTTCTAGAAATATGGACAAATGGA  
AGTTTAACTCCTAAGGAAGCACTTTATGAAGCTTCTCGTAATTTGATTGATTTATTTATTC  
CTTTTCTACATGCGGAGGAAGAG-----GACATTAATTTCAAAGAAAATAAA---AACAGGT  
TACTCTACCCCTTTTTACCTTTCAAGATAGATTAACT--AATCTAAAGAAAAACAAAA  
A---GAAATTCATTGAAATGTATTTTTATTGACCAATCAGAATTACCTTCCAGGACCTATA  
ATTGTCTCAAAGGTCCAATATACATACATTATTGGACCTTTTGGGTAAGAGTCAAGAA  
GATCTTATGAGAATTGAATATTTTCGCATAGAAGATGTAAAAGAGATATCGGACACTCTA  
CAGAAGCAT-----TTCGCAATTGATTTACCTAAGAATAAGATGCTCCGGAATGATGGAAA  
TGAGGGAATGTCCACAATACCTGGATTTAGTCAGATCCAATTTGAGGGATTTTGTAGGT  
TCATTAATGAGGGCTTGACGGAAGAATTTTCATAAGTTTCCAAAAATTGAAGATACAGAT  
CAAGAAATTGAATTTAAATTATTTGTGGAAAGATATCAATTGGTAGAACCTTGATAAA  
CGAAAGAGATGCTGTGTATGAATCACTCACATATTCTTCTGAATTATATGTACCCGCGGG  
ATTAATTTGGAAAACCGGTAGAGATATGCAAGAACAACCGTTTTTTATTGGAAACATTC  
CTCTAATGAATTCCCTGGGAACCTCTATAGTAAATGGAATATACAGAATTGTGATCAATC  
AAATATTGCAAAGTCCCGGTATTTACTACCGTTCAGAATTGGACCATAACGGAATTTCT  
GTCTATAACCAGCACTATAATATCAGATTGGGGAGGAAGATCGGAATTAGAAATTGATAG  
AAAAGCAAGGATATGGGCTCGTGTGAGTAGGAAACAAAAAATATCTATTCTAGTCTAT  
CATCAGCTATGGGTTCGAATCTAAGAGAAATTCTAGATAATGTTTGTACCCTGAAATTT  
TCTTGTCTTTCCCGAATGATAAGGAGAAAAAAAAGATTGGGTCAAAGAAAATGCTAT  
TTTGGAAATTTATCAACAATTTGCTTGTGTAGGCGGAGATCCGGTATTTTCTGAGTCCTT  
ATGTAAGGAATTACAAAAGAAATTTTTTCAACAAAGATGTGAATTAGGAAGGATTGGT  
CGACGAAATATGAACCGGAGACTGAATCTTGATATACCTCAGAACAATACATTTTTGTT  
ACCACGAGATGTATTGGCTGCTGCGGATCATTTGATCGGAATGAAATTTGGAATGGGTA  
CACTTGACGAT-----ATGAATCACTTGAAAAATAAACGTATTTCGTTCTATAGCGGATCTGT  
TACAGGATCAATTCGGACTGGCTCTTGTTTCGTTTAGAAAATGCGGTTTCGAGGAACCTATA  
TGTGGAGCAATTCGG---CATAAATTGATA---CCGACTCCTCAAATTTGGTAACTTCAAC  
TTCA-----TTAACAACCACTTATGAATCGTTTTTTGGCCTGCATCCTTTATCTCAAGT  
TTTGGATCGAACTAATCCATTAACACAAATCGTTCATGGGCGAAAATTGAGTTATTTGG  
GTCCTGGAGGATTGACGGGGCGAACTGCTAGTTTTTCGATACGAGATATTCATCCTAGC  
CACTATGGACGTATTTGTCCAATTGACACGTCCGAAGGAATCAATGTTGGACTTATTGG  
ATCCTTAGCCATTCATGTGAGGATTGGCCATTGGGGA---TCCATAGAGAGTCCATTTAT-  
-----GAAATATCTGAAAGATCAAAGAA---GAGGCACAGATAGTTTATTTATCACCAAA  
TAGAGATGAATATTATATGGTAGCAGCAGGAAATCTTTGGCCTTGAATCGGGGTATTCA  
GGAAGAACAGGTTGTTCCAGCTCGATACCGTCAAGAGTTCCTGACTATTGCATGGGAA  
CAGATTCATCTTAGAAGTATTTTCCCTTCCAATATTTTCTATTGGAGCTTCCCTCATTC  
CTTTTATCGAGCATAATGATGCGAATCGGGCTTTAATGAGTTCTAATATGCAGCGCCAAG

CAGTTCCGCTTTCTCAGTCCGAGAGGTGCATTGTTGGAACCTGGACTGGAACGCCAAAC  
GGCTCTAGATTCGGGGGTTTCCGCTATAGCCGAACACGAGGGAAAGATCATTTATACTG  
ATCCTCACAAAGATCATTATCAAGTAATGGGGACACTATAAGTATTCCATTAGTTATCTA  
TCAACGTTCCAACAAAAATACTTGTATGCATCAAAAACCTCAGGTTCCGCGGGGTAAA  
TGCATTA AAAAGGGACAAATTTTAGCGGACGGTGC GGCTACAGTTGGTGGGGAACCTCG  
CTTTAGGAAAAACGTATTAGTAGCTTATATGCCATGGGAAGGTTACAATTCTGAAGAC  
GCAGTACTAATTAGCGAACGTCTGGTATATGAAGATATTTATACTTCTTTTTCACATCCGG  
AAATATGAAATTCAGACTCATGTGACAAGCCAAGGA---CCTGAAAGAATCACTAAGGA  
AATACCGCATCTGGAGGCTCATTTACTCCGCAATTTAGACAGAAATGGAGTTGTGATGC  
TGGGATCTTGGGTGGAAACAGGTGATATTTTAGTAGGTA AATTAACGCCTCAGACAGCA  
AACGAA---TCGTCTGATGCTCCAGAGGATAGATTATTACGAGCCATACTTGGAAATTCAGG  
TATCCACTGCAAAGAAACTTCTCTAAAACCTATAGGCGGAAGAGGTTCGCGTTATT  
GATGTGAGATGGATCCGGAAAAAGGGG---GGTCCAGTTATAATTCAGAAACGATTTCGT  
ATATATATTTACAGAAACGTGAAATCAAAGTAGGTGATAAAGTAGCTGGAAGACATGG  
GAATAAAGGTATCATTTCAAAAATTTGCCTAGACAAGATATGCCCTATTTGCAAGATGG  
AACACCTGTTGATATGGTCTTCAACCCATTAGGAGTACCGTCACGAATGAATGTGGGAC  
AGATATTTGAATGCTCGCTCGGGTTAGCGGGGGATCTGCTAAAGAGACATTATAGAATA  
GCACCTTTTGATGAGAGATATGAGCAAGAGGCTTCGAGAAAACTAGTGTTTTCCGAATT  
ATATGAAGCCAGTAAGCAAACAAAAAATCCATGGGTATTTGAACCCGAATATCCGGGA  
AAAAGCAGAATATTTGATGGAAGAACGGGAAATCCTTTTGAACAACCTGTTCTAATAG  
GAAAGTCCTATATTTTAAATTAATTCATCAAGTTGATGATAAATCCATGGACGTTCCA  
GTGGACATTACGCACTTGTTACACAACAACCCCTTAGAGGAAGGGCGAAGCAAGGGG  
GACAACGAGTAGGAGAAATGGAAGTTTGGGCTCTAGAGGGATTGCGGTTGCTCATAT  
TTTACAAGAGATGCTTACTTATAAATCTGATCATATTAGAGCTCGTCAAGAAGTACTTGG  
TGCTACGATCATTGGAGGAAGGGTATCTAACCCAGAAGATGCTCCAGAATCTTTTCGAT  
TGCTCGTTCGAGAACTACGATCTTTAGCTCTAGA ACTGAATCATTTCTTGTATCTGAGA  
AGA ACTTCCAGATTAATAGGAAGGAAGCT-----ATGATTGACCGGTATAAAC  
ATCAACA ACTTCGAATTGGACTAGTTTCTCCTCAACAAATAAAGGCTTGGGCCAACAA  
AATCTTACCTAATGGAGAGATAGTTGGAGAGGTGACAAAGCCCTATACGTTTCATTATA  
AGACCAATAAACC GGAAAAAGATGGATTGTTTTGTGAAAGAATCTCTGGGCCCATAAA  
AAGTGGAATTTGTGCTTGC GGAAATTATCGAGTTATTGGAGCTGAAAAAGAAGACCCG  
AAATTTTGTGAACAATGCGGGGTGGAATTTGTTGATTCTCGGATACGAAGATATCAAAT  
GGGATACATCAA ACTCGCATGTCCAGTGACTCATGTGTGGTATTTGAAACGTCTTCTTA  
GTTATATCGCGAATCTTTTAGATAAACCCTTAAGGAATTAGAAGGCCTAGTATACTGC--  
---GATTTTCTTTTGCTAGGCC---ATAGCTAAAAACCTACTTTCTTACGATTACGAGG  
TTTATTCGAATATGAAATCCAATCCCGGAAATACAGCATACCACTTTTTTTTACTACCCA  
AGGCTTCGAGACATTTGAAATCGAGAAATCTCTACAGGAGCAGGTGCTATCAGAGAA  
CAATTAGCGGATTCAGATTTGCGAATTATTATGGGTAATTCATTGGTAGAATGGAAGGAG  
TTAGGGCAGGAG---GGGTCCACTGGAATGAATGGGAAGATAGAAAAATTAGAAGAAG  
AAAGGATTTTTTGGTTAGACGCATGGAATTAGCTAAACATTTTATTTCGAACAAATGTAG  
AACCAGAATGGATGGTTTTTGTGCTTATTACCAGTTCTTCTCCTGAGTTGAGACCAATC  
ATTCAGATAGATGGGGGTAAACTAATGAGTTCGGATATTAATGAACTCTATAGACGAGTT  
ATCTATCGGAATAATACTCTTACCGATCTATTAGCAACAAGTAGATCTACGCCAGGGGAA  
TTAGTAATGTGTCAGGAGAAATTGGTACAAGAGGCCGTGGATACACTTCTTGATAATGG

GATACGCGGGCAACCAATGAGGGATGGTCATAATAAAGTTTACAAGTCATTTTCAGATG  
TAATTGAAGGCAAAGAGGGAAGATTTTCGTGAGACTCTGCTTGGTAAACGTGTGCGATTA  
TTCGGGACGTTCCGTCATTGTCGTGGGGCCTTCGCTTTCATTACATCAGTGTGGATTAC  
CTCGAGAAATAGCAATAGAGCTTTTCCAAACATTTGTAATTCGTGGTCTAATCAGACAA  
CATGTTGCTTCTAACATAGGAATTGCTAAAAGTAAAATTCGGGAAAAAGAACCCATTGT  
ATGGGAAATACTTCAAGAAGTTATGCAGGGGCATCCTGTATTATTGAATAGAGCACCCA  
CCCTGCACAGATTGGGCATACAGGCGTTCCAACCTATTTTAGTGGAGGGACGCGCTATT  
TGTTTACACCCATTAGTTTGTAAAGGGCTTCAATGCGGACTTTGATGGGGATCAAATGGC  
TGTTTCATGTACCTTTATCTTTGGAAGCTCAAGCGGAGGCTCGTTTACTTATGTTTTCTCA  
TATGAATCTCTTGTCTCCAGCTATTGGGGATCCTATTTCCGTACCAACTCAAGATATGCTT  
ATCGGACTGTATTTATTAACGATCGGGAATCGTCGAGGTATTTGTGCAAATAGGTATAAT  
CCATATAGTTGCGGAAACTAC-----CAAATAAAACAGTTGACAATAATAATTATAGGT  
ATACGAAAGAAAAAGAACCCTATTTTCTAGTTCCTATGATGCACTTGGAGCTTATCGA  
CAGAAACGAATCAGTTTAGATAGTCTTTGTGGCTCCGATGGAGACTAGATCAACGT---  
GTCATTGGCTCA-----AGAGAAGTTCCCATCGAAGTTCAATATGAATCTTTGGGTA  
TCAATGAGATTTATGGGCACTATCTAATAGTAGGAAGTGTAACAAAGGAAATCCGTTGTAT  
ATACATTCGAACCACTCTCGGTCAATTTCTTTTTATCGAGAAATAGAAGAAGCCATACA  
GGGGTTTTGTGCGAGCCTACTCATAACGCTATC-----ATGGCAGAAC  
GGGCCGATCTGGTCTTTCACAATAAAGTGATAAATGGAACCTGCTATGAAACGACTTATT  
AGCAGGTTAATAGATCATTTCGGAATGGCATATACATCACATATCCTGGATCAAGTAAAG  
ACTTTGGGTTTTCCAGCAAGCCACTGCTACATCTATTTTATTAGGAATTGATGATCTTTTA  
ACAATCCCTTCTAAGGGATGGTTAGTCCAAGACGCTGAACAACAAAGTTTGATTTTGG  
AGAAACACCATCATTATGGGAATGTACACGCGGTAGAAAAATTACGTCAATCCATTGAG  
ATATGGTATGCTACAAGTGAATATTTGAGACAAGAAATGAATCCTAATTTTCGGATGACT  
GATCCTTCTAATCCAGTGCATCTAATGTCCTTTTCGGGAGCTAGAGGAAATGCATCTCA  
GATACCAATTAGTAGGTATGAGAGGATTAATGTCCGATCCCCAAGGACAAATGATTG  
ATTTACCCATTCAAAGCAATTTACGTGAAGGACTTTCTTTGACAGAATATATAATTTCT  
GCTATGGAGCCCGCAAAGGAGTTGTAGATACTGCTGTACGAACATCAGATGCTGGATAC  
CTTACACGTAGACTTGTTGAAGTAGTTCAACACATTATTGTACGTAGAACAGATTGTGG  
CACTATCCTAGGTATTTCCGTGAGTCTCGAAATGGGATGACGGAA-----AAAATTTT  
TCCAAACACTAATTGGTGTGTATTAGCAGACGATATATATATCGGTCTACGATGCCTTG  
CCTACTCGAAATCAAGATATTGGGATTGGACTTGTCAATCGATTCAATACC-----  
TTTCGAGCACAACCAATATATATTCGAACCCCTTTACTTGCAGGAGTACATCTTGGATC  
TGCCAATTATGTTATGGTCCGAGTCTACTCATGGCGACCTGGTTCGAATTGGGAGAAGC  
TGTAGGTATTATTGCGGGTCAATCAATTGGGGAACCAGGGACTCAACTAACATTAAGAA  
CTTTTCATACTGGTGGAGTATTCACAGGCGGTACTGCCGAGCATGTACGAGCTCCTTCT  
AATGGAAAAATAAATCAATGAGGATTTGGTTCATCCACACGTACCCGTCATGGGCA  
TCTGCTTTTCTATGTTCTATAGACTTGTATGTAATAATTGAGAGTCGGGATATTATACAT  
AATGTAATATTCCACCAAAAAGTTTGATTTTAGTTCAAATGATCAATATGTAGAATCA  
GAACAAGTGATTGCTGAGATTCGTGCTGGAACGTCCACTTTT-----TTAAAGAGAAGG  
TACGAAAACATATTTATTCTGAATCAGAGGGAGAA---ATGCACTGGAGTACCCATGTCT  
ACCATGCACCTGAATATACATATGGTAATGTTTCTATTATCAAAAACAAGTCATTTATG  
GATATTAGCAGGAGGTCCGCGCAGA-----TCCAGTATAGTGTCTTTTCTACTCCACAAGG  
ATCAAGATCAAATGAATGTTTCTTTTCTGTGCAAGAAAGA-----TATATCTCTGGCC

TATCA-----ATGACTAAT--GGTCGAGTAAGACATAAATTGTTGGATACTTCTGGT-----  
-GATAAGAAAATTCTTGACTATTCAACAAGACCTGATCAAACGATATCTAATGGTCATTG  
GAATTTAATATATCCTTCT--ATTATCCAAGGGAAT-----TCTTATTTCTTGGCGAAAAAGC  
GAAGAAATAGATTCATCATCCCATTACAATATGATCAAGAACGAGAGAAAGAACTAATA  
CCCTGTTTTGGTATTTCAATCGAAATACCAAACAG-----GGTATTTTACGTAGAAATAGT  
ATTCCTTGCTTATTTTGATGATCCACAATACAGAAGAAGC-----GGAATTACTAAATAT---A  
CCGTAGAGGTCAATTCAATCATAAAA-----AAAGAGGATTTGATTGAGTATCGAGGA---T  
CAAAAGAATTTAGTACGAAATAC---AAAGTAGATCGGTTTTTTTTTCATTCTCGAAGAAG  
TGCATATCTTACCCGGATCTTCGTTGATAATGGTCCGGAACAATAGTATCATTGGAGTAG  
ATACACAACCTCGCTTTAAATACAAGAAGTCGAGTAGGCGGATTAGTCCGAGTGGAGAG  
AAAAAAAAAATATATTGAACTAAAAATCTTTTCCGGAGATATTTATTTTCTGGGGAGG  
CAGATAAGATATCCAGGCACAGCGGCATTTTGATACCACCGAAACAGAAAAAAAA---  
--AATTCTAAGGAA---TCAAAA---AAATGGAAAAATGGATCTATGTCCAACGG-----ATC  
ACACCTACCAAGAAAAAG-----TATTTTGTTCGGTTCGACCCGTAGTCACATATGAAAT  
AGCTGATGGCATAAATTTAGCAACACTTTTTCTCAAGATCTCTTGCGGGAAAAGGATA  
ATGTCCAACCTTAGAGTTGTCAATTATATCCTTTATGGAAATGGCAAGTCAATTCGAGGAA  
TTTCTCACACAAGT--CAATTAGTTCGGACTTGCTTAGTATTGAATTGGGATCAAGAACA  
AAATGGTTCTCCGGAA-----GAGGTTTCATGCTTCTTTGTTGAGGTAAGGGCAAAT  
GATCTGATTCGCGATTTCATAAGAATTGAGTTAGTCAAGTCCACTATTTCTGATACCGGA  
AAAAGATATGATAGGGCAAGTTCAGGATTGATTTTCAGAT-----TTAGATCGCACAAATA  
TCAATCCTTTTTATTGCAAGGCCAGGATTCAATCA-----CTTACCCAACATCAAGG  
TACTATT-----GGTACATTGTTGAATCGAAATAAG-----GAATGCCAATCTTTGATAA  
TTTTGTTCATCATCCAATTGCTCTCGAATTGGT-----CCATTCAATGGTTCGAAATATAAC---  
-----AATATGACAAAAGAATCGGATCCATAATCCCAATT--GATTTGTTGGGTCCCTTAG  
GCACTATTGTACCT--AAAATAGCAAATTTCTATTCATCT--TACCATTTAATAACT-----T  
ATAATCAGATCTTGTTAAAG---AAATATTTGCTACTTGAC-----AATTTTCAACAGACTT  
TCCAAGTACTTCAAGTACTTAAATACTGTTAATAGATGAAAATAGGAGG-----ATTTATA  
ATCCCGATCCATGCAGTAATATCATTTTTGAATCCATTCCATTTGAATTGGCACTTTCTCCA  
TCACGATTATTGGGAAGAGACATCTACAATAATTAGC---CTTGGACAATTTTTTTGTGAA  
AATGTATGTCTATTCAAATACGAACCA-----CACGTAAAAAATCTGGTCAAATTATAATT  
GTTTCAT--GTTGACTCCTTAATTATAAGATCAGCTAAGCCCTATTTGGCCACTCCAGGAG  
CAACTGTTTCATGGCCATTATGGAGAAATCTTTTACGAAGGAGATACATTAGTTACATTTA  
TATATGAAAATCGAGATCTGGTGACATAACGCAAGGTCTTCCAAAAGTGGAACAAAT  
CTTAGAAGTACGTTCGATTGATTCAATATCGATGAACCTCGAAAGGAGAGTTGAAGGTT  
GGAACGAAGGTATAACCAAATTTCTTGGAAATCCCCTGGGGATTCTTGATTCAAGCTGA  
GCTAACCATAGCTCAAAGTCGTATCTCTTTGGTTAATAAAAATCCAAAAGGTTTATCGATC  
CCAGGGGGTACAGATCCATAATAGACATATAGAGATTATTGTACGTCAAGTAACATCAA  
AAGTGTGGTTTCAGAA-----GATGGAATGTCTAATGTTTTTTTACCTGGGGAAATTAAT  
CGGATTGTTGCGAGCGGAACGAGCAGGGCGTGCTTTGGACGAAGCGATCTCTTATCGG  
GCAATCCTATTGGGAATAACGAGGGCATCTTTGAATACTCAAAGTTTCATATCCGAAGC  
AAGTTTTCAAGAAACCGCTCGAGTTTTAGCAAAAAGCTGCTCTACGAGGTCGTATTGATT  
GGTTGAAAGGCCTGAAAGAGAACGTTGTTCTGGGTGGGATTATACCTGTTGGTACCGG  
ATTCAAAAAATTAGTGCACCGTTCAAGG-----CAAGACAAGAACATTTAT-----TTGGAA  
ATCAAAGAAGAATCTATTCGACTTGGAATG-----AGAGATATTTTGTACACCATAG

AGAATTATTTTGTTCCTTACGTCCCAAACAATTTTCATGAGACATCAGAACAATCATTTAC  
GCGATTTTCATGATTCC-----ATGACAAGAAGATATTGGAGCATCAATTTGGAAG  
AGATGATGGAGGCCGAGTTCATTTTGGTCATGGTACTAAGAAATGGAATCCTAGAATG  
GCCCTTACATCTCTGCAAAGCGTAAAGGTATTCATATTACAAATCTCACTAGAACTGCT  
CGTTTTTTATCAGAAGCCTGTGATTTAGTTTTTGGATGCAGCAAGTAGGGGAAAAACCTT  
CTTAATTGTTGGTACCAAAAATAAAGCAGCGGATTCAGTAGCATCAGCTGCAATAAGGG  
CCCGGTGTCATTATGTTAATAAAAAATGGCTCGGTGGTATGTTAACGAATTGGTCTACTA  
CGGAAACGAGACTTCAAAAAGTTCAGGGGTTTAAGAGCAGAACAAAAGATGGGGAAA  
CTCAACCGTCTTCCAAAAGAGATGCAGCAATGTTGAAGAGAAAATTATCTACCTTGC  
AACATATCTCGGCGGTATCAAATATATGACGGGGTTCCTGATATTGTGATCATCGTTG  
ATCAGCAAGAAGAATATACGGCTCTTCGAGAATGTGTAATTTTGGGGATTCCGACGATT  
TGTTTAATCGATACAAATTGTGACCCAGATCTCGCAGATATTTTCGATTCCAGCCAACGAT  
GACGCTATAGCTTCAATCCGATTGGTTCCTTAACAAATTAGTATCCGCAATTTGTGAGGGC  
CGTTCTAGC---TATATAAGAAATCGTATGGGACAAAAATAAATCCACTTGGTTTCAGAC  
TTGGTACAACCCAACGTCATCATTCTTTTGGTTCGCACAACCAAAAAATTATTCCGTG  
GGTCTACAGGAAGATGAAAAATACGGAATTGTATCAAGAAGTATGTACAAAAAATA  
GGAGAATATCCTCGGGT---TTCGAAGGAATCGCACGTATAGGAATTCAAAAAGAATCG  
ATTTGATCCAGGTCATAATCTATATTGGATTTCCAAATTTATTAATAGAGGGC-----CAA  
CACGA-----GGAATCGAAGAATTACAGATGAATGTACAAAAGGAATTTAATTTTGTGAA  
CCGGAGACTCAACATTGTTATCACAAAGAGTTGAAAACCTTATGGGCAACCTAATATTC  
TTGCGGAATACATAGCTTTACAATTAATAAATAGAGTTTCGTTTCGAAAGGCAATGAAA  
AAAGCTATTGAATTAGCTGAACAAACGGATACAAAAGGAATTCAAGTACAAATTGCAG  
GACGGATCGACGGAAAAGAAATTGCACGTGTCGAATGGATTAGAGAGGGCAGGGTTC  
CCCTACAAACAATTCGCGCTAAAATTGATCATTGTTCTTATAACAATTCGAACTATCTATG  
GAGTATTAGGCATAAAAATTTGGATATTTGTGGACGAGGAAATGTCTCGTTACCGAGGA  
CCTCGTTTCAAAAAATACGCCGTCTGGGGGCTTTACCAGGACTAAGTAAAAGAC  
CTAGATCCGGAAGTGATCTTAAAAACCAATTGCGTTCTGGGAAA---AGATCGCAATATC  
GTATTCGTCTAGAAGAAAAACAGAAATTGCGTTTTTCATTATGGTCTGACAGAGCGACA  
GTTACTTAGATATGTGCATATCGCTGGAAAAGCCAAAGGGTCAACAGGTCAGGTTTTAC  
TACAATTACTTGAGATGCGTTTGGATAACATCCTTTTCCGATTGGGTATGGCTTCGACCA  
TTCTGGAGCCAGGCAATTAGTTAACCATAGACATATTTTAGTTAATGGTTCGTATAGTGG  
ATATACCAAGTTATCGTTGTAAACCCAGAGATATTACTACGAAGGATAAACAAGAT  
CGAAAGCTCTGATTCAAAATTATATTGCTTTATCCCCCACGAA-----TTGCCAAAACATT  
TGACTTTTACTCA-----TTCCAATATAAAGGAGTAGTAAATCAAATAATAGATAGTAAAT  
GGATCGGTTTGAATAAATGAGTTGTTAGTCGTAGAATATTATTTCCCGTCAAACCTATGT  
CACGTGAGGTAATGCAGAAAGAAAAACTGCAAAATCCGATCCAATTTATCGTAATCG  
ATTAGTTAACATGTTGGTTAACCGTATTCTGAAACACGGAAAAAAATCATTGGCTTATC  
AAATTATCTATCGAGCCATGAAAAAGATTCAACAAAAGACAGAAACAAATCCACTATC  
TGTTTTACGTCAAGCAATACGTGGAGTAACTCCCGATATAGCAGTAAAAGCAAGACGT  
GTAGGCGGATCGACTCATCAAGTTCTATTGAAATAGGATCTACACAAGGAAAAGCAC  
TTGCCATTCGTTGGTTATTAGGGGCATCCCGAAAACGTCCGGGTGCAAAATATGGCTTTC  
AAATTAAGTTCCGAATTAGTAGATGCTGCCAAAGGGAGTGGCGATGCCATACGCAAAA  
AGGAAGAGACTCATAGAATGGCAGAGGCAAATAGAGCTTTTGCACATTTTCGTATGGG  
TAGGGACACTATTGCCGATATAAATACTTCTATAAGAAATGCTGACATGGATAAAAAAG

GAACGGTTCGAATAGCATCTACTAATATCACCGAAAATATTGTGAAAATACTTCTACGA  
GAAGGTTTTATTGAAAACGTTCCGAAACATCAGGAAGGTAACAAATATTTCTTGGTTTC  
AACTCTGCGACAT-----AGAAAGACTAGGAAAAGAATACATAGA-----ACTATTTT  
AAAGCGTATCAGCCGACCCGGTTTACGAATTTATTCCAACATCAACAAATTCCTAAGA  
TTTTAGGTGGAATAGGAATTGTAATTTCTTCTACTTCTCGAGGTATAATGACAGATCGAG  
AAGCTCGACGAGAAAAAATTGGAGGCGAACTTTTGTATATATATGGATGACAAAAGCT  
ATACCAAGAATTGGTTCACGTAGGAATGGGCGTATTGGTTCACGTAAGAATGGACGTAG  
AATACCAAAAAGGAATTATTCATGTTCAAGCAAGTTTCAACAATACCATTGTAAGTGTTA  
CAGATGTACGAGGTCGGGTGGTTTCTTGGGCCTCCGCTGGTACTTCTGGATTCAAAGG  
CACAAGAAGAGGGACACCCTATGCTGCTCAAGCAGCAGCGGTAAATGCTATTCGTACG  
GTAGTTGATCAGGGTATGCAACGAGCAGAAGTTATGATAAAAGGTCCTGGTCTCGGAA  
GAGATGCAGCATTACGAGCCATTCGTAGAAGTGGTATACTATTAAGTTTCGTACGTGAT  
GTAACACCTATGCCACATAATGGATGTGACCCCCCTAAAAAAGACGTGTGATGCCAA  
CTATTAACAACCTTATTAGAAACGCAAGACAGCCAATAAGAAATGTTACGAAATCCCC  
GCTCTTAGAGGATGTCCTCAGCGTCGAGGAACATGTACTAGGGTGTAT---ATCACCCCC  
AAAAAACCAACTCTGCCTTACGTAAAGTTGCCAGAGTACGATTAACCTCTGGATTTG  
AAATCACTGCTTATATACCTGGTATTGGCCATAATTTACAAGAACATTCTGTAGTATTAGT  
AAGAGGAGGAAGGGTTAAGGATTTACCCGGTGTGAGATATCACATTGTTTCGAGGAACC  
CTAGATGCTGTCCGAGTAAAGGATCGTCAACAAGGGCGTTCTAGATATGGGGTCAAAA  
AGCCAAAAATGGCAAGAAAAAGTTTGATTACAGAGGGAGAAGAAGCGGCAGAAATTG  
GAACAGAAATATCATTTGATTCGTGATCCTCAAAAAAAAAAATAAGC-----AAAGTT  
CCATCATTGAGTGAAAAATGGGAAATTCATGGAAAATTGCAATCCCCACCACGTAATAG  
CGCACCTATACGTCTCCATCGACGTTGCTTTTTGACTGGAAGACCTAGAGCTAACTATC  
GAGACTTTGGGCTATCCGGACACATACTTCGAGAAATGTTTCATGCATGTTTGTACCG  
GGCGCAATAAGATCAAGTTGGATGGTCAA---TCACTCATTCACTTATCCACAAGAA  
GAAAAAGAAGAAAAC-----AGGGGTCCGTTGAATTTCAAGTATTCAGTTTCACCAATA  
AGATACGAAGACTTACTTCACATTTGGAATTGCACAAAAGAGATTTTTTATCACAAAGA  
GGTCTACAAAAAATTCTGGGAAAACGTCAACGTCTGCTGGCTTATTTGTCAAAGAAAA  
ATAGAGTGC GTTATAAGAAATTAATTAATCAGTTGGATATTCGGGAGCGAAAAATCGT-  
-----ATGGTAAACTTCGTTTGAACGATGTGGTAGAAAGCAACGAGCCATCTATCGAAT  
CGTTGCAATTGATGTTTCGATCCCGAAGAGAAGGAAGAGATCTTCGAAAAGTGGGTTTT  
TATGATCCGATAAAGAATCAAACCTATTCAAACGTTCCCTGCTATTCTATATTTCTTGAA  
AAGGGCGCTCAACCAACAGGAACTGTTTATGACATTTTAAGGAAGGCAGAATTATTA  
AAGAA--AGA ACTTCGAGT-----ATGGATAAATCCAAGCAATCTTTTCGTAAATCC  
AAGCGATCTTTTCGTAGGCGTTTGCCCCCAATTGGATCGGGGGATCGAATCGATTATAG  
AAACATGAGTTTAATTAGTCGATTTATTAGTGAACAAGGAAAAATATTATCTAGACGGG  
TGAATAGATTGACTTTGAAACAACAACGATTAATTACTATTGCTATAAAACAAGCCCGTA  
TTTTATCTTTGTTACTTTTCTTAATAATGAGAAA-----CAATTTGAGAGAGCGGAGTCGA  
TCCCCAGAACTACTGGTCTAGAACCAAAAATAAAATGACACGTTCACTAAAAAAA  
CCTTTTGTAGCTAATCATTTATCGGCAAAAATTGAAAACTCAACATGAGGGGAGGAG  
AAAGAAATAATAGTAACTTGGTCTCGGGCATCTACCATTATACCCACAATGATTGGCCAT  
ACAATCGCTATTCATAATGGAAAGGAACATTTACCTATTTATATAACAGATCGTATGGTA  
GGTCACAAATTGGGAGAATTCGCGCTACTCTGACTTTTGCAGACATGCAAGAAACG  
ATAATAAATCTCGTTCGTATGATTTTGAATCTTTTCTACTAGGTAATCTATTATCCTTATGC

ATGAAGATAATAAATTCGGTCGTTTTGGTTCGGACTCTATTATGGATTTCTGACCACATTC  
TCCATAGGGCCCTCTTATCTCTTCCTTCTTCGAGCTCGGGTTATGGAAGAAGGA-----A  
CCGAGAAGGAGGTATCAGCAACAACCTGGTTTTATTACGGGACAGCTCATGATGTTCCATA  
TCGATCTATTATGCGCCTCTGCATCTAGCATTGGGTAGACCTCATAACAATAACTGTCCTA  
GTTCTACCCTATCTTTTTGTTTCATTTCTTCTGGAACAATCACAAAACTTTTTTGATTATG  
GGTCTACTACCAGAAATTC AATGCGTAATCTCAGCATTCAATGTGTATTCTGAATAATC  
TAATTTTTCAATTATTCAACCATTTTCATTTTACCAAGTTCAACGTTAGCCAGATTAGTCA  
ACATTTATATGTTTCGATGCAACAACAAGATGTTATTTGTAACAAGTAGTTTTATTGGTT  
GGTTAATTGGTACATTTTCTTCATGAAATGGGTTGGATTGGTATTATTCTGGATACGGC  
AAAATCATTCTATTTCGATCT-----TCTAATAGGTACCTTGTGTCAGAATTGAGAAATTCT  
ATGGCTCGAATCTTTAGTATTCTCTTATTTATCACCTGTGTCTACTATTTAGGCAGAATGC  
CGTCGCCTATTGTCACTAAGAACTGAAAGAAACCGAAGAAGACGAAACTCTTGTA  
CTTTTCTTTTCGATTTTAAGCGGTGGAATCGTCCATTGCGATATATAAAAAATAATAGATT  
TGAAAATAGTGTACGAAATGAAATGTCACAATATTTTTTTTTTATACATGTTCAAGTGATGG  
AAAACAATAATATCTTTTACATATCCACCTAGTTTATCGACTTTTTTCGAAATGATAGA  
ACGCAAAATGTCTTTGTACACGACAGAAAAATTATCCCATGAAGACCTA-----TATTGGG  
TTTCTACCAATGAGCAAAAAAAGTACAACCTTGAGCAATGAATTAATAAGTCGAATAAA  
AACTCTAGAAAAAGAAAAGCTTGCTCTAGATATACTCGAAAAAAGGACCAGATTATGC  
AATGATGAGAATGAGCAAGAATACTTGCCAAAAGCATATGATCCTTTTTTTGAACGGACC  
ATATCGTGGAACAATAAAAAAATTCTATTACATATAGAAATGTTTTGGATAAATAAGAT  
TCATGGTCTCTTTTCCCAGAAATTTGAACATGAA-----TCATTGAATAATGAAGAA  
ATCAGTAAAAAGGTTCCCTCGATGGTCATACAAATTGACTGATTTAGAAGGACAGGATG  
AAGAAGAAATTCGTTCAAGAAAAGCCAGACCGGTGGTGATTATACTGATACTTTGATA  
CGTTACTCGCAACAACCTGATTTTCGTCGGGGTATGATCAAAGGATCCATGCGTGCTCA  
AAGACGTAAACTGTAACCTTGGGAAATATTTCAAGCAAATGTTTCATTCCCCGCTTTTTG  
TGGATCGAATAGACAAAGCATTTTTTATTTTATTTTTTTGAT---ATCTATCAAATGATTAATC  
TTATTTTTAGGAAT---GAGGAAAATCGACGGATAGAAATATCAGAACTTGGGATAGCAT  
TATATTTGCTCAAGAAATAAGAGGTTTGATGCTGATAACCCAATCTTTTCTTAGAAAATA  
CATTGTATTGCCTTCATTGATAATAGCTAAAAATATTGGACGTATGTTATTATTCCAATTC  
CCCGAGTGGTATGAGGATTTGAAGGAATGGAATAGAGAAATGCATGTTAAATGCACCTA  
TAATGGTGTTCAATTATCAGAAACAGAATTTCCAAAAGATTGGTTAACAGATGGTATTC  
AGATAAAGATTCTATTTCTTTCCGTTTAAAACCTTGCGGAAGATCTAAAAAAGGAAAA  
AAAGACAATTTTTGTTTTTTAACAGTTTGGGGAATGGAAGCGGAACTCCCTTTTGGTTC  
TCCCCGAAAACAACCTTCTTTTTTTGAACCCATATATAAAGAACTCGAAAAAAAATA  
GAAAAGTTAAA---AAGA ACTATTTTCTAGCTCTAAAAGTTTCA-----  
AAAGAAAAACAAGATGGGTCATCAGAATAGTTCTA-----GTTCTAAAACGAATAATGA  
AGAACTTGAAAAAGTGA ACTCAAAAAAAAAT---AATGAGATTATTTCGCGAATCGACC  
ATTCAAATTCGATCCATAAATTGGACAAATTATTTACTCATAGAAAAAAAAGAAAGA  
TCTTGCTGATAAGACAATCACAATCAAGAATAAAATAGAAGGAATCACAAAAGAAAAG  
AAGAAA-----GATAAAAGACCGGAATTACAGAAACATATTTGGCAGATAT  
TCAAAGAAAAAATACCCGATTAATACGCAAATCACATTTTTTTTATGAAATCTTTCATTG  
AAAAATATACATAGATATCTTGCTATGTATGGTTACCATTTCTAAGGTCAATGCACAAC  
TT--ATGAACTTTATTTTCGTACGACTTATCTTCCTTGTCCTCAAGCATATGTATTTTACAAAT  
TATCACAACCCAATTACTTAACAACCATCACTTGAGATCTGTACTTCAATATACCTATC

CTTTTATTAAGGACAAGATAAAGTATTATTGTACACGAGGAATATTTGATTCCAAATCAA  
GGCATAAGAAAATTAATAAGTCTGGAATGAATGAATGGAAAACTGGTTAAAAGGTCA  
TTATCAATTTAATTTATCTCAGAGCAAATGGTCTCGATTAGTATCGAAAAAATGGCGAAA  
TAGAATCAATCAACGTTGTACGATTCAAATAAAAATGAAATTGTATTCATATAAAAAAG  
AAAAAGACCGATTAATTCATTACATGAAAGAAACAAAATTTAAAAAACACTACAGATAT  
GATCTTTTATCACATGAATATATAAATGGATATATTATTGATCTGGATAGAAAATATTTTGA  
TTGCAGAATTCTTCATTTTTGCCTTAGATTTTTTATTGATTGGATGGGAATGAATCGAAAAAG  
GGTTTATTGTTGGTCTTCCCAGAACTTGTGTTACTTTTTTATTGATGCATATAAAAATTAACC  
GTGGATCATACCAATCAAATTAATCTTTCTAATTCGAAGAAAAACAGGGAAAGAGAA  
CTAGATTTGTTCCCTGAAAAAATATTTTCTTTTTCAATTAAGATGGGACGACCCCTTGAAT  
GAAAAAATGATGACTAATATCACGGTATATTGTCTCCTACTTAGATTGATAAATCCAAGG  
AAAATTGCTATATCCTCAATTCAAAGAGGAGAGATGCATCTGGATGTAATGCTGATTCA  
GAAAGATCTAGCTCTTACAGAATTGATAAAAAAAGGAATATTGATTATCGAACCAGTTC  
GTCTATCTTTAAGAAGGGACGGAAAAATTCATTATATATCAAACCATAGGTATTTCAATTGG  
TCGATAAGAGTAAGTACGATCATTATGATTTCTTGTTCCTGAAAAATTTCTATCTCCTAG  
ACGTCGTAGAGAATTGAGAATTCTAATTTGTTTCAGATTTCTTTGGCCCAATTACCGATT  
AGAAGATTTAGCTTGTATGAATCGCTATTGGTTTGATAACCAATAATGGTAGTCGTTTCAG  
TATGTCAAGGATACATATGTATCCAATGAAACGACATCAATTCAAATCCTGGATCGTCGA  
ATTGAGAGAGATATTGAGAGAGATCAAGAATTCTCACTATTTCTTAGATTCATGGATCA  
AATCAATTCAGTGGGATCTTCACTCACATTTTTTTCCATCAAGAACGCTTTATGAAAC  
TCTTTGACCCCGAATTTGGAGTATCTACTTTCA---CGTGATTTCG-----CAGGGTTCAAC  
AAGCAATCGATATTTTCGCG-----ATCAAAGGTGTAGTACTGCTTGTAGTAGCG---GTCC  
TTATATCT-----CGTATTAACAATCGAAAGATGGTCGAAAGAAAAAATCTCTATTTGA  
TGGGGCTTCTT-----CCTATACCTATGAATTCATTGGACCCAGAAATGAGACATT  
GGAAGAATCTTTT---TGGTCTTCCAATATCAATAGGTTGATTGTTTCG---CTCCTGTATCTT  
CCAAAAGGGAAAAAGATTTCTGAGAGTTGTTTCATGGATCCGCAAGAGAGTACTTGGG  
TTCTCCAATAAAT-----AAAAGTGTATCATGCCTGAATCTAACCGGAGTTCGCGG  
TGGTGGAGGAACCGGATCGGAAAAAAGAGG-----GATTCTAGTTGTAAGATATCT-----  
AATGAAACCGTAGCTGGAATTGAGATCTCATTCAAAGAGAAAGATAGCAAA---TATCTG  
GAGTTTATTTTTTTATCCTATACG-----GATGATCCGATCCGCAAGGACCATGATTGGGAA  
TTGTTTGTATCGTCTTTCTCCGAGGAAGAAGCGAAACATAATCAACTTG-----AATTCGGG  
ACAGCTATTCGAAATCTTAGGGAAAGACTTGATTTGTTATCTCATGTCTGCTTTTTCGTGA  
AAAAAGACCAATTGAAGGGGAGGGT---TTCTTCAAACAACAAGGA---GCTGAGGCAAC  
TATTCATCAAATGATATTGAGCATGTTTCCCAT-----CTCTTCTCGAGAAACAAGTGGGG  
TATTTCTTTGCAAATTTGTGCTCAATTTCATATGTGGCAATTCCGCCAAGATCTCTTCGTT  
-----AGTTGGGGGAAG---AATCAGCACGAATCGGATTTTTTTGAGGAAC---GTATCGAG  
AGAGAATTTGATTTGGTTAGACAATGTGTGGTTGGTAAACAAGGATCGG-----TTTTTT  
AGC-----AAGGTACGGAATGTATTGTCAAATATTCAATATGATTCC-----ACAAGA-----T  
CTATTTTCGTTCAAGTAAGGGATTCTAGC-----GGATCTTCT--GATCAATCCATAGATC  
ATTCGATTCCATTAGA-----AATGAGGATTCAGAA-----TA  
TCCCACATTGATCGATCAAACAGAGATTCAGCAACTAAAAGAAAGATCGATTCTT---TG  
GGAT-----CCTTCCTTTCTTCAAACCGGAACGAACAGAGATAGAATCAGAT-----CGATTCC  
CGAAA-----TGCCTTTTTGGATCTTCC-----TCAATGTCCCGGCTATTCACG---GAACGTG  
AGAAGCAGATGAATAATCATCTGCTTCCGGAAGAAATCGAAGAATTTCTT-----GGAAT



CCTACAAGATCAATTCGTTCTTTTTTCTCTGACAGATGG-----TCAGAACTTCAT--CTGG  
GTTCTGAATCCTATTGAGAGGTCCACTAGAGATCAG-----AAATTTTTGAAGAAAA  
ACAAGATGTTTCT--TTTGTCCCTCCAGGCGATCGGAA-----AATAAAGAAATGGT  
TGATATATTCAAGATAATTACGTATTTACAAAAT-----ACCGTCTCAATTCATCCTATTTCA  
TCAGATCCGGGATGTGATATGGTTCCG---AAGGATGAACCGGAT--ATGGACAGTTCCAA  
TAAGATTTCAATTCTTGAACAAAAATCCATTTTTTGAT-----TTATTTTCATCTATTCATGAC  
CGGAACAAAAGGGGATACACGTTA-----CACCACGATTTT--GAATCA--GAAGAGAGAT  
TTCAAGAAATGGCAGATCTATTCCTCTATCAATAACCGAGCCG---GATCTGGTGTATCA  
TAGGGGATTTGCCCTTTCTATTGATTCCTACGGGTTGGATCAAAAAAAAA-----TTCTTGA  
ATGAGGTATTCAACTCCAGAGATGAATCGAAAAAGAAATCTTTA-----TTGGTTCTAC  
CTCCTCTTTTTTAT-----GAAGAGAATGAATCTTTTTTATCGAAGGATCAGAAAAAATCG  
GTCCGG--ATCTACTGCGGGAATGATTTGGAAGATCCAAAACATAAAAACAGCGGTATTT  
GCTAGCAACAACATAATGGAGGCGGTCAATCAATATAGATTGATCCGAAATCTGATTCA  
AATCCAATATAGCACCTATGGG-----TACATAAGAAATGTATCTAATCGATTCTTTTTAATG  
-----AATAGATCCGATCGCAACTTCGAATATGGAATTCAA-----AGGGATCAAATAGG  
AAATGATACTCTGAATCATATAACTATAATGAAATATACGATCAACCAACATTTATCGAAT  
TTGAAAAAG--AGTCAGAAGAAATGGTTTGATCCT-----CTTATTTCTCGAACCGAG  
AGATCCATGAATCGGGATCCTGATGTATATAGATACAAATGGTCCAATGGGAGCAAGAA  
TTCCAGGAACATTTGGAACATTTTCGTTTCTGAACAGAAGAAC-----CGTTTTCAAGT  
AGTGTTTCGATCGATTACGTATTAATCAATATTCGATTAATTGGTCCGAGGCTATCGACAA  
ACAAGATTTGTCTAAGTCACTTCGTTTCTTTTTGTCCAAGTCA-----CTT  
CTCTTTTTGTCC-----AAGTCACTTCTCTTTTTG--TCCAAGGCACTTCCCCTT  
TTCTTTGTGAGTATCGGGAATATCCCATTTCATAGGTCCGAG---ATCCACATCTAT--GAA  
TTGAAAGGTCCGAATGATCAACTCCGCAATCCGTTGTTAGAATCAATAGGTGTTCAAAT  
CGTTCATTTGAATAAATTGAAACCC-----TTCTTATTGGAT-----GATCATGATACTTCC---  
CAAAGACCGAAATTTCTTGATCAATGGAGGAACAATATTACCATTTTTGTTCAAAAAGAT  
ACCA---AAGTGG--ATGATTGACTCATTCCATACT-----AGAAATAATCGCAGGAAATCCT  
TTGATAACACGGATTTCCTATTTCTCAATGATATTCCATGATCGAGACAATTGGCTGAATC  
CCGTGAAACCATTTTCATAGAAGTTCATTGATATCTTCTTTTTATAAAGCAAATCGACTTC  
GATTCTTGAATGATCCAAATCACTTCTGGTTCTAT-----TGTAACAAAAGATTCCCTTTTT  
ATGTG-----GAAAAGACCCGTATCAATAATTATGAT-----CTTACATAT--GGACAATTC  
CTCACTATCTTGTTTCATTCGCAACAAA---ATATTTTCTTTGTGCGTCGGTAAA-----AAAA  
AACATATTTTTTTGGAG---AGAGAGACTATTTACCAATCGAGTCACAGGTATCTGACAT  
ATTCATACCTAACGATTTTCCACAAAGTGGTGACGAAACG---TATAACTTGTACAAA-----  
----TCTTTCCATTTTCCAATTCGATCCGAGCCATTCGTTTCGT-----AGAGCTATTTACTCGA  
TCGCAGACATTTCTGCAACACCTCTAACAGAGGAACAAATAGTCAATTTTGAAAGAAC  
TTATTGTCAGCCTCTTTCAGATATGAATCTATCTGATTCAGAAGGGAAGAAGACTTGCATCA  
GTATCTCAGT-----TTCAATTCAAACATGGGTTTGATTCACTCCATGTTCTGAGAAATA  
TTTACCA-----TCCGAAAGAGGAAAAAAAA-----CGGAGTCTTCTCTAA  
AG-----AAATGCGTTGAGAAACGGCAGATGTATAGAACCTTTCAACGAGATAGTGCTTT  
TTCAAATCTCTCAAATGGAATCTGTTCCAAACATATATGCCATGGTTTCTTACTTCGAC  
AGGGTGCAAATATCTAAATTCACCCTTTTAGATACTTTTTTCAGACCCATTG-----CCGAT  
ACTAAGTAGCAGT--CACAAATTTGTATCCATTTTTTCATGATATTATGCATGGATCAGATAT  
ATCATGGCCAATTCCTCAGAAG-----ATTCTTCCACAATGGACTCTG---ATA

AGTGAGATTTTCGAGTAAGTGTTTACAGAAT-----CTTCTTCTGTCCGAAGAAATGATTCA  
TCGAAATAATGAGTCACCCGTTCCATTGATATGGACACATCTGAGATCAACAAATGCTC  
GGGAGTTC---CTCTATTCAATCCTTTTCTTCTTCTTGTGCTGGATAT---CTCGTTCGTAT  
ACATCTTCTCTTTGTTTCCCGA-----GCCTCTAGTGAGTTACAGACAGAGTTAGAAAAGA  
TCAAATCTTTGATGATTCCATCATAATGATTGAGTTGCGAAAACCTTTTGGATAGGTATC  
CTACATCTGAACTGAATTCTTTCTGGTTAAAGAATCTCTTTCTAGTTGCTCTGGAACAAT  
TAGGAGATTCTCTGGAAGAAATACGGGGTCTGCTTCTGGTGGCAACATGCTATTGGGT  
GGTGGTCCC-----GCTTATGGG---GTCAAATCAATACGTTCTAAGAAGAAATATTT  
GAATATCAAT-----CTCATCGATCTCATA---AGTATCATACCAAATCCCATCAATCGAATC  
ACTTTTTTCGAGAAATACGAGACATCTAAGTTCGTACAAGTAAAGAGATCTATTCAATTGAT  
AAGAAAAAGAAAAAGGTGAACGGTGATTGGATTGATGAGAAAATAGAATCCTGGGT  
CGCGAATAGTGATTTCGATTGATGATGAAGAAAGAGAATTCTTGGTTCAGTTCTCC-----A  
CCTTAACGACA-----GAAAAAAGGATTGATCAAATCTATTGAGTCTGACT---CATAGTG  
ATCATTATCA-----AGAATGACTCTGGTTATCAAATGATTGAACAACCGGGATC  
AATTTACTTACGATACTTAGTTGACATTCATAATCATAAAAAGTATCCAATGAATTATGAG  
TTCAATAGATCCTGTTTAGCAGAAAGACGGATATTCCTTGCTCATTATCAGACAATCACT  
TAT-----TCACAAACCTCGTGTGGGGCTAATAGTTTTTCATTTCCCATCTCATGGA-----A  
AACCTTTTTCGCTCCGCTTAGCCCTATCCCCTTCT---AGGGTATTTTAGTGATAGGTTCT  
ATAGGAATTGGACGATCCTATTTGGTCAAATACCTAGCGACAAACTCCTATGTTCTTTTC  
ATTACGGTATTTCCGAACAAGTTCTGGATGACAAGCCTAAAGGTTATCTTATTGAT-----  
-----GATATCGAT---ATTGATGATAGTGACGATAGCGAT-----ATTGATGATAGTGAC  
GATATCGATATTGATGATAGTGAC-----GATATTGATGATGACCTTGAT  
ACGGAGCTGCTAACTATGACGAATGCGCTA-----ACTATGTATATGACG-----CCGAA  
AATAGACCGATTTGATATCACCTTCAATTCGAATTAGCAAAGCAATGTCTCCTTGCAT  
AATATGGATTCCAACATTCATGATCTGTATGTGAATGAGTCGAATTACTTATCCCTCGG  
TCTATTAGAGAACTATCTCTCC-----AGAGATTGTGAAAGATGTTCC---ACTAGAAATAT  
TCTTGTATTGCTTCGACTCATATTCCCCAAAAGTGGATCCCGCTCTAATAGCTCCGAA  
TAAATTAATACATGCATTAAGATACGAAGGCTTCTTATTCCACAACAACGAAAGCACT  
TTTTCAATCTTTATATACTAGGGGATTTCACTTGGAAAAGAAAATGTTCCATACT-----A  
ACGGATTCGGGTCCATAACCGTGGGTTCCAATGCACGAGATCTTGTAGCACTTATCAAT  
GAGGCCCTATCAATTAGTATTACACAGAAGAAATCAATTATAGAACTAATACAATTAGA  
TCAGCTCTTCATAGACAACTTGGGATTTGCGA-----TCCCAGGTAAGATCGGTTTCAG  
GATCATGGGATCCTTTTCTATCAGATAGGAAGGGCTGTTGCACAAAATGTACTTCTAAG  
TAATTGCCCATAGATCCTATATCTATCTATATGAAGAAGAAA-----TCATGTAAAGAAGG  
GGATTCTTATTGTACAAATGGTACTTCGAACTTGGAACGAGCATGAAGAAATTAACGA  
TACTTCTTTATCTTTTGTGAGTTGTTCTGCCGGATCGGTCGCTCAAGATCTTTGGTCTTAC  
CC-----GGACCTGATGAAAAA---AATTGGATCACTTCTTATGGATTTCGTTGAGAATGATTC  
T---GATCTAGTTCATGGCCTATTAGAAGTAGAAGGCGCTCTGGTGGGA-----TCCTCACG  
GACAGAAAAAGATTGCAGTCAGTTTGATAATAAT-----CGAGTGACATTACTTCTTCGGT  
CCGAACCAAGGAAT---CAGTTAGATATGATGCAAAACGGATCTTGTTCTATCGTTGATCA  
GAGATTTCTATATGAAAAA-----TACGAATCGGGGTTTGAAGAA---GGGGAAGGG-----G  
CCGTCGACCCGCAA-----CAGATAGAGGAGGAT-----TTATTCAATCAC-----ATA  
GTTTGGGCTCCT-----AGAATATGGCGCCCT-----TGTGGCAATCTATTTGATTGATTGA  
AAGGCCACTGAATTGGGATTTCC---TATTGGGCCGGGTCATTTCCG-----GGCAAG

CGGATCATTTATCATAAAGAGGATGAGCTTCAAGAGAATGATTTCGGAGTTCTTGCAGAG  
TGGAACCATGCAGTACCAGACACGAGATAGATCTTCCAAAGAACAAGGCTTTTTTTCGA  
ATAAGCCAATTCATTTGGGACCCTGCGGATCCATTCTTTTTTCTATTCAA---GATCAGC  
CCTTTGTCTCTGTGTTTTACGTCGAGAATTCTTTGCAGATGAAGAGATGTCAAAGGGG  
CTTATTACTTCCCAAACAATCCTCCTACATCTATATATAAACGCTGGTTCATC-----AAG  
AATACGCAAGAAAAGCACTTCGAATTGTTGATTCATCGCCAGAGATGGCTTAGAAGC---  
-----AATAGTTCATTATCT-----AATGGATCTTTCCGTTCTAAT-----ACTCTATCCGAGAGTT  
ATCAGTATTTATCAAATCTGTTCCCTATCTAAC---GGAACGCTATTGGATCAAATGACAAA  
GACAGTGTGAGAAAGGGATGGCTTTTCCCGGATGAAATGAAACATTTGATT-----CATG  
TAACAGGAGAAAGATTTCCCATTCCTATGCCTAGATCTCGG---ATAAATGCAAATTTTAT  
TGATAAGACCTCTTCAATTGTAGCCAATATCTTATTACGAATAATTCCGACAACCTCCGG  
AGAAAAAAGGCATTTACCTATTACAGAGATGGG-----ATGTTGGCTCAATCCGAAGGA  
AATTATGCGGAAGCTTTACAGAATTATTATGAAGCTACGCGACCAGAAATTGATCCCTAT  
GATCGAAGTTATATACTCTATAACATAGGCCTTATACACACAAGCAACGGAGAGCATA  
AAAGGCTTTGGAATATTATTTCCGGGCACTAGAACGAAACCCATTCTTACCACAAGCTT  
TTAATAATATGGCCGTGATCTGTCATTAC---CGGGGAGAACAGGCCATTCTACAGGGTGA  
TTCTGAAATTGCAGAGGCTTGGTCCGATCAAGCTGCTGAGTATTGGAAACAAGCTATA  
GCGCTTAGTCCAGGTAATTATATTGAAGCACATAATTGGTTGAAGATCACGAGGCGTTT  
CGAA-----ATGAATTGGCGATCAGAACATATATGGATAGAACTTATAACGGGGTCTCGAA  
AAACGAGTAATTTTTGCTGGGCCTGTATCCTTTTTTTTAGGTTCACTAGGATTCTTAGTGG  
TTGGAACCTCCAGTTATCTTGGTAGGAATTTGATATCCGTATTTCCATCTCAGCAAATCC  
TTTTTTTTCCACAAGGGATCGTGATGTCTTTCTATGGGATCGCGGGTCTATTCATTAGCT  
CCTATTTGTGGTGCACAATTTTCGTGGAATGTAGGTAGCGGTTATGACCGATTTCGATAGA  
AAAGAAGGAATAGTGTGTATTTTTTCGTTGGGGATTTCTGGAATAAATCGTCGCATCTT  
CCTTCGCTTCCTTATGAGAGATATCCAATCAATCAGAATGGAGGTTAAAGAGGGTCTTT  
ATCCTCGTCGTGTCTTTATATGGACATCAGAGGCCAAGGAGCCATTCCCTTGACTCGT  
ACTGATGAGAAT--TTTACTCCACGAGAAATTGAACAAAAAGCTGCCGAATTGGCCTAT  
TTCTGCGCGTACCAATTGAAGTATTT

>Pseudophoenix

ATGGA AAAATGGTGGTTCAATTCGATGTTGTCTCTAAATAAATCAATGGATAGTCTTGAT  
GCTATTGGACATAACCAGTGGAAGTGAAGAACCCATTCTAAATGGTACGGAGAAAAACA  
TTCCT---TTCAGAAATGTTGATTATTTATTTGATATCAGGGATATTTGGAGTTTGATCTCTG  
ATGACACTTTTTTAGTTAGGGATAGTAATGGTGACAGTTTTTCTGTATGTTTTGATATTG  
AAAATCAGATTTTTGAGATTGACAATGAT-----AGTTCTTTTATGAGTGAAGTAGAAAGT  
TTTTTTTCTAGT-----TATTTAAATAGTGGGTCTAAGAGAAACAATCACA ACTATTA  
TCATTACATATATGATACTCAATCTAGTTGGAATAATCACATTAATAGTTGCATTGATAATT  
ATCTTCGTTTTGAAGTC-----AGTATTAATAGTTCCATTTCGGGTGGTACCGACAATTACA  
GTGACAGTTACATTTATAGTTTCATTTGTACTGAAAGTGGGAGTTCTATAAGA ACTAGTC  
AAAATAGAAGCGATTTCAATATAAGAAGAAGATCT--GATTTCCGGTAGAAATAAAAAAT  
ACAGACATTTATGGGTTCAATGCGAAAATTGTTATGGATTA AATTATAAAAAATTTTTTA  
GGTCAAAAATGAATATTTGTGAACAGTGTGGATATCATTTGAAAATGAGCAGTT CAGAT  
AGAATCGAACTTTCGATTGATCCGGGGACTTGGGATCCTATGGATGAAGATATGGTCTC  
TATGGACCCCATTTGAATTTCAATTCAGAGGGGGAAACCCTATAGAGATCGTATCGATTCTTA  
TCAAAGAAACACAGGTTTAACTGAAGCTGTTCAAACAGGCATAGGTCAACTAAATGGT

ATTCCTGTAGCAATTGGAGTTATGGATTTTAAGTTCATGGGAGGTAGTATGGGATCTGTA  
GTAGGCGAGAAAATCACCCGTTTGATCGAGTATGCTACTAATCGATCTCTACCTGTCATT  
ATTGTGTGTGCTTCTGGAGGAGCACGCATGCAAGAAGGAAGTTTGAGTTTGATGCAAA  
TGGGTAAAATATCTTCCGCTTCATATAATTATCAATCAAATAAAAAATTATTCTATGTATC  
AATCCTTACATCTCCTACAACCGGTGGAGTAACAGCCAGTTTTGGTATGTTGGGAGATG  
TCATTGTTGCTGAACCTCATACTACATTGCATTTGCGGGCAAAGAGTAATTGAACAA  
ACATTGAATAAGACAGTACCCGATGGTTCACAAGCGGCTGAGTATTTATTCCATAAAGG  
CTTATTTGACCCAATTGTACCACGTAATCCTTTAAAAGGTGTTCTGAGTGAGTTATTTCA  
GCTCCACGGTTTCTTTCCCTTGAATCAAATTCAAAAATATGGTAACCCTTCGAGCCG  
ACGAAATTAGTAATATTATCCGTGAACGTATTGAACAATATAATAGAGAAGTAAAGATTG  
TGAATACCGGTACCGTACTTCAAGTGGGCGATGGCATTGCTCGTATTCATGGTCTTGAT  
GAAGTAATGGCAGGTGAATTAGTAGAATTTGAAGAGGGTACAATAGGAATTGCTCTGA  
ATTTGGAATCAAATAATGTTGGCGTTGTATTAATGGGTGATGGTTTGATGATACAAGAAG  
GAAGTTCTGTAAAAGCAACAGGAAGAATTGCTCAGATACCTGTGAGTGAGGCTTATTT  
GGGTCGTGTTATAAATGCTCTGGCTAAACCTATTGATGGGAGAGGTGAAATTCAGCTT  
CTGAATCTCGGTTAATTGAATCTCCTGCCCGGTATTATTTTCGAGACGTTCTGTATATG  
AACCTCTTCAAACGGGGCTTATTGCTATCGATTCGATGATCCCTATAGGACGCGGTCAG  
CGAGAATTAATTATTGGGGACAGACAGACTGGAAAAACAGCAGTAGCTACAGATACGA  
TTCTTAACCAAAAAGGGCAAAATGTGATATGTGTTTATGTAGCTATTGGTCAAAAAGCA  
TCTTCTGTGGCTCAGGTAGTGACTACTTTTCAGGAACGAGGGGCGATGGAATACACCA  
TTGTGGTAGCCCAAACGGCGGATTCACCTGCTACATTACAATACCTCGCTCCTTATACG  
GGAGCGGCTCTGGCTGAATATTTTATGTACCGTGAACGACATACTTTAATAATTTATGAT  
GATCTCTCCAAGCAGGCACAAGCTTATCGACAAATGTCTCTTCTATTAAGAAGACCCCC  
TGGTCGTGAAGCTTATCCAGGAGATGTTTTTTATTTGCATTTCGCGCCTTTTGGAAAGAG  
CCGCTAAATCAAATTCTCGTTTAGGTGAAGGGAGTATGACTGCTTTACCAATAGTTGAG  
ACTCAATCTGGGGATGTTTCAGCTTATATTCTACTAATGTAATTTCCATTACAGATGGA  
CAAATATTCTTATCCGCCGATCTATTCAATGCTGGAATCCGACCCGCTATTAATGTGGGTA  
TTTCTGTTTCCAGAGTGGGATCCGCAGCTCAAATTAAGCCATGAAACAAGTAGCTGG  
CAAATCAAATTTGGAAGTAGCGCAATTCGCGGAGTTAGAAGCCTTTGCACAATTCGCT  
TCTGATCTCGATAAAGCTACTCAGAATCAATTGGCAAGAGGTCAACGATTACGTGAGTT  
GCTTAAACAATCCCAATCAGACCCTCTCACGGTGGAAAGAACAGATAGTTACTATTTATA  
CCGGAGCGAATGGATATCTTGATCCGTTAGATATTGGACAGGTAAAGAAATTTCTCGTT  
CAGTTACGTACCTACTTAAAAAAGAATAAACCTCAATTCGAAGAAATTATATCTTCTACC  
AAGACATTCACCGAGCAAGCGGAAGCCCTTTTGAAGGAAGCTATTCAGGAACAGATC  
GAACTGTTTTTACTTCAGGAACAAACGATGAGAATCAATCCTACTCCTTCTAGTCCTGT  
GGTTTCCACACTTGAAGAAAAAACCTAGGGCGTATCGCTCAAATATTGGCCCAGTA  
CTGGATGTCGTTTTTCCCCCGGGCAAGATGCCTAATATTATAACGCTTTGGTAGTTAAG  
GGTCGAGATACTGTCGGTCAGCAAATTAATGTGACTTGTGAGGTACAGCAATTATTAGG  
AAATAATCGAGTTAGAGCTGTAGCTATGAGTGCTACAGATGGGCTGATGAGAGGAATG  
GAAGTGATTGACACGGGAGCTCCTCTAAGTGTTCAGTCGGCGGAGCTACTCTCGGAC  
GAATTTTCAACGTTCTTGGGGAACCTGTTGATAATTTAGGTCCTGTAGATACTCGCACA  
ACATCTCCTATTCATAGATCTGCGCCTGCCTTTATACAGTTAGATACGAAATTATCAATCT  
TTGAAACAGGGATTAAGTGGTGGATCTTTTAGCTCCTTATCGCCGTGGAGGAAAAATC  
GGACTATTTGGGGGAGCTGGAGTGGGTAAAACAGTACTCATCATGGAATTGATCAATA

ACATTGCCAAAGCTCATGGAGGCGTATCCGTATTTGGCGGAGTAGGCGAACGTACTCG  
TGAAGGAAATGATCTTTACATGGAAATGAAAGAATCCGGAGTGATTAATGAAAAAAT  
ATTGCGGAATCAAAGTAGCTCTAGTCTATGGTCAAATGAATGAACCGCCGGGAGCTC  
GTATGAGAGTTGGTTTAACTGCCCTAACCATGGCGGAATATTTCCGGGATGTTAATGAA  
CAAGACGTGCTTCTATTCATCGACAATATTTTTTCGTTTCGTCCAAGCAGGATCAGAAGT  
ATCCGCCTTATTAGGGAGAATGCCTTCCGCAGTGGGTATCAACCTACCCTTAGTACAG  
AAATGGGTCTTTTGCAAGAAAGAATTACCTCTACCAAAGAGGGATCTATAACTTCGATA  
CAAGCGGTTTATGTACCTGCGGACGATTTGACCGACCCTGCTCCTGCCACGACATTTGC  
ACATTTAGATGCTACTACCGTACTATCAAGAGTATTAGCTGCTAAAGGTATTTATCCAGC  
AGTGGATCCGTTAGATTCAACGTCAACTATGTTACAACCTCGAATCGTTGGTGAGGAAC  
ATTATGAAACTGCGCAAAGAGTTAAGCAAACCTTCACAACGTTACAAAGAACTTCAGGA  
CATTATAGCTATCCTTGGGTTGGACGAATTATCCGAAGAAGATCGTTTAACTGTAGCAA  
GAGCACGAAAAATTGAGCGTTTCTTATCACAACCCTTCTTCGTGGCAGAAGTATTTACT  
GGTCTCCAGGGAATATGTTGGTCTTGCAAGAAACAATTAGGGGGTTTCAATTGATCCT  
TTCCGGAGAATTAGACGGTCTTCCCGAGCAGGCCTTTTATTTGGTGGGTAACATCGATG  
AAGCTACCGCGAAAGCTATGAACTTAGAAGTGGAGAGCAAATTGAAGAAAATGACCTT  
AAATCTTTGTGTACTGACTCCTAATCGAATTATTTGGGATTCAGAAGTGAAAGAAATCA  
TTTTATCTACTAATAGTGGCCAAATTGGTGTATTACCAAACCACGCCCTATTGCCACGG  
CTGTAGATATAGGTCTTTTGAGAATACGCCTCAACGACCAATGGTTAACGGTGGCTCTG  
ATGGGTGGTTTCGCTAGAATAGGTAATAATGAGATCACCATTTTAGGAAATGATGCGGA  
GATGAGTACTGACATTGATCCGCAAGAAGCTCAGCAAGCTCTTGAAATAGCTGAAGCT  
AACTTGAGTAGAGCTGAGGGTAAGAGACAAGCAATTGAAGCGAATCTAGCTCTCAGA  
CGAGCTAGGACACGAGTAGAGGCTGTAATGCTATTTCCATGAAAAATGTAACCGATT  
TTTCTTTCTTGGGTCACTGGCCATCCGCCGGGAGTTTCGGGTTTAAATACCGATATTTT  
AGCAACAAATCCAATAAATCTAAGTGTAGTGCTTGGTGTATTGATTTTTTTTGGAAAGG  
GGGTGTAAATGATTTATTAGATAATCGAAAACAGAGGATCTTGAGTACTATTGAAATT  
CGAAGAATTACGTAGAGGGGCCATTGAGCAGCTCGAAAGAGCCAGGACTCGCTTAC  
GGAAAGTGGAAATAGAAGCAGATGAGTATCGAATGAATGGATACTCTGAGATAGAACG  
AGAAAAAGAAAATTTGATTAATGCTACTTGTGACACTTTGGAACGATTAGAAAATTACA  
AAAATGAAACCCTTCATTTTGAACAACAAAGAGCGATTAATCAGGTCCGACAACGAGT  
TTTTCAACAAGCCTTACAAGGAGCTCTAGGAACTCTGAATAGTTGTTTGAATAGTGAGT  
TACATTTCCGTACGATCCGTGCTAATATTGGCATTCTAGGGGCCATGGAAGAAATAACA  
GATATGAATCCACTGATTTCTGCCGCTTCCGTTATTGCTGCTGGATTGGCCGTAGGGCTT  
GCTTCTATTGGACCTGGAGTTGGTCAAGGTACTGCTGCAGGCCAAGCTGTAGAAGGTA  
TTGCGAGACAACCAGAAGCAGAGGGTAAAATACGAGGTACTTTATTGCTTAGTCTAGC  
TTTTATGGAAGCTTTAACAATTTATGGACTGGTTCGTGGCGTTAGCGCTTTTGTGCGAA  
TCCTTTTGTTATGAATGTTATACCATGTTCCATTAACAACTCAAAGGGTTATACGATATA  
TCGAGTGTAGAAGTAGGCCAACATTTCTATTGGCAAATAGGAGGTTTACAAATCCATGC  
CCAAGTACTTATCACTTCTTGGGTCGTAATTGCTATCTTATTAGGTTTCAGTCATCATAGCT  
GTTCCGAATCCACAAACCATTCCGACCGACGGTCAGAATTTCTTCGAATATGTCCTTGA  
ATTTATTCGAGATTTGAGCAAACTCAGATTGGAGAAGAATATGGTCCTTGGGTTCCCT  
TTATTGGAACATGTTCTTATTTATTTTGTCTTAACTGGTCAGGTGCTCTTTTACCTTG  
GAAAATCATACAATTACCTCATGGGGAGTTAGCTGCGCCTACGAATGATATAAATACTAC  
TGTTGCTTTAGCTTTACCCACGTCAGCGGCATATTTTTATGCGGGTCTTACCAAAAAAG

GATTGGGTATTTCGGGAAATACATTCAACCAACCCCAATACTTTTACCAATTAACATCC  
TAGAAGATTTACAAAACCTTTATCTCTTAGTTTTTCGACTTTTTCGGGAATATATTGGCTG  
ATGAATTAGTAGTTGTTGTTCTTGTCTTTAGTCCCTTCAGTAGTTCCTATACCTGTTAT  
GCTTCTTGGATTATTTACAAGTGGTATTCAAGCTCTTATTTTTGCAACGTTAGCCGCGG  
TTATATAGGTGAATCCATGGAGGGTCATCATATGATATTTGTGACTTTAGAACATATATTA  
ACTCATATCTTTTTTCGATCATTTC AATTGTGATTACGATTCATTTTCATGAACCTTATTAGT  
CTACGAAATCGTAAGATTACGTGATTCATCGGAAAAAGGGATGATAGCCACCTTTTTCT  
CTATAACAGGATTATTAGTTTCTCGTTGGATTCTTCGGGACATTTTCCGTTAAGTAATTT  
ATACGAGTCATTAATCTTCCTTTCATGTAGTTTATTTATTATTTCATATAATTTCCAAGAAAT  
TGAACCATAAAAATGATTTAAGCATAATAACTACCCCAAGTACTATTTTTACTCAAGGCT  
TCGCTACGTCGGGTCTTTCAACTGAAATGCATCAATCCGCAATATTAGTACCTGCTCTAC  
AATCTCAGTGGTTAATGATGCACGTAAGTATGATGTTATTGAGCTATGCAGCTCTTTTAT  
GCGGATCGTTATTATCAATCGCTCTTCTAGTCATTACATTTTCGAAACAACATAAATTTTT  
TTGTA AAAAGCAATGAGATTA AATACTTGAATGAAAAAGAAGTGTTTTTAAAAAACT  
TCTTTTCTTTTCATTTTCGAAATTATTACAAATATCAATTGACTCAGCGTTTGGATTATTGGA  
GTTATCGTATGATTAGTTTAGGGTTTACCTTTTTAACCATAGGCATTCCTTGTGGAGCAGT  
ATGGGCCAATGAAGCATGGGGATCTTATTGGAGTTGGGACCCGAAGGAACTTGGGCA  
TTTATTACTTGGACCATATTCGCGATTTATTCACATACTAGAACA AATCAAAGTTTACAA  
GGTACGAATTCGGCACTTATAGCTTCTATAGGATTTTTTATAATTTGGATATGCTATTTTG  
GGTCAATCTATTAGGAATAGGTTTACATAGTTATGGTTCATTCACATTAACAAAAAAA  
AAAAGCCTTGGTCTCCCTCCCATATATTTATTTTCATCCATAATTTTTTGCCTGGTGGT  
CTCTCTCTCATTTAATAAATGTCTGGAACCTTGGGTACTAATTGGTGGAATACCGGGAA  
ATCCGAAACTTTTTTGAATGATATTCAAGAGAAAAACGTTCTAGAAAGATTCATAGAAT  
TGGAAGAACTATTCCTCTTGGATGAAATGATAAAGGAGTACCCGGAGACGCATATACAA  
AACTTCGTATAGGAATACACAAGGAAACGATACAATTGGTCAAAACACACAATGAAT  
ATCATCTCCATATCATTTTGGATTTCTCGACAAATATAATTTGTTTCGCTATTCTAAGTGG  
TTATTTTATTCTGGGTAATGAAGA AACTTGTCAATCTTAATTCTTGGATTCAGGAATTCCTC  
TATAACTTAAGTGACACAATAAAAGCTTTTTTGTATTCTTTTAGTTACTGATTTATGGATCG  
GATTTTCATTCGACCCATGGTTGGGAACTAATGATTGGTTCGGTCTACAACGATTTTGGAT  
TGTTTCATAACGATCAAATTATATCTAGTCTTGTTCCTTCCACTTTTCCAGTTATTCTAGATAC  
AATTGTGAAATATTGGATCTTCTATTATTTAAATCGTGTATCTCCTTCACTTGTAGTTATTT  
ATCATTCAATGAATGAAATGCCATTGGTGTTCAAAAGTACCTTTTTCGGAGTCCTGGA  
GAGGAAGATGCAGTTTGGGTGACGTATAACCGACTTCATCGAGAAAGATTACTTTT  
TTTAGGCCAAGAAGTTGATAGCGAGATCTCGAATCAACTTGTGGTCTCATGGTATATC  
TCAGTATAGAAGATGATACTAGAGATCTTTATTTATTTATAAACTCTCCCGGCGGATGGG  
TAATACCAGGAATAGCCATTTATGATACTATGCAATTTGTGCCACCCGATGTGCATACAA  
TATGCATGGGATTAGCCGCTTCAATGGGATCTTTCATTCTGGTTCGGAGGAGAAATTACC  
AAACGTCTAGCATTCCCTCACGCTAGGGTTATGATTCACCAACCTGCTAGTTCTTTTTAT  
GAGGCACAAGCAGGCGAATTTATCCTGGAAGCGGAAGA AACTACTGAAACTTCGCGAA  
ACCCTCACAAAGGTTTATGTACAAAGAACGGGTAATCCTTTATGGGTTGTATCCGAAGA  
CATGGAAAGAGATGTTTTTATGTGACAAACAGAAGCCCAAGTTCATGGCATTGTTGATC  
TTGTAGCGGTTCGAAATGAAAGAACA AAAAATTGATTCATGAAGGTTTAATTACTGAATCA  
CTTCCCAACGGTATGTTCCGGGTCCGTTTAGATAATGAAGATCTAATTCTAGGTTATGCT  
TCAGGGAGGATCCGGCGCAGTTTTATACGGATACTACCAGGAGATAGAGTAAAAAATTG

AAGTAAGTCGTTATGATTCAACCAGAGGACGTATAATTTATAGACTTCGCAACAAAGAT  
TCGAACGATATGGAAGAATTACAAGGATATTTAGAAAAAGATAGATCTCGGCAACAAC  
ACTTTCTATATCCGCTTCTCTTTAAGGAGTATATTTACACATTTGCTCATGATCGTGGTTT  
ATTTGGTTATGACAAT--TCTAGTTCAGTACTTGTGAAACGTTCAATTATTCGAATGTATC  
AACAGAATTATTTGATTTATTCGGTTAATGATTCTAACCAAATCGATTCGTTGGGTTTC  
ATTTTTATTTTCAGATGATATTGGAAGGTTTTGCAGTCATTGTGGAAATTCATTCTTGCT  
GCGATTAGTATCTTCCCTCATACCAAATCTCAGAATTTACGATCTATTCAATCAATATTT  
CCTTTTTAGAGGACAAATTATCGCATTTAAATTATGTGTCAGATATACTAATACCTTATC  
CCATCCATCTGAAAATCTTGGTTCAAATCCTTCAATGCTGGATCCAAGATGTTCCCTTCTT  
TACATTTATTGCGATTCTTCTTTCACGAATATCATAATTGGAATAGTCTTATTACTAATTCT  
ATTTTT--TTTTTCAAAAAAGACTATTTTCGGTTCTCATATAATCTTATGTATCTGAATGC  
GAATTTGTATTAGTTTTTCTTCGTAAACAATCTTCTTATTTACGATTAACATCTTCTGTAG  
CTTTTCTTGAGCGAACACATTTCTATGGAAAAATAGAACAT--ATAGTAGTGCGCCGTAA  
TCAGAAGACCCTATGGTTCTTCAAGGATCCCTTCATGCATTATGTTTCGATATCAAGGAA  
AAGCAATTCTGGTTTCAAAGGGGACTCATCTTCTGATGAAGAAATGGAAATGTCACCT  
TGTCATTTCTGGCAATATTATTTCACTTTTGGTCTCAACCGTACAGGATACATATAAA  
CCAATTATCAAACGTCTTCTTCTATTTTCTAGGTTATTTTTCAAGTGTACTAATAAATCCT  
TCGTCGGTAAGGAATCAAATGCTAGAGAATTCATTTCTAATAGATACTGTTATT-----AAA  
AAATTCGATACCAGAGTCCCAGTTATTCCTCTTATTGGATCATTGTATAAAGCTAAATTTT  
GTACCGTATCGGGGCATCCTATTAGTAAGCCGATCTGGACCCATTTATCAGATTGCGATA  
TTATTGATCGATTTGGTCGGATATGTAGAAATCTTCTCATTATCACAGTGGATCCTCAA  
AAAAACAGGGTTTGTATCGAATAAAGTATATACTTCGATTTTCGTGTGCTAGAACTTTG  
GCTCGTAAACATAAAAGTACGGTACGCGCTTTTTTGCAAAGATTAGGTTTCGGGATTATT  
AGAAGAATCTTTACGGAAGAAGAAGAAGTTGTTTCTTTGATCTTCCAAAAACGTATTT  
GGTATTTGGATATTATCCGTATCAATGACTTGGTGAATTATTCAATGATAATTGATACGAC  
A--GAAGTACAA--GCTATCAATCTTTTTCTACATCGGAA--TCCATAAAAGAAATCTAT  
GGACTCATATGGATGTTTGTATCCATTTTTACCCTTATATTTGGAATCATAATAGGGGTAC  
TAGTAATTGTGTGGTTAGAAAGAGAAATATCTGCAACGATACAACAACGTATTGGACCT  
GAATATGCTGGTCCGTTGGGAATCTTCAAGCTCTAGCAGATGGGACTAAATTACTTTTT  
AAGGAGGACCTACTCCCATCTAGAGGAGATATTCGTTTGTTTAGTGTGGACCGTCTAT  
AGCGGTCATATCAATCTACTAAGTTATTTAGTAATTCCTTTTTGGATACCGCCTTGTTTTA  
GGTGATCTCAGTATAGGTGTTTTTTTTATGGATCACCATTTCAAGTATTGCCCTATTGGG  
CTTCTTATGTCAGGATATGGATCGAATAATAAATATCTTTTTTCAGGTGGTCTACGAGCT  
GCTGCTCAATCTATTAGTTATGAAATACCATTA ACTCTATGCGTCTTATCAATATCTCTACT  
ATCTAATAGTTCAAGTACAGTTGATATAGTTGAAGCGCAGTCAAATATGGTTTTTTGGG  
GATGGAATCTGTGGCGTCAACCTATAGGGTTTATTGTTTTTCTAATTTCTTCTTAGCCG  
AATGTGAGAGATTGCCATTTGATTTACCGGAAGCAGAGGAGGAATTAGTAGCAGGTTAT  
CAAACCGAATATTCAGGTATCAAATTCGGTTTATTTTATATTGCTTCTTACCTAAATCTAT  
TACTTTCTTCAATTTTGTAAACAGTTCTTTACTTAGGTGGGTGGAATTTTTCTATTCCGTA  
CATATCTATTCCTGAACTTTTTCGGAATAAATAAAATGGCCGGAGTTTTTGGAAATTACAAT  
TGGTATCTTTATTACATTAGCTAAAGCTTATTTGTTTCTGTTCAATCCTATCACAACAAGA  
TGGACTTGCCTAGGATAAGAATGGACCAGCTATTAATCTTGGATGGAAATTTCTTTTA  
CCTATTTCTTTAGGTAATCTATTATTGACAACCTTCTCCCAACTTGTTTCACTAATGATCT  
GGCATGTACAGAATGAAAACCTCATTCTCGATTCTACGAGAATTTTTATGAAAGCGTTT

CATTTGCTTCTCTTCCATGGAAGTTTCATTTTCCCAGAATGTATCCTAATTTTTGGCCTAA  
TTCTTCTTCTGATGATCGATTCAACCTCTGATCAAAAAGATAGACCTTGGTTCTATTTCA  
TCTCTTCAACAAGTTTAGTAATAAGCATAACGGCCCTATTGTTCCGATGGAGAGAAGAA  
CCTATAATTAGCTTTTTCGGGAAATTTCCAAACGAACAATTTCAACGAAATCTTTCAATTT  
CTTATTTTACTATGTTCAACTCTATGTATTCCTCTATCCGTAGAGTACATTGAATGTACAG  
AAATGGCTATAACAGAGTTTCTGTTATTCGTATTAACAGCTACTCTAGGAGGAATGTTTT  
TATGTGGTGCTAACGATTTAATAACTATCTTTGTAGCTCCAGAATGTTTCAGTTTATGTTC  
CTACCTATTATCTGGATATAACCAAGAGAGATGTACGGTCTAATGAGGCTACTACGAAATA  
TTTACTCATGGGTGGGGCAAGCTCTTCTATTTCTGGTTCATGGTTTCTCTTGGCTATATGG  
TTTATCTGGGGGGGAGATCGAGCTTCAAGAAATAGTGAATGGTCTTATCAATACACAAA  
TGATAACTCCCCAGGAATTTCAATTGCGCTTATATCCATCACTGTAGGAATTGGGTTCA  
AGCTTTCCCCAGCCCCTTTTCATCAATGGACTCCTGACATATACGAAGGATCTCCCCT  
CCAGTCGTTGCTTTTTCTTTCTGTTACTTTCGAAAGTAGCTGCTTCAGCTTCAGCCACGCG  
AATTTTCGATATTCCTTTTTATTTCTCATCAAACGAATGGCATCTTCTTCTGAAATCCTA  
GCTATTCTTAGCATGATATTGGGGAATCTCATTGCTATTACTCAAACAAGCATGAAACGT  
ATGCTTGCATATTCGTCCATCGGTCAAATCGGATATGTAATTATTGGAATAATTGTTGGAG  
ACTCAAATGATGGATATGCAAGCATGATAACTTATATGCTGTTCTATATCTCCATGAATCT  
AGGAACTTTTGCTTGCATTGTATCATTGGTCTACGTACCGGAAGTATAACATTTCGAGA  
TTATGCAGGATTATACACGAAAGATCCTTTTTTTGGCTCTCTCTTCAGCCCTATGTCTCTTA  
TCCCTAGGGGGTCTTCCCTCCACTAGCAGGTTTTTTTCGGAAAACCTCCATCTATTCTGGTG  
TGGATGGCAGGCAGGCCTATATTTCTTGGTTTTCAATAGGACTCCTTACGAGCGTTGTTT  
CTATCTACTATTATCTAAAAATAATCAAGTTATTAATGACTGGACGAAACCAAGAAATAA  
CCCCTTACGTGCGAAATTATAGAAGATCTCCTTTAAGATCAAACAATTCCATCGAATTG  
AGTATGACTGTATGTGTGATAGCATCTACTATAACCAGGAATATCAATGAACCCAATTCTT  
GCAATTGCTCAGGATACCCTCTTTATGTTTCTGCTTCACGAATATGATATTTTCTGGGCAT  
TTCTGATAATATCAAGCGTTATTCCTATCTTGACATTTGTAATTTCCGGAGTTTTAGCACC  
GGTTAGTGAAGGACCAGAGAAGCTTTCGAGTTATGAATCGGGTATAGAACCCATGGGG  
GATGCTTGGTTACAATTCCGAATCCGCTATTACATGTTTGCTCTAGTTTTTTGTTGTTTTTG  
ATGTTGAAACGGTCTTTCTTTATCCATGGGCAATGAGTTTCGATGTATTGGGTGTATCTG  
TATTTATCGAAGCTTTCATTTTCGTGCTTATCCCAATTGTTGGTTCAGTTTATGCATGGCG  
AAAAGGAGCATTGGAATGGTCTACGAGTTATTTTCTTGGTTAACAATACTTGTAGTTTT  
GCCGATATTCGCGGGTTCCTCAATTTCTTTTTCTCATAGAGGAAATAAGATGTTTAG  
ATGGTATACTATTTGTATATGTTTATTAGAATCCTTCTAACAACCTATGCATTCTGTTATC  
ATTTCCAATTGGACGATCCATTAATCCAATTGGAAGAAGATTATAAATGGATAGATATTT  
TTGATTTTCACTGGAAACTGGGAATCGATGGACTTTCATAGGACCCATTTTACTGACA  
GGATTTATCACTACTTTAGCTACTTTAGCGGCTTGGCCAGTTACGCGAAATTCGCGATTG  
TTCTATTTCTGATGTTAGCAATGTACAGCGGTCAAATAGGATCATTTTCTTCTCGAGAC  
CTTTTACTTTTTTTCATCATGTGGGAGTTAGAATTAATTCCTGTTTACTTACTTTTTATCCAT  
GTGGGGAGGAAAAAACGTCTCTACTCGGCTACAAAGTTTATTTTGTACACAGCAGGG  
GGTTCTATTTTTCTCTTAATAGGAGTTCTAGGTATGGGTTTATATGGTTCCAATGAACCA  
ACATTAGATTTTGAAGATTAGTTAATCAATCATATCCTGTGGCATTGGAATAATATTAT  
ATTTTGGTTTCTTTATTGCTTATGCTGTCAAATCGCCGATTATACCCCTGCATACATGGTT  
ACCAAATACCCATGGAGAAGCACATTACAGCACATGTATGCTTCTAGCTGGAATCTTATT  
AAAAATGGGAGCATATGGATTGATTTCGGATCAATATGGAATTATTACCCACGCTCATT



TATATTTTCTCCCTGGTTGGTAATAGTTGGAACGATGCAAATAATCTATGCAGCTTTAATT  
TCTATCGGTCAACGAAATTTTAAAAAGAGAATAGCCTATTCTCTGTATCTCACATGGGT  
TTTATAATTATAGGAATTGGTTCTATAACCGACATGGGACTCAATGGAGCCATTTTACAA  
ATACTCTCTCATGGATTTATTTGGTGCTGCACTTTTTTTCTGGCGGGAACGAGTTGTGAT  
AGAATACGTCTTGTATCTCGACGAAATGGGAGGTATATCTATCCCAATGCCAAAATA  
TTTACCATGTTTCAGTAGTTTCTCGATGGCTTCTCTTGCATTGCCAGGAATGAGTGGTTTT  
GTTGCGGAATCAGTAGTATTTTTTGGAAATAACTAGTCCAAAATATCTTTTAATGCCA  
AAAATACTAATTACTTTTTGTAATGGCAATTGGAGTGATATTAACCTCTATTTATTATC  
TATGTCACGTCAGATGTTCTATGGATACAAGCTATTCAATGTTCCACACTCTAATTTTTG  
GATTCTGGACCACGAGAACTATTTGTTTCAATTTGTATCTTTCTCCCTATAATAGGGATT  
GGTATTTATCCTGATTTTCGTTCTCTCGTTATCAATTGACAGGGTACAAGCTATCCTATCTA  
ATTACTTTTATAGAATGATGTTTCGAGCATGTACTTTTTTTGAGTGTCTATTTATTCTCTATC  
GGTATCTATGGATTGATCACAAGTCGAAAGATGGTTAGAGCACTTATGTGTCTTGAGCT  
TATACTTAATTCGGTTAATATCAATCTCGTAACATTTTCTAATATATTTGATAATCGCCAAT  
TAAAAGGCGACATTTTCTCAATCTTTGTTATAGCTGTTGCGGCTGCTGAAGCAGCTATT  
GGGCTAGCTATTGTTTCATCAATTCATCGTAACAGAAAATCAACTCGTATCAATCAATCG  
AATTTGTTGAATAATATGGAACATACATATCAATATGCATGGATAATACCTTTTCTTCCAC  
TTACAGTTACTATGTCAATAGGATTTGGACTTATACTTATTCCGACAGCAACAAAAATA  
TTCGTCGTATATGGGCTTTTCTAGTATTTTTCTGTTAAGTATAGCTATGGGATTTTCCGC  
TTGTCTGTCTATTCAACAAATAAATGGAAGTTTTATTATCAATATCTATGGTCTTGAGC  
ATAGATATTGATTTTTCTTAGAGTTTGGATATTTGATCGATCCGCTTACTTCTATTATGTC  
AATACTAATTACTACTGTTGGAGTCATGGTTCTTATTTATAGTGACAATTATATGTCTCAC  
GACCAAGGATATTTGAGATTTTTGCTTATATGAGTTTTTCCAATCTTCCATGTTGGGAT  
TAGTTACTAGTTCTAATTTGATACAAATTCATATTTTTTGGGAAGTATGGGAATGTGTT  
CATATTTATTAATAGGGTTTTGGTTCACACGACCGATTGCCGCAAGTGCTTGTCAAAA  
GCTTTTGTAACTAATCGTGTAGGAGATTTTGGTTTATTATTAGGAATCTTAGGTCTTTATT  
GGATAACAGGTAGTTTGAATTTCCGGATTTGTTTCGAAATAACTAATAACAATGGGGTC  
AACTCCTTATTTGCTACTTTGTGTGCCCTTACTATTTGTCGGTGCAGTTGCTAAATCT  
GCACAATTCCCCCTCCACGTATGGTTACCTGATGCCATGGAAGGACCTACTCCTATCTC  
GGCCCTTATACACGCTGCTACTATGGTAGCAGCAGGAATTTTTCTTGTAGCTCGGCTTAT  
TCTCTTTTTCATAGACATACCTTATATAATGAATTTCAATTTCTTAAATAGGTATAATAACAG  
TACTATTAGGAGCTACTTTTTCTCTTGCTCAAAGAGACATTAAGAAGTTTAGCCTATT  
CTACAATGTCTCAATTAGGTTATATTATGTTAGCTCTAGGTATAGGTTCTTATCGAGCGGC  
TTTATTCATTTGATCACTCATGCCTATTCTAAAGCTTTATTGTTTTTGGGATCTGGATCTA  
TTATTCATTCAATGGAACCTATTGTTGGATATTCACCAGAAAAAGTCAAATATGGTTC  
TTATGGGTGGTTTAAACAAGATATGTTCCAATTACAAGAAGTACTTTTTTATTAGGTACAC  
TTTCTCTTTGTGGTATTCCACCTCTTGCTTGTTTTTGGTCCAAGATGAAATCTTAATAA  
TAGTTGGTTATATTCACCAATTTTTGCAATAATACCTTATTTACAATAGGATTAACCGCA  
TTTTATATGTTTCCGGTATATTTACTTACCTTTGATGGGTATTTGCGCGTTATTTTTAAAA  
TCACAGTAGCACTAAGAATAACTCGTCTTATCAATATCTCTATGGGGAAAAGAAGCAC  
CAAAAACAGTCAATAAA---AATTTACTTTTTATCAACAATGAATTTTTTTTCAAATAAATAT  
-----ACTTCCATGTATCCTCACGAATCAGACAATACTATGCTATTTCTCTGCTTGTATTGG  
TACTATTTACTTTGTTTCGTTGGATCAATAGGAATTTCTTTTGATTTTGATATATTATCGAAA  
TGTTAAACCCCATCCAAAATCTTTCCATCCAAATTCGAATTATTCTGTGAATTGGTAT

GAATTTTTTACAAATCAATTTTTTCAGTAAGTATAGCCATTTTAGGATTATTCATAGCAT  
ATATTTTATATGGGTCTGTTTATTCATTTTTCCAGAATTTGGACTTAATCAATTCATTTGTA  
ATTATCTTGGACCGAATAAAAAGTGTTATATACAATTTGGTCATATAATCGTGGTTACATAG  
ATATTTTTTATACTAGAGTTTTAGCCATGAGTATAAGAGGATTAACCGAGCTAACTCAAT  
TTTTTGATAGACATATAATTGATGGAATTACAAATGTAGTTGGCCTTACAAGTTCTCTTAT  
AGGTGAAGGAATCAGATAT---ATGGGGGGGGGCCGAATTCGTCTTATTTATTCCTTATATT  
TTTTTTATGTATCAATATTTTTTATTATTTTTTTTGTATGGATTTACCTGGACCAATACATGATA  
TTCTGTAGTATTTTTTGGATCAGTCTTGTATTAGGAGGTCTGGGAGTAGTATTACTTAC  
CAATCCCATTTTTTCTGCCTTTTCGTTGGGATTGGTTCCTTGTTTGTATATCCTTATTCTATA  
TTCTATCGAATTCCTATTTTGTAGCTGCCGCACAGCTCCTTATTTATGTTGGAGCAATAAA  
TGCTTAATCATATTTGCTGTAATGTTTCATGAATGGTTCAGAATATCCAATGATTCCCAT  
TTTTGGACCATTGGAGATGGGGTCACTTCACTGGTTTGTACAAGTATTTTTTTTTCACTA  
ATTACTATTATCCCAGATACGTCATGGTATGGAATTTTTTGGACTACAAGATCAAGCCAG  
ATTATAGAACAGGACCTAATAAGTAACATTCAACAAATTTGGTATTCATTTATCAACAGAT  
TTTTATCTTCCGTTTGAACCTCATTTCATAATCTTTTTAGTTTCCTTGATAGGTGCAATTA  
CTATGGCTCGTCAAATGACTATAACGGCTACAAGAAAAGATCTCATGATAGTCAATATG  
GGTCTCACCAACCATCAATGCATGGTGTCTTCGACTGATCGTTACTCTCGATGGTGA  
AGATGTTATTGATTGTGAACCCATATTGGGATATTTACACAGAGGGATGGAAAAAATAG  
CAGAAAACCGAACAAATTATAACAATATCTTCCTTATGTAACACGTTGGGATTATTTAGCTA  
CTATGTTACAGAGGGCAATAACGGTAAATGCACCAGAACAATTGGAAAATGTTCAAGT  
ACCTCAGAGAGCCAGTTATATCAGAGTAATTATGCTGGAGCTGAGTCGTATAGCTTCTC  
ATTTGTTATGGCTTGGACCTTTTATGGCGGATATCGGTGCACAGACTCCATTTTTCTATAT  
TTTCAGAGAGAGAGAATTGTTATATGATCTATTCGAAGCCGCCACAGGTATGCGAATGA  
TGCATAATTATTTCCGCATCGGAGGAGTAGCTGCTGATCTACCTCATGGCTGGATAGATA  
AATGTTTGGATTTCTGCGATTATTCTTTAACAGGAGTTGTTGAATATCAAAAACCTTATTA  
CACGGAATCCCATTTTTTTGGAACGAGTTGAAAGAGTGGGCATTATTGGTGGAGAGGA  
AGCAATAAATTGGGGTTTATCAGGACCAATGTTACGAGCTTCTGGAATCCAATGGGATC  
TTCGTAAGGTTGATCATTATGAGTGTTACAATGAATTCGATTGGGAAGTCCAATGGCAA  
AAAGAAGGAGATTCATTAGCTCGTTATTTAGTACGAATAGGTGAAATGGGGGAATCTAT  
AAAAATTATTCAACAGGCTCTAGAAGGAATTCCTGGAGGTCCCTATGAGAATTTAGAA  
GTCCGACGC---GATAGAGCAAAAAATTCGAATGGAATGATTTTGAATATAGATTTATTA  
GTAAAAACCTTCACCCAATTTTGAATTGTGCAACAAGAACTTTATGTAAGAGTAGA  
AGCCCCAAAAGGAGAATTAGGAATTTATTTGATAGGGGATAATAGCATTTTCCCCTGGA  
GATGGAAAATTCGTCCACCCGGTTTCATCAATTTGCAAATTCCTCCTCAGCTAGTTAAA  
AGAATGAAATTGGCTGATATCATGACGATACTAGGTAGTATAGATATCATTATGGGAGAA  
GTTGATCGTATGTTCTCTATGGTGACTGGGTTTCATGAATTATAGTCAACAAACAATACGA  
GCTGCAAGGTATATTGGTCAAAGTTTCATAATTACCTTATCCACACAAATCGTTTACCT  
ATAACTATTCAATATCCTTATGAAAAATCAATCACATCAGAGCGTTTCCGTGGTCAATC  
CACTTTGAATTTGATAAATGTATTGCTTGTGAAGTATGTGTTTCGTGTATGCCCGATAGAT  
CTACCCGTGTTGATTGGAGATTTGAAAGAGATATTAACAAAAACAATTGCTTAATTAT  
AGTATTGATTTTGGGGTCTGTATATTTTGTGGTAATTGTGTGCGAGTATTGTCCAACAAC  
TGTTTATCAATGACTGAAGAATATGAACTTTCTACTTCTGATCGTCACGAATTGAATTAT  
AATCAAATTGCTTTGGGTCGGTTACCAATGTCAATAATTGGAGATTACACAATTCAAAC  
AGTTATGAATTCGAAAATAGACAAAGATAAACCTTTGATTCAAGAACGATTACCAATT

ACCAGCAGGATCGTTTATCTGATTGGTTAGTCAAGCATGAGCTAGTTCATAGATCTTTG  
GGCTTCGATTGCCGAGGAATAGAGACTTTACAAATAAAAACCGAGGATTGGTACTCCA  
TTGCTGTCATTTTCATATGTATATGGTTACAATTATTTACGCTCCCAGTGTGCCTATGATGT  
AGCACCAGGCGGATTTTGTAGCTAGTGTGTATCATCTTACGAGAATACAATATGGTGTAGA  
TAAACCAGAAGAAGTATGCATAAAAGTATTTGTCCCAAGGAATAATCCTAGAATCTCGT  
CTGTTTTCTGGATTTGGAAAAGTGCTGATTTTCAAGAACGCGAATCTTATGATATGTTG  
GGAATCTCTTATGATAATCATCCACGCCTTAAACGTATCTTGATGCCTGAAAGTTGGATA  
GGCTGGCCCTTACGTAAGGACTATATTACCCCAATTTCTATGAAATACAAGATGCTCAT-  
-----ATGG  
TCTTAACT--GAATATTCAGACAATCAAATAAAAAGGAAGGAAAAGATTACATTGAGA  
CAGTTATGAATTTGATTGAGTTTCCATTACTTGACCAAACAACCCCGATTACAGTTATTT  
CAACTACATCGAATGATCTTTCGAATTGGTCAAGACTCTCTAGTTTATGGCCGCTTCTAT  
ATGGTACCAGTTGTTGTTTCATTGAATTTGCTTCATTAATAGGCTCGCGATTGACTTTG  
ATCGTTATGGATTGGTACCAAATCGAGTCCTAGGCAAGCGGACCTAATTTTAAACAGCC  
GGCACAGTAACAATGAAAATGGCTCCTTCTTTAGTGAGATTATATGAGCAAATGCCTGA  
ACCAAATATGTCATTGCTATGGGAGCTTGTACTATTACAGGAGGGATGTTTACAGTACTG  
ATTCTTATAGTACTGTTCCGGGAGTCGATAAGCTAATTCCTGTGGATGTCTATTTGCCGG  
GCTGTCCACCTAAACCAGAAGCAGTTATAGATGCTATAATGAAACTTCGTAAGAAGATA  
TCTCGAGAAATCTTTGAAGATAGAAGTGTGTCTCAA--GAAAATCGATGTTTTTCTACC  
AATCACAAGTTTTATGTTTCGACGCAGTACTCATACTGGAAATTACGATCAAGGATTGCT  
CTATCAATCACCATCTACTTCAGAGATGCCTACA-----TTTTTCAAATCCAAAAGTTCAAT  
ATCTTCCCACGAATTAGTTAATATGCAAATAGAAATACTTTTTCTTGGGTAAAGGAAC  
AGATGACTCAATCGATTTCTGTATCGATCATGATATATGTAATAACTCGGGCATCTATTT  
AAATGCATATCCATTTTTGCGCAGCAGGGTTATGAAAACCCACGAGAAGCAACTGGA  
CGAATTGTATGTGCCAATTGCCATTTAGCTAATAAGCCCGTGGATATTGAAGTTCCGCAA  
GCCGTGCTTCCCTGATACTGTATTTGAAGCAGTTGTTTTCGAATCCCTTATGATATGCAACTG  
AAACAAGTTCTTGCTAATGGTAAAAGGGGGCTTTGAATGTAGGGGCTGTTCTTATTTT  
ACCCGAGGGATTTCGAATTAGCCCCCCCCGATCGTATTTCTCCCGAGGTGAGAGAAAAG  
ATGGGAAATCTGTCTTTTCAGAGTTATCGTCCCAATAAAAAGAAATATTCTTGTGATAGGT  
CCTGTTCCCGGTCAGAAATATAGTGAAATCGCCTTTCCCATTTCTTTCCCCCGACCCTGCT  
ACGAGGAAAGACGTTCACTTCTTAAAATATCCCATATATGTAGGTGGGAACAGAGGAA  
GGGGTCAGATTTATCCTGATGGGAGCAAGAGTAACAATACAGTCTATAATGCTACATCA  
GCAGGTATAGTAAGCAGGATAGTACGTAAAGAAAAGGAGGATATGAAATAACCATAG  
TTGATGCATCGGATGGACATCAAGTGGTTGATATTGTACCTCCAGGACCAGAAGTCTT  
GTTTCAGAGGGTGAATCCATCAAGCTTGATCAACCATTAACAAGCAATCCCAATGTAGG  
AGGGTTTGGTCAGGGAGATGCAGAAATAGTGCTTCAAGATCCATTACGTGTCCAAGGC  
CTTTGTTCTTCTTGGCATCTGTTATTTTGGCACAAGTTTTTTTTGGTTCTTAAAAGAAA  
CAGTTTGAAAAGGTTCAATTGTATGAAATGAATTTCTCAATAAGGTATATGATTGGTTT  
GAGGAACGTCTCGAGATTCAGGCGATTGCGGATGATATAACTAGTAAATATGTTCTCC  
TCATGTCAACATATTTTATGTTTAGGGGGGATCACACTTACTTGTTTTTTAGTACAAGT  
AGCTACAGGTTTTGCTATGACTTTTTACTATCGTCCAACCGTTACAGAAGCTTTTTCTC  
TGTTCAATACATAATGACTGAGGCCAATTTTGGTTGGTTAATTCGATCAGTTCATCGATG  
GTCAGCAAGTATGATGGTTCTAATGATGATCCTGCACGTATTTTCGTGTATATCTCACAGG  
TGGATTTAAAACCCCGCGAATTAAGTGGGTTACAGGTGTGGTTTTAGCTGTATTGA

CTGCATCTTTTGGTGTAACCTGGTTATTCCCTACCTCGGGACCAAATTGGTTATTGGGCAG  
TAAAAATCGTGACAGGTGTACCTGAAGCTATTCCCTGTAATAGGATCGCCTTTGGTAGAG  
TTATTACGTGGAAGTGCTAGTGTGGGCCAATCCACTTTGACTCGTTTTTATAGTTTACAC  
ACTTTTGTATTGCCTCTTCTTACTGCCGTATTTATGTTAATGCACTTTCCAATGATACGTA  
AGCAAGGTATTTTCGGGTCCTTTAATGGGAGTAACAAAGAAACCTGACTTGAATGATCC  
TGATTAAGAGCTAAATTGGCTAAAGGAATGGGGCATAATTATTATGGAGAACCCGCAT  
GGCCAATGATCTTTTATATATTTTTCCAGTAGTAATTCTAGGTACTCTCGCGTGTAATGT  
AGGCTTAGCGGTTCTAGAACCCTCAATGATTGGTGAACCGGCAGATCCATTTGCAACT  
CCTTTGGAAATATTACCCGAATGGTACTTCTTTCCCGTATTTCAAATACTCCGCACAGTG  
CCCAATAAGTTATTGGGTGTTCTTTAATGGTTTCAGTACCAACGGGATTATTGACAGTA  
CCTTTTTTGGAGAATGTCAATAAATCCAAAATCCATTTTCGTCGTCCAGTAGCTACAAC  
AGTCTTTTTGATCGGTACCGTAGTAGCTCTTTGGTTAGGTATTGGAGCAACATTACCTAT  
TGATAAATCCCTAACTTTAGGTCTTTTTATGATTGAAGTTTTTCTATTTGGAATCGTCTTA  
GGTCTAATCCTATTACTTTGGCAGGATTATTCGTAACTGCATATTTACAATACAGACGT  
GGTGATCAGTTGGACCTTATGCCTACTATAACTAGTTATTTCCGGTTTTCTACTGGCTGCT  
TTAACTATAACCCAGCTCTATTGATTGGTTTTGAATAAGATACGACTTATTATGGATATAG  
TAAGTCTCACTTGGGCTGCTTTAATGGTAGTCTTTACATTTTCCCTCTCACTCGTAGTAT  
GGGAAGAAGTGGACTCATGATTATTCGTTCCCGGAACCAAGTGAATAATTGTTGT  
AGATAGGGATCCTATAAAAACGTCTTTTGAGGAATGGGCCAGACCCGGCCATTTCTCAA  
GAACAATAGCTAAGGGCCCTGATACTACCCTTGGATCTGGAACCTACATGCTGATGCT  
CACGATTTTCGATAGTCATAACAGTGATTGGAGGAGATCTCCCGAAAAGTATTTAGTGC  
TCATTTTGGTCAACTCTCCATTATCTTTCTTTGGCTGAGTGGCATGTACTTCCATGGCGC  
CCGTTTTTCCAATTATGAAGCATGGCTAAGTGATCCTACTCATATTGGACCCAGTGCCCA  
GGTAGTTTGGCCAATAGTAGGTCAAGAAATATTGAATGGTGTGATGTGGGCGGGGGTTTCC  
GAGGAATACAAATAACCTCCGGTTTTTTTTTCAGATTTGGCGAGCATCTGGAATAACTAGT  
GAATTACAACCTCTATTGTACCGCAATTGGTGCATTGGTCTTTGCATCGTTAATGCTTTTT  
GCCGGTTGGTTCCATTATCACAAAGCTGCCCAAATTGGCTTGGTTCCAAGATGTAGA  
ATCTATGTTGAATCACCCTTAGCGGGGTTACTAGGACTTGGGTCTCTCTCTTTGGGCGG  
GACACCAAATCCATGTATCTTTACCGATTAACCAATTTCTCGATGCTGGAGTTGATCCTA  
AAGAGATACCCTCCTCATGAATTTATCTTGAATCGGGACCTTTTGGCTCAACTTTATC  
CCAGTTTTGCCGAGGGAGCAACCCCTTTTTACCTTGAATTGGTCAAATAACGCGGA  
ATTCCTGAGTTTTTCGTGGAGGATTAGATCCAATAACAGGGGGTCTATGGCTGAGCGATA  
TTGCACACCATCATTTAGCTATTGCTATTTCTTTCCCTGATCGCTGGTCATATGTATAGGAC  
CAACTGGGGCATCGGTTCATGGCCTTAAAGACATTTTAGAGGCTCATAAAGGTCCATTTA  
CAGGCCAGGGTCATAAGGGCCTATATGAAATCCTAACAACGTCATGGCATGCTCAATTA  
TCTCTTAACCTGGCTATGTTAGGTTCTTTAACCATTGTTGTAGCTCACCATATGTATCCA  
TGCCCCCTATCCATACCTAGCTATTGATTATGGTACACAACCTTTTCGTTGTTACACATC  
ACATGTGGATCGGTGGATTCTCATAGTTGGTGCTGCTGCACATGCAGCCATTTTTATGG  
TAAGAGACTATGATCCAACCTACTCGATACAACGATCTATTAGATCGTGTCTTAGGCACC  
GCGATGCAATCATATCACATCTTAACTGGGCATGTATATTTCTAGGTTTTACAGTTTTG  
GCTTGTATATTCATAATGATACCATGAGCGCTTTAGGGCGGCCCAAGATATGTTTTAG  
ATACCGCTATAAATTACAACCCATCTTTTCTCAATGGGTACAAAACATTCATGCTTTAG  
CACCTGGGGTAACAGCTCCTGGTGCAACAACAAGTACCAGCTTAACTTGGGGGGGTG  
GTGAGTTAGTAGCAGTAGGCGGCAAAGTAGCTTTGTTACCTATTCCATTAGGAACCGCA

GATTTTTTGGTCCATCACATTCATGCATTTACGATCCATGTGACTGTATTGATACTACTGA  
AAGGTGTTCTATTTGCTCGCAGTTCCCGTTTGATACCCGATAAAGCAAATCTTGGTTTTTC  
GTTTCCCTTGTGATGGGCCTGGAAGAGGGGGGACATGCCAAGTATCCGCCTGGGATCA  
TGTCTTCTTAGGTCTATTTCTGGATGTACAATGCAATTTCCGGTAGTCATTTTCCATTTTCA  
TGAAAATGCAGTCGGATGTTTGGGGTACTATAAGTGATCAAGGGGTAGTAACTCATAT  
CACAGGAGGAAACTTTGCACAGAGTTCCATTACTATTAATGGGTGGCTCCGAGATTTCT  
TATGGGCACAGGCATCTCAGGTAATTCAGTCTTATGGTTCTGAATTATCCGCATATGGTC  
TTTTTTTCTTAGGTGCTCATTTTATCTGGGCTTTCAGTTTAATGTTTCTATTCACTGGCCG  
TGGTTATTGGCAAGAACTCATTGAATCCATCGTTTGGGCTCATAACAAATTAAGTTG  
CTCCTGCTACTCAGCCTAGAGCCTTGAGCATTGTACAAGGACGTGCTGTAGGAGTAAC  
CCATTACCTTCTGGGTGGAATTGCCACAACATGGGCATTCTTCTTAGCAAGAATTATTGC  
AGTAGGAATGGCATTAAAGATTTCCGAGGTTTAGCCTCGGCTTAGCTCAGGACCCCACTA  
CTCGTTCGATTTGGTTTGGTATTGCTACCGCACATGACTTCGAGAGTCATGATGATATTA  
CTGAGGAACGTCTTTATCAGAACATTTTTGCTTCTCATTTTGGGCAGTTAGCAATAATCT  
TTCTGTGGACGTCCGGAAATCTGTTTCATGTAGCTTGGCAAGGAAATTTTGGTTCATGG  
ATACAGGACCCTTTACATGTAAGACCTATTGCTCATGCAATTTGGGATCCTCATTTTGGT  
CAACCAGCTGTAGAAGCCTTTACTCGAGGGGGTGTATCGGCCAGTGAATATCGCTTA  
TTCCGGTGTATTATCAGTGGTGGTATAACAATCGGATTGCGCACCAATGAGGATCTTTATA  
AGGAGCTCTTTTTCTATTATTTCTTTCTGCTATATCCTTAATAGCGGGTTGGTTACATCTA  
CAACCCAAATGGAACCAAGTGTTCGTGGTTCAAAAATGCCGAATCTCGTCTCAATC  
ATCATTGTGTCAGGACTTTTCCGAGTAAGTTCCCTGGCTTGGGCAGGACATTTAGTTCATA  
TCGCTATTCCCGGATCCAGGGGAGAGTACGTCAGATGGAATAATTTCTTAGACGTATTA  
CCGTATCCTCAAGGGTTGGGACCCTTTTACGGGTCAGTGGAAATCTTTATGCTCAAAA  
CCCTGATTCGAGTAGTCATTTATTTGGTACTTCCCAAGGAGCCGGAATGCCATTCTAA  
CCCTTCTTGGGGGATTCCATCCACAAACGCAAAGTTTATGGTTGACCGATATTGCTCAT  
CATCATTAGCTATTGCATTTATTTTTCTCGTTGCTGGTCATATGTATAGAATAACTTCG  
GAATTGGGCACAGTATCAAAGATCTTTTAGAAGCACATATTCCTCCGGGGGGTTCGATTA  
GGACGTGGGCATAAGGGTCTTTATGACACAATCAATAATTCGATTCATTTTCAATTAGGT  
CTTGCTCTAGCCTCTTTAGGGGTTATTACTTCCCTTAGTAGCTCAACACATGTACTCTTTA  
CCTGCTTATGCATTCATAGCACAAGACTTTACTACTCAAGCTGCCTTATATACTCATCAC  
CAATACATCGCAGGGTTCATCATGACAGGAGCCTTTGCTCATGGAGCTATATTCTTCATT  
AGAGATTACAATCCGGAACAGAATGAGGATAATGTATTGGCAAGAATGTTAGACCATAA  
AGAAGCTATCAAATCTCATTAAAGTTGGGCCAGCCTGTTTCTCGGGTTCATACCTTGG  
GCCTTTATGTTTATAACGACGTCATGCTCGCTTTTGGTACTCCGGAAAAACAATCTTG  
ATCGAACCTATATTTGCCCAATGGATAACAATCCGCTCATGGTAAGACTTCATATGGGTTT  
GATGTACTCTTATCTTCAACGAATGGTCCAGCATTCAATGCTGGTCAAAGCATATGGTTA  
CCTGGCTGGTTGAATGCTATTAATGAG-----AATAGTAATTCGCTCTTCTTAACAATAGGT  
CCTGGAGATTTCTTGGTTTATCATGCTATTGCTCTAGGTTTGCATACAATACTACATTGATTT  
TAGTAAAAGGTGCTTTAGATGCACGTGGTTCCAAGTTAATGCCAGATAAAAAGGATTTT  
GGTTATAGTTTTCTTGGCAGGGCCAGGACGCGGGTACTTGTGATATTTCTGCTTG  
GGACGCATTTTATTTGGCAGTTTTCTGGATGTTAAATACCATTGGATGGGTTACTTTTTAT  
TGGCATTGGAACACATCACATTATGGCAGGGTAACGTTTCACAATTTAATGAATCCTC  
CACTTATTTGATGGGATGGTTAAGAGATTATCTATGGTTAAACTCTTCACAACTTATCAA  
TGGATATAACCCTTTTGGTATGAATAGTTTATCGGTATGGGCGTGGATGTTCTTATTTGGA

CATCTTGTTTGGGCTACTGGATTTATGTTCTTAATTTCCCTGGCGTGGATATTGGCAGGAA  
TTGATTGAAACTTTAGCATGGGCTCATGAACGCACACCTTTGGCTAATTTAATTCGATG  
GAGAGATAAGCCAGTGGCTCTTTCCATTGTGCAAGCAAGATTGGTTGGATTAGCCCAC  
TTTTCCGTAGGTTATATATTCACCTTATGCAGCTTTCTTGATTGCCTCTACATCAGGAAAAT  
TTGGTATGTCACATTCAGTAAAAATTTATGATACATGTATAGGGTGTACTCAATGTGTAC  
GAGCCTGCCCCACAGATGTATTGAAATGATACCTTGGGACGGATGTAAAGCTAAGCA  
AATTGCTTCCGCACCAAGAACCGAGGACTGTGTAGGTTGTAAGAGATGTGAATCCGCC  
TGCCCAACAGATTTTTTGGAGTGCCGTGTTTATTTATGGCATGAAACAACCTCGCAGCAT  
GGGTCTATCTTATATGACAGATCTCAACTTACCCTCTATTTTTGTGCCTTTAGTGGGCCTA  
GTATTTCCGGCAATTGCAATGGCTTCTTTATCTCTTCATGTCCAAAAAATAAGATTGTC  
ATGCGAGATATAAAAACATATCTCTCCGTGGCACCTGTGCTAACTACTCTATGGTTTGGG  
TCTTTAGCAGGTCTATTGATAGAAATTAATCGTTTATTCCCAGATGCCTTGTCAATCCCTT  
TTTTT-----ATGACTGCAATTTTAGAGAGACGCGAAAGTACAAGCCTATGGGGTCGCTTC  
TGCAACTGGATAACCAGCACCGAAAACCGTCTTTACATTGGATGGTTCCGGTGTTTTGGT  
GATCCCTACCTTATTGACCGCAACTTCTGTATTTCATTATCGCCTTCATTGCTGCTCCTCCA  
GTAGATATTGATGGTATTCGTGAACCAGTTTCTGGTTCTCTACTTTATGGAAACAATATTA  
TCTCTGGTGCCATTATTCCTACTTCTGCAGCTATCGGTTTGCATTTTACCCGATATGGGA  
AGCGGCATCTGTTGATGAGTGGTTATAACAATGGCGGTCCTTATGAGCTAATTGTTCTACA  
CTTCTTACTTGGTGTAGCTTGTACATGGGTCGTGAATGGGAACTTAGTTTCCGCCTGG  
GTATGCGTCCTTGGATTGCTGTTGCATATTCAGCTCCTGTTGCAGCTGCTACTGCTGTTT  
TCTTGATCTACCCTATTGGTCAAGGAAGTTTCTCTGATGGTATGCCTTTAGGAATATCTG  
GTACTTTCAACTTCATGATTGTATTCCAGGCGGAACACAACATCCTTATGCATCCATTC  
ACATGTTGGGCGTAGCTGGTGTATTCCGGCGGCTCCCTATTTCAGTGCTATGCATGGTTCCCT  
TGGAACCTCTAGTTTGTATCAGGGAAACCACTGAAAACGAATCTGCTAATGCAGGTTA  
CAGATTCGGTCAAGAGGGAGAACTTATAATATCGTAGCTGCTCATGGTTATTTTGGCC  
GATTGATCTCCAATATGCTAGTTTCAATAATTCTCGTTCCTTACATTTCTTCTGGCTGC  
TTGGCCTGTAGTAGGTATCTGGTTCACTGCTTTAGGTATTAGTACTATGGCTTTC AACCT  
AAATGGTTTCAATTTCAACCAATCTGTAGTTGACAGTCAGGGTCGTGTTATCAACACTT  
GGGCTGATATCATCAATCGTGCTAACCTTGGTATGGAAGTAATGCATGAACGTAATGCTC  
ACA ACTTCCCTCTAGACCTAGCTGCTGTCGAAGTTCCATCTACAAATGGAATGGGTTTG  
CCTTGGTATCGTGTTCACTACTGTCGATTGAATGATCCCGGTCGATTGCTTTCTGTCCATA  
TAATGCATACAGCTCTAGTTTCTGGTTGGGCCGTTTCGATGGCTCTATACGAATTAGCGG  
TTTTTGATCCCTCTGACCCTGTTCTTGATCCAATGTGGAGACAAGGTATGTTTCGTTATAC  
CCTTCATGACTCGTTTAGGAATAACCAATTCGTGGGGTGGTTGGAGTATTTCA---GGAG  
GAACTATAACGAATCCGGGTATTTGGAGTTATGAAGGTGTCGCAGGGGCACATATTGTG  
TTTTCTGGCTTGTGCTTCTTGGCAGCTATCTGGCATTGGGTGTATTGGGATCTAGAAATA  
TTCTGTGATGAGCGTACGGGAAAACCTTCTTTGGATTTGCCAAGATCTTTGGAATTCA  
TTTATTTCTCTCAGGGGTGGCTTGTCTTTGGCTTTGGCGCATTTTCATGTAACAGGTTTGT  
TGGTCTGGAATATGGGTGTCCGATCCTTATGGACTAACTGGAAAAGTACAATCTGTAA  
ATCCAGCGTGGGGCGCGGAAGGTTTTGATCCTTTTGTTCGGGGAGGAATAGCCTCTCAT  
CATATTGCAGCGGGTACGTTGGGCATATTAGCAGGTCTATTCCATCTTAGTGTCCGTCG  
CCTCAACGTCTATACAAAGGATTACGTATGGGAAATATTGAAACTGTACTTTCTAGTAGT  
ATCGCTGCTGTTTTTTTTTGCAGCTTTTCGTTGTTGCTGGAACCTATGTGGTATGGTTT  
ACTACCCCAATCGAATTATTTGGTCCCCTCGTTATCAGTGGGATCAGGGATACTTTT

CAAGAAATATATCGAAGAGTTAGCGCCGGACTAGCCGAAAATCTGAGTTTATCGGAAG  
CTTGGTCTAAAATCCCGAAAAATTAGCTTTTTATGATTACATTGGTAATAATCCGGCAA  
AAGGGGGATTATTCAGAGCAGGCTCAATGGACAACGGGGATGGAATAGCTGTTGGATG  
GTTAGGACACCCCGTCTTTAGAGATAAAGAAGGGCGCGAGCTTTTTGTACGTCGTATGC  
CTACTTTTTTTGAAACATTTCCGGTAGTTTTAGTAGATGGAGACGGAATTGTGAGAGCC  
GATGTTCCTTTTAGAAAGGGCAGAATCAAAGTATAGTGTGAACAAGTAGGTGTAAGTGT  
CGAGTTCTATGGTGGCGAACTCAATGGAGTTAGTTATGGTGATCCTGCTACTGTAAAAA  
AATACGCTAGACGTGCCCAATTAGGTGAAATTTTTGAATTAGATCGGGCTACTTTGAAA  
TCCGATGGTGTTTTTTCGTAGCAGTCCAAGGGGTGGTTCACTTTTGGGCATGCTACGTT  
TGCTTTGCTCTTCTTTTTTGGACACATTTGGCATGGTGTAGAACCTTGTTTCAGAGATGT  
TTTTGCTGGTATTGATCCAGATTTGGATGCTCAAGTGGAATTTGGAACATTTCAAAAAA  
TTGGGGATCCAATAACAAGGAGACAAGTAGTCATGAAAACCTTATATCCCTGAGGAG  
GTTCTACCCCGTGGAAACGCTCTTAATGGAACCTTAGCTTTAGCTGGTTCGTGACCAAG  
AAACCACTGGTTTTCGCTTGGTGGGCCGGGAATGCCAGACTTATCAATTTGTCCGGTAA  
ACTACTTGGAGCTCACGTAGCCCATGCCGGATTAATCGTATTCTGGGCCGGAGCAATGA  
ACCTATTTGAAGTGGCTCATTTCGTACCAGAGAAACCCATGTATGAACAAGGATTGATT  
TACTTCCACACCTAGCTACTCTAGGTTGGGGGGTAGGTCGGGGGGGGGAAGTTATAG  
ACACCTTTCCATACTTTGTATCTGGAGTACTCCACTTAATTTCCCTCTGCAGTCTTAGGCT  
TTGGCGGTATTTATCATGCGCTTCTTGGACCTGAGACTCTTGAAGAATCTTTCCATTTT  
TCGGTTATGTATGGAAAGATAGAAATAAAATGACTACAATTTGGGTATTCACTTAATTT  
TGTTAGGTATAGGTGCTTTTCTTCTAGTACTCAAGGCTCTTTATTTTGGGGGCGTATATGA  
TACCTGGGCCCTGGGGGGGAGATGTAAGAAAATAACCAACTTAACACTTAGCCCA  
AGTGTTATATTTGGTTATTTACTAAAATCTCCTTTTGGGGGAGAAGGATGGATTGTTAGT  
GTGGACGATTTAGAAGATATAATTGGAGGACATGTATGGTTAGGTTCCATTTGTATACTT  
GGTGGAAATTTGGCATATCTTAACCAAACCTTTGCATGGGCTCGCCGTGCATTTGTATG  
GCTGGAGAGGCTTACTTGTCTTATAGCTTAGGTGCTTTATCTGTTTTTGGTTTCATCGC  
TTGTTGTTTCGTATGGTTCAATAATACCGCTTATCCTAGTGAGTTTTACGGACCCACCGG  
GCCAGAAGCTTCTCAAGCTCAAGCATTACCTTTCTAGTTAGAGACCAACGCTTTGGA  
GCTAACGTGGGATCCGCCAAGGACCTACTGGTTTAGGTAAATATCTAATGCGTTCCCC  
GACCGGGGAGGTTATTTTTGGAGGAGAACTATGCGTTTTTGGGATCTTCGTGCTCCCT  
GGTTAGAACCCCTAAGGGGTCCAATGGTTTGGACTTGAGTAGGCTGAAAAAAGACAT  
ACAACCTTGGCAAGAACGACGTTTCGGCAGAATATATGACTCATGCTCCTTTAGGTTCTT  
TAAATTCAGTGGGTGGCGTAGCTACCGAGATCAATGCAGTCAATTATGTCTCTCCTAGA  
AGTTGGTTAGCGACCTCTCATTTTGTTCTAGGATTCTTCCTATTTGTGGGGCATTGTGG  
CATGCGGGAAGGGCCCGTGCGGCTGCAGCAGGGTTTGAAAAAGGAATCGATCGTGAT  
TTGGAACCTGTTCTTTCCATGACCCCTTAGCATGACTATAGCCCTTGGTAGATTTACC  
AAAGAAGAA---GATTTATTTGATATTATGGATGATTGGTTACGGAGGGACCGTTTTCGTTT  
TTGTAGGCTGGTCTGGCCTATTACTCTTTCCTTGTGCTTATTTTCGCTTTAGGAGGTTGGT  
TTACAGGTACAACTTTTGTAACCTCATGGTATAACCATGGATTGGCCAGTTCCTATTTGG  
AAGGTTGCAATTTCTTGACCGCTGCAGTTTCCACTCCTGCGAATAGTTTAGCACATTCC  
TTGTTGCTACTATGGGGCCCTGAAGCACAAGGGGATTTACTCGTTGGTGTCAATTAGG  
CGGTCTGTGGACTTTTTGTTGCTCTCCATGGTGTTCGACTAATAGGTTTTATGTTACG  
TCAATTCGAACCTTGCTCGATCTGTGCAATTGCGACCTTATAATGCAATCGCATTCTCTGC  
TCCAATTGCTGTTTTTGTCTGTATTCTGATTTATCCACTGGGTCAATCTGGTTGGTTC

TTTGCGCCAGTTTTGGCGTAGCAGCTATATTTTCGATTCATCCTCTTCTTCCAAGGGTTT  
CATAATTGGACGTTGAACCCATTTTCATATGATGGGAGTTGCCGGAGTATTAGGCGCTGC  
TCTACTATGCGCTATTTCATGGTGTACCGTAGAAAATACTTTATTTCGAAGATGGTGACGG  
TGCAAATACATTCCGTGCTTTTAACCCAACTCAAGCCGAAGAGACTTATTCAATGGTCA  
CTGCTAACCGCTTTTGGTCCCAAATCTTTGGGGTTGCTTTTTCCAACAAACGTTGGTTA  
CATTTCTTTATGCTATTTGTACCAGTAACCGGTTTATGGATGAGTGCTCTTGGAGTAGTC  
GGCCTGGCTCTGAACCTCCGTGCCTATGACTTCGTTTTCCAAGAAATCCGTGCAGCGG  
AAGATCCTGAATTTGAGACTTTCTACACCAAAAATATCCTCTTAAACGAAGGTATTTCGT  
GCTTGGATGGCGGCTCAGGATCAGCCTCATGAAAACCTTATATTCCCTGAGGAGGTTCT  
ACCCCGTGGAAACGCTCTTATGTCTGGAAGCACGGGAGAACGTTCTTTTGTGATATTA  
TTACCAGTATTCGATACTGGGTCATTCATAGCATTACTATACCTTCCCTATTCATTGCGGG  
TTGGTTATTTCGTCAGTACGGGTTTAGCTTACGACGTGTTTGAAGTCCTCGGCCAAACG  
AGTATTTACAGAGAGCCGACAAGGGATTCCATTGATAACCGGCCGTTTTGATTCTTTG  
GAACAACCTCGATAAATTTAGTAGATCCTTTATGACCATAGATCGAACCTATCCAATTTTT  
ACAGTACGATGGTTGGCTGTTACGGATTAGCTGTACCTACCGTTTTTTTTCTTGGGGTC  
AATATCAGCAATGCAGTTCATCCAACGAATGGCTACACAAACCGTTGAGGGTAGTTCTA  
GA---TCTGGGCCAAGACGAACACTACTGTAGGGAATTTATTGAAACCATTGAATTCGGAAT  
ATGGTAAAGTAGCACCGGGCTGGGGGACTACCACTTATGGGGGTCGCAATGGCTCT  
ATTTGCGATATTCCTATCTATTATTTTGGAAATTTATAATCTTCCGTTTTACTGGATGGAA  
TTTCAATGAGTATGCTTACTCTCAAACCTATTTCGTTTATACAGTAGTGATATTCTTTATTT  
TCTATTCATCTTCGGATTTTTATCTAATGATCCAGGGCGTAATCTGGACGTGAGGAAAT  
GGCCGATACTACTGGAAGGATTCCCTCTTTGGCTGATAGGTACTGTAACCGGTATTCTTGT  
GATCGGTTAATAGGTATTTCTTTTACGGTTCATATCCGGGTTGGGTTTCATCTCTGATG  
CTTAATATCTTTAGTTAATCTGCATCTGTCTTAATTTCTGTCTTTTAT--AGTAGTTTTTCT  
TCGCCAAATTGCCCGAAGCTTATGCCTTTTTAAATCCAATCGTGGATGTTATGCCTGTCA  
TACCTGTACTTTTTTTCTTCTTAGCCTTTGTTTGGCAAGCTGCTGTAAGTTTTTCGAATGA  
CACAATCAAACCCGAATGAACAAAATGTTGAATTGAATCGTACCAGTCTATACTGGGGT  
TTATTACTCATTTTTGTACTTGCTGTTTTATTTTCCAATTATTTCTTCAATATGGAAGTCAA  
TATTCTCGCATTTATTGCTACTGCACTGTTCACTTAGTTCCTACTGCTTTTTTACTTATCA  
TCTACGTAACAAACAGTCAGTCAAAAATGATATGGAAACAGCAACCCTAGTCGCCATCTC  
CATATCTGGTTTACTTGTAAGCTTTACTGGGTACGCCTTATATAACCGCTTTTGGGCAACC  
CTCTCAACAACCTAAGAGATCCATTCGAAGAACACGGGGACATGGAAGCATTGGTTTAT  
ACATTCCTTTTAGTCTCGACTTTAGGGATAATTTTTTTTCGCTATCTTTTTTCGAGAACCG  
CCTAAGGTTCCGACTAAAAAAATGAAAATGACTATTGCTTTCCAATTAGCTGTTTTTGC  
ATTAATTGCGACTTCATCAATCTTACTGATTAGTGTACCCGTTGTATTTGCTTCTTCTGAT  
GGTTGGTCAAGTAACAAAATGTTGTATTTCCGGTACATCATTATGGATTGGATTAGTC  
TTTCTAGTAGCTATCCTTAATTTCTCTCATCTCTATGAGTTGTAGGGAGGGACTTATGTCA  
CCACAAACAGAGACTAAAGCAAGTGTGGATTTAAAGCTGGCGTTAAAGATTACAAAT  
TGACTTATTATACTCCTGACTACGAAACCAAAGATACTGATATCTTGGCAGCATTCCGAG  
TAACTCCTCAACCCGGAGTTCCGCCCCGAGGAAGCAGGGGCAGCGGTAGCTGCCGAAT  
CTTCTACTGGTACATGGACAACCTGTGTGGACTGATGGACTTACCAGTCTTGATCGTTAC  
AAAGGACGATGCTACCACATCGACCCCGTTGTCGGGGAGGAAAATCAATATATTGCTTA  
TGTAGCTTATCCTTTAGACCTTTTTGAAGAAGGTTCTGTTACTAACATGTTTACTTCCAT  
TGTGGGTAATGTATTTGGTTTCAAAGCCCTACGAGCTCTACGTCTGGAGGATCTGCGAA



TTCCCACTTCTTATTCCAAAACTTTCCAAGGCCCGCCTCATGGCATCCAAGTTGAAAGA  
GATAAGTTGAACAAGTATGGTCGTCCTCTATTGGGATGTACTATTAACCAAAAATTGGG  
ATTATCCGCAAAGAACTACGGTAGAGCGGTTTATGAATGTCTACGCGGTGGACTTGATT  
TTACCAAGGATGATGAAAACGTGAACTCACAACCATTTATGCGTTGGAGAGACCGTTT  
CTTATTTTGTGCCGAAGCAATTTATAAAGCGCAGGCCGAAACGGGTGAAATCAAAGGA  
CATTACTTGAATGCTACTGCGGGTACATGTGAAGAAATGATCAAAAGGGCCGTATTTGC  
CAGAGAATTGGGAGTTCCTATCGTAATGCATGACTACTTAACTGGGGGATTCACTGCAA  
ATACTAGCTTGGCTCATTATTGCCGCGATAACGGCCTACTTCTTCACATCCATCGCGCAA  
TGCATGCAGTTATTGATAGACAGAAAAATCATGGTATGCATTTTCGTGTACTAGCTAAAG  
CATTACGTATGTCTGGTGGAGATCATATTCACGCGGGTACAGTAGTGGGTAAACTGGAA  
GGGGAACGTGAGATGACTTTGGGTTTTGTTGATTTATTACGTGATGATTTTATTGAAAA  
AGACCGAAGTCGCGGTATCTTTTTACTCAAGATTGGGTCTCTATGCCAGGTGTTATACC  
CGTGGCTTCAGGGGGTATTCATGTTTGGCATATGCCTGCCCTGACCGAAATCTTTGGGG  
ATGATTCCGTACTACAGTTTGGCGGAGGAACTTTAGGACACCCTTGGGGAAATGCACC  
CGGTGCAGTAGCTAATCGGGTGGCTTTAGAAGCGTGTGTACAAGCTCGTAATGAAGGA  
CGTGATCTTGCTCGTGAAGGTAATGAAATTATCCGTGAAGCTAGCAAATGGAGCCCTGA  
ACTAGCTGCCGCTTGTGAAGTATGGAAGGAAATCAAATTCGATTTGATCCAGTAGATA  
AGCTGGATAAAACGGCGATACATTTATACAAAACCTTCTACCCCGAGCACACGCAATGG  
AGCCGTAGACAGTCAAGTGAAATCCAATCCACGAAATAATTTGATCTATGGACAGCATC  
GTTGTGGTAAAGGTCGTAATGCCAGAGGAATCATTACCGCAAGGCATAGAGGGGGAGG  
TCATAAGCGCCTATACCGTAAAATCGATTTTTCGACGGAATGAAAAAGACATATCTGGTA  
GAATCGTAACCATAGAATACGACCCTAATCGAAATGCATACATTTGTCTCATACTATG  
GGGATGGTGAGAAGAGATATATTTTACATCCCAGAGGGGCTATAATTGGAGATACCATT  
GTTTCTGGTACAGAAGTTCCTATATCAATGGGAAATGCCCTACCTTTGACCGATATGCC  
TTAGGCACGGCCATACATAACATAGAAATCACACTTGGAAAGGGTGGACAATTAGCTA  
GAGCAGCAGGTGCTGTAGCGAAACTGATTGCAAAAAGAGGGTAAATCGGCCACATTAA  
GATTACCATCTGGGGAGGTCCGTTTGTATATCCAAAACCTGCTTAGCAACAGTCGGACA  
AGTGGGTAATGTTGGGGTGAACCAAAAAAGTTTGGGTAGAGCCGGATCTAAGTGTGG  
CTAGGTAAGCGTCCTGTAGTAAGAGGAGTAGTTATGAACCCTGTAGACCATCCCCATGG  
GGGCGGTGAAGGGAGAGCCCCAATTGGTAGAAAAAAACCCACAACCCCTTGGGGTTA  
TCCTGCGCTTGGGAAGAAGAAGTAGGAAAAGGAAAAATATAGTGATAGTTTTATTCTTC  
GTCGCCGTA---ATGATTCAATCTCAGACCCTTTTGAATGTAGCGGATAACAGCGGAG  
CTCGAGAATTGATGTGTATTGCAATCATAGGAGCTGGT---AATCACCGATATGCTCATATT  
GGTGACGTTATTGTTGCTGTAATCAAAGAAGCAGTGCCAAATATGCCTCTAGAAAGATC  
AGAAGTCATTAGAGCTGTAATTGTACGTACATGTAAAGAACTCAAACGTGAAAACGGT  
ATGATAATACGATATGATGACAATGCGGCGGTGCTCATTGATCAAGAAGGAAATCCAAA  
AGGAACTCGAGTTTTTGGTGCATCGCTCGGGAATTGAGACAGTTGAATTTACTAAA  
ATAGTTTCATTAGCTCCCAGAGGTGTTAATGCTTAGTCCCAAAGAACCAGATTTTCGTAA  
ACAACATAGAGGAAGAATGAAGGGAATATCTTGTGCGAGGCAATCATATTTGTTTCGGCG  
GATACGCTCTTCAGGCACTTGAACCCGCTTGGATCACAGCTAGACAGATAGAAGCGGG  
GCGGAGAGCAATGACACGATATGCGCGTCTGTTGGTGGAAAAATATGGGTACGTATATTC  
CCGACAAACCTGTTACAGTAAGACCTACGGAAACACGTATGGGTTCCGGAAAGGGATC  
CCCCGAATATTGGGTATCTGTTGTTAAACCGGGTCAATACTCTATGAAATGGGCGGAG  
TATCAGAAACTGTAGCCAGAGCAGCTATTTCAATAGCTGCGTGCAAAATGCCTATACGA

ACTCAATTTGTTATTTTCACGAATGACCAGAGTTAGACGAGGATATACAGCTCGGAAACG  
TCGAACAAAAATTCGTTTATTTGCATCAACCTTTATTGGGGCTCATTCAAGACTTACTCG  
AACGACTACTCAACAGAAAATTAGAGCTTTGGTTTCCTCTCATCGAGATAGAGGCAGG  
CAAAAGAGGGATTTTCGTAGTTTGTGGATCACTCGAATAAATGCAGTAATTCGTGAGAA  
T-----GTATTCTATAATTATAGCAGATTAATACCAAATCTGTACAAGAAGCAATTGCTTCTT  
AATCGTAAAATACTTGCACAAATATCTATATCAAATAAGAATTGTCTTTACATGATTTCCA  
ATAAGATTATCAAA-----ATGTCTGTTT  
TAAAAGCGCAAAGAGTAATTGATCAGATTCGCGGACGTTCCCTATGAGGAAACACTTAT  
GATACTGGAACCTCATGCCTTATCGAGCATCTTATCCAATTTTACAATTGGTTTATTCTGCA  
GCAGCAAACGCTAATCATAATATGGGTTTGAACGAAGCTGATTCATTATTAGTAAAGC  
CGAAGTCAATAGGAGTGCTATTGTGAAAAAGTTAAGACCTCGGGCTCGGGGACGTAGT  
TATCCGATAAAAAACCCACTTGTATATAACAATTGTATTAAAG---AAATCTAAATCT---  
-----ATGGATGGAATCAAATATGCAGTATTTACAGAAAAAAGTATTCGGTTATTG  
GGGAACAATCAA---TATACTTCTAATGTGCAATCAGGATCAACTAGGACAGAAATAAAG  
CATTGGGTGCAACTCTTCTTTGGTGTCAAGGTAATAGCTATGAATAGTCATCGACTCCC  
GGGAAAGGGTAGAAGAATGGGACCTATTATGGGACATACAATGCATTACAGACGTATGA  
TCATTACGCTTCAACCGGGTTATTCTATTCCACCTCTTATAGAGAAAAGAACTATGGCAG  
TTCCAAAAAACGTATTTCTATGTCAAAAAACATATTCGTAGGAATATTTGGAAGAAA  
AAAGGATATTTAACTGCAGTAAAAGCTTTTTCTTTAGCGAAATCGGTTTCTACCGGACA  
TTCAAAAAGTTTTTTT-----CAAAAAATAATATGGCCAAGGGTAAAGATGTCAGAGTCA  
GAGTTATTTTGAATGTACCAGTTGTGTCCGAAAT-----GGT-----AAAGAATCGCCGGGT  
ATTTCTAGATATATTACTCAAAAGAATCGACACAATACATCCAGTCGATTAGAATTGAGA  
AAATTTTGTGCTATTGTGCAACAAGCATAACGATTCATGGGGAAATAAAGAAAATGAAAAT  
AAAGACTTCTGTTTCGTAATAATTTGTGAAAAATGTCGACTGATCCGTAGGCGCGGACGA  
ATTATAGTGATTTGTTCCAATCCGAGACATAAACAGAGACAAGGAATGGTTCGAGAGG  
AAGTAGTAGGATCCACTCGAACACTACGGTGGAAATGTGTTGAATCAAGAGTAGACAG  
TAAGCGTCTTTATTATGGTTCGTTTCATTCTGTCCCCGTTATGAAAGGTCAAGCCGATAC  
CATAGGTATTGCCATGCGAAGGGCTTTACTTGGAGAAATAGAAGGAACATGTATCACAC  
GTGCAAAATCTGAG-----AAAGTAGCACATGAATATTCTACGATAGTAGGTATTGAAGAA  
TCAGTACATGAAATTTACTAAATTTGAAAGAAATTATATTGAGAAGTAATCTGTATGGA  
GTTATAGACGCATCCATCTGCGTCAGGGGGCCTAGATACGTAACCGCTCAAGATATCAT  
CTCACCACCTTACGTGGAAATAGTTGACACGACACAACATATAGCTAACCTGACGGAA  
CCAATTGATTTGTGTATTCAATTACAAATCAAGAGAGATCGCGGATATCGTATGAAATCC  
GCAAATAACTCTCAAGATGGAAGTTAT-----CCTATAGATGCTGTATCCATGCCTGTTTCGA  
AATGCGAATCATAGTATTCATTCTTATGGGAATGGGAATGAAAAACAAGAGATACTTTT  
TCTAGAAATATGGACGAATGGAAGTTTAACTCCTAAGGAAGCACTTTATGAAGCTTCTC  
GTAATTTGATTGATTTATTTATTCCTTTTCTACATGCGGAGGAAGAG-----GACATTAATTT  
CGAAGAAAATAAA---AACAGGTTTCCTCTACCCCTTTTTTACCTTTCAAGATAGATTA  
ACT---AATCTAAAGAAAAACAAAAAA---GGAATTCATTGAAATGTATTTTATTGACCAATC  
AGAATTGCCTTCCAGGACCTATAACTGTCTCAAAGGGTCCAATATACATACATTATCGGA  
CCTTTTGGAGTAACAGTCAAGAAGATCTTATGAGAATTGAATTTTTTTCGAATAGAAGATG  
TAAAACAGATATTGGACACTCTACAGAAGTAT-----TTCGCAATTGATTTATCTAAGAATA  
AGATGCTCCGGAAT---GGAAATGAGGGAATGTCCACAATACCTGGATTTAGTCAGATTC  
AATTTGAGGGATTTTGTAGATTCATTAATCAGGGCTTGACGGAAGAATTCATAAATTC

CAAAAATTGAAGAT-----CAAGAAATTGAATTTAAATTATTTGTGGAAACATATAAATTG  
GTAGAACCCTTGATAAAAGAAAGAGATGCTGTGTATGAATCACTCACATATTCTTCTGA  
ATTATATGTACCCGCGGGACTAATTTGGAAAACCGGTAGAGATATGCAAGAACAAACCG  
TTTTTATCGGAAACATTCCTCTAATGAATTCCTAGGAACCTTTATAGTAAATGGAATATA  
CAGAATTGTGATCAATCAAATATTGCAAAGTCCCGGTATTTACTACCGTTCAGAATTGG  
ACAATAACGGAATTTCTGTCTATAACCAGCACTATAATATCAGATTGGGGGGGAAGATCG  
GAATTAGAAATTGATAGAAAAGCAAGGATATGGGCCCGCGTGAGTAGGAAACAAAA  
ATATCTATTCTAGTTCATCATCAGCTATGGGTTTCGAATCTAAGAAAAATTCTAGATAATG  
TTTGTTATCCTGAAATTTCTTGTCTTTTCCGAATGATAAGGAGAAAAAAAAGATTGGG  
TCAAAAGAAAATGCTATTTTGGAGTTTATCAACAATTTACTTGTGTGGGTGGGGATCC  
GGTATTTTCTGAGTCCTTATGTAAGGAATTACAAAAGAAATTTTTTCAACAAAGATGTG  
AATTAGGAAGGATTGGTCGACGAAATATGAACCGGAGACTGAATCTTGATATACCTCAG  
ACAATACATTTTTGTTACCACGAGATTTATTGGCTGCTGCGGATCATTGATCGGAATG  
AAATTTGGAATGGGTACACTTGACGAT-----ATGAATCACTTGAAAAATAAACGTATTCG  
TTCTGTAGCAGACCTGTTACAGGATCAATTCGGATTGGCTCTTGTTTCGTTTAGAAAATG  
CGTTTCGAGGAECTATATGTGGAGCAATCAGG---CATAAATTAATA---CCGACTCCTCAA  
AATTTGGTAACCTCAACTTCA-----TTAACAACCACTTATGAATCATTTTTTGGCCTA  
CACCCGTTATCTCAAGTTTTGGATCGAACTAATCCATTGACACAAATTGTTTCATGGGCG  
AAAATTGAGTTATTTGGGTCCTGGAGGATTGACGGGGCGAACTGCTAGTTTTCGGATAC  
GAGATATCCATCCTAGCCACTATGGACGATTTGTCCAATTGACACGTCCGAAGGAATC  
AATGTTGGACTTATTGGATCCTTAGCTATTCACGTGAGGATTGGTCATTGGGGA---TCTAT  
AGAGAGTCCGTTTTAT-----GAAATATCTCAGAGATCAAAAGAG-----GCACAGGTGGT  
TTATTTATCACCAAATAGAGATGAATATTATATGGTAGCGGCAGGAAATTCTTTGGCCCT  
GAATCGGGGTATTCAGGAAGAACAGGTTGTTCCAGCTCGATATCGTCAAGAATTCCTTA  
CTATTGCATGGGAACAGATTCATCTTAGAAGCTTTTTTCCCTTCCAATATTTTTCTATTGG  
AGCTTCCCTCATTCTTTTATCGAGCATAATGATGCGAATCGGGCTTTAATGAGTTCTAA  
TATGCAGCGCCAAGCAGTTCGCTTTCTCGGTCCGAGAAGTGCATTGTTGGAACCTGGG  
CTGGAACGCCAACGGCTCTAGATTCCGGGAGTTTCAGCTATAGCCGAACACGAGGGAA  
AGATCATTTATACTGATCCTCACAAAATCATTTTATCAAGTAATGGGGACACTATAAGTA  
TTCCATTAGTGATGTATCAACGTTCCAACAAAAATACTTGTATGCATCAAAAACCTCAG  
GTTCCGGCGGGGTAAATACATTA AAAAGGGACAAATTTTAGCGGACGGTGC GGCTACAG  
TTGGTGGGGAACCTCGCTTTAGGAAAAACATATTAGTAGCTTATATGCCATGGGAAGGT  
TACAATTCTGAAGACGCAGTATTAATTAGTGAACGTCTGGTATATGAAGATATTTATACT  
TCTTTTCACATCCGGAATATGAAATTCAGACTCATGTGACAAGCCAGGGC---CCTGAA  
AGAATTAATAAGGAAATACCGCATCTAGAGACTCATTTACTCCGAAATTTAGACAGAAA  
TGGAATCGTTATGCTGGGATCTTGGGTGGAAACAGGTGATATTTTAGTGGGTAAATTA  
CGCTCAGACAGCGAACGAA---TCGTCGTATTCCCCGGAGGATAGATTATTACGAGTCA  
TACTTGGCATTCAAGTATCCA CTGCAAAGAACTTCTCTAAAACCTATAGGTGGA  
AGGGGTCGCGTTATTGATGTGAGATGGATCCAGAAAAAGGGG---GGTCCAGTTATAAT  
CCAGAAATGATTCGTGTATATATTTACAGAAACGTGAAATCAAAGTAGGTGATAAAGT  
AGCTGGAAGACATGGGAATAAAGGTATCATTTCAAAAATTTTGCCTAGACAAGATATGC  
CCTATTTGCAAGATGGGACACCTGTTGATATGGTCTTCAACCCATTAGGAGTACCCTCA  
CGAATGAATGTGGGACAGATATTTGAATGTTTCGCTCGGATTAGCGGGGGATCTGCTAAA  
GAAACATTATAGAATAGCACCTTTTGATGAGAGATATGAACAAGAGGCTTCGAGAAAA

CTAGTGTTTTCTGAATTATATGAAGCCTGTAAGCAAACAAAAATCCATGGGTATTTGA  
ACCCGAGTATCCAGGAAAAAGCAGAATATTTGATGGAAGAACAGGGGATCCTTTTGAA  
CAACCTGTTCTAATAGGAAAGTCCTATATCTTAAATTAATTCATCAAGTTGATGATAAA  
ATCCATGGACGTTCTAGTGGGCATTACGCACTTGTTACACAACAACCCCTTAGAGGAA  
GGCCAAGCAAGGGGGACAACGAGTAGGAGAAATGGAAGTTTGGGCTCTAGAGGGAT  
TTGGTGTGCTCATATTTTACAAGAGATGCTTACTTATAAATCTGATCATATTAGAGCTCG  
TCAAGAAGTACTTGGTGCTACAATCGTTGGAGGAACAGTACCTAACCCCGAGGATGCT  
CCAGAATCTTTTCGATTGCTCGTTTCGAGAACTACGATCTTTGGCTCTAGAACTGAATCA  
TTTCCTTGATCTGAGAAGAACTTCCGGATTAATAGGAAGGAAGCT-----ATG  
ATCGACCGGTATAAACATCAACAACCTCGAATTGGACCAGTTTCTCCTCAACAAATAAG  
GGCTTGGGCCAAAAAATCCTACCTAATGGAGAGATAGTTGGAGAGGTGACAAAACC  
CTATACTTTTCATTATAAAACCAATAAACCGGAAAAAGATGGATTGTTTTGTGAAAGAA  
TCTTTGGACCCATAAAAAGTAGAATTTGTGCTTGTGGAAATTATCGAGTGATCAGAGCT  
GAAAAAGAAGACCCGAAATTTTGTGAACAATGCGGGGTGGAATTTGTTGATTCTAGGA  
TACGAAGATATCAAATGGGATACATCAAACCTCGCATGTCCAGTGA CT CATGTGTGGTAT  
TTGAAACGTCTTCCTAGTTATATCGCGAATCTTTTAGATAAACCCCTTAAAGAATTAGAA  
GGCCTGGTATACTGC-----GATTTTTCTTTTGTAGGCC---ATATCTAAAAAACCTACTTT  
CTTACGATTACGAGGTTTCATTCGAATATGAAATCCAATCCCGGAAATACAGCATCCCAC  
TTTTTTTTACTACTCAAGGCTTCGAGACATTTCGAAATCGAGAAATCTCTACAGGAGCA  
GGTGCTATCAGAGAACAATTATCCGATTCAGATTTGCGAATTATTATAGATAATTTCGTTG  
GTAGAATGGAAGGAATTAGGAGATGAG---GGGTCCACTGGAAATGAATGGGAAGATAG  
AAAAATTAGAAGAAGAAAGGATTTTTTGGTTAGACGCATGGAATTAGCTAAACATTTTA  
TTCGAACAAATGTAGAACCAGAATGGATGGTTTTTGTGCTTATTACCAGTTCCTCCTCCC  
GAGTTGAGACCAATCATTACAGACAGATGGGGGTAAACTAATGAGTTCGGATATTAATGA  
ACTCTATAGAAGAGTTATCTATCGGAACAATACTCTTACCGATCTATTAGCAACAAGTAG  
ATCTACGCCAGGGGAATTAGTAATGTGTCAGGAGAAATTGGTACAAGAAGCCGTGGAT  
ACACTTCTTGATAATGGGATCCGGGGGCAACCAATGAGGGATGGTCATAATAAAGTTTA  
CAAGTCATTTTCAGATGTAATTGAAGGCAAAGAAGGAAGATTTTCGTGAGACTCTGCTT  
GGTAAACGGGTTCGATTATTCGGGACGTTCCGTCATTGTTGTGGGTCCCTTCTTTTCATTA  
CATCAATGTGGATTACCTCGAGAAATAGCAATAGAGCTTTTCCAAACATTTTTAATTCGT  
GGTCTAATCAGACAACATGTTGCTTCTAACATAGGGATTGCTAAAAGTCAAATTCGGGA  
AAAAGAACCGATTGTATGGGAAATACTTCAAGAAGTTATGCGGGGGCATCCTGTATTGT  
TGAATAGAGCACCCACCTTGCATAGATTAGGCATACAGGCCTTCCAACCCACTTTAGTG  
GAGGGGCGCGCTATTTGTTTACACCCATTAGTTTGTAAAGGGTTTCAATGCGGACTTTGA  
TGGAGATCAAATGGCTGTTTCATGTACCTTTATCTTTGGAAGCTCAAGCAGAGGCTCGTT  
TACTTATGTTTTCTCATATAAATCTCTTGTCTCCAGCTATTGGGGATCCCATTTCGTACC  
AACTCAAGATATGCTTATCGGACTCTATGTATTAACGATCAAGAATCGTAGAGGTATTTG  
TGCAAATAGGAATAATCCATATAATCGCGGAAACTAT-----CAAATAATACAGTTGAC  
ATAATGACTATAAGTATACGAAAGAGAAAGAACTGTATTTTTGTAGTTCTTATGATGTA  
CTTGGAGCTTATCGGCAGAAACGAATCAGTTTAAATAGTCCTTTGTGGCTCCGATGGAG  
ACTAGATCAACGT--GTCATTGGCTCA-----AGAGAAGTTCCCATCGAAGTTCAATATGA  
ATCTTTGGGTACTTATCATGAGATTTATGAGCACTATCTAATAGTAGGAAGTGTAATAAAA  
AGAAATCCATTGTATATACATTCGAACCACTCTTGGTCATATTTCTTTTTATCGAGAAATA  
GAAGAAGCCATACAGGGGTTTTGTGCGGCCTATTCATACACTATC-----

-----ATGGCAGAACGGGCTGATCTGGTCTTTCCACAATAAAGTGATAAATGGAACCTGCTA  
TGAAACGACTTATTAGCAGATTAATAGATCATTTCGGAATGGCATATACATCACACATCC  
TGGATCAAGTAAAGACTTTGGGTTTCCAGCAAGCCACTGCTACATCTATTTTCATTAGGA  
ATTGATGATCTTTTAAACAATACCTTCTAAGGGATGGTTAGTCCAAGACGCTGAACAACA  
AAGTTTTATTTTTGAAAAACACCATCATTATGGAAATGTACATGCGGTAGAAAAATTAC  
GTCAATCCATTGAGATATGGTATGCTACAAGTGAATATTTGAGACAAGAAATGAATCCT  
AATTTTCGGATGACTGATCCTTCTAATCCAGTCCATCTGATGTCCTTTTCGGGAGCTAGA  
GGAAATGCATCTCAGATACACCAATTAGTAGGTATGAGAGGATTAATGTCCGGATCCCCA  
AGGACAAATGATTGATTTACCCATTCAAAGCAATTTACGCGAAGGGCTTTCTTTGACAG  
AATATATAATTTCTGCTACGGAGCCCGCAAAGGAGTTGTAGATACTGCTGTACGAACA  
TCAGATGCCGGATACCTCACGCGTAGACTTGTTGAAGTAGTTCAACACATTATTGTACG  
TAGAACGGATTGTGGTACTATCCGAGGTATTTCTGTGAGTCCTCGAAATGGGATGACGG  
AA-----AAAATTTTTGTCCAAACACTAATTGGTTCGTGTATTAGCAGACAATATATATATGG  
GTCTACGATGCATTGCCGCTCGAAATCAAGATATTGGGATTGGACTTGTCAATCGATTCA  
TAACC-----TTTTCGGGCACAACCAATATATATTCGAACCCCTTTACTTGCAAG  
AGTGCATCTTGGATCTGTCAATTATGTTATGGTTCGGAGTCCCACTCACGGCGACCTGGT  
CGAATTGGGAGAAGCCGTAGGTATTATTGCGGGTCAATCAATTGGGGAACCAGGGACT  
CAACTAACATTAAGAACTTTTCATACCGGTGGAGTATTCACAGGTGATACTGCCGAACA  
TGACGAGCTCCTTCTAATGGAAAAATAAAATTCAATGAGGATTTGGTTTATCCACAC  
GTACCCGTCATGGGCATCCTGCTTTTCTATGTTCTATAGACTTGTATGTAACATTGAGAC  
TCGGGATATTATCCATAATGTGAATATTCCACAAAAAAGTTTGATTTTAGTTCAAATGA  
TCAATATGTAGAATCAGAACAAGTGATTGCTGAGATTCGTGCCGGAACGTCTACTTTT---  
---TTAAAGAGAAGGTACGAAAACATATTTATTCTGAATCAGAGGGAGAA---ATGCACT  
GGAGTACCGATGTCCACCATGCATCTGAATATACACATGGTAATGTTTCATCTATTACCAA  
AAACAAGTCATTTATGGATATTAGCAGGAGGTCCGTGCAGA-----TCCAGTATAGTGTCT  
TTTTCGCTCCACAAAGATCAAGATCAAATGAATGTTTCATTCTTTTTCTTTTCGAAGAAAG  
A-----TATATCTTTGACCTCTCA-----ATGACTAAT--CATCGAGTAAGACATAAATTGTTGG  
ATACTTCTGGT-----GATAGGGAAATTCTTGACTATTCA---AGACCTGATCGAATCAT  
ATCCAACGGTCATTGGAATTTTCATATATCCTTCT--ATTCTCCAAGAAAAT-----TCTGATT  
TCTTGGCGAAAAAACGAAGAAATAGATTCAATTATCCATTACAATATGATCAAGAACGA  
GATAAAGAATAATGCCCTGTTTTGGTATTTTCGATTGAAATACCCATAAAT-----GGTATT  
TTACGTAGAAATAGTATTCTTGCTTATTTTGATGATCCACGATACAGAAGAAAT-----GGA  
ATTACTAAATAT--ACCATAGAGGTAGATTCAATCATAAAA-----AAAGAGGATTTGATTG  
AGTATCGAAGA--GCAAAAGAATTTAGTCCGAAATAC---AAAGTAGATCGGTTTTTTTTTC  
ATTCTCGAAGAAGTGCATATCTTACCCGGATCTTCGTTTCATAATGGTCCGGAACAATAGT  
ATTATTGGAGTAGATACACAACCTCGCTTTAAATACAAGAAGCCGGGTAGGCGGATTAGT  
CCGAGTGGAGAGAAAAAAGTATTGAACTGAAAATCTTTTCTGGAGATATTCAT  
TTTCCTGGAGAAACAGATAAGATATCCAGGCACAGCGGCATTTTGATAACCACCAGAGA  
CGAAAAAAA-----AATTCTAAGAAA--TCAAAA--AAATTGAAAAATTGGATCTATGT  
CCAACGG-----ATCACACCCACCAAGAAAAAG-----TATTTTGTTCGGTTCGGTCCGTA  
GTCACATATGAAATAGCTGATGGGATAAATTTAGCAACACTTTTCCCTCGGGATCTCTTG  
CAGGAAAAGGATAATGTCCAACCTTAGAGTTGTCAATTATATCCTTTATGGAAATGGCAA  
GTCAATTCGAGGAATTTATCACACAAGT--CAATTAGTTCGGACTTGCTTAGTATTGAAT  
TGGGACCAAGAAAAAATGGTTCTATAGAA-----GAGGTTTCATGCTTCCTTTGTG

AGGTAAGGACAAATGATCTGATTCGCGATTTTCATAAGAATTGAGTTAGTCAAGTCCACT  
ATTTTCGTATACCGGAAAAAGGTATGATAGGGCAAGTTCCGTATTGATTTCCGAT-----TT  
AGATCGCACCAATATCAATCCTTTTTATTCCAAGGCGAAGATTCAATCA-----CTT  
ACCCAACATCAAAGAACTATTGGTATT-----GGTACGTTGTTGAATCGAAATAAT-----G  
AATGCCAATCTTTGATAATTTTGTTCATCATCCAATTGTTCTCGAATTGGT-----CCATTCAA  
TGGTTTCGAAATATAAC-----AATGTGACAAAAGAATCAGATCCCATAATCAAAATT--G  
ATTTGCTGGGTCCCTTAGGGACTATTGTCCCT--AAAATAGCGAATTTTTTTTCATCT--TA  
CTATTTAATAACT-----CATAATCATATCTTGTTAAAG---AAATATTTGTTACTTGAC-----  
--AATTTTAAACAGACTTTC-----CAAGTACTTAAATACTGTTTAATAGATGAAAATAGG  
AGA-----ATTTATAATCCCGATCCATGCGGTAACATAATTTTGAATCCATTCCATTTGAATT  
GGTGCTTTCTCCATCACGATTATTGTGAAGAGATATCTACAATAATTAGC---CTTGAC  
ATTTATTTGTGAAAATGTATGTCTATTCAAATACGAATCA-----CACGTAAAAAATCCGG  
TCAAATTTAATTGTTTCAT--GTTGACTCCTTAGTTATAAGATCAGCTAAACTCTATTTGG  
CCACTCCAGGAGCAACTGTTTCATAGCCATTATGGAGAAATCCTTTACGAAGGAGATACA  
TTAGTTACATTTATATATGAAAAATCGAGATCTGGTGACATAACGCAAGGTCTTCCAAA  
AGTGGAACAAATCTTAGAAGTGCGTTTCGATTGATTCAATATCGATGAACCTAGAAAGG  
AGAGTTGAAGGTTGGAACGAACGTATACAAAGAATTCTTGAATCCCCTGGGGATTCC  
TGATTGGAGCTGAGCTAACCATAGCCCAAAGTCGTATCTCTTTGGTTAATAAGATCCAA  
AAGGTTTATCGATCCCAGGGGGTACAGATCCATAATAGACATATAGAAATTATTGTACGT  
CAAGTAACATCAAAGTGTGGTTTCAGAA-----GATGGAATGTCTAATGTTTTTTTAC  
CTGGAGAATTAATCGGCTTTTTGCGAGCGGAACGAGCAGGGCGTGCTTTGGACGAAGC  
GATCTGTTATCGGGCAATCTTATTGGGAATAACGAGGGCATCTCTAAATACTCAAAGTTT  
CATATCCGAAGCAAGTTTTCAAGAAACCGCTCGAGTTTTAGCAAAGCTGCTCTACGA  
GGTCGTATTGATTGGTTGAAAGGCCTGAAAGAGAACGTTGTTCTGGGGGGGATTATAC  
CTGTTGGTACCGGATTCAAAAAATCAGTACACCCTTCAAGG-----CAAGACAAGAACAT  
TCAT-----TTGGAATCAAAGAAAGAATCTATTCGAGTTGGAAATA-----AGAGATATTT  
TGTTATACCATAGAGAATTATTTTGTCTTACGTCCAAAAC-----TCAGAACAATC  
ATTTACCGGATTTAATGATTCC-----ATGACAAGAAGATATTGGAACATCAATTT  
GGAAGAGATGATGGAAGCAGGAGTTCATTTTGGTCATGGTACTAAGAAATGGAATCCT  
AGAATGGCCCTTACATCTCTGCAAAGCGTAAAGGTATTCATATTACAAATCTCACTAG  
AACTGCTCGTTTTTTATCAGAAACCTGTGATTTAGTTTTTGTATGCAGCAAGTAGGGGAA  
AAAACCTCTTAATCGTTGGTACAAAAATAAAGCAGTGGATTCAGTAGCATCAGCTGC  
AATAAGGGCTCGGTGTCATTATGTTAATAAAAAATGGCTTGGTGGTATGTTAACGAATT  
GGTCCACTACGGAAACGAGACTTCAAAGTTCAGGGACTTAAGAGCAGAACAAAAGA  
TGGGGAAACTCAACTCTCTCTCCAAAAGAGATGCAGCAATGTTGAAGAGAAAATTATC  
TACCTTGCAAACATATCTCGGTGGGATCAAATATATGACGGGGTTGCCTGATATTGTGAT  
CATCGTCGATCAGCAAGAAGAATATACGGCTCTTCGAGAATGTGTCATTTTGGGGATTC  
CGACAATTTGTTAATCGATACAAATTGTGACCCAGATCTTGCAGATATTTGATTCCAG  
CAAATGATGACGCTATAGCTTCAATCCGATTGATTCTTAACAAATTAGTATCTGCAATTT  
GTGAGGGTTCGTTCTAGC---TATATAAGAAATCGTATGGGACAAAAATAAATCCACTTG  
GTTTCAGACTTGGTACAACCCAAAGTCATCGTTCCTTTTGGTTCGCACAAACAAAAAA  
TTATTCCGTGGGTTTACAGGAAGATGAAAAAATACGGAATTGTATCAAGAACTATGTAC  
AAAAAATAGGAGAATGTCCCTCGGGT---TTCGAAGGAATCGCACGTATAGGAATTCAAA  
AAAGAATCGATTTGATCCAGGTCATAATCCATATTGGATTCCCAAATTTATTAATAGAGG

GC-----CAAACACGA-----GGAATAGAAGAATTACAGATGAATGTACAAAAGGAACTTCA  
TTTTGTGAACCGGAGACTCAACATTGCTATCACAAGAATTGAAAAACCTTATGGACAA  
CCAAATATTCTTGCAGAATATATAGCTTTACAGCTAAAAAATAGAGTTTCGTTTCGAAAG  
TCAATGAAAAAAGCTATTGAATTAAGTGAACAAACAGATACAAAAGGAATTCAAGTAC  
AAATCGCAGGGCGTATCGACGGAAAAGAAATTGCACGTGTCGAATGGATCAGAGAAG  
GTAGGGTTCCCTACAAACAATTCGCGCTAAAATTGATCATTGTTCCCTATACAATTCGAA  
CTATTTATGGAGTATTAGGCATAAAAATTTGGATATTTGTAAACGAGAAAATGTCTCGTT  
ATCGAGGACCTCGTTTCAAAAAAATACGCCGTCTGGGGACTTTACCAGGACTAAGTAG  
TAAAAGACCTAAATCCGGAAGTGATCTTAAAACCCAATTGCGTTCTGGGAAA---AGATC  
GCAATATCGTATTCGTCTAGAAGAAAACAGAAATTGCGTTTTTCATTATGGTCTGACGG  
AGCGACAATTAGTTAGATATGTACATATCGCTGGAAAAGCCAAAGGGTCAACAGGTCA  
GGTTTTACTACAACACTTGGAGATGCGTTTGGATAACATCCTTTTTTCGATTGGGTATGGC  
TTCGACCATTCCCTGGAGCTAGGCAATTAGTTAACCATAGACATATTTAGTTAATGGTCG  
TATAGTGGATATACCAAGTTATCGTTGCAAACCCCGAGATATTACTACGAAGGATAA  
ACAAAGATCGAAAGCTCTGATTCAAATTATATTGCTTCACCCCCCCCCGAA-----TTGC  
CAAAACATTTGACTATTGACTCA-----TTCCAATATAAAGGATTAGTAAATCAAATAATAG  
ATAGTAAATGGATCGGTTTGAAAATAAATGAGTTGTTAGTCGTAGAATATTATCCCGCC  
AGACTATGTCACGTCGAGGTAAGTGCAGAAGAAAAAACTGCAAAATCCGATCCAATTA  
TCGTAATCGATTAGTTAACATGTTGGTTAACCGTATTATGAAACACGGAAAAAAATCATT  
GGCTTATCAAATTATCTATCGAGCCGTGAAAAGATTCAACAAAAGACAGAAACAAAT  
CCACTATCTGTTTTACGTCAAGCAATACATGGAGTAAGTCCCGATATAGCAGTAAAAGC  
AAGACGTGTAGGCGGATCGACTCATCAAGTTCCTATTGAAATAGGATCTACACAAGGA  
AAAGCACTTGCCATTTCGTTGGTTATTAGGGGCATCCCGAAAACGTCCGGGTCGAAATAT  
GGCTTTCAAATTAAGTTCCGAATTAGTAGATGCTGCCAAAGGGAGTGGCGATGCCATAC  
GCAAAAAGGAAGAGACTCATAGAATGGCAGAGGCAATAGAGCTTTTGCACATTTTCG  
TATGGGTAGGGACACTATTGCCAATATAAATCTTATAAGAAATGCTGACATGAATAA  
AAAAGGAATGGTTCGAATAGCATCTACTAATATCACCGAAAACATTGTTAAAATACTTCT  
ACGAGAAGGTTTTATTGAAAATGTTTCGGAAACATCAGGAAAATAACAAATATTTCTTGG  
TTTTAACCTGCGACAT-----AGAAAGACTAGGAAAGGAATATATAGA-----ACCG  
TTTTAAAGTGTATCAGCCGACCCGTTTACGAATTTATTCCAACATCAACGAATTCCTA  
AGATTTTAGGTGGAATGGGAATTGTAATTTCTTACTTCTCGAGGTATAATGACAGATC  
GAGAAGCTCGACTAGAAAGAATTGGAGGAGAAATTTGTGTTATATATGGATGACAAA  
AGCTATACCAAGAATTGGTTCACGTAGGAATGGACGTATTGGTTCACGTAAGAATGGAC  
GTAGAATACAAAAGGAGTTATTCATGTTCAAGCGAGTTTCAACAATACCATTGTAAGT  
GTTACAGATGTACGAGGTCAGGTGGTTTCTTGGGCCTCCGCGGGTACTTCTGGATTCAA  
AGGCACAAGAAGAGGTACACCCTATGCTGCTCAAGCCGCAGCGGTAAATGCTATTCGT  
ACAGTAGTTGATCAGGGTATGCAACGGGCAGAAGTTATGATAAAAGGCCCTGGTCTCG  
GAAGAGATGCAGCATTACGAGCCATTCGTAGAAGTGGTATACTATTAAGTTTAGTACGT  
GATGTAACACCTATGCCACATAATGGGTGTCGACCTCCTAAAAAAGACGTGTGATGCC  
AACTATTAAACAACCTTATTAGAAACACAAGACAGCCAATAAGAAATGTCACGAAATCT  
CCCGCTCTTAGAGGATGTCCTCAGCGTCGAGGAACATGCACTAGGGTGTAT---ATCACC  
CCCAAAAACCAAACTCTGCCTTACGTAAAGTTGCCAGAGTACGATTAACCTCTGGAT  
TTGAAATCACTGCTTATATACCTGGTATTGGCCATAATTTACAAGAACATTCTGTAGTATT  
AGTAAGAGGAGGAAGGGTTAAGGATTTACCCGGTGTGAGATATCACATTGTTTCGAGGA

ACCCTAGATGCTGTCGGAGTAAAGGATCGTCAACAAGGGCGTTCTAAATATGGGGTCA  
AAAAGCCAAAAATGGCAAGAAAAAGTTTGATTCAGAGAGAGAAGAAGCGGCAGAAA  
TTGGAACAGAAATATCATTTGATTCGTCGATCTTCAAAAAAAAAAATAAGC-----GAA  
GTTCCATCGTTGAGTGAAAAATGGGAAATTCATGGAAAATTGCAATCCCCACCACGTAA  
TAGTGCACCTATACGTCTTCATCGACGTTGTTTTTTGACTGGAAGACCTAGAGCTAACT  
ATCGAGACTTTGGGCTATCTGGACACATACTTCGAGAAAATGGTTCATGCATGTTTGTTA  
CCGGGCGCAACAAGATCAAGCTGGATGATCAAAAATTCATTCATCTCAGTTATTTTACA  
AGAAGAAAAAGAAGAAAAC-----AAGGGTCTGTTGAATTTCAAGTATTAAGTTTCACC  
AGTAAGATACGTAGACTTACTTACATTTGGAATTGCACAAAAGAGATTTTTTATCCCA  
AAGAGGTCTACGAATAATTCTGGGAAAACGTCAACGGCTCCTGGCTTATTTGTCAAAG  
AAAAATAGAGTCCGTTATAAGAAATTAATAGATCAGTTGGATATTCGGGAGCCAAAAAC  
TCGT-----ATGGTAAAACCTTCGTTTGAAACGATGTGGTAGAAAGCAACGAGCCATCTAC  
CGAATCGTTGCAATTGATGTTTCGATCCCGAAGAGAAGGAAGAGATCTTAGAAAAGTAG  
GTTTTTACGATCCGATAAAGAATCAAACCTTATTTAAATGTTCTGTTATTCTATATTTCT  
TGAAAAAGGTGCTCAACCTACGGGAACGTTTGTGATATTTAAGGAAGGCAGAATTA  
TTTCAAGAA---AGAACTTCGATTCGAGTTAAT-----ATGGATAAATCCAAGCAACCTTTTC  
GTAAATACAAGCGATCCTTTTCGTAGGCGTTTGTCCCAATTGGATCGGGGGATCGAATC  
GATTATAGAAACATGAGTTTAATTAGTCGATTTATTAGTGAACAAGGAAAAATATTATCT  
AGACGGGTGAATAAATTGACCTTGAAACAACAACGATTAATTAATCTATTGCTATAAAACA  
AGCTCGTATTTTATCTTTGTTACCTTTTCTTAATAATGAGAAA-----CAATTTGAGAGAGC  
CGAGTCGATCCCAGAACTACTGGTCCTAGAACCAGAAATAAAGTGACACGTTCACTA  
AAAAAAAATCCTTTTGTAGCTAATCATTATCGCGAAAAATTGAAAACTCAACATGAG  
GGAGGAGAAAGAAATAATAGTAACTTGGTCTCGGGCATCTACCATTATACCCACAATGA  
TTGGCCATACAATCGCTATTCATAATGGAAAGGAAAATTTACCTATTTATATAACAGATC  
GTATGGTAGGTCACAAATTGGGAGAATTCGCGCCTACTCTGACTTTTCGCGAGACATGCA  
AGAAACGACAATAAATCTCGTCGTATGATTTTGAATCTTTTCTACTAGGTAATCTATTAT  
CCTTATGCATGAAGATAATGAATTCGGTCGTTGTGGTTCGGACTCTATTATGGATTTCTGA  
CCACATTCTCCATAGGGCCCTCTTCTCTTCTTCTCCGAGCTCGGGTTATGGAAGAA  
GGA-----ACCGAGAAGGAGGTATCAGCAACAACCTGGTTTTATTACGGGACAGCTCAT  
GATGTTCAATCGATCTATTATGCGCCTCTGCATCTAGCATTGGGTAGACCTCATAACAATA  
ACTGTCCTAGTTCTACCGTATCTTTTGTTCATTTCTTCTGGAACAATCACAAAACTTT  
TTTTATTATGGATCTACTACCAGAAATTCAATGCGTAATCTCAGCATTCAATGTGTATTCC  
TGAATAATCTAATTTTTCAATTATTCAACCATTTCAATTTACCAAGTTCAACGTTAGCCAG  
ATTAGTCAACATTTATATGTTTCGATGCAACAACAAGATGTTATTTGTAACAAGTAGTTT  
TGTTGGTTGGTTAATTGGTCACATTTTATTTCATGAAATGGGTTGGATTGGTATTATTCTGG  
ATACGGCAAAATCATTCTATTTCGATCT-----AATAAGTACCTTGTGTCAGAATTGAGA  
AATTCTATGGCTCGAATCTTTAGTATTCTCTTATTTATCACCTGTGTCTACTATTTAGGCA  
GAATGCCGTCGCCTATTGTCACTAAGAACTGAAAGAAGCCGAAGAAGACAAACCTC  
TTGTGACTTTTCTTTTCGATTATAAACGATGGAATTGTCCATTGCGATATATAAAAAATGA  
TCGGTTTGAAAATGCTGTACGAAATGAAATGTCACAATATTTTTTTTATAACATGTCCAAG  
TAATGGGAAACAAAAAATATCTTTTACATATCCACCTAGTTTATCGACTTTTTCGGAAAT  
GATAGAACGAAAAATGTCTTTGTACACGACAAAGAAATTATCCCATGGAGACCTG-----  
TATTGGGTTTATACCAATGAACAAAAAATAACAAATTGAGCAATGAATTAATAAGTCG  
AATAAAAGCTCTAGAAAAAGAGAACTTGCTCTAGATATGCTCGAAAAAAGGACTAGA



TTTTGCAATCATGAGAATGAACAAGAATGCTTGATCAAAAACATATGATCCTTTATTGAG  
CGGACCATGCCGTGGAGCAATAAAAAAATTTGATTTACATATAAAAAGTCTTTGGATAA  
ATAAGATCCATGAGCTATTTTTCCGAGAATTTGAACATCAAGATCCAAATGATCAATCTA  
TTGGAATAGAAGAAATCAGTAAAAAGGTTTCTCGATGGTCATATAAATTGACCGTTCTG  
GAAGAACAGGAGGAAGAAGAAATTCGTTCAAGAAAAGCCAAATATGTGGTAATTTATA  
CTGATGATTTGATACGCTACTCGCAACAATCGGATTTTCGTAGGGATATAATAAAAGGAT  
CCATGCGTACTCAAAGACGTAAAACAGTTATTTGGGAAATGTTTCAAGCAAATGCGCAT  
TCCCCGCTTTTTTTGGATCGAATAGACAAAACATTTTTTTTTTCTTCTTTTGAT---ATCTC  
TGAAATGATGAATCTCATTTTTAGGAAT---GAGGAAAATGAACAGATAACAATATCAGA  
AATTGGGATAACATTATATTTGCTCAAACAATAAGAAGTTTAACGTTAGTAACCCAATC  
CTTCTTAGAAAATACATTGTATTGCCTTCATTGATAATAGCTAAAAATATTGTCCGTATG  
TTATTATACCAATCCACCGAGTGGGATGAGGATTGGGAGGAATGGAATAGAGAAACAC  
ATGTTAAATGCACCTATAATGGTGTTCATTATCGGAAAAAGAATTTCCCAAATTTGGT  
TAACAGACGGTATTCAGATAAAGATTATGTTTCTTTCTATCTTAAACCTTGGCGAAGAT  
CTAAAAAAGAAAAAAGAAGATTTTTGTTTTTAAACAATTTTGGGAATGGAAGCAGA  
AGTTCCTTTTGGTTCTCCCCGAAAACGACCTTCTTTTTTTGAACCCATTTATAAAGAAC  
TCAAAAAAAAATTGTAAAAATAATTAGAAAGAATTTTTTTTTTCGTTCTAAAAGTTTTT-  
-----AAAGAAAA---GGATGGGTATCAAAATAGTTCTA-----GTTAT  
AAAACAAAAAATGAAG-----GAAAAAGTAAACTCTAAAATAAAT---ATAAGATTATTCG  
CGAATCAACCATTGCAATTAGATCCATGAATTTGGAAAATTACTCACTCATAGAAAAAA  
AAATAAAGGACCTTGCTGATAGGACAGTCACAATCAGGAATGAACTAGAAGGAATCAC  
AAAAGACAAGAAAAA-----GATAAAAATCGGAATCACAGAAACATAT  
TTTGCAGATATTTAAAAGAAAAAAGATCCGATTTATACGTAAATTAATTTTTTTATGAA  
ATCATTCAATTGAAAAATATACATAGATATCTTTCTACGTACGATTACTATTTTTAGGATC  
AATGCACAACCTTTCATGAACTTTATTTTCG---AATTTATCCTCCTGTCCCAAGCATATGT  
ATTTTACAAATTATCACAAACCCAATTACTTAAACAATATCACTTGAGACCTGACTTCA  
ATATACCCATTCTTTTATTAAGGATAAAGTCAAGGATTATTGTACACGAGGAATATTTGAT  
TCCAAATCAAAGCAAAGAAAATTTATAAGTCTGGAAAAAATGAATGGAAAAACTGGT  
TAAAGGGACATTATCAATACAATTTATCTCAGACAAAATGGTCTCGATTAGTACCTCAA  
AATGGCGAAATAGAATCAACCAACGTTCTACGATTCAAATAAAATTAATTTGATTC  
ACATAAAAAGAAAAAGACCAATTAATTCATTACATGAAACAAGAAAAATTTAAAAAA  
CACTACAGATATTATCTTTTATCACATAAATATATGAATGAATATATTATTGCTCTGGATAG  
AAAATATTTTGATTGTAGAATTCTCCATATTTGTCTTAGATTTTTTTGATTGGATGGGAATG  
AATCAAGAAAAGTTTTATCGTCGGTCTTCCCAGAATTTGTGCCACTCTTTGATGCATAT  
AGGATTAACCATGGATCATAACCAATCAAATTACTTCTTTTTAATTCCAAGAAAAAGAA  
GGAAACAGAACTAGATTTATTCCTGAAAAAATATTTCTTTTTTCAATTAAGATGGGATG  
ACTCCTTGAATCAAAAATGATCGATAATATCAAAGTATATTGTCTCCTACTTAGACTGA  
TAAATCCAAGGAAAATTGCTATATCCTCAATTCAAAGAGGAGAGATACGTCTGGATAAA  
ATGCTAATTCAGAAAAGTCTAGCTATTACAGAATTGATAAAAAAAGGAATATTGATTATC  
GAACCGATTCGTTTATCTATAAAAAGGGATGGAAAATTTATTATATATCAAACCCTAGGT  
ATTTCAATTGATCGATAAAATTAAGCACAGTAATTATGATTTCTTTGTTCTGAAAATATTC  
TATCTCCTAGACGTCGTAGAGAATTGAGAATTCTAATTTGTTTTAGATTTCTTTGGCCCA  
ATTACCGATTAGAAGATTTAGCTTGTATGAATCGCTATTGGTTTAATACCAATAATGGCA  
GTCGTTTCAGTATGTCAAGGATATATATGTATCCAATGAAACGACATCAATTCAAATCCT

GGATCTTCGAATTGAGAGAGATATTGAGAGAGATCAAGAATTCTCACTATTTCTTAGAT  
TCATGGATCAAATTCGATTCAGTGGGATCTTCTACTCACATTTTTTTCCACCAAGAACG  
TTTTATGAAACTCTTTGACCCCCGAATTTGGAGTATCCTACTTTCA---CGTGATTCA-----  
CAGGGTTCAACAAGCAATCGATATTTACG-----ATCAAAGGTGTAGTACTGCTTGTA  
GTAGCG---GTCCTTATATCT-----CGTATTAACAATCGAAAGATGGTCGAAAGAAAA  
AATCTCTATTTGATGGGGCTTCTTCCTATACCTATTTCTTCTATACCTATGAATTCATTGG  
ACCCAGAAATGAGACATTGGAAGAATCTTTT---TGGTCTTCCAATATCAATAGGTTGATT  
GTTTCG---CTCCTGTATCTTCCAAAAAGGAAAAAGATTTCTGAGAGTTGTTTCATGGAT  
CCGCAAGAGAGTACTTGGGTTCTCCCAATAAAT-----AAAAAGTGTATCATGCCTGA  
ATCTAACCGGAGTTCGCGGTGGTGGAGGAACCGGATCGGAAAAAAGAGG-----GATTC  
CAGTTGTAAGATATCT-----AATGAAACCGTAGCTGGAATTGAGATCTCATTCAAAGA  
GAAAGATAGCAAA---TATCTGGAGTTTCTTTTTTTATCCTATACG-----GATGATCCGATCC  
GCAAGGACCATGATTGGGAATTGTTTGATCGTCTTCTCCGAGGAAGAAGCGAAACAT  
AATCAACTTG-----AATTCGGGACAGCTATTCGAAATCTTAGGGAAAGACTTGATTTGTT  
ATCTCATGTCTGCTTTTCGTGAAAAAAGACCAATTGAAGGGGAGGTT---TTCTTCAAAC  
AACAAGGA---GCTGAGGCAACTATTCAATCAAATGATATTGAGCATGTTTCCCAT-----CT  
CTTCTCGAGAAACAAGTGGGGTATTTCTTTGCAAATTTGTGCTCAATTTTCATATGTGGC  
AATCCGCCAAGATCTCTTCGTT-----AGTTGGGGGAAG---AATCAGCACGAATCGGA  
TTTTTTGAGGAAC---GTATCGAGAGAGAATTTGATTTGGTTAGACAATGTGTGGTTGGT  
AAACAAGGATCGG-----TTTTTTAGC-----AAGGTACGGAATGTATTGTCAAATATTCAA  
TATGATTCC-----ACAAGA-----TCTATTTTCGTTCAAGTAAGGGATTCTAGCCAATTGA  
AAGGATCTTCT---GATCAATCCATAGATCATTTCGATTCCATTAGA-----AATGAGGAT  
TCGGAA-----TATCACACATTGATCGATCAAACAGAGATTTCAG  
CAACTAAAAGAAAGATCGATTCTT---TTGGAT-----CCTTCCTTTCTTCAAACGGAACGA  
ACAGAGATAGAATCAGAT-----CGATTCCCGAAA-----TGCCTTTTGGATCTTCC-----TC  
AATGTCCCGGCTATTCACG---GAACGTGAGAAGCAGATGAATAATCATCTGCTTCCGGA  
AGAAATCGAAGAATTTCTT-----GGGAATCTACAAGATCAATTCGTTCTTTTTTCTCTGA  
CAGATGG-----TCAGAACTTCAT---CTGGGTTTCGAATCCTACTGAGAGGTCCACTAGAGA  
TCAG-----AAATTTTGAAGAAAAACAAGATGTTTCT---TTTGTCCCTTCCAGGCG  
ATCGGAA-----AATAAAGAAATGGTTGATATATTCAAGATAATTACGTATTTACAAAA  
T-----ACCGCCTCAATTCATCCTATTTTCATCAGATCCGGGATGTGATATGGTTCCG---AAG  
GATGAACCGGAT---ATGGACAGTTCCAATAAGATTTTCATTCTTGAAAAAAATCCATTTT  
TTGAT-----TTATTTTCATCTATTCCATGACCGGAACAAAGGGGATACACGTTA-----CACC  
ACGATTTT---GAATCA---GAAGAGAGATTTCAAGAAATGGCAGATCTATTCACTCTATCA  
ATAACCGAGCCG---GATCTGGTGTATCATAGGGGATTTGCCTTTTCTATTGATTCCCTACGG  
GTTGGATCAAAAAAAA-----TTCTTGAATGAGGTATTCAACTCCAGAGATGAATCGAAA  
AAGAAATCTTTA-----TTGGTTCTACCTCTCTTTTTTAT-----GAAGAGAATGAATCTTT  
TTATCGAAGGATCAGAAAAAATCGGTCCGG---ATCTACTGCGGGAATGATTTGGAAGA  
TCCAAAACATAAAAACAGCGGTATTTGCTAGCAACAACATAATGGAGGCAGTCAATCAA  
TATAGATTGATCCGAAATCTGATTCAAATCCAATATAGCACCTATGGG-----TACATAAGA  
AATGTATCGAATCGATTCTTTTTAATG-----AATAGATCCGATCGCAACTTCGAATATGG  
AATTCAA-----AGGGATCGAATAGGAAATGATACTCTGAATCATATAACTATAATGAAA  
TATACGATCAACCAACATTTATCGAATTTGAAAAAG---AGTCAGAAGAAATGGTTTGAT  
CCT-----CTTATTTCTCGAACCGAGAGATCCATGAATCGGGATCCTGATGCATATAGA

TACAAATGTTCCAATGGGAGCAAGAATTTCCAGGAACAT-----TTCGTTTCTGAACAG  
AAGAAC-----CGTTTTCAAGTAGTGTTCAATCGATTACGTATTAATCAATATTCGATTGA  
TTGGTCCGAGGCTATCGACAAACAAGATTTGTCTAAGTCACTTCGTTTCTTTTTGTCCA  
AGTCA-----CTTCTCTTTTTGTCC-----AAGTCACTTCCCTTTT  
TG---TCCAAGTCACTTCCCCTTTTCTTTGTGAGTATCGGGAATATCCCCATTCATAGGTCC  
GAG---ATCCACATCTAT---GAATTGAAAGGTCCGAATGATCAACTCTGCAATCAGTTGTT  
AGAATCAATAGGTGTTCAAATCGTTCATTTGAATAAATTGAAACCCTTTTTATTTTTATT  
GGAT-----GATCATGATACTTCC---CAAAGACCGAAATTCTTGATCAATGGAGGAACAA  
TATTACCATTTTTGTTCAAAAAGATACCA---AAGTGG---ATGATTGACTCATTCCATACT---  
---AGAAATAATCGCAGGAAATCCTTTGATAACACGGATTCCCTATTTCTCAATGATATCCC  
AGGATCGAGACAATTGGCTGAATCCCGTGAAACCATTTTCATAGAAGTTCATTGATATCT  
TCTTTTTATAAAGCAAATCGACTTCGATTCCCTGAATGATCCACATCACTTCTGGTTCTAT-  
----TGTAACAAAAGATTCCCTTTTTATGTG-----GAAAAGACCCGTATCAATAATTAT  
GAT-----CTTACATAT---GGACAATTCCTCAATATCTTGTTCAATCGCAACAAA---ATATTTT  
CTTTGTGCGTCCGTAAA-----AAAAACATATTTTTTTGGAG---AGGGAGACTATTTTAC  
CAATCGAGTCACGGGTATCTGACATATTCATACCTAAGGATTTTCCACAAAGTGGTGAC  
GAAACG---TATAACTTGTACAAA-----TCTTTCCATTTT-----CGATCCGATCCATTGTT  
CGT-----AGAGCTATTTACTCGATCGACAGACATTTCTGCAACACCTCTAACAGAGGAACA  
AATAGTCAATTTTGAAGAAGTATTGTCAGCCTCTTTCAGATATGAATCTATCTGATTC  
AGAAGGGAAGAAGTGTATCAGTATCTCAGT-----TTCAATTCAAACATGGGTTTGATTC  
ACACTCCATGTTCTGAGAAATATTTACCA-----TCCGAAAGAGGAAAAA-----  
-----CGGAGTCTTTGTCTAAAG-----AAATGCGTTGAGAAACGGCAGATGTATAGAATCT  
TTCAACGAGATAGTGCTTTTTCAAATCTCTCAAATGGAATCTGTTCCAAACATATATGC  
CATGGTTCCTTACTTCGACAGGGTGCAAATATCTAAATTTTACCCTTTTAGATACTTTTTTC  
AGACCCATTG-----CCGATACTAAGTAGCAGT---CAAAAATTTGTATCCATTTTTTCATGATA  
TTATGCATGGATCAGATATATCATGGCCAATTCCTCAGAAG-----ATTCTTC  
CACAATGTACTCTG---ATAAGTGAGATTTTCGAGTAAGTGTTTACAGAAT-----CTTCTTCT  
GTCCGAAGAAATGATTCATCGAAATAATGAGTCACCCGTTCCATTGATATGGACACATC  
TGAGATCAACAAATGCTCGGGAGTTC---CTCTATTCAATCCTTTTCCCTTCTTCTTGTGTC  
TGGATAT---CTCGTTCGTATACATCTTCTCTTTGTTTCCCGA-----GCCTCTAGTGAGTTAC  
AGACAGAGTTAGAAAAGATCAAATCTTTGATGATTCCATCATAATGATTGAGTTGCGA  
AACTTCTGGATAGGTATCCTACATCTGAACTGAATTCTTTCTGGTTAAAGAATCTCCTT  
CTAGTTGCTCTGGAACAATTAGGAGATTCTCTGGAAGAAATACGGGGTTCTGCTTCTGG  
TGGCAACATGCTATTGGGTGGTGGTCCC-----GCTTATGGG---GTCAAATCAATAC  
GTTCTAAGAAGAAATATTTGAATATCAAT-----CTCATCGATCTCATA---AGTATCATACC  
AAATCCCATCGATCGAATCACTTTTTTCGAGAAATACGAGACATCTAAGTTCGTACAAGTA  
AAGAGATCTATTCATTGATAAGAAAAAGAAAAACGTGAACGGTGATTGGATTGATGA  
TAAAATAGAATCCTGGGTCGCGAACAGTGATTTCGATTGATGATGAAGAAAGAGAATTC  
TTGGTTCAGTTCTCC-----ACCTTAACGACA-----GAAAAAAGGATTGATCAAATCTATT  
GAGTCTGACT---CATAGTGATCATTATCA-----AAGAATGACTCTGGTTATCAAAT  
GATTGAACAACCGGGATCAATTTACTTACGATACTTAGTTGACATTCAT-----AAAAAGTA  
TCTAATGAATTATGAGTTCAATAGATCCTGTTTAGCAGAAAGACGGATATTCCTTGCTCA  
TTATCAGACAATCACTTAT-----TCACAAACCTCGTGTGGGGCTAATAGTTTTTCATTTCCC  
ATCTCATGGA-----AAACCCTTTTCGCTCCGCTTAGCCCTATCCCCTTCT---AGGGGTAT

TTTAGTGATAGGTTCTATAGGAACTGGACGATCCTATTTGGTCAAATACCTAACGACAA  
ACTCCTATGTTCCCTTTCATTACGGTATTTCCGAACAAGTTCCTGGATGACAAGCCTAAA  
GGTTATCCTATTGAT-----GATATCGAT---ATTGATGATAGTGACGATATCGAT-----  
---ATTGATGATAGTGACGATATCGATATTGATGATAGTGAC-----GATAT  
TGATGATGACCTTGATACGGAGCTGCTAACTATGACGAATGTGCTA-----ACTATGTAT  
ATGACG-----CCGAAAATAGACCGATTTGATATCACCTTCAATTTCGAATTAGCAAAA  
GCAATGTCTCCTTGCATAATATGGATTCCAAACATTCATGATCTGTATGTGAATGAGTCG  
AATTACTTATCCCTCGGTCTATTAGAGAACTATCTCTCC-----AGGGATTGTGAAAGAT  
GTTCC---ACTAGAAATATTCTTGTATTGCTTCGACTCATATTCCCAAAAAGTGGATCC  
CGCTCTAATAGCTCCGAATAAATTAATACATGCATTAAGATACGAAGGCTTCTTATTCC  
ACAACAACGAAAGCACTTTTTTCATTCTTTCATATACTAGGGGATTTCACTTGGAAGA  
AAATGTTCCATACT-----AACGTATTCGGGTCCATAACCATGGGTTCCAATGCACGAGAT  
CTTGTAGTACTTATCAATGAGGCCCTATCAATTAGTATTACACAGAAGAAATCAATTATA  
GAAACTAATACAATTAGATCAGCTCTTCATAGACAACTTGGGATTTGCGA-----TCCC  
AGGTAAGATCGGTTTCAGGATCATGGGATCCTTTTCTATCAGATAGGAAGGGCTGTTGCA  
CAAAATGTACTTCTAAGTAATTGCCCATAGATCCTATATCTATCTATATGAAGAAGAAA-  
----TCATGTAAGGAAGGGGATTCTTATTTGTACAAATGGTACTTCGAACTTGGAACGAG  
CATGAAGAAATTAACGATACTTCTTTATCTTTTGAGTTGTTCTGCCGGATCGGTCGCTCA  
AGATCTTTGGTCTTCACCC-----GGACCCGATGAAAAA---AATTGGATCACTTCTTATGGA  
TTCGTTGAGAATGATTCT---GATCTAGTTCATGGCCTATTAGAAGTAGAAAGCGCTCTGG  
TGGGA-----TCCTTACGGACAGAAAAAGATTGCAGTCAGTTTGATAATAAT-----CGAGTG  
ACATTACTTCTTCGGTCCGAACCAAGGAAT--CAGTTAGATATGATGCAAAATGGATCTT  
GTTCTATCGTTGATCAGAGATTTCTATATGAAAAA-----TACGAATCGGAGTTTGAAGAA-  
--GGGGAAGGA-----GCCGTCGACCCGCAA-----CAGATAGAGGAGGAT-----TTA  
TTCAATCAC-----ATAGTTTGGGCTCCT-----AGAATATGGCGCCCT-----TGTGGCAATC  
TATTTGATTGTATCGAAAGGCCACTGAATTGGGATTTCCC---TATTGGGGCGGGTCATT  
TCGG-----GGCAAGCGGATCATTTATCATAAAGAGGATGAGCTTCAAGAGAATGATTC  
GGAGTTCTTGCAGAGTGGAACCATGCAGTACCAGACACGAGATAGATCTTCCAAGAA  
CAAGGCTTTTTTTCGAATAAGCCAATTCATTTGGGACCCTGCGGATCCATTCTTTTTCTA  
TTCAA---GATCAGCCCTTTGTCTCTGTGTTTTACGTCGAGAATTCTTTGCAGATGAAG  
AGATGTCAAAGGGGCTTATTACTTACCAAACAAATCCTCCTACATCTATATATAACGCT  
GGTTCATC-----AGAATACGCAAGAAAAGCACTTCGAATTGTTGATTCATCGCCAGAG  
ATGGCTTAGAACC-----AATAGTTCAATTATCT-----AATGGATCTTCCGTTCTAAT-----A  
CTCTATCCGAGAGTTATCAGTATTTATCAAATCTGTTCCCTATCTAAC---GGAACGCTATTG  
GATCAAATGACAAAGACATTGTTGAGAAAGAGATGGCTTTTCCCGGATGAAATGAAAC  
ATTTGATT-----CATGTAACAGGAGAAAGATTTCCATTCCCTATGCCTAGATCTCGG---ATA  
AATGTAATTTTATTGATAAGACCTCTTCAATTGTAGCCAATATTCTATTACGAATAATTC  
CGACAACCTTCAGGAGAAAAAAGGCATTTACCTATTACAGAGATGGG-----ATGTTGGC  
TCAATCCGAAGGAAATTATGCGGAAGCTTTACAGAATTATTATGAAGCTACGCGACCAG  
AAATTGATCCCTATGATCGAAGTTATATACTCTATAACATAGGCCTTATACACACAAGCA  
ACGGAGAGCATACAAAGGCTTTGGAATATTATTTCCAGGCACTAGAACGAAACCTTTTT  
TTACCACAAGCTTTTAATAATATGGCCGTGATCTGTCATTAC---CGGGGAGAACAGGCCA  
TTCTACAGGGTGATTCCGAAATTGCGGAGGCTTGGTCCGATCAAGCTGCTGAGTATTGG  
AAACAAGCTATAGCGCTTACTCCAGGTAATTATATTGAAGCACATAATTGGTTGAAGATC

ACGAGGCGTTTCGAATTCGAAATGAATTGGCGATCAGAACATATATGGATAGAACTTAT  
AATGGGGTCTCGAAAAACAAGTAATTTTTTCTGGGCCTGTATCCTTTTTTTTGGTTCACT  
AGGATTCTTAGTGGTTGGAACCTCCAGTTATCTTGGTAGGAATCTGATATCCGTATTTCC  
ATCTCAGCAAATATTTTTTTTCCACAAGGGATCGTGATGTCTTTCTATGGGATCGCAGG  
TCTATTCATTAGCTCCTATTTGTGGTGCACAATTTTCATGGAATGTAGGTAGTGGTTATGA  
CAGATTCGATAGAAAAGAAGGAATAGTGTGATTTTTTCGTTGGGGATTTCCCTGGAATAA  
ATCGTCGCATCTTCTTCGCTTACTTATGAGAGATATAACAATCAATCAGAATGGAGGTTA  
AAGAGGGTCTTTATCCTCGTCGTGTCCTTTATATGGAAATCAGAGGCCAAGGAGCCATT  
CCCTTGACTCGTACTGATGAGTAT---TTACTCCACGAGAAATTGAACAAAAAGCTGCC  
GAATTGGCCTATTTCTTGCGCGTACCAATTGAAGTATTT

>Bismarckia

ATGGAAAATGGTGGTTCAATTCGATGTTGTCTCTAAATAAATCAATGGATAGTCTTGAT  
GCTATTGGACATAACCAGTGGAAATGAAGAACCCATTCTAAATGGTACGGAGAAAAACA  
TTCTT--TTCAGAAATGTTGATTATTTATTTGATATCAGGGATATTTGGAGTTTGATCTCTG  
ATGACACTTTTTTAGTTAGGATAGTAATGGTGACAGTTTTTCTGTATGTTTTGATATTG  
AAAATCAGATTTTTGAGATTGACAATGAT-----AGTCTTTTTCTGAATGAACTAGAAAGT  
TTTTTTTCTAGTTATTTA-----TATTTAAATAGTGGGTCTAAGAGAAACAATCACTACTA  
TTATCATTGCATATATGATACTCAATCTAGTTGGAATAATCACATTAATAGTTGCATTGATA  
ATTATCTTCGTTTTGAAGTC-----AGTATTAATAGTTCCATTTCCGGGTGGTACCGACAATT  
ACAGTGACAGTTACATTTATAGTTTCATTTGTACTGAAAGTGGGAGTTCTATAAGAACT  
AGTCAAAATGGTAGTGATTTCAATATAAGAAGAAGATCT--GATTTCCGGTAGAAATAAA  
AAATACAGACATTTATGGGTTCAATGCGAAAATTGTTATGGATTAAATTATAAAAAATTT  
TTTAGGTCAAAAATGAATATTTGTGAACAGTGTGGATATCATTTGAAAATGAGCAGTTC  
AGATAGAATCGAACTTTTCGATTGATCCGGGGACTTGGGATCCTATGGATGAAGATATGG  
TCTCTATGGACCCCATCGAATTCATTCAGAGGGGGAACCCTATAGAGATCGTATCGATT  
CTTATCAAAGAAAGACAGGTTTAACTGAAGCTGTTCAAACAGGCATAGGTCAACTAAA  
TGGTATTCCCATAGCAATTGGAGTTATGGATTTTGAGTTCATGGGAGGTAGTATGGGATC  
CGTAGTAGGCGAGAAAATCACCCGTTTGATCGAGTATGCTACTAATCGATCTTTACCTG  
TCATTATTGTGTGTGCTTCTGGAGGAGCGCGCATGCAAGAAGGAAGTTTGAGTTTGAT  
GCAAATGGCTAAAATATCTTCCGCTTCATATAATTATCAATCAAATAAAAAATTATCTAT  
GTATCAATCCTTACATCTCCTACAACCGGTGGAGTAACAGCCAGTTTTGGTATGTTGGG  
AGATGTCATTGTTGCTGAACCTAATGCCTACATTGCATTTGCGGGTAAAAGAGTAATTG  
AACAAACATTGAATAAGACAGTACCCGATGGTTCACAAGCGGCTGAGTATTTATCCAT  
AAAGGCTTATTTGACCCAATTGTACCACGTAATCCTTTAAAAGGTGTTCTGGGTGAGTT  
ATTCAGCTCCACGGTTTCTTTCCCTTGAATCAAATTCAAAAAATATGGTAACCCTTC  
GAGCCGACGAAATTAGTAATATTATCCGTAACCGTATTGAACAATATAATAGAGAAGTA  
AAGATTGTGAATACCGGTACCGTACTTCAAGTGGGCGATGGCATTGCTCGTATTCATGG  
TCTTGATGAAGTAATGGCAGGTGAATTAGTAGAATTTGAAGAGGGTACAATAGGAATTG  
CTCTGAATTTGGAATCAAATAATGTTGGCGTTGTATTAATGGGTGATGGTTTGATGATAC  
AAGAAGGAAGTTCTGTAAAAGCAACAGGAAGAATTGCTCAGATACCTGTGAGTGAGG  
CTTATTTGGGTCGTGTTATAAATGCTCTGGCTAAACCTATTGATGGGAGAGGTGAAATTT  
CAGCTTCTGAATCTCGGTTAATTGAATCTCCTGCCCCAGGTATTATTTTCGAGACGTTCTG  
TATATGAACCTCTTCAAACGGGGCTTATTGCTATCGATTCGATGATCCCTATAGGACGCG  
GTCAGCGAGAATTAATTATTGGGGACAGACAGACTGGAAAAACAGCAGTAGCTACAGA

TACGATTCTTAACCAAAAAGGGCAAAATGTGATATGTGTTTATGTAGCTATTGGTCAAA  
AAGCATCTTCTGTGGCTCAGGTAGTGACTACTTTTCAGGAACGAGGGGCGATGGAATA  
CACCATTGTGGTAGCCGAAACAGCGGATTCACCTGCTACATTACAATACCTCGCTCCTT  
ATACGGGAGCGGCTCTGGCTGAATATTTTATGTACCGTGAACGACATACTTTAATAATTT  
ATGATGATCTCTCCAAGCAGGCACAAGCTTATCGCCAATGTCTCTTCTATTAAGAAGA  
CCCCCTGGTCGTGAAGCTTATCCAGGAGATGTTTTTATTTGCATTCGCGCCTTTTGGAA  
AGAGCCGCTAAATCAAATTCTCGTTTAGGTGAAGGGAGTATGACTGCTTTACCAATAGT  
TGAGACTCAATCTGGAGACGTTTCGGCTTATATTCCTACTAATGTAATTTCCATTACAGA  
TGGACAAATATTCTTATCTGCCGATCTATTCAATGCTGGAATCCGACCCGCTATTAATGT  
GGGTATTTCTGTTTCCAGAGTAGGATCCGCAGCTCAAATTAAGCCATGAAACAAGTA  
GCTGGCAAATCAAATGGAAGTACGCAATTCGCGGAGTTAGAAGCCTTTGCACAAT  
TCGCTTCTGATCTCGATAAAGCTACTCAGAATCAATTGGCAAGAGGTCAACGATTACGT  
GAGTTGCTTAAACAATCCCAATCAGACCCTCTCACGGTGAAGAACAGATAGTTACTAT  
TTATACCGGAGCGAATGGATATCTTGATCCGTTAGAAATTGGACAGGTAAAGAAATTC  
TCGTTACAGTTACGTACCTACTTAAAAAAGAATAAACCTCAATCCAAGAAATTATATCTT  
CTACCAAGACATTTACCGAGGAAGCGGAAGCCCTTTTGAGGGAAGCTATTCAGGAACA  
GATCGAACGGTTTTTACTTCAGGAACAAACAATGAGAATCAATCCTACTCCTTCTAGTC  
CTGTGGTTTCCACACTTGAAGAAAAAACCTAGGGCGTATCGCTCAAATTATTGGCCC  
AGTACTGGATGTCGTTTTTCCCCGGGCAAGATGCCTAATATTTATAACGCTTTGGTAGT  
TAAGGGTCGAGATACTGTCCGGTCAGCAAATTAATGTGACTTGTGAAGTACAACAATTAT  
TAGGAAATAATCGAGTTAGAGCTGTAGCTATGAGTGCTACAGATGGGCTGATGAGAGG  
AATGGAAGTGATTGACACGGGAGCTCCTCTAAGTGTTCAGTCGGCGGAGCTACTCTC  
GGACGAATTTTCAACGTTCTTGGGGAACCTGTTGATAATTTAGGGCCTGTAGATACTCG  
TACAACATCTCCTATTCATAGATCTGCGCCTGCCTTTATACAGTTAGATACGAAATTATCA  
ATCTTTGAAACAGGGATTAAAGTGGTGGATCTTTTAGCTCCTTATCGCCGTGGAGGAAA  
AATCGGACTATTTGGGGGAGCTGGAGTGGGTAAAACAGTACTCATCATGGAATTGATC  
AATAACATTGCCAAAGCTCATGGAGGCGTATCCGTATTTGGCGGAGTAGGCGAACGTAC  
TCGTGAAGGAAATGATCTTTACATGGAAATGAAAGAATCCGGAGTGATTAATGAAAAA  
AATATTGCAGAATCAAAGTAGCTCTAGTCTATGGTCAAATGAATGAACCGCCGGGAG  
CTCGTATGAGAGTTGGTTTAACTGCCCTAACCATGGCGGAATATTTCCGGGATGTTAATG  
AACAAAGACGTGCTTCTATTCATCGACAATATTTTCGTTTCGTCCAAGCAGGATCAGAA  
GTATCCGCCTTATTGGGGAGAATGCCTTCCGCAGTGGGTTATCAACCTACCCTTAGTAC  
AGAAATGGGTTCTTTGCAAGAAAGAATTACCTCTACCAAAGAGGGATCTATAACTTCGA  
TCCAAGCGGTTTATGTACCTGCGGACGATTTGACCGACCCTGCTCCTGCCACGACATTT  
GCACATTTAGATGCTACTACCGTACTATCAAGAGTATTAGCTGCTAAAGGTATTTATCCA  
GCAGTGGATCCGTTAGATTC AACGTCAACTATGTTACAACCTCGAATCGTTGGTGAGGA  
ACATTATGAAACTGCGCAAAGAGTTAAGCAAACCTTACAACGTTACAAAGA ACTTCAG  
GACATTATAGCTATCCTTGGGTTGGACGAATTATCCGAAGAAGATCGTTTAACTGTAGC  
AAGAGCACGAAAAATTGAGCGTTTCTTATCACAACCCTTCTTCGTGGCAGAAGTATTTA  
CTGGTTCTCCAGGGAAATATGTTGGTCTTGCAGAAACAATTAGGGGGTTTCAATTGATC  
CTTTCCGGAGAATTAGACGGTCTTCCCGAGCAGGCCTTTTATTTGGTGGGTAACATCGA  
TGAAGCTACCGCGAAAGCTATGAACTTAGAAGTGGAGAGCAAATTGAAGAAAATGAC  
CTTAAATCTTTGTGTA CTGACTCCTAATCGAATATTTGGGATTCAGAAGTGAAGAAA  
TCATTTTATCTACTAATAGTGGCCAAATTGGCGTATTACCAAACCACGCCCTATTGCCA

CGGCTGTAGATATAGGTCTTTTGAGAATACGCCTCAACGACCAATGGTTAACGGTGGCT  
CTGATGGGTGGTTTCGCTAGAATAGGTAATAATGAGATCACCATTTTAGGAAATGATGC  
GGAGATGAGTACTGACATTGATCCGCAAGAAGCTCAGAAAGCTCTTGAAATAGCTGAA  
GCTAACTTGAGTAGAGCTGAGGGTAAGAGACAAGCAATTGAAGCGAATCTAGCTCTCA  
GACGAGCTAGGACACGAGTAGAGGCTGTAAATGCTATTTCCATGAAAAATGTAACCGA  
TTCTTTCCTTTCCTTGGGTCACTGGCCATCCGCCGGGAGTTTCGGGTTAATACCGATAT  
TTTAGCAACAAATCCAATAAATCTAAGTGTAGTGCTTGGTGTATTGATTTTTTTTGGAAA  
GGGAGTGTAAATGATTTATTAGATAATCGAAAACAGAGGATCTTGAGTACTATTGAA  
ATTCGGAAGAATTACGTAGAGGGGCCATTGAGCAGCTCGAAAGAGCCAGGACTCGCTT  
ACGGAAAGTTGAAATAGAAGCAGATGAGTATCGAATGAATGGATACTCTGAGATAGAA  
CGAGAAAAAGAAAATTTGATTAATGCCACTTGTGACACTTTGGAACGATTAGAAAATT  
ACAAAATGAAACCTTCATTTTGAACAACAAAGAGCGATTAATCAGGTCCGACAACG  
AGTTTTTCAACAAGCCTTACAAGGAGCTCTAGGAACTCTGAATAGTTGTTTGAATAGT  
AGTTACATTTCCGTACGATCCGTGCTAATATTGGCATTCTAGGGGCCATGGAAGAAATA  
ACAGATATGAATCCACTGATTTCTGCCGCTTCCGTTATTGCTGCTGGATTGGCCGTAGGG  
CTTGCTTCTATTGGACCTGGAGTTGGTCAAGGACTGCTGCAGGCCAAGCTGTAGAAG  
GTATTGCGAGACAACCAGAAGCAGAGGGTAAAATACGAGGTACTTTATTGCTTAGTCTA  
GCTTTTATGGAAGCTTTAACAATTTATGGACTGGTCGTGGCGTTAGCGCTTTTGTTCG  
AATCCTTTTGTATGAATGTTATAACCATGTTCCATTA AAAACTCAAAGGGTTATACGATA  
TATCGGGTGTAGAAGTAGGCCAACATTTCTATTGGCAAATAGGAGGTTTACAAATCCAT  
GCCCAAGTACTTATCACTTCTTGGGTGCTAATTGCTATCTTATTAGGTTT CAGTCATCATAG  
CTGTTCCGAATCCACAAACCATTCGACCGACGGCCAGAATTTCTTCGAATATGTCCTT  
GAATTTATTTCGAGATTTGAGCAAACTCAGATTGGAGAAGAATATGGTCCTTGGGTTC  
CTTTATTGGA ACTATGTTCTTATTTATTTTGTTC TAACTGGTCAGGTGCTCTTTTACCT  
TGAAAATCATA CAATTACCTCATGGGGAGTTAGCTGCGCCTACGAATGATATAAATACT  
ACTGTTGCTTTAGCTTTACCCACGTCAGCGGCATATTTTATGCGGGTCTTACCAAAA  
AGGATTGGGTATTTTCGGGAAATACATCAACCAACCCCAATACTTTTACCAATTAACAT  
CCTAGAAGATTTACAAAACCTTTATCTCTTAGTTTTTCGACTTTTTCGGGAATATATTGGC  
TGATGAATTAGTAGTTGTTGTTCTTGTTCCTTAGTCCCTTCAGTAGTTCCTATACCTGTT  
ATGCTTCTTGGATTATTTACAAGTGGTATCAAGCTCTTATTTTGC AACGTTAGCCGCG  
GCTTATATAGGTGAATCCATGGAGGGTCATCATATGATATTTGTGACTTTAGAACATATAT  
TAACTCATATCTCTTTTTCGATCATTTC AATTGTGATTACGATTCATTT CATGAACTTATTA  
GTCTACGAAATCGTAGGATTACGCGATTCATCGGAAAAAGGGATGATAGCCACCTTTTT  
CTCTATAACAGGATTATTAGTTTTCTCGTTGGATTTCTTCGGGACATTTTCCGTTAAGTAAT  
TTATACGAGTCATTAATCTTCCTTTCATGTAGTTTCTTTATTATT CATATAATTTCCAAGAA  
ATTGAACCATAAAAATGATTTAAGCACATAACTACCCCAAGTACTATTTTTACTCAAGG  
CTTCGCTACGTCGGGTCTTTCAACTGAAATGCATCAATCCACAATATTAGTACCTGCTCT  
ACAATCTCAGTGGTTAATGATGCACGTAAGTATGATGTTATTGAGCTATGCAGCTCTTTT  
ATGCGGATCGTTATTATCAATCGCTCTTCTAGTCATTACATTTTCGAAACAACATCAATTTT  
TTTTGTAAAAGCAATAAGATTAATACTTGAATGAAAAAAGAAGCGTTTTTAAAAACA  
CTTCTTTTCTTTCATTTTCGAAATTTATCAAATATCAATTGACTCAGCGTTTGGATTATTG  
GAGTTATCGTATGATTAGTTTAGGGTTACCTTTTTA ACCATAGGCATTCTTTGTGGAGC  
AGTATGGGCTAATGAAGCATGGGGATCTTATTGGAGTTGGGACCCGAAGGAAACTTGG  
GCATTTATTACTTGGACCATATTTCGCGATTTATTACATACTAGAAAAAATCAAAGTTTA

CAAGGTACGAATTCGGCACTTATAGCTTCTATAGGATTTTTTATAATTTGGATATGCTATT  
TTGGGGTCAATCTATTAGGAATAGGTTTACATAGTTATGGTTCATTACATTAACAAAA  
AAAAAAAAGCCTGGGTC---TCCCTCCCATATATTTTCATCCATAATATTTTTGCCCTGGTG  
GGTCTCTCTCATTTAATAAATGTCTGGAACCTTGGGTTACTAATTGGTGGAATACCGG  
GAAATCCGAAACTTTTTTGAATGATATTCAAGAGAAAAACGTTCTAGAAAGATTCATAG  
AATTGGAAGAACTATTCTCTTGGATGAAATGATAAAGGAGTACCCGGAGACACATATA  
CAAAAACCTTCGTATAGGAATACACAAGGAAACGATACAATTGGTCAAAAACACACAATG  
AATATCATCTCCATATCATTTTTGGATTTCTCGACAAATATAATTTGTTTTCGCTATTCTAAGT  
GGTATTTTTATTCTGGGTAATGAAGAACTTGTCAATTCTTAATTCTTGGATTCAGGAATTC  
CTCTATAACTTAAGCGACACAATAAAAGCTTTTTTGAATTCTTTTAGTTACTGATTTATGGA  
TCGGATTTCAATTCGACCCATGGTTGGGAACATAATGATTGGTTCGGTCTACAACGATTTT  
GGATTGGTTCATAACGATCAAATTATATCTAGTCTTGTTCCTTTCCAGTTATTCTAG  
ATACAATTGTGAAATATTGGATCTTCTATTATTTAAATCGTGTATCTCCTTCACTTGTAGT  
CATTTATCATTCAATGAATGAAATGCCCATTTGGTGTTCAAAAGTACCTTTTCGGAGTCC  
TGGAGAGGAAGATGCAGTTTGGGTTGACGTATAACAACCGACTTTATCGAGAAAGATTA  
CTTTTTTTAGGCCAAGAAGTTGATAGCGAGATCTCGAATCAACTTGTGGTCTCATGGT  
ATATCTCAGTATAGAAGATGATACTAGGGATCTTTATTTATTTATAAACTCTCCCGGCGGA  
TGGGTAATACCAGGAATAGCCATTTATGATACTATGCAATTTGTGCCACCCGATGTGCAT  
ACAATATGCATGGGATTAGCCGCTTCAATGGGATCTTTCATTCTGGTTCGGAGGAGAAAT  
TACCAAACGTCTAGCATTCCCTCACGCTAGGGTTATGATTCACCAACCTGCTAGTCTTT  
TTATGAAGCACAAAGCAGGCGAATTTATCCTGGAAGCGGAAGAAGAACTACTGAAACTTCG  
GAAACCCTCACAAAGGTTTATGTACAAAGAACGGGTAATCCTTTATGGGTTGTATCCGA  
AGACATGGAAAGAGATGTTTTTATGTCAGCAACAGAAGCCCAAGTTCATGGCATTGTT  
GATCTTGTAGCGGTCGAAATGAAAGAACAAAAATTGATTCATGAAGGTTTAATTACTGA  
ATCACTTCCCAACGGTATGTTCCGGGTCCGCTTAGATAATGAAGATCTAATTCTAGGTTA  
TGCTTCAGGGAGGATCCGGCGCAGTTTTATACGGATACTACCAGGAGATAGAGTAAAA  
ATTGAAGTAAGTCGTTATGATTCAACCAAAGGACGTATAATTTATCGACTTCGCAACAA  
AGATTTCGAACGATATGGAAGAATTACAAGGATATTTAGAAAAAGATAGATCTTGGCAAC  
AACACTTTCTATATCCGCTTCTCTTTAAGGAGTATATTTACCCATTTGCTCATGATCGTGG  
TTTATTTGGTTATGACAAT--TCTAGTTCATTACTTGTGAAACGCTCAATTATTCGAATGTA  
TCAACAGAATTATTTGATTTATTCGGTTAATGATTCTAACCAAAATCGATTCGTTGGGTT  
TCATTTTTATTCTCAGATGATATTGGAAGGTTTTGCAGTTATTGTGGAAATCCATTCTTG  
CTGCGATTAGTATCTTCCCTCATACCAAAATCTCAGAATTTACGATCTATTCAATCAATAT  
TTCCCTTTTTGGAGGACAAATTATCGCATTTAAATTATGTGTCAGATATACTAATACCTTA  
TCCCATCCATCTGAAAATCTTGGTTCAAATCCTTCAATTCTGGATCCAAGATGTTCCCTC  
TTTACATTTATTGCGATTCTTTCTTACGAATATCATAATTGGAATAGTCTTATTACTAATT  
CTATTTTTCTTTTTTCAAAAAAAGACTATTTTCGGTTCCTCATATAATTCTTATGTATCTGA  
ATGCGAATTTGTATTAGTTTTTCTTCGTAAACAATCTTCTTATTTACGATTAACATCTTCT  
GGAGCTTTTCTTGAGCGAACACATTTCTATGGAAAAATAGAACATGTAGTAGTAGTGCG  
CCGTAATCAGAAGACCCTATGGTTCCTCAAGGATCCCTTCATGCATTATGTTTCGATATCA  
AGGAAAAGCAATTCTGGTTTCAAAGGGGACTCATCTTCTGATGAAGAAATGGAAATGT  
CGCCTTGTCAATTTCTGGCAATATTATTTTCACTTTTGGTCTCAACCGTACAGGATCCAG  
ATAAACCAATTATCAAACCTGTTCTTTCTAATTTCTAGGTTATCTTTCAAGTGTACTAATAA  
ATCTTTCGGCGGTAAGGAATCAAATGCTAGAGAATTCATTTCTAATAGATACTGTTTTT---



---AAAAAATTCGATACCAGAGTCCCAGTCATTCCTCTTATTGGATCATTGTCTAAAGCGA  
AATTTTGTACCGTATCGGGGCATCCTATTAGTAAGCCGATCTGGACCGATTTATCAGATT  
GCGATATTATTGATCGATTTGGTTCGGATATGTAGAAATCTTTCATTATCACAGTGGATC  
CTCAAAAAAACAAAGTTTGTATCGAATAAAGTATATACTTCGATTTTCGTGTGCTAAAA  
CTTTGGCTCGTAAACATAAAAGTATGGTACGCGCTTTTTTGC AAAGATTAGGTTCCGGA  
TTATTAGAAGAATTTTTTATGGAAGAAGAACAAGTTGTTTTCTTTGATCTTCCAAAACG  
TATTTGGTATTTGGATATTATCCGTATCAGTGACCTGGTGAATTATTCAATGATAATTGAT  
ACGACA---GAAGTACAA---GCTATCAATTCTTTTTCTACATTGGAA---TCCATAAAAGAA  
ATCTATGGACTCATATGGATGTTTGTATCCATTTTTACCCTTATATTTGGAATCATAATAGG  
AGTACTAGTAATTGTATGGTTAGAAAGAGAAATATCTGCAACGATACAACAACGTATTG  
GGCCTGAATATGCCGGTCCGTTGGGAATTTCTCAAGCTCTAGCAGATGGGACTAAATTA  
CTTTTTAAGGAGGACCTACTCCCATCTAGAGGAGATATTCATTTGTTTAGTGTCCGACC  
GTCATAGCGGTCATATCAATTCTACTAAGTTATTTAGTAATTCCTTTTTGGGTACCGCCT  
GTTTTAGGTGATCTCAGTATAGGTGTTTTTTTTATGGATCACCATTTCAAGTATTGCCCTA  
TTGGGCTTCTTATGTCAGGATATGGATCGAATAATAAATATTCTTTTTCAGGTGGTCTAC  
GAGCTGCTGCTCAATCTATTAGTTATGAAATACCATTAACCTCTATGTGTGTTATCAATATC  
TCTACTATCTAATAGTTCAAGTACAGTTGATATAGTTGAAGCACAGTCAAATATGGTTT  
TTGGGGGTGGAATCTGTGGCGTCAACCTATAGGGTTTATTGTTTTTCTAATTTCTTCTCT  
AGCCGAATGTGAGAGATTGCCATTTGATTTACCGGAAGCAGAGGAGGAATTAGTAGCA  
GGTTATCAAACCGAATATTCAGGTATCAAATTTGGTTTATTTTATATTGCTTCTTACCTAA  
ATCTATTACTTTCTTCATTATTTGTAACAGTTCTTTACTTAGGTGGGTGGAATTTTTCTATT  
CCGTATATATCTATTCCTGAACTTTTCGGAATAAATAAAATGGCCGGAGTTTTTGGAAATG  
ACAATTGGTATCTTTATTACATTAGCTAAAGCTTATTTGTTTCTGTTCAATCCTATCACAA  
CAAGATGGACTTTGCCTAGGATAAGAATGGACCAACTATTAATCTTGGATGGAAATTT  
CTTTACCCATTTCTTTAGGTAATCTATTATTGACAACTTCTTCCCACTTGTTTCACTAA  
TGATCTGGCATGTACAGAATGAAAACCTCATTCTCGATTCTACGAGAATTTTTATGAAA  
GCGTTTTCAATTGCTTCTCTTCCATGGAAGTTTCATTTTCCAGAATGTATCCTAATTTTTG  
GCCTAATTTCTTCTCTGATGATCGATTCAACCTCTGATCAAAAAGATAGACCTTGGTTCT  
ATTCATCTCTTCAACAAGTTTAGTAATAAGCATAACGGCCCTATTGTTCCGATGGAGAG  
AAGAACCTATAATTAGCTTTTCGGGAAATTTCCAAACGAACAATTTCAACGAAATCTTT  
CAATTTCTTATTTTACTATGTTCAACTCTATGTATTCCTCTATCCGTAGAGTACATTGAAT  
GTACAGAAATGGCTATAACAGAGTTTCTGTTATTTCGTATTAACAGCTACTCTAGGAGGA  
ATGTTTTTATGTGGTGCTAACGATTAATAACTATCTTTGTAGCTCCAGAATGTTTCAGTT  
TATGTTCCCTACCTATTATCTGGATATAACCAAGAGAGATGTACGGTCTAATGAGGCTACTA  
CGAAATATTTACTCATGGGTGGGGCAAGCTCTTCTATTCTGGTTCATGGTTTCTCTTGGC  
TATATGGTTTATCTGGGGGGGAGATCGAGCTTCAAGAAATAGTGAATGGTCTTATCAATA  
CACAAATGTATAACTCCCCAGGAATTTCAATTGCGCTTATATCCATCACTGTAGGAATTG  
GGTTCAAGCTTTCCCCAGCCCCTTTTTCATCAATGGACTCCTGACATATAACGAAGGATCT  
CCCCTCCAGTCGTTGCTTTTTCTTCTGTTACTTCGAAAGTAGCTGCTTCAGCTTCAGC  
CACGCGAATTTTCGATATTCCTTTTTATTTCTCATCAAACGAATGGCATCTTCTTCTGGA  
AATCCTAGCTATTCTTAGCATGATATTGGGGAATCTCATTGCTATTACTCAAACAAGCAT  
GAAACGTATGCTTGCATATTCGTCCATCGGTCAAATCGGATATGTAATTATTGGAATAATT  
GTTGGAGACTCAAATGATGGATATGCAAGCATGATAACTTATATGCTGTTCTATATCTCC  
ATGAATCTAGGAACTTTTGCTTGCATTGTATCATTGGTCTACGTACCGGAACGTGATAAC

ATTCGAGATTATGCAGGATTATACACGAAAGATCCTTTTTTTGGCTCTCTCTTCAGCCCTA  
TGTCTCTTATCCCTAGGAGGTCTTCCTCCACTAGCAGGTTTTTTTCGGAAAACCTCCATCTA  
TTCTGGTGTGGATGGCAGGCAGGCCTATATTTCTTGGTTTTCAATAGGACTCCTTACGAG  
CGTTGTTTTCTATCTACTATTATCTAAAAATAATCAAGTTATTAATGACTGGACGAAACCA  
AGAAATAACCCCTTACGTGCGAAATTATAGAAGATCCCCTTTAAGATCAAACAATTCCA  
TCGAATTGAGTATGACTGTATGTGTGATAGCATCTACTATAACCAGGAATATCAATGAACC  
CAATTCTTGCAATTGCTCAGGATACCCTCTTTATGTTTCTGCTTCACGAATATGATATTTT  
CTGGGCATTTCTGATAATATCAAGCGTTATTCCTATCTTGACATTTGTAATTTCCGGAGTT  
TTAGCACCGGTTAGTGAAGGACCAGAGAAGCTTTTCGAGTTATGAATCGGGTATAGAAC  
CCATGGGGGATGCTTGGTTACAATTCCGAATCCGCTATTACATGTTTGCTCTCGTTTTTG  
TTGTTTTTGATGTTGAAACGGTCTTTCTTTATCCATGGGCAATGAGTTTTCGATGTATTGG  
GTGTATCTGTATTTATCGAAGCTTTCATTTTCGTGCTTATCCCAATTGTTGGTTCAGTTTA  
TGCATGGCGAAAAGGAGCATTGGAATGGTCTACGAGTTATTTTCCCTGGTTAACAATAC  
TTGTTGTTTTGCCGATATTCGCGGGTTCCTCAATTTTCTTTTTTCCCTCATAGAGGAAATA  
AGATGTTTAGATGGTATACGATTTGTATATGTTTATTAGA ACTCCTTCTAACAACCTATGC  
ATTCGTGTTATCATTTCCAATTGGACGATCCATTAATCCAATTGGAGGAAGATTATAAATG  
GATAGATATTTTTGATTTCCACTGGAGACTGGGAATCGATGGACTTTCATAGGACCCAT  
TTTACTGACAGGATTTATCACTACTTTAGCTACTTTAGCGGCTTGGCCAGTTACGCGAAA  
TTCACGATTGTTCTATTTCCCTGATGTTAGCAATGTACAGTGGTCAAATAGGATCATTTTC  
TTCTCGAGACCTTTTACTTTTTTTCATCATGTGGGAGTTAGAATTAATTCCTGTTTACTTA  
CTTTTATCCATGTGGGGAGGAAAAAACGTCTCTACTCGGCTACAAAGTTTATTTTGTA  
CACAGCAGGGGGTTCTATTTTTCTCTTAATAGGAGTTCTAGGTATGGGTTTATATGGTTC  
CAATGAACCAACATTAGATTTTGAAAGATTA ACTAATCAATCATATCCTGTGGCATTGGA  
AATAATATTATATTTTGGTTTTCTTTATTGCTTATGCTGTCAAATCGCCGATTATACCCCTGC  
ATACATGGTTACCAAATACCCATGGAGAAGCACATTACAGTACATGTATGCTTCTAGCTG  
GAATCTTATTA AAAATGGGAGCATATGGATTGATTCGGATCAATATGGAATTATTACCCC  
ACGCTCATTCTATATTTTCCCCCTGGTTGGTAATAGTTGGAACGATGCAAATAATCTATG  
CAGCTTTAATTTCTCTCGGTCAACGCAATTTTAAAAAGAGAATAGCCTATTTCCTCTGTAT  
CTCACATGGGTTTTATAATTATAGGAATCGGTTCTATAACCGACATGGGACTCAATGGAG  
CCATTTTACAAATACTCTCTCATGGATTTATTGGTGCTGCACTTTTTTTCTTGGCGGGAA  
CGAGTTGTGATAGAATACGTCTTGTTTATCTCGACGAAATGGGAGGGATATCTATCACAA  
TGCCAAAATATTTACCATGTT CAGTAGTTTCTCGATGGCTTCTCTTGCATTGCCGGGAA  
TGAGTGGTTTTGTTGCGGAATCAGTAGTATTTTTTGGAAATAATTA CTAGTCCAAAATATC  
TTTTAATGCCAAAATACTAATTA CTTTTTGTAATGGCAATTGGAGTGATATTA ACTCCTAT  
TTATTTATTATCTATGTCACGTCAGATGTTCTATGGATA CAAGTTATTCAATGTTCCACAC  
TCTAATTTTTTGGATTCTGGACCAGAGA ACTATTTGTTTCAATTTGTATCTTTCTACCCG  
TAATAGGGATTGGTATTTATCCTGATTTCTGTTCTCTCGTTATCAGTTGACAGGGTACAAG  
CTATCCTATCTAATTA CTTTTATAGAATGATGTTTCGAGCATGTACTTTTTTTGAGTGTCTAT  
TTATCTCTATCGGTATCTATGGATTGATCACAAGTCGAAAGATGGTTAGAGCACTTATG  
TGTCTTGAGCTTATACTCAATTCGGTTAATATCAATCTCGTAACATTTTCTGATATAATTTGA  
TAGTCGCCAATTA AAAAGGCGACATTTTCTCAATCTTTGTTATAGCTATTGCGGCTGCTGA  
AGCAGCTATTGGGCTAGCTATTGTTTCATCAATTCATCGTAACAGAAAATCAACTCGTAT  
CAATCAATCGAATTTGTTGAATAATATGGAACATACATATCAATATGCATGGATAATACCT  
TTTCTTCCACTTACAGTTACTATGTCAATAGGATTTGGACTTATACTTATTCCGACAGCA

ACAAAAATATTCGTCGTATATGGGTTTTTCCTAGTATTTTTCTGTAAAGTATAGCTATGG  
GATTTTCGGCCAATCTGTCTATTCAACAAATAAATGGAAGTTTTATTTATCAATATCTATG  
GTCTTGGACCATAGATATTGATTTTTCCCTTAGAGTTTGGATATTTGATCGATCCACTTACT  
TCTATTATGTCAATACTAATTACTACTGTTGGAGTCATGATTCTTATTTATAGTGACAATTA  
TATGTCTCACGACCAAGGATATTTGAGATTTTTTGCTTATATGAGTTTTTCCAATACTTCC  
ATGTTGGGATTAGTTACTAGTTCTAATTTGATACAAATTCATATTTTTTGGGAAGTAGTGG  
GAATGTGTTTCATATTTATTAATAGGGTTTTGGTTCACACGACCAATTGCCGCAAGTGCTT  
GTCAAAAAGCTTTTGTAACATAATCGTGTAGGAGATTTTGGTTTATTATTAGGAATCTTAG  
GTCTTTATTGGATAACAGGTAGTTTGGAAATTCGGGATTTGTTCAAATAGCTAATAACA  
ATGGGGTCAGCCCCCTATTTGCTACTTTGTGTGCCTCTTTATTATTTGTCGGTGCAGTTG  
CTAAATCTGCACAATCCCCCTCCACGTATGGTTACCTGATGCCATGGAAGGACCTACT  
CCTATCTCGGCCCTTATACACGCTGCTACTATGGTAGCAGCAGGAATTTTTCTTGTAGCT  
CGGCTTATTCCTCTTTTCATAGACATACCCTATATAATGAATTCATTTCCTTAATGGGTGT  
AATAACAGTACTATTAGGAGCTACTTTTTCTCTTGCTCAAAGAGACATTAAGAAGTT  
TAGCCTATTCTACAATGTCTCAATTAGGTTATATTATGTTAGCTCTAGGTATAGGTTCTTAT  
CGAGCGGCTTTATTCATTTGATCACTCATGCCTATTCTAAAGCTTTATTGTTTTTGGGAT  
CTGGATCTATTATTCATCAATGGAACCTATTGTTGGATATTCACCAGAAAAAAGTCAGA  
ATATGGTTCTTATGGGTGGTTTAAACAAGATATGTTCCAATTACAAGAACTACTTTTTTATT  
AGGTACACTTTCTCTTTGTGGTATTCCACCTCTTGCTTGTTTTTGGTCCAAAGATGAAAT  
TCTTAATGATAGTTGGTTATATTCACCAATTTTTGCAATAATACCTTATTTCAATAGGA  
TTAACCGCATTTTATATGTTTCGGGTATATTTACTTACCTTTGATGGGTATTTGCGCGTTT  
CTTTTCAAATCACAGTAGCACTAAAATAATTTGTTCTATTCAATATCTCTATGGGGAA  
AAGAAGCACCAAAAACAGTCAATAAA---AATTTACTTTTATCAACAATGAATTTTTTTTC  
AAATAAATAT-----ACTTCCATGTATCCTCATGAATCAGACAATACTATGTTATTTCTCTG  
CTTGATTGGTACTATTTACTTTGTTTCGTTGGATCAATAGGAATTTCTTTTGATTTGATAT  
ATTATCGAAATGGTTAACCCATCCCAAATCTTTTTTCATCCAAATTCGAATTATTCTGT  
GAATTTGGTATGAATTTTTTACAAATTCATTTTTTTCAGTAAGTATAGCCATTTTTGGATTA  
TTCATAGCATATATTTTATATGGGTCTGTTTATTCATTTTTCCAGAATTTGGACTTAATCAA  
TTCATTTGTAATTATCTTAGACCAAATAAAAAGTTTTATATACAATTGGTCATATAATCGT  
GGTTACATAGATATTTTTTATGTTAGGGTCTTAGCCATGGGTATAAGAGGATTAACCGAG  
CTAACTCAGTTTTTTGATAAACATATAATTGATGGAATTACAAATGGAGTTGGCCTTACA  
AGTTCACTTATAGGTGAAGGTATAAGATAT--ATGGGGGGGGGACGAATCTCGTCTTATT  
TATTTTTATATTTTTTTTATGTATCAATATTTTAGIATTTTTTTTTGATGGATTTACCTGGAC  
CAATACATGATATCTTGTAGTATTTTTTGGATCAGTTCTTGTATTAGGAGGTCTGGGAGT  
AGTATTACTTACCAATCCCATTTTTTCTGCCTTTTCGTTGGGATTGGTTCCTTGTTTGTATA  
TCCTTATTCTATATTCTATCGAATTCCTATTTTGTAGCTGCCGCACAGCTCCTTATTTATGT  
TGGAGCCATAAATGTCTTAATCATATTTGCTGTAATGTTTCATGAATGGTTCAGAATATTC  
AATGATTCCTATTTTTTGGACCATTTGGAGATGGGGTCACTTCACTGGTTTTGTACAAGTATT  
CTTTTTTCACTAATTACTATTATCCCAGATACGTCATGGTACGGAATTTTTTGGACTACAA  
GATCAAGCCAGATTATAGAACAGGACCTAATAAGTAACATTCAACAAATTGGGATTCAT  
TTATCAACAGATTTTTTATCTTCCGTTTGAACCTATTTCCATAATTCTTTTAGTTTCCCTGAT  
AGGTGCAATTACCATGGCTCGTCAAATGACTATAACCGGTTACAAGAAAAGATCTCATGA  
TAGTCAATATGGGTCCCTACCACCCATCAATGCATGGTGTCTTCGACTGATCGTTACTC  
TCGATGGTGAAGATGTTATTGATTGTGAACCCATATTGGGATATTTACACAGAGGGATG

GAAAAAATAGCAGAAAACCGAACAATTATACAATATCTTCCTTATGTAACACGTTGGGA  
TTATTTAGCTACTATGTTACAGAGGCCAATAACGGTAAATGCACCAGAACAATTGGAAA  
ATGTTCAAGTACCTCAGAGAGCCAGTTATATCAGAGTAATTATGCTGGAGCTGAGCCGT  
ATAGCTTCTCATTTGTTATGGCTTGGACCTTTTATGGCAGATATCGGTGCGCAGACTCCT  
TTTTTCTATATTTTCAGAGAGAGAGAATTGTTATATGATTTATTTCGAAGCCGCCACAGGT  
ATGCCAATGATGCATAATTATTTCCGCATCGGAGGAGTAGCTGCTGATCTACCTCATGGC  
TGGATAGATAAATGTTTGGATTCTGCGATTATTCTTTAACAGGAGTTGTTGAATATCAA  
AACTTATTACCGGAATCCCATTTTTTTTGGAACGAGTTGAAAGAGTGGGCATTATTGG  
TGGAGAGGAAGCAATAAATTGGGGTTTATCAGGACCAATGTTACGAGCTTCCGGAATC  
CAATGGGATCTTCGTAAGGTTGATCATTATGAGTGTACAATGAATTCGATTGGGAAGT  
CCAATGGCAAAAAGAAGGAGATTCATTAGCTCGTTATTTAGTACGAATAGGTGAAATGG  
GGGAATCCATAAAAATTATTCAACAGGCTCTAGAAGGAATTCCTGGAGGTCCCTATGAG  
AATTTAGAAGTCCGACGC---GATAGAGCAAAAATTCGGAATGGAATGATTTTGAATAT  
AGATTTATTAGTAAAAAACCTTCACCCAATTTTGAATTGTCGAAACAAGAACTTTATGT  
CAGAGTAGAAGCCCCAAAAGGAGAATTAGGAATTTATTTGATAGGGGATAATAGCATT  
TCCCCTGGAGATGGAAAATTCGTCCACCCGGTTTCATCAATTTGCAAATTCCTCCTCAG  
CTAGTTAAAAGAATGAAATTGGCTGATATCATGACGATACTAGGTAGTATAGATATCATT  
ATGGGAGAAGTTGATCGTATGTTCTCTATGGTGACTGGGTTCATGAATTATAGTCAACA  
ACAATACGAGCTGCAAGGTATATTGGTCAAAGTTTCGTAATTACCTTATCCCACACAA  
ATCGTTTACCTATAACTATTCAATATCCTTATGAAAAATCGATCACATCAGAGCGTTTCC  
GTGGTTCGAATCCACTTTGAATTTGATAAATGTATTGCTTGTGAAGTATGTGTTTCGTGTAT  
GCCCCGATAGATCTACCCGTTGTTGATTGGAGATTTGAAAGAGATATTAAAAAAAAAACAA  
TTGCTTAATTACAGTATTGATTTTGGGGTCTGTATATTTTGTGGTAATTGTGTCGAGTATT  
GTCCAACAACTGTTTATCAATGACTGAAGAATATGAACTTTCTACTTCTGATCGTCAC  
GAATTGAATTATAATCAAATTGCTTTGGGGCGGTTACCAATGTCAATAATTGGAGATTAC  
ACAATTCAAACAGTTATGAATTCGAAAATAGACAAAGATAAACCCCTTTGATTCAAGAA  
CGATTACCGATTACCAGCAGGATCGTTTATCTGATTGGTTAGTCAAGCATGAGCTAGTTC  
ATAGATCTTTGGGCTTCGATTGCCAAGGAATAGAGACTTTACAAATAAAAACCGAGGAT  
TGGTACTCCATTGCTGTCAATTCATATGTATATGGTTACAATTATTTACGCTCCCAGTGTG  
CCTATGATGTAGCACCAGGCGGATTTTAGCTAGTGTGTATCATCTTACGAGAATACAAT  
ATGGTGTAGATAAACAGAAAGAAGTATGCATAAAAGTATTTGTACCAAAGAATAATCCT  
AGAATCTCGTCTGTTTTCTGGATTTGGAAAAGTACTGATTTTCAAGAACGCGAATCTTA  
TGATATGTTGGGAATCTCTTATGATAATCATCCACGCCTTAAACGTATCTTGATGCCTGA  
AAGTTGGATAGGCTGGCCCTTACGTAAGGACTATATTACCCCAAATTTCTATGAAATACA  
AGATGCTCAT-----  
-----ATGGTCTTAACT--GAATATTCAGACAATCAAAATAAAAAGGAAGGAAAAGAT  
TACATTGAGACAGTTATGAATTTGATTGAGTTTCCATTACTTGACCAAACAACCCCAA  
TTCAGTTATTTCAACTACATCGAATGATCTTTCGAATTTGGTCAAGACTCTCTAGTTTATG  
GCCGCTTCTATATGGTACCAGTTGTTGTTTCATTGAATTTGCTTCATTAATAGGCTCGCGA  
TTCGACTTTGATCGTTATGGATTGGTACCAAATCGAGTCCCTAGGCAAGCGGACCTAAT  
TTAACAGCCGGCACAGTAACAATGAAAATGGCTCCTTCTTTAGTGAGATTATATGAGC  
AAATGCCTGAACCAAATATGTCATTGCTATGGGAGCTTGTACTATTACAGGAGGGATG  
TTCAGTACTGATTCTTATAGTACTGTTCCGGGAGTCGATAAGCTAATTCCTGTGGATGTC  
TATTTGCCGGGCTGCCACCTAAACCAGAAGCAGTTATAGATGCTATAATGAACTTCG

TAAGAAGATATCTCGAGAAATCTTTGAAGATAGAACTGCGTCTCAA---GAAAATCGATG  
TTTTTCTACCAATCACAAGTTTTATGTTTCGACGCAGTACTCATACTGGAAATTACGATCA  
AGGATTGCTCTATCAATCACCATCTACTTCAGAGATGCCTACA-----TTTTTCAAATCCAA  
AAGTTCAATATCTTCCCACGAATTAGTGAATATGCAAATAGAAATACTTTTTCTTGGGT  
AAAGGAACAGATGACTCAATCGATTTCTGTATCGATCATGATATATGTAATAACTCGGGC  
ATCTATTTCAAATGCATATCCCATTTTTGCGCAGCAGGGTTATGAAAACCCACGAGAAG  
CAACTGGACGAATTGTATGTGCCAATTGCCATTTAGCTAATAAGCCCCTGGATATTGAA  
GTTCCGCAAGCTGTGCTTCCTGATACTGTATTTGAAGCAGTTGTTCGAATCCCTTATGAT  
ATGCAACTGAAACAAGTTCTTGCTAATGGTAAAAAGGGGGCTTTGAATGTAGGGGCTG  
TTCTTATTTTACCCGAGGGATTGAATTAGCCCCCCCCGATCGTATTTCTCCCGAGGTGA  
GAGAAAAGATGGGAAATCTGTCTTTTTCAGAGTTATCGTCCCAATAAAAGAAATATTCTT  
GTGATAGGTCCTGTTCCCGGTCAGAAATATAGTGAAATCGCCTTTCCCATCTTTCCCC  
GACCCTGCTACGAGGAAAGACGTTCACTTCTTAAAATATCCCATATATGTAGGTGGGAA  
CAGAGGAAGGGGTCAGATTTATCCTGATGGGAGCAAGAGTAACAATACAGTCTATAAT  
GCTACATCGGCAGGTATAGTAAGCAGAATAGTACGTAAAGAAAAAGGAGGATATGAAA  
TAACCATAGTTGATGCATCGGATGGACATCAAGTGGTTGATATTATACCTCCAGGACCA  
GAACTTCTTGTTCAGAGGGTGAATCCATCAAGCTTGATCAACCATTAACAAGCAATCC  
CAATGTAGGAGGGTTTGGTCAGGGAGATGCAGAAATAGTGCTTCAAGATCCATTACGT  
GTCCAAGGCCTTTTGTCTTCTTGGCATCTGTTATTTTGGCACAAGTTTTTTTGGTTCTT  
AAAAAGAAACAGTTTAAAAGGTTCAATTGTATGAAATGAATTCCTCAATAAGGTATA  
TGATTGGTTTGAGGAACGTCTCGAGATTCAGGCGATTGCGGATGATATAACTAGTAAAT  
ATGTTCCCTCCTCATGTCAACATATTTTATTGTTTAGGGGGGATCACACTTACTTGTTTTTT  
AGTACAAGTAGCTACAGGTTTTGCTATGACTTTTTACTATCGTCCAACCGTTACAGAAG  
CTTTTTCTCTGTTCAATACATAATGACTGAGGCCAATTTTGGTTGGTTAATTCGATCAG  
TTCATCGATGGTCAGCAAGTATGATGGTTCTAATGATGATCCTGCACGTATTTCTGTGATA  
TCTCACAGGTGGGTTTTAAAAACCCCGCAATTAACCTGGGTTACAGGTGTGGTTTTA  
GCTGTATTGACTGCATCTTTTGGTGTAAGTGGTTATTCCTTACCTCGGGACCAAATGGT  
TATTGGGCAGTAAAATCGTGACAGGTGTACCTGAAGCTATTCCTGTAATAGGATCGCC  
TTTGGTAGAGTTATTACGTGGAAGTGCTAGTGTGGGCCAATCCACTTTGACTCGTTTTTA  
TAGTTTACACACTTTTGTATTGCCTCTTCTTACTGCCGTATTTATGTTAATGCACTTTCCA  
ATGATACGTAAGCAAGGTATTTCCGGTCTTTAATGGGAGTAACAAAGAAACCTGACTT  
GAATGATCCTGTATTAAGAGCTAAATTGGCTAAAGGAATGGGGCATAATTATTATGGAG  
AACCCGCATGGCCCAATGATCTTTTATATATTTTTCCAGTAGTAATTCAGGTACTCTCGC  
ATGTAATGTAGGTTTAGCGGTTCTCGAACCGTCAATGATTGGTGAACCGGCAGATCCAT  
TTGCAACTCCTTTGGAAATATTACCCGAATGGTACTTCTTTCCCGTATTTCAAATACTCC  
GCACAGTGCCCAATAAGTTATTGGGTGTTCTTTTAATGGTTTCAGTACCAACGGGATTAT  
TGACAGTACCTTTTTTGGAGAATGTCAATAAATCCAAAATCCATTCGTCTGTCAGTA  
GCTACAACAGTCTTTTTGATCGGTACCGTAGTAGCTCTTTGGTTAGGTATTGGAGCAAC  
ATTACCTATTGATAAATCCCTAACTTTAGGTCTTTTTATGATTGAAGTTTTTCTATTTGGA  
ATCGTCTTAGGTCTAATTCCTATTACTTTGGCAGGATTATTCGTAAGTGCATATTTACAAT  
ACAGACGTGGTGATCAGTTGGACCTTATGCCTACTATAACTAGTTATTTCCGGTTTTCTAC  
TGGCTGCTTTAACTATAACCCAGCTCTATTGATTGGTTTGAATAAGATACGACTTATTAT  
GGATATAGTAAGTCTCACTTGGGCTGCTTTAATGGTAGTCTTTACATTTTCCCTCTCACT  
CGTAGTATGGGGAAGAAGTGGACTCATGATTATTCGTTCCCGGAACCAGAAGTGAAA

ATTGTTGTAGATAGGGATCCTATAAAAACGTCTTTTCGAGGAATGGGCCAGACCCGGCCA  
TTTCTCAAGAACAATAGCTAAGGGCCCTGATACTACCACTTGGATCTGGAACCTACATG  
CTGATGCTCACGATTTTCGATAGTCATACCAGTGATTTGGAGGAGATCTCCCGAAAAGTA  
TTTAGTGCTCATTTTGGTCAACTCTCCATTATCTTTCTTTGGCTGAGTGGCATGTA CTTC  
CATGGCGCCCGTTTTTCCAATTATGAAGCATGGCTAAGTGATCCTACTCATATTGGACCC  
AGTGCCAGGTAGTTTGGCCAATAGTAGGTCAAGAAATATTGAATGGTGATGTGGGCG  
GGGGTTTTTCGAGGAATACAAATAACCTCCGGTTTTTTTTTCAGATTTGGCGAGCATCTGGA  
ATAACTAGTGAATTACA ACTCTATTGTACCGCAATTGGTGCATTGGTCTTTGTCATCGTTA  
ATGCTTTTTGCCGGTTGGTTCCATTATCACAAAGCTGCCCAAAATTGGCTTGGTTCCA  
AGATGTAGAATCTATGTTGAATCACC ACTTAGCGGGGTTACTAGGACTTGGGTCTCTCT  
CTTGGGCGGGACACCAATCCATGTATCTTTACCGATTAACCAATTTCTCGATGCTGGA  
GTTGATCCTAAAGAGATA CCACTTCCTCATGAATTTATCTTGAATCGGGACCTTTTTGGCT  
CAACTTTATCCCAGTTTTTGGCGAGGGAGCAACCCCTTTTTCACCTTGAATTGGTCAA  
ATACGCGGAATTCCTGAGTTTTTCGTGGAGGATTAGATCCAATAACAGGGGGCCTATGGC  
TGAGCGATATTGCACACCATCATTTAGCTATTGCTATTCTTTTCTGATCGCTGGTCATAT  
GTATAGGACCAACTGGGGCATCGGT CATGGCCTTAAAGACATTTTAGAGGCTCATAAAG  
GTCCATTTACAGGCCAGGGCCATAAGGGCCTATATGAAATCCTAACAACGTCATGGCAT  
GCTCAATTATCTATTAACCTGGCTATGTTAGGTTCTTTAACCATTGTTGTAGCTCACCATA  
TGTATTCCATGCCCCCTTATCCATACCTAGCTATTGATTATGGTACACA ACTTTTCGTTGTT  
CACACATCACATGTGGATCGGTGGATTTCTCATAGTTGGTGCTGCTGCACATGCAGCCA  
TTTTTATGGTAAGAGACTATGATCCA ACTACTCGATACAACGATCTATTAGATCGTGTCC  
TTAGGCACCGCGATGCAATCATATCACATCTTAACTGGGCATGTATATTTCTAGGTTTTC  
ACAGTTTTGGCTTGTATATTCATAATGATACCATGAGCGCTTTAGGGCGGCCCAAGATA  
TGTTTTTCAGATAACCGCTATA CAATTACAACCCATCTTTTCTCAATGGGTACAAAACATTC  
ATGCTTTAGCACCTGGGGTAACAGCTCCTGGTGCAACAACAAGTACCAGCTTAACTTG  
GGGGGGTGGTGAGTTAGTAGCAGTAGGCGGCAAAGTAGCTTTGTTACCTATTCCATTAG  
GAACCGCAGATTTTTTGGTCCATCACATTCATGCATTTACGATCCATGTGACTGTATTGA  
TACTACTGAAGGGTGTTCTATTTGCTCGCAGTTCCCGTTTGATACCCGATAAAGCAAAT  
CTTGGTTTTTCGTTTCCCTTGTGATGGACCTGGAAGAGGGGGGACATGTCAAGTATCCGC  
CTGGGATCATGTCTTCTTAGGTCTATTCTGGATGTACAATGCAATTCGGTAGTCATTTT  
CCATTTAGTTGGAAAATGCAGTCGGATGTTTGGGGTACTATAAGTGATCAAGGGGTGG  
TAACTCATATCACAGGAGGAACTTTGCACAGAGTTCCATTACTATTAATGGGTGGCTC  
CGAGATTTCTTATGGGCACAGGCATCTCAGGTAATTCAGTCTTATGGTCTTCATTATCC  
GCATATGGTCTTTTTTTTCTTAGGTGCTCATTTTATTTGGGCTTTCAGTTAATGTTTCTATT  
CAGTGGCCGTGGTTATTGGCAAGAACTCATTGAATCCATCGTTTGGGCTCATAACAAAT  
TAAAAGTTGCTCCTGCTACTCAGCCTAGAGCCTTGAGCATTGTACAAGGACGTGCTGTA  
GGAGTAACCCATTACCTTCTGGGTGGAATTGCCACAACATGGGCATTCTTCTTAGCAAG  
AATTATTGCAGTAGGAATGGCATTAAAGATTTCCGAGGTTTAGCCTCGGCTTAGCTCAGG  
ACCCCACTACTCGTCGTATTTGGTTTGGTATTGCTACCGCACATGACTTCGAGAGTCAT  
GATGATATTACTGAGGAACGTCTTTATCAGAACATTTTTGCTTCTCATTTTGGGCAGTTA  
GCAATAATCTTTCTGTGGACGTCCGGAAATCTGTTTCATGTAGCTTGGCAAGGAAATTT  
TGAGTCATGGATACAGGACCCTTTACATGTAAGACCTATTGCTCATGCAATTTGGGATCC  
TCATTTTGGTCAACCAGCTGTAGAAGCCTTTACTCGAGGGGGTGCTACTGGCCCGGTG  
AATATCGCTTATTCCGGTGTTTATCAGTGGTGGTATACAATCGGATTGCGCACCAATGAG

GATCTTTATACAGGAGCTCTTTTTCTATTATTTCTTTCTGCTATATCCTTAATAGCGGGTTG  
GTTACATCTACAACCCAAATGGAAACCAAGTGTTCGTGGTTCAAAAATGCCGAATCT  
CGTCTCAATCATCATTTGTTCAGGACTTTTCGGAGTAAGTTCCTTGGCTTGGGCAGGACA  
TTTAGTTCATATCGCTATTCCCGGATCCAGGGGAGAGTACGTCAGATGGAATAATTTCTT  
AGACGTATTACCGTATCCTCAAGGGTTGGGACCACTTTTTACGGGTCAGTGGAATCTTT  
ATGCTCAAAACCCCTGATTCGAGTAGTCATTTATTTGGTACTTCCAAGGAGCCGGAAC  
GCCATTCTAACCCCTTCTTGGGGGATTCCATCCACAAACGCAAAGTTTATGGTTGACCGA  
TATTGCTCATCATCATTTAGCTATTGCATTTATTTTTCTCGTTGCTGGTCATATGTATAGAA  
CTAACTTCGGAATTGGACACAGTATCAAAGATCTTTTAGAAAACACATATTCCTCCGGGG  
GGTCGATTAGGACGTGGGCATAAGGGTCTTTATGACACAATCAATAATTCGATTCATTT  
CAATTAGGTCTTGCTCTAGCCTCTTTAGGGGTATTACTTCTTAGTAGCTCAACACATG  
TACTCTTTACCTGCTTATGCATTCATAGCACAAGACTTTACTACTCAAGCTGCCTTATATA  
CTCATACCAATACATCGCAGGGTTCATCATGACAGGAGCCTTTGCTCATGGAGCTATAT  
TCTTCATTAGAGATTACAATCCGGAACAGAATGAGGATAATGTATTGGCAAGAATGTTA  
GACCATAAGGAAGCTATCAAATCTCATTTAAGTTGGGCCAGCCTGTTTCTCGGGTTCCA  
TACCTTGGGCCTTTATGTTTATAACGACGTCATGCTCGCTTTTGGGACTCCGGA AAAAC  
AAATCTTGATCGAACCCATATTTGCCCAATGGATAACAATCCGCTCATGGTAAGACTTCAT  
ATGGGTTTCGATGTACTCTTATCTTCAACGAATGGTCCAGCATTCAATGCTGGTCAAAGC  
ATATGGTTACCTGGCTGGTTGAATGCTATTAATGAG-----AATAGTAATTCACTCTTCTTA  
ACAATAGGTCTCTGGAGATTTCTTGGTTCATCATGCTATTGCTCTAGGTTTGCATACAAC  
ACATTGATTTTAGTAAAAGGTGCTTTAGATGCACGTGGTTCCAAGTTAATGCCAGATAA  
AAAGGATTTTCGGTTATAGTTTTCTTTCGACGGCCAGGACGCGCGGTACTTGTGATA  
TTTCTGCTTGGGACGCATTTTATTTGGCAGTTTCTGGATGTTAAATACCATTGGATGGG  
TTACTTTTTTATTGGCATTGGAACACATCACATTATGGCAGGGTAACGTTTACAAATTA  
ATGAATCCTCCACTTATTTGATGGGATGGTTAAGAGATTATCTATGGTTAAACTCTTCAC  
AACTTATCAATGGATATAACCCTTTTGGTATGAATAGTTTATCGGTATGGGCGTGGATGTT  
CTTATTTGGACATCTTGTGGGCTACTGGATTTATGTTCTTAATTCCTGGCGTGGATAT  
TGGCAGGAATTGATTGAAACTTTAGCATGGGCTCATGAACGCACACCTTTGGCTAATTT  
AATTCGATGGAGAGATAAGCCAGTGGCTCTTTCCATTGTGCAAGCAAGATTGGTTGGAT  
TAGCCCACTTTTCCGTAGGTTATATATTTCACTTATGCAGCTTTCTTGATTGCCTCTACATC  
AGGAAAATTTGGTATGTCACATTCAGTAAAAATTTATGATACATGTATAGGGTGTACTCA  
ATGTGTACGAGCCTGCCCCACAGATGTATTGAAATGATACCTTGGGACGGATGTAAAG  
CTAAGCAAATTGCTTCCGCACCAAGAACCGAGGACTGTGTAGGTTGTAAGAGATGTGA  
ATCCGCCTGCCCAACAGATTTTTTGTAGTGTCCGTGTTTATTTATGGCATGAAACAAC  
GCAGCATGGGTCTATCTTATATGACAGATCTCAACTTACCCCTCTATTTTTGTGCCTTTAGT  
GGGCCTAGTATTTCCGGCAATTGCAATGGCTTCTTTATCTCTTCATGTCCAAAAAATAA  
GATTGTCATGCGAGATATAAAAACATATCTCTCCGTGGCACCTGTGCTAACTACTCTATG  
GTTTGGGTCTTTAGCAGGTCTATTGATAGAAATTAATCGTTTATTCCCAGATGCCTTGT  
ATTCCCTTTTTTT-----ATGACTGCAATTTTAGAGAGACGCGAAAGTACAAGCCTATGGG  
GTCGCTTCTGCAACTGGATAACCAGCACTGAAAACCGTCTTTACATTGGATGGTTCCGGT  
GTTTTGATGATCCCTACCTTATTGACCGCAACTTCTGTATTCAATATCGCCTTCATTGCTG  
CTCCTCCAGTAGATATTGATGGTATTCGTGAACCAGTTTCTGGTTCTCTACTTTATGGAA  
ACAATATTATCTCTGGTGCTATTATTCCTACTTCTGCAGCTATCGGTTTGCATTTTTACCC  
GATATGGGAAGCGGCATCTGTTGATGAGTGGTTATACAATGGCGGTCTTATGAGCTAA

TTGTTCTACACTTCTTACTTGGTGTAGCTTGTACATGGGTCGTGAGTGGGAACTTAGTT  
TCCGCCTGGGTATGCGTCCTTGGATTGCTGTTGCATATTCAGCTCCTGTTGCAGCTGCTA  
CTGCAGTTTTCTTGATCTACCTATTGGTCAAGGAAGTTTCTCTGATGGTATGCCTTTAG  
GAATATCTGGTACTTTCAACTTCATGATTGTATTCCAGGCGGAACACAACATCCTTATGC  
ATCCATTTACATGTTGGGCGTAGCTGGTGTATTGGGCGGCTCCCTATTAGTGCTATGC  
ATGGTTCTTGGTAACTCTAGTTTGTATCAGGGAAACCACTGAAAACGAATCTGCTAAT  
GCAGGTTACAGATTCGGTCAAGAGGAAGAACTTATAATATCGTAGCTGCTCATGGTTA  
TTTTGGCCGATTGATCTTCCAATATGCTAGTTTCAACAATTCTCGTTCCTTACATTTCTTC  
TTGGCTGCTTGGCCTGTAATAGGTATCTGGTTCACCGCTTTAGGTATTAGTACTATGGCT  
TTCAACCTAAATGGTTTCAATTTCAACCAATCTGTAGTTGACAGTCAGGGTCGTGTTAT  
CAACACTTGGGCTGATATCATCAATCGTGCTAACCTTGGTATGGAAGTAATGCATGAAC  
GTAATGCTCACAACCTCCCTCTAGACCTAGCTGCTGTGCGAAGTTCCATCTACAAATGGA  
ATGGGTTTGCCTTGGTATCGTGTTCACTGTCGTATTGAATGATCCCGGTCGATTGCTT  
TCTGTCCATATAATGCATACAGCTCTAGTTTCTGGTGGGCGGTTTCGATGGCTCTATAC  
GAATTAGCGGTTTTTGACCCCTCTGACCCCTGTTCTTGATCCAATGTGGAGACAAGGTAT  
GTTTCGTTATACCCTTCATGACTCGTTTAGGAATAACCAATTCGTGGGGTGGTTGGAGTAT  
TTCA---GGAGGAACTATAACGAATCCGGGTATTTGGAGTTATGAAGGTGTCGCAGGGGC  
ACATATTGTGTTTTCTGGCTTGTGCTTCTTGGCAGCTATCTGGCATTGGGTGTATTGGGA  
TCTAGAAATATTCTGTGATGAGCGTACGGGAAAACCTTCTTTGGATTGCCCCAAGATCT  
TTGGAATTCATTTATTTCTCTCAGGGGTGGCTTGGCTTTGGCGCATTTCATGTAA  
CAGGTTTGTATGGTCCTGGAATATGGGTGTCCGATCCTTATGGACTAACTGGAAAAGTA  
CAATCTGTAAATCCAGCGTGGGGCGCGGAAGGTTTTGATCCTTTTGTCCGGGAGGAAT  
AGCCTCTCATCATATTGCAGCGGGTACATTGGGCATATTAGCGGGTCTATTCCATCTTAG  
TGCCGTCGCCTCAACGTCTATACAAAGGATTACGTATGGGAAATATTGAAACTGTAC  
TTTCTAGTAGTATCGCTGCTGTTTTTTTTGCAGCTTTCGTTGTTGCTGGAACATGTGGT  
ATGGTTCAGCAACTACCCCAATCGAATTATTTGGTCCCACTCGTTATCAGTGGGATCAG  
GGATACTTTCAGCAAGAAATATATCGAAGAGTTAGCGCCGGACTAGCCGAAAATCTGA  
GTTTATCGGAAGCTTGGTCTAAAATCCCGAAAAATTAGCTTTTTATGATTACATTGGTA  
ATAATCCGGCAAAAGGGGGATTATTAGAGCAGGCTCAATGGACAACGGGGATGGGAT  
AGCTGTTGGATGGTTAGGACACCCCGTCTTTAGAGATAAAGAAGGGCGCGAGCTTTTT  
GTACGTCGTATGCCTACTTTTTTTGAAACATTTCCGGTAGTTTTAGTAGATGGAGACGG  
AATTGTGAGAGCCGATGTTCTTTTAGAAGGGCAGAATCAAAGTATAGTGTGAACAA  
GTAGGTGTAACCTGTCGAGTTCTATGGTGGCGAACTCAATGGAGTTAGTTATGGTGATCC  
TGCTACTGTAAAAAATACGCTAGACGTGCCCAATTAGGTGAAATTTTTGAATTAGATC  
GGGCTACTTTGAAATCCGATGGTGTTTTTTCGTAGCAGTCCAAGGGGTTGGTTCACTTTT  
GGGCATGCTACGTTTGCTTTGCTCTTTTTTTGGACACATTTGGCATGGTGCTAGAAC  
CTTGTTCAAGAGATGTTTTTGTGGTATTGATCCAGATTTGGATGCTCAAGTGAATTTGG  
AGCATTTCAAAAACCTTGGGGATCCAATAACAAGGAGACAAGTAGTCATGAAAACCTTA  
TATCCCTGAGGAGGTTCTACCCCGTGGAACGCTCTTTAATGGAACCTTAGCTTTAGC  
TGGTCGTGACCAAGAAACCACTGGTTTCGCTTGGTGGGCGGGGAATGCCAGACTTATC  
AATTTGTCCGGTAAACTACTTGGAGCTCACGTAGCCCATGCCGGATTAATCGTATTCTG  
GGCCGGAGCAATGAACCTATTTGAAGTGGCTCATTTTCGTACCAGAGAAACCCATGTATG  
AACAAGGATTGATTTTACTTCCACACCTAGCTACTCTAGGTTGGGGGGTAGGTCCGGGG  
GGGGAAGTTATAGACACCTTTCCATACTTTGTATCTGGAGTACTCCACTTAATTTCTCT



GCAGTCTTAGGCTTTGGCGGTATTTATCATGCGCTTCTTGGACCTGAGACTCTTGAAGA  
ATCTTTTCCATTTTTCGGTTATGTATGGAAAGATAGAAATAAAATGACTACAATTTTGGG  
TATTCACTTAATTTTGTAGGTATAGGTGCTTTTCTTCTAGTACTCAAGGCTCTTTATTTT  
GGGGGCGTATATGATACCTGGGCCCTGGGGGGGAGATGTAAGAAAAATAACCAACT  
TAACACTTAGCCCAAGTGTTATATTTGGTTATTTACTAAAATCTCCTTTTGGGGGAGAAG  
GATGGATTGTTAGTGTGGACGATTTAGAAGATATAATTGGAGGACATGTATGGTTAGGTT  
CCATTTGTATACTTGGTGGAAATTTGGCATATCTTAACCAAACCCTTTGCATGGGCTCGCC  
GTGCATTTGTATGGTCTGGAGAGGCTTACTTGTCTTATAGCTTAGGTGCTTTATCTGTTT  
TTGGTTTCATCGCTTGTGTTTCGTATGGTTCAATAATACCGCTTATCCTAGTGAGTTTAA  
TGGACCCACCGGGCCAGAAGCTTCTCAAGCTCAAGCATTACCTTTCTAGTTAGAGAC  
CAACGTCTTGGAGCTAACGTGGGATCCGCCCAAGGACCTACTGGTTTAGGTAAATATCT  
AATGCGTTCCTCCGACCGGGGAGGTTATTTTGGAGGAGAACTATGCGTTTTTGGGATC  
TTCGTGCTCCCTGGTTAGAACCCCTAAGGGGTCCTAATGGTTTGGACTTGAGTAGGCT  
GAAAAAAGACATAACAACCTTGGCAAGAACGACGTTCCGCAGAATATATGACTCATGCT  
CCTTTAGGTTCTTTAAATTCAGTGGGTGGCGTAGCTACCGAGATCAATGCAGTCAACTA  
TGTCTCTCTAGAAAGCTGGTTAGCGACCTCTCATTTTGTCTAGGATTCTTCCTATTTGT  
GGGGCATTGTGGCATGCGGGAAGGGCCCGTGCAGCTGCAGCAGGGTTTGA AAAAAGG  
AATCGATCGTGATTTGGAACCTGTTCTTTCCATGACCCCCCTTAGCATGACTATAGCCCT  
TGGTAGATTTACCAAAGAAGAA---GATTTATTTGATATTATGGATGATTGGTTACGGAGG  
GACCGTTTCGTTTTTGTAGGCTGGTCTGGCCTATTGCTCTTTCCCTGTGCTTATTTTCGCT  
TTAGGAGGTTGGTTTACAGGTACAACCTTTTGTAACTTCATGGTATACCCATGGATTGGCC  
AGTTCTATTTGGAAGGTTGCAATTTCTTGACCGCTGCAGTTTCCACTCCTGCGAATAG  
TTAGCACATTCCTTGTGCTACTATGGGGCCCTGAAGCACAAGGGGATTTTACTCGTT  
GGTGTCAATTAGGCGGTCTGTGGACTTTTGTGCTCTCCATGGTGTTTTTCGGACTAATA  
GGTTTTATGTTACGTCAATTCGAACTTGCTCGATCTGTGCAATTGCGACCTTATAATGCA  
ATCGCATTCTCTGCTCCAATTGCTGTTTTTGTCTGTATTCTGATTTATCCACTGGGGC  
AATCTGGTTGGTTCTTTGCGCCAGTTTTGGCGTAGCAGCTATATTTGATTATCCTCT  
TCTTCCAAGGGTTTCATAATTGGACGTTGAACCCATTTTCATATGATGGGAGTTGCCGGA  
GTATTAGGCGCTGCTCTGCTATGCGCTATTCATGGTGCTACCGTAGAAAATACTTTATTC  
GAAGATGGTGACGGTGCAAATACATTCCGTGCTTTTAAACCCAACCTCAAGCCGAAGAGA  
CTTATTC AATGGTCACTGCTAACCGCTTTTGGTCCCAAATCTTTGGGGTTGCTTTTTCCA  
ATAAACGTTGGTTACATTTCTTTATGCTATTTGTACCAGTAACCGGTTTATGGATGAGTG  
CTCTTGGGGTAGTCGGCCCTGGCTCTGAACCTCCGTGCCTATGACTTCGTTTCCCAAGAA  
ATCCGTGCAGCGGAAGATCCTGAATTTGAGACTTTCTACACCAAAAATATCCTCTTAAA  
CGAAGGTATTTCGTGCTTGGATGGCGGCTCAGGATCAGCCTCATGAAAACCTTATATTCC  
CTGAGGAGGTTCTACCCCGTGGAACGCTCTTATGTCTGGAAGCACGGGAGAACGTTT  
TTTTGCTGATATTATTACCAGTATTTCGATACTGGGTCAATTCATAGCATTACTATACCTCCC  
TATTCATTGCGGGTTGGTTATTCGTCAGTACGGGTTTAGCTTACGACGTGTTTGGAAAGTC  
CTCGGCCAAACGAGTATTTACAGAGAGCCGACAAGGGATTCCATTGATAACCGACCG  
TTTTGATTCTTTGGAACAACCTCGATAAATTTAGTAGATCCTTTATGACCATAGATCGAAC  
CTATCCAATTTTACAGTACGATGGTTGGCTGTTACGGATTAGCTGTACCTACCGTTTT  
TTTCTTGGGGTCAATATCAGCAATGCAGTTCATCCAACGAATGGCTACACAAACCGTTG  
AGGGTAGTTCTAGA---TCTGGGCCAAGACGAACTACTGTAGGGAATTTATTGAAACCAT  
TGAATTCGGAATATGGTAAAGTAGCACCGGGCTGGGGGACTACACCACTTATGGGGGT

CGCAATGGCTCTATTTGCGATATTCCTATCTATTATTTTGGAAATTTATAATTCTTCCGTTT  
TACTGGATGGAATTTCAATGAGTATGCTTACTCTCAAACCTATTTCGTTTATACAGTAGTGA  
TATTCCTTATTTCTCTCTTTCATCTTCCGATTTTTATCTAATGATCCAGGGCGTAATCCTGG  
ACGTGAGGAAATGGCCGATACTACTGGAAGGATTCCTCTTTGGCTGATAGGTACTGTAA  
CCGGTATTCTTGTGATCGGTTTAATAGGTATTTCTTTTACGGTTCATATCCGGGTTGGG  
TTCATCTCTGATGCTTAATATCTTTAGTTTAAATCTGTATCTGTCTTAATTCTGTCTTTTAT--  
AGTAGTTTTTTCTTCGCCAAATTGCCGAAGCTTATGCCTTTTTAAATCCAATCGTAGAT  
GTTATGCCTGTACATACCTGTACTTTTTTTTCTCTTAGCCTTTGTTTGGCAAGCTGCTGTA  
AGTTTTCGAATGACACAATCAAACCCGAATGAACAAAATGTTGAATTGAATCGTACCA  
GTCTATACTGGGGTTTATTACTCATTTTTGTACTTGCTGTTTTATTTTCCAATTATTTCTTC  
AATATGGAAGTCAATATTCTCGCATTTATTGCTACTGCCTGTTCAATTCTAGTTCCTACTG  
CTTTTTACTTATCATCTATGTAAAAACAGTCAGTCAAATGATATGGAAACAGCAACC  
CTAGTCGCCATCTCCATATCTGGTTTACTTGTAAGCTTTACTGGGTACGCCTTATATACCG  
CTTTTGGGCAACCCTCTCAACAATAAGAGATCCATTGGAAGAACACGGGGACATGGA  
AGCATTGGTTTATACATTCCTTTTAGTCTCGACTTTAGGGATAATTTTTTTCGCTATCTTT  
TTTCGAGAACCCTAAGGTTCCGACTAAAAAATGAAAATGACTATTGCTTTCCAATT  
AGCTGTTTTTGCATTAATTGCGACTTCATCAATCTTACTGATTAGTGTACCCGTTGTATTT  
GCTTCTTCTGATGGTTGGTCAAGTAACAAAATGTTGTATTTCCGGTACATCATTATGG  
ATTGGATTAGTCTTTCTGGTAGCTATCCTTAATTCTCTTATCTCTATGAGTTGTAGGGAGG  
GACTTATGTCACCACAAACAGAGACTAAAGCAAGTGTGGATTTAAAGCTGGTGTAA  
AGATTACAAATTGACTTATTATACTCCTGAGTACGAAACCAAAGATACTGATATCTTGGC  
AGCATTCCGAGTAACTCCTCAACCCGGAGTTCCGCCTGAGGAAGCAGGGGCAGCGGT  
AGCTGCCGAATCTTCTACTGGTACATGGACAACCTGTGTGGACTGATGGACTTACCAGTC  
TTGATCGTTACAAAGGACGATGCTACCACATCGAAACCGTTGTCGGGGAGGAAAATCA  
ATATATTGCTTATGTAGCTTATCCTTTAGACCTTTTTGAAGAAGGTTCTGTTACTAACATG  
TTTACTTCCATTGTGGGTAATGTATTTGGTTTCAAAGCCCTACGAGCTCTACGCTGGAG  
GATCTGCGAATTCCTTCTTATTCCAAAACCTTCCAAGGCCCGCCTCATGGCATCCA  
AGTTGAAAGAGATAAGTTGAACAAGTATGGTCGTCTCTATTGGGATGACTATTA AAC  
CAAATTTGGGATTATCCGCAAAGAACTACGGTAGAGCGGTTTATGAATGTCTACGCGGT  
GGACTTGATTTTACCAAGGATGATGAAAACGTGAACTCACAACCATTTATGCGTTGGA  
GAGACCGTTTCTTATTTTGTGCCGAAGCGCTTTATAAAGCGCAGTCCGAAACGGGTGA  
AATCAAAGGACATTACTTGAATGCTACTGCGGGTACATGTGAAGAAATGATCAAAGG  
GCCGATTTGCCAGAGAATTGGGAGTTCCCTATCGTAATGCACGACTACTTAACTGGGGG  
ATTCCTGCAAATACTAGCTTGGCTCATTATTGCCGCGATAACGGCCTACTTCTTACAT  
CCATCGCGCAATGCATGCAGTTATTGATAGACAGAAAATCATGGTATGCATTTTTCGTGT  
ACTAGCTAAAGCATTACGTATGTCTGGTGGAGATCATATTCACGGAGGTACAGTAGTGG  
GTAAACTGGAAGGGGAACGTGAGATGACTTTGGGTTTTGTTGATTTATTACGTGATGAT  
TTTATTGAAAAAGACCGAAGTCGCGGTATCTTTTTTACTCAAGATTGGGTCTCTATGCC  
AGGTGTTATACCCGTGGCTTCAGGGGGTATTCATGTTTGGCATATGCCTGCCCTGACCG  
AAATCTTTGGGGATGATTCCGTACTACAGTTTGGCGGAGGAACTTTAGGACACCCTTGG  
GGAAATGCACCCGGTGCAGTAGCTAATCGGGTGGCTTTAGAAGCGTGTGTACAAGCTC  
GTAATGAGGGACGTGATCTTGTCTGTGAAGGTAATGAAATTATCCGTGAAGCTAGCAA  
TGGAGCCCTGAACTAGCTGCCGCTTGTGAAGTATGGAAGGAGATCAAATTCGAATTCG  
AACCAGTGGATAAGCTGGATAAAACGGCGATACATTTATACAAAACCTTCTACCCCGAGC

GCACGCAATGGAGCCGTAGACAGTCAAGTGAAATCCAATCCACGAAATAATTTGATCTA  
TGGACAGCATCGTTGTGGTAAAGGTCGTAATGCCAGAGGAATCATTACTGCAAGGCAT  
AGAGGGGGAGGTCATAAGCGCCTATACCGTAAAATCGATTTTCGACGGAATGAAAAAG  
ACATATCTGGTAGAATCGTAACCATAGAATACGACCCTAATCGAAATGCATACATTTGTC  
TCATACACTATGGGGATGGTGAGAAGAGATATATTTTACATCCCAGAGGGGCTATAATTG  
GAGATAACCATTGTTTCTGGTACAGAAGTTCCTATATCAATGGGAAATGCCCTACCTTTGA  
CCGATATGCCCTTAGGCACGGCCATACATAACATAGAAATCACACTTGGAAAGGGTGGGA  
CAATTAGCTAGAGCAGCAGGTGCTGTAGCGAAACTGATTGCAAAAAGAGGGTAAATCGG  
CCACATTAAGATTACCATCTGGGGAGGTCCGTTTGATATCCAAAACTGCTTAGCAACA  
GTCGGACAAGTGGGTAATGTTGGGGTGAACCAAAAAGTTTGGGTAGAGCCGGATCT  
AAGTGTGGCTAGGTAAGCGTCCTGTAGTAAGAGGAGTAGTTATGAACCCTGTAGACC  
ATCCCATGGGGGCGGTGAAGGGAGAGCCCAATTGGTAGAAAAAAACCCACAACCC  
CTTGGGGTTATCCTGCGCTTGGGAAGAAGAAGTAGGAAAAGGAAAAAATATAGTGATAG  
TTTGATTCTTCGTCGCCGTA---ATGATTCAACCTCAGACCCTTTTGAATGTAGCGGAT  
AACAGCGGAGCTCGAGAATTGATGTGTATTTCGAATCATAGGAGCTGGT---AATCACCGA  
TATGCTCATATTGGTGACGTTATTGTTGCTGTAATCAAAGAAGCAGTGCCAAATATGCCT  
CTAGAAAGATCAGAAGTCATTAGAGCTGTAATTGTACGTACATGTAAAGAACTCAAAC  
GTGACAACGGTATGATAATACGATATGATGACAATGCAGCGGTCGTCATTGATCAAGAA  
GGAAATCCAAAAGGAACTCGAGTTTTTGGTGCGATCGCTCGGGAATTGAGACAGTTGA  
ATTTTACTAAAATAGTTTCATTAGCTCCCGAGGTATTAATGCTTAGTCCCAAAGAACCA  
GATTTTCGTAAACAACATAGAGGAAGAATGAAGGGAATATCTTGTCGAGGCAATCATATT  
TGTTTCGGCGGATACGCTCTTCAGGCGCTTGAACCCGCTTGGATCACAGCTAGACAGAT  
AGAAGCGGGGCGGAGAGCAATGACACGATATGCGCGTCGTGGTGGAAAAATATGGGT  
ACGTATATTTCCCGACAAACCTGTTACAGTAAGACCTACGGAAACACGTATGGGTTTCGG  
GAAAGGGATCCCCGAATATTGGGTATCTGTTGTTAAACCGGGTCAATACTTTATGAA  
ATGGGCGGAGTATCAGAACTATAGCCAGAGCAGCTATTTCAATAGCTGCGTGCAAAAT  
GCCTATACGAACTCAATTTGTTATTTACGAATGACCAGAGTTAGACGAGGATATACAG  
CTCGGAAACGTCAACAAAAATTCGTTTATTTGCATCAACTTTTATTGGGGCTCATTCA  
AGACTTACTCGAACGACTACTCAACAGAAAATGAGAGCTTTGGTTTCCTCTCATCGAG  
ATAGAGGCAGGCAAAAGAGGGATTTTCGTAGTTTGTGGATCACTCGAATAAATGCAGT  
AATTCGTGAGAAT-----GTATTCATAATTATAGTAGATTAATACCAAATCTGTACAAGAA  
GCAATTGCTTCTTAATCGTAAAATACTTGCGCAAATATCTATATCAAATAAGAATTGTCTT  
TACATGATTTCCAATAAGATTATCAA-----  
-----ATGTCTGTTTTAAAAGCGCAAAGAGTAATTGATCAGATTCGCGGACGTTCCCTATGA  
GGAAACACTTATGATATTGGAACCTATGCCTTATCGAGCATCTTATCCAATTTTACAATT  
GGTTTATTCTGCAGCAGCAAACGCTAATCATAATATGGGTTTGAACGAAGCTGATTCAT  
TCATTAGTAAAGCCGAAGTCAATAGGAGTGCTATTGTGAAAAAGTTAAGACCTCGGGC  
TCGGGGACGTAGTTATCCGATAAAAAAACCACTTGTCATATAACAATTGTATTAAG---  
AAATCTAAATCA-----ATGGATGGAATCAAATATGCAGTATTTACAGAAAAA  
AGTATTCGGTTATTGGGGAACAATCAA---TATACTTCTAATGTGCAATCAGGATCAACTA  
GGACAGAAATAAAGCATTGGGTCGAACTCTTCTTTGGTGTCAAGGTAATAGCTATGAAT  
AGTCATCGACTCCCGGAAAGGGTAGAAGAATGGGACCTATTATGGGACATACAATGC  
ATTACAGACGTATGATCATTACGTTCAACCGGGTTATTCTATTCCACCTCTTATAGAGA  
AAAGAACTATGGCAGTTCCAAAAAACGTATTTCTATGTCAAAAAACATATTCGTAGG

AATATTTGGAAGAAAAAAGGATATTTAACTGCAGTAAAATCTTTTTCTTTAGCGAAATC  
GGTTTCTACCGGACATTCAAAAAGTTTTTTT-----CAAAAAATAATATGGCCAAGGGTA  
AAGATGTCAGAGTCAGAGTTATTTTGGAAATGTACCAGTTGTGTCCGAAAT-----GAT-----  
AAAGAATCGCCGGGTATTTCTAGATATATTA CTCAAAGAATCGACACAATACATCCAG  
TCGATTAGAATTGAGAAAATTTTGTCACTATTGT CACAAGCATACGATTCATGGGGAAA  
TAAAGAAAATGAAAATAAGGACTTCTGTTCGTAAAATTTGTGAAAAATGTCGCCTGATC  
CGTAGGCGCGGACGAATTATAGTGATTTGTTCCAATCCGAGACATAAACAGAGACAGG  
GGATGGTTCGAGAGGAAGTAGTAGAATCCACTCGAACACTACGGTGGAATGTGTTGA  
ATCAAGAGTAGACAGTAAGCGTCTTTATTATGGTCGTTTCGTTCTGTCCCCGCTTATGAA  
AGGTCAAGCCGATACCATAGGTATTGCCATGCGAAGGGCTTTACTTGGAGAAATAGAA  
GGAACATGTATCACACGTGCAAATCTGAG-----AAAGTAGCACATGAATATTCTACGAT  
AGTAGGTATTGAAGAATCAGTACATGAAATTTACTAAATTTGAAAGAAATTATATTGAG  
AAGTAATCTGTATGGAGTTATAGACGCATCCATCTGCGTCAGGGGGCCTAGATACGTAA  
CCGCTCAAGATATCATCTCACCACCTTACGTGGAAATAGTTGACACAACACAACATATA  
GCTAACCTGACGGAACCAATTGATTTGTGTATTGAATTACAAATCAAGAGAGATCGCGG  
ATATCGTATGAAATCCGCAAATAACTCTCAAGATGGAAGTTAT-----CCTATAGATGCTGT  
ATCCATGCCTGTTGAAATGCGAATCATAGTATTCATTCTTATGGGAATGGGAATGAAAA  
ACAAGAGATACTTTTTCTAGAAATATGGACGAATGGAAGTTAACTCCTAAAGAAGCA  
CTTTATGAAGCTTCTCGTAATTTGATTGATTTATTTATTCCTTTTTCTACATGCGGAGGAAG  
AG-----GACATTAATTTGAAAGAAAATAAA---AACAGGTTTCCTCTACCCCTTTTACCTT  
TCAAGATAGATTA ACT--AATCTAAAGAAAAACAAAAA---GGAATTCATTGAAATGTA  
TTTTTATTGACCAATCAGAATTGCCTTCCAGGACCTATAACTGTCTCAAAGGGTCCAATA  
TACATACATTATCGGACCTTTTGAATAACAGTCAAGAAGATCTTATGAGAATTGAATTTT  
TTCGAATAGAAGATGTA AACAGATATTGGACACTCTACAGAAGTAT-----TTCGCAATT  
GATTTATCTAAGAATAAGATGCTCCGGAAT---GGAAATGAGGGAATGTCCACAATACCTG  
GATTTAGTCAGATTC AATTTGAGGGATTTTGTAGATTCATTAATCAGGGCTTGACGGAA  
GAATTTCATAAATTTCCAAAAATTGAAGAT-----CAAGAAATTGAATTTAAATTTTGTG  
GAAACATATAAATTTGGTAGAACCTTGATAAAAGAAAGAGATGCTGTGTATGAATCACT  
CACATATTCTTCTGAATTATATGTACTCGCGGGACTAATTTGGAAAACCGGTAGAGATAT  
GCAAGAACAAACCGTTTTTATTGGAAACATTCCTCTAATGAATCCCTAGGAACCTTTAT  
AGTAAATGGAATATACAGAATTGTGATCAATCAAATATTGCAAAGTCCCGGTATTTACTA  
CCGTT CAGAATTGGACAATAACGGAATTTCTGTCTATAACCAGCACTATAATATCAGATTG  
GGGGGAAGATCGGAATTAGAAATTGATAGAAAAGCAAGGATATGGGCCCGCGTGAGT  
AGGAAACAAAAAATATCTATTCTAGTTCTATCATCAGCTATGGGTTCGAATCTAAGAAA  
AATTCTAGATAATGTTTGTATCCTGAAATTTTCTTGTCTTTTTCCGAATGATAAGGAGAA  
AAAAAGATTGGGTCAAAGAAAATGCTATTTTGGAGTTTTATCAACAATTTGCTTGTG  
TAGGTGGGGATCCGGTATTTTCTGAGTCTTTATGTAAGGAATTACAAAAGAAATTTTTC  
AACAAAGATGTGAATTAGGAAGGATTGGTCGACGAAATATGAACCGGAGACTGAATCT  
TGATATACCTCAGAACAATACATTTTTTGTACCACGAGATGTATTGGCTGCTGCGGATCA  
TTTGATCGGAATGAAATTTGGAATGGGTACACTTGACGAT-----ATGAATCACTTGAAAA  
ATAACGTATTCGTTCTGTAGCAGACCTGTTACAGGATCAATTCGGATTGGCTCTTGTTC  
GTTTAGAAAATGTGGTTCGAGGAACTATATGTGGAGCAATCAGG---CATAAATTAATA---  
CCGACTCCTCAAATTTGGTAACTTCAACTTCA-----TTAACAACCACTTATGAATC  
GTTTTTTGGCCTACACCCGTTATCTCAAGTTTTGGATCGAACTAATCCATTGACACAAAT

CGTTCATGGGCGAAAATTGAGTTATTTGGGTCTGGAGGATTGACGGGGCGAACTGCT  
AGTTTTCGGATACGAGATATCCATCCTAGCCACTATGGACGTATTTGTCCAATTGACACG  
TCCGAAGGAATCAATGTTGGACTTATTGGATCCTTAGCTATTCATGTGAGGATTGGTCAT  
TGGGGA---TCTATAGAGAGTCCGTTTTAT-----GAAATATCTCAGAGATCAAAAGAG---  
--GCACAGGTGGTTTATTTATCACC AAATAGAGATGAATATTATATGGTAGCGGCAGGAAA  
TTCTTTGGCCCTGAATTGGGGTATTCAGGAAGAACAGGTTGTTCCAGCTCGATATCGTC  
AAGAATTCCTTACTATTGCATGGGAACAGATTCATCTTAGAAGCTTTTTTCCCTTCCAAT  
ATTTTTCTATTGGAGCTTCCCTCATTCTTTTATCGAGCATAATGATGCGAATCGGGCTTT  
AATGAGTTCTAATATGCAGCGCCAAGCAGTTCCGCTTTCTCGGTCCGAGAAGTGCATTG  
TTGGA ACTGGGCTGGAACGCCAAACGGCTCTAGATTCGGGGGTTTCAGCTATAGCCGA  
ACACGAGGGAAAGATCATTTATACTGATCCTCACAAAATCATTTTATCAAGTAATGGGG  
ACACTATAAGTATTCCATTAGTGATGTATCAACGTTCCAACAAAAATACTTGTATGCATC  
AAAAACCTAAGGTTCCGGCGGGGTAAATACATTA AAAAGGGACAAATTTTAGCGGACGG  
TGCGGCTACAGTTGGTGGGGA ACTCGCTTTAGGAAAAAACATATTAGTAGCTTATATGC  
CATGGGAAGGTTACAATTCTGAAGACGCAGTATTAATTAGCGAACGTCTGGTATATGAA  
GATATTTATACTTCTTTTACATCCGGAATATGAAATTCAGACTCATGTGACAAGCCAG  
GGC---CCTGAAAGAATTACTAAGGAAATACCGCATCTAGAGACTCATTTACTCCGAAAT  
TTAGACAGAAATGGAATCGTTATGCTGGGATCTTGGGTAGAAACAGGTGATATTTTAGT  
AGGTAAATTAACGCCTCAGACAGCGAACGAA---TCGTCTGATTCCCCGGAGGATAGATT  
ATTACGAGTCATACTTGGCATT CAGGTATCCACTGCAAAAGAACTTCTCTAAA ACTAC  
CTATAGGTGGAAGGGGTCGCGTTATTGATGTGAGATGGATCCAGAAAAAGGGG---GGTT  
CCAGTTATAATCCAGAAATGATTCGTGTATATATTTACAGAAACGTGAAATCAAAGTG  
GGTGATAAAGTAGCTGGAAGACATGGGAATAAAGGTATCATTTCAAAAATTTTGCCTAG  
ACAAGATATGCCCTATTTGCAAGATGGGACACCCGTTGATATGGTCTTCAACCCATTAG  
GAGTACCTTCACGAATGAATGTGGGACAGATATTTGAATGTTTCGCTCGGATTAGCGGGA  
GATCTGCTAAAGACACTTTTATGGAAAGCACCTTTTGATGAGAGATATGAGCAAGAGG  
CTTCGAGAAA ACTAGTGTTTTCTGAATTATATTCAGCCTGTAAGCAAAGAAAAAATCCA  
TGGGTATTTGAACCCGAGTATCCAGGAAAAAGCAGAATATTTGATGGAAGAACAGGGG  
ATCCTTTTGAACAACCTGTTCTAATAGGAAAGTCCTATATCCTAAAATTAATTCATCAAG  
TTGATGATAAATCCATGGACGTTCTAGTGGGCATTACGCACTTGTTACACAACAACCC  
CTTAGAGGAAGGGCCAAGCAAGGGGGACAACGAGTAGGAGAAATGGAAGTTTGGGC  
TCTAGAGGGATTTGGTGTGCTCATATTTTACAAGAGATGCTTACTTATAAATCTGATCAT  
ATTAGAGCTCGTCAAGAAGTACTTGGTGCTACAATCGTTGGAGGAACAGTACCTAACC  
CCGAGGATGCTCCAGAATCTTTTCGATTGCTCGTTTCGAGAACTACGATCTTTGGCTCTA  
GAACTGAATCATTTCCTTGTATCTGAGAAGAACTTCCAGATTAATAGGAAGGAAGCT---  
-----ATGATCGACCGGTATAAACATCAACA ACTTCGAATTGGACCAGTTTCTCCT  
CAACAAATAAGGGCTTGGGCCAACAAAATCCTACCTAATGGAGAGATAGTTGGAGAGG  
TGACAAAACCTATACTTTTTCATTATAAAACCAATAAACCGGAAAAAGATGGATTGTTT  
TGTGAAAGAATCTTTGGACCATAAAAAGTAGAATTTGTGCTTGTGGAAATTATCGAGC  
GATCAGAGCTGAAAAAGAAGACCCGAAATTTTGTGAACAATGCGGGGTGGAATTTGTT  
GATTCTAGGATACGAAGATATCAAATGGGATACATCAA ACTCGCATGTCCAGTGACCCA  
TGTGTGGTATTTGAAACGTCTTCTAGTTATATCGCGAATCTTTTAGATAAACCCCTTAA  
AGAATTAGAAGGCCTGGTATACTGC-----GATTTTCTTTTGTAGGCC---ATATCTAAA  
AAACCTACTTTCTTACGATTACGAGGTTCAATCGAATATGAAATCCAATCCCGGAAATAC

AGCATCCCACCTTTTTTTTACTACTCAAGGCTTCGAGACATTTTCGAAATCGAGAAATCTC  
TACAGGAGCAGGTGCTATCAGAGAACAATTATCCGATTCAGATTTGCGAATTATTATAGA  
TAATTCATTGGTAGAATGGAAGGAATTAGGAGATGAG---GGGTCCACTGGAAATGAATG  
GGAAGATAGAAAAATTAGAAGAAGAAAGGATTTTTTGGTTAGACGCATGGAATTAGCT  
AAACATTTTATTTCGAACAAATGTAGAACCAGAATGGATGGTTTTGTGCTTATTACCAGT  
TCTTCCTCCCGAGTTGAGACCAATCATTTCAGACAGATGGGGGTAAACTAATGAGTTCG  
GATATTAATGAACTCTATAGAAGAGTTATCTATCGGAACAATACTCTTACCGATCTATTAG  
CAACAAGTAGATCTACGCCAGGGGAATTAGTAATGTGTCAGGAGAAATTGGTACAAGA  
AGCCGTGGATACACTTCTTGATAATGGGATCCGGGGGCAACCAATGAGGGATGGTCATA  
ATAAAGTTTACAAGTCATTTTCAGATGTAATTGAAGGCAAAGAAGGAAGATTTTCGTGA  
GACTCTGCTTGGTAAACGGGTCGATTATTCGGGACGTTCCGTCATTGTTGTGGGTCTT  
CTCTTTCATTACATCAATGTGGATTACCTCGAGAAATAGCAATAGAGCTTTTCCAAACAT  
TTTTAATTCGTGGTCTAATCAGACAACATGTTGCTTCTAACATAGGGATTGCTAAAAGTA  
AAATTCGGGAAAAAGAACCGATTGTATGGGAAATACTTCAAGAAGTTATGCGGGGGCA  
TCCTGTATTGTTGAATAGAGCGCCACCTTGCATAGATTAGGCATACAGGCCTTCCAAC  
CCATTTTAGTGGAGGGGGCGCGCTATTTGTTTACACCCATTAGTTTGTAAAGGGTTTCAATG  
CAGACTTTGATGGAGATCAAATGGCTGTTCATGTACCTTTATCTTTGGAAGCTCAAGCG  
GAGGCTCGTTTACTTATGTTTTCTCATATAAATCTCTTGTCTCCAGCTATTGGGGATCCCA  
TTCCGTACCAACTCAAGATATGCTTATCGGACTCTATGTATTAACGATCAGGAATCGTA  
GAGGTATTTGTGCAAATAGGCATAATACATATAATCGCGGAAACTAT-----CAAATAAT  
ACAGTTGACAATAATGACTATAAGTATACGAAAGAGAAAGAACTGTATTTTTGTAGTTC  
CTATGATGTACTTGGAGCTTATCGGCAGAAACGAATCAGTTTAGATAGTCCTTTGTGGC  
TCCGATGGAGACTAGATCAACGT--GTCATTGGCTCA-----AGAGAAGTTCCCATCGAAC  
TTCAATATGAATCTTTGGGTACTTATCATGAGATTTATGAGCACTATCTAATAGTAGGAA  
GTGTCAAAAAAGAAATCCATTGTATATACATTTCGAACCACTCTTGGTCATATTTCTTTTT  
ATCGAGAAATAGAAGAAGCCATACAGGGGTTTTGTCCGGCCTATTCATACGCTATC-----  
-----ATGGCAGAACGGGCTGATCTGGTCTTTCACAATAAAGTGATAAA  
TGGAAC TGCTATGAAACGACTTATTAGCAGATTAATAGATCATTTCGGAATGGCATATAC  
ATCACACATCCTGGATCAAGTAAAGACTTTGGGTTTCCAGCAAGCCACTGCTACATCTA  
TTTCATTAGGAATTGATGATCTTTTAAACAATACCTTCTAAGGGATGGTTAGTCCAAGACA  
CTGAACAACAAAGTTTTATTTTTGAAAAACACCATCATTATGGAAATGTACATGCGGTA  
GAAAAATTACGTCAATCCATTGAGATATGGTATGCTACAAGTGAATATTTGAGACAAGA  
AATGAATCCTAATTTTCGGATGACTGATCCTTCTAATCCAGTCCATCTGATGTCTTTTC  
GGGGGCTAGAGGAAATGCATCTCAGATACACCAATTAGTAGGTATGAGAGGATTAATGT  
CGGATCCCCAAGGACAAATGATTGATTTACCCATTCAAAGCAATTTACGCGAAGGGCTT  
TCTTTGACAGAATATATAATTTCTGCTACGGAGCCCGCAAAGGAGTTGTAGATACTGC  
TGTACGAACATCAGATGCCGGATACCTCACGCGTAGACTTGTGTAAGTAGTTCAACACA  
TTATTGTACGTAGAACGGATTGTGGTACTATCCGAGGTATTTCCGTGAGTCTCGAAATG  
GGATGACGGAA-----AAAATTTTTGTCCAAACACTAATTGGTCGTGTATTAGCAGACAAT  
ATATATATGGGTCTACGATGCATTGCCGCTCGAAATCAAGATATTGGGATTGGACTTGT  
AATCGATTCATAACT-----TTTTCGGGCACAACCAATATATATTTCGAACCCCCTTT  
ACTTGCAAGAGTGCATCTTGGATCTGTCAATTATGTTATGGTCGGAGTCCCACTCACGG  
CGACCTGGTCGAATTGGGAGAAGCCGTAGGTATTATTGCGGGTCAATCAATTGGAGAA  
CCAGGGACTCAACTAACATTAAGAAGCTTTTCATACCGGTGGAGTATTCACAGGTGATAC

TGCCGAACATGTACGAGCTCCTTCTAATGGAAAAATAAAATTTAATGAGGATTTGGTTT  
ATCCCACACGTACCCGTCATGGGCATCCTGCTTTTCTATGTTCTATAGACTTGTATGTAA  
CTATTGAGACTCGGGATATTATCCATAATGTGAATATTCCACCAAAAAGTTTGATTTTAG  
TTCAAATGATCAATATGTAGAATCAGAACAAGTGATTGCTGAGATTCGTGCCGGAACG  
TCTACTTTT-----TTTAAAGAGAAGGTACGAAAACATATTTATTCTGAATCAGAGGGAGA  
A---ATGCACTGGAGTACCGATGTCCACCATGCATCTGAATATACACATGGTAATGTTTCAT  
CTATTACCAAAAACAAGTCATTTATGGGTATTAGCGGGAGGTCCGCGCAGA-----TCCAG  
TATAGTGTCTTTTTCACTCCACAAAGATCAAGATCAAATGAATGTTTCATTCTTTTTCTTT  
CGAAGAAAGA-----TATATCTTTGACCTCTCA-----ATGACTAAT--CATCGAGTAAGACAT  
AAATTGTTGGATACTTCTGGT-----GATAGGGAAATTCTTGACTATTCA---AGACCTG  
ATCGAATCATATCCAATGGTCATTGGAATTCATATATCCTTCT--ATTCTCCAAGAAAAT--  
---TCTGATTTCTTGGCGAAAAAACGAAGAAATAGATTCATTATCCCATTACAATATGATC  
AAGAACGAGATAAAGAATAATGCCCTGTTTTGGTATTTTCGATTGAAATACCCATAAAT-  
----GGTATTTTACGTAGAAATAGTATTCTTGCTTATTTTGATGATCCACGATACAGAAGAA  
AT-----GGAATTACTAAATAT---ACCATAGAGGTAGATTCAATCATAAAA-----AAAGAGGA  
TTTGATTGAGTATCGAGGA---ACAAAAGAATTTAGTCCGAAATAC---AAAGTAGATCGG  
TTTTTTTTTCAATTCTCGAAGAAGTGCATATTTTACCCGGATCTTCGTTTCATAATGGTCCGG  
AACAAATAGTATCATTGGAGTAGATACACAACCTCGCTTTAAATACAAGAAGCCGGGTAGG  
CGGATTAGTCCGAGTGGAGAGAAAAAAGAAAAGTATTGAACTGAAAATCTTTTCTGGA  
GATATTCATTTTCTTGAGAAATAGATAAGATATCCAGGCACAGCGGCATTTTGATACC  
ACCAGAGACGGAAAAAAA-----AATTCTAAGAAA---TCAAAA---AAATTGAAAATTG  
GATCTATGTCCAACGG-----ATTACACCCACCAAGAAAAAG-----TATTTTGTTTCGGTTC  
GGTCCGTAGTCACATATGAAATAGCTGATGGGATAAATTTAGCAACACTTTTCCCTCGG  
GATCTCTTGCAGGAAAAGGATAATGTCCAACCTTAGAGTTGTCAATTATATCCTTTATGGA  
AATGGCAAGTCAATTTCGAGGAATTTATCACACAAGT---CAATTAGTTCGGACTTGCTTA  
GTATTGAATTGGGACCAAGAAAAAATGGTTCTATAGAA-----GAGGTTTCATGCTTC  
CTTTGTTGAGGTAAGGACAAATGATCTGATTCGCGATTTTCATAAGAATTGAGTTAGTCA  
AGTCCACTATTTTCGTATACCGGAAAAAGATATGATAGGGCAAGTTCCGTATTGATTTCCG  
AT-----TTAGATCGCACCAATATCAATCCTTTTTATTCCAAGGCGAAGATTCAATCA-----  
-----CTTATCCAACATCAAGGAACCTATTGGTATT-----GGTACGTTGTTGAATCGAAATA  
AA-----AAGGAATGCCAATCTTTGATAATTTGTCATCATCCAATTGTTCTCGAATTGGT--  
---CCATTCAATGGCTCGAAATATAAC-----AATGTGACAAAAGAATCAGATCCCATAAT  
CCAAATT--GATTTGCTGGGTCCCCTTAGGGACTATTGTCCCT--AAAATAGCGAATTTTTT  
TTCATCT--TACTATTTAATAACT-----CATAATCATATCTTGTTAAAG---AAATATTTGCT  
ACTTGAC-----AATTTTAAACAGACTTTC-----CAAGTACTTAAATACTGTTTAAATAGA  
TGAAAATAGAAGG-----ATTTATAATCCCGATCCATGCGGTAACAAAATTTTGAATCCAC  
TCCATTTGAATTGGTGCTTTCTCCATCACGATTATTGTGAAGAGACATCTACAATAATTA  
GC---CTTGGACAATTTATTTGTGAAAATGTATGTCTATTCAAATACGAATCA-----CACGT  
AAAAAATCTGGTCAAATTTAATTGTTTCAT--GTTGACTCCTTAGTTATAAGATCAGCT  
AAACCTATTTGGCCACTCCAGGAGCAACTGTTTCATAGCCATTATGGAGAAATCCTTTA  
CGAAGGAGATACATTAGTTACATTTATATATGAAAATCGAGATCTGGTGACATAACGCA  
AGGTCTTCCAAAAGTGGAACAAATTTAGAAGTGCGTTCGATTGATTCAATATCGATGA  
ACCTAGAAAGGAGAGTTGAAGGTTGGAACGAACGTATACAAAGAATTCTTGGAATCCC  
CTGGGGATTCTTGATTGGAGCTGAGCTAACCATAGCCCAAAGTCGTATCTCTTTGGTTA

ATAAGATCCAAAAGGTTTATCGATCCCAGGGGGTACAGATCCATAATAGACATATAGAA  
ATTATTGTACGTCAAGTAACATCAAAAAGTGTGGTTTCAGAA-----GAAGGAATGTCT  
AATGTTTTTTTACCTGGAGAATTAATCGGCTTTTTGCGAGCGGAACGAGCAGGGCGTG  
CTTTGGACGAAGCGATCTGTTATCGGGCAATCTTATTGGGAATAACGAGGGCATCTCTA  
AATACTCAAAGTTTCATATCCGAAGCAAGTTTTCAAGAAACCGCTCGAGTTTTAGCAA  
AAGCTGCTCTACGAGGTCGTATTGATTGGTTGAAAGGCCTGAAAGAGAACGTTGTTCT  
GGGGGGGATTATACCTGTTGGTACCGGATTCCAAAAATTAGTACACCCTTCAAGG-----C  
AAGACAAGAACATTCAT-----TTGGAAATCAAAAAGAAAGAATCTATTTCGAGTTGGAAAT  
A-----AGAGATATTTGTTACCCATAGAGAATTATTTTGTCTTACGTCCAAAACCTATTT  
CCATGAGACATCAGAACAATCATTACTCGATTTAATGATTCC-----ATGACAA  
GAAGATATTGGAACATCAATTTGGAAGAGATGATGGAAGCAGGAGTTCATTTTGGTCAT  
GGTACTAAGAAATGGAATCCTAGAATGGCCCCTTACATCTCTGCAAAGCGTAAAGGTAT  
TCATATTACAAATCTCACTAGAACTGCTCGTTTTTTATCAGAAACCTGTGATTTAGTTTT  
TGATGCAGCAAGTAGGGGAAAAAACTTCTTAATCGTTGGTACAAAAATAAAGCAGCG  
GATTCAGTAGCATCAGCTGCAATAAGGGCTCGGTGTCATTATGTTAATAAAAAATGGCT  
TGGTGGTATGTTAACGAATTGGTCCACTACGGAAACGAGACTTCACAAGTTCAGGGAC  
TTAAGAGCAGAACAAAAGATGGGGAACTCAACTGTCTCTCCAAAAGAGATGCAGCA  
ATGTTGAAGAGAAAATTATCTACCTTGCAAACATATCTCGGTGGGATCAAATATATGACG  
GGGTTGCCTGATATTGTGATCATCGTCGATCAGCAAGAAGAATATACGGCTCTTCGAGA  
ATGTGTCATTTGGGTATTCCAACAATTTGTTAATCGATACAAATTGTGACCCAGATCT  
CGCAGATATTTGATTCCAGCAAACGATGACGCTATAGCTTCAATCCGATTGATTCTTAA  
CAAATTAGTATCTGCAATTTGTGAGGGTCGTTCTAGC---TATATAAGAAATAGTATGGGA  
CAAAAAATAAATCCACTTGGTTTCAGACTTGGTACAACCCAAAGTCATCATTCTTTTG  
GTTTCGCACAAAACAAAATTTATCCGTGGGTTTACAGGAAGATGAAAAAATACGGAAT  
TGTATCAAGAACTATGTACAAAAAATAGGAGAATATCCTCGGGT---TTCGAAGGAATC  
GCACGTATAGGAATTCAAAAAGAATCGATTTGATCCAGGTCATAATCCATATTGGATTC  
CCAAATTTATTAATAGAGGGC-----CAAACACGA-----GGAATAGAAGAATTACAGATGA  
ATGTACAAAAGGAACTTCATTCTGTGAACCGGAGACTCAACATTGCTATCACAGAAT  
TGAAAAACCTTATGGACAACCAAATATTCTTGCAGAATATATAGCTTTACAGTTAAAAA  
ATAGAGTTTCGTTTCGAAAGTCAATGAAAAAAGCTATTGAATTAAGTGAACAAACAGA  
TACAAAAGGAATTCAAGTACAAATCGCAGGGCGTATCGACGGAAAAGAAATTGCACGT  
GTCGAATGGATCAGAGAAGGTAGGGTTCCCCTACAAACAATTCGCGCTAAAATTGATC  
ATTGCTCTATACAATTCGAACATTTATGGAGTATTAGGCATCAAAATTTGGATATTTGT  
AAACGAGTTTATGTCTCGTTATCGAGGACCTCGTTTCAAAAAAATACGCCGTCTGGGG  
ACTTTACCAGGACTAAGTAGTAAAAGACCTAAATCCGGAAGTGATCTTAAAACCCAATT  
GCGTTCTGGGAAA---AGATCGCAATATCGTATTCGTCTAGAAGAAAAACAGAAATTGCG  
TTTTATTATGGTCTGACGGAGCGACAATTAGTTAGATATGTACATATCGCTGGAAAAGC  
CAAAGGGTCAACAGGTCAGGTTTTACTACAACACTTGGAGATGCGTTTTGGATAACATCC  
TTTTTCGATTGGGTATGGCTTCGACCATTCTGGAGCTAGGCAATTAGTTAACCATAGAC  
ATATTTTAGTTAATGGTCGTATAGTGGATATACCAAGTTATCGTTGCAAACCCCGAGATAT  
TATTACTACGAAGGATAAACAAAGATCGAAAGCTCTGATTCAAATTTATATTGCTTCAC  
CCCCCCCCGAA-----TTGCCAAAACATTTGACTATTGACTCA-----TTCCAATATAAAGGA  
TTAGTAAATCAAATAATAGATAGTAAATGGATCGGTTTGAAAATAAATGAGTTGTTAGTC  
GTAGAATATTATCCCGCCAGACTATGTACGTCGAGGTTACTGCAGAAGAAAAAACTG



CAAAATCCGATCCAATTTATCGTAATCGATTAGTTAACATGTTGGTTAACCGTATTATGA  
AACACGGAAAAAATCATTGGCTTATCAAATTATCTATCGAGCCGTGAAAAAGATTCAA  
CAAAGACAGAAACAAATCCACTATCTGTTTTACGTCAAGCAATACATGGAGTAACTC  
CCGATATAGCAGTAAAAGCAAGACGTGTAGGCGGATCGACTCATCAAGTTCCTATTGAA  
ATAGGATCTACACAAGGAAAAGCACTTGCCATTCGTTGGTTATTAGGGGCATCCCGAAA  
ACGTCCGGGTCGAAATATGGCTTTCAAATTAAGTTCCGAATTAGTAGATGCTGCCAAAG  
GGAGTGGCGATGCCATACGCAAAAAGGAAGAGACTCATAGAATGGCAGAGGCAAATA  
GAGCTTTTGCACATTTTCGTATGGGTAGGGACAATATTGCCGATATAATAACTTCTATAA  
GAAATGCTGACATGAATAAAAAAGGAACGGTTCGAATAGCATCTACTAATATCACCGAA  
AACATTGTTAAAATACTTCTACGAGAAGTTTTATTGAAAATGTTGAAAACATCAGGA  
AAATAACAAATATTTCTTGGTTTCAACCCTGCGACAT-----AGAAAGACTAGGAAAGGA  
ATATATAGA-----ACCGTTTTAAAGTGTATTAGCCGACCCGGTTTACGAATTTATTC  
CAACTATCAACGAATTCCTAAGATTTTAGGTGGAATGGGAATTGTAATCTTTCTACTTC  
TCGAGGTATAATGACAGATCGAGAAGCTCGACTAGAAAGAATTGGAGGAGAAATTTTG  
TGTTATATATGGATGACAAAAGCTATACCAAGAATTGGTTCACGTAGGAATGGACGTATT  
GGTTCACGTAAAGAATGGACGTAGAATACCAAAAAGGAGTTATTCATGTTCAAGCGAGTT  
TCAACAATACCATTGTAAGTGTACAGATGTACGAGGTCGGGTGGTTTCTTGGGCCTCC  
GCGGGTACTTCTGGATTCAAAGGCACAAGAAGAGGTACACCCTATGCTGCTCAAGCCG  
CAGCGGTAAATGCTATTTCGTACAGTAGTTGATCAGGGTCTGCAACGGGCAGAAGTTATG  
ATAAAAGGCCCTGGTCTCGGAAGAGATGCAGCATTACGAGCCATTTCGTAGAAGTGGTA  
TACTATTAAGTTTAGTACGTGATGTAACACCTATGCCACATAATGGGTGTCGACCTCCTA  
AAAAAGACGTGTGATGCCAACTATTAACAACCTATTAGAAACACAAGACAGCCAAT  
AAGAAATGTCACGAAATCTCCCGCTCTTAGAGGATGTCCTCAGCGTCGAGGAACATGC  
ACTAGGGTGTAT--ATCACCCCAAAAAACCAAACTCTGCCTTACGTAAAGTTGCCAGA  
GTACGATTAACCTCTGGATTTGAAATCACTGCTTATATACCTGGTATTGGCCATAATTTAC  
AAGAACATTCTGTAGTATTAGTAAGAGGAGGAAGGGTTAAGGATTTACCCGGTGTGAG  
ATATCACATTGTTTCGAGGAACCCTAGATGCTGTTCGGAGTAAAGGATCGTCAACAAGGG  
CGTTCTAAATATGGGGTCAAAAAGCCAAAAATGGCAAGAAAAAGTTTGATTTCAGAGG  
GAGAAGAAGCGGCAGAAATTGGAACAGAAATATCATTGATTTCGTCGATCTTCAAAAA  
AAAAATAAGC-----GAAGTTCCATCATTGAGTGAAAAATGGGAAATTCATGAAAAAT  
TGCAATCCCCACCACGTAATAGTGCACCTATACGTCTTCATCGACGTTGTTTTTTGACTG  
GAAGACCTAGAGCTAACTATCGAGACTTTGGGCTATCTGGACACATACTTCGAGAAATG  
GTTTCATGCATGTTTGTACCCGGGCGCAACAAGATCAAGTTGGATGATCAAAAATTCATT  
CATCTCAGTTATTTACAAGAAGAAAAAGAAGAAAAC-----AAGGGTCTGTTGAATTT  
CAAGTATTAAGTTTCACCAGTAAGATACGTAGACTTACTTCACATTTGGAATTGCACAA  
AAGAGATTTTTTATCCCAAAGAGGTCTACGAATAATTCTGGGAAAACGTCAACGGCTC  
CTGGCTTATTTGTCAAAGAAAAATAGAGTCCGTTATAAGAAATTAATGGATCAGTTGGA  
TATTCGGGAGCCAAAAACTCGT-----ATGGTAAAACCTTCGTTTGAAACGATGTGGTAGA  
AAGCAACGAGCCATCTACCGAATCGTTGCAATTGATGTTTCGATCCCGAAGAGAAGGAA  
GAGATCTTAGAAAAGTAGGTTTTTACGATCCGATAAAGAATCAAACCTATTTAAATGTT  
CCTGTTATTCTATATTTCTTGA AAAAGGTGCTCAACCTACGAGAACTGTTTGTGATATT  
TTAAGGAAGGCAGAATTATTTCAAGAA---AGAACTTCGATTCGAGTTAAT-----ATGGAT  
AAATCCAAGCAACCTTTTCGTAAATACAAGCGATCCTTTTCGTAGGCGTTTTGTCCCAAT  
TGGATCGGGGATCGAATCGATTATAGAAACATGAGTTTAATTAGTCGATTTATTAGTGA

ACAAGGAAAAATATTATCTAGACGGGTGAATAAATTGACCTTGAAACAACAACGATTAA  
TTACTATTGCTATAAAACAAGCTCGTATTTTATCTTTGTTACCTTTTCTTAATAATGAGAA  
A-----CAATTTGAGAGAGCCGAGTCGATCCCCAGAACTTCTGGTCCTAGAACCAGAAAT  
AAAGTGACACGTTCACTAAAAAAAATCCTTTTGTAGCTAATCATTTATCGGGAAAAAT  
TGAAAACTCAACATGAGGGAGGAGAAAGAAATAATAGTAACTTGGTCTCGGGCATCT  
ACCATTATACCCACAATGATTGGCCATACAATCGCTATTCATAATGGAAAGGAAAAATATA  
CCTATTTATATAACAGATCGTATGGTAGGTCACAAATTGGGAGAATTCGCGCCTACTCTG  
ACTTTCGCGAGACATGCAAGAAACGACAATAAATCTCGTCGTATGATTTTTAAATCTTT  
TCTACTAGGTAATCTATTATCCTTATGCATGAAGATAATAAATTCGGTCGTTGTGGTTCGG  
ACTCTATTATGGATTTCTGACCACATTCTCCATAGGGCCCTCTTCTCTCTTCTTCTCCGA  
GCTCGGGTTATGGAAGAAGGA-----ACCGAGAAGGAGGTATCAGCAACAACCTGGTTT  
TATTACGGGACAGCTCATGATGTTTCATATCGATCTATTATGCGCCTCTGCATCTAGCATTG  
GGTAGACCTCATACAATAACTGTCCTAGTTCACCGTATCTTTTGTTCATTTCTTCTGG  
AACAAATCACAAAACCTTTTTTGAATTATGGATCTACTACCAGAAATTCAATGCGTAATCTC  
AGCATTCAATGTGTATTCTGAATAATCTAATTTTTCAATTATTCAACCATTTCATTTTAC  
CAAGTTCAACGTTAGCCAGATTAGTCAACATTTATATGTTTCGATGCAACAACAAGATG  
TTATTTGTAACAAGTAGTTTTGTTGGTGGTTAATTGGTCACATTTTATTTCATGAAATGG  
GTTGGATTGGTATTATTCTGGATACGGCAAATCATTCTATTTCGATCT-----AATAAGT  
ACCTTGTGTCAGAATTGAGAAATCTATGGCTCGAATCTTTAGTATTCTCTTATTTATCAC  
CTGTGTCTACTATTTAGGCAGAATGCCGTCGCCTATTGTCACTAAGAACTGAAAGAAG  
CCGAAGAAGACAAACCTCTTGTGACTTTTTCTTTTCGATTATAAACGATGGAATTGTCCA  
TTGCGATATATAAAAAATGATCGGTTTGAACATGCTGTACGAAATGAAATGTCACAATAT  
TTTTTTTATACATGTAAAAGTAATGGGAAAAAAAATATCTTTTACATATCCACCTAGT  
TTATCGACTTTTTTCGGAAATGATAGAACGAAAAATGTCTTTGTACACG-----AAATTATC  
CCATGGAGACCTG-----TATTGGGTTTATACCAATGAACAAAAAAAATGCAACTTGAGC  
AATGAATTAATAAATCGAATAAAAGCTCTAGAAAAAGAAAAAATTACTATAGATATGCT  
CGAAAAAAGGACTAGATTTTGAATCATAAGAATGAACAAAAATGCTTGACCAAAACA  
TATGATCCTTTATTGAGCGGACCATGCCGTGGATCAATAAAAGAATCTGATTTATGTATA  
AAAAGCTTTTGGATAAATAAGATCCATGGGCTACTTTTCCGAGAATTTGAACATCAAGA  
TCCAAATGATCAATCTATTGGAATGGAAGAAATCAGTAAAGAGGTTTCTCGATGGTCAT  
ATAAATTGACCCTTCTGGAAGAACAGGAGGAAGAAGAAATTCGTTCAAGAAAAGCCA  
AACGTGTGATAATTTATACTGAATCTTTGATACGCTACCCGCAACAATCGGATTTTCGTA  
GGGATTTAATAAAAGGATCCATGCGTACTCAAAGACGTAAAACAGTTATTTGGAAAAC  
GTTTCAAGCAAATGCGCATTCCCCGCTTTTTTTTGTATCGAATAGACAAAACATTTTTTTT  
TTCTTCTTTTGAT---ATCTCTGAAATGATGAATCTCTTTTTTTAGGAATAGAGAGGAAAAT  
GAACGGATAGCACTATCAGAAAGTTGGGATAACGTTATGTTTTCTCAAACAACAAGAA  
GTTTGTCTTATTAACCAATCCTTTCTTAGAAAATACATTGTATTGCCTTCATTGATAAT  
AGCTAAAATATTGGTCGTATATTATTATCCAATCCCCGAGTGGGATGAGGATTTGAA  
GGAATGGAATAGAGAAATGCATGTTAAATGCACCTATAATGGTGTTCATTATCGGAAA  
CAGAATTTCCCAAAGATTGGTTAACAGACGGTATTCAGATAAAGATTATATTTCTTTCT  
TTCTTAAACCTTGGCGAAGATCTAAAAAAGGAAAAAACAATAATTTAGTTTTTTAAC  
AGTTTGGGGAATGGAAACAGAAGTTCCTTTTGGTTCTCCCGAAAACGACCTTCTTTT  
TTTGAACCCATTATAAAGAACTCCCCAAAAAATTAGAAAAGTAAAA---AAGGATTTT  
TTTTTCGTTCTAAAAGTTTTT-----AAAGAAAAG---AAAATATGTAT

CAAAATAGTTCTA-----GTTATAAAACAAAAAATGAAGGAACTTGCAAAAAGTAAACTCT  
AAAATAAAT--AATAAGATTATTCGCGAATCAACCATTGCAATTCGATCCATGAATTGGG  
CAAATTACTCACTCATAGAAAAAAAATAAAGTATCTTGCTGATAGGACAGTCACAATC  
AGGAATGAACTAGAACAATCACAAAAGACAAGAAAAA-----GATAAA  
AAATCGGAATCACAGAAACATATTTTGCAGATATTTAAAAGAAAAAAGATCCGATTAT  
ACGTAAATCAATTTTTTATGAAATCATTCAATTGAAAAATATACATAGATATCTTTCTA  
CGTATGATTACTATTTTTAGGATCAATGCACAATTTTTTATGAACTTTATTTTGAATGATT  
TGTCCTCCTTGTCCTAAGCATATGTATTTTACAAATTATCACAAACCCAATTACTTAAAC  
AGTATCACTTGAGATCTGTACTTCAATATACCCATTCTTTTATTAAGGATAAAATCAAGG  
ATTATTGTACACGAGGAATATTTGATTCCAAATCAAAGCAA-----ATTTATAAGTCTGGAA  
AAAATGAATGGAAAAACTGGTTAAAGGGCCATTATCAATACAACCTTATCTCAGACAAA  
ATGGTCTCGATTAGTACCTCAAAGTGGCGAAATAGAATCAACCAACGTTCTACGATTC  
AAAATAAAATGAAATTTGATTCAAATAAAAAAGAAAAAGACCAATTAATTCATTACATG  
AAACAAGAAAAATTGAAAAACACTACAGATATTATCTTTTATCACATAAATATATGAAT  
GAATATATTATTGCTCTGGATAGAAAATATTTGATTGTAGAATTCTCCATATTTGTCTTA  
GATTTTTTGATTGGATGGGAATGAATCAAGAAAAGGTTTATTGTTGGTTCTTCCAGAA  
TTTGTGCCACTTTTTGATGCATATAAGATTAACCATGGACCATAACCAATCAAATTACTT  
CTTTTTAATCCCAAAAAAAGAAGGAAGCAGAACTCGATTTTTTCTGAAAAAATATTT  
CCTTTTTCAATTAAGATGGGATGACTCCTTGAATCAAAGAATGATCGATAATATCAAGGT  
ATATTGTCTCCTACTTAGACCGATAAATCCAAGGGAAATTGCTATATCCTCGATTCAAAG  
AGGAGAAATATATCTGGATATAATGCTAATTCAGAAAAATCTAGTTCTTACAGAATTGGT  
AAAAACGGAATATTGATTATCGAACCGATTCGTTTATCTATAAACGGGGATGGAAAAT  
TTATTATATATCAAACCCTAGGTATTTCAATTGATCGATAAAATTAAGCACAGTAATTATGA  
TTTCTTTGTTCTGAAAATATTCTATCTCCTAGACGTCGTAGAGAATTGAGAATTCTAAT  
TTGTTTTAGATTTCTTTGGCCCAATTACCGATTAGAAGATTTAGCTTGTATGAATCGCTAT  
TGGTTTAATACCAATAATGGGAATCGTTTCAGTATGTCAAGGATATATATGTATCCAATGA  
AACGACATCAATTCAAATCCTGGATCTTCGAATTGAGAGAGATATTGAGAGAGATCAA  
GAATTCTCACTATTTCTTAGATTCATGGATCAAATTCGATTCAGTGGGATCTTTCACTCA  
CATTTTTTTCCACCAAGAACGTTTTATGAACTCTTTGACCCCGAATTTGGAGTATCCT  
ACTTTCA---CGTGATTTCG-----CAGGGTTCAACAAGCAATCGATATTTACG-----ATCA  
AAGGTGTAGTACTGCTTGTAGTAGCG---GTCCTTATATCT-----CGTATTAACAATCG  
AAAGATGGTCGAAAGAAAAAATCTCTATTTGATGGGGCTTCTTCTATACCTATTCTTCC  
TATACCTATGAATTCCATTGGACCCAGAAATGAGACATTGGAAGAATCTTTT---TGGTCT  
TCCAATATCAATAGGTTGATTGTTTCG---CTCCTGTATCTTCCAAAAGGGAAAAAAGATTT  
CTGAGAGTTGTTTCATGGATCCGCAAGAGAGTACTTGGGTTCTCCCAATAAAT-----  
AAAAAGTGTATCATGCCTGAATCTAACCGGAGTTCGCGGTGGTGGAGGAACCGGATCG  
GAAAAAAGAGG-----GATTCTAGTTGTAAGATATCT-----AATGAAACCGTAGCTGGAA  
TTGAGATCTCATTCAAAGAGAAAGATAGCAA---TATCTGGAGTTTCTTTTTTTATCCTAT  
ACG-----GATGATCCGATCCGCAAGGACCATGATTGGGAATTGTTTGTATCGTCTTTCTCC  
GAGGAAGAAGCGAAACATAATCAACTTG-----AATTCGGGACAGCTATTGCAAATCTTA  
GGGAAAGACTTGATTTGTTATCTCATGTCTGCTTTTTCGTGAAAAAAGACCAATTGAAGG  
GGAGGTT---TTCTTCAAACAACAAGGA---GCTGAGGCAACTATTCAATCAAATGATATTG  
AGCATGTTCCCAT-----CTCTTCTCGAGAAACAAGTGGGGTATTTCTTTGCAAAATGT  
GCTCAATTCATATGTGGCAATTCGCGCAAGATCTTTCGTT-----AGTTGGGGGAAG--

-AATCAGCACGAATCGGATTTTTTTGAGGAAC---GTATCGAGAGAGAATTTGATTTGGTTA  
GACAATGTGCGGTTGGTAAACAAGGATCGG-----TTTTTTAGC-----AAGGTACGGAAT  
GTATTGTCAAATATTCAATATGATTCC-----ACAAGA-----TCTATTTTCGTTCAAGTAAG  
GGATTCTAGCCAATTGAAAGGATCTTCT--GATCAATCCATAGATCATTTTCGATTCCATTA  
GA-----AATGAGGATTTCGGAA-----TATCACACATTGATCG  
ATCAAACAGAGATTCAGCAACTAAAAGAAAGATCGATTCTT--TTGGAT-----CCTTCCTT  
TCTTCAAACGGAACGAACAGAGATAGAATCAGAT-----CGATTCCCGAAA-----TGCCTT  
TTTGGATCTTCC-----TCAATGTCCCGGCTATTTCGCG---GAACGTGAGAAGCAGATGAAT  
AATCATCTGCTTCCGGAAGAAATCGAAGAATTTCTT-----GGGAATCCTACAAGATCAAT  
TCGTTCTTTTTTCTCTGACAGATGG-----TCAGAACTTCAT--CTGGGTTCGAATCCTACT  
GAGAGGTCCACTAGAGATCAG-----AAATTTTTGAAGAAAAACAAGATGTTTCT--  
TTTGTCCCTTCCAGGCGATCGGAA-----AATAAGAAATGGTTGATATATTCAAGAT  
AATTACGTATTTACAAAAT-----ACCGTCTCAATTCATCCTATTTTCATCAGATCCGGGATGT  
GATATGGTTCCG---AAGGATGAACCGGAT--ATGGACAGTTCCAATAAGATTTTCATTCTT  
GAAAAAAATCCATTTTTTGTAT-----TTATTTTCATCTATTCCATGACCGGAACAAAGGGG  
GATACACGTTA-----CACCACGATTTT--GAATCA--GAAGAGAGATTTCAAGAAATGGC  
AGATCTATTCACTCTATCAATAACCGAGCCG--GATCTGGTGTATCATAGGGGATTTGCC  
TTTTCTATTGATTCCTACGGGTTGGATCAAAAAAA-----TTCTTGAATGAGGTATTCAA  
CTCCAGAGATGAATCGAAAAAGAAATCTTTA-----TTGGTTCTACCTCCTCTTTTTTAT-  
-----GAAGAGAATGAATCTTTTTATCGAAGGATCAGAAAAAATCGGTCCGG---ATCTAC  
TGCGGGAATGATTTGGAAGATCCAAAACATAAAACAGCGGTATTTGCTAGCAACAACA  
TAATGGAGGCAGTCAATCAATATAGATTGATCCGAAATCTGATTCAAATCCAATATAGCA  
CCTATGGG-----TACATAAGAAATGTATCGAATCGATTCTTTTTAATG-----AATAGATCC  
GATCGCAACTTCGAATATGGAATTCAA-----AGGGATCGAATAGGAAATGATACTCTG  
AATCATATAACTATAATGAAATATACGATCAACCAACATTTATCGAATTTGAAAAAG---A  
GTCAGAAGAAATGGTTTGATCCT-----CTTATTTCTCGAACCGAGAGATCCATGAAT  
CGGGATCCTGATGCATATAGATACAAATGTTCCAATGGGAGCAAGAATTTCCAGGAACA  
TTTGGAACATTTTCGTTTCTGAACAGAAGAAC-----CGTTTTCAAGTAGTGTTC AATCG  
ATTACGTATTAATCAATATTCGATTGATTGGTCCGAGGCTATCGACAAACAAGATTTGTC  
TAAGTCACTTCGTTTCTTTTTGTCCAAGTCA-----CTTCTCTTTTTGTCC-  
-----AAGTCACTTCCCTTTTTG---TCCAAGTCACTTCCCCTTTTCTTTGTGAGT  
ATCGGGAATATCCCATTCATAGGTCCGAG---ATCCACATCTAT--GAATTGAAAGGTCCG  
AATGATCAACTCTGCAATCAGTTGTTAGAATCAATAGGTGTTCAAATCGTTCAATTTGAAT  
AAATTGAAACCCTTTTTATTTTTATTGGAT-----GATCATGATACTTCC---CAAAGACCG  
AAATTCTTGATCAATGGAGGAACAATATTACCATTTTTGTTCAAAAAGATACCA---AAGT  
GG---ATGATTGACTCATTCATACT-----AGAAATAATCGCAGGAAATCCTTTGATAACAC  
GGATTCCATTTCTCAATGATATCCCAGGATCGAGACAATTGGCTGAATCCCGTGA AAC  
CATTTCATAGAAGTTCATTGATATCTTCTTTTTATAAAGCAAATCGACTTCGATTCCTGAA  
TGATCCACATCACTTCTGGTTCTAT-----TGTAACAAAAGATTCCCTTTTTATGTG-----  
-GAAAAGACCCGTATCAATAATTATGAT-----CTTACATAT--GGACAATTCCTCAATATCTT  
GTTCAATTCGCAACAAA---ATATTTCTTTGTGCGTCCGTA AAA-----AAAAACATATTTTT  
TTGGAG---AGGGAGACTATTTACCAATCGAGTACGGGTATCTGACATATTCATACCTA  
AGGATTTTCCACAAAGTGGTGACGAAACG---TATAACTTGTACAAA-----TCTTTCCAT  
TTT-----CGATCCGATCCATTCGTTTCGT-----AGAGCTATTTACTCGATCGCAGACATTTCT

GCAACACCTCTAACAGAGGAACAAATAGTCAATTTTGAAAGAACTTATTGTCAGCCTC  
TTTCAGATATGAATCTATCTGATTCAGAAGGGAAGAACTTGTATCAGTATCTCAGT-----T  
TCAATTCAAACATGGGTTTGATTCACACTCCATGTTCTGAGAAATATTTCCCA-----TCCG  
GAAAGAGGAAAAA-----CGGAGTCTTTGTCTAAAG-----AAATGCGTTG  
AGAAACGGCAGATGTATAGAATCTTTCAACGAGATAGTGCTTTTTCAAATCTCTCAAAA  
TGGAATCTGTTCCAAACATATATGCCATGGTTCCTTACTTCGACAGGGTGCAAATATCTA  
AATTTTACCCTTTTAGATACTTTTTTCAGACCCATTG-----CCGATACTAAGTAGCAGT--CA  
AAAATTTGTATCCATTTTTTCATGATATTATGCATGGATCAGATATATCATGGCCAATTCCTC  
AGAAG-----ATTCTCCACAATGGACTCTG---ATAAGTGAGATTCGAGTA  
AGTGTTTACAGAAT-----CTTCTTCTGTCCGAAGAAATGATTCATCGAAATAATGAGTCA  
CCCGTTCCATTGATATGGACACATCTGAGATCAACAAATGCTCGGGAGTTC---CTCTATT  
CAATCCTTTTCCTTCTTCTTGTGCTGGATAT--CTCGTTCGTATACATCTTCTCTTTGTTT  
CCCGA-----GCCTCTAGTGAGTTACAGACAGAGTTAGAAAAGATCAAATCTTTGATGATT  
CCATCATAATGATTGAGTTGCGAAAACCTTCTGGATAGGTATCCTACATCTGAACTGAAT  
TCTTTCTGGTTAAAGAATCTCCTTCTAGTTGCTCTGGAACAATTAGGAGATTCTCTGGA  
AGAAATACGGGGTTCTGCTTCTGGTGGCAACATGCTATTGGGTGGTGGTCCC-----  
-GCTTATGGG--GTCAAATCAATACGTTCTAAGAAGAAATATTTGAATATCAAT-----CT  
CATCGATCTCATA---AGTATCATAACCAAATCCCATCAATCGAATCACTTTTTTCGAGAAATA  
CGAGACATCTAAGTCGTACAAGTAAAGAGATCTATTCATTGATAAGAAAAAGAAAAA  
CGTGAACGGTGATTGGATTGATGATAAAATCGAATCCTGGGTCGCGAACAGTGATTTCGA  
TTGATGATGAAGAAAGAGAATTCTTGGTTCAGTTCTCC-----ACCTTAACGACA-----GA  
AAAAAGGATTGATCGAATTCTATTGAGTCTGACT--CATAGTGATCATTTATCA-----  
--AGAATGACTCTGGTTATCAAATGATTGAACAACCGGGATCAATTTACTTACGATACTT  
AGTTGACATTCAT-----AAAAAGTATCTAATGAATTATGAGTTCAATAGATCCAGTTTACG  
AGAAAGACGGATATTCCTTGCTCATTATCAGACAATCACTTAT-----TCACAAACCTCGT  
GTGGGGCTAATAGTTTTTCATTTCCCATCTCATGGA-----AAACCCTTTTCGCTCCGCTT  
AGCCCTATCCCCTTCT--AGGGGTATTTTAGTGATAGGTTCTATAGGAACTGGACGATCC  
TATTTGGTCAAATACCTAACGACAACTCCTATGTTTCTTTTATTACGGTATTTCCGAAC  
AAGTTCCTGGATGACAAGCCTAAAGGTTATCTTATTGAT-----GATATCGAT--ATT  
GATGATAGTGACGATATCGAT-----ATTGATGATAGTGAC-----  
-----GATATTGATGATGACCTTGATACGGAGCTGCTAACTATGACGAATGTGCTA  
-----ACTATGTATATGACG-----CCGAAAATAGACCGATTTGATATCACCTTCAATTC  
GAATTAGCAAAGCAATGTCTCCTTGATAATATGGATTCCAAACATTCATGATCTGTAT  
GTGAATGAGTCGAATTACTTATCTCTCGGTCTATTAGGGAACCTATCTCTCC-----AGGG  
ATTGTGAAAGATGTTCC---ACTAGAAATATTCTTGTATTGCTTCGACTCATATCCCCAA  
AAAGTGGATCCCGCTCTAATAGCTCCGAATAAATAAATACATGCATTAAGATACGAAG  
GCTTCTTATTCCACAACAACGAAAGCACTTTTTTCATTCTTTTCATATACTAGGGGATTTCA  
CTTGAAAAGAAAATGTTCCATACT-----AACGTATTCGGGTCCATAACCATGGGTTCCA  
ATGCACGAGATCTTGTAGTACTTATCAATGAGGCCCTATCAATTAGTATTACACAGAAGA  
AATCAATTATAGAACTAATAACAATTAGATCAGCTTTCATAGACAACTTGGGATTTGC  
GA-----TCCCAGGTAAGATCGGTTCCAGGATCATGGGATCCTTTTCTATCAGATAGGAA  
GGGCTGTTGCACAAAATGTACTTCTAAGTAATTGCCCATAGATCCTATATCTATCTATAT  
GAAGAAGAAA-----TCATGTAAGGAAGGGGATCTTATTTGTACAAATGGTACTTCGAA  
CTTGAACGAGCATGAAGAAATTAACGATACTTCTTTATCTTTTGAGTTGTTCTGCCGG

ATCGGTCGCTCAAGATCTTTGGTCTTCACCC-----GGACCCGATGAAAAA---AATTGGAT  
CACTTCTTATGGATTCGTTGAGAATGATTCT--GATCTAGTTCATGGCCTATTAGAAGTAG  
AAAGCGCTCTGGTGGGA-----TCCTTACGGACAGAAAAAGATTGCAGTCAGTTTGATAA  
TAAT-----CGAGTGACATTACTTCTTCGGTCCGAACCAAGGAAT--CAGTTAGATATGATG  
CAAATGGATCTTGTCTATCGTTGATCAGAGATTTCTATATGAAAAA-----TACGAATCG  
GAGTTTGAAGAA---GGGAAGGA-----GCCGTCGACCCGCAA-----CAGATAGAGG  
AGGAT-----TTATTCAATCAC-----ATAGTTTGGGCTCCT-----AGAATATGGCGCCCT--  
-----TGTGGCAATCTATTTGATTGTATCGAAAGGCCACTGAATTGGGATTTCCC---TATT  
GGGGCGGGTCATTTCCG-----GGCAAGCGGATCATTATCATAAAGAGGATGAGCTTC  
AAGAGAATGATTCGGAGTTCTTGCAGAGTGAACCATGCAGTACCAGACACGAGATAG  
ATCTTCCAAAGAACAAGGCTTTTTTTCGAATAAGCCAATTCATTTGGGACCCTGCGGATC  
CATTCTTTTTCTTATCAA---GATCAGCCCTTTGTCTCTGTGTTTTACGTCGAGAATTC  
TTTGCAGATGAAGAGATGTCAAAGGGGCTTATTACTTACCAAACAAATCCTCCTACATC  
TATATATAACGCTGGTTCATC-----AGAATACGCAAGAAAAGCACTTCGAATTGTTGA  
TTCATCGCCAGAGATGGCTTAGAACC-----AATAGTTCATTATCT-----AATGGATCTTTC  
CGTTCTAAT-----ACTCTATCCGAGAGTTATCAGTATTTATCAAATCTGTTCTATCTAAC--  
-GGAACGCTATTGGATCAAATGACAAAGACATTGTTGAGAAAGAGATGGCTTTTCCCGG  
ATGAAATGAAACATTTGATT-----CATGTAACAGGAGAAAGATTTCCCATTCCTATGCCTA  
GATCTCGG---ATAAATGCAAATTTTATTGATAAGACCTCTTCAATTGTAGCCAATATTCTA  
TTACGAATAATTCCGACAACCTCAGGAGAAAAAAGGCATTTACCTATTACAGAGATGG  
G-----ATGTTGGCTCAATCCGAAGGAAATTATGCGGAAGCTTTACAGAATTATTATGAAG  
CTACGCGACCAGAAATTGATCCCTATGATCGAAGTTATATACTCTATAACATAGGCCTTAT  
ACACACAAGCAACGGAGAGCATACAAAGGCTTTGGAATATTATTTCCAGGCACTAGAA  
CGAAACCCGTTTTTACCACAAGCTTTTAATAATATGGCCGTGATCTGTCATTAC---CGGG  
GAGAACAGGCCATTCTACAGGGTGATTCCGAAATTGCGGAGGCTTGGTTGATCAAGC  
TGCTGAGTATTGGAAACAAGCTATAGCGCTTACTCCAGGTAATTATATTGAAGCACATAA  
TTGGTTGAAGATCATGAGGCGTTTCGAATTCGAAATGAATTGGCGATCAGAACATATAT  
GGATAGAACTTATAATGGGGTCTCGAAAAACAAGTAATTTTTTCTGGGCCTGTATCCTTT  
TTTTAGGTTCACTAGGATTCTTAGTGGTTGGAATTTCCAGTTATCTTGGTAGGAATCTGA  
TATCCGATTTCCATCTCAGCAAATTATTTTTTTTCCACAAGGGATCGTGATGTCTTTCTA  
TGGGATCGCAGGTCTATTCAATAGCTCCTATTTGTGGTGCACAATTCATGGAATGTAGG  
TAGTGGTTATGACCGATTGATAGAAAAGAAGGAATAGTGTGTATTTTTCGTTGGGGAT  
TTCTTGGAAATAAATCGTCGCATCTTCTTTCGCTTACTTATGAGAGATATCCAATCCATCA  
GAATGGAGGTTAAAGAGGGTCTTTATCCTCGTCGTGTCCTTTATATGGAATCAGAGGC  
CAAGGAGCCATTCCCTTGACTCGTACTGATGAGTAT--TTTACTCCACGAGAAATTGAA  
CAAAAAGCTGCCGAATTGGCCTATTTCTTGCGCGTACCAATTGAAGTATTT

>Trithuria

ATGGAAAGACGGTGGTTAAATCAATCTGGTCTTTAAGTAAATTAATGGTGAATCGTGG  
TCCTATTGGCCATAGTAGCGAAGGAGAAGAACAGATTCTAAATAATAATGATAAAACCA  
TTCTAGTGAAAGTAATGTGGATCCTTTATTTGGCTTCGCAGAAATTTTGAGT-----TT  
GATCTCTGGTGAAGTCAGGGATAGTAATGGTGACAGTTACTACATATATTTGATATTGA  
AAACCAAATTTTTGATGTCCATATTGAAAAT--AGTGATCTGACTCCAATAGGGAAGAT  
AAG-----AGTTCTGATCCTTATTATGAA---TACATCTATGAT  
ACGGAGTACAGTTGGAAGGATCATGTTAATGATTGCATTATCAATTATCTTCGT-----TCT

GAAACCAACAATATCTGGATTTTAAAGATTAGCAAGATTAATTATATTAAGTTACATTT  
ATAGCCAGAGTAGAGGGGGTAGTCGAGGAATCCAAAAAAGTGGTCTTAGTAAAAGTG  
ATTCACATTTACAAAGTGATTCAGAAGATCAAAATGAAAAACCATCTTACGCACATTTA  
TGGGTTCTATGCGAAAATTGTAATATATTGAATTATAAGAAATCTTTGCGATCAAACATG  
AGTATTTGTGAATATTGTGAATACCACTTGGCAATGAGTAGTTCAGATAGAATAGACCTT  
TTGATTGATCCAGGAACCTTTTCATCCTATGGATGAAAACATGATCTTGGACCCTCCCTCG  
GAGGAATCCCAATGGAGGACCCTTATGAAGATCGTATCCATTCTTATCAACTGGAGAC  
AGGTTTAACTGAAGCTGTTCAAACGGGCATAGGTCAACTAAATGGTATTCGCACAGCC  
ATCGGGGTTATGGATTTTGAGTTCATAGCGGGTAGTATGGGATCCGTAGTAGGAGAGAA  
AATCACCCGTTTAAATCGAGTATGCTACTAATGAATCTCTCCCTCTTATTATTGTATGTGCT  
TCTGGAGGAGCACGCATGCAAGAGGGAAAGTTTGAGCTTGATGCAAATGGCGAAAATA  
GCCGCCGCTTTAAATGATTATCAATCAAAAAAGAATCATTCTATGTATCAATTCTTACA  
TCACCTACAACCTGGTGGAGTGACAGCCAGTTTTGGTATGTTGGGGGATATCATTATTGC  
CGAGCCTGATGCAACTATTGCATTTGCGGGTAAAAGAGTAATTGAAGACATATTGAAGA  
CGCCAGTACCTGAGGATTCGCAAGTAGCGGAGTATTTATTCCCTATGGGTTTATTTGATA  
CAATGGTACCACGTAATCTTTTAAAAGGTGTTCTGACTGAGTTATTTTCAGTTCCATGGG  
TTCTTTCC-----ATGGGAACCATTTCGCGCAGAAGAAATTTATAAGATTATCC  
GTGAACGCATTGAGCAATATAATAGAGAAGTCAAGATTATAAACACGGGTATTGTACTT  
CAAGTGGGCGACGGCATTGCTCGTATTCATGGTCTTTATGAAGTAATGTCAGGTGAATT  
AGTAGAATTTGAAGAAGGTACAATAGGTATTGCTCCCAATTTGGAATCAGATAACGTTG  
GCGTTGTATTAATGGGCGATGGTTTGCTTATAACAAGAGGGTAGTTCTGTAAAAGCAAGA  
GGTCAAATTGCTCAGATACCAGTGGGTGATGCTTATCTAGGCCGTGTGATAAATGCTCT  
AGCTAAACCTATTGATGGGAGGGGCGAAATTGTAGCTTCCGAATATCGCTTAATTGAAT  
CTCCCGCTCCAGGTATTATTTTCGAGGCGTTCGGTATATGAGCCCCTTCAGACAGGGCTTA  
TTGCTATTGATTTCGATGATCCCTATAGGACGCGGTCAGCGAGAATTAATTATTGGAGACA  
GACAGACTGGTAAGACAGCTGTAGCTACAGATACTATTCTCAATCAAAAAGGTCAAAA  
TGTCATATGTGTTTATGTAGCTATTGGTCAAAAAGCATCTTCCGTGGCTCAGATAGTGAA  
TACTTTCCAGGAAAAAGGGCGATGGAATACACTATTGTGGTAGCGGAAATGGCGGAT  
TCTCCTGCTACATTACAATACCTTGCTCCTTATACAGGAGCCGCTCTGGCTGAATATTTTA  
TGTACCGTGAACGACATACCTTAATAATTTATGATGATCTCTCAAACAAGCACAAAGCT  
TATCGCCAAATGTCTCTTCTATTAAGGCGACCTCCCGGTCGCGAAGCTTATCCAGGAGA  
CGTTTTTTATTTGCACTCCCGCCTTTTGGAAAGAGCCGCAAATTAAGTTCCCGTTTAG  
GCGAAGGGAGTATGACTGCTTTACCAATAGTTGAGACTCAAGCCGGAGACGTTTCAGC  
TTATATTCCCACTAATGTCATTTCCATTACAGATGGACAAATCTTTTTATCGGCGGATCTA  
TTCAACGCTGGAATTCGACCGGCTATTAATGTGGGTATCTCGGTCTCCAGAGTGGGATC  
CGCAGCTCAAATTAAGCCATGAAACAAGTAGCTGGCAAATCAAATTAAGAATTAGCT  
CAATTTGTAGAGCTAGAAGCCTTTTACAATTTGCTTCCGACCTGGATAAAGGCACTCA  
GAATCAATTGGCAAGAGGTAACGATTACGGGAGTTGCTCAAACAATCCCAATCATCC  
CCTCTCCCGGTAGAAGAGCAGATAGTTACTATTTATACCGGGACGAATGGGTATGTTGA  
TCAATTAGAAATTGGACAGGTAAAGAAATTTCTTTTTTCAGTTATGTACCCATTTAAGAA  
CGAAGAAGCCTGAGTTCCAAGAAATCATATCTTCCACGAAGGTATTCACTGAGCAAGC  
GGAAGCACTTTTGAAGGAAGTTATTCAAGAACAGAGGGAACCTATTTATAGTTTCAGGAA  
CAAGCCATGAAAATGAATCCTACTACTTCT-----GGTGTTCGCGCAGTTGCGGAAAAGAA  
TATGGGACGTATCACTCAAATCATTGGTCCGGTATTGGATGTAGCTTTTCGACCGGGCA

AGATGCCCAATATTTACAATTCTTTGATAGTTAGGGGTCGAGATAGCGCCGGGCAGGAA  
ATTAATGTGACTTGTGAGGTACAGCAATTAGTCGGAAATAATCGAGTTAGAGCTGTAGC  
TCTGAGTGCAACAGACGGTCTGATGAGAGGGATGGAAGTGATTGACACGGGATCTCCT  
CTAAGTGTTCAGTCGGTGGAGCCACTCTCGGACGAATTTTCAACGTTCTTGCGAAC  
CTATGGATAATTTAGGTCCTGTAGATACTGGCAGCAGATTTTCTATTATAGATCTGCACC  
CGCCTTTACAGAGTTAGATAACAAATTATCCATCTTTGAAACAGGCATTAAGTGGTGG  
ATCTTTTAGCCCCTTATCGACGCGGAGGAAAAGTTGGACTTTTCGGGGGAGCAGGTGT  
CGGTAAAACAGTACTCATCATGGAATTAATCAACAACATTGCCAAAGCTCATGGAGGT  
GTATCCGTATTTGGTGGAGTAGGAGAACGCACTCGCGAAGGAAATGATCTTTACATAGA  
AATGAAAGAATCTGGAGTGATTAACGAACAAGATATTGCAAAATCAAAGTTGCTCTG  
GTATATGGTCAAATGAATGAACCGCGGGAGCTCGTATGAGAGTTGGTTTAAACCGCCT  
AACCATGGCAGAATATTTCCGTGATGTTAATCAACAAGATGTACTTCTCTTTATCGACAA  
TATCTTTTCGCTTCGTCCAGGCAGGGTCAGAAGTATCTGCCTTATTAGGTGCAATGCCTTC  
CGCCGTGGGTTATCAGCCTACCCTTAGTACAGAAATGGGTTCTTTGCAAGAAAGAATTA  
CTTCCACTAAGAAGGGATCTATAACTTCCATTCAAGCCGTTTACGTACCTGCGGACGAT  
TTGACTGATCCCGCTCCTGCTACAACATTTGCACATTTAGATGCTACTACTGTACTCTCA  
AGAGTACTAGCTGCCAAAGGTATCTATCCAGCAGTAGATCCTTTAGATTCAACCTCAAC  
TATGCTACAACCTTGGATCGTCGGCGAAGAACATTATGAAACGGCGCAAAGAGTGAAA  
CAAACCTTACAACGTTACAAGAACTTCAGGACATTATATCTATTCTCGGACTGGACGA  
ATTATCTGAAGAAGATCGTTAATCGTAGCAAGAGCACGAAAAATGGAACGTTTCTTAT  
CACAACCCTTTTTCGTAGCAGAAGTCTTTACTGGTTCTCCCGGAAATATGTTGGTTCGT  
ACAGAACTATTCGTGGGTTTCAACTGATCCTTTCCGGAGAATTAGATAGTTTTCCCGA  
GCAGGCCTTCTATTTGGTAGGTAACATCGAGGAAGCTACCGCGAAGGCTATGAACTTA  
GAAGTAGAGAGCAAATGGAAGAAAATGAACTCAATCTTTGTGTACTCACCCCTAATC  
GAATCATTGGGATTCCGAAGTGCAAGAAATCATTATCCACTACTAGTGGGCAAATT  
GGCATATTAACGAATCATGTTCCCTATAGCTACGTGTGTAGATATAGGTATTTAAGAATAC  
GCCTCAACGACCAATGGGTTACAATAGCTTTGATGGGGGTTTTTGCCAGAATATGCAAC  
AATGAAATTACCATATTAGTAAATGATGCGGAGAAAGGGACTGACATGGATCCGCGAG  
AAGCTCAAAGAACCCTTGAAATAGCCAAATCTAACCGGAGTAAAGCAGAAGGCAAGA  
GACAACTAATTGAGGCAAATTTAGCGATCAGACGAGCTAGGGCAAGAGTTGAAGCTAC  
CAATGGCATTTCGATGAAAAATCTAAGTCACTTTTTACTTTCTTTGGCTCACCGGCCATC  
CGACGGTGCTTTCGGGTTTAATAACCGATATTTTTGCAACAAATCTAATAAATCTCAGTGT  
GGTGCTTGGTGTATTGATCTTTTTTCGGAAAGGGAGTGTTAAGTGATTTATTAGATAATCG  
AAAGCAGAGAATCTTAAGTACTATTCGCAATTCAGAAGAACTACGCGCGGGAGCCCTT  
GAGCAGATTGAAAAAGCTAGGGTTCGATTGCGGAAAGTAGAAAGAGAAGCGGACGAA  
TTTAGAGTGAATGGGTATTCTGAGATAGAACGACAAAAAGTGAATTTGATTAATGGCGC  
TTATAAGAATTTAGAACAATTAGAAAATGATAAAAACGAAAGCATTCCGTTGGAACAA  
CAAAGAGCCATTAATCAGGTACAACAACGAGTTTTCCAACAAGCCTTAAAGGAGCTT  
TAGGAACTCTGAATAGTTGTTTGAATGGCGAGTTACATTTACGCACCATCCTTGCTAATA  
TTGGCATACTTGATTCCATGAAAGAAATGACCCATATGAATCCCATCATTCTGCTGCTT  
CCGTTATTGCTGCTGGCTTGGCCGTAGGCCTTGCTTCCATTGGACCCGGAGTTGGTCAA  
GGTACTGCTGCAGGCCAAGCCGTGCAAGGTATCGCGAGACAACCAGAAGCAGAGGGT  
AAAATACGAGGTACTTTATTGCTTAGTCTGGCTTTTATGGAAGCTTTAACAATTTATGGA  
CTGGTCGTGGCATTAGCACTTTTATTTGCAAATCCCTTTGTTATGAATGTTCTACCATGTT





????????????????????????????????????????????????????????????????????????????????????  
????????????????????????????????????????????????????????????????????????????????????  
TATGACGGGTTAGTTATTGAATCACTTCCCGCCGGGATGTTCTGGGTTTCGCTTAGATAAT  
GGGAACAAGGTTTTAGGTTATATTTCAAGGAAGATACGACGTAGTTTTATACGGATACT  
CCCAGGAGATAGAGTCGCAATTGAAATCAGCCCTTATGATCCAACGAAGGGACGTATC  
ATTTATCGAATTTCCAATACAGATTCAAATGATCAATTCGAATTTCAAGGCCATTTGAA  
ATAGATAACTATCGTCAACAACCTTTTCTGTATCCACTTCTTTTTTCAGGAGTATATTTACG  
CACTGGCTTATGATCATGGTTTATTAGGTTCTGACAAT---TCTAGTTTACTAATTGTGAAA  
CGCTTAATTAGTCGCCTGCATCAACAGAATCGTTTAATCATTTCGTTTACTGATTCT-----  
--AGGTTTCGTTGGGAGGATTCTTTATTATCGAGCGATTTCCGAGGGTTTTGTAGGAATTCT  
CGAAATTCATTCTCAAAGAGATCAATATCTTATCCAATAGCAAATATCAT---TTACGAT  
CTATTCATTCCCTCTTTCCCTTTTTCGAAGACAAATCTCGCATTAGATTATGTCTCAGA  
TATACTAATACCTTACCCCATTAATCCTGAAATCTTCGTTTCAGACTCTTCGAGGCTGCAT  
ACGGGATGCTCCTTCTTTGCATTTATTGAGATTCTTTCTACACGAGCATCATCATTGGAA  
TAGAGTTCTTACGAAACCAATTTCTATTTTCTCAAAGAAAAGATTCTTCTTCTTCTTATAT  
AATTATTATGTATATGAATGTGAATCGTTTTTTCTTTTCTTCGTAAACAATCTTATTATTT  
ACGGTTCGATATCTTTTCTAGCCTTTCTTGAGAGATCCCATTTTGATATAAAAAAAAAAATA  
T---GTAGGAGTTCTTCTAATCAAAGGTACCTATGGGTAAACAAGAACCCTTGCTGCAT  
TATGCCAGGTATCAAGGAAAAGCCATTCTGGCTTCAAGGGGTATTAATCTTCTGATGAA  
GAAATGGAAATATTACCTTGTCACTCTCTGGCAATGCCATTTCCATTTTTGGTCTCAGCC  
GAGCCGGATCCATATAAACAATTATCAAATCATTCTTTCCCTTTTTTGGGCTATCTTTCA  
GGTGTACAATTTACTCCTTGGGTGGTAAGAAGTCAAATGCTAGAGAGTTCATTTCTCAT  
TGATACTGTTATT-----AATCAATTGGATACAATAGTCCCCATTGTTCCCTCTCATTTTATCT  
TTGGCGAAAGCCAAATTCTGTAATATATCAGGGTATCCCATCAGTAAGTCAGTCTGGTC  
AGATTTGTCAGATTCTGATATAATTGATCGCTTCGGGTCCATCTGCAGGAATCTATCTCA  
TTATTACAGTGGATCCTCAAAAAACACGGTTTGTATCGAGTTAAGTATATCCTTCGACT  
TTCGTGTGCTAGAACTTTAGCTCGTAAACATAAAAGTGCGGTACGCGCCATTTGGAAA  
AGATTAGGTTCCAAATTATTGGAAGAGTTCTTTATGGAGGAAAAGAAATGGGTTCCCTT  
CCTATTCCAAAGACAGATTTGGTATTTGGATATTATCTATATTAATGGTCTCGTCAATCAT  
GAAATGATCATTGATATGAAAGAA-----CTAGCTATCCATTCTTTTTTCATCTGGGGATC  
C---AGAAAGGAGGTCTCTGGTATCATAACGGTTACTTGTACCTATTTGACTCTTGTATCG  
GGAATAACACTAGGCGTATTAGTGATTGTGTGGATGGAAAGAAAATATCTGCAGGGAT  
ACAACAACGAATTGGACCTGAATATGCCGGCCCCCTTAGGCATTGTTCAACCTCTCGCA  
GACGGGATCAAATACTTTTTCAAAGAGGATCTTCTTCCATCTAGGGGGAATACTCGTTT  
ATTCAGTGTCGGACCATCCTTAGCGGTCTCTCAGTCCTACTGACTTATTCCGTAATTCC  
TTTCGGATATCACCTTGTCTAACCGATCTTAGTATAGGTGTTTCTCTATGGATCGCCATT  
TCAAGTATTGCCCTATTGGACTTCTTATGTCAGGATATGGATCAAATAATAAATATTCTT  
TTTCAGGTGGTTTACGAGCTGCTGCTCAATCTATTAGTTATGAAATACCATTAACTCCGT  
GTGTGTTATCAATATCTCTACTATCTAACAGTTCAAGTACGGTTCGATATAGTTCAGGCAC  
AGTCAAACACTACGGTTTTTTGGGGTTGGAATCTTTGGCGTCAACCTATCGGATTTCTAGTT  
TTTATAATCTCTTCGCTCGCGGAATGTGAGCGGTTGCCCTTTGATTTACCAGAAGCCGA  
GGAGGAATTAGTAGCAGGTTATCAAACCGAATATTCAGGCATTCCATTTTCTTTCTTTTA  
TGTTGCTTCTTACCTAAATCTACTAGTTTTTTTCATTATTTCGTAACAGTTCTTTACTTAGGG  
GGGTGGAATCCTTCTATTCCATACATACTAATTAACGGGATTTTTGAAATCAATCCAAT

AGTGTGATCCTTGGAGCAACAATCAGTATCCTTATTACACTGGTTAAAGCTTATTTGTTCTGTTTTCTTCCTATCGCAACAAGATGGACTTTACCCAGGATGAGAATGGACCAACTATTAAATCTTGGGTGGAAATTTCTTTTACCTATTTCCCTAGGGAATCTATTATTAACAACCTCTCTCAACTCCTTTTCGCTGATGATCTGGCATGTACAGAATGAAAACCTTCATTCTCGATTCTACGAGAATTGTTATGAAAGCCTTTCATTTGCTTCTCTTCCATGGAAGTTTGATTTTACCA GAATTGATCCTCATTTTGGGCCTAATTTCTTCTTGATGATCGATTCAACCTCTGATCAA AAAGATACACCTTGGTTCTATTTTCATCTCTTCAACAAGTTTAGTAATGAGCATAACCGCC CTATTGTTCCGATGGAGAGAAGAACCTATGATTAGCTTTTCGGGAAATTTCCAAACGAA CAATTTCAACGAAATCTTTCAATTCCTTATTTACTATGTTCAACTCTATGTATTCTCTAT CCGTAGAGTACATTGAATGTACAGAAATGGCTAGAACAGAGTTTCTTATTTCATATTA CAGCTACTCTAGGAGGAATCTTTTTATGTGGTGCTAACGATTTCCATAACTATCTTTGTAG CTCCAGAATCTTTCAGTTTATGCTCCTACCTATTATCTGGATATACCAAGAGAGATGTAC GGTCTAATGAGGCTACTACGAAATATTTACTCATGGGTGGGGCAAGCTCTTCTATTCTG GTTCATGCTTTCTCTTGGCTATATGGTTTATCCGGGGGAGAGATCGAGCTTCAAGAAAT AGTGAACGGTCTTATCAATACACAAATGTATAACTCCCAGGAATTTTCGATTGCGCTTCT ATTCATCACTGTAGGAATTTGGGTTCAAGCTTTCCCTAGTCCCTTTTCATCAATGGACTCC TGACGTATATGAAGGATCTCCACTCCAGTCGTTGCTTTTCTTTCTGTTACTTCGAAAGT AGCTGCTCAGCTTTAGCCACTCGAATTTTCGATATTCTTTCTATCTCTCATCGAAGGA ATGGCATCTTCTTCTGGAAATCCTAGCTATTCTTAGCATGATATTGGGGAATCTCATTGCT ATTACTCAAACAAGCATGAAACGTATGCTTGCATATTCGTCCATAGGTCAAATCGGATAT GTCATTATTGGCATAATTGTTGGAGACTCAAATGATGGATATGCAAGCATGATAACTTAT ATGCTGTTCTATATCTCCATGAATCTAGGAACTTTTGCTTGCATTGTCTCATTGGTCTAC GTACCGGAACTGATAACATTCGGGATTATGCAGGATTATACACGAAAGATCCTTTTTTG GCTCTCTTTCAGCCCTATGTCTCCTATCCCTAGGGGGTATTCCTCCATTAGCAGGTTTT TTCGAAAACCTCTATCTATTCTGGTGTGGATGGCGGGCAGGCCTCTATTTCTTGGTTTCA ATAGGGCTCCTTACGAGCGTTCTTTCTATCTATTATTATCTCCAAATAATCAAGTTAGTAA TGA CTGGACGAAACAAAGAAATAACCCCTCACGTGCGAAATTATAGATCATCTCCTTTC ACATCAAACAATTCCATCGAATGGAGTATGATTGTATGTGTAATAGCATCCACTATAACCA GGAATAGCAATGAACCCATTATTGCAATTGCTCAGGATACCCCTTAGCATGTTTCTGCTT CACGAATATGATAGTTTCTGGGCGTTTCTAATGATATCAAGTGGTATTCCTATTTTAGCAT TTCTACTTTCCAGGGTTTTAGCCCAATTAGTGAAGTACCTGAGAAGCTCTCCAGTTAT GAATCGGGTATAGAACCCATAGGAGATGCTTGGATACAATTCGGATCCGATATTACATC TTTGCTCTCGTTTTTGTGTTTTTGATATTGAAACGGTCTTTCTTTATCCATGGGCCATGA GTTTCGATATATTGGGAGTATCCGTATTTATAGAAGCTTTGATTTTCGTGCTTATCCTAAT TGTGGTTCAGTTTATGCATGGCGAAAAGGAGCATTGGAATGGTCTACGAGTCATTTTT ATTGGTTAAACAATAATTGTTGTTTTGCCCATATCCGCGGGTCTTCAATTGTCTTTCTACC TCATAGAGGAAATAAGGTGGTTCGATCATATGCCATCTGTATCTGCTTATTTGAACTCCT TCTAACAACCTATGCCTTTTGCTATCATTTTCAATTAGATGATCCATTAATCCAACCTGGGG GAAGATTTAAACTGGATAAATACCTTTGATTTTCACTGGCGACTAGGAATTGATGGACT TTCTATAGGACCCATTTTATTGACAGGATTTATCACTACTTTAGCTACTTCAGCGGCCCG GCCAGTTACCCCAAATTCGCGATTGTTCTATTTCCCTTATGTTAGCTATGTACAGCGGTCA AATAGGATCTTTTTCTTCCCGAGATCTTTTACTATTTTTTCATTATGTGGGAGTTGGAGTTA ATTCCTGTTTACCTACTTCTGTCCATGTGGGGAGGAAAGAAGCGTCTGTACTCCGCTAC AAAGTTCATTTTGTACTGCGGGGGGGTCCATTTTCTTTTAAATGGGCATTCTAGGTAT

GGGTTTATATGCTTCCAATGAACCAAGATTCCATTTTGAACATTAGCTAATCAACCCTA  
TCCTGCGGCATTGGAATAATATTTTATTTGGGCTTCCTTATTGCTTATGCTGTAAATCA  
CCGATCATACCTTTACATACATGGTTGCCGATACCCATGGGGAGGCGCATTATAGTACA  
TGATGCTTCTGGCTGGAATCTTATTAATAAATGGGGGCATATGGATTTGTTGGAATAAAT  
ATGGAATTATTACCCCATGCCATTCTCTCTTTTCTCCCTATTTGATAATACTAGGAACTA  
TTCAAATAATCTATGCAGCTTCAACTTCTCCAGGTCAACGAACTGTAAAAAAGAATA  
GCCTATTCTCCGTATCTCATATGGGCTTTATACTCATAGGAATTAGTTCTATAACCGAAA  
TTGGGCTTAACGGAGCCATTTTACAAATAATCTCTCATGGACTTATTGGTGCTGCACTTT  
TTTTCTAGCAGGAACAAGCTATGATAGAATACGCCTTACTTATCTTGAAGATATGGGAG  
GAATAGGTATACTAATGCCAAAAATATTTACGATGTTTAATACCTTCTCTATGGCTTCTCT  
TGCATTGCCAGGAATGAGTGGTTTTGTTGCGGAATTCTTGATATTTTTGGGAACAATTA  
CCAGCCAAAAATACTTTCTAATGTCAAAAATACTAATTACTTTTTGTAATGGCAATTGGGA  
TGATATTAACACCTATTTATTTATTATCTATGTTGCGACAGATGTTCTATGGATACAAGTTA  
TTGAATGTTCCAAATCCTTACCTTATAGATTCTGCACCAAGAGAAATATTTCTTTAATCT  
GCATTCTTTTACCCATCATAGGTATTGGTATTTATCCTGATTTTGTCTCTCACTATCAGTT  
GATAAGGTAGAAGCTATTGTATCCAATATTTTAAACACAATGATGCTCGAGCAGATACTT  
GTTTTGAGTGCCTATTTATTTTCTATTGGGATATATGGATTAATCACAAGTCGAAACATAG  
TTAGAGCACTCATGTGTCTTGAACCTATACTGAATGCTGTTAATATCAATCTTGTAACAT  
TTCCGATTTATTTGATAATCGCGAATTAAGGGCGACATTTTTTCCCTATTCGTTATGGC  
TATTGCAGCCGCTGAAGCTGCTATTGGCCTGGCCATTCTTTCTTTGATCCATCGTAACAG  
AAAATCAACGCGTATCAATCAATCCAATTTGTTGAATAAAATGGAAGGCACATATCAAT  
ATGCGTGGATTATCCCTTTCGTTCCACTTATAGTTACTATGTTAATAGGATTGGGGCTCCT  
CCTTATTCCGACGGCAACAAAAATATTCGTCGTATATGGGCTTTTCCAAGTATTCTTTT  
GCTAACTATAGTTATGGCTTTTTCAACCAAGTTGTCCATAACAATAAATAAGTAGTTT  
TCTTTATGAATATCTATGGCCTTGGATCATCAACAGTGATTTTTGTTTAGAGGTTGGCTA  
CTTGATCGATCCACTTACTTCTATTATGTTGATGCTAATTACTACTGTTGGAATCTTGGTT  
CTTATCTATAGCGATGGTTATATGTCTCATGATCAAGGATATTTTCGATTTTTTGCTTATAT  
TAGTTTCTTCACCGCTTCCATGCTTGGATTGGTTACTAGTCCCAATTCATACAACCTATAT  
ATTTTTTGGGAACCTCGTGGGAATGTGCTCTTATTTATTAATAGGATTTTGGTTTACCCGC  
CCAATTGCAGCAACTGCCTGTCAAAAAGCTTTTATACTAATCGTGTGGCGGACTTTGG  
TTTATTAGTAGGAATATTAGGCTGTTATTTTCATGACAGGAAGTTTTGAATTCGAGATTTA  
TGCAAAATACTTAAT--AATGATATTCATTCTTTATTTGCTATGATATTGGCCCTATTATTAT  
TCCTTGGCGCAATTGCTAAATCGGCGCAATTCCTCTTCATATATGGTTACCTGATGCTAT  
GGAGGGACCCACTCCCATTTTCGGCTCTTATACATGCTGCCACTATGGTAGCAGCAGGAA  
TTTTTTTTGGTCGCTCGGCTTTTTCTCTTTTCGAACTTATACCTTACCTAATGAATATGAT  
TTCTCTCATAGGTTTAATAACGATATTATTAGGATCTACTTTAGCTCTTGCTGAAAGAGA  
CATTAAAGAAAGGTTTAGCTTATTCCACAATGTCTCAACTGGGCTATATGATGTTAGCTTT  
AGGTATAGGTTCTTATCGAGCCGCTTTATTCATTTGATCACTCATGCTTATACTAAAGCA  
TTGTTATTTTTAGGATCCGGGTCCATTATTCATTCAATGGAAGCAATTGTTGGATATTCTC  
CAGCTAAGAGTCAAAACATGGTCCTTATGGGGGGTTTTAAAAGATATATGCCAATTACA  
AAAATACTTTTTTGTAGGTACGTTTTCGCTTTCTGGTATTCCTCCCTTGGCTTGT  
TGGTCCAAAGATGAAATTCTTAATGATAGTTGGTTGTATTCACCAATTTTTGGGGTAATA  
GCTTGTACACAGCGGGATTAACGCAATTTTATATGTTTCGTCCTTATTTACTTACTTTTCG  
AAGGCCATTTACGTCTTCATTTTCAAATTATAGTGGTTATCTAAATGGTTCGCTATATTC

AATATCCGTATGGGGAAAAAAGGTTCCAAATCAGTTGTGAGA---AACTTCCTTGCTTC  
ACAATCAATTTCTCTTTTAATAAAGAT-----CATTTTCTGTATCCCCATGAGTCTGATAAT  
ACCCTTCTATTTCCATTGATTATATTAGTTGCATTTACTCTGTTTATAGAATGCATAGGAG  
TTCTTTTCGAGGTTGATATATTATCAAAGTGGTTAACTCCAGCTATGAAACTCTTACATG  
AAAATTCAAGT-----GTTGATTGGTATCAATTTACCACAAAGGCAATTTATTCCGTCACTA  
TAGCTTGTTTAGGAATATACACAGCATTACTTCTTTATGGATCTGTCTATTTCGCCCTTACA  
AAATTTGGATTTCATAAATTTCTTTTGTATTCTACTAGAGCGTATAATAAATTTGATATATA  
ATTGGTCATATAATCGAGCTTACATAGATCTTTATTATGAAAAAGTCTTTATTAAGGGTAT  
ACGAGGATTATCGGAGATAGTTCATTATTTTGATCAACAAGTACTTGATGGAATTGCTAA  
TGGTATTGGAATTACAAGTTTCTTTATAGGAGAGGGGATTAATAAC---TTTGTGGAGGA  
AGAATTTCTTCTTATCTCTTTTTCTATTTTTCTTTGTATCAATATTTTTATTTCTTCTTTTT  
ATGGATTTACCTGGGACAATACATGATATTCTTTTAGTATGTCTAGGATCCGTTCTTATAT  
TAGGAGGTCTAGGAGTAGTATTATTTACCAATCCTATTTATTCTGCCTTTTCATCGGGATT  
AGTTCTTATTTGTATATCTTTATTTTATATTTTATCCAATCCTATTTTGTAGCTGCTGCAC  
AACTCCTTATTTACGTGGGAGCCATAAATGTATTAATCCTATTTGCTGTTATGTTTATGAA  
TGGGTCAGAATATTACAATAATTTTTCTATTTGGACTGTTGGAGATGGGTTCACTTCAGT  
AGTTTGTATAAGTATTTCCATTTCACTAATTGCTACTATCTCAAACACGTCATGGTACGG  
AATTGTTTGGACTACAAGATCAAACCAAATCATAGAACAGGAACTCACAAGTAATGTC  
CAACGGATTGGGATTCATTTATCAACAGATTTTTCTCTTCCATTTGAACTTCTTTCTATAA  
TTCTTTTAGTTTCCTTGGTGGGCGCAATTTCTATGGCTCGTCCGATGACTGTACCAGAC  
ACAAAAAAGACCTTTCATAGTCAATATGGGGCCTCACCAATCAATGCATGGTGT  
TCTTCGACTCCTTCTTACTCTAGACGGTGAAGATGTTATTAAGTGTGAACCCATATTGGG  
TTATTTACACAGAGGGATGGAAAAAATTGCGGAAAACCGAACAATATAAATATCTAC  
CTTATGTGACACGCTGGGATTATTTAGCTACCATGTTTACAGAGGCCATAACGGTTAATG  
GGCCGGAGAAATTGGGAAATATTCAAGTACCTAAAAGAGCCAGCAATATCAGGGCAAT  
TATGCTGGAGTTGAGTCGTATAGCTTACATTTGTTATGGCTTGGAAACCTTTATGGCCGA  
TATTGGTGCACAGACTCCTTCTTCTATATTTTTAGAGAGAGAGAATTAATATATGATCTA  
TTTGAAGCTGCCACCGGTATGCGAATGATGCACAATTATTTCCGTATTGGGGGAGTAGC  
TGCGGATCTCCCCTATGGATGGATAGATAAATGTTTCGATTTCTGCAATCTTTTTTAAAC  
GGGAGTTGTTGAATATCAACAGCTTATTACGCGCAATCCCATATTTTTTGGAAACGAGTTG  
AAGGGGTAGGCTTTATTTGTACAGAGGAAGCAATAAATTGGGGTTTATCAGGACCTATG  
CTACGAGCTTCCGGAATCCCATGGGATCTTCGTAAAGTGGATCGTTATGAGTCTTATGAT  
GAATTCGATTGGAAAGTACAATGGCAAAAGGAAGGAGACTCCTTAGCTCGTTATTTAGT  
ACGAATGGGTGAAATGACAGAATCTATCAAATTATTCAACAGGCTCTCGAAAGAATT  
CCGGGGGGGGCCTATGAAAATTTAGAATTCCGACGCTTTGATACAACAAGAGATTCAA  
AATGGAATGATTTTACTATCGATTCATTGCGAAAAAGCCTTCTCCCAACTTTGAATTGT  
TAAAGCAAGAGCTTTATGTGAGAGTAGAAGCTCCAAAAGGAGAATTAGGTATTTTTCT  
GATAGGGGATCATAGTGTTTTTCTTGGAGATGGAAAATTCGTCCACCGGGGTTTCATCA  
ATTTGCAAATCTTCTCAGCTAGTTAAAAGAATGAAATTGGCTGATATCATGACAATAC  
TAGGTAGTGTAGATATCATTATGGGAGAAGTTGATCGTATGTTTCCCATGGTGGCTAGGT  
TCATGAATTATGGTCAACAAAGAGTACGAGCTGCAAGATACATTGGTCAAAGTTTCATG  
ATTACCTTATCTCACGCGAATCGTTTACCCGTAACCATTCAATATCCCTATGAAAAATCG  
AGAACATCGGAGCGTTTCCGTGGACGAATCCACTTTGAATTTGATAAATGCATTGCTTG  
TGAAGTATGTGTTTCGCGTATGTCCAATAGATCTACCTGTTGTTGATTGGAAACTAGAAA

GAGATATTAGAAAGAAGCGGTTGCTTCATTATAGTATTGATTTTCGGAATCTGTATATTTTG  
TGGTAACTGCCTTGAGTATTGCCCCACCAACTGTTTATCAATGACTGAAGAATATGAGC  
TTTCTACTTATGATCGCCACGAATTGAATTATAACCAAATAGCTTTGGGTTCGGTTACCAA  
AGTCCGTAAGTGGAGATTACACAGTTCGAACAGTTCGGACTTCGAAAAGATCTATGGA  
TAAACCCCTTGATTCCAGAACGATTCCCAAT---ATGCAGGGTCGTTTCATCCGCTTGGCTA  
GTGAAACACGAGCTAGTTCATAGATCCTTGGGCTTCGATTACCAAAGAATAGAGACTTT  
ACAAATAAAGTCCGAGGATTGGCACTCCATTGCTGTCATTTTCATATGTATATGGTTACAA  
TTATCTACGTTCCCAATGTGCCTATGATGTGCAACCCGGTGGATTGTTAGTTAGTGTGTA  
TCATCTGACGAGAATACAGTATGATGTGGACCAATCGGAAGAGGTATGCATTAAGTAT  
TTGTTCCCCGGAGGAACCCTATAATCCCGTTCGATTTTCTGGATTGGAAAAGTGTGAT  
TTTCAAGAACGGGAATCTTATGATATGTTGGGAATCCATTATCAAATCATCCACGCATG  
AAACGCATCTTGATGCCCGAAAGTTGGATCGGGTGGCCCCTACGCAAGGATTATATTGC  
CCCGAATTTCTATGAAATACAGGATGCTCAT-----  
-----ATGGCGAAAAGGAGCATTGGAATGGTCTTAGCTCCGGAA  
TATTCAACTAATAAAAAAGAAAGAAAAAGTGTCTTTGAGACAGTTAGGAATTCTATGA  
AGTTTCCGTTACTTGAACAAGGAACCCCAATTCAGTTATTTCAACTACCTCGAATGAT  
CTTTCAAATTGGTCAAGACTCTCCAGTTTATGGCCCTTCTCTATGGTACCAGTTGTTGT  
TTTATTGAATTTGCTTCATTAATAGGCTCGCGATTTCGACTTTGATCGTTATGGACTGGTTC  
CAAGATCAAGCCCTAGGCAAGCCGACCTTATTTTAACAGCTGGTACAGTAACAATGAA  
AATGGCTCCTTCCCTAGTGAGACTATATGAACAAATGCCTGAGCCAAAATATGTAATTG  
CTATGGGAGCCTGTACTATTACAGGAGGAATGTTTCAGTACCGATTCTTATAGTACCGTTC  
GTGGAGTCGATAAGTTAATTCCTGTAGATGTCTATTTGGCGGGCTGTCCACCTAAACCA  
GAGGCAATTATAGACGCTATAACAAAACCTCCGTAAGAAGGTATCTCGAGAAATCTATGA  
AGATAGAACGGGATCCCAACAGCAAATCGATGTTTTACTACCAATCATAAATTTTCTC  
GTGAACATACTGTGGAAATGACGATCAAAGATTACTCT-----ACCCACCGGCATCAA  
AAGACCTTCGGAAACCTTTT-----ATGCAAAAAAATAGAA  
ATTTTTATTGGGTAAAGGAACAGATGATTTCGATCCATTTCTCTCTCGATGATGATATATGT  
AATAACTCGTACATCTATTTCAAATGCCTATCCCATTTTTGCGCAGCAGGGTTATGAAAA  
TCCGAGAGAGGCAACTGGGCGCATTGTATGTGCCAATTGCCATTTGGCAAATAAGCCC  
GTCGATATTGAGGTTCCACAAGCTGTGCTTCCCTGATACTGTATTTGAGGCCGTTGTTAG  
AATCCCCTACGATATGCAACGAAAACAGGTTCTTGCAAATGGCAAAAAGGGAGGTTTG  
AATGTGGGGGCTGTCTCATTTTACCCCAAGGATTTGAATTAGCTCCCCGGATCGTATC  
GATCCCAGATAAAAGAAAAACTAGGGAACCTTGTCTTTTCAGAGTTACCGTCCCTAATA  
AAAAAATATTATTGTGATAGGCCCTGTTCTTGGGCAGAAATACAGTGAAATCACATTT  
CCCATTCTTTCCCCGGATCCTGCTACTACGAAAGATGTTTCATTTCTTAAAATATCCTATAT  
ATGTAGGCGGTAACAGGGGAAGGGGTCAGATTTATCCGGACGGGAGTAAGAGTAACAA  
TACAGTCTATAATGCTTCAGTAGCAGGTATAGTAAGCAAATAGTACGTAAAGAAAAGG  
GTGGATATGAAATAACCATAGTGGATCCATCAAATGGACAGCAAGTGGTTGATATTATCC  
CCCAGGTCCAGAGCTTCTGATTTCTGAAGGTGAATCCATCAAGCTTGATCAACCCCTA  
ACAAGTAATCCTAACGTTGGTGGATTTGGTCAAAGTGATGCGGAAATAGTACTTCAAGA  
TCCGTTACGTATCCAAGGGCTTTTGTCTTCTTGGCATCCGTTATTCTGGCACAAGTATT  
TTTGGTTCTTAAAAAGAAACAGTTTGAGAAGGTTCAATTGGCCGAAATGAATTTTCATG  
AGTAAAGTATATGATTGGTTCGAGGAGCGTCTCGAGATTCAAGCGATTGCGGATGATAT  
AACTAGTAAATACGTTCCCCCTCATGTCAATCTATTTTATTGCCTAGGAGGAATCACACT

TACTTGTTTTTTAGTACAAGTAGCTACAGGTTTTGCTATGACTTTTTACTATCGTCCGAC  
CGTTACAGAGGCTTTTTCTCTGTTCAATACATCATGACGGAAGCTAACTTTGGTTGGT  
TAATCCGATCAGTTCATCGGTGGTTCGGCAAGTATGATGGTTCTAATGATGATCCTGCACG  
TATTTCTGTGTTTATCTCACGGGTGGATTTAAGAAACCCCGCAATTGACTTGGGTTACG  
GGTGTAGTTCTGGCTGTATTGACTGCATCCTTTGGTGTAAGTGGTTATTCTTTACCTTGG  
GACCAGATCGGTTATTGGGCAGTCAAATTGTGACCGGTGTACCCGAGGCTATCCCTAT  
AGTGGGATCACCTTTGGTAGAATTATTACGTGGAAGTGCTAGTGTGGGTCAATCCACTT  
TGACCCGTTTTTATAGTTTACACACTTTTTGTACTACCTCTTCTTACTGCGGTATTTATGTT  
AATGCACTTCCTCATGATACGTAAGCAAGGTATTTGGGTCCTTAATGGGAGTAACAA  
AGAAACCCGACTTGAATGATCCTGTATTAAGAGCTAAATTGGCTAAGGGTATGGGACAT  
AATACTATGGAGAACCCGCATGGCCTAATGATCTTTTATATATTTTTCCAGTAGTAATTC  
TAGGTACGATTGCATCTAACGTGGGTCTAGCAGTTCTAGAACCGTCAATGATTGGTGAA  
CCCGCGGATCCATTTGCAACGCCTTTGGAAATATTACCCGAATGGTACTTCTTTCCCGTA  
TTTCAAATACTACGTACAGTACCTAATAAGTTATTGGGGGTTCTTTAATGGTTTCGGTA  
CCAGCGGGATTAATGACAGTGCCCTTTTTGGAGAATGTTAATAAATTCCAAAATCCATT  
TCGTGACCCGTGGCTACAACAGTCTTTTTGATTGGTACCGCAGTAGCTCTTTGGTTAG  
GTATTGGAGCAACATTACCTATTGAGAAATCTCTCACTTTGGGTCTTTTTATGATTGAAG  
TTTTCTTTATTGGAATCGTCTTAGGTCTAATTCCTATTACTTTAGTCGGATTATTTGTAAC  
TGCCTATTTACAATACAGACGCGGTGATCAGTTGGATTTTATGCTTACTATAACTAGTTAT  
TTCGGTTTTTCTACTGACTGCTTCAACTATAACCTAGCTCTATTGATTGGTCTGAGCAAG  
ATACGACTTATTATGGATATAATAAGTCTCGCTGGGCTGCTTTAATGGTAGTTTTTTTCGT  
TTCCCTTTCACTCGTAGTATGGGGTAGAAGTGGGCTCATGATTATTCGTTCCGCCGAA  
CCAGAAGTGAAGATTGTGGTAGATAGGGATCCCATAAAACTTCATTTGAGGAATGGG  
CCAGACCCGGCCATTTCTCAAGGACAATAGCTAAAGGCCCGGATACTACCACGTGGAT  
CTGGAACCTACATGCTGATGCTCACGATTTGATAGCCATAACCAGTGATTTGGAGGAAA  
TCTCCCGAAAAGTATTTAGTGCTCATTTTGGTCAACTAGCCATCATCTTTCTTTGGCTGA  
GTGGAATGTACTTTCATGGGGCCCGTTTTTCCAATTATGAAGCATGGCTGAGCGATCCT  
ACTCACATCAAACCCAGTGCCAGGTAGTTTGGCCAATAGTGGGTCAAGAAATATTA  
ATGGAGATGTGGGTGGGGTTTTCCGAGGAATACAAATAACCTCTGGATTTTTTCAGATT  
TGGCGAGCGTCAGGAATAACGAGTGAATTACAACCTTTATTGTACCGCAATTGGAGCATT  
GGTATTTGCAGCTTTAATGCTTTTTGCTGGTTGGTTCCATTATCACAAGGCTGCTCCAAA  
ACTCGCTTGGTTTCAAGATGTAGAATCCATGTTGAACCACCACTTAGCAGGGTTACTAG  
GACTTGGCTCTCTTTCTTGGGCTGGACATCAAGTGCATGTATCTTTACCAATTAACCAAT  
TTCTAGATGCTGGAGTAGATCCTAAAGAGATACCACTTCCTCATGAATTGATTTTGAATC  
GGTCTCTTTTGGCCCAACTTTATCCTAGTTTTTCTGAGGGAGCAACTCCCTTTTTTACTT  
TGAATTGGTCAAAGTATGCTGAATTCCTTACTTTTCGTGGAGGATTAGATCCGGTAACA  
GGGGCCTCTGGTTGACCGACACTGCACACCATCATTTGGCTATTGCCATTATTTTCT  
GATAGCTGGTACATGTATAAGACCAACTGGGGCATTGGTTCATGGCCTGAAAGATATTT  
TAGAGGCTCATAAAGGTCCGTTTACAGGTGAGGGCCATAAAGGACTCTATGAAATTTTA  
ACAACGTCGTGGCATGCCCAATTAGCTCTTAACCTAGCTATGTTAGGCTCTTTAACTATT  
GTTGTAGCTCACCATATGTATTCTATGCCCCCTATCCATATCTAGCTGTGGATTATGGTA  
CACAACCTTCATTGTTACACATCACATGTGGATCGGCGGATTTCTCATAGTTGGTGCT  
GCTGCGCATGCAGCGATTTTTATGGTAAGAGACTATGATCCAATACTCGATACAACGA  
TCTATTAGATCGTGTCTTAGGCACCGAGATGCAATAATATCACATCTCAACTGGGCATG

TATTTTTCTAGGCTTTCATAGTTTTGGCTTGTATATTCATAATGATACCATGAGCGCTTTG  
GGACGTCCCCAAGATATGTTTTCAGATACTGCTATAACAATTGCAACCTATCTTTGCGCAA  
TGGATACAAAACACGCATGCTTTAGCACCCAGCGCAACAGCCCCCTGGTGCAACAGCA  
AGCACCAGCTTGACTTGGGGGGGTAGTGATTTAGTAGCAGTAGGCGGCAAAGTCGCTT  
TGTTACCTATTCCACTAGGAACCGCGGATTTTTTGGTACATCACATTCATGCATTTACGA  
TCCATGTGACTGTATTGATACTACTGAAAGGTCTTCTATTTGCCCGCAGTTCCCGTTTTGA  
TACCCGATAAAGCAAATCTTGGTTTTTCGTTTTCCCTTGTGACGGGCCAGGAAGAGGGGG  
AACATGTCAAGTGTCCGCCTGGGATCATGTCTTCCCTGGGGCTATTCTGGATGTACAATG  
CAATTTGATAGTCATATTCATTTAGCTGGAAAATGCAGTCAGATGTTTGGGGCACC  
ATAAGTGATCAAGGGGTAGTAACTCATATAACGGGAGGAACTTTGCACAGAGTTCCA  
TTACGATTAATGGGTGGCTACGAGATTTTTTATGGGCACAGTCCTCCCAAGTAATCCAG  
TCTTATGGTTCTTCATTATCTGCATATGGCCTTTTTTTCTTAGGTGCTCATTTTGTCTGGG  
CCTTTAGTTTAAATGTTTCTATTTAGCGGCCGTGGTTATTGGCAAGAACTCATTGAATCCA  
TCGTCTGGGCTCATAACAAATTAAGTTGCTCCTGCTACTCAGCCTAGAGCCTTGAGC  
ATTGTACAAGGACGTGCTGTAGGAGTAACCCATTACCTTCTGGGTGGAATTGCCACAA  
CATGGGCATTCTTCTAGCAAGAATGATTTCCGTAGGAATGGCATTAAAGATTTCCAAGG  
TTTAGCCAAGGTTTAGCTCAGGACCCACTACTCGTCGTATTTGGTTTGGCATTGCTAC  
CGCACATGACTTCGAGAGTCATGATGATATACCGAAGAACGTCTTTATCAGAATATTTT  
TGCTTCTCACTTCGGTCAGTTAGCAATTATCTTTCTGTGGACTTCCGGAAATCTCTTTCA  
TGTGGCTTGGCAAGGAAATTTGAGTCATGGGTACAGGACCCCTTACATGTAAGACCC  
ATTGCTCATACTATTTGGGATCCTCATTTTGGTCAACCCGCTGTGGAAGCCTTTACTAGA  
GGGGGTGCTCTAGGACCAGTGAATATCGCGTATTCAGGTCTTTATCAGTGGTGGTATAC  
CATTGGCTTGCGTACCCACGAGGATCTTTATACTGGAGCTCTTTTTCTATTATTTCTTTCT  
GCTCTCTTTTAGTAGCGGGTGGTTGCATCTACAACCAAATGGAAGCCAAGCCTTTC  
GTGGTTCAAAAACGCCGAATCTCGTCTCAATCATCATTTGTCAGGACTCTTCGGAGTCA  
GCTCCTTGGCTTGGGCAGGACATTTGGTTCATGTGCTATTCCCGGATCAAGGGGAGAA  
TACGTCAGATGGGATAATTTTTTAAATGTATTACCATATCCCAAGGGTTGGGTCCACTT  
TTTACAGGTCAGTGGAAATCTTTATGCCCAAACCCGGATTCCAGCAGTCATTTATTTGGT  
ACCTCCCAAGGAGCGGGAACAGCCATTCTAACCTTCTTGGGGGATTCCATCCGCAAA  
CTCAAAGTTTATGGCTAACCGATATGGCTCATCATCATTTAGCTATTGCATTTGTTTTTCT  
GGTTGCTGGTCATATGTATAGAACGAACTTCGGGATTGGTACAGTATAAAAGATCTTC  
TAGAAGCACATATCCTCCAGGGGGTGGATTGGGACGTGGGCATAAAGGACTTTATGA  
CACAATCAATAATTCGGTTCATTTCAATTGGGTCTTGCTCTAGCCTCCTTGGGGGTCAT  
TACTTCCTTGGTAGCTCAACACATGTACTCTTTACCAGCTTATGCATTCATAGCAAAAGA  
CTTTACTACTCAAGCTGCGTTATACTCATCACCAATACATTGCAGGGTTCATCATGAC  
AGGGGCCTTTGCTCATGGAGCTATATCTTCATTAGGGATTACAACCCAGAGCAGAATG  
AGGATAATGTCTTAGCAAGAATGTTAGAACATAAAGAAGCTATCATATCCCATTTAAGTT  
GGGTTAGCTTGTTCCTAGGGTCCATACCCTGGGACTCTATGTTTATAACGACGTCATGC  
TTGCTTTTGGTACTCCAGAAAAACAATCTTGATTGAACCCATATTTGCACAATGGATA  
CAGTCCGCTCACGGAAAGACTTCCTATGGATTTCGATGTACTTTTATCTTCAACGAATGG  
ACCAGCATTCAATGCTGGTCAAAGCTTATGGTTACCTGGATGGTTAAATGCGATCAATG  
AG-----AATGGTAATCACTATTCTTACCAATAGGACCTGGGGATTTCTTGGTTCATCATG  
CTATTGCTCTAGGTTTGCATACACTACATTGATCTTAGTAAAGGGTGCTTTAGATGCC  
GTGGTTCTAAGTTAATGCCAGATAAAAAAGATTTCCGTTATAGTTTCCCTTGGCATGGTC



CAGGGCGAGGCGGTACTTGTGATATTTTCGGCTTGGGACGCATTTTATTTGGCAGTTTTTC  
TGGATGTTAAATACCATTGGATGGGTACTTTCTATTGGCATTGGAAGCATATCACATTAT  
GGCAAGGTAACCCCTCCCAATTAATGAATCCTCCACTTATTTGATGGGATGGTTAAGG  
GATTATCTTTGGTTAAACTCTTCGCAGCTTATCAATGGATATAACCCCTTTGGTATGAATA  
GTTTATCCGTCTGGGCATGGATGTTCTTATTTGGACATCTCGTTTTGGGCTACCGGATTCA  
TGTTCTTAATTTCTGGCGTGGATATTGGCAGGAATTGATTGAAACTTTAGCATGGGCTC  
ATGAACGCACACCTTTGGCTAATTTAATTCGTTGGAGGGATAAACCAGTAGCTCTTTCC  
ATTGTACAAGCAAGATTGGTTCGGCTTAGCCACTTTTCTGTAGGTTATATATTTACTTATG  
CAGCTTTCTTGATTGCCTCCACATCAGGGAAATTTGGTATGTCACACTCAGTAAAAATT  
TATGATACATGTATAGGATGTACCCAATGCGTACGAGCATGTCCTACAGATGTACTGGAA  
ATGATACCTTGGGATGGATGTAAAGCTAAGCAAATTGCTTCCGCCCAAGAACAGAGG  
ACTGCGTGGGTTGTAAGAGATGTGAATCCGCTTGTCCAACCGACTTTTTGAGTATACGG  
GTTTATTTATGGCATGAGACAACCTCGCAGCATGGGTCTTGCTTATATGACAGATCTCAAC  
TTACCCTCTATTTTTGTGCCTTTAGTAGGCCTATTATTTCCAGCAATTGCAATGACTTCTT  
TATTTTTGCATGTGCAAAAAATAAAATTGTCATGCGAGATATCAAACATATCTTTCTG  
TGGCGCCTGTGCTAACTACTCTATGGTTTTGGTTCTTTAGCGGGTCTATTGATAGAGATCA  
ATCGGTTATTCCCAGATGCGTTGACATTCCCATTTTTT-----ATGACTGCTATTTTAGAGA  
GACGCGAAAGCACAAGCCTATGGGGCCGTTTTTGCAATTGGATAACCAGCACTGAAAA  
TCGTCTTTACATTGGATGGTTCGGTGTTTTGATGATCCCGACCCTATTGACCGCTACTTC  
TGTATTTCTTATTGCCTTCATTGCGGCTCCTCCAGTCGATATTGATGGTATTCGTGAACCC  
GTTTCTGGCTCGTACTTTATGGAATAATATCATTCTGGTGCTATTATTCCTACTTCTG  
CGGCTATTGGTTTGCATTTTTATCCAATATGGGAAGCGGCATCTGTTGATGAATGGCTAT  
ACAATGGTGGCCCTTATGAGTTAATTGTTCTACACTTCTTACTTGGTGTAGCTTGTTACA  
TGGGCCGTGAGTGGGAGCTTAGCTTCCGTCTGGGTATGCGTCCTTGGATTGCTGTTGCA  
TATCCGCTCCTGTTGCAGCTGCTACTGCTGTTTTCTTGATCTACCCTATTGGTCAAGGA  
AGCTTCTCTGATGGTATGCCTCTAGGAATATCTGGGACTTTCAACTTTATGATTGTGTTT  
CAGGCTGAACACAACATTCTTATGCATCCATTTACATGCTAGGTGTGGCTGGTGTATT  
GGCGGCTCTCTATTTAGTGCTATGCATGGTTCCTTGGTAACCTCTAGTTTGATCAGGGAA  
ACTACTGAAAATGAGTCTGCTAACGCTGGTTACAGATTCGGTCAAGAGGAAGAACTT  
ATAATATCGTAGCTGCTCATGGTTATTTGGCCGATTGATCTTCCAATATGCTAGTTTCAA  
CAACTCTCGTTCCTTGCCTTCTTCTAGCTGCTTGGCCTGTAGTGGGTATATGGTTCAC  
TGCTTTAGGTATTAGCACCATGGCTTTCAATCTAAATGGATTTAATTTCAACCAATCCGT  
AGTTGACAGTCAAGGTCGTGTCATTAACACTTGGGCAGATATCATTAAATCGTGCTAATC  
TTGGTATGGAAGTTATGCATGAACGTAATGCTCACAACCTTCCCTCTAGATTTAGCTGCTA  
TGGAAGCTCCATCTAAAATGGAATGGGTTTACCTTGGTATCGTGTTACACCCGTCGTA  
TTGAACGATCCTGGTTCGTTTCTGTTTCTGTACATATAATGCATACAGCTCTAGTCGCAGGT  
TGGGCGGGTTCGATGGCTCTATACGAATTAGCTGTTTTTATGATCCCTCTGATCCCGTCTT  
GATCCAATGTGGAGACAAGGGATGTTTCGTTATACCCTTTATGACTCGTTTAGGAATAAC  
CGATTCATGGGGCGGTTGGAGTATCGCA---GGGGGACTCTAACGAATCCCGGTATTTG  
GAGTTATGAAGGTGTGGCCGGGGCACACATTGTGTTTTCTGGATTGTGCTTCTTGGCAG  
CGATCTGGCATTGGGTCTATTGGGATATAGAAATTTTCTTTGATGAACGTACAGGAAAA  
CCCTCCTTGGATTTGCCCAAGATCTTTGGAATTCATTTATTTTTATCCGGGTTGGCTTGC  
TTTGGGTTTGGTGCATTTTCATGTAAACAGGTTTGTATGGTCTTGGAAATATGGGTTTCTGAT  
CCTTATGGTCTAACTGGAAGGTACAACCTGTAAGTCCAACGTGGGGCGCGGAAGGTT

TTGATCCTTTTGTTCGGGGGGTATAGCTTCTCATCATATTGCTGCAGGTACATTGGGAA  
TATTAGCCGGTTTATTTTCATCTTAGTGTCCGTCCGCCCAACGTCTATACAAAGGATTAC  
GTATGGGTAATATTGAAACTGTACTTTCCAGTAGTATCGCTGCTGTGTTTTTTCAGCTT  
TCGTGGTTGCTGGAACATGTGGTATGGTTCAGCAACAACCTCCGATCGAATTATTTGGT  
CCCCTCGTTATCAGTGGGATCAGGGATACTTCCAGCAAGAAATATATCGAAGAGTTAA  
CGCCGCGTAGCCGAAAATAGGAGTTTCTCAGAAGCTTGGTCTAAAATTCCCGATAAA  
CTAGCTTTTTATGATTACATTGGTAATAATCCGGCGAAGGGGGGATTATTTCAGAGCTGGA  
TCGATGGACAACGGGGATGGAATAGCTGTTGGGTGGTTAGGGCACCTATCTTTAGAG  
ATAAGGAAGGGCATGAACTTTTTGTGCGTCGTATGCCTACCTTTTTTGAAACATTCCCA  
GTCGTTTTGTAGACGGAGACGGGATTGTGAGAGCGGATGTTCCTTTTAGAAAGGGCAG  
AATCAAATATAGTGTGCAACAGGTAGGTGTAACCTGTGGAGTTCTATGGTGGTGAACCT  
GCTGGAGTCAGTTATAATGATCCTGCTACTGTCAAAAAGTATGCTAGACGTGCTCAATT  
AGGTGAAATCTTTGAATTGGATCGTGCTACGTTGAAATCCGATGGTGTTTTTTCGGAGCA  
GTCCACGAGGTTGGTTCACTTTTGGACATGCTAACCTTTGGTTTTGCTCTTCTTTTTCGGA  
CACATTTGGCATGGTGTAGAACCTTGTTCGAGATGTTTTTGTGGTATCGATCCAGAT  
TTAGATGCTCAAGTAGAATTTGGAGCCTTCCAAAACCTAGGGGATCCAACCTACAAAGA  
AAGAAGCAGTCATGAAAACCTTATATTCCCTGAGGAGGTTCTACCACGTGGAAACGCT  
CTTTAATGGAACCTTTAGCTTTAGCTGGTCGTGACCAAGAAACCACCGGTTTTGCTTGGT  
GGGCGGGGAATGCCGACTTATCAATCTGTCCGGTAAATTGCTCGGAGCTCACGTTGCT  
CATGCCGATTAATCGTCTTCTGGGCCGGAGCAATGAACCTATTTGAAGTGGCTCATT  
CGTACCAGAAAAACCCATGTATGAACAAGGATTAATTTTACTTCCCCATTTAGCTACTCT  
AGGTTGGGGAGTAGGTCCTGGTGGGGAGGTTGTAGACACCTTCCATACTTTGTATCTG  
GAGTACTTCACTTAATTTCTCCGAGTCCTAGGCTTTGGGGGTATTTTTTCATGCGCTC  
TCGGGCCCGAAACTCTTGAAGAATCTTTTCCATCTTTGGTTATGTATGGAAAGATAGA  
AATAAAATGACCACCATTTGGGTATTCACTTAATCCTCTTAGGTATAGGAGCTTTTCTC  
CTGGTCTCAAAGCTCTTTATTTGGGGGTGTATATGATACCTGGGCACCCGGCGGTGG  
AGATGTAAGAAGAATTACCAACTTGACCCTTAACCCAAGCGGGTTATTTGGTTATTTAC  
TAAAGTCTCCCTTTGGGGGAGAGGGGTGGATTGTTAGTGTGGACGATTTAGAAGATATA  
ATTGGAGGACATGTATGGTTAGGTTCCATTTGTATACTTGGCGGAATCTGGCATATCTTA  
ACCAAACCTTTTGCATGGGCTCGTCGCGCACTTGTATGGTCTGGAGAAGCTTACTTGTCT  
TTATAGTTTAGCGGCATTAGCTGTCTTTGGTTTTATTGCTTGTGTTTTGTCTGGTTCAAT  
AATACCGCTTATCCTAGTGAGTTTTACGGACCTACTGGTCCAGAAGCTTCTCAAGCTCA  
AGCATTTACTTTTCTAGTTAGAGACCAGCGTCTTGGAGCTAACATTGGATCCGCTCAAG  
GACCTACGGGTTTAGGTAAATACCTAATGCGTTCCCCGACCGGAGAGGTCATTTTTGGA  
GGAGAAACTATGCGTTTTTGGGATCTACGTGCTCCCTGGTTAGAACCTCTAAGGGGGC  
CAAACGGCTTGGACTTAAGTAGGCTTAAAAAAGACATACAACCTTGGCAAGAACGAC  
GTTCCGCAGAATATGACTCATGCCCCCTAGGTTCTTTAAATCCCGTGGGAGGTGTA  
GCTACCGAGATCAATGCAGTCAATTATGTCTCTCCAGAAGCTGGTTAGCTACCTCTCA  
TTTTGTTCTAGGATTCTTCTATTTGTGGGTCATTTGTGGCACGCGGGAAGAGCTCGTG  
CAGCTGCAGCAGGTTTTGAAAAAGGAATTGATCGTGATACTGAACCCGTTCTTTTCATG  
ACTCCTCTTAATATGACTATAGCCCTTGGTGGATTTACCAAAGAAGAAAATGATTTATTT  
GATATTATGGATGACTGGCTACGCAGGGACCGTTTCGTTTTTGTGGGTTGGTCCGGTCT  
ATTACTTTTCTTGTGCCTATTTTCGCAATTAGGGGGGTGGTTCACAGGGACAACCTTTGT  
AACTTCATGGTATACCCATGGATTGGCTAGTTCCTATTTTGAAGGGTGCAATTTCTAAC

CGCTGCAGTTTCTACTCCCGCTAATAGTTTAGCACATTCTTTATTGCTACTATGGGGTCC  
TGAAGCACAGGGGGATTTTACTCGTTGGTGCCAATTAGGTGGGCTGTGGACTTTTGTT  
GCTCTACATGGTGCTTTTGGACTTATAGGCTTCATGTTACGTCAATTCGAACTTGCTCGA  
TCCGTTCAATTGCGACCTTATAACGCAATCGCATTCTCTGGTCCAATTGCTGTTTTTGT  
TCCGATTCCCTAATTTATCCACTAGGCCAGGCTGGATGGTTCTTTGCACCTAGTTTCGGT  
GTAGCAGCTATATTTTCGGTTCATCCTTTTCTTCCAGGGGTTTCATAATTGGACGTTAAAC  
CCATTTCATATGATGGGAGTTGCCGGAGTATTGGGTGCTGCTCTCCTATGTGCTATTCAT  
GGTGCTACCGTAGAAAATACTTTATTTCGAGGACGGTGACGGTGCAAATACATTCGGTGC  
CTTTAATCCAACCTCAAGCTGAAGAGACTTATTTCGATGGTGACCGCTAACCGCTTTTGGT  
CACAAATCTTTGGGGTTGCTTTTTTCCAATAAACGTTGGTTACATTTCTTTATGTTATTTGT  
ACCAGTCACGGGTTTGTGGATGAGTGCTATTGGGGTAGTCGGTTTGGCTTTGAACCTCC  
GCGCCTATGACTTCGTTTCCCAGGAAATCCGTGCAGCAGAAGATCCTGAATTTGAGAC  
TTTCTACACAAAAATATTCTTTTAAACGAGGGTATTTCGCGCTTGGATGGCGGCTCAGG  
ATCAGCCTCATGAAAACCTTATATTCCCTGAGGAGGTTCTACCACGTGGAAACGCTCTT  
ATGTCTGGAAGTACGGGAGAACGCTCTTTTGGCTGATATTATTACCAGTATTAGATACTGG  
GTCATTCATAGCATTACTATACCTTCCCATTTCATTGCAGGTTGGTCATTTCGTTAGCACGG  
GTTTAGCTTACGATGTGTTTGGAAAGCCCTCGACCCAACGAATATTTACAGAGAGACG  
ACAAGGAATTCCCTTAATAACAGGCCGTTTCGATTTCGTTGGAACAACCTCGATGAATTA  
ATCGATCCTTTATGACAATAGATAGAACCTATCCCATTTTACAGTGAGATGGTTGGCTG  
TTCACGGACTAGCTGTACCTACTGTTTCTTTTTTGGGGTCCATATCGGCAATGCAGTTCA  
TCCAACGAATGGCTACACAAATGGCTGAAGGTGGTTCCAGATTTAGT---CCAAGACGA  
ACTCCTGTAGGGGATTTATTA AAAACCATTGAATTCGGAGTATGGTAAAGTCGCTCCTGG  
GTGGGGAAC TACCCCTTATGGGGGTCACAATGGCTCTATTTGCAGTATTTTATGCAT  
TATTTTGGAGATTTATAATTCTTCCGTTTTATTGGATGGGATTTTCATTGAGTATGCTTACT  
CTTAAACTGTTTCGTTTACATAGTAGTGATATCTTTGTTTCTCTTTTTATCTTTGGATTCCT  
GTCTAATGACCCTGGACGTAATCCTGGACGTGAGGAAATGGCCGATACTACTGGAAGG  
ATTCCTCTTTGGCTAATAGGTACTGTAACCTGGTATTCTTGTGATCGGTTTAGTAGGCGTT  
TTCTTCTACGGATCATATTCGGATTGGGCTCATCCCTGATGCTTACTATT-----TTGATCT  
CTATCTGTCTTAATTCTATCCTTCAGCCAAGTGCT--TTCCTTGGTAAATTGCCCGAGGCT  
TATGCTTTTTTCAACCCAATTGTAGATATTATGCCGGTTATACCTGTGCTCTTTCTTCTTTT  
AGCTTTTGTGGCAAGCTGCTGTAAGTTTTTCGAATGACACAATTAATCCAAACGAAC  
AAAATGTTGAATTGAATCGTACCAGTTTATACTGGGGTTTATTACTCATTTTTGTACTTG  
CTGTTTTATTTTCCAATTATTTCTTCAATATGGAAGTCAATATACTCGCATTATTGCTACT  
GCGCTGTTCATTTTAGTTCCTACTGCTTTTTTACTTATCATATACGTAAAAACAGTCAGTC  
AAAATGATATGGAAACTGCAAACCTAGTCGCCATCTTCCTATCTGGTTTACTTGTAAGCT  
TTACAGGATATGCCCTATATACTGCTTTTGGGCAACCCTCTCAACAACCTAAGAGATCCAT  
TCGAGGAACACGGGGACATGGAAGCATTGGTTTATACATTCTTGTGGTCTCAACTCTA  
GGGATTCTTTTTTTTGCTATCTTTTTTCGAGAACCACCTAAGGTTCCGACTAAAAAGGT  
GAAAATGACTATTGCTTTCCAATTGGCTGTTTTTGCATTAATTGCTACTTCATCAATCTTA  
TTGATTAGTGTACCTGTTGTATTGTCTTCTGATGGTTGGTCAAGTAATAAAAATGTT  
GTATTTTCCGGTACGTCATTATGGGTTGGATTAGTATTTCTAGTAGCTATCCTTAGTTCTC  
TCATTTAT-----ATGTCACCAAAAACAGAACTAAAGCCAGTATTGGATTCAA  
AGCCGGTGTTAAAGATTACAGATTGACTTATTACACTCCTGAGTATGTAACCCTTGATAC  
TGATATCTTGGCAGCATTCCGAGTAACCCCTCAACCTGGGGTCCCACCAGAGGAAGCT

GGAGCTGCGGTGGCTGCCGAATCTTCCACCGGTACATGGACCACTGTCTGGACCGATG  
GCCTTACTAGCCTGGATCGTTACAAAGGACGATGCTACCACATTGAGTCGGTTGCTGGA  
GAGGAAAATCAATATGTTGCTTATGTAGCTTATCCTTTGGACCTTTTTGAAGAAGGTTCT  
GTTACTAACATGTTTACTTCCATTGTCGGTAATGTTTTTGGGTCAAGGCCCTACGAGCT  
CTACGTCTGGAGGATCTTAGAATTCCTCCTGCTTATTCGAAAACCTTCCAGGGCCCACC  
TCACGGTATCCAAGTTGAAAGAGATAAATTGAACAAATACGGTCGTCGCCCTGTTGGGAT  
GTACTATTAACCTAAATTGGGTTTATCCGCTAAGAACTATGGAAGGGCAGTTTATGAAT  
GTCTCCGTGGTGGACTTGATTTTACCAAAGATGATGAGAACGTTAACTCCCAACCATT  
ATGCGTTGGAGAGACCGTTTCTTATTTTGTGCCGAAGCTATTTATAAAGCACAAGCTGA  
AACGGGGGAAATCAAAGGGCATTACTTAAATGCTACCGCGGGTACATCTGAAGAAATG  
ATAAAAAGGGCTGCATGTGCTAGAGAATTGGGAGTTCCTATCGTAATGCATGACTACTT  
AACAGGGGGGTTACCGCAAATACTACCTTGTCTCGGTACTGTGCGGATAATGGACTAC  
TTCTGCACATACATCGTGCAATGCATGCAGTGATTGATAGACAAAAGAATCATGGTATA  
CACTTCCGTGTACTAGCTAAAGCGTTGCGTATGTCAGGGGGGGATCATATCACTCTGG  
TACCGTAGTAGGTAACTAGAAGGTGAACGAGAGATTACTTTGGGCTTTGTTGATTTAC  
TACGTGATAATTGGATTGAAAAAGACCGCAGTCGCGGTATTTATTTCACTCAAGATTGG  
GTATCTATGCCAGGTGTTCTGCCCGTGGCTTCAGGGGGTATTCACGTTTGGCATATGCCT  
GCTCTGACCGAGATCTTTGGGGATGATTCCGTACTACAGTTCGGTGGAGGAACTTTGG  
GACACCCTTGGGGAAATGCACCTGGTGCAGTAGCTAATCGTGTAGCTCTAGAAGCGTG  
TGTAACAAGCTCGTAATGAGGGACGTGATCTTGCTCGCGAAGGTAATGACGTTATTCGTC  
AAGCTTGCAAATGGAGTGATGAACTGAATGTTGCTTGCAGGATGGAAGGAGATCAA  
ATTTGAATCCAAGCAATGGATACCTTG-----ATGGCGAGACATTTATACAAAACCTTCTA  
CCCCGAGCGCACGTAATGGAACCGTAGACAGTCAAGTGAAATCCAATCCACGAAAAA  
ATTTGATCCATGGAAAGCATCATTGTGGTAAAGGTCGTAATGCCAGAGGAATCATTACC  
GCTGGGCATAGAGGGGGAGGTCATAAGCGTCTATACCGTCAAATTGATTTTCGACGGAA  
TGAAAAAGACATCTCTGGTAGAATCGTAACCATAGAATACGACCCTAATCGAAATGCAT  
ACATTTGTCTCATACTATGGGGATGGTGAGAAGAGATATATTTTACATCCCAGAGGG  
GCTAGAATTGGAGATACCATTGTTTCGGGTACAGGAGTTCCTATCTCAATGGGAAATGC  
CCTACCTTTGACCAATATGCCCTTAGGCACGGACATACATAACATAGAAATAACACTTG  
GAAAGGGTGGACAATTAGCTAGAGCAGCAGGCGCTGTAGCGAAACTGATTGCAAAAAG  
AGGGGAAATCGGCCACATTAAGATTACCGTCTGGGGAGGTTTCGTTTGATATCCAAAAA  
CTGCTCAGCAACAGTCGGACAAGTGGGTAATGTTGGGGTGAAGCAGAAAAGTTTGGG  
TAGAGCCGGATCGAAATGTTGGCTAGGTAAGCGCCCTGTAGTAAGAGGAGTCGTTATG  
AACCTGTAGACCATCCCCATGGAGGTGGGGAAGGGAGGGCCCCAATTGGGAGAAAA  
AAACCCACAACCCCTTGGGGCTATCCCGCGCTTGGGAAGAAGAAGTAGGAAAAGGAAT  
AAATATAGTGATCGTTTTATTCTTCGTGCGCCGTAAG---ATGATTCAACCTCAGACCCGTT  
TGAATGTAGCGGACAACAGCGGAGCTCAAGAAGTATGATGTGATTTCGAATTGTAGGAGC  
TAGT---AATTACCGATATGCTCATATTGGTGACGTTATTGTTGCTGTAATTAAGAAGCAG  
TGCCAAAATGTCTCTGGAAAGATCAGAAGTATCAGAGCTGTAATTGTACGTACATG  
CAAAGAACTTAAACGAGATAACGGTATGATAATACGATATGATGACAATGCAGCAGTTG  
TCATTGATCAAGCAGGAAATCCAAAGGGCACTCGAGTTTTTGGGCCGATCGCCCGGA  
ATTGAGACATTTGAATTTCACTAAGATAGTCTCATTAGCTCCTGAGGTATTAATGCTTAG  
TCCAAAAAGAACCAGGTTTCGTAAACAACATAGAGGAAGAATGAAAGGAGTATCTTAT  
CGGGGAAATCAAATTGGTTTTGGTAGATACGCACTTCAGGCACTTGAACCCGCTTGGG

TCACATCTCGACAAATAGAAGCAGGACGACGAGCAATGACACGATATGTGCGTCGTGG  
TGGAAAATATGGGTACGTATATCCCCGACAAACCCGTTACAGTAAGATCCGCGGAAA  
CACGTATGGGTTTCGGGGAAGGGATCTCCTGAATATTGGGTATCCGTCGTTAAACCAGAT  
CGCATACTTTATGAAATGGGCGGAGTATCAGAAGTTGTAGCAAGAGCAGCTATGGAAAT  
CGCTGCGTGCAAAATGCCTATACGAACTAAATTTGTTGTTTCGGAAATGACCAGAGTTA  
AACGCGGATATATTGCTCGCAGACGCAGAACCAAAATGGGTGTATTTGTATCGAACTTT  
CGAGGGGCTCATTCAAGACTGACTCGAGCTGCTACTCAACAGACAAGGAGAGCTTTG  
GTTTCCAACCGGCGGGATAGAGGCAAGCAAAAGAGAGATTTTCGTCGTTTGTGGATCA  
TTCGTATAAATGCAGTAATTCGAGAGATT-----TTCACCTATAGTCGATTACTACATG  
ATCTGTACAAGAGGCAGCTCTTTCTGAATCGTAAAATACTTGGACAAATAGGGATATTC  
AATAAGAATTGCCTTTACGTGATTGCCAATGATCTTAGCAATTCATTC-----  
---ATGATCAAGGAAATACGAGCTATAGCTAGACATATACATATATCACCTGAAAAAGCGC  
GAAGGATAATTGATCAAAATCCGGGGCTCTTCCTATGAGCAAACACTTATGATACTGAAA  
CTCATGCCTTATCGAGCATGTTATCCCATTTTCAAATTAGTGTATTCTGCAGCAGCAAAT  
GCTAGTCACAATATGGGTTTAAAGGAAGAGAATTTATTCATTAATAAGCCGAAGTCAA  
CAAAGGTGTTATCGTGAAAAGGTTAAGACCGAGAGCTAAGGGACGTAGTTATGCGATA  
AAAAGGACGACGTGTCATATAACAATTGTATTAAGT-----GAAAAGCCT-----  
ATGGATGGAATCAAATATGCAGTATTTACAGAAAAAAGTATTCGGTTATTGCGGAACAA  
TCAA---TATACTTCTAATGTGCAATCAGGATCAACTAGGACAGAAATAAAGCATTGGATC  
GAACTCTTCTTTGGTGTCAAGGTAATAGCTATGAATAGTCATCGACTCCCGGTAAAGGG  
TAGAAGAATGGGACCTATTATGCGACATACAATGCATTACAGACGTATGATCATTACGCT  
TCAACCGGGTTATTCTATTCCACTTCTTCTAGAGAAAAGAACTATGGCGGTTCCAAAGA  
AACGTACTTCGACATCAAAAAACGTATTCGTAGAAACATTTGGAAGAGAAAAGTATA  
TTTGTCCGCGGTAAAAGCCTTTGCTTTATCCAAATCGATTGCCAACGCG-----GGTTTT  
TTG-----AAAAAAGCAAAATGGCCACTGGTAAAAATCCCAGAGTAACAGTTATTTTGG  
AATGTACCAGTTGCGTCCAAAATTCT-----AAGAGTAAGAAATCGTCGGGGATTTCTAGA  
TATATTACTCAAAAGAATCGACACAATACACCGGACCGATTGCAATTGAGCAAATTCTG  
TCGCTATTGTTACAAGCATAACAGTGCATGGGGAGATAAATAAAATGAAAATAAGAGCCT  
CCGTTTCGTAAGATTTGTGAAAAATGTAGACTAATCCGTAGGAGGAGACGAATTAGAGT  
CATTTGTCCCAACCCGAAACATAAACAGAGACAGGGAATGGTTTCGAGAGGAAGGACC  
AGTATCCACTCGGACACTGCAGTGGAAAGTGTGTTGAATCAAGAGCAGACAGTAAGCG  
ACTTTATTATGGTCGTTTCATTCTGTCCCCACTTATGAAAGGTCAAGGGGATACAATAGG  
TATTGCGATGCGAAGGGCTTTACTTGGAGAAGTAGGAGGGACATGTATAACGCGTGCA  
AAACTTGAT-----AAAGTACTACATGAATATTCTACGATGGTAGGTATTGAAGAATGCGTC  
CATGAGATTTAATGAATTTAAAAAGAATTGTATTTTGAAGTACTTGTACGGGCCTCG  
CCAGGCATCTATCCGTGTCCGGGGGCCTAGATATGTAAGTACTGCTCAAGATATCATCTCACC  
ACCTTCTGTGCAAAATAGTTGACACTACACAGCATATAGCTACCCTGACCGAACCCGTTG  
ATTTGTCTATTGAATTACAAATCGAGAAGGCTCGCGGATATCCTATGAGAGCTCAAAAA  
AACTGTCAAGATGGAAGTTAT-----CCTATAGATGCTGTATCCATGCCTGTTGAAATGTA  
AATCATACTATTCAATTAACGGGAATGGCAATAAAAAACAAGAGCTACTTTTTCTCGA  
AATATGGACGAATGGAAGCTTAACCCCTAAAGAAGCACTTTGCGAGGCTTCCCGCAAT  
TTGATCGATTTCTTTCTCCTTTTCTACACGCGGAGGAAGAGGACGTAAAT-----AGAGA  
GGACAATCAA---AAAAGGACTGCTGTGCCCTTTTTCCCTTTCATGATGCATTGGAT---A  
ATATGGCGAAGAGCCAAGGA---GAAGTTGGATTGAAACATATTTTTATTGATCAATTAGA

ATTGCCTGCCAGGATTTATCACTGCCTCGAAAGGTCCAATATACATACATTATGCGACCT  
TTCGAGTAAGAGTCAAGAAGATCTTATGAGAATGGAGCATTTCGGGTAGAAGACGTA  
AAAAAGATATTCGACATTCGACAGAAG-----GCCATGGATGGATTTTCAAAT--ATGT  
TCCGGGATGCTAGAGATGAGGAAATGTTTACAATACCTGGATTTAGTCAGATTCAATTT  
CAGGGATTTTCTAGGTTTCATTGATGAGGGCTTGATGGAAGAACTTTCTCAATTTCCAAA  
CATTGAGGATCCAGATCAAGAGATTGAATTTAAATTTTGGCGAATCATATGAATTGGT  
GGAACCCTTTCTAAAGGAAAGAGATGCTGTGTATGCAGCACTTACATACTCCTCCGCGT  
TATATGTACCGGCGGGATTTCATTGGTAGAACCAGGTGGAGATACGCAAAAAACAACTATA  
TTGATTGGAAGGATTCCTCAAATGACTTCGTTGGGAACCTTTATAGTAAATGGAATTCA  
CAGAATTGTAGTCAATCAAATCTTGCAAAGACCCGGGATTTATTACAGTTTGAGATTGG  
AAAAAAAG--GAAATTGTTTATACTGGCACCATAATATCAGATTGGGGAGGAAGATCAA  
AATTAGAGATTGATGGAAAAAGAGGATATGGGCTCGTGTAGGCAGGAAAGAAAAAAT  
ATCTATTCTAGTTCTATCATCAGCTATGGGTTCAAATCTAAGGGAAATTCTAGCCAATGT  
TTGTTACCCTGAAATCTCTTGTCTTTCCCAAACAAGAATAATGATGAAAGGATTCTTTC  
AAAGGAAAATGCCATTTTGGAGTTTACCAAAATTTGTTTCGTGTAGATGACGATTTGG  
TAGTTTCAGATTCCTTATGTGAAAAATTACAAGAGAAATTTTTTAAACAAAGATGTGAA  
TTAGGAATAGTTGGTCGACAAAATCTCAATCAGCGGCTGAATCTTAATATACCTCAAAA  
TATTACATTCTTGTACCATCCGATGCTTGGCTGCTGTGAATTATTGATCGGATTCCAA  
TTTGAATGGGTACACTTGACGAT-----ATGCATCACTTGAAAAATAAACGGATTCTTC  
CGTAGGGGATCTATTGCAGGATCAATTAAGATTGGCTCTGGTTCGTTTGGAAAAGGTAG  
TTGAAGAAAGTCTATGTGAAGTAATCTGGGATGATATAGTGACT-----CCCCTAAGTTG  
GTGATAACTAGAAGTCCA-----TTAACAAGGACTTATCAATCATTTTTCGGGCAACA  
CCCTTTATCTCAGGTTTTTGGATCAAACGAATCCATTGTCACAACCTAGTTCATGGGCGAA  
AATATAGTTTTTTGGGTCCTGGGGGATTGACAGCGGATACTGCAAGTTCTCGTCCACGA  
GATATCCATCCTAGTTATTATGGACGATTTTGTCCAATTGATACCTCTGAAGGAATTAAG  
GTTGGACTTATTGGATCCTTAGCTATTCATACGAGGATTGGTGATTGGGGG---TGGATAG  
AGAGTCCCTTTTAT-----GAAATATCTGAAAGATCAAAGAG-----GAACAGATGGTTT  
ATTTATACCAAGGAGAGATGAATACTATAGGGTAGGGACTGGAAATCTTTTGGCCTTG  
AATCGTGGTATTACAGGAAGAAGAGGCGTTCCAGCGCAATACCGTCAAGAATTTCTGA  
CTATTGCATGGGAACAGATTCAGCTTCGAAACATTTCTCCCTCCAATTTTTTCTCTTG  
GTGCTTCCCTCATTCTTTTATGGAGCATAATGATGCCAATCGAGCTTTAATGGGTTCTA  
ATATGCAGCGTCAAGCAGTTCCTCTTTATCAGTGTGAAAAGTGCATTGTTGGGACTGGG  
TTGGAAGGCAAGTGGCTCTCGATTCCGGTAATTCGGCTATAGCCGAAGGCGCGGGAA  
AGATCATTATACCGATGCTGAAAAGATCCTTATTTTGTCCAATGGAGACACTATAACCA  
TTCCATTGGTTGTATATCAGCGTTCCAACCAAATACTTGGATGCATCAAAAATCCCAG  
GTTTATCGGAAAAATATATTAATAAAGGACAAATTTTGGCGGATGGTGCGGCTACATT  
TGGTGGCGAACTCGCATTGGGAAAAAATATATCAGTAGCTTATATGCCATGGGAAGGTT  
ACAATTTTGAAGATGCGGTACTCATTAGTGAACGTCTAGTATATGACGATTTTATACTT  
CTTTTCATATACGCAAATATGAAATTCAGACTTATGTGACAAATCAAGGA---CCCGAAAA  
AATCACTAATGAAATACCAGGTTTGGCGCCTTATTTCCCTCCGAAATTTAGACAGAAATG  
GAATAGTAATGCTTGGATCTTGGGTACAAACAGACGATGTTTTAGTAGGCAAATTAACA  
CCCCTGACAGCGAAGGAA---TCATTGATCGAGCCCGAAGATAGATTATTACGAGCCATA  
CTTGACCTTCCGGTATCCGTAACAAAGGAACTTCTCTTACGTTGCCCATAGGTGGAAC  
AGGTCGAGTTATTGATGTGAGCTGGTTCAAGAGAAGTGGT-----GATAGCGAACT

AATTCGTGTATATGTCTTACAGAAACGTAAAATCCAAGTGGGTGATAAAGTTGCTGGAC  
GACATGGGAATAAAGGCGTCATTTCAAAGATTTTGCCTAGACAAGATATGCCTTATTT  
CAAGATGGGACACCTGTTGATATGGTCTCAACCCATTAGGAGTACCCTCGCGAATGAA  
TGTGGGACAGATCTTTGAATGCTCGCTCGGATTAGCGGGAAGCCTGCTGGACAGACAT  
TATAGAATAACGCCTTTTGTATGAGAGATATGAGCAAGAGGCTTCGAGAAAACCTCGTGTT  
TTCTGAATTATATGAAGCCAGTAAGCAAACATCAAATCCATGGGTATTTGAACCTGAGT  
ATCCTGGAAAAAGCATCATATTTGATGGAAGAACAGGAGATCCTTTTCAACGACCCGTT  
TTAATAGGAAAGTCCTATATCCTAAAATTAATTCATCAAGTTGATGATAAAATTCATGCG  
CGTTCCACAGGGCCTTATGCATCTATTACACAACAAGCAGTTAAGGGGAGGAAAAAGC  
TAGGGGGACAACGAGTAGGAGAAATGGAAGTTTGGGCTCTAGAGGGATTTGGTGTG  
CTCATATTTTACAAGAGATGCTCACTTATAAATCTGATCATAGGAGAGCTCGTCGGGAA  
CTACTCGGTACAATCATCTTTGGAGGA---ACAATTAATCCTGAGGGTGCTACAGAATCTT  
TTCGGTTGCTCGTTTCGCGAACTACGATCTTTATCTCTTGAACCTGAACCATTTCCTTGTAT  
CGGAGAAAAACTTCGAGATTACTAGGAAGGAAGTT-----ATGATCGACCAGT  
ATAAACATCAACAACCTTCGAATTGGATTAGTTTCGCCTCAACAAATAAGGGCTTGGGCT  
ACCAAAATTTTACCTAATGGAGAAATAGTTGGAGAGGTTAAAAAAGCCTCCACTTTTG  
ATTACGAAAGCGATGAACCAGTAAAAGATGGGTTGTTTTGTGAAAGAATTTTGGACC  
GATAAAAAGTGGATTTTGTGCTTGTGGCAATTATCAAGACATTGAGGGAGAAAAAGAA  
CAACCTCGATTTTGTAAAGTATGCGGAGTAGAATCTGTGGATTCTCGGATACGAAGATA  
TCAAATGGGATACATCAAATTAGCACGTCCAATGACTCATATATGGTATTTGAAACGTCG  
TCCTAGTTATATCGCGAATCTTTCAGATCAACCTCTTAAGGATTTAGAAGGCCTGGTATA  
TCGCGGT-----TATTTTTTTGCTAGGCCTAGAGATAATCAAAAACATCCTTTCTTACGATT  
ACGTGGTTTATTCAGATCTGAGATGGAATCCTGTACATCTAGCATGACTCCTTTCTTTAG  
TACTGAGGGCTTCGATACATTGAGAAATCGACAACCTATCCAGTGGAGCTGCTGCTATCA  
GAGAAAAATTAGCCGACCCGGATTTGGGAATGATTATTGATCGTTCGTTGTGCGAATGG  
AACGACTTGGCAGAAGAAGAAGGATCCACCGGGTCCGATTGGCGGGCTATACAAATTC  
GAAGGAGAAAAGCTTTTTTAGTTAGACGCATACAATTGGCTAAGCATTTTATTCAAGCA  
AATGTAGAACCAGAACGGATGGTTTTGTGCCTGTTACCAGTTCTTCCCTCCCGAATTGAG  
GCCACTCTTTCGGCTAGAAGATGAGACAGTTGTGGGTTTCAGATATTAATGAACTTTATA  
CAAGAGTGATCTCTCGGAACAATCGTCTTACAAAACCTGCTAAGGAAATTGACGCCG----  
--GTGGAATTAATAAGAGCTCAGGAGAAAGTAGTACAAGAAGCTGTTGATACACTTCTT  
GATAATGGAATCCGGGGAGAGCCACTGAAGGACCATAACAATCAAGTTTATAAGTCGT  
TTTCAGATGTCATTTCAAGCAAAGAGGGAAGATTTTCGTCATACTCTACTTGGTAGACGT  
GTCGATTATTCGGGTCGTTCTGTTCATTGTGGTGGGTCCTTCGCTCTCATTACATGAATGT  
GGATTACCTCGAGAAATAGCAATGGTGCTATTTTCAGCCATTTGTAATTCGTGTTCTATTT  
AAACAACATCTTGCTTCCAGCATAAAGATTGCTAAAAGTATAATTTGGCAAAACAGACC  
AATTGTATGGGAAATACTTCAACAAGTTATGCAAGGACATCCTGTATTGCTAAATAGAG  
CCCCCACTTTGCATAGATTAGGCATACTGGCCTTCCAGCCATTTTAGTAGAGGGGGCGC  
GCGATTTGGTTACATCCATTGGTTTTGTAAAGGATTCAATGCGGACTTCGATGGGGATCA  
AATGGGAGTTCATATACCTTTATCCTTGAAGCTCAAGCGGAAGCTCGTTTACTTATGTT  
TTCTCATACAAATCTCTTATCCCCAGCCGTTGGTGATCCCATTTGCGTACCAACTCAAGA  
TATGCTTATCGGACTTTATTTATTAACGATAGGCAATCGTGTAAGTATTTATGCAAATAGG  
TATAATCCGTGTGACCACAAACAC-----TACCAAAATGAAAGGGTTGGGAATACTAAA  
TCTAAGTTTAGGAAAGCCAAAGAACCCCATTTTTATAGCTCCTATGATGCACTCGGGGC

TTATCGGCAGAAACGAATCGATTTGGATAGTCCTTTGTGGTTACGGTGGCAACTAGAGC  
AACCT--GTCATTGCCTCACGCAATGGAGAAGTTCCCATCGAAGTTCAATATGAATCCC  
GGGGTATTTCTCATGAGATTTATGGTCACTATCGAGTAGTAAGAAGTTCAAAAAAAAAA  
AAAAAAAAATGTCTTTCTATATACATTCGAACCACCGTTGGCCATATTTCTTTTATCGAG  
AAA-----ATGCTAGAAAGGAAAAAT  
GGGGTCTTTCACAATAAAGTGATAGATGGAAGTCCATGAAACGAATTATTAGCAGATT  
AATAGATTATTTTCGGACTAGCCTATACATCATAATTTTGGATCAAATAAAAACTTTGGG  
TTCCAGCAAGCCACTGCCACATCCATTTTCATTGGGAATTGATGATCTTTTTACAACACC  
TTCTAAGGGATGGTTAGTCCAAGATGCTGAACAGCAAAGTTTGATTTTCGAAAAGCAA  
CATCATTATGGGAATGTACATGCAGTAGAAAAATTACGTCAATCAATTGAGACATGGTAT  
GCTACAAGTGAGTATTTGAAACAAGAAATGAATCTGAATTTTAGGATGACTGATCCCTT  
TAATCCAGTTCATATAATGTCTTTTTTCAGGAGCTCGGGGAAATCCATCTCAGGTCCACC  
AATTAGTGGGTATGAGAGGATTGATGTCAGATCCCCAAGGACAAATGATTGATTTACCT  
ATTCAAAGCAATTTATGCGAAGGGCTTTCTTTAACGGAGTACATCATTTCCTGCTACGG  
AGCCCGCAAAGGGGTTGTGGATACTGCCATACGAACAGCAGATGCTGGATACCTTACG  
CGTCGACTTGTGAGGTAGTTCAACACATGGTTGTACGTAGAACGGATTGTGGAAGT  
CTCGGGTACTTACGTGAGTACTCAAACGGGATGACGGAA-----AGAGTTCCTTATACA  
AACACTAATAGGTTCGCTTCTAGCGAACGATGTCTATATGGGTCTGCGATGCATTGCTA  
CGAGAAACCAAGATATTGGGATTGGACTTTTCAATCGATTCATAACC-----TCT  
CGGACGCCTACAATATCTATTTCGAACCCCTTCACTTGCAGGACTACATCTTGGATCTGT  
CGATTATGTTATGGTAGGAGTCTGATCATGGTGACCTCGTCGATTTGGGGGAAGCAGT  
AGGTATTATTGCGGGTCAATCCATTGGGGAACCAGGGACTCAACTAACATTAAGAACTT  
TTCATACGGGTGGAGTATTCACAGGTGGTACTGCAGAATATATACGAGCTCCCTTTAATG  
GAAAAATACAATTCATGAGGATTTGGTTCATCCTGCACGCACACGTATGGACATCCT  
GCTTTTTTATGCTATGTAGACCTTTGTCTAACTATCGAAAGTCAGGATATTCTACATAATG  
TGAATATTCCAGCAAAAAGTTTGATTTTGGTTCAAAAAATAACTATGTGGAATCAGAA  
CAAGTGATTGCTGAGATTCGTGCTGGAACAGCCACTTTC-----TTGAAAGAGAGGGTTG  
AAAAACATCTTTATTCGGACTCAGAAGGAGAA---ATACATTGGAGTAGGGATGTGTACC  
AGGCATCTGAATATACACATGGTAATGTTTCAGTTCCTTAACCAAACAAGTCATTTATGGA  
TATTATCAGGAGATTTGTGCAGA-----GACAGCTTAGTGCCCTTTTCGCTCCACAAAGAC  
GAAGATCAAATTCACGTTCAA-----TCCCTTTCTTCCAAAAGAAAGACGTTTCCGACC  
TATCA-----TCCAATAAGAATCTA---GTAAGGCACAGATTGTTTGGCTGGGATTCTCCGGT  
CAA---GGTGGGATAATTGATGATTATGCA-----TCGGAGCGAATCATATCCAATGGGCAT  
TGGGATTTTCATCTCTCCTGTC---ATTTACCCGAGAATTCTTAT-----TTGTTGTCGAAGA  
GGGACAGAAATGGATTCATAATCCCAGTACAATACGATCCAGAAAGGGAGAAGGAACT  
AAGG-----CACGGTATTACGATTGAAATACCCATCAAC-----GGTATTTTACGCAGAAACA  
GTATTCTTGCTTATTTTGTATGATCCCCGATACAGAGTAAACAGTTCAGGAATTCTCAAAT  
ATGGCTCGACCATTATCGAGTCCATATCCGTGGAAGAAGGT-----TTGATTACTTATCGAG  
CAATCAAACCAGAATTTCTACAAAATGC---GATGTCGAGCTATTTTTTTTTCATTCCCGA  
GGAAGTGCATATCTTATCCGAATCTTCGTCTATAATGGTACGGAACAATAGTCTCATTGG  
AGTAGATACAAGAATTACTTTTGTAGAGAAGAAGCAAAAATAGGTGGATTGGTCCAGGTG  
GAGAAAAAAAAAAACGGGATTGAACTGAAAATCCTTTCTGGGGATATCCATTTTCGTG  
GTAAAAAAGATAAGGTATCCGAGGACATTGGCATCTTGATACCACCAGGAACGGGAAA  
AAAACCTCGAGAAAAAATCAAAAGGGAAA-----AATCGGGTCTATGTCCAAAAG--



---ATCACACCTATCAAAAAGAAGAAGAAATTTTTTGTTTTAGTACGACCCGTAGTAACG  
TATGAAATAACGGAGGATATCAGTCTGGTAAGGCTTTTTCCCCAGATACGTTACAGGA  
AAAAAGAATTGGCAACTCAGGGTTGTCGATTATATCCTTTATGGAGAGAACAAACCA  
ATTCGGGAATTCACGCAGAAGTTTTCAATTAGTTCGGACTTGTTTAGTCTTGAATTG  
GTGCCAAGACCAAAAC-----AAATCCATAGAAGAGGTTTATGCTTCTTCCGCTGAA  
GTAAGGGCAATGATCTGATTCGATATTTATAAGGATTGATTTGGTGAAGTACCCCAT  
TTGTATACTGGAAAAAGGAATGATAGGCCAAGTTCACTGATACCTGAGACT-----AGATC  
ATATTGCACCACTACCCATGCGCCTTCGAAGAAGGCCGAAGATTCAATCA-----  
-----CTTAGTCAACATAAAGGAACTATTGGTACATTTCTTAATAGA-----ATAAGGAA  
AAACAATCTCTTACCATTTTTTCATCATCTAATTGTTCTCGCGTCCTTCCA-----TTCATG  
AATCCAAATACCCCAAT-----GTAAACAAAGAATCC---CCCGTGATGAAATCACAG-----  
--GGTCTCTTGGGTACT-----GGAACAAAAATGAAGAATTTTTCTTCATCT-----TACCATT  
CAATAAGT-----CATAATGAGCTCTTTTTAAAG---AAATATTTGCTAGGGGAATAAT---TATC  
CAAAACAAGCTTTGCCACGATTTTATCAT-----TTTGATTTACTAGATGAAAATGGGAG  
A-----ATCTCTACCCCAACCCATACAGCGGCATTCTTTTTAATATATTCGACTCGAATTC  
GTGCTTTCTCCATCAGGATTATGCTGAGGTAGCATCCACA-----ATAATGCTTGGACAGT  
TTCTTTTTGAAGATGTATGCATATCAAAATGTGGATCA-----CGCATACAATCGGGTCA  
AGTTCTAATGGTTCAT---CTTGATTCTTTCATAATAAGATTGGCTAAACCCTATTTAGTCC  
CTCGAGGAGCCACTGTGCATGTTGGTTATGGCGAAATCCTTTCCCAAGGCGATACATTA  
GTAACATTTATATATGAAAAATCGAGATCTAGTGATATAACTCAGGGTCTTCCAAAAGTA  
GATGAACTCTTCGAAGGTCGTTTCGGTTGATTCAATATCGAGGAACCTAAAAGAAGAAT  
GTAAA-----AATCTAACGGAAATCTTTGGAATTCCTTGGGGATTTATTATTGGTGCTG  
AACTAACCATAGAGCTACGTTCGATTTCTTTGGTTAGTGAGATTCAAGAGGTTTATCGAT  
CCCAGGGGGTACAGATTCATAATAGACATATAGAGCTTATTGTACGCCAAATAACATCCA  
AAGTTTTGGTTTCAGAA-----GATGGAATGTCTAATGTTTTTTTACCTGGTGAACATAAT  
AGAATTCTCGCGAGCAGAACGAGCGGGTCGTGCTTTAGAAGAAGCTATTTGTTACCGA  
GCGGCCCTTAGTGGAATCACGAAAGCATCTTTGAACACTCAAAGTTTCATATCCGAGG  
CGAGTTTTCAAGAAACCGCTCGAGTTTTAGCAAAAGCCGCTATACGAGGCCGGGTTGA  
TTGGTTGAAAGGGCTGAAGGAGCATGTTGTTCTGTGAGATATGATCCCCGCTGGTACCG  
GATTGAAAACACCCTTCAAGGGA-----ATACAAGAGCATA  
CTTTTTTGGC-----TGTCGAAATACAAAAGAAGAATCTA  
TTTGGCAGAGTGAGAAAGAGAATCTTTTAAACA-----ATGACAAGAAGAT  
ATTGGGACATCAATTTGGAAGAGATGCTAGAAGCAGGGGTTCATTTTGGTTCATGGTATT  
AGGCAATGGAATCCTAGAATGGAACCTTACATTTCTGCAAAGCGTAAAGGTACTCATAT  
TACAAATCTTATGAAAACCGCTCGTTATTTATCAGAAGCCTGCGACTTACTTTATGACGC  
AGCAAAGAGAGGAAAACACTTCTTAATAGTTGGTACGAAAGATAAAGCAGCGGATTC  
GGTAGCATCCGCGGCAATAAGGGCTCGGTGTCATTATGTCAATAAAAAATGGCTCGGTG  
GTATGTTAACGAATTGGTCCACTACAGAAAGGAGACTTCAGAAATTCAGGGACTTGAG  
AGTGAAAGCAGAACAAGGGCAACTCCGCCGTCTCCCGAAAAGAGATGTAGCAATATT  
GAAGAGGCAATTATCTCACTTTCAAACATATCTGGGTGGGATCAAATATAATGACTGGCTT  
ACCCGACATTGTTATCATCCTTGATCAGGAAAAAGAATATATGGCTCTGAGAGAATGCA  
TCACTTTGGGTATTCCAACGATATGTTTAAATCGATACAACTGTGATCCGGATCTCCCGG  
ATATTCCGATTCCAGCGAACGATGATACTATAGCTTCAATCCGATGGATTCTTAACAAAT  
TGGTATCGGCTATTTGTGAGGGTAGTTCTAAC-----ATGGGACAGAAAATAAAT

CCACTCGGTTTCAGACTTGGTTCAACCCAAAGTCATCGTGCCCTTTGGTTTCGAGCAAC  
CAAAAGAGTATTCCAAGGGTCTACAGGAAGATGCAAAAATACGGGATTGTATCAAGGA  
TTATGTACAAAAGGATATGAGAATATCTTCGGGT---TTCGAAGGAATTGCGCGTATCGAG  
ATTCAAAAAGCATTGATCTGATTCAGGTAATCATACATATTGGATTCGTCAATAGGTTA  
AGAAAGGGT-----CGAGACCAG-----GGAATAAAAGAATTAGAGACTAATGTCCAAAA  
AGGTTTCATTCTTTAAATCGGAGAATCAACATTGATATCGCAAGAATTGCAAAACCTTAT  
GGGCAACCCACTATTCTTGCAGAGTATATCGCTCTACAATTAAGAATAGAGTTGCCTT  
TCGAAAGGCAATGAAAAAGCTATTCAATTAGCTGAAAAAGCAGATGTAAAGGGAATT  
CAGGTACAAATTGCAGGGCGTCTCAACGGAAAGGAAATGGCCCGTGTGAGTGGGTT  
AGAGAAGGAAGGGTTCCTTACAGACCATTTCGAGCTAAAATGGATTATTGTTCCCTATCC  
CGTTCGAACTATCTATGGGGTATTAGGTATCAAAGTTTGGATATTTTTGGATGAAGAAAT  
GTCTCGTTACCGAGGACCTCGTTTTAAAAAGTACGCCGTCTGGGAGCTTTGCCCGGA  
CTCACTAGTAAAAACCTAAATCCACAAGTGATCGTAAAACCCAATCCCGTTCAAGAA  
AA---AGATCTCAATATCGTATTCGTTTAGAAGAAAAACAGAAATTGCGTTTTTCATTACGG  
TCTAACGGAGCGCCAACCTGCTTCGATATGTTTCGTATCGCTGGAAAAGCCAAGGGGTCA  
ACCGGGGAGGTTTTACTCCAGCTACTTGAAATGCGTTTTGGATAACATTCTTTTTCGGTT  
GCGTATGGCTTCCACTATTCTGGAGCCCGCCAATTAGTTAACCATGGACATATTTTAGT  
AAACGGCCGTGTAGTGGATATAACCAAGTTACCGATGCAAATCTCGAGATGTTATTACTA  
CGAGGGATGACCAAAGATCCAAAGCTCTTATTCAAATCATATGGATTATCCTCACAA  
AAA-----TTGTCAAACCATTTGACTTTCGACCCA-----TCGCAATATAAAGGAGTAGTAA  
TGGAATAGTACCTACTCAAAGGGTCGGTTTTGAAAATCAATGAATTGCTAATCGTAGAAT  
ATTATCCCGGCAGACTATGTCACGTCGAGGTAAGTGCAGAAGAAAAAACTGCAAAATC  
CGATCCAATTTATCGTAATCGATTAGTTAACATGTTGGTTAACCATATTCTGAAACACGG  
AAAAAATCATTGGCTTATCAAATTATCTATCGAGCCGTGAAAAAGATTCAACAAAAGA  
CAAAAACAATCCACTATCTGTTTTACGTGAAGCAATACGTCGAGTAACTCCCAAGATA  
GCAGTAAAAGCAAGACGTCAATCCGGATTGACTCAGCAAGTTCCCATTTGAAATAGGAT  
CTACACAAGGAAAAGCACTTGCCATTTCGTTGGTTATTAGGGGCATCCCGAAAACGTT  
GGGTCGAAATATGGCTTTCAAATTAAGTTCCGAATTAATGGATGCTGCCAAAGGGAAG  
GGCAATGCCATACGAAAAAGGAAGAGACTCATAGAATGGCAGAGGCAAATAGAGCT  
TTTGACATCTTCGTATGGGTAAGGATACTATTGCCAATATAATAACTTCTATAAGAAATG  
CTGATATGAATAAAAAGAAAACGGTTCGAATAACATCCACAGATATCAGCGAAAACATT  
GTGAAAATCCTTCTACGAGAAGGTTTTATTGAAAATGTTAGAAAGCATGAGGAAAACA  
ATAAATCTTTCTTGGTTTCAACCCTTCGGCATAGAAGA-----AATAGGGAAGGAAGATAT  
ATAAAT---ACTTTA-----AAACGTATCAGTAGGCCTGGTCTACGAATCTATTCCAAC  
CTCAACGAATTCCTAGGATTTTAGGCGGAATGGGCCTTGTAATTCTTCCACTTCTAGA  
GGGATAATGACGGACCGAGAAGCCGACTAAAAAAATGGGAGGAGAAATTTTATGTT  
ATATATGGATGACAAAACCTATAGCTAGAAGTGGTTCACGTAGGAATCGCCGTATTGCTT  
CACGTAAGCACGGGCGTAGAATACCAAAAGGGCTTATTCATGTTCAAGCGAGTTTCCA  
CAATACCATTGTGACTGTTACAGATGTGCGAGGTCGGGTTGTTTCTTGGTCTCCTCCGCG  
GTACGTCTGGATTCAGAGGCACAAGAAGAGGTACGCCATTTGCTGCTGAAACCGCAGC  
AAGAAATGCTATTCAGACAGTAGTGCACCAGGGTATGCAACGAGCCGAAGTCATGATA  
AAGGGTCTTGGTCTGGGAAGAGATGCAGCATTACAATCCATCCGTAGAAGTGGTATAC  
GACTCCATTTTCGTACGTGACGTAACCCCATGTCACATAATGGGTGTAGACCACCAAAA  
AAAAGGCGCGTGATGCCAACTATTAACAACCTATTAGAAAGACAAGACAGCCAATCA

GAAATGTCACGAAATCTCCCGCCCTTCGAGGATGCCCTCAGCGCAGAGGAACATGTAC  
TAGGGTGTATACTATCAACCCCAAAAAACCAAACCTCCGCCTTACGTAAAGTTGCCAGA  
GTACGATTAACCTCTGGATTTGAAATCACTGCTTATATACCTGGTATTGGCCATAATTTAC  
AAGAACATTCTGTAGTATTAGTAAGAGGAGGAAGGGTTAAGGATTTACCCGGTGTGAG  
ATATCACATTGTTTCGAGGAACCCGAGATGCTGTGGAGTAAAGGCTCGTCAACAAGGG  
CGTTCTAAATATGGGGTCAAAAAGCAAAAATGGCAAGGAAAGGTCTCATTAGAGG  
GAAAGGAAGAGAGAGAAATTAGAACAAAATATCATTGATTTCGTGCATCCTCAAAAA  
AAGAAATAAGC-----AAAGTTTCAACATTGAGTGAAAAATGGGAAATTCATGGAAAA  
TTGCAATCCCACCACGTAACAGCGCACCTATACGTCTTCATCGACGTTGTTTTTCAAC  
CGAAGACCTAGAGCTAACTACCGAGATTTTCGGAATATCTGGACACGTACTCCGGGAG  
ATGGTCCATGCGTGTGTTGTTGCCCGGGGCAACAAGATCAAGTTGGATGGCCAAAAATT  
CGTTCATGTCGGTTATCGCACAAAA-----GAGAAAAAGGGATCTGTGCAATTC  
AAGTATCCCTTTTTACCAATAGGATAGATAGGCTTACTTCGCACTTGGAACTGCACAGA  
AAGGACTATTTATCTCAGAGGGGCCTGCGTCAAATTCTGGAGAAACGTAAAAGACTGC  
TGCTTTATTTATCAAAGAAAAATGGAGCACGTTATAAGGAATTAATTGGTCAATTGGGTA  
TTCGTGAACTAACGAGTAGT-----ATGATAAACTTCGTTTGAAACGATGCGGTAGAAA  
GCAACGAGCCACTTATCGAATCGTTGCAATTGATGTTAGATCTCCAAGAGAGGGCAGA  
GATCTTCGTAAATTGGGTTTTTACGACCCAATAAAGAATCAACTTATTTAAATGTTCCC  
GCCATATTATTTTTCTTGAAAAAGGAGCTCAACCTACGGAAATTGTTTCATGATATTTCA  
AAAAGAGCAGAGGTATTTAAGGCATTTGGAGTACTAGAACAAAAGAAAATTCAATGG  
AAAAATATAAGCCACCCTTTCGTAAATCCAAGCGATCTTTTCGTAGGCCTTTCGCCCCG  
ATTGGATTGGGGGATCAAATTGATTATAGAAACATGAGTTTAATTACTAGATTTATTAGT  
GAACAAGGAAAAATACTATCTAGACGAGTAAATAGGTTGAACTTGAACAACAACGAT  
TAATTACTCTTGCTATAAAAACAAGCTCGTATTTTATCTTTGTTACCTTTCTTAAAAATGA  
GAAA-----CAATTTGAGAGAGCTAAGCCACTCTCTAGAACCACAAAAAAAATGGAATCG  
AAAAAGA-----CGTGCACTTAAAAAAAATCCTTTTGTAGCCATTCATTTATTAGGGAAAA  
TGGAGAGGCTCAATAAGGATGAGGAAAAAAGATAATAGTAACGTGGTCCCAGGCATC  
CACGATTCTACCCACAATGGTTCGGTCATACCATTGCTATTCATAACGGAAAAGAACATG  
TACCCATTTATATAACCGATCATATAGTGGGTCACAAATTGGGGGAATTCGCACCTACTC  
GAACTTTCTCGGGATACGAAAAAAGGATCATAGATCTCGTCCG-----ATGGGGAGAGT  
TACAATGAATTTTATGCCGTCCAATGTGCCAGGTACCCGTCTTACGGTTCGTTGCTTTTGG  
CAGTTTCTATGGTTTGATGACTTCCGTATCGATAAGCCCAGCGTATCTATTCTTTATCCGG  
---TCCATTCCTATAAAAAA-----ACTGATAAGGAAGAAGTAGCGGCCGTAGGTTTTGT  
TGTGGGAAATTTAATCGTCTTCATGGCGATCTACTTTCTTCTTCTATTCATGTAGCATTAGGC  
AGACCGCACGTGTTCACTTTGCTACCTTTGCCCTATCTTTGTTCTCACTACTTTTTTCTC  
AGCGGAAGGAATTAGTT-----GACACGCAGCGG-----GACTTGAAATGTGTA  
TTCCTGAATAATATGTTTTTCAAATTCTCAATCCATTCCTTTGCCGAGTTCAACCTTA  
GCCAGATTAGTTCATGTGCTTTTGTTCGATTCCAACATAAGGAACTTTTTCTGTAAAGC  
GCCTTTGTGGGTTGGTTCGTTGGGTATATGTTTTTCATTA---TTACAATTTTGTACC  
ATACTATGGAATTTTACTGGAAGCGAAAA-----GTTTTCTTAAAGGAGGCAATTC  
TCTGCAGAT-----CAAGTGTCCGGGCCATCTTATTTGTGATCCTTCTAATATATGTCGGTC  
GGATGCCGCTGCCCTTCTTATAAAGAATCAAATCTTTACAAAAAATCTGTCATTAATCG  
GGCGTCGTTTTTTCGATCCTCGCCGGTGGAAACGACCGATGCGATATATAGCCAATCAT  
CTATTTCAAATCCTGTCCGGAATGAGATGTCTCAATATTTTTTCAAATAAGTACAAGT

GCTGGAAAAGCTCGTATATCTTTACATATCCACCGAGTTTGTCTACTTTTTGGGATATG  
CTCGAAGAAAATCATTGGGCGCACTCGGACTTAGTTGTCTCG-----GACCCATGG  
GTTGATACCAACGAACAACACAGGGGGGACCTAGCATATGAATTTGTAAGCCGAAAAG  
CATTCTAGACGAAGGCGCTCTTATCTTCGATGTGCTGGAAAAGAGTAATAGATTGTAC  
AACCAAGAAGATTCAAAGGAATCC---AAAAGAAAGAGGAGAAAAGTCCAATGAG--  
-----GAGCAAGAGGAAGAATCCACATTGAACGGACCATATCGTGTAAACAATCCAC  
GGAAAAGAA-----CATCCAACGGATCAAGAATTTGAAGTGAAAGAAATCAA  
CAAATAGTTCCCTCGATGGGTATACAAGTTAACCACGAAGAATAACAGAGGAGGAT  
GAAAAGAGAGATGAGGAAGAATTTGACCTCATGACAATGGCAGTCAGTTACTTAGAGT  
TTGTCGACGAACCCGATTTTGATCGTTCGATAATCAAGTGGTCGATGCGCTCTCAAAGA  
CGTAAAATCGTCACTTTGAAAAGCTGGCAACCAAATGTTACTGCGCCCCTTTTTTATCA  
CCGG---CACGAAAACATTATGCCTGCTTTGTCTTTCTTTTTTGGTTTGTTTTTTACTGG  
TTTGATTTGTCTAATGAGGAAGAAGAGAGGAGAAGAACGATAGATATGGTAGAAATCA  
TTCCATCCGGCCAAGAAATAAGGACTTATATGTTATTAGGACAGTCGATTCTTAGAAAA  
AAGATAGTATTACCGTCATTAATCATATTCAAAATGTGCTTCGTAAACTTTTTATTTCAT  
CTCCGGAGTGGTCCCAAGATTGGAGGGCCTTGCCTAAAGAAAAGCATTATATATCCACA  
TTTACTGGTATTGCACTATCTGAGTTCCTTCCAGAAAAGTGGGAAGAGGACGGTAT  
TCAGATAAAAATCGTATTTCTTTCTGAAACCCTGGCGGAAATCTAAGGGAAAAA  
AAAAATAACTTACCGTTATTTAACTGTTTCTGGAAAGGAAACGGCAATCCCCCTTGGT  
TCTCCCGTAAAGCGCACTCCTTTTTTAAACGAATCTTAACTCATTCCAAACAAAG----  
-----AGAGTCCCAACGAGACTAAGAAAGTGTCTAAGAATGTGTCTAAGACTAAGA  
ATACAAATAATAAGAGAAATGGTAAGAATGATAATCAAATCCAACGT-----TTTTTCAA  
AGAAAAACAAGGAGGATATCT-----GAGGATTACAGTAATACGATCATCCCTGAAT  
CAACTATTCGAATTGGATCCATGCATGGGGAAGAT--TCAATGAAACAAAGAAGGATTC  
AGGACCTG-----GAGAAAAGAATCAAACA---ATAGACCAAATCAATAGCATCAAGG  
AAAGG-----ATAGCTAAAAGAACGGAATCAAAGAAAAGAGAGTTTGAAAATA  
TTGAAAAAACAAGTAGCCAATTAATTAATAATGGAACGATTTTAGAAAATCGTTGAT  
TGAAAGAATATACATGGATATCTTTCTATGTATCATTCCCATTTCCAAGAAAATGTACC  
ACTTTTT-----GATTTTTCTTCTTTGTCCCAAATCCATGTATTTTACAAATTACTG  
CAAACCAAT-----TGGAATCCCAAATCTATCTCCGAAGTCC  
TATTTAAAAGACGTCTCTTAAAGGCG-----CCAATAATACTGAATGGA  
AAAGCTGGTTAAGGACTTGTATCCATCCATTTATCTCATCTAAACTGGTCTAAATTAG  
CGCCGAGAGAATGGGTTAATCAATGGAGAAGGAGGGTGAGGGTTAATCAACATAATGA  
CGACTCGGAGGATTCATATGAAAAATATCAAGGGATTGGTTCTGATAGACAG-----TAT  
AGAAGATATAGAGACGATCTTTTAGCGTATCAATATTTTATAGATAGGGCGGAAAATCTA  
GATAGAGAATTCAGCCATTTCTTACTAGAGAGGAGACTAGGACGCTTTTTGATTGGGT  
GGGAGGACCGCCTGGGATGGTGAATCTGGGTTCTTCCAGAATTGCTACGACTTGATT  
AT--TATATGACTGAACCTTGGATCATACCAATCAAATTACTTCTATTTAGTGAATTAGCC  
AGTCAAACCATGAAATGAAGAGGAAATATAAGAGGGTGGAACAATTTTTCATTTCTC  
AATTCGGATGCTATGATGAACACATGACTAATACTCTTCCCTAGGTGCTATAGTAGCTA  
AAACGGGCGAGACGGAGGGACTTCAAATTATTCTTCGAAAAGAAGAATAGACATGT  
GGACAGTATGGATTGGTCTTCTAGATCCCCTTTTCCACCTTTGGTAAACGAACCTGAA  
TTCTTGATTGAACCGCGTACTTTTTGCTATACAATGGGATGGAATTGGGATTATGTATCAA  
ACCATAGCTATGTCATTCGCCCTAAGGTTAAGTACCAGAATTCTGATTTCTTTCTTCTT



TCATTTGTTAGAATCGACAGGTGTTCAAATCGTTCAGTTGAAGAAATTGAAACCG-----  
-----GAT-----GATCCTGAGACTCCC---CGAAGATCGAAATTCTTGATCAATGGAGGAA  
GAATACCAGCATTTTTGTTCGATAAGATACCA---AAGTGG---ATGATTGACTCATTCCATA  
TTAGG-----AAGAATCACAGGAAATTCTTTGATAACACCGATTCTTCTCAATGATAT  
TCCACGATCGAGACAATGGGCTGAATCCCGTCAAACCATTTCATAGAAGTTCCTTGATC  
TCTTCTTTTATAAAGCAAATCGACTTCGATTCTTGAATAATCCATATCACTAT-----  
-TCTAACAAAAGATTCCCTTTTTATGTGGAAAAG-----ACACGTATCGATAATTCTGA  
T-----CTTACATATGGA---CAATTCCTCACTATCTCGTTCATCCGCAACAAG---GTATTTTC  
TTTGTGCGTCGGTAAA-----AAAAACCTGTTTTTTTGGAG---AGAGATACTATTTACC  
AATCGAGTCACAGGTATCTGACATATTAATACCTAATGATTTTCCACAAAGCGGTGATGA  
AAGG---TATAACTTGATAAATCT-----TTCCATTTTCCAACCTCGATCCGATCCACTCGT  
TGAT-----AGAGCTATTTACTCGATCCCAGACATTTCTGGAACACCTCTCACAGAGGAAG  
AAATAGTCAATTTGGAAGGAACGTATTGTCAGCCTCTTTCAGATATGAATCTATCTGATT  
CAGAAGGGGAGAACCTGCATCAGTATCTCGGT-----TTCAGTTCAAACATGGGTTTGATT  
CACACCGCATGTTCTGAGAAATATTTCCA-----TCCAGAAATGGGAAAAAACAGAGT---  
-----CTTTTGCTAATTTGGATAAAG-----AAATGTGGTGAGATACTGCCAATAGATAA  
AGAA-----CGAGATTCATGG-----AATCCGTTCCAAACATCTATGCAATGGTT  
CCTTACTTGGACGGGGTGCAACAACAACCCT--TACCTTTTAGAGATTTTCTCGACGATA  
CGAAGCAGTCTTTTGGATAATACT--TATGAAAAAGGGCTATCCTTTTTTTATGATATTAG  
TCATGGATCCTATATATTATGGCCAATTGTTTCAGATTCCATTGTGGAAGATTTTCACTCTC  
CCA-----CGGATAAATGAGATTTGACTAAGTGTGTACAGAAT-----TGTTTTCT  
GTCCGAAGAAATCATTTCATCGAAAGAATGAGTTACCT-----CTTCCATTGAGATGGACAC  
ATCGGACAAATGCTCAGGAATTC--CTCTATTCAATCCTTTTCTTCTTGTGTTGCTGGA  
TAT--CTCGTTGGTACACATCTGCTCTTTGTTTCCATA-----GTCTCTAGTGAGTTACAGAC  
AGAGTTCGAAAAGATCAAATCTTTGATTAATCCATCATAACAGCTTTGATTTGGAAGAAC  
TTCTGTATACGTATCCTCCCCCTAAACATAAACAGAATTCTTGGTTCGAGACTCTTCTAG  
TTCTCTGGGCCAAATAGTAGATTCTCTGTACGGAATATGGATGTTTCTTGTTTTTGGTG  
GCAAGAGGCGTGGTCCCACCTTATGGAGTCAAATTCATTCTCATCGACATCGTCGATCTC  
ATTCTCCTGAATATCAATTGCATTCTCATCGGC-----ATCTTCGATTTTATAAGGATGAT  
ACTCAATCCCATCATCAATGGAATCACTTTTTTGGAGAAAGACGAGACATCTAAGTCGTA  
CAAGTAGAGAGATCCATTATTTCATAAGCAAGAGA---AAC-----AGTGATTGGATTGATG  
ATGAAATAGAATCCTGGGTCGCGACCAGTCTTTGCTTAAGGAGGATAAAAAAGAATT  
CTTACTTGAGTATTCCAAC-----GTAACGACA-----GAAAAAAGGATTGATCAAATCTAT  
TGAGTCTGACT--CATAGTGATCATTTATCA-----AACAAATGACTTTGGTGTTCAAA  
TGATTGACCAACCGGATCCATTACTTACGAAACTTGGTTGACATTCAT-----AATAAG  
TCTCTACTGAATTATGAGTTCAATCCATCCTATTTAGCAGAAGGACGGATAGTCCTTGCT  
CATTCTCAGACAATTCTTGCT-----CATTCTCAGACAATTCTTCTCATTACAAATCGT  
GGCTAATACTGAGAAA---AAACCCTTTTCGCTCCGCTTAGTCCTAGCCCCTTCT--AGGG  
GTATTTTAGTGCTAGGCTCTATAGTAACTGGACGATCCTATTTGGTCAAATACCTAGCGA  
GAAACTCCTACCTTCTTTCATTACGGTATGTCCGGAGACGTTTCAGGACTGATGACAAT  
CAAGGGAATTGGGATGCTGATTATGAGGAGGCTAAGGAGGATTTGAATAAGGATGTGG  
ATTGGGAGGAGTTCGATGCCAACTAAGGTTCTACTCAACCTAGTC-----  
-----GCAGAGGATCCTTTTGCTGCTTGTACGATATCTATAATGGCCTTGATATT  
GATATTGATAGGGAGCTCCAAAAGATATCGGATAAGCTAACTACTTCGCTGTTTCGGAT

CACCCTTCCATTTCGAATTAGCAAAAAGCAATGTCCCCTTGCATAATATGGATGCCAAACA  
TTCATAAGCTGTATGTGGATGAGTCAAAGGACCTCGCACTCGGTCTAGTAGTGAACAAT  
CTCCGCAGG-----GATTGTGAAAGATCTTCCACTAGA---GATATTCTTGTTATTGCTTCG  
ACTTCTTTTCCCAAAAAGTGGATCCCGCTCTAATAGCTTTGAATAGATCAAATACATGC  
ATTAAGATACGAAGGATTCTTATTCTACAACAACGAAAGCACTTTTTCATTCTTTCCTAT  
GCTGGGGGATGCCACTTGGAAAGAGCAAATGTCCCAGTCCCCTACTAATGGATTCCGGT  
CCATAAGCATGGCTTCCAATGTACGAGATCTTGTAGCACTTACCAATGGGGTCTATCCA  
TCTGTATTGCAAGCAAGAAATCCATTATAGACATTAATACAATTAGATTGGCTCGTTATA  
GACAACTTGGACTTGGCGA---GAC---CGCCTACTACCTTCGCCTCGTGAT-----CTGGTT  
TTCTATCAGATAGGAAGGGCTGTTGCACAACATGGACTTGTAAGTGATTGCTCCATAGA  
TTTTATCTATAGGTATCTCAAGCCTGAA-----TCATATCAGGAAAAGGATTTTTATTGTC  
CAAATGGTACTTTCGAACTTGGAACGAGCGTGCAGAAATTAACGAGATTTCTTTATCTTT  
TGAGTTGTTCTGCCGGATTCGTGCTCAAGATCTTTGGTCCGTACCC-----GAT  
GAAAATAAGTGGAGCACTTTTTATTGCTTGAGTATGATGCT--GAGCTAGTTCATAGC---  
-----TTACAAAGCGCTCTGGTGAGATACCCA-----CGGGCGGAATGCAGTCAGTTG  
ATAATGATCAT--CGAGTGAGACTCTTCTTCGGTCCGAACCAAGGAAT--CCGGTCGAT  
ACGATGGAATATTTTGCTGATTCTATCAAAGCCGACGAATCGGACTTTGAAATTCCACT  
GCTAGGGGGATGGAAGTATCGG-----GAGAATGAGCAGGTAAAGAGGGATAAG-----  
-----GAGGAT-----TTAGTCAATCAA-----ATACTTTTCGCTCCT-----AGACTATGGC  
ACCC-----GGTGGCAATCTATTAGAA-----AGGCCCGAGAAATTTTCGATTTACC---TA  
TAGGGACAGGGCATTTCGTTTCAGT--ATTTATCATATAGAGGAGAAGGTAGAGGATGA  
GTTCTTGGGACCCGAGCCCGCGCCCTACCAGGTACCACCCTACCAGGTACCAGATAGA  
TCT-----TCCAAAGGACAAGCGTTTTTTCAACAAACCCGATTCATTTGGGACCCCTGGAG  
ATCCATTCTTTTGATATTCAAAAAGGCAGAGCCCTTTATCTCTGTGTTTTCAACCCGAG  
AATTATTTGGAGATGAAGAGATGCCAAGGGAACCTTCTATTTCCGATATTTGGCCTAGA  
ACTATGGCTGAGCGCGTGTTCGTGATC-----AGAAGCTGCACGAAGAAGACTGGAAAT  
GGGTGCTTCGTAACGAGAGATGGGTTCTAACT-----AATACTACTAGTTCATTACCTAA  
T--TCTTTCCATTCTAAT-----ACTCCATCCGAGAGTTATCAGTATTTATCAAATCTCTCCT  
ATCTAATAACGGAAGGCTATTGAAGCAAGTAGAAAAGACATTGGGTAGAAAGAAATTC  
CTTTTACCGGATGAACTGAAAGATGTACTA-----ATAGAAAGCCGATTAGAAAGG-----  
ATGCCTAGATCTCGA---ATAAATGGAAATTTTATTGATAAAACCTCTTCAATTGTAGCCA  
CTATCTTATTACGAATCATTCTTACAACCTTCGGGAGAAAAAGAGGCATTTACCTATTACA  
GAGATGGG-----ATGTCAGCTCAATCCGAAGGAAATTATGCCGAAGCTTTACAAAATTAT  
TATGAAGCTATGCGACTAGAAATTGATCCCTATGATCGAAGTTATATACTCTATAATATAG  
GCCTTATACACACAAGCAACGGGGAGCACACGAAAGCTTTGGAATATTATTTCCGAGC  
ACTAGAACGAAATCCATTCTTACCGCAAGCTTCTAATAATATGGCCGTGATCTGCCATTA  
C---CGGGGAGAAGAAGCCATTCGACAGGGAGATTCTGAGATTGCGGAGGCTTGGTTG  
ATCAAGCTGCGGAGTATTGGAAACAAGCGATAGCGCTTACTCCAGGTAATTATATTGAA  
GCACAGAATTGGTTGAAGATCACAGGTCGGTTTAAA-----ATGAATTGGCGATCAGAAC  
ACGTATGGATAGAACGTCTAATGGGTTCTAGAAAATAATGAATTTCTGTTGGGCCTGT  
ACCCTTTTTTTAGGTTCACTAGGATTCTTATTAGTTGGAACAGCCAGTTATCTTGGCAAG  
AATCTGATATCCTTGTTGACATCTTATCAAATCATTTTCTTCCACAAGGGATCATAATGT  
CTTCTATGGCATTGCGGGCCTGTTTATTAGCTCTTATTTGTGGTGCCTAATTTTCGTGGA  
ATGTGGGTAGTGGTTATGACAAATTGGATAGAAAAGAGGGAATAGTTCGTATTTTTTCGT

TGGGGATTTCCTGGAAGAAATCGTCGTATCTTCTTGCAATTCCCTATCAAAGATATTCGC  
TCGATTAGAATGGAAGTTAAAGAGGGCCTTTATCCCCGTCGTGTCCTTTATATGGAAATA  
GGAGGCCGGTTAGACATTCCATGGACGGGCACCGATGAGAAT---TTAACTCCACGAGA  
AATGGAACAAAAAGCTGCCGAATTAGCCTATTTTTTGC GCGTACCAATTGAAGTGTTT

>Salvia

ATGGGAAGATGGTGGTTTAATTTCGACG-----ATAAAGAAATTAATGGACAATCTTAGTCC  
TTTTGAAAATACTAGTGAAAGTGAAGAT--CATCCAAAAGGTAGGGCTAAAAACATTCA  
TAGTTACAGTGATGTTGGTCGTTTATTTGGTATCAAAGACATTCGGAATTCATCTCTGA  
TGATACTTTTTTAGTTAGGGATAGTAATGGAGATAGTTATTCT---TATTTTGATATAGAAAA  
TCAGATTTTTGAGATTGACAGCGAT-----CATTCTTTTCTGAATGAACTAGAAAAGTTATTT  
TTGTAGTTATCGCAATTCTAGTTATATGAATTCTGGCTCT--AATGAAGATTCCTTATACAA  
T-----ATGTATGATACTCAATCTAGTTGGAATAATCACACTAGTTGCATTGACAGTTAT  
CTTCAG-----TCTCAAATCTGTATTGATTCCATTGTAAGTGATAGTAGT--GGTTAC-----  
--ATTTCTAGGTGCATTTTTGATGGCGGGGGGTCCAGTATACCAACCCGCGCTAAGAACA  
GTGATTTAACTCTAAGAGAAAGGTCTAGTGATCTTGATGCAACTCAAAAATACAGGCAT  
TTGTGGGTTCAATGCGAAAATTGTTATGGATTAAATTATAAGAAATTTTTGCAATCAAAA  
ATGAATATTTGTGAACAGTGTGGATACCATTTGAAAATAAGTAGTTCAGAAAAGAATCGA  
AGTTTCGATCGATCCCGTACTTGGGACCCTATGGATGAAGACATGGTCTCTCTGGATC  
CCATTGGATTCATTTCGGAGGAGGAG---TATAAAGATCGGATTGATTCTTATCAAAGAAA  
GACAGGATTAACTGAGGCTGTTCAAACAGGCATAGGTCAACTAAATGGTATTCCTGTAG  
CAATTGGGGTTATGGATTTTCAGTTTATGGGGGGTAGTATGGGATCCGTAGTCGGGGGAG  
AAAATCACCCGCTTGATTGAGTACGCTACCAATCAATTTCTACCTCTTATTATAGTGTGC  
GCTTCGGGGGGGAGCGCGCATGCAAGAAGGGAGTTTGAGCCTAATGCAAATGGCTAAA  
ATATCGTCTGCTTTATATGATTATCAATCAAATAAAAAGTTATTGTATGTATCAATCCTTAC  
ATCTCCTACTACTGGTGGGGTAACAGCCAGTTTTTGGTATGTTGGGAGATATTATTATTGC  
CGAACCAAACCTCCTACATTGCATTTGCGGGTAAAAGAGTAATTGAACAAACATTGAAT  
AAAACAGTACCCGAAGGTTACAAGCGGCTGAATATTTATTCCAGAAGGGCCTTATTCG  
ACCTAATCGTACCGCGTAATCTTTTGAAAAGTGTTCTGAGTGAGTTATTTAAGCTCCAC  
GCCTTCTTTCTTTGAATTCCAATTCAATCAAGATGGTAACTATTTCGAGCCGACGAAATT  
AGTAATATTATCCGTGAACGTATTGAACAATATAATAGAGAAGTCAAGATTGTAAACAC  
CGGCACCGTACTTCAAGTAGGCGACGGTATTGCTCGTATTCATGGTCTTGATGAAGTAA  
TGCGGGTGAATTAGTCGAATTTGAAGAAGGTACAATAGGTATTGCTCTGAATTTGGAA  
TCAAATAATGTTGGTGTGTATTAATGGGTGATGGTTTGATGATACAAGAAGGAAGTTC  
TGTAAGCAACAGGAAGAATTGCTCAGATACCAGTGAGTGCGGCTTATTTGGGCCGT  
GTTATAACGCCCTGGCTAAACCTATTGATGGCAGGGGGGAAATTCAGCTTCTGAATC  
TCGATTAATTGAATCTCCCGCTCCAGGTATTATTTCCCGGCGCTCCGTATACGAACCTCT  
TCAGACCGGGCTTATTGCTATCGATGCGATGATCCCTATAGGACGTGGTCAGCGAGAAT  
TAATTATTGGAGACAGACAGACCGGTAAAACAGCAGTAGCCACAGATACGATTCTCAA  
TCAACAAGGCCAAAATGTAATATGTGTTTATGTAGCTATTGGGCAAAAAGCATCTTCTG  
TAGCTCAGGTAGTAACTACTTTACAGGAAAGGGGGCGATGGAATACACTATTGTGGTA  
GCCGAAACGGCGGATTCCCCTGCTACATTACAATACCTCGCTCCTTATACAGGAGCTGC  
TTTGGCTGAATATTTTATGTACCGTAAACAACACACTTTAATCATTTATGATGATCTCTCC  
AAACAAGCCCAAGCTTATCGCCAAATGTCTCTTCTACTACGAAGACCACCGGGGCGCG  
AAGCTTATCCAGGAGATGTTTTTTATTTGCATTACGCCTTTTAGAAAGAGCCGCTAAAT



TAAATTCTAGTTTAGGTGAAGGGAGTATGACCGCCTTGCCAATAGTTGAAACTCAATCG  
GGAGATGTTTCGGCCTATATCCCTACTAATGTAATTTCTATTACTGATGGACAAATATTTT  
TATCTGCCGATCTATTCAATGCTGGAATCAGACCTGCCATTAACGTGGGTATCTCCGTTT  
CCAGAGTAGGGTCTGCGGCTCAAATTAAGCCATGAAACAAGTAGCCGGTAAGTTAAA  
ATTGAACTGGCGCAATTTGCAGAATTAGAAGCCTTTGCACAATTTGCTTCAGATCTTG  
ATAAAGCTACTCAGAATCAATTGGCAAGAGGTCAACGATTACGCGAATTGCTTAAACA  
ATCTCAAGCGGCCCCCTTAAGGTAGAAGAACAGGTAATGACTATTTATAACCGGAACA  
AATGGTTATCTTGATTCATTAGAAATTGGACAGGTAAGGAAATTTCTTGTTGAATTACGT  
ACTTACTTAAAAACCAATAAACCTCAGTTCCAAGAAATCATATCTTCTACTAAGACATTT  
ACTGAAGAAGCAGAAGCTCTTTTAAAAGAAGCTATTCAGGAACAAATGGACCGGTTTC  
TACTTCAAGAGCAAGCAATGAGAATGAATCCTACTACTTCTGGTTCTGGGGTTTCCACG  
CTTGAAAAAAAACCTGGGGCGTATTATCCAAATCATTGGTCCGGTACTAGATGTGGC  
CTTCCCGCCAGGACAGATGCCTAATATTTATAACGCTCTGGTAGTTAAAGGCCGAGATA  
CTGTTGGTCAACCAATTAACGTGACTTGTGAGGTACAGCAATTATTAGGAAATAATCGA  
GTTAGAGCTGTAGCTATGAGTGCTACAGATGGTCTGATGAGAGGAATGGAAGTGATTG  
ATACGGGAGCTCCTCTAAGTGTTCCAGTCGGTGGAGCGACTCTAGGACGCATTTTTAAT  
GTGCTTGGAGAGCCTGTTGATAATTTAGGTCCTGTAGATACTCGTACAACATTTCTTATT  
CATCGATCTGCGCCTGCCTTTATACAGTTAGATACAAAATTATCTATTTTTGAAACAGGA  
ATTAAGTAGTAGATCTTTTAGCACCTTATCGCCGTGGGGGAAAAATCGGACTATTTGG  
TGAGCTGGGGTTGGTAAAACGGTACTCATTATGGAATTGATTAACAATATTGCCAAAG  
CCCACGGGGGGGTATCCGTATTTGGCGGAGTAGGTGAACGTACTCGTGAAGGAAATGA  
TCTTTACATGGAAATGAAAGAATCTGGAGTAATTAATGAAGAAAATATTGCAGAATCAA  
AAGTGGCTTTAGTTTATGGCCAGATGAATGAACCGCCGGGAGCTCGTATGAGAGTTGG  
TTTACTGCTCTAACGATGGCGGAGTATTTCCGAGATGTTAATGAACAAGACGTAATTC  
TATTTATCGACAATATCTTCCGTTTCGTTCAAGCCGGATCCGAAGTATCAGCCTTATTGG  
GTAGAATGCCTTCCGCTGTCGGTTATCAACCCACCCTGAGTACTGAAATGGGCTCTTTA  
CAAGAAAGAATTACTTCTACCAAAGAAGGATCCATAACTTCTATTCAAGCGGTTTATGT  
ACCTGCAGACGATTTGACCGATCCTGCCCTGCTACCACATTTGCACATTTAGATGCTA  
CTACCGTACTATCAAGAGGATTAGCTGCCAAAGGGATCTATCCGGCAGTAGATCCTTTA  
GATCAACCTCAACCATGCTTCAACCTCGGATCGTTGGTGAGGAACATTATGAAACTGC  
GCAAAGAGTTAAGCAAACCTTTACAACGTTATAAAGAGCTTCAGGACATTATAGCTATCC  
TTGGGTTGGACGAATTATCCGAAGAGGATCGTTTAAACCGTAGCAAGAGCGCGAAAAAT  
TGAGCGTTTCTTATCACAACCCTTTTTGTAGCCGAAGTATTTACCGGTTCTCCGGGGA  
AATATGTTGGTCTAGCAGAAACCATTAAGGGTTTCAATTGATCCTTTCCGGAGAATTA  
GATGCTCTTCCCTGAGCAGGCCTTTTATTTAGTAGGTAATATCGATGAAGCTACCGCGAA  
GGCTATCAACTTAGAAATGGAGAGCAATTTGAAGAAAATGACTTTAAATCTTTGTGTAC  
TGACCCCTAATCGAATTGTTTGGGATTCAGAAGTGAAGAAAATCATTTTATCTACAAAT  
AGTGGTCAAATTGGCGTATTACCGAATCATGCTCCTATTGCTACAGCTGTAGATATAGGG  
ATTTTGAGAATACGCCTTAAGGACCAATGGTTAACGATGGCTCTGATGGGCGGTTTTGC  
TAGAATAGGCAATAATGAGATCACTGTTTTAGTAAATGATGCGGAAAAGGGTAGTGATA  
TTGATCCACAAGAAGCTCAGGAACTCTTGAATAGCAGAAGCTAGTTTGAGAAAAG  
CTGAAGGAAAGAGACAAATAATTGAGGCAAATCTAGCTCTCCGACGAGCTAGGACAA  
GAGTCGAGGCTGTCAAGTCAATTTCAATGAAAATGTAACCGATTCTTTCGTTTCTTTG  
GGTACTGGCCATCTGCCGGGAGTTTCGGATTTAATACTGATATTTTAGCAACAAATCCA

ATAAATCTAAGTGTAGTGATTGGTGTATTGATCTTTTTTGGAAAGGGAGTGTTAAGTGAT  
TTATTAGATAATCGAAAACAGAGGATTTTGAATACTATTCGAAATTCAGAAGAAGTGC  
TGAGGGGGCCATTGAACAGCTGGAAAAAGCCCCGGGCCCGCTTACGGAAAGTAGAAAT  
GGAAGCAGATCAGTTTCGGGTGAATGGATACTCTGAGATAGAACGAGAAAAAATTGAAT  
TTAATTAATTCAACTTATAAGACTTTGGGACAATTAGAAAATTACAAAATGAAACGAT  
TCAGTTTGAACAGCAAAGGGCAATTAATCAAGTCCGACAACGAGTTTCCAACAAGCC  
TTGCAAGGGGCTCTAGGAACTCTGAATAGCTGTTTACTAACGAGTTGCATTTACGTAC  
CATTAGTGCCAATATTGGCATGTTGGGAGTGATGAAAGAAATAACCGATATGAATCCAC  
TGATTTCTGCTGCTTCCGTTATTGCTGCTGGATTGGCTGTAGGGCTTGCTTCTATTGGAC  
CTGGAGTTGGTCAAGGGACTGCTGCGGGCCAAGCCGTAGAGGGTATCGCGAGACAGC  
CCGAGGCAGAGGGAAAAATACGAGGTAATCTATTGCTTAGTTTAGCTTTTATGGAAGCT  
TTAACGATTTATGGATTGGTTGTAGCACTAGCACTTTTATTTGCGAATCCTTTTGTATGA  
ATGTACTATCATGTTCCATCAACACACTAAAAGGGTTATATGATATATCCGGTGTGGAAG  
TAGGCCAACATTTCTATTGGCAAATAGGAGGTTTCCAAGTACATGGACAAGTACTTATT  
ACTTCTTGGGTTGTAATTGCGATCTTATTAGGTTTCAAGTACTATAGCTGTTCCGAAACCA  
CAAACCATCCGACTGGGGGTCAGAAATTTCTTCGAATATGTTCTTGAATTCATTTCGAGA  
TGTGAGTAAACTCAAATTGGAGAAGAATATGGCCCCTGGGTTCTTTTATTGGAACATA  
TGTTTTTATTTATTTTTGTTTTCTAATTGGTTCAGGAGCCCTTTTACCCTGGAAAATCATAGA  
ATTACCTCATGGAGAGTTAGCCGCACCTACGAATGATATAAATACTACTGTTGCTTTGGC  
TTACTCACATCAGTGGCATATTTCTATGCAGGTCTTACCAAAAAGGATTAAGTTATTT  
CGGGAAATATATTCAACCAACCCCAATCCTTTTACCATTAACATCTTAGAAGATTTTAC  
AAAGCCGTTATCACTTAGTTTTCGACTTTTTCGGGAATATCTTAGCGGATGAATTAGTAGT  
TGTTGTTCTTGTCTTTTATTAGTACCTTCAGTGGTTCCTATCCCTGTCATGTTCTTGGATTA  
TTTACGAGTGGTATTCAAGCTCTTATTTTTGCAACTTTAGCCGCGGCTTATATAGGTGAA  
TCTATGGAGGGCCATCATATGATATTTCAACTTTAGAGCATATATTAATCATATTTCTTT  
TGCGACTGTTTCAATTCTAATTACAATTCATTTGATAACTTTTTTTGTCGATGAAATCGTA  
AAACTATATGATTCATCCGAAAAGGGCATGATAATGATCTTTTTTGTGTATAACAGGATTA  
TTAATTTCTCGTTGGATTTATTCAAACATTTTCCACTAAGTGATTTATATGAATCGTTAA  
TCTTCTTTTTCATGGAGTTTTTCTTTTATTTATATCGTTCCATAT-----AAAGAAAAAATAT  
TCTAAACACAATAATTCGCCCAAGTGTATTTTTTCCCAGGGATTTGCTACCTCAGGTCT  
TTTAACTGAAATACACGAATCCACAATATTAGTACCCGCTTTCAGTCCGAGTGGTTAAT  
AATGCATGTAAGTATGATGATATTAGGATATGTAGCCCTTTTATGTGGATCATTATTATCA  
GTATCACTTCTAGTCATTACAGTTAGAAAAAATAGAAGATTTTTTTCT-----ACGAAAGT  
CAAATACATGAATGAAGGAAAAAATGTTTTACAAAAAATCTTCT-----CCAATAAATTAT  
TATAAGTCGCAATTGATTCAACAATTGGATTATTGGAGTTATCGGGTTATTAGTCTAGGA  
TTTCTCTTTTTAACGATAGGAATTTCTTTCTGGAGCAGTATGGGCTAACGAAGCATGGGG  
ATCCTATTGGAGTTGGGACCCAAAAGAACTTGGGCCTTATTACTTGGATCATATTTGC  
AATTTATTTACATACTCAAACAAATATAAAATGGAAGGGTACAAATTCAGCAATTGTAGC  
GTTTATTGGGTTTCTTATAATTTGGATATGCTATTTTGGAGTAAATCTATTAGGAATAGGG  
TTACATAGTTATGGTTTCAATTTACATTAACAATGGCAAAAAGAAAGCTTTCCTCTCTT  
TTGTATCTTGCATCTATAGTCTTTCTGCCCTGGTGGATTTCTCTCTCATTACTAAAAGTA  
TGGAATCTTGGGTTATTAATTGGGCGGATATCGGCCAATCTGAAATTTTTTTGAATGATA  
TTCAAGAAAAAAGTATTCTAGAAAAGTTCATAGAATTAGACGAAATCCTCTTCTTGGAA  
GAAATGATCAAGGAATACTCGGAGACATATCTACAAAAGTTTCTTATA---ATCCACAAA

GAAACGATCCAATTAATCAAGATACACAACGAGGATCGTATCCATACAATTTTACACTT  
CTCGACAAATATAATCTGTTTTGTTATTCTAAGTGGTTATTCGATTTTAGGTAATGAAGA  
ACTTGTATTCTTAACTCTTGGGCTCAGGAATTCCTATATACTTAAGTGATACAGTAAA  
AGCCTTTTCGATTCTTTTATTAAGTATTTATGTATCGGATTCATTACCCCCACGGCTGG  
GAACTAATGATTGGTTCTGTGTACAAAGATTTTGGATTTGGTCATAATGATCAAATTATA  
TCTGGTCTTGTTCCTTTTCCGTTATTCTCGATACTATTTTAAATATTGGATTTTCG  
TTATTTAAATCGTGTATCTCCATCACTTGTAGTTATTTATCATTCAATGAATGATATGCCTA  
TTGGTGTTCCAAAGTACCCTTCCGAAGTCTGGAGAGGAAGATGCATCTTGGGTTGA  
CGTATACAACCGACTTTATCGAGAAAGATTACTTTTTTTAGGCCAAGAGGTTGATAGCG  
AGATCTCGAATCAACTTATTGGTCTTATGGTATATCTCAGTATTGAGGATGAGACCAAAG  
ATCTTTATTTGTTTATAAACTCCCCTGGTGGATGGGTAATACCCGGAGTAGCCATTTATGA  
TACTATGCAATTTGTACGACCAGAAGTCCATACAATATGCATGGGATTGGCCGCGTCAAT  
GGGATCTTTTATTCTTGTGGAGGAGAAATTACCAAACGTCTAGCATTCCCTCACGCTA  
GGGTAATGATCCATCAACCTGCTAGTTCTTTTTATGAAGCACAAACGGGAGAATTTATC  
CTGGAAGCGGAAGAAGTCTGAACTACGCGAAACCCTCACAAAGGTTTATGTACAA  
AGGACGGGCAAACCTTTATGGGTTGTATCTGAAGACATGGAAAGAGATGTTTTTATGTC  
AGCAACAGAAGCCCGAGCTTATGGAATTGTTGATCTTGTAGCAGTTGAAATGAAAGAA  
CAAAAATGGACTCATGAAGGTTAATTACTGAATCGCTTCCCAATGGCATGTTCCGGGT  
TCGGTTAGATAATGAGGATCTGATTCTAGGTTATGTTTCGGGAAAGATCCGACGTAGTTT  
TATACGGATACTACCCGGGGATAAAGTCAAATTGAAGTAAGTCGTTATGATTCAAGCA  
GAGGACGTATAATTTATCGACTCCGAAACAAGGATTCAAAAGATATGGAGAAAATCCA  
AAGATATTTACAG---AAGAGATCTCAACAACACGACTTCCTATATCCACTTATATTTT  
CAGGAGTATATTTATGTGTTTGTCTATAATCGTGCTTTGCCAGGTTATGACAATAAATCCAGTT  
TACGGATTGTGAAACGGTAAATTACTCGAATGTATCAACAGAATCATTTGATTATTTCTT  
CTAATGATTCTAACAATAATCCATTTTGGCGACTAATTTGTATTCTCAAATTCTATCAG  
AGGGGTTTGTCTTTTATTGTGCGAAATTCATTTTTTCTACAATTAAGATCTTGTCTAAAAG  
TAAAATCTCATAATTTACAATCAATTCATTCAATATTTCCATTTTTAGAGGACAATTTTTC  
ACATTTAAATTTTGTATTAGATATACTAATACCTCGCTCTGTCCATGTGGAAATCCTGATT  
CAAACCTTTCGCCATTGGGTAAAAGATGTTTCTTCTTGCATTTATTACGAGTCTTTCTC  
AACGAATATTGGAATTGGAGTAGTCTTCTTACTGTCCAGC---TTCTCTTTGTCAAACAAA  
GGTTATTTTTTTTCTTATATAATTTCTCATGTATGTGAATACGAATCTATTTTCGTCTTTCTA  
CGTAACCAATCTTTTCATTTACGATCAACGTCTTCTGGAGTTCTTCTTGAACGAATTTAT  
TTCTATATAAAAATAGAACGCTTTTTGAACACCTTTGTTAATAATTTAACCTGGGGTTG  
GTCGAGGAACCCTGCATGCATTATATTAGGTATCAAAGAAAATCCATTCTGGCTTCAA  
AGGGACATCCCTTTTCTGAATAAATGGAAATTTTACCTTGTCACTTTTTGGCAATGGCA  
TTTTTCGGTGTGGTTTCATCCAAGAAGGATTTGGCTAAACCAATTTTCCAAGCATTCCC  
TTGAAATTTTGGGCTATCTTTCAAACGTGCAAATAAACCTTCCGTGGTACGGAGTCAA  
ATTTCTAGAAAATTCATTTCTAATCAATAATGCTATT-----AAGAAGCTCGATACCCTTGT  
CCAATTATTCCTCTGATTGCGGAATTGGCTAAAGCGAAATTTTGTAAACGTATTGGGGCAT  
CCCATTAGTAAGCCGATTCGGGCTGATTTATCAGATTCTAATATTATTGACCGATTTGCGC  
GTATATGCAGAAATATTTCTCATTATCATAGCGGATCTTCCAAAAAAAAGAGTTTGTATC  
GAATAAAGTATATACTTCGACTCTTGTGCTAGAACTTTGGCGCGGAAACACAAAAGT  
ACTGTACGTGCTTTTTTAAAAAGATTAGGCTCGGAATTATTGGAAGAATTTCTTATGTCG  
GAAGAAGACGTTCTTTTTTTGACCTTCCAAAAACGGATTTGGTATTTGGATATGATTTCT

GTCAATGATCTCGCAAATCACAAAATGATAATTGAT---ATAATAGAAATAGAA---GCTATC  
CATTCTTTTTCCAGATTGGAATCC---TTAAAAGAATTTTATGGAATCATAGGGATGCTTGT  
CCCTATTTTCATTCTTGTATTAGGAATCACACTGGGTGTTCTAGTAATTGTTTGGTTAGA  
AAGAGAAATATCCGCAGGGATACAGCAACGTATTGGACCCGAATACGCGGGCCTTTG  
GGAATTCTTCAAGCTTTAGCCGACGGTACAAACTACTTTTCAAAGAAAATATTCTTCC  
ATCTAGAGGAGATACTCGTTTATTAGTATTGGTCCATCCATAGCAGTCATATCCATTTTA  
CTAAGTTATTCAATAATCCCTTTAGTTGTCGCTTTATTCTAGCTGATCTTAGTATTGGTG  
TTTTTTTATGGATCGCCATTCAAGTCTTGCTCCCGTTGGATTGCTTATGTCAGGATATGG  
ATCAAATAATAAATATTCTTTTTAGGTGGATTAAGGGCTGCTGCTCAATCAATTAGTTAT  
GAAATACCATTAACTCTATGTGTATTATCAATATCTCTACTATCTAACAGTTTAAGTACAG  
TTGATATAGTTGAAACACAATCCAAATATGGTTTTTTGGGGATGGAATTTGTGGCGTCAA  
CCTATAGGGTTTATCATTTTTCTAATTTCTTCTCTAGCCGAGTGTGAGAGATTACCTTTTG  
ATTTACCAGAAGCAGAAGAAGAATTAGTAGCTGGTTATCAAACCGAATATTCAGGTATA  
AAATTTGGCTTATTTTATGTTGCTTCGTATCTAAATCTACTAATTTCTTCATTATTTGTAAC  
AGTTCTTTACTTGGGGGGGTGGAATCTTTCTATTCCAAACCTATTTGATCCTGAGTTATT  
TGACATAAATCAAAGAGGGGAAGGTTTTTTGGAACAATAATCGGTATCTTTATTACTGG  
CTAAAACCTTATTTGTTCTTATTCAATTTCTATTGCAACAAGATGGACTTTACCAAGACTGA  
GAATGGACCAACTATTAATCTTGGATGGAAATTTCTTTTACCTATTTCTTTGGGTAATCT  
ATTATTAACGACTTCGTTCCAACCTCTTTCACTGATGATCTGGCATGTACAGAATGAAAA  
CTTCATTCTCGATTCTACGAGAATTTTTTATGAAAGCCTTTCATTTGCTTCTCTTCGATGG  
AAGTTTGATTTTCCCAGAATGTATCCTAATTTTTTGGCCTAATTTCTTCTTCTGATGATCGAT  
TCAACCTCTGATCAAAAAGATATACCTTGGTTATATTTTATCTCTTCAACAAGTTTAGTA  
ATGAGCATAACGGCCCTATTGTTCCGATGGAGAGAAGAACCTATGATTAGCTTTTCGGG  
AAATTTCCAAACGAACAATTTCAACGAAATCTTTCAATTTCTTATTTTACTATGTTCAAC  
TCTATGTATTCTCTATCCGTAGAGTACATTGAATGTACAGAAATGGCTATAACAGAGTT  
TCTCTTATTTCGTATTAACAGCTACTCTAGGAGGAATGTTTTTATGTGGTGCTAACGATTT  
AATAACTATCTTTGTAGCTCCAGAATGTTTCAGTTTATGCTCCTACCTATTATCTGGATAT  
ACCAAGAAAGATGTACGGTCTAATGAGGCTACTATGAAATATTTACTCATGGGTGGGGC  
AAGCTCTTCTATTCTGGTTCATGGTTTCTCTTGGCTATATGGTTTATCCGGGGGAGAGAT  
CGAGCTTCAAGAAATAGTGAATGGTCTTATCAATACACAAATGTATAACTCCCCGGGAA  
TTTCAATTGCGCTCATATTCATCACTGTAGGAATTGGGTTCAAGCTTTCCCCAGCCCCTT  
CTCATCAATGGACTCCTGACGTATACGAAGGATCTCCCACTCCAGTCGTTGCTTTTCTTT  
CTGTTACTTTCGAAAGTAGCTGCTTCAGCTTCAGCCACTCGAATTTTCGATATTCCTTTTT  
ATTTCTCATCAAACGAATGGCATCTTCTTCTGGAAATCCTAGCTATTCTTAGCATGATATT  
GGGAAATATCATTGCTATTACTCAAACAAGCATGAAACGTATGCTTGCATATTCGTCCAT  
AGGTCAAATTGGATATGTAATTATTGGAATAATTGTTGGAGACTCAAATAATGGATATGC  
AAGCATGATAACTTATATGCTGTTCTATATCTCCATGAATCTAGGAGCTTTTGCTTGCATT  
GTATTATTTGGTCTACGTACCGGAACTGATAACATTTCGAGATTATGCAGGATTATACACG  
AAAGATCCTTTTTTTGGCTCTCTCTTTAGCCCTATGTCTCTTATCCCTAGGAGGTCTTCCT  
CCACTAGCAGGTTTTTTTCGGAAAACCTCTATTTATTCTGGTGTGGATGGCGGGCAGGCCT  
ATATTCCTTGGTTTTAATAGGACTCCTTACAAGCGTTGTTTCTATCTACTATTATCTAAAA  
ATAATCAAGTTATTAATGACTGGACGAAACCAAGAAATCACCCCTCACGTGCGAAATTA  
TAGAAGATCTCCTTTAAGATCAAACAATTCATCGAATTGAGTATGATTGTATGTGTGAT  
AGCATCTACTATAACCAGGAATATCAATGAACCCGATTATTGCAATTGCTCAGGATACCCT

TTTTATGTTTTTGCCTTACGAATATGATATTTTTTGGGCATTTCTAATAATCTCAAGTCTTA  
TTCTATTTTTGGCATTTTTAATTTCTGGGATTTTAGCCCCGATTAGGAAAGGGCCGGAGA  
AACTTTCTAGTTATGAATCGGGTATAGAACCAATGGGCAACGCTTGGTTACAATTTAGA  
ATCCGTTATTATATGTTTGCTCTAGTTTTTGTGTTTTTGTATGTTGAAACGGTTTTTCTTTA  
TCCATGGGCAATGAGTTTCGATATATTGGGCGTATCTGTATTTATAGAAGCTTTAATTTTC  
GTGCTTATCTTAATTGTTGGTTTAGTTTTATGCATGGCGAAAGGGGGCATTGGAATGGTCT  
ACGAACCATTTTCTTGTTTAACAATAATTGTGGTTTTGCCAATATTTGCAGGTTGCTTA  
ATTTTTTTTCTTCCACATAGGGGAAATAGAGTAATACGTTGGTATACTATATGTATGTGTA  
TTTTAGAGCTTCTTCTAACGACTTATGCATTTTGCTATCATTTTCAATCAGACGACCCATT  
AATCCAATAATAGAGGATTATAAATGGATCCTTTTTTTGGATTTTCATTGGAGATTAGG  
AATAGATGGACTCTCGATAGGACCCATTTTACTAACGGGATTCATCACTACTTTAGCTAC  
TTTAGCGGCTTGGCCAGTGACTCGAGATTCTCGATTATTTCAATTCCTGATGTTAGCAAT  
GTACAGTGGACAAATAGGATTATTTCTTCTCGAGATCTTTACTTTTTTTTCTCATGTG  
GGAGTTAGAATTAATCCCGTTTATCTACTTGTATCCATGTGGGGAGGAAAAAACGCC  
TGATTCGGCTACAAAATTTATTTTGTACACGGCAGGGGGTTCTATTTTTCTTTAATGG  
GAGTTCTGGGTGTCGGTTTATATAGTTCTACTGAACCAACATTAATTTTGAAATATTGG  
CTAATCAGTCCTATCCCGCGGCCTTGGAAATATTATTTTATAGTGGATTTTTTCTTGCTTT  
TGCTGTCAAATTACCAATCATACCCCTACATACATGGTTACCAGATACCCACGGAGAAG  
CGCATTATAGTACTTGTATGCTTCTAGCCGGAATCTTATTAATAATGGGAGCGTATGGAT  
TAGTTCGGATCAATATGGAATTTTTTCTCATGCTCATTCTCTATTTTCTCCTTGGTTGAT  
AATAGTGGGCGCAATGCAAATAATCTATGCAGCTTCAACATCTCTGGGTCAACGGAATT  
TAAAAAAAAGAATAGCCTATTCTCTGTATCTCATATGGGTTTTATAATTATAGGAATTGG  
TTCTATCACGGATATGGGGCTCAACGGAGCCCTTTTACAAATAATCTCTCATGGATTTAT  
CGGTGCTGCACTTTTTTTTCTTGGCCGGAACAACCTTATGATAGAATACGTCTTCTTTATCT  
TGATGAAATGGGTGGAATAGCTATCCCAATGCCAAAATGTTACAGATGTTACAGTAGTT  
TTTCGATGGCCTCCCTCGCATTACCAGGTATGAGTGGTTTTGTGCGGAATTAATAGTAT  
TTTTTGGATTAGTTACTAGTCCAAAATTTCTTTTAATGACAAAATCCCAATTACTTTTGT  
AATGGCAATTGGAATGATATTAACCCCTATTTATTTATTTATCTATGTTACGCCAGATGTTCT  
ATGGATACAAGATATTTAACGGCCCAAACCTTATTTTTTTGATTCTGGGCCGCGAGAAT  
TATTTCTTTCAATATCTATTTTTTTTACCCGTA CTGGTATTGGTATATACCCAGATTTTCGTT  
CTTTCATATCAGTTGAAAAGGTTGAAGTTATCCTATCTAATTTCTTTTTATAGAATGATGC  
TCGAACATATACTTGTTTTGAGTGCCTATTTATTTTCTGTTGGTATCTATGGATTGATCAC  
AAGTCGAAATATGGTTAGAGCCCTTATGTGCCTTGAACCTCTATTAATTCAGTTAATAT  
AAATTTTGTAACATTTTCTGATATTTTGTATAATCGTCAATTAAGAGGAGACATTTTTTCC  
ATTTTTGTTATAACTATTGCAGCCGCTGAAGCAGCTATTGGACCGGCTATTGTTTCATCA  
ATTTATCGTAACAAAAAATCAACTCGTATTAACCAATCAAACCTGTTGAATAAAAATGCA  
ACAAACATATCAATATGGGTGGATTTTACCTTTTCGTTCCACTTCCAGTTCCTATGTTAATA  
GGAGTGGGCCTTCTTCTTTTTCCGACAGCAACAAAAAATCTTCGTCGTATGTGGGCTTT  
TCCAAGTATTTTATTGTTAAGTATAGTCATGATTTTTTCAACTAATCTGTCTATTCAGCAA  
GTAATAGCAGTTCTATCCCAATATGTAIGGTCTTGGACACTCGATAATGATTTTTTCTT  
TAGAATTCGGCTGCTTGATCGATCCACTTACTTCTATTATGTCAATGTTAATCACTACTGT  
TGGAATCATGGTTCTTATTTATAGTGATAATTATATGGCTCACGATCAAGGATACTTGAGA  
TTTTTTGCTTATATGAGTTTTTTTTCAGTACTTCCATGGTAGGATTAGTTACTAGTTCAAATT  
TGATACAAATTTATTTTTTTTTGGGAATTGGTTGGAATGTGTTCCCTATCTATTAATAGGGTT

TTGGTTTACGCGACCTCCTGCATCAAATGCTTGTCAAAAAGCATTGTAACCTAACCGTG  
TAGGGGATTTTGGTTTATTATTAGGAATTTTAGGTTTTTATTGGATAACAGGTAGTTTTGA  
ATTCGGGATTTATTCGAAATACTCAATAACAATGAAGTTAATTTTTCTTTGTTACTTTG  
TGTGCTGCTTTATTATTTGCCGGTGCGGTTGCTAAGTCTGCACAATTTCCCCTTCATGTG  
TGGTTACCTGATGCTATGGAGGGACCCACTCCTATTTCCGGCTCTTATACACGCTGCTACT  
ATGGTAGCAGCGGGGATTTTTCTTGTAGCTCGCCTTCTCCCTCTTTTCTGGTTATACCC  
CATATAATGAATTAATCTCGTTGATCGGCACAATAACACTATTATTAGGAGCTACTTTAG  
CTCTTGCTCAAAAAGACATTAAAAGAGGTTTAGCCTATTCGACAATGTCTCAATTGGGT  
TATATGATGTTAGCGCTAGGAATGGGGTCTTATCGAAGTGCTTTATTTCAATTTGATTACTC  
ATGCTTATTCCAAAGCGTTATTATTTTTAGGGTCTGGGTCTGTTATTCATTCAATGGAAA  
CTGTTGTTGGCTATTCTCCGGATAAAAGTCAGAATATGGTTCTTATGGGTGGTTAAACAA  
AACATGTACCAATTACCAAACTTCTTTTTTTTTAGGTACACTTTCTCTTTGTGGTATTC  
CGCCTCTTGCTTGTTTTTGGTCAAAAGATGAAATCTTAATGATAGTTGGTTGTATTTCG  
CAATTTTCGCAATAATAGCTTGGGCCACCGCAGGATTAACCGCATTATATATGTTTCGCA  
TCTATTTGCTTACTTTTGAAGGCCATTTAAACATTCATTTTCAAATTACAGTGGAATC  
AAAATGCTTCTTTCTATTCTATATCTTTATGGGGAAAGGGGTATTCAAATAAC-----A  
ATTTTTGTTTATTAAGAATGAATTTTTTTTTCTTTTGATAATAAAAAGGTCTTTTTTTATCCT  
TATGAGTCGACAATACGATGTTATTTCCCTTACTTCTATTAGTCCTATTTACTTTGTTG  
TTGGATCTATAGGAGTTCCTTTTGATTTGGATATATTAACCAAATGGTTAGCACCTTCTAT  
TAACTTTTTAGATCAAAAATCAAAA---TCAACAGATTGGTATGAATTTTTTCAAATGCA  
ACTTTGTCAGTTAGTCTAGCTTATTTCCGAATATTTATCGCATCCTTTTTATATAAACCA  
TTTATTCTTCTTTGAAAAATTTGATTTAATAAATTCATTTGTTAAACATTGGGATAAATT  
TCTAAACGCTCTATATGATTGGTCATATAATCGGGCTTATATCGATACTTTTTATACAACAT  
CTTTTACTGGGGGAATAAGAGAATTGGCTCAATTAACACATTTTTTTGATAGACAAGTA  
ATTGATGGAATTACGAATGGGGTTGGTATCATGAGTTTCTTTGTAGGAGAAGGTATAAA  
AAATTTAGGGGGTGGC---CGCATTTCTTCTTATCTTTTCTTCTATTTTTCTTGTGTATCCGT  
TTTTTTATTAGTTTAT---ATGGATTTACCCGGACCAATACACGATTTTCTTTTAGTCTTTCT  
AGGATCGGGTCTTATATTAGGAAGTCTGGCAGTAGTATTACTTCCGAATCCAATTTATTC  
GGCCTTTTCGTTGGGATTGGTTCTTTTTGTATATCCTTATTCTATATTCTATCGAACTCCT  
ATTTGTAGCTGCTGCGCAGCTCCTTATTTATGTAGGAGCTATAAATGTTTTAATAATTTT  
TGCTGTGATGTTTATGAATGGTTCAGAATATTACAAAGATTTTCACCTTTGGACCGTTGG  
GGATGGGGTTACTTCAATGATTTGTACAAGTCTTTTTATTTCACTAATTACTACTATTCCA  
GATACGGCCTGGTATGGGATCAGCTGGACTACAAAATCAAATCATATTTTAGAACAAGA  
TTTGATAAGTAATAGCCAACAAATGGAATTCATTTAGCAACGGATTTTTTTCTTCCATT  
TGAACTCATTTCATAATCCTTTTAGTCGCTTTAATAGGTGCTATTTCTATAGCTCGTCAA  
ATGATTACACCAATTACAAGAAATGACCTTATGATAGTGAATATGGGGCCTCACCACCC  
ATCAATGCATGGTGTCTTTCGACTGATCGTTACTCTCGATGGTGAAGATGTTATTGACTG  
TGAACCTATATTAGGTTATTTACATAGAGGAATGGAGAAAATTGCGGAAAATCGAACAA  
TTATACAATATTTGCCTTATGTAACACGTTGGGATTATTTAGCTACCATGTTTACAGAAGC  
ATAACTGTAAATGGACCTGAACAGCTAGGCAATATTCAAGTACCTAAAAGGGGCTAGCT  
ATATTAGAGCTATTATGCTGGAGTTGAGTCGTATCGCTTCCCATTTGTTATGGCTTGGCC  
CTTTTATGGCAGATATTGGGGCACAGACCCCTTTTTCTATATTTTTCGAGAACGAGAAT  
TGATATATGACCTATTCGAGGCTGCTACCGGTATGCGCATGATGCATAATTATTTTCGTAT  
CGGAGGGGTCGCTGCTGATCTACCTTATGGATGGGTAGATAAATGTTTGGATTTTTGCG

ATTATTTTTTAACTGGGGTTGCTGAATATCAAAAGCTTATTACCCGAAATCCTATTTTTTT  
AGAACGAGTGGAAGGCGTAGGTATTATTGGCGGAGAAGAAGCACTAAATTGGGGTTTA  
TCGGGGCCAATGCTACGAGCTTCCGGAATACAATGGGATCTTCGTAAAGTTGATCGTTA  
TGAGTGTTATGACGAATTTGATTGGGAGATTCAATGGCAAAAAGAAGGGGATTCATTA  
GCTCGTTATTTAGTACGAATTAGTGAAATGACAGAATCCATAAAAATAATCCAACAAGC  
CTTGGAAGGAATTCCAGGGGGCCGTATGAGAATTTAGAAAAGCCGGCGCTTTGATAGA  
ATAAAAGACCCTGAATGGAATGATTTTGAATATCGATTTATTAGTAAAAAGCCTTCTCCC  
ACTTTTGAATTGTCCAAGCAAGAACTTTATGTAAGAGTCGAAGCACCAAAGGAGAAT  
TGGGAATTTTTCTGATCGGAGATCAGAGTGTTTTTCTTGGCGATGGAAAATCCGACCG  
CCGGGGTTTATCAACTTGCAAATCTTCCGCAGTTAGTTAAAAGAATGAAATTGGCTGA  
TATTATGACGATACTAGGTAGTATAGATATCATTATGGGAGAAGTTGATCGTATGTTCCCT  
ATGCTAACTCGGTTCTTGAACCTCTGGTCAACAAACAATACGAGCTGCCAGGTACATTG  
GTCAAGGTTTCGTGATTACCTTGTCCCATGCAAATCGTTTACCTGTAAC TATTCAATACC  
CCTACGAAAAATTGATTACATCAGAACGTTTCCGAGGCCGAATCCACTTTGAATTTGAT  
AAATGCATTGCTTGTGAAGTATGTGTTTCGTGTATGTCCTATAGATTTACCCGTTGTAGAT  
TGGAATTTGCAAATGGATATTCGAAAGAAACGATTACTTAATTACAGTATTGATTTTGG  
ATTTGTATATTTTGTGGTAATTGTGTTGAGTATTGTCCAACAAATTGTTTATCAATGTCCG  
AAGAATATGAGCTTTCTACTTATAATCGTCATGAATTGAATTATAATCAAATTGCTTTAGG  
TCGGTTACCGGTCTCAATAATTGAAGATTACACAATTCGAACAATTTCTTCGAAT-----  
AATGTA-----ATGCAGGGTTCGTTTATCTGCTTGGCTAGTCAAGCAC  
GCGATAATTCATAGATCTTTGGGCTTTGATTATCAAGGAATAGAGACTTTACAAATAAAG  
CCCGAGGATTGGCATTCTATTGCCGTCATTTTATACGTATATGGTTACAATTATCTACGCT  
CCCAATGTGCCTATGATGTAGCACCTGGTGGACTGTTAGCTAGTGTGTATCATCTTACCA  
GAATAGAGTATGGTGTGGATCAACCAGAAGAGGTATGCATAAAAGTATTTGCCTCGAG  
GAGGAATCCTAGAATTCCGTCCGTTTTCTGGGTTTGGAAAAGCGTGGATTTTCAAGAA  
CGAGAATCCTATGATATGTTGGGAATCTCTTATGATAATCATCCGCGCTTGAAACGTATT  
TTAATGCCTGAAAGTTGGATAGGATGGCCCTTTCGTAAGGATTATATTTCCCCCAATTT  
TATGAAATACAAGATGCTCAT-----  
-----ATGAATTC  
CATTGAGTTTCCTTTACTTAATCGAACAGCCGAAATTTCAAGTTATTTCAACTACATTA  
TGATCTTTCAAATTTGGTCAAGACTCTCCAGTTTATGGCCGCTTCTCTATGGTACCAGTTG  
TTGTTTTATTGAATTTGCTTCACTAATAGGATCACGGTTTGACTTTGATCGTTATGGACTA  
GTACCAAGATCGAGTCCTAGACAAGCAGATCTAATTTTAAACAGCTGGAACAGTAACAA  
TGAAAATGGCCCCCTCCTTGGTGAGATTATATGAGCAAATGCCCGAACCGAAATATGTT  
ATTGCTATGGGAGCCTGTACAATTACAGGGGGGATGTTTCAGTACCGATTCTTATAGTACT  
GTTCCGGGAGTCGATAAACTAATCCCGTGGATGTCTATTTGCCAGGTTGTCCCCTAA  
ACCGGAAGCAGTTATAGATGCTATAACAAAACCTTCGTAAGAAAATATCTCGAGAAATCT  
ATGAAAATAGAATTGGCTCTCAACAAGCAAATCGGTGTTTTTACGACCAATCACAAGTTT  
CATGTTGGACGCAATATTCATACTGGAAATTATGATCAAAAATTCCTCTATCAACCGGTA  
CCTACTTCAGAAATCCCTACTGAAAACCTTTTTCAAATATAAAAAGTTTCAGGATCTTCTCA  
GGAATTTGTGAATATGCAAAC TAGAAATACTTTTTCTTGGATAAAGGAACATATTACTCA  
ATCTATTTCCGTATCGCTCATGATATATATCATAACTCGGGCACCCGTTTCAAGTGCATAT  
CCCCTTTTGCACAGCAGGGTTATGAAAATCCACGAGAAGCGACTGGGCGTATTGTAT  
GTGCCAATTGTCATTTAGCTAATAAGCCCGTGGATATTGAGGTTCCACAAACAGTACTT

CCTGATACTGTATTTGAAGCAGTTGTTTCGAATTCCTTATGATAAGCAAGTGAAACAAGT  
CCTTGCTAATGGTAAGAAAGGGGGTTTGAATGTGGGGGCTGTTCTTATTTTACCGGAGG  
GGTTTGAATTAGCTCCTTCCGATCGTATTTCTCCCGAGATGAAAGAAAAGATAGGAAAT  
TTGTCTTTTCAGAGCTATCGCCCTAATAAAAAAATATTCTTGTAATAGGGCCTGTCCCC  
GGCCAGAAATATAGTGAAATCACCTTTCCTATTCTTTCCCCGACCCCGCTACTAAGAA  
AGATGTTCACTTCTTAAAATATCCTATATATGTAGGAGGAAATAGGGGAAGGGGTCAGA  
TTTATCCCGACGGAAGCAAGAGTAACAATACAGTTTATAATGCTACAGGGGGCGGGCATA  
GTAAGCAAATCATAACGAAAAGAAAAGGGGGATATGAAATAATCATAACAGATCCAT  
CGGATGGACGTCAAGTGGTTGATATTATCCCTCCAGGACCAGAAGTTCTTGTTTCAGAG  
GGTGAATCCATCAAATTTGATCAACCATTAACGAGTAATCCTAATGTGGGTGGATTTGG  
TCAGGGAGATGCCGAAATAGTACTTCAAGATCCATTACGTGTCCAAGGCCTTTTGGTCT  
TCTTGGCATCTGTTATTTTGGCACAAATATTTTATGTTCTTAAAAGAAACAGTTCGAG  
AAGGTTCAATTAGCCGAAATGAATTCATGAGTAAAGTCTATGATTGGTTCGAAGAACG  
TCTTGAGATTCAGGCGATTGCGGATGATATAACTAGTAAATATGTTCCCTCCCATGTCAA  
TATATTTTATTGTTTAGGGGAATTACTCTTACTTGTTTTTTAGTACAAGTAGCTACGGGG  
TTTGCTATGACTTTTTACTATCGTCCGACCGTTACTGAAGCTTTTGCCTCTGTTCAATAC  
ATAATGACGGAAGCGAACCTTGGTTGGTTAATCCGATCAGTTCATCGATGGTCAGCAAG  
TATGATGGTCCATGATGATTCTACATGTTTTTCGTGTGTATCTCACTGGTGGATTTAAA  
AAACCCCGCAATTGACTTGGGTTACAGGTGTGGTTCTGGGAGTATTGACCGCATCTTT  
TGCGGTAACTGGTTATTCCTTACCTCGGGACCAAATTGGTTATTGGGCGGTGAAAATTG  
TAACAGGTGTACCTGAGGCTATTCCTGTAATAGGATCGCCTTTAGTAGAATTATTGCGCG  
GAAGCGCTAGTGTGGGACAATCCACCTTAACTCGTTTTTATAGTTTACACACTTTTGTAT  
TGCCACTTCTTACTGCTGTATTTATGTTAATGCACCTTCCAATGATACGCAAACAAGGTA  
TTTCTGGTCTTTAATGGGAGTAACAAAAAACCTGATTTGAATGATCCTGTATTAAGA  
GCTAAATTGGCTAAAGGCATGGGTCATAATTATTACGGAGAACCCGCATGGCCAAATGA  
TCTTTTATATATTTTCCAGTAGTAATTCTAGGGACTATTGCATGTAACGTAGGCTTAGCG  
GTTCTAGAACCATCAATGATTGGTGAACCGGCAGATCCGTTTGCAACCCCTTTGGAAAT  
ATTACCAGAATGGTATTTCTTTCCCGTATTTCAAATACTTCGTACAGTGCCCAATAAATT  
GTTGGGTGTTCTTTAATGGTTTCAGTACCTGCGGGATTATTAACAGTACCTTTTTTAGA  
GAATGTTAATAAATTCCAAAATCCATTTCCCGTCCAGTAGCGACAACCGTCTTTTTGAT  
TGGTACTGCAGTTGCCCTTTGGTTGGGTATTGGTGCAACATTACCTATTGATAAATCCCT  
AACTTTAGGTCTCTTTATGATTGAAGTTTTTCTATTTGGAATCGTGTTAGGTCTAATTCCT  
ATTACTTTGGCTGGATTATTCGTAACCTGCATATTTACAATACAGGCGTGGTGATCAGTTG  
GACCTTATGCTTACTATAACCAAGTATTTTCGGTTTTCTACTAGTGGCTTTAACTATAACTT  
CAGCTCTATTTATTGGTCTGAGCAAGATACGACTTATTATGGATATAGTAAGTCTCGCTT  
GGGCTGCTTTAATGGTAGTCTTTACATTTCCCTTTCACTCGTAGTGTGGGGAAGAAGT  
GGGCTTATGATTATTCGTTCCCGGAACCAGAAGTAAAAATTTGGTGGATAAGGATCC  
CGTAAAAACTTCTTTTCGAGCAATGGGCCAAACCGGGTCATTTTTCAAGAACAATAGCT  
AAAGGACCTGATACTACCACTTGGATCTGGAACCTACATGCTGATGCTCACGATTTCGA  
TAGCCATAACCAGTGATTTGGAGGAGATCTCTCGAAAAGTATTTAGTGCCCATTTCCGCC  
AACTCTCCATCATCTTTCTTTGGCTGAGCGGCATGTATTTCCACGGTGCTCGTTTTTCCA  
ATTATGAAGCGTGGCTAAGTGATCCAACCCACATTGGGCCAAGTGCTCAGGTGGTTTG  
GCCAATAGTGGGCCAAGAAATATTGAATGGTGATGTGGGCGGGGGTTTCCGAGGAATA  
CAAATAACCTCTGGTTTTTTTTCAGATTTGGCGAGCATCTGGAATAACTAGTGAATTACA



ACTCTATTGTACCGCAATCGGTGCATTGGTCTTTGCAGCGTTAATGCTTTTTGCTGGTTG  
GTTTCATTATCATAAAGCGGCCCCAAAATTGGCTTGGTTTCAAGATGTAGAATCTATGTT  
GAATCACCATTTAGCGGGGCTACTGGGACTTGGGTCTCTTTCTTGGGCGGGGCATCAA  
GTACATGTATCTTTACCGATTAACCAATTTCTAAACGCTGGAGTAGATCCTAAAGAGATA  
CCGCTCCCTCATGAATTTATCTTGGATCGCGATCTTTTGGCTCAACTTTATCCAAGTTTT  
GCCGAGGGAGCAACCCATTTTTACCTTGAATTGGTCAAATATGCGGACTTTCTTAC  
TTTTCGTGGAGGATTAGATCCAGTAACTGGAGGTCTATGGTTGACCGATATTGCACATC  
ATCATTTAGCGATTGCTATTCTGTTCCCTGATAGCGGGTCACATGTATAGAACCAACTGGG  
GCATTGGTCATGGGCTAAAAGACATTTTAGAAGCTCATAAAGGTCCATTTACAGGCCAG  
GGCCATAAAGGACTATATGAGATCCTAACAACATCATGGCATGCTCAATTATCTCTTAAC  
TTAGCCATGTTAGGCTCTTTAACCATTGTTGTAGCTCACCATATGTATTCCATGCCCCCTT  
ATCCATATCTAGCTACTGACTATGGTACACAACCTGTCATTGTTACACATCACATGTGGA  
TTGGTGGATTTCTCATAGTCCGTGCTGCTGCGCATGCCGCCATTTTTATGGTAAGAGACT  
ATGATCCAACACTCGATAACAACGATCTATTAGATCGTGTCTTAGACATCGTGATGCAA  
TAATATCACATCTCAACTGGGCATGTATTTTTCTGGGCTTTCACAGTTTTGGTTTGTATAT  
TCATAATGATACGATGAGTGCCTTAGGGCGTCTCAAGATATGTTTTTCAGATACCGCTAT  
ACAATTACAACCCGTTTTTGCCCAATGGATACAAAATACTCATGCTTTAGCACCCGGTG  
CAACGGCTCCTGGTGAACGGCAAGTACCAGTTTAACTGGGGGGGTGGTGATTTAGT  
AGCAGTGGGTGGCAAAGTGGCTTTGTTACCTATTCCGTTAGGAACCGCGGATTTTTTGG  
TACATCATATCCATGCATTTACGATTCATGTCACGGTATTGATACTCCTGAAAGGTGTTCT  
ATTTGCTCGCAGCTCCCGTTGATACCAGATAAAGCAAATCTTGGTTTTCTGTTTTCTTG  
TGATGGGCCTGGAAGAGGGGGTACATGTCAAGTATCGGCTTGGGATCATGTCTTCTTAG  
GACTATTCTGGATGTACAATTCGATTTCCGGTAGTAATATTCCATTTAGCTGGAAAATGC  
AGTCAGATGTTTGGGGCAGTATAAGCGATCAAGGGGTAGTAACTCATATCACGGGAGG  
AACTTCGCGCAGAGTTCTATTACTATTAATGGGTGGCTCCGGGATTTCTTATGGGCAC  
AGGCATCCCAGGTAATTCAGTCTTATGTTCTTCAATTATCTGCATATGGCCTTTTTTCT  
AGGTGCTCATTTTGTATGGGCTTTTAGTTTAAATGTTTCTATTAGTGGACGTGGTTATTG  
GCAAGAACTTATTGAATCTATCGTTTTGGGCTCATAATAAATTAAGTTGCTCCTGCTAC  
TCAGCCGAGAGCCTTGAGCATTGTACAAGGACGTGCTGTAGGAGTAACCCATTACCTT  
CTGGGTGGAATTGCCACAACATGGGCGTCTTCTTCTAGCAAGAATTATTGCAGTAGGAAT  
GGCATTAAAGATTTCCAAGGTTTAGCCAAGGGTTAGCTCAGGACCCCACTACTCGTCGTA  
TTTGGTTTGGTATTGCTACCGCACATGACTTCGAAAGTCATGATGATATTACTGAGGAA  
CGTCTTTATCAGAATATTTTTGCTTCCCCTTTGGTCAATTAGCAATAATTTTTCTGTGGA  
CTTCCGGAATCTGTTTCATGTAGCTTGGCAAGGAAATTTGAATCATGGGTACAAGAC  
CCTTTACACGTAAGACCTATTGCTCATGCAATTTGGGATCCTCATTTTGGTCAACCGGCC  
GTGGAGGCTTTTACTAGAGGGGGTGTCTTTGGCCCAGTGAATATCGCGTATTCGGGGTGT  
TTATCAGTGGTGGTATAACAATCGGTTTACGTAATAATGAAGATCTTATACCGGAGCTCT  
TTTTCTATTATTTCTTTCTGCCATATCCTTAATAGCAGGTTGGCTGCACTTACAACCGAAA  
TGAAACCGAGCGTTTCGTGGTTCAAAAATGCCGAATCTCGTCTGAATCATCATTTGTC  
AGGACTCTTCGGCGTAAGTTCCTTGGCTTGGACAGGACATTTAGTACATGTCGCTATTC  
CTGGATCCAGAGGGGAGTACGTTTCGATGGAATAATTTCTTAGATGTATTACCGCATCCCC  
AGGGGTAGGCCCACTTTTTACAGGTCAGTGGAAATCTTATGCTCAAACCCCTGATTCG  
AGTAGTCATTTATTTGGGACCTCCCAAGGAGCAGGAACTGCCATTCTAACCCCTTCTGG  
AGGATTCCATCCACAAACACAAAGTTTGTGGTTGACTGATATGGCTCATCATCATTTAG

CTATTGCATTTCTTTTTCTTGTGGCTGGTCATATGTATAGAACTAATTTCTGGGATTGGACA  
CAGTATCAAGGATCTTTTAGATGCACATATTCCTCCAGGAGGGCGATTGGGGCGTGGGC  
ATAAGGGTCTTTATGATACAATCAACAATTCGCTTCATTTTCAATTAGGTCTTGCTCTAG  
CTTCTTTAGGGGTTATTACCTCCTTGGTAGCGCAACACATGTACTCTTTACCTGCTTATG  
CATTCATAGCACAAAGACTTTACTACTCAAGCTGCATTATATACCCATCACCAATATATCGC  
AGGATTCATCATGACAGGGGCTTTTGCTCATGGAGCTATCTTTTTTCATTAGAGATTACAA  
CCCGGAGCAAAACGAAGATAATGTATTGGCAAGAATGTTAGACCATAAGGAAGCTATC  
ATACTCATTTAAGTTGGGCCAGCCTCTTTTTGGGATTCCATACCTTGGGACTTTATGTT  
CATAATGATGTCATGCTTGCTTTTGGTACTCCGGAAAAGCAAATTTTGATCGAACCCATA  
TTTGCTCAATGGATACAATCGGCTCATGGGAAAACCTTCATATGGGTTTCGATGTACTTTTA  
TCTTCAACGAGCGGCCCGGCATTCAATGCGGGTTCGAAGCATCTGGTTGCCCGGTTGGT  
TAAATGCTATTAATGAG-----AATACTAATTCATTATTCTTAACAATAGGGCCCGGAGACT  
TTTTGGTCCATCATGCTATTGCTCTTGGTTTACATACAACACTACATTGATCTTGGTAAAAG  
GTGCTTTAGATGCACGGGGTTCCAAGTTAATGCCAGATAAAAAGGATTTTCGGTTATAGT  
TTCCATGCGATGGCCCTGGGCGAGGGGGTACTTGTGATATTCGGCATGGGACGCATT  
TTATTTAGCCGTTTTTTGGATGTTAAATACTATTGGATGGGTTACTTTTTATTGGCATTGG  
AAGCATATCACATTATGGCAAGGTAACGTTTCACAGTTTAATGAATCTTCCACTTATTTG  
ATGGGCTGGCTAAGAGATTATTTATGGTTAAACTCTTCACAACCTTATCAATGGATATAAT  
CCTTTTGGTATGAATAGTTTATCGGTCTGGGCATGGATGTTCTTATTTGGACATCTTGTTT  
GGGCTACTGGATTTATGTTCTTAATCTCCTGGCGGGGATATTGGCAAGAATTGATTGAA  
ACTTTAGCATGGGCTCATGAACGCACACCTTTGGCGAATTTGATTCGATGGAGAGATAA  
ACCCGTGGCCCTTTCTATTGTGCAAGCAAGATTGGTTGGATTAGCCCATTTTTCTGTAG  
GTTATATATTCACTTATGCAGCTTTCTTGATTGCCTCTACGTCGGGAAAATTTGGCATGTC  
ACATTCAGTAAAGATTTATGATACATGTATAGGATGTACCCAATGTGTCCGGGCGTGCCC  
CACCGATGTATTAGAAATGATACCTTGGGATGGATGTAAAGCTAAACAAATCGCTTCTG  
CCCCAAGGACCGAAGACTGCGTTGGTTGTAAGAGGTGTGAATCCGCGTGTCCAACGG  
ATTTTTTGAGTGTTTCGGGTTTATTTATGGCATGAAACAACCTCGCAGTATGGGTCTAGCTT  
ATATGACAACTTTCCACTTTCCCTCTATTTTTGTGCCTTTAGTAGGCCTAGTATTTCCGGC  
AATTGCAATGGCTTCTTTATTTCTTCATGTTCAAAAAACAAGATTGTTATGCGAGATCT  
AAAAACATATCTCTCCGTGGCCCCAGTACTAAGTACGCTATGGTTCGGGGCTTTAGCAG  
GTCTATTGATAGAGATTAATCGTTTTTTCCCCGATGCGTTGACATTCCCCTTTTTTTTCATT  
AATGACTGCAATTTTAGAGAGACGCGAAAGCGAAAGCCTATGGGGTCGCTTCTGCAAC  
TGGATAACCAGTACCGAAAACCGTCTTTACATTGGATGGTTTGGTGTTTTGATGATCCCT  
ACCTTATTGACCGCAACTTCTGTATTTATTATTGCCTTCATTGCTGCTCCTCCAGTAGATA  
TTGATGGTATTCGTGAACCTGTTTCTGGATCTTTACTTTACGGAAACAATATTATCTCAG  
GTGCCATTATTCCTACTTCTGCAGCTATCGGTTTGCACTTTTACCCAATTTGGGAAGCAG  
CATCCGTTGATGAATGGTTATACAACGGTGGTCCTTATGAACCTAATTGTTCTACACTTTT  
TACTTGGTGTAGCTTGTTACATGGGTCGTGAGTGGGAGCTTAGTTTCCGTTTGGGTATG  
CGCCCTTGGATTGCTGTTGCGTATTCAGCTCCTGTTGCAGCTGCTACCGCCGTTTTCTTG  
ATCTACCCAATAGGCCAAGGGAGTTTTTCTGATGGTATGCCTCTAGGGATTTCTGGTACT  
TTCAACTTCATGATTGTATTCCAGGCTGAGCACAACATCCTTATGCACCCATTTTCATATG  
TTAGGCGTAGCTGGTGTATTTCGGCGGCTCCCTATTTCAGTGCTATGCATGGTTCCTTGGTA  
ACTTCTAGTTTGATCAGGGAAACCACAGAAAATGAATCTGCTAATGAAGGTTACAGATT  
CGGTCAAGAGGAAGAACTTATAATATCGTAGCCGCTCATGGTTACTTTGGCCGATTGA

TCTTCCAATATGCTAGTTTCAACAACCTCTCGTTCATTACACTTCTTCTTAGCTGCTTGGC  
CTGTAGTAGGTATCTGGTTCAGTCTTTAGGTATCAGCACCATGGCTTTCAACCTAAATG  
GTTTCAATTTCAACCAATCTGTAGTTGATAGTCAAGGCCGTGTAATTAATACTTGGGCTG  
ATATCATCAACCGTGCTAACCTTGGTATGGAAGTTATGCATGAACGTAATGCTCATAACT  
TCCCTCTAGACCTAGCTGCTATCGAAGCTCCA---ACAAATGGCATGGGTTTGCCTTGGTA  
TCGTGTTTCATACCGTTGTATTGAATGATCCCGGCCGGTTGCTTTCCGTTTCATATAATGCAT  
ACAGCTCTGGTTGCTGGTTGGGCGGGCTCGATGGCTTTGTATGAATTAGCAGTTTTTGA  
TCCTTCTGACCCTATTCTTGATCCGATGTGGAGACAGGGTATGTTTCGTTATACCCTTCAT  
GACTCGTTTAGGAATAACCAATTCGTGGGGGGTGGAGTATCACA---GGCGGAACTGT  
AACGAATCCGGGGATTGGAGTTATGAAGGTGTAGCTGGGGCACATATTGTGTTTTCTG  
GCTTATGCTTTTTTGGCAGCTATCTGGCATTGGGTCTATTGGGATCTAGAAATATTTTTCTGA  
TGAACGTACAGGAAAACCTCTTTGGATTTGCCCAAGATCTTTGGAATTCATTTATTTCT  
CTCCGGGGTGGCTTGCCTTGGTTTTGGTGCATTTTCATGTAACAGGTCTGTACGGCCCTG  
GAATATGGGTGTCCGATCCTTATGGACTGACGGGAAGAGTACAGCCTGTAAATCCGTCG  
TGGGGCGTGGAAGGTTTTGATCCTTTTGTTCGGGAGGAATAGCTTCTCATCATATTGC  
AGCAGGTACACTGGGCATATTAGCGGGTCTATTCCATCTTAGCGTTCGACCGCCACAAC  
GTCTATACAAAGGGTTACGTATGGGAAATATTGAAACTGTACTCTCCAGTAGTATCGCG  
GCTGTCTTTTTTGCAGCTTTTGTGTTGCTGGAACTATGTGGTATGGTTCAGCAACTACT  
CCCATCGAATTGTTTGGTCCCCTCGTTATCAATGGGATCAGGGTTATTTCCAGCAAGA  
GATATATCGAAGAGTTAGCGCCGGGCTAGCCGAAAATCAAAGTTTATCAGAAGTCTGGT  
CTAAAATTCCTGAAAAATTAGCTTTTTATGATTATATCGGCAATAATCCGGCAAAAAGGAG  
GATTATTTAGGGCAGGCTCAATGGATAACGGAGATGGAATAGCGGTAGGATGGTTAGGA  
CATCCTATCTTTAGAGATAAAGAAGGGCGTGAGCTTTTTGTACGTCGTATGCCACTTTT  
TTTGAACATTTCCAGTCGTTTTGGTAGACGGCGACGGGATTGTTAGAGCGGATGTACC  
TTTTCGAAGGGCAGAATCCAAGTATAGTGTGAACAAGTAGGTGTAACCGTTGAGTTTT  
ATGGCGGCGAACTTAATGGAGTCAGTTATAGTGATCCTGCTACTGTGAAAAAATATGCT  
AGACGTGCTCAATTGGGTGAAATTTTTGAATTAGATCGCGCAACTTTGAAATCCGATGG  
TGTTTTTCGTAGCAGTCCAAGGGTTGGTTACTTTTTGGGCATGCTTCGTTTGCCTTGGCT  
CTTCTTCTTCGGACACATTTGGCATGGTGTCTAGAACCCTTGTTCAGAGATGTTTTTGGCG  
GCATTGACCCAGATTTGGATGCTCAAGTAGAGTTTGGAGCATTCCAAAAACTTGGGGA  
TCCAACTACAAGAAGACAGGCAGTCATGAAAATCTTATATCCCTGAGGAGGTTCTACC  
ACGTGGAAACGCTCTTTAATGGAACCTTATCTGTAGCTGGTCGTGACCAAGAAACCAC  
CGTTTTTGGCTTGGTGGGCCGGAAATGCCCGACTTATTAATTTATCCGGTAAACTACTAG  
GAGCTCATGTAGCCCATGCCGGATTAATCGTATTCTGGGCGGGGGCAATGAACCTATTT  
GAAGTGGCTCATTTTCGTACCAGAGAAACCTATGTATGAACAAGGATTAATTTTACTTCC  
CCATCTAGCTACTCTAGGTTGGGGGGTAGGACCCGGGGGAGAAGTTATAGATACCTTTC  
CATACTTTGTATCTGGAGTACTTCATTTAATTTCTCTGCAGTATTGGGCTTTGGCGGTAT  
TTATCATGCACTTCTGGGACCCGAGACACTGGAAGAATCTTTTCCATTTCTCGGTTATGT  
ATGGAAAGATAGAAATAAAATGACCACAATTTTAGGTATTCATTAATCTTGTGGGTCT  
GGGTGCTTTTCTTCTAGTCTTCAAAGCTCTTTATTTTGGGGGGCGTATATGATACTTGGGC  
TCCGGGAGGGGGAGATGTAAGAAAAATTACCAACTTGACCTTAGCCCAAGTATCATAT  
TTGGTTATTTACTAAAATCCCCCTTTGGGGGGGAAGGATGGATTGTTAGTGTGGACGAT  
TTAGAAGATATAATCGGAGGACATGTATGGTTAGGTTCCATTTGTATACTTGGTGGAAATC  
TGGCATATCTTAATAAACCCTTTGCGTGGGCTCGACGCGCCCTTGTATGGTCTGGAGA

GGCTTACTTATCTTATAGTTTACGGGCTTTATCCGTCTTTGGTTTCATTGCTTGTTGTTTT  
GTCTGGTTCAATAATACTGCTTATCCTAGCGAGTTTTACGGACCTACTGGACCAGAAGC  
TTCTCAGGCTCAAGCATTACTTTTTCTAGTTAGAGACCAACGTCTTGGGGCTAATGTAG  
GATCGGCTCAAGGACCTACTGGCTTAGGTAATATCTAATGCGTTCCCGACCGGAGAA  
GTCATTTTTGGAGGAGAACTATGCGTTTTTGGGATCTGCGTGCTCCTTGGTTAGAACC  
TCTAAGAGGTCCAAATGGATTGGACTTGAGTAGGTTGAAAAAAGACATACAACCTTGG  
CAAGAACGACGTTCCGCAGAATATATGACTCATGCTCCTTTAGGCTCTTTAAATTCTGT  
GGGTGGTGTAGCTACTGAGATTAATGCAGTCAATTATGTCTCCCCTAGAAGTTGGTTAG  
CTACCTCTCATTGTTCTAGGATCTTCCTTTTTGTGGGTCAATTATGGCACGCGGGAA  
GGGCTCGTGCAGCTGCAGCAGGATTTGAAAAGGAATTGATCGTGATTTTGAACCTGT  
TCTTCCATGACCCCTCTAATATGACTATAGCCCTTGGTAAATTTACCAAAGACGAAAA  
TGATTTATTTGATATTATGGATGACTGGTTACGTAGGGACCGTTTTCGTTTTTGTAGGCTG  
GTCCGGCCTATTGCTCTTTCCTTGTGCCTATTTGCTGTAGGGGGTTGGTTACAGGTAC  
AACCTTTGTAACCTTCATGGTATACCCATGGATTGGCGAGTTCCTATTTGGAAGGCTGTAA  
TTTCTTAACAGCCGCAGTTTCTACTCCTGCTAATAGTTTAGCGCATTCTTTATTGTTACTC  
TGGGGTCTGAAGCACAAGGAGATTTACTCGTTGGTGTCAATTAGGCGGTCTGTGGA  
CTTTTGTGCTCTGCATGGCGTTTTCGGACTAATAGGTTTCATGTTACGTCAATTTGAGC  
TTGCTCGATCTGTTCAATTGCGACCTTATAATGCAATCGCATTCTCTGGTCCAATTGCTG  
TTTTTGTCTGTATTCTGATTTATCCACTAGGGCAGTCTGGTTGGTTCTTTGCACCTA  
GTTTTGGTGTAGCAGCTATATTTTCGATTCATCCTCTTTTTTCAAGGATTTCAATAATTGGAC  
GCTGAATCCATTTATATGATGGGAGTTGCCGGTGTATTGGGGGCTGCTTTGCTATGCGC  
TATTCATGGTGCTACCGTAGAAAATACTTTATTTGAAGATGGTGATGGTGCAAATACATT  
CCGTGCTTTTAACCCAACTCAAGCCGAAGAACTTATTCATGGTCAACCGCTAACCGCT  
TTTTGGTCCCAAATCTTTGGGGTTGCTTTTTTCCAATAAACGTTGGTTACATTTCTTTATGTT  
ATTTGTACCAGTAACCGGTTTATGGATGAGTGCTCTTGGAGTAGTCGGTTTTGGCCCTGA  
ACCTACGTGCCTATGACTTCGTTTCTCAAGAAATTCGTGCAGCGGAAGATCCGGAATTT  
GAGACTTTCTACACCAAAAATATTCTATTAACGAAGGTATTCGTGCTTGGATGGCGGC  
TCAAGATCAGCCTCATGAAAATCTTATATCCCTGAGGAGGTTCTACCACGTGGAAACG  
CTCTTATGTCTGGAAGCACAGGAGAACGTTCTTTTGTGATATTATTACCAGTATTCGAT  
ATTGGGTCATTCATAGCATTACTATACCTTCCCTATTCATTGCGGGTTGGTTATTCGTCAG  
TACCGGTTTAGCTTACGATGTATTTGGAAGCCCTCGGCCAAACGAGTATTTACAGAGA  
GCCGACAAGGAATTCCATTAATAACTGGCCGTTTTGATTCTTTGGAACAACCTCGATGAA  
TTAGTAGATCGTTTATGACTATAGATCGAACCTATCCAATTTTTACAGTACGATGGTTG  
GCTGTTTATGGCCTGGCTGTACCTACCGTCTTTTTTTTTGGGGTCAATATCAGCAATGCAG  
TTCATCCAACGAATGGCTACACAACTGTTGAGAACAGTTCTAGATCGGGT---CCAAGA  
CGAACTACTGTAGGGAGTTTATTAATAACCAATTGAATTCGGAATATGGTAAAGTAGCTCC  
CGGGTGGGAACGACTCCATTGATGGGTGTCGCAATGGCTCTATTTGCGGTATTTCTAT  
CTATATTTTTGGAGATTTATAATCTTCCGTTTTTATTGGATGGAATTTCAATGAATATGCTT  
ACTCTGAAACTCTTCGTTTATACCGTAGTGATATTTTTTGTCTCTCTTTATCTTTGGAT  
TCCTATCTAATGATCCGGGGCGTAATCCTGGACGTGAAGAAATGGCCGATACTACTGGA  
AGGATTCCTCTTTGGATAATAGGTACTGTAACCTGGTATTCTTGTGATCGGTTTAGTAGGC  
ATTTCTTTTATGGTTCATATTCGGGATTAGGTTTCATCCCTGATGCTTAATATCGTTAGTTT  
GATCTGTATT-----AATTCGCCCTTTAT---AGTAGTTTTTTCTTCGGCAAATTGCCCGAAG  
CCTATGCTTTTTTGAATCCAATCGTAGATGTTATGCCAGTCATACCTCTGCTTTTTTTTCT

CTTAGCTTTTGTGGCAGGCTGCTGTAAGTTTTTCGAATGACACAATCAAACCCGAATG  
AACAAAGTGTGAATTGAATCGTACCAGTCTCTACTGGGGTTATTACTCATTTTTGTAC  
TTGCTGTTTTATTTTCCAATTATTTTTTCAATATGGAAGTAAATATTCTTGCATTTATTGCT  
ACTGCACTATTCACTTAGTTTCTACCGCCTTTCTACTTATCATTTACGTAAAAACAGTC  
AGTCAAATGATATGGAACAGCAACCCTAGTCGCCATTTTATATCTGGTTTACTTGTA  
AGTTTTACCGGTACGCCTTATATACCGCTTTTGGGCAACCTTCTCAACAACCTAAGAGA  
TCCATTCGAGGAACACGGGGACATGGAAGCATTGGTTTATACATTCCTTTTAGTCTCGA  
CTCTAGGGATCATTTTTTTCGCTATTTTTTTTTCGAGAAACACCTAAAGTTCCAACCTAAA  
AGGTAAAAATGACTCTTGTTTTCCAATTGGCTGTTTTGCATTAATTGCTACTTCATCAA  
TCTTATTGATTAGCGTACCTGTCGTATTTGCTTCTCCCGATGGTTGGTCAAGTAACAAA  
ATGTTGTATTTCCGGTACATCATTATGGATTGGGTTAGTCTTTCTGGTGGGTATCCTTAA  
TTCTCTCATCTCT-----ATGTCACCACAAACAGAGACTAAAGCAAGTGTGG  
ATTCAAAGCGGGTGTAAAGAGTACAAATTGACTTATTATACTCCTGAATACGAAACCA  
AAGATACTGATATCTTGGCAGCATTCCGAGTAACTCCTCAACCTGGAGTTCCGCCTGAA  
GAAGCAGGGGCCGCGGTAGCTGCCGAATCTTCTACTGGTACATGGACAACCTGTGTGGA  
CCGATGGACTTACCAGCCTTGATCGTTACAAAGGGCGATGCTACCACATTGAGCCCGTT  
CCTGGAGAAAAAGATCAATATATCTGTTATGTAGCTTACCCTTTAGACCTTTTTGAAGAA  
GGTTCTGTACTAACATGTTTACTTCCATTGTAGGAAATGTATTTGGATTCAAAGCCCTA  
CGTGCTCTACGTCTGGAAGATCTGCGAATTCCTGTTGCTTATGTTAAAACCTTTCCAAGG  
CCCGCCTCATGGGATCCAAGTTGAAAGAGATAAATTGAACAAGTACGGTCGTCTCTG  
CTGGGATGTACTATTAACCTAAATTGGGGTTATCTGCTAAAAACTATGGTAGAGCGGT  
TTATGAATGTCTTCGCGGTGGACTTGATTTTACCAAAGATGATGAGAACGTGAACTCCC  
AGCCATTTATGCGTTGGAGAGACCGCTTCTTATTTTGTGCCGAAGCAATTTATAAAGCA  
CAGACTGAAACAGGTGAAATCAAAGGGCATTACTTGAATGCTACTGCGGGTACATGCG  
AAGAGATGATGAAAAGAGCTATATTTGCTAGAGAATTGGGAGTTCCTATCGTAATGCAT  
GACTACTTAACAGGAGGATTCACCGCAAATACCCTTTGGCTCATTATTGCCGAGATAA  
TGGCTTACTTCTTCACATTCACCGTGCAATGCATGCAGTTATTGATAGACAGAAGAATC  
ACGGTATGCACTTCCGTGTACTAGCTAAAGCGTTACGTCTGTCCGGTGGAGATCATATT  
CACGCTGGTACCGTAGTAGGTAACTTGAAGGAGAGAGAGACATTACTTTAGGCTTTG  
TTGATTTACTGCGTGATGATTTTGTGAAAAGATCGAAGTCGCGGTATTTATTTCACTC  
AAGATTGGGTCTCCCTGCCCGGTGTTATTCCCGTGGCTTCAGGGGGTATTCAGTTTTGG  
CATATGCCTGCTCTGACCGAGATCTTTGGAGACGATTCCGTAACAGTTCGGTGGAGG  
AACTTTAGGACACCCTTGGGGTAATGCGCCAGGTGCTGTAGCTAACCAGTAGCTGTA  
GAAGCGTGTGTACAAGCTCGTAATGAAGGACGCGATCTTGCTGCTGAGGGTAATGCAA  
TTATCCGTGAAGCTTGCAAATGGAGTCCTGAACTAGCTGCCGCTTGTGAGGTATGGAA  
AGAAATCAAATTTGAGTTTAAAGCAGTGGATACTTTGGATAAAATGGCGATACATTTAT  
ACAAAACCTTCTACCCCGAGCACACGCAATGGAACCGTAGACAGTCAAGTGAAATCCA  
ATCCACGAAATAATTTGATCTATGGACAGCATCATTGTGGTAAAGGTCGTAATGCCAGA  
GGAATCATTACCGCAAGGCATAGAGGGGGAGGTCATAAGCGTCTATACCGTAAAATCGA  
TTTTCGACGGAATGAAAAGACATATATGGTAGAATCGTAACCATAGAATACGACCCTA  
ATCGAAATGCATACATTTGTCTCATACTATGGGGATGGTGAGAAGAGATATATTTTAC  
ATCCCAGAGGGGCTATAATTGGAGATACCATTGTTTCTGGTACAGAAGTTCCTATAAAA  
ATGGGAAATGCCCTACCTTTGACCGATATGCCCTTAGGCACGGCCATACATAACATAGA  
AATCACACTTGGAAGGGTGGACAATTAGTTAGAGCAGCGGGTGTGTAGCGAACT

GATTGCAAAAAGAGGGGAAATCGGCCACATTAATAATTACCTTCTGGGGAGGTCCGTTTG  
ATATCCAAAACTGCTCAGCAACAGTCGGACAAGTGGGGAATGTTGGGGCGAACCAG  
AAAAGTTTGGGTAGAGCCGGATCCAAGCGTTGGCTAGGTAAGCGTCCTGTAGTAAGAG  
GAGTAGTTATGAACCCTGTAGACCATCCCATGGGGGTGGTGAAGGGCGAGCCCAAT  
TGGTAGAAAAAACCCACAACCCCTTGGGGTTATCCTGCACTTGGAAGAAGAAGTAG  
AAAAAGGAATAAATATAGTGATAATTTGATTGTTTCGTCGCCGTAGTAAAATGATTCAAC  
CTCAGACCTATTTAAATGTAGCGGATAACAGCGGGGCTCGAAAATTGATGTGTATTTCGA  
ATCATAGGAGCTAGT---AATCGCCGATATGCTCATATTGGTGACGTTATTGTTGCTGTGAT  
CAAAGAAGCCGTACCAAATATGCCCTAGAAAAATCAGAAGTAGTCAGAGCTGTAATT  
GTTTCGTACCTGTAAAGAACTTAAACGTGACAGCGGTATGATAATACGATATGATGACAA  
TGCTGCAGTTGTGATTGATCAAGAAGGAAATCCAAAAGGAACTCGCATTTTTGGGGCA  
ATCCCCCGCAATTGAGACAATTAATTTTACTAAAATAGTTTCATTAGCTCCCGAAGTA  
TTAATGCTTAGTCCCAAAGAACTAGATTCCGTAAACAACACAGAGGAAGAATGAAGG  
GAATATCTTATCGAGGTAATCATATTTGTTTCGGTAAATATGCTCTTCAAGCACTTGAAC  
CCGCTTGGATCACATCGAGACAAATCGAAGCAGGTCCCGGGCAATGACACGAAATG  
CACGCCGTGGTGGAAAAATATGGGTCCGTCTCTTCCAGACAAACCAGTTACAGTAAG  
ACCTGCTGAAACGCGTATGGGTTTCGGGGAAAGGATCCCCTGAATATTGGGTAGCTGTT  
GTAAACCGGGGCGAATACTATATGAAATGGGTGGAGTAACCGAAAATATAGCTAAAA  
GGGCTATTTAATAGCAGCATCCAAAATGCCTATTCGAACTCAATTTATTATTTTCGGGAA  
TGACTAGAGTTAAACGCGGATATATAGCCCGAAAACGTAGAACAAAAATTCGTTTATTT  
GCATCAAGTTTTTCGAGGGTCTCATTCAAGACTTACTCGAACGATTACTCAACAGAAAAT  
AAGAGCTTTGGTTTCGGCTCGTCGGGATAGGGATAAGCAAAAGAGAACTTTCGTTCGT  
TTGTGGATCACTCGGATAAACGCAGTAATTCGAGAA---AAGGGAGTATCCTATAGTTATA  
GTAAATTAATACATGATTTATATAAGAGGCAGTTGCTTCTTAATCGTAAAATACTGGCAC  
AAATAGCTATATCAAATAGGAATTGTCTTTATATGATTTCCAACGAAAGAGAAAAA---GT  
GGATTGGAAAGAATACACCGAAATAATTCTGCTAAAGGAAGTACGCGCTTTAGGCCGA  
CATATATCTGTATCTGCTGACAAAGCAAGAAGAGTAATTGATCAAATTCGCGGACGTTT  
CTATGAGGAAACCCTTATGATACTAGAACTCATGCCCTATAAAGCATGTTATCCCATTTT  
CAAGTTAGTTTATTCTGCCGCAGCAAATGCTAGTTACACTATGGGCTCCGCCGAAGACA  
ATTTAATAATTATTAAGCTGAAGTTAACGAGGGGACTGTCGTGAAAAAATTAACCT  
CGTGCTCGAGGACGTAGTTATGCGATAAAAAAGCTACCTGTCATATACTATTGGAGT  
GAAAGATATATCTTTAGATGAGGTAGTATGGGACAAAAAAATGGATGGAATCAAATATG  
CAGTATTTACAGACAAAAGTATTCGGTTATTGGGGAAAAAT---CAATATACTTCTAATGT  
CGAATCAGGATCAACTAGGACAGAACTAAAGCATTGGGTGCAACTCTTCTTTGGTGTC  
AAGGTAATAGCTATGAATAGTCATCGACTTCCGGGAAAGGGTAGAAGAATGGGACCCA  
TTATGGGACATACAATGCATTACAGACGTATGATCATTACGCTTCAACCGGGTATTCTA  
TTCCACCTCTTAGAAAGAAAAGAACTATGGCAGTTCCAAAAAACGTACTTCTGCATC  
AAAAAAGCGTATTCGTAAAAATTTTGGAAAAGGAAAGGCTATTGGGCGGCGTTAAAA  
GCATTTTCTTTAGGGAAATCTCTTTCTACCGGGACTTCAAAAAGTTTTTTTTGTGCGACA  
GACAAATAAAATGGCCAAGAAGAAAGATGCGCGGGTAGCGGTCATTTTGAATGTACC  
AGTTGTATACAAAACGGT-----GTTAAGAAGGTATCAACGGGTATTTCCAGATATATTACT  
CAAAAGAACCGGCACAATACACCCAATCGATTAGAATTGCGAAAATTCTGTCCCTATTG  
TTACAAACATATGATTCATGGGGAAATAAAGAAAATGAAAATAAGAGCTTCCGTTTCGTA  
AAATTTGTGAAAAATGTCGACTAATCCGTAGACGGGGGCGCATTAGAGTAATTTGTTCC

AACCCGAGACATAAACAAAGACAAGGAATGGTTCGAGAGAAAAGTAACAGTATCTACT  
CGGACACTACAGTGGAAGTGTGTTGAATCAAGAACAGACAGTAAACGTCTTTATTATG  
GTCGATTTATTCTGGCTCCGCTTATGAAAGGACAAGCCGACACAATAGGGATTGCGATG  
CGAAGAGCTTTGCTTGGAGAAATAGAAGGAACATGTATCACACGTGTAAAATCCGAG--  
----AATGTCTCCCACGAATATTCGACTCTAACAGGTATTCAAGAATCGGCCACGAAATT  
CTAATGAATTTGAAGGAAATTGTATTGAGAAGTAATCTATATGGAACCTTGTGACGCGTCT  
ATTTGTGTTAGGGGTCCTGGATATGTAAGTCTCGAGATATCATCTTACCACCTTATGTA  
GAAATCGTCGACAATACACAACATATAGCTAGATTGACAGAACCAATTAATTTGCATATT  
GGATTAGAAATTGAGAGAAATCGCGGATATCTTAGAAAGATGCCACAG---AACTTTGAT  
GGAAGTTAT-----CCTATAGATGCTGTATTTCATGCCTGTTCGAAATGTGAATCATAGTATTC  
ATTCCTATGGAAATGGGAATGAAAAACAAGAGATACTGTTTCTCGAAATATGGACAAAT  
GGCAGTTTAACTCCGAAAGAAGCACTTCATGAAGCCTCTCGGACTTTGATTGATTTATT  
TATTCCTTTTTATATAAGGACGAAGAA-----AACTTACCTTTAGAGCACAATCAA---CAT  
AGGGTTCCTTTATCCCCCTTTACTTTTCACGATAAATTGAAT--AAAGTCCAAAAAAACA  
AA-----ATAGCATTGAAATCGATTTTTATTGATCAATCCGAATTGTCTCCTAGAATTTAT  
AATTGCCTTATAAGGTCCAATATATATACATTATTGGACCTTATGAATAAGAGTCAAGAA  
GATCTTATGAAAATTGAGCATTTCGCCTAGGAGATGTAAAAGGGATATTGGACATTCTA  
GAACAACAT-----TTCGCAATTTTTTTACCAAAAAGAAAATGCTCGGGGATGCA---AAT  
GAGACAATGTCTACAATACCTGGATTTAATCAGATCCAATTTGAAGGATTTTGTAGGTTT  
ATCGATCAGGGTTTGGCAGAAGAAGCTTTATAAGTTTCCAAAATTGAAGATACAGATCA  
TGAAATCGAATTTCAATTCTTTTTGGAAAAATATCAATTGGTAGAACCTCGATAAAGG  
AAAGAAATGCTGTGTATGAATCACTCACATATTCTTCTGAATTATATGTATCCGCGAGAT  
TAATTTGGAAAACAGTAGAGATATGCAAGAACAAACTATTTTAATTGGAAACATTCCT  
CTAATGAATTCCTAGGAACCTCTATAGTAAATGGAATATATAGAATTGTGATCAATCAA  
ATACTGCAAAGTCCCGGTATTTATTACCGGTCAGAATTGGACCATAACAGAATTTCCGT  
CTATACCGGCACCATAATATCAGATTGGGGAGGAAGATTAGAATTAGAGATTGATAGAA  
AAGCAAGGATATGGGCTCGCGTGAGTAGGAAACAAAAAATATCTATTCTAGTTCTATTA  
TCAGCTATGGGTTCAAATCTAAGAGAAATTTAGACAATGTTTATTATCCTGAAATTTTT  
TTGTCTTTTCTGAATGATAAGGAGAGAAAAAAATTGGATCAAAGAAAATGCCATTT  
TGGAGTTTTATCAACAATTTGCTTGTGTAGGCGGGGATCCGGTATTTTCTGAATCCTTAT  
GTAAGGAATTACAAAAGAAGTTTTTTTCAACAAAGATGTGAATTGGGAAGGATTGGTCG  
ACGAAATATGAACCGAAGACTAAACCTTGATATACCCAGAACATAACATTTTTGTTAC  
CCCGAGACATACTGACGGCTGCCGATCATTAAATTGGACTTAAATTTGGAATGGGTACA  
CTTGACGAT-----ATGAATCATTGAAAAATAAGCGCATTTCGCTCTGTAGCGGATCTTTTA  
CAAGATCAATTCGGATTGTCTCTGGTTTCGTTTAGAAAATGTGGTTCGAGGAACTATATG  
TGGAGCAATTCGG---CATAAATTG---ATACCGACTCCTCAGAATTTGGTAACTTCAACTC  
CA-----TTAACAACCACTTATGAATCCTTTTTTGGTTTACACCCCTTATCTCAAGTTT  
TAGATCGAACTAATCCATTGACACAAATAGTTCATGGGAGAAAATTGAGTTATTTAGGT  
CCTGGAGGACTAACAGGGCGAACTGCTAGTTTTTCGGATACGAGATATCCACCCTAGTC  
ACTATGGTCGTATTTGCCAATTGACACATCGGAGGGAATCAATGTTGGACTTATCGGA  
TCCTTAGCAATTCATGCGAGAATGGGTTATTGGGGA---TCTCTAGAAAGTCCGTTTTAT--  
-----GACATTTCCGAGAAATCAACGGGG-----TCACGGCTGCTTTATTTATCACCCGATAT  
AGATGAATACTATATGTTAGCAGCAGGAAATCTTTGGCGTTGAATCAGGATATTCAGG  
AAGAACAAGTTGTTCCAGCTCGATACCGTCAAGAATTCCTGACTATTGCATGGGAACG

GGTTCATCTTCGAAGTATTTTTCCCTTCCAATATTTTTCTATTGGAGCTTCCCTCATTCCCT  
TTTATTGAACATAATGATGCAAATAGGGCTTTAATGAGTTCTAATATGCAACGCCAGGCA  
GTTCCGCTTTCTCGGTCCGAGAAATGCATTATTGGAAGTGGGTTGGAACGACAAGCAG  
CTCTAGATTTCGGGGGTTCTTGCTATAGCTGAACGCGGGGGAAAGATCATTATATAGATA  
TTGACAAAATCCTTTTTCTCTGGGAATGGCGATACTCTAAGCATTTCATTAGTTATGTATG  
AACGTTCCAACAAAATACTTGTATGCATCAAAAACCCAGGTTTCGGCGGGGTCAATG  
CATTA AAAAGGGACAAATTTTAGCAGATGGTGCTGCTACGGTTGGTGGCGA ACTTGCT  
TTGGGGAAAACGTATTAGTAGCTTATATGCCATGGGAGGGTTACAATTCTGAAGATGC  
GGTACTCATTAGCGAGCGTTTGGTATATGAAGATATTTATACTTCTTTTCACATACGGAA  
ATATGAGATTCAGACTCATGTGACAAGCCAAGGC---CCTGAAAGGATCACTAACGAAAT  
ACCGCATTTAGAAGCCATTTACTTCGCAATTTAAACAAAATGGAATTGTGGTGTGG  
GATCTTGGGTAGAGACGGGTGATATTTTAGTAGGGAAATTAACGCCCCAAATGGTGAA  
AGAA---TCCTCGTATGCCCCGAAGATAGATTGTTACGAGCTATACTCGGCATTCAGGTA  
TCTACTTCAAAGAACTTGTTTAAACTCCCTATAGGTGGTAGGGGCCGGGTATTGA  
TGTGAGGTGGATCCAGAAAAGAGGA---GGTCTAGTTATAATCCAGAAATGATTTCGTGT  
ATATATTTACAGAAACGTGAAATCAAAGTAGGCGATAAAGTAGCCGGAAGGCATGGA  
AATAAAGGTATCATTTCAAAATTTTGCCTAGACAAGATATGCCTTATCTGCAAGATGGA  
AAACCCGTTGATATGGTCTTCAACCCATTAGGAGTACCTTCACGAATGAATGTAGGACA  
GATATTTGAATGTTTCGCTCGGGTTAGCGGGGGGTTCTTAGACAGACATTATCGAATAG  
CGCTTTTGATGAGAGATATGAACAAGAAGCTTCCAGAAA ACTAGTGT TTTCTGAATTA  
TATGAAGCCAGTAAGCAAACAGCGAATCCATGGGTATTTGAACCCGAGTATCCAGGAA  
AAAGCAGAATATTTGATGGAAGGACGGGGAGCCTTTTGAACAACCCGTTATAATAGG  
AAAGCCTTATATCTTGAATTAATTCATCAAGTTGATGATAAAATCCATGGACGTTCCAG  
TGGACATTATGCGCTTGTACACAACAACCCCTTAGGGGAAGGGCAAACAAGGGGG  
ACAACGGGTAGGAGAAATGGAGGTTTGGGCTCTAGAAGGATTTGGTGTTGCTCATATT  
TTACAAGAGATGCTTACTTATAAATCTGATCATATTAGAGCGCGTCAAGAAGTACTTGGT  
ACTACGATCACTGGAGGAACAATACCTAATCCTGAGGATGCTCCC GAATCATTTCGACT  
GCTTGTTCGAGAACTACGATCTTTAGCTCTGGA ACTGAATCATT TTTCTTGATCTGAGA  
AAA ACTTCCAGATTAATAGGAAGGAAGCTATAAATCCGAATTTGTATTCTATGATCGATC  
GGTATAAACACCAACAGCTACGAATTGGATTAGTTTCTCCTCAACAAATAAGCGCTTGG  
GCCACTAAAATCCTACCTAATGGGGAGATAGTTGGAGAGGTGACAAAACCC TATACTTT  
TCATTATAAAACCAATAAACCGGAAAAAGATGGATTATTTTGTGAAAGAATTTTGGGC  
CTATCAAAGTGAATTTGTGCTTGTGGAAATTATCGAGTAATCGAAGATGAAAAAGA  
AAACCCGAATTTTGTGAACAATGCGGGTTCGAGTTTGTGATTCTCGGATACGAAGAT  
ATCAAATGGGCTACATCAA ACTCGCATGCCAGTAACCCATGTGTGGTATTTAAAACGT  
CTTCCCAGTTATATTGCGAATCTTTTAGATAAACCTCTTAAAGAATTAGAAGGCCTAGTA  
TATTGCGATGTGAATTTTCTTTTGCTAGGCC---ATAACGAAAAACCTACTTTCTTGC  
GATTACGAGGTTTATTCGAATATGAAATCCAATCTTGGAAATATAGCATCCCGCTTTTTTT  
TACTACCCGGGCTTCGATACATTCGCAATCGAGAAATCTCTACCGGTGCAGGTGCTA  
TTCGAGAACAATTAGCCGATCTAGATTTACGCATTATTCTAGAAAATTCCTTGGTAGAAT  
GGAAAGAGTTGGGGGAAGAA--GGGTCCACGGGAATGAATGGGAAGATCGAAAGGT  
TGGAAGAAGAAAGGATTTTTTGGTTAGACGCATGGAATTGGCTAAGCATT TTTCTTCGA  
ACAAATATAGAACCAGAATGGATGGTTTTGTGTCTATTACCGGTTCTTCTCTGAGTTA  
AGACCCATCATT CAGATAGATGGGGTAAATTAATGAGCTCAGATATTAATGAACTCTAT



AGAAGAGTTATCTATCGGAACAATACTCTTACCGATCTATTAACAACAAGTAGATCTAC  
GCCAGGAGAATTAGTAATGTGTCAGGAGAAATTAGTACAAGAGGCTGTGGATACTT  
CTTGATAATGGAATCCGCGGGCAACCAATGAGGGACGGTCATAATAAAGTTTACAAGT  
CATTTTCCGATGTAATTGAAGGCAAAGAGGGGAAGATTCGCGAGACTCTACTTGGCAA  
ACGGGTCGATTATTCAGGGCGTTCCGTCATTGTCGTAGGTCCTTCACTTTCATTACACCG  
ATGTGGATTGCCGCGCGAAATAGCAATAGAGCTTTTCCAGACATTTGTAATTCGTGGTC  
TAATTAGACAACATCTTGCTTCGAACATAGGAGTTGCTAAGAGTAAAATTCGTGGAAAA  
GAACGGATTGTATGGGAAATACTGCAGGAAGTTATGCAGGGGCATCCTGTATTGCTGAA  
TAGAGCTCCCCTCTGCATAAATTGGGCATACAGGCATTCCAACCCGTTTTAGTGGAGG  
GGCGTGCTATTTGTTTACATCCATTAGTTTGTAAGGATTCAATGCAGATTTTGATGGGG  
ATCAAATGGCTGTTTCATGTACCCTTATCTTTGGAGGCTCAAGCGGAGGCGCGTTTACTT  
ATGTTTTCTCATATGAATCTTTTGTCTCCAGCTATTGGAGATCCCATTCCGTACCAACCC  
AAGATATGCTTATTGGACTCTATGTATTAACGAGCGGGAATCGTCGAGGTATTTGTGTAA  
ATAGGTATAATCCATGGAATCAC-----AAAAGCTGTCAAATAAAAGAAGTGACAATA  
ATAAATATAAGCATATG-----GAAGCTTTTTTTTCTAATTCCTATGATGCAATTGGAGCT  
TATCGGCAAAAACGAATCAATTTAGATAGCCCTGTGTGGCTTCAGTGGCGACTAGATCA  
ACGC---CTTATTTCTTCA-----AGAGAACTCCCATCCAAGTTCCTATGAATCTTTAGGC  
AATTATTATGAGATTTATGGACACTATCTAATAGTAAGAAGTATAAAAAAAGAAATCTT  
TTTCTATACATTCGAACCACTGTTGGTCATATTTCTCTTTATCGAGAAATTGAAGAAGCC  
ATACAGGGGTTTTTCGCAGGCCTGTTTCATACGGTATC-----ATGGAGGTACT  
TATGGCAGAACGGGCCAATCTGGTATTTACAATAAAGTGATAGACGGAACCTGCCATG  
AAACGACTTATTAGTCGATTAATAGATCACTTCGGAATGGCATATACATCACACATCTTG  
GATCAAGTAAAGGCTTTGGGTTTTCAACAAGCTACTGCTACATCCATTTCAATTAGGAAT  
TGATGATCTTTTAAACAATACCCTCGAAGAGATGGCTAGTTCAAGATGCTGAACAACAAA  
GTTTTATTTTGGAAAAACACCATCATTGCGGGAATGTACACGCAGTAGAAAAATTACGT  
CAATCCATTGAAATATGGTATGCCACAAGTGAATATTTGCGACAAGAAATGAATCCTAA  
TTTTAGAATGACCGACCCCTTTAATCCAGTTCATATAATGTCTTTTTTCGGGAGCTAGAGG  
AAATGCATCTCAGGTACATCAATTAGTAGGTATGAGAGGATTAATGTCGGACCCCTCAAG  
GACAAATGATTGATTTACCCATTCAAAGCAATTTACGCGAAGGGCTTTCTTTAACAGAA  
TATATAATTTCTTGCTACGGAGCGCGTAAAGGGGTTGTGGACACTGCTGTACGAACATC  
AGATGCTGGATATCTCACGCGTAGACTTGTGGAAGTAGTTCAACACATTGTTGTACGTC  
GAACAGATTGTGGCACCGTCCGTGGTATTTCTGTGAGTCCTGGGAATGGTATGATGCCA  
---GAAAGGATTTTTATCCAAACATTAATTGGTCGTGTATTAGCCGATGATATATATATGGG  
CACACGCTGTATTGCCACTAGAAATCAAGACATTGGGATTGGACTTGTAATCGATTCA  
TAACC-----TTTTCGAGCACAACCAATAACCATTTCGAACCCCTTTTACTTGTAGG  
AGTGCATCTTGGATCTGTGATTATGTTATGGACGAAGTCTACTCATGGCGACCTGGTT  
GAATTGGGAGAAGCCGTAGGTATTATTGCAGGCCAATCGATTGGAGAACCGGGTACTC  
AATTAACATTACGAACTTTTCATACCGGCGGAGTATTCACGGGGGGTACTGCAGAACAC  
GTGCGAGCCCTTCTAATGGAAAAATAAAATTCAATGAAGATTTGGTTCATCCAACACG  
TACACGCCATGGACATCCCGCCTTTCTCTGTTCATAAACTTGTATGTAACCTATTGAAAG  
TGAAGATAGTCGACATAATGTAAATATTCACCCCAAAGTTTTCTTTTAGTTCAAACGA  
TCAATATGTAGAATCAGAACAAGTGATTGCTGAGATTCGCGCAGGAACATCCACT---TT  
ACATTTTAAAGAGAAAGTTCGAAAACATATTTATTCTGACTCAGACGGAGAA---ATGCA  
CTGGAGCACCGATGTGTATCATGCACCCGAATTTCCATATGGAAATGTTTCATCTATTACC

AAAAACAAGTCATTTATGGATATTATTAGGAGAACCGCACAGA-----TCTAGTATAGTTT  
CACTTTTCGATCCACAAGGATCAAGATCAAATAAATGCGCAT-----TCTTGTCTGTCAAG  
AGAAATCTACTTCTAACCTCTCA-----GGAACGAATGATCCG---TCGAGAGAAAATTC  
TTTACTTCTCATTTTTTCGGATAAA---GAAGATAGGCTTCTTGATTAT---TCAGACTTTGGT  
CGAATTATAGGTACCGGTCGTTATAATCTCGTAGATCCG---ACCATTCTCTACCAGAATTC  
G-----GATTTATTCTCAAAGAGGGCGAAGCAATAGATTCATCATGCCACTCCAATCGATTC  
AAAAACGCGAGAATGAATTAACACCTCCCTCGGATATCTTGATTGAAATCCCC-----ATC  
AATGGCGTTTTCCGTAGAAATAGTATTCTTGCTTATTTGGACGATCCTCGATACAGAAGA  
AAGAGTTCGGGCATTACTAAACACGGGACTCTAGAAACGGATTCAATCGTCAAAAAAG  
AGGAT-----TTGATTGAGTATCGAGGA---GGTAAGGAATTTAGTCCAAAATACATGAAAG  
TCGATCGTTTTTTTTTTCATCCCGAGGAAGTGCATATATTCCCTGGATCTTCTCCCTAAT  
GGTACGGAACAATAGTATCATTGAGGTGGATACACAAATTACTTTAAATATAAGAAGCC  
GAGTAGGCGGGTTGGTCCGAGTGGAGAGAAAAAAGAAATTGAACTTAAAATCT  
TTTCTGGAGATATCCATTTTCTGGAGAGACAGATAAGGTATCCCGACATAGTGGCGTT  
TTGATACCA---CCGGGA---ACAGGAAAACAAAATGCCAAGGAATCCAAAAA-----TGG  
AAAAATTGGATGTATGTTCAACGG-----ATCACACCTAGTAAG-----AAAAATATTTTGT  
TTTGGTTTCGCCCTGTCGTACCTATGAAATAACGGACGGTATAATTTTAGGAACGCTTTT  
CCCTCCGGATCTGTTGCAGGAAAGGGATAATGTGGAACCTTCGAGTTGTCAATTATATCC  
TTTATGGGAATGGTAAACCAATTCGAGGAATTTCTGATACAAATATTCAATTAGTTCGGA  
CTTGTTTAGTATTGAATTGGGACCAAGACAAAAA-----AGTTCTTATAGTCAAGAAG  
CTCGTGCTTCTTTTGTGAAATAAGGGCAAATGGTTTGATTTCGACATTTCTTAAGAATC  
GACTTACTGAAATCCACTATTTTCATATAGCGGAAAAAGGAATGACCGGCCGGGCTCAG  
GATTTCTCCCCGCT---AATGGATCAGATTGCACCAATATAAATCCGTTTTCTTCC-----ATT  
TAT-----TCCAAAATAAGAATTCAACAACCTCTTAATCAAATAACAGAACTATTCATA  
CGTTGTTGAATAGA-----ATAAGGGATTCCAATCGTCGATAATTTTGTTCATCATCCAA  
TTGTTTTTCGAATGGGTCCA-----TTCAACGATGTA---AAATATCACAATCATAATGCGATA  
AAAGAATCAGATCCTGTAATTCCAATTAAGAATTTGTGCGAGGCCTTTAGGAACA-----GC  
CCTTCTAATTGCGAATGTTTATTCA-----TTTTACCATTTA-----ACGATTCATAATCATATC  
TTG---GTAAATAACTATTTGCAACTTGACAAT-----TTAAAACAGACTTTTCAAGTAATT  
AAATTTCAA---TATTATTTAATCGATGAAAAT-----AAAAATTTTATAACCCCCGTCCGTG  
CAGTAACATTATTTTCAAT-----TTGAATTGGTATTTTCTCCACCCCGATTATTGTCAAG  
AAAAATCT---ACAATAATGAATCTTGACAGTTTATTTGTGAAAAAATATATATAGCCAA  
AAACGCCCCACAC---CTAAAATTAATAATCGGGTCAAGTTATACTTGTTCAA---GTTGACT  
CTGTAGTAATACGATCAGCTAAGCCTTATTTGGCTACTCCAGGAGCAACTGTTTCATGGC  
CATTATGGAGAAATCCTATACGAAGGAGATACTTTAATTACATTTATATATGAAAAATCG  
AGATCTGGTGATATAACCCAAGGGCTCCCAAAAGTAGAACAGGTGTTAGAAGTGCAGTT  
CGATTGATTCCATATCGATGAATCTAGCAAAGAGGGTTGAGGGTTGGAACGAACGTATA  
ACAAGAATTCTTGGAATGCCGTGGGCATTCTTGATTGGTGCTGAGCTAACTATAGTGCA  
AAGTCGTATCTCTTTGGTTAATAAGATCCAAAAGGTTTATCGATCCCAAGGAGTGCAGA  
TTCATAATAGGCATATAGAAATTATTGTACGTCAAATAACATCAAAGGTCTTGGTTTCCG  
AA-----GAGGGAATGTCTAATGTTTTTTTACCAGGAGAACTAATTGGATTGTTACGGG  
CAGAACGAATGGGACGCGCGTTGGAAGAGGCGGTTTGTACCGAGCCCTCTTATTGGG  
CATAACAAGAGCGTCTCTCAATACTCAAAGTTTTATATCTGAAGCAAGTTTTCAAGAAA  
CTGCTCGAGTTTTAGCAAAAAGCAGCTCTTCGGGGTTCGAATTGATTGGTTGAAAGGCCT

GAAAGAGAACGTTGTTTTGGGGGGTATGATACCTGTTGGTACAGGGTTGAAAGGATTG-  
----GTGCCCTATTCAAACAACACAACAGGAGTCCTTTGGAAATGGAAACAAAAAAAA  
ACAATCTATTTCGAGGGGGAAATGAGA-----GATATTTTGTTCACCACAGAAAATTATTT  
GATCTTTGTTTTCAAAGAATTTCCACGATAGACCAGAACAAGCATTATAGGA-----  
-----TTAATGATTCCATGACAAGAAGATATTGGAACATCAACTTGAAGAGATGCTGG  
AGGCGGGAGTTCATTTGGCCATGGTACTAGGAAATGGAATCCTAAAATGGCACCTTAT  
ATCTCTGCAAAGCGTAAAGGTATTCATATTACAAATCTTACTAAAACCTGCTCGTTTTTTA  
TCCGAAGCCTGCGATTTGGTTTTTGGATGCAGCAAGTAGGGGAAAACAGTTCCTTGATTG  
TTGGTACCAAAAAGAAAGCAGCTGATTCAGTAGCATGGGCTGCAATAAAAGCCCGGTG  
TCATTGTGTTAATAAAAAATGGCTCGGCGGGATGTTAACAAATTGGTCCACTACAGAAA  
CGAGACTTCATAAGTTCAGGGACTTGAGAATGGAACAAAAACGGGAAGACTCGACC  
GTCTTCCGAAAAGAGATGCGGCTGTGGTGAAAAGACAATTATCTCGCCTACAAACATA  
TCTGGGCGGGATTAAATATATGACAGGGTTACCCGATATTGTAATCATCATTGATCAGCA  
CGAAGAATATACGGCCCTGCGGGAGTGTATCACTTTGGGAATTCCAACAATTTGTTTAA  
TCGATACAAATTGTGACCCTGATCTTGCAGATATTTGATTCCAGCGAACGATGACGCTA  
TATCTTCAATCCGCTTAATCTTAATAAATTAGTATTGCAATTAGTGAGGGCCGTTCT--  
AGCTATATAAGAAATCCTATGGGACAAAAATAAATCCACTTGGTTTCCGACTTGGTATA  
ACCCAAAAGCATCATTCCCTTTGGTTTTGCAAAACCAAAAAATTATTCCGAAGACCTAC  
AAGAAGATCAAAAAATAAGAGACTTTATTAATAAATTATATTCAAAGAATATGAGAATA  
TCCTCTGGA---ACCGAGGGAATTTTCGCATATAGAGATTCAAAAAAGAATCGATTTGGTC  
CAGATCATAATCTTTATGGGATTCCCAAAGTTATTAATAGAAAGTAGACCCCGA-----  
GGGGTCGAAGAATTACAAATGAATCTACAAAAAAATTTTATTATGTGAACCGAAAAC  
TTAACATTGCTATCACAAGAATTTCAAACCTTATGGAAACCCATAATTTCTTGCAGAAT  
TTATAGCCGGACAATTAAGAATCGAGTTTCATTTGAAAAGCAATGAAAAAGGCTATT  
GAATTAAGTGAACAAGCGGATACAAAAGGAATTCAGTACAAATTGCAGGGCGTATCG  
ACGGAAAAGAAATCGCCCGTGTGCAATGGATCAGAGAAGGCAGAGTTCCCTACAAA  
CCATTTCGAGCGAAAATAGATTATTGTTCCCTATACAGTTTCGAACTATCTATGGGGTCTTGG  
GCATCAAAATTTGGATTTTTATAGACAAGGAAATGTCGCGTTACCGAGGACCTCGTTTC  
AAAAAATACGTCGCCTGGGGGCTTTACCAGGACTAACTAATAAAAGGCCTAAAGCCG  
GGAGTGATCTTAGAAACCAACCACGTTCCGGGAAA---AAATCTCAATATCGTATTCGCC  
TAGAAGAAAAACAAAATTGCGTTTTTATTATGGTCTTACAGAACGACAATTACTTAAA  
TACGTTTATATCGCCGAAAAGCCAAGGGGTCAACAGGTCAAGTTTTACTACAATTACT  
TGAAATGCGTTTTGGATAACATCCTTTTTTCGATTGGGTATGGCTTCGACTATTCGCGCAGC  
CCGCCAATTAGTTAACCATAGACATATTTTAGTGAATGAGCGTATAGTAGATATACCAAG  
TTATCGCTGCAAACCTCGAGATATTATTATGGCGAAGGATGAACAAAAATCCAAAACCTC  
TGGTTCAAATTTCTCTCAACTCTTCCCCTCAG---GCGGAAGTGCCAAACCATTTGACTC  
TTCACCCAGTCCAA-----TATAAAGGACTGGTCAATCAAATAATAGATAGTAAATGGGTC  
GGTTTAAAAATAAATGAATTGCTAGTCGTAGAGTATTATTCTCGTCAAACCTATGTCACGT  
CGAGGTAAGTGCAGAAGAAAAACAGCAAAATCCGATCCAATTTATCGTAATCGATTAG  
TTAACATGTTGGTTAACCGTATTCTGAAACACGGAAAAAAATCATTGGCTTATCAAATTA  
TCTATCGAGCCATGAAAAAATTCAACAAAAGACAGAAACAAATCCACTATCTGTTTT  
ACGTCAAGCAATACGTGGAGTAACTCCCGATATAGCAGTAAAAGCAAGACGTGTAGGT  
GGATCCAATCATCAAGTTCCCATGAAATAGGATCCACACAAGGAAAAGCACTTGCCA  
TTCGTTGGTTATTAGCGGCATCCCGAAAACGTCCAGGTCGAAATATGGCTTTCAAATTA

AGTTCTGAATTAGTGGATGCTGCCAAAGGGAGTGGCGATGCCATACGCAAAAAGGAA  
GAGACTCATAAAATGGCAGAGGCAAATAGAGCTTTTGCACATTTTCGTATGGGTAGAG  
ACACTATTGCTGAGATAATAACCTCTATACGAAATGCTGATATGGATAGAAAAGAGTT  
GTTTCGCATAGCATCTACTAATATTACCGAAAATATTGTTAAAATACTTTTCCGAGAAGGT  
TTTATCGAAAACGTCAGAAAACATCGAGAAAAAACA AAAATTTTTTGGTTTTAACCC  
TGCGACATAGCAGG-----AATAGGAAAAGACCCTAT-----AGAAATTTTTTAAATTTAA  
AACGGATCAGCCGACCCGGTCTACGAATCTATTCTAACTCTCAACGAATTCCTAGAATT  
TTAGGTGGAATGGGTATTGTAATCTTTCCACTTCTCGGGGTATAATGACAGATCGGGA  
AGCTCGACTAGAAGGAATCGGCGGAGAAATTTTATGTTATATATGGATGGCAAAAGCTA  
TACCGAGA ACTGGTTTACGTAGAAATGTACGTATTGGTGCACGTA AAAAGTGCACGTAA  
AATACCAAAGGGAGTTATTCATGTTCAAGCAAGTTTTAATAATACCATTGTCACAGTTAC  
AGATGTACGAGGTCGGGTGGTTTCCTGGTCCTCGGCCGGTACTTGTGGATTCAATGGTA  
CGCGAAGAGGGACACCCTTTGCCGCTCAA ACTGCAGCAGCAAATGCTATTTCGTACAGT  
AGTAGATCAGGGTATGCAACGAGCAGAAGTCATGATAAAAAGGTCCCGGTCTCGGAAGA  
GACGCCGCATTACGAGCTATTTCGTAGAAGTGGTATCCTATTA ACTTTTGTACGGGATGTA  
ACCCCTATGCCACATAATGGCTGTAGACCTCCGAAAAAAGACGTGTGATGCCAACTAT  
TAAACA ACTTATTAGAAATACAAGACAGCCATTTCGAAATGTCACGAAATCACCCGCTC  
TTCGGGGGTGTCCCTCAGCGTCGAGGAACATGTACTAGGGTGTATACTATCACCCCAA  
AAACCAA ACTCTGCCTTACGTAAAGTTGCCAGAGTACGATTAACCTCTGGATTTGAAAT  
CACTGCTTATATACCCGGTATTGGCCATAATTCACAAGAACATTCTTCAGTCTTAGTAAG  
AGGGGGGAGGGTTAAGGATTTACCCGGTGTAAAGATATCACATTGTTTCGAGGAACCTA  
GATGCTGTCCGAGTAAAGGATCGTCAACAAGGGCGTTCTAAATATGGGGTAAAAAAGC  
CAAAAATGGCAAGGAAAAGTTTGATT CAGAGGGAGAAGAAGAGGCAAAAATTTGGAA  
CATAAATATCATTTGATTTCGTGCATCCTCAAAAAAAGAAATAAGT-----CAAGTTCCTG  
CATTAAAGTGACAAATGGGAAATTTATGGAAAGTTACAATCCCCACCACGTAATAGTGCA  
CCTACACGCCTGCATCTCCGTTGTTTTTCGACCCGGAAGGCCGAGAGCTAACTATCGAG  
ACTTTGGACTATCCGGACACATACTTCGTGAAATGGTTCATGCATGTTTGGTGCCAGGA  
GCAACAAGATCGAGTTGGATGGTAAAAAATTCAGTAATTTTCGATTATTTCTCAA-----AA  
AGAAAACGAAGAAAATAAAGGGTCTGTTGAATTTCAAGTATTCAGTTTCACCACGAAG  
ATAAGGAGACTTACTTCACATTTGGAATTGCACAAAAAAGACTTTTCATCTCAGAGAG  
GTTTGCGCAAAAATTTTGGGAAAACGTCAACGACTACTAGCCTATTTGTCAAAAAGAAG  
GAGAGGACGCTATAAAGAATTAATTGATGAGTTGGATATTCGAGAAATAAAAACGCGT--  
----ATGGTAAA ACTTCGTTTGAACGATGTGGTAGAAAGCAACGTGCCGTCTATCGAAT  
CGTTGCAATTGATGTTTCGATCCCGAAGAGAAGGAAAAGATCTTAGAAAAGTGGGCCTT  
TATGATCCAATGAAGAATCAA ACTTATTTAAATGTTCCCTGTTATTCTATATTTCCCTTGAAA  
AAGGGGCTCAACCCACAGGAACTGTCCAGAATCTTTTAAAGAAGGCGGGAGTTTTTA  
AA-----ATGGATAAATCCAAGCGACCCTTTCTTAAATCCAAGCGAT  
CTTTTCGTAGGCGTTTGC CCGGATTCAATCGGGGGATCGAATTGATTATAGAAACATG  
AGTTTAATTAGTCGATTTATTAGTGAACAGGGAAAAATATTATCTAGACGAGTGAATAGA  
TTGACCTTGAAACAACAACGATTAATTA ACTATTGCTATAAAAACAAGCTCGTATTTTATCT  
TTGTTACCTTTTCTCAATAATGAGAAA-----CAATTTGAAAGAATTGAGTCGACTACTAG  
AACTACCGGTCTTAGAACAGAAATAAAGTGATACGTTCACTAAAAAAAATCCTTTT  
GTAGACAAAAATATATTA AAAAAAATCTCTAAACTTAATCAAAAAGCAGAAAAAGAAA  
TAATTGTA ACTTGGTCTCGTGCATCTACCATTATACCTACAATGATTGGCCATACGATTGC

CATTCATAATGGCAAAGAGCATTTCGCTGTTTATATAACAGATCGTATGGTAGGTCACAA  
ATTGGGCGAATTTGTACCTACTTTAAATTTCCGAGGACATGCAAAAAGCGATAATAGAT  
CCCGTCGTATGATTTTCAATCTTTTCTACTAGGTAATCTAGTATCCTTATGCATGAAGCT  
AATCAATTCGGTTCGTTGTGGTCGGACTCTATTATGGATTTCTGACCACATTCTCTATAGG  
GCCCTCTTATCTCTTCGTTCTCCGAGCTCAGGTTATGGAAGAAGGA-----ACCGAGAA  
GAAGGTATCAGCAACAACCTGGTTTTATTACGGGACAGCTCATGATGTTTCATATCGATCTA  
TTATGCGCCTCTGCATCTAGCATTGGATAGACCTCATAACAATAACTGTCCTAGCTCTACC  
ATATCTTTTGTTCATTTCTTCTGGAACAATCACAAACACTTTTTTTGATTATGGATCGACT  
ACCAGAAATTCAATGCGTAATTTAGCATTCAATGTTTATTCCTGAATAATCTCATTTTTTC  
AATTATTCAACCATTTTCATTTTACCAAGTTCAATGTTAGCCAGATTAGTCAACATTTATAT  
GTTTCGATGCAACAACAAGATGTTATTTGTAACAAGTAGTTTTTGTGGTTGGTTAATTG  
GTCACATTTTATTCATGAAATGGCTTGGGTTGGTATTAGTCTGGATACGGCAAAATCATT  
CTATTAGATCGTACATTCGATCTAATAAGTACCTTGATCAGAATTGATAAATTCTATGGC  
TCGGATCTTTAGTATTCTTTATTTATTACCTGTGTCTACTATTTAGGCAGAATACCGTCA  
CCCCTTTTTACTAAGAACTGAAAGAAACCGAAGAAGATAAACCTCTTATAACTCTTCT  
TTTCGATTCGAAGAAATGGAATCGACCATTTTCGCTACATAAAAAATAACTCTTTGACA  
GAATTGTCAGAAATGAAATGTCACAATATTTTTTTGACATACGTCAAAGTGATGGAAAA  
GAAAGAATTTCTTTTACATATCCTCCTGGTTTATCAATTTTTTTTTGAAATGATAAAAAGA  
AGGATATCTCCCATCTTTTCGAAAAATCTTCATGTAATGAACTTTATAATCCTTGGGTTT  
ATACCAACAAAGAAAAGGGGAAA---TTAACAACGAATTTCAAATCGAATTAAGCT  
CTAGACAAAGAATCTATTTCTTTGAGTGTACTGGAAACAAGAAGCTCGATTGTGTAATGA  
GGATTCTACAAAAGAATACTTATCAAAGTATATGATCCCTTCTTGAACGCATCATATCG  
GAAAACAATCTACAAAATCTTTCCCTTATAGATAAATTTGAGATAAATCGCATTATCG  
TATACTTTATCGAAAATTTGAACCCCAAGATTCGGATGGTCGATCGATTAGAATAAAAG  
AAATCAGTAAAGAAATACCCCGATGGTCATACAAATTAATTGATTTAGAACAACAATCA-  
--GGACAAATTCGTTCAAGAAAGGGCAAACGTGTAGTAATTTTTACTGTTGCTTTGATAC  
GTTATTACAACAATCAGACTTTTCGGCGGAATATAATCAAAGGTTCTATGCGAGCTCAA  
AGACGTAAAATAGTTATTTTCAAGAAATGTTTCAAGCAAATGTGCATTCCCTCCTTTTTTTT  
GAAAGACTACAAAATTCCTCTTTTTTTCTTTTGATATC-----TCCGGATTGATTAACCTT  
TTTTTTTCGAAATAGAAAGGAAAAAGTTTCGAATAGAGATAGCAGAGGCCTGGGATAGCA  
TTCCACTTGCGCAAGTAATAAGAGGTTGTATGTTACTAACTCAATCTATTTTTAGAAAAA  
GTATTCTATTACCTTTATTAATAATTACAAAAATATTGGCCGTATACTCCTATTCGAACTT  
CCTGAATGGGCTGAGGATTTCCAGGAATGGAATAGAGAGGTACATCTTAAATGTACCTA  
TAATGGGGTTCCATTATCCGAAACAGAATTTCCAAAAAATGGTTGACAGATGGTATTC  
AGATAAAAATATTGTTTCCGTTCTGTCTGAAACCTTGGCGCAAATCCAAAAAAAAGA  
AAAAGATGATTTTTGTTTTTTAACAATTTGGGGAATGGAAGCAGAAGCTTCCTTTTGGTC  
CGCCCCGAAAACGTCTTCTTTTTTTTAAACCCATTTTTTAAGGAATTCAAAAACAAATT  
GAAAAATTAAGAAAGAAAGTATTTGCGAGTT---CTAACAGTTTTTCAAAGAAAAAACCA  
ATTACTTCAAAGGTTTCAAAGAAATCAAAAAATGGGTTTTTCGGAGGTATTTTT-----T  
TTATTAATAATAATAAAGAACTTTCAAAGTAAATGATTCCACGATAAGCAATGAG  
ATAATTCACGAATCATTTAGTCAAATTCATCTCCGAGTTGGACAAATTCTCCATTGACA  
GAAAAAAAACGAAAGATGTCCTGATAGAACAAGTACAATCCGAAATCAACTAGAA  
AAAATCTCAAAGAGAAAAAAAAGTCTTAACAAA-----ACAAATTCTAATGCTA  
AAAGATTTGAAAAATGGCAAATATTAAGAAGAAATGCTCGATTAATCTGTAAATTA

CCCTCCCTTTTAAAAATTTTCATTGAAAAATCTATACAGATATATTTGTATCTATCATTA  
TATTCCCAGAATAAATACAGAATTTTTT--TCGTTTATTTTCGTATGACTTATCCTACATGTC  
ACAAGCATATGTATTTTACAAATTATCACAAATAAAAATTAGTAACTCGGTAAGATCTGT  
TGTTCAATATCAAATATACCCCCTTTTCTTAAGTCTAAAATAAAGGATTCTTTTAGACA  
AGGAATGGATCATTCGAAATTAGCAAATAAGAACTTCCGCGCTATGAACTAATAAAT  
GGAAAACTGGTTAAAAGGGCATTTCATACCATTTATCTCAGATCAGATGGTTCGAAA  
TTAATACCAGAAAAATGGCGAAATAGAGTTCGCCAGCGTTGTATAGCCAAAAAGGCAA  
GCAAGCAGCATTATGAAAAAGACCTG-----TTAGTTGGTTCCAAAAA---GATAATT  
TTCGAAAATACTATAGATATAATCTTTTATCATATAAATTTATTAATGTTGATTTCCATATG  
CTGATAGAAAATATTTTGCTTGAAAATTTTCAATTTTATCTTAGATTTTGTATTGGAT  
GGGAATGAATGAAAAAGGCTAAAGGGTGGCTCTTCCCAGAATTTGTGTTACTTTATA  
AAGCATATAAATGAAACCTTGGTTTATACCAAGCAAATTACTTCTTTTAAATTACAAA  
GCAATACAGAAGCAGAAGCTCGATTCTTCTGAAACATTATTTGCTTTTCAATTGAGA  
TGGGACGCAACTTTGAATCAAAGAATGATCAATAATCAAGATCTATTGTCTCCTGCTT  
AGACTGATAGATCCAAGAAAATTACTATATCCTCCATTCAAAGAGAGAAATGAGTTT  
GGATATAATGTTGATTCAAAGAATTTGACTCTCTCAGAGTTGATGAAG---GGAGTATTG  
ATTGTACAACCACTTCGTCTGTCTGGCAAAAAGACGGACAATTTATTATGTACCAAAC  
CATAGGTATTTTCGTTGCTTCATAAGAGTAAGCATAAGCATTTTTATTTACTTGTTCGGGA  
AAATATTTTATCGTTTAAACGTCGTAGAAAAGTGAGAATTCTAATTTGTTTCAGATTTCT  
TTGGCCTAATTATCGATTAGAAGATTTAGCTTGTATGAATCGTTATTGGTTTGATACCAAT  
AATGGCAGTCGTTTCAGTATGTTAAGAATACATCTGTATCCGATGAAAGGACATCAATT  
CCAATCCTGGATTTTCGAATTGCGAGAGATATTGAGAGAGATCAAGAATTCTCACCATT  
TCTTAGATTCATGGATCCAATTCATTCAGTGAGGTCTTTCATTCACATTTTTTCCACC  
AAGAACGTTTTCTAAAACCTTTGACCCCGAATTTTGAGTATCCTACTTTCA---CGCAA  
TTCA-----CAGGGTTCAACAAGCAATCGGTATTTACAG-----ATCAAGGGT---GTAATAC  
TATTTGTAGTAGCGGTCCTTATATATCGT-----ATTAACAATCGAAATATGGTTCGAAA  
GAAAAAATCTCTATTTGAGAGGGCTTCTTCTCT-----ATACCTATGAATTCCATTGG  
ACCCAGAAATGATACCTTGGGAAGAATCGGTT---GGGTCTTCCAATATCAATAGGTTGATT  
GTTTCG---CTCCTGTATCTTCCAAAAGGAAAAAAGATCTCTGAGAGTTGTTTCCTGAAT  
CCGAAAGAGAGTACTTGGGTTCTCCCAATAACT-----CAAAGTGTAGCATGCCTG  
AATCTAACTGGGGTTCGCGGTGGTGGAGGAACTGGATCGGAAAAAAGAGG-----GATT  
CTAGTTGTACGATATCTAAT-----GAAACCGTCGCTGGAATTGAGATCTTATTCAAAGA  
GAAAGATATCAA---TATTTGGAGTTTCTTTTTGTATATTATATGGAT-----GATCCGATCC  
GCAAGGACCGTGATTGGGAATTATTTGATCGTCTTCTCTGAGGAAGAGGGCGAAATAG  
AATCAACTTG-----AATTCGGGACCGCTATTCGAAATCTTAGTGAAACACTGGATTCTT  
ATCTCATGTCTGCTTTTCGTGAAAAATACCAATTGAAGTGGAGGGT---TTCTTCAAAC  
AACAAAGG---GCTGGGTCAACTATTCAATCAAATGATATTGAGCATGTTCCCAT-----CT  
CCTCTCGAGAAAGAAGTGGGCTATTTCTTTGCAAAATTGTGCTCAATTTTCATATGTGGC  
AATTCGCCAAGATCTCTTCGTT-----AGTTGGGGGAAG---AATCCGCACGAATCGGAT  
TTTTTGAGGAAC---GTATCAAGAGAGAATTGGATTTGGTTAGACAGTGTGTGGTTGGTA  
AACAAAGGATCGG-----TTTTTTAGC-----AAGGTACGGAATATATCGTCAAATATTCAAT  
ATGATTCC-----ACAAGA-----TCCAGTTTCGTTCAAGTAACGGATTCTAGCCAACTGA  
AAGGATCTTCT---GATCAATCCAGAGATCATTTGGATTCCATTAGT-----AATGAGGA  
TTCGGAA-----TATCACACATTGATCAATCAAAGAGAGATTCA

ACCACTAAAAGAAAGATCGATTCTT---TGGGAT-----CCTTCCTTTCTTCAAACGGAAGG  
AACAGAGATAGAATCAGAC-----CGATTCCCGAAA-----TGCCTTTCTGGATATTCC-----T  
CAATGTCCC GGCTATT CACG---GAACGTGAGAAGCAGATGATTAATCATCTGCTTCCGG  
AAGAAATCCAAGAATTTATT-----GGAATCCTACAAGATCGGTTTCGTTCTTTTTTCTCTG  
ATAGATGG-----TCAGAACTTCGT---CTGGGTTCTGAATCCTACTGAGAGGTCCACTAGAG  
ATCAG-----AAATTGTTGAAGAAACAACAAGATCTTTCT---TTTGTCCCTTCCAGGC  
GATCGGAA-----AATAAAGA ACTGGTTAATATATTCAAGATAATTACGTATTTACAAA  
AT-----ACTGTCTCAATTCATCTATTTCACCAGATCCGGGGTGTGATAGGGTTCTG---AA  
GGATGAACCGGAT---ATGGACAGTTCCAATAAGATTTCAATCTTGAACAAAAATCCATTT  
TTTGATTTA-----TTTCATCTATTCCATGACCGGAACAGGGGAGGATACACGTTA-----CA  
CCACGATTTTGAATCAAAA-----GAGAGATTTCAAGAAATGGCAGATCTATTCACTCTAT  
CAATAACCGAGCCG---GATCTGGTGTATCATAAGGGATTTGCCTTTTCTATTGATTCCTAC  
GGATTGGATCAAAAACAA-----TTCTTGAATGAGGCCAGGGATGAA-----TCGAAAAA  
GAAATCT-----TTATTGGTTCTACCTCCTATTTTTTAT-----GAAGAGAATGAATCTTTTT  
CTCGAAGGATCAGAAAAAAAAGGGTCCGG---ATCTACTGCGGGAATGATTTGGAAGAT  
CCAAAACCAAAAATAGTGGTATTTGCTAGCAACAACATAATGGAGGCAGTCAATCAATA  
TAGATTGATCCGAAATCTGATTCAAATCCAATATAGTACCTATGGG-----TACATAAGAAA  
TGTATTGAATCAATCTTTTTTAATGAAT-----CGATCCGATCGCAACTTCGAATATGGA--  
-----ATTCAAAGGGATCAAATAGGAAAGGATACTCTGAATCATAGA ACTATAATGAAATA  
TATGATCAACCAACATTTATCAAATTTGAAAAAG---AGTCAGAAGAAACGGTTCGATCC  
TCTT-----ATCTTGATTTCTCGAACCGAGAGATTCATGAATCGGGATCCTGATGCATATAG  
ATACAAATGGTCCAATGGGAGCAAGAATTTCCAGGAACAT-----TTCGTTTCTGAGCA  
GAAGAGCCAT-----TTTCAAATAGTGTTTCGATCAATTATGTATTAATCAATATTCGATTG  
ATTGGTCTGAGGTTATCGACAAAAAAGATTTGTCTAAGCCACTTCGTTTCTTTTTGTCC  
AAG-----TCACTTCTTTTTTTGTCC-----AAGTTGCTTTTCTTT  
TTGTCTGAAC---TCACTTCCTTTTTTCTGTGTGAGTTTCGGGAATATCCCATTCATGGGT  
CCGAG---ATCTACATCTAT--GAATTGAAAGGTCCGAATGATCAACTCTGCAATCAGTTG  
TTAGAATCAATAGGTCTTCAAATTTGTTCAATTTGAAAAAATGGAAACCCTC-----TTATTG  
GAT-----GATCATGATACTTCC---CAAAAATGGAAATCTTGATCAATGGAGGA-----AC  
GCCCTTTTTGTTCAATAAGATACCA---AAGTGG---ATGATTGACTCATTCCATACTAGA----  
--AATAATCGCAGGAAATCCTTTGATAACGCGGATTCCTATTTCTCAATGATATCCACAA  
TCAAGACAATTGGCTGAATCCCGTGAAACCATTCCATAGAAGTTCATTGATATCTTCTTT  
TTATAAAGCAAATCGACTTCGATTCTTGAATAATCCACATCACTTCTGCTTCTAC-----TG  
TAACACAAGATTCCCCTTTTCTGTG-----GAAAAGGCCCGTATCAAT-----AATTATGA  
TTTTACGTATGGA---CAATTCCTCAATATCTTGTTCAATTCGCAACAAA---ATATTTTCTTTG  
TGCCTCGGTAAA-----AAAAACATGCTTTTGAGGGG---AGAGATACTATTTACCAATC  
GAGTCACAGGTATCTAACATATTCATACCTAACGATTTTCCACAAAGTGGT--GACGAAA  
CGTATAACTTGTACAAATCT-----TTCCATTTTCCAAGTCGATACGATCCATTCGTTTCGT-  
----AGAACTATTTACTCGATCGCAGACATTTCTGGAACACCTCTAACAGAGGGACAAAT  
AGTCAATTTTGGGAAGAACTTATTGTCAACCTCTTTT CAGACATGAATCTATCTGATTCAG  
AAGGGAAGAACTTGCATCAGTATCTCAAT-----TCAAACATGGGTTTGATTCACACT  
CCATGTTCTGAG-----TTACCATCCGAAAAG-----AGGAAAAA-----CAGA  
GTCTTTGTCTAAAG-----AAATGCGTTGAGAAAGGGCAGATGTATAGAACCTTTCAACG  
AGATAGTGCTTTTTCAACTCTCTCAAATGGAATCTATTCCAAACGTATATGCCATGGTT

CCTTACTTCGACAGGGTACAAATATCTAAATTTGATATTTTTAGATACTTTTTTCAGACCTA  
TTG-----CCGATACTAAGTAGC---AGTCAAAAATTTGTATCCATTTTTTCATGATATTATGCA  
TGGATCAGGTATATCATGGCGAATTCTTCAGAAAAAATGG-----TGTCTTCCGC  
AATGGAATCTG---ATAAGTGAGATTTTCGAGTAAGTGTTCCATAAT-----CTTCTTCTGTC  
CGAAGAAATGATTCATCGAAAT-----AATGAGTCACCATTGATATCGACACATCCGAGAT  
CGCCAAATGTTCCGGGAGTTC---CTCTATTCAATCCTTTTCCTTCTTCTTGTGCTGGATAT-  
--CTCGTTTCGTACACATCTTCTCTTTGTTTCCCGG-----GCCTCTAGTGAGTTACAGACAG  
AGTTTCGAAAAGGTCAAATCTTTGATGATTCATCATCTATGATTGAGTTACGAAAACCTT  
CTGGATAGGTATCCTACATCTGTACCGAATTCTTTCTGGTTAAAGAATCTCTTTCTAGTT  
GCTCTGGAACAATTAGGAGATTCTCTAGAAGAAATATGG-----GCTTCTGGCGGCAACAT  
GCTTGGT-----CCCGCT-----TATGGG---GTCAAATCACTACGTTCTAAGAAGAA  
ATATTTGAGTATCAATCTCATCGATATCATCGATCTCATA-----CCAAATCCCATCAAT  
CGAATCACTTTTTTCGAGAAATACGAGACATCTAAGTCATACAAGTAAAGAGATCTATTC  
ATTGATAAGAAAAAGAAAAACCGTGAATGGGGGTTGGATTGATGATAAAATAGAATCC  
TGGGTCGCGAACAGTGATTGATTGATGATGAAGAAAGAGAATTCTTGGTTCAGTTCT  
CC-----GCCTAACGACA-----GAAAAAAGGATTGATCAAATTCTATTGAGTCTGACT--C  
ATAGTGATCATTTA-----TCAAAGAATGACTCTGGTTATCAAATGATTGAACAACC  
GGGAGCAATTTACTTACGATACTTAGTTGACATTCAT-----AAAAAGTATCTATTGAATTA  
TGAGTTCAATACATCCTCTTTAGCAGAAAGACGGGTATTCTTGCTCATTATCAGACAAT  
CACTTAT-----TCACAAACTTCGTGTGGGACTAATACTTTGCATTTCCCATCTCATGGA----  
----AAACCTTTTTCGCTCCGCTTAGCCTTATCCCCCTCT--AAGGGGATTTTAGTGATAGG  
TTCTATAGGAACTGGACGATCCTATTTGGTCAAATACCTAGCGACAACTCCTATGTTCC  
TTTCATTACGGTATTTTTGAACAAGTTCCTGGATAACAAGCCTAAAGGTTTTCTTATTGA  
T-----GAGAGTGACAATATTGATGCTAGTGACGATATTGATGCTAGTGACGATATT  
GATGCTAGTGAC-----GATGTCGATCGTGACCTTGA  
TACGGAGCTG---GAACTGCTAACTATGATGAATGCGCTAACTATGGATATGATGCCGGAA  
-----ATAGACCGATTTTATATCATCCTTCAATTGCAATTGGCAAAGCAATGTCTCCCT  
GCATAATATGGATTCCAAACATTCATGATCTGGATGTGAATGAGTCGAATTACTTATCCC  
TCGGTCTATTAGCGAACCATCTCTCT-----GAAAGATGTTCC---ACTAGAAATAT  
TCTTGTATTGCTTCGACTCATATTTCCCAAAAAGTGGATCCCGCTCTAATAGCTCCGAA  
TAAATTAATAACGTGCATTAAGATACGAAGGCTTCTTATCCACAACAACGAAAGCACT  
TTTTCACTCTTTCATATACTAGGGGATTTCACTTGGAAAAGAAAATGTTCCATACT-----A  
ACGGATTCGGGTCATAACCATGGGTTCCAATGCAAGAGATCTTGTAGCACTTACCAAT  
GAGGCCCTATCGATTAGTATTACACAGAAGAAATCAATTATAGACACTAATACAATTAGA  
TCCGCTCTTCATAGACAAGCTTGGGATTTGCGA-----TCCCAGGTAAGATCGGTTTCAG  
GATAATGGGATCCTTTTCTATCAGATAGGAAGGGCTGTAGCACAAAATGTACTTCTAAG  
TAATTGCCCATAGATCCTATATCTATCTATATGAAGAAGAAA-----TCATGTAACGAAGG  
GGATTCTTATTTGTACAAATGGTACTTCGAACTTGGAAACGAGCATGAAGAAATTAACGA  
TACTTCTTTATCTTTTGTAGTTGTTCTGCCGGATCGGTCGCTCAAGATCTTTGGTCTCTAC  
CC-----GGACCCGATGAAAAA---AATGGGATCACTTCTTATGGACTCGTTGAGAATGATT  
CA--GATCTAGTTCATGGCCTATTAGAAGTAGAAGGCACTCTGGTGGGA-----TCTTCAC  
GGACAGAAAAAGATTGCAGTCCGTTTGATAATGAT-----CGAGTTACATTGCTTCTTCGG  
CCCGAACCGAGGAAT--CCCTTAGATATGATGCAAAACGGATCTTGTCTATCTTTGATC  
AGAGATTTCTCTATGAAAAATAC-----GAATCGGAGTTTGAAGAA---GGGGAGAGGGAA



GGAGCCCTTGACCTGCAACAG-----ATAGAGGAGGAT-----TTATTCAATCAC----  
--ATAGTTTGGGCTCCT-----AGAATATGGCGCCCT-----TGGGGCTTCTATTTGATTGTA  
TCGAAAGGCCCAATGAATTGGGATTTCCC--TATTGGTCCAGGTCATTTCCGGGGCAAG--  
-----CGGATCATTTATGATGAAGAGGATGAGCTTCAAGAGAATGGTTCGGAGTTCTTGCA  
GAGTGAACCATGCAGTACCAGACGCGAGATAGATCTTCCAAAGAACAAGGCCTTTTT  
CGAATAAGCCAATTCATTTGGGACCCTGCAGATCCGCTCTTTTTCTATTCAA---GATC  
AGCCCCCTGGCTCTGTGTTTTACATCGAGAATTATTTGCAGATGAAGAGATGTCAAAG  
GGGCTTCTTACTTCCCAAATGGATCCTCCTACATCTATATATAAACGCTGGTTTTATC-----A  
AGAATACACAAGAAAAGCACTTCGAATTGTTGATTAATCGTCAGAGATGGCTTAGA----  
----ACCAATAGTTCATTATCT-----AATGGATCTTCCGTTCTAAT-----ACTCTATCCGAGAG  
TTATCAGTATTTATCAACTCTGTTCCCTATCTAAT--GGAACGCTATTGGATCAAATGACAA  
AGACATTGTTAAGAAAAAGATGGCTTTTCCCGGATGAAATGAAAATTGGATTC-----ATG  
-----ATGCCTAGATCACGG---ATAAATGGAAATTTTATTGATAAGACCTTT  
TCAATTGTAGCCAATATCTTATTGCAAATAATTCCGACAACCTCAGGAGAAAAGGAGGC  
ATTTACCTATTACAGAGATGGT--GTGATGTCAGCTCAATCCGAAGGAAATTATGCAGAA  
GCTTTACAGAATTATATGAAGCTATGCGACTAGAAATTGATCCCTATGATCGAAGTTAT  
ATACTCTATAATATAGGTCTTATCCATACAAGTAATGGAGAACATACGAAAGCTTTGGAA  
TATTATTTTCGAGCACTAGAACGAAATCCATTCTTACCACAAGCTTTTAATAATATGGCC  
GTGATCTGTCATTAC--CGGGGAGAACAGGCCATTACCAGGGCGATTCTGAAATTGCG  
GAGGCTTGGTTTGATCAAGCTGCTGAGTATTGGAAACAGGCTATAGCACTTACTCCTGG  
TAATTATATTGAAGCACATAATTGGTTGAAGATCACAGGGCGTTTCGAA-----ATGAGTT  
GGCGATCAGAACATATATGGATAGAACTTATAACGGGGTCTCGAAAATAAGTAATTTT  
TGCTGGGCCCTTATCGTTTTTTTAGGTTTATTAGGATTCTTGTGGTTGGAACCTCCAGT  
TTTCTTGGTAGAAATTAATATCTTTTGTTCGCTCAGCAAATCATTTTTTTTCCACAGG  
GGATCGTGATGCTTTCTACGGGATTGCGGGTCTCTTTATTAGTTCCTATTTGTGGTGCA  
CAATCTCCTGGAATGTAGGTAGTGGTTATGATCGATTTGATAGAAAGGAAGGAATAGTG  
TGATTTTTTCGTTGGGGATTTCTGGAATAATCGTCGCATATTCCTGCGATTCCCTATA  
AAAGATATCAATCCGTTTCAATAGAAGTTAAAGAGGGTATTTTTGCTCGTCCTGTCT  
TTATATGGATATCAGAGGCCGGGGGCTGTCCGTTGACTCGTACTGATGAGAAT--TTG  
ACTCCACGAGAAATTGAACAAAAGCCGCGGAATTGGCCTATTTCTTGC GCGTACCAA  
TTGAAGTATTT

>Artemisia

ATGAAAAGATGGTGGTTCAATTCGATGTTATTTCTAAGTAAATCAACGGGCAGTCTTGG  
TCCTATTGCAAGTGCCGTTCAAAGTAAAGATCCGAGTATAAATGATACGGATAAAAACA  
TTCAGAGTTACAATAATGTTGATCTTTTTTTTGGCGTCAAGGACATTCGGAATTTTCTCT  
CTGATGATACTTTTTTAGTTAAAGATAGTAATGGGGACAGTTATTCTATATATTTTGATATT  
GAAAATCATATTTTTGAGATTGACAATGATCAT-----CCTTTTTGTAGTGAAGTAGAAAAT  
TCTTTTTTAT-----CGAAATTCTAGTTATCTCAATAATGGATCTAAGAGTAAGAATCCCCAC  
CAGGATCATTACATGGATGATACTCAGTATACTTGAATAATCACATTAATAGTTGCATTG  
ACAGTTATCTTCAG-----TCTCAAATCTGTATTGATAGTTACATTGTAAATGGTAGTGACA  
ATTCCAGTAACAATTACATTTCTAGTTCCATTTGTAGT-----ACTAGGACTAAAACCCAGG  
ATGCCATAAGGAGTGATCAAATACTACGAGAAAGTTCTACCGATCTGGATGGAAATCAA  
AAATACAGTCATTTGTGGTTCAATGCGAAAATTGTTATGGATTAAATTATAAGAAATTT  
TTAAATCAAAAATGAATCTTTGTGAACAATGTGGATATCATTGAAAATGAGTAGTTCT

GATAGAATTGACCTTTTGATTGATTTCGGGTACTTGGGAGCCTATGGACGAAGACATGGT  
CTCTCTGGATCCCATTGAATTTTCATTTCGGAGGAGGAGCCTTATAAAAATCGTATCGATTC  
TTATCAAAGAAAGACAGGATTAACCGAGGCTATTCAAACAGGTATAGGGCAATTA AAC  
GGTATTAACGTAGCAATTGGGGTTATGGATTTTCAGTTTATGGGGGGTAGTATGGGATCC  
GTAGTTGGGGAGAAAATTACCCGTTTGATTGAATACGCCACTAAAGAATTTCTACCTCT  
TATTATAGTGTGTGCTTCCGGAGGGGCACGCATGCAAGAAGGAAGTTTGAGCTTGATG  
CAAATGGCTAAAATATCTGCTGCTTTATATGATTATCAATCAAATAAAAAGTTATTCTATG  
TACCAATCCTTACATCTCCTACTACCGGCGGGGTGACAGCTAGTTTTGGTATGTTGGGG  
GATATCATTATTGCCGAACCCCATGCCTACATTGCCTTTGCGGGTAAAAGAGTAATTGAA  
CAAACATTAAATAAAACAGTACCCGAAGGTTACAAGGGGCTGAGTATTTATTCCAGA  
AGGGCTTATTTCGATCTAATCGTACCACGTAATCCTTTAAAAGCGTTCTGAGTGAGTTAT  
TTCAACTCCACACTTTCTTTCCCTTTGAATCAAAAT-----ATGGTAACCATTCAAGCCGA  
CGAAATTAGTAATATTATCCGCGAACGTATTGAGCAATATAATAGAGAAGTAAAGATTGT  
AAATACTGGTACCGTACTTCAAGTAGGTGATGGCATTGCTCGTATTCATGGTCTTGATGA  
AGTAATGGCGGGTGAATTAGTAGAATTTCAAGAGGGTACAATAGGCATTGCTCTTAATT  
TGGAATCAACTAATGTTGGTGTGTATTAATGGGTGATGGTTTACTGATACAAGAGGGG  
AGTTCTGTAAAAGCAACAGGAAAAATTGCTCAGATACCTGTGAGTGAGGCCTATTTGG  
GTCGTGTTGTAAACGCCCTGGCTAAACCTATTGATGGTAGAGGTGAAATTGCATTTTCT  
AAATATAGGTTAATTGAATCGCCCGCTCCGGGGATTATTTCTCGACGTTCTGTATATGAA  
CCTCTTCAAACAGGGCTTATTGCTATTGATTCAATGATTCCCATAGGACGTGGTCAGCG  
AGAATTAATTATTGGGGACAGACAGACCGGTAAAACAGCAGTAGCAACAGATACAATT  
CTAAATCAACAAGGCCAAAATGTAATATGCGTTTATGTAGCTATTGGTCAAAAAGCTTC  
TTCTGTGGCTCAGGTAGTAACTACTTTCCAGGAAAGGGGCGCGATGGAATATACTATTG  
TGGTAGCCGAAATGTCGGATTCCCCTGCTACATTACAATACCTCGCTCCTTATACAGGA  
GCAGCTCTGGCTGAATATTTTATGTACCTTGAACGACACACTTCAATCATTATGATGAT  
CTCTCTAAACAAGCGCAAGCTTATCGCCAAATGTCTCTTCTATTACGAAGACCACCTGG  
GCGCGAAGCTTATCCAGGGGATGTTTTTTTATTACATTCACGCCTTTTGGAAAGAGCTG  
CTAAATTAAGTTCTCTTTTAGGTGAAGGAAGTATGACCGCTTACCAATAGTTGAAACC  
CAAGCGGGAGATGTTTCGGCTTATATTCCTACTAATGTAATTTTCGATTACTGACGGCAA  
ATATTCTTATCTGCCGATCTCTTCAATGCTGGAATCCGACCCGCTATTAATGTGGGTATCT  
CTGTTTCTAGAGTAGGGTCTGCGGCTCAAATTAAGCTATGAAACAAGTAGCCGGTAA  
ATTAATAATTAGA ACTGGCACAATTCGCAGAATTAGAAGCTTTTGCACAATTTGCTTCTG  
ATCTCGATAAAGCTACTCAGAATCAATTGGCAAGAGGTCAACGATTACGTGAATTGCTT  
AAACAATCCAATCCGCCCTCTCGGGGTAGAAGAACAGATACTTACTATTTATACCGG  
AACAAACGGTTATCTCGATTCATTAGAAGTTGGACAGGTAAGGAAATTTCTGGTTGAGT  
TACGTA CTTACTTAAAACCAATAAACCACAGTTTCAAGAAATAATCTTCTACCAAG  
ACATTCACCGAGGACGCAGAAGCCATTTTGAAGAAGCTATTCAGGAACAGAGGGAA  
CGTTTTCTACTTCAGGAACAAGCA-----ATGAATCCT-----GCTAGTTCTGGGGTTGCGAC  
G-----CAAAGAACCTGGGGCGTATCGCCCAAATCATTGGTCCGGTACTAGATGTAGCTT  
TTCCGCCAGGCAAAAATGCCTAATATTTATAACGCTCTGGTAGTTAAGGGCCAAGATATC  
AATGGTGAACCAATTAATGTGACTTGTGAGGTACAGCAATTATTAGGAAACAATCGAGT  
TAGGGCCGTAGCTATGAGTGCTACAGACGGTCTAACGAGAGGAATGGACGTAATTAAT  
ACGGGAGCTCCGCTAAGTGTTCGGTTCGGTGGAGCGACTCTCGGGCGAATTTTAAACG  
TGCTTGGCGAGCCTGTTGATAACTTAGGTCCTGTAGATCAAAGCACAAACATTTCTTATT

CATAGATCGGCGCCTGCCTTTATACAGTTAGATACAAAATTATCTATTTTTGAAACCGGA  
ATTAAGTAGTAGATCTTTTAGCCCCCTTATCGCCGTGGAGGAAAAATTGGACTATTTGG  
GGGAGCTGGCGTGGGTAAAACAGTACTCATTATGGAATTGATTAACAATATTGCCAAAG  
CTCACGGAGGCGTATCTGTATTTGGCGGAGTTGGTGAACGGACTCGTGAAGGAAATGA  
TCTTTACATGGAAATGAAAGAATCTGGAGTAATTAATGAAAAAATATTGCAGAATCAA  
AAGTGGCTCTAGTTTACGGTCAGATGAATGAACCGCCGGGAGCTCGTATGAGAGTTGG  
TTTACTGCCCTAACTATGGCGGAATATTTCCGAGATGTTAATGAACAAGACGTACTTTT  
ATTTATTGACAATATCTTCCGTTTTTGTTC AAGCAGGATCTGAAGTATCCGCCTTGTTGGG  
TAGAATGCCTTCCGCTGTGGGTATCAACCTACCTTAGTACCGAAATGGGTACTTTAC  
AAGAAAGAATTACTTCTACTAAAGAAGGGTCCATAACTTCTATTCAAGCTGTTTATGTA  
CCTGCAGATGATTTGACCGACCCTGCTCCTGCTACGACATTTGCACATTTAGATGCTACT  
ACCGTACTTTCAAGAGGATTAGCCGCCAAAGGTATCTATCCAGCAGTAGATCCTTTAGA  
TTCAACGTCAACTATGCTACAACCCCGGATCGTTGGTGACGACCATTATGACTGCAC  
AAGAGGTTAAGCAAACCTTTACAACGTTACAAAGAACTTCAAGATATTATAGCCATTCTT  
GGATTGGACGAATTATCCGAAGAAGATCGGTTAACTGTAGCAAGAGCGCGAAAAATAG  
AGCGTTTCTTATCACAACTTTTTTCGTAGCAGAAGTATTTACGGGTTCTCCGGGAAAA  
TATGTTGGTTTAGCAGAAACAATTAGAGGCTTTAAATTAATCCTTTCCGGAGAATTAGAT  
GGTCTTCTGAACAGGCCTTTTATTTGGTAGGTAACATCGATGAAGCTACGGCGAAGGC  
TATTAECTTAGAAACGGAGAGCAATTCGAAGAAAATGACCTTAAATCTTTGTGTACTGA  
CCCCTAATCGAATCGTTTGGGATTCAGAAGTGAAAGAAATCATTTTATCTACTAATAGTG  
GACAAATTGGCGTATTACCAAATCACGCTCCTATTGCCACAGCAGTAGATATAGGTATTT  
TGAGAATACGCCTTAACGACCAATGGCTAACGATGGCTTTGATGGGCGGTTTTGCTAGA  
ATAGGTAATAATGAAATCACTGTTTTAGTAAATGATGCAGAGAAAAGTGGTGACATTGA  
TCCACAAGAAGCTCAGCAAACCTTTGAAATAGCGGAAGCTGCTTTGAGAAAAGCTGA  
AGGAAAGAGACAAACAATTGAGGCAAATCTAGCTCTCCGACGGGCTAGGACACGAGT  
AGAGGCTATCAATGCCATTTCAATGAAAACCTGTAACCGATTCTTTTCGTTTTCTTTGGGCC  
AATGGCCATCCGCCGGGAGTTTCGGGTTTAATACCGATATTTTAGCAACAAATCTAATAA  
ATCTAAGTG TAGTGCTTGGGGTCTTGATCTTTTTTGGAAAGGGAGTGTTAAGTGATTTA  
TTAGATAATCGAAAACAGAGAATCTTGAAGACGATTA AAAATTCAGAAGAATTGCGCG  
AGGGGGCCATCGAACAGCTGGAAAAAGCCCGACTCGCTTACGTAAAGTAGAAATAG  
AAGCAGATCAGTTTCGTGTGAATGGATACTCTGAGATAGAGCGAGAAAAATTGAATTT  
GATTGATTCAACTTATAAGACTTTGGAACAATTAGAAAATTACAAAATGAACTATAA  
ATTTTGAACAACAAAAGGCCAGTAATCAAGTCCGACAACGGGTTTTCCAACAAGCCTT  
ACAAGGAGCTCTAGGA ACTCTGAATAGTTGTTTAAACAGTGAGTTACATTTACGTACTA  
TCAGTGCCAATATTGGCATATTGGGGGCGATGAAACAAATAACGGATATGAATCCACTG  
ATTTCTGCCGCTTCCGTTATTGCTGCTGGATTGGCTGTAGGGCTTGCTTCTATTGGACCT  
GGAGTTGGTCAAGG TACTGCTGCGGGTCAAGCTGTAGAAGGTATCGCGAGACAGCCC  
GAGGCGGAGGGAAAAATACGAGG TACTTTATTGCTTAGTCTAGCTTTCATGGAAGCTTT  
ACAATTTATGGCTTGGTTGTAGCATTAGCACTTTTATTTGCTAATCCTTTTGTTATGAAT  
GTTCTATCATGTTCCATCAACACACTAAACGGATTATATGATCTATCCGGTGTGGAAGTA  
GGCCAACATTTTTATTGAAAAATCGGGGGTTTTCCAAGTCCACGGCCAAGTACTTATTAC  
TTCTTGGGTTGTAATTGCTATCTTATTAGGTT CAGCCGCTCTAGCCGTTCCGGAACCCACA  
AACCATTCCGACCGGTGGTCAGAATTTCTTCGAATATGTCCTTGAATTTATTTCGAGATGT  
GAGTAAAAC TCAAATTGGAGAGGAGTATGGTCCTTGGGTTCTTTTTATTGGA ACTATGT

TTCTATTTATTTTTGTTTCTAATTGGTCAGGCGCCCTTTTACCTTGGAACCTCATAACAATT  
ACCTCATGGGGAGTTAGCCGCACCCACGAATGATATAAATACTACTGTTGCTTTGGCTTT  
ACTCACGTCAGTGGCATAATTTCTATGCGGGTCTTAGCAAAAAAGGATTAAGTTATTTTCG  
GGAAATATATTCAACCAACTCCAATTTTACCTATTAACATCTTAGAAGATTTACAA  
AGCCCTATCACTTAGTTTTGACTTTTCGGAAATATATTAGCTGATGAATTAGTAGTTG  
TTGTTCTTGTTCCTTTAGTACCTTCGGTGGTTCCTATCCCTGTCATGTTCCCTGGATTATT  
TACAAGTGGTATTCAAGCTCTTATTTTTGCAACTTTAGCCGCGGCTTATATAGGTGAATC  
CATGGAAGGCCACCATATGATATTTCAACTTTAGAGCATATATTAACCTCATATTTCCCTT  
TCTATTGTTTCAATTGTAATTACAATTCATTTGATAAGCTTATTGGGCAATCAAATTAGAA  
AACCATATTATCCTCAGAAAAGGGGATGATAGCTACTTTTTTATGTCTAACAGGATTGT  
TAATAACTCGTTGGATTTATTTCGGGCCATTTCCACTAAGTGATTTATACGAATCCTTAAT  
TTTTCTTTTCATGGAGTTTCTCCCTTATTCATATAGTTCCTTATCCTTATATAAGAAAAAATT  
ATTTAACAACAATAACTGCCTCAAGTACTATTTTTACCCAAGGCTTTGCTACATCGGGTC  
TTTTAAATGAAATACATAAACCCACAATATTAGTACCTGCTCTACAATCGGAATGGTTAA  
TAATGCACGTAAGTATGATGATATTGAGCTATGCGGCTCTTCTTTGTGGATCATTATTATC  
AGTAGCACTTCTAGTCATTACATTTAGAAAA-----CTTTTTTATAGTTCTAAAGAAATC  
CAATACAAGAATGAAAGAAACAATATTTTTCAAAAAAATAT-----GTTAATAATTATT  
ACAAGGCCCAATTGATTCAACAATTAGATTATTGGAGTTATCGTGTGATTAGCCTAGGAT  
TCATCTTTTTAACCATAGGTATTCTTTCAGGAGCAGTATGGGCTAATGAAGCGTGGGGAT  
CATATTGGAGTTGGGATCCAAAGGAACTTGGGCGTTTATTACTTGGATCGTATTTCGCA  
ATTTATTTGCATACTCGAACAAATAAAAATTTGCAGGGGACAAATTCCGCAATTGTGGC  
GACTATAGGTTTTCTTATAATTTGGATATGCTATTTTGGGGTCAATCTATTAGGAATAGGG  
CTACATAGTTATGGTGCATTTACGTTAACCATGGCAAAAAAGAAAGCATTAACTCCTCT  
TTTCTATCTTGCATCTATAGTATTTTTGCCTTGGTGGATTTTCGCTCTCATTCAAAAAAGT  
CTGGAATCATGGATTACAAATTGGTGGAACTAGGCAATCCGAACTTTTTTGAATGA  
TATTGAAGAAAATAGTATTCTAGAAAATTCAAAGAATTAAGGAACTCCTCCTCTTAG  
AGGAAATGATCAAGGAATACTCGGAGACACATCTACAAAACCTTCGTATA---ATTCACA  
AAGAAACAATCCAATTAATCAAGATACACAATGAGGGTTCGTATTCATACGATTTTGCAC  
TTCTCGACAAATATAATCTGTTTCATTATTCTAAGTGGTTATTCTATTTTGGGTAATAAAG  
AACTTGTATTCTTAACTCTTGGGCTCAGGAATTCCTATATAACTTAAGTGACACAATAA  
AAGCTTTTTCTCTTCTTTTATTAAGTATTATGATCGGATTTTCATTCGCCCCATGGTTG  
GAACTGCTGATTGGCTTTGTCTACAAGGATTTTGGATTTGTTTATAATGATCAAATTAT  
ATCTGGCCTTGTTCCTACTTTTCCAGTCATTCTAGATACAATTTTAAAATATTGGATTTTC  
CGTTATTTAAATCGCGTATCTCCGTCACTTGTAGTGATTTATCATTCAATGAATGACATGC  
CTATTGGTGTTCCAAAGTACCTTTTTCGAAGTCCTGGAGAGGAAGATGCATCTTGGGTT  
GACATATAACAACCGACTTTATCGAGAAAGATTACTTTTTTTAGGTCAAGAGGTTGATAG  
TGAGATCTCAAATCAACTTATTGGTCTTATGATATATCTCAGTATCGAGGATGATACCAA  
AGATCTGTATTTGTTTATAAACTCTCCTGGCGGATGGGTAATACCGGGGGTTCGCTCTTTA  
TGATACTATGCAATTTGTGCAACCAGATGTACATAAATATGCATGGGATCAGCCGCTTC  
AATGGGATCTTTTATCCTGGTAGGAGGAGAAATTACCAAACGTCTAGCATTCCCTCAGC  
CTAGGGTAATGATCCATCAACCTGCTGGTCTTTTTTCTGAAGTAGCAACGGGAGAATTC  
ATCCTGGAAGTGGGAGAACTGCTGAAACTACGTGAAACCCTGACAAGGTTTTATGTAC  
AAAGAACGGGCAAACCTTTATGGGTTGTATCCGAAGACATGGAAAGAGATGTTTTTAT  
GTCAGCAACAGAAGCCCAAGCTTATGGAATTGTTGATCTTGTAGCGGTTGAAATGAAA

GAACAAAAATGGATTCATGAAGGTTTAATTACTGAATCGCTTCCCAACGGTATGTTCCG  
GGTTCGTTTAGATAATGAAGATATGATTCTAGGTCATGTTTCAGGAAAGATCCGACGTA  
GTTTTATACGGATACTGCCAGGCGATAGAGTCAA AATTGAAGTAAGTCCGGTATGATTCA  
ACCAGAGGTCGTATAATTTATCGACTCCGCAACAAAGATTCGAAAGATATGGAGAAATT  
CCAAAGCTATTTAGGG---GATAGATCTCAACAACACTCTTTCTTATATCCACTTATCTTTC  
AGGAGTATATTTATGTA CTGCTCATGATCATGGTTTAGTAGGTTATGACAATAAATTCAG  
CTTACTAATTGTGAAACGTTTAATCATTTCGAATGTATCAACAGAATCATTTTATTCTTTCT  
GTTAATGATTCTAAACAA-----TTGGGGAATAATTTTTATTTCGCAAGTAATGTCAGAGG  
TTTCTTCAATTATCTGGAAATTCCATTGTCTCTGCGATTAATATCTTCCCATTAGTTAAA  
TTCGATAATTTACGATCAATTCATTCAATATTTCTTTTTTAGAGGACA ACTTTTCACATT  
TAAATTATGTATTAGATATACTAATACCTTACCCAGTCCATCTGGAAATCTTGGTTCAGGC  
TCTTCGCTATTGGATAAAAGATGCTTCCTCTTTGCATTTATTAAGATTCTTTCTCCATGAG  
TGTCATAATTGGGATAGTCTTATTACTAAAGTTAGTTCTTCTTTTTCAAAAACAGATTAT  
TCTTCTTCTATATACTTTTCATGTATGTGAATATGAATCTGGCTTCCTCTTTCTCCGTAA  
CCAGTCTTCTCACTTACGATCAACATCTTCTGGAGCCCTTATTGAACGAATAAATTTCTA  
TGGAAAATAGAGCATCTTGCAGAAGTCTTTGT CAGGTCTTTTAATTTATGGTTGTTCA  
AAGATCCTTTCATGCATTATGTTAGGTATCAAGGAAAATCCATTCTTGCTTCAAAAGGG  
ACGTTTCTTTTGATGAATAAATGGAAATATTACTTTGTCAATTTCTGGAAATATTATTTTT  
ACCTGTGGCCTCAACCAGGAAGGATTTATATAAACCAATTATCCAATCATTCCCTTGACT  
TTCTGGGTTATCGTTCAAGTGTGCGGCTAAATCCTTCAACGGTACGCAGTCAAATGCTA  
GAAAATGCATTTCTAATCGATAATGCTATT-----AAGAAGTTTGATACTCTTGTTCCAATTA  
TGCCTCTGATTGGATCACTGGCTAAATCGAAATTTTGTAACGCATTGGGGCATCCTATTG  
GCAAGGCGATTTGGACCGATTTATCAGATTCTGATATTATTGAGCGCTTTGGGCGTATAT  
ACAGAAATCTTTCTCATTATCATAGTGGATCTTCAAAAAAAAAGAGTTTGTATCGAGTA  
AAGTATATACTTCGACTTTCTTGTGCTAGAACTTTAGCTCGTAAGCATAAAAGTACTGTA  
CGTGCTTTTTTGAAAAGATTTGGTTCGGAATTATTGGAAGAATTCTTTACGGAAGAAGA  
ACAAGTTTTTTCTTGACCTTTCCAAGACGGATTTGGTATTTGGATATTATTTGTATCAAT  
GATTTGGCCAATCATGAAATGATAATGGAT---ACAACAGAAGTACAA---GCTATCAATTC  
TTTTTCTAGATTGGAATCC---TTAAAAGAGGTCTATGGGATCATATGGATGCTTATCCCTA  
TTTTTACTCCTGTATTAGGAATCACAAATAGGTGTACTAGTAATTGTTTTGGTTAGAAAGAG  
AAATATCTGCAGGTATACAACAACGTATTGGTCCTGAATACGCAGGACCTTTGGGAATT  
CTTCAAGCTCTAGCAGATGGTACCAAATTA CTTTTTCAAAGAGAATCTTCTTCCATCTAG  
AGGAGATACTCGTTTATTTCAGTATTGGACCGTCTATAGCAGTAATATCCGTTTTATTAAGT  
TATTTAGTAATTCCTTTTGGGGATCATCTTGT TTTTAGCCGATCTCAGTATCGGTGTTTTTT  
TATGGATTGCTATTTCAAGTATAGCTCCTGTCGGCCTTCTTATGTCAGGATATGGCTCCAA  
TAATAAATATTCTTTTTTAGGTGGTCTACGAGCTGCTGCTCAATCAATTAGTTATGAAATA  
CCATTA ACTCTATGTGTGTTATCAATATCTCTACTATCTAACAGTTCAAGTACCGTTGATA  
TAGTGGAAGCGCAGTCAA AATATGGTTTTTTGGGGATGGAATTTGTGGCGTCAACCTATA  
GGATTTCTAGTTTTTCTAATTTCTTCCCTAGCAGAGTGTGAACGATTACCTTTTGATTTA  
CCAGAAGCAGAAGAAGAATTAGTAGCAGGTATCAAACCGAATATTCGGGTATCAAATT  
TGGTTTTATTTACGTTGCTTCATATTTAAATCTACTAGTTTCTTCATTATTCGTAACAGTTC  
TTACTTGGGGGGTTGGAATCTTTCTATTCCATACATATTTGTTCCCGAGCTTTTTGAAAT  
TACTAAAAGGGGTAGAGTCTTTGGAACAATAATTGGTATCTTTATTACATTAGCTAAAAC  
TTATTTGTTCTTGTTCAATTCCTATCGCAACAAGATGGACTTTACCGAGGCTGAGAATGG

ACCAATTATTAAATCTTGGATGGAAATTTCTTTTACCTATTTCTCTAGGTAATCTATTATTA  
ACAACCTTCTTCCCAACTTCTTTCACCTGATGATCTGGCATGTACAGAATGAAAACCTTCAT  
TCTCGATTCTACGAGAATTTTTATGAAAGCCTTTCATTTGCTTCTCTTCGATGGAAGTTT  
GATTTTCCGAGAATGTATCCTAATTTTTGGCCTAATTTCTTCTTCTGATGATCGATTCAACC  
TCTGATCAAAAAGATATACCTTGGTTATATTTTCATCTCTTCAACAAGTTTAGTAATGAGC  
ATAACGGCCCTATTGTTCCGATGGAGAGAGGAACCTATGATTAGCTTTTCGGGAAATTT  
CCAAACGAACAATTTCAACGAAATCTTTCATTTCTTATTTTACTATGTTCAACTCTATG  
TATTCCTCTATCCGTAGAGTACATTGAATGTACAGAAATGGCTATAACCGAGTTTCTCTT  
ATTCGTATTAACAGCTACTATAGGAGGAATGTTTTTATGCGGTGCTAACGATTTAATAAC  
TATCTTTGTAGCTCCAGAATGTTTCAGTTTATGCTCCTACCTATTATCTGGATATACCAAG  
AAAGATGTACGGTCTAATGAGGCTACTATGAAATATTTACTCATGGGTGGGGCAAGCTC  
TTCTATTCTGGTTCATGGTTTCTCTTGGCTATATGGTTCATCCGGGGGAGAGATCGAGCT  
TCAAGAAATAGTGAATGGTCTTATCAATACACAAATGTATAACTCCCCAGGAATTTCAAT  
TGCCTCATATTCATCACTGTAGGAATGGGTTCAAGCTTTCCCCAGCCCCTTCTCATCA  
ATGGACTCCTGACGTATATGAAGGATCTCCCACTCCAGTCGTTGCTTTTCTTTCTGTTAC  
TTCGAAAGTAGCTGCTTCAGCTTCAGCCACTCGAATTTTCGATATTCCTTTTTATTTCTC  
ATCAAATGAATGGCATCTTCTTCTGGAATCCTAGCTATTTCTTAGCATGATATTGGGGAA  
TCTCGTTGCTATTACTCAAACAAGCATGAAACGTATGCTTGCATATTCGTCCATAGGTCA  
AATCGGATATGTAATTATTGGAATAATTGTTGGAGACTCAAATGATGGATATGCAAGCAT  
GATAACTTATATGCTGTTCTATATCTCCATGAATCTAGGAACCTTTGCTTGCATTGTCTTA  
TTTGGTCTACGTACCGGAACTGAGAACATTCGGGATTATGCAGGATTATACACGAAAGA  
TCCTTTTTTGGCTCTCTCTTTAGCCCTATGTCTCTTATCCCTAGGAGGTCTTCTCCACTA  
GCAGGTTTTTTCGGAAAACCTCTATTTATTCTGGTGTGGATGGCAGGCAGGCCTATATTC  
TTGGTTTTAATAGGACTCCTTACAAGCGTTGTTTCTATCTACTATTATCTAAAATAATCA  
AGTTATTAATGACTGGACGAAACCAAGAAATAACCCCTCACGTGCGAAATTATAGAAG  
ATCCCCTTTAAGATCAAACAATTCCATCGAATTGAGTATGATTGTATGTGTGATAGCATC  
TACTATACCAGGAATATCAATGAATCCGATTATTGCAATTGCTCAGGATACCCTTTTTATG  
TTTTCTGCTTTACGAATATGATATTTTTTGGGCATTTCTGATAATATCAAGTCTTATTCCAT  
TTTGGTATTTTTTCATTTCCGGATTTTTAGCTCCGAGTAGCAAAGGACCGGAGAACTTT  
CTAGTTATGAATCGGGTATAGAACCAATAGGCGACGCTTGGTTACAATTTAGAATCCGCT  
ATTATATGTTTGTCTAGTTTTTGTGTTTTTGTATGTTGAAACAGTTTTTCTTTATCCATG  
GGCAATGAGTTTCGATGTATTAGGTGTATCTGTATTTGTAGAAGCTTTAATTTTCGTGCTT  
ATTTTAATTATTGGTTTAGTTTATGCATGGCGAAAGGGGGCATTAGAATGGTCTACGAAC  
AAATTTCCCTGGTTAACAATAATTGTAGTTTTTACCAATATTTGCGGGTTCCTTAATTTCT  
TTCTCCCCATAAAGGAAATAGGGTAATTAGGTGGTATACTATATGTATATGCATGTTAGA  
ACTTCTTCTAACAACCTATGTATCTGTTATCATTCCAAATTGGACGATCCATTAATCCAA  
CTAGTAGACGACTATAAATGGATCAATTTTTTTGATTTCCGTTGGAAATTAGGAATAGAT  
GGACTGTCTATAGGACCCGTTTTATTAACAGGATTTATCACTACTTTAGCTACCTTAGCG  
GCCTGGCCTGTTACTCGGGATTCTCGATTATTCCATTTCTTGATGTTAGCAATGTACAGC  
GGTCAAATAGGATCATTTTCTTCTCGGGACCTTTTACTTTTTTTTTATCATGTGGGAATTA  
GAATTAATTCGGTTTATCTACTTCTATCCATGTGGGGAGGAAAGAAACGTCTCTATTCA  
GCCACAAAATTTATTTGTACACGGCGGGGGTTCCATTTTTCTCTTAATGGGAGTTCT  
GGGTATCGGTTTATATGGTTCTAATGAACCAACATTAATTTTGAACATCAGTTAATCA  
GTCGTATCCTGTGGCTTTGGAAATAATATTCTATATTGGATTTTTTATCGCTTTTGCTGTC

AAATTACCGATTCTACCCCTACATACATGGTTACCAGATACCCACGGAGAGGCACATTA  
CAGTACTTGTATGCTTCTAGCCGGAATTTTATTAATAAATGGGAGCGTATGGATTGATTTCG  
GATTAATATGGAATTATTACCACACGCTCATTCTATATTTTCTCCTTGTTGATGATAGTA  
GGTACAATACAAATAATCTATGCAGCTTCAACATCTCCCGGCCAACGTAATTTAAAAAA  
AAGAATAGCCTATTCCTCGGTATCTCATATGGGTTTTATACTTATAGGAATTGCTTCTATA  
ACCGATACGGGACTCAATGGAGCTATTTTACAAATAATCTCTCATGGATTTATTGGTGCT  
GCACTTTTTTTCTTGGCAGGAACGAGTTATGATAGAATACGTCTTGTTTATCTCGATGAA  
ATGGGCGGAGTAGCTATCCCATGCCAAAATATTTACGATGTTTACGATGCTTTTCCATG  
GCTTCCCTTGCATTACCGGGTATGAGTGGTTTTATTGCAGAAGTTATAGTCTTTTTAGGA  
ATAATTACTAGCCAAAATATCTTTTTAATGCCAAAATTGCCATCACTTTTGTAAATGGCA  
ATTGGAATGATATTAACCTCTATTTATTTATTATCTATGTCACGCCAGATGTTCTATGGATA  
CAAGTTATTTAATACTCCAACTCTTATGTTTTTATTCTGGACCGCGCGAGTTATTTGT  
TTCCATCTCCATTTTTCTACCTGTAATAGGTATTGGTATGTATCCCGATTTTGTCTTTTCC  
TATCAGTTGACAAGGTTGAAGGTATTCTATCTAATTTTTTATAGAATGATGCTCGAACA  
TGTACTTGTGTTTGGAGTGCCTATTTATTTTCTGTCTGGTCTATATGGATTGATTACAAGTAGA  
AATATGGTTAGGGCTCTTATGTGTCTTGAAGTTATATTAATGCGGTTAATCTCAATTTG  
TAACATTTTCTGATTTTTTTGATAGTCGTCAATTAAGGAGCAATTTTTTCTATTTTTGT  
TATAGCTATTGCAGCTGCTGAAGCCGCTATTGGACTCGCTATTGTTTCATCAATTTATCGT  
AACAGAAAATCAACTCGTATAAATCAATCTAATTTGTTGAATAAGATGGAACAGACATA  
TCAATATGCGTGGATAATACCTTTTCTTCCACTTCCAGTTCCTATGTTAATAGGGTTGGG  
ACTTCTTATTTTTCCGACGGCAACAAAAGTCTTCGTCGTATGTGGGCTTTTCAGAGCG  
TTTTATTGTTAAGTATAGTCATGATTTTTTCCATAAATCTGTCTATTCAGCAAATAAATAG  
CAGTTCTGTCTATCAATATGTATGGTCTTGGATTATCAATAATGATTTTTTCTTTAGAAATTT  
GGATACTTGATTGATCCACTTACTTCTATTATGTCAATATTAATCACTACTGTTGGAATTT  
TAGTTCTTATTTATAGTGATAATTATATGTCTCATGATCACGGGTATTTGAGATTTTTTGCT  
TATATGAGTTTTTTTCAGTACTTCCATGTTGGGGTTAGTTACTAGTTCAAATTTGATACAAA  
TTTATATTTTTTGGGAATTAGTTGGAATGTGTTTCGTATCTATTAATAGGATTTTGGTTTCC  
ACGACCTGTTGCAGCAAAGGCTTGTCAAAAGCGTTTTGTAATAATCGTGTGTTGGCGAT  
TTTGGTTTATTATTAGGCATTTTAGGGTTTTATTGGGTAACGGGGAGTTTCGAATTTTCGT  
GATTTATTCCAAATATTTAATAACAATGAGGTCAATTTTTTATTGTTACTTTGTGCGCTG  
TTCTATTTTGGCGGTGCTATTGCTAAATCTGCACAATTTCCCTTCATGTATGGTTACC  
TGATGCAATGGAAGGGCCGACTCCTATTTCCGGCTCTTATACATGCTGCTACGATGGTAG  
CAGCGGGAATATTTCTTGTAGCTCGACTTATGCCTCTTTTCATAGTCATACCCACATAA  
TGAATTTTATCTCTTTGATAGGGATAATAACGGTTTTTTTTAGGAGCTACTTTAGCTCTTGC  
TCAAAAAGACATTAAGAGGGGTTTAGCCTATTCCACAATGTCTCAATTGGGTTATATGAT  
GTTAGCTTTAGGTATGGGGTCTTATCGCAGTGCCTTATTTTCAATTTGATTACTCATGCTTAT  
TCAAAAGCGTTATTGTTCTTAGGATCGGGATCCGTTATTCATTCAATGGAACTCTTGTT  
GGATATTGTCCAAAAAAGTCAGAATATGGTCTTATGGGGGGTTTAAACAAAACATGT  
ACCAATTACTAAAAATTCTTTTTTATTAGGTACACTTCTCTTTGTGGTATTCCACCTCTT  
GCTTGTTTTTGGTCCAAAGATGAAATTTCTAATGATAGTTGGTTGTATTACCTATTTTT  
GCAATAATAGCTTGGTCTACCGCGGGATTAACCGCATTTTATATGTGTGCGATCTATTTAC  
TTACTTTTGAAGGACATTTAAACGTTTCAATTTTCAAATTACAGTGGAAAAAGGAATACC  
CCCTTGATTTCAATATCTCTATGGGGTAAAGAGGGTTCAAAAATAAGTAACAAA---TTGG  
TAACTTTATTAATAAATGAACTTTTTTTTTCATTAGGCAATACCAAGACTTCTTTGTATCCTTA

TGAATCAGATAACACTATGTTATTCCCAATACTTATATTAATTCTATTTACTTTGTTTCGTTG  
GATTCTTAGGAATTCCTTTC---GTGGATATTTTAAACAAAATGGTTAACCCCGTCTATAAAT  
CTTTTACATAAAAATTCAAAC---TCAATAGATTGGTATGAATTTTGTAAAGATGCAGTTTT  
TTCAGTTAGTATAGCCTCTTTCGGAATATTTATAGCATTTTTTTTTTATATAAACCTGTTTATT  
CATCTTTTCAAATTTGTATTTAATTAATTCATTTGTTAATTTTTATGACAAAATAAAAAA  
TGCTATATATGATTGGTCATATAATCGGGGTTACATAGATTCTTTTTATGGAACATTCTCA  
TTGGGGGGATGAGAAAATTGGCCAAATTAACCTCATTTTTTTGATAGAATTATAATTGATG  
GAATTCCAAATGGAGTTGGTCTTATGAGTTTCTTTGTAGCAGAGGTTATTAATCGGTA  
GGGGGTGGG---CGTATTTCTCTTATCTGTTCTTTTATTTTTCTTATGTATCCATTTTTTA  
GTAATTTACTACATGGATTACCTGGACTAATACATGATTTTCTTTTAGTCTTTCTGGGAT  
TGGGTCTTATATTAGGGGTCTGGGAGTAGTATTACTTCCCAATCCCATTTATTCTGCCTT  
TTCATTGGGATTTGTTTTGTTTGTATATCTTATTCTATATTCTATCAAACCTCGCATTTTG  
TAGCTGCCGCGCAGCTCCTTATTTACGTAGGAGCCATAAATGTTTTAATCATTTTTGCTG  
TGATGTTCATAAATGGTTCAGAATATTCAAAGATTTCCGCCTTTGGACCGTGGGAGAT  
GGAGTAACTTCCGTGGTCTGCACAAGTATTTTTTTTCTACTAATTACTACTATTCCAGAT  
ACGTCATGGTACGGGATTATTTGGACTACAAAAGCAAGCCAGATTATAGAGCAAGATCT  
GATAAGTAATAGTCAACAAATTGGGATTCATTTATCAACAGATTTTTTTTATTCCGTTTGA  
ATTTATTTCACTAATTCTTTTAGTTGCGTTAATCGGCGCAATTGCTGTAGCTCGTCAAAT  
GACTGTACCAGCTACAAGAAAAGACCTCATGATAGTCAATATGGGACCTCACCACCCA  
TCAATGCATGGTGTCTTTCGACTCATTGTTACTCTAGATGGTGAAGATGTTATTGACTGT  
GAACCAATATTGGGTTATTTACACAGAGGTATGGAAAAAATTGCGGAAAATCGAACAA  
TTATACAATATTTGCCTTATGTAACACGTTGGGATTATTTAGCTACTATGTTACAGAAGC  
AATAACTGTAAATGCACCAGAGCAATTAGGGAATATTCAAGTCCCTAAAAGGGCCAGTT  
ATATCAGAGTCATTATGTTGGAGTTAAGTCGTATAGCTTCACATTTGTTATGGCTTGGCC  
CTTTTATGGCAGATATTGGGGCACAGACTCCTTTCTTCTATATTTTTCGAGAAAGAGAAT  
TGATATATGACCTATTCGAAGCTGCCACCGGTATGCGAATGATGCACAATTTTTTTTCGTA  
TTGGAGGAGTCGCTGCTGATTTACCTCATGGCTGGATAGATAAATGTTTGGATTTTTGCG  
ATTACTTTTTAACAGGAATTGCCGAATATCAAAGCTTATTACACGGAATCCCGTTTTTT  
TAGAACGAGTTGAAGGAGTAGGCATTATTGGTGGAGAGGAAGCAATAAATTGGGGTTT  
GTCGGGACCTATGCTACGAGCTTCCGGAATACAATGGGATCTTCGTAAAGTTGATCATT  
ATGAGTGTACGACGAATTTGATTGGGAAGTCCAATGGCAAAAAGAGGGGGATTTCATT  
AGCTCGTTATTTAGTACGAATCAGTGAAATGACGGAATCCATAAAAATTATTCAACAGG  
CGCTAGAAGGAATCCGGGAGGGCCCTATGAAAATTTAGAAATACGCCGTTTTGATAGA  
GCAAAAGATACTGTATGGAATGACTTTGATTATCGATTATTAGTAAAAAACCTTCTCCG  
ACTTTTGAATTGTGCAAGCAAGAACTTTATGTGAGAGTTGAAGCACCAAAGGGAGAAT  
TGGGCATTTTTCTGATAGGAGATAAGGGTGTTTTTCTTGGCGATATAAAATTAGACCGC  
CAGGATTTATTAATTTGCAAATCTTCTCAGTTAGTTAAAAGGATGAAATTGGCTGATA  
TTATGACGATACTAGGTAGTATAGATATCATTATGGGAGAAGTTGATCGTATGTTCCCTAT  
GGTAACTGAGTTCATGAATTATGGCCAACAAACAGTACGAGCCGCAAGGTATATTGGTC  
AAGGTTTTATGATTACCTTATCACACGCGAATCGTTTACCTGTAACCTATTCAATACCCCTA  
TGAAAAATTGATTACATCCGAGCGTTTCCGCGGCCGAATCCACTTTGAATTTGATAAAT  
GCATTGCTTGTGAAGTATGTGTTTCGCGTATGTCCTATAGATCTGCCCGTTGTTGATTGGA  
AATTGGAACTGATATTAGAAAGAAACGATTGCTTAATTACAGTATTGATTTGGAGTAT  
GTATATTTGTGGTAATTGCGTTGAGTATTGTCCAACAAATTGTTTATCAATGACTGAAG



AATATGAACTTTCTACTTATGATCGTCACGAATTGAATTATAATCAAATTGCTTTGGGTC  
GGTTACCAATGTCAGTAATTGACGATTACACAATTCGAACAATTTCAATTTG-----  
-----ATGCAGGGTAATTTGTCTGCTTGGCTAGTTAAGCATGGGCTA  
ATTCATAGATCTTTGGGCTTTGATTACCAAGGAATAGAGACTTTACAAATAAAACCCGG  
GGATTGGCATTCCATTGCTGTCATTTTATATGTATATGGTTACAATTATCTCCGCTCCCAA  
TGTGCCTATGATGTAGCACCCGGCGGACTATTAGCTAGTGTGTATCATCTTACTAGAATA  
GAGTATGGTGTGGATCAACCAGAAGAGGTCTGCATAAAAGTATTTGCCCGAGGAGGG  
ATCCTAGAATCCGCTCTGTTTTCTGGGTTTGGAAAAGCGTGGATTTTCAAGAACGGGAA  
TCTTATGATATGTTGGGAATCTACTATGATAATCATCCACGTTTGAAACGTATCTTAATGC  
CTGAAAGTTGGATAGGATGGCCTTTACGTAAGGATTATATTGCTCCCAATTTTATGAAA  
TACAAGATGCTCAT-----  
-----ATGAATTCCATTGAG  
TTCCCTTATTTTCATCGAACAACCCAAAATTCAGTTATTTCAACTACATTAATGATCTTT  
CAAATTGGTCAAGACTCTCTAGTTTATGGCCACTTCTCTATGGTACCAGTTGTTGCTTCA  
TTGAATTTGCTTCACTAATAGGCTCACGATTGACTTTGATCGTTATGGACTAGTACCAA  
GATCGAGTCCTAGACAAGCGGACCTTATTTTAAACAGCCGGAACAGTAACAATGAAAAT  
GGCCCCCTCCTTAGTGAGATTATACGAGCAAATGCCTGAACCAAAATATGTTATTGCTAT  
GGGAGCATGTACAATTACAGGGGGGATGTTTCAGTACCGATTCTTATAGTACTGTTCTGTG  
GAGTCGATAAGCTAATTCCTGTGGATGTCTATTTGCCGGGCTGTCCACCCAAACCAGAA  
GCAATTATAGATGCTATAACAAAACCTTCGTAAGAAAATATCTCGAGAAATCTATCCAGAT  
AGAATTCTGTCTCAGCGAGAGAATCGGTGTTTTACTACCAATCACAAGTTTAAAGGTTGG  
GCATAGTATTCATACTGGAAATTATGATCAAGGATTCCTTTATCAACCGCCATCTACCTC  
AGAAATTCCTCCTGAAACATTTTTCAAATACAAAAGTTCAGTATCTTCCCACGAATTAG  
TAAATATGCAAACCTAGAAATACTTTTTCTTGGATAAAGGAACAGATTACTCGATCTATTT  
CCATATCGCTCATGATATATATCATAACTCGTACATCCATTTCAAATGCATATCCCATTTTT  
GCACAGCAGGGTTATGAAAATCCACGAGAAGCCACTGGACGTATTGTATGCGCAATT  
GCCATTTAGCTAATAAACCAGTGGATATTGAGGTTCCGCAAGCGGTACTTCCCAGACT  
GTATTTGAAGCAGTTGTTTCAATTCCTATGATATGCAACTGAAACAAGTTCTTGCTAAT  
GGTAAAAAGGGGGGTTTGAATGTAGGGGCTGTTCTTATTTTACCAGAGGGTTTTGAATT  
AGCCCCCTCCCGATCGTATTTCCCCCGAGATAAAAGAAAAGATGGGCAATCTGTCTTTTC  
AGAGTTATCGCCCCAACCAAAAAAATATCTTGTTCATAGGCCCTGTTCTGGTCAGAAA  
TATAGTGAAATCACCTTTCCTATTCTTTCCCCGACCCCGCTACTAAGAAAGACATTAC  
TTCTTAAAATATCCTATATACGTAGGCGGAAACAGAGGAAGGGGCCAAATTTATCCTGA  
TGGGAGCAAGAGTAACAATACAGTTTATAATGCTACAGCATCAGGTATAGTAAGCAAAA  
TCCTACGAAAAGAAAAGGGGGGATACGAAATAACCATAGCGGATGCATCCGATGGACG  
TCAAGTGGTTGATATTATCCCTCCGGGGCCAGAACTTCTTGTTCAGAAAGGTGAATCTA  
TCAAATTTGGATCAACCGTTGACAAGTAATCCTAATGTGGGCGGATTTGGTCAGGGAGAT  
GCAGAAATAGTACTTCAAGATCCATTACGTGTACAAGGTCTTTTGTCTTCTTCGCATCT  
GTGATTTTGGCACAATCTTTTTGGTTCTTAAAAAGAAACAGTTCGAGAAGGTTCAATT  
GTCCGAAATGAATTTTCATGAGTAAAGTCTATGATTGGTTTGAAGAACGTCTCGAGATTC  
AGGCGATTGCGGATGATATAACTAGTAAATATGTTCCCTCCTCATGTAAACATATTTTATTG  
TTTAGGGGGAATTACGCTTACTTGTTTTTTAGTACAAGTGGCTACAGGTTTTGCTATGAC  
CTTTTACTATCGTCCGACTGTACTGATGCTTTTGCTTCTGTTCAATACATAATGACTGA  
AGCGAATTTGGTTGGTTAATCCGATCAGTTCATCGATGGTTCGGCAAGTATGATGGTCT

AATGATGATCCTACATGTATTTTCGTGTATATCTCACCGGTGGATTAAAAACCTCGTGA  
ATTAACCTGGGTACAGGTGTGGTCTGGCTGTATTGACTGCATCTTTTGGTGTAACCTG  
GTTATTCCTTACCTCGGGACCAAATTGGTATTGGGCAGTTAAAATTGTAACAGGTGTA  
CCTGACGCTATTCCTGTAATAGGATCGCCTTTGGTAGAATTATTGCGCGGAAGTGCTAGT  
GTGGGACAATCCACTTTGACTCGTTTTTATAGTTTACACACGTTTGTATTGCCGCTTCTT  
ACTGCCGTATTTATGTTAATGCACTTCCCAATGATACGTAAACAAGGTATTTCTGGTCCT  
TTAATGGGAGTAACAAAAAACCTGACTTGAATGATCCTGTATTAAGGGCTAAATTGGC  
TAAGGGTATGGGTACATAATTATTACGGGGAGCCAGCATGGCCCAACGATCTTTTATATAT  
TTTTCCGGTAGTAATTCAGGACTATTGCATGTAACGTAGGCTTAGCGGTTCTAGAACC  
ATCAATGATTGGTGAACCGGCAGATCCATTTGCAACTCCTTTGGAAATATTACCTGAAT  
GGTATTTCTTTCCGGTATTTCAAATACTTCGTACAGTACCCAACAATTATTGGGTGTTC  
TTTTAATGGTTTCAGTACCCGCGGGATTATTAACAGTACCCTTTTTAGAGAATGTTAATA  
AATCCAAAATCCTTTTCGTCGTCCAGTAGCGACAACCGTATTTTTGATTGGTACCGCA  
GTGGCCCTTTGGTTGGGTATTGGTGCAACATTACCTATTGATAAATCCCTAACTTTAGGG  
CTTTTTATGATTGAAGTTTTTCTATTTGGAATCGTGTTAGGTCTAATTCCTATTACTTTGG  
CTGGATTATTTGTAACCTGCGTATTTACAATACAGACGTGGCGATCAGTTGGACCTTATGC  
CTACCATAACTAGTTATTTCCGTTTTCTACTAGCGGCTTTAACTATAACCTCAGCTCTATT  
TATTGGTCTGAGCAAGATACGACTTATTATGGATATAGTAAGTCTCGCTTGGGCTGCTTT  
AATGGTAGTCTTTACTTTTTCCCTTTCCTCGTAGTATGGGGAAGAAGTGGACTTATGAT  
TATTCGTTCCCGGAACCAGAAGTAAAAATTTTGGTAGATAGGGATCACATAAAACTT  
CATTCGAGGAATGGGCTAGACCGGGTCATTTCTCAAGAACAATAGCGAAAGGCCCCGA  
AACTACCACTTGGATCTGGAACCTACATGCTGATGCTCACGATTTGATAGCCATACCA  
GTGATTTGGAGGAGATCTCTCGAAAAGTATTTAGTGCGCATTTCCGGTCAACTCTCCATC  
ATCTTCCTTTGGCTGAGTGGCATGTATTTCCACGGTGCTCGTTTTTCCAATTATGAAGCA  
TGGCTAAGCGATCCGACTCACATTCGGCCTAGTGCCAGGTGGTTTTGGCCGATAGTGG  
GCAAGAAATATTGAATGGTGTATGTGGGCGGGGGCTTCCGAGGAATACAAATAACCTC  
TGGTTTTTTTCAGATTTGGCGAGCATCTGGAATAACTAGCGAATTACAGCTCTATTGTAC  
CGCAATTGGTGGATTGGTCTTTGCAGCGTTAATGCTTTTTGCTGGTTGGTTTCATTATCA  
TAAAGCTGCTCCAAAAGTACTTGGTTTCAAGATGTAGAATCTATGTTGAATCACCATTT  
AGCGGGGCTACTGGGGCTTGGGTCTCTCTCTTTGGGCGGGGCATCAAGTACATGTATCTT  
TACCGATTAACCAATTTCTAAACGCTGGAGTAGATCCTAAAGAAATACCACTTCTCAT  
GAATTTATCTTGAATCGGGATCTTTTGGCTCAACTTTATCCAGTTTTGCCGAGGGAGC  
AACCCATTTTTACCTTGAATTGGTCAAAATATTCGGACTTTCTTACTTTTTCGTGGAGG  
ATTAGACCCAGTAACTGGAGGTCTATGGCTAACCGATACTGCACATCATCATTTAGCTAT  
TGCAATTCTTTTTCTGATAGCGGGTCACATGTATAGGACCAACTGGGGCATTGGTTCATG  
GTCTAAAAGATATTTAGAAAGCTCATAAAGGTCCATTTACGGGCCAGGGCCATAAAGGC  
CTATATGAGATCCTAACAAACGTCATGGCATGCTCAATTATCTCTTAACCTAGCTATGTTAG  
GCTCTTTAAACCATTTATTGTAGCTCATCATATGTATGCCATGCCCCCTTATCCATATCTAGCT  
ACTGACTATGGTACACAACCTGTCATTGTTACACATCATATGTGGATTGGTGGATTTCTC  
ATAGTTGGTGCTGCTGCGCATGCAGCCATTTTTATGGTAAGAGACTATGATCCAACCTACT  
CGATAACAACGATCTATTAGATCGTGTCTTAGGCATCGTGATGCAATCATATCACATCTTA  
ACTGGGCATGTATATTTCTAGGCTTTCACAGTTTTGGTTTGTATATTCATAATGATACCAT  
GAGCGCTTTAGGGCGTCTCAAGATATGTTTTAGATAACCGCTATACAATTACAACCGGT  
ATTTGCTCAATGGATACAAAACACCCACGCTTTAGCACCTAGTGCAACGGCGCCTGGT

GCAACAGCAAGCACCAAGTTTAACTTGGGGGGGCGGTGATTTAGTAGCAGTGGGTGGC  
AAGGTAGCTTTGTTACCTATTCCATTAGGAACCGCAGATTTTTTGGTACATCACATTCAT  
GCATTTACGATTCATGTGACGGTATTGATACTTCTGAAAGGTGTTCTATTTGCTCGTAGC  
TCTCGTTTGATAACCGGATAAAGCAAATCTTGGGTTTCGTTTTCCCTGTGATGGGCCTGG  
AAGAGGGGGTACATGTCAAGTATCGGCTTGGGACCATGTCTTCTTAGGACTATTCTGGA  
TGATAATGCAATTCAGTAGTCATATTCATTCAGTTGGAAAATGCAGTCAGATGTTT  
GGGGCAGTATAAGCGATCAAGGAGTAGTAACTCATATCACGGGAGGAAACTTCGCGCA  
GAGTTCTATTACTATTAATGGGTGGCTCCGCGATTTCTTATGGGCACAGGCATCCCAGGT  
AATTCAGTCGTATGGTTCTTCATTATCCGCATATGGACTTTTTTTCCTAGGTGCTCATTTT  
GTCTGGGCTTTTAGTTAATGTTTTTATTTCAGTGGACGTGGTTATTGGCAAGAACTTATT  
GAATCCATCGTTTGGGCTCATAATAAATAAAAAGTTGCTCCTGCTACCCAGCCGAGAGC  
CTTAAGCATTGTACAAGGACGTGCTGTAGGAGTAACCCATTACCTTCTGGGTGGAATTG  
CCACAACATGGGCGTTCCTTAGCAAGAATTATTGCAGTAGGAATGGCATTAAAGATTT  
CCAAGTTTTAGCCAAGGCTTAGCTCAGGACCCCACTACTCGTCGATTTGGTTTTGGTAT  
TGCTACCGCGCATGACTTCGAGAGTCATGATGATATTACGGAGGAACGTCTTTATCAGA  
ATATTTTTGCTTCTCACTTCGGGCAATTAGCAATAATTTTTCTGTGGACTTCCGGAAATC  
TATTTTCATGTAGCTTGGCAAGGAAATTTGAGTCATGGGTACAGGACCCTTTACATGTA  
AGACCTATTGCTCATGCAATTTGGGATCCTCATTTTGGTCAACCGGCTGTAGAAGCTTTT  
ACTCGAGGGGGTGTCTTGGGCCAGTGAATATCGCCTATTCTGGTGTTTATCAGTGGTG  
GTATAACAATCGGTTTACGAACTAATGAAGATCTTTATACTGGAGCTCTTTTTCTATTATTT  
TTTTCTGCCATATCTTTAATAGCGGGTTGGTTACACCTACAACCGAAATGGAAACCGAG  
TGTTTTCTTGGTTCAAAAATGCAGAATCTCGTCTTAATCATCATTTATCAGGACTGTTTCGG  
CGTAAGTTCCTTGGCTTGGACAGGACATTTAGTCCATGTCGCTATTCCCTGCATCCAGAG  
GGGAGTACGTTTCGATGGAATAATTTCTTAGATGTATTACCACATCCCCAAGGGCTAGGC  
CCACTTTTTACAGGTCAGTGGAATCTTTATGCTCAAATCCCGATTCAAGTAGTCATTTA  
TTTGGTACCTCCCAAGGAGCAGGAACTGCCATTTTAAACCCTTCTTGGGGGATTCCATCC  
ACAAACCCAAAGTTTATGGCTGACTGATATGGCTCATCATCATTTAGCTATTGCATTTATT  
TTTTCTCATTGCTGGACATATGTATAAGAACTAATTTTGGGATTGGGCACAGTATGAAAGAT  
CTTTTAGATGCACATATCCCTCCGGGAGGTCGATTGGGACGTGGGCATAAGGGACTTTA  
TGACACAATTAATAATTCGATTCATTTTCAATTAGGCCCTTGCTCTAGCTTCTTTAGGGGTT  
ATTACTTCTTTGGTAGCTCAACACATGTACTCTTTACCGGCTTATGCATTTATAGCACA  
GACTTTACTACCCAAGCTGCGTTATATACTCATCACCAATACATCGCAGGATTCATCATG  
ACAGGAGCTTTTGGCTCATGGAGCTATATTTTTTATTAGGGATTACAATCCGGAACAGAAT  
GAGGATAATGTATTGGCAAGAATGTTAGAACATAAAGAAGCTATCATATCTCATTTAAGT  
TGGGCCAGTCTCTTTTTGGGTTTTCCATACCTTGGGACTTTATGTTTCATAATGATGTCATG  
CTTGCCTTTGGTACTCCGGAGAAGCAAATCTTAATTGAACCTATATTTGCTCAATGGATA  
CAATCTGCTCACGGTAAAACCTTCATATGGGTTTCGATATACTTTTATCTTCAACGAATGGC  
CCGGCATTCAATGCGGGTCAAGTATCTGGTTGCCGGGTTGGTTAAATGCTATTAATGA  
G-----AATAGTAATTCATATTCTTAACAATAGGTCCTGGAGACTTTTTGGTTCATCATGC  
TATTGCTCTGGGTTTACATACAACTACGTTGATCTTAGTAAAAGGTGCGCTAGATGCAC  
GTGGTTCCAAGTTAATGCCAGATAAAAAGGATTCGGTTATAGTTTTCCGTGCGATGGC  
CCAGGACGAGGCGGTACTTGTGATATTCGGCTTGGGACGCATTTTATTTGGCAGTTTT  
TTGGATGTTAAATACCATTGGATGGGTTACTTTTTTATTGGCATTGGAAGCACATTACATTA  
TGGCAGGGTAATGTTTCACAGTTAATGAATCTTCCACTTATTTGATGGGCTGGTTAAG

AGATTATTTATGGTTAAACTCTTCACAACCTATTAATGGATATAATCCTTTTGGTATGAAT  
AGTTTATCAGTCTGGGCATGGATGTTTTTATTTGGACATCTTGTTTGGGCTACTGGATTT  
ATGTTTTTAATTTCCCTGGCGTGGATATTGGCAGGAATTGATTGAAACTTTAGCATGGGCT  
CATGAACGCACACCTTTGGCCAATTTGATTCGTTGGAGAGATAAACCGGTGGCACTTTC  
CATTGTACAAGCAAGGTTGGTTGGATTAGCCCACTTTTCTGTAGGTTATATATTTACTTAT  
GCAGCTTCTTGATTGCCTCTACATCAGGGAAATTTGGTATGTTCGCATTCAGTAAAGATT  
TATGATACATGTATTGGGTGTACTCAATGTGTCCGAGCCTGTCCTACGGATGTATTAGAA  
ATGATACCTTGGGACGGATGTAAAGCCAAACAAATAGCTTCCGCTCCAAGAACAGAGG  
ATTGTGTTCGGCTGTAAGAGATGCGAATCCGCCTGCCAACGGATTTCTTGAGTGTTCTGA  
GTTTATTTATGGCATGAAACAACCCGAGTATGGGTATAGCTTATATGACAACCTTTAAC  
TTCCCTCTGTTTTGGTCCCTTTAGTAGGCCTAGTATTTCCGGCAATCGCAATGGCTTCT  
TTATTTCTTCATGTTCAAAAAACAAGATTGTTATGCGAGATCTAAAAACATATCTTTCC  
GTGGCACCGGTACTAAGTACTCTATGGTTCCGTTCTTTGGCAGGTTTATTGATAGAAATT  
AATCGTTTTTTCCCGGATGCGTTGACGTTCCCTTTTTTTTCATTCATGACTGCAATTTTA  
GAGAGACGCGAAAGCGAAAGCCTATGGGGTCGCTTCTGTAAGTGGATAACTAGCACCG  
AAAACCGTCTTTACATTTGGATGGTTTGGTGTTTTGATGATCCCTACCTTATTGACCGCAA  
CTTCTGTATTTATTATCGCCTTCATTGCTGCTCCTCCAGTAGATATTGATGGTATTTCGTGA  
ACCTGTTTCTGGATCTCTACTTTACGGAAACAATATTATTTTCAGGTGCCATTATTCTACT  
TCTGCAGCTATAGGTTTGCATTTTTACCCAATCTGGGAAGCAGCATCCGTTGATGAATG  
GTTATACAATGGTGGTCCCTTATGAACATAATCGTTCTACACTTCTTACTTGGTGTAGCTTG  
TTACATGGGTTCGTGAGTGGGAACCTTAGTTTCCGCTGGGTATGCGCCCTTGGATTGCTG  
TTGCATATTCAGCTCCTGTTGCAGCTGCGACTGCTGTTTTCTTGATCTACCCAATCGGTC  
AAGGAAGCTTTTCTGATGGTATGCCTCTAGGAATTTCTGGTACTTTCAACTTCATGATTG  
TATTCAGGCTGAGCACAATATCCTTATGCACCCATTTACATGCTAGGCGTAGCTGGTG  
TATTCGGCGGCTCCCTATTTAGTGCTATGCATGGTTCTTTGGTAACCTCTAGTTTGATCA  
GGGAAACCACAGAAAATGAATCTGCTAACGAAGGTTACAGATTTCGGTCAAGAAGAAG  
AACTTACAATATCGTAGCCGCTCACGGTATTTTTGGCCGATTGATCTTCCAATATGCTA  
GTTTCAACAACCTCTCGTTCTTTACATTTCTTCCCTAGCTGCTTGGCCTGTAGTAGGTATCT  
GGTTCACTGCTTTAGGTATCAGTACTATGGCTTTCAACCTAAATGGTTTCAATTTCAACC  
AATCAGTAGTTGATAGTCAAGGCCGTGTAATTAACACTTGGGCTGATATCATTAAACCGT  
GCTAACCTTGGTATGGAAGTTATGCATGAACGTAATGCTCATAATTTCCCTCTAGACTTA  
GCTGCTATTGAAGCTCCATCTACAAATGGAATGGGTTTGCCTTGGTATCGTGTTCATAAC  
GTTGTATTGAATGATCCCGGACGGTTGCTTGCTGTTTCATATAATGCATACAGCTTTGGTT  
TCTGGTTGGGCCGGTTCGATGGCCCTGTATGAATTAGCAGTTTTTGATCCTTCTGACCCT  
GTTCTTGATCCAATGTGGAGACAGGGTATGTTTCGTTATACCCTTCATGACTCGTTTAGGA  
ATAACCAATTCATGGGGCGGTTGGAGTATCACG---GGAGGGACTATAACGAATCCGGGT  
ATTTGGAGTTACGAAGGTGTGGCTGGAGCCCATATTGTGTTTTCTGGGTTGTGCTTTTT  
GGCAGCTATTTGGCATTGGGTGTATTGGGATTTAGAAATTTTTAGTGATGAACGTACAG  
GAAAACCTTCTTTGGATTTGCCAAGATCTTTGGAATACATTTATTTCTTGCAGGTGTGG  
CTTGCTTTGGTTTTGGTGCATTTTCATGTAACAGGCTTATAATGGTCCCTGGCATATGGGTGT  
CCGATCCTTATGGGCTAACAGGAAAAGTACAATCTGTAAATCCATCGTGGGGTGTGGA  
GGTTTTGATCCTTTGTTCCGGGAGGAATAGCCTCTCATCATATTGCGGCAGGGACTT  
TGGGCATATTAGCGGGCCTATTTTCATCTTAGCGTTCCGCCGCTCAACGTCTATACAAAG  
GATTGCGTATGGGCAATATCGAAACTGTCTTTCCAGTAGTATCGCTGCTGTCTTTTTTG

CAGCTTTTGTGTTGCCGGA ACTATGTGGTATGGTTCAGCGACTACCCCATCGAATTAT  
TTGGGCCTACTCGTTATCAATGGGATCAGGGGTACTTTCAACAAGAAATATATAGAAGA  
GTTAGCGCTGGGTAGCCGAAAATCAAAGTTTATCAGAAGCTTGGTCTAAAATTCCTGA  
AAAATTAGCCTTTTATGATTACATCGGAAATAATCCGGCAAAAAGGGGGATTATTTAGGG  
CGGGCTCGATGGATAACGGGGATGGAATAGCGGTTGGATGGTTAGGACATCCTGTCTTT  
AGAGATAAAGAAGGGCGTGAACTTTTGTACGTCGTATGCCTACCTTTTTTGAAACATT  
TCCGGTCGTTTTTGGTAGACGGAGACGGGATTGTTAGAGCCGATGTTCTTTTTCGAAGG  
GCAGAATCCAAGTATAGTGTGCAACAAGTAGGTGTA ACTGTTGAGTTCACGGTGGTG  
AACTCAATGGAGTCACTTATAGCGATCCTGTTACTGTCAAAAAATATGCTAGACGCGCT  
CAATTGGGGGAAATTTTTGAATTAGATCGTGCTACTTTGAAATCCGATGGTGTTTTTCGT  
AGCAGTCCGAGGGGTTGGTTTACTTTTTGGACATGCTTCATTTGCTTTACTCTTCTTCTC  
GGACACATTTGGCATGGTGCTCGAACTTTGTTTAGAGATGTTTTTGCTGGTATTGACCC  
AGATTTGGATGCTCAAGTAGAATTTGGAGCATTCCAAAACTTGGAGATCCA ACTACA  
AAAAGACAAGCAGTCATGAAAACCTTATATTCCCTGAGGAGGTTCTACCCCGTGGAAA  
CGCTCTTTAATGGA ACTTTAGCTTTAGCTGGTCGTGACCAAGAAACCACCGTTTTCGCT  
TGGTGGGCCGGGAATGCCCGCTTATCAATTTATCCGGTAAACTACTAGGGGCTCATGT  
AGCACATGCCGATTAATCGTATTCTGGGCCGGAGCAATGAATCTATTTGAAGTGGCTC  
ATTTTGTACCAGAGAAGCCTATGTATGAACAAGGATTAATTTTACTTCCTCACCTAGCTA  
CTCTAGGTTGGGGGGTAGGTCCTGGTGGGGAAGTTATAGATACGTTTCCATACTTTGTAT  
CTGGAGTACTTCATTTAATTTCCCTCCGCAGTATTGGGCTTTGGCGGTATTTATCACGCAC  
TTTTAGGGCCTGAGACGCTTGAAGAATCTTTCCATTCTTCGGTTATGTATGGAAAGATA  
GAAATAAAATGACTACAATTTTAGGTATTCACTTAATCTTGTTAGGTCTAGGTGCTTTTC  
TTCTAGTATTCAAGGCTCTTTATTTTGGGGGCGTATATGATACTTGGGCTCCGGGAGGAG  
GAGATGTAAGAAAAATCACCAACTTGACGCTTAGCCCAAGTATCATATTTGGTTATTTA  
CTAAAATCGCCCTTTGGGGGGGAAGGATGGATTGTTAGTGTAGACGATTTGGAAGATAT  
AATCGGAGGCCATGTATGGTTAGGTTCCATTTGTATACTTGGTGGAATTTGGCATATCTT  
AACCAAACCCTTCGCATGGGCTCGACGCGCACTTGTATGGTCTGGAGAGGCTTACTTAT  
CTTATAGTTTAGCGGCTATATCTGTCTTTGGTTTCATTGCTTGTTGTTTTGTCTGGTTCAA  
TAATACGGCTTATCCTAGTGAGTTTTACGGACCCACTGGACCAGAAGCTTCTCAAGCCC  
AAGCATTACTTTTTCTAGTTAGAGACCAACGTCTTGAGCTAATGTGGGATCCGCTCAA  
GGCCTACTGGTTTAGGTAAATATTTAATGCGTTCTCCGACCGGAGAAGTCATTTTTGG  
AGGAGAACTATGCGTTTTTGGGATCTGCGTGCTCCTTGGTTAGAACCTTTAAGGGGTC  
CAAACGGGTTGGACTTGAGTCGGCTGAAAAAAGACATAAACCTTGGCAAGAACGTC  
GTTCCGCAGAATATATGACCCATGCTCCTTTGGGTTCTTTAAATCCGTGGGTGGAGTA  
GCTACCGAGATCAATGCAGTCAATTATGTGTCTCCTAGAAGTTGGTTAGCTACTTCTCAT  
TTTGTCTAGGATTCTTCTTCTTCGTAGGGCATTGTGGCACGCAGGAAGGGCTCGTGC  
AGCTGCAGCAGGATTTGAAAAGGAATTGATCGTGATTTGAACCTGTTCTTTCCATGA  
CCCCTCTTAATATGACTATAGCCCTTGGTAAATTTACCAAAGACGAAAAGATTTGTTTG  
ATATTATGGATGACTGGTTACGTAGGGACCGTTTCGTTTTTGTAGGCTGGTCCGGCCTAT  
TGCTCTTTCCTTGTCCTATTTTGCTGTAGGGGGTTGGTTCACGGGTACAACCTTTGTA  
ACTTCATGGTATACCCATGGATTAGCCAGTTCCTATTTGGAAGGCTGCAATTTCTTAACT  
GCCGCAGTTTCTACTCCTGCTAATAGTTTAGCACATTCTTTGTTATTACTATGGGGTCCT  
GAAGCACAAGGAGATTTTACTCGTTGGTGTCAATTAGGCGGTCTGTGGACTTTTTGTTGC  
TCTCCACGGTGCTTTCGGACTAATAGGTTTCATGTTACGTCAATTGCAACTTGCTCGATC

TGTTCAATTGCGACCTTATAATGCAATCGCATTCTCTGGTCCAATTGCCGTTTTTGTTC  
TGTATTCCTGATTTATCCACTAGGTCAGTCTGGTTGGTTCTTTGCGCCTAGTTTTGGTGT  
AGCAGCTATATTTGATTTATCCTCTTTTTTCAAGGATTTTCATAACTGGACATTGAACCC  
ATTTTCATATGATGGGAGTTGCCGGTGTATTGGGCGCTGCTTTGCTATGCGCTATTCATGG  
TGCTACTGTAGAAAATACTTTATTTGAAGATGGTGATGGTGCAAATACATTCCGTGCTTT  
TAACCCAACCTCAAGCTGAAGAACTTATTC AATGGTCACTGCTAATCGCTTTTTGGTCAC  
AAATCTTTGGGGTTGCTTTTTTCCAATAAACGTTGGTTACATTTCTTTATGTTATTTGTACC  
AGTAACTGGTTTATGGATGAGTGCTCTTGGAGTAGTCGGTCTGGCCTTGAACCTACGTG  
CCTATGACTTCGTTTTCTCAGGAAATTCGCGCGGCGGAAGATCCTGAATTTGAGACTTTC  
TACACCAAAAATATTCTTTTAAACGAAGGTATTCGTGCTTGGATGGCGGCTCAAGATCA  
GCCTCATGAAAACCTTATATTCCTGAGGAGTTCTACCCCGTGGAACGCTCTTATGT  
CTGGAAGCACAGGAGAACGTTCTTTTGCTGATATTATTACCAGTATTCGTTACTGGGTCA  
TTCATAGCATTACTATACTTCCCTATTCATTGCGGGTTGGTTATTCGTCAGCACTGGTTT  
AGCTTACGATGTGTTTGAAGCCCTCGGCCAAACGAGTATTTACAGAGAACCGACAA  
GGAATTCCATTAATCACCGGCCGTTTTGATTCTTTGGAACAACCTCGATGAATTTAGTAGA  
TCTTTTATGACCATAGATCGAACCTATCCAATTTTACAGTGCGATGGTTGGCTGTTTAC  
GGCCTAGCTGTACCTACCGTTTCTTTTTTGGGGTCAATATCAGCAATGCAGTTCATACAA  
CGAATGGCTACACAACTGTTGAGAGCGGTTCTAAAGCTCGT---CCAAGACAAACTAC  
TGTAGGGATGTTATTA AACCTTGAATTCGGAATATGGTAAAGTAGCTCCTGGGTGGG  
GAACGACCCCTTTGATGGGGGTCGCAATGGCTTATTTGCGGTATTTCTATCTATTATTT  
GGAGATTTATAATTCTTCCGTTTTATTGGATGGAATTTCAATGAATATGCTTACTCTCAA  
CTTTTCGTTTATAACAGTAGTAATATTCTTTGTTTCTCTCTTCATCTTTGGATTCCATCAA  
TGATCCAGGACGTAATCCTGGACGTGAAGAAATGGCCGATACTACTGGAAGAATTCCT  
CTTTGGATAATAGGTACTGTAGCTGGTATTCTTGTGATCGGTTTAGTAGGCGTTTTCTTTT  
ATGGTTCATATCCGGATTGGGTTTATCCCTGATGCTTAATATCTTTAGTTTGTATCTGT----  
-CTTAATTCGCCCCTTATCCGAGTAGTCTTTTCTTGGCCAAATTGCCCGAAGCCTATGCT  
TTTTTGAATCCAATCGTAGATGTTATGCCAGTCATAACCCTGTTCTTTTTTCTTTTAGCCT  
TTGTTTGGCAAGCTGCTGTAAGTTTTTTCGAACGACACAATCAAACCCAAACGAACAAAA  
TGTTGAATTGAATCGTACCAGCCTCTACTGGGGGTTATTACTCATTTTTGTACTTGCTGT  
TTATTTTCCAATATTTCTTCAATATGGAAGTAAATATTCTTGCATTTATTGCTACTGCAC  
TGTTCAATTTAGTTTCTACTGCTTTTCTACTTATAATTTACGTAAAAACAGTAAGTCAA  
ATAATATGGAAACAGCAACCCTAGTCGCCATCTTTATATCTGGTTTACTTGTAAGTTTTA  
CTGGGTACGCTTATATAACCGTTTTTGGGCAACCTTCTCAACAACCTAAGAGATCCATTC  
GAGGAACATGGGGACATGGAAGCATTGGTTTATAACATTCTTCTTAGTCTCGACTCTAGG  
AATCATTTTTTTTCGCTATCTTTTTTLAGAGAACCGCCAACAATTCAAACCTAAAAA-----AT  
GACTCTTGCTTTCCAATTGGCTGTTTTTGCATTAATTGCTACTTCATCAATCTTATTGATT  
GGCGTACCCGTTGTATTTGCTTCTCCTGATGGTTGGTCAAGTAACAAAAATGTTGTATTT  
TCAGGTACATCGTTATGGCTTGGATTAGTCTTTCTGGTGGGTATCCTTAATTCTCTCATCT  
CT-----ATGTCACCACAAACAGAGACTAAAGCAAGTGTGGATTCAAAGCT  
GGGGTTAAAGATTATAAATTGACTTATTATACTCCTGAGTATGAAACCAAGGATACTGAT  
ATCTTGGCAGCATTTTCGAGTAACTCCTCAACCTGGAGTTCCGCCTGAAGAAGCAGGGG  
CCGCAGTAGCTGCCGAATCTTCTACTGGTACATGGACAACCTGTGTGGACCGATGGACTT  
ACGAGCCTTGATCGTTACAAAGGGCGATGCTATGGAATTGAGCCTGTTCTGGAGAAG  
AGAATCAATATATTTGCTATGTAGCTTACCATTAGACCTTTTTGAAGAAGGTTCTGTTA

CTAACATGTTTACTTCCATTGTAGGTAACGTATTTGGTTTCAAAGCCCTGCGTGCTCTAC  
GTCTGGAAGATTTGCGAATTCCTACTGCGTATGTTAAAACCTTCCAAGGTCCGCCTCAC  
GGTATCCAAGTTGAAAGAGATAAATTGAACAAGTATGGTCGTCTCTGTTGGGATGTAC  
TATTAACCTAAATTGGGGTTATCCGCTAAAAACTACGGTAGAGCTGTTTATGAATGTCT  
TCGTGGTGGCCTTGATTTTACTAAAGATGACGAGAACGTAAACTCCCAACCATTTATGC  
GTTGGAGAGACCGTTTCTTATTTTGTGCCGAAGCTATTTTTAAATCACAAGCTGAAACA  
GGTGAAATCAAAGGGCATTACTTGAATGCTACTGCGGGTACATGCGAAGACATGATGA  
AAAGGGCTGTATTTGCCAGAGAATTGGGAGTTCCTATCGTAATGCATGACTACCTAACA  
GGTGGATTCCTGCAAATACTACCTTGGCTCATTATTGCCGAGATAATGGCTTACTTCTT  
CACATCCACCGCGCAATGCATGCAGTTATTGATAGACAGAAGAATCATGGTATGCACTT  
CCGTGTACTAGCTAAAGCGTTACGTATGTCTGGTGGAGATCATATCCATGCCGGTACCGT  
AGTAGGTAACTTGAAGGGGAAAGAGAGATCACTTTGGGCTTTGTTGATTTATTACGT  
GATGATTTTATTGAAAAAGATAGAAGTCGCGGTATTTATTTACCCAAGATTGGGGTGTCT  
CTACCGGGTGTCTGCGGGTAGCTTCGGGCGGTATTCACGTTTGGCATATGCCTGCTCT  
GACCGAGATCTTTGGAGATGATTCCGTACTIONACAGTTCGGTGGCGGAACCTTAGGCCAC  
CCTTGGGGAAATGCACCTGGTGCCGTAGCTAACCGAGTAGCTCTAGAAGCATGTGTAC  
AAGCTCGTAATGAGGGACGCGATCTTGCTACCGAGGGTAATGAAATTATCCGCGAAGCT  
ACCAAATGGAGTCTGAACTAGCTGCTGCTTGTGAAGTATGGAAGGAGATCAAATTTG  
AATCCAGGCAATGGATACTTTGGATGGGATGGCGATAAATTTATACAAAACCTTCTACCC  
CGAGCACACGCAATGGAACCGTAGACAGTCAAGTGAAATCCAATCCACGAAATAATTT  
GATCTATGGACAGCATCATTGTGGTAAAGGTCGTAATGCCAGAGGAATCATTACCGCAG  
GGCATAAGAGGGGGAGGTCATAAGCGTCTATACCGTAAAATAGATTTTTCGACGGAATGA  
AAAAGACATATATGGTAGAATCGTAACCATAGAATACGACCCGAATCGAAATGCATACA  
TTTGTCTCATACTATAGGGATGGTGAGAAGAGATATATTTTACATCCCAGGGGGGCTA  
TAATTGGAGATAACCATTGTTTCTGGTACAGAAGTTCCTATAAAAATGGGAAATGCCCTA  
CCTTTGACCGATATGCCCTTAGGCACGGCCATACATAACATAGAAATCACACTTGGAAA  
GGGTGGACAATTAGCTAGAGCAGCGGGTGTGTAGCGAAACTGATTGCAAAAAGAAGG  
GAAATCGGCCACATTAATAATTACCTTCTGGGGAGGTCCGTTTGATATCCAAAAACTGCT  
CAGCAACAGTCGGACAAGTGGGGAATGTTGGGGTGAACCAGAAAAGTTTGGGTAGAG  
CCGGATCTAAGCGTTGGCTCGGTAAGCGCCCTGTAGTAAGAGGAGTAGTTATGAACCC  
TGTAGACCATCCACATGGGGGTGGTGAAGGAAGGGCCCAATTGGTAGAAAAAAACC  
CACAACCCCTTGGGGTTATCCTGCACTTGGAAAAAGAACTAGAAAAAGGAATAAATAT  
AGTGATAATTTGATTCTTCGTGCGCCGTAGTAAAATGATTCAACCTCAGACCCATTTGAAT  
GTAGCAGATAACAGCGGGGCTCGAGAATTGATGTGTATTTCGAATCATAGGAGCTAGC---  
AATCGTCGATATGCTCGTATTGGTGACGTTATTGTTGCTGTGATCAAAGACGCAGTTC  
AAACATGCCTCTACAAAGATCAGAAGTGGTCAGAGCTGTAATTGTACGTACTTGTAAA  
GAACTTAAACGTGACAACGGTATGATAATACGATATGATGACAATGCTGCAGTTGTGAT  
TGATCAAGAAGGAAATCCAAAAGGAACTCGAGTTTTTGGTGCGATTGCCCGAGAATTG  
AGACAGTTCAATTTTACTAAAATAGTTTCATTAGCTCCCGAGGTATTAATGCTTAGTCCC  
AAAAGAACCAGATTCGTAACAACATAGAGGAAGAATGAAGGGAATATCTTATCGAG  
GTAATACTATTTGTTTTGGTAAATACGCTCTTCAGGCACTTGAACCCGCTTGGATCACAT  
CTAGGCAAATAGAAGCAGGTCGACGAGCAATGACACGAAATGCACGTCGCGGTGGAA  
AAATATGGGTTCGTATATTTCCAGATAAACAGTTACAGTAAGACCCGCAGAAACACGT  
ATGGGTTTCAGGTAAAGGCTCTCCCGAATATTGGGTAGCTGTTGTTAAGCCTGGTCAAT

TCTTTATGAAATGGGTGGAGTAACAGAAAATATAGCCCGAAGGGCTATTTCAATAGCAG  
CGTCCAAAATGCCTATACGAGCTCAATTTATAATTTTCGGGCATGACCAGAATTAGACGG  
GGATATATCGCTCGGAGACGTAGAACAAAAATTCGTTTATTTGTCATCAAGCTTTTCGGGG  
GGCTCATTCAAGACTTACTCGAACTATTACTCAACAAAAATAAGAGCTTTGGTTTCGG  
CTCATCGGGATAGGGATAGGCAAAAATAAATTTTCGTCGTTTGTGGATCACTCGAATA  
AATGCAGCAATTCGTGAA---AGGGGGGTATGCTATAGTTATAGTAGATTAATAAATGATC  
TGTACAAGAGACAGTTGCTTCTTAATCGTAAAATACTTGCACAAATAGCTATATCAAATA  
GGAATTGTCTTTATATGATTTCCAATGAGATCATAAAAGAAGTGAGTTGGAAGGAATCC  
ACCGGT-----GAAGTATACGCTTTAGGTCAACATATATCTATGTCTGCTCACAAAG  
CGCGAAGAGTAATTGATCAAATTCGTGGGCGTTCCTACGAAGAAACACTTATGATATTA  
GAACTCATGCCTTATCGAGCATGTTATCCATTTTCAAATTAGTTTATTCTGCAGCAGCA  
AATGCTAGTTTCAATATGGGTTCGAATGAAGCAAATTTAGTCATTAGTAAAGCCGAAGT  
AAATGAAGGTAATTCGTGAAGAGATTAACCTCGAGCTCGAGGGCGTAGTTTTGCC  
ATACAAAACCTACCTGCCATATAACTATTGTAATGAAAGATATATCCTTAGGTGGGGGA  
ACATGGGACAAAAAATGGATGGAATCAGGTATGCAGTATTTACAGACAAAAGTATTC  
GGTATTGGGGAAAAAT---CAATATACTTCTAATGTGCGAATCAGGATCAACTAGGACAGA  
AATAAAGCATTGGGTGCGAACTCTTCTTTGGTGTCAAGGTAATCGCGATGAATAGTCAGC  
GACTTCGGGGAAAGGCTAGAAGAATGGGACCCATTATGGGACAGACAATGCATTACAG  
ACGTATGATCATTACGCTTCAACCGGGTTATTCTATTCCACCTCTTAGAAAAGAAAAGAA  
CTATGGCAGTTCCAAAAAACGTACTTCGATATCAAAAAAGCGTATTTCGTAAAAATATT  
TGAAAAGGAAAGGATATTGGGCGGCATTAAGCTTTGTGATTAGGGAAATCTCTTTC  
TACCGGAATTCAAAAAGTTTTTTTGTACGACAACCAAATAAGATGGCCAAGGGTAAA  
GATGTGCGAATACCGGTTCTTTTGAATGTACCGCTTGTGTTCGAAACGGT-----GTAA  
TAAGGAATCAAAGGGCATTTCAGATATATTACTCAAAAAGAACCGGCACAATACGCCTA  
ATCGATTGGAGTTGCTAAAATTCTGTCCATATTGTAACAAACATACGATTCACGGGGAG  
ATAAAGAAAATGAAAATAAGAGCTTCCGTTTCGTAAAATTTGTGAAAAGTGTGCGACTAAT  
ACGTCGTAGGGGACGAATTATAGTAATTTGTTTCGAACCCAAGACATAAACAAAGACAA  
GGAATGGTTCGAGAGAAAATAACAGTATCTACTCGGACACTCCAGTGGAAGTGTGTTG  
AATCAGCAGCAGACAGTAAGCGTCTTTTTTATGGGCGCTTTATTCTGTCTCCGCTTATGA  
AAGGTCAAGCAGACACAATAGGCATTGCGATGCGAAGAGCTTTGCTTGGAGAAATCG  
AAGGAACATGTATCACACGCGCAAAATTTGAG-----AAAATATCACACGAATATTCTACC  
ATAATGGGTATTCAAGAATCGGTACATGAAATTTAATGAATTTGAAAGAAATCGTATTG  
AGAAGTAATCTCTATGGAACCTTGAGAGGCGTCTATTTGTGTCAGGGGGCCCTGGATATGT  
AACTGCTCAAGATATCATCTTACCGCCTTATGTAGAAATCGTCGATAATACACAACATAT  
AGCTACCTTGACAGAACCCATTGAGTTGGTTATTGGATTACAAATAGAGAAGAATCGTG  
GATATCTTATAAAAGCGCCAAAT---ACCTTTGATGGAAGTTAT-----CCTATAGATCCTGTA  
TTCATGCCTGTTTCGAAATGCGAATCATAGTATTCATTCTTATGAAAATGGTAAC-----AAA  
GAGATACTATTTCTCGAAATATGGACAAATGGAAGTTTAACTCCTAAAGAAGCACTTCA  
CGAAGCCTCCCGGAATTTGATTGATTTATTGATTCCCTTTTTACATACCAAAGAAGAA---  
--AATTTAAATTTAGAGGACAATCAA---CACATGATTCCTTTACCCCTTTTACCTTTTATG  
ATAAATTGGCT--AAACTAACAAAAATAAAAAA---AAAATGGCGTTGAAATCGATTTTT  
ATTGACCAATCAGAATTGCCTCCAGGATCTATAATTGCCTCAAAGATCCAATATATAT  
ACACTGTTGGACCTTTTGAATAACAGCCAAGAAGATCTTATGAAAATGGAGCATTTTCA  
CATAGAAGATGTCAAACAAATTTAGGAATCTAGAAAAAAT-----TTCGTAATTGATTT



ACCGAAAAATAAG-----ATGTCCACAATACCTGGATTTAATCAGATACAA  
TTTGAAGGATTTTGTAGGTTTCATTGATCAGGGTTTGACAGAAGAACTTTCTAAGTTTCC  
TAAAATTGAAGATACAAATCAAGAAATTGACTTTGAATTATTTTTGGAAAGATATCAATT  
GGTAGAACCCCTGATAAAGGAAAGAGATGCTGTGTATGAATCACTCACATATTCTTCTG  
AATTATATGTATCCGCTAGACTCATTGGAAAAACCGTAGGTATATCCAAGAACAAACA  
ATTTTGATAGGAAAGATACCTCTAATGACTTCTCTGGGAGCGTTTATAGTAAATGGAATT  
TATAGAATTGTAATCAATCAATATTGCAAAGTCCCGGTATTTATTACCAGTCAGAATTG  
AATGATAACGGAATTCGGTCTATACCGGCACTATAATATCAGATTGGGGAGGAAGATTA  
GAATTAGAGATTGATAGAAAAGCAAGGATATGGGTTCGTGTGAGTAGGCAACAAAAAC  
TATCTATTCTAGTTCTATTATCAGCTATGGGGTTGAATATACGAGAAATTCTAGAAAATGT  
TTGCTATCCTGAACTATTTTTGTCTTTTTCTGAATGATAAA-----AAAAAATAGGTTCAAA  
AGAAAATGCTATTTTGGAGTTTTATCAACAATTTGCTTGTGTAGAGGGAGATCCGGTAT  
TTTCTGAATCCTTATCTAAGGATTTACAAAAAAATTTCTTTCAACAAAGATGTGAATTG  
GGAGGGATTGGTCGACGAAATATGAATCGGAGACTGAACCTTGATATACCCGAGAACA  
ATACATTTTTGTTACCGCGAGATATATTGGCAGCCGCGGATCGTTTGATTCGAATAAAAT  
TTGGAATGGGTACGCTTGACGAT-----ATGAATCATTGCAAATAAGCGTATTCGTTCTG  
TAGCAGATCTTTTACAAGAGCAATTTGGATTGGCCTTAGTTCGTTTAGAAAATATGGCTC  
GAGGAAATATATATGCAGCACTTAAG--CATAACTGGACA---CCAACCTCAGAACTTG  
GTAAATTCAACTCCA-----TTAACAGATACTTATAAAGTTTTTTTTCCGTTTACACCCA  
TTATCTCAAGTTTTGGATCGAACTAATCCATTGACACAAATAGTTCATGGGAGAAAATT  
GAGTTATTTGGGCCCGGGGGGATTGACTGCACGAACTGCTACTTTTCCAATACGAGATA  
TTCATCCTAGTCACTATGGGCGTATTTGCCAATTGACACATCTGAAGGAATAAATGTTG  
GACTTATTGGATCCTTAGCAATTCATGCGAAGATTGGTCGTTGGGGG---TCTCTAGAAA  
GTCCGTTTTAT-----AAAATTTCCGAGAGATCAAAAGGG-----ACACGGATGCTTTATTT  
ATCACCGGGTAAAGATGAATATTATATGGTAGCGGCAGGAAATTCCTTGGCCTTGAATC  
AGGGTATTCAGGAAGAACAGGTTGTTCCAGCTCGATATCGTCAAGAATTCCTGACTATT  
GCATGGGAACAGGTTCCCTCTTCGAAGTATTTTTTCCCTTCCAATATTTTTCTATTGGGGCT  
TCCCTCATTCCTTTTATCGAGCATAATGATGCGAATCGGGCTTTAATGAGTTCTAACATG  
CAACGCCAAGCAGTCCCTCTTTCTCAGTCGGAGAAGTGCATTGTTGGAACCTGGATTGG  
AAGGCCAGGCGGCTCTAGATTCAGGGGCTCTTGCTATAGCCGAACATGAGGGAAAGAT  
TATTTATACCGATACTGAGAAGATCCTTTTATCAGGTAATGGGGATACTCTTAGTATTCCT  
TTAATTATGTATCAACGTTCCAACAAAAATACTTGTATGCATCAAAAACCCAGGTTCA  
GCGGGGTAAATGCATTA AAAAGGGACAAATTTTAGCGTATGGTGCTGCTACAGTTGAC  
GGCGAACTCGCTTTGGGGAAAAACGTATTAGTAGCTTATATGCCATGGGAAGGTTACAA  
TTTTGAAGATGCAGTACTCATTAGCGAGCGCTTAGTATACGAAGATATTTATACTTCTTT  
TCACATACGTAAATATGAAATTCAGATTAAC-----CAAGGC---TCCGAAAGGGTCACTA  
ATGAAATACCACATTTAGAAGTCCATTTACTTCGAAATTTAGACAAAAATGGAATTGTA  
ATGCTGGGATCTTGGGTGGAAACAGGTGATATTTTAGTAGGTAAATTAACGCCCAAAT  
GGTGAAAGAA--TCATCCTATGCTCCGGAAGATAGATTGTTACGAACCATACTTGGCAT  
GCGGGTATATACTTCAAAGAAACTTGTCTAAACTACCTATAGGCGGTAGGGGTCCGGG  
TTATTGATGTGAGATGGGTCCAGAGTTCTAAGACAGATGAGACAGAGAAAACAGAAA  
GTATTCGTGTATATATTTTACAAAAACGTGAAATCAAAGTAGGCGATAAAGTAGCTGGA  
AGACATGGAAATAAGGGTATCATTTCAAATTTTGCCTAGACAAGATATGCCTTATTTG  
CAAGATGGAAGACCCGTTGATATGGTCTTCAATCCATTAGGAGTACCTTCACGAATGAA

TGTAGGACAAATATTTGAATCTTCACTTGGGTAGCGGGGATTTGCTAGACAGACATT  
ATCGAATAGCACCTTTTGGATGAGAGATATGAACAAGAAGCTTCGAGAAAACCTGGTGTT  
TTCTGAATTATATGAAGCCAGTAAGCAAACAGCGAATCCATGGATATTTGAACCTGAGT  
CTCCAGGAAAAAGCAGAATTTTGGATGGAAGAACGGGGGATCCTTTTGAACAACCTGT  
TATAATAGGAAAGCCTTATATCTTGAAATTAATTCATCAAGTTGATGATAAAATCCATGG  
GCGTTCTAGTGGGCGTTATTCACGTCTTACACAACAACCCCTTAAAGGAAGGGCCAAG  
AAAGGGGGACAACGGGTAGGAGAAATGGAGGTTTGGGCTTTAGAGGGGTTTGGTGTT  
GCTTATATTTTACAAGAGATGCTTACTTATAAATCTGATCATATTAGAGCTCGCCAGGAA  
GTACTTGGTACTATAATCTTTGGAGGAAGAATACCAACTCCTGAGGATGCTCCAGAATC  
TTTTCGGTTATTCGTTTCGAGAACTACGATCTTTAGCTCTGGAACCTGAATCATTTTCTTGT  
ATCTGAGAAGACTTTCCAGCTTAATAGGAAGGAAGCT-----ATGATCGATCG  
ATATACACATCAACAACCTCCGAATTGGATTAGTTTCTCCTCAACAAATAAGTACTTGGTC  
CAAAAAAATCCTGCCTAATGGCGAGATAGTTGGAGAGGTGACAAAACCTTATACCTTT  
CATTACAAAACCAATAAACCAGAAAAAGATGGATTATTTTGTGAAAGAATTTTGGGCC  
TATAAAAAGTGGAATTTGTGCTTGTGGAAATTATCGAGTAATCGGAGATGAAAAAGAA  
GACCCGCAATTTTGTGAACAATGCGGAGTCGAGTTTGTGATTCTCGGATACGAAGATA  
TCAAATGGGCTACATCAAACCTCGCATATCCGGTAATGCATGTGTGGTATTTGAAACGTC  
TTCCTAGTTATATTGTGAATCTTTTAGATAAACCTCTTAACGAATTAGAAGACCTAGTATA  
CTGCAAT-----TTTTATTTTGGCTAGGCC---ATAGATAAAAAACCCACTTTTTTACGATTAC  
GGGGTTTATTGGAATACGAAATCCAACCCTGGAAATACAGGATCCCCATTTTTTTTACTA  
CCCGGAGCTTCGATACATTTCGAAATCGAGAGATGTCTACCGGAGGGGGCTCTATCAG  
ACAACAATTAGCCAATCTAGATTTACGAAGTATTATAGATTCTTCATTGATAGAATGGAA  
AGAATTGGAGGAAGAA---GAACCCACAGGGAATGAATGGGAAGATCGAAAAGTTGGA  
AGAAGAAAAGATTTTTTGTCTTAGACGCATGGAATTGGCTAAGCATTTTATTTCGAACAAA  
TATAGAACCAAAATGGATGGTTTTGCGTCTATTACCAGTTCTTCCTCCTGAGTTGAGAC  
CAATCTATCATATAGATGAGGATAAACTAGTGACCTCGGATATTAATGAAATCTATAGAA  
GAATTATCTATCGGAATAATACTCTTACAGATCTATTAACAACAAGTATAGCTACGCCAG  
AAGAATTAATAATATCTCAGGAAAAATTGCTGCAAGAAGCCGTGGATGCACTTCTTGAT  
AATGGAATCTGCGGACAACCGATGAGGGATGATCATAATAGAGTTTACAAGTCTCTTTC  
AGATGTAATTGAAGGCAAAGAAGGAAGAGTTTCGCGAGACTTTGCTTGGTAAACGGGT  
TGATTATTCAGGGCGGTTCAGTGATTGTCGTGGGCCCTTCACTTTCATTACATCGATGTGG  
ATTGCCTCGCGAAATAGCAATAGAACTTTTCCAGGCATTTGTAATTCGTGACCTAATTAG  
AAAACATCTTGCTTCGAACATCGGAGTTGCTAAAAGTAAAATTCGAAAAAAAAAACCG  
ATTGTATGGGAAATACTTCAGGAAATTCTGGATGACCATCCTGTATTGCTGAATAGAGC  
GCCTACTCTGCATAGATTAGGCATACAGGCATTCCTGCCCATTTTLAGTGGAAGGGCGTG  
CTATTTGTTTACATCCATTAGTTTGTAAAGGGCTTCAATGCAGACTTTGACGGGGATCAAA  
TGGCTGTTTCATGTGCCTTTATCTTTGGAGGCTCAAGCAGAGGCACGTTTACTTATGTTTT  
CTCATATGAATCTTTTGTCTCCAACCTATTGGAGATCCCATTTCTGCACCAACTCAAGATA  
TGCTTAGTGGACTCTATTTCTTAACGAGTGGAATCGTCGGGGTATTTGTGTAATAGGT  
ATAATCCATGTAATCGTATAAAC-----TATCAAAATGAAGAT-----AATAACTATAAGTA  
TACAAAAAAGAACCTTTTTTTTCTAATGCCTATGATGCAATTGGAGCTTATCGGC  
AAAACGCATCAATTTAGGTAGTCCCTTGTGGCTGCGGTGGCGACTAGATCAACGC---G  
TTATTGCTGCA-----AGAGAACTCCCATCGAAATTCATGATCTTTGGGGACCTATT  
ATGAGATTTATGGACACTATCTAATAGTAAGAAGTATAAAAAAAGAAATCTTTTATATATA

TATTCGAACCACTCTCGGTCATATTTCTCTTTATCGAGAAATAGAAGAAGCCATACAGG  
GGTTTTGGCAGTGTAATTCTATGCTACCAGGGGGAATTCGAGTCTCACCGGGTATGGAG  
GTAATGATGGCAGAACGGCCCACTCAGGTCTTTCACAATAAAATGATAGACGGAACCTG  
CCATGAAACGACTTATTAGTCGATTTATTGATCACTATGGAATAGGATATACATCACATAT  
CCTGGATCAAGTAAAGACTCTGGGTTTCCGACAAGCTACCGCCGCATCCATTTTCATTAG  
GAATTGATGATCTTTTAAACAATACCTTCTAAAAGATGGCTAGTTCAAGACGCTGAACAA  
CAAAGTTTTATTTTGGAAAAACACCATCATTATGGGAATGTACACGCGGTAGAAAAATT  
ACGTCAATCGATCGAGATCTGGTATGCCACAAGTGAATATTTGCGACAAGAAATGAATC  
CTAATTTTCGGATGACCGATCCTTTTAAATCCAGTCCATATAATGTCTTTTTTCGGGAGCCA  
GAGGAAATGCATCTCAGGTACATCAATTAGTAGGTATGAGAGGATTAATGTCGGATCCC  
CAAGGGCAAATGATTGATTTACCCATTCAAAGCAATTTACGCGAAGGACTCTCTTTAAC  
AGAATATATTATTTCTTGTTACGGAGCCCGTAAAGGAGTTGTGGATACCGCTATCCGAAC  
ATCAGATGCAGGATATCTCACGCGCAGACTTGTGAAGTAGTTCAACACATTGTTGTAC  
GTCGAACAGATTGCGGCACCGTCCGAGGTATTTCTGTAAGTCCTCGAAATGGAATGAT  
GGCG---GACAGGATTTTTATCCAAACATTAATTGGGCGTGTATTAGCAGATCATGTATATA  
TAGGTTTCGCGATGCATTGCTACTAGAAATCAAGATATTGGAGTTGGACTTGTCAATAGA  
TTCATAACT-----TTAGAGCACAACCAATCTCTATTTCGAACTCCCTTTACTTGT  
AGGAGTACGTCGTGGATTTGTCAATTATGTTATGGCCGAAGTCCAGTCCATGACGACCT  
GGTCGAATTGGGAGAAGCTGTAGGTATTATTGCAGGTCAATCTATTGGAGAACCGGGC  
ACTCAATTAACATTAAGAACTTTTCATACCGGCGGAGTATTCACAGGGGGTACTGCAGA  
ACATGTGCGAGCCCCTTCTAATGGAAAAATCAAATCAACGAGGATTTGGTTCATCCGA  
CACGTACACGTCATGGACATCCTGCTTTTCTATGTTCTAGAGACTTATATGTAACTATTG  
AGAGTGAAGATATTATACACAATGTGTGTATTCCGCCAAAAGTTTTCTTTTAGTTCAA  
ACGATCAATATGTAGAATCAGAACAAGTCATTGCTGAGATTTCGCGCGAGAACATCCACT  
---TTGAATTTGAAAGAGAAAGTTCGAAAACATATTTATTCTGACTCAGAGGGCGAA---A  
TGCACTGGAATACCGATGTGTACCATGCACCTGAATTTACATATGGTAATATTCATCTCTT  
ACCAAAAACAAGTCATTTATGGATATTATTAGGGGAGCCCTGGAGA-----TCCAGTCCAG  
GCCCTGTTCGATCCATAAGGATCAAGATCAAATAAACGCTTAT-----TCTCTTTCTGTTA  
AGCGAAGATATATTTCTAACCCCTCA-----GTAACATAATAATCAA---GTTAGACACAAATT  
TTTTAGTTCGTATTTTTCTGGTAAAATGGAGATAGGATTCCTGATTAT--TCAGAACTTA  
ATCGAATGACATGTAATGGTCTTGGAAATCTCAGATATCCG---TCCATTCTCGAGGGGAA  
TTCT-----GATTTATTAGCAAAGAGGCGAAGAAATAGAGTCATCATCCACTCGAATCGA  
TTCCAGAAGGAGAGAACCCACTCATACTTCTTCGGGTATCTCAATTGAAATCCCC-----  
AGAAATGGTATTCTCCGTAGAAATAGTATTCTTGCTTATTTTGATGATCCTCGATATATAA  
GAAAGAGCTCGGGACTTACTAAATATGAGACTAGAGAACTTAATTCAATCGTCAACGA  
AGAGGAT-----TTGATTGAATATCGAGGA---GTCAATGTACTTTGGCCAAAATACAAGGA  
AGTAAATCCATTTTTTTTTTATTCCCGTGGAAAGTCCACATTTTGGCCGAATCTTCTTCCAT  
AATGGTACGGCACAATAGTATTATTGGGGTAGATACACAAATAACTTTAAATCGAAGAA  
GTCGGGTAGGCGGATTGGTCCGAGTGAAGAAAAAAGCAGAAAAAATTAACCTGATAA  
TCTTTTCTGGAGATATCCATTTTCTGGAAGACAAATAAGGCATTCCGA-----TTG  
ATACCACCAGGAGGG-----GGAAAACAGAATTCCAAGAATACAAAAA-----TTGAAA  
AATTGGTCTATATCCAACGA-----ATGAAACTTCCAGGTATGAAAAAATTATTTTGT  
TTGGTTCAACCTGTAGTCCCATATAAAAAACAGATGGTATAAATTTAGGA---CTTTTCC  
CGCCGGATCTCTTGCAGGAAAGTGATAATCTACAACCTTCGAGTTGTCAATTATATCCTTT

ATTACGACCCA-----ATTCTTGAAATTTGGGACACAAATATTCAATTAGTTCGGACTTGTT  
TAGTGCTGAACTGGGACCAAGACAAAAAG-----ATCGAAAAGGCCTGTGCTT  
CCTTTGTTGAAATAAGGACAAATGGTTTGATTAGAGATTTTCTAAGAATCGACTTAGCG  
AAGTCCCCTATTTCTGATACCGGAAAAAGAAATGATCTGTCGGGTTTCAGGATTGATCTC  
TGAG---AATGGATCAGATCGCGCTAATGTCAATCCGTTTTCTTCCATTATTCCATTCCA  
AT--CCCAAGCCAAGGATTCAAGAATCCCTTAATCCAAATCAAGGAACTATTCCATACGTT  
ATTGAATCGA-----ATAAAGGAATCTCAATCTTTGATAATTTTGTTCATCATCTAATTGTT  
CTCGAATAGGCCCA-----TTCAACGATGTAAAATCAACCAATGTG-----ATAAAAGAAT  
CA--CTGCTCATTCCAATTAGGAATTCGTTGGGCCCTTAGGAACA-----GGCTTTCCAAT  
TTATAATTTTGATTTA-----TTTCCCATTTA-----ATAACCCATAATCAGATCTTG---GTAAC  
TAACTATTTGCAACTTGATAATTTCAA-----CAGATTTTTCAAATACTTAAA-----TA  
CTATTTACTGGATGAAAAT-----GGTAAAATTTATAATCCCTATTTCGTGCAGTAACATCATT  
TTGAATCCATTGAATTTGAATTGGTATTTTCTCCATTACAATTATTGTGAAGAGACATCT--  
-ACAATCGTTAGTCTTGGGCAGTTTCTTTGTGAAAATGTATGTATAGCCAAAAAAGGAC  
CGCAT--TTAAA-----TCGGGTCAAGTTCTAATTCTTCAA---GTTGACTCTGTGGTAATA  
CGATCGGCTAAGCCTTATTTGGCTACTCCAGGAGCAACTGTTTCATGGGCATTATGGGGA  
AATCCTTTACGAAGGAGATACATTAGTTACATTTATATATGAAAAATCCAGATCTGGTGA  
TATAACCCAAGGTCTTCCAAAAGTGGAACAGGTGTTAGAAGTGC GTTCAATTGATTCA  
ATATCGATGAATCTCGAAAAGAGGATTGAGAGTTGGAATAAATGTATAACAAGAATTCT  
TGGAATTCCTTGGGCATTCTTGATTGGTGCTGAGCTAACTATAGTGCAAAGTCGTATCTC  
TTTGGTTAATAAGGTCCAAAAGGTTTATCGATCCCAGGGGGTGCAGATACATAATCGGC  
ATATAGAAATTATTGTACGTCAAATAACATCAAAGTATTGGTTTCAGAA-----GATGA  
AATGTCTAATGTTTTTCGCCCCGGAAGACTTATTGGATTGTTGCGAGCGGAACGAATGG  
GGCGCGCTTTGGAAGAAGCGATCTGTTACCAAGCCGTCTTATTGGGAATAACAAGAGC  
ATCTATGAATACTCAAAGTTTCATATCCGAAGCGAGTTTCAAGAAACCGCTCGGGTTT  
TAGCAAAGCAGCTCTCCTAGGGCGTATCGATTGGTTGAAAGGCCTGAAAGAAAACGT  
TGTTCTGGGGGGGATGATACCTGTTGGTAGCGGCTTCAAACACCA---TCAAATGAACC  
TAACAACATTCCATAACAACATTGCC-----TTTGAACCCCAAAAAAGAATCTATTAGAGG  
GGGAAATGAAA-----GATATTTGTTTTACCACAGAAAATTATTAGATTCTTGCCTTTCAA  
AGAATTTCCATGATACACAAGAACAATCTTTTTTT-----ATGACAAG  
AAGATATTGGAACATTAATTTAGAAGAGATGATGGAAGCAGGAGTTCAATTTGGCCATG  
GTACTAGGAAATGGAATCCTAAAATGGTACCTTATATCTCTGCAAACGTAAAGGTATT  
CATATTATAAATCTTACTAGAAGCTGCTCGTTTTTTATCAGAAGCTTGTGATTGGTTTTTG  
ATGCAGCAAGTAAGGGAAAACAATCTTAATTGTTGGAACATAAAATAAAGAAGCTGA  
TTCAGTAGCATGGGCTGCAATAAGGGCTAGGTGTCATTATGTTAATAAAAAATGGCTCG  
GTGGTATGTTAACAATTTGGTCCACTACAGAAACGAGACTTCATAAGTTTAGAGACTTG  
AGAACCGAACAAAAACAGGGGGACTCAACCGTCTTCCGAAAAGAGATGCGGCTATG  
TTGAAAAGACAATTATCTCATTGCAAAAATATCTGGGCGGGATTAAATATATGACAGG  
GTTACCCGATATTGTAATCATCGTTGATCAGCACGAAGAATATACGGCCCTTCAAGAATG  
TATCACGTTGGGAATTCACAATTTGTTTAATCGATACAAATTGTGACCCTGATCTCGC  
AGACATTTTCGATTCCAGCGAATGATGACGCTATATCTTCAATCCGATTAATTTAAACAA  
ATTAGTATTTGCAATTTGTGAGGGACGTTCT--GGCTATATAAGAAATCCGATGGGACAA  
AAAATAAATCCAATTGGTTTCAGACTTGGTACAACCCAAGGTCATCATTCCCTTTGGTT  
CGCACAACCAAAAAATTATTCTGAGGGTCTGCAAGAAGATCAAAAAATAAGAAATTAT

ATCAAGAATTATGTACAAAAAATATGAAAACATCCTCTGGC---GTTGAGGGAATTGCG  
CGTATAGAGATTCAAAAAAGAATCGATCTGATCCAAATCATAATCTATATGGGATTTCCA  
AAAATATTAATTGAAAGTCGACCCCGAGGAATC-----GAAGAATTACAGATGAATTT  
ACAAAAAGAATTTAATTCTGTAAATAGAAAACCTTAACATTGCTATCACACGAATTGAAA  
AGCCTTACGGAAACCCTAATATTCTTGCAGAATTTATAGCCGGCCAATTA AAAAATAGA  
GTTTCTTTTCGCAAAGCAATGAAAAAGGCTATAGAATTA ACTGAACAAGCAGATACAA  
AAGGAATTCAAGTGCAAATTGCAGGACGTATCGACGGAAAAGAAATTGCGCGTGTG  
AATGGATCAGAGAGGGTAGGGTTCCACTACAAACCATTTCGAGCTAAAATTGATTATTGT  
TCCTATACAGTTCGAACTATCTATGGGGTATTAGGCATCAAAATTTGGATATTTATAGACG  
GGGAAATGTCGCGTTACCGAGGTCTCGTTTCAAAAAAATACGTCGCCTGGGGGCTTT  
ACCAGGGCTAACTAATAAAAGGCTCAGACCTGGAAGTGATCTTAGAAACCAATCGCGT  
TCCGGGAAA---AAATCCCAATATCGTATTCGTCTAGAAGAAAAACAAAATTGCGTTTT  
CATTATGGTCTTACAGAACGACAATTA ACTTAAATACGTTTCGTATCGCCGGAAAGGCAA  
GGGGTCAACAGGTCAAGTTTTATTACAATTACTTGAAATGCGCCTGGATAACATCCTTT  
TTCGGTTGGGTATGGCCCCGACTATTCCGGGAGCTCGCCAATTAGTTAACCATAGACAT  
ATTTTAGTCAATGGTCGTATAGTAGATATACCAAGTTATCGCTGCAAACCCCGAGACT  
ATTGCGGCGAGGGATGAACAAAATCTAGA ACTCTAATTCAAATTTCTCTCGATTTCATC  
CCCTGCT--GAGGAATTGCCAAACCATTTGACTCTTCAACCATTCCAA-----TATAAAGGA  
TTAGTCAATCAAATAATAGATAGTAAATGGGTTCGGTTTGAAAATAAATGAATTACTAGTT  
GTAGAATATTATTCTCGTCAGACTATGTCACGTTCGAGGTACTGCAGAAGAAAAA ACTGC  
AAAATCCGATCCAATTTATCGTAATCGATTAGTTAACATGTTGGTTAACCGTATTCTGAA  
ACACGGAAAAAATCATTGGCTTATCAAATTATCTATCGAGCCGTGAAAAAGATTCAAC  
AAAAGACAGAAACAAATCCACTATCTGTTTTACGTCAAGCAATACATGGAGTAACTCC  
GGGTATAGCAGTAAAAGCAAGACGTGTAGGTGGATCGACTCATCAAGTTCCCATTGAA  
ATAGGATCCACACAAGGAAAAGCACTTGCCATTCGTTGGTTATTAGCGGCATCCCGAA  
AACGTCCGGGTCGAAATATGGCTTTCAAATTAAGTTCCGAATTAGTGGATGCTGCCAAA  
GGGAGTGGCGATGCCATACGCAAAGGGAAGAGACTCATAGAATGGCAGAGGCAAAT  
AGAGCTTTTGCACATTTTCGTATGGGTAGTGATACTATTGCTGACATAATAACCTCTATA  
CGAAATGCCGATATGTATAGAAAAAGCGTGGTTCGAGTAGCATCTACTAATATCAGCGA  
AAGTATTGTGAAAATACTTTTACGAGAGGGTTTTATCGAAAACGTGAGAAAACATCGA  
GAAAACAACAAATATTTTTTGGTTTTAACCCCTACGACATAAAAGG-----AATAGGAAA  
GCACTTAT-----AGAAATCTTTTAAATTTAAAACGGATCAGTCGGCCGGGTCTACGAAT  
CTATTCTAACTATCAAAGAATTCCTAGAATTTTAGGTGGGATGGGTGTTGTAATTTCTTC  
TACATCTCGGGGTATAATGACAGACCGAGAGGCTCGACTAGAAAGAATAGGCGGAGAA  
ATTTTGTGTTATATATGGATGGCAAAGCTATACCGAAAAAGGGTTTACCGT-----GGACG  
TATTGGTTACGTAAGAGTACACGTAAAATACCAAAGGGGGTTATTCATATTCAAGCAA  
GTTTCAATAATACCATTGTGACTGTTACAGATGTACGGGGGCGAGTGGTTTCTTGGTCC  
TCTGCCGGTACTTGTGGCTTCCGAGGTACAAGAAGAGGGACACCATTTGCTGCTCAAA  
CCGCAGCGGCAAATGCTATTCGTGCAGTAGTAGATCAAGGTATGCAACGAGCAGAAGT  
CATGATTAAAGGTCCCGGTCTCGGAAGAGACGCAGCATTACGAGCTATTCGCAGAAGT  
GGTATACTATTA ACTTTTCGTACGGGATGTA ACTCCTATGCCACATAATGGCTGTAGACCC  
CCGAAAAAAGACGTGTAATGCCAACGATTAAACA ACTTATTAGAAATACAAGACAGC  
CAATTAGAAATGTCACAAAATCCCCCGCGTTTCGGGGATGCCCTCAGCGTTCGAGGAAC  
ATGTACTAGGGTGTAT--ATCACCCCAAAAAAACC AA ACTCTGCCTTACGTAAAGTTGC

CAGAGTACGATTAACCTCTGGATTTGAAATCACTGCTTATATACCTGGTATTGGCCATAA  
TTCACAAGAACATTCTGTAGTCTTAGTAAGAGGGGGGAGGGTTAAGGATTTACCCGGT  
GTGAGATATCACATTGTTTCGAGGAACCTAGATGCTGTCGGAGTAAAGGATCGTCAAC  
AAGGGCGTTCT--AGTGCGTTG-----ATGGCAAAAAAAAAAGTTTGATTCAGAGGGAA  
AAGAAGAGGCAAAAATTGGAACAGAAATATCATTGATTCGCCGATCCTCAAAGAAG  
AAATAAGC-----AAAGTTCGATCGTTGAGTGACAAATGGGAAATTTATGGAAAGTTGC  
AATCCCCACCGCGGAATAGTGCACCTACACGCCTTCATCGACGTTGTTTTTCAACCGGA  
AGGCCAAGAGCTAACTATCGAGACTTTGGACTATCCGGACACATACTTCGTGAAATGG  
TTCATGCATGTTTGTGCCAGGGGCGACAAGATCGAGTTGGATGGTAAAAAATTCATTT  
ATTTCAATTATTTTGAAGAACAAGAAGAAAACAAAGAAAATAGCGGATCCGTTGAAT  
TTCAAGTAGTAAGTTTACCAACAAGATACGGAGACTTACCTCACATTTGGAATTACAC  
AAAAAAGACTATTTATCTCAGAGAGGTCTGCGGAAAATTCTGGGAAAACGTCAACGGC  
TGCTGGCTTATTTGTCAAAAAAAAAACAGAGCACGTTATAAAGAATTAATAGGACAGTT  
GGATATTCGAGAGAGAAAACTCGT-----ATGGTAAAACCTTCGTTTAAAACGATGTGGT  
AGAAAGCAA-----CGAATCGTTGCAATTGATGTTTCGATCCCGAAGAGAAGGAAGA  
GATCTTCAGAAAGTGGGTTTTTATGATCCGATCAAGAATCAAATTTAATTAACGTTCC  
CGTATTTCTATTTCCCTTGAAAAGGTGCTCAACCTACAGGAACTGTTTCAGGATATTTT  
AAAAAAGGCAGAGGTTTTGCCC-----ATGGATAAATCCAAGCGAA  
CTTTTCTTAAATCCAAGCGATCTTTTCGTAGGCGTTTGCCCCGATAACAATCGGGGGATC  
GAATTGATTATAAAAACATGAGTTTAATTAGTCGATTTATTAAGTGAACAGGGAAAAATAT  
TATCTAGACGAGTGAATAGATTGACCTTGAACAACAACGATTAATTACGATTGCTATA  
AAACAAGCTCGTATTTTATCTTTGTTACCTTTTCTTAATAATGAGAAA-----CAGCTGGAA  
AGAATTGAGCCGACCCTAGAACTCCTAGTCTTAGAGCCCGAAAAAGAGTGACACGTT  
CACTAAAAAAAAAATCCTTTTGTAGCGAATAATTTATTAATAAATAAATAAGCTTAAC  
ACAAAAGAAGAAAAAGAAATAATAAACCTGGTCCCGGCATCTACCATTATACCCAT  
AATGGTTGGCCATACTATTGCAATCCATAATGGAAAGGAACATTTACCTATTTATATAAC  
AGATCGTATGGTAGGACACAAATTGGGAGAATTCGCACCTACTTTAAATTTCCGAGGAC  
ATGCAAAAAGCGATAATAGGTCTCGTCGTATGATTTTGAATCTTTTCTACTAGGTAATC  
TAGTATCCTTATGCATGAAGATAATCAATTCGGTCGTTGTGGTTCGGACTCTATTATGGATT  
TCTGACCACATTCTCCATAGGACCTCCTATCTCTTCTCCGAGCTCACGTTATGGA  
AGAAGGA-----ACCGAGAAGAAGGTATCAGCAACAACCTGGTTTTATTACGGGACAGC  
TCATAATGTTTCATATCGATCTATTATGCGCCTCTGCATCTAGCACTGGGTAGACCTCATA  
ATAACTGTCCTAGTCTACCGTATCTTTGTTTTATTCTTCTGCAATAATCACAAACA  
CTTCTTTGATTATGGATCTACTACCAGAAATCAATGCGTAATCTCAGCATTCAATGTGTA  
TTCCTGAATAATCTCATTTTTCAATTATTCAATCATTTTATTACCAAGTTCAATGTTAG  
CGAGATTAGTCAACATTTTTATGTTTCGATGCAACAGCAAGATGCTATTTGTAACAAGTA  
GTTTTGTTGGTTGGATAATAGGTACATTTTATTTCATGAAATGGATTGGATTGCTATTAGT  
TCGGATCCGTCAAATCGATCCATTCGT-----ATTCAATCTAATAAGTATCTTGTGTCAGA  
ATTGAAAAATTCTATGTCTGGTATCTTTAGTATTTTCTTATTAGTTACCTGTGTCTACTATT  
TAGGTAGAATACCTTCACCCATTTTTAGTAATAAACTGAACAAA-----AAACCTCTT  
TTGACTTTTTTTTTTCGATTATAACCGATGGAATCGTCCATTACGATACATCAGAAAGAAA  
AATTTAAAGGCTCCGTAAGAAAAGAAGCCTCACAAATTTTTTTTTTATACATGCCAAAG  
TGATGGAAAACAAAGAATATCTTTTACATATCCTCCGAGTTTGTCAACTTTTGGGGAAA  
TGCTAGCAAAAAGGATATCCTTATCTACATTAGAAAAACTGTCCGCCGATGAACTATATA

GCGAGTGGCTTTATACCAATAAAGAGAAAAAAGAACTTAAATAATGAATTTATAAAC  
AGAATAGAGGCTTTAGAGACAGTATTTCTTTCTCTAAATATACTTGAAACAAAGACTAG  
ATTGTGTAATAAAAAAACAAAAAGAATTCCTAATTAATGTATGATCCCTTTTTTAA  
T--ATGTATCGTGGAAGAATGAAGAAAATTTTTTCATCTACAGAACCTTCTGAAATAAT  
AAAATTCACGATATCCTTTTTCCAGAATCTGAACAGAAAAATCCTAAGCGCGAA-----  
ATAAATGAAATAGGTAAAAAACACCTCGATGGTCATACAAATTAATCGAGTTGGAACA  
AATGTTTAAAAAACAGCTTCGAACAAGAAAATTTAAACGTATAGCTTTTTTAACTCGTG  
GTTTTATAAGTTATTTGGAAGAACCAGATTTTCGTCGAGCCGTAATCAAAGGATCTATGC  
GCACTCAAAGGCGTAAAATGGTTATTTGGGGACCGTCTCAAGGAAATCCCCATTCCCC  
TCTTTTTTTGGAAAAA---ATGGAA---GATTTTCCTTTTCT-----ATATCCGACATAATGA  
AGCTTTTTTTTAAAT---ATAAAAAAACCAACCAGGAAGAC-----TGGGAAAACATTC  
CATATGCACAAAAACAAGAAGTATTCTGTTACTAGCACAAATCAATTTTTAGAAAGGTAT  
ATTAAATTACCCTTATTGATAATAGCTAAGAATATTGGCCGATTTTATTAGGGCAATCTC  
CGAATGGTATGAGGATTTCCAAGATTGGAATAGAGAAATTTATTTAAAGTGCAGCTAT  
AATGGTCTTCAATTCTCCAAAACAGAATTCCTAAAAATTGGTTAATAGAAGGTTTTCA  
GATCAAAATCTTATATCCTTTTCATTTGAAACCGTGGCACGGATCTAAGCAACAAGATG  
ATTTTGATTCTTGTTTTTTAACAGTTTTGGGAATGGAAACAGAATATCCTTTTGGTCTC  
CTCGAAAAACACCTTCTTTTTTTGAACCCGTTTTTAAAGATATAGAC-----  
-----TACAAAGTCGAAATAAGAAATTTTAGAGTTCAAAGAGTTTTAAAA  
AAAATAACAAGCAACAAGAAAAAGCATTTTTATTTTTAAAACAAACTT-----TTA  
AAAGGAAAGGATTCGATAATCAGCACTCAGATAATTCATGAATCATTAGTCAAATAA  
ATCT-----AGAGATTATTCACAGGCAAAAGAAGAGATTAACATAGAATTGATAGAAG  
AAACACAATAAGAAATCAAATAGAAATAATGAAAAAAAATAAA-----  
AAGAATAATCGAGAATCACCCCAAAAATTTGGAAAATATTAATAA-----AGAA  
AAAATATTGAATTAATATTCAATTTTGCATTGAAAAAATATACGTAGATATCTTTTTATGT  
ATAATTAATATGCGCAGAATTTCTCTACAACTTTTT-----TTTGATTTTTCTTACTTG  
TCACAAAATATGTATTTTTTAAATATCACAAACCAAGTTATTAACCTTCAATAAGTTA  
AGGTCTATTCTTCAATATCCATCTTTTTTTCTTAAGAATGAAATAAAGGATTTTTTTACAC  
AAGGAATATTTGATTCCAAAGTAAGACATAACAACTTTCAAATTATGAAAAGAATCCA  
TGAAAAAAGTGGTTAAGAAGT---TATCAATATGATTTATCTCAGATTACATGGTCTACATT  
AGTCCCACAAAAATGGCGAAATCAAATAAATCAATGCCATATGTCTCAAATGATAAGA  
AAAGGTATTCCTATGAAAAAGACCCA-----TTATTGGATTACAAAAAAA---AATTTTC  
AAAAAACTATAGATATGATCTTTTCTCATATAAATATATGAATAGTGATATTATATATA  
GATAGAAAATATTTGGGTTGGAAATTTAAT-----TCTTTTGATTGGATGGGAATGA  
ATGAAAAATTCTTAATCTTATTTTTTATTCCAGAGTTTTTAATACTTTATCATAAATATAAA  
GAGAAACCTTGGTTTATCCCAAGCAACTTACTTCTTTTTAAT-----CTAAA  
AGTATTGCTTAAAGGAGATTTTCTTTTCAATTAAGATGGACTGGACGTTTGAATCAA  
AAATGATGAATAATATCCAGATATATGGTCTCCTGCTTAGCCTCATAAATGTAAGAAAA  
TTACTATATCCTATATTCAAAGGAAAGAAATGAATCTGGATATAATGAGAAGGCGT-----  
-TTAAATCTTACACAATTAACGAAAGGAATATTAATTATGGAACCTACCCGTCTATCTGTA  
AAAAATGACGGACAGTTTTTTATGTATCAAATCATAGGTATTTTATTGGTTCATAAAAGT  
AAGCACAATAATTATGATTTGCTTGTTCTGAAAAAATTTTATCATCTAGACGTCGTAGA  
GAATTGCGAATTCATTTCTTTTCGCGTTTTTTTGGCCTAATTATCGATTAGAAGATTTAG  
CTTGATGAATCGCTATTGGTTTGATACCAATAATGGGAGCCGCTTGAGTATGTTAAGGA

TATATATGTACCCCATGACAGGACATGAATTCAAGTCCTGGATTTTAGAATTGAGAGAGA  
TATTGAGAGAGATCAAGAATTCTCACTATTTCTTAGATTCCCTGGACCCAATTCAATTCAG  
TGGGATCTTTCATTCACATTTTTTCCACCAAGAACGTTTTATAAACTTTTTGACTCCC  
GAATTTGGAGTATCTACTTTCA--CACAATCA-----CAGGGTTCAACAAGCAATCGATA  
TTTCACG-----ATCAAGGGT--GTAATACTCTTGGAGTAGCGGTCTTATATATCGT----  
-----ATTAACAATCGAAATATGGTCGAAAGAAAAAATCTCTATTTGATAGGGCTTCTTCC  
T-----ATACCTATGAATTCATTGGACCCAGAAATGATACATTGGAAGAATCCGTT-  
--GGGTCTTCTAATATCAATAGGTTGATTGTTTCG--CTTCTGTATCTTCCAAAAGGAAAA  
AAGATCTATGAGAGTTCTTTCCTGAATCCGAAAGAGAGTACTTGGGTTCTCCCAATAAC  
T-----AAAAGTGTAGCATGCCTGAATCTAACTGGGGTTCGCGGTGGTGGAGGGAC  
TGGATCGGAAAAAAGAGC-----AATTCTAGTTGTAAGATATCTAAT-----GAAACCGTC  
GCTGGAATTGAGATATTATTCAAAGAGAAAGATCTCAA--TATCTGGAGTTTTTCTTTG  
TATATTATAGGGAT-----GATCCGATCCGCAAGGACCATGATTGGGAATTGTTTGATCGTC  
TTTCTCTGAGGAAGAGGCAAATAGAATCAACTTG-----AATTCGGGCCCACTATTTCGA  
AATCTTAGTGAAACACTGGATTTGTTATCTCATGTCTGCTTTTCGTGAAAAAATACCAAT  
AGAAGTGGAGGGT--TTTTTCAAACAACAAGG--GCTGGGTCAACTATTCAATCAAAT  
GATATTGAGCATGTTCCCAT-----CTCTTCTCGAGAAACAAGTGGGCTATTTCTTTGCAA  
AATTGTGCTCAATTCATATGTGGCAATTCCGCCAAGATCTCTTCGTT-----AGTTGGG  
GGAAG--AATCTGCCCGAATCGGATTTTTTGAGGAAC--GTATCAAGAGAGAATTTGATT  
TGTTAGACAATGTGTGGTTGGTAAACAAGGATCGG-----TTTTTTCGC-----AAGGTA  
CGAATGTATCGTCAAATATTCAATATGATTCC-----ACAAGA-----TCTAGTTTCGTT  
AAGTAAGGGATTCTAGCCAATTGAAAGGATCTTCT--GATCAATCCAGAGATCATTTTGA  
TTCCATTAGT-----AATGAGGATTCGGAA-----TATCACACA  
TTGATCAATCAAAGAGAGATTCAACAATAAAAGAAAGATCGATTCTT--TGGGAT-----  
CCTTCTTTCTTCAAACCGGAAGGAACAGAGATAGAATCAAGC-----CGATTCCCGAAA--  
---TGCTTTCTGGATATTCC-----TCAATGTCCCGGCTATTCACG--GAACGCGAGAAGC  
AGATGATTAATCATCTGCTTCCGGAAGAAATCGAAGAATTTCTT-----GGGAATCCTACA  
AGATCCGTTCTGTTCTTTTTTCTCTGACAGATGG-----TCAGAACTTCAT--CTGGGTTTCGA  
ATCCTACTGAGAGGTCCACTAGAGATCAG-----AAATTGTTGAAGAAACAACAAGA  
TCTTTCT--TTTCTC-----AGGCGATCGGAA-----AATAAAGAAATGGTTAATCTATT  
AAGATAATTACGATTTACAAAAT-----ACCGTCTCAATTCATCCTATTTTCATCAGATTTCG  
GATGTGATATGGTTCCG--AAAGATGAACCGGAT--ATGGACAGTTCCAACAAGATTTC  
TTCTTGAACAAAATCCATTTTTTGATTTA-----TTTCATCTATTCCATGACCGGAACAGG  
GGAGGATACGCGTTA-----CACCACGATTTTGAATCAGAA-----GAGAGATTTCAAGAAA  
TGGCAGATTTATTCATCTATCAATAACCGAGCCG--GATCTGGTGTATCATAAGAGATT  
TGCCTTTTCTATTGATTCCATGGATTGGATCCAAAACAA-----TTCTTGAATGGGGTATT  
CAACTCCAGGTATGAATGGAAAACGACATCT-----TTATTGGTTCTACTTCTATTTTT  
AT-----GAAGAGAATGAATCTTTTTATCGAAGGATCAGAACAAAAAAGGTCCGG--ATCT  
CCTGCGGGAATGATTTGGAAGAGCCAAAACCAAAAATAGTGGTATTTGCTAGCAACAA  
CATAATGGAGGCAATCAATCAATATAGATTGATCCGAAATCTGATTCAAATCCAACATAG  
CACCCATAGG-----TACATAATAAATGTATTGAATCGATTCTTTTTAATGAAT-----AGAT  
CCGATCGCAACTTCGAATATGGA-----ATTCAAAGGGATCAAATAGGAAAGGATACTC  
TGAATCATAGAACTCTAATGAAATATACGATCAACCAACATTTATCGAATTTGAAAAAG-  
--AGTCAGAAGAGATGGTTCGATCCTCTT-----ATTTTTTTTTCTCGAACCGAGAGATTAAT



GAATCGGGATCCTGATGCATATAGATACAAATGGTCCACTGGGAGCAATAATTTCCAGG  
AACATTTGGAACATTTCTGTTTCTGAGCAGAAGAGCCGT-----TTTCAAGTAGTGTTTCG  
ATCGATTACGTATTAATCCATATTCGATTGATTGGTCTGAGGTTATCGACAAAAAAGATT  
TGTCTAAGCCACTTCGTTTCTTTTTGTCCAAG-----  
-----TTGCTTCTTTTTTTGTCTAAC---TCACTTCCTTTTTTGTGTTGTCAGTTTCGGGA  
ATATCCCCATTCATAGGTCCGAG---ATCTACATCTAT--GAATTGAAAGGTCCGAATGAT--  
-----CCACAGTTTTTAGAATCAATAGGTCTTCAAATCGTTCATTTGAAAAAATTGAAACC  
CTTC-----TTATTGGAT-----GATCATGAGACTTGC---CAAAAATCAAAATTATTGATCAA  
TGGAGGAACAATATCACCGTTTTTGTTCATAAAGATACCA---AAGTGG---ATGATTGACT  
CATTCATACTAGA-----ACTAATTGCAGGAAATCCTTTTATAACACGGATTCCATTATTC  
AATGATATTCCACGATCAATACAATTGGCTGAATCCCGTGAAATCATTTTCATAGAAGTTC  
ATTGAGATCTTCTTTTTATAAAGCAAATCAACTTCGATTCTTGAATAATCCACATCACTT  
CTGCTTCTAT-----TGTAACAAAAGATTCCCCTTTTATGTG-----GAAAAGGCCCGTAT  
CAAT-----AATTATGATTTTACGTATGGA--CAATTCCTCAATATCTTGTTCAATTCGCAACA  
AA---ATATTTTCTTTGTGCGTCCGTAAA-----AAAAACATGCTTTTTGGGGG---AGAGAT  
ACTATTTTCAGCAATCGAGTCACAGGTATCTAACATATTAATACCTAAGGATTTTCCACAA  
AGTGGT--GACGAAACGTATAACTTGTACAAATCT-----TTCCATTTTCCAAGTCGATC  
CAATCCACTCGTTCGT-----AGAGCTATTTACTCGATCGCCGACATTTCTGGAACACCTCT  
AACAGAGGGACAAATAGTCAATTTTGAAGAACTTATTGTCAACCTCTTTCAGATATGA  
ATCTATCTGATTCAGAAGGGAAGAACTTGTATCAGTATCTCAAT-----TTCAATTCAAACA  
TGGGTTTGATTCACACTCCATGTTCTGAAAAATATTTACCATCCGAAAAG-----AGGAAA  
AAA-----CGGAGTCTTTGTCTAAAG-----AAATGCGTTGAGAAAGGGCAGA  
TGTATAGAACTTTTCAACGAGATAGTGCTTATTCAACTCTCTCAAATGGAATCTATTCC  
AAACATATATGCCATGGTTCCTTACTTCGACAGGGTACAGATATCTAAAGTTTTTATTTTT  
AGATACTTTTTCAGACCTATTG-----CCGATACTAAGTAGC---AGTCAAAAATTTGTATCC  
ATTTTTCATGATATTATGCATGGATCAGATATATCATGGCGAATTCTTCAGAAAAAATTA--  
-----TGTCTTCCACAATGGAATCTG---ATAAGTGAGATTTTCGAGTAAGTTTTTCCA  
TAAT-----CTTCTTCTGTCCGAAGAAATGAGTCATCGAAAT-----AATGAGTCACCATTGAT  
ATCGACACATCTGACA-----AATGTTCCGGGAGTTC---CTCTATGCAATCCTTTTCTTCTT  
CTTGTTGCTGCATAT--CTCGTTTGTACACATCTTCTCTTTGTTTTCGGG-----GCCTCTAG  
TGAGTTACAGACAGAGTTCGAGAAGGTCAAATCTTTGATGATTCCATCATCTATGATTG  
AGTTGCGAAAACCTTCTGGATAGGTATCTACATCTGAACCGAATTCTTTCTGGTTAAAG  
AATCGCTTTCAGTTGCTCTGAAACAATTAGGAGATTCCCTA-----GGTGG  
CAACATGCTATTGGGTGGTGGTCCC-----GGG---GTCAAATCAATACGCTCTA  
AGAAGAAATATTTGAATATCAATCTCATCGATATCATCGATCTCATA---AGTATCATACCA  
AATCCCATCAATCTAATCACTTTTTTCGAGAAATACGAGACATCTAAGTCATACAAGTAA  
AGAGATCTATTCAATTGATAAGAAAAAGAAAAACGTGAACGGGGACTGGATTGATGAT  
AAAATAGAATCCTGGGTTGCAAACAGTGATTCAATTGATGATGAAAAAAGAGAATTCT  
TGGTTCAGTTCTCC-----ACCTTAACGACA-----GAAAAAAGGATTGATCAAATTTTATTG  
AGTCTGACT--CATAGTGATCATTTA-----TCAAAGAATGACTCTGGTTATCAAATG  
ATTGAACAACCGGGAGCAATTTACTTACGATACTTAGTTGACATTCAT-----AAAAAGTA  
TCTAATGAATTATGAGTTCAATACATCCTCTTTAGCAGAAAGACGGATATTCCTTGCTCA  
TTATCAGACAATCACTTAT-----TCACAAACTGCGTGTGGGGCTAATAGTTTTTCATTTCCC  
GTCTCATGGA-----AAACCCTTTTCGCTCCGCTTAGCCTTATCCCTCTCT--AGGGGTAT

TTTAGTGATAGGTTCTATAGGAACTGGACGCTCTTATTTGGTCAAATACCTAGCGAAAA  
ACTCCTATCTTCCTTTCATTACGGTATTTCTGAACAAGTTCCTGGATAACAAGTCTCAAG  
GTTTTGATGATATC-----GATATTGAT--ATTGACGATATTGAT-----GCTAGTGAC  
GATATTGATGCTAGTGACGATATTGATGCT-----AGTAACGATATC-  
-----CTTGATATGGAGCTG---GAACTGCTAACTAGCATGAATGCGCTAACTATGGATATG  
ATGCCTGAAGAT-----GAAGACCAACTTTATATCACCCTTCAATTGCAATTAGCAAAAAGC  
AATGTCTCCTTGCATAATATGGATTCCAAACATTCATGATCTGGATGTGAATGAGTCAAA  
TTACTTCTCCCTAGGCTCTATTAGTGAACCTTCTCTCCAGG-----GATTATGAA-----  
ACTAGAAATATTCTTGTTATTGCTTCGACTCATATCCCCAAAAAGTGGATCCCCTCTA  
ATAGCTCCGAATAAATAACGTGCATTAAGATACGAAGGCTTCTTATTCCACAACAA  
CGAAAGCACTTTTTCACTCTTTCATATACTAGGGGATTTCACTTGGAAAATAAATGTTC  
CATACT-----AATGGATTCCGGTCCATAACCATGGGTCCAATGCACGAGATCTTGTAGC  
ACTTACCAATGAGGCCCTATCGATTAGTATTACACAGAAGAAATCAATTATAGATACTAA  
TACAATTAGATCCGCTTTCATAGACAAATTTGGGATTTGCGA-----TCCCAGGTAAGA  
TCGGTCCAGGATCATGGGATCCTTTTCTATCAGATAGGAAGGGCTGTAGCACAAAATGT  
ACTTTTAAGTAATTGCCCATAGATCCTATATCTATATATATGAAAAAGAAA-----TCATGT  
AACGAAGTGGATTATTATTTGTACAATTGGTACTTCGAACTTGAACGAGCATGAAGAA  
ATTAACGATACTTCTTTATCTTTTGAGTTGTTCTGCCGGATCGGTCACTCAAGATCTTTG  
GTCTCTACCC-----GGACCCGATGAAAAA---AATGGGATCACTCCTTATGGACTCGTTGA  
GAATGATTCT---GGTCTAGTTCGTGGCCTATTAGAAGTGAAGGCGCTCTGGTGGGA-----  
-TCCTCGCGG-----ACATGCAGTCAGTTTGATAAGGAT-----CGAGTGACATTGCTTCTT  
CGACCCGAACCAAGGGAT---CCCTTAGATATGATGCAAAATGGATCTTGTCTATCCTTG  
ATCAGAGATTTCTCTATGAAAAAGAC-----GAATCGGAGTTTGAAGAG---GGGGAAGGA  
GAAGGAGCCCTCGACCGCAACAG-----ATAGAGGAGGAT-----TTATTCAATC  
AC-----ATAGTTTGGGCTCCT-----AGAATATGGCGCCCT-----TGGGGCTTTCTATTGA  
TTGTATCGAAAGGCCTAATGAATTGGGATTTCCC---TATTGGTCCAGGTCATTTCCGGGGC  
AAG-----CGGATCATTATGATGAAGAGGATGAGCTTCAAGAGAATGATTCCGGCGTTC  
TTGCAGAGTGAACCGTGCAGTACCAGACACGAGATAGATCTTCCAAGAACAAGGC  
CTTTTTCGAATAAGCCAATTCATTTGGGACCCTGCAGATCCACTCTTTTTCTATTCAAA  
---GCTCAGCCCCTTGTCTCTGTGTTTTACATCGAGAATTATTTGCAGATGAAGAGGTGT  
CAAAGGGGCTTCTTACTCCCCAAACAATCCTCCTACATCTCTATATAAACGCTGGTTTA  
TC-----AAGAAGACGCAAGAAAAGCACTTCGAATTGTTGATTAATCGCCAGAGATGGCT  
TAGA-----ACCAATCGT-----AATGGATCTTCCGTTCTAAT-----ACTCTATCCGA  
GAGTTATCAGTATTTATCAAATCTGTTCCCTATCTAAC---GGAACACTATTGGATCAAATGA  
CAAAGGCATTGTTGAGAAAAAGATGGCTTTTCCCGGATGAAATGCAAATTGGATTC-----  
-ATGGAACAGGAGAAGGATTTCCATTCTTATGTCTAGATCCCGG---ATAAATGGAAAT  
TTTATTGATAAAACCTTTTCAATTGTAGCCAATATCTTATTACGAATAATTCCGACAACCT  
CAGGAGAAAAAGAGGCATTTACCTATTACAGAGATGGT-----ATGTCAGCTCAATCCGA  
AGGAAATTATGCGGAAGCTTTACAGAATTATTATGAAGCTATGCGACTAGAAATTGATC  
CCTATGACCGAAGTTATATACTCTATAACATAGGACTTATCCACACAAGTAACGGAGAA  
CACACGAAAGCTTTGGAATATTATTTTCGAGCGCTCGAACGAAACCCATTCTTACCACA  
AGCTTTTAATAATATGGCCGTGATCTGTCATTAC---CGGGGAGAACAGGCCATTCCGGCA  
GGGGGATTCTGAAATTGCGGAGGCTTGGTTTCGACCAAGCCGCTGAGTATTGGAAACAG  
GCTATAGCACTTACTCCTGGTAATTATATTGAAGCTCATAATTGGTTGAAGATCACTAGA











repeated text





repeated text block consisting of multiple lines of identical or near-identical content, possibly representing a corrupted document or a placeholder.









repeated text





TCGCAATTTGTGAGGGTCGTTCTAGCAGCTATATAAGAAATCCTATGGGACAAAAATA  
AATCCACTTGGTTTTAGACTTGGTACAACCCAACTCATCATTCTCTTTGGTTTTGCACA  
ACCAAAAAATTATTCTGAGAGTCTACAAGAAGATCAAAAAATAAGATATTTTATAAAAA  
ATTATGTACAAAAGAATATGAGAATATCCTCTGAC---GCCGAGGGAATTGCCCATATAGA  
GATTAAAAAAGAATTGATTTGATCCAAGTCATAATTTTTATGGTATTTCCAAAATTATTA  
ATTGAAAGTAGACCCCGA-----GGAATCAAAGAATTACAGATGAATCTACAAAAAG  
AATTTTCATTATGTAAATCGAAAATTTAACATTGCTATCACAAAGAATTA AAAAGCCTTATG  
GAAACCCCAATATTCTTGCAGAATATATAGCCGGGCAATTA AAAAATAGAGTTTCATTTC  
GAAAAGCAATCAAAAAGGCTATTGAATTA ACTGAACAAGCGGATACAAAAGGAATTCA  
AGTACAAATTT CAGGGCGTATCGACGGAAAAGAAATTGCACGTGTAGAATGGATCAGA  
GAGGGTAGGGTTCCCTACAAACCATTTCGAGCTAAAATTGATTATTGTTCTATATAGTT  
CGGACTATCTATGGGGTATTAGGCATAAAAATTTGGATTTTTATAGAA-----ATGTCGCGT  
TACCGAGGGCCTCGTTTCAAAAAATACGTGCGCTGGGGGCTTTACCAGGACTAACTA  
ATAAAAGGCCGAAAGCCAGAAAGGATTTTCGAAACCAATCACGTTTCAGGGAAA---AAA  
TCTCAATATCGTATTCGCCTAGAAGAAAAACAAAATTGCGTTTTTCATTATGGTCTTACA  
GAACGACAATTACTTAAATACGTTTCGTATCGCCGGAAAAGCCAAGGGGTCAACAGGTC  
AAGTTTTACTACAATTACTTGAATGCGTTTTGGATAACATCCTTTTTTCGATTGGGTATGG  
CTTCAACTATTCCCGCAGCCCGCCAATTAGTTAACCATAGACACGTTTTTGGTGAATGGA  
CGTATAGTAGATATAACCAAGTTATCGCTGTAAACCCCGGGATATTATTATGTGCAAGGAT  
GAAGAACAATCCAGA ACTCTGATTCAAATTC TTTAAACCTTTACGCTCGT---GCGGAA  
GTACCAAACCATTTGACCCTTCACCCATTTCAA-----TATAAAGGATTAGTCGATCAAATA  
ATAGATAGTAAATGGGTTCGTTTTGAAAATAAATGAATTGTTAGTCGTAGAATATTATTCG  
CGTCAGACTATGTCACGTCGAGGTA CTGCAGAAGAAAAAACAGCAAAATCCGATCCTA  
TTTATCGTAATCGATTAGTTAACATGTTGATTAACCGTATTCTGAAACATGGA AAAAAAT  
CATTGGCTTATCAAATTATCTATCGAGCCATGAAAAAATTCAACAAAAGACAGAAACA  
AATCCACTATCGGTTTTACGTCAAGCAATACGTGGAGTAACTCCCGATATAGCAGTAAA  
AGCAAGACGTGTAGTTGGATCGACTCATCAAGTTCCCATTTGAAATAGGATCCACACAA  
GGAAAAGCACTTGCCATTCGTTGGTTATTAGCGGCATCCCGAAAACGTCCGGGTCGAA  
ATATGGCTTTCAAATTAAGTTCCGAATTAGTGGATGCTGCCAAAGGGAGTGGCGATGCC  
ATACGCAAAAAGGAAGAGACTCATAAAATGGCAGAGGCAAATAGAGCTTTTGCACATT  
TTCGTATGAGTAGAAACACTATTGCTGATATAATAACTTCTATACGAAATGCTGATATGG  
ATATAAAGAGTGTGTTTCGCATCGCATCTACTAATATTATCGAAAATTTTGTAAAATACT  
TTTACGAGAAGGTTTTATCGAAAACATCAGAAAACATCGAGAAAAAAACAAATTTTTT  
TTGGTTTTAACCTTGCAACATATAAGG-----AAT-----AAGAAAAGTTTTTTAA  
ATTTAAAACAGATCAGTCGACCCGGTCTACGAATCTATTCTAACTCCCAACGAATTCCT  
AGAATTTTAGGTGGAATGGGAGTTGTTATTCTTTCTACCTCTCAAGGTATAATGACAGA  
CAGGGAAGCTCGACTAGAAAGAATAGGTGGAGAAATTTTGTGTTATATATGGATGGCA  
AAAGCTATACCGAAAACCTGGTTCACGTAGGAATGCACGTCTTGGT-----AAGAGTGCAT  
GTAGAATACCAAAGGAGTTATTCATGTTCAAGCTAGTTTCAATAATACCATTGTCACGA  
TTACAGATATACGGGGTAGAGTGATTTCTTGGTCTCGGCTGGCACTTGTGAATTC AAG  
GGTACAAGAAAGAAGACACCCTTTGCTGCCAAACTGCAGCAGCAAAGGCTATTCGT  
ACAGTAGTAGATCAAGGTATGCAACGAGCAGAAGTCATGATAAAGGGTCCCGGTCTAG  
GAAGAGACGCAGCATTACGAGCTATTCGTAGAAGTGGTATACTATTA ACTTTTTATACGG  
GATGTAACCCCTATGCCACATAATGGCTGCAGACCTCCGAAAAAAGACATGTGATGC





AAGTGGAGGTT--TTCTTCAAACAACAAGGG--GCTGGGTCAACTATTCAATCAAATGA  
GATTGAGCATCTTTCTCAT-----CTTTTCTCGAGAAACAAGTGGGCTATTTCTTTGCAAAA  
TTGTGCTCAATTTCAATGTGGCAATTTTCGCCAGGATCTTTTCCTT-----AGTTGGGGG  
AAG--AATCCGCACGAATCGGATTTTTTGTAGGAAC--GTATCGAGAGAGAATTTGATTG  
GTTAGACAATGTGTGGTTGGTAAACAAGGATCGG-----TTTTTTATA-----AAGGTACG  
GAATGTATCGTCAAATATTCAATAT-----GATTCCACAAGA-----TCCAGTTTCGTTCAA  
GTAACGAATTCTAGCCAAGTAAAGAATCTTCT--GATCAATCCAGAGATCATTTTAAT--  
TCCATTAGT-----AATGAGGATTCGGAA-----TATCACACATT  
GATCAATCAAAGAGAGATTCAACCACTAAAAAAGAAAGATCGATTATTGGGGAT-----  
CCTTCCTTTCTTCAAACCGGAAGGAACAGAGATAGAATCAGAC-----CGATTCCCGAAA--  
---TGCTTTCTGGATATTCCTCA-----ATGTCCCGGCTATTCACG---GAACGTGAGAAGC  
AGATGATTAATCATCTGCTTCCGGAAGAAATCGAAGAATTTCTTGGT-----CCAAGA  
TTGGTTCGTTCTTTTTTCTCTGATAGATGG-----TCAGAACTTCAT--CTGGGTTCGAATCC  
TACTGAGAGGTCA-----GATCAT-----AAATTGTTGAAGAAACAACAAGATCTTTCT--  
-TTTGTCCCTTCCAGGCGATTGGAA-----AATAAAGAAGTGGTTAATATATTCAAGAT  
AATTATGTATTTACAAAAT-----ACTGTCTCAATTCATCCTATTTTCATCAGATCCGGGGTGT  
GATAGGGTTCTG--AAGGATGAACCGGAT--ATGGACAGTTCCAATAAGATTTTCATTCTT  
GAACAAAAATCCATTTTTTGTATTA-----TTTTATCTATTCCATGATCGGAACAGGGGAGG  
ATACACCTTA-----CACCACGATTTTGAATCAGAA-----GAGAGATTTCAAGAAATGGCA  
GATCTATTCACTCTATCAATAACCGAACCG---GATCTGGTGTATCATAAGGGATTTGCTTT  
TTCTATTGATTCCTACGGATTGGATCAAAAACAATTC-----TTGAATGAGGCCAGG  
GATAAATCGAAAAAGAAATCTTTA-----TTGGTCTACCTCCTATTTTTTAT-----GAAG  
AGAATGAATCTTTTTCTCGAAGGATCAGAAAAAACGGGTCCGT--CTCTCTGCGGGA  
ATGATTTGGAAGATCCA-----AAAATGGTGGTATTTGCTAGCAACAACATAATGGAGGCA  
GTCAATCAATATAGATTGATCCGAAATCTGATTCAAATCCAATATAGTACCTATAGA-----T  
ACATAAGAAATGTATTGAATCGATTCTTTTTAATGAAT-----AGATCCGATCGCAACTTT  
GAATATGGAATTCAA-----AGGGATCAAATAGGAAAGGATACTCTGAATCATAGAAGT  
ATAATGAAATATACGATCAACCAACATTTATCGAATTTGAAAAAG---AGCCAGGATAAAT  
GGTTTGATCCT-----CTTATCTTGATTTCTCGAACCGAGAGATCCATGAATTGGGATCCTG  
ATGCATATAGATACAAATGGTCCAATGGGAGCAAGAATTTTCAGGAACATTTGGAAGAT  
TTCGTTTCTGAGCAGAAGAGC-----CGTTTTCAAATAGTGTTCGATCAATTACATATTA  
AGCAATATTCGATTGATTGGTCTGAGGTTATCAACACAAAAGATTTGTCTAAGTCACTT  
CGTTTCTTTTTGTCCAAG-----TTGCTTT  
TATTTTTGTCTAAC---TCACTTCCTTTTTTCTGTGTGAGTTTCGGGAATATCCCATTTCAT  
AGGTCCGAG---ATCTACATCTAT--GAATTGAAAGGTCCGAATGATCAACTCTGCAATCA  
GTTGTTAGAATCAATAGGTCTTAAAATTTTTCATTTGAAAAAATGGAAACCCTTC-----TT  
ATTGGAT-----GATCATGATACTTCC---CGAAAATCAAATTCCTTGATCGCTGGAGGAA  
GA-----CCCTTTATGTTCAATAAGATACCA---AAGTGG---ATGATTGACTCATTCCATACTA  
GA-----ATAATCGCAGGAAATCCTTTGATAACACGGATTCCATTTCTCAATGATATTCC  
ACAATCAAGACAATTGGCTGAATCCCGTGAAACCATTTTCATAGAAGTTCATTGATATCT  
TCTTTTTATAAAGCAAATCGACTTCGATTCTTGAATAATCTACATCACTCCTGCTTCTAT--  
---TGTAACACAAGATTCCCCTTTCCGTG-----GAAAAGGCCCGTATCAATAATTAT  
GAT-----TTTATGTATGGA---CAATTCCTCAATATCTTGTTCAGTCGAAACAAA---ATATTTT  
CTTTGTGTGTCGGTAAA-----AAAAACATGCTTTTGGGGGG---AGAGATACTATTTAC

CTATCGAGTCACAGGTATCTAACATATTCATACCTAACGATTTTCCACAAAGTGGTGACG  
AAACG--TATAACTTGTCCAAACCT-----TTCCATTTTCCAAGTCGATACGATCCATTCG  
TTCGT-----AGAACTATTTACTCGACCGCAGACATTTCTGGAACACCTCTAACAGAGGG  
ACAAATAGTCAATTTTGAAAGAACTTATTGCCAACCTCTTTCAGATATGAATCTATCTGA  
TTCAGAAGGAAAGAAGCTTGCATCAGTATCTCAAT-----TCAAACATGGGTTTGATTC  
ACACTCCATGTTCTGAGAAATATTTACCATCCAAAAAG-----AGGAAAAA-----  
-----CGGAGTCTTTATCTAAAG-----AAATGCGTTGAGAAAGGGCAGATGTATAGAACCT  
TTCAACGAGATAGTGCTTTT-----CTCTCAAATGGAATCTATTTCAAACATATATGCCAT  
GGTTCTTTACTTCGACAGGGTACAAATATCTAAATTTGATATTTTGTAGATACTTTTTCAGA  
ACTATTGCCGATACTAATAAGTAGCAGT-----CAAAAATTTGTATCCATTTTTCATGATATT  
ATGCACAGATCAGGTATATCGTGCGAATTATTCAGAAAAAATGG-----GGTCT  
TCCG-----CTGATAAGTGAGATTTTCGAGTAAGTGTTTACATAAT-----CTTCTTCTGTC  
CGAAGAAATGATTCATCGAAATAATGAGTCA-----CCGTTGATATCGACACATCTGAGAT  
CGCCAAATGTTTTGGAGTTC---TTCTATTTAATCCTTTTCTTCTTCTTGTGCTGGATAT--  
-CTCGTTCATACACATCTTTTCTTTGTTTCCGGA-----GCCTCTAGTGAGTTACAGACAGA  
GTTTCGAAAGGGTCAAATCTTTGATGATGGAATCATCTATGATTGAGTTGCAAAAACCTTA  
TGGATATGTATCCTACT--GCATCGAATCCTTTCTGGTTAAAGAATCTCTTTCTAGTTGTT  
CTGGAATATTATGGGATTCTCTAAAGTAATAGTAATATGGGCTTATGGC-----G  
GCATTGGTCCC-----GGGGTCAAATCAATACGTCGTTATAAGAATAAATATTT  
GAATATCAAT-----CTCATC---GATATCATACCAAATCCCATCAATCGAATCACTT  
TTTTCGAGAAATACGAGACATCTAAGTCATACAAGTAAAGAGATCTATTCATTGATAAGA  
AAAATAAAAAACGTGAATTGGGATTGGATTGATGATAAAATAGAATCCTGGGTTCGCGA  
ACAGTGATTCGATTGATGATAAAGAAAGAGAATCCTTGGTTCAGTTCTCC-----ACCTTA  
ACGACA-----GAAAAAAGGATTGATCAAATCTATTGAGTCTGACT--CATAGTGATCATT  
TATCA-----AAAATGACTCTGGTTATCAAATGATTGAACAACCGGGAGCAATTT  
ACTTACGATACTTAGTTGACATTCAT-----AAAATTATCTATTGAATTATGAGTTCAATAC  
ATCCTGTTTAGCAGAAAGACGGGTATTCTTGGCTCATTATCAGACAATCACTTAT-----TC  
ACAAACTTCGTGTGGGACTAATACTTTGTATTTCCCA-----GGA-----AAACCCTTTTCG  
CGCTTATTAGCCTTATCCCCCTCT--AGGGGGATTTTAGTGATAGGTTCTATGGGAACTG  
GACGATCCTATTTGGTCAAATATCTAGCGACAACTCCTATGTTCCCTTTCATTACGGTAT  
TTCTGAACAAGTTCCTGGATAAC---ACTAAAGAGTTTCTTTTGTGAT-----GATAGT  
GATGATAGTGATGATATTGATGATATTGATGATAGTGATGATAGTGATGAT-----  
-----AGTGATAATATTTATTATGACCTTGATATGGAGCTGG  
AACTGCTA-----ACTATGGATATGATGTCG-----GAAATAAACCGATTTTTTATCACCC  
TTCAATTCGAATTAGCAAAGCAATGTCTCCTTGCATAATATGGATTCCAAACATTCATG  
ATCTGGATGTGAATGAATCGAATTACTTATCCTTCGGTCTATTAGTGAACCATCTCTCT---  
-----GAAAGATGTTCC---ACTAGAAATATTCTTGTATTGCTTCGACTCATATTCCCC  
AAAAAGTGGATCCCGCTCTACTAGCTCCGAATAAATTAATACGTGCATTAAGATACGA  
AGGCTTCTTATTCCACAACAACGAAAGCACTTTTTCGCTCTTTCATATACTAGGGGATTT  
CACTTGGAAAAGAAAATGTTCCATACT-----AACGGATTGGGTTCCATAACCATGGGTTT  
CAATGCAAGAGATCTTGTAGCACTTACCAATGAGGCCCTATCAATTAGTATTACACAGA  
AGAAATCAATTCTAGACACTAATAACAATTAGATCCGCTCTTTATAGACAACTTGGGATT  
TGCGA-----TCCCGGGTAAGACCGGTTCAAGATCATGGGATCCTTTTCTATCAGATAG  
GAAGGGCTGTAGCACAAAATGTACTTCTAAGTAATTGCCTCATAGATCCTATATCTATCT

ATATAAAGATGAAA-----TTATGTTACGAAGTGGATTCTTATTTGTACAAATGGTACTTCG  
AACTTGGAATGAGCATGAAGAAATTAACGATACTTCTTTATCTTTTGAGTTGTTCTGCC  
GGATCGGTTCGCTCAAGAGCTTTGGTCTCTACCC-----GGACCCGATGAAAAA---AGG---A  
TCACTTCTTATGGACTCGTTGAGAATGATTCG---GATCTAGTTCATGGCCTATTAGAAGT  
AGAAGGCGCTCTGGTGGGA-----TCTTCACGGACAGAAAAAGATTGCAGTCCATTTGA  
GAATGATCGAGTTACATTT-----CTTCTTCGGCCCGAACCGAGGAAT---CCCTTATATATGA  
TGAAAAATGGATCTTGTCTATCTTTGATCAGAGATTTATCTATGAAAAA-----TACGAAT  
TGGAGTTTGAAGAA---GGGGAG-----GTCCTTGACCCGCAG-----GAGGAG---  
-----TTC-----ATAGTTTGGGCTCCT-----AGAATATGGCGCCCT-----TGGGG  
CTTCTATTTGATTGTATCGAAAGGCCCAATGAATTGGGATTTCCC---TATTGGTCCAGGT  
CTTGG-----GGCAAACGGATCATTATGATTATGATGCTGAGCTTCAAGAGAATGAT  
TCGGAGTTCTTGCAGAATGGA-----ACGTACCAGACACGAGATAGATCTTCCAAAGAAC  
AAGACACTGTTCAAATAAACCAATACATTTTGGACCCTACAGATCCGCTCTTTTTACTAT  
TCAA--GATCAGCCCCCGTCTCTGTGTTTTACATCGAGAATTGTTTGCAGATGAAG  
AGATGTCAAACGTGCTTTGTGCTTTACAAATAGATACATCTAAATCTTTATATAAACT  
GGTTTATC-----AAGAATAGACAAGAGAAGCGCTTTGAATTGTTGATTAATCACCAGAAA  
TGGCTTAGAACC-----AATAGTTCATTATCT-----AATGGATCTTCCGTTCTAAT-----AC  
TCTATCCGAGAGTTATCAGTATTTATCAACTCTGTTCCCTATCTAAC---GGAACGCTATTGG  
ATCAAATGACAAAGACATTGTTAAGAAAAAGATGGCTTTTCCCGGATGAAATGAAAAT  
T G G A T T C - - - - - A T G - - - - -

????????????????????????????????????????????????????????????????????  
????????????????????????????????????????????????????????????????????  
????????????????????????????????????????????????????????????????????  
????????????????????????????????????????????????????????????????????  
????????????????????????????????????????????????????????????????????  
????????????????????????????????????????????????????????????????????  
????????????????????????????????????????????????????????????????????  
????????????????????????????????????????????????????????????????????  
????????????????????????????????????????????????????????????????????  
????????????????????????????????????????????????????????????????????  
????????????????????????????????????????????????????????????????????  
????????????????????????????????????????????????????????????????????  
????????????????????????????????????????????????????????????????????  
????????????????????????????????????????????????????????????????????  
????????????????????????????????????????????????????????????????????  
????????????????????????????????????????????????????????????????????  
????????????

>Catharanthus

ATGGAAAGATGGTGGTTTAATTTCGATGTTGTTTCTAAATAAATCAATGGATAGTCTTGGT  
CCTATTGAAAATACCAGTGAAATTGAAGATTCGAATAGAAAAGATACAACCTAAAAATAT  
TCAGACTGACAGTAATGGTGTATGTTTATTTCGAGGTCAAAGACATTCAGAATTTTCATCC  
CCGATGACACTTTTTTGGTTAAGGATAGTAATGGAGACAGTTATTCATATATTTTGATAT  
TGAAAATCCAATTTTTGAGATTGACAACAATCAT-----TCGTTTCTGAGTGAAGTAGAAA  
GTTCTTTTCTAGTTATCGGAATTCTAGTTATCTGCATAATGGATCTACGAGTGAAGATA  
CCTACTATAATCGTTACATGTATGATACTCAATATAGTTGGAATAATCATATTAATAGTTGC  
ATTGACAGTTATCTTCAG-----TCTCAAATCTGTATCGATACTTCCATGGTAAGTGATAGT  
GATAATTACAGTGATAGTTACATTTATAGGTCCATTTGTGGT--GAGGGTTCGGATATACA  
AACCCGCGCGGAAGGTACTGGTGAATTAATACTATAGAAAGTTCTGATGATATCGATGTAA

CTCAAAAATATAGGCATTTGTGGGTTCAATGTGAAAATTGTTATGGATTA AATTATAAGA  
AATTTTTTAAATCCAAAATGAATATTTGTGAACAATGTGGATATCATTGAAAATGAGTA  
GTTTCAGATAGAATAGA AACTTTCGATCGATCCGGGTACTTGGCATCCTATGGACGAAGAC  
ATGGTCTCTCTAGATCCCATTGAATTTTCATTCGGAGGAGGAACCTTATAAAGATCGTATT  
GATTCTTATCAAAGAAAGACAGGATTAACCGAGGCTGTTCAAACAGGCATAGGCCAAC  
TAAACGGCATTCCCGTAGCAGTTGGGGTTATGGATTTTCAGTTTATGGGGGGTAGTATG  
GGATCCGTAGTCGGGGAAAAAATCACCCGTTTGATTGAGTATGCTACCAATAAAGTTCT  
ACCTCTTATTATAGTGTGTGCTTCCGGGGGGGCGCGCATGCAAGAAGGAAGTTTGAGC  
TTGATGCAAATGGCTAAAATATCGTCTGCTTTATATGATTATCAATCAAATCAAAGTTAT  
TCTATGTATCAATCCTTACATCTCCTACTACTGGCGGGGTGACGGCTAGTTTTGGTATGT  
TGGGCGATATCATTATTGCCGAACCAATGCTTACATTGCGTTTGCGGGTAAAAGAGTA  
ATTGAACAAACATTAAATAAAACAGTACCCGAAGGTTTCGCAAGCGGCTGAATATTTATT  
CCAGAAGGGATTATTTCGACCTAATCGTACCGCGTAATCTTTTAAAAAACGTTCTGAGTG  
AGTTATTTAAGCTCCACGCTTTCTTTCTTTGAATCAAATCAAATCGAGATGGTAACCA  
TTCGAGCTGACGAAATTAGTAATATTATTCGTGAACGGATTGAACAATATAATAGAGAA  
GTAAGATTGTAAATACTGGTACCGTGCTTCAAGTAGGTGATGGCATTGCTCGTATTCAT  
GGTCTTGATGAAGTAATGGCGGGCGAATTGGTCGAATTTGAAGAGGGAACAATAGGTA  
TTGCTCTGAATTTAGAATCAAATAATGTTGGTGTGTATTAAATGGGTGATGGTTTGATGA  
TACAAGAAGGAAGTTCGGTAAAAGCAACAGGAAGAATTGCTCAGATACCAGTGAGCG  
ACGCCTATTTAGGGCGTGTATAAACGCCCTAGCTAAACCTATTGATGGTCGAGGTGAA  
ATTTTCAGCTTCCGAATCGCGATTAATTGAATCTCCTGCTCCAGGTATTATTTTCGCGGCGG  
TCCGTATATGAGCCTCTTCAAACCGGACTTATTGCTATTGATTTCGATGATTCTATAGGG  
CGGGGCCAGCGAGAATTAATTATGGGGACAGACAGACCGGTAAAACAGCAGTAGCC  
ACGGATACGATTCTCAATCAACAAGGTCAAATGTAATATGTGTTTATGTAGCTATTGGT  
CAAAAAGCATCTTCTGTGGCTCAGGTAGTAACTACTTTACAGGAAAGGGGGGCGATGG  
AATACACTATCGTGGTAGCCGAAACGGCGGATTCCCCTGCTACATTACAATATCTCGCTC  
CTTATACAGGAGCAGCTCTGGCTGAATATTTTATGTATCGTCAACGACACACTTCAATCA  
TTTATGATGATCCCTCCAAACAAGCACAAGCTTATCGTCAAATGTCTCTTCTATTACGAA  
GACCACCTGGACGCGAAGCTTATCCGGGGGATGTTTTTTATTTACATTCACGCCTTTTG  
GAAAGAGCCGCTAAATCAAGTTCTAGTTTAGGTGAAGGAAGTATGACCGCCTTACCAA  
TAGTTGAAACTCAATCGGGAGATGTTTCGGCTTATATTCCTACTAATGTAATTTCCATTAC  
TGATGGTCAAATATTCTTATCCGCTGATCTATTCAATGCTGGAATCAGGCCCGCTATTAAT  
GTGGGGATCTCCGTTTCCAGAGTGGGATCCGCAGCTCAAATTAAGCGATGAAACAAG  
TAGCTGGTAAATTAAGTTGGAACCTGGCTCAATTCGCAGAATTAGAAGCCTTTGCACAA  
TTTGCTTCTGATCTCGATAAAGCTACTCAGAATCAATTGGCAAGAGGTCAACGATTGCG  
TGAATTGCTTAAACAATCCCAATCAGCTCCTCTCGCGGTGGAAGAACAGATAATGACTA  
TTTATACCGGAACAAACGGTTATCTTGATTCAATAGAAATTGGACAGGTAAGGAAATTT  
CTTGTTGAGTTACGGACTTACGTAAAACTAATAAACCTCAGTTCCAAGAAATCATCTC  
TTCTACCAAGACATTCACCGAGGAAGCGGAAACCTTTTGAAAGAAGCTATTCAGGAA  
CAAATGAACCGTTTTCTCCTTCAGGAA-----ATGAGAATAAATCCTACTACTTCTGGTTC  
TGGGGTTTCCACGCTTGAAAAAACAACCTGGGGCGTATCGTCAAATCATCGGTCCG  
GTACTAGATGTAGCCTTTCGCGGGTAAGATGCCTAATATTTACAACGCTCTGGTAGTT  
AAAGGTCGAGATACTGTTGGTCAACCAATTAATGTGACCTGTGAGGTACAGCAATTATT  
AGGAAATAATCGAGTTCGAGCTGTAGCTATGAGTGCTACAGATGGTCTAATGAGAGGA

ATGGAAGTGATTGACACGGGAGCTCCTCTAAGTGTTCCGGTAGGTGGAGCGACTCTGG  
GACGAATTTTCAACGTGCTTGGAGAGCCTGTTGATAATTTAGGGCCTGTAGATGCTCGT  
ACAACATCTCCTATTCATAGATCTGCGCCCCCCTTTGTACAGTTAGATACAAAATTATCT  
ATTTTTGAAACGGGAATTAAGTAGTAGATCTTTTAGCCCCTTATCGCCGTGGAGGAAA  
AATAGGACTCTTCGGTGGAGCTGGGGTGGGTAAAACAGTACTCATTATGGAATTGATTA  
ACAATATTGCCAAAGCTCACGGGGGCGTATCCGTATTTGGCGGAGTGGGTGAACGTAC  
TCGTGAAGGAAATGATCTTTACATGGAAATGAAGGAATCTGGAGTTATTAATGAAGAA  
AATATTGCAGAATCAAAAGTGGCTCTAGTTTACGGTCAGATGAATGAACCCCGGGAG  
CTCGTATGCGAGTTGGTTTACTGCCCTAACTATGGCGGAATATTTCCGAGATGTTAATG  
AACAGACGTACTTTTATTTATCGACAATATTTTCCGTTTCGTTCAAGCAGGATCCGAA  
GTCTCGGCCTTATTGGGTAGAATGCCTTCCGCTGTGGGCTATCAACCCACCTTGAGTAC  
CGAAATGGGTCTTTACAAGAAAGAATTACTTCTACCAAAGAAGGGTCCATAACTTCG  
ATTCAGCAGTTTATGTACCTGCGGACGATTTAACCGACCCTGCTCCTGCTACGACATT  
TGCACATTTAGATGCTACTACCGTACTATCAAGAGGATTAGCTGCCAAAGGTATCTATCC  
AGCAGTAGATCCTTTAGATTCAACATCAACCATGCTTCAACCCGGGATCGTCGGTGAGG  
AACATTATGAACTGCGCAAAGAGTTAAGCAAACCTTTACAACGTTACAAGGAACTTCA  
GGATATTATAGCTATCCTTGGGTAGACGAATTATCCGAAGAGGATCGTTTAAACCGTAGC  
GCGAGCGCGAAAAATTGAGCGTTTCTTATCACAACCCTTTTTCGTAGCAGAAGTATTA  
CTGGTTCTCCAGGGAAATATGTTGGTCTAGCAGAAACAATTAGAGGATTTCAATTGATC  
CTTCTGGAGAATTAGATGGTCTTCCCTGAACAGGCCTTTTATTTGGTAGGTAATATCGAT  
GAAGCTACCGCAAAGGCTATGAACTTAGAAATGGAGAAGAAA-----ATGACCTTAAA  
TCTTTGTGTAATAACCCCTAATCGAATTGTTTGGGATTCCGAAGTAAAAGAAATCTTTT  
ATCTACTAATAGTGGTCAAATTGGCGTATTACCCAACCATGCCCTATTGCCACAGCTGT  
AGATATAGGTATTTTGAGAATACGCCTTAACGACCAATGGTTAACGATGGCTCTGATGG  
GTGGTTTTGCTAGAATAGGCAATAATGAGATCACTGTTTTAGTAAATGATGCAGAGAAG  
GGTAGTGACATTGATCCACAAGAAGCCCAGCAAACCTTTGAAATCGCGGAAGCTAATT  
TGAGAAAAGCGGAAGGAAAGAGACAAACAATTGAGGCAAATCTAGCTCTACGCCGAG  
CTAGGACACGGGTAGAGGCTATTAATGCGGTT--ATGCAAATGTAACCGATTCTTTCGT  
TTCTTTGGGCCATTGGCCATCCGCCGGGAGTTTCGGGTTTAAACCGATATTTTATCAAC  
AAATCTAATAAATCTAAGTGTAGTGCTTGGTGTATTGATCTTTTTTGGAAAGGGAGTGTT  
AAGCGATTTATTAGATAATCGAAAACAGAGAATCTTGAATACTATTGAAAACCTCAGAAG  
AACTCCGTGGAGGCGCCATTGAACAGCTGGAAAAAGCCCAGCTCGCTTACGGAAAG  
TTGAAATTGAAGCAGATCAGTTTCGAGTAAATGGATACTCTGAAATAGAGCGAGAAAA  
GTTGAATTTAATTAATTCAACTTCTAAAACCTTTAGAACAATTAGAAAATTACAAAATG  
AACTATTCAATTTGAACAGCAAAGGGCGATTAATCAAGTCCGACAGCGGGTTTTCCA  
ACAAGCCTTACGGGGAGCCCTAGGAACTCTGAATAGTTGTTTAAATAACGAGTTACATT  
TACGTACTATTAGTGCTAATATTGGCATGTTAGGGTCAATGAAAGAAATAACCGATATGA  
ATCCACTGATTTCTGCCGCTTCCGTTATTGCTGCTGGGTTGGCCGTAGGGCTTGCTTCTA  
TTGGACCCGGAGTTGGTCAAGGGACTGCTGCGGGTCAAGCTGTAGAGGGTATCGCGA  
GACAGCCTGAGGCAGAGGGAAAAATACGAGGTACTCTATTGCTTAGCCTAGCTTTTATG  
GAAGCTTTAACAATTTATGGACTGGTTGTAGCATTAGCGCTTTTGTGTTGCTAATCCTTTT  
GTTATGAATGTTCTA-----GCAAACACACTAAAAGGGTTATATGATGTATCCGGTGTGG  
AAGTAGGCCAGCATTCTATTGGCAAATAGGAGGCTTCCAAGTCCACGGCCAAGTACTT  
ATTACTTCTTGGGTTGTAATTGCTATCTTATTAGGTTTCGGCCGCTATAGCTGTTCCGGGAC



CCACAAACCATTCGAGCGGGGGTCAGAATTTCTTCGAATATGTTCTTGAATTCATTG  
AGATGTTAGTAAAACCTCAAATTGGAGAAGAATATGGGCCTTGGGTTCCTTTTATTGGAA  
CTATGTTTCTATTTATTTTTGTTTCTAATTGGTCAGGGGCTCTTTTACCTTGGAAAATCAT  
ACAATTACCTCATGGGGAGTTAGCCGCACCCACGAATGATATAAATACTACTGTTGCTTT  
GGCTTTACTCACGTCAGTGGCCTATTTCTATGCGGGTCTTGCCAAAAAAGGATTAGGTT  
ATTTTCGGGAAATATATTCAACCAACTCCAATCCTTTTACCCATTAACATCTTAGAAGATT  
TCACAAAACCCCTATCGCTAAGTTTTTCGACTTTTTCGGGAATATCTTAGCTGATGAATTAG  
TCGTTGTTGTTCTTGTTTCTTTAGTACCTTCAGTGGTTCCTATACCTGTTATGTTCCCTTGG  
ATTATTTACAAGTGGTATTCAAGCTCTTATTTTTGCAACTTTAGCCGCGGCTTATATAGGT  
GAATCCATGGAGGGCCATCATATGATATTTTCAACTTTAGAACATATATTAATCATATTT  
CCCTTTCCACTGTTTCAATCGTAATTACAATTCGTTTGATAACCTTTTTTCGTAGATGAAA  
TCGTACAACCTATACGATTCGTGCGAAAAAGGCCTGATAGTTAGTTTTTTCTGTATAACAG  
GATTATTGGTTACGCGTTGGGTTTATTTCGGGTCATTTTCCACTAAGTGATTATATGAATC  
ATTAATCTTCTTTCATGGAGTTTCTCCCTTATTCATATAATTCGGTAT-----AAAATAAA  
AATTATTTAAGCATAATAACCGGTTCAAGTGCTATTTTTACCCAAGGCTTTGCTACTTCC  
GGGCTTTTAACTCAAATACACCAATCTTCAATATTAGTACCCGCTCTTCAATCCGAGTGG  
TTAATAATGCATGTAACCTATGATGATAGTGGGCTATGCGTCCCTTTTATGTGGATCATTAT  
TATCAGTAGCACTTGTAGTCATTACATTTCGAAAAACAGAAAGATTTTTTGTATTACTA  
AAGAAATTGAATACATGAATAAAGAAGCAATCTTTTCCAACTACTTCT-----GATAA  
GAATTATTACAGATCTCAATTAATTCAACAATTGGATTATTGGAGTTATCGGGTTATTAGT  
CTAGGGTTTTTCTTTTAAACCATAGGTATTCTTTTCGGGAGCAGTATGGGCTAACGAAGCA  
TGGGGATCGTATTGGAATTGGGATCCAAAGGAAACTTGGGCATTTATTACTTGGATCGT  
ATTCGCGATTTATTTACATACTCGAACAAATATAAACCTGCAAGGTGCAAAATTCGGCAAT  
TGTGGCATCTATAGGCTTTCTTATAATTTGGATATGCTATTTGGGGGTTAATCTATTAGGA  
CTAGGGCTACATAGTTATGGTTCGTTTACATTAACAATGGCAAAAAAGAAAGCATTAC  
TCCT-----CTTGATCTATAGTATTTTTGGCTTGGTGGCTTCTCTCTCATTTCAAAAA  
GTTTGAATCTTGGGTTACTAATTGGTGGAAATGCTGGGCAATCCGAAAGTTTTTTGAAC  
GATATTCAAGAAAGGCGTATTCTAGAAAAATTCATAGAATTAGAGGAACCTCCTCGTCTT  
GGACGAAATGATCGAAGAATACTCAGAGACACGTTTACACAAGCTTCGTATA---GTCCA  
AAAAGAAACGATCCAATTAATCAAGATACACAACGAGGATCGTATCCATACGATTTTGC  
ACTTCTGGATAAATATAATTTGTTTTGTTATTCTAAGTAGTTATTCTATTTTTGGGTAATGA  
AGAACTTGTTATTCTTAACTCTTGGGCCAGGAATCCTATATAACCTAAGCGACACAG  
TCAAAGCTTTTTCTATTTCTTTTATTAACCGATTTATGTATCGGATTCCATTCAACCCACGG  
TTGGGAGTTAATGATCGGCTCTGTCTACAAAGATTTTGGATTTGTTTCAGAATGATCAAA  
TTATATCGGGTCTTGTTTCCACTTTTCCAGTCATTCTTGATACAGTTTTTAAATATTGGAT  
TTTCCGTTATTTAAATCGTGTATCTCCGCCACTTGTAGTTATTTATCATTCAATGAATGAC  
ATGCCTATTGGTGTTCCAAAGTACCTTTCCGAAGTCCTGGAGAGGAAGATGCATCTTG  
GGTTGACGTAAAC---CGACTTTATCGAGAAAGATTACTTTTTTTTAGGACAAGCAATTGAT  
AGCGAGATCTCAAATCAACTTATTGGTCTTATGATATATCTCAGTATTGAAGATGATAAC  
AAAGATCTGATTTGTTTATAAACTCTCCCGCGGATGGGTAATACCTGGAGTAGCGATT  
TATGATACTATGCAATTTGTACGACCGGATGTCCATAACAATATGCATGGGGTTAGCCGCT  
TCAATGGGATCTTTTATCCTGGTTCGGAGGCGAAATTACCAAACGTCTAGCATTCCCTCA  
CGTAGGGTAATGATCCATCAACCTGCTAGTTCGTTTTATGAGGCACAAACGGGAGAAT  
TTATCCTGGAAGCGGAAGAATTGCTGAAAATGCGTGAAACCCTCACAAGGGTTTATGT

ACAAAGAACAGGTAAACCCTTATGGGTTGTATCCGAAGACATGGAAAGAGATGTTTTT  
ATGTCAGCAACAGAAGCACAAGCTTATGGAATTGTTGATCTTGTAGCGGTTGAAATGA  
AAGAACAAAATGGATTCATGAGGGTTTAATTACCGAATCGCTTCCCAATGGCATGTT  
CGGGTTCGTTTATGATAATGAAGATCTGATTCTAGGTTATGTTTCAGGAAAGATCCGTCG  
AGTTTTATACGGATACTACCGGGAGATAGAGTCAAGGTTGAGGTAAGTCGTTATGATTC  
AACCAGAGGACGTATAATTTATCGACTCCGCAACAAGGATTCGAAGGATATGGAAGAA  
ATCCAAAGATATTTACAG---GATAGATCTCAACAACCCAGCTTTCTATATCCACTTATCT  
TCAGGAGTATATTTATGCACTTGTTTCATGACCATAGTTTACCGGGTTATGAGAATAAATA  
CAGTTTCCTTATTGTGAAACGATTAATTAATCGCATGTATGAACAGAATCATTTCCTTATT  
TCTGCTAATGATTCTAACCAAAATCGATTTTTGGGGAAGAATTTGTATTCTAAAATGTTA  
TCAGAGGGATTTTCAGTTATGATGGAATCCCGTTTTCTAAACGATTAATATTTCTGAA  
ATATTCAAATCCCCTAATTTACGATCAATTCATTCAATATTTCTTTCTTAGAGGACAATT  
TTGCACATTTTAATTTTGTGTTAGATATACTAATAACCCACCCCGTTCATCTGGAAATCTT  
GGTTCAAACCTTCGCTATTGGGTAAGATGCCCTTCTTTGCACTTATTACGATTCTT  
TCTCCGCGAGTATTGGAATTGGAATAATCTTATTGCTCTCAGT---TTTGATTTTTTAATAC  
AAAGATCTTCTTCTTCTTATATAATTTTATGTATGTGAATACGAATCCATTTTCGCTTT  
CTCTATAACCAATCTTCTCATTACGATCAACATCTTTTGGGGTCTTCTTGAACGAATC  
CATTTCTATGGAAAATAGAACGCTTGTGCGAAGTATTTGCT---GATTTTAACTTAGGCT  
TGTTCAAAGATCCTTTCATGCATTATGTTAGGTATCAAGGAAAATCCATTTTGGTTTCAA  
AAGGGCCGTCTCTTTGGATAAATAAATGGAAATCTTACCTTGTCAACTTTTGGCAATGT  
TATTTTGACCTGTGGTTTCACTCGGAAAGGGTCTATATAAAACAATTGTCCAATCATTCT  
CTTGACTTTATGGGTTATCTTGCAAATGTGCGACTAAACCCTTCAATGGTACGGGGTCA  
AATGCTAGAAAATGCATTTCTAATCAATAATGCTATT-----AAGCAATTCGATACCCTTGT  
TCCAATTTCTCTCTGATTAGATCATTGGCTAAAGCGAAATTTTGTAACTATTAGGACA  
TCCTATTAGTAAGCTGGTTTCGACTGATTTATCAGATTCTGATATTCTGGACAGATTTGG  
GCGGATATGCAGAAACCTTTCTCATTATCATAAGTGGATCTTCCAAAAAAGAGTTTGT  
ATCGAATAAAGTATATACTTCGACTTTCTTGTGCTAAAACCTTTAGCTCGGAAACACAAA  
AGTACTGTACGGGCTTTTTTTGAAAAGATTAGGTTTCGGCATTTTTTGGAAGAATTCCTCAT  
GTCGGAAGAAGAAGCCCTTTCTTTGACCTTCCCAAAACGTATTTGGTATTTGGATATTA  
CTTGATCAACGATCTGGCGAATCGGCAAATGATAATTGAT---ACAACCAAAATACAA---  
GTTATCAATTTCTTTTCCAGATTGGAATCC---TAAAAGAGGCCTATGGGATTATATGGCT  
ACTTGTTCCGATTTTACTCTTGTATTAGGAATCACAATCGGTGTAATCGTAATTGTTTG  
GTTAGAAAGAGAAATATCTGCAGGGATACAACAACGTATTGGACCTGAATATGCCGGC  
CCCTTGGGAATTTCTCAAGCTCTAGCAGATGGTACAAAACCTGCTTTTCAAAGAGAACC  
TTCTCCATCTCGAGGAGATGGTCGTTTATTAGTATCGGACCTCTGTGCGAGTCATAT  
CCATTTTACTAAGTTATTCAGTAATTCCTTTTGGATATCACCTTATTCTAGCCGATCTTGG  
TATTGGTGTTTTTTTATGGATCGCTATTTCAAGCATTGCTCCCGTTGGACTTCTTATGTCG  
GGATATGCATCAAATAATAAATATTCCTTTTTAGGTGGTCTACGGGCTGCTGCTCAATCA  
ATTAGTTATGAAATACCATTAACCTTTATGTGTATTGTCAATATCTCTATTATCTAACAGTTC  
AAGTACAGTTGATATAGTTGAAGCCCAGTCAAATATGGTTTTTGGGGGTGGAATTTGT  
GGCGTCAACCTATAGGGTTTATCATTTTTCTAATTTCTTCTCTAGCCGAGTGTGAGAGAT  
TACCTTTTGATTTACCAGAAGCAGAAGAAGAATTAGTAGCAGGTTATCAAACCGAATAT  
TCAGGTATCAAATTTGGTTTATTTTACGTTGCTTCATATCTGAATCTACTAGTTTCTGCAT  
TATTTGTAACAGTTCTTACTTAGGGGGTTGGAATCTTTCTATTCCGTACATATTAGTCC

TGAAATTTTTGACATAAATAAAGTAGATAAAGTTTTTGGAAACAATACTCAGCATCTTTAT  
TACATTAGCTAAAACCTATTTGTTCTTGTTTCATTCTTATTGCAACAAGATGGACTTTACC  
AAGGCTGAGGATGGACCAACTATTAATCTTGGATGGAAATTTCTTTTACCTATTTCTCT  
AGGTAATCTATTATTAACAACCTTCGTCCCAACTTCTATCACTGATGATCTGGCATGTACA  
GAATGAAAACCTTCATTCTCGATTCTACGAGAATTTTTATGAAAGCCTTTCATTTGCTTCT  
CTTCGATGGAAGTTTGATTTTCCCAGAATGTATCCTAATTTTTGGCCTAATTTCTTCTCTG  
ATGATCGATTCAACCTCGGATCAAAAAGATATACCTTGGTTATATTTTCATCTCTTCAACA  
AGTTTAGTAATGAGCATAACGGCCCTATTGTTCCGATGGAGAGAAGAACCTATGATTAG  
CTTTTCGGGAAATTTCCAAACGAACAATTTCAACGAAATCTTTCAATTTCTTATTTACT  
ATGTTCAACTCTATGTATTCTCTATCCGTAGAGTACATTGAATGTACAGAAATGGCTAT  
AACAGAGTTTCTTATTTCGTATTAACAGCTACTCTAGGAGGAATGTTTTTATGCGGTGC  
TAACGATTTCATAACTATCTTTGTAGCTCCAGAATGTTTCAGTTTATGTTCTTACCTATTA  
TCTGGATATACCAAGAAAGATGTACGGTCTAATGAGGCTACTATGAAATATTTACTCATG  
GGTGGGGCAAGCTCTTCTATTCTGGTTCATGGTTTCTCTTGGCTATATGGTTCATCCGGG  
GGAGAGATCGAGCTTCAAGAAATAGTGAATGGTCTTATCAATACACAAATGTATAACTC  
CCCAGGAATTTCAATTGCGCTCATATTCATTAAGTATGAGGAAATGGGTTCAAGCTTTCCCC  
AGCCCTTCTCATCAATGGACTCCTGACGTATACGAAGGATCTCCCACTCCAGTCGTTG  
CTTTTCTTTCTGTTACTTTCGAAAGTAGCTGCTTCAGCTTTAGCCACTCGAATTTTCGATA  
TTCCTTTTTATTTCTCATCAAACGAATGGCATCTTCTTCTGGAAATCCTAGCTATTCTTAG  
CATGATATTGGGAAATCTCATTGCTATTACTCAAACAAGCATGAAACGTATGCTTGATA  
TTCGTCCATAGGTCAAATCGGATATGTAATTATTGGAATAATTGTTGGAGACTCAAATGA  
TGGATATGCAAGCATGATAACTTATATGCTGTTCTATATCTCCATGAATCTAGGAACTTTT  
GCTTGCATTGTATTATTTGGTCTACGTACCGGAACGGATAACATTCGAGATTATGCAGGA  
TTATACACGAAAGATCCTTTTTTGGCTCTCTTTAGCCCTATGTCTCTTATCCCTAGGG  
GGTCTTCCCTCCACTAGCAGGTTTTTTCGGAAAACCTCTATTTATTCTGGTGTGGATGGCA  
GGCAGGCCTATATTTCTTGGTTTTAATAGGACTCCTTACAAGCGTTGTTTCTATCTACTAT  
TATCTAAAATAATCAAGTTATTAATGACTGGACGAAACCAAGAAATAACCCCTCACGT  
GCGAAATTATAGAAGATCTCCTTTAAGATCAAACAATTCATCGAATTGAGTATGATTGT  
ATGTGTAATAGCATCTACTATAACCAGGAATATCAATGAACCCGATTATTGCAATTGCTCA  
GGATACACTTTTTATGTTTCTGCTTACGAATATGATATTTTTTGGGCATTTCTAATAATAT  
CAAGTCTTATTCTATTTTGGCTTTTTTAATTTCCGGAGTTTTAGCCCCGATTAGCAAAG  
GACCAGAGAACTTTCTAGTTATGAATCGGGTATAGAACCAATGGGCGACGCTTGGTTA  
CAATTCGAATCCGTTATTATATGTTTGGCTCTAGTTTTTGTGTTTTTGGATGTTGAAACGG  
TTTTTCTTTATCCCTGGGCAATGAGTTTCGATGTATTGGGTGTATCCGTATTTATAGAAGC  
TTTCATTTTTGTGCTTATCTTAATTGTTGGTTTATGTTTATGCATGGCGAAAGGGGGCATT  
GAATGGTCTACGAAATTTTTTCTTGGTTAACCATAATTGTAGTTTTGCCAATATTTGCG  
GGTTTCTTAATTTCTTCTTCCCATAGGGGAAATAGGGTCATTCCGTGGTATACTATAT  
GTATATGATTTTAGAACTCCTTCTAATGGTCTATACATTCTGTTATCATTCCAACCAGA  
CGATCCATTAATCCAACCTATTGGAGGATTATAAATGGATCCGTTTTTTTGGATTTCCACTG  
GAGATTAGGAATAGATGGACTTTCTATAGGACCCATTTTACTAACGGGATTCATTACCAC  
CTTAGCTACTTTATCGGCTTGGCCTGTTACTCGAGATTCTCGATTATTTCAATTTCTGATG  
TTAGCAATGTACAGTGGTCAAATAGGATCATTTTCTTCTCGAGACCTTTTACTTTTTTTC  
ATCATGTGGGAGTTAGAATTAATCCCCTTATCTACTTCTAGCCATGTGGGGAGGAAA  
GAAACGTCTGTACTCGGCTACAAAATTTATTTTGTACACGGCAGGGGGCTCGATTTTTC

TATTAATGGGAGTTCTAGGTATAGGTTTATATGGTTCTAATGAACCAACATTAATTTTTGA  
AACATCGGCTAATCTGTCATATCCTGTGGCCTTAGAAATAATATTGTACATTGGATTTTTT  
ATTGCTTTTGGCTGTCAAATCGCCGATTATACCCCTACATACATGGTTACCAGATACCCAC  
GGAGAAGCACATTACAGTACTTGTATGCTTCTAGCCGGAATCTTATTAATAATGGGAGC  
ATATGGATTGGTTCGGATCAATATAGAGTTATTATCTCACGCCATTATATCTTTTTCCCCTT  
GGTTAGTGATAGTAGGAACAATCCAAATAATCTATGCAGCTTCAACATCTCTTGGCCAA  
CGGAATTTAAAAAAGAATAGCCTATTCTTCTGTATCTCATATGGGGTTCATAATTATA  
GGAATTGGTTCTCTAACTGATACAGGACTCAATGGAGCTCTTTTACAAATAATCTCTCAT  
GGGTTTATTGGTGCTGCCCTTTTTTCTTGGCAGGGACAACCTTATGATAGAACACGTCT  
TGTTTATCTTGACGAAATGGGCGGAATAGCTATCACAAATGCCAAAACCTATTACGATGT  
TTAGTAGCTTTTCGATGGCTTCCCTTGCATTACCGGGTATGAGCGGCTTTGTTGCTGAAT  
TGATAGTATTTTTGGGGATAATTACCAGCCACAAATATTTTTTAATGCCAAAATACTAAT  
TACTTTTGAATGGCAATTGGGATGATATTAACCTCTATTATTTCATTATCTATGTCACGCC  
AGATGTTCTATGGATATAAGCTTTTTAACGTCCCAAACCTTATTTTTTGGATTCTGGAC  
CGCGAGAGTTATTTCTTTTCGATTTCTCTTTTTTACCCGTAAGTATTGGTATGTACCC  
GGATTTTCGTTCTTTCACTATCGGTTGATAAGGTCGAAGTTATCCTATCTAATTCTTTTTCT  
AAAATGATGCTCGAACATGTACTTGTTTTGGAGTGCTTATTTATTTTCTATCGGTATCTATG  
GATTGATCACAAGTCGAAATATGGTTAGAGCCCTTATGTGTCTTGAACCTATATTGAATG  
CAGTTAATATAAATTTTGTAAACATTTTCTGATTTTTTTGATAATCGTCAATTAAGGGAGA  
TATTTTCTCAATTTTGTATAGCTATTGCAGCCGCTGAAGCAGCTATTGGACTGGCTATT  
GTTTCATCAATTTATCGTAATCGAAAATCAACTCGTATTAACCAATCGAATTTGTTGAAT  
AAGATGCAACAAACATATCAATACGGGTGGCTCATACTTTTATTCCACTTCCCGTTCCT  
ATATTAATAGGGGTGGGGCTTCTTCTTTTTCCGACGGCAACCAAAAATGTTTCGACGTAT  
GTGGTCTTTTCAGAGTGTTTTATTGTTAAGTATAGTCATGATTTTTTCAATCAATTTGTCT  
ATTCATCAAATAAATACTAATTCTGTCTATCAATATGTATGGTCTTGGATCATTAAATAATGA  
TTTTTCTTTTCGAATTCGGCTATTTGATAGATCCACTTACTTCTATTATGTCAATATTAATCA  
CTACCGTTGGAATTATGGTTCTTATTTATAGTGATAATTATATGGCTCATGATCAAGCATAT  
TTGAGATTTTTTGCTTATATGAGTTTTTTTCAGTACTTCCATGTTAGGATTAGTTACTAGTT  
CGAATTTGATCCAAATTTACATTTTTTGGGAATTGGTTGGGATGTGTTCCCTATCTATTAAT  
CGGATTTTGGTTCACACGACCTCTTGCAGCAAATGCTTGCCAAAAGCTTTTGTAAACA  
AATCGTGTAGGGGATTTTGGTTTATTATTAGGAATCTTAGGTTTTTATTGGATAACAGGC  
AGCTTCGAATTTTCAGGATTTATTCGAAATATTCAATAACAACGAGGTCAATTTTTTATT  
GTTACTTTGTGTGCTGTTCTATTATTTACTGGTGCCATTGCTAAATCTGCACAATTTCCCC  
TTCATGTATGGTTGCCGATGCTATGGAAGGGCCACTCCGATTTCCGCTCTTATACACG  
CCGCTACTATGGTAGCGGCGGGAATTTTTCTTGTAGCTCGACTTCTTCCCTTTTTCATAG  
TTATACCTTCGATAATGAATTTTATTTTCGTTGATAGCAATAATAACAGTGCTATTAGGAGC  
TACTTTAGCTCTTGCTCAAAAAGACATTAAGAAAGGTTTAGCCTATTCCACAATGTCTC  
AATTGGGTTATATGATGTTAGCTCTAGGTATGGGGTCTTATCGAAGTGCTTTIATTTCAAT  
GATTACTCATGCCTATTCTAAAGCATTACTATTTTTAGGATCCGGATGCGTTATTCATTCA  
ATGGAAAACCTTGTGGCTATTCTCCCTATAAAAGTCAGAATATGGTTCTTATGGGAGG  
TTTAAGAAAACATGTCCCAATTACCAAAAATGCTTTTTTATTAGGTACACTTTCTCTTTG  
TGGTATTCCGCCCTTGGCTTGTTTTTGGTCCAAAGATGAAATTCCTAATGATACTTGGGT  
GTATTCGACGGTTTTTGTCAATAACAGCCTGGGGTACCGCTGGATTAACCGCATTTTATAT  
GTTTCGAATCTATTTACTTACCTTTGAGGGACATTTAAACGTTCAATTTCAAATATAGT

GGCAACCAAAAAATCCCTTTCTATTCAATATCTTTATGGGGTAAAGGAGTTTCAAAAAG  
AATTAACCAA---TTATTGGCA-----ATGAGTTTTTTTTTCATTTGAGAATAAAAAACTTCA  
GCCCTATCCTTATGAATCAGACAATACTATGTTATTCCCTCTACTTGTATTGGGCCTATTT  
ACTTTGTTCTGTTGGGTCTATAGGAATTCCTTTTCGATGTTGATATATTATCGAAATGGTTAA  
TTTCGTCTCTAAACCTTTTGCATCAAAGTTGACT---TCGACGGATTGGTATGAATTTTC  
AAAAGATGCCATTTTTTCAGTCAGTATAGCTTATTTAGGAATATTGATAGCGTCCTTTTTA  
TATAAAGCTCCTTATTCCCTATTTACTCAATTTTTATTTAATTAATTCAGTTGTTATTCTTTG  
GGAAAAAATTATAAACGGTATATATGCTTGGTCATATAATCGTGCTTACATAGATTCTTTT  
TATACCAGATTCTTAACTGGGGGAACAAGAGGATTTCGCCGAATTAACTCATTTTTTTGA  
TCGACGAATAATTGATGCAATTACCAATGGAGTTGGTCTTATTAGTTTCTTTGTAGGAGA  
AGCTATCAAATATGTAGGAGGCGGC---CGCATCTCTTCTTATCTTTTTTTCTATTTATCGTA  
TGATCGATTTGTTTATTCAATTTGTTTATGGATTTCCCTGGGCCAATACATGATTTTCTTT  
TAGTCGTTCTGGGATCGAGTCTGATTTTAGGAAGTCTAGGAGTAATATTACTTCCCAATC  
CAATTTATTCTGCCTTTTCGTTAGGATTGGTTCTTGTTTGTATATCCTTATTCTATATTCTAT  
TGAATTCCTACTTTGTAGCTGCTGCGCAACTACTTATTTACGTAGGGGCTATAAATGTTT  
TAATTTTTTTGCTGTGATGTTCAATGAACGGTTCAGAATATTACGAAGATTCTAATCTTG  
GGACTGTTGGGGATGGGATTACTGCAATGGTTTGTACAAGTCTTTTTTATTTACTAATTA  
CTACTATTCCAGATACGTCATGGTACGGGATTCTTTGGACTACAAGATCAAACCAGGTT  
CTAGAACAAGATTTGATAAGCAATAGTCAACAAATTGGAATTCATTTATCAACAGATTT  
TTTTCTTCCATTTGAACTCATTTCAATAATTCTTTTAGTTGCTTTAATAGGTGCAATTGCT  
GTAGCTCGTCAAATGACTGTACCAGCTACAAGAAAAGACCTCATGATAGTCAATATGGG  
TCCTCACCACCCATCGATGCATGGTGTCTTCGACTCATCGTTACTCTAGATGGTGAAG  
ATGTTATTGACTGTGAACCGATATTGGGTTATTTACACCGAGGGATGGAGAAAATTGCG  
GAAAATCGAACAATTGTCCAATATTGCCCCTATGTAACACGTTGGGATTATTTAGCTACT  
ATGTTACAGAAGCAATAACTGTAAACGGGCCCGAACAATTAGGAAATATTCAAGTAC  
CTAAAAGAGCTAGTTATATCAGAGTCATTATGTTGGAGTTGAGTCGTATAGCTTCCCATC  
TGTTATGGCTTGGCCCCTTTATGGCAGATATTGGTGCCCAGACCCCTTTCTTCTATATTTT  
TCGAGAAAGGGAATTGATATATGACCTATTCGAAGCTGCTACAGGTATGCGAATGATGC  
ACAATTTTTTTCGTATCGGAGGAGTAGCTGCTGATCTACCTTATGGCTGGATAGATAAAT  
GTTTGGATTTTTGTGATTACTTTTTTAACGGGGGTTGCTGAATATAAAAAACTTATTACAC  
GGAATCCTATTTTTTTTAGAACGAGTTGAAGGCGTGGGCATTATTGGCGGAGAAGAAGC  
ACTAAATTGGAGTTTATCAGGACCAATGCTACGGGCTTCCGGAATCCAATGGGATCTTC  
GTAAAGTTGATCATTATGAGTGTTACGATGAATTTGATTGGGAAGTTCAATGGCAAAAA  
GAAGGGGATTTCGCTAGCTCGTTATTTAGTACGACTCGGTGAAATGACAGAATCCATAAA  
AATTATACAACAAGCTTTAGAAGGAATTCCAGGAGGGCCCTATGAGAATTTAGAAATAC  
GACGTTTTGATAGAGTAAAAGATCCCAAATGGAATGATTTTGAATATCGATTTATTAGTA  
AAAAGCCTTCTCCAACTTTTGAATTGGCCAAACAAGAACTTTATGTGAGAGTCGAAGC  
TCCAAAAGGAGAATTGGGAATTTTTCTGATAGGGGATCAGAGCGTTTTTTCTTGGAGAT  
GGAAAATTCGCCC GCCGGTTTTATCAATTTGCAAATCTTCCCTCAGTTAGTTAAAAGA  
ATGAAATTGGCTGATATTATGACGATATTAGGTAGCATAGATATCATTATGGGAGAAGTT  
GATCGTATGTTACCTATGATAACTGAGTTCATGAATTTATGGTCAACAAACAATACGAGCT  
GCCAGGTACATCGGTCAAGTTTTACGATTACTCTGTCTCACGCAAATCGTTTACCTAT  
AACTGTGCAATACCCCTATGAAAACTAATCGCATCGGAACGTTTTTCGAGGCCGAATCC  
ACTTTGAATTTGATAAATGCATTGCTTGTGAAGTATGCGTTCGTGTATGTCCTATAGATCT

CCCCGTTGTAGATTGGAAATTGGAAAGTCATATTCGAAAGAAACGATTATTTAATTACA  
GTATTGATTTTGGAACTGTATATTTGTGGTAATTGCGTTGAGTATTGTCCAACAAATTG  
TTTATCAATGACTGAAGAATACGAACTTTCCCTGTTATGATCGTCACGAATTGAATTATAA  
TCAAATTGCTTTGGGTCGGTTACCGACGTCAGTAGTTGATGATTACACAATTCGAACAA  
TTTCGAATTCA-----ATGCAGGGTCCTTTGTCTGCTTGG  
CTAGTCAAGCATGGGTTAATTCATAGATCTTTGGGCTTTGATTACCAAGGAATAGAGAC  
TTTACAAATAAAGTCCGAGGATTGGCATTCCATTGCTGTCATTTTATATGTATATGGTTAC  
AATTATCTACGCTCCAATGCGCCTATGATGTAGCACCCGGAGGGCTGTTAGCTAGTGT  
GTATCATCTTACAAGAATAGAGTATGGTGTGGAGCAACCAGAAGAGGTATGCATAAAA  
GTATTTGCCTCAAGGAGGAATCCTAGGATTCCGTCCGTCTTCTGGGTTTGGAAAGGTGT  
GGATTTTCAAGAACGAGAATCTTATGATATGTTGGGAATCTCTTATGATAATCATCCACG  
CTTGAAACGTATCTTAATGCCTGAAAGTTGGATAGGATGGCCCTTACGTAAGGATTATAT  
TACCCCAATTTTATGAAATACAAGATGCTCAT-----

-----ATGAATTCTATTGAGTTTCCTTTACTTAATCGAACAGCCCAAATTCAGTTATTT  
CAACTACATTAATGATCTTTCAAATTGGTCAAGACTCTCTAGTTTATGGCCGCTTCTCT  
ATGGTACCAGTTGTTGCTTCATTGAATTTGCTTCCCTAATAGGGTCACGATTGACTTTG  
ATCGTTATGGACTAGTACCAAGATCGAGTCCTAGACAGGCGGATCTAATTTTAAACAGCC  
GGAACAGTAACAATGAAAATGGCCCTTCTTAGTGAGATTATATGAGCAAATGCCTGA  
ACCAAATATGTTATTGCTATGGGAGCATGTACAATTACCGGAGGTATGTTTCAGTACCGA  
TTCTTATAGTACTGTTTCGGGGAGTCGATAAGCTAATTCCTGTGGATGTGTATTTACCGGG  
CTGTCCACCTAAACCGGAAGCAGTTATAGATGCTATAACAAAACCTTCGCAAGAAAATAT  
CTCGAGAAATCTATGAAGATAGAATTAGGTCTCAACGAGCGAATCGGTGTTTTACTACC  
AATCACAAGTTTCATGTTGGACGCAGTATTCATACTGGAAATTATGATCAAGGATTCCTT  
TATCAACCGCCATCGACTTCAGAGATACCTACTGAACTTTTTTCAAATATAAAAGTTC  
AGTATCTTCCCATGAATTAGTGACTATGGAACTAGAAAGACTTTTTCTTGGATAAAGG  
AACAGATTACTCGATCGATTTCCGTATCGCTCATGATATATATCATAACTCGGACGGCCAT  
TTCAAATGCATATCCCATTTTTGCACAGCAGGGTTATGAAAATCCACGAGAAGCGACCG  
GGCGTATTGTATGTGCCAATTGTCATTTAGCTAATAAGCCCGTGGATATTGAGGTACCGC  
AAGCGGTACTTCCCATACTGTATTTGAAGCAGTCGTTTCGAATTCCTTATGATATGCAAC  
TGAAACAAGTTCTTGCTAATGGTAAAAAAGGGGGTTTGAATGTAGGGGCTGTTCTTATT  
TTACCGGAAGGTTTTGAATTAGCTCCCCGGATCGTATTTCTCCCGAAATGAAAGAAA  
GATAGGCAATTTGCTTTTTAGACCTATCGCCCTAATAAAAAAATATTCTTGTGATAGG  
CCCTGTCCCTGGTCAGAAATATAGTGAAATCACCTTTCCCATCTTTCCCCGACCCCG  
CTACTAAGAAAGATGTTCACTTCTTAAAATATCCTATATACGTAGGCGGGAACAGGGGA  
AGGGGTCAGATTTATCCCGACGGGAGCAAGAGTAATAATACAGTTTATAATGCTACAGC  
AGCAGGTATAGTAAGCAAATCATAAGAAAAGAAAAGGGGGGTATGAAATAACCATA  
ACAGATCCG---GATGGACGTCAAGTGGTTGATATTATCCCCCAGGACCGGAACCTTCTT  
GTTTCGGAGGGCGAATCCGTGAAATTTGATCAACCATTAACGAGTAATCCTAATGTGGG  
CGGATTTGGTCAGGGGGATGCGGAAATAGTACTTCAAGATCCCTTACGTGTCCAAGGC  
CTTTTGTCTTCTTGGCATCTGTATTTTGGCACAAATCTTTTTGGTTCTTAAAAAGAAA  
CAGTTCGAGAAGGTTCAATTGGCCGAAATGAATTTTCATGAGTAAAGTCTATGATTGGTT  
CGAAGAACGTCTCGAGATTCAGGCCATTGCGGATGATATAACCAGTAAATACGTTCCCTC  
CCCACGTCAATATATTTTATTGTTTGGGGGTATTACGCTTACTTGTTTTTTAGTACAAGT

AGCTACGGGATTTGCTATGACTTTTTACTATCGTCCGACTGTTACTGAAGCTTTTGCTTC  
TGTTCAATACATAATGACTGAAGCTAACTTTGGTTGGTTAATCCGATCAGTTCATAGATG  
GTCGGCAAGTATGATGGTCCTAATGATGATTCTACATGTCTTTCGTGTGTAICTTACCGG  
TGGATTTAAAAAACCTCGCGAATTGACTTGGGTTACAGGTGTGGTTCTAGCTGTATTGA  
CCGCATCTTTTGGCGTAACTGGTTATTCCTTACCCTGGGACCAAATTGGTTATTGGGCA  
GTGAAAATTGTAACAGGTGTACCTGAAGCTATTCCTGTAATAGGATCCCCTTTGGTAGA  
ATTGTTGCGTGGAAGTGCTAGTGTGGGACAATCCACTTTGACTCGTTTTTATAGTTTAC  
ACACTTTTGTCTTGCCCTTCTTACTGCCGTATTTATGTTAATGCACTTTTCAATGATACG  
TAAACAGGGTATTTCTGGTCCTTTAATGGGAGTAACAAAAAACCTGACTTGAATGATC  
CTGTATTACGAGCTAAATTGGCTAAAGGGATGGGTCATAATTATTACGGAGAGCCTGCA  
TGGCCCAATGATCTTTTATATATTTTTCCGGTAGTAATTCTAGGTACTATTGCATGTAACG  
TAGGCTTAGCGGTTCTAGAACCATCAATGCTTGGTGAACCGGCAGACCCGTTTGCAAC  
TCCTTTGGAAATATTACCGGAATGGTATTTCTTTCCCGTATTTCAAATACTTCGTACAGTC  
CCCAATAAATTATTGGGTGTTCTTTTAAATGGTTTTAGTACCTGCGGGATTATTAACAGTA  
CCTTTTTAGAAAATGTTAATAAATTTCAAATCCATTTTCGTTCGTCCAGTAGCGACAAC  
CGTCTTTTTAATTGGTACCGCAGTCGCTCTTTGGTTGGGTATTGGTGCAACATTACCTAT  
TGATAAATCCCTAACTTTAGGTCTTTTTATGATTGAAGTTTTTCTATTTGGAATCGTGTTA  
GGTCTAATTCCTATTACTTTGGCTGGATTATTCGTAACCTGCATACTTACAATACAGACGT  
GGTGATCAGTTGGACCTTATGCTTACTATAACTAGTTATTTTGGTTTTCTACTAGCGGCTT  
TAACTATAACCTCTGCTCTATTTATTGGTTTTGAGCAAGATAGGACTTATTATGGATATAGT  
AAGTCTCGCTTGGGCTGCTTTAATGGTAGTCTTTACATTTTCCCTTTCACTCGTAGTGTG  
GGGACGAAGTGGACTCATGATTATTCGTTCCCGGAACCAGAAGTAAAAATTTTGGTA  
GATAGGGATCCCGTAAAACTTCTTTCAAGGAATGGGCCAAACCGGGTCATTTCTCAA  
GAACAATAGCTAAAGGGCCTGATACTACCCTTGGATCTGGAACCTACATGCTGATGCT  
CACGATTCGATAGCCATAACCAGTGATTTGGAGGAGATCTCTCGAAAAGTATTTAGTGC  
CCATTTCCGGCCAACTCTCCATCATCTTTCTTTGGCTGAGTGGCATGTATTTCCACGGTGC  
TCGTTTTTCCAATTATGAAGCATGGCTTAGTGATCCAACCTCACATTGGGCCTAGTGCC  
AGGTGGTTTTGGCCAATAGTGGGCCAAGAAATATTGAATGGTGATGTGGGCGGAGGTTT  
CCGAGGAATACAAATAACCTCCGGGTTTTTTTTCAGATTTGGCGAGCATCTGGAATAACTA  
GTGAATTACAACCTATATTGTACCGCAATTGGTGCATTGGTCTTTGCCGCGTTAATGCTTT  
TTGCTGGTTGGTTTCACTATCATAAAGCAGCGCCAAAATTGGCTTGGTTTTCAAGATGTA  
GAATCTATGTTGAATCACCATTTAGCGGGGTTACTAGGACTTGGGTCTCTCTCTTGGGC  
AGGACATCAAGTCCATGTATCTTTACCAATTAACCAATTTCTAAACGCTGGAGTAGATC  
CTAAAGAGATAACCACTTCCTCATGAATTTATCTTGAATCGAGATCTTTTGGCTCAACTTT  
ATCCCAGTTTTGCGGAGGGAGCAACCCCATTTTTTACCTTGAATTGGTCAAATACCGG  
GAATTTCTTACTTTTCGTGGAGGATTAGATCCAGTAACTGGGGGTCTATGGTTGACCGAT  
ATTGCACACCATCATTAGCTATTGCAATCTTTTCCCTGATAGCAGGTACATGTATAGG  
ACCAACTGGGGCATTGGTCATGGTCTGAAAGATAATTTTAGAAGCTCACAAAGGTCCATT  
TACAGGTCAGGGTCATAAAGGACTATATGAGATCCTAACAACGTCATGGCATGCTCAAT  
TATCTCTTAACTAGCCATGTTAGGCTCTTTAACCATTGTTGTAGCTCACCATATGTATTC  
CATGCCCCCTATCCATATCTAGCTACTGACTATGGTACCCAACTGTCCTTGTTCACACA  
TCACATGTGGATTGGTGGATTTCTCATAGTTGGGGCTGCTGCGCATGCAGCCATTTTTAT  
GGTAAGAGACTATGATCCAACCTACTCGATACAACGATCTATTAGATCGTGTCTTCGACA  
TCGTGATGCAATCATATCACATCTCAACTGGGTATGTATATTTCTAGGCTTTCACAGTTTT

GGTTTGTATATTCATAATGATACCATGAGTGCTTTAGGGCGTCCTCAAGATATGTTTTCA  
GATACCGCTATCCAATTACAACCTGTTTTGCTCAATGGATACAAAATACCCACGCTTTT  
GCACCTGGTGCACGGCTCCTGGTGCAACAGCAAGCACCAGCTTAACCTGGGGAGGT  
GGTGATCTAGTAGCAGTGGGTGGCAAGGTAGCTTTGTTACCTATTCCATTAGGAACCGC  
AGATTTTTTGGTACATCACATTCATGCATTTACGATTCATGTGACGGTATTGATACTCCTT  
AAAGGTGTTTTATTTGCTCGTAGCTCCCGTTTTGATACCGGATAAAGCAAATCTTGGTTTT  
CGTTTTCTTGCATGGACCTGGAAGAGGGGGTACATGCCAAGTATCGGCTTGGGATC  
ATGTCTTCTTAGGACTATTCTGGATGTACAATGCAATTTCCGGTAGTAATATCCATTTAG  
TTGGAAAATGCAGTCAGATGTTTGGGGCAGTATAAGCGATCAAGGGGTAGTAACTCATA  
TCACGGGAGGAACTTTGCGCAGAGTTCTATTACTATTAATGGGTGGCTACGCGATTTC  
TTATGGGCACAGGCATCCAGGTAATTCAGTCTTATGGTTCGTCATTATCCGCCTATGGC  
CTTTTTTCTAGGCGCGCATTTTGTATGGGCTTTTAGTTTAATGTTTCTATTAGTGGAC  
GTGGTTATTGGCAAGAACTTATTGAATCCATCGTTTGGGCTCATAATAAATAAAAGTTG  
CTCCTGCTACTCAGCCGAGAGCCTTGAGCATTGTACAAGGACGTGCTGTAGGGGTAAC  
CCACTACCTTCTGGGTGGAATTGCCACAACGTGGGCATTCTTCTTAGCAAGAATTATTG  
CAGTAGGAATGGCATTAAAGATTTCCAAGGTTTAGCCAAGGCTTAGCACAGGACCCAC  
TACTCGTCGATTTGGTTTGGTATTGCTACCGCACATGACTTCGAGAGTCATGATGATAT  
TACTGAGGAACGTCTTTATCAGAATATTTTTGCTTCTCACTTCGGTCAATTAGCAATAAT  
TTTTTTGTGGACTTCCGGAAATCTGTTTCATGTAGCTTGGCAAGGAAATTTGAGTCAT  
GGGTAAAGGACCCTTTACATGTAAGACCTATTGCGCATGCAATTTGGGATCCTCATT  
GGTCAACCGGCCGTGGAAGCTTTTACTCGAGGCGGTGCTCTTGGCCCAGTGAATATTG  
CTTATTCTGGTGTATCAGTGGTGGTATAACAATCGGGTTACGCACTAATGAAGATCTTT  
ATACTGGAGCTCTTTTTCTATTATTTCTTTCTGCCCTATTCTTAATAGCAGGTTGGTTACA  
CCTACAACCGAAATGGAAACCAAGTGTTCGTGGTTCAAAAATGCCGAATCTCGTCTG  
AATCATCATTGTGAGGACTCTTCGGCGTAAGTTCCCTTGGCTTGGACAGGGCATTAGT  
ACATGTCGCTATTCTGGATCCAGAGGGGAGTATGTTTCGATGGAATAATTTCTTAGATGT  
ATTACCGCATCCCCAAGGGTTAGGTCCACTTTTTACAGGTCAGTGGAATCTTTATGCTC  
AAAACCCCGATTCAAGTAGTCATTTATTTGGGACCTCCCAAGGAGCAGGAACTGCCAT  
TCTAACTCTTCTCGGAGGATTTATCCACAAACGCAAAGTTTATGGCTGACTGATATTG  
CTCATCATCATTAGCTATTGCATTTATTTTTCTCATTGCTGGCCATATGTATAGAACGAAT  
TTCGGGATTGGTCACAGTATGAAAGATCTTTTAGATGCACATGTTCCCTCCAGGGGGCG  
ATTGGGACGTGGGCATAAGGGTCTTTATGACACAATCAATAATTCGCTTCATTTCAATT  
AGGACTTGCTCTAGCTTCTTTAGGGGTTACTTCCCTTGGTAGCTCAACACATGTATTC  
TTTACCTGCTTATGCATTCATAGCACAAAGACTTTACTACCCAAGCTGCATTATATACTCAT  
CACCAATATATTGCAGGATTTATCATGACAGGAGCTTTTGTCTCATGGAGCTATATTTTCA  
TTAGAGATTACAATCCGGAGCAAATGAAGATAATGTATTGGCAAGAATGTTAGACCAT  
AAAGAAGCTATCATATCTCATTAAAGTTGGGCCAGTCTCTTTCTAGGATTCCACACTTGG  
GGACTTTATGTTCAATAATGATGTCATGCTTGCCTTTGGTACTCCGGAGAAACAAATCTTG  
ATCGAACCTATATTTGCTCAATGGATACAATCGGCTCATGGGAAAACCTCATATGGGTTC  
GATGTACTTTTATCTTCAACAAGTGGGCCGGCATTCAATGCGGGTCGAAGCATCTGGTT  
GCCCCGTTGGTTAAATGCTGTTAATGAA-----AATAGCAATTCATTATTCTTAAACAATAGG  
TCCTGGAGACTTTTTGGTTCATCATGCTATTGCTCTGGGTTTACATACAACCACATTGAT  
CCTAGTCAAAGGTGCTTTAGATGCACGTGGGTCCAAGTTAATGCCAGATAAAAAGGAT  
TTCGGTTATAGTTTTCCGTGCGACGGCCCGGACGAGGCGGTACTTGTGATATTTCCGC



ATGGGACGCATTTTATTTGGCAGTTTTTTGGATGTAAATACTATTGGATGGGTTACTTTT  
TATTGGCATTGGAAGCACATCACATTGTGGCAGGGTAACGTTTCACAATTTAATGAATC  
TTCCACCTATTTGATGGGCTGGTTAAGAGATTATTTATGGTTAAACTCTTCACAACTTAT  
CAATGGATATAATCCTTTTGGTATGAATAGTTTATCGGTCTGGGCATGGATGTTCTTATTT  
GGACATCTTGTGTGGGCTACTGGATTTATGTTCTTAATTTCTGGCGGGGTATTGGCAA  
GAATTGATTGAAACTTTAGCCTGGGCTCATGAACGCACACCTTTAGCCAATTTGATTCTG  
CTGGAGAGATAAACCAGTGGCCCTTTCCATTGTGCAAGCAAGATTAGTTGGATTAGCCC  
ACTTTTCTGTAGGTTATATATTCACCTTATGCGGCTTTTTTTGATTGCCTCTACATCGGGTAA  
ATTTGGTATGTCACATTCAGTAAAGATTTATGATACATGTATAGGATGTAATGCGTC  
CGCGCTGCCCGACCGATGTATTAGAAATGATACCCTGGGACGGATGTAAAGCTAAAC  
AAATAGCTTCTGCTCCAAGAACGGAAGACTGCGTCGGTTGTAAAAGATGTGAATCTGC  
TTGTCCAACGGATTTCTTGAGTGTTCGGGTTTATTTAGGGGCTGAAACAACCTCGCAGTA  
TGGGTCTAGCTTATATGACAAGTTTCGACCTTCCCTCTATTTTTGTGCCTTTCGTAGGCC  
TAGTATTTCCGGCAATTGCAATGGCTTCTTTATCTTTTCATGTTCAAAAAACAAGATTG  
TTATGCGAGATTTAAAACATATCTCTCCGTGGCACCAGTACTAAGTACGCTATGGTTCG  
GGGCTTTAGCAGGTCTATTGATAGAGATTAATCGTTTTTTTTCCGGATGCGTTGACATTC  
CCTTTTTTTCATTCTATGACTGCAATTTTAGAGAGACGCGAAAGCGAAAGCCTATGGGGT  
CGTTTCTGTAACCTGGATAACTAGCACCGAAAACCGTCTTTACATTGGATGGTTTGGTGT  
TTTGATGATCCCGACCTTATTGACCGCAACTTCCGTATTTATTATCGCCTTCATTGCTGCT  
CCTCCAGTAGATATTGATGGTATTCGTGAACCCGTTTCTGGATCTTTACTTTACGGAAAC  
AATATTATTTAGGTGCCATTATTCCTACTTCTGCAGCTATAGGTTTGCATTTTACCCAA  
TCTGGGAAGCGGCATCCGTTGATGAATGGTTATATAACGGTGGTCCTTATGAACTAATTG  
TTCTACACTTCTTACTTGGTGTAGCTTGTACATGGGTCGTGAGTGGGAGCTTAGCTTC  
CGTCTGGGTATGCGACCTTGGATTGCTGTTGCATATTCAGCTCCTGTTGCAGCTGCTACC  
GCTGTTTTCTTGATCTACCCAATCGGTCAAGGAAGTTTTTCTGATGGTATGCCTCTAGGA  
ATCTCTGGTACTTTCAACTTCATGATTGTATTCCAGGCTGAGCACAACATCCTTATGCAC  
CCATTTACATGTTAGGCGTAGCTGGGGTATTCGGCGGCTCCTTATTCAGTGCTATGCAT  
GGTTCCTTGGTAACTTCTAGTTGATCAGGGAAACCACAGAAAATGAATCTGCTAATGA  
AGGTTACAGATTCGGTCAAGAGGAAGAACTTATAATATCGTAGCCGCTCATGGTTATT  
TCGGCCGATTGATCTTCCAATATGCTAGTTTCAACAATTCCCCTCGTTACACTTCTTCC  
TAGCTGCTTGGCCTGTAGTAGGTATCTGGTTCAGTCTTTAGGTATCAGCACTATGGCTT  
TCAACCTAAACGTTTTCAATTTCAACCAATCTGTAGTTGATAGTCAAGGTCGTGTAATT  
AATACTTGGGCTGATATCATTAACCGTGCTAACCTTGGTATGGAAGTTATGCATGAACGT  
AATGCTCATAATTTCCCTCTAGACCTAGCTGCTATTGAAGTCCCATCTATCAATGGCATG  
GGTTTACCTTGGTATCGTGTTCATACCGTTGTATTGAATGATCCCGGCCGCTTGCTTTCT  
GTTTACCTAATGCATACAGCTCTGGTTGCTGGTGGGCTGGTTCGATGGCTTTGTATGAA  
TTAGCAGTTTTTTGATCCTTCTGACCCTGTTCTTGATCCAATGTGGAGACAGGGTATGTT  
GTTATACCCTTCATGACTCGTTTAGGAATAACCAATTCATGGGGCGGTTGGAGTATCAC  
A--GGGGGACTGTAACGAATCCGGGTATTTGGAGTTACGAAGGTGTAGCTGGGGCAC  
ATATTGTGTTTTCTGGTTTATGCTTTTTGGCAGCTATCTGGCATTGGGTGTATTGGGATCT  
AGAAATTTTTGTGATGAACGTACAGGAAAACCTTCTTTGGATTTGCCTAAGATCTTTG  
GAATTCATTTATTTCTTTTCCAGGAGTGGCTTGTCTTTGGTTTTGGAGCATTTTCATGTAACGG  
GCTTGTATGGTCCCTGGAATATGGGTGTCCGATCCTTATGGACTAACAGGAAAAGTACAA  
CCTGTAAATCCAGCGTGGGGCGTGGAAGGTTTTGATCCTTTTGTCCGGGAGGAATAG

CCTCTCATCATATTGCAGCAGGGACGTTGGGCATATTAGCGGGTCTATTCCATCTTAGTG  
TCCGCCACCACAACGTCTATACAAAGGATTGCGTATGGGAAATATTGAAACCGTCCTT  
TCCAGTAGTATCGCTGCTGTCTTTTTTGCAGCTTTTGTGTTGTTGCCGGAATATGTGGTAT  
GGTTCAGCAACTACTCCGATCGAATTATTTGGGCCACTCGTTATCAATGGGATCAGGG  
ATACTTCCAACAAGAGATATATCGAAGAGTTAGTGCTGGGCTAGCAGAAAATCAAAGT  
TTATCAGAAGCCTGGTCTAAAATTCTGAAAAATTAGCTTTTTATGATTACATCGGAAAT  
AATCCGGCGAAAGGAGGATTATTCAGGGCGGGCTCGATGGATAACGGGGATGGAATAG  
CAGTTGGATGGTTAGGACACCCCATCTTTAGAGATAAAGAAGGACGTGAACTTTTTGT  
ACGTCGTATGCCTACTTTTTTTGAAACATTTCCAGTCGTTTTGGTAGACGGGGACGGAA  
TTGTTAGAGCGGATGTTCCTTTTTCGAAGGGCAGAATCGAAGTATAGTGTGAACAAGT  
GGGTGTAAGTGTGAGTTCTACGGTGGCGAACTAACGGAGTGAGTTATAGTGATCCT  
GCTACTGTGAAAAATATGCTAGACGTGCTCAATTGGGTGAAATTTTTGAATTAGATCG  
TGCTACTTTGAAATCCGATGGTGTTTTTTCGTAGCAGTCCAAGGGGTTGGTTACTTTTG  
GACATGCTTCATTTGCTTTGCTCTTCTTCTTCGGACACATTTGGCACGGTGCTAGAACC  
TTGTTTCAGAGATGTTTTTGCCGGCATTGACCCGGATTTAGATGCTCAAGTAGAATTTGG  
AGCATTCCAAAACTTGGGGATCCAATAACAAGAAGACAGGCAGTCATGAAAACCTTA  
TATTCCTGAGGAGGTTCTACCACGTGGAAACGCTCTTTAATGGAACTTTAGCTTTAGC  
TGGTCGTGACCAAGAAACCACCGTTTTGCTGGTGGGCCGGAAATGCCCGACTTATC  
AATTTATCCGGTAAACTACTAGGAGCTCATGTAGCCCACGCCGATTAATCGTATTCTGG  
GCCGGAGCAATGAACCTGTTTGAAGTGGCTCATTTTCGTACCAGAGAAACCTATGTATG  
AACAAGGGTTAATTTTACTTCCCCACCTAGCTACTCTAGGTTGGGGAGTCGGTCCTGGG  
GGAGAAGTTATAGACACCTTCCGTACTTTGTATCTGGAGTACTTCATTTAATTTCTCT  
GCGGTTTTGGGCTTTGGCGGTATTTATCATGCGCTTCTTGGTCCTGAGACGCTTGAAGA  
ATCTTTTCCATTCTTCGGTTATGTATGGAAAGATAGAAATAAAATGACCACAATTTTAGG  
TATTCATTAATCTTGTTAGGTCTAGGTGCTTTTTCTTCTAGTATTCAAGGCTCTATATTT  
GGGGCGTGTATGATACTTGGGCTCCGGGGGGGGGAGATGTAAGAAAAATTACTAACT  
TGACTCTTAGCCCGAGTATCATATTTGGTTATTTACTAAAATCGCCCTTTGGAGGGGAAG  
GATGGATTGTTAGTGTGGACGATTTAGAAGATATAATCGGAGGACATGTATGGTTAGGT  
TCCATTTGTATACTTGGTGGAATCTGGCATATCTTAACTAAACCCTTCGCGTGGGCTCGA  
CGCGCACTTGTATGGTCTGGAGAGGCTTACTTATCGTATAGTTTAGGGGCTTTATCCGTC  
TTCGTTTTTCATGCGTGTGTTTTGTCTGGTTCAATAATACAGCTTATCCTAGTGAGTTTT  
ACGGACCCACTGGGCCAGAAGCTTCTCAAGCTCAAGCATTACTTTTCTAGTTAGAGA  
CCAACGCTTTGGGGCTAACGTGGGATCCGCTCAAGGGCCTACTGGTTTAGGTAAATATC  
TAATGCGTTCCTCAACCGGAGAAGTCATTTTTGGAGGAGAAACGATGCGTTTTTGGGA  
TCTGCGTGCTCCCTGGTTAGAACCTCTAAGGGGGCCAAATGGGTTGGACTTGAGTAGG  
TTGAAAAAAGACATAACAACCTTGGCAAGAACGGCGTTCCGCAGAATATATGACTCATG  
CTCCTTTAGGTTCTTTAAATTCCGTGGGTGGCGTAGCTACGGAGATCAATGCAGTCAAT  
TATGTCTCTCCTAGAAGTTGGTTAGCTACCTCTCATTTTGTCTAGGATTCTTCTTGTTCG  
TAGGTCATTTGTGGCACGCGGGGAGGGCTCGTGCAGCTGCAGCAGGATTTGAAAAAG  
GAATTGATCGTGATTTTGAACCTGTTCTTTCCATGACCCCTCTTAATATGACTATAGCGC  
TTGGTAAATTTACCAAAGACGAAAATGATTTATTTGATATTATGGATGACTGGTTACGTA  
GGGACCGTTTTCGTTTTTGTAGGCTGGTCCGGTCTATTGCTCTTTCCTTGTGCCTATTTCG  
CTTTAGGGGGTTGGTTCACAGGTACAACCTTTGTAACCTTCATGGTATAACCATGGATTG  
GCCAGTTCCTATTTGGAAGGCTGCAATTTCTTAACTGCCGCAGTTTCTACTCCTGCTAAT

AGTTTAGCACACTCTTTGTTGTTACTTTGGGGTCCTGAAGCACAAGGAGATTTTACTCG  
TTGGTGTCAATTAGGTGGTCTGTGGACTTTTGTGCTCTTCATGGCGCTTTCGGATTAAT  
AGGTTTCATGTTACGTCAATTCGAGCTTGCTCGATCGGTTCAATTGCGACCTTATAATGC  
AATCGCATTCTCTGGTCCAATTGCTGTTTTTGTCTGTATTCTGATTTATCCACTAGGT  
CAATCTGGTTGGTCTTTTGCGCCGAGTTTTGGCGTAGCAGCTATATTTGATTTCATCCTG  
TTTTTTCAAGGGTTTCATAATTGGACGTTGAACCCCTTTCATATGATGGGAGTTGCCGGT  
GTATTGGGCGCCGCTTTGCTGTGCGCTATTCACGGTGCTACCGTAGAAAATACTTTATTT  
GAAGATGGTGATGGTGCAAATACATTCCGTGCTTTTAAACCAACCCAGGCTGAAGAAA  
CTTATTCAATGGTCACCGCTAACCGCTTTTGGTCCCAAATCTTTGGGGTTGCTTTTTCCA  
ATAAACGTTGGTTACATTTCTTTATGTTATTTGTACCAGTAACCGGTTTATGGATGAGTG  
CTCTTGGAGTAGTTGGTCTAGCCCTGAACCTACGTGCCTATGACTTCGTTTCTCAGGAA  
ATTCGAGCAGCGGAAGATCCGGAATTTGAGACTTTCTACACCAAAAATATTCTCTTAAA  
CGAAGGTATTTCGTGCTTGGATGGCGGCTCAAGATCAGCCTCATGAAAACCTTATATTCC  
CTGAGGAGGTTCTACCACGTGGAACGCTCTTATGTCTGGAAGCACAGGAGAACGTTCT  
TTTTGCTGATATTATCACCAGTATTTCGATACTGGGTCATTCATAGTATTACTATACCTTCCC  
TATTCATTGCGGGTTGGTTATTCGTCAGCACCGGTTTAGCTTATGATGTGTTTGGAAAGTC  
CTCGGCCAAACGAGTATTTACAGAGAGCCGGCAGGGAATTCCATTAATAACTGGCCG  
TTTTGATCCTTTGGAACAACCTTGATGAATTTAGTAGATCTTTTATGACTATAGATCGAAC  
CTATCCAATTTTTACAGTACGATGGTTGGCTGTTACGGCCTAGCTGTACCTACCGTCTT  
TTTTTTGGGATCAATATCAGCAATGCAGTTCATCCAACGAATGGCTACACAAACTGTTG  
AGAACGGTTCTAGATCTGGT---CCAAGACGAACTGTTGTAGGGGATTTATTAACCAT  
TGAATTCGGAATATGGTAAAGTAGCTCCTGGGTGGGGAACAACCTCTTTGATGGGTGTC  
GCAATGGCTCTATTTGCCGATTTCTATCTATATTTGGAGATTTATAATCTTCCGTTTT  
ATTGGATGGAATTTCAATGAATATGCTTACTCTCAAACCTCTTCGTTTACACAGTAGTAAT  
ATTTTTGTTTCTCTCTTCATCTTTGGATTCTATCTAATGATCCTGGACGTAATCCTGGG  
CGTGAGGAAATGGCCGATACTACTGGAAGGATTCTCTTTGGATAATAGGTAAGTAAAC  
TGGTATTCTTGTGATCGGTTTAAATAGGTGTTTTCTTTTATGGTTCATATCCGGATTGGGT  
TCATCCCTCATGCTTAATATCTTTAGTTGATCTGTATCTGTCTTAAATCTGCCTTTTTAT---A  
GTAGTTTTTTCTTCGGAAAATTGCCCGAGGCCTATGCTTTTTTTGAACCAATTGTAGATG  
TTATGCCAGTCATACCTTTGTTCTTTTTTCTCTTAGCTTTTGTGTTGGCAAGCTGCTGTAA  
GTTTTTCGAATGACACAATCAAACCCGAACGAACAAAATGTTGAATTGAATCGTACCAG  
TCTATACTGGGGTTATTACTCATTTTTGTAAGTTTACTGGGTACGCCTTATATACCGCT  
ATATGGAAGTCAATATTCTTGCATTTATTGCTACTGCACTATTCAATCTAGTTCCCTACCGC  
CTTCTACTTATCATTACGTAACAAACAGTTAGTCAAATGATATGGAAACAGCAACCCT  
AGTAGCCATCTTTATATCTGGTTTACTTGTAAAGTTTTACTGGGTACGCCTTATATACCGCT  
TTTGGGCAACCTTCTCAACAACAAAGAGATCCGTTTGGAGAACATGGGGACATGGAAG  
CACTGGTTTATACATTCCTCTTAGTCTCGACTCTAGGAATCATTTTTTCTCTATCTTTTT  
TCGAGAACCGCCTAAAGTTCCAACATAAAAAGGTGAAAATGACTCTTGCTTTCCAATTG  
GCTGTTTTTGCATTAATTGCTACTTCATCAATCTTATTGATTAGCGTGCCCGTTGTATTG  
CTTCTCCTGATGGTTGGTCGAGTAACAAAATGTTATATTTCCGGTACCTCATTATGGA  
TTGGGTTAGTCTTTCTAGTCGGTATTCTTAATCTCTCATCTCT-----ATGTCA  
CCACAAACAGAGACTAAAGCAAGTGTGGATTCAAAGCTGGTGTTAAAGAGTACAAA  
TTGACTTATTATACTCCTGAATACGAAACCAAGATACTGATATCTTGGCAGCATTCCGA  
GTAACCTCAACCTGGAGTTCCACCCGAAGAAGCAGGGGCTGCGGTAGCTGCTGAAT

CTTCTACTGGTACATGGACAACCTGTGTGGACCGATGGACTTACCAGCCTTGATCGTTAC  
AAAGGGCGATGCTACCACATCGAGCCCGTTCCCTGGAGAAGAAGATCAATATATTGCTTA  
TG TAGCTTACCCCTTAGACCTTTTTGAAGAAGGTTCTGTTACTAACATGTTTACTTCCAT  
TG TAGGTAATGTATTTGGGTTCAAAGCCCTACGCGCTCTACGTCTGGAAGATTTGCGAA  
TCCCTACGGCTTATATTAACCTTCCAAGGCCCGCTCATGGGATCCAGGTTGAGAGA  
GATAAATTGAACAAATATGGTCGTCGCCCTGTTGGGATGTAATAAACCTAAATTGGG  
GTTATCCGCTAAAACTACGGTAGGGCATGTTATGAATGTCTTCGTGGTGGACTTGATTT  
TACCAAAGATGATGAAAACGTGAACTCCCAACCGTTTATGCGTTGGAGAGATCGTTTC  
TTATTTTGTGCCGAAGCAATTTATAAAGCACAGGCTGAAACCGGTGAAATCAAAGGGC  
ATTACTTGAATGCTACTGCAGGTACATGCGAAGAAATGATGAAAAGAGCTATATTTGCT  
AGAGAATTGGGAGTTCCCTATCGTAATGCATGACTACTTAACAGGGGGATTCACTGCAAA  
TACTAGCTTGGCTCATTATTGCCGAGATAATGGCCTACTTCTGCACATCCACCGTGCAAT  
GCACGCAGTTATTGATAGACAGAAGAATCATGGTATCCACTTCCGCGTACTAGCTAAAG  
CGTTACGTATGTCTGGTGGAGATCATATCACTCTGGTACCGTAGTAGGTAACCTTGAA  
GGGGAAAGAGACATCACTTTGGGCTTTGTTGATTTACTGCGTGATGATTTTATTGAAA  
AGATCGAAGTCGCGGTATTTATTTCACTCAAGATTGGGTCTCTCTACCAGGTGTTCTGC  
CGGTGGCTTCAGGGGGTATTCACGTTTGGCACATGCCCGCTCTAACCGAGATCTTTGGG  
GATGATTCTGTACTACAGTTTGGTGGAGGAACCTTAGGACACCCTTGGGGTAATGCACC  
AGGTGCCGTAGCGAATCGAGTAGCTCTAGAAGCATGTGTACAAGCTCGTAATGAAGGG  
CGCGATCTTGCTCTTGAGGGTAATGAAATTATCCGTGAGGCTAGCAAATGGAGTCCTGA  
ACTGGCTGCTGCTTGTGAGGTATGGAAGGAGATCAGATTTAATTTAAAGCAGTGGATA  
CTTTGGATGTGATGGCGATACATTTATACAAAACCTTCTACCCCGAGCACACGCAATGGA  
ACCGTAGACAGTCAAGTAAATCCAATCCACGAAATAATTTGATCTATGGACAGCATCG  
TTGTGGGAAAGGTTCGTAATGCCAGAGGAATCATTACCGCAGGGCATAGAGGGGGAGGT  
CATAAGCGTCTATACCGTAAAATCGATTTTCGACGAAATGAAAAAGACATATATGGTAG  
AATCGTAACCATAGAATACGACCCTAATCGAAATGCATACATTTGTCTCATACTATGG  
GGATGGTGAGAAGAGATATATTTTACATCCAGAGGGGCTATAATTGGAGATACCATTG  
TTTCTGGTACAGAAGTTCCATAAAAATGGGAAATGCCCTACCTTTGACCGATATGCC  
TTAGGCACGGCCATACATAACATAGAAATCACACTTGGAAAGGGTGGACAATTAGCTA  
GAGCAGCGGGTGCTGTAGCGAAACTGATTGCAAAGAGGGGAAATCGGCCACATTAA  
AATTACCTTCTGGGAGGTCCGTTTGATATCCAAAACTGCTCAGCAACAGTCGGACA  
GGTGGGGAATGTTGGGGTGAACCAGAAAAGTTTGGGTAGAGCCGGATCTAAGCGTTG  
GCTAGGTAAGCGTCCTGTAGTAAGAGGAGTAGTTATGAACCCTGTAGACCATCCCCATG  
GGGGTGGTGAAGGGAGAGCCCCAATTGGTAGAAAAAAACCCACAACCCTTGGGGTT  
ATCCTGCACTTGGAAAAAGAAGTAGAAAAAGGAATAAATATAGTGATAATTTGATTCTT  
CGTCGCCGTAGTAAATGATTCAACCTCAGACCCATTTAAATGTAGCAGATAACAGCGG  
GGCTCGAGAATTGATGTGTATTTCGAATCATAGGAGCTAGC---AATCGTCGATATGCTCAT  
ATTGGTGACGTTATTGTTGCTGTGATCAAAGAAGCAGTACCAAATATGCCCTAGAAAA  
ATCAGAAGTAGTTAGGGCTGTAATTGTGCGTACCTGTAAAGAACTCAAACGTGACAAC  
GGCATGATAATCCGATATGATGACAATGCCGCAGTTGTTATTGATCAAGAAGGAAATCC  
AAAAGGAACTCGAATTTTTGGTGCGATCGCCGGGAATTAAGACAATTCCATTTTACTA  
AAATAGTTTCTTTAGCTCCTGAGGTATTAATGCTTAGTCCCAAAGAACCAGATTCCGT  
AAACAACATAGAGGAAGAATGAAAGGAATAGCTTATCGAGGGAATCATATTTGTTTCG  
GTAAATATGCCCTTCAGGCACTTGAGCCCGCTTGGATCACATCTAGACAAATAGAAGCC

GGTCGACGAGCAATGACACGAAATGCACGTCGTGGTGGAAAACGTGGGTACGTATAT  
TTCCAGACAAACCAGTTACACTAAGGCCCGCCGAAACACGTATGGGTTCGGGGAAAG  
GATCCCCCGAATATTGGGTAGCTGTTGTTAAACCAGGTCTGAATACTTTATGAAATGAGC  
GGAGTAACAGAAAATATAGCTAGAAGGGCTATTTCAATAGCAGCATCCAAAATGCCTAT  
ACGGACTCAATTCATTATTTCTGGGAATGACTAGAATTAGACGGGGATATATAGCTCGGA  
GACGTAGAACAAAAATTCGTTTATTGTCATCAAGCTTTCGAGGAGCCCATTCAAGACTT  
ACTCGAACTATTACTCAACAGAAAATAAGAGCTTTGGTTTTCGGCTCATCGAGATCGGG  
GCAGTCAAAAAGAGAAATTTTCGTCTGTTTGTGGATCACGCGGATAAACGCAGTAATCCG  
CGAA---AGGAGAGTATCCTATAGTTATAGTCGATTAATACACGATCTGTCCAAGAGACAG  
TTGCTTCTTAATCGTAAATACTTGCACAAATAGCTATATTAATAGGAATTGTCTTTCTA  
TGATTTCGAATGAGATAATAAAAGAAGTAGGTTGTAAAGAATCCACCGGAATAATTATG  
CTAAAAGAAGTATATGCTTTAGGTCAACATATTTCTATGTCTGCTGACAAAGCACGAAG  
AATAATTGACCAAATTCGCGGACGTTCCATGAAGAAACACTTATGATACTCGAACTTA  
TGCCTTATCGAGCATGTTATCCATTTTCAAATTTGGTTTTATTCTGCAGCAGCAAATGCTA  
GTTACAATATGGCTTCCAACGAAGCCAATTTAGTCATTAGTAAAGCCGAAGTTAACAAA  
GGTACTACCGTCAAGAAATTCAAACCTAGGGCTCGGGGACGTAGTTATCCGATAAAAA  
AACCTACCTGTCAATAACTATTGGAATGAAAGATATATCTTTAGGTGGGGGAATATGGG  
ACAAAAAAATGGATGGAATCAAATATGCAGTATTTACAGACAAAAGTATTCGGTTATTG  
GGGAAAAAT---CAATATACTTCTAATGTCTGAATCGGGATCAACTAGGACAGAAATAAAG  
CATTGGGTCTGAACCTTCTTTGGTGTCAAGGTAATAGCTATGAATAGTCATCGACTCCC  
GGGAAAGGGTAGAAGAATGGGACCTATTATGGGACATACAATGCATTACAGACGTATGA  
TCATTACGCTTCAACCGGGTTATTCTATTCCACCTTTAGAAAGAAAAGAACTATGGCC  
GTTCCAAAAAACGTATTTCTAGATCAAAAAGCGTATTCGGAAAAATATTTGGAAAA  
GGAAGGGATATTGGACAGCGTTAAAAGCTTTTTCTGTTAGGGAAATCAATTTTTACAGGT  
AGCACAAAAGTTTTTTTTGTGCAGCAAACAAAACAATGGCCAAGGGTAAAGATGTT  
CGAGTAACGGTGATTTTGGAAATGTACCAGTTGTGTCCGAAACAAGGTTAATGGG-----G  
TAGCAAGAGGCATTTCCAGATATATTACTCAAAAAGAACCGTCACAATACGCCTAATCGA  
TTAGAATTAAGAAAATTTTGTCCGTATTGTTACGAATATACGATTCATGGGGAGATAAAG  
AAAATGAAAATAAGAGCTTCTGTTCTGTAATAATTTGTGAAAAATGTCTGACTAATCCGCA  
GGCGGGGGCGAATTATAGTAATTTGTTCCAATCCGAGACATAAACAAAGGCAGGGAAAT  
GGTTCGAGAGAAAATAACAGTATCTACTCGGACACTACAGTGGAATGTGTTGAATCA  
AGAACAGACAATAAACGTCTTTATTATGGACGTTTTATTCTGTCTCCACTTATGAAAGGT  
CAAGCCGACACAATAGGCATTGCGATGCGAAGAGCTTTGCTTGGAGAAATAGAAGGA  
ACATGTATCACACGTGTAATAATTTGAG-----AAAGTACCCCATGAATATTCTACCATAAA  
GGGTATTCAAGAATCGGTACATGAAATCTTAATGAATTTGAAAGAAATTGTATTGAGAA  
GTAATCTATATGGAACCTTGTGACGCGTCTATTTGTGTGAGGGGTCTGGATATGTAAGT  
CTCAAGATATCGTCTTACCGCCTTATGTAGAAATAGTTGATAATACGCAACATATAGCTA  
GCTTGATGGAACCGATTGATTTGTGATTGAATTACAAATCGAGAGAAATCGCGGATAT  
CTTATAAAAACGCCACAG---AACTTTGATGGAAGTTAT-----CCTATAGATGCTGTATTCAT  
GCCTGTTTCGAAATGCAAATCATAGTATTCATTCTTATGGGAATGGGAATGAAAAACAAG  
AGATACTTTTTCTCGAAATATGGACAAACGGAAGTTTAACTCCGAACGAAGCACTTCAT  
GAAGCATCCCAGAATTTGATTGATTTGTTTATTCCCTTTTTACATATGGAAGAAGAA-----  
AACTCACATTTAGAGAACAATCAA---CACCCGATTCCCTTTATCCCCCTTTACCTTTACG  
AGAAATTGGCT--AAACTCATAAAAAAGAAAAAA---GAAATAGCATTCAAATCGATTTT

TATTGACCAATCAGAATTGCCTCCCAGGATCTACAATTGCCTCAAAGGTCCAATATATA  
TACATTATTGGACCTTTTGAATAACAGTCAAGAAGATCTTATGAAAATGGAACATTTTC  
GCATAGAAGATGTAAAACAAATATTGGTCGTTCTAGAGAAACAT-----TTGGAAATTTT  
TTACCGAAAAAA---ATGCTCGGGGATGGA---AATGAGGGAATGTCTACAATACCTGGAT  
TTAATCAGATCCAATTTGAAGGATTTTGTAGGTTTCATTGATCAGGGTTTGACGGAAGAA  
CTTTACAAGTTTCCAAAAATCGAAGATACAGATCAAGAAATCGAATTTCAATTATTTGT  
GGAAACATATCAATTAGTAGAACCTTTGATAAAGGAAAGAAATGCTGTGTATGAATTAC  
TCACATATTCTTCTGAATTATATGTATCCGCGGGATTAATTTGGAAAACCAGTAGGGATAT  
GCAAGAACAAACCATTTTTATTGGAAACATTCCTCTAATGAATCCCTAGGAACTTTTAT  
AGTAAATGGAATATATAGAATTGTGATCAATCAAATATTGCAAAGCCCCGGTATTTATTA  
CCGGTCAGAATTGGACCATAACGGAATTTTCGGTTTATAACGGCACCATAATATCAGATTG  
GGGAGGAAGATCAGAATTAGAGATTGATAGAAAAGCAAGGATATGGGCTCGTGTGAGT  
AGGAAACAAAAAATATCTATTCTAGTTCTATCATCAGCTATGGGTTTCGAATCTAAGAGA  
AATTCTAGAGAATGTTTGCTATCCTGAAATTTTTTGTCTTTTCTGAATGATAGGGAGAG  
AAAAAAAATTGGGTCAAAGAAAATGCCATTTTGGAGTTTATCAACAATTTGCTTGTG  
TAGGTGGAGATCCGGTATTTTCTGAATCCTTATGTAAGGAATTACAAAAGAAATTTCTTC  
AACAAAGATGTGAATTAGGAAGGATTGGTCGACGAAATATGAACCGAAGACTGAACCT  
TGATATACCTCAGAACAATCCATTTTTGTTACCACGAGATATATTGGCAGCCGCCGATCA  
TTAATTGGGCTGAAATTTGGAATGGGTACACTTGACGAT-----ATGAATCATTGAAAA  
ATAACGTATTCGTTCTGTAGCGGATCTTTTACAAGATCAATTTGGATTGGCTCTGGTTC  
GTTTAGAAAATGTGGTTTCGAGGAACTCTAGGTGGTGCAATTCGG---CATAAATTG---ATA  
CCGACCCCTCAAATTTGGTAACTTCAACTCCA-----TTAACA ACTACTTATGAATC  
CTTTTTCGGTTTACACCCATTATCTCAAGTTTGGATCGAACGAATCCGTTGACACAAAT  
AGTTCATGGGAGAAAATTGAGTTATTTGGGCCCTGGAGGAGTAACAGGGCGAACTGCT  
AGTTTTCGGATACGAGATATCCATCCTAGTCACTATGGGCGTATTTGTCCAATCGACACA  
TCTGAAGGCATCAATGTTGGACTTATTGGATCCTTGTCAATTCATGCGAGGATTGGTCAT  
TGGGGA---TCTCTAGAAAGTCCATTTTAT-----GAAATTTCCGAGAGATCAACAGGA----  
--GTACGGATGCTTTATTTATCACCAGGTAGAGATGAATACTATATGGTAGCGGGCGGAA  
TTCTTTGGCCTTGAATCAAGATATTCAGGAAGAACAGGTTGTTCCGGCTCGATACCGTC  
AAGAATTCCTCACTATTGCATGGGAACAGATTTCATCTTCGAAGTATTTTTCCCTTCCAAT  
ATTTTTCTATTGGAGCTTCCCTCATTCCTTTTATCGAACATAATGATGCAAATCGAGCTTT  
AATGAGTTCGAATATGCAACGTCAAGCAGTTCCTCTTTCTCGGTCCGAGAGATGCATTG  
TTGGAACCTGGGTTGGAACGACAAGCAGCTCTAGATTCAAGGGGCTCTTTCTATAGCCGA  
ACGCGAGGGAAAGGTTGTGTATACTGATACGGACAAGATCCTTTTATCAGTTAATGGAG  
ATACTCTAACATTCCATTAGTTATGTATCAACGTTCCAACAAAAATACGTGTATGCACC  
AAAAAGCGCGGGTTCACCGAGGTAATACATTA AAAAGGGACAAATTGTAGCTGACG  
GTGCTGCTACGGTTGGTGGTGAACCTTTCTTTGGGTAAAACGTATTAGTAGCTTATATGC  
CATGGGAAGGTTACAATTTTGAAGATGCAGTACTCATTAGCGAGCGTTTGGTATATGAA  
GATATTTATACTTCTTTTCATATACGGAAATATGAAATTCAGACTCATGTGACAAGCCAA  
GGC---CCCGAAAGGGTCACTAATGAAATACCGCATTTAGAAGCCCATTTACTCCGCAAT  
TTAGACAAAATGGAATTGTGATGCTGGGATCTTGGGTAGAGACGGGTGATATTTTAGT  
AGGTAAATTAACACCCAGATGGTGAAAGAA---TCATCATATGCCCCGGAAGATAGATT  
GTTACGAGCCATACTTGGCATTAGGTATCTACTTCAAAGAACTTGTCTAAAACCTCC  
CTATAGGTGGTAGGGTTCGGGTTATTGATGTAAGGTGGATCCAGAAAAAAGGG---GGTT

CTAGTTATAATCCAGAAACGATTCGTGTATATATTTTCACAGAAACGTGAAATCAAAGTA  
GGCGATAAAGTAGCTGGAAGACACGGAAATAAGGGGATCATTTCAAAATTTTGCCTA  
GACAAGATATGCCTTATTTGCAAGACGGAAGACCTGTTGATATGGTCTTCAACCCACTA  
GGAGTACCTTACGAATGAATGTAGGACAGATATTTGAATGTTCACTCGGGTTAGCGGG  
GAGTCTGCTAGACAGACATTATCGAATAGCACCTTTTGATGAGAGATATGAACAAGAA  
GCTTCGAGAAAACCTGGTGTFTTCTGAATTATATCAAGCTAGTAAGCAAACAGCGAACC  
CGTGGGTATTTGAACCCGAGTATCCAGGAAAAAGTTCGAATATTTGACGGAAGGACGGG  
GAATCCTTTTGAACAACCCGTTCTAATAGGAAAGCCTTATATCTTAAAATTAATTCATCA  
AGTTGATGATAAAATCCACGGACGTTCCAGTGGACATTATGCGCTTGTTACACAACAAC  
CCCTTAGAGGAAGGGCGAAGCAGGGGGGACAACGGGTCGGAGAAATGGAGGTTTGG  
GCTCTAGAAGGATTTGGTGTGCTCATATTTTACAAGAAATGCTTACTTATAAATCTGAT  
CATATTAGAGCTCGCCAGGAAATACTTGGGACTACGATCGTTGGAGGAACAATACCGAA  
TCCCAGGATGCTCCAGAATCTTTTCGATTACTCGTTTCGAGAACTACGATCTTTAGCTCT  
GGAACTGAATCATTTCCTTGTATCTGAGAAGAACTTCCAGATTAATAGGAAGGAAGCT--  
-----ATGATCGATCGGTATAAACATCAACAACCTCCGAATTGGATCAGTTTCTCC  
TCAACAAATAAGTGCCTGGGCCACTAAAATCCTGCCTAATGGAGAGATAGTTGGAGAG  
GTGACAAAACCCTACACTTTTTATTACAAAACCAATAAACCGGAAAAGGATGGATTATT  
TTGTGAAAGAATTTTTGGACCTATAAAAAGTGGAAATTTGTGCTTGTGGAATTATCGAG  
TAATCGGAAATGAAAAAGAAGACCCGAAATTTTGTGAACAATGCGGAGTCGAATTTGT  
TGATTCTCGGATACGAAGGTATCAAATGGGCTACATCAAACCTCGCATGTCCAGTAACCC  
ATGTGTGGTATTTAAAGCGTCTTCCTAGTTATATTGCGAATCTTTTAGATAAATCCCTTAA  
AGAATTAGAAGGCTTAGTATACTGCGATGTGAATTTTCTTTTGCTAGGCCA---ATAACT  
AAAAAACCCACTTTCTTACGATTACGAGGTTCAATCGAATATGAAATCCAATCTTGGAA  
ATACAGCATCCCCTTTTTTTTACTACCCAAGGCTTCGATACATTCGCAATCGAGAAAT  
ATCTACTGGCGCGTGTGCTATCCGAGAACAATTAGCCGATCTAGATTTACGAATTATTCT  
AGAAAATTCATTAGTGGAGTGGAAAGAATTGGGGGAAGAA---GGTCCCACAGGGAATG  
AATGGGAAGATCGAAAAGTTGGAAGAAGAAAGGATTTTTTGGTTAGACGTATGGAATT  
GGCTAAGCATTTTATTTCGAACAAATGTAGAACCAGAATGGATGGTTTTGTGTCTATTACC  
AGTTCTTCCTCCTGAGTTGAGACCGATCATTCAGATAGACGGGGGTAACTAATGAGTT  
CGGATATTAATGAACTCTATAGAAGAGTTATTTATCGGAACAATACTCTTACCGATCTATT  
AACAAACAGTAGATCTACGCCGGGAGAATTAATAATGTGCCAGGAAAAGTTAGTACAA  
GAAGCGGTGGATACGCTTCTTGATAATGGAATTCGCGGCCAACCAATGAAGGATGGTC  
ATAATAAAGTTTACAAGTCATTTTCAGATGTAATTGAAGGCAAAGAGGGGAAGATTTTCGT  
GAGACTCTGCTTGGCAAACGGGTCGATTATTCAGGTCGTTCCGTTATTGTTGTGGGTCC  
TTTACTTTTATTACATCGATGTGGATTGCCTCGAGAAATAGCAATAGAGCTTTTCCAGAC  
ATTTGTAATTCGTGGTCTAATTAGACAACATCTTGCTTCGAACATAGGAGTTGCTAAGA  
GTAAAATTAGGGAAAAGAGCCCATTTGTATGGGAAATACTTCAGGAAGTTATGGAGGG  
ACATCCTGTATTGTTGAATAGAGCACCCACTCTGCATAGATTAGGCATACAGGCATTTCA  
GCCATTTTAGTGGAGGGCGTGCTATTTGTTTACATCCACTAGTTTGTAAAGGATTCAA  
TGCAGATTTTGATGGGGATCAAATGGCTGTTTCATGTACCTTTATCTTTGGAGGCCAAG  
CGGAGGCCCGTTTACTTATGTTTTCTCATATGAATCTTTTGTCTCCAGCTATTGGGGATC  
CCATTTCCGTACCAACTCAAGATATGCTTATGGGACTCTATGTATTAACGAGCGGAAATC  
GTCGAGGTATTTGTGTAAATAGATATAATCCGGGTAATCGC-----AGAACTATCAAAA  
TCAAAGAAGTGATAATAATAACTATGAGTATACG-----GAACCTTTTTTTTTGTAATTCCT

ATGATGCAATTGGGGCTTATCGGCACAAAACGAATCAATTTAGATAGCCCTTTTTGGCTC  
CGGTGGCGACTAGATCAACGC---GTTATTGCTTCA-----AGAGAAACTCCCATCGAAGTT  
CACTATGAATCTTTAGGAACTTACTATCAAATTTATGGACACTATCTAATAGTAAGAAGT  
ATAAAAAAAGAAATTCTTTTTATATACATTCGAACCACTGTTGGTCATATTTCTCTTTATC  
GAGAAATCGACGAAGCCATACAGGGATTTTCTCATGCCTGTTTCATATGGTACC-----  
-----ATGGAGGTACTTATGGCAGAACGGGCAAATCTGGTCTTTCACAATAAAGCGAT  
AGACGGAAGTGCCATGAAACGACTTATTAGTCGATTAATAGATCACTTCGGAATGGCAT  
ATACATCCCACATCCTGGATCAAGTAAAACTCTGGGTTTCCAACAAGCTACGGCTACA  
TCCATTTCAATAGGAATTGATGATCTTTTAAACAATACCTTCGAAAGGATGGCTAGTTCAA  
GATGCTGAACAGCAAAGTTTCATTTTAGAAAAACACCACCATTATGGGAATGTACACG  
CAGTAGAAAAATTACGCCAATCCATTGAAATATGGTATGCTACAAGTGAATATTTGCGA  
CAAGAAATGAATCCGAATTTTAGGATGACCGACCCTTTAATCCAGTTCATATAATGTCT  
TTTTTCGGGAGCTAGAGGAAATGCATCTCAGGTACATCAATTAGTAGGTATGAGAGGCTT  
AATGTCGGATCCTCAAGGACAAATGATTGATTTACCCATTCAAAGCAATTTACGCGAAG  
GACTCTCTTTAACAGAATATATCATTTCTTGCTACGGAGCCCGTAAGGGGGTTGTGGAT  
ACTGCTGTACGAACATCCGATGCTGGATATCTCACGCGCAGACTTGTGAAGTAGTTCA  
ACACATTGTTGTACGCCGAGCAGACTGTGGTACCCCGCGGGGTATTTCTGTGAGTCCTC  
GGAATGGGATCATGCCG---GAAAGGGTTTTTATTCAAACATTAATTGGTCGTGTATTAGC  
AGATGACATATATATGGGTCCGCGTTGTATTGCCACTAGAAATCAAGACATCGGGATTG  
GACTTGCAATCGATTCCATAACC-----TTTCGAGTACAACCAATATCTATTCGAA  
CTCCCTTTACCTGTAGGAGTACATCTTGGATCTGTCGATTATGCTATGGGCGGAGCCCCA  
CTCATGGCGACCTGGTTGAGTTGGGAGAAGCTGTAGGTATTATTGCAGGTCAATCGATT  
GGAGAACCGGGTACTCAATTAACATTAAGAACTTTTCATACGGGCGGAGTATTCACGG  
GAGGTACTGCAGAACATGTGAGAGCGCCCTCTAATGGAAAAATCCAATTTAATGAGGA  
TTTGGTTTATCCGACACGTACACGTCATGGACATCCTGCCTTCTATGTTCTATAGACTT  
GTATGTAACCTATTGAGAGTGAAGATATTATACATAATGTGAATATTCCACCCAAAAGTTT  
TCTTTTAGTTCAAACGATCAATATGTAGAATCAGAACAAGTCATTGCTGAGATTCGCG  
CGGGAACATCCACT---TTGAATTTTAAAGAGAAGGTTTCGAAAACATATTTATTCTGACTC  
AGACGGGGAA---ATGCACTGGAGTACCGATGTCGATCATGCACCTGAATTTACATATGG  
TAATGTGCATCTATTACCAAAAACAAGTCATTTGTGGATATTATTAGGAGGGCCGTGCA  
GA-----TCCAGTCTAGTCTCCCTTTCGCTTACAAAGGATCAAGATCAAATGAACGCGCAT  
-----TCCCTTCTGTCAAGCAAAGATATACTTCTAACCTCTCG-----GTAACCTAAG-----  
-AGACACAAATTCTTTAGTTTCGAATTTTATGGTAAC---AAAGATAGCATTCCCTGATTAT--  
TCAAACCTTAATCAAGTCCTACGTACTGCTCATTGGAATCTCATATATCCG---GCCATTCT  
CCGCGAGAATTCT-----GATTTATTGTCAAAGAGGCGAAGAAATAGATTTATTATTCCACT  
CCAA-----TCGCGCGAGAACGAACATAATGCCCCCTCTGGGTATCTCGATTGAAATCCC  
C-----ATAAATGGTATTTTCCATAGAAATAGTATTCTTTCTTATTTCGATGATCCTCGGTAT  
AGAAGAAAGAGTTCGGGAATTAATAAATATGGGACTATAGAAATGCATTCAATCGTTAA  
AAAGGAAGAT-----TTGATTGAGTATCGAGGA--GTCAAGGAATTTAGGCCAAAATACAT  
GAAAGTAGATCGATTTTTTTTTCATTCCCGAGGAAGTTCATATCTTACCTGGATCTTCTTC  
CATAATGGTACGGAACAATAGTATCATTGGGGTAGATACACAAATCACTTTAAATCTAAG  
AAGCCGGGTAGGCGGGTTGGTCCGGGTGGAGAGAAAAAAAAAAGAATTGAACTTA  
AAATCTTTTCTGGAGATATCCATTTTCTGGAGAAATAGATAAGATATCCCGGCATAGCG  
CGTTTTTGATACCA-----CCGGGAAGGGGAAAAAGAAATTCCTTGGAAATTTCCAAAA---



--TTGAAAAACTGGATCTATGTCCAACGG-----ATTACACCTAGCAA-----AAAAAGTATT  
TTGTTTTGGTTCGACCTGTCGTACATATGAAATACCGGACGGTCTAAATTTAGCAACG  
CTTTCCCCCGATATGTTGCAGGAAAGGGATATTGTGCAACTTCGAGTTGTTAATTAT  
ATCCTTTATGGAAACGGCAACCCAATTTCGAGGAATTTATGACACAACACTATCAATTAGT  
TCGGACTTGTTTAGTATTGAATTGGGACCAAGACAAAAA-----AGTTTTTCTGGCGA  
AGAAGCCCGCGCTTCTTTTGTGAAATAAGGATAAATGGTTTGATTTCGACATTTCTTAC  
GAATCGACTTGGCGCAATCCCCTATTTCTATATCGGAAAAAGGAATGATTCCTCGGGT  
TCG-----GCTGAT--AATGGATCAGATTGCGCCAATATCAATCCGTTTTCTCCATATATT  
CCTAT-----TCCAAGACAAGAATTCAACAATTCCTTAACCCAAATCAAGGAACTATTCA  
TACGTTGTTGAATAGA-----AATAAGGAATTCCATTCTTGATAATTTGGTTATCATCCA  
ATTGTTCTCGAACGGGTCCA-----TTCAACGATCTAAAATATCACAATGGA-----ATAAA  
AGAATCAGATCCCTTAATTCCAATTAGGAATTCGTTGGGCCCTTTAGGATCA-----GCC  
CTCCAATTGATAATTTTTATTTA-----TTTTACCACTTA-----ATAACTCATAATCAAATCTTT  
--TTAACTAATTTGCAACTCGACAATTTAAAA--TTAAAACAGACTTTTCAAGTAATT  
AAA-----TATTATTCAATGGATGAAAGT-----GGGAAATTTATAATCCCGATCCATGCA  
GTAACATTATTTGCAATCCATTCAATTTGAATTGGTATTTTCTCCGTCACAATTATTGTGA  
AGAGACATCT--ACAATAATTAGCCTTGGACAGTTTATTTGTGAAAATGTGTGTATAGCC  
AAAAACAGACCACAC---CTAAAA-----TCGGGTCAAGTTATATTTGTTCAA---GTCGATTC  
TGTAAGTAATACGATTAGCTAAGCCTTATTTGGCCACCCCGGGGCAACCGTTCATGGCC  
ATTATGGGGAAATCCTTTATGAAGGAGATACATTAGTTACATTTATATATGAAAAGTTCGA  
GATCTGGGGACATAACGCAGGGTCTTCCAAAAGTGGAACAGGTGTTAGAAGTGCCT  
CGATCGATTCAATATCGATGAATCTAGAAAAGAGAATTGAGGGTTGGAACAAATGGATA  
ACAAGAATCTTTGGGATTCCTGGGGATTCTGCATTGGTGCTGAGCTAACTATAGTGCA  
AAGTCGTATCTCTTTGGTCAATAAGATCCAAAAGGTTTATCGATCCAGGGGGTGCAGA  
TTCATAATAGGCATATAGAAATTATTGTACGTCAAATAACATCAAAGTGTGGTTTCAG  
AA-----GACGGAATGTCTAATGTTTTTTTACCCGGAGAGATAATTGGATTGTTGCGAGC  
AGAACGAATGGGACGCGCTTTGGAAGAAGCGATCTGTTACCGAGCCATCTTATTGGGA  
ATAACAAGAGCATCTCTCAATACTCAAAGTTTCATATCTGAAGCAAGTTTTCAAGAAAC  
TGCTCGAGTTTTAGCAAAGGCAGCTCTCCGGGGCGTATCGATTGGTTGAAAGGTCTG  
AAAGAGAACGTTGTTTTGGGGGGGATGATACCTGTTGGGACCGGGTTCAAAGGATTA--  
---GTGCACCCTTCAAACAACATAACAAAATTCCT-----TTGGAAAGCAAAAAAAGAA  
TCTATTCGAGGTGAAAATGAGA-----GATATTTTGTTCACCAGAGAAAATTAGTTGATT  
CGTCCCTTTCAAAGAATTTCCACGATACATCAGAAATT-----  
ATGACAAGAAGATATTGGAACATAAATTTAGAAGAGATGATGGAGTCAGGAGTTCATTT  
TGGCCATGGTACTAGAAAATGGAATCCTAAAATGGGACCTTATATCTCTGCAAAACGTA  
AGGGTATTCATATTACAAATCTTACTCGAAGTCTCGTTTTTTATCAGAAGCTTGTGATT  
TGGTTTTTGTATGCAGCAAGTAGAGGAAAACAATCTTAATTGTTGGTACCAAAAATAAA  
GCAGCTGATTAGTAGCATGGGCTGCAATAAGGGCCCGGTGTCATTATGTTAATAAAAA  
GTGGCTCGGTGGTATGTTAACGAATTGGTCCACTACCGAAACGAGACTTCATAAGTTCA  
GGGACTTGAGAATGGAACAAAAACAGGGAGACTCAATCGTCTTCCAAAAGAGATG  
CAGCTATGTTCAAAGACAATTATCTCGTTTGCAAACATATCTGGGCGGGATTAATATA  
TGACAGGGTTACCCGATATTGTAATCATCGTTGATCAGCACGAAGAATATACGGCGCTA  
CGAGAGTGTATCACTTTGGGAATTCACAATTTGTTTAAATCGATACAAATTGTGACCC  
CGATCTAGCAGATATTTCCATTCCAGCTAATGATGACGCTATATCTTCAATCCGATTAATT

CTTAACAAATTAGTGTTTGC AATTTGTGAGGGTCGTTCT---AGCTATATAAGAAATCCTAT  
GGGACAAAAATAAATCCACTTGGTTTCAGACTTGGTATAACCCAAGATCATCATTCTC  
TTTGGTTTGCACAACCAAAAAAGTATTTTGTGAGGGTTTACAAGAAGATCAAAAAATAAG  
AGATTGTATCAAGAATTATATACAAAAGAATATGAAAATATCCTCTGCG---GTAGAGGGA  
ATTGCACGTATAGAGATTCAAAAAAGAATCGATCTGATCCAGGTCATAATCTTTATGGGA  
TTCCCAAATTCTTACTAGAAAAGTCGACCGCGA-----GGAGTCGAAGAATTACAGA  
TGACTCTACAAAAGAGTTTAATTGTATGAACCGAAAACCTTAACATTGCTATCAAAAAGA  
ATTGCAAAACCTTATGGGAACCTAATATTCTTGCAGAATTTATAGCCGGACAATTA  
GAATAGAGTTTCATTTTCGAAAAGCAATGAAAAAGCTATTGAATTAAGTGAACAAGCA  
GATACAAAAGGAATTCAAGTACAAATTGCAGGTCGTATTGACGGAAAAGAAATTGCAC  
GTGTCGAATGGATTTCGAGAAGGTAGGGTTCCCTACAAACCATTCGAGCTAAAATTGAT  
TATTATCCTATACAGTTCGAACTATCTATGGTGTATTGGGCATAAAAATTTGGATATTTCT  
AGACGAGGAAATGTCGCGTTACCGAGGACCTCGTTTGAAAAAATACGCCGGCTGGG  
AGCTTTACCGGGACTAACTAATAAAAGGCCTAGAGTCGGAAATGATCTTCGAAACCAA  
TCGCGTTTCGGGGAAA---AAATCTCAATATCGTATTTCGCCTAGAAGAAAACAAAAGTTG  
CGTTTTCATATGTTTACAGAACGACAATTACTTAAATACGTTTCGGATCGCCGAAA  
AGCCAAGGGTTCAACAGGTCAAGTTTTACTCCAATTACTTGAATGCGTTTGGATAACA  
TCCCTTTAGATTGGGTATGGCTTCGACTATTCCTGCAGCCCGACAATTAGTTAACATA  
GGCATATTTTAGTTAATGGTCGTATAGTAGATATACCAAGTTATCGCTGTAAACCTCGAG  
ATATTATTACGGCGAAGGATGAACAAAAATCCAGAGCTCTGATTCAAAAATCTCTGGAT  
TCATCCCCTCAT---GAGGAATTGCCAAGCCATTTGATCCTTCAACCATTCCAA-----TATA  
AAGGATTAGTCAATCAAATAATAGATAGTCAATGGGTTGGTTTGAAAATAAATGAATTG  
CTAGTTGTAGAATATTATTCTCGTCAGACTATGTCACGTCGAGGTGCTGCAGAAGAAAA  
AACAGCCAAATCCGATCCAATTTATCGTAATCGATTAGTTAACATGTTGGTTAACCGTAT  
TCTGAAACACGGAAAAAAATCATTGGCTTATCAAATTATCTATCGAGCCGTGAAAAAGA  
TTCAACAAAAGACAGAAACAAATCCACTATCTGTTTTACGTCAAGCAATACGTGGAGT  
AACTCCCGATATAACAGTAAAAGCAAGACGTGTAGGCGGATCGACTCATCAAGTTCCC  
ATTGAAATAGGATCCACACAAGGAAAAGCACTTGCCATTCGTTGGTTATTAGCGGCATC  
CCGAAAACGTCCGGGTCGAAATATGGCTTTCAAATTAAGTTCCGAATTAGTGGATGCTG  
CCAAAGGGAGTGGCGATGCCATACGCAAAAGGGAAGAGACTCATAGAATGGCAGAGG  
CAAATAGAGCTTTTGCACATTTTCGTATGGGTAGGGACACTATTGCTGAGGTAATAACC  
TCTATACGAAATGCTGATATGGATAAAAAAGAATGGTTTGAATAACAGCTACTAAAAT  
TACCGAAAATATTGTCAAATACTTTTAAAGAGAAGGCTTTATCGAAAACGTGAGAAAA  
CATCGAGAAAACACTACAAAGATTTTTTGGTTTTAACGCTGCGACATAGAAGG-----ATA  
GGAAAAGGCCTTAT-----CGAAATCTTTTAAATTTAAAACGGATCAGTCGACCTGGTCT  
ACGAATCTATTCTAATTATCAACGAATTCCTCGAATTTTAGGCGGGATGGGAATTGTAAT  
TATTTCTACTTCTCGAGGTATAATGACAGACCGAGAGGCTCGGCTAGAAGGAGTCGGC  
GGAGAAATTTTGTGTTATATATGGATGGCAAAAGCTATACCGAGAATTGGTTCACGTAG  
GAATGGACGTAGTGGGTCACGTAAGAGTGCACGTAGAATACCAAAGGGAGTTATTCAT  
GTTCAAGCAAGTTTCAATAATACCATTTGTCACCGTTACAGATGTACGGGGTAGGGTGGT  
TTCTTGGTCTCCGCCGTAATTTGTGGATTCAAGGGTACGAGAAGAGGGACACCATTT  
GCTGCTCAAACCGCAGCGAGCAATGCTATTCGTACAGTCGTGGATCAAGGTATGCAAC  
GAGCAGAGGTCATGATAAAAGGTCCCGGTCTCGGAAGAGACGCAGCTCTCCGAGCTAT  
TCGTAGAAGTGGTATATTATTAACTTTTGTACGGGATGTAACCCCTATGCCACATAATGG

CTGTAGACCTCCGAAAAAAGACGTGTGATGCCAACTATTAACAACCTTATTAGAAATA  
CAAGACAGCCCATCAGAAATGTCACGAAATCCCCGCTCTTCGGGGATGTCCTCAACG  
TCGAGGAACATGTACTCGGGTGTATACTATCACCCCAAAAAACCAAACCTCTGCCTTAC  
GTAAAGTTGCCAGAGTACGATTAACCTCTGGATTTGAAATCACTGCTTATATACCCGGTA  
TTGGCCATAATTTACAAGAACATTCTGTAGTCTTAGTAAGAGGGGGAAGGGTTAAGGAT  
TTACCCGGTGTGAGATATCACATTGTTGAGGAACCCCTAGATGCTGTCGGAGTAAAGGA  
TCGTCAACAAGGGCGTTCTCAATATGGGGTAAAAAAGCCAAAAATGGCAAGGAAAGG  
TTTGATTACAGCGGGAGAAGAAGAGGCCAAAAATTGGAACAGAAATATCATTTGATTCGT  
CAATCCTCAAAAAAAGAAATAAGC-----AAAGTTCCGTCATTGAGTGAGAAATGGGA  
AATTTATAGAAAGTTACAATCCCCACCGCGGAATAGTGCAGCTACACGCCTTCATCGAC  
GTTGTTTTGCGACCGGACGGCCGAGAGCTAATTATCGAGACTTTGGGCTATCCGGACAT  
ATACTTCGTGAAATGGTTCATGCATGTTTGTGGCCAGGAGCAACAAGATCGAGTTGGAT  
GGTAAAAAATGCATTCATTCGGTTATTTCTGAAGAA-----GAAAAG-----AGAGGAGC  
GGTTGAATTTACGGTATTCCGTTTTACCAATAAGATACGGAGACTTACTTCACATTTGGA  
AGTGCACAAAAAAGACTATTTATCTCAGAGAGGTTTTCGAAAAATTTTAGGAAAACGT  
CAACGGCTGTTGGCTTATTTAGCAAAAAAATAGAGTACGTTATAAAGAATTAATTGG  
TCAGTTGAATATTCGAGAGACAAAACTCGT-----ATGGTAAAACCTTCGTTTGAACGAT  
GTGGTAGAAAGCAACGTGCCGTCTATCGAATCGTTGCAATTGATGTTTCGATCCCGAAG  
AGAAGGAAAAGATCTTCAGAAAGTAGGTTTTTATGATCCGATAAAGAATCAAACCTTATT  
TAAACGTTCCCTGCTATTCTATATTTCCCTTAAAAGGGTGCTCAACCTACAGGAACTGTT  
CAGGATATTTAAAAAAGGGGGGGTTT---AAAGAATTTATCCTAATCAAACGAAATTC  
AAT---ATGGATAATCCAAACGACCTTTTCTTAAATCCAAGCGATCTTTTCGTAGGCGTT  
TGCCCCGATTCAATCGGGGGATCGAATTGATTATAGAAATATGAGTTTAAATTAGTCGAT  
TTATTAGTGAACAAGGAAAAATATTATCTAGACGAGTGAATAGATTAACCTTAAAACAA  
CAACGATTAATTAATGCTATAAAACAAGCTCGTATTTTATCTTTGCTACCCTTTCTCA  
ATAATGAGAAA-----CAATTTGAAAGAAATGAGTACGACCGCTAGAACTACTGGTCTTAG  
AACCAGAAATGACGTGACACGTTCACTAAAAAAAATCCTTTTGTAGCCAACCATTAT  
TAAAAAAAATGGAGAACTTAACACAAAAGCAGAAAAAGAAATAATCGTAACCTGGT  
CCAGAGCATCTACCATTATACCCACAATGATCGGACATACCATTGCTATCCATAATGGAA  
AGGAGCATCTGCCTATTTATATAACAGATCGTATGGTCGGCCACAAATTGGGAGAATTC  
GCCCCGACTTTAAATTTCCGAGGACACGCAAAAAGGATAATAGATCTCGTCGTATGAT  
TTTTCAATCTTTTCTACTAGGTAATCTAGTATCCTTATGCATGAAGATAATCAATTCGGTC  
GTTGTGGTCGGACTCTATTATGGATTTCTGACCACATTTCCATAGGGCCCTCTTATCTC  
TTCTTCTCCGAGCTCAGGTTATGGAAGAAGGA-----ACCGAGAAGAAGGTATCAGC  
AACAACTGGTTTTATTACGGGACAGCTCATGATGTTTCATATCGATCTATTATGCGCCTCT  
GCATCTAGCATTGGGTAGACCTCATAACAATACTGTCCTAGCTCTACCATATCTTTTGTTT  
CATTTCTTCTGGAACAATCACAAACACTTTTTTGGATTATGGATCTACTACCCGAAACTTA  
ATGCGTAATCTCAGCATTCAATGTGTATTCCTGAATAATCTCATTTTTCAATTATTCAACT  
ATTTCAATTTACCAAGTTCAATGTTAGCCAGATTAGTCAACATTTATATGTTTCGATGCAA  
CAACAAGATGTTATTTGTAACAAGTAGTTTTGTTGGTTGGTTAATTGGTACATTTTATT  
CATGAAATGGCTTGGATTGGTATTAGTCTGGATACGGCAAAATCATTCTATTAGATCGTA  
CATTCGATCTAATAAGTACCTTGTGTCAGAATTGAGAAATTCTATGGCTCGGATCTTTAG  
TATTTCTTATTTATTACCTGTGTCTACTATTTAGGCAGAATACCGTCACCCATTCTTACT  
AAGAACTGAAAGAA-----AAATCTCTTGTGACTCTTCTTTTCGATTATAATCGATG

GAATCGCCCACTTCGCTACATCAAAAAGAATCGATTTGAAAAGGCTGTACGAAATGAA  
ATGTCACAATATTTCTTTGACACATGCCAAAGTGATGGAAAATAAGAATTTCTTTTAG  
CTATCTATCCAGTTTGTCAATTTTTGGAAAATGTTAAAAGAAAGATATCTTGGTCTAC  
AATAGAGAAAACCCACTCGAATCAATTTGACAACCTATTGGGTTTTTCCAACAACATAA  
ACATAAAAGGGATAAACAAGGAATTTAGAAACCGAATTGAAGCTCTAGACAAGGAATC  
ACTTTTTCTAGATATACTGGAAACACGAACTCGATTGTATAATGATGATACTAAAACCGA  
ATATTTTCCTAAAATGTATGATCCTTTCTTAAATGGGACCTATCGGGGGGTAATGAAAA  
AGGGGGTTCACCAAGAGAACTCTTGGTATAAATCGGGTTTATGCTATTCTTTCCCAAG  
AATTTAAACAGAAACATACTAATGATCAATCTATTGGACTAAAAGAAATTAGTAAAAAA  
GTCCCCGATGGTCATACAAATTAATCGATTTAGAACACAATCA---GGCCAAATTCGAT  
CAAGAAAAGCCAAACGTGTAGTGATTTTTACTGCTGCTTTGCCACGCTATTCACAACAA  
TCGGACTTTCGGCGAGGAATAATTAAGGTTCTATGCGCGCTCAAAGGCGTAAAATTGT  
GATTTGGGAATTTCAAGCAAATGCACGTTCTCCCCTTTTTTTGGACAGAATCAAAA  
GAAACTCCTGGTTTTCTTTGATATA-----TCCGAAATAATTAAGTGATTTTTTACAAATA  
GAAAAGAACAACACGAATAGAGATAGCGGAAGCATGGGATACCATTCCATTTGCACA  
AGTAATAAGGGCTCCATGTTAATAACTCAATCTATTCTTAGAAAATATATTCTATTGCCT  
TCATTTATAATAGCGAAAAATATTGGACGTATGTTATTATTGCAATTTCCGGAATGGTTTG  
AAGATATAACAAGATGGAACCAAGAAATGCATGTTAAATGTACCTATAATGGTATCCAAT  
TATCGGAAACGGAATTTCCGAAAAATTGGTTGACAGATGGTATTCAGATAAAAATCCTA  
TTTCCTTTCTGTCTGAAACCTTGGCACAAATCTAAAAAAAACAAAAGATGATTTTTG  
TTTTTTAACAGTTTGGGGAATGGAACTGAACTTCCCTTTGGTTCTCCAGAAAACGCT  
ATTCCTTTTTTGAGCCCGTTTTTACGGAACCTGCAAACAAAATTGGAAAATTCAAAAG  
GGCGTATTTATTAGCT---CTAAGAGTTTTTAAAAGGCAAAAAGTCAATTCGTTTTA-----A  
AAGAAACAAAAAAAGGGTTATCGAAAATTTTATA-----TTTCTAAAAAAAAGAATAAA  
AGGACTTTCAAATTAACGATTCTAGAATCAGCAAGCAAATAATTCATGAATCGTTTA  
GTCTAATTCAATCTCCAAATTGGACAAATTCTTCACTGACAGAAAAAAGAGAAGGA  
TCTGACTGATAGAACAAGCACAAATCCAAAATCAAATAGAAAAAATTACAAAAGAAAA  
AAAAAAAAGTCTACCCAAAAA-----AGTTCTAGATTGCAATTGCCAACAAATATTG  
GCAAATATTAAGAAGAAATGTCCGATTAATCTCTCAATTCGATTGTTTTATAAAAAT  
TTTCGTTGAAAAGTATACATAGATATATTTTTATCTATTATTAATATTCCTAGACTCAATA  
CACAACTTTTT---CACTTTATTTTCATGTGATTTATCCTATTTGTCACAAGCCTATGATTTT  
ACAAATTATCACAACCCAAGTTAGTAACTTGATAAATTACGATCTGTTTTTCAATATAT  
GCCTTTTTTTATTAAGACTGAAATAAAGGATTCTTTTACACAAGGAATAATTCAT---AAAT  
TAAGTCATAAAAAACTTCAGAGTTATGAAATGAATGAATGGAAAACTGGTTAAAGGG  
ACATTATCAATACGATCTATCTCGGATTAGATGGTTCGGGATTAATACCACAAAAGTGGAG  
AAATAGGGTTAATCTACGCCGTATGTCTAAAAATCAA-----GATTCATATGAAAAA-----  
-----ATGAAGTCCAAAAACAAAAGAATTTTCAAAAAACGCTCGATATGATCTTTTA  
TCATATAAATCTATTAATGGCAATATTAGATATCCCGATAGAAAATATTTTGATTGGAAAA  
TTCTCAATTTGGGTCTTAGATTTTTGGATTGGATGGGAATGAATGAAGAAATACTAAATC  
GTTGGTTCTTCCCAGAATTTGTGCTACTTTATAATCTATATAAAATCAAACCCTGGGTTAT  
ACCAAGTAAAGGACTTCTTTTAAATTACAAAAGTAATACAGGAGCGGAACTTGATTTCT  
TCCTAAAACGTTATTTACTTTTTCAATTGAGATGGGGCGATGCTTTGAATCAAAGAATGA  
TGAATAATATCAAAATATATTGTCTGCTGCTTAGGCTGATAAATCCACGAAAAATTAAT  
ATCCTCGATTCAAAGAAGAGAAATGAGTTTGGATATAATGCTGATTGAGAAGAATTTAA

GTCTTGCAGAATTGATCAAA---GGGGTCTTGATTATCGAACCCACTCGTCTGTCTGTAA  
AAAATGATGGACAATTGATTATGTATCAAACCTGTAGGTATTTTCATTGATTCATAAGAGTA  
AGCAC---GATTTTGTACTTGTCCCGAAAATATTTTATCACATAGACGTTCGTAGAGA  
GTTGAGAATTCGAATTTCTTCAAATTTCTTTGGCCTAATTATCGATTCTGAAGATTTAGC  
TTGTATGAATCGCTATTGGTTTGATACGAATAATGGCAGTCGTTTCAGTATGTTAAGGAT  
ACATCTGTATCCGATGAAAGGAAATCAATTCAAATCCTGGATTTTCGAATTGAGAGAGA  
TATTGAGAGAGATCAAGAATTCTCACTATTTCTTAGATTTCATGGACCCAATTCAATTCAG  
TGGGATCTTTCATTACATTTTTTTCCACCAAGAACGTTTTATAAACTCTTTGACCCCC  
GAATTTGGAGTATCCTACTTTCA---CGCAATCA-----CAGGGTTCAACAAGCAATCGATA  
TTTCACG-----ATCAAGGGT---GTAATACTCTTTGTAGTAGCGGTCCTTATATATCGT-----  
-----ATTAACAATCGAAATATGGTCGAAAGAAAAAATCTCTATTTGATAGGACTTCTTCCT  
-----ATACCTATGAATTCCATTGGACCCAGAAATGATACATTGGAAGAATCCGTG--  
-GGGTCTTCCAATATCAATAGGTTGATTGTTTCG---CTCCTGTATCTTCCAAAAGGAAAA  
AAGATCTCTGAGAGTTGTTTCTGAATCCGAAAGAGAGTACTTGGGTTCTCCAATAA  
CT-----AAAAAGTGTAGCATCCCTGAATCTAACTGGGGTTCGCGGTGGTGGAGGAA  
CTGGATCGGAAAAAAGAGG-----GATTCTAGTTGTAAGATATCTAAT-----GAAACCGT  
CGCTGGAATTGAGATCTTATTCAAAGAGAAAGATCTCAA---TATCTGGAGTTTCTTTTT  
GTATATTATATGGAT-----GATCCGACCCGCAAGGACCACGATTGGGAATTGTTTGATCGT  
CTTCTCTGAGGAAGAGGGCGAAATACAATCAACTTG-----AATTCGGGACCGCTATTCG  
AAATCTTAGTGAAACACTGGATTTCTTATCTCATGTCTGCTTTTCGTGAAAAAATACCA  
AGTGAAGTGGAGGGT---TTCTTCAAACAACAAGGG---GCTGGGTCAACTACTCAATCAA  
ATGATATTGAGCATGTTTCCCAT-----CCCTTCTCGAGAAACAAGTGGGCTATTTCTTTCG  
AAAATAGTGCTCAATTTTCATATGTGGCAATTCCGCCAAGATCTCTTCGTT-----AGTTG  
GGGGAAG---AATCCGCACGAATCGGATTTTTTTGAGGAAG---GTATCGAGAGAGAATTGG  
ATTTGGTTAGACAATGTGTGGTTGGTAAACAGGGATCGG-----TTTTTTAGC-----AAG  
GTACGGAATGTATCGTCAAATATCAATATGATTCC-----ACAAGA-----TCTACTTTCGT  
TCAAGTAACGGATTTTAGCCAACCTGAAAGAATCTTCT--GATCAATCCAGAGATCATTG  
GATTCATTAGT-----AATGAGGATTCGGAA-----TATCACA  
CATTGGTCAATCAAAGAGAGATTCAACAATAAAAGAAAGATCGATTCTT--TGGGAT---  
---CCTTCCTTTCTTCAAACGGAACGAACAGAGATAGAATCAGAC-----CGATTCCCGAAA  
-----TGCCTTTCTGGCTATTCC-----TCAATATTCACG---GAACGTGAGAAGCAGAT  
GATTAATCATCTGCTTCCGGAAGAAATCGAAGAATTTCTT-----GGGAATCCTACAAGAT  
CCGTTTCGTTCTTTTTTCTCTGATAGATGG-----TCAGAACTTCAT--CTGAGTTCGAATCCT  
ACTGAGAGGTCCACTAGAGATCCA-----AAATTGTTGAAGAAAGAACAAGATCTTT  
CT--TTTGTCCCTTCCAGGCGATCGGAA-----AATAAAGAAATGGTTAATATATTCAA  
GATAATTACGTATTTACAAAAT-----ACCGTCTCAATTCATCCTATTTTCATCAGATCCGGGA  
TGTGATATGGTTCCG---AAGGATGAACCGGAT---ATGGACAGTTCCAATAAGATTTTCATT  
CTTGAACAAAAATCCATTTTTTTGATTTA-----TTTCATCTATTACATGACCGGAACAGGGG  
AGGATACACGTTA-----CACCACGATTTTGAATCAGAA-----GAGAGATTTCAAGAAATG  
GCAGATCTATTCACTCTATCAATAACCGAGCCG---GATCTGGTGTATCATAAGGGATTTG  
CCTTTTCTATTGATTCCTACGGATTGGATCAAAAACAA-----TTCTTGAATGAGGTATTCA  
ACTCCAGGGATGAATCGAAAAAGAAATCT-----TTATTGGTTCTACCTCCTATTTTTTAT  
-----GAAGAGAATGAATCTTTTTTCTCGAAGGATCAGAAAAAATGGGTCCGG---ATATCC  
TGCGGGAATGATTTGGAAGATCCACAACCAAAAAGAGTGGTATTTGCC-----ATAATG

GAGGCAGTCAATCAATACAGATTGATCCGAAATCTGATTCCAATCCCATATAGTACCTAT  
GGG-----TACATAAGAAATGTATTGAATCGATTCTTTTTAATGAAT-----AGATCTGATCG  
CAACTTCGAATATGGA-----ATTCAAAGGGATCAAATAGGAAAGGATACTCTGAATCA  
TAGAACTCTAATGAAATATACGATCAACCAACATTTATCGAATTTGAAAAAG---AGTCAG  
AAGAAATGGTTAGATCCCCTT-----ATTTGGATTTCTCGAACCGAGAGATCCATGAATCG  
GAATCCTGATGCATATAGATACAAATGGTCCAATGGGAGCAAGAATTTCCAGGAACATT  
TGGAACATTTTCGTTTCTGAGCAGAAGAGCCGC-----TTTCAAGTAATGTTTGATCGATT  
ACGTATTAATCAATATTCGATTGATTGGTCTGAGGTTATCGACAAAAAAGATTTGTCTAA  
GCCACTTCGTTTCTTTTTGTCCAAG-----TCACTTCTTTTTTTGTCC-----  
-----AAGTTGCTTTTCTTTTTGTCTAAC---TCACTTCCTTTTTTCTGTGTGAGTTTCG  
GGAATATCCCATTTCATAGGTCCGAG---ATCTACATCTAT--GAATTGAAAGGTCCGAATG  
ATCAACTCTGCAATCCGTTGTTAGAATCAATAGGCCTTCAAATTGTTCAATTTGAAAAAA  
TGGAAACCCTTC-----TTATTGGAT-----GATCATGATACTTCC---CAAAAATCGAAATTC  
TTGATCAATGGAGGAACAATATCACCATTTTTGTTCAATAAGATACCA---AAGTGG---AT  
GATTGACTCATTCCATACTAGA-----AATAATCGCAGGAAATCCTTTGATAACACGGATTC  
CTATTTATCAATGATATTCACGATCAAGACAATTGGCTGAATCCCGTGAAACCATTTCA  
TAGAAGTTCATTGATATCTTCTTTTTATAAAGCAAATCGACTTCGATTCTTGAATAATCCA  
CATCACTTCTGCTTCTAT-----TGGAACACAAGATTCCCCTTTTCTGTG-----GAAAA  
GGCCCGTATCAATATCAATAATTATGATTTTACGTATGGA---CAATTCCTCAATATCTTGTT  
CATTCGCAACAAA---ATATTTTCTTTGTGCGTCGGTAAA-----AAAAACATGCTTTTTTG  
GGG---AGAGATACTATTTACCAATCGAGTCACAGGTATCTAACATATTCATACCTAACG  
ATTTTTCACAAAGTGGT--GACGAAACGTATAACTTGTACAAATCT-----TTCCATTTTC  
CAAGTCGATCCGATCCATTTCGTTTCGT-----TACTCGATCGCAGACATTTCTGGAAC  
ACCTCTAACAGAGGGACAAATAGTCAATTCTGAAAGAACTTATTGTCAACCTCTTTTCAG  
ATATGAATCTATCTGATTCAGAAGGGAAGAACTTGCATCAGCATCTCAAT-----TTCAATT  
CAAACATGGGTTTGATTACACTCCATGTTCTGAGAAATATTTACCATCTGAAAAG-----  
AGGAAAAAA-----CGGAGTCTTTGTCTAAAG-----AAATGCGTCGAGAAA  
GGGCAGATGTATAGAGCCTTTCAACGAGATAGTGCTTTTTTCAACTCTCTCAAAATGGAA  
TCTATTCCAAACATATATGCCATGGTTCCTTACTTCGACAGGGTACAAATATCTAAATTTG  
ATATTTTATAGATACTTTTTTCAGACCTATTG-----CCGATACTAAGTAGC---AGTCAAAAATT  
GGTATCCATTTTTTCACGATATTATGCATGGATCGGGTATATCATGGCGAATTTCTCAGAAA  
AATTTG-----TGTCTTCCACAATGGAATCTG---ATAAGTGAGATTTTCGAGTAAGT  
GTTTACATAAT-----CTTCTTCTCTCCGAAGAAATGATTCATCGAAAT-----AATGAGTCAC  
CATTGATATCGACACATCTGAGATCGCCAAATGTTTCGGGAGTTC--CTCTATTCAATCCT  
TTTCCTTCTTCTTGTTGCTGGATAT--CTCGTTCGTACACATCTTCTCTTTGTTTCCCGG---  
---GCCTCTAGTGAGTTACAGACAGAGTTCGAAAAGGTCAAATCTTTGATGATTCCATCA  
TCTATGATTGAGTTGAGAAAACCTTCTGGATAGGTATCCTACATCTGAACCGAATTTCTTC  
TGGTTAAAGAATCTCTTTCTAGTTGCTCTGGAACAATTAGGAGATTTCTTAGAAGAAAT  
ACGGGGTTCTGCTTCTGGCGGCAACATGCTTGGT-----CCCGCT-----TATGGG--  
-GTCAAATCAATACGCTCTAAGAAGAAATATTTGAATATCAATCTGATCGATATTGTCGAT  
CTCATA-----CCAAATCCCATCAATCGAATCACTTTTTTCGAGAAATACGAGACATCT  
AAGTCATACAAGTAAAGAGATTTATTCATTGATAAGAAAAAGAAAAACGTGAACGGG  
GGTTGGATTGATGATAAAATAGAATCCTGGGTTCGCGAACAGTGATTTCGATTGGTGATGA  
AGAAAGAGAATTTCTTGGTTCAGTTCTCC-----ACCTTAACGACA-----GAAAAGGGGATT

GATCAAATCTATGGAGTCTGACT--CATAGTGATCATTTA-----TCAAAGAATGAC  
TCTGGTTATCAAATGATTGAACAACCGGGAGCAATTTACTTACGATACTTAGTTGACATT  
CAT-----AAAAGTATCTAATGAATTATGAGTTCAATACATCCTGTTTAGCAGAAAGACG  
GATATTCCTTGCTCATTATCAGACAATCACTTAT-----TCACAAACTTTGTGTGGGACTAA  
TAGTTTTCAATTCATCTCATGGA-----AAACCCTTTTCGCTCCGCTTAGCCCTATCCC  
CCTCT--AGGGGTATTTAGTGATAGGTTCTATAGGAAGTGGACGATCCTATTTGGTCAA  
ATACCTAGCGACAAACTCCTATGTTCTTTTCATTACGGTATTTCTGAACAAGTTCCTGGA  
TAACAAGCCTAATGGTTTTCTTATTGAT-----GATATCAAT-----ATTGAT  
GATAGTGACGATATTGATGCTAGTGAC-----GATATC  
GATCGTGACCTTGATACGGAGCTG--GAGCTGCTAACTATGATGAATGCGCTAACTATGG  
ATATGATGCCGAA-----ATAGACCCATTTTATATCACCCCTCAATTCGAATTAGCAA  
AGCAATGTCTCCTTGCATAATATGGATTCCAAACATTCATGATCTGGATGTGAATGAGTC  
GAATTAATCCCTCGGTCTATTAGTGAACCATCTCTCCAGG-----GATTGTGAAAGA  
TGTTCC---ACTAGAAATATCTTGTATTGCTTCGACTCATATTCCCCAAAAAGTGGATCC  
CGCTCTAATAGCTCCGAATAAATTCAATACGTGCATTAAGATACGAAGGCTTCTTATTCC  
ACAACAACGAAAGCACTTTTTCATATACTAGGGGATTTCACTTGGAAAATA  
AAATGTTCCATACT-----AATGGATTCGGGTCCATAACCATGGGTTCCAATGCACGAGAT  
CTTGATGCACTTACCAATGAGGCCCTATCGAGTAGTATTACACAGAAGAAATCAATTAT  
AGACACTAATAAATTAGATCCGCTCTTCATAGACAACTTGGGATTTGCGA-----TCC  
CAGGTAAGATCGGTTTCCAGGATCATGGGATCCTTTTCTATCAGATAGGAAGGGCTTTAGC  
ACAAAATGTACTTCTAAGTAATTGCCCATAGATCCTATATCTATCTATATGAAGAAGAA  
A-----TCGTGTAACGAAGGGGATTCTTATTTGTACAAATGGTACTTCGAACTTGGAACGA  
GCATGAAGAAATTAACGATACTTCTTTATCTTTTGAGTTGTTCTGCCGGATCGGTTCGCTC  
AAGACCTTTGGTCTCTACCC-----GGACCCGATGAAAAA---AATGGGATCACTTCTTATG  
GACTCGTTGAGAATGATTTCG---GATCTAGTTCATGGCCTATTAGAAGTAGAAGGCGCTC  
TGGTGGGA-----TCTTCACGGACAGAAAAGATTGCAGTCAGTTTGATAATGAT-----CG  
AGTGACATTGCTTCTTCGGCCCGAACCGAGGAAT--CCCTTAGATATGATGCAAGGCGG  
ATCTTGTTCTATCCTTGATCAGAGATTTCTCTATGAAAATAC-----GAATCGGAGTTTGA  
AGGG--GGGAGGGAGAAGGAGCCCTTGACCCGCAACAG-----ATAGAGGAGGAT-  
-----TTATTCAATCAC-----ATAGTTTGGGCTCCT-----AGAATATGGCGCCCT-----TG  
GGCCTTTCGATACAATCAAATAGAAAGGCCCAACGAATTGGGATTTCCC---TATTGGGC  
CAGGTCATTTCCGGGCAAG-----CGGATCATTATGATGAAGAGGATGAGCTTCAAGA  
GAATGATTCGGAGTTCTTGCAGAATGGAAGGGTGCAGTACCAGACACGAGATAGATCT  
TCCAAAGAACAAGGCCTTTTTCGAATAAGCCAATTCATTTGGGACCCTGCAGATCCACT  
CTTTTCCTATTCAA---GATCAGCCCCCTGGCTCTGTGTTTTACATCGAGAATTATTTA  
CAGATGAAGAGATGTCAAAGGGGCTTCTGACTTCCCAAACAGATCCTCCTACATCTATA  
TATAAACGCTGGTTTATC-----AAGAATACGCAAGAAAAGCACTTCGAATTGTTGATTAA  
TCGTCAGAGATGGCTTAGA-----ACCAATAGTTCATTATCT-----AATGGATCTTCCGT  
TCGAAT-----ACTCTATCCGAGAGTTATCAGTATTTATCAAATCTGTTCCCTATCTAAC---GG  
AACGCTATTGGATCAAATGACAAAGACATTGTTGAGAAAAAGATGGCTTTTCCCGGAT  
GAAATGAAAATTGGATTC-----ATG-----ATGCCTAGATCGCGA---ATAAA  
TGAAATTTTATTGATAAGACCTTTTCAATTGTAGCCAATATCTTATTACGAATAATTCCG  
ACAACCTTCGGGAGAAAAAGAGGCATTTACCTATTACAGAGATGGT-----ATGTCAGCTC  
AATCCGAAGGAAATTATGCGGAAGCTTTACAGAATTATTATGAAGCTATGCGACTAGAA

ATTGATCCCTATGATCGAAGTTATATACTCTATAATATAGGCCTTATCCACACAAGTAATG  
GAGAACACACGAAAGCTTTGGAATATTATTTTCGAGCACTCGAACGAAATCCATTCTTA  
CCACAAGCTTTTAATAATATGGCCGTGATCTGTCATTAC---CGGGGAGAAGTGGCCATTC  
GACAGGGAGATTCGGAATAGCGGAAGCTTGGTTCGATCAAGCCGCTGAGTATTGGAA  
ACAAGCTATAGCGCTTACTCCTGGTAATTATATTGAAGCGCATAATTGGTTGAAGATCAC  
GGGGCGTTTCGAA-----ATGAGTTGGCGATCAGAACATATATGGATAGAAGTTATAACAG  
AGTCTCGAAAATAAGTAATTTCTGCTGGGCCTTTATCCTTTTTTTTAGGTTTCATTAGGAT  
TCTTATTGGTTGGAAGTTCAGTTATCTTGGTAGAAATTTGATATCTTTTTTTCCGTCTCA  
GCAAATCATTTTTTTTCCACAAGGTATCGTGATGTCTTTCTACGGAATCGCGGGTCTCTT  
TATTAGTTCCTATTTGTGGTGCACAATTTCTGGAATGTAGGCAGCGGTTATGATCGATT  
CGATAGAAAGGAAGGCATAGTGTGCATTTTTTCGGTGGGGATTCCTGGAAAAAATCGT  
CGCATATTCCTCCGATTCCTTATCAAAGATATTCAGTCTATTAGAATAGAAGTTAAAGAG  
GGTATTTATGCCCGTCGTGTCTTTATATGGACATTCGAGGCCAGGGGGGCATTCCCTA  
ACTCGTACTGATGAGAAT--TTGACTCCACGAGAAATTGAACAAAAAGCTGCGGAATTG  
GCCTATTTCTTGCGTGTACCAATTGAAGTATTT

>Tetracentron

ATGGAAAATGGTGGTTCAATTCGATGTTGTCTCTAAGTAAATCAATGGAAAGTCTTGG  
TCCTATTGGAAATACCAGTGGAAGTGAAGACCCCGTTAGAAATGATACAGATAAAAAC  
ATTCAT--TGCAATAATGTTGATCATTTTTTTCGGTGTACAGGACATTCGGAGTTTCATTTC  
TGATGACACTTTTTTAGTTAGGGATAGTAATGGGGACAGTTATTCCATATATTTTGATATT  
GAAAATAAGATTTTTGAGATTGACAATGAT-----CATTCTTTTCTGAGTGAAGTAGAAAA  
TTATTTTTCTAGTTATCTGAATTCTAGTTATATGAATAATGGATCTAAGAATGACAATCCC  
TACTATGATCGTTACATGTATGATACTAAATATAGTTGGAATAATCACATTAATAGTTGCA  
TTGACAGTTATCTTCGTTCTGAAATCAGT-----ATTGATAGTTACATTTAAGTGGTAGCG  
ACAATTACAGTGACAGTTACATTTATAGTTACATTTGTAGTGACAGTGGGAGTTCCATAA  
GA-----AATGGCAGTGAT--AATATAAGAGGAAGATAT--GATCTCGATATAAATAAAAA  
ATACAGGCATTTGTGGGTTCAATGCGAAAATTGTTATGGATTAAATTATAAGAAATTTTT  
TAGGTCAAAAATGCATATTTGTGAACAATGTGGATATCATTGAAAATGAGTAGTTTCAG  
ATAGAATAGAACTTTTCGATTGATCCGGTACTTGGGATCCTATGGATGAAGACATGGTC  
TCTATAGACCCGATTGAATTTCAATTCGGAGGAGGAACCTTATAAAGATCGTATCGATTTCG  
TATCAAAGAAAGACAGGCTTAACTGAGGCTGTTCAAACAGGAATAGGTGACTAAATG  
GTATTCCCATAGCAATTGGGGTTATGGATTTTCAGTTCATGGGGGGCAGTATGGGATCCG  
TAGTAGGCGAGAAAATCACCCGTTTGATCGAGTATGCTACTAATAGATCTCTACCTCTTA  
TTATAGTGTGTGCTTCCGGAGGAGCACGCATGCAAGAAGGAAGTTTGAGCTTGATGCA  
AATGGCTAAAATATCTTCCGCTTCATATGATTATCAATCAAATAAAAAGTTATTTTATGTT  
TCAATCCTTACATCTCTACAACCGGTGGGGTGACAGCTAGTTTTGGTATGTTGGGGGA  
TATCATTATTGCTGAACCAAATGCCTACATTGCATTTGCGGGTAAAAGAGTAATTGAAC  
AAACATTGAATAAGACAGTACCTGATGGTTCACAAGCGGCTGAGTATTTATTTTCATAAG  
GGCTTATTCGATCCAATCGTACCACGTAATCCTTTAAAAGGCGTTCTGAGTGAGTATTT  
CAGCTCCACGGTTTCTTTCCCTTGAATCAAATCAATCAAGATGGTAACCATTCGAGC  
CGACGAAATTAGTAATATTATCCGTGAACGTATTGAACAATATAATAGAGAAGTAAAGAT  
TGTGAATACCGGTACCGTACTTCAAGTAGGCGACGGCATTGCTCGTATTCATGGTCTTG  
ATGAAGTAATGGCAGGTGAATTAGTAGAATTTGAAGAGGGTACAATAGGCATTGCTCTG  
AATTTGGAATCCAATAATGTTGGTGTGATTAATGGGTGACGGTTTGATGATACAAGA



GGGGAGTTCTGTAAAAGCAAGAGGAATAATTGCTCAGATACCAGTGAGTGAGTCTTAT  
TTGGGTCGTGTTATAAATGCTCTGGCTAAACCTATTGATGGTAGAGGTGAAATTCCAGC  
TTCTGAATTCGGTTAATTGAATCTCCCGCTCCAGGTATTATTTTCGAGACGTTCCGTATAT  
GAGCCTCTTCAAACGGGGCTTATTGCTATTGATTTCGATGATCCCTATAGGACGCGGTCA  
GCGAGAATTAATTATTGGGGACAGACAGACCGGTAAAACAGCAGTAGCCACAGATACG  
ATTCTCAATCAAAAAGGGCAAATGTAATATGTGTTTATGTAGCTATTGGTCAAAAAGC  
ATCTTCTGTGGCTCAGGTAGTGACTACTTTCCAGGAAAGGGGTGCGATGGAATACACTA  
TTGTAGTAGCCGAAACAGCAGACTCCCCTGCTACATTACAATACCTCGCTCCTTATACA  
GGAGCGGCTCTGGCTGAATATTTTATGTACCGTGAACGACATACTTCAATCATTATGAT  
GATCTCTCCAAACAAGCACAAGCTTATCGCCAAATGTCTCTTCTATTACGAAGACCACC  
TGGTCGTGAAGCTTATCCAGGAGATGTTTTTTATTTGCATTACGCCTTTTTGGAAAGAG  
CCGCTAAATCAAGTTCTCTTTTAGGTGAAGGAAGTATGACCGCTTTACCAATAGTGGAG  
ACTCAATCAGGAGACGTTTCGGCTTATATTCTACTAATGTAATTTCCATTACAGATGGA  
CAAATATTCTTATCCGCCGATCTATTCAATGCTGGAATCCGACCTGCTATTAATGTGGGTA  
TTCCCGTCTCCAGAGTAGGATCTGCAGCTCAAATTAAGCCATGAAACAAGTAGCTGG  
CAAATCAAAATTGGAAGTGGCTCAATTCGCAGAGTTAGAAGCTTTTGCACAATTTGCTT  
CTGATCTCGATAAAGCTACTCAGAATCAATTGGCAAGAGGTCAACGATTACGTGAATTG  
CTCAAACAATCCCAATCAGCCCCCTCACGGTGGAAGAACAGATAGTGACTATTTATAC  
CGAACGAATGGGTATCTTGATTCATTAGAAATTGGCCAGGTAAAGAAATTTCTCGTTC  
AGTTACGTACCTACTTAAAACGAATAAACCTCAGTTCCAAGAAATCATATCTTCTACC  
AAGACATTCACCGAGGAAGCGGAAGCCCTTTTGAAAGAAGCTATTCAGGAACAGATG  
GAACGCTTTCTACTTCAGGAACAAACAATGAGAATCAATCCTACTATTTCTGGTCCTGG  
GATTTCTACACTTGAAGAAAAAACCTGGGGCGTATCGCTCAAATCATTGGTCCGGTAC  
TGGATGTAGCTTTTCCCCGGGGAAGATGCCTAATTTTACAACGCTCTGGTAGTTAAG  
GGTCGAGATACTGTCCGCCAACAAATTAATGTGACTTTCGAGGTACAGCAATTATTAGG  
AAATAATCGAGTTAGAGCTGTAGCTATGAGTGCTACAGATGGTCTGACGAGAGGACTG  
GAAGTGATTGACACGGGAGCTCCTCTAAGTGTTCAGTCGGTGGAGCGACTCTCGGAC  
GAATTTTCAACGTTCTTGGAGAGCCTGTTGATAATTTAGGTCCTGTCGATACTCGCACA  
ACATCTCCTATTCATAGATCTGCGCCTGCCTTTATACAGTTAGATACCAAATTATCTATTT  
TTGAAACAGGAATTAAGTAGTGGATCTTTTAGCTCCTTATCGCCGTGGAGGAAAAATA  
GGACTATTCGGGGGAGCTGGAGTGGGTAAAACAGTACTCATCATGGAATTGATCAACA  
ACATTGCCAAAGCTCATGGAGGTGTATCTGTATTTGGCGGAGTAGGCCGAACGTACTCGT  
GAAGGAAATGATCTTTACATGGAAATGAAAGAATCTGGAGTGATTAATGAACAAAATAT  
TGCAGAATCAAAAGTAGCTCTAGTCTACGGTCAGATGAATGAACCGCCGGGAGCTCGT  
ATGAGAGTTGGTTTGAAGTCCCTAACCATGGCAGAGTATTTCCGGGATGTTAATGAACA  
AGACGTAATCTATTTATCGACAATATCTTCCGTTTCGTCCAAGCAGGATCCGAAGTATC  
TGCCTTATTAGGCAGAATGCCTTCTGCTGTGGGTATCAACCTACCCTTAGTACAGAAAT  
GGGTTCTTTGCAAGAAAGAATTACTTCTACAAAAGAAGGATCCATAACTTCTATTCAAG  
CAGTTTATGTACCTGCGGACGATTTGACGGACCCTGCTCCTGCCACGACATTTGCACAT  
TTAGATGCTACTACCGTACTATCAAGAGGATTAGCTGCCAAAGGTATCTATCCAGCAGT  
AGATCCTTTAGATTCAACGTCAACTATGCTTCAACCTCGGATTGTTGGTGAGGAACATT  
ATGAAATTGCGCAAAGAGTTAAGCAAACCTTTACAACGTTACAAAGAAGTTCAGGACAT  
TATAGCTATCCTTGGATTGGACGAATTATCCGAAGAAGATCGTTTAAACCGTAGCAAGAG  
CACGAAAAATTGAGCGTTTCTTATCACAACCCTTCTTCGTAGCAGAAGTATTTACGGGT

TCTCCAGGGAAATATGTTGGTCTAGCAGAAACAATTAGGGGGTTTCAATTGATCCTTTC  
CGGAGAATTAGATGGTCTTCCTGAACAGGCCTTTTATTTGGTAGGTAACATCGATGAAG  
CTACCGCGAAGGCTATGAACTTAGAAGTGGAGAGCAAATTGAAGAAAATGACCTTAAA  
TCTTTGTGTACTTACTCCTAATCGAATTGTTTGGGATTCAGAAGTGAAAGAAATTATTTT  
ATCTACTAATAGTGGCCAAATTGGCGTATTACCAAATCACGCCCTATTGCCACAGCTGT  
AGATATAGGTATTTTGAGAATACGTCTTAACGACCAATGGTTAACGATGGCTCTGATGG  
GTGGTTTCGCTAGAATAGGCAATAATGAGATAATTATTTTAGTAAATGATGCGGAGAAG  
GGTAGTGACATTGATCCGCAAGAAGCTCAGCGAACTCTTGAAATAGCTGAAGCCAGCT  
TGAGGAGAGCTGAAGGCAAGAGACAAACAATTGAGGCGAATCTAGCTCTCAGACGAG  
CTAGGACGCGGGTAGAGGCTATCGATGTTATTTCAATGAAAAATGTAACCGATTCTTTC  
GTTCTCTTGGGTCACTGGCCATCCGCCGGGAGTTTCGGGCTTAATACCGATATTTTACG  
AACAAATCCAATAAATCTAAGTGTAGTGCTTGGTGTATTGATCTTTTTTTGGAAAGGGAG  
TGTTAAGTGATTTATTAGATAATCGAAAACAGAGAATCTTGAGTACTATTGCAAATTCAG  
AAGAACTACGTGGAGGGGCCATTGAACAAC TAGAAAAGCCCGGACCCGCTTACGGA  
AAGTGGAAATGGAAGCAGATGAGTTTCGAGTGAATGGATACTCTGAGATAGAACGAG  
AAAAATTGAATTTGATAAATCAACTTATAAGAATTTGGAACAATTAGAAAATTACAAA  
AATGAAACCATTTATTTTGAACAACAAAGAGCTATTAATCAAGTCCGACAACGAGTTTT  
CCAACAAGCCTTACAAGGAGCTTTAGGAACTTTGAATAGTTGTTTGAACAGTGAGTTA  
CATTTACGAACTATCAGTGCTAATATTGGCATGTTTGGGGCGATGAAAGAAATAACGGA  
TATGAATCCACTGATTTCTGCCGCTTCTGTTATTGCTGCTGGATTGGCTGTAGGGCTTGC  
TTCTATTGGACCCGGAGTTGGTCAAGGTACTGCTGCGGGACAAGCTGTAGAAGGTATC  
GCGAGACAGCCAGAGGCAGAGGGTAAAATACGAGGTACTTTATTGCTTAGTCTGGCTT  
TTATGGAAGCTTTAACCATTATGGACTGGTCGTGGCATTAGCGCTTTTATTTGCGAATC  
CCTTTGTTATGAATGTTCTACCATGTTCTATCAACACCCTAAAAGGGTTATACGATATATC  
CGGTGTGGAAGTAGGCCAACATTTCTATTGGCAAATAGGAGGTTTCCAAGTCCATGCCC  
AAGTACTTATTACTTCTTGGGTCGTAATTGCTATCTTATTAGGTTTCAGCCACTATAGCTGT  
TCGCAATCCACAAACCATTCCGCCTGACGGTCAAATTTTTTTTGAATATGTCCTTGAATT  
CATTCGAGACTTGAGCAAAACGCAGATTGGAGAAGAATATGGTCCTTGGGTTCCCTTTA  
TTGGAECTATGTTCCATTTATTTTGTCTAATTGGTCAGGGGCTCTTTTACCTTGGAA  
ATAATAGAGTTACCTCATGGGGAGTTAGCCGCACCCACGAATGATATAAATACTACTG  
TTGCTTTAGCTTTACCCACGTCAGTGGCATAATTTCTATGCGGGTCTTACCAAAAAAGGAT  
TAGGTTATTTCCGGTAAATACATTCAACCAACTCCAATCCTTTTACCAATTAACATCCTAG  
AAGATTTACAAAACCTTTATCACTGAGTTTTCGACTGTTCCGGGAATATATTAGCTGATG  
AATTAGTAGTTGTTGTTCTTGTCTTTTAGTACCTTCAGTGGTTCCTATACCTGTGATGTT  
CCTTGGATTATTTACAAGTGGTATTCAAGCTCTTATTTTTGCAACTTTAGCCGCGGCTTAT  
ATAGGCGAATCCATGGAGGGTCATCATATGATATTTCAACTTTAGAACATATATTAATC  
ACATCTCTTTTTCGATCGTTTTCCATTGTAATTACGATTCATTTGATAACCTTATTAGTCGA  
TGAAATCGTAGGACTATATGATTCGTCAGAAAAAGGTATGATAGCCACCTTTTTCTGTAT  
AACAGGATTATTAGTTACTCGTTGGATTTATTCAAGTCAATTTCCCATTAAGTGATTTATAT  
GAATCATTAAATGTTCCCTTTCATGGAGTTTCTCCATTATTCATATGGTTCCGTATTTTAAA  
ACCATAAAAATAATTTAAGCGCAATAACCGTGCCAAGTACTATTTTTACCCAAGGCTTT  
GCCACTTCGGGTCTTTTAACTGAAATGCATCAATCCGCAATATTAGTACCTGCTCTCCAA  
TCTCAGTGGTTAATGATGCATGTAAGTATGATGGTATTGAGCTATGCAGCTCTTTTATGT  
GGATCATTATTATCAGTAGCTCTTCTCGTCATTACATTTTCGAAAAACATAGAGATTTTT

GGTAAAAGCAATGAGATCCAATACATGAATGAAAGAAGCAATGTTTTACGAAAACTT  
CTTTTCTTTCCGTTAGAAATTATCACAGGTATCAATTGATTCAACAATTGGATCATTGGA  
GTTATCGTGTATTAGTCTAGGGTTTATCTTTTTAACCATAGGTATTCTTTCCGGGAGCAGT  
ATGGGCTAATGAAGCATGGGGATCGTATTGGAATTGGGACCCAAAAGAACTTGGGCA  
TTTATTACTTGGACCATATTCGCGATTTATTTACATACTCGAACAAATAAAAATTTGCAA  
GGTGTGAATTCCGCAATTGTGGCTTCTATGGGATTTCTTATAATTTGGATATGCTATTTG  
GAGTCAATCTATTAGGAATAGGACTACATAGTTATGGTTCATTTACATTAACAATGGCAA  
AAAAGAAAGCGTTCACTCCCCTCCCATATCTTGCATCTATAGTATTTTTGCCCTGGTGGA  
TCTCTTTCTCATTTAATAAAAAGTTTGAATCCTTGGGTTACTAATTGGTGGAATACTAGGC  
AATCCGAAACTTTTTTGAATGATATTCAAGAGAAGAACATTCTAGAAAAATTCATAGAA  
TTAGAAGAACTACTCCTGTTGGATGAAATGATAAAGGAATACCCGGAGACACATATA  
TAAGCTTCGTATAGGAATCCACAAAGAAACGATCCAATTGGTCAAGATGCACAATGAG  
GGTCATATCCATACGATTTTGCACCTTCTCGACAAATATAATCTGTTTCGCTATTCTAAGTG  
GTTATTCTATTTTGGGTAATGAAGAACTTTTCATTCTTAATTCTTGGATTGAGGAATCCT  
ATATACTTAAGCGACACAATAAAAGCTTTTTCTATTCTTTTATTAAGTATTATGTATC  
GGATTCCACTCGCCCCATGGTTGGGAACTAATGATTGGCTCTTTCTACAAAGATTTTGG  
ATTTGCTCATAACGATCAAATTATATCTGGTCTTGTTCCTTTCCAGTCATTCTAGAT  
ACAATTTTTAATATTGGATCTTCCGTTATTTAAATCGTGTATCTCCATCACTTGTAGTGA  
TTTATCATTCAATGAATGACATGCCTATTGGTGTTCAAAAGTACCTTTTCCGAGTCCTG  
GAGAGGAAGATGCGGTTTGGGTTGACGTATACAACCGACTTCATCGAGAAAGATTACT  
TTTTTTAGGCCAAGACGTTGATAGCGAGATCTCGAATCAACTTATTGGTCTCATGGTATA  
TCTCAGTATAGAAGATGATACCAGGGATCTGTATTTGTTTATAAACTCTCCCGCGGATG  
GGTAATACCCGGAATCGCTATTTATGATACTATTCAATTTGTGCCACCCGATGTACATACA  
ATATGCATGGGATTAGCCGCTTCAATGGGATCTTTTATCCTGGTTGGAGGAGAAATTACC  
AAACGTCTAGCATTCCCTCACGCTAGGGTAATGATCCATCAACCTGCTAGTTCTTTTTAT  
GAGGCACAAACAGGAGAATTTATCCTAGAAGCGGAAGAAGAACTACTGAAACTCCGCGAA  
ACCATCACAAGGGTTTATGTACAAAGAACGGGAAACCCCTTATGGGTTGTATCCGAAG  
ACATGGAAAGGGATGTTTTTATGTCAGCAACAGAAGCCCAAGCTCATGGACTTGTTGA  
TCTTGATAGCGGTGCAAATGAAAGAACAAAATGGATTCATGAAGGTTTAATTACTGAAT  
CACTTCCCAATGGTATGTTTCGGGTTTCGTTTATAGATAATGAAGATCTGATTCTAGGATAG  
TTTCAGGAAGGATCCGACGTAGTTTTTATACGGATACTACCAGGAGATAGAGTCAAAATC  
GAAGTAAGTCGTTATGATTCAACCAGAGGACGTATAATTTATAGACTCCGCAACAAAGA  
TTCAAACGATATGGAGGAATTAGAAGGATATTCGAAATAGATAGATCTCGGCAACAAG  
ACTTCCTATATCCACTTCTTTTTTTCAGGAGTATATTTATGCACTTGCTCATGATCATGGTTT  
AGAAAATTTAGGT---AAATCCAGTTCACTAATTGTGAAACGTTTCATTACTCGAATGTAT  
CAACAGAATTATTTTATTATTTTCGGCTAATAATTTTAGCCAAAATCAATTTGTTGGGTATA  
ATTTTGATTATCAAATTATATCAGAGGGGTTTGGAGTCATTGTGGAAATTCATTCTCGT  
TACGATTAGTATCTTCCCTAATAGCAAAATCGCATAATTTACGATCAATTCATTCAATATT  
TCCTTTTTTAGAGGACAAATTATCACATTTAAATTATGTGGCAGATATACTAATACCCAC  
CCCATCCAATCTGGAAATCTTGATTCAAACCCCTTCGCTGCTGGGTACAAGATGCCCCGTC  
TTTGCATTTATTGCGATTTCTTCTCCACGAGTATTGTAATTGGAATAGTCTTATTACTAGA  
TCCATTTCCCTTTTTTCAAACAAAGATTATTTTTTTTCTATATAGTTCTCATGTATGTG  
AATGCGAATCAATATTCGTTTTTCTCCGTAAACAATCTTCTCATTTACGATCAACATCTTT  
TGCGCCCTTCTTGAGCGAACACATTTTTTATGGAAAATAGAAGTACTTGTGCTAGTGT

TTCGCAATTATTTTATTCTATGGTTGTTCAAGGATCCTTTTCATGCATTATGTCAGATATCA  
AGGAAAATCTATTCTGTCTTCAAAGGGGACTCCTCTTCTGATGAATAAATGGAAATATT  
ACCTTGTC AATTTCTGGCAATGTAATTTTAACTTGTGGTCTCAACCGGGTAGGATTCATA  
TAAAGCAATTATCCAATAATCCCTCGATTTTCTGGGCTATCTTTCAAGTGTACGACTAA  
ATCCTTTAGTGGTAAGGAGTCAAATGATAGAAAATGCATTTCTAATAGATAGTGCTATT---  
---AAGAAGTTTGATACCATAGTCCCAATTAGTCCCTCTGATTGGATCTTTGGCTAAAGTGA  
AATTTTGTAAACGTATCAGGGCATCCCATAGTAAGCCGGTACGGGCCGATTCATCAGATT  
CTGATATTATCGACCGATTTGGGCGGATATGCAGAAATCTTTCTCATTATCACAGCGGAT  
CCTCAAAAAAAAAAGAGTTTGTATCGAATAAAGTATATACTTCGACTTTCATGTGCTAGA  
ACTTTGGCTCGTAAACACAAAAGTACTGTACGTGCTTTTTTTGAAAAGATTTGGTTCGGA  
ATTATTGGAAGAATTCCTTACGGAGGAAGAACAAGTGCTTTCTTTAATCTTCCCAAAC  
GGATTTGGTATTTTGTATTTATTCGTATCAATAATCTGGCGATGATTGGTATGATAATTGAT  
ACGACA---GAAGTACAA---GCTCTCAATTCTTTTTCCAGATCGGAA---TCCTTAAAAGAG  
GTCTATGGGCTCATATGGTTGCTTGTTCCTATTTTTACTCCTGTATCGGGAATCACAATAG  
GAGTACTAGTAATTGTGTGGTTAGAAAGAGAAATATCAGCAGGGATACAACAACGTATT  
GGACCTGAATACGCCGGTCTTTGGGAATTCTTCAAGCTCTAGCAGATGGGACCAAAC  
TACTTTTCAAAGAGGATCTTCTCCCATCTAGAGGAGATCCTCGTTTATTTCAGTATCGGAC  
CATCTATAGCAGTCATATCAATTCTACTAAGTTATTTCAGTAATTCCTTTTGGCTATCGCCT  
TGTTCTATCCGATCTCAGTATAGGTGTTTTTTTTATGGATCGCTATTTCAAGTATTGCTCCT  
ATTGGACTTCTTATGTCAGGATATGGGTGCGAATAATAAATATTCTTTTTTAGGTGGTCTAC  
GAGCTGCTGCTCAATCGATTAGTTATGAAATACCATTA ACTCCATGTGTGTTATCAATAT  
CTCTACTATCTAACAGTTCAAGTACAGTTGATATAGTTGAGGCGCAGTCCAAATATGGTT  
TTTGGGGGTGGAATTTGTGGCGTCAACCTATAGGGTTTATCGTTTTTCTAATTTCTTCCC  
TCGCGGAATGTGAGAGATTACCCTTTGATTTACCAGAAGCAGAGGAAGAATTAGTAGC  
AGGTTATCAAACCGAATATTCAGGTATCAAATTTGGTTTATTTTACGTTGCTTCCCTATCTA  
AATCTACTAGTTTCTTCATTATTTGTAACAGTCCTTTACTTGGGCGGTTGGAATCTCTCTA  
TTCCGATATTCATCATTCTGAACTTTTTGA AAAAATAAAGCGGGTGGAGTCTTTGGA  
ACGACAATTGGTATTTTTATTACATTAGCTAAAGCTTATTTGTTCCCTGTTCAATTTCTATCA  
CAACAAGATGGACTTTACCTAGGATGAGAATGGACCAACTCTTAAATCTGGGGTGGAA  
ATTTCTTTTACCATTCTCTAGGTAATCTATTATTGACAAC TTCTTCCCAACTCCTTTCA  
CTGATGATCTGGCATGTACAGAATGAAAAC TTCAATCTCGATTCTACGAGAATTTTTATG  
AAAGCGTTTCATTGCTTCTCTTCCATGGAAGTTTCATTTTCCAGAATGTATCCTAATT  
TTTGGCCTAATTTCTTCTGATGATCGATTCAACCTCTGATCAAAAAGATATACCTTGG  
TTATATTTTCATCTCTTCAACAAGTTTAGTAATGAGCATAACGGCCCTATTGTTCCGATGG  
AGAGAAGAACCTATGATTAGCTTTTTCGGGAAATTTCCAAACGAACAATTTCAACGAAA  
TCTTTCAATTTCTTATTTTACTATGTTCAACTCTATGTATTCTCTATCCGTAGAGTACATT  
GAATGTACAGAAATGGCTATCACAGAGTTTCTGTTATTTCGTATTAACAGCTACTCTAGGA  
GGAATGTTTTTATGCGGTGCTAACGATTTAATAACTATCTTTGTAGCTCCAGAATGTTTC  
AGTTTATGCTCCTACCTATTATCTGGATATAACCAAGAGAGATGTACGGTCTAATGAGGCT  
ACTACGAAATATTTACTCATGGGTGGGGCAAGCTCTTCTATTCTGGTTCAATGGTTTCTCT  
TGGCTATATGGTTCATCCGGGGGAGAGATCGAGCTTCAAGAAATAGTGAATGGTCTTAT  
CAATACACAAATGTATAACTCCCCAGGAATTTCAATTGCGCTTATATTCATCACTGTAGG  
AATTGGGTTCAAGCTTTCCCAAGCCCTTCTCATCAATGGACTCCTGACGTATACGAAG  
GATCTCCCACTCCAGTCGTTGCTTTTTCTTTCTGTTACTTCGAAAGTAGCTGCTTCAGCTT

CAGCCACTCGAATTTTCGATATTCCTTTTTATTTCTCATCAAACGAATGGCATCTTCTTCT  
GGAAATTCTAGCTATTCTTAGCATGATATTGGGGAATCTCATTGCTATTACTCAAACAAG  
CATGAAACGTATGCTTGCATATTCGTCCATAGGTCAAATTGGATATGTAATTATTGGAATA  
ATTGTTGGAGACTCAAATGATGGATATGCAAGCATGATAACTTATATGCTGTTCTATATCT  
CCATGAATCTAGGAACTTTTGCTCGCATTGTATCATTGGTCTACGTACCGGAACTGATA  
ACATTTCGAGATTATGCAGGATTATACACGAAAGATCCTTTTTTTGGCTCTCTCTTTAGCCC  
TATGTCTCTTATCCCTAGGAGGTCTTCCCTCCACTAGCAGGTTTTTTTCGGAAAACCTCCATC  
TATTCTGGTGTGGATGGCAGGCAGGCCTATATTTCTTGGTTTCAATAGGACTCCTTACGA  
GCGTTGTTTCTATCTACTATTATCTAAAAATAATCAAGTTATTAATGACTGGACGAAACC  
AAGAAATAACCCCTCACGTGCGAAATTATAGAAGATCTCCTTTAAGATCAAACAATTCC  
ATCGAATTGAGTATGATTGTATGTGTGATAGCATCTACTATAACCAGGAATATCCATGAAC  
CCAATTATTGCAATTGCTCAGGATACCCTTTTTATGTTTCTGCTTCACGAATATGATATTT  
TCTGGGCATTTCTAATAATATCAAGTGTATTCCCTATTTTGGCATTCTAATTTCCGGAGT  
TTTAGCACCGATTAGCCAAGGACCAGAGAAATTTCTAGTTATGAATCGGGTATAGAGC  
CAATGGGCGATGCTTGGTTACAATTTAGAATCCGTTATTATATGTTTGGCTCTAGTTTTTGT  
TGTTTTTGATGTTGAAACGGTTTTTCTTTATCCATGGGCGATGAGTTTTCGATGTATTGGG  
TGTATCCGTATTTATAGAAGCTTTAATTTTCGTGCTTATCCCAATTGTTGGTTCAGTTTAT  
GCATGGCGAAAAGGAGCATTGGAATGGTCTACGAATCTTTTTCTTGGTTAACAATAAT  
TGTAGTTTTGCCGATATCGGTGGGTCTTTTCATTTCTTTCTCCCTCATAGAGGGAATAA  
GGTGATTTCGCTGGTATACTATATGTATATGCTTATTAGAAATCTTCTAACGACCTATGCA  
TTCTGTTATCATTTCGAATTGGACGATCCATTAATCCAAGTGGAGGAGGATTATAAATGG  
ATAAATATTTTTGATTCTCACTGGAGATTAGGAATCGATGGACTTTCCATAGGACCCATT  
TACTGACGGGATTCATCACTACTCTAGCTACTTTAGCGGCTTGGCCCCGTTACTCGAGAT  
TCCCATTATTCATTTCTGATGTTAGCAATGTACAGTGGTCAAATAGGATCATTTTCTT  
CTCGAGACCTTTTACTTTTTTTTATCATGTGGGAATTAGAATTAATCCCGTTTACCTACT  
TTTATCCATGTGGGGAGGGAAGAAACGCCTGTACTCAGCGACAAAGTTTATTTTGTACA  
CTGCGGGGGGTTCCATTTTTCTCTTAATGGGAGTTCTGGGTATGGGTTTATATGGTTCCA  
ATGAACCAACATTAAATTTTGAACATCAGCTAATAAATCGTATTCTGTGGGATTGGAA  
ATAATATTCTATTTTGGATTTCTTATTGCTTTTGGCTGTCAAATTACCGATTATACCCCTACA  
TACATGGTTACCAGATACCCATGGAGAAGCACATTACAGTACATGTATGCTTCTAGCCG  
GAATCTTATTAATAAATGGGAGCGTATGGACTGGTTCGGATCAATATGGAATTATTACCC  
ACGCTCATTCTATATTTCTCCCTGGTTGATGATAGGAGGCACAATTCAAATAATCTATG  
CAGCTTCAACATCTTCCGGTCAACACAATTTAAAAAAGAATAGCCTATTCCTCCGTA  
TCTCATATGGGTTTCAACAATTATAGGAATCGGTTCTATAACCGATACGGGACTCAATGGA  
GCCATTTTACAAATAATCTCTCATGGATTTATTGGTGCTGCACTGTTTTTCTTGGCAGGA  
ACGAGTTACGATAGAATACGTCTTGTATCTCGACGAAATGGGCGGAATAGCTATCCC  
AATGCCAAAATATTTATGATGTTACGTAGCTTCTCGATGGCTTCTCTTGCATTGCCGGG  
AATGAGTGGTTTTGTTGCAGAATTGATAGTTTTTTTTTGGAAATAATTACCAGTCAAAAATA  
TCTTTAATGCCAAAATACTAATTACTTTTGTAAATGGCAATTGGAATGATATTAACCTCT  
ATTTATTCAATTATCTAIGTCACGCCAGATGTTCTATGGATAACAAGCTATTCAATGCTCCCA  
ACTCTTATTTTTTTGATTCTGGCCCACGAGAGCTATTTGTTTCGATCTCGATCTTGCTACC  
CGTAATAGGTATTGGTATTTATCCGATTTTGTCTCTCACTATCAGTTGACAAGGTTCGA  
AGCTATTCTATCTAATTACTTTTATAGAATGATGCTCGAACATGTAATTGTTTTGAGTGCC  
TATTTATTTCTATCGGTATCTATGGATTGATCACGAGCCGAAATATGGTTAGAGCACTTA

TGTGTCTTGAACTTATACTGAATGCAGTTAATATGAATTTTCGTAACATTTTCTGATTTTTT  
TGATAGTCGCCAATTAAGGAGACATTTTCTCGATTTTGTATAGCTATCGCAGCCGC  
TGAAGCAGCTATTGGACCAGCTATTGTTTCATCAATTTATCGTAACAGAAAATCAACTC  
GTATCAATCAATCTAATTTGTTGAATAAAATGGAACATACATATCAATATGCATGGATTAT  
ACTTTTCGTCCACTTCCAGTTCCTATGTTAATAGGAGTGGGACTTCTCCTTTTTCCGAC  
AGCAACAAGAAATCTTCGTCTATATGGGCTTTTCTAGTGTTTTATTATTAAGTATAGTT  
ATGATTTTTTCGATCGATCTGTCTATTCAGCAAATAAATGGCAGTTCTATCTACCAATATG  
TATGGTCTTGGACCATCAATAATGATTTTTTCTTAGAGTTCGGACACTTGATCGATCCAC  
TTACTTCTATTATGTCAATCTTAATCACTACTGTTGGAATCATGGTTCTTATTTATAGTGA  
CAATTATATGTCTCATGATGAAGGATATTTGAGATTTTTTGTCTATATGAGTTTTTCCAAT  
ACTTCCATGTTGGGATTAGTTACTAGTTCCAATTTGATACAAATTCATATTTTTTGGGAAT  
TAGTTGGAATGTGTTCCCTATCTATTAATAGGTTTTTGGTTTACACGACCAATTGCGGCAA  
CTGCGTGTCAAAAAGCGTTTGTAACTAATCGTGTAGGGGATTTGGTTTATTATTAGGAA  
TCTTAGGTCTTTATTGGATAACGGGTAGTTTCGAATTTTCGGGATTTGTTGAAATATTCA  
ATAACATTGGGGTAAATTCTTTATTTGTTACTTTGTGTGCCTCCCTATTATTTGCTGGTGC  
AGTTGCTAAATCTGCACAATCCCTCTTCATGTATGGTTACCTGATGCGATGGAGGGGC  
CTACTCCTATTTTCGGCTCTTATACATGCTGCTACTATGGTAGCAGCGGGCATTTTTTCTTGT  
AGCTCGGCTTCTCCTCTTTTCACAGTCATACCTTACATAATGAATATAATTTCTTTGATA  
GGTATAATAACAGTACTATTAGGAGCGACTTTTGCTCTTGCTCAAAAAGACATTAAGAG  
AAGTTTAGCCTATTCTACAATGTCTCAATTGGGTTATATTATGTTAGCTCTAGGTATGGGG  
TCTTATCGAGCGGCTTTATTTCAATTTGATCACTCATGCCTATTCGAAAGCATTATTGTTTT  
TAGGATCCGGATCTATTATTCATTCAATGGAAGCCATTGTTGGTTATTCTCCAGATAAAA  
GTCAGAACATGGTTTTTATGGGTGGTTTAAACAAAATATGTGCCAATTACAAAACCTGCT  
TTTTTTTTAGGTACACTTTCTCTTTGTGGTATTCCACCTCTTGCTTGTTTTTGGTCCAAA  
GATGAAATCTTAATGATAGTTGGTTGTATTCACCGATTTTTGCGATAATAGCTTGTTCCA  
CAGCAGTATTAACCTGCATTTTATATGTTTTCGGATATATTTACTTACTTTTGAGGGGCCTTT  
AAACATGCATTTTCAAAATTATAGTGGCAAAAAAATAGCTTGTTCTATTCAATATCTAT  
ATGGGGTAAAGAAGAACCGAAAACGATTAACACAAAT---TTGTGTTTATCAACAATGAA  
TTTTTTTTCGTTTGACAATAAAAAGACTTCCTTGATCCCCATGAATCGGACAATACTAT  
GTTATTGCCTCTGCTTGTATTGGGTCTATTTACTTTGTTTCGTTGGATCCATAGGAATTCCT  
TTCGATTTTGATATATTATCGAAATGGTTAAGTCCGTCGATAAACCTTTTACATCCAAATT  
CAAAC---TCTTTGGATTGGTATGAATTTGTGACAAATGCAATTTTTTCAGTTAGTCTAGC  
CTATTTAGGAATATTTATAGCGTCTCTTTTATATAGGCCGTGTTCCCTCATCTTTCCAGAATT  
TGGACTTAATTAATTCATTTGTTATTTTGGGAACAAATAATAAATTTGATATACAATTG  
GTCATATAATCGTGGTTACATAGACGCTTTTTATGCAACAGCCTTAACTAGGGGTTTAAAG  
AGGATTGGCAGAACTAACTCATTTTTTGATAGACGAGTAATTGATGGAATTACGAATG  
GGTTTGGTGTACAAGTTCTTTGTAGGAGAAGGAATCAAATATGTAGGGGGGGGG---C  
GAATTTCTTCTTATCTCTTTTTGTATTTATCTTATGTATCAATCTTTTTTATTAATTTACTACA  
TGGATTTACCTGGACCAATACATGATTTTCTTTTAGTATTTCTGGGATCAGGTCTTATATT  
AGGAGGTCTAGGAGTGGTATTACTTACCAATCCAATTTATTCTGCCTTTTCATTAGGATT  
GGTTCTTGTGTTGATATCCTTATTCTATATCCATCGAACTCCCATTTTGTAGCTGCTGCA  
CAGCTCCTTATTTACGTGGGAGCCATAAATGTCTTAATCATATTTGCTGTGATGTTTATGA  
ATGGTTCAGAATATTACAATGATTTCCATCTTTGGACCATTGGAGATGGGGTAACTTCAC  
TGTTTTGTACAAGTATTTTTGTTTCACTAATTACTACTATCCAGATACGTCATGGTACG

GGATTATTTGGACTGCAAGATCAAACCAAATTATAGAGCAGGATTCATAAGTAATAGT  
CAACAAATTGGGATTCATTTATCAACAGAATTTTTCTTCCATTTGAACTCATTCTATAA  
TTCTTTTAGTTGCCTTGATAGGTGCAATTGCTATGGCTCGTCAGATGACTGTACCAGTTA  
CAAGGAAAGACCTCATGATAGTCAATATGGGTCTCAACACCCATCAATGCACGGTGTT  
CTTCGACTCATCGTTACTCTAGATGGTGAAGATGTTATTGACTGTGAACCCATATTGGGT  
TATTTACACAGAGGGATGGAAAAAATTGCAGAAAACCGAACCAATTATACAATATCTGCC  
TTATGTAACACGTTGGGATTATTTAGCTACTATGTTACAGAAGCAATAACCGTAAATGC  
ACCCGAACAGTTGGGAAATATTCAAGTACCTAAAAGAGCCAGCTATATCAGAGTAATTA  
TGCTGGAGTTGAGTCGTATAGCTTCTCATTATTATGGCTTGGCCCTTTTATGGCAGATAT  
TGGTGCACAGACTCCTTTCTTCTATATTTTCAGAGAAAGAGAATTGATATATGATCTATT  
CGAAGCTGCCACAGGTATGCGAATGATGCATAATTATTTCCGTATCGGAGGAGTAGCTG  
CTGATCTACCTCATGGCTGGATAGATAAATGTTTGGATTCTGCGATTATTTCTTAACAG  
GGTTGCTGAATATCAAAAACCTTATCACACGGAATCCTGTTTTTTTTGGAACGAGTTGAA  
GGAGTGGGCATTATTGGTGGGGAGGAAGCAATAAATTGGGGTTTATCAGGACCAATGC  
TACGAGCTTCCGGAATTGAATGGGATCTTCGTAAAATTGATCATTATGAGTGTTACGAC  
GAATTTGACTGGGAAGTCCAATGGCAAAAAGAAGGAGATTCATTAGCTCGTTATTTAGT  
ACGAATCAGTGAAATGACGGAATCCATAAAAATTATTCAACAGGCTCTGGAAGGAATT  
CCGGGGGGACCTTATGAGAATTTAGAAGTCCGACGCTTTGATAGAGCAAGAGGGTCCG  
AATGGAATGATTTTGAATATAGATTTCTTAGTAAAAAACCTTCTCCACTTTTGAATTGG  
CGAAACAAGAACTTTATGTAAGAGTAGAAGCCCCAAAAGGGGAATTGGGCATTTTCT  
GATAGGAGATCAGAGTGTTTTTCTTGGAGATGGAAAATTCGCCACCAGGTTTTATCA  
ATTTGCAAATCTTCCCTCAGCTAGTTAAAAGAATGAAATTGGCTGATATTATGACGATAC  
TAGGTAGTATAGATATCATTATGGGAGAAGTTGATCGTATGTTCTCTATGGTAACTGGGT  
TCATGAATTATGGTCAACAAACAGTACGAGCTGCAAGATACATTGGTCAAAGTTTCATG  
ATTACCTTATCTCACACGAATCGTTTACCTGTAACTATTCAATATCCTTATGAAAAATTGA  
TCACATCAGAGCGTTTTTCGCGGTCAATCCACTTTGAATTTGATAAATGCATTGCTTGT  
GAAGTATGTGTTTCGTGTATGCCCTATAGATCTACCTGTTGTTGATTGGAAATTAGAACT  
GATATTCGAAAGAAACGATTGCTTAATTACAGTATTGATTTTCGGAATCTGTATATTTTGT  
GGTAACTGTGTTGAGTATTGTCCAACAACTGTTTATCAATGACTGAAGAATATGAACT  
TTCCACTTATGATCGTCACGAATTGAATTATAATCAAATTGCTTTGGGTCCGTTACCAAT  
GTCAGTAATCGGAGATTACACAATTCGAACAATTATGAATTCGAAAATAGCCACAGATA  
AACCCCTTGAGTCAAGAACAATTACCAATGACATGCAGGGTTCGTTTGTCTGCTTGGCT  
AGTCAAGCATGGGCTAGTTCATAGATCTTTGGGCTTCGATTACCAAGGAATAGAGACTT  
TACAAATAAAGCCCCGAGGATTGGCACTCCATTGCTGTCAATTCATATGTATATGGTTACA  
ATTATCTACGTTCCCAGTGTGCCTATGATGTAGCACCAGGGGGACTGTTAGCTAGTGTGT  
ATCATCTTACGAGAATACAGTATGGTGTGGATCAACCGGAAGAGGTATGCATAAAAGTA  
TTTGCCCCAAGGAGGAATCCTAGAATTCCGTCTGTTTTCTGGATTTGGAAAAGTGCAGA  
TTTTCAAGAACGGGAATCTTATGATATGTTGGGAATCTCTTATGATAATCATCCACGCCT  
AAAACGTATCTTGATGCCTGAAAGTTGGATAGGATGGCCCTTACGTAAAGATTATATTG  
CCCCCAATTTCTATGAAATACAAGATGCTCATATGGGCGATGAGTTTCGATGTATTGGGT  
GTATCCGTATTTATAGAAGCTTTAATTTTCGTGCTTATCCCAATTGTTGGTTCAGTTTATG  
CATGGCGAAAAGGAGCATTGGAATGGTCTTAGCTCCTGAATATTCAGACAATAAAAAG  
AAAAAAGAAGAAAAAATAACATTGAGACAGTTATGAATTCATTGAGTTTCCGGTAC  
TTGATCGAACAAACCCAAAATTCAGTTATTTCAACCACATCGAATGATCTTTCAAATTGG

TCAAGACTCTCTAGTTTATGGCCGCTTCTCTATGGTACCAGTTGTTGCTTCATTGAATTT  
GCTTCATTAATAGGCTCGCGATTTCGACTTTGATCGTTATGGACTGGTACCAAGATCGAG  
TCCTAGGCAAGCAGACCTCATTTTAACAGCTGGCACAGTAACAATGAAAATGGCTCCT  
TCTTTAGTGAGATTATATGAGCAAATGCCTGAACCAAATATGTCATTGCTATGGGAGCC  
TGTACGATTACAGGAGGGATGTTTCAGTACCGATTCTTATAGTACTGTTTCGGGGAGTTGAT  
AAACTAATTCCTGTCGATGTCTATTTGCCGGGCTGCCACCTAAACCGGAGGCAGTTAT  
GGATGCTATAACAAAACCTTCGTAAGAAGGTATCTCGAGAAATCTATGAAGATAGAATTG  
GGTCTCAACAGGAGAATCGATGTTTTACTACCAATCACAAGTTTCATGTTGGACGCAGT  
ACTCATACTGGAAATTATGATCAAGGATTACTTTGTCAATCGCCATCTACTTCAGAGATC  
CCTTCTGAAACATTTTTCAA-----ATGCAAACCTAGAAATACCTT  
TTCTTGATAAAGGAACAGATGACTCGATCCATTTCCGTATCGATCATGATATATGTAAT  
AACTCGAACATCCATTTCAAATGCATATCCATTTTTGCACAGCAGGGTTATGAAAATC  
CACGAGAAGCGACTGGGCGTATTGTATGTCCAATTGCCATTTAGCTAATAAGCCCGTG  
GATATTGAGGTTCCACAAGCGGTACTTCTGATACTGTATTTGAAGCAGTTGTTAGAAT  
CCCTTATGATATGCAACTGAAACAAGTTCTTGCTAATGGTAAAAAAGGGGCTTTGAATG  
TAGGGGCTGTTCTTATTTTACCTGAGGGATTTCGAATTAGCTCCCCCGATCGTATTTCTC  
CCGAGATGAAAGAAAGGATAGGCAATCTGTCTTTTCAGAGCTATCGCCCCACTAAAA  
AAATATTCTTGATAGGTCTGTTCTGTCAGAAATATAGTGAAATCGCCTTTCTAT  
TCTTTCCCGGACCCCGCTACTAAGAAAGACGTTCACTTCTTAAAATATCCCATATACGT  
AGGCGGGAACAGGGGAAGGGGTCAGATTTATCCCGATGGGAGCAAGAGTAACAATAC  
AGTCTATAATGCTACAGCAGCAGGTATAGTAAGCAAATAGTACGTAAAGAAAAAGGA  
GGATATGAAATAAGCATAGCGGATGCATCAGATGGACATCAAGTGGTCGATATTATACCT  
CCAGGACCAGAACTTCTTGTTTCAGAGGGTGAATCTATCAAGCTTGATCAACCATTAAC  
TAGTAATCCCAATGTGGGTGGATTTGGTCAGGGAGATGCAGAAATAGTACTTCAAGATC  
CATTACGTGTCCAAGGCCTTTTGTCTTCTTGGCATCTGTTGTTCTGGCACAAATATTTT  
TGGTTCTTAAAAAGAAGCAGTTTGAGAAGGTTCAATTGTCCGAAATGAATTTTCATGAG  
TAAAGTATATGATTGGTTCGAAGAACGTCTCGAGATTCAGGCGATTGCAGATGATATAA  
CTAGTAAATATGTTCCCTCCTCATGTCAATATATTTTATTGTCTAGGAGGAATTACGCTTAC  
TTGTTTTTTAGTACAAGTAGCTACAGGGTTTGCTATGACTTTTTACTATCGTCCAACCGT  
TACTGAGGCTTTTGCTTCTGTTCAATACATAATGACTGAAGCTAACTTTGGTTGGTTAAT  
CCGATCAGTTCATCGATGGTCGGCAAGTATGATGGTCTTAATGATGATCCTGCACGTATT  
TCGCGTGTATCTCACTGGTGGATTTAAAAACCTCGCGAATTGACGTGGGTACGGGTG  
TGGTTCTGGCTGATTGACCGCATCTTTTGGTGTCACTGGTTATTCCCTACCTCGGGATC  
AAATTGGTTATTGGGCAGTAAAAATTGTGACAGGTGTACCTGAAGCTATTCCTGTAATA  
GGATCACCTTTGGTAGAGTTATTACGCGGAAGTGCTAGTGTGGGTCAATCCACTTTGAC  
TCGTTTTTATAGTTTACACACTTTTGTATTACCTCTTCTTACTGCCGATTTATGTTAATGC  
ACTTCCAATGATACGTAAACAAGGTATTTCTGGTCTTTAATGGGAGTAACAAAAAAA  
CCTGACTTGAATGATCCTGTATTAAGAGCTAAATTGGCTAAAGGGATGGGTACATAATTAT  
TACGGAGAACCCGCATGGCCAAATGATCTTTTATATATTTTTCCAGTAGTAATTCTAGGT  
ACTATTGCATGTAACGTAGGCTTAGCGGTTCTAGAACCGTCAATGATTGGTGAACCAGC  
AGATCCATTTGCAACTCCTTTGGAAATATTACCCGAATGGTACTTCTTTCCTGTATTTCA  
AATACTCCGTACAGTACCCAATAAGTTATTGGGTGTTCTTTAATGGTTTCAGTACCTGC  
AGGATTATTGACAGTACCTTTTTTGGAGAATGTTAATAAATCCAAAATCCATTTCTGTCG  
TCCAGTAGCTACAACCGTCTTTTTGATCGGTACCGTAGTAGCTCTTTGGTTGGGTATTGG



AGCAACATTACCTATTGATAAATCCTTAACTTTAGGTCTTTTTATGATTGAAGTTTTTCTA  
TTTGGAAATCGTGTTAGGTCTAATTCCTATTACTTTGGCTGGATTATTCGTAAGTGCATATT  
TACAATACAGACGCGGTGATCAGTTGGACCTTATGCCTACTATAACTAGTTATTTTTGGTT  
TTCTATTGGCGGCTTCAACTATAACCCAGTTCTATTTATTGGTCTGAGCAAGATACGAC  
TTATTATGGATATAGTAAGTCTCGCTTGGGCTGCTTTAATGGTAGTTTTTACATTTTCCCT  
TTCCTCGTAGTATGGGGAAGAAGTGGACTCATGATTATTCGTTTCGCCGGAACCAGAA  
GTGAAAATTTTTGGTGGATAGGGATCCATAAAAACTTCTTTTCGAGGAATGGGCCAGAC  
CCGGTCATTTCTCAAGAACAATAGCTAAGGGCCCTGATACTACCACTTGGATCTGGAAC  
CTACATGCTGATGCTCACGATTTTCGATAGCCATACCAGTGATTTAGAGGAGATCTCTCG  
AAAAGTATTTAGTGCACATTTTCGGTCAACTCTCCATCATCTTTCTTTGGCTGAGTGGCAT  
GTATTTCCACGGTGCCTTTTCCAAATTATGAAGCATGGCTAAGTGATCTACTCACAT  
TGGACCTAGCGCCAGGTGGTTTGGCCAATAGTGGGCCAAGAAATATTGAATGGTGAT  
GTGGGCGGGGGTTTCCGAGGAATACAAATAACCTCTGGTTTTTTTTCAGATTTGGCGAG  
CATCTGGAATAACTAGTGAATTACAACCTTATTGTACCGCAATTGGTGCATTGGTCTTTG  
CAGCGTTAATGCTTTTTGCTGGTTGGTTCCATTATCACAAAGCTGCTCCAAAATTGGCT  
TGGTTCCAAGATGTAGAATCCATGTTGAATCACCCTTAGCAGGGTTACTAGGGCTTGG  
GTCTCTTTCTTGGGCGGGACACCAAGTACATGTATCTTTACCAATTAACCAATTTCTAGA  
CGCTGGAGTGGATCCTAAAGAGATCCCACTTCCTCATGAATTTATCTTGAATCGGGATC  
TTTTGGCTCAACTGTATCCCAGTTTTGCCGAGGGAGCAACCCCATTTTTTACCTTGAAT  
TGGTCAAATATGCGGAATTTCTTACTTTTCGTGGAGGATTAGATCCAGTAACAGGGGG  
TCTATGGCTGACCGATATTGCACACCATCATTTAGCTATTGCAATTTCTTTTTCTGATAGCT  
GGTCACATGTATAGGACCAACTGGGGCATTGGTCATGGCCTAAAAGATATTTTAGAGGC  
TCATAAAGGTCCATTTACAGGTACAGGGCCATAAAGGCCTCTATGAAATCCTAACCAACGT  
CATGGCATGCTCAATTATCTCTTAACTAGCTATGTTAGGTTCTTTAACCATTGTTGTAGC  
TCACCATATGTATTCCATGCCCCCTTATCCATATCTAGCTACTGACTATGGTACACAACCT  
TCGTTGTTACCCATCACATGTGGATTGGTGGATTTCTCATAGTTGGTGTCTGCTGCGCAT  
GCAGCCATTTTTATGGTAAGAGACTATGATCCAACCTACTCGATACAACGATCTATTAGAT  
CGTGTCTTAGGCACCGGATGCAATCATATCACATCTCAACTGGGCATGTATATTTCTA  
GGCTTTACAGTTTTTGGTTTTGTATATTCATAATGATACCATGAGCGCTTTAGGGCGTCCC  
CAAGATATGTTTTAGATAACCGCTATAACAATTACAACCCGTCTTTGCTCAATGGATACAA  
AACACCCATGCTTTAGCACCTGGTGCAACAGCTCCTGGTGCAACAACAAGCACCAGCT  
TGACTTGGGGGGTAGTGATTTAGTAGCAGTAGGCGGCAAAGTCGCTTTGTTACCTATT  
CCATTAGGAACCGCAGATTTTTTGGTACATCACATTCATGCATTTACGATCCATGTGACG  
GTATTGATACTATTGAAAGGTGTTCTATTTGCTCGTAGCTCCCGTTTGATACCTGATAAA  
GCAAATCTTGGTTTTTCGTTTTCTTGTGACGGACCTGGAAGAGGAGGGACATGTCAAG  
TATCCGCCTGGGATCATGTCTTCTTAGGTCTATTCTGGATGTACAATGCAATTTTCGGTAG  
TAATATTTCAATTCAGTTGGAAAATGCAGTCGGATGTTTGGGGTAGTATAAGTGATCAAG  
GGGTGGTAACTCATATCACGGGAGGAACTTTGCGCAAAGTTCCATTAATTAATGGG  
TGGCTCCGTGATTTTTTATGGGCACAGGCATCCCAGGTAATTCAGTCTTATGGTTCTTCA  
TTATCCGCGTATGGCCTTTTTTTTCTAGGTGCTCATTTTGTCTGGGCTTTCAGTTAATGT  
TTCTATTACGCGGCCGTGGTTATTGGCAAGAACTTATTGAATCCATTGTTTGGGCTCATA  
ACAAATTAAGTTGCTCCTGCTACTCAGCCTAGAGCCTTGAGCATTGTACAAGGACG  
TGCTGTAGGAGTAAACCATTACCTTCTGGGTGGAATTGCCACAACATGGGCGTTCTTCT  
TAGCAAGAATTATTGCAGTAGGAATGGCATTAAAGATTTCCAAGTTTAGCCAAGGCTTA

GCGCAGGACCCCACTACTCGTCGTATTTGGTTTTGGTATTGCTACCGCACATGACTTCGA  
GAGTCATGATGATATTACTGAGGAACGTCTTTATCAGAATATTTTTGCTTCTCACTTTGG  
GCAGTTAGCGATAATTTTTCTATGGACTTCCGGAAATCTGTTTCATGTAGCTTGGCAAG  
GCAATTTTGAGTCATGGGTACAGGACCCTTTACATGTAAGACCTATTGCTCATGCAATTT  
GGGATCCTCATTGTTGGTCAACCGGCTGTGGAAGCCTTTACTCGAGGGGGTGCTCTCGG  
CCCAGTGAATATCGCTTATTCTGGTGTATCAGTGGTGGTATAACAATCGGCTTACGCAC  
TAATGAAGATCTTTATACTGGAGCTCTTTTTCTATTATTTCTTTCTGCCATATCCTTAATAG  
CGGGTTGGTTACACCTACAACCGAAATGGAAACCGAGTGTTCATGGTTCAAAAATGC  
CGAATCTCGTCTCAATCATCATTGTCAGGACTCTTCGGAGTAAGTTCCTTGGCTTGGGA  
CAGGTCATTTAGTTCATGTGCTATTCTGGATCCAGGGGGGAGTACGTTTCGATGGAAT  
AATTTCTTAGATGTATTACCGCATCCCCAAGGGTTAGGCCCACTTTTTACAGGTCAGTG  
GAATCTTTATGCGCAAACCCCGATTCCAGTAGTCATTTATTTGGTACTTCCCAAGGAG  
CGGGAACCTGCCATTCTAACCTTCTCGGGGGATTCCATCCACAAACGCAAAGTTTATGG  
CTGACTGATATGGCTCATCATCATTAGCTATTGCATTTATTTTTCTCGTTGCTGGTCATAT  
GTATAGAACTAACTTCGGGATTGGGCACAGTATGAAAGATCTTTTAGAAGCACATATTC  
CTCCGGGAGGGCGATTGGGGCGTGGACATAAGGGTCTTTATGACACAATCAATAATTCG  
ATTCATTTCAATTAGGCCTTGCTCTAGCCTCTTTAGGGGTTATTACTTCTTGGTAGCTC  
AACACATGTATTCTTTACCCGCTTATGCGTTCATAGCACAAGACTTTACTACTCAAGCTG  
CGTTATATACTCATCACCAATACATCGCAGGATTCATCATGACAGGAGCCTTTGCTCATG  
GAGCTATATTTTTTCATTAGAGATTACAATCCGGAACAGAATGAAGATAATGTATTGGCAA  
GAATGTTAGACCATAAAGAAGCTATCAAATCCCATTAAAGTTGGGCCAGCCTCTTTCTG  
GGTTCCATACCTTGGGACTTTATGTTTATAACGACGTCATGCTCGCTTTTGGTACTCCG  
GAGAAACAAATTTTGATCGAACCCATATTTGCTCAATGGATACAATCTGCTCATGGTAA  
GACTTCATATGGGTTTCGATGTACTTTTATCTTCAACGAATGGCCCAGCATTCAATGCGGG  
TCGAAGCATATGGTTGCCTGGCTGGTTAAATGCTATTAATGAG-----AATAGTAATTCACT  
ATTCTTAAACAATAGGTCCTGGAGACTTCTTGGTTCATCATGCTATTGCTCTAGGTTTACA  
TACAACTACATTGATCTTAGTAAAAGGTGCTTTAGATGCACGTGGTTCCAAGTTAATGC  
CAGATAAAAAGGATTTGGTATAGTTTTCTTGGCAGCGGCCCGGACGAGGCGGTAC  
TTGTGATATTTGGCTTGGGACGCATTTTATTTGGCAGTTTTCTGGATGTTAAATACTATT  
GGATGGGTTACTTTTTATTGGCATTGGAAGCACATCACATTATGGCAGGGTAACGTTTC  
ACAGTTTAAATGAATCCTCCACTTATTTGATGGGATGGTTAAGAGATTATCTATGGTTAAA  
CTCTTCACAACCTTATCAATGGATATAACCCTTTTGGTATGAATAGTTTATCGGTCTGGGC  
ATGGATGTTCTTATTTGGACATCTTGTGGGCTACTGGATTATGTTCTTAAATTTCTGG  
CGTGGATATTGGCAGGAATTGATTGAAACTCTAGCATGGGCTCATGAACGTACACCTTT  
GGCTAATTTGATTTCGATGGAGAGATAAACCAGTGGCTCTTCCATTGTTCAAGCAAGAT  
TGGTTGGATTAGCCCACTTTTCTGTAGGTTATATATTCATTATGCAGCTTTCTTGATTGC  
CTCTACATCGGGCAAATTTGGTATGTCACATTCAGTAAAGATTTATGATACATGTATAGG  
GTGTAATCAATGTGTACGAGCCTGCCCCACAGATGTATTAGAAATGATACCTTGGGACG  
GATGTAAAGCTAAGCAAATTGCTTCTGCTCCAAGAACAGAAGACTGTGTGGGTTGTAA  
GAGATGTGAATCCGCTGTCCAACGGATTTCTTGAGTGTCCGGGTTTATTTATGGCATG  
AGACAACCTCGCAGCATGGGTCTAGCTTATATGACAACCTTTCAACTTACCCTCTATTTTTG  
TGCCTTTAGTGGGCCTAGTATTTCCGGCAATTGCAATGGCTTCTTTATCTCTTCATGTTT  
AAAAAAACAAGATTGTCATGCGAGATATAAAAACATATCTCTCCGTAGCACCTGTGATA  
AGTACTCTATGGTTCCGGTCTTTAGCAGGTCTATTAATAGAGATCAATCGTTTATTCCCA

GATGCGTTAGCATTCCCTTTTTTT-----ATGACTGCAATTTTAGAGAGACGCGAAAGCGA  
AAGCCTATGGGGTCGCTTCTGTAACCTGGATAACCAGCACTGAAAACCGTCTTTACATTG  
GATGGTTTCGGTGTGTGATGATCCCTACCTTATTGACCGCAACTTCTGTATTTATTATCGC  
CTTCATTGCTGCCCTCCAGTGGATATTGATGGTATTCGTGAACCTGTTTCTGGATCTCT  
ACTTTATGGAAACAATATTATTTCTGGTGCCATTATTCCTACTTCTGCAGCTATAGGTTTG  
CACTTTTACCCGATATGGGAAGCGGCATCCGTGATGAATGGTTATACAATGGTGGTCC  
TTATGAGCTAATTGTTCTACACTTCTTACTTGGTGTAGCTTGTACATGGGTTCGTGAGTG  
GGAAGTTAGTTTCCGTCTGGGTATGCGCCCTTGGATTGCTGTTGCATATTCAGCTCCTGT  
TGCAGCTGCTACTGCTGTTTTCTTGATCTATCCAATTGGTCAAGGAAGCTTCTCTGATG  
GTATGCCTCTAGGAATCTCTGGTACTTTCAACTTCATGATTGTATTCCAGGCTGAACACA  
ACATCCTTATGCACCCATTTACATGTTAGGCGTAGCTGGTGTATTCGGCGGTTCCCTAT  
TCAGTGCTATGCATGGTTCCTTGGTAACCTCTAGTTTGATCAGGGAAACCACAGAAAAT  
GAATCTGCTAATGAAGTTACAGATTCGGTCAAGAGGAAGAACTTATAATATCGTAGC  
TGCTCATGGTTATTTTGGCCGATTGATCTTCCAATATGCTAGTTTCAACAATTCTCGTTCT  
TTACATTTCTTCCCTAGCTGCTTGGCCTGTAGTAGGTATCTGGTTCCTGCTTTAGGTATC  
AGCACCATGGCTTTCAACCTAAATGGTTTTAATTTCAACCAATCTGTAGTTGATAGTCA  
AGGTCGTGTAATTAACACTTGGGCTGATATCATAACCGTGCTAACCTTGGTATGGAAG  
TTATGCATGAACGTAATGCTCACAACCTCCCTCTAGACTTAGCTGCTGTGCAAGCTCCA  
TCTACAAATGGAATGGGTTTGCCTTGGTATCGTGTTCCATACCGTCGTATTGAATGATCCC  
GGTCGGTTGCTTTCTGTTTCATATAATGCATACAGCTCTAGTTGCTGGTTGGGCTGGTTCG  
ATGGCTCTATATGAATTAGCAGTTTTTGATCCCTCTGACCCGGTTCTTGATCCAATGTGG  
AGACAAGGTATGTTTCGTTATACCCTTCATGACTCGTTTAGGAATAACCAATTCATGGGG  
CGGTTGGAGTATCACA---GGAGGTAATAACGAATCCGGGTATTTGGAGTTACGAAGG  
TGTGGCCGGGGCACATATTGTGTTTTCTGGCTTGTGCTTCTTGGCAGCTATCTGGCATTG  
GGTTTATTGGGATCTAGAAATATTTGTGATGAACGTACAGGAAAACCTTCTTTGGATT  
GCCAAGATCTTTGGAATTCATTTATTTCTCTCAGGGGTGGCTTGCTTCGGGTTTGGCG  
CATTCATGTAACAGGCTTGTACGGTCCCTGGAATATGGGTGTCCGATCCTTATGGACTAA  
CTGGAAAAGTACAATCTGTAAATCCCGCGTGGGGCGTGGAAGGTTTTGATCCTTTTTGTT  
CCGGGAGGAATAGCCTCTCATCATATTGCAGCAGGGACATTGGGCATATTAGCGGGCCT  
ATCCATCTTAGTGTCCGCCCGCCTCAACGTCTATACAAAGGATTACGTATGGGCAATAT  
TGAAACTGTCCTTTCCAGTAGTATCGCTGCTGCTTTTTTTGCAGCTTTTGTGTTGCTGG  
AACTATGTGGTATGGTTCAGCAACTACCCCGATCGAATTATTTGGTCCCACTCGTTATCA  
ATGGGATCAAGGATACTTCCAGCAAGAAATATATCGAAGAGTTGGCACCGGGCTAGCC  
GAAAATCAAAGTTTATCAGAAGCTTGGTCTAAAATTCCTGAAAAATTAGCTTTTTATGA  
TTACATCGGCAATAATCCAGCAAAAGGGGATTATTCAGAGCGGGCTCAATGGACAAC  
GGGGATGGAATAGCTGTTGGATGGTTAGGACACCCCATCTTTAGAGATAAAGAAGGGC  
GTGAGCTTTTTGTACGTCGTATGCCTACTTTTTTTGAAACATTTCCAGTGGTTTTGGTAG  
ACGGAGACGGAATTGTGAGAGCCGATGTTCTTTTTCGAAGGGCAGAATCGAAGTATAG  
TGTCGAACAAGTAGGTGTAACCTGTTGAGTTCTATGGTGGCGAACTCAATGGAGTCAGT  
TATAGTGATCCTGCTACTGTGAAAAAATATGCTAGACGTGCTCAATTGGGTGAAATTTTT  
GAATTAGATCGTGCTACTTTGAAATCCGATGGTGTTTTTTCGTAGCAGTCCAAGGGGTTG  
GTTTACTTTTTGGACATGCTTCGTTTGTCTTGTCTTCTTTTTTCGGACACATTTGGCATGG  
TGCTAGAACTTTGTTTAGAGATGTTTTTGTGGTATTGACCCAGATTTGGATGCTCAAGT  
GGAATTTGGAGCATTCCAAAACTTGGAGATCCAACCTACAAAGAGACAAGTAGTCATG

AAAACCTTATATTCCCTGAGGAGGTTCTACCCCGTGGAACGCTCTTTAATGGAACTTT  
AGCTTTAGCTGGTCGTGATCAAGAAACCACCGTTTTGCTTGGTGGGCCGGAATGCC  
CGACTTATCAATTTGTCCGGTAAACTACTCGGGGCTCACGTAGCCCATGCCGGATTAAT  
CGTATTCTGGGCTGGAGCAATGAACCTATTTGAAGTGGCTCATTTTCGTACCAGAGAAGC  
CCATGTATGAACAAGGCTTGATTTACTTCCCCATCTAGCTACTCTAGGTTGGGGGGTA  
GGTCCCGGTGGGGAAGTTATAGACACCTTTCATACTTTGTATCTGGAGTACTTCACTT  
AATTTCCCTCTGCAGTATTGGGCTTTGGCGGTATTTATCATGCACTTCTTGGACCTGAGAC  
TCTTGAAGAATCTTTTCCATTCTTCGGTTATGTATGGAAAGATAGAAAATAAAATGACCAC  
AATTTTGGGTATTCACTTAATCTTGTAGGTATAGGTTCTTTTCTTCTAGTATTCAAGGCT  
CTTTATTTTGGGGGCGTATATGATACCTGGGCTCCCGGGGGGGAGATGTAAGAAAAAT  
TACCAACTTGACCCTTAGCCCAAGTGTATATTTGGTTATTTACTAAAATCGCCCTTTGG  
GGGAGAAGGATGGATTGTTAGTGTGGACGATTTAGAAGATATAATTGGAGGACATGTAT  
GGTTAGGTTCCATTTGTATACTTGGTGGAACTGGCATATCTTAACCAAACCCTTTGCAT  
GGGCTCGCCGCGCACTTGTATGGTCTGGAGAGGCTTACTTGTCTTATAGTTTAGGTGCT  
TTAGCGGTCTTTGGTTTCATCGCTTGTGCTTTGTCTGGTTCAATAATACCGCTTATCCTA  
GTGAGTTTTACGGGCCCACTGGGCCAGAAGCTTCTCAAGCTCAAGCATTTACTTTTCTA  
GTTAGAGACCAACGTCTTGGGGCTAACGTGGGATCCGCTCAAGGACCTACTGGTTTAG  
GTAATATCTAATGCGTTCCCCGACCGGAGAGGTCATTTTTGGAGGAGAACTATGCGG  
TTTTGGGATCTCCGTGCTCCCTGGTTAGAACCTTTAAGGGGTCCAAATGGTTTGGACTT  
GAGTAGGCTGAAAAAAGATATAACAACCTTGGCAAGAACGGCGTTCCGCGGAATATATG  
ACTCATGCTCCTTTAGGTTCTTTAAATTCCGTGGGTGGCGTAGCTACCGAGATCAATGC  
AGTCAATTATGTCTCTCCTAGAAGTTGGTTAGCTACCTCTCATTTTGTCTAGGCTTCTT  
CCTATTCGTAGGTCATTTGTGGCATGCGGGAAGGGCCCGTGCAGCTGCAGCAGGATTT  
GAAAAAGGAATTGATCGTGATTTTGAACCTGTTCTTTCCATGACCCCTCTTAACATGAC  
TATAGCTCTTGGTAGATTTACCAAAGACGAAAATGATTTATTTGATATTATGGATGACTG  
GTTACGGAGGGACCGTTTTGTTTTGTAGGTTGGTCCGGTCTATTGCTCTTTCCTTGTGC  
CTATTCGCTTTAGGAGGTTGGTTCACAGGTACAACCTTTTGTAACTTCATGGTATACCCA  
TGGATTGGCCAGTTCTTATTTGGAAGGCTGCAATTTCTTAACCGCCGCAAGTTTCTACTC  
CTGCTAATAGTTTAGCACATTTCTTGTGCTACTATGGGGTCCTGAAGCACAAGGGGAT  
TTACTCGTTGGTGTCAATTAGGTGGTCTGTGGACTTTTGTGCTCTCCATGGCGCTTTC  
GGACTAATAGGTTTCATGTTACGTCAATTCGAACCTGCTCGATCTGTTCAATTGCGACCT  
TATAATGCAATCGCATTTTCTGCTCCAATTGCTGTTTTTGTCTGTATTCCTGATTTATCC  
ACTAGGTCAGTCTGGTTGGTTCTTTGCACCTAGTTTTGGTGTAGCAGCTATATTTGATT  
CATCCTCTTCTCCAAGGGTTTCATAATTGGACGTTGAACCCGTTTCATATGATGGGAGT  
TGCCGGTGTATTGGGCGCTGCTCTGCTATGCGCTATTCATGGTGCTACCGTAGAAAATAC  
TTTATTCGAAGATGGTGACGGTGCAAATACATTCCGTGCTTTTAACCCAACTCAAGCTG  
AAGAGACTTATTCAATGGTCACCGCTAACCGTTTTTGGTCCCAAATCTTTGGGGTTGCT  
TTTTCCAATAAACGTTGGTTACATTTCTTTATGTTATTTGTACCAGTAACCGGTTTATGGA  
TGAGTGCTCTTGGAGTAGTCGGTCTGGCTCTGAACTTACGCGCCTATGACTTCGTTTCC  
CAAGAAATCCGTGCAGCGGAAGATCCTGAATTTGAGACTTTCTACACCAAAAATATTCT  
CTTAAACGAAGGTATTCGCGCTTGGATGGCGGCTCAAGATCAGCCTCATGAAAACCTTA  
TATTCCTGAGGAGGTTCTACCCCGTGGAACGCTCTTATGTCTGGAAGCACGGGAGA  
ACGTTCTTTTGTGATATTATTACCAGTATTCGATACTGGGTCATTCATAGCATTACTATA  
CCTTCCCTATTCATTGCGGGTTGGTTATTCGTCAGCACGGGTTTAGCTTACGATGTGTTT

GGAAGCCCCGGCCAAACGAGTATTTTACAGAAAGCCGACAAGGAATTCATTAATAA  
CTGGCCGTTTTGATCCTTTGGCACAACCTCGATGAATTTAGTAGATCCTTTATGACCATAG  
ATCGAACCTATCCAATTTTACAGTGCATGGTTGGCTGTTACGGACTAGCTGTACCT  
ACCGTTTCTTTTTGGGGTCAATATCAGCAATGCAGTTCATCCAACGAATGGCTACACA  
AACCGTTGAGGGTAGTTCTAGATCTGGT---CCAAGACGAACTATTACAGGGGATTATT  
GAAACCATTGAATTCGGAATATGGTAAAGTAGCTCCTGGATGGGGTACTACTCCTTTGA  
TGGGTGTCGCAATGGCTCTATTTGCGATATTCCTATCTATTATTTTAGAGATTTATAATTCT  
TCCGTTTTACTGGATGGAATTTCAATGAGTATGCTTACTCTCAAACCTTTCGTTTACACA  
GTAGTGATATCTTTGTTTCTCTGTTCATCTTCGGATTCTTATCTAATGATCCAGGACGTA  
ATCCTGGACGTGAGGAAATGGCCGATACTACTGGAAGGATTCTCTTTGGCTGATAGGT  
ACTGTAACGGTATTCCTGTGATCGGTTAATAGGTATTTTCTTTTACGGTTCATATCCG  
GATTGGGTTTCATCCCTGATGCTTAATACCTTTAGTTTGATCTGTATCTGTCTTAATTCTGC  
CCTTCATTCGAGTAGTTTTTTCTTGGCCAAATTGCCCGAGGCTTACGCTTTTTTCAATCC  
AATCGTAGATATTATGCCAGTCATACCTCTGTTCTTTTTTCTCTTAGCCTTTGTTTGGCAA  
GCTGCTGTAAGTTTTCGAACGACACAATCAAACCCGAACGAACAAAATGTTGAATTGA  
ATCGTACCAGTCTCTACTGGGGGTATTACTCATTTTTGTACTTGCTGTTTTATTTTCCAA  
TTATTTCTTCAATATGGAAGTCAATATTCTCGATTTATTGCTACTGCACTGTTCAATCTA  
GTTCTTACAGCCTTTTTACTTATCATCTACGTAAAAACAGTCAGTCAAAATGATATGGAA  
ACAGCAACCCTAGTCGCCATCTCTATATCTGGTTCACTTGTAAGTTTTACTGGGTACGCC  
TTATATACCGCTTTTGGGCAACCCTCTCAACAACCTAAGAGATCCATTCGAGGAACACGG  
GGACATGGAAGCATTGGTTTATACATTCTCTTAGTCTCGACTTTAGGGATCATTTTTTT  
CGCTATCTTTTTTCGAGAACCGCCTAAAGTTCCGACTAAAAAGATGAAAATGACTATTG  
CTTTCCAATTGGCTGTTTTTGCATTAATTGCTACTTCATCAATCTTACTGATTAGTGTACC  
CGTTGTATTTGCTTCTCCTGATGGTTGGTCAAGTAACAAAATGTTGTATTTTCCGGTAC  
ATCATTATGGATTGGATTAGTCTTTCTGGTGGGTATCCTTAATTCTCTCATTTCT-----  
-----ATGTCACCACAAACAGAGACTAAAGCAAGTGTGGATTCAAAGCTGGTGTTAAA  
GATTACAAATTGACTTATTATACTCCTGAATATAAAACCAAAGATACTGATATCTTAGCA  
GCATTCCGAGTAACCTCAACCTGGAGTTCCACCTGAGGAAGCAGGGGGCCGCGGTA  
GCTGCGGAATCTTCTACTGGTACATGGACAACCTGTGTGGACCGATGGACTTACCAACCT  
TGATCGTTACAAAGGACGATGCTACCACATCGAACCTGTTGCTGGAGAAGAAAGTCAA  
TTTATTGCTTATGTAGCTTACCCTTTAGACCTTTTTGAAGAAGGTTCTGTACTAACATG  
TTACTTCCATTGTGGGTAATGTATTTGGGTTCAAAGCCCTACGCGCTCTACGTTTGGAG  
GATCTACGAATCCCTCCTGCTTATTCTAAACCTTCCAAGGCCCGCCTCATGGCATCCA  
AGTTGAGAGAGATAAATTGAACAAGTATGGTCGTCCCCTATTGGGATGTAATAAAC  
CAAATTTGGGGTTATCTGCTAAGAACTATGGTAGAGCAGTTTATGAATGTCTCCGCGGT  
GGACTTGATTTTACCAAGGATGATGAGAACGTGAACTCCCAACCTTATGCGTTGGAG  
AGACCGTTTCTTATTTGTGCCGAAGCCCTTTATAAAGCACAGGCTGAGACAGGTGAA  
ATCAAAGGACATTACTTGAATGCTACTGCAGGTACATGCGAAGAAATGATCAAAGGG  
CTGTATTTGCCAGAGAATTGGGAGTTCTATCGTAATGCATGACTACTTAACAGGGGGA  
TTCACTGCAAATACTAGCTTGTCTTATTATTGCCGAGATAATGGCCTTCTTCTTACATCC  
ATCGCGCAATGCATGCAGTTATTGATAGACAGAAGAATCATGGTATACTTTTCGTGTAC  
TAGCTAAAGCGTTACGTATGTCTGGCGGAGATCATATCACTCAGGTACCGTAGTAGGT  
AACTTGAAGGGGAAAGAGAAATCACTTTGGGCTTTGTTGATTTACTACGTGATGATTT  
TATTGAAAAAGACCGAAGTCGTGGTATTTATTTCACTCAAGATTGGGTCTCTTACCAG

GTGTTCTGCCCGTGGCTTCAGGGGGTATTCACGTTTGGCATATGCCTGCTCTGACCGAG  
ATCTTTGGGGATGATTCCGTACTACAGTTTGGTGGAGGAACTTTAGGACACCCTTGGGG  
AAATGCACCCGGTGCCGTAGCTAATCGAGTAGCTCTAGAAGCATGCGTACAAGCTCGT  
AATGAGGGACGTGATCTTGCTCGTGAAGGTAATGAAATTATCCGTGAGGCTAGCAAAT  
GGAGTCCTGAACTAGCTGCTGCTTGTGAGGTATGGAAGGAGATCAAATTCGAATTTGA  
AGCAATGGATACTTTA-----ATACATTTATACAAAACCTTCTACCCCGAGCACACGCA  
ATGGAGCCGTAGACAGTCAAGTGAAATCCAATCCACGAAATAAATTTGATCTATGGACAG  
CATCGTTGTGGTAAAGGTCGTAATGCCAGAGGAATCATTACCGCAGGGCATAGAGGGG  
GAGGTCATAAGCGTCTATACCGTAAAATCGATTTTCGACGGAATGAAAAAGACATATAT  
GGTAGAATCGTAACCATAGAATACGACCCTAATCGAAATGCATACATTTGTCTCATAAC  
TATGGGGATGGTGAGAAGAGATATATTTTACATCCAGAGGGGCTATAATTGGAGATAC  
CATTGTTTCTGGTACAGAAGTTCCTATAAAAATGGGAAATGCCCTACCTTTGACCGATAT  
GCCCTTAGGCACGGCCATACATAACATAGAATAACACTTGGAAAGGGTGGACAATTA  
GCTAGAGCAGCGGGCGCTGTAGCGAACTGATTGCAAAAAGAGGGTAAATCGGCCACA  
TTAAAATTACCTTCTGGGGAGGTCCGTTTGTATCCAAAACTGCTCAGCAACAGTCGG  
ACAAGTGGGTAAATGTTGGGGTGAATCAGAAAAGTTTGGGTAGAGCCGGATCTAAGTGT  
TGGCTAGGTAAGCGTCCTGTAGTAAGAGGAGTAGTTATGAACCCTGTAGACCATCCCCA  
TGGGGGTGGTGAAGGGAGGGCTCCAATTGGTAGAAAAAAACCCACAACCCCTTGGGG  
TTATCCTGCGCTTGAAGAAGAAGTAGAAAAAGGAATAAATATAGTGATAGTTTGATTC  
TTCGTCGCCGTAGTAAAATGATTCAACCTCAGACCCATTTGAATGTAGCGGACAACAGC  
GGGGCTCGAGAATTGATGTGTATTTCGAATCATAGGAGCTAGT---AATCGCCGATATGCTC  
ATATTGGTGACGTTATTGTTGCTGTAATCAAAGAAGCAGTACCCAATATGCCTCTAGAA  
AGATCAGAAGTGATCAGAGCTGTAATTGTACGTACATGTAAAGAACTCAAACGTGACA  
ACGGTATGATAATACGATATGATGACAATGCAGCAGTTGTCATTGATCAAGAAGGCAAT  
CCAAAAGGAACTCGAGTTTTTGGTGCGATCGCCCGGAATTGAGACAGTTGAATTTTA  
CTAAAATAGTTTTCATTAGCTCCTGAGGTATTAATGCTTAGTCCCAAAGAACCAGATTC  
CGTAAACAACATAGAGGAAGAATGAAGGGAATATCTTATCGAGGCAATCGTATTTGTTT  
CGGTAGATATGCTCTTCAGGCACTTGAACCCACTTGGATCACATCTAGACAAATAGAAG  
CAGGGCGACGAGCAATGACACGATATGCACGTCGTGGTGGAAAAATATGGGTACGTAT  
ATTTCCAGACAAACCCGTTACAGTAAGACCTACGAAACACGTATGGGTTCGGGGAAA  
GGATCTCCCGAATATTGGGTATCTGTGCTTAAACCGGGTCAATACTTTATGAAATGGGC  
GGAGTATCAGAAATTGTAGCCAGAGAAGCTATTGAAATAGCGGCGTCCAAAATGCCTAT  
ACGAACTCAATTCATTATTGCGGGAATGACCAGAATTAGACGAGGATATATAGCTCGGA  
GACGTAGAACAAAAATTCGTTTATTTGCATCAACTTTTCGGGGGGCTCATTCAAGACTT  
ACTCGAACTATTACTCAACAGAAAATAAGAGCTTTGGTTTTCGGCCCATAGAGATAGGG  
GCAGGCAAAAGAGGGGATTTTCGTGCTTTATGGATCACTCGGATAAATGCAGTAATTCGT  
GATAAT-----GTATCCTATAGTTATAGTCGATTAATACACGATCTGTACAAGAGGCAGTTG  
CTTCTTAATCGTAAAATACTTGCACAAATAGCTATATCAAATAGGAATTGTCTTTCCATAA  
TTTCCAATGAGATCATCAA-----ATGATAAAGGAAGTATACGCTTT  
AGGTCAACATATATGTATGTCTGCTCACAAAGCGCGAAGAGTAATTGATCAGATTCGTG  
GGCGTTCCCTACGAGGAAACACTTACGATACTAGAACTCATGCCTTATCGAGCATGTTAT  
CCCATTTTTAAATTGGTTTATTCTGCAGCAGCAAATGCTAGTACAATATGGGTTTCAAC  
GAAGCGGATTCAGTCATTAGTAAAGCCGAAGTCAACGAGGGTACTAGCGTGAAAAAG  
TTAAAACCTCGAGCTCGAGGACGTAGTTATCCGATAAAAAGACCCACCTGTCATATAAC

TATTGTATTGAAAGATATATCTATAGATGGGGGAGTATGGGACAAAAAATGGATGGAAT  
AAAATATGCAGTATTTACAGACAAAAGTATTCGGTTACTGGGTAAAAAT--CAATATACT  
TCTAATGTCTGAATCAGGATCAACTAGGACAGAAATAAAGCATTGGGTCTGAACCTCTTCTT  
TGGTGTCAAGGTAATAGCTATGAATAGTCATCGACTCCCGGGAAAGGGTAGAAGAATG  
GGACCTATTATGGGACATAACAATGCATTACAGACGTATGATCATTACGCTTCAACCGGGT  
TATTCTATTCCACCTCTTAGAAAAGAAAAGAACTATGGCGGTTCCAAAAAACGTACTTC  
TATGTCAAAAAAGCGTATTCGTAAAAATCTTTGGAAAAAGAAGGGGTATTTGGCAGCG  
GTAAAAGCTTTTTTCATTAGCGAAATCTCTTTGTACCGGGAATTCAAAAAGCTTTTTTGT  
GCGACAAATAAACAAGATGGCCAAGGGTAAAGATATCAGAGTACTAGTTATGTTGGAA  
TGTACCAGTTGTGTCCGAAACGGG-----GTTAATAAGGAATCACCGGGGATTTCCAGATA  
TATTACTCAAAAAGAAATCGACACAATACGCCTGGTTCGATTGGAATTGAAAAAATTCTGTC  
CCTATTGTTACAAGCATAACGATTCATGGGGAGATAAAGAAAATGAAAATAAGGGCCTCC  
ATTCGTAAAAATTTGTGAAAAATGTCGCCTGATCCGTAGGCGAAAACGAATTATAGTAAT  
TTGTTCCAACCCGAGACATAAACAAGACAAGGAATGGTTCGAGAGGAAATAACATTA  
TCCACCTGGACACTACAGTGGAAAGTGTGTTGAATCAAGAGCAGACAGTAAGCGTCTTT  
ATTATGGACGTTTTATTCTGTCTCCGCTTATGAAAGGTCAAGCCGATACGATAGGCATCG  
CGATGCGAAGGGCTTTGCTTGGAGAAATAGAAGGGACATGTATCACACGTGCAAAATC  
TGAG-----AAGATACCACATGAATATTCTACCATAGTAGGTATTGAAGAATCAGTACAGG  
AAATTTTACTGAATTTAAAAGAAATTGTATTGAGAAGTAATCTGTATGGAACCTTTGAC  
GCCTCTATTTGCGTCAGGGGTCTGGATACGCAACTGCTCAAGACATCATCTCACCGCC  
TTCTGTGGAAATCGTTGATGCTACACAGCATATAGCTAGCCTGACGGAACCAATGGATT  
TGTGTATTGGATTACAAATCGAGAGGAGTCGGGGATATCGTATAAAAACGCCAAATAAC  
TCTCAAGATGGAAGTTAT-----CCTATAGATGCTGTATTTCATGCCTGTTGAAATGCGAGT  
CATAGTATTCATTCTTATGGGAATGGGAATGAGAAACAAGAGATCCTTTTTTCTCGAAATA  
TGGACGAATGGAAGTTTAACTCCTAAAGAAGCACTTCACGAAGCCTCCCGGAATTTGA  
TTGATTTATTTATCCCTTTTCTACATGCGGAAGAAGAA-----AACATGAATTTAGAGGAC  
AATCAA---AACGGTATTTATTTACCTTTTTTTTTGCGTTTCATGATAGATTGGCT---AACCTA  
AAGAAAAACAAAAA-----ATCGAATTTAAATGTATTTTTTATTGACCAATCAGAATTGCC  
TCCAGGACCTATAATTGCCTCAAAGGTCCAATATATATACATTATTTGACCTTTTGAAT  
AACAGTCAAGAAGATCTTATGAAAATTGAGCATTTCGTCATAGAAGATGTAAAACAGAT  
ATTGGACATTCTACAAAAGCAT-----TTCTCAATTGATTTACCGAAGAATAAGATGCTCC  
GGGATGGAAT--GAGGGAATGTCTACAATACCTGGGTTTAGTCAGATACAATTTGAGG  
GATTTTGTAGGTTTCATTGATCAAGGCTTGACGGAAGAACTTTATAAGTTTCCAAAAATT  
GAAGATACAGATCAAGAAATTGAATTTCAATTATTTGTGGAAACATATCAATTGGTGA  
ACCCTTGATAAAAGAAAGAGATGCTGTGTATGAATCACTCACATATTCTTCTGAATTGTA  
TGTACCCGCGGGATTAATTTGGAAAACCAGTAGGGATATGCAAGAACAACCAATTTTTTA  
TTGGAACATTCCCCTAATGAATTCCTGGGAACCTCTATAGTAAATGGAATATACAGAA  
TTGTGATCAATCAATATTGCAAAGTCCAGGTATTTATTACCGTTTCAGAATTGGACCATA  
ACGGAATTTAGTCTATAACCGGCACTATAATATCAGATTGGGGAGGAAGATCAGAATTA  
GAAATTGACAGAAAAGCAAGGATATGGGCTCGTGTGAGTAGGAAACAAAAAATATCTA  
TTCTAGTTCCATCATCAGCTATGGGTTGCAATCTAAGGGAAATTCTAGATAATGTTTGT  
ACCCTGAAATTTCTTGTCTTTCTCGAATGATAAGGAGAAAAAAAAGATTGGGTCAA  
AGAAAATGCTATTTTGGAGTTTTATCAACAATTTGCTTGTGTAGGTGGGGATCCGGTATT  
TTCTGAGTCCTTATGTAAGGAATTACAAAAGAAATTTTTTCAACAAAGATGTGAATTAG

GAAGGATTGGTCGACGAAATATGAACCGGAGACTGAATCTTGATATACCTCAGAACAAT  
ACATTTTTGTTACCGCGAGATATATTGGCAGCTGCAGATCATTTGATTGGAATGAAATTT  
GGAATGGGTACACTTGACGAT-----ATGAATCACTTGAAAAATAAACGTATTCGTTCTGT  
AGCGGATCTGTTACAAGATCAATTCGGATTGGCTCTGATTCGTTTAGAAAATGCGATTC  
GAGGCACTATATCTGGAGCAATTAGG---CATAAATTGATA---CCGACTCCTCAGAATTTG  
GTAACCTCAACTCCA-----TTAACAACCACTTATGAATCCTTTTTTCGGCCTACACCC  
CTTATCTCAAGTTTTGGATCGAATAATGCATTGACACAAATAGTTCATGGGCGAAAAT  
CGAGTTATTTGGGTCCTGGAGGATTGACAGGGCGAACTGCCAGTTTTTCGGATACGAGA  
TATCCATCCTAGTCACTATGGACGATTTTGCCCAATTGACACGTCTGAAGGAATTAATGT  
TGGACTTATTGGATCCTTAGCGATTCATGCGCGGATCGGTCATTGGGGG---TCTCTAGAA  
AGCCCATTTTAT-----GAAATTTCTGAGAGATCA-----AAAGAGGTACGGATGATTTATT  
TATCACCAGTAGAGATGAATACTATATGGTAGCGGCAGGAAATTCCTTTGGCCTTGAAT  
CAGGGTATTCAGAAGAACAGGTTGTTCCAGCTCGATAACCGTCAAGAATTCCTGACTAT  
TGCATGGGAACAGGTTTCATCTTCGAAGTATTTTTCCCTTCCAATATTTTTCTATTGGAGC  
TTCTCTCATTCTTTTATCGAGCATAATGATGCGAATCGGGCTTTAATGAGTTCTAATATG  
CAACGTCAAGCAGTTCCTACTTTCTCGGTCCGAGAAGTGCATTGTTGGAACCTGGGTTGG  
AACGCCAAGCGGCTCTAGATTCGGGGGTTTCCGCTATAGCCGAACACGAGGGAAAGAT  
CATTTATACCGATACTGACAAGATCATTTTATCAGGTAATGGAGAACTCGAAACATTCC  
ATTGGTTATATATGAACGTTCCAACAAAATACTTGTATGAATCAAAAACCCAGGTTTC  
AGCGGGGTAAATACATTA AAAAGGGACAAATTTTAGCGGACGGTGCCGCTACAGTTGG  
TGGCGAACTCGCTTTGGGAAAAACGTATTAGTAGCTTATATGCCGTGGGAAGGCTAC  
AATTCTGAAGACGCGGTACTCATTAGCGAGCGTCTGGTATATGGAGATATTTATACTTCT  
TTTCACATACGAAAATATGAAATTCAGACTCATGTGACAAGCCAAGGT---CCCGAAAGG  
ATCACTAGCGAAATACCACATTTAGAAGCCATTTACTCCGCAATTTAGACAGAAATGG  
AATTGTGATGCTAGGATCTTGGGTAGAAACGGGTGATATTTAGTAGGTAATAACGC  
CCCAGATGGCGAAAGAA---TCATCGTATGCTCCAGAAGATAGATTATTACGAGCCATACT  
TGGCATTACGGTATCCACTTCAAAGGAACTTGTCTAAAACCTACCTATAGGTGGCAGGG  
GTCGAGTTATTGATGTGAGATGGATCCAGAAAAAAGGG---GGTTCCAGCTATAATCCAG  
AAACGATTTCGTGTATATATTTACAGAAACGTGAAATCAAAGTAGGTGATAAAGTAGCT  
GGAAGACATGGAAATAAAGGGATCATTTCAAAATTTTACCTAGACAAGATATGCCTTA  
TTTACAAGATGGAACACCTGTTGATATGGTCTTCAACCCATTAGGAGTACCTTCACGAA  
TGAATGTAGGACAGATATTTGAATGCTCGCTCGGGTTAGCGGGGGGTCTGCTAGACAG  
ACATTATCGAATAGCACCTTTTGATGAGAGATATGAACAAGAAGCTTCGAGAAAACCTA  
GTGTTTCCTGAATTATATGAAGCCAGTAAGCAAACAGCAAATCCATGGGTATTTGAACC  
CGAGTATCCGGGAAAAAGCAGAATATTTGATGGAAGAACGGGAGATCCTTTTGAACAA  
CCTGTTATAATAGGAAAGTCTTATATCCTTAAATTAATTCATCAAGTTGATGATAAAATCC  
ATGGACGTTCCAGTGGACATTATGCGCTTGTTACACAACAACCCCTTAGAGGAAGAGC  
CAAGCAAGGAGGACAACGGGTAGGAGAAATGGAAGTTTGGGCTCTAGAGGGATTTGG  
TGTTGCTCATATTTTACAAGAGATGCTTACTTATAAATCTGATCATATTAGGGCTCGTCAG  
GAAGTACTTGGTACTACGATCATTGGAGGAACAGTACCTAACCCCTGAGGATGCTCCAG  
AATCGTTTTCGATTGCTCGTTGAGAACTACGATCTTTGGCTCTGGAACCTGAATCATTTC  
TTGTATCTGAGAAGA ACTTCCAGATTAATAGGAAGGAAGCT-----ATGATCG  
ACCGGTATAAACATCAACA ACTTCGAATTGGATCAGTTTCTCCTCAACAAATAAGCGCT  
TGGGCCAATAAAATCCTACCTAATGGAGAGATAGTTGGAGAGGTAACAAAACCTTATAC



TTTTTCATTACAAAACCAATAAACC GGAAAAAGATGGATTATTTTGTGAAAGAATTTTGTG  
GGCCTATAAAAAGTGAATTTGTGCTTGTGGAAATTATCGAGTAATCGGAGATGAAAA  
AGAAGACCCGAAATTTTGTGAACAATGCGGAGTCGAATTTGTTGATTCTCGGATACGA  
AGATATCAAATGGGATACATTAACCTGGCATGTCCAGTAACTCATGTGTGGTATTTGAA  
ACGTCTTCCTAGTTATATCGCGAATCTTTTAGATAAGCCTCTTAAAGAATTAGAAGGCCT  
AGTATATTGCGAT-----TTTTCTTTTGTAGGCC---ATAGCTAAAAAACCTACTTTCTTAC  
GATTACGAGGTTTCATTCGAATATGAAATCCAATCCTGGAAATACAGCATCCCCTTTTTT  
TTACTACCCAAGGCTTCGATACATTTTCGAAATCGAGAAATCTCTACTGGAGCAGGTGCT  
ATCCGAGAACAATTAGCCGATCCGGATTTGCGAATTATTACAGATTATTCATTGGTAGAA  
TGGAAGAATTAGGGGAAGAA---GGACCCACAGGTAATGAATGGGAAGATAGAAAAAT  
TGGAAGAAGAAAGGATTTTTTGGTTAGACGCATGGAATTAGCTAAGCATTTTATTTCGAA  
CAAATGTAGAACCAGAACGGATGGTTTTGTGCCTATTACCAGTTCTTCCTCCCGAGTTG  
AGACCGATCATTACAGATAGATGGGGGTAAACTAATGAGTTCGGATATTAATGAACTCTAT  
AGAAGAGTTATCTATCGGAACAATACTCTTACCGATCTATTAACAACAAGTAGATCTAC  
GCCAGGGGAATCGGTAATGTGTCAGGAGAAATTGGTACAAGAAGCCGTGGATACACTT  
CTTGATAATGGGATCCGTGGACAACCAATGAGGGACGGTCATAATAAAGTTTATAAGTC  
ATTTTCAGATGTAATTGAAGGCAAAGAGGGAAAGATTTTCGTGAGACTCTGCTTGGCAA  
CGGGTCGATTATTCGGGGCGTTCCGTCATTGTCGTGGGCCCTTCGCTTTCATTACATCGA  
TGTGGATTGCCTCGCGAAATAGCAATAGAGCTTTTCCAGACATTTGTAATTCGTGGTCT  
AATTAGACAACATGTTGCTTCCAACATAGGAGTTGCTAAAAGTAAAATTCGAGAAAA  
GAACCAATTGTATGGGAAATACTTCAAGAAGTTATGCGGGGGCATCCTGTATTGCTAAA  
TAGAGCACCCACTCTACATAGATTAGGCATACAGGCATTCCAACCCATTTTAGTGGAAG  
GACGTGCTATTTGTTTACATCCATTAGTTTCGTAAGGGATTCAATGCAGACTTTGATGGG  
ATCAAATGGCTGTTTCATGTACCTTTATCTTTGGAGGCTCAAGCGGAGGCTCGTTTACTTA  
TGTTTTCTCATATGAATCTCTTGTCTCCAGCTATTGGAGATCCCATTTCGGTACCAACTC  
AAGATATGCTTATTGGACTCTATGTATTAACGAGCGGGAATCGTCGAGGTATTTGTGCAA  
ATAGGTATAATCCATGTAATTACAGAAAC-----TATAAAAATGAAAGAATTGACGATAA  
TAACTATAAGTATACGAAAGAAAAAGAACCCTATTTTTTTTAGTTCCTATGATGCAATTGG  
AGCTTATCGGCAGAAACGAATCAATTTAGATAGTCCTTTGTGGCTCCGGTGGCGACTAG  
ATCAACGC---ATCATTGCATCA-----AGAGAAGTTCCCATCGAAGTTCACTATGAATCTTT  
GGGTACCTATCATGAGATTTATGGGCACTATCTAATAGTAAGAAGTGTAACAAAAACAAA  
TTCTTTGTATATACATTCGAACCACTGTTGGTCCTATTTATTTTATCGAGAAATCGAAGA  
AGCTATACAAGGGTTTTGCGGGCCTGCTCATAACGGTACC-----ATGGAGG  
TACTTATGGCAGAACGGGCCGATCTGGTCTTTCACAATAAAGCGATAGATGGAAGTACC  
ATGAAACGACTTATTAGCAGATTAATAGATCACTTCGGAATGGCATATACATCACACATC  
CTGGATCAAGTAAAGACTCTGGGTTTCCAGCAAGCCACTGCTACATCCCTTTCATTAGG  
AATTGATGATCTTTTAAACAATACCTTCTAAGGGATGGCTAGTCCAAGATGCTGAACAAC  
AAAGTTCGATTTTGGAAAAACACCATCATTATGCGAATGTACACGCGGTAGAAAAATTA  
CGTCAATCCATTGAGATATGGTATGCTACAAGTGAATATTTGCGACAAGAAATGAATCCT  
AATTTTAGGATGACTGACCTTCTAATCCAGTCCATATAATGTCTTTTTTCGGGAGCTAGA  
GGAAATGCATCTCAGGTACACCAATTAGTAGGTATGAGAGGATTAATGTCAGATCCCCA  
AGGACAAATGATTGATTTACCCATTCAAAGCAATTTACGCGAAGGACTCTCTTTAACGG  
AATATATAATTTCTGTACCGGAGCCCGTAAAGGAGTTGTGGATACTGCTGTACGAACAT  
CAGATGCTGGATATCTCACGCGGAGACTTGTGAAGTAGTTCAACACATTGTTGTCCGT

AGAACAGATTGTGGCACCATCCGAGGTATTTCTGTGAGTCCTCGAAATGGGATGATGA  
CG--GAAAGAATTTTATCCAAACATTAATAGGTCGTGTATTAGCAGACGATATATATATG  
GGTCCACGATGCATTGCCATTCGAAATCAAGATATTGGGATTGGACTTGTCAATCGATT  
CATAACC-----TTTCGAGCACAAACCAATATCTATTCGAACCCCTTTACTTGTAG  
GAGTACATCTTGGATCTGTGCGATTATGTTATGGTTCGAAGTCCCCTCATGGCGACCTGG  
TCGAATTGGGAGAAGCTGTAGGTATTATTGCGGGTCAATCTATTGGGGAACCAGGGACT  
CAACTAACATTAAGAACTTTTCATACCGGTGGAGTATTCACAGGGGGTACTGCAGAACA  
TGTACGAGCTCCTTCTAATGGAAAAATAAAATTC AATGAGGATTTGGTTCATCCCACGC  
GTACACGTCATGGACATCCTGCCTTTCTATGTTATATAGACCTGTATGTA ACTATTGAGA  
GTCAGGATATTATACATAATGTGAATATTCCACCAAAAAGTTTCCTTTTAGTTCAAACG  
ATCAATATGTGGAATCAGAACAAGTGATTGCTGAGATTCGCGCGGGAACATCCACTTTG  
--AATTTTAAAGAGAAAGTTCGAAAACATATTTATTCTGACTCAAAGGGAGAA--ATGC  
ACTGGAGTACTGATGTGTACCATGCACCTGAATATACATATGGTAATGTTTCATCTCTTAC  
CAAAAACAAGTCATTTATGGATATTATCAGGAGGTCCGTGCAGA-----TCCAGTATAGTC  
CCTTTTTCTCTCCACAAGGATCAAGATCAAATGAACGTTTCAG-----TCTCTTTCTGTGCA  
ACGAAGATATATTTCTAAC-----CTCTCAGTGACTAATGATCAA--GTGAAACACAAATTG  
TTTAGTTTGGATCCTTCTGGT-----GGGGGTAGGATTCTTGATTAT--TCAGCACCTAATCG  
AATCATATGCAATGGTCATTGTAATTCATATATCCTGCC---ATTCTCCACGAGAATTCTG  
AT-----TTATTGGCAAAGAGGCGAAGAAATAGATTCATCATTCCATTCCAATCTAATCAAG  
AACGAGAGAAAGAACTAATGCCCGTTCGGGTATCTCGATTGAAATACCCATAAAT-----  
GGTATTTTCCGTAGAAATAGTATTCTTGCTTATTTTCGATGATCCTCGATACAGAAGAAAG  
AGTTCGGGAATTACTAAATATGGGACTATAGAGGTTTCATTCCATCGTTAAAAAAGAGGA  
T-----TTGATTGAGTATCGAGGA-----AAAGAATTTAGGCCAAAATACATGAAAGTGGATC  
GATTTTTTTTTTCATTCCCAGGAAGTGTATATCTTACCTGGATCTTCTTCCATAATGGTACG  
GAACAATAGTATCATTGGAGTAGATACACGAATCGCTTTAAATACAAGAAGCCGAGTAG  
GCGGATTGGTCCGAGTGGAGAGAAAAAAGGGGGATTGAACTTAAATCTTTTCTG  
GAGCTATCCATTTTCTGGAGAGACGGATAAGATATCCCGGCACAGTGGCATCTTGATA  
CCACCAGGAACGGGAAAAAAA-----AATTCTAAGGAATCAAAAAA---AAATTGAAAA  
ATTGGATCTATGTCCAACGG-----ATCACACCTACCAAGAAAAAG-----TATTTTGTTTTG  
GTTTCGACCCGTAGTCACATATGAAATAGCGGACGGGATAAATTTAGCAAGGCTTTTCCC  
CCAGGATCTGTTGCAGGAAAGGGATAATTTGCAACTTCCAGTTGTCAATTATATCCTTTA  
TGAAATGGCAAACCTATTGGAGGAATTTCTCACACAAGTATTCAATTAGTTCGCACTT  
GTTTAGTATTGAATTGGGACGAAGACAAAAAG-----GGTTCTTCTATAGAAGAGGTTT  
ATGCTTCCTTTGTTGAAGTAAGGGCAAATGGTCTGATTTCGAGATTCATAAGAATGGAC  
TTAGTGAAATCCCCTATTTTCGTATACCGGAAAAAGGAATGATCTGTCAGGTTTCAGGATT  
GATCCCCGAT--AATGGATCAGATCGTATCAATATCAATCCTTTTTAT-----TCCAAGGC  
AAGT-----ATTCAACAATTAAGTCCAAACATCCAGGAATTCGTACGTTGTTG  
AATAGA-----AATAATGAATGCCAATCTTTGATAATTTGTGCATCATCAATTGTTCTCG  
A-----ATGGGTCCATTTAAGGGTTTTAAATATCACAAT-----GTGACAAAAGAATCAGAT  
CCCCTAATCCAATTAGGAAGTCGTTGGGTCTTTAGGGATT-----GTACCTAAAATTGC  
GAATTTTTACTCA-----TTTTACCATTTAATAACT-----CATAATCAGATCTTG---GTAATA  
AATATTTGTTACTTGACAAT-----TTAAAACAGACTTTCCAAGTAATTA---TATT  
ATTTTCATGGATGAAAATGGGAGG-----ATTTTTTCATCCCGATCCATGCAGTAACATCATT  
TGAATCCATTCCATTTGAATTGGTATTTTCTCCATCACGATTCTTATGAAGATACAGCCA

CAATAATTAGC---CTTGGACAGTTTCTTTGTGAAAATATATGTATATCCAAAAACGGACC  
A-----CACCTAAAATCTGGTCAAGTTTTAATTGTTTCAT--GTTGACGCTTTAGTAATAAG  
ATCCGCTAAGCCTTATTTGGCCACTCCAGGAGCAACTGTTTCATGGTCATTATGGGGAAA  
TCCTTTACGAAGGAGATACATTAGTTACATTTATATATGAAAAATCGAGATCTGGTGATAT  
AACGCAGGGTCTTCCAAAAGTGGAACAAGTGTTAGAAGTGCGTTTCGATTGAATCAATA  
TCGATGAACCTAGAAAAGAGGGTTGAGGGTTGGAACGAACGTATAACAAGAATTCTTG  
GAATTCCTTGGGGATTCTTGATTGGCGCTGAGCTAACCATAGCGCAAAGTCGTATCTCT  
TTGGTTAATAAGATCCAAAAGGTTTATCGATCCCAGGGGGTGCAAATCCATAATAGGCA  
TATAGAAATTATTGTACGTCAAATAACATCAAAGTTTTGGTTTTAGAA-----GATGGA  
ATGTCTAATGTTTTTTTACCCGGAGAACTAATTGGATTGTTGCGAGCGGAACGAACGG  
GACGCGCTTTGGAAGAAGCAATCTGTTACCGAGCCGTCTTATTGGGAATAACGAGGGC  
ATCTCTGAATACTCAAAGTTTCATATCCGAGGCGAGTTTTTCAGGAACTGCTCGAGTTT  
TAGCAAAGCCGCTCTACGAGGTCGTATCGATTGGTTGAAAGGTCGAAAGAAAACGT  
TGTTCTGGGGGGGATGATACCTGTTGGTACCGGATTCAAAGGATTGATGCACCATTCA--  
----AGGCAACACAACAACATTCCT-----TTGGAACCGAAAAGAAGAATCTATTTCGAGGG  
GGAAATGAGA-----GATATTTTGTTCACCACAGAGAATTATTTGATTCTTGTATTCCAAA  
GAATTTCCATGATACATCAGAACA-----ATGACAAGAAGAT  
ATTGGAACATCCATTGGAAGAGATGATGGAAGCAGGAGTTCATTTTGGTCATGGTACT  
AGGAAATGGAATCCTAGAATGGCACCCCTACATCTCTGCAAAGCGTAAAGGTATTCATAT  
TACAAATCTTACTCGAACTGCTCGTTTTTTTATCAGAAGCTTGTGATTTAGTTTTTGTATGC  
AGCAAGTGGGGGAAAAGAATTCTTAATTGTTGGTACCAAAAATAAAGCAGCTGATTCA  
GTAGCATCGGCTGCAATAAGGGCTCGGTCTCATTATGTTAATAAAAAATGGCTCGGTGG  
TATGTCAACGAATTGGTCCACTACAGAAACGAGACTTCATAAGTTCAGGGACTTGAGA  
GCGGAACAAAAGATGGGGAGACTGAGCCGTCTTCCGAAAAGAGATGCAGCAATGTTA  
AAAAGACAATTATCTCATTTGCAAGCATATCTGGGTGGGATCAAATATATGACAGGGTT  
ACCTGATATTGTAATCATTGTTGATCAACAAGAAGAATATACGGCTCTTCGAGAATGTGT  
CACTTTGGGAATTCCAACGATTTGTTAATCGATACAAATTGTGATCCGGATCTCGCAGA  
TATTTCTATTCCAGCGAATGATGACGCTATAGCTTCAATCCGATTAATTCTTAACAAATTA  
GTATCCGCAATTTGTGAGGGTCGTTCTAGC---TATATAAGAAATCGTATGGGACAAAAAA  
TAAATCCACTTGGTTTCAGACTTGGTACAACCCAAGGTCATCATTCCCTTTGGTTTTGCA  
CAACCAAAAAGTTATTCCGAGGGTCTCCAGGAAGATAAAAAAATACGGGATTGTATCA  
AGAATTATGTACAAAAAATATGAGAATATCCTCAGGT---GTCGAGGGAATTGCACGTAT  
AGAGATTCAAAAAGAATCGATCTGATCCAGGTCATAATCTATATGGGATTCCCAAAGT  
TGTTAATAGAGGGTAGACCACGA-----GGAATCGAAGAATTACAGATCAATGTACA  
AAAAGACTTTAATTCTGTGAACCGAAAACCTAACATTGCTATCACAAGAATTGCAAAA  
CCTTATGGACAACCTAATATTCTTGCAGAATTTATAGCCGGACAATTAAGAATAGAGTT  
TCATTTGAAAGGCAATGAAAAAAGCTATTGAATTAAGTGAACAAGCAGATACAAAAG  
GAATTCAGTACAAATTGCGGGTCGTATCGACGGAAAAGAAATTGCACGTGTCGAATG  
GATCAGAGAAGGTAGGGTCCCCTACAAACCATTGAGCTAAAATTGATTATTGTTCT  
ATACAGTTCGAACTATCTATGGGGTATTAGGCATCAAATTTGGATATTTGTAGACGAGG  
AAATGTCTCGTTACCGAGGGCCTCGTTTTCAAAAAAATACGCCGTCTGGGGGCTTTACC  
GGGACTAACTAGTAAAAGGCCTAGAGCCGGAAGTGATCTTAGAAACCAATCGCGTCCC  
GGGAAA---AGATCTCAATATCGTATTTCGTCTAGAAGAAAAACAAAAATTGCGTTTTTCAT  
TATGGTCTGACAGAGCGACAATTACTTAAATACATTTCGTATTGCTGGAAAAGCCAAAGG

ATCAACAGGTCAGGTTTTACTACAATTACTTGAAATGCGTTTTGGATAACATCCTTTTTTCG  
ATTGGGTATGGCTTCGACCATTCTGGAGCCCGCAATTAGTTAACCATAGACATATTTT  
AGTTAATGGTTCGTATAGTAGATATACCAAGTTATCGCTGCAAACCTCGAGATATTATTAC  
GGCGAGGGATGAACAAAAATCCAGAGCTCTGATTCAAATATCTTGATTCATCCCCC  
AT--GAGGAATTGCCAAAACATTTGACTCTTCACTCATTCCAATAT-----AAAGGATTAGT  
CAATCAAATAATAGATAGTAAATGGGTTCGGTTTTGAAAATAAATGAGTTGCTAGTCGTAG  
AATATTATTCCCGCCAAACTATGTCACGTTCGAGGTACTGCAGAAGAAAAAACTGCAAA  
ATCCGATCCAATTTATCGTAATCGATTAGTTACCATGTTGGTTAACCGTATTCTGAAACA  
CGGAAAAAATCATTGGCTTATCAAATTATCTATCGAGCCGTGAAAAAGATTCAACAAA  
AGACAGAAACAAATCCACTATCTGTTTTACGTCAAGCAATACGTGGAGTAACTCCCGAT  
ATAGCAGTAAAAGCAAGACGTGTAGGCGGATCGACTCATCAAGTTCACATTGAAATAG  
GATCTACACAAGGAAAAGCACTTGCCATTCGTTGGTTATTAGGGGCATCCCGAAAACG  
TCCGGGTCGAAATATGGCTTTCAAATTAAGTTCCGAATTAGTGGATGCTGCCAAAGGGA  
GTGGCGATGCCATACGCAAAAAGGAAGAGACTCATAGAATGGCAGAGGCAAATAGAG  
CTTTTGCACATTTTCGTATGAGTAGGGACACTATTGCCGACATAATAACTTCTATACGAA  
ATGCTGACATGGATAAAAAGGAACGGTTCGAATAGCATCTACTAATATCACCGAAAAC  
ATTGTTAAAATACTTCTACGAGAAGGTTTTATCGAAAACGTGAGGAAACATCGGGAAA  
GCAACAAATATTTCTTGGTTTCAACCCTGCGACATAGAAGG-----AATAGGAAAGGACC  
ATATAGA-----ACTATTTTA-----AAACGTATCAGCCGACCCGGTCTACGAATCTATTCC  
AACTATCAACGAATTCCTAGGATTTTAGGTGGAATGGGGATTGTAATCTTTCTACTTCT  
CGAGGTATAATGACAGACCGAGAGGCTCGACTAGAAGGAATCGGAGGAGAAATTTTGT  
GTTATATATGGATGACAAAACCTATAACCAAGAATTGGTTCACGTGGGAATGGACGTATT  
GGTTCACGTAAAGAATAGTCGTAGAATACCAAGGGAGTTATTCATGTTCAAGCAAGTTT  
CAACAATACCATTGTAAGTGTACAGATGTACGGGGGCGAGTAATTTCTTGGTCTCCG  
CCGGTACTTGTGGATTCAAAGGAACAAGAAGAGGGACACCATTGCTGCTCAAACCG  
CAGCAGGAAATGTGATTCGTACAGTAGTGGATCAAGGTATGCAACGAGCAGAAGTCAT  
GATAAAGGGTCTGGTCTCGGAAGAGATGCAGCATTACGAGCCATTCTGTAGAAGTGGT  
ATACTATTAAGTTTCGTACGGGACGTAACCCCTATGCCACATAATGGATGTAGACCTCCT  
AAAAAAGGCGTGTGATGCCAACTATTAACAACCTTATTAGAAACACAAGACAGCCAA  
TCAGAAATGTCACGAAATCCCCCGCGCTTCGGGGATGTCCTCAGCGCCGAGGAACATG  
TACTAGGGTGTATACTATCACCCCAAAAAACCAAACCTCTGCCTTACGTAAAGTTGCCA  
GAGTACGATTAACCTCTGGATTTGAAATCACTGCTTATATACCTGGTATTGGCCATAATT  
CACAAGAACATTCTGTAGTCTTAGTAAGAGGAGGAAGGGTTAAGGATTTACCCGGTGT  
GAGATATCACATTGTTTCGAGGAACCCTAGATGCTGTTCGGAGTAAAGGATCGTCAACAA  
GGGCGTTCTAAATATGGGGTCAAAAAGCCAAAATGGCAAGGAAAAGTTTGATTTCAG  
AGGGAGAAGAAGAGGCAAAAATTGGAACAGAAATATCATTGATTTCGTGATCCTTAA  
AAAAAGAAATAAGC-----AAAGTTCCGTTCGTTGAGTGACAAATGGGAAATTCATGGA  
AAATTACAATCCCACCGCGTAATAGTGCACCGACACGTCTTCATAGACGTTGTTTTTC  
GACCGGAAGGCCGCGAGCTAACTATCGAGACTTTGGGTTATCCGGGCACATACTTCGT  
GAAATGGTTCATGCATGTTTGTGGCCGGGGCAACAAGATCAAGTTGGATGGTAAAAA  
ATGCATTATCTCAATATTTTACAAGAACAAAAGAAGAAAACAAG-----GGGTCTGT  
TGAATTTCAAGTATTCAGTTTCACTAATAAGATACGGAGACTTACTTCACATTTGAAATT  
GCACAGAAAAGACTATTTATCTCAGAGAGGTCTACGAAAAATCTGGGAAAACGTCAA  
AGGCTGCTGGCTTATTTGTCAAAGAAAATAGAGTACGTTATAAAGAATTAATTGGTCA

GTTGGATATTCGGGAACCAAAAACCTCGT-----ATGGTAAAACCTTCGTTTGAAACGATGTG  
GTAGAAAGCAACGAGCCATCTATCGAATCGTTGCAATTGATGTTTCGATCTCGAAGAGA  
AGGAAGAGATCTTCGGAAAGTGGGTTTTTATGATCCGATAAACAATCAAACCTTATTCAA  
ATGTTCCCGCTATTCTATATTTCCCTTGAAAAGGGTGCTCAACCTACAGGAACTGTTTCATG  
ATATTTCAAAGAAGGCAGAGGTTTTTAAGGAACTTTGTGTTAATCAAACGAAATCAAAT  
---ATGGATAAATCCAAGCGACCTTTTTCTGAAATCCAAGCGATCTTTTCGTAGGCGTTTGC  
CCCAATTGGATCGGGGATCGAATTGATTATAGAAACATGAGTTTAATTAGTCGATTTA  
TTAGTGAACAAGGAAAAATATTATCTAGACGAGTGAATAGATTGACCTTGAAACAACA  
ACGATTAATTACTATTGCTATAAAAACAAGCTCGTATTTTATCTTCGTTACCTTTTCTTAAT  
AATGAGAAA-----CAATTTGAGAGAACTGAGTCCGACCTAGAACTACTGGTTCTAGAA  
CCAGAAAT---GTGACACGTTCACTCAAAAAAAATCCTTTTTGTAGCTAATCATTTATTAGG  
AAAAATGGAGAAGCTTAACATGAGGGCGGAAAAAGAAATAATAGTAACTTGGTCCCG  
GGCATCTACCATTATACCCACAATGATCGGCCATACAATTGCTATTTCATAATGGAAAGGA  
GCATTTGCCTATTTATATAACAGATCGTATGGTAGGTCACAAATTGGGAGAATTTGCACC  
TACTCTTAATTTCCGGGGACATGCGAGAAACGATAATAGATCTCGTCGTATGATTTTGAA  
ATCTTTTCTACTAGGTAATCTATTATCCTTATGCATGAAGATAATCAATTCGGTCGTTGTG  
GTCGGACTCTATTATGGATTTCTGACCACATTCTCCATAGGGCCCTCTTATCTCTTCCCTC  
TCCGAGCTCGGGTTATGGAAGAAGGA-----ACCGAGAAGAAGGTATCAGCAACAACCT  
GGTTTTATTACGGGACAGCTCATGATGTTTCATATCGATCTATTATGCGCCTCTGCATCTAG  
CATTGGGTAGACCTCATACAATAACTGTCCTAGCTCTACCGTATCTTTTGTTTTCAATTCCT  
CTGGAACAATCACAAAACCTTTTTTTTATTATGGATCTACTACCAGAAATTCATGCGTAA  
TCTCAGCATTCAATGTGTATTCCTGAATAATCTCATTTTTCAATTATTCAACCATTTTCATT  
TTACCAAGTTCAACGTTAGCCAGATTAGTCAACATTTATATGTTTCGATGCAACAACAA  
GATGTTATTTGTAACAAGTAGTTTTGTTGGTTGGTTAATTGGTCACATTTTTTTCATGAA  
ATGGGTTGGATTGGTATTATTCTGGATACGGCAAATAATTCTATTAGATCT---AATGTAC  
TTATTAAGTACCTTGTGTCAGAATTGAGAAATTCATGGCTCGAATCTTTAGTATTCTCTT  
ATTTATCACCTGTGTCTACTATTTAGGCAGAATACCGTCACCTATTGTCACTAAGAACT  
GAAAGAAACCGAAGAAGACAAACCTCTTTTGACTCTTCTTTTCGACTATAAACGATGG  
AATCGTCCATTGCGATATATAAAAAACGATCGATTTGAGAATGCTGTAAGAAATGAACT  
GTCACAATATTTTTTTTATAACATGTCAAAGTGACGGAAAACAAAAAATATCTTTTACCTA  
TCCACCTAGTTTGTCAACTTTTTGGGAAATGATACAAAGAAAGATGTTTTTATAACGA  
CAGAAAAACTTTCCTCTGAGGAACTGTATAATCATTGGGTTTATACCAATGAACAAAAA  
AAGAACAACCTGAACAACGAGTTCATAAATCGAATTGAAGCTCTAGATAAGGGATCTC  
TTGCTCTAGATGTACTCGAAAAAAGGACTAGATTGTGTAATGATGAGACTGAACAAGA  
ATGCTTGCCTAAAATACATGATCCTTTCTGGAACGGACCCTATCGCGGAACAATAAAAA  
AAAAGTATTCACAT-----ATGGTTTGGATAAATAAGATTCATGATATCCTTTACAGAGAAT  
TTGAACATAAAGATCCGAATGATCAA-----GGAATAAAAGAAATAAGTAAAAAAGTCCC  
TCGATGGTCATATAAATTGATCGATTTGGAACAACAAGAGGGGGGAGAGATTCGTTCA  
AGAAAAGCCAAACGTGTAGTCATTTTTACTGATGCTTTGATACGTTATTCTCAACAAGC  
AGATTTTCGTCCGGATATAATCAAAGGATCCATGCGCGCTCAAAGACGTAATAAGTTA  
TTTGGGAACTGTTTCAAGCAAATGTACATTCCTCCGCTTTTTTTTGGACAGAATAGACAAA  
ACTTTTTTTTTTTCTTTTGATATC-----TTCGGAATGATGAAGCCATTTTTAGGAATAGA  
GAGGAGAAAACGCGGATAGAAATAGCAGAAACATGGGATAGTGTCCCATTTGCTCAAG  
TAATAAGGGGTTCCATGTTAATAACCCAATCGATTCTTCGAAAATATATTGTATTGCCTTC

ATTGATAATAGCTAAAAATATTGGACGTATGTTATTATTTC AATTTCCCGAGTTATATGAG  
GATTTAAAGGCGTGGAATAGAGAAATGTATGTTAAATGCACCTTTAATGGTGTTC AATTA  
TCAGAAACAGAATTTCCAAAAGACTGGTTAACAGATGGCATT CAGATAAAGATCCTATT  
TCCTTTCTGTCTGAAACCTTGGCGCGAATCTACCAAAGGACAAA AATATGATTTTTGTT  
TTTTAACAGTTTGGGGAATGGAAGCTGAACTTCCTTTTGGTTCTCCCCGAAAACGACC  
TTCCTTTTTTGAACCCATTTGGAAAGAACTCGAAAAAAA AATTAGAAAAGTGAAA---A  
AGAAATCTTTTCTAGTTCTAAAAC TTTTAAAAGAAAGAACA AAAATTATTTTTAAGGGTC  
TTAAAAGAAATAACAGGATGGGTTATCAAAGAGTTCTA-----TTTATAAAAAGAATAAT  
AAAAGAATTTGCAAAAGTAAAT-----ATAATAACAATCAGATGATTCATAAATCATCCAT  
TCGAATTAGATACATGGATTGGACAAATTATTCACTAACAGAAAAAAA AATGAAGGATC  
TGGCTGATAGGACAAGCACAATCAGAAATAAAATAGAAA GAATCACAAAAGACAAGA  
GAAAAAGTCCTAATGAAAGAAGTTGTGATGATAAAAGATTAGAATCACCACAAAATAT  
TTGGCGGATAATTAAGAAGAAAGTGCCCGATTAATACGTAAATGGA ACTCTTTTATGC  
AATTTTTTCATTCAAAAATATAC---GATACTCTTCTCTCTATCATTAATATTTCCAGGAGC  
AATGCACA ACTTTTCATTCATTTATTTTCG---GACTTATCTTCCTTGTCACAAGCATATGT  
ATTTTACAAATTATCACAAACCCAAGTTATTAACAAGTATAACTTGAGATCTGTATTTCA  
ATATACGTCTATTTTCTAAAAGATAGAATAAAGGATTCTTTTAAACTAAAATATTTTCAT  
TACGAATCAAAGCATAAGAACTTTTGAATTCCGGAATAAATGAATGGAAAAACTGGT  
TAAGGGGTCAATTATCAATATGATTTATCTCAGATTAGATGGTCTAGATTAGTACCACAAA  
AATGGCGAAATAGAGTAAATCAACGTCATATGGTTCAAATAAAAAAAA AATGGGGTTC  
ATATGAAAAAGACCAA-----TTAATTCATTACGAGAAACAAGAAAATTTAAAAAAA AAT  
TATAGATATGATCTTTTATCATATAAATATATTAATGATTATATAATTCAGCCGAATAGAAA  
ATATTTTGATTGGAGAATTCTCCATTTTGTCTTAGATTTTTTGATTGGATGAGAATGAAT  
GAAGAAATACTAAATCGTTTGTCTTACCAGAATTTGTACTACGTTATAATGCATATAAG  
ATTAAACCATGGGTCATACCAATAAAATTACTTCTTTTAAATTACAAGAGCAACATGGA  
AGCAGAACTCGATTTCTCCTGAAAAGATATTTGCTTTTTCAATTGAGATGGACTAATC  
CTTTAAATCAAAAAATATTCCAGAATATCAAAGTGTATTGTCTCCTGCTTAGACTGATAA  
ATCCAAAGGAAATTGCTCTATCTTCTATTCAAACGGAGAAATGAGTCTAGATATAATCC  
AGATGCAGAAAGATCAA ACTTTTACAGAATTGATAAGAAAAGGAGTAGTGAGTATCGA  
ACCAATTCGTCTGTCTATAAAACGGGATGGACAATTTATTATGTATCAAACCATAGGTAT  
TTCATTGGTCCATAAGAGTAAGCACAATCAGTATGATTTGTTTGTCTCCTGAAAATATTTCT  
ATCGCCTAGGCGTCGTAGAGAATTGAGGATCCTAATTTGTTTCAGATTTCTTTGGCCCAA  
TTATCGATTAGAAGATTTAGCTTGTATGAATCGTTATTGGTTTGATACCAATAATGGCAGT  
CGTTTCAGTATGTCAAGGATACATATGTATCCAACGAAACGACATCAATTCCAATCCTG  
GATCTTCGAATTGAGAGAGATATTGAGAGAGATCAATAATTCTCACTATTTCTTAGATTC  
ATGGACCAAATTCGATTCGGTGGGATCTTTCCTCGCATTTTCTTCCCCCAAGAACGTT  
TTATGAAACTCTTTGACCCCCGAATTTGAGTATCCTACTTTCA---CGCGATTCA-----CA  
GGGTTCAACAAGCAATCGATATTTACAG-----ATCAAAGGTGTAGTACTATTTGTAGTA  
GCG---GTCCTTATATAT-----CGTATTAACAATCGAAATATGGTCGAAAGAAAAAATC  
TCTATTTGATGGGGCTTCTT-----CCTATACCTATGAATTCCATTGGACCCAGAAAT  
GATACATTGGAAGAATCTTTT--GGGTCTTCCAATATCAATAGGTTGATTGTTTCG---CTC  
CTGTATCTTCCAAAAGGGAAAAAGATCTCTGAGAGTTGTTTCTGGATCCGAAAGAGA  
GTA CTGGGTTCTCCCAATAACT-----AAAAGTGTATCATGCCTGAATCTAACTGG  
GGTTCGCGGTGGTGGAGGAACTGGATCGGAAAAAAGAGG-----GATTCTAGTTGGAAG

ATATCT-----AATGAAACCGTAGCTGGAATTGAGATCTCATTCAAAGAGAAAGATATCA  
AA--TATCTGGAGTTTCTTTTTGTATACTATACGGAT-----GATCCGATCCGCAAGGACCAT  
GATTGGGAATTGTTTGATCGTCTTTCTCCGAGGAAGAAGCGAAACATAATCAACTTG----  
--AATTCGGGACAGCTATTCGAAATCTTAGTGAAACACTGGATTTGTTATCTCATGTCTGC  
TTTTCGTGAAAAAAGACCAATTGAAGTGGAGGGT--TTCTTCAAACAACAAGGA---GCT  
GAGTCAACTATTCAATCAATGATATTGAGCATGTTTCCCAT-----CTCTTCTCGAGAAAC  
AAGTGGGGTATTTCTTTGCAAAATTGTGCTCAATTTTCATATGTGGCAATTCCGCCAAGAT  
CTCTTCGTT-----AGTTGGGGGAAG---AATCCGCACGAATCGGATTTTTTGAGGAAC---  
GTATCGAGAGAGAATTGGATTTGGTTAGACAATGTGTGTTTGGTAAACAAGGATCGG---  
-----TTTTTTAGC-----AAGGTACGGAATGTATCGTCAAATATTCAATATGATTCC-----AC  
AAGA-----TCTATTTTCGTTCAAGTAACGGATTCTAGCCAATTGAAAGGATCTTCT--GAT  
CAATCCAGAGATCATTTTGATTCCATTAGT-----AATGAGGATTCGGAA-----  
-----TATCACACATTGATCAATCAAAGAGAGATTCAACAACATAAAAGAAAG  
ATCGATTCTT--TGGGAT-----CCTTCCTTTCTTCAAAGGGAACGAACAGAGATAGAATCA  
GAC-----CGATTCCCGAAA-----TGCTTTTCTGGATATTCC-----TCAATGTCCCGGCTATT  
ACG---GAACGTGAGAAGCAGATGAATAATCATCTGCTTCCGGAAGAAATCGAAGAATT  
TCTT-----GGGAATCCTACAAGATCCATTCGTTCTTTTTTCTCTGACAGATGG-----TCAGA  
ACTTCAT--CTGGGTTTCAATCCTACTGAGAGGTCCACTAGAGATCAG-----AAATT  
GTTGAAGAAACAACAAGATGTTTCT--TTTGTCCCTTCCAGGCGATCGGAA-----AA  
TAAAGAAATGGTTGATATATTCAAGATAATTACGTATTTACAAAAT-----ACCGTCTCAAT  
TCATCCTATTTTCATCAGATCCAGGATGTGATATGGTTCCG---AAGGATGAACCGGAT--AT  
GGACAGTTCCAATAAGATTTCAATTTTTGAACAAAATCCATTTTTTGAT-----TTATTTTCAT  
CTATTCCATGACCCGGAACAGGGGGGGGATACACGTTA-----CACCAAGATTTTGAATCAG  
AA-----GAGAGATTTCAAGAAATGGCAGATCTATTCACTCTATCAATAACCGAGCCG---G  
ATCTGGTGTATCATAAGGGATTGCTTTTCTATTGATTCCTACGGATTGGATCAAAAAA  
AA-----TTATTGAATGAGGTATTCAACTCCAGGGATGAATCGAAAAAGAAATCTTTA-----  
---TTGGTTCTACCTCCTATTTTTGAT-----GAAGAGAATGAATCTTTTTATCGAAGGATCAG  
AAAAAATCGGTCCGG---ATCTCCTGCGGGAATGATTTGGAAGATCCAAAACCAAAAA  
GAGTGGTATTTGCTAGCAACAACATAATGGAGGCAGTCAATCAATATGGATTGATCCGA  
AATCTGATTCAAATCCAATATAGCACCTATGGG-----TACATAAGAAATGTATCGAATCGA  
TTCTTTTTAATGATTTAATGAATAGATCCGATCGCAACTTCGAATATGGAATTCAA-----  
--AGGGATCAAATAGGAAATGATACTCTGAATCATAGAACTATAATGAAATATACGATCAA  
CCAACATCTATCGAATTTGAAAAAG---AGTCAGAAGAAAGGGTTTCGATCCT-----CT  
TATTTCTCGAACCGAGAGATCCATGAATCGGGATCCTGATGCATATAGATACAAATGGTC  
CAATGGGAGCAAGAATTTCCAGGAACATTTGAAACATTTTCGTTTCTGAGCAGAAGAGC  
-----CGTTTTCAAGTAGTGTTCGATCGATTACGTATTAATCAATATTCGATTGATTGGTC  
CGAGGTTATCGACAAAAAAGATTTGTCTAAGTCACTTCGTTTCTTTGTGTCCAAGTCA--  
-----CTTCTCTTTTTGTCC-----AAGTCGCTTCTCTTTTTGTCTA  
AG--TCACTTCCTTTTTTCTTTGTGAGTTTCGGGAATATCCCATTCATAGGTCCGAG---A  
TCCACATCTAT--GAATTGAAAGGTCCGAATGATCAACTCTGCAATCAGTTGTTAGAATC  
AATAGGTGTTCAAATCGTTTCATTTGAATAAATTGAAACCCTTC-----TTATTGGAT-----G  
ATCATGATACTTCC---CAAAAATCGAAATCTTGATCAATGGAGGAACAGTATCACCATT  
TTTGTTCATAAAGATACCA---AAGTGG---ATGATTGACTCATTCCATACT-----AGAAATAA  
TAGCAGGAAATCCTTTGATAACACTGATTCCTATTTCTCAATGATATCCCACGATCGAGA

CAATTGGCTGAATCCCGTGAAACCATTTTCATAGAAGTTCATTGATATCTTCTTTTTATAA  
AGCAAATCTACTTCGATTCTTGAATAATCCACATCACTTCTGCTTCTAT-----TGTAACAA  
AAGATTCCCTTTTTATGTG-----GAAAAGGCCCGTATCAATAATTATGAT-----CTTAC  
GTAT--GGACAATTCCTCAATATCTTGTTCATTTCGCAACAAA---ATATTTTCTTTGTGCGT  
CGGTAAA-----AAAAACATGCTTTTTTGGAG---AGAGATACTATTTACCAATCGAGTC  
ACAGGTATCTAACATATTCATACCTAATTTTTCCACAAAATGGTGACGAAACG---TAT  
AATTGTACAAATCT-----TTCCATTTTCCAATTTCGATCCGATCCATTTCGTTTCGT-----AG  
AGCTATTTACTCGATCGCAGACATTTCTGGAACACCTCTAACAGAGGGACAAATAGTCC  
ATTTTGAAAGAACTTATTGTCAACCTCTTTCAGGTATGAATCTATCTGATTCAGAAGGCA  
AGAACTTGCATCAGTATCTCAAT-----TTCAATTCAAACATGGGTTTGATTACACTCCGT  
GTTCTGAGAAATATTTCCCA-----TCCGAAAAGAGGAAAAAA-----CGGAG  
TCTTTGTCTAAAG-----AAATGCGTTGAGAAAGGGCAGATGTATAGAACCTTTCAACGA  
GATAGTGCTTTTTCAAATCTCTCAAAATGGAATCTGTTTCAAACATATATGCCATGGTTC  
CTTACTTCGACAGGGTGCAAATATCTAAATTTAACCTTTTAGATACTTTTTTCAGACCTA  
TTG-----CCGATACTAAGTAGCAGT--CAAAAATGGGTATCCATTTTTCATGATATTATGCA  
TGGATCAGATATATCATGGCCAATTCCTCAGAAAAAATGG-----TGTCTTCCAC  
AATGGAATCTG--ATAAGTGAGATTTTCGAGTAAGTGTTTACATAAT-----CTTCTTCTGTC  
CGAAGAAATGATTCATCGAAATAATGAGTCACCCGTTCCACTGATAGGGACACATCTGA  
GAGCACCAAATGCTCGGGAGTTC--CTCTATTCAATCCTTTTTGCTTCTTCTTGTGCTGC  
ATAT--CTCGTTCGTACACATCTTCTCTTTGTTTCCCGA-----GCCTCTAGTGAGTTAGAG  
ACAGAGTTCGAAAAGATCAAATCTTTGATGATTCCATCATAATGATTGAGTTGCAAAA  
ACTTCTGGATAGGTATCCTACATCTGAACTGAATTCTTCTGGTTAAAGAATCTCTTTCT  
AGTTGCTCTGGAACAATTAGGAGATTCTCTAGAAGAAATACGGGGTTCTGCTTCTGGTG  
GCAACATGCTATTGGGTGGTGGTCCC-----ACTTATGGG--GTCAAATCAATACGT  
TCTAAGAAGAAATATTTGAATATCAATCTCATCGATATCATCGATCTCATA---AGTATCATA  
CCAAATCCCATCAATCGAATCACTTTTTTCGAGAAATACGAGACATCTAAGTCGTACAAG  
TAAAGAGATCTATTATTGATAAGAAAAAGAAAAACGTGAACGGTGATTGGATTGAT  
GATAAAATAGAATCGTGGGTTCGCGAACAGTGATTTCGATTGATGATGAAGAAAGAGAAT  
TCTTGATTGAGTTCTCC-----ACCTTAACGACA-----GAAAAAAGGATTGATCAAATTCTA  
TGGAGTCTGATT--CATAGTGATCATTATCA-----AAGAATGACTCTGGTTATCAA  
ATGATTGAACAACCGGGATCAATTTACTTACGATACTTAGTTGACATTCAT-----AAAA  
GTATCTAATGAATTATGAGTTCAATAGATCCTGTTTAGCAGAAAGACGGATATTCCTTGC  
TCATTATCAGACAATCACTTAT-----TCACAAACCTCGTGTGGGGCTAATAGTTTTCAATT  
CCCATCTCATGGA-----AAACCCTTTTCGCTCCGCTTAGCCCTATCCCCCTCT---AGGG  
GTATTTAGTGATAGGTTCTATAGGAACTGGACGATCATATTTGGTCAAATACCTAGCGA  
CAAACCTCCTATGTTCCCTTTCATTACGGTATTTCCGAACAAGTTCCTGGATGACAAGCCT  
AAAGGTTATCTTATTGATGAT-----ATCGATATTGATGATATTGAT-----  
-----GATAGTGACGATATCGATGATGACCTTGAT  
ACGGAGCTGCTAACTATGACGAATGCGCTA-----ACTATGTATATGACG-----CAGAA  
AATAGACCGATTTGATATCACCTTCAATTCGAATTAGCAAAAAGCAATGTCCTCCTTGCAT  
AATATGGATTCCAAACATTCATGATCTGTATGTGAATGAGTCGAATTACTTATCCCTCGG  
TCTATTAGTGAACATCTCTCC-----AGGGATTGTGAAAGATGTTCC---ACTAGAAATAT  
TCTTGTTATTGCTTCGACTCATATTTCCCAAAAAGTGGATCCCGCTCTAATAGCTCCGAA  
TAAATTAATAACATGCATTAAGATACGAAGGCTTCTTATTCCACAACAACGAAAGCACT



TTTTCACTCTTTCATATACTAGGGGATTTCACTTGGAAAAGAAAATGTTCCATACT-----A  
ATGGATTTCGGGTCCATAACCATGGGTTCCAATGCACGAGATCTTGTAGCACTTACCAAT  
GAGGCCCTATCAATTAGTATTACACAGAAGAAATCAATTATAGACACTAATACAATTAGA  
TCCGCTCTTCATAGACAACTTGGGATTTGCGA-----TCCCAGGTAAGATCGGTTTCAG  
GATCATGGGATCCTTTTCTATCAGATAGGAAGGGCTGTTGCACAAAATGTACTTCTAAG  
TAATTGCCCATAGATCCTATATCTATCTATATGAAGAAGAAA-----TCATGTAAGGAAGG  
GGATTCTTATTTGTACAAATGGTACTTCGAACTTGGAACGAGCATGAAGAAATTAACGA  
TACTTCTTTATCTTTTGAGTTGTTCTGCCGGATCGGTCGCTCAAGATCTTTGGTCTCTAC  
CC-----GGACCCGATGAAAAA---AATGGGATCACTTTTTATGGACTCGTTGAGAATGATT  
CT--GATCTAGTTCATGACCTATTAGAAGTAGAAGGGCGCTCTGGTGGGA-----TCCTCAC  
GGACAGAAAAAGATTGCAGTCAGTTTGATAATGAT-----CGAGTGACATTGCTTCTTCGG  
TCCGAACCAAGGAAT--CCCTTAGATATGATGCAAAATGGATCTTGTCTATCGTTGATC  
AGAGATTTCTATATGAAAAA-----TACGAATCGGAGTTTGAAGAA---GGGGAAGGAGAA  
GGAGCCCTCGACCCGCAA-----CAGATAGAGGAGGAT-----TTATTCAATCAC---  
---ATAGTTTGGGCTCCT-----AGAATATGGCGCCCT-----TGTGGCAATCTATTTGATTGT  
ATCGAAAGGCCCAATGAATTGGGATTTCCC---TATTGGGCCAGGTCATTTTCGG-----GG  
CAAGCGGATCATTATCATAAAGAGGATGAGCCTCAAGAGAATGATTTCGGAGTTCTTAC  
AGAGTGGAACCATGCAGTACCAGACACGAGATAGATCTTCCAAAGAACAAGGCTTTTT  
TCGAATAAGCCAATTCATTTGGGACCCTGCGGATCCATTCTTTTTCTATTCAA---GAT  
CAGCCCTTTGTCTCTGTGTTTTACGTCGAGAATTCTTTCAGATGAAGAGATGTCAA  
GGGGCTTCTTACTTCCCAAACAATCCTCTACATCTATATATAAACGCTGGTTCATC-----  
-AAGAATACGCAAGAAAAGCACTTCGAATTGTTGATTCATCGCCAGAGATGGCTTAGAA  
CC-----AATAGTTCATTACCT-----AATGGATCTTCCGTTCTAAT-----ACTCTATCCGAG  
AGTTATCAGTATTTATCAAATCTCTTCCTATCTAAC---GGAACGCTATTGGATCAAATGAC  
AAAGACATTGTTGAGAAAGAGATGGCTTTTCCCGGATGAAATGAAAATTGGATTC-----  
ATG-----ATGCCTAGATCGCGG---ATAAATGGAAATTTTATTGATAAGACC  
TCTTCAATTGTAGCCAATATCTTATTACGAATAATTCCGACAACCTTCAGGAGAAAAAGA  
GGCATTACCTATTACAGAGATGGG-----ATGTCAGCTCAATCCGAAGGAAATTATGCGG  
AAGCTTTACAGAATTATTATGAAGCTACGCGGCTAGAAATTGATCCCTATGATCGAAGTT  
ATATACTCTATAACATAGGACTTATCCACACAAGCAACGGAGAACATACAAAAGCTTTG  
GAATATTATTTCCGGGCACTAGAACGAAACCCATTTTTACCACAAGCTTTTAATAATATG  
GCCGTGATCTGTCATTAC---CGGGGAGAACAGGCCATTCGACAGGGAGATTCTGAAATT  
GCGGAGGCTTGGTCCGATCAAGCTGCTGAATATTGGAAACAAGCTATAGCGCTTACTCC  
AGGTAATTATATTGAAGCGCATAATTGGTTGAAGATCACGAGGCGGTTTCGAA-----ATGA  
GTTGGCAATCAGAACGTATATGGGTAGA ACTTATAACGGGGTCTCGAAAAACAAGTAA  
TTTCTGCTGGGCCTTTATCCTTTTTTTAGGTTCACTAGGATTCTTATTGGTTGGA ACTTCC  
AGTTATCTTGGTAGGAATCTGATATCTTATTTCGCTCAGCAAATCTTTTTTTTTCCAC  
AAGGGATCGTGATGTCTTTCTATGGGATTGCAGGTCTATTCAATTAGTTCCCTATTTGTGGT  
GCACAATTGCGTGGAATGTAGGTAGTGGTTATGATCGATTTCGATAGAAAAGAAGGACTA  
GTGTGTATTTTTCGTTGGGGATTTCCCTGGAATAAATCGTCGCATCTTCCCTCCGATTCCTTA  
TGAGAGATATCCAATCAATCAGAATAGAAGTTCAAGAAGGTCTTTATCCTCGTCGTGTC  
CTTTATATGGAAATAAGAGGCCAGGGAGCCATTCCCTTGACTCGTACTGATGAGAAT--T  
TGACTCCACGAGAAATTGAACAAAAAGCTGCGGAATTGGCCTATTTCTTGCGCGTACC  
AATTGAAGTTTTT

>Trochodendron

ATGGAAAAATGGTGGTTCAATTCGATGTTGTCTCTAAGTAAATCAATGGAAAGTCTTGG  
TCCTATTGGAAATACCAGTGGAAGTGAAGACCCCGTTTCGAAATGATACAGATAAAAAC  
ATTCAT--TGCAATAATGTTGATCCTTTTTTCGGTGTCAGGGACATTCGGAGTTTCATTTC  
TGATGACACTTTTTTAGTTAGGGATAGTAATGGGGACAGTTATTCCATATATTTTGATATT  
GAAAATCAGATTTTTGAGATTGACAATGAT-----CATTCCTTTTCTGAGTGAAGTAGAAAAG  
TTATTTTTCTAGTTATCTGAATTCTAGTTATATGAATAATGGATCTAAGAGTGACAATCCC  
TACTACGATCGTTACATGTATGATACTAAATATAGTTGGAATAATCACATTAATAGTTGCA  
TTGACAGTTATCTTCGTTATGAAATCAGT-----ATTGATAGTTACATTTAAGTGGTAGCG  
ACAATTACAGTGACAGTTACATTTATAGTTACATTTGTAGTGACAGCGGGAGTTCCATA  
AGA-----AATGGTAGTGAT--AATATAAGAGGAAGATAT--GATCTCGATATAAATAAAA  
AATACAGGCATTTGTGGGTTCAATGCGAAAATTGTTATGGATTAATTATAAGAAATTTT  
TTAGGTCAAAAATGCATATTTGTGAACAATGTGGATATCATTGAAAATGAGTAGTTCA  
GATAGAATAGAACTTTTCGATTGATCCGGGTACTTGGGATCCTATGGATGAAGACATGGT  
CTCTATAGACCCGATTGAATTTTCATTTCGGAGGAGGAACCTTATAAAGATCGTATCGATTC  
TTATCAAAGAAAGACAGGATTAAGTGGGCTGTTCAAACAGGAATAGGTGACTAAAT  
GGTATTCCCATAGCAATTGGGGTTATGGATTTTCAGTTCATGGGGGGCAGTATGGGATCC  
GTAGTAGGCGAGAAAATCACCCGTTTGATCGAGTATGCTACTAATAGATCTCTACCTCTT  
ATTATAGTGTGTGCTTCCGGAGGGGCACGCATGCAAGAAGGAAGTTTGAGCTTGATGC  
AAATGGCTAAAATATCTTCCGCTTCATATGATTATCAATCAAATAAAAAGTTATTTTATGT  
TTCAATCCTTACATCTCCTACAACCGGTGGGGTGACAGCTAGTTTTGGTATGTTGGGGG  
ATATCATTATTGCTGAACCCAATGCCTACATTGCATTTGCGGGTAAAAGAGTAATTGAAC  
AAACATTGAATAAGACAGTACCTGATGGTTCACAAGCGGCTGAGTATTTATTTTCATAAG  
GGTTTATTCGATCCAATCGTACCGCGTAATCCTTTAAAAGGCGTTCCTGAGTGAGTTATTT  
CAGCTCCACGGTTTCTTTCCCTTGAATCAAATTCATCAAGATGGTAACCATTCGAGC  
CGACGAAATTAGTAATATTATCCGTGAACGTATTGAACAATATAATAGAGAAGTAAAGAT  
TGTGAATACCGGTACCGTACTTCAAGTAGGCGACGGCATTGCTCGTATTTCATGGTCTTG  
ATGAAGTAATGGCAGGTGAATTAGTAGAATTTGAAGAGGGTACAATAGGCATTGCTCTG  
AATTTGGAATCAAATAATGTTGGTGTGTATTAATGGGTGACGGTTTGATGATACAAGA  
GGGAAGTTCTGTAAAAGCAAGAGGAATAATTGCTCAGATACCAGTGAGTGAGGCTTAT  
TTGGGTCGTGTTATAAATGCTCTGGCTAAACCTATTGATGGTAGAGGTGAAATTCAGC  
TTCTGAATTCGGTTAATTGAATCTCCCGCTCCAGGTATTATTTTCGAGACGTTCCGTATAT  
GAGCCTCTTCAAACGGGGCTTATTGCTATTGATTTCGATGATCCCTATAGGACGCGGTCA  
GCGAGAATTAATTATTGGGGACAGACAGACCGGTAAAACAGCAGTAGCCACAGATACG  
ATTCTCAATCAAAAAGGGCAAATGTAATATGTGTTTATGTAGCTATTGGTCAAAAAGC  
ATCTTCTGTGGCTCAGGTAGTACTACTTTCCAGGAAAGGGGTGCGATGGAATACACTA  
TTGTAGTAGCCGAAACAGCAGACTCCCCTGCTACATTACAATACCTCGCTCCTTATACA  
GGAGCGGCTCTGGCTGAATATTTTATGTACCGTGAACGACATACTTCAATCATTATGAT  
GATCCCTCCAAACAAGCACAAGCTTATCGCCAAATGTCTCTTCTATTACGAAGACCACC  
TGGTCGTGAAGCTTATCCAGGAGATGTTTTTTATTTGCATTCACGCCTTTTGAAAGAG  
CCGCTAAATCAAGTTCTCTTTTAGGTGAAGGAAGTATGACCGCTTTACCAATAGTGGAG  
ACTCAATCAGGAGACGTTTCGGCTTATATTCCCTACTAATGTAATTTCCATTACAGATGGA  
CAAATATTCTTATCCGCCGATCTATTCAATGCGGGAATCCGACCTGCTATTAATGTGGGT  
ATTTCCGTCTCCAGAGTAGGATCTGCAGCTCAAATTAAGCCATGAAACAAGTAGCTG

GCAAATCAA AATTGGA ACTGGCTCA ATTTCGCAGAGTTAGAAGCTTTTGCACAATTTCGCTTCTGATCTCGATAAAGCTACTCAGAATCAATTGGCAAGAGGTCAACGATTACGTGAATTGCTCAAACAATCCCAATCAGCCCCTCTCACGGTGGAGAACAGATAGTA ACTATTTATACCGGAACGAATGGGTATCTTGATTCATTAGAAATTGGACAGGTAAAGAAATTTCTCGTTCAGTTACGTACCTACTTAAAAACGAATAAACCTCAGTTCCAAGAAATAATATCTTCTACCAAGACATTCACCGAGGAAGCGGAAGCCCTTTTGAAAGAAGCTATTCAGGAACAGATGGAACGCTTTCTACTTCAGGAACAAACAATGAGAATCAATCCTACTATTTCTGGTCCTGGGGTTTCTACACTTGAAGAAAAAACCTGGGGCGTGTGCTCAAATCATTGGTCCGGTACTGGATGTAGCTTTTCCCCGGGCAAGATGCCTAATATTTACAACGCTCTGGTAGTTAAGGGTCGAGATACTGTGCGCCAACAAATTAATGTGACTTGTGAGGTACAGCAATTATTAGGAAATAATCGAGTTAGAGCTGTAGCTATGAGTGCTACAGATGGTCTGACGAGAGGACTGGAAGTGATTGACACGGGAGCTCCTCTAAGTGTTCCAGTCGGTGGAGCGACTCTCGGACGAATTTCAACGTTCTTGAGAGCCTGTTGATAATTTAGGTCCTGTGCTACTCGCAACATCTCCTATTCATAGATCTGCGCCTGCCTTTATACAGTTAGATACCAAATTTATCCATTTTGAAACAGGAATTAAGTAGTGGATCTTTTAGCTCCTTATCGCCGTGGAGGAAAAATCGGACTATTCGGGGGAGCTGGAGTGGGTAAACAGTACTCATCATGGAATTGATCAACAACATTGCCAAAGCTCATGGAGGTGTATCTGTATTTGGCGGAGTAGGCGAACGTACTGTGAAGGAAATGATCTTTACATGGAAATGAAAGAATCTGGAGTGATTAATGAACAAAAATTGCAGAATCAA AAGTAGCTCTAGTCTACGGTCAGATGAATGAACCGCCGGGAGCTCGTATGAGAGTTGGTTTGACTGCCCTAACCATGGCAGAGTATTTCCGGGATGTTAATGACAAGATGTACTTCTATTTATCGACAATATCTTCCGTTTCGTCCAAGCAGGATCCGAAGTATCTGCCTTATTAGGCAGAATGCCTTCTGCTGTGGGTTATCAACCTACCCTTAGTACAGAAATGGGTTCTTTGCAAGAAAGAATTACTTCTACAAAAGAAGGATCCATAACTTCTATTAAGCAGTTTATGTACCTGCGGACGATTTGACCGACCCTGCTCCTGCCACGACATTTGCA CATTAGATGCTACTACCGTACTATCAAGAGGATTAGCTGCCAAAGGTATCTATCCAGCAGTAGATCCTTTAGATTCAACGTCAACTATGCTCCAACCTCGGATTGTTGGTGAGGAACA TTATGAAACTGCGCAAAGAGTTAAGCAAACCTTTACAACGTTACAAAGA ACTTCAGGACATTATAGCTATCCTTG GATTGGACGAATTATCCGAAGAGGATCGTTTAACCGTAGCAAGAGCACGAAAAATTGAGCGTTTCTTATCACAACCCTTCTTCGTAGCAGAAGTATTTACCGGTTCTCCAGGGAAATATGTTGGTCTAGCAGAAACAATTAGGGGGTTTCAATTGATCCTTCCGGAGAATTAGATGGGCTTCTGAACAGGCCTTTTATTTGGTAGGTAACATCGATGAGCTACCGCGAAGGCTATGAACTTAGAAGTGGAGAGCAAATTGAAGAAAATGACCTTA AATCTTTGTGTA CTACTCCTAATCGAATTGTTTGGGATTCAGAAGTGAAAGAAATAATT TATCTACTAATAGTGGCCAAATTGGCGTATTACCAAATCACGCCCTATTGCCACAGCTGTAGATATAGGTATTTTGAGAATACGTCTTAACGACCAATGGTTAACGATGGCTCTGATGGTGGTTTCGCTAGAATAGGCAATAATGAGATAATTATTTTAGTAAATGATGCGGAGAA GGGTAGTGACATTGATCCGCAAGAAGCTCAGCAAACCTTTGAAATAGCTGAAGCTAGCTTGAGGAGAGCTGAAGGCAAGAGACAAACAATTGAGGCGAATCTAGCTCTCAGACGAGCTAGGACGCGGGTAGAGGCTATCAATGTTATTTCAATGAAAAATGTAACCGATTCTTT CGTTCTCTTGGGTC ACTGGCCATCTGCCGGGAGTTTCGGGCTTAATACCGATATTTTAGCAACAAATCCAATAAATCTAAGTGTAGTGCTTGGTGTATTGATCTTTTTTGGAAAGGGAGTGTTAAGTGATTTATTAGATAATCGAAAACAGAGGATCTTGAGTACTATTCGAAATTCAGAAGAACTGCGTGGAGGGCCATTGAACA ACTAGAAAAAGCCCGGACCCGCTTACGGAAAGTGGAATGGAAGCAGATGAGTTTTCGAGTGAATGGATACTCTGAAATAGAACGAG

AAAAATTGAATTTGATAAATTCAACTTATAAGAATTTGGAACAATTAGAAAATTACAAA  
AATGAAACCATTCATTTTGAACAACAAAGAGCGATTAATCAAGTCCGACAACGAGTTT  
TCCAACAAGCCTTACAAGGAGCTCTAGGAACCTTGAATAGTTGTTTGAACAGCGAGTT  
ACATTTACGAACTATCAGTGCTAATATTGGCATGTTTGGGGCGATGAAAGAAATAACTG  
ATATGAATCCACTGATTTCTGCCGCTTCCGTTATTGCTGCTGGATTGGCCGTAGGGCTTG  
CTTCTATTGGACCCGGAGTTGGTCAAGGTAAGTACTGCTGCGGGACAAGCTGTAGAAGGTAT  
CGCGAGACAGCCAGAGGCAGAGGGTAAAATACGAGGTACTTTATTGCTTAGTCTGGCT  
TTTATGGAAGCTTTAACCATTTATGGACTGGTCGTGGCATTAGCGCTTTTATTGCGAAT  
CCCTTTGTTATGAATATTCTACCATGTTCTATCAACACCCTAAAAGGGTTATACGATATAT  
CCGGTGTGGAAGTAGGCCAACATTTCTATTGGCAAATAGGAGGTTTCCAAGTCCATGCC  
CAAGTACTTATTACTTCTTGGGTCGTAATTGCTATCTTATTAGGTTTCAGCCGCTATAGCTG  
TTCGCAATCCACAAACCATTCCGCCTGACGGTCAGAATTTTTTCGAATATGTCCTTGAA  
TTCATTCGAGACTTGAGCAAACGCAGATTGGAGAAGAATATGGTCCTTGGGTTCCCT  
TTATTGGAAGTATGTTCCATTTATTTTTGTTTTCTAATTGGTCAGGGGCTCTTTTACCTTG  
GAAAATCATAGAGTTACCTCATGGGGAGTTAGCCGCACCCACGAATGATATAAATACTA  
CTGTTGCTTTAGCTTTACCCACGTCAGTGGCATATTTCTATGCGGGTCTTACCAAAAA  
GGATTGGGTTATTTTCGGTAAATACATTCAACCAACTCCAATCCTTTTACCAATTAACATC  
CTAGAAGATTTACAAAACCTTTATCACTGAGTTTTTCGACTTTTTCGGGAATATATTAGCT  
GATGAATTAGTAGTTGTTGTTCTTGTCTTTAGTACCTTCAGTGGTTCCTATACCTGTCA  
TGTTCCCTTGGATTATTTACAAGTGGTATTCAAGCTCTTATTTTTGCAACTTTAGCCGCGG  
CTTATATAGGCGAATCCATGGAGGGTCATCATATGATATTTTCAACTTTAGAGCATATATT  
AACTCACATCTCTTTTTTCGATCGTTTTCCATTGTAATTACGATTCATTTGATAACCTTATTA  
GTCGATGAAATCGTAGGACTATATGATTCGTCAGAAAAAGGCATGATAGCCACCTTTTT  
CTGTATAACAGGATTATTAGTTACTCGTTGGATTTATTCAGGTCATTTCCCATTAAGTGAT  
TTATATGAATCATTAAATGTTCCCTTTCATGGAGTTTCTCCATTATTCATATGGTTCGGTATTT  
TAAAAACCATAAAAAGAATTTAAACGCAATAACCGCGCCAAGTACGATTTTTTACCCAA  
GGCTTTGCCACTTCGGGTCTTTTAACTGAAATGCATCAATCCGCAATATTAGTACCTGCT  
CTCCAATCTCAGTGGTTAATGATGCATGTAAGTATGATGGTATTGAGCTATGCAGCTCTT  
TTATGTGGATCATTATTATCAGTAGCTCTTCTCGTCATTACATTTCGAAAAACATAGAG  
ATTTTTGGTAAAAGCAATGAGATCCAATACATGAATGAAAGAAGCAATGTTTTACGAAA  
AACTTCTTTGCTTTCCGTTAGAAAATTATCACAGGTATCAATTGATTCAACAATTGGATCA  
TTGGAGTTATCGTGTTATTAGTCTAGGGTTTATCTTTTTAACCATAGGTATTCTTTCGGGA  
GCAGTATGGGCTAATGAGGCATGGGGATCGTATTGGAATTGGGACCCAAAAGAACTT  
GGGCATTTATTACTTGGACCATATTCGCGATTTATTTACATACTCGAACAAATAAAAATTT  
GCAAGGTGTGAATTCGCAATTGTGGCTTCTATGGGATTTCTTATAATTTGGATATGCTAT  
TTTGGAGTCAATTTATTAGGAATAGGGCTACATAGTTATGGTTCATTTACATTAACAATG  
GCAAAAAAGAAAGCATTCACTCCCCTCCCATATCTTGCATCTATAGTATTTTTGCCCCTGG  
TGGATCTCTTCTCATTTAATAAAAAGTTTTGGAATCTTGGGTTACTAATTGGTGGAATACT  
AGGCAATCCGAACTTTTTTGAATGATATTCAAGAGAAGAACATTCTAGAAAAATTCAT  
AGAATTAGAAGAACTACTCCTGTTGGACGAAATGATAAAGGAATACCCGGAGACACAT  
ATACATAAGCTTCGTATAGGAATCCACAAAGAAACGATCCAATTGGTCAAGATGCACAA  
TGAGGGTCATATCCATACGATTTTGCACCTCTCGACAAATATAATATGTTTCGCTATTCTA  
AGTGGTTATTCTATTCTGGGTAATGAAGAATTTTTCATTTCTTAATTCTTGGATTCAGGAA  
TTCTATATAACTTAAGCGACACAATAAAAAGCTTTTTCTATTCTTTTATTAAGTATTAT

GTATCGGATTCCACTCGCCCCATGGTTGGGAACTAATGATTGGCTCTTTCTACAAAGATT  
TTGGATTTGCTCATAACGATCAAATTATATCTGGTCTTGTTTCCACCTTTCCAGTCATTCT  
AGATACAATTTTTAAATATTGGATCTTCCGTTATTTAAATCGTGTATCTCCGTCACCTTGTA  
GTGATTTATCATTCAATGAATGACATGCCTATTGGTGTTCAAAAGTACCTTTTCGGAGT  
CCTGGAGAGGAAGATGCGGTTTGGGTTGACGTATAACAACGACTTCATCGAGAAAGAT  
TACTTTTTTTAGGCCAAGACGTTGATAGCGAGATCTCGAATCAACTTATTGGTCTCATGG  
TATATCTCAGTATAGAGGATGATACCAGGGATCTGTATTTGTTTATAAACTCTCCCGGCG  
GATGGGTAATACCCGGAGTCGCTATTTATGATACTATGCAATTTGTGCCACCAGATGTAC  
ATACAATATGCATGGGATTAGCCGCTTCAATGGGATCTTTTATCCTGGTCCGAGGAGAA  
ATTACCAAACGTCTAGCATTCCCTCACGCTAGGGTAATGATCCATCAACCTGCTAGTTCT  
TTTTATGAGGCACAAACAGGAGAATTTATCCTAGAAGCGGAAGAAGTACTGAAACTCC  
GCGAAACCATCACAAGGGTTTATGTACAAAGAACGGGCAACCCCTTATGGGTTGTATC  
CGAAGACATGGAAAGGGATGTTTTTATGTACGCAACAGAAGCCCAAGCTCATGGACTT  
GTTGATCTTGTAGCGGTTCGAAATGAAAGAACAAAATGGATTCATGAAGGTTTAATTAC  
TGAATCACTTCCCAATGGTATGTTTCGGGTTTCGTTTAGATAATGAAGATCTCATTCTAGG  
ATATGTTTCAGGAAGGATCCGACGTAGTTTTATACGGATACTACCAGGAGATAGAGTCA  
AAATCGAAGTAAGTCGTTATGATTCAACCAGAGGACGTATAATTTATAGACTCCGCAAC  
AAAGATTCGAACGATATGGGGGAATTAGAAGGATATTTGAAATAGATAGATCTCGGCA  
ACAAGACTTTCTATATCCACTTCTTTTTCAGGAGTATATTTATGCACTTGCTCATGATCAT  
GGTTTAGAAAATTTAGGT---AAATCCAGTTCACTAATTGTGAAACGTTTAATTACTCGAA  
TGTATCAACAGAATTTTATTGATTATTTTCGGTTAATGATTTTAGCCAAAATCAATTTGTTGG  
GTATAATTTTGATTATCAAATGATATCAGAGGGGTTTGCAGTCATTGTGGAAATTCATT  
CTCGTTACGATTAGTATCTTCCCTAATAGCAAAATCTCATAATTTACGATCAATTCATTCA  
ATATTTCCTTTTTTAGAGGACAAATTATCACATTTAAATTATGTGGCAGATATACTAATAC  
CCCACCCCATCCATCTGGAAATCTTGATTCAAACCCTTCGCTGCTGGGTACAAGATGCC  
CCGTCTTTGCATTTATTGCGATTCTTCTCCACGAGTATTGTAATTGGAATAGTCTTATTA  
CTAGATCCATTTCCCTTTTTTCAAACAAAGATTCTTTTTTTTTCTATATAGTTCTCATGT  
ATCTGAATGCGAATCAATATTCGTTTTTCTCCGTAAACAATCTTCTTATTTACGATCAACA  
TCTTTTGGCGCCCTTCTTGAGCGAACACATTTTTATGGAAAATAGAACTACTTGTCGT  
AGTGTTCGCAATTTATTTATTCTATGGTTGTTCAAAGATCCTTTCATACATTATGTCAGA  
TATCAAGGAAAATCTATTCTGTCTTCAAAGGGGACTCCTCTTCTGATGAATAAATGGAA  
ATATTACCTTGTCAATTTCTGGCAATGTAATTTAACTTGTGGTCTCAACCGGGTAGGAT  
TCATATAAAGCAATTATCCAATAATCCCTCGATTTTCTGGGCTATCTTTC AAGTGTACGA  
CTAAATCCTTCAGTGGTAAGGAGTCAAATGATAGAAAATGCATTTCTAATAGATAGTACT  
AGC-----AAGAAGTTTGATAACCATAGTCCCAATTAGTCCCTCTGATTGGATCTTTGGCTAA  
AGCGAAATTTGTAAACGTATCAGGGCATCCATTAGTAAGCCGGTACGGGCCGATTCAT  
CAGATTCTGATATTATCGACCGATTTGGGCGGATATGCAGAAATCTTCTCATTATCACA  
GCGGATCCTCAAAAAAAAAAGAGTTTGTATCGAATAAAGTATATACTTCGACTTTCGTGT  
GCTAGA ACTTTGGCTAGTAAACACAAAAGTACTGTACGCGCCTTTTTGAAAAGATTTG  
GTTCCGAATTTATTGGAAGAATTCCTTACGGAGGAAGAACAAGTGCTTTCTTTGATCTTC  
CCAAAACGGATTTGGTATTTTGATATTATTCGTATCAATAATCTGGCGATGATTGGTATGA  
TAATTGATACGACA---GAAGGACAA---GCTCTCAATTCTTTTTCCAGATCGGAA---TCCTT  
AAAAGAAGTCTACGGGCTCATATGGATGCTTGTTCCCTATTTTTACTCCTGTATCGGGAAT  
CACAATAGGGGTACTAGTAATTGTGTGGTTAGAAAGAGAAATATCAGCAGGGATACAA

CAACGTATTGGACCTGAATACGCCGGTCCCTTTGGGAATTCTTCAAGCTCTAGCAGATGG  
GACCAAACACTACTTTTCAAAGAGGATCTTCTCCCATCTAGAGGAGATCCTCGTTTATTCA  
GTATCGGACCATCTATAGCAGTCATATCAATTCTACTAAGTTATTCGGTAATTCCTTTTGG  
CTATCGCCTTGTTCTATCCGATCTCAGTATAGGTGTTTTTTTTATGGATCGCTATTTCAAGT  
ATTGCTCCTATTGGACTTCTTATGTCAGGATATGGGTCTGAATAATAAATATTCCTTTTTAG  
GTGGTCTACGAGCTGCTGCTCAATCGATTAGTTATGAAATACCATTAACCTCATGTGTGT  
TATCAATATCTCTACTATCTAACAGTTCAAGTACAGTTGATATAGTTGAGGCGCAGTCCA  
AATATGGTTTTTTGGGGGTGGAATTTGTGGCGTCAACCTATAGGGTTTATCGTTTTTCTAA  
TTTTCTCCCTCGCGGAATGTGAGAGATTACCCTTTGATTTACCAGAAGCAGAGGAAGA  
ATTAGTAGCAGGTTATCAAACCGAATATTCAGGTATCAAATTTGGTTTTATTTTACGTTGC  
TTCCTATCTAAATCTACTAGTTTTCTTCATTATTTGTAACAGTCCTTTACTTGGGCGGTTGG  
AATCTCTCTATTCCGATATTCATCATTCTGAACTTTTTGAAAAAATAAAGCGGGTGGA  
GCTTTTGGAAACGACAATTGGTATTTTTATTACATTAGCTAAAGCTTATTTGTTCCCTGTTC  
TTTTCTATCACAAACAAGATGGACTTTACCTAGGATGAGAATGGACCAACTATTAATCTT  
GGGTGGAAATTTCTTTTACCTATTTCTCTAGGTAATCTATTATTGACAACCTTCTTCCCAAC  
TCCTTTCACTGATGATCTGGCATGTACAGAATGAAAACCTTCATTCTCGATTCTACGAGA  
ATTTTTATGAAAGCGTTTCATTTGCTTCTCTCCATGGAAGTTTCATTTTCCAGAATGTA  
TCCTAATTTTTGGCCTAATCTTCTTCTGATGATCGATTCAACCTCTGATCAAAAAGATAT  
ACCTTGGTTATATTTTCACTCTTCAACAAGTTTAGTAATGAGCATAACGGCCCTATTGTT  
CCGATGGAGAGAAGAACCTATGATTAGCTTTTCGGGAAATTTCCAAACGAACAATTC  
AACGAAATCTTTCAATTTCTTATTTTACTATGTTCAACTCTATGTATTCCTCTATCCGTAG  
AGTACATTGAATGTACAGAAATGGCTATAACAGAGTTTCTGTTATTCGTATTAACAGCTA  
CTCTAGGAGGAATGTTTTTATGCGGTGCTAACGATTAATAACTATCTTTGTAGCTCCAG  
AATGTTTTCAGTTTATGCTCCTACCTATTATCTGGATATACCAAGAGAGATGTACGGTCTA  
ATGAGGCTACTACGAAATATTTACTCATGGGTGGGGCAAGCTCTTCTATTCTGGTTCATG  
GTTTCTCTTGGCTATATGGTTCATCCGGGGGAGAGATCGAGCTTCAAGAAATAGTGAAT  
GGTCTTATCAATACACAAATGTATAACTCCCAGGAATTTCAATTGCGCTTATATTCATC  
ACTGTAGGAATTGGGTTCAAGCTTTCCCCAGCCCCTTCTCATCAATGGACTCCTGACGT  
ATACGAAGGATCTCCCACTCCAGTCGTTGCTTTTCTTTCTGTTACTTCGAAAGTAGCTG  
CTTAGCTTCAGCCACTCGAATTTTCGATATTCCTTTTTTATTCTCATCAAACGAATGGCA  
TCTTCTTCTGGAAATCTAGCTATTCTTAGCATGATATTGGGGAATCTCATTGCTATTACT  
CAAACAAGCATGAAACGTATGCTTGCATATTCGTCCATAGGTCAAATCGGATATGTAATT  
ATTGGAATAATTGTTGGAGACTCAAATGATGGATATGCAAGCATGATAACTTATATGCTG  
TTCTATATCTCCATGAATCTCGGAACTTTTGCTTGCATTGTATCATTGGTCTACGTACCG  
GAACTGATAACATTCGAGATTATGCAGGATTATACACGAAAGATCCTTTTTTTGGCTCTCT  
CTTTAGCCCTATGTCTCTTATCCCTAGGAGGTCTTCCCTCCACTAGCAGGTTTTTTTCGGAA  
AACTCCATCTATTCTGGTGTGGATGGCAGGCAGGCCTATATTTCTTGTTTTCAATAGGAC  
TCCTTACGAGCGTTGTTTTCTATCTACTATTATCTAAAATAATCAAGTTATTAATGACTGG  
ACGAAACCAAGAAATAACCCCTCACGTGCGAAATTATAGAAGATCTCCTTTAAGATCA  
ACAATTCATCGAATTGAGTATGATTGTATGTGTGATAGCATCTACTATAACCAGGAATAT  
CCATGAACCCAATTATTGCAATTGCTCAGGATACCCTTTTTTATGTTTCTGCTTCACGAAT  
ATGATATTTTCTGGGCATTTCTAATAATATCAAGTGTTATTCCTATTTTTGGCATTCTAATT  
TCCGGAGTTTTTAGCACCGATTAGCAAAGGACCAGAGAAATTTTCTAGTTATGAATCGGG  
TATAGAGCCAATGGGCGATGCTTGGTTACAATTTCGAATTCGTTATTATATGTTTTGCTCTA

GTTTTGTTGTTTTGATGTTGAAACGGTTTTCTTTATCCATGGGCGATGAGTTTCGAT  
GTATTGGGTGTATCCGTATTTATAGAAGCTTTAATTTTCGTGCTTATCCCAATTGTTGGTT  
CAGTTTATGCATGGCGAAAAGGAGCGTTGGAATGGTCTACGAATTCTTTTCCTTGGTTA  
ACAATAATTGTAGTTTTGCCGATATCGGTGGGTTCTTTAATTTCTTTCTCCCTCATAGAG  
GAAATAAGGTGATTCGCTGGTATACTATATGTATATGCTTATTAGA ACTTCTTCTAACGAC  
CTATGCATTCTGTTATCATTTCCAATTGGACGATCCATTAATCCA ACTGGAGGAGGATTAT  
AAATGGATAAATATTTTTGATTCTCATTGGAGATTAGGAATCGATGGACTTTCATAGGA  
CCCATTTTACTGACGGGATTCATCACTACTCTAGCCACTTTAGCGGCTTGGCCAGTTACT  
CGAGATTCGGATTGTTCCATTTCCCTGATGTTAGCAATGTACAGTGGTCAAATAGGATCA  
TTTTCTTCTCGAGACCTTTTACTTTTTTTTATCATGTGGGAATTAGAATTAATTCCCGTTT  
ACCTACTTTTATCCATGTGGGGAGGGAAGAAACGCCTGTACTCAGCGACAAAGTTTATT  
TTGTACACTGCGGGGGTTCATTTTTCTCTTAATGGGAGTTCTTGGTATGGGTTTATAT  
GGTTCCAATGAACCAACATTAATTTTGAACATCAGCTAATAAATCGTATTCTGTGGG  
ATTGGAAATAATATTCTATTTTGGATTTCTTATTGCTTTTGTCTCAAATTACCGATTATAC  
CCCTACATACATGGTTACCAGATACCCATGGAGAAGCACATTACAGTACATGTATGCTTC  
TAGCCGGAATCTTATTA AAAATGGGAGCGTATGGATTGGTTCCGGATCAATATGGAATTAT  
TACCCACGCTCATTCTATATTTTCTCCCTGGTTGATGATAGGAGGCACAATTCAAATAA  
TCTATGCAGCTTCAACATCTTCCGGTCAACACAATTTAAAAAAAAGAATAGCCTATTCC  
TCCGTATCTCATATGGGTTTCACAATTATAGGAATTGGTTCCATAACCGATACGGGACTC  
AATGGAGCCCTTTTACAAATAATCTCTCATGGATTTATTGGTGTGCTGCACTTTTTTTCTTG  
GCAGGAACGAGTTACGATAGAATACGTCTTGTTTATCTCGACGAAATGGGCGGAATAGC  
TATCCCAATGCCAAAATATTTACGATGTT CAGTAGCTTCTCGATGGCTTCTCTTGCATT  
GCCGGGAATGAGTGGTTTTGTTGCAGAATTGATAGTTTTTTTTTGGAATAATTACCAGTC  
AAAAATATCTTTTAATGCCAAAATACTAATTACTTTTTGTAATGGCAATTGGAATGATATT  
AACTCCTATTTATT CATTATCTATGTCACGCCAGATGTTCTATGGATACAAGCTATTCAAT  
GTTCCAAACTCTTATTTTTTTGATTCTGGACCACGAGAGCTATTTGTTTCGATCTCGATC  
TTTCTACCCGTAATAGGTATTGGTATTTATCCGGATTTTCGTTCTCTCACTATCAGTTGACA  
AGGTGGAAGCTATTCTATCTAATTACTTTTATAGAATGATGCTCGAACATGTACTTGT  
GAGTGCTTATTTATTTCTATCGGTATCTATGGATTGATCACGAGCCGAAATATGGTTAGA  
GCACTTATGTGTCTTGA ACTTATACTGAATGCAGTTAATATAAATTTCATAACATTTCTG  
ATTTTTTTGATAGTCGCAATTA AAAAGGAGACATTTTCTCGATTTTTGTTATAGCTATCGC  
AGCCGCTGAAGCAGCTATTGGACCAGCTATTGTTTCATCAATTTATCGTAACAGAAAAT  
CAACTCGTACCAATCAATCGAATTTGTTGAAA---ATGGAACATACATATCAATATGCATG  
GATTATACCTTTTCGTTCCACTTCCAGTTCCTATCTTAATAGGAGTGGGGCTTCTCCTTTTT  
CCGACAGCAACAAAAAATCTTCGTCGTATATGGGCTTTTCCTAGTGTTTTATTATTAGGT  
ATAGTTATGATTTTTTCGATCGACCTGTCTATTCAGCAAATAAATGGCAGTTCCATCTATC  
AATATGTATGGTCTTGGACCATCAATAATGATTTTTCTTAGAGTTCGGACACTTGATCG  
ATCCACTTACTTCTATTATGTCAATCTTAATCACTACTGTTGGAATCATGGTTCCTATTAT  
AGTGACA ACTATATGTCTCATGATGAAGGATATTTGAGATTTTTTGTCTATATGAGTTTTT  
CCAATACTTCCATGTTGGGATTAGTTACTAGTTCTAATTTGATACAAATTCATATTTTTTG  
GGAATTAGTTGGAATGTGTTTCGTATCTATTAATAGGTTTTTGGTTTACACGACCAATTGC  
GGCAACTGCTTGTCAAAAAGCGTTTGTA ACTAATCGTGTAGGGGATTTTGGTTTATTATT  
AGGAATCTTAGGTCTTTATTGGATAACGGGTAGTTTTCGAATTTCCGGGATTTGTTTCGAAAT  
ATTCAAGTTAATTGGGGTAAATCTTTATTTGTTACTTTGTGTGCCTCCCTATTGTTT GCC

GGTGCAGTTGCTAAATCTGCACAATTTCCCCTTCATGTATGGTTACCTGATGCCATGGAG  
GGGCCTACTCCTATTTTCGGCTCTTATACATGCTGCTACTATGGTAGCAGCGGGAATTTTT  
CTTGTAGCCCGACTTCTTCCCTTTTTACAGTCATACCTTACATAATGAATATAATTTCTT  
TGATAGGTATAATAACAGTACTATTAGGAGCTACTTTTGCTCTTGCTCAAAAAGACATTA  
AGAGAAGTTTAGCCTATTCTACAATGTCTCAATTGGGTTATATTATGTTAGCTCTAGGTAT  
GGGGTCTTATCGAGTGGCTTTATTTCAATTTGATCACTCATGCCTATTCGAAAGCATTATT  
GTTTTTAGGATCCGGATCTATTATTCATTCAATGGAAGCTGTTGTTGGTTATTCTCCAGAT  
AAAAGTCAGAACATGGTTTTTATGGGTGGTTTAAAAAATATGTGCCAATTACAAAAAC  
TGCTTTTTTATTAGGTACACTTTCTCTTTGTGGTATTCCACCCCTTGCTTGTTTTTGGTCC  
AAAGATGAAATCTTAATGATAGTTGGTTGTATTACCGATTTTTGCGATAATAGCTTGT  
TCCATAGCAGTATTAAGTGCATTTTATATGTTTCGGATATATTTACTTACTTTTTGAGGGC  
CTTTAAACGTGCATTTTCAAATTATAGTGGCAAAAAAACAGCTTGTTCTATTCAATAT  
CTATATGGGGTAAAGAAGAACCGAAAACGATTAACACAAAT---TTTGGTTTAGCAACAA  
TGAATTTTTTTTCGTTTGACAATAAAAAAACTTCTTTGTATCCCCATGAATCGGACAATA  
CTATGCTATTGCCTCTACTTGTATTGGGCCTATTTACTTTGTTTCGTTGGATCCATAGGAAT  
TCTTTTCGATTTTGATATATTATCGAAATGGTTAAGTCCGTCGATAAACCTTTTACATCCA  
AATTCGAAC---TCTGTGGATTGGTATGAATTTGTGACAAATGCAATTTTTTCAGTTAGTAT  
AGCCTATTTAGGAATATTTATAGCGTCTCTTTTATATAGGCCTGTTTCCTCATCTTTCCAG  
AATTTGGACTTAATTAATTCATTTGTTATTCTTAGGGAACAAATAATAAATTTGATATACA  
ATTGGTCATATAATCGTGGTTACATAGACGCTTTTTATGCAACAGCCTTAACTAGGGGTC  
TAAGAGGATTGGCGGAACCTAACTCATTTTTTTGATAGACGAGTAATTGATGGAATTACA  
AATGGGGTTGGTGTACAAGTTTCTTTGTAGGAGAAGGAATTAATATGTAGGGGGCG  
GA---AGAATTTCTTCTATCTCTTTTTGTATTTATCTTATGTATCAATCTTTTTATTAATTA  
CTACATGGATTTACCTGGACCAATACATGATTTTCTTTTAGTATTTCTGGGATCAGGTCTT  
ATATTAGGAGGTCTAGGAGTGGTATTACTTACCAATCCAATTTATTCTGCCTTTTCATTAG  
GATTGGTTCTTGTTTGTATATCCTTATTCCATATCCATCGAACTCCTATTTTGTAGCTGCT  
GCACAGCTCCTTATTACGTGGGAGCCATAAATGTCTTAATCATATTTGCTGTGATGTTTA  
TGAATGGTTCAGAATATTACAATGATTTCCATCTTTGGACTGTTGGAGATGGGGTAACTT  
CACTGGTTTGTACAAGTATTTTTGTTTCACTAATTACTACTATCCCAGATACGTCATGGTA  
CGGGATTATTTGGACTGCAAGATCAAACCAAATTATAGAGCAGGATTTAATAAGTAATA  
GTCAACAAATTGGGATTCATTTATCAACAGATTTTTTTCTTCCATTTGAACTCATTCTAT  
AATCTTTTAGTTGCCTTGATAGGTGCAATTGCTATGGCTCGTCAGATGACTGTACCTGT  
TACAAGGAAAGACCTCATGATAGTCAATATGGGTCTCAACACCCATCAATGCACGGTG  
TTCTTCGACTCATGGTACTCTAGATGGCGAAGATGTTATTGACTGTGAACCCATATTGG  
GTTATTTACACAGAGGGATGGAAAAAATGCAGAAAACCGAACAATTATACAATATCTG  
CCTTATGTAACACGTTGGGATTATTTAGCTACTATGTTACAGAAAGCAATAACCGTAAAT  
GCACCAGAACAGTTGGGAAATATTCAAGTACCTAAAAGAGCCAGCTATATCAGAGTAA  
TTATGTTGGAGTTGAGTCGTATAGCTTCTCATTTATTATGGCTTGGCCCTTTTATGGCAGA  
TATTGGTGCACAGACTCCTTTCTTTTATATTTTCAGAGAAAGAGAATTGATATATGATCTA  
TTCGAAGCTGCCACAGGTATGCGAATGATGCATAATTATTTCCGTATCGGAGGAGTAGC  
TGCTGATCTACCTCATGGCTGGATAGATAAATGTTTGGATTTCTGCGATTATTTTTTAACA  
GGGGTTGCTGAATATCAAAAACCTTATCACACGGAATCCTGTTTTTTTTGGAACGAGTTGA  
AGGAGTGGGCATTATTGGTGGGGAGGAAGCAATAAATGGGGTTTATCAGGACCAATG  
CTACGAGCTTCCGGAATCGAATGGGATCTTCGTAAAGTTGATCATTATGAGTGTTACGA



CGAATTTGACTGGGAAGTCCAATGGCAAAAAGAAGGAGATTCATTAGCTCGTTATTTA  
GTACGAATCAGTGAAATGACGGAATCAATAAAAATTATTCAACAGGCTCTGGAAGGAA  
TTCCGGGGGGACCTTATGAGAATTTAGAAGTACGGCGCTTTGATAGAGCAAGAGGGTC  
AGAATGGAATGATTTTGAATATCGATTTCTTAGTAAAAAACCTTCTCCTACTTTTGAATT  
GGCGAAACAAGAACTTTATGTGAGAGTAGAAGCCCCAAAGGGGGAATTGGGAATTTT  
TCTGATAGGAGATCAGAGTGTTTTTCCTTGGAGATGGAAAATTCGCCCGCCGGGTTTTA  
TCAATTTGCAAATTCCTCCTCAGCTAGTTAAAAGAATGAAATTGGCTGATATTATGACGA  
TACTAGGTAGTATAGATATCATTATGGGAGAAGTTGATCGTATGTTCTCTATGGTAACTG  
GGTTCATGAATTATGGTCAACAAACAGTACGAGCTGCAAGATACATTGGTCAAAGTTTC  
ATGATTACCTTATCCACGCGAATCGTTTACCTGTAACCTATTCAATATCCTTATGAAAAT  
TGATCACATCCGAGCGTTTTTCGCGGTCTGAATCCACTTTGAATTTGATAAATGCATTGCTT  
GTGAAGTATGTGTTTCGTGTATGCCCTATAGATCTACCTGTTGTTGATTGGAAATTGGAAA  
CTGATATTCGAAAGAAACGATTGCTTAATTACAGTATTGATTTCCGGAATCTGTATATTTG  
TGGTAACTGTGTTGAGTATTGTCCAACAACTGTTTATCTATGACTGAAGAATATGAAC  
TTTCCACTTATGATCGTCACGAATTGAATTATAATCAAATTGCTTTGGGTCCGTTACCAA  
TGTTAGTAATTGGAGATTACACAATTCGAACAATTATGAATTCGAAAATAGCCACAGAT  
AAACCCCTTGAGTCAAGAACAATTACCAATTACATGCAGGGTTCGTTTGTCTGCTTGGCT  
AGTCAAGCATGGGCTAGTTCATAGATCTTTGGGCTTCGATTACCAAGGAATAGAGACTT  
TACAAATAAAGCCCGAGGATTGGCACTCCATTGCTGTCAATTCATATGTATATGGTTACA  
ATTATCTACGTTCCCAGTGTGCCTATGATGTAGCACCAGGGGGACTGTTAGCTAGTGTGT  
ATCATCTTACGAGAATACAGTATGGTGTGGATCAACCGGAAGAGGTATGCATAAAAGTA  
TTTGCCCCAAGGAGGAATCCTAGAATTCGCTCTGTTTTCTGGATTTGGAAAAGTGCGGA  
TTTTCAAGAACGGGAATCTTATGATATGCTGGGAATCTCTTATGATAATCATCCACGCCT  
GAAACGTATCTTGATGCCTGAAAGTTGGATAGGATGGCCCTTACGTAAAGATTATATTG  
CCCCAATTTCTATGAAATACAAGATGCTCATATGGGCGATGAGTTTCGATGTATTGGGT  
GTATCCGTATTTATAGAAGCTTTAATTTTCGTGCTTATCCCAATTGTTGGTTCAGTTTATG  
CATGGCGAAAAGGAGCGTTGGAATGGTCTTAGCTCCTGAATATTCAGACAATAAAAAG  
AAAAAAGAAGAAAAAATAACATTGAGACAGTTATGAATTCCATTGAGTTTCCGTTAC  
TTGATCGAACAACCCAAAATTCAGTTATTTCAACCACATCGAATGATCTTTCAAATTGG  
TCAAGACTCTCTAGTTTATGGCCGCTTCTCTATGGTACCAGTTGTTGCTTCATTGAATTT  
GCTTCGTTAATAGGCTCGGATTCGACTTTGATCGTTATGGACTGGTACCAAGATCGAG  
TCCTAGGCAAGCAGACCTCATTTTAAACAGCTGGCACAGTAACAATGAAAATGGCTCCT  
TCTTTAGTGAGATTATATGAGCAAATGCCTGAACCAAAATATGTCATTGCTATGGGAGCC  
TGACGATTACAGGAGGGATGTTCACTACTGATTCTTATAGTACTGTTCCGGGAGTCGAT  
AAACTAATTCCTGTCCATGTCTATTTGCCGGGCTGCCACCTAAACCGGAGGCAGTTAT  
GGATGCTATAACAAAACCTTCGTAAGAAGGTATCTCGAGAAATCTATGAAGATAGAATTG  
GGTCTCAACAGGAGAATCGATGTTTTACTACCAATCACAAGTTTCATGTTGGACGCAGT  
GCTCATACTGGAAATTATGATCAAGGATTACTTTATCAATCGCCATCTACTTCAGAGATC  
CCTTCTGAAACATTTTTCAAATACAAAAGTTCAGTATCTTCTACGAATTAGTGAATATG  
CAAAC TAGAAATACCTTTTCTTGGATAAAGGAAGAGATGACTCGATCCATTTCCGTATC  
GATCATGATATATGTAATAACTCGAACATCCATTTCAAATGCATATCCCGTTTTTGCACAG  
CAGGGTTATGAAAATCCACGAGAAGCGACTGGGCGTATTGTATGTGCCAATTGCCATTT  
AGCTAATAAGCCCGTGGATATTGAAGTTCCACAAGCGGTACTTCCTGATACTGTATTTG  
AAGCAGTTGTTAGAATCCCTTATGATATGCAACTGAAACAAGTTCTTGCTAATGGTAAA

AAAGGGGCTTTGAATGTAGGGGCTGTTCTTATTTTACCTGAGGGATTTCGAATTAGCTCC  
CCCCGATCGTATTTCTCCCGAGATGAAAGAAAAGATAGGCAATCTGTCTTTTCAGAGCT  
ATCGCCCCACTAAAAAAATATTCTTGTGATAGGTCCTGTTCCCTGGTCAGAAATATAGT  
GAAATCACCTTTCCTATTCTTTCCCGGACCCCGCTACTAAGAAAGACGTTCACTTCTT  
AAAATATCCCATATACGTAGGCGGGAACAGGGGAAGGGGTCAGATTTATCCCGATGGG  
AGCAAGAGTAACAATACAGTCTATAATGCTACAGCAGCAGGTATAGTAAGCAAAATAGT  
ACGTAAAGAAAAAGGGGGATATGAAATAAGCATAGCGGATGCATCAGATGGACATCAA  
GTGGTCGATATTATACCTCCAGGACCAGAACTTCTTGTTTTAGAGGGTGAATCTATCAA  
GCTTGATCAACCATTAAGTAGTAATCCCAATGTGGGTGGATTTGGTCAGGGAGATGCAG  
AAATAGTACTTCAAGATCCATTACGTGTCCAAGGCCTTTTGTCTTCTTGGCATCTGTTA  
TTCTGGCACAATATTTTTGGTCTTAAAAAGAAGCAGTTTGAGAAGGTTCAATTGTCC  
GAAATGAATTTTCATGAGTAAAGTATATGATTGGTTCGAAGAACGTCTCGAGATTCAGGC  
GATTGCAGATGATATAACTAGTAAATATGTTCCCTCCTCATGTCAACATATTTTATTGTCTA  
GGAGGAATTACGTTACTTGTTTTTTAGTACAAGTAGCTACGGGGTTTTGCTATGACTTTT  
TACTATCGTCCAACCGTTACTGAGGCTTTTGTCTTGTTCATAACATAATGACTGAAGCT  
AACTTTGGTTGGTTAATCCGATCAGTTCATCGATGGTCGGCAAGTATGATGGTCTTAATG  
ATGATCCTGCACGTATTTTCGCGTGTATCTCACTGGTGGATTTAAAAAACCTCGCGAATT  
GACGTGGGTTACGGGTGTGGTCTGGGTGTATTGACCGCATCTTTTGGTGTCACTGGTT  
ATTCCTTACCCCGGGATCAAATTGGTTATTGGGCAGTCAAATTGTGACAGGTGTACCT  
GAAGCTATTCCTGTAATAGGATCACCTTTGGTAGAGTTATTACGCGGAAGTGCTAGTGT  
GGGTCAATCCACTTTGACTCGTTTTTATAGTTTACACACTTTTGTATTACCTCTTCTTACT  
GCCGTATTTATGTTAATGCACTTCCCAATGATACGTAAGCAAGGTATTTCTGGTCTTTA  
ATGGGAGTAACAAAAAACCTGACTTGAATGATCCTGTATTAAGAGCTAAATTGGCTAA  
AGGGATGGGTCATAATTATTACGGAGAACCCGCATGGCCAAATGATCTTTTATATATTTT  
TCCAGTAGTAATTCTAGGTAATTTGCATGTAACGTAGGCTTAGCGGTTCTAGAACCGTC  
AATGATTGGTGAACCAGCAGATCCATTTGCAACTCCTTTGGAAATATTACCCGAATGGT  
ACTTCTTTCTGTATTTCAAATACTCCGTACAGTACCCAATAAGTTATTGGGTGTCTTTT  
AATGGTTTTAGTACCTGCAGGATTATTGACAGTACCTTTTTTGGAGAATGTTAATAAATT  
CCAAAATCCATTTTCGTCGTCCAGTAGCTACAACCGTCTTTTTGATCGGTACCGTAGTAG  
CTCTTTGGTTGGGTATTGGAGCAACATTACCTATTGATAAATCCCTAACTTTAGGTCTTT  
TTATGATTGAAGTTTTTCTATTTGGAATCGTGTTAGGTCTAATTCCTATTACTTTGGCTGG  
ACTATTCGTAAGTGCATATTTACAATACAGACGCGGTGATCAGTTGGACCTTATGCCTAC  
TATAACTAGTTATTTTGGTTTTCTATTGGCGGCTTCAACTATAACCCAGTTCTATTATT  
GGTCTGAGCAAGATACGACTTATTATGGATATAAGTCTCGCTTGGGCTGCTTTAATG  
GTAGTCTTTACATTTTCCCTTTCACTCGTAGTATGGGGAAGAAGTGGACTCATGATTATT  
CGTTCGCCGAACCAGAAGTGAAAATTTTGGTGGATAGGGATCCATAAAAACTTCTT  
TCGAGGAATGGGCCAGACCCGGTCATTTCTCAAGACAATAGCTAAGGGCCCTGATAC  
TACCACTTGGATCTGGAACCTACATGCTGATGCTCACGATTTTCGATAGCCATAACAGTG  
ATTTAGAGGAGATCTCTCGAAAAGTATTTAGTGCACATTTCCGTCAACTCTCCATCATCT  
TTCTTTGGCTGAGTGGCAIGTATTTCCACGGTGCCCGTTTTTCCAATTATGAAGCATGGC  
TAAGTGATCCTACTCACATTGGACCTAGCGCCAGGTGGTTTTGGCCAATAGTGGGCCA  
AGAAATATTGAATGGTGTGATGTGGGCGGGGTTTTCCGAGGAATACAAATAACCTCTGGTT  
TTTTTCAGATTTGGCGAGCATCTGGAATAACTAGTGAATTACAACCTCTATTGTACCGCAA  
TTGGTGCATTGGTCTTTGCAGCGTTAATGCTTTTTGCTGGTGGTTCATTATCACAAAG

CTGCTCCAAAATTGGCTTGGTTCCAAGATGTAGAATCTATGTTGAATCACCCTTAGCA  
GGTTATTAGGGCTTGGGTCTCTTTCTTGGGCGGGACATCAAGTACATGTATCTTTACCA  
ATTAACCAATTTCTAGACGCTGGAGTGGATCCTAAAGAGATCCCCTTCCCTCATGAATT  
TATCTTGAATCGGGATCTTTTGGCTCAACTTTATCCCAGTTTTTGCCGAGGGAGCAACCC  
CATTTTTCACCTTGAATTGGTCAAATATGCGGAATTTCTTACCTTTTCGGGGAGGATTAG  
ATCCAGTAACAGGGGGTCTATGGCTGACCGATATTGCACACCATCATTTAGCTATTGCAA  
TTCTTTTTCTGATAGCCGGTCACATGTATAGGACCAACTGGGGCATTGGTCATGGCCTA  
AAAGATATTTTAGAGGCTCATAAAGGTCCATTTACAGGTTCAGGGCCATAAAGGCCTCTA  
TGAAATCCTAACAACGTCATGGCATGCTCAATTATCTCTTAACCTAGCTATGTTAGGTTT  
TTAACCATTGTTGTAGCTCACCATATGTATTCCATGCCTCCTTATCCATATCTAGCTACT  
GACTATGGTACACAACCTTTCGTTGTTCCACACATCACATGTGGATTGGTGGATTTCTCATA  
GTTGGTGCTGCTGCGCATGCAGCCATTTTTATGGTAAGAGACTATGATCCAACCTACTCG  
ATACAACGATCTATTAGATCGTGTCTTAGGCATCGCGATGCAATCATATCACATCTCAA  
CTGGGCATGTATATTTCTAGGCTTTCACAGTTTTGGTTTTGTATATTCATAATGATACCATG  
AGCGCTTTAGGGCGTCCCAAGATATGTTTTAGATACCGCTATAACAATTACAACCCGT  
CTTTGCTCAATGGATACAAAACACCCATGCTTTAGCACCTGGTGCAACAGCTCCTGGTG  
CAACAACAAGCACCAGCTTGACTTGGGGGGGTAGTGATTTAGTAGCAGTAGGCGGCA  
AAGTAGCTTTGTTACCTATTCCATTAGGAACCGCAGATTTTTTGGTACATCACATTCATG  
CATTTACGATCCATGTGACGGTATTGATACTACTGAAAGGTGTTCTATTTGCTCGTAGCT  
CCCGTTTGATACCTGATAAAGCAAATCTTGGTTTTTCGTTTTCTTGTGACGGACCTGGA  
AGAGGAGGGACATGTCAAGTATCCGCCTGGGATCATGTCTTCTTAGGTCTATTCTGGAT  
GTACAATGCAATTTTCGGTAGTAATATTTCAATTCAGTTGGAAAATGCAGTCGGATGTTTG  
GGGTAGTATAAGTGATCAAGGGGTGGTAACTCATATCACGGGAGGAAACTTTGCGCAA  
AGTTCCATTACTATTAATGGGTGGCTCCGTGATTTTTTATGGGCACAGGCATCCCAGGTA  
ATTCAGTCTTATGGTTCTTCATTATCCGCGTATGGCCTTTTTTTTCTAGGTGCTCATTTTG  
TCTGGGCTTTCAGTTAATGTTTCTATTACGCGGCCGTGGTTATTGGCAAGAACTTATTG  
AATCCATTGTTTGGGCTCATAACAAATTAAGTTGCTCCTGCTACTCAGCCTAGAGCC  
TTGAGCATTGTACAAGGACGTGCTGTAGGAGTAACCCATTACCTTCTGGGTGGAATTGC  
CACAACATGGGCGTTCTTCTTAGCAAGAATTATTGCAGTAGGAATGGCATTAAAGATTC  
CAAGGTTTAGCCAAGGCTTAGCGCAGGACCCACTACTCGTCGTATTTGGTTTTGGTATT  
GCTACTGCACATGACTTCGAGAGTCATGACGATTAATGAGGAACGTCTTTATCAGAA  
TATTTTTGCTTCTCACTTTGGGCAGTTAGCGATAATTTTTCTATGGACTTCCGGAAATCT  
GTTTCATGTAGCTTGGCAAGGCAATTTTGAGTCATGGGTACAGGACCCTTTACATGTAA  
GACCTATTGCTCATGCAATTTGGGATCCTCATTTTGGTCAACCGGCTGTGGAAGCCTTT  
ACTCGAGGGGGTGTCTCTCGGCCAGTGAATATCGCTTATTCTGGTGTATTATCAGTGGTG  
GTATAAATCGGCTTACGCACTAATGAAGATCTTTATACTGGAGCTCTTTTTCTATTATTT  
CTTCTGCCATATCCTTAATAGCGGGTTGGTTACACCTACAACCGAAATGGAAACCGAG  
TGTTTCATGGTTCAAAAATGCCGAATCTCGTCTCAATCATCATTTGTCAGGACTCTTCG  
GAGTAAGTTCCTTGGCTTGGACAGGGCATTAGTTCATGTCGCTATTCTGGATCCAGG  
GGGGAGTACGTTTCGATGGAATAATTTCTTAGATGTATTACCGCATCCCCAAGGGTTAGG  
CCCCTTTTTACAGGTTCAGTGGAAATCTTTATGCTGAAAACCCTGATTCCAGTAGTCATTT  
ATTTGGTACCTCCAAGGAGCGGGAACCTGCCATTCTAACCTTCTCGGGGGATTCCATC  
CACAAACGCAAAGTTTATGGCTGACTGATATGGCTCATCATCATTTAGCTATTGCATTTA  
TTTTTCTCATTGCTGGTCATATGTATAGAATAACTTCGGGATTGGGCACAGTATGAAAG

ATCTTTTAGAAGCACATATTCCTCCGGGAGGGCGATTGGGGCGTGGACATAAGGGTCTT  
TATGACACAATCAATAATTCGATTCATTTTCAATTAGGCCTTGCTCTAGCCTCTTTAGGG  
GTTATTACTTCCTTGGTAGCTCAACATATGTACTCTTTACCTGCTTATGCGTTCATAGCAC  
AAGACTTTACTACTCAAGCTGCGTTATATACTCATCACCAATACATCGCAGGATTCATCA  
TGACAGGAGCCTTTGCTCATGGAGCTATATTTTTTATTAGAGATTACAATCCGGAACAG  
AATGAAGATAATGTATTGGCAAGAATGTAGACCATAAAGAAGCTATCAAATCCCATT  
AAGTTGGGCCAGCCTCTTTCTGGGGTTCATACCTTGGGACTTTATGTTTATAACGACG  
TCATGCTCGCTTTTGGTACTCCGGAGAAACAAATCTTGATCGAACCCATATTTGCTCAA  
TGGATAACAATCTGCTCATGGTAAGACTTCATATGGGTTTCGATGTACTTTTATCTTCAACG  
AATGGCCCAGCATTCAATGCGGGTCGAAGCATATGGTTGCCCGGCTGGTTAAATGCTAT  
TAATGAG-----AATAGTAATTCACTATTCTTAACAATAGGTCCTGGAGACTTCTTGGTTCA  
TCATGCTATTGCTCTAGGTTTACATACAACACTACATTGATCTTAGTAAAAGGTGCTTTAGA  
TGCACGTGGCTCCAAGTTAATGCCAGATAAAAAGGATTCGGTTATAGTTTTCCTTGGC  
ACGGCCCGGACGAGGTGGTACTTGTGATATTTGGGCTTGGGACGCATTTTATTTGGCA  
GTTTTCTGGATGTTAAATACTATTGGATGGGTTACTTTTTATTGGCATTGGAAGCACATC  
ACATTATGGCAGGGTAAACGTTTACAGTTTAAATGAATCCTCCACTTATTTGATGGGATGG  
TTAAGAGATTATCTATGGTTAAACTCTTCAACTTATCAATGGATATAACCCTTTTGGTA  
TGAATAGTTTATCGGCTGGGCGTGGATGTTCTTATTTGGACATCTGTTTTGGGCTACTG  
GATTTATGTTCTTAATTTCTGGCGTGGATATTGGCAGGAATTGATTGAACTTTAGCAT  
GGGCTCATGAACGTACACCTTTGGCTAATTTGATTTCGATGGAGAGATAAACAGTGGCT  
CTTCCATTGTTCAAGCAAGATTGGTTGGATTAGCCCACTTTTCTGTAGGTTATATATTC  
ACTTATGCAGCTTTCTTGATTGCCTCTACATCGGGCAAATTTGGTATGTCACATTCAGTA  
AAGATTTATGATACATGTATAGGGTGTACTCAATGTGTACGAGCCTGCCCCACAGATGTA  
TTAGAAATGATACCTTGGGACGGATGTAAAGCTAAGCAAATTGCTTCTGCTCCAAGAA  
CAGAAGACTGTGTGGGTTGTAAGAGATGTGAATCTGCCTGTCCAACAGATTTCTTGAG  
TGCCCGGTTTATTTATGGCATGAGACAACTCGCAGCATGGGTCTAGCTTATATGACAA  
CTTCAACTTACCCTCTATTTTTGTGCCTTTAGTGGGCTAGTATTTCCGGCAATTGCAA  
TGGCTTCTTTATCTCTTCATGTTCAAAAAACAAGATTGTCATGCGAGATATAAAAACAT  
ATCTCTCCGTAGCACCTGTGATAAGTACTCTATGGTTCGGGTCTTTAGCAGGTCTATTAA  
TAGAGATCAATCGTTTATTTCCAGATGCGTTAGCATTCCCTTTTTTT-----ATGACTGCAA  
TTTTAGAGAGACGCGAAAGCGAAAGCCTATGGGGTCGCTTCTGTAACCTGGATAACCAG  
CACTGAAAACCGTCTTTACATTGGATGGTTCGGTGTTTTGGATGATCCCTACCTTATTGAC  
CGAACTTCTGTATTTATTATCGCCTTCATTGCTGCCCCCTCCAGTGGATATTGATGGTATT  
CGTGAACCTGTTTCTGGATCTCTACTTTATGGAAACAATATTATTTCTGGTGCCATTATTC  
CTACTTCTGCAGCTATAGGTTTGCACCTTTTACCCGATATGGGAAGCGGCATCCGTGATG  
AATGGTTATACAATGGTGGTCCTTATGAGTTAATTGTTCTACACTTCTTACTTGGTGTAG  
CTTGTTACATGGGTGCTGAGTGGGAACCTAGTTTCCGTCTGGGTATGCGCCCTTGGATT  
GCTGTTGCATATTCAGCTCCTGTTGCAGCTGCTACTGCTGTTTTCTTGATCTATCCAATT  
GGTCAAGGAAGCTTCTCTGATGGTATGCCTCTAGGAATCTCTGGTACTTTCAACTTCAT  
GATTGTATTCCAGGCTGAACACAACATCCTTATGCACCCATTTTCATATGTTAGGCGTAGC  
TGGTGTATTCGGCGGTTCCCTATTCAGTGCTATGCATGGTTCCTTGGTAACCTCTAGTTT  
GATCAGGGAACCACAGAAAATGAATCTGCTAATGAAGGTTACAGATTCGGTCAAGAG  
GAAGAACTTATAATATCGTAGCTGCTCATGGTTATTTTGGCCGATTGATCTTCCAATAT  
GCTAGTTTCAACAATTCTCGTTCTTTACATTTCTTCTAGCTGCTTGGCCTGTAGTAGGT

ATCTGGTTCACCGCTTTAGGTATCAGCACCATGGCTTTCAACCTAAATGGTTTTAATTC  
AACCAATCTGTAGTTGATAGTCAAGGTCGTGTAATTAACACTTGGGCTGATATCATTAAAC  
CGTGCTAACCTTGGTATGGAAGTTATGCATGAACGTAATGCTCACAACTTCCCTCTAGA  
CTTAGCTGCTATTGAAGCTCCATCTACAAATGGAATGGGTTTGCCTTGGTATCGTGTTCA  
TACCGTCGTATTGAATGATCCCGGTCGGTTGCTTTCTGTGCATATAATGCATACAGCTCT  
AGTTGCTGGTTGGGCCGGTTTCGATGGCTCTATATGAATTAGCAGTTTTTGTATCCCTCTGA  
CCCCGTTCTTGATCCAATGTGGAGACAAGGTATGTTTCGTTATAACCCTTCATGACTCGTTT  
AGGAATAACCAATTCATGGGGCGGTTGGAGTATCACA---GGAGGGACTATAACGAATCC  
GGGTATTTGGAGTTACGAAGGTGTGGCCGGGGCACATATTGTGTTTTCTGGCTTGTGCT  
TCTTGGCAGCTATCTGGCATTGGGTTTATTGGGATCTAGAAATATTTTGTGATGAACGTA  
CAGGAAAACCTTCTTTGGATTTGCCCAAGATCTTTGGAATTCATTTATTTCTCTCAGGG  
GTGGCTTGCTTCGGGTTTGGCGCATTTCATGTAACAGGCTTGTATGGTCTGGAATATG  
GGTGTCCGATCCTTATGGACTAACTGGAAAAGTACAATCTGTAAATCCCGCGTGGGGC  
GTGGAGGGTTTTGATCCTTTTGTTCGGGAGGAATAGCCTCTCATCATATTGCAGCAGG  
GACATTGGGCATATTAGCGGGCCTATTCCATCTTAGTGTCCGCCCGCCTCAACGTCTATA  
CAAAGGATTACGTATGGGCAATATTGAAACTGTCTTTCCAGTAGTATCGCTGCTGTCTT  
TTTTGCAGCTTTTGTGTTGCTGGAACATATGTGGTATGGTTCAGCAACTACCCCGATCG  
AATTATTTGGTCCCACTCGTTATCAATGGGATCAAGGATACTTCCAGCAAGAAATATATC  
GAAGAGTTGGCACCGGGCTAGCCGAAAATCAAAGTTTATCAGAAGCTTGGTCTAAAAT  
TCCCGAAAATAGCTTTTTATGATTACATCGGCAATAATCCAGCAAAAGGGGGATTATT  
CAGAGCGGGCTCAATGGACAACGGGGATGGAATAGCTGTTGGATGGTTAGGACACCCC  
ATCTTTAGAGATAAAGAAGGGCGTGAGCTTTTTGTACGTCGTATGCCTACTTTTTTTGA  
AACATTTCCAGTAGTTTTGGTAGACGGAAACGGAATTGTGAGAGCCGATGTTCCTTTTA  
GAAGGGCAGAATCGAAGTATAGTGTGAAACAAGTCGGTGTAACCTGTTGAGTTCTATGG  
TGGCGAACTCAATGGAGTGAGTTATAGTGATCCTGCTACTGTGAAAAAATATGCTAGAC  
GTGCTCAATTGGGTGAAATTTTTGAATTAGATCGTGCTACTTTGAAATCCGATGGTGT  
TTCGTAGCAGTCCAAGGGGTTGGTTTACTTTTGGACATGCTTCATTTGCTTTGCTCTTCT  
TTTTCGGGCACATTTGGCATGGTGCTAGAACTTTGTTTAGAGATGTTTTTGGTATTG  
ACCCAGATTTGGATGCTCAAGTGGAATTTGGAGCATTCCAAAACTTGGAGATCCAAC  
TACAAGGAGACAAGTAGTCATGAAAACCTTATATTCCCTGAGGAGGTTCTACCCCGTG  
GAAACGCTCTTTAATGGAACTTTAGCTTTAGCTGGTCGTGATCAAGAAACCACCGTTT  
CGCTTGGTGGGCCGGGAATGCCCGACTTATCAATTTGTCCGGTAACTACTCGGGGCTC  
ACGTAGCCCATGCCGGATTAATCGTATTCTGGGCCGGAGCAATGAACCTATTTGAAGTG  
GCTCATTTTCGTACCAGAGAAGCCCATGTATGAACAAGGATTGATTTTACTTCCCATCTA  
GCTACTCTAGGTTGGGGGGTAGGTCCCGGTGGGGAAGTTATAGACACCTTTCCATACTT  
TGATCTGGAGTACTTCACTTAATTTCTCTGCAGTATTGGGCTTTGGCGGTATTTATCAT  
GCACTTCTCGGACCTGAGACTCTTGAAGAATCTTTTCCATTCTTCGGTTATGTATGGAA  
AGATAGAAATAAAATGACCACAATTTGGGTATTCACTTAATCTTGTTAGGTATAGGTTT  
TTTTCTTCTAGTACTCAAGGCTCTTTATTTTGGGGGCGTATATGATACCTGGGCTCCCGG  
GGGGGAGATGTAAGAAAAATTACCAACTTGACCCTTAGCCCAAGTGTTATATTTGGTT  
ATTTACTAAAATCGCCCTTTGGGGGAGAAGGGTGGATTGTTAGTGTGGACGATTTAGAA  
GATATAATTGGAGGACATGTATGGTTAGGTTCCATTTGTATACTTGGTGGAACTTGGCAT  
ATCTTAACCAAAACCCTTTGCATGGGCTCGCCGCGCACTTGTATGGTCTGGAGAGGCTTA  
CTTGTCTTATAGTTTAGGTGCTTTATCGGTCTTTGGTTTCATCGCTTGTGCTTTGTCTGG

TTCAATAATACCGCTTATCCTAGTGAGTTTTACGGGCCCACTGGGCCAGAAGCTTCTCA  
AGCTCAAGCATTACTTTTTCTAGTTAGAGACCAACGTCTTGGGGCTAACGTGGGATCCG  
CTCAAGGACCTACTGGTTTAGGTAAATATCTAATGCGTTCCCCGACCGGAGAAGTCATT  
TTTGGAGGAGAACTATGCGTTTTTTGGGATCTCCGTGCTCCCTGGTTGGAACCTTTAAG  
GGGTCCAAATGGTTTGGACTTGAGTAGGCTGAAAAAAGACATACAACCTTGGCAAGA  
ACGGCGTTCCGCGGAATATATGACTCATGCTCCTTTAGGTTCTTTAAATTCGGTGGGTGG  
CGTAGCTACCGAGATCAATGCAGTCAATTATGTCTCTCCTAGAAGTTGGTTAGCTACCT  
CTCATTTTTGTTCTAGGATTCTTCTATTTCGTAGGTCATTTGTGGCATGCGGGAAGGGCCC  
GTGCAGCTGCAGCAGGATTTGAAAAAGGAATTGATCGTGATTTTGAACCTGTTCTTTCC  
ATGACCCCTCTAACATGACTATAGCTCTTGGTAGATTTACCAAAGACGAAAATGATTTA  
TTTTGATATTATGGATGACTGGTTACGGAGGGACCGTTTCGTTTTTTGTAGGTTGGTCCGGT  
CTATTGCTCTTTCCTTGTGCCTATTTTCGCTTTAGGAGGTTGGTTCACAGGTACAACTTTT  
GTAACCTCATGGTATACCCATGGATTGGCCAGTTCCTATTTGGAAGGCTGCAATTTCTTA  
ACCGCCGAGTTTCTACTCCTGCTAATAGTTTAGCACATTCTTTGTTGCTACTATGGGGT  
CCTGAAGCACAAGGGGATTTTACTCGTTGGTGTCAATTAGGTGGTCTGTGGACTTTTGT  
TGCTCTCCATGGCGCTTTCGGATTAATAGGTTTCATGTTACGTCAATTCGAACTTGCTCG  
ATCTGTTCAATTGCGACCTTATAATGCAATCGCATTCTCTGCTCCAATTGCTGTTTTTGT  
TCTGTATTCTGATTTATCCACTAGGTCAGTCTGGTTGGTTCTTTGCACCTAGTTTTGGT  
GTAGCAGCTATATTTGATTCATCCTCTTCTTCCAAGGGTTTCATAATTGGACGTTGAAC  
CCATTTCATATGATGGGAGTTGCCGGTGTATTGGGCGCTGCTCTGCTATGCGCTATTCAT  
GGTGCTACCGTAGAAAATACTTTATTCGAAGATGGTGACGGTGCAAATACATTCGGTGC  
TTTTAACCCAACTCAAGCTGAAGAGACTTATTCAATGGTCACCGCTAACCGTTTTTGGT  
CCCAAATCTTTGGGGTTGCTTTTTTCCAATAAACGTTGGTTACATTTCTTTATGTTATTTGT  
ACCAGTAACCGGTTTATGGATGAGTGCTCTTGGAGTAGTCGGTCTGGCTCTGAACCTAC  
GTGCCTATGACTTTGTTTCCCAAGAAATCCGTGCAGCGGAAGATCCTGAATTTGAGACT  
TTCTACACCAAAAATATTCTCTTAAACGAAGGTATTTCGCGCTTGGATGGCGGCTCAAGA  
TCAGCCTCATGAAAACCTTATATTCCCTGAGGAGGTTCTACCCCGTGGAACGCTCTTA  
TGTCTGGAAGCACGGGAGAACGTTCTTTTGCTGATATTATTACCAGTATTCGATACTGG  
GTCATTCATAGCATTACTATACCTTCCCTATTCATTGCGGGTTGGTTATTCGTCAGCACGG  
GTTTAGCTTACGATGTGTTTGGAAAGCCCCGGCCAAACGAGTATTTTACAGAAAGCCG  
ACAAGGAATTCATTAATAACTGGCCGTTTTGATCCTTTGGCACAACCTCGATGAATTTA  
GTAGATCCTTTATGACCATAGATCGAACCTATCCAATTTTTACAGTGCATGGTTGGCTG  
TTCACGGACTAGCTGTACCTACCGTTTCTTTTTTGGGGTCAATATCAGCAATGCAGTTCA  
TCCAACGAATGGTTACACAAACCGTTGAGGGTAGTTCTAGATCTGGT--CCAAGACGAA  
CTATTACAGGGGATTTATTGAAACCATTGAATTCGGAATATGGTAAAGTAGCTCCTGGAT  
GGGGTACTACTCCTTTGATGGGTGTCGCAATGGCTCTATTTGCGATATTTCTATCTATTAT  
TTTGGAGATTTATAATTCTTCCGTTTTACTGGATGGAATTTCAATGAGTATGCTTACTCTC  
AAACTCTTCGTTTACACAGTAGTGATATTCTTTGTTTCTCTTTCATCTTCGGATTCCTAT  
CTAATGATCCAGGACGTAATCCTGGACGTGAGGAAATGGCCGATACTACTGGAAGGAT  
TCCTCTTTGGCTGATAGGTAAGTAACTGGTATTCTGTGATCGGTTAATAGGTATTTTC  
TTTTACGGTTCATATTCCGGATTGGGTTTCATCCCTGATGCTTAATATCTTTAGTTTGATCT  
GTATCTGTCTTAATTCTGCCCTTCATTCGAGTAGTTTTTTCTTGGCCAAATTGCCCGAGG  
CTTACGCTTTTTTCAATCCAATCGTAGATATTATGCCAGTCATACCTCTGTTCTTTTTTCT  
CTTAGCCTTTGTTTGGCAAGCTGCTGTAAGTTTTTCGAACGACACAATCAAACCCGAAC

GAACAAAATGTTGAATTGAATCGTACCAGTCTCTACTGGGGGTTATTACTCATTTTTTGTA  
CTTGCTGTTTTATTTTCCAATTATTTCTTCAATATGGAAGTAAATATCCTCGCATTATTGC  
TACTGCACTGTTTCATTCTAGTTCCTACAGCCTTTTTACTTATCATCTACGTAAAAACAGT  
CAGTCAAAATGATATGGAAACAGCAACCCTAGTCGCCATCTCTATATCTGGTTCACCTGT  
AAGTTTTACTGGGTACGCCTTATATAACCGCTTTTGGGCAACCCTCTCAACAACCTAAGAG  
ATCCATTTCGAGGAACACGGGGACATGGAAGCATTGGTTTATACATTCCCTCTTAGTCTCG  
ACTTTAGGGATCATTTTTTTCGCTATCTTTTTTCGAGAACCCTAAAGTTCCGACTAAA  
AAGATGAAAATGACTATTGCTTTCCAATTGGCTGTTTTTGCATTAATTGCTACTTCATCA  
ATCTTACTGATTAGTGTACCCGTTGTATTTGCTTCTCCTGATGGTTGGTCAAGTAACAAA  
AATGTTGTATTTCCGGTACATCATTATGGATTGGATTAGTCTTTCTGGTGGGTATCCTCA  
ATTCTCTCATTCT-----ATGTCACCACAAACAGAGACTAAAGCAAGTGTG  
GATTCAAAGCTGGTGTAAAGATTACAAATTGACTTATTATACTCCTGAATATAAAACCA  
AAGATACTGATATCTTAGCAGCATTCCGAGTAACTCCTCAACCAGGAGTTCCACCTGAG  
GAAGCAGGGGCCGCGGTAGCTGCGGAATCTTCTACTGGTACATGGACAACCTGTGTGGA  
CCGATGGACTTACCAGCCTTGATCGTTACAAAGGACGATGCTACCACATCGAAACTGTT  
ACTGGAGAAGAAAATCAATTTATTGCTTATGTAGCTTACCCTTTAGACCTTTTTGAAGA  
AGTTTCTGTTACTAACATGTTTACTTCCATTGTGGGTAATGTATTTGGGTTCAAAGCCCT  
ACGCGCTCTACGTCTGGAGGATCTACGAATCCCTCCTGCTTATTCTAAAACCTTTCCAAG  
GCCCCCTCATGGCATCCAAGTTGAGAGAGATAAATTGAACAAGTATGGTCGTCCCCTA  
TTGGGATGTACTATTAACCAAATTTGGGGTATCTGCTAAGAACTATGGTAGAGCAGT  
TTATGAATGTCTCCGCGGTGGACTTGATTTTACCAAGGATGATGAGAACGTGAACTCCC  
AACCATTATGCGTTGGAGAGACCGTTTCTTATTTGTGCCGAAGCCCTTTATAAAGCA  
CAGGCTGAGACAGGTGAAATCAAAGGACATTACTTGAATGCTACTGCAGGTACATGCG  
AAGAAATGATCAAAAGGGCTGTATTTGCCAGAGAATTGGGAGTTCCTATCGTAATGCAT  
GACTACTTAACAGGGGGATTCACTGCAAATACTACCTTGTCTTATTATTGCCGAGATAAT  
GGCCTTCTTCTCACATCCATCGCGCAATGCATGCAGTTATTGATAGACAGAAGAATCA  
TGGTATACACTTTCGTGTACTAGCTAAAGCGTTACGTATGTCTGGCGGAGATCATATTCA  
CTCAGGTACCGTAGTAGGTAACCTTGAAGGGGAAAGAGACATAACTTTGGGCTTTGTT  
GATTTACTACGTGATGATTTGATTGAAAAGACCGAAGTCGTGGTATTTATTTCACTCA  
AGATTGGGTCTCTCTACCAGGTGTTCTGCCCGTGGCTTCAGGGGGTATTCACGTTTGGC  
ATATGCCTGCTCTGACCGAGATCTTTGGGGATGATTCCGTACTACAGTTTGGTGGAGGA  
ACTTTAGGACACCCTTGGGGAAATGCACCGGGTGCCGTAGCTAATCGAGTAGCTCTAG  
AAGCATGTGTACAAGCTCGTAATGAGGGACGTGATCTTGCTCGTGAAGGTAATGAAATT  
ATCCGTGAGGCTAGCAAATGGAGTCTGAACTAGCTGCTGCTTGTGAGGTATGGAAGG  
AGATCAAATTTGAATTTGAAGCAATGGATACTTTA-----ATACATTTATACAAACTT  
CTACCCCGAGCACACGCAATGGAGCCGTAGACAGTCAAGTGAAATCCAATCCACGAAA  
TAATTTGATCTATGGACAGCATCGTTGTGGTAAAGGTCGTAATGCCAGAGGAATCATT  
CCGCAGGGCATAGAGGGGGAGGTCATAAGCGTCTATAACCGTAAAATCGATTTTCGACG  
GAATGAAAAGACATATATGGTAGAATCGTAACCATAGAATACGACCCTAATCGAAATG  
CATAATTTGTCTCATACTATGGGGATGGTGAGAAGAGATATATTTTACATCCCAGAG  
GGGCTCTAATTGGAGATAACATTGTTTCTGGTACAGAAGTTCCTATAAAAATGGGAAAT  
GCCCTACCTTTGACCGATATGCCCTTAGGCACGGCCATAACATAGAAATAACACT  
TGGAAGGGTGGACAATTAGCTAGAGCAGCGGGCGCTGTAGCGAAACTGATTGCAAA  
AGAGGGTAAATCGGCCACATTAATAATTACCTTCTGGGGAGGTCCGTTTGATATCCAAA

ACTGCTCAGCAACAGTCGGACAAGTGGGTAATGTTGGGGTGAATCAGAAAAGTTTGG  
GTAGAGCCGGATCTAAGTGTGGCTAGGTAAGCGTCCTGTAGTAAGAGGAGTAGTTAT  
GAACCTGTAGACCATCCCCATGGGGTGGTGAAGGGAGGGCTCCAATTGGTAGAAA  
AAAACCCACAACCCCTTGGGGTTATCCTGCGCTTGGGAAGAAGAAGTAGAAAAAGGAA  
TAAATATAGTGATAGTTTGATTCTTCGTCGCCGTAGTAAAATGATTCAACCTCAGACCCA  
TTTGAATGTAGCGGACAACAGCGGGGCTCGAGAATTGATGTGTATTCTGAATCATAGGA  
GCTAGT--AATCGCCGATATGCTCATATTGGTGACGTTATTGTTGCTGTAATCAAAGAAG  
CAGTACCCAATACGCCTCTAGAAAGATCAGAAGTGATCAGAGCTGTAATTGTACGTACA  
TGTAAGAAGACTCAAACGTGACAACGGTATGATAATACGATATGATGACAATGCAGCAGT  
TGTCATTGATCAAGAAGGCAATCCAAAAGGAACTCGAGTTTTTGGTGCGATCGCCCGG  
GAATTGAGACAGTTGAATTTTACTAAAATAGTTTCATTAGCTCCTGAGGTATTAATGCTT  
AGTCCCAAAGAACCAGATTCCGTAAACAACATAGAGGAAGAATGAAGGGAATATCTT  
ATCGAGGCAATCGTATTTGTTTCGGTAGATATGCTCTTCAGGCACTTGAACCCACTTGG  
ATCACATCTAGACAAATAGAAGCAGGGCGACGAGCAATGACACGATATGCACGTCGTG  
GTGAAAAATATGGGTACGTATATTTCCAGACAAACCCGTTACAGTAAGACCTACGGAA  
ACACGTATGGGTTCCGGGAAAGGATCTCCCGAATATTGGGTATCAGTCGTTAAACCGG  
GTCGAATACTTTATGAAATGGGCGGAGTATCAGAAATTGTAGCCAGAGAAGCTATTGAA  
ATAGCGCGTCCAAAATGCCTATACGAACTCAATTCATTATTGCGGGAATGACCAGAAT  
TAGACGAGGATATATAGCTCGGAGACGTAGAACAAAAATTCGTTTATTTGCATCAACTT  
TTCGGGGGGCTCATTCAAGACTTACTCGAACTATTACTCAACAGAAAATAAGAGCTTTG  
GTTTCGGCCCATAGAGATAGGGGCAGGCAAAAGAGGGATTTTCGTCGTTTATGGATCA  
CTCGGATAAATGCAGTAATTCGTGAGAAT-----GTATCCTATAGTTATAGTCGATTAATACA  
CGATCTGTACAAGAGGCAGTTGCTTCTTAATCGTAAAATACTTGCACAAATAGCTATATC  
AAATAGGAATTGTCTTTCCATGATTTCCAATGAGATCATCAA-----  
ATGATAAAGGAAGTATACGCTTTAGGTCAACATATATGTATGTCTGCTCACAAAGCGCG  
AAGAGTAATTGATCAGATTCGTGGGCGTTCCTACGAGGAAACACTTACGATACTAGAA  
CTCATGCCTTATCGAGCATGTTATCCCATTTTTAAATTGGTTTATTCTGCAGCAGCAAAT  
GCTAGTCACAATATGGGTTTCAACGAAGCGGATTCAGTCATTAGTAAAGCCGAAGTCA  
ACGAGGGTACTAGCGTGAAAAAGTTAAAACCTCGAGCTCGAGGACGTAGTTATCCGAT  
AAAAAGACCCACCTGTATATACTATTGTATTGAAAGATATATCTATAGATGGGGGAGT  
ATGGGACAAAAAATGGATGGAATAAAATATGCAGTATTTACAGACAAAAGTATTCGGT  
TACTGGGTAAAAAT--CAATATACTTCTAATGTCTGAATCAGGATCAACTAGGACAGAAAT  
AAAGCATTGGGTCGAACTCTTCTTTGGTGTCAAGGTAATAGCTATGAATAGTCATCGAC  
TCCCGGAAAGGGTAGAAGAATGGGACCTATTATGGGACATACAATGCATTACAGACG  
TATGATCATTACGCTTCAACCGGTTATTCTATTCCACCTCTTAGAAAGAAAAGAACTAT  
GGCGGTTCCAAAAAACGTACTTCTATGTCAAAAAAGCGTATTCGTAAAAATCTTTGG  
AAAAAAAAGGGGTATTTGGCAGCGGTAAAAGCTTTTTTCATTAGCGAAATCTCTTTGTG  
CCGGGAATTCAAAAGGCTTTTTTGTGCGACAAATAAATAAGATGGCCAAGGGTAAAGA  
TGTCAGAGTACTAGTTATGTTGGAATGTACCAGTTGTGTCCGAAACGGG-----GTTAATA  
AGGAATCACCGGGGATTTCCAGATATATTACTCAAAGAATCGACACAATACGCCTGGT  
CGATTGGAATTGAAAAAATCTGTCCCTATTGTTACAAGCATAACGATTCATGGGGAGAT  
AAAGAAAATGAAAATAAGGGCCTCCGTTTCGTAAAATTTGTGAAAAATGTCGCCTGATC  
CGTAGGCGGGGACGAATTAGAGTAATTTGTTCCAACCCGAGACATAAACAAAGACAAG  
GAATGGTTCGAGAGCAAATAACATTATCTACTTGGACACTGCAGTGGAAGTGTGTTGA



ATCAAGAGCAGACAGTAAACGTCTTTATTATGGACGTTTTATTCTGTCTCCGCTTATGAA  
AGGTCAAGCCGATACAATAGGCATCGCGATGCGAAGGGCTTTGCTTGGAGAAATAGAA  
GGGACATGTATCACACGCGCAAATCTGAG-----AAGATACCACATGAATATTCTACCAT  
AGTAGGTATTGAAGAATCAGTACAGGAAATTTTACTGAATTTAAAAGAAATTGTATTGA  
GAAGTAATCTGTATGGAACCTTTGACGCCTCTATTTGCGTCAGGGGTCCTGGATACGTA  
ACTGCTCAAGACATCATCTCACCGCCTTCTGTGGAATCGTTGATGCTACACAGCATAT  
AGCTAGCCTGACGGAACCAATTGATTTGTGTATTGGATTACAAATCGAGAGGAATCGGG  
GATATCGTATGAAAACGCCAAATAACTCTCAAGATGGAAGTTAT-----CCTATAGATGCTG  
TATTCATGCCTGTTTCGAAATGCGAGTCATAGTATTCATTCTTATGGGAATGGGAATGAGA  
ACAAGAGATACTTTTTCTCGAGATATGGACGAATGGAAGTTTAACTCCTAAAGAAGC  
ACTTCACGAAGCCTCCCGGAATTTGATTGATTTATTTATCCCTTTTCTACATGCGGAAGA  
AGAA-----AGCATAAAATTAGAGGACAATCAA---AACGGGATTTCTTTACCTTTTTTTGC  
GTTTCATGATAGATTGGCT---AACCTAAAGAAAAAGAAAAA-----ATAGCATTTAAATG  
TATTTTTATTGACCAATCAGAATTGCCTCCCAGGACCTATAATTGCCTCAAAGGTCCAA  
TATATATACATTATTGGACCTTTTGAATAACAGTCAAGAAGATCTTATGAAAATTGATCAT  
TTTCACATAGAAGATGTAAAACAGATATTGGACATTCTACAAAAGCAT-----TTCTCAATT  
GATTTACCGAAGAATAAGATGCTCCGGGATGGAAT--GAGGGAATGTCTACAATACCT  
GGGTTTAGTCAGATACAATTTGAGGGATTTTGTAGGTTCAATTGATCAGGGCTTGACGGA  
AGA ACTTTATAAGTTTCCAAAAATTGAAGATACAGATCAAGAAATTGAATTTCAATTAT  
TTGTGGAAACATATCAATTGGTAGAACCTTGATAAAAGAAAGAGATGCTGTGTATGAA  
TCACTCACATATTCTTCTGAATTGTATGTACCCGCGGGATTAATTTGGAAAACCAGTAGG  
GATATGCAAGAACAACCATTTTTATTGGAAACATTCCTCTAATGAATTCCCTGGGAAC  
CTCTATAGTAAATGGAATATACAGAATTGTGATCAATCAATATTGCAAAGCCCCGGTAT  
TTATTACCGTTCAGAATTGGACCATAACGGAATTTCAAGTCTATACCGGCACTATAATATC  
AGATTGGGGAGGAAGATCAGAATTAGAAATTGACAGAAAAGCAAGGATATGGGCTCG  
TGTGAGTAGGAAACAAAAATATCTATTCTAGTTCCATCATCAGCTATGGGTTCGAATCT  
AAGGGAAATTCTAGATAATGTTTGTACCCTGAAATTTTCTTGTCTTTCTGAATGATAA  
GGAGAAAAAAAGATTGGGTCAAAGAAAATGCTATTTTGGAGTTTATCAACAATTT  
GCTTGTGTAGGTGGGGATCCGGTATTTTCTGAGTCCTTATGTAAGGAATTACAAAAGAA  
ATTTTTTCAACAAAGATGTGAATTAGGAAGGATTGGTTCGACGAAATATGAACCGGAGA  
CTGAATCTTGATATACCTCAGAACAATACATTTTTGTTACCGCGAGATATATTGGCAGCT  
GCAGATCATTGATTGGAATGAAATTTGGAATGGGTACACTTGACGAT-----ATGAATCA  
CTTGAAAATAAACGTATTCGTTCTGTAGCAGATCTGTTACAAGATCAATTCGGATTGG  
CTCTGATTCGTTTAGAAAATGCGGTTTCGAGGCACTATATCTGGAGCAATTAGG---CATAA  
ATTGATA---CCGACTCCTCAGAATTTGGTAACTTCAACTCCA-----TTAACAACCACT  
TATGAATCCTTTTTTCGGCCTACACCCCTTATCTCAAGTTTTGGATCGAACTAATGCATTG  
ACACAAATAGTTCATGGGCGAAAATCGAGTTATTTGGGTCCTGGAGGATTGACAGGGC  
GAACTGCCAGTTTTTCGGATACGAGATATCCATCCTAGTCACTATGGACGTATTTGCCAA  
TTGACACGTCTGAAGGAATTAATGTTGGACTTATTGGATCCTTAGCGATTTCATGCGCGG  
ATTGGTCAATTGGGGG---TCTCTAGAAAGCCATTTTAT-----GAAATTTCTGAGAGATC  
A-----AAAGAGGTACGGATGATTTATTTATCACCAAGTAGGGATGAATACTATACGGTAG  
CGGCAGGAAATCTTTGGCCTTGAATCAGGGTATTCAAGAAGAACAGGTTGTTCCAGC  
TCGATACCGTCAAGAATTCCTGACTATTGCATGGGAACAGGTTACCTTCGAAGTATTT  
TTCCCTTCCAATATTTTTCTATTGGAGCTTCTCTCATTCTTTTATCGAGCATAATGATGC

GAATCGGGCTTTAATGAGTTCTAATATGCAACGTCAAGCAGTTCCACTTTCTCGGTCCG  
AGAAGTGCATTGTTGGAAGTGGGTTGGAACGCCAAGCGGCTCTAGATTCCGGGGTTTC  
CGCTATAGCCGAACACGAGGGAAAGATCATTATACCGATACTGACAAGATTATTTATC  
AGGTAATGGAGAACTCGAAACATTCATTGGTTATATATGAACGTTCCAACAAAAATA  
CTTGATGAATCAAAAACCCAGGTTACGCGGGGTAATACATTAAAAAGGGACAAAT  
TTAGCGGACGGTGCCGCTACAGTTGGTGGCGAACTCGCTTTGGGAAAAAACGTATTA  
GTAGCTTATATGCCGTGGGAAGGCTACAATTCTGAAGACGCGGTACTCATTAGCGAGCG  
TCTGGTATATGGAGATATTTATACTTCTTTTCACATACGAAAATATGAAATTCAGACTCAT  
GTGACAAGCCAAGGC---CCCGAAAGGATCACTAGCGAAATACCACATTTAGAAGCCCA  
TTACTCCGCAATTTAGACAGAAATGGAATTGTGATGCTAGGATCTTGGGTAGAAACGG  
GTGATATTTTAGTAGGTAATTAACGCCTCAGATGGCGAAAGAA---TCATCGTATGCCCC  
AGAAGATAGATTATTACGAGCCATACTTGGCATTACAGATATCCACTTCAAAGGAACTT  
GTCTAAACTACCTATAGGTGGCAGGGGTCGAGTTATTGATGTGAGATGGATCCAGAAA  
AAAGG---GGTCCAGCTATAATCCAGAAACGATTCGTGTATATATTTACAGAAACGT  
GAAATCAAAGTAGGTGATAAAGTAGCTGGAAGACATGGAAATAAAGGTATCATTTC  
AAATTTGCTAGACAAGATATGCCTTATTTGCAAGATGGAACACCTGTTGATATGGTCT  
TCAACCCATTAGGAGTACCTTCACGAATGAATGTAGGACAGATATTTGAATGCTCGCTC  
GGGTTAGCGGGGGTCTGCTAGACAGACATTATCGAATAGCACCTTTTGATGAGAGATA  
TGAACAAGAAGCTTCGAGAAAACCTAGTGTTCCTGAATTATATGAAGCCAGTAAGCAA  
ACAGCAAATCCATGGGTATTTGAACCCGAGTATCCGGGAAAAAGCAGAATATTTGATG  
GAAGAACGGGAGATCCTTTTGAACAACCTGTTATAATAGGAAAGTCTTATATCCTTAA  
TTAATTCATCAAGTTGATGATAAATCCATGGACGTTCCAGTGGACATTATGCGCTTGT  
ACACAACAACCCCTTAGAGGAAGAGCCAAGCAAGGAGGACAACGGGTAGGAGAAAT  
GGAAGTTTGGGCTCTAGAGGGATTTGGTGTGCTCATATTTTACAAGAGATGCTTACTTA  
TAAATCTGATCATATTAGAGCTCGTCAGGAAGTACTTGGTACTACCATCATTGGAGGAA  
CAGTACCTAATCCTGAGGATGCTCCAGAATCTTTTCGATTGCTCGTTCGAGAACTACGA  
TCTTTGGCTCTGGAACCTGAATCATTTCATTGTATCTGAGAAGAAGTCCAGATTAATAGG  
AAGGAAGCT-----ATGATCGACCGGTATAAACATCAACAACCTTCGAATTGGA  
TCAGTTTCTCCTCAACAAATAAGCGCTTGGGCCAATAAAATCCTGCCTAATGGAGAGAT  
AGTTGGAGAGGTAACAAAACCTACACTTTTCATTACAAAACCAATAAACCCGGAAAAA  
GATGGATTATTTTGTGAAAGAATTTTGGGCCCTATAAAAGGTGGAATTTGTGCTTGTGG  
AAATTATCGAGTAATCGGAGATGAAAAAGAAGACCCGAAATTTTGTGAACAATGCGGA  
GTCGAATTTGTTGATTCTCGGATACGAAGATATCAAATGGGATACATAAACTGGCATGT  
CCAGTAACTCATGTGTGGTATTTGAAACGTCTTCCCTAGTTATATCGCGAATCTTTTAGAT  
AAGCCTCTTAAAGAATTAGAAGGCCTAGTATACTGCGAT-----TTTTCTTTTGCTAGGCC  
---ATAGCTAAAACCCCTACTTTCTTACGATTACGAGGTTCAATCGAATATGAAATCCAAT  
CCTGGAAATACAGCATCCACTTTTTTTTACTACCCAAGGCTTCGATACATTCGAAATC  
GAGAAATCTCTACTGGAGCAGGTGCTATCCGAGAACAATTAGCCGATCCGGATTTGCG  
AATTATTACAGATTATTCATTGATAGAATGGAAAGAATTAGGGGAAGAA---GGACCCAC  
AGGTAATGAATGGGAAGATAGAAAAATTGGAAGAAGAAAGGATTTTTTGGTTAGACGC  
ATGGAATTAGCTAAGCATTTTATTCGAACAATGTAGAACCAGAACGGATGGTTTTGTG  
CCTATTACCAGTTCTTCCCTCCCGAGTTGAGACCGATCATTACAGATAGATGGGGGTAAAC  
TAATGAGTTCGGATATTAATGAACTCTATAGAAGAGTTATCTATCGGAACAATACTCTTA  
CCGATCTATTAACAACAAGTAGATCTACGCCAGGGGAATCGGTAATGTGTCAGGAGAA

ATTGGTACAAGAAGCCGTGGATACACTTCTTGATAATGGGATCCGTGGACAACCAATGA  
GGGACGGTCATAATAAAGTTTACAAGTCATTTTCAGATGTAATTGAAGGCAAAGAGGG  
AAGATTTTCGTGAGACTCTGCTTGGCAAACGGGTTCGATTATTCGGGGCGTTCCCGTCATTG  
TCGTGGGCCCTTCGCTTTCATTACATCGATGTGGATTGCCTCGCGAAATAGCAATAGAG  
CTTTTCCAGACATTTGTAATTCGTGGTCTAATTAGACAACATGTTGCTTCCAACATAGGA  
GTTGCTAAAAGTAAAATTCGAGAAAAAGAACCAATTGTATGGGAAATACTTCAAGAAG  
TTATGCGGGGGCCTCCTGTATTGCTAAATAGAGCACCCACTCTGCATAGATTAGGCATAC  
AGGCATTCCAACCCATTTTAGTGGAAGGACGTGCTATTTGTTTACATCCATTAGTTCGTA  
AGGGATTCAATGCAGACTTTGATGGGGATCAAATGGCTGTTTCATGTACCTTTATCTTTG  
GAGGCTCAAGCGGAGGCTCGTTTACTTATGTTTTCTCATATGAATCTCTTGTCTCCAGCT  
ATTGGAGATCCCATTTCTGTACCAACTCAAGATATGCTTATTGGACTCTATGTATTAACG  
AGCGGGAATCGTCGAGGTATTTGTGCAAATAGGTATAATCCATGTAATCACAGAAAC----  
----TATAAAAATGAAAGAATTGACGATAATAACTATAAGTATACGAAAGAAAAAGAACC  
CTATTTTTTTAGTTCCTATGATGCAATTGGAGCTTATCGGCAGAAACGAATCAATTTAGA  
TAGTCCTTTGTGGCTCCGGTGGCGACTAGATCAACGC---GTCATTGCATCA-----AGAGA  
AGTTCCCGTCGAAGTTCACTATGAATCTTTGGGTACCTATCATGAGATTTATGGGCACTA  
TCTAATAGTAAGAAGTGTAAAAAAACAATTCCTTTGTATATACATTTCGAACCACTGTTG  
GTCCTATTTATTTTTATCGAGAAATCGAAGAAGCTATAACAAGGGTTTTGCCGGGCTGCT  
CATACGGTACC-----ATGGAGGTACTTATGGCAGAACGGGCCGATCTGGTC  
TTTACAATAAAGCGATAGATGGAAGTCCATGAAACGACTTATTAGCAGATTAATAGA  
TCACTTCGGAATGGCATATACATCACACATCCTGGATCAAGTAAAGACTCTGGGTTTCC  
AGCAAGCCACTGCTACATCCCTTTCATTAGGAATTGATGATCTTTTAAACAATACCTTCTA  
AGGGATGGCTAGTCCAAGATGCTGAACAACAAGTTCGATTTTGGAAAAACACCATCA  
TTATGGGAATGTACACGCGGTAGAAAAATTACGTCAATCCATTGAGATATGGTATGCTAC  
AAGTGAATATTTGCGACAAGAAATGAATCCTAATTTTAGGATGACTGATCCTTCTAATCC  
AGTCCATATAATGTCTTTTTTCGGGAGCTAGAGGAAATGCATCTCAGGTACACCAATTAG  
TAGGTATGAGAGGATTAATGTCGGATCCCCAAGGACAAATGATTGATTTACCCATTCAA  
AGCAATTTACGCGAAGGACTCTCTTTAACGGAATATATAATTTCTGTTACGGAGCCCGT  
AAAGGAGTTGTGGATACTGCTGTACGAACATCAGATGCTGGATATCTCACGCGGAGAC  
TTGTTGAAGTAGTTCAACACATTGTTGTCCGTAGAACAGATTGTGGCACCATCCGAGGT  
ATTTCTGCGAGTCCTCGAAATGGGATGATGACG---GAAAGAATTTTTATCCAAACATTA  
TGGGTTCGTGTATTAGCAGACGATATATATATAGGTCCACGATGCATTGCCATTTCGAAATC  
AAGATATTGGGATTGGACTTGTCAATCGATTCATAACC-----TTTCGAGCACAG  
CCAATATCTATTTCGAACCCCTTTACTTGTAGGAGTACATCTTGGATCTGTCGATTATGTT  
ATGGTTCGAAGTCCCCTCATGGCGACCTGGTTCGAATTGGGAGAAGCTGTAGGTATTATT  
GCAGGTCAATCTATTGGGGAACCAAGGACTCAACTAACATTAAGAAGTTCATACCG  
GTGGAGTATTCACAGGGGGTATTGCAGAACATGTACGAGCTCCTTCTAATGGAAAAATA  
AAATTCAATGAGGATTTGGTTCATCCACACGTACACGTACATGGACATCCTGCCTTTCTA  
TGTTATATAGACCTGTATGTAATTTGAGAGTCAGGATATTATACATAATGTGAATATTC  
CACCAAAAAGTTTCTTTTAGTTCAAACGATCAATATGTAGAATCAGAACAAGTGATT  
GCTGAGATTCGCGCGGGAACATCCACTTTG---AATTTTAAAGAGAAAGTTCGAAAACAT  
ATTTATTCTGACTCAAAGGGAGAA---ATGCACTGGAGTACTGATGTGTACCATGCACCT  
GAATATACATATGGTAATGTTTCATCTTACCAAAAACAAGTCATTTATGGATATTATCAG  
GAGGTCCGTGCAGA-----TCCAGTATAGTCCCTTTTTTCGCTCCACAAGGATCAAGATCA

AATGAACGTTTCAG-----TCTCTTTCTGTCGAAAGAACATATATTTCTAAC-----CTCTCAGT  
GACTAATGATCAA--GTGAAACACAAATTGTTTAGTTTTGATCCTTCTGGT-----GGGGGT  
AGGATTCTTGATTAT--TCAGGACCTAATCGAATCATATGCAATGGTCATTGTAATTTTCAT  
ATATCCTGCC--ATTCTCCACGAGAATTCTGAT-----TTATTGGCAAAGAGGGCGAAGAAAT  
AGATTCATCATTCCATTCCAATCTAATCAAGAACGAGAGAAAGAACTAATGCCCGTTC  
AGGTATCTCGATTGAAATACCCATAAAT-----GGTATTTCCGTAGAAATAGTATTCTTGCT  
TATTTTCGATGATCCTCGATACAGAAGAAAGAGTTCGGGAATTACTAAATATGGGACTATA  
GAGGTTCAATTCTATCGTTAAAAAAGAGGAT-----TTGATTGAGTATCGAGGA-----AAAGA  
ATTTAGGCCAAAATACATGAAAGTGGATCGATTTTTTTTCATTCCCGAGGAAGTGTATAT  
CTTACCTGGATCTTCTTCCATAATGGTACGGAACAATAGTATCATTGGAGTAGATACACG  
AATCACTTTAAATACAAGAAGCCGAGTAGGCGGATTGGTCCGAGTGGAGAGAAAAAA  
AAGGGGGATTGAACTTAAAATATTTTCTGGAGCTATCCATTTTCTGGAGAGACGGATA  
AGATATCCCGGCACAGTGGCATCTTGATACCACCAGGAACGGGAAAAAAA-----AATTC  
TAAGGAATCAAAAAAA---AAATTGAAAAATTGGATCTATGTCCAACGG-----ATCACACC  
TATCAAGAAAAAG-----TATTTTGTTTTGGTTCGACCCGTAGTCACATATGAAATAGCGG  
ACGGGATAAATTTAGCAAGGCTTTTCCCCCAGGATCTGTTGCAGGAAAGGGATAATTTG  
CAACTTCGAGTTGTCAATTATATCCTTTATGGAAATGGCAAACCAATTGGAGGAATTTCT  
CACACAAGGATTCAATTAGTTCGCACTTGTTTAGTATTGAATTGGGACCAAGACAAAA  
AG-----GGTCTTCTATAGAAGAGGTTTCATGCTTCCTTTGTTGAAGTAAGGGCAAATG  
GTCTGATTTCGAGATTTCATAAGAATGGACTTAGTGAAATCCCCTATTTTCGTATACCGGAA  
AAAGGAATGATCTGTCAGGTTTCAGGATTGATCCCCGAT---AATGGATCAGATCGCATCAA  
TATCAATCCTTTTTATTCCATTTATTCCAAGGCAAGT-----ATTCAACAATCACTTA  
GCCAACATCAAGGAATTCGTACGTTGTTGAATAGA-----ATAATGAATGCCAATC  
TTTGATAATTTTGTTCATCATCCAATTGTTCTCGA-----ATGGGTCCATTTAAGGGTTTTAAA  
TATCACAAT-----GTGACAAAAGAATCAGATCCCCTAATTCCAATTAGGAAGTCGTTAG  
GTCCTTTAGGGACA-----GTCCATAAAATTGCGAATTTTTACTCA-----TTTTACCATTTAA  
TAACT-----CATAATCAGATCTTG---GTAAATAAATATTTACTACTTGACAAT-----TTAAA  
ACAGACTTTCCAAATAATTTAAA-----TATTATTTAATGGATGAAAATGGGAGG-----ATT  
TTTCATCCCGATCCATGCAGTAACATCATTTTGAATCCATTCCATTTGAATTGGTATTTTC  
TCCATCACGATTATAGTGAAGATACATCCACAATAATTAGC---CTTGGACAGTTTCTTTGT  
GAAAATATATGTATATCCAAAAACGGACCA-----CACTTAAAATCTGGTCAAGTTTTAA  
TTGTTTCAT--GTTGACGCTTTAGTAATAAGATCCGCTAAGCCTTATTTGGCCACTCCAGG  
AGCAACCGTTCATGGTCATTATGGGGAAATCCTTTACGAAGGAGATACATTAGTTACAT  
TTATATATGAAAAATCGAGATCTGGTATATAACGCAGGGTCTTCCAAAAGTTGAACAA  
GTGTTAGAAGTGCGTTTCGATTGAATCAATATCGATGAACCTAGAAAAGAGGGTTGAGG  
GTTGGAACGAACGTATAACAAGAATTATTGGAATTCCTTGGGGATTCTTGATTGGCGCT  
GAGCTAACCATAGCGCAAAGTCGTATCTCTTTGGTTAATAAGATCCAAAAGTTTATCG  
ATCCCAGGGGGTGCAAATCCATAATAGGCATATAGAAATTATTGTACGTCAAATAACATC  
AAAAGTTTTGGTTTCAGAA-----GATGGAATGTCTAATGTTTTTTCACCCGGAGAACT  
AATTGGATTGTTGCGAGCGGAACGAACGGGACGCGCTTTGGAAGAAGCAATCTGTTAC  
CGAGCCGTCTTATTGGGAATAACGAGGGCATCGCTGAATACTCAAAGTTTCATATCCGA  
GGCGAGTTTTTCAGGAAACTGCTCGAGTTTTAGCAAAAAGCCGCTCTACGAGGTCGTATC  
GATTGGTTGAAAGGCTGAAAGAAAACGTTGTTCTGGGGGGGATGATACCTGTTGGTA  
CCGATTCAAAGGGTTGATGCACCATTCA-----AGGCAACACAACAACATTCT-----TT

GGAAACCGAAAAGAAGAATCTATTCGAGGGGGAAATGAGA-----GATATTTTGTTCAC  
CACAGAGAATTATTTGATTCTTGCATTCCAAAGAATTTCCATGATACATCAGAACA-----  
-----ATGACAAGAAGATATTGGAACATCCATTTGGAAGAGATGA  
TGGAAGCAGGAGTTCATTTTGGTCATGGTACTAGGAAATGGAATCCTAGAATGGCACC  
CTACATCTCTGCAAAGCGTAAAGGTATTCATATTACAAATCTTACTAGAACTGCTCGTTT  
TTTATCAGAAGCTTGTGATTTAGTTTTTGGATGCAGCAAGTAGGGGAAAAGAATTCTTAA  
TTGTTGGTACCAAAAATAAAGCAGCTGATTCAGTAGCATCGGCTGCAATAAGGGCTCG  
GTCTCATTATGTTAATAAAAAATGGCTCGGTGGTATGTCAACGAATTGGTCCACTACAG  
AAACGAGACTTCATAAGTTCAGGGACTTGAGAGCGGAACAAAAGATGGGGAGACTCG  
GCCGTCTCCGAAACGAGATGCAGCAATGTTAAAGAGACAATTATCTCATTTGCAAGCA  
TATCTGGGTGGGATCAAATATATGACAGGGTTACCCGATATTGTAATCATTGTTGATCAG  
CAAGAAGAATATACGGCTCTTCGAGAATGTGTCACTTTGGGAATTCCAACGATTTGTTT  
AATCGATACAAATTGTGACCCGGATCTCGCAGATATTTCTATTCCAGCGAATGATGACGC  
TATAGCTTCAATCCGATTAATTCTTAACAAATTAGTATCCGCAATTTGTGAGGGTCTGTTCT  
AGC---TATATAAGAAATCGTATGGGACAAAAATAAATCCACTTGGTTTCAGACTTGGTA  
CAACCAAGGTCATCATTCCCTTTGGTTTGCACAACCAAAAAGTTATCCGAGGGTCTC  
CAGGAAGATAAAAAATACGGGATTGTATCAAGAATTATGTACAAAAAATATGAGAAT  
ATCCTCAGGT---GTCGAGGGAATTGCACGTATAGAGATTCAAAAAAGAATCGATCTGAT  
CCAGGTCATAATCTATATGGGATTCCCAAAGTTGTTAATAGAGGGTAGACCACGA-----  
---GGAATCGAAGAATTACAGATCAATGTACAAAAGACTTTAATTCTGTGAACCGAAAA  
CTCAACATTGCTATCACAAGAATTGCAAAACCTTATGGACAACCTAATATTCTTGCAGA  
ATTTATAGCCGACAATTAAGAATAGAGTTTCATTTGAAAGGCAATGAAAAAGCTA  
TTGAATTAACCTGAACAAGCAGATACAAAAGGAATCAAGTACAAATTGCAGGTCTGAT  
CGACGGAAAAGAAATTGCACGTGTCGAATGGATCAGAGAAGGTAGGGTCCCCTACA  
AACCATTGAGCTAAAATTGATTATTGTTCCCTATACAGTTCGAACTATCTATGGGGTATTA  
GGCATCAAATTTGGATATTTGTAGACGAGGAAATGTCTCGTTACCGAGGGCCTCGTTT  
CAAAAAATACGCCGCCTGGGGGCTTTACCGGGACTAACTAGTAAAAGGCCTAGAGCC  
GGAAGTGATCTTAGAAACCAATCACGTTCCGGGAAA---AGATCTCAATATCGTATTCGT  
CTAGAAGAAAAACAAAATTGCGTTTTTCATTATGGTCTGACAGAGCGACAATTA  
AATACATTCGTATCGCTGGAAAAGCCAAAGGATCAACAGGTCAGGTTTTACTACAATTA  
CTTGAAATGCGTTTGGATAACATCTTTTTTCGATTGGGTATGGCTTCGACCATTCTGGA  
GCCCCGCAATTAGTTAACCATAGACATATTTTAGTTAATGGTCGTATAGTAGATATACCA  
AGTTATCGCTGCAAACCTCGAGATATTATTACGGCGAGGGATGAACAAAATCCAGAG  
CTCTGATTCAAATTTATTTGATTATCCCCCAT--GAGGAATTGCCAAAACATTTGACT  
CTTCACTCATTCCAATAT-----AAAGGATTAGTCAATCAAATAATAGATAGTAAATGGGTC  
GGTTTGAAAATAAATGAGTTGCTAGTCGTAGAATATTATTTCCCGCCAACTATGTCACGT  
CGAGGTACTGCAGAAGAAAAAACTGCAAATCCGATCCAATTTATCGTAATCGATTAGT  
TACCATGTTGGTTAACCGTATTCTGAAACACGGAAAAAAATCATTGGCTTATCAAATTAT  
CTATCGAGCCGTGAAAAAGATTCAACAAAAGACAGAAACAAATCCACTATCTGTTTTA  
CGTCAAGCAATACGTGGAGTAACTCCCGATATAGCAGTAAAAGCAAGACGTGTAGGCG  
GATCGACTCATCAAGTTCCCATGAAATAGGATCTACACAAGGAAAAGCACTTGCCATT  
CGTTGGTTATTAGGGGCATCCCGAAAACGTCCGGGTCGAAATATGGCTTTCAAATTAAG  
TTCCGAATTAGTGGATGCTGCCAAAGGGAGTGGCGATGCCATACGCAAAAAGGAAGA  
GACTCATAGAATGGCAGAGGCAAATAGAGCTTTTGCACATTTTCGTATGAGTAGGGAC

ACTATTGCCGACATAATAA ACTTCTATACGAAATGCTGACATGGATAAAAAAGGAACGGT  
TCGAATAGCATCTACTAATATCACCGAAAACATTGTAAAATACTTCTACGAGAAGGTTT  
TATCGAAAACGTGAGGAAACATCGGGAAAGCAACAAATATTTCTTGGTTTCAACCCTG  
CGACATAGAAGG-----AATAGGAAAGGACCATATAGA-----ACTATTTTA-----AAACGT  
ATCAGCCGACCCGGTCTACGAATCTATTCCA ACTATCAACGAATCCTAGGATTTTAGGT  
GGAATGGGGATTGTAATTCTTTCTACTTCTCGAGGTATAATGACAGACCGAGAGGCTCG  
ACTAGAAGGAATCGGAGGAGAAATTTTGTGTTATATATGGATGGCAAACCTATAACAA  
GAATTGGTTCACGTGGGAATGGACGTATTGGTTCACGTAAGAATGGCCGTAGAATACC  
AAAAGGAGTTATTCATGTTCAAGCAAGTTTCAACAATACCATTGTA ACTGTTACAGATG  
TACGGGGGCGAGTAATTTCTTGGTCTCCGCCGGTACTTGTGGATTCAAGGGCACGAG  
AAGAGGGACACCATTGCTGCTCAAACCGCAGCAGGAAATGCGATTTCGTACAGTAGTG  
GATCAAGGTATGCAACGAGCAGAAGTCATGATAAAGGGTCTGGTCTCGGAAGAGATG  
CAGCATTACGAGCCATTTCGTAGAAAGTGGTATACTATTAAGTTTCGTACGGGACGTAACC  
CCTATGCCACATAATGGATGTAGACCTCCTAAAAAAGGCGTGTGATGCCAACTATTA  
ACA ACTTATTAGAAACACAAGACAGCCAATCAGAAATGTCACGAAATCCCCGCTCTT  
CGGGGATGTCTCAGCGCCGAGGAACATGTA CTAGGGTGTATACTATCACCCCCAAA  
AACCAA ACTCTGCCTTACGTAAAGTTGCCAGAGTACGATTAACCTCTGGATTGAAATC  
ACTGCTTATACCTGGTATTGGCCATAATTCACAAGA ACATTCTGTAGTCTTAGTAAGG  
GGAGGAAGGGTTAAGGATTTACCCGGTGTGAGATATCACATTGTTTCGAGGAACCCTAG  
ATGCTGTGCGAGTAAAGGATCGTCAACAAGGGCGTTCTAAATATGGGGTCAAAAAGCC  
AAAAATGGCAAGGAAAAGTTTGATTTCAGAGGGAGAGGAAGAGGGCAAAAATTGGAAC  
AGAAATATCATTTGATTTCGTGATCCTTAAAAAAGAAATAAGC-----AAAGTTCCGT  
CGTTGAGTGACAAATGGGAAATTCATGGAAAATTACAATCCCCACCGCGTAATAGTGC  
ACCGACACGTCTTCATAGACGTTGTTTTTCGACGGGAAGGCCGAGAGCTAACTATCGA  
GACTTTGGGTTATCCGGGCACATACTTCGTGAAATGGTTCATGCATGTTTGTGTCGGG  
GGCAACAAGATCAAGTTGGATGGTAAAAAATGCATTTCATCACAATTATTTACAAGAA  
CAAAAAGAAGAAAACAAG-----GGGTCTGTTGAATTTCAAGTATTCAGTTTACTAATA  
AGATACAGAGACTTACTTCACATTTGAAATTGCACAGAAAAGACTATTTATCTCAGAGA  
GGTCTACGAAAAATTCTGGGAAAACGTCAAAGGCTGCTAGCTTATTTGTCAAAGAAAA  
ATAGAGTACGTTATAAAGAATTAATTGGTTCGGTTGGATATTCGGGAGCCAAAAACTCGT-  
----ATGGTAAA ACTTCGTTTTGAAACGATGTGGTAGAAAGCAACGAGCCATCTATCGAAT  
CGTTGCAATTGATGTTTCGATCTCGAAGAGAAGGAAGAGATCTTCGGAAAGTGGGTTTT  
TATGATCCGATAAACAATCAA ACTTATTTAAACGTTCCCGCTATTCTATATTTCTTGA  
AGGGCGCTCAACCTACAGGAACTGTTTCATGATATTTCAAAGAAGGCGGAGGTTTTTAA  
GGA ACTTCGTGTTAATCAAACGAAATTTAAT---ATGGATAAATCCAAGCGACCTTTTCTG  
AAATCCAAGCGATCTTTTCGTAGGCGTTTGCCCCCAATTGGATCGGGGGATCGAATTGA  
TTATAGAAACATGAGTTTAATTAGTCGATTTATTAAGTGAACAAGGAAAAATATTATCTAG  
ACGAGTGAATAGATTGACCTTGAAACAACAACGATTAATTACTATTGCTATAAAACAAG  
CTCGTATTTTATCTTCGTTACCTTTTCTTAATAATGAGAAA-----CAATTTGAGAGAACTG  
AGTTAGCCGCTAGAACTACTGGTCTTAGAAC CAGAAAT--GTGACACGTTCACTCAAAA  
AAAATCCTTTTGTAGCTAATCATTTATTAGGAAAAATGGAGAAGCTTAACATGAGGGCG  
GAAAAAGAAATAATAGTAACTTGGTCCCGGCATCTACCATTATACCCAATGATCGG  
CCATACAATTGCTATTCATAATGGAAAGGAGCATTTGCCTATTTATATAACAGATCGTATG  
GTAGGTCACAAATTGGGAGAATTTGCACCTACTCTTAATTTCCGGGGACATGCGAGAA

ACGATAATAGATCTCGTCGTATGATTTTTAAATCTTTTCTACTAGGTAATCTATTATCCTTA  
TGCATGAAGATAATCAATTCGGTCGTTGTGGTCGGACTCTATTATGGATTTCTGACCACA  
TTCTCCATAGGGCCCTCTTATCTCTTCCTTCTCCGAGCCCGGTTATGGAAGAAGGA-----  
----ACCGAGAAGAAGGTATCAGCAACAACCTGGTTTTATTACGGGACAGCTCATGATGTT  
CATATCGATCTATTATGCGCCTCTGCATCTAGCATTGGGTAGACCTCATACAATAACTGTC  
CTAGCTCTACCGTATCTTTTGTTTTCAATTTCTTCTGGAACAATCACAAAACTTTTTTTATT  
ATGGATCTACTACCAGAAATCAATGCGTAATCTCAGCATTCAATGTGTATTCTGAATA  
ATCTCATTTTTCAATTATTCAACCATTTCAATTTACCAAGTTCAACGTTAGCCAGATTAGT  
CAACATTTATATGTTTCGATGCAACAACAAGATGTTATTTGTAACAAGTAGTTTTGTTGG  
TTGGTTAATTGGTACATTTTATTTCATGAAATGGGTTGGATTGGTATTATTCTGGATACGG  
CAAATAATTCTATTAGATCT---AATGTACTTATTAAGTACCTTGTGTCAGAATTGACAAA  
TTCTATGGCTCGAATCTTTAGTATTCTCTTATTTATCACCTGTGTCTACTATTTAGGCAGA  
ATACCGTCACCTATTGTCACTAAGAACTGAAAGAAACCGAAGAAGACAAACCTCTTT  
TGACTCTTCTTTTCGACTATAAACGATGGAATCGTCCATTGCGATATATAAAAAACGATC  
GATTTGAAAATGCTGTAAGAAATGAACTGTCACAATATTTTTTTGATACATGTCAAAGC  
GACGGAAAACAAAGAATATCTTTTACATATCCACCCAGTTTGTCAACTTTTTGGGAAAT  
GATACAAAGAAAGATGTCTTTGTGCACGACAGAAAACTTTCCTCTGAGGAACTGTAT  
AATCATTGGGTTTATAACCAATGAACAAAAAAGAACAACCTGAACAACGAGTTCATAA  
ATCGAATTGAAGCTCTAGATAAGGGATCTCTTGCTCTAGATGTACTCGAAAAAAGGACT  
AGATTGTGTAATGATGAGACTGAACAAGAATGCTTGCCTAAAATGTATGATCCTTTCTG  
GAACGGACCTTATCGCGGAACAATAAAAAAATGGTATTCACAT-----ATAGTTTGGATAA  
ATAAGATTCATGATATCCTTTATAGAGAATTTGAACAGAAAGATCCGAATGATCAA-----  
GGAATAAAAGAAATAAGTAAAAAAGTCCCTCGATGGTCATACAAATTGATCGATTTGG  
AACACAGGAAGGAGGAGAGATTCGTTCAAGAAAAGCGAAACGTGTAGTCATTTTTTA  
CTGATGCTTTGATACGTTATTCTCAACAAGCGGATTTTCGTCGGGATATAATCAAAGGAT  
CCATGCGCACTCAAAGACGTAATAAGTTATTTGGGAACTGTTTCAAGCAAATGTCCAT  
TCTCCTCTTTTTTTGGACAGAATAGACAAAACCTTTTTTTTTTTCTTTTGTATC-----TTCG  
GAATGATGAAGCCAATTTTTAGGAATAGAGAGGAGAAAACGCGGATAGAAATAGCAGA  
AACATGGGATAGTGTCCATTTGCTCAAGTAATAAGGGGTTCCATGTTAGTAACCCAAT  
CGATTCTTCGAAAATATATTGTATTGCCTTCATTGATAATAGCTAAAAATATTGGCCGTAT  
GCTATTATTTCAATTTCCCGAGTTGTATGAGGATTTAAAGGGGTGGAGTAGAGAAATGC  
ATGTTAAATGCACCTTTAATGGTGTTCAATTATCAGAAACAGAATTTCCAAAAAAGTGG  
TTAACAGATGGCATTGAGATAAAGATCCTATTTCTCTTTCTGTCTGAAACCTTGGCACGG  
ATCTACAAAAGGACAAAAAAGTGATTTTTGTTTTTTAACAGTTTGGGGAATGGAAGCT  
GAACTTCCTTTTGGTTCTCCCCGAAAACGACCTTCCTTTTTTTGAACCCATTTGTAAAGA  
ACTCGAAAAAAAATAGAAAAGTGAAA---AAGAAATCTTTTCTAGTTCTAAAAGTTTT  
AAAAGAAAGAACAAAATTGTTTTTAAGGGTCTCAAAGAAATAACAGGATGGGTTATC  
AAAAGAGTTCTA-----TTTATAAAAAGAATAATGAAAGAATTTGCAAAAGTAAAT-----AT  
AATAACAATAAGATGATTCATAAATCATCCATTCGAATTAGATACATGGATTGGACAAA  
TTATTCACAAACAGAAAAAAAATGAAGGATCTCGCTGATAGGACAAGCACAAATCAGA  
AATAAATAGAAAATAACAAAAGACAAGAAAAAAAATCCTAATGAAAGAAGTTGT  
GATGATAAAAGATTAGAATCACCACAAAATATTTGGCAGATAGTAAAAAGAAGAAGTG  
CTCGATTAATACGTAATGGAACATTTTATGCAATTTTTTCATTGAAAAGATATAC---GAT  
ACTCTTCTCTATCATTAATATTTCCCGGAGCAATGCACAACCTTTTCATTCATTTTATT

CG---GACTTATCTTCTTTGTCACAAGCATATGTATTTTACAAATTATCACAAACCCAAGTT  
ATTAACAAGTATAACTTGAGATCTGTACTTCAATATACATCTCTTTTTCTGAAAGAGAGA  
ATAAAGGATTCTTTTAAACTCAAATATTTTCATTCCAAATCAAAGCATAAGAACTTTTG  
AATCCGGAATGAATGAATGGAAAACTGGTTAAGGGGTCATTATCAATATGATTTATCT  
CAGATTAGATGGTCTAGATTAGTACCACAAAAATGGCAAATAGAGTAAATCAACATCA  
TATGGTTCAAATAAAAAAAAAACGAGGTTTCATATGAAAAAGACCAA-----TTAATTCATT  
ACGAGAAACAAGAAAATTTAAAAAAAAAATTATAGATATGATCTTTTATCATATAAATATA  
TTAATGATTATATAATTGAGCCGAATAGAAAATATTTTGATTGGAGAATTCCTCCATTTTGG  
TCTTAGATTTTTTGATTGGATGAGAATGAATGAAGAAATACTAAATCGTTGGTTCTTACC  
AGAATTTGTACTACTTTATAATGCATATAAGATTAACCATGGGTCATACCAATAAAATTA  
CTTTTTTTTAAATTACAAGAGCAACACGGAAGCAGAGCTCGATTTCTCCTGAAAAATA  
TTTGCTTTTTCAATTGAGATGGAATAATCCTTTGAATCAAAAAATATTCCAGAATATCAA  
AGTGTATTGTCTCCTGCTTAGACTGATAAATCCAAAGGAAATTGCTCTATCTTCTATTCA  
AAACGGAGAAATGAGTCTGGATGTAATCCAGATGCAGAAAGATAAAACTCTTACAGAA  
TTGATAAGAAAAGGAATATTGATTATCGAACCAGTTCGTCTGTCTATAAAACAGGATGG  
ACAATTTATTATGTATCAAACCATAGGTATTTTCATTGGTCCATAAGAGTAAGCACAATCA  
TTATGATTTGCTTGTTCCTGAAAATATTTTCATCGCCTAGACGTCGTAGAGAATTGAGGAT  
TCTAATTTGTTTCAGATTTCTTTGGCCCAATTATCGATTAGAAGATTTAGCTTGTATGAAC  
CGTTATTGGTTTGATACCAATAATGGCAGTCGTTTCAGTATGTCAAGGATACATATGTATC  
CAACGAAACGACATCAATTCCAATCCTGGATCTTCGAATTGAGAGAGATATTGAGAGA  
GATCAATAATTCTCACTATTTCTTAGATTCATGGACCAAATTCGATTTCGGTGGGATCTTT  
CACTCGCATTTTCTTCCCCAAGAACGTTTTATGAAACTCTTTGACCCCGAATTTTGA  
GTATCCTACTTTCA---CGCGATTCA-----CAGGGTTCAACAAGCAATCGATATTTACG----  
----ATCAAAGGTGTAGTACTATTTGTAGTAGCG---GTCCTTATATAT-----CGTATTAAC  
AATCGAAATATGGTCGAAAGAAAAATCTCTATTTGATGGGGCTTCTT-----CCTA  
TACCTATGAATTCCATTGGACCCAGAAATGATACATTGGAAGAATCTTTT---GGGTCTTC  
CAATATCAATAGGTTGATTGTTTCG---CTCCTGTATCTTCCAAAAGGGAAAAAGATCTCT  
GAGAGTTGTTTCCTGGATCCGAAAGAGAGTACTTGGGTTCTCCCAATAACT-----A  
AAAAGTGTATCATGCCTGAATCTAACTGGGGTTCGCGGTGGTGGAGGAACTGGATCGG  
AAAAAAGAGG-----GATTCTAGTTGTAAGATATCT-----AATGAAACCGTAGCTGGAAT  
TGAGATCTCATTCAAAGAGAAAGATATCAAA---TATCTGGAGTTTCTTTTTGTATACTATA  
CGGAT-----GATCCGATCCGCAAGGACCATGATTGGGAATTGTTTGATCGTCTTTCTCCG  
AGGAAGAAGCGAAACATAATCAACTTG-----AATTCGGGACAGCTATTCGAAATCTTAG  
TGAAACACTGGATTTGTTATCTCATGTCTGCTTTTCGTGAAAAAAGACCAATTGAAGTG  
GAGGGT--TTCTTCAAACAACAAGGA---GCTGAGTCAACTATTCAATCAAATGATATTGA  
GCATGTTTCCCAT-----CTCTTCTCGAGAAACAAGTGGGGTATTTCTTTGCAAATTTGTG  
CTCAATTTTCATATGTGGCAATTCGCAAGATCTCTTCGTT-----AGTTGGGGGAAG---  
AATCCGCACGAATCGGATTTTTTTGAGGAAC---GTATCGAGAGAGAATTGGATTTGGTTA  
GACAATGTGTGTTTGGTAAACAAGGATCGG-----TTTTTTAGC-----AAGGTACGGAAT  
GTATCGTCAAATATTCAATATGATTCC-----ACAAGA-----TCTATTTTCGTTCAAGTAAC  
GGATTCTAGCCAATTGAAAGGATCTTCT--GATCAATCCAGAGATCATTTTGATTCCATTA  
GT-----AATGAGGATTCGGAA-----TATCACACATTGATCAA  
TCAAAGAGAGATTCAACAATAAAAGAAAGATCGATTCTT--TGGGAT-----CCTTCCTT  
TCTTCAAAGGGAACGAACAGAGATAGAATCAGAC-----CGATTCCCGAAA-----TGCCTT



TCTGGATATTCC-----TCAATGTCCCGGCTATTCACG---GAACGTGAGAAGCAGATGAAT  
AATCATCTGCTTCCGGAAGAAATCGAAGAATTTCTT-----GGGAATCCTACAAGATCCAT  
TCGTTCTTTTTTCTCTGACAGATGG-----TCAGAACTTCAT--CTGGGTTCGAATCCTACT  
GAGAGGTCCACTAGAGATCAG-----AAATTGTTGAAGAAACAACAAGATGTTTCT--  
-TTTGTCCCTTCCAGGCGATCGGAA-----AATAAGAAATGGTTGATATATTCAAGAT  
AATTACGTATTTACAAAAT-----ACCATCTCAATTCATCCTATTTTCATCAGATCCAGGATGT  
GATATGGTTCCG---AAGGATGAACCGGAT--ATGGACAGTTCCAATAAGATTTTCATTTTT  
GAACAAAAATCCATTTTTTGTAT-----TTATTTTCATCTATTCCATGACCGGAACAGGGGGG  
GATACACGTTA-----CACCAAGATTTTGAATCAGAA-----GAGAGATTTCAAGAAATGGC  
AGATCTATTCCTCTATCAATAACCGAGCCG---GATCTGGTGTATCATAAGGGATTTGCC  
TTTTCTATTGATTCCTACGGATTGGATCAAAAAAAAA-----TTATTGAATGAGGTATTCAAC  
TCCAGGGATGAATCGAAAAAGAAATCTTTA-----TTGGTTCTACCTCCTATTTTTTAT---  
--GAAGAGAATGAATCTTTTTATCGAAGGATCAGAAAAAATCGGTCCGG---ATCTCCTG  
CGGGAATGATTTGGAAGATCCAAAACCAAAAAGAGTGGTATTTGCTAGCAACAACATA  
ATGGAGGCAGTCAATCAATATAGATTGATCCGAAATCTGATTCAAATCCAATATAGCACC  
TATGGG-----TACATAAGAAATGTATCGAATCGATTCTTTTTAATGATTTTAATGAATAGAT  
CCGATCGCAACTTCGAATATGGAATTCAA-----AGGGATCAAATAGGAAATGATACTC  
TGAATCATAGAACTATAATGAAATATACGATCAACCAACATCTATCGAATTTGAAAAAG--  
-AGTCAGAAGAAAGGGTTCGATCCT-----CTTATTTCTCGAACCGAGAGATCCATGA  
ATCGGGATCCTGATGCATATAGATACAAATGGTCCAATGGGAGCAAGAATTTCCAGGAA  
CATTTGAAACATTTTCGTTTCTGAGCAGAAGAGC-----CGTTTTCAAGTAGTGTTCGAT  
CGATTACGTATTAATCAATATTCGATTGATTGGTCCGAGGTTATCGACAAAAAAGATTTG  
TCTAAGTCACTTCGTTTCTTTTTGTCCAAGTCA-----CTTCTCTTTTTGTG  
C-----AAGTCGCTTCTTTTTGTCTAAG---TCACTTCCTTTTTTCTTTGTGAG  
TTTCGGGAATATCCCCATTCATAGGTCCGAG---ATCCACATCTAT--GAATTGAAAGGTCC  
GAATGATCAACTCTGCAATCAGTTGTTAGAATCAATAGGTGTTCAAATCGTTCATTTGA  
ATAAATTGAAACCCTTC-----TTATTGGAT-----GATCATGATACTTCC---CAAAAATCGA  
AATCTTGATCAATGGAGGAACAATATCACCATTTTTGTTCATAAAGATACCA---AAGTG  
G---ATGATTGACTCATTCCATACT-----AGAAATAATCGCAGGAAATCCTTTGATAACACT  
GATTCCTATTTCTCAATGATATCCACGATCGAGACAATTGGCTGAATCCCGTGAAACCA  
TTTCATAGAAGTTCATTGATATCTTCTTTTTATAAAGCAAATCGACTTCGATTCTTGAATA  
ATCCACATCACTTCTGCTTCTAT-----TGTAACAAAAGATTCCCTTTTTATGTG-----G  
AAAAGGCCCGTATCAATAATTATGAT-----CTTACGTAT--GGACAATTCCTCAATATCTTG  
TTCATTGCAACAAA---ATATTTTCTTTGTGCGTCGGTAAA-----AAAAACATGCTTTTT  
TGGAG---AGAGATACTATTTACCAATCGAGTCACAGGTATCTAACATATTCATACCTAA  
CGATTTTCCACAAAATGGTGACGAAACG---TATAACTGTACAAATCT-----TTCCATTT  
TCCAATTCGATCCGATCCATTTCGTTTCGT-----AGAGCTATTTACTCGATCGCAGACATTC  
TGGAACACCTCTAACAGAGGGACAAATAGTCAATTTTGAAAGAACTTATTGTCAACCT  
CTTTCAGATATGAATCTATCTGATTCAGAAGGCAAGAACTTGCATCAGTATCTCAAT-----  
TTCAATTCAAACATGGGTTTGTATTCACTCCGTGTTCTGAGAAATATTTCCCA-----TCC  
GAAAAGAGGAAAAAA-----CGGAGTCTTTGTCTAAAG-----AAATGCGTT  
GAGAAAGGGCAGATGTATAGAACCCTTCAACGAGATAGTGCTTTTTCAATCTCTCAA  
AATGGAATCTGTTTCAAACATATATGCCATGGTTCCTTACTTCGACAGGGTGCAAATATC  
TAAATTTAACCTTTTAGATACTTTTTTCAGACCTATTG-----CCGATACTAAGTAGCAGT---

CAAAAATGGGTATCCATTTTTTCATGATATTATGCATGGATCAGATATATCATGGCCAATTC  
CTCAGAAAAAATGG-----TGTCTTCCACAATGGAATCTG---ATAAGTGAGATTT  
CGAATAAGTGGTTACATAAT-----CTTCTTCTGTCCGAAGAAATGATTCATCGAAATAATG  
AGTCACCCGTTCCACTGATAGGGACACATCTGAGATCACCAAATGCTCGGGAGTTC---C  
TCTATTCAATCCTTTTGGCTTCTTCTTGTGCTGCATAT---CTCGTTCGTACACATCTTCTCT  
TTGTTTCCCGA-----GCCTCTAGTGAGTTAGAGACAGAGTTGGAAAAGATCAAATCTTT  
GATGATTCCATCATAATGATTGAGTTGCAAAAACCTTCTGGATAGGTATCCTACATCTGA  
ACTGAATCTTTCTGGTTAAAGAATCTCTTTCTAGTTGCTCTGGAACAATTAGGAGATTC  
TCTAGAAGAAATACGGGGTTCTGCTTCTGGTGGCAACATGCTATTGGGTGGTGGTCCC--  
-----ACTTATGGG---GTCAAATCAATACGTTCTAAGAAGAAATATTTGAATATCAATC  
TCATCGATATCATTGATCTCATA---AGTATCATACCAAATCCCATCAATCGAATCACTTTTT  
CGAGAAATACGAGACATCTAAGTCGTACAAGTAAAGAGATCTATTCATTGATAAGAAA  
AAGAAAAACGTGAACGGTGATTGGATTGATGATAAAATAGAATCGTGGGTCGCGAAC  
AGTGATTGATTGATGATGAAGAAAGAGAATTCTTGGTTCAGTTCTCC-----ACCTAAC  
GACA-----GAAAAAAGGATTGATCAAATTCTATGGAGTCTGATT---CATAGTGATCATTTA  
TCA-----AAGAATGACTCTGGTTATCAAATGATTGAACAACCGGGATCAATTTAC  
TTACGATACTTAGTTGACATTCAT-----AAAAAGTATCTAATGAATTATGAGTTCAATAGA  
TCCGTGTTAGCAGAAAGACGGATATTCCTTGCTCATTATCAGACAATCACTTAT-----TCA  
CAAACCTCGTGTGGGGCTAATAGTTTTTCATTTCCCATCTCATGGA-----AAACCCTTTT  
CGCTCCGCTTAGCCCTATCCCCCTCT---AGGGGTATTTTAGTGATAGGTTCTATAGGAACT  
GGACGATCATATTTGGTCAAATACCTAGCGACAACTCCTATGTTCCCTTTCATTACGGTA  
TTCCGAACAAGTTCCTGGATGACAAGCCTAAAGGTTATCTTATTGATGAT-----ATCG  
ATATTGATGATATTGATGATAGTGAGGATATTGAT-----  
-----GATAGTGACGATATCGATGATGACCTTGATACGGAGCTGCTAACTATGA  
CGAATGCGCTA-----ACTATGTATATGACG-----CAGAAAATAGACCGATTTGATATCA  
CCCTTCAATTCGAATTAGCAAAGCAATGTCTCCTTGCATAATATGGATTCCAAACATTC  
ATGATCTGTATGTGAATGAGTCGAATTACTTATCCCTCGGTCTATTAGTGAACCTATCTCTC  
C-----AGGGATTGTGAAAGATGTTCC---ACTAGAAATATTCTTGTTATTGCTTCGACTCA  
TATTCCCCAAAAGTGGATCCCGCTCTAATAGCTCCGAATAAATTAATACATGCATTAA  
GATACGAAGGCTTCTTATTCCACAACAACGAAAGCACTTTTTCACTCTTTCATATACTAG  
GGGATTTCACTTGGAAAAGAAAATGTTCCATACT-----AATGGATTGCGGGTCCATAACCA  
TGGGTTCCAATGCACGAGATCTTGTAGCACTTACCAATGAGGCCCTATCAATTAGTATTA  
CACAGAAGAAATCAATTATAGACACTAATACAATTAGATCCGCTCTTCATAGACAACT  
TGGGATTTGCGA-----TCCCAGGTAAGATCGGTTCCAGGATCATGGGATCCTTTTCTATC  
AGATAGGAAGGGCTGTTGCACAAAATGTACTTCTAAGTAATTGCCCATAGATCCTATAT  
CTATCTATATGAAGAAGAAA-----TCATGTAAGGAAGGGGATTCTTATTTGTACAAATGGT  
ACTTCGAACTTGAACGAGCATGAAGAAATTAACGATACTTCTTTATCTTTTGAGTTGT  
TCTGCCGGATCGGTCGCTCAAGATCTTTGGTCTCTACCC-----GGACCCGATGAAAAA---  
AATGGGATCACTTTTTATGGACTCGTTGAGAATGATTCT--GATCTAGTTCATGACCTATT  
AGAAGTAGAAGGCGCTCTGGTGGGA-----TCCTCACGGACAGAAAAGATTGCAGTCA  
GTTTGATAATGAT-----CGAGTGACATTGCTTCTTCGGTCCGAACCAAGGAAT---CCCTTA  
GATATGATGCAAAATGGATCTTGTCTATCGTTGATCAGAGATTTCTATATGAAAAA-----  
TACGAATCGGAGTTTGAAGAA--GGGGAAGGAGAAGGAGCCCTCGACCCGCAA-----  
---CAGATAGAGGAGGAT-----TTATTCAATCAC-----ATAGTTTGGGCTCCT-----AGAA

TATGGCGCCCT-----TGTGGCAATCTATTTGATTGTATCGAAAGGCCCAATGAATTGGG  
ATTTCCC--TATTGGGCCAGGTCATTTTCGG-----GGCAAGCGGATCATTATCATAAAG  
AGGATGAGCTTCAAGAGAATGATTTCGGAGTTCTTACAGAGTGAACCATGCAGTACCA  
GACACGAGATAGATCTTCCAAAGAACAAGGCTTTTTTTCGAATAAGCCAATTCATTTGGG  
ACCCTGCGGATCCATTCTTTTTCTATTCAA---GATCAGCCCTTTGTCTCTGTGTTTTCA  
CGTCGAGAATTCTTTGCAGATGAAGAGATGTCAAAGGGGCTTCTTACTTCCCAAACAA  
ATCCTCCTACATCTATATATAAACGCTGGTTCATC-----AAGAATACGCAAGAAAAGCAC  
TTCGAATTGTTGATTCATCGCCAGAGATGGCTTAGAACC-----AATAGTTCATTACCT--  
---AATGGATCTTTCCGTTCTAAT-----ACTCTATCCGAGAGTTATCAGTATTTATCAAATCT  
CTTCCTATCTAAC---GGAACGCTATTGGATCAAATGACAAAGACATTGTTGAGAAAGAG  
ATGGCTTTTCCCGGATGAAATGAAAATTGGATTC-----ATG-----ATGCCT  
AGATCGCGG---ATAAATGGAAATTTTATTGATAAGACCTCTTCAATTGTAGCCAATATCTT  
ATTACGAATAATTCCGACAACCTTCAGGAGAAAAAGAGGCATTTACCTATTACAGAGATG  
GG-----ATGTCAGCTCAATCCGAAGGAAATTATGCGGAAGCTTTACAGAATTATTATGAA  
GCTACGCGGCTAGAAATTGATCCCTATGATCGAAGTTATATACTCTATAACATAGGACTT  
ATCCACACAAGCAACGGAGAACATACAAAAGCTTTGGAATATTATTTCCGGGCACTAG  
AACGAAACCCATTTTTACCACAAGCTTTTAATAATATGGCCGTGATCTGTCAATTAC---CG  
GGGAGAACAGGCCATTTCGACAGGGAGATTCTGAAATTGCGGAGGCTTGGTACGATCA  
AGCTGCTGAGTATTGGAAACAAGCTATAGCGCTTACTCCAGGTAATTATATTGAAGCGC  
ATAATTGGTTGAAGATCACGAGGCGGTTTCGAA-----ATGAGTTGGCAATCAGAACGTATA  
TGGATAGAACTTATAACGGGGTCTCGAAAAACAAGTAATTTCTGCTGGGCCTTTATCCT  
TTTTTTAGGTTCACTAGGATTCTTATTGGTTGGAACCTCCAGTTATCTTGGTAGGAATCT  
GATATCTTTATTTCCGTCTCAGCAAATCTTTTTTTTTCCCAAGGAATCGTGATGTCTTTC  
TATGGGATTGCAGGTCTATTTCATTAGTTTCTATTTGTGGTGCACAATTGCGTGGAATGTA  
GGTAGTGGTTATGATCGATTTCGATAGAAAAGAAGGACTTGTGTGTATTTTTCGTTGGGG  
ATTTCCCTGGAATAAATCGTCGCATCTTCCCTCCGATTCCCTTATGAGAGATATCCAATCGAT  
AAGAATAGAAGTTCAAGAGGGTCTTTATCCTCGTCGTGTCCTTTATATGGAATCAGAG  
GCCAGGGAGCCATTCCCTTGACTCGTACTGATGAGAAT---TTGACTCCACGAGAAATTG  
AACAAAAAGCTGCGGAATTAGCCTATTTCTTGC GCGTACCAATTGAAGTATTT

>Cymbidium

ATGGAAAAATGTTGGTTCAATTTCGATGTTGTCTCTAAGTAAATCAATGGATAGTCTTGAT  
GCTCTTGGACATAACCAGTGGAAGTGAAGAACTAAT-----GATCCGGAGAAAAAGATCC  
CTAGCTTCAGTAATATTCATTATTTATTTGATAGCAGGAATATTTGGAGTTTGATCTCTGA  
TCATACTTTTTTAGTTAGAAATAGTAATGGTGACACTTATTCTGTATATTTTGATATTGAC  
AATCATATTTTTGATATTGACAATGCTAGT-----TCTTTTTTGAGTGAAGTACTAGAGATTCTCT  
TT-----AGTTATTTGAATGGTGGGTCTAATAGTAGTAAT---TCTTATTAT---TCCAT  
GTATGATACTCAATCTAATTGGAATAATCATATTAATAGTTGCATTGACAGCTATCTTCGT-  
-----TTTGAAATCAGTCTGAATAGTGACATTTACAGTGGTATCGAC-----TACATTT  
TAGTTTCATTTGTGCGAGTGGAATCCTAGTGTTAAACTAGTAGC-----AGTTCTTTCA  
ATATAAGAGAAAAATCTAATGATTTTCGATATAAATACAAAATACAAACAGTTATGGGTTT  
AATGTGATAATTGTTATGGATTAATAAAAAATTTTTTAGTTCAAAAATGAATATTTG  
TGAACACTGCGGATATCATTGAAAATGAGTAGTTCAGATAGAATCGAACTCTTTATTG  
ATCCTGGCACTTGGGAGCCTATGGACGAAGATATGGTCTCTATGGACCCCATTTGAATTT  
CATTCAGAGGAGGAACCTTATATAGATCGCATCTTTTTTATCAAATAAAAACGGGTTTA

ACTGAAGCTGTTCAAACGGGTGTAGGTCAACTAAATAGTATTCCCATAGCAATGGGAGT  
TATGGATTTTCAGTTTATGGGAGGTAGTATGGGATCCGTAGTAGGTGAGAAAATCACCC  
GTTTGATTGAGTATGCTACTAATCGATCTCTACCTATCATTATTATGTGTGCTTCTGGAGG  
AGCACGCATGCAAGAAGGGAGTTTGAGCTTGATGCAAATGGCTAAAATATCTTCTGCT  
TTATATGATTATCAATCAAATACAAAGTTATTCTATGTATCAATCCTTACATCTCCTACAA  
CTGGCGGAGTTACAGCAAGTTTTGGTATGTTGGGAGATATCATTATTGCTGAACCTAAT  
GCCTACATTGCGTTTGCGGGTAAAAGAGTAATTGAACAAACATTGAAAAAGACAGTAC  
CTGACGGTTCACAAACGGCTGAGTATTTATCCATAAGGGCTTATTCGACCTAATCGTAC  
CACGTAATCTTTTAAAAGGTGTTCTGAATGAGTTATTTTCAGCTACACGGTTTCCTTCCCT  
TGAATGAAGATTCAAAA---ATGGGAACCCTTCGAGCTGACGAAATTAGTAATATTATAC  
GCGAACGTATTGAACAATATAATAGAGAAGTAAAGATTGTGAATACTGGTACCGTACTT  
CAAGTGGGCGACGGCATTGTTTCGTATTCACGGTCTTGATGAAGTAATGGCAGGTGAATT  
AATAGAATTTGAAGAGGGTACCATAGGTATTGCTCTGAATTTGGAATCAAATAATGTTG  
GTGTTGTATTAATGGGTGATGGTTTGTATGATAAAAGAGGGAAGCTCGGTAAGCAAC  
AGGAAGAATCGCTCAGATCCCTGTGAGCGAGGCTTTTTTGGGTCGTGTCATAAATGCTC  
TGGCTAAACCTATTGATGGGAGAGGTGAAATTTTCATCTTCTGAATCTCGGTTAATTGAAT  
CTCCTGCCCCAGGTATTATTTTCGAGACGTTCCGTATATGAGCCCCTTCAAACGGGACTTA  
TTGCTATTGATTCAATGATTCCTATAGGACGCGGGCAGCGAGAATTAATTATTGGAGACA  
GACAGACTGGTAAAACAGCAGTAGCCACAGATACGATTCTCAATCAAAAAGGACAAA  
ATGTAATATGTGTTTATGTAGCTATTGGTCAAAAAGCATCTTCTGTGGCTCAAGTAGTGA  
CTACCTTCCAGGAAGGAGGGGCAATGGAATACACTATTGTGGTAGCCGAAACAGCAGA  
TTCGCCTGCTACATTACAATATCTCGCTCCTTATACGGGAGCGGCTCTGGCTGAATATTT  
TATGTACCGTGAACGACATACTTCAGTAATTTATGATGATCTCTCCAAGCAGGCACAAG  
CTTATCGTCAAATGTCTCTTCTATTAAGAAGACCCCCAGGTCTGTAAGCTTATCCAGGA  
GATGTTTTTTATTGCAATTCACGACTTTTGGAAAGAGCCGCTAAATCAAGTTCTCGTTTA  
GGTGAAGGAAGTATGACTGCTTTACCAATAGTAGAGACTCAATCTGGAGACGTTTCGG  
CTTATATCCGACTAATGTAATTTCTATTACAGATGGACAAATATTCTTATCTGCGGATTTA  
TTCAATGCTGGAATCAGGCCTGCTATTAATGTAGGTATTTCTGTTTCAAGAGTAGGATCG  
GCAGCTCAAATTAAGCCATGAAACAAGTAGCTGGCAAATCAAATTTGGAAGTAGCTC  
AATTTGCAGAATTAGAAGCCTTTGCACAATTTGCTTCTGACCTAGATAAAGCTACTCAG  
AATCAATTTGGCAAGAGGCCAACGATTACGTGAGTTGCTTAAACAATCTCAATCAGACC  
CTCTCGCGGTGGAAGACCAGATAGCTACTATTTACACCGGAACAAATGGATATCTTGAT  
ACGTTAGAAATTGGACAGGTAAAGAAATTTCTCGTTGAGTTACGTACCTACTTAACAAA  
GAAGAAACCTAAATTCCAAGAAATTCTATCTTTTACCAAGATATTCACCGAAGAGGCTG  
AAACACTTTTGAAGAAGCTATTCAGGAACAGATTGAACTCTTTCTACTTCAGGAACA  
AAGAATGATAAGCAATCCCACTACTTCTAATCCTGTGGTTTCTACACTTGAAGAACAAA  
ACCTAGGGCGTATCACTCAAATTTGGCCAGTACTGGATGTCATTTTTCCACCAGGC  
AAGATGCCTAATATTTATAATGCTTTGGTAATTAAGGTCGAGATACTGTGCGTCAGCAA  
ATTAATGTAACCTTGTGAAGTACAACAATTATTAGGAAATAATCGAGTGAGAAGTGTAGC  
TATGAGTGCTACAGATGGTCTGATGAGAGGAATGAAAGTGATTAACACGGGAGCTCCT  
CTAAGTGTTCAGTCGGGGGAGCTACTCTCGGACGAATTTTCAACGTTCTTGGAGAGC  
CCGTTGATAATTTAGGTCCTGTCGATACTCGCACAACATCTCCTATTCATAGATCTGCAC  
CCGCCTTCATACAGTTAGATACGAAATTATCAATCTTTGAAACAGGGATTAAGTGGTA  
GATCTTTTAGCTCCCTATCGCCGTGGAGGAAAAATCGGACTATTTGGGGGAGCTGGAGT

GGGTA AACAGTACTCATCATGGAATTGATCAACAACATTGCCAAAGCTCACGGAGGC  
GTATCTGTATTTGGCGGAGTAGGTGAACGTACTCGTGAAGGAAATGATCTCTACATGGA  
AATGAAAGAATCCGGGGTTATTAATGAAAAAATCTTGCAGAATCAAAGTGGCTCTA  
GTCTATGGTCAAATGAATGAACCGCCAGGAGCTCGTATGAGAGTTGGCTTACTGCCCT  
AACCATGGCGGAATACTTTAGGGATGTTAATGAACAAGACGTACTTCTATTCATCGACA  
ATATATTTTCGTTTCGTTCAAGCAGGGTCCGAAGTCTCTGCCTTATTAGGTAGAATGCCTT  
CTGCAGTGGGTATCAACCTACCCTTAGTACGGAAATGGGTCTTTTGCAAGAAAGAATT  
ACTTCTACTAAAGAAGGATCCATAACATCGATCCAAGCAGTTTATGTACCTGCGGATGA  
TTTGACCGACCCTGCTCCTGCCACGACATTTGCACATTTAGATGCTACTACCGTATTATC  
AAGAGGATTAGCTGCCAAAGGTATTTATCCAGCAGTAGATCCCTTGGATTCAACGTCAA  
CTATGTTACAACCTCGGATCGTTGGTGAGGAACATTATGAAACTGCGCAAAGGGTTAA  
GCAAAC TTTACAACGTTACAAGA ACTTCAGGACATTATAGCTATCCTTGGGTGGACG  
AATTATCCGAAGAAGATCGTTTAACTGTAGCAAGAGCACGCAA AATTGAGCGTTTCTTA  
TCACAACCCTTCTTTGTGGCAGAAGTCTTTACTGGTTCTCCAGGGAAATATGTTGGTCT  
CGCAGAAACAATTCCGGGGTTTAAATTCATCCTTTCCGGAGAATTAGACGGTCTTCCCG  
AGCAGGCCTTTTATTTGGTGGGTAACATCGATGAAGCTACCGCGAAAGCTATGAACTTA  
GAAGAGGAGAACA AATTGAAAAAATGACCTTAAATCTTTGTGTACTGACTCCTAATC  
GAATGATTTGGAATTCCGAAGTGAAAGAGATTATTTTATCTACTAATAGTGGACAAATTG  
GGATATTACCAAACCATGCCCCATTGCCACGGCTGTAGATATAGGTCTTTTGAGAATAC  
GGCTAAAC---CGATGGTTAACGGTGGCTCTTATGGGCGGTTTTGCTAGAATAAGTAATAA  
TCAGATCACCATTTTAGGAAATGGTGC GGAAATTAGTACTGACATTGATCCACAAGAAG  
CTCAACAAACTCTTGAAATAGCTGAAGCTAACTTGAGTAGAGCTGAGGGTAAGAGAC  
AAGCAATTGAGGCAAATCTAGCTCTCAGACGAGCTAGGACACGAGTAGAAGCTGTCA  
AAGCGATTTCCATGAAAAATATAACCGATTCTTTTGTTCGGTGGGGCACTGGCCATCC  
GCTGGGAGTTTCGAGTTAATAACGATATTTTAGCAATAAATCCAATAAATCTAAGCGTA  
GTGCTGGGTGTATTGATTTTTTTGGAAAGGGAGTGTTAAATGATTTATTAGATAAGCGA  
AAACAGAGGATCTTGAGTACTATTCGAAATTCAGAAGAATTACGTAGAGGAGCCATTG  
AACAGCTCGAAAAAGCTCGGGTTAGATTACGGAAAGTGGAATCAAAGCAGATGAGT  
ATCGAACGAATGGATATTCTGAGATAGAACAAGAAAAAGTAAATTTGATTAATGCTACT  
TGCAAGAGTTTGGAACAATTAGAAAATTACAAAAATGAAACTCTTTTTTTGAAAAAC  
AAAGAGCAATTAATCGGGTCCGACAACAAGTTTTGCAACAAGCCTTACAAAGAGCTCT  
AGGAACTTTGAATAGTTGTTTGAATAGCGAATTACATTTTCGTACCATCAGTGCTAATAT  
TGGTATTCTCGGGTCCGCGGAAGAAATAACTGATATGAATCCACTTATTTCTGCTGCTTC  
CGTTATTGCTGCTGGATTGGCTGTAGGGCTTGCTTCTATCGGACCCGGGGTTGGTCAAG  
GAACTGCTGCGGGCCAAGCCGTAGAAGGTATTGCGAGACAACCAGAAGCAGAGGGTA  
AAATACGAGGTACTTTATTGCTGAGTCTGGCTTTTATGGAAGCTTTAACCATTTATGGAC  
TGGTCGTGGCATTAGCTCTTTTATTTGCAAATCCTTTTGTATGAATGTTATACCATGTTT  
CATTA AACACTCAAAGGGTTATATGATATATCAGGTGTAGAAGTAGGCCAACATTTATA  
TTGGCAAATAGGAGGTTTACAAATTCATGCCAAGTACTTATCACTTCTTGGGTGTAAT  
TGCTATCTTATTAGGTTCAGTATCATAGCTGTTCCGGAATCCACAACCATTCGACCGA  
CGGTCAGAATTTCTTCGAATATGTCCTTGAATTTATTCAAGACTTGAGCAA AACTCAGA  
TTGGAGAGGAGTATGGTCCTTGGGTTCCTTTTATAGGAACGATGTTCCATTTATTTTGG  
TTTCTAACTGGTCAGGCGCTCTTTTACCTTGGAAAATCATAAAGTTACCTCATGGAGAG  
TTAGCTGCGCCACGAATGATATAAATACTACTGTTGCTTTAGCTTTACCCACGTCAGTG

GCATATTTCTATGCGGGTCTTAGTAAAAAAGGATTGGGATATTTCTGGGAAATATATTCAA  
CCAACTCCAATACTTTTACCAATTAATATTCTAGAAGATTTACCAAACCTTTATCTCTTA  
GTTTTCGACTTTTTGGGAATATATTGGCTGATGAATTAGTGGTTGTTGTTCTTGTTTCTTT  
AGTGCCTTCAGTAGTTCCCTATACCTGTCATGTTTCTTGATTATTTACAAGCGGTATTCA  
AGCTCTTATTTTTGCAACTTTGGCTGCGGCTTATATAGGTGAATCCATGGAGGGTCATCA  
TATGATATTTGCGACTTTAGAACATATATTAACATATTTCTTTTTTCGATCATTCAATTG  
TGATTCTAATTCATTTGATGAACTTATTAGTCTACGAAATCGAAGGATTACGTAATTCGT  
CAGAAAAAGGGATGATAGCTACTTTTTTCTCTATAACAGGGTTTTTAGTTATTCGTTGGA  
TTTTCTTCGGGACATTTTCCTTAAGTAATTTATACGAATCGTTAATCTTCCTTTCATGGAG  
TTTATCCATTATTCATATGATTCCGTATCTTGAAATCATAAAAATGATTTAAGCGCAATA  
ACTGCACCAAGTGTTATTTTTACCCAAGGTTTTGCCACGTCAGGTCTTCAACTGAAAT  
GCATAAACCCGTAATATTAGTACCTGCTCTACAATCTCAGTGGTTAATAATGCATGTAAG  
TATGATGCTCTTGAGCTATGCAGCTCTTTTATGCGGATCTTTATTATCAGTTGCTCTTATA  
GTGATTACATTTCAAAAAAGAATTGATTCTTTTTTGAAAAACAATGATATGGAATATTTG  
AACGAAAAA---AGTGTATTAATAAAGACTTATTTTCTATCATTTCAAAATTTTTACAAAT  
ATCAATTAATTCAGCGTTTAGATTATTGGAGTTATCGTGTCAATTAATTTAGGATTTACCTT  
TTTAACCATAGGCATTTCTTCTGGAGCAGTATGGGCTAATGAAGCATGGGGTTTCGTATTG  
GAATTGGGACCCTAAGGAACTTGGGCATTTATTACTTGGACCATATTTGCAATTTATTT  
ACATACTAGAAAAAATTCAAATTTGCAAGATACGAATTCGGCATTGTAGCTTCTATAG  
GATTTATCCTAATTTGGATATGCTATTTTGGGATCAATATATTAGGAATCGGGTTACATAG  
TTATGGTTCAATCCAATTAATAAGAAAAAAGTATTGGCT---TCCCTCCCATATCTTG  
TATCTATACTCTTTTTGCCCTGGTGGGTTTCTCTCTCATTAAAGAAATGTCTAGAACTT  
GGATTCTTAATTTGGTGGAAATACCAGGCAATCCGAAATCCTTTTGAATGATATCAAGAG  
AAAAATGTTCTAGAAAGATTTATGGAATTAGAAGAATTCCTGTTGGACGAAATGAT  
AAAGGAGTACTCGGAGACACATATGCAAAGGTTTCATATAGGAATGCACAAGGAAACA  
ATACAATTTGGTCCAAAGACAAAATGAATCTCATTTCCATATAATTTGCATTTCTCTACA  
AACCTAATCTGTTTCGCTATACTAAGTGGTTATTTTTTTTTCTGGGTAATGAAGAATTTTC  
ATTCTAAATTTCTGGATTCAGGAATTTCTCTATAACTTAAGTGATACAATCAAAGCTTTT  
TCAATTTCTTTAGTTACTGATTTATGGATCGGGTTTCACTCAACCCATGGTTGGGAACTA  
ATGATTGGTTCAATCTACAACGATTTTGGATTGGCTCAGAATGATCAGATTATCTCTGGT  
CTTGTTTCCACTTTTCCAGTGATTCTAGATACAATTTGTGAAATATTGGATCTTCCATTTTT  
TAAATCGTGTATCTCCTTCGCTTGTAGTAATTTATCATTCAATGAATGAAATGCCCTTGG  
TGTTCCAAAAGTACCTTTTCGGAGTCTTGAGAGGGAAGATGCAGCTTGGGTTGACGTA  
AAC---CGACTTCATCGAGAAAGATTACTTTTTTTTAGGCCAAGAGGTTGATAGCGAGATC  
TCGAATCAACTTGTGGTCTCATGATATATCTCAGCATAGAAGATGATACTAGGGATCTT  
TATTTGTTTATAAATTTCTCCAGGCGGATGGGTAATACCAGGAATAGCCATTTATGATACTA  
TGCAATTTGTGTCACCGGATGTACATACAATATGTATGGGATTAGCCGCTTCAATGGGAT  
CTTTCGTTCTGGTCGGAGGAGAAATTACCAAACGTCTAGCATTCCCTCACGCTAGGGTT  
ATGATTCACCAACCTGCTAGTTCTTTTTACGAGGCACAAGCAGGGGAATTTATTCTGGA  
AGCAGAAGAATATTGAAGCTTCGCGAAACTCTCACAAAAGTTTATGTACAAAGAACG  
GGCAACCCTTTATGGGTTATATCCGAAGATATGGAAAGGGATGTTTTTATGTCAGCAAC  
AGAAGCCCAAGCTCATGGCATCGTTGATCTTGTAGCGGTCGAAATGAAAGAACAAAAA  
TTGATTCATGAGGGTTTAATTAATTAATCACTTCCCAACGGTATGTTCCGAGTTCAATTA  
GATAATGAAGATCTAATTTCTAGGTTATATTTACGGGAGAATCCGACGCAGTTTTTATACGT











TTGAATGATCCTGTATTAAGAGCTAAATTGGCTAAAGGGATGGGACATAATTATTATGGA  
GAACCCGCATGGCCAATGATCTTTTATATATTTTTCCAGTAGTAATCCTAGGCACTATTG  
CATGTAGTGTGGGTTTAGCAGTTCTAGAGCCGTCAATGATAGGTGAACCAGCGGATCC  
GTTTGCAACTCCGTTGGAAATATTACCCGAATGGTACTTCTTTCCCGTATTTCAAATACT  
TCGCACAGTGCCCAATAAATTATTGGGTGTTCTTTTAATGGTTTCAGTACCAATAGGATT  
ATTGACAGTACCTTTTTTGGAGAATGTCAATAAATCCAAAATCCATTTGTCGTCCAGT  
AGCTACAACAGTATTTTTGATCGGTACCGCAGTAGCTCTTTGGTTAGGTATTGGAGCAA  
CTTACCTATCGAGAAATCCCTCACTTTAGGTCTTTTTATGATTGAAGTTTTTCTATTTGG  
AATCGTCTTAGGTCTAATTCCTATTACTTTAACAGGATTATTTGTAAGTGCATATTTACAA  
TACAGGCGCGGTGATCAGTTGGACCTTATGCCTATTCTAACTAGTTATTTTGGTTTTTTA  
CTGGCTGCTTCAACTATAACTCCAGCTCTATTTATTGGTTTTGAACAAGATACGACTTATT  
ATGGATATAGTAAGTCTCGCTTGGGCTGCTTTAATGGTAGTGTTTACATTTTCTCTTTCA  
CTTGTAGTATGGGGAAGGAGTGGGCTTATGATTATTCGTTCCGCGGAACCCGAAGTGA  
AAATTGTTGTAGACAGGAATCCTATAAAAACGTCTTTTTGAGGAATGGGCCAGACCCGG  
CCATTTCTCAAGAACAATAGCTAAGGGTCCTGATACTACCACTTGGATCTGGAACCTAC  
ATGCTGATGCTCACGATTTTCGATAGTCATAACAGTGATTTGGAGGAGATTTCTCGAAAA  
GTCTTTAGTGCTCATTTTGGCCAACTCTCTATTATCTTTCTTTGGCTGAGTGGCATGTAC  
TTCCATGGCGCCCGTTTTTCCAATTATGAAGCATGGCTAAGCGATCCTACTCATATTGCA  
CCCAGTGCACAAGTAGTTTGGCCAATAGTAGGTCAAGAAATATTGAATGGAGATGTGG  
GCGGTGGTTTTCCGAGGAATAACAATAACCTCCGGTTTTTTTCAGATTTGGCGAGCATCT  
GGAATCACTAATGAATTACAACCTCTATTGTACCGCAATTGGTGCATTGGTCTTTGCATCG  
TTAATGCTTTTTGCTGGTTGGTTCCATTATCACAAAGCCGCTCCGAAATTGGCTTGGTTC  
CAAGATGTAGAATCTATGTTGAATCATCACTTAGCGGGGTTACTAGGACTTGGGTCTCT  
TTCTTGGGCGGGACACCAAATCCACGTATCTTTACCAATTAACCAATTTCTTGACGCTG  
GAGTTGATCCTAAAGAAATACCACTTCTCATGAATTTATCTTGAATCGGGATCTTTTGG  
CTCAACTTTATCCAAGTTTTTCCGAGGGAGCAACGCCCTTTTTACCTTGAATTGGGCA  
AAATATGCGGAATTTCTGAGTTTTCGTGGAGGATTAGATCCAATAACAGGGGGTCTTTG  
GTTGAGTGATATTGCACACCATCATTTAGCTATTGCGATTCTGTTCCCTGATCGCAGGTCA  
TATGTATAGGACTAACTGGGCCATTGGTCATGGTCTGAAAGACATTTTAGAGGCTCATA  
AAGGTCCATTTACGGGCCAGGGCCATAAAGGTCTCTATGAAATCCTAACAACGTCAATGG  
CATGCTCAATTATCTCTGAATCTAGCTATGTTAGGTTCTTTAACCATTGTTGTAGCTCACC  
ATATGTATTCCATGCCCCCTATCCATACCTAGCTATTGACTATGGTACACAACCTTTGTT  
GTTACACATCACATGTGGATCGGGGGATTTCTTATAGTTGGCGCTGCTGCACATGCAG  
CCATATTTATGGTAAGAGACTACGATCCAACTACTCGATAACAACGATCTATTAGATCGTG  
TCCTTAGACACCGTGATGCAATCATATCACATTTGAACTGGGCATGCATATTTCTAGGAT  
TTCACAGTTTTTGGCTTGTATATTCATAATGATACTATGAGCGCTTTAGGGCGTCCCAAG  
ATATGTTTTTACGATACCGCTATAACAATTACAACCCATCTTTGCTCAATGGGTACAAAACA  
CCCATACTTTAGCACCTAGTGTAACAGCTCCTGGTGAACAACAAGTACCAGTTTAACT  
TGGGGAGGTGGTGAAGTTAGTAGCAGTGGGTGGCAAAGTTGCTTTGTTACCTATAACCATT  
AGGAACTGCAGATTTTTTGGTTCATCACATTCATGCATTTACAATTCATGTGACTGTATT  
GATCCTACTGAAAGGTGTTCTATTTGCTCGCAGTTCCCGTTTGATACCTGATAAAGCAA  
ATCTTGGTTTTCGTTCCCTTGTGATGGGCCTGGTAGGGGGGAACATGTCAAGTATCT  
GCTTGGGATCATGATTTCTTAGGTCTATTCTGGATGTACAATGCAATTTCCGGTAGTAATTT  
TCCATTTAGTTGGAAAATGCAGTCGGATGTTTTGGGGTACTATAAGTGATCAAGGAGTA

GTCACTCATATCACAGGAGGGAAC TTTGCACAGAGTTCCATTACTATTAATGGATGGCT  
CCGGGATTTCTTATGGGCACAGGCATCTCAAGTAATTCAGTCTTATGGTTCTTCATTATC  
TGCATATGGTCTTTTTTCTTAGGTGCTCATT TTTGTCTGGGCTTTCAGTTAATGTTTCTA  
TTCAGTGGCCGTGGTTATTGGCAAGAACTCATTGAATCCATCGTTTGGGCTCATAACAA  
ATTA AAAAGTTGCTCCTGCTACCCAGCCTAGAGCCTTGAGTATTGTACAAGGACGTGCTG  
TAGGAGTAA ACCATTACCTTCTGGGTGGAATTGCCACAACATGGGCATTCTTCTTAGCA  
AGAATTATTGCAGTAGGAATGACATTAAGATTCCCAAGGTTTAGCCAAGGCTTAGCTCA  
GGACCCACTACTCGTCGTATTTGGTTTGGTATTGCTACCGCACATGACTTCGAGAGTC  
ATGATGATATTACTGAAGAACGTCTTTATCAGAACATTTTGTCTCGCACTTTGGACAGT  
TAGCAATAATCTTTCTGTGGACGTCCGGAAATCTGTTTCATGTAGCTTGGCAAGGAAAT  
TTTGAGTCATGGATACAGGACCTTTACATGTAAGACCTATTGCTCATGCAATTTGGGAT  
CCTCATTTTGGTCAACCCGCTGTAGAAGCCTTTACTAGAGGAGGTGCTATCGGTCCAGT  
GAATATCGCTTATTCTGGTGT TTTATCAGTGGTGGTATAACAATCGGATTACGCACCAATGG  
GGATCTTTATACTGGAGCTCTTTTTCTATTACTTCTTTCTGCTATATCCTTAATAGCGAGT  
TGGTTACACCTACAACCAAATGGAAACCAAGCGTTTCTTGGTTCAAAAATGCCGAAT  
CTCGTCTCAATCATCATTTGT CAGGACTTTTTGGAGTAAAGTTCCTTGGCTTGGACAGGA  
CATTTAGTTCATGTGCTATTCCC GAATCGAGGGGAGAGTACGTCAGATGGAATAATTT  
CTTAGACGTATTGCCGTATCCCCAAGGGTTGGGTCCACTTTTTACGGGTCAATGGAATC  
TTTATGCTCAAAACCCTGATTCCAGTAGTCATTTATTTGGTACCTCCCAAGGGGCAGGA  
ACTGCCATTCTAACCTTCTTGGGGGATTCCATCCCCAAACGCAAAGTTTATGGCTAAC  
CGATATTGCTCATCATCATTTAGCTATTGCATTCTTTTTCTCGTTGCTGGTCATATGTATA  
GAACTA ACTTCGGGATTGGACACAGTATCAAAGATCTTTTAGAAGCACATATTCCTCCG  
GGGGTTCGATTAGGACGTGGTCATAAGGGTCTTTATGACACAATAAATAATTCGCTTCA  
TTTTCAATTGGGCCTTGCTCTAGCCTCTTTAGGGGTTATTACTTCTTAGTAGCTCAACA  
CATGTA CTCTTACCTGCTTATGCATTCATAGCACAAAGACTTTACTACTCAAGCTGCGTT  
ATATACTCATCACAATAACATCGCAGGGTTCATCATGACAGGAGCCTTTGCTCATGGGG  
CTATATTCTTCATTAGGGATTACAATCCAGAACAGAATGAGGATAATGTATTGGCAAGAA  
TGTTATATCATAAAGAAGCTATAATATCTCATTTAAGTTGGGCTAGCCTATTTCTGGGGTT  
CCATACCTTGGGCCTTTATGTGCATAACGACGTCATGCTTGCTTTTGGTACTCCGGAAA  
AACAAATATTAATTGAACCTATATTTGCCCAATGGATACAATCTGCTCATGGCAA AACTT  
CGTATGGGTTTCGATGTA CTCTTATCTTCAACGAATAGCCCTGCATTCAATGCAGGTGCA  
AGCATATGGTTACCTGGCTGGTTGAATGCTATTAATGAG-----AATAGTAATTCACTTTTC  
TTAACAATAGGGCCAGGAGATTTCTTGGTTCATCATGCTATTGCTCTGGGTTTACATACG  
ACTACATTGATTTTAGTAAAAGGTGCTTTAGATGCGCGTGGTTCCAAGTTAATGCCAGA  
TAAAAAGGATTTTCGGTTATAGTTTTCTTGGCAGCGTCCC GGCGTGCGGTTACTTTGTG  
ATATTTCTGCTTGGGACGCATTTTATTTGGCAGTTTTTTGGATGCTAAATACCATTGGATG  
GGTACTTTTTTATTGGCATTGGAAACACATCACATTATGGCAGGGTAACGTTTCA CAATT  
TAATGAATCCTCCA CTTATTTGATGGGATGGTTAAGAGATTATCTATGGTTAAACTCTTC  
ACA ACTTATCAATGGATATAACCCTTTTGGTATGAATAGTTTATCGGTCTGGGCGTGGAT  
GTTCTTATTTGGACATCTTGTTTGGGCTACTGGATTTAIGTTCTTAATTTCTTGGCGTGGC  
TATTGGCAGGAATTGATTGAAACTTTAGCGTGGGCTCATGAACGGACACCTTTGGCTAA  
TTTGATT CGATGGAAAGATAAGCCAGTGGCTCTTCCATTGTGCAAGCAAGATTGGTTG  
GATTAGCCACTTTTCCGTAGGTTATATATTTACTTACGCAGCTTTCTTGATTGCCTCCAC  
ATCAGGAAAATTTGGTATGTACATTCAGTAAAGATTTATGATACATGTATAGGATGTAC

CCAATGTGTTTCGAGCTTGCCCCACGGATGTATTGGAAATGATACCTTGGGACGGATGTA  
AAGCTAAGCAAATTGCTTCTGCCCAAGAACCGAAGATTGCGTAGGTTGTAAAAGATG  
TGAATCCGCTTGTCCAACGGATTTTTTGTAGTGTCCGTGTTTATTTATGGCATGAAACAA  
CTCGTAGCATGGGTCTTTCTATATGATAGATTTGAACTTTCCCTCTATTTTTGTTCCTTT  
AGTGGGCCTAGTCTTTCCGGCAATCGCAATGGCTTCTTTATCTCTTTATGTTCAAAGAAA  
TAAGATTGTCATGCGAGATATAAAAACATATCTCTCAACGGCACCTGTGCTAACCCTC  
TATGGTTTGGGTCTTTAGCAGGTCTATTGATAGAAATTAATCGTTTATTTCCAGATGCCTT  
GTCATTCCCCTTTTTTTCATCTATGACTGCAATTTTAGAGAGACGCGAAAGTACAAGCC  
TATGGGGTCGCTTCTGCAACTGGATTACCAGTACTGAAAACCGTCTTTACATTGGATGG  
TTTGGTGTTTTGTATGATCCCTACTTTATTGACCGCAACTTCTGTATTTATCATTGCCTTCA  
TTGCTGCCCTCCAGTTGATATTGATGGTATTCGTGAACCTGTTTCTGGATCTCTACTTT  
ACGGAAACAATATTATATCAGGTGCCATTATCCTACTTCCGCAGCTATAGGTTTGCATTT  
TTACCCAATATGGGAAGCAGCATCTGTTGATGAGTGGTTATACAATGGCGGTCTTATG  
AACTGATTGTTCTACACTTTTTACTTGGTGTAGCTTGTACATGGGTCTGTGAGTGGGAA  
CTTAGTTTCCGTCTGGGTATGCGTCCTTGGATTGCTGTTGCATATTCAGCTCCTGTTGCG  
GCTGTACAGCTGTTTTCTTGATCTACCTATTGGTCAAGGAAGTTTCTCTGATGGTATG  
CCTTTAGGAATATCTGGTACTTTCAACTTCATGATTGTATTCCAGGCAGAGCACAACATT  
CTTATGCATCCATTTACATGTTAGGCGTAGCTGGTGTATTTCGGCGGCTCTCTATTCAGT  
GCTATGCATGGTTCTTTGGTAACTTCTAGTTTAATAAGGGAAACCACTGAAAACGAGTC  
TGCTAATGAAGGTTACAGATTCGGTCAAGAGGAAGAAACCTATAATATTGTAGCCGCTC  
ATGGTTATTTTGGCCGATTGATCTTCCAATATGCTAGTTTCAACAATTCCCGTTCCTTACA  
TTTCTTCCCTGGCTGCTTGGCCAGTAGTGGGTATCTGGTTCCTGCTTTGGGTATTAGCAC  
TATGGCGTTCAACCTGAACGGTTTCAATTTAACCAATCTGTAGTTGACAGTCAAGGTC  
GTGTTATTAACACTTGGGCTGATATCATAAATCGTGCTAATCTTGGTATGGAAGTAATGC  
ACGAACGTAATGCACACAACCTCCCTCTAGACCTAGCTTCTGTGGAAGTTCCATCTATA  
AATGGAATGGGTTTGCCTTGGTATCGTGTTCATACCGTTGTATTGAATGATCCCGGTCGA  
TTACTTTCTGTTCAATAATGCATACAGCTCTAGTTTCTGGTTGGGCCGGCTCGATGGCT  
CTATATGAATTAGCGGTTTTTGTATCCCTCTGACCCTGTTCTTGATCCAATGTGGAGACAA  
GGCATGTTTCGTTATACCCTTTATGACTCGTTTAGGAATAACCAATTCGTGGGGGGGTTG  
GAATATATCG---GGAGGAACTATAATGAATCCGGGCATTTGGAGTTATGAAGGCGTGGC  
AGGAGCACATATTTGTTTTCTGGCTTGTGCTTCTTATCAGCTATCTGGCATTGGGTGTA  
TTGGGACCTAGAAATCTTCTGTGATGAACGTACGGGAAAACCTTCTTTGGATTTGCCCA  
AGATCTTTGGAATTCATTTATTTCTCTCAGGAGTTGCTTGCTTTGGCTTTGGTGCATTT  
ATGTAACAGGATTATATGGTCCCTGGTATATGGGTGTCTGATCCTTATGGACTAACGGGAA  
AAGTACAATCTGTAAATCCAGCGTGGGGTGCAGGAAAGGTTTTGATCCTTTTGTCCGGG  
AGGAATAGCTTCTCATCATATTGCAGCAGGTACATTGGGCATATTAGCGGGTCTATTCCA  
TCTTAGTGTCCGTCCGCCTCAACGTTTATACAAAGGATTACGCATGGGTAATATTGAAA  
CTGTGCTTTCCAGTAGTATTGCTGCTGTTTTTTTTTGCAGCTTTCGTAGTTGCTGGAAC  
TGTGGTATGGTTCAGCAACTACTCCAATCGAATTATTTGGTCCCACTCGTTATCAGTGGG  
ATCAGGGGTACTTCCAACAAGAAATATATCGAAGAGTTGGGGCCGGACTAGCCGAAAA  
TTTGAGCTTATCGGAAGCTTGGTCTAAAATTTCCCGAAAAATTAGCTTTTTACGATTACAT  
TGGTAATAATCCGGCGAAAGGGGGATTATTACAGAGCAGGCTCAATGGATAATGGGGAT  
GGAATAGCTGTTGGATGGTTGGGGCACCCCATATTTAGAGATAAAGAAGGGCGTGAAC  
TCTTTGTACGTCGTATGCCTACCTTTTTTGAACATTTCCGGTAGTTTTGGTAGATGGAG

ACGGAATTGTGAGGGCCGATGTTCCCTTTTAGAAGGGCAGAATCCAAGTATAGTGTTGA  
ACAAGTAGGGGTAACCTGTTGAATTCTGTGGTGGAGAACTCAATGGAGTCATTTATAGTG  
ATCCTGCTACTGTGAAAAATATGCTAGACGTGCCCAATTGGGTGAGATTTTTGAATTA  
GACCGGGCTACTTTGAAATCCGATGGTGTTTTTTCGTAGTAGCCCAAGGGGTGGTTCCAC  
TTTTGGACATGCTACGTTTGCTTTGCTTTTCTTTTTTCGGACACATTTGGCACGGCGCCA  
GAACCTTGTTTCCAGAGATGTTTTTGCCGGTATTGATCCAGATTTGGATGCTCAAGTGGAA  
TTTGAGCATTCCAAAACTTTGGAGATCCAATAAGGAAACAAGTAGTCATGAAAA  
CCTTATATTCCCTGAGGAGGTTCTACCCCGTGAAACGCTCTTTAATGGAACCTTAGCTT  
TAGTTGGTCGTGACCAAGAAACCACCGTTTTGCTTGGTGGGCCGGGAATGCGGAGACT  
TCTAAATTTGTCCGGTAACTACTTTGGGGCTCATGTAGCTCATGCCGGATTAATCGTATT  
CTGGGCCGGAGCAATGAACCTATTTGAAGTGGCTCATTTTCGTACCAGAGAAACCTATGT  
ATGAACAAGGATTGATTTTACTTCCGCACTTAGCTACTCTAGGGTGGGGAGTAGGTCCG  
GGGGGAGAAGTTATCGACACCTTTCCTTACTTTGTATCTGGAGTACTCCACTTAATTTCC  
TCTGCAGTCTTAGGCTTTGGTGGTATTTATCATGCACTTCTAGGACCTGAACTCTTGA  
AGAATCCTTTCCATTCTTCGGTTATGTATGGAAAGATAGAAATAAAATGACTACAATTT  
GGGTATCACTTAATTTTATTAGGTATAGGTGCTTTTCTTCTAGTACTCAAGGCTCTTTAT  
TTTGAGGGCGTATATGATACCTGGGCACCCGGAGGGGGAGATGTAAGAAAAATTACCA  
ACTTGACCCTTAGCCCAAGCGTGATCTTTGGTTATTTACTAAAATCTCCTTTTGGGGGA  
GAAGGATGGATTGTTAGTGTGGACGATTTAGAAGATATAATTGGGGGACATGTTTGGTT  
AGGTTCCATTTGTATACTTGGTGGAAATTTGGCATAATTTTAACCAAACCTTTTGCATGGGC  
TCGCCGTGCATTTGTATGGTCTGGAGAGGCTTACTTGTATATAGTTTLAGGTGCTCTATC  
TGTCTTTGGTTTCATCGCTTGTGTTTCGTCTGGTTCAATAATACCGCTTATCCTAGTGA  
GTTTTACGGACCCACTGGGCCAGAAGCTTCTCAAGCTCAAGCATTACTTTTTCTAGTGA  
GAGACCAACGTCTTGGAGCTAACGTGGGATCCGCCCAAGGACCCACTGGTTTAGGTAA  
ATATCTAATGCGTTCTCCGACCGGAGAGGTTATTTTTGGGGGAGAACTATGCGTTTTT  
GGGATCTTCGTGCTCCCTGGTTAGAACCTCTAAGGGGTCCAATGGTTTGGACTTGAGT  
AGGCTTAAAAAAGACATACAGCCTTGGCAAGAACGACGTTTCAGCAGAATATATGACTC  
ATGCTCCTTTAGGTTCTTTAAATCCGTGGGTGGCGTAGCTACCGAGATAAATGCAGTC  
AATTATGTTTCTCCTAGAAGTTGGTTAGCTACCTCTCATTTTGTCTAGGATTTTTCCTAT  
TTGTGGGACATTTGTGGCATGCGGGAAGGGCACGTGCAGCTGCAGCGGGGTTTAAA  
AAGGAATCGATCGTGATTTGGAACCTGTTCTTTCCATGACCCCTCTTAGCATGACTATAG  
CCCTTGGTAGATTTATCAAAGAAGAAAATGATTTATTTGATATTATGGATGATTGGTTAC  
GGAGGGACCGTTTTCGTTTTTGTAGGCTGGTCCGGCCATTGCTCTTTCCTTGTGCTTATT  
TCGCTTTAGGGGGTTGGTTCACAGGTACAACCTTTTGTAACTTCATGGTATACCCATGGAT  
TGGCTAGTTCCTATTTGGAAGGTTGTAATTTCTTAACGGCTGCGGTTTCTACTCCTGCAA  
ATAGTTTAGCACATTTCTTTGTTGCTACTATGGGGTCCCTGAAGCACAAGGAGATTTTACTC  
GCTGGTGCCAATTAGGTGGTCTATGGACTTTTGTGCTCTCCATGGTGTCTTCGGTCTAA  
TAGGTTTCATGTTACGTCAATTCGAACCTTGCTCGTTCTGTTCAATTGCGACCTTATAATG  
CAATTGCATTTTCTGCTCCAATTGCTGTTTTTGTCTGTATTCTGATTTATCCACTGGG  
TCAATCTGGTTGGTTCTTTGCACCCAGTTTTGGTGTAGCAGCTATATTTGATTCATCCT  
TTTTTTCCAAGGGTTTCATAATTGGACGTTGAACCCATTTTCATATGATGGGAGTTGCTGG  
AGTCTTAGGCGCTGCTCTGCTATGTGCTATTCATGGCGCTACCGTAGAAAATAACCTTATT  
CGAAGATGGTGATGGTGCAAATACATTCCGTGCTTTTAACCCAACTCAAGCTGAAGAG  
ACTTATTCAATGGTCACTGCTAACCGTTTTTGGTCCCAAATCTTTGGGGTTGCTTTTTCC

AATAAACGTTGGTTACATTTCTTTATGCTATTTGTGCCAGTAACCGGTTTATGGATGAGT  
GCTATTGGGGTAGTCGGTCTGGCTCTGAACCTACGTGCCTATGACTTTGTTTTCCCAAGA  
AATCCGTGCAGCAGAAGATCCTGAATTTGAACTTTCTACACCAAAAATATTCTCTTAA  
ACGAAGGTATTCGTGCTTGGATGGCGGCTCAGGATCAGCCTCATGAAAACCTTATATTC  
CCTGAGGAGGTTCTACCCCGTGGAAACGCTCTTATGTCTGGAAGCACGGGAGAACGTT  
CTTTTGCTGATATTACTAGTATTCGATACTGGGTCAATCATAGCATTACTATAACCTTCC  
CTATTCATTGCGGGTTGGTTATTCGTACAGTACGGGTTTAGCTTACGATGTTTTTGGAAGT  
CCTCGGCCAAATGAATATTTACAGAGAACCAGACAAGGGATTCCATTAATAACAGGCC  
GTTTTGATTCCTTGGAACTCGATGAATTTAGTAAATCCTTTATGACCATAGATCGAA  
CCTATCCAATTTTACAGTGCATGGTTGGCTGTTACGGACTGGCTGTACCTACTGTTT  
CTTTTTTAGGGTCAATATCAGCAATGCAGTTCATCCAACGAATGGCTACAAAAACCGTT  
GAGAGTAGTTCTAGATCTGGG--CCAAGATCAACTGGCATAGGGAGTTTATTGAAACCA  
TTGAATTCGGAATATGGAAAAGTAGCTCCAGGGTGGGGGACTACACCACTTATGGGAA  
TTGCAATGGCTCTATTTGCAATATTTCTATCTATATTTTAGAAATTTATAATTCATCTGTT  
TACTGGATGGAATTTCAATTAATATGCTTACTCTTAACTATTTGTTTATACAGTAGTAA  
TATTCCTTGTCTCTCTTCATCTTCGGATTCTTATCTAATGATCCAGGGCGTAATCCTGG  
GCGTGAAGAAATGACCGATACTACTGGAAGGATTCTCTTTGGCTAATAGGTACTGTAA  
CTGGTATTCCTGTAATCGGTTTAAATAGGCATTTCTTTTACGGATCCTATTCCGGGTTGGG  
TTCATCTCTGATGTTAATATCTTTAGTTTAAATCTGTCTCTGTCTTAATTCTACCCTTTATT  
CAAGTAGTTTCTTCTTCGCCAAATTGCCCGAAGCTTATGCCTTTTCAATCCAATTGTAG  
ACGTTATGCCGGTATCCCTGTACTTTTTCTTCTCTTAGCCTTTGTTTGGCAAGCTGCTG  
TAAGTTTTCGAATGACACAATCAAACCCGAATGAACAAAATGTTGAATTGAATCGTACC  
AGTCTATACTGGGGTTTATTACTCATTTTTGTACTTGTCTTTTTATTTTCCAATTATTTCTT  
CAATATGGAAGTCAATATTCTTGCCTTATTGCTACTGCGCTGTTCAATTTAGTTCTACT  
GCCTTTTTACTTATCATATACGTCAAACAGTCAGCCAAAATGATATGGAAACAGCAAC  
CCTAGTCGCCATCTCCATATCCGGTTTACTTGTAAGCTTTACTGGGTATGCCTTATATACC  
GCTTTTGGGCAACCCTCTCAAAAATTAAGAGATCCCTTCGAAGAACATGGGGACATGG  
AAGCATTGGTTTATATATTCCTCTTAGTTTCGACTTTAGGGATAATTTTTTCGCTATATTT  
TTTCGAGAACCACCTAAAGTTCCAATAAAAAAATGAAAATGACTATTGCTTTCCAATT  
AGCTGTTTTTGCATTAATTGCAACTTCATTAATCTTACTGATTAGTGTACCCGTTGTATTT  
GCTTCTTCTGATGGTTGGTCAAATAACAAAATGTTGTATTTTCTGGTACATCATTATGG  
ATTGGATTAGTCTTTCTGGTAGCTATCCTGAATTCTCTCATCTCTATGAGTTGTAGGGAG  
GGACTTATGTCACCACAAACAGAACTAAAGCAAGCGTTGGATTTAAAGCTGGTGTTA  
AAGATTACAAATTGACTTATTATACTCCTGATTACGAAACCAAAGATACTGATATCTTGG  
CAGCATTCCGAGTAACTCCTCAACCGGGAGTTCGCGCGGAAGAAGCGGGGGCTGCGG  
TAGCAGCCGAATCTTCTACTGGTACATGGACAACGTGTGTGGACTGATGGACTTACCAGT  
CTTGATCGTTACAAAGGACGATGCTACCACATCGAGGCTGTTGTTGGGGAGGAAAATC  
AATATATTGCTTATGTAGCTTATCCTTTAGACCTTTTTGAAGAAGGTTCTGTTACTAACAT  
GTTTACTTCCATTGTGGGTAATGTTTTTGGTTTCAAAGCCCTGCGAGCTTTACGTCTGG  
AAGATCTGCGAATTCCTTATTCCAAAACCTTTCGAAGGTCCGCCTCATGGCATC  
CAAGTTGAAAGAGATAAATTGAACAAGTATGGTCCGCTTATGGGATGTAATATAA  
ACCAAATTGGGATTATCCGCAAAAAACTACGGTAGAGCAGTTTATGAATGTCTACGGG  
GTGGACTTGATTTTACTAAGGATGATGAAAACGTAATTCACAACCATTATGCGTTGG  
AGAGATCGTTTCTTATTTTGTGCCGAAGCGCTTTTTTAAAGCGCAAGCCGAAACGGGTG

AAATTAAGGACATTACTTGAATGCAACTGCGGGTACATGTGAAGAAATGATCAAAAG  
AGCGGTATTTGCCAGAGAATTGGGAGTTCCTATCGTAATGCATGACTACTTAACTGGGG  
GGTTCACCGCAAATACTAGCTTGGCTCATTATTGCCGCGACAATGGTCTACTTCTTCACA  
TCCATCGCGCAATGCATGCAGTTATTGATAGACAGAAAAATCATGGTATGCATTTTCGTG  
TACTAGCTAAAGCATTACGTATGTCTGGCGGAGATCATATTCACGCTGGTACAGTAGTG  
GGTAAACTGGAAGGGGAACGTGAGATGACTTTGGGTTTTGTTGATTTATTACGTGATGA  
TTTTATTGAAAAAGATCGAAGTCGTGGTATTTTTTTTCACTCAAGACTGGGTCTCTATGCC  
AGGTGTTATACCCGTGGCTTCAGGGGGTATTCAATGTTTGGCATATGCCTGCCCTAACCG  
AAATCTTTGGGGATGATTCTGTACTACAGTTCGGCGGAGGAACTTTAGGGCACCCCTTGG  
GAAATGCACCCGGTGCAGTAGCTAATCGAGTGGCTTTAGAAGCATGTGTACAAGCTC  
GTAATGAGGGACGTGATCTTGCTCGTGAAGGTAATGATATTATTCGTGAAGCTAGCAAA  
TGGAGCCCTGAGCTAGCCGCTGCTTGTGAAATATGGAAAGAGATCACATTTGATTTTGA  
CCCAGTGGATAAGCTAGATAAAACGGCAATACATTTATACAAAACCTTCTACCCCGAGCA  
CACGCAATGGAGCCGTAGACAGTCAAGTGAAATCCAATCCACGAAAGAATTTGATCTA  
TGGACAGCATCGTTGTGGTAAAGGTCGTAATGCCAGAGGGATCATTACCGCAGGGCAT  
AGAGGGGGAGGTCATAAGCGTCTATACCGTAAAATCGACTTTTCGACGGAATGAAAAAG  
GGATATCTGGTAGAATCGTAACCATAGAATATGACCCTAATCGAAATGCATACATTTGTC  
TCATACACTATGGGGATGGTGAGAAGAGATATATTTTACATCCCAGAGGGGGCTATAATTG  
GAGATAACCATTGTTTCTGGTACAGAAGTTCCTATATCAATGGGAAATGCCCTACCTTTGA  
CCGATATGCCCTTAGGCACGGCCATACATAACATAGAAATCACACTTGGAAAGGGTGGGA  
CAATTAGCTAGAGCAGCAGGCGCTGTAGCGAAACTGATTGCAAAAGAGGGTAAATCG  
GCCACATTAAGATTACCATCTGGGGAGGTCCGTTTGATATCCAAAACTGCTTAGCAAC  
AGTCGGACAAGTGGGTAATGTTGGGGTGAACCAAAAGAGTTTGGGTAGAGCCGGATC  
TAAGTGTGGCTAGGTAAGCGTCTGTAGTAAGAGGAGTAGTTATGAACCCTGTAGAC  
CATCCCCATGGGGGCGGTGAAGGGAGAGCCCCAATTGGTAGAAAAAAACCCACAACC  
CCTTGGGGTTATCCTGCGCTTGGAGAAGAAGTAGGAAAAGGAACAAATATAGTGATA  
GTTTTCTTCTTCGTGCGCGTAAA---ATGATTCAACCTCAGACCCTTTTGAATGTAGCGGA  
TAACAGTGGAGCTCAAGAATTGATGTGTATTGGAATCATAGGAACTGGT---AATCACCG  
ATATGCTCATATTGGCGATGTTATTGTTGCTGTAATCAAAGAAGCAGTGTCCAACATGCC  
TCTAGAAAGATCAGAAATAATTAGAGCTGTGATTGTACGCACGTGTAAAGAACTCAA  
CGTGACAACGGCATGATAATACGATATGATGACAACGCAGCGGTTATCATTGATCAAGA  
AGGAAATCCAAAAGGAACTCGAATCTTTGGTGCATTGCTCGAGAATTGCGACAGTTG  
AATTTACTAAAATAGTTTTCATTAGCACCCGAAGTCTTAATGCTCAGTCCCAAAGAAC  
CAGATTTTCGTAAACAACATAGAGGTGCAATGAAGGGAATATCTTGCCGAGGCAATCAG  
ATTTGTTTTGGCAGATACGCTCTTCAGGCACTTGAACCTGCTTGGATCACAGCTAGACA  
AATAGAAGCAGGGCGAAGAGCAATGACACGATATGCGCGTCGTGGCGGAAAGATATG  
GGTACGTATCTTTCCCGATAAACCTGTTACTGTGAGACCTACAGAAACACGTATGGGTT  
CAGGCAAGGGATCCCCGAATATTGGGTATCCGTTGTTAAACCGAGCCGAATACTTTAT  
GAAATTAGTGGAGTATCAGAACTGTAGCCAAAGCTGCTATGAAATAGCAGCATGCA  
AAATGCCTATACGAACTCAATTTGTTATTTTCAGGAATGACCAGAGTTAAACGAGGATAT  
ACAGCTCGGAGACGTCGAAAAAAGATTCGTTTATTTGCATCAACCTTTATAGGGGCTCA  
TTCAAGACTTACTCGAACAATACTCAACAAAGAATGAGAGCTTTGGTTTCTTCTCATC  
GAGATAGGAGCAGGAAAAAGAGAGATTTTCGTGTTTTGTGGATCACTCGGATAAATGC  
GGTAACTCGTGAGGAT-----CTATTCTATAGTTATAGCCTATTCATCCACAATCTGTACAA



GAGACAATCGCTTCTGAATCGTAAAATACTTGCGCAAATAGCCCTATCAAAGAAGAATT  
TTTTTGATATTATTTCAAATAAAATCATTAATCAAAAA-----ATGATAAAG  
AAAGTTTAA---GCTCAACATATATAT--ATGTCTGTTTTCAAAGCACGAAGAGTAATTGAT  
CAGATTCGGGGACGTTCTTATGAAGAAACTCATGATACTGGAACATAATGCCTTATTG  
GGCATCTTATCCAATTTTAAAATTAGTTTATTCTGCAGCAGCAAATGCTAGTCATAATAG  
GGTTTAAATGAAGCTGATTTATTTATTAGTAAAGCTGAAGTCAATAGAGGTGCTATTTTA  
AAAAAGTTAAAACCCCGGGCTCGAGGACGTAGTTATATGATAAAAAAAACCACTTGTC  
ATATAAAGATTTCTTTAAA-----TCTAAAATT-----ATGGATGGAATCAAATAT  
GCAGTATTTACAGAAAAAGTATTCGGTTATTGGGGAACAATCAA---TATACTTCTAATG  
TCGAATCAGGATCAACTAGGACAGAAATAAAGCATTGGGTCGAACTCTTCTTTGGTGT  
CAAGGTAAGAGCTATGAATAGTCATCGACTCCCGGAAAGGGTAAAAGGATGGGACCT  
ATTATGGGACATACAATGCATTACAGACGTATGATCATTACGCTTCAACCGGGTTATTCT  
ATTCCACCTCTTATAGAGAAAAGAACTATGGCAGTTCCAAAAAACGTACTTCTATGTC  
AAAAAACATATTCGTAGAAATCTTTGGAAAAAAAAGGATCTTTAGAGGCAGTAAAA  
GTTTTTCTTTAGCTAAATCTATTTCCACCGGAAAGTCAAAAAGTTTTTTT-----CAAAA  
AAAGTCATGGCCAAGGGTAAAGATATTCGAATTATAGTTATTTTGGAAATGTACCTGTTGT  
---GTTCGAAAG-----GTCAATAAAAA-----GGCATTCTAGATATGTTACTCAAAGAAT  
CGAAACAATACCCCAATCGACTAGAATTTAAAAAATTTTGTGCGTATTGTCAAAGTA  
TACAATTCATGGGGAAATAAAGAAAATGAAAATAAGGGCTTCTGTTTCGTAAAATTTGTG  
AAAAATGTCGTTTGATTTCGTAGGCGGGGGCGAATTATAGTCATTTGTTCCAATCTGAGA  
CATAAACAGAGACAGGGGATGGTTCGAGAAGAAGTAGCAGGATCCACTCGAAAATA  
AAGTGGAATGTGTTGAATCAAGAGTAGACAGCAAGCGTCTTTATTATGGTCGTTTTGT  
TCTGTCCCCGCTTATGAAAGGTCAAGCCGATACCATAGGTATTGCCATGCGAAGGGCTT  
TACTTGGAGAAATAGAAGGAACATGTATCACACGTGCAACATCTGAA-----AATGTTCT  
GCATGAATATTCTACGATAGCGGGTATTGAAGAATCAGTACATGAGATTTAATAAATTT  
GAAAGAGATTGTATTGAAAAGTAATCTCTATGGAGTTAGGGACGCATCCATTTGCGTCA  
GGGGACCTAAATATATAACAGCTCAAGATATTATCTCACCACCTTCTGTACAAATAGTTG  
ACACGACACAGCATATAGCTAACCTGACAGAACCAATTGATTTGTGTATTGAATTACAA  
ATCAAGAGAGGTCGTGGATATCATATGAAATCCACAAATGAATCTCACGAGGGAAGTTA  
T-----CCTATAGATATTGTATCTATGCCTGTTCGAAATGCAAATCATAGTATTCATTCTTATG  
GGAATGGGAATGAAAAACAAGAAATACTCTTTCTAGAAATATGGACGAATGGAAGTTT  
AACTCCTAAAGAAGCACTTTATGAAGCTTCTCGTAATTTGATTGATTTATTGATTCCTTT  
TCTACATGCAGAGGAAGAG-----TACATGAATTTAGAGGAAAATGAA---AACAGATGGA  
ATCTACCCTTTTTTTTCTTTCAAGACAGATTCCT--AATCTCAAGAAAAACAAAAA---  
GGAATTCCATTGACATGTATTTTATTGACCAATCAGAATTGTCTTCCAGGACCTATAAT  
TGTCTCAAAGGTCCAATATACATACATTATTGGACCTTTTGAATCACAGTCAAGAAGA  
TCTTATGAAAATGGAATATTTTCGCATAGAAGATATAAACAGATATTGGGCACTCTACA  
GAAGCAT-----TTTGCAATCAATTTACCTAAGAAAAATATGCTCCAGAAT--GGAAATGAG  
GGAATGTCCACAATACCTGGATTTAGTCAGATACAATTTGAGGGATTTTGTAGGTTTCATT  
AATCAGGGCTTGACGGAAGAATTTCAATAAGTTTCAAAAAATTGAAGATAGAGATCAAG  
AAATTGAATTTCAATTTTGTGGAAACATATCAATTGGTAGAGCCCTTGATAAAAGAA  
AGAGATGCTGTGTATGAATCACTCACATATTCTTCTGAATTATATGTCCCCGCGGTCTTA  
ATTTGGAAAACCGGTAGAAATATGCAAGAACAAACCGTTTTTTATTGGAAACATCCCTAT  
AATGAATCTTTTTGGAACCTCTATAGTAAATGGAATATACCGAATTGTGATCAACCAAAT

ATTGCAAAGTCCCGGTATTTACTACCGTTCAGAGTTGGAACATAACGGAATCTCTGTCT  
ATACCTGTACTATAATATCGGATTGGGGGGGAAGGTCGGAATTAGAAATTGATAGAAAA  
GCAAGGATATGGGCCCGTGTAAAGTAGAAAACAAAAAATATCTATTCTAGTTCTATCATC  
AGCTATGGGTTTGAATATAAGAGAAATTCTAGATAATGTTTGTACCCTGAAATTTTCTT  
GTCTTTCCCGAATGATAAAGAGAAAAAAGATTGGGTCAAAGAAAATGCTCTTTTG  
GAATTTTATCAACAATTTGCTTGTGTAGGGGGGGATCCGGTATTTTCTGAGTCCTTATGC  
AAGGAATTACAAAAGAAATTTTTCAACAAAGATGTGAATTAGGAAAGATTGGTCGAC  
GAAATATGAACCGGAGACTTAATCTTGATATACCCCAAAACAATACATTCTTGTTACCAC  
GAGATCTATTGGCTGCTGTGGATCATTGATTGGAATGAAATTGGGAATGGGTACACTT  
GACGAT-----ATGAATCACTTGAGAAATAAACGTATTCGTTCTGTAGCAGATCTTTACA  
GGATCAATTCGGATTGGCTCTTGTTCGTTTAGAGAATACGGTTCGAGGAACTATATGTG  
GAGCAATCAGG---CATAAATTGATA---CCGACTCCTCAAATTTGGTAACTTCAACTTCA  
-----TTAACAACACTTATGAATCGTTTTTTGGCCTACACCCTTTGTCTCAAGTTTTG  
GATCGAACTAATCCGTTGACACAAATCGTTCATGGGCGAAAATGGAGTTATTTGGGTCC  
TGGAGGATTGACGGGGCGAACTGCTAGTTTTCGGATACGAGATATCCACCCGAGTCAC  
TATGGACGTATTTGCCAATTGACACGTCCGAAGGAATCAATGTTGGACTTATTGGATC  
ATTAGCTATTCATGTGAAGGTTGGTTATTGGGGA---TCTATAGAGAGTCCGTTTTAT-----  
-GAATTATCTGATAGATCAAAAAAT-----GCACAGATGGTTTATTTATCACCAAATAGAGA  
TGAATATTATATGGTAGCAGCAGGAAATCTTTGGCCTTGAACCGGGGTATTCAAGAAC  
AACAGGTTGTTCCAGCTCGATATCGTCAAGAATTCCTGACTATTGCATGGGAAGAGATT  
CATCTTAGAAGCATTTTTCCCTTTCCAATATTTTTCTATTGGAGCTTCCCTCATTCTTTTAT  
CGAGCATAATGATGCGAATCGAGCTTTAATGAGTTCTAATATGCAGCGCCAAGCAGTTC  
CCTTTCTCGGTCCGAGAAGTGCATTGTTGGAACCTGGGTTGGAAGGCCAAACGGCTCT  
AGATTCGGGGATTTCAGCTATAGCCGAACGCAAGGGAAAAATCATTTATACTGATACTC  
AAAAGATCATTCTCAAGTAATGGGGATACTATAAGCATTCCATTAGTTATGTATCAAC  
GTTCCAACAAAAATACTTGTATGCATCAAAAACTCAGGTTACGCGGGGTAATACAT  
GAAAAAGGGACAAATTCTAGCGGACGGTGC GGCTACAGCTGGTGGGGAACCTCGCTTT  
AGGAAAAAATGTATTAGTAGCTTATATGCCATGGGAAGGTTACAATTTTGAAGATGCAG  
TACTAATTAGCGAACGTATGGTCTATGAAGATATTTATACTTCTTTTCACATCCGGAAATA  
TGAAATTCAGACTCATGTAACAAGTCAAGGT---CCTGAAAGAATCACTAAGGATATCCC  
GCATTTAGAGGCTCGTTTACTCCGAAATTTAGACAGAAATGGAATTGTGATGCTGGGAT  
CTTGGATAGAAACAGGTGACATCTTAGTAGGTAAATTAACACCTCAGACAGCGAGCGA  
A---TCGTCAATATGCTCCGGAGGATAGATTATTACGAGCTATACTTGGTATTACGGTATCCA  
CTTCAAAGAAACTTCTCTAAGACTACCTATAGGAGGAAGGGGTCGAGTTATTGATGT  
GAGATGGATCCATAGAAAGGGA---GTTTCCAATTCTAATCCAGAAAAGATTTCGTGTATAT  
ATTTACAGAAACGTGAAATCAAAGTAGGTGATAAAGTAGCTGGAAGGCATGGGAATA  
AGGGTATAATTTCTAAGATTTTGTCTAGACAAGATATGCCCTATTTGCAAGATGGAACGC  
CCGTTGATATGGTATTC AACCCATTAGGAGTCCCCTCACGAATGAATGTGGGACAGATA  
TTTGAATGTTTCGCTCGGGTTAGCGGGGGATCTGCTAAATAAACATTATAGAATAGGACC  
TTTTGATGAGAGATATGAGCAAGAGGCCTCAAGAAAACCTAGTGTCTTCTGAATTATATG  
AAGCCAGTAAGAAAACAAAAAATCCATGGGTATTTGAACCCGAATATCCGGGAAAAAG  
CAGAATATTTGATGGAAGAACGGGAGATCTTTTTGAACAACCTGTTCTAATAGGAAAGT  
CCTATATCCTAAAATTAATTCATCAAGTTGATGATAAAATCCATGGACGTTCCAGCGGGC  
ATTACGCACTTGTTACACAACAACCCCTTAGAGGGAGGGCCAAACAAGGGGGACAAA

GAGTAGGAGAAATGGAAGTTTGGGCTCTAGAGGGATTTGGTGTGCTCATATTTTACAA  
GAGATGCTTACTTATAAATCTGATCATATTAGAGCTCGTCAAGAAGTACTTGGTGCTACG  
ATTATTGGAGCAACAGTACCTAATCCAGAGGGTGCTCCAGAATCTTTTCGATTGCTCGT  
TCGAGA ACTACGATCTTTGTCCCTGGA ACTGAATCATTTCCTTGTATCTGAAAAGAACT  
TTCAGATGGACAGGAAGGAAGCT-----ATGATCGACCAGTATAAACATCAAC  
AACTTCGAATTGGACCAGTTTCCCTAAACAAATAATGGCTTGGGCAAAAAAATTTTA  
CCCAATGGAGAGATAGTCGGAGAGGTTACAAAACCCTATACTTTTCATTATAAACTAA  
TAAACCGGAGAAAGATGGATTGTTTTGTGAAAGGATTTTCGGACCCATAAAAAGTGGG  
ATTTGTTCTTGTGGAAATTACCGAGGGATTGGGACTGAAAAAGAAGAGCCAAAATTTT  
GTGAAGAATGCGGAGTGGAATTTGTTGATTCTCGGATACGAAGGTACCAAATGGGATA  
CGTCAA ACTGACATGTCCAGTGACTCATGTGTGGTATTTGAAACGCTTTCCTAGTTATAT  
TGCGAATATTTTAGATAAGCCCCTTAGGGAATTAGAGGGCCTAGTATATTGCGATGTGAA  
TTTTTCTTTTGTAGGCCT--ATAGCTAAAAACCTACTTTCTTACGATTACGAGGTTTCAT  
TCGAATATGAAATCCAATCCTGGAAATACAGCATCCCCTCTTTTTTACTACTCAAGGTT  
TCGAGACATTTGAAACCGAGAAATATCTACGGGGGCAGGTGCTATCAGAGAACAATT  
AGCCGATTCGGATTTGCGAATTATTACAGAGAATTCTTTGGTAGAATGGAAGGAATTAG  
GAGACGAA--GAGTCCGCAGAAAATGAATGGGAAGATCAAAAAATTAGAAGAAGAAA  
GGATTTTTTGGTTAGGCGAATAGAATTAGCTAAACATTTTCTTCGAACAAATGTAGACC  
CAGAATGGATGGTTTTTGTGCCTATTACCAGTTATTCCTCCTGAGTTGAGACCAATCATT  
AGATAGACGGAGGTAAACTAATGAGTTCGGATATTAATGAACTCTATAGAAGAGTCATT  
TATCGGAACAATACTCTTACCGATCTATTAGCAACAAGTAGATCTACACCAGGGGAATT  
AGTAATGTGTCAAGAGAAATTGGTACAAGAGGCCGTGGATACACTTTTTGATAATGGGA  
TCCGCGGACAACCCATGAGAGATGGTCATAATAAAGTTTACAAGTCATTTTCCGATGTA  
ATTGAAGGCAAAGAAGGAAGATTTTCGTGAGACTCTGCTTGGTAAACGGGTCGATTATT  
CGGGGCGTTCCGTCATTGTCGTGGGTCTTTGCTTTCATTACATCAATGTGGATTACCTC  
GAGAAATAGCAATAGA ACTCTTCCAAACATTTGTAATTCGTGGTCTAATCAGACAAGAT  
TTTGCTTCTAACACAGGGATTGCTAAAAGCAA AATTAGGGAAAAAGAACCCATTGTAT  
GGGAAATCCTTCAAGAAGTGATGCAGGGGCATCCTGTATTGTTGAATAGAGCGCCAC  
CCTTCATAGATTAGGTATACAGGCGTTCCAACCCATTTTAGTGGAGGGGCGTGCTATTTG  
TTACACCCATTAGTTTGTAAAGGGCTTTAACGCAGACTTTGATGGGGATCAAATGGCTG  
TTCACATACCTTTATCTCTGGAAGCTCAAGCAGAAGCTCGTTTACTTATGTTTTCTCATA  
TGAATCTCTTATCTCCAGCTATTGGGGATCCCGTTCCGTACCAACTCAAGATATGCTTA  
TTGGACTCTATGTATTAACGATTGGGAATCTCCGAGGTATTTGTGCAAATAGGTATAATC  
AATATAATCCTAATTGCAGA-----AAAAAGGAAACAGTTTACAAGAATAACTTTAAGT  
ATACAAA-----GAGCCGTATTTTTGTAGTTCTTATGATGCACTTGGAGCTTATAGGCAG  
AAACGAATTCATTTAGATAGTCTTTGTGGCTCCGGTGGAGACTAGATCAACGT--GTC  
GTTGGCTCA-----AGAGAAGTCCCATCGAAGTCAATATGAATCTTTTGGTAATTATAAT  
GAGATTTATAAGCACTATCGAATAATAGGAAGTGTA AAAAGAGAAATTCGTTGTATATA  
CATTCGAACTACTGTTGGTCATCTTTCTTTTTATCGAGAAATAGAAGAAGCCATACAGG  
GGTTTTGGCGGGCCTACTCA-----ATGGCAGAACGGACCG  
ATCTGGTCTTTCACAATAAAGTGATAGATGGAATTGCTATAAACGACTTATTAGTAGAT  
TAATAGATCATTTCCGAATGGCATATACATCACATATCCTGGATCAAATGAAGACTTTGG  
GTTCCAGCGAGCCACTGCTACATCTATTTCAATTAGGAATTGATGATCTTTTAAACAATAC  
CTTCTAAGGGATGGTTAGTTCAAGACGCTGAACAACAAAGTTTTCTTTTAGAGAAAA

CCATCATTATGGGAATGTACATGTGGTAGAAAAATTACGTCAATCCATTGAGATATGGTA  
TGCTACAAGTGAATATTTGAGACAAGAAATGAATCCTAATTTTCGGATGACTGATCCAT  
CTAATCCAGTCCATCTAATGTCCTTTTCGGGGGCTAGAGGAAATGCATCTCAAGTACAC  
CAATTAGTAGGTATGAGAGGATTAATGTCCGATCCTCAAGGACAAATGATTGATTTACC  
CATTCAAAGCAATTTACAGGAAGGGCTTTCTTTGACAGAATATAATTTCTTGCTACGG  
AGCCCGCAAAGGGGTTGTAGATACTGCTGTACGAACATCAGATGCTGGATACCTCACA  
CGTAGACTTGTGAAGTAGTTCAACACATTCTTGTACGTAGATCGGATTGTGGTACTATT  
CGAGGTATTTCCGTGAGTCCTCAAATTGGATGACAGAA-----AAGATTTTGTCCAAA  
CATTAATTGGTCGTGATTAGCAGACGATATATATATTGGTCTACGATGCATTGCCACTCG  
AAATAAAGATATTGGAATTGGACTTGTTAATCGATTATAACC-----TTTCGAGC  
ACACCCAATATATATTTCGAACCCCTTTTACTTGTAGAAGTACATCTTGGATCTGTCAATTA  
TGTTATGGCCGGAGTCTACTCATGGTGACCTGGTTGAGTTGGGAGAAGCCGTAGGCA  
TTATTGCGGGTCAATCAATTGGGGAACCGGGGACTCAACTAACATTAAGAACTTTTCAT  
ACCGGCGGAGTATTCACAGGTGGTACTGCCGAATATGTAAGAGCTCCCTCTAATGGAA  
AAATAAGATTTGATGAGGATTTGGTTCATCCTACACGTACCCGTCATGGGCATCCTGCTT  
TTCTATGTTTTATAGACTTGTATGTAATATTGAGAGTCGAGATATTATACATAATGTGAA  
TATTCCAACAAAAAGTTTTGATTTTAGTTCAAATGATCAATATGTAGAATCAGAACAGG  
TAATTGCCGAGATTCGTGCCGGAACGTCCACTTTT-----TTTAAAGAGAGGGTTCAAAA  
ACATATTTATTCTGAGTCAGAAGGAGAA---ATGCACTGGAGCACTGATGGCTATCATGC  
GCCCCGAATATACATATAGTAACGTTTCATCTATTACCAAAAACAAGTCATTTATGGATATTA  
GCAGGAGATCTATGCAGA-----TCCAAGATAGGGTCTTTTTTCACTCCACAAGGATCAAG  
ATCAATTTAATACTAATTCTTTTTCTCTCGAAGAAAGA-----TATATCTTTGATCTCTCA----  
--CTGACTCAT--GATCAAGTAAACATAAATTGTTGGATACTTTTGGT-----GATAGG  
AAGATTCTTGACTATTCA---AAACCTTATCGG-----ACCAAGGGTCTCTGGAATCTCATAG  
AGACTTCT---ACTTATATTCGTCAA-----GAGAATTCCTTGGCGAAAAAGCGAAGGAATA  
GATTCGTGATTCCTTTACAATATGATCAAGAACAAGAAAAAAGCTAATACCCTGTTTT  
GGTATTTTCGATTAATACTATAAAT-----GGTATTTTACGTAGAAATAGTATTCTTGCTT  
ATTTTGATGATCCGCGATACAGAAGAAGC-----GGAATTAATAAATAT---ATTTACGAAGT  
AGATTTCGATTGTAAAA-----AAAGAGAATTTGATTGAGTATCGAGGA---GCAAAAAGAATT  
TAGTTCGAAATAC---AAAGTAGATCAATTTTTTTTTTTCATTCCCGAGGAAGTTCATATCTTAC  
CCGGATCTTCGTCCATAATGGTCCGGAACAATAGTATCATTGGAGTAGATACACGACTT  
GCTTTAAATACAAGAAGTCGAGTAGGTGGATTAGTCCGAGTGGAGAAAAAAAAGAAA  
AGTATGGAACGTGAAAATCTTTTCTGGAGATATTCATTTTTCTGGAGAGGTGGATAAAATA  
TCTAGGCACAGTGGCATTGATAACCACCAGGAATGGAAAAAAA-----GATTCTAAAG  
GA---TCAAAA---AGATTGAAAAATTGGATCTATGTCCAACGC-----ATTACACCTACCAAA  
AAAAAG-----TCTTTTGTGTTTGGTTCGTCCCGTAGTACATATGAAATAGCTGATGGAAT  
AAATTTAGCAACACTTTTCTTTCAGGATCTCTTGCAGGAAAAGGATAATGTCCAACCTC  
GAATTGTCAATTATATACTTTATGGAAATGGCAAGTCAATTCGAGGAATTTCTCACACAA  
GT--CAATTAGTTCGGGCTTGCTTAGTATTGACTTGGGACCAAGAAAAAAGAGTTCTA  
TAGAAGAA-----GAGGTTTCATGCTTCTTTTGTGAAATAAGGGCAAATGATCTGCTTC  
GTGATTTTCATCCGAATTGAGTTAGTAAAGTCCACTATTTTCGTATACCGAAAAAAGGTAT  
GATACGACAGGTTCAAGATTGATTTCAAAT-----TTAGATCGTATCTATAGAAATCCTTT  
TGATTCCAAGGCAAAGATTCAATCA-----TTTCCCAACATAAGGGAACCTTTGG  
T-----ACGTTGTTGAATCGAAATAAG-----GAATGCCAATCTTTCATAATTTTGTCA

TCATCCAATTGCTCTCGAATAGGT-----CCCTTCAATACTTCGAGATATAAT-----AATGC  
GACAAAAGGATCGGATCCCATGACTCCAATT--GATTTGTTGGGTCCCTTAGGTACTATT  
GTGCCT--AAAATAGTAAATCTTCGTTCACT--TACTATTTAAGAACT-----TATAATCA  
AGTCTTTTTAAAG--AAATATTTTTTACTTGAA-----AATTTTCAACAGACTTTCCAAGT  
GCTTCAAGTACTTCAATACTGTTTCCTAGATGAAAATAGTAGG-----ATTATAATCCCGA  
TCCATGCAGTAACATCATTTGGAATTCATTCCATTTGAATTGGTGTTTTTCTCCATCACGA  
TTCTTGTGAAGAGGCATGGACAATAATTAGC---CTTGGACAATTCCTTTGTGAAAATGTA  
TGTCTATTGAAATATGGATCA-----CGCATAAAAAAATCTGGTCAAATTTTCATTGTTTCAT-  
--GTTGACTCTTTAGTTATAAGATCATCTAAGCCCTATTTGGTCACTCCAGGAGCAACTAT  
CCATGGCCATTATGGAGAAATCTTTTCTGAAGGAGACACATTAATTACATTTATATATGA  
AAAATCGAGATCTGGTGACATAACGCAAGGTCTTCCAAAAGTGGAACAAATCTTAGAA  
GTTTCGTTCAATTGATTCAATATCGATGAACCTCGAAAGAAGAGTTGAAGGTTGGGATG  
AACGTATCCGAAGGATTCTTGGGATCCCTTGGGGATTCTTGATTGGAGCTGAACTAACC  
ATAGCCCAAAGTCGTATCTCTTTGGTTAATAAGATCCAAAAGGTTTATCGATCCCAAGG  
GGTACAGATCCATAATAGACATATAGAGATTATTGTACGTCAAGTAACATCAAGAGTTTT  
AGTTTCAGAA-----GATGGAATGTCTAATGTTTTTTTACCTGGGGAATTTATTGGATTG  
TTGCGAGCAGAGCGAGCAGGGCGCGTTTTGGACGAAGCGATCTGTTATCGGGCAATCT  
TATTGGGAATAACGAAATCATCTCTGAATACTCAAAGTTTTATATCCGAAGCGAGTTTTTC  
AAGAACTGCTCGAGTTTTAGCAAAAAGCTGCTCTACGAGGTCGTATTGATTGGTTGAA  
AGGCCTGAAAGAGAACGTTGTTCTGGGGGGGATTATACCGGTTGGTACCGGATTCAAT  
AAATTATTACATCGTTCAAAG-----CAAGACAAAACATTCAT-----TTGAAAATAAAAG  
GAAGGATCTATTTCGAGTTGGAATG-----AGAGATATCTTGTATACCATAGAGAATTATT  
TTGTTCTTGTGCCCAAAC-----GCAGACCAATCATTTACG-----  
---ATGGGAAGACGATATTGGAACATCAATTTGGAAGAAATGATGGAAGCAGGAGTTCA  
TTTTGGTCAATGGTACTAATAAATGGAATCCTAGAATGGCTCCTTACATCTCTGCAAAGCG  
TAAGGGTATTACATTTACAAATCTTACTATAACTGCTCGTTTTTTTATCAGAAGCTTGCGAT  
TTAGTTTTTATGATGCAGCAAGTAGGGGAAAAAATTCTTAATCGTTGGTACCAAAAAGA  
AAGCAGCGGATTTAGTAGCATCAGCAGCAATAAGGGCTCGATGTCATTATGTTAATAAA  
AAATGGCTTGGTGGTATGTTAACGAATTGGTATACTACAGAAACAAGACTTCAGAAGTT  
CAGGGACTTAATAACAGAACAAAAGATGGGGAAATTCATCGTCTCCCAAAGGAGAT  
GCAGCAATGTTGAAGAGAAAGTTATCTACCTTGCAAGCATATCTGGGTGGGATCAAATA  
TATGACGGGATTGCCCGATATTGTAATTATCGTTGATCAGCAAGAAGAATATATGGTTCT  
TCGAGAATGTTCCATTTTGGGTATTCCGACGATTTGTTAATTGATACAAATTGTGACCC  
AGATCTTGCAGATATTTCTATTCCGGCCAACGATGATGCTATAGCTTCGATTTCGATTGATT  
CTTACCAAATTAGTATCTGCAATTTGTGAGGGCCGTTCCCTGT--TATATAAAAATGGTAT  
GGGACAAAAAATAAATCCACTTGGTTTCAGACTTGGAAAACTCAAAGTCATCATTCT  
TTTTGGTTCGCAAATCAAAGAATTTTTCCATGGGTCTACAAGAAGATGAAAGAATAC  
GGAATTGTATTAAGGACTATGTAATAAAAAAATAAGAAAATATCCTCAGGT---TTCGAAG  
GAATTGCCATATAGTAATTCAAAAAGAATAGATTTGATTCAGGTCATAATCTACATTG  
GATTTCCCAACTTATTAATAGAAGGA-----CGGACACGG-----GGAGTCGAAGAATTACA  
GATGAATGTACAAAAGAGTTTCATTCTGTAAACCGGAGACTCAATATTGCTATCACAA  
GAATTGAAAAGCCTTATGGACAACCTAATATTCTTGCAGAATATATAGCTTTACAATTAA  
AAAATAGAGTCTCATTTTCGAAAGGCAATGAAAAAAGCTATTGAATTAAGTGAACAAAC  
GGGTACAAAAGGAATTCAAGTGCAAATTGCAGGACGTATCGACGGAAAAGAGATTGC

ACGTATCGAATGGATCAGAGAAGGCAGGGTTCCCTTACAAACAATTTCGCGCTAAAATT  
GATCACTGTTCCCATAACAATAAGAAGCTATCTATGGAGTCTTAGGCATCAAAAATTTGGATA  
TTTGTAACCAAGAAATGTCTCGTTACCGAGGACCTCGTTTCAAAAAAATACGCCGGC  
TGGGAGCTTTACCGGGACTAACTAGTAAAAGACCCAGATCCAGAAGTGATCTTCAAAC  
CCAATTGCGCTCTGTAAAA---AGATCACAATATCGTATTTCGTTTAGAAGAGAAACAGAA  
ATTGCGTTTTTCATTATGGTCTAACAGAGCGACAATTACTGAAATATGTGCATATTGCTGG  
AAAAGCCAAAGGGTCAACAGGCCAGGTTTTACTACAACACTACTTGAGATGCGTTTTGGAT  
AACATCCTTTTTTCGATTAGGTATGGCTTCGACCATTCTGGAGCCAGACAATTAGTGAA  
CCATAGACACATCTTAGTGAATGGTCGTATAAGTGGATATACCAAGTTATCGTTGCAAACC  
CCGAGATATTCTTACTACGAAGGATAAAGAAAGATCGAAAGCTCTGATTCAAATTTATC  
TTGTTTCATCCCCCTACGAA-----TTGCCAAACCATTTGACTATTGACTCC-----TTACAAT  
ATAAAGGATTTGTAAATCAAATAATAGATAGTAAATGGACCGGTCTTAAAATAAATGAG  
TTGTTGGTCGTAGAATATTATTTCCCGTCAGACTATGTCACGTCGAGGTAAGTGCAGAAGA  
AAAAACTGCAAATCCGATCCAATTTATCGTAATCGATTAGTTAACATGTTGGTTAACCG  
TATTCTGAAACACGGAAAAAAATCATTGGCTTATCAAATTATCTATCGAGCCGTGAAAA  
AGATTCAACAAAAGACAGAAACAAATCCACTATCTGTTTTACGTCAAGCAATACGTGG  
AGTAACTCCCGATATAGCAGTAAAAGCAAGACGTGTAGGCGGATCGACTCATCAAGTT  
CCTATTGAAATAGGATCTACACAAGGAAAAGCGCTTGCCATTCGTTGGTTATTAGGGGC  
ATCCCGAAAGCGTCCGGGTCGAAATATGGCTTTCCGATTAAGCTCCGAATTAGTAGATG  
CTGCCAAAGGCAGTGGCGATGCCATACGCAAAAAGGAAGAGACTCATAGAATGGCAG  
AGGCAAATAGAGCTTTTGCATTTTCGTATGGGTAGGGACATTATTGCCGATATAATAA  
CTTCTATAAGAAATGCTGACATAGATCAAAAAGGAAGAGTTCAAATAGTATCTACTAAT  
ATCACTAAAACATTGTGAAAATACTTTTACGAGAAGGTTTTATTGAAAACGTTTCGAAA  
ACATCAAGAAAGTCAAAAAAATTTCTTGGTTTCAACCTTACGACATAGAAAG-----GTT  
AGGAAAGGG-----AATAAAATAAGATTAAAGCGTATCAGCCGACCCGGTCTAC  
GAATCTATTCCAATCAACGAATTCCTAAGATTTTAGGTGGAATGGGAATTGTAATTC  
TTTCTACTTCTCGAGGTATAATGACAGATCGAGAAGCTCGACTAGAAAAAATTGGAGG  
AGAAATTTTGTGTTATATATGGATGACAAAACCTATAGCAAAAATTGGTTTACGTAAGAA  
TGCACGTATTGGTTCAAAAAAGAATGAACGTAGAATACCAAAAGGAGTTATTCATGTTT  
AAGCGAGTTTCAACAATACTATTGTAACGTGTACAGATGTACGAGGTCAGGTGGTTTCT  
TGGGCTTCCGCAGGTAATCTGGATTCAGAGGCACAAGAAAAGGAACACCCTATGCTG  
CTCAAGCCGCGGCATTTAATGCTATTCGTACATTAATTGATCAGGGTATGCAACGAGCA  
GAAGTTATGATAAAGGGTCCAGGTCTCGGAAGAGATGCGGCATTACGAGCCATTCGGA  
GAAATGGGATGCTATTAAGTTTTCGTACGTGATGTAACACCCATGCCGATAATGGGTGT  
CGCCCTCCTAAAAAAGACGTGTGATGCCAACCATTAAACAACCTTATTAGAAACGCAC  
GAAAGCCAATAAGAAATGTAACGAAATCTCCCGCTTTCGAGGATGTCCTCAGCGTCG  
AGGAACATGTACTAGGGTGTATACTATACCCCCAAAAAACCAACTCTGCCTTACGTA  
AAGTTGCCAGAGTACGATTAACCTCTGGATTTGAAATCACTGCTTATATACCTGGTATTG  
GCCATAATCACAAGAACATTCTGTAGTATTAGTAAGAGGAGGAAGGGTTAAGGATTA  
CCCGGTGTGAGATATCACATTGTTTCGAGGAACCCTAGATGCTGTGCGGAGTAAAGGATC  
GCCAACAAGGGCGTTCTAAATATGGGGTCAAAAAGCCAAAAATGGCAAGAAAAAGTT  
TGATTCAAAGGGAGAAGAAACGCCAGAAATTGGAACAGAAATATTATTGGATTTCGTCG  
ATCCTTAAAAAAGAAATAAGC-----AAAGTTCCCTCGTTGAGGGAACAATGGAAAA  
TTCATGGAAAATTGCAATCCCCACCACGTAATAGTGCGCCTATACGTCTTCATCGACGTT

GTTTTTTAACCGGAAGACCTAGAGCGAACTATCGAGACTTTGGACTATCTGGACACATA  
CTTCGAGAAATGTTTCATGCATGTTTGTACCTGGCGCAACAAGATCAAGTTGGATGGT  
CAAAAATCATTGATCTCAGTTATTACACAAGAAGAAAAGAAGAAAAT-----AGTGGG  
TCTGTTGAATTTCAAGTATCCCATTTACCAATAAGATACGGAGACTTACTTTACATTTA  
CAATTGCACAAAAGAGATTTTTTATCGCAAAGGGGTCTACGAATAATTCTGGGAAAAC  
GTCAACGATTATTGACTTATTTGTCAAAGAAAAATAAAATGCGTTATAAGAAATTAATAG  
AGCAGTTATATATTCGGGAACCAAAAACCTCGT-----ATGGTAAAACCTCGTTTGAACGA  
TGTGGTAGAAAGCAACGAGCTATCTATCGAATCGTTGCAATTGATGTTTCGATCCCGAAG  
AGAAGGAAGAGATCTTCGAAAAGTGGGTTTTTATGATCCGATAAAGAATCAAACCTTATT  
CAAATGTTCTGCTATTTTATATTTCTTGAAAAAGGTGTTCAACCCACAGGAACCTGTTT  
ATGATATTTTAAAGGAAGGCAGAATTCTTTAAAGAATTTCAAATTTCTTTTGATAAAAAA  
AGAAAGATGGATAAATCCAAACAACCTTTTCGTAAATCCAAGAGATCTTTTCGTAGACG  
TTTACCCCAATTGGATCGGGGGATCGAATCGATTATAGAAACATGAGTTTAAATTAGTCG  
ATTTCTTAGTGAACAAGGAAAAATATTATCTAGACGGACAAATAGGTTAACTTTGAAAC  
ACAACGATTAATTACTATTGCTATAAAACAAGCTCGTATTTTATCTTTGTTACCTTTTCG  
CAATAATGAGAAA-----CAATTGGAGAGAGTGGAGTCGATCCCTAGAACTACTGGTCCT  
AGAACCAAAAATAAAGTGACACGTTCACTCAAAAAAATCCTTTTGTAGCTAATCATT  
ATCGGGAAGAATTGAAAACTCAACAGGAGGGAGGAGAAAGAAATCATAGTGAAGTGG  
GTCTCGGGCATCTACCATTATACCCACAATGATTGGCCATAACAATCGCTATTCATAATGG  
AAAGGAACATTTACCTATTTATATCACAGATCGTATGGTCGGTCACAAATTGGGAGAATT  
TGCACCTACTCTCACTTTTCGTGAGACACGCAAGAAACGATAAGAAATCTCGTCGTATGA  
TTTTGAAATCTTTTCTACTAGGTAATCCATTATCCTTATGCATGAAGATAATAAATTCGGT  
CGTTGTGGTCGGACTCTATTATGGATTTCTGACCACATTCTCCATAGGGCCCTCTTATCT  
CTTCCTTCTCCGAGCTCGGGTTATGGAAGAGGGA-----ACCGAGAAGGAGGTATCAG  
CAACAACCTGGTTTTATTGCGGGACAGCTCATGATGTTTCATATCGATCTATTATGCGCCTC  
TGCATCTAGCATTGGGTAGACCTCATAAATACTGTCCATAATTCTACCGTATCTTTTGTT  
TCATTTATTCTGGAACAATCAGAAAACTTTTTTGATTATGGATCTACTACCAGAAATTC  
AATGCGTAATCTCAGCATTCAATGTGTATTCCCTGAATAATCTAATTTTTCAATTATTCAAC  
CATTTCATTTTACCAAGTTCCACGTTAGCCAGATTAGTCAACATTTATATGTTTCGATGC  
AACGACAAGATTTTATTTTAAACAAGTAGTTTTGTTGGTTGGTTAATTGGTCACATTTTA  
TTCATGAAATGGGTTGGATTGGTATTATTCTGGATACGGCAAATCATTCTATTCAATCT--  
-----AAGTATCTTGTGTCAGAATTGAGAAATTCTATGGCTCGAATCTTTAGTATTCT  
CTTATTTATCACCTGTGTTTACTATTTAGGCAGAATGCCGTCGCCTATTTTCACTAAGAAA  
TTGAAAGAGACCGAAGAAAACACAACCTTTTCGTCAATTTTTTTTTTCAATTATAAACGATG  
GAATCATCCATTACGATATATAAAAAATGAGAAATTCGAAAATGCTTTACGCAATGAAAT  
GTCACAACTTCTTTTTTGTACATGTAAGTAGTGGTAAACAAAGAATTTCTTTTACATA  
TCCGCCAGTTTATCAGCTTTTTTCAGAAATGGTAGAACAAAGAATCTCTTTGTACATAAT  
AGAGAAACTT-----TATGACGAAGATCTTTATTGGATTATACTAATGAAAAAAGT  
GCAATTTGAACAATGAATTGAGAAGACGAATCCAAATTATAGAAAAAATGAG---AGT  
CTGGATATGCTTGAAAAAAGAACCATATTATGTGATGATGAAAAAATAAATGTTT  
TCCAAAGGAATATGATCCTTTTTTAAACGGACCATATCGAGGAACGAGAAAAAATA  
GATTCACGTGTAGAATCTTTTTTATAAATAAGATTCATTATCTACTT-----CTTT  
GTACAAAAAAGGGATTAGACTAGAAGAGATTAGTAAAAAGGTTTCTCGATGGTC  
ATACAAATTAACCTTGGGAGAAGAGGAAGAAGAA---CAGATTCATTCAAGAAGATCCA

AACGTATAATCATTATAATGATACTTTGATACGTTACTCACAACAATCGGATTTTCGTGCG  
CAATCTAATCAAAGGATCCATGCGCGCTAAAAGACGTAAAACAGTTATTTGGGACCTAT  
TTCAAGTAAATGTACATTCCCCACTTTTTTTGGATCGTCTAGACAAAACCTCTTTTTTTT  
CCTCTTTTGAT--ATAAACGAAATAAAGAATCGAATTTTTAGGAATAACTATAAAAATGA  
ACAGATAGAAATATCAGAAGCTTGGGATACCTTTATATTTACTCAAGTAATAAGAGGTTT  
GATGTTAGTAAACCAATCTTTTCTTAGAAAATACATCATATTGCCTTCATTAATAATAGCC  
AAAAATATTTCCGTATGTTATTATTCCAAATTCCCAGTGGGACGAGGATTTTAAGGAA  
TGGAATAGAGAAATGCATATTAATGTACCTATAATGGTGTTCATTATCAGAAACAGAA  
TTTCCCAAGATTGGTTAATAAACGGTATTCAGATAAAGATTCTATATCCTTTCTGTCTAA  
AACCTTGGAGAAAATCTAAGAAAGAGAAAAAACAAATTTTTGTTTTTAACAGTCTG  
GGGAATGGAAGCGGAACTTCCCTTTGGTTTTCTCGGAAACGACCTTTTTTTTTTTGAAC  
CTATTTATAAAGAACTCCAAAAATAAAAAAAAAAGGAAAAA---AAAAGATTTTTACAA  
GTTCTAAAATTTTTCAATAAAGAAATAAAATCCTTTTTAAAAGTTATAAAGAAAAAAC  
GAAAGGAGTCATAAAAATAGTTCGA-----GTTATCAACCTAATAATGAAAAACTGGAG  
AAAGTAAATTTCAAAGAAAT---AATAAGATTCTTCGAGAATCGTTCGTTCTAAATCGA  
ACAATGGATTGGTTAATTATTCACTAATAGAAAGAAGAATTAAGATCTTTCTGATAAA  
ACAATCAAATCAAGAATCAAATTGAACGAACTGCAAAAGACAAGAAAAA-----  
-----ATAAAGATCGGGATCACAGAAACATTTTTGGAAAACATTAATAAAGAAGA  
ATATCCGATTAATGCGTAAATCACACTGCTTTATTAAGCATTCAATTGAAAAATATACAT  
AGATATTTTGCTATGTACCATTACCATTTCTAAGATAAATAACAACCTTTTCATGAATTT  
ATTTTGTGGAACCTTATCTTCCCTGTCCCAAGCATATGTTTTTTACAAAATATCACAAAT  
CAATTAAGTAAAGTCTCAATTGAGACCTGTACTTCAATATCCT-----TTTTTAAGGAT  
AATTTTAAAAACTCTTTTATCCACGGAATCTTTAATCTAAATCAAGACATAAAGAATT  
---ACATATGTAATGAATGAATGGAAAAATTGGTTAAAAGTTTCTTATCAATATGATTTCTC  
TCAAAAAAAAAAGGTCTCGATTAGTAACTAAAGAATACCGAAATAGAATAAATAACATT  
GTCTGATTAAAAAACAAGAACCAATTGGATTTATATAAAAAATATCAA-----TTCATTTCTT  
CCATGAAAAAAAAACAAATGGAAAAACATTACAGATATGATCTTTTATCTTATAAATACA  
TAAGTGGATATCTTATTGATTTGGATAGAAAATATTTTGATTGTAGAATTCCTTCATCTTTG  
TTTTATA-----TTCCCATGCAATCAAAAAGGTTCTATCATTGGTTCTTCCCAGAATT  
TGTGCTACTTTTTGATGTATATAAAATCAACCTTGGATCATCCCAATCAAATCACTCCTT  
TTTCATTATAAGAGCAAGAATGAAACGGAACCTGGATTTTTTTTTTGAAAAATATTCCTT  
TTTCAACTAAGATGGGCTGATCCCTGAAGAAGAAAATAATGAAAAATATCAGGATATA  
TTGTCTCTACTTAGACTGATAAATCCAAAGGATATTGCTATATCTTCGATTCAAAGAGG  
TGAAATAAATCTAGATGAAATGCTGATTCAAAAGGACCTAGTTCTTGCAGAATTAATAA  
GAAAGGGAATATTTATTATTGAACCAATTCATCTATCTATAGGAAGGAACGGAAAAATCTA  
TTATATATCAAATGATGATTTTCATTGGTTGATAATAAGAAACACAATCATTATAATTTA  
CTTATTCCTGAAAATATCTATCTCCAGACGTCGTAGAGAATTTTGAATTCGAATTTGT  
TTCAGATTTCTTTGGCCCAATTATCGATTAGAAGATGTAGCTTGATGAACCGCTATTGG  
TTTGATACCAATAATGGCAGTCGTTTTAGTATGTCAAGAATACATATGTATTCAATGAAA  
CGACATCAATTCAAATCCTGGATATTCGAATTGAGAGAGATATTGAGAGAGATCAAGAA  
TTCTCACTATTTCTTAGATTCATGGATCAAATTCGATTCAGTGGGATCTTCACTCACATT  
TTTTCCACCAAGAACGTTTTATGAAACTCTTTGACCCCGAATTTGGAGTATCCTACTT  
TCA---CGTGATTCA-----CAGGGTGCAACAAGCAATCGATATTTACG-----ATCAAAG  
GTGTAGTACTGCTTGTAGTAGTG---GTCCTTATATCT-----CGTATTAACAATCGAAAG



ATGGTCGAAAGAAAAAATCTCTATTTGATGGGGCTTCTTCCT-----ATACCTATGA  
ATTCCATTGGACCCAGAAAGGAGACATTGGAAGAATCTTTT--TGGTCTTCCAATAGAA  
ATAGGTTGATTGTTTCG---CTCCTGTATCTTCCAAAAGGGAAAAAGATTTCTGAGAGTT  
GTTTCATGGATCCGCAAGAGAGTACTTGGGTTATCCCAATAAAG-----AAAAAGCG  
TATCATGCCTGAATCTAACCGGGTTCGCGGTGGTGGAGGAACCGGATCGGAAAAAAT  
AGG-----GATTCTAGTTGTCAGATATCT-----AAGGAAACCGTAGCTGGAATTGAGATC  
TCATTCAAAGAGAAAGATAGCAA---TATCTGGAGTTTCTTTTTTTATCCTATACG-----G  
ATGATCCGATCCGCAAGGACCATGATTGGGAATTTTTTGATCGTCTTTCTCCGAGGAAG  
AAACGAAACATAATCAACTTG-----AATTCGGGACAGCTATTCAAATCTTAGGGAAAG  
ACTTGATTTGTTATCTCATGTCTGCTTTTCGTGAAAAAAGACCAATTCAGGGGGAGAGT  
---TTCTTCAAACAACAAGGA---GCTGGGGCAACTATGCAATCCAATGATATTGAGCATGT  
TTCCCAT-----CTCTTCTCGAGAAACAAGTGGGGTATTTCTTTGCAAATTTGTGCTCAATT  
TCATATGTGGCAATTCCGCCAAGATCTCTTCGTT-----AGTTGGGGGAAG---AATCAGC  
ACGAATCGGATTTTTGGAGGAAC---GTCTCGAGAGAGAATTGGATTTGGTTAGACAATG  
TGTGGTTGGTAAACAAGGATCGG-----TTTTTAGC-----AAGGTACGGAATGTATTGT  
CAAATATTCAATATGATTCC-----ACAAGG-----TCTATTTTCGTTCAAGTAACGGATTCT  
AGCCAATGGAAAGGATCTTCTTCTGATCAATCCAGAGATCATTTTCGATTCCGTTATA-----  
-----AATGAGAATTCAGAA-----TATCACACATTGATCGATCAA  
ACAGAGATTCAGCAACTAAAAGAGAGATCGATTCTT--TGGGAT-----CCTTCCTTTCTTC  
AAACGGAACGAACAGAGATAGAATCAGAT-----CGATTCCCGAAA-----TGCCTTTTTGG  
ATCTTCC-----TCCATGTCCTGGCTATTCACG---GAACCTGAGAAGCGGATGAAGAATCA  
TCTGCTTCCGGAAGAAATCGAAGAATTTCTT-----GGGAATCCTACAAGATCCATTCGTT  
CTTTTTTCTCTGACAGATGG-----TCAGAACTTCAT--CTGGGTTTCGAATCCTACTGAGAG  
GTCCACTAGAGATCAT-----AAATTGTTGAAGAAAAACAAGATGTTTCT--TTTGT  
CTCTCCAGGCGAGCGGAA-----AATAAAGAAATGGTTGATATATTCAAGATAATTA  
CGTATTTACAAGAT-----ACCGTCTCAATTCATCTTCGGAACCATATCACATCCCGGATC  
TGGTTCCG---AAGGATGAACCGGAT--ATGGACAGCTCCAATAAGATTTCAATCTTGAAC  
AAGAATCCATTTTTTGAT-----TTCTTTCATCTATTCCATGACCGGAACAAAGGGGGATAC  
GCGTTA-----CGCCACGATTTTTTTGAATCA---GAAGAGAGATTCCCAGAAATGGCGGAT  
CTATTCATCTATCAATAACCGAGCCG---GATCTGGTGTTCGTAGGGGATTTGCCTTTT  
CTATTGATTCCACGGGTTGGATCAAAAAA-----TTCTTGAATGAGGTATTCAACTCC  
AGAGATGAATCGAAAAAGAAATCTTTA-----TTGGTTCTACCTCCTCTTTTTTAT-----G  
AGGAGAATGAATCTTTTTCTCGAAGGATCAGAAAAAATTGGTCCGG---ATCTACTGCG  
GGAATGAGTTGGAAGATCCCAAACATAAAACAGCGGTATTTGCTAGCAACAACATAAT  
GGAGGCAGTCAATCAATATAGATTGATCCGAAATCTGATTCAAATCCAATATAGCACCTA  
TGGG-----TACATAAGAAATGTATCGAATCGATTCTTTTTAATG-----AATAGATCCGATC  
GCAACTTCGAATATGGAATTCAA-----AGGGATCAGATAGGAAATGATACTCTGAATC  
ATATAACTATAATGAAATATACGATCAACCAACATTTATCGAATTTGAAAAAG---AGTCA  
GAAGAAATGGTTTGATCCT-----CTTATTTCTCGAACCGAGAGATCCATGAATCAGG  
ATCCTGATGCATATAGATACAAATGGTCCAATGGGAGCAAGAATTTCCAGGAACATTTG  
GAACATTTCTGTTTCTGAACAGAAGAATCCTTTTCAAGTAGTGCAAGTAGTGTTCGATCG  
ATTACGTATTAATCAATATTCGATTGATTGGTCCGAGGCTATCGACAAAGAAGATTTGTA  
TAAGCCACTTCGTTTCTTTTTGTCCAAG-----  
-----TCACTTCTTTTTGTCCAAGTCACTTCTTTTTCTTTGTGAGTATCGGGAATAT

CCCCATTCATAGGTCCGAG---ATCCACATCTAT--GAATTGAAAGGTCCGAATGATCAAC  
TCTACAATCAGTTGTTAGAATCCATAGGTGTTCAAATCGTTCATTTGAAGAAATTGAAA  
CCC-----TTCTTATTGGAT-----GATCATGATACTTCC---CAAAGACCAAATTTCTTGATC  
AATGGAGGAACAATATTACCATTTTTGTTCAAAAAGAGACCA---AAGCGG---GTGATTG  
ACTCATTCCATACT-----AGAAAGAATCGCAGGAAATCCTTTGATAACACGGATTCCCTAT  
TTCTCAATGATATCCACGATCGAGACAATTGGCTGAATCCCGTGAAACCATTTTCATAG  
AAGTTCTTTGCTATCTTCTTTTTATAAAGCAAATCGACTTCGATTCTTGAATGATCCACA  
TCACTTCTGGTTCTAT-----TGTAACAAAAGATTCGCCCTTTGATGTG-----GAAAAGA  
CCCGTATCAATAATTATGAT-----CTTACATAT--GGACAATTCTCAATATCTTGTCCATTC  
GCAACAAA---ATCTTTTCTTTGTGCGTGGGTAAA-----AAAAAAGATCTCTTTTTGGAG--  
-AGAGAGACTATTTACCAATCGAGTCGCAGGTATCTGACATCTTCATACCTAAAGATTT  
CCCACAAAGTGGTGATGAAGCG---TATAACTTGTACAAATCGTACAAATCTTTCCATTTT  
CCAATTCGATCCGATCCATTCGTTTCGT-----GGAGCTATTTACTCGATCGCAGACATTTCT  
TCAACACCTCTAACAGAGGAACAAATAGTCAATTTGGAAAAAACTTATTGTCAGCCTC  
TTTCAGATATGAATCTATCTGATTCAGAAGGGAATAACTTGCATCAGTATCTCAGT-----T  
TCAATTCAAACATGGGTTTGATTCACACTCCATGTTCTGAGAAGTATTTACCA-----TTC  
GGAAAGAGGAAAAAA-----CGGAGTCTTTGTCTAAAG-----AAATGCGTT  
GAGAAAGGGCAGATGTATAGAACCTTTCAACGAGAT-----AGTGTCTCAAATGGA  
ATCTGTTCCAAACATATATGCCATGGTTCCTTACTTCGACAGGGTGCAAATATCTCAATT  
TCACCCTTTTAGATACTCTTTCAGACCCATTG-----CCGATACTGAGTAGTAGT---CAAAA  
ATTTGTATCCATTTTTTCATGATATGATGCATGGATCAGATATATCACGGCCAATTCCTCAG  
AAT-----ATTCTTCCACAATGGACTCTG---ATCAGTGAGATTTTCGAGTCAAT  
GTTTACAGAAT-----CTTCTTCTGTCCGACGAAACGATTCATCGAAATAATGAGTCACCC  
GTTCCATTGATACGGACACATCTGAGATCAACAAATGCTCGGGAGTTC---CTCTATTCCA  
TCTTTTTCTTCTTCTTGTGCTGGATAT---CTCGTTCGTATACATCTTCTCTTTGTTTCCC  
GA-----GCCTCTAGTGAGTTACAGACAGAGTTAGAAAAGATCAAATCTTTGATGATTTCCA  
TCATACATGATGGAATCTCGAAAACCTTCTGGATAGGTATCCTACATCTGAAATGAATCCT  
TTCTGGTTAAAGAATCTCTTTCTAGTTGTTCTGGAACAATTAGGAGATTCTCTGGAAGA  
AATACGGGGTTCTGCTTCTGGTGGCAACATGCTATTGGGTGGTGGTCCC-----GC  
TTATGGG---GTCAAATCAATCCGTTCTAAGAAGAAATATTGGAAGATCAAT-----CTCAT  
CGAT-----CTCATAACCAATCCCATCAATCGAATCATTTTTTCGAGAAATACGAGACA  
TCTAAGTCGTACAAGTAAAGAGATCTATTCATTGATAAGAAAAAGAAAAACGTGAAC  
GGTGATTGGATTGATGAGAAAATAGAATTCTGGGTCGCGAACAGTGATTTCGATTGATGA  
TGAAGAAAGAGAATTCTTGGTTCAGTTCTCC-----ACCTTAACGACA-----GAAAAAAGG  
ATTGATCAAATCCTATTGAGTCTGACT--CATAGTGATCATTTAACA-----AAGAAT  
GACTCTGGTTATCAAATGATTGAACAACCGGGATCAATTTCTTACGATACTTAGTTGA  
CATTCAT-----CAAAGGATCTAATGAATTATGAGTTCAATAGATCCTGTTTAGCAGAAAG  
ACGGATATTCCTTGCTCATTATCAGACAATCACTTAT-----TCACAAACCTCGTGTGGGGC  
TGATAGTTTTTATTCCCCTTCCCATCTCCTCATGGAAAACCCTTTTCGCTCCGCTTAGC  
CCTATCCCCTTCT--AGAGGTATTTTAGTGATAGGTTCTATAGGAACTGGACGATCCTGTT  
TGGTCAAATACCTAGCGACGAACCTCTATGTTTCTTTTATTACGGTCTTTCCGAACAAG  
TTCCTGGATGACAAGCCTAAAGGTTATCTTCTTGTGATGAT-----ATCGAT---ATTGAT  
GATAGTGACGATATTGAT-----GATAGT-----  
--GATGATGACCTTGATATTGATACGGAGCTGCTAACTATGACGAATGTGCTA-----ACT

ATGTATATGACG-----CCGAAAATAGACCGATTTGATATAACCCTTCAATTCGAATTAG  
CAAAAGCAATGTCTCCTTGCATAATATGGATTCCAAACATTCATGATCTGCATGTGAATG  
AGTCGAATTACTTATCCCTCGGTCTATTAGAGAACTATCTCTCC-----AGGGATTGTGA  
AAGATGTTCC---ACTGGAAAGATTCTTGTCTTGGCTTCGACTCATATTCCCCAAAAAGTG  
GATCCCGCTCTAATAGCTCCGAATAAATTCAATACATGCATTAAGATACGAAGGCTTCTT  
CTTCCACAACAACGAAAGCACTTTTTTCATTCTTTCATATACTAGGGGATTTCACTTGGA  
AAAGAAGATGTTCCATACT-----AACGGATTCCGGTCCATAACCATGGGTTCCAATGCGC  
GAGATCTTGTAGCACTTATCAATGAGGCCCTATCAATTAGTATTACACAGAAGAAATCCA  
TTATAGAACTAATACAATTAGATCAGCTCTTCATAGAAAACTTGGGATTTTCGA-----  
-TCCCAGATAAGATCGGTTTCAGGATCATGGGATCCTTTTTCTATCAGATAGGAAAGGCTGT  
TACACAAAATGTACTTCTAAGTAATTGCCCATAGATCCTATATCTATCTATATGAAGAAG  
AAA-----TCATGTAAGGTAGGGGATTCTTATTTGTACAAATGGTACTTCGAACTTGGAAC  
GAGCATGAAGAAATTCACGATACTTCTTTATCTTTTGAGTTGTTCTGCCGGATCGGTCG  
CTCAAGATCTTTGGTCTTCATCC-----AGACACGATGAAAA---AATTGGATCACTTCTTA  
TGGATTCGTTGAGAATGATTCT--GATCTAGTTCATGGCCTATTAGAAGTAGAAGGCGCT  
CTGGCTCTGGCGGGATCCTCACGGACAGAAAAATCTTGCAGTCAGTTTGATAATAAT---  
--CGAGTGACATTACTTCTTCGGTCCGAACCAAGGAAT--CAGTTAGATATGATGCAAAA  
TGGATCTTGTCTATCATTGATCAGGGATTTCTATATGAAAA-----TACGAATCGGAGTT  
TGAAGAA--GGGAAGGG-----GCCCTCGATCCGCAA-----CAGATAGAGGAGGAT--  
-----TTATTCAATCAC-----ATAGTTTGGGCTCCT-----AGAATATGGCGCCTT-----TGT  
GGCAATCTATTTGATTGTATCAAAAGGCCCACTGAATTGGGATTTCCC---TATTGGACTG  
GGTCATTTTCGG-----GGCAAATGGATCATTATCATAAAGAGGATGAGCTTCAAGAGA  
ATGATTCGGAGTTCTTGCAGAGTGGAACCATGCAGTACCAGACACGAGATAGATCTTC  
CAAAGAACAAGGCTTTTTTCGACCAAGCCAATTCATTTGGGACCCTGCCGATCCATTCT  
TTCCCTATTCAA---GATCAGCCCTCTGTCTCTGTGTTTTACGTCGAGAATTCTTTGC  
AGATGAAGAGATGTCAAAGGGGCTTATTGCTTCCCAAACAATCCTCCTACATCTATATA  
TAAACGCTGGTTCATC-----AAGAATACGCAAGAAAAGCACTTCGAATTGTTGATTCATC  
GCCAGAGATGGTTTAGAACC-----AATAGTTCATTATCT-----AATGGATCTTCCGTTCT  
AAT-----ACCCTATCCGAGAGTTATCAGTATTTATCAAATCTGTTCCCTATCTAAC---GGAAC  
GCTATTGGATCAAATGACAAAGACATTGTTGAGAAAGAGATGGATTTTCCCGATGAA  
ATGAAACATTTGATT-----CATGTAACAGGAGAAAGATTCCCATCCCTATGCCTAGATCT  
CGA---ATCAATGGAAATTTTATTGATAAGACCTCTTCAATTGTAGCCAATATCTTATTACG  
AATAATTCCGACAACCTCAGGAGAAAAAAGGCATTTACCTATTACAGAGATGGG-----  
ATGTCGGCTCAATCCGAAGGAAATTATGCAGAAGCTTTACAGAATTATTATGAAGCTAC  
GCGATCAGAAATTGATCCCTATGATCGAAGTTATATACTCTATAACATAGGTCTTATACAC  
ACAAGCAACGGAGAGCATACAAAAGCTTTGGAATATTATTTCCGAGCACTAGAACGAA  
ATCCATTTTACCACAAGCTTTTAATAATATGGCCGTGATCTGTCATTAC---CGGGGAGA  
ACAGGCCATTCTACAAGGTGATTCGGAATTGCAGAGGCTTGGTTCGATCAAGCTGCT  
GAGTATTGGAACAAGCTATAGCGCTTACTCCAGGGAATTATATTGAAGCACATAATTG  
GTTAAAAATAACGAGGCGTTTTGAA-----ATGAACTGGCGATCAGAACATATATGGATAG  
AATTCTAACGGGTCTCGAAAAACAAGTAATTTTTGCTGGGCCTGTATCCTTTTTTTTA  
GGTTCAGTACTAGGATTCTTAGTGGTTGGAAGTTCCAGTTATCTTGGTAAAAATATGATATCC  
GTATTTCCGTCTCAGCAAATCTTTTTTTCCCCCAAGGGATCGTGATGTCTTTCTATGGA  
ATCGCAGGTCTATTCATTAGTCTTATTTGTGGTGCACAATTCATGGAATGTAGGTAGT

GGTTATGACCGATTTGATAGAAAAGAAGGGATAATGTCCCTTTTTTCGTTGGGGATTTC  
TGGAATAAATCGTCGCATCTTTCTTCGTATCTTTCTGAAAGATATCCAATCAATCAGAAT  
GGAGGTGAGAGAGGGTCTTTTTCTCGTCGTGTCTTTATATGGAAATCAGGGGCCAA  
GGAGCCATTCCGTTGACCCGTACTGATGAGAAT--TTGACTCCACGAGAAATTGAACAA  
AAAGCTGCCGAATTGGCCTCTTTCTTGC GCGTACCCATTGAAGTATTT

>Utricularia

ATGGAAAGATGGTGGTTCAATTTACTG-----ATAAATAAATCAACAGGT-----CCTATTG  
AAAATACTAGTGAGAATGAAGAT---AATAGAAAGGGTAAGGCTCAAATATTTCATAGGT  
ACAGTAATGTCGATCATTCTTTAGTGTCAAGGATACTCGTAATTTCTTTTTTGTATGAGA  
CTTTTTTAGTTAGGGATAGTAATGGGAATAGTTATTTT---TATTTTGATCTTCAAATAATA  
TTTTGGAAATTGACAACGAT-----CATCCTTTTCTGAGTGAAGTGAATAAATTCTTTGTGG  
GGTTTTTCGCATATATAGTTATATGAATTCTCCTACT-----CAAATTTCTTACAAT---TAC  
ATGTATGATACTGAATCTAGTTGGCGTAATTACACTAGTTGCATTGACAATTATCTTA  
AG-----TCTCAAATCTCTATTGAT-----TCCAGTAGTAGT---AGTTAC-----ATTTCTA  
GCTTGTTTTCTGATGGGGGGGATCCTCTATACGAACTCGCTCAAAGAGTAGTGATTTA  
ACTCTAAGAGAAAGAGCTAACGATCTCAATACAACCTCAAAAATACAGGCATTTGTGGA  
TTCAATGCGAAAATTGTTATGGATTAAATTATAAGAAATTTTGAAGTCAAATAATGAATA  
TTTGTGAACAATGCGGATATCATTGAAAATGAGCAGTTCAGAAAGAATCGAAGTTTC  
GATTGACGCTGGCACTTGGGATCCTATGGATGAAGACATGGTCTCTCGGGATCCCATTG  
GATTTTTTTCAGAAGAGGAT---TATAAAAATTATATGGATTCTTATCAAAGAAAGACAGG  
ATTGACAGAGGCTGTTCAAACAGGCGTGGGTCAACTAAATGGTATTCCGGTAGCGATC  
GGGATTATGGATTTTCAATTTTTGGGGGGTAGTATGGGATCCGTAGTCGGGGAAAAAAT  
AACCCGCTTGATTGAGTACGCTACCAATCAATTTATACCTCTTATTATAGTGTGCGCTTC  
GGGGGGTGC GCGCATGCAAGAAGGAAGTTTAAGCTTGATGCAAATGGCTAAAATATCG  
TCTTCCTTACATGATTATCAATCAAATAAAAAGTTATTTTATGTAACAATCCTTACGTCTC  
CTACTACGGGTGGAGTAACAGCAAGTTTTGGTATGTTGGGAGATATCATTATTGCCGAA  
CCCAATTCCTACATTGCATTTGCGGGTAAAAGAGTAATTGAACAAACATTAATAAAAC  
AGTACCTGAAGGTTTACAAGCGTCTGAATATTTATTCATAAGGGCTTATTTGACCTAAT  
CGTACCCCGTAATCTTTTAAAAGTGTTTTGGGTGAGTTATTTAACTTCACGGCTTCTT  
TCCTTTGAATCCAATTCAATGAAGATGGGAACCATTTCGAGCCGACGAAATTAGTAATA  
TTATACGTGAACGTATTGAACAATATAATAGAGAAGTGAAGATTGTAATACAGGTACC  
GTACTTCAAGTAGGGGATGGTATTGCTCGTATTCACGGTCTTGATGAAGTCATGGCGGG  
TGAATTAGTCGAATTTGAAGAAGGTACAATAGGGATTGCTCTGAATTTGGAATCAAATA  
ATGTTGGTGTGTTATTAATGGGTGATGGTTTGAGAATACAAGAAGGAAGTTCTGTAAAA  
GCAACAGGAAGAATTGCTCAGATAACCGGTGGGCGAGGCTTATTTGGGTCGTGTTATAA  
ACGCCCTGGCTAAACCTATTGATGGTAGAGGTGAAATTTACGCTTCTGAATCGCGATTA  
ATTGAATCTCCTGCTCCGGGTATTATTTCCCGTCTTCCGTATACGAGCCTCTTCAAACC  
GGACTTATTGCTATTGATTCTATGATTCTATAGGACGCGGGCAGCGGAATTAATTATT  
GGAGATAGGCAGACCGGTAAAACAGCAGTAGCGACGGATACCATTCTCAATCAATATG  
GTCAAATGTAATATGTGTTTATGTAGCTATTGGGCAAAAAGCATCTTCTGTGGCTCAG  
GTAGTAAATACTTTACAGGAAAGGGGGGCTATGGAATATACTATTGTGGTAGCCGAAAC  
CGCGGATTCCCCTGCTACATTACAATACCTTGCCCCGTATACAGGAGCTGCTTTGGCTG  
AATATTTTATGTACCGTAAACAACATACTTTAATTTATGATGATCTTTCCAAACAAGC  
CCAAGCCTACCGCAAATGTCTCTTATTACGAAGACCACCTGGTTCGCGAAGCTTATC

CAGGGGATGTTTTTATTTGCATTACGCCTTTTGGAAAGAGCAGCTAAATTAAGTTCT  
AGTTTAGGTGAAGGAAGTATGACCGCATTACCAATAGTGGAAACTCAATCGGGAGATG  
TTTCAGCTTATATTCCTACTAATGTAATTTCCATTACGGATGGACAAATATTTTTATCTGC  
GGACCTATTTAATGCGGGAATCAGACCTGCAATTAATGTGGGTATTTCTGTTTCCAGAGT  
AGGGTCTGCAGCTCAAATTAAGCCATGAAGCAAGTAGCTGGTAAATTAATTAAGTAA  
TTGGCCCAATTTGCAGAATTAGAAGCCTTTGCACAATTTGCTTCAGATCTTGATAAAGC  
TACTCAGAATCAATTGGCAAGAGGTCAACGATTACGTGAATTGCTTAAACAATCCCAAT  
CAGCCCCCTTACGGGTAGAAGAACAGATAATAACTATTTATACTGGAACAAATGGTTAT  
CTTGATTCATTAGAAATTGGACAGGTAAGGAAATTTCTTGTTGAATTACGTACTTACTTA  
AAAAGTAATAAACCTCAGTTTCAAGAAATCATATCTTCTACTAAGACATTTACTGAGGA  
AGCGGAGGCTCTTTTGAAAGAAGCTATTCAGCAACTAATGGAGCGGTTTCTACTTCAG  
GAACAAGGAATGAGAATTAATCCGACTACTTCTAGTTCTGAGGTTGCCACGCTTGAAA  
AAAAAAACCAGGGGCGTATCGTCCAAATCATCGGTCCGGTACTAGATGTAGCCTTTCTT  
CCAGGCAAGATGCCTAATATTTATAACGCTCTGATAGTTCAAGGTAGAGATACTGTTGGT  
GAACCAATTAATGTAACCTGTGAAGTACAGCAATTATTAGGAAATAATCGCGTTCGAGC  
TGTAGCTATGAGTGCTACAGACGGTCTGACGAGAGGAATGAAAGTTATTGATACGGGA  
GCTCCTCTAAGTGTTCGGTTCGGTGGATCGACTCTCGGACGAATTTTCAACGTGCTTGG  
TGAGCCTATTGATAATTTAGGGCCTGTCGATACTTCTACAACATCTCCTATTTCATCGATCT  
GCGCCCGCCTTTATACAGTTAGATACAAAATTAGCTATTTTTGAAACAGGAATTAAGT  
AGTAGATCTTTTAGCCCCCTATCGTCTGGCGGAAAATAGGACTATTTGGAGGCGCTG  
GGGTTGGTAAAACAGTACTCATTATGGAATTAATTAATAATATTGCCAAAGCCCATGGGG  
GCGTATCCGTATTTGGTGGCGTAGGTGAACGTAACGTAAGGAAATGATCTTTACATG  
GAAATGAAAGAATCTGGAGTCATTAATCAAGAAAATATTGCGGAATCAAAGTAGCTTT  
AGTTTACGGCCAGATGAATGAACCACGGGAGCTCGGATGCGAGTTGGTTTACTGCC  
CTAACGATGGCAGAATATTTCCGAGATGTTAATGAACAAGACGTAACCTTATTATCGAC  
AATATCTTCCGTTTCGTTCAAGCAGGGTCCGAAGTATCTGCCTTATTGGGTAGAATGCCT  
TCCGCTGTCGGTTACCAACCAACTCTAAGTACCGAAATGGGCTCTTTACAAGAAAGAA  
TTACTTCTACCAAAGAAGGGTCCATAACTTCTATTCAAGCAGTCTATGTGCCTGCAGAC  
GATTTGACCGATCCTGCTCCTGCTACAACATTTGCACATTTAGATGCTACTACCGTACTT  
TCAAGAGGATTAGCTGCCAAAGGTATCTATCCAGCAGTAGATCCTTTAGATTCAACTTC  
AACGATGCTTCAACCTCGTATCGTCGGCGAGGAACATTATGAAACTGCGCAAAGAGTT  
AAGCAAACCTTTACAACGTTATAAGGAACCTCAAGACATTATAGCTATTCTTGGGTTGGA  
CGAATTATCCGAAGAGGATCGTTAACCCTAGCAAGAGCGCGAAAATTTGAGCGTTTC  
CTATCACAACCTTTTTTTGTAGCTGAAGTATTTACCGTTCTCCCGAAAATATGTTGGT  
CTAGTGAAACCATTAGAGGGTTTCAATTGATCCTTGCTGGAGAATTAGATGGTCTTCC  
CGAACAGGCCTTTTATTTGGTAGGTAATATCGATGAAGCTACCACGAAGGCTATAAAAT  
TAGAAATGGAGAGCAATTTGAAGAAAATGACCTTAAATCTTTGTGTATTAACCCCAAT  
CGAATTGTTTGGGATTCCGAAGTGCAAGAAATCATTTTATCGACGAATAGTGGCCAAAT  
TGGCGTATTACCAAACCATGCTCCTATTGCTACAGCTGTAGATATAGGGATTTGAGAAT  
ACGACTTAAGGAACAATGGTTAACGATGGCTCTGATGGGTGGTTTTGCTAGAAATAGGA  
AATAACGAGATCACTGTTTTAGTAAATGATGCGGAAAAGGGTAATGATATTGATCCACA  
AGAAGCTCAGCAAACCTTTGAAATAGCAGAAGCTAATTTGAGAAAAGCGGAAGGAAA  
GAGACAAATAATTGAGGCAAATCTAGCTCTGCGACGAGCTAGGACAAGAATAGAAGCC  
GTCAATGTGGTTTTCAATGAAAAATGTAACCGATTCTTTCGTTTTTTTTGGACTACTGGCCA

TCTGCCGGGAGTTTCGGATTTAATACCGATATTTTAGCAACAAATCTAATAAATCTAAGT  
GTAGTAATTGGTGTATTAATTTTTTTTGGAAAGGGAGTGTTAAGTGATTTATTAGATAAT  
CGAAAGCAGAGGATCTTGAATGCTATTCGAAATTCAGAAGAAGTGCCTGGGGGGGCC  
GTTGAACAATTGGAAAACGCCCGGATTCGCTTACGTAAAGTGGAACAGAAGCAGAT  
GAGTTTCGTGTGAATGGATATTCGGAGATAGAGCGAGAAAAATTGAATTTGATTAATC  
AACTTCTAAGACTTTGGAACAATTAGAAAATTACAAAAATGAAACGATTCAGTTTGAA  
CAGCAAAGGGCAATTAATCAAGTCCGACAACGGATTTTCCAACAAGCCTTAGAGGGA  
GCTCTAGGCACTCTAAATAGTTGTTTGAACAACGAGTTACATTTACGTAATTAATGCG  
AATATTGGCATATTGGTAGCGATGAAAGAAAAAAGGATATGAACCCACTGATTTCTGC  
TGCTTCCGTTATTGCTGCTGGATTGGCTGTAGGGCTTGCTTCTATTGGTCTGGAGTTGG  
TCAAGGGACTGCTGCGGGACAAGCTGTAGAAGGTATCGCGAGACAGCCCGAGGCAGA  
GGGAAAAATAAGAGGTACTCTATTGCTTAGTCTCGCTTTTATGGAAGCTTTAACGATTTA  
TGGATTGGTTGTAGCATTAGCACTTTTATTTGCTAATCCTTTTGTATGAATGTGCTATCA  
TGTTCTATCAACGTACCTAAAGTTTTATACGATATATCCGGTGTGGAAGTAGGCCAACAT  
TTCTATTGGCAAATAGGCGGTTTCCAAGTCCACGGTCAAGTACTTATTACTTCTTGGGTT  
GTAATTGCTATCTTATTAGTTTCAGCTACTATCGCTGTTTCGGAACCCACAAACCGTTCCG  
ACTGGGGGTCAGAATTTCTTTGAATATGTTCTTGAATTCATTTCGAGATGTGAGTAAAC  
CCAAATTGGAGAAGAATACGGCCCTTGGGTTCTTTTATTGGAACATGTTTCTATTAT  
TTTTGTTTCTAATTGGTTCGGGAGCTCTTTTACCTTGGAAAATCATAGAATTACCTCATGG  
CGAGTTGGCCGCACCAACGAATGATATAAATACTACTGTTGCTTTGGCTTTACTTACGTC  
AGGAGCATATTTCTATGCAGGTCTTAGCAAAAAAGGATTAAGCTATTTTCGGTAAATATAT  
TCAACCAACCCCAATCCTTTTACCCATTAATATCTTAGAAGATTTACAAAGCCGTTATC  
ACTTAGTTTTTCGACTTTTCGGGAATATCTTAGCAGATGAATTAGTAGTTGTTGTTCTTGT  
TTCTTTAGTACCTTTAGTAGTCCGATCCCGGTCATGTTCTTGGATTATTTACAAGTGG  
GATTCAAGCTCTTATTTTTGCAACTTTAGCCGCGGCTTATATAGGTGAATCCATGGAAGG  
CCATCATATGATATTTCAACCTTAGAGCGTATATTAACATCATATTTCTTTTCAATTGTTG  
TAATTCTAATTACAATTCAGTTGATAACCTTTTTCGTTGGTGAATCGTAAAACCTTTATTA  
CTCATCCGAAAAGGGTATGCTAATTACTTTTTTATCTATAACAGGATTATTAATTACTCGT  
TGGATTAATTCGAGACATTTTCCACTAAGTAATTTATATGAATCGTTAATCTTTCTTTCAT  
GGAGTTTGTCTCTGATTCATATAGTTCCATAT-----AAAACGAAAATATTTAAGCACCA  
TAATTGGTCCAAGTGCTATTTTTACACAAGGCTTTGCTACTTCGGGTCTTTTAACTGCAA  
TACACCAATCAACAATATTGTCCCCGCTCTTCAATCCGAGTGGCTAATAATGCACGTA  
AGTATGATGATATTAGGATATGCGGCACCTTTATGTGGATCATTATTATCAGTATCACTTCT  
AGCCATTACAGTTAGAAAAACAAGAACCGTTTTTCT-----ATGGAAACCGAATACATAA  
AAGAACGGGGTATTAGTTTACAAAATATTTCT-----AAACAAAATTTCTATAGGTCCT  
ATTGCTTAAGCAATTGGATTATTGGAGTTATCGAGTTATTAGTCTAGGTTTTATCTTTTTA  
ACCCTAGGAATTCTTTCTGGAGCGGTATGGGCTAATGAAGCGTGGGATTCCTATTGGAG  
TTGGGATCCAAAAGAACTTGGGCTTTTATTACTTGGATTGTATTTGCAATTTATTTACAT  
ATTCGAACA-----AAATGGAAAGGTATAAAGTCATCAATTGTGGCGTCTATTGGATTTATT  
ATAATTTGGATATGCTATTTTTGGGGTAAATCTTTTTCGGACTAGGATTACACAGTTATGGTT  
CATTTTCATTAATAATGGCAAAAAAGAAAGCATTCACTACTCTTTTCTATCTTGCATCTAT  
AGTATTTTTGCCCTGGTGGTTTTCTTTTCAATTTACTAAAAGTATGGAATCCTGGGTAC  
TAATTGGTCCAATAGGGGGAAATCAGAAATATCTTGAATGATATTCAGAAAAAATTAT  
TCTAGAAAAGTTCATAGACTTAGAGCAAATCCTCTTCTTGGATCAAATCATCAAGGAAT

CCTCGGAGACAGATCTAGAAGAGTTTCCTATA---ATCCACAAAGAAACGATACAATTA  
TCAAGATATACAATGAGGATCTTATCCATATGATTTTGCACCTTCTCGACCAATCTAATCTG  
TTTTATTATTCTAATCGGTTATTCTATTTTAGGTAATAACGAACCTGTTCTTATTAATCTT  
GGGTTTCAGGAATTCCTATATAACTTAAAGTGATACAGTAAAAGCTTTTTTCGATTCTTTTAG  
TAACCGATTTATGTATCGGATTTTCATTCACCCCATGGGTGGGAACCTGATGATTGGTTATG  
TCTACAAAGATTTTGGATTTGGCAATAATGATCAAATAGTATCTGGTCTTGTTTCCACCT  
TTCCAGTTATCCTCGATACTTTTTTTAAATATTGGATTTTCCGTTATTTAAATCGTCTATCT  
CCATCACTTGTAGTTATTTATCATGCAATGAATGATATGCCTATTGGTGTTCCTAAAAGTAC  
CTTTCCGAATTCCTGGAGAGGAGGATGCAACTTGGGTGACGTAAAC---CGACTTTATC  
ACGAAAGATTACTTTTTTTAGGACAAGAAGTTGATAGCGAGATCTCGAATCAACTTCTT  
GGTCTTATGATATATCTCAGTCTTGAGGATAATACCAAAGACCTGTATTTATTTATAAACT  
CTCCCGGTGGATGGGTCTACCCGGAATAGCTATTTATGATACTATGCAGTTTGTGCGAC  
CAGAGGTACATACAATATGCATGGGATTGGCCGCATCCATGGGCTCTTTTATCCTGGCTG  
GGGGAGAAATTACCAAACGTCTAGCATTCCCTCACGCTAGGGTAATGATCCATCAACCC  
GCTAGTTCTTTTTATGAGGCACAAACGGGAGAATTTATCCTGGAAGCGGAAGAATTGCT  
GAAACTACGCGAAATCCTCACAAGGGTTTATGTACAAAGAACGGGAAAACCCATATGG  
GTTGTATCTGAAGATATGGAAAGAGACGTTTTTATGTCAGCAAACGAAGCACAGGCTTA  
TGGAATTGTTGATCTTGTAGCAATTGAAATGAAAGAACAAAATGGATTCATGAAGGTT  
TAATTACTGAATCACTTCCAAATGGCATGTTTCGAGTTCGGTTAGATAATGAAAATGTGA  
TTCTAGGTTATGTTTCAGGAAAGATACGACGTAGTTTATACGGATACTGCCGGGAGAT  
AAAGTAAAAATTGAAGTAAGTCGTTACGATTCGACCAGAGGACGTATAATTTATCGACT  
CAGAAACAAGGATTCGAAAGATATGGAGGAAATCAAACCTATTTACAG---GAGGAAT  
TTCAACGACACGACTTCCTATATCCACTTATCTTTCAGGAGTCTATTTATGCCTTTGCTC  
ACGATCATGGTTTACCGGGTTATGACAAAAAATCCAGTTTATTGATTGTGAAACGAATA  
ATTACTCGAATGTATCAACAGAATAAGTTTATTATTTCTCATAATTCTTCGAACCAAAATC  
CATTTTTCTTGACGAATTTGTATTCTCGAATCATATCAGAGGGATTTGCGTTTATTGTAGA  
AATCCATTTTATCTTCGAGTAATTTCTTGTATCATAATTCAATCTCAGAATTTACGATCA  
ATTCATTCAATATTTCCTTTTGTAGAGGACAATTTATCCCATTTAAATTTTGTATTAGATG  
CGGAAATCCCCTATCCTGTCCATGCGGAAATTTGGTTCAAGCTCTTCGTTATTGGTTAA  
AAGACGCCTCTTCGTTGCATTTATTACGATTCTTTCAGCGAGTCTTGGAAATGGGAATA  
GTCTTTTTAAATCTTTCT-----TTTTCAAAACAAAGAGTTTTCTTATCTTATATAGTTCTT  
ATGTATATGAATATGAATCCATTTTCGTCTTCTACGCAATCAATCTTTTCATTTACGATC  
AACATCTTTTGAGTTTTTTCTGGAACGAATCTATTTCTATAGAAAAATCGAACTCCTTGT  
GAAAGTCTTTGGGAAGGATTTAATCTATGGTTGGTGAAGGAACCTTGCATACATTATAT  
TAGGTATCAAAGAAAATATCTTCTGTCTTCTAAAGGCATATCTCGTTTCCTGAATAAATG  
GAAATGTTATCTTGTGAATTTTGGCAATGGTATTTTTCCTTGTGGTTTTCCACAAAAAA  
GATTTTTTTCAACGAATTAGCTAATCATTCCATAGAATTTTTGGGTTATTTTTCAAGTGTA  
CGAATGAATCTTTTGTGGTACGGAGTCAAAGTCTAGAAAATTCATTTCTAATGAATAAT  
GCTATT-----AAAAGTGTGATACACTTGTCCAATTATTCCTTTGCTTATGGCATTGACT  
AAGGCTAAATTTGTAAACGTATTAGGACATCCGATTAGTAAGTCGTCTTGGGCTGATTTA  
GCAGATTCTACTATTATAGATAGATTTGGACGTATATGCAGGAATCTTTCATTATCATA  
GTGGGTCTTACAAAAAAGAAGTTTGTATCGAATTAATATATACTCCAACCTTCTTGTG  
CTAGAACGTTGGCTCGGAAACACAAAAGCACTGTACGTACTTTTTTTAAAAGGTTGGA  
CTCGGGATTATTGGGCGAATTTTTTATGTCGACCGAAGCGGTTCTTTTTATTACCGTACC

TAAAAGGGTTTGGTTTTTGGATATTATTTCTATCGATGATTTGTTCAATCACAAGATGATA  
ATTAAT--ACAACAGAAGTAGAA--GCTATCAATTCTTTTTCCAGAGTTGGATAC--TTAA  
AAGAAGTTTATGGCATTATATGGGTACTTGGCCCTATTTTGACACTTGTATTAGGAATTA  
CCTTAGGTGTCCTAGTAATTGTTTGGTTAGAAAGAGAAATATCTGCAAGGATACAACAA  
CGCATTGGACCCGAATACACAGGTCCGTGGGGACTTCTTCAAGCTCTAGCAGACGGTA  
CAAACTGCTTTTTAAAAGAGAATCTTCGTCCATCTAGAGGAGATACTCATTTATTCAGTA  
TAGGACCGTCCATAGCAGTCATATCCATTTTACTAAGTTATTCAGTAATTCCTTTTAGCTA  
TCGCTTTTATTCTATCCGATCTTAGTATTGGTGTTTTTTTATGGATATCTATTTGAGTCTTG  
CTCCGGTTGGACTTCTTATGGCGGGCTATGGATCAAATAATAAATATTCCTTTTTAGGTG  
GATTAAGGGCTGCTGCCAATCAATTAGTTATGAAATACCATTAACCTTTATGTGTATTATC  
AATATCTCTATTATCTAATAGTTCAAGTACAGTTGATATAGTTGAAGCCCAGGCAAAATA  
TGGTTTTTGGGGATGGAATTTGTGGCGTCAACCTATAGGGTTTATCATTTTTTTAATTTCT  
TCTCTAGCCGAGTGTGAAAGATTACCTTTTGATTTACCGGAAGCTGAAGAAGAATTAGT  
AGCAGGTTATCAAACCGAATATTCGGGGATCAAATTTGGTTTATTTTATGTTGCTTCATAT  
CTAAATCTATTAATTTCTTCATTATTTGTAACAGTTCTTTACTTAGGGGGTTGGAGTTTTT  
CTATCCATACATATTCGTTCCCGAGCTTTTTGCCCTAAATAAAAGAAGTCAAGTCTTTG  
GAATACTAATCGGCATTTTTTATTACATTAGCTAAAACCTATTTATTCTTATTTAGTTGATT  
GTAACAAGATGGACTTTACCGAGGCTGAGAATGGACCAACTATTAATCTTGGGTGGA  
AATTTCTTTTACCCGTTTCTTTAGGTAATTTATTATTAACAACCTTCATTCCAGCTTTTTTC  
ACTGATGATCTGGCATGTACAGAATGAAAACCTTCATTCTCGATTCTACGAGAATTTTTAT  
GAAAGCCTTTTCATTTGCTTCTCTTCGATGGAAGTTTGATTTTCCAGAATGTATCCTAAT  
TTTTGGCCTAATCTTCTTCTGATGATCGATTCAACCTCTGATCAAAAAGATATACCTTG  
GTTATATTTTCATCTCTTCAACAAGTTTAGTAATGAGCATAACGGCCCTATTGTTCCGATG  
GAGAGAAGAACCTATGATTAGCTTTTCGGGAAATTTCAAACGAACAATTTCAACGAA  
ATCTTTCAATTTCTTATTTTACTATGCTCAACTCTATGTATTCCTCTATCCGTAGAGTACAT  
TGAATGTACAGAAATGGCTATAACTGAGTTTCTCTTATTCGTATTAACAGCTACTCTAGG  
AGGAATGTTTTTATGCGGTGCTAACGATTTAATAACTATCTTTGTAGCTCCAGAATGTTT  
CAGTTTATGCTCCTACCTATTATCTGGATATACCAAGAAAGATGTACGGTCTAATGAGGC  
TACTATGAAATATTTACTCATGGGTGGGGCAAGCTTCTTATTCTGGTTCATGGTTTCTC  
TTGGCTATATGGTTTATCCGGGGGAGAGATCGAGCTTCAAGAAATAGTGAATGGCCTTA  
TCAATACAAAATGTATAACTCCCCAGGAATTTCAATTGCGCTCATATTCATCACTGTAG  
GAATTGGGTTCAAGCTTTCCCCAGCCCTTCTCATCAATGGACTCCTGACGTATACGAA  
GGATCTCCCACTCCAGTCGTTGCTTTTTCTTTCTGTTACTTCGAAAGTAGCTGCTTCAGC  
TTCAGCCACTCGAATTTTCGATATTCCTTTTTATTTCTCATCAAACGAATGGCATCTTCTT  
CTGGAAATCCTAGCTATTCTTAGCATGATATTGGGAAATATCATTGCTATTACTCAAACA  
AGCATGAAACGTATGCTTGCATATTCGTCCATAGGTCAAATCGGATATGTAATTATTGGA  
ATAATTGTTGGAGACTCAAATGATGGATATGCAAGCATGATAACTTATATGCTGTTCTATA  
TCGCCATGAATATAGGAACTTTTGCTTGCATTGTATTATTTAGTCTACGTACCGGAACTG  
ATAACATTCGAGATTATGCAGGATTATACACGAAAGATCCTTTCTTGGCTCTCTCTTTAG  
CCCTATGTCTCTTATCCCTAGGAGGTCTTCCTCCACTAGCAGGTTTTTTTCGGAAAACCTCT  
ATTTATCTGGTGTGGATGGCAGGCAGGCCTATATTCCTTGGTTTTAATAGGACTCCTTA  
CAAGCGTTATTTCTGTTTATTATTATCTAAAAATAATCAAGTTATTAATGACTGGACGAA  
ACCAAGAAATCACCCCTCACGTGCGAAATTATAGAAGGTCTTCTTTAAGATCAAACAAT  
TCCATCGAATTGAGTATGATTGTATGTGTGATAGCATCTACTATACTAGGAATATCAATGA



ACCCGATTATTGCAATTGCTCAGGATACCCTTTTTATGTTTTTTGATTTACGAATATAACAC  
TTTTTGGGCATTTCTAATAATATCAAGTTTTATTCTATTTTGGCATTTTAAATTTCCGGGA  
TTTTAGCGCCGATTAGGAAAGGGCCGGAGAACTTTCTAGTTATGAATCGGGTATAGAA  
CCAATGGGCGACGCTTGTTACAATTTGCAATCCGGTATTATATGTTTGCTCTAGTTTTT  
GTTGTTTTTGATGTTGAAGCGGTTTTTCTTTATCCATGGGCAATGAGTTTCGATATATTG  
GGTGTATCCGATTTCTAGAAGCTTTCATTTTCGTGATTATTTAATTCTGGGTTAGTTT  
ATGCATGGCGAAAGGGAGCATTGGAATGGTCTACGAATAATTTCCGTGCTTAACAATA  
ATTGTGGTTTTGCCAATAATTGCGGGTTCGTTAATTTCTTTCTTCCATATAGAGGAAATA  
GAGTAATACGTTTGTATACTATATCTATATGCATCTTAGAACTGCTTCTAACGACTTATGC  
ATTTTCTTATCATTCCAATCGGATTATCCATTAATACTAGTCGACGATTATAATTGG  
ATCCATTTTTTGGATTTCCATTGGAGATTGGGAATAGATGGACTATCTATAGGACCCATT  
TACTGACAGGATTCATCACTACTTTAGCTACTTTAGCTGCATGGCCGATTACTCGAGAT  
TCTCAATTATTTCAATTCCTGATGTTAGCAATGTACAGTGGACAAATAGGATTGTTTTCT  
TCACAGAACCTTTTACTTTTTTTTTCTGATGTGGGAGTTGGAATTAATTTCCCGTGTATTTA  
CTTGATTTTATATGGGGAGGAAAAAACGTCTCTACTCAGCTACAAAGTTTATTTTGTAT  
ACTGCAGGGGGTTCCATTTTTCTTTAATGGGAGTTCTGGGTATTGGTTTATATAGTTCT  
ACTGAACCAGCATTAAATTTTGAATATTGGCTAATCGGTCCTATCCTGTGGCGTTGGA  
AATTATATTCTATATTGGATTTTTTATTGCTTTTTCGGTCAAATTACCAATGATACCCCTAC  
ATACATGGTTACCAGATACTCATGGAGAAGCCATTATAGTACTTGTATGCTTTTAGCCG  
GAATATTATTAATAAATGGGAGCTTACGGATTAGTTCGCATTAATATGGAATTATTTCTCA  
TGCTCATTCTATATTTTCTCCTTGGTTGCTGATAGTAGGCGCAATACAAATAATTTATGCA  
GCTTCAACATCTCTTGGTCAACGTAATTTAAAAAACGAATAGCCTATTCTTCTGTATCG  
CATATGGGTTTTATAGTTATAGGAATTGCTTCTATTACCGATATGGGACTGAATGGAGTTC  
TTTTACAAATAATTTCTCATGGATTTATTGGTGTGCACTTTTTTTCTTGGCGGGAATAA  
CTTATGATCGCATACTCTTGTATTCTTGTATGAAATGGGTGGAATAGCTATCCAAATGC  
CAAACTATTTACGATGTTCAATAGCTTTTCAATGGCTTCTCTTGCATTACCTGGTTTAA  
GTGGTTTTTTTGTGTAATTAATAGTATTTTTTGGATTAATTAAGTTCAAAATATCTTTT  
AATGACAAAACCTTAATTACTTTTTGTAATGGCAATTGGAATGATATTAAGTCCCATTTAT  
TTATTAGCTATGTTACGTCAAATGTTCTATGGATAACAAGATATTTCCGATTTCAAATCTT  
CTTTTTTGGATTCTGGTCCACGAGAGTTATTTCTTTAATCTGTCTTTTCTTACCCGTA  
AGGTATTGGTGTGTATCCTGATTTCTTCTTCACTATCAGTTGAAAAAGTGGAACTTAT  
TCTATGTAATTTTTTTGATAAATGATGCCCGAAGATATACTTGTTTTAAAGTGCCTATTTA  
TTTGCTATTGGTACCTATGGATTAGTCACAAGTCGAAATATGGTTAGAGCCCTTATGTGT  
CTTGAACCTCATATTAATTCAGTTAATATTAATTTTGTAAATTTTCTAATATTTTAGATAA  
TCGTCAATTAAGAGGGGATATTTTCTCTATCTTTGTTATAGCTATTGCAGCCGCTGAAGC  
AGCTATTGGTCTAGCTATTGTTTCATCAATTTATCGTAACAGAAAATCCACTCGAATTA  
TCAATCCAATTTGTTGAGTAAAATGGAAACGACATATCAATATACGTGGATCATACTTT  
GGTTCAACTTCCAGTTCCTATCTTAATAGGAATGGGACTCCTTATTTTCCCGACAGCAA  
CAAAAAATATTCGTCGTATGTGTGCCTTTACGAGTATTTTTTTGTTAACTATAGCTATGAT  
TTTGTCATTAATTTGTCTATTCAACAAATAAATAGTAGTTCAATCTATCAATATGTATGG  
TCTTGGGCCCTCGATAATGATTTTTATTTAGAATTCGGGTATTTACTCGATCCTCTTACGT  
CCATTATGTTAATGTTAATTAATTAATTTACTACTGTTGGAATTCTAGTTCTTATTTATAGTGACAATTAT  
ATGCTCATGATCAAGGATACTTGAGATTTTTTGTCTATGAGTTTTTTTCAGTACTTCAA  
TGTTGGGATTAGTTACTAGTTCAAATTTTATACAAATTTATATTTTTTGGGAATTGGTTGG

AATGTCTTCCTATCTATTAATTGGGTTTTGGTTCACACGACCTTCTGCGGCAAATGCTTG  
TCAAAAAGCTTTTATACTAATCGTGTAGGAGATTTTGGTTTATTATTAGGAATTTTAGG  
TTTTTATTGGATAACAGGGAGTTTTGAACTGACCGATTTATTCGAAATAATGAATAACGA  
TCAAGTAAATTTTCCATTTGCTACCTTGTGTGCTGTTTTAGTATTTGCTGGAGCAGTTGC  
TAAATCTGCACAATTCCTCTGCACGTATGGTTAGCTGATGCTATGGAAGGACCCACAC  
CGATTTGCGGCTCTTATCCATGCAGCCACTATGGTGGCAGCGGGTATTTTTCTTGTAGCTC  
GCCTTCTCCTCTTTTTATAGTTATACCTTATATAATGAATTTAATTTTCGTTGATAGGCATA  
ATCACAGTATTTCTAGGAGCTACTTTAGCGCTTGCTCAAAAAGACATTAAGAGAGGTTT  
AGCTTATTCTACAATGTCTCAATTGGGTTATATGATGGTAGCTCTCGGAATGGGGTCTTA  
TCGAAGTGCTTTATTTCAATTTGATTACGCATGCTTATTCCAAAGCTTTATTATTTTTGGGT  
TCTGGATCTGTTATTCATTCATGAAACTGTTGTTGGCTATTCGCCGAATAAAAGTCAG  
AATATGGGTCTTATGGGGGGTTAACAAAACATGCACCAATTAATCAAAAACGCTTTTTT  
ATTAGGAACACTTTCTCTTTGCGGTATTCCACCGCTTGCTTGTTTTTGGTCAAAGGATG  
AAATCCTTAATGATAGTTGGTTATATTCGCCTATTCTCGCACTAATATCTTGGACTGTGGC  
AGGATTCACGGCATTATATATGTTTCGTATTTATTTACTTACTTTTGAGGGCCATTTAAAT  
GTTATTTTTCAAATTATAGTGGTAACCAAAATATATCTTTATACTCCCTATCTCTATGGG  
GAAAAGGGTATTCAAAAAA-----AATTTTAGTCTAGTAAGAATGAATCTTTTTTTC  
CAAAAAGGATTCCCTGTTTTTCTATCCTTCTGAATCGGATACTACTATGTTATTTCTT  
TATTTATATTAGTACTATTCACCTTGTTTGGTGGATTTTTAGGAATCCCTTTTTTCGTTTGAT  
ATCTTATCCAAATGGATATTTCCGCTATTAACCTTTTACATCAAACGTCACAA---TCACC  
AGATTTGTATGAATTTTTGCAAATGCAATTTGTTCCGGTAAGTATAGCTTATTTAGGAAT  
AGTTGTGGCGTGCTTTTTTTATAAACCTATTTATTCGTCTTTCCAAAATTTGACTTAATA  
AATTATTTTTTAGTTTTTGGGAAAACCTTTTAAACGTAATAACGAGTGGGCGTATAAT  
CGTGCTTATATCGATCCCTTTTATGGAGCAGCTTTTATTGCCCAATACGGGAATTATCTA  
AATTAATTTCTTCTTTGAAAAAAAGTAATTGATGCAATCCGAATGTAATTGGTGTCA  
GTAATTTCTTTGCAGGAGAAGGAACAAAATATGTTGGCGGTGGG---CGTATTTCTTCTTA  
TCTTTTCTTATATTTTATATCCCTTTTCTCTTTTTTTTTGTTTGGTTTCCATGGATTTACCTG  
GACCAATACAGGATTTTCTTTTAAACATTGCTGGGATTCGGTCTTATATTAGGAAGTTTGA  
CATTAATATTATTTCCGAATACAATTTATTCGGCTTTTTTCATTGGGATTGGTTCTTTTTTGT  
ATATCTTTATTCTATATTCTATCGAACTCGTATTTTGTAGCCGCGCCCAACTCCTTATTTA  
TGTAGGGGCTATAAATGTTTTAATCATTTTTGCTGTGATGTTTCATGAATGATTCAGAATAT  
TACAAAGATTTTCGTCTTGGTACCGTTGGGGATCGAGTTACTTCAATAGTTTCTACAAG  
TCTTTTTATTTCACTAATTGCCACTATTTAGACACATCTTGGTATGGTCTCTTTTGGACT  
ACAAAATCAAATCAAATCTGGAGCAAGATTTGATAAGTACTAGTCAACAAATCGGAAT  
TCATTTATCAACCGATTTTTTTCTTCCATTTGAACTTAGTTCGATAATTCTTTTAGTGGCT  
TTAATAGGTGCAATTGCTATAGCCCGTCAAATGATTGCACCAACTATGAAAAAAACCT  
CATGATAGTCAATATGGGACCTCACCACCCTCAATGCATGGTGTCTTCGACTTATTGT  
TACTCTGGACGGTGAAGATGTTATTGACTGTGAACCAATATTGGGTTATTTACATAGAG  
GGATGGAGAAAATTGCAGAAAATAGAACAATTATACAATATTTGCCTTATGTAACACGT  
TGGGATTATTTAGCTACTATGTTTACAGAAGCCATAACCGTAAATGGACCCGAGCAGCT  
CGGAAATATTCAAGTACCTAAAAGAGCTAGTTATATCAGAGCTATTATGTTAGAGTTAAG  
TCGTATCGCTTACATTTGTTATGGCTTGGACCTTTTATGGCAGATATTGGGGCACAAC  
TCTTTCTTCTATATTTTTTCGAGAACGAGAATTGATATATGACCTATTCGAAGCTGCTACC  
GGGATGCGCATGATGCATAATTATTTTTCGTATCGGAGGAGTCGCTGCTGATCTACCCCAT

GGATGGATCGATAAGTGTTTGGATTTTTGCGATTATTTTTTAACCGGAATTACTGAATATC  
AAAAGCTTATTACACGGAATCCTATTTTTTTAGAACGAACTGAAGCCGTAGGTATTATTG  
ATACAGAAGAAGCCATCAATTGGGGTTTATCAGGTCCAATGCTCCGCGCTTCCGGAATC  
CAATGGGATCTTCGTAAAATCGATCATTATGAGTGTTACGACGAATTTGATTGGGAGATT  
CAATGGCAAAAAGAAGGGGATTCATTAGCGAGGTATTTAGTACGAATCAATGAAATGA  
AAGAAGCCATCAAATTATACAACAGGCGTTAGAAGGACTTCCAGGGGGGCCCTACGA  
GAATTTAGAAACCCGACGCTTTGATAGAATAACAGACCCAAAATGGACTGATTTTTGAAT  
ATCGATTTATTAGTAAAAAACCTTCTCCAACCTTTGAATTGTCCAAACAAGAGCTTTATG  
TAAGACTCGAAGCACCAAAGGAGAATTGGGAATCTTTCTGATAGGAGATCGGAGTGT  
TTTTCTTGGAGATGGAAAATTAGACCACCGGATTTATCAACTTGCAAATCTTCTCCTC  
AGTTAGTTAAAAGAATGAAATTGGCTGATATTATGACGATACTAGGTAGCATAGATATCA  
TTATGGGAGAAGTTGATCGTATGTTCCCTATATTAACCTCAGGTCTCAAATCTTTGCACC  
AAACTACTACGAGCGGCCAGGTACATTGGTCAAGGGTTCATGATTACCCTGTACCACAC  
GAATCGTTTACCTGTAACCTATTCAATACCCCTACGAAAATTGATCACATCGGAACGGT  
TTCGAGGCCGAATCCACTTTGAATTTGATAAATGCATTGCTTGTGAAGTCTGTATTCTGTG  
TATGTCCTATAGATCTACCTGTTATTGATTGGAAATTGGAAACGGATATTA AAAAGAAAC  
GGTTATTTAATTACAGTATTGATTTTTGGAGTCTGTATATTTTGTGGTAATTGCGTTGAATA  
TTGTCCGACCAATTGTTTATCAATGACTGAAGAATATGAGCTTTCTACTTATGATCGTCA  
TGAATTGAATTATAATCAAATGGCTCTAGGTGCGATTACCGGTGTCAATAATTGATGATTA  
CACAATTCGAACAATTTTCGTGCAAT-----AATGTAAAACCTTGATTCAAAAAACT-----  
-----ATGCAAGGTCGTTTATCTGCTTGGCTAGTCAAGCATGGGATAATTCATAGATCTTT  
GGGCTTTGATTATCGAGGAATAGAGACTTTACAAATAAAGGCTGAGGATTGGCACTCCA  
TTGCTATTATTTTATATGTATATGGTTACAATTATCTACGCTCCCAATGTGCTTATGATGTA  
GCACCCGGCGGACTGTTAGCTAGTGTTTATCATCTTACCAGAATAGAGTATGGTGTAGA  
TCAACCCGAAGAGGTATGCATAAAAGTATTTACCTCAAGAAGGAATCCTCGAATTCCTT  
CTGTTTTCTGGGTTTGGAAAAGCGTGGATTTTCAAGAACGAGAATCTTATGATATGTTG  
GGAATCTCCTATGATAATCATCCGCGCTTGAACGTATCTTAATGCCTGAAAGTTGGATA  
GGATGGCCTTTACGTAAGGATTATATTGCTCCCAATTTTTATGAAATCCAAGATGCTCAT-  
-----  
-----ATGAAGTCCATTAAGTTTTCTTTATTGAT  
CGAACGGCCGAAAATTCAGTTATTGCAACTACATTAATGATTTTTCAAATTGGTCAAC  
ACTTTCTAGTTTATGGCCACTTCTCTATGGTACCAGTTGTTGTTTTATTGAATTTGCTTCA  
CTAATAGGCTCGCGATTTGACTTTGATCGCTATGGACTAATAACCAAGATCGAGTCCTAG  
ACAAGCGGATCTAATTTTAACAGCCGGAACGGTAACAATGAAAATGGCCCCCTCCTTA  
GTGAGATTATATGAGCAAATGCCCGAACCTAAATATGTTATTGCTATGGGAGCCTGCAC  
AATTACGGGAGGGATGTTTACGTACCGATTCTTATAGTACTGTTTCGGGGGGTTCGATAAGC  
TAGTCCCTGTGGATGTCTATTTGCCGGGTTGTCCCCCTAAACCGGAAGCAGTTATAGAC  
GCTATAACAAAACCTTCGGAAGAAAATCTCACTAGAAAATCTATGAAGCTAGAATTAGGTC  
TCAACAAGCAAATCGGTGTTTTACGACCAATCACAAGTTTTATCTTGGACACAGTATTA  
ATACTGGAAATTATGATCAAAGATTTTTCTATCAACCCCATCTACTTCCGAGATCCGGA  
TCGAAACCTTTTTATCAAATAGAAATAAAATATCTTATTATGAATTAGTAAATATGCAAAC  
TAGAAATACTTTTTTCGTGGATAAAGGAAGAGATTACTCGATCTATTTCCGGTATCGCTCAT  
GATATATATCCTAACGTGGACATCCATTGCAAGCGGATATCCCATTTTTGCCCAGCAGGG  
TTATGAAAATCCACGAGAAGCAACTGGGCGTATTGTCTGCGCCAATTGCCATTTAGCTA

ATAAGCCTGTGGATATTGAGGTTCCACAAGCGGTACTTCCGAATACTATATTCGAAGCG  
GTTGTTTGAATTCTTATGATAAGCAAGTGAAACAAGTTCTTGCTAATGGTAAGAAGGG  
GGGGTTGAATGTGGGAGCTGTTCTTATTTTACCGGAGGGGTTTGAATTAGCCCTTCCG  
ATCGTATTTCTCCCGAGATGAAGGAAAAGATAGGCAATTTATCTTTTCAGAGCTACGGC  
CCTGCTAAAAAAATATTCTTGTGCATAGGTCCTGTCCCTGGTCAAAAATATAGTGAAAT  
AACCTTTTCTTATCTTTCTCCCGACCCCGCTAATAATAAAGATGTTTACTTCTTAAAATAT  
CCTATATATGTAGGGGGAAATAGGGGAAGGGGTGAGATTTATCCCGACGGAAGCAAGA  
GTAACAATACGGTTTATAATGCTACAGGAGCAGGTATAGTAAGTAAAATTTTACGAAAA  
GAAAAGGGCGGGTATGAAATATCTATAACAGATCCATCGGATGGACGTCAAGTGCTTGA  
TATTATACCTCCCGGACCAGAACTTCTTGTTCAGAAAGGCGAGTCGATCAAATTTGATC  
AACCATTAACGAGTAATCCTAATGTGGGTGGATTTGGTCAAGGAGAGGCAGAAATAGT  
ACTTCAAGATCCATTACGTATCCAAGGTCTTTTGTCTTCTTGGCATCTGTTATTTTGGC  
ACAAATCTTTTGGTTCTTAAAAAGAAACAATTTGAGAAGGTTCAATTGGCCGAAATG  
AATTTTATGAGTAAAGTCTATGATTGGTTTCAAGAACGTCTCGAGATTCAAGCGATTGC  
GGATGATATACTAGTAAATATGTTCCGCCCATGTCAATATATTTTATTGTTTGGGGGG  
ATTACCCTTACTTGTTTTTTAGTCCAAGTAGCTACAGGGTTTGCTATGACTTTTTACTATC  
GGCCGACCGTTACGGAAGCTTTTTCTCTGTTCAATACATAATGACAGAAGTTAACTTT  
GGTTGGTTAATCCGATCAGTTCATCGATGGTCAGCGAGTATGATGGTTCTAATGATGATT  
CTACACGTTTTTCGTGTATATCTCACCGGTGGATTTAAAAAACCCCGGAATTAACTTG  
GGTTACAGGTGTGGTTCTGGGAGTATTGACCGCATCTTTTGGTGTGACTGGTTATTCTTT  
ACCTTGGGACCAAATTGGTTATTGGGCGGTAAAAATTGTAACAGGTGTACCCGAGGCTA  
TTCTGTAAATAGGATCCCCTTTGGTAGAATTATTGCGCGGAAGTGCTAGTGTGGGGCAA  
TCCACCTTAACCCGCTTTTATAGTTTACATACTTTTGTATTGCCGCTTCTTACTGCTGTAT  
TTATGTTAATGCACTTTCCAATGATACGTAAACAAGGTATTTTCAAGTCTCTTT  
A????????????????????????????????????????????????????????????  
????????????????????????????????????????????????????????????  
????????????????????????????????????????????????????????????  
????????????????????????????????????????????????????????????  
????????????????????????????????????????????????????????????  
????????????????????????????????????????????????????????????  
????????????????????????????????????????????????????????????  
????????????????????????????????????????????????????????????  
ATGATTGAAGTTTTTCTATTTGGAATCGTGTTAGG  
TCTAATTCCTATTACTTTGGCTGGATTATTCGTAAGTGCATATTTACAATACAGACGGGGT  
GATCAGTTGGACTTTATGTTTACTATACTAGTTATTTTGGTTTTCTCCTAGTAGCTTTAA  
CTATAACTTCAGCTCTCTTTATTAGTCTGAGCAAGATCCGACTTATTATGGATATAGTCAG  
TCTGGCTTGGGCTGCTTTAATGGTAGTATTTACATTTTCTCTTTCACTCGTAGTGTGGGG  
ACGAAGTGGGCTCATGATTATTCGTTCCCGGAACCAGAAGTAAAATTTTGGTGGATA  
AGGATCCCGTACAACTTCTTTTCGAGGAATGGGCCAAACCGGGTCATTTCTCAAGAAC  
AATAGCCAAAGGACCTGAACTACCACGTGGATCTGGAATCTACATGCCGATGCTCATG  
ATTTTGATAGCCATAACCAGTGATTTGGAGGAGATTTCTCGAAAAGTGTTTAGTGCCCAT  
TTCGGTCAACTCTCCATCATCTTTCTTTGGCTGAGCGGCATGTATTTCCACGGTGCTCGT  
TTTTCCAATTATGAAGCATGGCTAAGTGATCCAAGTTCGCAATTGGGCCGAGCGCCAGGT  
AGTTTGGCCAATAGTGGGCCAAGAAATATTGAATGGTGATTTGGGAGGGGGGTTCCGA  
GGAATCCAATAACCTCTGGTTTTTTTTCAGATTTGGCGAGCATCGGAATAACTAGTGA  
ATTACAACCTATTGCACCGCAATTGGTGCAATGGTCTTTGCAGCCTTAATGCTTTTTGC  
TGTTGGTTTCATTATCATAAAGCGGCCCAAAATTGGCTTGGTTTCAAGATGTAGAAT

CTATGTTGAATCACCATTTAGCGGGACTACTAGGCCTCGGGTCTCTTTCTTGGGCAGGG  
CATCAAGTACATGTATCTTTACCGATTAACCAATTTCTAAACGCTGGAGTAGATCCTAAA  
GAAATACCACTTCCTCATGAATTTATTTTGAATCGTGACCTTTTGGCTCAACTTTATCCA  
AGTTTTGCCGAGGGAGCAACCCCTTTTTTTACCTTGAATTGGGCAAATATGCCGACTT  
TCTTACTTTTCGCGGAGGATTAGACCCAGTAACCGGAGGTCTATGGCTGACTGATATTG  
CTCATCATCATTTAGCTATTGCTATTCTATTCTTGTTAGCGGGTCACATGTATAGGACCAA  
CTGGGGCATTGGTCATAGCCTAAAAGATATTTTAGAAAAGTCATAAAGGTCCATTTACGG  
GCCAGGGCCATAAAGGACTATATGAAATCTTAACAACGTCATGGCATGCTCAATTAGCT  
ATTAECTTAGCCATGTTAGGCTCTTTAACCATTGTTGTAGCTCACCATATGTATTCTATGC  
CCCCTTATCCATATCTAGCTACTGACTATGGTACACAACCTGTCATTGTTACCCATCATAT  
GTGGATTGGTGGATTTTTAATAGTTGGTGCTGCTGCGCATGCAGCCATTTTTATGGTAAG  
AGACTATGACCCAACTACTAGATACAACGATCTATTGGATCGTGTCTTCGACATCGTGA  
TGCAATCATATCACATCTTAACTGGGCATGTATATTTCTGGGCTTTCATAGTTTTGGTTG  
TATATTCATAATGATACGATGAGTGCCTTAGGACGTCTCAAGATATGTTTTAGATAACC  
GCTATAACAATTACAACCTGTTTTTGCTCAATGGATACAAAATACCCACGCTTTAGCACCC  
GGCGCAACGGCCCTGGTGCAACGGCAAGCACTAGTTTAACTGGGGGGGTGGTGAT  
TTAGTAGCCGTGGGCGGCAAAGTGGCTTTATTACCTATTCCGTTAGGAACCGCAGATTT  
TTTAGTACATCATATCCATGCATTTACGATTCATGTGACGGTATTGATACTCCTGAAAGG  
AGTTCTATTTGCTCGTAGTTCCCGTTTTGATACCGGATAAAGCAAATCTTGGTTTTCGCTT  
TCCTTGATGGGCCTGGAAGAGGGGGGACATGCCAAGTATCGGCTTGGGATCATGTC  
TTCTTAGGACTATTCTGGATGTACAACTCCATTTAGTAGTAATATCCATTTAGTTGG  
AAAATGCAGTCAGATGTTTGGGGCAATATAAGTGATCAAGGGGTAGTAACGCATATCAC  
GGGCGGAAACTTCGCACAGAGTTCTGTTACTATTAATGGGTGGCTCCGAGATTTCTTAT  
GGGCACAGGCATCCCAAGTAATTCAATCTTATGGTTCTTATTATCTGCATATGGTCTGT  
TTTTCTAGGTGCTCATTGTTGCTGGGCTTTTAGTTTAAATGTTTCTATTAGTGACGTG  
GTTATTGGCAAGAACTTATTGAATCCATCGTTTGGGCTCATAATAAATTAAGTTGCTC  
CTGCTACTCAGCCGAGAGCCTTGAGCATTGTACAAGGGCGTGCTGTAGGAGTAACCCA  
TTACCTTCTGGGTGGAATTGCCACAACATGGGCGTTCTTCTTAGCAAGAATTATTGCAG  
TAGGAATGGCATTAAAGATTTCCAAGGTTTAGCCAAGGGTTAGCTCAAGACCCCACTACT  
CGTCGTATTTGGTTTTGGTATTGCTACCGCACATGACTTTGAAAGTCATGATGATATTACT  
GAGGAACGTCTTTATCAGAATATTTTTGCTTCTCACTTCGGCCAATTAGCAATAATTTTT  
CTGTGGACTTCCGGAATCTGTTTCATGTAGCTTGGCAAGGCAACTTTGAATCGTGGGT  
ACAGGACCCTTTACATGTAAGACCTATTGCCCATGCGATTTGGGATCCTCATTTTGGTCA  
ACCTGCCGTAGAGGTTTTACTCGAGGAGGCGCTCTTGGGCCAGTGAATATCGCTTATT  
CTGGTGTATTATCAATGGTGGTATACAATCGGTCTACGCACTAATGAAGATCTTTATACTG  
GAGCTCTTTTTCTATTATTTCTTTCTGGTATATTCTTAATAGCGGGTTGGCTACATTTACA  
ACCGAAATGGAAACCGAGCATTTCGTGGTTCAAAAATGCCGAATCTCGCTTGAATCAT  
CATTTGTCAGGGCTCTTCGGCGTAAGTTCCCTTGCTTGGGCAGGACATTTAGTACATGT  
TGCTATTCCTGGATCCAGAGGGGAGTATGTTTCGATGGAATAATTTTTTAGACGTATTACC  
ACATCCTCAAGGGTTAGGCCCACTTTTGGACAGGTCAGTGGAATCTTTATGCTGAAAATA  
CTGATTCAAGTAGCCATTTATTTGGTACCGCTCAAGGAGCGGGAACGGCGATTCTAACT  
CTTCTTGGAGGATTCATCCACAAACACAAAGTTTATGGCTGACTGATATTGCTCATCAT  
CATTTAGCTATTGCATTTATTTTTCTTGTTGCTGGTCATATGTATAGAACGAATTTCCGAA  
TTGGACACAGTATCAAGGATCTTTTAGATGCACATATTCCTCCGGGAGGACGATTGGGA

CGAGGACATAAGGGTCTTTATGATACAATCAATAATTCGCTTCATTTTCAATTAGGTCTT  
GCTCTAGCTTCTTTAGGGGTATTACATCCTTGGTAGCTCAACATATGTACTCTTTACCTG  
CATACGCGTTCATAGCACAAAGACTTTACTACTCAAGCTGCATTATATACTCATACCAAT  
ATATCGCAGGATTTATCATGACAGGAGCTTTTGCTCATGGAGCTATATTTTTCATTAGAG  
ATTACAACCCGGAGCAAATCAAGATAATGTCTTGGCAAGAATGTTAGACCATAAGGA  
AGCTATCATATCTCATTTAAGTTGGGCGAGTCTCTTTCTGGGATTCCATACCTTGGGGCT  
TTATGTTCATAATGATGTCATGCTGGCTTTTGGTACTCCGAAAAGCAAATTTTAATCGA  
ACCCATATTTGCTCAATGGATCCAGTCGGCTCATGGTAAAACTGCATACGGGTTTGATGT  
ACTGTTATCTTCAACCAGTGGCCCGGCATTCAATGCGGGTCGAAGCATTGTTACCAG  
GTTGGTTAAATGCTGTTAATGAT-----AATACGAATTCATTATTTTTAACAATAGGTCCTGG  
AGACTTTTTGGTTCATCATGCTATTGCTCTAGGTTTACATACAACTACATTGATCTTAGTA  
AAAGGTGCTTTAGATGCACGCAGTTCCAAGCTAATGCCAGATAAAAAGGATTTTCGGTTA  
TAGTTTTCTTGTGATGGGCTGGAAGAGGGGGTACTTGTGATATCTCGGCATGGGACG  
CATTTTATTTGGCAGTTTTTTGGATGTTAAATACTATTGGATGGGTTACTTTTTATTGGCA  
TTGGAAGCACATCACATTATGGCAGGGTAACGTTTACAGTTTAAACGAATCTTCGACTT  
ATTTGATGGGTTGGCTACGAGATTATTTATGGTTAAACTCTTCACAACCTTATCAATGGAT  
ATAACCCTTTTGGTATGAATAGTTTATCGGTCTGGGCGTGGATGTTCTTATTTGGACATC  
TTGTTTGGGCTACTGGATTTATGTTCTTAATCTCCTGGCGCGGATATTGGCAGGAATTGA  
TTGAAACTTTAGCATGGGCTCATGAACGCACACCCTTAGCCAATTTGATTCGATGGAGA  
GATAAACCTGTGGCACTTCCATTGTGCAAGCAAGATTGGTTGGATTAGCACATTTTTTC  
GGTAGGTTATATATTCATTATGCAGCTTCTTGCTTGCCTCTACATCGGGCAAATTTGG  
CATGTCACATTCAGTAAAGATTTATGATACATGTATAGGATGTACTCAATGTGTACGAGC  
GTGTCCACCGATGTATTAGAAATGATACCCTGGGATGGTTGTAAGCTAACCAAATAG  
CTTCGGCCCCAAGGACCGAGGATTGTGTTGGTTGTAAGAGATGTGAATCCGCCTGTCC  
AACGGATTTCTTGAGTGTTCGGGTCTATTTATGGCATGAAACAACCTCGCAGTATGGGTC  
TAGCTTATATGACAACCTTCAACCTTCCCCCTATTTTTGTGCCTTTCGTTCGGCCTAGTATT  
TCCGGCAATTGCGATGGCTTCTTTATTTCTTTATGTTCAAAAAAACAAAATTATTATGCG  
AGACCTAAAAACATATCTCTCCGTGGCCCCAGTACTAAGTACGCTATGGTTTCGGGTTGT  
TAGCCGGGCTATTGATAGAGATTAATCGTTTTTTCCCGGATGCGTTGACATTTCCCTTTT  
TTTCATTATGACTGCAATTTTAGAGAGACGCGAAAGCGAAAGCCTATGGGGCCGTTT  
CTGTAACCTGGATAACCAGCACCGAAAATCGTCTTTACATTGGCTGGTTTGGTGTGTGA  
TGATTCCTACCTTATTGACCGCAACTTCTGTATTTATTATTGCGTTCATTGCTGCTCCTCC  
GGTAGATATTGATGGTATTTCGTGAACCTGTTTCTGGATCTCTACTTTACGGAAACAATAT  
TATTTCTGGTGCCATTATTCCCTACTTCAGCAGCTATCGGTTTGCATTTTACCCAATCTGG  
GAAGCAGCATCCGTTGACGAATGGTTATACAACGGTGGTCCTTATGAACTAATAGTTCT  
ACACTTCTTACTTGGTGTAGCTTGTACATGGGTCGTGAGTGGGAACCTTAGTTTCCGTC  
TGGGTATGCGACCTTGGATTGCTGTTGCATATTCAGCTCCTGTTGCAGCTGCTACCGCA  
GTTTTCTTGATCTACCCAATAGGTCAAGGAAGTTTTTCTGATGGTATGCCTTTAGGAATT  
TCTGGTACTTTCAATTTTATGATTGTATTCCAGGCTGAGCACAACATCCTTATGCACCCA  
TTTCACATGTTAGGTGTAGCTGGTGTATTCCGGCGGCTCCCTATTTAGTGCTATGCATGGT  
TCCTTGGTAACTTCAAGTTTGTATCAGGGAAACCACAGAAAATGAATCTGCTAATGAAG  
GTTACAAATTCGGTCAAGAGGAAGAACTTATAATATTGTAGCTGCTCATGGTATTTTG  
GCCGATTGATCTTCCAATATGCTAGTTTCAACAACCTCTCGTTCGTTACACTTCTTCTTAG  
CTGCTTGGCCTGTAGTGGGTATTTGGTTTACTGCTTTAGGTATTAGCACAAATGGCTTTCA

ACCTAAATGGTTTCAACTTTAACCAATCTGTAGTTGATAGTCAAGGTCGTGTAATTAATA  
CTTGGGCTGATATTATCAACCGTGCTAACCTTGGTATGGAAGTTATGCATGAACGTAATG  
CTCATAACTTTCCTCTAGATCTAGCTTCTATCGAAGCTCCA---ACAAATGGAATGGGTTT  
GCCTTGGTATCGTGTTCATACCGTTGTATTGAATGATCCCGGCCGGTACTTTCTGTTCAT  
ATAATGCATACCGCTCTAGTTGCTGGTTGGGCGGGCTCGATGGCTTTGTATGAATTAGCA  
GTTTTTGATCCTTCTGATCCTGTTCTTGATCCAATGTGGAGACAGGGTATGTTTCGTTATA  
CCCTTCATGACTCGTTTAGGAATAACAAATTCGTGGGGAGGTTGGAGTATCACA---GGA  
GGGGCTGTAACGAATCCTGGGATTTGGAGTTACGAAGGTGTAGCTGGAGCTCATATTGT  
GTTTTCTGGCTTATGCTTTTTGGCATCTATCTGGCATTGGGTCTATTGGGATCTAGAACT  
CTTTCGTGATGAACGTACAGGAAAACCCGCTTTGGATTTGCCCAAGATCTTCGGAATTC  
ATTTATTTCTCGCCGGTGC GGCTTGCTTTGGTTTTGGTGCATTTTCATGTAACAGGTTTGT  
ACGGCCCTGGAATATGGGTGTCCGATCCTTATGGACTAACGGGAAAAGTGCAACCTGT  
AAGTCCGTCATGGGGTGTGGAGGGTTTTGATCCTTTTGTTCGGGGGGAATAGCTTCTC  
ATCATATTGCAGCAGGTACATTGGGCATATTAGCAGGTCTATTTTCATCTTAGTGTCCGAC  
CGCCACAACGTCTATACAAAGGATTGCGCATGGGAAATATAGAAACCGTACTCTCCAGT  
AGTATCGCGGCTGTTTTTTTTGCAGCTTTTGTGTTGCTGGAACATGTGGTATGGTTCA  
GCAACTACACCCATCGAATTATTTGGCCCCACTCGTTACCAATGGGATCAGGGTTACTT  
TCAGCAAGAGATATATCGAAGAGTTAGCGGCGGGCTAGCCGAAAATCAAAGTTTATCA  
GAAGCCTGGTCTAAAATTCCTGAAAAATTAGCTTTTTTATGATTATATCGGTAATAATCCG  
GCAAAAGGAGGATTATTCAGGGCAGGATCAATGGATAGCGGAGATGGAATAGCGGTTG  
GATGGTTGGGCCATCCTATTTTTTAGAGATAAAGAAGGACGTGAACTTTTTGTCCGTCGT  
ATGCCTACTTTTTTTGAAACATTTCCGGTGGTTTTAGTAGACGGCGACGGAATTGTTAG  
AGCCGATGTTCTTTTAGAAGGGCAGAATCAAAGTATAGTGTGTAACAGGTAGGTGTA  
ACCGTTGAGTTCTACGGCGGAGA ACTCAATGGAATCAGTTATAGTGATCCGGCTACTGT  
GAAAAAATATGCTAGACGCGCTCAATTGGGCGAAATTTTTGAATTAGATCGTGCGACTT  
TGAAATCTGATGGTGTTCGTTAGCAGTCCAAGGGGTGGTTTACTTTTTGGGCATGCT  
TCATTTGCTTTGCTCTTCTTCTTCGGACACATTTGGCATGGTGCGAGAACATGTTCCG  
AGATGTTTTTGCTGGTATTGACCCCGATTTGGATGCTCAAGTAGAATTTGGAGCATTCC  
AAAAAGTTGGGGATCCA ACTACTAAGGCAAGGAGTCATGAAAACCTTATATTCCCT  
GAGGAGGTTCTACCACGTGGAAACGCTCTTTAATGGAAC TTTAGCTATAGCTGGTCTGTG  
ACCAAGAAACCACCGTTTTGCTTGGTGGGCCGAAATGCACGACTTATTAATTTATCC  
GGTAAACTACTAGGAGCTCATGTAGCCCATGCCGATTAATCGTATTCTGGGCCGGAGC  
AATGAACCTATTTGAAGTGGCTCATTTTCGTACCAGAGAAACCTATGTATGAACAAGGAT  
TAATCTTACTTCCGCATCTAGCTACTCTAGGTTGGGGGTAGGTCCTGGGGGAGAGGTT  
ATAGATACCTTTCCTTACTTTGTATCTGGAGTACTTCATTTAATTTCTTCTGCTGTATTGG  
GCTTTGGCGGTATTTATCATGCACTTCTGGGGCCTGAAACGCTGGAAGAATCTTTTCCA  
TTCTTCGGTTATGTATGGAAGATAGAAATAAAATGACCACAATTTTAGGGATTCACTTA  
ATCTTGTTGGGTCTAGGTGCTTTTCTTCTAGTCTTCAAGGCTCTTTATTTTTGGGGGTGTA  
TATGATACTTGGGCGCCAGGAGGGGGAGATGTAAGAAAAATTACCAACTTAACCTTA  
GCCCAAGTATCATATTTGGTTATTTATTAATAAATCCCCCTTTGGGGGGGAGGGGTGGATTG  
TTAGTGTGACGATTTAGAAGATATAATCGGGGGACATGTATGGTTAGGTTCCATTTGTA  
TAATTGGTGGAATCTGGCATATTTAACTAAACCCTTCGCGTGGGCTCGACGTGCCCTT  
GTATGGTCTGGGGAGGCTTATTTATCTTATAGTTTGGGGCTTTAGCTGTCTTTGGTTTCA  
TTGCTTGTGTTTTGTCTGGTTCAATAATACGGCTTATCCTAGCGAGTTTTTACGGACCTA

CTGGACCAGAAGCTTCTCAGGCTCAAGCGTTTACTTTTCTAGTTCGAGACCAACGTCT  
TGGGGCTAATGTAGGATCCGCTCAAGGACCTACTGGTTTAGGTAAATATCTAATGCGTT  
CCCCTACCGGAGAAGTAATTTTTGGAGGGGAAACTATGCGTTTTTGGGATCTTCGTGCT  
CCTTGGTTAGAACCTTTAAGAGGCCCAAATGGATTGGACTTGAGTAGGTTGAAAAAGG  
ACATACAACCTTGGCAAGAACGGCGTTCGCGAGAATATATGACCCATGCTCCTTTAGGT  
TCTTTAAATTCTGTGGGTGGCGTAGCGACCGAGATTAATGCAGTGAATTATGTCTCTCCT  
AGAAGTTGGTTAGCTACCTCTCATTTTGTTTTAGGATTCTTCTTTTTTGTAGGTCATTTGT  
GGCACGCGGGAAGGGCTCGTGCAGCTGCAGCAGGATTTGAAAAAGGAATTGATCGTG  
ATTTTGAACCTGTTCTTTCCATGACTCCTCTTAATATGACTATAGCCCTTGGTAAATTTAC  
CAAAGACGAAAATGATTTATTTGATATTATGGATGACTGGTTACGCAGAGACCGTTTTCG  
TTTTTGTAGGCTGGTCGGGCCTATTGCTCTTTCCTTGTGCCTATTTGCTATAGGGGGTT  
GGTTCACCGGTACAACCTTTGTAACCTCATGGTATAACCCACGGTCTAGCTAGTTCCTATT  
TGGAAGGCTGTAATTTTTTAACAGCCGCGGTTTCGACTCCTGCTAATAGTTTAGCGCAT  
TCTTTATTGTTACTATGGGGTCTGAAGCACAAGGGGATTTTACTCGTTGGTGTCAATTA  
GGTGGTCTGTGGACTTTTGTGCTCTGCATGGTGTCTTTGGACTAATAGGTTTTATGTTA  
CGTCAATTTGAGCTTGCTCGATCTGTTCAATTGCGACCTATAATGCAATCGCATTCTCT  
GGTCCAATTGCTGTTTTTGTCTGTATTTCTGATTTATCCGCTAGGGCAGTCTGGTTGG  
TTCTTTGCACCTAGTTTTGGTGTAGCAGCTATATTTGATTCATCCTCTTCTTTCAAGGAT  
TTCATAATTGGACATTGAACCCATTTATATGATGGGAGTTGCCGGTGTATTGGGGGCTG  
CGTTGCTATGCGCTATTCATGGTGCCACTGTAGAAAATACTTTATTTGAAGATGGTGTAG  
GTGCAAATACATTCCGTGCTTTTAACCCAACCTCAAGCCGAAGAACTTATTCATGGTC  
ACCGCTAACCGCTTTTGGTCCCAAATCTTTGGGGTTGCTTTTTCCAATAAACGTTGGTT  
ACATTTCTTTATGTTATTTGTACCAGTAACCGGTTTATGGATGAGTGTCTTTGGAGTAGT  
TGGCTTGGCCCTAAACCTACGTGCCTATGACTTTGTTTCTCAGGAAATTCGCGCAGCGG  
AAGATCCAGAATTTGAGACTTTCTACACCAAAAATATTCTATTAACGAGGGTATTCGT  
GCTTGGATGGCGGCTCAAGATCAGCCTCATGAAAACCTTATATTCCCTGAGGAGGTTCT  
ACCACGTGGAAACGCTCTTATGTCTGGAAGCACAGGAGAACGTTCTTTTGCAGGATATTA  
TTACCAGTATTCGATATTGGGTCATTCATAGCATTACTATACCTTCCCTATTCATTGCAGG  
TTGGTTATTCGTCAGCACAGGCTTAGCTTACGATGTTTTTGGAAAGCCCTCGGCCAACG  
AGTATTTACAGAAAGCCGGCAGGGGATTCCATTAATAACCGGTCGTTTTGATTCTTTG  
GAACAACCTCGATGAATTTAGTAGATCGTTTATGACTATAGATCGAACCTATCCAATTTTT  
ACAGTACGATGGTTGGCTGTTACGGCTTAGCTGTACCTACCGTCTTTTTTTTTGGGGTC  
AATATCAGCAATGCAGTTCATCCAACGAATGGCTACACAAACTGGTGAGAACAGTTCT  
AGATCGAAC---TCAAGACGAACTAATGCAGGGGGTTTATTAACCAATTGAATTCGGAA  
TATGGTAAAGTAGCTCCGGGGTGGGGACGACTCCTTTGATGGGTGTCGTAATGTCTCT  
ATTTGCAGTATTTTTATCTATTTTAGAGATTTATAATTCGTCCGTTTTTGTGGATGGAA  
TTTCAATAAATATGCTTACTCTAAACTCTTCGTTTATACCGTAGTAATATTTTTTGTGTC  
TCTCTTTATCTTTGGATTCCATCTAATGATCCGGGGCGTAATCCTGGACGTGAAGAAAT  
GGCCGACACTACAGGAAGGATTCTCTTTGGCTAATAGGTAAGTACTGTAAGTGGTATTATTG  
TGATTGGTTTAAATAGGTATTTCTTTTATGGTTCAATTCGGATTAGGTTTCATCCTTAATG  
CTTAATATAATTAGTTTGTATCTGATTTCTATTAATTCGCGTTTTAT--AGTAGTTTTTCT  
TCGGCAAATTACCCGAAGCATATGCTTTTTTGAATCCAATCATAGATGTTATGCCAGTTA  
TACCTGTGCTTTTTTTCTCTTAGCTTTTGTGGCAAGCTGCTGTAAGTTTTTCGAATGA  
CACAATCAAACCCGAACGAACAAAACGTTGAATTGAATCGTACCAGTCTCTACTGGGG



GCTATTACTCATTFFFFTGTACTTGCTGTTTTATTTTTCCAATTATTTCTTCAATATGGAAGTAA  
ATATTCTTGCATTTATTGCTACTGCACTATTTATTCTAGTTCCGACCGCTTTTCTACTTATC  
ATTTACGTA AAAACAGTTAGTCAA AATGATATGGAAACAGCAACCCTAGTCGCCATCTT  
TCTATCTGGTTTACTTGTAAGTTTTACGGGGTACGCCTTATATACCGCTTTTGGGCAACC  
TTCTGAACA ACTAAGAGATCCATTCGAGGAACACGGGGACATGGAAGCATTGGTTTAT  
ACATTTCTTTTAGTCTCGACGCTAGGGATAATTTTTTTTCGCTATCTTTTTTCGCGAACCA  
CCTAAAGTTCCA ACTAAAAAGCTGAAAATGACTCTTGTTTTCCAATTAGCTGTTTTTGC  
ATTAATTGCTACTTCATTAATCTTATTGATTAGTGTACCCGTCGTATTTGCTTTTCCTGATG  
GTTGGTCAAGTAATAAAAATGTTGTATTTCCGGTACATCATTATGGATTGGGTTAGTCT  
TTCTGGTAGGTATCCTTAATTCTCTTATTTCT-----ATGTCACCACAAACAGAG  
ACTAAAGCAAGTGTGGATTCAAAGCGGGCGTTAAAGAGTACAAATTGACTTATTATAC  
TCCTGAATACGAAACCAAGGATACTGATATCTTGGCAGCATTCCGAGTAACCCCTCAAC  
CTGGGGTTCCGCTGAAGAAGCAGGGGCCGCGGTAGCTGCCGAATCTTCTACTGGTAC  
CTGGACA ACTGTATGGACCGATGGACTTACCAGCCTTGATCGTTACAAAGGACGATGCT  
ACAATATCGAGCCGGTTCCTGGAGAAACAGATCAATATATCTGTTATGTAGCTTACCCTT  
TAGACCTTTTTGAAGAAGGTTCTGTTACTAACATGTTTACTTCCATTGTAGGAAATGTAT  
TTGGATTCAAAGCCCTGCGGGCTCTACGTCTAGAGGATCTGCGAATCCCTGCTGCTTAT  
GTAAAACTTTCCAAGGCCCGCCTCATGGAATCCAAGTTGAAAGAGATAAATTGAATA  
AGTATGGTCGTCCCTTGTTGGGTTGTACGATTAACCAAAAATTAGGTTTATCTGCTAAA  
AACTATGGTAGAGCAGTTTATGAATGTCTTCGCGGTGGCCTTGATTTTACCAAAGATGA  
TGAGAACGTGAACTCCAGCCGTTTATGCGTTGGAGAGATCGTTTCTTATTTTGTGCCG  
AAGGCATTTATAAAGCACAGGCTGAAACAGGTGAAATCAAAGGGCATTACTTGAATGC  
TACTGCGGGTACATGTGAAGAAATGATGAAAAGAGCTGTATTTGCCAGAGAATTGGGA  
GTTCCATCGTAATGCATGACTACTTAACAGGAGGATTCAGTCAAATACTAGCTTGTCT  
CATTATTGTCGAGATAATGGCCTGCTTCTTCATATTCACCGTGCAATGCACGCAGTTATT  
GATAGACAGAAGAATCATGGTATACATTTTCGTGTACTAGCTAAAGCGTTACGTATGTCT  
GGTGGAGATCATATTCAGTACCGTAGTAGGTA AACTTGAAGGAGAAAGAGAAA  
TCACTTTGGGCTTTGTTGATTTACTGCGTGACGATTTTATTGAAAAAGATCGAAGTCG  
GGTATTTATTTTCGCTCAAGATTGGGTCTCTTACCAGGTGTTATTCCCGTAGCTTCAGGC  
GGTATTCACGTTTGGCATATGCCTGCTCTGACTGAGATCTTTGGGGATGATTCGGTACTA  
CAGTTTGGTGGAGGAACTTTAGGCCACCCTTGGGGTAATGCACCCGGTGCCGAGCTA  
ATCGAGTCGCTTTAGAAGCATGTGTACAAGCTCGTAATGAAGGACGTGATCTTGCTGCT  
GAGGGTAATGTAATTATTCGTGAGGCTAGCAAATGGAGTCCTGAGCTAGCAGCCGCTTG  
TGAGGTATGGAAAGAGATCAAATTTGAGTTTAAACCAGTAGATACTTTGGATCAGATGG  
CGATACATTTATACAAA ACTTCTACCCCGAGCACACGCAATGGAACCGTAGACAGTCA  
AGTGAAATCCAATCCACGAAATAATTTGATCTATGGACAGCATCATTGTGGTAAAGGTC  
GTAATGCCAGAGGAATCATTACCGCAAGGCACACAGGGGGAGGTCATAAGCGTCTATA  
CCGTAAAATCGATTTTCGACGGAATGAAAAAGACATATATGGTAGAATCGTAACCATAG  
AATACGACCCTAATCGAAATGCATACATTTGTCTCATACTATGGGGATGGTGAGAAG  
AGATATATTTTACATCCAGAGGGGCTATAATTGGAGATAACCATTGTTTCTGGTACAGAA  
GTTCCATATAAAAATGGGAAATGCCCTACCTTTGACCGATATGCCCTTAGGCACGGCCAT  
ACATAACATAGAAATTACACTTGGAAAGGGCGGACAATTAGTTAGAGCAGCGGGTGCT  
GTAGCGAAACTGATTGCAAAAAGAGGGGAAATCAGCCACATTA AATTTACCTTCTGGGG  
AGGTCCGTTTGATATCCAAAAACTGCTCAGCAACAGTCGGACAAGTGGGGAATGCTGG

GGCGAACCAGAGAAGTTTGGGTAGAGCCGGATCCAAGCGTTGGCTAGGTAAGCGTCC  
TG TAGTAAGAGGAGTAGTTATGAACCCTGTAGACCATCCCCATGGGGGTGGTGAAGGG  
AGAGCCCCAATTGGTAGAAAAAACCACAACCCCTTGGGGTTATCCTGCACTTGGAA  
GAAGAAGTCGAAAAAGGAATAAATATAGTCAAAATTTTATTGTTTCGCCGCCGTAGTAAA  
ATGATTCAACCCCAGACCCATTTAAATGTTGCAGATAACAGCGGGGCTCGCGAATTGAT  
GTGATTTCGAATCCTAGGAGCTAAC---AATCGTCGATATGCGCATATTGGCGACATTATTG  
TTGCTGTGATCAAAGAAGCAGTGCCAAATATGCCTCTAGAAAAATCTGAAGTAGTCAG  
AGCTGTAATTGTTTCGTACCCGTAAAGAACTTAAACGTGCCAATGGTATGATAATAAGATA  
TGATGACAACGCTGCCGTTGTGATTGATCAAGAAGGAAACCCAAAAGGGACTCGAATT  
TTTGGTGCCTCCCTAGGGAATTGAGACAATTCAATTTTACTAAAATAGTTTCATTAGCT  
CCTGAGGTATTAATGCTTAGTCCCAAAAAGAAGTATTCCGCAAACAACATAGAGGAA  
GAATGAAGGGAATGTCTTATCGAGGAAATCATATTTGTTTTGGTAAATATGCTCTTCAGG  
CACTTGAACCTGCTTGGATTACATCTAGACAAATCGAAGCAGGACGACGAGCAATGAC  
ACGAAATGCACGCCGTGGTGGAAAAATTTGGGTCCGTATATTTCCCGACAAACCAGTT  
ACAGTAAGACCTGCTGAAACACGTATGGGTTCGGGTAAAGGATCCCCGAGTATTGGG  
TAGCTGTTGTGAAACCCGGTAGAATACTATATGAAATGGGGGGGGTAACCGAAACTATA  
GCTAGAAGGGCTATTTAATAGCAGCGTCCAAATTGCCATACAAACGCAATTTATTATT  
TCGGGAATGACCAGGATTAACGCGCATATATAGCTCGAAGACGTAGAACAAAAATGC  
ATTTATTTGCATCAAGTTTTTCGAGGAGCTCATTCAAGACTTACTCGAACTATTATTCAAC  
AGAAAATAAGAGCTTTGGTTTCATCTCATAGGGATAGGGAAAAGCAAAGAGAAATTT  
TCGTCGTTTGTGGATCACTCGTATAAACGCGAGTAATTCGAGAAAGG-----GTATTATATAG  
TTATAGTAAATTACTACATGATCTATACAAAGTAAATTGCTTCTTAATCGTAAATACTG  
TCCCAAATAGCTATATCAAATAGGAATTGTCTTTATATGATTTCTAACGAAATAAAAAAG  
ACGGAAGTAGATTGTAAAGAATATGCCGAAGTCAAGGGAAGTATATGCCTCAGG  
TAGACATATATCTATATCTGCCGATAAAGCAAGAAGAGTAATTGATCAAATTCGCCGACG  
TTCTTACGAGGAAACACTTATGATACTAGAATCATGCCCTATAAAGCATGTTATCCCGT  
GTTACAATTGATTTCTTCTGCAGCATCGAATGCACGGTCCGTTCTGGGTCCGACAAAG  
TAAATTTAATAATTAGTAAAGCTGAGGTTAAACAAAGGTCGTACCGTCAAAAAATTA  
CCTCGAGCTCGAGGGCGTAGTTATGCAATAAAAAGAACTTCATGTCATATAACTATTGTA  
TTGAAAGATATTTCTTTAGATGGGGTAGTATGGGACAAAAAAATGGATGGAATAAAATA  
TGCAGTATTTACAGACAAAAGTATTCGGTTATTGGGGAAAAAT---CAATATACTTCTAAT  
GTCGAATCAGGATCAACTAGGACAGAACTAAAGCATTGGGTTCGAACTCTTCTTTGGTG  
TCAAGGTAATAGCTATCAATAGTCATCGACTTCCGGGAAAGGGTAGAAGAATGGGACC  
TATTATGGGACATAAATGCATTACAAACGTATGATCATTACGCTTCAACCGGGTTATTCT  
ATTCCACCTCTTAGAAATAAAAGAAGTATGGCAGTTCCAAAAAACGTACTTCTGCATC  
AAAAAACGTGTTTCGTAAAAATTTTGGAAAAGGGAGGGGTATTGGGCAGCGTTAAA  
AGCGTTTTCTTAGGTAAATCTCTTTCAACTGGTAATTCAAAAAGTTTTTTT-----AC  
AACAATGGCTAAAAAAAAGATGCCCGAGTAACAGTAATTTTGGAAATGTACTGGTTGT  
ATCCGAAACGGT-----CCTAAGAAGGTATCAGCAGGTATTTCCAGATATATTACTCAAAA  
GAACCGGCATAATACGCCGGTTCGATTAGAATTAAGAAAATTCTGTCCCTATTGTTACA  
AACATATGATTCATGGGGAAATAAAGAAAATGAAAATAAGAGCTTCCATTCGTAAAATT  
TGTGACAAATGTCGACTAATACGTAGGCGTAGTCGAATTATAGTAATTTGTTCCAACTCG  
AGGCATAAACAAAGACAAGGAATGGTTCGGGAGAAAAGTAACAGTATCTACTCGGACA  
CTACAGTGGAAGTGTCTTGAATCAAGACCAGACAGTAAACGTCTTTATTACGGCCGCT

TTATGCTATCTCCACTTCGTAAAGGACAAGCCGACACAATAGGCATTGCGTTGCGAAGA  
GCTTTGCTTGGCGAAATAGAAGGAACATGTATTACACGTGTAAAATTTGAG-----AACGT  
TCCGCACGAGTATTCGACTATAACGGGTATTCAAGAATCTGTCCATGAAATTTTACTGAA  
TTTGAAAGAAATTGTATTGAGAAGTAACTATATGGAACCTGTGAGGCGTCTATTTGTG  
TCAGGGGTCCGGGGTATGTAAGTCAAGATATCATCTTACCGACGTATGTAGAAATC  
ATTGATAATAACAACATATAGCTAGCTTGACAGAACCGATTAATTTTTGTATTGAATTA  
AAAATAGAAAGAAATCGTGGTTATCTTAAAAAATGCCACGG---GTCTTTGATGGAAGT  
TAT-----CCTATAGATGCTGTATTACGCCGGTTTCGAAATGTAAATCATAGTATTCATCCT  
ATGGGAATGAGAATGAAAAACAAGAGATACTCTTTATCGAAATATGGACAAACGGGAG  
TTAACTCCGAAAGAAGCACTTCATGAAGCGTCGAGAAATTTGATTGATTTGTTTCTTC  
GATTTTTACATAAGGAAGACGAA-----ATGGGTCTTTTCGAGAACAATCAG---CACACGA  
TTCCTTTATCCCCTTTGCCCTTGTATGATAAATTGGAT---AAACTCGGAATAAAAAA-----  
-----GAATCTATTTTTATTGATCAATCAGAATTATCTCCTAGAATATATAATTGCCTCA  
AGAGGTCCAACATATATACATTATTGGACCTGTTGAATAACAGCCAAGAAGATCTTATG  
AAAATTGAGCATTTCGCGCCGAAGATGTAAACAGATCTTGGGCATTCTCCAAAACC  
AT-----TTCGCAATTGATTTACCATACCAAAAAAACTCAAGGCCGAA---ATAAGGCAA  
TGTCTACAATACCGGGACTTAATCAGATACAATTTGAGGGGTTTTCTAGGTTTCATTGATC  
AAGGTTTACTGAAGAATCTTTAAGTTTCCAAAATTGAAGATACTGATCATGAAATT  
GAATTTCAATTATTTGTCGAAAGCTATCAATTGGTAGAACCATTGATAAAGGAAAAA  
TGCTGTCTATGAATCACTCACATATTCTTCTGAATTATATGTATCCGCGGGATTAATTTGG  
AAAACCAGTAGGGATATGCAAGAACAAGTATTTTATTGATTGGGAACATTCCTCTAATGAA  
TTCCCTAGGAACTTTTATAGTAAATGGAATATATAGAATTGTGATCAATCAAGTACTGCA  
AAGCCCCGTATTTATTACCGGTCAGAGTTGGACTATAACGGAATTGCGATCTATACCG  
GCACTATAATATCAGACTGGGGAGGAAGATTACAATTAGAGATTGATAGAAAAGCAAG  
GATATGGGCTCGAGTGAGTAGGAAACAAAAAATATCGATTCTAGTTCTATCATCAGCTA  
TGGGTTTGAATCTAAGAGAAATCTAGACAATGTTTATTATCCTGAAATTTTTTTGTCTT  
TTTTGAATCATAAAGAGAGAACA AAAAATAGGATCAAAAAGAAAATGCCATTTTGGAGTT  
TTATCAACAATTTGCTTGCGTAGGTGGGGATCCAATTTTTCTGAATTCTTATGTAAGGA  
ATTACAAAAGAAATTTCTTCAACAAGATGTGAATTAGGAAGGGTTGGTCGACGAAAT  
ATGAACCAAAGACTGAACCTTGATATATCCAGAACAAATACATTTTTTGGTACCACGAGA  
TATATTGGCTGCCACTGATCAATTGATTGGACTGAAATTTGGAATGGGGACACTTGACG  
AT-----ACGAATCATTGAAAAATAAGCGCATTCGTTCTGTAGCGGATCTTTTACAAGATC  
AATTTGGGTTGTCTCTGGTTCGTTTAGAAAATGTGGTTCGAGGAACTATATGTGGAGCA  
ATTCGG---CATAAATTG---ATACCAACTCCTCAGAATTTGGTAACATCAACTCCA-----  
-TTAACAACCACTTATGAATCTTTTTTTGGTTTACATCCTTTATCTCAAGTTTTAGATCGA  
ACTAATCCATTGACACAAATAGTTCATGGGAGAAAATTGAGTTATTTAGGTCTGGAGG  
ACTAACAGGGCGGACTGCTAGTTTTCGAATACGAGATATCCATCCTAGTCACTACGGTC  
GTAGTTGTCCAATTGATACATCTGAGGGAATTAATGTTGGACTTATTGGATCCTTAACAA  
TTCATGCGAGGATGGATCCTTGGGGA---TCCCTAGAAAAGTCCGTTTTAT-----GAAATT  
TCAGAAAGATCGACGGGG-----TTACGATTGCTTTATTTATCACCGGGTAGAGATGAATA  
CTATACGGTAGCATCGGGAAATCTTTGTCAATTGAATCAGGATATTCAGGAAGAACAGG  
TTGTTCCGGCTCGATACCGTCAAGAATTCCTCACTATTGCATGGGAACGGGCCCATCTT  
CGAACTATTTTTCCCTTCCAATATTTTTCTATTGGAGCTTCCCTCATTCTTTTATTGAAC  
ATAATGATGCGAATAGAGCTTTAATGAGTTCTAATATGCAACGCCAGGCAGTTCTCTTT

CTAGGTCGGAAAAATGTATTGTTGGAACCTGGTTTAGAACAACAAACGGCTCTAGATT  
GGGGTCTTCTGCTATAGCTGAACGTGAAGGCAAGATCATTATATAGAGACTGGCAAGA  
TCCTTTTCTCCGGAAATGGAGATACTCTAAGCATCCCATTAGTTATGTATCAACGTTCCA  
ACAAAAATACTTGTATGCATCAAAAACCCAGGTTTCACGGGGTAAATACATTA  
GGGACAAATTTTAGCAGATGGTGCTGCTACGGTTGGTGGCGAGCTTGCTTTGGGGAAA  
AACGTATTAGTAGCGTATATGCCATGGGAAGGTTACAACCTCTGAAGATGCAGTACTCAT  
TAGTGAGCGGTTGGTATATGAGGATATTTATACTTCTTTTACATACGGAAATATGAGATT  
CAGACTCATGTGACAAGTCAAGGT---CCTGAACGGATCACTAACAAAAATACCCATT  
GAAACTCATTTACTTCGCAATTTAGATAAAAAATGGAATTGTGATGTTGGGGTCTTGGGT  
AGAGGCGGGCGATATTTTAGTAGGTAAATTAACGCCCAAATGGTGAAGAA---TCCTC  
GTATGCCCCGAGGATAGATTGTTACGAGCTATACTTGGCATTACAGGTATCTACTTCAA  
AGAACTTGTTTAAACTACCCATAGGTGGCAGGGGCTGGGTTATTGATGTGAGGTGG  
ATCCAGAAAAGGGGA---AGTTCTAGTTATAATTCGGAAATTAATCGTGTATATATTTACA  
GAAACGTGAAATCAAGGTAGGCGATAAAGTAGCTGGAAGACACGGAAATAAAGGGAT  
CGTTTCAAAAATTTGCCTAGACAAGATATGCCTTATCTGCAAGATGGAAGACCTGTTG  
ATATGGTCTTCAACCCATTAGGAGTACCTTCGCGAATGAATGTAGGACAAATATTTGAAT  
GTTTCGCTCGGGTTAGCAGGGTGTGTTGCTCGACAGACATTATCGAATAGCGCCTTTT  
GAGAGATATGAACAAGAAGCTTCCAGAAAACCTGTTTTTTCTGAATTATATGAAGCCAG  
TAAACAACTGCGAATCCATGGGTATTTGAACCCGAGTATCCAGGAAAAAGCAGAATA  
TTTGATGGAAGGACAGGGAATCCTTTTGAACAACCCGTTATAATAGGAAAGCCCTATAT  
CTTGAAATTAATTCATCAAGTTGATGATAAATCCACGGACGTTCTAGTGGACATTATGC  
GCTTGTTACGCAACAACCCCTTAGAGGAAGGGCAAAACAAGGGGGACAGCGAGTGG  
GAGAAATGGAGGTTTGGGCTCTAGAAGGATTTGGTGTGCTCATATTTACAAGAGATG  
CTTACTTATAAATCTGATCATATTAGAGCACGCCAAGAGGTACTTGGTACTACGATCATT  
GGAGGAACAATACCTAATCCAGAGGATACTCCAGAATCGTTTCGATTGCTTGTTCGAGA  
ACTACGATCTTTAGCTCTGGAACCTGAATCATTTCCTTGTATCTGAGAAAAATTTT  
CAGATTAAGAGGAAGAAAGTTATAAATGGTAATTTTGATTCTATGATCGATCAGTATAAACATCA  
ACAGCTACGAATTGGATTAGTTTCTCCTCAACAAATAAGCGCTTGGGCTACTAAAATCC  
TCCCTAATGGAGAGATAATTGGAGAGGTGACAAAACCCCTATACGTTTCATTACAAAACC  
AATAAACCGGAAAAAGATGGGTTGTTTTGTGAACGCATTTTTTGGACCTATCAAAGTG  
GAATTTGTGCTTGTGGAATTTATCGAGTAATCGGAGATGAAAAAGACGACCCTAATTTT  
TGTGAACAATGCGGAGTCGAATTTGTTGATTTCGCGCATAACGAAGATATCAAATGGGCTA  
CATCAAATCGCATGCCAGTAACCTCATGTGTGGTATTTAAAATGTCTTCCCAGTTATAT  
TGCGAATCTTTTAGATAAACCTCTTAAAGAACTAGAGGGTCTAGTATACTGCGATGTGA  
ATTTTTCTTTTGGCTAGGCC---ATAACGAAAAACCGACTTTTTTTGCGATTACGTGGTTT  
ATTCGAATCTGAAATCCAATCTTGGAAATACAGTATCCCACCTTTTTTTTACTAACCAAGG  
CTTCGAGACATTTTCGAATCGAGAAATCTCTACTGGTGCAGTGTCTATTTCGAGAACAAT  
TATCCGATCTAGATTTACACATTATTCTAGATAATTCATTGTTAGAATGGAAGAATTAGG  
GGACGAG---GGACCCACAGGAAATGAATGGGACGACCGAAGGGTTGGACGAAGAAA  
GGATTTTTTGGTTCGACGCATGGAATTTGGCTAAGCATTTTCTCCGAACAAATATAGAAC  
CAGAATGGATGGTTTTATGTCTATTACCAGTTCTTCCCTCCTGAATTAAGACCTATCATT  
AACTAGATGGTGGTAAATTAATGAGCTCGGATATTAATGAACTCTATAGAAGAGTTATCT  
ATCGGAACAATACTCTTGCCGATCTATTAACAACAAGTAGATCTACGCCAGGAGAATTA  
GTCATGTGTCAGGAAAAATTAGTACAAGAAGCCGTGGATACACTTCTTGATAATGGAAT

CCGCGGGCAACCGATGAGGGATGGACATAATAAAGTTTACAAGTCATTTGCAGATGTAA  
TTGAAGGCAAAGAAGGAAGATTTTCGTGAGACTCTGCTCGGCAAACGGGTTCGATTACTC  
AGGGCGCTCCGTCATTGTTGTAGGTCTTCACTTTCCCTTACATCGATGCGGATTGCCAC  
GGGAAATAGCAATAGAGCTTTTCCAGACCTTTGTAATTCGTGGCCTAATTCGACAACAT  
CTTGCTTCGAACATAGGAGTTGCAAAGAATAAAATTCAGGAAAAGAACCCATAGTAT  
GGGAAATACTTCAGGACGTTATGCAGGGACATCCTGTATTGCTGAATAGAGCACCCACT  
CTGCATAAATTAGGCATACAAGCATTCCAGCCCGTTTTAGTGGAGGGTCGCGCTATTTG  
TTTACATCCATTAGTTTGTAAAGGGATTCAATGCAGATTTTGTATGGGGATCAAATGGCTGT  
TCATGTACCTTTATCTTTGGAGGCTCAAACCGAGGCCCGTTTACTTATGTTTTCTCATAT  
GAATCTTTTGTCTCCCGCTATTGGAGATCCTATTTCCGTACCAACTCAAGATATGCTTATT  
GGACTCTATGTATTAACGAGTGGGAACCGTCGCGGTATTTGTGTAAATAGGTATAATCCA  
TGGAAGTGG-----AGAAACTCTAAAAAGAAAAGAAGTGACAATAACAATTATAAGGA  
TTCG-----GAACCTTTTTTTTCTAATTCCTATGATGCAATTCGAACTTATCGGCAGAAA  
GGAATCCTTTTAGATAGACCTTTGTGGCTCCGATGGCGCCTAGATCAACGC--GTTATTG  
CGTTA-----AGAGAACTCCTATCGAAGTTCACTATCAATCTTTAGGTACTTATTATGAGA  
TTTATGGACAATATTTAATAGTAAGAAGGATAAACAAGAAATTTTCTATAACATTC  
GAACCACTGTTGGTCATATTTCTCTTTATCGAGAAGTCGAAGAAGCCATGCGGGGGTTT  
TCTCAGGCCGGTTCATATGGTACC-----ATGGAGGTACTTATGGCAGAACA  
GGACAATCTGGTATTTCAACAATAAAGTGATAGACGGAACTGCCATGAAACGACTTATTA  
GTAGATTAATAGATCACTTCGGAATGGCATATACATCCCACATCCTGGATCAAGTAAAGA  
CTCTGGGTTTTGAACAAGCTACTGCTACATCCATTTTCATTAGGAATTGATGATCTTTTAA  
CAATACCCTCGAAGAGATGGCTAGTTCAAGATGCCGAAGAACAAGTTTTATTTTGA  
AAAACACCATCATTATGGGAATGTAAACGCGGTAGAAAAATTACGCCAATCAATTGAAA  
TATGGTATGCCACAAGTGAATATTTGCGACAAGAAATGAATCCTAATTTTAGGATGACT  
GATCCCCTTAATCCAGTTCATATGATGTCTTTTTCGGGAGCCAGAGGAAATGCATCGCA  
AGTACATCAATTAGTAGGTATGAGAGGATTAATGTCCGACCCTCAAGGACAAATGATTG  
ATTTACCCATTCAAAGCAACTTACGCGAAGGACTTTCTTTAACAGAATATATCATTTTCGT  
GCTACGGAGCTCGTAAAGGGGTTGTGGATACTGCCGTACGAACATCAGATGCTGGATAT  
CTTACGCGTAGACTTGTTGAAGTAGTTCAACACATTGTTGTACGACGAACCGATTGTGG  
TACCGTCCGTGCTATTTCTGTGAGTCTCCGAATGGAATGATACCA---GAAAAATTTTT  
ATACAAACATTAATGGGTCGTATATTAGCCCATGATGTATATATTGGCACCCGGTGTATTG  
CCACCCGAAATCAAGACATTGGAATTAGACTTATAAATAAATTCATAACC-----  
CTTCAAGTACAATCTATAGCTATTCGAACTCCTTTTACTTGTAGGAGTGCCTCTTGGATC  
TGTCGACTATGCTATGGCCGAAGTCCTACTCATGGCGACCTGGTTGAGTTGGGGGAAG  
CTGTAGGTATTATTGCAGGCCAATCGATTGGAGAACCGGGGACTCAATTAACATTAAGA  
ACTTTTCATACTGGCGGAGTATTTACGGGTGGTACTGCCGAACATGTGCGGGCCCTTC  
TAATGGAAAATAAAATTC AATACGGATTTTCGTTTCATCCGACACGTACACGCCATGGGC  
ATCCCGGATTTATATGTTCTCTAAACGTGTTAGTCACTATTGAGAATGAAGATATTCGCC  
ACGATGTAAATATTCCACCTCAAAGTTTTCTTTTAGTTCAAATGATCAATATGTCCAAT  
CAGAACAAGTGATCGCTGAGATTTCGCGCGCGAACATCCACT--TTGAATTTTAAAGAGA  
AAGTTCGAAAACATATTTATTTCTGACTCAGACGGAGAA---ATGCACTGGAGCATTGATG  
TATATCATGCACCCGAATTTGCATACGGGAATGTTTCATCTATTACCAAACCAAGTCATT  
TATGGATATTATTAGGAGGACCTTGCAGA-----TCCAGTTTGTCTCACTTTCACTACACA  
AGGATCAAGATCAAATGAGTGCGCAT-----TCTTGGTCTATCACGAGAAGATCCACTTCG

AACCTCTCA-----GGAACAAATGAGCGT--TCGGTACAAAACGTCTTTATTTTTTCATTGTT  
CAGGTAAAGTTGACGATAGGATTTCTGATTAT--TCAGACCCTGGCCGAATTATCGGTAC  
TGGTTATTGTAATCTCAACGATCCG---CCCATTCTCTACGAGAATTAT-----GCTTTATTCT  
CAAAGAGACGAAGAAATAGATTCATCATTCCAATCCAATCGATTCAAGAACGCGAGAA  
CACAATAAAGGCTTCTTCAGGCATCGCGGTTGAAATCCCT-----ATCAACGGTATTTTCC  
GTAGAAATAGCATTCTTGCTTATTTCAACGATCCTCGATATAGAAGAAAGAGTTCGGGA  
ATTATTAATATGGGACTCGAGAAATGCATTCAATCAATAAAAAAAGAGGAT-----TTTGT  
GAGTATCGAGGA---GGCAAGGAATTTCGGTCAAAAAACATGCAAGTAGATCCGCTTTTT  
TTCATTCCCGAGGAAGTGCATATCTTACCTGGGTCTTCTTCGATAATGGTACGAAACAAT  
AGTATTATTGGCGTAGATACACAAATTACTTTAAATATAAGAAGCCGAGTAGGTGGTTTG  
GTCCGAGTGGAGAGAAAAAAGAGAATTGAACTTCAAATACTTGCCGGAGATATC  
CATTTTCTGGCGATATGGATAAGATATCCCGACATGGCGGCGTTTTGATAACA--CCAG  
GA---ACACGAAAACAAAATGCCAAGGAATCCAAAAAC-----TGGAAAAATTGGATATAT  
GTTCAACGG-----ATCACACCTAGTAAG-----AAAAAGTATTTTCATTTTGGTTCGACCTGT  
TGTCACATATGAAATAAAGGATGGTATACTTTAGCAACACTTTTTCCCCAGATTTATT  
GCAGGAAAGGGATAATGGGAAACTGCGAGTTGTCAATTATATCCTTTATGGAAATGGTA  
AACCAATTCGAGCAATTTTCGCATACAAGTATTCAATTAGTTCGAACTTGTTTAGTATTGA  
ATTGGGAGCAAGGCAAAAAA-----AGTTCTTCGAGTCAAGAAGCTCGTGCTTACTTT  
GTTGAACTAAGGTCAACAGAGTTGACCCGACCTTTTCTAAGAATCCACTTAGCGAAAT  
CCACTATTTTCATATATCGGAAAAAGAAATGATTCGTTCGGCCTCAGGACTGCTCTCTGCT-  
--AATGGATTGGATTGCAACAATATCAATCCATTTTCTGCT-----CGTTAT-----TCCAAG  
CAAGAAGTCAACAACCTCTTAATCAAAATCAAGGAACTATTCATACGCTATTGAATAGA  
-----AATATGGGATTTCAATCGTTGATAATTCTGTATCATCCAATTGTTTTCGGATGGA  
TCCA-----TTCAGCGATGTA---AAATATCCAAT-----TTGAGAAAAGAATCAGATCTTCTA  
ATTCCAATTAATAAATGGGATGGGTCTTTAGGAACA-----GTCTTTCTAGTTACGAATGT  
TTATACA-----TTTTACCATTTA-----ATAACTCATAATCAG-----AAAAACGATTTGCA  
ACTTGACAAC-----TTAAAACAGACTTTTCAAATAATAAAATTTAAA--TATTATTTAAT  
GGATGAAAAG-----AAAAAATTTATAACCCAGATCTCGAAAGTAACATTATTTTGAAA--  
-----TTGAATTCGTACTTTTGTGATCCCAATTATTGTCAAGAAAGATCT--ATAATAATGA  
GTCTTGGGCAGTTTATTTGTGAAAATATCTGTATCGCCCCAAACGCACCAAGC---CTAA  
AA-----TCGGGTCAAATTATACTCATTGAA--GTTGACTCTGTAGTAATACGATTAGCTAA  
GCCTTATTTGGCCACTCCGGGAGCAACAGTTCATGGCCATTATGGGGAAATCCTGTATG  
AAGGAGATACTTTAATTACCTTTATATATGAAAAGTCAAGATCTGGTGATATAACTCAGG  
GACTTCCAAAAGTAGAACAGGTGTTAGAAGTTCGTTTCGATTGATTCAATATCGATGAAT  
TTAGAAAAGAGGGTTGAGGGTTGGAACGAATGTATAACAAGAATTCTTGGAATTCCAT  
GGGCATTTAATTGGTGCTGAGTTAACTATAGTGCAAAGTCGTATATCTTTGGTTAATA  
AGATTCAAAGGTTTATCGATCCAGGGGTGCAGATTCATAATAAGCATATAGAAATTA  
TTGTACGTCAAATAACATCAAAGGTGTTGGTTTTGGAA-----GATGGAATGTCTAATGT  
TTTTTTACCTGGAGAACTAATCGGGGTGTTGCGAGCAGAACGAATGGGACGCGCGTTG  
GAAGAAGCGGTTTGTACCGAGCACTCTTATTGGGAATAACTCGAGCATCTCTGAATAC  
TCAAAGTTTTATATCTGAAGCTAGTTTTCAAGAAACGGCTAGAGTTTTAGCAAAGCAG  
CTCTACGGGGTCGAATCGACTGGTTGAAAGGCCTGAAAGAGAACGTTGTTTTGGGGG  
GTATGATACCTGTTGGTACCGGATTGAAAGGATTA-----GCAGACCCTTCAAAT--TCAAA  
AAAAGGACCT-----TTTGTAATAAAAAAATAATCTTTTCCAGGGGGAAATGAGA-----GA

TATTTTGATTACCCACCGATCTTTA-----  
-----ATGACAAGAAGATATTCGAACACCGACTTAGAAGAAATGCTAGAGGCAG  
GAGTTCATTTTGGCCATGGCACTAGTAAATGGAATCCTAAAATGGCACCTTATATCTCTG  
CAAAGCGTAATGGTATTCATATTATAAATCTTACTAGAAGTCTCGTTTTTTATCCGAAG  
CATGCGATTTGGTTTTTGGATGCAGCAAGAAACGGAAAACAATTCCTGATTGTTGGGAC  
CAAAAATAAAGCAGCTGATTACAGTAGCACGGGCTGCAGTAAGGGCCCGGTGTCATTGT  
GTAAACAAAAAATGGCTTGGCGGAATGTAAACGAATTGGTTCGACTACAGAAAACGAGAC  
TTCATAAGTTCAGGGACTTGAGAATGGAACAAAAAACTGGAAGACTCAACCGTCTTCC  
AAAAAGAGATGCGGCTATGGTGAAAAGACAATTATCTCGCTTGCAAACATATCTGGGC  
GGGATTAATATATGACAGGGTTGCCCGATATTGTAATCATCGTCGATCAGCATGAAGAA  
TATACGGCCCTGCGGGAATGTATCACTCTGGGAATCCAACAATTTCTTTAATTGATACA  
AATTGTGATCCTGATCTTGCAGATATTTCTATTCCAGCGAATGATGACGCTATATCTTCAA  
TCCGCTTAATCTTAACAAATTAGTATTTGCAATTTGTGAGGGCCGTTCT--AGCTATCTA  
AGAAATACTATGGGACAAAAATAAATCCACTTGGTTTCCGGCTTGGTACAAGTCAAA  
GTCATCATTCCCTTTGGTTTGCACAACCAAAAAATTATTCTGAGGGTTTACAAGAAGAT  
CAAAAAATAAGAGATTTTATAAAAAATTATATACAAAAGAAAATGAGAATATCCTCCGG  
C--GCCGAGGGAATTACCCGTATAGAGATTCAAAAAGAATCGATTTAATCCAGATAATA  
ATCTTTATGGGATTTCCAAAGTTCTTAATCGAAAGTCGTCCCCGA-----GGAATCGA  
AGAATTACAGATAAATCTACAAAAGGAATTCAGTATGTAAACCGAAAACTTAACATTG  
CTATTACAAAATAGCAAAACCTTACGGAAACCCAACAATTCTTGCAGAATTTATAGCT  
GGACAATTAAGAGTAGGGTTTCGTTTCGAAAAGCAATTA AAAAGGCTATTGAATTA  
CTGAACAAGCAGAAACAAAAGGAATTC AATACAAATAGCAGGCCGTATCGACGGCA  
AAGAAATTGCACGTGTCGAATGGATCAGAGAGGGTAGGGTTCCCTCCAAACTATTCG  
AGCTAAAATTGATTATTGTTCTTATACAGTTCGAACTATCTATGGGGTATTAGGCATAAA  
AATTTGGATTTTTTTTGAA-----ATGTCGCGTTACCGAGGTCCTCGTTTCAAAAAATAC  
GTCGTTTGGGGGCTTTACCAGGATTA ACTAAAAAAGGCCTAAAGCCGTAAGTGATCT  
TAAAAACCAATCCCGCTCCGGTAAA---AATCTCAATATCGTATTCGTCTAGAAGAAAA  
ACAAAATTGCGTTTTTCACTATGGTGTACAGAACGACAATTAATTAATATGTTTCGTAT  
CGCCAGAAAAGCCAAGGGGTCAACGGGTCAAGTTTTACTTCAATTA CTGAAATGCGT  
TTGGATAACATACTTTTTTCGATTGGGCATGGCTTCGACTATCCCGCAGCCCGCCAATTA  
GTAAACCATAGACATATTTTAGTAAATGGGCGGATAGTAGATATACCAAGTTATCGTTGC  
AAACCCCAAGATATCATTATGGCGAAAGATGAACAAAAATCCAGA ACTCTGATTCAAA  
ATTTTCTCAACTCTGCCCTCAT--GAAGAAGTACCAAGCCATTTGACCCTGCGCCAG  
TCGAA-----TATAAAGGATTAGTCAACCAATACTAGATAGTAAATGGGTCCGTTTGAAA  
CTAAATGAATTGTTAGTCGTAGAATATTATTCTCGTCAGACTATGTCACGTCGAGGTACT  
GCAGAAGAAAAACCAGCAAAATCCGATCCAATTTATCGTAATCGATTAGTTAACATGTT  
GGTTAACCGTATTCTGAAACACGGA AAAAAAATCATTGGCTTATCAAATTTCTATCGAG  
CCATGAAAAAATTCAACAAAAGACAGAAACAAATCCATTATCTGTTTTACGTCAAGC  
AATACGTGGAGTAACTCCCGATATAGCAGTAAAAGCAAGACGTGTAGGTGGATCGACT  
CATCAAGTTCCCATTTGAAATAGGATCCACACAAGGAAAAGCACTTGCCGTTCTGTTGGT  
TATTAGCGGCATCCCGAAAACGTCCGGGTCGAAATATGGCTTTCAAATTAAGTTCCGAA  
TTAGTGGATGCTGCCAAAGGGAGTGGCGATGCCATACGCAAAAAGGAAGAGACTCATA  
AAATGGCAGAGGCAAATAGAGCTTTTGCACATTTTCGTATGGGTAGAGACACTATTGCC  
GAGATAATAACCTCGATACGAAATGCTGATATGGATCAAAAAAGAATGGTTTCGCATAGA

ATCTACTAATATTGGCGAAAATATTGTTCAAATACTTTTTTCGAGAGGGGTTTATCGAAAA  
CGTTCGAAAACATCGAGAAAAAGAGAAAAATTTTTGGTTTTAACACTGCACCATAGA  
AGG-----AATAGGAAAAGACTTTCT-----AGAAATTTTTTAAATTTAAAACGGATCAGT  
CGAACTGGCCTACGAATATACTCTAACTCTCAACGAATTCCTAGAATTTTGGGCGGTAT  
GGGTATTGTAATTATTTCTACTTCTCGAGGTATAATGACAGACCGGGAGGCTCGACGCG  
AAGGAATTGGGGGAGAAAATATTGTGTTATATATGGATGGCAAAAAGCTATACCGAGA  
GGTTCGCGTAGGAATGTACGTATTGGTTTACGTAAGAGTACACGTAGAATATCAAAGG  
GGTATTTCATGTTCAAGCGAGTTTCAATAATACCATTATCGCGGTTACCGATGTACGGG  
GCGGGTGGTTTTCTGGTCCTCGGCCGGTACTTGTGGATTCACAGGTACGAGAAGGGGA  
ACACTTTTGCCGCCAAACTGCCGCAGCAGTTGCTATTCGTGCAGGAATGGATCAGG  
GTATGCAACGAGCAGAAGTCATGATAAAAGGTCGCCGGTCTGGGAAGGGATGCAGCATT  
ACGAGCTATTCGTAGAAGTGGTATACTCTTAACTTTTTGTACGAGATGTAACCCCTATGCC  
ACATAATGGCTGTAGACCTCCGAAAAAAGACGTGTCATGCCAACCATTAACAACCTT  
ATTAGAAATACAAGACAGCCAATTCGAAATGTCACGAAATCCCCCGCTCTTCGGGGAT  
GTCCTCAGCGTCGAGGAACATGTACTAGGGTGTATACTATCACCCCCAAAAACCAA  
CTCTGCCTTACGTAAAGTTGCCAGAGTACGATTAACCTCTGGATTTGAAATCACTGCTT  
ATATACCCGGTATTGGCCATAATTCACAAGAACATTCTTCAGTCTTAGTAAGAGGGGGA  
AGGGTTAAGGATTTACCCGGTGTAAAGATATCACATTGTTTCGAGGAACCCTAGATGCTGT  
CGGAGTAAAGGATCGTCAACAAGGGCGTTCTAAATATGGGGTAAAAAAGCCAAAAAT  
GGCAAGGAAAAGTTTGATTCAGAGGGAGAAGAAGAAGCAAAAATTGGAACAGAAAT  
ACCATTTGATTCGTGCATCTTCAAAAAAAGAAATAAGT-----AAAGTTTCATCATTGAG  
TGACAAATGGGAAATTTATGGAAAGTTACAATCCCCACCACGGAATAGTGCAGCTACA  
CGTCTACATCGGCGTTGTTGTTGACCGGAAGACCCAGAGCTAATTATCGAGACTTTGG  
ACTATCCGGACACATACTTCGTGAAATGGTTCACGCGTGTGTTGTTGCCAGGAGCCACA  
AGATCGAGTTGGATGGTAAAACCATCATTAAATTTTCAGTTATTTCTCAA-----AAA-----G  
AAAACAAAGGTTCCGTTGAATTTCAAGTAGTCAACTTCACTAACAAAATAAAAAAACT  
TACTTCCCATTTGGAATTGCACAAAAAAGACTCGTCATCTCAGAGAGGATTGCGTAAA  
ATTTTGGGAAAACGTCAACGCCTCTTGAATTAATTTGTCAAAAAAATATAGAACGCTA  
TAAAGAATTAATTCGTGGGTTAGATAGTCGAGAAAAAAAACGCGT-----ATGTTAAA  
CTTCGTTTTAAAACGATGTGGTAGAAAGCAACGTGCCGTTTATCGAATTGTTGCAATTGA  
TGTTTCGATCTCGAAGAGAAGGAAGAGATCTTCGAAAAGTGGGTTTTTATTATCCAATGA  
AGAATCAAATTTATTTAAATGTTCCCTCTATTTTATATTTCCCTGAAAAAGGAGCTCAAC  
CCACAGGAACGTTCAGAATCTTTTAAACCAAAGCAGAAGTTTTTAAGGAACCTCCGTC  
GAATCAAATGCAATTTAAC---ATGGATAAACCCAAACGACTTTTTCTTAAATCCAAACGA  
TCTTTTCGTAGGCGTTTGCCCCGATTCAATCGGGGGATCGAATTGATTATAGAAACATG  
AGTTTAATTAGTCGATTTATTAGTGAACAAGGAAAAATATTATCTAGACGGGTTAATAGA  
TTAACCTTGAAACAACAACGATTAATTAATGCTATAAAACAAGCTCGTATTTTATCT  
TTGTTACCCTTTCTCAATAATGAGAAA-----CAGTTTGAAAAAACCGAGACCGCTAGAA  
CTACGACAGGTCTTCTAATCAGAAATAAAGTGATACGTTCACTAAAAAAAATCCTTTT  
GTAGCGAATCATCTCGTAAAAAAAATTCATAAGCTTAATAAAAAAACGGAAAAAGAAA  
TAATAGTAACTTTTTCTCGGGCTTCAACCATTACCCACAATGATTGGTCATACAATTG  
CCATTCATAATGGAAAAGAACATTTGCCTATTTATATCACAGATCGTATGGTAGGTCACA  
AATTGGGGGAATTTTACCTACTTTTAAATTTTCGAGGGCATGCAAAAAACGATAACAAA  
TCCGTCGTATGCTTTTTCAATCTTTTCAACTAGGTAATCTAGTATCCTTATGCATGAAGN





AATATCAATAGGTTGGTTGTTTCG---CTCCTGTATCTTCCAAAAGGGAAAAAGATCTCTG  
AGAGTTGTTTCCTGAATCCGAAAGAGAGTACTTGGGCTCTCCAATAACT-----AA  
AAAGTGTAGCATGCCTGAATCTAACTGGGGTTCGCGGTGGTGGAGGAACTGGATCGGA  
AAAAAGAGT-----GATTCTAGTTGTAAGATATCTAAT-----GAAACCGCCGCTGGAATTG  
AGATCTTATTCAAAGAGAAAGATATCAAA---TATCTGGAGTTTCTTTTTGTATATTATATG  
GAT-----GATCCGATCCGCAAGGACCCTGATTGGGAATTGTTTGATCGTCTTTCTCTGAG  
GAAGAGTCGAAATAGAATCAACTTG-----AATTCGGGACCGCTATTTCGAAATCTTAGTG  
AAACTGTTGATTTCTTATCTGATGTCTTCTTTTCGTGAAAAAATACCAATTGAAGTGGG  
GGGT--TTCTTCAAACAACAAAGG--GCTGGGTCAACTATTCAATCAAATGATATTGAGC  
ATGTTTCCCAT-----CTCGTCTCGAGAAACAGGTGGGCTATTTCTTTGCAAATTGTGCT  
CAATTTCAATGTGGCAATTTTCGCCAAGACCTCTTCGTT-----AGTTGGGGGAAG---AA  
TCTGCACGAATCGGATTTTTTGTAGGAAC--GGATCGAGAGAGAATTTTTTTTTGGTTAGA  
CAATGTGTGGTTGGTAAATAAGGATCGG-----TTTTTTAGAAAAAGAAAGGTACGGAA  
TGTATCGTCAAATATTCAATATGATTCC-----ACAAGG-----TCCAGTTTCGTTCAAGTA  
ACGGATTCTAGCCAACGGAAAGGATCTTCT--GATCAATCCAGAGACTATTGGATTCCA  
TTAGT-----AATGAGGATTCGGAA-----TATCAC-----ATAAA  
TCAAAGAGAGATTCAACCACTAAAAGAAAGATCGATTCTT--TGGGAT-----CCTTCCTT  
TCTTCAAACGGAAGGAACAGAGATAGAATCGGAC-----CGATTCCCGAAA-----TGCCTT  
TCTGGATATTCC-----TCAATGTCCCGGCTATTCACG--GAACGTGAGAAGCAGATGATTA  
ATCATCTGCTTCCGGAAGAAATCGAAGAATTTCTT-----GGAATCCTACAAGATCGGTT  
CGTTCTTTTTTCTATGATAGATGG-----TCAGAACTTCAT--CTGGGTTCTGAATCCTACTGA  
GAGGTCCACTAGAGATCAG-----AAATTATTGAAGAAA-----GATCTTTCT--TTTGT  
CCTTCCAGGCGATCGGAA-----ATAAAGAACTGGTTACTATATTCAAGATAATTAC  
GTATTTACAAAAT-----ACTGTCTCAATTCATCCTATTTTCATCAGATCCGGGGTGTGATAG  
GGTTCTG---AAGGATGAACCGGAT--ATGGACAGTTCCCATAGATTTCATTCTTGAACA  
AAAATCCATTTTTGGATTTA-----TTTCATCTATTCCCTGACCGGAACAGGGGAGGATAC  
ACGTTA-----CACCACGATTTTGAATCCGAA-----GAGATATTTCAAGAAATGGCAGATCT  
ATTCACTCTATCACTAACCGAGCCG--GATCTGGTGTATCATAAGGGATTTGCCTCTTCC  
ATTGATTCTACGGATTGGATCAAAAACAA-----TTCTTGAACGAGGCCAGGGTTCGATG  
CA---ATTGAGAAAAAGAACTCT-----TTATTGGTTCTACCTCCTATTTTTTAT-----GAAG  
AGGGTGAATCTTTTTCTCGAAGGATCAGAAAAAATGGGTCCAG---ATCTCCTGCGGG  
AATGATTTGGAAGATCCAAAACCAAAAATAGTAGTATTTGCTAGCAACAACATAATGGA  
GGCAGTCAATCAATATAGATTGATCCGAAATCGGATTCAAATCCAATATAGTACCTATGG  
G-----TACATAAGAAATCTATTGAATCGATTCTTTTTAATGAAT-----AGATCCGATCGCA  
ACTTCGAATATGGA-----ATTCAAGGGGATCAAATAGAAAAGGATACTCTGAATCACA  
GAACTATAATGAAATATACGATCAACCAACATTTATCGAATTTGAAAAAG---AGTCAGA  
AGAAATGGTTTCGATCCTCTT-----ATCTTTATTTCTCGAACCAAGAGATCCATGAATCGGG  
ATCCTGATGCATATAGATACAAATGGTCCAATGGGAGCAAGAATTTCCAGGAACATTTG  
GAACATTTGTTTTCGGAGCAGAAGAGCCGT-----TTTCAAATAGTGTGGTTCGATTA  
CGTATTAATCAATATTGATTGATTGGTCTGAGGTTATCGACAAAAAAGATTTGTCTAAG  
CCGCTTCGTTTCTTTTTGTCCAAG-----TCACTTCTTTTTTTATCC-----  
-----AAGTTGCTTTTCTTTTTGTCTAAC--TCACTTCCTTTTTTCTGTGTGAGTTTCGG  
GAATATCCCATTCAGAGGTCCGAG---ATCTACATCTAT--GAATTGAAAGGTCCGAATG  
ATCAACTCTGCAATCAGTTGTTAGAATCAATAGGTCTTCAAATTGTTCAATTTGAAAAAA

TGGAAACCCTTT-----TTATTGGAT-----GATCATGATATTTCC---CGAAAATCGAAATTC  
TTGATCAATGGAGGA-----ACACCCTTTTTGTTCAATAAGATACCA---AAGTGG---ATGAT  
TGACTCATTCCATACTAGA-----CACAGGAAATCCTTTGATAACGCGGATTCCGATT  
TCTCAATGATATTCACAATCAAGACAATTGGCTGAATCCCGTGAAACCATTTCATAGA  
AGTTCATTGATATCTTCTTTTTATAAAGCAAATCGACTTCGATTCTTGAATAATCCACAC  
CACTTCTGCTTCTCT-----TGTAACACAAGATTCCCCTTTTCTGTG-----GAAAAGGA  
CCGTATCAAT-----AATTATGATTTTACGTATGGA---CAATTCCTCAATATCTTGTTCATTTCG  
CAACAAA---ATATTTTCTTTGTGTGTCGGTAAA-----AAAAACATGCTTTTGGGGGG---  
AGAAATACTAGTTCATCAATCGAGTCACAGGTATCTAACATATTCAAC-----GATTTTACA  
CAAAGTGTT---GACGAAACGTATAACTTGTACAAATCT-----TTCCATTTTCCAAGTCG  
ATACGATCCATTTCGTTTCGT-----AGAACTATTTACTCGATCGCAGACATTTCTGGAACACC  
TCGAACAGAGGGACAAATAGTAAATTTGAAAGAACTTATTGTCAACCTCTTTTCAGATA  
TGAATCTATCTGATTCAGAAGGGAAGAACTTGCATCAGTATCTCAAT-----TCAAAC  
ATAGGTTTGATTACCTTCCATGTTCTGAGAAATATTTACCATCCGAAAAG-----AGGAA  
AAA-----CGGAGTCTTTGTCTAAAT-----AAATGCGTTGAGAAAGGGCAG  
ATGTATAGAACCTTTCAACGAGATAGTGCTTTTCAACTCTCTCAAATGGAATCTATTC  
CAAACATATATGCCGTGGTTCCTTACTTCGACAGGGTACAAATATCTAAAATTTCTATTT  
TTAGATACTTTTTCAGACCTATTG-----CCAATACTAAGTAGC---AGTCAAAAATTTGTATC  
CATTTTTCATGATATTATGCACGGATCAGGTATATCATGTGCAATTCTTCCGAAAAAATG  
G-----TGTCTTCCACACTGGAATCTG---ATAAGTGAGATTTTCGAGTAAGTGTTT  
CCAGAAT-----CTTCTTCTGTCCGAAGAAATGATTCATCGAAAT-----AATGAGTCACCGT  
TGATATCTACACATCTGAGATCGACGAACGTTCCGGGAGTTC---CTCTATTCAATCCTTTT  
CCTTCTTCTTGTGCTGGATAT---TTCGTTTCGTACACATCTTCTCTTTGTTTCCCGG-----G  
CCTCTAGTGAGTTACAGACAGAGTTTCGAAAGGGTCAAATCTTTGATGATTCCATCATCT  
ATGATGGAGTTGCGAAAACCTTCTGGATAGGTATCCTACATCTGCACCGAATTCTTTCTG  
GTAAAGAATCTCTTTCTAGTTACTCTGGAACAATTAGGAGATTCTCTAGAAGAAATAC  
GG-----GCTTCTGGCGGCAACGTGCTTGGT-----CCCGCT-----TATGGG---GTCA  
AACCAATACGTTCTAAGAAGAAATATTTGAATATCAATCTCATCGATATCATCGATCTCAT  
A-----CCAAATCCCATCAATCGAATCACTTTTTTCGAAAATACGAGACATCTAAGTC  
ATACAAGTAAAGAGATCTATTCAATTGATAAGA-----AAAACGTGAATCGGGATTGGATT  
GATGATAAAATCGAATCCTGGGTCGCGAACAGTGATTTCGATTGATGATGAAGAAAGAG  
AATTCTTGGTTCAGTTCTCC-----GCCTTAACGACA-----GAAAAAAGGATTGATCAAATT  
CTATTGAGCCTGACT--CATAGTGATGATTTA-----TCAAAGAATGACTCTGGTTAT  
CAAATGATTGAACAACCGGGAGCATTTTACTTACGATACTTAGTTGACATTCAT-----AA  
AAAGTCTCTATTGAATTATGAGTTCAATACACCCTGTTTAGCAGAAAGACGGGTATTTCT  
TTGCTCATTATCAGACAATCACTTAT-----TCACAACTTCGTGTGGGACTAATACTTTGC  
ATTTCTCATCTCATGGA-----AAACCCTTTTCGCTCCGCTTAGCCTTATCCCCCTCT---A  
GGGGGATTTTAGTGATAGTTCTATAGGAACTGGACGATCTTATTTGGTCAAATACCTAG  
CGACAAACTCCTATGTTTCTTTTATTACGGTATTTCTGAACAAGTTCCTGGATAACAAA  
CCTAAA---TTTATTATTGAT-----GATATCGAT--ATTGAGGATAGT-----GA  
CGATATTGATGATAGTGAC-----GATATCGATCGTGA  
CCTTGCTACGGAACTG---GAACTGCTAGCTATGATGAATGTGCTAACTATGGATATGATG  
CCGGAA-----ATAGACCGATTTTATATCACCTTCAATTTCGAATTAGCAAAAGCAATGT  
CTCCTTGCATAATATGGATTCCAAACATTCATGATCTGGATGTAAATGAGTCGAATTACT

TATCCCTCGGTCTATTAGTGAACCATCTCTCT-----GAAAGATGTTCC---ACTAG  
AAATATTCTTGTTATTGCTTCGACTCATATTCCCCAAAAAGTGGATCCCCTCTAATAGC  
TCCGAATAAATTCAATACGTGCATTAAGATACGAAGGCTTCTTATTCCACAACAACGAA  
AGCACTTTTTCACTCTTTTCATCTACTAGGGGATTTCACTTGGAAAAGAAAATGTTACAT  
ACT-----AACGGATTCGGGTCCATAAACATGGGGTCCAATGCAAGAAATCTTGTAGCACT  
TACCAATGAGGCCCTATCAATTAGTATTACACAGAAGAAATCAATTCTAGACACTAATAC  
AATTAGATCCGCTCTTCATAGACAAACCTGGGATTTGCGA-----TCCCAGGTAAGATC  
GGTTCAGGATCATGGGATCCTTTTCTATCAGATAGGAAGGGCTGTAGCACAAAATGTCC  
TTCTAAGTAATTGCCCCATAGATCCTATATCTATCTATATGAAGAAGAAA-----TCATGTAA  
CGAAGGGGATTCTTATTTGTACAAATGGTACTTCGAACTTGGAACGAGCATGAAGAAA  
TTAACGATACTTCTTTATCTTTTGAGTTGTTCTGCCGGATCGGTTCGCTCAAGATCTTTGG  
TCTCTGCC-----GGACCCGATGAAAA---AATGGGATCACTTCTTATGGACTCGTTGAG  
AATGATTG---GATCTAGTTCATGGCCTATTAGAAGTCGAAGGCGCTCTGGTGGGA-----  
TCTTCACGGACAGAAAAAGATTGCAGTCGGTTTGATAATGAT-----CGAGTTACATTGCT  
TCTTCGGCCCGAACCGAGGAAT---CTCTATATATGATGCAAATGGATCTTGTCTATCT  
TTGATCAGAGATTTCTCTATGAAAAATAC-----GAATCGGAGTTTGAAGAA---GGGGAGG  
GGGAAGGAGCGCTTGCCCCGCAACAG-----ATAGAGGAGGAT-----TTATTCAA  
TCAC-----ATAGTTTGGGCTCCT-----AGAATATGGCGCCT-----TGGGGCTTTGATT  
GATTGTATCGAAAGCCCCAATGAATTGGGATTTCT--TATTGGTCCAGGTCATTTCCGGG  
GCAAG-----CGGATCATTTATTATGAAGAGGATGAGCTTCAAGAGAATGATTCGGAGT  
TCTTGCAGAGTGGAAACCATGCAGTACCAGACACGAGATAGATCTTCCAAAGAACAAG  
GTCCTTTTCAAATAAGCCAATTCATTTGGTACCCCGCAGATCCGCCCTTTTCTATTCA  
AA---GATCAGCCCCCTGACTCTGTGTTTTACATCGAGAACTCTTTGCAAATGAAGAGA  
TGCAAAGGTGCTTCTTACTTCCCAAACAGATCCTCCTACATCTATATCTAAACGCTGGT  
TTATC-----AGAATACACAAGAAAAGCACTTCGAATTGTTGATTAATCGTCAGAGATGG  
CTTAGA-----ACCAATAGTTCATTATCT-----AATGGATCTTTCCGTTCTAAT-----ACTCT  
ATCCGAGAGTTATCAGTATTTATCAACTCTCTTCTATCTAAC---AGAACGCTATTGGATC  
AAATGACAAAGACATTGTTAAGAAAAGATGGCTTTTCCCGGATGAAATGCAAATTGG  
ATTC-----AGAGAACAGGAGAAAGATTTCCCATTCCTTATGCCTAGATCGCGT--ATAAAT  
GGAAATTTTATTGATAAAACATTTTCAATTGTAGCCAATATCTTATTGAAAATAATTCCGA  
CAACTTCAGGAGAAAAGGAGGCATTTACCTATTACAGAGATGGT--GTGATGTCGGCTC  
AATCCGAAGGAAATTATGCGGAAGCTTTACAGAATTATTATGAAGCTATGCGACTAGAA  
ATTGATCCCTACGATCGAAGTTATATACTCTATAATATAGGTCTTATTCATACAAGTAATG  
GAGAACATACGAAAGCTTTGGAATATTATTTTCGAGCACTAGAACGAAATCCATTCTTA  
CCACAAGCTTTTAACAATATGGCCGTGATCTGTCATTAC---CGGGGAGAACAGGCCATT  
CGCCAGGGCGATTCTGAAATCGCGGAAGTTTGGTTTGATCAAGCCGCTCAGTATTGGA  
AACAGGCTATCGCACTTACTCCTGTAATTATATTGAAGCACACAATTGGTTGAAGATC  
ACGAGACGTTTCGAA-----ATGATTTGTCGATCAGAACATATATGGATAGAACTTATAAC  
GGGGTCTCGAAAATTAAGTAATTTTGTGGCTCTTATCATTTTTTTAGGTTTCATTAGG  
ATTCGTATTGGTTGGTATTCCAGTTATCTTGGTAGAAATTTGATATCGTTTGTCCGTCT  
CAGCAGATCTTTTTTTTCCACAAGGGATCATATGTCTTTCTACGGGATCGCGGGTCTC  
TTATTAGTTCCTATTTGTGGTGCACAATCTACTGGAATGTAGGTAGTGGCTATGATCGA  
TTCGATAGAAAGGAAGGACTTGTGTGATTTTTTCGTTGGGGATTTCTGGAAAAAATCG  
TCGCATATTCCTCCGATTCTTTATAAAAGATATCAATCCGTTAGAATAGAAATTAAGGA

GGGTATTTATGCTCGTCGTATCCTTTATATGGGCATCAAAGGCAGGGAGGCTATTCCGCT  
GACCCGTA CTGATGATAAT--TTGACTACCCGAGAAATTGAACAAAAGGCCGCGGAATT  
GGCCTATTTCTTGCGCGTACCCATTGAAGTCTTT

>Picea

ATAAGGGAGTGGTTC-----ATAACTGGATTACTAAAAAAT-----TCGGTTCGAAAG  
G-----GATAGTAAGGAC-----GTCAATGAGATGGAGAGGAACAAGAAT-----  
-----CTAAGTA  
TTGATTACGTAAA-----  
-----  
-----

-----ATTAATAGATTATGGGTTCAATGCGATAATTGCGAGAGCTTGCTCTATATCAG  
ATTCTTGAGAGAGAATAAAAGTGTGGTGAAGAATGTGGATATTATCTGCAAATGAATA  
GTTTCAGATAGAATAAGAACTTCTAATTGATCGCGGCACTCGGCATCCTATGGATGAAGAC  
ATGTACTACTAGATGTTCTTCAATTTCAATTCTGAGGATGAATCTTATAAGGATCATATCA  
CTTTCTGTCAAATAGAGACAGGTTTAACTGATGCTATTCAAACAGGCATAGGTCAATTA  
AATGGTCTTCCATCGCACTCGGAGTTATGGATTTTAAAGTTCATGGGAGGTAGTATGGGC  
TCTGTAGTAGGCGAGAAAATAACCCGTCTGATCGAGCGCGCTACCGAGGAATCTCTTC  
CAGTCATTATGGTGTGTGCTTCCGGAGGAGCACGCATGCAAGAAGGAAGTTTTAGTTC  
AATGCAAATGGCTAAAATAGCTTCTGCGTTATATATTCATCAGAAGGATAAAAGGTTGTT  
ATATGTATCGATTCTGACGTCTCCGACAACCCGGTGGAGTTACTGCTAGTTTTGGCATGTT  
GGGAGATATCATTATTGCCGAACCTAAAGCGTACATTGCATTTGCAGGTAAAAGAGTAA  
TCGAACAGACATTAGGTCAGAAAGTGATTGAAGATTTTCAGGTGACTGAGCATTATTT  
GGCCATGGTTTATTTGATCTGATCGTTCCACGTAATCTCTTAAAAGGTGTTCTAAGTGAA  
CTATTTACGCTTTACAGTCCT-----CGTAAAGAAAAAAAATGAACATGGGAAATATTCG  
ACTCGACGAAATTAGTAGTATTATACGGAAACAGATCGAACAATATAACAACGAAGTAA  
GAGTTGGTAATCTTGGCACCCTACTTCAAGTAGGAGATGGCATTGCTCGTATTCATGGT  
CTTGATGAAGTAATGGCAGGGGAATTAGTTGAATTTGGAGATGGTACAATAGGCATTGC  
CCTAAATTTGGGATCGGATAATGTTGGAGCTGTATTAATGGGCGATGGCTTGATGATACA  
AGAAGGCAGTTCCGTGAGAGCAACGGGAAAAATTGCTCAGATACCAGTAAGTGATGC  
GTATTTGGGTCTGTTGTAAATGCTCTAGCCCAACCCATTGATGGCAAGGGTCAAATTT  
CAGCTTCCGAATTTGACTGATTGAATCTCCCGCCCCAGGTATTATATCAAGACGTTCCG  
TATATGAACCCCTTCAAACGGGGCTTATTGCTATTGATTCTATGATTCCTATAGGACGTG  
GTCAGCGAGAATTAATTATTGGGGACAGACAGACCCGGCAAGACAGCAGTAGCTACAGA  
TACTATTCCTAATCAAAGAGTCAAATGTCATCTGTGTCTATGTAGCAATTGGTCAA  
AAGCTTCTTCCGTGGCTCAGGTAGTTAATACATTCCGAGAACGTGGCGCAATGGAATAT  
ACCATTGTGGTAGCGGAACTGCGGATTCTTCCGCTACATTACAATATCTCGCTCCTTAT  
ACAGGGGCAGCTTTGGCTGAATACTTCAATGATAAGAAACAACATACATCAATCATTAT  
GATGATCTCTCAAACAGGCACAAGCTTATCGACAAATGTCTCTTCTATTAAGAAGACC  
ACCTGGTCGAGAAGCTTATCCGGGAGATGTTTTCTATTTGCATTCCCGTCTCTCGGAAA  
GAGCAGCTAAATTAAGTTCCAGTTAGGTGAGGGGAGTGTTACTGCTCTACCAATAGTT  
GAGACTCAAGCTGGAGATGTTTCAGCTTATATTTCCACTAATGCAATTTCCATTACCGAT  
GGACAAATATTTTCATCGGCCGATCTATTCAATGCCGGAATCCGACCTGCTATTAATGTG  
GGTATTTCCGTATCTAGAGTAGGATCCGCGGCTCAGATAAAAGCTATGAAAAGGTAGC  
TGAAAATTGAAATTAGAGTTAGCTCAATTTGCAGAGTTGGAAGCTTTTGCACAATTTG

CTTCCGATCTTGATAAAGCTACTCAAGATCAGTTGGCAAGGGGTCAACGATTACGTGA  
GTTGCTCAAACAATCTCAGGCGGCTCCTTTGAAAGTAGAAGAACAAATAGCTACTATTT  
ATACCGGAACGAATGGATACCTGGATATATTAGAGATAGCACAGGTGAGAAAATTTCTC  
GTTCCGTTACGCGAGTATTTGATAAAGAATAAACCTCAGTTCGGAGAAATTATACGTTCT  
TACTGGTACATTTACGGAAGAAGCGAAAGCCCTTCTGGAAGAGGCTCTTAAGGAACAT  
ACTGAACTTTTTGTACTTCAAGAACAAAAGATGAGAACCAATCCTCTTGTTCTT-----  
GTTTCCGCACTTGTAGAAAAAATGTGGGACGTATAGCTCAAATCATTGGCCCAGTACT  
GGATGTCTCTTTTCTCCAGGTAATATGCCTAATATTTACAATTCATTAATAGTTAAGGGT  
CAAGGTACAGCCGGTCAGGAAATTCAGGTTACTTGTGAGGTACAGCAATTATTAGGAA  
ATCATAAGGTTAGAGCTGTAGCTATGAGTGCTACAGATGGTTTGACGAGAGGAATGAG  
AGTGATTGACACGGGAGCTCCTCTGAGTGTTCCAGTTGGTGGAGCTACTCTCGGACGA  
ATTTTCAATGTTCTTGCGAACCTGTTGATAATTTGGGTCCTGTAGATGCTCGCATAACA  
TCTCCTATTCATAGATCTGCTCCCGCCTTTACAGAGTTGGATACAAAATTATCTATCTTCG  
AAACAGGCATTAAGTAGTAGATCTTTTGGCTCCTTACCGCCGTGGGGGAAAAATCGG  
TTTATTTGGAGGAGCTGGAGTGGGTAACAGTACTCATTATGGAGTTGATTAACAACA  
TTGCTAAGGCTCATGGAGGGGTATCTGTATTTGGAGGAGTAGGAGAACGTACTCGTGA  
AGGGAATGATCTTTACATGGAAATGAAAGAATCGGGAGTAATTGATGAACAAAACATC  
TCAGAATCAAAGTGGCTCTGGTCTATGGTCAGATGAATGAACCACCAGGAGCTCGTA  
TGAGAGTCGGTTTAACTGCTCTAACCATGGCCGAATATTTCCGAGATGTCAATGAGCAA  
GACGTAATCATTATTGATAACATCTTCCGCTTTGTCCAAGCGGGATCAGAGGTATCC  
GCCCTATTAGGTAGAATGCCTTCCGCCGTGGGTTATCAGCCAATCCTTGCCACGGAAAT  
GGGTTCTTTGCAAGAGAGAATTACTTCCACAAAAAGGGGATCGATAACCTCGATTCAA  
GCAGTTTATGTACCTGCTGACGACTTGACTGACCCCTGCTCCTGCTACGACATTTGCACA  
TTTAGATGCTACTACCGTACCATCGAGAGGATTAGCTGCCAAGGGTATCTATCCAGCAG  
TAGATCCTTTAGATTCAACATCGACTATGCTCCAACCTTGGATCGTAGGCGAAGAACAT  
TACGAACTGCACAAGGGGTTAAGCAAACCTTTACAACGTTATAAGGAACTTCAAGACA  
TTATAGCTATTCCTGGACTGGATGAATTATCGGAGGAAGATCGTTTAAATCGTAGCAAGA  
GCAAGAAAAATTGAACGTTTCTTATCACAACCCTTTTTTCGTAGCAGAGGTATTCACAGG  
TTTCCCGGGCAAATATGTTGGTCTCATGGAAACCATTAGAGGGTTTCAAATGATCCTTT  
CCGGAGAATTAGATGGTATTACCGAACAGTCTTTTTTATTTAGTGGGTAACATTGATGAA  
GCTACCGCGAAGGCTATGAACTCCAAAACGGAAAGT-----ATGACCTTAAATCTTC  
GTGTACTGTCTCCTAATCGAGTCATTTGGGATTCAGAAGTTCAAGAAATAATCTTATCTA  
CTAATAGTGGTCAAATTTGGCGTATTACCCAATCATGCTTCACTTGTGGCAGCTGTAGATA  
TAGGAGTTATGAAAATACGTCTTAATGGGCAGTGGTCCACTATGGCTTTGATGGGCGGT  
TTCGCCAAGATAGACAATGATAGAATCACCGTATTGGTAAATAATGCAGAGAGAGATGT  
TGACATCGATCTCAAAGAAGCCCAGGAAACCTTTAAAGTAGCTAAAGCTGACTTAGCT  
CGAGCCGAAGGCAAAGACAAGCAATTGAGGCTGATGTAGCTCTGAAAAGAGCTAGA  
ACACGATTAGAAGCTATCCCC---GTCTCTATGAAAAATGTAATTGATCCTTTCAATTCCTT  
GAGTTATTGGCCTTCCGCTGGGGGTTTCGGGTCAAATACCAATATTTTAGAAACAAATAT  
AATAAATCCAAGTTTGGTGCTTAGTGTACTGATCTATTTTGGAAAGGGA---TTAAGTAAT  
CTATTAGATAACCGTAAACAGAAAAATATTGAATACTATTCGGAATTCGGAAGAACTATGT  
AAAGGAGCTATCGATCAGCTCGAGAAAGCTCGGGCTCGCTTAAGGGAAGTGGAATG  
ATAGCGGGCGAAATCCGGGTAAATGGAGACTCCCAAATAGAACGAGAGAAAGAGGAT  
CTCATCAATGCTGCTTCTGAGAATTTGGAACAATTAGAGGATCCCAAGAATGAGACGG

TTTACTCCGAACAGCAAAGAGCAATTGACCAGATCCGACAACAAGTTTCTCGCCAAGC  
TTTACGAAGAGCTATAGGAACTTTGAATAGTCGTTTGAATACTGAGTTACATTTACGTAC  
GATCGATCACAATATTGGCCTGCTTAGAACCATGATGAACACAAGTGATATGGATCCCTT  
AATTTCTGCTGCTTCCGTTATTGCTGCTGGATTATCTGTAGGGCTTGCTTCCATTGGACC  
CGGCGTTGGTCAGGGCACTGCTGCGGGCCAAGCTGTAGAAGGTATTGCAAGACAACC  
AGAAGCGGAAGGTAAAATACGAGGTACCTTACTGCTAAGTTTAGCTTTTATGGAAGCTT  
TAACTATTTATGGACTAGTTGTGGCCCTAGCACTTCTATTTGCGAATCCCTTTGTTATGGA  
TATCGTACGATCTCCTATTAGCACACTGAATCATATCTACGAGATATCCGGTGTGGAGGT  
GGGTCAACATTTTTATTGGCAAATCGGGGGTTTCAAGTTCATGCACAGGTACTTATAA  
CTTCTTGGGTTGTAATTGCTGTCTTATTAGGTTTACAGCTACCATAGCTGTTTCGAGATCCAC  
AAACCATTCCCTACCGGTGGTCAAAATTTTGTGCAATATATTCTCGAATTTTTTCGGGACT  
TGACCAGAACTCAGATTGGGGAAGAATATGGTCCCTGGGTTCCCTTTATTGGAACCTG  
TTTCTATTTATCTTTGTTTCTAACTGGTCAGGTGCTCTTCTTCCCTGGGGAATTATAAAAT  
TACCTCATGGGGAGTTAGCTGCACCTACAAATGATATTAATACTACAGTTGCTCTAGCTT  
TGCTTACGTCAGTAGCATATTTCTATGCAGGTCTTGCAAAGAAGGGGTTAGGTTATTTG  
GTAATATATTAACCAACCCCAATACTTTTACCAATTAACATCTTAGAGGATTTTACAA  
AACCTTTATCACTTAGTTTTTCGACTTTCTGGAAATATATTAGCTGACGAATTGGTAGTTG  
CCGTTCCCTGTTTCTCCGGTACCCTCAGTAGTTCCTATACCTGTAATGTTCCCTGGGATTATT  
TACGAGCGGTATTCAAGCTCTAATCTTTGCAACTCTAGCTGCAGCTTATATAGGCGAATC  
CATGGAGGGTCATCATATGATATTCATAACTTTAGAACATATATTGGCTCACATCTCTTTT  
TCTCTCATTTTGGTTGTCACTCTCATTTATTGGGGAACC---TTAGTTTATCGAATTGAAGG  
ACTAAGTAGTTTCGGGAGGAAAGGGCATGATAGTTACTTTTCTTTGTACAACGGGATTAT  
TAATTAICTGTTGGCTTTATTTCGGGACATTTACCGTTGAGTAATTTGTATGAATCATTTCAT  
GTTCCCTTCCCTGGAGTTCATCCGTGCTCCATATAGTTCTAGAAGTACGGAACCGGGATG  
ATTGGTTAGGTGCAATCACCGCGCCAAGTGCTATGTTAACTCATGGTTTTGCTACTTTAG  
GTCTTCCGGAGGAAATGCAACGATCCGGAATGTTAGTACCCGCGCTACAATCTCATTGG  
TCAATGATGCATGTAAGTATGATATTGTTTACGCTATGCAACCCTTTTATGTGGATCCCTAG  
CATCAATAGCTCTTCTAGTGATTATGTCCGGAGTAAATAGACAGGTTCTT-----TTTGGTG  
AAAAATTTTATTCACATGAAAAACAAAGTGATTTGCAATACACTTTTGATTTTTTCATCAA  
CGAATTATCGTAAATGTCAATTGATTAAACAATTAGATCATTGGAGTTATCGTGCGATTG  
GTCCCGGTTTTTCTCTTTCAACCATAGGTACTCTTTCTGGAGCAATATGGGCCAATGAA  
GCATGGGGATCTTATTGGAGCTGGGATCCAAAAGAGACTTGGGCATTAATTACTTGGAC  
CATATTCGCAATCTATCTGCATACTAGAATGAATAAGGGTTGGCAGGGTGAGGAACCGG  
CAATTGTGGCTTCTTTAGGATTTTCTATAGTTTGGATCCGTTATTTGGGGGTGATCTATT  
AGGAATAGGGTTACACAGCTATGGATGGTTGGAACCA---GTGGCCGAAAAA---GCATCA  
GCTTCCCTACGATATCTTGCATGTTTGTAGTGGTACTGCCTTGGGTCATTCCTATTTTCATTAC  
GGAAAGGTTTGGAAACCTTGGGTTACAAATTGGTGGAAATACGGGTCAATCTCAGAAAAT  
TTTTGATTATCTCCAGGAAGAAAATGTTCTGGGAAGATTTGAGAAAATAGAAGAACTAT  
TCCTGTTAGAAAGAATGGTGGAAAGATTCTTCGGGAACAGATTCAAAGATCTTCGTATA  
GAGATTCACAAAGAAACGATCCAATTGGTCGAAATGTACAATGAAGATTGTATTAAGAT  
AATCTCACATTTATTAACAAATCTAATAGGTTTTGCTTTTATAAGTGCTTATCTCATTCTG  
GGTAAGAATAAACTTGGCATTCTCAATTCTTGGATCCAAGAATCTTCTATAGTCTGAGC  
GATACAATGAAAGCTTTTCTCATTCTTTTAGCAACCGATCTATGTATTGGGTTTCATTCA  
CCCATGGTTGGGAACTGATGATCGATTGATCTCCGAAAATTTTGGCTTTGCCATAA





repeated text block consisting of 40 lines of identical, illegible characters.





TAGCTACTGGTTCTGCTATGACTTTTTACTATCGTCCGACCGTTACAGAAGCTTTTGCCT  
CTGTTCAATACCTAATGACCGAAGTGAAC TTTGGTTGGTTAATCCGATCCATCCATCGAT  
GGTCGGCAAGTATGATGGTTCTGATGATGATCCTGCACGTATTCCGTGTTTATCTCACAG  
GTGGATTCAAAAAACCCCGTGAATTAAC TTTGGGTCACGGGTGTAATTTTGGGTGTGCT  
GACCGTATCTTTCGGTGTAACTGGTTATTCTTTGCCCTGGGATCAAATTGGTTATTGGGC  
AGTGAAAATTGTGACTGGTGTGCCTGAGGCTATTCCCTGTAATAGGATCTCCTTTGGTAG  
AGTTATTACGCGGAAGTGTTAGCGTGGGTCAATCTACCTTGACCCGTTTTTATAGTTTAC  
ACACTTTCATATTACCCCTTCTTACTGCTGTATTTATGCCAATGCACTTTCTAATGATCCG  
TAAGCAGGGTATTCCAGGTCCTTTAATGGGAGTAACAAAGAAACCTGACCTGAATGAT  
CCTGTGTTAAGGGCTAAATTAGCTAAAGGTATGGGACATAATTATTATGGAGAGCCCGC  
TTGGCCAATGATCTTTCATATATTTTCCAGTAGTAATTTTAGGTA CTATTGCATGTACA  
ATAGGTTTAGCGGTTCTAGAACCATCAATGATTGGTGAACCAGCAAATCCATTTGCAAC  
TCTTTGGAGATATTGCCGAATGGTATCTTTCCCTGTATTCCAAATACTTCGTACAGT  
ACCTAACAAATTATTAGGTGTCCTTTTAATGGCCTCAGTACCCGCGGGATCATTGACAG  
TGCCTTTTCTAGAGAATGTGAATCAATTTCAGAATCCATTTTCGTTCGTCCAGTAGCTACA  
ACAGTATCCTTGATCGGTACTGCAGTAGCCCTTTGGTTAGGCATTGGGGCAGCGTTACC  
TATTGATGAATCTTTAACTTTAGGTCTTTTCATGATTGAGGCTTTGCCATCCGGAATTGT  
GTTAGGTCTAATTCCATAACTTTGGCCGGATTATCCGTA ACTGCATATTCACAATACCG  
ACGTGGTGATCAATTGGATATTACGCCTACTATAACTAGTTATTTCCGTTTCTTATTGGCT  
TCTATCATTTTACCCTAGTCCTATTCTATTAGCTCGAGCAAGATACA ACTTATTATGGATA  
TAGTCGGTATAACTTTGGGCTGCTTTAATGGTAGTTTTTACATTTTCCCTTTCACTCGTAGT  
ATGGGGGAGAAGTGGATTAATGATCATTTCGTTACCCGGAACCAGAAGTCAAGGTCGTA  
GTAGAGAGGGATCCTGTCAAAACCTCTTTTGAAAAATGGGCCAAACCTGGGCATTTCT  
CAAAGACGCTAGCTAAAGGCCCTGATACTACCCTTGGATCTGGAATTTACATGCTGAT  
GCTCACGATTTTGATAGTCATACTGATGATTTGGAAGATATTTCTCGCAAAGTATTTAGC  
GCTCATTTTGGTCAACTAGCCATCATCTTTATTTGGTTAAGTGGGATGACTTTCACGGC  
GCTCGTTTCTCCAATTATGAAGCATGGCTGGGTGATCCCACTCACATAAAACCCAGTGC  
CCAAGTAGTTTGGCCAATAGTAGGTCAAGAAATATTGAATGGGGATGTAGGTGGAGGT  
TTTCGAGGGATACAAATAACCTCTGGGTTTTTCCAGCTTTGGCGAGCATCTGGAATAAC  
CAGTGAATTGCAACTTTACTGCACTGCAATTGGTGCATTGATCTTTGCAGCGTTAATGC  
TTTTTGCTGGTTGGTTTCATTATCACAAAGCTGCTCCAAAATTGGCTTGGTTCCAGGAT  
GTAGAATCCATGTTGAACCATCATTTAGCAGGGTACTAGGACTTGGGTCTCTAGGTTG  
GGCAGGACACCAAATACACGTCTCTTACCCATTAACCAACTTCTAGACGCTGGAGTG  
GATCCTAAAGAGATAACCACTTCTCATGAATTTATTTTGAATCGCGATCTTTTGGCTCAA  
CTTTATCCCAGTTTTTGCGAAGGGATTGACCCCATTTTTTACCCTGAATTGGTCGGAATAT  
TCAGACTTTTTGACTTTTCGTGGAGGATTAATCCAGTAACGGGGGGTCTGTGGCTGA  
CCGATACTGCGCATCATATTTGGCTATTGCAGTTCTTTTCTGATAGCCGGTCATATGTA  
TAAGACCAATTGGATCATTGGCCATAACCTCAAGGACATTTTAGAAGCTCATAAAGGTC  
CATTTACGGGGGAGGGCCATAAAGGTCTTTACGAGATCTTAACTACCTCATGGCATGCT  
CAATTAGCTATTAACCTAGCTCTTTTAGGATCTTAACTATTGTTCGTAGCTCACCACATGT  
ATGCGATGCCCCCTATCCATACCTAGCTATTGACTACGGTACCCA ACTCTCTCTGTTCA  
CACATCATATGTGGATTGGTGGGTTTATCATAGTTGGTGCTGCTGCACATGCAGCGATTT  
TTATGGTAAGAGACTATGATCCA ACTACTCAATACAACAATTTATTAGATCGCGTTCTTA  
GACATCGTGATGCAATTATATCACACCTCAACTGGGTATGTATATTCTTAGGCTTCCATAG

TTTTGGTCTGTATATTCATAATGATACTATGAGCGCTCCAGGACGTCCTCAAGATATGTT  
CTCAGATACTGCTATAACAATTACAACCTATCTTTGCTCAATGGATACAAAACACTCATGC  
TTCAGCACCTGGTTCAACAGCTCCCGGTGCAACAGCGAGTACCAGTTTAACTGGGGA  
GGTGGTGATTTGGTGACAGTAGGTTCCAAAGTGGCTTTGTTACCAATTCCATTAGGAAC  
CGCGGATTTTTTGGTACATCACATTCATGCATTTACTATCCATGTGACTGTTTTAATCCTA  
CTTAAAGGTGTTCTATTTGCCCCGTAGCTCCCGTTTAAATACCCGATAAAGCGAATCTTGGT  
TTTCGCTTTTCCTTGTGATGGACCCGGGAGAGGAGGAACATGTCAAGTATCTGCCTGGG  
ATCATGTTTTCTTGGTTTATTCTGGATGTACAATGCAATTTTCGGTAGTAATATTCCATTT  
CAGCTGGAAAATGCAGTCCGATGTTTGGGGTAGTATAAGTGATCAGGGAGTGGTAACT  
CATATTACGGGAGGAACTTTGCACAGAGTTCCATTACGATTAACGGGTGGCTCCGTGA  
CTTTCTATGGGCACAAGCCTCTCAAGTAATCCAATCTTATGGTTCTTCATTATCTGCATAC  
GGTCTTTTTATTTTTAGGTGCTCATTTTTATTTGGGCGTTTAGTTTAAATGTTCTTATTCAGCG  
GCCGTGGGTACTGGCAAGAACTCATTGAATCTATCGTTTGGGCCATAACAAATTGAAG  
GTTGCTCCTGCTATCCAGCCAGAGCCTTGAGCATTGTACAGGGACGTGCTGTAGGAG  
TAGCTCATTACCTTCTGGGTGGAATCGTCACAACATGGGCGTTCTTCCTGGCAAGAATT  
ATTGCAGTAGGAATGGCATCAAGATTTCCAAAGTTCAGCCAAGGCTTGGCCAGGACC  
CAACTACTCGTCGTATTTGGTTCGGTATTGCGACCCGCACATGACTTCGAGAGTCATGAT  
GATATTACCGAAGAACGCCTTTATCATAAAATTTTTGCTTCCCACTTTGGTCAGTTGGCT  
ATAATATTTCTGTGGACCTCTGGTAATTTGTTCCATGTGGCTTGGCAAGGCAATTTTGAA  
GCATGGGTACCGGATCCCTTACATGTAAGACCCATTGCTCATGCAATTTGGGATCCCTCAT  
TTTGGTCAACCAGCTATAGAAGCCTTTACCCGGGGAGGTGCTCCCGGTCCGGTCAATAT  
TGCTTATTCGGTGTTTATCAGTGGTGGTATAACAATCGGCTTACGCACTAACGAAGATCT  
TTATGCTGGAGCTCTTTTCTTGCTATTTGTTTCTGCCATTTTTTTAATAGCGGGTAGATTA  
CATCTACAACCTAAATGGAGACCCAGTGTTTCATGGTTCAAAAATGCCGAATCCCGTCT  
TAATCATCATTTGTCAGGACTCTTCGGAGTCAGTTCTCTAGCTTGGACAGGGCATTTAG  
TTCATGTCGCTATTCCTGAATCAAGGGGAGAGCATGTAAGATGGGATAATTTTTTGAAT  
GTATTACCGCATCCCCAAGGGTTAGGACCGCTTTTCACAGGTCAAGTGAATCTTTATGC  
TCAAAATCCTGATTCAGTAGTCACTTATTTGGTACCTCCCAAGGGGCGGGAAGTCTGCTA  
TTCTAACTCTTCTCGGAGGATTCCATCCACAACTCAAAGTTTGTGGCTGACTGATATG  
GCTCATCATCATTTAGCTATTGCATTTGTTTTTCAATTGCTGGTCATATGTATAGAACTA  
ACTTTGGTATTGGTCACAGTATGGAAGATATTTTGGAGGCACATGTTCTCCAGGAGGC  
CGATTAGGACGCGGACATAAGGGTCTTTATAACACAATCAATAACTCTCTTCATTTCAA  
TTGGGTCTTGCTTTAGCTTCTTTGGGGTTATAACTTCTTGGTAGCTCAACACATGTAT  
TCTTTACCCGCTTATGCATTCATAGCACAAGACTTCACCACCCAAGCTGCATTATATACT  
CATCATCAATACATTGCCGGTTCATTATGACAGGGGCCTTTGCTCATGGAGCTATATTC  
CTCATTAGGGATTATAATCCGGAGCAGAATAAGGATAATGTATTGGCGAGAATGTTGGA  
ACAGAAGGAAGCAATAATATCTCATCTTAGTTGGGTTAGCTTATTACTAGGTTTCCATAC  
CTTGGGACTTTATGTTTATAATGATGTTATGCTTGCTTTTCGGTACTCCAGAAAAACAAAT  
ATTGATCGAGCCCATATTTGCTCAGTGGATAACAATCTGCTCATGGTAAGACCTTATATGG  
TTTCGATGTAATCTTCAACAAGTGGTCCAGCATTTCGATGCAGGTAAGAGCATAT  
GGTTACCTGGTTGGTTAAATGCTATTAATGAT-----ATAATAATTCATTGTTCTTAACAAT  
CGGTCTGGAGACTTTTTGGTTCATCATGCTATTGCTCTAGGTTTGCATACAACTACATT  
GATCTAGTTAAAGGTGCTTTGGATGCGCGTGGTTCCAAGTTAATGCCAGATAAGAAAG  
ATTTTGGTTATAGTTTTCTTGCATGGTCCGGGACGGGGTGGTACTTTCGATATCTCGG

CCTGGGACGCTTTTTATTTAGCAGTTTTCTGGATGTTGAATACTATTGGATGGGTTACTT  
TCTATTGGCATTGGAAGCATATAACGTTATGGCAGGGTAATGTAGCGCAATTTAATGAGT  
CTTCCACTTATTTAATGGGATGGTTAAGAGATTATCTATGGTTAAATTCTTCACAACTTAT  
TAATGGATAACAATCCTTTTCGGTATGAACAGTTTATCTGTTTGGGCGTGGATGTTCTTATT  
CGGGCATCTTGTTTGGGCTACTGGATTTATGTTCCCTGATTTCCCTGGCGTGGATATTGGCA  
GAACTGATCGAAACTCTCGCATGGGCCCATGAGCGCACACCTTTGGCTAATTTAGTTC  
GATGGAGAGACAAGCCAGTAGCTCTTTCCATTGTTCAAGCACGATTAGTTGGATTAGCT  
CACTTTTCCGTAGGTTATATATTTCACTTATGCAGCTTTTTTAATTGCCTCTACATCAGGTA  
AATTTGGTATGGCACATTCGGTCAAAATTTATGATACATGTATTGGTTGTACCCAATGCG  
TACGAGCTTGTCCACAGATGTATTGGAAATGATACCTTGGGAAGGATGTAAAGCTAAG  
CAAATTGCTTCTGCTCCAAGAACAGAAGACTGCGTAGGTTGTAAGCGGTGCGAATCCG  
CTTGTCCAACAGATTTCTTGAGTGTACGTGTTTATTTATGGCATGAGACAACGCGCAGT  
ATGGGTCTAGCTTACATGATAATTCCTAACCTACCTTCTTTTTTTCGTGCCTTTAGTCCGGCT  
TATTACTTCCGGCAATTACAATGGTTCTTTTCCATCTGTATATTCAGAATGACGATATTTT  
TATGCAAGATCTAAAGACCTATCTTTCCACAGCGCCTGTGTTAGCTATTTTCATCGTTCAT  
TTTTTTAGCCGGTCTATTGATAGAAATCAATCGTTTTTTTTCCAGATGCTCTTACTTTTGCT  
TTTTTT-----ATGACCGCAATTATAGAAAGACGCGAAAGCGCAAATTTATGGGGTTCGCTT  
CTGCGACTGGATCACTAGCACCGAAAACCGTCTTTACATTGGATGGTTCGGTGTTTTGA  
TGATCCCTACCCTATTGACCGCAACCTCTGTATTCATTATTGCTTTCATCGCAGCTCCTCC  
GGTAGATATTGATGGTATTTCGTGAGCCCCTTCCGGTTCCTTCTTTATGGAAACAATAT  
TATCTCCGGTGCCATTATTCCTACCTCTGCAGCTATCGGTTTGCACCTTCTATCCCATCTGG  
GAAGCAGCTTCCGTGATGAATGGCTATAACAACGGGGTTCCTTACGAGCTAATCGTTCT  
ACACTTCTACTTGGTGTAGCTTGTATATGGGTTCGTGAGTGGGAGCTTAGCTTCCGTC  
TAGGTATGCGTCCCTGGATTGCTGTTGCATACTCAGCTCCTGTTGCAGCTGCTACTGCC  
GTTTTCTTGATCTACCCTATTGGTCAAGGAAGCTTCTCTGACGGTATGCCTCTAGGAATC  
TCTGGTACTTTCAATTTTCATGATTGTATTCCAGGCTGAGCACAAATATCCTTATGCATCCAT  
TCCACATGTTGGGTGTAGCTGGTGTATTCCGGCGGCTCTCTATTTCAGTGTATGCATGGTT  
CTTTGGTAACTTCTAGTTTGATCAGGGAACTACTGAGAATCAGTCCGCAAATGCAGGT  
TACAAATTTGGTCAGGAGGAAGAAACCTACAATATTGTGGCTGCTCACGGTTATTTCCG  
CCGATTGATCTTCCAGTATGCTAGTTTCAACAACCTCCCGTTCTTTACATTTCTTCTTAGC  
TGCTTGGCCCGTAGCAGGTATCTGGTTTACCCTCTAGGCATAAGCACTATGGCTTTCA  
ACCTAAATGGATTCAATTTCAACCAATCTGTAGTTGACAGTCAAGGTCGTGTAATTAAC  
ACTTGGGCCGATATCATTAAATCGTGCTAACCTAGGTATGGAAGTTATGCACGAACGTAAT  
GCTCATAACTTTCTCTGGATCTAGCTGCTGTTGAATCTATTTCAATAGGTGGAATGGGT  
TTGCCTTGGTATCGCGTTCATACCGTCGTATTGAATGATCCTGGCCGGTTAATTTCTGTA  
CATATAATGCATACAGCTCTAGTTGCTGGTTGGGCCGGTTCAATGACTCTGTACGAATTA  
GCTGTTTTTATGACTCGTTTGGGAATAAAGGATTCATGGACTGGATGGAACATCACC---G  
GAGAAACCGTAATTAATCCTGGTATTTGGAGTTATGAAGGTGTGGCTGGGGCACATATA  
ATGTTTTCTGGTCTGTGCTTTTTGGCAGCTATTTGGCATTGGGTATATTGGGATTTGGAA  
ATATTCTGTGATGAACGTACAGGAAAACCTTTGTTTAGATTTGCCAAAAGTATTTGGAAT  
TCATTTATTCCTCTCAGGAGTAGCTTGTTCGGATTTGGAGCATTTCATGTAACGGGTTT  
GTATGGTCCCTGGGATATGGGTGTCTGATCCTTATGGACTAACTGGAAAAATACAACCAG  
TGGATCCAGCATGGGGAGCTGAAGGTTTTGATCCTTTTTGTTCCGGGAGGAATAGCTTCT

CATCATATTGCAGCAGGTATATTGGGTATATTAGCAGGTCTATTCCATCTCAGTGTTTCGTC  
CTCCCCAACGTTTATACGTAGGATTACGCATGGGGAATATTGAAACGGTCCTATCCAGC  
AGTATTGCTGCTGTGTTTTTTGCAGCTTTCGTTGTTGCCGGAACCATGTGGTATGGCTCC  
GCAACTACTCCGGTCAAAATTTTGGTCCCCTCGTTACCAGTGGGATCAGGGATACTT  
CCAACAAGAAATAGATCGACGGGTTTCGTGCCGGTCTGGCCGAAAATTTGAGCCTATCG  
GAAGCTTGGTCAAAAATTCCCGAAAACTCGCTTTTTATGATTACATTGGTAATAATCC  
AGCTAAGGGGGGGTTATTTCAGAGCAGGTGCGATGGACAATGGAGATGGAATAGCTGTT  
GGTTGGTTAGGACACCCTATCTTCAAAGATAAGGAGGGAAATGAGCTTTTTGTACGTC  
GTATGCCTACCTTTTTTCGAAACATTTCCAGTAGTTCTGGTAGACAAAGAAGGAATTGTG  
AAAGCCGATGTTCCTTTTAGGAGGGCAGAATCAAAGTATAGTGTGAACAAGTAGGTG  
TAACTGTTGAGTTCTATGGTGGTGGACTTGACAGGGTCAGTTTTGGTGATCCTGCTATA  
GTAAAAAATATGCTAGACGTGCTCAATTAGGTGAAATTTTTGAATTAGATCGTGCTAC  
TCTAAAATCCGATGGTGTTTTTTCGTAGTAGTCCAAGGGGTTGGTTTACTTTCGGACATG  
CTACATTTGCTCTCCTTTTTCTTTTCTGGACACATTTGGCATGGTGTAGAACCCCTATTCA  
GAGATGTTTTTGTGGTATCGACCCGGATTTGGATGCTCGAATAGAATTTGGAGCATTC  
CAAAACTAGGAGATCCAATACTAAGAGACAAGTGGTAATGAAAACCTTATATTTCC  
TGAGGAGGTCTACCCCGTGGAAACGCTCTTTAATGGAATATAGCTTTAGCTGGTTCGT  
GATCAAGAAACCACTGGTTTTCGCTTGGTGGGCGGTAATGCCCGACTTATCAATTTGTC  
TGGTAAATTGCTTGGGGCTCACGTGGCTCATGCCGATTAATTGTATTCTGGGCCGGAG  
CAATGAACCTATTCGAAGTGGCTCATTTCGTACCCGAAAAGCCTATGTATGAACAAGGA  
TTGATTCTACTTCCCCATCTAGCTACTCTAGGATGGGGAGTCGGTCTGGTGGGGAAAT  
CGTGGACACTTTTCCATATTTTGTATCTGGGGTACTTCACTTAATTTCTTCTGCGTTTTA  
GGTTTTGGTGGTATTTATCATGCACTCATAGGACCTGAAACTTTAGAAGAATCTTTTCCA  
TTCTTTGGCTATGTATGGAAAGATAGAAACAAAATGACCACAATCTTGGGTATTCACCT  
AATCTTGCTAGGTGTTGGTGCTTTTTCTTCCAGTGCTCAAGGCTTTGTATTTTGGAGGTGT  
ATATGATACTTGGGCTCCCGCGGTGGAGATGTAAGAAAAATTACGAACCCGACTCTTA  
ACCCAAGTGCTATATTTGGTTATTTACTGAAATCTCCTTTTCGGAGGAGAAGGATGGATC  
GTTAGCGTGGACAATCTAGAAGATGTAATTGGAGGACATGTATGGTTAGGTTCCATTG  
TATCTTCGGTGGTATCTGGCATATATTAACCAAACCTTTTGCATGGGCTCGCCGTGCATT  
CGTATGGTCCGGAGAAGCTTATTTGTCCTATAGTTTLAGCGGCTTTATCTCTCTTTGGTTTT  
ATTGCTTGTGTTTTCGTTTTGGTTCAACAATACAGCTTATCCCAGTGAATTTTATGGGCC  
ACCGGCCCAGAAGCTTCTCAAGCTCAAGCGTTTACTTTTCTAGTTAGAGACCAACGTC  
TTGGAGCTAGTGTGGGGTCTGCCCAAGGACCTACTGGGTTAGGTAATAACCTTATGCGT  
TCTCCGACTGGAGAAATTATATTTGGAGGGGAAACGATGCGTTTTTGGGATCTCCGTGC  
TCCCTGGTTGGAACCCCTAAGAGGCCCTAATGGTTTGGACCTGAGCAAGTTGAGAAAA  
GACATACAGCCTTGGCAGGAACGACGTTCCGGCAGAATATATGACTCATGCTCCTTTAGG  
TTCTTCAAATCTGTGGGTGGTGTAGCTACCGAAATCAATGCGGTGAATTATGTCTCTCC  
CCGAAGTTGGTTAGCCACCTCCCATTTTCGTTCCAGGATTTTTCTCTTTCGTAGGTCATTT  
GTGGCATGCGGGAAGGGCTCGTGCAGCTGCAGCAGGATTTGAGAAAGGAATTGATCG  
TGATTTCGAACCTGTTCTTTCCATGACTCCTCTTAACATGACTGTAGCCCTTGGAAAGT  
CTTCTAAAGAAGAAAAAATTTTATTTCGATACTGTTGATGACTGGCTACGCAGAGACCG  
TTTCGTTTTTGTGGGTTGGTCCGGTCTATTGCTCTTTCCTTGTGCCTATTTTGCCTTAGGT  
GGATGGTTTACGGGTACAACCTTTGTGACTTCATGGTATACTCACGGATTGGCCAGTTC  
CTATCTGGAAGGTTGTAATTTCTAACTGCCGCAGTTTCTACTCCTGCTAATAGTTTACG

ACATTCTCTGCTGCTATTATGGGGTCCCGAAGCACAAGGAGATTTACTCGTTGGTGTC  
AATTAGGTGGTCTATGGACCTTCGTTGCTCTTCATGGTGCTTTCGGTCTAATAGGTTTCA  
TGTTACGTCAATTTGAACTTGCTCGATCTGTACAATTGCGACCTTATAATGCAATTGCAT  
TCTCTGCTCCAATTGCTGTCTTTGTTCCCTGTATTTTTGATCTATCCATTGGGCCAGTCCG  
GTTGGTTTTTCGCACCTAGTTTTGGTGTAGCAGCTATTTCCGTTTTATCCTCTTCTTTC  
AAGGTTTTTCATAATTGGACCTTGAATCCATTTATATGATGGGAGTTGCCGGAGTATTGG  
GTGCTGCCCTTCTATGTGCTATTCATGGTGCTACCGTGGAATACTTTATTTGAAGATG  
GTGATGGTGCAAATACGTTCCGTGCTTTTAACCCGACTCAAGCTGAAGAGACTTATTCC  
ATGGTCACTGCTAACCCTTCTGGTCCCAGATTTTTGGGGTTGCTTTTTCTAATAAACGT  
TGTTACATTTCTTCATGTTATTTGTGCCAGTGACCGGTTTCATGGATGAGTGCCATTGGA  
GTAGTTGGTCTAGCTCTAACTTACGTGCCTATGATTTTTGTTTTCCAGGAGATCCGTGCA  
GCAGAAGATCCTGAATCTGAGACTTTCTACACTAAAAATATTCTCCTGAACGAAGGTAT  
TCGTGCTTGGATGGCGGCTCAAGATCAGCCTCATGAAAACCTTATATTCCCTGAGGAGG  
TCCTACCCCGTGGAACGCTCTTATGTCTGGGAATACGGGAGAACGCTCCTTTGCTGAC  
ATTATTACTAGTATTAGATACTGGGTTATCCATAGCATTACCATACCTTCTCTATTTATTGC  
AGGTTGGTTATTTGTCAGCACGGGTTTGGCTTATGATGTGTTCCGGGAGCCCCCGGCCGA  
ATGAGTATTTACAGAAAGTCGACAAGAGGTTCCATTAGTAACTGGCCGTTTCGATTTCG  
TTAGAGCAACTCGATGAATTTACTAGATCTTTTATGACTATAGATAGAACTTATCCGATTT  
TTACAGTTAGATGGTTGGCCATTCACGGGCTAGCTGTCCCTACAGTTTTTTTTCTCGGGAT  
CAATATCGGCAATGCAGTTCATCCAGCGAATGGCTACACAGACCATTGATGATACTTCC-  
--AAAACCACGCCAAGAGCAACCGGTGTAGGAACGTCTTAAAACCGCTTAATTCGGAA  
TATGGTAAAGTAGCTCCTGGATGGGGAACACTCCTCTTATGGGTTTTACAATGGCTCTA  
TTTGCAGTATTCCTATCTATATCTTGGAGATTTATAATCTTCCGTTTTATTGGACGGGAT  
CCCGTTAGTATGCTTACTCTTAAGCTGTTCGTTTACACAGTAGTGATATTTTTCATTTCT  
CTTTTTATCTTTGGATTTCTATCGAACGATCCAGGACGTAATCCCGGACGTAAAGAAAT  
GGCCGATACCACTGGAAGGATCCCTCTTTGGTTGATAGGTAAGTAACTGGTATTATCGT  
GATTGGTCTACTGGGTATCTTTTTCTATGGTTCATATTCGGATCAGGGTCATCCCTAATG  
CCAGTTATG-----CTCAATATTTTTCTAGATGATGCCTTTATCTATAATATCTTT---TTTGG  
AAAATTACCTGAGGCTTATGCGATTTCCGATCCAATTGTTCGATGTAATGCCAATTATTC  
TGTTCTCTCTTTCTCTTAGCCTTTGTTTGGCAAGCTGCTGTAAGTTTTCGAATGACACA  
ATTGAATCCGAACAACCAAAATGTTGAATTGAATCGTACCAGTCTCTACTGGGGGTTGC  
TACTAATTTTTGTACTTGCTGTTCTATTCTCTAATTATTTGTTCAATATGGAAGTAAATAC  
CCTTGCATTTATTGCTGTTCTACTGTTCCCTTGCAATTTCTACTGCTTTTTCTATTTATCCCT  
ACGTAAAAACGGCCAGTGCAAGTAACATGGAACTGCAACCTTAGTCACCATCTCCAT  
ATCTTGTTTACTTGTGAGCTTTACTGGTTATGCCCTATACACCGCCTTTGGGCAACCCCTC  
TGAACAACCTTAGGGATCCTTTTGGAGATCACGAGGACATGGAAGCATTGGTTTATACAT  
TCCTGTTGGTATCGACCCTAGGGATAATCTTTTTCGCTATTTTCTTCCGAGAACCACCCA  
AAATTCCGAATAAAGGGGGGAAAAATGACTATTGCTTTCCAATCGGCTGTGTTTGCATTA  
ATTGCTATTTCATTTTACTAGTGATTGGTGTACCTGTTGCACTTGCCTCTCCCGATGGTT  
GGTCAAGTAGCAAAAATGTTGTATTTTCGGGTGTATCATTATGGATCGGATCAGTCCTTT  
TTGTAGGTATCCTTAATTTCTTTCATATCT-----ATGTCACCAAAAACAGAGACT  
AAAGCTAGTGTTCGGATTTAAAGCTGGTGTAAAGATTACAGATTAACCTTATTATACTCCT  
GAATATCAGACCAAGATACGGATATTTTGGCAGCATTCCGAGTAACTCCTCAACCAGG  
GGTGCCGCCGAGGAAGCGGGAGCAGCAGTAGCTGCTGAATCTTCCACCGGTACATG



GACCACTGTTTTGGACCGATGGACTTACTAGTCTTGATCGTTACAAGGGGCGATGCTATG  
ACATCGAGCCCGTTGCTGGAGAGGAAAGTCAATTTATTGCCTTTGTAGCTTACCCCTTA  
GACCTTTTCGAAGAAGGTTCTGTTACTAACTTGTTCACTTCCATTGTAGGTAATGTATTT  
GGATTCAAGGCCCTACGGGCTCTACGTTTGGAAAGATTTGCGGATTCCCCCTGCTTATTC  
CAAAACATTTCAAGGTCCACCTCATGGTATCCAAGTTGAAAGAGATAAATTGAACAAAT  
ATGGCCGTCCTTTATTGGGATGTACTATCAAACCAAATTTGGGTCTATCGGCCAAGAAC  
TATGGTAGAGCAGTTTACGAATGTCTCCGTGGTGGACTCGATTTTACCAAGGATGATGA  
GAACGTAAATTCCCAACCATTCATGCGCTGGAGAGATCGTTTTGTCTTTTGTGCGGAAG  
CAATTTATAAAGCTCAGGCTGAGACGGGTGAAATTAAGGGACATTACTTGAATGCTACT  
GCAGGTACATGTGAAGAAATGATGAAAAGGGCAGTATTTGCAAGAGAATTGGGAGTTC  
CTATCGTTATGCATGACTATCTGACGGGAGGTTTTACCGCAAATACTTCTTTGGCTCATT  
ATTGCCGAGACAACGGCCTACTTCTTCACATTCACCGCGCGATGCATGCAGTGATTGAC  
AGACAAAAAATCATGGTATGCACTTCCGTGTACTGGCTAAAGCATTGCGTATGTCCGG  
TGGAGATCATATTCACGGCGGTACTGTAGTAGGTAACCTTGAAGGGGAACGAGAAATC  
ACTTTAGGGTTTTGTTGATCTACTGCGTGATGATTTTATCGAAAAAGATCGAAGTCGTGG  
TATTTACTTCACTCAAGATTGGGTATCTATGCCAGGTGTCCTGCCCGTAGCTTCAGGAG  
GTATTCACGTTTGGCATATGCCTGCTCTGACCGAGATCTTTGGGGATGATTCCGTACTAC  
AGTTTGGTGGGGGAACCTTTGGGACACCCTTGGGGAAATGCACCTGGTGCAGTAGCTAA  
TCGAGTTGCTCTAGAAGCTTGTGTACAAGCTCGTAATGAAGGACGTGATCTTGCTCGTG  
AAGGTAATGAAGTGATCCGTGAAGCTAGTAAATGGAGTCCTGAAGTAGCTGCTGCTTG  
TGAAATATGGAAGGAGATCAAATTTGAATTTGAGGCAGTAGATAACAATT-----ATGGCCA  
TCCGTTTATATAGAATTTTAACTCCGGATACACGCAATAGATCTGTATCAGGTAGAGTGC  
AGTTGGACCCGCAGAAGAAATTGACCTCTGGACAGCATCATTGTGGGAAAGGTGCTAA  
TGGAAGAGGAATTATTACCGCAAGACACAGGGGAGGGGGTACAAGCGTCTGTATCGT  
CAAATTGATTTTCGACGGGATAAGGAACACATATCGGGAAAAATTGTAACCATAGAATA  
CGACCCTAATAGAAGTGCATACATTTGCAAGGTGCACTACAAGAATGGCGATAAGATGT  
ATATTCTGCATCCCAGAGGGGTGATGATTGGAGATACTATTCTTTCTGGTCCAAAAGCTC  
CTATATCAATAGGAAATGCCCTACCTCTGACCAATATGCCCTTAGGCACGGCTATACATA  
ACATAGAAATAACACTTGGAAAGGGTGGACAATTAGCTAGAGCGGCAGGTGCTGTAGC  
AGAACTTATCGCAAAAAGAAGATCGATCGGCCACATTAAGATTACCATCTGGAGAAGTT  
CGTTTAATATCTGAGAAGTCTGCTCAGCAACAATTGGACAAGTGGGTAATATAACTGCAAA  
CAATAGAAGTTTCGGTAAAGCCGGAGCTAAACGTTGGTTGGGTAAGCGTTCTGAGGTA  
AGAGGAGTAGCTATGAACCCTGTAGACCATCCTCATGGAGGTGGAGAAGGAAGAACC  
CCAATTGGCAGGAAAAAACCCGTGACCCCTGGGGCTATAGTGCCTTGGAAAGAAA  
AGTCGGAAGAGGAATAGGTACAGTGATGCTTCAATCCTTCGTCGACGTGAG---ATGATT  
CAGTCTCAAACCTATTTGAATATAGCGGATAACAGTGGAGCCCGAAAAATAATGTGTAT  
TCGAGTTCTAGGAGCAAGT--AATCGTAAATGTGCTCATATAGGTGATGTTATCATTGCTA  
TAATTAAGAAGCAGTACCTAACATGCCCTGGAAAAATCGGAAGTGGTTAGAGCCGT  
AGTTATACGCACCTGTAAAGAATTTGAACGTGACAATGGAATGATGATACGATCTGATG  
ACAATGCAGCAGTTGTCATTGATCAGGAAGGAAATCCAAAAGGAACTCGAGTTTTTGG  
TCCGTTGCTCAGGAATTGAGACAATTTGAATTTACGAAAATAGTTTCATTGGCTCCCG  
AAGTATTAATGCTTAGTCCAAAAGAACAATTTTCGTAAACAACATAGGGGAAGAAT  
GAAAGGAGTATCTTATCGCGGCAATCGCATTTGTTTCGGTAGATTTCGCTCTTCAAGCAC  
TTGAACCTGCTTGGATCACATCTGGGCAGATAGAAGCCGGACGAAGAACGATTACTCG

TTATGCCCGTCGTGGCGGAAAAATATGGGTACGTATATTTCCCGACAAACCTATTACAAT  
GAGACCTGCAGAAACACGTATGGGTTCGGGAAAGGATCTCCCGAATATTGGGTATCC  
GTCATCAGACCAGGTTCGAATACTTTATGAAATGGGTGGAGTATCTGAAACCGTCGCTAG  
AGCAGCTGCTAGAATAGCTGCATACAAAATGCCTATACGTACTCAATTTGTTACTACT---  
ATGACCAGAGTGAAACGTGGATATATAGCTCGAAAACGTGGGAAAAAGATTCTTGCAT  
TTGTATCAGGCTCTCGAGGGGCCATTTCGAAACTTTTTTCGAACTGCTAACCAACGGAA  
AGCTAGAGCCTTAGTTTCCGCCACCGAGATAGAGGTAAACGCAAGAGAGATCTTCGT  
CGTTTGTGGATTACTCGAATTAATGCAGCAGCCCGTGCCAAT-----GTCTCTTATAAC  
AGATTCATCCAATATTTGTACAAGAGGCAGTTGCTTCCAAATCGTAAAACACTTGCACA  
AATAGCTGTATTAGATAGTAATTGCTTTTCCACCATCTTGAAGAACTTATCGTGTGATGA  
AATAGGT-----ATGGGAAATGAGATACGAGCTTTGGCGAGAAATATACGTAT  
GTCTGCTCATAAAGCACGTAGAGTAATTAATCAAATTCGTGGTTGTTCATATGGACAAG  
CACTTATGATATTGGAACCTGATGCCTTATGGGGCCTGTTATCCCATATCACAAATTAATTCA  
TTCTGCGGCGGCGAATGCAAATCACAATATGGGTTTGAACAAAGCCAATTTACTCGTCA  
GTAGAGTTGAAGTGAATGAGGGTGCTGTTTTCAAAGGGTTCAACCTAGAGCTCAGG  
GACGTGGTTATCCAATACAGAAACCCACTTGTATATAACTATTGTATTGGAGGAAATCT  
CCAGATCG-----ATGGATGAAGTTAAATATCCAGTACTTACGGAGAAAAGTA  
TTCGTCTATTAGAAAGGAAT---CAATATACTTTTAAACGTCGATTTCGCAATTGAACAAAAC  
AAAGATGAAAATTTGGATTGAACATTTCTTCGATGTTAAAGTAATAGCTATGAACAGTTA  
TCGCCTCCCTGAAAAAGGAGGAAAGAGAGGGTCAATGATAGGACATCCAATACGTTGT  
AAACGTATGATTATTACACTTAAACCCGGTGATTCTATTCCACTCTTTTCAGAACAA-----  
ATGGCAGTTCCAAAAAACGTACTTCTAGATCCAAGAAAAAATTCGTAAAAATGTTTC  
GGAAGGGAAAAGCATATCGGGCCGCAATAAAAGCTTTTTCTTTAGCTAAGTCTATCTCC  
ACCGGTCATTTCGAAAAGTTTTTAT-----GCCAATGATGATATGGCCAAGAGCGGAGATGT  
AAGAGTAACAATTACTTTGGAGTGCACTAGTTGTACCCAAGATAGT-----GTTTATAAAA  
GATTCCCGGGGATTTCTAGATATACGACTCGGAAAAATCGACGCAATACACCTATTTCGA  
TTGGAATCAAATAAATTTTGTCCCTATTGTTACAAGCATAACCATTACGGAGAGATAAAA  
AAAAATGAAAATTCGTGCTTCTATTTCGTAGAATTTGTGGAAAATGTCGACCAATTCGTA  
GACGGAAACGAGTTATGATAATTTGTTCCAATCCGAGACATAAGCAAAAACAGGGGAT  
GATTCGAGATGAAATCTCAGTCTCTATTACGACACTACGATGGAAGTGCATCGAATCCA  
GAGCATAAGTGTGAGCGTCTTCATTATGGCCGTTTTGCTCTATCCCCGCTCCGCAAAGGT  
CGAGCCGATAACAATAGGCATCGCAATGCGAAGAGTTTTACTTGGAGAAGTAGAAGGAA  
CATGTATCACACATGTTAAATTGGAG-----AACATAAACATGAATATTCCGCGATAATAG  
GTATTGAAGAATCAGTACATGACATTTTGTGATGAATCTAAAAGAAATTGTACTTAGAAGT  
GATTCGTACGGAATCCGAGGAGCTTCTATCTGTATCGTTGGACCCAGAAATGTAACCTGC  
TCAAGATATCATATTACCACCTTCTGTGAAAATAATTGATACTACACAACATATAGCTAG  
ACTTACTAAATCAATTACTTCTGATATAAGATTACAAATTGAAAAAATCGCGGATATAT  
TATACATAGTCCAAATAATTATCAGGACGGAATTTTT-----CCTATAGATGCTGTTTTTATG  
CCTGTTTCGCGATGCGAATTATAGTATTCATTCCCTATGGGAGCGGAAATGAAATACGAGA  
AGTCCTTTTCCCTGGAATATGGACGAATGGGGGGTTAACTCCTAGGGAGGCACTTTCC  
GAAGCTTCTCGAATTTTGTATCGAGTTATTTATCCCTTCCTGCATGGAGAGGAACAA-----  
-AACATCGATGGAATGAACAATAGA---AAAGGATCTAATATGCCTCCCTTCCCCCTTTCG  
CACGTATTGACTGATGGGGAAACGAAAGAAAAA-----ATTGCATTTCAACATATTT  
TCATTGACCAATTAGAGTTACCCCCAGAGTCTATAACTGCCTCAGAAGAGCCAATATA

CATACATTATCGGACCTCTTAAATTACAGTCGAGAAGATCTAATGAGAATTGAACGCTT  
CGGGAAGGAATCTGTGCGAACAGGTATTTGAAATTTTACGAAAACGT-----TTTGCAATTG  
ATCCACCCAGGAAT---ATGCGATTAGATGAAAAT--GAGGGAGCGTTTACAATCCCCGAA  
TTTGTAAGATAACAATTTGAAGGATTTTGTGCTTTCATCGATCAGGGCTTGATGGAAGA  
ACTCCATAATTTCCGAAAATTGAGGATACAGATAAAGAAATTGAATCCAGGCTTTTTG  
GTAATGAATATGAATTAGCAGAACCTTTTATAAAAGAGAGAGATGCTGTATATCAGTCCC  
TTACATATTACTCTGAATTATATGTACCAGCAAGATCGATTCGGAGGAATAGTAGTAAGA  
TACAGAAACAACTGTATTTCTCGGAAATATTCCTTTAATGAATCCCATGGAACGTTTG  
TAGTAAATGGAATTTACAGAATCGTGGTGAATCAGATATTAATAAGTCCCGGTATTTATT  
ACCGTTCAGAATTAGACCATAATAGAATAAACATATATACTGGCACTCTGATTTTCAGATT  
GGGGAAGAAGATCGAAATTAGAGATCGATGTGGGAGAAAGGATATGGGCTCGTGTAAG  
CAGAAAACGAAAAATATCTATTCCAGTTCTATTATCAGCTATGGGTTTAAATCTCGAAGA  
GATTCTGGACAATACTCGCTATCCCGAAAAATTTTTCTTTAAGGGGAGGTGGGAGCGG  
GAGGAATATATCTGGTCGAAGGAAAAAGCCATTCTGGAGTTTTATAAAAAACTCTACTG  
TGTAAGTGGCGATTTGGTATTTTCCGAGTCTCTATGTAAAGAATTGCAGGAAAAATTTT  
TCCGACAAAGATGTGAATTGGGAAAGATTGGTCGACGAAATCCGAACCAAAAACTGA  
ATCTTGATATACCCGAGAACGAGATTTTTTCATTGCCACAAGATGTATTGGCTGCTGTGG  
ATTACCTTATCGGAGTGAAATTTGGAATGGGTACACTCGATGAT-----ATAGATCACCTTA  
GAAATCGACGTATTCGTTCTGTAGCAGATTTATTACAGAATCAATTCAGATTAGCTCTAG  
GTCGTTTGGAAAGATGCAGTTTCAAGAACTATAACACAGAGCAACCAAGCGTAGA-----  
--TCAACTCCTCAGAACTTGGTAACTTCAACTCTA-----TTAAAAAACACTTTTCAAG  
ATTTTTTTGGTTCACACCCCTTATCCCAATTTTTAGATCAAATAATCCATTGACGGAAA  
TAGCTCATGGGCGAAAATTGAGCCATTTAGGCCCTGGGGGCTTAACAGGGCGAACTGC  
TAGTTTTCGGACACGGGATATTCATCCAGTTATTATGGGCGTATTTGTCCAATCGATAC  
GTCCGAAGGAATGAATGCTGGACTTGTGCATCATTATCTATTCATGCAAAGATTGGTC  
AGTGTGGT--TCTTTACAAAGTCCATTCTAT-----AAGATCTCTGAGAGATCGAGAGAA  
-----GAACATATGGTTTATCTATTACCGGGAGAAGATGAGGATGAACGGATAGCTACGGG  
AAATTCTTTGGCGTTAAATCAAGGGATTCAAGAGGAACAAATTACTCCAGCTCGATACC  
GACAAGAATTTATAGTTATTGCATGGGAACAAATCCATTTCAGAAGTATTTTTCTTTCC  
AATATTTTTCTGTTGGAGTTTCCCTTATTCTTTTCTCGAACATAATGATGCGAATCGCGC  
TCTAATGGGTTCTAATATGCAGCGTCAAGCAGTTCCACTTTTTCAACCCGAGAAGTGCA  
TTGCCGGAACCTGGGTTGGAAGGTCAAGCAGCTCTAGATTCAGGAAGTGTAGCTATAGC  
TACACAAGAGGGAAAGGATCGAGTATATCGATGCTGTAAATATCACTTCATCGGTTAATG  
GAGACACTGTACGAACAGAATTGGTTATATATCAACGTTCTAATACCAATACTTGTACGC  
ATCAAAAACCTCAAGTTCGTCAAGGGGAATGTGTAAAGAAGGGACAAATTCTGGCGG  
ACGGTGCGGCTACGGTAGGGGGAGAACTCTCTTTGGGAAAAAACGTTTTAGTAGCTTA  
TATGCCATGGGAAGGATACAATTTGGAAGACGCAATACTCATTAGTGAACGTCTGGTAT  
ATGAAGATATTTATACCTCTTTCCATATCGTAAGGTACAGGATTGAAATCTGTATGACGA  
GCCAGGGT--CCTGAAAGAATCACTAGAGAAATACCTCATTAGATGCTCATTCACTTC  
GTCATTTGGACGAAAATGGTCTTGTAAATGCTAGGATCTTGGATAGAAACAGGTGATGTT  
TTGGTAGGTAAATTAACGCCTCAAACAACAGAAGAA---TCATTATGTGCCCCGGAAGG  
AAGATTATTACAAACCATATTTGGTATTGAGGTATCCACTGCGAGAGAAAATTGTCTCA  
GAACACCTATAGGTGGAAGAGGTTCGAGTTATTGATGTGAGATGGATCAATAGAGTAGAT  
--GATTCGGTGATAATGCGGAAACAGTCCACGTATATATATCACAAAAACGTAAGATAC

AAGTGGGTGATAAAGTAGCTGGAAGGCATGGTAATAAAGGTATTATTTCAATAGTTTTG  
CCCAGACAAGATATGCCCTATTTGCAAATGGAATACCAGTTGATATGGTATTGAATCCA  
TTAGGGGTACCTTCACGAATGAATGTAGGACAGATCTTTGAATGTTTGCCCGGTTTACG  
AGGAAACCCGATGAACAAACATTATAGAATAACACCTTTTGACGAAAGATACGAGCGA  
GAAGCTTCGAGAAAAGTAGTGTTCCTGAGCTTTATAAAGCTAGTGAGCAAACAGCTA  
ATCCATGGGTATTCGAACCGGATCATCCTGGAAAACATAGATTAATCGATGGAAGAACA  
GGAGATGTTTTTGAACAACCTGTTACAATAGGAAAAGCTTATATGTCGAAATTGAGTCA  
TCAAGTTGATGATAAAATACATGCACGTTTCGAGTGGACCTTATGCACGGGTTACACAAC  
AACCTCTTAGAGGAAAATCCAAACGAGGGGGCAACGAATAGGAGAAATGGAAGTTT  
GGGCTCTAGAAGGTTTTGGTGTGCTTATATTTTACAAGAGATGCTTACTCTCAAATCTG  
ACCATATTAGAAGCTCGTAATGAAGTACTTGGTGCCATTATCACTGGAGGGCCAATACCT  
AAACCTGACACTGCTCCAGAATCTTCCGATTGCTCATTTCGAGAATTACGATCTTTAGC  
TCTAGAATTGAATCATGCTATTATATCTGAGAAAGACTTTCAGATAGATAGAGAGGAAG  
TT-----ATGATTGACCAGAATAAACATCAACAACCTTCGAATTGGATTAGCTTC  
TCCCGAACAGATTTGTGCTTGGTCCGAAAAAATTTACCTAATGGCGAGATAGTTGGAC  
AGGTGACTAAACCCTATACTCTACATTATGAACTAATAAACCAGAAAGAGATGGATCG  
TTTTGTGAAAGAATCTTTGGACCTATCAAAGTAGGGTTTGTTCCTTGTGGAAATTCTCC  
AGGGATCGGAAATGAGAAGATAGACTCTAAATTTGCACACAATGTGGAGTTGAATTC  
GTTGATTCTCGAATTCGAAGATATCGAATGGGATACATTAAACTGGCATGTCCGGTGGC  
TCACATATGGTATTTGAAACGTCTTCCTAGTTATATTGCGAATCTATTAGCTAAAACCTCG  
GAAAGAATTAGAAGGCCAGTATACTGCGAT-----CTTTTTATTGCTAGGCC---ATAGCT  
AACAAACCAACTTTATTGAGATCACGGGGTACATTCAATTATGAGATTCAATCCTGGAG  
AGATATTATTCCTCATTACCTCTCTGCTCGGGGTTCTGGAACATTTCAAGAGAGAGAAA  
TAGCTACTGGGGGAGATGCTATAAGGGAACAACCTCACTGGTCTGGATCTTCAAATTATT  
ATAGATCGTTCACATATGGAATGGAAGAACTTGTTGGAGGAGCAAGAATCTACTGTGGA  
TGGATGGGAGGATGAAACAATTCGAAGAAGAAAGGATTTTCTGGTTGGACGTATGAAA  
TTGGCTAAACATTTTCTCCGAACAAATATAGAACCAAAATGGATGGTCTTATGCCTATTA  
CCAGTTCTTCCCTCCCGAACCGAGGCCAATCGTTCAATTAGGTGAAGGTGGACTTATTAC  
CTCGGATCTAAATGAACTTTATCGAAGAGTGATCAATCGGAATAATACTCTTACCAATTT  
ATTAGCAAGAAGTGGATCTGAGTCA-----TTTGTATTGTCAAAAAAATTGATCCAGG  
AAGCCGTAGATGCACTTCTCGATAATGGCATCTGTGGACAACCAATGAGAGACAGTCA  
TGATAGGCCTTATAAATCGTTCTCAGATGTGATCGAAGGTAAAGAGGGAAGATCTCGTG  
AAAATTTACTAGGGAAACGAGTTGATTATTCAGGTCGTTCCGTTATTGTGGTGGGTTCC  
TTTCTATCATTGTATCAATGTGGATTACCCTCAGAAATAGCAATAGAGCTTTTTCAAGCA  
TTTGTAATTCGTAGTCTCATTGGACGACATATTGCTCCCAACCTAAGAGCTGCTAAAAG  
TATGATTTCGAGATAAGGGACCCATTGTATGGGAAGTACTTCAAGAGGTTATGCAAGGAC  
ATCCCGTATTGTTGAATCGAGCACCTACCTTGCACAGATTAGGAATACAAGCGTTTCAA  
CCTATTTTAGTAGAAGGACGTGCCATTCTGTTACATCCATCGGTTTGTGGAGGATTTAAT  
GCGGACTTCGACGGAGATCAGATGGCTGTCCATGTACCTTTATCTCTGGAAGCTAGAGC  
AGAAGCTCGTTACTAATGTTTTCTGAGACAAATCTTTTGTCTCCAGCTATCGGAGATC  
CTATTTCTATAACCGACTCAGGATATGCTTCTTGGACTTTATATATCAACGGTCGGAATAG  
TCAAGGTATTTATGGGAATAGGTACCATCCATATCACTCG-----GAAAAGAAAA  
GC-----TTTTCTGTAAAGAAA-----CCTTCTTTTTATAGTTATGATGATGTGCTCA  
GAGCTTATCGACAGAAACGAATTGACTTATACAGCCCTTATGGCTCCGGTGGGGGT



GCTTATGCTTCTCTTACTTCAGTAAGAACAATAAGATCGTTAGCAATATGATTCAAATT  
AGCTTGATTAAATAC-----TTTTTCGGGAGAAGGGACAATAAAGCAAGTTCAAATTTG  
ATGTTCCAT--AACAAATTGGACCACACTAATCTT-----TTCTATTCCAATGGGGAGAGG--  
-----CAATTAATTAGTAAGCATCAAGGAACTATTTGTTTCATTATATAATGGG  
-----GAAGAAGACAGTGGATCTTTTATGATTTTGTCCACCATCTGACTGTTTTCGAATCG  
TTCTA-----TTCAATGATTCAAAAATGTTATGATACG-----GTAAATAAATCAGATCCTATG  
AGGAAAATCATTGAATTTTCGGGTCTCTTGGGTCAT-----TTAAGTATCACCAACCGCT  
TCCCATCC-----TCCCATTTTCTAACT-----TATAAAAAGTATTGTGGAAG---AAACATTC  
CATTTTCCACAAT-----TCTTTCAATACTTTCCAAGTACCTAAA-----TACTATTTTCATG  
GACGAAAATACGAGA-----ATTTCTCATTTCGATCCGTGCAGGAACATCATTTCGAATCT  
CTTGGGTCCAAATTGGTGCTCTTCTCATCCGAATTCTGCAAAAAAATATTTCCAGTAG  
TTAGT--CCTGGACAATTAATCCTGAAAGTGTATGTATATCCGAGGATGAACCA-----C  
TCCCCGAATCTGGTCAAATTATAGCAGTTGAT--GAGGAATCTTTAGTCATTAGATCAGC  
TAAACCCTATTTGGCTACTCGAAAAGCGACTGTTTCATGGTCATTATGGAGAAATTATTG  
ACAAAGGAGATACATTGATAACATTGATATATGAAAGGTTCAAATCCAGTGATATAATTC  
AAGGTCTTCCTAAAGTTGAACAATTGTCAGAAGCCCGTTTGAATAATTCAATATCGATG  
AATCTGAAAGAAAGTTTTGAAAATTGGACCGGAGATATGACAAGATTTCTTGGAAAGTC  
TTTGGGGGTTATTTCATCAGTGCTAGGATAACTATGGAACAAAGTCAGATTCATTTGGTC  
AATCAGATTCAAAAAGTTTACCGATCCCAAGGGGTACGAATTTGTGATAAGCATATAGA  
GATTATTGTACGCCAAATGACATCGAAAGTCTTAATTTTCAGAA-----GATGGAATGGCT  
AATGTTTTTTTACCAGGGGAACTCATTGGATTATCACGAGCACAGAGAATGGATCGTGC  
TCTGGAAGAGGCAATCTACTATCAAACCATGTTATTAGGAATAACAAGGGCATCTCTTA  
ATACTCAAAGTTTTATATCCGAAGCAAGTTTCCAGGAACTGCTCGGGTCTTAGCTAAA  
GCTGCTCTACAAGGTCGATCGATTGGTTGAAAGGCTTGAAGGAAAATGTTATTCTCGG  
GGGGATTATACCTGCCGTTACTGGA-----CAGCATATTCACCGTTCAGGG-----AAACGG  
AACGGAATGGAT-----CCAAGAATGGGGAATAGGAATCTATTTAGCAAAAAAGTGAAA--  
---GATATTTTCTTTTCATTATCACAAAGTCTCTTTTTTTTTCCATTCAAGAAAATTCTCACAA  
TATTTTGAAGCAGCCATTCAA-----ATGAGCAAAAAGATATTGGAA  
CATGGATTTGGAAGAGATGATGGAAGCAAGAGTTCATTTAGGACATAAACTAGGAAA  
TGGAATCCTAAGATGGCACCTTACATTTTACAGAGCGTAAAGATACTCATATTATAAAT  
CTCGCTAAAAGTCTCGTCTTTTATCAGAAGCTTGTGATTTGGCGTTTGATATAGCAGGT  
AGGGGAAAACAATTCCTGATAGTTGGTACGAAATATCAAGCAGCTGATTTAGTAGCATC  
AGCTGCTACAGAAGCTCGATGTCATTATGTAAATAGAAAATGGCTTGGTGGTATGTTAA  
CTAATTGGTCTACTACAGAGACGAGACCTCAGAAGTTCAAGGATTTAAAAAAGAACA  
AGATACGGGACGATTCAATCGACCTCCAAAGAAAGAAGCAGCAATGCTCAAGAGAAA  
ATTGGACCAATTGCAGAAATATCTAGGTGGGATTAGATACATGACGAGCTTACCCGATAT  
TGCGATAATTACCAATCAACAAGAAGAATCCATTGCTCTCGGGGAATGTAGAATTTTGG  
GTATTCCGACAATTTGCTTAGTTGATACAGACTGTGATCCAGATCTCGTGGATATCCCAA  
TTCCAGCCAATGATGATGGTATAGCTTCAATCCAATTGATCCTGAACAGATCAACGTCA  
GCAATTTGCGAAGGAAGGTCA-----TTAAGGTCATTAATGGCGCAGAAAATAAATCCA  
CTTGGTTTTAGACTTGGTGTAAACCAAAATGATCGTTCCCATTTGGTTCGCGCAACAAAG  
GAATTATTCAAAGATCTCCGAGAAGATCAAAAAATACGTACTTGCATTGAAAATATG  
TACGAACACATATAAAGAGCTCCTCGAAT-----ATTGCACGTGTAGAGATTAGCAGA  
AAGATCGATTTGATTGAGTCAAATATATATAGGATTTCCCAACTTGTTAATAGAAGGT

AGGGGTTTT-----CAAGGAATTGAAAAATTA AAAAACGATGTACTAAATATGCTCGAT  
TCTGTGGACCGAAAAC TTCACATTGCTATAGAAAAAGTTGCGAAACCCTATAGAAAAC  
CTAATATTCTTGCGGAGTATATTGCCCTACA ACTAGAGAAGAGAGTTCCATTCAGAAAA  
ACAATGAAGAAAGCTATTGAACTGGCTGAACGGGAAGAGGTAGAAGGTATT CAGATCC  
AAATTGCAGGACGTCTCGACGGAAAGGAAATTGCCCGGGT CGAATGGGACAGGGGAG  
GTAGGGTTCCCTACAGACAATTCGGGCTAGGATTGATTATTGTTATTATCCGGTTCAAA  
CCATCTATGGAGTTTTAGGGATCAA AATTTGGATCTTAGAAGAG-----ATGTCCCGTTATC  
GGGGACCTCGTTTAAAAATAATACGTCGTC TTA AAACTTTACCAGGGCTCACTAGTAAA  
AGACCCAAAAACAGAAAGGATTCTATGAACCGGTCTTCTTCCAGGAAA---ATATCTCAA  
TATCGTATCCGGCCAGAAGAAAAACAGAAATTGCGTTTTTCATTACGGACTAACGGAGC  
GACAATTGCTGAAATATGTTTCGTATTGCTAGAAGAGCCAAAGGATCAACGGGCCAGGT  
CCTATTGCAATTACTTGAAATGCGTTTCGGATAATATTATTTTTCAATTGGGTATGGCTCCC  
ACCATTCGGGTGCTAGACAATTAGTTAATCATGGACATATCCGGGTCAATGACCATATG  
GTAGATATACCAAGTTACCTTGCAAACCTCAAGATGTTATTACTATAAGAGATCAACA  
AAGATTGAGAGATATTATTAGGAAGAATCTAGATCTGTTCCAGAGG---GATAAATTGCCA  
AATCATTTGACTTTTCATTTCGTTACAA-----TATAAAGGATTCATCAATCAAATAATAGATA  
GTAAATGGATCAGTTTGAAGATTAATGAATTGCTGGTCGTAGAGTATTATTCCCGTCAAG  
CTATGTCACGGCGAAGTACTGCAGAAAAAAA AACTGCAAATCCGATCCTATTTATCAT  
AATCGATTAGTTAACATGGTGGTTAACCGTATTCTTAAAAACGGGAAAAAATCATTGGC  
TTATCGAATTCTTTATCGAGCCATCAAAAATATTCAACAAAAGACGGAGAAAAATCCAC  
TATCTGTTCTACGCCAAGCAATACGTAGAGTAACTCCCAATGTAACAGTCAAAGCAAG  
ACGTGTGGGTGGATCGACTTATCGAGTTCCATTGAGATAAGATCTACACAAGGAAAA  
GTA CTTGCCATTCGTTGGTTATTAGGGGCATCTCGAAAACGTCCGGGTGCGAAATATGAA  
TTTCAAATTGAGTCACGAATTAATGGATGCTGCCAGAGGGAATGGCAATGCTATACGCA  
AAAAGGAAGAGACTCATAGAATGGCAGAAGCCAATAGAGCTTTTGCACATTTCCGTAT  
GGGTAACGATACTATTGCAAATCTAATTACTTCTATAAGAAACGCTGACATGGTAGAAA  
AAAGAACGGTTCGAGTAACAGCTACTAATATTACCAAGAACATTGGAAGGATCCTTTTA  
CGAGAAGGTTTTATAGAAGATGTTAGGGAACATCAGGAAGGCCAAAAATCTTTTTTTTAT  
CTCGACTTTAAAATATCGGAGA-----AGGAAGAAAACATATATGACT-----ACGT  
CAAAGCGTACCAGCAAATCTGGTTTGAGAATTTATTCCAATTATCGAGAAATTCCAAAG  
GTTCTAGGTGGAATGGGGATCGTAATTCTTTCTACTTCCCAAGGGATTTTGACGGATCG  
AGAGGCTCGACAGAAAAAATTGGAGGAGAAATATTATGTTATGTATGGATGTCAAAA  
ACTAAAAGAAGAATTGGTTCACGTAGGAAT-----GAAAATCGAGTACTCA  
AAGGAGTTATTTATGTTCAAGCAAGTTTTAACAATACCATTGTTACTGTTACAGATGTAC  
GAGGACAAGTTTTGTGTTGGTCTTCTGCCGGTGCCTGTGGATTCAAAGGTACAAGGAG  
AGGTACACCATTTGCTGCCAGACTGCAGCAGAAAATGTTATTCGTACATTAATGGATC  
GGGGTATGGAACGAGTCAAGTTATGATAAGTGGCCCTGGTCGGGGGAGAGATACAGC  
ATTACGAACCATTCGTAGAAGTGGCATATTATTAAGTTTTGTACGTGACGTAACCCCTAT  
GCCACATAATGGATGTAGACCTCCCAAAAAGAGACGTGTGATGCCACTATTCAACAA  
CTTATTAGAAAAGCAAGACAGCCAATAGAGAATAGAAAAAAATCTCCTGCTCTTCGAG  
GATGTCCTCAGCGTAGAGGAGTATGTGCTAGGGTGTATACTATCACCCCAAAAAACCA  
AACTCTGCCTTACGTAAAGTTGCCAGAGTACGATTA ACTTCTGGATTTGAAATCACTGC  
TTATATACCTGGTATTGACCATAATTTACAAGAACATTCTGTAGTATTAGTAAGAGGAGG  
AAGGGTTAAAGATTTACCCGGTGTGAGATATCATTGTTTCGAGGAACCCTAGATGCTG





AAAATTATGATATGGAAGAAGATGCAACCGAATGTACATTCC-----TTTTTCTTTTTG-----  
AGAAAGGAAATACCCACTTATCCTAAAGATCATTACGACACGTCCGATTCT-----TC  
GGAGCCGGTCCCCACCCGACACTCGCTGAGTCTGTACAATGTGGCCGGAATTGAAC  
TATTTAAGAGGTTTATTTTTAGTGGCTCAATCAAATCTTAGAAAAAGTATAATATTACCAT  
CACTTATAATAGCCAAAAATATTGGTCTATATTATTATTCAAGGCTCCGAATTTCCAAA  
AGATTGGGAACAAATGAGGAGAGAAGTGCATATCAAATGCGCTCCTGATGGTACCGAA  
TATTCTGAAACAGAATTCCCAGACAAATGGAAAAGAAATGGTATGCAGATAAAGCTTC  
TATTCCTTTTTCGTTTGAAGCCTTGGCATAGCCATAGCTTCGAGAAAAAATTGCGTTGG  
AGCTATTTAACGACCCTTGGATTTGAAACTGACATACCTTTTGGTGATCCAATCCCACA  
GTCGGAATTTTTTCAACCTATCTTCAAAGAATTGATCTTCAA-----AAATTGAAGAGA--  
-----GGGTTGATCATCTTTCAAATAATTGAGAAAAATTCTTTTCAAATAATTGAAGA  
GACGATTGATGGGATCTACAGGAATAAGACGCGTTCCACGAGTTAGATATATAGACAAA  
AGTGAAGT-----GACCCGATACAAAAT--TACTGAGTGAGACTACCAGTGCAAAT  
GATTCATCAGAAATGAATGATTATGAAACCCGAACAATTAATGTGAAAGATCCA---GAT  
CGGATGACCACAATGAAGGAGTCTATCGCGATCATAAATAGCGCTCCTATAACTTCGAA  
GGGGAGTTTGGGATCAACATTCAAAAACGATTGGTTCAGATTTCGGCCTGGTTCGATTT  
CGAAAGAAAAGT---GTCCAATTAATCCGAAAAAGGTTCAAATTAATGAACTTTTTCTC  
AAAAGAATGGAC---TATCTTTTACCAAGTTTATTTCATTTCTCGAGTCAAATATCAATTT  
TTGG-----CCTGATCGAAACATGTTCTCACAAGCATATGTATTTACAAGATATGG  
CAGATAAGGGCAATGAACAGGTCCTATTCAAAGTATTTATTCAAATCCTCATATCCCTTG  
ATCAAGAAGAAGATCCAAGAATTATTAATACAAAGAATATTGGATCAC---GAGAAACCA  
CAAGATCTGAAG-----GACTGGAAACAATGGTTGAGATGTTTT---CGGTACAACA  
TATCCCCAGAGATATGGTCTAGGATAAACCCACAGAACTGGAGAAATGGAGTAAGTAA  
GCAATGTACGTGCTAT-----GAAGAACAATTCATTCCTATGAACAA  
CAACGGAAAATGAACAAACGTTACAGATACGATCTTATCATATAGTTATCTCAATGAT  
TCTACAAAAGATAAAGATTTGGATTCTACAAAAGATTTCGGATATTTACCCAGTACAACC  
TCGAAGAGACAATGTTGGCATTATTGATTCTCCGAAATCGAGTGGTTATTCCCGGACC  
TTTTTGGAAATCAAAAATATATATGACACTGAATCGAAGTACGTACCAAAAAAATCGTTT  
TTACGAGAATACAAAGCGGTAGAAGGTATAGGGGAAGACAGTATATTCAAGCTGGTTT  
GCAGGGTTATGTGCGGAATTAAGGATCCGGTACCAATATCCACCAGGGAAATGTTAAC  
CTGAATCTAATGTTCTTCTTCTTAAGACTAGCAATGAAGATAGCAATGAAAAGGAAAT  
ATGGGAAGAGAATATTCTTCGGGAGGATGTTCCGAGAAAGGTAAGCAATCGAAATGAA  
ATATGGGAAGATAACATAGTGATCCCCGAACCATATCGTTTATCAAGCATACTGGACGA  
CCAATTCCTGATGTATAAATCGTAAGTATTTCAATTAAGTTTCCAAATAAAGCCAACAT  
TTTGAGTTCCTCAATTTAGAAGATCTTTTGCTCCCAAAACGTCGTAGAGAATTTCGAA  
TCCTGAATCGGTTT---TTTCTTTGGCCTAGTTATCGATTAGAGGATCTTATTTGTATGAATA  
GATATTGGTTCAATACAAATGATGGGAGTGCATCCGCGATGTTGAGAATACGTATGTATC  
CCATGAAAAAAGAAGA-----TCCTGGATAGTGAAATTG-----GAAGAGATCAAAA  
GTTATCAATTTCTATACAATCCATGGACCGAATCCAATTTAGTGAGATTTTAAATCAAAT  
CCTTTCGCACCCGGGAGCGCCTTATAAAGCTCTTTGACCTTAGAATTTCTCAGTACGTTGC  
TTTTACGCGATCTACGT-----AAAAGCAATCCATATTTTTTG-----GTCAAAGGTA  
TAGTAGTACTTACATTATCG---GTCCTCACATATCAC-----TTCAATTATAAAAGTAGTAT  
GATTGATAGAAAAAATTTCTATTTGATGAAACTATTTCT-----ATACATATAAACG  
TTATGGAACCTGGAAATGAAACATCGGAAGAATATTTAAAACCTTTCCTCAAAAATTGG

TTGATACTTCCGCATCTTTTCCTGTCTTTC-----  
-----  
-----  
-----  
-----  
-----  
-----CAATTGAAAAGATCTTACAATCA  
ATCCATAGAACATTCTGATCCCATTAATTTCAATTCAGAATATGACAGGAAC---ATGAAC  
AAGAAGGATGAGATGATCTCGGAGAATCAAGGACCGAGC-----GAAACTCATTCGGAA  
AAGGATGAGAAAGATATCAATTCGAAGATCGATTGACTCTCATTTCAACCGAAAATAA  
GTATTGGGAACCTGAAAAAGATCTTTGTGAAGATCCATTCACAAGA-----AATAAAAC  
GGAGATTGAGCAACGAAGAGAAAGATCAATTATTTGTTCTCTT-----TCAATAAAAGAG  
AGAGAAAAAAGA---AAAATAGAATCAGAT-----TTGTCCTCAAAG-----CGTTTATCAGAA  
TATTCTCCAATCTCTTGGGCGAAAGAATTATTTACAGAAGATCAAAGATATACGGAAGA  
G---TCTTTTCCTTTGGAAAGGAAAAGATTTCATT-----GAGAATTTTACAAAATCAATTCGT  
TATTCTTTTTTTTACATATTGCTAATAGATGAATCGTATATGGGTAGTCCTAGTGCTACTG  
AGAAGCCCATGAAAGATTTCAACTTATCCAAAAGGTTATTGAAAAGGCAACAAGAGGT  
TTTT---TCCCAAGATTTAAGGGATTCAAAATCCTATTCATTAATGAATAGGATAGTTGATC  
TATGGAAGATCAAAACATATTTTGAAATTGAAAATCCTTCCTCGAATTGTGCTATTTTCAT  
CAGATCTCGGATCT---ATTATTCTTAAAAAGCCAAGTTATATG-----CACCGATCCGGATCT  
ATAAAG---CGGAATTTGACTCTGCCTTTGAATCTA-----TCTTCTGCATTCTGTGATCAAA  
GCAAGGGACAATACATATTG-----CACAAAAATTTTCGATCGAAAATAAAAAAATTGTT  
CTGGAATGATAGATCAATTCCTCTATCAATAACTAAGCCT---AGTCAGGTTTCATGATC  
AAATTTATTTT---TAT---CAATTATATGAACTCAACAAAAATGGATCGTTGAGATCGGATC  
GGATCTTCAACCACAGAGATAAATTGAAGAATCAATCTTTA-----TGGGTCCTACTCA  
AGATTACTGAT-----AAAGAGGATGAATATTTAGATCAAATAATCGACAAAGAATTGAGC  
CAA---ATCGATTCAAAAAATCGCTTGGAGATAGGAACTCCT-----CTTAACGATTA  
TAGAACTGAAGCTTTTCATTGGTATGAA-----TCGATTCCGGTATAATATTTCCGG  
G-----TATTCGGAAAATATATTGAATATATTCAATTTTATGAAA-----AGGTCCAGTCGCA  
AGTTAAAGGATCAAATTCGA-----ACAAATTGGATAGAAAATGAAAGTTTTCATAAT---  
---GTAACGAAAGATACAATTGACCGGCATTTCGTCAAGTTGGAGAAAA---AGTCAGAGA  
GAATGGTTCAACCGTTCT-----ATTATTCGAACGGATAAACATATCAATCGGAATTTG  
AATGTGTAC-----AATCAGACCGAATACTTTATAAAATATTTGAAACATGTTTTTTTC  
TAAACAAAATAT-----TTGAAAATAGTGTTTCGATCCAATTGGAATAATCAAGATT  
CAATTGGTTGGTCTCTAAGTTCCAACAAAAAAGATTATTTAAAGTTTTCTTCCCTTTTTA  
AAAGTACT-----GTGAAGATCTTAAATTC  
GAAC-----TTCGATATCATTTCGAAGTTCATTTTCATTTCAATTTTGGAT---TTTCGC  
TTTTAT---GAGCTCAAAGTCTTAATGATCAACTATTAATAAGTTGTTGGATCCAATTGG  
TGCTCTAATCGTTCAATTTAAAAAATTAAAACCCCTT-----CTTTTGGAT-----GACCATA  
ATCTTTCA---AAAAGATCAAATTTATTGATTGATGAAGGAACAATTAACCATTTTTTTTC  
GAATAAGATAACCGATTTATCCATTGATTATTGACTTATTCGATAATGAA-----AAGAATCA  
CATGGAATCGTTCAATAACACTTCT-----TTTTCGACGATATCTAACGATCGAGACAATTG  
GTTGAATCCCATCAAATCTGATCAGAGCTCATTGAGAGCTTATTTTCATGGAGCAA  
ATACGCTCCAATTTTTTTGATTATTTGCATCATCCTCGGTCAAAT-----TATAGGAAGATTCT

TCCTTCTTATATG-----AATCCTTTCCATATCAGAAGGAAGAAT-----CTTACATATGG  
A--CAATTATTTTCATCTTTTGTCCATCCACAACAAT--CTATCTTCCTTGCCCATTGGTGAA  
-----ATAGGACCCGTTCACTCAGAG--AAAGAGACTATTTTCATTCATCAAGTCACAAATA  
TCTAACATATTTCTTACCTAAATATTTACAACGAAGTGGTGACCAAACGTTTGTATTAATC  
TATGACTTGTACAGATCCTTCAATTTACTAACTCGATTTAATCCATTTCGTTTCGTGACAAT  
GGATGTCTTTTCCTCGATCGAAGAGATTTCTATAACGCCTTTAACAAAAGAACAATAGT  
CAATTTGGAAAAAACTTTTTGCCAGCCTTTT-----TTCCATAGATCCGATTCAGAAGAGA  
ACAACCTCGATCAGTACCTTAAAAAGGATTTTCAGTTCAAACATGGATCTTATTCAAACT  
CGATCTTATCAAGATGATTTACTATCCGAACAA-----GATTGGTTTGTA-----ACCG  
AAAGTTTTCAAACATAATTGGAAACAAAGGCATAGATGGGAGGAGTACCCTTTCTAA  
TTCATCTAAAAAACAGGAGATGTATAGGATCTCTAAATGGGATTTGCTCCAAACATATAT  
GCCATGGTTTTTTTACCTCTGCAGGGTGTAATATATTGAA--ATGCTTTTAGATAATCTTC  
CAGAGATATTACTATAT-----GGGAGTAAT-----CAATTTGTATTTATTTTGCAGAAATATTA  
TACATAAATTGAATATCTTGTGGGAACTTTATCATCCATTATGGGAACT-----  
CAATGGAAATTGAGAACGAATCTTTTTCAAAGAAAATTCATTCTGAATAAGTTTTTCTT  
TCTAAGTCTTTGAATGAATCTAGTACTGTTGATTCATCAGTTTCATTCATATGGAAACA  
TCTGAGATTACTAAATGCTCGGAGGTATGAAGAATATGGGATTCCTTATCCCTTTTTTTCGT  
CCTTGGGTAT--TCTGTTCTTCAATATTTGAAAGTGACTTCCTTA-----ACCTTTCTCAATT  
TAAAAGTAGACTTTGAACTCATCAAGTATTTAAAGGATCCGTCATACGTGATAGAGTTG  
CAAAAACCTTATGAATCCTTTCGTGCCT-----

-----AATCTCTGGTTATCTTATATAGGGGACACA  
TCCAGCTCTTCTTCTATGAAGAGG-----AAGATGAAGAATAGAAAGCTTAATTCGCCT  
ATAACTATAATAAGAGAGTGGAACAAATGGTGTCTAGTATGGATATCTACGAAAAAGA  
GATAGAATTACTAGTTCAGCTTCTA-----ATGATG-----GAAAAAACATTTATCAATT  
TGAATCAAATTTGACT--TACAGTCATAATTTCCCTC-----AAGAATGAAATTGGTTA  
TCAAATAACTGGACAGCCGGGACTTATTCACTTACGATATTTGGCCTACACTTAT-----CA  
AAAAGATCTAATGAATTACGAGTTCGATCCATTTGTTTAGCAGAAAGATGGGTATTCTT  
TGCTTTTTGTGAGAAGATAACCTCT-----TCACAAATATTGTGT-----CAAACCAACCCC  
CCATTTTCATGGA-----CCCCCTTATCACTCCACTCAGGATCATTACTTTCC---AAAGGA  
ATTTTACTCATAGTCTTATGGGAACTGGTCGATCCTATTTGGTCAAAGTATAGCAGCA  
GACTCTTATGTTCTTTAATCAAATA--CTGAACAAGTTCTTGTATGGTAAGTATTTAAA  
TTAC-----

-----CCTGATAGTAGAATTATTCAAACCTGAATTTTTTAAT---  
--TTGGCAATAGACAAAATGCGA-----CAATTCATCTTACCTTGGAATTGG  
CAAAAAGAATGTCTCCTTGCCATAATATGGATTCCAAACATTCATGAACTGAATGTCAAT  
GACTTAACTCACGCTTTCTTGGTTTATTAGTGAGCCATCTCTCT-----AGAGATTATGA  
TAGAGATTCT--ATTAGAAATATTCTTGTATTGCTCCGACTCATATCCCCCAAAAAGTGG  
ATCCAGCCCTAATAGCTCCAAATCGATTAGATAGATCGATCAATATTCGAATGCTTGTAT  
CCCACAACGACAAAGGGAATTTCTATTCTTTTATGTAGTAAAGGGTTCTACTCGGAAA  
AAGAGTTGTCTGTTC-----GATGAATTTGGATCTAGAACCATAAGTTCTGATGCACGA  
GATCTAGCAGCACTGGCCAATGAAGCCTTAATAATAAGTATTACCCGAAAGAAATCCGT  
TATAGACACTAATACGATTTCGATCAGCTCTTTTATGGCAAACCTTGTAATTGGAAATCTAT  
GGAGAATCAGGTTGGATCCGGTCAAACCTTATGAAAGACTTATCTACAAAGTAGGAAAG

GCTTTTATACAAAATACACTTAGAAGGAATTCTCCCCTGAATCATCTATCTACCAAAAAG  
GAATTATGGAAG-----AAAAGGTTTTGTTATTTGTCCGAATGGTATTTAGAACCTTC  
GACAACATGAAGGAATTGACCATACTTCCCATATTTTGGGTTGCTTGGCCGGATCAG  
CGGCTCGAGATTCTTGGTCTATATCG-----GAACGAAATATCGAG---AATTGCATTACTCT  
CGATAGATCCGCTGAGCATGATCTC---GATCTAGCTTCTAGT-----CTTTTAGAAAGTCTT  
CTGGTGGAA-----TTTCCATGGTTAGGAAGATTTTCGGGGTACGTTTCGATAAGGAT-----CA  
GAGCACATTCGCTCCTCAGCCAAAACGAGAAAT---CATCTAGATATGATACGA-----TTT  
CTTCAAGAATATGAATTAAGTTTCTACAAGAACTCTTGACGCAAAAACAAAAGAAA  
CTTTCGAATCAAAAACAAAAGAACTCTCGACCCAAA-----CAAATGGATAGGGA  
TATGGATGAAGAATTCATAAATAAC-----ATAGTTTGGGCTCCT-----AGGATCTGGCGTCT  
TAGTTTTCTTCGCAGTAATCGATTTCGATCGTACAAAAGAGGT-----  
-----ACAAAAGACGTATAAAAAGACCCAATTCAAGATCGTTTAAAAACAGAT  
GATAAGATCTAAAATTTCTATAAAATATCCGAATCCGATGCAATATAAATCCTCTAAGAA  
ACCCATGTTCTTTCTAGGAAGACGATTTCTTTGGGATCCC-----TTCCTATTTCAAGAA  
GAG-----TGCCTTGTGTTTTACGCCGAGAATTTTTCACAAATGAAGAACAGCTG  
AAAAGGCTTTATATTACTTATGGTTCATATCCTATATTTGCATATCAACGTTGGTTAATCG  
GAAATAAGAGAGAAAAGTTTACCCTTCGAATCGTTAATTCATCGCCAAAATGGCTC  
GGAACC-----AATAGTTTATTATCT-----AATGAATCTTTTCTTTATAAT-----ACTCTATCT  
GAGAGTTATCAATATTTATTCAATCTGTTCCCTATCTAAC---AGAATGTTATTGGATCAAAT  
GACAAGGACATTGTCCGAGAATCAATGTCTTTTTCCGAATGAAATTGAACACTCAATTC  
ATACAACAGGATTAAGATTTGACATCAGCCGGGATATGCCTAGATCTCAG---AGAAATG  
ACAATTTTATTGATAAGACCTTCACAATTGTAGCGGATATCTTATTGCGAATAATCCCGAT  
GGCTCCGGAGGAGAAAGAAGCATTACCTATTACAGAGATGGTGTG---ATGTCAGCTCA  
ATCGGAAGGGGAATATGCGGAAGCTTTACAAAATTATTATGAAGCTATGCGACTGGAAA  
CTGACCCTTATGATCGAAGTTATATACTATATAATATAGGTCTTGTGCATACAAGTAATGG  
GGAACATACGAAGGCTTTGGAATATTATTTTTCAGGCATTAGAACGAAACCCATCCCTAC  
CACAAGCTCTTAATAATACGGCCTTGATCTGTCATTAC---CGAGGAGAACAGGCCATTC  
GACAGGGAGATCCTGAAACCGCGGAGGCTTGGTTCGATCAAGCTGCTGAGTATTGGGA  
ACAAGCTATAGCACTTGCTCCGGCAATTACATCGAAGCACAAAATTGGTTAAAGATTA  
CAGGACGCTTTGGAGAA---ATGAATAATCGATCCAAATGGCTCTGGATAGAACCCTATAA  
CAGGGTCTCGAAAAGAAGTAATTTCTTTTGGGCTTGTATCCTCTTTCTGGGTTCACTA  
GGATTTTCTTAGTTCGGGATTTTCGAGTATTTTGGTGAGAACCTGATACCCCTATTGTCA  
TCTCAGGAATACTCTTTGTTCCACAAGGAATTGTAATGTGTTTTTATGGTATTGCAGGT  
CTGTTCAATTAGCTCTTATCTGTGGTGCACAATTTTGTTCGATGTGGGTAGTGGCTATAAT  
AAGTTTGATAAAAAGAAAAGGAATTGTATGTCTTTTTTCGTTGGGGATTTCCCGGAAAAAA  
TCGTCGATTTTCTACGATTTCTTATGAAGGATATTCAGATGATTAATAATGGAAATTC  
AGAAGGTATTTCCCTCGTCTGTTCTTTATATGAAATAAAGGGCCGACAAGACATTC  
CTTTAGCTCGTACTGGTGATAAT---TTGAACCTAAGGGAGATCGAACAGAAAGCTGCTG  
AATCAGCCCGTTTCTTGCGTGTATCCATTGAAGGGTTT

>Najas

ATGATTTTGTATTGGTTTAGATGGATTTATTATTTTCTCGGATTTTGTATAATACATTGTT  
ATATAACTCTTTTATGTAGCAATCAAGTT---TTACCAAGTCATAGTCATAAAGTTTTG  
TT---TTGTCAAGTAATCATACCTTCTACTTGCCAAATTGAAATA-----CCTGAGAGTG  
GAAGGGCAAAATATGAAAAGGGTCTTCTAGAGATGTGGTCCGTAGCAACAAAGACTT

ATCTTTTGCCTTATATGATTTCTCA-----TTACGTCAAGCTGATACTAGC-----  
---AGGGATTTATCC-----CGTAGTTTTAATCTTTTGTATCACCAGAAAGTCTTTCGTGA  
AAAACGAACTCTTCGAAAAAAGATGGCAAAGTCATCCATAATAATAATCATGGAAGA  
TTTGGTAATAATGAAGGAGGAAATCAGACAGGACCTTCTGATGGCCATCAGAAGAAT--  
TGTTTTTCGGATGTTCAAAA---TTGGATCTCCTATCCCCCTGATCAGCCTTTTACTCC  
TTATCCACTTCCGTCTTGGGATCAAGATTTTCGAGTTCTTTCTTCTGATTCTGATTTAAT  
TTGGAAGATGAAAATGCTTATTTTTTCAATCCTGATGAATAC---GAATTCATTATAGGA---  
GATAAACCTCAACCCTTTGAGGAGAAATCTTCCAGAAGGAACCTTTTGGGAAGACAAAT  
CTCAACCTTTTGGAGGAGGAAGGTTTTGAAGAGGAAGTCTATGAGGAGGAA-----  
TATGAAGACAAACCTTATCAGGATCGTATTGCTTCTTCTCAAAGAGATACAGGTTTAAAC  
AGAAGCTATTCAAACGGGCATAGGTAAATTAACGGTATTACTGTAGCAATTGGCGTTA  
TGGATTTTCAGTTCATAGGAGGGAGTATGGGATCCGTAGTGGGTGAGAAAATAACCCG  
TCTGATCGAGTATGCTGCTAATCGATCTCTACCTCTTATTATTGTGTGTGCTTCTGGTGG  
GCTCGCATGCAAGAGGGAAAGTTTGGCCTGATGCAAATGGCGAAAATATCGTCGGCTT  
CATATGATTAC-----AATAAAAAGCTATTCTATGTATCAATCCTGACTTCTCCTACAACCG  
GTGGAGTTACGGCAAGTTTTGGTATGTTGGGGGATATTATTACTGAACCCGGCGCTT  
CTATTGCGTTTGCAGGGAAAAGAGTAATTGAACAAACATTAATATCACAGTTCCGGA  
AGGTATTCAAGAAGCGGAGTATTTATTCGAAAAGGGTTTATTGGATTCAATCGTACCAC  
GTAATTCTCTAAAAGCTACTCTTGGTGAGTTATTGCAGCTCCATGGGTTTTTTCCTACTA  
CCTCC-----ATTTTGTATGGGAACCATTCGAGCCGACGAAATTAGGAATATTATTCGTGAA  
CGTATTGAACAATATAATAGAGAAGTAAAGGTTCGTGAATACCGGTACCGTACTTCAAGT  
GGGTGATGGCATTGCTCGTATTTCATGGTCTTGATGAAGTAATGGCGGGTGAATTAGTAG  
AATTTGAAGATGGTACAGCCGGTATTGCTCTGAATCTGGAATCAGATAATGTTGGTGTT  
GTATTAATGGGAATGGTTTGTATGATACAGGAAAGAAGTTCTGTAAAAGCAACGGGAA  
AAATTGCTCAGATACCGGTGAGTGAGGCTTATTTGGGCCGTGTTGTCAATGCTTTAGCT  
CAATCCATTGATGGTAGAGGTGAAATTCAGCTTCTGAATCTCGCTTAATTGAATCCCC  
CGCTCCAGGTATTATTTTCGAGACGTTCCGTATATGAACCTCTTCAAACGGGTCTGATTGC  
TATTGATTCGATGATTCCTATAGGGCGCGGTCAGCGAGAATTAATTATTGGGGACAGGC  
AGACTGGTAAAACGGCAGTAGCAACGGATACGATTCTCAATCAAAAAGGGCAGAATGT  
CATATGTGTTTATGTAGCTATCGGTCAAAGAGCATCTTCCGTGGCTCAGGTTCGTGACGA  
CTTTACAGGAACGGGGGGCCATGGAATACACAATTGTGGTAGCCGAAATGGCGAATTC  
GCCTGCTTCATTACAATATCTCGCCCCTTATACAGGAGCGGCTCTGGCTGAATATTTTAT  
GTAATGTGAACGACATACTTTAATAATCTATGACGATCTATCCAAACAGGCACAAGCTTA  
TCGTCAAATGTCTCTTCTATTAAGAAGACCCCCTGGACGTGAAGCTTATCCGGGAGATG  
TATTTTATTTGCATTCACGCCTTTTAGAAAGAGCTGCTAAATTAAGTTCTAAGTTAGGTG  
AAGGAAGTATGACCGCTTTACCGATAGTGGAGACGCAATCCGGAGACGTTTCAGCTTAT  
ATTCCTACTAATGTCATTTCCATTACAGACGGACAAATCTTCCTATCTGCTGATCTATTCA  
ATGCCGGAATACGACCTGCTATTAATGTAGGTATTTCTGTCTCCAGAGTTGGATCTGCAG  
CTCAAATTAAGCCATGAAACAAGTAGCCGGCAAATTAATAATTGGAATTAGCTCAATTC  
ACAGAGTTAGAAGCCTTTGCACAATTCTCTTCTGATCTGGATAAAGCTACTCAGAATCA  
ATTGGCAAGAGGTTCGACGGTTGCGTGAGTTGCTTAAACAATCCCAAGCAAATCCTCTT  
ACGGTCGACGAACAAATAGCTACTATTTACACCGGAACAAATGGATATCTTGATTCGTT  
AGAAATTGAACAGGTAAAGAGCTTTCTGACTAAGTTACGTACCTATTTAAAAGAGAAG  
AAACCTCAATTCCAAGAAATTATATCTTCTACTAAAACATTCACAGTGGAAGCAGAAGC

AATTTTGAAAGAAGCGATTCAAGAACGGATGGAAACCTTTGTA CTT CAGGAAGAAAC  
AATGATGAAAAATCCTACTGCTTTT--CCTGTAGATCCCACATTGGAACAAAAAACCT  
AGGACGGGTCGTTCAAATTATTGGTCCAGTACTGGATGTTGCTTTTTCTCCGGGAAAGA  
TGCCTAATATTTATAACGCTTTGGTAGTCAAGGGTCGGGATACTCTCGGTCAGCAAATG  
AATGTGACTTGTGAAGTACAGCAATTATTAGGAAATAATCGAGTTAGGGCCGTAGCTAT  
GAGTGCTACGGATGGTCTGACGAGGGGCATGGAAGTGATTGACACAGGAGCTCCTCTC  
AATGTTCCAGTTGGTGGTGCTACTCTCGGACGAATTTTCAACGTTCTTGGAGAGTCTGT  
TGATAATTTAGGTCTGTGGATACTCCACAAGATCTCCTATTACAGATCCGCCCCAC  
TTTTATAGAGTTAGATACAAAATTATCCATTTTTGAAACGGGTATTAAGTGGTGGATCT  
TTTAGCTCCTTACCGTCGTGGAGGAAAATCGGACTGTTTGGAGGGGCTGGAGTGGGT  
AAAACAGTACTCATCATGGAATTGATCAACAACATTGCAAAAGCTCATGGGGGCGTAT  
CGGTATTTGGTGGAGTAGGCCAACGTACTCGTGAAGGAAATGATCTTTATATGGAGATG  
AAAGAATCGGGCGTTATTAATGAACAAAATATTGCAGAATCAAAAGTGGCTCTAGTCTA  
CGGTCAGATGAATGAACCACCAGGAGCTCGTATGAGAGTGGGTTTACTGCGCTAACT  
ATGGCGGAATATTTCCGGGATGTGAATGAGCAAGACGTACTTCTATTTATCGACAATATC  
TTTCGATTCGTTCAAGCAGGATCTGAGGTATCCGCCTTATTAGGGAGAATGCCGTCCGC  
GGTGGGTTATCAACCTACTCTGAGTACGGAAATGGGTTCTTTGCAAGAAAGAATTACG  
TCTACCAAAAAGGAGCGATAACCTCTATTCAAGCTGTTTATGTACCTGCCGACGATTT  
AACCGACCCCGCTCCTGCCACGACATTTGCACATTTAGATGCGACTACCGTACTATCAA  
GAGGATTAGCTGCCAAAGGAATTTATCCGGCAGTGGACCCTTTAGATTCCACATCAACT  
ATGCTTCAACCCGGAATCGTTGGTAAGGAACATTATGAAACTGCGCAAAGAGTGAAGC  
AACTTTACAGCGTTACAAAGAGCTTCAGGACACTATAGCGATTCTTGGATTGGACGA  
ATTATCGGAAGAGGACCGTTTAACTGTGGCAAGAGCGCGAAAAATTGAACGTTTCTTA  
TCACAGCCCTTCTTCGTAGCAGAAGTATTTACAGGGTCTCCGGGAAATATGTTGATCT  
CGCAGAAACAATTAGAGGATTTCAACTGATCCTTTCCGGAGAATTAGACAGTCTTCCC  
GAGCAGGCCTTTTATTTGGTAGGTAACATTGATGAAGCTACCGCGAAAGCTATGAACTT  
GGAAGTGGAGAGTAAAAGGAAGAAAATGACCTTAAATCTTTGTGTA CTT GACCCCTAAT  
CGAATGGTTTGGAAATTCGAAGTGAAAGAAATCATTTTATCTACTAATAGTGGTCAAAT  
TGGTGTATTACCAAACCACGTTCCCATGCTACAGCCGTAGATATAGGTGTTTTGAGAAT  
ACGCCTCAACGACCGATGGTTAACAGTAGCTCTTATGGGTGGTTTCGCTAGAATAGGTA  
ATAATGAGATCACCATTTTAGGAAATGATGCGGAACTGTGTA CTT GACATTGATCCACAA  
GAAGCTCAGCAA ACTCTCGAAATAGCTGAAGCTAACTT GAGTAGAGCAAAGGGTAAG  
AGACAAATCATTGAGGCAAATCTAGCTCGCAGACGAGCTATTACGCGAGTAGAGGCTA  
GCAATACTCTTTACATGAAAAATCTAAGCGATTCCTTTCTTTCCCTTGGACTATTGGCCGT  
CTGCCGGGAGTTTTGGGTTAATAACCAATATTTTAGCAACCAATCCAATAAATCTAAGCG  
TAGTGCTTGGTGTGTTGATTTTTTTTTGGAAAGGGAGTGTAACTGGTTTATTAGATAATC  
GAAAACAGAGGATTTAAGTACGATTCGAAATTCAGAAGAATTACGTAGAAGTGCTGT  
TGAAGAGCTCGAAAAAGCTCGAGATCGTTTACGTAAAGTGGAAAGAGAAGCAGATGA  
GTATCGCGTGAATGGATATTCTGAGATAGAACGAGAAAAAGCAAATTTGATTCATGCTA  
CTTCTGATAGTTTGGAAACAATTAGAAAAGTTCCAAAATGAAACCCTTCGTTTTGAACA  
ACAAAGAGCCATTAATCAGGTTTCGACAACGGGTTTTTCAACAAGCTTTAGAGAGGGCT  
ATGGAACTCTAACCCATTGTTTAGAAAAGTGAATTACATTTTCGTACCATTAGTGCTAAC  
ATTGGTATCCTAGGGACTATGGAAGAAATAACTAATATGAATCCACTGATTTCTGCCGCT  
TCCGTTATTGCTGCTGGATTAGCTGTAGGGCTTGCTTCTATTGGACCTGGAGTTGGACA

GGGTACTGCTGCAGGACAAGCTGTAGAGGGTATTGCAAGACAACCAGAAGCAGAAGG  
TAAAATACGAGGTACTTTATTACTAAGTTTGGCTTTTATGGAAGCTTTAACAATTTATGG  
ATTGGTTGTGGCATTAGCACTTTTATTTGCAAATCCGTTTGTATGAATGTTATACCATGT  
TCCATTACACACTCATAGGATTTTACGATATATCGGGTGTAGAAGTAGGCCAACATTTA  
TATTGGCAAATAGGGGGTTTACAAGTACATGCTCAAGTACTTATCACTTCCTGGGTCGT  
AATTGCTATTTTATTGGGTTCCGGTCACCGTAGCTGTTCCGGAATCCACAAACCATTCCGA  
CTAACGGCCAAAATTTCTTCGAATATGTCCTTGAGTTCATTCCGGACTTAAGCAAGACG  
CAGATTGGGGAAGAATATGGTCCTTGGGTTCCCTTTATTGGAACATATGTTCTATTATT  
TTTGTTCAAAATTGGTCAGGTGCTCTTTTCCCTTGGAACCTGATAGAGTTACCTCACGG  
GGAGTTAGCTGCGCCGACGAATGATATAAATACTACTGTTGCTTTAGCTTTACTCACGTC  
AGTGGCATAATTTCTACGCGGGCCTTAGCAAAAAAGGATTGAGTTATTTCAAGAAATATA  
TTCAACCAACCCCAATCCTTTTACCAATTAACATTTTAGAAGATTTACAAAACCCTTAT  
CGCTGAGTTTTCGACTTTTGGAAATATATTAGCTGATGAATTAGTAGTTGTTGTTCTTG  
TTTCTTTAGTACCTTCGGTAGTTCCCTATACCCGTCATGTTTCTTGGATTATTTACAAGTGG  
TATTCAAGCTCTAATTTTGGCACTTTAGCTGCGGCTTATATAGGTGAATCCATGGAAGG  
TCATCATATGATATTTGTGACTCTAGAACATATATCACTCATATCTCTTTTCGATCGTTT  
CTGTTGTTATTATGATTCATTTTCTGAATTTACTAGTTCAAGAAATCATAGAGCTCTGGGA  
TTCATCAGAAAAAGGGATGACAGTTACTCTTATTATCACAGGATTATTAGTTATTCG  
TTGGTATTTTATTGGGACATTTTCCCTTAAGCAATTTATACGAATCATTAATCTTCCCTTC  
GTGGAGTTTCCCTATTATCATATGACTCTGTCTTTTTGACAAAACCTAAAAGTATTTACGT  
GCAATAATGGCTCCAAGTGCTATTTTGACCCAAGCTTTCGCCATTTCTGGCCTTTCTACC  
GGAATACGGCACTCTCCAATCTTAGTGCCTGCTCTACAGTCGCAGTGGTTGATGATGCA  
TGTAAGTATGATGTTATTAAGTTATGCAGCTCTTTTATTTGGATCATTATTTTCAATAGCTC  
TTTTAGTTATTACATTTTCGAAAAACATCAATATCCTTTGTAAAACCTAAC-----  
---GATAATATTTTACAAAGTTCTGCTTTTCTCTCATTGAAAAATTATTACAAATATCAATT  
GATTCAAAATTAGATTATTGGAGTTATCGTGTAATTAGTTTAGGATTTATCTTCTTAACT  
ATAGGTATTCTTTCTGGGGCAGTATGGGCTAATGAAGCTTGGGGGTCATATTGGAATTG  
GGATCCGAAAGAACTTGGGCTTTTATTACTTGGACTATATACGCAATTTATTTACATAC  
TAGAACAAACCAACGTTTTCAAGGTATTAATCCGCAATTGTAGCTTGTATTGGATTTTT  
TATCATTGGATATGTTATTTTGGAGTGAATCTATTGGGAATAGGTCTTTCA-----  
-----TTGCCCTGGTGGATCTCTCTATCATTTCAT  
AAATGTCTGGAACCTTGGATTACTCATTGGTGGAACTACTCGACAACCTGAAACTCTTTT  
GAATGATATTCAAGAGAAAAATGTTCTAGAAAGATTCTTAGAACTAGAAGAACTAATAT  
TCTTGGACGAAATAATAAAGGAGTTCCCCGGGACACATATACAAAAGTTTCCCGTAGG  
AATTCACAAAGAAACGATGCAATTGGTCAAAACACACAATGACTATCATCTACATATTA  
TCTCGCATTTCTCGACAAATATGATATCTTTTGGCTATTCTAAGTGGTTATTTTATTCTGCGT  
AATGAAGAACTTGTGTTCTTAATCTTGGGTTCCAGGAATTCCTTTCCAACCTAACGGA  
CACAATAAAAGCTTTTTCCATTCTTTTAGTTACTGATTTATGGATTGGATTTTATTTCGCC  
CACGGTTGGGAACTCATGATTGGTTCGGTCTACAAGGATTTTGGATGGACTCATGATGA  
TCAAATTATATCCGGCCTTGTTCACCTTTCCAGTCATTCTAGATACAATTGTGAAGTAT  
TGGATTTTTTCAATTTTAAATCGTGTATCTCCCTCACTTGTAGTGATTTATCATTCCATGAA  
TGAAATGCCCGTTGGTGTTCAAAAGTACCTACTCCAGAAGAAGCTGAGGATAATAAA  
ATTTGGGTTGACCTATACAACAGACTTTATGTACAAAGAATCGTTTTCTTAATAGGTCCG  
CTTAAGATGGAGAACGCAAATCAAGTTATGAGTCTTACGGTATATCTCACTCTGAAGAA





repeated text block





ACTTTTGTATTGCCTCTTCTTACTTCCGTATTTATGTTAATGCATTTTCTAATGATACGGA  
AGCAGGGTATTTCCGGGCCTTTAATGGGAGTAACGAAGAAACCTGATTTGAATGATCCC  
GTATTAAGAACTAAATTGGCTAAAGGGATGGGACATAATTATTACGGAGAACCCGCATG  
GCCCAATGATCTTTTATATATTTTTCCGGTAGTCATTCTAGGTACTATAGCGTGTAACGTA  
GGTTTAGGGTTCTAGAACCGTCAATGATCGGTGAGCCGGCGGATCCATTTGCAACTC  
CTTTGGAAATATTACCTGAATGGTACTTCTTTCCTGTATTTCAAATACTTCGCACAGTAC  
CGAATAAGTTATTGGGCGTTCTTTAATGGTTTCAGTACCATTAGGATTATTGACAGTAC  
CTTTTTTGGAGAATGTCAATAAATTCCAAAATCCGTTTCGTTCGTCCAGTCGCTACAAC  
GTTTTTTTGGTTGGTACTGCAATAGCACTTTGGCTAGGTATTGGGGCAACATTACCTATC  
GATAAATCTTTGACTTTAGGTCTTTTTATGATTGAAGTTTTTCTATTTGGAATTGTCTTAG  
GTCTAATTCCTATTACGTTAGCAGGATTATTCGTAACCTGCATATTTACAATACAGACGTG  
GTGATCAGTTGGATCTTATGCTTATTATAACTAGTTATTTCCGGTTTTCTACTGGCAGCTTC  
AACTATAACTTCAGTTCATTTCATTGGTTTGAACAAGATAGGACTTATTATGGATATAGTA  
AGTTTTGCTTGGACTGCTTTAATGGTAGTCTTTACATTTTCCCTTTCACTCGTAGTATGG  
GGAAGGAGTGGACTGATGATTATTCGTTTCGCCGGAACAAGAAGTGAAAATTGTGGTGG  
ATAGGGATCCTGTAAAAACGTCTTTCGAGCAATGGGCAAAACCGGGACATTTCTCAA  
ACAATAGCTAAAGGTCCTGATACTACTACTTGGATCTGGAACTTACACGCGGATGCTC  
ACGATTTTCGATAGTCATACCGATGATTAGAAGAAATCTCTCGAAAAGTGTTTAGTGCT  
CATTTTGGTCAACTCTCCATTATCTTTCTTTGGCTGAGTGGCATGTACTTCCACGGTGCT  
CGTTTTTCTAACTATGAAGCGTGGCTAAGTGATCCTACTCACATTCGACCTAGTGCTCA  
GGTAGTTTGGCCAATAGTGGGTCAAGAAATATTGAATGGTGATGTTGGTGGGGGCTTCC  
GAGGAATACAAATAACCTCTGGTTTGTTCAGATGTGGCGAGCATCTGGAATCACTAGT  
GAATTACAACCTCTATTGTACCGCGATCGGTGCATTGGTTTTTGCAGCCTTAATGCTTTTT  
GCCGGTTGGTTCCATTATCACAAAGCTGCTCCAAAATTGGCTTGGTTCCAAGATGTGGA  
ATCCATATTGAATCACCATTTAGCGGGGTTATTGGGACTTGGGTCTCTTTCTTGGGCGGG  
ACACCAAATCCACGTATCTTTACCGATTAACCAATTTCTCGACGCTGGAGTAGATCCTA  
AAGAGATAACCACTTCCTCATGAATTTATCTTAAATCGGGATCTTTTGGCTCAACTTTATC  
CCAGTTTTGCTGAGGGAGCAACCCCTTTTTTACCTTGAATTGGTCAAAATATGCGGAT  
TTTCTTACTTTTCGCGGAGGGTTAGATCCAATAACAGGCGGTTTATGGTTAACTGATATT  
GCTCATCATCATTAGCTATTGCAGTCTTTTTCTGATAGCCGGTCATATGTATAGGACCA  
ATTGGGGAATTGGGCATGGACTGAAAGATCTTTTAGAGGCACATAAGGGTCCGTTTAC  
AGGTCAGGGTCATAAGGGCCTTTATGAAATCCTAACAACATCATGGCATGCTCAATTAT  
CTCTTAACCTGGCTATGTTAGGTTCTTTAACCATTGTAGTAGCCACCATATGTATTCCAT  
GCCCCCTTATCCATACCTAGCTATTGATTATGGTACACAAATTTCTTGTTTACGCATCAC  
ATGTGGATCGGTGGATTTCTCATAGTTGGTGCTGCTGCGCACGCAGCTATTTTTATGGTA  
AGAGACTACAATCCAATACTCGATAACGATCTTTTAGACCGTGTCTTAGACATCG  
TGATGCAATTATATCACATCTCAACTGGGCATGTCTATTTCTCGGTTTTACAGTTTTGG  
TTTGTATATTATAATGACACCATGAGTGCTTTAGGACGCCCTCAAGATATGTTTTCAGA  
TACCGCTATAAATTACAACCCATCTTTGCTCAATGGATAAAAATACTCATGCTTTAGC  
ACCTGGTACAACAGCTCCGGGTGCAATAGCAAGCACCAGCTTAACGTGGGGGGGGTGG  
TGAGTTAGTAACAGTAGGTGGCAAAGTAGCTTTATTACCAATTCCATTAGGAACTGCAG  
ACTTTTTGGTACATCACATTCATGCTTTTACAATTCATGTGACTGTATTGATTCTATTGAA  
GGGTGTTCTATTTGCTCGCAGTTCACGTTTGATACCTGATAAAGCCAATCTTGGTTTTCG  
TTTTCTTGTGATGGCCCCGGAAGAGGAGGAACATGTCAAGTATCTGCCTGGGACCAT

GTTTTCTTAGGTCTATTCTGGATGTACAATGCCATTTTCGGTAGTAATATTCCATTTTCAGTT  
GGAAAATGCAATCGGATGTTTGGGGTACTGTAAGTGATCAGGGGGTAGTAAATCATATC  
ACAGGAGGAACTTTGCACAGAGTTCCACTACTATTAATGGATGGCTCCGAGATTTTTT  
ATGGGCACAAGCGTCTCAGGTCATTACAGTCTTATGGTTCTTCATTATCTGCTTATGGTCT  
TTTCTTCTTGGGTGCTCATTTTGTCTGGGCTTTTAGTTAATGTTTTTATTACAGCGGACGT  
GGTATTGGCAAGAACTTATTGAATCAATTGTTTGGGCTCATAACAAATTA AAAAGTTGC  
TCCTGCTACTCAGCCTAGGGCCTTGAGCATTGTACAAGGACGTGCTGTAGGAGTAACC  
CATTACCTTCTGGGTGGAATTGCTACAACATGGGCATTCTTCTTAGCAAGAATTATTGCA  
GTAGGAATGGCATTACGATTTCCAAGTTTAGCCAAGGCTTAGCTCAGGACCCCACTAC  
TCGTCGTATTTGGTTTGGTATTGCGACCGCGCATGACTTCGAGAGTACGATGATATTAC  
TGAGGAACGTCTTTATCAAAACATTTTGTCTCTCACTTTGGACAGTTAGCAATCATCTT  
TCTGTGGACGTCTGGAAACCTTTTTCATGTAGCCTGGCAAGGAAATTTGAATCCTGGG  
TACAGGATCCTTTACATGTACGACCTATTGCTCATGCAATCTGGGATCCCCATTTCCGGT  
AACCCGCTGTAGAAGCCTTTACACGAGGAGGTGCTCTTGGACCTGTGAATATTGCCTAT  
TCCGGTGTTTATCAGTGGTGGTATAACAATCGGATTACGCACCAATGAGGATCTTTATACT  
GGAGCTCTTTTTCTATTATCTCTTTCTGCTATATCTTTGATAGCGGGTTGGTTACACCTAC  
AACCCAAATGGACACCAAGACTTTTCGTGGTTCAAAAATGCCGAATCTCGTCTCAATCA  
TCATTTATCAGGACTTTTCGGGGTAAGTTCTTTGGCCTGGACAGGACATTTAGTTCATGT  
CGCTATTCCTGCATCGAGAGGTGAGTATGTTAGATGGAATAATTTCTTAGACGTATTACC  
ATATCCTCAAGGATTGGGTCCTCTTTTTACAGGTCAGTGGAGTCTTTATGCACAAAACC  
CAGATTCCAGTGGGCATTTATTTGGTACCTCTCAAGGGTCCGGAACTGCTATTTTAACC  
CTTCTGGGCGGGTTCCACCCACAAACACAAAGTTTATGGCTAACTGATATTGCCATCA  
TCATTTAGCTATTGCAGTTCTTTTCCTGATAGCTGGGCATATGTATAGGACCAACTTTGG  
AATTGGGCACAGTATAAAAAGATCTTTTAGAAGCACATATTCCTCCGGGGGGTTCGATTAG  
GTCGTGGGCATAAAGGTCTTTATGACACAATCAATAATTCATTCAATTTCAATTGGGTC  
TTGCCCTAGCCTCTTTAGGGGTCATTACTTCTTTAGTAGCTCAACATATGACTCTTTACC  
CTCTTATGCATTCATAGCACAAGACTTTACTACGCAGGCTGCGTTATATACTCATACCA  
ATACATCGCAGGATTCATCATGACAGGAGCCTTTGCTCATGGAGCTATCTTTTTTCATTAG  
AGATTACAACCCGGAACAGAATGAAGATAATGTATTGGCAAGGATGTTAGACCATAAA  
GAAGCTATCATATCTCATTAAAGTTGGGCCAGCCTTTTTCTGGGATTCATACGTTAGGA  
CTTTATGTTACATAACGACGTATGCTTGCCTTTGGTACTCCCGAGAAACAAATCTTGATC  
GAACCCATTTTTGCCCAATGGATAACAATCCGCACACGGTAAGACTTCATATGGGTTTCGA  
TGACTCTTATCTTCAACGGTTGGACCCGCATTCAATGCTGGCCGAAGTATATGGTTACC  
GGGGTGGTTGAATGCTGTTAATGAG-----AATAGTAATTCACTCTTCTTAACAATAGGTC  
CTGGAGATTTCTTGGTTCATCATGCTATTGCTCTAGGGTTACATACA ACTACATTGATTTT  
AGTCAAAGGTGCTTTAGATGCACGCGTTCTAAGCTAATGCCGATAAAAAGGATTTT  
GGTTATAGTTTTCTTGTGACGGTCCAGGACGGGGCGGTACTTGTGATATTTCCGGCTTG  
GGACGCATTTTATTTGGCAACTTTCTGGATGTTAAATACTATTGGATGGGTA ACTTTTTAT  
TGGCATTGGAAGCACATCGCATTATGGCAGGGTAATGTTTACAATTTAATGAATCTTCC  
ACTTATTTGATGGGATGGTTAAGAGATTATCTATGGTTAAACTCTTACAATTAATTAATG  
GGTATAACCCTTTTGGTATGAATAGCTTATCGGTCTGGGCGTGGATGTTCTTATTTGGAC  
ATCTTGTTTGGGCTACTGGATTTATGTTTTAATCTCCTGGCGCGGGTATTGGCAGGAAT  
TAATTGAGACTTTAGCATGGGCTCATGAACGCACGCCTTTGGCTAATTTAATTCGATGG  
AGAGATAAGCCGGTGGCTCTTCCATTGTGCAAGCAAGATTGGTCCGATTAGCTCATT

TTCTGTAGGTTATATATTTCACTTATGCCGCTTTCTTGATTGCCTCTACATCAGGAAAATTC  
GGTATGTCACATTCAGTAAAAATTTATGATACATGTATAGGGTGTACTCAATGCGTACGA  
GCTTGCCCTACAGATGTGTTGGAAATGATACCTTGGAAGGGATGTAAAGCAAAGCAAA  
TTGCTTCCGCGCCAAGAACAGAGGACTGTGTAGGTTGTAAGAGATGTGAATCCGCTTG  
TCCAACGGATTTTTTGAGTGTTTCGTGTTTATTTATCCGATGAGACAACCCGTAGTATGGG  
TCTAGCTTATATGACAGATCTTCACTTACCTTCTATTTTTGTGCCTTTAGTAGGCTTAGTA  
TTTCCGGCAATTGCAATGGCTTCTCTATTTCTTTCATGTTCAAAAGAATAAGATTGTCATG  
CGAGATATAAAAACATATCTCTCTGTGGCACCCGTAATACTACTATATGGTTTGGGTCT  
TTAGCGGGTTTATTGATAGAAATTAATCGTTTCTTCCCAGATGCTTTGTCATTC-----  
--ATGACTGCAATTTTAGAGAGACGCGAAAGTACAAGTCTATGGGGCCGCTTCTGTAAC  
TGGATAACCAGCACCGAAAACCGTCTTTACATTGGATGGTTTGGTGTTTAATGATTCCT  
ACCTTATTGACTGCAACTTCTGTATTTATTATCGCTTTCATCGCTGCTCCTCCAGTGGATA  
TTGATGGTATTCGTGAACCTGTTTCTGGATCTTACTTTATGGAAACAATATCATTAGTG  
GTGCAATTGTTCTACTTCTGCAGCTATAGGTTTGCATTTTTATCCAATTTGGGAAGCAG  
CATCTGTTGATGAATGGTTATACAATGGTGGTCCTTATGAACTAATTGTTCTACATTTCTT  
ACTTGGTGTAGCTTGTTACATGGGTCGTGAGTGGGAACTGAGTTTTCGCTTGGGTATGC  
GTCCTTGGATTGCTGTTGCGTATTCAGCTCCTGTTGCAGCTGCTACTGCTGTTTTCTTGA  
TCTATCCGATTGGTCAAGGAAGTTTTTCTGATGGTATGCCTCTAGGAATCTCCGGTACTT  
TCAATTTTATGATCGTATTTCAAGGCAGAACACAATATTTTATGATGCATCCATTTACATGTT  
AGGGGTAGCTGGTGTATTTGGCGGCTCCCTATTTAGTGCTATGCATGGGTCTTTGGTAAC  
CTCTAGTTTATGATCAGGGAAACCACTGAAAACGAGTCTGCTAATGCGGGTTACAGATTC  
GGTCAAGAGGAAGAACTTATAATATTGTGGCTGCTCATGGCTATTTTGGCCGATTGAT  
CTTCCAATATGCTAGTTTCAACAACCTCTCGTTCTTTACACTTTTTCTAGCTGCTTGGCC  
TGTAATAGGTATCTGGTTCCTGCGTTAGGTATTAGTACTATGGCTTTCAACCTAAATGG  
TTTCAACTTTAACCAATCTGTAGTTGACAGTCAAGGTCGTGTTATTAACACTTGGGCAG  
ATATTATTAACCGCGCTAACCTTGGTATGGAAGTTATGCATGAACGTAACGCTCACAAC  
TCCCTCTAGACTTAGCTGCTGTTGAGTTTCCATCCACAAAAGGAATGGGTTTGCCTTGG  
TATCGTGTTTCATACAGTTGTTTTGAATGATCCCGGTCGGTTACTTTCCGTCCATATCATGC  
ATACTGCCCTAGTTTCTGGTTGGGCCGTTCAATGGCTCTATACGAATTAGCGGTTTTTG  
ACCCGTCTGACCTGTTCTTGATCCGATGTGGAGACAGGGTATGTTTCGTTATACCTTCA  
TGAATCGTTTAGGAATAACCAATTCATGGGGTGGTTGGAGTATTACA---GGGGAGACTA  
TAACGAATCCGGGTATTTGGAGTTATGAGGGTGTAGCAGGAGCACATATTGTGTTTTCT  
GGTCTGTGTTTTTTGGCAGCTATCTGGCATTGGGTGTATTGGGACCTAGAAATATTCTGC  
GATGAACGTACAGGAAAACCTCTTTGGACTTGCCAAAATCTTTGGAATTCATTTATT  
TCTCTCAGGAGTCGCTTGCTTTGGTTTTGGGGCATTTCATGTCACAGGTTTATATGGTCC  
TGGGATATGGGTATCGGATCCTTATGGGCTAACTGGAAAAGTACAACCTATCAGTCCTAT  
GTGGGGCGCCGAAGGTTTTGATCCTTTTGTTCCTGGAGGAATCGCTTCTCATCATATTG  
CAGCGGGTATTTTGGGCATATTAGCAGGTCTATTCCATCTTAGTGTTCCGCCACCTCAAC  
GTTTATATAAGGATTACGTATGGGAAATATTGAAACCGTACTTTCCAGTAGTATTGCTG  
CTGTATTTTTTCGCAGCTTTCGTTGTTGCTGGAACCTATGTGGTATGGTTCAGCAACTACTC  
CGATCGAATTTTGGTCCGACTCGTTATCAGTGGGATCAGGGGTATTTCCAGCAAGAA  
ATCTATCGAAGAGTTAACGCTGGATTAGCCGAAAACCGAAGTTTATCAGAAGCTTGGT  
CTACAATTTCCCGAAAATTTGGCTTTTTATGATTACATCGGTAATAACCCCGCAAAAAGG  
GGGTTATTCAGAGCGGGTTCAATGGACAACGGAGATGGAATAGCTGTTGGTTGGTTAG

GACATCCTATTTTTTCGAGATAAAGAAGGGAGCGAACTTTTTGTACGTCGTATGCCTACT  
TTTTTTGAAACATTTCCGGTAGTGTTGGTGGATGGAGAGGGAGTTGTGAGAGCTGATG  
TTCCCTTTAGAAGGGCGGAATCAAATATAGTGTTGAACAAGTAGGTGTAACCTGTTGA  
GTTTTATGGTGGCGAACTCAATGGAGTCAGTTATAGTGATCCCGCTACTGTGAAAAAAT  
ATGCTAGACGCGCTCAATTAGGTGAGATTTTTGAATTGGATCGGGCTACTTTGAAATCA  
GATGGAGTTTTTTTCGTAGTAGTCCAAGGGGCTGGTTCACCTTTGGGCATGCTACGTTTTGC  
TTTGCTGTTCTTTTTTTGGACACATTTGGCATGGTGCTAGAACCTGTTTTCGAGATGTTTT  
TGCTGGTATTGATCCAGATTTGGACGCTCAAGTGGAATTTGGGACATTCAAAAAGTTG  
GGGATCCTACTACAAAGAGACAGACAGTC-----GTGGAAACGCT  
CTTTAATGGAACCTTTCACCTTAGCTGGCCGTGATCAAGAAACCACTGGTTTTGCCTGGT  
GGGCCGGGAATGCCAGACTTATCAATTTGTCCGGTAGACTACTTGGAGCTCATGTAGCC  
CATGCCGGGTTAATTGTATTTTGGGCTGGAGCAATGAACCTATTTGAAGTGGCCCATTC  
CGTACCAGAGAAGCCTATGTATGAACAGGATTGTATTTACTACCCTATCTAGCCACTTT  
AGGTTGGGGAGTAGGCCCGGGGGGAGGTTATAGACACTTTTCCATACTTTGTGTCT  
GGAGTGCTTCACTTAATTTCCCTCCGCAGTCTTAGGCTTTGGTGGTATTTATCATGCACTT  
CTTGGGCCTGAGACTCTGGAAGAATCTTTTCCATCTTTGGTTATGTATGGAAAGACAG  
AAATAAAATGACCACCATTTTAGGTATTCATTTAATTTTGTGGGTGTAGGTGCTTTTTTT  
CTAGTATTTAAAGCTCTTTATTTTGGCGGTGTATATGATACTTGGGCTCCCGGAGGAGGA  
GATGTAAGAAAAATTACCAATTTAACCTTAGTCCAAGTGTAATATTTGGTTATTTATTA  
AAATCTCCTTTTGGGGGAGAAGGGTGGATTGTTAGTGTAGACGATCTCGAAGATATAAT  
TGGAGGACATGTATGGCTAGGTTCCATTTGTATATTTGGTGGAAATTTGGCATATACTAAC  
AAAACCTTTTGCATGGGCTCGTCGTGCACTTGTATGGTCTGGCGAAGCTTACTTGTCT  
ATAGTTTAGGCGCTTTAGCCATCTTTGGTTTTACCGCTTGTGTTTTGTATGGTTCAATAA  
TACTGCTTATCCTAGTGAATTTTATGGCCTACTGGACCAGAGGCTTCTCAAGCCCAAG  
CATTTACTTTTCTAGTTAGAGATCAACGTCTTGGGGCTAATATAGGATCGGCTCAAGGG  
CCCACCGTTTTAGGTAAATACCTAATGCGTTCCTACTGGAGAGGTCATTTTTGGAGG  
GGAAACTATGCGTTTTTGGGATCTCCGTGCTCCTTGGTTGGAACCTCTAAGAGGTCCAA  
ATGGTTTGGACTTGAGCAGGCTGAAAAAAGACATACAGCCTTGGCAAGAACGACGTT  
CGGCGGAATATATGACTCACGCCCTTTAGGCTCTTTAAATCTGTGGGTGGCGTAGCT  
ACCGAGATCAATGCAGTCAATTATGTTTCTCCTAGAAGTTGGTTAGCTACCTCTCATTTT  
GTTCTAGGATCTTCTTATTTGTGGGCCATTTATGGCATGCGGGAAGAGCTCGCGCAGC  
TGCAGCAGGATTTGAAAAAGGAATCGATCGCGATTTGGAACCCGTTCTTTCCATGACC  
CCTCTTAGCATGACTATAGCCCTTGGTAGATTTACCAAAGACGAAAATGATTTATTCGAT  
ATTATGGATGACTGGTTACGCAGGGACCGTTTTCGTTTTTTGTAGGTTGGTCTGGCCTATTG  
CTCTTTCCTTGCCTTATTTTGCTTTAGGAGGTTGGTTCACGGGTACAACCTTTTGTAACC  
TCATGGTATACTCATGGATTGGCTAGTTCCTTATTTGGAAGGCTGCAATTTCTTAACTGCC  
GCGGTTTCTACCCCTGCGAATAGTTTAGCGCATTTCGTTGTTGCTACTATGGGGTCTCTGA  
AGCACAAGGGGATTTCACTCGTTGGTGTCAATTAGGAGGTCTGTGGACGTTTGTGCT  
CTTCATGGTGCCTTCGGGCTAATAGGTTTTATGTTACGTCAATTTGAACTCGCTCGATCT  
GTTCAATTGCGCCCTTATAATGCAATCGCATTTTCTGGTCCAATTGCTGTTTTTTGTTTCC  
GTATTCTTGATTTATCCTTTGGGTCAATCTGGTTGGTTTTTTTGCCTAGTTTTGGTGTAG  
CCGCTATATTTGATTTATTTCTTCTTCCAAGGTTTTATAATTGGACCTTGAACCCCTT  
TCATATGATGGGAGTTGCTGGAGTATTAGGTGCAGCTCTACTATGCGCTATTCATGGTGC  
TACTGTAGAAAATACTATATTCGAAGATGGTGTATGGTCAAATACATTTTCGAGCTTTTAA

CCCCACTCAGGCGGAAGAACTTATTCGATGGTAACTGCTAATCGCTTTTGGTCCCAA  
TTTTTGGGGTTGCTTTTTCCAATAAACGTTGGTTACATTTCTTTATGTTATTCGTACCAGT  
AACTGGTTTATGGATGAGTGCTATTGGAGTAGTTGGCCTGGCTCTCAACCTACGCGCCT  
ATGACTTTGTTTCTCAAGAGATCCGTGCAGCAGAGGATCCTGAATTTGAGACTTTCTAC  
ACCAAAAATATTCTCTTAAACGAGGGTATTTCGTGCTTGGATGGCAGCTCAGGATCAGCC  
TCATGAAAACCTTATATCCCTGAGGAGGTTCTACCACGTGGAAACGCTCTTATGTCTG  
GAAGCACGGGAGAACGTTCTTTTGGCTGATATTATTACTAGTATTCGATACTGGGTATTTC  
ATAGTATTACTATACCTTCCCTATTTCATTGCGGGTTGGTTATTCGTACAGTACGGGTTTACG  
TTACGATGTCTTTGGAAGTCCACGGCCAAATGAGTATTTACAGAGAGCCGACAGGGG  
ATTCCATTAATAACCGGGCGTTTTGATTCTTTGGAACAACCTCGATCAATTTAGTAGATCC  
TTTATGACCATAGATCGAACCTATCCCATTTTTACAGTGCGATGGTTGGCTGTTACAGGA  
CTAGCTGTACCTACTGTGTTTTTTTTGGGATCAATATCAGCAATGCAGTTCATCCAACG  
A????????????????????????????????????????????????????????????  
????????????????????????????????????????????????????????????  
????????????????????????????????????????????????????????????  
????????????????????????????????????????????????????????????  
????????????????????????????????????????????????????????????  
ATGCTTACTCTGAAATTCCTTGTATTATAC  
AGTCGTAATATCTTTGTTCCCTTTTCATTTTTGGATTCTTGTCTAATGATCCAGGGCGT  
AATCCTGGTGGACGTGAAATGGCGGATACGACTGGAAGGATTCCCCTTTGGCTAATAG  
GTAAGTGTAGCTGGTATTCTTGTGATCGGTTCAATAGGTGTTTTCTTTTACGGTTCATATC  
CGGATTGGGCTCATCTCTGATGCTTAATATCTTTAGTTTCATCTGTATCTGTCTTTCCCTCT  
GTCCCTCATTGAGTAGTTTTCTTTTCGCCAAATTGCCTGAGGCTTATGCCATTTTCCAG  
CCAATTGTAGATGTTATGCCGGTAATACCTCTATTCTTTTTTCTTCTAGCTTTTGTGGC  
AAGCAGTCGTCAGTTTTCGAATGACACAATCAAATCCGAATGAACAAAATGTGGAATT  
GAATCGTACCAGTCTATACTGGGGATTATTACTGATTTTTGACTTGGCGTTTTATTTTCC  
AATTATTTCTTCAATATGGAAGTAAATATTCTCGCATTTATTGCTACTGCACTCTTTATTCT  
AGTTCCGACTGCCTTTTTACTTATTATCTACGTAAAAACAGTAAGTCAAAATGATATGGA  
AACAGCAATCCTAGTCACCATATTCTATCTGGTTTACTTGTGACTTTTACTGGGTACGC  
CTTATATACCGCCTTTGGGCAACCCTCTCAACAATAAGAGATCCTTTTCGAGGAACACG  
GAGACATGGAAGCATTGGTTTATACATTTCTGTTAGTATCTACTTTGGGGATCATTTTTTT  
CGCGATCTTTTTTCGAGAACCGCCTAGGGTTCCGACTAAAAATCAAAAATGACTATTG  
CTTCCAATTGGCTGTTTTTGCCTAATTGCAACTTCATCAATTCTGTTGATTAGTGTAC  
CCGTTGTATTTGCTTCTTCTGATGGTTGGTCAAGTAACAAGAATATTGTATTTTCTGGTA  
CATCATTATGGATTGGATTAGTCTTTCTGGTAGCTATCCTTAATCCCTTATTCT-----  
-----ATGTCACCACAAACAGAGACTAAAGCAGGTGTTGGATTCAAAGCTGGTGTGAA  
AGATTACAAATTGACTTATTATACTCCTGAATATGAAACCAAAGATACTGATATCTTGGC  
AGCATTCCGAGTCACTCCTCAACCTGGAGTTCACCTGAAGAAGCAGGAGCTGCAGTA  
GCTGCCGAATCTTCTACCGGTACATGGACAACCTGTGTGGACTGATGGACTTACTAGCCT  
TGATCGTTACAAAGGACGATGCTATCATATCGAGCCAGTTGCTGGAGAGGAAGATCAAT  
ATATTGCTTATGTAGCTTATCCTTTAGACCTTTTTGAAGAGGGTTCTGTTACCAACATGT  
TTACTTCCATTGTGGGTAATGTATTTGGATTCAAAGCTCTACGAGCTCTACGCTTGGAGG  
ATTTGCGAATTCCTCCTGCTTATTCCAAAACCTTTCAAGGTCCACCTCATGGAATCCAA  
GTCGAAAGAGATAAATTAACAAATATGGTCGTCTCTATTGGGATGTAATAAACC  
AAATTGGGATTATCTGCGAAAACTACGGTAGAGCCGTTTATGAATGTCTACGCGGTGG  
ACTTGATTTTACCAAAGATGATGAAAACGTGAACTCACAGCCATTTATGCGTTGGAGA  
GATCGTTTTCTATTTTGTGCTGAAGCAATTTATAAAGCACAAAGCCGAAACGGGTGAAAT



TAAAGGACACTACCTGAATGCTACTGCGGCTACATGTGAAGAAATGATCAAAAAGGGCC  
GTATTTGCCAGAGAATTGGGAGTTCCTATCGTAATGCATGACTATTTAACAGGGGGTTTC  
ACTGCAAATACTAGTTTTGTCTTTTTATTGCCGAGACAACGGCTTACTTCTTCATATTCAC  
CGTGCAATGCATGCAGTTATTGATAGACAGAAGAATCATGGTATACACTTTCGTGTACTA  
GCTAAAGCATTACGTATGTCTGGTGGGGATCATATTCCTCTGGTACAGTAGTGGGTAA  
ACTAGAAGGTGAACGCGAGATGACTTTAGGCTTTGTTGATTTACTACGTGACGATTATA  
TCGAAAAAGACCGAAGTCGTGGTATTTTCTTCACTCAAGATTGGGTCTCTATGCCGGGT  
GTTCTGCCTGTAGCTTCAGGAGGTATTCATGTTTGGCATAATGCCTGCTCTGACCGAGATC  
TTTGGAGATGATTCCGTACTACAGTTCGGCGGAGGAACTTTAGGACATCCTTGGGGGA  
ATGCGCCTGGTGCAGTAGCTAATAGGGTGGCTTTAGAAGCGTGCGTACAAGCTCGTAAT  
GAAGGATGTGATCTTGCTACGGAAGGCAATGACATTATCCGAAAAGCTTGCAAATGGA  
GCCCCGAACTTGCCGCTGCTTGTGAAGTATGGAAAGAAATCAAATTTGAATTCAGCC  
GGTAGATACGCTGGATCAAATGGCGAGACATTTCTACAAAACCTTCTACCCCCGAGCACA  
CGCAACGTAGCCGTAGACAGG-----AAATCCAATCCACGAAATCATTTGATTTATGGACA  
GCATCGTTGTGGTAAAGGTCGTAATGCCAGAGGAATCATTACCGCAAGGCATAGAGGA  
GGGGGTCATAAGCGTCTATACCGTAAAATCGATTTTCGACGGAATGAAAAAGACATATC  
TGGTAGAATCGTAACCATAGAATACGACCCTAATCGAAATGCATACATTTGTCTCATA  
CTATGGGGGTGGTGAGAAGAGATATATTTTACATCCCAGAGGGGCTATAATTGGAGATA  
CCATTGTTTCTGGTACAGGAGTTCCTATATCAATGGGAAATGCCCTACCTTTG---GATATG  
CCCTTAGGCACGGCCATACATAACATAGAAATCACACTTGGAAAGGGTGGACAATGCG  
CGAGAGCAGCGGGTGTGTAGCGAAACTGATTGCAAAGAGGGCAAATCAGCCACAT  
TAAGATTACCATCTGGAGAGGTCCGTTTGATATCCAAAACTGCTTAGCAACAGTCGGA  
CAGGTGGGTAATGCTGAGGCAAAGGTCAAAAAGTTGGGTAGAGCCGGATCGAAATGT  
TGGCTAGGTAAGCGTCCTGTAGTAAGAGGAGGAGTTATGAACCCTGTAGACCATCCCC  
ACGGAGGCGGTGAAGGAAGAGCCCCAATTGGTAGAAAAAACCTGTGACCCCTTGGG  
GTTATCCTACGCTTGGAAGAAGAACTAGGAAAAGGAAAAACATAGTGATACTTTGAT  
TCTTCGTCGCCGTA---ATGGTTCAACCTCAGACCCTTTTGAATGTAGCGGATAACAG  
TGGGGCTAGAAAATTGATGTGTATTCGAGTCTTAGGAACTAGT---AATTACCAATATGCT  
CATATTGGTGACGTTATTATTGCTGTAATCAAGGAAGTGGTACCTAATATGTCTTTAGAA  
AAATCAGAAATCATTAGAGCTGTGATTGTACGTACACGTAAAGAACTAAAACGTGACG  
ATGGTATGGTAATACAATATGATGACAATGCAGCAGTTATCATTGATCAAAAAGGGAAATC  
CAAAGGGAACCTCGGGTTTTTGGTGCAATTGCTCAAGAATTGAGACAGTTAAAGTTCAC  
AAAAATAGTCTCATTAGCCCCTGAGGTATTCATGCTTAGCCCCAAAAGAATAAATTC  
GTAAACAACATAGAGGAAGAATGAAAGGAATATCTTCTAGAGGAAATCATATTTCTTTC  
GGAAAGTATGCTCTTCGGGCACTTGAACCCGCTTGGATCACAACCTAGACAAATCGAAG  
CTGGACGAAGAGCAATGACACGATATGCGCGCCGTGGTGGAAAAATATGGGTACGCAT  
ATTTCCCGACAAACCTTTTACACAAAGAACAACAGAAGCACGTATGGGTTCCGGAAAA  
GGAAACCCAAAGTATTGGGTAGCTGTTGTGAAACGCGGTGAGTACTTTATGAAATGG  
TTGGAGTATCAGAAACCGTAGCTAGAAGAGCTATGTCAATAGCTGCATACAAAATGCCT  
ATACGCACTGAATTCATTATTGCAGAAATGACCAGAGTTAAAAGAGGATATATAGCTAG  
GAGACGTAAAACAAAAGTACGCTTATCTGTATCAGCCTTTCGAGGGGCTCGTTCAAGA  
CTTATTCGAACTATGACTACAAAGAAAAAGAAAGCCTGGTTTTTGTCTCATCGAGATAG  
AGGTAGGAAAAAGAGAGATTTTCGCCGTTTGTGGATTACTCGGATAAATGCAGTAACT  
CGTGAGAAT-----CTATCTTATAGTTATAGTAGATTCATACATAATTTGTACACAAGGCAAT

TACTTCTTAATCGGAAAATGCTTGCACAAATAGCTATATTAATCAAAAATGTCTTTCCA  
TTATTTCTAATAAGATTATCGACAAATCAAAGAGGTTATCTGATCATCTAAAAGAGATGA  
TAAGAAAAGTTTTA---GCTCAACATATACAT---ATGTCTATTTTCAAAGCCCGAAGAGTG  
ATTGATCAAATTCGCGGGCGTTTCGTATGAAGAAACACTTATGATACTGCAACTCATGCC  
TTATCGAGCCTCTTACCCCATTTTGAAAATGGTTTCTTCTGCAGCAGCAAATGCTAGTCA  
TAATATGGGTTTGAACGAAGCGGATTCATTTATTAGTAAAGCGGAAGTCAACGGAGGCT  
CTATTGTGAAAAAGTTGAGGCCCGGAGCTAAAGGGCGTAGTTATGCAATAAAGAGGCC  
CCTCTGTCATATAACAATTGTAAG---AAATCGAAA-----ATGGATGG  
AATCAAATATGCAGTATTTACCGAAAAAGTACTCGATTATTGGGTTATAATCAA---TATA  
CTTCTAATGTGCAATCAGAGTCAACTAGGACAGAAATAAAGCATTGGGTCGAACTCTT  
CTTTGGTGTCAAGGTCATAGCTATGAATAGTCATCGACTCCCCGAAAGGGTAGAAGA  
ATGGGATCTATTATAGGACATAACAATGCATTACAAACGTATGATCATTACGCTTCAAGCG  
GGTATTCTATTCCACCTCTTATAGAGAAAAGAACTATGGCAGTTCCAAAAAACGTAC  
TTCTATATCAAAAAACGTATCCGTAAAAACGTTTGGAAAGAAAAAGGATATTTGGCTG  
CGTTAAAGCTTTTTCTTTAGCCAAATCAATTTAACGGGAAAATCTAAAAGTTTTCTG-  
----AAAATGGAAAAATGGCAAAGGTAAGAGGTTAGAGTCAGAGTTATTTTGGAAAT  
GTACCTGTTGTGTTAGAAAGGGT-----GTTAATAAAAAA-----GGAATTTCTCGATATATTA  
CTCAAAGAACCGACACAATACATCCAATCGATTAGAATTGAGAAAATTTTGCCGTCAT  
TGTTACAAGCATAACGATTCACAGGGAAATAAAGGAAATGAAAATGAGAGCTTCTGTTC  
GTAAAATTTGTCTAAAATGCCGACTTATTCGTAGGCGAGGACGCTTTATAGTACTTGT  
CCCAATCCGAAACATAAACAAGGCAAAAAATGGTTTCGAGAGGAAGGAATAGGATCC  
ACTCGAAGACTACAGTGGAAGTGTGTTGAATCAAGAGTAGACAGTAAACGTCTCCATT  
ATGGACGCTTCACTCTGCTCCACTTAGAAAAGGTCAAGCCGATACCATAGGTATTGCC  
ATGCGAAGGGTTTTACTTGGAGAAATGGAAGGGACGTGTATTATACATGCAAAATTTGA  
T-----AATGTACCACATGAATATTCTTCCATACCAGGTATGGAAGAATCCATACAAGAAAT  
TCTAATGAATTTGAAAGAAATTGTATTGAGAAGTCATTTGTATGGAGTTCGAGACGCAC  
TTATTTGCGTCAAAGGTCCCAAATGTGTAACCGCTCAAGATATAATCTCACCCTTTCTG  
TGGAATAGTTGACTACACAGCATATAGCTAACCTTACAGAAGCCGTTGATTTACGT  
ATTGAATTACAAATCCAGAGAGATCGTGGATATCGGATAAAATCCACAAATGACTCTCA  
AGTTGGAAGTTAT-----CCTATAGACGCTGTATCCATACCTGTTTCGAAATGCAAAATATAG  
TATTTATCTTATGGAGATGGGAATGAAAAACAAGAAATCCTTTTTCTAGAAATATGGAC  
AAACGGAAGTTTAACTCCAAAAGAAGCACTTTATGGAGCTTCTCGTAATTTGATTGATT  
TATTGATTCCTTTTCTACATGCGGAAGAGGAAAACACAAATACAAATTTGGAGGAAAA  
GAAA---AACAAATTTACTTTACCT--TTTACCTCCCATGATAGCTTATCT---AATGCAAAG  
AAAAATACAAAC---GGGATGACATTGAAATATCTCTTTATTGACCAATTAGAATTACCCT  
CCAGGGTCTATAATTGTCTCAAAAGGTCCAATATACATACATTATTGGACCTTTTGAATC  
AAAGTCAAGAAGATCTTATGAGAATTCATTTTTCGTGCAGAAGATGAAAACGGATA  
TTGAGTATTCTACAGAAGCGT-----TTCGCAATTCATTTACCTAAGAAT---ATGCTCTGTGA  
TGGAAT--GAGGAAATGTTCACAATACCCGACTTAGTCAGATACAATTGGAAGGATT  
TTCTAGGTTTCAATCAGGGTTTGACCGAAGAGTTTCATCAATTTCCAAAAATTGAATA  
TAGAGATCACGAAATTGAATTTCAATTTTTTGGAGCGATATCAATTGGTAAAACCTTT  
GATAAACGAAAGAGATGCTGTGTATGAATTAATCACAATTTCTTCTGAATTATATGTACC  
CGGAGGACTCATTGGAAACCAAGTAAGAATATGCAAGAACAAACCGTGTATTGGA  
AACATCCCTCTAATGAATTCCTGGGAACCTTTTATAGTTAATGGAATTTATCGAATAGTG

ATCAATCAAATATTGCAAAGCCCCGGGTATTTACTACCGTGCAGAATTGGACCAGAGGGG  
AAATCCTACTTATATAAGTACTATCATATCAGATTGGGGAGGAAGATCAGAATTAGAAAT  
TGATAAAAAAGTACAGATATGGGCCCGTGTGAGTAGGAAACAAAAATAGATATTCTAC  
TTTTATTATCAGCTATGGGTTTCGGACCTAAGCGAAATTCAGATCATGTTTGTACCCTG  
AAATTTTCTTGTCTAAAAAGAAGTCAAAGGAAAAAAGAAGGAAAAGAAGCATCAA  
ATGCCATTGTAGAATTTTATAACAATTTGCTGGTGTGGACGGTAACCTAGTATTTCTG  
AAACCGTATGTGAGGAATTACAAACGAAATTTTTTCAACAAAAATGTGAATTAGGAAG  
GATTGGTCGACGGAATATAAATAGAAGACTCAACCTTGATATACCTCAGAACAATACAT  
TTTTGCTACCGCGAGATGTATTGGCTGCTGTCGATCATTTGATTAGAATGAAATTTGGAG  
TAGGTACACTTGACGAT-----ATGAATCATTTGAAAAATAAACGTATTCGCTCGGTAGCA  
GATCTGTTACAGGATCAATTTGGATTGGCTCTTGTTTCGTTTAGAACACGCAGTTCGAGG  
AACTATATGTGAAGCAATCCGG--CGGAATTTTAGA--CCTATTCCTAAACAATTGGTAA  
CTTCCACTTTA-----TTAACAAGCACTTATGAATCCTTTTTTACTCTACACCCTTTATC  
TCAAGTTGCGGATCAAACGAATCCATTGACACATATCGTTCATGGGCGAAAATTGAGTT  
ATTTGGGTCCGGAAGGATTGACAGGACGAACTGCCAGTTTTTCGTATGCGGGATATCCAT  
CCTAGTTACTATGCACGTATTTGCCAATTGACACGTCTGAGGGAATCAATGTTGGACTT  
ATTGGATCTTTAGCTATTCATGCAAGGATTGGTCATTGGGGA---TCTATAGAGAGCCCTT  
TTTAT-----GAAATATGTAAACGATCGAAAGAA-----GGACAGATGGTTTATTTATCACC  
AAGTAAAGATGAATATTATATGATAGCAACAGGAAATCCCTTGGCCTTGAATCGGGGCA  
TTCAGGAGAAACAAGTTGTTCCAGCCCGATATCGTCAAGAATTCCTGACTACTGCATG  
GAAACAGATTCATTTTCGAAGCATTTTTCCCTTCCAATATTTTCTATTGGAGCTTCCCT  
CATTCCTTTTATCGAACATAATGATGCAAATCGGGCTTTAATGAGCTCTAATATGCAACG  
TCAAGCGGTTCCCTTTCTCGGTCCGAGAAGTGCATTGTTGGAAGTGGGTTGGAAGGT  
CAAGTTGCCCTAGATTCAGGGGTTTCGGCTATAGCCGAAGACGCAGGAAAGATCATTTA  
TACTGATACTCATAAGATGATTTTATCAAATCAAGGAAAGGCTCAAAGCATTCCATTAGT  
TATGTATCAACGTTCCGGCAAAGTACTTGTATGCACCAAAAACCTCAGGTTCCACGG  
GGTCAATACATTA AAAAAGGGCAAATTTTAGCGAACGGCGCCGCTACCCTTGGAGGAG  
AACTTGCTTTGGGAAAAAATGTATTAATAGCTTATATGCCATGGGAAGGCTACAATTTTG  
AAGATGCAGTACTTATCAGTGAACGCTTAATATATGAGGATATTTACACTTCTTTTCATAT  
ACGAAAGTATGAAATTCAGATTTATATGACGAGTCAAGGT---CCTGAAAGAATTACTAAT  
GAAATACCTCATTTAGAGGATCATTTACTCCGCAATTTAGACAGAAATGGAATTGTGAT  
GCTGGGTGCTTGGGTAGAAGAGGGTGATATTTAGTAGGTAAATTAACGCCGCAGGTA  
ACGAACGAA---TCCTCCTATACTCCGGAAGATCGATTATTACGGGCTATACTTGGCATT  
AGGGATCCACTGCAAAGAAAGTTCCCTCAAATTACCTATAGGCGGAAGGGGCCGAGT  
TATTGATGTGAGATGGATACAGAAAAAGGGA---GCTTCCAGCGGTAATTCAGAAATGAT  
TTGTATATATATTTTACAAAAACGTCAAATCCAAGTGGGTGATAAAGTTGCTGGAAGAC  
ATGGGAATCAAGGTATTGTTTCCAGAGTCTTGCCATAACAAGATATGCCCTATTTGCAA  
GACGGAACATCGGTTGATATGGTCTTCAACCCATTAGGAGTACCCTCGCGAATGAATGT  
GGGACAGATATTTGAATGCTCGCTCGGATTAGCAGGAGATCTTTTAAACAGACATTATA  
GAATAGCGCCTTTTGATGAGAGATACGAACAAGAGGCGTCAAGAAAACCTAGTCTTTTC  
TGAATTATATGAGGCCAGTAAGCAAACAAAAAATCCATGGGTATTTGAGCCCGAGTATC  
CGGGAAAAAGCAGAATCTTTGACGGAAGAACAGGAGATCCTTTTGAACAACCTGTTC  
TAATAGGAAAGTCTTATATCCTGAAATTAATTCATCAAGTTGATGATAAATTCATGGAC  
GTTCCAGTGGACCTTACGCCCTTGTTACACAACAACCCCTTAAAGGAAGGGCCCAACG

AGGAGGGCAACGAGTGGGAGAAATGGAAGTTTGGGCCTTAGAGGGATTTCGGTGTTC  
TCATATTTTACAAGAGATGCTTACTTATAAATCTGATCATATTAGAGCTCGCCAGGAAAT  
AATAGGTACTIONCATTTTTGGAGGAACAATACCTAATCCTGAGGATGTTCCAGAATCGT  
TTCGATTGCTAGTTCGAGAACTACGATCTTTAGCTCTAGAATTGAACCATTTCTTTGTAT  
CTGAGAAGAGCTTCCAGATCCACAGGAAGGAAGTT-----ATGATCGATCGGT  
ATAAACATCAGCAACTTCGAATTGGACTAGTCTCCCTGAACAAATAAGTTCTTGGGCC  
AACAAAATTCTACCGAATGGAGAAGTTGTTGGAGAGGTGAAAAAACCTTACACTTTTC  
ATTACAAGACCAATCAACCAGAAAAAGATGGCTTGTTTTGTGAAAGAATCTTTGGACC  
TATAAAAAGTGGAATTTGTGCGTGTGGAAATTATCGATCGATCGAACTGAAAAGGAA  
GGCAGGGAATTCTGTGAACAATGCGGAGTTCGAGTTTGTGATTCTCGGATACGAAGAT  
ATCAAATGGGATACATTAACCTCGCGTGTCCAGTGGCTCATGTTTGGTATTTGAAACGT  
TTTCTAGTTATATCGTGAATCTTTTAGATAAACCCCTTAACCAATTAGAAGACCTTGTAT  
ACTGCGAT-----TTTTCTTTTGTAGGTCT--ATAACTAAAAACCTACTTTCTTACGATTA  
CAAGGTTTATTTCGAAGATGAAATCCAATTATGGAAAGATGAGATCTGCTTTTTTTTTACT  
ACCAGCCTCGTCGAGATATTTGAAATCGAGAAATCTCGACCGGAGCGGGTGTCTATCA  
GAGAGCTGTTAGCCGATTCGGATTTGCGAATGATTATAGATGAATCATTGGTCGAGTGG  
GAGGAATTAGTAAAAAAGGAATCTATACGTGGACAG-----AAAAAGGAAAGCATTTCGA  
CGAAGAAAGGATTTTTTGGTTAGGCGTATGGAATTAGCTAAACATTTGATTTCGAACAAA  
TGTAGAACCAGAATGGATGGTTTTATGTCTATTACCAGTTCTTCCCCCTGAGTTAAGACC  
CATGATCCAAATAGATGGGGGTAAACTAATGAGCTCCGATATGAATGAACTCTATAGAA  
GAGTGATTTCGTCGGAATAATGCTCTTATTGATTTCTTAAGAGCTGATAGATTCACACCCG  
GGGAATTAGTAATGGGTCAGGAAAGACTATTACAAGAAGCCGTGGATGCACTTCTCGA  
TAATGGGGCCCGCGGGCAATCAACAAAAGAAGGTCATAATAAAGTTTACAAGTCCTTT  
TCAGATATAATTGAAGGTAAAGAGGGAAAGATTTGTCATACTCTGCTTGGTAAACGAGT  
TGACTATTCGGGACGTTCCGTCATTGTCGTGGGTCCCTTCGCTTTCATTCCATCAATGCGG  
ATTACCTCGAGAAATAGCAATAGAACTTTTTAGCCATTTGTGATTCGTGGTCTAATCAG  
ACAACATGTTGCTTCCAATATAGGTCTTGCTAAAAGTCAAATTATAGAAAAAGAACCCA  
TTGTATGGGAATACTTCAAGAAGTTATGCAGGGGCACCCGTATTGCTGAATAGAGCA  
CCCCTCTGCATAGATTAGGAATACAGGCATTCCAACCTATTTTAGTAGAGGGACGTGC  
TATTTGGTTACATCCATTAGTTTGTAAAGGGCTTTAATGCAGACTTTGATGGGGATCAAAT  
GGCTGTTACGTAACCTTTATCCTTGGAAAGCTCAAGCTGAGGCTCGTTACTTATGTTTTC  
CCATATGAATCTATTATCTCCAGCTATGGGGGATCCATTTGTGTACCAACTCAAGATAT  
GCTCCTTGGGCTCTACGTATTAACAATCAAGAAAGGTCGAGGTATTTATACAAATAGGT  
ATAATACATGGGGTTGCGAAAAT-----TTGCAAGATCCAATAGCCGACAAAACCTAATTA  
TGAGTATAGGAAAGAAAAGGAACCCTCTTTTTCTAGTCTTATGATGCGCTTGGGGCTT  
ATCGTCGAAAACAAATCTATTTAGATAGTTCTTTGTGGCTCCGATGGCGATTAGATCAAC  
GT--GTCATTGGCGCA-----AAAGAAGTTCCTATTGAGATTCAATATGAATCCTTGGGTAC  
CTATCATGAGATTTATGGGGATCATCTAATAGTAAACAGTCTAAAAAAGAAATTTGTTG  
TATATATATTCGAAGTACTGTGGGCCCATTTCTTTTATCGAAAAATAGACGAAGCTAT  
ACAAGGATTTTGTTCGGGGCCATTCATACGGCAGC-----ATGGCA  
GAACGAGCCAATCTGCTCTTTGACAATCAAGTGATGGATGGAGCTGCCATGAAACGAC  
TTATTAGCAGATTCATAGATCATTTTGAATGGCATATACATCACACATTCTAGATCAACT  
GAAAACTCTAGGGTTTCAACAAGCCACTGCTACATCTATTTTATTAGGAATTGATGATC  
TTCTAACACTACCTTCTAAGGGATGGTTAGTCCAAGATGCTGAACAACAAAGTTGGATT

TTGGAGAAACATCATTATTATGGGAATGTGCATGCGGTAGAAAAATTACGTCAATCCAT  
TGAGATATGGTATGCTACAAGTGAATATCTGAGACAAGAGATGAATCCTCATTTCGAA  
TGACCAATCCCTCTAATCCAGTCCATTTAATGTCTTTTCAGGAGCTAGAGGAAATGTAT  
CTCAGGTACACCAATTAGTTGGCATGAGAGGATTAATGTTCGGACCCACAAGGACAAAT  
GATTGATTTACCCATCCAAAGCAACTTTCGCGAGGGGCTTCTTTAACAGAATATATAAT  
TTCTGTATGGGGCTCGTAAAGGAGTTGTAGATACTGCTGTACGAACAGCCGATGCCG  
GATACCTCACGCGTAGACTTATTGAAGTCGTTCAACACGTTATTGTACGCAGAACGGAT  
TGTGGTACTATCCGAGGTAGTTTCGTGAGCCCTCAAAGGGGAATGGACGAA-----AGAA  
TTTTTATCCAAACATTAATGGGCCGCGTATTAGCAGACGATATATATATAGGTCCACGGT  
GCATTGCCGTTCCGAATCAAGATATTGGGATTGGACTTGTCAATCGATTTCATAACT-----  
-----TTTCGAGTACAACCCATATATATTCGAACTCCTTTTACATGCAGAAGTACATCTT  
GGATCTGCCAACTATGTTATGGCCGGAGTCCTACCCATGGCGACCTGGTTGAGTTGGGA  
GAAGCCGTGGGTATTCTTGCGGGTCAATCCATCGGAGAACCAGGTACTCAACTAACAC  
TAAGAACTTTTCATACCGGTGGAGTATTTACAGGAGGTACTGCTAAACACGTACGAGCT  
CCTTCTAACGGGAAAATCCAATTCAATGAGAATTTGGTTCATTCTACACGTA CTGTC  
CGGACATCCCGCTTTTCTATGTTCTAGAGGCCTGAATGTTACTATTGAAAGTCCGGATAT  
TCTACATAATGTGAATATTCCACCAAACAGTTTGATTTTAGTTCAAATGATCAATATGT  
AGAATCGGAACAAGTAATTGCTGAAATTCGTGCCGGAACACCTCCTTTG-----AAAG  
AATGGGTGCAAAAACATATTTATTCTGAATCGGAAGGAGAA---ATGCACTGGAATCAAA  
ATGTCAATCATGTGCCTAAAGAGAGAATGAGTAATGTTTCATCTATCATCAAAGACAAGT  
CATTTATGGATATTAGCTGTGAGTACGTGTAGA-----TCCAATATAGTGTCTTTTCGCTCC  
ACAAGGATCAAGATCAAATCCATACTCATTTTTTTTCTATGGAAGAAAA-----TTTATCT  
CTCATTCTTCA-----ACGGCTAAGAGT---TTAATGCATCCATTGTCTAGTTCAGACTCTC  
TGGT-----AAGAATGGGGTTCTTGATTATGAT--AGATCTGATGAACTCATATCCGAGAG  
TCAGCGGAATTTTCATATATCCTTCT--ATTTTCCAAGAAAAC-----TATGATTTCTGGGGA  
AGAGTCGAAGAAACAAATTCATAATTCATTACAATATAATCAGGAGCGAAAGAAAGA  
ATTCATACCTTCTTTTGATATTTTCGATGGAATACCCATAAAT-----GGTATTTTACGTAGA  
AATACTATTTTGTCTATTACGACGATCCAGATACAGAACAACAAGCCATAGAATCATC  
CAATAT--TTCATAAAGGTGGATCCCATCGGCAAAGAAGAAAAAGAGGATTCCATGGAG  
GACGGAAAA---ACAAAAGAATTTTCATATGGAATAT-----GTAGATCGATTCTTCTCATT  
CCGAAACAATCTATTTCTTCCCTAGATCCATGCCTATAATGGTCCGAAACAATAGTCTTA  
TTGAGGTGGGTACACAAATCACTTTCTATAACAAGAAGTCGAGTCAGCGGATTGGCGCG  
AGTGCAGAGAAAAGAAAAGAGATTCAACTGACAATTTTTTCTGGGAATATTCATTT  
CCTGCAACAGATAAGAAGATATTCAGGCACAGTAGCATTTCATATCTGGAGGAAGAA  
GAAAAGAA-----CATTTTAAGGAA---TCTAAA---CAGACGAAAAATGGAATCTATGTCCA  
AGGG-----ATTACACTTACCAAGAACAAA-----TATTTTCTTTTGGCTCGGCCCGTAGTGA  
CATATCAAATAACCGATGGGATTCAGTTCCCAACATTCTTCCACAAGATCCTCTGCAG  
GAAAGGGGTAACGTCCAACCTGAGAATTGCCAATTATATCCTTTATGGAAATAATAAGCT  
AATCCGGGATTCTATCCAGAAGT--CAATTCGTCCGACTTGCTTAGTATTGAATTGG  
GACCAAGAGACAAATTCTTCTCTAGAA-----GAGGTTTCATGCTTCTTTGTTGAAAT  
AAGAACAAGGTTCTGATTCGCGATTTTCATAAGAATGGAGTTGGGTCAACCCTCTATTT  
CATATCTTGTA AAAAGAAAAGGTGCGAGGGGTTCCGGATTTATTGTC-----TTAGAT  
TGTAACAATATCAATCCTTTTCTTCCAAGCCCAAGATTCGGCCA-----CTTATTC  
AAGATCAGAAAACCTCCT-----ATTGGTACGTTGTTGAATCGAAATCAG-----GAATGT

CCATCTTTGAGAATTTTGTGCATCATCCAACCTGCTCTCGAATCGACGGT---CCATCCCACG  
GTTTAAAATATCAC-----AATGTGGCAAAAAGAACCAGATCTTACAATTTCCATT---AATT  
TGTTAGGCCCTTAGGTATGAAAGTACCT--AAAATCACAAATTTTTATTCTCTTACTAC  
CATTTAATAACT-----ATAATCCGATATTATTAATAAAGAAAGATTTACTACTTAATGT  
TAATGACAATTTTCAACAAACCTTTCAAGCCCTTCCA-----TATTGTTTCATGGACGAA  
AATAGGAGG-----ATTTATCATCCCGATCCATGCAGTGATATCATTTTGAATCCCTTGGAT  
TTGAATTGGTACTTTCTATATCGTGATGATTGCGATAAATCATCCCCAATCATTATC---CTT  
GGTCAGTTTCTTTGTGAAAATTTATGTTTATTCAAATACGGATTA-----CAAATCGAATC  
TGGTCAAGTTTTTCATTGTTTAT--ATGGATTCTTTAGTAATCAGATCTGCAAAACCTTATT  
TGGTCACTCCAGGAACAACGGTTCATGGTCATTATGGGCAAATCCTTTACGGAGGGGAT  
ACATTAGTTACTTTTCTATATGGAAAATCCCGATCTGGTGACATAACGCAGGGTCTTCCA  
AAAGTGGAACGGGTCTTAGAAGGA-----TATTCTATACCCATGAACCTCGAAAGAAG  
GGTTCAACGTTGGAATAAGCATATCCCAAGCATTCTCGGGATTCTTGGGGATTATTGGT  
TGGTGCTGAACACCATAGCCCAAAGCCGTATCTCTTTGGTTAATGAGATCCAAGAGG  
TTTATCGATCGCAGGGAGTACAGATTCATAATAGACATATAGAGATGATTGTGCGTCAAG  
TCACATCCAAAGTGTTGGTTTCAGAAAAAGATGGAGATGGAATGTCTCATGTTTTTTCA  
CCAGGAGAATTAATAGGGTTGTTGCGAGCAGAACGAGCGGGGCGCGCTCTGGCTACA  
ACAATCTGTTATCGAGCAATCTTATTAGGAATGACTAGGACATCCTTGAATACTCAAAGT  
TTTATATCCGAAGCTAGCTTTCAAGAACTGCTCGAATTTTAGCCAAAGCTGCTATACG  
AGGTCGTATTGATTGGTTGAAAGGTCTTAAAGAAAACATTGTTCTGGGGGGGATTATAC  
CCGCCGGTACCGGATTCCAAAAATTAGTACACAGTTCAAAG-----CAACAAAGGAACAC  
TCCG-----CTGGAAATCAAAAATAGGAATTTATTCAAGGGAAGGATG-----AGAGATATTT  
TATCCATTAT-----A  
TGAAGAAAAAATATTGGAACATCCATTTGAAAGAAATGCTGAAAGCAGGAGTCCATTT  
TGGTCATCGTATTGAGAAATGGAATCCTAAGATGGCACCTTATATTTCTGCAAAGCGTA  
AAGGTATTCATATTACAAATCTTGTGAAAACCACTCGTTTTTTTATCCGAAGCTTGTCAAT  
TAGTTTTTAATGCAGCAAGGAGAAGAAAACATGTTTTAATCGTTGGTACCAAAAAGAG  
AGCGGCTGACTTAGTAGCATCAGCTGCAATAAGGGCTCGGTGTCATTATGTTAATAAAA  
AATGGCTTGGTGGTATGTTAACGAATTGGTCTACTACAGAAACAAAACCTTCGTAAATTC  
AGAGATTTAAGAGCAAAACAAAAGATGGGTCAATTCGACCATCTCCCAAAAAGAGAT  
GTAGCAATCTTGAAGAGACAATTGTGCACTCTACAAAAATATCTGGGTGGAATCAAATA  
TATGACGAGATTACCTGATATTGTAATCATCCTTGATCAAAAAAAGAATATAAAGCTCT  
TCACGAATGTATTATTTTGGGGATTCCGACAATTTGTTTAAATCGATACAAATTGTGACCC  
CGATCTTGCGGATTTTTTCGATTCCAGCCAATGATGACGCTATAGCTTCAATACGATGGAT  
TTTGAATCAATTAGTGTTTCGCTATTTATAAAGGCCGTTCTAGC---TATATAAAAAGTCGTA  
TGGGACAAAAAATAAATCCACTTGGTTTCCGACTTGGTACAACCTCAAACCATCATCC  
CTTTGGTTCGAAAACCCCAAAAATTTTCCGCGGGTCTGCAAGAAGATGAAAGAATAC  
GAGATTGTATCCAGAATTTTATGCAAAAACTATGAAAGTATTCTCTGGT---TCCGAAGG  
AATTGTCCGTATAGAAATTCGAAAAGGAACAGATTTTACCACTATTCTCATCTATATAGG  
A-----TTCTTACTAAAAGATGTTCAAGAACAG-----GAATGGGAGGAATTATGGACA  
AATGTAGAAAAAACGTTAAATTTCTGTGGAC---AACTCAAGATCTTTTTCAAAAAAATT  
GAAAAACCCTACGGGGAACCTAAGCTTCTTGCAGAATATATAGCTTTACAATTGAAAAA  
TAGAGTCTCCTTCCGAAAAGCAATGAAAAAAGCAATTGAATTAATAAAAAACAGGT  
ACAAAAGGAATTCGAATACAAATTGCAGGACGTATCGGTGGAAAAGAAAAGGCCCGT

GTCGTATGGACTCGAAAAGGTAGAGTTCCTTAAATACTATTCATGCTAAAATAGATTAT  
TATTGTTATACAGTTCGAACTATTCATGGGGCCTTAGGCATAAAAATTTGGATGTTTGCA  
AATCAAAAATGTCTCGTTATCGAGGACCTCGTTTTAAAAAATACGCCGTCTGGGAG  
CTTTACCAGGACTAAGTAGTAAAAAACCTATATCCGGGAGTCATCCAAAACAAGTTC  
CGCTTTAGAAAA---AGACCAGAATATAGCCTTCGTCTACACGAAAAACAGAAATTACGT  
TTTCATTATGGTCTGACAGAACGACAATTAATTCGATATGTGCATATGGCTGGAAAAGG  
AAAAGGACCAACAGGACAGGTTTTACTACAACACTTGAATGCGTTTTGGATAACATTA  
TTTTTCGATTGGGTATGGCTTCGACTATTCCTGGAGCCAGACAATTAGTTAACCATAGAC  
ATATTTTAGTTAATGGTCGTATAGTAGATATACCAAGTTATCGTTGCAAGCCTCGAGATAT  
TATTACTACGAAAGATAAACAAGGGTCAAAAACCTCTGGTTCAAATTTCTATTGCTTCAT  
TTTCCCAGAAAAAGAAATTGCCATACCATTGACTCGTGACTCATCCCAATATCAATATA  
AAGGATTAGTAAATCAAATCATAGATAGAAAATGGGTCGGTTTGAAAATTAACGAATTG  
TTAGTCGTAGAATATTATTCACGT-----ATGTCACGTCGAAGTACTGCAAAAAAAAAAAC  
TGCAAATCGGATCCCATTTATCGTAATCGAGTCGTTACATGTTGGTTAACCGTATTCT  
GAAACACGGAAAAAATCATTGGCTTATCAAATTTTCTATCGAGCCATGAAAAAGACT  
CAACAAGAGACAGAAGGAAATCCACTATCTGTTTTACGTCAAGCAATGGGTAGAGTCA  
CTCCCTATATAACAGTCAAAGCAAGACGAAAGGGAGCATCAACTCATCGAGTTCCTATT  
GAAATAGAATCTACAAAAGCAACATTACTTGCCATTCGTTGGTTATTAGGAGCATCCCG  
AAAACGTTCCGGTTCGAAATATGGCTTGCAAATTAAGTTCCGAATTAATAGATGCTGCCA  
AAGGGCGTGGCGGTGCGATACGAAAAAGGAAGAGACTCATAAAATGGCAGAGGGCAA  
ATCGAACTTTGGCACATTTTCGTATGGGTAAAGATACTGTTGCCGATATAATAACTTCAA  
TAAGAAATGCTGATATACATAAAAAGGAAATAGTTTCGAGTCATATCTACCAATATAACTG  
AAAACATTGTTAAATACTTTTACAGGAGGGTTTTATTAAAAATGTTAGAAAATATCATC  
AAAATAACAAATATTTCTTGGTTTCAACTCTACGGCGACATAATAAAAAGACTAGGAAA  
GGTATGCAGAAAAC-----GTTTTAACACGTATCAGCCGACCCGGTCGAAGAATC  
TATTCTAGCTATCAAGGAATTCCGAAGATTTTGGGGGGTATGGGGATTACCATTCTTTCC  
ACTTCTCAGGGTATAATGACGGATCGGGAAGCCGACTCAAAGGAATTGGAGGAGAAA  
TGTTATGTCATATATATAACAAAGCATATAACCAAAAATTTGGTTTGGGTAAAAATAGAC  
GTATA---CAACGTAAAAATGTACGTAAAATAGAAAAAGGGATGATTCATATTCAAGCAA  
ATTACAATAATACCATTGTCAGTGTACAGATGTACGAGGTCAGGTAGTTTGTGGTCCCT  
CTGCTGGGGCTTCTGGATTTAAAGGACCCAGAAGGGGAACGCCTTTTGCCGCTCAAGC  
TGCCGCAATAAATGCTATTCAGCCAGTGGTTAATCAAGGTATGAAACGAGCAGAAGTT  
CGGATAAAGGGTCCCTGGTGTGGAAAGAGATGCAGCATTACGAGTGATTTGTAGAAGTG  
GTATAGTATTAAGTTTCATACGTGATGTAACGCCTATATCACACAATGGATGTAGACCTC  
CTAAAAGAAGACGCGTGATGCCAACTACTAAACAACCTATTAGAAAAGATAAGACAGCC  
AATCAGAAATATTACGAAAACCTCCCGCTCTTCGAGGATGTCCTCAGCGTCGAGGAACA  
TGTGCTAGGGTGTATACTATCAACCCCAAAAACCAAACCTCTGCCTTACGTAAAGTTGC  
CAGAGTACGACTAACCTCTGGATTGGAAATCACCGCTTATATACTGGTATTGGCCATAA  
TTTACAAGAACATTCTGTAGTATTAGTAAGAGGAGGAAGGGTTCCGGATTTACCCGGCG  
TGAGATATCACATTGTTTCGAGGAACCCTAGATGCTGTGCGAGTAAAGGATCGTCAACA  
AGGGCGTTCTAAATATGGGGTCAAAAAGAAAAAGATGGCAAGAAAAAGTTTGATTCA  
GAGGGAGAATAAGAGGCCAAAAATTGGAACAGAAATATCATTGGATTTCGTGATCCTCA  
AAAAACGAAATTAAG-----AAAGTTTCATCGGTGAGTGAAAAATGGAAAATTCATGG  
AAAATTGCAATCCTCACCGGTAACAGTGCACCTACACGTCTTCATCGACGTTGTTTT

CGACAGGAAGATCTAGAGCTCACTATCGAGACTTTGGACGATCCGGATACATACTTCGA  
GAAATGGTTTATGCATGTTTGTACCGGGCGCAACAAGATCAAGTTGGATGGTAAAA---  
--TTATCCCTTTCAGTTCTTCCACAAGAA-----GAAAAG-----AGGGGATCTGTCTGAATTTC  
AAGTATTCAGCTTCACTAATAGGGTACGGAACTTACTTTACACTTTGAATTGCACAAA  
AAAGATTTTTTCATCTCAAAGGGGTCTTCGAAGGATTTTAGGAAAACGCCAACGATTAC  
TCACTTATTTGGCAAAGAAAAAGAAAGTGCCTTATAAGGATTTTATAAATCAACTGGGT  
ATTCGAGAGCAAAAAACTCCT-----ATGGTAAAACCTTCGTTTCAAACGATGTGGTAGAA  
AGCAACGAGCCATCTATCGAATTGTTGCAATTGATGCTCGATCCCGAAGAGAAGGACG  
AGCTCTTCGAAAAGTGGGTTTTTACGATCCGATAAAGAAGCAAACCTTATTTAAATGTTT  
CTGCTGTTCTATATTTTCTTGAAAAGGGGGCTCAACCCACCGAAACTGTTACGATCTT  
TTGAAGAAGGCAGAAATCTTTAAGGAAATT-----ATGGACAAATCCAAA  
CCACTTTTTTCATAAATCTAAGCGTCCTTTTTTTTCGTCGTTTGGCCGCAATTAGGTCGGGG  
GATCCTATTGATTATAGAAACGTGAATTTACTTAATCAATTTATTAGTGAACAAGGAAAA  
ATATTGTCTAGACGAGTAAAGAGATTGACCTTGAAACAACAACGATTAATTAGTATTGC  
TATAAAACAAGCTCGTATTTTATCTTTCTTACCTTTTATTGCC-----  
-----ATGGCACTTTCACGAAAAAAAATCCGTTTGGCGGTGATCA  
TTTATTGAAAAAATTGAAAAAGCTAACGAAAACGAAGAAAAAGAAATCATAAAAAC  
TTGGTCTAGAGCATCTGCTATTCTACCCTCAATGCTTGGCAATACAATAGGTATTCATAAT  
GGAAAAGAACATTTACCCATCTATATAACAGACCGTATGCTGCATCATAAATTGGGAGA  
ATTTGCACCAACTAGGACTTTTAAATCTCATCCGAAAAGGATCAGAAATCTCGTCGTC  
TTTTTTCATCCTCTTTGTTACTAAGTCGTTTGTATCCTTATGCATGAGTGTCAAACTC  
AGTCGTTTTGGTCGGATTCTATTATGGATTTTGGACCCTATTTCCATAGGACCTTCTGAT  
CTCTTCCTTCTACAACTCGGGTTATGGAAGAAGGA-----ACCGAGAAGGAGATAGC  
AGCAACAACCTGGTCTGATTACGGGGCAACTCATGATGTTTCATATCGATCTATTATGCGCC  
TCTTTATCTAGCATTGGGCAGACCACATACCGCAACGGTCCTAGTTTTAGCATACTTTT  
CTTTCATTGCTGCATCGTTACGAAAAAGAACCACTTT--TCTGGACCTACTACCAGAAAT  
TTCATCGGTCATCTCAGCATGCCATGGGTATTCTCAATCATTTTGTTTTGCAATTATTCA  
ACCCTTTCGTTTTCCCAAGTTCTACATTAGCCAGATTGCTTAACACCTATATGTTTCGGT  
GCAACAACAAGATAGTATTTCTCACAAGTGCTTTTCTTGGCTGGTTAATTGGTCACATT  
TTATTCATGAAATGGGTTGGATTGATATTACTCCGATACATAAAAACCTCTTGGATTCCA  
TCT-----AAATACCTTGTGTCCAAATTCAAAAAAAATGAATCGAATCTTTAGTA  
GCCTCTTATTTATAACCTGTCTTTACTCTTTAAACAGAACTCCATTCCCTATTCAGAAA---  
---CAGGTAGAATATGCGGATTCTCAACCTCTTGTGACTTTTCTTTTCGATTATAACCAATG  
GCATCGTCCATTACGATATCTAAAAAATGCGCAATTGAAAAAGGCTGTACGAAATGAAA  
TGTCACAATATTTTTTTTATCCATGTCCAAGTGATGGAAAACAGAGACTATGTTTTACAT  
ACCCACCAGGTTTATCCACTTTTTTAGAAATGATAGAGCGACAAATCTCTTTGTACACA  
ACACTATCCAGGAAAACAAGAGCTTATATAAGAATTGGGTTGCTACTAATGAAGAAA  
ACAAACAAAACATGAGGAAGGAATTGAGAGATCGAGTCTTTCTTCTCGAAAGAACAG  
GT-----CTCAATGCGCTAGAAAAAAGGTCCGATTATACGATAAGGCAAAGGAAAAGGA  
AAAATTGCCCGAGGAATATGATCCTTTTGTCAACGGACCAGAGCGTGGAACA---AAGG  
GGGGATTTGAAAAAGAGGAAGAGAAGGGGATAAAGACACTTTGGAATCTACTT--CAA  
GAATTGGAGGATCAAAGCTGGAAGACCTGGAAGAAGGAAAAAGGGCAAACAATC  
AGAAGAAAAAAGTCAAACAAGAGGTA TAGATATTCGTTCAAGAAGATACAGAAA  
AGGAAGGGATATCCAAACGAGTCGCCAACTTAGTACTACAAACGTTGTTACGAGTTAC



TCACAGTCACCAGATTTCCGTCGAAATCTAATCAGAGGGTCTATGCGTGCTCAAAGAC  
GGAAAACCGCTTTTTGGCGATACTTTCAACACAAGATGCGCTCACCCTTTTTGCAGAT  
TTTACTCAGGAACTGGAACCCATTTTTCTCGATTTGGCCAAATACAGAAATCTGGAC  
ATGGGTAAAGGAAAAAAAAACACGATCAAGAAACACTTGTATCAGAAGGCTGGGATAG  
GGTAAAAAATGTTCAAATGGTAAGGAGTTGGGCCTTACTAACGCAAGCCTTTTTGAGA  
AGACACATTAATAATTACCTTTCTTGATACTAGTTAAAAATATTGGGCGTATGCTATTATTGC  
AATACCCCGAGTTTTCTGAAGATTGGAAAGAATTGGAAAACGAAACGCATGTTATATGT  
TCTTATAGTGGTATTCCATTAGCAGAAAATAAACTTCCTGAAACTTGGCGAAAAGACGG  
TTTCCAGATAAAAATTCTATTTCTTTCCGTGTGAAACCTTGGCAGGGGGCTACGCAAG  
GTGAGGACGGAGACTTTAGTTATTTAACAGCTTCTGGACAAGAAGTAACGATAACCATTT  
TCAGCCCCAAAACAAAATGAATCTTTTTCTTACGCTATTTTTCAAGAATGGGCAAGAAG  
A-----AGAGAACTCAAAGAAACAATAAATAGAAAAGAGATCTTCC  
AAGAAATTTAAGAGTGTTAAGAGACGTTGTAGAAAGCTTAAGAAATGAAAAATACA  
AAGCATCTTAAAAAACTAAAAAAAACGAAGAGTCCGTTGAAAATGAAAACATAAT  
AACGAATTTTTCATATGAAGAAGAAATGGAAAATTATTCATATGAGGAAGCAATGGAAA  
AGAGAATTCACATCTTATTGATCGGACAATAACAATGAAGAATCAAATAGAGCAGATC  
AAAAAGAAAAAGAACAAGTCCTCAGAAGACAGATTTTCATGATAAAAAATCCAAA  
TTGCAGAAACATATTGGCGAATATTCAAAGGAAAAAGAATCCGATTCATACGTAAATC  
ACGTTATTTGTAAAATCTTTCATTGAAAGAATATATATTAAC-----ACCGTTAG  
ACAATTTTCCCCTCAAACGAA-----TATGACCTATCCTCCGTGTCCCAAGCATAT  
GTGTTGTACAAAATATCAGAACTCAAATAAGTTAACTCTCACCTGAGATCTGTACT  
TCAATATACTTATCTTTTTCTTGAGGATGAAATCAAGAATTATTAC---CAAGGAATATTC  
ATGCCAAATCAAAGCATAAGCAAGTTAAG---TCTAGAATAAATGAATGGAAAACTGGT  
TAAAAAACCATCATCAATACCATTTACCTGAACTCTATGGTCTTGCTTAGGAGCTACA  
AAGTATAGAGCT-----CGATATCGTATGAAATGCGATTCTCATAAAGAAAA  
AAAAGGCCGCATTGTAGAAGTAAAACAAAAA-----AAATTTTCACGATATGATCGT  
TTATTACATGGATATATAAAC-----TATTTCTCAGAGTATGCAACAATGAGT-  
-----CAAATGAGTGGAGTCGGAAGCTGCAGAATCTTCTAGAGGCG-----AGA  
TCCAGGAAGCGTGGGAAAAGCGGGAGAGAAAATATTATGGCAATCCGATCCATCGGAG  
ATTTTCCAG-----GATATAGCCAAGAAGATTCAATTGCTGAAGAGAAAAG-----  
-----AGGGAATTGAATCAGAGGGTTCTTAAGGAATTTCTTCGTCTTCTGCTTA  
CAAAAAGGGCCTGATATTCAGAATAGTAATTGTTCTGAAATGGAGGATATTCTCTCTG  
ATCTTTTCAAAGCTTTTCAAAAAGCGCACACTGATCTAAATCCTGGAAGGAAAAGTGG  
AGCACCGGAATCCGATCTCAATCCTGAAATGGAAGCATCCAAAATCGAAAAAGAACG  
TTTTTTAAAAAGTTTTTTGAATTGGATGGGGTAATCCATCAAGAAATGAGAATGAATCA  
CAAATCATTTCAACCCAGAGAAAACAAAAAGTTGTTTCTCCAGAGTTTGAAATGCAA  
GCAAAAAAAAACCAACAACAACAGAGTCAAGCGGATCGTGACTCCAATGTAAAAGAA  
AAAGATAAACAAAAAAAATACTACATCAACTACATCAAAAAGAAAAAG-----

-----  
-----  
-----  
-----  
-----  
-----



ACCAAATCCCATCCGTCCAATCACTTTTTTCGAGAAATACGATACATCTAAGTCGTACAA  
GTAAAGAGATCTATTCATTGCTAAGAAAAAGAAAAAGCGTGAACAGTGATTGGGTCA  
TGAGAAAATAGAATTCTGGCTCGCGAAGAGTGATGTGATTAAGGATCAAAGAAGAGAA  
TTCTTGACTTGGGTCTCC-----ACCCTAACGACA-----GAAAAAAGAATGGATCCAATGC  
TCTTGAGTCTGACTCATCCTAGTGATCATTATCA-----AAGAAAACTTCGGTTA  
TCAAATAATTGAACAACCAGGATCCATTTACTTACGATACATAGTTGACATTCAT-----CA  
AAAGTATCTAATGAATTATGAGTTCAATAGATCCTGTTTGTAGTGGAAGACGGATATTTCT  
TGCTCATTATCAGACAATCACTTAT-----TCACAAGCCTCGGGTGGGGCTAATAGTTTTCA  
TTTCCCATCTCATCGAAAC-----AACTTTTTTCGCTCCGCTTAGCCCCATCCCCTTCT--A  
GGGGGATTTTGTAGTATAGTTCTATAGGAATTGGACGATCCTATTTGGTCAAATACCTAG  
CGACAAACTCCTATGTTCTTTTATTACGGTATTTCCGGCCGAGACCCTGTGCCGGGAT  
GAGAAGGCTCGGCGCCTCTAT-----GAGGCGGAG--GTTTTTGAGCATAAGCGTA  
TCCATATGGAT-----CATATTCCTAAG  
AACTTTGATAACGGGCTGAGAAAGACGGTGGATGCACTAGCT-----AAGTATAATAAGA  
TGACTAGTAGGGCGAAAGTAGATCTATTTCTATCATCTTTCAATTCGAATTAGCAAAG  
CAATGTCTCCTTGATAATATGGATTCCAAGCATTCATGATCTGTATGTGCATGAGTCGC  
ATTATTTATCCCTCGGTCTATTAGCGAACTATCTCTCC-----AGGGATTATGAAAGATGT  
TCC---ACTAGAAATATTCTTGTTATTGCTTCGACTCATATTCCCCAAAAAGTGGATCCCTC  
TTTAATAGCTCCGAATAAATTAATACATGCATTAAGATACGAAGGCTTCCTATTCCAGA  
ACAACGAAAGCACCTTTTTCTTCTTCTATACTAAGGGATTTCACTTGGAAGAAAA  
TGTCCTACT-----AACGAATTCGGCAAACCCTCCTGGTTTCCAATGCACGAGATCTT  
GGAGCACTTATCAATGAGGTCCTATTAATTAGTATGATACAGAAGAAATCCATTATAGAA  
GCTAATAACAATTCGATTAGCTTTTCATAGACAACTTGGGAGTTTCGA-----TCCGAGG  
TAAGACCAGTTCAGGATCATGGGATCCTTTTCTATCAGATAGGAAGGGCTGTTGTACAA  
AATGTACTTTGTAAT--TGGACCTTAGATCCTCTATCTATCTATCGGAAGGGGAAA-----TC  
CTCTTATGAAAAGCAAAGAGATTTGTCCGAATGGTACTTCGAACTTGAAGGAGCATG  
AAGAGATTCACGATACTTCTTTATCTTTTGTAGTTGTTCTGCCGGATCGGTTCGCTCGAGAT  
CTTTGGTCTCCATTC-----CTACCCGAGGAAAA---AGGGGGATCACTTCTGAGGGATTC  
CTTGAGAATGATTCT--CATCTAGCTCATAACCTATTTCGAATTCGAAGGCGTTCTGGAGG  
GA-----TCCTCGCGGGCAGAAAAAGATTGCAGTCAGTTTGAGAATCATCATAATCGAGT  
GACATTGCTTCTTCGGCCCGAACCAAGGAAT--CCGTTCGATATGATGCAAAATGGATTT  
CGTTCTATCGTTGGC-----CTTGAACAAGAGGAA-----GGAG  
CGGTCGACCCGCAA-----CGGATAGAGCAAGAGATG-----GATTTCTTCAATTACAG  
AGACATAGTTGGTTCTCCG-----AGAATATGGCGCCCC-----CGTAGGAATCTATTTGAT  
TGTATCGAAGAGTCCGAGGAATTGGGATTTCTC---CCTTTAGTCAGGTTCTTTTCGGAAC  
AGA-----AATGATTATGTGGGTGAGGAAGACTATGAGCTTCAAGACGAGGATTCGGAGT  
TCTTGCGGAGTGCAATCCTGCAGTACCAGACACGAGATAGATCTTCAAAGAACAAGG  
CTTTGTTCAAATAGGCCAATTCCTTTGGGACCCTGATCTCTCATCCTTTGTCTAGTCCG  
TGAGCAGCCGCCCTCTGTCTCTGTGTTTTCATGTGCGAGAATTCTTTGGATTT--GATAAA  
CAAAGCACCTTATTACTTCCGAAATGAAGATGCCAAAATCGATGTCTGGAAGCTGGT  
TCATC-----AGGACGAGGCGAAGAAAGCGCTTCGAATTCCTTGATTCATCGCCAAGATT  
CCTTAGAACC-----AATAGTTCATTATATAAAGGGTCTTTTTCTTCCGTTTCGAAT-----C  
TTCTAGCCGAGAGTTATCAGTATTTATCCAATCTGTTTCTATCGAACGGAGGAAGGCTAT  
TGGATGAAGTGACAAAGACATTGTTTGTAGAAAGAGATGGCTTTTCCCGCATGAAATGAA

AAATTTGATT-----CATGTAATAGAAAAAGGATTTCCCATTCCTATGCCTAGATCTCGG---A  
TAAATGGAAATTTTATTGATAAGACCTTTTCAATTGTAGCCACTATATTATTACGAATCAT  
TCCGACAACCTCAGGAGAAAAAGAGGCATTTACCTATTACAGAGATGGG-----ATGTCG  
GCTCAATCTGAAGGAAATTATGCGGAAGCTTTACAGAATTATTATGAAGCTACGCGACT  
AGAAATTGATCCCTACGATCGAAGTTATATACTTTATAACATAGCACTTATACACACAAG  
TAACGGGGAGCATACAAAGGCCTTGGAAATATTATTTCCGGGCACTAGAACGAAATCCCT  
TCTTACCACAAGCTTTTTAATAATATGGCTGTGATCTGTCATTAC---CGAGGAGAACAGGC  
CATTGGACTGGGTGATTCAGAAATGGCAGAGGCTTGGTTCGATCAAGCTGCTCAGTATT  
GGAAACAAGCTATAGCGCTTACTCCAGGTAATTATATTGAGGCACACAATTGGTTGAAG  
ATTACGGGGCGCTTCGAA-----ATGAACTGGCAATCAGAACATATATGGATAGAACTCAT  
AAGAGGATCTAGAAAAACAAGTAATTTTTGTGCTGGGCCTGTATCCTTTTTTTTAGGTTTAC  
TAGGATTTGTAGTGAAGTGGGCTTCTAGTTATCTTGGTAGAAATCTTATCTTCATATCCC  
TGATCAGCAAATCCCTTTTTTCCCACAAGGAATTGTAATGTCTTTCTATGGGATTGCGGG  
TCTATTTATTAGCTCCTATTTGTGGTGCACAATTTTCGTGGAATATAGGTAGTGGTTATGAT  
CAATTCGATAGAAAAGAAGGGATAGTATGTATTTTTTCGTTGGGGATTTCCCGGAAAAAA  
TCGCCGCATCTTCTTCGCTTCTTTATGCGAGATATCCAGTCAATCAGAATGGAGGTGA  
AAGAGGGTCTTCTTCTCGTCGTGTTCTTTATATGGAAATCAGAGGTCAGGGAGCCATC  
CCCTTGACTCGTACTGATGAGAAT---TTGACTCCACAGGAAATGGAACAAAAAGCAGC  
GAAATTGGCCTATTTCTTGC GCGTACCAATTGAAATCTTT

>Corymbia

ATGGAAAAATGGTGGTTCAATTCGATGTTGTATCTAAGTAAATCAATTGATAGGTTTGGT  
CCTATTGAAAAAACCAGTGTAAGTGAAGATCCGGTTCTAAACGATACGGATAAAAAGA  
TTCATAGTTACAGTAATGCTAATCATTAGTGGGCATCAGGGACGTTTCGTAATTTTATCT  
CTGATGACACCTTTTTAGTTAGAGATAGTAATAGGAATATTTATTCCATATATTTTGATATT  
ACTAATCCAATTTTTGAGATTGACAATGATCCT-----TCTTTACTGAGTGAACGAGAAAG  
TTCTTTTTTTAGTTATCGGACTTATGCTTATCTGAAGAATGGATCTAAGAATGACGATCC  
GCCCTGTGATCGTTCATGTATGATACTAAATACAGTTGGAATAATCACACTACTAGTTG  
CATTAACTCTTATCTTGGT-----TCTCAAATCTGTATTGAGAGTTCCATTTTAAAGTAGTAGT  
GACAATTCAGTGCCAGTTACATTTATAGTTACATTTATGGTAGGGGGAGCTCCAGTATA  
CGAACTAGCAGGAATGGTATTGATTTCACTCGAAGAGAAAATTCTACT---TTCGATTTGA  
CTCAAAAATATAGGCATTTGTGGGTCAATGCGAAAATTGTTATGGATTA AATTATAAGA  
AACTTTTGAAATCCAAAATGAATATTTGTGACCAATGTGGATATCATTGAAAATGAGTA  
GTTCAAGATCGAATCGAATTTTCGATTGATCCAGGTACTTGGGATCCTATGGATGAAGAC  
ATGGTTTCTCTGGATCCTATTGAATTTCAATTCGGAGGAGGAACCTTATAAAGATCGTATT  
GATTCTTATCAAAAAAAGACAGGATTAACCGATGCTGTTCAAACAGGCACAGGTCAAC  
TAAATGGTATTTCCATAGCAATTGGAGTTATGGATTTTTCAGTTTATGGGGGGTAGTATGG  
GATCCGTAGTAGGCGAGAAAATCACCCGTTTGATCGAGTATGCTACCAATAAATTTTA  
CCTCTGATTTAGTGTGTGCTTCCGGAGGAGCACGTATGCAAGAAGGAAGCTTGAGCT  
TGATGCAAATGGCTAAAATATCTGCTGCTTTATATGATTATCAATCCATAAAAAGTTATT  
CTAIGTATCAATCCTTACATCTCCTACTACTGGTGGGGTAACGGCTAGTTTTGGGATGTT  
GGGGGATATTATTATTGCCGAACCTAATGCTTACATTCGATTCGAGGTA AAAAGAGTAAT  
TGAACAAACATTGAATAAGATAGTACCTGAAGGTTCAACAAGCGGCTGAATATTTATTCC  
ATAAGGGCTTATTCGATCCAATCGTACCACGTAATCCTTTAAAGGGTGTCTGAGTGAG  
TTATTTAAGCTTCACGCTTTTTTTTCCCTTGAAT-----ATGGTAACCATTAGAGCCGA

CGAAATTAGTAATATTATCCGTGAACGTATTGAGCAATATAATAGAGAAGTAAAGATTGT  
AAATACCGGTACCGTACTGCAAGTAGGCGACGGCATTGCTCGTATTTATGGTCTTGATG  
AAGTAATGGCGGGTGAATTAGTAGAATTTGAAGAGGGTACAATAGGGATTGCTCTGAAT  
TTGGAATCAAATAATGTTGGTGTGTATTAATGGGTGACGGTTTGATGATACAAGAGGG  
AAGTTCTGTAAAAGCAACAGGAAGAATTGCTCAGATACCGGTGAGTGAGGCTTATTTG  
GGTCGTGTTATAAATGCCCTGGCCAAACCTATTGATGGTCGAGGTGAAATTTACGCTTC  
TGAATCTCGATTAATTGAATCTCCTGCTCCAGGTATTATTTTCGAGACGTTCCGTATATGA  
GCCTCTTCAAACCTGGACTTATTGCTATTGATTGATCGATGATCCCTATAGGACGTGGTCAGCG  
AGAATTAATTATTGGGGACAGACAGACCGGTAAAACAGCAGTAGCCACGGATACTATT  
CTCAATCAACAAGGTCAAATGTAATATGTGTTTATGTAGCTATTGGTCAAAAAGCATCT  
TCTGTGGCTCAGGTAGTGAATACTCTCCAGGAAAGGGGAGCTATGGAATACACTATTGT  
GGTAGCTGAAACGGCGGATTCCCCAGCTACGTTACAATACCTCGCTCCTTATACAGGAG  
CAGCTCTTGCTGAATATTTTATGTTTCGTGAACGACACACTTTAATCATTATGATGATCT  
CTCCAAACAAGCACAGGCTTATCGCCAAATGTCTCTTCTATTACGAAGACCACCCGGTC  
GCGAAGCTTATCCAGGAGATGTTTTTTATTTGCATTCACGCCTTTTAGAAAGAGCTGCT  
AAATTAAGTTCTCTTTTAGGTGAAGGAAGTATGACTGCCTTACCAATAGTGGAGACCCA  
GTCGGGAGATGTTTCGGCTTATATTCTACTAATGTAATTTCCATTACAGATGGACAAAT  
ATTCTTATCAGCCGATCTATTCAATGCTGGAATCAGACCTGCTATTAATGTGGGTATTTCT  
GTTTCCAGAGTAGGATCTGCAGCTCAAATTAAGCCATGAAACAAGTAGCTGGAAAAT  
TAAAATTGGAATTAGCGCAATTCGCAGAATTAGAAGCCTTTGCACAATTCGCTTCTGAT  
CTCGATAAAGCTACCCAGAATCAATTGGCAAGAGGTCAACGATTACGTGAATTGCTTAA  
ACAATCCCAATCAGCCCCTCTCACGGTGGAAGAACAGATAATGACTATTTATACGGGAA  
CGAATGGTTATCTTGATTCATTAGAAATTGGACAGGTAAGGAAATTTCTCGTTGAGTTA  
CGTACTTACGTAAAAACGAATAAACCTCAATTCCAAGAAATTATATCTTCTACTAAAACA  
TTTACTGAGGAAGCAGAAGCCCTTTTGAAAGAAGCTATCCAGGAACAGAAGGAACGC  
TTTCTACTTCAGGAACAAGGAATGAGAATCAATCCTACTACTTCGGGTCCCTGGAGTTTC  
CACACTTGAAAAAAAACCTGGGACGTATCGCTCAAATCATTGGTCCGGTACTAGAT  
GTAGCCTTTCCCCGGGCAAGATGCCTAATATTTATAACGCTCTGGTAGTTAAAGGTCG  
AGATACTATCGGTCAAGAAATTAATGTGACTTGTGAGGTACAGCAATTATTAGGAAATA  
ATCGAGTTAGAGCTGTAGCTATGAGTGCTACAGATGGTCTAATGAGAGGAATGGAAGT  
GATTGACACAGGAGCTCCTCTAAGTGTTCAGTCGGCGGAGCGACTCTCGGCCGAATT  
TTCAACGTGCTTGGAGAACCTGTTGATGATTTAGGACCTGTAGATACTCGTACAACATC  
TCCATTTCATAGATCTGCGCCCGCCTTTATACAGTTAGATACAAAATTATCTATTTTTGAA  
ACAGGAATTAAGTAGTAGATCTTTTAGCCCTTATCGGCGTGGAGGAAAAATAGGACT  
ATTCGGGGGGGCTGGAGTGGGTAAAACAGTACTCATTATGGAATTGATCAACAACATT  
GCTAAAGCTCATGGGGGGGTATCCGTATTTGGAGGAGTAGGTGAACGTACTCGTGAAG  
GAAATGATCTTTACATGGAAATGAAAGAATCGGGAGTAATTAATGAACAAAATATTGCA  
GAATCTAAGGTGGCTCTAGTCTACGGTCAGATGAATGAACCCCTGGAGCTCGTATGA  
GAGTTGGTTTGACTGCCCTAACTATGGCGGAATATTTCCGAGATGTTAATGAACAAGAC  
GTACTTCTATTTATCGACAATATATTCCGTTTCGTCCAAGCAGGATCTGAGGTATCCGCC  
TTATTGGGTAGAATGCCTTCTGCTGTGGGTATCAACCCACCCTTAGTACCGAAATGGG  
TACTTTACAAGAAAGAATTACTTCTACCAAAGAGGGATCCATAACTTCTATTCAAGCAG  
TTTATGTACCTGCGGACGATTTAACCGACCCTGCTCCTGCCACGACATTTGCACATTA  
GATGCTACGACCGTACTATCAAGAGGATTAGCTGCTAAAGGTATCTATCCAGCAGTAGA

TCCTTTAGATTCAACGTCAACTATGCTCCAACCTCGAATCGTTGGTGAGGAACATTATG  
AAACTGCGCAAAGAGTTAAGCAAACCTTTACAACGTTACAAAGAACTTCAGGACATTAT  
AGCTATCCTTGGGTTGGACGAATTATCCGAAGAGGATCGCTTAACCGTAGCAAGAGCA  
CGAAAAATTGAGCGTTTCTTATCCCAACCCTTTTTTCGTAGCAGAAGTATTTACCGGTTCC  
CCCGGGGAAATATGTTGGTCTAGCAGAAACAATTAGAGGGTTTAAATTGATCCTTTCCG  
GAGAATTAGATGGTCTTCCCTGAACAAGCCTTTTATTTGGTAGGTAACATCGATGAAGCT  
ACTGCGAAGGCTACGAACTTAGAAATGGAGAGTAAATTGAAGAAAATGACCTTAAATC  
TTTGTGTAATAACCCCTAATCGAATTGTTTGGAAATCAGAAGTGAAAGAAATCATTTTAT  
CTACTAATACTGGACAAATTGGCGTATTACCAAATCACGCGCCTATTGCCACAGCTGTA  
GATATAGGTATTTTGAGAATACGCCTTAACGACCAATGGTTAACAATGGCTCTGATGGG  
TGGTTTTGCTAGAATAGGCAATAATGAGATCACTATTTTAGTAAATGACGCGGAAAAGG  
GTAGTGATATTGATCCACAAGAAGCTCAGGAAACTCTTGAAGTAGCGGAAGCTAACTT  
AAGAAAAGCTGAAGGTAAGAGACAAACAATTGAGGCAAATCTAGCTCTCAGACGAGC  
TAGGACACGAGTCGAGGCTATCAATGCAATTTCAATGAAAAATGTAACCGATTCTTTTCG  
TTTCCTTGGGTCACTGGCCATCGGCCGGGAGTTTCGGATTTAATACCGATATTTTAGCAA  
CAAATCCAATAAATCTAAGTGTAGTCCTTGGTGTATTGATCTTTTTTTGGAAAGGGAGTG  
TTAAGCGATTTATTAGATAATCGAAAACAGAGGATCTTGAATACTATTGAAATTCAGA  
AGAATTACGCGGCGGGGCCATTGAACAGCTGGAAAAAGCCCGGGCCCGTTTACGGAA  
AGTGGAATGGAAGCGGAGCAGTTTTCGAGTGAATGGATACTCTGAGATAGAACAAGA  
AAAGTTGAATCTGATTAATTCAACTTATAAGACCTTGAACAATTAGAAAATTACAAAA  
ACGAAACTATTCATTTTGAACAGCAAAGAGCGATTAATCAAGTCCGACAACGGGTTTT  
CCAACAAGCCTTACAAGGAGCTCTAGGAACTCTGAATAGTTGTTTGAACAACGAGTTC  
CATTTACGTAATCAGTGCTAATATTGGCATGTTTGGGGCGATGAAAGAAATAACTGAT  
ATGAATCCACTGATTTCTGCCGCTTCCGTTATTGCTGCTGGGTTAGCTGTGGGGCTTGCT  
TCTATTGGACCTGGAGTTGGTCAAGGTAAGTCTGCTGCGGGCCAAGCTGTAGAAGGTATTG  
CAAGACAGCCCGAGGCGGAGGGAAAAATACGAGGTACTTTATTGCTTAGTCTGGCTTT  
TATGGAAGCGTTAACAATTTATGGATTGGTTGTAGCCTTAGCGCTTTTATTTGCGAATCC  
CTTTGTGATGAATGTTTTATCATGTTCCACCAACACACTAAAAGGGTTATACGATATATC  
GGGTGTGGAAGTAGGCCAACATTTCTATTGGCAAATAGGAGGTTTTCAAGTCCATGGC  
CAAGTCCTTATTACTTCTTGGGTTGTAATTGCTATCTTATTAGGTTCCGCCAGTATAGCTG  
TTCGGAATCCACAACCAATTCCGAATGACAGTCAGAATTTCTTCGAATATGTCCTTGAA  
TTCATTGAGACGTTAGCAAACTCAGATTGGAGAAGAATATGGTCCATGGGTTCCCTTT  
TATTGGAATATGTTCCATTTATTTTTGTTTCGAATTGGTCAGGGGCTCTTTTACCATGG  
AAAATCATAGAGTTACCTCATGGGAATTAGCCGCACCCACGAATGATATAAATACTAC  
CGTTGCTTTAGCTTTACTCACGTCAGTAGCATATTTCTATGCAGGTCTTACCAAAAAAG  
GATTAAGTTATTTAGTAAATACATTCAACCAACTCCAATCCTTTTACCCATTAACATCTT  
AGAAGATTTCAAAAACCTTTATCACTTAGTTTTCGACTTTTCGGAATATATTAGCCGA  
TGAATTAGTAGTTGTTGTTCTTGTCTTTAGTACCTTTAGTGGTTCCTATACCTGTTATG  
TTCCTTGGATTATTTACAAGTGGTATTCAAGCTCTTATTTTTGCAACTTTAGCCGCGGCT  
TATATAGGCGAATCCATGGAGGGTCATCATATGATATTTCCACCTTAGAACATATATTA  
CTCATATATCCTTTTCGATCGTTTCAATAGTAATTACTATTTTTTTGATAAGCTTATCGGTC  
---GAAATCGTAGGACTATATGATTCGTCAGAAAAAGGCATGATAGCTACTTTTTTTCTGTA  
TAACAGGATTATTAGTCACTCGTTGGATTATTCCGGACATTTCCCGTTAAGTGATTATA  
TGAATCATTAATTTTTCTTTCATGGAGTTTCTCCGTTATTCATATGGTTCCGTATTTAAA

AAACATAAAAATTATTTAAGCGCAATAACCGCGCCAAGTACTATTTTTACCCAAGGCTT  
TGCTACTTCGGGTCTTTTAACTGAAATGCATCAATACCAAATAGTAGTACCTGCTCTCCA  
ATCCCAATGGTTAATGATGCATGTAAGTATGATGATATTGGGCTACGCAGCTCTTTTATGT  
GGATCATTATTATCAGTAGCTCTCTTAGTCATTACATTGCGAAAAGCCATAAGGATTTTT  
AGTAAAAAAACGAGATCCAATACATGAATGAAAGAAGCAATGTTTTACTA-----TCTTT  
TTGTTCTTCTCGAAATATTACAGGGCTCAACTGATTCAACAATTAGATCAGTGGAGTTA  
TCGTATTATTAGTCTAGGGTTTATCTTTTTAACCATAGGTATTCTTTCGGGAGCAGTATGG  
GCTAATGAGGCATGGGGGTCAATTGGAATTGGGACCCAAAGGAAACTTGGGCATTTAT  
TACTTGGACCCTATTTGCGATTTATTTACATACTCGAACAAATAAAAATTGGGAAAGTTT  
AAATTGCGCAATTGTGGCTTCTATAGGCTTTCTTATAATTTGGATATGCTATTTGGGGGTC  
AATTTATTAGGAATAGGATTACATAGTTATGGTTCATTTAATTTCCATATGGTAAAAAAGA  
AAGCATTCTTCTCTTCTATATCTTGCATCTATAGTATTTTTGCCCTGGTGGATCTCTCT  
CTCATTAAATAAAAGTCTTGAATTTTGGATTACTAATTGGTGGAAATACTAGGCAATCCGA  
AACTTTTTTGACTGATATTCAAGAAAAGAGTATTCTAGAAAAATTCATAGAATTGGAAG  
AACTCTTACTCTTGGACGAAATGATAAAAGAATACCCGGAACACATCTACAAACACT  
TCGTATAGGAATCCACAAAGAAACGATCCAATTGATCAAGATGCACAATGAGGATCATA  
TCCATATGATTTTGCACCTATCGACAAATATAACCTCTTTCATTATTTTAAAGTGGTTATTCT  
ATTTTGGGTAATGAAGAACTTGCTATTCTTAACTCTTGGGTTCAAGAATTCCTATATAAC  
TTAAGTGACACAATAAAAGCTTTTTCTATTCTTTTATTAACCTGATTTATGTATCGGATTCC  
ATTCGCCCCATGGTTGGGAACATAATGATTGGCTATGTCTACAAAGATTTTGGATTTGTTC  
ACAACGATCAAATTATATCGGGTCTTGTTTCTACTTTTTCCAGTCATTCTGGATACAATTTT  
TAAATATTGGATCTTCCGTTATTTAAATCGTATATCTCCATCACTTGTAGTGATTTATCATT  
CAATGAATGACATGCCTATTGGTGTCCAAAAGTACCCTTTCGAAGTCTTGAGAGGA  
AGATGCCTCTTGGGTTGACGTATAACCGACTTTATCGAGAAAGATTACTTTTTTTTAG  
GCCAAGAGGTTGATAGCGAGATTTCGAATCAACTTATTGGTCTTATGGTATATCTCAGTA  
TAGAGAATGATAACAAGGATCTGTATTTGTTTATAAACTCTCCTGGCGGATGGGTAATCC  
CCGGAGTAGCTATTTATGATACTATGCAATTTGTGCAACCCGATGTGCATACAATATGCA  
TGGGATTAGCCGTTCAATGGGATCTTTTATCCTGGTCCGGCGGAGAGATTACCAAACGT  
CTAGCATTCCCTCACGCTAGGGTAATGATACATCAACCTGCGAGTTCTTTTTATGAGGCA  
CAAACGGGAGAATTTATCCTGGAAGCAGAAGAACTACTGAAACTGCGCGAAACCATC  
ACAAGAGTTTATGTACAAAGAACGGGCAAACCCCTATGGGTTGTATCCGAAGATATGG  
AAAGGATGTTTTTATGTCAGCAACAGAAGCCCAAGCTCATGGAATTGTTGATCTTGTA  
G C G A T T G A  
A????????????????????????????????????????????????????????????????  
????????????????????????????????????????????????????????????????  
????????????????????????????????????????????????????????????????  
????????????????????????????????????????????????????????????????  
ATGGAGGAATTTCAAGGATATTT  
AGAAGTACTAGATCTAGACAACATGACTTCTTATAACCACTTCTTTTTTCGAGAGTATAT  
TTATGCACTTACTCATGATCATGGTTTAGCAGGTTATGACAATAAATCTAGTTCAATAATT  
GTGAAACGTTTAATTACTCGAATGTATCAACAGAATCCTTTGATTTTTTCAGCTAATGAT  
TCTATCCAAAATCCATTTTTTGGGAAGAATTTTATTCTCAAATTATCTCCGAGGGATTT  
GCAGTCATTGTGGAAATCCATTTTCCCTAAGATTAGTATCTTCTTAAATAGCAAATAT  
CATAAATTACGATCAATTCATTCCATATTTCTTTTTAGAGGACAAATTTTACATTTAG  
ATTATGTGTCGGACGTAATAACCATATCACATCCATCTAGAAATCTTGGTTCAAACCC  
TTCGCTACTGGGTGAACGATGCCTCTTCTTGCATTTATTACGTTTCTTTCTCCACGAGT

ATTGGAAT-----AGTCTTATTACTAAACATATTACCATTTTTTTTCAAACCAAGATTATTCTT  
GTTCCCTATATAATTCTCGTATATGTGAATACGAATACATCTTTCTTTTTCTCCTTAATCAAT  
CTTCTCATTACGGTCAACATCTTCTGGAATCTTTTTTGAGCGAATATATTTCTATGTA  
AATAGAACATTTTGTCAAAGTCTTCTTTGATTTTCAGATCCTATGGTTCTTCAAAGATCC  
TTTCATGCATTATGTTTCGATATCAAGGAAAATCAATTCTGGCTTCAAAGATACGCCTCT  
TCTGATGAAGAAATGGAAATATTACCTTGTTAATTTATGGCAATATCATTTTTTACGCCTG  
GTTGAAACCAGGAAGGATCGATATAACCAATTATGCAAGTATTCTCTTGACTTTTTGG  
GCTATCGTTCAAGCGTGC GACTAAATTCTTCAGTGGTACGAAGTCAAATGCTAGAAAAT  
TCATTTCTAATAAATAAT-----GCTATGAAGAAGTTTGAGACAATAGTTCCAATTATTCCT  
CTGATTGGATCATTGTCTAAAGCGAATTTTTGTAACACATTAGGGCATCCCATTAGTAAA  
CCGACCCGGGCTGATTCATCAGATTCTGATATTATCGACCGTTTTTTTTGCGTATATGCAGA  
AATCTTTCTCATTATCACAGCGGATCCTCAAAAAAAAAAGAGTTTATATCGAGTAAAATAT  
ATACTTCGACTTTCTTGTGTTAAAACCTTTGGCTCGTAAACACAAAAAGACTGTACGCAC  
TTTTTTAAAAGATTAGGTTTCGGAATTTTTGGAAGAATTCCTTACGGAGGAAGAAGTTG  
TTCTTTCTTTGATCTTCCCAAGACGGATTTGGTATTTGGATATTACTTCTATCAATGATCT  
AGTCAATTATGAAATGATAATTGATAACA---GAAGTACA---GATATAAATTCTTTTTTC  
TAGATTGGAATCT--TTAAAAGAAGTCTATGGAATCATAGGGATGTTTTTACCTATTTTGA  
CTCTTGATTGGGAATACAATAGGTGTACTCGTAATTGTGTGGTTAGAAAGAGAAATA  
TCCGCAGGAATACAACAACGTATTGGTCCCGAATACGCCGGTCTTTGGGAATTCTTCA  
AGCTTTAGCAGATGGGACAAAACCTTATTTTCAAAGAGAATCTTTTTCCATCTCGAGGAG  
ATACTCGTTTATTTCAGTATAGGACCATCCATAGCAGTTATATCGATTTTACTAAGTTATTC  
AGTAATTCCTTTTAGTTATCACCTTGTTTTATCTGATCTCAATATCGGTGTTTTTTTATGGA  
TTGCCATTTCCAGTATTGCTCCCATTTGGACTTCTTATGTCAGGATATGGATCAAATAATA  
ATATTCTTTTTTAGGTGGTCTACGAGCCGCTGCTCAATCGATTAGTTATGAAATACCATTA  
ACTCTTTGTGTGTTATCAATATCTCTATTATCTAACAGTTCAAGTACAGTTGATATAGTTG  
AGGCCAGTCCAAATATGGTTTTTTGGGGATGGAATTTGTGGCGTCAACCTATAGGGTTT  
TTCGTTTTTCTAATTTCTTCCCTAGCAGAATGTGAGAGATTACCTTTCGATTTACCAGAA  
GCAGAAGAAGAATTAGTAGCAGGTATCAAACCGAATATTCGGGTATCAAATTTGGGTT  
ATTTTACGTTGCTTCCATCTAAATCTATTAGTTTCTTCGTTATTTGTAACAGTTCTTTACT  
TAGGGGGTTGGAATATCTCTATTCCCTTACATATTCGTTCCCGAGCTATTT-----GAAAAG  
TAGGTAGAGTCTTTGGAACGACAATTGGGATTTTTATTACATTAGCTAAAACCTATTTGT  
TCTTGTTTATTTCTATCACAACAAGATGGACTTTACCTAGACTAAGAATAGATCAATTATT  
AAATCTTGGATGGAAATTTCTTTTACCCATTTCTCTGGGTAATCTATTATTAACAACCTCT  
TTCCAACCTCTTTTCATTGATGATCTGGCATGTACAGAATGAAAACCTCATTCTCGATTCT  
ACGAGAATTTTTATGAAAGCCTTTCATTTGCTTCTCTTCGATGGAAGTTTTATTTTCCCA  
GAATGTATCCTAATTTTTGGCCTAATTTCTTCTGATGATCGATTCAACCTCTGATCAA  
AAGATATACCTTGGTTCTATTTTCATCTCTTCAACAAGTTTAGTAATGAGCATAACGGCCC  
TATTGTTCCGATGGAGAGAAGAACCTATGATTATCTTTTCAGGAAATTTCCAAACGAAC  
AATTTCAACGAAATCTTTCAATTTCTTATTTACTATGTTCAACTCTATGTATTCTCTATC  
CGTAGAGTACATTGAATGTACAGAAATGGCTATCACAGAGTTTCTCTTATTTGTATTAAC  
AGCTACTCTAGGAGGAATGTTTTTATGCGGTGCTAACGATTTAATAACTATCTTTGTAGC  
TCCAGAATGTTTCAGTTTATGCTCCTACCTATTATCTGGATATACCAAGAAGGATGTACG  
GTCTAATGAGGCTACTATGAAATATTTACTCATGGGTGGGGCAAGCTCTTCTATTCTGGT  
TCATGGTTTCTCTTGGCTATATGGTTCATCCGGGGGAGAGATCGAGCTTCAAGAAATAG



TGAATGGTCTTATCAATACACAAATGTATAACTCCCCAGGAATTTTAATTGCGCTTCTAT  
TCATCACTGTAGGAATTGGGTTCAAGCTTTCCTAGCCCCTTCTCATCAATGGACTCCT  
GACGTATACGAAGGATCTCCCACTCCAGTCGTTGCTTTTCTTTCTGTTACTTCGAAAGT  
AGCTGCTTCAGCTTCAGCCACTCGAATTTTCGATATTCCTTTTTATTTCTCATCAAACGA  
ATGGCATCTTCTTCTGGAAATCCTAGCTATTCTTAGCATGATATTGGGGAATCTCATTGCT  
ATTACTCAAACAAGCATGAAACGTATGCTTGCATATTCGTCCATAGGTCAAATCGGATAT  
GTAATTATTGGAATAATTGTTGGAGACTCAAATGGTGGATATGCGAGCATGATAACTTAT  
ATGCTGTTCTATATCTCCATGAATCTAGGAACTTTTGCTTGCATTGTATTATTTGGTCTAC  
GTACCGGAACTGATAACATTTCGAGATTATGCAGGATTATACACGAAAGATCCTTTTTTG  
GCTCTCTCTTAGCCCTATGTCTCTTATCCCTAGGAGGTCTTCCTCCACTAGCAGGTTTT  
TTCGAAAACCTCCATTTATTTCTGGTGTGGATGGCAGGCAGGCCTATACTTCTTGGTTTC  
AATAGGACTCCTTACGAGCGTTATTTCTATCTACTATTATCTAAAAATAATCAAGTTATTA  
ATGACTGGACGAAACCAAGAAATAACACCTCACGTGCGAAATTATAGAAGATCCCCTT  
TCAGATCAAACAATTCCATCGAATTGAGTATGATTGTATGTGTGATAGCATCTACTATAC  
CAGGAATATCAATGAACCCGATTATTGCAATTGCTCAGGATACCCTTTTTATGTTTCTTC  
TTTACGAATATGATATTTTCTGGGCATTTCTAATAATATCAAGTGTATTTCCTATTTTGGCA  
TTTCTAATTTCCGGAATTTTAGCCCCGATTAGCAAAGGGCCAGAGAACTTTCGAGTTA  
TGAATCAGGTATAGAACCAATGGGCGATGCTTGGTTACAATTTCGAATCCGTTATTATAT  
GTTTGTCTAGTTTTTGTGTTTTTGTATGTTGAAACGGTTTTTCTTTATCCATGGGCAAT  
GAGTTTCGATGTATTGGGGGTATCCGTATTTATAGAAGCTTTAATTTTCGTGCTTATCCTA  
ATTGTTGGTTAGTTTATGCATGGCGAAAAGGAGCATTGGAATGGTCTACGAATTATTTT  
CCTTGGTTAACAATAATTGTACTTTTGCCGATATTCGCAGGTTCTTTAATTTTCTTTCTAC  
CTCATAGAGGAAATAAGGTAATACGGTGGTATACTATATGCATATCTACTTTAGAGCTCC  
TTTTAACTACCTATACATTCTGTTATCATTCCAATTGAACGATCCATTAACCAATTAAC  
AGAGGATTATAAATGGATTAATTTTTTTGATTTTTTACTGGAGATTGGGAATAGATGGACT  
TTCTATAGGACCTATTTTACTGACGGGATTTATCACCCTTTAGCTACTTTAGCGGCTCG  
GCCAGTACTCGAGATTCCCGATTATTCCATTTCTGATGTTAGCAATGTACAGCGGTCA  
AATAGGATCATTTTCTTCTCGAGACCTTTTACTTTTTTTCATCATGTGGGAGTTAGAATT  
AATCCCGTTTATCTACTTCTATCGATGTGGGGGGGAAAGAAACGTCTGTATTCCGCTAC  
AAAATTTATTTGTACACTGCGGGAGGTTCCATTTTTCTATTAATAGGGGTTCTGGGTAT  
TGGTTTATATGGTTCCAACGAACCAACATTAATTTTGAACATTAGCTAATCAATCGTA  
TCCGGTGGCGCTGGAAATAATATTCTATATTGGATTTCTTATTGCTTTTGTGTTAAATTA  
CCGATTATACCCTTACATACATGGTTACCAGACACCCATGGCGAGGCACATTATAGTACT  
TGTATGCTTTTAGCCGGAATTTTATTAATAAATGGGAGCATATGGGTTGGTTCGGATCAAT  
ATGGAATTATTACCTCATGCTCATTCTATATTTTCTCCCTGGTTGATTATAGTAGGCGCAA  
TCCAAATAATCTATGCAGCTTTAACATCTCCTGGTCAACGTAATTTAAAAAAGAATA  
GCCTATTCTCTGTATCTCATATGGGTTTCATAATTATTGGAATTGGCTCGATAACTGATA  
CGGGACTCAATGGAGCCATTTTACAAATAATCTCTCATGGATTTATCGGCGCTGCTCTTT  
TTTTCTTGGCAGGAACGAGTTATGATAGAATACGTCTTGTATTATCTCGACGAAATGGGT  
GGAATGGCTATCCACCTTCCAAAAATATTCACGATGTTTAGTATCTTATCAATGGCTTCC  
CTTGCAATTACGGGTATGAGTGGTTTTCTTGCAGAATTGATATTATTTTTTGAATAATTA  
CCAGCCAACAATATCTTTAATGCCAAAAATACTAATTACTTTTGTAAATGGCAATTGGAA  
TGATATTAATCCTATTTATTTATTTATCTATGTTACGCCAAATGTTCTATGGATACAAGTTA  
TTAATGTTCCAAACTCTTATTTTTTTGATTTTTGGGCCGCGAGAGTTATTTGTTTCCATCT

CTATTCTTCTACCAATAATAGCTATTGGTATTTATCCAGATTTTCGTTCTTTCACTATCTGTT  
GACAAAGTCGAAGCTATTATATCTAATTATTTTATCAAATGATACTCGAACATGTA CTG  
TTTTGAGTGCCTATTTATTTTCTATTGGTATCTATGGATTGATCACGAGTCGAAATATGGT  
TAGGGCCCTTATGTGTCTTGAACCTATCCTCAATGCGGTTAATATAAATTCGTAACATTT  
TCAGATTTTTTTGATAGTCGGCAATTA AAAAGGAGATATTTCTCCATTTTTGTTATAGCTA  
TTGCAGCCGCCGAAGCAGCTATTGGGTTAGCTATTGTTTCATCGATTATCGTAACAGA  
AAATCAACTCGTATCAATCAATCGAATTTGTTGAATAAAAATGGAATATACATATCAATATT  
CATGGATTATCCCCTTCATTCCACTTCCAGTTCCTATGTTAATAGGAGTGGGACTTCTAC  
TTTTTCCAACGGCAACAAAAAATCTTCGCCGATGTGGGCTTTTTCTTAGTATTTTTCTGT  
TAAGTATAGTTATGATACTTTCCGGTCTATCTATCTATTCAGCAAATAAATAGAAGTTTTAT  
CTATCAATATGTATGGTCTTGGACCATTAATAATGATTTTTCTTTAGAGTTCGGTCACTTA  
ATAGATCCACTTACTTCTATTATGTTAATATTAATTACTACTGTTGGAATTTGGTTCTTTT  
TTATAGTGACAATTATATGTCTCATGATCAAGGATATTTGAGATTTTTTGCTTATATGAGT  
TTTTTCAATACTTCCATGTTGGGATTAGTACTAGTTCGAATTTGATACAAATTTATATTT  
TTTGGGAATTAGTTGGAATGTGTTCTTATCTATTAATAGGTTTTTGGTTCACACGACCTA  
GTGCGGCGACTGCTTGTCAAAAAGCGTTTTGTAACAAATCGTGTAGGCGATTTTGGTTTA  
TTATTAGGAATTTTAGGTCTTTATTGGATAACCGGTAGTTTTGAATTCGGGATTTGTTCC  
AAATATTGAATAAC---GAGGTTCTTTTTTATTCTTACTTTGTGTGCCTTTTCTTTTATTG  
CAGGTGCAGTTGCGAAATCGGCACAATCCCCCTTCATGTATGGTTACCTGATGCCATG  
GAAGGCCCTACTCCCATTTCCGGCTCTTATACATGCCGCTACGATGGTAGCAGCGGGCAT  
TTTTCTTGTAGCTCGACTTCTTCTCTTTTTATAATCATACTTACATAATGAATTCATAT  
CTTTAATAGGTATAATAACAGTATTATTAGGAGCTACTTTAGCTCTTGCTCAAAAAGATAT  
TAAAAGAGGTTAGCTTATTCTACAATGTCTCAATTTGGGTTATATGATGTTAGCTCTAGG  
TATGGGGTCTTATCGAGCCGCTTTCTTTCATTTGATTACTCATGCTTATTCGAAAGCGTT  
GTTGTTTTTAGGATCCGGATCAATTATTCATTCAATGGAAGCTATTGTTGGATATTCTCCA  
GATAAAAGTCAGAATATGGTTCTTATGGGAGGTTTTAAAAAGCATGTACCAATTACAAA  
AACTGCTTTTTTAGTAGGTACACTTCTCTTTGTGGTATCCCCCTTGCTTGTTTTTG  
GTCCAAAGATGAAATTTCTTAATGATAGTTGGTTGTATTCACCTATTTTCGCAATAATAGC  
TTGTTCCACAGCAGGATTAACCGCATTTTATATGTTTCGGATCTATTTACTTACTTTTGAG  
GGACATTTCAATGTTCAATTTTCAAATTACAGTGGTCAAAAAGTAGTTCCTACTATTC  
AATATCTCTATGGGGAAAAGAAGTACCAAAAACGATTA AAAATAAATTATTAAGTTTATT  
GACAATGAATTTTTTTTTCAGTCACTAAAAAT---ACTTTCTCTTATCCTCATGAATCGGAC  
AATACCATGTTATTTTCTATGGTTATATTAGTGCTATTTACTTTCTTTGTGGAGTCGTAGG  
AGCT---TTTCATTTGGATATATTATCTAAATTTGTTAAATCCGTCTATAAACCTTTTACATCC  
GAACTCAAAT--TCTGTGGATTGG---GAATTTGTGACAAATGCAAGTTTTTCTGTTAGTAT  
AGCTTTTTTTCGGAATATTTATAGCGTCTTTTTTATATAAGCCTATTTATTCCTCTTTACAAA  
ATTTGAACTTACTAAATTCGTTTTCTATTTTAGGGGACAGAATAAGAAATGTGATATATG  
ATTGGTCATATAATCGTGGTTACATAGATACTTTTTATAACAATATCCTTAACTCAGGGTAT  
AAGAGGACTAGCTGAACTAATTCATTTTTTGGATAGACGAGTAATTGATGGAATTACGA  
ATGGTTTTCGGTCTTACAAGTTTCTTTTTTCGGAGAAGGTATCAAATATGTAGGGGTCGGT-  
--CGCATCTCTTCTTATCTCTTATTGTATTTATTGTTTGTATTAATTTTTTTTATTGATTTATTC  
CATGGATTTGCCTGGACCAATACATGATTTTCTTTTCGTTTTTCTGGGATCAGGTCTTATA  
TTAGGAAGTCTAGGAGTGGTATTA CTTACCAATCCAATTTATTCTGCCTTTTCTTGGGA  
TTGGTCTTGTGTTGTATATCCTTATTTTATATTCTATCAAATCCCATTTTGTAGCGGCTGC

GCAGCTCCTTATTTATGTAGGAGCTATAAACGTTTTAATTCTATTTGCTGTGATGTTTCATG  
AATGGTTCAGAATATTACAAAGATTTGAATCTTTGGACTGTTGGAGATGGGATTACTTC  
GTTGGTTTTGTACAAGTATTTTGGTTTCACTAATGACTACTATTTTAGATACGTCCTTGGTAC  
GGGATTATCTGGACGACAAAAGTCAAACCAGATTATCGAGCAAGATTTGATAGGTAATAG  
TCAACAAATCGGAATTCATTTATCAACAGATTTTTTTCTTCCATTTGAACTCATTTCATA  
ATTCCTTTTAGTTGCTTTGATAGGTGCAATGCTGTTGCTCGTCAAATGAATGTAACAAC  
ACAAGAAAAGACCTCATGATAGTCAATATGGGACCTCACCAACCATCAATGCATGGTGT  
TCTTCGGCTCATCCTTACTCTAGATGGTGAAGATGTTATTGATTGTGAACCAATATTGGG  
TTATTTACACAGAGGAATGGAAAAAATTGCGGAAAATCGAACAGTTATACAATATCTAC  
CTTATGTAACACGTTGGGATTATTTAGCTACTATGTTTACAGAAGCAATAACCGTAAATG  
GACCCGAACAGTTGGGAAATATTCAAGTACCTAAAAGAGCCAGTTATATCAGAGTAATT  
ATGTTAGAGTTGAGTCGTATAGCTTCTCATCTGTTATGGCTTGGCCCCTTTATGGCAGAT  
ATTGGTGCACAGACTCCTTTTTTCTATATTTTCAGAGAAAGAGAATTAGTATATGATCTA  
TTCGAAGCTGCCACCGGTATGAGAATGATGCATAATTATTTTCGTATCGGAGGAGTAGC  
GGCCGATCTACCTTATGGATGGATAGATAAATGTTTGGATTCTGTGATTATTTTTTAACA  
GCGGTTTCGGAATATCAAAAACCTATTACGCGAAATCCTATTTTTTTTAGAACGAGTTGA  
GGGAGTAGGCATTATTGGTCCAGAAGAAGCAATAAATTGGGGTTTATCGGGACCAATG  
CTACGAGCTTCCGGAATCCAATGGGATCTTCGTAAAGTTGATCATTATGAATGTTACGA  
CGAATTGGATTGGGAAATCCATTGGCAAAAAGAAGGAGATTCATTAGCTCGCTATTTGG  
TCCGAATCGGTGAAATGACGGAATCTATAAAAATTATTCAACAAGCTCTGGAAGGAATT  
CCAGGAGGGCCCTATGAGAATTTAGAAACCCGGTGCTTTGCTAGAGAAAGGGATCCGG  
AATGGAATGATTTTGAATATCGATTCATTAGTAAAAACCTTCTCCTACTTTTGAATTGC  
CGAAGCAAGAACTTTATGTAAGAGTTGAAGCCCCAAAGGGAGAATTGGGAATTTTTTT  
AATAGGAGATCAGAGTGGTTTTCTTGGAGGTGGAAAATTCGTCCACCTGGTTTTATCA  
ATTTGCAAATTCCTCCTCAGTTAGTTAAAAGAATGAAATTGGCCGATATTATGACAATAC  
TAGGTAGCATAGATATCATTATGGGAGAAGTTGATCGTATGTTCCCTATGGTAACTGGGT  
TCATGAATTACGGCCAACAAACAGTACGAGCTGCAAGGTACATTGGTCAAGGGTTCAT  
GATTACCTTATCCACGCCAATCGTTTACCTGTAAC TATTCAATATCCTTATGAAAAATTA  
ATTACATCCGAGCGTTTCCGCGGCCGAATCATTTTGAATTTGATAAATGTATTGCTTGT  
GAAGTATGTGTTTCGTGTATGTCCTATAGATCTACCTGTTGTTGATTGGAAATTGGAACT  
GGTATACGAAAGAAACGCTTGCTTAATTACAGTATTGATTTTCGGAATTTGTATTTTTTGT  
GGTAACTGTGTTGAGTATTGTCCAACAAATTGTTTATCAATGACTGAGGAATATGAACT  
TTCTACTTATGATCGTCACGAATTGAATTATAATCAAATCGCTTTGGGTGCTTTACCAAT  
GTCAGTAATTAACGATTATAACAATTCGAACAATTCGAATTCG-----ATAATAAAA-----  
-----ATGCAGGGTCCTTTGTCTGCTTGGCTAGTCAAGCATGGACTAGTTCAT  
AGATCTTTGGGCTTTGATTATCAAGGAATAGAGACTTTACAAATAAAGCCTGAGGATTG  
GCATTCCATTGCTGTCATTTTATATGTATATGGTTACAATTATCTACGTTCCCAATGTGCTT  
ATGATGTAGCACCCGGTGGACTGTTAGCTAGTGTGTATCATCTTACGAGAATAGAGTAT  
GGTGTAGATCAACCGGAAGAGGTATGCATAAAAGTATTTGCCCGAGGAGTAATCCTC  
GAATTCGTCTGTTTTCTGGATTTGGAAAAGTTCGGATTTTCAAGAACGGGAATCCTTAT  
GATATGTTGGGAATCTGTTATGATACTCATCCACGACTTAAACGTATCTTAATGCCTGAA  
AGTTGGATAGGATGGCCCTTACGTAAGGATTATATTGCCCTAATTTTTATGAAATACAA  
GATGCTCAT-----  
-----ATGAATTCCATAGAATTTCC

CTTACTTGCTCGAACAACCCAAAATTTCAGTTATTTCAACTACATTAAATGATCTTTCAA  
TTGGTCAAGGCTCTCTAGTTTATGGCCGCTTCTTTATGGTACCAGTTGTTGCTTCATTGA  
ATTTGCTTCATTAATAGGCTCACGATTCGACTTTGATCGTTATGGACTGGTACCAAGATC  
GAGTCCTAGACAGGCAGACCTCATTTTAACAGCCGGCACAGTAACAATGAAAATGGCT  
CCTTCTTTAGTGAGATTATATGAACAAATGCCTGAACCAAATATGTTATTGCTATGGGA  
GCATGTACAATTACAGGGGGGATGTTTCAGTACCGATTTCGTATAGTACTGTTCCGGGGAGT  
CGATAAGCTAATTCCTGTAGATGTCTATTTGCCAGGCTGTCCACCTAAACCAGAGGCAG  
TTATAGATGCTATAACAAAACCTTCGTAAGAAAATAGCTAGAGAAATCTATGAAGAGCGA  
ATTAGGTCTCAAGAAGAAAATCGGTGTTTTACTACCAATCACAAGTTTCATGTTGGACG  
CAGTATTCATACTGGAAATTATGATCAAGGATTACTCTATCAATCACCATCTACTTCAGA  
GATACCTCCTGAAACATTTTTCAAATACAAAAGTTCAGTATCTTCCCACGAATTAGTGA  
ATATGCAAACATAAAAACACCTTTTTCTTGATAAAGAAAGAGATTATTCGATGTATTTCCG  
TATCGCTGATGATATATATCATAGCTCGGACATCCATTTCAAATGCATATCCCATTTTTGC  
ACAGCAGGGTTATGAAAATCCACGAGAAGCGACCGGGCGTATTGTATGTGCCAATTGC  
CATTTAGCTAATAAGCCCGTGGATATTGAGGTTCCGCAAGCGGTACTTCCTGATACTGTA  
TTTGAAGCAGTTGTTTCGAATTCCTTATGATATGCAAGTTAAACAAGTTCTTGCTAATGGT  
AAAAGGGGAGGTTTGAATGTGGGGGCTGTTCTTATTTTACCTGAGGGGTTTGAATTAGC  
GCCTCCCGATCGTATTTCCGCGAGATGAAAGAAAAGATAGGCAATCTGTCTTTTCAGA  
GCTATCGCCCCAATAAAAAAATATTCTTGTGATAGGTCCTGTTTCTGGTCAGAAATATA  
GTGAAGTCACCTTTCCTATTCTTTCCCCGGACCCCGCTACTAATAAAAATGTTCACTTCT  
TAAAATATCCATATATGTAGGCGGGAACAGAGGAAGGGGTCAGATTTATCCCGATGGG  
ACAAGAGTAACAATACAGTTTATAATGCTACAGCGGCTGGTGTAGTAAGTAAAATCAT  
ACGAAAAGAAAAGGGGGGTACGAAATAACCATATCGGATGCGTCAGATGAACGTCA  
AGTGGTTGATATTATTCACCAGGGCCAGAACTTCTTGTTCGGAAGGCGAATCTATCA  
AACTTGATCAGCCATTAACGAGTAATCCTAATGTGGGTGGATTGGTCAAGGAGATGCG  
GAAATAGTACTTCAAGATCCATTCGTTGTTCCAAGGCCTTTTGTCTTCTTGGCATCTGTT  
ATTTTGGCACAAATATTTTTGGTTCTTAAGAAGAAACAGTTTGAGAAGGTTCAATTGTC  
CGAAATGAATTCATGAGTAAAGTCTATGATTGGTTTGAAGAACGTCTCGAGATTCAGG  
CGATTGCAGATGATATAACTAGTAAATATGTTCTCCTCATGTCAACATATTTTATTGTCT  
AGGAGGAATTACGCTTACTTGTTTTTTAGTACAAGTAGCTACGGGGTTTGCTATGACTTT  
TTACTACCGTCCAACGTGTTACTGAGGCTTTTGCTTCTGTTCAATACATAATGACTGAAGC  
TAACTTTGGTTGGTTAATTCGATCAGTTCATCGATGGTCGGCAAGTATGATGGTCCTAAT  
GATGATCCTGCACGATTTTCGTGTGTATCTCACTGGTGGTTTTAAAGAACCTCGCGAATT  
AACTTGGGTTACAGGTGTGGTCTGGCTGTATTGACCGCATCCTTTGGTGTAACCTGGTT  
ATTCCTTACCTTGGGACCAAATTGGTTATTGGGCAGTCAAATTGTAACAGGTGTACCG  
GAAGCTATTCCTGTAATAGGATCCCCTTTAGTAGAGTTATTACGCGGAAGTGCTAGTGT  
GGGACAATCCACTTTGACTCGTTTTTATAGTTTACACACTTTTGTATTACCTCTTCTTACT  
GCCGTGTTTATGTTAATGCATTTTCTAATGATACGTAAGCAAGGTATTTCCGGTCCCTTAA  
TGGGAGTAACAAAAAACCTGACTTTAATGATCCTGTATTAAGAGCTAAATTGGCTAAA  
GGGATGGGTCATAATTATTACGGAGAACCTGCATGGCCAACGATCTTTTATATATTTTT  
CCAGTAGTAATTTAGGTACTATTGCGTGTAACGTAGGCTTAGCGGTTCTAGAACCATC  
AATGATTGGTGAACCCGCCGATCCATTTGCAACTCCTTTGGAAATATTACCCGAATGGTA  
TTTTCTTCTGTATTTCAAATACTTCGTACAGTACCTAATAAGTTATTGGGTGTTCTTTTA  
ATGGTTTCAGTACCTGCGGGATTATTAACAGTACCTTTTTTGGAGAATGTTAATAAATTT

CAAAATCCATTTTCGTCGTCCAGTAGCGACAACCTGTCTTTTTGATTGGTACCGTAGTGGC  
CCTTTGGTTGGGTATTGGAGCAACATTACCTATTGATAAATCCCTAACTTTAGGTCTTTTT  
ATGATTGAAGTTTTTCTATTTGGAATTGTCTTAGGTCTAATTCCTATTACTTTAGCTGGAT  
TATTTGTAACCTGCATATTTACAATACAGACGTGGTGATCAGTTGGATCTTATGCTTACTAT  
AACTAGTTATTTTCGGTTTTCTACTAGCAGCTTTAACTATAACCTCAGCTCTCTTTATTGGT  
CTGACCAAGATACGACTTATTATGGATATAGTAAGTCTTGCTTGGGCTGCTTTAATGGTA  
GTCTTTACATTTTCTCTTTCACTCGTAGTATGGGGAAGAAGTGGACTCATGATTATTCGT  
TCGCCGGAACCAGAAGTCAAAATTTGGTAGATAGGGATCCCGTAAAACTTCTTTTCG  
AGGAATGGGCCAAACCGGGTCATTTCTCAAGAACAATAGCTAAGGGCCCTGATACTAC  
CACTTGGATCTGGAACCTACATGCTGATGCTCACGATTTTCGATAGCCATAACCAATGATTT  
GGAGGAGATCTCTCGAAAAGTATTTAGTGCTCATTTTGGCCAACCTTTCCATTATCTTTCT  
TTGGCTGAGTGGTATGTATTTCCATGGTGCTCGTTTTTCCAATTATGAAGCATGGCTAAG  
TGACCCTACTCACATTGGACCTAGTGCCAGGTGGTTTTGGCCAATAGTGGGCCAAGAA  
ATATTGAATGGCGATGTGGGCGGGGGTTTTCCGAGGAATACAAATAACCTCTGGTTTTTT  
TCAGATTTGGCGAGCATCTGGAATAACTAGTGAATTACAACCTCTATTGTACCGCAATTG  
GTGCATTAGTCTTTGCAGCCTTAATGCTTTTTGCTGGTTGGTTCCATTATCACAAAGCTG  
CTCCAAAATTGGCCTGGTTCCAAGATGTAGAATCTATGTTGAATCACCATTTAGCAGGG  
CTACTAGGACTTGGGTCTCTTTCTTGGGCGGGGCATCAAGTACATGTATCTTTACCAATT  
AACCAATTTCTAAACGCTGGAGTAGATCCTAAAGAGATCCCACTTCCTCATGAATTTAT  
CTTGAATCGGGATCTTTTTGGCTCAACTTTATCCCAGTTTTGCCGAGGGAGCAACCCCAT  
TTTTTACCTTGAATTGGTCAAAATATGCGGAATTTCTTACTTTTCGTGGCGGATTAGATC  
CAGTAACTGGGGGTCTATGGCTGACTGATATTGCTCATCATCATTTAGCTATTGCAATTC  
TTTTCTTGATAGCAGGTACATGTATAGGACCAACTGGGGCATTGGTCATGGCATAAAA  
GATATTTTAGAGGCTCATAAAGGTCCATTTACAGGCCAGGGCCATAAAGGCCTATACGA  
GATCCTAACACGTCATGGCATGCTCAATTATCTCTTAACCTAGCTATGTTAGGCTCTTT  
AACCATTTGTTGTAGCTCACCATATGTATTCATGCCCCCTTATCCATATCTAGCTACTGAC  
TATGGTACACAACTGTCATTGTTACACATCACATGTGGATTGGCGGATTTCTCATAGTT  
GGTGCTGCCGCGCATGCAGCTATTTTTATGGTAAGAGATTATGATCCAACCTACTCGATAC  
AACGATCTATTAGATCGTGTCCTTAGGCATCGTGATGCAATCATATCACATCTCAACTGG  
GTATGTATATTTCTAGGCTTTCACAGTTTTGGTTTTGTATATTCATAATGATACCATGAGCG  
CTTTAGGGCGACCCCAAGATATGTTTTCTGATACCGCTATCCAATTACAACCCGTCTTTG  
CTCAATGGATACAAAACACCCATGCTTTGGCGCCTGCTGCAACCGCCCCTGGTGCAAC  
AGCAAGCACCAGTTTGACTTGGGGAGGTGATGATTTAGTGGCAGTAGGTGGCAAGGTT  
GCTTTATTACCTATTCCATTAGGAACCGCAGATTTTTTGGTCCATCACATTCATGCATTTA  
CGATTCATGTAACAGTATTGATACTCCTGAAAGGTGTTCTATTTGCTCGTAGCTCTCGTT  
TGATACCGGATAAAGCAAATCTTGGTTTTCGTTTTCCCTTGTGATGGACCTGGAAGAGGG  
GGGACATGTCAAGTATCCGCTTGGGATCATGTCTTCTTAGGCCTATTCTGGATGTACAAT  
GCAATTTTCGGTAGTCATATTTCAATTCAGTTGGAAAATGCAGTCAGATGTTTGGGGTAGT  
ATAAGTGATCAAGGAGTGGTAACTCATATCACGGGAGGAACTTTGCGCAGAGTTCCA  
TCACTATTAATGGGTGGCTCCGCGATTTCTTATGGGCACAGGCATCCCAAGTAATTCAG  
TCTTATGGTTCCTTCAATATCTGCATATGGCCTTTTTTTTCTAGGTGCTCATTTTGTATGGG  
CTTTTAGTTTAATGTTTCTATTCAGCGGGCGTGGTTATTGGCAAGAACTTATTGAATCCA  
TCGTTTTGGGCTCATAATAAATTAAGTTGCTCCTGCTACTCAGCCTAGAGCCTTGAGC  
ATTGTACAAGGACGTGCTGTAGGAGTAACCCATTACCTTCTGGGTGGAATTGCCACAA

CATGGGCGTTCTTCTTAGCAAGAATTATTGCAGTAGGAATGGCATTAAAGATTTCCAAGG  
TTTAGCCAAGGCTTAGCTCAGGACCCCACTACTCGTCGTATTTGGTTTGGTATTGCGAC  
CGCGCATGACTTTGAGAGTCATGATGATACTGAGGAACGTCTTTATCAGAATATTTT  
TGCTTCTCACTTCGGGCAATTAGCAATAATTTTCTATGGACTTCCGGAAATCTGTTTCA  
TGTAGCTTGGCAAGGAAATTTGAGGCATGGGTACAGGACCCCTTACATGTAAGACCTA  
TTGCTCATGCAATTTGGGATCCTCAATTTGGTCAACCGGCCGTGGAAGCTTTTACTCGA  
GGGGGTGCTCTTGGCCAGTGAATATCGCTTATTCTGGTGTTTATCAGTGGTGGTATAACA  
ATTGGTTTACGTACTAATGAAGATCTTTATACGGGAGCCCTTTTTCTATTATTTCTTTCTG  
CCATATCCTTAATAGCAGGTTGGTTACACCTACAACCGAAATGGAAACCGAGCGTTTCG  
TGGTTCAAAAATGCCGAATCTCGTCTCAATCATCATTTGTCAGGACTATTCGGTGTAAAG  
TTCTTTGGCTTGGACAGGGCATTAGTACATGTCGCTATTCTGGATCCAGGGGGGAAT  
ACGTTTCGATGGAATAATTTTTTAGATGTATTACCGCATCCCGAAGGGTTAGGACCACTTT  
TTACAGGTCAGTGGAATCTTATGCCCAAACCCCGATTCAAATAGTCATTTATTTGGTA  
CCTCCCAAGGATCAGGAACTGCCATTCTAACCCTTCTAGGGGGATTCCATCCACAAAC  
GCAAAGTTTATGGTTGACTGATATTGCTCATCATCATTTGGCTATTGCATTTATTTTTCTC  
GTTGCTGGTCATATGTATAGAACTAACTTCGGGATTGGGACAGTATAAAAGATCTTTTA  
GAAGCACATATTCCTCCGGGGGGCGATTGGGGCGTGGACATAAAGGTCTTTATGACA  
CAATCAATAATTCGATTCATTTCAATTAGGCCTTGCTCTAGCCTCTTTAGGTGTTATTAC  
TTCCTTGGTAGCTCAACACATGTACTCTTACCTGCTTATGCGTTCATAGCACAAGACTT  
TACTACTCAAGCTGCGTTATATACTCATCACCAATACATCGCAGGATTCATCATGACAGG  
GGCTTTTGGCTCATGGGGCTATATTTTTCAATTAGAGATTACAATCCGGAACAGAATGAGGA  
TAATGTATTGGCAAGAATGTTAGACCATAAAGAAGCTATCATATCCCATTTAAGTTGGGC  
CAGCCTCTTTCTGGGGTTCCACACTTTGGGGCTTTATGTTTATAATGATGTCATGCTTGC  
TTTTGGTACTCCGGAGAAACAAATCTTAATCGAACCTATATTTGCCAATGGATAACAATC  
TGCTCATGGGAAAACCTTCATATGGGTTTCGATGTGCTTTTATCTTCAACGAATAGCCCAG  
CATTTAATGCAGGTCAAAGCATATGGTTGCCCGGCTGGTTAAATGCTATTAATGAG-----  
AATAGTAATTCATATTCTTAACAATTGGTCCTGGAGACTTCTTGGTTCATCATGCGATT  
GCTCTAGGTTTACATACAACTACATTGATCTTAGTAAAAGGTGCTTTAGATGCACGTGGT  
TCAAAGTTAATGCCAGATAAAAAGGATTTCCGGTTATAGTTTTCTTGGCATGGTCCGGG  
ACGAGGCGGTACTTGTGATATTTCCGCTTGGGACGCATTTTATTTGGCAGTTTTCTGGAT  
GTAAATAACATTGGGTGGGTTACTTTTTATTGGCATTGGAAACACATCACATTATGGCA  
GGGTAACGTTTACAGTTAATGAATCTTCCACTTATTTGATGGGATGGTTAAGAGATTA  
TCTATGGGTAAACTCTTCACAACTTATCAATGGATATAACCCCTTTGGTATGAATAGTTTA  
TCAGTTTGGGCGTGGATGTTCTTATTTGGACATCTTGTGTTGGGCTACTGGATTTATGTTT  
TTAATTTCTTGGCGTGGATATTGGCAGGAATTGATTGAAACTTTAGCATGGGCTCATGA  
ACGCACACCTTTAGCTAATTTGATTCGATGGAGAGATAAACCAGTGGCTCTTTCCATTG  
TACAAGCAAGATTGGTTGGATTAGCCCATTTTTCTGTAGGTTATATATTCACGTATGCGG  
CTTTCTTGATTCCTCCACGTCAGGCAAATTTGGTATGTCACATTCAGTAAAGATTTATG  
ATACATGTATAGGATGTACTCAATGTGTACGAGCCTGCCAACAGATGTATTAGAAATGA  
TACCGTGGGATGGATGTAAAGCTAAGCAAATTGCTTCTGCTCCAAGAACAGAGGACTG  
TGTCGGTTGTAAGAGATGTGAATCCGCTGTCCAACAGATTTTTTTGAGCGTTCGAGTTT  
ATTTATGGCATGAAACAACCTCGAAGCATGGGTCTAGCGTATATGATAATTTTTAACTTAC  
CCTCTTTCTTTGTGCCTTTAGTGGGCCTAGTATTTCCGGCAATTGCAATGGCTTCTTTAT  
CTCTTCATGTTCAAAAAACAAGATTTTTATGCGAGATCTAAAAACATATCTTTCCGTG

GCACCGGTAAGTACTCTATGGTTTGGGGCTTTAGCAGGTCTTTTGATAGAGATCAA  
TCGTTTATTTCCGGATGCGTTGACATTCCCTTTTTTTTCGTTTCATGACTGCAATTTTAGA  
GAGACGCGAAAGCGAAAGCCTATGGGGTCGCTTCTGTAAGTGGATAACCAGCACCGA  
AAACCGTCTTTACATTGGATGTTTTGGTGTTTTGATGATCCCTACCTTATTGACCGCAAC  
TTCTGTATTTATTATTGCCTTCATTGCTGCTCCTCCAGTAGATATTGATGGTATTCGTGAA  
CCTGTTTCTGGATCTCTACTTTATGGAAACAATAATTATCTCTGGTGCCATTATTCCTACTT  
CTGCAGCTATAGGTTTGCATTTTTACCCAATATGGGAAGCGGCATCTGTTGATGAATGGT  
TATACAACGGCGGTCCTTATGAGCTAATTGTTCTACACTTCTTACTTGGTGTAGCTTGTT  
ACATGGGTCGTGAGTGGGAACCTTAGTTTTCCGCTGGGTATGCGCCCTTGGATTGCTGTT  
GCATATTCAGCTCCTGTTGCAGCTGCTACTGCTGTTTTTCTTGATCTACCCAATTGGTCAA  
GGAAGTTTTTTCGGATGGTATGCCTCTAGGAATTTCTGGTACTTTCAACTTCATGATTGTA  
TTCCAGGCTGAGCACAACATCCTTATGCACCCATTTACATGTTAGGCGTAGCTGGTGT  
ATTCGGCGGCTCCCTATTCAGTGCTATGCATGGTTCCTTGGTAACCTCTAGTTTGATCAG  
GGAAACCACAGAAAATGAATCTGCTAATGAAGGTTACAGATTCGGTCAAGAGGAAGA  
AACGTATAATATCGTAGCTGCTCATGGTATTTTTGGCCGATTGATCTTCCAATATGCTAGT  
TTCAACAATTCCTCGTTCTTTACACTTCTTCCTAGCTGCTTGGCCTGTAGTAGGTATCTGG  
TTCCTGCTTTAGGTATCAGCACTATGGCTTTCAACCTAAATGGTTTCAATTTCAACCAA  
TCCGTAGTTGATAGTCAAGGTCGTGTAATTAACCTGGGCTGATATTATTAATCGTGCT  
AACCTTGGTATGGAAGTTATGCATGAACGTAATGCTCATAACTTCCCTCTAGACCTAGCT  
GCTGTGCAAGTTCATCTACAAATGGAATGGGTTTGCCTTGGTATCGTGTTCCATACCGT  
CGTATTAATGATCCCGGCCGTTTGCTTTCTGTCCATATAATGCATACAGCTTTGGTTGCT  
GGTTGGGCCGTTTCGATGGCTCTATATGAATTAGCAGTTTTTGATCCCTCGGATCCCGTT  
CTTGATCCAATGTGGAGACAAGGTATGTTTCGTTATACCCCTCATGACTCGTTTAGGAATA  
ACCAATTCATGGGGCGGCTGGAGTATTACA---GGAGGGACTATAACAAATCCGGGTATT  
TGGAGTTACGAAGGCGTGGCCGGTGCACATATTGTGTTTTCTGGCTTGTGCTTCTTGGC  
AGCTATTTGGCATTGGGTGTATTGGGATTTAGAAATATTTTGTGATGAGCGTACAGGAA  
AACCTTCTTTGGATTGCCAAAAATTTTTGGAATTCATTTATTTCTTTTCAGGAGTGGCTT  
GCTTTGGGTTTGGCGCATTTTCATGTAACAGGATTGTATGGTCCTGGAATATGGGTGTCC  
GATCCTTATGGACTAACTGGAAAGGTACAACCTGTAAATCCAGCGTGGGGTGTAGAAG  
GTTTTGATCCTTTTGTTCGGGAGGAATAGCCTCTCATCATATTGCAGCAGGTACTTTAG  
GCATATTAGCGGGCCTATTTTCATCTTAGTGTCCGTCGCCCCAACGTCTATATAAAGGAT  
TACGTATGGGCAATATTGAAACCGTCCTTTCCAGTAGTATTGCTGCTGTCTTTTTTGCAG  
CTTTTGTGTTGCTGGAACCTATGTGGTATGGTTCAGCAACTACCCCTATCGAATTATTTG  
GTCCCACTCGTTATCAATGGGATCAGGGATACTTCCAGCAAGAAATATATCGAAGAGTT  
GGTGCTGGGCTAGCCAAAAATCAAAGTTTATCAGAAGCTTGGTCTAAAATTCCTGAAA  
AATTAGCTTTTTATGATTATATCGGTAATAATCCGGCAAAGGGGGGATTATTCAGAGCGG  
GTTCAATGGACAACGGGGATGGAATAGCTGTTGGGTGGTTAGGACATCCTATCTTTTCGA  
GATAAAGAAGGGCGTGAACTTTTTGTACGTCGTATGCCTACTTTTTTTGAAACATTTCC  
GGTTGTTTTGGTAGACGGAGACGGAATTGTTTCGAGCCGACGTTCTTTTCGAAGGGCA  
GAATCGAAGTATAGTGTGAAACAAGTGGGTGTAAGTGTGAGTTCTATGGTGGGGAAC  
TCAATGGAGTCAGTTATAGTGATCCTGCTACTGTGAAAAAATATGCTAGACGTGCCCAA  
TTAGGTGAAATTTTTGAATTCGATCGTGCTACTTTGAAAGCCGATGGTGTTTTTTCGTAGC  
AGTCCAAGGGGTTGGTTTACTTTTGGACATGCTTCGTTTGCTCTGCTCTTCTTCTTCGG  
ACACATTTGGCATGGTGTAGAACCTTGTTCAGAGATGTTTTTGTGCTGGTATTGACCCG

ATTTGGATGCTCAAGTGAATTTGGAGCATTCCAAAACTTGGAGATCCA ACTACAAG  
AAGACAAGTAGTCATGAAAACCTTATATCCCTGAGGAGGTTCTACCCCGTGGAAACG  
CTCTTTAATGGAACCTTAGCTTTAGCTGGTCGTGACCAAGAAACCACCGGTTTCGCTTG  
GTGGGCCGGGAATGCACGACTTATCAATTTATCCGGTAAACTGTTGGGGGCTCATGTAG  
CCCATGCCGGATTAATCGTATTCTGGGCCGGAGCAATGAACCTATTTGAAGTGGCTCAT  
TTTGTACCAGAAAAGCCCATGTATGAACAAGGATTAATTTTACTTCCCACTTAGCTACT  
CTAGGTTGGGGGGTAGGTCCGGGTGGGGAAGTTATAGACACCTTTCCATATTTTGTATC  
TGGAGTACTTCACTTAATTCGTCTGCAGTATTAGGCTTTGGCGGTATTTATCATGCACT  
TCTGGGCCCTGAGACTCTTGAAGAATCTTTTCCATTCTTTGGTTATGTATGGAAAGATAG  
AAATAAAATGACCACAATTTTGGGTATTCACTTAATCTTGTTAGGTATAGGTGCTTTTCT  
TCTAGTATTCAAGGCTCTTTTTTTTGGAGGCGTATATGATACCTGGGCTCCGGGAGGGG  
GAGATGTAAGAAAAATTACCAACTTGACCCTTAGCCCAAGTGTTATATTTGGTTATTTAC  
TAAAATCTCCTTTTGGAGGAGAAGGATGGATTGTTAGTGTGGACGATTTGGAAGATATA  
ATTGGAGGGCATGTATGGTTAGGTTCCATTTGTATACTTGGCGGAATCTGGCATACTTA  
ACCAAACCTTTTGCATGGGCTCGTCGAGCACTTGTATGGTCTGGGGAGGCTTACTTGTC  
TTATAGTTTLAGCTGCTTTATCTGTTTTTGGTTTCATTGCTTGTGCTTTGTCTGGTTCAAT  
AATACCGCTTATCCTAGTGAATTTTACGGGCCTACTGGGCCAGAAGCTTCTCAAGCTCA  
GGCATTACTTTTCTAGTTAGAGACCAACGCTTGGGGGCTAACGTGGGATCCGCTCAAG  
GACCTACTGGTTTAGGTAAATACCTAATGCGTTCCCCGACTGGAGAAGTCATTTTTGGA  
GGGGAAACTATGCGTTTTTGGGATCTGCGTGCTCCTTGGTTAGAACCTCTAAGGGGTCC  
GAATGGATTGGACTTGAGTAGGCTGAAAAAAGATATACAGCCTTGGCAAGAACGGCGT  
TCCGCAGAATATATGACTCATGCTCCTTTAGGTTCTTTAAATCTGTGGGTGGTGTGCT  
ACCGAGATCAATGCAGTCAATTATGTCTCTCTAGAAAGTTGGTTAGCTACCTCTCATTTT  
GTTCTAGGATTCTTTCTATTCGTAGGTCATTTATGGCACGCGGGAAGGGCTCGTGCAGC  
TGCAGCAGGATTTGAAAAGGGAATTGATCGTGATTTTGAACCTGTTCTTTCCATGACCC  
CCCTTAATATGACTATAGCCCTTGGTAAATTTACCAAAGACGAAAATGATTTATTTGATAT  
TATGGATGACTGGTTACGTAGAGACCGTTTTCGTTTTTGTAGGTTGGTCCGGTCTATTGCT  
CTTTCCTTGTGCCTATTTTCGCCTTAGGTGGTTGGTTCACAGGTACAACCTTTGTAACCTC  
ATGGTATACTCATGGATTGGCCAGTTCCTATTTGGAAGGATGCAACTTCTTAACCGCCG  
CAGTTTCTACTCCCGCTAATAGTTTAGCACATTCTTTGTTGTTACTATGGGGTCCCTGAAG  
CACAAGGAGATTTTACTCGTTGGTGTCAATTAGGCGGTCTGTGGACTTTTGTGGCTCTC  
CACGGCGCTTTTCGACTAATAGGTTTCATGTTACGTCAATTTGAACCTTGCTCGATCTGTT  
CAATTGCGACCTTATAATGCAATCGCATCTCTGGTCCAATTGCTGTTTTTGTCTGTAT  
TCCTGATTTATCCACTAGGTCAGTCTGGTTGGTCTTTTTCGCCTAGTTTTGGTGTAGCAG  
CTATATTCGCTTCATCCTTTTTTTTCCAAGGGTTTCATAATTGGACATTGAACCCATTCA  
TATGATGGGAGTTGCCGGTGTATTGGGCGCTGCTCTCCTATGCGCTATTCATGGTGCTAC  
CGTAGAAAATACTTTATTTGAAGATGGTGTGTTGCAATAACATTCCGTGCTTTTAAACC  
AACTCAAGCTGAAGAACTTATTCAATGGTCACCGCTAATCGCTTTTGGTCCCAAATCT  
TTGGGGTTGCTTTTTTCCAATAAACGTTGGTTACATTTCTTTATGTTATTTGTACCAGTAAC  
CGTTTTATGGATGAGTGCTCTTGGAGTAGTCGGTCTGGCTCTGAACCTACGTGCCTATG  
ACTTCGTTTCCCAGGAGATCCGTGCAGCGGAAGATCCTGAATTTGAAACTTTCTATACC  
AAAAATATTCTTTAAACGAAGGTATTCGTGCTTGGATGGCGGCTCAAGATCAGCCTCA  
TGAAAACCTTATATTCCTGAGGAGGTTCTACCCCGTGGAAACGCTCTTATGTCTGGAA  
GCACAGGAGAACGTTCTTTTGTGATATTATTACCAGTATTTCGATACTGGGTTATTCATA



GTATTACTATACCTTCCCTATTCATTGCGGGTTGGTTATTCGTCAGCACGGGTTTLAGCTTA  
TGATGTGTTTGGGAAGCCCTCGTCCAAACGAATATTTTACAGAGAGCCGACAAGGAATT  
CCATTAATAACTGGCCGTTTTGACCCTTTGGAAACAACCTCGATGAATTTAGTAGATCTTTT  
ATGACCATAGATCGAACCTATCCAATTTTACAGTGCGATGGTTAGCTGTTTCATGGACTA  
GCTGTACCTACCGTTTCTTTTTTAGGGTCAATATCAGCAATGCAGTTCATCCAACGAATG  
GCTACGCAAACCGTTGAGGGTAGTTCTAGATCTGGA---CCAAGACGAACTATTGTAGGG  
GATTTATTGAAACCATTGAATTCAGAATATGGTAAAGTAGCTCCTGGATGGGGAACACTAC  
TCCTTTGATGGGTGCCGCAATGGCTCTATTTGCAGTATTCCTATCTATTATTTTAGAAATT  
TATAATTCTTCTGTTTTACTGGACGGAATTTCAATGAATATGCTTACTCTCAAACCTCTTTG  
TTTACACAGTAGTAATATTTTTGTTTCTCTCTTCATCTTTGGATTCTATCTAATGATCCA  
GGACGTAATCCTGGACGTGAAGAAATGGCCGATACTACTGGAAGGATTCCTCTTTGGAT  
AATAGGTACTGTAACGGGTATTCTTGTGATTGGTTAATAGGTATTTCTTTTATGGTTCA  
TACTCCGGGTTGGGTTCACTCTGATGCTTAATATCTTTAGTTTGATCTGTATCTGTCTTC  
ATTCCACCCTTTATTCAAGTAGTTTTTTCTTAGCCAAATTGCCTGAGGCCTACGCTTTTT  
TGAATCCAATCGTAGATTTTATGCCAGTAATACCCCTTCTCTTTTTTCTCTTAGCCTTTGT  
T T G G C A A G C T G C T G T A A G T T T C G  
A????????????????????????????????????????????????????????????  
????????????????????????????????????????????????????????????  
????????????????????????????????????????????????????????????  
ATGGAAGTAAATATTCTCGCATTATTGCTACTGCACTCTTC  
ATTCTAGTTCCCTACTGCTTTTTTACTTATAATATACGTAAAAACAGTCAGTCAAAGTGAT  
ATGGAACAGCAACCCTAGTCGCCATCTCTATATCTGGTTTACTTGTAAGTTTTACTGGG  
TACGCCTTATATACTGCTTTTGGGCAACCCTCTCAACAATTAAGAGATCCATTGGAAGA  
ACACGGGGACATGGAAGCATTGGTTTATACATTCTCTTAGTCTCGACTCTAGGGATAA  
TTTTTTTCGCTATCTTTTTTCGAGAACCCTAAAGTTCCAACATAAAAGGTGAAAATG  
ACTATTGCTTTCCAATTGGCTGTTTTTGCATTAATTGCTACTTCATTAATCTTACTGATTA  
GTGTACCCGTTGTATTTGCTTCTCCTGACGGTTGGTCGAGTAACAAAAATATTGTATTT  
CTGGTACATCATTATGGATTGGATTAGTCTTTCTGGTGGGTATCCTTAATTCTCTCATCTC  
T-----ATGTCACCACAAACAGAGACTAAAGCAAGTGTTGGATTCAAAGCTG  
GTGTTAAAGATTATAAACTGACTTATTATACTCCTGATTATGAAACCAAAGATACTGATA  
TCTTGGCAGCATTCCGAGTAACTCCTCAACCTGGAGTTCTCCTGAGGAAGCAGGGGC  
TGCGGTAGCTGCTGAATCTTCTACTGGTACATGGACAACCTGTGTGGACCGATGGGCTTA  
CCAGCCTTGATCGTTATAAAGGAAGATGCTACCACATCGAGCCTGTTGCTGGAGAAGA  
AAATCAATATATATGTTATGTAGCTTACCCTTTAGACCTTTTTGAAGAAGGTTCTGTACT  
AATATGTTTACTTCCATTGTGGGTAATGTATTTGGGTTCAAAGCCCTGCGCGCTCTACGT  
CTGGAGGATCTGCGAATCCCTCCTTCTTATAACGAAAACCTTTCCAAGGCCCGCCTCATGG  
TATCCAAGTTGAGAGAGATAAATTGAACAAGTATGGGCGTCCCCTATTGGGATGTACTA  
TTAAACCTAAATTGGGGTTATCCGCTAAGAACTACGGTAGAGCAGTTTATGAATGTCTT  
CGTGGTGGACTTGATTTTACGAAAGATGATGAGAACGTGAACTCACAACCATTTATGC  
GTTGGAGAGACCGTTTCTTATTTTGTGCCGAAGCAATTTTTAAATCACAGGCTGAAACA  
GGTGAAATCAAAGGGCATTACTTGAATGCTACTGCAGGTACATGCGAAGAAATGATCA  
AAAGGGCTGTATTTGCCAGAGAATTGGGAGTTCCCTATCGTAATGCATGACTACTTAAACA  
GGGGGATTCCTGCAAATACTAGCTTGGCTCATTATTGCCGAGATAATGGTCTACTTCTT  
CACATCCATCGTGCAATGCATGCAGTTATTGATAGACAGAAAATCATGGTATACACTTT  
AGGGTACTAGCTAAAGCCTTACGTATGTCTGGTGGAGATCATATTCCTCTGGTACTGTA  
GTAGGTAAACTTGAAGGAGAAAGAGACATTACTTTGGGCTTTGTTGATTTACTACGTGA

TGATTTTATTGAAAAAGATCGAAGCCGCGGTATTTATTTCACTCAAGATTGGGTCTCTCT  
ACCAGGTGTTCTGCCCGTAGCTTCTGGGGGTATTCACGTTTGGCATATGCCTGCTCTGA  
CCGAGATCTTTGGAGATGATTCGGTACTACAATTCGGCGGAGGAACTTTAGGACACCCT  
TGGGGAAATGCACCGGGTGCCGTAGCTAATCGAGTAGCTCTAGAAGCATGCGTACAAG  
CTCGTAATGAGGGACGTGATCTTGCTCGTGAGGGTAATGAAATTATCCGTGAGGCTAGC  
AAATGGAGTCTGAAGTAGCTGCTGCTTGTGAAGTATGGAAGGAGATCAAATTTGAAT  
TTGAAGCAATGGATACTTTG-----ATGGCGATACATTTATACAAAATTTCTACCCCGAGC  
ACACGCAATGGAGCCGTAGACAGTCAAGTGAAATCCAATACACGAAATAATTTGATCTA  
TGGACAGCATCGTTGTAGTAAAGGTCGTAATGCCAGAGGAATCATTACCGCAGGGCAT  
AGAGGGGGAGGTCATAAGCGTCTATACCGTAAAATCGATTTTCGACGGAATGAAAAAG  
ACATATATGGTAGAATCGTAAGCATAGAATACGACCCTAATCGAAATGCATCCATTTGTC  
TCATACACTATGGGGATGGTGAGAAGAGATATATTTTACATCCCAGAGGGGGCTATAATTG  
GAGATACCATTGTTTCTGGTACAGAAGTTCCTATAAAAATGGGAAATGCCCTACCTTTG  
ACCGATATGCCCTTAGGCACGGCCATACATAAGAAATCACACTTGGAAGGGGTGG  
ACAATTAGCTAGAGCAGCGGGTGTGTAGCGAAACTGATTGCAAAAGAGGGGAAATC  
GGCCACATTAATAATTACCTTCTGGGGAGGTCCGTTTGATATCCAAAAACTGCTCAGCAA  
CAGTCGGACAAGTGGGGAATGTTGAGGTGAACCAGAAAAAGTTGGGTAGAGCCGGAT  
CTAAATGTTGGCTAGGTAAGCGTCTGTAGTAAGAGGAGTGGTTATGAACCTGTAGAC  
CATCCCCATGGGGGTGGTGAAGGGAGAGCCCCAATTGGTAGAAAAAAACCCGCAACC  
CCTTGGGGTTATCCTGCACTTGAAGAAGAAGTAGAAAAAGGAAGAAATATAGTGATA  
ATTTGATTCTTCGTCGCCGTAGTAAATGATTCAACCTCAAAGCCATTTGAATGTAGCG  
GATAACAGCGGGGCCCGAGAATTAATGTGTATTAGAATCATAGGAGCTAGT--AATCGCC  
GATATGCTCATATCGGTGACATTATTGTTGCTGTGATCAAGGAAGCATTACCAAACACA  
CCTCTAGAAAGATCAGAGGTGATCAGAGCTGTAATTGTACGTACTTGTAAGAAGCTTAA  
ACGTGACAACGGTATGATAATACGATATGATGATAATGCTGCAGTTGTGATTGATCAAGA  
AGGAAATCCAAAAGGAACTCGAGTTTTTTGGTGCAGATTGCCCGAGAATTGAGACAGTTA  
AATTTCACTAAAATAGTTTCATTAGCACCTGAGGTATTAATGCTTAGTCCTAAAAGAACC  
AGATTTGAAAAACAACATAGAGGAAGAATGAAAGGAATATCTTATCGAGGTAATCGTAT  
TTGTTTCGGTAAATATGCTCTTCAGGCACTTGAACCCGCTTGGATCACATCTAGACAAA  
TAGAAGCAGGGCGACGAGCAATGACAAGAAATGTGCGCCGTGGTGGAAAAATATGGG  
TACGTATATTTCCAGACAAACCAGTTACGGTAAGACCTACGGAAACACGTATGGGTTCC  
GGTAAAGGATCTCCCGAATATTGGGTAGCTGTCTGTTAAACCAGGTAGAATACTTTATGA  
AATGGGCGGAGTAGCAGAAAATATAGCCAGAAAGGCTATTTCAATAGCGGCGTCCAAA  
ATGCCTATACGAACTCAATTTATTATTTTCGGGAATGACTAGAATTAGACGAGGATATATA  
GCTCGGAGACGTAGAACAAAAATTCGTTTATTTGCATCAAGCTTTCCGGGGGGCTCGTT  
CAAGACTTACTCGAACAATTATTCAACAGAAAATAAGATCTTTGGTTTCGTCTCATCGA  
GATAGAGATAGGAAAAAGATAGATTTTCGTCGTTTGTGGATCACTCGGATAAATGCAGT  
AATTCGCGGGAAT---AGAGTATCCTATAGTTATAGTAGATTAATACACAATCTGTACAAG  
AGACAGTTGCTTCTTAATCGTAAAATACTTGCACAAATAGCTATATTAATAGGAATTGT  
CTTTATATGATTTCTAATGAGATCAGATCA-----ATGACAAAGGAAG  
TATATGCTTTAGGTCAACATATATCTATGTCTGCTCACAAAGCACGAAGAGTAATTGATC  
AGATTCGTGGACGTTCCCTACGAAGAGACACTTATGATACTCGAACTTATGCCTTATCGA  
GCGTGTIATCCCATTTTAAAGTTGGTTIATCTGCAGCAGCAAATGCTAGTCATAATATG  
GGTTTCAATGAAGCAAGTTTAGTTATTAGTAAAGCCGAAGTCAACGAGGGTACTACTAT

GAAAAAATTAACCTCGAGCTCGAGGACGGAGTTATGCAATAAAAAGACCCACTTGT  
CATATAAGGATTGTATTGAAAGATAAATCTTTCTAT--GGATTATGGGACAAAAAATGG  
ATGGAATCAAATATGCAGTATTTACAGACAAAAGTATTCCGGTTATTGGGGAAAAAT--CA  
ATATACTTTTAATGTCGAATCAGGATCAACTAGGACAGAAATAAAGCATTGGGTTCGAAC  
TCTTCTTTGGTGTCAAGGTAAAAGCTATGAATAGTCATCGACTCCCGGGAAAGGGTAG  
AAGAATGGGACCTATTCTGGGACATACAATGCATTACAGACGTATGATCATTACGCTTC  
AACCGGGTTATTCTATTCCACCTCTTAGAAAGAAAAGAACTATGGCAGTTCCAAAAAA  
AAGTACTTCTATATCAAAAAACGTATTCGTAAAAACATTTGGAAAAAGAAGGTATATT  
GGGCAGCGTTGAAAGCTTTTTCTTAGCGAAGTCTCTTTCTACCGGGAATTCAAAAAG  
TTTTTTGTACGAAAATTAATAGTATGGCCAAGGGTAAAGATGTCCGAGTAAGGGTTA  
TTTTAGAATGTACCAACTGT--GTTAGAAC-----CTTAATAAGGAATCAAGGGGTGTTTC  
CAGATATATTACTCAAAAGAATCGACACAATACGCCTAGTCGATTGGAATTGAGAAAAT  
TCTGTCCCTATTGTTACAAACATACGATTCACGGGGAGATAAAGAAAATGAAAATAAGG  
GCCTCCATTCGTAATAATTTGTGAAAAATGTCGACTGATCCGTAGAAGGGGACGAATTAT  
AGTAATTTGTTTCGAATCCGAGACATAAACAAAGACAAGGAATGGTTCGAGAGAAAGTA  
AGAGTATCTACTCGGACACTACAGTGGAAAGTGTGTTGAATCAAGAGCAGACAGTAAGC  
GTCTTTATTATGGACGCTTTATTCTATCTCCCTTATGAAAGGGCAAGCCGATACAATAG  
GCATTGCGATGCGAAGAGCTTTGCTTGGTGAATAGAAGGAACATGTATCACCCGTGC  
AAAATTTGAA-----AAAATACCACATGAATATTCTACCATAGTAGGTATTCAAGAATCAGT  
ACATGAAATTTAATGAATTTGAAAGAAATTGTATTGAGAAGTAATCTATATGGAACCTCG  
CAACGCGTCTATTTGTGTCAAGGGTCTGGATGTGTAAGTCTCAAGACATCATCTTAC  
CAACTTCTGTGGAATCGTTGATAACACACAGTATATAGCTAATCTAACGGAACCCATT  
AATTTGTGTATTGGATTACAAATCGAGAGGAATCGCGGATATCATATAAAAACACCAAA  
AACTTTCAAGATGGAAGTTAT-----CCTATAGATGCTGTATTCATGCCTGTTTCGAAATGC  
GAATCATAGTATTCATTCTTATGGGAATGGAATGAAAAACAAGAGATACTTTTTCTCG  
AAATATGGACAAACGGAAGTTAACTCCTAAAGAAGCACTTCATGAAGCCTCCCGGAA  
TTAATTGATTTATTTATTCCTTTTCTACATGCAGAAGAAGAA-----AACTTACATTTAGA  
GAACAATCAG--TACAAGGTTACTTTACCCTTTTTTACTTTTCATGATAGATTGGCTAAG-  
--CTAAGGAAAACGAAAAA--GAAATAGCATTGAAATCTATTTTATTGACCAATTCGA  
ATTGCCTCCCAGGACCTATAATTGCCTCAAAGGTACAATATACATATTATTGACCT  
TTTGAATAAGAGTCAAGAAGACCTTATGAAAATGGAATATTTTCGCATAGAAGATGTAA  
AACAGATATTGGACAGTCTAGAAATCGAAAAAGCATTTCACAACCCATTTACCGAAGA  
A--ATGCTCGGGGATGGAATGATGAGGGAATGTCTACAATACCTGGGTTAATCAGAT  
ACAATTTGAAGGATTTTGTAGATTCATTGATCAGGGCTTAACAGAAGAACTTTATAAGT  
TTCCAAAATTGAAGATACAGATCAAGAAATTGAATTTCAATTATTTGTGGAACATAT  
CAATTGGTAGAACCTTTGATAAAGAAAGAGATGCTGTATATGAATCACTCACATATTCT  
TCTGAATTATATGTATCCGCGGGATTAATTTGAAAACCAGTAGGGATATGCAAGAACA  
AACTCTTTTTATTGGAAACATTCCTTTAATGAATTCCTGGGAACTTCTATAGTAAATGG  
AATATACAGAATTGTGATCAATCAAATATTGCAAAGTCCCGGTATCTATTACCGGTCAGA  
ATTGGACCATAACGGAATTTCCGGTCTATACCGGGACCATAATATCAGATTGGGGAGGAA  
GATTAGAATTAGAGATTGATCGAAAAGCAAGGATATGGGCTCGTGTGAGTAGGAAACA  
GAAAATATCTATTCTAGTTCTATCATCAGCTATGGGTTCGAATCTAAGAGAAATTCTAGA  
GAATGTTTGCTATCCTGAAATTTCTTGTCTTTCTGAAATGATAAAGAGAAAAA  
TGGGGTCAAAGAAAATGCCATTTTGGAGTTTATCAACAATTTGCTTGTGTAGGCGGA

GATCCTGTATTTTCTGAATCCTTATGTAAGGAATTACAAAAAAATTCTTTCAACAAAGA  
TGTGAATTAGGAAGGATTGGTCGACGAAATATGAATCGGAGACTAAATCTTGATATACC  
TCAGAACAATACATTTTTTGTACC CGGAGATATATTGGCAGCTGCGGATCATTGATTGG  
AATGAAATTCGGAATGGGTACACTTGACGAT-----ATGAATCATTTGAAAAATAAGCGTA  
TTCGTTCTGTAGCGGATCTCTTACAAGATCAATTCGGATTGGCTCTGGTTCGTTTAGAA  
AATGTGGTTAAAGGAACTATATGTGGAGCAATTAGG---CATAAATTGATA---CCGACTCC  
TCAGAATTTGGTAACTTCAACTCCA-----TTAACAACCACTTATGAATCTTTTTTCGG  
ATTACACCCATTATCTCAAGTTTTGGATCGAACGAATCCATTGACACAAATGTTTCATGG  
GAGAAAATTGAGTTATTTGGGCCCTGGAGGATTAACAGGGCGAACTGCTAGTTTTCGA  
ATACGAGATATCCACCCTAGTCACTATGGACGCATTTGCCCAATCGATACGTCTGAAGG  
AATCAATGTTGGACTTATTGGATCTTTAGCAATTCATGCGAGAATTGGTCAGGGGGGA--  
-TCTCTAGAAAGCCCATTTTAT-----GAAATCTCCGAGAGATCAAATCAAAAAAAGTA  
CGGATGCTTTATTTATCACCAAGTAGAGATGAATACTATATGATAGCGGCGGGAAATTCT  
TTAGCGCTGAATCAGGGTATTCAAGAAGAACAGGTTGTTCCAGCTCGATACCGTCAAG  
AATTCCTAACTATTGCATGGGAACAGGTTAATCTTCGAAGTATTTTTCTTTCCAATATTT  
TTCTATTGGAGCTTCTCTCATTCTTTTATCGAGCATAATGATGCGAATCGAGCTTTAATG  
AGTTCGAATATGCAACGCCAAGCAGTTCACCTTTCTCGGTCCGAGAAGTGCATTGTTG  
GAACTGGGTTGGAACGCCAAGCGGCTCTAGATTCAGGGGTTACCGCTATAGCCGAACA  
CGAGGGAAAGATCATTTATACCAATACTGACAAGATCATTTTATTGGGCAATGGAGATA  
CTTTAAGCATTCCATTAGTTATGTATCAACGTTCCAACAAAAATACTTGTATGCATCAA  
AACCCAGGTTCCGCGGGGTAAATGCATTAATAAAGGACAAATTTTAGCGGATGGTGC  
CGCTACAGTTGGTGGTGAACCTCGCTTTGGGTAAAAATGTATTAGTAGCTTATCTGCCAT  
GGGAAGGTTACAATTTGAAGATGCAGTACTCATTAGCGAGCGTCTGGTATATGAAGAT  
ATTTATACTTCTTTTCACATACGGAAATATGAAATTCAGACTCATGTGACAAGCCAAGG  
A---CCCGAAAGGATCACTAACGAAATACCGCATCTAGAAGCCCATTTACTCCGCAATTT  
AGACAAAAATGGAATTGTGATGCTGGGATCTTGGGTAGAGGCGGGCGATATTTTAGTA  
GGTAAATTAACCTCCCAGACGGCGAAAGAA---TCATCGTATGCCCCAGAAGATAGATTA  
TTACGAGCCATACTTGGCATTACAGGTATCCACTTCAAAGGAAACTTGTCTAAAACCTACC  
TATAGGTGGTAGGGGTAGAGTTATTGATGTGAGATGGATCCAGAAAAAAGGG---GGTTC  
GAATTATAATCCAGAACTATTTGTGTCTATATTTTACAGAAACGTGAAATCAAAGTGG  
GTGATAAAGTAGCTGGAAGGCATGGAATAAAGGTATCATTTCCAAATTTTACCTAGA  
CAAGATATGCCTTATTTGCAAGATGGAAGACCTGTTGATATGGTCTTCAATCCATTAGGA  
GTACCCTCACGAATGAATGTAGGACAGATATTTGAATGCTCACTCGGGTTAGCGGGGGA  
TCTGCTAGATAGACATTATCGAATAGTACCCTTTGATGAGAGATATGAGCAAGAGGCTT  
CGAGAAAACCTAGTGTTTTCTGAATTATATGAAGCCAGTCAGCAAACAGCGAATCCATG  
GGTATTTGAACCCGAGTATCCGGGAAAAAGCAGAATATTTGATGGAAGAACGGGAGAT  
CCTTTTGAACAACCTGTTATAATAGGAAAGCCTTATATCTTGAAATTAATTCATCAAGTT  
GATGATAAATAACACGGACGTTCCAGTGGACATTATGCACTTGTTACACAACAACCCCT  
TAGAGGAAGGGCCAAACAAGGGGGACAACGAGTAGGAGAAATGGAGGTTTGGGCTC  
TCGAGGGGTTTGGTGTGCTCATATTTTACAAGAGATGCTTACTTATAAATCGGATCATA  
TTAGAGCTCGTCAAGAAGTACTTGGTACTACAATCATTGGGGGAACAATACCTAAACCT  
GAAGATGCTCCAGAATCTTTTCGATTGCTCGTTCGAGAACTACGATCTTTGGCTCTGGA  
ACTGAATCATTTCTTGTATCTGAGAAGA ACTTCCAGATTAATAGGAAGGAAGCTATGA  
ATCATAATTTTCTTCTATGATCGATCGGTATAAACATCAACA ACTCCGAATTGGATCAG

TTTCTCCTCAACAAATAAGTGCTTGGGCCAAAAAATCCTCCCTAATGGAGAGATAGTT  
GGAGAGGTGACAAAACCCTATACTTTTCATTACAAAACCAATAAACCGGAAAAAGATG  
GATTGTTTTGTGAAAGAATTTTTGGTCCTATAAAAAGTGGAATTTGTGCTTGTGGAAAT  
TATCGAGTAATCGGAAATGAAAAAGAGGACCCGAAATTTTGTGAACAATGCGGAGTCG  
AATTTGTTGATTCTCGGATACGAAGATATCAAATGGGATACATCAAATTAGCATGTCCAG  
TAACCCATGTGTGGTATTTGAAACGTCTTCCTAGTTATATCGCGAATATTTTAGATAAAC  
CTCTTAAAGAATTAGAAGGGCTAGTATACTGCGATTTT-----TCTTTTGCTAGGCC---AT  
AGCTAAAAAACCTACTTTCTTACGATTACGAGGGTTATTCGAATATGAAATCCAATCATG  
GAAATACAGCATCCCCTTTTTTTACTACTCAAGGCTTCGATACATTCGAAATCGAG  
AAATTTCTACTGGAGCGGGTGCTATCCGAGAACAATTAGCCGATCTCGATTTGCGAATT  
ATTATAGATTATTCATTGGTAGAATGGAAGGAATTAGGAGAAGAA---AGACCCACGGGT  
AATGAATGGGAAGATCACAAAATTGGAAGAAGAAAGGATTTTTTGGTTAGACGCATGG  
AATTGGCTAAGCATTTTCTTCGAACAAATATAGAACCAGAATGGATGGTTTTATGTCTAC  
TACCAGTTCTTCTCCCGAACTACGACCCATCATTAGATAGATGGAGGTAAGCTAATG  
AGCTCGGATATTAATGAACTCTATAGAAGAGTTATCTATCGGAACAATACTCTTACCGAT  
CTATTAACAACAAGTAGATCTACACCAGGGGAATTAGTAATGTGTCAAGAGAAATTGGT  
ACAAGAAGCCGTGGATACACTTCTTGATAATGGAATTCGCGGACAACCAATGAGGGAT  
GGTCATAATAAGGTTTACAAGTCGTTTTCGGATGTAATTGAAGGCAAAGAGGGAAGAT  
TTCGTGAGACTCTGCTTGGCAAACGGGTTCGATTATTCGGGTCGTTCTGTCATTGTCTGTA  
GGACCCCTCACTTCCATTACATCGATGTGGATTGCCTCGGGAAATAGCAATAGAGCTTTT  
TCAGACATTTGTAATTCGTGGGCTAATTAGACAACATCTTGCTTCGAACATAGGAGTTG  
CTAAGAGTAAAATTCGGGAAAAGGAGCCCATTGTATGGGAAATACTGCAAGAAGTTAT  
GCAGGGACATCCCGTATTGCTGAATAGAGCGCTACTCTGCATAGATTAGGCATACAGG  
CATTTCAACCCATTTTAGTGGAAGGACGTGCTATTTGTTTACATCCATTAGTTCGTAAGG  
GATTCAATGCAGACTTTGATGGGGATCAAATGGCTGTTTCATGTACCTTTATCTTTGGAG  
GCTCAAGCGGAGGCTCGTTTACTTATGTTTTCTCATATGAATCTCTTGTCTCCAGCTATT  
GGGGATCCCATTTCCGTACCAACCCAAGATATGCTTATTGGTCTATATGTATTAACGAGT  
GGGAATCGCCGAGGTATTTGTACAAATAGGTATAATCCATGGAATCGC-----AGAACT  
ATCAAAATGAAAGAACTTATGATAATAACTATAAATATAGAAAAAA---GAACCTTTTTT  
TTGTAATTCCTATGATGCAATTGGAGCTTATCGACAGAAAAGAATCAATTCGATAGTCC  
TTTGTGGCTTCGATGGCGACTAGATCAACGC---ATTATTGCTTCA-----AGAGAAGTTCCT  
ATCGAGATCACTATGAATCTTTGGGTACCTATCATGAAATTTATGGGCATTATCTAATAG  
TAAGAAGTGTAATAAAGAAATTATTTGTATATACATTCGAACAACCTGTCCGGTCATATTT  
CTTTTTTTCGAGAAATCGAAGAAGCTATACAAGGGTTTTGTTCGAGCCTGCTCATTGGT  
ACC-----ATGGAGGTACTTATGGCAGAACGAGTCAATCTAGTCTTTCACAA  
TAAAGTAATAGATGGAACCTGCAATTAAGACTTATTAGCAGATTAATAGATCACTTCG  
GAATGGCATATACATCACACGTTCTGGATCAAGTAAAGACTCTGGGTTTCCAGCAAGCC  
ACTGCTACATCCATTTCAATTAGGGATTGATGATCTTTTAAACAATACCTTCGAAGGGATGG  
TTAGTACAAGATGCTGAACAACAAAGTTTAATTTTGGAAAAACACCATCATTATGGGAA  
TGATACATGCAGTAGAAAAATTACGCCAATCCATTGAGGTATGGTATGCTACAAGTGAAT  
ATTTGCGACAAGAAATGAATCCTAATTTTAGGATGACAGATCCCTTTAATCCAGTCCATA  
TAATGTCTTTTTTCGGGAGCCAGAGGAAATGCATCTCAAGTACACCAATTAGTAGGTATG  
AGAGGATTAATGTCAGATCCTCAAGGACAAATGATTGATTTACCCATTCAAAGCAATTT  
ACGCGAAGGACTATCTTTAACAGAATATATCATTCTTGCTACGGAGCCCGCAAAGGAG

TTGTGGATACTGCTGTACGAACATCAGATGCTGGATATCTTACGCGCAGACTTGTTGAA  
GTAGTACAACACATTGTTGTACGGAGAACAGATTGTGGAACCATCCGAGGGGTTTCTG  
TGAGTCCTCGAAATGGGATGATGCCG---GAAAGAATTTTTATTCAAACATTAATTGGTCTG  
TGTATTAGCAGACGATATCTATATGGGCCACGATGCATTGCCATTCGAAATCAAGATAT  
TGGAATTGGACTTGTCAATCGATTCATAACC-----TTTCGAACACAACCAATAT  
CTATTCGAACCCCTTTACTTGTAGGAGTACATCTTGGATCTGTTCGATTATGTTATGGTA  
GGAGTCCTACTCATGGCGACCTGGTTCGAATTGGGAGAAGCTGTAGGTATTATTGCGGGT  
CAATCTATTGGAGAACCAGGGACTCAACTAACATTAAGAACTTTTCATACCGGCGGAGT  
ATTCACAGGTGGTACTGCCGAACATGTACGAGCCCCCTCTAATGGAAAAATCAAATTCA  
ATGACGATTTGGTTCATCCCACACGTACGCGTTCATGGGCATCCTGCCTTTCTATGTTCTA  
TAGACTTGTATGTAACATTTGAGAGTGAAGATATTCTACATAAGGTGACTATTCCACCAA  
AAAGTTTTCTTTTGGTTCAAAATAATCAATATGTAGAATCAGAACAAGTGATTGCTGAA  
ATTCGCGCGGGAACATACACTTTC---AATTTGAAAGAGAGGGTTCGAAAACATATTTAT  
TCTGAATCAGAGGGAGAA---ATGCACTGGAGCACCGATGTGTACCATGCACCTGAATTT  
ACATATAGTAATGTCCATCTTTTACCAAAAACAAGCCATTTATGGATATTATCAGGGGGT  
TCGTGCAGA-----TCCAGTGGAGTCCCTTTTTTCACTCTACAAGGATCAAGACCAATGA  
ATCTTCGT-----TCGACAGAAAGAGAACGA---AGATATATTTTCGAGTCTC---TCAGTGAAT  
AATGATCAA---ATGAGATACGAATTATGTAGTTCTGATTTTTCTGGTAAAATAGAAGATA  
GGATTCCTGATTAT--TCAGAACTTAATCGAATCATATCTATTGTTTCATTGTAATCTTAAAT  
ATCCTACT---ACTTCCACGAGAGTTCTGAT-----TTATTGGCAAAAAGGCGAAGAAATC  
GATTTATTATTCCACTCGAATCGATTCAAGAACGAAAGAAAGAACTAATGCCCCATTCA  
GGTATCTCGATTGAACTACCGATAAAT-----GGAATTTTACGTAGAAAGAGTATTCTTGCT  
TATTTTCGATGATCCTCGATACAGAAGAAAGAGTTCGGGAATTACTAAATATGGGACTCT  
AGGGGTTTCATTTCAGTCGTTAAAAAAGAGGAT-----TTGATTGAGTATCGA---GGAATCAA  
AGAATTTAAGCAAAAATGCATGAACTAGATCCATTTTTTTTCATTCCCGAAGAAGTGC  
ATATTTTCCCTGAATCTTCTTCGATAATGGTACGGAACAATAGTCTGATTGGAGTAGATA  
CACGAATCGCTTTAAATACAAGAAGCCGAGTGGGCGGATTAGTCCGAGTGGAGAGAA  
AAAAAAAAGGATTGAACTGAAAATCTTTTCTGGAGATATCCATTTTCTGGAGAGAC  
AGATAAGATATCCCGACACAGTGGCATCTTGATACCCCCAGGAACAGGAAAAACA-----  
AATTCTAAGGAATCCAAAAA-----TTGAAAAATTGGATCTATGTCCAACGG-----ATCAC  
ACCTACTAAGAAAAAG-----TATTTTGTTTTAGTTCGACCCGTAGTGACATATGAAGTATC  
GGACGGTATAAATTTAGCAACACTCTTCCCCCGGATCTGTTACAAGAAAGGGATAATA  
TGCAACTTCGAGTTGTCAATTATATTGTTTACAGAAATGGCAAACCAATTCGGGGGAATT  
TCTGATACAAGTATTCAATTAGTTCGGACTTGTTTAAATTTTGAATTGGGACCAAGACAA  
A-----AAAAGTCTTCTATCGAAGAGGCTCATACTTCCTTTGTTGAAGTAAGTACAAA  
TGGTCTGATTTCGAGATTTCCTAAGAATTGACTTAGTGAAATTCCTATTTCCCTATCTCAG  
AAAAGGAATGATCCCTCAGGCTCAGGATTGATCTCAGATGATAATGTGTCAGATCACA  
CCAATAACAATCCCTTTTAT-----TCCAAGACAAAA-----ATTCAACAATTACTTA  
GCCAAAATCAAGGAATATTTCGCACGTTGTTAAATAA-----AATAAGGAATGCCCAT  
CTTTGATAATTTGTTCATCATCTAATTGTTTCCGAATGGGTCCA-----TTCAACGCTGGAA  
AATATCACAAT-----GTGATAAAAGAATCA---CCTATAATTAATAATAGGAATTCGATTG  
GCCCTTTAGGAACA-----GTCCTTCAATTTGTGAATTT-----TATTCATTTTACTATTTAAT  
AACT-----CAAAATCCTATTTTG---GTAACATAAATTTGCAACTTGAAAAT-----TAAA  
ACCGACTTTTCAAGTAATT-----AAC---TATTATTTAATGGATGAAAATGGGAGA-----ATT

TTGAATCCCGATTTCATGCAGTAACATCGTTTTGAATTCATTCAATTTGAATTGGTATTTTC  
TCCATCATAATTATTTTGAAGAAAGATCCACAATAATTAGT--CTTGGACAGTTTATTTGT  
GAAAATGGATGTATATCCAAAAACGGACCC-----CATCTCAAATCGGGTCAAGTTTTG  
ATTGTTCAA--GTTGACTCTGTAGTAATAAGATCCGCCAAGCCTTATTTGGCCACTCCAG  
GAACAACACTGTTTCATGGTCATTATGGAGAAATCCTTTACGAGGGAGATACATTAGTTACA  
TTTATATATGAAAAATCGAGATCCGGTGATATAACGCAGGGTCTTCCAAAAGTGGAACA  
AGTGTTAGAAGTGC GTTCAATTGATTCAATATCGATGAACCTAGAAAAAAGAATTGAG  
GGTTGGAACGAGCATATAAAAAAATTCTTGGAAATTCCTTTGGGATTCTTGATTGGGGC  
TGAGCTAACTATAGTGCAAAGTCGTATATCTTTGGTTAATAAGATCCAAAAGGTTTATCG  
ATCCCAGGGGGTGCAAATCCATAATAGGCACATAGAAATTATTGTACGCCAAATAACAT  
CAAAGGTGTTGGTTTCAGAG-----GATGGAATGTCTAATGTTTTTTTACCTGGAGAAC  
TAATTGGATTGTTGCGAGCGGCGCAACGGGGCGCGCTTTGGAAGAATCGATCTGTTA  
CCGCGCCATCTATTGGGAATAACAAGGGCATCTTTGAATACTCAAAGTTTCATATCTG  
AAGCGAGTTTTCAAGAACTGCTCGAGTTTTAGCCAAAGCTGCTCTCCGGGGCCGTAT  
CGATTGGTTGAAAGGCCTAAAAGAGAACGTTGTTATAGGGGGGATGATACCCGTTGGT  
ACCGGATTCAAAGGATTAGTGCATCGTTCA-----AGGCAACATAAGAACATTCCTTTGA  
AAACCAAAAAGAAGAAT-----TTTTTCGAGGGGGAAATCGGA-----GATATTTTGTCCA  
CCACAGAGAATTATTTGATTCTTCCATTTCAAAGAAGTTTCATGATACATCAGAACAATC  
ATTTAGAGGATTTAATGATTCT-----ATGACAAGAAGGTATTGGAATATCAATTT  
GGAAGAGATGATGGAAGCGGGAGTTCATTTGGTCATGGTACTAGGAAATGGAATCCT  
AGGATGGCACCTTATATTTCTGCCAAGCGTAAAGGTATTTCATATTCCAAATCTTACTAAA  
ACTGCTCGTTTTTTATCAGAAGCTTGTGATTTAGTTTTTGTATGCAGCAAGTAGGGGAAA  
ACAGTTTTTAATTGTTGGTACCAAGAATAAAGCAGCTGATTCAGTAGCACGGGCTGCAA  
TAAGGGCTCGATGTCATTATGTTAATAAAAAGTGGCTTGGTGGTATGTTAACGAATTGG  
TCCACTACAGAAACGCGACTTCATAAGTTCAGGGACTTGAGAACGGAACAAAAGGCG  
GGGAGACTCAATCGTCTTCCGAAAAGAGACGCAGCTATGTTGAAGAGACAATTATCTC  
ACTTGCAAACATATCTGGGCGGGATTAATATATGACGGGGTTACCTGATATTGTAATTA  
TCGTTGATCAACAAGAAGAATATACGGCTCTTCGAGAATGTATCACTTTGGGAATCCCA  
ACAATTTGTTAATCGATACAAATTGTGACCCGGATCTTGCAGATATTTGATTCCAGCA  
AATGATGACGCTATAGCTTCAATCCGATTAATTCTTAACAAATTAGTATTTGCAATTTGTG  
AGGGTTCGTTCT--AGCTATATACGAAATCCTATGGGACAAAAAATAAATCCACTTGGTTT  
CAGACTTGGTACAACCCAAGGTCATCATTCTATTTGGTTTGCACAACCCAAAAATTATT  
CCGAGGGTCTACAAGAAGATCAAAAAATACGAAATTGTATCAAGAATTATCTACAAA  
AAATATGAGAATATCCTCT--GGTGTGGAGGGAATTGCACGCATAGAAATTCGAAAAAG  
AATTGATCTGATTCAAGTCATAATCTATATGGGATTCCCAAAGTTATTACTAGAAGGCAA  
GACGCGA-----AGAATCGAAGAATTACAGATGAATGTACAAAAAGA ACTTAATTGT  
GTGAACCGAAA ACTCAACATTGCTATTACAAGAATTACAAACCCTTATGGGCACCCTAA  
TATTTCTGCAGAATTTATAGCCGGACAGTTAAAGAATAGAGTTTCATTTGCAAAGCAA  
TAAAAAAGGCTATTGAATTAACCGAACAGGCAGAGACAAAAGGAATTCAAGTACAAA  
TTGCAGGTTCGCTCGACGGAAAAGAAATTGCACGTGTCGAATGGATCAGAGAAGGTA  
GGGTTCTCTACAAACCATTTCGAGCTAAAATTGATTATTGTTCTTATGGAGTCCGAACG  
GTCTATGGAGTATTAGGCATCAAATTTGGATATTTGGGGAA-----ATGTCGCGTTACCG  
AGGGCCTCGTTTCAAAAAAATACGCCGTCTTGGGGCTTTACCAGGACTAACTAGTAAA  
AGGCCTAGAGCCGGAAGCGATCTTAGAAACCAATCGCGCTCTGGGAAA---AAATCTCA

ATATCGTATTCGTTT TAGAAGAAAAACAAAATTGCGTTTT CATTATGGTCTTACAGAAC  
GACAATTACTTAAATACGTTTCGTATCGCCGAAAAGCAAAGGGTCAACAGGTCAGGT  
TTTACTACAATTACTTGAAATGCGTTTTGGATAACATCCTTTTCCGATTGGGTATGGCTC  
GACTATTCCTCAAGCCCGCCAATTAGTTAACCATAGACATATTTTAGTTAATGGCTGTAT  
AGTAGATATACCAAGTTATCGCTGCAAACCACGCGATATTATTACGGCGAGGGATCATC  
AAAAATCGAGAGCTATGATTCAAATTATCTTGATTATCCCCCAT--GAGGAAGTGCC  
AAAACATTTGACTCTTACCCATTTCAA-----TATAAAGGATTAGTCAATCAAATAATCGA  
TAGTAAATGGATCGTTTTGAAAATAAATGAATTGCTAGTCGTAGAATATTATTCTCGTCA  
GACTATGTCACGTCGAGGTA CTGCAGAAGAAAAACTGCAAAATCCGATCCAATTTAT  
CGTAATCGATTAGTTAACATGTTGGTTAACCGTATTCTGAAACACGGAAAAAATCATT  
GGCTTATCAAATTATCTATCGAGCCATGAAAAAGATTCAACAAAAGACAGAAACAAAT  
CCACTATCCGTTTTACGTCAAGCAATACGTGGAGTAACTCCCGATATAGCAGTAAAAGC  
AAGACGTGTAGGCGGATCGACTCATCAAGTTCCCATTGAAATAGGATCCACACAAGGA  
AAAGCACTTGCCATTCGTTGGTTATTAGGAGCATCCCGAAAACGTCCGGGTCGAAATAT  
GGCTTTCAAATTAAGTTCCGAATTAGTGGATGCTGCCAAAGGGAGTGGCGATGCCATAC  
GCAAAAAGGAAGAGACTCATAGAATGGCAGAGGCAAAATAGAGCTTTTGCGCATTTTCG  
TATGGGTAGGGACACTATTGCTGACATAATAACCTCTATACGAAATGCTGACATGAATAG  
AAAAGGGACGATTCAAATAGCATCCACTAACATCACGGAAAACATTGTTAAAATACTTT  
TAAGAGAAGGTTTTATCAAAAACGTGAGGAAGCATCAGGAAAACAACAAATATTTTTT  
GGTTTTAACCCCTACGACATAGAAGG-----AATAGGAAAGGACCCTATCGAACT---ATT-----  
-TTAAATTTAAAACGTATCAGTAGGCCTGGCCTACGAATCTATTTCGAACTATCAACGAAT  
TCCTAGAATTTTAGGCGGGATGGGGATTGTAATCTTTCTACTTCTCGAGGTATAATGAC  
AGACCGAGAGGCTCGACTAGAAGGAATCGGCGGAGAAATTTGTGTTATATATGGATG  
GCAAAATCTATACCAAGA ACTGGTTCACGTAGGAATGCCCGTAGTGGTTCACGTAAAA  
GTACACGTAGAATACCAAAGGGAGTTATTCATGTTCAAGCAAGTTTCAACAATACCATT  
GTGACTGTTACAGATGTACGGGGTCGGGTAATTTCTTGGTCTCCGCCGGTACGTGTGG  
ATTCAATGGTACAAGAAGGGGGACACCATTTGCTGCTCAAACCGCAGCAGGAAATGCT  
ATTCGGACAGTAGTAGATCAAGGTATGCAACGAGCAGAAGTCATGATAAAAGGTCTTG  
GTCTCGGAAGAGATGCAGCATTAAAGAGCTATTCGTAGAAGTGGTATACTATTAAGTTTC  
GTACGTGATGTAACCCCTATGCCACATAATGGCTGTAGACCTCCTAAAAAAGACGTGT  
GCACCCTACATGTTCTCGACGCTGAGGACATCCCCAAGAGCGGGGGATTTCGTGAC  
ATTTCTGATTGGCTGTCT--TGTGTTTCTAATAAG---TTGTTTAATAGTTGGCATACTATCA  
CCCCAAAAAACCAAACTCTGCCTTACGTAAAGTTGCCAGAGTACGATTAACCTCTGG  
ATTTGAAATCACTGCTTATATACCTGGTATTGGCCATAATTCACAAGAACATTCTGTAGT  
CTTAGTAAGAGGGGGAAGGGTTAAGGATTTACCCGGTGTGAGATATCACATTGTTTCGA  
GGAACCCTAGATGCTGTCGGAGTAAAGGATCGTCAACAAGGGCGTTCTCAATATGGGG  
TCAAAAAGCCAAAATGGCAAGGAAAAGTTTGATTGAGAGGGAGAAGAAGAGGGCAA  
AAACTGGAACAAAATATCATTGATTGTCGATCCTCAAAAAAAGAAATAAGC-----  
AAAGTTCCGTCGTTGAGTGAGAAATGGAAAATTCATGGAAAGTTACAATCCTCACCGC  
GTAATAGTGCGCCTACACGTCTTCATCGACGTTGTTTTTCGACCGGAAGACCGAGAGCT  
AACTATCGAGACTTTGGGCTTTCCGGACACATACTTCGGGAAATGGTTCATGCATGTTT  
GTTGCCAGGGGCAACAAGATCAAGTTGGATGGTAAAAAATTCATTCATTTCAAGTATTT  
CACAAGAA---GAA---AAAGAAGAAAACAAGGGGTCCATTGAATTTCAAGTATTTTCGTTT  
CACCAATAAGATACGAAGACTGACTTCCCATTTGGAATTGCACCGAAAAGATTATTTAT



CTCAGAGAGGTTTACGTAAAATCCTGGGAAAACGCCAACGACTGCTGTCTTATTTGTC  
AAAGAAAAATAGAACGTTATAAAGAATTAATTAGTCACCTGGATATTCGGGAGTCAA  
AAACTCGT-----ATGGTAAAACCTTCGTTTTGAAACGATGTGGTAGAAAGCAA---CCCGTTT  
ATCGAATCGTTGCAATTGATGTTTCGATCCCGAAGAGAAGGAAGAGATCTTCGGAAAGT  
GGTTTTTTATGATCCGATAAATAATCAAACGTATTTAAATATTCTGCTATTCTATTTTTTC  
TTGAAAAAGGTGCTCAACCTACAGGAACTGTTTATGATATTTTAAAGAAGGCGGGGGT  
TTGT-----TTT-----ATGGAAAAATCCAAGCGACTCTTTCTTAAATCCAAG  
CGATCTTTTCGTAGGCGTTTTGCCCCGATCCAATCGGGGGATCGAATTGATTATAGAAA  
CATGAGTTTAATTAGTCGATTTATTAGTGAACAAGGAAAAATATTATCTAGACGGGTAAA  
TAGATTAACCTTAAAACAACAACGATTAATTACTATTGCTATAAAACAAGCTCGTATTTT  
ATCTTTGTTACCTTTTCTTAATAATGAGAAA-----CAATTTGAAAGAAGCGAGTCGACCG  
CCGGAGCTACTGGTCTTAGAACCATAAATAAAGTGACACGTTCACTAAAAAAAAATCC  
TTTTGTAGCGAATCATTATTAAGAAAAATTGAGAAGCTTAACACAAAGGCGGAAAAA  
GAAATAATAATAACTTGGTCTCGGGCATCTACCATTATACCTACAATGATCGGACATACT  
ATTGCTATCCATAATGGAAGGGAGCATTACCTATTTATATAACAGATCGTATGGTAGGA  
CATAAATTGGGAGAATTTTACCTACTATAAATTTCCGTGGACATGCGAAAAATGATAAT  
AGATCTCGTCGTATGATTTTGAATCTTTTCTACTAGGGAATCCAGTATCCTTATGCATG  
AAGATAATAAATTCGGTTCGTTATGGTCGGACTCTATTATGGATTTCTGACCACATTCTCC  
ATAGGGCCCTCTTATCTCTTCTTCTCCGAGCTCGGGTTCTGGAAGAAGGAGAAGAAG  
GAACCGAGAAGAAGGTATCAGCAACGACGGGTTTTATTGCGGGACAGCTCATGATGTT  
CATATCGATCTATTATGCGCCTCTGCATCTAGCATTGGGTAGACCTCATACAATAACTGTC  
CTAGCTCTACCGTATCTTTTGTTCATTTCTTCTGGAACAATCACAAACACTTTTTTGATT  
ATGGATCTACTACCAGAAATCAATGCGTAATCTTAGCATTCAATGTATATTCCTGAATAA  
TCTCATTTTTCAATTATTCAACCATTTTCAATTTTACCAAGTTCAATGTTAGCCAGATTAGTC  
AACATTTATATGTTTCGATGCAACAACAAGATGTTATTTGTAACAAGTAGTTTTGTTGGT  
TGGTTAATTGGTACATTTTTTTCATGAAATGGGTTGAATTGGTATTAGTCTGGATACAG  
CAAATAATTCTATTCGATCG---ATTCGATCGAATAAGTACCTTGTGTCAGAATTGAGAA  
ATTCTATGGCTCGAATCTTTAGTATTCTCTTATTTATTACCTGTGTTTACTATTTAGGCAGA  
ATACCGTCACCCATTGTTACTAAAAAATTCAAAGAAACCGAAGAAGATAAACCTCTTG  
TCACTCTTCTTTTCGACTATAAACGATGGAATCGTCCATTACGATATATAAAAAACAATC  
AATTTGAAAATGCCGTAAGAAATGAAGTGTCAACAATTTTTTTTTTATAATGTCGAAAC  
AATGGAAAAGAAAGAATATCTTTTACATATCCCCCAGTTTGTCAACTTTTTTTGGAAAT  
GATACAAAGAAAAATTTATTTGTTGACAAGAGAAAAACTACCTCTGATGAATTGTATG  
ATCATTGGATTTATACCAATGAACAAAAAAGAAAAACTTGAGCAAAAAATTAAAAAA  
TCGAATGAAAGCTCTAAAT-----ATTACTCTAGATGTATTCGAAAAAAGAAGACTAGATTG  
GGTAGTGATGAAAATAAAAAAGAATACTTGCCTAAAATATATGATCCTTTTTTTGAATGG  
GCCCCGTCGTAGAAGGGTCAAATTTTTTTTTTTCATCCATCGAGACAGGTTGGATAAATA  
AGATTCAGGGTATACTTCAGGAAAAATTTGAAGAACAAGAGCCCAAGACTAAAGGA---  
---ATAAAAGAAATAAGTAAAAAAGTTCCCTCCATGGTCATACAAATTAATCGATTTGGAA  
CAACAGGAGGGAGAACAGATTTCGTTCCAGAAAAGCCAAACGTGTAGTAATTTTTACTG  
ATGCTTTGATACGTTATTCACAACAATCGGATTTTCGTCGAGACATAATCAAAGGCTCTA  
TGCGTGCTCAAAGACGTAAAACAGTATTTGTAATTTGTTCAAGCAAATGTGCATTCT  
CTTCTTTTTTTGGACAGAATAGACAAACCC-----CTTTTTTCTTTTGATATCTCCGGGAT  
GATAAATTCATTTTGA AAAACAGAGAAGAGAAAGCACGAATAGAAATAGCGGAAGC

CTGGGATAGCATTTTATTTGCTCAAGTAATAAGAGGATCCCTATTAGTAACCCAATCTTT  
TCTTAGAAAATATATTCTATTCCCTTCATTGATAATAGCTAAAAATATAGCCCGTATGTTAT  
TATTTCAATTTCCCGAGTGGTCCGAAGACTTAAAAGATTGGAATAGAGAAATGCATGTT  
AAATGCACCTATAATGGTATTCAATTATCAGAAACCGAATTTCCAAAAAATTGGTTGAC  
AGACGGTATTTCAGATAAAGATCCTATTTCCTTTTTGCCTTAAACCTTGGCACAGATCTAA  
G-----CAAAAAAACGATTTTTGTTTTTTAACAGTTTGGGGAATGGAACTGAACTTCCTT  
TTGGTTCTCCCCGAAAACAACGTTTCATTTTTTTGAACCCATTTTTTAAAGGACTCAGAAAA  
AAAATTATCAAATTGAAAAAGAATTCTTTTTTAGTT---ATACAGGTTTTTAAAAGAAAGAA  
TCCATTTTTTTTTTACTTTTTCAAAGAAAGAAAAAATGGGTCATGAAAACCATTCTA-  
-----TTTTTAAAAGGAATAATAAAAGAACTTTCCAAAAGAAACAATGGGGTAATCAGTAA  
TGGGATGATTAATGAATCG---ATTCCAATTCGATTTATGGATTTGACAGAT---TCATTGAC  
AGAAAAAAAATGAAAGATCTGGCTCATAGAACCAGCACAATCAGGAATCAAATAGA  
AAAAATTACAAAAGATAAGAAAAAAGTTCTAATAAAATAAGTTATCCTACTAACTAT  
TAGCATCAATAAAAAATATTTGGCAGAAATTAAGAAATTCAATGTTTCGATTAATCCGTA  
AATCATATTCTTTTTTCAAATTTTTAATTGAAAGGATATATATAGATATACTTCTCTGTATC  
ATTAATAGTCCGAAGATCACTATACAACTT---ACAATTCGTTTTCTT-----TTATCCTCCTT  
CTCACAAGGATATGTATTTTACCAATTATATCAAACG---ATTTTTAATTTGTATAAGTTAA  
GATATGTCCTTCACTATAACATCTTTTTTTCTTAAGAATCAAATAAAGGATTATTTTACA-----  
-ATTTTTTATTCTGAATTA AACATAAAAATATTTTGGAAATGGAAATGATTCAATGGAA  
AAACTGGTTAAGGGGTCATTATCAATATGATTTATCTTCGATTAGATGGTATCTATTAGTA  
CCACACAAATGCCGAAATAGATTCAATCAAACACGTATAGTGCAAATAAAAAACAAA  
GGCATTTCAGATGAAAAAGATCAATTAATATTAATTACAAAAAATTA---AACCTTCA  
AAAATACTATGGATATGACCTTTTCTCATATAAATCGATTAATGATGATATTCTAAATACA  
GATAGAAAATATTTTGATTGGAGAATTTTCGATTTTTGTCTTCGACTTTTTTGATTGGATG  
GGAATGAATGAAGAAATACTAAGTCGTTGGTTCTTTCCAGAATTTGTGCTGCTTTATAAT  
ACATATCTTATGAAACCGTGGATCATAACCAATCCAACACTTCTTTTTAAATAGCAAC-----  
ACGGAAGCCGAGCTTGATTTTTTCTTAAAAGGTATTTACGTTTTTCAATTGAGATGGGA  
T-----AATAAAAAAATGATCAATAATATCAAAGTATATTGTCTCCTACTTAGACTGATAA  
ATCCAAGAGAAATTGCTATATCCTCTATTCAAAGGGGAGAAATGAGTTTAGATATTTGA  
TGATTCAAAGGATTTACCTCTTACAGAATTAATGAAAAAGGGTATATTAATTATCGAAC  
CAGTTTCGTTTGTCTATAAAAAATGATGGACAATTGATTATGTATCAAAGTCTAAATATTT  
CATTGTTTCATAAGAGTAAGCCCAATTATGATTTGTTGTTGTTCCCGAAAAAGTTTTAT  
CCACTAAAGGACGTAGAGAATTAAGAATTCTAATTTGTTTCAAATTTCTTTGCCCTAATT  
ATCGCTTAGAAGATTTATCTTGTATGAATCGATATTGGTTTGATACCAATAATGGGAGCC  
GCTTCACTATGATAAGGATACATATGTATCCAATGAAAGGACATCAATTCAAATCCTGGA  
TTTTCGAATTGAGAGAGATATTGAGAGAGATCAAGAATTCTCACTATTTCTTAGATTCAT  
GGACCAATTCAATTCCGTGGGATCTTTCATTCACATTTTTTTCCACCAAGAACGTTTTTA  
TAAACTCTTGGACCCCGAATTTGGAGTATCCTACTTTCA---CGCAATTC-----CAGG  
GTTCAACAAGCAATCGATATTT-----ACGATCAAGGGTGTAGTACTATTTGTAGTAGC  
G---GTCCTTATATATCGT-----ATTAACAATCGAAATATGGTCGAAAGAAAAAATCTC  
TATTTGACAGGGCTTCTTCCT-----ATACCTATGAATTCCATTGGACCCAGAAATG  
ATACATTGGAAGAATCTTTT---GGGTCTTCCAATATCAATAGGTTGATTGTTTCG---CTCC  
TCTATCTTCAAAGGAAAAAAGATCTCTGAGAGCTGTTTCTGGATCCGAAAGAGAG  
TACTTGGGTTCTCCCAATAACG-----AAAAAGTGTATCATGCCTGAATCTAACTGGG

GTTCGCGGTGGTGGAGGAACTGGATCGGAAAAAAGAGG-----GATTCGAGTTGTAAGA  
TATCTAAT-----GAAACCGTCGCTGGAATTGAGATCTCATTCAAAGAGAAAGATATCA  
AA--TATCTGGAGTTTCTTTTTTATATTATATGGAT-----GATCCGATCTGCAAGGACCAT  
GATTGGGAATTTTTGGATCGTCTTTCTCCGAGTAAGAGACGAAACATAATTAACCTG-----  
-AATTCGCGACAGCTATTCGAAATCTTAGTTAAAGACTGGATTTGTTATCTCATGTTTGC  
TTTTTCGTGAAAAAATACCAATTGAAGTGGAGGGT--TTCTTCAAACAACAAGGA--GCT  
GGGTCAACTATTCAATCAAATGATATTGAGCCTATTTCCCAT-----CTCTTCTCGAGAAAG  
AAGTGGGCTATTTCTTTGCAAAATTGTGCTCAATTTCATATGTGGCAATTCCGCCAAGAT  
CTCTTCGTT-----AGTTGGGGGAAG---AATCCGCCCGAATCGGATTTTTTGAGGAAC---  
ATATCGAGAGAGAATTGGATTTGGTTAGACAATGTGTGGTTGGTAAACAAGGATCGG---  
-----TTTTTTAGC-----AAGGTACGGAATGTATCGTCAAATATTCAATATGATTCT-----AC  
AAGA-----TCTAGTTTTCGTTCAAGTAACGGATTCTAGCCAATTGAAAGGATCTTCT--GAT  
CAATCCAGAGATCATTTCGATTCCATTAGT-----AATGAGGATTCGGAA-----  
-----TATCACACATTGATCAATCAAAGAGAGATTCAACAACATAAAAGAAAG  
ATCGATTCTT--TGGGAT-----CCTTCCTTCTTCAAACGGAACGAACAGAGCTAGAATCA  
GAC-----CGATTCTCTAAA-----TGCCTTTCTGGATATTCC-----CGGCTATTCACG--  
GAACGTGAGAAGGAGATGAAGAATCATCTGCTTCCGGAAGAAATCGAAGAATTT-----C  
TTGGGAATCCTACAAGATCCATTCTTTCTTTTTTCTCTGACAGATGG-----TCAGAACTTC  
AT--CTGGGTTTCAATCCTACTGAGAGGTCCACTAGAGATCAG-----AAATTGTTGA  
AGAAAGAACAAGATGTTTCT--TTTGTCCCTTCCAGGCGATCGGAA-----AATAAAG  
AAATAGTTAATATATTCAAGATAATTACGTATTTACAAAAT-----ACCGTCTCAATTCATCC  
TATTTATCAGATCCGGGATGTGATATGGTTCCG---AAGGATGAACTGGAT--ATGCACA  
GTTCCATAAGATTTCAATCTTGAACAAAAATACATTTTTTGATTTA-----TTTCATCTGTT  
CCATGACCGGAACAGGGGGGGGATACACGTTA-----CACCACGATTTTGAATCAGAA-----  
GAGAGATTTCAAGAAATGGCAGATCTATTCACTCTATCAATAAGCGAGCCG---GATCTG  
GTGTATCATAAGGGATTTGCCTTTTCTATGGATTCTTACGTATTGGATCAAAAACAA-----  
TTCTTGAATGAGGTATTCAACTCCAGGGATGAATCGAAAAAGAAATCTTTA-----TTG  
GTTCTACCTCCTCTTTTTTAT-----GAAGAGAATGAATCTTTTTATCGAAGGATCAGAAAA  
AAATGGGTCCGG---ATCTCCTGCGGGAATGATTTGGAAGATCCAAAACCAAAAATAGTG  
GTATTTGCTAGCAACAACATAATGGAGGCAGTCAATCAATATAGATGGATCCGAAATCT  
GATTCAAATCCAA-----TATAGCACCTATGGGTACATAAGAAATGTATGGAATCGATTCTT  
TTAATGAAT-----AGATCCGATCGCAACTTCGAATATGGAATTCAA-----AGGGATC  
AAATAGGAAATGATACTTTGAATCATAGAACGATAATGAAATATACGATCAACCAACATT  
TATCGAATTTGAAAAAG---AGTCAGAAGAAATGGTTCAATCCT-----CTTATTTTTATTTC  
TCGAACCGAGAGATCCGTGAATCGGGATCCTAATGCATATAGATACAAATGGTCCAATG  
GGAGCAAGAATTTCCAGGAACATTTGGAACATTTTCGTTTCTAAGCAGAAGAGCCGT----  
---TTTCAAGTAGTCTTCGATCGATTACGTATTAATCAATATTTCGATTGATTGGTTCGGAGG  
TTATCGACAAAAAAGATTTGTCTAAGTCACTTCGTTTCGTTTTGTCCAAGTTACTTCTC--  
-----TTTTTGTCC-----AAGTTTCTTCTTTTTTTGTCTAACTCAC  
TTCCT--TTTTCTTTGTGAGTTTCGGGAATACCCCATTCATAGGTCCGAG---ATCCACG  
TCTAT--GAATTGAAAGGTCCGAATGATCAACTCTGCAATCAGTTGTTAGAATCAATAGG  
TCTTCAAATCGTTCATTTGAAAAAATGGAAACCATTA-----TTATTGGAT-----GATCAT  
GATCCTTCC---CAAAAATCGAAATTATTGATCAATGGAGGAACAATATCACCATTTTTGT  
TCAATAAGATACCA---AAGTGG---ATGATTGACTCATTCCATACTAGA-----AATAATCGC

AGGAAATCTTTTGATAACACGGATTCCTATTTCTCAATGATATCCCACGATCAAGACAAT  
TGGCTGAATCCCGTGAAACCATTCATAGAAGTTCATTGATATCTTCTTTTTATAAAGCA  
AATCGACTTCGATTCTTGAATAATCCACATCACTTCTGCTTCTAT-----TGTAACAAAAGA  
TTCCCCTTT-----TAT--GTGGAAAGGGCCCGTATCAATAATTATGAT-----TTTACATATG  
GA---CAATTCCTCAATATCTTGTTTCATTTCGCAACAAA---ATATTTTCTTTGTGCGGCGGTA  
AA-----AAAAAATACGCTTTTTTTGGAG---AGAGATACTATTTACCAATCGAGTCACAGG  
TATCTAACATATTCATACCTAACGATTTTCCACAAAAGTGGTGACGAAAGG---TCTAACTT  
GTACAAATCT-----TTCCATTTTGAATTCGATCCGATCCATTAGTTCGT-----AGAGCTA  
TTTACTCGATCGCAGACATTTCTGGAACACCTCTAACAGAGGGACAAATAGTCAATTTG  
GAAAGAACTTATTGTCAACCTCTTTCCGATATGAATCTATCTGATTCAGAAGGGAAGAA  
CTTGTATCAGTATCTCAAT-----TTCAATTCAAACATGGGTTTGATTACACTCCATGTTC  
TGAGAAATATTTACCATCCGAAAAG-----AGGAAAAA-----CGGAGTCTT  
TGTCTAAAG-----AAATGCGTTGAGAAAGGACAGATGTATAGAACCTTTCAACGAGATA  
GTGCTTTTTCAACTCTCTCAAATGGAATCTATTCCAAACATATATGCCATGGTTCCTTA  
CCTCGACAGGGTACAAATATCTAAATTGGATATTTTAGATACTTTTTTCAGAC---CTATTG  
CCGATACTAAGTAGCAGT-----CAAAAATTTGTATCCATTTTTCATGATATTATGCATGGAT  
CAGATATATCATGGCAAATTCTTCAGAAAAAATTC-----TGTCTTCCACAATGG  
AAT---CTGATAAGTGAGATTTTCGAGTAAGTGTTTACATAAT-----CTTCTTCTGTCCGAAG  
AAATGATTCATCGAAATAATGAGTCA-----CCATTGATATCGACCCATCTGAGATCTCCAA  
ATGTTCCGGGAGTTC---CTCTATTCAATCCTTTTCCCTTCTTCTTGTGCTACATAT---ATCGT  
TCGTACACATCTTCTCTTTGTTTCCCGA-----GCCTATAGTGAGTTACAGACAGAGTTCG  
AAAGGGTCAAATCTTGGATGATTCCATCATACATGATGGAGTTGCGAAAACCTTCTGGAT  
AGGTACCCTACATCTGAACTGAATTCCTTTCTGGTTAAAGAATCTCTTTCTAGTTGCTCTG  
GAAAAATTAGGAGATTCTCTAGAAGAAATACGGGGTTCTGCTTCTGGCGGCAACATGC  
TATGGGGTGGTGGTCCC-----GCTTATGGG---TTCAAATCAATACGTTCTAAGAAG  
AAATATTTGAATATCAAT-----CTCATCGATCTCATA---AGTATCATACCAAATCCCATCC  
ATCGAATCACTTTTTTCGAAAAAGACGAGACATCTAAGTCATACAAGTAAAGAGATCTAT  
TCATTGATAAGAAAAAGAAAAAATGTGAACGGTGATTGGATTGATGATAAAATAGAATC  
CTGGGTCGCGAACAGTGATTTCGATTGATGATAAAGAAAGAGAATTCTTGGTTCAGTTTT  
CC-----ACCTTAACGACA-----GAAAAAAGGATTGATCAAATCTATTGAGTTTGACT--C  
ATAGTGATCATTTATCA-----AAGAATGACTCTGGTTATCAAATGATTGAACAACC  
GGGAGCAATTTACTTACGATACTTAGTTGACATTCAT-----AAAAAGTATCTAATGAATTA  
TGAGTTCAATACATTTCTGTTTAGCAGAAAGACGGATATTCCTTGCTCATTATCAGACAAT  
CACTTAT-----TCACAAACCTCGTGTGGGACTAATAGTTTTTCATTTACATCTCATGGA---  
-----AAACCCTTTTCGCTCCGCTTAGCCCTATCCCCTTCT---AGGGGTATTTTAGTGATAGG  
TTCTATAGGAACTGGACGATCCTATTTGGTCAAATACCTAGCGACAAACTCCTATGTCC  
TTTCATTACAGTATTTCTGAACAAGTTCCTGGATAACAAGCCTAAAGGTTTTCTTATTGA  
T-----GATATCGAT-----GAGGATAGTGACGATATTGAGGATAGTGACGATATTGAG-  
-----GATAGTGACGATATTGATCGTGACCTTGATACGGAG  
CTGGAGCTTCTAACTAGGATGAATGCGCTA-----ACTATGGATATGATGCCG-----GA  
AATAGACCGATTTTATATTACCCTTCAATTCGAATTAGCAAAAAGCAATGTCTCCTTGCAT  
AATATGGATTCCAAACATTCATGATCTGGATGTGAATGAGTCGAATTACTTATCCCTCGG  
TCTATTAGTGAACATCTCTCC-----AGGGATTGTGAAAGATGTTCC---ACTCAAAATAT  
TCTTGTATTGCTTCAACTCATATTCCCCAAAAAGTGGATCCCGCTCTAATAGCTCCGAA

TAAATTAATAACATGCATTAAGATACGAAGGCTTCTTATTCCACAACAACGAAAGCACT  
TTTTACCCCTTTCATATACTAGGGGATTTCACTTGGAAAAGAAAATGTTCCATACT-----A  
ATGGATTTCGGGTCCATAACCATGGGTTCCAATGTACGAGATCTTGTAGCACTTACCAAT  
GAGGCCCTATCGATTAGTATTACACAGAAGAAATCAATTCTAGACACTAATACAATTAGA  
TCTGCTCTTCATAGACAACTTGGGATTTGCGA-----TCCCAGGTAAGATCGGTTTCAG  
GATCATGGGATCCTTTTCTATCAGATAGGAAGGGCTGTTGCACAAAATGTACTTCTAAG  
TAATTGCCCATAGATCCTATATCTATCTATATGAAGAAGAAA-----TCATGTAACGAAGG  
GGATTCTTATTTGTACAAATGGTACTTCGAACTTGGAACGAGCATGAAGAAATTAACGA  
TACTTCTTTATCTTTTGTAGTTGTTCTGCCGGATCGATCGCTCAAGACCTTTGGTCTCTAC  
CC-----GGACCCGATGAAAAA---AATGAGATCACTTCTTATGGACTCGTTGAGAATGATT  
CT--GATCTAGTTCATGGCCTATTAGAAGTAGAAGGCGCTCTGGTGAA-----TCCTCGC  
GGACAGAAAAAGATTACAGTCAGTTTGATAATGAT-----CGAGTGACATTGCTTCTTCGG  
CCCAAACCAAGGAAT--CCCTTAGATATGATGCAAAATGGATCTTGTCTATCGTTGATC  
CGAGATTTCTCTATGAAAAA-----TACGAATCGGAGTTTGAAGAA--GGGAAGGAGAA  
GGAGTCCTCGACCCGCAA-----CAGATAGAGGAGGAC-----TTATTCAATCAC---  
---ATAGTTTGGGCTCCT-----AGAATATGGCGCCCT-----TGGGGCTTCTATTTGATTGT  
ATCGAAAGGCCCAATTCATTGGGATTTCCC--TATTGGGCCAGGTCATTTTCGGGGCAAG-  
-----CGGATCATTATGATGAAAAGGAGGAGCTTCAAGAGAATGATTCGGAGTTCTTG  
CAGAGTGGAACCATGCAGTACCAGACACGAGATAGATCTTCCAAAGAACAAGGCTTTT  
TTCGAATAAGCCAATTCATTTGGGACCCTGCAGATCCACTCTTTTTTCTATTCAA---GA  
TCAGCCCTTTGTCTCTGTGTTTTACATCGAGAATTCTTTGCAGATGAAGAGATGTCAA  
AGGGGCTTCTTATTTCCCAAACAGATTCCCCTACATCTATATATAAACGCTGGTTTATC----  
--AGAATACGCAAGAAAAGCACTTCGAATTGTTGATTCATCGCCAGAGATGGCTTAGA-  
-----ACCAATAGTTCATTATCT-----AATGGATTTTTCCGTTCTAAT-----ACTCCATCCGAG  
AGTTATCAGTATTTATCAAATCTGTTCCCTATCTAAC---GGAAGGCTATTGGATCAAATGAC  
AAAGACATTGTTGAGAAAAAGATGGCTTTTCCCGGATGAAATGAAAATCGGATTC-----  
ATG-----ATGCCTAGATCGAGG---ATAAATGGAAATTTTATTGATAAGAC  
CTTTTCAATTGTAGCCAATATCTTATTACGAATAATCCGACAACCTTCAGGAGAAAAAG  
AGGCATTTACCTATTACAGAGATGGG-----ATGTCGGCTCAATCCGAAGGAAATTATGCG  
GAAGCTTTACAGAATTATTATGAAGCTATGCGACTAGAAATTGATCCCTATGATCGAAGC  
TATATACTTATAACATAGGCCTTATCCACACAAGTAACGGAGAACATACAAAGCTTT  
GGAATATTATTTTCGGGCACTAGAACGAAACCCGTTTTTACCACAAGCTTTTAATAATAT  
GGCTGTGATCTGTCATTAC---CGGGGAGAACAGGCCATTTCGACAGGGGGATTCTGAAAT  
TGCGGAGGCTTGGTTCGATCAAGCCGCTGAGTATTGGAAACAAGCTATAGCGCTCACT  
CCTGGTAATTATATTGAAGCGCAGAATTGGTTGAAGATCACGAGACGTTTTCGAA-----AT  
GAGTTGTCGATCAGAACATATATGGATAGAACTTATAGTGGGGTCTCGAAAAATAAGTA  
ATTTCTGCTGGGCCTTTATCCTTTTTTTAGGTTCACTAGGATTCGTATTAGTTGGATCTTC  
CAGTTATCTCGGTAAGAATTTGATATCTTTAGTTCCGTCTCAACAAATCTTTTTTTTCCA  
CAAGGGATCGTGATGTCTTTCTACGGTATCGCAGGTCTCTTATTAGTTCCCTATTTGTGG  
TGCACAATTTTCGTGGAATGTAGGTAGTGGCTATGATCGATTTCGATAGAAAAGAAGGAAT  
AGTGTGATTTTTTCGTTGGGGATTTCTGGAAAAAATCGTTCGATCTTTCTACGATTTTCG  
TATGAAAGATATTCAGTCCATCCGAATCGAAGTTAAAGAGGGTATTTATGCTCGTCGTGT  
CCTTTATATGAAATCAAAGGACAGGGGGCCGTTCCCTTGACGCGTATTGATGAGAAT--  
-TTGACTCCGCGTGAAATTGAGCAAAAAGCCCGCAATTGGCCTATTTCTTGCCTGTAC

CGATTGAAGTATTT

>Angophora

ATGGAAAAATGGTGGTTCAATTCGATGTTGTATCTAAGTAAATCAATTGATAGGTTTGGT  
CCTATTGAAAAAACCAGTGTAAGTGAAGATCCGGTTCTAAACGATACGGATAAAAAGA  
TTCATAGTTACAGTAATGCTAATCATTAGTGGGCATCAGGGACGTTGTAATTTTATCT  
CTGATGACACCTTTTTAGTTAGAGATAGTAATAGGAATATTTATTCCATATATTTTGATATT  
ACTAATCCAATTTTTGAGATTGACAATGATCCT-----TCTTTACTGAGTGAACGAGAAAG  
TTCTTTTTTTAGTTATCGGACTTATGCTTATCTGAAGAATGGATCTAAGAATGACGATCC  
GCCCTGTGATCGTTCATGTATGATACTAAATACAGTTGGAATAATCACATTACTAGTTG  
CATTAACTCTTATATTGGT-----TCTCAAATCTGTATTGAGAGTTCATTTTAAAGTAGTAGT  
GACAATCCAGTGCCAGTTACATTTATAGTTACATTTATGGTAGGGGGAGCTCCAGTATA  
AGAACTAGCAGGAATGGTATTGATTTCACTCGAAGAGAAAATTCTACT---TTCGATTTG  
ACTCAAAAATATAGGCATTTGTGGGTTCAATGCGAAAATTGTTATGGATTAAATTATAAG  
AAACTTTTGAAATCCAAAATGAATATTTGTGACCAATGTGGATATCATTGAAAATGAGT  
AGTTCAGATCGAATCGAACTTTGATTGATCCAGGTACTTGGGATCCTATGGATGAAGA  
CATGGTTTCTCTGGATCCTATTGAATTTTCATTCGGAGGAGGAACCTTATAAAGATCGTAT  
TGATTCTTATCAAAAAAAGACAGGATTAACCGATGCTGTTCAAACAGGCACAGGTCAA  
CTAAACGGTATTCCCATAGCAATTGGAGTTATGGATTTTCAGTTTATGGGGGGTAGTATG  
GGATCCGTAGTAGGCGAGAAAATCACCCGTTTGATCGAGTATGCTACCAATAAATTTTT  
ACCTCTGATTCTAGTGTGTGCTTCCGGAGGAGCACGTATGCAAGAAGGAAGCTTGAGC  
TTGATGCAAATGGCTAAAATATCTGCTGCTTTATATGATTATCAATCCCATAAAAAGTTAT  
TCTATGTATCAATCCTTACATCTCCTACTACTGGTGGGGTAACGGCTAGTTTTGGGATGT  
TGGGGGATATTATTATTGCCGAACCTAATGCTTACATTGCATTCGCAGGTAAAAGAGTAA  
TTGAACAAACATTGAATAAGATAGTACCTGAAGGTTACAAGCGGCTGAATATTTATTC  
CATAAGGGCTTATTTCGATCCAATCGTACCACGTAATCCTTTAAAGGGTGTCTGAGTGA  
GTTATTTAAGCTTCACGCTTTTTTTTCCTTTGAAT-----ATGGTAACCATTAGAGCCG  
ACGAAATTAGTAATATTATCCGTGAACGTATTGAGCAATATAATAGAGAAGTAAAGATTG  
TAAATACCGGTACCGTACTGCAAGTAGGCGACGGCATTGCTCGTATTTATGGTCTTGATG  
AAGTAATGGCGGGTGAATTAGTAGAATTTGAAGAGGGTACAATAGGGATTGCTCTGAAT  
TTGGAATCAAATAATGTTGGTGTGTATTAATGGGTGACGGTTTGATGATACAAGAGGG  
AAGTTCTGTAAAAGCAACAGGAAGAATTGCTCAGATACCGGTGAGTGAGGCTTATTTG  
GGTCGTGTTATAAATGCCCTGGCCAAACCTATTGATGGTCGAGGTGAAATTTACGCTTC  
TGAATCTCGATTAATTGAATCTCCTGCTCCAGGTATTATTTGAGACGTTCCGTATATGA  
GCCTCTTCAAACCTGGACTTATTGCTATTGATTGATCGATGATCCCTATAGGACGTGGTCAGCG  
AGAATTAATTATTGGGGACAGACAGACCGGTAAAACAGCAGTAGCCACGGATACTATT  
CTCAATCAACAAGGTCAAATGTAATATGTGTTTATGTAGCTATTGGTCAAAAAGCATCT  
TCTGTGGCTCAGGTAGTGAATACTCTCCAGGAAAGGGGAGCTATGGAATACACTATTGT  
GGTAGCTGAAACGGCGGATTCCCCAGCTACGTTACAATACCTCGCTCCTTATACAGGAG  
CAGCTCTTGCTGAATATTTTATGTTTCGTGAACGACACACTTTAATCATTATGATGATCT  
CTCCAAACAAGCACAGGCTTATCGCCAAATGTCTCTTCTATTACGAAGACCACCCGGTC  
GCGAAGCTTATCCAGGAGATGTTTTTTTATTGTCATTCACGCCTTTTAGAAAGAGCTGCT  
AAATTAAGTTCTCTTTTAGGTGAAGGAAGTATGACTGCCTTACCAATAGTGGAGACCCA  
GTCGGGAGATGTTTCGGCTTATATTCCTACTAATGTAATTTCCATTACAGATGGACAAAT  
ATTCTTATCAGCCGATCTATTCAATGCTGGAATCAGACCTGCTATTAATGTGGGTATTTCT

GTTTCCAGAGTAGGATCTGCAGCTCAAATTAAGCCATGAAACAAGTAGCTGGAAAAT  
TAAAATTGGAATTAGCGCAATTCGCAGAATTAGAAGCCTTTGCACAATTCGCTTCTGAT  
CTCGATAAAGCTACCCAGAATCAATTGGCAAGAGGTCAACGATTACGTGAATTGCTTAA  
ACAATCCCAATCAGCCCCTCTCACGGTGGAGAACAGATAATGACTATTTATACGGGAA  
CGAATGGTTATCTTGATTCATTAGAAATTGGACAGGTAAGGAAATTTCTCGTTGAGTTA  
CGTACTTACGTAAAAACGAATAAACCTCAATTCCAAGAAATTATATCTTCTACTAAAACA  
TTTACTGAGGAAGCAGAAGCCCTTTTGAAAGAAGCTATCCAGGAACAGAAGGAACGC  
TTTCTACTTCAGGAACAAGGAATGAGAATCAATCCTACTACTTCGGGTCTGGAGTTTC  
CACACTTGAAAAAAAAAACCTGGGACGTATCGCTCAAATCATTGGTCCGGTACTAGAT  
GTAGCCTTTCCCCGGGCAAGATGCCTAATATTTATAACGCTCTGGTAGTTAAAGGTCG  
AGATACTATCGGTCAAGAAATTAATGTGACTTGTGAGGTACAGCAATTATTAGGAAATA  
ATCGAGTTAGAGCTGTAGCTATGAGTGCTACAGATGGTCTAATGAGAGGAATGGAAGT  
GATTGACACAGGAGCTCCTCTAAGTGTTCAGTCGGCGGAGCGACTCTCGGCCGAATT  
TTCAACGTGCTTGGAGAACCTGTTGATGATTTAGGACCTGTAGATACTCGTACAACATC  
TCCTATTCATAGATCTGCGCCCGCCTTTATACAGTTAGATACAAAATTATCTATTTTTGAA  
ACAGGAATTAAGTAGTAGATCTTTTAGCCCCTTATCGGCGTGGAGGAAAAATAGGACT  
ATTCGGGGGGGCTGGAGTGGGTAAAACAGTACTCATTATGGAATTGATCAACAACATT  
GCTAAAGCTCATGGGGGGGTATCCGTATTTGGAGGAGTAGGTGAACGTACTCGTGAAG  
GAAATGATCTTTACATGGAAATGAAAGAATCGGGAGTAATTAATGAACAAAATATTGCA  
GAATCTAAGGTGGCTCTAGTCTACGGTCAGATGAATGAACCCCCTGGAGCTCGTATGA  
GAGTTGGTTTGACTGCCCTAACTATGGCGGAATATTTCCGAGATGTTAATGAACAAGAC  
GTACTTCTATTTATCGACAATATATTCCGTTTCGTCCAAGCAGGATCTGAGGTATCCGCC  
TTATTGGGTAGAATGCCTTCTGCTGTGGGTATCAACCCACCCTTAGTACCGAAATGGG  
TACTTTACAAGAAAGAATTACTTCTACCAAAGAGGGATCCATAACTTCTATTCAAGCAG  
TTTATGTACCTGCGGACGATTTAACCGACCCTGCTCCTGCCACGACATTTGCACATTTA  
GATGCTACGACCGTACTATCAAGAGGATTAGCTGCTAAAGGTATCTATCCAGCAGTAGA  
TCCTTTAGATCAACGTCAACTATGCTCCAACCTCGAATCGTTGGTGAGGAACATTATG  
AAACTGCGCAAAGAGTTAAGCAAACCTTTACAACGTTACAAAGAAGTTCAGGACATTAT  
AGCTATCCTTGGGTGGACGAATTATCCGAAGAGGATCGCTTAACCGTAGCAAGAGCA  
CGAAAATTGAGCGTTTCTTATCCCAACCCTTTTCGTAGCAGAAGTATTTACCGGTTCC  
CCCAGGGAAATATGTTGGTCTAGCAGAAACAATTAGAGGGTTTAAATTGATCCTTTCCG  
GAGAATTAGATGGTCTTCTGAAACAAGCCTTTTATTTGGTAGGTAACATCGATGAAGCT  
ACTGCGAAGGCTACGAACTTAGAAATGGAGAGTAAATTGAAGAAAATGACCTTAAATC  
TTTGTGTAATAACCCCTAATCGAATTGTTGGGATTCAGAAGTGAAAGAAATCATTTTAT  
CTACTAATACTGGACAAATTGGCGTATTACCAAATCACGCGCCTATTGCCACAGCTGTA  
GATATAGGTATTTGAGAATACGCCTTAACGACCAATGGTTAACAATGGCTCTGATGGG  
TGGTTTTGCTAGAATAGGCAATAATGAGATCACTATTTTAGTAAATGACGCGGAAAAGG  
GTAGTGATATTGATACACAAGAAGCTCAGGAAACTCTTGAAGTACGCGGAAGCTAACTT  
AAGAAAAGCTGAAGGTAAGAGACAAACAATTGAGGCAAATCTAGCTCTCAGACGAGC  
TAGGACACGAGTCGAGGCTATCAATGCAATTTCAATGAAAAATGTAACCGATTCTTTTCG  
TTTCTTGGGTCACTGGCCATCGGCCGGGAGTTTCGGATTTAATACCGATATTTTAGCAA  
CAAATCCAATAAATCTAAGTGTAGTCCTTGGTGTATTGATCTTTTTTGGAAAGGGAGTG  
TTAAGCGATTTATTAGATAATCGAAAACAGAGGATCTTGAATACTATTCGAAATTCAGA  
AGAATTACGCGCGGGGCCATTGAACAGCTGGAAAAAGCCCGGGCCCGTTTACGGAA

AGTGGAATGGAAGCGGAGCAGTTTCGAGTGAATGGATACTCTGAGATAGAACAAGA  
AAAGTTGAATCTGATTAATTCAACTTATAAGACCTTGGAACAATTAGAAAATTACAAAA  
ACGAAACTATTCATTTTGAACAGCAAAGAGCGATTAATCAAGTCCGACAACGGGTTTT  
CCAACAAGCCTTACAAGGAGCTCTAGGAACTCTGAATAGTTGTTTGAACAACGAGTTC  
CATTTACGTA CTATCAGTGCTAATATTGGCATGTTTGGGGCGATGAAAGAAATAACTGAT  
ATGAATCCACTGATTTCTGCCGCTTCCGTTATTGCTGCTGGGTTAGCTGTCCGGGCTTGCT  
TCTATTGGACCTGGAGTTGGTCAAGGTACTGCTGCGGGCCAAGCTGTAGAAGGTATTG  
CAAGACAGCCCCGAGGCGGAGGGAAAAATACGAGGTACTTTATTGCTTAGTCTGGCTTT  
TATGGAAGCGTTAACAATTTATGGATTGGTTGTAGCCTTAGCGCTTTTATTTGCGAATCC  
CTTTGTGATGAATGTTTTATCATGTTCCACCAACACACTAAAAGGGTTATACGATATAC  
GGGTGTGGAAGTAGGCCAACATTTCTATTGGCAAATAGGAGGTTTTCAAGTCCATGGC  
CAAGTCCTTATTACTTCTTGGGTTGTAATTGCTATCTTATTAGGTTCCGCCAGTATAGCTG  
TTCGGAATCCACAAACCATTCCGAATGACAGTCAGAATTTCTTCGAATATGTCCTTGAA  
TTCATTCGAGACGTTAGCAAACTCAGATTGGAGAAGAATATGGTCCATGGGTTCCTTTT  
TATTGGA ACTATGTTCC TATTTATTTTTGTTTCGAATTGGTCAGGGGCTCTTTTACCATGG  
AAAATCATAGAGTTACCTCATGGGGAATTAGCCGCACCCACGAATGATATAAATACTAC  
CGTTGCTTTAGCTTTACTCACGT CAGTAGCATATTTCTATGCAGGTCTTACCAAAAAAG  
GATTAAGTTATTT CAGTAAATACATTCAACCAACTCCAATCCTTTTACCCATTAACATCTT  
AGAAGATTT CACAAAACCTTTATCACTTAGTTTTCGACTTTTTCGGAAATATATTAGCCGA  
TGAATTAGTAGTTGTTGTTCTTGTTTCTTTAGTACCTTTAGTGGTTCCTATACCTGTTATG  
TTCCTTGGATTATTTACAAGTGGTATTCAAGCTCTTATTTTTTGCAACTTTAGCCGCGGCT  
TATATAGGCGAATCCATGGAGGGTCATCATATGATATTTCCACCTTAGAACATATATTA  
CTCATATATCCTTTTCGATCGTTTCAATAGTAATTA CTATTTTTTTTGATAAGCTTATCGGTC  
--GAAATCGTAGGACTATATGATTCGTCAGAAAAAGGCATGATAGCTACTTTTTTTCTGTA  
TAACAGGATTATTAGTCACTCGTTGGATTATTTCGGGACATTTCCCGTTAAGTGATTTATA  
TGAATCATTAATTTTTCTTTCATGGAGTTTCTCCGTTATTCATATGGTTCCGTATTTTAAA  
AAACATAAAAATTATTTAAGCGCAATAACCGCGCCAAGTACTATTTTTTACCCAAGGCTT  
TGCTACTTCGGGCTTTTTAACTGAAATGCATCAATACCAATAGTAGTACCTGCTCTCCA  
ATCCCAATGGTTAATGATGCATGTAAGTATGATGATATTGGGCTACGCAGCTCTTTTATGT  
GGATCATTATTATCAGTAGCTCTCTTAGTCATTACATTGCGAAAAGCCATAAGGATTTTT  
AGTAAAAAAAACGAGATCCAATACATGAATGAAAGAAGCAATGTTTTACTA-----TCTTT  
TTGTTCTTCTCGAAATTATTACAGGGCTCAACTGATTCAACAATTAGATCAGTGGAGTTA  
TCGTATTATTAGTCTAGGGTTTATCTTTTTAACCATAGGTATTCTTTCCGGGAGCAGTATGG  
GCTAATGAGGCATGGGGGTCATATTGGAATTGGGACCCAAAGGAAACTTGGGCATTTAT  
TACTTGGACCCTATTTGCGATTTATTTACATACTCGAACAAATAAAAATTGGGAAAGTTT  
AAATTGCGCAATGTGGCTTCTATAGGCTTTCTTATAATTTGGATATGCTATTTGGGGGTC  
AATTTATTAGGAATAGGATTACATAGTTATGGTTCATTTAATTTCCATATGGTAAAAAAGA  
AAGCATTTCTTCTCTTCTATATCTTGCATCTATAGTATTTTTGCCCCTGGTGGATCTCTCT  
CTCATTTAATAAAAAGTCTTGAATTTTGGATTACTAATTGGTGGAACTAGGCAATCCGA  
AACTTTTTTGGACTGATTTCAAGAAAAGAGTATTCTAGAAAAATTCATAGAATTGGAAG  
AACTCTTACTCTTGGACGAAATGATAAAAAGAATACCCGGAAACACATCTACAAACACT  
TCGTATAGGAATCCACAAAGAAACGATCCAATTGATCAAGATGCACAATGAGGATCATA  
TCCATATGATTTTGC ACTTATCGACAAATATAACCTCTTTTCATTATTTTAAAGTGGTTATTCT  
ATTTTGGGTAATGAAGAACTTGCTATTCTTAACTCTTGGGTTCAAGAATTCCTATATAAC



TTAAGTGACACAATAAAAAGCTTTTTCTATTCTTTTATTAAGTATTATGTATCGGATTCC  
ATTCGCCCCATGGTTGGGAACATAATGATTGGCTATGTCTACAAAGATTTTGGATTTGTTT  
ACAACGATCAAATTATATCGGGTCTTGTCTACTTTTCCAGTCATTCTGGATAACAATTT  
TAAATATTGGATCTTCCGTTATTTAAATCGTATATCTCCATCACTTGTAGTGATTATCATT  
CAATGAATGACATGCCTATTGGTGTTCAAAAGTACCCTTTCGAAGTCCTGGAGAGGA  
AGATGCCTCTTGGGTTGACGTATAACAACCGACTTTATCGAGAAAAGATTACTTTTTTTAG  
GCCAAGAGGTTGATAGCGAGATTTTGAATCAACTTATTGGTCTTATGGTATATCTCAGTA  
TAGAGAATGATAACAAGGATCTGTATTTGTTTATAAACTCTCCTGGCGGATGGGTAATCC  
CCGGAGTAGCTATTTATGATACTATGCAATTTGTGCAACCCGATGTGCATACAATATGCA  
TGGGATTAGCCGCTTCAATGGGATCTTTTATCCTGGTTCGGCGGAGAGATTACCAAACGT  
CTAGCATTCCCTCACGCTAGGGTAATGATACATCAACCTGCGAGTTCTTTTTATGAGGCA  
CAAACGGGAGAATTTATCCTGGAAGCAGAAGAACTACTGAAACTGCGCGAAACCATC  
ACAAGAGTTTATGTACAAAGAACGGGCAAACCCCTATGGGTTGTATCCGAAGATATGG  
AAAGGGATGTTTTTATGTGACAAACAGAAGCCCAAGCTCATGGAATTGTTGATCTTGTA  
G C G A T T G A  
A????????????????????????????????????????????????????????????  
????????????????????????????????????????????????????????????  
????????????????????????????????????????????????????????????  
????????????????????????????????????????????????????????????  
ATGGAGGAATTTCAAGGATATTT  
AGAAGTATGATAGATCTAGACAACATGACTTCCTATAACCCACTTCTTTTTCGAGAGTATAT  
TTATGCACTTACTCATGATCATGGTTTAGCAGGTTATGACAATAAATCTAGTTCAATAATT  
GTGAAACGTTTAAATTACTCGAATGTATCAACAGAATCCTTTGATTTTTTCAGCTAATGAT  
TCTATCCAAAATCCATTTTTTGGGAAGAATTTTTATTCTCAAATTATCTCCGAGGGATT  
GCAGTCATTGTGGAAATCCATTTCCCTAAGATTAGTATCTTCTTAATAGCAAAATCT  
CATAAATTACGATCAATTCATTCCATATTTCTTTTTAGAGGACAAATTTTCACATTTAG  
ATTATGTGTCGGACGTACTAATACCATATCACATCCATCTAGAAATCTTGGTTCAAACCC  
TTCGCTACTGGGTGAACGATGCCCTTCTTTGCATTTATTACGTTTCTTTCTCCACGAGT  
ATTGGAAT-----AGTCTTATACTAAACATATTACCATTTTTTCAAACCAAGATTATTCTT  
GTTCCCTATATAATTCTCATATATGTGAATACGAATACATCTTCTTTTTCTCCTTAATCAAT  
CTTCTCATTACGGTCAACATCTTCTGGAATCTTTTTTGAGCGAATATATTTCTATGTA  
AATAGAACATTTTGTCAAAGTCTTCTTTGATTTTCAGATCCTATGGTTCTTCAAAGATCC  
TTTCATGCATTATGTTTCGATATCAAGGAAAATCAATTCTGGCTTCAAAGATACGCCTCT  
TCTGATGAAGAAATGGAAATATTACCTTGTTAATTTATGGCAATATCATTTTTACGCCTG  
GTTGAAACCAGGAAGGATCGATATAACCAATTATGCAAGTATTCTCTTGACTTTTTGG  
GCTATCGTTCAAGCGTGCGACTAAATCTTTCAGTGGTACGAAGTCAAATGCTAGAAAAT  
TTATTTCTAATAAATAAT-----GCTATGAAGAAGTTTGAGACAATAGTTCCAATTATTCCTC  
TGATTGGATCATTGTCTAAAGCGAATTTTTGTAACACATTAGGGCATCCCATAGTAAAC  
CGACCCGGGCTGATTCATCAGATTCTGATATTATCGACCGTTTTTTGCGTATATGCAGAA  
ATCTTTCTCATTATCACAGCGGATCCTCAAAAAAAAAAAGAGTTTATATCGAGGAAAATATA  
TACTTCGACTTTCTTGTGTTAAAACCTTTGGCTCGTAAACACAAAAAGACTGTACGCACT  
TTTTTAAAAAGATTAGGTTTCGGAATTTTTGGAAGAATTCCTTACGGAGGAAGAAGTTGT  
TCTTTCTTTGATCTTCCCAAGACGGATTTGGTATTTGGATATTACTTCTATCAATGATCTA  
GTCAATTATGAAATGATAATTGATACAACA---GAAGTACAA---GATATAAATTCTTTTTCT  
AGATTGGAATCT--TAAAAGAAGTCTATGGAATCATAGGGATGTTTTTACCTATTTTGA  
CTCTTGATTGGGAATCACAATAGGTGTACTCGTAATTGTGTGGTTAGAAAGAGAAATA

TCCGCAGGAATACAACAACGTATTGGTCCCGAATACGCCGGTCCCTTTGGGAATTCTTCA  
AGCTTTAGCAGATGGGACAAAACCTATTTTCAAAGAGAATCTTTTTCCATCTCGAGGAG  
ATACTCGTTTATTTCAGTATAGGACCATCCATAGCAGTTATATCGATTTTACTAAGTTATTC  
AGTAATTCCTTTTAGTTATCACCTTGTTTTATCTGATCTCAATATCGGTGTTTTTTTATGGA  
TTGCCATTTCCAGTATTGCTCCCATTGGACTTCTTATGTCAGGATATGGATCAAATAATAA  
ATATTCCTTTTTTAGGTGGTCTACGAGCCGCTGCTCAATCGATTAGTTATGAAATACCATTA  
ACTCTTTGTGTGTTATCAATATCTCTATTATCTAACAGTTCAAGTACAGTTGATATAGTTG  
AGGCCCAGTCCAAATATGGTTTTTTGGGGATGGAATTTGTGGCGTCAACCTATAGGGTTT  
TTCGTTTTTCTAATTTCTTCCCTAGCAGAATGTGAGAGATTACCTTTCGATTTACCAGAA  
GCAGAAGAAGAATTAGTAGCAGGTTATCAAACCGAATATTCGGGTATCAAATTTGGGTT  
ATTTTACGTTGCTTCCCTATCTAAATCTATTAGTTTCTTCGTTATTTGTAACAGTTCTTTACT  
TAGGGGGTTGGAATATCTCTATTCCTTACATATTCGTTCCCGAGCTATTT-----GAAAAAG  
TAGGTAGAGTCTTTGGAACGACAATTGGTATTTTTATTACATTAGCTAAAACCTATTTGT  
TCTTGTTTTATTTCTATCACACAAGATGGACTTTACCTAGACTAAGAATAGACCAATTAT  
TAAATCTTGGATGGAAATTTCTTTTACCCATTTCTCTCGGTAATCTATTATTAACAACCTC  
TTTCCAACCTCCTTTCATTGATGATCTGGCATGTACAGAATGAAAACCTCATTCTCGATTC  
TACGAGAATTTTTATGAAAGCCTTTCATTTGCTTCTCTTCGATGGAAGTTTTATTTTCCC  
AGAATGTATCCTAATTTTTGGCCTAATTCTTCTTCTGATGATCGATTCAACCTCTGATCAA  
AAAGATATACCTTGGTTCTATTTTCATCTCTTCAACAAGTTTAGTAATGAGCATAACGGCC  
CTATTGTTCCGATGGAGAGAAGAACCTATGATTATCTTTTCAGGAAATTTCCAAACGAA  
CAATTTCAACGAAATCTTTCAATTTCTTATTTTACTATGTTCAACTCTATGTATTCTCTAT  
CCGTAGAGTACATTGAATGTACAGAAATGGCTATCACAGAGTTTCTCTTATTTGTATTAA  
CAGCTACTCTAGGAGGAATGTTTTTATGCGGTGCTAACGATTTAATAACTATCTTTGTAG  
CTCCAGAATGTTTCAGTTTATGCTCCTACCTATTATCTGGATATACCAAGAAGGATGTAC  
GGTCTAATGAGGCTACTATGAAATATTTACTCATGGGTGGGGCAAGCTCTTCTATTCTGG  
TTCATGGTTTCTCTTGGCTATATGGTTCATCCGGGGGAGAGATCGAGCTTCAAGAAATA  
GTGAATGGTCTTATCAATACACAAATGTATAACTCCCCAGGAATTTTAATTGCGCTTCTA  
TTCATCACTGTAGGAATTGGGTTCAAGCTTTCCCTAGCCCCTTCTCATCAATGGACTCCT  
GACGTATACGAAGGATCTCCCACTCCAGTCGTTGCTTTTCTTTCTGTTACTTCGAAAGT  
AGCTGCTTCAGCTTCAGCCACTCGAATTTTCGATATTCCTTTTTTATTCTCATCAAACGA  
ATGGCATCTTCTTCTGGAAATCCTAGCTATTCTTAGCATGATATTGGGGAATCTCATTGCT  
ATTACTCAAACAAGCATGAAACGTATGCTTGCATATTCGTCCATAGGTCAAATCGGATAT  
GTAATTATTGGAATAATTGTTGGAGACTCAAATGGTGGATATGCGAGCATGATAACTTAT  
ATGCTGTTCTATATCTCCATGAATCTAGGAACTTTTGCTTGCATTGTATTATTTGGTCTAC  
GTACCGGAACTGATAACATTTCGAGATTATGCAGGATTATACACGAAAGATCCTTTTTTTG  
GCTCTCTCTTTAGCCCTATGTCTCTTATCCCTAGGAGGTCTTCCTCCACTAGCAGGTTTT  
TTCGAAAACCTCCATTTATTCTGGTGTGGATGGCAGGCAGGCCTATACTTCTTGGTTTC  
AATAGGACTCCTTACGAGCGTTATTTCTATCTACTATTATCTAAAAATAATCAAGTTATTA  
ATGACTGGACGAAACCAAGAAATAACACCTCACGTGCGAAATTATAGAAGATCCCCTT  
TAAGATCAAACAATTCCATCGAATTGAGTATGATTGTATGTGTGATAGCATCTACTATAC  
CAGGAATATCAATGAACCCGATTATTGCAATTGCTCAGGATACCCTTTTTATGTTTCTTC  
TTTATGAATATGATATTTTCTGGGCATTTCTAATAATATCAAGTGTTATTCCTATTTTGGCA  
TTTCTAATTTCCGGAATTTTAGCCCCGATTAGCAAAGGGCCAGAGAACTTTCGAGTTA  
TGAATCAGGTATAGAACCAATGGGCGATGCTTGGTTACAATTCGAATCCGTTATTATAT

GTTTGCTCTAGTTTTTGTGGTTTTTGATGTTGAAACGGTTTTTCTTTATCCATGGGCAAT  
GAGTTTCGATGTATTGGGGGTATCCGTATTTATAGAAGCTTTAATTTTCGTGCTTATCCTA  
ATTGTTGGTTTAGTTTATGCATGGCGAAAAGGAGCATTGGAATGGTCTACGAATTATTTT  
CCTGGTTAACAATAATTGTACTTTTGCCGATATTCGCAGGTTCTTTAATTTTCTTTCTAC  
CTCATAGAGGAAATAAGGTAATGCGGTGGTATACTATATGCATATGTACTTTAGAGCTCC  
TTTTAACTACCTATACATTTCTGTTATCATTTCCAATTGAACGATCCATTAACCCAATTAAC  
AGAGGATTATAAATGGATTAATTTTTTTGATTTTTACTGGAGATTGGGAATAGATGGACT  
TTCTATAGGACCTATTTTACTGACGGGATTTATCACCCTTTAGCTACTTTAGCGGGCTCG  
GCCAGTTACTCGAGATTCCCGATTATTCATTTCTGATGTTAGCAATGTACAGCGGTCA  
AATAGGATCATTTTCTTCTCGAGACCTTTTACTTTTTTTCATCATGTGGGAGTTAGAATT  
AATCCCGTTTATCTACTTCTATCGATGTGGGGGGGAAAGAAACGTCTGTATTCCGCTAC  
AAAATTTATTTGTACACTGCGGGAGGTTCCATTTTTCTATTAATAGGGGTTCTGGGTAT  
TGGTTTATATGGTTCCAACGAACCAACATTAATTTGGAAACATTAGCTAATCAATCGTA  
TCCGGTGGCGCTGGAAATAATATTCTATATTGGATTCTTATTGCTTTTTGCTGTTAAATTA  
CCGATTATAACCCTTACATACATGGTTACCAGACACCCATGGAGAGGCACATTATAGTACT  
TGATGCTTTTAGCCGGAATTTTATTAATAAATGGGAGCATATGGGTTGGTTCGGATCAAT  
ATGGAATTATTACCTCATGCTCATTCTATATTTTCTCCCTGGTTGATTATAGTAGGCGCAA  
TCCAAATAATCTATGCAGCTTTAACATCTCCTGGTCAACGTAATTTAAAAAAAAGAATA  
GCCTATTCCTCTGTATCTCATATGGGTTTTATAATTATTGGAATTGGCTCGATAACTGATA  
CGGGACTCAATGGATCCATTTTACAAATAATCTCTCATGGATTTATCGGGCGCTGCTCTTT  
TTTTCTTGGCAGGAACGAGTTATGATAGAATACGTCTTGTTTATCTCGACGAAATGGGT  
GGAATGGCTATCCACCTTCCAAAATATTACGATGTTTAGTATCTTATCAATGGCTTCC  
CTTGCAATTACCGGGTATGAGTGGTTTTCTTGCAGAATTGATAGTATTTTTTGGAAATAATT  
ACCAGCCAACAATATCTTTAATGCCAAAATACTAATTACTTTTTGTAATGGCAATTGGA  
ATGATATTAACTCCTATTTATTTATTATCTATGTTACGCCAAATGTTCTATGGATACAAGTT  
ATTTAATGTTCCAAACTCTTATTTTTTTGATTTTTGGGCCGCGAGAGTTATTTGTTTCCATC  
TCTATTCTTCTACCAATAATAGCTATTGGTATTTATCCAGATTTCTGTTCTTTCACTATCTGT  
TGACAAAGTCGAAGCTATTATATCTAATTATTTTTTATCAAATGATACTCGAACATGTACTT  
GTTTTGAGTGCCTATTTATTTTCTATTGGTATCTATGGATTGATCACGAGTCGAAATATGG  
TTAGGGCCCTTATGTGTCTTGAACCTATCCTCAATGCGGTTAATATAAATTCGTAACATT  
TTCAGATTTTTTTGATAGTCGACAATTAAGGAGATTTTTCTCCATTTTTGTTATAGCT  
ATTGCAGCCGCCGAAGCAGCTATTGGGTTAGCTATTGTTTCATCGATTTATCGTAACAGA  
AAATCAACTCGTATCAATCAATCGAATTTGTTGAATAAAATGGAATATACATATCAATATT  
CATGGATTATCCCCTTCATTCCACTTCCAGTTCCATGTTAATAGGAGTGGGACTTCTAC  
TTTTTCCAACGGCAACAAAAATCTTCGCCGTATGTGGGCTTTTTCTTAGTATTTTTCTTGT  
TAAGTATAGTTATGATACTTTCCGTCTATCTATCTATTCAGCAAATAAATAGAAGTTTTAT  
CTATCAATATGTATGGTCTTGGACCATAATAATGATTTTTCTTTAGAGTTCCGGTCACTTA  
ATAGATCCACTTACTTCTATTATGTTAATATTAATTACTACTGTTGGAATTTTGGTTCTTTT  
TTATAGTGACAATTATATGTCTCATGATCAAGGATATTGAGATTTTTTGGCTTATATGAGT  
TTTTTCAATACTTCCATGTTGGGATTAGTTACTAGTTTCGAATTTGATACAAATTTATATTT  
TTTGGGAATTAGTTGGAATGTGTTCTTATCTATTAATAGGTTTTTGGTTTCACACGACCTA  
GTGCGGCGACTGCTTGTCAAAAAGCGTTTGTAAACAATCGTGTAGGCGATTTTGGTTTA  
TTATTAGGAATTTTAGGTCTTTATTGGATAACCGGTAGTTTTTGAACCTCGGGATTTGTTC  
CAAATATTGAATAAC--GAGGTTCCTTTTTATTTCTTACTTTGTGTGCCTTTCTTTTATTT

GCAGGTGCAGTTGCGAAATCGGCACAATTCCCCCTTCATGTATGGTTACCTGATGCCAT  
GGAAGGCCCTACTCCCATTTCGGCTCTTATACATGCCGCTACGATGGTAGCAGCGGGCA  
TTTTCTTGTAGCTCGACTTCTTCCTCTTTTTATAATCATACCTTACATAATGAATTCATA  
TCTTTAATAGGTATAATAACAGTATTATTAGGAGCTACTTTAGCTCTTGCTCAAAAAGATA  
TTAAAAGAGGTTTAGCTTATTCTACAATGTCTCAATTGGGTTATATGATGTTAGCTCTAG  
GTATGGGGTCTTATCGAGCCGCTTCTTTTCATTTGATTACTCATGCTTATTCGAAAGCGT  
TGTTGTTTTTAGGATCTGGATCAATTATTCATTCAATGGAAGCTATTGTTGGATATTCTCC  
AGATAAAAGTCAGAATATGGTTCTTATGGGAGGTTTAAAAAAGCATGTACCAATTACAA  
AAACTGCTTTTTTAGTAGGTACACTTTCTCTTTGTGGTATTCCCCCCTTGCTTGTTTT  
GGTCCAAAGATGAAATTCCTAATGATAGTTGGTTGTATTACCTATTTTCGCAATAATAG  
CTTGTTCCACAGCAGGATTAACCGCATTTTATATGTTTCGGATCTATTTACTTACTTTTGA  
GGGACATTTCAATGTTCATTTTCAAATTACAGTGGTCAAAAAAGTAGTTCCTACTATT  
CAATATCTCTATGGGGAAAAGAAGTACCAAAAACGATTAATAAATAAATTATTAAGTTTA  
TTGACAATGAATTTTTTTTTCAGTCACTAAAAAT--ACTTTCTCTTATCCTCATGAATCGGA  
CAATACCATGTTATTTTCTATGGTTATATTAGTGCTATTTACTTTCTTTGTTGGAGTCGTAG  
GAGCT--TTTCATTTGGATATATTATCGAAATTGTTAAATCCGTCTATAAACCTTTTACATC  
CGAACTCAAAT--TCTGTGGATTGG--GAATTTGTGACAAATGCAAGTTTTTCTGTTAGT  
ATAGCTTTTTTCGGAATATTTATAGCATCTTTTTTATATAAGCCTATTTATTCCTCTTTACA  
AAATTTGAACTTACTAAATTCGTTTTTTATTTTAGGGGACAGAATAAGAAATGTGATATA  
TGATTGGTCATATAATCGTGGTTACATAGATACTTTTTATACAATATCCTTAACTCAGGGT  
ATAAGAGGACTAGCTGAACTAATTCATTTTTTGGATAGACGAGTAATTGATGGAATTAC  
GAATGGTTTCGGTCTTACAAGTTTCTTTTTTCGGAGAAGGTATCAAATATGTAGGGGTCG  
GT--CGCATCTCTTCTTATCTCTTATTGTATTTATTTTTGTATTAATTTTTTATTGATTTAT  
TCCATGGATTTGCCTGGACCAATACATGATTTTCTTTTAGTTTTTCTGGGATCAGGTCTTA  
TATTAGGAAGTCTAGGAGTGGTATTACTTACCAATCCAATTTATTCTGCCTTTTCCTTGG  
GATTTGGTTCTTGTTTGTATATCCTTATTTTATATCTATCAAACCTCCCATTTTGTAGCGGCT  
GCGCAGCTCCTTATTTATGTAGGAGCTATAAACGTTTTTAATTCTATTTGCTGTGATGTTCA  
TGAATGGTTCAGAATATTACAAAGATTTGAATCTTTGGACTGTTGGAGATGGGATTACT  
TCGTTGGTTTGTACAAGTATTTGGTTTCACTAATGACTACTATTTTAGATACGTCTTGGT  
ACGGGATTATCTGGACGACAAAGTCAAACCAGATTATCGAGCAAGATTTGATAGGTAAT  
AGTCAACAAATCGGAATTCATTTATCAACAGATTTTTTTCTTCCATTTGAACTCATTTCC  
ATAATCTTTTAGTTGCTTTGATAGGTGCAATTGCTGTTGCTCGTCAAATGAATGTAACA  
ACTACAAGAAAAGACCTCATGATAGTCAATATGGGACCTCACCACCCATCAATGCATGG  
TGTTCTTCGGCTCATCCTTACTCTAGATGGTGAAGATGTTATTGATTGTGAACCAATATT  
GGTTATTTACACAGAGGAATGGAAAAAATTGCGGAAAATCGAACAGTTATAACAATATC  
TACCTTATGTAACACGTTGGGATTATTTAGCTACTATGTTTACAGAAGCAATAACCGTAA  
ATGGACCAGAACAGTTGGGAAATATTCAAGTACCTAAAAGAGCCAGTTATATCAGAGT  
AATTATGTTAGAGTTGAGTCGTATAGCTTCTCATCTGTTATGGCTTGGCCCCCTTTATGGC  
AGATATTGGTGCACAGACTCCTTTTTTCTATATTTTCAGAGAAAGAGAATTAGTATATGA  
TCTATTCGAAGCTGCCACCGGTATGAGAATGATGCATAATTATTTTCGTATCGGAGGAGT  
AGCGGCCGATCTACCTTATGGATGGATAGATAAATGTTTGGATTTCTGTGATTATTTTTTA  
ACAGCGGTTTCGGAATATCAAAAACCTTATTACGCGAAATCCTATTTTTTTAGAACGAGT  
TGAGGGAGTAGGCATATTGGTCCAGAAGAAGCAATAAATTGGGGTTTATCGGGACCA  
ATGCTACGAGCTTCCGGAATCCAATGGGATCTTCGTAAAGTTGATCATTATGAATGTTAC

GACGAATTGGATTGGGAAATCCATTGGCAAAAAGAAGGAGATTCATTAGCTCGCTATTT  
AGTCCGAATCGGTGAAATGACGGAATCTATAAAAATTATTCAACAAGCTCTGGAAGGA  
ATTCCAGGGGGGCCCTATGAGAATTTAGAAACCCGGTGCTTTGCTAGAGAAAGGGATC  
CGGAATGGAATGATTTTGACTATCGATTCATTAGTAAAAAACCTTCTCCTACTTTTGAAT  
TGCCGAAGCAAGAACTTTATGTAAGAGTTGAAGCCCCAAAGGGAGAATTGGGAATTTT  
TTAATAGGAGATCAGAGTGGTTTTTCCTTGGAGGTGGAAAATTCGTCCACCTGGTTTTTA  
TCAATTTGCAAATTCCTCCTCAGTTAGTTAAAAGAATGAAATTGGCCGATATTATGACAA  
TACTAGGTAGCATAGATATCATTATGGGAGAAGTTGATCGTATGTTCCCTATGGTAACTG  
GGTTCATGAATTACGGCCAACAAACAGTACGAGCTGCAAGGTACATTGGTCAAGGGTT  
CATGATTACCTTATCCCACGCCAATCGTTTACCTGTAACCTATTCAATATCCTTATGAAAA  
TTAATTACATCCGAGCGTTTTCCGCGGCCGAATCCATTTTGAATTTGATAAATGTATTGCT  
TGTGAAGTATGTGTTTCGTGTATGTCCTATAGATCTACCTGTTGTTGATTGGAAATTGGAA  
ACTGGTATACGAAAGAAACGCTTGCTTAATTACAGTATTGATTTCCGGAATTTGTATTTTT  
TGTGGTAACTGTGTTGAGTATTGTCCAACAAATTGTTTATCAATGACTGAGGAATATGA  
ACTTTCTACTTATGATCGTCACGAATTGAATTATAATCAAATCGCTTTGGGTCGTTTACC  
AATGTCAGTAATTAACGATTATACAATTCGAACAATTTTCGAATTCG-----ATAATAAAA-  
-----ATGCAGGGTCCTTTGTCTGCTTGGCTAGTCAAGCATGGACTAGT  
TCATAGATCTTTGGGCTTCGATTATCAAGGAATAGAGACTTTACAAATAAAGCCTGAGG  
ATTGGCATTCCATTGCTGTCAATTTATATGTATATGGTTACAATTATCTACGTTCCCAATGT  
GCTTATGATGTAGCACCCGGTGGACTGTTAGCTAGTGTGTATCATCTTACGAGAATAGA  
GTATGGTGTAGATCAACCGGAAGAGGTATGCATAAAAGTATTTGCCCCGAGGAGTAATC  
CTCGAATTCCGTCTGTTTTCTGGATTTGGAAAAGTGCGGATTTTCAAGAACGGGAATCT  
TATGATATGTTGGGAATCTGTTATGATACTCATCCACGACTTAAACGTATCTTAATGCCTG  
AAAGTTGGATAGGATGGCCCTTACGTAAGGATTATATTGCCCTAATTTTTATGAAATAC  
AAGATGCTCAT-----  
-----ATGAATTCCATAGAATTT  
CCCTTACTTGCTCGAACAACCCAAAATTCAGTTATTTCAACTACATTAATGATCTTTCA  
AATTGGTCAAGGCTCTCTAGTTTATGGCCGCTTCTTTATGGTACCAGTTGTTGCTTCATT  
GAATTTGCTTCATTAATAGGCTCACGATTCGACTTTGATCGTTATGGACTGGTACCAAGA  
TCGAGTCCTAGACAGGCAGACCTCATTTTAACAGCCGGCACAGTAACAATGAAAATGG  
CTCCTTCTTTAGTGAGATTATATGAACAAATGCCTGAACCAAAATATGTTATTGCTATGG  
GAGCATGTACAATTACAGGGGGGATGTTTACGTACCGATTTCGTATAGTACTGTTTCGGGGA  
GTCGATAAGCTAATTCCTGTAGATGTCTATTTGCCAGGCTGTCCACCTAAACCAGAGGC  
AGTTATAGATGCTATAACAAAACCTTCGTAAGAAAATAGCTAGAGAAATCTATGAAGAGC  
GAATTAGGTCTCAAGAAGAAAATCGGTGTTTTACTACCAATCACAAGTTTCATGTTGGA  
CGCAGTATTCATACTGGAAATTATGATCAAGGATTACTCTATCAATCACCATCTACTTCA  
GAGATACCTCCTGAAACATTTTTTCAAATACAAAAGTTTACGTATCTTCCACGAATTAGT  
GAATATGCAAATAAAAACACCTTTTTCTTGGATAAAGAAAAGAGATTATTCGATGTATTT  
CCGTATCGCTGATGATATATATCATAGCTCGGACATCCATTTCAAATGCATATCCCATTTT  
TGCACAGCAGGGTTATGAAAATCCACGAGAAGCGACCCGGGCGTATTGTATGTCCAAT  
TGCCATTTAGCTAATAAGCCCGTGGATATTGAGGTTCCGCAAGCGGTACTTCTGATACT  
GTATTTGAAGCAGTTGTTTCAATTCCTTATGATATGCAAGTTAAACAAGTTCTTGCTAAT  
GGTAAAAGGGGAGGTTTGAATGTGGGGGCTGTTCTTATTTTACCTGAGGGGTTTGAATT  
AGCGCTCCCGATCGTATTTCCGCCGAGATGAAAGAAAAGATAGGCAATCTGTCTTTTC

AGAGCTATCGCCCCAATAAAAAAAAAATATTCTTGTGATAGGTCCTGTTTCTGGTCAGAAA  
TATAGTGAAGTCACCTTTCTATTCTTTCCCCGGACCCCGCTACTAATAAAAAATGTTTAC  
TTCTTAAAATATCCCATATATGTAGGCGGGAACAGAGGAAGGGGTGAGATTTATCCCGA  
TGGGAACAAGAGTAACAATACAGTTTATAATGCTACAGCGGCTGGTGTAGTAAGTAAA  
ATCATAACGAAAAGAAAAAGGGGGGTACGAAATAACCATATCGGATGCGTCAGATGAAC  
GTCAAGTGGTTGATATTATTCCACCAGGGCCAGAACTTCTTGTTCGGAAGGCGAATCT  
ATCAAACCTTGATCAGCCATTAACGAGTAATCCTAATGTGGGTGGATTTGGTCAAGGAGA  
TGCGGAAATAGTACTTCAAGATCCATTCCGTGTCCAAGGCCTTTTGTCTTCTTGGCAT  
CTGTTATTTTGGCACAAATATTTTGGTTCTTAAGAAGAAACAGTTTGAGAAGGTTCAA  
TTGTCCGAAATGAATTTTCATGAGTAAAGTCTATGATTGGTTTGAAGAACGTCTCGAGAT  
TCAGGCGATTGCAGATGATATAACTAGTAAATATGTTCCCTCCTCATGTCAACATATTTTAT  
TGTCTAGGAGGAATTACGCTTACTTGTTTTTTAGTACAAGTAGCTACGGGGTTTGTATG  
ACTTTTTACTACCGTCCAACCTGTTACTGAGGCTTTTGGCTTCTGTTCAATACATAATGACT  
GAAGCTAACTTTGGTTGGTTAATTCGATCAGTTCATCGATGGTCGGCAAGTATGATGGT  
CCTAATGATGATCCTGCACGTATTTTCGTGTGTATCTCACTGGTGGTTTTAAAAACCTCG  
CGAATTAACCTTGGGTTACAGGTGTGGTTCTGGCTGTATTGACCGCATCCTTTGGTGTA  
CTGGTTATTCCTTACCTTGGGACCAAATTGGTTATTGGGCAGTCAAATTGTAACAGGT  
GTACCGGAAGCTATTCCTGTAATAGGATCCCCTTTAGTAGAGTTATTACGCGGAAGTGCT  
AGTGTGGGACAATCCACTTTGACTCGTTTTTATAAGTTTACACACTTTTGTATTACCTCTT  
CTTACTGCCGTGTTTATGTTAATGCATTTTCTAATGATACGTAAGCAAGGTATTTCCGGTC  
CTTTAATGGGAGTAACAAAAAACCTGACTTAAATGATCCTGTATTAAGAGCTAAATTG  
GCTAAAGGGATGGGTCATAATTATTACGGAGAACCTGCATGGCCCAACGATCTTTTATAT  
ATTTTCCAGTAGTAATTTAGGTACTATTGCGTGTAACGTAGGCTTAGCGGTTCTAGAA  
CCATCAATGATTGGTGAACCCGCCGATCCATTTGCAACTCCTTTGGAAATATTACCCGA  
ATGGTATTTCTTTCCTGTATTTCAAATACTTCGTACAGTACCTAATAAGTTATTGGGTGTT  
CTTTAATGGTTTCAGTACCTGCGGGATTATTAACAGTACCTTTTTTTGGAGAATGTTAAT  
AAATTTCAAATCCATTTTCGTTCGTCAGTAGCGACAACCTGTCTTTTTTGATTGGTACCGT  
AGTGGCCCTTTGGTTGGGTATTGGAGCAACATTACCTATTGATAAATCCCTAACTTTAGG  
TCTTTTTATGATTGAAGTTTTTCTATTTGGAATTGTCTTAGGTCTAATTCCTATTACTTTAG  
CTGGATTATTTGTAACCTGCATATTTACAATACAGACGTGGTGTATCAGTTGGATCTTATGC  
TTACTATAACTAGTTATTTTCGGTTTTCTACTAGCAGCTTTAACTATAACCTCAGCTCTCTT  
TATTGGTCTGACCAAGATACGACTTATTATGGATATAGTAAGTCTTGCTTGGGCTGCTTT  
AATGGTAGTCTTTACATTTTCTTTTCACTCGTAGTATGGGGAAGAAGTGGACTCATGAT  
TATTCGTTCCCGGAACCAGAAGTCAAATTTTGGTAGATAGGGATCCCGTAAAAACTT  
CTTTCGAGGAATGGGCCAAACCGGGTCAATTTCTCAAGAACAATAGCTAAGGGCCCTGA  
TACTACCACTTGGATCTGGAACCTACATGCTGATGCTCACGATTTTCGATAGCCATACCAA  
TGATTTGGAGGAGATCTCTCGAAAAGTATTTAGTGCTCATTTTGGCCAACCTTTCCATTAT  
CTTCTTTTGGCTGAGTGGTATGTATTTCCATGGTGCTCGTTTTTCCAATTATGAAGCATG  
GCTAAGTGACCCTACTCACATTGGACCTAGTGCCAGGTGGTTTGGCCAATAGTGGGC  
CAAGAAATATTGAATGGCGATGTGGGCGGGGGTTTTCCGAGGAATACAAATAACCTCTG  
GTTTTTTTTCAGATTTGGCGAGCATCTGGAATAACTAGTGAATTACAACCTCTATTGTACCG  
CAATTGGTGCATTAGTCTTTGCAGCCTTAATGCTTTTTTGGCTGGTTGGTTCCATTATCACA  
AAGCTGCTCCAAAATTGGCCTGGTTCCAAGATGTAGAATCTATGTTGAATCACCATTA  
GCAGGGCTACTAGGACTTGGGTCTCTTTCTTGGGCGGGGCATCAAGTACATGTATCTTT

ACCAATTAACCAATTTCTAAACGCTGGAGTAGATCCTAAAGAGATCCCACCTTCCTCATG  
AATTTATCTTGAATCGGGATCTTTTGGCTCAACTTTATCCCAGTTTTGCCGAGGGAGCA  
ACCCCATTTTTTACCTTGAATTGGTCAAATATGCGGAATTTCTTACTTTTCGTGGCGGA  
TTAGATCCAGTAACTGGGGGTCTATGGCTGACTGATATTGCTCATCATCATTTAGCTATT  
GCAATTTCTTTCTTGATAGCAGGTCACATGTATAGGACCAACTGGGGCATTGGTCATGG  
CATAAAAGATATTTTAGAGGCTCATAAAGGTCCATTTACAGGCCAGGGCCATAAAGGCC  
TATACGAGATCCTAACACGTCATGGCATGCTCAATTATCTCTTAACCTAGCTATGTTAG  
GCTCTTTAACCATTGTTGTAGCTCACCATATGTATTCCATGCCCCCTTATCCATATCTAGC  
TACTGACTATGGTACACAACCTGTCATTTGTTACACATCACATGTGGATTGGCGGATTTCT  
CATAGTTGGTGCTGCCGCGCATGCAGCTATTTTTATGGTAAGAGATTATGATCCAACCTAC  
TCGATACAACGATCTATTAGATCGTGTCTTAGGCATCGTGATGCAATCATATCACATCT  
CAACTGGGTATGTATATTTCTAGGCTTTCACAGTTTTGGTTTGTATATTCATAATGATACC  
ATGAGCGCTTTAGGGCGACCCCAAGATATGTTTTCTGATACCGCTATCCAATTACAACCC  
GTCTTTGCTCAATGGATACAAAACACCCATGCTTTGGCGCCTGCTGCAACCGCCCCTGG  
TGCAACAGCAAGCACCAGTTTGACTTGGGGAGGTGGTGATTTAGTGGCAGTAGGTGG  
CAAGGTTGCTTTATTACCTATTCCATTAGGAACCGCAGATTTTTTGGTCCATCACATTCA  
TGCATTTACGATTCATGTAACAGTATTGATACTCCTGAAAGGTGTTCTATTTGCTCGTAG  
CTCTCGTTTGATACCGGATAAAGCAAATCTTGGTTTTCGTTTTCCCTTGTGATGGACCTG  
GAAGAGGGGGGACATGTCAAGTATCCGCTTGGGATCATGTCTTCTTAGGCCTATTCTGG  
ATGTACAATGCAATTTCCGGTAGTCATATTTTCAATTCAGTTGGAAAATGCAGTCAGATGTT  
TGGGGTAGTATAAGTGATCAAGGAGTGGTAACTCATATCACGGGAGGAAACTTTGCGC  
AGAGTTCCATCACTATTAATGGGTGGCTCCGCGATTTCTTATGGGCACAGGCATCCCAA  
GTAATTCAGTCTTATGGTTCTTCATTATCTGCATATGGCCTTTTTTTTCTAGGTGCTCATT  
TTGTATGGGCTTTTAGTTAATGTTTCTATTACAGCGGGCGTGGTTATTGGCAAGAACTTA  
TTGAATCCATCGTTTGGGCTCATAATAAATAAAAGTTGCTCCTGCTACTCAGCCTAGAG  
CCTTGAGCATTGTACAAGGACGTGCTGTAGGAGTAAACCATACCTTCTGGGTGGAATT  
GCCACAACATGGGCGTCTTCTTAGCAAGAATTATTGCAGTAGGAATGGCATTAAAGATT  
TCCAAGGTTTAGCCAAGGCTTAGCTCAGGACCCCACTACTCGTCGTATTTGGTTTTGGTA  
TTGCGACCGCGCATGACTTTGAGAGTCATGATGATATTACTGAGGAACGTCTTTATCAG  
AATATTTTTGCTTCTCACTTCGGGCAATTAGCAATAATTTTTCTATGGACTTCCGGAAAT  
CTGTTTCATGTAGCTTGGCAAGGAAATTTGAGGCATGGGTACAGGACCCCTTACATGT  
AAGACCTATTGCTCATGCAATTTGGGATCCTCATTTTGGTCAACCGGCCGTGGAAGCTT  
TFACTCGAGGGGGTGTCTTGGCCCAGTGAATATCGCTTATTCTGGTGTATTATCAGTGGT  
GGTATAAATGGTTTACGTACTGATGAAGATCTTTATACGGGAGCCCTTTTTCTATTATT  
TCTTTCTGCCATATCCTTAATAGCAGGTTGGTTACACCTACAACCGAAATGGAAACCGA  
GCGTTTTCGTGGTTCAAAAATGCCGAATCTCGTCTCAATCATCATTTGTCAGGACTATTC  
GGTGTAAGTTCTTTGGCTTGGACAGGGCATTAGTACATGTCGCTATTCCTGGATCCAG  
GGGGGAATACGTTTCGATGGAATAATTTTTTAGATGTATTACCGCATCCCGAAGGGTTAG  
GACCACTTTTTACAGGTCAGTGAATCTTTATGCCAAAACCCCGATTCAAATAGTCAT  
TTATTTGGTACCTCCAAGGATCAGGAACTGCCATTCTAACCCCTTCTAGGGGGGATTCCA  
TCCACAAACGCAAAGTTTATGGTTGACTGATATTGCTCATCATCATTTGGCTATTGCATT  
TATTTTTCTCGTTGCTGGTCATATGTATAGAACTAACTTCGGGATTGGGCACAGTATAAA  
AGATCTTTTAGAAGCACATATTCCTCCGGGGGGCGATTGGGGCGTGGACATAAAGGT  
CTTTATGACACAATCAATAATTCGATTCATTTTCAATTAGGCCTTGCTCTAGCCTCTTTAG

GTGTTACTTTCCTTGGTAGCTCAACACATGTA CTCTTTACCTGCTTATGCGTTCATAGC  
ACAAGACTTTACTACTCAAGCTGCGTTATATACTCATCACC AATACATCGCAGGATTCAT  
CATGACAGGGGCTTTTGTCTCATGGGGCTATATTTTTCATTAGAGATTACAATCCGGAACA  
GAATGAGGATAATGTATTGGCAAGAATGTTAGACCATAAAGAAGCTATCATATCCCATTT  
AAGTTGGGCCAGCCTCTTTCTGGGGTTCACACTTTGGGGCTTTATGTTTATAATGATG  
TCATGCTTGCTTTTGGTACTCCGGAGAAAACAAATCTTAATCGAACCTATAATTTGCCAAT  
GGATACAATCTGCTCATGGGAAAACCTCATATGGGTTTCGATGTGCTTTTATCTTCAACGA  
ATAGCCCAGCATTTAATGCAGGTCAAAGCATATGGTTGCCCGGCTGGTTAAATGCTATTA  
ATGAG-----AATAGTAATTCACTATTCTTAACAATTTGGTCCTGGAGACTTCTTGGTTCATC  
ATGCGATTGCTCTAGGTTTACATACAACTACATTGATCTTAGTAAAAGGTGCTTTAGATG  
CACGTGGTTCAAAGTTAATGCCAGATAAAAAGGATTTTCGGTTATAGTTTTCCTTGCGAT  
GGTCCGGGACGAGGCGGTACTTGTGATATTTCCGCTTGGGACGCATTTTATTTGGCAGT  
TTTCTGGATGTTAAATACCATTGGGTGGGTTACTTTTTATTGGCATTGGAAACACATCAC  
ATTATGGCAGGGTAACGTTTACAGTTTAAATGAATCTTCCACTTATTTGATGGGATGGTT  
AAGAGATTATCTATGGGTAAACTCTTCACACTTATCAATGGATATAACCCCTTTGGTAT  
GAATAGTTTATCAGTTTGGGCGTGGATGTTCTTATTTGGACATCTTGTTTGGGCTACTGG  
ATTTATGTTTTTAATTTCTTGGCGTGGATATTGGCAGGAATTGATTGAAACTTTAGCATG  
GGCTCATGAACGCACACCTTTAGCTAATTTGATTTCGATGGAGAGATAAACCAGTGGCTC  
TTCCATTGTACAAGCAAGATTGGTTGGATTAGCCCATTTTTCTGTAGGTTATATATTCAC  
GTATGCGGCTTTCTTGATTGCCTCCACGTCAGGCAAATTTGGTATGTCACATTCAGTAA  
AGATTTATGATACATGTATAGGATGTA CTCAATGTGTACGAGCCTGCCAACAGATGTAT  
TAGAAATGATACCGTGGGATGGATGTAAAGCTAAGCAAATTGCTTCTGCTCCAAGAAC  
AGAGGACTGTGTCGGTTGTAAGAGATGTGAATCTGCCTGTCCAACAGATTTTTTGAGC  
GTTTCGAGTTTATTTATGGCATGAAACA ACTCGAAGCATGGGTCTAGCGTATATGATAATT  
TTAACTTACCCTCTTTCTTTGTGCCTTTAGTGGGCCTAGTATTTCCGGCAATTGCAATG  
GCTTCTTTATCTCTTCATGTTCAAAAAACAAGATTTTTATGCGAGATCTAAAAACATAT  
CTTCCGTGGCACCGGTA CTAAAGTACTCTATGGTTTGGGGCTTTAGCAGGTCTTTTGATA  
GAGATCAATCGTTTATTTCCGGATGCGTTGACATTCCTTTTTTTTTCGTTTACTGACTGCA  
ATTTTAGAGAGACGCGAAAGCGAAAGCCTATGGGGTCGCTTCTGTA ACTGGATAACCA  
GCACCGAAAACCGTCTTTACATTGGATGGTTTGGTGTTTTGGATGATCCCTACCTTATTGA  
CCGCAACTTCTGTATTTATTATTGCCTTCA TTGCTGCTCCTCCAGTAGATATTGATGGTAT  
TCGTGAACCTGTTTCTGGATCTCTACTTTATGGAAACAATATTATCTCTGGTGCCATTATT  
CCTACTTCTGCAGCTATAGGTTTGCATTTTACCCAATATGGGAAGCGGCATCTGTTGAT  
GAATGGTTATACAACGGCGGTCCCTTATGAGCTAATTGTTCTACACTTCTTACTTGGTGTA  
GCTTGTACATGGGTTCGTGAGTGGGAACTTAGTTTCCGCCTGGGTATGCGCCCTTGGAT  
TGCTGTTGCATATTCAGCTCCTGTTGCAGCTGCTACTGCTGTTTTCTTGATCTACCCAAT  
TGGTCAAGGAAGTTTTTTCGGATGGTATGCCTCTAGGAATTTCTGGTACTTTCAACTTCAT  
GATTGTATTCAGGCTGAGCACAACATCCTTATGCACCCATTTACATGTTAGGCGTAG  
CTGGTGTATTCGGCGGCTCCCTATTCA GTGCTATGCATGGTTCCTTGGTAACCTCTAGTT  
TGATCAGGGAAACCACAGAAAATGAATCTGCTAATGAAGGTTACAGATTCGGTCAAGA  
GGAAGAAACGTATAATATCGTAGCTGCTCATGGTTATTTTGGCCGATTGATCTTCCAATA  
TGCTAGTTTCAACAATTCTCGTTCTTTACACTTCTTCTAGCTGCTTGGCCTGTAGTAGG  
TATCTGGTTCACTGCTTTAGGTATCAGCACTATGGCTTTCAACCTAAATGGTTTCAATTT  
CAACCAATCCGTAGTTGATAGTCAAGGTCGTGTAATTAATACCTGGGCTGATATTATTA



TCGTGCTAACCTTGGTATGGAAGTTATGCATGAACGTAATGCTCATAACTTCCCTCTAGA  
CCTAGCTGCTGTCTGAAGTTCCATCTACAAATGGAATGGGTTTGCCTTGGTATCGTGTTC  
ATACCGTCTGATTAAATGATCCCGGCCGTTTGGCTTCTGTCCATATAATGCATACAGCTTT  
GGTTGCTGGTTGGGCCGTTTCGATGGCTCTATATGAATTAGCAGTTTTTTGATCCCTCGGA  
TCCCGTTCTTGATCCAATGTGGAGACAAGGTATGTTTCGTTATAACCCTTCATGACTCGTTT  
AGGAATAACCAATTCATGGGGCGGCTGGAGTATTACA---GGAGGGACTATAACAAATCC  
GGGTATTTGGAGTTACGAAGGCGTGGCCGGTGCACATATTGTGTTTTCTGGCTTGTGCT  
TCTTGGCAGCTATCTGGCATTGGGTGTATTGGGATTTAGAAATATTTTTGTGATGAGCGTA  
CAGGAAAACCTTCTTTGGATTTGCCAAAAATTTTTGGAATTCATTTATTTCTTTCAGGAG  
TGGCTTGTCTTGGGTTTGGCGCATTTTCATGTAACAGGATTGTATGGTCCCTGGAATATGGG  
TGTCGATCCTTATGGACTAACTGGAAAGGTACAACCTGTAAATCCAGCGTGGGGTGTA  
GAAGTTTTGATCCTTTTGTCCGGGAGGAATAGCCTCTCATCATATTGCAGCAGGTAC  
TTTAGGCATATTAGCGGGCCTATTTTCATCTTAGTGTCCGTCGCCCCAACGTCTATATAA  
AGGATTACGTATGGGCAATATTGAAACCGTCTTTTCCAGTAGTATTGCTGCTGTCTTTTT  
TGCAGCTTTTGTGTTGCTGGAACCTATGTGGTATGGTTCAGCAACTACCCCTATCGAATT  
ATTTGGTCCCCTCGTTATCAATGGGATCAGGGATACTTCCAGCAAGAAATATATCGAA  
GAGTTGGTGTGCTGGGCTAGCCAAAAATCAAAGTTTATCAGAAGCTTGGTCTAAAATTCC  
TGAAAAATTAGCTTTTTATGATTATATCGGTAATAATCCGGCAAAGGGGGGATTATTAG  
AGCGGGTTCAATGGACAACGGGGATGGAATAGCTGTTGGGTGGTTAGGACATCCTATC  
TTTCGAGATAAAGAAGGGCGTGAACCTTTTTGTACGTCGTATGCCTACTTTTTTTGAAAC  
ATTTCCGGTTGTTTTGGTAGACGGAGACGGAATTGTTTCGAGCCGACGTTTCTTTTCGAA  
GGGCAGAATCGAAGTATAGTGTGAAACAAGTGGGTGTAACCTGTTGAGTTCTATGGTGG  
GGAACCTCAATGGAGTCAGTTATAGTGATCCTGCTACTGTGAAAAAATATGCTAGACGTG  
CCCAATTAGGTGAAATTTTTGAATTAGATCGTGTACTTTGAAAGCCGATGGTGTTTTTTC  
GTAGCAGTCCAAGGGGTTGGTTTACTTTTGGACATGCTTCGTTTGCTCTGCTCTTCTTC  
TTCGGACACATTTGGCATGGTGTAGAACCTTGTTCAGAGATGTTTTTGTGTTATTGA  
CCCCGATTTGGATGCTCAAGTGAATTTGGAGCATTCCAAAAACTTGGAGATCCAAC  
ACAAGAAGACAAGTAGTCATGAAAACCTTATATTCCCTGAGGAGGTTCTACCCCGTGG  
AAACGCTCTTTAATGGAACCTTAGCTTTAGCTGGTTCGTGACCAAGAAACCACCGGTTT  
CGTTGGTGGGCCGGAATGCACGACTTATCAATTTATCCGGTAAACTGTTGGGGGCTC  
ATGTAGCCCATGCCGATTAATCGTATTCTGGGCCGGAGCAATGAACCTATTTGAAGTG  
GCTCATTTTGTACCAGAAAAGCCCATGTATGAACAAGGATTAATTTTACTTCCCCACTTA  
GCTACTCTAGGTTGGGGGGTAGGTCGGGTGGGGAAGTTATAGACACCTTTCCATATTT  
TGTATCTGGAGTACTTCACTTAATTTTCGCTGTCAGTATTAGGCTTTGGCGGTATTTATCAT  
GCACTTCTGGGCCCTGAGACTCTTGAAGAATCTTTTCCATTCTTTGGTTATGTATGGAA  
AGATAGAAATAAAAATGACCACAATTTTGGGTATTCACTTAATCTTGTAGGTATAGGTGC  
TTTTCTTCTAGTATTCAAGGCTCTTTATTTTGGAGGCGTATATGATACCTGGGCTCCGGG  
AGGGGGAGATGTAAGAAAAATTACCAACTTGACCCTTAGCCCAAGTGTTATATTTGGTT  
ATTTACTAAAATCTCCTTTTGGAGGAGAAGGATGGATTGTTAGTGTGGACGATTTGGAA  
GATATAATTGGAGGGCATGTATGGTTAGGTTCCATTTGTATACTTGGCGGAATCTGGCAT  
ATCTTAACCAACCTTTTGCATGGGCTCGTCGAGCACTTGTATGGTCTGGGGAGGCTTA  
CTTGTCTTATAGTTTAGCTGCTTTATCTGTTTTTGGTTTCATTGCTTGTGCTTGTCTGG  
TTCAATAATACCGCTTATCCTAGTGAATTTTACGGGCCTACTGGGCCAGAAGCTTCTCA  
AGCTCAGGCATTTACTTTTTCTAGTTAGAGACCAACGTCTTGGGGCTAACGTGGGATCCG



ATTCTAGTTCCTACTGCTTTTTTACTTATAATATACGTAAAAACAGTCAGTCAAAGTGAT  
ATGGAACAGCAACCCTAGTCGCCATCTCTATATCTGGTTTACTTGTAAGTTTTACTGGG  
TACGCCTTATATACTGCTTTTGGGCAACCCTCTCAACAATTAAGAGATCCATTGGAAGA  
ACACGGGGACATGGAAGCATTGGTTTATACATTCCTCTTAGTCTCGACTCTAGGGATAA  
TTTTTTTCGCTATCTTTTTTCGAGAACCACCTAAAGTTCCAATAAAAAGGTGAAAATG  
ACTATTGCTTTCCAATTGGCTGTTTTTGCATTAATTGCTACTTCATTAATCTTACTGATTA  
GTGTACCCGTTGTATTTGCTTCTCCTGACGGTTGGTTCGAGTAACAAAAATATTGTATTT  
CTGGTACATCATTATGGATTGGATTAGTCTTTCTGGTGGGTATCCTTAATCTCTCATCTC  
T-----ATGTCACCACAAACAGAGACTAAAGCAAGTGTTGGATTCAAAGCTG  
GTGTTAAAGATTATAAACTGACTTATTATACTCCTGATTATGAAACCAAAGATACTGATA  
TCTTGGCAGCATTCCGAGTAACTCCTCAACCTGGAGTTCCTCCTGAGGAAGCAGGGGC  
TGCGGTAGCTGCTGAATCTTCTACTGGTACATGGACAACCTGTGTGGACCGATGGGCTTA  
CCAGCCTTGATCGTTATAAAGGAAGATGCTACCACATCGAGCCTGTTGCTGGAGAAGA  
AAATCAATATATATGTTATGTAGCTTACCCTTTAGACCTTTTTGAAGAAGGTTCTGTACT  
AATATGTTTACTTCCATTGTGGGTAATGTATTTGGGTTCAAAGCCCTGCGCGCTCTACGT  
CTGGAGGATCTGCGAATCCCTACTTCCTATACGAAAACCTTTCCAAGGCCCGCCTCATGG  
TATCCAAGTTGAGAGAGATAAATTGAACAAGTATGGGCGTCCCCTATTGGGATGTACTA  
TTAAACCTAAATTGGGGTTATCCGCTAAGAACTACGGTAGAGCAGTTTATGAATGTCTT  
CGTGGTGGACTTGATTTTACGAAAGATGATGAGAACGTGAACTCACAACCATTTATGC  
GTTGGAGAGACCGTTTCTTATTTTGTGCCGAAGCAATTTTTAAATCACAGGCTGAAACA  
GGTGAATCAAAGGGCATTACTTGAATGCTACTGCAGGTACATGCGAAGAAATGATCA  
AAAGGGCTGTATTTGCCAGAGAATTGGGAGTTCCTATCGTAATGCATGACTACTTAACA  
GGGGGATTCACTGCAAATACTAGCTTGGCTCATTATTGCCGAGATAATGGTCTACTTCTT  
CACATCCATCGTGCAATGCATGCAGTTATTGATAGACAGAAAAATCATGGTATACACTTT  
AGAGTACTAGCTAAAGCCTTACGTATGTCTGGTGGAGATCATATTCACTCTGGTACTGTA  
GTAGGTAAACTTGAAGGAGAAAGAGACATTACTTTGGGCTTTGTTGATTTACTACGTGA  
TGATTTTATTGAAAAGATCGAAGCCGCGGTATTTATTTCACTCAAGATTGGGTCTCTCT  
ACCAGGTGTTCTGCCCGTAGCTTCTGGGGGTATTCACGTTTGGCATATGCCTGCTCTGA  
CCGAGATCTTTGGAGATGATTCCGTACTACAATTCGGCGGAGGAACTTTAGGACACCCT  
TGGGGAAATGCACCGGGTGCCGTAGCTAATCGAGTAGCTCTAGAAGCATGCGTACAAG  
CTCGTAATGAGGGACGTGATCTTGCTCGTGAGGGTAATGAAATTATCCGTGAGGCTAGC  
AAATGGAGTCCTGAACTAGCTGCTGCTTGTGAAGTATGGAAGGAGATCAAATTTGAAT  
TCGAAGCAATGGATACTTTG-----ATGGCGATACATTTATACAAAACCTTACCCCGAGC  
ACACGCAATGGAGCCGTAGACAGTCAAGTCAAATCAATACACGAAATAATTTGATCTA  
TGGACAGCATCGTTGTAGTAAAGGTCGTAATGCCAGAGGAATCATTACCGCAGGGCAT  
AGAGGGGGAGGTCATAAGCGTCTATACCGTAAAATCGATTTTTCGACGGAATGAAAAG  
ACATATATGGTAGAATCGTAAGCATAGAATACGACCCTAATCGAAATGCATCCATTTGTC  
TCATACACTATGGGGATGGTGAGAAGAGATATATTTTACATCCCAGAGGGGGCTATAATTG  
GAGATAACCATTGTTTCTGGTACAGAAGTTCCTATAAAAATGGGAAATGCCCTACCTTTG  
ACCGATATGCCCTTAGGCACGGCCATACATAACATAGAAATCACACTTGGAAGGGGTGG  
ACAATTAGCTAGAGCAGCGGGTGTGTAGCGAACTGATTGCAAAAAGAGGGGAAATC  
GGCCACATTAATAATTACCTTCTGGGGAGGTCCGTTTGTATATCCAAAACCTGCTCAGCAA  
CAGTCGGACAAGTGGGGAATGTTGAGGTGAACCAGAAAAAGTTGGGTAGAGCCGGAT  
CTAAATGTTGGCTAGGTAAGCGTCTGTAGTAAGAGGAGTGGTTATGAACCTGTAGAC

CATCCCCATGGGGGTGGTGAAGGGAGAGCCCCAATTGGTAGAAAAAACCCGCAACC  
CCTTGGGGTTATCCTGCACTTGAAGAAGAAGTAGAAAAAGGAAGAAATATAGTGATA  
ATTTGATTCTTCGTCGCCGTAGTAAATGATTCAACCTCAAAGCCATTTGAATGTAGCG  
GATAACAGCGGGGCCGAGAATTAATGTGTATTAGAATCATAGGAGCTAGT--AATCGCC  
GATATGCTCATATCGGTGACATTATTGTTGCTGTGATCAAGGAAGCATTACCAAACACA  
CCTCTAGAAAGATCAGAGGTGATCAGAGCTGTAATTGTACGTACTTGTAAAGAACTTAA  
ACGTGACAACGGTATGATAATACGATATGATGATAATGCTGCAGTTGTGATTGATCAAGA  
AGGAAATCCAAAAGGAACCTCGAGTTTTTTGGTGCAGTTGCCCGAGAATTGAGACAGTTA  
AATTTCACTAAAATAGTTTTATTAGCACCTGAGGTATTAATGCTTAGTCCTAAAAGAACC  
AGATTTGAAAACAACATAGAGGAAGAATGAAAGGAATATCTTATCGAGGTAATCGTAT  
TTGTTTCGGTAAATATGCTCTTCAGGCACCTGAACCCGCTTGGATCACATCTAGACAAA  
TAGAAGCAGGGCGACGAGCAATGACAAGAAATGTGCGCCGTGGTGGAAAAATATGGG  
TACGTATATTTCCAGACAAACCAGTTACGGTAAGACCTACGGAAACACGTATGGGTTCC  
GGTAAAGGATCTCCCGAATATTGGGTAGCTGTGCTTAAACCAGGTAGAATACTTTATGA  
AATGGGCGGAGTAGCAGAAAATATAGCCAGAAAGGCTATTTCAATAGCGGCGTCCAAA  
ATGCCTATACGAACTCAATTTATTATTTTCGGGAATGACTAGAATTAGACGAGGATATATA  
GCTCGGAGACGTAGAACAAAAATTCGTTTATTTGCATCAAGCTTTTCGGGGGGCTCGTT  
CAAGACTTACTCGAACAATTATTCAACAGAAAATAAGATCTTTGGTTTCGTCCTCATCGA  
GATAGAGATAGGAAAAAGATAGATTTTCGTCGTTTGTGGATCACTCGGATAAATGCAGT  
AATTCGCGGGAAT---AGAGTATCCTATAGTTATAGTAGATTAATACACAATCTGTACAAG  
AGACAGTTGCTTCTAATCGTAAAATACTTGCACAAATAGCTATATTAATAGGAATTGT  
CTTTATATGATTTCTAATGAGATCAGATCA-----ATGACAAAGGAAG  
TATATGCTTTAGGTCAACATATATCTATGTCTGCTCACAAAGCACGAAGAGTAATTGATC  
AGATTCGTGGACGTTTCTACGAAGAGACACTTATGATACTCGACCTTATGCCTTATCGA  
GCGTGTATCCCATTTTTAAGTTGGTTTATTCTGCAGCAGCAAATGCTAGTCATAATATG  
GGTTTCGATGAAGCAAGTTTAGTTATTAGTAAAGCCGAAGTCAACGAGGGTACTACTAT  
GAAAAAATTAACCTCGAGCTCGAGGACGGAGTTATGCAATAAAAAGACCCACTTGT  
CATATAAGGATTGTATTGAAAGATAAATCTTTCTAT--GGATTATGGGACAAAAAATGG  
ATGGAATCAAATATGCAGTATTTACAGACAAAAGTATTCGGTTATTGGGGAAAAAT--CA  
ATATACTTTTAATGTGCAATCAGGATCAACTAGGACAGAAATAAAGCATTGGGTTCGAAC  
TCTTCTTTGGTGTCAAGGTAAAAGCTATGAATAGTCATCGACTCCCGGGAAAGGGTAG  
AAGAATGGGACCTATTCTGGGACATACAATGCATTACAGACGTATGATCATTACGCTTC  
AACCGGGTTATTCTATTCCACCTCTTAGAAAGAAAAGAAGTATGGCAGTTCCAAAAAA  
AAGTACTTCTATATCAAAAAACGTATTCGTAAAACATTTGGAAAAAGAAGGTATATT  
GGGCAGCGTTGAAAGCTTTTTTCCTTAGCGAAGTCTCTTTCTACCGGGAATTCAAAAAG  
TTTTTTTGTACGAAAATTAATAGTATGGCCAAGGGTAAAGATGTCCGAGTAACGGTTA  
TTTTAGAATGTACCAACTGT--GTTAGAAAC-----CTTAATAAGGAATCAAGGGGTGTTTC  
CAGATATATTACTCAAAGAATCGACACAATACGCCTAGTCGATTGGAATTGAGAAAAT  
TCTGTCCCTATTGTTACAAACATACGATTCACGGGGAGATAAAGAAAATGAAAATAAGG  
GCCTCCGTTTCGTAATAATTTGTGAAAATGTGCGACTGATCCGTAGAAGGGGACGAATTAT  
AGTAATTTGTTTCGAATCCGAGACATAAACAAGACAAGGAATGGTTCGAGAGAAAAGTA  
AGAGTATCTACTCGGACACTACAGTGGAAGTGTGTTGAATCAAGAGCAGACAGTAAGC  
GTCTTTATTATGGACGCTTTATTCTATCTCCCTTATGAAAGGGCAAGCCGATACAATAG  
GCATTGCGATGCGAAGAGCTTTGCTTGGTGAATAGAAGGAACATGTATCACCCGTGC

AAAATTTGAA-----AAAATACCACATGAATATTCTACCATAGTAGGTATTCAAGAATCAGT  
ACATGAAATTTTAATGAATTTGAAAGAAATTGTATTGAGAAGTAATCTATATGGAACCTCG  
CAACGCGTCTATTTGTGTCAAGGGTCTGGATGTGTAAGTCAAGACATCATCTTAC  
CAACTTCTGTGGAAATCGTTGATAACACACAGTATATAGCTAATCTAACGGAACCCATT  
AATTTGTGTATTGGATTACAAATCGAGAGGAATCGCGGATATCATATAAAAACACCAA  
AAACTTTCAAGATGGAAGTTAT-----CCTATAGATGCTGTATTCATGCCTGTTTCGAAATGC  
GAATCATAGTATTCAATTCTTATGGGAATGGAAATGAAAAACAAGAGATACTTTTTTCTCG  
AAATATGGACAAACGGAAGTTAACTCCTAAAGAAGCACTTCATGAAGCCTCCCGGAA  
TTTAATTGATTTATTTATTCCTTTTCTACATGCAGAAGAAGAA-----AACTTACATTTAGA  
GAACAATCAG---TACAAGGTTACTTTACCCTTTTTTACTTTTCATGATAGATTGGCTAAG-  
--CTAAGGAAAACGAAAAA---GAAATAGCATTGAAATCTATTTTTATTGACCAATTTCGA  
ATTGCCTCCCAGGACCTATAATTGCCTCAAAGGTACAATATACATACATTATTTGACCT  
TTTGAATAAGAGTCAAGAAGACCTTATGAAAATGGAATATTTTCGCATAGAAGATGTAA  
AACAGATATTGGACAGTCTAGAAATAGAAAAAGCATTTCACAACCCATTTACCGAAGA  
A---ATGCTCGGGGATGGAAATGATGAGGGAATGTCTACAATACCTGGGTTTAATCAGAT  
ACAATTTGAAGGATTTTGTAGATTCATTGATCAGGGCTTAACAGAAGAACTTTATAAGT  
TTCCAAAATTGAAGATACAGATCAAGAAATTGAATTTCAATTATTTGTGGAAACATAT  
CAATTGGTAGAACCTTTGATAAAAGAAAGAGATGCTGTATATGAATCACTCACATATTCT  
TCTGAATTATATGTATCCGCGGGATTAATTTGGAAAACCAGTAGGGATATGCAAGAACA  
AACTCTTTTTATTGGAAACATTCCTTTAATGAATTCCTGGGAACTTCTATAGTAAATGG  
AATATACAGAATTGTGATCAATCAAATATTGCAAAGTCCCGGTATCTATTACCGGTCAGA  
ATTGGACCATAACGGAATTCGGTCTATACCGGGACCATAATATCAGATTGGGGAGGAA  
GATTAGAATTAGAGATTGATCGAAAAGCAAGGATATGGGCTCGTGTGAGTAGGAAACA  
GAAAATATCTATTCTAGTTCTATCATCAGCTATGGGTTCGAATCTAAGAGAAATTCTAGA  
GAATGTTTGCTATCCTGAAATTTCTTGTCTTTCTGAATGATAAAGAGAAAAAAAAAAAA  
TTGGGTCAAAGAAAATGCCATTTTGGAGTTTATCAACAATTTGCTTGTGTAGGCGGA  
GATCCTGTATTTCTGAATCCTTATGTAAGGAATTACAAAAAAATTCCTTCAACAAAGA  
TGTGAATTAGGAAGGATTGGTCGACGAAATATGAATCGGAGACTAAATCTTGATATACC  
TCAGAACAATACATTTTTGTTACCGCGAGATATATTGGCAGCTGCGGATCATTGATTGG  
AATGAAATTCGGAATGGGTACACTTGACGAT-----ATGAATCATTTTAAAAATAAGCGTAT  
TCGTTCTGTAGCGGATCTCTTACAAGATCAATTCGGATTGGCTCTGGTTTCGTTTAGAAA  
ATGTGGTTAAAGGAACTATATGTGGAGCAATTAGG---CATAAATTGATA---CCGACTCCT  
CAGAATTTGGTAACTTCAACTCCA-----TTAACAACCACTTATGAATCTTTTTTCGGA  
TTACACCCATTATCTCAAGTTTTGGATCGAACGAATCCATTGACACAAATTGTTTCATGG  
GAGAAAATTGAGTTATTTGGGCCCTGGAGGATTAACAGGGCGAACTGCTAGTTTTTCGA  
ATACGAGATATCCACCCTAGTCACTATGGACGCATTTGCCAATCGATACGTCTGAAGG  
AATCAATGTTGGACTTATTGGATCTTTAGCAATTCATGCGAGAATTGGTCAGGGGGGA--  
-TCTCTAGAAAGTCCATTTTAT-----GAAATCTCCGAGAGATCAAATCAAAAAAAGTA  
CGGATGCTTTATTTATCACCAAGTAGAGATGAATACTATATGATAGCGGCGGGAAATTCT  
TTAGCGCTGAATCAGGGTATTCAAGAAGAACAGGTTGTTCCAGCTCGATACCGTCAAG  
AATTCCTAACTATTGCATGGGAACAGGTTTCATCTTCGAAGTCTTTTTCTTTCCAATATT  
TTTCTATTGGAGCTTCTCTCATTCTTTTATCGAGCATAATGATGCGAATCGAGCTTTAAT  
GAGTTCGAATATGCAACGCCAAGCAGTTCCACTTTCTCGGTCCGAGAAGTGCAATTGTT  
GGAATGGGTTGGAACGCCAAGCGGCTCTAGATTCAGGGGTTACCGCTATAGCCGAAC

ACGAGGGAAAGATCATTTATACCAATACTGACAAGATCATTTTATTGGGCAATGGAGAT  
ACTTTAAGCATTCCATTAGTTATGTATCAACGTTCCAACAAAATACTTGTATGCATCAA  
AAACCCAGGTTCCGCGGGGTAAATGCATTAATAAGGAAAAATTTAGCGGATGGTG  
CCGCTACAGTTGGTGGCGAACTCGCTTTGGGTAAAAATGTATTAGTAGCTTATCTGCCA  
TGGGAAGGTTACAATTTTGAAGATGCAGTACTCATTAGCGAGCGTCTGGTATATGAAGA  
TATTTTACTTCTTTTCACATACGGAAATATGAAATTCAGACTCATGTGACAAGCCAAGG  
A---CCC GAAAGGATCACTAACAAAATACCGCATCTAGAAGCCCATTTACTCCGCAATTT  
AGACCAAAAATGGAATTGTGATGCTGGGATCTTGGGTAGAGGCGGGCGATGTTTTAGTA  
GGTAAATTCACTCCCCAGACGGCGAAAGAA---TCATCGTATGCCCCAGAAGATAGATTA  
TTACGAGCCATACTTGGCATTCAAGGTATCCACTTCAAAGGAACTTGTCTAAAACCTACC  
TATAGGTGGTAGGGGTAGAGTTATTGATGTGAGATGGATCCAGAAAAAAGGG---GGTTC  
GAATTATAATCCAGAACTATTTGTGTCTATATTTTACAGAAACGTGAAATCAAAGTGG  
GTGATAAAGTAGCTGGAAGGCATGGAATAAAGGTATCATTTCAAAATTTTACCTAGA  
CAAGATATGCCTTATTTGCAAGATGGAAGACCTGTTGATATGGTCTTCAATCCATTAGGA  
GTACCCTCACGAATGAATGTAGGACAGATATTTGAATGCTCACTCGGGTTAGCGGGGGA  
TCTGCTAGATAGACATTATCGAATAGTACCCTTTGATGAGAGATATGAGCAAGAGGCTT  
CGAGAAAAC TAGTGTTTTCTGAATTATATGAAGCCAGTCAGCAAACAGCGAATCCATG  
GGTATTTGAACCCGAGTATCCGGGAAAAAGCAGAATATTTGATGGAAGAACGGGAGAT  
CCTTTTGAACAACCTGTTATAATAGGAAAGCCTTATATCTTGAAATTAATTCATCAAGTT  
GATGATAAAATACACGGACGTTCCAGTGGACATTATGCACTTGTTACACAACAACCCCT  
TAGAGGAAGGGCCAAACAAGGGGGACAACGAGTAGGAGAAATGGAGGTTTGGGCTC  
TCGAGGGGTTTGGTGTGCTCATATTTTACAAGAGATGCTTACTTATAAATCGGATCATA  
TTAGAGCTCGTCAAGAAGTACTTGGTACTACAATCATTGGGGGAACAATACCTAAACCT  
GAAGATGCTCCAGAATCTTTTCGATTGCTCGTTCGAGAACTACGATCTTTGGCTCTGGA  
ACTGAATCATTTCCTTGTATCTGAGAAGA ACTTCCAGATTAATAGGAAGGAAGCTATGA  
ATCATAATTTTCTTCTATGATCGATCGGTATAAACATCAACAACCTCCGAATTGGATCAG  
TTTCTCCTCAACAAATAAGTGCTTGGGCCAAAAAATCCTCCCTAATGGAGAGATAGTT  
GGAGAGGTGACAAAACCTATACTTTTCATTACAAAACCAATAAACCGGAAAAAGATG  
GATTGTTTTGTGAAAGAATTTTTGGTCCTATAAAAAGTGGAATTTGTGCTTGTGGAAT  
TATCGAGTAATCGGAAATGAAAAGAGGACCCGAAATTTTGTGAACAATGCGGAGTCG  
AATTTGTTGATTCTCGGATACGAAGATATCAAATGGGATACATCAAATTAGCATGTCCAG  
TAACCCATGTGTGGTATTTGAAACGTCTTCCTAGTTATATCGCGAATATTTTAGATAAAC  
CTCTTAAAGAATTAGAAGGGCTAGTATACTGCGATTTT-----TCTTTTGTAGGCC---AT  
AGCTAAAAACCTACTTTCTTACGATTACGAGGGTTATTTCGAATATGAAATCCAATCATG  
GAAATACAGCATCCCACTTTTTTTTACTACTCAAGGCTTCGATACATTCGAAATCGAG  
AAATTTCTACTGGAGCGGGTGCTATCCGAGAACAATTAGCCGATCTCGATTTGCGAATT  
ATTATAGATTATTCATTGGTAGAATGGAAGGAATTAGGAGAAGAA---AGACCCACGGGT  
AATGAATGGGAAGATCACAAAATTGGAAGAAGAAAGGATTTTTTGGTTAGACGCATGG  
AATTGGCTAAGCATTTCCTTCGAACAAATATAGAACCAGAATGGATGGTTTTATGTCTAC  
TACCAGTCTTCTCCCGAACTACGACCCATCATTAGATAGATGGAGGTAAGCTAATG  
AGCTCGGATATTAATGAACTCTATAGAAGAGTTATCTATCGGAACAATACTCTTACCGAT  
CTATTAACAACAAGTAGATCTACACCAGGGGAATTAGTAATGTGTCAAGAGAAATTGGT  
ACAAGAAGCCGTGGATACACTTCTTGATAATGGAATTCGCGGACAACCAATGAGGGAT  
GGTCATAATAAGGTTTACAAGTCGTTTTTCGGATGTAATTGAAGGCAAAGAGGGAAGAT

TTCGTGAGACTCTGCTTGGCAAACGGGTCGATTATTCGGGTCGTTCTGTCATTGTCGTA  
GGACCCTCACTTCCATTACATCGATGTGGATTGCCTCGGGAAATAGCAATAGAGCTTTT  
TCAGACATTTGTAATTCGTGGGCTAATTAGACAACATCTTGCTTCCAACATAGGAGTTG  
CTAAGAGTAAAATTCGGGAAAAGGAGCCCATTGTATGGGAAATACTGCAAGAAGTTAT  
GCAGGGACATCCCGTATTGCTGAATAGAGCGCCTACTCTGCATAGATTAGGCATACAGG  
CATTTCAACCCATTTTAGTGGAAGGACGTGCTATTTGTTTACATCCATTAGTTCGTAAGG  
GATTC AATGCAGACTTTGATGGGGATCAAATGGCTGTTTCATGTACCTTTATCTTTGGAG  
GCTCAAGCGGAGGCTCGTTTACTTATGTTTTCTCATATGAATCTCTTGTCTCCAGCTATT  
GGGGATCCCATTTCCGTACCAACCCAAGATATGCTTATTGGTCTATATGTATTAACGAGT  
GGGAATCGCCGAGGTATTTGTACAAATAGGTATAATCCATGGAATCGC-----AGAACT  
ATCAAATGAAAGAACTTATGATAATAACTATAAATATAGAAAAAAA---GAACCTTTTTT  
TTGTAATTCCTATGATGCAATTGGAGCTTATCGACAGAAAAGAATCAATTTGATAGTCC  
TTTGTGGCTTCGATGGCGACTAGATCAACGC---ATTATTGCTTCA-----AGAGAAGTTCCT  
ATCGAGATTCATGATGAATCTTTGGGTACCTATCATGAAATTTATGGGCATTATCTAATAG  
TAAGAAGTGTAAGAAAAGAAATTATTTGTATATACATTGCAACAACCTGTCCGGTCATATTT  
CTCTTTTTTCGAGAAATCGAAGAAGCTATACAAGGGTTTTGTGCGAGCCTGCTCATTTGGT  
ACC-----ATGGAGGTACTTATGGCAGAACGAGTCAATCTAGTCTTTCACAA  
TAAAGTAATAGATGGAACCTGCCATTAAGACTTATTAGCAGATTAATAGATCACTTCG  
GAATGGCATATACATCACACGTTCTGGATCAAGTAAAGACTCTGGGTTTCCAGCAAGCC  
ACTGCTACATCCATTTTATTAGGGATTGATGATCTTTTAAACAATACCTTCGAAGGGATGG  
TTAGTACAAGATGCTGAACAACAAGTTTAAATTTTGGAAAAACACCATCATTATGGGAA  
TGACATGCAGTAGAAAAATTACGCCAATCCATTGAGGTATGGTATGCTACAAGTGAAT  
ATTTGCGACAAGAAATGAATCCTAATTTTAGGATGACAGATCCCTTTAATCCAGTCCATA  
TAATGTCTTTTTTCGGGAGCCAGAGGAAATGCATCTCAAGTACACCAATTAGTAGGTATG  
AGAGGATTAATGTCAGATCCTCAAGGACAAATGATTGATTTACCCATTCAAAGCAATTT  
ACGCGAAGGACTATCTTTAACAGAAATATATCATTTCTTGCTACGGAGCCCGCAAAGGAG  
TTGTGGATACTGCTGTACGAACATCAGATGCTGGATATCTTACGCGCAGACTTGTGAA  
GTAGTACAACACATTGTTGTACGCAGAACAGATTGTGGAACCATCCGAGGGGTTTCTG  
TGAGTCCTCGAAATGGGATGATGCCG---GAAAGAATTTTTATTCAAACATTAATTGGTCG  
TGTATTAGCAGACGATATCTATATGGGCCACGATGCATTGCCATTCGAAATCAAGATAT  
TGGAATTTGGACTTGTCAATCGATTCATAACC-----TTTCGAACACAACCAATAT  
CTATTCGAACCCCTTTACTTGTAGGAGTACATCTTGGATCTGTGCGATTATGTTATGGTA  
GGAGTCCACTCATGGCGACCTGGTTCGAATTTGGGAGAAGCTGTAGGTATTATTGCGGGT  
CAATCTATTGGAGAACCAGGGACTCAACTAACATTAAGAATTTTCATACCGGCGGAGT  
ATTCACAGGTGGTACTGCCGAACATGTACGAGCCCCCTCTAATGGAAAAATCAAATTCA  
ATGACGATTTGGTTCATCCCACACGTACGCGTCATGGGCATCCTGCCTTTCTATGTTCTA  
TAGACTTGTATGTA ACTATTGAGAGTGAAGATATTCTACATAAGGTGACTATTCCACCAA  
AAAGTTTTCTTTTGGTTCAAATAATCAATATGTAGAATCAGAACAAGTGATTGCTGAA  
ATTCGCGCGGGAACATACACTTTC---AATTTGAAAGAGAGGGTTCGAAAACATATTTAT  
TCTGAATCAGAGGGGAGAA---ATGCACTGGAGCACCGATGTGTACCATGCACCTGAATTT  
ACATATAGTAATGTCCATCTTTTACCAAAAACAAGCCATTTATGGATATTATCAGGGGGT  
TCGTGCAGA-----TCCAGTGGAGTCCCTTTTTCTACTCTACAAGGATCAAGACCAAATGA  
ATCTTCGT-----TCGACAGAAAGAGAACGA---AGATATATTTTCGAGTCTC---TCAGTGAAT  
AATGATCAA---ATGAGATACGAATTATGTAGTTCTGATTTTTCTGGTAAAATAGAAGATA

GGATTCCTGATTAT---TCAGAACTTAATCGAATCATATCTATTGTTTCATTGTAATCTTAAAT  
ATCCTACT---ACTTTCACGAGAGTTCTGAT-----TTATTGGCAAAAAGGCGAAGAAATC  
GATTTCTTATTCCACTCGAATCGATTCAAGAACGAAAGAAAGAACTAATGCCCCATTCA  
GGTATCTCGATTGAACTACCGATAAAT-----GGAATTTTACGTAGAAAGAGTATTCTTGCT  
TATTTTCGATGATCCTCGATACAGAAGAAAGAGTTCGGGAATTACTAAATATGGGACTCT  
AGGGGTTTCATTAGTCGTTAAAAAAGAGGAT-----TTGATTGAGTATCGA---GGAATCAA  
AGAATTTAAGCAAAAATGCATGAACTAGATCGATTTTTTTTTTCATTCCCGAAGAAGTGC  
ATATTTCCCTGAATCTTCTTCGATAATGGTACGGAACAATAGTCTGATTGGAGTAGATA  
CACGAATCGCTTTAAATACAAGAAGCCGAGTGGGCGGATTAGTCCGAGTGGAGAGAA  
AAAAAAAAGGATTGAACTGAAAATCTTTTCTGGAGATATCCATTTTCTGGAGAGAC  
AGATAAGATATCCCGACACAGTGGCATCTTGATACCCCGAGGAACAGGAAAAACA-----  
AATTCTAAGGAATCCAAAAA-----TTGAAAAATTGGATCTATGTCCAACGG-----ATCAC  
ACCTACTAAGAAAAAG-----TATTTTGTTTTAGTTTCGACCCGTAGTGACATATGAAGTATC  
GGACGGTATAAATTTAGCAACACTCTTCCCCCGGATCTGTTACAAGAAAGGGATAATA  
TGCAACTTCGAGTTGTCAATTATATTGTTTACAGAAATGGCAAACCAATTCGGGGAATT  
TCTGATACAAGTATTCAATTAGTTTCGGACTTGTTAATTTTGAATTGGGACCAAGACAA  
A-----AAAAGTTCTTCTATCGAAGAGGCTCATACTTCCTTTGTTGAAGTAAGTACAAA  
TGGTCTGATTTCGAGATTTCTAAGAATTGACTTAGTGAAATTCCTATTTTCGTATCTCAG  
AAAAGGAATGATCCCTCAGGCTCAGGATTGATCTCAGATGATAATGTGTCAGATCACA  
CCAATAACAATCCCTTTTAT-----TCCAAGACAAA-----ATCAACAATTACTTA  
GCCAAAATCAAGGAATTTTCGCACGTTGTAAATAAA-----ATAAGGAATGCCCAT  
CTTTGATAATTTTGTATCATCTAATTGTTTCCGAATGGGTCCA-----TTCAACGCTGGAA  
AATATCACAAAT-----GTGATAAAGAATCA---CCTATAATTAATAATTAGGAATTCGATTG  
GCCCTTTAGGAACA-----GTCCTTCAATTTGTGAATTTT-----TATTCATTTTACTATTTAAT  
AACT-----CATAATCCTATTTTG---GTAACATAATTTTGCAACTTGAAAAT-----TTAAA  
ACCGACTTTTCAAGTAATT-----AAC---TATTATTTAATGGATGAAAATGGGAGA-----ATT  
TTGAATCCCGATTTCATGCAGTAACATCGTTTTTGAATTCATTCAATTTGAATTGGTATTTTC  
TCCATCATAATTATTTTGAAGAAAGATCCACAATAATTAGT---CTTGGACAGTTTATTTGT  
GAAAATGGATGTATATCCAAAAACGGACCC-----CATCTCAAATCGGGTCAAGTTTTG  
ATTGTTCAA---GTTGACTCTGTAGTAATAAGATCCGCCAAGCCTTATTTGGCCACTCCAG  
GAACAACCTGTTTCATGGTCATTATGGAGAAATCCTTTACGAGGGAGATACATTAGTTACA  
TTTATATATGAAAATCGAGATCCGGTGATATAACGCAGGGTCTTCCAAAAGTGGAACA  
AGTGTTAGAAGTGCGTTCAATTGATTCAATATCGATGAACCTAGAAAAAAGAATTGAG  
GGTTGGAACGAGCATATAAAAAAATCTTGGAAATTCCTTTGGGATTCTTGATTGGGGC  
TGAGCTAACTATAGTGCAAAGTCGTATATCTTTGGTTAATAAGATCCAAAAGGTTTATCG  
ATCCCAGGGGGTGCAAATCCATAATAGGCACATAGAAATTATTGTACGCCAAATAACAT  
CAAAGGTGTTGGTTTCAGAG-----GATGGAATGTCTAATGTTTTTTTACCTGGAGAAC  
TAATTGGATTGTTGCGAGCGGCGCAACGGGGCGCGCTTTGGAAGAATCGATTTGTTA  
CCGCGCCATCCTATTGGGAATAACAAGGGCATCTTTGAATACTCAAAGTTTCATATCTG  
AAGCGAGTTTTCAAGAACTGCTCGAGTTTTAGCCAAAGCTGCTCTCCGGGGCCGTAT  
CGATTGGTTGAAAGGCCTAAAAGAGAACGTTGTTATAGGGGGGATGATACCCGTTGGT  
ACCGGATTCAAAGGATTAGTGCATCGTTCA-----AGGCAACATAAGAACATTCCTTTGA  
AAACCAAAAAGAAGAAT-----TTTTTCGAGGGGGAATCGGA-----GATATTTTGTCCA  
CCACAGAGAATTATTTGATTCTTCCATTTCAAAGAAGTTTCATGATACATCAGAACAATC



ATTTAGAGGATTTTCATGATTCT-----ATGACAAGAAGGTATTGGAATATCAATTT  
GGAAGAGATGATGGAAGCGGGAGTTCATTTTGGTCATGGTACTAGGAAATGGAATCCT  
AGGATGGCACCTTATATTTCTGCCAAGCGTAAAGGTATTTCATATTCCAAATCTTACTAAA  
ACTGCTCGTTTTTTATCAGAAGCTTGTGATTTAGTTTTTGGATGCAGCAAGTAGGGGAAA  
ACAGTTTTTAATTGTTGGTACCAAGAATAAAGCAGCTGATTCAGTAGCACGGGCTGCAA  
TAAGGGCTCGATGTCATTATGTTAATAAAAAGTGGCTTGGTGGTATGTTAACGAATTGG  
TCCACTACAGAAACGAGACTTCATAAGTTCAGGGACTTGAGAACGGAACAAAAGGCG  
GGGAGACTCAATCGTCTTCCGAAAAGAGACGCAGCTATGTTGAAGAGACAATTATCTC  
ACTTGCAAACATATCTGGGCGGGATTAATATATGACGGGGTTACCTGATATTGTAATTA  
TCGTTGATCAACAAGAAGAATATACGGCTCTTCGAGAATGTATCACTTTGGGAATCCCA  
ACAATTTGTTAATCGATACAAATTGTGACCCGGATCTTGCAGATATTTGATTCCAGCA  
AATGATGACGCTATAGCTTCAATCCGATTAATTCTTAACAAATTAGTATTTGCAATTTGTG  
AGGGTCGTTCT--AGCTATATACGAAATCCTATGGGACAAAAATAAATCCACTTGGTTT  
CAGACTTGGTACAACCCAAGGTCATCATTCTATTTGGTTTGCACAACCCAAAAATTATT  
CCGAGGGTCTACAAGAAGATCAAAAAATACGAAATTGTATCAAGAATTATCTACAAA  
AAATATGAGAATATCCTCT--GGTGTGGAGGGAATTGCACGCATAGAAATTCGAAAAAG  
AATTGATCTGATTCAAGTCATAATCTATATGGGATTCCCAAAGTTATTACTAGAAGGCAA  
GACGCGA-----AGAATCGAAGAATTACAGATGAATGTACAAAAAGAACTTAATTGT  
GTGAACCGAAAACCTCAACATTGCTATTACAAGAATTACAAACCCTTATGGGCACCCTAA  
TATTCTTGCAGAATTTATAGCCGGACAGTTAAAGAATAGAGTTTCATTTCGCAAAGCAA  
TAAAAAAGGCTATTGAATTAACCGAACAGGCAGAGACAAAAGGAATTCAAGTACAAA  
TTGCAGGTTCGCTCGACGGAAAAGAAATTGCACGTGTCGAATGGATCAGAGAAGGTA  
GGTTCCCTCTACAAACCATTTCGAGCTAAAATTGATTATTGTTCCCTATGGAGTCCGAACG  
GTCTATGGAGTATTAGGCATCAAATTTGGATATTTGGGGAA-----ATGTGCGGTTACCG  
AGGGCCTCGTTTCAAAAAAATACGCCGTCTTGGGGCTTTACCAGGACTAACTAGTAAA  
AGGCCTAGAGCCGGAAGCGATCTTAGAAACCAATCGCGCTCTGGGAAA---AAATCTCA  
ATATCGTATTCGTTTAGAAGAAAAACAAAATTGCGTTTTTCATTATGGTCTTACAGAAC  
GACAATTACTTAAATACGTTTCGTATCGCCGAAAAGCAAAGGGTCAACAGGTCAGGT  
TTACTACAATTACTTGAAATGCGTTTGGATAACATCCTTTTCCGATTGGGTATGGCTTC  
GACTATTCCTCAAGCCCGCCAATTAGTTAACCATAGACATATTTTAGTTAATGGCTGTAT  
AGTAGATATACCAAGTTATCGCTGCAAACCACGCGATATTATTACGGCGAGGGATCATC  
AAAAATCGAGAGCTATGATTCAAATTATCTTGATTATCCCCCAT--GAGGAAGTGCC  
AAAACATTTGACTCTTCAACCATTTCAA-----TATAAAGGATTAGTCAATCAAATAATCGA  
TAGTAAATGGATCGGTTTGAATAAATGAATTGCTAGTCGTAGATAATATTCTCGTCA  
GACTATGTCACGTCGAGGTACTGCAGAAGAAAAAACTGCAAATCCGATCCAATTTAT  
CGTAATCGATTAGTTAACATGTTGGTTAACCGTATTCTGAAACACGGAAAAAAATCATT  
GGCTTATCAAATTATCTATCGAGCCATGAAAAAGATTCAACAAAAGACAGAAACAAAT  
CCACTATCCGTTTTACGTCAAGCAATACGTGGAGTAACTCCCGATATAGCAGTAAAAGC  
AAGACGTGTAGGCGGATCGACTCATCAAGTTCCATTGAAATAGGATCCACACAAGGA  
AAAGCACTTGCCATTTCGTTGGTTATTAGGAGCATCCCGAAAACGTCCGGGTCGAAATAT  
GGCTTTCAAATTAAGTTCCGAATTAGTGGATGCTGCCAAAGGGAGTGGCGATGCCATAC  
GCAAAAAGGAAGAGACTCATAGAATGGCAGAGGCAAATAGAGCTTTTGCGCATTTTCG  
TATGGGTAGGGACACTATTGCTGACATAATAACCTCTATACGAAATGCTGACATGAATAG  
AAAAGGGACGATTCAAATAGCATCCACTAACATCACGAAAACATTGTAAAATACTTT

TAAGAGAAGGTTTTATCAAAAACGTGAGGAAGCATCAGGAAAACAACAAATATTTTTT  
GGTTTTAACCTACGACATAGAAGG-----AATAGGAAAGGACCCTATCGAACT---ATT----  
-TTAAATTTAAAACGTATCAGTAGGCCTGGCCTACGAATCTATTCGAACTATCAACGAAT  
TCCTAGAATTTTAGGCGGGATGGGGATTGTAATTCTTTCTACTTCTCGAGGTATAATGAC  
AGACCGAGAGGCTCGACTAGAAGGAATCGGCGGAGAAATTTGTGTTATATATGGATG  
GCAAAATCTATAACCAAGAACTGGTTCACGTAGGAATGCCCGTAGTGGTTCACGTAAAA  
GTACACGTAGAATACCAAAGGGAGTTATTCATGTTCAAGCAAGTTTCAACAATACCATT  
GTGACTGTTACAGATGTACGGGGTCGGGTAATTTCTTGGTCTCCGCCGGTACGTGTGG  
ATTCAATGGTACAAGAAGGGGGACACCATTTGCTGCTCAAACCGCAGCAGGAAATGCT  
ATTCGGACAGTAGTAGATCAAGGTATGCAACGAGCAGAAGTCATGATAAAAGGTCTCG  
GTCTCGGAAGAGATGCAGCATTAAAGAGCTATTCGTAGAAGTGGTATACTATTAAGTTTC  
GTACGTGATGTAACCCCTATGCCACATAATGGCTGTAGACCTCCTAAAAAAGACGTGT  
GCACCCTACATGTTCCCTCGACGCTGAGGACATCCCCAAGAGCGGGGGATTTTCGTGAC  
ATTTCTGATTGGCTGTCT--TGTGTTTCTAATAAG---TTGTTAATAGTTGGCATACTATCA  
CCCCAAAAAACCAAACCTCTGCCTTACGTAAAGTTGCCAGAGTACGATTAACCTCTGG  
ATTTGAAATCACTGCTTATATACCTGGTATTGGCCATAATTCACAAGAACATTCTGTAGT  
CTTAGTAAGAGGGGGAAGGGTTAAGGATTTACCCGGTGTGAGATATCACATTGTTTCGA  
GGAACCCTAGATGCTGTCGGAGTAAAGGATCGTCAACAAGGGCGTTCTCAATATGGGG  
TCAAAAAGCCAAAAATGGCAAGGAAAAGTTTGATTTCAGAGGGAGAAGAAGAGGCAA  
AAACTGGAACAAAAATATCATTGATTTCGTCGATCCTCAAAAAAAGAAATAAGC-----  
AAAGTCCGTCGTTGAGTGAGAAATGGAAAATTCATGGAAAGTTACAATCCTCACCGC  
GTAATAGTGCCTACACGTCTTCATCGACGTTGTTTTTCGACCGGAAGACCGAGAGCT  
AACTATCGAGACTTTGGGCTTTCCGGGCACATACTTCGGGAAATGGTTCATGCATGTTT  
GTTGCCAGGGGCAACAAGATCAAGTTGGATGGTAAAAAATTCATTCAATTCAGTTATTT  
CACAAGAA---GAA---AAAGAAGAAAACAGGGGGTCCGTTGAATTTCAAGTATTTTCGTT  
TCACCAATAAGATACGAAGACTGACTTCCCATTTGGAATTGCACCGAAAAGATTATTTA  
TCTCAGAGAGGTTTACGTAAAATCCTGGGAAAACGCCAACGACTGCTGTCTTATTTGTC  
AAAGAAAAATAGAATACGTTATAAAGAATTAATTAGTCACCTGGATATTCGGGAGTCAA  
AAACTCGT-----ATGGTAAAACCTTCGTTTGAACGATGTGGTAGAAAGCAA---CCCGTTT  
ATCGAATCGTTGCAATTGATGTTTCGATCCCGAAGAGAAGGAAGAGATCTTCGGAAAGT  
GGGTTTTTATGATCCGATAAATAATCAAACGTATTTAAATATTCCTGCTATTCTATTTTTTC  
TTGAAAAAGGTGCTCAACCTACAGGAACTGTTTATGATATTTTAAAGAAGGCGGGGGT  
TTGT-----TTT-----ATGGAAAATCCAAGCGACTCTTTCTTAAATCCAAG  
CGATCTTTTCGTAGGCGTTTGCCCCGATCCAATCGGGGGATCGAATTGATTATAGAAA  
CATGAGTTTAATTAGTCGATTTATTAGTGAACAAGGAAAAATATTATCTAGACGGGTAAA  
TAGATTAACCTTAAAACAACAACGATTAATTAATGCTATAAAAACAAGCTCGTATTTT  
ATCTTTGTTACCTTTTCTTAATAATGAGAAA-----CAATTTGAAAGAAGCGAGTCGACCG  
CCGGAGCTACTGGTCTTAGAACCATATAAATAAAGTGACACGTTCACTAAAAAAAATCC  
TTTTGTAGCGAATCCTTTATTAAGAAAAATTGAGAAGCTTAACACAAAGGCGGAAAAA  
GAAATAATAATAACTTGGTCTCGGGCATCTACCATTATACCTACAATGATCGGACATACT  
ATTGCTATCCATAATGGAAGGGAGCATTTACCTATTTATATAACAGATCGTATGGTAGGC  
CATAAATTGGGAGAATTTTCACCTACTATAAATTTCCGTGGACATGCGAAAAATGATAAT  
AGATCTCGTCGTATGATTTTGAATCTTTTCTACTAGGGAATCCAGTATCCTTATGCATG  
AAGATAATAAATTCGGTTCGTTATGGTTCGGACTCTATTATGGATTTCTGACCACATTCTCC

ATAGGGCCCTCTTATCTCTTCCTTCTCCGAGCTCGGGTTCTGGAAGAAGGAGAAGAAG  
GAACCGAGAAGAAGGTATCAGCAACGACGGGTTTTATTGCGGGACAGCTCATGATGTT  
CATATCGATCTATTATGCGCCTCTGCATCTAGCATTGGGTAGACCTCATACAATAACTGTC  
CTAGCTCTACCGTATCTTTTGTTTTCAATTCCTTCTGGAACAATCACAAACACTTTTTTGATT  
ATGGATCTACTACCAGAAATCAATGCGTAATCTTAGCATTCAATGTATATTCCTGAATAA  
TCTCATTTTTCAATTATTCAACCATTTCAATTTTACCAAGTTCAATGTTAGCCAGATTAGTC  
AACATTTATATGTTTTCGATGCAACAACAAGATGTTATTTGTAACAAGTAGTTTTGTTGGT  
TGGTTAATTGGTACATTTTTTTCATGAAATGGGTTGAATTGGTATTAGTCTGGATACAG  
CAAAATAATTCTATTCGATCG---ATTCGATCGAATAAGTACCTTGTGTCAGAATTGAGAA  
ATTCTATGGCTCGAATCTTTAGTATTCTCTTATTTATTACCTGTGTTTACTATTTAGGCAGA  
ATACCGTCACCCATTGTTACTAAAAAATTCAAAGAAACCGAAGAAGATAAACCTCTTG  
TCACTCTTCTTTTCGACTATAAACGATGGAATCGTCCATTACGATATATAAAAAACAATC  
AATTTGAAAATGCCGTAAGGAATGAAGTGTCACAATATTTTTTTTATAATGTCGAAAC  
AATGGAAAAGAAAGAATATCTTTTACGTATCCCCCAGTTTGTCAACTTTTTTGGAAAT  
GATACAAAGAAAATTTATTTTTGACAAGAGAAAACTACCCTCTGATGAATTGTATG  
ATCATTGGATTATACCAATGAACAAAAAAGAAAACTTGAGCAAAAAATTAAAAA  
TCGAATGAAAGCTCTAAAT-----ATTAATCTAGATGTATTGAAAAAAGAACTAGATTG  
GGTAGTGATGAAAATAAAAAAGAATACTTGTCTAAAATATCTGATCCTTTTTTGAATGG  
GCCCCGTCGTAGAAGGGTCAAATTTTTATTTTCATCCATCGAGACAGGTTGGATAAATA  
AGATTCATGGTATACTTCAGGAAAAATTGGAAGAACAAGAGCCCAAGACTAAAGGA----  
--ATAAAGAAATAAGTAAAAAAGTTCCCTCCATGGTCATACAAATTAATCGATTTGGAAC  
AACAGGAGGGAGAACAGATTCGTTCCAGAAAAGCCAAACGTGTAGTAATTTTTACTGA  
TGCTTTGATACGTTATTCACAACAATCGGATTTTCGTCGAGACATAATCAAAGGCTCTAT  
GCGTGCTCAAAGACGTAAAACAGTTATTTGTAAATTGTTTCAAGCAAATGTGCATTCTC  
TTCTTTTTTTGGACAGAATAGACAAACCC-----CTTTTTCTTTTGATATCTCCGGGAT  
GATAAAATTCATTTTGAAAAACAGAGAAGAGAAAGCACGAATAGAAATAGCGGAAGC  
CTGGGATATCATTTTATTTGCTCAAGTAATAAGAGGATCCCTATTAGTAACCCAATCTTTT  
CTTAGAAAATATATTCTATTCCCTTCATTGATAATAGCTAAAAATATAGCCCGTATGTTATT  
ATTTCAATTTCCCGAGTGGTCCGAAGACTTAAAAGATTGGAATAGAGAAATGCATGTTA  
AATGCACCTATAATGGTATTCAATTATCAGAAACCGAATTTCCAAAAAATTGGTTGACA  
GACGGTATTCAGATAAAGATCCTATTTCTTTTTGCCTTAAACCTTGGCACAGATCTAAG  
-----CAAAAAACGATTTTTGTTTTTAACAGTTTGGGGAATGGAACTGAACTTCCTTT  
TGGTTCTCCCCGAAAACAACGTTCAATTTTTGAACCCATTTTAAAGAACTCAGAAAA  
AAAATTATCAAATTGAAAAAGAATTCTTTTTTAGTT--ATACAGGTTTTAAAAGAAAGAA  
TCCATTTTTTTTTTTCCTTTTCAAAGAAAGAAAAAATGGGTCATGAAAACCATTTCTA-  
----TTTTTTAAAGGAATAATAAAGAACTTTCCAAAAGAAACAATGGGGTAATCAGTAA  
TGGGATGATTAATGAATCG---ATTCAAATTCGATTTATGGATTTGACAGAT--TCATTGAC  
AGAAAAAAAATGAAAGATCTGGCTCATAGAACCAGCACAATCAGGAATCAAATAGA  
AAAAATTACAAAAGATAAGAAAAAAGTTCTAATAAATAAGTTATCCTAATAAACTAT  
TAGCATCAATAAAAAATATTTGGCAGAAATTAAGAAATTCATGTTTCGATTAATCCGTA  
AATCATATTCTTTTTTCAAATTTTTAATTGAAAGTATATATATAGATATACTTCTCTGTATCA  
TTAATAGTCCGAGGATCACTATACAACTT---ACAATTCGTTTTCTT-----TTATCCTCCTC  
TCACAAGGATATGATTTTTACCAATTATATCAAACG---ATTTGTAATTTATATAAGTTAAGA  
TATGGCCTTCACTATACATCTTTTTTTCTTAAGAATCAAATAAAGGATTATTTTACA-----A

TTTTTTATTCTGAATTAACATAAAAATATTTTGGAAATGGAAATGATTCAATGGAAAA  
ACTGGTTAAGGGGTCATTATCAATATGATTTATCTTCGATTAGATGGTATCTATTAGTACC  
ACACAAATGCCGAAATAGATTCAATCAAGCACGTATAGTGCAAAATAAAAACAAAAGG  
CATTCAGATGAAAAAGATCAATTAATATTAATTAATTACAAAAAATTA---AACCTTCAAA  
AATACTATGGATATGACCTTTTCTCATATAAATCGATTAATGATGATATTCTAAATACAGAT  
AGAAAATATTTTGATTGGAGAATTTTCGATTTTGTCTTCGACTTTTGTGATTGGATGGGA  
ATGAATGAAGAAATACTAAGTCGTTGGTCTTTCCAGAATTTGTGCTGCTTTATAATACA  
TATCTTATGAAACCGTGGATCATACCAATCCAACACTTCTTTTA---AGCAAC-----ACGG  
AAGCCGAGCTTGATTTTTTCTAAAAAGGTATTTACGTTTTCAATTGAGATGGGAT-----  
-AATCAAAAATGATCAATAATATCAAAGTATATTGTCTCCTACTTAGACTGATAAATCCA  
AGAGAAATTGCTATATCCTCTATTCAAAGGGGAGAAATGAGTTTAGATATTTTGATGATT  
CAAAGGATTTAACTCTTACAGAATTAATGAAAAAGGGTATATTAATTATCGAACCAGT  
TCGTTTGTCTATAAAAATGATGGACAATTGATTATGTATCAAAGTCTAAATATTTTCATTG  
TTTCATAAGAGTAAGCCCAATTATGATTTGTTGTTTGTCCCGAAAAAGTTTTATCCACT  
AAAGGACGTAGAGAATTAAGAATTCTAATTTGTTTCAAATTTCTTTGGCCTAATTATCGC  
TTAGAAGATTTATCTTGTATGAATCGATATTGGTTTGATACCAATAATGGGAGCCGCTTC  
ACTATGATAAGGATACATATGTATCCAATGAAAGGACATCAATTCAAATCCTGGATTTTC  
GAATTGAGAGAGATATTGAGAGAGATCAAGAATTCTCACTATTTCTTAGATTCATGGAC  
CCAATTCAATCCGTGGGATCTTTCATTCACATTTTTTTCCACCAAGAACGTTTTATAAA  
ACTCTTGGACCCCGAATTTGGAGTATCCTACTTTCA---CGCAATTCA-----CAGGGTTC  
AACAAGCAATCGATATTTTC-----ACGATCAAGGGTGTAGTACTATTTGTAGTAGCG---G  
TCCTTATATATCGT-----ATTAACAATCGAAATATGGTCGAAAGAAAAAATCTCTATT  
TGACAGGGCTTCTTCTCT-----ATACCTATGAATTCCATTGGACCCAGAAATGATAC  
ATTGGAAGAATCTTTT--GGGTCTTCCAATATCAATAGGTTGATTGTTTCG---CTCCTCTAT  
CTTCCAAAAGGAAAAAAGATCTCTGAGAGCTGTTTCCTGGATCCGAAAGAGAGTACTT  
GGGTTCTCCCAATAACG-----AAAAAGTGTATCATGCCTGAATCTAACTGGGGTTCG  
CGGTGGTGGAGGAACTGGATCGGAAAAAAGAGG-----GATTCGAGTTGTAAGATATCTA  
AT-----GAAACCGTCGCTGGAATTGAGATCTCATTCAAAGAGAAAGATATCAAA---TAT  
CTGGAGTTTCTTTTTTATATTATATGGAT-----GATCCGATCTGCAAGGACCATGATTGGG  
AATTTTTGGATCGTCTTCTCCGAGTAAGAGACGAAACATAATTAACCTG-----AATTCG  
CGACAGCTATTCGAAATCTTAGTTAAAGACTGGATTTGTTATCTCATGTTTGTCTTTTCGT  
GAAAAAATACCAATTGAAGTGGAGGGT--TTCTTCAAACAACAAGGA---GCTGGGTCA  
ACTATTCAATCAAATGATATTGAGCCTATTTCCCAT-----CTCTTCTCGAGAAAGAAGTGG  
GCTATTTCTTTGCAAAATTGTGCTCAATTTCATATGTGGCAATTCGCAAGATCTCTTC  
GTT-----AGTTGGGGGAAG---AATCCGCCCGAATCGGATTTTTTTGAGGAAC---ATATCG  
AGAGAGAATTGGATTTGGTTAGACAATGTGTGGTTGGTAAACAAGGATCGG-----TTT  
TTTAGC-----AAGGTACGGAATGTATCGTCAAATATTCAATATGATTCT-----ACAAGA---  
---TCTAGTTTCGTTCAAGTAACGGATTCTAGCCAATTGAAAGGATCTTCT--GATCAATCC  
AGAGATCATTTGATTCCATTAGT-----AATGAGGATTCGGAA-----  
-----TATCACACATTGATCAATCAAAGAGAGATTCAACAATAAAAGAAAGATCGAT  
TCTT--TGGGAT-----CCTTCTTTCTTCAAACGGAACGAACAGAGCTAGAATCAGAC-----  
-CGATTCTCTAAA-----TGCCTTTCTGGATATTCC-----CGGCTATTCACG---GAACG  
TGAGAAGGAGATGAAGAATCATCTGCTTCCGGAAGAAATCGAAGAATTT-----CTTGGG  
AATCCTACAAGATCCATTCTTTCTTTTTTCTCTGACAGATGG-----TCAGAACTTCAT--CT

GGGTTCTGAATCCTACTGAGAGGTCCACTAGAGATCAG-----AAATTGTTGAAGAAA  
GAACAAGATGTTTCT--TTTGTCCCTTCCAGGCGATCGGAA-----AATAAAGAAATA  
GTTAATATATTCAAGATAATTACGTATTTACAAAAT-----ACCGTCTCAATTCATCCTATTT  
CATCAGATCCGGGATGTGATATGGTTCCG--AAGGATGAACTGGAT--ATGCACAGTCC  
CATAAGATTTCAATTCTTGAACAAAAATACATTTTTTTGATTTA-----TTTCATCTGTTCCATG  
ACCGGAACAGGGGGGGGATACACGTTA-----CACCACGATTTTGAATCAGAA-----GAGA  
GATTTCAAGAAATGGCAGATCTATTCCTACTCTATCAATAAGCGAGCCG--GATCTGGTGTA  
TCATAAGGGATTTGCCTTTTTCTATGGATTCTTACGTATTGGATCAAAAACAA-----TTCTT  
GAATGAGGTATTCAACTCCAGGGATGAATCGAAAAAGAAATCTTTA-----TTGGTTCT  
ACCTCCTCTTTTTTAT-----GAAGAGAATGAATCTTTTTTATCGAAGGATCAGAAAAAAT  
GGGTCCG--ATCTCCTGCGGGAATGATTTGGAAGATCCAAAACCAAAAATAGTGGTAT  
TTGCTAGCAACAACATAATGGAGGCAGTCAATCAATATAGATGGATCCGAAATCTGATT  
CAAATCCAA-----TATAGCACCTATGGGTACATAAGAAATGTATGGAATCGATTCTTTTTA  
ATGAAT-----AGATCCGATCGCAACTTCGAATATGGAATTCAA-----AGGGATCAAAT  
AGGAAATGATACTTTGAATCATAGAACGATAATGAAATATACGATCAACCAACATTTATC  
GAATTTGAAAAAG--AGTCAGAAGAAATGGTTCAATCCT-----CTTATTTTTATTTCTCGA  
ACCGAGAGATCCGTGAATCGGGATCCTAATGCATATAGATACAAATGGTCCAATGGGAG  
CAAGAATTTCCAGGAACATTTGGAACATTTTCGTTTCTAAGCAGAAGAGCCGT-----TT  
TCAAGTAGTCTTCGATCGATTACGTATTAATCAATATTCGATTGATTGGTCTGAGGTTATC  
GACAAAAAAGATTTGTCTAAGTCACTTCGTTTCGTTTTGTCCAAGTTACTTCTC-----  
-----TTTTTGTC-----AAGTTTCTCTTTTTTTGTCTAACTCACTTCTC  
--TTTTCTTTGTGAGTTTCGGGAATACCCCATTCATAGGTCCGAG--ATCCACGTCTAT-  
--GAATTGAAAGGTCCGAATGATCAACTCTGCAATCAGTTGTTAGAATCAATAGGTCTTC  
AAATCGTTCATTTGAAAAAATGGAAACCATTA-----TTATTGGAT-----GATCATGATCC  
TTCC--CAAAAATCGAAATTATTGATCAATGGAGGAACAATATCACCATTTTTGTTCAAT  
AAGATACCA--AAGTGG--ATGATTGACTCATTCCATACTAGA-----AATAATCGCAGGAA  
ATCTTTTGATAACACGGATTCTTCTCAATGATATCCCACGATCAAGACAATTGGCT  
GAATCCCGTGAAACCATTTTCATAGAAAGTTCATTGATATCTTCTTTTTATAAAGCAAATCG  
ACTTCGATTCTTGAATAATCCACATCACTTCTGCTTCTAT-----TGTAACAAAAGATTCCC  
CTTT-----TAT--GTGGAAAGGGCCCGTATCAATAATTATGAT-----TTACATATGGA--C  
AATTCCTCAATATCTTGTTCAATTCGCAACAAA--ATATTTCTTTGTGCGGCGGTAAA-----  
-AAAAAATACGCTTTTTTTGGAG--AGAGATACTATTTACCAATCGAGTCACAGGTATCT  
AACATATTCATACCTAACGATTTTCCACAAAGTGGTGACGAAAGG--TCTAACTTGATC  
AAATCT-----TTCCATTTTGCAATTCGATCCGATCCATTAGTTTCGT-----AGAGCTATTTA  
CTCGATCGCAGACATTTCTGGAACACCTCTAACAGAGGGACAAATAGTCAATTTGGAA  
AGAACTTATTGTCAACCTCTTCCGATATGAATCTATCTGATTGAGAAGGGAAGAACTT  
GTATCAGTATCTCAAT-----TTCAATTCAAACATGGGTTTGATTCACTCCATGTTCTGA  
GAAATATTTACCATCCGAAAAG-----AGGAAAAA-----CGGAGTCTTTGT  
CTAAAG-----AAATGCGTTGAGAAAGGACAGATGTATAGAACCTTTCAACGAGATAGTG  
CTTTTTCAACTCTCTCAAAATGGAATCTATTCCAAACATATATGCCATGGTTCCCTTACCT  
CGACAGGGTACAAATATCTAAATTGGATATTTTTAGATACTTTTTTCAGAC--CTATTGCCG  
ATACTAAGTAGCAGT-----CAAAAATTTGTATCCATTTTTTCATGATATTATGCATGGATCAG  
ATATATCATGGCAAATTCCTTCAGAAAAAATTC-----TGTCTTCCACAATGGAAT--  
-CTGATAAGTGAGATTTTCGAGTAAGTGTTTACATAAT-----CTTCTTCTGTCCGAAGAAAT

GATTCATCGAAATAATGAGTCA-----CCATTGATATCGACCCATCTGAGATCTCCAAATGT  
TCGGGAGTTC--CTCTATTCAATCCTTTTCTTCTTCTTGTGCTACATAT--ATCGTTCGT  
ACACATCTTCTCTTTGTTTCCCGA-----GCCTATAGTGAGTTACAGACAGAGTTCGAAAG  
GGTCAAATCTTGATGATTCCATCATAATGATGGAGTTGCGAAAACCTTCTGGATAGGT  
ACCCTACATCTGAACTGAATTCTTCTGGTTAAAGAATCTCTTTCTAGTTGCTCTGGAA  
AAATTAGGAGATTCTCTAGAAGAAATACGGGGTTCTGCTTCTGGCGGCAACATGCTATG  
GGGTGGTGGTCCC-----GCTTATGGG--TTCAAATCAATACGTTCTAAGAAGAAAT  
ATTTGAATATCAAT-----CTCATCGATCTCATA---AGTATCATAACCAAATCCCATCCATCG  
AATCACTTTTTTCGAAAAAGACGAGACATCTAAGTCATACAAGTAAAGAGATCTATTCAT  
TGATAAGAAAAAGAAAAATGTGAACGGTGATTGGATTGATGATAAAATAGAATCCTG  
GGTCGCGAACAGTGATTGATTGATGATAAAGAAAGAGAATTCTTGGTTTCAGTTTTCC--  
---ACCTTAACGACA-----GAAAAAAGGATTGATCAAATTCTATTGAGTTTGACT--CATA  
GTGATCATTTATCA-----AAGAATGACTCTGGTTATCAAATGATTGAACAACCGGG  
AGCAATTTACTTACGATACTTAGTTGACATTCAT-----AAAAAGTATCTAATGAATTATGA  
GTTCAATACATTCTGTTTAGCAGAAAGACGGATATTCCTTGCTCATTATCAGACAATCAC  
TTAT-----TCACAAACCTCGTGTGGGACTAATAGTTTTTCATTTACATCTCATGGA-----  
AAACCCTTTTCGCTCCGCTTAGCCCTATCCCCTTCT--AGGGGTATTTTAGTGATAGGTTT  
TATAGGAACCTGGACGATCCTATTTGGTCAAATACCTAGCGACAAACTCCTATGTTCCTTT  
CATTACAGTATTTCTGAACAAGTTCTGGATAACAAGCCTAAAGGTTTTCTTATTGAT---  
-----GATATCGAT-----GAGGATAGTGACGATATTGAGGATAGTGAC-----  
-----GATATTGATCGTGACCTTGATACGGAGCTGGAGCTTCT  
AACTAGGATGAATGCGCTA-----ACTATGGATATGATGCCG-----GAAATAGACCGAT  
TTTATATTACCCTTCAATTCGAATTAGCAAAAGCAATGTCTCCTTGATAATATGGATTCC  
AAACATTCATGATCTGGATGTGAATGAGTCGAATTACTTATCCCTCGGTCTATTAGTGAA  
CTATCTCTCC-----AGGGATTGTGAAAGATGTTCC---ACTCAAATATTCTTGTATTGC  
TTCAACTCATATTCCCCAAAAAGTGGATCCCGCTCTAATAGCTCCGAATAAATTAATAC  
ATGCATTAAGATACGAAGGCTTCTTATCCACAACAACGAAAGCACTTTTTACCCCTT  
CATATACTAGGGGATTTCACTTGGAAAAGAAAATGTTCCATACT-----AATGGATTCGGG  
TCCATAACCATGGGTTCCAATGTACGAGATCTTGTAGCACTTACCAATGAGGCCCTATC  
GATTAGTATTACACAGAAGAAATCAATTCTAGACACTAATAACAATTAGATCTGCTCTTCA  
TAGACAAACTTGGGATTTGCGA-----TCCCAGGTAAGATCGGTTTCAGGATCATGGGAT  
CCTTTTCTATCAGATAGGAAGGGCTGTTGCACAAAATGTAATTCTAAGTAATTGCCCAT  
AGATCCTATATCTATCTATATGAAGAAGAAA-----TCATGTAACGAAGGGGATTCTTATTT  
GTACAAATGGTACTTCGAACTTGGAAACGAGCATGAAGAAATTAACGATACTTCTTTATC  
TTTTGAGTTGTTCTGCCGGATCGATCGCTCAAGACCTTTGGTCTCTACCC-----GGACCC  
GATGAAAAA---AATGAGATCACTTCTTATGGACTCGTTGAGAATGATTCT--GATCTAGT  
TCATGGCCTATTAGAAGTAGAAGGCGCTCTGGTGGAA-----TCCTCGCGGACAGAAAAA  
GATTACAGTCAGTTTGATAATGAT-----CGAGTGACATTGCTTCTTCGGCCCAAACCAAG  
GAAT--CCCTTAGATATGATGCAAAATGGATCTTGTCTATCGTTGATCCGAGATTTCTCT  
ATGAAAAA-----TACGAATCGGAGTTTGAAGAA---GGGAAGGAGAAGGAGTCCCTCGA  
CCCGCAA-----CAGATAGAGGAGGAC-----TTATTCATCAC-----ATAGTTTGGG  
CTCCT-----AGAATATGGCGCCCT-----TGGGGCTTTCTATTTGATTGTATCGAAAGGCC  
CAATTCATTGGGATTTCCC--TATTGGGCCAGGTCATTTCCGGGGCAAG-----CGGATCA  
TTTATGATGAAAAGGAGGAGCTTCAAGAGAATGATTCCGAGTTCTTGCAGAGTGGAAAC

CATGCAGTACCAGACACGAGATAGATCTTCCAAAGAACAAGGCTTTTTTTCGAATAAGC  
CAATTCATTTGGGACCCTGCAGATCCACTCTTTTTCTATTCAA---GATCAGCCCTTGT  
TCTCTGTGTTTTACATCGAGAATCTTTGCAGATGAAGAGATGTCAAAGGGGCTTCTT  
ACTTCCCAAACAGATTCCCCTACATCTATATATAAACGCTGGTTTATC-----AGAATACG  
CAAGAAAAGCACTTCGAATTGTTGATTCATCGCCAGAGATGGCTTAGA-----ACCAAT  
AGTTCATTATCT-----AATGGATTTTTCCGTTCTAAT-----ACTCCATCCGAGAGTTATCAGT  
ATTTATCAAATCTGTTCCCTATCTAAC---GGAAGGCTATTGGATCAAATGACAAAGACATT  
GTTGAGAAAAAGATGGCTTTTTCCCGGATGAAATGAAAATCGGATTC-----ATG-----  
-----ATGCCTAGATCGAGG---ATAAATGGAAATTTTATTGATAAGACCTTTTCAATT  
GTAGCCAATATCTTATTACGAATAATTCCGACAACCTTCAGGAGAAAAAGAGGCATTTAC  
CTATTACAGAGATGGG-----ATGTCGGCTCAATCCGAAGGAAATTATGCGGAAGCTTTAC  
AGAATTATTATGAAGCTATGCGACTAGAAATTGATCCCTATGATCGAAGCTATATACTCTA  
TAACATAGGCCTTATCCACACAAGTAACGGAGAACATACAAAAGCTTTGGAATATTATT  
TTCGGGCACTAGAACGAAACCCGTTTTTACCACAAGCTTTTAATAATATGGCTGTGATC  
TGTCATTAC---CGGGGAGAACAGGCCATTTCGACAGGGGGATTCTGAAATTGCGGAGGC  
TTGGTTTCGATCAAGCCGCTGAGTATTGGAAACAAGCTATAGCGCTCACTCCTGGTAATT  
ATATTGAAGCGCAGAATTGGTTGAAGATCACGAGACGTTTCGAA-----ATGAGTTGTCG  
ATCAGAACATATATGGATAGAACTTATAGTGGGGTCTCGAAAAATAAGTAATTTCTGCTG  
GGCCTTTATCCTTTTTTTAGGTTCACTAGGATTCGATTAGTTGGATCTTCCAGTTATCTC  
GGTAAGAATTTGATATCTTTAGTTCCGCCTCAACAAATCTTTTTTTTCCACAAGGGATC  
GTGATGTCTTTCTACGGTATCGCAGGTCTCTTTATTAGTTCTTATTTGTGGTGCACAATTT  
CGTGGAATGTAGGTAGTGGCTATGATCGATTCGATAGAAAAGAAGGAATAGTGTGTATT  
TTTCGTTGGGGATTTCTGGAAAAAATCGTTCGCATCTTTCTACGATTTTCGTATGAAAGAT  
ATTCAGTCCATCCGAATCGAAGTTAAAGAGGGTATTTATGCTCGTTCGTGTCCTTTATATG  
GAAATCAAAGGACAGGGGGCCGTTCCCTTGACGCGTACTGATGAGAAT---TTGACTCC  
GCGTGAAATTGAGCAAAAAGCCCGCAATTGGCCTATTTCTTGC GTGTACCGATTGAA  
GTATTT

>Allosyncarpia

ATGGAAAAATGGTGGTTCAATTCGATGTTGTATCTAAGTAAATCAATTGATAGGTTTGGT  
CCTATTGAAAAAACCAGTGTAAGTGAAGATCCGGTTATAAACGATACGGATAAAAAGA  
TTCATAGTTACAGTAATGCTAATCATTTAGTGGGCGTCAAGGACGTTTCGTAATTTTATCT  
CTGATGACACCTTTTTAGTTAGAGATAGTAATAGGAATATTTATCCATATATTTTGATATT  
ACTAATCAAATTTTTGAGATTGACAATGATCCT-----TCTTTACTGAGTGAACGAGAAAG  
TTCTTTTTTTAGTTATCGGACTTATGCTTATCTGAAGAATGGATCTAAGAATGACGATCC  
GCCCTGTGATCGTTCCATGTATGATACTAAATACAGTTGGAATAATCACACTACTAGTTG  
CATTAATCTTATCTTGGT-----TCTCAAATCTGTATTGAGAGTTCCATTTAAGTAGTAGT  
GACAATTCAGTGACAGTTACATTTCTAGTTACATTTATGGTAGGGGGAGCTCCAGTATA  
AGAACTAGCAGGAATGCTATTGATTTCACTCGAAGAGAAAATTCTACT---TTCGATTTGA  
CTCAAAAATATAGGCATTTGTGGGTTCAATGCGAAAATTGTTATGGATTAAATTATAAGA  
AACTTTTGAAATCCAAAATGAATATTTGTGACCAATGTGGATATCATTGAAAATGAGTA  
GTTTCAGATCGAATCGAATTTTCGATTGATCCAGGTACTTGGGATCCTATGGATGAAGAC  
ATGGTTTCTCTGGATCCTATTGAATTTCAATTCGGAGGAGGAACCTTATAAAGATCGTATT  
GATCTTATCAAAGAAAGACAGGATTAACCGATGCTGTTCAAACAGGCACAGGTTCGAC  
TAAACGGTATTCATAGCAATTGGAGTTATGGATTTTTCAGTTTATGGGGGGTAGTATGG

GATCCG TAGTAGGCGAGAAAATTACCCGTTTGATCGAGTATGCTACCAATAAAATTTTAC  
CTCTGATTCTAGTGTGTGCTTCCGGAGGAGCACGTATGCAAGAAGGAAGCTTGAGCTT  
GATGCAAATGGCTAAAATATCTGCTGCTTTATATGATTATCAATCCCATAAAAAGTTATTC  
TATGTATCAATCCTTACATCTCCTACTACTGGTGGGGTAAACGGCTAGTTTTGGGATGTTG  
GGGGATATTATTATTGCCGAACCTAATGCTTACATTGCATTTCGCAGGTAAAAGAGTAATT  
GAACAAACATTGAATAAGATAGTACCTGAAGGTTCAACAAGCGGCTGAATATTTATTCCA  
TAAGGGCTTATTTCGATCCAATCGTACCACGTAATCCTTTAAAGGGTGTCTGAGTGAGT  
TATTTAAGCTTCACGCTTTTTTTTCTTTGAAT-----ATGGTAACCATTAGAGCCGAC  
GAAATTAGTAATATTATCCGTGAACGTATTGAGCAATATAATAGAGAAATAAAGATTGTA  
AATACCGGTACCGTACTGCAAGTAGGCGACGGCATTGCTCGTATTTATGGTCTTGATGA  
AGTAATGGCGGGTGAATTAGTAGAATTTGAAGAGGGTACAATAGGGATTGCTCTGAATT  
TGGAATCAAATAATGTTGGTGTGTATTAAATGGGTGACGGTTTGATGATACAAGAGGGA  
AGTTCTGTAAAAGCAACAGGAAGAATTGCTCAGATACCGGTGAGTGAGGCTTATTTGG  
GTCGTGTTATAAATGCCCTGGCCAAACCTATTGATGGTCGAGGTGAAATTTACGCTTCT  
GAATCTCGATTAATTGAATCTCCTGCTCCAGGTATTATTTTCGAGACGTTCCGTATATGAG  
CCTCTTCAAACCTGGACTTATTGCTATTGATTTCGATGATCCCTATAGGACGTGGTCAGCGA  
GAATTAATTATTGGGGACAGACAGACCGGTAAAACAGCAGTAGCCACGGATACTATTCT  
CAATCAACAAGGTCAAATGTAATATGTGTTTATGTAGCTATTGGTCAAAAAGCATCTTC  
TGTGGCTCAGGTAGTGAATACTCTCCAGGAAAGGGGAGCTATGGAATACACTATTGTG  
GTAGCTGAAACGGCGGATTCCCCAGCTACGTTACAATACCTCGCTCCTTATACAGGAGC  
AGCTCTCGCTGAATATTTTATGTTTCGTGAACGACACACTTTAATCATTTATGATGATCTC  
TCCAAACAAGCACAGGCTTATCGCCAAATGTCTCTTCTATTACGAAGACCACCCGGTCG  
CGAAGCTTATCCAGGAGATGTTTTTTATTTGCATTCACGCCTTTTGGAAGAGCCGCTA  
AATTAAGTTCTCTTTTAGGTGAAGGAAGTATGACTGCCTTACCAATAGTGAGACCCAG  
TCGGGAGATGTTTCGGCTTATATTCCTACTAATGTAATTTCTATTACAGATGGACAAATAT  
TCTTATCAGCCGATCTATTCAATGCTGGAATCAGACCTGCTATAAATGTGGGTATTTCTG  
TTTCCAGAGTAGGATCTGCAGCTCAAATTAAGCCATGAAACAAGTAGCTGGAATAATT  
AAAATTGGAATTAGCGCAATTCGCAGAATTAGAAGCCTTTGCACAATTCGCTTCTGATC  
TCGATAAAGCTACCCAGAATCAATTGGCAAGAGGTCAACGATTACGTGAATTGCTTAA  
ACAATCCCAATCAGCCCCCTCTCACGGTGGGAAGAACAGATAATGACTATTTATACGGGAA  
CGAATGGTTATCTTGATTCATTAGAAATTGGACAGGTAAGGAAATTTCTCGTTGAGTTA  
CGTACTTACGTAAAAACGAATAAACCTCAATTCCAAGAAATTATATCTTCTACTAAAACA  
TTTACTGAGGAAGCAGAAGCCCTTTTGAAAGAAGCTATCCAGGAACAGAAGGAACGC  
TTTCTACTTCAGGAACAAGGAATGAGAATCAATCCTACTACTTCGGGTCTCGGAGTTTC  
CACACTTGAAAAAACAACCTGGGACGTATCGCTCAAATCATTGGTCCGGTACTAGAT  
GTAGCCTTTCCCCGGGCAAGATGCCTAATATTTATAACGCTCTGGTAGTTAAAGGTCG  
AGATACTATCGGTCAAGAAATTAATGTGACTTGTGAGGTACAGCAATTATTAGGAAATA  
ATCGAGTTAGAGCTGTAGCTATGAGTGCTACAGATGGTCTAATGAGAGGAATGGAAGT  
GATTGACACAGGAGCTCCTCTAAGTGTCCAGTCGGCGGAGCGACTCTCGGCCGAATT  
TTCAACGTGCTTGGAGAGCCTGTTGATGATTTAGGGCCTGTAGATACTCGTACAACATC  
TCCTATTCATAGATCTGCGCCCGCCTTTATACAGTTAGATACAAAATTATCTATTTTTGAA  
ACAGGAATTAAGTAGTAGATCTTTTAGCCCCCTTATCGGCGTGGAGGAAAAATAGGACT  
ATTCGGGGGGGCTGGAGTGGGTAAAACAGTACTCATTATGGAATTGATCAACAACATT  
GCTAAAGCTCATGGGGGGGTATCCGTATTTGGAGGAGTAGGTGAACGTACTCGTGAAG



GAAATGATCTTTACATGGAAATGAAAGAATCTGGAGTAATTAATGAACAAAATATTGCA  
GAATCTAAGGTGGCTCTAGTATACGGTCAGATGAATGAACCCCCGGAGCTCGTATGAG  
AGTTGGTTTGACTGCCCTAACTATGGCGGAATATTTCCGAGATGTTAATGAACAAGACG  
TACTTCTATTTATCGACAATATCTTCCGTTTTCGTCCAAGCAGGATCTGAGGTATCCGCCT  
TATTGGGTAGAATGCCTTCTGCTGTGGGTATCAACCCACCCTTAGTACCGAAATGGGT  
ACTTTACAAGAAAGAATTACTTCTACCAAAGAGGGATCCATAACTTCTATTCAAGCAGT  
TTATGTACCTGCGGACGATTTAACCGACCCTGCTCCTGCCACGACATTTGCACATTTAG  
ATGCTACGACCGTACTATCAAGAGGATTAGCTGCTAAAGGTATCTATCCAGCAGTAGAT  
CCTTTAGATTCAACGTCAACTATGCTCCAACCTCGAATCGTTGGTGAGGAACATTATGA  
AACTGCGCAAAGAGTTAAGCAAACCTTTACAACGTTACAAAGAACTTCAGGACATTATA  
GCTATCCTTGGGTTGGACGAATTATCCGAAGAGGATCGCTTAACCGTAGCAAGAGCAC  
GAAAAATTGAGCGTTTCTTATCCCAACCCTTTTTTCGTAGCAGAAGTATTTACCGGTTCC  
CCGGGGAAATATGTTGGTCTAGCAGAAACAATTAGAGGGTTTAAATTGATCCTTTCCGG  
AGAATTAGATGGTCTTCTGAACAAGCCTTTTATTTGGTAGGTAACATCGATGAAGCTA  
CTGCGAAGGCTACGAACTTAGAAATGGAGAGTAAATTGAAGAAAATGACCTTAAATCT  
TTGTGTACTAACCCCTAATCGAATTGTTTGGGATTCAGAAGTGAAAGAAATCATTTTATC  
TACTAATACTGGACAAATTGGCGTATTACCAAATCACGCGCCTATTGCCACAGCTGTAG  
ATATAGGTATTTTGAGAATACGCCTTAACGACCAATGGTTAACAATGGCTCTGATGGGT  
GGTTTTGCTAGAATAGGCAATAATGAGATCACTATTTTAGTAAATGACGCGGAAAAGGG  
TGGTGATATTGATCCACAAGAAGCTCAGGAAACTCTTGAAGTACGCGGAAGCTAACTTA  
AGGAAAGCTGAAGGTAAGAGACAAACAATTGAGGCAAATCTAGCTCTCAGACGAGCT  
AGGACACGAGTCGAGGCTATCAATGCAATTTCAATGAAAAATGGAACCGATTCTTTTCG  
TTTACTTGGGTCACTGGCCATCGGCCGGGAGTTTCGGATTTAATACCGATATTTTAGCAA  
CAAATCCAATAAATCTAAGTGTAGTCCTTGGTGTATTGATCTTTTTTGGAAAGGGAGTG  
TTAAGCGATTTATTAGATAATCGAAAACAGAGGATCTTGAATACTATTCGAAATTCAGA  
AGAATTACGCGGGGGGGCCATTGAACAGCTGGAAAAGCCCCGGGCCCGTTTACGGAA  
AGTGGAATGGAAGCGGAGCAGTTTCGAGTGAATGGATACTCTGAGATAGAACAAGA  
AAAGTTGAATCTGATTAATTCAACTTATAAGACCTTGAACAATTAGAAAATTACAAAA  
ACGAAACTATTCATTTTGAACAGCAAAGAGCAATTAATCAAGTCCGACAACGGGTTTT  
CCAACAAGCCTTACAAGGAGCTCTAGGAACTCTGAATAGTTGTTTGAACAACGAGTTA  
CATTTACGTACTATCAGTGCTAATATTGGTATGTTTGGGGCGATGAAAGAAATAACTGAT  
ATGAATCCACTGATTTCTGCCGCTTCCGTTATTGCTGCTGGGTAGCTGTCCGGCTTGCT  
TCTATTGGACCTGGAGTTGGTCAAGGACTGCTGCGGGCCAAGCTGTAGAAGGTATTG  
CAAGACAGCCCCGAGGCGGAGGGAAAAATACGAGGTACTTTATTGCTTAGTCTGGCTTT  
TATGGAAGCGTTAACAATTTATGGATTGGTTGTAGCCTTAGCGCTTTTATTTGCGAATCC  
CTTTGTGATGAATGTTTTATCATGTTCCACCAACACACTAAAAGGGTTATACGATATATC  
GGGTGTGGAAGTAGGCCAACATTTCTATTGGCAAATAGGAGGTTTTCAAGTCCATGGC  
CAAGTCCTTATTACTTCTTGGGTTGTAATGCTATCTTATTAGGTTCCGCCAGTATAGCTC  
TTCGGAATTCACAAACCATTCCGAATGACAGTCAGAATTTCTTCGAATATGTCCTTGAA  
TTCATTCGAGACGTTAGCAAACTCAGATTGGAGAAGAATATGGTCCATGGGTTCCCTTT  
TATTGGAACTATGTTCCATTTATTTTTGTTTCGAATTGGTCAGGGGCTCTTTTACCATGG  
AAAATCATAGAGTTACCTCATGGGAGTTAGCCGCACCCACGAATGATATAAATACTAC  
CGTTGCTTTAGCTTTACTCACGTCAGTAGCATATTTCTATGCAGGTCTTACCAAAAAAG  
GATTAAGTTATTTTCAGTAAATACATTCAACCAACTCCAATCCTTTTACCCATTAACATCTT



AGAACTAGATAGATCTAGACAACATGACTTCCTATAACCCACTTCTTTTTTCGAGAGTATAT  
TTATGCACTTGCTCATGATCATGGTTTAAACAGGTTATGACAATAAATCTAGTTCAATAATT  
GTGAAACGTTTAACTACTCGAATCTATCAACAGAATCCTTTTGATTTTTTCAGCTAATGAT  
TCTATCCAAAATCCATTTTTTGGGAAGAATTTTGATTCTCAAATTATCTCCGAGGGATTT  
GCAGTCATTGTGGAAATCCATTTTTCTAAGATTAGTATTTTCTTAATAGCAAAATCT  
CATAAATTACGATCAATTCATTCCATATTTCTTTTTTAGAGGACAAATTTTCACATTTAG  
ATTATGTGTGCGACGTACTAATACCCTATCACATACATCTAGAAATCTTGGTTCAAACCC  
TTCGCTACTGGGTGAACGATGCCCTCTTCTTTGCATTTATTACGTTTCTTTCTCCACGAGT  
ATTGGAAT-----AGTTTTATTACTAAAGATATTACCATTTTTTCAAACCAAGATTCTTCTT  
GTTCCATATAAATTTTCATATATGTGAATACGAATACATCTTTCTTTTTCTCCGTAATCAAT  
CTTCTCATTACGGTCAACATCTTCTGGAATCTTTTTTGAGCGAATCTATTTCTATGTA  
AAATAGAACATTTTATCAAAGTCTTCTTTGATTTTCAGATCCTATCTTTCTTCAAAGATCCT  
TTCATGCATTATGTTTCGATATCAAGGAAAATCAATTCTGGCTTCAAAGATACGCCTCTT  
CTGATGAAGAAATGGAAATATTACCTTGTTAATTTATGGCAATATCATTTTTACGCCTGG  
TTGAAACCAGGAAGGATCGATATAACCAATTATGCAAGTATTCTCTTGACTTTTTGGG  
CTATCGTTCAAGCGTGCGACTAAATCTTCCGGTGGTACGAAGTCAAATGCTAGAAAATT  
CATTTCGAATAAATAAT-----GCTATGAAGAAGTTCGAGACAATAGTTCCAATTATTCCTC  
TGATTGGATCATTGTCAAAGCGAATTTTTGTAAACACATTAGGGCATCCCATTAGTAAA  
CCGACCCGGGCTGATTCATCAGATTCTGATATTATCGACTGTTTTTTGCGTATATGCAGA  
AATCTTTCTCATTATCACAGCGGATCCTCAAAAAAAAAAGAGTTTATATCGAGTAAAATAT  
ATACTTCGACTTTCTTGTGTTAAAACCTTTGGCTCGTAAACACAAAAGAATGTACGCAC  
TTTTTTAAAAGATTAGGTTTCGGAATTTTTGGAAGAATTCCTTACGGAGGAAGAAGTTG  
TTCTTTCTTTGATCTTCCCAAGACGGATTTGGTATTTGGATATTACTTCTATCAATGATCT  
AGTCAATTATGAAATGATAATTGATAACAACA---GAAGTACAA---GATATAAATTTCTTTTC  
TAGATTGGAATCT---TTAAAAGAAGTCTATAGAATCATAGGGATGTTTTTACCTATTTTGA  
CTCTTGTATTGGGAATCACAATAGGTGTACTCATAATTGTGTGGTTAGAAAGAGAAATAT  
CCGCAGGAATACAACAACGTATTGGTCCCGAATACGCCGGTCTTTTGGGAATCTTCAA  
GCTTTAGCAGATGGGACAAAACCTATTTTCAAAGAGAATCTTTTTCCATCTCGAGGAGA  
TACTCGTTTATTAGTATAGGACCATCCATAGTAGTTATATCCATTTTACTAAGTTATTCA  
GTAATTCCTTTTAGTTATCACCTTGTTTTATCTGATCTCAATATCGGTGTTTTTTTTATGGAT  
TGCCATTTCCAGTATTGCTCCCATTTGGACTTCTTATGTCAGGATATGGATCAAATAATAAA  
TATTCTTTTTTAGGTGGTCTACGAGCCGCTGCTCAATCGATTAGTTATGAAATACCATTA  
ACTCTTTGTGTGTTATCAATATCTCTATTATCTAACAGTTCAAGTACAGTTGATATAGTTG  
AGGCCAGTCAAATATGGTTTTTTGGGGATGGAATTTGTGGCGTCAACCTATAGGCTTT  
TTCATTTTTCTAATTTCTTCCCTAGCAGAATGTGAGAGATTACCTTTTCGATTTACCAGAA  
GCAGAGGAAGAATTAGTAGCAGGTATCAAACCGAATATTCGGGTATCAAATTTGGGTT  
ATTTTACGTTGCTTCCATCTAAATCTATTAGTTTCTTTCGTTATTTGTAACAATTCTTTACT  
TAGGGGGTTGGAATATCTCTATTCCCTACATATTCGTTCCCTGAGCTATTT-----GAAAAAG  
TAGGTAGAGTCTTTGGAACGACAATTGGTATTTTTATTACATTAGCTAAAACCTATTTGT  
TCTTGTATTATTCTATCACACAAGATGGACTTTACCTAGACTAAGAATAGACCAATTAT  
TAAATCTTGGATGGAATTTCTTTTACCCATTTCTCTCGGTAATCTATTATTAACAACCTC  
TTTCCAACCTCTTTTATTGATGATCTGGCATGTACAGAATGAAAACCTCATTCTCGATTC  
TACGAGAATTTTTATGAAAGCCTTTCATTTGCTTCTCTTCGATGGAAGTTTTATTTCCC  
AGAATGTATCCTAATTTTTGGCCTAATTTCTTCTTCTGATGATCGATTCAACCTCTGATCAA

AAAGATATACCTTGGTTCTATTTTCATCTCTTCAACAAGTTTAGTAATGAGCATAACGGCC  
CTATTGTTCCGATGGAGAGAAGAACCTATGATTATCTTTTCAGGAAATTTCCAAACGAA  
CAATTTCAACGAAATCTTTCAATTTCTTATTTTACTATGTTCAACTCTATGTATTCTCTAT  
CCGTAGAGTACATTGAATGTACAGAAATGGCTATCACAGAGTTTCTCTTATTCGTATTAA  
CAGCTACTCTAGGAGGAATGTTTTATGCGGTGCTAACGATTAAATAACTATCTTTGTAG  
CTCCAGAATGTTTCAGTTTATGCTCCTACCTATTATCTGGATATACCAAGAAGGATGTAC  
GGTCTAATGAGGCTACTATGAAATATTTACTCATGGGTGGGGCAAGCTCTTCTATTCTGG  
TTCATGGTTTCTCTTGGCTATATGGTTCATCCGGGGGAGAGATCGAGCTTCAAGAAATA  
GTGAATGGTCTTATCAATACACAAATGTATAACTCCCCAGGAATTTAATTGCGCTTCTA  
TTCATCACTGTAGGAATTGGGTTCAAGCTTTCCCTAGCCCCTTCTCATCAATGGACTCCT  
GACGTATACGAAGGATCTCCCACTCCAGTCGTTGCTTTTCTTTCTGTTACTTCGAAAGT  
AGCTGCTTCAGCTTCAGCCACTCGAATTTTCGATATTCCTTTTTATTTCTCATCAAACGA  
ATGGCATCTTCTTCTGGAAATCCTAGCTATTCTTAGCATGATATTGGGGAATCTCATTGCT  
ATTACTCAAACAAGCATGAAACGTATGCTTGCATATTCGTCCATAGGTCAAATCGGATAT  
GTAATTATTGGAATAATTGTTGGAGACTCAAATGGTGGATATGCGAGCATGATAACTTAT  
ATGCTGTTCTATATCTCCATGAATCTAGGAACTTTTGCTTGCATTGTATTATTTGGTCTAC  
GTACCGGAACTGATAACATTTCGAGATTATGCAGGATTATACACGAAAGATCCTTTTTTG  
GCTCTCTCTTAGCCCTATGTCTCTTATCCCTAGGAGGTCTTCCCTCCACTAGCAGGTTTT  
TTCGGAAAACCTCCATTTATTCTGGTGTGGATGGCAGGCAGGCCTATACTTCTTGGTTTC  
AATAGGACTCCTTACGAGCGTTATTTCTATCTACTATTATCTAAAATAATCAAGTTATTA  
ATGACTGGACGAAACCAAGAAATAACACCTCACGTGCGAAATTATAGAAGATCCCCTT  
TAAGATCAAACAATTCCATCGAATTGAGTATGATTGTATGTGTGATAGCATCTACTATAC  
CAGGAATATCAATGAACCCGATTATTGCAATTGCTCAGGATACCCTTTTTATGTTTTCTGC  
TTTACGAATATGATATTTTCTGGGCATTTCTAATAATATCAAGTGTATTCTTATTTTGGCA  
TTTCTAATTTCCGGAATTTTAGCCCCGATTAGCAAAGGGCCAGAGAAACTTTTCGAGTTA  
TGAATCAGGTATAGAACCAATGGGCGATGCTTGGTTACAATTTTCGAATCCGTTATTATAT  
GTTTGCTCTAGTTTTTGTGTTTTGATGTTGAAACGGTTTTTCTTTATCCAGGGGCAAT  
GAGTTTCGATGTATTGGGGGTATCCGTATTTATAGAAGCTTTTCATTTTCGTGCTTATCCTA  
ATTGTTGGTTTAGTTTATGCATGGCGAAAAGGAGCATTGGAATGGTCTACGAATTATTTT  
CCTTGGTTAACAATAATTGTACTTTTGCCGATATTCGCAGGTTCTTTAATTTTCTTTCTAC  
CTCATAGAGGAAATAAGGTAATAAGGTGGTATACTATATGCATATGTACTTTAGAACTCC  
TTTTAACTACCTATACGTTCTGTTATCATTCCAATTGAACGATCCATTAACCCAATTAAC  
AGAGGATTATAAATGGATTAATTTTTTTTATTTTTACTGGAGATTGGGAATAGATGGACT  
TTCTATAGGACCTATTTTACTGACGGGATTTATCACCCTTTAGCTACTTTAGCAGCTCG  
GCCAGTACTCGAGATTCCCATTATTCCATTTCTGATGTTAGCAATGTACAGCGGTCA  
AATAGGATCATTTTCTTCTCGAGACCTTTTACTTTTTTTTCATCATGTGGGAGTTAGAATT  
AATCCCGTTTATCTACTTCTCTCGGTGTGGGGGGGAAAGAAACGTCTGTATTCCGCTA  
CAAAATTTATTTTGTACACTGCGGGAAGTTCCATTTTTTCTATTAATAGGGGTTCTGGGTA  
TTGGTTTATATGGTTCCAACGAACCAACATTAATTTGGAAACATTAGCTAATCAATCGT  
ATCCGGTGGCACTGGAAATAATATTCTATATTGGATTTCTTATTGCTTTTGCTGTTAAATT  
ACCGATTATACCCTTACATACATGGTTACCAGACACCCATGGAGAGGCACATTATAGTAC  
TTGTATGTTTCTAGCCGGAATTTATTAATAAATGGGAGCATATGGGTTGGTTCGGATCAA  
TATGGAATTAATACCTCATGCTCATTCTATATTTTCTCCCTGGTTGATTATAGTAGGTGCAA  
TCCAAATAATCTATGCAGCTTTAACATCTCCTGGTCAACGTAATTTAAAAAAAAGAATA

GCCTATTCCCTCTGTATCTCATATGGGTTTCATAATTATTGGAATTGGCTCGATAACTGATA  
CGGGACTCAATGGAGCCATTTTACAAATAATCTCTCATGGATTATCGGGCGCTTCTCTTT  
TTTTCTTGGCAGGAACGAGTTATGATAGAATACGTCTTGTTTATCTCGACGAAATGGGT  
GGAATGGCTATCCACCTTCCAAAAATATTACGATGTTTCAGTATCTTATCAATGGCTTCC  
CTTGCATTACCGGGTATGAGTGGTTTTCTTGCAGAATTGATAGTTTTTTTTTGGATAAATT  
ACCAGCCAACAATATCTTTTAATGCCAAAAATACTAATTACTTTTTGTAATGGCAATTGGA  
ATGATATTAACTCCTATTTATTTATTATCTATGTTACGCCAAATGTTCTATGGATAACAAGTT  
ATTTAATGTTCCAAACTCTTATTTTTTTGATTCTGGGCCGCGAGAGTTATTTGTTTCCATC  
TCTATTCTTCTACCAATAATAGCTATTGGTATTTATCCAGATTTTCGTTCTTTCACTATCTGT  
TGACAAAGTCGAAGCTATTATATTGAATTATTTTTTATCAAATGATACTCGAACATGTACTT  
GTTTTGAGTGCCTATTTATTTTCTATTGGTATCTATGGATTGATCACGAGTCGAAATATGG  
TTAGGGCCCTTATGTGTCTTGAACCTATCCTCAATGCGGTTAATATAAATTCGTAACATT  
TTCAGATTTTTTTGATAGTCGACAATTAAGGAGATATTTTCTCCATTTTTGTTATATCT  
ATTGCAGCCGCCGAAGCAGCTATTGGGTAGCTATTGTTTCGTCGATTTATCGTAACAG  
AAAATCAACTCGTATCAATCAATCGAATTTGTTGAATAAAATGGAATATACATATCAATA  
TTCATGGATTATCCCCTTCATTCCACTTCCAGTTCCTATGTTAATAGGAGTGGGACTTCT  
ACTTTTTCCAACGGCAACAAAAATCTTCGCCGTATGTGGGCTTTTCTTAGTATTTTCTT  
GTTAAGTATAGTTATGATACTTTCGATCTATCTATCTATTACGCAAATAAATAGAAGTTTT  
ATCTATCAATATGTATGGTCTTGGACCATTAATAATGATTTTTCTTTGGAGTTCGGTCACT  
TAATAGATCCACTTACTTTTATTATGTTAATATTAATTACTACTGTTGGAATTTTGGTCTT  
TTTTATAGTGACAATTATATGTTTCATGATCAAGGATATTTGAGATTTTTTGCTTATATGAG  
TTTTTCAATACTTCCATGTTGGGATTAGTACTAGTTCGAATTTGATACAAATTTATATT  
TTTTGGGAATTAGTTGGAATGTGTTCTTATCTATTAATAGGTTTTTGGTTCACACGACCT  
AGTGCGGGGACTGCTTGTCAAAAAGCGTTTTGTAACGAATCGTGTAGGCGATTTTGGTTT  
ATTATTAGGAATTTTAGGTCTTTATCGGATAACCGGTAGTTTTTGAATTTCCGGGATTTGTTT  
CAAATATTGAATAAC---GAGGTTCCTTTTTTATTTCTTACTTTGTGTGCCTTTCTTTTATTT  
GCAGGTGCAGTTGCGAAATCGGCACAATTCCCCCTTCATGTATGGTTACCTGATGCCAT  
GGAAGGCCCTACTCCCATTTCCGGCTCTGATACACGCCGCTACTATGGTAGCAGCGGGCA  
TTTTTCTTGTAGCTCGACTTCTTCCTCTTTTTATAATCATACCTTACATAATGAATTTATA  
TCTTTAATAGGTATAATAACAGTATTATTAGGAGCTACTTTAGCTCTTGCTCAAAAAGATA  
TTAAAAGAGTTTTAGCTTATTCTACAATGTCTCAATTTGGGTTATATGATGTTAGCTCTAG  
GTATGGGGTCTTATCGAGCCGCTTTATTTCAATTTGATTACTCATGCTTATTTCGAAAGCATT  
GTTGTTTTTAGGATCCGGATCAATTATTCATTCAATGGAAGCTATTGTTGGATATTCTCCA  
GATAAAAGTCAGAATATGGTCTTATGGGAGGTTTTAAAAAAGCATGTACCAATTACAAA  
AACTGCTTTTTTTAGTAGGTACACTTCTCTTTGTGGTATTCCCCCCTTGCTTGTTTTTG  
GTCCAAAGATGAAATTTCTTAATGATAGTTGGTGTATTACCTAGTTTTCGCAATAATAGC  
TTGTTCCACAGCAGGATTAACCGCATTATATGTTTCGGATCTATTTACTTACTTTTTGAG  
GGACATTTCAATGTTCAATTTTCAAATTTACAGCGGTCAAAAAGTAGTTCCTACTATTC  
AATATCTCTATGGGGAAAAGAAGTACCAAAAACGATTAATAAAC---TTATTAAGTTTATTA  
ACAATGAATTTTTTTTTGGGTCACTAAAAAT---ACTTCTCTTATCCTCATGAATCGGACAA  
TACTATGCTATTTTCTATGGTTATATTAGTACTATTTACTTTGTTTGTGGAGTCGTAGGA  
GCT---TTTCATTTGGATATATTATATAAATTGTTAAATCCGTCTATAAACCTTTTACATCCG  
AATTCAAAT---TCTGTGGATTGG---GAATTTGTGACAAATGCAAGTTTTTCTGTACAGTATA  
GTTTTTTTTCGGAATATTTATAGCGTCTTTTTTTATATAAGCCTATTTATTCATCTTTACAAAA

TTTGAACCTACTAAATTCATTTTCTATTTTAGGGGACAAAATAAAAAATGTGATATATGAT  
TGGTCATATAATCGTGGTTACATAGAAGCTTTTTATAACAATATCCTTAACTCAGGGTATAA  
GAGGACTAGGTGAACTAATTCATTTTTTGGATAGACGAGTAATTGATGGAATTACGAAT  
GGTTTCGGTCTTACAAGTTTCTTTTTTCGGAGAAGGTATCAAATATGTAGGGGGCGGT--C  
GCATCTCTTCTATCTCTTATTGTATTTATTGTTTGTATTAATCTTTTTATTAATTTATTCCAT  
GGATTTGCCTGGACCAATACATGATTTTCTTTTAGTTTTTCTGGGATCAGGTCTTATATTA  
GGAAGTCTAGGAGTGGTATTACTTACCAATCCAATTTATTCTGCCTTTTCTTGGGATTG  
GTTCTTGTGTGATATCCTTATTTTATATTCTATCAAACCTCCATTTTGTAGCGGCTGCGC  
AGCTCCTTATTTATGTAGGAGCTATAAACGTTTTAATTCTATTTGCTGTGATGTTTCATGAA  
TGGTTCAGAATATTACAAAGATTTGAATCCTTGGACTGTTGGAGATGGGATTACTTCGT  
TGGTTTGTACAAGTATTTTGGTTTCACTAATGACTACTATTTTAGATACGTCTTGGTACG  
GGATTATCTGGACGACAAAGTCAAACCAGATTATCGAGCAAGATTTGATCGGTAATAGT  
CAACAAATCGGAATTCATTTATCAACCGATTTTTTCTTCCATTTGAACTCATTTCATAA  
TTCTTTTAGTTGCTTTGATAGGTGCAATTGCTGTTGCTCGTCAAATGAATGGAACAACCT  
ACAAGAAAAGACCTCATGATAGTCAATATGGGGCCTCACCAACCATCAATGCATGGTGT  
TCTTCGGCTCATCCTTACTCTAGATGGTGAAGATGTTATTGATTGTGAACCAATATTGGG  
TTACTTACACAGAGGAATGGAAAAAATTGCGGAAAATCGAACAGTTATACAATATCTAC  
CTTATGTAACACGTTGGGATTATTTAGCTACTATGTTTACAGAAGCAATAACCGTAAATG  
GACCCGAACAGTTGGGAAATATTCAAGTACCTAAAAGAGCCAGTTATATCAGAGTAATT  
ATGTTAGAGTTGAGTCGTATAGCTTCTCATCTGTTATGGCTTGGCCCCTTATGGCAGAT  
ATTGGTGCACAGACTCCTTTTTTCTATATTTTCAGAGAAAGAGAATTAGTATATGATCTA  
TTCGAAGCTGCCACCGGTATGAGAATGATGCATAATTATTTTCGTATCGGAGGAGTAGC  
GGCCGATCTACCTTATGGATGGATAGATAAATGTTTGGATTCTGTGATTATTTTTTAACA  
GCGGTTTCTGAATATCAAAACTTATTAAGCGAAATCCTATTTTTTTTAGAAAGAGTTGA  
AGGGGTAGGCATTATTGGTCCAGAAGAAGCAATAAATTGGGGTTTATCAGGACCAATG  
CTACGAGCTTCCGGAATCCAATGGGATCTTCGTAAAGTTGATCATTATGAATGTTACGA  
CGAATTGGATTGGGAAATCCATTGGCAAAAAGAAGGAGACTCATTAGCTCGCTATTTAG  
TCCGAATCGGTGAAATGACGGAATCTATAAAAATTATTCAACAGGCTCTGGAAGGAATT  
CCAGGGGGGCCCTATGAGAATTTAGAAACCCGGTGCTTTGCTAGAGAAAGGGATCCGG  
AATGGAATGATTTTGAATATCGATTCATTAGTAAAAACCTTCTCCTACTTTGGAATTGC  
CGAAGCAAGAACTTTATGTAAGAGTTGAAGCCCCAAAGGGAGAATTGGGAATTTTTTT  
AATAGGAGATCAGAGTGGTTTTCTTGGAGGTGGAAAATTCGTCCACCTGGTTTTATCA  
ATTTGCAAATCCTTCCCTCAGTTAGTTAAAAGAATGAAATTGGCCGATATTATGACAATAC  
TAGGTAGCATAGATATCATTATGGGAGAAGTTGATCGTATGTTCCCTATGGTAACTGGGT  
TCATGAATTACGGTCAACAAACAGTACGAGCTGCAAGGTACATTGGTCAAGGGTTCAT  
GATTACCTTATCCCACGCAAATCGTTTACCTGTAACCTATTCAATATCCTTATGAAAAATTA  
ATTACATCCGAGCGTTTCCGCGGCCGAATCATTGGAATTTGATAAATGCATTGCTTGT  
GAAGTATGTGTTTCGTGTATGTCCTATAGATCTACCTGTTGTTGATTGGAAATTGGAACT  
GGTATACGAAAGAAACGCTTGCTTAATTACAGTATTGATTTCGGAATTTGTATTTTTTGT  
GGTAACTGTGTTGAGTATTGTCCAACAAATTGTTTATCAATGACTGAAGAATATGAACT  
TTCCACTTATGATCGTCACGAATTGAATTATAATCAAATCGCTTTGGGTCGTTTACCAAT  
GTCAGTAATTAACGATTATACAATTCGAACAATTCGAATTCGAATAATAATAAAAATAA  
AAAATGT-----ATGCAGGGTCGTTTGTCTGCTTGGCTAGTCAAGCATGGAC  
TAGTTCATAGATCTTTGGGCTTCGATTATCAAGGAATAGAGACTTTACAATAAAGCCT

GAGGATTGGCATTCCATTGCTGTCATTTTATATGTATATGGTTACAATTATCTACGTTCCC  
AATGTGCTTATGATGTAGCACCCGGTGGACTGTTAGCTAGTGTGTATCATCTTACGAGAA  
TAGAGTATGGTGTAGATCAACCGGAAGAGGTATGCATAAAAGTATTTGCCCGAGAAGT  
AATCTTCGAATTCCGTCTGTTTTCTGGATTTGGAAAAGTGC GGATTTTCAAGAACGGGA  
ATCTTATGATATGTTGGGAATCTGTTATGATACTCATCCACGACTTAAACGTATCTTAATG  
CCTGAAAGTTGGATAGGATGGCCCTTACGTAAGGATTATATTGTCCCTAATTTTTATGAA  
ATACAAGATGCTCAT-----  
-----ATGAATTCCATAGA  
ATTTCCTTTACTTGCTCGAACAACCCAAAATTCAGTTATTTCAACTACATTAATGATCT  
TTCAAATTGGTCAAGGCTCTCTAGTTTATGGCCGCTTCTTTATGGTACCAGTTGTTGCTT  
CATTGAATTTGCTTCATTAATAGGCTCACGATTTCGACTTTGATCGTTATGGACTGGTACC  
AAGATCGAGTCCTAGACAGGCAGACCTCATTTTAACAGCCGGCACAGTAACAATGAAA  
ATGGCTCCTTCTTTAGTGAGATTATATGAACAAATGCCTGAACCAAAATATGTTATTGCT  
ATGGGAGCATGTACAATTACAGGGGGGATGTTTCAGTACCGATTTCGTATAGTACTGTTCCG  
GGGAGTCGATAAGCTAATCCTGTAGATGTCTATTTGCCAGGCTGTCCGCCTAAACCAG  
AAGCAGTTATAGATGCTATAACAAAACCTTCGTAAGAAAATAGCTAGAGAAAATCTATGAA  
GAGCGAATTAGGTCTCAAGAAGAAAATCGGTGTTTTCTACCAATCACAAGTTTCATGT  
TGGACGCAGTACTCATACTGGAAATTATGATCAAGGATTACTCTATCAATCACCATCTAC  
TTCCGAGATACCTCCTGAAACATTTTTCAAATACAAAAGTTTCAGTATCTTCCCACGAATT  
AGTGAATATGCAAACATAAAACACCTTTTCTTGGATAAAGAAAGAGATTATTTCGATCTA  
TTTTCCGTATGGCTGATGATATATATCATAGCTCGGACATCCATTTCAAATGCATATCCCAT  
TTTTGCACAGCAGGGTTATGAAAATCCACGAGAAGCGACCGGGCGTATTGTATGTGCC  
AATTGCCATTTAGCTAATAAGCCCGTGGATATTGAGGTTCCACAAGCGGTACTTCTGAT  
ACTGTATTTGAAGCAGTTGTTTCGAATTCCTTATGATATGCAAGTTAAACAAGTTCTTGCT  
AATGGTAAAAGGGGAGGTTTGAATGTGGGGGCTGTTCTTATTTTACCTGAGGGATTGTA  
ATTAGCGCCCCCGATCGTATTTTCGCCCCGAGATGAAAGAAAAGATAGGCAATCTGTCTT  
TTCAGAGCTATCGCCCCAATAAAAAAATATTCTTGTGATAGGTCCTGTTTCTGGTCAG  
AAATATAGTGAAGTCACCTTTCCTATTCTTTCACCGGACCCCGCTACTAATAAAGATGTT  
CACTTCTTAAAATATCCCATATATGTAGGCGGGAACAGAGGAAGGGGTCAGATTTATCC  
CGATGGGAGCAAGAGTAACAATACAGTTTATAATGCTACAGGGGCTGGTGTAGTAAGT  
AAAATCATAACGAAAAGAAAAGGGGGGTACGAAATAACCATATCGAATGCGTCAGATG  
AACGTCAAGTGGTTGATATTATCCCCCAGGGCCAGAACTTCTTGTTCGAAAGGCGAA  
TCTATCAAACCTTGATCAGCCATTAACGAGTAATCCTAATGTGGGTGGATTTGGTCAAGG  
AGATGCGGAAATAGTACTTCAAGATCCATTCGTGTCCAAGGCCTTTTGTCTTCTTGG  
CATCTGTTATTTTGGCACAATATTTTTGGTTCTTAAGAAGAAACAGTTTGAGAAGGTT  
CAATTGTCCGAAATGAATTTTCATGAGTAAAGTCTATGATTGGTTTGAAGAACGTCTCGA  
GATTCAGGCGATTGCAGATGATATAACTAGTAAATATGTTCCCTCCTCACGTCAACATATT  
TTATTGTCTAGGAGGAATTACGCTTACTTGTTTTTTAGTACAAGTAGCTACAGGGTTTGC  
TATGACTTTTTACTACCGTCCAACCTGTTACTGAGGCTTTTGTCTCTGTTCAATACATAAT  
GACTGAAGCTAACTTTGGTTGGTTAATTCGATCAGTTCATCGATGGTTCGGCAAGTATGA  
TGGTCTAATGATGATCCTGCACGTATTTTCGTGTGTATCTCACTGGTGGTTTTAAAAAAC  
CTCGCGAATTAACCTGGGTTACAGGTGTGGTTCTGGCTGTATTGACCGCATCCTTTGGT  
GTAACCTGGTTATTCTTACCTTGGGACCAAATGGTTATTGGGCAGTCAAAATTTGTAAC  
AGGTGTACCGGAAGCTATTCCTGTAATAGGATCCCCTTTAGTAGAGTTATTACGCGGAA

GTGCTAGTGTGGGACAATCCACTTTGACTCGTTTTTATAGTTTACACACTTTTGTATTAC  
CTCTTCTTACTGCCGTGTTTATGTTAATGCATTTTCTAATGATACGTAAGCAAGGTATTTC  
TGGTCCTTTAATGGGAGTAACAAAAAACCTGACTTAAATGATCCTGTATTAAGAGCTA  
AATTGGCTAAAGGGATGGGTCATAATTATTACGGAGAACCCGCATGGCCCAACGATCTT  
TTATATATTTTCCAGTAGTAATTTTAGGTACTATTGCGTGTAACGTAGGCTTAGCGGTTT  
TAGAACCATCAATGATTGGTGAACCCGCGGATCCATTTGCAACTCCTTTGGAAATATTA  
CCGAATGGTATTTCTTTCCCGTATTTCAAATACTTCGTACAGTACCTAATAAGTTATTGG  
GTGTTCTTTAATGGTTTCAGTACCTGCGGGATTATTAACAGTACCTTTTTTTGGAGAATG  
TTAATAAATTTCAAATCCATTTTCGTTCGTCCAGTAGCGACAACCTGTCTTTTTGATTGGTA  
CCGTAGTGGCCCTTTGGTTGGGTATTGGAGCAACATTACCTATTGATAAATCCCTAACTT  
TAGGTCTTTTTATGATTGAAGTTTTTCTATTTGGAATTGTCTTAGGTCTAATTCCTATTAC  
TTTAGCTGGATTATTTGTAACCTGCATATTTACAATACAGACGTGGTGATCAGTTGGATCT  
TATGCTTACTATAACTAGTTATTTCCGGTTTTCTACTAGCAGCTTAACTATAACCTCAGCT  
CTCTTTATTGGTCTGACCAAGATACGACTTATTATGGATATAGTAAGTCTTGCTTGGGCT  
GCTTTAATGGTAGTCTTTACATTTTCTCTTTCACTCGTAGTATGGGGAAGAAGTGGACTC  
ATGATTATTCGTTACCCGGAACCAGAAGTCAAAATTTTGGTAGATAGGGATCCCATAAA  
AACTTCTTTCGAGGAATGGGCCAAACCGGGTCAATTTCTCAAGAACAATAGCTAAGGGC  
CCTGATACTACCACTGGATCTGGAACCTACATGCTGATGCTCACGATTTTCGATAGCCAT  
ACCAATGATTTGGAGGAGATCTCTCGAAAAGTATTTAGTGCTCATTTTGGCCAACTTTC  
CATTATCTTTCTTTGGCTGAGTGGCATGTATTTCCATGGTGCTCGTTTTTCCAATTATGAA  
GCATGGCTAAGTGACCCTACTCACATTGGACCTAGTGCTCAGGTGGTTTTGGCCAATAGT  
GGGCCAAGAAATATTGAATGGCGATGTGGGCGGGGTTTTCCGAGGAATACAAATAACC  
TCTGGTTTTTTTTCAGATTTGGCGAGCATCTGGAATAACTAGTGAATTACAACCTCTATTGT  
ACCGCAATTGGTGCATTAGTCTTTGCAGCCTAATGCTTTTTTGTGGTTGGTTCCATTAT  
CACAAAGCTGCTCCAAAATTGGCCTGGTTCCAAGATGTAGAATCTATGTTGAATCACCA  
TTTAGCAGGGCTACTAGGACTTGGGTCTCTTTCTTGGGCGGGGCATCAAGTACATGTAT  
CTTTACCAATTAACCAATTTCTAAACGCTGGAGTAGATCCTAAAGAGATCCCACCTTCT  
CATGAATTTATCTTGAATCGGGATCTTTTGGCTCAACTTTATCCCAGTTTTGCCGAGGGA  
GCAACCCCATTTTTTACCTTGAATTGGTCAAATATGCGGAATTTCTTACTTTTCGTGGC  
GGATTAGATCCAGTAACCGGGGTCTATGGCTGACTGATATTGCTCATCATCATTTAGCT  
ATTGCAATTTCTTTCTTGATAGCAGGTCACATGTATAGGACCAACTGGGGCATTGGTCAT  
GGCATAAAAGATATTTTAGAAGCTCATAAAGGTCCATTTACAGGCCAGGGCCATAAAGG  
CCTATACGAGATCCTAACAACGTCATGGCATGCTCAATTATCTCTTAACTTAGCTATGTT  
AGGCTCTTTAACCATTTGTTGTAGCTCACCATATGTATTCCATGCCCCCTTATCCATATCTA  
GCTACTGATTATGGTACACAACCTGTCATTGTTACACATCACATGTGGATTGGCGGATTT  
CTCATAGTTGGTGCTGCCGCGCATGCAGCTATTTTTATGGTAAGAGATTATGATCCAAC  
ACTCGATAACAACGATCTATTAGATCGTGTCTTAGGCATCGCGATGCAATCATATCACAT  
CTCAACTGGGTATGTATATTTCTAGGCTTTCACAGTTTTTGGTTTTGTATAATCATAATGATA  
CCATGAGCGCTCTAGGGCGACCCCAAGATATGTTTTCTGATACCGCTATAACAATTACAA  
CCCGTCTTTGCTCAATGGATACAAAACACCCATGCTTTGGCGCCTGGTGCAACTGCTCC  
TGGTGCAACAGCAAGCACCAAGTTTACTTGGGGAGGTGGTAATTTAGTGGCAGTAGGT  
GGCAAGGTTGCTTTATTACCTATTCCATTAGGAACCGCAGATTTTTTGGTACATCACATT  
CATGCATTTACGATTCATGTAACGGTATTGATACTCCTGAAAGGTGTTCTATTTGCTCGT  
AGCTCTCGTTTTGATACCGGATAAAGCAAATCTTGGTTTTTCGTTTTCCCTTGTGATGGACC



TGGAAGAGGGGGACATGTCAAGTATCCGCCTGGGATCATGTCTTCTTAGGCCTATTCT  
GGATGTACAATGCAATTTCCGGTAGTCATATTTCAATTCAGTTGGAAAATGCAGTCAGATG  
TTTGGGGTAGTATAAGTGATCAAGGAGTGGTAACTCATATCACGGGAGGAACTTTGC  
GCAGAGTTCCATCACTATTAATGGCTGGCTCCGCGATTTCTTATGGGCACAGGCATCCC  
AAGTAATTCAGTCTTATGGTTCTTCATTATCTGCATATGGCCTTTTTTTCTTAGGTGCTCA  
TTTTGTATGGGCTTTTAGTTAATGTTTCTATTCAGCGGGCGTGGTTATTGGCAAGAACT  
TATTGAATCCATCGTTTGGGCTCATAATAAATTAAGTTGCTCCTGCTACTCAGCCTAG  
AGCCTTGAGCATTGTACAAGGACGTGCTGTAGGAGTAACCCATTACCTTCTGGGTGGA  
ATTGCCACAACATGGGCGTTCTTCTTAGCAAGAATTATTGCAGTAGGAATGGCATTAAAG  
ATTTCCAAGTTTAGCCAAGGCTTAGCTCAGGACCCACTACTCGTCGTATTGGTTTG  
GTATTGCGACCGCGCATGACTTTGAGAGTCATGATGATTACTIONGAGGAACGTCTTTATC  
AGAATATTTTGGCTTCTCACTTCGGGCAATTAGCAATAATTTTCTATGGACTTCCGGAA  
ATCTGTTTCATGTAGCTTGGCAAGGAAATTTTGAGGCATGGGTACAGGACCCCTTACAT  
GTAAGACCTATTGCTCATGCAATTTGGGATCCTCATTTTGGTCAACCGGCCGTGGAAGT  
TTTTACTCGAGGGGGTGTCTTTGGCCCAGTGAATATCGCTTATTCTGGTGTATTATCAGTG  
GTGGTATACAATTGGTTTACGTACTAATGAAGATCTTTATACGGGAGCCCTTTTTCTATTA  
TTTCTTTCTGCCGTATCCTTAATAGCAGGTTGGTTACACCTACAACCGAAATGGAAACC  
GAGCGTTTCGTGGTTCAAAAATGCCGAATCTCGTCTCAATCATCATTTGTCAGGACTAT  
TCGGTGTAAGTTCTTTGACTTGGACAGGGCATTAGTACATGTCGCTATTCTGGATCC  
AGGGGGGAATACGTTTCGATGGAATAATTTTTTAGATGTATTACCACATCCCGAAGGGTT  
AGGACCCCTTTTTACAGGTCAGTGGAAATCTTTATGCCCAAACCCCGATTCAAATAGTC  
ATTTATTTGGTACCTCCCAAGGATCAGGAACTGCCATTCTAACCTTCTAGGGGGATT  
CATCCACAACGCAAAGTTTATGGTTGACTGATATTGCTCATCATCATTTGGCTATTGCA  
TTTTTTTTCTCGTTGCTGGTTCATATGTATAGAATACTTCGGGATTGGGCACAGTATA  
AAAGATCTTTTAGAAGCACATATTCCTCCGGGGGGCGATTGGGGCGTGGACATAAAG  
GTCTTTATGACACAATCAATAATTCGATTCATTTTCAATTAGGCCTTGCTCTAGCCTCTTT  
AGGTGTTATTACTTCTTGGTAGCTCAACACATGTACTCTTTACCTGCTTATGCGTTCAT  
AGCACAAGACTTTACTACTCAAGCTGCGTTATATACTCATCACCAATACATCGCAGGATT  
CATCATGACAGGGGCTTTTGCCCATGGGTCTATATTTTTTCATTAGAGATTACAATCCGGA  
ACAGAATGAGGATAATGTATTGGCAAGAATGTTAGACCATAAAGAAGCTATCATATCCC  
ATTTAAGTTGGGCCAGCCTCTTTCTGGGGTTCCACACTTTGGGGCTTTATGTTTATAATG  
ATGTCATGCTTGCTTTTGGTACTCCGGAGAAACAAATCTTAATCGAACCTATATTTGCC  
AATGGATACAATCTGCTCATGGTAAACTTCATATGGGTTCGATGTGCTTTTATCTTCAA  
CGAATAGCCCAGCATTTAATGCAGGTCAAAGCATATGGTTGCCCGGCTGGTTAAATGCT  
ATTAATGAG-----AATAGTAATCACTATTCTTAACAATTGGTCCTGGAGACTTCTTGGTT  
CATCATGCGATTGCTCTAGGTTTACATACAACTACATTGATCTTAGTAAAAGGTGCTTTA  
GATGCACGTGGTTCAAAGTTAATGCCAGATAAAAAGGATTTCCGGTTATAGTTTTCTTG  
CGATGGTCCGGGACGAGGCGGTACTTGTGATATTTCCGCTTGGGACGCATTTTATTTGG  
CAGTTTTCTGGATGTTAAATACCATTGGGTGGGTACCTTTTATTGGCATTGGAAACACA  
TCACATTATGGCAGGGTAACGTTTACAGTTTAAATGAATCTTCCACTTATTGATGGGAT  
GGTTAAGAGATTATCTATGGGTAAACTCTTCACAACTTATCAATGGATATAACCCCTTTG  
GTATGAATAGTTTATCAGTTTGGGCGTGGATGTTCTTATTTGGACATCTTGTTTGGGCTA  
CTGGATTTATGTTTTTAAATTCCTGGCGTGGATATTGGCAGGAATTGATTGAAACTTTAG  
CATGGGCTCATGAACGCACACCTTTAGCTAATTTGATTCGATGGAGAGATAAACCAGTG

GCTCTTTCCATTGTACAAGCAAGATTGGTTGGATTAGCCCATTTTTCTGTAGGTTATATAT  
TCACGTATGCGGCTTTCTTGATTGCCTCTACGTCAGGCAAATTTGGTATGTCACATTCAG  
TAAAGATTTATGATACATGTATAGGATGTACTCAATGTGTGCGAGCCTGCCAACAGATG  
TATTAGAAATGATACCGTGGGATGGATGTAAAGCTAAGCAAATTGCTTCTGCTCCAAGA  
ACAGAGGACTGTGTCGGTTGTAAGAGATGTGAATCCGCCTGTCCAACGGATTTTTTTGA  
GCGTTTCGAGTTTATTTATGGCATGAAACAACCTCGAAGCATGGGTCTAGCGTATATGATA  
ACTCTTAACTTACCCTCTTTCTTTGTGCCTTTAGTGGGCCTAGTATTTCCGGCAATTGCA  
ATGGCTTCTTTATCTCTTCATGTTCAAAAAACAAGATTTTTATGCGAGATCTAAAAACA  
TATCTTTCCATGGCACCGTACTAAGTACTCTATGGTTTGGGGCTTTAGCAGGTCTTTTG  
ATAGAGATCAATCGTTTATTTCCGGATGCGTTGACATTCCCTTTTTTTTTCATTCATGACTG  
CAATTTTAGAGAGACGCGAAAGCGAAAGCCTATGGGGTTCGCTTCTGTAACCTGGATAAC  
CAGCACCGAAAACCGTCTTTACATTGGATGGTTTGGTGTTTTGATGATCCCTACCTTATT  
GACCGCAACTTCTGTATTTATTTATGTCCTTCATTGCTGCTCCTCCAGTAGATATTGATGGT  
ATTCGTGAACCTGTTTCTGGATCTCTACTTTATGGAAACAATATTATCTCTGGTGCCATTA  
TTCCTACTTCTGCAGCTATAGGTTTGCATTTTTACCCAATATGGGAAGCGGCATCTGTTG  
ATGAATGGTTATACAACGGTGGTCCCTATGAGCTAATTGTTCTACACTTCTTACTTGGTG  
TAGCTTGTACATGGGGCGTGAGTGGGAACCTTAGTTTCCGTCTGGGTATGCGCCCTTGG  
ATTGCTGTTGCATATTCAGCTCCTGTTGCAGCTGCTACTGCTGTTTTCTTGATATACCCA  
ATTGGTCAAGGAAGTTTTTCGGATGGTATGCCTCTAGGAATTTCTGGTACTTTCAACTTC  
ATGATTGTATTCCAGGCTGAGCACAACATCCTTATGCACCCATTTACATGTTAGGCGTA  
GCTGGTGTATTCGGCGGCTCCCTATTCAGTGCTATGCATGGTTCCTTGGTAACCTCTAGT  
TTGATCAGGGAAACCACAGAAAATGAATCTGCTAATGAAGGTTACAGATTCGGTCAAG  
AGGAAGAACTTATAATATCGTAGCTGCTCATGGTTATTTTGGCCGATTGATCTTCCAAT  
ATGCTAGTTTCAACAATTCTCGTTCTTTACACTTCTTCCTAGCTGCTTGGCCTGTAGTAG  
GTATCTGGTTCACTGCTTTAGGTATCAGCACTATGGCTTTCAACCTAAATGGTTTCAATT  
TCAACCAATCCGTAGTTGATAGTCAAGGTCGTGTAATTAATAACCTGGGCTGATATTATTA  
ATCGTGCTAACCTTGGTATGGAAGTTATGCATGAACGTAATGCTCATAACTTCCCTCTAG  
ACTTAGCTGCTGTCGAAGTTCCATCTAGAAATGGAATGGGTTTGCCTTGGTATCGTGTT  
CATACCGTCGTATTAATGATCCCGGCCGTTTGTCTTCTGTCCATATAATGCATACAGCTT  
TGGTTGCTGGTTGGGCCGGTTCGATGGCTCTATATGAATTAGCAGTTTTTTGATCCCTCTG  
ATCCCGTTCTTGATCCAATGTGGAGACAAGGTATGTTTCGTTATAACCTTCATGACTCGTT  
TAGGAATAACCAATTCATGGGGCGGCTGGAGTATTACA---GGAGGGACTGTAACAAATC  
CGGGTATTTGGAGTTACGAAGGCGTGGCCGGTGACATATTGTGTTTTCTGGCTTGTGC  
TTCTTGGCAGCTATCTGGCATTGGGTATATTGGGATTTAGAAATATTTTGTGATGAGCGT  
ACAGGAAAACCTTCTTTGGATTTGCCAAAATTTTTGGAATTCATTTATTTCTTTCAGGA  
GTGGCTTGCTTTGGGTTTGGCGCATTTTCATGTAACAGGATTGTATGGTCCCTGGAATATGG  
GTGTCCGATCCTTATGGACTAACTGGAAAGGTACAACCTGTAAATCCAGCGTGGGGTGT  
AGAAGTTTTTGATCCTTTTGTTCGGGAGGAATAGCCTCTCATCATATTGCAGCAGGTA  
CTTTAGGCATATTAGCGGGCCTATTTTCATCTTAGTGTCCGTCCGCCCAACGTCTATATA  
AAGGATTACGTATGGGCAATATTGAAACCGTCCCTTTCCAGTAGTATTGCTGCTGTCTTTT  
TTGGAGCTTTTTGTTGTTGCTGGAACCTATGTGGTATGGTTCAGCAACTACCCCTATCGAAT  
TATTTGGTCCCCTCGTTATCAATGGGATCAGGGATACTTCCAGCAAGAAATATATCGAA  
GAGTTGTTGCTGGGCTAGCCAAAATCAAAGTTTATCAGAAGCTTGGTCTAAAATTCCT  
GAAAAATTAGCTTTTTTATGATTATATCGGTAATAATCCGGCAAAGGGTGGATTATTCAGA

GCGGGTTC AATGGACAACGGGGATGGAATAGCTGTTGGGTGGTTAGGACATCCTATCTT  
TCGAGATAAAGAAGGGCGTGAAC TTTTTGTACGTCGTATGCCTACTTTTTTTGAAACAT  
TTCCGGTTGTTTTGGTAGACGGAGACGGAATTGTTTCGAGCCGACGTTCC TTTTCGAAG  
GGCGGAATCGAAGTATAGTGTGAAACAAATGGGTGTAAC TGTGAGTTCTATGGTGGG  
GAACTCAATGGAGTCAGTTATAGTGATCCTGCTACTGTGAAAAAATATGCTAGACGTGC  
CCAATTAGGTGAAATTTTTGAATTAGATCGTGCTACTTTGAAATCCGATGGTGT TTTTCG  
TAGCAGTCCAAGGGGTGGTTACTTTTTGGACATGCTTCGTTTGCTCTGCTCTTCTTCTT  
CGGACACATTTGGCATGGTGCTAGAACC TTGTTTCAGAGATGTTTTTTGCTGGTATTGACC  
CCGATTTGGATGCTCAAGTGAATTTGGAGCATTCCAAAACTTGGAGATCCA ACTAC  
AAGAAGACAAGTAGTCATGAAAACCTTATATTCCCTGAGGAGGTTCTACCCCGTGGAA  
ACGCTCTTTAATGGAAC TTTAGCTTTAGCTGGTCGTGACCAAGAAACCACCGGGTTCG  
CTTGGTGGGCCGGGAATGCACGACTTATCAATTTATCCGGTAAACTGTTGGGGGCTCAT  
GTAGCCCATGCCGATTAATCGTATTCTGGGCCGGAGCAATGAACCTATTTGAAGTGGC  
TCATTTTGTACCAGAAAAGCCCATGTATGAACAAGGATTAATTTACTTCCC ACTTAGC  
TACTCTAGGTTGGGGGGTAGGTTCCGGGTGGGGAAGTTATAGACACCTTTCCATATTTG  
TATCTGGAGTACTTCACTTAATTTCTGCTCTGCAGTATTAGGCTTTGGCGGTATTTATCATGC  
ACTTCTGGGCCCTGAGACTCTTGAAGAATCTTTTCCATTCTTTGGTTATGTATGGA AAG  
ATAGAAATAAAATGACCACAATTTTGGGTATTCACTTAATCTTGT TAGGTATAGGTGCTT  
TTCTTCTAGTATTCAAGGCTCTTTATTTTGGAGGCGTATATGATACCTGGGCTCCGGGGG  
GGGGAGATGTAAGAAAAATTACCAACTTGACCCTTAGCCCAAGTGTATATTGGGTTAT  
TTACTAAAATCTCCTTTTGGAGGAGAAGGATGGATTGTTAGTGTGGACGATTTGGAAGA  
TCTAATTGGAGGGCATGTATGGTTAGGTTCCATTTGTATACTTGGCGGAATCTGGCATAT  
CTTAACCAACCTTTTGCATGGGCTCGTCGAGCACTTGTATGGTCTGGGGAGGCTTACT  
TGTCTTATAGTTTAGCTGCTTTATCTGTTTTTGGTTTCATTGCTTGTGCTTTGTCTGGTT  
CAATAATACCGCTTATCCTAGTGAATTTACGGGCCTACTGGGCCAGAAGCTTCTCAAG  
CTCAGGCATTTACTTTTCTAGTTAGAGACCAACGTCTTGGGGCTAACGTGGGATCCGCT  
CAAGGACCTACTGGTTTAGGTAAATACCTAATGCGTTCCCGACTGGAGAAGTAATTTT  
TGGGGGGGAAACTATGCGTTTTTGGGATCTGCGTGCTCCTTGGTTAGAACCCTTAAGG  
GGTCCAAATGGATTGGACTTGAGTAGGCTGAAAAAAGATATACAGCCTTGGCAAGAAC  
GGCGTTCCGCAGAATATATGACTCATGCTCCTTTAGGTTCTTTAAATTCTGTGGGTGGTG  
TCGCTACCGAGATCAATGCAGTCAATTATGTCTCTCCTAGAAGTTGGTTAGCTACCTCTC  
ATTTTGTCTAGGATTTCTTCTATTTCGTAGGTCATTTATGGCACGCGGGAAGGGCTCGTG  
CAGCTGCAGCAGGATTTGAAAAGGGAATTGATCGTGATTTTGAACCTGTTCTTTCCATG  
ACCCCCCTTAATATGACTATAGCCCTTGGTAAATTTACCAAAGACGAAAATGATTTATTT  
AATATTATGGATGACTGGTTACGTAGAGACCGTTTCGTTTTTGTAGGTTGGTCCGGTCTA  
TTGCTCTTTCCCTTGTGCCTATTTGCCTTAGGTGGTTGGTTCACAGGTACAACCTTTGTA  
ACTTCATGGTATACCCATGGATTGGCCAGTTCCATTTGGAAGGATGCAACTTCTTAACC  
GCCGCAGTTTCTACTCCCGCTAATAGTTTAGCACATTTCTTTGTTGTTACTATGGGGTCT  
GAAGCACAAGGAGATTTTACTCGTTGGTGTCAATTAGGCGGTCTGTGGACTTTTGTGG  
CTCTCCACGGCGCTTTCGGACTAATAGGTTTCATGTTACGTCAATTTGAACTTGCTCGAT  
CTGTTCAATTGCGACCTTATAATGCAATCGCATTCTCTGGTCCAATTGCTGTTTTTGT TTT  
CTGTATTCCTGATTTATCCACTAGGTCAGTCTGGTTGGTTCTTTGCGCCTAGTTTTGGTG  
TAGCAGCTATATTTTCGCTTCATCTTTTTTTCCAAGGGTTTCATAATTGGACATTGAACC  
CATTTCATATGATGGGAGTTGCCGGTGTATTGGGCGCTGCTCTTCTATGCGCTATTCATG

GTGCTACCGTAGAAAATACTTTATTTGAAGATGGTGATGGTGCAAATACATTCCCGTGCTT  
TTAACCCAACTCAAGCTGAAGAACTTATTCAATGGTCACCGCTAATCGCTTTTGGTCC  
CAAATCTTTGGGGTTGCTTTTTCCAATAAACGTTGGTTACATTTCTTTATGTTATTTGTAC  
CAGTAACCGGTTTATGGATGAGTGCTCTTGGAGTAGTCGGTCTGGCTCTGAACCTACGT  
GCCTATGACTTCGTTTCCCAGGAGATCCGTGCAGCGGAAGATCCTGAATTTGAACTTT  
CTACACCAAAAATATTCTCTTAAACGAAGGTATTTCGTGCTTGGATGGCGGCTCAAGATC  
AGCCTCATGAAAACCTTATATTCCCTGAGGAGGTTCTACCCCGTGGAACGCTCTTATG  
TCTGGAAGCACAGGAGAACGTTCTTTTGGCTGATATTATTACCAGTATTTCGATACTGGGTT  
ATTCATAGTATTACTATACCTTCCCTATTCATTGCGGGTTGGTTATTCGTCAGCACGGGTT  
TAGCTTATGATGTGTTTGAAGCCCTCGTCCAAACGAATATTTTACAGAGAACCGGCAA  
GGAATTCCATTAATAACTGGCCGTTTTGACCCTTTGGAACAACCTCGATGAATTTAGTAG  
ATCTTTTATGACCATAGATCGAACCTATCCAATTTTTACAGTGCGATGGTTAGCTGTTCAT  
GGACTAGCTGTACCTACCGTTTCTTTTTTAGGGTCAATATCAGCAATGCAGTTCATCCAA  
CGAATGGCTACGCAAACCGTTGGGGGTAGTTCTAGATCTGGA---CCAAGACGAACTATT  
GTAGGGGATTTATTGAAACCATTGAATTCAGAATATGGTAAAGTAGCTCCTGGATGGGG  
AACTACTCCTTTGATGGGTGTCGCAATGGCTCTATTTCGCAGTATTCCTATCTATTATTTT  
GAAATTTATAATTCTTCCGTTTTACTGGATGGAATTTCAATGAATATGCTTACTCTCAAAC  
TCTTTGTTTACACAGTAGTGATATTTTTGTTTCTCTTTCATCTTTGGATTCTATCTAAT  
GATCCAGGACGTAATCCTGGACGTGAAGAAATGGCCGATACTACTGGAAGGATTCCTC  
TTTGATAATAGGTAAGTACTGTAAGTATTCTTGTGATCGGTTTAATAGGTATTTTCTTTTA  
TGGTTCATACTCCGGGTTGGGTTTCTCTGATGCTTAATATCTTTAGTTTGTATCTGTATC  
TGTCTTCATTCCACCCTTTATTCAAGTAGTTTTTTCTTAGCCAAATTGCCTGAGGCCTAC  
GCTTTTTTGAATCCAATCGTAGATTTTATGCCAGTAATACCCCTTCTCTTTTTTCTTTAG  
C C T T T G T T T G G C A A G C T G C T G T A A G T T T T C G  
A????????????????????????????????????????????????????????????  
????????????????????????????????????????????????????????????  
ATGGAAGTGAATATTCTCGCATTATTGCTACTGCACTCTTC  
ATTCTAGTTCCTACTGCTTTTTTACTTATAATATACGTAAAAACAGTCAGTCAAAGTGAT  
ATGGAACAGCAACCCTAGTCGCCATCTCTATATCTGGTTTACTTGTAAGTTTTACTGGG  
TACGCCTTATATACTGCTTTTGGGCAACCCTCTCAACAATTAAGAGATCCATTCGAAGA  
ACACGGGGACATGGAAGCATTGGTTTATACATTCCCTCTTAGTCTCGACTCTAGGGATAA  
TTTTTTTCGCTATCTTTTTTCGAGAACCACCTAAAGTTCCAATAAAAAGGTGAAAATG  
ACTATTGCTTTCCAATTGGCTGTTTTTGCATTAATTGCTACTTCATTAATCTTACTGATTA  
GTGTACCCGTTGTATTGCTTCTCCTGACGGTTGGTTCGAGTAACAAAAATGTTGTATTT  
CGGGTACATCATTATGGATTGGATTAGTCTTTCTGGTGGGTATCCTTAATTCTCTCATCTC  
T-----ATGTCACCACAAACAGAGACTAAAGCAAGTGTGGATTCAAAGCTG  
GTGTTAAAGATTATAAACTGACTTATTATACTCCTGACTATGAAACCAAAGATACTGATA  
TCTTGGCAGCATTCCGAGTAACTCCTCAACCTGGAGTTCCTCCTGAGGAAGCAGGGGC  
TGCGGTAGCTGCTGAATCTTCTACTGGTACATGGACAACCTGTGTGGACCGACGGGCTT  
ACCAGCCTTGATCGTTATAAAGGAAGATGCTACCACATCGAGCCTGTTGCTGGAGAAG  
AAAATCAATATATATGTTATGTAGCTTACCCTTTAGACCTTTTTGAAGAAGGTTCTGTTA  
CTAATATGTTTACTTCCATTGTGGGTAATGTATTTGGGTTCAAAGCCCTGCGCGCTCTAC  
GTCTGGAGGATCTGCGAATCCCTCCTTCTATACGAAAACCTTCCAAGGCCCGCCTCAT  
GGCATCCAAGTTGAGAGAGATAAATTGAACAAGTATGGGCGTCCCCTATTGGGATGTAC  
TATTAACCTAAATTGGGGTTATCCGCTAAGAACTACGGTAGAGCAGTTTATGAATGTCT

TCGTGGTGGACTTGATTTTACGAAAGATGATGAGAACGTGAACTCACAACCATTTATGC  
GTTGGAGAGACCGTTTCTTATTTTGTGCCGAAGCAATTTTTAAATCACAGGCTGAAACA  
GGTCAAATCAAAGGACATTACTTGAATGCTACTGCAGGTACATGCCGAAGAAATGATCA  
AAAGGGCTGTATTTGCCAGAGAATTGGGAGTTCCTATCGTAATGCATGACTACTTAACA  
GGGGATTCACTGCAAATACTAGCTTGGCTCATTATTGCCGAGATAATGGTCTACTTCTT  
CACATCCATCGTGCAATGCATGCAGTTATTGATAGACAGAAAAATCATGGTATGCACCTT  
AGGGTACTAGCTAAAGCCTTACGTATGTCTGGTGGAGATCATATTCACGCTGGTACTGT  
AGTAGGTAAACTTGAAGGAGAAAGAGACATTACTTTGGGCTTTGTTGATTTACTACGTG  
ATGATTTTATTGAAAAAGATCGAAGCCGCGGTATTTATTTCACTCAAGATTGGGTCTCTC  
TACCAGGTGTTCTGCCGTAGCTTCTGGGGGTATTACGTTTGGCATATGCCTGCTCTG  
ACCGAGATCTTTGGAGATGATTCCGTACTACAATTCGGCGGAGGAACTTTAGGACACC  
CTTGGGGAAATGCACCGGGTGCCGTAGCTAATCGAGTAGCTCTAGAAGCATGCGTACA  
AGCTCGTAATGAGGGACGTGATCTTGCTCGTGAGGGTAATGAAATTATTTCGTGAGGCTA  
GCAAATGGAGTCCTGAACTAGCTGCTGCTTGTAAGTATGGAAGGAGATCAAATTTGA  
ATTCGAAGCAATGGATACTTTG-----ATGGCGATACATTTATACAAACTTCTACCCCGAG  
CACACGCAATGGAGCCGTAGACAGTCAAGTGAAATCCAATACACGAAATAATTTGATC  
TATGGACAGCATCGTTGTAGTAAAGGTCGTAATGCCAGAGGAATCATTACCGCAGGGCA  
TAGAGGGGGAGGTCATAAGCGTCTATAACCGTAAAATCGATTTTCGACGGAATGAAAAA  
GACATATATGGTAGAATCGTAAGCATAGAATACGACCCTAATCGAAATGCATCCATTTGT  
CTCATACACTATGGGGATGGTGAGAAGAGATATATTTTACATCCAGAGGGGGCTATAATT  
GGAGATACCATTGTTTCTGGTACAGAAGTTCCTATAAAAATGGGAAATGCCCTACCTTT  
GACCGATATGCCCTTAGGCACGGCCATACATAACATAGAAATCACACTTGAAAGGGTG  
GACAATTAGCTAGAGCAGCGGGTGCTGTAGCGAAACTGATTGCAAAAAGAGGGGAAAT  
CGGCCACATTAATAATTACCTTCTGGGGAGGTCCGTTTGATATCCAAAACTGCTCAGCA  
ACAGTCGGACAAGTGGGGAATGTTGAGGTGAACCAGAAAAAGTTGGGTAGAGCCGGA  
TCTAAATGTTGGCTAGGTAAGCGTCTGTAGTAAGAGGAGTGGTTATGAACCCTGTAGA  
CCATCCCATGGGGGTGGTGAAGGGAGAGCCCAATTGGTAGAAAAAAACCCGCAAC  
CCCTTGGGGTATCCTGCACTTGGGAAGAAGAAGTAGAAAAAGGAAGAAATATAGTGAT  
AATTTGATTCTTCGTGCGCGTAATAAAATGATTCAACCTCAAAGCCATTTGAATGTAGCG  
GATAACAGCGGGGCCCGAGAATTAATGTGTATTAGAATCATAGGAGCTAGT--AATCGCC  
GATATGCTCATATCGGTGACATTATTGTTGCTGTGATCCAGGAAGCATTACCAAACACAC  
CTCTAGAAAAGATCAGAAGTGATCAGAGCTGTAATTGTACGTACTTGTAAGAAGACTTAA  
ACGTGACAACGGTATGATAATACGATATGATGATAATGCTGCAGTTGTGATTGATCAAGA  
AGGAAATCCAAAAGGAACCTCGAGTTTTTGGTGCAGTTGCCCGAGAATTGAGACAGTTA  
AATTTCACTAAAATAGTTTCATTAGCACCTGAGGTATTAATGCTTAGTCCTAAAAGAACC  
AGATTTTCGAAAACAACATAGAGGAAGAATGAAAGGAATATCTTATCGAGGTAATCGTAT  
TTGTTTCGGTAAATATGCTCTTCAGGCACCTGAACCCGCTTGGATCACATCTAGACAAA  
TAGAAGCAGGGCGACGAGCAATGACAAGAAATGTGCGCCGTGGTGGAAAAATATGGG  
TACGTATATTTCCAGACAAAGCAGTTACGGTAAGACCTACAGAAACACGTATGGGTTCG  
GGTAAAGGATCTCCCGAATATTGGGTAGCTGTCTGTTAAACCAGGTAGAATACTTTATGA  
AATGGGCGGAGTAGCAGAAAATATAGCCAGAAAGGCTATTTCAATAGCGGCGTCCAAA  
ATGCCTATAAGAACTCAATTTATTATTTTCGGGAATGACTAGAATTAGACGAGGATATATA  
GCTCGGAGACGTAGAACAATAATTCGTTTATTTGCATCAAGCTTTCCGGGGGGCTCGTT  
CAAGACTTACTCGAACAATTATTCAACAGAAAATAAGATCTTTGGTTTCGTCTCATCGA

GATAGAGATAGGAAAAAGATAGATTTTCGTCGTTTGTGGATCACTCGGATAAATGCAGT  
AATTCGCGAGGAT--AGAGTATCCTATAGTTATAGTAGATTAATACACAATCTGTACAAG  
AGACAGTTGCTTCTAATCGTAAATACTTGCACAAATAGCTATATTAATAGGAATTGT  
CTTTATATGATTTCTAATGAGATCATAAAA-----ATGACAAAGGAAG  
TATATGCTTTAGGTCAACATATATCTATGTCTGCTCACAAAGCACGAAGGGTAATTGATC  
AGATTCGTGGACGTTCTTACAAGGAAACACTTATGATACTCGAACTTATGCCTTATCGA  
GCGTGTATCCCATTTTTTAAGTTGGTTTATTCTGCAGCAGCAAATGCTAGTCATAATATG  
GGTTTCAATGAAGCAAGTTTAGTTATTAGTAAAGCCGAAGTCAACGAGGGTACTACTAT  
GAAAAAATTAACCTCGAGCTCGAGGACGGAGTTATGCAATAAAAAGACCCACTTGT  
CATATAAGGATTGTATTGAAAGATAAATCTTTCTAT-----TTATATGGA-----ATGGATGGAA  
TCAAATATGCAGTATTTACAGACAAAAGTATTCGGTTATTGGGGAAAAAT---CAATATAC  
TTTTAATGTGCAATCAGGATCAACTAGGACAGAAATAAAGCATTGGGTGCAACTCTTCT  
TTGGTGTCAAGGTAAAAGCTATGAATAGTCATCGACTCCCGGGAAAGGGTAGAAGAAT  
GGGACCTATTCTGGGACATACAATGCATTACAGACGTATGATCATTACGCTTCAACCGG  
GTTATTCTATTCCACCTCTTAGAAAAGAAAAGAACTATGGCAGTTCCAAAAAAAAGTACT  
TCTATATCAAAAAACGTATTCGTAAAAACATTTGGAAAAAGAAGGTATATTGGGCAGC  
GTTGAAAGCTTTTTCTTAGCGAAGTCTCTTTCAACCGGAATTCAAAAAGTTTTTTTG  
TACGAGAATTAATAGTATGGCCAAGGGTAAAGATGTCCGAGTAACGGTTATTTTAGAA  
TGTACCAACTGT--GTTAGAAAC-----CTTAATAAGGAATCAAGGGGTCTTTCCCGATATA  
TACTCAAAAGAATCGACACAATACGCCTAGTCGATTGGAATTGAGAAAATTCTGTCCC  
TATTGTTACAAACATACGATTCACGGGGAGATAAAGAAAATGAAAATAAGGGCCTCCG  
TTCGTAAAATTTGTGAAAAATGTCGACTGATCCGTAGAAGGGGACGAATTCTAGTAATT  
TGTTCTAATCCGAGACATAAACAAGACAAGGAATGGTTCGAGAGAAAGTAAGAGTAT  
CTACTCGGACACTACAGTGGAAGTGTGTTGAATCAAGAGCAGACAGTAAGCGTCTTTA  
TTATGGCCGCTTTATTCTATCTCCACTTATGAAAGGGCAAGCCGATACAATAGGCATTGC  
GATGCGAAGAGCTTTGCTTGGTGAAATAGAAGGAACATGTATCACCCGTGCAAATTT  
GAA-----AAAATACCACATGAATATTCTACCATAGTAGGTATTCAAGAATCAGTACATGA  
AATTTAATGAATTTGAAAGAAATTGTATTGAGAAGTAATCTATATGGAACCTTGCAACGC  
GTCTATTTGTGTCAGGGGTCCTGGATGTGTAAGTCTCAAGACATCATCTTACCAACTT  
CTGTGGAAATCGTTGATAACACACAGTATATAGCTAATCTAACGGAACCCATTCAATTTGT  
GTATTGGATTACAAATCGGGAGGAATCGCGGATATCATATAAAAACACCAAAAAACTTT  
CAAGATGGAAGTTAT-----CCTATAGATGCTGTATTCATGCCTGTTTCGAAATGCAAATCAT  
AGTATTCATTTTTATGGAAAT-----GAAAAACAAGAGATACTTTTTCTCGAAATATGGACA  
AACGGAAGTTTAACTCCTAAAGAAGCACTTCATGAAGCCTCCCGGAATTTAATTGATTT  
ATTTATTCCTTTTCTACATGCGGAAGAAGAA-----AACTTACATTTAGAGAACAATCAG---  
TACAAGGTTACTTTACCCTTTTTTACTTTTCATGATAGATTAGCTAAG---CTAAGGAAAA  
CGAAAAAA---GAAATAGCATTGAAATCTATTTTTATTGACCAATTAGAATTGCCTCCCAG  
GACCTATAATTGCCTCAAAAGGTACAATATACATATTATTGACCTTTTGAATAAGAG  
TCAAGAAGACCTTATGAAAATGGAATATTTTCGCATAGAAGATGTA AACAGATATTGG  
ACAGTCTAGAAATAGAAAAGCATTTCACAACCCATTTACCGAAGAA---ATGCTCGGG  
GATGGAAAT--GAGGGAATGTCTACAATACCTGGGTTTAAATCAGATACAGTTTGAAGGA  
TTTTGTAGATTCATTGATCAGGGCTTAACAGAAGAACTTTATAAGTTTCCAAAAATTGA  
AGATACAGATCAAGAAATTGAATTTCAATTATTTGTGGAAACATATCAATTGGTAGAAC  
CTTTGATAAAAAGAAAGAGATGCTGTATATGAATCACTCACATATTCTTCTGAATTATATGT

ATACGCGGGATTAATTTGGAAAAGCAGTAGGGATATGCAAGAACAACACTCTTTTTATTG  
GAAACATTCCTTTAATGAATCCCTGGGAACTTCTATAGTAAATGGAATATACAGAATTG  
TGATCAATCAAATATTGCAAAGTCCCGGTATCTATTACCGGTCAGAATTGGACCATAACG  
GAATTTCCGGTCTATACCGGGACCATAATATCAGATTGGGGAGGAAGATTAGAATTAGAG  
ATTGATCGAAAAGCAAGGATATGGGCTCGTGTGAGTAGGAAACAGAAAATATCTATTCT  
AGTTCTATCATCAGCTATGGGTTCGAATCTAAGAGAAAATTCTAGAGAATGTTTGCTATCC  
TGAAATTTTCTTGTCTTTCCTGAATGATAAAGAGAAAAAAAATTGGGTCAAAAAGAA  
AATGCCATTTTGGAGTTTTATCAACAATTTGCTTGTGTAGGAGGAGATCCGGTATTTTCT  
GAATCCTTATGTAAGGAATTACAAAAGAAATCTTTCAACAAAGATGTGAATTAGGAAG  
GATTGGTCGACGAAATATGAATCGGAGACTAAATCTTGATATACCTCAGAACAATACAT  
TTTTGTTACCGCGAGATATATTGGCAGCTGCGGATCATTGATTGGAATGAAATTCGGAA  
TGGGTACACTTGACGAT-----ATGAATCATTGAAAAATAAGCGTATTCGTTCTGTAGCG  
GATCTCTTACAAGATCAATTCGGATTGGCTCTGGTTCGTTTAGAAAATGTGGTTAGAGG  
AACTATATGTGGAGCAATTAGG---CATAAATTGATA---CCGACTCCTCAGAATTTGGTAA  
CTTCAACTCCA-----TTAACAACCACTTATGAATCTTTTTTCGGATTACACCCATTAT  
CTCAAGTTTTGGATCGAACGAATCCATTGACACAAATTGTTTCATGGGAGAAAATTGAG  
TTATTTGGGCCCTGGAGGATTAACAGGGCGAACTGCTAGTTTTTCGAATACGAGATATCC  
ACCCTAGTCACTATGGACGCATTTGCCCAATCGACACGTCTGAAGGAATCAATGTTGGA  
CTTATTGGATCTTTAGCAATTCATGCGAGAATTGGTCAGGGGGGG---TCTCTAGAAAGC  
CCATTTTTT-----GAAATCTCCGAGAGATCAAAATCAAAAAAAGTACGGATGCTTTATT  
TATACCAAGTAGAGATGAATACTATATGGTAGCGGCGGGAAATTCTTTAGCGCTGAAT  
CAGGGTATTCAAGAAGAACAGGTTGTTCCAGCTCGATACCGTCAAGAATTCCTAACTAT  
TGCATGGGAACAGGTTAATCTTCGAAGTATTTTTCTTTCCAATATTTTTCTATTGGAGC  
TTCTCTCATTCTTTTATCGAGCATAATGATGCGAATCGAGCTTTAATGAGTTCGAATAT  
GCAACGCCAAGCAGTTCCACTTTCTCGGTCCGAGAAGTGCATTGTTGGAACCTGGGTTG  
GAACGCCAAGCGGCTCTAGATTCAGGGGTTACCGCTATAGCCGAACACGAGGGAAAG  
ATCATTTATACCAATACTGACAAGATCATTTTATTGGGTAATGGAGATACTTTAAGGATTC  
CATTAGTTATGTATCAACGTTCCAACAAAATACTTGTATGCATCAAAAACCCCAGGTT  
CCGCAGGGTAAATGCATTA AAAAAGGACAAATTTTAGCGGATGGTGCCGCTACAGTTG  
GTGGCGAACTCGCTTTGGGTAAAAATGTATTAGTAGCTTATCTGCCATGGGAAGGTTAC  
AATTTTGAAGATGCAGTACTCATTAGCGAGCGTCTGGTATATGAAGATATTTATACTTCT  
TTTCACATACGAAATATGAAATTCAGACTCATGTGACAAGTCAAGGA---CCCGAAAGG  
ATCACTAACGAAATACCGCATCTAGAAGCCATTTACTCCGCAATTTAGACAAAATGG  
AATTGTGATGCTGGGATCTTGGGTAGAGGCGGGCGATGTTTTAGTAGGTAAATTAATC  
CTCAGACGGCGAAAGAA---TCATCGTATGCCCCAGAAGATAGATTATTACGAGCCATAC  
TTGGCATTCAAGGATCCACTTCAAAGGAACTTGTCTAAAACCTACCCATAGGTGGTAGG  
GGTAGAGTTATTGATGTGAGATGGATCCAGAAAAGGGG---GGTTCGAATTATAATCCA  
GAAACTATTTGTGTCTATATTTTACAGAAACGTGAAATCAAAGTGGGTGATAAAGTAGC  
TGGAAGGCATGGAAATAAAGGTATCATTTCAAAATTTTACCTAGACAAGATATGCCTT  
ATTTGCAAGATGGAAGACCTGTTGATATGGTCTTCAATCCATTAGGAGTCCCCTCACGA  
ATGAATGTAGGACAGATATTTGAATGCTCACTCGGGTTAGCGGGGGATCTGCTCGATAG  
ACATTATCGAATAGCACCTTTGATGAGAGATATGAGCAAGAGGCTTCGAGAAAACCTA  
GTGTTTTCTGAATTATATGAAGCCAGTCAGCAAACAGCGAATCCATGGGTATTTGAACC  
CGAGTATCCGGGAAAAGCAGAATATTTGATGGAAGAACGGGAGATCCTTTTTGAACAA

CCTGTTATAATAGGAAAGCCTTATATCTTGAAATTAATTCATCAAGTTGATGATAAAAATAC  
ACGGACGTTCCAGTGGACATTATGCACTTGTTACACAACAACCCCTTAGAGGAAGGGC  
CAAGCACGGGGGACAACGGGTAGGAGAAATGGAGGTTTGGGCTCTCGAGGGGTTTGG  
TGTTGCTCATATTTTACAAGAGATGCTTACTTATAAATCGGATCATATTAGAGCTCGTCA  
AGAAGTACTTGGTACTACAATCATTAGGGGAACAATACCTAACCTGAAGATGCTCCA  
GAATCTTTTCGATTGCTCGTTTCGAGAACTACGATCTTTGGCTCTGGAAGTGAATCATTTC  
CTTGATCTGAGAAGAAGTACTACAGATTAATAGGAAGGAAGCTATGAATCATAATTTTCT  
TCTATGATCGATCGGTATAAACATCAACAACCTCCGAATTGGATCAGTTTCTCCTCAACA  
AATAAGTGCTTGGGCCAAAAAATCCTCCCGAATGGAGAGATAGTTGGAGAGGTGAC  
AAAACCTATACTTTTCATTACAAAACCAATAAACCGGAAAAGGATGGATTGTTTTGTG  
AAAGAATTTTTGGTCTATAAAAAGTGAATTTGTGCTTGTGGAAATTATCGAGTAATC  
GGAGATGAAAAAGAGGACCCGAAATTTGTGAACAATGCGGAGTCGAATTTGTTGATT  
CTCGGATACGAAGATATCAAATGGGATACATCAAATTAGCATGTCCAGTAACCCATGTG  
TGGTATTTGAAACGTCTTCTAGTTATATCGCGAATATTTTAGATAAACCTCTTAAAGAA  
TTAGAAGGGCTAGTATACTGCGATTTT-----TCTTTTGCTAGGCC---ATAGCTAAAAAC  
CTACTTTCTTACGATTACGAGGGTTATTTCGAATATGAAATCCAATTATGGAAATATAGCAT  
CCCCTTTTTTTTACTACTCAAGGCTTCGATACATTTTCGAAATCGAGAAATTTCTACTGG  
AGCGGGTGCTATCCGAGAACAATTAGCCAATCTCGATTTGCGAATTATTATAGATTATTC  
ATTGGTAGAATGGAAGGAATTAGGAGAAGAA---AGACCCACGGGTAATGAATGGGAAG  
ATCGAAAATTGGAAGAAGAAAGGATTTTTTGGTTAGACGCATGGAATTGGCTAAGCA  
TTTTCTTCGAACAAATATAGAACCAGAATGGATGGTTTTTATGTCTACTACCAGTTCTTCC  
TCCCGAACTACGACCCATCATTAGATAGATGGAGGTAAGCTAATGAGCTCGGATATTA  
ATGAACTCTATAGAAGAGTTATCTATCGGAACAATACTCTTACCGATCTATTAACAACAA  
GTAGATCTACACCAGGGGAATTAGTAATGTGTCAAGAGAAATTGGTACAAGAAGCCGT  
GGATACACTTCTTGATAATGGAATTCGCGGACAACCAATGAGGGATGGTCATAATAAGG  
TTTACAAGTCGTTTTTCGGATGTAATTGAAGGCAAAGAGGGGAAGATTTTCGTGAGACTCT  
GCTTGGCAAACGGGTCGATTATTCGGGTCGTTCTGTTCATTGTTCGTAGGACCCTCACTTC  
CATTACATCGATGTGGATTGCCTCGGGAAATAGCAATAGAGCTTTTTTCAGACATTTGTAA  
TTCGTGGGCTAATTAGACAACATCTTGCTTCGAACATAGGAGTTGCTAAGAGTCAAATT  
CGGGAAAAGGAGCCCATTGTATGGGAAATACTGCAAGAAGTTATGCAGGGGCATCCCG  
TATTGCTGAATAGAGCGCCTACTCTGCATAGATTAGGCATACAGGCATTTCAACCCATTT  
TAGTGGAAGGACGTGCTATTTGTTTACATCCATTAGTTTCGTAAGGGATTCAATGCAGATT  
TTGATGGGGATCAAATGGCTGTTTCATGTACCTTTATCTTTGGAGGCTCAAGCGGAGGCT  
CGTTTACTTATGTTTTCTCATATGAATCTCTTGTCTCCAGCTATTGGGGATCCCATTTCCG  
TACCAACCCAAGATATGCTTATTGGTCTATATGTATTAACGAGTGGGAATCGCCGAGGTA  
TTTGTACAAATAGGTATAATCCATGGAATCGC-----AGAACTATCAAATGAAAGAA  
CTTATGATAATAACTATAAGTCTAGAAAAAAA---GAACCTTTTTTTTTGTAATTCCTATGAT  
GTAATTGGAGCTTATCGACAGAAAAGAATCAATTTAGATAGTCCTTTGTGGCTTCGATG  
GCGACTAGATCAACGC---ATTATTGCTTCA-----AGAGAAGTTCCTATCGAGATTCATAT  
GAATCTTTGGGTACCTATCATGAAATTTATGGGCATCTAATAGTAAGAAGTGTA  
AAA  
AAAGAAATCATTTGTATATACATTCGAACAACCTGTCGGTCATATTTCTCTTTTTTCGAGAA  
ATTGAAGAAGCTATACAAGGGTTTTGTGCGAGCCTGCTCATTGGTACC-----  
--ATGGAGGTA  
CTTATGGCAGAACGAGTCAATCTAGTCTTTCACAATAAAGTAATAGATG  
GAACTGCCATTAAAAGACTTATTAGCAGATTAATAGATCACTTCGGAATGGCATATACAT



CACATATTCTAGATCAAGTAAAGACTCTAGGTTTCCAGCAAGCCACTGCTACATCCATT  
TCATTAGGGATTGATGATCTTTTAAACAATACCTTCGAAGGGATGGTTAGTGCAAGATGC  
TGAACAACAAAGTTTGATTTTGGAAAAACACCATCATTATGGAAATGTACATGCAGTAG  
AAAAATTACGCCAATCCATTGAGGTATGGTATGCTACAAGTGAATATTTGCGACAAGAA  
ATGAATCCTAATTTTAGGATGACAGACCCCTTAAATCCAGTCCATATAATGTCTTTTTCG  
GGAGCCAGAGGAAATGCATCTCAAGTACACCAATTAGTAGGTATGAGAGGATTAATGT  
CAGATCCTCAAGGACAAATGATTGATTTACCCATTCAAAGCAATTTACGCGAAGGACTA  
TCTTTAACAGAATATATCATTCTTGCTACGGAGCCCGCAAAGGAGTTGTGGATACTGC  
TGTACGAACATCAGATGCTGGATATCTTACGCGCAGACTTGTTGAAGTAGTACAACACA  
TTGTTGTACGCAGAACAGATTGTGGAACCATCCGAGGGGTTTCTGTGAGTCCCTCGAAA  
TGGGATGATGCCG---GAAAGAATTTTATTCAAACATTAATTGGTTCGTGTATTAGCAGAC  
GATATCTATATGGGCCACGATGCATTGCCATTGCAAATCAAGATATTGGAATTGGACTT  
GTCAATCGATTATAACC-----TTTCGAACACAACCAATATCTATTGAAACCC  
TTTACTTGTAGGAGTACATCTTGATCTGTGATTATGTTATGGTAGGAGTCTACTCAT  
GGCGACCTGGTCAATTGGGAGAAGCTGTAGGTATTATTGCGGGTCAATCTATTGGCGA  
ACCAGGGACTCAACTAACATTAAGAAGTTTCATACCGGCGGAGTATTCACAGGTGGT  
ACTGCCGAACATGTACGAGCCCCCTAATGGAAAAATCAAATTCAATGACGATTTGGT  
TCATCCACACGTATGTGTCATGGGCATCCTGCCCTTCTATGTTCTATAGACTTGTATGTA  
ACTATTGAGAGTGAAGATATTCTACATAACGTGACTATTCCACCAAAAAGTTTTCTTTTG  
GTTCAAATAATCAATATGTAGAATCAGAACAAGTGATTGCTGAAATTCGCGGAGAAC  
ATACACTTTC---AATTTGAAAGAGAGGGTTCGAAAACATATTTATTCTGAATCAGAGGG  
AGAA---ATGCACTGGAGTACCGATGTGTACCATGCACCTGAATTTACATATAGTAATGTC  
CATCTTTTACCAAAAACAAGCCATTTATGGATATTATCAGGGGGTTCGTGCAGA-----TC  
CAGTGGAGTCCCTTTTTCACTCTACAAGGATCAAGACCAAATGAATCTTCGT-----TCTC  
TTTCTGTGCAACGA---AGATCTATTTTCGAGTCTC---TCAGTGAATAATGATCAA---ATGAG  
ATACGAATTATGTAGTTCTGATTTTCTGGTAAAATAGAAGATAGGATTCCTGATTAT---T  
CAGAACTTAGTCGAACCATATCTATTGTTTCGTTGTAATCTCAAATATCCTACT---ACTTTC  
CACAAGAATTCTGAT-----TTATTGGCAAAAAGGCGAAGAAATCGATTTCTTATTCCACT  
CCAATCGATTCAAGAACGAAAGAAAGAACTAATGCCCCATTCAGGTATCTCGATTGAA  
CTAGCGATAAAT-----GGAATTTTACGTAGAAATAGTATTCTTGCTTATTTTCGATGATCCTC  
GATACAGAAGAAAGAGTTTCGGGAATTACTAAATATGAGACTCTAGGGGTTTCATTGATC  
GTAAAAAAGAGGAT-----TTGATTGAGTATCGA---GGAATCAAAGAATTTAAGCAAAA  
TGCATGAAACTAGATCGATTTTTTTTCATCCCGAAGAAGTGCATATTTCCCTGAATCT  
TCTTCGATAATGGTACGGAACAATAGTCTGATTGGAGTAGATACACGAATCGCTTTAAAT  
ACAAGAAGCCGATTGTGCGGATTAGTCCGAGTGGATAGAAAAAAGGATTGAA  
CTGAAAATCTTTTCTGGAGATATCCATTTTCTGGAGAGACAGATAAGATATCCCGACA  
CAGTGGCATCTTGATACCCCCAGGAACAGGAAAAACA-----AATTCTAAGGAATCCAAA  
AAA-----TTGAAAAATTGGATCTATGTCCAACGG-----ATCACACCTAATAAGAAAAAG---  
---TATTTTGTTTTAGTTCGACCCGTAGTGACATATGAAATATCGGACGGTATAAATTTAGC  
AACACTCTTCCCCCGGATCTGTTACAAGAAAGGATAATATGCAACTTCGAGTTGTCA  
ATTATATTGTTTACAGAAATGGCAAACCAATTCGGGGAATTTCTGATACAAGTATTCAAT  
TAGTTCGGACTTGTTAATTTTGAATTGGGACCAAGACAAA-----AAAAGTTCTTCTAT  
CGAAGAGGCTTATACTTCTTTGTTGAAGTAAAGTACAAATGGTCTGATTTCGAGATTTCC  
TAAGAATTGACTTAGTGAAATTCCCTATTTTCGTATCTCAGAAAAAGGAATGATCCCTCA

GGCTCAGGATTGATCTCAGATGATAATGTATCAGATCACACCAATAGAAATCCCTTTTAT-  
-----TCCAAGACAAAA-----ATTCAACAATCACTTAGCCAAAATCAAGGAACTAT  
TCGCACGTTGTTAAATAAA-----AATAAAGAATGCCCATCTTTGATAATTTTGTATCAT  
CTAATTGTTTCCGAATGGGTCCA-----TTCAACGCTGGAAAATATCACAAT-----GTGAT  
AAAAGAATCA---CCTATAATTAATAATTAGGAATTTGATTGGCCCTTTAGGAACA-----GTC  
CTTCAATTTGTGAATTT-----TATTCATTTTACTATTTAATAACT-----CATAATCCTATTTT  
G---GTAATAAATATTTGCAACTTGAAAAT-----TTAAAACAGACTTTTCAAGTAATT---  
--AAC---TATTATTTACTGGATGAAAATGGGAGA-----ATTTTGAATCCCGATTCATGCAGT  
AACAGCGTTTTGAATTCATTCAATTTGAATTGGTATTTTCTCCATCCTAATATTTTGAAG  
AAAGATCCACAATAATTAGT---CTTGGACAGTTTATTTGTGAAAATGTATGTATAGCCAA  
AAACGGACCC-----CATCTCAAATCGGGTCAAGTTTGTGATTGTTCAA---GTTGACTCTG  
TAGTAATAAGATCCGCCAAGCCTTATTTGGCCACTCCAGGAGCAACTGTTTCATGGTCAT  
TATGGAGAAATCCTTTACGAAGGAGATACATTAGTTACATTTATATATGAAAAATCGAGA  
TCCGGTGATATAACGCAAGGTCTTCCAAAAGTGGAACAAGTGTTAGAAAGTGC GTTCAA  
TTGATTCAATATCGATGAACCTAGAAAAAGAATTGAGGGCTGGAACGAGCATATAAA  
AAAAATCTTGGAAATCCTTGGGGATTCTTGATTGGGGCTGAGCTAACTATAGTGCAAA  
GTCGTATATCTTTGGTTAATAAGATCCAAAAGTTTATCGATCCAGGGGGTGCAAATCC  
ATAATAGGCACATAGAAATTATTGTACGCCAAATAACATCAAAGGTGTTGGTTTCAGAG-  
-----GATGGAATGTCTAATGTTTTCTTACCTGGAGAATAATTGGATTGTTGCGAGCGG  
CGCGAACGGGGCGCGCTTTGGAAGAATCGATCTGTTACCGTGCCATCCTATTGGGAATA  
ACAAGGGCATCTTTGAATACTCAAAGTTTCATATCTGAAGCGAGTTTTCAAGAACTGC  
TCGAGTTTTAGCCAAAGCTGCTCTCCGGGGCCGTATCGATTGGTTGAAAGGCCTAAAA  
GAGAACGTTGTTATAGGGGGGATGATACCCGTTGGTACCGGATTCAAAGGATTAGTGCA  
TCGTTCA-----AGGCAACATAAGAACATTCCTTTGAAAACCAAAAAGAAGAAT-----TTT  
TTCGAGGGGGAAATCGGA-----GATATTTTGTTCACCACAGAGAATTATTTGATTCTTC  
CATTTCAAAGAAGTTTCATGATACATCAGAACAATCATTTAGAGGATTTAATGATTCC----  
-----ATGACAAGAAGGTATTGGAATATCAATTTGGAAGAGATGATGGAAGCGGGA  
GTTCATTTTGGTCATGGTACTATGAAATGGAATCCTAGGATGGCACCTTATATTTCTGCC  
AAGCGTAAAGGTATTATATTACAAATCTTACTAAAAGCTGCTCGTTTTTTATCAGAAGCT  
TGTGATTTAGTTTTTGTATGCAGCAAGTAGGGGAAAACAGTTTTTTAATTGTTGGTACCAA  
GAATAAAGCAGCTGATTCAGTAGCACGGGCTGCAATAAGGGCTCGGTGTCATTATGTTA  
ATAAAAAGTGGCTCGGTGGTATGTTAACGAATTGGTCCACTACAGAAACGAGACTTCAT  
AAGTTCAGGGACTTGAGAACGGAACAAAAGGCGGGGAGACTCAATCGTCTTCCGAAA  
AGAGACGCAGCTATGTTGAAGAGACAATTATCTCACTTGCAAACATATCTGGGTGGGAT  
TAAATATATGACGGGGTTACCTGATATTGTAATTATCGTTGATCAACAAGAAGAATATAC  
GGCTCTTCGAGAATGTATCACTTTGGGAATCCAACAATTTGTTAATCGATACAAATTG  
TGACCCGATCTTGCAGATATTTGATTCCAGCAAATGATGACGCTATAGCTTCAATCCG  
ATTAATCTTAAACAAATTAGTATTTGCAATTTGTGAGGGTCTGTTCT---AGCTATATACGAA  
ATCCTATGGGACAAAAATAAATCCACTTGGTTTCAGACTTGGTACAACCCAAGGTCAT  
CATCTATTTGGTTTGCACAACCCAAAATTATTCGAAAGGTCTACAAGAAGATCAAAA  
AATACGAAATTGTATCAAGAATTATATACAAAAAATATGAAAATATCCTCT---GGTGTG  
GAAGGAATTGCACGCATAGAAATTCGAAAAAGAATTGATCTGATTCAAGTCAGAATCT  
ATATGGGATTCCAAAGTTATTACTAGAAAGGCAAGACGCGA-----AGAATCGAAGA  
ATTACAGATGAATGTACAAAAAGAACTTAATTGTGTGAACCGAAAACCTCAACATTGCTA

TTACAAGAATTACAAACCCCTTATGGGCACCCTAATATTCTTGCAGAATTTATAGCCGGAC  
AGTTAAAGAATAGAGTTTCATTTTCGCAAAGCAATAAAAAAGCTATTGAATTAACCGA  
ACAGGCAGATACAAAAGGAATTC AAGTACAAATTGCAGGTCGCATCGACGGAAAAGA  
AATTGCACGTGTCGAATGGATCAGAGAAGGTAGGGTTCTCTACAAACCATTCGAGCT  
AAAATTGATTATTGTTCCCTATGCAGTCCGAACGGTCTATGGAGTATTAGGCATCAAATT  
TGGATATTTGGGGAA-----ATGTCGCGTTACCGAGGGCCTCGTTTCAAAAAATACGCC  
GTCTTGGGGCTTTACCAGGACTAACTAGTAAAAGGCCTAGAGACAGAAGCGATCTTCG  
AAACCAATCGCGCTCTGGGAAA---AAATCTCAATATCGTATTTCGTTTAGAAGAAAAACA  
AAAATTGCGTTTTTCATTATGGTCTTACAGAACGACAATTACTTAAATACGTTTCGTATCGC  
CGAAAAGCAAAGGGTCAACAGGTCAGGTTTTACTACAATTACTTGAATGCGTTTG  
GATAACATCCTTTTCCGATTGGGTATGGCTTCGACTATTCTCAAGCCCGCCAATTAGTT  
AACCATAGACATATTTTAGTTAATGGCTGTATAGTAGATATACCAAGTTATCGCTGCAAA  
CCACGAGATATTATTACGGCGAGGGATGATCAAAAATCGAGAGCTATGATTCAAAATTA  
TCTTGATTCATCCCCCAT--GAGGAAGTGCCAAAACATTTGACTCTTCACCCATTTCAA  
-----TATAAAGGATCAGTCAATCAAATAATCGATAGTAAATGGATCGTTTTGAAAATAAAT  
GAATTGCTAGTCGTAGAATATTATTCTCGTCAGACTATGTCACGTCGAGGTA CTGCAGA  
AGAAAAAAGTGCAAAATCCGATCCAATTTATCGTAATCGATTAGTTAACATGTTGGTTA  
ACCGTATTCTGAAACACGGAAAAAATCATTGGCTTATCAAATTATCTATCGAGCCATG  
AAAAAGATTCAACAAAAGACAGAAACAATCCACTATCCGTTTTACGTCAAGCAATAC  
GTGGAGTA ACTCCCATATAGCAGTAAAAGCAAGACGTGTAGGCGGATCGACTCATCA  
AGTTCCCATGAAATAGGATCCACACAAGGAAAAGCACTTGCCATTCGTTGGTTATTAG  
GAGCATCCCGAAAACGTCCGGGTCGAAATATGGCTTTCAAATTAAGTTCCGAATTAGTG  
GATGCTGCCAAAGGGAGTGGCGATGCCATACGCAAAAAGGAAGAGACTCATAGAATG  
GCAGAGGCAAATAGAGCTTTTGCGCATTTTCGTATGGGTAGGGACACTATTGCTGACAT  
AATAACCTCTATACGAAATGCTGACATGAATAGAAAAGGGACGATTCAAATAGCATCCA  
CTAACATCACGAAAACATTGTTAAATACTTTTAAAGAGAAGGTTTTATCAAAAACGTG  
AGGAAGCATCAGGAAAAGAACAATATTTTTTGGTTTTAACCTACGACATAGAAGG---  
---AATAGGAAAGGACCCCATCGAACT---ATT-----TTAATTTAAAACGTATCAGTAGGCC  
TGGCCTACGAATCTATTTCGAACTATCAACGAATTCCTAGAATTTTAGGCGGGATGGGGA  
TTGTAATTCCTTCTACTTCTCGAGGTATAATGACAGACCGAGAGGCTCAACTAAAAGGA  
ATCGGCGGAGAAATTTTGTGTTATATATGGATGGCAAAATCTATACCAAGA ACTGGTTC  
ACGT-----AAAAGTACACGTAGAATAACCAAAGGGAGTTATTCATGTTCAA  
GCAAGTTTCAACAATACCATTGTGACTGTTACAGATGTACGGGGTCGGGTAATTTCTTG  
GTCCTCCGCCGGTACTTGTGGATTCAATGGTGAAGAAGGGGGACACCATTGCTGCT  
CAAACCGCAGCAGGAAATGCTATTCGGACAGTAGTAGATCAAGGTATGCAACGAGCAG  
AAGTCATGATAAAGGGTCTGCTCGGAAGAGATGCAGCATTAAAGAGCTATTTCGTAG  
AAGTGGTATACTATTAAGTTTCGTACGTGATGTAACCCCTATGCCACATAATGGCTGTAG  
ACCTCTAAAAAAGACGTGTGCACCCTACATGTTCTCGACGCTGAGGACATCCCC  
AAGAGCGGGGATTCGTGACATTTCTGATTGGCTGTCT--TGTGTTTCTAATAAG--TT  
GTTAATAGTTGGCATACTATCACCCCAAAAAACCAAACCTCTGCCTTACGTAAAGTTG  
CCAGAGTACGATTAACCTCTGGATTTGAAATCACTGCTTATATACCTGGTATTGGCCATA  
ATTCACAAGAACATTCTGTAGTCTTAGTAAGAGGGGGAAGGGTTAAGGATTACCCGG  
TGTGAGATATCACATTTGTCGAGGAACCCTAGATGCTGTTCGGAGTAAAGGATCGTCAAC  
AAGGGCGTTCTCAATATGGGGTCAAAAAGCCAAAATGGCAAGGAAAAGTTTGATTCA

TAGGGAGAAGAAGAGGCCAAAACTGGAACAAAAATATCATTGATTCGTCGATCCTCA  
AAAAAAGAAATAAGC-----AAAGTTCCGTCGTTGAGTGAGAAATGGAAAATTCATGG  
AAAGTTACAATCCTCACCGCGTAATAGTGCGCCTACACGTCTTCATCGACGTTGTTTTT  
CGACCGGAAGACCGAGAGCTAACTATCGAGACTTTGGGCTTTCCGGACACATACTTCG  
GGAAATGGTTCATGCATGTTTGTGGCCAGGGGCAACAAGATCAAGTTGGATGGTAAAA  
AATTCATTCATTCAGTTATTTCAACAAGAA---GAA---AAAGAAGAAAACAGGGGGTCCC  
TTGAATTTCAAGTATTTCTGTTTACCAATAAGATACGAAGACTGACTTCACATTTGGAAT  
TGCACAGAAAAGATTATTTATCTCAGAGAGGTTTACGTAAAATCCTGGGAAAACGCCA  
ACGACTGCTGTCTTATTTGTCAAAAAAATCGAATACGTTATAAAGAATTAATTAGTC  
AGCTGGATATTCGGGAATCAAAAACCTCGT-----ATGGTAAAACCTTCGTTTGAAACGATGT  
GGTAGAAAGCAA---CCCGTTTATCGAATCGTTGCAATTGATGTTTCGATCCCGAAGAGAA  
GGAAGAGATCTTTGGAAAGTGGGTTTTTATGATCCGATAAATAATCAAACGTATTTAAAT  
ATTCCTGCTATTCTATTTTTTCTTGAAAAAGGCGCTCAACCTACAGGAACTGTTTATGAT  
ATTTTAAAGAAGGCGGGGGTGT-----TTTTACAGAATTTTCGTGT-----ATGGAAA  
ATCCAAGCGACTCTTTCTTAAATCCAAGCGATCTTTTCGTAGGCGTTTGCCCCGATCC  
AATCGGGGGATCGAATTGATTATAGAAACATGAGTTTAATTAGTCGATTTATTAGTGAAC  
AAGGAAAATATTATCTAGACGGGTAAATAGATTAACCTTAAAACAACAACGATTAATT  
ACTATTGCTATAAAACAAGCTCGTATTTTATCTTTGTTACCTTTTCTTAATAATGAGAAA--  
---CAATTTGAAAGAAGGGAGTCGACCGCCGGAGCTACTGGTCTTAGAACCATAAATAA  
AGTGACACGTTCACTAAAAAAAATCCTTTTGTGGCGAATCATTATTAAGAAAAATTG  
AGAAGCTTAACACAAAGACGGAAAAAGAAATAATAATAACTTGGTCTCGGGCATCTAC  
CATTATACCTACAATGATCGGCCATACTATTGCTATCCATAATGGAAGGGAACATTTGCCT  
ATTTATATAACAGATCGTATGGTAGGCCATAAATTGGGAGAATTTTCACCTACTATAAATT  
TCCGTGGACATGCGAAAAATGATAATAGATCTCGTCGTATGATTTTGAAATCTTTTCTAC  
TAGGGAATCCAGTATCCTTATGCATGAAGATAATAAATTCGGTTCGTTATGGTCCGACTCT  
ATTATGGGTTTCTGACCACATTCTCCATAGGGCCCTCTTATCTCTTCTTCTCCGAGCTC  
GGGTTCTGGAAGAAGGA-----ACCGAGAAGAAGGTATCAGCAACAACGGGTTTTATT  
GCGGGACAGCTCATGATGTTTCATATCGATCTATTATGCGCCTCTGCATCTAGCATTGGGT  
AGACCTCATAACAATAACTGTCCTAGCTCTACCGTATCTTTTGTTCATTTCTTCTGGAAC  
AATCACAAACACTTTTTTGTATTATGGATCTACTACCAGAAATTCAATGCGTAATCTTAGC  
ATTCAATGTGTATTCTGAATAATCTCATTTTTCAATTATTCAACCATTTTCATTTACCAA  
GTTCAATGTTAGCCAGATTAGTCAACATTTATATGTTTCGATGCAACAACAAGATGTTAT  
TTGTAACAAGTAGTTTTGTGGTTGGTTAATTGGTCAATTTTTTTCATGAAATGGGTTG  
AATTGGTATTAGTCTGGATACAGCAAATAATTCTATTTCGATCG-----AAGTACCT  
TGTGTCAGAATTGAGAAATTCTATGGATCGAATCTTTAGTATTCTTATTATTACCTGT  
GTTACTATTTAGGCAGAATACCGTCACCCGTTGTTACTAAAAAATCAAAGAAACCGA  
AGAAGATAAACCTCTTGTGACTCTTCTTTTCGACTATAAACGATGGAATCGTCCATTGC  
GATATATAAAAAACAATCAATTTGAAAATGCCGTAAGAAATGAAGTGTCACAATATTTT  
TTTTCTATATGTCGAAACAATGGAAAAGAAAGAATATCTTTTACGTACCTCCCCAGTTG  
TCAACTTTCTTGGAATCATAAAAAGAAAAATGGATTTGTTGACAAGAGAAAAACTAC  
CCTATGATGAATTGTATTATCATTTGGATTTATACCAATGAACAAAAAAGAAGAACTTGA  
GCAAAAAATTTAGAAATCGAATGGAAGCTCTAAAT-----ATTATTCTAGATGTATTGGA  
AAAAAGAACTAAATTGTGTAATGATGAAAATAAAAAAGAATACTTGCCATAAATATATG  
ATGCTTTTTTGAATGGGCCCTGTCGTAGAAGGGTCAAATTTTTTTTTTTCATACATCGAGA

CGGGTTGGATAAATAAGATTCATGGTATACTTGAGGAAAAATTTGAAGAAAAAGAGCC  
CAAGACTAAAGGA-----ATAAAAGAAATAAGTAAAAAAGTTCCTCCATGGTCATACAAA  
TTAATCGATTTGGAACAACAGGAGGGAGAACAGATTCGTTCCAGAAAAGCCAAACGT  
GTAGTAATTTTTACTGATGCTTTGATACGTTATTCACAACAATCGGATTTTCGTGAGAC  
ATAATCAAAGGCTCTATGCGTGCTCAAAGACGTAAAACAATTATTTGTGAATTGGTTCA  
AGCAATGCGCATTCTCTCTTTTTTTGGACAGAATAGACAAACCC-----CTTTTTTCT  
TTTTATATCTCCGGGATGATAAAATTCATTTTGAAAAACAGAGAAGAGAAAAGCACGAAT  
AGAAATAGCGGAAGCCTGGGATAGCATTATTTGCTCAAGTAATAAGAGGATCCCTAT  
TAGTAACCCAATCTTTTCTTAGAAAATATATTCTATTTCTTCATTGATAATAGCTAAAAA  
TATAGCCCGTATGCTATTATTTCAATTTCCCGAGTGGTCCGAGGACTTAAAAGATTGGAA  
TAGAGAAATGCATGTTAAATGCACCTATAATGGTGTTCATTATCAGAAACCGAATTTCC  
AAAAAATTGGTTGACAGACGGTATTCAGATAAAGATCCTATTCCCTTTTTGCCTTAAAC  
CTTGGCACAGATCTAAG-----CAAAAAACGATTTTGTTTTTTAACAGTTTGGGGAATG  
GAACTGAACTTCCTTTTGGTTCTCCAGAAAACAACGTTTCATTTTTTGAACCCATTTT  
TAAAGAACTCAGAAAAAAAATTAAAAAATTGCAAAAGAATTCTTTTTTAGTT---ATACA  
GGTTTTAAAAGAAAGAATAATTTTTTTTTTAACCTTTCAAAAGAAAGAAAAAATGG  
GTCATGAAAAACATTCTA-----TTTTTAAAGGAATAATAAAAGAACTTCCAAAAGAA  
ACAATGGGATAATCAGTAATGGGATGATTAATGAATCG---ATTCAAATTCGATTTCTGGA  
TTTGACAGAT---TCATTGACAGAAAAAAAATGAAAGATCTGACTGATAGAACCAGCA  
CAATCAGGAATCAAATAGAAAAAATTACAAAAGATAAGAAAAAAGTTCTAATAAAAT  
AAGTTATCCTACTAACTATTATCATCAATAATAAATTTGGCAGAAATTAAGAAATT  
CAATGTTTCGATTAATCCGTAAATCATATTCTTTTTTCAAATTTTAATTGAAAGAATATAC  
ATAGATACTTTTTCTGTATCATTAAATAGTCCGAGGATCACTACACAACCT-----  
---TTATCCTCCTTCTCACAAAGCATATATATTTTACCAATTATATCAAACG---ATTCGTAATT  
TGTATAAGTTAAGATATGTCCTTCAATATACAGCTTTTTTTCTTAAAAATGAAATAAAGG  
ATTATTTTACACAAGGAATTTTTTATTCTGAATTAACATAAAAAATATTTTT---TCGGAA  
ATGATTC AATGGAAAAACTGGTTAAGGGGTCATTATCAATATGATTTATCTCCGATTA  
TGGTATCGATTAGTACCACACAAATGGCGAAATAGATTCAATCAAAGACGTATAGTGCA  
AAATAAAAAACAAAAGTCATTCAGATGAAAAAGATCGATTACTATTAATTAATTACAAA  
AATTA---AACCTTGCAAAATACTATGGATATGACCTTTTCTCATATAAATCGATTAATGAT  
GATATTCTAAATAAAGATAGAAAATATTTGATTGGAGAATTTCCGATTTTTGTCTTCGA  
CTTTTTGATTGGATGGGAATGAATGAAGAAATACTAAGTCGTTGGTTCTTTCCAGAATT  
TGTGCTGCTTTATAATACATATATTATGAAACCGTGGATCATACCAATCCAACACTTCTT  
TTAAATAGCAAC-----ACGGAAGCAGAGCTTGATTTTTTCTTAAAAAGGTATTTACGTTT  
TCAATTGAGATGGGAT-----AATCAAAGAATGATCAATAATATCAAAGTATATTGTCTCC  
TACTTAGACTGATAAATCCAAGAGAAATTGCTATATCCTCTATTCAAAGGGGAGAAATG  
AGTTTAGATATTTGATGATTCAAAGGATTTAACTCTTACAGAATTAATGAAAAAGGGT  
ATATTAATTATCGAACCAATTCGTTTGTCTATAAAAAATGATGGACAATTTTTTATGTATC  
AAAGTCTAAATATTTCAATGTTTCATAAGAGTAAGCCCGATTATGATTTGTTCTTTGTTAC  
CGAAAAAGTTTTATCCACTAAAGGACGTAGAGAATTAAGAATTCATTTCTTTGAAAT  
TTCTTTGGCCTAATTATCGATTAGAAGATGTATCTTGTATGAATCGATATTGGTTTGATAC  
CAATAATGGGAGCAGCTTCACTATGATAAGGATACATATGTATCCAATGAAAGGACATC  
AATTC AATCCTGGATTTTCGAATTGAGAGAGATATTGAGAGAGATCAAGAATTCTCAC  
TATTTCTTAGATTCATGGACCAATTCAATTCCGTGGGATCTTTCATTCACATTTTTTCC

ACCAAGAACGTTTTATAAACTCTTGGACCCCCGAATTTGGAGTATCCTACTTTCA---CG  
CAATTCA-----CAGGGTTCAACAAGCAATCGATATTC-----ACGATCAAGGGTGTAGT  
ACTATTTGTAGTAGCG---GTCCTTATATATCGT-----ATTAACAATCGAAATATGGTCG  
AAAGAAAAAATCTCTATTTGACAGGGCTTCTTCCT-----ATACCTATGAATTCCAT  
TGGACCCAGAAATGATACATTGGAAGAATCTTTT---GGGTCTTCCAATATCAATAGGTTG  
ATTGTTTCG---CTCCTCTATCTTCCAAAAGGAAAAAAGATCTCTGAGAGCTGTTTCCTG  
GATCCGAAAGAGAGTACTTGGGTTCTCCCAATAACG-----AAAAAGTGTATCATGC  
CTGAATCTAACTGGGGTTCGCGGTGGTGGAGGAAGTGGATCGGAAAAAAGAGG-----G  
ATTCTAGTTGTAAGATATCTAAT-----GAAACCGTCGCTGGAATTGAGATCTCATTCAA  
AGAGAAAGATATCAA---TATCTGGAGTTTCTTTTTGTATATTATATGGAT-----GATCCGA  
TCTGCAAGGACCATGATTGGGAATTTTGGATCGTCTTTCTCCGAGTAAGAGACGAAA  
CATAATTAAGTTG-----AATTCGCGACAGCTATTGAAATCTTAGTTAAAGACTGGATTTG  
TTATCTCATGTTTGCTTTTCGTGAAAAAATACCAATTGAAGTGGAGGGT---TTCTTCAA  
CAACAAGGA---GCTGGGTCAACTATTCAATCAAATGATATTGAGCATATTTCCCAT-----C  
TCTTCTCGAGAAACAAGTGGGCTATTTCTTTGCAAATTGTGCTCCATTCATATGTGGC  
AATCCGCCAAGATCTCTTCGTT-----AGTTGGGGGAAG---AATCCGCCGAATCGGAT  
TTTTTGAGGAAC---ATATCGAGAGAGAATTGGATTTGGTTAGACAATGTGTGGTTGGTA  
AACAAGGATCGG-----TTTTTTAGC-----AAGGTACGGAATGTATCGTCAAATATTCAAT  
ATGATTCT-----ACAAGA-----TCTAGTTTCGTTCAAGTAACGGATTCTAGCCAATTGAA  
AGGATCTTCT---GATCAATCCAGAGATCATTTCGATTCCATTAGT-----AATGAGGATT  
CGGAA-----TATCACACATTGATCAATCAAAGAGAGATTCAAC  
AACTAAAAGAAAGATCGATTCTT---TGGGAT-----CCTTCCTTTCTTCAAACGGAACGAA  
CAGAGCTAGAATCAGAC-----CGATTCTCGAAA-----TGCCTTTCTGGATATTC-----  
---CGGCTATTACG---GAACGTGAGAAGGAGATGAAGAATCATCTGCTTCCGGAAGAAA  
TCGAAGAATTT-----CTTGGGAATCCTACAAGATCCATTCTTTCTTTTTTCTCTGACAGAT  
GG-----TCAGAACTTCAT---CTGGGTTCGAATCCTACTGAGAGGTCCACTAGAGATCAG--  
-----AAATTGTTGAAGAAAGAACAAGATGTTTCT---TTTGTCCCTTCCAGGCGATCGG  
AA-----AATAAAGAAATAGTTAATATATTCAAGATAATTACGTATTTACAAAAT-----A  
CCGTCTCAATTCATCCTATTTTCATCAGATCCGGGATGTGATATGGTTCCG---AAGGATGA  
ACTGGAT---ATGCACAGTTCCCATAAGATTCATTCTTGAACAAAAATACATTTTTTTGATT  
TA-----TTTCATCTGTTCCATGACCGGAACAGGGGGGGGATACACGTTA-----CACCACGAT  
TTTGAATCAGAA-----GAGAGATTTCAAGAAATGGCAGATCTATTCACTCTATCAATAAG  
CGAGCCG---GATCTGGTGTATCATAAGGGATTTGCCTTTTCTATGGATTCTTACGTATTGG  
ATCAAAAACAA-----TTCTTGAATGAGGTATTCAACTCCAGGGATGAATCGAAAAAGAA  
ATCTTTA-----TTGGTTCTACCTCCTCTTTTTTAT-----GAAGAGAATGAATCTTTTTATC  
GAAGGATCAGAAAAAATGGGTCCGG---ATCTCCTGCGGGAATGATTTGGAAGATCCA  
AAACCAAAAAGAGTGGTATTTGCTAGCAACAACATAATGGAGGCAGTCAATCAATATA  
GATGGATCCGAAATCTGATTCAAATCCAA-----TATAGCACCTATGGGTACATAAGAAAT  
GTATGGAATCGATTCTTTTTAATGAAT-----AGATCCGATCGCAACTTCGAATATGGAAT  
TCAA-----AGGGATCAAATAGGAAATGATACTTTGAATCATAGAACGATAATGAAATAT  
ACGATCAACCAACATTTATCGAATTTGAAAAAG---AGTCAGAAGAAATGGTTCGATCCT-  
-----CTTCTTTTTATTTCTCGAACCGAGAGATCCGTGAATCGGGATCCTAATGCATATAGAT  
ACAAATGGTCCAATGGGAGCAAGAATTTCCAGGAACATTTGGAACATTTGTTTCTAA  
GCAGAAGGGCCGT-----TTTCAATTAGTCTTCGATCGATTACGTATTAATCAATATTCGA

TTGATTGGTCTGAGGTTATCGACAAAAAAGATTTGTCTAAGTCACTTCGTTTCGTTTTG  
TCCAAGTTACTTCTC-----TTTTGTCC-----AAGTTTCTTCTT  
TTTTTGTCTAACTCACTTCCT--TTTTCTTTGTGAGTTTCGGGAATACCCCCATTATAG  
GTCCGAG---ATCCACGTCTAT--GAATTGAAAGGTCCGAATGATCAACTCTGCAATCAGT  
TGTTAGAATCAATAGGTCTTCAAATCGTTCATTTGAAAAAATGGAAACCATTA-----TTAT  
TGGAT-----GATCATGATACTTCC--CAAAAATCGAAATTATTGATCAATGGAGGAACA  
ATATCACCATTTTTGTTCAATAAGATACCA---AAGTGG---ATGATTGACTCATTCCATACT  
AGA-----AATAATCGCAGGAAATCTTTTGATAACACGGATTCCATTTCTCAATGATATCC  
CACGATCAAGACAATTGGCTGAATCCCGTGAAACCATTTCATAGAAGTTCATTGATATC  
TTCTTTTTATAAAGCAAATCGACTTCGATTCTTGAATAATCCACATCACTTCTGCTTCTAT  
-----TGTAACAAAAGATTCCCCTTT-----TAT--GTGGAAAGGGCCCGTATCAATAATTAT  
GAT-----TTACATATGGA--CAATTCCTCAATATCTTGTGCATTCGCAACAAA---ATATTTT  
CTTTGTGCGGCGGTAAA-----AAAAAATACGCTTTTTTTGGAG---AGAGATACTATTTTAC  
CAATCGAGTCACAGGTATCTAACATATTCATACCTAACGATTTTCCACAAAAGTGGTGAC  
GAAAGG---TCTAACTTGTACAAATCT-----TTCCATTTTGCAATTCGATCCGATCCATTA  
GTTTCGT-----AGAGCTATTTACTCGATCGCAGACATTTCTGGAACACCTCTAACAGAGGG  
ACAAATAGTCAATTTTGAAAGAACTTATTGTCAACCTCTTTCAGATATGAATCTATCTGA  
TTCAGAAGGGAAGAAGTGTATCAGTATCTCAAT-----TTCAATTCAAACATGGGTTTGA  
TTCACACTCCATGTTCTGAGAAATATTTACCATCCGAAAAG-----AGGAAAAAA-----  
-----CGGAGTCTTTGTCTAAAG-----AAATGCGTTGAGAAAGGACAGATGTATAGAA  
CCTTTCAACGAGATAGTGCTTTTTCAACTCTCTCAAATGGAATCTATTCCAAACATATA  
TGCCATGGTTCCTTACCTCGACAGGGTACAAATATCTAAATTGGATATTTTTAGATACTTT  
TTCAGAC--CTATTGCCGATACTAAGTAGCAGT-----CAAAAATTTGTATCCATTTTTCATG  
ATATTATGCATGGATCAGATATATCATGGCAAATCTTTCAGAAAAAATTC-----T  
GTCTTCCACAATGGAAT--CTGATAAGTGAGATTTTCGAGTAAGTGTTTACATAAT-----CT  
TCTTCTGTCCGAAGAAATGATTCATCGAAATAATGAGTCA-----CCATTGATATCGACCCA  
TCTGAGATCTCCAAATGTTTCGGGAGTTC--CTCTATTCAATCCTTTTCTTCTTCTTGTG  
CTACATAT--ATTGTTTCGTACACATCTTCTCTTTGTTTCCCGA-----GCCTATAGTGAGTTA  
CAGACAGAGTTCGAAAAGGTCAAATCTTGGATGATTCCATCATACTATGATGGAGTTGCG  
AAAACCTTCTGGATAGGTACCCTACATCTGAACTGAATTCTTTCTGGTTAAAGAATCTCT  
TTCTAGTTGCTCTGGAAAAATTAGGAGATTCTCTAGAAGAAATACGGGGTTCTGCTTCT  
GGCGGCAACATGCTATGGGGTGGTGGTCCC-----GCTTATGGG---TTCAAATCAAT  
ACGTTCTAAGAAGAAATATTTGAATATCAAT-----CTCATCGATCTCATA---AGTATCATA  
CCAAATCCCATCCATCGAATCACTTTTTCGAAAAAGACGAGACATCTAAGTCATACAAG  
TAAAGAGATCTATTATTGATAAGAAAAAGAAAAAATGTGAACGGTGATTGGATTGATG  
ATAAAATAGAATCCTGGGTGCGAACAGTGATTTCGATTGATGATAAAGAAAGAGAATTC  
TTAGTTCAGTTTTCC-----ACCTTAACGACA-----GAAAAAAGGATTGATCCAATTCTATT  
GAGTTTGACT--CATAGTGATCATTTATCA-----AAGAATGACTCTGGTTATCAAAT  
GATTGAACAACCGGGAGCAATTTACTTACGATACTTAGTTGACATTCAT-----AAAAAGT  
ATCTAATGAATTATGAGTTCAATACATTCTGTTTAGCAGAAAGACGGATATTCCTTGCTC  
ATTATCAGACAATCACTTAT-----TCACAAACCTCGTGTGGGGCTAATAGTTTTTCATTTC  
CATCTCATGGA-----AAACCCTTTTCGCTCCGCTTAGCCCTATCCCCTTCT---AGGGGTA  
TTTTAGTGATAGTTCTATAGGAACTGGACGATCCTATTTGGTCAAATACCTAGCGACAA  
ACTCCTATGTTCTTTCATTACAGTATTTCTGAACAAGTTCCTGGATAACAAGCCTAAAG

GTTTTCTTATTGAT-----GATATCGAT-----GAGGATAGTGACGATATTGAGGATAGT  
GAC-----GATATTGATCGTGACCTTGATAC  
GGAGCTGGAGCTTCTAACTAGGATGAATGCGCTA-----ACTATGGATATGATGCCG-----  
--GAAATAGACCGATTTTATATTACCCTTCAATTCGAATTAGCAAAAAGCAATGTCTCCTT  
GCATAATATGGATTCCAAACATTCATGATCTGGATGTGAATGAGTCGAATTACTTATCCC  
TCGGTCTATTAGTGAACCTATCTCTCC-----AGGGATTGTGAAAGATGTTCC---ACTCAA  
AATATTCTTGTATTGCTTCGACTCATATTCCTCCAAAAAGTGGATCCCGCTCTAATAGCT  
CCGAATAAATTAATAACATGCATTAAGATACGAAGGCTTCTTATTCCACAACAACGAAA  
GCACTTTTTACCCCTTTCATATACTAGGGGATTTCACTTGGAAAAGAAAATGTTCCATAC  
T-----AATGGATTCCGGTCCATAACCATGGGTTCCAATGTACGAGATCTTGTAGCACTTAC  
CAATGAGGCCCTATCGATTAGTATTACACAGAAGAAATCAATTCTAGACACTAATAACAAT  
TAGATCTGCTCTTCATAGACAAACTTGGGATTTGCGA-----TCCCAGGTAAGATCGGTT  
CAGGATCATGGGATCCTTTTCTATCAGATAGGAAGGGCTGTTGCACAAAATGTACTTCT  
AAGTAATTGCCCATAGATCCTATATCTATCTATATGAAGAAGAAA-----TCATGTAACGA  
AGGGGATTCTTATTTGTACAAATGGTACTTCGAACTTGGAACGAGCATGAAGAAATTA  
CGATACTTCTTTATCTTTTGAGTTGTTCTGCCGGATCGATCGCTCAAGACTTTTGGTCTC  
TACCC-----GGACCCGATGAAAAA--AATGAGATCACTTCTTATGGACTTGTGAGAATG  
ATTCT--GATCTAGTTCATGGCCTATTAGAAGTAGAAGGCGCTCTGGTGGGA-----TCCTC  
GCGGACAGAAAAAGATTACAGTCAGTTTGATAATGAT-----CGAGTGACATTGCTTCTTC  
GGCCCAAACCAAGGAAT--CCCTTAGATATGATGCAAAATGGATCTTGTCTATCGTTGA  
TCAGAGATTTCTCTATGAAAAA-----TACGAATCGGAGTTTGAAGAA---GGGGAAGGAG  
AAGGAGTCCTCGACCCGCAA-----CAGATAGAGGAGGAC-----TTATTCAATCA  
C-----ATAGTTTGGGCTCCT-----AGAATATGGCGCCT-----TGGGGCTTTCTATTTGATT  
GTATCGAAAGGCCCAATTCATTGGGATTTCCC--TATTGGGCCAGGTCATTTCCGGGCA  
AG-----CGGATCATTTATGATGAAAAGGAGGAGCTTCAAGAGAATGATTCGGAGTTCT  
TGCAGAGTGGAACCATGCAGTACCAGACACGAGATAGATCTTCCAAAGAACAAGGCT  
TTTTTCGAATAAGCCAATTCATTTGGGACCCTGCAGATCCACTCTTTTTCTTATCAAA--  
-GATCAGCCCTTTGTCTCTGTGTTTTACATCGAGAATTCTTTGCAGATGAAGAGATGTC  
AAAGGGGCTTCTTACTTCCCAAACAGATTCCCCTACATCTATATATAAACGCTGGTTTAT  
C-----AGAATACGCAAGAAAAGCACTTCGAATTGTTGATTCATCGCCAGAGATGGCTT  
AGA-----ACCAATAGTTCATTATCT-----AATGGATTTTCCGTTCTAAT-----ACTCCATC  
CGAGAGTTATCAGTATTTATCAAATCTGTTCTATCTAAC---GGAAGGCTATTGGATCAA  
ATGACAAAGACATTGTTGAGAAAAAGATGGCTTTTCCCGGATGAAATGAAAATCGGAT  
TC-----ATG-----ATGCCTAGATCGAGG---ATAAATGGAAATTTTATTGATA  
AGACCTTTTCAATTGTAGCCAATATCTTATTACGAATAATTCCGACAACCTCAGGAGAA  
AAAGAGGCATTTACCTATTACAGAGATGGG-----ATGTCGGCTCAATCCGAAGGAAATTA  
TGCGGAAGCTTTACAGAATTATTATGAAGCTATGCGACTCGAAATTGATCCCTATGATCG  
AAGCTATATACTCTATAACATAGGCCTTATCCACACAAGTAACGGAGAACATACGAAAG  
CTTTGGAATATTATTTTCGGGCACTAGAACGAAACCCGTTTTTACCACAAGCTTTTAATA  
ATATGGCTGTGATCTGTCAATTAC---CGGGGAGAACAGGCCATTTCGACAGGGGGATTCTG  
AAATTGCGGAGGCTTGGTTCGATCAAGCCGCTGAGTATTGGAACAAGCTATAGCGCT  
CACTCCTGGTAATTATATTGAAGCGCAGAATTGGTTGAAGATCACGAGGCGTTTCGAA--  
---ATGAGTTGTGATCAGAACATATATGGATAGAACTTATAGTGGGGTCTCGAAAAATA  
GGTAATTTCTGCTGGGCCTTTATCCTTTTTTTAGGTTCACTAGGATTTCGATTAGTTGGAT



CTTCCAGTTATCTCGGTAAGAATTTGATATCTTTAGTTCCGTCTCAACAAATTCTTTTTTT  
TCCACAAGGGATCATGATGTCTTTCTACGGTATCGCAGGTCTCTTTATTAGTTCCTATTT  
GTGGTGCACAATTCGTGGAATGTAGGTAGTGGCTATGATCGATTTCGATAGAAAAGAAG  
GAATAGTGTGATTTTTTCGTTGGGGATTTCTGGAAAAAATCGTCGCATCTTTCTACGAT  
TTCGTATGAAAGATATTCAGTCCATCCGAATCGAAGTTAAAGAGGGTATTTATGCTCGTC  
GTGTCCTTTATATGGAAATCAAAGGACAGGGGGCCGTTCCCTTGACGCGTACTGATGA  
GAAT---TTGACTCCGCGTGAAATTGAGCAAAAAGCCGCCGAATTGGCCTATTTCTTGCG  
CGTACCGATTGAAGTATTT

>Stockwellia

ATGGA AAAATGGTGGTTC AATTCGATGTTGTATCTAAGTAAATCAATTGATAGGTTTGGT  
CCTATTGAAAAAACCAGTGTAAGTGAAGATCCGGTTATAAACGATACGGATAAAAAGA  
TTCATAGTTACAGTAATGCTAATCATTAGTGGGCGTCAAGGACGTTTCGTAATTTTCTCT  
CTGATGACACCTTTTTAGTTAGAGATAGTAATAGGAATATTTATTCCATATATTTTGATATT  
ACTAATCCAATTTTTGAGATTGACAATGATCCT-----TCTTTACTGAGTGAACGAGAAAAG  
TTCTTTTTTTAGTTATCGGACTTATGCTTATCTGAAGAATGGATCTAAGAATGACGATCC  
GCCCTGTGATCGTTCATGTATGATACTAAATACAGTTGGAATAATCACACTACTAGTTG  
CATTAACTCTTATCTTGGT-----TCTCAAATCTGTATTGAGAGTTCATTTTTAGTAGTAGT  
GACAATTCAGTGGCAGTTACATTTATAGTTACATTTATGGTAGGGGGAGCTCCAGTATA  
AGA ACTAGCAGGAATGGTATTGATTTCACTCGAAGAGAAAATTCTACT---TTCGATTTG  
ACTCAAAAATATAGGCATTTGTGGGTTCAATGCGAAAATTGTTATGGATTAAATTATAAG  
AAACTTTTTGAAGTCCAAAATGAATATTTGTGACCAATGTGGATATCATTGAAAATGAG  
TAGTTCAGATCGAATCGAACTTTTCGATTGATCCAGGTA CTGGGATCCTATGGATGAAG  
ACATGCTTTCTCTGGATCCTATTGAATTTCAATTCGGAGGAGGAACCTTATAAAGATCGTA  
TTGATTCTTATCAAAGAAAGACAGGATTAACCGATGCTGTTCAAACAGGCACAGGTCG  
ACTAAACGGTATTCCCATAGCAATTGGAGTTATGGATTTTCAGTTTATGGGGGGTAGTAT  
GGGATCCGTAGTAGGCGAGAAAATTACCCGTTTGATCGAGTATGCTACCAATAAATTTTT  
ACCTCTGATTCTAGTGTGTGCTTCCGGAGGAGCACGTATGCAAGAAGGAAGCTTGAGC  
TTGATGCAAATGGCTAAAATATCTGCTGCTTTATATGATTATCAATCCCCTAAAAAGTTAT  
TCTATGTATCAATCCTTACATCTCCTACTACTGGTGGGGTAACGGCTAGTTTTGGGATGT  
TGGGGGATATTATTATTGCCGAACCTAATGCTTACATTGCATTTCGCAGGTAAAAGAGTAA  
TTGAACAAACATTGAATAAGATAGTACCTGAAGGTTACAAGCGGCTGAATATTTATTC  
CATAAGGGCTTATTCGATCCAATCGTACCACGTAATCCTTTAAAGGGTGTTCTGAGTGA  
GTTATTTAAGCTTCACGCTTTTTTTTCCTTTGAAT-----ATGGTAACCATTAGAGCCG  
ACGAAATTAGTAATATTATCCGTGAACGTATTGAGCAATATAATAGAGAAGTAAAGATTG  
TAAATACCGGTACCGTACTGCAAGCAGGCGACGGCATTGCTCGTATTTATGGTCTTGAT  
GAAGTAATGGCGGGTGAATTAGTAGAATTTGAAGAGGGTACAATAGGGATTGCTCTGA  
ATTTGGAATCAAATAATGTTGGTGTGTGATTAATGGGTGACGGTTTGATGATACAAGAG  
GGAAGTTCTGTAAAAGCAACAGGAAGAATTGCTCAGATAACCGGTGAGTGAGGCTTATT  
TGGGTCGTGTTATAAATGCCCTGGCCAAACCTATTGATGGTCGAGGTGAAATTTACGCT  
TCTGAATCTCGATTAATTGAATCTCCTGCTCCAGGTATTATTTTCGAGACGTTCCGTATATG  
AGCCTCTTCAAACCTGGACTTATTGCTATTGATTTCGATGATCCCTATAGGACGTGGTCAGC  
GAGAATTAATTATTGGGGACAGACAGACCGGTAAAACAGCAGTAGCCACGGATACTAT  
TCTCAATCAACAAGGTAAAATGTAATATGTGTTTATGTAGCTATTGGTCAAAAAGCCT  
CTTCTGTGGCTCAGGTAGTGAATACTCTCCAGGAAAGGGGAGCTATGGAATACACTATT

GTGGTAGCTGAAACGGCGGATTCCCCAGCTACGTTACAATACCTCGCTCCTTATACAGG  
AGCAGCTCTCGCTGAATATTTTATGTTTCGCGAACGACACACTTTAATCATTATGATGA  
TCTCTCCAAACAAGCACAGGCTTATCGCCAAATGTCTCTTCTATTACGAAGACCACCCG  
GTCGCGAAGCTTATCCAGGAGATGTTTTTATTTGCATTCACGCCTTTTGGAAAGAGCC  
GCTAAATTAAGTTCTCTTTTAGGTGAAGGAAGTATGACTGCCTTACCAATAGTGGAGAC  
CCAGTCGGGAGATGTTTCGGCTTATATTCCTACTAATGTAATTTCCATTACAGATGGACA  
AATATTCCTTATCAGCCGATCTATTCAATGCTGGAATCAGACCTGCTATAAATGTGGGTATT  
TCTGTTTCCAGAGTAGGATCTGCAGCTCAAATTAAGCCATGAAACAAGTAGCTGGAA  
AATTAATAATTGGAATTAGCGCAATTCGCAGAATTAGAAGCCTTTGCACAATTCGCTTCT  
GATCTCGATAAAGCTACCCAGAATCAATTGGCAAGAGGTCAACGATTACGTGAATTGCT  
TAAACAATCCCAATCAGCCCCTCTCACGGTGGGAAGAACAGATAATGACTATTTATACGG  
GAACGAATGGTTATCTTGATTCATTAGAAATTGGACAGGTAAGGAAATTTCTCGTTGAG  
TTACGTACTTACGTAAAAACGAATAAACCTCAATTCCAAGAAATTATATCTTCTACTAAA  
ACATTTACTGAGGAAGCAGAAGCCCTTTTGAAGAAGCTATCCAGGAGCAGAAGGAA  
CGCTTTCTACTTCAGGAACAAGGAATGAGAATCAATCCTACTACTTCGGGTCCTGGAGT  
TTCCACACTTGAAAAAAAACCTGGGACATATCGCTCAAATCATTGGTCCGGTACTA  
GATGTAGCCTTTCCCCCGGCAAGATGCCTAATATTTATAACGCTCTGGTAGTTAAAGGT  
CGAGATACTATCGGTCAAGAAATTAATGTGACTTGTGAGGTACAGCAATTATTAGGAAA  
TAATCGAGTTAGAGCTGTAGCTATGAGTGCTACAGATGGTCTAATGAGAGGAATGGAA  
GTGATTGACACAGGAGCTCCTCTAAGTGTTCCAGTCGGCGGAGCGACTCTCGGCCGAA  
TTTTCAACGTGCTTGGAGAGCCTGTTGATGATTTAGGACCTGTAGATACTCGTACAACA  
TCTCCTATTCATAGATCTGCGCCCGCCTTTATACAGTTAGATACAAAATTATCTATTTTG  
AAACAGGAATTAAGTAGTAGATCTTTTAGCCCCCTATCGGCGTGGAGGAAAAATAGG  
ACTATTCGGGGGGGCTGGAGTGGGTAACAGTACTCATTATGGAATTGATCAACAAC  
ATTGCTAAAGCTCATGGGGGGGTATCCGTATTTGGAGGAGTAGGTGAACGTA CTCTGTA  
AGGAAATGATCTTTACATGGAAATGAAAGAATCTGGAGTAATTAATGAACAAAATATTG  
CAGAATCTAAGGTGGCTCTAGTCTACGGTCAGATGAATGAACCCCCCGGAGCTCGTAT  
GAGAGTTGGTTGACTGCCCTAACTATGGCGGAATATTTCCGAGATGTTAATGAACAAG  
ACGTACTTTTATTTATCGACAATATCTTCCGTTTCGTCCAAGCAGGATCTGAGGTATCCG  
CCTTATTGGGTAGAAATGCCTTCTGCTGTGGGTTATCAACCCACCCTTAGTACCGAAATG  
GGTACTTTACAAGAAAGAATTACTTCTACCAAAGAGGGATCCATAACTTCTATTCAAGC  
AGTTTATGTACCTGCGGACGATTTAACCGACCCTGCTCCTGCCACGACATTTGCACATT  
TAGATGCTACGACCGTACTATCAAGAGGATTAGCTGCTAAAGGTATCTATCCAGCAGTA  
GATCCTTTAGATTCAACGTCAACTATGCTCCAACCTCGAATCGTTGGTGAGGAACATTA  
TGAAACTGCGCAAACAGTTAAGCAAACCTTTACAACGTTACAAAGAACTTCAGGACATT  
ATAGCTATCCTTGGGTAGACGAATTATCCGAAGAGGATCGCTTAACCGTAGCAAGAGC  
ACGAAAAATTGAGCGTTTCTTATCCCAACCCTTTTTCGTAGCAGAAGTATTTACCGGTT  
CCCCGGGAAATATGTTGGTCTAGCAGAAACAATTAGAGGGTTTAAATTGATCCTTTCC  
GGAGAATTAGATGGTCTTCTGAACAAGCCTTTTATTTGGTAGGTAACATCGATGAAGC  
TACTGCGAAGGCTACGAACTTAGAAATGGAGAGTAAATTGAAGAAAATGACCTTAAAT  
CTTTGTGTACTAACCCCTAATCGAATTGTTTGGGATTCAGAAGTGAAGAAATCATTTTA  
TCTACTAATACTGGACAAATTGGCGTATTACCAAATCACGCGCCTATTGCCACGGCTGTA  
GATATAGGTATTTGAGAATACGCCTTAACGACCAATGGTTAACAATGGCTCTGATGGG  
TGTTTTGCTAGAATAGGCAATAATGAGATCACTATTTTAGTAAATGACGCGGAAAAGG

GTGGTGATATTGATCCACAAGAAGCTCAGGAAACTCTTGAAGTAGCGGAAGCTAACTT  
AAGGAAAGCTGAAGGTAAGAGACAAACAATTGAGGCAAATCTAGCTCTCAGACGAGC  
TAGGACACGAGTCGAGGCTATCAATGCAATTTCAATGAAAAATGTAACCGATTCTTTTCG  
TTTCCTTGGGTCACTGGTCATCGGCCGGGAGTTTCGGATTTAATACTGATATTTAGCAA  
CAAATCCAATAAATCTAAGTGTAGTCCTTGGTGTATTGATCTTTTTTTGGAAAGGGAGTG  
TTAAGCGATTTATTAGATAATCGAAAACAGAGGATCTTGAATACTATTCGAAATTCAGA  
AGAATTACGCGGGGGGGCCATTGAACAGCTGGAAAAAGCCCGGGCCCGCTTATGGAA  
AGTGGAATGGAAGCGGAGCAGTTTCGAGTGAATGGATACTCTGAGATAGAACAAGA  
AAAGTGGAATCTGATTAATTCAACTTATAAGACCTTGGAAACAATTAGAAAATTACAAA  
ACGAAACTATTCATTTTGAACAGCAAAGAGCAATTAATCAAGTCCGACAACGGGTTTT  
CCAACAAGCCTTACAAGGAGCTCTAGGAACTCTGAATAGTTGTTTGAACAACGAGTTA  
CATTTACGTACTATCAGTGCTAATATTGGTATGTTTGGGGCGATGACAGAAATAACTGAT  
ATGAATCCACTGATTTCTGCCGCTTCCGTTATTGCTGCTGGGTAGCTGTCCGGGCTTGCT  
TCTATTGGACCTGGAGTTGGTCAAGGTACTGCTGCGGGCCAAGCTGTAGAAGGTATTG  
CAAGACAGCCCGAGGCTGAGGGAAAAATACGAGGTACTTTATTGCTTAGTCTGGCTTT  
TATGGAAGCGTTAACAATTTATGGATTGGTTGTAGCCTTAGCGCTTTTATTTGCGAATCC  
CTTTGTGATGAATGTTTTATCATGTTCCACCAACACACTAAAAGGGTTATACGATATATC  
GGGTGTGGAAGTAGGCCAACATTTCTATTGGCAAATAGGAGGTTTTCAAGTCCATGGC  
CAAGTCCTTATTACTTCTTGGGTTGTAATTGCTATCTTATTAGGTTCCGCCAGTATAGCTG  
TTCGGAATCCACAAACCATTTCGAATGACAGTCAGAATTTCTTCGAATATGTCCTTGAA  
TTCATTCGAGACGTTAGCAAACTCAGATTGGAGAAGAATATGGTCCATGGGTTCCCTTT  
TATTGGAACTATGTTCCCTATTTATTTTTGTTTCGAATTGGTCAGGGGCTCTTTTACCATGG  
AAAATCATAGAGTTACCTCATGGGGAGTTAGCCGCACCCACGAATGATATAAATACTAC  
TCTTGCTTTAGCTTTACTCACGTCAGTAGCATATTTCTATGCAGGTCTTACCAAAAAAGG  
ATTAAGTTATTTAGTAAATACATTCAACCAACTCCAATCCTTTTACCCATTAACATCTTA  
GAAGATTTACAAAACCTTTATCACTTAGTTTTTCGACTTTTTCGGAAATATATTAGCCGAT  
GAATTAGTAGTTGTTGTTCTTGTTCCTTTAGTACCTTTAGTGGTTCCTATACCTGTATGT  
TCCTTGGATTATTTACAAGTGGTATTCAAGCTCTTATTTTTGCAACTTTAGCCGCGGCTT  
ATATAGGCGAATCCATGGAGGGTCATCATATGATATTTCCACTTTAGAACATATATTAAC  
TCATATATCCTTTTCGATCGTTTCAATTGTAATTACTATTTTTTTGATAAGTTTCTCGGTC--  
-GAAATCGTAGGACTCTATGATTCGTACAGAAAAAGGCACGATAGCTACTTTTTTCTGTAT  
AACAGGATTATTAGTCACTCGTTGGATTTATTCGGGACATTTCCCGTTAAGTGATTTATAT  
GAATCATTAATTTTTCTTTTCATGGAGTTTCTCGGTTATTCATATGGTTCCGTATTTAAAA  
AACAGAAAAATTATTTAAGCGCAATAACTGCGCCAAGTACTATTTTTTACCCAAGGCTTT  
GCTACTTTCGGGCTTTTTAACTGAAATGCATCAATCCCAAATAGTAGTACCTGCTCTCCAA  
TCCCAATGGTTAATGATGCATGTAAGTATGATGATATTGGGCTACGCAGGTCTTTTATGT  
GGATCATTATTATCAGTAGCTCTCTTAGTCATTACATTGCGAAAAGCCATAAGGATTTTT  
AGTAAAAAAAACGAGATCCAATACATGAATGAAAGAAGCAATGTTTTACTA-----TCTTT  
TTGTTCTTCTCGAAATTATTACAGGGCTCAACTGATTCAACAATTAGATCAGTGGAGTTA  
TCGTATTATTAGTCTCGGGTTTATCTTTTTAACCATAGGTATTCTTTCAGGAGCAGTATGG  
GCTAATGAGGCATGGGGGTCATATTGGAATTGGGACCCAAAGGAAACTTGGGCATTTAT  
TACTTGGACCCTATTTGCGATTTATTTACATACTCGAACAAATAAAAATTGGGAAAGTTT  
AAATTGCGCAATTGTGGCTTCTATGGGCTTTCTTATAATTTGGATATGCTATTTTGGGGTC  
AATTTATTAGGAATAGGATTACATAGTTATGGTTCATTTAATTTACATATGGCAAAAAAG

AAAGCATTCTTCTTCTTCTATATCTTACATCTATAGTATTTTTGCCCCTGGTGGATCTCTC  
TCTCATTTAATAAAAAGTCTTGAATTTTGGATTACTAATTGGTGGAACTAGGCAATCCG  
AAACTTTTTTGGACTGATATTCAAGAAAAGAGTATTCTAGAAAAATTCATAGAATTGGAA  
GAACTCTTACTCTTGGACGAAATGATAAAAAGAATACCCGGAAACACATCTACAAACAC  
TTCGTATAGGAATCCACAAAGAAACGATCCAATTGATCAAGATGCACAATGAGGATCAT  
ATCCATATGATTTTGCACCTATCGACAAATATAACCTCTTTCATTATTTAAGTGGTTATTC  
TATTCTGGGTAATGAAGAACTTGGCTATTCTTAACTCTTGGGTTCAAGAATTCCTATATAA  
CTTAAAGTGACACAATAAAAAGCTTTTTCTATTCTTTTATTAAGTATTATGTATCGGATTC  
CATTCGCCCCATGGTTGGGAACTAATGATTGGCTATGTCTACAAAGATTTTGGATTTGCT  
CACAATGATCAAATTATATCGGGTCTTGTCTTACTTTTCCAGTTATTCTGGATAACAATTT  
TTAAATATTGGATCTTCCGTTATTTAAATCGTGTATCTCCATCACTTGTAGTGATTTATCAT  
TCAATGAATGACATGCCTATTGGTGTTCAAAAGTACCCTTTCGAAGTCCTGGAGAGG  
AAGATGCCTCTTGGGTTGACGTATACAACCGACTTATCGAGAAAGATTACTTTTTTTA  
GGCCAAGAGGTTGATAGTGAGATTTCGAATCAACTTGTGGTCTTATGGTATATCTCAGT  
ATAGAGAATGATAACAAGGATCTGTATTTGTTTATAAACTCTCCTGGCGGATGGGTAATC  
CCCGGAGTAGCTATTTATGATACTATGCAATTTGTGCAACCCGATGTGCATACAATATGC  
ATGGGATTAGCCGCTTCAATGGGATCTTTTATCCTGGTTCGGCGGAGAGATTACCAAACG  
TCTAGCATTCCCTCACGCTAGGGTAATGATACATCAACCTGCGAGTTCTTTTTATGAGGC  
ACAAACGGGAGAATTTATCCTGGAAGCAGAAGAATACTGAAACTGCGCGAAACCAT  
CACAAGAGTTTATGTACAAAGAACGGGCAAACCCCTTATGGGTTGTATCCGAAGATATGG  
AAAGGGATGTTTTTATGTCAGCAACAGAAGCCCAAGCTCATGGAATTGTTGATCTTGTA  
G C G A T T G A  
A????????????????????????????????????????????????????????????  
????????????????????????????????????????????????????????????  
????????????????????????????????????????????????????????????  
????????????????????????????????????????????????????????????  
ATGGAGGAATTTCAAGGATATTT  
AGAAGTAGATAGATCTAGACAACATGACTTCCTATACCCACTTCTTTTTTCGAGAGTATAT  
TTATGCACTTGCTCATGATCATGGTTTAAACAGGTTATGACAATAAATCTAGTTCAATAATT  
GTGAAACGTTTAAATTAAGTGAATATATCAACAGAATCCTTTGATTTTTTCAGCTAATGAT  
TCTATCCAAAATCCATTTTTTGGGAAGAATTTGATTCTCAAATTATCTCCGAGGGATTT  
GCAGTCATTGTGGAAATTCATTTTCCCTAAGATTAGTATTTTCCCTAATAGCAAAATCT  
CATAAATTACGATCAATTCATTCCATATTTTCTTTTTTAGAGGACAAATTTTCACATTTAG  
ATTATGTGTGCGACGTACTAATACCCTATCACATCCATCTAGAAATCTTGGTTCAAACCC  
TTCGCTGCTGGGTGAACGATGCCTCTTTTTTGCATTTATTACGTTTCTTTTCTACACGAGT  
ATTGGAAT-----AGTCTTATTACTAAACATATTACCATTTTTTCAAACCAAGATTCTTCTT  
GTTCCCTATATAATTCTCATATATGTGAATACGAATACATCTTTCTTTTTCTCCGTAATCAAT  
CTTCTCATTTACGGTCAACATCTTCTGGAATCTTTTTTGGAGCGAATATATTTCTATGTA  
AATAGAACATTTTATCAAAGTCTTCTTTGATTTTCAGATCCTATGTTTCTTCAAAGATCCT  
TTCATGCATTATGTTTCGATATCAAGGAAAATCAATTCTGGCTTCAAAGATAACGCTCTT  
CTGATGAAGAAATGGAAATATTACCTTGTTAATTTATGGCAATATCATTTTTACGCCTGCT  
TTCAACCAGGAAGGATTGATATAACCAATTATGCAAGTATTCTCTTGGACTTTTTGGGCT  
ATCGTTCAAGCGTGCAGCTAAATTTCTCAGTGGTACGAAGTCAAATGCTAGAAAATTC  
TTTCGAATAAATAAT-----GCTATGAAGAAGTTCGAGACAATAGTTCCAATTATTCCTCTG  
ATTGGATCATTTGTCAAAAGCGAATTTTTGTAACACATTAGGGCATCCATTAGTAAACC  
GACCCGGGCTGATTCATCAGATTCTGATATTATCGACCGTTTTTTTGCATATATGCAGAAA

TCTTTCTCATTATCACAGCGGATCCTCAAAAAAAAAAGAGTTTCTATCGAGTAAAATATAT  
ACTTCGACTTTCTTGTGTTAAAACCTTTGGCTCGTAAACACAAAAAGAATGTACGCACTT  
TTTTAAAAAGATTAGGTTTCGGAATTTTTGGAAGAATTCCTTACGGAGGAAGAAGTTGTT  
CTTTCTTTGATCTTCCCGAGACGGATTTGGTATTTGGATATTACTTCTATCAATGATCTAG  
TCAAT-----ATGATAATTGATAACAACA---GAAGTACAA---GATATAAATTCTTTTCTAGAT  
TGGAATCT--TTAAAAGAAGTCTATAGAATCATAGGGATGTTTTTACCTATTTTGACTCTT  
GTATTGGGAATCACAATAGGTGTACTCGTAATTGTGTGGTTAGAAAAGAGAAATATCCGC  
AGGAATACAACAACGTATTGGTCCCGAATACGCCGGTCCTTTGGGAATTCTTCAAGCTT  
TAGCAGATGGGATAAACTTATTTTCAAAGAGAATCTTTTTCCATCTCGAGGAGATACT  
CGTTTATTTCAGTATAGGACCATCCATAGCAGTTATATCCATTTTACTAAGTTATTTCAGTAA  
TTCCTTTTAGTTATCACCTTGTTTTATCTGATCTCAATATCGGTGTTTTTTTTATGGATTGCC  
ATTTCCAGTATTGCTCCCATTGGACTTCTTATGTCAGGATATGGATCAAATAATAAATATT  
CTTTTTTAGGTGGTCTACGAGCCGCTGCTCAATCGATTAGTTATGAAATACCATTAATC  
TTTGTGTGTTATCAATATCTCTATTATCTAACAGTTCAAGTACAGTTGATATAGTTGAGGC  
CCAGTTCAAATATGGTTTTTGGGGATGGAATTTGTGGCGTCAACCTATAGGCTTTTTTCAT  
TTTTCTAATTTCTTCCCTAGCAGAATGTGAGAGATTACCTTTCGATTTACCAGAAGCAG  
AGGAAGAATTAGTAGCGGGTTATCAAACCGAATATTCGGGTATCAAATTTGGGTATTTTT  
ACGTTGCTTCCCTATCTAAATCTATTAGTTTCTTCGTTATTTGTAACAATTCCTTACTTAGG  
GGGTTGGAATATCTCTATTCCTTACATATTCGTTCCCTGAGCTATTT-----GAAAAAGTAGG  
TAGAGTCTTTGGAACGACAATTGGTATTTTTTATTACATTAGCTAAAACCTATTTGTTCTTG  
TTTATTTCTATCACAAACAAGATGGACTTTACCTAGACTAAGAATAGACCAATTATTAAT  
CTTGGATGGAATTTCTTTTACCCATTTCTCTCGGTAATCTATTATTAACAACCTTCTTTCC  
AACTCCTTTCATTGATGATCTGGCATGTACAGAATGAAAACCTCATTCTCGATTCTACGA  
GAATTTTGATGAAAGCCTTTCATTTGCTTCTCTTCGATGGAAGTTTTATTTTCCAGAAT  
GTATCCTAATTTTTGGCCTAATTCTTCTTCTAATGATCGATTCAACCTCTGATCAAAAAG  
ATATACCTTGGTCTATTTTCATCTCTTCAACAAGTTTAGTAATGAGCATAACGGCCCTATT  
GTTCCGATGGAGAGAAGAACCTATGATTATCTTTTCAGGAAATTTCAAACGAACAATT  
TCAACGAAATCTTTCAATTTCTTATTTTACTATGTTCAACTCTATGTATTCCCTCTATCCGTA  
GAGTACATTGAATGTACAGAAATGGCTATCACAGAGTTTCTTATTTCGTATTAACAGCT  
ACTCTAGGAGGAATGTTTTTATGCGGTGCTAACGATTTAATAACTATCTTTGTAGCTCCA  
GAATGTTTCAGTTTATGCTCCTACCTATTATCTGGATATAACCAAGAAGGATGTACGGTCT  
AATGAGGCTACTATGAAATATTTACTCATGGGTGGGGCAAGCTCTTCTATTCTGGTTCAT  
GGTTTCTCTTGGCTATATGGTTCATCCGGGGGAGAGATCGAGCTTCAAGAAATAGTGAA  
TGGTCTTATCAATACACAAATGTATAACTCCCCAGGAATTTTAATTGCGCTTCTATTCATC  
ACTGTAGGAATTGGGTTCAAGCTTTCCCTAGCCCCTTCTCATCAATGGACTCCTGACGT  
ATACGAAGGATCTCCCACTCCAGTCGTTGCTTTTCTTTCTGTACTTCGAAAGTAGCTG  
CTTCAGCTTCAGCCACTCGAATTTTCGATATTCTTTTTTATTTCTCATCAAACGAATGGC  
ATCTTCTTCTGGAAATCCTAGCTATTCTTAGCATGATATTGGGGAATCTCATTGCTATTAC  
TCAAACAAGCATGAAACGTATGCTTGCATATTCGTCCATAGGTCAAATCGGATATGTAAT  
TATTGGAATAATTGTTGGAGACTCAAATGGTGGATATGCGAGCATGATAACTTATATGCT  
GTTCTATATCTCCATGAATCTAGGAACTTTTTGCTTGCATTGTATTATTTGGTCTACGTACC  
GGAAGTATAACATTTCGAGATTATGCAGGATTATACACGAAAGATCCTTTTTTGGCTCTC  
TCTTTAGCCCTATGTCTCTTATCCCTAGGAGGTCTTCCTCCACTAGCAGGTTTTTTTCGGA  
AAACTCCATTTATTCTGGTGTGGATGGCAGGCAGGCCTATACTTCTTGGTTTCAATAGG

ACTCCTTACGAGCGTTATTTCTATCTACTATTATCTAAAAATAATCAAGTTATTAATGACT  
GGACGAAACCAAGAAATAACACCTCACGTGCGAAATTATAGAAGATCCCCTTTAAGAT  
CAAACAATTCCATCGAATTGAGTATGATTGTATGTGTGATAGCATCTACTATAACCAGGAA  
TATCAATGAACCCGATTATTGCAATTGCTCAGGATACCCTTTTTATGTTTCTGCTTTACGA  
ATATGATATTTTCTGGGCATTTCTAATAATATCAAGTGTTATTCCTATTTTGGCATTCTAA  
TTTCCGGAATTTTAGCCCCGATTAGCAAAGGGCCAGAGAACTTTTCGAGTTATGAATCA  
GGTATAGAACCAATGGGCGATGCTTGGTTACAATTCGAATCCGTTATTATATGTTTGGCT  
CTAGTTTTTGTGTTTTTGTATGTTGAAACGGTTTTTCTTTATCCATGGGCAATGAGTTTC  
GATGTATTGGGGGTATCCGTAATTTATAGAAGCTTTAATTTTCGTTCTTATCCTAATTGTTG  
GTTTAGTTTATGCATGGCGAAAAGGAGCATTGGAATGGTCTACGAATTATTTTCCTTGGT  
TAACAATAATTGTACTTTTGCCGATATTCGCAGGTTCTTTAATTTTCTTTCTACCTCATAG  
AGGAAATAAGGTAATAAGGTGGTATACTATATGCATATGTACTTTAGAGCTCCTTTAAC  
TAGCTATACGTTCTGTTATCATTTCCAATTGAACGATCCATTAACCCAATTAACAGGGGA  
TTCTAAATGGATTAATTTTTTTTTATTTTTACTGGAGATTGGGAATAGATGGACTTTCTATA  
GGACCTATTTACTGACGGGATTTATCACCCTTTAGCTACTTTAGCGGCTCGGCCAGTT  
ACTCGAGATTCCCGATTATTCCATTTCTGATGTTAGCAATGTACAGCGGTCAAATAGGA  
TCATTTTCTTCTCGAGACCTTTTACTTTTTTTCATCATGTGGGAGTTAGAATTAATTCCCG  
TTTATCTACTTCTATCGATGTGGGGGGGAAAGAAACGTCTGTATTCCGCTACAAAATTC  
TTTTGTACACTGCGGGAAGTTCCATTTTTCTATTAATAGGGGTTCTGGGTATTGGTTTATA  
TGGTTCCAACGAACCAACATTAATTTGGAACATTAGCTAATCAATCGTATCCGGTGG  
CACTGGAAATAATATTCTATATTGGATTTCTTATTGCTTTTTGCTGTAAATTACCGATTATA  
CCTTACATACATGGTTACCAGACACCCATGGAGAGGCACATTATAAGTACTTGTATGCTT  
CTAGCCGGAATTTTATTAATAATGGGAGCATATGGGTTGGTTCGGATCAATATGGAATTA  
TTACCTCATGCTCATTCTATATTTTCTCCCTGGTTGATTATAGTAGGCGCAATCCAAATAA  
TCTATGCAGCTTTAACATCTCCTGGTGAACGTAATTTAAAAAAAAGAATAGCCTATTCCT  
CTGTATCTCATATGGGTTTCATAATTATTGGAATTGGCTCGATACTGATACGGGACTCA  
ATGGAGCCATTTTACAAATAATCTCTCATGGATTTATCGGCGCTGCTCTTTTTTTCTTGGC  
AGGAACGAGTTATGATAGAATACGTCTTGTTTATCTCGACGAAATGGGTGGAATGGCTA  
TCCACCTTCCAAAATATTCACGATGTTTCAATGATCTTATCAATGGCTTCCCTTGCATTAC  
CGGGTATGAGTGGTTTTTCTTGCAGAATTGATAGTGTTTTTTGGAAATAATTACCAGCCAA  
CAATATCTTTAATGCCAAAATACTAATTCCTTTTTGTAATGGCAATTGGAATGATATTA  
CCCCTATTTATTTATTTATTTATGTTACGCCAAATGTTCTATGGATACAAGTTATTTAATGTT  
CCAAACTCTTATTTTTTTGATTCTGGGCCGCGAGAGTTATTTGTTTCTATCTCTATTCTTC  
TACCAATAATAGCTATTGGTATTTATCCAGATTTTCGTTCTTTCCTATCTGTTGACAAAGT  
CGAAGCTATTATATCGAATTCTTTTTATCAAATGATACTCGAACATGTACTTGTTTTGGAGT  
GCCTATTTATTTTCTATTGGTATCTATGGATTGATCACGAGTCGAAATATGGTTAGGGCCC  
TTATGTGTCTTGAACCTATCCTCAATGCGGTTAATATAAATTTTCGTAACATTTTCAGATTT  
TTTTGATAGTCGACAATTAAGGAGATATTTTCTCCATTTTTGTTATAGCTATTGCAGCC  
GCCGAAGCAGCTATTGGGTTAGCTATTGTTTCGTCGATTTATCGTAACAGAAAATCAAC  
TCGTATCAATCAATCGAATTTGTTGAATAAAATGGAATATACATATCAATATTCATGGATT  
ATCCCCTTCATTCCACTTCCAGTTCCTATGTTAATAGGAGTGGGACTTCTACTTTTTCCA  
ACGGCAACAAAAATCTTCGCCGTATGTGGGCTTTTCTAGTATTTTCTTGTAAAGTATA  
GTTATGATACTTTCGATCTATCTATTCAGCAAATAAATAGAAGTTTTATCTATCAATA  
TGTATGGTCTTGGACTATTAATAATGATTTTTCTTTAGAGTTCGGTCACTTAATAGATCCA

CTTACTTCTATTATGTTAATATTAATTACTACTGTTGGAATTTTGGTTCTTTTTTATAGTGA  
CAATTATATGTCTCATGATAAAGGATATTTGATATTTTTTGTCTATATGAGTTTTTTCAATA  
CTTCCATGTTGGGATTAGTTACTAGTTCGAATTTGATACAAATTTATATTTTTTGGGAATT  
AGTTGGAATGTGTTCTTATCTATTAATAGGTTTTTGGTTCACACGACTTAGTGCGGCGAC  
TGCTTGTCAAAAAGCGTTTGTAAACGAATCGTGTAGGCGATTTTGGTTTATTATTAGGAAT  
TTTAGGTCTTTATCAGATAACCGGTAGTTTTGAATTTTCGGGATTTGTTCCAAATATTGAAT  
AAT--GAGGTTCCTTTTTTATTTCTTACTTTGTGTGCCTTTCTTTTTATTTGCAGGTGCAGT  
TGCGAAATCGGCACAATTCCCCCTTCATGTATGGTTACCTGATGCCATGGAAGGCCCTA  
CTCCCATTTTCGGCTCTGATACATGCCGCTACTATGGTAGCAGCGGGCATTTTTCTTG TAG  
CTCGACTTCTTCTCTTTTTATAATCATACCTTACATAATGAATTTTCATATCTTTAATAGGT  
ATAATAACAGTATTATTAGGAGCTACTTTAGCTCTTGCTCAAAAAGATATTA AAAAGAGGT  
TTAGCTTATTCTACAATGTCTCAATTGGGTTATATGATGTTAGCTCTAGGTATGGGGTCTT  
ATCGAGCCGCTTTATTTCAATTTGATTACTCATGCTTATTTCGAAAGCATTGTTGTTTTTAGG  
ATCCGGATCAATTATTCATTCAATGGAAGCTATTGTTGGATATTCTCCAGATAAAAAGTCA  
GAATATGGTCTTATGGGAGGTTTAAAAAGCATGTACCAATTACAAA AACTGCTTTTT  
TAGTAGGTACACTTTCTCTTTGTGGTATTCCCCCTTGCTTGTTTTTGGTCCAAAGATG  
AAATTCTTAATGATAGTTGGTTGTATTACCTAGTTTCGCAATAATAGCTTGTTCACAG  
CAGGATTAACCGCATTTTATATGTTTCGGATCTATTTAATTACTTTTGAGGGACATTTCAA  
TGTTCATTTTCAA AATTACAGTGGTCAAAAAGTAGTTCC TACTATTCAATATCTCTATG  
GGGAAAAGAAGTACCAAAAACGATTA AAAAA---TTATTAAGTTTATTAACAATGAATTT  
TTTTTGGGTCACTAAAAT--ACTTTCTTATCCTCATGAATCGGACAATACTATGCTAT  
TTTCTATGGTTATATTAGTACTATTTACTTTGTTTGGTGGAGTCGTAGGAGCT--TTTCATT  
TGGATATATTATCTAAATTGTTAAATCCGTCTATAAACCTTTTACATACGAATTC AAAT--T  
CTGTGGATTGG---GAATTTGTGACAAATGCAAGTTTTTCTGTGAGTATAGCTTTTTTTTCGG  
AATATTTATAGCGTCTTTTTTATATAAGCCTATTTATTTCATCTTTACAAAATTTGAACTTAC  
TAAATTCGTTTTATATTTTAGGGGACAAAATAAAAATGTGATATATGATTGGTCATATAA  
TCGTGGTTACATAGATGCTTTTTTATACAATATCCTTAACTCAGGGTATAACAGGACTAGC  
TGAACTAATTCATTTTTTGGATAGACGAGTAATTGATGGAATTACGAATGGTTTCGGTCT  
TACAAGTTTCTTTTTTCGGAGAAGGTATCAAATATGTAGGGGGCGGT--CGCATCTCTTCT  
TATTTCTTATTGTATTTATTGTTTGTATTAATCTTTTTATTAATTTATTCCATGGATTTGCCT  
GGACCAATACATGATTTTCTTTTAGTTTTCTGGGATCAGGTCTTATATTAGGAAGTCTA  
GGAGTGGTATTACTTACCAATCCAATTTATTCTGCCTTTTCCTTGGGATTGGTTCTTGTTT  
GTATATCCTTATTTTATATTCTATCAAAC TCCATTTTGTAGCGGCTGCGCAGCTACTTATT  
TATGTAGGAGCTATAAACGTTTTTAATTCTATTTGCTGTGATGTTTCATGAATGGTTCAGAAT  
ATTACAAAGATTTGAATCTTTGGACTGTTGGAGATGGGATTACTTCGTTGGTTTGTACA  
AGTATTTTGGTTTCACTAATGACTACTATTTTAGATACGTCTTGGTACGGGATTATCTGGA  
CGACAAAGTCAAACCAGATTATCGAGCAAGATTTGATCGGTAATAGTCAACAAATCGG  
AATTCATTTATCAACCGATTTTTTTCTTCCATTTGAACTCATTTCATAATTTCTTTTAGTTG  
CTTTGATAGGTGCAATTGCTGTTGCTCGTCAAATGAATGGAACA ACTACAAGAAAAGA  
CCTCATGATAGTCAATATGGGACCTCACCACCCATCAATGCATGGTGTCTTCGGCTCAT  
CCTTACTCTAGATGGTGAAGATGTTATTGATTGTGAACCAATATTGGGTTATTTACACAG  
AGGAATGGAAAAAATTGCGGAAAATCGAACAGTTATACAATATCTACCTTATGTAACAC  
ATTGGGATTTTAGCTACTATGTTTCACAGAAGCAATAACCGTAAATGGACCCGAACAG  
TTGGGAAATATTCAAGTACCTAAAAGAGCCAGTTATATCAGAGTAATTATGTTAGAGTT

GAGTCGTATAGCTTCTCATCTGTTATGGCTTGGCCCCTTTATGGCAGATATTGGTGCACA  
GACTCCTTTTTTCTATATTTTCAGAGAAAGAGAATTAGTATATGATCTATTCGAAGCTGC  
CGCCGGTATGAGAATGATGCATAATTATTTTCGTATCGGAGGAGTAGCGGCCGATCTACC  
TTATGGATGGATAGATAAATGTTTGGATTTCTGTGATTATTTTTTAACAGCGGTTTCTGAA  
TATCAAAAACCTTATTACGCGAAATCCTATTTTTTTAGAAAGAGTTGAGGGGGTAGGCAT  
TATTGGTCCAGAAGAAGCAATAAATTGGGGTTTATCGGGACCAATGCTACGAGCTTCCG  
GAATCCAATGGGATCTTCGTAAAGTTGATCATTATGAATGTTACGACGAATTGGATTGG  
GAAATCCATTGGCAAAAAGAAGGAGACTCATTAGCTCGCTATTTAGTTCGAATCGGTG  
AAATGACGGAATCTATAAAAATTATTCAACAGGCTCTGGAAGGAATTCCAGGGGGGCC  
CTATGAGAATTTAGAAACCCGGCGCTTTGCTAGAGAAAGGGATCCGGAATGGAATGAT  
TTTGAATATCGATTATTAGTAAAAAACCTTCTCCTACTTTTGAATTGCCGAAGCAAGA  
ACTTTATGTAAGAGTTGAAGCCCCAAAGGGAGAATTGGGAATTTTTTTAATAGGAGATC  
AGAGTGGTTTTCCCTGGAGGTGAAAATTCGTCCACCTGGTTTTATCAATTTGCAAATT  
CTTCCTCAGTTAGTTAAAAGAATGAAATTGGCCGATATTATGACAATACTAGGTAGCATA  
GATATCATTATGGGAGAAGTTGATCGTATGTTCCCTATGGTAACTGGGTTTCATGAATTAC  
GGTCAACAAACAGTACGAGCTGCAAGGTACATTGGTCAAGGGTTTCATGATTACCTTATC  
CCACGCAAATCGTTTACCTGTAACCTATTCAATATCCTTATGAAAAATTAATTACATCCGA  
GCGTTTTCCGCGGACGAATCCATTTTGAATTTGATAAATGATTGCTTGTGAAGTATGTGT  
TCGTGTATGTCCTATAGATCTACCTGTTGTTGATTGGAAATTGGAACTGGTATACGAAA  
GAAACGCTTGCTTAATTACAGTATTGATTTCCGGAATTTGTATTTTTTGTGGTAACTGTGT  
TGAGTATTGCCCAACAAATTGTTTATCAATGACTGAAGAATATGAACTTTCCACTTATGA  
TCGTACGAATTGAATTATAATCAAATCGCTTTGGGTCGTTTACCAATGTCAGTAATTA  
CGATTATACAATTCGAACAATTTTCGAATTTGAATAATAATAAAAAATAAAAAAATGT-----  
-----ATGCAGGGTCGTTTGTCTGCTTGGCTAGTCAAGCATGGACTAGTTCCATAGATC  
TTTGGGCTTCGATTATCAAGGAATAGAGACTTTACAAATAAAGCCTGAGGATTGGCATT  
CCATTGCTGTCATTTTATATGTATATGGTTACAATTATCTACGTTCCCAATGTGCTTATGAT  
GTAGCACCCGGTGGACTGTTAGCTAGTGTGTATCATCTTACGAGAATAGAGTATGGTGT  
AGATCAACCGGAAGAGGTATGCATAAAAGTATTTGCCCCGAGGAGTAATCCTCGAATTC  
CGTCTGTTTTCTGGATTTGGAAAAGTTTCGGATTTTCAAGAACGGGAATCTTATGATATG  
TTGGGAATCTGTTATGATACTCATCCACGACTTAAACGTATCTTAATGCCTGAAAGTTGG  
ATAGGATGGCCCTTACGTAAGGATTATATTGCCCTAATTTTTATGAAATACAAGATGCT  
CAT-----  
-----ATGAATTCCATAGAATTTCCCTTACT  
TGCTCGAACAACCCAAAATTCAGTTATTTCAACTACATTAAATGATCTTTCAAATTGGTC  
AAGGCTCTCTAGTTTATGGCCGCTTCTTTATGGTACCAGTTGTTGCTTCATTGAATTTGC  
TTCATTAATAGGCTCACGATTCGACTTTGATCGTTATGGACTGGTACCAAGATCGAGTCC  
TAGACAGGCAGACCTCATTTTAACAGCCGGCACAGTAACAATGAAAATGGCTCCTTCT  
TTAGTGAGATTATATGAACAAATGCCTGAACCAAAATATGTTATTGCTATGGGAGCATGT  
ACAATTACAGGGGGGATGTTTACGTACCGATTTCGTATAGTACTGTTTCGGGGAGTCGATAA  
GCTAATTCCTGTAGATGTCTATTTGCCAGGCTGTCCGCCTAAACCAGAGGCAGTTATAG  
ATGCTATAACAAAACCTTCGTAAGAAAATAGCTAGAGAAATCTATGAAGAGCGAATTAGG  
TCTCAAGAAGAAAATCGGTGTTTTACTACCAATCACAAGTTTCATGTTGGACGCAGTAC  
TCATACTGGAAATTTATGATCAAGGATTACTCTATCAATCACCATCTACTTCCGAGATACC  
TCCTGAAACATTTTTCAAATACAAAAGTTTCAGTATCTTCCCACGAATTAGTGAATATGC



AAACTAAAAACACCTTTTTCTTGGATAAAAAAAGAGATTATTCGATCTATTTCCGTATCGC  
TGATGATATATATCATAGCTCGGACATCCATTTCAAATGCATATCCCATTTTTGCACAGCA  
GGTTATGAAAATCCACGAGAAGCGACCGGGCGTATTGTATGTGCCAATTGCCATTTAG  
CTAATAAGCCCGTGGATATTGAGGTTCCACAGGCGGTACTTCCTGATACTGTATTTGAA  
GCAGTTGTTTGAATTCCTTATGATATGCAAGTTAAACAAGTTCTTGCTAATGGTAAAAG  
GGGAGGTTTTGAATGTGGGGGCTGTTCTTATTTTACCTGAGGGATTGAATTAGCGCCCC  
CCGATCGTATTTTCGCCCAGATGAAAGAAAAGATAGGCAATCTGTCTTTTTCAGAGCTAT  
CGCCCCAATAAAAAAATATTCTTGTGATAGGTCCTGTTTCTGGTCAGAAATATAGTGA  
AGTCACCTTTCCTATTTCTTTCACCGGACCCCGCTACTAATAAAGATGTTCACTTCTTAAA  
ATATCCCATATATGTAGGCGGGAACAGAGGAAGGGGTCAGATTTATCCCGATGGGAGCA  
AGAGTAACAATACAGTTTATAATGCTACAGGGGCTGGTGTAGTAAGTAAAATCATA CGA  
AAAGAAAAAGGGGGGTACGAAATAACCATATCGAATGCGTCAGATGAACGTCAAGTG  
GTTGATATTATTTCCCCAGGGCCAGAACTTCTTGTTTCCGAAGGCGAATCTATCAA ACT  
TGATCAGCCATTAACGAGTAATCCTAATGTGGGTGGATTGGTCAAGGAGATGCGGAAA  
TAGTACTTCAAGATCCATTCCGTGTCCAAGGCCTTTTGTTCTTCTTGGCATCTGTTATTT  
TGGCACAAATATTTTTGGTTCTTAAGAAGAAACAGTTTGAGAAGGTTCAATTGTCCGA  
AATGAATTCATGAGTAAAGTCTATGATTGGTTTGAAGAACGTCTCGAGATTCAGGCGA  
TTGCAGATGATATAACTAGTAAATATGTTCCCTCATGTCAACATATTTTATTGTCTAGG  
AGGAATTACGCTTACTTGTTTTTTAGTACAAGTAGCTACAGGGTTTGCTATGACTTTTTA  
CTACCGTCCA ACTGTTACTGAGGCTTTTGCTTCTGTTCAATACATAATGACTGAAGCTA  
ACTTTGGTTGGTTAATTCGATCAGTTCATCGATGGTCGGCAAGTATGATGGTCCTAATGA  
TGATCCTGCACGTATTTTCGTGTGTATCTCACTGGTGGTTTTAAAAACCTCGCGAATTA  
ACTTGGGTTACAGGTGTGGTTCTGGCTGTATTGACCGCATCCTTTGGTGTA ACTGGTTA  
TTCCTTACCTTGGGACCAAATTGGTTATTGGGCAGTCAA AATTGTAACAGGTGTACCGG  
AAGCTATTCCTGTAATAGGATCCCTTTAGTAGAGTTATTACGCGGAAGTGCTAGTGTG  
GGACAATCCACTTTGACTCGTTTTTATAGTTTACACACTTTTGTATTACCTCTTCTACTG  
CCGTGTTTATGTTAATGCATTTTCTAATGATACGTAAGCAAGGTATTTCTGGTCCTTTAAT  
GGGAGTAACAAAAAACCTGACTTAAATGATCCTGTATTAAGAGCTAAATTGGCTAAA  
GGGATGGGTCATAATTATTACGGAGAACCCGCATGGCCCAACGATCTTTTATATATTTTT  
CCAGTAGTAATTTTAGGTA CTATTGCGTGTAACGTAGGCTTAGCGGTTCTAGAACCATC  
AATGATTGGTGAACCCGCGGATCCATTTGCAACTCCTTTGGAAATATTACCCGAATGGT  
ATTTCTTTCCCGTATTTCAAATACTTCGTACAGTACCTAATAAGTTATTGGGTGTTCTTTT  
AATGGTTTCAGTACCTGCGGGATTATTAACAGTACCTTTTTTTGGAGAATGTTAATAAATT  
TCAA AATCCATTTTCGTCCAGTAGCGACA ACTGTCTTTTTGATTGGTACCGTAGTGG  
CCTTTTGGTTGGGTATTGGAGCAACATTACCTATTGAGAAATCCCTAACTTTAGGTCTTT  
TTATGATTGAAGTTTTTCTATTTGGAATTGTCTTAGGTCTAATTCCTATTACTTTAGCTGG  
ATTATTTGTA ACTGCATATTTACAATACAGACGTGGTGATCAGTTGGATCTTATGCTTACT  
ATAACTAGTTATTTTCGGTTTTCTACTAGCAGCTTTAACTATAACCTCAGCTCTCTTTATTG  
GTCTGACCAAGATACGACTTATTATGGATATAGTAAGTCTTGCTTGGGCTGCTTTAATGG  
TAGTCTTTACATTTTCTCTTTCACTCGTAGTATGGGGAAGAAGTGGACTCATGATTATTC  
GTTTCGCCGGAACCAGAAGTCAA AATTTGGTAGATAGGGATCCATAAAAACTTCTTTC  
GAGGAATGGGCCAAACCGGGTCATTTCTCAAGAACAATAGCTAAGGGCCCTGATACTA  
CCACTTGGATCTGGAACCTACATGCTGATGCTCACGATTTTCGATAGCCATACCAATGATT  
TGGAGGAGATCTCTCGAAAAGTATTTAGTGCTCATTTTGGCCAACTTCCATTATCTTTC

TTTGGCTGAGTGGCATGTATTTCCATGGTGCTCGTTTTTCCAATTATGAAGCATGGCTAA  
GTGACCCTACTCACATTGGACCTAGTGCCAGGTGGTTTGGCCAATAGTGGGCCAAGA  
AATATTGAATGGCGATGTGGGCGGGGGTTTCCGAGGAATACAAATAACCTCTGGTTTTT  
TTCAGATTTGGCGAGCATCTGGAATAACTAGTGAATTACAACCTATTGTACCGCAATTG  
GTGCATTAGTCTTTGCAGCCTTAATGCTTTTTGCTGGTTGGTTCCATTATCACAAAGCTG  
CTCCAAAATTGGCCTGGTTCCAAGATGTAGAATCTATGTTGAATCACCATTTAGCAGGG  
CTACTAGGACTTGGGTCTCTTTCTTGGGCGGGGCATCAAGTACATGTATCTTTACCAATT  
AACCAATTTCTAAACGCTGGAGTAGATCCTAAAGAGATCCCACCTCCTCATGAATTTAT  
CTTGAATCGGGATCTTTTGGCTCAACTTTATCCCAGTTTTGCCGAGGGAGCAACCCCAT  
TTTTGACCTTGAATTGGTCAAATATGCGGAATTTCTTACTTTTTCGTGGCGGATTAGATC  
CAGTAACCGGGGGTCTATGGCTGACTGATATTGCTCATCATCATTTAGCTATTGCAATTC  
TTTTCTTGATAGCAGGTCACATGTATAGGACCAACTGGGGCATTGGTCATGGCATAAAA  
GATATTTTAGAAGCTCATAAAGGTCCATTTACAGGCCAGGGCCATAAAGGCCTATACGA  
GATCCTAACACGTCATGGCATGCTCAATTATCTCTTAACCTAGCTATGTTAGGCTCTTT  
AACCATTTGTTGAGCTCACCATATGTATTCCATGCCCCCTTATCCATATCTAGCTACTGAT  
TATGGTACACAACTGTCAATTGTTTACACATCACATGTGGATTGGCGGATTTCTCATAGTT  
GGTGCTGCCGCGCATGCAGCTATTTTTATGGTAAGAGATTATGATCCAACCTACTCGATAC  
AACGATCTATTAGATCGTGTCCTTAGGCATCGCGATGCAATCATATCACATCTCAACTGG  
GTATGTATATTTCTAGGCTTTCACAGTTTTGGTTTTGTATATTCATAATGATACCATGAGCG  
CTCTAGGGCGACCCCAAGATATGTTTTCTGATACCGCTATACAATTACAACCCGTCTTTG  
CTCAATGGATACAAAACACCCATGCTTTGGCGCCTGGTGCAACCGCTCCTGGTGCAAC  
AGCAAGCACAGTTTGACTTGGGGAGGTGGTAATTTAGTGGCAGTAGGTGGCAAGGTT  
GCTTTATTACCTATTCATTAGGAACCGCAGATTTTTTGGTACATCACATTCATGCATTA  
CGATTCATGTAACGGTATTGATACTCCTGAAAGGTGTTCTATTTGCTCGTAGCTCTCGTT  
TGATACCGGATAAAGCAAATCTTGGTTTTCGTTTTCCCTTGTGATGGACCTGGAAGAGGG  
GGGACATGTCAAGTATCCGCTTGGGATCATGTCTTCTTAGGCCTATTCTGGATGTACAAT  
GCAATTTCCGGTAGTCATATTTCAATTCAGTTGGAAAATGCAGTCAGATGTTTGGGGTAGT  
ATAAGTGATCAAGGAGTGGTAACTCATATCACGGGAGGAAACTTTGCGCAGAGTTCCA  
TCACTATTAATGGGTGGCTCCGCGATTTCTTATGGGCACAGGCATCCCAAGTAATTCAG  
TCTTATGGTTCTTCATTATCTGCATATGGCCTTTTTTTCTTAGGTGCTCATTTTGTATGGGC  
TTTTAGTTTAAATGTTTCTATTCAGCGGGCGTGGTTATTGGCAAGAACTTATTGAATCCAT  
CGTTTGGGCTCATAATAAATTAAGTTGCTCCTGCTACTCAGCCTAGAGCCTTGAGCA  
TTGTACAAGGACGTGCTGTAGGAGTAACCCATTACCTTCTGGGTGGAATTGCCACAAC  
ATGGGCGTTCTTCTTAGCAAGAATTATTGCAGTAGGAATGGCATTAAAGATTTCCAAGGT  
TTAGCCAAGGCTTAGCTCAGGACCCCACTACTCGTTCGTATTTGGTTTGGTATTGCGACC  
GCGCATGACTTTGAGAGTCATGATGATTAATGAGGAACGTCTTTATCAGAATATTTTT  
GCTTCTCACTTCGGGCAATTAGCAATAATTTTTCTGTGGACTTCCGGAAATCTGTTTCAT  
GTAGCTTGGCAAGGAAATTTTGGAGCATGGGTACAGGACCCCTTACATGTAAGACCTAT  
TGCTCATGCAATTTGGGATCCTCATTTTGGTCAACCGGCCGTGGAAGCTTTTACTCGAG  
GGGGTGCTCTTGGCCCAGTGAATATCGCTTATTCTGGTGTTTATCAGTGGTGGTATACAA  
TTGGTTTACGTACTAATGAAGATCTTTATACGGGAGCCCTTTTTCTATTAATTTCTTTCTGC  
CATATCCTTAATAGCAGGTTGGTTACACCTACAACCGAAATGGAAACCGAGCGTTTCGT  
GGTTCAAAAATGCCGAATCTCGTCTCAATCATCATTTGTCAGGACTATTCCGGTGTAAGT  
TCTTTGGCTTGGACAGGGCATTTAGTACATGTCGCTATTCCTGGATCCAGGGGGGAATA

CGTTCGATGGAATAATTTTTTAGATGTATTACCGCATCCCGAAGGGTTAGGACCACTTTT  
TACAGGTCAGTGGAATCTTTATGCCAAAACCCCGATTCAAATAGTCATTTATTTGGTAC  
TTCCCAAGGATCAGGAACCTGCCATTCTAACCCCTTCTAGGGGGATTCCATCCACAAACGC  
AAAGTTTATGGTTGACTGATATTGCTCATCATCATTGGCTATTGCATTTATTTTTCTCGT  
TGCTGGTCATATGTATAGAACTA ACTTCGGGATTGGGCACAGTATAAAAGATCTTTTAGA  
AGCACATATTCCTCCGGGGGGCGATTGGGGCGTGGACATAAAGGTCTTTATGACACA  
ATCAATAATTCGATTCATTTTCAATTAGGCCCTTGCTCTAGCCTCTTTAGGTGTTATTACTT  
CCTGGTAGCTCAACACATGTACTCTTTACCTGCTTATGCGTTCATAGCACAAAGACTTTA  
CTACTCAAGCTGCGTTATATACTCATCACCATAACATCGCAGGATTCATCATGACAGGGG  
CTTTGCCCATGGGGCTATATTTTTTCATTAGAGATTACAATCCGGAACAGAATGAGGATA  
ATGTATTGGCAAGAATGTTAGACCATAAAGAAGCTATCATATCCCATTTAAGTTGGGCCA  
GCCTCTTTCTGGGGTTCACACTTTGGGGCTTTATGTTCATAATGATGTCATGCTTGCTT  
TTGGTACTCCGGAGAAACAAATCTTAATCGAACCTATATTTGCCCAATGGATACAATCTG  
CTCATGGTAAAACCTTCATATGGGTTGATGTGCTTTTATCTTCAACGAATAGCCCAGCAT  
TTAATGCAGGTCAAAGCATATGGTTGCCCGGCTGGTTAAATGCTATTAATGAG-----AAT  
AGTAATTCATATTCTTAACAATTGGTCTGGAGACTTCTTGGTTCATCATGCGATTGCT  
CTAGGTTTACATACTACATTGATCTTAGTAAAAGGTGCTTTAGATGCACGTGGTTCA  
AAGTTAATGCCAGATAAAAAGGATTTCCGGTTATAGTTTTCTTGGCATGGTCCGGGACG  
AGGCGGTACTTGTGATATTTCCGCTTGGGACGCATTTTATTTGGCAGTTTTCTGGATGTT  
AAATACCATTGGGTGGGTACTTTTTATTGGCATTGGAAACACATCACATTATGGCAGG  
GTAACGTTTCACAGTTTAAATGAATCTTCCACTTATTTGATGGGATGGTTAAGAGATTATC  
TATGGGTAAACTCTTCACA ACTTATCAATGGATATAACCCCTTTGGTATGAATAGTTTATC  
AGTTTGGGCGTGGATGTTCTTATTTGGACATCTTGTTGGGCTACTGGATTTATGTTTTT  
AATTTCTTGGCGTGGATATTGGCAGGAATTGATTGAAACTTTAGCATGGGCTCATGAAC  
GCACACCTTTAGCTAATTTGATTCGATGGAGAGATAAACCAGTGGCTCTTTCCATTGTA  
CAAGCAAGATTGGTTGGATTAGCCCATTTTTCTGTAGGTTATATATTCACGTATGCGGCT  
TTCTTGGTTGCCTCTACGTCAGGCAAATTTGGTATGTCACATTCAGTAAAGATTTATGAT  
ACATGTATAGGATGTACTCAATGTGTGCGAGCCTGCCCAACAGATGTATTAGAAATGAT  
ACCGTGGGATGGATGTAAAGCTAAGCAAATTGCTTCTGCTCCAAGAACAGAGGACTGT  
GTCGGTTGTAAGAGATGTGAATCCGCCTGTCCAACGGATTTTTTTGAGCGTTCGAGTTTA  
TTTATGGCATGAAACA ACTCGAAGCATGGGCCTAGCGTATATGATAACTCTTAACTTACC  
CTCTTTCTTTGTGCCTTTAGTGGGCCTAGTATTTCCGGCAATTGCAATGGCTTCTTTATCT  
CTTCATGTTCAAAAAACAAGATTTTTATGCGAGATCTAAAAACATATCTTTCCGTGGC  
ACCGTACTAAGTACTCTATGGTTTGGGGCTTTAGCAGGTCTTTTGATAGAGATCAATC  
GTTTATTTCCGGATGCGTTGACATTCCCTTTTTTTTCATTCACTGACTGCAATTTTAGAGA  
GACGCGAAAGCGAAAGCCTATGGGGTGCCTTCTGTA ACTGGATAACCAGCACCGAAA  
ACCGTCTTTACATTGGATGGTTTGGTGTTTTGATGATCCCTACCTTATTGACCGCAACTT  
CTGTATTTATTATTGCCTTCAATGCTGCTCCTCCAGTAGATATTGATGGTATTTCGTGAACC  
TGTTTCTGGATCTCTACTTTATGGAAACAATATTATCTCTGGTGCCATTATTCCTACTTCT  
GCAGCTATAGGTTTGCATTTTTACCCAATATGGGAAGCGGCATCTGTTGATGAATGGTTA  
TACAACGGGGGTCCTTATGAGCTAATTGTTCTACACTTCTTACTTGGTGTAGCTTGTTAC  
ATGGGTCGTGAGTGGGAACTTAGTTTTCCGTCTGGGTATGCGCCCTTGGATTGCTGTTGC  
ATATTCAGCTCCTGTTGCAGCTGCTACTGCTGTTTTCTTGATCTACCCAATTGGTCAAGG  
AAGTTTTTCCGGATGGTATGCCTCTAGGAATTTCTGGTACTTTCAACTTCATGATTGTATT

CCAGGCTGAGCACAACATCCTTATGCACCCATTTACATGTTAGGCGTAGCTGGTGTAT  
TCGGCGGCTCCCTATTCAGTGCTATGCATGGTTCCTTGGTAACCTCTAGTTTGATCAGGG  
AAACCACAGAAAATGAATCTGCTAATGAAGGTTACAGATTCGGTCAAGAGGAAGAAA  
CTTATAATATCGTAGCTGCTCATGGTTATTTTGGCCGATTGATCTTCCAATATGCTAGTTT  
CAACAATTCTCGTTCCTTACACTTCTTCCTAGCTGCTTGGCCTGTAGTAGGTATCTGGTT  
CACTGCTTTAGGTATCAGCACTATGGCTTTCAACCTAAATGGTTTCAATTTCAACCAATC  
CGTAGTTGATAGTCAAGGTCGTGTAATTAATACCTGGGCTGATATTATTAATCGTGCTAA  
CCTTGGTATGGAAGTTATGCATGAACGTAATGCTCATAACTTCCCTCTAGACCTAGCTGC  
TGTCGAAGTTCCATCTATAAATGGAATGGGTTTGCCTTGGTATCGTGTTACATCCGTCGT  
ATTAAATGATCCCGGCCGTTTGTCTTCTGTCCATATAATGCATACAGCTTTGGTTGCTGG  
TTGGGCCGGTTCGATGGCTCTATATGAATTAGCAGTTTTTGTATCCCTCTGATCCCGTTCT  
TGATCCAATGTGGAGACAAGGTATGTTTCGTTATACCCTTCATGACTCGTTTAGGAATAAC  
CAATTCATGGGGCGGCTGGAGTATTACA---GGAGGGACTGTAACAAATCCGGGTATTG  
GAGTTACGAAGGCGTGGCCGGTGCACATATTGTGTTTTCTGGCTTGTGCTTCTTGGCAG  
CTATCTGGCATTGGGTATATTGGGATTTAGAAATATTTTGTGATGAGCGTACAGGAAAAC  
CTTCTTTGGATTTGCCAAAATTTTTGGAATTCATTTATTTCTTTCAGGAGTGGCTTGCT  
TTGGGTTTGGCGCATTTTCATGTAACAGGATTGTATGGTCCTGGAATATGGGTGTCCGATC  
CTTATGGACTAACTGGAAAGGTACAACCTGTAAATCCAGCGTGGGGTGTAGAAGGTTT  
TGATCCTTTTGTCCGGGAGGAATAGCCTCTCATCATATTGCAGCAGGTACTTTAGGCAT  
ATTAGCGGGCCTATTTTCATCTTAGTGTCCGTCCGCCCAACGTCTATATAAAGGATTACG  
TATGGGCAATATTGAAACCGTCCTTTCGAGTAGTATTGCTGCTGTCTTTTTTGCAGCTTT  
TGTTGTTGCTGGAACCTATGTGGTATGGTTCAGCAACTACCCCTATCGAATTATTTGGTCC  
CACTCGTTATCAATGGGATCAGGGATACTTCCAGCAAGAAATATATCGAAGAGTTGGTG  
TTGGGCTAGCCAAAATCAAAGTTTATCAGAAGCTTGGTCTAAAATTCCTGAAAATTA  
GCTTTTTATGATTATATCGGTAATAATCCGGCAAAGGGTGGATTATTCAGAGCGGGTTCA  
ATGGACAACGGGGATGGAATAGCTGTTGGGTGGTTAGGACATCCTATCTTTCGAGATAA  
AGAAGGGCGTGAACTTTTTGTACGTCGTATGCCTACTTTTTTTGAAACATTTCCGGTTG  
TTTTGGTAGACGGAGACGGAATTGTTTCGAGCCGACGTTTCTTTTTCGAAGGGCGGAATC  
GAAGTATAGTGTTGAGCAAGTGGGTGTAACCTGTTGAGTTCTATGGTGGGGAACCTCAAT  
GGAGTCAGTTATAGTGATCCTGCTACTGTGAAAAATATGCTAGACGTGCCCAATTAGG  
TGAAATTTTTGAATTAGATCGTGCTACTTTGAAATCCGATGGTGTTTTTTCGTAGCAGTCC  
AAGGGGTTGGTTTACTTTTGGACATGCTTCGTTTGTCTCTGCTCTTCTTCTTCGGACACAT  
TTGGCATGGTGCTAGAACCTTGTTTCAGAGATGTTTTTGTGCTGGTATTGACCCCGATTTGG  
ATGCTCAAGTGGAATTTGGAGCATTCCAAAACTTGGAGATCCAACCTACAAGAAGACA  
AGTAGTCATGAAAACCTTATATTCCCTGAGGAGGTTCTACCCCGTGGAAACGCTCTTTA  
ATGGAACCTTTAGCTTTAGCTGGTCGTGACCAAGAAACCACCGTTTTCGCTTGGTGGC  
CGGGAATGCACGACTTATCAATTTATCCGGTAAACTGTTGGGGGCTCATGTAGCCCATG  
CCGGATTAATCGTATTTCTGGGCCGGAGCAATGAACCTATTTGAAGTGGCTCATTTTGT  
CCAGAAAAGCCCATGTATGAACAAGGATTAATTTTACTTCCCACTTAGCTACTCTAGG  
TTGGGGGGTAGGTCCGGGTGGGGAAGTTATAGACACCTTTCCATATTTTGTATCTGGAG  
TACTTCACTTAATTTCTGCTGCAGTATTAGGCTTTGGCGGTATTTATCATGCACTTCTGG  
GCCCTGAGACTCTTGAAGAATCTTTTCCATTCTTTGGTTATGTATGGAAAAATAGAAATA  
AAATGACCACAATTTTGGGTATTCACTTAATCTTGTAGGTATAGGTGCTTTTCTTCTAGT  
ATTCAAGGCTCTTTATTTTGGAGGCGTATATGATACCTGGGCTCCGGGAGGGGGAGATG

TAAGAAAAATTACCAACTTGACCCTTAGCCCAAGTGTTATATTTGGTTATTTACTAAAAT  
CTCCTTTTGGAGGAGAAGGATGGATTGTTAGTGTGGACGATTTGGAAGATATAATTGGA  
GGGCATGTATGGTTAGGTTCCATTTGTATACTTGGCGGAATCTGGCATATCTTAACCAAA  
CCTTTTGCATGGGCTCGTCGAGCACTTGTATGGTCTGGGGAGGCTTACTTGTCTTATAG  
TTAGCTGCTTTATCTGTTTTTGGTTTCATTGCTTGTTCCTTTGTCTGGTTCAATAATACC  
GCTTATCCTAGTGAATTTTACGGGCCTACTGGGCCAGAAGCTTCTCAAGCTCAGGCATT  
TACTTTTCTAGTTAGAGACCAACGTCTTGGGGCTAACGTGGGATCCGCTCAAGGACCTA  
CTGGTTTAGGTAAATACCTAATGCGTTCCTCCGACTGGAGAAGTCATTTTTGGGGGGGAA  
ACTATGCGTTTTTGGGATATGCGTGCTCCTTGGTTAGAACCTCTAAGGGGTCCAAATGG  
ATTGGACTTGAGTAGGCTGAAAAAAGATATACAGCCTTGGCAAGAACGGCGTTCGCA  
GAATATATGACTCATGCTCCTTTAGGTTCTTTAAATTCTGTGGGTGGTGTGCTACCGAG  
ATCAATGCAGTCAATTATGTCTCTCCTAGAAGTTGGTTAGCTACCTCTCATTTTGTTCTA  
GGATTCTTTCTATTTCGTAGGTCATTTATGGCACGCGGGAAGGGCTCGTGCAGCTGCAGC  
AGGATTTGAAAAGGGAATTGATCGTGATTTTGAACCTGTTCTTTCCATGACCCCCCTTA  
ATATGACTATAGCCCTTGGTAAATTTACCAAAGACGAAAATGATTTATTTGATATTATGGA  
TGACTGGTTACGTAGAGACCGTTTCGTTTTTGTAGGTTGGTCCGGTCTATTGCTCTTTCC  
TTGTGCCTATTTTCGCTTAGGTGGTTGGTTCACAGGTACAACCTTTGTAACCTCATGGTA  
TACCCATGGATTGGCCAGTTCCTATTTGGAAGGATGCAACTTCTTAACCGCCGAGTTT  
CTACTCCCGCTAATAGTTTAGCACATTCTTTGTTGTTACTATGGGGTCTGAAGCACAAG  
GAGATTTTACTCGTTGGTGTCAATTAGGCGGTCTGTGGACTTTTGTGGCTCTCCACGGC  
GCTTTCGGACTAATAGGTTTCATGTTACGTCAATTTGAACTTGCTCGATCTGTTCAATTG  
CGACCTTATAATGCAATCGCATTCTCTGGTCCAATTGCTGTTTTTGTCTGTATTCTGA  
TTTATCCACTAGGTCAGTCTGGTTGGTTCTTTGCGCCTAGTTTTGGTGTAGCAGCTATAT  
TTCGCTTCATCCTTTTTTTCCAAGGGTTTCATAATTGGACATTGAACCCATTTTCATATGAT  
GGGAGTTGCCGGTGTATTGGGCGCTGCTCTTCTATGCGCTATTCATGGTGTACCGTAG  
AAAATACTTTATTTGAAGATGGTGATGGTGCAAATACATTCGCTGCTTTTAACCCAATC  
AAGCTGAAGAACTTATTCAATGGTCACCGCTAATCGCTTTTGGTCCCAAATCTTTGGG  
GTTGCTTTTTTCCAATAAACGTTGGTTACATTTCTTTATGTTATTTGTACCAGTAACCGGTT  
TATGGATGAGTGCTCTTGGAGTAGTCGGTCTGGCTCTGAACCTACGTGCCTATGACTTC  
GTTTCCCAGGAGATCCGTGCAGCGGAAGATCCTGAATTTGAAACTTTCTACACCAAAA  
ATATTTCTTTAAACGAAGGTATTCGTGCTTGGATGGCGGCTCAAGATCAGCCTCATGAA  
AACCTTATATCCCTGAGGAGGTTCTACCCCGTGGAAACGCTCTTATGTCTGGAAGCAC  
AGGAGAACGTTCTTTTGCTGATATTATTACCAGTATTCGATACTGGGTTATTTCATAGTATT  
ACTATACCTTCCCTATTCATTGCGGGTTGGTTATTCGTCAGCACGGGTTTAGCTTATGAT  
GTGTTTTGGAAGCCCTCGTCCAACGAATATTTTACAGAGAACCGACAAGGAATTCATT  
AATAACTGGCCGTTTTGACCCTTTGGAACAACCTCGATGAATTTAGTAGATCTTTTATGAC  
CATAGATCGAACCTATCCAATTTTACAGTGCGATGGTTAGCTGTTTCATGGACTAGCTGT  
ACCTACCGTTTCTTTTTTAGGGTCAATATCAGCAATGCAGTTCATCCAACGAATGGCTAC  
GCAAACCGTTGAGGGTAGTTCTAGATCTGGA--CCAAGACGAACTATTGTAGGGGATTT  
ATTGAAACCATTGAATTCAGAATATGGTAAAGTAGCTCCTGGATGGGGAACCTACTCCTT  
TGATGGGTGTGCAATGGCTCTATTTGCAGTATTCCTATCTATTTTAGAAATTGATAA  
TTCTCCGTTTTACTGGATGGAATTTCAATGAATATGCTTACTCTCAAACCTTTTGTTTAC  
ACAGTAGTGATATTTTTGTTTTCTCTTTCATCTTTGGATTCCCTATCTAATGATCCAGGAC  
GTAATCCTGGACGTGAAGAAATGGCCGATACTACTGGAAGGATTCCCTCTTTGGATAATA

GGTACTGTAAC TGGTATTCTTTTGATCGGTTTAATAGGTATTTCTTTTATGGTTCATACT  
CCGGGTGGGTTTCATCTCTGATGCTTAATATCTTTAGTTTGATCTGTATCTGTCTTCATTC  
CACCTTTATTCAAGTAGTTTTTTCTTAGCCAAATTGCCTGAGGCCTACGCCTTTTTGAA  
TCCAATCGTAGATTTTATGCCAGTAATACCCTTCTCTTTTTTTCTCTTAGCCTTTGTTTGG  
C A A G C T G C T G T A A G T T T T C G  
A????????????????????????????????????????????????????????????  
????????????????????????????????????????????????????????????  
????????????????????????????????????????????????????????????  
ATGGAAGTGAATATTCTCGCATTATTGCTACTGCACTCTTC  
ATTCTAGTTCCTACTGCTTTTTTACTTATAATATACGTAAAAACAGTCAGTCAAAGTGAT  
ATGGAAACAGCAACCCTAGTCGCCATCTCTATATCTGGTTTACTTGTAAGTTTTACTGGG  
TACGCCTTATATACTGCTTTTGGGCAACCCTCTCAACAATTAAGAGATCCATTGGAAGA  
ACACGGGGACATGGAAGCATTGGTTTATACATTCCTCTTAGTCTCGACTCTAGGGATAA  
TTTTTTTCGCTATCTTTTTTCGAGAACCACCTAAAGTTCCAACATAAAAAGGTGAAAATG  
ACTATTGCTTTCCAATTGGCTGTTTTTGCATTAATTGCTACTTCATTAATCTTACTGATTA  
GTGTACCCGTTGTATTTGCTTCTCCTGACGGTTGGTCGAGTAACAAAAATGTTGTATTTT  
CGGGTACATCATTATGGATTGGATTAGTCTTTCTGGTGGGTATCCTTAATTCTCTCATCTC  
T-----ATGTCACCACAAACAGAGACTAAAGCAAGTGTTGGATTCAAAGCTG  
GTGTTAAAGATTATAAACTGACTTATTATACTCCTGACTATGAAACCAAAGATACTGATA  
TCTTGGCAGCATTCCGAGTAACTCCTCAACCTGGAGTTCCTCCTGAGGAAGCAGGGGC  
TGCGGTAGCTGCTGAATCTTCTACTGGTACATGGACAACCTGTGTGGACCGATGGGCTTA  
CCAGCCTTGATCGTTATAAAGGAAGATGCTACCACATCGAGCCTGTTGCTGGAGAAGA  
AAATCAATATATATGTTATGTAGCTTACCCTTTAGACCTTTTTGAGGAAGGTTCTGTACT  
AATATGTTTACTTCCATTGTGGGTAATGTATTTGGGTTCAAAGCCCTGCGCGCTCTACGT  
CTGGAGGATCTGCGAATACCTCCTTCTATAACGAAAACCTTTCCAAGGCCCGCCTCATGG  
CATCCAAGTTGAGAGAGATAAATTGAACAAGTATGGGCGTCCCCTATTGGGATGTACTA  
TTAAACCTAAATTGGGGTTATCCGCTAAGAACTACGGTAGAGCAGTTTATGAATGTCTT  
CGTGGTGGACTTGATTTTACGAAAGATGATGAGAACGTGAACTCACAACCATTATGC  
GTTGGAGAGACCGTTTCTTATTTTGTGCCGAAGCCCTTTTTAAATCACAGGCTGAAACA  
GGTGAATCAAAGGACATTACTTGAATGCTACTGCAGGTACATGCGAAGAAATGATCA  
AAAGGGCTGTATTTGCCAGAGAATTGGGAGTTCCTATCGTAATGCATGACTACTTAACA  
GGGGGATTCACTGCAAATACTAGCTTGGCTCATTATTGCCGAGATAATGGTCTACTTCTT  
CACATCCATCGTGCAATGCATGCAGTTATTGATAGACAGAAAAATCATGGTATACACTTT  
AGGGTACTAGCTAAAGCCTTACGTATGTCTGGTGGAGATCATATCACTCTGGTACTGTA  
GTAGGTAAACTTGAAGGAGAAAGAGACATTACTTTGGGCTTTGTTGATTACTACGTGA  
TGATTTTATTGAAAAGATCGAAGCCGCGGTATTTATTTCACTCAAGATTGGGTCTCTCT  
ACCAGGTGTTCTGCCCCGTAGCTTCTGGGGGTATTCACGTTTGGCATATGCCTGCTCTGA  
CCGAGATCTTTGGAGATGATTCGGTACTACAATTCGGCGGAGGAACCTTTAGGACACCCT  
TGGGGAAATGCACCGGGTGCCGTAGCTAATCGAGTAGCTCTAGAAGCATGCGTACAAG  
CTCGTAATGAGGGACGTGATCTTGCTCGTGAGGGTAATGAAATTATTCGTGAGGCTAGC  
AAATGGAGTCCTGAACTAGCTGCTGCTTGTGAAGTATGGAAGGAGATCAAATTTGAAT  
TCGAAGCAATGGATACTTTG-----ATGGCGATACATTTATACAAAACCTTCTACCCCGAGC  
ACAAGCAATGGAGCCGTAGACAGTCAAGTGAAATCCAATACACGAAATAATTTGATCT  
ATGGACAGCATCGTTGTAGTAAAGGTCGTAATGCCAGAGGAATCATTACCGCAGGGCAT  
AGAGGGGGAGGTCATAAGCGTCTATAACGTAATAATCGATTTTCGACGGAATGAAAAG  
ACATATATGGTAGAATCGTAAGCATAGAATACGACCCTAATCGAAATGCATCCATTTGTC

TCATACACTATGGGGATGGTGAGAAGAGATATATTTTTACATCCTAGAGGGGCTATAATTG  
GAGATAACCATTGTTTCTGGTACAGAAGTTCCTATAAAAATGGGAAATGCCCTACCTTTG  
ACCGATATGCCCTTAGGCACGGCCATACATAACATAGAAATCACACTTGGAAGGGTGG  
ACAATTAGCTAGAGCAGCGGGTGTGTAGCGAACTGATTGCAAAAAGAGGGGAAATC  
GGCCACATTAATAATTACCTTCTGGGGAGGTCCGTTTGATATCCAAAACTGCTCAGCAA  
CAGTCGGACAAGTGGGGAATGTTGAGGTGAACCAGAAAAAGTTGGGTAGAGCCGGAT  
CTAAATGTTGGCTAGGTAAGCGTCTGTAGTAAGAGGAGTGGTTATGAACCTGTAGAC  
CATCCCCATGGGGTGGTGAAGGGAGAGCCCCAATTGGTAGAAAAAACCCGCAACC  
CCTTGGGGTTATCCTGCACTTGAAGAAGAAGTAGAAAAAGGAAGAAATATAGTGATA  
ATTTGATTCTTCGTGCGCGTAATAAAATGATTCAACCTCAAAGCCATTTGAATGTAGCGG  
ATAACAGCGGGGCCGAGAATTAATGTGTATTAGAATCATAGGAGCTAGT---AATCGCCG  
ATATGCTCATATCGGTGACATTATTGTTGCTGTGATCAAGGAAGCATTACCAAACACACC  
TCTAGAAAGATCAGAAGTGATCAGAGCTGTAATTGTACGTAAGTGTAAAGAACTTAAA  
CGTGACAACGGTATGATAATACGATATGATGATAATGCTGCAGTTGTGATTGATCAAGAA  
GGAAATCCAAAAGGAACTCGAGTTTTTGGTGCGATTGCCCGAGAATTGAGACAGTTAA  
ATTTCACTAAAATAGTTTCATTAGCACCTGAGGTATTAATGCTTAGTCCTAAAAGAACCA  
GATTTTCGAAAACAACATAGAGGAAGAATGAAAGGAATATCTTATCGAGGTAATCGTATT  
TGTTTCGGTAAATATGCTCTTCAGGCACTTGAACCCGCTTGGATCGCATCTAGACAAAT  
AGAAGCAGGGCGACGAGCAATGACAAGAAATGTGCGCCGTGGTGGAAAAATATGGGT  
ACGTATATTTCCAGACAAACCAGTTACGGTAAGACCTACAGAAACACGTATGGGTTTCG  
GGTAAAGGATCTCCCGAATATTGGGTAGCTGTGTTAAACCAGGTAGAATACTTTATGA  
AATGGGCGGAGTAACAGAAAATATAGCCAGAAAGGCTATTTCAATAGCGGCGTCCAAA  
ATGCCTATAAGAACTCAATTTCTTATTTTCGGGAATGACTAGAATTAGACGAGGATATATA  
GCTCGGAGACGTGCAACAAAAATTCGTTTATTTGCATCAAGCTTTCGGGGGGCTCGTT  
CAAGACTTACTCGAACAATTATTCAACAGAAAATAAGATCTTTGGTTTCGTCTCATCGA  
GATAGAGATAGGAAAAAGATAGATTTTCGTGCTTTGTGGATCACTCGGATAAATGCAGT  
AATTCGCGAGGAT---AGAGTATCCTATAGTTATAGTATATTAATACACAATCTGTACAAGA  
GACAGTTGCTTCTTAATCGTAAAATACTTGCACAAATAGCTATATTAATAGGAATTGTC  
TTTATATGATTTCTAATGAGATCATAAAA-----ATGACAAAGGAAGT  
ATATGCTTTAGGTCAACATATATCTATGTCTGCTCACAAAGCACGAAGGGTAATTGATCA  
GATTCGTGGACGTTCTACGAGGAAACACTTATGATACTCGAACTTATGCCTTATCGAG  
CGTGTTATCCATTTTTAAGTTGGTTTATTCTGCAGCAGCAAATGCTAGTCATAATATGG  
GTTCAATGAAGCAAGTTTAGTTATTAGTAAAGCCGAAGTCAACGAGGGTACTACTATG  
AAAAAATTAACCTCGAGCTCGAGGACGGAGTTATGCAATAAAAAGACCCACTTGTC  
ATATAAGGATTGTATTGAAAGATAAATCTTTCTAT---GGATTATGGGACAAAAAATGGAT  
GGAATCAAATATGCAGTATTTACAGACAAAAGTATTCGGTTATTGGGGAAAAAT---CAAT  
ATACTTTTAATGTGCAATCAGGATCAACTAGGACAGAAATAAAGCATTGGGTGCAACTC  
TTCTTTGGTGTCAAGGTAAAAGCTATGAATAGTCATCGACTCCCGGGAAAGGGTAGAA  
GAATGGGACCTATTCTGGGACATACAATGCATTACAGACGTATGATCATTACGCTTCAAC  
CGGGTTATTCTATTCCACCTCTTAGAAAGAAAAGAAGTATGGCAGTTCCAAAAAAAAG  
TACTTCTATATCAAAAAACGTATTCGTAAAAACATTTGGAAAAAGAAGGTATATTGGG  
CAACGTTGAAAGCTTTTTCTTAGCGAAGTCTCTTTCAACCGGGAATTCAAAAAGTTTT  
TTTTGTACGACAATTA---ATGGCCAAGGGTAAAGATGTCCGAGTAACGGTTATTTA  
GAATGTACCAACTGT---GTTAGAAAC-----CTTAATAAGGAATCAAGGGGTCTTTCCAGA

TATATTACTCAAAAAGAATCGACACAATACGCCAGTCGATTGGAATTGAGAAAATTCTG  
TCCTTATTGTTACAAACATAGGATTCACGGGGAGATAAAGAAAATGAAAATAAGGGCCT  
CCATTTCGTAAAATTTGTGAAAAATGTCGACTGATCCGTAGAAGGGGACGAACTCTAGT  
AATTTGTTCTAATCCGAGACATAAAACAAAGACAAGGAATGGTTCGAGAGAAAGTAAGA  
GTATCTACTCGGACACTGCAGTGGAAAGTGTGTTGAATCAAGAGCAGACAGTAAGCGTC  
TTTATTATGGCCGTTTTATTCTATCTCCACTTATGAAAGGGCAAGCCGATACAATAGGCA  
TTGCGATGCGAAGAGCTTTGCTTGGGGAAATAGAAGGAACATGTATCACCCGTGCAAA  
ATTTGAA-----AAAATACCACATGAATATTCTACCATAGTAGGTATTCAAGAATCAGTACA  
TGAAATTTAATGAATTTGAAAGAAATTGTATTGAGAAGTAATCTATATGGAACCTTGCAA  
CGCGTCTATTTGTGTCAAGGGTCCCTGGATGTGTAAGTCTCAAGACATCATCTTACCAA  
CTTCTGTGGAATCGTTGATAACACACAGTATATAGCTAATCTAGCGGAACCCATTAATT  
TGTGTATTGGATTACAAATCGGGAGGAATCGCGGATATCCTATAAAAACACCAAAAAAC  
TTTCAAGATGGAAGTTAT-----CCTATAGATGCTGTATTTCATGCCTGTTGAAATGCAAAT  
CATAGTATTCATTTTTATGGGAATGGAAATGAAAAACAAGAGATACTTTTTCTCGAAATA  
TGGACAAACGGAAGTTTAACTCCTAAAGAAGCACTTCATGAAGCCTCCCGGAATTTAA  
TTGATTTATTTATTCCTTTTTCTACATGCGGAAGAAGAA-----AACTTACATTTAGAGAACA  
ATCAG--TACAAGGTTACTTTACCCTTTTTTACTTTTCATGATAGATTGGCTAAG--CTAA  
GGAAAACGAAAAAA---GAAATAGCATTGAAATCTATTTTTATTGACCAATTAGAATTGC  
CTCCCAGGACCTATAATTGCCTCAAAAAGGTACAATATACATACATTATTTGACCTTTTGA  
ATAAGAGTCAAGAAGACCTTATGAAAATGGAAATATTTTCGCATAGAAGATGTAAAACAG  
ATATTGGACAGTCTAGAAATAGAAAAAGCATTTCACAACCCATTTACCGAAGAA---ATG  
CTCGGGGATGGAAT--GAGGGAATGTCTACAATACCTGGGTTTAAATCAGATACAGTTT  
GAAGGATTTGTAGATTCATTGATCAGGGCTTAACAGAAGAACTTTATAAGTTTCCAAA  
AATTGAAGATACAGATCAAGAAATTGAATTTCAATTATTTGTGGAAACATATCAATTGGT  
AGAACCTTTGATAAAAGAAAGAGATGCTGTATATGAATCACTCACATATTCTTCTGAATT  
ATATGTATACGCGGGATTAATTTGGAAAAGCAGTAGGGATATGCAAGAACAAACTCTTT  
TTATTGGAAACATTCCTTTAATGAATTCCTGGGAACTTCTATAGTAAATGGAATATACA  
GAATTGTGATCAATCAAAATATTGCAAAGTCCCGGTATCTATTACCGGTCAGAATTGGAC  
CATAACGGAATTTCGGTCTATACCGGGACCATAATATCAGATTGGGGAGGAAGATTAGA  
ATTAGAGATTGATCGAAAAGCAAGGATATGGGCTCGTGTGAGTAGGAAACAGAAAATA  
TCTATTCTAGTTCTATCATCAGCTATGGGTTGCAATCTAAGAGAAATTCTAGAGAATGTT  
TGCTATCCTGAAATTTCTTGTCTTTCTGAATGATAAAGAGAAAAAAAATTGGGTC  
AAAAGAAAATGCCATTTTGGAGTTTTATCAACAATTTGCTTGTGTAGGAGGAGATCCGG  
TATTTTCTGAATCCTTATGTAAGGAATTACAAAAGAAATTCTTTCAACAAAGATGTGAAT  
TAGGAAGGATTGGTCGACGAAATATGAATCGGAGACTAAATCTTGATATACCTCAGAAC  
AATACATTTTGTACC GCGAGATATATTGGCAGCTGCGGATCATTGATTGGAATGAAA  
TTCGGAATGGGTACACTTGACGAT-----ATGAATCATTGAAAATAAGCGTATTCGTTCT  
GTAGCGGATCTCTTACAAGATCAATTCGGATTGGCTCTGGTTCGTTTAGAAAATGTGGT  
TAGAGGAACTATATGTGGAGCAATTAGG--CATAAATTGATA---CCGACTCCTCAGAATT  
TGGTAACTTCAACTCCA-----TTAACAACCACTTATGAATCTTTTTTCGGATTACACC  
CATTATCTCAAGTTTTGGATCGAACGAATCCATTGACACAAATTGTTTCATGGGAGAAAA  
TTGAGTTATTTGGGCCCTGGAGGATTAACAGGGCGAACTGCTAGTTTTCGAATACGAGA  
TATCCACCCTAGTCACTATGGACGCATTTGCCAATCGACACGTCTGAAGGAATCAATG  
TTGACTTATTGGATCTTTAGCAATTCATGCGAGAATTGGTCAGGGGGGG---TCTCTAGA



AAGCCCATTTTTT-----GAAATCTCCGAGAGATCAAAATCAAAAAAAGTACGGATGCT  
TTATTTATCACCAAGTAGAGATGAATACTATATGGTAGCGGCGGGAAATTCTTTAGCGCT  
GAATCAGGGTATTCAAGAAGAACAGGTTGTTCCAGCTCGATACCGTCAAGAATTCCTA  
ACTATTGCATGGGAACAGGTTAATCTTCGAAGTATTTTTCTTTCCAATATTTTTCTATTG  
GAGCTTCTCTCATTCTTTTATCGAGCATAATGATGCGAATCGAGCTTTAATGAGTTCGA  
ATATGCAACGCCAAGCAGTTCCACTTTCTCGGTCCGAGAAGTGCAATTGTTGGAAGTGG  
GTTGGAACGCCAAGCGGCTCTAGATTCAGGGGTTACCGCTATAGCCGAACACGAGGGA  
AAGATCATTTATACCAATACTGACAAGATCATTTTATTGGGTAATGGAGATACTTTAAGC  
ATTCCATTAGTTATGTATCAACGTTCCAACAAAAATACTTGTATGCATCAAAAACCCAG  
GTTCCGCGGGGTAAATGCATTAATAAAAGGACAAATTTTAGCGGATGGTGCCGCTACAG  
TTGGTGGCGAACTCGCTTTGGGTAAAAATGTATTAGTAGCTTATCTGCCATGGGAAGGT  
TACAATTTTGAAGATGCAGTACTCATTAGCGAGCGTCTGGTATATGAAGATATTTATACT  
TCTTTTCACATACGGAAATATGAAATTCAGACTCATGTGACAAGTCAAGGA---CCCGAA  
AGGATCACTAACGAAATACCGCATCTAGAGGCCATTTACTCCGCAATTTAGACAAAA  
TGGAATTGTGATGCTGGGATCTTGGGTAGAGGCGGGCGATGTTTTAGTAGGTAAATTA  
CTCCCAGACGGCGAAAGAA---TCATCGTATGCCCCAGAAGATAGATTATTACGAGCCA  
TACTTGGCATTACAGGTATCCACTTCAAAGGAAACGTGTCTAAAACTACCTATAGGTGGT  
AGGGGTAGAGTTATTGATGTGAGATGGATCCAGAAAAAAGGG---GGTTCGAATTATAAT  
CCAGAAACTATTTGTGTCTATATTTTACAGAAACGTGAAATCAAAGTGGGTGATAAAGT  
AGCTGGAAGGCATGGAATAAAGGTATCATTTCCAAAATTTTACCTAGACAAGATATGC  
CTTATTTGCAAGATGGAAGACCTGTTGATATGGTCTTCAATCCATTAGGAGTCCCCTCAC  
GAATGAATGTAGGACAGATATTTGAATGCTCACTCGGATTAGCGGGGGATCTGCTAGAT  
AGACATTATCGAATAGCACCTTTGATGAGAGATATGAGCAAGAGGCTTCGAGAAAAAC  
TAGTGTTTTTCTGAATTATATGAAGCCAGTCAGCAAACAGCGAATCCATGGGTATTTGAA  
CCCGAGTATCCGGGAAAAAGCAGAATATTTGATGGAAGAACGGGAGATCCTTTTGAAC  
AACCTGTTATAATAGGAAAGCCTTATATCTTGAAATTAATTCATCAAGTTGATGATAAAA  
TACACGGACGTTCCAGTGGACATTATGCACTTGTTACACAACAACCCCTTAGAGGAAG  
GGCCAAGCAAGGGGGACAACGGGTAGGAGAAATGGAGGTTTGGGCTCTCGAGGGGTT  
TGGTGTGCTCATATTTTACAAGAGATGCTTACTTATAAAGCGGATCATATTAGAGCTCG  
TCAAGAAGTACTTGGTACTACAATCATTGGGGGAACAATACCTAAACCTGAAGATGCTC  
CAGAATCTTTTCGATTGCTCGTTCGAGAACTACGATCTTTGGCTCTGGAAGTGAATCAT  
TTCCTTGTATCTGAGAAGAACTTCCAGATTAATAGGAAGGAAGCTATGAATCATAATTT  
TCTTCTATGATCGATCGGTATAAACATCAACAACCTCCGAATTGGATCAGTTTCTCCTCAA  
CAAATAAGTGCTTGGGCCAAAAAAATCCTCCCGAATGGAGAGATAGTTGGAGAGGTG  
ACAAAACCTATACTTTTTCATTACAAAACCAATAAACCGGAAAAGGATGGATTGTTTTG  
TGAAAGAATTTTTGGTCCATAAAAAGTGGAATTTGTGCTTGTGGAAATTATCGAGTAA  
TCGGAGATGAAAAGAGGACCCGAAATTTGTGAACAATGCGGAGTCAATTTGTTGA  
TTCTCGGATACGAAGATATCAAATGGGATACATCAAATTAGCATGTCCAGTAACCCATGT  
GTGGTATTTGAAACGTCTTCCTAGTTATATCGCGAATATTTTAGATAAACCTCTTAAAGA  
ATTAGAAGGGCTAGTATACTGCGATTTT-----TCTTTTGCTAGGCC---ATAGCTAAAAAA  
CCTACTTTCTTACGATTACGAGGGTTATTTCGAATATGAAATCCAATCATGGAAATATAGC  
ATCCCCTTTTTTTTACTACTCAAGGCTTCGATACATTTTCGAAATCGAGAAATTTCTACT  
GGAGCGGGTGCTATCCGAGAACAATTAGCCGATCTCGATTTGCGAATTATTATAGATTAT  
TCATTGGTAGAATGGAAGGAATTAGGAGAAGAA---AGACCCACGGGTAATGAATGGGA

AGATCGCAA AATTGGAAGAAGAAAGGATTTTTGGTTAGACGCATGGAATTGGCTAAG  
CATTTTCTTCGAACAAATATAGAACCAGAATGGATGGTTTTATGTCTACTACCAGTTCTT  
TCTCCCGAACTACGACCCATCATT CAGATAGATGGAGATAAGCTAATGAGCTCGGATATT  
AATGAACTCTATAGAAGAGTTATCTATCGGAACAATACTCTTACCGATCTATTAACAACA  
AGTAGATCTACACCAGGGGAATTAGTAATGTGTCAAGAGAAATTGGTACAAGAAGCCG  
TGGATACACTTCTTGATAATGGAATTCGCGGACAACCAATGAGGGATGGTCATAATAAG  
GTTTACAAGTCGTTTTTCGGATGTAATTGAAGGCCAAAGAGGGGAAGATTCGTGAGACTC  
TGCTTGGCAAACGGGTTCGATTATTCGGGTCGTTCTGTTCATTGTTCGTAGGACCCTCACTT  
CCATTACATCGATGTGGATTGCCTCGGGAATAGCAATAGAGCTTTTT CAGACATTTGTA  
ATTCGTGGGCTAATTAGACAACATCTTGCTTCGAACATAGGAGTTGCTAAGAGTAAAAT  
TCGGGAAAAGGAGCCCATTTGTATGGGAAATACTGCAAGAAGTTATGCAGGGGCATCCC  
ATATTGCTGAATAGAGCGCCTACTCTGCATAGATTAGGCATACAGGCATTTCAACCCATT  
TTAGTGGAAAGGACGTGCTATTTGTTTACATCCATTAGTTCGTAAGGGATTCAATGCAGA  
CTTTGATGGGGATCAAATGGCTGTT CATGTACCTTTATCTTTGGAGGCTCAAGCGGAGG  
CTCGTTTACTTATGTTTTCTCATATGAATCTCTTGTCTCCAGCTATTGGGGATCCCATTTC  
CGTACCAACCCAAGATATGCTTATTGGTCTATATGTATTAACGAGTGGGAATCGCCGAGG  
TATTTGTACAAATAGGTATAATCCATGGAATCGC-----AGAACTATCAA AATGAAAGA  
ACTTATGATAATAACTATAAGTCTAGAAAAAAA---GAACCTTTTTTTTTGTAATTCCTATGA  
TGCAATTGGAGCTTATCGACAGAAAAGAATCAATTTAGATAGTCCTTTGTGGCTTCGAT  
GGCGACTAGATCAACGC---ATTATTGCTTCA-----AGAGAAGTTCCTATCGAGATTCACTA  
TGAATCTTTGGGTACCTATCATGAAATTTATGGGCACTATCTAATAGTAAGAAGTGTA  
AAAAGAAATTATTTGTATATACATTCGAACA ACTGTTCGGTCATATTTCTCTTTTTTCGAGA  
AATTGAAGAAGCTATACAAGGGTTTTGTTCGAGCCTGCTCATTGGTACC-----  
---ATGGAGGTACTTATGGCAGAACGAGTCAATCTAGTCTTTCACAATAAAGTAATAGAT  
GGA ACTGCCATTA AAGACTTATTAGCAGATTAATAGATCACTTCGGAATGGCATATACA  
TCACATATTCTAGATCAAGTAAAGACTCTGGGTTTTCCAGCAAGCCACTGCTACATCCAT  
TTCATTAGGGATTGATGATCTTTTAAACAATACCTTCGAAGGGATGGTTAGTGCAAGATG  
CTGAACAACAAAGTTTTGATTTTTGGAAAAACACCATCATTATGGAAATGTACATGCAGTA  
GAAAAATTACGCCAATCCATTGAGGTATGGTATGCTACAAGTGAATATTTGCGACAAGA  
AATGAATCCTAATTTTAGGATGACAGATCCCTTAAATCCAGTCTATATAATGTCTTTTTTCG  
GGAGCCAGAGGAAATGCATCTCAAGTACACCAATTAGTAGGTATGAGAGGATTAATGT  
CAGATCCTCAAGGACAAATGATTGATTTACCCATTCAAAGCAATTTATGCGAAGGACTA  
TCTTTAACAGAAATATATCATTCTTGCTACGGAGCCCGCAAAGGAGTTGTTGATACTGCT  
GTACGAACATCAGATGCTGGATATCTTACGCGCAGACTTGTTGAAGTAGTACAACACAT  
TGTTGTACGCAGAACAGATTGTGGAACCATCCGAGGGGTTTCTGTGAGTCCCTCGAAAT  
GGGATGATGCCG---GAAAGAATTTTTATTCAAACATTAATTGGTCGTGTATTAGCAGACG  
ATATCTATATGGGCCACAATGCATTGCCATTCGAAATCAAGATATTGGAATTGGACTTG  
TCAATCGATTCATAACC-----TTTTCGAACACAACCAATATCTATTGCAACCCCCT  
TTACTTGTAGGAGTACATCTTGATCTGTTCGATTATGTTATGGTAGGAGTCCTACTCATG  
GCGACCTGGTTCGAATTGGGAGAAGCTGTAGGTATTATTGCGGGTCAATCTATTGGCGAA  
CCAGGGACTCAACTAACATTAAGAACTTTTTCATACCGGCGGAGTATCACAGGTGGTAC  
TGCCGAACATGTACGAGCCCCCTCTAATGGAAAAATAAAATTCAATGACGATTTGGTTC  
ATCCCACACGTATGCGTCATGGGCATCCTGCCTTTCTATGTTCTATAGACTTGTATGTAA  
CTATTGAGAGTGAAGATATTCTACATAACGTGACTATTCCACCAAAAAGTTTTCTTTTGG

TTCAAATAATCAATATGTAGAATCAGAACAAGTGATTGCTGAAATTCGCGCGGGAACA  
TACACTTTC--AATTTGAAAGAGAGGGTTCGAAAACATATTTATTCTGAATCAGAGGGA  
GAA---ATGCACTGGAGTACCGATGTGTACCATGCACCTGAATTTACATATAGTAATGTCC  
ATCTTTTACCAAAAACAAGCCATTTATGGATATTATCAGGGGGTTCGTGCAGG-----TCC  
AGTGGAGTCCCTTTTTCTACTCTACAAGGATCAAGACCAAATAAATCTTCGT-----TCTCT  
TTCTGTGCAACGA---AGATATATTTTCGAGTCTC---TCAGTGAATAATGATCAA---ATGAGA  
TACGAATTATGTAGTTCTGATTTTTCTGGTAAAATAGAAGATAGGATTCCTGATTAT---TC  
AGAACTTAGTCGAACCATATCTATTGTTCAATTGTAATCTCAAATATCCTACT---ACTTTCC  
ACGAGAATTCTGAT-----TTATTGGCAAAAAGGCAAAGAAATCGATTTCTTATCCACTC  
CAATCGATTCAAGAACGAAAGAAAGAACTAATGCCCCATTAGGATCTCGATTGAACT  
AGCGAGAAAT-----GGAATTTTACGTAGAAATAGTATTCTTGCTTATTTTCGATGATCCTCG  
ATACAGAAGAAAGAGTTCGGGAATTACTAAATATGGGATTCTAGGGGTTCAATCAGTCG  
TAAAAAAGAGGAT-----TTGATTGAGTATCGA---GGAATCAAAGAATTTAAGCAAAAAT  
GCATGAAACTACATCGATTTTTTTTTTTCATTCCCGAAGAAGTGCATATTTTCCCTGAATCTT  
CTTCGATAATGGTACGGAACAATAGTCTGATTGGAGTAGATACACGAATCGCTTTAAAT  
ACAAGAAGCCGAGTGGGCGGATTAGTCCGAGTGGAGAGAAAAAAAAAAGGATTGA  
ACTGAAAATCTTTTCTGGAGATATCCATTTTCTGGAGAGACAGATAAGATATCCCGAC  
ACAGTGGCATCTTGATACCCCGAGAACAGGAAAAACA-----AATTCTAAGGAATCCAA  
AAAA-----TGAAAAATTGGATCTATGTCCAACGG-----ATCACACCTACTAAGAAAAAG  
-----TATTTTGTTTTAGTTCGACCCGTAGTGACATATGAAATATCGGACGGTATAAATTTA  
GCAACACTCTTCCCCCGGATCTGTTACAAGAAAGGGATAATATGCAACTTCGAGTTGT  
CAATTATATTGTTTACAGAAATGGCAAACCAATTCGGGGAATTTCTGATACAAGTATTCA  
ATTAGTTCGGACTTGTTAATTTTGAATTGGGACCAAGACAAA-----AAAAGTTCCTCT  
ATCGAAGAGGCTCATACTTCCTTTGTTGAAGTAAGTACAAATGGTCTGATTTCGAGATTT  
CCTAAGAATTGACTTAGTGAAATCCCTATTTTCGTATCTCAGAAAAAGGAATGATCCCT  
CAGGCTCAGGATTGATCTCAGATGATAATGTGTCAGATCACACCAATCGAAATCCCTTT  
TAT-----TCCAAGACAAA-----ATTCAACAATCACTTAGCCAAAATCAAGGAA  
CTATTCGCACGTTGTTAAATAAA-----AATAAGGAATGCCATCTTTGATAATTTTGTC  
TCATCTAATTGTTTCCGAATGGGTCCA-----TTCAACGCTGGAAAATATCACAAT-----G  
TGATAAAGAATCA---CCTATAATTAATAATTAGGAATTCGATTGGCCCTTTAGGAACA----  
-GTCCTTCAATTTGTGAATTTT-----TATTCATTTTACTATTTAATAACT-----CATAATCCTA  
TTTTG---GTAACATAATTTGCAACTTGAAAAT-----TTAAAACAGACTTTTCAAGTAA  
TT-----AAC---TATTATTTACTGGATGAAAATGGGAGA-----ATTTTGAATCCCGATTTCATGC  
AGTAACAGCGTTTTGAATTCATTCAATTTGAATTGGTATTTTCTCCATCCTAATTATTTTG  
AAGAAAGATCCACAATAATTAGT---CTTGGACAGTTTATTTGTGAAAATGTATGTATAGC  
CAAAAATGGACCC-----CATCTCAAATCGGGTCAAGTTTTGATTGTTCAA--GTTGACT  
CTGTAGTAATAAGATCCGCCAAGCCTTATTTGGCCACTCCAGGAGCAACTGTTTCATGGT  
CATTATGGAGAAATCCTTTACGAAGGAGATACATTAGTTACATTTATATATGAAAAATCG  
AGATCCGGTGATATAACGCAAGGTCTTCCAAAAGTGGAACAAGTGTTAGAAGTGCGTT  
CAATTGATTCAATATCGATGAACCTAGAAAAAAGAATTGAGGGTTGGAACGAGCATATA  
AAAAAATTCTTGAATTCCTTGGGGATTCTTGATTGGGGCTGAGCTAACTATAGTGCA  
AAGTCGTATCTCTTTGGTTAATAAGATCCAAAAGGTTTATCGATCCAGGGGGTGCAAA  
TCCATAATAGGCACATAGAAATTATTGTACGCCAAATAACATCAAAAAGTGTGGTTTCA  
GAG-----GATGGAATGTCTAATGTTTTCTTACCTGGAGAATAATTGGATTGTTGCGAG

CGGCGCGAACGGGGCGCGCTTTGGAAGAATCGATCTGTTACCGTGCCATCCTATTGGG  
ATAACAAGGGCATCTTTGAATACTCAAAGTTTCATATCTGAAGCGAGTTTTCAAGAAA  
CTGCTCGAGTTTTAGCCAAAGCTGCTCTCCGGGGCCGTATCGATTGGTTGAAAGGCCTA  
AAAGAGAACGTTGTTCTAGGGGGGATGATACCCGTTGGTACCGGATTCAAAGGATTAG  
TACATCGTTCA-----AGGCAACATAAGAACATTCCTTTGAAAACCAAAAAGAAGAAT-----  
-TTTTTCGAGGGGGAAATCGGA-----GATCTTTTGTTCACCACAGAGAATTATTTGATTTC  
TTCCATTTCAAAGAAGTTTCATGATACATCAGAACAATCATTTAGAGGATTTAATGATTTC  
C-----ATGACAAGAAGGTATTGGAATATCAATTTGGAAGAGATGATGGAAGCG  
GGAGTTCATTTTGGTCATGGTACTAGGAAATGGAATCCTAGGATGGCACCTTATATTTCT  
GCCAAGCGTAAAGGTATTTCATATTACAAATCTTACTAAAACCTGCTCGTTTTTTATCAGAA  
GCTTGTGATTTAGTTTTTGTATGCAGCAAGTAGGGGAAAACAGTTTTTTAATTGTTGGTAC  
CAAGAATAAAGCAGCTGATTCAGTAGCACGGGCTGCAATAAGGGCTCGGTGTCATTAT  
GTTAATAAAAAGTGGCTCGGTGGTATGTTAACGAATTGGTCCACTACAGAAACGAGAC  
TTCATAAGTTCAGGGACTTGAGAACGGAACAAAAGGCGGGGAGACTCAATCGTCTTC  
CGAAAAGAGACGCAGCTATGTTGAAGAGACAATTATCTCACTTGCAAACATATCTGGG  
CGGGATTAAATATATGACGGGGTTACCTGATATTGTAATTATCGTTGATCAACAAGAAGA  
ATATACGGCTCTTCGAGAATGTATCACTTTGGGAATTCCAACAATTTGTTAATCGATAC  
AAATTGTGACCCGGATCTTGCAGATATTTTCGATTCCAGCAAATGATGACGCTATAGCTTC  
AATCCGATTAATTCTTAACAAATTAGTATTTGCAATTTGTGAGGGTCGTTCT--AGCTATA  
TACGAAATCCTATGGGACAAAAATAAATCCACTTGGTTTCAGACTTGGTACAACCCA  
AGGTCATCATTCTATTTGGTTTTGCACAACCCAAAAATTATTCCGAAGGTCTACAAGAAG  
ATCAAAAATACGAAATTGTATCAAGAATTATATACAAAAAATAGGAAAATATCCTCT--  
-GGTGTGGAGGGAATTGCACGCATAGAAATTCGAAAAAGAATTGATCTGATTCAAGTCA  
TAATCTATATGGGATTCCCAAAGTTATTACTAGAAGGCAAGACGCGA-----AGAATC  
GAAGAATTACAGATGAATGTACAAAAGAAGCTTAATTGTGTGAACCGAAAACCTCAACA  
TTGCTATTACAAGAATTACAAACCCCTTATGGGCACCCCTAATATTCTTGCAGAATTTATAG  
CCGGACAGTTAAAGAATAGAGTTTCATTTTCGCAAAGCAATAAAAAAAGCTATTGAATTA  
ACCGAACAGGCAGATACAAAAGGAATTCAAGTACAAATTGCAGGTCGCATCGACGGA  
AAAGAAATTGCACGTGTCGAATGGATCAGAGAAGGTAGGGTTCCTCTACAAACCATTC  
GAGCTAAAATTGATTATTGTTCCCTATGCAGTCCGAACGGTCTATGGAGTATTAGGCATCC  
AAATTTGGATATTTGGGGAA-----ATGTGCGGTTACCGAGGGCCTCGTTTTCAAAAAATA  
CGCCGTCTTGGGGCTTTACCAGGACTAACTAGTAAAAGGCCTAGAGCCGGAAGCGATC  
TTCGAAACCAATCGCGCTCTGGGAAA---AAATCTCAATATCGTATTTCGTTTAGAAGAAA  
AACAAAAATTGCGTTTTTCATTATGGTCTTACAGAACGACAATTACTTAAATACGTTTCGTA  
TCGCCGGAAAAGCAAAAGGGTCAACAGGTCAGGTTTTACTACAATTACTTGAAATGCG  
TTTGGATAACATCCTTTTCCGATTGGGTATGGCTTCGACTATTCCTCAAGCCCAGCAATT  
AGTTAACCATAGACATATTTTAGTTAATGGCTGTATAGTAGATATACCAAGTTATCGCTGC  
AAACAACGAGATATTATTACGGCGAGGGATGATCAAAAATCGAGAGCTATGATTCAAAA  
TTATCTTGATTCATCCCCCAT--GAGGAAGTGCCAAAACATTTGACTCTTCACCCATTT  
CAA-----TATAAAGGATCAGTCAATCAAATAATCGATAGTAAATGGATCGGTTTAAAAT  
AAATGAATTGCTAGTCGTAGAATATTATTCTCGTCAGACTATGTCACGTCGAGGTAAGTGC  
AGAAGAAAAAACTGCAAATCCGATCCAATTTATCGTAATCGATTAGTTAACATGTTGG  
TTAACCGTATTCTGAAACACGGAAAAAAATCATTGGCTTATCAAATTATCTATCGAGCCA  
TGAAAAAGATTCAACAAAAGACAGAAACAAATCCACTATCCGTTTTACGTCAAGCAAT

ACGTGGAGTAACTCCCGATATAGCAGTAAAAGCAAGACGTGTAGGCGGATCGACTCAT  
CAAGTTCCCATTGAAATAGGATCCACACAAGGAAAAGCACTTGCCATTCGTTGGTTATT  
AGGAGCATCCCGAAAACGTCCGGGTCGAAATATGGCTTTCAAATTAAGTTCCGAATTA  
GTGGATGCTGCCAAAGGGAGTGGCGATGCCATACGCAAAAAGGAAGAGACTCATAGA  
ATGGCAGAGGCAAATAGAGCTTTTGCGCATTTTCGTATGGGTAGGGACACTATTGCTGA  
CATAATAACCTCTATACGAAATGCTGACATGAATAGAAAAGGGACGATTCAAATAGCAT  
CCACTAACATCACGAAAACATTGTTAAAATACTTTTAAGAGAAGGTTTTATCAAAAAC  
GTGAGGAAGCATCAGGAAAAGAACAATATTTTTGGTTTTAACCTACGACATAGAA  
GG-----AATAGGAAAGGACCCTATCGAACT---ATT-----TTAAATTTAAAACGTATCAGTAG  
GCCTGGCCTACGAATCTATTGAACTATCAACGAATTCCTAGAATTTTAGGCGGGATGG  
GGATTGTAATCTTTCTACTTCTCGAGGTATAATGACAGACCGAGAGGCTCGACTAAAA  
GGAATCGGCGGAGAAATTTGTGTTATATATGGATGGCAAATCTATACCAAGAACTGG  
TTCACGTGGGAATGCCCGTAGTGGTTCACGTAAAAGTACACGTAGAATACCAAGGGA  
GTTATTCATGTTCAAGCAAGTTTCAACAATACCATTGTGACTGTTACAGATGTACGGGG  
TCGGGTAATTTCTTGGTCCTCCGCCGGTACTTGTGGATTCAATGGTGCAAGAAGGGGG  
ACACCATTGCTGCTCAAACCGCAGCCGGAAATGCTATTCGGACAGTAGTAGATCAAG  
GTATGCAACGAGCAGAAGTCATGATAAAAGGTCCTGGTCTCGGAAGAGATGCAGCATT  
AAGAGCTATTCGTAGAAGTGGTATACTATTAAGTTTCGTACGTGATGTAACCCCTATGTC  
ACATAATGGCTGTAGACCTCCTAAAAAAGACGTGTGCACCCTACATGTTCTCGACG  
CTGAGGACATCCCCAAGAGCGGGGGATTTCGTGACATTTCTGATTGGCTGTCT---TGT  
GTTTCTAATAAG---TTGTTAATAGTTGGCATACTATCACCCCAAAAAACCAAACCTCTG  
CCTTACGTAAAGTTGCCAGAGTACGATTAACCTCTGGATTTGAAATCACTGCTTATATAC  
CTGGTATTGGCCATAATTCACAAGAACATTCTGTAGTCTTAGTAAGAGGGGGAAAGGGTT  
AAGGATTTACCCGGTGTGAGATATCACATTGTTTCGAGGAACCCTAGATGCTGTCGGAGT  
AAAGGATCGTCAACAAGGGCGTTCTCAATATGGGGTCAAAAAGCCAAAAATGGCAAG  
GAAAAGTTTGATTCATAGGGAGAAGAAGAGGCCAAAAACTGGAACAAAAATATCATT  
GATTCGTGATCCTCAAAAAAAGAAATAAGC-----AAAGTTCGGTCGTTGAGTGAGA  
AATGGAAAATTCATGGAAAGTTACAATCCTCACCGCGTAATAGTGCGCCTACACGTCTT  
CATCGACGTTGTTTTTCGACCGGAAGACCGAGAGCTAACTATCGAGACTTTGGGCTTT  
CCGGACACATACTTCGGGAAATGGTTCATGCATGTTTGTGTCAGGGGCAACAAGATC  
AAGTTGGATGGTAAAAAATTCATTCATTTTCAGTTATTTCAACAAGAA---GAA---AAAGAA  
GAAAACAGGGGGTCCGTTGAATTTCAAGTATTTCGTTTCACCAATAAGATACGAAGAC  
TGAATTCACATTTGGAATTGCACAGAAAAGATTATTTCTCTCAGAGAGGTTTACGTA  
ATCCTGGGAAAACGCCAACGACTGCTGTCTTATTTGTCAAAGAAAAATCGAATACGTTA  
TAAAGAATTAATTAGTCAGCTAGATATTCGGGAATCAAAAACCTCGT-----ATGGTAA  
AAC  
TTCGTTTGAAACGATGTGGTAGAAAGCAA---CCCGTTTATCGAATCGTTGCAATTGATG  
TTCGATCCCGAAGAGAAGGAAGAGATCTTCGGAAAGTGGGTTTTTATGATCCGATAAAT  
AATCAAACGTATTTAAATATTCCTGCTATTTCTATTTTTCTTGAAAAAGGCGCTCAACCT  
ACAGGAACTGTTTATGATATTTTAAAGAAGGCGGGGGTTTGT-----TTTTACAGAA  
TTCT  
GTCT-----ATGGAAAATCCAAGCGACTCTTCTTAAATCCAAGCGATCTTTTTGTA  
GGCGTTTGCCCCGATCCAATCGGGGGATCGAATTGATTATAGAAACATGAGTTTAATT  
AGTCGATTTATTAGTGAACAAGGAAAAATATTATCTAGACGGGTAAATAGATTAACCTTA  
AAACAACAACGATTAATTACTATTGCTATAAAACAAGCTCGTATTTTATCTTTGTTACCT  
TTTCTTAATAATGAGAAA-----CAATTTGAAAGAAGCGAGTCGACCGCCGGAGCTACTG

GTCTTAGAACCATATAAATAAAGTGACACGTTCACTAAAAAAAATCCTTTTTGTGGCGAAT  
CATTTATTAAGAAAAATGGAGAAGATTAATACAAAGGCGGAAAAAGAAATAATAATAA  
CCTGGTCTCGGACATCTACCATTATACCTACAATGATCGGCCATACTATTGCTATTCATAA  
TGGAAGGGAGCATTTGCCTATTTATATAACAGATCGTATGGTAGGCCATAAATTGGGAG  
AATTTTCACCTACTATAAATTTCCGTGGACATGCGAAAAATGATAATAGATCTCATCGTA  
TGATTTTGAAATCTTTTCTACTAGGGAATCCAGTATCCTTATGCATGAAGATAATAAATTC  
GGTCGTTATGGTCGGACTCTATTATGGATTTCTGACCACATTCTCCATAGGGCCCTCTTA  
TCTCTTCTTCTCCGAGCTCGGGTTCTGGAAGAAGGA-----ACCGAGAAGAAGGTAT  
CAGCAACAACGGGTTTTATTGCGGGACAGCTCATGATGTTTCATATCGATCTATTATGCGC  
CTCTGCATCTAGCATTGGGTAGACCTCATAACAATAACTGTCCTAGCTCTACCGTATCTTT  
TGTTTCATTTCTTCTGGAACAATCACAACACTTTTTTTGATTATGGATCTACTACCAGAA  
ATTCAATGCGTAATCTTAGCATTCAATGTGTATTCCTGAATAATCTCATTTTTCAATTATTC  
AACCATTTCATTTTACCAAGTTCAATGTTAGCCAGATTAGTCAACATTTATATGTTTTCGAT  
GCAACAACAAGATGTTATTTGTAACAAGTAGTTTTGTTGGTTGGTTAATTGGTCACATT  
TTTTTCATGAAATGGGTTGAATTGGTATTAGTCTGGATACAGCAAAATAATTCTATTTCGA  
TCG-----AAGTACCTTGTGTCAGAATTGAGAAATTCTATGGATCGAATCTTTAGTA  
TTCTCTTATTTATTACCTGTGTTTACTATTTAGGCAGAATACCGTCACCCATTGTTACTAA  
AAAATTCAAAGAAACCGAAGAAGATAAACCTCTTGTGACTCTTCTTTTTCGACTATAAA  
CGATGGAATCATCCATTGCGATATATAAAAAACAATCAATTTGAAAATGCCGTAAGAAA  
TGAAGTGTCAACAATTTTTTTTCATATATGTCGAAACAATGGAAAAGAAAGAATATCTTT  
TACGTACCCCCCAGTTTGTCAACTTTCTTGGAAATGATACAAAGAAAAATGGATTTGT  
TGACAATAGAAAACTACCCTCTGATGACTTGTATGATCATTGGATTTATACCAATGAAC  
AAAAAAGAACAACCTTGAGTAAAAAATTTAAAAATCGAATGGAAGCTCTAAAT-----  
ATTATTCGAGATGTATTCGAAAAAGAATAAATTGTGTAATGATGAAAATAAAAAAGA  
ATACTTGCCTAAAATATATGATGATTTTTTGAATGGGCCCTGTCGTGGAAGGGTCAAATT  
TTTTTTTTCATCCATCGAGACAGGTTGGATAAATAAGATTCATGGTATACTTGAGGAAAA  
TTTTGAAGAAAAAGAGCCCAAGACTAAAGGA-----ATAAAAGAAATAACTAAAAAAGT  
TCCCTCATGGTCATACAAATTAATCGATTTGGAACAACAGGAGGGAGAACAGATTCGTT  
CCAGAAGAGCCAAACGTGTAATAATTTTTACTGATGCTTTGATACGTTATTCACAACAAT  
CAGATTTTCGTCGAGACATAATCAAAGGCTCTATGCGTGCTCAAAGACGTAAAACAATT  
ATTTGTGAATTGGTTCAAGCAAATGTGCATCTCCTCTTTTTTTGGACAGAATAGACAA  
ACCC-----CTTTTTCTTTTGATATCTCCGGGATGATAAAATTCATTTTGAAAAACAGA  
GAAGAGAAAGCACGAATAGAAATAGCGGAAGCCTGGGATAGCATTTTATTTGCTCAAG  
TAATAAGAGGATCCCTATTAGTAACCCAATCTTTTCTTAGAAAATATATTCTATTCCCTTC  
ATTGATAATAGCTAAAATATAGCCCGTATGCTATTATTTCAATTTCCCGAGTGGTCCGA  
GGACTTAAAAGATTGGAATAGAGAAATGCATGTTAAATGTACCTATAATGGTGTTCAATT  
ATCAGAAACCGAATTTCCAAAAAATTGGTTGACAGACGGTATTCAGATAAAGATCCTAT  
TTCTTTTTGCCTTAAACCTTGGCACAGATCTAAG-----AAAAAAAACGATTTTTGTTTT  
TTAACAGTTTGGGGAATGGAACTGAACTTCCTTTTTGGTTCTCCAGAAAACAACGTT  
CATTTTTTGAACCCATTTTTAAAGAACTCAGAAAAAAAATGAAAAAATTGCAAAAAGAA  
TTCTTTTTTAGTT--ATACAGGTTTTAAAGAAAGAATCATTTTTTTTTTAAACCTTTCAA  
AAGAAAGAAAAAATGGGTCATGAAAAACATTCTA-----TTTTTAAAAGGAATAATAAA  
AGAACTTTCCAAAAGAAACAATGGGATAATCAGTAATGGGATGATTAATGAATCG---AT  
TCAAATTCTATTTCTGAATTTGACAGAT--TCATTGACAGAAAAAAAATGAAAGATCTG

ACTGATAGAACCAGCACAATCAGGAATCAAATAGAAAAAATTACAAAAGATAATAAAA  
AAAGTTATAATAAAATAAGTTATCCTACTAACTATTATCATCAATAAAAAATATTTGGCA  
GAAATTAAGAAATTCAATGTTTCGATTAATCCGTAAATCATATTCTTTTTTCAAATTTTA  
ATTGAAAGAATATACATAGATATACTTTTCTGTATCATTAATAGTCCGAGGATCACTACAC  
AACTT-----TTATCCTCCTTCTCACAAGCATATGTATTTTACCAATTATATCA  
AAGG---ATTCGTAATTTGTATAAGTTAAGATATGTCCTTCAATATACATCTTTTTTTCTTAA  
AAATGAAATAAAGGATTATTTTACACAAGGAATTTTTTATTCTGAATTA AACATAAAAA  
TATTTTG---TCTGAAATGATTCAATGGAAAACTGGTTAAGGGGTCATTATCAATATGAT  
TTATCTCCGATTAATGGTATCGATTAGTACCACACAAATGGCGAAATAGATTCAATCAA  
AGACGTATAGTGCAAATAAAAAACAAAAGGCATTGAGATGAAAAAGATCGATTACTATT  
AATTAATTACAAAAATTA---AACTTCAAAAATACTATGGATATGACCTTTTCTCATATA  
AATCGATTAATGATGATATTCTAAATAAAGATAGAAAATATTTTGATTGGAGAATTTTCTA  
TTTTTGTCTTCGACTTTTTGATTGGATGGGAATGAATGAAGAAAACTAAGTCGTTGGT  
TCTTTCCAGAATTTGTGCTGCTTTATAATACATATATTATGAAACCGTGGATCATACCAAT  
CCAACTACTTCTTTTAAATAGCAAC-----ACGGAAGCAGAGCTTTATTTTTTCTAAAA  
GGTATTTACGTTTTCAATTGAGATGGGAT-----AATCAAAGAATGATCAATAATATCAA  
AGTATATTGTCTCCTACTTAGACTGATAAATCCAAGAGAAATTGCTATATCCTCTATTCAA  
AGGGGAGAAATGAGTTTAGATATTTTGATGATTCAAAAGGATTTAACTCTTACAGAATT  
AATGAAAAAGGGTATATTAATTATCGAACCAATTCCTTTGTCTATAAAAAATGATGAACA  
ATTTTTTATGTATCAAAGTATAAATATTTCAATTGTTTCATAAGAGTAAGCCCGATTATGAT  
TTGTTGTTTGTACCAGAAAAAGTTTTATCCACTAAAGGACGTAGAGAATTAAGAATTCT  
AATTTGTTTGAAATTTCTTTGGCCTAATTATCGATTAGAAGATGTATCTTGTATGAATCGA  
TATGGGTTTGATACCAATAATGGGAGCCGCTTCACTATGATAAGGATACATATGTATCCA  
ATGAAAGGACATCAATTCAAATCCTGGATTTTCGAATTGAGAGAGATATTGAGAGAGAT  
CAAGAATTCTCACTATTTCTTAGATTGATGGACCCAATTCAATTCCGTGGGATCTTTCAT  
TCACATTTTTTCCACCAAGAACGTTTTATAAACTCTTGGACCCCGAATTTGGAGTAT  
CCTACTTTCA---CGCAATTCA-----CAGGGTTCAACAAGCAATCGATATTTT-----ACGA  
TCAAGGGTGTAGTACTATTTGTAGTAGCG---GTCCTTATATATCGT-----ATTAACAAT  
CGAAATATGGTCGAAAGAAAAATCTCTATTTGACAGGGCTTCTTCCT-----ATAC  
CTATGAATTCCATTGGACCCAGAAATGATACATTGGAAGAATCTTTT---GGGTCTTCCAA  
TATCAATAGGTTGATTGTTTCG---CTCCTCTATCTTCCAAAAGGAAAAAAGATCTCTGAG  
AGCTGTTTCTGGATCCGAAAGAGAGTACTTGGGTTCTCCCAATAACG-----AAAA  
AGTGTATCATGCCTGAATCTAACTGGGGTTCGCGGTGGTGGAGGAACTGGATCGGAAA  
AAAGAGG-----GATTCTAGTTGTAAGATATCTAAT-----GAAACCGTCGCTGGAATTGA  
GATCTCATTCAAAGAGAAAGATATCAA---TATCTGGAGTTTCTTTTTGTATATTATATGG  
AT-----GATCCGATCTGCAAGGACCATGATTGGGAATTTTTGGATCGTCTTTCTCCGAGTA  
AGAGACGAAACATAATTAACTTG-----AATTCGCGACAGCTATTCGAAATCTTAGTTAAA  
GACTGGATTTGTTATCTCATGTTTGCTTTTCGTGAAAAAATACCAATTGAAGTGGAGGG  
T---TTCTTCAAACAACAAGGA---GCTGGGTCAACTATTCAATCAAATGATATTGAGCATA  
TTTCCCAT-----CTCTTCTCGAGAAACAAGTGGGCTATTTCTTTGCAAAATTGTGCTCAAT  
TTCATATGTGGCAATTCGCGCAAGATCTCTTCGTT-----AGTTGGGGGAAG---AATCCG  
CCCGAATCGGATTTTTTGGAGAAC---ATATCGAGAGAGAATTGGATTTGGTTAGACAAT  
GTGTGGTTGGTAAACAAGGATCGG-----TTTTTTAGC-----AAGGTACGGAATGTATCG  
TCAAATATTCAATATGATTCT-----ACAAGA-----TCTAGTTTCGTTCAAGTAACGGATT

CTAGCCAATTGAAAGGATCTTCT--GATCAATCCAGAGATCATTTCGATTCCATTAGT-----  
-----AATGAGGATTTCGGAA-----TATCACACATTGATCAATCAA  
AGAGAGATTCAACAATAAAAGAAAGATCGATTCTT--TGGGAT-----CCTTCCTTCTTC  
AAACGGAACGAACAGAGCTAGAATCAGAC-----CGATTCTCGAAA-----TGCCTTCTGG  
ATATTCC-----CGGCTATTACG--GAACGTGAGAAGGAGATGAAGAATCATCTGC  
TTCCGGAAGAAATCGAAGAATTT-----CTTGGGAATCCTACAAGATCCATTCTTCTTTTT  
TCTCTGACAGATGG-----TCAGAACTTCAT--CTGGGTTCGAATCCTACTGAGAGGTCCA  
CTAGAGATCAG-----AAATTGTTGAAGAAAGAACAAGATGTTTCT--TTTGTCCCTT  
CCAGGCGATCGGAA-----AATAAGAAATAGTTAATATATTCAAGATAATTACGTATT  
TACAAAAT-----ACCGTCTCAATTCATCCTATTTTCATCAGATCCGGGATGTGATATGGTTC  
CG--AAGGATGAACTGGAT--ATGCACAGTTCCCATAAGATTTTCATTCTTGAACAAAAT  
ACATTTTTTTGATTTA-----TTTCATCTGTTCCATGACCGGAACAGGGGGGGATAACGTT  
A-----CACCACGATTTTGAATCAGAA-----GAGAGATTTCAAGAAATGGCAGATCTATTC  
ACTCTATCAATAAGCGAGCCG--GATCTGGTGTATCATAAGGGATTTGCCTTTTCTATGG  
ATTCTTACGTATTGGATCAAAAACAA-----TTCTTGAATGAGGTATTCAACTCCAGGGAT  
GAATCGAAAAAGAAATCTTTA-----TTGGTCTACCTCCTCTTTTTTAT-----GAAGAGA  
ATGAATCTTTTTATCGAAGGATCAGAAAAAATGGGTCCGG--ATCTCCTGCGGGAATG  
ATTTGGAAGATCCAAAACCAAAAAGAGTGGTATTTGCTAGCAACAACATAATGGAGGC  
AGTCAATCAATATAGATGGATCCGAAATCTGATTCAAATCCAA-----TATAGCACCTATGG  
GTACATAAGAAATGTATGGAATCGATTCTTTTTAATGAAT-----AGATCCGATCGCAAC  
TTCGAATATGGAATTCAA-----AGGGATCAAATAGGAAATGATACTTTGAATCATAGAA  
CGATAATGAAATATACGATCAACCAACATTTATCGAATTTGAAAAAG--AGTCAGAAGA  
AATGGTTTCGATCCT-----CTTATTTTTATTTCTCGAACCGAGAGATCCGTGAATCGGGATC  
CTAATGCATATAGATACAAATGGTCCAATGGGAGCAAGAATTTCCAGGAACATTTGGAA  
CATTTTCGTTTCTAAGCAGAAGAGCCGT-----TTTCAAGTAGTCTTCGATCGATTACGTA  
TTAATCAATATTCGATTGATTGGTCTGAGGTTATCGACAAAAAAGATTTGTCTAAGTCAC  
TTCGTTTCGTTTGTCCAAGTTACTTCTC-----TTTTTGTCC-----  
---AAGTTTCTTCTTTTTTTGTCTAACTCACTTCT--TTTTTCTTTGTGAGTTTCGGGAATA  
CCCCATTCATAGGTCCGAG--ATCCACGTCTAT--GAATTGAAAGGTCCGAATGATCAA  
CTCTGCAATCAGTTGTTAGAATCAATAGGTCTTCAAATCGTTCATTTGAAAAAATGGAA  
ACCATTA-----TTATTGGAT-----GATCATGATACTTCC--CAAAAATCGAAATTATTGATC  
AATGGAGGAACAATATCACCATTTTGTTCATAAAGATACCA---AAGTGG---ATGATTGA  
CTCATTCCATACTAGA-----AATAATCGCAGGAAATCTTTTGATAACACGGATTCCATTT  
CTCAATGATATCCACGATCAAGACAATTGGCTGAATCCCGTGAAACCATTTTCATAGAA  
GTTCAATTGATATCTTCTTTTTATAAAGCAAATCGACTTCGATTCTTGAATAATCCACATCA  
CTTCTGCTTCTAT-----TGTAACAAAAGATTCCCCTTT-----TAT--GTGGAAAGGGCCCG  
TATCAATAATTATGAT-----TTTACATATGGA---CAATTCCTCAATATCTTGTGCATTTCGAA  
CAAA---ATATTTTCTTTGTGCGGCGGTAAA-----AAAAAATACGCTTTTTTTGGAG---AGAG  
ATACTATTTACCAATCGAGTCACAGGTATCTAACATATTCATACCTAACGATTTTCCAC  
AAAGTGGTGACGAAAGG---TCTAACTTGTACAAATCT-----TTCCATTTTGCAATTTCGA  
TCCGATCCATTAGTTCGT-----AGAGCTATTTACTCGATCGCAGACATTTCTGGAACACCT  
CTAACAGAGGGACAAATAGTCAATTTTGAAGAAGTATTGTCAACCTCTTTCAGATAT  
GAATCTATCTGATTGAGAAGGGAAGAACTTGATCAGTATCTCAAT-----TTCAATTCAA  
ACATGGGTTTGATTACACTCCATGTTCTGAGAAATATTTACCATCCGAAAAG-----AGG



AAAAAA-----CGGAGTCTTTGTCTAAAG-----AAATGCGTTGAGAAAGGA  
CAGATGTATAGAACCTTTCAACGAGATAGTGCTTTTTCAACTCTCTCAAATGGAATCT  
ATTCCAAACATATATGCCATGGTTCCTTACCTCGACAGGGTACAAATATCTAAATTGGAT  
ATTTTTAGATACTTTTTTCAGAC---CTATTGCCGATACTAAGTAGCAGT-----CAAAAATTTG  
TATCCATTTTTTCATGATATTATGCATGGATCAGATATATCATGGCAAATTCCTCAGAAAA  
ATTC-----TGTCTTCCACAATGGAAT---CTGATAAGTGAGATTCGAGTAAGTGT  
TTACATAAT-----CTTCTTCTGTCCGAAGAAATGATTCATCGAAATAATGAGTCA-----CCA  
TTGATATCGACCCATCTGAGATCTCCAAATGTTTCGGGAGTTC---CTCTATTCAATCCTTTT  
CCTTCTTCTTGTGCTACATAT--ATCGTTCGTACACATCTTCTCTTTGTTTCCCGA-----G  
CCTATAGTGAGTTACAGACAGAGTTCGAAAAGGTCAAATCTTGGATGATTCCATCATA  
ATGATGGAGTTGCGAAAACCTTCTGGATAGGTACCCTACATCTGAACTGAATTCCTTTCTG  
GTTAAAGAATCTCTTTCTAGTTGCTCTGGAAAAATTAGGAGATTCTCTAGAAGAAATAC  
GGGGTCTGCTTCTGGCGGCAACATGCTATGGGGTGGTGGTCCC-----GCTTATG  
GG---TTCAAATCAATACGTTCTAAGAAGAAATATTTGAATATCAAT-----CTCATCGATC  
TCATA---AGTATCATACCAAATCCCATCCATCGAATCACTTTTTCGAAAAAGACGAGACA  
TCTAAGTCATACAAGTAAAGAGATCTATTCATTGATAAGAAAAAGAAAAAATGTGAAC  
GGTGATTGGATTGATGATAAAATAGAATCCTGGGTCGCGAACAGTGATTTCGATTGATGA  
TAAAGAAAGAGAATTCCTTAGTTCAGTTTTCC-----ACCTAACGACA-----GAAAAAAGG  
ATTGATCAAATTCATTGAGTTTACT--CATAGTGATCATTATCA-----AAGAAT  
GACTCTGGTTATCAAATGATTGAACAACCGGGAGCAATTTACTTACGATACTTAGTTGA  
CATTCAT-----AAAAAGTATCTAATGAATTATGAGTTCAATACATTCTGTTTAGCAGAAAG  
ACGGATATTCCTTGCTCATTATCAGACAATCACTTAT-----TCACAAACCTCGTGTGGGGC  
TAATAGTTTTCATTTACATCTCATGGA-----AAACCCTTTTCGCTCCGCTTAGCCCTAT  
CCCCTTCT--AGGGGTATTTAGTGATAGTTCTATAGGAACTGGACGATCCTATTTGGTC  
AAATACCTAGCGACAACTCCTATGTTTCCTTTCATTACAGTATTTCTGAACAAGTTCCTG  
GATAACAAGCCTAAAGGTTTTCTTATTGAT-----GATATCGAT-----GAGGATAGTG  
AC-----GATATTGATCGTGAC  
CTTGATACGGAGCTGGAGCTTCTAACTAGGATGAATGCGCTA-----ACTATGGATATGA  
TGCCG-----GAAATAGACCGATTTTATATTACCCTTCAATTCGAATTAGCAAAAGCAAT  
GTCTCCTTGCATAATATGGATTCCAAACATTCATGATCTGGATGTGAATGAGTTCGAATTA  
CTTATCCCTCGGTCTATTAGTGAACCTATCTCTCC-----AGGGATTGTGAAAGATGTTCC-  
--ACTCAAATATTCTTGTATTGCTTCGACTCATATCCCAAAAAGTGGATCCCGCTCT  
AATAGCTCCGAATAAATTAATAACATGCATTAAGATACGAAGGCTTCTTATTCCACAACA  
ACGAAAGCACTTTTTACCCCTTTCATATACTAGGGGATTTCACTTGGAAGAAAGAAATGT  
TCCATACT-----AATGGATTCCGGTCCATAACCATGGGTTCCAATGTACGAGATCTTGTAG  
CACTTACCAATGAGGCCCTATCGATTAGTATTACACAGAAGAAATCAATTCTAGACACT  
AATACAATTAGATCTGCTCTTCATAGACAACTTGGGATTTGCGA-----TCCCAGGTAA  
GATCGGTTACAGGATCATGGGATCCTTTTCTATCAGATAGGAAGGGCTGTTGCACAAAAT  
GTACTTCTAAGTAATTGCCCCATAGATCCTATATCTATCTATATGAAGAAGAAA-----TCAT  
GTAACGAAGGGGATTCTTATTTGTACAAATGGTACTTCGAACTTGGAACGAGCATGAA  
GAAATTAACGATACTTCTTTATCTTTTGAGTTGTTCTGCCGGATCGATCGCTCAAGACTT  
TTGGTCTCTACCC-----GGACCCGATGAAAAA---AATGAGATCACTTCTTATGGACTTGT  
TGAGAATGATTCT--GATCTAGTTCATGGCCTATTAGAAGTAGAAGGCGCTCTGGTGGG  
A-----TCCTCGCGGACAGAAAAAGATTACAGTCAGTTTGATAATGAT-----CGAGTGACAT

TGCTTCTTCGGCCCAAACCAAGGAAT--CCCTTAGATATGATGCAAAATGGATCTTGTTCT  
TATCGTTGATCAGAGATTTCTCTATGAAAAA-----TACGAATCGGAGTTTGAAGAA--GG  
GGAAGGAGAAGGAGTCCTCGACCCGCAA-----CAGATAGAGGAGGAC-----TT  
ATTCAATCAC-----ATAGTTTGGGCTCCT-----AGAATATGGCGCCCT-----TGGGGCTTT  
CTATTTGATTGTATCGAAAGGCCAATTCATTGGGATTTCCC---TATTGGGCCAGGTCATT  
TCGGGGCAAG-----CGGATCATTATGATGAAAAGGAGGAGCTTCAAGAGAATGATTC  
GGAGTTCTTGCAGAGTGAACCATGCAGTACCAGACACGAGATAGATCTTCCAAAGAA  
CAAGGCTTTTTTCGAATAAGCCAATTCATTTGGGACCCTGCAGATCCACTCTTTTTCCTA  
TTCAA--GATCAGCCCTTTGTCTCTGTGTTTTACATCGAGAATTCTTTGCAGATGAAG  
AGATGTCAAAGGGGCTTCTTACTTCCCAAACAGATTCCCCTACATCTATATATAAACGCT  
GGTTTATC-----AAGAATACGCAAGAAAAGCACTTCGAATTGTTGATTCATCGCCAGAGA  
TGGCTTAGA-----ACCAATAGTTCATTATCT-----AATGGATTTTCCGTTCTAAT-----AC  
TCCATCCGAGAGTTATCAGTATTTATCAAATCTGTTCCCTATCTAAC--GGAAGGCTATTGG  
ATCAAATGACAAAGACATTGTTGAGAAAAAGATGGCTTTTCCCGGATGAAATGAAAAT  
CGGATTC-----ATG-----ATGCCTAGATCGAGG---ATAAATGGAAATTTTAT  
TGATAAGACCTTTTCAATTGTAGCCAATATCTTATTACGAATAATCCGACAACCTTCAGG  
AGAAAAAGAGGCATTTACCTATTACAGAGATGGG-----ATGTCGGCTCAATCCGAAGGA  
AATTATGCGGAAGCTTTACAGAATTATTATGAAGCTATGCGACTAGAAATTGATCCCTAT  
GATCGAAGCTATATACTCTATAACATAGGCCTTATCCACACAAGTAACGGAGAACATAC  
GAAAGCTTTGGAATATTATTTTCGGGCACTAGAACGAAACCCGTTTTTACCACAAGCTT  
TTAATAATATGGCTGTGATCTGTCATTAC---CGGGGAGAACAGGCCATTCGACAGGGGG  
ATTCTGAAATTGCGGAGGCTTGGTTCGATCAAGCCGCTGAGTATTGAAACAAGCTATA  
GCGCTCACTCCTGGTAATTATATTGAAGCGCAGAATTGGTTGAAGATCACGAGGCGTTT  
CGAA-----ATGAGTTGTCGATCAGAACATATATGGATAGAACTTATAAGTGGGGTCTCGAA  
AAATAGGTAATTTCTGCTGGGCCTTTATCCTTTTTTTAGGTTCACTAGGATTCGTATTAGT  
TGGATCTTCCAGTTATCTCGGTACGAATTTGATATCTTTAGTTCCGTCTCAACAAATTCT  
TTTTTTTCCACAAGGGATCGTGATGTCTTTCTACGGTATCGCAGGTCTCTTTATTAGTTC  
CTATTTGTGGTGCACAATTTCTGTGGAATGTAGGTAGTGGCTATGATCGATTGATAGAAA  
AGAAGGAATAGTGTGATTTTTCTGTTGGGATTTCCCTGGAAAAAATCGTCGCATCTTTC  
TACGATTTCTGATGAAAGATATTCAGTCCATCCGAATCGAAGTTAAAGAGGGTATTTATG  
CTCGTCTGTCTCTTTATATGGAAATCAAAGGACAGGGAGCCCTTCCCTTGACGCGTACT  
GATGAGAAT--TTGACTCCGCGTGAAATTGAGCAAAAAGTCGCCGAATTGGCCTATTTCT  
TTGCGCGTACCGATTGAAGTATTT

>Cocos

ATGGAAAAATGGTGGTTCAATTCGATGTTGTCTCTAAATAAATCAATGGATAGTCTTGAT  
GCTATTGGACATAACCAGTGGAAGTGAAGAACCCATTCTAAATGGTACGGAGAAAAACA  
TTCCT--TTCAGAAATGTTGATTATTTATTTGATATCAGGGATATTTGGAGTTGATCTCTG  
ATGACACTTTTTTAGTTAGGGATAGTAATGGTGACAGTTTTTCTGTATGTTTTGATATTG  
AAAATCAGATTTTTGAGATTGACAATGAT-----AGTCTTTTTCTGAGTGAAGTAAAGT  
TTTTTTTCTAGT-----TATTTAAATAATGGGTCTAAGAGAAACAATCACAACCTATTA  
TCATTACATATATGATACTCAATCTAGTTGGAATAATCACATTAATAGTTGCATTGATAATT  
ATCTTCGTTTTGAAGTC-----AGTATTAATAGTTCCATTTCCGGTGGTACCGACAATTACA  
GTGACAGTTACATTTATAGTTTCATTTGACTGAAAGTGGGAGTTCTATAAGAAGTAAAGT  
AAAATGGCAGTGATTTCAATATAAGAAGAAGATCT--GATTTCCGGTAGAAAAAAAAT

ACAGACATTTATGGATTCAATGCGAAAATTGTTATGGATTAAATTATAAAAAATTTTTTA  
GGTCAAAAATGAATATTTGTGAACAGTGTGGATATCATTTGAAAATGAGCAGTTCAGAT  
AGAATCGAACTTTCGATTGATCCGGGGACTTGGGATCCTATGGATGAAGATATGGTCTC  
TATGGACCCCATTTGAATTTCAATCAGAGGGGAAACCCTATAGAGATCGTATCGATTCTTA  
TCAAAGAAAGACAGGTTTAACTGAAGCTGTTCAAACAGGCATAGGTCAACTAAATGGT  
ATTCCCATAGCAATTGGAGTTATGGATTTTAAAGTTCATGGGAGGTAGTATGGGATCTGTA  
GTAGGCGAGAAAATCACCCGTTTGATCGAGTATGCTACTAATCGATCTCTACCTGTCATT  
ATTGTGTGTGCTTCTGGAGGAGCGCGCATGCAAGAAGGAAGTTTGAGTTTGATGCAAA  
TGGCTAAAATATCTTCCGCTTCACATAATTATCAATCAAATAAAAAATTATTCTATGTATC  
AATCCTTACATCTCCTACAACCGGTGGAGTAACAGCCAGTTTTGGTATGTTGGGAGATG  
TCATTGTTGCTGAACCTAATGCCTACATTGCATTTGCGGGCAAAAGAGTAATTGAACAA  
ACATTGAATAAGACAGTACCCGATGGTTCACAAGCGGCTGAGTATTTATTCCATAAAGG  
CTTATTTGACCCAATTGTACCACGTAATCCTTTAAAAGGTGTTCTGAGTGAGTTATTTCA  
GCTCCACGGTTTTCTTCCCTTGAATCAAATTCAAAAATATGGTAACCCTTCGAGCCG  
ACGAAATTAGTAATATTATCCGTGAACGTATTGAACAATATAATAGAGAAGTAAAGATTG  
TGAATACCGGTACCGTACTTCAAGTGGGCGATGGCATTGCTCGTATCCATGGTCTTGAT  
GAAGTAATGGCAGGTGAATTAGTAGAATTTGAAGAGGGTACAATAGGAATTGCTCTGA  
ATTTGGAATCAAATAATGTTGGCGTTGTATTAATGGGTGATGGTTTGATGATACAAGAAG  
GAAGTTCTGTAAAAGCAACAGGAAGAATTGCTCAGATACCTGTGAGTGAGGCTTATTT  
GGGTCGTGTTATAAATGCTCTGGCTAAACCTATTGATGGGAGAGGTGAAATTTACGCTT  
CTGAATCTCGGTTAATTGAATCTCCTGCCCCAGGTATTATTTTCGAGACGTTCTGTATATG  
AACCTCTTCAAACGGGGCTTATTGCTATCGATTCGATGATCCCTATAGGACGCGGTCAG  
CGAGAATTAATTATTGGGGACAGACAGACTGGAAAAACAGCAGTAGCTACAGATACGA  
TTCTTAACCAAAAAGGGCAAAATGTGATATGTGTTTATGTAGCTATTGGTCAAAAAGCA  
TCTTCTGTGGCTCAGGTAGTGACTACTTTTCAGGAACGAGGGGCGATGGAATACACCA  
TTGTGGTAGCCCAAACGGCGGATTCACCTGCTACATTACAATACCTCGCTCCTTATACG  
GGAGCGGCTCTGGCTGAATATTTTATGTACCGTAAAAAACATACTTTAATAATTTATGAT  
GATCTCTCCAAGCAGGCACAAGCTTATCGACAAATGTCTCTTCTATTAAGAAGACCCCC  
TGGTCGTGAAGCTTATCCAGGAGATGTTTTTTATTTGCATTCGCGCCTTTTGGAAGAG  
CCGCTAAATCAAATCTCGTTTAGGTGAAGGGAGTATGACTGCTTTACCAATAGTTGAG  
ACTCAATCTGGGGACGTTTCAGCTTATATTCTACTAATGTAATTTCCATTACAGATGGA  
CAAATATTCTTATCCGCCGATCTATTCAATGCTGGAATCCGACCCGCTATTAATGTGGGTA  
TTTCTGTTTCCAGAGTGGGATCCGCAGCTCAAATTAAGCCATGAAACAAGTAGCTGG  
CAAATCAAATGGAAC TAGCGCAATTCGCAGAGTTAGAAGCCTTTGCACAATTCGCT  
TCTGATCTCGATAAAGCTACTCAGAATCAATTGGCAAGAGGTCAACGATTACGTGAGTT  
GCTTAAACAATCCCAATCAGACCCTCTCACGGTGGAAAGAACAGATAGTTACTATTTATA  
CCGGAGCGAATGGATATCTTGATCCGTTAGAAATTGGACAGGTAAAGAAATTTCTCGTT  
CAGTTACGTACCCACTTAAAAAGAATAAACCTCAATTCCAAGAAATTATATCTTCTAC  
CAAGACATTCACCGAGCAAGCGGAAGCCCTTTTGAGGGAAGCTATTCAGGAACAGAT  
CGAACTGTTTTTACTTCAGGAACAAGCGATGAGAATCAATCCTACTCCTTCTAGTCCTG  
TGGTTTTCCACACTTGAAGAAAAAACCTAGGGCGTATCGCTCAAATATTGGCCAGT  
ACTGGATGTCGTTTTTCCCCGGGCAAGATGCCTAATATTTATAACGCTTTGGTAGTTAA  
GGGTCGAGATACTGTCCGTCAGCAAATTAATGTGACTTGTGAGGTACAACAATTATTAG  
GAAATAATCGAGTTAGAGCTGTAGCTATGAGTGCTACAGATGGTCTGATGAGAGGAATG

GAAGTGATTGACACGGGAGCTCCTCTAAGTGTTCCAGTCGGCGGAGCTACTCTCGGAC  
GAATTTTCAACGTTCTTGGGGAACCTGTTGATAATTTAGGTCCTGTAGATACTCGCACA  
ACATCTCCTATTCATAGATCTGCGCCTGCCTTTATACAGTTAGATACGAAATTATCAATCT  
TTGAAACAGGGATTAAAGTGGTGGATCTTTTAGCTCCTTATCGCCGTGGAGGAAAAATC  
GGACTATTTGGGGGAGCTGGAGTGGGTAAAACAGTACTCATCATGGAATTGATCAATA  
ACATTGCCAAAGCTCATGGAGGCGTATCCGTATTTGGCGGAGTAGGGCGAACGTACTCG  
TGAAGGAAATGATCTTTACATGGAAATGAAAGAATCCGGAGTGATTAATGAAAAAAT  
ATTGCGGAATCAAAAGTAGCTCTAGTCTATGGTCAAATGAATGAACCGCCGGGAGCTC  
GTATGAGAGTTGGTTTAACTGCCCTAACCATGGCGGAATATTTCCGGGATGTTAATGAA  
CAAGACGTGCTTCTATTTCATCGACAATATTTTTTCGTTTCGTCCAAGCAGGATCAGAAGT  
ATCCGCCTTATTAGGGAGAATGCCTTCCGCAGTGGGTATCAACCTACCCTTAGTACAG  
AAATGGGTCTTTTGCAAGAAAGAATTACCTCTACCAAAGAGGGATCTATAACTTCGATC  
CAAGCGGTTTATGTACCTGCGGACGATTTGACCGACCCTGCTCCTGCCACGACATTTGC  
ACATTTAGATGCTACTACCGTACTATCAAGAGTATTAGCTGCTAAAGGTATTTATCCAGC  
AGTGGATCCGTTAGATTCAACGTCAACTATGTTACAACCTCGAATCGTTGGTGAGGAAC  
ATTATGAACTGCGCAAAGAGTTAAGCAAACCTTCACAACGTTACAAAGAACTTCAGGA  
CATTATAGCTATCCTTGGGTTGGACGAATTATCCGAAGAAGATCGTTTAACTGTAGCAA  
GAGCACGAAAAATTGAGCGTTTCTTATCACAACCCTTCTTCGTGGCAGAAGTATTTACT  
GGTCTCCAGGGAAATATGTTGGTCTTGCAGAAACAATTAGGGGGTTTCAATTGATCCT  
TTCCGGAGAATTAGACGGTCTTCCCGAGCAGGCCTTTTATTTGGTGGGTAACATCGATG  
AAGCTACCGCGAAAGCTATGAACTTAGAAGTGGAGAGCAAATTGAAGAAAATGACCTT  
AAATCTTTGTGTACTGACTCCTAATCGAATTATTTGGGATTCAGAAGTGAAAGAAATCA  
TTTTATCTACTAATAGTGGCCAAATTGGCGTATTACCAAACCACGCCCTATTGCCACGG  
CTGTAGATATAGGTCTTTTGGAGAATACGCCTCAACGACCAATGGTTAACGGTGGCTCTG  
ATGGGTGGTTTCGCTAGAATAGGTAATAATGAGATCACCATTTTAGGAAATGATGCGGA  
GATGAGTACTGACATTGATCCGCAAGAAGCTCAGCAAGCTCTTGAAATAGCTGAAGCT  
AATTGAGTAGAGCTGAGGGTAAGAGACAAGCAATTGAAGCGAATCTAGCTCTCAGA  
CGAGCTAGGACACGAGTAGAGGCTGTAATGCTATTTCCATGAAAAATGGAACCGATT  
CTTTCCTTTCCTTGGGTCACTGGCCATCCGCCGGGAGTTTCGGGTTTAAATACCGATATTT  
TAGCAACAAATCCAATAAATCTAAGTGTAGTGCTTGGTGTATTGATTTTTTTTTGGAAAG  
GGGGTGTTAAATGATTTATTAGATAATCGAAAACAGAGGATCTTGAGTACTATTCGAAA  
TTCGGAAGAATTACGTAGAGGGGCCATTGAGCAGCTCGAAAAAGCCAGGACTCGCTTA  
CGGAAAGTAGAAATAGAAGCAGATGAGTATCGAATGAATGGATACTCTGAGATAGAAC  
GAGAAAAAGAAAATTTGATTAATGCTACTTGTGACACTTTGGAACGATTAGAAAATTAC  
AAAAATGAAACCCTTCATTTTGAACAACAAAGAGCGATTAATCAGGTCCGACAACGAG  
TTTTTCAACAAGCCTTACAAGGAGCTCTAGGAACTCTGAATAGTTGTTTGAATAGTGAG  
TTACTTCCGTACGATCCGTGCTAATATTGGCATTCTAGGGGCCATGGAAGAAATAAC  
AGATATGAATCCACTGATTTCTGCCGCTTCCGTTATTTGCTGCTGGATTGGCCGTAGGGCT  
TGCTTCTATTGGACCTGGAGTTGGTCAAGGTACTGCTGCAGGCCAAGCTGTAGAAGGT  
ATTGCGAGACAACCAGAAGCAGAGGGTAAAATACGAGGTACTTTATTGCTTAGTCTAG  
CTTTTATGGAAGCTTTAACAATTTATGGACTGGTCGTGGCGTTAGCGCTTTTGTGCGA  
ATCCTTTTGTATGAATGTTATACCATGTTCCATTAACAACACTCAAAGGGTTATACGATAT  
ATCGGGTGTAGAAGTAGGCCAACATTTCTATTGGCAAATAGGAGGTTTACAAATCCATG  
CCCAAGTACTTATCACTTCTTGGGTCGTAATTGCTATCTTATTAGGTTTCAGTCATCATAGC

TGTTTCGGAATCCACAAACCATTCGACCGACGGTCAGAATTTCTTCGAATATGTCCTTG  
AATTTATTCGAGATTTGAGCAAACTCAGATTGGAGAAGAATATGGTCCTTGGGTTCCC  
TTTATTGGAACATATGTTCTTATTTATTTTGTCTTAACCTGGTCAGGTGCTCTTTTACCTT  
GGAAAATCATACAATTACCTCATGGGGAGTTAGCTGCGCCTACGAATGATATAAATACTA  
CTGTTGCTTTAGCTTTACCCACGTCAGCGGCATATTTTATGCGGGTCTTACCAAAAA  
GGATTGGGTTATTTTCGGAAAATACATTCAACCAACCCCAATACTTTTACCAATTAACATC  
CTAGAAGATTTACAAAACCTTTATCTCTTAGTTTTCGACTTTTCGGGAATATATTGGCT  
GATGAATTAGTAGTTGTTGTTCTTGTCTTCTTAGTCCCTTCAGTAGTTCCTATACCTGTTA  
TGCTTCTTGGATTATTTACAAGTGGTATTCAAGCTCTTATTTTTCGAACTTACCGCGG  
CTTATATAGGTGAATCCATGGAGGGTCATCATATGATATTTGTGACTTTAGAACATATATT  
AACTCATATCTCTTTTTCGATCATTTCAAATTGTGATTACGATTCATTTTCATGAACCTATTA  
GTCTACGAAATCGTAGGATTACGTGATTCATCGGAAAAAGGGATGATAGCCACCTTTTT  
CTCTATAACAGGATTATTAATTTCTCGTTGGATTTCTTCGGGACATTTTCCGTTAAGTAAT  
TTATACGAGTCATTAATCTTCCTTTCATGTAGTTTATTTATTATTTCATATAATTTCCAAGAA  
ATTGAACCATAAAAATGATTTAAGCATAATAACTACCCCAAGTACTATTTTACTCAAGG  
CTTCGCTACGTCGGGTCTTTCAACTGAAATGCATCAATCCGCAATATTAGTACCTGCTCT  
ACAATCTCAGTGGTTAATGATGCACGTCAGTATGATGTTATTGAGCTATGCAGCTCTTTT  
ATGCGGATCGTTATTATCAATTGCTCTTCTAATCATTACATTTTCGAAACAACATAAATTTT  
TTTTGTAAAAGCAATGAGATTAAATACTTGAATGAAAAAGAAGCCTTTTTTAAAAACC  
CTTCTTTTCTTTCATTTTCGAAATTATTACAAATATCAATTGACTCAGCGTTTGGATTATTG  
GAGTTATCGTATGATTAGTTTAGGGTTTACCTTTTTTAACCATAGGCATTCTTTGTGGAGC  
AGTATGGGCCAATGAAGCATGGGGATCTTATTGGAGTTGGGACCCGAAGGAACTTGG  
GCATTTATTACTTGGACCATATTTCGCGATTATTTACATACTAGAACAAATCAAAGTTTAC  
AAGGTACGAATTCGGCACTTATAGCTTCTATAGGATTTTTTATAATTTGGATATGCTATTT  
TGGGGTCAATCTATTAGGAATAGGTTTACATAGTTATGGTTCATTACATTAACAAAAA  
AAAAAAGCCTGGGTC---TCCCTCCCATATATTTTCATCCATAATTTTTTCCCTGGTGGG  
TCTCTCTCTCATTTAATAAATGTCTGGAACCTTGGGTTACTAATTGGTGAATACCGGGA  
AATCCGAACTTTTTTGAATGATATTCAAGAGAAAAACGTTCTAGAAAGATTCATAGAA  
TTGGAAGAACTATTCCTCTTGGATGAAATGATAAAGGAGTACCCGGAGACGCATATACA  
AAAACCTTCGTATAGGAATACACAAGGAAACGATACAATTGGTCAAACACACAATGAA  
TATCATCTCCATATCATTTTGGATTTCTCGACAAATATAATTTGTTTCGCTATTCTAAGTG  
GTTATTTTATTCTGGGTAATGAAGAACTTGTCAATCTTAATTCTTGGATTCAGGAATTCCT  
CTATAACTTAAGTGACACAATAAAAGCTTTTTTGGATTCTTTTAGTTACTGATTTATGGATC  
GGATTTTCATTCGACCCATGGTTGGGAACTAATGATTGGTTCGGTCTACAACGATTTTGG  
ATTGGTTCATAACGATCAAATTATATCTAGTCTTGTTCCTTTCCACTTTTCCAGTTATTCTAGAT  
ACAATTGTGAAATATTGGATCTTCTATTATTTAAATCGTGTATCTCCTTCACTTGTAGTTA  
TTTATCATTCAATGAATGAAATGCCATTGGTGTTCAAAAGTACCTTTTTCGGAGTCCTG  
GAGAGGAAGATGCAGTTTGGGTTGACGTATAACAACCGACTTCATCGAGAAAGATTACT  
TTTTTTAGGCCAAGAAGTTGATAGCGAGATCTCGAATCAACTGTTGGTCTCATGGTATA  
TCTCAGTATAGAAGATGATACTAGGGATCTTTATTTATTTATAAACTCTCCCGGCGGATG  
GGTAATACCAGGAATAGCCATTTATGATACTATGCAATTTGTGCCACCCGATGTGCATAC  
AATATGCATGGGATTAGCCGCTTCAATGGGATCTTTCATTCTGGTTCGGAGGAGAAATTA  
CCAAACGTCTAGCATTCCCTCACGCTAGGGTTATGATTCACCAACCTGCTAGTTCTTTTT  
ATGAGGCACAAGCAGGCGAATTTATCCTGGAAGCGGAAGAACTACTGAAACTTCGCG

AAACCCTCACAAAGGTTTATGTACAAAGAACGGGTAATCCTTTATGGGTTGTATCCGAA  
GACATGGAAAGAGATGTTTTTATGTCAGCAACAGAAGCCCAAGTTCATGGCATTGTTG  
ATCTTGTAGCGGTCGAAATGAAAGAACAAAAATTGATTCATGAAGGTTAATTACTGAA  
TCACTTCCCAACGGTATGTTCCGGGTCGGTTTAGATAATGAAGATCTAATTCTAGGTTAT  
GCTTCAGGGAGGATCCGGCGCAGTTTTATACGGATACTACCAGGAGATAGAGTAAAAA  
TTGAAGTAAGTCGTTATGATTCAACCAGAGGACGTATAATTTATAGACTTCGCAACAAA  
GATTCGAACGATATGGAAGAATTACAAGGATATTTAGAAAAAGATAGATCTCGGCAACA  
ACACTTCTATATCCGCTTCTCTTTAAGGAGTATATTTACACATTTGCTCATGATCGTGGT  
TTATTTTGTATGACAAT--TCTAGTTCAGTACTTGTGAAACGTTCAATTATTCGAATGTA  
TCAACAGAATTATTTGATTTATTCGGTTAATGATTCTAACCAAAATCGATTCGTTGGGTT  
TCATTTTTATTCTCAGATGATATTGGAAGGTTTTGCAGTCATTGTGGAAATTCATTCTT  
GCTGCGATTAGTATCTTCCCCATACCAAAATCTCAGAATTTACGATCTATTCAATCAATA  
TTCCCTTTTTGGAGGACAAATTATCGCATTAAATTATGTGTCAGATATACTAATACCTT  
ATCCCATCCATCTGAAAATCTTGGTTCAAATCCTTCAATGCTGGATCCAAGATGTTCTT  
CTTACATTTATTGCGATTCTTCTTTCACGAATATCATAATTGGAATAGTCTTATTACTAAT  
TCTATTTTT--TTTTCAAAAAAAGACTATTTTCGGTTCCCATATAATTTCTATGTATCTGAA  
TGCGAATTTGTATTAGTTTTTCTTCGTAAACAATCTTCTTATTTACGATTAACATCTTCTG  
GAGCTTTTTCTTGAGCGAACACATTTCTATGGAAAAATAGAACAT---ATAGTAGTGCGCC  
GTAATCAGAAGACCCTATGGTTCTTCAAGGATCCCTTCATGCATTATGTTTCGATATCAAG  
GAAAAGCAATTCTGGTTTCAAAGGGGACTCATCTTCTGATGAAGAAATGGAAATGTCA  
TCTTGTCAATTTCTGGCAATATTATTTTCACTTTTTGGTCTCAACCGTACAGGATCCATATA  
AACCAATTATCAAGCTGTTCTTTCTATTTTCTAGGTTATCTTCAAGTGTACTAATAAATC  
CTTCGGCGGTAAGGAATCAAATGCTAGAGAATTCATTTCTAATAGATACTGTTATT-----A  
AAAAATTCGATACCAGAGTCCAGTTATTCCTCTTATTGGATCATTGTCTAAAGCTAAAT  
TTTGTACCGTATCGGGGCATCCTATTAGTAAGCCGATCTGGACCAATTTATCAGATTGCG  
ATATTATTGATCGATTTGGTTCGGATATGTAGAAATCTTCTCATTATCACAGTGGATCCTC  
AAAAAACAGAGTTTGTATCGAATAAAGTATATACTTCGATTTTTCGTGTGCTAGAACTT  
TGGCTCGTAAACATAAAAGTATGGTACGCGCTTTTTTGGCAAAGATTAGGTTTCGGGATTA  
TTAGAAGAATTCTTTACGGAAGAAGAAGAAGTTGTTTCTTTGATCTTCCAAAAACGTAT  
TTGGTATTTGGATATTATCCGTATCAATGACCTGGTGAATTATTCAATGATAATTGATACG  
ACA---GAAGTACAA---GCTATCAATTCTTTTCTACATCGGAA---TCCATAAAAGAAATCT  
ATGGACTCATATGGATGTTTGTATCCATTTTACCCTTATATTTGGAATCATAATAGGGGT  
ACTAGTAATTGTGTGGTTAGAAAGAGAAATATCTGCAACGATACAACAACGTATTGGGC  
CTGAATATGCTGGTCCGTTGGGAATTCCTTCAAGCTCTAGCAGATGGGACTAAATTACTT  
TTAAGGAGGACCTACTCCCATCTAGAGGAGATATTCGTTTGTTTAGTGTCCGACCGTC  
TATAGCGGTCATATCAATTCTACTAAGTTATTTAGTAATTCCTTTTGGATACCGCCTTGT  
TTAGGTGATCTCAGTATAGGTGTTTTTTTTATGGATCACCATTTCAAGTATCGCCCCTATTG  
GGCTTCTTATGTCAGGATATGGATCGAATAATAAATATTCTTTTTTCAGGTGGTCTACGAG  
CTGCTGCTCAATCTATTAGTTATGAAATACCATTAACCTTTATGTGTGTTATCAATATCTCT  
ACTATCTAATAGTTCAAGTACAGTTGATATAGTTGAAGCACAGTCAAATATGGTTTTTG  
GGGGTGGAATCTGTGGCGTCAACCTATAGGGTTTATTGTTTTTCTAATTTCTTCTCTAGC  
CGAATGTGAGAGATTGCCATTTGATTTACCGGAAGCAGAGGAGGAATTAGTAGCAGGT  
TATCAAACCGAATATTCAGGTATCAAATTCGGTTTATTTTATATTGCTTCTTACCTAAATC  
TATTACTTTCTTCAATATTTGTAACAGTTCCTTACTTAGGTGGGTGGAATTTTTCTATTCC

GTACATATCTATTCCTGAACTTTTCGGAATAAATAAAAATGGCCGGAGTTTTTGGAAATTAC  
AATTGGTATCTTTATTACATTAGCTAAAGCTTATTTGTTTCTGTTTCATTCTATCACAACA  
AGGTGGACTTTGCCTAGGATAAGAATGGACCAGCTATTAATCTTGGATGGAAATTTCT  
TTTACCTATTTCTTTAGGTAATCTATTATTGACAACTTCTTCCCAACTTGTTTCACTAATG  
ATCTGGCATGTACAGAATGAAAACCTTCATTCTCGATTCTACGAGAATTTTTATGAAAGC  
GTTTCATTTGCTTCTCTTCCATGGAAGTTTCATTTTCCAGAATGTATCCTAATTTTTGGC  
CTAATTCCTTCTTGATGATCGATTCAACCTCTGATCAAAAAGATAGACCTTGGTTCTAT  
TTCATCTCTTCAACAAGTTTAGTAATAAGCATAACGGCCCTATTGTTCCGATGGAGAGA  
AGAACCTATAATTAGCTTTTCGGGAAATTTCCAAACGAACAATTTCAACGAAATCTTTC  
AATTTCTTATTTTACTATGTTCAACTCTATGTATTCTCTATCCGTAGAGTACATTGAATGT  
ACAGAAATGGCTATAACAGAGTTTCTGTTATTTCGTATTAACAGCTACTCTAGGAGGAAT  
GTTTTTATGTGGTGCTAACGATTTAATAACTATCTTTGTAGCTCCAGAATGTTTCAGTTTA  
TGTTCCCTACCTATTATCTGGATATAACCAAGAGAGATGTACGGTCTAATGAGGCTACTACG  
AAATATTTACTCATGGGTGGGGCAAGCTCTTCTATTCTGGTTCATGGTTTCTTGGCTA  
TATGGTTTATCTGGGGGGGAGATCGAGCTTCAAGAAATAGTGAATGGTCTTATCAATAC  
ACAAATGTATAACTCCCCAGGAATTTCAATTGCGCTTATATCCATCACTGTAGGAATTGG  
GTTCAAGCTTTCCCCAGCCCCTTTTCATCAATGGACTCCTGACATATACGAAGGATCTC  
CCACTCCAGTCGTTGCTTTTCTTTCTGTTACTTCGAAAGTAGCTGCTTCAGCTTCAGCC  
ACGCGAATTTTCGATATTCCTTTTTATTTCTCATCAAACGAATGGCATCTTCTTCTGGAA  
ATCCTAGCTATTCTTAGCATGATATTGGGGAATCTCATTGCTATTACTCAAACAAGCATG  
AAACGTATGCTTGCATATTCGTCCATCGGTCAAATCGGATATGTAATTATTGGAATAATTG  
TTGGAGACTCAAATGATGGATATGCAAGCATGATAACTTATATGCTGTTCTATATCTCCAT  
GAATCTAGGAACTTTTGCTTGCATTGTATCAATTTGGTCTACGTACCGGAACTGATAACAT  
TCGAGATTATGCAGGATTATACACGAAAGATCCTTTTTTGGCTCTCTCTTCAGCCCTATG  
TCTCTTATCCCTAGGGGGTCTTCCTCCACTAGCAGGTTTTTTTCGGAAAACCTCCATCTATT  
CTGGTGTGGATGGCAGGCAGGCCTATATTTCTTGGTTTCAATAGGACTCCTTACGAGCG  
TTGTTTCTATCTACTATTATCTAAAATAATCAAGTTATTAATGACTGGACGAAACCAAG  
AAATAACCCCTTACGTGCGAAATTATAGAAGATCTCCTTTAAGATCAAACAATTCCATC  
GAATTGAGTATGACTGTATGTGTGATAGCATCTACTATACCAGGAATATCAATGAACCCA  
ATTCTTGCAATTGCTCAGGATACCCTCTTTATGTTTCTGCTTCACGAATATGATATTTTCT  
GGGCATTTCTGATAATATCAAGCGTTATTCCTATCTTGACATTTGTAATTTCCGGAGTTTT  
AGCACCGGTTAGTGAAGGACCAGAGAAGCTTTTCGAGTTATGAATCGGGTATAGAACCC  
ATGGGGGATGCTTGGTTACAATTCGAATCCGCTATTACATGTTTGGCTCTAGTTTTTGT  
GTTTTTGATGTTGAAACGGTCTTTCTTTATCCATGGGCAATGAGTTTCGATGTATTGGGT  
GTATCTGTATTTATCGAAGCTTTCATTTTCGTGCTTATCCCAATTGTTGGTTCAGTTTATG  
CATGGCGAAAAGGAGCATTGGAATGGTCTACGAGTTATTTTCTTGGTTAACAATACTT  
GTAGTTTTGCCGATATTCGCGGGTCTTCAATTTTCTTATTTCTCATAGAGGAAATAAG  
ATGTTTAGATGGTATACTATTTGTATATGCTTATTAGAACTCCTTCTAACAACCTATGCATT  
CTGTTATCATTTCCAATTGGACGATCCATTAATCCAATTGGAAGAAGATTATAAATGGAT  
AGATATTTTTGTATTTCACTGGAGACTGGGAATCGATGGACTTTCATAGGACCCATTTT  
ACTGACAGGATTTATCACTACTTTAGCTACTTTAGCAGCTTGGCCAGTTACGCGAAATT  
CGCGATTGTTCTATTTCTGATGTTAGCAATGTACAGCGGTCAAATAGGATCATTTTCTT  
CTCGAGACCTTTTACTTTTTTTCATCATGTGGGAGTTAGAATTAATTCCTGTTTACTTACT  
TTTATCCATGTGGGGAGGAAAAAACGTCTCTACTCGGCTACAAAGTTTATTTTGTACA

CAGCAGGGGGTTCTATTTTTCTCTTAATAGGAGTTCTAGGTATGGGTTTATATGGTTCCA  
ATGAACCAACATTAGATTTTGAAAGATTAGCTAATCAATCATATCCTGTGGCATTGGAAA  
TAATATTATATTTTGGTTTCTTTATTGCTTATGCTGTCAAATCGCCGATTATACCCCTGCAT  
ACATGGTTACCAAATACCCATGGAGAAGCACATTACAGTACATGTATGCTTCTAGCTGG  
AATCTTATTA AAAATGGGAGCATATGGATTGATTCCGGATCAATATGGAATTATTACCCCA  
CGTCTATTCTATAATTTCTCCCTGGTTGGTAATAGTTGGAACGATGCAAATAATCTATGC  
AGCTTTAATTTCTCTCGGTCAACGCAATTTAAAAAGAGAATAGCCTATTCCTCTGTATC  
TCACATGGGTTTTACAATTATAGGAATTGGTTCTATAACCGACATGGGACTCAATGGAG  
CCATTTTACAAATACTCTCTCATGGATTTATTGGTGCTGCACTTTTTTTCTTGGCGGGAA  
CGAGTTGTGATAGAATACGTCTTGTTTATCTCGACGAAATGGGAGGGATATCCATCCCA  
ATGCCAAAATATTTGCCATGTTTCAGTAGTTTCTCGATGGCTTCTCTTGCATTGCCTGGA  
ATGAGTGGTTTTGTTGCGGAATCAGTAGTATTTTTTGAATAATTA TAGTCCAAAATAT  
CTTTAATGCCAAAATACTAATTACTTTTTGTAATGGCAATTGGAGTGATATTA ACTCCTA  
TTTTATTATTATCTATGTCACGTCAGATGTTCTATGGATACAAGCTATTCAATGTTCCACA  
CTCTAATTTTTTTGATTCTGGACCACGAGAACTATTTGTTTCAATTTGTATCTTTCTACCC  
ATAATAGGGATTGGTATTTATCCTGATTTTCGTTCTCTCGTTATCAGTTGACAGGGTACAA  
GCTATCCTATCTAATTACTTTTATAGAATGATGTTTCGAGCATGTACTTTTTTTGAGTGTCT  
ATTTATTCTCTATCGGTATCTATGGATTGATCACAAGTCGAAAGATGGTTAGAGCACTTA  
TGTGTCTTGAGCTTATACTCAATTCGGTTAATATCAATCTCGTAACATTTTCTGATATATTT  
GATAGTCGCCAATTA AAAGGCGACATTTTCTCAATCTTTGTTATAGCTGTTGCGGCTGCT  
GAAGCAGCTATTGGGCTAGCTATTGTTTCATCGATCCATCGTAACAGAAAATCAACTCG  
TATCAATCAATCGAATTTGTTGAATAATATGGAACATACATATCAATATGCATGGATAATA  
CCTTTTCTCCGCTTACAGTTACTATGTCAATAGGATTTGGACTTATACTTATTCCGACAG  
CAACAAAAAATATTCGTCGTATATGGGCTTTTCTAGTATTTTTCTGTTAAGTG TAGCTAT  
GGGATTTTCGGCCAATCTGTCTATTCAACAAATAAATGGAAGTTTTATTATCAATATCTA  
TGGTCTTGGACCATAGATATTGATTTTTCTTAGAGTTTGGATATTTGATCGATCCACTTA  
CTTCTATTATGTCAATACTAATTACTACTGTTGGAGTCATGATTCTTATTTATAGTGACAA  
TTATATGTCTCACGACCAAGGATATTTGAGATTTTTGCTTATATGAGTTTTTCCAATACT  
TCCATGTTGGGATTAGTTACTAGTTCTAATTTGATACAAATTCATATTTTTTGGGAACTAG  
TGGGAATGTGTTCCATTTTATTAATAGGGTTTTGGTTCACACGACCGATTGCCGCAAGT  
GCTTGTCAAAAAGCTTTTGTAACTAATCGTGTAGGAGATTTTGGTTTATTATTAGGAATC  
TTAGGTCTTTATTGGATAACAGGTAGTTTGGAAATTCGGGATTTGTTTCGAAATAGCTAAT  
AACAAATGGGGTCAACTCCTTATTTGCTACTTTGTGTGCCTCTTTATTATTTGTCGGTGCA  
GTTGCTAAATCTGCACAATTCCTCCACGTATGGTTACCTGATGCCATGGAAGGACC  
TACTCCTATCTCGGCCCTTATACACGCTGCTACTATGGTAGCAGCAGGAATTTTTCTTGT  
AGCTCGGCTTATTCCTCTTTTCATAGACATACCTTATATAATGAATTTCAATTTCTTTAATAG  
GTGTAATAACAGTACTATTAGGAGCTACTTTTTCTCTTGTCTCAAAGAGACATTA AAAAGA  
AGTTTAGCTTATTCTACAATGTCTCAATTAGGTTATATTATGTTAGCTCTAGGTATAGGTT  
CTTATCGAGCGGCTTTATTCCATTTGATCACTCATGCCTATTCTAAAGCTTTATTGTTTTT  
GGGATCTGGATCTATTATTCATTCAATGGAACCTATTGTTGGATATTCACCAGAAAAAAG  
TCAGAATATGGTTCTTATGGGTGGTTTAAACAAGATATGTTCCAATTACAAGAACTACTTT  
TTTATTAGGTACACTTTCTCTTTGTGGTATTCCACCTCTTGCTTGTTTTTGGTCCAAGAT  
GAAATTC TTAATGATAGTTGGTTATATTCACCAATTTTTGCAATAATACCTTATTTCAAA  
TAGGATTAACCACATTTTATATGTTTCGGGTATATTTACTTACCTTTGATGGGTATTTGCG



CATTTATTTTCAAATCACAGTAGCACTAAAAGTAACTCGTTCTATTCAATATCTCTATG  
GGGAAAAGAAGCACCAAAAACAGTCAATAAA---AATTTACTTTTATCAACAATGAATTT  
TTTTTCAAATAAATAT-----ACTTCCATGTATCCTCACGAATCAGACAATACTATGCTATTT  
CCTCTGCTTGTATTGGTACTATTTACTTTGTTCGTTGGATCAATAGGAATTTCTTTTTATT  
CTGATATATTATCGAAATGGTTAAACCCATCCCAAATCTTTTCCATCCAAATTGGAATTA  
TTCTGTGAATTGGTATGAATTTTTTATAAATCCATTTTTTTCAGTAAGTATATCCTTTTTTCG  
GATTATTCATAGCATATATTTTATATGGGTCTGTTTATTCAATTTTTCCAGAATTTGGACTTA  
ATCAATTCATTTGTAATTATCTTGGACCAAATAAAAAGTATTATATACAATTGGTCAAATA  
ATCGTGGTTACATAGATATTTTTTATACTAGAGTTTTAGCCATGGGTATAAGAGGAATAA  
CCGAGCTAACTCAGTTTTTTGATAGACATATAATTGATGGAATTACAAATGGAGTTGGCC  
TTACAAGTCCCTTATAGGTGAAGGGATCAGATAT---ATGGGGGGGGGGCGAATCTCGT  
CTTATTTATTCTTATATTTTTTTTATGTATCAATATTTTTATTATTTTTTTTATGATGGATTTACC  
TGGACCAATACATGATATTTCTGTAGTATTTTTTGGATCAGTTCTTGTATTAGGAGGTCTG  
GGAGTAGTATTACTTACCAATCCCATTTTTTCTGCCTTTTCGTTGGGATTGGTTCTTGT  
GTATATCCTTATTCTATATTCTATCGAATTCCTATTTTGTAGCTGCCGCACAGCTCCTTATT  
TATGTTGGAGCTATAAATGTCTTAATCATATTTGCTGTAATGTTTCATGAATGGTTCAGAAT  
ATTCCAATGATTCCTATTTTTGGACCGTTGGAGATGGGGTCACTTCACTGGTTTGTACA  
AGTATTCTTTTTTCACTAATTACTATTATCCCAGATACGTCATGGTACGGAATTTTTTGG  
CTACAAGATCAAGCCAGATTATGGAACAGGACCTAATAAGTAACATTCAACAAATTGGT  
ATTCATTTATCAACAGATTTTTATCTTCCGTTTGAACCTCATTCCATAATTCTTTTAGTTTC  
CTTGATAGGTGCAATTACTATGGCTCGTCAAATGACTATAACCGGCTACAAGAAAAGATC  
TCATGATAGTCAATATGGGCCCTCACACCCATCAATGCATGGTGTCTTTCGACTGATCG  
TACTCTCGATGGTGAAGATGTTATTGATTGCGAACCCATATTGGGATATTTACACAGAG  
GAATGGAAAAAATAGCAGAAAACCGAACAAATTATACAATATCTTCCCTTATGTAACACGT  
TGGGATTATTTAGCTACTATGTTTACAGAGGCAATAACGGTAAATGCACCAGAACAATT  
GGAAAATGTTCAAGTACCTCAGAGAGCCAGTTATATCAGAGTAATTATGCTGGAGCTGA  
GCCGTATAGCTTCTCATTGTTATGGCTTGGACCTTTTATGGCAGATATCGGTGCACAGA  
CTCCTTTTTTCTATATTTTTCAGAGAGAGAGAATTGTTATATGACCTATTCGAAGCCGCCA  
CAGGTATGCGAATGATGCATAATTATTTCCGCATCGGAGGAGTAGCTGCTGATCTACCTC  
ATGGCTGGATAGATAAATGTTTGGATTTCTGCGATTATTCTTTAACAGGAGTTGTTGAAT  
ATCAAAAATTTATTACACGGAATCCATTTTTTTTGGAACGAGTTGAAAGAGTGGGCATT  
ATTGGTGGAGAGGAAGCAATAAATTGGGGTTTATCAGGACCAATGTTACGAGCTTCTG  
GAATCCAATGGGATCTTCGTAAGGTTGATCATTATGAGTGTACAATGAATTCGATTGGG  
AAGTCCAATGGCAAAAAGAAGGAGATTCATTAGCTCGTTATTTAGTACGAATAGGTGA  
AATGGGGGAATCTATAAAAATTATTCAACAGGCTCTAGAAGGAATTCCTGGAGGTCCCT  
ATGAGAATTTAGAAGTCCGACGC---GATAGAGCAAAAATTCGGAATGGAATGATTTT  
AATATAGATTTATTAGTAAAAACCTTCACCCAATTTGAATTGTGCAACAAGAATTTT  
ATGTCAGAGTAGAAGCCCCAAAAGGAGAATTAGGAATTTATTTGATAGGGGATAATAGC  
ATTTCCCTGGAGATGGAAAATTCGTCCACCCGGTTTCATCAATTTGCAAATTCCTCCT  
CAGCTAGTTAAAAGAATGAAATTTGGCTGATATCATGACGATACTAGGTAGTATAGATATC  
ATTATGGGAGAAGTTGATCGTATGTTCTCTATGGTGACTGGGTTTCATGAATTATAGTCAA  
CAAACAATACGAGCTGCAAGGTATATTGGTCAAAGTTTCGTAATTACCTTATCCCACAC  
AAATCGTTTACCTATAACTATTCAATATCCTTATGAAAAATCGATCACATCAGAGCGTTT  
CCGTGGTCAATCCACTTTGAATTTGATAAATGTATTGCTTGTGAAGTATGTGTTTCGTGT

ATGCCCGATAGATCTACCCGTTGTTGATTGGAGATTTGAAAGAGATATTAATAAAAAAAC  
AATTGCTTAATTATAGTATTGATTTTGGGGTCTGTATATTTGTGGTAATTGTGTCGAGTA  
TTGTCCAACAACTGTTTATCAATGACTGAAGAATACGAACTTTCCACTTCTGATCGTC  
ACGAATTGAATTATAATCAAATTGCTTTGGGTCTGGTTACCAATGTCAATAATTGGAGATT  
ATACAATTCAAACAGTTATGAATTCGAAAATAGACAAAGATAAACCCTTTGATTCAAGA  
ACGATTACCAATTACCAGCAGGATCGTTTATCTGATTGGTTAGTCAAGCATGAGCTAGTT  
CATAGATCTTTGGGCTTCGATTGCCGAGGAATAGAGACTTTACAAATAAAAACCGAGGA  
TTGGTACTCCATTGCTGTCATTTTCATATGTATACGGTTACAATTATTTACGCTCCCAGTGT  
GCCTATGATGTAGCACCAGGCGGATTTTGTAGCTAGTGTGTATCATCTTACGAGAATACAA  
TATGGTGTAGATAAACCAGAAGAAGTATGCATAAAAGTATTTGTCCCAAGGAATAATCC  
TAGAATCTCGTCTGTTTTCTGGATTTGGAAAAGTGCTGATTTTCAAGAACGCGAATCTT  
ATGATATGTTGGGAATCTCTTATGATAATCATCCACGCCTTAAACGTATCTTGATGCCTGA  
AAGTTGGATAGGCTGGCCCTTACGTAAGGACTATATTACCCCAAATTTCTATGAAATACA  
AGATGCTCAT-----  
-----ATGGTCTTAACT--GAATATTCAGACAATCAAATAAAAAGGGAAGGAAAAGAT  
TACATTGAGACAGTTATGAATTTGATTGAGTTCCATTACTTGACCAAACAACCCCAA  
TTCAGTTATTTCAACTACATCGAATGATCTTTCGAATTGGTCAAGACTCTCTAGTTTATG  
GCCGCTTCTATATGGTACCAGTTGTTGTTTCATTGAATTTGCTTCATTAATAGGCTCGCGA  
TTCGACTTTGATCGTTATGGATTGGTACCAAATCGAGTCCTAGGCAAGCGGACCTAAT  
TTAACAGCCGGCACAGTAACAATGAAAATGGCTCCTTCTTTAGTGAGATTATATGAGC  
AAATGCCTGAACCAAATATGTCATTGCTATGGGAGCTTGTACTATTACAGGAGGGATG  
TTCAGTACTGATTCTTATAGTACTGTTCCGGGAGTCGATAAGCTAATCCTGTGGATGTC  
TATTTGCCGGGCTGTCCACCTAAACCAGAAGCAGTTATAGATGCTATAATGAAACTTCG  
TAAGAAGATATCTCGAGAAATCTTTGAAGATAGAAGTGTGTCTCAA---GAAAATCGATG  
TTTTTCTACCAATCACAAGTTTTATGTTTCGACGCAGTACTCATACTGGAAATTACGATCA  
AGGATTGCTCTATCAATCACCATCTACTTCAGAGATGCCTACA-----TTTTTCAAATCCAA  
AAGTTCAATATCTTCCCACGAATTAGTGAATATGCAAAAATAGAAATACTTTTTCTTGGGT  
AAAGGAACAGATGACTCAATCGATTTCTGTATCGATCATGATATATGTAATAACTCGGGC  
ATCTATTTCAAATGCATATCCATTTTTCGCGCAGCAGGGTTATGAAAACCCACGAGAAG  
CAACTGGACGAATTGTATGTGCCAATTGCCATTTAGCTAATAAGCCCGTGGATATTGAA  
GTTCCGCAAGCCGTGCTTCCCTGATACTGTATTTGAAGCAGTTGTTTCGAATCCCTTATGAT  
ATGCAACTGAAACAAGTTCTTGCTAATGGTAAAAAGGGGGCTTTGAATGTAGGGGCTG  
TTCTTATTTTACCCGAGGGATTCGAGTTAGCCCCCCCCGATCGTATTTCTCCCGAGGTGA  
GAGAAAAGATGGGAAATCTGTCTTTTCAGAGTTATCGTCCCAATAAAAAGAAATATTCTT  
GTGATAGGTCCTGTTCCCGGTCAGAAATATAGTGAATCGCCTTTCCCATCTTTCCCCC  
GACCCTGCTACGAGGAAAGACGTTCACTTCTTAAATATCCCATATATGTAGGTGGGAA  
CAGAGGAAGGGGTCAGATTTATCCTGATGGGAGCAAGAGTAACAATACAGTCTATAAT  
GCTACATCAGCAGGTATAGTAAGCAGAATAGTACGTAAAGAAAAAGGAGGATATGAAA  
TAACCATAGTTGATGCATCGGATGGACATCAAGTGGTTGATATTGTACCTCCAGGACCA  
GAACTTCTTGTTCAGAGGGTGAATCCATCAAGCTCGATCAACCATTAAACAAGCAATCC  
CAATGTAGGAGGGTTTGGTTCAGGGAGATGCAGAAATAGTGCTTCAAGATCCATTACGT  
GTCCAAGGCCTTTTGTCTTCTTGGCATCTGTTATTTTGGCACAAGTTTTTTTGGTTCTT  
AAAAAGAAACAGTTTGAAGGGTTCAATTGTATGAAATGAATTTTCATGAGTAAGGTATA  
TGATTGGTTTGAAGAACGTCTCGAGATTCAGGCGATTGCGGATGATATAACTAGTAAAT

ATGTTCCCTCCTCATGTCAACATATTTTATTGTTTAGGGGGGATCACACTTACTTGTTTTTT  
AGTACAAGTAGCTACAGGTTTTGCTATGACTTTTTACTATCGTCCAACCGTTACAGAAG  
CTTTTCCCTCTGTTCAATACATAATGACTGAGGCCAATTTTGGTTGGTTAATTCGATCAG  
TTCATCGATGGTCAGCAAGTATGATGGTTCTAATGATGATCCTGCACGTATTTTCGTGTATA  
TCTCACAGGTGGATTTAAAAACCCCGCGAATTA ACTTTGGGTTACAGGTGTGGTTTTAG  
CTGTATTGACTGCATCTTTTGGTGTA ACTGGTTATTCCTTACCTCGGGACCAAATTGGTT  
ATTGGGCAGTCAAATCGTGACAGGTGTACCTGAAGCTATTCTGTAAATAGGATCGCCT  
TTGGTAGAGTTATTACGTGGAAGTGCTAGTGTGGGCCAATCCACTTTGACTCGTTTTTAT  
AGTTTACACACTTTTGTATTGCCTCTTCTTACTGCCGTATTTATGTTAATGCACTTTCCAA  
TGATACGTAAGCAAGGTATTTTCGGGTCTTTAATGGGAGTAACAAAGAAACCTGACTT  
GAATGATCCTGTATTAAGAGCTAAATTGGCTAAAGGAATGGGGCATAATTATTATGGAG  
AACCCGCATGGCCCAATGATCTTTTATATATTTTCCAGTAGTAATTCTAGGTA CTCTCGC  
ATGTAATGTAGGCTTAGCGGTTCTAGAACCGTCAATGATTGGTGAACCGGCGGATCCAT  
TTGCAACTCCTTTGGAAATATTACCCGAATGGTACTTCTTTCCCGTATTTCAAATACTCC  
GCACAGTGCCCAATAAGTTATTGGGTGTTCTTTAATGGTTTCAGTACCAATGGGATTAT  
TGACAGTACCTTTTTTGGAGAATGTCAATAAATCCAAAATCCATTTTCGTCTCCAGTA  
GCTACAACAGTCTTTTTGATCGGTACCGTAGTAGCTCTTTGGTTAGGTATTGGAGCAAC  
ATTACCTATTGATAAATCCCTAACTTTAGGTCTTTTTATGATTGAAGTTTTTCTATTTGGA  
ATCGTCTTAGGTCTAATTCCTATTACTTTGGCAGGATTATTCGTA ACTGCATATTTACAAT  
ACAGACGTGGTGATCAGTTGGACCTTATGCCTACTATAACTAGTTATTTTCGGTTTTCTAC  
TGGCTGCTTTAACTATAACCCAGCTCTATTGATTGGTTTTGAATAAGATACGACTTATTAT  
GGATATAGTAAGTCTCACTTGGGCTGCTTTAATGGTAGTCTTTACATTTTCCCTCTCACT  
CGTAGTATGGGGAAGAAGTGGACTCATGATTATTCGTTTCGCCGGAAC CAGAAGTGAAA  
ATTGTTGTAGATAGGGATCCTATAAAAACGTCTTTTCGAGGAATGGGCCAGACCCGGCCA  
TTTCTCAAGAACAATAGCTAAGGGCCCTGATACTACCACTTGGATCTGGAACCTACATG  
CTGATGCTCACGATTTTCGATAGTCATACCAGTGATTTGGAGGAGATCTCCCGAAAAGTA  
TTTAGTGCTCATTTTGGTCAACTCTCCATTATCTTTCTTTGGCTGAGTGGCATGTA CTTC  
CATGGCGCCCGTTTTTCCAATTATGAAGCATGGCTAAGTGATCCTACTCATATTGGACCC  
AGTGCCAGGTAGTTTGGCCAATAGTAGGTCAAGAAATATTGAATGGTGATGTGGGCG  
GGGGTTCCGAGGAATACAAATAACCTCCGGTTTTTTTCAGATTTGGCGAGCATCTGGA  
ATAACTAGTGAATTACA ACTCTATTGTACCGCAATTGGTGCATTGGTCTTTGCATCGTTA  
ATGCTTTTTGCCGGTTGGTTCCATTATCACAAAGCTGCCCAA AATTGGCTTGGTTCCA  
AGATGTAGAATCTATGTTGAATCACCCTTAGCGGGGTTACTAGGACTTGGGTCTCTCT  
CTTGGGCGGGACACCAAATCCATGTATCTTTACCGATTAACCAATTTCTCGATGCTGGA  
GTTGATCCTAAAGAGATACTCACTTCCTCATGAATTTATCTTGAATCGGGACCTTTTGGCT  
CAACTTTATCCCAGTTTTGCCGAGGGAGCAACCCCTTTTTCACCTTGAATTGGTCAAA  
ATACGCGGAATTCCTGAGTTTTCGTGGAGGATTAGATCCAATAACAGGGGGCCTATGGC  
TGAGCGATATTGCACACCATCATTTAGCTATTGCTATTCTTTTCTGATCGCTGGTCATAT  
GTATAGGACCAACTGGGGCATCGGTCATGGCCTTAAAGACATTTTAGAGGCTCATAAAG  
GTCCATTTACAGGCCAGGGCCATAAGGGCCTATATGAAATCCTAACAACGTCATGGCAT  
GCTCAATTATCTTTAACCTGGCTATGTTAGGTTCTTTAACCATTGTTGTAGCTCACCATA  
TGATTCCATGCCCCCTATCCATACCTAGCTATTGATTATGGTACACA ACTTTTCGTTGTT  
CACACATCACATGTGGATCGGTGGATTTCTCATAGTTGGTGCTGCTGCACATGCAGCCA  
TTTTTATGGTAAGAGACTATGATCCA ACTACTCGATACAACGATCTATTAGATCGTGTCC

TTAGGCACCGCGATGCAATCATATCACATCTTAACTGGGCATGTATATTTCTAGGTTTTTC  
ACAGTTTTGGCTTGTATATTCATAATGATACCATGAGCGCTTTAGGGCGGCCCAAGATA  
TGTTTTAGATACCGCTATAAATTACAACCCATCTTTTCTCAATGGGTACAAAACATTC  
ATGCTTTAGCACCTGGGATAACAGCTCCTGGTGCAACAACAAGTACCAGCTTAACTTG  
GGGGGTGGTGAGTTAGTAGCAGTAGGCGGCAAAGTAGCTTTGTTACCTATTCCATTAG  
GAACCGCAGATTTTTTGGTCCATCACATTCATGCATTTACGATCCATGTGACTGTATTGA  
TACTACTGAAAGGTGTTCTATTTGCTCGCAGTTCCCGTTTGATACCCGATAAAGCAAAT  
CTTGGTTTTTCGTTTTCCCTTGTGATGGACCTGGAAGAGGGGGGACATGTCAAGTATCCGC  
CTGGGATCATGTCTTCTTAGGTCTATTCTGGATGTACAATGCAATTTCCGGTAGTCATTTT  
CCATTTAGTTGGAAAATGCAGTCGGATGTTTGGGGTACTATAAGTGATCAAGGGGTGG  
TAACTCATATCACAGGAGGAACTTTGCACAGAGTTCCATTACTATTAATGGGTGGCTC  
CGAGATTTCTTATGGGCACAGGCATCTCAGGTAATTCAGTCTTATGGTTCTTCATTATCC  
GCATATGGTCTTTTTTTCTTAGGTGCTCATTTTATCTGGGCTTTCAGTTAATGTTTCTATT  
CAGTGGCCGTGGTTATTGGCAAGAACTCATTGAATCCATCGTTTGGGCTCATAACAAAT  
TAAAAGTTGCTCCTGCTACTCAGCCTAGAGCCTTGAGCATTGTACAAGGACGTGCTGTA  
GGAGTAACCCATTACCTTCTGGGTGGAATTGCCACAACATGGGCATTCTTCTTAGCAAG  
AATTATTGCAGTAGGAATGGCATTAAAGATTTCCGAGGTTTAGCCTCGGCTTAGCTCAGG  
ACCCCACTACTCGTCGTATTGGTGGTATTGCTACCGCACATGACTTCGAGAGTCAT  
GATGATATTACTGAGGAACGTCTTTATCAGAACATTTTTGCTTCTCATTTTGGGCAGTTA  
GCAATAATCTTTCTGTGGACGTCCGGAATCTGTTTCATGTAGCTTGGCAAGGAAATTT  
TGAGTCATGGATACAGGACCCTTTACATGTAAGACCTATTGCTCATGCAATTTGGGATCC  
TCATTTTGGTCAACCAGCTGTAGAAGCCTTTACTCGAGGGGGTGCTATCGGCCAGTG  
AATATCGCTTATCCGGTGTTTATCAGTGGTGGTATAACAATCGGATTGCGCACCAATGAG  
GATCTTTATACAGGAGCTCTTTTTCTATTATTTCTTTCTGCTATATCCTTAATAGCGGGTTG  
GTTACATCTACAACCCAAATGGAAACCAAGTGTTCGTGGTTCAAAAATGCCGAATCT  
CGTCTCAATCATCATTTGTACAGGACTTTTCGGAGTAAGTTCCTTGGCTTGGGCAGGACA  
TTTAGTTCATATCGCTATTCCCGGATCCAGGGGAGAGTACGTCAGATGGAATAATTTCTT  
AGACGTATTACCGTATCCTCAAGGGTTGGGACCCTTTTTACGGGTCAGTGGAATCTTT  
ATGCTCAAAACCCTGATTCGAGTAGTCATTTATTTGGTACTTCCCAAGGAGCCGGAAT  
GCCATTCTAACCCTTCTTGGGGGATTCATCCACAACGCAAAGTTTATGGTTGACCGA  
TATTGCTCATCATCATTTAGCTATTGCATTTATTTTTCTCGTTGCTGGTCATATGTATAGAA  
CTAACTTCGGAATTGGACACAGTATCAAAGATCTTTTAGAAACACATATTCTCCGGGG  
GGTCGATTAGGACGTGGGCATAAGGGTCTTTATGACACAATCAATAATTCGATTCATTT  
CAATTAGGTCTTGCTCTAGCCTCTTTAGGGGTATTACTTCTTAGTAGCTCAACACATG  
TACTCTTTACCTGCTTATGCATTCATAGCACAAAGACTTTACTACTCAAGCTGCCTTATATA  
CTCATACCAATACATCGCAGGGTTCATCATGACAGGAGCCTTTGCTCATGGAGCTATAT  
TCTTCATTAGAGATTACAATCCGGAACAGAATGAGGATAATGTATTGGCAAGAATGTTA  
GACCATAAAGAAGCTATCAAATCTCAATTAAGTTGGGCCAGCCTGTTTCTCGGGTTCCA  
TACCTTGGGCCTTTATGTTTATAACGACGTCATGCTCGCTTTTGGTACTCCGGAAAAAC  
AAATCTTGATCGAACCCATATTTGCCCAATGGATACAATCCGCTCATGGTAAGACTTCAT  
ATGGGTTTCGATGTACTCTTATCTTCAACGAATGGTCCAGCATTCAATGCTGGTCAAAGC  
ATATGGTTACCTGGCTGGTTGAATGCTGTTAATGAG-----AATAGTAATTCGCTCTTCTTA  
ACAATAGGTCTTGGAGATTTCTTGGTTCATCATGCTATTGCTCTAGGTTTGCATACAAC  
ACATTGATTTTAGTAAAAGGTGCTTTAGATGCACGTGGTTCCAAGTTAATGCCAGATAA

AAAGGATTTTCGGTTATAGTTTTTCCTTGGCGACGGCCAGGACGCGGCGGTACTTGTGATA  
TTTCGGCTTGGGACGCATTTTATTTGGCAGTTTTCTGGATGTTAAATACCATTGGATGGG  
TACTTTTTTATTGGCATTGGAACACATCACATTATGGCAGGGTAACGTTTCACAATTA  
ATGAATCCTCCACTTATTTGATGGGATGGTTAAGAGATTATCTATGGTTAAACTCTTCAC  
AACTTATCAATGGGTATAACCCTTTTGGTATGAATAGTTTATCGGTATGGGCGTGGATGT  
TCTTATTTGGACATCTTGTTTGGGCTACTGGATTTATGTTCTTAATATCCTGGCGTGGATA  
TTGGCAGGAATTGATTGAACTTTAGCATGGGCTCATGAACGCACACCTTTGGCTAATT  
TAATTCGATGGAGAGATAAGCCAGTGGCTCTTCCATTGTGCAAGCAAGATTGGTTGGA  
TTAGCCCACTTTTCCGTAGGTTATATATTTCACTTATGCAGCTTTCCTTGATTGCCTCTACAT  
CAGGAAAATTTGGTATGTCACATTCAGTAAAATTTATGATACATGTATAGGGTGTACTC  
AATGTGTACGAGCCTGCCCCACAGATGTATTGGAAATGATACCTTGGGACGGATGTA  
GCTAAGCAAATTGCTTCCGCACCAAGAACCGAGGACTGTGTAGGTTGTAAGAGATGTG  
AATCCGCTGCCAACAGATTTTTTGGAGTGTCCGTGTTTATTATGCCATGAAACA  
CGCAGCATGGGTCTATCTTATATGACAGATCTCAACTTACCCTCTATTTTTGTGCCTTTAG  
TGGCCTAGTATTTCCGGCAATTGCAATGGCTTCTTTATCTCTTCATGTCCAAAAAATA  
AGATTGTCATGCGAGATATAAAAACATATCTCTCCGTGGCACCTGTGCTAACTACTCTAT  
GGTTTGGGTCTTTAGCAGGTCTATTGATAGAAATTAATCGTTTATTCCCAGATGCCTTGT  
CATTCCCTTTTTTTTCAATTCATGACTGCAATTTAGAGAGACGCGAAAGTACAAGCCTAT  
GGGGTCGCTTCTGCAACTGGATAACCAGCACTGAAAACCGTCTTTACATTGGATGGTT  
CGGTGTTTTGATGATCCCTACCTTATTGACCGCAACTTCTGTATTCAATATCGCCTTCATT  
GCTGCTCCTCCAGTAGATATTGATGGTATTCGTGAACCAGTTTCTGGTTCTCTACTTTAT  
GGAACAATATTATCTCTGGTGCCATTATTCCTACTTCTGCAGCTATCGGTTTGCATTTTT  
ATCCGATATGGGAAGCGGCATCTGTTGATGAGTGGTTATAACAATGGCGGTCCTTATGAG  
CTAATTGTTCTACACTTCTTACTTGGTGTAGCTTGTACATGGGTCTGTGAGTGGGA  
AGTTTCCGCCTGGGTATGCGTCCTTGGATTGCTGTTGCATATTCAGCTCCTGTTGCAGCT  
GCTACTGCTGTTTTCTTGATCTACCCTATTGGTCAAGGAAGTTTCTCTGATGGTATGCCT  
TTAGGAATATCTGGTACTTTCAACTTCATGATTGTATTCCAGGCGGAACACAACATCCTT  
ATGCATCCATTTACATGTTGGGTGTAGCTGGTGTATTTCGGCGGCTCCCTATTCAAGTGT  
ATGCATGGTTCCTTGGTAACCTCTAGTTTGTATCAGGGAAACCACTGAAAACGAATCTGC  
TAATGCAGGTTACAGATTCGGTCAAGAGGAAGAACTTATAATATCGTAGCTGCTCATG  
GTTATTTTTGGCCGATTGATCTTCCAATATGCTAGTTTCAACAATTCTCGTTCCTTACATTT  
CTTCTTGGCTGCTTGGCCTGTAGTAGGTATCTGGTTCCTGCTTTAGGTATTAGTACTAT  
GGCTTTCAACCTAAATGGTTTCAATTTCAACCAATCTGTAGTTGACAGTCAGGGTCGTG  
TTATCAACACTTGGGCTGATATCATCAATCGTGCTAACCTTGGTATGGAAGTAATGCATG  
AACGTAATGCTCACAACCTCCCTCTAGACCTAGCTGCTGTCGAAGTTCCATCTACAAAT  
GGAATGGGTTTTGCCTTGGTATCGTGTTCATACTGTCGATTGAATGATCCCGGTCGATTG  
CTTCTGTCCATATAATGCATACAGCTCTAGTTTCTGGTTGGGCCGGTTCGATGGCTCTA  
TACGAATTAGCGGTTTTTGTATCCCTCTGACCTGTTCTTGATCCAATGTGGAGACAAGG  
TATGTTTCGTTATACCCTTCATGACTCGTTTAGGAATAACCAATTCGTGGGGTGGTTGGAG  
TATTTCA--GGAGGA  
ACTATAACGAATCCGGGTATTTGGAGTTATGAAGGTGTCGCAGG  
GGCACATATTGTGTTTTCTGGCTTGTGCTTCTTGGCAGCTATCTGGCATTGGGTGTATTG  
GGATCTAGAAATATTCTGTGATGAGCGTACGGGAAAACCTTCTTTGGATTTGCCCAAGA  
TCTTTGGAATTCATTTAATTTCTCTCAGGGGTGGCTTGCTTTGGCTTTGGCGCATTTCATG  
TAACAGGTTTGTATGGTCCCTGGAATATGGGTGTCCGATCCTTATGGACTAACTGGAAAA

GTACAATCTGTAAATCCAGCGTGGGGCGCGGAAGGTTTTGATCCTTTTGTTCGGGAG  
GAATAGCCTCTCATCATATTGCAGCGGGTACATTGGGCATATTAGCAGGTCTATTCCATC  
TTAGTGTCCGTCCGCCTCAACGTCTATACAAAGGATTACGTATGGGAAATATTGAAACT  
GTACTTTCTAGTAGTATCGCTGCTGTTTTTTTTGCAGCTTTCGTTGTTGCTGGAACATG  
TGGTATGGTTCAGCAACTACCCCAATCGAATTATTTGGTCCCACTCGTTATCAGTGGGAT  
CAGGGATACTTTCAGCAAGAAATATATCGAAGAGTTAGCGCCGGACTAGCCGAAAATC  
TGAGTTTATCGGAAGCTTGGTCTAAAATTCCCGAAAAATTAGCTTTTTATGATTACATTG  
GTAATAATCCGGCAAAGGGGGATTATTCAGAGCAGGCTCAATGGACAACGGGGATGG  
AATAGCTGTTGGATGGTTAGGACACCCCGTCTTTAGAGATAAAGAAGGGCGCGAGCTT  
TTTGTACGTCGTATGCCTACTTTTTTTGAAACATTTCCGGTAGTTTTAGTAGATGGAGAC  
GGAATTGTGAGAGCCGATGTTCTTTTTAGAAGGGCAGAATCAAAGTATAGTGTGAAC  
AAGTAGGTGTAAGTGTGAGTTCTATGGTGGCGAACTCAATGGAGTTAGTTATAGTGAT  
CCTGCTACTGTAAAAAATACGCTAGACGTGCCCAATTAGGTGAAATTTTTGAATTAGA  
TCGGGCTACTTTGAAATCCGATGGTGTTTTTCGTAGCAGTCCAAGGGGTTGGTTCACCT  
TTGGGCATGCTACGTTTGCTTTGCTCTTCTTTTTGGACACATTTGGCATGGTGCTAGAA  
CCTTGTTTACAGAGATGTTTTGCTGGTATTGATCCAGATTTGGATGCTCAAGTGGAATTTG  
GAGCATTTCAAAAAATTGGGGATCCAAC TACAAGGAGACAAGTAGTCATGAAAACCTT  
ATATTCCCTGAGGAGGTTCTACCCCGTGGAACGCTCTTTAATGGAACTTTAGCTTTAG  
CTGGTCGTGACCAAGAAACCACTGGTTTTCGCTTGGTGGGCCGGGAATGCCAGACTTAT  
CAATTTGTCCGGTAAACTACTTGGAGCTCACGTAGCCCATGCCGGATTAATCGTATTCTG  
GGCCGGAGCAATGAACCTATTTGAAGTGGCTCATTTTGTACCAGAGAAACCCATGTATG  
ACAAGGGTTGATTTTACTTCCACACCTAGCTACTCTAGGTTGGGGGGTAGGTCCGGG  
GGGGGAAGTTATAGACACCTTTCCATACTTTGTATCTGGAGTACTTCACTTAATTTCCCTC  
TGCAGTCTTAGGCTTTGGCGGTATTTATCATGCGCTTCTTGGACCTGAGACTCTTGAAG  
AATCTTTTCCATTTTTCGGTTATGTATGGAAAGATAGAAATAAAATGACTACAATTTTGG  
GTATTCATTAATTTGTTAGGTATAGGTGCTTTTCTTCTAGTACTCAAGGCTCTTTATTT  
TGGGGGCGTATATGATACCTGGGCCCTGGGGGGGAGATGTAAGAAAATAACCAAC  
TTAACACTTAGCCCAAGTGTATATTTGGTTATTTACTAAAATCTCCTTTTGGGGGAGAA  
GGATGGATTGTTAGTGTGGACGATTTAGAAGATATAATTGGAGGACATGTATGGTTAGG  
TTCCATTTGTATACTTGGTGGAAATTTGGCATATCTTAACCAAACCTTTGCATGGGCTCG  
CCGTGCATTTGTATGGTCTGGAGAGGCTTACTTGTCTTATAGCTTAGGTGCTTTATCTGT  
TTTTGGTTTCATCGCTTGTGTTTCGTATGGTTCAATAATACCGCTTATCCTAGTGAGTTT  
TACGGACCCACCGGGCCAGAAGCTTCTCAAGCTCAAGCATTTACCTTTCTAGTTAGAG  
ACCAACGTCTTGGAGCTAACGTGGGGTCCGCCAAGGACCTACTGGTTTAGGTAAATA  
TCTAATGCGTTCCCCGACCGGGGAGGTTATTTTTGGAGGAGAACTATGCGTTTTTTGGG  
ATCTTCGTGCTCCCTGGTTAGAACCCCTAAGGGGTCCCAATGGTTTGGACTTGAGTAGG  
CTGAAAAAAGACATAACAACCTTGGCAAGAACGACGTTCCGCAGAATATATGACTCATG  
CTCCTTTAGGTTCTTTAAATTCAGTGGGTGGCGTAGCTACCGAGATCAATGCAGTCAAT  
TATGTCTCTCCTAGAACCTGGTTAGCGACCTCTCATTTTGTCTAGGATTCTTCTATTTG  
TGGGGCATTGTGGCATGCGGGAAGGGCCCGTGCAGCTGCAGCAGGGTTTGA AAAAG  
GAATCGATCGTGATTTGGAACCTGTTCTTTCCATGACCCCTTAGCATGACTATAGCCC  
TTGGTAGATTTACCAAAGAAGAA---GATTTATTTGATATTATGGATGATTGGTTACGGAG  
GGACCGTTTCGTTTTTGTAGGCTGGTCTGGCCTATTGCTCTTTCCTTGTGCTTATTTTCG  
TTTAGGAGGTTGGTTTACAGGTACAACCTTTGTAACCTTCATGGTATACCCATGGATTGGC

CAGTTCCTATTTGGAAGGTTGCAATTTCTTGACCGCTGCAGTTTCCACTCCTGCGAATA  
GTTTAGCACATTCTTGTTGCTACTATGGGGCCCTGAGGCACAAGGGGATTTACTCGT  
TGGTGTCAATTAGGCGGTCTGTGGACTTTTGTGCTCTCCATGGTGTTCGACTAATA  
GGTTTTATGTTACGTCAATTCGAACTTGCTCGATCTGTGCAATTGCGACCTTATAATGCA  
ATCGCATTCTCTGCTCCAATTGCTGTTTTTGTCTGTATTCTGATTTATCCACTGGGTC  
AATCTGGTTGGTCTTTGCGCCCAGTTTTGGCGTAGCAGCTATAATTCGATTCATCCTCT  
TCTTCCAAGGATTTTATAATTGGACGTTGAACCCATTTTATATGATGGGAGTTGCCGGA  
GTATTAGGCGCTGCTCTGCTATGCGCTATTCATGGTGCTACCGTAGAAAATACTTTATTC  
GAAGATGGTGACGGTGCAAATACATTCCGTGCTTTTAAACCAACTCAAGCCGAAGAGA  
CTTATTC AATGGTCACTGCTAACCGCTTTTGGTCCCAAATCTTTGGGGTTGCTTTTTCCA  
ATAAACGTTGGTTACATTTCTTTATGCTATTTGTACCAGTAACCGGTTTATGGATGAGTG  
CTCTTGGGGTAGTCGGCCTGGCTCTGAACCTCCGTGCCTATGACTTCGTTTTCCAAGAA  
ATCCGTGCAGCGGAAGATCCTGAATTTGAGACTTTCTACACCAAAAATATCCTCTTAAA  
CGAAGGTATTCGTGCTTGGATGGCGGCTCAGGATCAGCCTCATGAAAACCTTATATTCC  
CTGAGGAGGTTCTACCCCGTGGAACGCTCTTATGTCTGGAAGCACGGGAGAACGTTT  
TTTTGCTGATATTATTACCAGTATTCGATACTGGGTCATTCATAGCATTACTATACCTTCCC  
TATTCATTGCGGGTTGGTTATTCGTACGACGGGTTAGCTTACGACGTGTTTGGAAAGTC  
CTCGGCCAAACGAGTATTCACAGAGAGCCGACAAGGGATTCCATTGATAACCGGCCG  
TTTTGATTCTTTGGAACAACTTGATAAATTTAGTAGATCCTTTATGACCATAGATCGAAC  
CTATCCAATTTTACAGTACGATGGTTGGCTGTTACGGATTAGCTGTACCTACCGTTTT  
TTTCTTGGGGTCAATATCAGCAATGCAGTTCATCCAACGAATGGCTACACAAACCGTTG  
AGGGTAGTTCTAGA---TCTGGGCCAAGACGAACTACTGTAGGGAATTTATTGAAACCAT  
TGAATTCGGAATATGGTAAAGTAGCACCCGGGCTGGGGGACTACACCACTTATGGGGGT  
CGCAATGGCTCTATTTGCGATATTCCTATCTATTTTGGAAATTTATAATCTTCCGTTT  
TACTGGATGGAATTTCAATGAGTATGCTTACTCTCAAACCTATTCGTTTATACAGTAGTGA  
TATTCCTTATTTCTCTCTTCATCTTCGGATTTTTATCTAATGATCCAGGGCGTAATCCTGG  
ACGTGAGGAAATGGCCGATACTACTGGAAGGATTCCTCTTTGGCTGATAGGTACTGTAA  
CCGGTATTCTTGTGATCGGTTTAATAGGTATTTCTTTTACGGTTCATATCCGGGTTGGG  
TTCATCTCTGATGCTTAATATCTTTAGTTTAATCTGCATCTGTCTTAATTCTATCTTTTAT---  
AGTAGTTTTTTCTTCGCCAATTGCCCGAAGCTTATGCCTTTTTTAAATCCAATCGTCGAT  
GTTATGCCTGTCATACCTGTACTTTTTTTCTCTTAGCCTTTGTTTGGCAAGCTGCTGTA  
AGTTTTCGAATGACACAATCAAACCCGAATGAACAAAATGTTGAATTGAATCGTACCA  
GTC TATACTGGGGTTTATTACTCATTTTTGTACTTGCTGTTTTATTTTCCAATATTCTTC  
AATATGGAAGTCAATATTCTCGCATTATTGCTACTGCACTGTTTATTCTAGTTCCTACTG  
CTTTTTTACTTATTATCTACGTAAAAACAGTCAGTCAAATGATATGGAAACAGCAACC  
CTAGTCGCCATCTCCATATCTGGTTTACTTGTAAGCTTTACTGGGTACGCCTTATATACCG  
CTTTTGGGCAACCCTCTCAACAATAAGAGATCCATTGGAAGAACACGGGGACATGGA  
AGCATTGGTTTATACATTCCTTTTAGTCTCGACTTTAGGGATAATTTTTTTCGCTATCTTT  
TTTCGAGAACCGCCTAAGGTTCCGACTAAAAAATGAAAATGACTATTGCTTTCCAATT  
AGCTGTTTTTGCATTAATTGCGACTTCATCAATCTTACTGATTAGTGTACCCGTTGTATTT  
GCTTCTTCTGATGGTTGGTCAAGTAACAAAATGTTGTATTTCCGGTACATCATTATGG  
ATTGGATTAGTCTTTCTGGTAGCTATCCTTAATTCTCTCATCTCTATGAGTTGTAGGGAG  
GGACTTATGTCACCACAAACAGAGACTAAAGCAAGTGTGGATTTAAAGCTGGTGTTA  
AAGATTACAAATTGACTTATTATACTCCTGACTACGAAACCAAGATACTGATATCTTGG

CAGCATTCCGAGTAACTCCTCAACCCGGAGTTCGCGCTGAGGAAGCAGGGGCAGCGG  
TAGCTGCCGAATCTTCTACTGGTACATGGACAACGTGTGTGGACTGATGGACTTACCAGT  
CTTGATCGTTACAAAGGACGATGCTACCACATCGAAACCGTTGTCGGGGAGGAAAATC  
AATATATTGCTTATGTAGCCTATCCTTTAGACCTTTTTGAAGAAGGTTCTGTTACTAACAT  
GTTTACTTCCATTGTGGGTAATGTATTTGGTTTCAAAGCCCTACGAGCTCTACGTCTGGA  
GGATCTGCGAATCCCACTTCTTATTTCCAAAACCTTTCCAAGGCCCGCCTCATGGTATCC  
AAGTTGAAAGAGATAAGTTGAACAAGTATGGTCGTCCTCTATTGGGATGTACTATTA  
CCAAAATTGGGATTATCCGCAAAGAACTACGGTAGAGCGGTTTATGAATGTCTACGCGG  
TGGACTTGATTTTACCAAGGATGATGAAAACGTGAACTCACAACCATTTATGCGTTGGA  
GAGACCGTTTTCTGCTTTTTGTGCCGAAGCAATTTATAAAGCGCAGGCCGAAACGGGTGA  
AATCAAAGGACATTACTTGAATGCTACTGCGGGTACATGTGAAGAAATGATCAAAAGG  
GCCGTATTTGCCAGAGAATTGGGAGCTCCTATCGTAATGCATGACTACTTAACTGGGGG  
ATTCCTGCAAATACTAGCTTGGCTCATTATTGCCGCGATAACGGCCTACTTCTTACAT  
CCATCGCGCAATGCATGCAGTTATTGATAGACAGAAAATCATGGTATGCATTTTCGTGT  
ACTAGCTAAAGCATTACGTATGTCTGGTGGAGATCATATTCACGCGGGTACAGTAGTGG  
GTAAACTGGAAGGGGAACGTGAGATGACTTTGGGTTTTGTTGATTTATTACGTGATGAT  
TTTATTGAAAAAGACCGAAGTCGCGGTATCTTTTTTACTCAAGATTGGGTCTCTATGCC  
AGGTGTTATACCCGTGGCTTCAGGGGGTATTCATGTTTGGCATATGCCTGCCCTGACCG  
AAATCTTTGGGGATGATTCTGTACTACAGTTTGGCGGAGGAACTTTAGGACACCCTTGG  
GAAAATGCACCCGGTGCAGTAGCTAATCGGGTGGCTTTAGAAGCGTGTGTACAAGCTC  
GTAATGAAGGACGTGATCTTGCCCGTGAAGGTAATGAAATTATCCGTGAAGCTAGCAA  
ATGGAGCCCTGAACTAGCTGCCGCTTGTGAAGTATGGAAGGCGATCAAATTCGAATTC  
GAACCACTAGATAAGCTGGATAAAACGGCGATACATTTATACAAAACCTTACCCCGAG  
CACACGCAATGGAGCCGTAGACAGTCAAGTCAAATCCAATCCACGAAATAATTTGATC  
TATGGACAGCATCGTTGTGGTAAAGGTCGTAATGCCAGAGGAATCATTACCGCAAGGC  
ATAGAGGGGGAGGTCATAAGCGCCTATACCGTAAAATCGATTTTCGACGGAATGAAAA  
AGACATATCTGGTAGAATCGTAACCATAGAATACGACCCTAATCGAAATGCATACATTTG  
TCTCATACTACTATGGGGATGGTGAGAAGAGATATATTTTACATCCCAGAGGGGGCTATAAT  
TGGAGATACCATTGTTTCTGGTACAGAAGTTCCTATATCAATGGGAAATGCCCTACCTTT  
GACCGATATGCCCTTAGGCACGGCCATACATAACATAGAAATCACACTTGGAAGGGTG  
GACAATTAGCTAGAGCAGCAGGTGCTGTAGCGAAACTGATTGCAAAAGAGGGTAAATC  
GGCCACATTAAGATTACCATCTGGGGAGGTCCGTTTATGATATCCAAAACCTGCTTAGCAA  
CAGTCGGACAAGTGGGTAATGTTGGGGTGAACCAAAAAAGTTTGGGTAGAGCCGGAT  
CTAAGTGTGGCTAGGTAAGCGTCCTGTAGTAAGAGGAGTAGTTATGAACCCTGTAGA  
CCATCCCATGGGGGCGGTGAAGGGAGAGCCCAATTGGTAGAAAAAAACCCACAAC  
CCCTTGGGGTTATCCTGCGCTTGAAGAAGAAGTAGGAAAAGGAAAAAATATAGTGAT  
AGTTTTATTCTTCGTCGCCGTA---ATGATTCAACCTCAGACCCTTTTGAATGTAGCGG  
ATAACAGCGGAGCTCGAGAATTGATGTGTATTTCGAATCATAGGAGCTGGT---AATCACC  
GATATGCTCATATTGGTGACGTTATTGTTGCTGTAATCAAAGAAGCAGTGCCAAATATGC  
CTCTAGAAAGATCAGAAGTCATTAGAGCTGTAATTGTACGTACATGTAAAGAACTCAA  
CGTGACAACGGTATGATAATACGATATGATGACAATGCAGCGGTCGTCATTGATCAAGA  
AGGAAATCCAAAAGGAACTCGAGTTTTTGGTGCGATCGCTCGGGAATTGAGACAGTTG  
AATTTTACTAAAATAGTTTTATTAGCTCCCGAGGTATTAATGCTTAGTCCCAAAAGAACC  
AGATTTTCGTAAACAACATAGAGGAAGAATGAAGGGAATATCTTGTGCGAGGCAATCATAT



TTGTTTCGGCGGATACGCTCTTCAGGCACTTGAACCCGCTTGGATCACAGCTAGACAG  
ATAGAAGCGGGGCGGAGAGCAATGACACGATATGCGCGTCGTGGTGGAAAAATATGGG  
TACGTATATTTCCCGACAAGCCTGTTACAGTAAGACCTACCGAAACACGTATGGGTTTCG  
GGAAAGGGATCCCCGAATATTGGGTATCTGTTGTTAAACCGGGTTCGAATACTTTATGA  
AATGGGCGGAGTATCAGAACTGTAGCCAGAGCAGCTATTTCAATAGCTGCGTGCAAA  
ATGCCTATACGAACTCAATTTGTTATTTACGAATGACCAGAGTTAGACGAGGATATAC  
AGCTCGGAAACGTTCGAACAAAAATTCGTTTATTTGCATCAACCTTTATTGGGGCTCATT  
CAAGACTTACTCGAACGACTACTCAACAGAAAATGAGAGCTTTGGTTTCCTCTCATCG  
AGATAGAGGCAGGCAAAAGAGGGATTTTCGTAGTTTGTGGATCACTCGAATAAATGCA  
GTAATTCGTGAGAAT-----GTATTCTATAATTATAGTAGATTAATACCAAATCTGTACAAGA  
AGCAATTGCTTCTTAATCGTAAAATACTTGCGCAAATATCTATATCAAATAAGAATTGTC  
TTTACATGATTTCCAATCAGATTATCAA-----ATGATAAAGAAAGT  
TTTA--GCTCAACATATATGT--ATGTCTGTTTTAAAAGCGCAAAGAGTAATTGATCAGAT  
TCGCGGACGTTCCCTATGAGGAAACACTTATGATACTGGAACCTCATGCCTTATCGAGCAT  
CTTATCCAATTTTACAATTGGTTTATTCTGCAGCAGCAAACGCTAATCATAATATGGGTTT  
GAACGAAGCTGATTCATTCATTAGTAAAGCCGAAGTCAATAGGAGTGCTATTGTGAAA  
AAGTTAAGACCTCGGGCTCGGGGACGTAGTTATCCGATAAAAAAACCCACTTGTTCATAT  
AACAATTGTATTAAG---AAATCTAAATCA-----ATGGATGGAATCAAATAG  
CAGTATTTACAGAAAAAGTATTCGGTTATTGGGGAACAATCAA---TATACTTCTAATGT  
CGAATCAGGATCAACTAGGACAGAAATAAAGCATTGGGTCGAACTCTTCTTTGGTGTC  
AAGGTAATAGCTATGAATAGTCATCGACTCCCGGAAAGGGTAGAAGAATGGGACCTA  
TTATGGGACATAACAATGCATTACAGACGTATGATCATTACGCTTCAACCGGGTTATTCTA  
TTCCACCTCTTATAGAGAAAAGAACTATGGCAGTTCCAAAAAATGTATTTCTATGTCA  
AAAAACATATTCGTAGGAATATTTGGAAGAAAAAAGGATATTTAACTGCAGTAAAAG  
CTTTTCTTTAGCGAAATCGGTTTCTACCGGACATTCAAAAAGTTTTTT-----CAAACA  
AATAATATGGCCAAGGGTAAAGATGTCAGAGTCAGAGTTATTTTGGAAATGTACCAGTTG  
TGTCGAAAT-----GGT-----AAAGAATCGCCGGGTATTTCTAGATATATTACTCAAAAGAA  
TCGACACAATACATCCAGTCGATTAGAATTGAGAAAATTTTGTGCTATTGTCACAAGC  
ATACGATTCATGGGAAATAAAGAAAATGAAAATAAGGACTTCTGTTTCGTAATTTGT  
GAAAAATGTCGACTGATCCGTAGGCGCGGACGAATTATAGTGATTTGTTCCAATCCGAG  
ACATAAACAGAGACAAGGAATGGTTCGAGAGGAAGTAGTAGGATCCACTCGAACACT  
ACGGTGGAATGTGTTGAATCAAGAGTAGACAGTAAGCGTCTTTATTATGGTCGTTTCA  
TTCTGTCCCCGCTTATGAAAGGTCAAGCCGATACCATAGGTATTGCCATGCGAAGGGCT  
TACTTGGAGAAATAGAAGGAACATGTATCACACGTGCAAATCTGAG-----AAAGCAG  
CACATGAATATTCTACAATAGTAGGTATTGAAGAATCAGTACATGAAATTTTACTAAATT  
TGAAAGAAATTATATTGAGAAGTAATCTGTATGGAGTTATAGACGCATCCATCTGCGTCA  
GGGGCCTAGATACGTAACCGCTCAAGATATCATCTACCACCTTACGTGGAAATAGTT  
GACACGACACAACATATAGCTAACCTGACGGAACCAATTGATTTGTGTATTGAATTACA  
AATCAAGAGAGATCGCGGATATCGTATGAAATCCGCAAATACTCTCAAGATGGAAGTT  
AT-----CCTATAGATGCTGTATCCATGCCTGTTTCGAAATGCGAATCATAGTATTCATTCTTA  
TGGAATGGGAATGAAAAACAAGAGATACTTTTTCTAGAAATATGGACGAATGGAAGT  
TTAACTCCTAAGGAAGCACTTTATGAAGCTTCTCGTAATTTGATTGATTTATTTATTCCTT  
TTCTACATGCGGAGGAAGAG-----GACATTAATTTGAAAGAGAATAAA---AACAGGTTTC  
CTCTACCCCTTTTTACCTTTCAAATAGATTAAT---AATCTAAAGAAAAACAAAAA---

GGAATTCCATTGAAATGTATTTTTATTGACCAATCAGAATTGCCTTCCAGGACCTATAAC  
TGTCTCAAAGGGTCCAATATACATACATTATCGGACCTTTTGAGTAACAGTCAAGAAGA  
TCTTATGAGAATTGAATTTTTTCGAATAGAAGATGTA AACAGATATTGGACACTCTACA  
GAAGTAT-----TTCGCAATTGATTTATCTAAGAATAAGATGCTCCGGAAT--GGAAATGAG  
GGAATGTCCACAATACCTGGATTTAGTCAGATTCAATTTGAGGGATTTGTAGATTCAAT  
AATCAGGGCTTGACGGAAGAATTTCAAAAATTTCCAAAATTGAAGAT-----CAAGAAAT  
TGAATTTAAATTATTTGTGGAAACATATAAATTGGTAGAACCTTGATAAAAGAAAGAG  
ATGCTGTGTATGAATCACTCACATATTCTTCTGAATTATATGTACCCGCGGGACTAATTTG  
GAAAACCGGTAGAGATATGCAAGAACAAACCGTTTTTATTGGAAACATTCCTCTAATGA  
ATTCCCTAGGAACCTTTATAGTAAATGGAATATACAGAATTGTGATCAATCAAATATTGC  
AAAGTCCCGGTATTTACTACCGTTCAGAATTGGACAATAACGGAATTTCTGTCTATACC  
AGCACTATAATATCAGATTGGGGGGGAAGATCGGAATTAGAAATTGATAGAAAAGCAA  
GGATATGGGCCCGCGTGTAGTAGGAAACAAAAATATCTATTCTAGTTCTATCATCAGCTA  
TGGGTTTCAATCTAAGAAAAAATTCTAGATAATGTTTGTATCCTGAAATTTTCTGTCTT  
TTCCGAATGATAAGGAGAAAAAAGATTGGGTCAAAGAAAATGCTATTTTGGAGTT  
TTATCAACAATTTGCTTGTGTAGGTGGGGATCCGGTATTTTCTGAGTCCTTATGTAAGGA  
ATTACAAAAGAAATTTTTTCAACAAAGATGTGAATTAGGAAGGATTGGTTCGACGAAATA  
TGAACCGGAGACTGAATCTTGATATACCTCAGAACAATACATTTTTTGTACCACGAGAT  
GTATTGGCTGCTGCGGATCATTGATCGGAATGAAATTTGGAATGGGTACACTTGACGA  
T-----ATGAATCACTTGAAAATAAACGTATTCGTTCTGTAGCAGACCTGTTACAGGATC  
AATTCGGATTGGCTCTTGTTCGTTTAGAAAATGCGGTTTCGAGGAACTATATGTGGAGCA  
ATCAGG--CATAAATTAATA---CCGACTCCTCAAAATTTGGTAACTTCAACTTCA-----  
-TTAACAACCACTTATGAATCGTTTTTTGGCCCTACACCCGTTATCTCAAGTTTTGGATCG  
AACTAATCCGTTGACACAAATCGTTCATGGGCGAAAATTGAGTTATTTGGGTCTGGAG  
GATTGACGGGGCGAACTGCTAGTTTTTCGGATACGAGATATCCATCCTAGCCACTATGGA  
CGTATTTGTCCAATTGACACGTCCGAAGGAATCAATGTTGGGCTTATTGGATCCTTAGCT  
ATTCATGTGAGGATTGGTCAATGGGGA---TCTATAGAGAGTCCGTTTTAT-----GAAATA  
TCTCAGAGATCAAAGAG-----GCACAGGTGGTTTTATTTATCACCAATAGAGATGAGTA  
TTATATAGTAGCGGCAGGAAATCTTTTGGCCCTGAATCGGGGTATTCAGGAAGAACAGG  
TTGTTCCAGCTCGATATCGTCAAGAATTCCTTACTATTGCATGGGAACAGATTCACTTA  
GAAGCTTTTTTCCCTTCCAATATTTTTCTATTGGAGCTTCCCTCATTCTTTTATCGAGCA  
TAATGATGCGAATCGGGCTTTAATGAGTTCTAATATGCAGCGCCAAGCAGTTCCGCTTT  
CTCGGTCCGAGAAGTGCATTGTTGGAACGGGCTGGAACGCCAACGGCTCTAGATTC  
GGGGTTTTAGCTATAGCCGAACACGAGGGAAAGATCATTTATACTGATCCTCACAAAA  
TCATTTTATCAAGTAATGGGGACACTATAAGTATTCCATTAGTGATGTATCAACGTTCCA  
ACAAAATACTTGTATGCATCAAAAACCTCAGGTTTCGGCGGGGTAAATACATTA AAAA  
GGGACAAATTTAGCGGACGGTGC GGCTACAGTTGGTGGGGAACCTCGCTTTAGGAAA  
AAACATATTAGTAGCTTATATGCCATGGGAAGGTTACAATTCTGAAGACGCAGTATTAAT  
TAGCGAACGTCTGGTATATGAAGATATTTATACTTCTTTTACATCCGGAAATATGAAATT  
CAGACTCATGTGACAAGCCAGGGC---CCTGAAAGAATTACTAAGGAAATACCGCATCTA  
GAGACTCATTTACTCCGAAATTTAGACAGAAATGGAATCGTTATGCTGGGATCTTGGGT  
AGAAACAGGTGATATTTAGTAGGTAAATTAACGCCTCAGACAGCGAACGAA---TCGTC  
GTATCCCCGGAGGATAGATTATTACGAGTCATACTTGGCATTCAAGGTATCCACTGCAAA  
AGAAACTTCTCTAAAACCTACCTATAGGTGGAAGGGGTGCGGTTATTGATGTGAGATGGA

TCCAGAAAAAGGGG---GGTTCAGTTATAATCCAGAAATGATTCGTGTATATATTTTCACA  
GAAACGTGAAATCAAAGTAGGTGATAAAGTAGCTGGAAGACATGGGAATAAAGGTATC  
ATTTCAAAAATTTTGCCTAGACAAGATATGCCCTATTTGCAAGATGGGACACCTGTTGAT  
ATGGTCTTCAACCCATTAGGAGTACCCTCACGAATGAATGTGGGACAGATATTTGAATG  
TTCGCTCGGATTAGCGGGGGATCTGCTAAAGAAACATTATAGAATAGCACCTTTTGATG  
AGAGATATGAACAAGAGGCTTCGAGAAAACTAGTGTTTTCTGAATTATATGAAGCCTGT  
AAGCAAACAAAAAATCCATGGGTATTTGAACCCGAGTATCCAGGAAAAAGCAGAATAT  
TTGATGGAAGAACAGGGGATCCTTTTGAACAACCTGTTCTAATAGGAAAGTCCTATATC  
CTAAAATTAATTCATCAAGTTGATGATAAAATCCATGGACGTTCTAGTGGGCATTACGCA  
CTTGTTACACAACAACCCCTTAGAGGAAGGGCCAAGCAAGGGGGACAACGAGTAGGA  
GAAATGGAAGTTTGGGCTCTAGAGGGATTTGGTGTGCTCATATTTTACAAGAGATGCT  
TACTTATAAATCTGATCATATTAGAGCTCGTCAAGAAGTACTTGGTGCTACAATCGTTGG  
AGGAAGAGTACCTAACCCCGAGGATGCTCCAGAATCTTTTCGATTGCTCGTTTCGAGAA  
CTACGATCTTTGGCTCTAGAACTGAATCATTTCCCTGTATCTGAGAAGAACTTCCAGATT  
AATAGGAAGGAAGCT-----ATGATCGACCGGTATAAACATCAACAACCTTCGA  
ATTGGACCAGTTTCTCCTCAACAAATAAGGGCTTGGGCCAACAAAATCCTACCTAATGG  
AGAGATAGTTGGAGAGGTGACAAAACCTATACTTTTCATTATAAAACCAATAAACCGG  
AAAAAGATGGATTGTTTTGTGAAAGAATCTTTGGACCCATAAAAAGTAGAATTTGTGCT  
TGTGGAAATTATCGAGTGATCAGAGCTGAAAAAGAAGACCCGAAATTTTGTGAACAAT  
GCGGGGTGGAATTTGTTGATTCTAGGATACGAAGATATCAAATGGGATACATCAAATC  
GCATGTCCAGTGACTCATGTGTGGTATTTGAAACGTCTTCCCTAGTTATATCGCGAATCTT  
TTAGATAAACCCCTTAAAGAATTAGAAGGCCTGGTATACTGC-----GATTTTTCTTTGCT  
AGGCC---ATATCTAAAAAACCTACTTTCTTACGATTACGAGGTTTCATTCGAATATGAAA  
TCCAATCCCGGAAATACACCATCCCCTTTTTTTTACTACTCAAGGCTTCGAGACATTC  
GAAATCGAGAAATCTCTACAGGAGCAGGTGCTATCAGAGAACAATTATCCGATTTCAGAT  
TTGCGAATTATTATAGATAATTCATTGGTAGAATGGAAGGAATTAGGAGATGAG---GGGT  
CCACTGGAATGAATGGGAAGATAGAAAAATTAGAAGAAGAAAGGATTTTTTGGTTAG  
ACGCATGGAATTAGCTAAACATTTTATTTCGAACAAATGTAGAACCAGAATGGATGGTTT  
TGTGCTTATTACCAGTTCTTCTCCCGAGTTGAGACCAATCATTTCAGACAGATGGGGT  
AAACTAATGAGTTCGGATATTAATGAACTCTATAGAAGAGTTATCTATCGGAACAATACT  
CTTACCGATCTATTAGCAACAAGTAGATCTACGCCAGGGGAATTAGTAATGTGTCAGGA  
GAAATTGGTACAAGAAGCCGTGGATACACTTCTTGATAATGGGATCCGGGGGCAACCA  
ATGAGGGATGGTCATAATAAAGTTTACAAGTCATTTTCAGATGTAATTGAAGGCAAAGA  
AGGAAGATTTTCGTGAGACTCTGCTTGGTAAACGGGTCGATTATTTCGGGACGTTCCGTCA  
TTGTTGTGGGTCTTCTCTTTTCATTACATCAATGTGGATTACCTCGAGAAATAGCAATAG  
AGCTTTTCCAAACATTTTTAATTCGTGGTCTAATCAGACAACATGTTGCTTCTAACATAG  
GGATTGCTAAAAGTCAAATTCGGGAAAAAGAAGTATTGTATGGGAAATACTTCAAGA  
AGTTATGCGGGGGCATCTGTATTGTTGAATAGAGCACCCACCTTGCATAGATTAGGCAT  
ACAGGCCTTCCAACCCATTTTAGTGGAGGGGCGCGCTATTTGTTTACACCCATTAGTTT  
GTAAGGGTTTTCAATGCAGACTTTGATGGAGATCAAATGGCTGTTCAITGTACCTTTATCTT  
TGGAAGCTCAAGCGGAGGCTCGTTTACTTATGTTTTCTCATATAAATCTCTTGTCTCCAG  
CTATTGGGGATCCCATTTCCGTACCAACTCAAGATATGCTTATCGGACTCTATGTATTAAC  
GATCAGGAATCGTAGAGGTATTTGTGCAAATAGGCATAATCCATATAATCGCGGAAACTA  
T-----CAAATAATACAGTTGACAATAATGACTATAAGTATACGAAAGAGAAAGAACT

GTATTTTTGTAGTTCCTATGATGTA CT TGGAGCTTATCGGCAGAAACGAATCAGTTTAGA  
TAGTCCTTTGTGGCTCCGATGGAGACTAGATCAACGT--GTCATTGGCTCA-----AGAGA  
AGTTCCCATCGAAGTTC AATATGAATCTTTGGGTACTTATCATGAGATTTATGAGCACTA  
TCTAATAGTAGGAAGTGTAAAAAAGAAATCCATTGTATATACATTTCGAACCACTCTTG  
GTCATATTTCTTTTATCGAGAAATAGAAGAAGCCATACAGGGGTTTTGTCCGGCCTATT  
CATACGCTATC-----ATGGCAGAACGGGCTGATCTGGTCTTTCAC  
AATAAAGTGATAAATGGA ACTGCTATGAAACGACTTATTAGCAGATTAATAGATCATTTC  
GGAATGGCATATACATCACACATCTGGATCAAGTAAAGACTTTGGGTTTCCAGCAAGC  
CACTGCTACATCTATTTCA TTAGGAATTGATGATCTTTTAAACAATACCTTCTAAGGGATG  
GTTAGTCCAAGACACTGAACAACAAAGTTTTATTTTTGAAAAACACCATCATTATGGAA  
ATGTACATGCGGTAGAAAAATTACGTCAATCCATTGAGATATGGTATGCTACAAGTGAAT  
ATTTGAGACAAGAAATGAATCCTAATTTTCGGATGACTGATCCTTCTAATCCAGTCCATC  
TGATGTCTTTTTCGGGAGCTAGAGGAAATGCATCTCAGATACACCAATTAGTAGGTATG  
AGAGGATTAATGTCGGATCCCCAAGGACAAATGATTGATTTACCCATTCAAAGCAATTT  
ACGCGAAGGGCTTTCTTTGACAGAATATATAATTTCTGCTACGGAGCCCGCAAAGGA  
GTTGTAGATACTGCTGTACGAACATCAGATGCCGGATACCTCACGCGTAGACTTGTTGA  
AGTAGTTCAACACATTATTGTACGTAGAACGGATTGTGGTACTATCCGAGGTATTTCCGT  
GAGTCTCGAAATGGGATGACGGAA-----AAAATTTTTGTCCAAACACTAATTGGTTCGT  
GTATTAGCAGACAATATATATATGGGTCTACGATGCATTGCCGCTCGAAATCAAGATATT  
GGGATTGGACTTGTCAATCGATT CATAACC-----TTTCGGGCACAACCAATATAT  
ATTCGAACCCCTTTACTTGCAAGAGTGCATCTTGGATCTGTCAATTATGTTATGGTTCGG  
AGTCCCCTCACGGCGACCTGGTTCGAATTGGGAGAAGCCGTAGGTATTATTGCGGGTC  
AATCAATTGGGGAACCAGGGACTCAACTAACATTAAGA ACTTTTCATACCGGTGGAGT  
ATTCACAGGTGATACTGCCGAACATGTACGAGCTCCTTCTAATGGAAAAATTAATTCA  
ATGAGGATTTGGTTTATCCCACACGTACCCGTCATGGGCATCCTGCTTTTCTATGTTCTAT  
AGACTTGTATGTA ACTATTGAGACTCGGGATATTATCCATAATGTGAATATTCCATCAA  
AAGTTTGATTTTAGTTCAA AATGATCAATATGTAGAATCAGAACAAGTGATTGCTGAGA  
TTCGTGCCGGAACGTCTACTTTT-----TTTAAAGAGAAGGTACGAAAACATATTTATTCT  
GAATCAGAGGGAGAA---ATGCACTGGAGTACCGATGTCCACCATGCATCTGAATATACA  
CATGGTAATGTT CATCTATTACCAAAAACAAGTCATTTATGGATATTAGCAGGAGGTCCG  
TGCAGA-----TCCAGTATAGTGTCTTTTTCGCTCCACAAAGATCAAGATCAAATGAATGT  
TCATTCTTTTTCTTTCGAAGAAAGA-----TATATCTTTGACCCCTCA-----ATGACTAAT--C  
ATCGAGTAAGACATAAATTGTTGGATACTTCTGGT-----GATAGGGAAATTCTTGACT  
ATTCA---AGACCTGATCGAATCATATCCAATGGTCATTGGAATTT CATATATCCTTCT--AT  
TCTCCAAGAAAAT-----TCTGATTTCTTGGCGAAAAAACGAAGAAATAGATTCATTATCC  
CATTACAATATGATCAAGAACGAGATAAAGAACTAATGCCCTGTTTTGGTATTTTCGATTG  
AAATACCATAAAT-----GGTATTTTACGTAGAAATAGTATTCTTGCTTATTTTGATGATCC  
ACGATACAGAAGAAAT-----GGAATTAATAATAT---ACCATAGAGGTAGATTCAATCATA  
AAA-----AAAGAGGATTTGATTGAGTATCGAGGA---GCAAAAGAATTTAGTCCGAAATA  
C---AAAGTAGATCGGTTTTTTTTTTCATTCTCGAAGAAGTGCATATCTTACCCGGATCTTCG  
TTCATAATGGTCCGGAACAATAGTATCATTGGAGTAGATACACA ACTCGCTTTAAATACA  
AGAAGCCGGGTAGGCGGATTAGTCCGAGTGGAGAGAAAAA AAGTATTGAACTG  
AAAATCTTTTCTGGAGATATTCATTTTCTGGAGAAAGAGATAAGATATCCAGGCACAG  
CGGCATTTTGATACCACCAGAGACGGAAAAAAA-----AATTCTAAGAAA--TCAAAA--

-AAATTGAAAAATTGGATCTATGTCCAACGG-----ATCACACCCACCAAGAAAAAG-----T  
ATTTTGTTCGGTTCGGTCCGTAGTCACATATGAAATAGCTGATGGGATAAATTTAGCAA  
CACTTTTCCCTCGGGATCTCTTGCAGGAAAAGGATAATGTCCAACCTAGAGTTGTCAAT  
TATATCCTTTATGGAAATGGCAAGTCAATTCGAGGAATTTATCACACAAGT---CAATTAG  
TTCGGACTTGCTTAGTATTGAATTGGGACCAAGAAAAAAATGGTTCTATAGAA-----  
GAGGTTTCATGCTTCCTTTGTTGAGGTAAGGACAAATGATCTGATTCGCGATTTCATAAG  
AATTGAGTTAGTCAATTCCACTATTTTCGTATACCGGAAAAAGGTATGATAGGGCAAGTT  
CCGTATTGATTTCCGAT-----TTAGATCGCACCAATATCAATCCTTTTTATTCCAAGGCG  
AAGATTCAATCA-----CTTACCCAACATCAAGGAACTATTGGTATC-----GGTACGT  
TGTTGAATCGAAATAAT-----GAATGCCAATCTTTGATAATTTTGTGCATCATCCAATTGT  
TCTCGAATTGGT-----CCATTCAATGGTTTCGAAATATAACAATAAC---AATGTGACAAAAG  
AATCAGATCCCATAATCCAAATT--GATTTGCTGGGTCCCTTAGGGACTATTGTCCCT--A  
AAATAGCGAATTTTTTTTCATCT--TACTATTTAATAACT-----CATAATCATATCTTGTTA  
AAG---AAATATTTGTTACTTGAC-----AATTTTAAACAGACTTTC-----CAAGTACTTA  
AATACTGTTTAATAGATGAAAATAGGAGG-----ATTTATAATCCCGATCCATGCGGTAACA  
TAATTTTGAATCCATTCCATTTGAATTGGTGCTTTCTCCATCACGATTATTGCGAAGAGA  
CATCTACAATAATTAGC---CTTGGACAATTTATTTGTGAAAATGTATGTCTATTCAAATAC  
GAATCA-----CACGTAAAAAAATCTGGTCAAATTTTCATTGTTTCAT--GTTGACTCCTTAG  
TTATAAGATCAGCTAAACCCTATTTGGCCACTCCAGGAGCAACTGTTTCATAGCCATTATG  
GAGAAATACTTTACGAAGGAGATACATTAGTTACATTTATATATGAAAAATCGAGATCTG  
GTGACATAACGCAAGGTCTTCCAAAAGTGGAACAAATCTTAGAAGTGCGTTTCGATTGA  
TTCAATATCGATGAACCTAGAAAGGAGAGTTGAAGGTTGGAACGAACGTATACAAAGA  
ATTCTTGGAATCCCCTGGGGATTCTTGATTGGAGCTGAGCTAACCATAGCCCAAAGTCG  
TATCTCTTTGGTTAATAAGATCCAAAAGGTTTATCGATCCCAGGGGGTACAGATCCATAA  
TAGACATATAGAAATTATTGTACGTCAAGTAACATCAAAGTGTTGGTTTCAGAA-----  
GATGGAATGTCTAATGTTTTTTTACCTGGAGAATTAATCGGCTTTTTTGCAGCGGAACG  
AGCAGGGCGTGCTTTGGACGAAGCGATCTGTTATCGGGCAATCTTATTGGGAATAACG  
AGGGCATCTCTAAATACTCAAAGTTTCATATCCGAAGCAAGTTTTCAAGAAACCGCTCG  
AGTTTTAGCAAAGCTGCTATACGAGGTCGTATTGATTGGTTGAAAGGCCTGAAAGAG  
AACGTTGTTCTGGGGGGGATTATACCTGTTGGTACCGGATTCCAAAATTAGTACACCC  
TTCAAGG-----CAAGACAAGAACATTCAT-----TTGGAAATAAGA-----  
----GATATTTTGTACACCATAGAGAATTATTTTGTCTTACGTCCAAAACAATTTCCATG  
AGACATCAGAACAATCATTTACGCGATTTAATGATTCC-----ATGACAAGAAGA  
TATTGGAACATCAATTTGGAAGAGATGATGGAAGCAGGAGTTCATTTTGGTCATGGTAC  
TAAGAAATGGAATCCTAGAATGGCCCCTTACATCTCTGCAAAGCGTAAAGGTATTTCATA  
TTACAAATCTCACTAGAACTGCTCGTTTTTTATCAGAAACCTGTGATTTAGTTTTTGATG  
CAGCAAGTAGGGGAAAAAACTTCTTAATCGTTGGTACAAAAAATAAAGCAGTGGATTCT  
AGTAGCATCAGCTGCAATAAGGGCTCGGTGTCATTATGTTAATAAAAAATGGCTTGGTG  
GTATGTTAACGAATTGGTCCACTACGGAACGAGACTTCACAAGTTCAGGGACTTAAG  
AGCAGAACAAAAGATGGGGAAACTCAACTGTCTCTCCAAAAGAGATGCAGCAATGTT  
GAAGAGAAAATTATCTACCTTGCAAACATATCTCGGTGGGATCAAATATATGACGGGGT  
TGCCTGATATTGTGATCATCGTTGATCAGCAAGAAGAATATACGGCTCTTCGAGAATGT  
GTCATTTTGGGGATTCCGACAATTTGTTAATCGATACAAATTGTGACCCAGATCTCGCA  
GATATTTTCGATTCCAGCAAATGATGACGCTATAGCTTCAATCCGATTGATTCTTAACAAA

TTAGTATCTGCAATTTGTGAGGGTCGTTCTAGC---TATATAAGAAATCGTATGGGACAAA  
AAATAAATCCACTTGGTTTCAGACTTGGTACAACCCAAAGTCATCGTTCCTTTTGGTTC  
GCACAAACAAAAAATTTTTCCGTGGGTTTACAGGAAGATGAAAAATACGGAATTGTA  
TCAAGA ACTATGTACAAAAAATAGGAGAATATCCTCAGGT---TTCGAAGGAATCGCAC  
GTATAGGAATTCAAAAAGAATCGATTTGATCCAGGTCATAATACATATTGGATTCCCAA  
ATTTATTAATAGAGGGC-----CAAACACGA-----GGAATAGAAGAATTACAGATGAATGTA  
CAAAAGGAACTACATTCTGTGAACCGTAGACTCAACATTGCTATCACAAGAATTGAAA  
AACCTTATGGACAACCAAATATTCTTGCAGAATATATAGCTTTACAGTTAAAAAATAGAG  
TTTCGTTTCGAAAGTCAATGAAAAAGCTATTGAATTAAGTGAACAAACAGATACAAA  
AGGAATTC AAGTACAAATCGCAGGGCGTATCGACGGAAAAGAAATTGCACGTGTGCGAA  
TGGATCAGAGAAGGTAGGGTCCCCTACAAACAATTCGCGCTAAAATTGATCATTGTTC  
CTATACAATTCGAACTATTTATGGAGTATTAGGCATCAAATTTGGATATTTGTAAACGA  
GTTTATGTCTCGTTATCGAGGACCTCGTTTCAAAAAAATACGCCGCTGGGGACTTTAC  
CAGGACTAACTAGTAAAAGACCTAAATCCGGAAGTGATCTTAAAACCCAATTGCGTTC  
TGGGAAA---AGATCGCAATATCGTATTCGTCTAGAAGAAAACAGAAATTGCGTTTCA  
TTATGGTCTGACGGAGCGACAATTAGTTAGATATGTACATATCGCTGGAAAAGCCAAAG  
GGTCAACAGGTCAGGTTTTACTACA ACTACTTGAAATGCGTTTGGATAACATCCTTTTT  
CGATTGGGTATGGCTTCGACCATTCTGGAGCTAGGCAATTAGTTAACCATAGACATATT  
TTAGTTAATGGTCGTATAGTGGATATACCAAGTTATCGTTGCAAACCCCGAGATATTATTA  
CTACGAAGGATAAACAAAGATCGAAAGCTCTGATTCAAATTTATATTGCTTCACCCCC  
CCCGAA-----TTGCCAAAACATTTGACTATTGACTCA-----TTCCAATATAAAGGATTAGT  
AAATCAAATAATAGATAGTAAATGGATCGGTTTGAAAATAAATGAGTTGTTAGTCGTAG  
AATATTATTC CGCCAGACTATGTCACGTTCGAGGACTGCAGAAGAAAAA ACTGCAAA  
ATCCGATCCAATTTATCGTAATCGATTAGTTAACATGTTGGTTAACCGTATTATGAAACAC  
GGAAAAAATCATTGGCTTATCAAATTATCTATCGAGCCGTGAAAAAGATTCAACAAAA  
GACAGAAACAAATCCACTATCTGTTTTACGTCAAGCAATACATGGAGTAACTCCCGATA  
TAGCAGTAAAAGCAAGACGTGTAGGCGGATCGACTCATCAAGTTCCTATTGAAATAGG  
ATCTACACAAGGAAAAGCACTTGCCATTTCGTTGGTTATTAGGGGCATCCCGAAAACGT  
CCGGGTCGAAATATGGCTTTCAAATTAAGTTCCGAATTAGTAGATGCTGCCAAAGGGAG  
TGCGCATGCCATACGCAAAAAGGAAGAGACTCATAGAATGGCAGAGGCAAATAGAGC  
TTTTGCACATTTTCGTATGGGTAGGGACACTATTGCCGATATAATAACTTCTATAAGAAA  
TGCTGACATGAATAAAAAAGGAACGGTTCGAATAGCATCTACTAATATCACCGAAAACA  
TTGTTAAAATACTTCTACGAGAAGGTTTTATTGAAAATGTTCCGAAACATCAGGAAAAT  
AACAAATATTTCTTGGTTTCAACCCTGCGACAT-----AGAAAGACTAGGAAAGGAATATA  
TAGA-----ACCGTTTTAAAGTGTATCAGCCGACCCGGTTTACGAATTTATTCCAAC  
TATCAACGAATTCCTAAGATTTTAGGTGGAATGGGAATTGTAATCTTTCTACTTCTCGA  
GGTATAATGACAGATCGAGAAGCTCGACTAGAAAGAATTGGAGGAGAAATTTTGTGTT  
ATATATGGATGACAAAAGCTATACCAAGAATTGGTTCACGTAGGAATGGACGTATTGGT  
TCACGTAAGAATGGACGTAGAATACCAAAGGAGTTATTCATGTTCAAGCGAGTTTCA  
ACAATACCATTGTA ACTGTTACAGATGTACGAGGTCGGGTGGTTTTCTTGGGCCTCCGCG  
GGTACTTCTGGATTCAAAGGCACAAGAAGAGGTACACCGTATGCTGCTCAAGCCGCAG  
CGGTAAACGCTATTCGTACAGTAGTCGATCAGGGTATGCAACGGGCAGAAGTTATGATA  
AAAGGCCCTGGTCTCGGAAGAGATGCAGCATTACGAGCCATTCGTAGAAGTGGTATAC  
TATTAAGTTTAGTACGTGATGTAACACCTATGCCACATAATGGGTGTCGACCTCCTAAAA

AAAGACGTGTGATGCCAACTATTAACAACCTTATTAGAAACACAAGACAGCCAATAAG  
AAATGTCACGAAATCTCCCGCTCTTAGAGGATGTCCTCAGCGTCGAGGAACATGCACT  
AGGGTGTAT---ATCACCCCCAAAAACCAAACCTCTGCCTTACGTAAAGTTGCCAGAGTA  
CGATTAACCTCTGGATTTGAAATCACTGCTTATATACCTGGTATTGGCCATAATTTACAA  
GAACATTCTGTAGTATTAGTAAGAGGAGGAAGGGTTAAGGATTTACCCGGTGTGAGATA  
TCACATTGTTTCGAGGAACCCTAGATGCTGTCGGAGTAAAGGATCGTCAACAAGGGCGT  
TCTCAATATGGGGTCAAAAAGCCAAAAATGGCAAGAAAAAGTTTGATTTCAGAGGGAG  
AAGAAGCGGCAGAAATTGGAACAGAAATATCATTGATTTCGTCGATCTTCAAAAAAAA  
AAATAAGC-----GAAGTTCCATCGTTGAGTGAAAAATGGGAAATTCATGGAAAATTGC  
AATCCCCACCACGTAATAGTGCACCTATACGTCTTCATCGACGTTGTTTTTTGACTGGA  
AGACCTAGAGCTAACTATCGAGACTTTGGGCTATCTGGACACATACTTCGAGAAATGGT  
TCATGCATGTTTGTACC GGCGCAACAAGATCAAGTTGGATGATCAAAAATTCATTCA  
TCTCAGTTATTTACAAGAAGAAAAAGAAGAAAAC-----AAGGGTCTGTTGAATTTCA  
AATATTAAGTTTACCAGTAAGATACGTAGACTTACTTCCATTTGGAATTGCACAAAA  
GAGATTTTTTATCCCAAAGAGGTCTACGAATAATTCTGGGAAAACGTCAACGGCTCCTG  
GCTTATTTGTCAAAGAAAAATAGAGTCCGTTATAAGAAATTAATGGATCAGTTGGATATT  
CGGGAACCAAAAACCTCGT-----ATGGTAAAACCTCGTTTGAACGATGTGGTAGAAAGC  
AACGAGCCATCTACCGAATCGTTGCAATTGATGTTTCGATCCC GAAGAGAAGGAAGAGA  
TCTTAGAAAAGTAGGTTTTTACGATCCGATAAAAAATCAAACCTATTTAAATGTTCCCTGT  
TATTCTATATTTCTTGAAAAGGTGCTCAACCTACGGGAACGTTTTGTGATATTTAAG  
GAAGGCAGAATTATTTCAAGAA---AGAACTTCGATTTCGAGTTAAT-----ATGGATAAATCC  
AAGCAACCTTTTCGTAAATACAAGCGATCCTTTTCGTAGGCGTTTTGTCCCAATTGGATC  
GGGGGATCAAATCGATTATAGAAACATGAGTTTAATTAGTCGATTTATTAGTGAACAAG  
GAAAAATATTATCTAGACGGGTGAATAAATTGACCTTGAAACAACAACGATTAATTACT  
ATTGCTATAAAACAAGCTCGTATTTTATCTTTGTTACCTTTTCTTAATAATGAGAAA-----C  
AATTTGAGAGAGCCGAGTCGATCCCCAGAACTACTGGTCCCTAGAACCAGAAATAAAGT  
GACACGTTCACTAAAAAAAATCCTTTTGTAGCTAATCATTTATCGGGAAAAAATTGAAA  
AACTCAACATGAGGGAGGAGAAAGAAATAATAGTAACTTGGTCTCGGGCATCTACCAT  
TATACCCACAATGATTGGCCATACAATCGCTATTCATAATGGAAAGGAAAATTTACCTAT  
TTATATAACAGATCGTATGGTAGGTCACAAATTGGGAGAATTCGCACCTACTCTGACTTT  
CGCGAGACATGCAAGAAACGACAATAAATCTCGTCGTATGATTTTTAAATCTTTTCTACT  
AGGTAATCTATTAGCCTTATGCATGAAGATAATAAATTCGGTCGTTGTGGGCGGACTCTA  
TTATGGATTTCTGACCACATTTCCATAGGGCCCTCTTCTCTCTTCTCCGAGCTCG  
GGTTATGGAAGAAGGA-----ACCGAGAAGGAGGTATCAGCAACAACCTGGTTTTATTA  
CGGGACAGCTCATGATGTTTCATATCGATCTATTATGCGCCTCTGCATCTAGCATTGGGTA  
GACCTCATACAATAACTGTCCTAGTTCTACCGTATCTTTTGTTCATTTCTTCTGGAACA  
ATCACA AAAA ACTTTTTTTTATTATGGATCTACTACCAGAAATCAATGCGTAATCTCAGCA  
TTCAATGTGTATTCCTGAATAATCTAATTTTTCAATTATTCAACCATTTCAATTTACCAAG  
TTCAACGTTAGCCAGATTAGTCAACATTTATATGTTTCGATGCAACAACAAGATGTTATT  
TGTAACAAGTAGTTTTGTTGGTTGGTTAATTGGTACATTTTATTTCATGAAATGGGTTGG  
ATTGGTATTATTCTGGATACGGCAAATCATTCTATTTCGATCT-----AATAAGTACCTT  
GTGTCAGAATTGAGAAATCTATGGCTCGAATCTTTAGTATTCTTATTATCACCTGTG  
TCTACTATTTAGGCAGAATGCCGTCGCCTATTGTCACTAAGAAACTGAAAGAAGCCGA  
AGAAGACAAACCTCTTGTGACTTTTTCTTTTCGATTATAAACGATGGAATTGTCCATTGC

GATATATAAAAAATGATCGGTTTGAAAATGCTGTACGAAATGAAATGTCACAATATTTTT  
TTTATACATGTCCAAGTAATGGGAAACAAAAAATATCTTTTACATATCCACCTAGTTTAT  
CGACTTTTTTCGGAAATGATAGAACGAAAAATGTCTTTGTACACGACAAAAAATTATCC  
CATGGAGACCTG-----TATTGGGTTTATACCAATGAACAAAAAATACAACTTGAGCAA  
TGAATTAATAAGTCGAATAAAAGCTCTAGAAAAAGAAAACTTGCTCTAGATATGCTAG  
AAAAAAGGACTAGATTTTGCAATCATGAGAATGAACAAGAATGCTTGACCAAAACATA  
TGATCCTTTATTGAGCGGACCATGCCGTGGAGCAATAAAAAATTTTGATTTATGTATAAA  
AAGTCTTTGGATAAATAAGATCCATGAGCTACTTTTCCGAGAATTTGAACATCAAGATT  
CAAATGATCAATCTATTGGAATAGAAGAAATCAGTAAAAAGGTTTCTCTATGGTCATATA  
AATTGAACGCTCTTCCAGAACAGGAGGAAGAAGAAATTCGTTCAAGAAAAGCCAAAC  
GTGTGATAATTTATACTGATGCTTTGATACGCTACCCGCAACAATCGGATTTTCGTAGGG  
ATATAATAAAAGGATCCATGCGTACTCAAAGACGTAAAACAGTTACTTGGCAAATGTTT  
CAAGCAAATGCGCATTCCCCGCTTTTTTTGGATCGAATAGACAAAACA---TTTTTTTCTT  
CTTTTGAT--ATCTCTGAAATGATGAATCTCATTTTTTAGGAATAAAGAGGAAAATGAACG  
GATAGCAATTCAGAACTTGGGATAACGTTATATTTGCTCAAGTAATAAGAAGTTAAT  
GTTAGTAACCAATCTTTTCTTAGAAAATACATTGTATTGCCTTCATTGATAATAGCTAAA  
AATATTGTCCGTATTTTATTATTCCAATCGCCCGAGTGGTATGAGGATTTTAAGGAATGG  
GATAGAGAAATACATGTTAAATGCACCTATAATGGTGTTCATTATCGGAAACAGAATTT  
CCAAAAATTGGTTAACAGACGGTATTCAGATAAAGATTCTATTTCTTTCTTTCTTAAA  
CCTTGGCAAAGATCTAAAAAAGGAAAAAAGAAGATTTTTGTTTTTTAAACAATTTGGG  
CAATGGAAGCAGAAGTTCCTTTTGGTTCTCCCGAAAACGACCTTCTTTTTTTAAACCT  
ATTTATAAAGAACTCAAAAAAATAATTAGAAAAGTCAA-----GTTCTAAAAG  
TTTTT-----AAAGAAAAAAGGATGGGTATCAAATGGTTCTA---  
---GTTATAAAACAAAAAATGAAGGAAGTGAAGAAAGTAACTCTAAAATAAAT---ATA  
AGATTATTCGCGAATCAACCATTGCAATTCGATCCATGAATTGGGCAAATTACTCACTCA  
TAGAAAAAATAAAGGATCTTGCTGATAGGACAGTCACAATCAGGAATGAACTAGA  
ACGAATTACAAAAGACAAGAAAAA-----GATAAAAATCGGAATCACA  
GAAACATATTTGCAGATATTTAAAAGAAAAAAGATCCGATTTATACGTAAATTAATTA  
TTTTATGAAATCATTCAATTGAAAAATATACATAGATATCTTTCTACGTATGATTACTATTT  
TTAGGATCAATGCACAACTTTTCATGAACTTTATTTTCG---GATTTATCCTCCTTGTCCTCAA  
GCATATGATTTTACAAATTATCACAACCCAATTACTTAAACAAGTATCACTTGAGATCT  
GTACTTCAATATACCCATTCTTTTATTAAGGATAAAATCAAGGATTATTGTACACGAGGA  
ATATTTGATTCCAAATCAAAGCAAAGAAAATTTATAAGTCTGGAAAAAATGAATGGGA  
AAACTGGTTAAAGGGCCATTATCAATACAATTTATCTCAGACAAAATGGTCTCGATTAGT  
ACCTCAAAAATGGCGAAATAGAATCAACCAACGTTCTATGATTCAAAAATAAATTAAT  
TTGATTCACATAAAAAAGAAAAAGACCAATTAATTCATTACATGAAGCAAGAAAAATTT  
AAAAAACTACAGATATTATCTTTTATCACATAAATATATGAATGAATATATTATTGCTCT  
GGATAGAAAATATTTTGATTGTAGAATTTCCATATTTGTCTTAGATTTTTTTGATTGGATG  
GGAATGAATCAAGAAAAGGTTTATCGTTGGTTCCCTCCAGAATTTGTGCCACTCTTTGA  
TGCATATAGGATTAACCATGGATCATACCAATCAAGTTTCTTCTTTTTAATTCCAAGAA  
AAAGAAGGAAACAGAACTAAATTTCTTCTGAAAAAATATTTCTTTTTCAATTAAGAT  
GGGATGACTCCTTGAATCAAAGAATGATCGATAATATCAAGATATATTGTCACCTTACTTA  
GACCGATAAATCCAAGTAAATTTGCTATATCCTCGATTTCGAAGAGGAGAGATAAATATG  
AATGGAATGCTAATTCATAAAGATCCAGCTCTTATAGGATTGATAAAAAAAGGAATATTG



ATTGTCGAACCGATTTCGTTTATCTATAAAAAGGGATGCAAAATTTATTATATATCAAACC  
CTAGGTATTTTCATTGATCGATAAAATTAAGCACAGTAATTATGATTTCTTTGTTCTGAA  
AATATTCTATCTCCTAGACGTCGTAGAGAATTGAGAATTCTAATTTGTTTTATATTTCTTT  
GGCCCAATTACCGATTAGAAGATTTAGCTTGTATGAATCGCTATTGGTTAATACCAATA  
ATGGCAGTCGTTTCAGTATGTCAAGGATATATATGTATCCAATGAAAGGACATCAATTCA  
AATCCTGGATCTTCGAATTGAGAGAGATATTGAGAGAGATCAAGAATTCTCACTATTTT  
TTAGATTCATGGATCAAATTCGATTCAGTGGGATCTTTCACTCACATTTTTTTCCACCAA  
GAACGTTTTATGAACTCTTTGACCCCCGAATTTGGAGTATCCTACTTTCA---CGTGATT  
CA-----CAGGGTTCAACAAGCAATCGATATTTACG-----ATCAAAGGTGTAGTACTGC  
TTGTAGTAGCG---GTCCTTATATCT-----CGTATTAACAATCGAAAGATGGTCGAAAG  
AAAAAATCTCTATTTGATGGGGCTTCTTCTATACCTATTCTTCTTATACCTATGAATTCC  
ATTGGACCCAGAAATGAGACATTGGAAGAATCTTTT--TGGTCTTCCAATATCAATAGGT  
TGATTGTTTCG---CTCCTGTATCTTCCAAAAGGGAAAAAGATTTCTGAGAGTTGTTTCAT  
GGATCCGCAAGAGAGTACTTGGGTTCTCCCAATAAAT-----AAAAAGTGTATCATGC  
CTGAATCTAACCGGAGTTCGCGGTGGTGGAGGAACCGGATCGGAAAAAAGAGG-----G  
ATTCTAGTTGTAAGATATCT-----AATGAAACCGTAGCTGGAATTGAGATCTCATTCAA  
AGAGAAAGATAGCAA---TATCTGGAGTTTCTTTTTTTATCCTATACG-----GATGATCCG  
ATCCGCAAGGACCATGATTGGGAATTGTTTGATCGTCTTTCTCCGAGGAAGAAGCGAA  
ACATAATCAACTTG-----AATTCGGGACAGCTATTGAAATCTTAGGGAAAGACTTGATT  
TGTTATCTCATGTCTGCTTTTCGTGAAAAAAGACCAATTGAAGGGGAGGTT---TTCTTCA  
AACAAACAAGGA---GCTGAGGCAACTATTCAATCAAATGATATTGAGCATGTTTCCCAT---  
---CTCTTCTCGAGAAACAAGTGGGGTATTTCTTTGCAAAATTGTGCTCAATTTCATATGT  
GGCAATTCGCGCAAGATCTTTCGTT-----AGTTGGGGGAAG---AATCAGCACGAATC  
GGATTTTTTGGAGAAC---GTATCGAGAGAGAATTTGATTTGGTTAGACAATGTGTGGTT  
GGTAAACAAGGATCGG-----TTTTTTAGC-----AAGGTACGGAATGTATTGTCAAATATT  
CAATATGATTCC-----ACAAGA-----TCTATTTTCGTTCAAGTAAGGGATTCTAGCCAAT  
TGAAAGGATCTTCT--GATCAATCCATAGATCATTTTCGATTCCATTAGA-----AATGA  
GGATTCCGAA-----TATCACACATTGATCGATCAAACAGAGAT  
TCAGCAACTAAAAGAAAGATCGATTCTT--TTGGAT-----CCTTCCTTTCTTCAAACGGA  
ACGAACAGAGATAGAATCAGAT-----CGATTCCCGAAA-----TGCCTTTTTGGATCTTCC--  
---TCAATGTCCCGGCTATTCACG---GAACGTGAGAAGCAGATGAATAATCATCTGCTTC  
CGGAAGAAATCGAAGAATTTCTT-----GGGAATCCTACAAGATCAATTCGTTCTTTTTTC  
TCTGACAGATGG-----TCAGAACTTCAT--CTGGGTTTCGAATCCTACTGAGAGGTCCACT  
AGAGATCAG-----AAATTTTTGAAGAAAAACAAGATGTTTCT--TTTGTCCCTTCC  
AGGCGATCGGAA-----AATAAAGAAATGGTTGATATATTCAAGATAATTACGTATTTA  
CAAAAT-----ACCGCCTCAATTCATCCTATTTTCATCAGATCCGGGATGTGATATGGTTCCG-  
--AAGGATGAACCGGAT---ATGGACAGTTCCAATAAGATTTTCATTCTTGAAAAAAATCC  
ATTTTTTGAT-----TTATTTTCATCTATTCATGACCGGAACAAAGGGGGATACACGTTA-----  
-CACCACGATTTT--GAATCA---GAAGAGAGATTTCAAGAAATGGCAGATCTATTCACTC  
TATCAATAACCGAGCCG---GATCTGGTGTATCATAGGGGATTTGCCTTTTCTATTGATTCC  
TACGGGTTGGATCAAAAAAAA-----TTCTTGAATGAGGTATTCAACTCCAGAGATGAAT  
CGAAAAAGAAATCTTTA-----TTGGTTCTACCTCCTCTTTTTTAT-----GAAGAGAATGA  
ATCTTTTTATCGAAGGATCAGAAAAAAATCGGTCCGG---ATCTACTGCGGGAATGATTT  
GGAAGATCCAAAACATAAAACAGCGGTATTTGCTAGCAACAACATAATGGAGGCAGTC

AATCAATATAGATTGATCCGAAATCTGATTCAAATCCAATATAGCACCTATGGG-----TAC  
ATAAGAAATGTATCGAATCGATTCTTTTTAATG-----AATAGATCCGATCGCAACTTCG  
AATATGGAATTCAA-----AGGGATCGAATAGGAAATGATACTCTGAATCATATAACTAT  
AATGAAATATACGATCAACCAACATTTATCGAATTTGAAAAAG---AGTCAGAAGAAATG  
GTTTGATCCT-----CTTATTTCTCGAACCGAGAGATCCATGAATCGGGATCCTGATGC  
ATATAGATACAAATGTTCCAATGGGAGCAAGAATTTCCAGGAACATTTGGAACATTTTCG  
TTTCTGAACAGAAGAAC-----CGTTTTCAAGTAGTGTTCAATCGATTACGTATTAATCA  
ATATTCGATTGATTGGTCCGAGGCTATCGACAAACAAGATTTGTCTAAGTCACTTCGTTT  
CTTTTTGTCCAAG-----TCACTTCTCTTT  
TTG---TCCAAGTCACTTCCCCTTTTCTTTGTGAGTATCGGGAATATCCCATTCCATAGGTC  
CGAG---ATCCACATCTAT--GAATTGAAAGGTCCGAATGATCAACTCTGCAATCAGTTGT  
TAGAATCAATAGGTGTTCAAATCGTTCATTTGAATAAATTGAAACCCTTTTTATTTTTATT  
GGAT-----GATCATGATACTTCC---CAAAGACCGAAATTCTTGATCAATGGAGGAACAA  
TATTACCATTTTTGTTCAAAAAGATACCA---AAGTGG---ATGATTGACTCATTCCATACT--  
---AGAAATAATCGCAGGAAATCCTTTGATAACACGGATTCCATTTCTCAATGATATCCC  
AGGATCGAGACAATTGGCTGAATCCCGTGAAACCATTTTCATAGAAGTTCATTGATATCT  
TCTTTTTATAAAGCAAATCGACTTCGATTCCCTGAATGATCCACATCACTTCTGGTTCTAT-  
----TGTAACAAAAGATTCCCTTTTTATGTG-----GAAAAGACCCGTATCAATAATTAT  
GAT-----CTTACATAT--GGACAATTCCTCAATATCTTGTTCAATTCGCAACAAA---ATATTTT  
CTTTGTGCGTCCGGTAAA-----AAAAACATATTTTTTTGGAG---AGGGAGACTATTTTAC  
CAATCGAGTACGGGTATCTGACATATTCATACCTAAGGATTTTCCACAAAGTGGTGAC  
GAAACG---TATAACTTGTACAAA-----TCTTTCCATTTT-----CGATCCGATCCATTCGTT  
CGT-----AGAGCTATTTACTCGATCGCAGACATTTCTGCAACACCTCTAACAGAGGAACA  
AATAGTCAATTTTGAAGAAGTATTGTCAGCCTCTTTCAGATATGAATCTATCTGATTC  
AGAAGGGAAGAAGTGTATCAGTATCTCAGT-----TTCAATTCAAACATGGGTTTGATTC  
ACACTCCATGTTCTGAGAAATATTTACCA-----TCCGGAAAGAGGAAAAA-----  
-----CGGAGTCTTTGTCTAAAG-----AAATGCGTTGAGAAACGGCAGATGTATAGAATCT  
TTCAACGAGATAGTGCTTTTTTCAAATCTCTCAAATGGAATCTGTTCCAACATATATGC  
CATGGTTCCTTACTTCGACAGGGTGCAAATATCTAAATTTTACCCTTTTAGATACTTTTTT  
AGACCCATCG-----CCGATACTAAGTAGCAGT---CAAAAATTTGTATCCATTTTTTCATGATA  
TTATGCATGGATCAGATATATCATGGCCAATTCCTCAGAAG-----ATTCTTC  
CACAATGGACTCTG---ATAAGTGAGATTTTCGAGTAAGTGTTTACAGAAT-----CTTCTTCT  
GTCCGAAGAAATGATTCATCGAAATAATGAGTCACCCGTTCCATTGATATGGACACATC  
TGAGATCAACAAATGCTCGGGAGTTC---CTCTATTCAATCCTTTTCCCTTCTTCTTGTG  
TGGATAT--CTCGTTCGTATACATCTTCTTTGTTTCCCGA-----GCCTCTAGTGAGTTAC  
AGACAGAGTTAGAAAAGATCAAATCTTTGATGATTCCATCATAATGATTGAGTTGCGA  
AACTTCTGGATAGGTATCCGACATCTGAACTGAATTCCTTTCTGGTTAAAGAATCTCCTT  
CTAGTTGCTCTGGAACAATTAGGAGATTCTCTGGAAGAAATACGGGGTTCTGCTTCTGG  
TGGCAACATGCTATTGGGTGGTGGTCCC-----GCTTATGGG---GTCAAATCAATAC  
GTTCTAAGAAGAAATATTTGAATATCAAT-----CTCATCGATCTCATA---AGTATCATACC  
AAATCCCATCAATCGAATCACTTTTTTCGAGAAATACGAGACATCTAAGTCGTACAAGTA  
AAGAGATCTATTCATTGATAAGAAAAAGAAAAACGTGAACGGTGATTGGATTGATGA  
TAAAATAGAATCCTGGGTCGCGAACAGTGATTTCGATTGATGATGAAGAAAGAGAATTC  
TTGGTTCAGTTCTCC-----ACCTTAACGACA-----GAAAAAAGGATTGATCAAATCTATT

GAGTCTGACT--CATAGTGATCATTATCA-----AAGAATGACTCTGGTTATCAAAT  
GATTGAACAACCGGGATCAATTTACTTACGATACTTAGTTGACATTCAT-----AAAAAGTA  
TCTAATGAATTATGAGTTCAATAGATCCTGTTTAGCAGAAAGACGGATATTCCTTGCTCA  
TTATCAGACAATCACTTAT-----TCACAAACCTCGTGTGGGGCTAATAGTTTTTCATTTCCC  
ATCTCATGGA-----AAACCCTTTTCGCTCCGCTTAGCCCTATCCCCTTCT--AGGGGTAT  
TTTAGTGATAGGTTCTATAGGAACTGGACGATCCTATTTGGTCAAATACCTAACGACAA  
ACTCCTATGTTCCCTTTCATTACGGTATTTCCGAACAAGTTCCTGGATGACAAGCCTAAA  
GGTTATCTTATTGAT-----GATATCGAT--ATTGATGATAGTGACGATATCGAT-----  
--ATTGATGATAGTGACGATATCGATATTGATGATAGTGAC-----GATAT  
TGATGATGACCTTGATACGGAGCTGCTAACTATGACGAATGTGCTA-----ACTATGTAT  
ATGACG-----CCGAAAATAGACCGATTTGATATCACCTTCAATTCGAATTAGCAAAA  
GCAATGTCTCCTTGCATAATATGGATTCCAAACATTCATGATCTGTATGTGAATGAGTCG  
AATTACTTATCCCTCGGTCTATTAGAGAACTATCTCTCC-----AGGGATTGTGAAAGAT  
GTTCC--ACTAGAAATATTCTTGTATTGCTTCGACTCATATTCCCCAAAAAGTGGATCC  
CGCTCTAATAGCTCCGAATAAATTAATACATGCATTAAGATACGAAGGCTTCTTATTCC  
ACAACAACGAAAGCACTTTTTTCATTCTTTCATATACTAGGGGATTCCACTTGGAAGA  
AAATGTTCCATACT-----AACGTATTCGGGTCCATAACCATGGGTTCGAATGCACGAGAT  
CTTGATAGTACTTATCAATGAGGCCCTATCAATTAGTATTACACAGAAGAAATCAATTATA  
GAAACTAATACAATTAGATCAGCTCTTCATAGACAACTTGGGATTTGCGA-----TCCC  
AGGTAAGATCGGTTCAAGATCATGGGATCCTTTTCTATCAGATAGGAAGGGCTGTTGCA  
CAAAATGTACTTCTAAGTAATTGCCCATAGATCCTATATCTATCTATATGAAGAAGAAA-  
----TCATGTAAGGAAGGGGATTCTTATTTGTACAAATGGTACTTCGAACTTGGAACGAG  
CATGAAGAAATTAACGATACTTCTTTATCTTTTGAGTTGTTCTGCCGGATCGGTTCGCTCA  
AGATCTTTGGTCTTCACCC-----GGACCCGATGAAAAA--AATTGGATCACTTCTTATGGA  
TTCGTTGAGAATGATTCT--GATCTAGTTCATGGCCTATTAGAAGTAGAAAGCGCTCTGG  
TGGGA-----TCCTTACGGACAGAAAAGATTGCAGTCAGTTTGATAATAAT-----CGAGTG  
ACATTACTTCTTCGGTCCGAACCAAGGAAT--CAGTTAGATATGATGCAAAATGGATCTT  
GTTCTATCGTTGATCAGAGATTTCTATATGAAAAA-----TACGAATCGGAGTTTGAAGAA-  
--GGGGAAGGA-----GCCGTCGACCCGCAA-----CAGATAGAGGAGGAT-----TTA  
TTCATCAC-----ATAGTTTGGGCTCCT-----AGAATATGGCGCCCT-----TGTGGCAATC  
TATTTGATTGTATCGAAAGGCCACTGAATTGGGATTTCCC--TATTGGGGCGGGTCATT  
TCGG-----GGCAAGCGGATCATTATCATAAAGAGGATGAGCTTCAAGAGAATGATTC  
GGAGTTCTTGACAGAGTGGAACCATGCAGTACCAGACACGAGATAGATCTTCCAAAGAA  
CAAGGCTTTTTTTCGAATAAGCCAATTCATTTGGGACCCTGCGGATCCATTCTTTTTCTTA  
TTCAA--GATCAGCCCTTTGTCTCTGTGTTTTACGTTCGAGAATTCTTTGCAGATGAAG  
AGATGTCAAAGGGGCTTATTACTTACCAAACAATCCTCCTACATCTATATATAAACGCT  
GGTTCATC-----AAGAATACGCAAGAAAAGCACTTCGAATTGTTGATTCATCGCCAGAG  
ATGGCTTAGAACC-----AACAGTTCATTATCT-----AATGGATCTTCCGTTCTAAT-----A  
CTCTATCCGAGAGTTATCAGTATTTATCAAATCTGTTCCCTATCTAAC--GGAACGCTATTG  
GATCAAATGACAAAGACATTGTTGAGAAAGAGATGGCTTTTCCCGGATGAAATGAAAC  
ATTTGATT-----CATGTAACAGGAGAAAGATTTCCATTCTATGCCTAGATCTCGG--ATA  
AATGTAATTTTATTGATAAGACCTCTTCAATTGTAGCCAATATTCTATTACGAATAATC  
CGACAACCTTCAGGAGAAAAAAGGCATTTACCTATTACAGAGATGGG-----ATGTTGGC  
TCAATCCGAAGGAAATTATGCGGAAGCTTTACAGAATTATTATGAAGCTACGCGACCAG

AAATTGATCCCTATGATCGAAGTTATATACTCTATAACATAGGCCTTATACACACAAGCA  
ACGGAGAGCATACAAAGGCTTTGGAATATTATTTCCAGGCACTAGAACGAAACCCATTT  
TTACCACAAGCTTTTAATAATATGGCCGTGATCTGTCATTAC---CGGGGAGAACAGGCCA  
TTCTACAGGGTGATTCCGAAATTGCGGAGGCTTGGTCCGATCAAGCTGCTGAGTATTGG  
AAACAAGCTATAGCGCTTACTCCAGGTAATTATATTGAAGCACATAATTGGTTGAAGATC  
ACGAGGGCTTTTCGAATTCGAAATGAATTGGCGATCAGAACATATATGGATAGAACTTAT  
AATGGGGTCTCGAAAAACAAGTAATTTTTTCTGGGCCTGTATCCTTTTTTTTAGGTTCACT  
AGGATTCTTAGTGGTTGGAACCTCCAGTTATCTTGGTAGGAATCTGATATCCGTATTTC  
ATCTCAGCAAATTCTTTTTTTTCCACAAGGGATCGTGATGTCTTTCTATGGGATCGCAGG  
TCTATTATTAGCTCCTATTTGTGGTGCACAATTTTCATGGAATGTAGGTTAGTGGTTATGA  
CAGATTCGATAGAAAAGAAGGAATAGTGTGATTTTTTCGTTGGGGATTTCCCTGGAATAA  
ATCGTCGCATCTTCCTTCGCTTACTTATGAGAGATATAACAATCAGAATGGAGGTTA  
AAGAGGGTCTTTATCCTCGTCGTGCCTTTATATGGAAATCAGAGGCCAAGGAGCCATT  
CCCTTGACTCGTACTGATGAGTAT---TTACTCCACGAGAAATTGAACAAAAAGCTGCC  
GAATTGGCCTATTTCTTGCGCGTACCAATTGAAGTATTT

>Asclepias

????????????????????????????????????????????????????????????  
????????????????????????????????????????????????????????????  
????????????????????????????????????????????????????????????  
????????????????????????????????????????????????????????????  
????????????????????????????????????????????????????????????  
????????????????????????????????????????????????????????????  
????????????????????????????????????????????????????????????  
????????????????????????????????????????????????????????????  
????????????????????????????????????????????????????????????  
????????????????????????????????????????????????????????????  
????????????????????????????????????????????????????????????  
????????????????????????????????????????????????????????????  
????????????????????????????????????????????????????????????  
????????????????????????????????????????????????????????????  
????????????????????????????????????????????????????????????  
????????????????????????????????????????????????????????????  
????????????????????????????????????????????????????????????  
????????????????????????????????????????????????????????????  
????????????????????????????????????????????????????????????  
???ATGGTAACCATTCGAGCTGACGAAATTAGTAATATTATTCGTGAACGGATTGAACAA  
TATAATAGAGAAGTAAAGATTGTAAATACTGGTAGCGTACTTCAAGTAGGCGATGGCAT  
TGCTCGTATTCATGGTCTTGATGAAGTAATGGCGGGAGAATTGGTCAATTTGAAGAGG  
GAACGGTAGGTATTGCTTTGAATTTAGAATCAAATAATGTTGGTGTGTTAATGGGTG  
ATGGTTTGATGATACAAGAAGGAAGTTCGGTAAAAGCAACAGGAAAAATTGCTCAGAT  
TCCAGTGAGTGACGCCACTTAGGGCGTGTATAAACGCCCTAGCTAAACCTATTGATG  
GTAGGGGCGAAATTTAGCTTCTGAATCTCGATTAATTGAATCTCCTGCCCGGGTATTA  
TTTCGCGGGCGTTCCGTATACGAGCCTCTCAAACCGGACTTATTGCTATTGATTCAATGA  
TTCTATAGGGCGGGGCCAGCGAGAATTAATTATGGGGACAGACAGACCGGTAAAAC  
TGCAGTAGCCACGGATACGATTCTCAATCAACAAGGTCAAATGTAATATGTGTTTATGT  
AGCTATAGGTCAAAAAGCATCTTCTGTGGCTCAGGTAGTAAGTCTTTACAGGAAAAG  
GGGGCGATGGAATACACTATTGTGGTAGCCGAAATGGCGGATTCCCCTGCTACATTACA

ATATCTCGCTCCTTATACAGGAGCAGCTCTGGCTGAATATTTTATGTATCGTGAACGACA  
CACTTCAATCATTTATGATGATCCCTCAAACAAGCGCAGGCTTATCGTCAAATGTCTCT  
TTTATTACGAAGACCGCCTGGGCGCGAAGCTTATCCAGGGGATGTTTTTTATTTACATTC  
ACGCCTTTTGGAAAGAGCTGCTAAATCAAGTTCTAGTTTAGGTGAAGGAAGTATGACC  
GCCTTACCAATAGTTGAAACTCAATCGGGAGATGTTTCGGCTTATATTCCTACTAATGTA  
ATTTCCATTACCGATGGCCAAATATTCTTATCCGCCGACCTATTC AATGCTGGAATTCGG  
CCCGCTATTAATGTGCGCATCTCCGTTTCCAGGGTGGGGTCCGCAGCTCAAATTAAGC  
CATGAAAAAGGTTGCTGGTAAATTAAGCTGGACCTGGCCCAATTCGTAGAATTAGAA  
GCCTTTGCACAATTTGCGTCTGATCTCGATAAAGCGACGCAGAATCAATTGGCAAGAG  
GTCAACGATTGCGTGAATTGCTTAAACAATCCCAATCAGCTCCTCTCGCGGTGGAAGA  
ACAGATAATGACTATTTATACCGGAACAAACGGTTATCTTGATTCAATAGAAATTGCACA  
AGTAAGGCAATTTCTTGGTGATTTACGGACTTACGTAAAACTAACAACCGCAGTTC  
AAGAAATTATCTCTTCTACCAAGATGTTTACCGAGGAAGCGGAAGCCTTTTGAAAGA  
AGCTATTCAGGAACAAATGGACCGGTTTCTACTTCAGGAA-----ATGAGAAAGAATCCT  
ACTACTTCCGGTTCTGGGGTTTCCACGCTTGAAAAACCAACCTGGGGCGTATCGTCC  
AAATCATCGGCCCGGTACTAGATGTAGCCTTTGGGCCGGGTAATATGCCTAATATTTATA  
ACGCCCTGGTAGTTAAAGGTCGGGATACCCTTGGTCAACCAATTAACATGACTTGTGA  
GGTACAGCAATTATTAGGGAATAATCGAGTTCGAGCTGTAGCTATGAGTGCTACAGATG  
GTCTAATGAGAGGAATGGAAGTAATTGACACGGGAGCTCCTCTAAGCGTTCCGGTAGG  
TGGGGCGACTCTGGGACGAATTTTCAACGTGCTTGGAGAGCCTGTTGATAATTTAGGG  
CCTGTAGATGCTCGTACAACATCTCCTATTCATAGATCTGCGCCCGCCTTTATACAATTA  
GATACAAAATTATCTATTTTTGAAACAGGAATTAAGTAGTAGATCTTTTAGCCCTTAT  
CGACGGGGAGGAAAAATAGGACTCTTCGGAGGAGCTGGTGTGGGTAAAACAGTACTC  
ATTATGGAATTGATTAACAATATTGCCAAAGCTCATGGGGGCGTATCCGTATTTGGTGGA  
GTGGGTGAACGTACTCGTGAAGGAAATGATCTTTACATGGAAATGAAGGAATCAGGAG  
TGATTAATGAAGAAAATATTGCAGAATCAAAGTGGCTCTGGTTTACGGCCAGATGAAT  
GAACCGCCGGGAGCTCGTATGAGAGTTGGCTTACTGCCCTAACTATGGCGGAATATTT  
CCGAGATGTTAATGAACAAGACGTACTTTTATTTATCGACAATATTTCCGTTTCGTTCA  
AGCAGGATCTGAAGTCTCGGCCTTATTGGGCAGAATGCCTTCCGCTGTGGGCTATCAGC  
CTACCTTGGGTACCGAAATGGGTTCTTTACAAGAAAGAATTACTTCTACCAAAGAGGG  
GTCCATAACTTCTATTCAAGCAGTTTATGTACCTGCAGACGATTTAACCGACCCCGCTCC  
AGCTACGACATTTGCACATTTAGATGCTACTACCGTACTATCAAGAGGATTAGCTGCCA  
AAGGTATCTATCCGGCAGTAGATCCTTTAGATTCAACATCAACCATGCTTCAACCTGGG  
ATCGTCCGGTGAGGAACATTATGAAACTGCGCAAAGAGTTAAGCAAACCTTTACAACGTT  
ACAAAGAACTTCAGGATATTATAGCTATCCTTGGGTTAGACGAATTATCCGAAGAAGAT  
CGTTTAATCGTAGCGCGGGCGGAAAAATTGAGCGTTTCTTATCACACCCTTTTTTCGT  
AGCAGAAGTATTTACCGGTTCTCCAGGAAATATGTTGGTCTAGCAGAAACAATTAGA  
GGATTTCAATTGATCCTTTCCGGAGAATTAGATGGTCTTCCTGAACAGGCCTTTTATTTG  
GTGGGTAATATCGATGAAGCTGCCGCAAAGGCTCTGAACTTAGAAATGGAGAATAAA---  
-----ATGACCTTACATCTTTGTGTACTAACCCTAATCGAATTGTTTGGGATTCTGAAGTA  
AAAGAAATTATATTACTACTAATAATGGTCAAATTTGGCGTATTACCTGACCACGCCCT  
ATTGCCACAGCTGTAGATATAGGTATTTGAAAATACGCCTTAACGGCCAATGGTTAAC  
GATGGCTCTGATGGGCGGTTTTGCTAGAATAGGCAATAATGAGATCACTGTTTTAGTAA  
ATGATGCAGAAAAGGGTAGTGACATTGATCCACAAGAAGCCCGGCAAACCTTTGAAAT

CGCGGAAGCTAATTTGAGAAAAGCGGAAGGAAAGAGACAAACAATTGAGGCAAATCT  
AGCTCTGCGGAGAGCTAGGACGCGGGTAGAGGCTATCAATGCGGTT--ATGAAAAATGT  
AACCGATTCTTTCGTTTCTTTGGGCCATTGGCCATCCGCCGGGAGTTTCGGGTTTAATA  
CCGATATTTTTTCAACAAATCTAATAAATCTAAGTGTAGTGCTTGGTGTATTGATCTTTTT  
TGAAAGGGAGTGTTAAGCGATTTATTAGATAATCGAAAACAGAGAATCTTGAATACTA  
TTCGAAACTCAGAAGAACTCCGTGGAGGCGCCATTGAACAGCTGGAAAAAGCCCGGG  
CTCGCTTACGGAAAGTGGAATGGAAGCAGATCAGTATCGAGTAAATGGATACTCTGA  
GATAGAGCGAGAAAAGTTGAATTTAATTAATTCAACTTCTAAGACTTTAGAACAATTAG  
AAAATTACAAAAATGAACTATTCAATTTGAACAACAAAGGGCGATTAATCAAGTCCG  
ACAGCGGGTTTTCCAACAAGCCTTACGGGGAGCCTTAGGAACTCTGAATAGTTGTTTA  
AATAACGAGTTACATTTACGTACGATTAGTGCCAATATTGGCAAGTTAGCGTCAATGGA  
AGAATAACTGATATGAATCCACTGATTTCTGCCGCTTCCGTTATTGCTGCTGGGTTGGC  
TGTAGGGCTTGCTTCTATTGGACCCGGAGTTGGTCAAGGGACTGCTGCAGGTCAAGCT  
GTAGAGGGTATTGCCAGACAGCCTGAGGCAGAGGGAAAAATACGAGGTACTCTATTGC  
TTAGTCTAGCTTTTATGGAAGCTTTAACAATTTATGGACTGGTTCGTAGCATTAGCGCTTT  
TGTTTGCGAATCCTTTTTGTTATGAATGTTCTA-----GCAAATACACTAAAGGGGTTATAT  
GATGTATCTGGTGTGGAAGTAGGCCAGCATTCTATTGGCAAATAGGGAGTTTCCAAGT  
CCACGGCCAAGTACTTATTACTTCTTGGGTTGTAATTGCTATCTTATTAGGTTCCGGCCG  
CATAGCTGTTCGAAATCCTCAAACCATTCCGAGTGGGGGTCAGAATTTCTTCGAATATG  
TTCTTGAATTCATTTCGAGATGTTAGTAAAACGCAAATTGGAGAAGAATATGGCCCTTGG  
GTTCCTTTTTATTGGAACATGTTTTCTATTTATTTTTGTTTCTAATTGGTCCGGGGCTTTTT  
ACCTTGAAAATCATAAATTACCTCATGGCGAGTTAGCCGCACCCACGAATGATATAA  
ATACTACTGTTGCTTTGGCTTTACTCACGTCAAGTGGCTTATTTCTATGCGGGTCTTACAA  
AAAAGGATTAGGTTATTTTCGGGAAATATATTCAACCAACTCCAATCCTTTTTACCCATTA  
ACATCTTAGAAGATTTTACAAAACCCCTATCGCTAAGTTTTTCGACTTTTCGGGAATATCT  
TAGCTGATGAATTAGTCGTTGTTGTTCTAGTTTCTTTAGTACCTTCAGTGGTTCCTATACC  
TGTTATGTTCCCTTGGATTATTTACAAGTGGTATTCAAGCTCTTATTTTTGCAACTTTAGCC  
GCGGCTTATATCGGTGAATCCATGGAAGGTCATCATATGATATTTTCAACCTTAGAACAT  
ATATTAACCTCATATTTCCCTTTCTATTGTTTCAACCGTAATTACAATTCGTTTAATAACCTT  
TTGCGTAGATGAAATCGTACAACCTGTATGATTCATCTGAAAAGGGTCTGATAGTTTGT  
TTCTGTATAACAGGATTATTAGTTACACGTTGGATTTATTCGGGTCATTTTCCACTAAGT  
GATTTATATGAATCATTAAATTCCTTTTCGTGGTGTCTCCCTTATTCATATAGTTCCATAT  
-----AAAAATAAAAATTTATTAAGCACATAACCGGTTCAAGTGCCATTTTTACCCAGGG  
CTTTGCTGCTTCCGGAGTTTTAACTCAAATACACCAATCTTCAATATTAGTACCCGCTCT  
TCAATCTGAGTGGTTATTAATGCATGTAACCTATGATGATATTGGGCTATGCATCCCTTTTA  
TGTGGATCATTATTATCAGTAGCACTTGTAGTCATTACATTTCGAAAAACGAAAAGATT  
CTTGGT-----AAAGAAATTGAATACATGAATAAAAGAAGCAATCTTTTAGAACTACTTC  
T-----GGTAAGAATTATTACAGATCTCAATTAATCCAACAATTGGATTATTGGAGTTATC  
GGATTATTAGTCTAGGGTTTGTATTTTTAACCATAGGTATTCTGTCAGGAGCAGTATGGG  
CTAACGAAGCTTGGGGATCCTATTGGAATTGGGATCCAAAAGAACTTGGGCATTTATT  
ACTTGGATCGTATTCGCGATTTATTTACATACTCGAACAAATATAAACCCGCAAGGTACA  
AATTCGGCAATTGTAGCGGTATAGGCTTTCTTATAATTTGGATATGTTATTTGGGGTTA  
ATCTATTAGGACTAGGATTACATAGTTATGGTTTCGTTTCCATTAACAATGTCCAAAAAGA  
AAGCATCCACTCCT-----CTTGTATATATAGTATTTTTTCCCTTGGTGGCTTTCTCTCAT

TTAAAAAAGTCTGGAATCTTGGGTTACTCATTTCGTGGAATGCCGGGCAATCCGAAATT  
TTTTTGAATGATATTCAAGAAAGGGGTATTCTAGAAAAATTCATAGAATTAGAGGACCT  
CCTCGTCTTGGACGAAATGATCGAAGAATACTCGGAGATACGTCTACACAAGCTTCCTA  
TACCTATACAAAAAGAAACGATCCAATTAATCAAGATACACAACGAAGATCGTATCCAT  
ACGATTTTTCACTTCTCAATAAACATAATCTGTTTTGTTATTCTCAGTGGTTATTCTATTT  
TGGGTAACGAAGAACTTGTTATTCTTAACTCTTGGGCCAGGAATTCCTATATAACCTAA  
GCGACACAGTCAAAGCTTTTTGTATTCTTTTATTAACCGATTTATGTATCGGATTCCATTC  
ACCCACGGTTGGGAATTACTGATTGGCTCTGTCTACAAAGATTTTGGATTTGTTTCAGA  
ATGATCAAATAATATCGGGTCTTGTTCCTACTTTTCCAGTGATTCCTGATACAGTTTTTAA  
ATATTGGATTTTTCGTTATTTAAATCGCGTATCTCCGTCACTTGTAGTTATTTATCATTTCGT  
T G A A T G A  
C????????????????????????????????????????????????????????????????  
????????????????????????????????????????????????????????????????  
????????????????????????????????????????????????????????????????  
????????????????????????????????????????????????????????????????  
????????????????????????????????????????????????????????????????  
????????????????????????????????????????????????????????????????  
????????????????????????????????????????????????????????????????  
????????????????????????????????????????????????????????????????  
????????????????????????????????????????????????????????????????  
????????????????????????????????????????????????????????????????  
GAAAAAGAACA AAAATGGATT  
CATGAGGGTTAATTACCGAATCGCTCCCAATGGCATGTTTCAGGGTTCGGTTAGATAA  
TGAAGATCTGATTCTAGGTTATATTTTCAGGAAAGATTTCGACGTAGTTTATACGGACT  
ACCGGGAGATAGAGTCAAGGTTGAGGTAAGTTCGGTATGATTCAACCAAAGGACGTATA  
ATTTATCGACTCCGTAAGAAGGATTCGAAGGATATGGAAGAAATCCAAAGATATTTACA  
G---GATAGATCTCAACAACCAACTTTCTATATCCACTTATCTTTCAGGAATATATTTATG  
CACTTGCTCATGACCATAGTTTACCGGGTTATGACAATAAATCGAGTTTCCTTATTGTGA  
AACGATTAATTATTCTAATGTATCAACAGAATCATTTCCTACTTCTATTAATGATTCTAA  
CCAAAATCCATTTTTTGGCAAAAATTTGTATTCTAAAATGATATCAGAGGGATTTTCATT  
TATTGTGGAAATTCATTTTCTATGCGATTAATATCTTCTGAAATATTTAAATCTCATAATT  
TACGCTCAATTCATTCAATATTTCTTTCTTAGAGGACAATTTTTCACATTTTAATTTCT  
CTTAGATATACTAATACCCTACCCTGTTTCATCTGGAAATCTTGGTTCAAACCCTTCGCTAT  
TGGGTAAGGATGCCCTTCTTTGCACTTATTACGATCCTTTCTACGCGAGTATTGTAAT  
TCCAATAATCTTATTGCTACTAGT---TTTCTTTTTTAAACAACGATTTTTTTTTCTTGTTA  
TATAATTTTTATGTATGTGAATACGAATCCATTTTCGTCTTTCTCCATAAGCAATCTTCTCA  
TTTACGACCAACATCCTTTGGGGCCTTTCTTGAACGAATCCATTTCTATGGAAAAATGG  
AACGTCTTGTGCAAGTCTTCGCT---GATTTAACTTATGCTTGGTCAAATATCCTTTGATG  
CATTATGTTAGGTATCAAGGAAAATCCATTCTGCTTTCAAGGGGGACGGCTCTTTTGAT  
GATGAAATGGAAATCCTACCTTGTCATTTTGGCAATCTAATTTTGACCTTTGGTTTCA  
TTCGCGAAGGGCCATATAAAGCAATTGTACAAAATCCCCTTGACTTTATGGGTTATCT  
TTCAATTGTGCGACTAAACCCTTCAAGGGTACGGGGTCAAATGCTCGAAAATCTTTTC  
TAATTAATATTGCTATTAGCAATAAGAAATTAGATACCCTTGTCCAATTATCCTCTGAT  
TGGATCATTGGCTAAAGAGAAATTTGTAACTAGTAGGACATCCATTAGTAAGCCGG  
TTCGACTGATTTATCAGATTCTGATATTATGGACAGGTTTGGGCGTATATGCAGAAACC  
TTTCTCATTATTATAGTGGATCTTCGCAAAAAAAGAGTTTGTATCGAATAAAGTATATAC  
TTCGACTTTCCTTGCTAAAACCTTAGCTCGAAAACAAAAAGTACTGTACGGGCTTTT  
TTGAAAAGATTACGTTCCGAATTTTTGGAAGAATTCTTGGTGTCCGAAGAAAAAGTCC

TTTCATTGACCTTCCCAAGACGGATTTGGTATTTGGATATTACTTGTATCAACGAGCTGT  
CGAATCAGCAAATGATAATGGAT--ACAACCGAAATACAA--GCTATCAATTCGTTTTCC  
AGATTAGAATCC--TAAAAGAGGGTCTATGGGCTTATATGGTTACTTGTCCCGGTTTTTAC  
TCTTGTATTAGGAATCACAATAGGTGTACTCGTAATTGTTTGGTTAGAAAGAGAAATATC  
TGCAGGGATACAACAACGTATTGGACCTGAATACGCCGGGCCTTTAGGAATTCTTCAA  
GCTCTAGCAGATGGTACAAAACCTTTTCAAAGAAAACCTTCTTCCATCTAGAGGAG  
ATAGTCGGTTATTTAGTATCGGCCATCCGTTGCAGTGATATCGATTTTACTAAGTTATTC  
AGTAATTCCTTTTGGATACCACCTTATTCTAGCCGATCTTGGTATTGGGGTTTTTTTATGG  
ATCGCTATTTCAAGTATTGCTCCCGTTGGACTTCTTATGTCGGGATATGGATCAAATAATA  
AATATTCCTTTTTAGGTGGTTTACGCGCTGCTGCTCAATCAATTAGTTATGAAATACCATT  
AACTTTATGTGTATTATCAATATCTCTACTATCTAACAGTTCAAGTACAGTTGATATAGTT  
GAAGCGCAGTCAAATATGGCTTTTGGGGGTGGAATTTGTGGCGTCAACCTATAGGGT  
TTCTCATTTTTCTAGTTTCTTCTCTAGCTGAATGTGAAAGATTACCTTTTGATTTACCAG  
AAGCAGAAGAAGAATTAGTAGCAGGTATCAAACCTGAATATTCAGGTATCAAATTTGGT  
TTATTTACGTTGCTTCATATCTGAATCTACTAGTTTCTTCGTTATTTATAACAGTTCTTTA  
CTTGGGAGGTTGGAATCTTTCTATTCCATACCCATTTCGTTCCCTAAAATTTTGGACATAAA  
TAAAGTAGGTAAAGTTTTTGAACAATAATCAGCATCTTTATTACATTAGCTAAAACCTTA  
TTTGTCTTGTTCATTCCATTGCAACAAGATGGACTTTACCAAGGTTGAGAATAGACC  
AACTTTTAAATCTTGGATGGAAATTTCTTTTACCTATTTCTCTAGGTAATCTATTATTAAC  
AACTTCGTCCCAACTTCTTTACTGATGATCTGGCATGTACAGAATGAAAACCTTCATTC  
TCGATTCTACGAGAATTTTTATGAAAGCCTTTCATTTGCTTCTCTTCGATGGAAGTTTGA  
TTTTCCCAGAATGTATCCTAATTTTTGGCCTAATTCTTCTTTTGATGATCGATATAACCTC  
GGATCAAAAAGATATACCTTGGTTATATTTTCATCTCTTCAACAAGTTTAGTAATGAGCAT  
AACGGCCCTATTGTTCCGATGGAGAGAAGAACCTATGATTAGCTTTTCGGGAAATTTCC  
AAACGAACAATTTCAACGAAATCTTTCAATTTCTTATTTTACTATGTTCAACTCTATGTAT  
TCCTCTATCCGTAGAGTACATTGAATGTACAGAAATGGCTATAACAGAGTTTCTCTTATT  
CGTATTAACAGCTACTCTGGGAGGAATGTTTTTATGCGGTGCTAACGATTTCATAACTAT  
CTTTGTAGCTCCAGAATGTTTCAGTTTATGTTCCCTACCTATTATCTGGATATACCAAGAA  
AGATGTACGGTCTAATGAGGCTACTATGAAATATTTACTCATGGGTGGGGCAAGCTCTT  
CTATTCTGGTTCATGGTTTCTCTTGGCTATATGGTTCATCCGGGGGAGAGATCGAGCTTC  
AAGAAATAGTGAATGGTCTTATCAATACACAAATGTATAACTCCCCAGGAATTTCAACT  
GCGCTCATATTCATTACTGTAGGAATTGGGTTCAAGCTTTCCCAGCCCCCTTCTCATCAA  
TGGACTCCTGACGTATACGAAGGATCTCCCACTCCAGTCGTTGCTTTTCTTTCTGTTACT  
TCGAAAGTAGCTGCTTCAGCTTTAGCCACTCGAATTTTCGATATTCCTTTTTTATTCTCAT  
CAAACGAATGGCATCTTCTTCTGGAAATCCTAGCTATTCTTAGCATGATATTGGGAAATC  
TCATTGCTATTACTCAAACAAGCATGAAACGTATGCTTGCATATTCGTCCATAGGTCAAAA  
TCGGATATGTAATTATTGGAATAATTGTTGGAGACTCAAATGATGGATATGCAAGCATGA  
TAACTTATATGCTGTTCTATATCTCCATGAATCTAGGAACTTTTGGCTTGCATTGTATTATTT  
GGTCTACGTACCGGAACGGATAACATTCGAGATTATGCAGGATTATACACGAAAGATCC  
TTTTTTGGCTCTCTCTTTAGCCCTATGTCTCTTATCCCTAGGGGGTCTTCCCCACTAGC  
AGGTTTTTTTCGAAAACCTCTATTTATTCTGGTGTGGATGGCAGGCAGGCCTATATTTCTT  
GGTTTTAATAGGACTCCTTACAAGCGTTGTTTCTATCTACTATTATCTAAAATAATCAA  
GTTATTAATGACTGGACGAAACCAAGAAATAACCCCTCACGTGCGAAATATAGAAGAT  
CTCCTTTAAGATCAAACAATTCATCGAATTGAGTATGATTGTATGTGAATAGCATCTA



CTATACCAGGAATATCAATGAACCCGATTATTGCAATTGCTCAGGATACTTTTTATGT  
TTCTGCTTTACGAATATGATATTTTTTTGGGCATTTCTAATAATATCAAGTCTTATTCCTATT  
TTGGCTTTTTTAATTTCCGGAGTTTTAGCCCCGATTAACAAAGGACCAGAGAACTTTC  
TAGCTATGAATCGGGTATAGAACCAATGGGCGACGCTTGGTTACAATTTTGAATCCGTT  
ATTATATGTTTGCTCTAGTTTTTTGTTGTTTTTGATGTTGAAACGTTTTTCTTTATCCCTG  
GGCAATGAGTTTCGATGTATTGGGCTATCCGTATTATAGAAGCTTTAATTTTTGTGCTT  
ATCTTAATTATTGGTTTAGTTTTATGCGTGGCGAAAGGGAGCATTGGAGTGGTCTACGAC  
TTTTTTTCCCTTGGTTAACAATAATTGTAGTTTTGCCAATATCTGCAGGTTCCTTAATTTTT  
TTTTCTCCCCATAGGGGAAATAAGGTAGTTCGGTGGTATAACAATATGTATATGTATTTAG  
AACTCCTTCTAACGGTGTATACATTCTGTTATCATTTCCAACCGGACGATCCGTTAATCC  
AACTATTGGAGGATTATAAATGGATCCGCCTTTTTGATTTCCATTGGAGGTTGGGAATAG  
ATGGACTTTCTATAGGCCCATTTACTAACGGGATTCATCACCACCTTAGCTACTTTATC  
GGCTTGGCCTGTACTCGAGATTCTCGATTATTTCAATTCCTGATGTTAGCAATGTACAG  
TGGTCAAATAGGATTATTTTTCTTCTCGCAATCTTTTACTTTTTTTTTATCATGTGGGAGTTA  
GAATTAATTCCTGTTTATCTACTTCTATCCATGTGGGGGGGAAAGAAACGTCTGTACTC  
GGCTACAAAATTTATTTGTACACAGCAGGGGGCTCCATTTTTTTTCCTAATGGGAGTTCT  
GGGTATAGGGTTATATGGTTCTAATCAACCAACATTAAGTTTTGAAACATCAGCAAATC  
AGTCGATCCTTTGGGCTTAGAAATAATTTTTATATTGGATTTTTTATTGCTTTTGCTGTC  
AAATCGCCGATTATACCACTACATACGTGGTTACCGGATACCCACGGAGAAGCACATTA  
CAGTACTTGTATGCTTCTAGCCGGAATCTTATTAATAAATGGGAGCGTATGGACTGGCTC  
GCATCAATATAGAATTATTATCTCATGCCATTATCTATTTTCCCCTTGGTTAGTGATAGTA  
GGCGCAATCCAAATAATTTATGCAGCTTCAACATCTCTTGGCCAACGGAATTTAAAAAA  
AAGAATAGCCTATTCCTTCTGTATCTCATATGGGTTTCCCTAATTATCGGAATTGGTTCTATA  
ACTGATACAGGACTCAACGGAGCTCTTTTACAAATAATTTCTCATGGATTTATTGGTGCT  
GCACTTTTTTTTCTTGGCAGGGACAACCTTATGATAGAACACGCCTTCTTTATCTTGACGA  
AATGGGCGGAATAGCTATCACAATGCCAAAATATTCACCATGTTTAGTAGCTTTGCAAT  
GGCTTCCCTTGCATTACCGGGTATGAGTGGCTTTGTTGCTGAATTGATAGTATTTTTTTGG  
AATAATTACTAGTCACAATTTTTTTTTTAATGCCAAAATACTAATTACTTTTTGTAATGGCA  
ATTGGAATCATATTAACCTCCTATTTATTCATTATCTATGTCACGTCAGATGTTTTATGGATA  
TAAGTTTTTTAACGTTCCAAACTCTTATTTTTTTGATTCTGGACCGCGAGAGTTATTTCT  
TGCGATTTCCCTCTTTTTTTCCCGTACTGGGTATTGGTATGTACCCCGATTCGTTCTTTCA  
CTATCGGTTGACAAGGTTGAAGTTATACTATCTAATTCTTTTTTCTAAAATGATGCTCGAA  
CATATACTTGTTTTGAGTGCCTATTTATTTTCTATGGGTATCTATGGATTGATCACAAGTC  
GAAATCTGGTTAGAGCCCTTATGTGTCTTGAACCTTATATTGAATGCAGTTAATATAAATTT  
TGTAACATTTTCTGATTTTTTTGATAATCGTCAATTAAGGGGAGATATTTTATCAATTTTT  
GTTATAGCCATTGCAGCCGCTGAAGCAGCCATTGGGCTGGCTATTGTTTCATCAATTTAT  
CGTAATCGAAAATCAACTCGTATTAACCAATCGAATTTGTTGAATAAGATGCAACAGAC  
ATATCAATACGGGTGGCTCATACCTTCATCCACTTCCCCTTCCCTATATTACTAGGGGT  
GGGACTTCTTATTTTTCCGACTGCAACAAAAGATTTTCGTCGCATGTGGGCTTTTCATA  
GTGTTTTTATTGTTAAGTATAGTCATGATTTTTTCAATGAATCTGTCTAGTCAGCAAATAAA  
TAGCAATTTCTAGCTATCAATATGTATGGTCTTGGATCATTACTAACGATTTTTCTTTAGAA  
TTCGGCTATTTGATAGATCCACTTACTTCTATTATGTCAATGTTAATAACTACCGTTGGGA  
TTTTGGTCTTATTTATAGTGATAATTATATGGCTCATGATCAAGGATATCCGAGATTTTTT  
GCTTATATGAGTTTTTTTCAGTGCTTCCATGTTAGGATTAGTTACTAGTTTCGAATTTGGTAC

AAATTTATATTTTTTGGGAATTGGTTGGAATGTGTTCCCTATTTATTAATAGGATTTTGGTT  
CACACGACCTCAAGCAGCAAATGCTTGCCAAAAAGCTTTTGTAACAAATCGTGTAGGG  
GATTTTGGTTTATTATTAGGAATTTTAGGTTTTTATTGGATAACGGGTAGTTTCGAATTTG  
AGGATTTATTCGAAATATTCAATGACAATCAGGTCAATTTTTTATTTGTTACTTTGTGTGC  
TGTTCTGTTATTTGCTGGTGCCGTTGCTAAATCTGCACAATTTCCCCTTCATGTATGGTT  
GCCCCATGCTATGGAAGGGCCTACTCCGATTTCTGCGCTTATACACGCTGCTACTATGGT  
AGCGGCAGGAATTTTTCTTGTAGCTCGGCTTCTTCCTCTTTTCATAGTTATACCTTCCAT  
AATGAATTTAATCTCGTTGATAGCAATAATCACTGTTTTATTAGGAGCTACATTAGCTCTT  
GCTCAAAAAGATATTAAGAGAGGTTTAGCCTATTCTACAATGTCTCAATTGGGTATATG  
ATGTTAGCTCTTGGTATGGGGTCTTATCAAAGTGCTTTATTTTCATTTGATTACTCATGCCT  
ATTCCAAAGCATTGTTATTTTTGGGATCCGGATCCGTTATTCATTCAATGGAAGGGATTG  
TTGGCTATTCTCCCGATAAAAGTCAGAATATGATTCTTATGGGAGGTTTAAGAAAACAT  
GTACCAATTACCAAAAATGCCTTTTTATTAGGTACACTCTCTCTTTGTGGTATTCGGCCT  
TTGGCTTGTTTTTGGTCCAAAGATGAAATCTTAATGCTACTTGGTCATATTCACGATT  
TTTGCAATAATAGCCTGGGTACTGCTGGATTAACCGCATTTTATATGTTTCGGATATATT  
TACTTACTTTTGAGGGACATTTAAATATTTATTTTCAAATTATAGTGGCAAACAAAAAA  
TACCTTTCTATTCAATATCTCTATGGGGTAGCACTGTTTCAAAGAATTAATAAA---TTA  
TTAACA-----ATGACTTTTTTTTCATTTGAGAATAAAAAACTTGATTCCATCCTTACGA  
ATCAGACAATAATATGCTATTTCCCTCTCCTTGTATTGGGACTATTTACTCTCTTTGTTGGA  
TTTATAAGAATTCCTTTCAATGATGATATATTATCTAAATGGTTAACTCCGTCGATAAATC  
TTTTGCATAAAACGTCGACT---TTGACGGATTGGTCTGAATTTTTCAAAGATGCAATTTT  
TTCAGTGAGTATAGGTTATTTAGGAATATTTATAGCGTCTTTTTTATATAAATCCCCCTATT  
CCTCCTTACTAAATTTGGATTTAATTAATTCAGTTGTTCCCTGTTTTGGAAAAAATGCTAA  
ATAGTATATATAGTTGGTCAGATAATCGCGCTTATATAGATTCTTTTTATAAAGATCCTTA  
ACCAGGGGCATTAGAGGATTGGCTAAAGTAACTCATTTTTTTGATCGTCGCGTAATTGA  
TGGAATTATCAATGGCGTTGGGTTTCTTAGTTTCTTTATAGGAGAATTTAGCAAATATATA  
GGCGGGGGG---CGGATCTCTTCTTATCTTTTCTCCTATTTATCGTATGTATTGGTTTGT  
TTAATATTTTTTATGGATTTACCCGGGCCAATGCATGATTTTCTTTTAGTCTTTCTGGGAT  
CGGGTCTGATCTTAGGAGGTCTAGGAGTAGTATTACTTCCCAATTCAATTTATTCGGCCT  
TTTCGTTAGGATTGGTTCTTGTGTTGTATATCCTTATTCTATATTCTATTGAGTTCTTATTT  
GTAGCTGCCGCGCAACTACTTATTTACGTAGGGGCTGTAAATGTTTTAATTCTTTTTGCT  
GTGATGTTTCATGAGTGATTCAGAATATTACAAGGATTCCCCTTTGGACTGTTGGAGA  
TGGGGTACTTTGGTGGTTTGTACAAGTCTTTTTATTTCACTAATTACTACTATTCCAGAT  
ACGTCATGGTATGGGATTATTTGGACTACAAGATCAAACCAGGTTCTAGAACAAGATTT  
GATAAGCAATAGTCAACAAATTGGAATTCATTTATCAACCGACTTTTTTCTTCCATTTGA  
ACTCATTTCACTAATTTCTTTAGTTGCTTTAATAGGTGCAATTGCTGTAGCTCGTCAAAT  
GACTGTACCGGCTACAAGAAAAGACCTTATGACAGTCAATATGGGACCTCACCACCCA  
TCAATGCATGGTGTCTTCGACTCATCGTTACTCTAGATGGTGAAGATGTTATTGACTGT  
GAGCCTATATTAGGGTATTTGCACAGGGGAATGGAAAAAATTGCGGAAAATCGAACAA  
TTATCCAATATTTGCCCTATGTAACCGGTTGGGATTATTTAGCTACTATGTTACGGAAGC  
AATCACGGTAAATGGGCCCGAACTATTAGGAAATATTCAAGTACCTAAAAGAGCTAGTT  
ATATCAGAGTCATTATGTTGGAGTTGAGTCGTATAGCTTCCCATTTGTTATGGCTTGGCC  
CTTTTATGGCAGATATTGGTGCAGACCCCATTTCTTATATTTTTTCGAGAAAGGGAAAT  
TGATATATGACTTATTCGAAGCAGCTACTGGTATGCGAATGATGCATAATTATTTTCGTAT

CGGAGGAATAGCTACTGATCTACCTTATGGCTGGATGGATAAATGTTTGGATTTTTGTAA  
TTACTTTTTAACGGGGGTTGCTGAATATAAAAAGCTTATTACACGGAATCCTATTTTTTT  
AGAACGGGTTGAAGGCGTGGGCGTTATTTCGCGGAGAAGAAGCACTAAATTGGGGTTTA  
TCGGGCCCAATGCTCCGGGGTCCGGAATCCAATGGGATCTTCGTAAAGTTGATCATT  
TGAGTGTTACGATGAATTTGATTGGGAAGTTCAATGGCAAAGGAAGGAGATTTCGTTA  
GCTCGTTATTTAGTACGAATCGGTGAAATGACAGAATCCATAAAAATAATACAACAGGC  
TCTGGAAGGAATTCCAGGAGGGCCCTACGAGAATTTAGAAATACGACGTTTTGATAGA  
GTAAAAGATTCCGAATGGAATGATTTGAATATCGATTTATTAGTAAAAAACCTTCTCCA  
ACCTTTGAATTGGCGAAACAAGAACTTTATGTGAGAGTTGAAGCCCCAAAGGGGGAAT  
TGGAATTTTTCTGATAGGAGATCTAGGTGTTTTTCTTGGAGATGGAAAATTCGCCCG  
CCGGGTTTTATCAATTTGCAAATTTCTTCTCAGTTAGTTAAAAGAATGAAATTGGCTGAT  
ATTATGACGATATTAGGTAGCATAGATATCATTATGGGGGAAGTTGATCGTATGTTCCCTA  
TGCTAACTGAATTCACAAATTATGGTCAACAAAGAATACGAGCTGCCAGATACATCGGT  
CAAGGTTTCGCGATTACCCTGTCTCACGCGAATCGTTTACCTATAACTATTCAATATCCC  
TACGAAAACTAATTACGTCGGAACGTTTCCGGGGCCGAATCCACTTTGAATTTGATAA  
ATGCATTGCTTGTGAAGTATGCGTTCGTGTATGTCTATAGATCTACCTGTTGTAGATTG  
GAAATTGGAAAGTGATATTCGAAAGAAACGTTGTTAATTACAGTATTGATTTTGAA  
TCTGTATATTTGTGGTAATTGCGTTGAGTATTGTCCAACAAATTGTTTATCAATGACTG  
AAGAATATGAACTTTCAAGTTATGATCGTCACGAATTGAATTATAATCAAATTGCTTTGG  
GTCGGTTACCAACGTCAGTAATTGATGATTACACAATTCGCACAATTTCGAATTCG-----  
-----ATGCAGGGTCGTTTGTCTGCTGGCTAGCCAAGCATGA  
GCTAATTCATAGATCTTTAGGCTTTGATTACCAAGGAGTAGAACTTTACAAGTAAAGC  
CCGAGGATTGGCATTCCATTGCTGTCATTTTATACGTATATGGTTACAATTTTCTACGCTT  
CCAATGCGCCTATGATGTAACACCCGGAGGGCTGTTAGCTAGTGTGTATCATCTTACGA  
GAATAGAGTATGGTGTGGATCAACCAGAAGAGGTATGCATAAAAGTATTTGCCTCAAG  
GAGCAATCCTAGGATTCCATCCGTGTTCTGGGTTTGGAAAAGTGTGGATTTTCAAGAAC  
GAGAGTCTTATGATATGTTGGGAATCTCTTACGACAATCATCCACGCTTGAAACGTATCT  
TAATGCCCGAAAGTTGGATAGGATGGCCCTTACGTAAGGATTATATTGCCCCCAATTTTT  
ATGAAATACAAGATGCTCAT-----  
-----ATGAATTCT  
ATTGAGTTTCTTTACTTAATCGAACGATCCAAAATTCAGTTATTTCAACTACATTAAT  
GATCTTTCAAATTGGTCAAGACTCTCTAGTTTATGGCCGCTTCTCTATGGTACCAGTTGT  
TGCTTCATTGAATTTGCTTCCCTAATAGGGTACGATTTCGACTTTGATCGTTATGGACTA  
GTCCCAAGATCGAGTCCTCGACAGGCAGATCTAATTTAACAGCCGGAACAGTAACAA  
TGAAAATGGCCCCTTCCCTAGTAAGATTATATGAGCAAATGCCTGAACCAAAATATGTTA  
TTGCTATGGGAGCCTGTACAATTACCGGAGGTATGTTTCAGTACTGATTCTTATAGCACTG  
TTCGGGGAGTTGATAAGCTAATTCCTGTGGATGTCTATCTGCCGGGCTGCCACCTAAA  
CCGGAAGCAGTTATAGATGCTATAACAAAACCTTCGTAAGAAAATATCTCGAGAAATCTA  
TGAAGATAGAATTAGGTCTCAACAAGTGAATCGGTGTTTTACTACCAATCACAAGTTTC  
CGGTTGGACGCAGTATTCATACTGGAAATTATGATCAAGGATTCCTTTATCAACCGCCAT  
GGACTTCAGAGATACCTACTGAAACCTTTTTCAAATATAAAAGTTCAGTATCTTCCCATG  
AATTAGTCACTATGGAACTAGAAATACTTTTTCTTGGATAAAGGAACAGATTACTCGA  
TCTATTTCCGTATCGCTCATGATATATATCATAACTCAGACGGCCATTTCAAATGCATATC  
CCATTTTTGCACAGCAGGGTTATGAAAATCCACGCGAAGCGACGGGGCGTATTGTATGT

GCCAATTGTCATTTAGCTAACAAGCCCGTGGATATTGAGGTACCGCAAGCGGTACTTCC  
TGATACTGTATTTGAAGCGGTTGTCCGAATTCCTTATGATATGCAACTGAAACAAGTTCT  
TGCTAATGGTAAAAAAGGGGGTTTGAATGTAGGGGCTGTTCTTATTTTACCGGAAGGTT  
TTGAATTAGCTCCCCCGATCGTATTTCTCCCGAGATGAAAGAAAAGATAGGAAATTTG  
TCTTTTCAGAGCTATCGCCCTAATAAAAAAATATTCTTGTGATAGGCCCTGTCCCCGGT  
CAGAAATATAGTGAAATTGCCTTTTCTATTCTTTCCCTGACCCCGCTACTAAAAAAGAT  
GTTCACTTCTTAAATATCCTATATATGTAGGCGGGAACAGGGGAAGGGGTCAGATTTAT  
CCTGACGGGAGCAAGAGTAACAATACAGTTTATAATGCTACAGCAGCGGGTATAGTAA  
GGAAAATCATACGAAAAGAAAAGGGGGGATATGAAATAACCATAACAGATCCG---GAT  
GGACGTCAAGTGGTTGATATTATCCCCCAGGACCAGAACTTCTTATTTTCAGAGGGGGA  
ATCCCTGAAATTTGATCAACCATTAACGAGTAATCCTAATGTGGGCGGATTTGGTCAGG  
GGGATACAGAAATAGTACTTCAAGATCCATTACGTGTCCAAGGCCTTGTATTCTTCTTG  
GCATCTGTTATTTGGCACAATCTTTTTGGTTCTTAAAAAGAAACAGTTCGAGAAGGT  
TCAATTGGCTGAAATGAATTCATGAGTAAAGTTTATGATTGGTTCGAAGAACGTCTCG  
AGATTCAGGCGATTGCGGATGATATAACTAGTAAATACGTCCCCCCCCACGTCAATATAT  
TTTATTGTTTAGGTGGAATTACGCTTACTTGTTTCTTAGTACAAGTAGCTACGGGATTTG  
CTATGACTTTTTACTATCGTCCGACTGTTACTGAAGCTTTTGTCTCCGTTCAATACATAAT  
GACTGAAGCTAATTTTGGTTGGTTAATCCGATCAGTTCATAGATGGTTCGGCAAGTATGA  
TGGTCCTAATGATGATCCTGCATGTATTTCTGTGTATCTTACCGGTGGATTTAAAAAAC  
CTCGCAATTGACTTGGGTTACAGGTGTGGTTCTAGCTGTATTGACTGCGTCTTTTGGC  
GTAACTGGTTATTCTTACCCTGGGATCAAATTGGTTATTGGGCAGTGAAAATTGTAAC  
AGGTGTACCTGAAGCTATTCCTGTAATAGGATCCCCTTTGGTAGAATTATTGCGTGGAA  
GTGCTAGTGTGGGACAATCCACACTGACTCGGTTTTATAGTTTACACACTTTTGTATTGC  
CCTTCTTACTGCCGTATTTATGTTAATGCACTTTCCAATGATACGGAAACAGGGTATTT  
CTGGTCCTTTAATGGGAGTAACAAAAAACCTGACTTGAATGATCCTGTATTAAGAGCT  
AAATTGGCTAAAGGTATGGGTCCATAATTATTACGGAGAGCCTGCCTGGCCAATGACCT  
TTTATATATTTTCCAGTAGTAATTTTAGGTACTATTGCATGTAACGTAGGCTTAGCGGTC  
CTAGAACCATCAATGATTGGTGAACCGGCGGATCCGTTTGCAACTCCGTTGGAAATATT  
ACCGGAATGGTATTTCTTTCCCGTATTTCAAATCCTTCGTACAGTACCCAATAAATTATTA  
GGTGTCTTTTAATGGTTTTCAGTACCTACAGGATTATTAACGGTACCCTTTTTAGAAAAT  
GTTAATAAATTTCAAATCCATTCGTCTCGTCCGGTAGCGACAACCGTCTTTTTGATTGGT  
ACCGCAGTCGCTCTTTGGTTGGGTATTGGTGCAACATTACCTATTGATAAATCCCTAACT  
TTAGGTCTTTTTATGATTGAAGTTTTTCTATTTGGAATCGTCTTAGGTCTAATTCCTATTA  
CTTTGGCTGGGTTATTCGTAACCTGCATACTTACAATACAGACGTGGTGTATCAGTTGGAC  
CTTATGCTTACAATAACTAGTTATTTGGTTTTCTATTAGCGGCTTTAACTATAACCTCCG  
CTCTGTTTATTGGTTTAAAGCAAGATACGACTTATTATGGATATAGTAAAGTCTCGCTTGGG  
CTGCTTTAATGGTAGTCTTTACATTTTCCCTTTCGCTCGTAGTGTGGGGAAGAAGTGGAA  
CTCATGATTATTCGTTCCGGCGGAACCAGAAGTAAAAATTTTGGTAACTAGGGATCCTGT  
AAAACTTCTTTCGAGGAATGGGCCAAACCGGGTCATTTCTCAAGAACAATAGCTAAA  
GGGCCTGATACTACCACTTGGATCTGGAACCTACATGCTGATGCTCACGATTTTCGATAG  
CCATACCAGTGATTTGGAGGAGATATCTCGAAAGGTTTTTATGTGCCATTTTCGGCCAAC  
TCTCCATCATCTTTCTTTGGCTAAGCGGCATGTATTTCCACGGTGCTCGTTTTTCCAATTA  
TGAAGCATGGCTTAGTGATCCAACCTCACATTGGGCCTAGTGCCAGGTGGTTTTGGCCA  
ATAGTGGGCCAAGAAATATTGAATGGTGATGTGGGCGGAGGTTTTTCGAGGAATACAAA

TAACCTCCGGGTTTTTTCAGATTTGGCGAGCCTCTGGAATAACTAGTGAATTACAACAT  
ATTGTACCGCAATTGGTGCATTGGCCTTTGCCGCGTAATGCTTTTTGCTGGTTGGTTTC  
ACTATCATAAAGCAGCTCCAAAATTGGCTTGGTTTCAAGACGTAGAATCTATGTTGAAT  
CACCATTTGGCGGGGTTACTAGGACTTGGGTCTCTCTCTTGGGCAGGACATCAAGTACA  
TGTATCTTTACCAATTAATCAATTTCTAAACGCGGGAGTAGATCCTAAAGAGATAACCACT  
TCCTCATGAATTTATTTTGAATCGAGATCTTTTGGCTCAACTTTATCCCAGTTTTGCCGA  
GGGAGCAACCCCATTTTTTACCTTGAATTGGTCAAAAATATTTCGGAATTTCTTACTTTTTCG  
TGGAGGATTAGATCCAGTAACTGGGGGTCTATGGTTAACCGATATTGCACACCATCATT  
AGCTATTGCAATTCTTTTCTGATAGCAGGTCACATGTATAGGACCAACTGGGGCATTG  
GTCATGGTCTGAAAGAGATTTTAGAAGCTCACAAAGGCCCATTTACAGGTCAGGGTCA  
TAAAGGGCTATATGAGATCCTAACAACATCATGGCATGCTCAATTAGCCCTAACCTAGC  
TATGTTAGGCTCTTTAACCAATTGTTGTAGCTCACCATATGTATTCTATGCCCCCTATCCA  
TATCTAGCTACTGACTATGGTACACAACACTGTCTGTTGTTACACATCACATGTGGATTGGT  
GGATTTCTCATAGTTGGGGCTGCTGCGCACGCAGCTATTTTTATGGTAAGAGACTATGAT  
CCAACTACTCGATAACAACGATCTATTAGATCGTGTCTTCGACATCGTGATGCAATCATA  
TCACATCTCAACTGGGTATGTATATTTCTAGGCTTTCACAGTTTTGGTTTTGTATATTCATA  
ATGATAACCATGAGTGCTTTAGGGCGTCTCAAGATATGTTTTTCAGATACCGCTATCCAAT  
TACAACCTGTTTTTGGCTCAATGGATACAAATAACCCACGCTTTTTGCGCCTGGTGCGACA  
GCCCCCGGTGCAACAGCAAGCACCAGTTTAACTTGGGGGGGGGGGGTTTTAGTAGCA  
GTGGGTGGCAAAGTAGCTTTGTTACCTATTCCATTAGGAACCGCAGATTTTTTGGTCCA  
CCACATTCATGCATTTACGATTCATGTGACGGTATTGATACTCCTTAAAGGTGTTTTATTT  
GCTCGTAGTTCCCGTTTAAATACCGGATAAAGCAAATCTTGGTTTTCGTTTTCTTGTGAT  
GGACCCGGAAGAGGGGGTACATGCCAAGTATCGGCTTGGGATCATGTCTTCTTAGGAC  
TATTCTGGATGTACAATGCAATTTCCGGTAGTAATATTCATTTTCAGTTGGAAAATGCAGT  
CAGATGTTTGGGGCAGTATAAGCGATCAAGGGGTAGTAAGTCATATCACGGGAGGAAA  
CTTTGCGCAGAGTTCTATTACTATTAATGGGTGGCTACGTGATTTCTTATGGGCGCAGGC  
ATCCCAGGTAATTCAGTCTTATGGTTCATCATTATCTGCCTATGGCCTTTTTTTCCTAGGT  
GCTCATTTTTGTATGGGCTTTTAGTTTAAATGTTTCTATTTCAGCGGACGTGGTTATTGGCAA  
GAACTTATTGAATCTATCGTTTTGGGCTCATAATAAATTAAGTTGCTCCTGCTATTTCAG  
CCGAGAGCCTTGAGCATTGTACAAGGACGTGCTGTAGGAGTAACCCATTACCTTCTGG  
GTGGAATTGCCACAACATGGGCATTCTTCTTAGCAAGAATTATTGCAATAGGAATGGCA  
TTAAGATTTCCAAGTTTTAGCCAAGGCTTAGCTCAGGACCCCACTACTCGTCGTATTTG  
GTTTGGTATTGCTACCGCACATGACTTCGAGAGTCATGATGATTACTGAGGAACGTC  
TTTATCAGAATATTTTTGCTTCTCACTTCGGTCAATTAGCAATAATTTTTCTGTGGACTTC  
CGAAATCTGTTTCATGTAGCTTGGCAAGGAAATTTGAGTCATGGGTACAGGACCCTT  
TACATGTAAGACCTATTGCTCATGCAATTTGGGATCCTCATTTTGGTCAACCGGCCGTGG  
AAGCTTTTACTCGAGGCGGTGCTCTTGGCCCAGTGAATATTGCTTATTCTGGTGTATTATC  
AGTGGTGGTATAACAATCGGTTTACGCACTAATGAAGATCTTTATACTGGAGCTCTTTTTTC  
TATTATTTCTTTCTGCGCTATTCTTAATAGCAGGTTGGTTACACCTACAACCGAAATGGA  
AACCAAGCGTTTCTGGTTCAAAAATGCCGAATCTCGTCTGAATCATCATTTGTGAGGA  
CTGTTCCGGCGTAAGTTCTTGGCTTGGACAGGGCATTTAGTACATGTGCTATTCTG  
ATCCAGAGGGGAGTATGTTTCGATGGAATAATTTCTTAGATGTATTACCGCATCCCCAAGG  
GTTAGGTCCACTTTTTACAGGTCAATGGAATCTTTATGCTCAAAAACCCCGATTCAACTA  
GTCATTTATTTGGGACCTCCAAGGAGCAGGAACTGCCATTCTAACTCTTCTTGGAGGA

TTTCATCCGCAAACGCAAAGTTTATGGCTGACTGATATTGCTCATCATCATTTAGCTATT  
GCATTTATTTTTCTCATTGCTGGTCATATGTATAGAACCAATTCGGGATTGGGCACAGTA  
TGAAAGATCTTTTAGATGCACACGTTCCCTCCGGGAGGACGGTTGGGACGTGGGCATAA  
GGGTCTTTATGACACAATCAACAATTCGCTTCATTTTCAATTAGGCCTTGCTCTAGCTTC  
TTAGGGGTTATTACTTCCTTAGTAGCTCAACATATGTATTCTTTACCTGCTTATGCATTC  
ATAGCACAGGACTTTACTACCCAAGCTGCATTATATACTCATCACCAATATATTGCAGGA  
TTTATCATGACAGGAGCTTTTGCTCATGGAGCTATATTTTTTCATTAGAGATTACAATCCG  
GAGCAAATGAAGATAATGTATTGGCAAGAATGCTAGACCATAAAGAAGCTATCATATC  
TCATTTAAGCTGGGCCAGCCTCTTTTTAGGATTCCATACCCTGGGACTTTATGTTCATAA  
TGATGTCATGCTTGCCTTTGGTACTCCGGAGAAACAAATCTTGATCGAACCTATATTTGC  
CCAATGGATAACAATCAGCTCATGGGAAAACCTTCATATGGGTTCGATGTACTTTTATCGTC  
ACAAGCGGGCCGGCATTCAATGCGGGTCGAAACATCTGGTTGCCTGGTTGGTTAAAT  
GCTGTAAATGAA-----AATAGCAATTCATTATTCTTAACAATAGGTCCCTGGAGACTTTTTG  
GTTTCATCATGCTATTGCTCTGGGTTTACATACAACTACATTGATCCTAGTGAAGGGTGCT  
TTAGATGCGCGCGGATCCAAGTTAATGCCAGATAAAAAAGATTCGGTTATAGTTTTCC  
GTGCGACGGCCCGGGGCGAGGCGGTACTTGTGATATTTCCGGCATGGGACGCATTTTATT  
TGGCAGTTTTTTGGATGTTAAATACTATTGGATGGGTTACTTTTTTATTGGCATTGGAAGC  
ATATCACGTTGTGGCAGGGTAATGTTTCACAATTAATGAATCTTCCACCTATTTGATGG  
GCTGGTTAAGAGATTATTTATGGTTAAACTCTTCACAACCTATCAATGGATATAATCCTTT  
TGGTATGAATAGTTTGTCCGGTCTGGGCATGGATGTTCTTATTTGGACATCTTGTTTGGGC  
GACTGGATTTATGTTCTTAATTTCCCTGGCGTGGTTATTGGCAGGAATTGATTGAAACTTT  
AGCTTGGGCTCATGAACGTACACCTTTAGCCAATTTGATCCGCTGGAGGGATAAACCA  
GTGGCCCTTTCCATTGTGCAAGCAAGATTAGTTGGATTAGCCCACTTTTCTGTAGGTTAT  
ATATTCACCTATGCGGCTTTCTTGATTGCCTCTACGTCGGGCAAATTTGGTATGTCACAT  
TCCGTAAAGATTTATGATACATGTATAGGATGTACTCAATGTGTCCGAGCCTGCCCTACC  
GATGTATTAGAAATGATACCTTGGGACGGATGTAAAGCTAAACAAATTGCTTCGGCTCC  
AAGAACAGAAGACTGCGTTGGTTGTAAGATGTGAATCCGCCTGTCCAACGGATTC  
TTGAGTGTTCGGGTTTATTTAGGGGCTGAAACAACCTCGCAGTATGGGTCTAGCTTAT----  
---ATGAACCTTCCCGCTTTTTTTGTGCCTTTAGTAGGCCTAGTTTTTCCGGCAATTGCAA  
TGGCTTCTTTATCTCTTCATGTTCAAGAAAACAAGATTGTTATGCGAGATTTAAAAACAT  
ATCTTTCTGTGGCACCAGTACTAAGTACGCTATGGTTCGGGGCTTTAGCAGGTCTATTGA  
TAGAGATTAATCGTTTTTTTTCCGGATGCGTTGACATCCCCTTTTTTTTCATTTATGACTGC  
AATTTTAGAGAGACGCGAAAGCGAAAGCCTGTGGGGTCGCTTCTGTAACCTGGATAACT  
AGCACTGAAAACCGTCTTTACATTGGATGGTTTGGTGTTTTTGATGATCCCGACCTTATT  
GACCGCAACTTCCGTATTTATTATCGCCTTCATTGCTGCTCCTCCTGTAGATATTGATGGT  
ATTCGTGAACCTGTTTCTGGATCTTTACTTTACGGAAACAATATTATTTCTGGTGCCATTA  
TTCTACTTCTGCAGCTATAGGTTTGCACCTTTACCCAATCTGGGAAGCGGCATCCGTT  
GATGAATGGTTATATAATGGTGGTCCTTATGAACTAATTGTTCTACACTTCTTACTTGGTG  
TAGCTTGTACATGGGTCGTGAGTGGGAGCTTAGTTTCCGTCTGGGTATGCGACCTTGG  
ATTGCGGTTGCATATTCAGCTCCGGTTGCAGCTGCTACCGCAGTTTTTCTTGATCTACCCA  
ATCGGTCAAGGAAGTTTTTCTGATGGTATGCCTCTAGGAATCTCTGGTACTTTCAACTTC  
ATGATTGTATTCCAGGCTGAGCACAACATCCTTATGCACCCATTTACATGTTAGGCGTA  
GCTGGGGTATTCGGCGGCTCCCTATTCAGTGCTATGCATGGTTCCCTGGTAACTTCTAGT  
TTGATCAGGGAAACCACAGAAAATGAATCTGCTAATGAAGGTTACAGATTCCGGTCAAG

AGGAAGAACTTATAATATCGTAGCCGCTCATGGTTATTTTGGTCGATTGATCTTCCAAT  
ATGCTAGTTTCAACAACCTCTCGTTTCGTTGCACTTCTTTCTAGCTGCTTGGCCTGTAGTAG  
GTATCTGGTTCACTGCTTTAGGTATCAGCACTATGGCTTTTAACTAAATGGTTTCAATT  
TCAACCAATCTGTTGTTGATAGTCAAGGCCGTGTAATTAATACTGGGCTGATATCATT  
ACCGTGCTAACCTTGGTATGGAAGTTATGCATGAACGTAATGCTCATAATTTCCCTCTAG  
ACCTAGCTGCTATAGAAGCTCCATCTATCAATGGCATGGGTTTGCCTTGGTATCGTGTT  
ATACCGTTGTATTGAATGATCCCGGCCGTTACTTTCTGTTTATATAATGCATACAGCTCT  
GGTTGCTGGTTGGGCCGTTTCGATGGCTCTGTATGAATTAGCAGTTTTTGGATCCCTCTG  
ACCCTGTTCTTGATCCAATGTGGAGGCAGGGTATGTTTCGTTATACCCTTCATGACTCGTT  
TAGGAATAACCAATTCATGGAGCGGTTGGAGTATCACA---GGAGGGGCTGTAACGAATC  
CGGGTATTTGGAGTTACGAAGGTGTAGCTGGAGCACATATTGTATTTTCTGGGTTATGCT  
TTTTGGCAGCTATCTGGCATTGGGTATATTGGGATCTAGAAATTTTTTCTGATGAACGGA  
CAGGGAAACCTTCTTTGGATTTGCCTAAGATCTTTGGAATTCATTTATTTCTTTCCGGGG  
TGGCTTGCTTTGGTTTTGGTGCATTTTCATGTAACCGGCTTGTATGGTCCTGGAATATGGG  
TGTCGGACCCTTATGGACTAACAGGAAAAGTACAACCCGTAGATCCAGCATGGGGCGT  
GGAAGGTTTTGATCCTTTTGTTCGGGAGGAATAGCCTCTCATCATATTGCAGCAGGGA  
CGCTGGGGATATTAGCGGGTCTATTCCATCTTAGTGTCCGCCCCCACAACGTCTATACA  
AGGGATTGCGTATGGGAAATATTGAAACCGTCTTTTCTAGTAGTATCGCTGCTGCTTTTT  
TTGCAGCTTTTTGTTGTTGCCGGAACCTATGTGGTATGGTTCAGCAACTACTCCGATCGAA  
TTATTTGGGCCACTCGTTATCAATGGGATCAGGGCTACTTCCAGCAAGAGATATATCGA  
AGAGTTAGTGCTGGGCTAGCAGAAAATCAAAGTTTATCAGAAGCCTGGTCTAAAATTC  
CTGAAAATTAGCTTTTTTATGATTACATCGGAAATAATCCGGCGAAAGGGGGATTATTC  
AGGGCGGGTTCGATGGATAGCGGGGATGGAATAGCAGTTGGATGGTTAGGACACCCCA  
TCTTTAGAGATAAAGAAGGACGTGAACTTTTTGTACGTCGTATGCCTACCTTTTTTTGAA  
ACATTCCCAGTCGTTTTGGTAGACGGCGACGGAATTGTTAGAGCGGATGTTCCTTTTCG  
AAGGGCAGAATCGAAATATAGTGTTGAACAAGTAGGTGTAAGTGTGAGTTCTACGGC  
GGCGAACTCAACGGAGTGAGTTATAGTGATCCCGCTACTGTGAAAAAATATGCTAGAC  
GCGCTCAATTGGGTGAAATTTTTGAATTAGATCGTGCTACTTTGAAATCCGATGGTGT  
TTCGTAGCAGTCCAAGGGGTTGGTTTACTTTTGGACATGCTTCATTTGCTTTGCTCTTCT  
TCTTTGGACACATTTGGCATGGTGCTAGAACCTTGTTCAGAGATGTTTTTGGCCGAATT  
GACCCGGATTTAGATTCTCAAGTAGAATTTGGAACATTCCAAAAAGTAGGGGATCCGA  
CTACAAGAAGACCGGCAGTC-----GTGGAAACGCTCTTTAATGG  
AACTTTAGCTTTAGCTGGTCGTGACCAAGAAACCACCGGTTTCGCTTGGTGGGCCGGA  
AATGCCCGACTTATCAATTTATCCGGTAAACTGCTAGGAGCTCATGTAGCCCACGCTGG  
ATTAATCGTATTCTGGGCCGGAGCAATGAACCTATTTGAAGTGGCTCATTTCGTACCAG  
AGAAACCGATGTATGAACAAGGGTTAATTCTACTTCCCCACCTAGCTACTCTAGGTTGG  
GGGGTAGGTCCTGGGGGGGAAGTTATAGACACTTTTCCGTACTTTGTATCTGGAGTACT  
TCATTTAATTTCTCTGCGGTTTTGGGTTTTGGTGGTATTTATCATGCGCTTCTTGGTCT  
GAGACGCTTGAAGAATCTTTTCCATTCTTTGGTTATGTATGGAAAGATAGAAATAAAAT  
GACCACAATTTAGGTATTTCACTTAATCTTGTAGGTCTAGGTGCCTTTCTTCTAGTATTC  
AAGGCTCTCTATTTTGGGGGCGTGTATGATACTTGGGCTCCGGGAGGGGGAGATGTAA  
GAAAAATTACCAACTTGACTCTTAGCCCGAGTATCATATTTGGCTATTTACTAAAATCGC  
CCTTTGGAGGGGAAGGGTGGATTGTTAGTGTGGACGATTTAGAAGATATAATCGGAGG  
ACATGTATGGTTAGGTTCCATTTGTCTACTTGGCGGAATCTGGCATATCTTAACAAAACC

CTTCGCGTGGGCTCGACGCGCACTTGTGTGGTCTGGAGAGGCTTACTTATCTTATAGTT  
TAGGGGCTTTATCTGTCTTTGGTTTCATTGCGTGTTGTTTTGTCTGGTTCAATAATACCG  
CTTATCCTAGTGAGTTTTACGGACCCACTGGGCCAGAAGCTTCTCAAGCTCAAGCATT  
ACTTTTCTAGTTAGAGACCAACGTCCTTGGGGCTAACGTGGGATCCGCGCAAGGGCCTA  
CTGGTTTAGGTAAATATCTAATGCGTTCCTCAACCGGAGAAGTCATTTTTGGAGGAGAA  
ACAATGCGTTTTTGGGATCTGCGTGCTCCTTGGTTAGAACCTCTAAGGGGTCCAAATGG  
GTTGGACTTGAGTAGGTTGAAAAAAGACATACAACCTTGGCAAGAACGGCGTTCAGC  
AGAATATATGACTCATGCTCCTTTAGGTTCTTTAAATTCCGTGGGTGGCGTAGCTACCGA  
GATCAATGCAGTCAATTATGTCTCTCTAGAAAGTTGGTTAGCTACCTCTCATTTTTGTTCT  
AGGATTCTTCTTCTTCGTAGGTCATTTGTGGCACGCGGGAAGGGCTCGTGCAGCTGCA  
GCAGGATTTGAAAAAGGGATTGATCGTGATTTTGAACCTGTTCTTTCCATGACCCCTCT  
TAATATGACTATAGCCCTTGGTAAATATAACCAAAGACGAAAAAGATTTATTTGATACTAT  
GGATGACTGGTTACGTAGGGACCGTTTCGTTTTTGTAGGCTGGTCCGGTCTATTGCTCT  
TTCCTTGTGCCTATTTTCGCTTTAGGGGGTGGTTTACAGGTACAACCTTTGTAACCTCAT  
GGTATAACCATGGATTGGCCAGTTCCTATTTGGAAGGCTGCAATTTCTTAACTGCCGCA  
GTTTCTACTCCTGCTAATAGTTTGGCGCATTCTTTGTTATTACTATGGGGTCCCGAAGCA  
CAAGGAGATTTACTCGTTGGTGTCAATTAGGCGGTCTGTGGACTTTTGTGCTCTTCA  
TGGCGCTTTCGCATTAATAGTTTTCATGTTACGTCAATTCGAGCTTGCTCGATCTGTTCA  
ATTGCGACCTTATAATGCAATCGCATTCTCTGGTCCAATTGCTGTTTTTGTCTGTATTC  
TTGATTTATCCACTAGGCCAATCTGGTTGGTTCTTTGCGCCAGTTTTGGCGTAGCAGCT  
ATATTTTCGATTTATCCTCTTTTTTCAAGGGTTTCATAATTGGACATTGAATCCCTTTCATAT  
GATGGGAGTTGCCGGTGTATTGGGGGCTGCTTTGCTATGTGCTATTCATGGTGCTACCGT  
AGAAAATACTTTATTTGAAGACGGCGACGGTGCAAATACATTCCGTGCTTTTAAACCAA  
CTCAGGCTGAAGAACTTATTCAATGGTCACCGCTAACCGCTTTTGGTCCCAAATCTTT  
GGGGTTGCTTTTTTCCAATAAACGTTGGTTACATTTCTTTATGTTATTTGTACCAGTAACC  
GGTTTATGGATGAGCGCTCTTGGAGTAGTTGGCCTGGCCCTGAACCTACGTGCCTATGA  
CTTCGTTTCTCAGGAAATTCGAGCAGCGGAAGATCCGGAATTTGAGACTTTCTACACC  
AAAAATATTCTCTTAAACGAAGGTATTTCGTGCTTGGATGGCGGCTCAAGATCAGCCTCA  
TGAAAACCTTATATTCCCTGAGGAGGTTCTACCACGTGGAAACGCTCTTATGTCCGGAA  
GCACAGGAGAACGTTCTTTTGTGATATTATTACCAGTATTTCGATACTGGGTTCATTCATA  
GCATTACTATACCTTCCCTATTCATTGCGGGTGGTTATTTGTTCAGCACCGTTTTAGCTTA  
TGATGTGTTTGAAGTCCTCGGCCAACGAGTATTTACAGAGAGCCGACAGGGAATT  
CCATTAATAACTGGCCGTTTTGATCCTTTGGAACAACCTGATGAATTTAGTAGATCTTTT  
ATGACTATAGATCGAACCTATCCAATTTTTACAGTACGATGGTTGGCTGTTACGGTCTA  
GCCGTACCTACCGTCTTTTTTTGGGATCAATATCAGCAATGCAGTTCATCCAACGAATG  
GCTACACAACTGTTGAGAACAGTTCTAAATCTGCT--CCAAGACGAACTAATGCAGG  
GAGTTTATTAACCAATTGAATTCGGAATATGGTAAAGTAGCCCTGGGTGGGGAACAA  
CTCCTTTGATGGGTGTCGCAATGGCCCTATTTACAGTATTTCTATCTATTATTTGGAGAT  
TTATAATTCTTCCGTTTTATTGGATGGAATTTCAATGAATATGCTTACTCTCAAACCTTTT  
GTTTACACAGTAGTGATATTTTTTGTCTCTCTTCATCTTTGGATTCCATCTAATGATC  
CTGGACGTAATCCTGGACGCGAAGAAATGGCCGATACTACTGGAAGGATTCCTCTTTG  
GATAATAGGTAAGTACAGGTATTCTTGTGATCGGTTTACTAGGTGTTTTCTTTTATGGT  
TCATATTCTGGATTGGGTTTCGTCCTCATGCTTAATATCTTTAGTTTGATCTGTATCTGTC  
TTAATTCTGCCTTTTAT--AGTAGTTTTTTCTTCGGAAAATTGCCCGAGGCCTACGCTTTT



TTGAACCCAATCGTAGATGTTATGCCAGTCATACCCGTGTTCTTTTTTCTCTTAGCTTTT  
GTTTGGCAAGCTGCTGTAAGTTTTTCGAATGACACAATCAAACCCGAACGAACAAAATG  
TTGAATTGAATCGTACCAGTTTATACTGGGGGTATTACTCATTTTTTGTAAGTGTGTTTT  
ATTTTCCAATTATTTTTTCAATATGGAAGTAAATATTCTTGCAATTTGTTGCTACTGCACTA  
TTCATTCTAGTTCCTACCGCCTTTCTACTTATCATTTACGTAAAAACAATCAGTCAAAT  
GATATGGAAACAGCAACCCTTGTAGCCGTCTTTCTATCTGGTTTACTTGTAAGTTTTACT  
GGGTACGCCTTATATAACCGCTTTTGGGCAACCTTCTCAACAATAAGAGATCCGTTTTGA  
GGAACATGGGGACATGGAAGCACTGGTTTATACATTCTCTTAGTCTCGACTCTAGGAA  
TAATTTTTTTCGCTATTTTTTTCGAGAACCGCCTAAAATTTCAACTAAAAGGTTGAAAA  
TGACTCTTGCTTTCCAATTGGCTGTTTTTGCATTAATTGCTACTTCATCAATCTTATTGAT  
TAGCGTGCCCGTTGTATTTGCTTCTCTGATGGTTGGTCGAGTAACAAAAATGTTATATT  
TTCCGGTACCTCATTATGGATTGGGTTAGTCTTTTTAGTCGGTATTCTTAATTCGCTCATC  
TCT-----ATGTCACCACAAACAGAGACTAAAGCAAGTGTGGATTCAAAGCC  
GGTGTAAAGAGTACAAATTGACTTATTATACTCCTGAATACGAAACAAAAGATACTGA  
TATCTTGGCAGCATTCCGAGTAACTCCTCAACCCGGAGTCCACCTGAAGAAGCAGGG  
GCCGCGGTAGCTGCCGAATCTTCTACTGGTACATGGACAACCTGTTTGGACCGATGGACT  
TACTAGCCTTGACCGTTACAAAGGGCGATGCTACCACATCGAGGCCGTTCTGAGAA  
GAAGATCAATTTATTGCTTATGTAGCTTACCCTTTAGACCTTTTTGAAGAAGTTCTGTT  
ACTAACATGCTTACTTCCATTGTAGGTAATGTATTTGGGTTCAAAGCCCTACGCGCTCTA  
CGTCTGGAAGATTTGCGAATCCCTCAGGCTTATATTAACCTTCCAAGGCCCGCCGCA  
TGGCATCCAGGTTGAGAGAGATAAATTGAACAAATATGGTCGTCTCTGTTGGGATGTA  
CTATTAACCAAATTGGGGTTATCAGCTAAAACTATGGTAGGGCGGTTTATGAATGT  
CTTCGTGGTGGACTTGATTTTACCAAAGATGATGAAAACGTCAACTCCCAACCGTTTAT  
GCGTTGGAGGGATCGTTTCTTGTTTTGTGCCGAAGCAATTTTTAAATCACAGGCTGAAA  
CCGGCGAAATCAAAGGGCATTACTTGAATGCTACTGCAGGTACATGCGAAGAAATGTA  
CAAAGAGCTATATTGCTAGAGAATTGGGAGTTCTTATAGTAATGCATGACTACTTAAC  
AGGGGGATTCACTGCAAATACGAGCTTGGCTCATTATTGCCGAGATAATGGCCTACTTC  
TTCACATCCACCGTGCAATGCACGCAGTTATTGATAGACAGAAGAATCATGGCATGCAC  
TTCCGCGTACTAGCTAAAGCGTTACGTATGTCTGGTGGAGATCATATTCACGCGGGTAC  
CGTAGTAGGTAACCTTGAAGGGGAGAGAGACATCACTTTGGGCTTTGTTGATTTATTGC  
GTGATGATTTTATTGAAAAAGATCGAAGTCGCGGGATTTATTTCACTCAAGATTGGGTC  
TCTCTACCAGGTGTTCTGCCGGTGGCTTCAGGGGGTATTACGTTTGGCATATGCCCGC  
TCTGACCGAGATCTTTGGGGATGATTCTGTACTACAGTTCGGTGGAGGAACCTTTAGGAC  
ACCCTTGGGGTAATGCGCCAGGTGCCGTAGCGAATCGAGTAGCTCTAGAAGCATGTGT  
ACAAGCTCGTAATGAAGGGCGCGATCTTGTGTTGAGGGTAATGAAATTATCCGTGAG  
GCTAGCAAATGGAGTCCCTGAACTGGCGGCTGCTTGTGAGGTATGGAAGGAGATCAGAT  
TTAATTTTAAAGCAGTGGATACTTTG-----ATGGCGATACATTTATACAAAACCTTCTACCC  
CGAGCACACGCAATGGAACCGTAGACAGTCAAGTGAAATCCAATCCACGAAATAATTT  
GATCTATGGACAACATCGTTGTGGTAAAGGTCGTAATGCCAGAGGAATCATTACCGCAG  
GGCATAGAGGGGGAGGTCATAAGCGTCTATACCGTAAAATCGATTTTTCGACGGAATGA  
AAAAGACATATATGGTAGAATCGTAACCATAGAATACGACCCTAATCGAAATGCATACAT  
TTGTCTCATACTACGGGGATGGCGAGAAGAGATATATTTTACATCCCAGAGGGGCTA  
TACTTGGAGATAACATTGTTTCTGGTACAGAAGTTCCTATAAAAATGGGAAATGCCCTA  
CCTTTGACCGATATGCCCTTAGGCACGGCCATACATAACATAGAAATCACACTTGAAAA

GGGTGGACAATTAGCTAGAGCAGCGGGTGCTGTAGCGAAACTGATTGCAAAAGAGGG  
GAAATCGGCCACATTAATAATTACCTTCTGGAGAGGTCCGTTTGATATCCAAAACTGCT  
CAGCAACAGTCGGACAAGTGGGGAATGTTGGGGTGAACCAGAAAAGTTTGGGTAGAG  
CCGGATCTAAGCGTTGGCTAGGTAAGCGGCCTGTAGTAAGAGGAGTAGTTATGAACCC  
TGTAGACCATCCCCATGGGGGTGGTGAAGGGAGAGCCCCAATTGGTAGAAAAAACC  
CACAACCCCTTGGGGTTATCCTGCACTTGGGAAGAAGAAGTAGAAAAAGGAATAAATAT  
AGTGATAATTTGATTCTTCGTCGCCGTAGTAAAATGATTCAATCTCAGACCCATTTAAAT  
GTAGCAGATAACAGCGGGGCGCGAGAACTGATGTGTATTCTGAATCATAGGAGCTAGC---  
AATCGTCGATATGCTCATATTGGTGACGTTATTGTTGCTGTGATCAAAGAAGCCGTACCA  
AATATGCCCTAGAAAAATCAGAAGTGGTCAGAGCTGTAATTGTGCGTACCCGTAAAG  
AATTCAAACGTGAGAACGGTATGATAATTCGATATGATGACAATGCTGCAGTTGTTATTG  
ACCAAGAAGGAAATCCAAAAGGAACGCGAATTTTTGGCGCGATCGCTCGGGAATTAA  
GACAATTTAATTTTACTAAAATAGTTTCATTAGCTCCCGAAGTATTAATGCTTAGTCCCA  
AACGAACCAGATTCCGTAAACAACATAGAGGAAGAATGAAGGGAATATCGTATCGAGG  
GAATCGTATTTGTTTCGGTAAATATGCTCTTCAGGCACTCGAACCCGCGTGGATCACAT  
CTAGACAAATAGAAGCCGGTCGACGGGCAATGACACGAAATGCACGTCGTGGTGGAA  
AACTATGGGTACGTATATTTCCAGACAAACCAGTTACACTAAGGGCCGCAGAAACACG  
TATGGGTTCTGGGAAAGGATCCCCGAATATTGGGTAGCTGTTGTTAAACCAGGCCGA  
ATACTTTATGAAATGGGCGGAGTAAAAGAAAATATAGCTAGAAGAGCTATTTCAATAGC  
AGCATCCAAAATGCCTATACGGACTCAATTCATTATTTTCGGAGATGACTAGAATTAGAC  
GGGGATATATAGCTCGTAGACGTAGAACAAAAATGCGTTTATTTGCATTAAGCTTTCTGA  
GGGGCCATTCAAGACTTACTCGAACTATTACTCAACAGAAAATAAGAGCTTTGTTTTC  
GGCTGATCGAGATCGGGGCAGTCAAAGAGAAAATTTTCGTCGTTTGTGGATCACTCGG  
ATAAACGCAGTAATTCGCGAA---AAGGCGGTATACTATAGTTATAGTAGATTAATACACG  
ATCTGTACAAGGGCCGGTTGCTTCTTAATCGTAAAATACTTGCACAAATAGCTATATTA  
ATAGAGATTGTCTTTATATGATCTCCAACGAGATAATAAAAGAAGTAGGTTATAAAAAGT  
CCGTCGGAATAATTATGCTAAAAGAAGTATATGCTTTAGGTCAACATATCTCTATGTCTG  
CTGACAAAGCACGAAGAGTAATTGACCAAATTCGTGGACGTTCCCTATGAGGAAACACT  
TATGATACTCGAACTTATGCCCTATCGAGCATGTTATCCCATTTTTAAATTGGTTTATTCT  
GCAGCAGCAAATGCTAGTTACAATATGGGTTCTGAACGAAGCCAATTTAGTAATTAGTAA  
AGCCGAAGTCAATAAGGGTACTACTATCAAGAAATTCAAACCTAGGGCTCGAGGACGT  
AGTTATCCGATAAAAAACCTACCTGTCATATAACTATTGTAATGGACGATATTTCTTTA  
GATGGGGGAATATGGGACAAAAAATGGATGGAATCAAATATGCAGTATTTACAGACA  
AAAGTATTCGGTTATTGGGGAAAAAT---CAATATACTTCTAATGTGCAATCGGGATCAAC  
TAGGACAGAAATAAAGCATTGGGTGCAACTCTTCTTTGGTGTCAAGGTAATAGCTATGA  
ATAGTCATCGACTTCCGGGAAAGGGTAGAAGAATGGGACCTATTATGGGACATACAATG  
CATTACAGACGTATGATCATTACGCTTCAACCGGGTATTCTATTCCACCTCTTAGAAAG  
AAAAGAACTATGGCCGTTCCAAAAAACGTATTTCTACATCAAAAAAGCGTATTCGGA  
AAAATATTTGAAAAAGGAAGGGATATTGGACAGCATTAAAAGCTTTTTTCGTTAGGGAA  
ATCCCTTTCTACAGGAAATTCAAAAAGTTTTTTTTGTGCAACAAAAAAT---ATGGCCAA  
GGGTAAAGATGTCCGAGTAACGGTGATTTTGGAAATGTACCAGTTGTGTCCGAAACGGG  
GTTAATGGG-----GTATCAAGAGGCATTTCCAGATACATTACTCAAAGAACCGTCACAA  
GACACCTAATCGATTAGAATTGAGAAAAATTTGTCCGCATTGTTACAAATATACAATTC  
TGGAGAGATAAAGAAAATGAAAATCAGAGCTTCTGTTCGTAAAATTTGTGACAAATGT

CGACTAATCCGCAGGCGGGGTCGAATTATAGTAATTTGTTCCAATCCGAGACATAAACA  
AAGGCAGGGAATGGTTCGAGAGAAAATAACAGTATCTACTCGGACACTACAGTGGAAA  
TGTGTTGAATCAAGAACAGAGAGTAAACGTCTTTATTATGGGCGTTTTATTCTGTCTCC  
ACTTCTGAAAAGTCAAGCCGACACAATAGGCATTGCGATGCGAAGAGCTTTGCTTGA  
GAAATAGAAGGAACATGTATTACACATGTAAAATTTGAT-----AAAATACCGCATGAATAT  
TCTACCATAAAAAGGTATTCAAGAATCGGTACATGAAATCTTAATGAATTTGAAAGAAAT  
TGTATTGAGAAGTAATCTATATGAACCTTGTGACGCCTATATTTGTGTGACGGGGGCCAG  
ATCTGTAACCTGCCAAGATATCGTCTTACCACCTTATGTAGAAATAGTTGATAATACACA  
ACATATAGCTAACTTGACGGAACCGATCAATTTGTGTATTGTATTAATAATCGAGAGAA  
ATCGCGGATATCTTATACAAACGCCACAG---AACGTTGATGGAAGTTAT-----CCTATCGA  
TGCTGTATTCATGCCTGTTTCGAAATGCAAATCATAGTGTTCATTCTTATGGGAATGGGAA  
TGAAAAACAAGAGATACTTTTTCTCGAAATATGGACAAACGGAAGTTTAACTCCGAAA  
GAAGCACTTCATGAAGCATCCCGGAATCTGATTGATTTGTTTATTCCCTTTTTACATATG  
GAAGAAGAA-----AACTCACATTTAGAGAACAATCAA---CACAGGGTTCCTTTATTCCCT  
TTTACCTTTCACGATAAACTGACT--AACTCATAAAAAATAAAAAA---GAAATAGCATT  
GAAATCAATTTTTATTGACCAATTAGAATTGCCTCCAGGATCTATAATTGCCTCAAAAG  
GTCCAATATATATACTATTGGACCTTTTGAATAACAGTCAAGAAGACCTTATGAAAAT  
TGAACATTTTCGCATAGAAGATGTAAAACAGATATTGGTCGTTCTAGAAAAACAT-----T  
TGGCAATTTTTTTTACCGAAAAAAAAGATGCTCGTGGATGGA---AATGAGGGAATGTCTA  
CAATACCTGGATTTAATCAGATCCAATTTGAAGGATTTTGTAGGTTTATTGATCGGGGTT  
TGCCGGAAGAACTTTATAAGTTTCCAAAAATCGAAGATACAGATCAAGAAATCGAATTT  
CAATTATTTGTGGAAACATATCAATTAGTAGAACCTTTGATAAAGGAAAGAGATGCTGT  
GTATGAATTAATCACATATCTTCTGAATTATATGTATCCGCGGGATTAATTTGGAAAAT  
AGTAGGGACGTGCAAGAACAACGATTTTTATTGGAAACATTCCTCTAATGAATTCCT  
AGGAACTTTTATAGTAAATGGAATATATAGAATTGTGATCAATCAATATTGCAAAGCCC  
CGGTATTTATTACCGGTCAGAGTTGGACCATAACGGAATTTCCGTCTATACCGGCACCAT  
AATATCAGATTGGGGAGGAAGATCACAATTAGAGATTGATAGAAAAGCAAGGATATGG  
GCTCGTGTGAGTAGGAAACAAAAATATCTATTCTAGTTCTATCATCAGCTATGGGTTCC  
AATCTAAGAGAAATTATAGAGAATGTTTGTATCCTGAATTTTTTTTGTCTTTTCTGAAT  
GATAAGGAGAGAAAAAAATTCGGTCAAAGAAAATGCCATTTTGGAGTTTATCAAC  
AATTTGCTTGTGTAGGTGGAGATCCGGTATTTTCTGAATCCTTATGTAAGGAATTGCAA  
AGAAATCTTCCAACAAAGATGTGAATTAGGAAGGATTGGGCGACGAAATATGAACCG  
AAGACTGAACCTTGATATACCCAGAACAAATACATTTTTGTTACCACGGGATATATTGGC  
AGCCGCTGATCATTTGATTGGACTGAAATTTGGAATGGGTACACTTGACGAT-----ATGA  
ATCATTTGAAAAATAAACGTATTCGTTCTGTAGCAGATCTTTTGTCAAGATCAATTTGGAT  
TGGCTCTGGTTCGTTTAGAAAATGCGGTTTCGAGGAACTATAGGTGGAGCAATTCGG---C  
ATAAATTG---ATACCGACCCCTCAAATTTGGTAACTTCAACTGCA-----TTAACAAC  
TACTTATGAATCCTTTTTCGGTTTACACCCATTATCTCAAGTTTTTGGATCGAACTAATCCG  
TTGACACAAATAGTTCATGGGAGAAAATTTAGTTATTTGGCCCCGGGAGGAGTAACAG  
GGCGAACTGCTAGTTTTCGAATACGAGATATCCATCCTAGTCACTATGGGCGTATTTGTC  
CAATCGACACATCTGAAGGCATGAATGTTGGACTTATTGGATCCTTGTCAATTCATGCG  
AGGATTGGACATTGGGGG---TCTCTAGAAAGTCCATTTTTT-----GAAATTTCTGAGAG  
ATCCACGGGA-----ATGCAGATGCTTTATTTATCACCAGGTAGAGATGAATACTATATGGT  
AGCTTGGGGAAATCTTTGGCCTTGAATCAGGATATTCAGGAAGAAGAGCTTGTTCG

GCTCGATACCGTCAAGAATTTCTGACTATTGCATGGGAACAGATTCATCTTAGAAGTATT  
TTCCCTTCCAATATTTTTCTATTGGAACCTCCCTCATTCCTTTTATCGAACATAATGATG  
CGAATCGCGCTTTAATGAGTTCGAATATGCAACGTCAAGCAATTCCTCTTTACCGGTCC  
GAGAAATGCATTGTTGGAACCTGGGTTGGAACGACAAGCAGCTCTAGATTCAGGGGCTC  
TTTCTATAGCTGAACGCGAGGGAAAGGTCGTGTATACTGATGTCGACAAGATCCTTTTA  
TCAGTTAATGGAGATACTCTAAGCATTCCATTAGTTCTGTATGAACGTTTCGAACAAAAAT  
ACTTGTATGCACCAAAAACCGCGGGTTCACCGAGGTAAATACATTA AAAAAGGGACAAA  
TTTTAGCCGACGGTGCTGCTACGGTTGGTGGTGAACCTTTCTTTGGGGAAAAACGTATTA  
GTAGCTTATATGCCATGGGAGGGTTACAATTCTGAAGATGCAGTACTCATTAGCGAGCG  
TTTGGTATATGACGATATTTTTACTTCTTTTCACATACGGAAATATGAAATTCAACTCAT  
GTGACAAGCCAAGGC---CCTGAAAGGGTCACTAAGGAAATACCGTATTTAGAAGCCCA  
TTTACTCCGAAATTTAGACAAAAAGGGAATTGTGATGCTGGGATCTTGGGTAGAGACA  
GGCGATATTTTAGTAGGTA AATTAACACCCCAAGGTGGTAAAAGAA---TCATCATATGCC  
CGAAGATAGATTGTTACGAGCCATACTTGGCATT CAGGTATCTACTTCAA AAGAACT  
TGTCTAAAATTACCTATAGGCGGTAGGGGTCGGGTTATTGATGTGAGGTGGATCCGGAA  
AAGAGGG---GGTCTAGTTATAATCCAGAAACGATTTCGTGTATATATTTACAGAAACGC  
GAAATAAAAGTAGGCGATAAAGTAGCTGGAAGACACGGAAATAAGGGTATTATTTCCA  
AAATTTTGCCTAGACAAGATATGCCCTATTTGCAAGACGGAAGACCCGTTGATATGGTC  
TTCAACCCACTAGGAGTACCTTACGAATGAATGTAGGACAGATATTTGAATGTTCACT  
TGGGTTAGCAGGGAGTCTGCTAGACAGACATTATCGAATAGCGCCTTTTGATGAGAGAT  
ATGAACAAGAAGCTTCGAGAAAAC TAGTGT TTTCTGAATTATATCAAGCTAGTAAACAA  
ACAGGGAATCCGTGGGTATTTGAACCCGAGTATCCAGGAAAAAGCCGACTATTTGATG  
GAAGGACGGGGAATGCTTTTGAACAACCTGTTCTAATCGGAAACTCTTATATCTTAAAA  
TTAATTCATCAAGTTGATGATAAAATCCACGGACGTTCCAGTGGACATTATGCGCTTGT  
ACACAACAACCCCTTAGAGGAAGGGCAAGGCAGGGGGACAACGGGTAGGAGAAAT  
GGAGGTTTGGGCTCTAGAAGGATTCGGCGTTGCTCATATTTTACAAGAAATGCTTACTT  
ATAAATCTGATGATATTAGAGCTCGCCAGGAAGTACTTGGGACTACGATGGTTGGAGGA  
ACAATACCGAATCCCAAGGATGCTCCAGAATCTTTTCGATTACTCGTTTCGAGAACTACG  
ATCTTTAGCTCTGGAACCTGAATCATTTCCTTATATCTGAGAAGAATTTCCAGATTAATAG  
GAAGGAA---ATGCGGCAGAATTTGCCTTCTATGATTGATCGGTATAAACATCAACAAC  
CCGAATTTGGATCAGTTTCTCCTCAACAAATAAGCGCCTGGGCCACTAAAATCCTGCCTA  
ATGGAGAGATAGTTGGAGAGGTGAAAAAGCCCTATACTTTTCATTACAAAACCAATAA  
ACCGGAAAAGGATGGATTATTTTGTGAAAGAATTTTGGACCTATAAAAAGTGGAAATTT  
GCGCTTGTGGAAATTATCGAGTAATAGGAAATAAAAAGGAAGGCCCGAAATTTTGTGA  
ACAATGCGGAGTCGAATTTGTTGATTCTCGGATACGAAGGTATCAAATGGGCTACATTA  
AACTCGCATCTCCAGTAACCCATGTGTGGTATTTAAAACGTCTTCCTAGTTATATTGCGA  
ATCTTTTAGATAAATCCCTTAAAGAATTAGAAGGCCTGGTATACTGCGAT-----TTTTCTT  
TTGCTAGGCCA---ATAACTAAAAAACCCACTTTCTTACGATTACGAGGTTTCATTGGAATA  
TGAAATCCAATCTTGGAAATACAGCATCCCCCTTTTTTTTACTACCCAAGGCTTCGATAC  
ATTTTCGCAATCGAGAAATATCTACAGGTGCGGGTGCTATCCGAGAACAATTAGCCGATC  
TAGATTTACGAATTTTCGGGAAAATTCATTAGTAGAATGGAAAGAATTGGGGAAAAGAA  
---GGTCTCACAGGGAATGAATGGGAAGATCGAAAAGTTGGAAGAAGAAAGAATTTTGT  
GGTTAGACGTATGGAATTGGCTAAGTATTTTATTCGAACAAATATAGAACCAGAATGGAT  
GGTTTTGTGTCTATTACCAGTTCTTCCCCCGGAGTTGAGACCGATCATT CAGATAGACG

GGGGTAAACTAATGAGCTCGGATATTAATGAACTCTATAGAAGAGTTATTTATCGGAAC  
AATACTCTTACCGATCTATTAACAACAAGTAGATCTACGCCGGGAGAATTAATAATGTGC  
CAGGAAAAATTAGTACAAGAAGCCGTGGATACGCTTCTTGATAATGGAATTCGGGGTC  
AACCAATGAAGGATGGTCATAATAAAGTTTACAAGTCATTTTCAGATGTAATTGAAGGC  
AAAGAGGGGAAGATTTCGTGAGACTCTACTTGGCAAACGGGTTCGATTATTCAGGGCGTT  
CCGTTATTGTTGTGGGCCCTTCACTTTTATTACATCGATGTGGATTGCCCGGAGAAATAG  
CAATAGAGCTTTTCCAGACATTTCTAATTCGTGGTCTAATTAGACAACATCTTGCTTCGA  
ACATAGGAGTTGCTAAGAGTAAAATTAGGGAAAAAGAACCATTGTATGGGAAATACT  
TCAGGAAGTTATGGAAGGACATCCTGTATTGTTGAATAGAGCGCCACTCTGCATAGAT  
TAGGTATACAGGCATTTGAGCCATTTTAGTGGAGGGACGTGCTATTTTTTTTACATCCAT  
TAGTTTGTAAGGGATTCAATGCAGATTTTGATGGGGATCAAATGGCTGTTCATGTACCTT  
TATCTTTGGAGGCCCAAACGGAGGCCCGTTTACTTATGTTTTCTCATATGAATCTTTTGT  
CTCCAGCTATTGGAGATCCCATTTGCGTACCAACTCAAGATATGCTTATGGGACTCTATG  
TATTAACGAGCGGGAATCGTCGAGGTATTTGTGTAAATAGATATAATTCAGGTAATCGC--  
-----GGAACTATCAA-----AGAAGGGATAATAATACTACGATTATATG-----GAACCT  
TTTTTTTGCAATTCCTATGATGCAATGGGGCTTATCGGCAAAAACGAATCAATTTAGAT  
AGCCCTTTGTGGCTCCGTTGGCGACTAGATCAAGGC---CTTATTGCTTCA-----AGAGAA  
ACTCCCATCGAAGTTCACTATGAATCTTTAGGAACTTACTATGAAATTTATGGACACTAT  
CTAATAGTAAGAAGTATAAAAAAAGAAATCTTTTTATATACATTCGAACCACTGTTGGT  
CATATTTCTCTTTATCGAGAAATCGACGAAGCCTTACAGGGATTTTCTCATGTCTGTTCA  
TTGGTACCTAAC-----ATGGAGGTACTTATGACAGAACGGGCTAATCAGGTC  
TTTACAATAAAGCGATAGACGGAAGTCCATGAAACGACTTATTAGTCGATTAATAGA  
CCACTTCGGAATGGCATATACATCACACATCCTGGATCAAGTAAAAACTCTGGGTTTTT  
AACAAAGCTACCGCTACATCCATTTTATTAGGAATTGATGATCTTTTAAACAATACCTTCGA  
AAGGATGGCTAGTTCAAGATGCTCAACAACAAGTTTTATTTTAGAAAAAACAACCA  
TTATGGGAATGTACACGCAGTAGAAAAATTACGCCAATCCATTGAAATATGGTATGCTAC  
AAGTGAATATTTGCGACAAGAAATGAATTCGAATTTTAGGATGACTGACCCTTTTAAATC  
CAGTCCATATAATGTCTTTTTTCGGGAGCTAGAGGAAATGCATCTCAGGTACATCAATTAG  
TAGGTATGAGAGGCTTAATGTCGGATCCTCAAGGACAAATGATTGATTTACCCATTCAA  
AGCAATTTACGCGAAGGACTCTCTTAAACAGAATATATCATTCTTGCTACGGAGCCCGT  
AAAGGGGTTGTGGATACTGCTGTACGAACATCAGATGCTGGATATCTCACGCGCAGAC  
TTGTTGAAGTAGTTCAACACATTGTTGTACGCCGAACAGACTGTGGGACCCCCCGGAG  
TATTTCTGTGAGTCTCGAAATGGGATAATGCCG---GAAAGGATCTTTATTCAAACATTA  
ATTGGTCGCGTATTAGCGGATGATATATATATGGGTCCGCGTTGTATTGCCACTCAAAG  
CAAGACATCGGGGTTGAACTTGTAATCGATTCAACC-----TTGCGAGTACA  
ACCAATATCTATTCGAACTCCCTTTACCTGTAGGAGTACATCTTGGATCTGTCGATTATG  
CTATGGGCGGAGTCCCCTCATGGGGATCTGGTTGAGTTGGGGGAGGCTGTAGGTATTA  
TTGCAGGCCAATCGATTGGAGAACCGGGTACTCAATTAACATTAAGAACTTTTCATACC  
GGCGGAGTATTCACGGGAGGTAAGTGCAGAACATGTGAGAGCGCCCTCTAATGGAAAAA  
TAAAATTTAATGAGGATTTGGTTCATCCGACACGTACACGTCAATGGTCAATCCTGCCTTTC  
TATGTTCTATAGACTTGTATGTAATTTAGGGGTGAAGATATCTACATAATGTGAATAT  
TCCACCCAAAAGTTTTCTTTTAGTTCAAATGATCAATATGTAGAATCAGAGCAAGTGA  
TTGCTGAGATTCGCGCGGGAACGTCCACT---TTGAATTTGAAAGACAAGGTTTCGCAAAT  
ATATTTATTCCGACTCAGACGGGGAA---ATGCACTGGAGTACCGATGTTGATCATGCGCC

TGAATTTACATACGGTAATGTGCATCTATTACCAAAAACAAGTCATTTATGGATATTATTA  
GGT-----AGA-----TGCAGTCCAGTCTCCCTTTCCCTTCACAAGGATCAAGATCAAACG  
AGCACGCAT-----TCTCTTTCTGTCAAGCAAAGATATACTTCTAACCTCTCG-----GTA  
ACTAAG-----AGAGAAAAATGCTTTAGTTCGGATTTTTTTTGGTAAA---AAAGGTAGCATT  
CCTGATTAT--TCACA ACTTAATCAAGTCATATG TACTGCTCATTCTAATCTCATATATCCG  
---TCCATTCTACGCGAAAATTCA-----GATTTATTGTCAAAGAGGCGAAGAAATAGATTTT  
TTATTCCACTCCAA-----TCGTGCGGAGAACGA ACTAATGTCCCCTCTGGGTATCTCGAC  
TGAACCCCC-----ATAAATGGTATTTTCCGTAGAAATTTTATTCTTTCTTATTTCGACGAT  
CCTCGGTATCGAAGAAAGAGTTCGGGAATTACTAAATATGGGACTTTAGGAATGCATTC  
AATCCTTAAAAAGAAGAT-----TCGATTGAGTATCGAAGA---GTCAAGGAATTTAGGCC  
AAAATACATGAAAGTAGATCGATTTTTTTTTTCATTCCCAGGAAGTTCATATCTTACCTGG  
ATCTTCTTCCATAATGGTACGGAACAATAGTCTCATTGGGGTAGATACACAAATCACTTT  
AAATCTAAGAAGCCGGGTAGGCGGGTGGTCCGGGTGGAGAGAAAAAAGAA  
TTGAACTTACAATTTTTCTGGAGATATACATTTTCTGGAGAAATAGATACGATATCCC  
GGCATAGCGGCGTTTTGATACCA-----CCGGAAGGGGAAAAGGAAATTC AAGGAATT  
TCAAAA-----ATGAAAATGGATGTATGTCCAACGG-----ATTACACCTAGCAA-----  
AAAAGCATTTTGTTTTGGTTCGCCCTGTCGTACATATGAAATAGCGGACGGTCTAAA  
TTTAGCAACTTTTTCCCTCCCGATATGTTGCAGGAAAGGGATATTGTGCAACTTCGAG  
TTATCAATTATATGCTTTATGGAAAGGGCAAACCGATTTCGAGGAATTTATGACACA ACTC  
TTCAATTAGTTCGGACTTGTTTAGTATTGAATTGGGACCAAGACAAAAA-----AGTG  
CTTCTGGCGAAGAAGCACGGGCTTCTTTTGTGAAATAAGGATAAATGGTTTGATTTCGA  
CATTTCTAAGAATCGACTTGCGAAATCCCCTATTTCTATATGGGAAAAGGAAGGA  
TCCCTCAGGTTTAGGATTGCTCTCTGAT--AATGGATCAGATTACATCAATATCAATCCGT  
TTTGTCTATATATTCCTAT-----TCAAAGACAAGAATTCAACAATTCCTTAACCCCAAT  
CAAGGAACTATTCATACATTGTTGAATAGA-----ATAAGGAATCCAACCATTGATCA  
TTTTGTTATCATCAACTGTTCTCGAATGGGTCCA-----TTCAACGATCAAAAATATCACA  
ATGGA-----ATAAAGAATCAGATCCCCTAATTCCAATTAGGAATTCGTTGGGCCCTTT  
AGGATCA-----GCCCCCCAATTGAGAATTTTTTTT-----TTTTCCACTTA-----ATAAC  
TCACAATCAAATCTTG---TTAACTAACTATTTGCAACCTGAC-----AAT--TTCAAACGGA  
CTTTTCAAGTAATTCAA-----TATTATTCAATGGATGAAAGTCAAAGTGGGAAATTTTA  
TAATCCCGACGCATGCAGTAAGATTCTTTTCAATCCATTCAATTTGAATTGGTATTTTCTC  
CGTCACAATTATTGTGAAGAGACGTCT--ACAATAATCAGCCTTGGACAGTTTATTTGTG  
AAAATGTGTGTATAGCCAAAACGGACCACAT--CTAAA-----TCGGGTCAAGTTATCT  
TTGTTCAA--GCCGATTCCGTAGTAATACGATCAGCTAAGCCTTATTTGGCCACCCCGGG  
AGCAACCGTTCATGGCAATTATGGGGAAATCGTTTATGAAGGAGATACATTAGTTACAT  
TTATATATGAAAAGTCGAGATCTGGGGACATAACGCAGGGTCTTCCAAAAGTGGAACA  
AGTGTTTCAAGCGCGCTCGATCGATTCAATATCGATGAATCTAGAAAAGAGGATTGAG  
GGTTGGAACGAATGTATAACAAGAATTCTTGGAAATTCCTTGGGGATTCTTTATTAGTGCT  
GAGCTAACTATAGTGCAAAGTCGTATCTCTTTGGTCAATAAGATCCAAAAGGTTTATCG  
ATCCCAGGGGGTGCAGATTCATAATAGGCATATAGAAATTATTGTACGTCAAATAACATC  
AAAAGTATTGGTTTCAGAA-----GACAGAATGTCTAATGTTTTTTTACCCGGAGA ACT  
AATCGGATTGTTACGAGCAGAACGAACGGGACGCGCTTTGGAAGAACCGATCTGTTAC  
CGAGCCATCTTATTGGGAATAACAAGAGCATCTCTCAATACCCAAAGTTTTATATCTGAA  
GCAAGTTTTCAAGAACTGCTCGAGTTTTAGCAAAGGCAGCTCTCCGGGGGCGTATCG

ATTGGTTGAAAGGTCTGAAAGAGAACGTTGTTTTGGGGGGGATGATACCTGTCGGGAC  
TGGGTTCAAAGGATTA-----GTGCACCCTTCAAAACAACATAATAAGATTCCT-----TTGA  
AAACAAAAAAGAATCTATTCGAGGCGAAAATGAGA-----GATATTTTGTTCACCA  
GAGAAAATTTGTTGATTCTTCCCTTTCACAGAATTTCCACGATATG-----  
-----ATGACAAGAAGATATTGGAACATAAATTTAGAAGAAATGATGGAGGC  
AGGAGTTCATTTGGGCCATGGTACTAAGAAATGGAATCCTAAAATGAGACCTTATATCT  
TTGCAAGGCGTAAAGGTATTACATATTACAAATCTTATTTCGGACTGCTCGTTTTTTATCAG  
AACTTGTGATTTGGTTTTTGGATGCAGCAAGTAGAGGAAAACAATTCTTAATTGTTGGT  
ACCAACAATAAAGCAGCTGCTTCAGTAGCATGGGCTGCAATAAAGGCCCGGTGTCATT  
ATGTTAATAAAAAGTGGCTCGGCCGATGTTAACGAATTGGTCCACTACAGAAACGAG  
ACTTCATAGTTCAGGGACTTGCGAATGGAACAAAAAACAGGAAGACTCAACCGTCT  
TCCAAAAAGAGATGCAGCTGTGTTGAAAAGACAATTATCCCGGTTGCAAACATATCTG  
GGCGGGATTAATATATGACAGAGTTACCCGATATTGTAATCATCGTCGATCAGCACGA  
AGACTATACGGCGCTACGAGAGTGTATCACTTTGGGAATTCCAACAATTTGTTAATCG  
ATACAAATTGTGACCCCGATCTAGCAGATCTTTCGATTCCAGCTAACGATGATGCTATAT  
CTTCAATCCGATTAATTCTTAACAAATTAGTGTTTGCAATTTGTGAGGGTCGTTCT---AG  
CTATATACGAAATCCTATGGGACAAAAATAAATCCACTTGGTTTCAGACTTGGTACAA  
CCCAAGTTCATCATTCTCTTTGGTTTTGCACAACCAAAAAATTATTTGGAAGGTTTACAA  
GAAGATCAAAAAATAAGAGATTGTATCAAGAATTATGTACAAAAGAATATGAAAAATAA  
TTCTGGG---CTAGACGGAATTACACGTATAGAGATTCAAAAAAGAATCGATCTGATCCA  
GGTCATAATCTTTATGGGATTCCCAAAATTGTTACTAGAAAGTCGCCCCCGA-----G  
GGGTCGAAGAATTACAAACGACTCTACAAAAAGAGTTTAATTGTATGAACCGAAAAC  
TAATATTGCTATCAAAAGAATTCCCAAACCTTATGGGAACCCTAAAATCCTTGCAGAATT  
TATAGCCAGACAATTAAGAATAGAGTTTCATTTCGAAAAGCAATGAAAAAAGCTATTG  
AATTAAGTGGACAAGCAGATACAAAAGGAATTAAGTACAAATTGCAGGTCGTATTGA  
TGAAAAAGAAATTGCACGTGTCAATGGATTCGAGAAGGTAGGGTTCCCTACAAACC  
ATTCGAGCGAAAATTGATTATTGTTCTTATACAGTTCGAACTATCCACGGTGTATTAGGT  
ATCAAAATTTGGATATTTATAGACAAGGAAATGTTCGCGTTACCGAGGACCTCGTTTGAA  
AAAAATCCGCCGGCTGGGAGCTTTACCGGGACTAACTAATAAAAGGCCTAGAGCCGGA  
AATGATCCTAGAAACCAATCTCGTTCCGGTAAAA---AAATCTCAATATCGTATTTCGTCTAG  
AAGAAAAACAAAAGTTGCGTTTTCACTATGGTCTTACAGAACGACAATTACTTAAATAC  
GTTACATCGCCGAAAAGCCAAGGGATCAACAGGTCAAGTTTTACTACAATTACTTG  
AAATGCGTTTTGGATAACATCCTTTTCCGATTGGGTATGGCTTCGACTATTCTGCAGCCC  
GGCAATTTGTTAACCATAGGCATATTTTAGTTAATGGTCATATAGTAGATATACCAAGTTA  
TCGCTGCAAACCCGGAGATATTATTACGGTAAAGGATGAACAAAAATCCAAAGCTCTG  
ATTCAAAAATCTCTGGATTCATCCTCTCAT--CAGGAATTGCCAAGCCATTTGATCCTTC  
AACCATTCAA-----TATAAAGGATTAGTCAATCAATAATAGATAGTAAATGGGTTGGTT  
TGAAAAATAAAGGAATTGCTAGTTGTAGAATACTATTCTCGTCAGACTATGTCACGTCGA  
GGTGCTGCAGAAGGAAAAACAGCCAAATCCGATCCAATTTATCGTAATCGATTAGTTAA  
CATGTTGGTTAACCGTATTCTGAAACACGGAAAAAAATCATTGGCTTATAAAATTCTCTA  
TCGAGCCGTGAAAAAGATTCAACAAAAGACAGAAAAAAATCCGCTATCTGTTTTACGT  
CAAGCAATACGTCGAGTAACTCCCGATATAACAGTAAAAGCAAGACGTGTAGCCGGAT  
CGACTCATCAAGTTCCCATGAAATAGGATCCACGCAAGGAAAAGCACTTGCCATTCG  
TTGGTTATTAGCGGCATCCCGAAAACGTCCGGGTCGAAATATGGCTTTCAAATTAAGTT

CCGAATTAGTGGATGCTGCCAAAGGGAGTGGCGATGCCATACGCAAAAAGGAAGAGA  
CTCATAGAATGGCAGAGGCAAATAGAGCTTTTGCACATTTTCGTATGGGCAGAGACACT  
ATTGCTGAGGTACTAACCTCTATACGAAATGCTGATATAGATAAAAAAGAGTAGTTCG  
AATAACAGCCACTAATATTACGAAAATATTGTCAAATACTTTTAAGAGAGGGTTTTCT  
CGAAAACGTGAGAAAACATCGAGAAAACAACAAAGACTTTTTGGTTTTAACGCTACG  
ACATAGAAGG-----AATAGGAAAAGGCCCTGT-----AGAAATCTTTAAATTTAAAACG  
GATCAGTCGACCTGGTCTACGAATCTATTCTAATTATCGAAAAATTCCTCGAATTTTAGG  
CGGGATGGGAATTGTAATTATTTCTACTTCTCGAGGTATAATGACAGACCGGGAGGCTC  
GGCTAGAAAGAATCGGAGGAGAAATTTATGTTATATATGGATGGCAAAAGCTATAACCG  
AGAATTGGTTTCGCGCAGGACTGGACGTATTGGGTCACGTAAGAGTACACGTAGAATCC  
CAAGGGGAGTTATTCATGTTCAAGCAAGTTTCAACAATACCATTGTGACCGTTACAGAT  
GTACGGGGTAGGGTGGTTTTCTTGGTCTCCGCCGGTACTTGTGGATTCAAGGGTCCGA  
GAAGAGGGACACCATTTGCTGCTCAAACCGCAACAAGCAATGCTATTCGTACAGTAGT  
GGATCAAGGTATGCAACGAGCGGAGGTCATGATAAAAGGCCCCGGTCTCGGAAGAGA  
CGCGGCTCTACGAGCTATTCGTAGAAGTGGTATATCATTAACTTTTGTACGGGATGTAAC  
CCCTCTACCGCATAATGGCTGTAGACCTCCGAAAAAACGACGTGTGATGCCAACTATTA  
AACAACTTATTAGAAATACAAGACAGCCAATCAGAAATCGAACGAAATCCCCGCTCT  
TCGGGGATGCCCTCAACGTGAGGAACATGTACTCGGGTGTATACTATCACCCCCAAA  
AAACCAAACCTCTGCCTTACGTAAAGTTGCCAGAGTACGATTAACCTCTGGATTTGAAAT  
CACTGCTTATATACCCGGTATTGGCCATAATTTACAAGAACATTCTGTAGTCTTAGTAAG  
AGGGGGAAGGGTTAAGGATTTACCCGGTGTGAGATATCACATTGTTTCGAGGAACCTA  
GATGCTGTTCGGAGTAAAGGATCGTCAACAAGGGCGTTCTAAATATGGGGTAAAAAAGC  
CAAAAATGGCAAGCAAAGCTTTGATTCAGCGGGAGAAGAAGAGGCCAAAAATTACACC  
AGAAATATCATTTGATTCGTCAATCCTCAAAAAAAGAAATAAGT-----AAAGTTCCGT  
CATTGAGTGAGAAATGGGAAATTTATAGAAAGTTACAATCTCCACCACGGAATAGCGC  
AGCTACACGCCTTCATCGACGTTGTTTTGTGACTGGACGGCCGAGAGCTAATTATCGAG  
ACTTTGGACTATCCGGATATATACTTCGTGAAATGGTTCATGCATGTTTGTGCCAGGAG  
CAACAAGATCGAGTTGGATGGTAAAAAGTGCATTCATTTTCGGTTATTTCTGAAAAA-----  
GAAAGA-----AGGGGGTTCGGTTGAATTTCAAGTATTCCGTTTTACCAATAAGATACGG  
AGACTTACTTCACATTTGGAAGTGCACAAAAAAGACTATTTATCTCAGACGGGTTTTCG  
AAAAATTTTAGGAAAACGTACGCGCTGTTGGCTTATTTGGAAAAAATAAGAGCA  
CGTTATAAAGAATTAATTGGTCAGTTGGGTATTTCGAGAGTCAAAAACAAAAACTCGTAT  
GGTAAAACTTCGTTTGAAACGATGTGGTAGAAAGCAACGAGTCGTCTATCGAATTGTT  
GCAATTGATGTTTCGATCTCGAAGAGAAGGAAAAGATCTTCAGAAAGTAGGTTTTTATG  
ATCCGATAAAGAATCAAACCTTATTTAAACGTTCCCTGCTATTCTTTATTTCCCTTGAAAAAG  
GGGCTCAACCTACAGGAACTGTTTCAGGATATTTCAAAGGGTGGGGGTTTTTAAGGA  
ACTTTATCCTAATCAAAGGGACTTCCAT---ATGGATAAATCCAACGACCTCCTCTTAA  
TCCAAGCGATCTTTTCGTAGACGTTTGCCCCGATTCAATCGGGCGATCGGATTGATTAT  
AGAAATATAAGTTTAATTAGTCGATTTATTAGTGAACAAGGGAAAATATTATCTAGACGA  
GTGAATAGATTGACCTTGAAACAACAACGATTAATTAATACTATTGCTATAAAACAAGCTCG  
TATTTTATCTTTGTTACCCTTTCGC---ATAAT-----AAAAAGGTTGAAAGAAAGGGGTCG  
ATCCCTAGAACTACTCGTCTTAGAACCAGAACCAGAGTGACACGTTCACTAAAAAAA  
ATCCTTTTGTAGCCAACCATTTATTAATAAAATTGAGAACTTAACAAAAAATCAGAA  
AAAGAAATAATTGTAACCTTGGTCCCGAGCATCTACCATTATACCCACAATGATCGGGCAT



ACCATTGCTATCCATAATGGAAGGGAGCACCTTCCTATTTATATAACAGATCGTATGGTC  
GGCCACAAATTGGGAGAATTTTCACCTACTTTAAATTTCCGCGGACATCCAAAAAGCG  
ATAATAGATCTCGTCGT-----ATGAGTTCTCTCATAACAGAACTCGTATTCTTATGGATG  
AAGATAACAATTCGGTCGTTTTGCTCGGACTCTTTTGTGGATTTCTGACCACACTCTC  
CCTAGGGCCCCCTTTTTCTTCTTTTTCCGACTTAAGCTTAGGGAAGAAGAA-----AC  
CGAGAAGAAGGCAGCAGCAAAAACCTGGTTTTCTTGTGGGACAACCTCGTGGTGCTCGT  
ATCGACCTTTTTTACGCCTCTGCATCTAGTATTGGGTAAACCTCATAACAATAGTTGCCAT  
AGGTGTACCATATCTTTTCTTTGATTTCTTCTGTAAGAATTTTGCATCTACTACC-----  
-----CGAAATTCCTGGTGAATTTGAGCATTTCGACATGTAGTCGTGCAAAATCTAATTC  
TCAATTCCTGAACTATGTTGTTTTACCAACTTCAATATTAGTCAGATTAGTCAACGTTTAT  
ATCTTTCGATAACAACAAGAGATTATTTCTAATAAGTAGTGTGGTTGGTTGGTTAATT  
GGTCAGATTTTTTTCCTGACAATTGTTGAATTGGTATTAGTCGGGGTACGGCAAAATAA  
GTTCAATATTCCTGATCTAACTAGCAATAAGAGAGCTAGGAATAAGAAGCTGAATAGCC  
TTGTGCGGATCACTAGTGCTTTCTTTTTTATTACCTGTGTCGTCTATTTAGGCATAGAAC  
CGGCACCCCTTGTTCGTCAGGAACCTTTTTGAC-----AAAGGCTTCCTTTCTGTTTT  
CGATTATCAACGATGGAACCGCCACTTCGCTACATAAACAAT-----GAGAAAGCCGT  
ACGAACAGAAATCTCGCAGTATTTCTTTTACATATGCAAAAGTGATGGAAAAGAAAAA  
ATTGCTTTTACGTATCCACCAAGTTTGTCAATTTTTCTGCAAATGCTAAAAGAAAGAGT  
AAGAGTATGGGAGTCTAAGAAAACCTCTGAATGATAATGATAATGAATTTGGGTTTATT  
CCAACAACAGAAAGGGGAATAAGATAAGTAAAGAATTTAGAAATCGACTTGAAGCTCT  
CGACAATAAATCCCTTTTTCGAGATATACTGGAAACAAGAAGCTCGATTATGTAATAGTG  
AAAACAACGAGGATAGTTTTCTAAAACCTATGATCCTTTGTTAAGTGGGCCTTCTAAG  
GGGGCGAAGGAAGAGATTTCTACTTCTGCTTTAAGGTTTGACATAAATCGGATTTACGC  
TATGCTTTACCAAGACTTTGATGGACAACCTAGACGAGGACTTTAAATCGGAATCGAAAT  
CGGAATCGAAAGCGGAATCGAAAAAGAAATTGAAATCGGAAGAGCAGGAAAAAAA  
GAGGACGAGGAAATTAGCTCAAGATCTTTCAAACCTTGAAACGTTTTTCATTCCCTCTT  
GTTACGCTTTTTTACCCGAATCGGACTTTGGGCGGGAACCTAATTACAGGTTCTGAACGCA  
CTCAAAGGCGTAAAGTTGGAGTTTGGCGACTGTTTCAAGGAAAAGCGCACTCTCCCCT  
TTTTGTGGATAGAACCAAAAGCTTCTCCTACCTACCGTTTGATATATCCAAAACCTTTTAA  
TTTTACAAAT-----CAGGAGGAAAACGCACGACTGGAGATGGTGCTACTATGGGAA  
GGTCTGCCATTTGGGCACCTAATAAGAGGATGCGCGTTAATAACTCAATCTGTTCTTAG  
AAAATATATTATATTGCCTTCATTGATAATAGCCAAAATATTGGACGTATTTTAGTATTC  
AAAAGCCTGAATTCGTTTCAGGATATAGAGGAATGGAAGCAAGAAGTGCACATTACATG  
TAGCAATGATGGTGTCCAAATATCGGAGATAGAATTGCCGGAAGGCTGGTGGGAAGAC  
GGTATGCAGATAAAAATCATATCTCCTTTCACCCTGAAACCTTGGCATAACATCTAAAAA  
AAAAAAAAGAAGGATTTTTCTTTTTTAAACAATTTCCGGGACATCAAGCTGCCCGTCCTT  
ATGGTTCTCCCAAACCTATAAATGATTTTTTTGAACTCGTTTTTAAGCAATTAGACAAAA  
AA-----ATTGAAAAATGGAAAA  
GGTCGATTTAGATTTAGAAAGAATACTAGTAAAATTAATACTACAAAAATTC AAC-----  
-----AGAATCAGCAATCAAATAATTGATGAATCGTTT---CTATTTGAGTCTGAAAAGTGG  
AAAACCT-----T TACTGATAAAAAAGAACGCTCTAATA-----GGAACAAGCAGAATTCGAA  
ATCTAATAGAAAGCATGACAAAAGAAAAAAA---CCTACCGAAAAAGGGTATCTT  
GCTAAAAGATTCGAATGGACAACAATAATTTGGCAAATATTA AAAAGAA GA-----AAT  
ATCTCTCAATTAGATTGTTTTCTAAAGATTTTCTTGA AAAAATATACATAGATATTTTTT



GTAAATATATTCAAGATAATTACGTATTTACAAAAT-----ACCGTCTCAATTCATCCTATTT  
CATCAGATTCGGGATGTGATACGGTTCCG---AAGGATGAACCGGAT---ATGACCAGTTCC  
AATAAGATTTCAATTCTTGAACAAAAATCCATTTTTTTGATTTA-----TTTCATCTATTCCATG  
ACCGGAACAGGGGAGGATACAGGTTA-----CACCACGATTTGGAATCAGAA-----GAGA  
GATTTCAAGAAATGGCAGATCTATTCACTCTATCAATAACCGAGCCG---GATCTGGTGTA  
TCATAACGGATTTGCCTTTTTCTATTGATTCTCCGAATTGGATCAAAAACAA-----TTCTT  
GAATGAGGTATTCAACTCCAGGGATGAATCGAAAAAGAAATCTTTA-----TTGGTTCT  
ACTTCTATTTTTTAT-----GAAGAGAATGCATCTTTTTCTCGAAGGATCAGAAAAAAC  
GGGTCCCG---ATCTCCTGCGGAATGATTTGGAAGATCCACAACCAAAAAGAGTGGTAT  
TTGCTAGCAACAACATAATGGAGGCAGTCAATCAATACAGATTGATCGGAAATCTGATT  
CAAATCCCATATAGTACCTCTCGG-----TACATAAGAAATGTATTGAATCGATTCTTTTTAA  
TGAAT-----AGATCCGATCGCAACTTCGAATATGGAATTCAA-----AGGGATCAAATA  
GGAAAGGATACTCTGAATCATAGAACTATAATGAAATATAGGATCAACCAACATTTATCG  
AATTTGAAAAAG---AGTCAGAAGAAATGGTTCGATCCC-----CTTATTTGGATTTCTCGA  
ACCGAGAGATCCATGAATCGGAATCCTGATGCATATAGATACAAATGGTCCAATGGGAG  
CAAGAATTTCCAGGAACAT-----TTCGTTTCTGAGCAGAAGAGCCGC-----CTTCAA  
GTAATGTTTGATCGATTACGTATTAATCAATATTCGATTGATTGGTCTGAGGTTATCGACA  
AAAAAGATTTGTCTAAGCTACTTATTTTTCTTTTTGTCCAAG---TTTCGTTTCTTTTTGTCT  
AACTCACTTCTTTCTTTTTGTCC-----AAGTTTCTTTTCTTTTTGTCTAAC---  
TCACTTCTTTTTTCTGTGTGAGTTTCGGGAATATCCCATTCATAGGTCCGAGATGATC  
TACATCTAT---GAATTGAAAGGTCCGAATGATCAACTCTGCAATCAGTTGTTAGAATCAA  
TAGGTCTTCAAATTGTTCAATTTGAAAAAATGGAAACCCTTC-----TTATTGGAT-----GA  
TCATGATACTTCC---CAAAAATCGAAATCTTGATCAATGGAGGAACAATATCACCATTT  
TTGTTCAATAAGATACCA---AAGTGG---ATGATTGACTCATTCCATACTAGA-----ATAAT  
CGCAGGAAATCCTTTGATAACACGGATTCCCTATTTATCAATGATATTCCACGATCAAGAC  
AATTTGGCTGAATCCCGTGAAACCATTTTCATAGAAGTTTCATTGATATCTTCTTTTTATAAA  
GCAAATCGACTTCGATTCTTGAATAATCCACATCACTTCTGCTTCTAT-----TGGAACACA  
AGATTCCCCTTTTCTGTG-----GAAAAGGCCCGTATCAATAATTATGAT-----TTTACG  
TATGGA---CAATCCTCAATATCTTGTTCAATTCGCAACAAA---ATATTTCTTTGTACGTC  
GGTAAA-----AAAAACATGCTTTTGGGGGG---AGAGATACTATTTACCAATCGAGTCA  
CAGGTATCTAACATATTCATACCTAACGATTTTCCACAAAAGTGGTGACGAGAGG---TATA  
ACTTGTACAAATCT-----TTCCATTTCCAAGTCGATCCGATCCATTCGTTCTG-----  
---TACTCGATCGCAGACATTTCTGGAACACCTCTAACAGAGGGACAAATAGTCAATTCT  
GAAAGAACTTATTGTCAACCTTTTTTCAGATATGAATCTATCTGATTCAGAAGGGAAGAA  
CTTGCATCAGTATCTCAAT-----TTCAATTCAAACATGGGTTTGATTACACTCGATGTTCT  
TGAG-----TTACCATCTGAAAAG-----AGGAAAAAA-----CGGAGTCTTTAT  
CTAAAG-----AAATGCGTCGACAAAGGGCAAATGTATAGAACCCTT-----C  
TCTCAAAATGGAATCTATTCCAAACATATATGCCATTGTTCCTTACTTCGACAGGGTACA  
AATATCTAAAGTGGATATTTTTAGATATTTTTTCATACCTATTGAAGAGC---AGTCGATCC-  
-----ATTTTTGATATTAGGCATGGA-----TCATGGCGAATTCCTTCAGAAA  
TATTTGTGT-----CTTCCAGAATGGGATCGG---ATAAGTGAGATTTTCGAGTAAGT  
GTTTACATAATCTTCTTCTGTTTCTGTCCGAAGAAATGATTCATCGAAATAATGAGTCA--  
---CCATTGATATCGACACATCTGAGATCGCCAAATGTTCCGGGAGTTC---TTCTATTCAAT  
CCTTTTCTTCTTCTTGTGCTGGATAT--CTCGTTCATACACAGCTTTTCTTTGGTTCCTT

G-----ACCTCTAGTGAGTTACAGACAGAGTTTCGAAAAGGTCAAATCTTTGATGATTCCAT  
CATCTATTATTGAGTTGAGAAAACCTTCTGGATAGGTATCCTCCG-----  
-----TTCTCGTTAAACAATTTATTCTA-----  
-----GTTGCTCTGGAAATTGTCGATCTCATAACA-----  
-----AATCCCATCAATCGAATCACTTTTTTCGAGAAATACGAGACATCTAAGTCATA  
CAAGTAAAGAGATTTTTTCATTGATAAGAAAAAGAAAA---GTGAACGGGGATTGGATT  
GATGATAAAATAGAATCCTGGGCCGCGACCAGTGATTTCGATTGGTGAGGAAGAAAAAA  
AAGTATTGGTTCAGTTCTCAAAC---TTAACGACAGAAAGG-----GGGATTGATCAAAT  
TCTATGGAGTCTGACT--CATAGTGATCATTATCA-----AAGAATGACTATGGTTA  
TCAAATGATTGAACAACCGGGAGCAATTTACTTACGATACTTAGTTGACATTCAT-----A  
AAAAGGATCTACTGAATTATGAGTTCAATACATCCTGTTTAGCAGAAAGACGGATATTC  
CTTGCTCAGTATCAGACAATCACTTAT-----TCACAAACTTCGTGTGGGACTAATAGTTTA  
TCTCATGGAAAACCA-----AAACCTTTTCGCTCCGCTTAGTCCTACCCCCCCT--A  
AGGGTATTTTAGTGATAGGTTCTGTAGGAAGTGGACGATCCTATTTGGTCAAATACCTA  
GCGACAAACTCCTATCTTCCTTTTCATTACGGTA-----AATAGAAAGGGTAGCCA  
TTTTATTATTAAGCTTCTTGAGCAGATTAGTCTTGAGGATATTGATGCTAGTGACGATGA  
CGATATTGCTGTTAGT-----GACGATATTGATGCT-----AGTCA  
CGATATTGATGGGGACCTTGATACGGAGCTGGAGCTGGAGCGGCTAACTATAGCTATGA  
GTTATAGGCTGCCGGACGGAATCCTAGTTTCTAAGGCCCTTTTTATATGAAGCTTCAAT  
TAGAATTAGCAAAGCAATGTCTTCTTGATAATATGGATTCCAAACATTCATGATCTGG  
ATATGAATGAGTTGAATTACTTATCCCTCGGTCTATTAGTGAACCATCTCTACGAGGAT--  
GAGGATTGTGAAAGATGTTCC---ACTGGAAATATTCTTCTTATTGCTTCGACTCATACTC  
CCAAAAAGTGGATCCCGCTCTAATAGGTCGGAATAAACTCAATACGTGCATTAAGATG  
CGAAAGCTTCTTATCCACAAAAACGAAAGAACTTTTTCACTTTTTTCATCTACTAGGGG  
ATTCACCTTGGAACCAAATGTTCCATACT-----CATGGATTCGGGTCCATAACCATTGC  
ACGA-----GATCTTGTAGCACTTAGCAATGAGGCCCTATCGAGTAGTATTACACAGAA  
GAAATCAATTCTAGACACTAATACAATTAGATCCGCTCTTCATAGACAACTTGGCATT  
GCCA-----TCCCACGTAAGATCGGTTACAGGATCATGGGATCCTTTTCTATCAGATAGGA  
AGGGCTTTAGCACAAAATGTACTTCTAAGTAATTGCCCATAGATCCTATATCTATCTATA  
TGAGGAAGAAA-----TCGTGTCAGGAAGGG-----GTTTTGTACAAATGGTACTTCGACCT  
TGGAACGAGCATGAAGAAATTAACGATACTTCTTTATCTTTTGC GTTGTCTGCCGGAT  
CGGTCGCTCAAGACCTTTGGTCTCTACCC-----GGACCCGATGAAAAA---AATGGGATCA  
GACTCGGT-----GAGAATGATTCG---GATCTAGTTCATGGCTATTAGAAGTAGAGGGC  
GCTCTGGTGGGA-----TCTTCACGGACAGAAAAAGATTGCAGTCAGTTTGATAATGAT--  
---CGAGTGACATTGCTTCTTCGGCCCGAACCGAGGAAT--CCCTTAGATATGATGCAAAA  
G-----AGATTTCTCTATGAAAAA-----TACGAATCGGAGGGGGAG-----  
GGAGAAGGGCTCCTTCTCCCGCAA-----CAGAAACAG-----ATAAAGCAGCA  
TTAC-----CTATTTGGGCTCCT-----AGACTATGGCGCCCT-----TGGGTCTTTCTATTG  
ATTGTATTGAAAGGCC-----ATGGGATTT--TGGACCGGGTCA-----TTTCTGGGC-----  
AAGCGGATCATTTATGAGGAAAAGGCTGAGCGTTCGAGAGACTGATTCCGGAGTTCTTGC  
AGAATGGAAGGGTGCAGTACCAGACACGAGATAGATCTTCCAAAGAACAAGGCTCTT  
TTGAAAATTAATAATTCATTGGGACCCTGCAGATCCACTCTTTTCCCTATTCAAAA---GA  
TCAGCCCCCTGGCTCTGTGTTTTACATCGAGAATTTTTGTAGATGAAGAGCTGTCAA  
AGGGG-----GCTCCTAAATCTCTAAGAAAAGGCTGGTCTATCAAG---AAT--A

CGCAAGACAAGAACTTCGAATTGTTGATTAATCGTCAGAGATGGCTTCGAACC-----A  
ATAGTTCATTATCT-----AATGAATCTTTCCGTTTCGAAT-----ACTCTATCCGAGAGTTATCA  
GTATTTATCAAATCTGTTCTTATCTAAC---GGAACGCTATTGGATCAAATGACAAAGACA  
TTGGTGAGAAAAAGATGGCTTTTCCCGGATGAAATGAAAATTGGA-----TTC  
ATG-----ATGCCTAGATCGCGA---ATAAATGGAAATTTTATTGATAAGACCTTTTCAA  
TTGTAGCCAATATCTTATTACGAATAATTCCGACAACCTTCGGGGGAAAGGGAGGCATTT  
ACCTATTACAGAGATGGG-----ATGTCAGCTCAATCCGAAGGAAATTATGCGGAAGCTTT  
ACAGAATTATTATGAAGCTATGCGACTAGAAATTGATCCCTATGATCGAAGTTATATACTA  
TATAATATAGGCCTTATCCACACAAGTAATGGAGAACATACGAAAGCTTTGGAATATTAT  
TTTCGAGCACTCGAACGAAACCCATTCTTACCACAAGCTTTTAATAATATGGCCGTGAT  
CTGTCATTAC---CGCGGAGAACAGGCCATTTCGACAGGGAGATTTCGGAAATAGCGGAAG  
CTTGTTTCGATCAAGCTGCCGAGTATTGGAAACAAGCTATAGCGCTTACTCCTGGTAAT  
TATATTGAAGCACATAATTGGTTGAAGATCACGAGGCGTTTCGAA-----ATGAATTGGCA  
ATCAGAACATATTTGGATAGAACTTAAAATGGAGTCTCGAAAAATAAGTAATTTCTTCT  
GGGCCTTTATCCTTTTTTTTAGGTTTCATTAGGGTTTCATATTGGTTGGAAGTTCCAGTTATCT  
TGGTAGAAATTTAATACCTTTTTTTCCGTGTGAGGAAATCATTTTTTTTCAACAAGGTAG  
CGTGATGTTTTTCTACGGGATCGCGGGTCTCTTTATTAGTTTCTATTTGTGGTGCACAAT  
TTTTCTGGAATGTAGGCAGCGGTTATGATCGATTTCGATAGAAAGAAAGGCATAGTGTGCA  
TTTTTCGGTGGGGATTTCTGGAATAATCGTCGCATATTCCGCCGATTCTTATAAAAG  
ATATTCTGTCCATTATAATAAAAAGTTCAAGAGGATAATTATAAACGTGGTGTGCTTTATAT  
GGACATCCGGGGCCAGGGAGCCATCCCTTAACCTCGTCTTGATGAGAAT---TTGACTTC  
ATTGCAAACCTGCACAAAAAGCTGGTGAATTGTCCCGTTTCTTGCGTGTACCAATAGAA  
GTATTT

>Berberis

-----ATGACTATTCATATATTT-----AGGGGGCAGGAAG  
GC-----TTTATGGAA--AAAGAAAAATGGTAT-----  
-----TTTTAGTTAAGGATAGTAACGGTAACACTTATTCCATATTTTTGATAGTGAAAA  
TAATATTTTAGAGATTAACAACCATCCT-----TCGTTGCCGGGTGAACCAAAAAGTTCTT  
TTTCTAGT-----GATCTGAATAATGGGTCTAAGAGTGACGATCACTACTATGATCG  
TTACATGTGTGATACTAAATATAGTTGGAAGAATCACATTAATAGTTGCATTGCCAATTAT  
CTTCATTTTCATTCTAAAATCAATATTAATAGTAACTTTCCAAGTGGTAGCGACAATTGC  
AGTAAGGGTTACATTTATAAGTTACATTTGTAATGAGGGAAGTGATTCCAGTAATTCCCAA  
GAAGAGGGAAAGTGATTTCCAAGAAAGTGATTCCCAAGAAAATACCGGTATAAATCAAA  
ACTACAAGCTTTTGTGGGTTCAATGCGACGAATGTGATGAATTAACCTATAAGAAATTT  
TTAAGAGCAAAATTAATATTTGTGAACACTGTGGAGTTCATTTGAAAATGGATAGTTC  
AGATAGAATCGAACTTTTCGATTGATCCGGGTAAGTTGGGATCCTATGGATGAATACATGGT  
TTCTGTAGACCCCATGAATTTTCAGTCAGAGGAGGAATCCTATACAGATCGTATTGATTC  
TTATCAAAAAGAGACGGGGTTAACTGAGGCTGTTCAAACAGGCATAGGTCAATTAAT  
GGTATTCCCATAGCAATTGGGATTATGGATTTTCGGTTCATGGGGGGAAGTATGGGATCC  
GTAGTAGGGGAAAAAATAACCCGTTTGTATCGAATATGCTACTAATGGATCTCTACCCCTT  
ATTATAGTGTGTGCTTCCGGAGGAGCGCGCATGCAAGAAGGAAGTTTGAGTTTGATGC  
AAATGGCAAAAATTTTCGTCCGCTTTATATAATTATCAATCAAACAAAAAGTTATTCTATG  
TATCAATCCTTACATCTCCTACAACCGGTGGAGTGACCGCTAGTTTTGGTATGTTAGGA  
GATATCATTATTGCCGAACCCGATGCCTACATTGCATTTGCAGGCAAAAAGAGTAATTGA

ACAAACATTGAATAAGACAGTACCTGAAGGTTCCCAATCGGCTGAGTATTTATTTCGACA  
AAGGCTTATTTCGACCCAATCATACCACGTAATCCTTTAAAAGATGTTCTGAGTGAGTTAT  
TTCAACTTCACGATTTCTTTCCCTTGAATCAAATTCACCT--ATGGTAACCTTTCGAGC  
CGACGAAATTAGTAACATTATCCGCGAACGTATTGAGCAATATACTACAGAAGTAAGGG  
TTGTCAATACCGGCACCGTACTTCAAGTAGGGCGATGGCATTGCTCGTATTACGGTCTT  
GATGAGGTAATGTCAGGCGAATTAGTAGAATTTGAAGAGGGTACTATAGGCATTGCTCT  
TAATTTGGAATCAAATAATGTTGGTGTGTATTAATGGGTGACGGTTTGATGATACAAGA  
GGGAAGTTCTGTAAAAGCAACAGGAAGAATTGCCAGATACCAGTGAGCGAGGCTTAT  
TTAGGTCGTGTTATAAATGCTCTGGCTAAACCCATTGATGGTAGAGGTGAGATTTACGC  
TTCTGAATCTCGGTTAATTGAATCTCCCGCTCCTGGTATTATTTCAAGACGTTCCGTATAT  
GAGCCTATGCAAACAGGGCTTATTGCTATTGATTTCGATGATCCCTATAGGACGAGGTCA  
GCGAGAATTAATTATTGGGGATAGACAGACCGGGAAGACAGCAGTAGCCACGGATACT  
ATTCTCAATCAAAAAGGACAAAATGTAATATGTGTTTATGTAGCTATTGGGCAAAAAGC  
ATCTTCTGTGGCTCAAGTAGTACTACTTTCCAGGAACAGGGGGCGATGGAATATACTA  
TTGTGGTAGCCGAAACAGCCGACTCGCCTGCTACATTACAATACCTTGCTCCTTATACA  
GGAGCATCTCTGGCTGAATATTTTATGTATCGTGAACGACATACTTTAATCATTIATGATG  
ATCCTTCCAAACAGGCACAAGCTTATCGCCAAATGTCTCTTCTATTACGAAGACCACCC  
GGTCGCGAAGCTTACCCAGGAGATGTTTTTATTTGCATTACAGCCTTTTGGAAGAGC  
CGCTAAATTAAGTTTTTCGTTTAGGTGAAGGAAGTATGACTGCTTTACCAATAGTTGAGA  
CTCAATCAGGAGACGTTTTCGGCTTATATTCCACTAATGTAATTTCCATTACAGATGGAC  
AAATATTCTTATCCGCCGATCTATTCAATTCTGGAATCCGACCTGCTATTAATGTGGGTAT  
TTCCGTCTCCAGAGTGGGGTCTGCGGCTCAAATTAAGCCATGAAACAAGTAGCCGGC  
AAATTAATTAAGGAAATTGGCTCAATTCGCAGAGTTAGAAGCCTTCGCACAATTCGCTTC  
TGATCTGGATAAAGCTACTCAGAATCAATTGGCAAGAGGTCAACGATTGCGCGAGTTG  
CTCAAACAATCCCAAGCATCCCCTCTCACGGTGGGAAGAACAAATAGTGACGATTTATAC  
CGGAACGAACGGATATCTTGATTCGTTAGAAATAGGACAGGTAAAGAACTTTCTCGTTC  
AATTACGTACCTACTTAAAACCAATAAACCTCAGTTCCAAGAAATCATATCTGCTACC  
AAGACATTCAACGAAGAGGCAGAAGTCCTTTTGAAGGAAGCTATTCAGGAACAGATG  
GAGCGGTTTATACTTCAGGAAGAAATAATGAAAATAAATCCTATTACTTCTGGTCCTGG  
GGTTTCCGCCCTTGAAGAAAAAATCAGGGGCGTATCATTCAAATCATTGGTCCGGTAC  
TGATGTAACTTTCCGCCGGGAAGATGCCTAATATTTACAACGCTTTGGTAGTTAAA  
GGGCAAGATACTGTTGCCAAGAAATTAATGTGACTTGTGAGGTACAGCAATTGTTAG  
GAAATAATCGAGTTAGAGCTGTAGCTATGAGTGCTACAGATGGTCTGATGAGAGGAATG  
GAAGTGATTGACACGGGAGTTCCTCTAAGTGTTCGGTTGGTGGAGCGACTCTCGGAC  
GAATTTTCAACGTTCTTGGAGAACCCGTTGATAATTTAGGTCCTGTAGATACTCGCACA  
ACATCTCCTATTATAGATCTGCGCCTGCCTTTATACAGTTAGATACCAAATTATCTATTT  
TTGAAACAGGATTAAGTAGTGGATCTTTTAGCGCCTTATCGCCGTGGAGGAAAAAT  
CGGACTATTCGGGGGGGCCGGAGTAGGTAAAACAGTACTCATTATGGAATTGATCAAC  
AACATTGCCAAGGCTCATGGGGGCGTATCCGTCTTTGGCGGAGTAGGCGAACGTACTC  
GTGAAGGAAACGATCTTTACATGGAATGAAAGAATCGGGAGTGATTAATGAACAAA  
TATTGCAGAATCAAAGTCGCCCTAGTCTATGGTCAGATGAATGAACCGCCGGGAGCT  
CGTATGAGAGTTGGTTTACTGCCCTAACTATGGCGGAATATTTCCGGGATGTGAATGA  
ACAAGACGTACTTCTATTTATCGACAATATTTCCGTTTCGTCCAAGCAGGATCCGAAGT  
ATCTGCTTTATTAGGCAGAATGCCTTCTGCTGTAGGTTATCAACCGACTCTTAGTACAGA

AATGGGTTCTTTGCAAGAAAGAATTACTTCTACCAAAGAGGGATCCATAACTTCCATTC  
AAGCAGTTTATGTACCTGCGGACGATTTGACTGACCCCGCTCCTGCCACAACATTTGCA  
CATTTAGATGCCACTACCGTACTATCAAGAGGACTAGCTTCCAAAGGCATCTATCCAGC  
AGTAGATCCTTTAGATTCAACGTCAACTATGCTCCAACCTCGGATCGTTGGTGACGAAC  
ATTATGAAACCGCGCAAAGAGTTAAGCAAACCTCACAAACGTTACAAAGAACTTCAGGA  
TATTATAGCTATTCTTGGGTTGGACGAATTATCCGAAGAGGATCGTTTAACCGTAGCAAG  
AGCACGAAAAATTGAGCGTTTCTTATCACAAACCCTTCTTTGTAGCAGAAGTATTTACCG  
GTTCCCCAGGAAAATATGTTGGTCTAACAGAAACAATTAGGGGGTTTCGACTGATCCTT  
TCCGGAGAATTAGATAGTCTTCCCTGAGCAGGCCCTTCTATTTGGTCCGTAACATCGATGA  
AGCTACCGCGAAGGCTATGAACTTAGACGTGGAGAGCAATTTGAAGAAAATGACCTTA  
AATCTATGTGTACTGACTCCTAATCGAATTGTTTGGAAATTCAGAAGTAAAAGAAATCAT  
TTTATCTACTAATAGTGGCCAAATTGGTGTATTGCCAAATCACGCCCCGATTGCCACCGC  
TG TAGATATAGGCATTTTGAGAATACGTCCTAATGACCAGTGGTTAACAATAGCCCTGAT  
GGGTGGTTTCGCTAGAATAGGCAATAATGAAATAACCGTTTTAGTAAATGATGCGGAGA  
AGGGTAATGACATTGATCCACAAGAAGCTCAGCAAACCTTTGAAATAGCTGAAGCTAA  
CTTGAGCCGAGCTGAAGGCAAGAGACAAACAATTGAGGCGAATTTAGCTCTCAGACG  
AGCTAGGACGCGGGTAGAGGCTATTAATGCAATCTCGATGAAAAATGTAACGGATTCTT  
TCGTTTCCTTGGGTCACTGGCCATCCGCCGGGGTTTTGGATTTAATACCGATATTTTAG  
CAACAAATCCAATAAATCTAAGTGTAGTACTGGGTGTATTGATCTTTTTTTGGAAAGGGA  
GTGTTAAGTGATTTATTAGATAATCGAAAACAGAGAATATTGAATACTATTCGAAATTCA  
GAAGAATTACGGGACAGTGCCATTGAAAGGCTGGAAAAAGCCCGGGCCCGCTTACGG  
AAAGTGGAAGGGAAGCCGAAGATTATATGGTGAATGGATACCTGGAAATAGAACGAG  
AAAAATTGAATTTGCAGAATTC AATAGGTCAGAATTTGGAACGGTTAGAAAATTACAA  
AAACGAAACCATT CAGTTTGAACAACAAAGAGCGATTAATCAAGTCCGACAACGAGT  
TTTCCAACAAGCTTTACAAGGAGCTCTAGGAACTCTGAATAGTTGTTTGAACAACGAG  
TTACATTTACGAACCATCAGTGCTAATATAGGGATGTTTGGGGCGATGAACGAAATAAG  
GGATATGAATCCACTGATTTCTGCCGCTTCCGTTATTGCTGCTGGATTGGCCGTAGGGCT  
GGCTTCTATTGGACCTGGAGTTGGTCAAGGTACTGCTGCAGGACAAGCCGTAGAAGGT  
ATCGCGAGACAACCAGAGGCAGAGGGTAAAATACGAGGTACTTTATTGCTAAGTCTGG  
CTTTTATGGAAGCTTTAACAATTTATGGACTGGTTCGTGGCATTAGCACTTTTATTTGCAA  
ATCCTTTTGTATGAATGTTCTACCATGTTCCATCAACACACTAAAGGGGCTATACGATAT  
ATCCGGTGTGGAGGTAGGCCAACATTTCTATTGGCAAATCGGAGGTTTCCAGGTACATG  
CCCAAGTACTTATTACTTCTTGGGTTGTAATGGCTATCTTACTAGGTT CAGCCGCTATAG  
CTGTTTCGAAATCCACAAACCATTCCCTACTGACGGTCAGAATTTCTTCGAATATGTCCTT  
GAATTCATTCGGGACTTGAGTAAACTCAAATTGGAGAAGAATATGGTCCTTGGGTGC  
CCTTTATTGGGACTATGTTCTTATTTATTTTGTTC TAACTGGTCAGGGGCTCTTTTACC  
TCGGAAAATCTTACAGTTACCCACGGGGAGTTAGCCGCACCCACGAATGATATAAATA  
CTACTGTTGCTTTAGCTTTACCGACGTCAATGGCATAATTTCTATGCGGGTCTTACAAAAA  
AGGGATTGGGTTATTTCCGGTAAATACATTCAACCAACTCCAATCCTTTTACCTATTAACA  
TCCTAGAAGATTTTACAAAACCCCTATCACTAAGTTTTTCGACTTTTTGGTAATATATTGG  
CTGATGAATGGTAGTTGTTGTTCTTGTTCCTTTAGTACCTTCAGTAGTTCCTATACCTGT  
CATGTTCCCTGGATTATTTACGAGTGGTATTCAAGCTCTTATTTTTGCAACTTTAGCTGC  
GGCTTATATAGGTGAATCCATGGAGGGTCATCATATGATATTTTTGACTTTAGAACATATA  
TTAACTCACATCTCTTTTTTCGATTATTTCTATTTTAATTACAATTTATTTGGTGACCTTATT

AGTCCATGAAATGGTAGGATTGTTTAATTCGTCAGAAAAAGGACTGATAGTTACCCTTT  
TCTGTATAACAGGAATTTTAGCTATTCGTTGGGTTTATTCTGGGCATTTCCCTTTAAGTAA  
TTTATTTGAATCATTAAATGTTCCTTTCATGGAGTTTTTCCATTATTTCATATGGTTCCCTATT  
TTACGAACCAAAAAAATCATTAAAGTGAATAACCGCACCAAGTGCTATTTTTACCCAA  
GGCTTTGCTACTTCAGGTCTTTTAACTGAAATGCATCAATCCACAAAATTAGTACCCGC  
TCTCCAATCACAGTGGTTAATGATGCACGTAAGTATGATGGTATTGAGCTACGCAGCCC  
TTCTATGTGGCTCATTATTATCAATAGCTCTTATAGTAATTACATTTTCGAAAAAATGTAAA  
AATATTTGGTAAAAACAAAGTGATTCAATATGTGAATGAAATAAAC---GTTTTACGAAAC  
ACTTTTTTTTATTTCAATTTAGAAATTATCATAGGTATCAATTGATTCAACAATTGGATTGTT  
GGAGTTGTCGTGTCATTAGTCTAGGGTTTATCTTTTTTAAACCATCGGTATTCTTTCAGGAG  
CAGTATGGGCTAATGAGGCATGGGGATCATATTGGAATTGGGATCCCAAGGAAACTTGG  
GCATTTATTACTTGGACTATATTCGCAATTTATTTACATACTCGAACAAATAAAAATTTGC  
AAGGCGTAAATTTCTGCAATTGTAGCTTCTATGGGATTTCTTATAATTTGGATATGCTATTT  
TGGGGTAAATCTATTAGGAATAGGGTTACATAGTTATGGTTCATTCACTAACCATGAC  
AAAAAGAAAGCATTCACTCTCCTCCCATATCTTGCATCTATAGTATTTTTGCCTTGGTG  
GATCTCTTTCTCATTTAAAAAAGTCTAGAATCCTGGGTATTAATTGGTGGAACTAG  
CCAATCCGAAGCTTTTTTTGAATGATATGCAAGAAAAGAGCGTTCTAGAAAAATTCATCG  
AATTGGAAGAACTATTTCTTTTTGAACGAAATGATAAAGGAGTACCCGGAGACACATATA  
CAAAAGCTTCGTATAGGAATCCACAAAGAAACGATCCAATTGGTCAAGATGCACAATG  
AGGGTCATATCCATACTATTTTGCACCTCTCGACAAATATAATAAGTTTTGTCTATTCTAAG  
TGGTTATTCTATTCTGGGTAATGAAGAACTTATCGTTCTAAATTTCTGGGTTCCGGGAATT  
TCTCTATAATTTAAGCGACACAATAAAAAGCTTTTTCTATTCTTTTGTTAACTGATTTATGT  
ATTGGATTCCACTCGCCCCATGGTTGGGAACATAATGATTGGTTTTGTCTACAAGGATTTT  
GGATTTTATCATAATGATCAAATTATATCTGGTCTTGTTTCCACTTTTCCAGTCATTCTAG  
ATACCATTTTTAAATATTGGATCTTTTCGTTATTTAAATCGTCTATCTCCCTCACTTGTAGTG  
ATTTATCACTCAATGAATGACATGCCCGTTGGTGTTCGAAAGTCCCCTTTCGAATTCC  
GGGAGATGAGGACGCAACCTGGGTTGACCTACTAATCCGACTTCATCGAGAAAGATTA  
CTTTTTTTAGGAGACTCCATAGAGGACGAACTAGCAAATCAAGTTATGGGGCTCATGCT  
ATTTCTCAATATAGAGGATAAGGACTTAGAGCAATGGTTATTTATAAACTCACCTGGCGG  
GTGGATAGTACCCGGAGTAGGCATTTATGATATGATGCAACTTGTGATACCAGATGTAAA  
TACAGTATGTATGGGAGTCGCCGTTCAATGGCATCTTTCGTTCTGGTTCGGAGGCGAAA  
TTACCAAACGCTTAGCATTCTTCGCGCT--ATGTTATATCATCAGGGTAATACCTGCTGG  
TACCTTTTATCAGCAAGAAATACCAGGATATACGCTAGAAATTTCAAGAGTTTCGCGACA  
GAATCGTAAAAATATATTCCGTACGAACACAACAACCCCACTGGGTTATAGCCGCCGAC  
CTGGAAAGAGATACTTTTATGGACGCAAGCGAAGCCAAAGAGTATGGAATTATAGATCT  
TATAGCAGAATCAGTATGAAAGATGAAAAATGGATCTTAGAAGGACTTGTAGTGGAATC  
ACTTCGCAATGGTATGTTTCGAGTTCGTTTAGATAATGACGATCTGATCCTAGGTTATATT  
TCTGGAAAGATACGGCGTAGTTATATACGAATACTACCAGGCGATAGAGTCAAAATTGA  
AGTAAGTCGTTATGATTCAACCCGGGGGCGCATAATTTTTAGAAATACGCAACAAAGATT  
CGAACGATATGGAAGAGTTACAAGGATATTTAGCAATAGATAGATCTCGACAACAAGAC  
TTCTATATCCACTTCTATTTTCAGGAGTATATTTATGCACTTGTCTCATGATCATGGTTTAGA  
TAATTTAGGT---AAATTCAGTTCACTGATTGTGAAACGTTTAATTACTCGAATGTATCAA  
CAGAAGCCTTTGGTTATTTTTGATAATGATTCTCAACAACATAAATTTGTGGATAATCAT  
TTTTATTCTCAAATGATATCAGAGGGCTGTGCAATCATTGTGGAAATTCCATTTTCACTG



CAATTAATATCTTCCCTAATAGCAAAATCTAAAAATTTACGATCAATTCATTCAGCATTTC  
CCTTTTTAGAGGATAAATTATCGCATTAAATCATGTCTTAGATATACTAATACCCACCC  
CATCCATCTGGAACCTTTTGATTCAACCCCTTCGCTGTTGGATACAAGATATCCCCGCTTT  
GCATTTATTGCGATTCTTTCTTTACGAGTTTCAGAATTGGAATAATCTTATTACTAAATAT  
ATTTCTGTTTTTTCAAACCGAAGATTATTCTTGTTCCTATATAATTTTCATGTATATGAATG  
CGAAGCGATATCCCCTTTCTCCGTAAACAATCTGCTCATTACGATCAACATCTTCTAG  
CGCCTTTCTTGAGAGAACACATTTTTTTGGAAAAATAGAACATTTTTTTGGTAGTTTTTC  
GTAATGATTTTATCCTCTGGGTTTTCAAGGACCTTTTCATACATTATGTCAGATATCAAGG  
AAAAGCTATTCTGGCTTTAAAGGGAACCTCTTCTGATGAATAAATGGAAGTATTACC  
TTATAAATCTCTGGCAATATAATTTGACTTGTGGTCTCAACCAGATAGGATTATATAA  
ACCAATTATAACAACCATCCCTCGATTTTTTTGGGCCATCTTTCAAGTGTACGACTAAAGC  
CTTCTGTGGTTAGGAGTCAAATGTTAGAAAATTCATTTATTATAGATATTGCTATA-----AA  
AAAGTTTTATACTATAGTCCCAATAATTACTTTGATTGGATCATTGGCTAACTCGAAATTT  
TGTAACGCATCAGGGCATCCCATAGTAAGTCGGCTCGGACCGATTCATCGGATTCTGA  
TATTATCGATAGATTTGGGCGGATATGCAGAAATCTTCTCATTATTATAGTGGATCCTCA  
AAAAAAAAGAGTTTGTATCGAGTAAAGTATATCCTTCGACTTTCATGTGCTAGAACTTT  
GTCTCGTAAACATAAAAGTACTGTCCGTTCTTTTTTTGAAAAGATTAGGTTTCGGAATTATT  
GGAAGAATTCTTTACAGAAGAAGAACAAGTTCTTTCTTTGATCTTCCCAAGACGGATTT  
GGTATTTTTGATATTATTCGTATCAATGACCTGGCCAATCATGAAATGATAATTGATACGAC  
A---AAAGTACAACAAGCTATCAATTCTTTTCCAGATCGGAA---TCCTTAAAGAGGTTT  
ATGGACTCATAGGGCTGCTTGTTCCTATTTTTACTCCTTTATCGGGAATCCTAATAGGGG  
TACTAGTTATTGTGTGGTTAGAAAGACAAATATCTGCGGGGATACAACAACGTATTGGA  
CCCGAATACGCAGGGCCTTGGGGAATCTTCAAGCTCTAGCAGATGGGACTAAACTAC  
TTTTCAAGGAGGATCTTCTCCCTCTAGAGGGGATATTCGTTTATTCAGTATCGGACCTT  
CTATAGCGGTTATATCCATTTACTAAGTTATTCAGTAATTCCTTTTGGCTATCACCTTGTT  
CTAGCCGATCTCAGTATCGGTGTTTTTTTTATGGATTGCAATTTCAAGTATTGCCCTATTG  
GACTTCTTATGTCAGGATATGGATCGAATAATAAATATTCCTTTTTAGGTGGTCTCCGAG  
CTGCTGCTCAATCGATTAGTTATGAAATACCATTAACTCCATGTGTTTTATCAATTTCTCT  
ATTATCTAACAGTTCAAGTACAGTTGATATAGTCGAGGCGCAGTCAAATATGGTTTTTG  
GGGGTGGAATCTATGGCGTCAACCTATAGGGTTTATGGTTTTTCTAATTTCTTCCCTAGC  
AGAATGTGAGAGATTACCTTTTGATTTACCAGAAGCAGAAGAAGAATTAGTTGCGGGT  
TATCAAACCGAATATCCGGTATAAAATTTGGTTTATTTTATGTTACTTCTCTATCTAAACC  
TATTAGTTTCTTCATTTTTGTAACAGTTCTTTACTTGGGCGGTTGGAATCTCTCTATTCC  
GTACATATTTATGCCAGATCTTTGGGGAATTAATGAAGTGCGCGGAGTCTTTGAAACGA  
CAATAGGTCTCTTTATTACATTAGCTAAAGCTTTTTTTGTTCTTATTCATTCCTATCACAAAC  
AAGGTGGACTTTACCTAGGATGAGAATGGACCAACTATTGAATCTTGGGTGGAAATTC  
TTTTACCTGTTTCTTTAGGTAATCTATTATTGACAACCTTCTTCTCAACTGCTTTCCTGAT  
GATCTGGCATGTACAGAATGAAAACCTTCATTCTCGATTCTACGAGAATTTTTTATGAAAG  
CGTTTCATTTGCTTCTTCCATGGAAGTTTTATTTTCCAGAATGTATCCTAATTTTTGG  
CCTAATTTCTTCTGATGATCGATTCAACCTCTGATCAAAAAGATATACCTTGGTTATAT  
TTCATCTCTTCAACAAGTTTAGTAATGAGCATAGCGGCCCTATTGTTCCGATGGAGAGA  
AGAACCCTATGATTAGCTTTTCGGGAAATTTCCAACGAACAATTTCAACGAAATCTTTC  
AATTTCTTATTTTACTATGTTCCACTCTATGTATTCCTCTATCCGTAGAGTACATTGAATGT  
ACAGAAATGGCTATAACAGAGTTTCTGTTATTCGTATTAACAGCTACTCTAGGAGGAAT

GTTTTATGTGGTGCTAACGATTTAATAACTATCTTTGTAGCTCCAGAATGTTTCAGTTTA  
TGCTCCTACCTATTATCTGGATATACCAAGAGAGATGTACGGTCTAATGAGGCTACTACG  
AAATATTTACTCATGGGTGGGGCAAGCTCTTCTATTCTGGTTCATGGTTTCTCTTGGCTA  
TATGGTTCATCCGGGGGAGAGATCGAGCTTCAAGAAATAGTGAATGGTCTTATCAATAC  
ACAAATGTATAACTCCCCAGGAATTTCAATTGCGCTTATATTCATCACTGTAGGAATTGG  
GTTCAAGCTTTCCCCAGCCCCTTCTCATCAATGGACTCCTGACGTATACGAAGGATCTC  
CCACTCCAGTTGTTGCTTTTTCTTTCTGTTACTTCGAAAGTAGCTGCTTCAGCTTTAGCCA  
CTCGAATTTTCGATATTCCTTTTTATTTCTCATCAAACGAATGGCATCTTCTTCTGGAAAT  
CCTAGCTATTCTTAGCATGATATTGGGGAATCTCATTGCTATTACTCAAACAAGCATGAA  
ACGTATGCTTGCATATTCGTCCATAGGTCAAATCGGATATGTAATTATTGGAATAATTGTT  
GGAGACTCAAATGATGGATATGCAAGCATGATAACTTATATGCTGTTCTATATCTCCATG  
AATCTAGGAACTTTTGCTTGCATTGTATCATTGGTCTACGTACCGGAACTGATAACATT  
CGAGATTATGCAGGATTATACACGAAAGATCCTTTTTTGGCTCTCTCTTTAGCCCTATGT  
CTCTTATCCCTAGGAGGTCTTCCCTCCACTAGCAGGTTTTTTTCGGAAAACCTCATCTATTC  
TGGTGTGGATGGCAGGCAGGTCTATATTTCTTGGTTTTCAATAGGACTCCTTATGAGCGTT  
GTTTCTATCTACTATTATCTAAAATAATCAAGTTATTAATGACTGGACGAAACCAAGAA  
ATAACCCCTCACGTGCGAAATTATAGAAGATCTCCTTTAAGATCAAACAATTCCATCGA  
ATTGAGTATGATTGTATGTGTGATAGCATCTACTATAACCAGGAATATCAATGAACCCCAT  
ATTGCAATTGCTCAGGATACCCTTTTTATGTTTCTGCTTCACGAATATGATATTTTCTGGG  
CATTCTAATAATATCAAGTGTTATCCCTATTTTAGCATTCTAATTTCCGGAGTTTTGGC  
CCCAATTAGTGAAGGACCGGAGAACTTTCTAGTTACGAGTCGGGTATAGAACCAATG  
GGCAATGCTTGGTTACAATTCCGAATCCGTTATTATATGTTTGCTCTAGTTTTTTGTTGTT  
TTGATGTTGAAACGGTTTTTCTTTATCCATGGGCGATGAGTTTCGACGTATTGGGTGTAT  
CCGTATTTATAGAAGCTTTAATTTTCGTGCTTATCCTAATTGTTGGTTCAGTTTATGCATG  
GCGAAAGGGGGCATTGGAATGGTCTACGAATCTTTTCCTTGGTTAACAATAATTGTTA  
TTTTTCCGATATTGGCGGGTTCCTCAATTTTATTTTTGCCCATAGGGGCAATAAGGTAA  
TCAGGTGGTATACTATTTCTATTTGTTTATTAGAACTCCTTTTAACCACCTATGCATTTTC  
TTATCATTTTAAATTGGACGATCCATTAATCCAATTGGAACAGGATTTCAAATGGATTAA  
TTTTTTTGATTTTCACTGGAGACTCGGAATCGATGGACTTTCCATAGGACCCATTTTACT  
GACAGGATTCATTACTACTTTAGCTACTTTAGCGGCTTGGCCAGTTACTCGGGATTTCG  
GATTGTTCCATTTCTGATGTTAGCAATGTACAGTGGTCAAATAGGATCATTTTCTTCTC  
GAGATCTTTTACTTTTTTTCATCATGTGGGAGTTAGAATTAATCCTGTCTACCTACTTCT  
AGCCATGTGGGGAGGGAAGAAACGTTTGTACTCAGCTACAAAGTTTATTTTGTACACG  
GCAGGAGGCTCGATTTTTCTCTTAATGGGAGTTCAGGTATGGGTTTATATGGTTCCAAT  
GAACCAACATTAAATTTTGAACCTCAGCCAATCAATCCTATCCTATAGCATTAGAAATC  
ATATCTATTTTGGATTTTTTATTGCTTATGCTGTCAAACCTGCCGATCATAACCCTACATAC  
ATGGTTACCGAATACCCATGGAGAAGCACATTACAGTACCTGTATGCTTTTAGCCGGAA  
TCTTATTAATAAATGGGAGCGTATGGATTGGTTCGGATCAATATGGAATTATTACCCACG  
CGCATTCTTTATTTTCTCCCTGGTTGATCATAATGGGCATTTTTTCAAATAATCTATGCAGC  
TTCAACATCTCCCGTCAACGTAATTTAAAAAAGAATTGCCTATTCTTCCGTAICTCA  
TATGGGTTTACAATTATAGGAATTAGTTCCATAACGGATACGGGACTCAACGGGGCTAT  
TTTGCAAATGATTTCTCATGGATTTATCGGTGCTGCACTTTTTTTCTTAGCAGGAACGAG  
TTACGATAGAATACGTCTTGTTTATCTCGACGAAATGGGGGGAATAGCTATCCCGATGCC  
AAAAATTTTTTACACTGTTTCAGTAGTTTCTCAATGGCTTCTCTTGCATTGCCAGGAATGA

GCGGTTTTGTTGCGGAATTGATAGTATTTTTTAGTATAATAACTAGTCAAAAATTCTTTT  
AATGCCAAAAATCTTAATTACGTTTGTAAACGGCAATTGGAATGATATTAACCTCCTATTTAT  
TTATTATCGATGTTACGCCAGATTTTCTATGGATACAAGCAATTAATGTTCCAATATCAA  
ATTTATTAGATTCTGGACCACGAGAATTATTTGTTTCGATCTGTATCCTTCTACCCGTAAT  
AGGTATTGGTATTTATCCGGATTTGTTTTTGC ACTATCAGTTGACAAGGTAGAAGCTAT  
TTTATCTAATTATTTTTATAGAATGATGCTCGAACATGTACTTGTTTTTAAGTGCCTATTTAT  
TATCCATCGGCATCTATGGATTGATTACAAGTCGAAATATGGTAAGAGCACTTATGTGTC  
TTGAGCTTATACTGAATGCGGTTAATATGAATTCGTAACATTTTCTGATTTATTTGATAG  
TCGCCAATTAAGGAGACATTTTCTCGATTTTGTATAGCTATTGCAGCCGCTGAAG  
CAGCTATTGGCTTAGCTATTGTTTCATCAATTCATCGTAACATAAAATCAACTCGTATCAA  
TCAATCGAATTTGCTAAATAAAATGGCATATACATCTCAATATGCATGGATCATACTTGG  
GTTCCACTTCCAGTTCCTATAGCAATAGGAATCGGACTTCTCGTTGTCCCTACAGCAGC  
AAAAAGTCTTCGTGCTATATGGGCCTTCTAGTATTTTATTAAGTATCATTATGATT  
TTTTCAGCCGATCTGTCTATTCAACAAATGAATGGCAGTTTTATATATCAATACGTATGGT  
CCTGGACTATCCATAATGATTTTTCTTTAGAATTTGGTACTTGATCGATCCACTTACGTC  
CATTATGTTAATATTAATTACTACTGTTGGAATAATGGTCTTATTTATAGTGACAATTATA  
TGTCTCATGATCAAGGCTATTTGAGATTTTTGCTTATATGAGTTTTTCCAATGCTTCCAT  
GTTGGGATTAGTTACTAGTTCCAATTTGATACAAATTTATATTTTTTGGGAATTGGTTGG  
AATGTGTTCTATTTATTAATAGGGTTTTGGTTCACACGACCAATTGCGGCAAATGCTTG  
CCAAAAGCCTTTGTAACATAATCGTGTAGGGGATTTGGTTTATTATTAGGAATCCTAGG  
TTTTTATTTTATAACGGGTAGTTTCGAATTTGGGATTTGTTTCGAAATAACCAATAACGA  
TGGAGTCAATTCCGAATTTCTACTTTGTGTGCCTCCCTATTATTCGTGCGTGCAGTTGC  
GAAATCGGCACAATCCCCCTTCATGTATGGTTACCCGATGCTATGGAAGGGCCTACTC  
CTATTTAGCTCTTATCCACGCTGCTACTATGGTAGCAGCGGGAATTTTTCTTGTAGCTC  
GATTTCTTCTCTTTTTTACCACTCTACCTTACGTAATGAATTTGATTTCTTTGGTAGGTAT  
AATAACAATACTATTCGGAGCCACTTTGGCTCTTGCTCAAAAAGATATTAAGAAAAGTT  
TAGCCTATTCTACAATGTCTCAATGGGTTATACTATGTTAGCTTTAGGTATGGGATCTTA  
TCGAGCTGCTTTATTTCAATTAATTACGCATGCCTATTCGAAAGCATTATTTTTTAGGA  
TCCGGATCGATTATTCCTCAATGGAAACCAATTATTGGATATTCGCCAGATAAAAGTCAG  
AATATGGCTCTTATGGGAGGCTTAACAAAATATGTGCCAATTACAAAACCTACCTTTTTA  
TTAGGTACACTTTCCATTTGCGGTATTCCACCTCTTGCTTGTTTTTTGGTCCAAAGACATT  
ATTCTTAATGATAGTTGGTTGTATTCACCCATTTTCGCGATAATAGCTTGTTCACAGCA  
GGATTAACCTGATTTTATATGTTTCGAATATATTTACTTACTTTTGAAGGGCATTAAATG  
TCCATTTGCAAAATTTAGTGGCAAACAAAATAGCTTGGGCTATTCAATCTCTATATGGG  
GCAAAGAAGGGTCGAAAGCGATAAAACAAAAT--TTTGTTTTATCATCAATCAATCTTTT  
TTCATTTTCCAATAAAAAGCTTTCCAGTACCCCATGAATCAGATAATACTATGCTATT  
GCCACTTCTTGTATTGGTATTATTTACTTTTATTCATCGGATTTATAGGAATTCCTTTTTATT  
TTGATGTATTATCCAAATGGTTAACTCCGTCGATAAATCTTTTACATTCAAAACCTCGAGT--  
TCTGTGGATTGGTATGAGTTTTTTACAAATATGATTTTTTCGGTAACTATCGCGTCTTTCG  
GAATATTTATAGCGTCTCTCTTATATAAGCCTGTTTTTTCAACTTTTCAAATTTAGACTT  
AATTAATTCATTTCTAAGTTTCTGGGAACAAATAATAAATGTGATATATAATTGGTCATAT  
AATCGTGGTTACATTGACAGTTTTTATTCAACAACCTTAACTAGGGGTATAAGAGGGTT  
AGCTGAACTAATTTCCTTTTTTGATCGACAAGTAATTGATGGAATTACTAATGGAATTGG  
TGTTACAAGTTTCTTTGTAGGAGAGGGGATAAAATATATAGGGCGCGGA---CGAATTTCT

TTTTATCTCTTCTTGTATTTATTTTATGTATCAATTTTTTTTTTATTTACTATATATGGATTAC  
CTGCGCCAATACATGATTTTCTTTTAGTATTTTLAGGGTTGGGTCTTATAGTCGGCGGTTT  
AGGAGTAGTATTATTTACCAATCCAATTTATTCTGCCTTTTCATTGGGATTGGTTCTTGCG  
TGTATATCCTTATTTTCATATCTATCGAACTCCCATTTTGTAGCTGCTGCACAACCTTCTTAT  
TTATGTGGGTGCCATAAATGTCTTAATTGTATTTGCTGTTATGTTTCATGAATGGCTCAGAA  
TATTATAACGATTTCCATCTTTGGACCGTTGGAGATGGGATCACTTCACTGGTTTGTACA  
AGTATTTTAGTTTCACTAATTACTACTATCTCAGATACGTCATGGTACGGTATTATTTGGA  
CCACAAGATCAAACCAAATTATAGAGCAAGATTTGATAAATAATGGTCAACAAATTGGA  
ATTCATTTATCAACAGATTTCTTTCTTCCATTTGAACTTATTTCTATAATTTCTTTTAGTTGC  
CTTGATCGGTGCAATTGCTATGGCTCGTCAGATGACTGTACCAACTACAAGACAAGATC  
TCATGATAGTCAATATGGGTCTCACCACCCATCAATGCATGGTGTCTTTCGACTCATTG  
TACTCTTGATGGCGAAGATGTTATTGACTGTGAACCCGTATTGGGTTATTTACACAGAG  
GAATGGAAAAAATTGCAGAAAATCGAACCATTATACAATATCTGCCTTATGTAACACGT  
TGGGATTATTTAGCTACTATGTTTACAGAGGCAATAACGGTAAATGCACCGGAACAGTT  
GGGAAATATTCAAGTACCTAAAAGAGCCAGCTATATTAGAGTCATTATGCTGGAATTGA  
GCCGTATAGCTTCTCATTGTGTTATGGCTTGGCCCTTTTATGGCGGATATCGGTGCGCAGA  
CCCCTTTCTTCTATATTTTTTCGAGAGAGAGAGTTGATATATGATCTATTCGAAGCTGCCA  
CCGGCATGCGAATGATGCACAATTTTTTCCGTATCGGGGGAGTAGCTGCCGATCTACCT  
CATGGCTGGATCGATAAATGTTTGGATTTCTGTGATTATTTTCTAACAGGGATTATTGAAT  
ATCAAATCTTATTACGCAGAATCCTATATTTTTGGAACGAGTTGAAGGAGTGGGCTTTA  
TTAGTGGAGAAGAAGCAATAAATTGGGGCTTATCCGGACCCATGCTACGAGCTTCCGG  
AATCCATGGGATCTTCGTAAAGTTGATCATTATGAGTGTTATGACGAATTTGATTGGGA  
AGTACAATGGCAAAAAGAAGGAGATTCATTAGCTCGTTATTTAGTCCGAATTAGTGAAA  
TGACGGAATCTATAAAAATTATTCAACAAGCTCTGGAACGAATTCCGGGGGGGCCTTAT  
GAGAATTTAGAGGTACGGCGTTTTGATAGAGCAAGGGATTACGAATGGAATGATTTTGA  
TTATCGATTATTAGTAAAAACCTTCCCCACTTTTGAATTGTCGAAACAAGAACTTTA  
TGTGAGAGTAGAAGCCCCGAAGGGAGAATTGGGAATTTTTCTGATAGGAGATCAGAGT  
GTTTTCTTGGAGATGGAAAATTCGTCCGCCAGGGTTTATCAATTTGCAAATTTCTTCT  
CAGCTAGTTAAAAGAATGAAATTGGCTGATATTATGACAATACTAGGTAGTATAGATATC  
ATTATGGGAGAAGTTGATCGTATGTTCCCTATGGTAACCGGGTCTTGAATTATGGTCAA  
CAAACAGTCCGAGCAGCAAGGTATATTGGTCAAAGTTTTATGATTACCTTATCCCACGC  
AAATCGTTTACCTATAACTATTCAATATCCTTATGAAAAATTGATCACATCGGAACGTTT  
CCGCGGTCGAATACATTTTGAATTTGATAAATGTATTGCTTGTGAAGTATGTGTTTCGTGT  
ATGCCCTATCGATCTACCCGTTGTTGATTGGAAAATTGGAACTGATATTCGAAAGAAAC  
GATTGCTTAATTACAGTATTGATTTTCGGAATCTGTATATTTTGTGGTAACTGCGTCGAGTA  
TTGTCCAACAACTGTTTATCAATGACTGAAGAATATGAACTTTCTACTTATAATCGTCA  
CGAATTGAATTATAATCAAATTGCTTTGGGTTCGTTACCTATGTCAATAATTGGAGATTA  
CACAATCCAAACAATTATGAATTCA-----AAAACCACGGG-----ATG  
CAGGGTCCTTTGTCTGCTTGGCTAGTCAAGCATGGGCTAGTTCATAGATCTTTAGGCTT  
CGATTACCAAGGAATAGAACTTTACAAATAAAGCCTGAGGATTGGCACTCCATTGCTG  
TCATTTATATATATATGGTTACAATTATCTACGCTCTCAATGTGCCTATGATGTAGCACC  
AGGCGGATTGTTAGCTAGTGTGTATCATCTTACGAGAATACAGTATGGTGTGGATCAAC  
CGGAGGAGGTTTGCATAAAAGTATTTGCCCAAGGAGTAATCCTAGAATTCGCTCTGTT  
TTCTGGATTTGAAAAAGCGCGGATTTTCAAGAACGGGAATCTTATGATATGTTGGGAAT

CTATTATGATAATCATCCGCGCCTGAAACGTATTTTGATGCCCGAAAGTTGGATAGGATG  
GCCTTTACGTAAGGATTATATTGCCCAAATTTCTATGAAATACAAGATGCTCTTATGGG  
CGATGAGTTTCGACGTATTGGGTGTATCCGTATTTATAGAAGCTTTAATTTTCGTGCTTAT  
CCTAATTGTTGGTTCAGTTTATGCATGGCGAAAGGGGGCATTGGAATGGTCTTAGCTCC  
TGAATATTCAGACAATAAAAATAAAAAACGAAGAAAAAATTGCATTGAGACAGTTATG  
AATCCATTGAGTTTCCGTACTTGATCGAACAACCCAAAATTCAGTTATTTCAACTACA  
TCAAATGATCTTTCAAATTGGTCAAGACTCTCCAGTTTATGGCCGCTTCTCTATGGTACC  
AGTTGTTGCTTCATTGAATTTGCTTCATTAATAGGCTCACGGTTCGATTTTGATCGTTATG  
GACTGGTACCAAGATCGAGTCCTAGGCAAGCGGACCTCATTTTAAACAGCCGGCACAGT  
ACAATGAAAATGGCTCCTTCTTTAGTGAGATTATATGAGCAAATGCCTGAACCAAAT  
ATGTCATTGCTATGGGAGCTTGTACTATTACAGGCGGGATGTTTCAGTACCGATTCTTATA  
GTACTGTTTCGAGGAGTCGATAAGCTAATTCCTGTTCGATGTTTATTTACCGGGTTGTCCAC  
CTAAACCGGAGGCAGTTATAGATGCTATAACAAAACCTTCGGAAGAAGGTATCTCGAGA  
AATCTATGAAGATAGAATCGGGGCTCAACAGGAGACTCGATGTTTTACTACCAATCACA  
AGTTTCATGTTGGGCGGAATACTCATACTGGAAATTATGATCAAGGATTACTCTATCAAT  
CGCCATCTACTTCCGAAATCCCGTCTGAAACATTTTCAAATACAAAATTCAGCATCT  
CCCCGTGAATTAGTAAATATGCAAATAGAAATATCTTTTCTTGGGTA---GAGCAGATGA  
CTCGATCCATTTCTGTATCGATCATGATGTTGATAATAACTTGGACATCTATTTACACGC  
ATATCCTATTTTTGCACAACAGAGTTATGAAAATCCACGAGAAGCAACTGGGCGTATTG  
TATGTGCCAATTGCCATTTAGCTAATAAACCCGTGGATATTGAGGTTCCACAAGCGGTA  
CTTCCTGATACTGTATTTGAAGCAGTTGTTAGAATCCCTTATGATATGCAACTGAAACAA  
GTTCTTTCAAATGGTAAAAAGGGGTCTTTGAATGTGGGGGCGGTTCTTATTTTACCTGA  
GGGATTCGAACTAGCCCCCTCCGATCGTATTTCTCCCGAAATGAAAGAAAAGATGGGA  
AATCTGTCTTTTCAGAGTTATCGTCCGACTAAAACAAATATTCTTGTGATAGGTCTCTGTT  
CCTGGTCAGAAATATAGTGAAATCACCTTTCCTATTCTTTCCCGGACCCTGCTACTAAG  
AAAGATATTTACTTTTTAAATATCCTATATACGTTGGTGGGAACAGGGGAAGGGGTCA  
GATTTATCCCGATGGGAGGAAGAGTAACAATACAGTCTATAATGCTACAGCGGCAGGTA  
TTGTCAGCAAAATAGTACGTAAAGAAAAGGGCGGTTTTGAAATAACCATAGTGGATGC  
GTCGGATGGACACCAATCCCTTGATATTATACCTCCAGGACCGGAACTTCTTGTTCAG  
AAGGTGAATCCATCAAGCTGGATCAACCATTAACGAGTAATCCCAACGTGGGTGGGTT  
TGGTCAAGGAGATGCAGAAATAGTACTTCAAGATCCATCACGCGTCCAAGGTCTTTTTT  
TCTTCTTTCATCTGTTATTCTGGCACAATTTTTTTGGTCTTAAAAAGAAACAGTTTG  
AAAAGGTTCAATTGTCCGAAATGAATTCCTCAATAAAGTATATGATTGGTTCGAAGAG  
CGTCTCGAAATTCAGGCGATTGCAGATGATATAACTAGTAAATATGTTTCTCCACATGTC  
AACATATTTTATTGTCTAGGAGGAATTACGCTTACTTGTTTTTTAGTACAAGTAGCTACG  
GGTTTTGCCATGACTTTTTACTATCGTCCAACCGTTACCGAGGCTTTTACCTCGGTTCAA  
TACATAATGACTGAAGCTAACTTTGGTTGGTTAATCCGATCAGTTCATCGATGGTCAGC  
AAGTATGATGGTCTAATGATGATCCTGCACGTATTTTCGTGTCTATCTACCGGTGGGTT  
TAAAAACCCCGCGAATTGACTTGGGTTACAGGTGTGGTTCTGGCTGTATTGACCGCAT  
CTTTTGGTGTAACCTGGTTATTCCTTACCTCGGGACCAAATTGGTTATTGGGCAGTCAA  
ATCGTGACAGGCGTACCCGACGCTATTCCTGTAATCGGATCGCCCCTGGTTCGAGTTATT  
ACGTGGAAGTGCTAGTGTGGGTCAATCTACTTTGACTCGTTTTTATAGTTTACACACTTT  
TGATTACCTCTTCTTACTGCCGATTTATGTTAATGCACTTCCTAATGATACGTAAGCAA  
GGTATTTCTGGCCCTTAAATCCAATAACAAAGAAACCTGATTTGAATGATCCTGTATTA

AGAGCTAAATTGGCGAAAGGGATGGGTCATAATTATTACGGTGAACCCGCATGGCCCA  
ATGATCTTTTATATATTTTTCCAGTAGTAATTTTGGGTACTATTGCATGTAACGTAGGTCT  
AGCGGTTCTAGAACCGTCAATGATAGGTGAACCCGCGGATCCATTTGCAACCCCTTTG  
GAAATATTGCCCGAATGGTACTTCTTTCTGTATTTCAAATACTCCGTACAGTGCCCAAT  
AAATTATTGGGAGTTCTTTTAATGGTTTCAGTACCAGCCGGATTATTAACGGTACCCTTT  
TTGGAGAATGTTAATAAATTCCAAAACCCGTTCCGTCGTCCAGTAGCTACAACCGTCTT  
TTAATTGGTACCCGAGTAGCTCTTTGGCTGGGTATTGGAGCAACATTACCTATTGATAA  
ATCTCTAACTTTAGGTCCTTTTATGATTGAAGTTTACTATTGGAAATCGTGTTAGGTC  
ATTCCTATTACTTTGGCTGGATTATTCGTAAGTGCATATTTGCAATACAGGCGCGGAGAT  
CAGTTGGAACCTTATGCTTACTATAACTAGTTATTTCCGTTTTCTACTGGCGGCTTTAACTA  
TAACTTCAGTTCTATTTATTGGTCTGAACAAGATACGACTTATTATGGATATAGTAAGTCT  
TGCTTGGGCTGCTTTAATGGTAGTCTTTACATTTTCCCTTTCACTCGTAGTATGGGGAAG  
AAGTGGACTCATGATTATTCGTTCCGCGGAACCAGAAGTGAAAATTTGGTGGATAGG  
GATCCCGTAAAACTTCTTTTCGAGGAATGGGCCAGACCCGGGTCATTTCTCAAGAACAA  
TAGCTAAGGGCCCGGATACTACCACTTGGATCTGGAACCTACATGCCGATGCTCACGAT  
TTCGATAGCCATACGAGTGATTGGAGGAGATCTCTCGAAAAATATTTAGTGCCCATTTT  
GGTCAACTCTCCATCATATTTCTTTGGCTGAGTGGCATGTATTTCCATGGTGGCCGTTTT  
TCCAATTATGAAGCATGGCTAAGCGATCCTACTCACATAGGACCTAGTGCCAGGTGGT  
TTGGCCAATAGTGGGCCAAGAAATATTGAATGGTGATGTGGGTGGGGGTTTTCCGAGGA  
ATACAAATAACCTCCGGTTTTTTTTTTCAGATTTGGCGAGCGTCTGGAATAACTAGTGAATT  
ACAACCTCTATTGTACTGCAATTGGTGCATTGGTTTTTGCAGCGTTAATGCTTTTTTGCCG  
TTGGTTCCATTATCACAAAGCTGCTCCAAAATTGGCTTGGTTCCAAGATGTAGAATCTAT  
GTTGAATCACCCTTAGCGGGGTTACTAGGACTTGGGTCTCTTTCTTTGGGCGGGGCAC  
CAAGTACATGTATCTTTACCAATTAACCAATTTCTAGACGCTGGAGTCGATCCTAAAGA  
GATCCCACTTCCTCATGAATTCATCTTGAATCGGGATCTTTTGGCTCAACTTTATCCCAG  
TTTTGCCGAGGGAGCAACTCCATTTTTTACCTTGAATTGGTCAAATATGCGGAATTC  
TTACTTTTTCGTGGAGGATTAGATCCAGTAACAGGGGTCTATGGCTGACCGATATTGCA  
CACCATCATTTAGCTATTGCAATCTTTTTCTGATAGCCGGCCACATGTATAGGACCAAT  
TGGGGTATTGGTCATGGTCTCAAAGATATTTTGGAGGCTCATAAAGGTCCATTTACCGG  
CCAGGGTCATAAAGGCCTCTATGAGATCCTAACAACGTCGTGGCATGCTCAATTAGCTC  
TTAACCTAGCTATGTTAGGTTCTTTAACTATTGTTGTAGCTCATCATATGTATTCCATGCC  
CCTTATCCATATCTAGCTACTGACTATGGTACACAACCTTTCATTGTTACACATCACAT  
GTGGATCGGTGGATTTCTCATAGTTGGTGCTGCTGCGCATGCAGCCATTTTTATGGTAAG  
AGACTATGATCCAACCTACTCGATAACAATGATCTATTAGATCGTGTCTTAGGCACCGCGA  
TGCAATCATATCACATCTCAACTGGGCATGTATATTTCTAGGTTTTTACAGCTTTGGTTT  
GTATATTCATAATGATACCATGAGCGCTCTAGGGCGTCCCAAGATATGTTTTAGATAC  
CGCTATAACAATTACAACCCGTCTTTGCTCAATGGATACAAAATACCCACGCTTTAGCAC  
CTGGCGCAACAGCCCCTGGTGCAACAACAAGTACCAGTTTGACTTGGGGGGGTAGTG  
GTTTAGTAGCAGTAGGCGGCAAGGTTGCTTTGTTACCTATTCCATTAGGAACCGCAGAT  
TTTTTGGTACACCACATTCATGCATTTACGATCCATGTGACGGTATTGATACTATTGAAA  
GGGGTTCTATTCGCCCGCAGTTCCCGTTTGATACCCGATAAAGCAAATCTTGGTTTTCG  
TTCCCTTGTGACGGGCCTGGAAGAGGAGGGACATGCCAAGTATCCGCCTGGGATCAT  
GTCTTCTTAGGTCTATTCTGGATGTACAATGCAATTTCCGGTAGTAATATTCATTTAGTT  
GGAAAATGCAGTCCGATGTTTTGGGGTAGTATAAATGATGAAGGGGTGGTAACTCATATC

ACGGGAGGAAACTTTGCGCAGAGTTCCATTACTATTAATGGATGGCTCCGTGATTTTTT  
ATGGGCACAGGCATCCCAGGTAATTCAGTCTTATGGTTCGTCATTATCTGCATATGGCCT  
TTTTTCCCTAGGTGCTCATTGTTGTGTGGGCTTTCAGTTTAATGTTTCTTTTCAGCGGCCG  
TGTTATTGGCAAGAACTTATTGAATCTATCGTTTGGGCTCATAACAAATTAAGGTTGC  
TCCTGCTACTCAGCCTAGAGCCTTGAGCATTGTACAAGGACGTGCTGTAGGAGTAACC  
CATTACCTTCTGGGTGGAATTGCCACAACATGGGCGTTCCTTCTTAGCAAGAATTATTGC  
AGTAGGAATGGCATTAAAGATTTCCAAGGTTTAGCCAAGGCTTAGCTCAGGACCCACT  
ACTCGTCGTATTTGGTTTGGTATTGCTACCGCACATGACTTCGAGAGTCATGATGATATT  
ACTGAGGAACGTCTTTATCAGAATATTTTTGCTTCTCACTTTGGGCAGTTAGCAATAATT  
TTTCTGTGGACTTCCGGAAATCTGTTTCATGTAGCTTGGCAAGGAAATTTGAGTCATG  
GGTACAGGACCCTTTACATGTAAGACCTATTGCTCATGCAATTTGGGATCCTCATTTTGG  
TCAACCAGCTGTGGAAGCCTTTACTCGAGGGGGTGTCTTCGGCCCTGTGAATATCGCTT  
ATTCCGGTGTATTATCAGTGGTGGTATAACAATCGGCTTACGCACTAATGAAGATCTTTATA  
CTGGAGCTCTTTTTCTATTATTCTTTCTGCCATATCCTTAATAGCGGGTTGGTTACATCT  
ACAACCGAAATGGAAACCAAGCGTTTCGTGGTTCAAAAATGCCGAATCTCGCCTGAAT  
CATCATTTGTCAGGACTCTTCGGAGTAAGCTCCTTGGCCTGGACGGGGCATTAGTTCA  
TGTTGCTATTCCCGGATCCAGGGGGGAATACGTTTCGCTGGAATAATTTCTTAGATGTATT  
ACCGCATCCCCAAGGGTTAGGCCACTTTTTACAGGTTCAGTGAATCTTTATGCCCAA  
ACCCCGATTCTGGTAGTCATTTATTTGGTACCTCCCAAGGCGCAGGAACTGCCATTCTA  
ACCCTTCTTGGGGGATTTTCATCCACAAACGCAAAGTTTATGGCTAACCGATATGGCTCA  
TCATCATTTAGCTATTGCATTTATTTTTCTTGTGCTGGTCATATGTATAGAACAAATTC  
GGGATTGGACACAGTATGAAAGATCTTTTAGAAGCACATATTCCTCCCGGAGGGCGAC  
TGGGGCGTGGACATAAGGGTCTTTATGATAACAATAATTCGATTCATTTTCAATTAG  
GTCTTGCTCTAGCCTCTTTAGGGGTATTACTTCTTTGGTTCGCTCAACACATGTACTCCT  
TACCTGCTTACGCATTCATAGCGCAAGATTTACTACTCAAGCTGCGTTATATACTCATC  
ACCAATACATTGCAGGATTCATCATGACAGGAGCTTTTGCTCATGGAGCTATTTCTTTA  
TTAGAGATTACAATCCGGAACAGAATGAGGATAATGTATTGGCAAGAATGTTAGACCAT  
AAAGAAGCTATCATTTCCCATTTAAGTTGGGCCAGCCTATTTCTGGGGTTCCATACCCTG  
GGACTTTATGTCCATAATGACGTCATGCTCGCTTTTGGTACTCCGGAGAAACAAATCTT  
GATCGAACCTATATTTGCCCAATGGATAACAATCTGCTCATGGTAAGACTTCCTACGGGTT  
CGATGTACTCTTATCTTCAACGAATGGCCCGGCATTTAATGCAGGTCGAAGCATATGGTT  
GCCTGGCTGGTTAAATGCTGTTAATGAG-----AATAGTAATTCCTATTCTTAACAATTGG  
CCCTGGAGACTTTTTGGTTCATCATGCTATTGCTCTAGGTTTACATACAACTACATTGAT  
CTTAGTAAAGGGTGCTTTAGACGCACGTGGTTCCAAGTTAATGCCAGATAAAAAGGAT  
TTCGGTTATAGTTTTCTTGTGACGGTCCGGGACGAGGTGGTACTTGTGATATTTCCGC  
TTGGGACGCATTTTATTTGGCAGTTTTTTGGATGTTAAATACCATGGATGGGTTACTTT  
TTATTGGCATTGGAAGCACATCACATTGTGGCAAGGTAACGTTTCACAGTTAATGAAT  
CCTCGACCTATTTGATGGGATGGTTAAGAGATTACTTATGGTTAAACTCTTCACAACCTTA  
TCAATGGATATAACCCCTTTGGTATGAATAGTTTATCGGTATGGGCGTGGATGTTTTTATT  
TGGACATCTTGTTTGGGCTACTGGATTTATGTTCTTAATTTCTGGCGTGGATATTGGCA  
AGAATTAATTGAAACTTTAGCATGGGCTCATGAACGCACACCTTTGGCCAATTTGATTC  
GATGGAGAGATAAACCAGTGGCTCTGTCCATTGTGCAAGCAAGATTGGTTGGATTAGC  
CCACTTTTCTGTAGGGTATATATTCATTTATGCAGCTTTCTTGATTGCCTCTACATCAGGA  
AAATTTGGTATGTCACATTCAGTAAAGATTTATGATACATGTATAGGGTGTACTCAATGT

GTACGAGCCTGCCCCACAGATGTATTAGAAATGATACCCTGGGACGGATGTAAAGCTAA  
GCAAATTGCTTCGGCCCCAAGAACAGAGGACTGTGTAGGTTGTAAAAGGTGTGAATCC  
GCCTGTCCAACAGATTTCTTGAGTGTACGGGTTTATTTATGGCATGAGACAACCCGCAG  
TATGGGGCTAGCTTATATGACAATTTTCAACTTTCCCTCTTTTTTTGTGCCTTTAGTAGGC  
CTAGTATTTCCGGCAATTGCAATGGCTTCTTTATCTATTCATGTTCAAAAAACAAGATT  
GTCATGCGAAATCTAAAAACATATCTTTCTGTGGCACCTGTGCTAGGTACTIONTATGGTTT  
GGGTCTTTAGCAGGTTTATTGATAGAGATCAATCGTTTATTCCC GGATGCGTTGACATTC  
CCATTTTTTTCATTCATGACTGCAATTTTAGAGAGACGCGAAAGCGAAAGCCTGTGGG  
GTCGTTTTTGTAATTGGATAACCAGCACCGAAAACCGTCTTTACATTGGATGGTTCGGT  
GTTTTGATGATCCCTACCTTATTGACCGCTACTTCTGTATTTATTATCGCCTTCATTGCCG  
CTCCTCCAGTGGATATTGATGGTATTCGTGAACCTGTTTCTGGGTCTCTACTTTATGGAA  
ACAATATAATTTCTGGTGCCATTATTCCTACTTCTGCAGCTATAGGTTTGCATTTTACCC  
GATTTGGGAAGCAGCATCTGTTGATGAATGGTTATACAACGGCGGTCCCTATGAACATA  
TTGTTCTACACTTCTTACTTGGTGTAGCTTGTACATGGGTCGTGAGTGGGAACTTAGTT  
TCCGTCTAGGTATGCGCCCTTGGATTGCTGTTGCATATTCAGCTCCTGTTGCAGCTGCAG  
CTGCAGTTTTTTTTGATCTACCCAATTGGTCAAGGAAGCTTCTCTGATGGTATGCCTCTAG  
GGATTTCTGGTACTTTCATTTTCATGATCGTATTCCAGGCTGAACACAACATCCTTATGC  
ACCCATTTACATGTTAGGCGTAGCTGGTGTATTCCGGCGGCTCCCTATTCAGTGCTATGC  
ATGGTTCCTTGGTAACCTCTAGTTTGTATCAGGGAAACCACAGAAAATGAATCTGCTAAT  
GAAGGTTACAGATTCGGTCAAGAGGGAGAACTTATAATATCGTAGCTGCTCATGGTTA  
TTTTGGCCGATTGATCTTCCAATATGCTAGTTTCAACAATTCTCGTTCTTTACACTTTTTTC  
CTAGCTGCTTGGCCTGTAGTAGGTATTTGGTTCCTGCTTTAGGTATCAGTACCATGGCT  
TTCAACCTAAATGGTTTTAATTTCAACCAATCTGTAGTTGATAGTCAAGGTCGTGTAATT  
AACACTTGGGCTGATATCATCAACCGTGCTAATCTTGGTATGGAAGTTATGCATGAACGT  
AATGCTCACAACCTCCCTCTAGATTTAGCTGCTGTTGAAGCTCCATCTATAAATGGTATG  
GGTTTGCTTGGTATCGTGTTCATACCGTCGTATTGAATGATCCCGGTCCGGTTGCTTGGCT  
GTCCATATAATGCATACAGCTCTAGTTTCTGGGTGGGCTGGTTCAATGGCTCTATACGAA  
TTAGCCGTTTTTTGATCCCTCTGACCCCGTTCTTGATCCAATGTGGAGACAGGGTATGTTT  
GTTATACCCTTCATGACTCGTTTAGGAATAACCAATTCATGGGGAGGTTGGAGTATCAC  
A---GGAGGAACTGTAACAAATCCGGGTATTTGGAGTTACGAGGGTGTGGCCGGGGCGC  
ATATTGTGTTTTCTGGTTTTGTGCTTTTTTGGCAGCTATCTGGCATTGGGTGTATTGGGATCT  
AGAAATATTCCGTGATGAACGTACAGGAAAACCTTCTTTGGATTTGCCAAGATTTTTG  
GAATTCATTTATTTCTATCAGGGTTAGCTTGGCTTTGGGTTTGGTGCATTTTCATGTAACGG  
GCTTGTATGGTCCCTGGAATATGGGTGTCCGATCCTTACGGACTAACTGGAAAAGTACAA  
TCTGTAAGTCCTGCGTGGGGCGTAGAAGGTTTTGATCCTTTTTGTTCCGGGAGGCATAGC  
CTCTCATCATATTGCAGCAGGGACATTGGGCATATTAGCAGGCCTATTTTCATCTTAGTGT  
TCGTCCGCCCCAACGCCTATACAAAGGTTTGGTATGGGTAATATTGAAACTGTTCTTT  
CCAGTAGTATCGCTGCTGTCTTTTTTTGCGGCTTTTTGTTGTTGCCGGAACCTATGTGGTATG  
GTTCCGGCAACTACCCCATCGAATTATTCGGTCCCACCCGTTATCAATGGGATCAGGGA  
TACTTCCAGCAAGAAATCTATCGAAGGTTTGGTGCCGACTAGCTGAAAATCAGAGTT  
TATCAGAAGCCTGGTCTAAAATTCCTGAAAAATTAGCTTTTTTATGATTACATCGGCAATA  
ATCCCGCAAAGGGGGGATTATTCAGAGCGGGCTCAATGGATAACGGGGACGGAATAGC  
TGTTGGATGGTTAGGGCACCTATCTTTAGAGATAAAGAGGGGCGTGAGCTTTTTGTAC  
GTCGTATGCCTACTTTTTTTGAAACATTTCCGGTAGTTTTTGGTAGATGGAGACGGAATT



GTGAGAGCCGATGTTCCTTTTTCGAAGGGCGGAATCGAAGTATAGTGTGAGCAAGTAG  
GGGTAAGTGTGAGTTCTATGGTGGCGAACTTAACGGAGTCAGTTATAGTGATCCTGCA  
ACTGTGAAAAAATATGCTAGACGCGCTCAATTAGGTGAAATTTTTGAATTAGATCGTGC  
TACTTTGAAATCTGATGGTGTTTTTTCGTAGTAGTCCGAGGGGTTGGTTCACCTTTGGGC  
ATGCTTCGTTTGCTTTGCTCTTCTTTTTTCGGACACATTTGGCATGGTGCTAGAACCCTGT  
TCAGAGATGTTTTTGCGGGATTGATCCAGATTTGGATGCTCAAGTAGAATTTGGAGCA  
TTCCAAAAACTTGGGGATCCAAC TACAAGGAGACAGGTAATCATGAAAACCTTATATTC  
CCCGAGGAGGTTCTACCCCGTGGAAACGCTCTTTAATGGAACCTTAGCTTTAGCTGGTC  
GTGACCAAGAAACTACCGGTTTCGCTTGGTGGGCCGGGAATGCCCGGCTTATTAATTTG  
TCCGGTAAACTACTCGGGGCTCACGTAGCCCATGCCGATTAATCGTATTCTGGGCCGG  
AGCAATGAACCTATTTGAAGTGGCTCATTTTCGTACCAGAAAAGCCCATGTATGAACAA  
GGATTGATTTACTGCCCATCTAGCTACCCTAGGTTGGGGGGTAGGTCCTGGTGGGGA  
AGTTATAGACACCTTTCCATATTTGTATCTGGAGTACTTCACTTAATTTCTCCGCAGTA  
TTAGGCTTTGGCGGTATTTATCATTCACTTCTGGGACCCGAAACTCTTGAAGAATCTTTT  
CCATTTTTCGGTTATGTATGAAAGATAGAAATAAGATGACCACCATTTTGGGTATTCAC  
TTAATCTTATTAGGTATAGGTGCTTTTCTTCTAGTACTCAAGGCTCTTTATTTTGGGGGCG  
TATATGATACCTGGGCTCCTGGAGGAGGAGATGTAAGAAAAATAACCAACTTGACACTT  
AGCCCAAGTGTATATTTGGTTATTTACTAAAATCCCCATTTGGAGGAGAAGGGTGGAT  
TGTTAGTGTGGACGATTTAGAAGATATAATTGGAGGACATGTATGGTTAGGTTCCATTTG  
TATATTTGGTGGAACTCTGGCATACTTAACCAAACCCTTTGCCTGGGCTCGACGAGCAC  
TTGTATGGTCTGGAGAGGCTTATTTGTCTTATAGTTTGGCTGCTTTATCTGTCTTTGGTTT  
CATCGCTTGTGCTTTGTATGGTTCAATAACTGCTTATCCTAGTGAGTTTTACGGGCC  
CACGGGGCCAGAAGCTTCTCAAGCTCAAGCATTACTTTTTCTAGTTAGAGACCAGCGT  
CTTGGAGCTAACGTGGGATCCGCTCAAGGACCCACTGGTTTAGGTAAATATCTAATGCG  
TTCCCCGACCGGAGAGGTCATTTTTGGAGGAGAACTATGCGTTTTTGGGATCTCCGTG  
CTCCCTGGTTGGAACCTCTAAGGGGTCCCAATGGTTTGGACTTAAGTAGGTTGAAAAA  
AGACATAACCTTGGCAAGAACGGCGTTCTGCAGAATATATGACTCATGCGCCCTTAG  
GTTCTTTAAATTCTGTGGGTGGTGTAGCTACTGAGATCAATGCAGTCAATTATGTTTCTC  
CTAGAAGTTGGTTAGCTACTTCTCATTFTTGTCTAGGATTCTTCCTATTTCGTGGGCCATTT  
GTGGCATGCCGGAAGGGCCCGTGCAGCTGCAGCCGGATTTGAAAAGGAATTGATCG  
TGATTTGGAACCTGTTCTTTTCATGACCCCTCTTAATATGACTATAGCCCTTGGTAGATTT  
ACCAAAGACGAAAATGATTTATTTGATATTATGGATGACTGGTTACGGAGGGACCGTTT  
CGTGTTTGTCGGTTGGTCCGGCCTATTGCTCTTTCCTTGTGCCTATTTGCTTTAGGGGG  
TTGGTTCACAGGTACAACCTTTGTAACCTCATGGTATACCCATGGATTGGCCAGTTCTTA  
TTTGGAAAGGCTGCAATTTCTTAACGGCCGCAGTTTCTACTCCTGCTAATAGTTTAGCAC  
ACTCTTTGTTACTACTATGGGGTCCCTGAAGCACAAGGAGATTTTACTCGTTGGTGTCAA  
TTAGGTGGTCTGTGGACTTTTGTGCTCTCCATGGCGCTTTCGGACTAATAGGTTTCATG  
TTACGTCAATTTGAACTTGCTCGATCTGTTCAATTGCGACCTTATAATGCAATCGCATTCT  
TCTGGCCCAATTGCTGTTTTTGTCTGTATTCCTAATTTATCCATTAGGCCAATCGGGTT  
GGTCTTTGACCTAGTTTTGGTGTAGCAGCTATATTTTCGATTCATCCTCTTCTTCCAAG  
GATTTCATAATTGGACGTTGAACCCATTTTCATATGATGGGAGTTGCCGGCGTATTGGGCG  
CTGCTCTGTTATGCGCTATTCATGGTGTCTACCGTAGAAAATACTTTATTTGAAGATGGTG  
ACGGTGCAAATACATTCCGTGCTTTTAAACCAACTCAAGCTGAAGAGACTTATTCAATG  
GTCACTGCTAACCGCTTTTGGTCCCAAATCTTTGGGGTTGCTTTTTTCCAATAAACGTTG

GTTACATTTCTTTATGTTATTTGTACCAGTAACCGGTTTATGGATGAGTGCTCTTGGAGT  
AGTCGGTCTGGCTCTGAACTTACGTGCCTATGACTTCGTTTCCCAGGAAATCCGTGCAG  
CAGAAGATCCTGAATTTGAGACTTTCTACACCAAAAATATTCTTTTAAACGAGGGTATT  
CGTGCTTGGATGGCGGCTCAGGATCAGCCTCATGAAAACCTTATATTCCCCGAGGAGGT  
TCTACCCCGTGGAACGCTCTTATGTCTGGAAGCACGGGAGAACGTTCTTTTGCTGATA  
TTATTACCAGTATCCGATACTGGGTCATTCATAGCATTACTATACCTTCCCTATTTATTGCG  
GGTTGGTTATTCGTCAGCACGGGTTTAGCTTATGATGTGTTTGGAAAGTCCTCGACAAA  
TGAGTATTTTACAGAGAGCCGACAAGGAATCCATTAATCACCGGCCGTTTTGATTCTT  
TGGCACAACCTCGATGAATTTAGTAGATCGTTTATGACTATAGATCGAACCTATCCAATTT  
TTACAGTGAGATGGTTGGCTGTTACGGACTAGCTGTACCTACCGTTTCTTTTTTAGGG  
TCAATATCCGCAATGCAATTCATCCAACGAATGGCTACACAAACCGTTGAGAATAATTC  
GAGA--TCTGGTCCAAGACAGACTGGTCTAGGAAGTTTATTGAAACCGTTGAATTCGG  
AATATGGTAAAGTAGCGCCCGGATGGGGAAC TACCCCGTTGATGGGTGTCGCAATGGC  
TCTCTTCGCGGTATTCCTATCTATTATTTTGGAGATTTATAACTCTTCCGTTTTACTGGATG  
GAATTTCAATGAATATGCTTACTCTCAAACCTCTTCGTTTACACAGTAGTGATTTTCTTTG  
TTTTCTCTTTCATCTTCGGATTCCTATCTAACGATCCAGGGCGTAATCCTGGGCGTGAGG  
AAATGGCCGATACTACTGGAAGGATTCTCTTTGGCTGATCGGTACTGTAGCTGGTATT  
CTTATAATCGGTTTACTAGGCGTTTTCTTTTATGGTTCATATCCGGATTAGGTTTCATCCC  
TAATGCTTAATATCTTTAGTTTGATCAGTATCTGTCTTAATTCTGCCCTTCATTCGAGTAG  
TTTTTTCTTTGCTAAATTACCCGAGGCTTACGCTTTTTTCAATCCAATCATAGATTTTATG  
CCAGTCATACCTGTGCTCTTTTTTCTCTTAGCCCTTGTTTGGCAAGCTGCTGTAAGTTTT  
CGAATGACACAATCAAATCCGAACGAACAAAATGTTGAATTGAATCGTACCAGTCTTTA  
TTGGGGATTATTACTAATTTTTGTACTTGCTGTTTTATTTTCCAATTATTTCTTCAATATGG  
AAGTAAATATCTCGCATTATTGCTACTGCATTGTTTCATTCTAATTCCTACTGCTTTTTTA  
CTTATTATTTATGTAAAAACGGTCAGTCAAATGATATGGAAATAGCAACCCTAGTCGCC  
ATCTTTATATCTGGTTTACTTGTAAGTTTTACCGGGTACGCCTTATATACCGCTTTTGGGC  
AACCTCTCAACAAC TAAGAGATCCATTTGAAGAACATGGGGACATGGAAGCATTGGT  
TTATACATTCCTCTTAGTCTCGACTCTAGGAATCATTTTTTTTCGCTATCTTTTTTCGAGAA  
C C G C C T A A G G T T C C G A C T A A A A A - - - - -  
-????????????????????????????????????????????????????????????????????????????????????????  
????????????????????????????????????????????????????????????????????????????????????????  
??????????-----ATGTCACCACAAACAGAGACTAAAGCAAGTGTTGGATTCAA  
AGCGGGTGTTAAAGATTACAAATTGAATTATTACTCCTGACTATGTAACCAAGATAC  
TGATATCTTGGCAGCATTCCGAGTAACTCCTCAACCCGGAGTTCCACCGGAAGAAGCA  
GGGGCCGCTGTAGCTGCCGAATCTTCTACGGGTACATGGACAACCTGTGTGGACCGATG  
GACTTACCAGTCTTGATCGTTACAAAGGACGATGCTACGACATTGAGCCCGTTGCTGG  
AGAAGACAATCAATATATTTGTTATGTAGCCTATCCTTTAGACCTTTTTGAAGAAGGTTT  
TGTTACTAACATGTTTACCTCTATTGTGGGTAATGTTTTTGGGTTCAAAGCGCTGCGCGC  
TCTACGTCTGGAGGATCTGCGAATTCCTACTGCTTATGTTAAACTTTCCAAGGCCCGC  
CTCATGGCATCCAAGTTGAGAGAGATAAATTGAACAAGTATGGTCGTCCCCTATTAGGA  
TGTAATAAACC AAAATTGGGATTATCCGCTAAGAACTATGGTAGAGCGGTTTATGAA  
TGTCTCCGTGGTGGACTTGATTTTACCAAAGATGATGAGAACGTGAACTCCAACCATT  
TATGCGTTGGCGCGACCGTTTCTATTTTGTGCCGAAGCACTTTTTAAAGCACAGGCTG  
AAACAGGTGAAATCAAAGGACATTACTTAAATGCTACTGCGGGTACATGCGAAGAAAT

GATGAAAAGGGCTGTATTTGCCAGAGAGTTGGGAGCACCCATCGTAATGCATGACTAC  
TTAACGGGGGGGTTCACTGCAAATACTAGCTTGGCTCATTATTGCCGAGATAATGGTCT  
ACTTCTTCACATCCACCGCGCAATGCATGCAGTTATTGATAGACAGAAGAATCATGGTA  
TGCATTTCCGTGTACTAGCTAAAGGGTTACGTATGTCTGGTGGAGATCATATTCACGCCG  
GTACCGTAGTAGGTAAACTGGAAGGAGAAAGAGAGATCACCTGGGTTTTGTTGATTT  
ATTGCGTGATGATTTTATTGAAAAAGACCGAAGTCGCGGTATTTATTTCACTCAAGATTG  
GGTCTCTCTACCAGGTGTTCTGCCCCTGGCATCAGGGGGTATTCACGTTTGGCATATGC  
CTGCTCTGACCGAAATCTTTGGGGATGATTCCGTACTACAGTTCGGTGGAGGAACTTTA  
GGACACCCTTGGGGAAATGCACCGGGTCCGTAGCTAATCGAGTAGCTCTAGAAGCGT  
GTGTACAAGCTCGTAATGAAGGACGTGATCTTGCTCGTGAAGGTAATGAAATTATCCGT  
GAGGCTTGCAAATGGAGCCCTGAACTAGCTGCTGCTTGTGAGGTCTGGAAGGAAATCA  
AATTTGAATTTGAAGCAATGGATACTATC-----ACGGCGATACATTTATACAAAACCTTCTA  
CCTCGAGCAGA-----ACCGTCGGCAGTCAAGTGAAATCCAATCCACGAAATAATTTGA  
TCTATGGACAGCGTCGTTGTGGTAAAGGTCGTAATGCCAGAGGAATCATTACCGCAAG  
GCATAGAGGGGGAGGTCATAAGCGTCTATACCGTAAAATTGATTTTCGACGGAATGAAA  
AAGACATATCTGGTAGAATCGTAACCATAGAATACGACCCTAATCGAAATGCAAACATT  
TGTCTCATACTATAGGGATGGTGAGAAGAGATATATTTTACATCCCAGAGGGGGCTATA  
ATTGGAGATAACCATTGTTTCTGGTACAGAAGTTCCTATCTCAATGGGAAATGCCCTACCT  
TTGACCGATATGCCCTTAGGCACGGCCATACATAACATAGAAATCACACTTGGAAGGG  
CGGACAATTAGCGAGAGCTGCGGGTGTGTAGCGAAACTGATTGCAAAAAGAGGGTAA  
ATCGGCCACATTAATAATTACCATCTGGGGAGGTCCGTTTGATATCCAAAACCTGCTCAG  
CAACAGTCGGGCAAGTGGGTAATCTTGGGGTGAACCAGAAAAGTTTGGGTAGAGCCG  
GATCTAAGTGTTGGCTAGGTAAGCGTCTGTAGTAAGAGGGGTAGTTATGAATCCTGTA  
GACCATCCCCATGGGGGTGGTGAAGGGAGGGCCCCAATTGGTAGAAAAAAACCCACA  
ACCCCTTGGGGTTATCCTGCGCTTGAAGAAGAAATAGAAAAAAGAAAAAATATAGTG  
ATAGTTTGATTCTCCGTCGCCGTAGTAAAATGATTC AACCTCAAACCCATTTAAATGTGG  
CGGACAACAGCGGGGCTAGAAAATTACTGTGTATTTCGAATCATAGGAGCTAGT---AATC  
GACGATATGCTCATATTGGTGACGTGATTGTTGCTGTAATCAAAGAAGCAGTACCTCATA  
TGCCTCTACAAAGATCCGAAGTGATCAGAGCTGTAATTGTACGTACATGTAAAGAACTT  
AAACGAGATAATGGTATGATTTTAAAATATGATGATAATGCTGCGGTTGTCATTGATCAA  
GAAGGAAATCCAAAAGGAACTCGAGTTTTTGGTGCGATCGCTCGAGAATTGAGACAG  
TTGAATTTTACGAAAATAATTTCAATTAGCTCCAGAGGTATTCATCAACTATCCAAAAGA  
ACCAGATTCCGTAAACAACATAGAGGAAGAATGAAGGGAATATCTTATCGAGGCAATC  
GTATTTGTTTCGGTAAATATGCTCTTCAGGCACCTGAACCCACTTGGATCACATCTAGAC  
AAATAGAAGCAGGGCGACGATCAATGACGCGATATGCGCGTCGCGGTGGGAAAATTTG  
GGTCCGTATATTTCCAGACAAAACCAGTTACAGTAAGATCTACAGAAACGCGTATGGGTT  
CGGGGAAAGGATCCCCCGAATATTGGGTATCCGTTGTTAAACCTGGTTCGAATACTTTAT  
GAAATGAGTGGAGTATCAGAAAGCGTAGCCAGAGAAGCTATTTCAATCGCTGCGTCAA  
AAATGCCTATACGAACTCAATTCGTTAGAAATGTAATGACCAGA ACTAGACGAGGGTAT  
ATAGCTCGTAGACGTAGAACAAAACGCGTTTATGTGTATCAACCTTTCGAGGGTCCCA  
TTCAAGACTTATGCGAACTGCTATTC AACAAAGAATTCGAGCTTTGGCTTCTTCTCATC  
GGGATAGGGGAAGCCAAAAGATAAATTTTCGTCGTCTGTGGATCACTCGAATAAATGC  
AGTAATTCGCGAGAAC-----GTATCCTATAGTTATAGTAGATCCATAAATAATCTGTACAA  
GAGACGGTTGCTTCTTAATCGTAAAATTTCTTGCACA ACTAGCCATATCAAATACAAATT



CTTATGTAAGGAATTACAAAAGAAATTTTTTCAACAAAGATGTGAATTAGGAAAGATTG  
GGCGACGAAATATGAATCGGAGACTTAATCTTGATATACCTCAGCACATTACATTTTTGT  
TACCGCGGGATGTATTGGCAGCTGCGGATCACTTGATCGGAATGAAATTTGGAATGGGT  
ACACTTGATGAT-----CTGAATCACTTGAAAAATAAACGTATTTCGTTCTGTAGCGGATCTT  
TTACAAGATCAATTCGGATTGGCTATGATTCGTTTAGAAAATGCGGTTTCGGGGAACAT  
AGGTGGAGCGATTAGG---CAAAAATGGATA---CCGACTCCTCATAATTTGGTAACTTCAA  
CTGCA-----TTAACAACCACTTATGAATCCTTTTTTCGGCCTACACCCCTTATCTCAAG  
TTATGGATCAAACAAATCCATTGACACAAATAGTTCATGGGCGAAAATCAAGTTATTTG  
GGTCTGGGGGGTTGACAGGGGAACTGCGAGTTTTTCGGATACGCGATATCCATCCTA  
GTCACTATGGGCGTATTTGCCAATTGACACATCTGAAGGAATCAATGTTGGACTCATT  
GGATCTTTAGCAATTCATGCGAGGATTGGTCATTGGGGG---TCTTTAGAAAGACCATTTT  
AT-----GAAATTTCTGAAAGCTCA-----AAGGGGGTACGGGTGGTTTATTTATCACCAA  
GCATAGATGAATACTACATGGTAACGGCCGAAATTCCTTGGCATTAAATCATGGTATTC  
AGGAAGAACAGGTTGTTCCAGCTCGCTATCGTCAAGAATTCCTGACTATTGCATGGGA  
ACGGATTCAGCTTCGAAGCATTTTTCCCTTCCAATATTTTCTATTGGAGCTTCCCTCAT  
TCTTTTATCGAGCACAAATGATGCGAATCGGGCTTTAATGAGTTCCAATATGCAACGTC  
AAGCAGTTCCGCTTTCTCGATCCGAGAAGTGCATTGTTGGAAGTGGGCTGGAACGCCA  
AGCGGCTCTGGATTCGGGGGTGTGCGCTATAGCCGAACACGAGGGAAAGATAGTTTAT  
ACTGCTACTGACAAGATGATTTTATCAGGTAATGGAGACACTCTAAGTATCCCATTGGTT  
ATGTATCAACGTTGAAACAAAATACTTGTATGCATCAAAAACCCCGGGTCCGCGGG  
GTAACGCATTA AAAAGGGACAAATTTTAGCGGATGGTGCTGCTACAGTTGGTGGCGA  
ACTCGCTTTAGGAAAAACGTATTAGTAGCTTATATGCCCTGGGAGGGCTACAATTTG  
AAGATGCGGTA CTATTAGCGAACGTCTGGTATATGGAGATATTTATACTTCTTTTCATAT  
ACGGAAATATGAAATTCAGACTCATGTGACAAGCCAAGGC---CCTGAAAGAATCACTA  
ACGAAATACCGCATTTAGAAGCCATTTACTTCGCAATTTAGACAGAAATGGAATTGTG  
ATGCTAGGCTCTTGGGTAGAAACGGGTGATATTTTAGTAGGTAAATTAACGCCGCAAAT  
GGCGAAAGAA---TCCTCATATGCCCCGGAGGATAGATTATTACGAGCCATACTTGGCATT  
CAGGTATCTACTGCAAAGGAACTTGTCTAAAATTACCTATAGGTGGCAGAGGCCGAG  
TTATTGATGTGAGATGGATCCATAAAAAAGGG---GGTTCCAGCTATAATCCGAAATGAT  
TCGTGTATATATTTACAGAAACGTGAAATCAAAGTAGGTGATAAAGTAGCTGGAAGAC  
ATGGAATAAAGGGTATCATTTCAAAATTTTGCCGAGACAAGATATGCCCTATTTGCAA  
GACGGAACACCCGTTGATATGGTCTTCAACCCATTAGGAGTACCTTCACGAATGAATGT  
AGGACAAATATTTGAATGCTCGCTCGGGTTAGCGGGGGATCTACTAGATAGGCATTATC  
GAATAGCACCCCTTTGATGAGAGATATGAGCAAGAGGCTTCGAGAAAAGTAGTGTTTTC  
TGAATTATATGAAGCCAGTAAGCAAACAGCGAATCCGTGGGTATTTGAACCTGAATACC  
CAGGAAAAGCAGAATATTTGATGGAAGAACGGGGGATCCTTTTCGAACAACCTGTTAT  
AATAGGAAAGTCTTATATCCTGAAATTAATTCATCAAGTTGATGATAAAATCCATGGACG  
TTCCAGTGGACCTTACGCGCTTGTACACAACAACCCCTTAGAGGAAGAGCCAAGCAA  
GGGGGACAGCGGGTAGGAGAAATGGAAGTTTGGGCCCTAGAGGGATTTGGTGTGCT  
CATATTTACAAGAGATGCTTACTTATAAATCTGATCATATTAGAGCTCGTCAGGAAGTA  
CTTGGTACTACGATCATTGGAGGAACAATACCTAACCCCTGAGGATGCTCCAGAATCTTT  
TCGATTGCTCGTTTCGAGAACTACGATCTTTGGCTCTAGA ACTGAACCATTTCTTGTATC  
TGAGAAGAACTTCCAGATAAATAGGAAGGAAGCT-----ATGATCGATCGGTA  
TAAACATCAACA ACTTCGAATTGGATCAGTTTCTCCTCAACAAATAAGTGCTTGGGCCA

ACAAAATCCTACCTAATGGAGAGATGGTTGGAGAGGTGACAAAACCCTATACTTTTCAT  
TACAAAAGCAATAAACCGGAAAAGGATGGATTATTTTGTGAAAGAATTTTGGGCCTAT  
AAAAAGTGAATTTGTGCTTGTGGAAATTATCGAGTAATCGGAGATAAAAAAGAAGAC  
CCGAAATTTTGTGAACAATGTGGCGTTGAATTTGTTGATTCTCGGGTACGACGATATCA  
AATGGGATACATTAAACTGGCATGTCCAGTAACTCATGTGTGGTATTTGAAGCGTCTTC  
CTAGTTATATTGCGAATCTTTTAGATAAACCCCTTAAAGAATTAGAAGGCCTCGTATACT  
GCGATGTGAATTTTCTTTTTCGAGGCC--GTAGCTAAAAAACCTACTTTCTTACGATT  
ACGAGGTTTCATTTCGAATATGAAATACAATCTTGGAAATACAGCATCCCCCTTTTTTTTAC  
TACCAAGGCTTCGATACATTTCGAAATAGAGAAATCTCGACTGGAGCAGGTGCTATCA  
GAGAACAATTAGCCGACTTAGACTTACGACTTATTATAGATTCCCTATTGGTTCGAATGG  
AAAGAATTAGGGGAAGAA--GGACCCATCGGTAATGAATGGGAAGATAGCAAATTGG  
AAGAAGAAAGGATTTTTTGGTTAGACGCATGGAATTAGCTAAGTATTTTATTCGAACAA  
ACGTAGAACCAGAACGGATGGTTTTGTGCCTATTACCGGTTCTTCCCTCCCGAATTGAGA  
CCCATCATTTCAGATAGATGGGGGTAACTAATGAGTTCGGATATTAATGAACTCTACAG  
AAGAGTTATTTATCGGAACAATACTCTTACCGATCTATTAACAACAAGTAGATCTACACC  
AAGGGAATTGGTAATGTGTTCAGGAGAAATTAGTACAAGAAGCCGTGGATACACTTCTT  
GATAATGGGATACGCGACAACCAATGAGGGACAGTCATAATAAAGTTTACAAGTCGT  
TTTCAGATGTAATTGAAGGCAAAGAGGGAAGATTTTCGCGAGACTCTGCTTGGTAAACG  
GGTCGATTATTCGGGACGTTCCGTCATTGTCTGGGCCCTTCGCTTTCATTACATCGCTG  
TGGATTGCCCCGCGAAATAGCAATAGAGCTTTTCCAGACATTTGTAATTCGTGGTCTAA  
TCAAACAACATGCTGCTTCCAACATAGGAGTTGCCAAAAGTAAAATTTCGGGAAAACGA  
ACCAATTGTGTGGGAATACTTCAAGAAGTTATGCAGGGGCATCCTGTATTGCTGAATA  
GAGCACCTACTTTGCATAGATTAGGCATACAGGCATTCCAACCCATTTTAGTGGAAGGA  
CGTGCTATTTTTTACATCCATTAGTTTGTAAAGGATTTAATGCAGACTTTGATGGGGAT  
CAAATGGCTGTTTCATGTACCTTTATCTTTGGAGGCTCAAGCGGAGGCTCGTTTACTTAT  
GTTTTCTCATATGAATCTCTTGTCTCCAGCTATTGGAGACCCCATTTCCGTACCAACTCA  
AGATATGCTTATGGGACTCTATGTATTAACAATTGGGAATCATCGCGGTATTTGTGCAAA  
GAGGTATAATCCGTGTAATCACAGAAAC-----TCTCAAATGAAAAATGGATAATAAT  
AATTATAAGTATGCA-----AAAGAACCCTATTTTTGTAGTTCCTATGATGCACTCGGCGCT  
TATCGGCAGAAACGAATCAATTTAAATAGTCCTTTGTGGCTCCAGTGGCGACTAGATCA  
ACGC---GTTATTGCATCA-----AGAGAAGTTCCTATCGAAGTTCAATATGAATCTTTGGGT  
ACCTATCATGAGATTTATGGGCACTATCTAATAGTAAGAAATATTA AAAAAGAAATCCTT  
TGATATAGATATTCGAACCACTGTTGGTCATATTTCTTTTTATCGAGAAATAGAAGAAGCC  
ATACAAGGGTTTTACCGGGCTTGTTTCATATGATACC-----ATGGC  
AGAACGAGCCGATCTGGTCTTTCACAATAAAGCGATAGACGGAACCTGCCATGAAACGA  
CTGATTAGCAGATTAATAGATCACTTTGGAATGGCATATACATCACATATCCTGGATCAA  
GTAAAGACTCTGGGGTTCAGCAAGCCACTGCTACATCCATTTTCATTAGGAATTGATGA  
TCTTTTAAACAATACCTTCTAAGGGATGGCTAGTCCAAGATGCTGAACAACAAAGTTTGA  
TTTTGGAAAAACCATCATTATGGGAATGTACACGCGGTAGAAAAATTACGTCAATCC  
ATTGAGATATGGTATGCCACAAGTGAATATTTGCGACAAGAAATGAATCCTAATTTTAGG  
ATGACTGATCCTTCTAATCCAGTCCATATAATGTCTTTTTTCGGGAGCTAGAGGAAATGCA  
TCTCAGGTACACCAATTAGTAGGTATGCGAGGATTAATGTCCGATCCCCAAGGACAAAT  
GATTGATTTACCCATTCAAAGCAATTTACGTGAAGGACTCTCTTTAACGGAATATATCAT  
TTCTGCTATGGAGCCCGCAAAGGGGTGGTGGATACTGCTGTACGAACATCAGATGCT

GGATACCTCACGCGGAGACTTGTGTAAGTAGTTCAACATATTGTTGTACGTAGAACAGA  
TTGTGGCACCCCTCCGAAGTATTTCTGTAAGTCCTCCAAGTGGGATGATAACA---GAAAG  
AATGTTTATACCAACATTAATTGGTCGTGTATTAGCAGACGATATATATATAGGTTCCCGA  
TGCATTGCCATTTCGAAATCAAGATATTGGGATCGGACTTGTGAATCGATTTCATAACC-----  
-----TTTCGAGCACAACCCATATCTATTTCGAACCCCTTTTACTTGCAGGAGTACATCT  
TGGATCTGTTCGATTATGTTATGGTCGGAGTCCCACTCATGGTGACCTGGTTCGAATTGGG  
AGAAGCAGTAGGTATTATTGCGGGTCAATCTATTGGGGAACCCGGGACTCAACTAACAT  
TAAGAACTTTTCATAACCGGTGGAGTATTCACAGGCGGTACTGCAGAACATGTACGAGCT  
CCTTCTAATGGAAAAATTAAATTCAATGAAGATTTGGTTCAGCCCACACGTACACGTCA  
TGGTCATCCTGCTTTTCTATGCTATATGGACCTATATGTAAC TATTGAAGGTCAAGATATT  
CTACACAATGTGACTATTCCAACAAAAAGTTTTCTTTTAGTTCAAATGATCAATATGTA  
GAATCAGAACAAGTGATTGCCGAGATTCGCGCAGGAACTTCCACCTTG---AATTTTAAA  
GAGAGGGTTCGAAAACATATTTATTCTGACTCAGAGGGAGAA---ATGCACTGGAGTACC  
CTTGATAACCATGCACCCGAATATACATATGGGAATGTTTCATCTCTTACCAAAAAACAAGC  
CATTTATGGATATTATCAGGGGGTCCGTACAGA-----TCCGGTATAGTCTCTTTTTTCACGC  
TACAAGGATCAAGATCAAATGAATGTTTCAT-----TCTCTTTTTGCCGAACGAAAATCCGT  
TTCTAAT-----CTCTCAGTGACTAATGATCAA---ATGAGACACAAC TTTTATAGTTCAGAG  
CCTCTTGGT-----AAGGAGAGGTTTCTTGATTAT---TCAGGACCTGATCAAATCACATGTA  
ATGGTCATTGTAATTTTCATATATCCAGAC---ACTCGCCACGAGAATTCTGAT--TTTTTCTT  
TGCAAAGAGGAGAAGAAATCAATTTTTTCATTCCATTCCAATATAATAAAGAACAAGAA--  
---CTAATAACCCGTTTCGGGTATCTCGATTGAAGTACCTATAAAT-----GGTATTTTCCGTA  
GAAATTGTATTCTTGCTTATTTTCGACGATCCCCGATACAGAAGAAACAGTTCTGGAATT  
ACTAAATATGGGACTAGAGAGGCGCATTCAATCGTCAAAAAAGAGGAT-----TTGATTG  
AGTATCGAAGA-----AGGCCAAAATACAAGAAAATAGATCGATTTTTTTTTTCATTCC  
CGAGGAAGTGCATATTTTACCCGGATCTTCTTCCGTAATGGTCCGGAATAATAGTATTAT  
TGGAGTAGATACACGAATCACTTTCAAGACAAGAAGCCGAGTAGGCGGGTGGTTTCGA  
GTGGAGAAAAAAGATTGAACTAAAAATTTTTCTGGAGATATCCATTTTC  
CTGGAGAGACGGATAAGATATCCTGGCACAGCGGCATTTTGATAACCCCGGAACGGG  
AAAAAA-----ACTTCTAAGGAATCAAAA-----AAATTGAAAAATTGGATCTATGTCCAA  
CGG-----ATCACCCCTACCAAGAAAAAG-----TACTTTGTTTTGGTTCGACCCGTAGTTAC  
ATATGAAATAGCAGATGGGGTAAATTTGGCAACGCTTTTCTCCAGGATCCATTGCAGG  
AAAGGATAATGTGCAACTTCGAGTTGTCAATTATATCCTCTATAAAAATGGCAAACCC  
ATTCGAGGGGTTTCTCACACAAATATCCAATTAGTTTCGAACTTGTTTATTATTGAATTGG  
GATCAAGAAAAAAT-----GGTCTTCTATGGAGGAGGTTTCATGCTTCCTTTGTTGAA  
GTAAGGGTAAAGGATCTGATTTCGAGATTTCATAAGAATGGACTTAGTGAAGTCCCCTAT  
TTCATATAACAGAAAAAGGAATCTCCGGCAGGGTCAGAATTGATTCTCGCT---AATGG  
ATCAGATGGCACCAATCTCAATCCTTTTTTTTATTCC-----AAGGCAAGG-----ATT  
CAACAATCACTTATCCAACATCAAGGAATTCGTACGTTGTTGAATAGA-----AATA  
AGGAATGTCAATCTTTCATAATTTGTATCATCTAATTGCTTTTCGA-----ATAGGTCCATT  
CAAGTTTTGAAATATACGAAT-----GTGATAAAAAATTCAGATTCCCTACTTCCAAGT  
AGGAATTGCTTGGGTCTTTAGGGATT-----GTCCCTAAAATTGCGAATCTTTTTTCA-----  
TTTTACCATTTAATAACT-----CATAATCAGATCTTG---GTAAATAAATATTTGCTACTTGAC  
AAT-----TTAAACAGACTTTCCAAATCCAAATACTTAAA---TATTATTTAATGGATGAA  
AATGGGAGA-----ATTTATAATCCCGATCCATGCAGTAACATGATTTTGAATTTATTCAAT

TGGAATTGGTATTTTCTACATTATGATTATTGTGAAGAACTTCGACAATAATTAGC---CT  
TGGACAGTTTTTTTTGTGAAAATTTATGTACATCTAAATATGGACCA-----CATCTAAAAT  
CTGGTCAGGTTCTAAGTGTTTCAT--GTTGATTCTTTTGTAAATAAGATCTGCTAAGCCCTAT  
TTGGCTACTCCAGGAGCAACCATTTCATGGTCATTATGGGGCAATATTTTCTGAAGGAGA  
TACGTTAGTTACTTTTATATATGAAAATCGAGATCTGGTGATATAACGCAGGGTCTTCC  
AAAAGTAGAACAAAGTATTAGAAGTGC GTTCGATTGATTCAATATCAATGAACCTAGAAA  
AGAGGGTTGAAGGTTGGAACGAACGTATAACAAGAATTCCTTGGGATTCTTGGGGATT  
CTTGATTGGCACTGAGCTAACCATAGCGCAAAGTCGTATCTCTTTGGTTAATAAGATTCT  
AAAAGGTTTATCGATCCCAGGGAGTGCAGATCCATAATAGGCATATAGAAAATTATTGTAC  
GTCAAATAACATCAAAGTGTTGGTTTCAGAA-----GATGGAATGTCTAATGTTTTTTC  
ACCTGGCGAACTGATTGGATTGTTGCGAGCGGAACGAACAGGGCGCGCTTTGGAAGA  
AGCAATCTGTTACCGAGCCATCTTATTGGGAATAACGAGGGCGTCTCTGAATACTCAA  
GTTTCATATCCGAAGCGAGTTTTCAAGAAACCACGCGAGTTTTAGCAAAGCGGCTCT  
GCGGGGTCGTATCGATTGGTTGAAGGGTCTGAAAGAGAACGTTGTTCTGGGGGGTATG  
ATACCTGTTGGTACCGGATTCAAAGGATTAGTACACCGTTCA-----AGTCAACACAGCA  
ACATTTCT-----TTGGAAATCAAAAATAAGAATCTATTCGCAGGGGGCATGAGA-----GAT  
ATTTTGTTCACCACAGAGAATTATTTTCTTTTTGTATTCCAAGAATTCCCATGATACAT  
CAGAAGAATATGTTAAAGGATTTATTGATTCC-----ATGACACGAAGATATTGG  
AACATCGATTTGGAAGAGATGCTGCAAGCAGGAGTGCATTTTGGCCATGGTACTAGGA  
AATGGAATCCTAGAATGGCACCTTACATCTCTGCAAAGCGTAAAGGTATGCATATTACA  
AATCTTACTAGAACTGCTCGTTTTTATCAGAAGCTTGTGATTTAGTTTTTGTATGCCGCA  
AGTGGGGGAAAACAATTCTTAATAGTTGGTACAAAAAAAAAAGCAGCTGATTCAGTAG  
CATCCGCTGCAATAAGGGCTCGATGTCATTATGTTAATAAAAAATGGCTCGGTGGTATGT  
CAACGAATTGGTCCACTACAGAAACGAGACTTCAAAGTTCCGGGACTTGAGAGCGG  
AACAAAAGGCGGGAAGATTCAACTGTCTGCCGAAAAGAGATGCAGCAATGCTGAAGA  
GGCAATTATCTCACTTGCAAACATATCTGGGTGGCATCAAATATATGACGGGGTTGCCT  
GATATTGTAATCGTTGTTGATCAGCAAGCAGAATATAAGGTTCTTCGAGAATGTGTCAC  
TTTAGGAATTCCAACAATTTGTTAATCGATACAAATTGTGACCCGGATCTCGCAGATCT  
TTCGATTCCCGCCAATGATGATGCTAGGGCTTCAATCCGATTCATTCTTAACAAATTCGT  
ATACGCAATTTGTGAGGGTCGTTCTAGC---GATATAAGAAATCGTATGGGACAAAAAAT  
AAATCCACTTGGTTTCAGACTTGGTACAACCCAAAGCCATCATTCCCTTTGGTTTGAAC  
AACCAAAAATTATCCTGAGGGTCTTCAGGAAGATCAAAAATACAGGATTGTATCAA  
GAATTATGTAGAAAAAATATAAAAATCTCTTCCAGT---GCCGAGACAATTGTATATATA  
AAGATTCAAAAACGATCGATCTGATCCATGTCATAATATATATAGGGTTCCCAAATTG  
TTAATAGAGGATGGATCGCGA-----AGAATCAAAGAATTACAGAGCCATGTACAAA  
AAAAAATTGATTCTGTAAACAAAAAATTAACATTACTATCAAAAAATTGCAAAACCT  
TACGGACACCCTAACATCCTTGCAGAATATATAGCCGAACAATTAAGGATAGAGTTTC  
ATTTTCGAAAAGCAATAAAAAAAGCTATTGCCTTAACTGAAGAGGCAGATACAAAAGGA  
ATTCAAGTACAAATTGCAGGGCGTATCGACGGAAAAGAAATTGCACGTGTGCAATGGT  
TTAGAGAAGGTAGGGTTCCCTACAAACCATTTCGAGCTAAAATTAATTATTGTTCCCTATA  
CAGTTTCGAACTATTTATGGGGCATTGGGCATAAAAATTTGGATATTTACAGACGAGAAG  
ATGTCTCGTTACCGAGGGCCTCGTTTTAAAAAATACGCCGTCTGGGAGCTTTACCGGG  
ACTTACTAGTAAAAGTCTACATCCGGAAGTGATCCTCGAAACCAATCGCGTTCCGGG  
AAA---AGATCTCAATATCGTATTTCGTCTAGAAGAAAAACAAAAATTGCGTTTTTCATTATG



GTCTGACAGAGCGACAATTGCTTAAATATGTTTCGTATCGCTGGAAAAGCCAAAGGTT  
AACAGGTCAGGTTTTACTACAATTACTTGAAATGCGTTTGGATAATATACTTTTTCGATT  
AGGTATGGCTTCGACCATTCAGGAGCCCCGACAATTAGTTAACCATAGGCATATTTTAG  
TTAATGGTCGTATAGTGGATATACCAAGTTACCGCTGCAAACCCCGAGATATTATTACGA  
CAAGAGATGAACAAAAATCCATAGCTCTGATTCAAATTTCTCTTGATTCATTCCCACAT--  
-GAGGAATTGCCAAAACATTTGACTCTTCACTCATCCAATAT-----AAAGGATTAGTCAA  
TCAAATAATAGATAGTAAGTGGGTTGGTTTAAAAATCAATGAGTTGCTAGTCGTAGAAT  
ATTATTCTCGTCAGACTATGTCACGTCGAGGTAAGTGCAGAAAAAAAAGTGCAAAATC  
CGATCCAATTTATCGTAATCGATTAGTTAACATGTTGGTTAACCGTATTTTGAAACACGG  
AAAAAATCATTGGCTTATCAAATTTCTATCGAGCCCTGAAAAAGATTCAACAAAAG  
ACAGAAACAAATCCACTTTATGTTTTACGTCAAGCAATACGTAGAGTAACTCCCGATAT  
AGCAGTAAAAGCAAGACGTGTAAGCGGATCGACTCAGCAAGTTCCCATTGAAATAGGA  
TCTAGACAAGGAAAAGCACTTGCCATTCGTTGGTTATTAGGGGCATCCCGAAAACGTC  
CGGGTCGAAATATGGCTTTCAAATTAAGTTCCGAATTAGTGGATGCTGCCAAAGGGAGT  
GGCGATGCTATACGCAAAAAGGAGGAGACTCATAGAATGGCAGAGGCAAATAGAGCTT  
TTGCACATTTTCGTATGGGTAGGGACACTATTGCTAACATAATAACTTCTATACGAAATG  
CTGACATGGATAAAAAGGAACAGTTCGAATCGCACATACGAAGATTACCGAAAGGAT  
TGTTAAATACTTCTACGAGAAGGCTTTATAGAAAATGTGAGAAAACATCGAGAAAGC  
ACGAAAAATTTCTTGGTTTCAACTCTGCGACATCGAAGG-----AATAGGAAGGGGCGAT  
ATAGA-----ACTATTTA-----AAACGGATCAGTCGACCCGGTCAACGAATCTATTCCAA  
TTATGAAAAAATTCCCAGGATTTTAGGAGGAATAGGTATTGTTATCCTTTCTACCTCTCG  
AGGTATAATGACAGACCGAGAGGCTCGACTAGAAGGAATCGGAGGAGAAATTTTGTGT  
TATATATGGATGGCAAAACCTATATCAAGAACTAGTTTACGGAAAAATCCGCGTTTTACT  
TCACGGAAAAGTAGTCTTTCGAATATCCAAGGGGGTAATAAATATTCAAGCAAGTTTCAA  
CAATACCATTGTAACGGTTACAGATACCCAGGGTCAGGTGGTTTCATGGTCTCCTCCGCCG  
GTAATTTGTGGATTCAGGGGCCAAGAAGAGGGACGCCCTTTGCTGCGCAAAGTGCGA  
CAGCAAATGCTATTAGTATAGTAATCGATCAGGGTATGCAAGAAGCAGACGTCAGAATA  
AAAGGTCCCGTCTCGGACGAGATTCTGCATTACGAGCCATTCGGAGAAGTGGAAATC  
GGCTAAATTGCGTCATGGACGTAACCCCTCTACCACATAATGGATGCAGACCTCCAAAA  
AAAAGACGCGTA-----  
-----ATCACCCCAAAAAACCAAAGTCTGCCTTACGTAAAGTTGCCAGAG  
TACGATTAACCTCTGGATTTGAAATCACTGCTTATATACCTGGTATTGGCCATAATTCACA  
AGAACATTCTGTAGTCTTAGTAAGAGGAGGAAGGGTTAAGGATTTACCCGGTGTGAGA  
TATCACATTGTTTCGAGGAACCCTAGATGCTGTCGGAGTAAAAGATCGTCAACAGGGGC  
GTTCT---AGTGCCTTG-----ATGGCAAGGAAAAGTTTGATTTCAGAGGGAGAAGAAG  
AGGCAGAGATTGGAACAGAAATATCATTGATTCGTCGATCCTCAAAAAACGAAATAA  
AA-----AAAGTTTCGTGCTTGAATGACAAATGGGAAATTCATGGAAAATTACAATCCC  
CACCACGGAATAGTGCACCCACACGCTTTCATCGACGTTGTTTTTCGACCGGAAGACC  
AAGAGCTAACTATCGGGACTTTGGGTTATCCGGACACATCCTTCGTGAAATGCTTAATG  
CATGTTTATTACCGGGGGCAACAAGATCCAGTTGGATGGTAAAAAATTCATTTCATCTCG  
GTTATTTTCGCAAGAAGAAAAAGAGGAAAATAGG-----GGGTCTGTTGAATTTCAAATAT  
TCAGTTTCACCAACAGGCTACGCAGACTTACTTCACATTTAGAATTGCACAGAAAAGA  
TTATTTATCCCAGAGAGGTCTTCAGAAAATTTCTGGGAAAACGTCAACGGCTACTGGCCT  
ATTTGTCAAAGAAAAATAGAGTACGTTATAAAGAATTAATAAATCTATTGGATATTCGCG

AGCCAAAACTCGT-----ATCTATCGAATCGTTGCAAT  
TGATGTTTCGATCTCGAAGAGAAGGAAGGGATCTTCAGAAAGTGGGTTTTTACGATCCG  
ATAAAGAGTCAAACCTATTTTAAACGTTCCCGCTATTCTATATTTCCCTTGAAAAAGGCGCT  
CAACCTACAGGAACCGTTCATGATATTTCAAAGAAGGCAGAGATTTTTAAG-----  
-----ATGGAAAAATCCAAG---CTTTTTCTTAAATCCAAGCGATCTTTTCGTAGGC  
GTTTGCCCCCAATTGGACCGGGGGATCGAATTGATTATAGAAACATAAGTTTAATTAGT  
CGATTTATTAGTGAGCAAGGAAAAATATTATCTAGACGAGTGAATAGATTGACTTTGAA  
ACAACAACGATTAATTACTATTGCTATAAAACAAGCTCGTACTTTATCTTCGTTACCTTT  
TCTTCGTAATGAAGAA-----TCTGCGAATAGAACTAAGTATACTCCTAGAACTACGGGTA  
CTCGAACCGAGAAAGAAAGTGACACGTTCACTAAAAAAAAAACCTTTGTAGCTAATCA  
TTTATTGGAAAAAATTGAGAAGCTCAACCGAAGGACAGAAAAAGAAATAATAGTAACT  
TGGTCCCGGGCATCTACCATTATACCCAAAATGATCGGCCATACAATTGCTATTCATAAT  
GGGAAAGAGCATTACCTATTTATATAACAGATAGTATGGTAGGTCACAAATTGGGAGA  
ATTTGCACCTACTCGGAATTTCCGGGAGCATAACGAGAAACGATAAAAAATCTCGTCGTT  
CAATTTTGAACGGTTTTGGACTTACTAATTTAGTATCTTTTTGCATGAAGATACTCAATT  
CGGTCGTTGTGGTCGGACTCTATTATGGATTTCTGAGCGCATTCTCCATAGGGCCGTCTT  
ATCTCCTCCTTATCCGAGCTCGGGTTATGAAAGAGGGA-----AACGAGAAGGAGGCA  
GCAGCAATAACTGGTTTTATTTGGGACAGCTCACTATGTTTCGTATCTATTTATTATACGC  
CTCTCCATCTAGCATTGGGTAGACCTCATAACAATAACGGTCCTAGTTCTACCGTATTCTT  
TGTTTCAGTTCTTCTGGACCAATCACAAAGACTTTTTTGGAA-----TCTACTACCAGAAAT  
TCAATACGAAATCTCAGCATTCAATGTGTATTCTTCGAAAATTTTATTTTTCAATTATTGA  
ACCATTTTGTTTTACCAAGCCCAACGTTAGCCAGATTAGTCAACATTTATATGTTTCGAT  
ACAACAACAAGATATTATTTCTAACAAGTAGTTTTGTGGTTGGTTAATTGGTCACATTT  
TATTAATGAAAGGGGTTGGATTTGTATTTTTCTGGATACGGCAA-----AGTAAAAAT----  
-----AAGTACCTTGTGTCGGAATTGAAAAGTTCTATGTCTCGAATTTTATAGTATGATCT  
TTTTTATCACCAGTGTCTACTATTTAGGCAGAGTACCGTCGCCTATTTTAACTAAGAAAC  
TGAAAGATGAAGAAGAAACAAAACCTCTTGTGACTCTTCTTTTTTACTATAAACGATG  
GAATCGTCCATTGCGATAT-----

-----AGGAATATGAAAGAGGAAGAT--GAAAATATGAAAGAGGAAGAT-----  
-----GAAAAACGT-----AAAAAGAAAGAGGAA-----

-----GATGAAAAACGTAAAA  
AGGAC-----GAGGAACCTTGAAAA  
CGT-----AAAATGAAAGAGAAAACATTTTTTAGAACT--ATTATAGAACAACCCCC  
GGATTATGACTTCGGG-----

-----ACTAAATTAATAATGTCGCGTATGCGCGAAGCTACT-----  
-----CTGCGGTGGATTAACCATTGTGATTATGAGTGGTGGATTGACCATTG  
TGATTCT-----

-----AAGAAA-----  
-----  
-----  
-----  
-----



GATCAAATAGGAAATGATACTCTGAATCATAGAACTATAATGAAATATACGATCAACCAA  
CATTTATCAAATTTGAAAAAG---AGTGAGAAGAAATGGTTCGATCCT-----CTTCTTT  
CTCGAACCGAGAGATCCATGAATCGGGATCCTGATGCATATAGATACAAATGGTCCAAT  
GGGAGCAAGAATTTCCAGAAACATTTGGAACATTTTCGTTTCTGAGCAGAAGAGCCGTT  
TTCAAGTTTTTCAAGTAGTGTTTCGATCGATTACGTATTAATCAATATTCGATTGATTGGTC  
CAGGGTTTTTCGACAAACAAGATCCTTCTAAGCCACTTCGTTTATTTTGGTCCACCTTTT  
TGCCTCTCTTTTTGCCC-----AAGTTCCTGCTCTTTTTTG-----CCCAAGTTCCT  
TCTCTTTTTGTCTAAGTCACTTTCTTTTTTCTTTGTGAGTTTCGGGAATACCCCATTCG  
TGGGTCCGAG--ATCCACATCTCT--CAATTCAAAGGTCCGAATGATCAACTCTGCGATC  
AGTTGTTAGAATCAATAGGTGTTCAAATCGTTCATTTGAATAAATTGAAACCC-----TTCT  
TATTGGAT-----GATCATAATACTTCC---CAAAAATCGAAATTGTTGATCGATGGAGGAA  
CAATATCACCATTTTTGTTCAATAAGATACCA--AAGTGG--ACGATTGACTCATTCCATA  
CTCCTACTAGAAAAAATCGCAGGAAATCCTTTGATAACACTGATTCCATTTCTCAATGC  
TATCCACGATCGAGACAATTGGATGAATCCCGTGAAACCATTTTCATAGAAGTTCATTG  
ATATCTTCTTTTTTAAAAGCAAATCGACTTCGATTCTTGAATAATCCACATCACTTCTGG  
TTCTAT-----TGTAACAAAAGATTCCTTTTTTATGTA-----GAAAAGGCCCGTATCAAT  
AATTATGAT-----CTTACGTAT--GGACAATTCCTTAATATCTTGTTCCTGGCAACAAA---  
AAATTTTCTTTGTGCGTCCGTA---AAAAACATGTTTTTTTCGGAG---AGAGATGCT  
ATTTCAACGATCGAGTCACGGGTATCTAACATATTCATACCTAACGATTTTCCA-----  
-----ATTCTATCCGCTCGATTTCGTTTCGT-----AGAGCTCTT  
TACGCAATCGCAGACATTTCTGGAACACCTCTAACAGAGGGACAAATAGTCAATTTAG  
AAAGAACTTATTGTCAACCTCTTTCAGATATGAATCCGTCTGATTACAGAAGGGAAGAAC  
TTGCATCAGTATCTCAATCTCAATTTCAATTCAAACATGGGTTTGATTACATTCATGT  
TCTGATAAATATTTACGA-----GCCAAAAAGAGGAAAAAA-----CAGAGTC  
TTTGTCTAAAG-----AAATGCGTTGAGAAACGGCAGATGGATAGAATCTTTCTACGA---G  
CAAATCTCTCA-----AAAAAATGGAAGCTGTTCCAAACATATCTGCCATGGTTCTTTACT  
TCGACAGGGTACAAATATCTAACTTTCATCCTTTTAGATACTTTTTTAGACCTATTGCCGA  
TACCGATACGAAGTAGCAGT--CAAAAAGTTGTATCCATTTTTTCACGATATTATGGAT-----  
---ATATCACGGCGAATTCCTCGGAAAATATGGTGG-----GCGATTCTTCCACAACGG  
AATCGG---ATAAGTCAGATTTTCGAGGAAGTGTTTACATAGT-----CTTCTTCTGTCCGAAG  
AAATGATTCATCGAAATAATGAGTCACCCCTTCA---TTCTGGGTACATCTGGGATCACC  
AAATGCTCGGGAGTTC---TTCTATTCAATCCTTTTCTTCTTCTTGTGCTGGATAT---CTC  
GTTCTGACACATCTTCTCTTTGTTTCCCGA-----GCCTCTAGTGAGTTACAGACAGAGTT  
CGAAAAGATCAAATCTTTGATGATTCCATCATAATGATTGAGTTACGAAAACCTTCTGG  
ATGGGTATCCTCCATCTGAACTGAATCTTTCTGGTTAAAGAATCTCTTTCTAGTTGCTC  
TGAAACAATTAGGATATTTTCTAGAAGAAATACGGGGTTCTGCTTTTGGCAGCAACATG  
CTATTGGGTGGTGGTCCC-----GCTTATGGG---GTCAAATCAATACGTTCTAAGAA  
GAAATATTTGAATATCAATCTCATCGATATCATGATTTCTA---AGTCTTATAACCAAATCC  
CATCAATCGAATAACTTTTTTCGAGAAATACGAGACATCTAAGTCGTACAAGTAAAGAGA  
TCTATTCAATTGATAAGAAAAAGAAAAACGTGAACGGTGCTTGGATTGATGATAAAATC  
GAATCCTGGTTCGCGAACAGTGATTTCGATTGATGATGAAGAAAGAGAATCTTGGTTC  
AGTTCTCC-----ACCTTAACGAAG-----GAAGAAAGGATTGATAAAATTCTATTGAGTCTG  
ACT--CATAGTGATCATTTCTCA-----AAGAATGACTCTGGTTATCAAATGATTGAA  
CAACCGGGATCCGTTTACTTACGATACTTAGTTGACATTCAT-----AAAAGCGTCTAAT

GAATTATGAGTTCAATAGATCCTGTTTAGCAGAAAGGCGGATATTCCTTGCTCATTATCA  
GACAATCACTTATTACATTACAAACCTCGTGTGGGGCTAATAGTTTTAATTTCCCATC  
TCATGGA-----AAACCCTTTTCGCTCCGATTAGCCCTATCCCCCTCT--AGGGGTATTTT  
AGTGATAGGTTCTATAGGAACTGGACGATCCTATTTGGTCAAATACCTAGCGACAACT  
CCTACGTTCTTTTCATTACGGTATTTACGAACAAGTTCCTGGATGACAAGCCTCAAGGT  
TATTTTTATGAAGAGAGC-----GATTTTGAA---TTTGATGATAGTAACGACGATGACCTT  
GAC-----CTTGATATTGATATTGATATT  
GAAAAGGAGCTGCTAACTTTGACGAGTGAGATA-----ACTATAGATAGGGAA---ATGA  
CGCCGAAAATAGACCTATTTGATATCACCTTCAACTCGAATTAGCAAAATCAATGTCT  
CCTTGCATAATATGGATTCCAAACATTCATGATCTGTCTGTGAATGAGTCAAATTACTTA  
TCCCTCGGTCTATTAGTGAACCATCTCTCCGGGGATTGTGAGGATTGTGAAAGCTCCTC  
C--ACTAGAAATATTCTAGTTATTGCTTCGACTCATATTCCTAAAAAAGTGGATCCCGCT  
CTAATAGCTCCGAATAAATTAATAACATGCATTAAGGTACGAAGGCTTCTTATTCACAA  
CAACGAAAGCACTTTTTCACTCTTTCATATACTAAGGGATTTCACTTGGAAAAGAAAAT  
GTTCCATACT-----AATGGATTTCGGGTCCATAACCATGGTTTCCAGTGCACGAGATCTTGT  
AGCACTTACCAACGAGGCCCTATCAATTAGTATTACACAGAAGAAATCCATTATAGACA  
GTAATACAATTCGATCCGCTCTTCATAGACAACTTGGGATTTGCGA-----TCCAAGGT  
AAGATCGGTTTCAGGATCATGGGATCCTTTTCTATCAGATAGGAAGGGCTGTTGCACAAA  
ATGTACTTCTAAGTAATGGCCCCATAGATCCAATATCTATCTATATGAAGAAGAAA-----T  
CATGTATGGAAGGGGATTCTTATTTGTCCAAATGGTACTTCGAGCTTGGAACGAGCATG  
AAGAAATTAACGATACTTCTTTATCTTTTGAGTTGTTCTGCCGGATCGGTTCGCTCAAGAT  
CTTTGGTCTCCACCC-----GGACCCGATGAAAAA---AATTGGGTCACTTCTTATGGATTC  
CTTGAGAATGATTCT--GATCTAGTTCATGGCTATTAGAAGTAGAAGGCGCTCTGGGGG  
GA-----TTCTCACGGACAGAAAAAGATTGCAGTCAGTTTGATAATGAT-----CGAGTGAC  
CCTGCTTCTTCGGTCCGAACCAAGGAAT--CCCTTAGATATGATGCAAAATGGATCTTGT  
TCTATCGTTGATCAGAGATTTCTATATGAAAATGAAGAATACGAATCGGAGTTTGAAGG  
G--GGG-----GGAGCCCTCGACCCGCAA-----GAGATAGAGGAGGAT-----TTA  
TTCAATCAC-----ATAGTTTGGGCTCCT-----AGAATGTGGCGCCCT-----TGGGGCAATC  
TATTTGATTGTATCGAAAGGCCCAATGAATTGGGATTTCCC--TATTGGGCCAGGTCATT  
TCGGTTTCGG--GGCAAGCGGATCATTGATCATGAACATGATGAGCTTCAAGAGAATGA  
TTCGGAGTTCTTGCAGAGTGGAAACCATGCAGTACCAGACACGAGATAGATGGTCCAAA  
GAACAAGGCTTTTTTTCGAATAAGCCAATTCATTTGGGACCCTGCGGATCCATTCTTTTT  
CCTATTCAAA--GATCAGCCCTTGTCTCTGTGTTTTACGTCGAGAATTCTTTGCAGAT  
CAAGAGATGTCAAAGGGGATTCTTACTTCCCAAAGAGCTCCTTCTACATCTATGAGAGA  
ACGCTGGTTCATC-----ATACTACGCAAGAAAAGCACTTCGAATTGTTGATTTCATCGCC  
AGAGATGGCTTAGAACC-----AATAGTTCATTATCT-----AATGGATCTTCCGTTCTAAT  
-----ACTCCATCCGAGAGTTATCAGTATTTATCAAATCTGTTCCCTATCTAAC--GGAACGCT  
ATTGGATCAAATGACAAAGACATTGTTGAGAAAGAGATGGCTTTTCCCGGATGAAATG  
AAA-----CATGTAATAGGAGAAAGATTTCCCATTCCTATGCCTAGATCGCGG--AT  
AAATGGAAATTTTATTGATAAGACCTTTTCAATTGTGGCCAATATCTTATTACGAATAATT  
CCGACAACCTTCTGGGGAAAAAGAGGCATTTACCTATTACAGAGATGGTGTG---ATGTCA  
GCTCAATCCGAAGGAAATTATGCGGAAGCTTTACAGAATTATTATGAAGCTACGCGACT  
AGAGATTGATCCCTATGATCGAAGTTATATACTATATAACATAGGTCTTATCCATACAAGC  
AACGGAGAACATACGAAAGCTTTGGAATATTATTTCCGGGCACTAGAACGAAACCCGT

TCTTACCACAAGCTTTTAATAATATGGCCGTGATCTGTCATTAC---CGAGGAGAACAGGC  
CATTCAACAAGGAGATTCTGAAATTGCAGAGTCTTGGTTCGCTCAAGCTGCTGAGTATT  
GGAAACAAGCTATAGCGCTTACTCCAGGTAATTATATTGAAGCTCATAATTGGTTGAAG  
ATCACGAGGCGCTTTGAA-----ATGAACTGGCGATCAGAACGTATATGGATAGAATTAT  
AACGGGGTCTCGAAAAACAAGTAATTTCTTCTGGGCCTGTATCCTTTTTTTAGGTTTAC  
TAGGATTCTATTGGTGGGAACCTTAGTTATCTTGGTTCGAAATCTGATATCCATATTTCC  
GTCTCAGCAAATCCATTTTTTTCCACAAGGGATCGTGATGTCTTTCTATGGGATCGCAG  
GTCTCTTCATTAGCTCCTATTTGTGGTGTACAATTTGGTGGAAATGTAGGCAGTGGTTATG  
ATCAATTCGATAGAAAAGAAGGAGTAGTGTGTATTTTTTCGTTGGGGATTTCTGGAAGA  
AATCGGCGCATCTTTCTTCGATTCCCTTATGAGAGATATCCAGTTCGATTAGAATAGCGGTT  
AAAGAGGGTCTTTATCCTCGTCCCGTACTTTATATGGAAATTAGAGGACAGGGAGCCCT  
TCCACTGACTCGTACTGATGAGAAT--TTGACTCCGCGAGAAATTGAACAAAAAGCTGC  
GGAATTGGCCTATTTCTTGCGCGTACCAATTGAAGTATTT

>Veratrum

ATGGAAAACGGCGATTCAATTCGATGTTGTTTCTAAGTAAATCAACGGATAGTTATGA  
TGCTAGTGGACATAACAGTGGAAAGTGAAGAGCCCATTATAAATGATACGGAGAAAAAC  
ATTCCT--TTCAGTAATGTTGATTACTTATTTGATATCAGGAATATTTGGAGTTTGATCTCC  
GACGACACTTTTTTAATTAGGGATAGTAACGGTGACAATTATTCTCTATATTTTGATATTG  
AAAATAATATTTTTGAGATTGACAATGAT-----AGTTCTTTTCTGAGCGAACTAGAAAGTT  
TTTTTTCGAGT-----TATTTTAATAGTGGGTCTAAGAGTAACAATCACTACTGCAAT  
CATTACATGTATGATACTCAATCTAGTTGGACTAATCACATTAATAGTTGCATTGATAGTT  
ATCTTCATTTTGAAGTC-----AGTATTAATAGTTCTATTTTCAGGTTCGTACCGACAATTATAG  
TGACAGTTATATTTATAGTTTCATTTGTAAGTAGAAGTTCTATAAGAAGTAGTAG  
TAATGGTAGTGATTTCAATATAATAGAAAAATCA---GATTTTGATCTAAATCAAAAATACC  
GGCATTATGGGTTCAATGCGAAAATTGTTATGGATTAAATTATAAAAAATTTTTTAGGT  
CAAAAATGAATATTTGTGAACAGTGTGGATATCATTGAAAATGAGTAGTTCAGATAGA  
ATCGAACTTTCGATTGATCCGACACTTGGCATCCTATGGATGAAGATATGGTCTCTATG  
GACCCCATTTGAATTTCAATCAGAGGAAGAACCTTATAGAGATCGTATCGATTCTTATCAA  
AAAAAGACAGGGTTAACTGAAGCTGTTCAAACGGGCATAGGTCAACTAAACGGTATTC  
CAATAGCAATTGGGGTTATGGATTTTCAGTTCATGGGGGGTAGTATGGGATCCGTAGTC  
GGCGAGAAAATAACCCGTTTGATTGAGTATGCTACTAATCGATCTTTACCTGTCATTATT  
GTGTGTGCTTCTGGAGGAGCGCGCATGCAAGAAGGAAGTTTGAGCTTGATGCAAATG  
GCTAAAATATCTTCTGCTTCATATTATTATCAATCAAATAAAAAGTTATTCTATGTGTCAA  
TCCTTACATCTCCTACAACCGGTGGAGTAACAGCCAGTTTTGGTATGTTGGGAGATGTT  
ATTATTGCTGAACCAAATGCCTACATTGCATTTGCGGGTAAAAGAGTAATTGAACAAAC  
ATTGAATAAGACAGTACCCGAGGGTTCGCAATCGGCTGAGTATTTATCCATAAGGGCT  
TATTCGACCCGATCGTACCACGTAATCCTTTAAAAGGTGTTCTGAGTGAGTTAGTTCAA  
CTACATGGTTTCTTTCCCTTGAATCAACAT-----ATGGCAACTCTTCGAGCCGACGAAA  
TTAGTAATATTATCCGCGAATGTATTGAACAATACAATAGAGAAATCAAATTGTAAATA  
CCGGTACCGTACTTCAAGTAGGCGACGGCATTGCTCGTATTCATGGTCTTGATGAAGTA  
ATGGCAGGTGAATTGGTAGAATTTGAAGAGGGTACAATAGGGATTGCTCTTAATTTGGA  
ATCCACTAATGTTGGTGTGTATTAATGGGTGATGGTTTGATGATAAAAGAGGGAAGTT  
CTGTAAAAGCAACAGGAAGAATTGCTCAGATACCTGTGAGTGAGGCTTATTTGGGTCG  
TGTATAAATGCTCTGGCTAAACCTATTGATGGGAGAGGTGAAATTTCAACTTCTGAAT

CTCGATTAATTGAATCTCCTGCCCGGGTATTATTTCTAGACGTTCCGTATATGAGCCTCT  
TCAAACAGGGCTTATTGCTATTGATTCAATGATCCCTATCGGACGCGGTACAGCGAGAAT  
TAATTATTGGGGACAGACAGACCGGCCAAAACAGCAGTAGCCACAGATACGATTCTCAA  
CCAAAAAGGGCAAATGTAATATGTGTTTATGTAGCTATTGGTCAAAAAGCATCTTCCG  
TCGCTCAAGTAGTCACTACTTTCCAGGAACAGGGGGCAATGGAATACACTATTGTGGTA  
GCTGAAACTGCGGATTCACCTGCTACATTACAATACCTCGCTCCTTATACAGGAGCGGC  
TCTGGCCGAATATTTTATGTACCGTGAACAACATACTTTAATAATTTATGATGATCTCTCC  
AAACAGGCACAAGCTTATCGCCAAATGTCTCTTCTATTAAGAAGACCCCCAGGCCGTG  
AAGCTTATCCGGGAGATGTTTTTTATTTGCATTGCGCCTTTTGGAAAGAGCCGCTAAA  
TCAAGTTCTCATTTAGGCGAAGGAAGTATGACTGCTTTACCGATAGTTGAGACTCAATC  
TGGAGACGTTTTAGCTTATATTCCTACTAATGTAATTTCTATTACGGATGGACAGATATTC  
TTATCCGCCGATCTATTCAATGCTGGAATACGACCTGCTATTAATGTAGGTATTTCTGTTT  
CTAGAGTAGGATCTGCAGCTCAAATTAAGCCATGAAACAAGTAGCCGGCAAATTA  
ATTGGAACCTCGCTCAATTCGCGGAGTTAGAAGCCTTTGCACAATTTGCTTCTGATCTCG  
ATAAAGCTACTCAGAATCAATTGGCAAGAGGTCAACGATTACGCGAGTTGCTCAAACA  
ATCCCAATCAGACCCTCTTCCGGTGGAAGAACAGGTAGCTACTATTTATACTGGAGCTA  
ATGGATATCTTGATCCGTTAGAAATTGGACAAGTAAAGAAATTTCTCGTTCAGTTACGT  
ACTTACTTAAAAAGAATAAACCTCAATTCCAAGAAATTATATCTTCTACCAAGATATTC  
AACGAGCAAGCGCAAGCCTTTTGAAGGAAGCTATTCAGGAACAGATCGAACTGTTTC  
TCCTTCAGGAACAAAGAATGAGAATCAATACTACTACTTCTGGTCCCTGTGGTTTCCACA  
CTTGAAGAAAAAACCTAGGGAGCATCGCTCAAATTATTGGCCCAGTCTGGATGTCG  
TTTTTCCCCCGGCAAGATGCCTAATTTATAACGCTTTGGTAGTTAAGGGCCGAGATA  
ATGTTGGTCAACAAATGAATGTTACTTGTGAGGTACAGCAATTATTAGGAAATAATCGA  
GTTTCGAGCTGTCGCTATGAGTGCTACAGATGGTCTGACGAGAGGGATGGAAGTGATTG  
ACACGGGAGCTCCTCTAAGTGTTCCAGTCCGCGGAGCTACTCTAGGACGAATTTTCAA  
TGTTCTTGGAGAGCCTGTTGATGATTTAGGTCCCTGTAGATACTCGCGCAACATCTCCTAT  
TCATAGATCTGCGCCTGCCTTTATACAGTTAGATAACGAAATTATCAATCTTTGAAACAGG  
AATTAAGTGGTGGATCTTTTAGCTCCCTATCGCCGTGGAGGAAAAATTGGACTGTTTG  
GGGAGCTGGAGTAGGTAAACAGTACTCATCATGGAATTGATCAATAACATTGCCAA  
AGCTCATGGAGGCGTATCTGTATTTGGTGGAGTAGGCCGAACGTACTCGTGAAGGAAAT  
GATCTCTACATGGAAATGAAAGAATCCGGGGTGATTAATGAAAAAATATTGCGGAATC  
AAAAGTAGCTCTAGTCTATGGTCAAATGAATGAACCGCCGGGAGCTCGTATGAGAGTT  
GGTTGACTGCCCTAACCATGGCGGAATATTTCCGTGATGTTAATGAACAAGACGTGCT  
TCTATTCATCGATAATATATTTTCGTTTTCGTCCAAGCAGGATCCGAAGTATCCGCCTTATTA  
GGGAGAATGCCCTCCGCGGTGGGTTATCAACCTACCCTTAGTACAGAAATGGGTTCTTT  
GCAAGAAAGAATTACTTCTACCAAGGAGGGATCCATAACTTCGATCCAAGCAGTTTATG  
TACCTGCGGACGATTTGACCGATCCTGCTCCTGCCACGACATTTGCACATTTAGATGCT  
ACTACCGTACTATCAAGGGGATTAGCCGCCAAAGGTATTTATCCAGCAGTGATCCTTT  
AGATTCTACGTCAACTATGTTACAACCCCGGATTGTTGGCGAGGAACATTATGAAACTG  
CGAAAGAGTTAAGCAAACCTTACAACGTTATAAAGAAGTTCAGGACATTATAGCTATC  
CTTGGATTGGACGAATTATCCGAAGAGGATCGTTTAACTGTAGCAAGAGCGCGAAAAA  
TGAGCGTTTTCTTATCACAACCCTTCTTCGTGGCAGAAGTATTTACTGGTTCTCCAGGA  
AAATATGTTGGTCTCGCAGAAACAATTAGGGGGTTTTCAACTGATTTCTTCCGGAGAATT  
AGATGGTCTTCCCGAGCAGGCCTTTTTATTTAGTGGGTAACATCGATGAAGCTACCGCGA

AAGCTATGAACTTAGAAGTAGAGAGCAAATTGAAGAAAATGACTTTAAATCTTTGTGT  
ACTGACTCCTAATCGAATTATTTTGGATTCAGAAGTGAAAGAAATCATTTTATCTACTAA  
TAGTGGCCAAATTGGCGTATTACCAAACCACGCCCTATTGCCACGGCTGTAGATATAG  
GTCTTTTGAGAATACGCCTCAACGACCAATGGTTAACGGTGGCTCTAATGGGCGGTTTT  
GCTAGAATAGGTAATAATGAGATCACTATTTTAGGAAATGATGCGGAGATGAGTACTGA  
CATCGATCCGCAAGAAGCTCAAAAACTCTTGAAATAGCGGAAGCTAATTTAAGTAAA  
GCTGAGGGTAAGAAACAAGCAATTGAGGCGAATCTAGCTCTCAGACGGGCTAAGACA  
CGAGTAGAGGCTATCAATGCTATTTCCATGAAAAATGTAACCGATTTTTTTGTTCCTTT  
GGCTATTGGCCATCCGCCGGGAGTTTCGGATTTAATACTGATATTTTAGCAACAAATACA  
ATAAATCTAACTGTAGTGCTTGGCGTATTGATTTTTTTTGGAAAGGGAGTGTTAAATGAT  
TTATTAGATAATCGAAAACAGAGGATCTTGAATACTATTCAAATTCGGAAGAATTACGT  
AAAGGGTCCATTGAGCAGCTTGAAAGAGCCCGGGCTCGATTACGAAAGGCGGAAATT  
GAAGCAGATGAGTATCGAAGGAATGGATACTCCGAGATAGAACTCGAAAAAGTAAATT  
TAATTAATGCCGCTTGTGATAGTTTGGAACGATTAGAACTTTCAAATAAGAAACCCTT  
AATTTTGAACAACAAAGATCGATTAATCAGGTCCGGCAACAAGTTTTCCAACAAGCCT  
TACAAGGGGCTCTAGGAACTCTAAATAGTTGTTTGAATAATGAGTTACATTTCCGTACG  
ATCCGTGCAAATATTGGCACCCCTCGGGGCCATGGAAGAAATAACTGATATGAATCCAAT  
AATTTCTGCCGCTTCCGTTATTGCTGCTGGATTGGCCGTAGGGCTTGCTTCTATTGGACC  
TGGGGTTGGTCAAGGTAAGTACTGCTGCAGGCCAAGCTGTAGAAGGTATTGCGAGACAACC  
AGAAGCGGAGGGTAAAATACGAGGTACTTTATTGCTTAGTCTAGCTTTTATGGAAGCTT  
TAACTATTTACGGATTGGTTGTTGCATTAGCGCTTTTATTGCGAATCCTTTTGTATGAA  
CGTTATAACCATGTTCCATTAACAACACTCAAGGGGTTATACGATATATCAGGTGTAGAGGT  
AGGCCAACATTTATATTGGCAAATAGGGGGTTTACAAATCCATGCCCAGGTACTTATCA  
CTTCTTGGGTCGTAATTGCTATCTTATTAGGTTTCAGTCGTCATAACTGTACGGAATCCAC  
AAACCATTCCGACCGACGGTCAGAATTTCTTCGAATATGTCCTTGAATTTATTTCGAGAC  
TTGAGCAAACTCAGATTGGAGAAGAATATGGTCCTTGGGTCCCTTTATAGGAACTAT  
GTTCCATTTATTTTTGTTTCTAACTGGTCAGGTGCTCTTTTACCATGGAAAATCATAACA  
GTTACCTCATGGGGAGTTAGCTGCACCTACGAATGATATAAATACTACTGTTGCTTTAGC  
TTTACCCACGTCAGTGGCATATTTTTATGCGGGTCTTACCAAAAAAGGATTGGGTTATTT  
CGGGAAATACATTCAACCAACTCCAATACTTTTACCAATTAACATCCTAGAAGATTTTAC  
AAAACCTTTATCTCTTAGTTTTTCGACTTTTCGGAAATATATTGGCTGATGAATTAGTAGT  
TGTTGTTCTTGTTCCTTAGTACCTTCAGTAGTTCCTATACCTGTTATGTTTCTTGGATTAT  
TTACAAGCGGTATTCAAGCTCTATTTTTGCAACTTTAGCCGCGGCTTATATAGGCGAAT  
CCATGGAGGGTCATCATATGATATTTGTGACTTTAGAACATATATTAACTCATATCTCTTT  
TTCGATCATTTAATGGTGTTTACGATTCATTTGATGACCTTATTATTCCACGAAAACATA  
GGATTATGTGATTCGTCGGAAAAAGGGATGATAGCTACATTTTTCTCTATAACAGGCTTA  
TTAGTTATTTCGTTGGATTATTTCGGGGCATTCCCATTAAGTAATTTATACGAGTCATTA  
TTTTCTTTTCGTGGAGTTTTTCCATTATTCATATTTTCCAAGATTAAGAACCGTAAAAA  
TGATTTAAGCACAATAACGGCACCCAGTGCTATTTTTATGCAAGGTTTCGCCACATCAG  
GTCTTTTAACCGAAATGCATCAATCTGCAATATTAGTACCTGCTCTACAATCTCAATGGT  
TAATGATGCACGTAAGTATGATGTTATTGAGCTACGCAGCTCTTTTATGCGGATCATTGTT  
ATCAGTCGCTCTTCTAGTTATTACATTTAGAAAAAGCATCGATATCTTTTGTAAAGGGCAA  
TGAGATCAAATACTTGAATGAAAAAGGAGGTGTTTTTAAAAACACTTCCTTTCTTTCAT  
TTCGAAATTATTACAAATATCAATTGACTCGGCGTTTTGGATTATTGGAGTTTTTCGTACCA



TTAGTTTAGGGTTTACTTTTTTAAACCATAGGCATTCTTTCTGGAGCAGTATGGGCTAATG  
ATACATGGGGATCTTATTGGAATTGGGACCCCAAGGAACTTGGGCATTATTACTTGG  
ACCATATTTGCGATTTATTACATACTAGAACAATAAGAATTTACAAGATATGAATTCG  
GCACTTGTGGCTTCTATAGGATTTCTTATAATTTGGATATGCTATTTTGGGATCAATCTATT  
AGGAATAGGTCTACATAGTTATGGTTCATTCACATTAACAATGAAAAAAAAAACATTAA  
CT--TCCTTCCCATATTTTGTATCTATAGTATTTTACCCTGGTGGTTCCTCTCTTTTTTCA  
TAAAAGTCTGGAACCTTTGGTTACTAATTGGTGGAACTACTCGGCAATCTGAAACTTTCT  
TGAATGATATCAAGAAAAAAAAACGTTCTAGAAAGATTCATAGAATTAGAAGAAGTATTC  
CTGTTGGACGAAATGATAAAGGAGTACCCCGAAACACATATACAAAGGCCTCGTATAG  
GAATACACAAAGAAACGATACAATTGATCAAAACACACAATGAGTATCATCTCCATATC  
ATTTTGCAGTTCTCGACAAATATAATCTGTTTCGCTATTCTAAGTGGTTATTTTATTTAG  
GTAATGAAGAACTTATCATTCTTAATTCTTGGGTTTCAGGAATTCCTATATACTTAAGTG  
ACACAATAAAAGCTTTTGGCAATCTTTTAGTTACTGATTTATGGATTGGGTTTCACTCGA  
CTCATGGTTGGGAACCTTATAATTGGTTCAGTCTACAACGATTTTGGATTGGCTCATAACG  
ATCAAATTATATCTGGTCTTGTTCCTTTCCACTTTTCCAGTTATTCTAGATACAATTGTGAAATA  
TTGTATCTTCCGTTATTTAAATCGTGTATCTCCTTCACTTGTAGTCATTTATCATTCAATGA  
ATGAAATGCCCATTTGGTGTTCAAAAGTACCTTTTTCGGAGTCCTGGAGAGGAAGATGC  
GATTTGGGTTGACGTCAAC---CGACTTTATCGAGAAAGATTACTTTTTTTTAGGACAAGA  
AGTTGATAGCGAGATATCGAATCAACTGGTTGGTCTCATGGTATATCTCAGTATAGAAGA  
TAATACTAGGGATCTTTATTTGTTTATAAACTCTCCCGGTGGATGGGTAATACCAGGAAT  
AGGCATTTATGATACTATGCAATTTGTGCCACCCGATGTACATACAATATGCATGGGATTA  
GCGGCTTCAATGGGATCTTTCATTCTGGTTGGTGGAGAAATTACCAAACGTCTAGCATT  
CCCTCACGCG---GTTATGATTCACCAACCTGCTAGTTCCTTTTTATGAGGCACAAGCAGG  
CGAATTCATCCTGGAAGCAGAAGAACTACTGAAACTTCGCGAAACCCTCACAAAGGTT  
TATGTACAAAGAACGGGCAACCCCTTGTGGGTTGTATCTGAAGACATGGAAAGGGATG  
TTTTTATGTCAGCAACAGAAGCCCAAGCTTATGGCATTGTTGATCTTGTAGCAGTTGA  
A????????????????????????????????????????????????????????????  
????????????????????????????????????????????????????????????  
????????????????????????????????????????????????????????????  
????????????????????????????????????????????????????????????  
ATGCAAGAATTACAAGGATATTT  
AGAAAAAGATAGATCTCGGCAACAACACTTCCTATATCCGCTTCTATTTTCAGGAGTATAT  
TTACACACTTGCTCATGATCATGGTTTATTTTGTATGACAAT--TCTAGTTCCTGACTTG  
TGAAACGTTTAATTATTCGAATCTATCAACAGAATTATTGGATTTCTTCGATGAAAAATT  
CTAGCCAAAATAGATTTGATGGGTCTCCTTTTTTTTTCTAAAATGGTATCTGAAGGATTTG  
CAGTTATTTTGGAAATTCCA-----TTACCCTCCCTAATAAAAAAATATCAGAATTT  
ACGATCTATTCATTCAACATTTCCTTTTTTAGAGGACAAATTTTTGCATTTAAATTATGTG  
TTAGATCTACTAATACCCTATCCTGTCCACCTGGAAGTCTTGGTTCAAATTCCTCAACGG  
TGATTCAAGATGTTCCCTTCTTGCATTTATTGCGATTCTTTCTCCATGAATATCATAATG  
GGAATAGATTTATTCGTAAATCTATTTACGTTTTTTTCAAAAAAACGACTATTTACGCTCC  
TGTATAATTCTTATGTATCTGAATATGAATTTGTATTAGTGTTCCTTCGTAAACAATCCTGT  
CATTTACGATCAACATCTTCTGGAACCTTTCTTGGGCGAAGACATTTCTACGAAAAAAT  
AGAACATGTTAGAATGGTGTATCATCATCGGAAGTCCCTAAGGTTCTTCAAGGATTCCT  
TCATGCATTATATTCGATATCAAGGAAAAGCAATTCTGGCTTCAAAGGGGACTCATCTTC  
TGATAAAGAAATGGAAATGTTACCTTGTCAATTTCTGGCAATATAATTTGAACTTTTGGT  
CTCAACCATATAGGGTCCATATAAACCAATTATCAAATTATTCCTTTTTTTTTTCTGGGGTA

TATTTCAAGTGTACTAATAAATACCTCGGCGATAAAGAATCAAATGCTAGAAAATTCATT  
TCTAGTATATACTGTTACT-----AATAAATTTGATACGATAGTCCCAGTAATTCCTCTTATT  
GGATCGTTGTCTAAAGCGAAATTTTGTACCGTATCCGGTTCATCTATTAGTAAGCCGATC  
TGGGCCGATTTATCAGATTCTGATATTATTGATCGATTTGGTAGGATATGTAGAAATCTTT  
CTCATTATTACAGTGGATCTTCAAAAAACAAAGTTTGTATCGAATAAAGTATATACTTC  
GACTTTCGTGTGCTAGAACTTTGGCTCGTAAACATAAAAGTACGGTACGCAATGTTTTG  
AAAAGATTAGGTTTCGAGATTATTAGAAGAATTCTTTACGGAAGAAGATCAAGTTATTTTC  
TTTGATCTTCGCGCAACGTATTTGGTATTTGGATATTATTCGTATCAATGACTTGGCGAAT  
-----ATGATAATTGGCACAGAA---GAAGTACAA---GCTATCAATTCCTTTTATAAATTGGA  
A---TCCTTAAAAGAAATCTATGGACTTATCTGGCTGTTTGTCCCCGTTTTGACCCCTATAT  
TGGGAATCACAATAGGGGTACTGGTAATTGTATGGTTAGAAAGAGAAATATCCGCAGCG  
ATCCAACAACGTGTTGGGCCTGAATATGCGGGCCCGTTGGGGATTCTTCAAGCTCTAGC  
AGACGGGACTAAACTACTCTTTAAAGAGGACCTACTACCATCTAGGGGAGATATTCATT  
TGTTTAGTGTCCGACCATTTATAGCGGTCATATCAATCCTACTAAGTTATTTAGTAATTC  
TTTTGGGTATCGACTTGTTTTAGCCGATCTCCGTATAGGCGTTTCTTTATGGATATCCATT  
TCCAGTATTGCTCCTATTGGTCTTCTTATATCAGGATATGGATCAAATAATAAATATTCCTT  
TTCGGGTGGTCTACGAGCTGCTGCTCAATCTATTAGTTATGAAATACCATTAACTCTATG  
TGATTATCCATATCTCTACTATCTAACAGTTCAAGTACAGTCGATATAGTTGAGGCACA  
GTCAAATATGGTTTTGAGGGGTGGAATCTGTGGCGGCAACCTATAGGTTTTATTGTTT  
TTCTAATTTCTTCTCTAGCAGAATGTGAAAGATTACCTTTTGATTTACCAGAAGCAGAG  
GAGGAATTAGTAGCAGGTTATCAAACCGAATATTCGGGTATCAAATATGGGTTATTTTAC  
GTTGCTTCTTACCTAAATCTATTAGTTTCTTCTTATTTGTAACAGTTCTTTATTTAGGGG  
GGTGGAATTTGTTTATTCCGTACATATCTATTCCCTGAACCTTTCGGA-----ATAAATGGA  
GTCTTTGGAATAACAATCGGTATCTTTATTACATTAGCGAAAGCTTATTTGTTTCTGTTC  
TCTCTATCGCAACAAGATGGACCTTACCTAGGATGAGAATGGACCAGTTGTTAAATCTT  
GGATGGAAATTTCTTTTACCTATTTCTCTGGGTAATCTATTATTGACAACTTCTTTCCAAC  
TTGTTTCACTAATGATCTGGCATGTACAGAATGAAAACCTTCATTCTCGATTCTACGAGAA  
TTTTTATGAAAGCGTTTCATTTGCTTCTTCCATGGAAGTTTCATTTTCCCAGAATGTAT  
CCTAATTTTTGGCCTAATTCTTCTTCTTATGATCGATTCAACCTCTGATCAAAAAGATAG  
ACCTTGGTTCATTTTCATCTCTTCAACAAGTTTAGTAATAAGCATAACGGCCCTATTGTT  
CCGATGGAGAGAAGAACCTATAATTAGCTTTTTCGGGAATTTCCAAACGAACAATTTCA  
ACGAAATCTTTCAATTTCTTATTTTACTATGTTCAACTCTATGTATTCCTCTATCCGTAGA  
GTACATTGAATGTACAGAAATGGCTATAACAGAGTTTCTGTTATTCGTATTAACAGCTAC  
CCTAGGAGGAATGTTTTTATGTGGTGCTAACGATTTAATAACTATCTTTGTAGCTCCAGA  
ATGTTTCAGTTTATGTTCCCTACCTATTATCTGGATATACCAAGAGAGATGTACGGTCTAAT  
GAGGCTACTACGAAATATTTACTCATGGGTGGGGCAAGCTCTTCGATTCTGGTTCATGG  
TTTCTCTTGGCTATATGGTTCGTCTGGGGGGGAGATCGAGCTTCAAGAAATAGTGAATG  
GTCTTATCAATACACAAATGTATAACTCCCCAGGAATTTCAATTGCGCTTATATCCATCA  
CTGTAGGAATTGGGTTCAAGCTTTCCCTAGCCCCTTTTCATCAATGGACTCCTGACGTAT  
ACGAAGGATCTCCCACTCCAGTCGTTGCTTTTCTTTCTGTCACTTCGAAAGTAGCTGCT  
TCAGCTTCAGCCACACGAATTTTCGATATTCCTTTTTTATTTCTCATCAAACGAATGGCAT  
CTTCTTCTGGAAATCCTAGCTATTCTTAGCATGATATTGGGGAATATCATTGCTATTACCC  
AAACAAGCATGAAACGTATGCTTGCATATTCGTCCATCGGTCAAATCGGATATGTAATTA  
TTGGAATAATTGTTGGAGACTCAAATGATGGGTATGCAAGCATGATAACTTATATGCTGT

TCTATATCTCCATGAATCTAGGAACTTTTGCTTGCATTGTATCATTTGGTCTACGTACCGG  
AACTGATAACATTCGAGATTATGCAGGATTATACACGAAAGATCCTTTTTTGGCTCTCTC  
TTTAGCCCTATGTCTCTTATCCCTAGGAGGTCTTCTCCACTAGCAGGTTTTTTCGGAAA  
ACTCCATCTATTCTGGTGTGGATGGCAGGCAGGCCATATTTCTTGGTTTTCAATAGGACT  
CCTTACGAGCGTTGTTTTCTATCTACTATTATCTAAAATAATCAAGTTATTAATGACTGGA  
CGAAACCAAGAAATAACCCCTCACGTGCGAAATTATAGAAGATCTCCTTTAAGATCAA  
ACAATTCCATCGAATTGAGTATGACTGTATGTGTGATAGCATCTACTATATCAGGAATATC  
AATGAACCCAATTCTTGCAATTGCCCAGGATACCCCTTTTATGTTTCTGCTTCACGAATA  
TGATATTTTCTGGGTATTTCTAATACTATCCAGCGTTATTGCTATCTTAGCATTTGTAATTT  
CCGGAGTTTTAGCACCTATTAGAGAAGGACCAGAGAACTCTCTAGTTATGAATCGGGT  
ATAGAACCCATGGGGGATGCTTGGTTACAATTCCGAATACGCTATTATATGTTTGCTCTA  
GTTTTTGTGTTTTTGATGTTGAAACAGTCTTCTTTTATCCATGGGCAATGAGTTTCGAT  
GTATTGGGTGTATCCGTATTTATAGAAGCTTTCATTTTCGTGCTTATCCCAATTGTTGGTT  
CAGTTTATGCATGGCGAAAAGGAGCATTAGAATGGTCTACGAGTTATTTTCCTTGGTTA  
ACAATACTTGTTGTTTTGCCGATATTCGCGGGTCTTCCATTTTTTTCTCCCTCATAAGG  
GGAATAAGGTGTTTCGGTGGTATACTCTATGTATATGCTTATTAGAGCTCCTTCTAACGA  
CTTATGCATTCTGTTACCGTTTTCAATTGGACGATCCATTAATCCAACCTGGAAGAAGATT  
TTCAATGGATAAATATTTTAAATTTTCACTGGAGATTGGGAATCGATGGACTTCCGTAG  
GACCCATTTACTGACAGGATTTATCACCCTTTAGCTACTTTAGCGGCTTGGCCGGTTA  
CTCGAAATTCACGATTGTTCTATTTCTGATGTTAGCAATGTACAGCGGTCAAATAGGAT  
TATTTTCTTCTAGAGACCTTTTACTTTTTTTCATTATGTGGGAATTAGAATTAATTCCCGT  
TTACTTACTTTTATCCATGTGGGGGGGAAAGAAACGTCTGTATTCCGGCTACAAAGTTTA  
TTTTGTACACTGCGGGAGGTTCTATTTTTCTCTTAATAGGAGTTCTAGGTATGGGTTTATA  
TGGTTCCAATGAGCCGACATTAGATTTTGAAAGATTAGCTAATCAATCATATCCTGTAGC  
ATTGGAATACTATTCTATTTTGGTTTCCTTATTGTTTATGCTGTCAAATTGCCAATTATAC  
CCCTACATACATGGTTACCAGATACCCATGGCGAGGCACATTACAGTACATGTATGCTTT  
TAGCTGGAATCTTATTAATAAATGGGAGCCTATGGATTGATCCGGGTCAATATGGAATTAT  
TTCCCCACGCTCATTCTATATTTTCTCCCTGGTTTGTGATAGTGGGAACAACGCAAATAA  
TATATGCAGCTTCAACTTCTTTTCGGTCAACGCAATTTTAAAAAGAGAATAGCCTATTCCT  
CCGTATCTCACATGGGTTTACAAATTATAGGAATTGGTTCTATAACCGGCATGGGACTAA  
ATGGAGCCATTTTACAAATACTTTCTCATGGATTTATTGGTGCTGCACTTTTTTTCTTGGC  
GGGAACGAGTTGTGATAGAATACGTCTTGTTTATCTCGACCAAATAGGGGGGATATCTAT  
ACAAATGCCAAAATATTTACCATGTTACGACGCTTCTCGATGGCTTCTCTTGCATTGCC  
AGGAATGAGTGGTTTTGTTGCGGAATTAGTAGTATTTTTTGAATAATTACCAGCTCAA  
AATATCTTTTAAATGCCAAAAGTGCTAATTACTTTTGTAAATAGCAATGGGAATGATATTAA  
CTCCTATTTATCTTTTATCTATGTTACGTCAGATGTTCTATGGATACAAGCTATTTCGATGTT  
CAAAATTCGAATTTTTTCGATTCTGGACCGCGAGAACTCTTATTCTATCTGTATCTTTC  
TACCCGTAATAGGGATTGGTATTTATCCTGATTTTCGCTCTCTTGTATCAGTTGATAAGGT  
ACAACTATCCTATCTAATTATTTTTATAGAATGATGTTTCGAGCATGTACTTTTTTTTAGTA  
TCCATTTATTTTCTATTGGTATCTATGGATTAATCACAAGTCGAAACATGGTTAGAGCAC  
TTATGTGTCTTGAACCTATACTAAATTCGGTTAATATAAATCTCGTAACATTTTCTGATTTA  
TTGATAGTCGCAATTAAGGAGACATTTCTCAATCTTTGTCATAGCTATTGCAGCG  
GCGGAAGCGGCTATTGGGCTAGCTATTGTTTCGTGATCCATCATAACATAAAATCAACT  
CATATCAATCAATCGAATTTGTTGAATAATATGGAACATACATATCAATATGCATTGATAA

TACCCCTTATTCCACTTCCGGTACTATGTCAATAGGATTTGGACTTCTGCTTATTCCTAC  
AGCAACAAAAATCTTCGTCGTATGTGGACTTTTCTTAGCATTTTACTGCTAAGTATAAC  
TATGGCGTTTTTCGGCCAATTTGTCTATTCAGCAAATAAATGGAAGTTTTATTTATCAATAT  
CTATGGTCTTGACCATCAATAATGATTTTTCTTAGAATTCGGATACTTGATCGATCCA  
CTTACTTCTATTATGTCAATACTAATTACTACTGTGGGAATTATGGTTCTTATTTATAGTGA  
CAATTATATGTCCCACGATCAAGGATATTTGAGATTTTTTGCTTATATTAGTTTTTCCAAT  
ACTTCCATGCTGGGATTAGTTACTAGCTCTAATTTGATACAAATTTATATTTTTTGGGAAC  
TTGTGGGAATGTGTTTCGTATTTATTAATAGGTTTTTGGTTTACACGTCCGATTGCAGCAA  
GTGCTTGCCAAAAAGCTTTTGTAACTAATCGTGTAGGGGATTTTGGTTTATTATTAGGAA  
TTTTAGGTTTTCTACTGGATAACAGGCAGTTTCGAATTTTCGGGATTTGTTTCGAAATAGTTA  
ATAACAATGAGTTCAATTCTTTATTTGCTACTTTGTGTGCCTGTTTATTATTTCGTCGGCGC  
AATCGCTAAATCTGCACAATTTCCCCTTCACGTATGGTTACCTGATGCCATGGAGGGAC  
CCACCCCATTTTCGGCTCTTATACACGCTGCGACGATGGTCGCAGCGGGAATTTTTCTT  
GTAGCTCGACTTCTCCTCTTTTCATAGTCATACCTTATATAATGAATCTAATTTCTTTAAT  
AGGTGTAATAACAGTACTATTAGGAGCTACTTTAGCTCTTGCTCAAGGAGACATCAAAA  
AAAGTTTAGCCTACTCTACAATGTCTCAATTGGGTTATATTATGTTAGCTCTAGGTATAGG  
TTCTTATAGAGCTGCTTTATTTCAATTTGATCACTCATGCCTATTCTAAAGCTTTATTATTTT  
TTGGATCCGGATCTGTTATTCATTCAATGGAGCCCATTGTTGGATATTCGCCAGAGAAA  
AGTCAGAATATGGTCTTATGGGCGGTTTAAACAAGGTATGTTCCAATTACAAGAATTACT  
TTTTTATTAGGTACGCTTTCTCTTTGCGGTATTCCACCTCTTGCTTGTTTTTGGTCCAAA  
GATGAAATCTTAATGATAGTTGGTTGTATTCACCCATTTTAGCAATAATAGCTTCTTTCA  
CAGTGGGATTAACCGCGTTTTATATGTTTCGGGTGTATTTACTTACTTTTGATGGATATTT  
GCGTGTTAATTTTCAAATTATAGTAGCACTAAAAACAGCTCATTCTATTCAATATCCATA  
TGGGGAAAAGAACCACCTAAAACAGTCAATAGA---AATTTACTTTTATCCGCAATGAAT  
CCTTTTTCAAAAAAAGAT-----CCTTCTATGTATCCTCATGAATCGGACAATACTATGCTA  
TTTTCTCTAGTCATATTGGTACTATTTACTTTGTTTCATTGGATTAATAGGAATTCGTTTTGA  
TTTTGATATATTATCGAGATGGTTAATTCCATCAGTAAGTCCTTTTCATCCAAATTCTAATT  
ATTCTGTGTATTGGTATGGGTTTTTCATAAATGCTATTTTTTTTCAGTAAGTATAGCCATTTT  
CGGACTATTCATAGCATCCATTTTATATGGGTCTGTTTATTCATCTTTCCAAAATTTGGAC  
TTAATCAACTCATTTGTAATTATCTCGGACAAAATAAAAAATGTGATATATAATTGGTCAT  
ATAATCGTGGCTATATAGATATTTTTTATACTAAGGTCTTAATTACAGGTATACGAAGATT  
AGCCGAAATAGTTCATTTTATAAATATACATATAATTGATGGAATTACAAATGGGGTTGG  
GGTTGCAAGTTTCTTTATGGGGGAAGGCATCAAATAT---ATGGGAGGTGGGCGAATTC  
GTCTTATCTATTTTTTTTATTTATCCTGCGTATCAATATTTTTTATTCATTTTT---ATGGATTTAT  
CTGGACCAACACATGATATTCTTGATGATTTCTGGGATCAGTTCTTATACTAGGGGGTC  
TGGGAGTAGTATTATTTACCCATCCAATTTATTCCTGCCTTTTCGTTGGGATTTGGTTCTTGT  
TTGTATATCCTTATTATATATTCCATCAAATTCCTATTTTGTAGCTGCTGCACAACCTCCTTA  
TTTATGTGGGAGCCATAAATGTATTAATCATATTTGCTGTAATGTTTCATGAATGGTTCAGA  
ATATTCCAATGATTCTCGTCTTTGGACCGTCGGAGATGGGATCACTTTATTGGTTTGTAT  
AAGTATTCTTTTTTCACTAATTACTACTATCCTAGATACATCATGGTACGGAATCTTTGG  
ACTACAAAATCAAACCAGATTCTAGAGCAGGACCTAATAATTAACGTTCAACAAATTGG  
GATTCATTTATCAACGGATTTTTATCTTCCGTTTGAACCTATTTCTATAATTCTTTTAGTTT  
CTTTAATAGGTGCAATTACTATGGCTCGTCAAATGACTGTACCCGCCACAAGAAAGGAT  
CTCATGATAGTCAATATGGGTCCTCACCACCCATCAATGCATGGTGTCTTCGACTAATT

GTTACTCTCGACGGTGAAGATGTTATTGACTGTGAACCTATATTGGGCTATTTACATAGA  
GGGATGGAGAAAATAGCAGAAAACCGAACAATTATACAATATCTGCCTTATGTAACACG  
TTGGGATTATTTAGCTACTATGTTCCACAGAAGCAATAACGGTAAATGCACCAGAACAAC  
TGGGAAATGTTCAAGTACCTCAAAGGGCCAGCTATATCAGAGTAATTATGCTGGAGCTA  
AGCCGTATAGCTTCTCATTGTTATGGCTTGGACCTTTTATGGCGGATATCGGTGCGCAG  
ACTCCCTTTTTCTATATTTTCAGAGAGAGGGAAATTGCTATATGATCTATTCGAAGCTGCC  
ACAGGTATGCGAATGATGCATAATTATTTCCGTATCGGAGGAGTAGCTGCCGATCTACCT  
CATGGCTGGATAGATAAAATGTTTGGATTTCTGCGATTATTTTTTAACTGGAGTTGTTGAG  
TATCAAAAACCTTATTACGCGGAATCCCATTTTTTTGGAACGAGTTGAAGGAGTGGGCAT  
TATTTGCGGAGAAGAAGCAATAAATTGGGGTTTATCCGGACCAATGTTACGAGCTTCTG  
GGATCCAATGGGATCTTCGCAAATGATCATTATGAATGCTACAATGAATTTGATTGGG  
AAGTTCAGTGGCAAAAAGAGGGAGATTCATTAGCTCGTTATTTAGTGCGAATTGGCGA  
AATGAGGGAATCCGTAAAAATTATTCAACAGGCTCTAGAAGGAATTCCAGGAGGACCT  
TATGAAAATTTAGAAGTTCGGCGC---GCTAGAACAAAAAATTCCGAATGGAATGATTTT  
GAATATAGATTTATTAGTAAAAAACCTTACCTAATTTTGAATTGTCGAAACAAGAGCTT  
TATGTAAGAGTAGAAGCCCCGAAGGGAGAATTAGGGGTTTATTTGATAGGAGATAATAG  
TGTTTTCCCTTGGAGATGGAAAATTCGTCCACCCGGTTTCATCAATTTGCAAATTTCTCC  
TCAACTAATTAAGAATGAAATGGCCGATATCATGACGATATTAGGTAGTATAGATAT  
CATTATGGGAGAAGTTGATCGTATGTTTCCCTATGGTGACTGGGTTCTTGAATTATGGTCA  
ACAAACAATACGAGCCGCAAGGTACATTGGTCAAAGTTTCATAATTACCTTATCCACA  
CAAATCGTTTACCTATAACTATTCAATATCCTTATGAAAAATCGATCATCTCAGAACGTTT  
CCGCGGTGCAATACATTTTGAATTTGATAAATGTATTGCTTGCGAAGTCTGCGTTCTGTG  
ATGCCCCATAGATCTACCCGTTGTTGATTGGAGATTTGAAAAAGATATAAAAAAGAAAC  
AATTGCTTAATTATAGTATTGATTTCCGGTGTCTGTATATTTTGTGGTAACTGTGTGCAATA  
TTGTCCAACAAATGTTTATCAATGACTGAAGAATATGAACTTTCTACTTACGATCGTCA  
CGAATTGAATTATAATCAAATGCTTTAGGTCCGCTACCAATATCAGTAATTGGAGATTA  
CACAATTCAAATCGTTAGAAATTCAAAATATACAAAGATAAATCCCTCGATTCAAGAA  
CGATTACCAAT---AAGCAGGGTCATTTATCTGATTGGCTAGTCAAGCATGAGCTACTTCA  
TAGATCTTTGGGCTTTGATTCCCAAGGAATAGAGACTTTACAAATAAAAACCGAGGATT  
GGGACTCCATTGCTGTCATTTTATATGTATATGGTTACAATTATTTACGCTCCCAGTGCGC  
CTATGATGTAGCACCAGGCGGATTTTATAGCTAGTGTGTATCATCTTACGAGAATACAGTA  
CGGTATAGAAAACCGGAAGAGGTATGCATAAAAATATTTGTCCCGAGGAGTAATCCTA  
GAATCCCGTCCGTTTTCTGGATTTGGAGAAGTGCTGATTTTCAAGAACGGGAATCTTAT  
GATATGTTTGGAAATTGATTATGATAATCATCCACGCCTTAAACGTATCTTGATGCCTGAA  
AGTTGGGTAGGCTGGCCCTTACGTAAGGACTATATTACCCCAAATTTCTATGAAATACA  
AGACGCTCATATGGGCAATGAGTTTTCGATGTATTGGGTGTATCCGTATTTATAGAAGCTT  
TCATTTTCGTGCTTATCCCAATTGTTGGTTCAGTTTATGCATGGCGAAAAGGAGCATTAG  
AATGGTCTTAGCT---GAATATTCAGACAATAAAAAAGGGGGGGGAGGAAAAGATTACAT  
TGAGACAGTTATGAATTTGATTGAGTTTCCGTTACTT-----GCAACACCCAATTCAATTAT  
TTCAACTACATCGAATGATCTTTCGAATTGGTCAAGACTCTCCAGTTTATGGCCACTTCT  
CTACGGTACTAGTTGTTGTTTCATTGAATTTGCTTCATTAATAGGCTCGCGATTTCGACTT  
TGATCGTTATGGATTGGTACCAAGATCCAGTCCTAGGCAGGCGGACCTAATTTAACAG  
CCGGCACAGTAACAATGAAGATGGCTCCTTCTTTAGTGAGATTATATGAGCAAATGCCG  
GAGCCAAAATATGTCATTGCTATGGGAGCTTGTACTATTACAGGGGGGATGTTTCAGTAC

TGATTCTTATAGTACTGTTAGGGGAGTCGATAAGCTAATTCCTGTCGATGTCTATTTGCC  
GGGTTGCCACCTAAACCGGAGGCAGTTATAGATGCTATAACGAACTTCGTAAGAAG  
ATATCTCGAGAAATTTCTGAAGATAGAAGTGCATCTCAA---GAAAATCGATGTTTTACTA  
CCAATCACAAGTTTTATGTTTCGGCGCAGTACTCATAGTGTAATTTATGATCAAGGATTGC  
TTGATCAATCACCATCTACTTCAGAGATACCTACA-----TTTTTCAAATCCAAAAATTCAG  
TATCTTCCCACGAATTAGTGAATATGCAAAATAGAAATACTTTTTATTGGGTAAAGGAAC  
AGATAACTCGATCCATTTCTGTATCGATTCTTATATATGTAATAACTGGGGCATCTATCTC  
AAATGCATATCCCATTTTTGCGCAGCAGGGTTATGAAAATCCACGAGAAGCAACTGGA  
CGAATTGTATGTGCCAATTGCCATTTAGCTAATAAGCCCGTGGATATTGAAGTTCGCAA  
ACTGTGCTTCCCTGATACTGTATTTGAAGCCGTTGTGCGAATCCCTTATGATATGCAACTG  
AAACAGGTTCTTGCTAATGGTAAAAAAGGGGCTTTGAATGTAGGGGCTGTTCTATTTTT  
ACCCGAGGGATTCTGAATTAGCTCCCCCGATCGTATTTCTCCCGAGATGAAAGAAAAG  
ACGGGAAATCTAGCTTTTCAGGGTTATCGTCCCAATAAAAAGAAATATTCTTGTGATAGG  
TCCTGTTCCGGGTCAGAAATATAGTGAAATTGTCTTTCCCATTTCTCTCCCCAGACCCTG  
CTACAAATAAAGACGTTCACTTCTTAAAATACCCCATATATGTAGGGGGGAATAGAGGA  
AGGGGTCAGATTTATCCTGATGGGAGCAAGAGTAACAATACAGTCTATAATGCTACATC  
CGCGGAATAGTAAGCAGAATAGTACGTAAAGAAAAAAGGGATATGAAATAACTATA  
GTTGATGCATCGGATGGACATCAAGTGGTTGATATTATACCTCCAGGACCAGAACTTCT  
TGTTTCAGAGGGTGAATCCATCAAGCTGGATCAACCATTAACAAGCAATCCTAATGTGG  
GAGGGTTTGGTCAGGGAGATGCAGAAATAGTGCTTCAAGATCCAGTACGCATCCAAGG  
CCTTTTGTCTTCTTAGCATCTGTTATTTTTGGCACAATTTTTTTGGTTCTTAAAAAGAA  
ACAGTTTGAAAAGGTTCAATTGTATGAAATGAATTCCTCAATAAAGTATATGATTGGTT  
CGAGGAACGTCCTCGAGATTCAGGCGATTGCCGATGATATAACTAGTAAATATGTTCCCC  
CTCATGTTAACATATTTTATTGTCTAGGGGGGATTACACTTACTTGTTTTTTAGTACAAGT  
AGCTACAGGTTTTGCTATGACTTTTTACTATCGTCCAACCGTTACAGAGGCTTTTTCTC  
AGTTCAATACATAATGACTGAGGCCAACTTTGGTTGGTTAATTCGATCAGTTCATCGATG  
GTCGGCAAGTATGATGGTTCTAATGATGATCCTGCACGTATTTTCGTGTATATCTCACGGG  
TGGTTTTAAAAAACCCCGAGAATTAACCTGGGGTGACAGGTGTAATCTGGCCGATTGA  
CTGCATCTTTTGGTGTAACCGGTTATTCTTACCCTGGGACCAAATTGGTTATTGGGCAG  
TCAAAATTGTGACAGGCGTACCTGAAGCAATTCCTGTAATAGGGTCACCTTTGGTAGA  
GTTATTACGCGAAGTGCTAGTGTGGGCCAATCCACTTTGACCCGTTTTTATAGTTTACA  
CACTTTTGTATTGCCTCTTCTTACTGCCGTATTTATGTTAATGCACTTCTAATGATACGT  
AAGCAGGGTATTTACAGGCCCTTTAATCCCAATAACAAAGAAACCTGACTTGAATGATCC  
TGTATTAAGAGCTAAATTGGCTAAAGGTATGGGGCATAATTATTATGGAGAACCCGCATG  
GCCTAATGATCTTTTATATATTTTTCCAGTAGTAATTCTAGGTAATGCTGTAACGTA  
GGCTTAGCGGTTCTAGAACCATCAATGATTGGTGAACCCGCGGATCCATTTGCAACTCC  
TTAGAAATATTACCTGAATGGTACTTCTTTCCCGTATTTCAAATACTCCGCACAGTACC  
AAATAAGTTATTGGGTGTTCTTTTAATGGTTTCAGTACCAACGGGATTATTGACAGTACC  
CTTTTTGGAAAATGTCAATAAATCCAAAATCCATTTTCGTCGTCCAGTAGCTACAACAG  
TCTTTTTGATCGGTACCGCAGTAGCTCTTTGGTTAGGTATTGGAGCAACATTACCTATTG  
ATAAATCCCTAACTTTAGGGCTTTTTATGATTGAAGTTTTTCTATTTGGAATCGTTTTAGG  
TCTAATTCCTATTACTTTAGCAGGATTATTTGTAAGTGCATATTTACAATACAGACGCGGC  
GATCAATTGGACCTAATGCCTACTATAACTAGTTATTTTTGGTTTTTCTACTGGCCGCTTCA  
ACTATAGTCCCCGTTCTATTGATTGGTTTTGAACAAGATACGACTTATTATGGATATAGTAA

GTCTCGCTTGGGCTGCTTTAATGGTAGTCTTTACATTTTCCCTTTCACTCGTAGTGTGGG  
GAAGGAGTGGACTCATGATTATTCGTTCCGCCGAACCAGAAGTTAAAATTGTTGTAGAT  
AGGGATCCCGTAAAAACGTCTTTTCGAGGAATGGGCCAGGCCGGGACATTTCTCCAGAA  
CAATAGCTAAGGGCCCGGATACTACCACTTGGATCTGGAACCTACATGCTGATGCTCAC  
GATTTTCGATAGTCATAACAGTGATTTGGAGGATATCTCCCGAAAAGTATTTAGTGCTCAT  
TTTGGTCAACTCTCCATTATCTTTCTTTGGCTGAGTGGCATGTACTTCCATGGCGCCCGT  
TTTTCCAATTATGAAGCATGGCTAAGTGATCTACTCACATTGGGCCAGTGCCCAGGT  
AGTTTGGCCAATAGTAGGTCAAGAAATATTGAATGGTGATGTAGGCGGGGGTTTCCGA  
GGAATAACAATAACCTCCGGGTTTTTTCAGCTTTGGCGAGCATCTGGAATAACTAGTGA  
ATTACAACCTATTGTACTGCAATTGGTGCATTGGTATTTGCATCATTAAATGCTTTTTGCT  
GGCTGGTTCCATTATCACAAGCCGCCCAAATTGGCTTGGTTCCAAGAGGTAGAAT  
CTATGTTGAATCACCATTTAGCGGGTTACTGGGACTTGGATCTCTTTCTTGGGCGGGA  
CACCAAATCCATGTCTCTTTGCCAATTAACCAATTTCTTGATGCTGGGGTTGATCCTAAA  
GAGATAACCACTTCTCATGAATTCATCTTGAATCGGGATCTTTTGGCTCAACTTTATCCC  
AGTTTTGCCGAAGGAGCAACCCCTTTTTACCTTGAATTGGTCAAATATGCGGAATT  
TCTGAGTTTTCGTGGAGGATTAATCCAATAACAGGGGGTCTGTGGCTGAGCGATATTG  
CACACCATCATTTAGCTATTGCAATTCTTTTCTGATCGCCGGTCATATGTATAGGACCAA  
TTGGGGCATTGGTCATGGCCTTAAAGACATTTTAGAAGCTCATAAAGGTCCATTTACAG  
GCCAGGGTCATAAAGGCCTCTATGAAATCCTAACAACGTCATGGCATGCTCAATTATCTA  
TTAACCTGGCTATGTTAGGCTCTTTAACCATAGTTGTAGCTCACCATATGTATTCCATGCC  
CCCTTATCCATACCTAGCTATTGACTATGGTACACAACCTTTTCGTTATTCACGCACCACAT  
GTGGATCGGTGGATTTCTAATAGTTGGTGCTGCTGCACATGCAGCAATTTTTATGGTAA  
GAGACTACGATCCAACCTACTCGATAACAACGATCTATTAGATCGTGTCCCTTAGGCACCGC  
GATGCAATTGTATCACATCTTAATTGGGCATGTATATTTCTAGGGTTTCACAGTTTTGGCT  
TGTATATTCATAATGATACCATGAGCGCTTTAGGGCGCCCTCAAGATATGTTTTTCAGATA  
CCGCTATAACAATTACAACCCATCTTTGCTCAATGGGTTCAAAACACCCATGCTTTAGCG  
CCCGGTGTAACAGCTCCTGGTGAACAACAAGTACCAGCTTAACTTGGGGGGGTAGTG  
AATTAGTAGCAGTAGGGCGGCAAAGTAGCTTTGTTACCTATTCCATTAGGAACCGCAGAT  
TTTTTGGTCCATCACATTCATGCATTTACGATTCATGTGACTGTATTGATACTACTGAAA  
GGTGTCTGTTTGGCTCGCAGTTCCCGTTTGATACCTGATAAAGCAAATCTGGGCTTTTCG  
TTTCCCTTGTGATGGACCTGGAAGAGGGGGTACATGTCAAGTATCTGCCTGGGATCATG  
TCTTCTTAGGTCTATTCTGGATGTACAATGCTATTTTCGGTAGTAATTTTTTCATTCAGTTG  
GAAAATGCAGTCGGATGTTTGGGGTACTATAAGTGATCAAGGGGTGGTAACTCATATCA  
CAGGAGGAAACTTTGCACAAAGTTCCATTACTATTAATGGGTGGCTCCGGGATTTCTTA  
TGGGCACAGGCATCTCAGGTAATTCAATCTTATGGGTCTTCACTATCCGCATATGGTCTT  
TTTTTCTTAGGTGCTCATTTTGTCTGGGCTTTTCAGTTTAAATGTTTCTATTTCAGTGGCCGT  
GGTTATTGGCAAGAACTCATTGAATCCATCGTTTGGGCTCATAATAAATTAAGTTGCT  
CCTGCTACTCAGCCTAGAGCCTTGAGTATTGTACAAGGGCGCGCTGTAGGAGTAACCC  
ATTACCTTCTGGGTGGAATTGCCACAACATGGGCATTCTTCTTAGCAAGAATTATTGCA  
GTAGGAATGGCATTAAAGATTTCCAAGGTTTAGCCAAGGCTTAGCTCAGGACCCCACTAC  
TCGTCGATTTTGGTTTGGTATTGCTACCGCACATGACTTCGAGAGTCATGATGATATTAC  
TGAGGAACGTCTTTATCAGAACATTTTGTCTTCTCACTTCGGGCAGTTAGCAATAATTTT  
TCTGTGGACGTCCGGAAATCTGTTTCATGTAGCTTGGCAAGGAAATTTTGGTTCATGGA  
TACAAGACCCTTTACATGTAAGACCTATTGCTCATGCAATTTGGGATCCTCATTTTGGTC

AACCCGCTGTAGAAACTTTTACTCGAGGAGGTGCTAGTGGCCCAGTGAATATCGCCTAT  
TCAGGTGTTTATCAGTGGTGGTATAACAATAGGATTACGCACCAATGAAGATCTTTATACT  
GGAGCTCTTTTTCTATTATTTCTTTCTGCTATATCCTTAATAGCGGGTTGGTTACACCTAC  
AGCCCAAATGGAAACCGAGCATTTTCATGGTTCAAAAATGCCGAATCTCGTCTAAATCAT  
CATTTGTCAGGACTTTTTCGGAGTAAGTTCCTTGGCTTGGACAGGACATTTAGTTCATGT  
CGCTATCCCCGGAGCCAGGGGCGAGTACGTCAGATGGAATAATTTCTTAGACGTATTGC  
CGACCCCCAGGGGTGGGACCACTTCTTACGGGTCAATGGAATCTTTATGCCCAAAA  
CCCCGATTCCAATAGTCATTTATTTGGTACCTCCAAGGAGCGGGAAGTCCATTCTAA  
CCCTTCTGGGGGATTCCATCCACAACGCAAAGTTTATGGCTGACCGATATTGCTCAT  
CATCATTTAGCTATTGCATTTATTTTTCTCATTGCTGGTCAATGTATAGAACGAACTTCG  
GGATTGGGCACAGTATCAAAGATCTTTTAGAAGCACATACTCCTCCGGGGGGTTCGATTA  
GGGCGTGGTCATAAGGGTCTTTATGACACAATCAATAATTCGATTCATTTTCAATTAGGT  
CTTGCCCTAGCCTCTTTAGGGGTTATTACTTCCCTTAGTAGCTCAACACATGTACTCTTTA  
CCTGCTTATGCATTCATAGCACAAGACTTTACTACTCAAGCTGCGTTATATACTCATCAC  
CAATACATTGCAGGGTTCATCATGACAGGAGCCTTTGCTCATGGAGCTATATTTTTTATT  
AGAGATTACAATCCGGAACAGAATGAGGATAATGTATTGGCAAGAATGTTAGACCATAA  
AGAAGCTATTATATCTCATTTAAGTTGGGCCAGCCTGTTTCTGGGGTCCATACCTGGG  
TCTTTATGTTTATAACGACGTCATGCTTGGTACTCCGGAAAAACAATCTTGAT  
TGAACCTATATTTGCCAATGGATAACAATCCGCTCATGGTAAGACTTCATATGGGTTCGA  
TGTACTCTTATCTTCAACGAATGGCCCTGCATTCAATGCAGGTTCGAAGCATATGGTTACC  
CGGCTGGTTGAATGCTATTAATGAG-----AATAGTAATCACTCTTCTTAACAATAGGTCC  
TGGAGATTTCTTGGTTCATCATGCTATTGCTCTAGGTTTACATACAACTACATTGATTTA  
GTAAGGTTGCTTTAGATGCGCGTGGTTCCAAGTTAATGCCGGATAAAAAGGATTTTCG  
GTTATAGTTTTCTTGGACGGCCCCGGACGCGGGGTACTTGTGATATTTCTGCTTGG  
GACGCATTTTATTTGGCAGTTTTCTGGATGTTAAATACCATTGGATGGGTAAGTCTTTTATT  
GGCATTGGAAACACATTACATTATGGCAGGGTAACGTTTCACAATTTAATGAATCCTCC  
ACTTATTTGATGGGGTGGTTAAGAGATTATTTATGGTTAAACTCTTCACAACTTATCAAT  
GGATATAACCCTTTTGGTATGAATAGTTTATCGGTATGGGCGTGGATGTTTTTATTTGGAC  
ATCTTGTGGGCTACTGGATTTATGTTCTTAATTTCTGGCGCGGATATTGGCAGGAAT  
TGATTGAAACTTTAGCATGGGCTCATGAACGCACACCTTTGGCTAATTTGATTCGATGG  
AGAGATAAGCCAGTAGCTCTTTCCATTGTGCAAGCAAGATTGGTTGGATTAGCTCACTT  
TTCCGTAGGTTATATATTTCACTTACGCAGCTTTCTTGATTGCCTCTACATCAGGAAAATTT  
GGTATGTCACATTCAGTAAAAATTTATGATACATGTATAGGGTGTACTCAATGTGTACGA  
GCCTGTCCACAGATGTACTGGAATGATACCTTGGGACGGATGTAAGGCTAAGCAAA  
TTGCTTCTGCGCCAAGAACCGAGGATTGTGTGGGTTGTAAGAGATGTGAGTCCGCTTG  
CCCAACAGATTTTTTAAGTGTCGGTGTTTATTTATGGCATGAAACAACCTCGAAGCATGG  
GTCTATCTTATATGACAGATCTTAACTTACCCTCTATTTTTGTGCCCTTAGCGGGCCTAGT  
ATTCCCAGCAATTGCAATGGCTTCTTTGTTTCTTCATGTCCAAAAAATAAGATTGTAAT  
GCAATATCTAAAAACATATCTCTCCACAGCACCCGTGCTAACTACTCTATGGTTTGGATC  
TTTAGCGGGTCTGTTGATAGAGATTAATCGTTTATTCCCAGATGCCTTGTTCATTTCCCTT  
TTTT-----ATGACTGCAATTTTAGAGAGACGCGAAAGTACAAGCCTATGGGGTTCGTTTT  
GCAACTGGATAACCAGCACTGAAAACCGTCTTTACATTGGATGGTTCGGTGTGTTTGGATG  
ATCCCTACCTTATTGACCGCAACTTCTGTATTTATTATCGCCTTCGTTGCTGCTCCTCCAG  
TAGATATTGATGGTATTCGTGAACCTGTTTCTGGTCTCTACTTTACGGAAACAATATTAT



TTCTGGTGCCATTATTCCTACTTCTGCTGCTATAGGTTTGCACCTTTTACCCAATATGGGA  
AGCAGCATCTGTTGATGAATGGTTATAACAATGGCGGTCCTTATGAGCTAATTGTTCTACA  
CTTCTTACTTGGTGTAGCTTGCTACATGGGTCGTGAGTGGGAACCTAGTTTCCGTTTTGG  
GTATGCGTCCTTGGATTGCTGTTGCATATTCAGCTCCTGTTGCAGCTGCTACTGCTGTTT  
TCTTGATCTACCCTATCGGTCAAGGAAGTTTTTCTGATGGTATGCCTTTAGGAATATCTG  
GTACTTTCAACTTTATGATTGTATTCCAGGCGGAGCACAACTACTTATGCACCCATTTC  
ACATGTTAGGCGTAGCTGGTGTATTTCGGCGGTTCCCTATTCAGTGCTATGCATGGTTCTT  
TGGTAACCTCTAGTTTGATCAGGGAAACCACTGAAAATGAGTCTGCTAACGAAGGTTA  
CAGATTTGGTCAAGAGGAAGAACTTATAATATCGTAGCTGCTCATGGTTATTTTGGCC  
GATTGATCTTCCAATATGCTAGTTTCAATAATTCTCGTTCCTTTACATTTCTTTTLAGCTGC  
TTGGCCTGTAGTAGGTATCTGGTTCACCGCTTTAGGTATTAGTACTATGGCTTTCAACCT  
AAACGGTTTTCAATTTTAAACCAATCTGTAGTTGACAGTCAGGGTCGTGTCATTAACACTT  
GGGCTGATATCATCAACCGTGCTAACCTTGGTATGGAAGTCATGCACGAACGTAATGCT  
CACAATTTCCCTCTAGACCTAGCTGCTGTTGAAGCTCCATATACAAATGGAATGGGTTT  
GCCTTGGTATCGTGTTCACTACTGTTGTATTGAATGATCCCGGTCGATTGCTTGCTGTCCA  
TATAATGCATACAGCTCTAGTTTCTGGCTGGGCCGGTTCCTATGGCTCTATATGAATTAGC  
GGTTTTTGGATCCCTCTGACCCCGTTCGATCCAATGTGGAGACAAGGTATGTTCTGTTAT  
ACCCTTCATGACTCGTTTAGGAATAACAAATTCATGGGGTGGTTGGACTATTTCA---GGA  
GGAACTATAACGAATCCGGGTATTTGGAGCTATGAAGGTGTGGCGGGGGCACATATTCT  
GTTTTCTGGCTTGTGCTTCTTGGCAGCTATCTGGCATTGGGTGTATTGGGATCTAGAAAT  
ATTTTCTGATGAACGTACGGGAAAACCTTCTTTGGATTTGCCCAAGATCTTTGGAATTC  
ATTTATTTCTCTCAGGGTTGGCTTGCTTCGCTTTTGGCGCATTTTCATGTAACAGGCTTGT  
ATGGCCCTGGAATATGGGTGTCCGATCCTTATGGGCTAACCGGAAAAGTACAATCTGTA  
AATCCAACGTGGGGTGCAGGGGTTTTGATCCTTTTGTTCGGGAGGAATAGCCTCTCA  
TCATATTGCAGCGGGTACATTGGGCATATTAGCGGGCCTATTCCATCTTAGTGTCCGTCC  
GCCCAACGTCTATACAAAGGATTGCGTATGGGCAATATTGAAACAGTACTTTCCAGTA  
GTATTGCTGCTGTTTTTTTTTGCAGCTTTCGTAGTTGCTGGAACCTATGTGGTATGGCTCAG  
CAACTACCCCATCGAATTATTTGGTCCCCTCGTTATCAGTGGGATCATGGATACTTTC  
AGCAAGAAATATATCGAAGAGTTGGGGCTGGACTAGCCGGAATCTTAGTTTATCGGA  
AGCTTGGTCTAAAATTTCCCGAAAAATTAGCTTTTTTATGATTACATTGGTAATAATCCGGC  
AAAGGGGGGATTATTCAGAGCAGGCTCAATGGACAACGGGGATGGAATAGCTGTTGGA  
TGGTTAGGACACCCTATCTTTAGAGATAAAGAAGGTCGCGAGCTTTTTGTACGTCGTAT  
GCCTACTTTTTTCGAAACATTTCCCGGTAGTTTTGGTAGATGGAGACGGGATTGTGAGAG  
CTGATGTTCCTTTTAGAAGGGCAGAATCAAAGTATAGTGTGCAACAAGTAGGTGTAAC  
GTTGAGTTCTATGGTGGAGAACTCAATGGAGTCAGTTATAGTGATCCTGCTACTGTGAA  
AAAATATGCTAGACGTGCCCAATTAGGCGAAATTTTTGAATTAGACCGGGCTACTTTGA  
AATCCGATGGTGTTTTTTCGTAGCAGTCCGAGGGGTTGGTTCATTTTGGGCACGCTACG  
TTTTGCTTTGCTCTTCTTTTTTCGGACACATTTGGCATGGCGCTAGAACCCTTGTTCAGAGAT  
GTTTTTGTGCTGTTATTGATCCAGATTTGGATGCTCAAGTGGAATTTGGGGCATTCCAAAA  
ACTTGGGGATCCAACCTACAAGGAGACAAGTAGTCATGAAAACCTTATATTCCCTGAGG  
AGGTTCTACCACGTGGAAACGCTCTTTAATGGAACCTTAGCTTTAATTGGTTCGTGACCA  
AGAAACCACCGGTTTCGCTTGGTGGGCCGGGAATGCCAGACTTATAAATTTGTCCGGT  
AAACTACTTGGAGCTCACGTAGCCCATGCCGGATTAATTGTATTCTGGGCCGGAGCAAT  
GAACCTATTTGAAGTGGCTCATTTTCGTACCAGAGAAACCCATGTATGAACAAGGATTAA

TTTTACTCCCCACCTAGCTACTTTAGGTTGGGGGGTAGGTCCGGGGGGGGAAGTTATA  
GACACCTTCCGTACTTTGTATCTGGAGTACTTCACTTAATTCCTCTGCAGTCTTAGGC  
TTTGGTGGTATTTATCATGCGCTTCTCGGACCTGAGACTCTTGAAGAATCCTTTCCATTT  
TTCGGTTATGTATGGAAAGATAGAAAATAAAATGACTACAATTTTAGGTATTCACTTAATT  
TTGTTAGGTATAGGTGCTTTTCTTCTAGTACTTAAGGCTCTTTATTTTGGGGGCATATATG  
ATACCTGGGCCCTGGGGGGGGGATGTCAGAAAAATAACCAACTTGACCCTTAGCCC  
AGGCGTTATATTTGGTTATTTACTAAAATCCCCTTTTGGGGGAGAAGGATGGATTGTTAG  
TGTGGACGATTTAGAAGATATAATTGGAGGACATGTATGGTTAGGTTCCATTTGTATATT  
TGGCGGATTTTGGCATATCTTAACCAAACCCTTTGCATGGGCTCGCCGCGCATTTGTATG  
GTCCGGCGAGGCTTACTTGTCTTATAGTTTAGCTGCTTTATCTGTCTTTGGTTTTATCGCT  
TGTTGTTTCGTCTGGTTCAATAATACCGCTTATCCTAGTGAATTTTACGGACCCACCGGA  
CCAGAAGCTTCTCAAGCTCAAGCATTACCTTTCTAGTTAGAGACCAACGTCTTGGGG  
CTAACGTGGGATCCGCCCAAGGACCCACTGGTTTGGGTAAATATCTAATGCGTTCCCA  
ACCGGGGAGGTTATTTTGGAGGAGAACTATGCGTTTTTGGGATCTCCGTGCTCCCTG  
GTTAGAACCTCTAAGGGGTCCAATGGTTTGGACTTGAATAGGCTGAAAAAAGACATA  
CAACCTTGGCAAGAACGACGTTTCGGCAGAATATATGACTCATGCTCCTTTAGGTTCTTT  
AAATTCCGTGGGTGGCGTAGCTACTGAAATCAATGCAGTCAATTATGTCTCTCCTAGAA  
GTTGGTTAGCTACCTCTCATTTTGTTCTAGGATTCTTCTATTTGTGGGGCATTGTGGC  
ATGCGGGAAGGGCCCGGGCGGCTGCGGCAGGATTTGAAAAAGGAATCGATCGCGATT  
TGGAACCTGTTCTTTCCATGACTCCTCTTAGCATGACTATAGCCCTTGGTAGATTTCCAA  
AAGAAGAAAATGATTTATTTGATATTATGGATGATTGGTTGCGAAGGGACCGTTTTCGTTT  
TTGTGGGCTGGTCCGGCCTATTGCTCTTTCCTTGTGCTTATTTGCTTTAGGGGGTTGGT  
TCACGGGTACAACTTTTGTAACCTTCATGGTATACCCATGGATTGGCCAGTTCTTATTTGG  
AAGGTTGCAATTTCTTAACCGCTGCAGTTTCTACTCCTGCAAATAGTTTAGCACATTCTT  
TGTTGCTACTATGGGGCCCTGAAGCACAAGGAGATTTCACTCGTTGGTGTCAATTAGGC  
GGTCTGTGGACTTTTGTGCTTTCATGGTGTCTTCGGGCTAATGGGTTTCATGTTACGT  
CAATTCGAACCTTGCTCGATCTGTCCAATTGCGTCTTATAATGCAATCGCATTCTCTGGC  
CCAATTGCTGTTTTTTGTTTCTGTATTCTGATTTATCCACTGGGTGAGTCGGGTTGGTTC  
TTTGCACCCAGTTTTGGTGTAGCAGCTATATTTGATTTCATACTCTTCTTCCAAGGATTT  
CATAATTGGACGTTGAACCCATTTTCATATGATGGGAGTTGCCGGAGTATTAGGCGCCGC  
TCTGTTATGCGTATTCATGGAGCTACCGTAGAAAATACTTTATTCGAGGATGGTGACGG  
TGCAAATACATTCCGTGCTTTTAACCCAACCCAAGCCGAAGAGACTTATTCAATGGTTA  
CTGCTAATCGCTTTTGGTCCCAAATCTTTGGGGTTGCTTTTTCCAATAAACGTTGGTTAC  
ATTTCTTTATGCTATTTGTACCAGTAACTGGTTTATGGATGAGTGCTATTGGGGTAGTCG  
GTCTGGCTCTGAACCTACGCGCCTATGACTTCGTTTCCCAAGAAATCCGTGCAGCAGA  
AGATCCTGAGTTTGAGACTTTCTACACCAAAAATATTCTCTTAAATGAAGGTATTCGTG  
CTTGATGGCAGCTCAGGATCAGCCCCATGAAAACCTTATATCCCTGAGGAGGTTCTA  
CCACGTGGAAACGCTCTTATGTCTGGAAGCACGGGAGAACGTTCTTTTGCTGATATTAT  
TACCAGTATTCGATACTGGGTCATTCATAGCATTACTATACCTTCCCTCTTCATTGCGGGT  
TGGTTGTTTGTGTCAGTACGGGTTTAGCTTACGATGTGTTTGGAAAGTCTCGGCCAAACGA  
ATATTTACAGAGAGCCGACAAGGGATTCTTTAATAACTGGGCGTTTTGATTCTTTGG  
AACAACTCGATGAATTTAGTAAATCCTTTATGACCATAGATAGAACCTATCCATTTTA  
CAGTACGATGGTTGGCTGTTTCATGGACTAGCTGTACCTACCGTTTTCTTTTTGGGTCAA  
TATCAGCAATGCAGTTCATCCAACGAATGGCTACACAAACCGTTGAGGGTAGTTCTAGA

TCTGCT--CCAAGACGAACTAATGCAGGGAGTTTGTGAAACCATTGAATTCAGAATAT  
GGTAAAGTAGCTCCGGGCTGGGGGACTACACCACTTATGGGGGTCACAATGGCTCTAT  
TTGCAATATTCCTATCTATTATTTTGGAAATTTATAATTCCTCCGTTTTACTGGATGGAATT  
TTAATGAATATGCTTACTCTCAAATTCGTTTATACAGTAGTGATAATTTTTGTTTCTCT  
CTTCATCTTTGGATTCTTATCTAACGATCCAGGACGTAATCCTGGACGTGAAGAAATGG  
CGGATACTACTGGAAGGATTCTCTTTGGCTGATAGGTAAGTAACTGGTATTCTTGTA  
TCGGTTCAATAGGTATTTTCTTTTACGGTTCATATCCGGGTTGGGCTCATCTCTGATGCT  
TAATATCTTTAGTTAATCGGTATCTGTATTAATTCTGCCTTTTATTCAAGTAGTTTTTCT  
TCGCAAATGCCCCGAGGCTTATGCCTTTTTCAACCAATCATAGACGTTATGCCTATCA  
TACCTCTACTCTTTTTCTCTTAGCCTTTGTTTGGCAAGCTGCTGTAAGTTTTCGAATGA  
CACAATCAAACCCAAATGAACAAAATGTTGAATTGAATCGTACCAGTTTATACTGGGGT  
TTATTACTCATTTTTGTACTTGCTGTTTTATTTTCCAATTATTTCTTCAATATGGGAGTCAA  
TATTCTCGCATTTATTGCTACTGCACTGTTTACTTAGTTCCTACTGCTTTTTTACTTATCA  
TCTACGTAAAAACAGTCAGTCAAATAATATGGAAACAGCAACTCTAGTCGCCATCTTC  
ATATCTGGTTTACTTGTAAGCTTACTGGGTACGCTTTATATACCGCTTTTGGGCAACCC  
TCTCAACAATTAAGAGATCCATTCGAAGAACATGGAGACATGGAAGCATTGGTTTATAC  
ATTCCTTTTAGTCTCGACTTTAGGGATCATTTTTTTTCGCTATCTTTTTTCGAGAACCGCCT  
AAGGTTCCGACTAAAAAA-----ATGACTATTGCTTTCCAATTAGCTGTTTTTGCATTAATT  
GCGACTTCATCAATCTTACTTATTAGTGTACCCGTTGTATTTGCTTCTTCTGACGGTTGG  
TCAAGTAACAAAATGTTGTATTCTCCGGTACATCATTATGGATTGGATTAGTCTTTCTG  
GTAGCTATCCTTAATTCTCTCATCTCTATGAGTTGTAGGGAGGGACTTATGTCACCACAA  
ACAGAGACTAAAGCAAGTGCTGGATTCAAAGCTGGTGTAAAGATTACAAATTGACTT  
ATTATACTCCTGACTACAAAACCAAAGATACTGATATCTTGGCAGCATTCCGAGTAACT  
CCTCAACCTGGAGTTCCACCTGAAGAAGCAGGCGCCGCGGTAGCTGCCGAATCTTCTA  
CTGGTACATGGACAACCTGTATGGACTGACGGACTTACTAGTCTTGATCGTTACAAAGGA  
CGATGCTACCACATTGAGAGCGTTGTTGGAGAGGAAAATCAATATATTGCTTATGTAGC  
TTATCCTTTAGACCTTTTCGAAGAAGGTTCTGTTACTAACATGTTTACTTCCATTGTGGG  
TAATGTATTTGGTTTCAAAGCCCTACGAGCTTACGGCTGGAAGATCTGCGAATTCCTA  
CTTCTTATTCCAAAACCTTTCCAAGGCCCGCCCCACGGTATCCAAGTTGAAAGAGATAAA  
TTAAACAAGTATGGTTCGTCCTTATTGGGATGTACCATTAAACCAAATGGGATTATCC  
GCAAAGAACTACGGTAGAGCGGTTTATGAATGTCTACGCGGTGGACTTGATTTTACTAA  
GGATGATGAAAACGTGAACTCACAACCATTTATGCGTTGGAGAGACCGTTTTCGTATTTT  
GTGCCGAAGCTATTTATAAGGCGCAAGCCGAAACGGGTGAAATCAAAGGACATTACTT  
GAATGCCACTGCGGGTACATGTGAAGAAATGATGAAAAGGGCCCAATTTGCTAGAGAA  
TTGGGAGTTCCTATCGTAATGCATGACTACTTAACTGGGGGATTTACTGCAAATACTAGC  
TTGGCTCATTATTGCCGCGACAACGGCCTACTTCTTCACATTCACCGCGCAATGCATGC  
AGTTATTGATAGACAGAAAATCATGGTATCCATTTCCGTGTACTAGCTAAAGCATTACG  
TATGTCTGGTGGAGATCATATTCACGCTGGTACAGTAGTGGGTAAACTGGAAGGAGAA  
CGTGAGATGACTTTAGGTTTTGTTGATTTACTACGTGACGATTTTATCGAAAAGACCG  
AAGTCGTGGTATTTTTTCACTCAAGATTGGGTCTCTATGCCAGGTGTTCTACCCGTAGC  
TTCAGGGGGTATTCATGTTTGGCATATGCCTGCCCTGACCGAAATCTTTGGGGATGATTC  
CGTACTTCAGTTCGGCGGAGGAACTTTAGGGCACCCCTGGGGAAATGCACCTGGTGCA  
GTAGCTAATCGAGTGGCCTTAGAAGCGTGTGTACAAGCTCGTAATGAGGGACGTGATC  
TTGCTCGTGAGGGTAATGAAATTATCCGCGAAGCTTGCAAATGGAGCCCTGAACTAGC

CGCTGCGTGTGAAGTCTGGAAGGCGATCAAATTCGAGTTCGAACCAGTGGATAAGATA  
GATAAGACGGCGATACATTTATACAAAACCTTCTACCCCGAGCACACGCAATGGAACCAT  
AGACAATCAAGTGAAATCCAATCCACGAAATAATTTGATCTATGGACAGCATCGTTGTA  
GTAAAGGTTCGTAATGCCAGAGGAATCATTACCGCAGGGCATAGAGGGGGAGGTCATAA  
GCGTCTATACCGTAAAATCGATTTTCGACGGAATGAAAAAGACATATCTGGTAGAATCG  
TAACCATAGAATACGACCCTAATCGAAATGCATACATTTGTCTCATACTATGGGGATG  
GTGAGAAGAGATATATTTTACATCCAGAGGGGCTATAATTGGAGATACCATTGTTTCTG  
GTACAGAAGTTCCTATATCAATGGGAAATGCCCTACCTTTGACCGATATGCCCTTAGGC  
ACGGCCATACATAACATAGAAATCACACTTGGAAAGGGTGGACAATTAGCTAGAGCAG  
CAGGTGCTGTAGCGAAACTGATTGCAAAGAGGGTAAATCGGCCACATTAAGATTACC  
ATCTGGGGAGGTCGGTTTGATATCCAAAAACTGCTTAGCAACAGTCGGACAAGTGGGT  
AATGTTGGGGTGAACCAAAAAAATTTGGGTAGAGCCGGATCTAAGTGTGGCTAGGTA  
AGCGTCCGTAGTAAGAGGAGTAGCTATGAACCCTGTAGACCATCCCCATGGGGGGCGG  
TGAAGGGAGAGCGCCAATTGGTAGAAAAAACCCACAACCCCTTGGGGTTATCCTGC  
GCTTGGAAAGAAGAAGTAGGAAAAGGAAAAAATATAGTGATAGTTTTATTCTTCGTTCG  
CGTAAA--ATGATTCAACCTCAAACCCTTTTGAATGTAGCGGATAACAGCGGAGCTCGA  
AAATTGATGTGATTTCGAATCATAGGGGCTGGT--AATCACCGATATGCTCATATTGGTGA  
CGTTATTGTTGCTGTAATCAAAGAAGCAGTACCAAATATGCCCTAGAAAGATCAGAAG  
TCATTAGGGCTGTAATTGTACGTACATGTAAAGAACTCAAACGCGATAACGGTATGATA  
ATACGATATGATGATAATGCCGCAGTTGTTATTGATCGAGAAGGAAATCCAAAAGGAAC  
TCGAGTTTTTTGGTGCATCGCTCGGGAATTGAGACAGTTTAATTTTACGAAAATAGTTT  
CATTAGCTCCCGAGGTATTAATGCTTAGTCCCAAAGAACCAGATTTTCGTAAACAACAT  
AGAGGAAGAATGAAGGGAATATCTTGTGCGAGGCAATCATATTAGTTTTCGGCAGATATGC  
TCTTCAGGCACTTGAACCTGCTTGGATCACGGCTAGACAAATAGAAGCAGGACGAAG  
AGCAATGACCGATATGTGCGTCGTGGTGGAAAAATATGGATACGCATATTTCTGACA  
AACCCGTTACAGTAAGACCTACAGAAACACGTATGGGTTTCGGGGAAGGGATCCCCCGA  
GTATTGGGTATCCGTTGTTAAGCCAGGGCGAATACTTTATGAAATGGGCGGAGTTTCAG  
AAACCGTAGCCAGAGCTGCTATTAGAATAGCTGCGCGCAAGATGCCTATACGCACTCAA  
TTCATTATTGCAGGAATGACCAGAGTTAGACGAGGATATACAGCTCGTAGGCGTCGAAC  
AAAAATTCGTTTATTTGCATCAACCTTTAGAGGGGCTCATTCAAGACTTACTCGAACGA  
CTATTCAACAAAAAATAAGAGCTTTGGTTTCTTCTTATCGAGATAGAGGCAGGCAAAA  
AAGAAATTTTCGTTGTTTGTGGATTACTCGTATAAATGCAGTAACTCGCGAGAAT-----GT  
ATTCCATAGTTATAGTCGATTAATCCACAATCTATACAAGAAGCAATTGCTTATTAATCGT  
AAAATACTTGCACAAATAGCTATATCAAATAAGAATTGTCTTTACCTGATTTCCAATAAG  
ATCATCAA-----ATGATAAAGAAAGTTTTA---GCTCAACATATATGT  
---ATGTCTGTTTTCAAAGCACGAAGAGTAATTGATCAGATTCGCGGGCGTTCCTATGAG  
GAAACACTTAGGATACTGGAACCTCATGCCTTATCGTGCATCTTATCCATTTTGA AAATG  
GTTTATTCTGCAGCATCAAATGCTAGTCATAACATGGGCTGGGACGAAGCGGATTTATTT  
ATTAGTAAAGCGGAAGTCAATGGGGGTGCTATTGTGAAAAAGTTAAGACCTCGAGCTC  
GAGGACGTAGTTTTCCGATAAAAAGACCCACTTGTGCATATAACAATTGTATTGGAT---AT  
A-----ATGGATGGAATCAAATATGCAGTATTTACAGAAAAAAGTATTC  
GGTTATTGGGGAACAATCAA---TATACTTCTAATGTCTGAATCAGGATCAACTAGGACAG  
AAATAAAGCATTGGGTCGAACTCTTCTTTGGCGTCAAGGTAATAGCTATGAATAGTCAT  
CGACTCCCCGAAAGGGTAGAAGAATGGGACCTATTATGGGACATACAATGCATTACA

AACGTATGATCATTACACTTCAACCGGGTTATTCTATTCCACCTCTTATAGAGAAAAGAA  
CTATGGCGGTTCCAAAAAACGTACTTCTATATCAAAAAACGTATTCGTAAAAATATTT  
GGAAGAAGAAGGGATATTTAAATGCAGTAAAAGCTCTTTCTTTAGCTAAATCTATTTCC  
ACAGGGCATTCAAAGAGTTTTTTTTGTGCAACAAACAAGCAATATGGCCAAGAGTAAGG  
ATGTCAGAATCAGAGTTATTTTGGAAATGTAATAATTGTGTCCGAAAT-----GGT-----AAA  
GAATCGTCGGGTATTTCTAGATATATTACTCAAAGAATCGACACAATACACCCAGTCG  
ATTAGAGTTGAGAAAATTTTGTGCGATATTGTCACAAGCATAGGATTCACGGGGAAATAA  
AGAAAATGAAAATAAGGGCTTCTGTTCTGTAAAAATTTGTGAAAATGTGCGACTGATCCGT  
AGGCGTGGACGGATTATAGTGATTTGTTCCAATCCAAGACATAAACAGAGACAAGGGA  
TGGTTCGAGAGGAAGTAGCAGGATCCACTCGAACACTACAGTGGAAGTGTGTTGAATC  
AAGAGTAGAGAGTAAGCGTCTTTGTTATGGGCGTTTCATTCTGTCCCCGCTTATGAAAG  
GTCAAGCTGATACCATAGGTATTGCCATGCGAAGGGCTTTACTTGGAGAAATAGAAGG  
AACATGTATTATACGCGCAAATCTGAG-----AAGGTACCGCATGAATATTCTACGGTAGT  
AGGTATTGAAGAATCAGTACATGAAATTTTCATAAATTTGAAAGAAATTGTATTGAGAA  
GCAATCTCTATGGAGTTAGAGACGCCTCCATTTGCGTAAGGGGTCCTAGATATGTAACC  
GCTCAGGATATCGTCGTGCCACCTTCTGTGGAATAATTGACACGACACAGCATATAGC  
TAACCTGACAGAACCGATTGATTTGTGTATTGGATTACAAATCATGAGAGATCGTGGAT  
ATCGTATGAAACCCATAAATACTCTCAAGATGGAAGTTAT-----CCTATAGATGCTGTAT  
CCATGCCAGTTCGAAATGCAAATCATAGTATTCATTCTTATAGGAATGGGAATGAAAAA  
CAAGAGATACTTTTTCTAGAAATATGGACGAATGGAAGTTTAACCCCTAAGGAAGCACT  
TTATGAAGCTTCTCGTAATTTGATTGATTTATTTATTCCTTTTTTACATGCGGAGGAAGAG  
-----TACATTAACCTCAAAGAAAATAAA---AATAGGTTTACTCTACCGCCTTTTCCCTTTC  
AAGATATATTAACT---AATCTAAAGAAAAACCAAAA---GAAATTCATTGCAATGGATT  
TTTATTGACCAATTAGAATTGCCTTCCAGAACCTATAATTGTCTCAAAGGTCCAATATA  
CATACCTTATTGGACCTTTTGTAGCAACAGTCAAGAAGACCTTATGAGAATTGAATATTT  
TCATATGGAAGATGTAAAACAGATATTGGACACCCTACAGAAGCGT-----TTCGCAATTG  
ATTTACCTAAAATCAAATGCTCCGTAAT--GGGAATGAGAGAATGTCCACAATACCTGG  
ATTTAGTCAGATACAATTTGAGGGATTTTGTAGGTTTCATTAATCAGGGCTTGAGGGGAAG  
AATTTACATAAGTTTCCAAAAATGGAAGATACAGATCAAGAAATTGAATTTAAATTGTTT  
GTGGAAAGATATCAATTTGGTAGAACCTTGATAAAAGAAAGAGATGCTATGTATGAATC  
ACTCACATATCTTCTGAATTATATGTCCCTGCGGGATTAATTTGGAAAACCGTTAAAGA  
TATGCAAGAACAAACCGTTTTTATTGGAAACATCCCTCTAATGAATTCTCTGGGAACCT  
CTATAGTAAATGGAATATACAGAATTGTAATCAACCAATATTGCAAAGTCCGGGTATTT  
ACTACCGTTCAGAATTAGACCATAAAGGAATTTCCGTCTATACCAGTACTATAATATCAG  
ATTGGGGAGGAAGATCAGAATTCGAAATTGATAGAAAAGCAAGGATATGGGCCCGTGT  
GAGTAGGAAACAAAAATATCTATTCTAGTTCTATCATCAGCTATGGGTTTCGAATCTAAG  
AGAAATTCTAGATAATGTTTGTACCCTGAAATTTTCTTGTCTTTCCCAAATGATAAGGA  
GAAAAAAAGGATTGGGTCAAAGAAAATGCCATTTTGGAGTTTTATCAAAAATTTGCT  
TGTGTAGGCGGAGATCCAGTATTTTCTGAGTCCTTATGTAAGGAATTACAAAAGAAATT  
TTTTCAACAAAGATGTGAATTAGGGAAGATTGGTCGACGAAATATGAACCGGAGACTA  
AATCTTGATACCTCAGAACAATACATTTTTGTTACCACGAGATGTATTGGCTGCTACG  
GATCATTTGATTGGAATGAAATTTGGAATGGGCGTAATTGACGAT-----ATGAATCACTTA  
AAAAATAACGTATTCGTTCTGTAGCAGATTTGTTACAGGATCAATTCGGATTGGCTCTT  
GTTCTGTTTAGAGAATGCGGTTTCGAGGGACTATATGCGGAGCAATCAGG---CATAAATTTA

TA---CCGACTCCTCAAAATTTGGTAACTTCAACCTCA-----TTAACAACCACTTATGA  
ATCCTTTTTTGGCCTACACCCCTTATCTCAAGTTTTGGATCGAACTAATCCATTGACACA  
AACCGTTCATGGGCGAAAATTGAGTTATTTGGGTCCTGGAGGATTGACAGGGCGCACT  
GCTAGTTTTTCGGATACGAGATATCCACCCAGCCACTATGGTCGTATTTGCCAATTGAC  
ACGTCAGAAGGAATCAATGTTGGTCTTATTGGATCCTTAGCTATTCATGCGAGAATTGG  
TCATTGGGGA---TCTATAGATAGTCCGTTTTAT-----GAAATATCTGAGAAATCAAAAGA  
G-----ACGCAGATAATTTATTTATCACCAAGTAGAGATGAATATTATATGGTAGCAGCAGG  
AAATTCTTTGGCCTTGAATAGGGGTGTTTCAGGAAGAACAGGTTGTTCCAGCTCGATATC  
GTCAAGAATTCTTACTATTGCATGGGAAGAGATTCATCTTAGAAGTATTTTTCCCTTTC  
AATATTTTTCTATTGGAGCTTCCCTTATTCCTTTTTATTGAGCATAATGATGCAAATCGGGC  
TTTAATGAGTTCTAATATGCAGCGCCAAGCAGTTCCGCTTTCTCGGTCCGAGAAGTGCA  
TTGTTGGAACCTGGGATGGAACGCCAAACGGCTCTAGATTCAGGGCTTTTAGTTATAGCC  
GAACACGAGGGAAAGATCATTATAACAGATACTCACAAGATCATTCTCAAGTAATGG  
TGACTACTATAAACATTCCATTAGTTATGTATCAATGTTCCAACAAAAACACTTGTATGCA  
TCAAAAACCTAAAGTTCAACGAGGTAAATGCATAAAAAAAGGACAAATTTTAGCGGAC  
GGTGC GGCTACAGTTGGGGGGGAACTCGCTTTAGGAAAAAACGTATTAGTAGCTCATA  
TGCCATGGGAAGGTTACAACCTTGAAGATGCAGTACTAATTAGTGCACATCTGGTATAT  
GAAGATATTTATACTTCTTTTTCACATTCGAAAATATGAAATTCAGACTCATGTGACAAGT  
CAAGGT--CCTGAAAGAATTACTAAAGAAATACCGCATTTAGAGGCTCATTTACTTCGC  
AATTTAGACAGAAATGGGGTGTGATGCTAGGATCTTGGATAGAAGCAGGTGATATTT  
AGTAGGTAAATTAACACCTCAAACATCGAATGAA---TCGTCCTATGCCCCCGAGGATAG  
ATTATTACGAGCCATACTTGGCATTTCAGGTATCCACGGCAAAGAACTTCTTTAAAAC  
TACCTATAGGCGGAAGGGTTCGAGTTATTGATGTAAGATGGATCCCGAAAAAGGGG---G  
GTTCCAGTTATAATTCAGAAATAATTCGTGTATATATTTACAGAAACGTGAAATCAAAG  
TAGGTGATAAACTAGCTGGAAGACATGGGAATAAAGGTATCATTCCAAAATTTTGCCT  
AGACAAGATATGCCCTATTTGCAAGATGGAACAACCTGTTGATATGGTCTTCAACCCATT  
AGGAGTACCCTCACGAATGAATGTGGGACAGATATTTGAATGTTTCGCTCGGGTTAGCCG  
GGGATCTGCTAAAGAGACATTATAGAATAGCACCTTTTGGATGAAAGATATGAGCAAGAG  
GCTTCAAGAAAACCTAGTGTTTTCTGAATTATATGAAGCCAGTAAGCAAACAAAAAATC  
CATGGGTATTTGAACCCGAGTATCCGGGAAAAAGTTCGAATATTTGATGGAAGAACAGG  
AGATCCTTTTGAACAGCCTGTTCTAATAGGAAAGTCTTATATCTTGAAATTAATTCATCA  
AGTTGATGACAAAATCCATGGGCGTTCCAGTGGACATTACGCACTTGTTACACAACAA  
CCCCTTAGAGGAAGGGCCAAGCAAGGGGGACAACGAGTAGGAGAAATGGAAGTTTG  
GGCTCTAGAGGGATTTGGTGTGCTCATATTTTACAAGAGATGCTTACTTATAAATCTGA  
TCATATTAGAGCTCGTCAAGAAGTACTTGGTGCTATGATCATTGGAGGAACAGTACCTA  
ACCCGGAGGATACTCCAGAATCATTTCGATTGCTTGTTCGAGAACTACGATCTTTGGCT  
CTGGAACCTGAATCATTTCCTTGTATCTGAGAAGAATTTCCAGATTAATAGGAAGGAAGC  
T-----ATGATCGATTGGTATAAACATCAACAACCTTCGAATTGGACCAGTTTCG  
CCCCAACAAATAAAGGCTTGGGCCAATAAAATTCTACCTAACGGAGAGATAGTTGGAG  
AGGTGACAAAACCTATACTTTTCATTACAAAACAAATAAACCGGAAAGAGATGGATT  
GTTTTGTGAAAGAATCTCTGGTCTATAAAAAGTGGAATTTGCACTTGTGGAATTTCTC  
GAGTAATCAGAGCTGAAAAAGAAGACCCGAAATTTTGTGAACAGTGCGGGGTGGAAAT  
TTGTTGATTCTCGGATACGAAGATATCAAATGGGATACATCAAACCTCGCATGTCCAGTG  
ACCCATGTGTGGTATTTGAAACGTCTTCCTAGTTATATCGCGAATCTTTTAGATAAACCT

CTTAAGGAATTAGAAGGCCTAGTATACTGTGATGTCTATTTTTCTTTTGCTAGGCCA---AT  
AGCTAAAAACCTACTTTCTTACGATTACGAGGTTTCATTTCGAATATGAAATACAATCCC  
GAAATACAGTATCCCCTTTTTTCTACTACCCCGGGCTTTGAGACATTTTCGAAATCGA  
GAAATCTCTACAGGAGCAAGCGCTATTCGAGAACAATTAGCCGATTCGGATTTGCGAA  
GTATTATAGATAATTCGTTGGTAGAATGGAAGGAATTAGGCGATGAG---GGGTCCACTG  
GAAATGAATGGGAAGATAGAAAAATTAGAAGAAGAAAGGATTTTTTGGTTAGACGCAC  
GGAGTTAGCTAAACATTTTATTCGAACAAATGTAGAACCAGAGCGGATGGTTTTGTGCT  
TATTACCGGTTCTTCCCCCTGAGTTGAGACCTATTATTCAGATAGATGGAGGTAAACTAA  
TGAGTTTCGGATATTAATGAACTCTATAGAAGAGTTATTTATCGGAACAATACTCTTACCG  
ATCTATTAACAACAAGTAGATCCGCACCCGGCGAATTAGTAATGTGTCAGGAGAAGTTA  
GTACAAGAAGCCGTGGATACACTGCTTGATAATGGGATACGCGGACAACCCATGAAGG  
ATGGTCATAATAAAGTTTACAAGTCATTTTCAGATGTAATTGAGGGCAAAGAGGGAAGA  
TTTCGCGAGACTCTGCTTGGTAAACGCGTCGATTATTCTGGTTCGTTCCGTCATTGTCGT  
GGGTCTTCGCTTTTCATTACATCAATGTGGATTACCTCGAGAAATAGCAATAGAGCTTTT  
CCAAACATTTGTAATTCGTGGTCTAATCAGACAACATCTTGCTTCTAACATAGGGATTGC  
TAAAAGTAAAATTAGGGAAAAAGACCCTATTGTATGGGAAATACTTCAAGAAGTTATGC  
AGGGACATCCTGTATTGTTGAATAGAGCACCTACCCTGCATAGATTAGGCATACAGGCC  
TTCCAACCCATTTTAGTAGAGGGGCGTGCTATTTGTTTACACCCATTAGTTTGTAAGGGC  
TTCAATGCAGACTTTGATGGGGATCAGATGGCTGTTTCATGTGCCTTTATCTTTAGAAGCT  
CAAGCGGAGGCTCGTTTACTTATGTTTTCTCATATAAATCTCTTGTCTCCCGCTATTGGG  
GATCCCATTTCCGTACCAACCCAAGATATGCTTATGGGACTCTACGTATTAACGATCGGG  
AATCCTCTAGGTATTTGTGCAAATAGGTATAATCCATATAATTGCGGAAACTAT-----AA  
AAATAAAATACTCGACAATAATACCTATAAATATACGAAAGAGAAAGAACCGTATTTTT  
GTAGTTCTATGATGCACTTGGAGCTTATCGGCAGAAACGAATCAATTTACATAGCCCTT  
TGTGGCTTCGATGGCGACTAGATCAACGTGTCGTTATTGGCTCA-----AGAGAAGGTCC  
CATCGAAGTTCAATATGAATCTTTGGGTACTTATCATGAGATTTATGGGCACTATCTAATA  
GTAGGAAGTGTAACAAAACAATCTTTTGTCTATACATTTCGAACCACTGTTGGTCATAT  
TTCTTTTTATCGAGAAATAGAAGAAGCCATACAGGGATTTTGTTCGGGCCTACTCATAAG  
CCATC-----ATGGCAGAACGGGTCGATCTGGTCTTTCACAATAAA  
GTGATAGACGGAACCTGCTATGAAACGACTTATTAGCAGATTAATAGATCATTTCGGGAT  
GGCATATACATCAGATATCCTAGATCAGGTAAAGACTTTGGGTTTCCGGCAAGCCACTG  
CTACATCTATTTTCATTAGGAATTGATGATCTTTTAAACAATACCATCTAAGGGATGGTTAGT  
CCGAGACGCTGAACAACAAGTTTTATTTTGGAGAAACACCCATCATTACGGGAATGTA  
CACGCGGTAGAAAAATTACGTCAATCCATTGAGATATGGTATGCTACAAGTGAATATTT  
GAGACAAGAAATGAATCCTAATTTTCGGATGACCGACCCCTCTAATCCAGTCCATCTAA  
TGTCCTTTTCAGGAGCTAGAGGAAATGCGTCTCAGGTACACCAATTAGTAGGTATGAGA  
GGATTAATGTCGGATCCACAAGGACAAATGATTGATTTACCCATTCAAAGCAATTTACG  
TGAAGGACTTTCTTTGACAGAATATATCATTTCCTGCTACGGAGCTCGCAAAGGAGTTG  
TGGATACTGCTGTTTCGAACATCAGATGCTGGATACCTTACACGTAGACTTGTGTAAGTA  
GTTCAACACATTATTGTACGTAGAACGGATTGTGGTACTATCCGAAGCATTTCGGTGATT  
CCTCGAAATAGGATGCCGAA-----AAAATTTTTGTCCAACACTAATTGGTTCGTGTATT  
AGCAGACGATATATATATGGGTCTGCGGTGCATTGCCACTCGAAATCAAGATATTGGGAT  
TGGACTTGCTAATCGATTATAACC-----TTTCGAGCACAACCAATATATATTAG  
AACCCCTTTACTTGCAGGAGTACATCTTGGATCTGTCAATTATGTTATGGTTCGGAGTCC

CACTCATGGGGACCTGGCCGAATTGGGAGAAGCTGTGGGTATTATGGCTGGACAATCA  
ATTGGGGAACCGGGGACCCAACATAAAGAACTTTTCATACCGGTGGAGTATTCA  
CGGGTGGTACTGCCGAACATGTACGAGCTCCTTCTAATGGAAAAATAAAATTCATGA  
GGATTTGGTTCATCCACACGTACCCTTCATGGTCATCCTGCTTTTTTATGTTCTATAGAC  
TTGTATGTAACGATTGAGAGTCGGGATATTATACATAATGTGAATATTCATCAAAGAGT  
TTGATTTTAGTCCAAAACGATCAATATGTAGAATCAGAACAAGTGATTGCTGAGATTCG  
TGCCGAAGCGTCCACTTTT-----TTTAAAGAGAGAGTACGAAAACATATTTATTCTGAAT  
CAGAGGGAGAA---ATGCACTGGAGTACTGACGTGCATGTACCCGAATATACATATG  
GTAATGTTTCATCTATTACCAAAAACAAGTCATTTATGGATATTAGCAGGAGGTCCGCGC  
GCA-----TCCAGTATAGTGTCTTTTTTCGCTCCACAAGGATCAAGATCAAATGAATGTTCT  
TTCTTTTTCTGTGCAAGACAGA-----TATATCTCTGAATTCTCA-----ATGACTACT--GATC  
GAGTAAGACATAAATTGTTGGATACTTCTAGT-----GATAGGGAAATTTTTGACTATT  
CA---ATATCCGATCGAATTATATCCAATAGTCATTGGAATTTTATATATCCTTGT---ATTCTC  
CAAATAAT-----TCTTCTTTTTTGGCGAAAAGGCGAAGAAATAGATTTATCATCCCATTA  
GAATATGATCAAGAACGAGAGAAAGAATAACCTGTTTTGGTATTTTCGATTGAAAT  
ACCCATAAAT-----GGTATTTTATGTAGAAATACTATTTTTGCTTTTTTTGATGATCCACAA  
TACATAAGAAGC-----GGAATTACTAAATAT---ACTGCAGAGGTGGATTCAATCGTAAAA-  
-----AAAGAGGATTTGATTGAGTATCGAGGA---GCAAAAAGAATTTAGTCTGAAATAC---AA  
AGTAGGTCGGTTTTTTTTTTCATTCCGGAAGAAGTACATATTTTACCTGGATCCTCATCCAT  
AATGGTCCGTAACAACAGTATGATTAGAGTAGATACACTACTTGCCTTAAATACAAGAA  
GCCGGATAGGCGGATTAGTCCGAGTGGAGACAAAAAAAAAAAGTATTGAACTTAAAAT  
CTTCTCTGGAGATATTTATTTTCTGGAGAGACAGATAAGATATCCCGGCACGGTGGCA  
TTTTGATACCACCAGGAACGGGAAAAAAAA-----GATTATAAGGAT---AAGGAA---AAATG  
GAAAAATTGGATCTATGTCCAACGG-----ATCACACCTATCAAGAAAAAA-----GATTTTG  
TTTCAGTTCGGCCCGTAGTCACATATGAAATATCGGGCGGGATAAATTTAGCAACACTT  
TTCCCTCAGGATCTCTTGCAGGAAAAGGATAATGTCCAACCTTAGAGTTGTTAACTATAT  
CCTTTATGGATATGGCAAGTCAATTCGAGGAATTTATCACACAAGT---CAATTAGTTCGG  
ACTTGTTTAGTATTAATTTGTACAAAAACAATAATGGT-----TCGGTCCATG  
CTTCCTTTGTTGAGGTAAGGGCAAATGCTCTAATTCGTGATTTTCATCAGAATTGAGTTA  
GCCAAGTCCGCTATTTTCGTATAGTGAAAAAGGTATGATACGGCGGGTTTCGGGATTGAT  
TCCAAAT-----TTAGATCGCACCAATATTAATCCTTTTCATTCCAATGGAAGATTCAAC  
CA-----CTTGCCAAACATCAAGGAACTGTT-----GGTACGTTGTTGAGTCGAA  
ATAAG-----GAATGCCAATCTTTGATAATTTTATCATCATCCAATTGTTTTCAAATTGGT-  
----CTATTCAAAGGTTTGAATATAAC-----AATGTTACAAAAGAATTGAATCCATAAT  
TCAAATT--GATTTGTTGGGTCCCCTGGGTACTATTGTACCT---AAAATAGCGAATTTTTA  
TTCATCT--TATAATTTATTAAC-----CATAATCGGATCTTGTTAAAT--AAATATTTGCTA  
CTTACC-----AATTTGAAACAGACTTTCCAAGTACTTCAAGTATTTAAATACTGTTTAA  
TGGATGAAAATAGGAGG-----GTTTATAATCCGGATCCATACCGTAATATCATTTTGAATC  
CATTCGGTTTGAATTGGTGTCTTCTCCATCACGATTATTGTGAGGAGACACCTACAATAA  
TTCGC---CTTGGACAATTTCTTTGTGAAAATATATGTTTATTCAAATACGGGGCCA-----CG  
CATAAAAAAATCCGGGCAAATTGTAATTGTTTCAT--GTTGATTTTTTAGTTATAAGATCCT  
CTAAGCCCTATTTGGCTACTCCGGGAGCAACTGTTTCATGGCCAGTATGGAAAAATACTT  
TATGAAGGAGAGCCATTAGTTACATTTATATATGAAAAATCGAGATCTGGTGACATAACG  
CAGGGTCTTCCAAAAGTGGAACAAGTCTTAGAAGTGCGTTCGATTGAATCAATATCGA



TGAACCTCGAAAAGAGAGTTGAAAGTTGGAATAAACGTATACCAAGAATTCTTGGAAT  
CCCCTGGGGATTCTTGGTTGGAGCTGAGCTAACCCATCCAAAGTCATATCTCTTTAG  
TTAATAAAATCCAAAAGGTTTATCGATCTCAGGGGTACAGATCCATAATAACATATAG  
AGATTATTGTACGTCAAATAACATCAAAGTGTTGGTTTCAGAA-----GATGGAATGT  
CTAATGTTTTTTTACCTGGAGAATTAATCGGATTCTTGCGGGCGGAACGAGCGGGGCGT  
GCTTTGGACGAAGCGATCAGTTATCGGGCAATCTTATTGGGAATAACGAGAACATCTCT  
GAATACTCAAAGTTTCATATCTGAAGCGAGTTTTCAAGAAACCGCTCGAGTTTTAGCAA  
AAGCTGCTTTACGAGGTCGTATTGATTGGTTAAAAGGCCTAAAAGAAAACGTTGTTCT  
GGGGGGGATTATCCCCGTTGGTACCGGATTCAAAAATTAGTGCACCATTCAAGG-----C  
AAGGCAAAAACATGGAA-----TTGAAATAAAAAGGAAGAATCTATTTGAGTCAGAAA  
TG-----ATAGATATTTTATTATACCATAGAGAATTTTTTTTGTTCCTTGTGCCAAAAC-----  
----TCAGAACAATTATTTATGCGATTTAATGATTCC-----ATGACAAAAGATATT  
GGAACATCAATTTGGAAGAGATGATGGAGGCGGGAGTTCATTTTGGTCATGGTACTAG  
GAAATGGAATCCTAGAATGGCCCCTTACATTTCTGCTAAACGTAAAGGTATTCATATTAC  
AAATCTTATGATAACTGCTCGTTTTTTATCAGAAGCCTGTGATTTAGTTTTTGTATGCAGC  
AAGCAGGGGAAAAAACTTTTTAATCGTCGGTACAAAAATAAAGCAGCGGATTCAAGTA  
GCATCAGCTGCAATAGGGGCTCGGTGTCATTATGTTAATAAAAAATGGCTCGGTGGTAT  
GTCAACGAATTGGTACACTATGGAAACGAGACTTCATAAGTTCAGGGACTTAAGAGCG  
GAACAAAAGATGGGGAAATTCAATCGTCTCCCCAAAAGAGATGCAGCAATGTTCAAG  
AGAAAATTATCTACCTTGCAAACATATCTGGGTGGGATCAAATATATGACGGGGTTGCC  
TGATATTGTAATCATTCTTGATCAACAAGAAGAATATACGGCTCTTCGAGAATGTGTCAT  
TTTGGGGATTCCGACCATTTGTTAATCGATACAAATTGCGATCCGGATCTCGCAGATAT  
TTCGATTCCAGCCAACGACGATGCTATAGCTTCAATCCGATTTATTCTTAACAAATTAGT  
ATTCGCAATCTGCGAGGGTCGTTCTAGC---TATATGAGAAATCGTATGGGACAAAAAATA  
AATCCACTCGGTTTCAGACTTGGTACAACCCAAAGTCATCATTCTTTTGGTTCGCACA  
ACCAAAAATTTTTCTAGGGGCTACGGGAAGATGAAAAATAAGGAATTGTATCAAG  
AAATATGTACAAAAAATAAGAGAACATCCTCGGGT---TTCGAAGGAATTGCACGTATA  
GAAATTAAAAAAAGAATCGATTTGATCCAAGTCATAATATATATTGGATTCCCAAATTTA  
TTAATAGAGGGT-----CGAACACGA-----GGAATAGAAGAATTACAGATGAATGTCCAAA  
AGGAGTTTCATTCTTGAACCGTAGACTTAACATTGCTATCACAAGAGTTGAAAAACCT  
TATGGACAACCTAATATTCTTGCGGAATATATAGCTTTACAATTA AAAAGTAGAGTCTCA  
TTTCGAAAGGCAATGAAAAAGCTATTGAATTA ACTGAACAAACGGATACAAAAGGAA  
TTCAAGTGCAAATTGCAGGACGTATTGATGGAAAAGAAATTGCACGTGTCGAATGGAT  
CAGAGAGGGTAGGGTCCCCCTACAAACAATTCGCGCTAAAATTGATCATTGTTCTGTA  
CAATTAGAACCATCTATGGATTATTAGGCATAAAAATTTGGATATTTGTAGACGAGGACA  
TGTCTCGTTACCGAGGGCCTCGTTTTCAAAAAATACGCCGTCTGGGAGCTTTACCAGG  
ACTAACTAGTAAAAGGCCTAGATCCGGAAGTGAT-----CAATTACGTTCTGGGAAA---  
AGATCGCAATATCGTATTCGTCTAGAAGAAAAACAGAAATTGCGTTTTTCATTATGGTCT  
GACAGAGCGACAATTGCTTAGATATGTGCATATCGCTAGAAAAGCCAAAGGGTCAACA  
GGTCAGGTTTTACTACA ACTACTCGAGATGCGTTTTGGATAACATACTTTTTTCGGTTGGGT  
ATGGCTTCGACCATTC CCGGGGCCAGGCAATTAGTTAACCATAGACATATTTTAGTTAAT  
GGTCGTGTAGTGGATATAACCAAGTTATCGTTGCAAACCCCGAGATATTACTACTACGAAG  
GATAAAGAAAAATCGAAAGCTCTGATTCAAAATTCTATTGCTTCATCTTCCCACGAA----  
--TTGCCAAAACATTTGACTATTGACTCA-----TCCCAATATAAAGGATTAGTAAATCAAAT

AATAGATAGTAAATCGATCGGGTTGAAAATAAATGAATTGTTAGTCGTGGAATATTATTC  
TCGTCAAACCTATGTCACGTCGAGGTAAGTGCAGAAAGAAAAACTGCAAAATCTGATCCA  
ATTTATCGTAATCGATTAGTTAACATGTTGGTTAACCGTATTCTGAAACACGGAAAAAAA  
TCATTGGCTTATCAAATTGTCTATCGAGCCTTGAAAAAGATTCAACAAAAGACAGAAA  
CAAATCCACTATCTGTTTTACGTCAAGCAATACGTGGAATAACTCCCGATATAGCAGTAA  
AAGCAAGACGTGTAGGCGGATCGACTCATCAAGTTCCTATTGAAATAGGATCTACACA  
AGGAAAGGCACTTGCCATTGTTGGTTATTAGGGGCATCCCGAAAACGTCCGGGTGCGA  
AATATGGCTTTCAAATTAAGTTCGGAATTAGTGGATGCTGCCAAAGGGAGTGGCGATGC  
CATACGCAAAAAGGAAGAGACTCATAGAATGGCAGAGGCAAATAGAGCTTTTGCACAT  
TTTCATATGGGTAAGGATACTATTGCTGATATAATAACTTCTATAAGAAATGCTGACATGG  
ATAAAAAAGGAACGGTTCGAATAACATCTACTAATATTGCCCAAAACATTAGTAAATA  
CTTCTACGAGAAGGTTTTATTGAAAATGTTCCGAAACATCAGGAAGATAACAAATATTT  
CTTGGTTTTCAACCCTGCGACAT-----AGAAGTACTAGAAAAGGAATATATAGA-----  
-ACTATTTTCAAGCGTATTAGCCGACCCGGTCTACGAATCTATTCCAACCTCTCAACGAAT  
TCCTAAAATTTTAGGCGGAATGGGAATTGTAATTCTTTCTACTTCTCGAGGTATAATGAC  
AGATCGAGAAGCTCGAATAGAAAGAATTGGGGGAGAAATTTTGTGTTATATATGGATGA  
CAAAACCTATACCAAGAACCGGT-----TCACGTAAGAATGGACGTAGAAT  
ACAAAAGGGGTTATTTCATGTTCAAGCAAGTTTCAACAATACCATTGTAACCTGTTACAG  
ATGTCCGAGGTGCGGGTGGTTTTCTTGGGCCTCCGCGGGTACTTCTGGATTCAAAGGCAC  
AAGACGAGGAACACCCTATGCTGCTCAAGCAGCAGCAACAAATGCTATTCTGACAGTT  
GTGGATCAGGGGATGCAACGAGCAGAAGTTATGATAAAAGGCCAGGTCTCGGAAGA  
GATGCCGATTACGGGCCATTTCGTAGAAGTGGTATATTATTAAGTTTCGTACGTGATGTA  
ACACCTATCTCACATAATGGATGTGACCTCTAAAAAAAGGCGTGTGATGCCAACTAT  
TAAACAACCTATTAGAAACACAAGACAGCCAATAAGAAATGTCACGAAATCTCCCGCT  
CTTCGAGGATGTCCTCAGCGTCGAGGAACATGTACTAGGGTGTATACTATCACCCCAA  
AAAACCAAACCTCTGCCTTACGTAAAGTTGCCAGAGTACGATTAACCTCTGGATTTGAA  
ATCACTGCTTATATACCTGGTATTGGCCATAATTTACAAGAACATTCTGTAGTATTAGTAA  
GAGGAGGAAGGGTTAAGGATTTACCCGGTGTGAGATATCACATTGTTTCGAGGAACCCT  
AGATGCTGTCGGAGTAAAGGATCGTCAACAAGGGCGTTCT--AGTGC GTT-----AT  
GGCAAGAAAAAGTTTGATTTCAGAGGGAGAAGAAACGGCAGAAATTGGAACAGAAATA  
TCATTTGATTCGCCGATCCTCAAAAAAAGAAATAAGC-----AAAGTTTCATCATTGAG  
TGAAAAATGGGAAATTCATGGAAAATTGCAATCCCACCACGTAATAGTGCACCTATAC  
GTATTCATCGGCGTTGTTTTGTGACTGGAAGACCTAGAGCTAACTATCGAGACTTTGGG  
CTATCCGGGCACATACTTCGAGAGATGTTTCATGCATGTTTGTACCAGGCGCAACAAG  
ATCAAGTTGGATGGTCAA---TCATTAATCTCGGTTATTCCACAAGAAGAAAAAGAGGA  
AAAC-----AAAGGGTCTGTTGAATTTCAAGTATTCAATTTCACTAATAAGATACGGAGAC  
TTACTTCGCATTTAGAATTTCACAAAAAGACTTTTTATCCCAAAGGGGTCTACGAAGA  
ATTCTGGGAAAACGTCAACGCTTGCTGGCTTATTTGTCAAAGAAAAGTGGAAATACGTTA  
TAAGAAATTAATTAAGTAATTTGGATATTCGTGAACTAAAACTCGT-----  
-????????????????????????????????????????????????????????????  
????????????????????????????????????????????????????????????  
????????????????????????????????????????????????????????????  
ATGGATAAATCCAAGCAACCCTTTCGTAAGTCCAAGCTCTCTTTTCGTGCGGCGTTGCC  
CCCAATTGGATCGGGGGATCGAATTGATTATAGAAACATGAGTTTAATTAGTCGATTTAT

TAGTGAACAAGGAAAAATATTATCTAGACGGGTGAATAGATTAACCTTGAAACAACAA  
CGATTAATTACTATTGCTATAAAACAAGCTCGTATTTTATCTTTGTTACCCTTTCTTAATAA  
TGAGAAA-----CAATTTGAGAGAGCCGAGTCGATCCCTAGAACTACAGGCCCTAGAATC  
AGAAATAAAGTGACACGTTCACTAAAAAAAATCCTTTTGTAGCTAATCATTATCGGG  
AAAAATGGAAAACTTAACATGAGGGAGGAGAAAGAAATAATAGTAACTTGGTCTAG  
GGCATCTACCATTATACCCACAATGATTGGCCATACAATCGCTATTATAATGGAAAGGA  
ACATTTACCTATTTATATAACAGATCGTATGGTAGGTCATAAATTGGGAGAATTCGCCCT  
ACTCTAACTTTGCAAGACATGCAAGAAACGATAATAAATCTCGTCGTATGATTTTGAA  
ATCCTTTCTACTAGGTAATCTAGTATCCTTATGCATGAAGATAATAAATTCGGTCGTTGTG  
GTCGGACTCTATTATGGATTTCTGACCACATTCTCCATAGGGCCCTCTTATCTCTTCCTTC  
TCCGAGCTCGGGTTATGGAAGAAGGA-----ACCGAGAAGGAGGTATCAGCAACAAC  
GGTTTTATTACGGGACAGCTCATGATGTTTCATATCGATCTATTATGCGCCTCTGCATCTAG  
CATTGGGTAGACCTCATAAATAACTGTCCTAGTTCTACCGTATCTCTTGTTTCATTTCCT  
CTGGAACAATAAAAAAACCTTTTTTATTATGGATCTACTACCAGAAATCAATACGTAA  
TCTCAGCATTCAATGTGTATTCTGAATAATCTAATTTTTCCATTATTCAACCATTTCATT  
TACCAAGCTCAACGTTAACCAGATTAGTCAACATTTATATGTTTTCGATGCAACAACAAG  
ATGTTATTTGTAACCAGTAGTTTTGTTGGTTGGTTAATTGGTCACATTTTTTTCATGAAAT  
GGGTTGGATTGTTATTATTCTGGATACGGCAAATCATTCTATTTCGATCT-----AATAA  
GTACTTTGTGTCAGAATTGATAAATTCTATGGCTCGAATCTTTAGTATTCTCTTATTATC  
ACCTGTGCCTACTATTTAGGCAGAATGCCGTCCCCTATTGTCACTAAACTGATGAAAGA  
AACCGAAGAAGACAAACCTTTTATTACCTTTCTTTTCGATTATAAAAGATGGAATCGTC  
CATATCGCTATATAAAAAATTATCTATTTGAAAATGCTGTACGAAATGAACTTTCACAATA  
TTTTTTTTATACATGTCCAAGCGATGGAAAACAAATAATATCTTTTACATATCCACCCAG  
TTTATCAACTTTTTCCGAAATGATAGAACGAAAAATTTATTTATACACAAAAGAAAAAT  
CATGCTATGAAGACCTA-----TATTTTGTTTATACCAATGAACAAAAGAAATACAACCTAA  
GAAATGAATTGATAAGGAGAATCAAAGTTCTAGAAAAAGAGAAGCCTGTTCCAGATAT  
GTTGCAAAAAAGGACCAGATTTTATAATGATAAAAATGAGCAAGAATGTCTGTCCAAA  
ACGTACGATCCTTTTTTTGAACGGACCATTTTCGCATAACAATAAAAAAATTATATTCAAGT  
GTAGAAATATTTTGGATAAATAAATTTATGGTATACTTTTCCGAAAAATGGAACATCAA  
GATCCAAATGATAAATCCATTAGACTAGAAGAAATAAGTAAAAGGCTTTCTCGATGGTC  
ATATAAATTATTGAATTTTTATGAGCAGGAAGAAGAAGAGATGCGTTCAAGAAAATCCA  
AACGCGTGGTAATTTATAATAATGCTTTGGTACGTTACGCTCAAGAATCAGATTTTCGTC  
GGGATATAATAAAGGATCCATGCGCGCTGAAAGACGCAAAACAGTTATTTTGAAATT  
TTTCAAGCAAATGTACTCTCCCTTTTTTTGGATCGAACAGACAAAACATTGATTTT  
CTCTATTTTAAAT---ATTTCTGAAATCAAAAATATCATTTTTAGGAATGAAGAAGAAAAT  
GATGAGATAACAATATCCGAACTTGGGATACTATTCTATTTGGTCAACCAATAAGAAG  
TTCGATATTATTAACCTACTCTTTTATTAGAAAATACATTGTATTGCCTTCGTTAATAATAG  
CTAAAAATGTTGGCCTTATATTATTATCCCAATTGCCTGAGTGGTACGAAGATTTGAAGG  
AATGGAATAGAGAAATGCACGTTAAATGTACCTATAACGGTGTTCATTATCAGAAACA  
GAATTTCCAAAGGGTTGGTTAACAGACGGGATTTCAGATAAAAATTATATTTCCTTTCTG  
TCTGAAATCTTGGAGAAGATCTAAGAAAGTAAAAAAGGACAATTTTTTTTTTTTAAACAA  
TATGGGGAACGGAAGCGGAACGCCATTTCGGTTCTCCCGAAAACGATCTTCGTTTTT  
TCAACTCATTATAAAGAATTCAAAAGAACAATTAGAAACGTAAAC-----GTAA  
AA-----AAAAAAAACAGGATGGAACATCAAATAGTTCT

A-----GTTATAAACGAATAATAAAAGAATTTGAAAAAAGAAATTCAAAAATCCAT---AA  
TCAAATTAATGATGAATCGACCATTCAAATTCTATCCACGAATTGGATAAATTCTGCGCT  
TATAGAAAAAAAATGAAAGATCTTTCTGATAGGATCATAACAATCAAGAATCAAATAG  
AACGAAACAAAAAAGACAATAAAAAA-----GAATCTAAGAAATA  
TATTTGGCAGCTATTCAAAGAAACAATATCCGATTAATACGTAAATCATATTATTTTATC  
AAATCTTTCATTGAAAAAATATACATAGATATTTTTTTATGTGCAATTACCATTCCCAGGA  
TCAATGCACAACCTTTTTATGCACTTTTTTTCGTGTGATTTATCTTCTTTGTCCAAACATA  
TGTATTTTACAAAATATCACAAATCAAATTACTTAACAAGTATCACTTGAGATCTGTACT  
TCAAGATACCCAACATTTTCTTAGGTATAAGATAAAGGATTTTTGTAAACGAGGAATATT  
TGATTACAAATCAAGGCATAAGAAAATAAAAAAGTCTAGAATGAATGAATGGAAAAAC  
TGGTTAAAGGGTCATTATCAATACAATTTATCCCAGACTAAATGGTCTCAGTTAGAACC  
GAAAAAATGGAGAAATATAGTAAATCAACGTTGTCTGATTCAAATAAAAATTAAATTGG  
ATTCATATAAAAAAGAAAA-----ATTGAAAAATTAAAAAAAACACTACAG  
ATATGATCTTTTTTTCATATAAATATATGAATAGATATATTATTGATATGGATAGAAAATATTT  
TAATTGTAGAATTTTCCATTTTTTTTATTAGATTTTTTTGATTGGATAGGGATGAATCAAGAT  
AGATTCTATCATTTATTTTTCCCAAATTTGTGCTACTTTTTGATACATATAAGATTAACC  
CATGGATTATACCAATTAATTACTTCTTTTAGATAGCAGGAAGGAAAAGGAAGAAGAA  
CTAGAATTATCCTGAATAAAATTTTCTTTTTCAATTAAGATGGGATAACTCCTCGAAT  
GAAATAATGATCGATAATATCAAGGCGTCTTTTCTACTGCTTAGAATGAAAAATATGAAG  
GAAATTGCTATATCTTCTATTCAAAGAGGAGAGATACGCCCGGATATAATGTTAATTCAG  
AAGGATCTAGCTATTAAGAATTGATACAATCAGGAATATTGATTATCGAACCAATTCCT  
TTATTTCTAAAAGGGATGGACAATTTATTATCTATCAAACCACAAGTATTTCAATTGTTT  
GATAAGAGAAAAGACAATTATTATAATTTGCTTGTTCCAGAAAATATTCTATCTCCTAGA  
CGTCGTAGAGAATTGAGAATTCTAATTTGTTTCATACTTCTTTGGCCCGATTATCGATTA  
GAAGATTTAGCTTGTATGAATCGATATTGGTTTGATACCAATAATGGAAGTCGTTTCAGT  
ATGTCAAGGATACATATGTATCCAATGAAAGGACATCCATTCAAATCCTGGATCTTCGAA  
TTGAGAGAGATATTGAGAGAGATCAAGAATTCTCACTTTTTCTTAGATTATCGGATCAA  
ATTCGATTCAGTGGGATCTTTCACTCACATTTTTCTCCACCAAGAACGTTTCATGAAAC  
TCTTTGACCCCGAATTTGAGTATCCTACTTTCA---CGTGATTCA-----CAGGGTTCAAG  
AAGCAATCGATATTCACG-----ATCAAAGGTGTAGTACTGCTTGTAGTAGCG---GTCC  
TTATAGCT-----CGTATTAACAATCGAAAGATGGTCGAAAGAAAAAATCTCTATTTG  
ATGGGGCTTCTTCCT-----ATACCTATGAATTCCATTGGACCCAGAAATGAGACAT  
TGGAAGAATCTTTT---TGGTCTTCCAATATCAATAGGTTGATTGTTTCG---CTCCTGTATCT  
TCCAAAAGGGAAAAAGATTTCTGAGAGTTGTTTCGTGGATCCGCAAGAGAGTACTTGG  
GTTCTCCCAATAAAT-----AAAAAGTGTATCATGCCTGAATCTAGCCGGGGTTCCGG  
GTGGTGGAGGAACCGGATCGGAAAAAAGAGG-----GATTCTAGTTGTAAGGTATCT-----  
---AATGAAACCGTAGCTGGAATTGAGATTTCAATCAAAGGGAAAGATAGCAA---TATC  
TGGAGTTTCTTTTTTATCCTATACG-----GATGATCCGATCCGCAAGGACCATGATTGGG  
AATTGTTTGATCGTCTTCTCCGAGGAAGAAGCGAAACATAATCAACTTG-----AATTCG  
GGACAGCTATTTGAAGTCTTAGGGAAAGACTTGATTTGTTATCTCATGTCTGCTTTTCGT  
-----GTTGAAGGGGGGGGG---TTCTTCAAACAACAAGGA---GCCGAGGCAACTATT  
CAATCAAATGATATTGAGCATGTTTCCCAT-----CTCTTCTCGAGAAACAAGTGGAGTATT  
TCTTTGCAAATTTGTGCTCAATTTTCATATGTGGCAATTCGCAAGATCTTTCGTT-----  
--AGTTGGGGGAAG---AATCAGCACGAATCGGATTTTTTGGAGAAC---GTATCGAGAGAG

AATTTGATTTGGTTAGACAATGTGTGGTTGGTAAACAAGGATCGG-----TTTTTTAGC--  
---AAGGTACGGAATGTATTGTCAAATATTCAATATGATTCC-----ACAAGA-----TCCAT  
TTTCGTTCAAGTAACGGATTCTAGCCAATTGAAAGGATCTTCT--GATCAATCCAGAGAT  
CATTTTCGATTCCATTAGA-----AATGAGGATTCCGAA-----T  
ATCACACATTGATCGATCGCAGAGAGATTCAGCAACTAAAAGAAAGATCTATTCTT--T  
GGGAT-----CCTTCCTTTCTTCAAACGGAAGGAACAGAGATAGAATCAGAT-----CGATTC  
CCGAAA-----TGCCTTTTTGGATCTTCC-----TCAATGTCCCGGCTATTACAG--GAACGTG  
AGAAGCAGATGAATAATCATCTGCTTCCGGAAGAAATCGAAGAATTTCTT-----GTGAAT  
CCTGCAAGATCAATTCGTTCTTTTTTCTCTGACAGATGG-----TCAGAACTTCAT--CTGG  
GTTTCGAATCCTACTGAGAGGTCCACTATAGATCAG-----AAATTTTTGAAGAAAA  
ACAAGATGTTTCT--TTTGTTCCTTCCAGGCGATCGGAA-----AATAAAGAAATGGT  
TGATATATTCAAGATAATTACGTATTTACAAAAT-----ACCGTCTCAATTCATCCTATTTCA  
TCAGATCCGGGATCTGATATGGTTCCG---AAGGATGAACCGGGT--ATGGACAGTTCCAA  
TAAGATTTTATTCTTGAACAAAAATCCATTTTTTGAT-----TTATTTTCATCTATTCCATGAC  
CGGAACAAGGGGGGATACACGTTA-----CACCACGATTTT--GAATCA---GAAGAGAGAT  
TTCAAGAAATGGCGGATCTATTCATCTATCAATAACCGGGCCG---GATCTGGTGTATCA  
TAGGGGATTTGCCGTTTCTATTGATTCCTACGGGTTAGATCAAAAAAAAA-----TTCTTGA  
ATACGGTATTCAACTCCAGAGATGAATCGAAAAATAAATCTTTA-----TGGATTCTACC  
TCCTCTTTTTTAT-----GAAGAGAATGAATCTTTTTATCGAAGGATCAGAAAAAATCGG  
TCCGG---ATCCACTGCGGGAATGATTTGGAAGATCCAAAGCTAAAAACGGCGGTATTTG  
CTAGCTCCAACATAATGGAGGCAGTCAATCAATATAGATTGATCCGAAATCTGATTCAA  
ATCCAATATAGCACCTATAGG-----TACATAAGAAATGTATCGAATCGATTCTTTTTAATG--  
-----AATAGATCCGATCGCAACTTCGAATATGGAATTCAA-----AGGGATCAAATAGGA  
AATGATACTCTGAATCATATAACTAGAATGAAATATACGATCAACCAACATTTATCGAAT  
TTGAAAAAG---AGTCAGAAGAAATGGTTTGATCCT-----CTTATTTCTCGAACCGAG  
AGATCCATGAATCGGGATCCTGATGCATATAGATACAAATGGTCCAATGGGAGCAAGAA  
TTTCAGGAACATTTGGAACATTTTCATTGCTGAACAGAAGAAC-----CGTTTTCAAGT  
AGTATTCGATCGATTACGTCTGAATCAATATTCGATTGATTGGTCCGAGGCTATCGACAA  
GCAAGATTTGTCTAAGTCACTTCGTTTCTTTTTGTCTAAG-----  
-----TCACTTCTCTTTTTG--TCCAAGTCACTTCCCTTTTTCTTTGTGAG  
TATCGGGAATATCCCCATTCATAGGTCCGAG---ATCCACATCTAT--GAATTGAAAGGTCC  
GAATGATCAACTCTGCAATCAGTTGTTAGAATCAATAGGTGTTCAAATCGTTCATTTGA  
ATAAATTGAAACCC-----TTCCTATTGTAT-----GATCATGATACTTCC---CAAAGACCGA  
AATTCCTTGATCAATGGAGGAAGAATATTACCATTTTTGTTCAAAAAGATACCA---AAGTG  
G---ATGATTGACTCATTCCATACT-----AGAAATAATCGCAGGAAATCCTTTGATAACACG  
GATTCCTATTTCTCAATGATATCCCACGATCGAGACAATTGGCTGAATCCCGCGAAACC  
ATTCATAGAAGTTCATTGATATCTTCTTTTTATAAAGCAAATCGACTTCGATTCTTGAAT  
GATCCACATCACTTCTGGTTCTAT-----TGTAACAAAAGATTCCCCTTTTATGTG-----  
GAAAAGACCCGTATCAATAATTATGAT-----CTTACATAT--GGACAATTCCTCAATATCTT  
GTTCAATTCGCAACAAA---ATATTTCTTTGTGCGTCCGGTAAA-----AAAAACATATTTG  
GGGGGA---AGAGAGACTATTTACCAATTGAGTCACAGGTATCTGACATATTCATACCTA  
ACGATTTTCCACAAAATGGTAACGAAACG---TATAACTTGTACAAA-----TCTTTCCAT  
TTTCCAATTCGATCCGATCCATTCGTTCTG---AGAGCTATTTACTCGATCGCAGACATT  
TCTGCAACACCTATAACAGAGGAACAAATAGTCCATTTTGAAGAAGTATTGTGTCAGCC

TCTTTCAGATATGAATCTATCTGATTCAGAAGGGAAGAACTTGTATCAGTATCTCAGT----  
--TTCAATTCAAACATGAGTTTGATTCACACTCCATGTTCTGAGAAATATTTACCTTTACC  
ATCCGGAAAGAGGAAAAA-----CGGAGTCTTTGTCTAAAG-----AAATGC  
GTTGAGAAACGGCAGATGTATAGAACCTTTCAACGAGATAGTGCTTTTTCAAATCTATC  
AAAATGGAATCTGTTCCAAGCATATATGCCATGGTTCCTTACTTCGACAGGGTGCAAAT  
ATCTAAATTTACCCCTTTTAGATACTTTTTTCAGACCCATTG-----CCGATACTAAGTAGCA  
GT--CAAAAATTTGTATCCATTTTTTCATGATATTATGCATGGATCAGATATATCATGGCCAA  
TTCCTCAGAAG-----ATTCTTCCACAATGGACTCTG--ATAAGTGAGATTTC  
AAGTAAGTGTTTACAGAAT-----CTTCTTCTGTCCGAAGAAATGATTCATCGAAATAATG  
AGTCACCCATTCCATTGATATGGACACATCTGAGATCAAAAATGCTCGGGAGTTC---C  
TCTATCAATCCTTTTCTTCTTGTGCTGCATAT--CTCGTTCGTATAACATCTTTTCTT  
TGTTTCCCGA-----GCCTCTATTGAGTTACAGACAGAGTTAGAAAAGATCAAGTCTTTGA  
TGATTCCATCATAACATGATTGAGTTGCGAAAACCTTCTGGATAGGTATCCTACATCTGAAC  
TGAATCTTTCTGGTTAAAGAATCTCTTTCTAGTTGCTCTGGAACAATTAGGAGATTCTC  
TGGAAGAAATACGAGGTTCTGCTTATGGTGGCAACATGCTATTGGGTGGTGGTCCC-----  
-----GCTTATGGG--GTCAAATCAATACGTTCTAAGAAGAAATATTTGAATATCAAT-----  
--CTCATTGATCTCATA---AGTATCATAACCAAATCCCATCAATCGAATCACTTTTTTCGAGA  
AATACGAGACATCTAAGTCATAACAAGTAAAGGGGCTATTTCATTTCATAAGAAAAAGAA  
AAAACGTGAACGGTGATTGGATTGATGATAGAATAGAATCCTGGGTTCGCGAACAATGA  
TTCATTTTATGATGAAGAAAGAGAATTCTTGTTTTCAGTTCTCC-----ACCTTAACGACA--  
---GAAAAAAGGATTGATCAAATCTATTGAGTCTGACT--CATAGTGATCATTTATCA----  
-----AAGAATGACTCTGGTTATCAAATGATTGAACAACCGGGATCAATTTACTTACGA  
TACTTAGTTGACATTCAT-----AAAAGTATCTAATGAATTATGAGTTCAATAGATCCTGT  
TTAGCAGAAAGACGGATATTCCTTGCTCATTATCAGACAATCACTTAT-----TCACAAACC  
TCGTGTGGGGCTAATAGTTTTCATTTCCCATCTCACGTA-----AAACCCTTTTCGCTCC  
GCTTAGCCCTCTCCCCTTCT--AGGGGTATTTAATGATAGGTTCTATAGGAACTGGACG  
ATCCTATTTGGTCAAATACCTAGCGACAACTCCTATGTTCTTTCATTACGGTATTTCC  
AAACAGGTTCTGGATGACAAGTCTAAAGATTATCTTATTGGC-----GATATCGGT  
--ATTGATGATAGTGACGATATCGAT-----ATTGACGATAGTGAC-----  
-----GATATTGATGATGACCTTGATACGGAGCTGCTAACTATGACGAATG  
TGCTA-----ACTATGTATATGACG-----ACGAAAATAGACCGATTTGATATCACCTTC  
AATTCGAATTAGCAAAGCAATGTCTCCTTGATAATATGGATTCCAAACATTCATGATC  
TGATGTGAATGAGTCGAATTAATCCCTCGGTCTATTAGAGAACTATCTCTCC-----  
AGGGATTGTGACAGATGTTCC---ACTAGAAATATTCTTGTATTGCTTCGACTCATATTCC  
CCAAAAGTGGATCCCGCTCTAATAGCTCCGAATAAATTAATACATGCATTAAGATAC  
GAAGGCTTCTTATTCACAACAACGAAAGCACTTTTTTCATTCTTTTCATATAACCAGGGGA  
TTTCACTTGGAAAAGAAAATGTTCCATACT-----AACGGATTCGGGTCCATAACCATGGG  
TTCCAATGCACGAGATCTTGTAGCACTTATCAACGAGGCCCTATCAATTAGTATTACACA  
GAAGAAATCCATTATAGAACTAATACAATTAGATCAGCTCTTCATAGACAACTTGGGA  
ATTTGCGA-----TCCCAGGTAAGATCGGTTTCAGGATCATGAGATCCTTTTCTATCAGAT  
AGGAAGGGCTGTTGCACAAAATGTACTTCTAAGTCATTGCCCATAGATCCTATATCTAT  
CTATATGAAGAAGAAA-----TCATGTAAGGAAGGGGATTCTTATTTGTACAAATGGTACT  
TCGAACTTGGAACGAGCATGAAGAAATTAACGATACTTCTTTATCTTTTGAGTTGTTCT  
GCCGGATCGGTCGCTCAAGATCTTTTGTCTTCGCC-----GGACCCGATGAAAAA---AAT

GGGATCACTTCTTATGGCTTCGTTGAGAATGATTCT--GATCTAGTTCATGGCCTATTTCGA  
AATAGAAGGCGCTCTGGTGGGA-----TCCTCACGGACAGAAAAAGATTGCAGCCAGTT  
TGATAATAAT-----CGAGTGACACTTCTTCCGGTCCGAACCAAGGAAT--CTGTTAGAT  
ATGATGCAAAATAGATCTTGTCTATCGTTGATCAGAGATTTCTATATGAAAA-----TAC  
GAATCGGAGTTTGAAGAA---GGGAAGGAGAAGGAGCCCTCGACCCGCAA-----C  
GGATAGAGGAGGAT-----TTATTCAATCAC-----ATAGTTTGGGCTCCT-----AGAATAT  
GGCGCCCT-----TGTGGCAATCTATTTGATTGTATCGAAAGGCCCACTGAATTGGGATT  
TCCC---TATTGGGCCGGGTCATTTCCG-----GGCAAGCGGGTCATTTATCATAAAGAGG  
ATGAGCTTCAAAGAATGATTCGGAGTTCTTGCAGAGTGGAACCATGCAGTACCAGAC  
ACGAGATAGATCTTCAAAGAACAAGGCTTTTTTTCGAATAAGCCAATTCATTTGGGACC  
CTGCGGATCCATTTCTTTTTCTATTCAA---GATCAGCCCTTTGTCTCTGTGTTTTCCCGT  
CTAGAATCTTTGCAGATGAAGAGATGTCAAAGGGGCTTATTACTTCCCAAAAAAATCT  
TCCCTACATCTCTATATAAACGCTGGTTCATC-----AGAATACGCAAGAAAAGCACTTCG  
AATTGTTGATTCATCGCCAGAGATGGCTTAGAACC-----AACAGTTCATTATCT-----AA  
TGGATCTTTCCGTTCTAAT-----ACTCTATCCGAGAGTTATCAGTATTTATCAAATCTGTTC  
CTATCTAAT--GGAACGCTATTGGATCAAATGACAAAGACATTGTTGAGAAAGAGATGG  
CTTTTCCCGGATGAAATGAAACATTTGATT-----CATGGAACGGGAGAAAGATTTCCCAT  
TCCATATGCCTAGATCTCGG---ATAAATGGAAATTTTATTGATAAGACCTTTCAATTGTAG  
CTAATATCTTATTACGAATAATTCCGACAACCTCAGGAGAAAAAAGGGCATTACCTATT  
ATAGAGATGGT-----ATGTCAGCTCAATCCGAAGGAAATTATGCGGAAGCTTTACAGAAT  
TATTATGAAGCTACGCGACCAGAAATTGATCCTTATGATCGAAGTTATATACTATATAATA  
TAGGCCTTATACACACAAGCAACGGGGAGCATAACGAAGGCTTTGGAATATTATTTTCGG  
GCACTAGAACGAAACCCATTCTTACCACAAGCTTTTAATAATATGGCCGTGATCTGTCAT  
TAC---CGGGGAGAGCAGGCCATTCTACAAGGTGATTCTGAAATTGCGGAGGCTTGGTC  
CGATCAAGCTGCTGAGTATTGGAAACAAGCTATAGCGCTTACTCCAGGTAATTATATTG  
AAGCACATAATTGGTTGAAGATCACGAGGCGTTTCGAATTCGAAATGAACTGGCAATC  
AAAACAGATATGGATAGAACTTATAACGGGGTCTCGAAAAACAAGTAATTTTGTGGG  
CCTGTATCCTTTTTTTAGGTTCCCTAGGATTCTTAGTGGTTGGAACCTCCAGTTATCTTG  
GTAGGAATTTGATATCTGTATTTTCATCTCAGCAAATCCTTTTTTTTTCCACAGGGGATCG  
TGATGTCTTCTATGGGATCGCAGGTCTATTATTAGTTCCTATTTGTGGTGCACAATTC  
GTGGAATGTAGGTAGTGGTTATGACCTATTTGATAGAAAAGAAGGAATAGTGTGTATTT  
TTCGTTGGGATTCCCCGGAATAAACCGTCGCATTTTCCTTCGTTTCCTTATGAAAGATA  
TTCAATCCATCAGAAATGGAGATTAAGAGGGTCTTTATCCTCGTCGCGTTCTTTATATGG  
AAATCAGAGGCCAGGGACCTATTCCCTTGACTCGTATTGATGAGAAT--TTACTCCAG  
AGAAATTGAACAAAAAGCTGCCGAATTGGCCTATTTCTTGCGCGTACCGATTGAAGTAT  
TT

>Brassaiopsis

ATGGAAAGATGGTGGTTCAATTCGATACTGTTTCTAAGTAAATCAACGGGTAGTCTTGG  
TCCTATTGAAAATACCAGTGAAAGTGAAGATCCTAATATAAATGATATGAAGAAAAATAT  
TCATAGTTACAGTAATGTTGATCATTATTTCGGCGTCAAGGACATTCGGAATTTCAITCTC  
TGATGAAACTTTTTTAGTTAGGGATAGTAATGGGAACAGTTATTCATATATTTTGATATT  
GAAAATCATATTTTCGAGATTGACAATGGTCAT-----TCTTTTCAGAGTGAAGTAGAAAG  
TTCTTTTTATAGTTATCGGAATTCAGTTATCTGAATAATGGATCTAACAGTGACGATCCC  
CACTATGATCATTACATGTATGATACTCAATACAGTTGGAATAATCACATTAATAGTTGCA

TTGACAATTATCTTCAG-----TCTCAAATCTTTATTGAGACTTACATTGTAAGTGGTAGTG  
ACAATTACAGTAACAGTTACATTTATAGTTCCATTTGTGGT-----GGTCCGGTATAAGAA  
CCAGCACGAATGATAGTGATTTAACTATAAGAGAAAGTTCTAATGATCTGGATGTAAC  
CAAAAATACAGGCATTTGTGGGTTCAATGTGAAAATTGTTATGGATTAAATTATAAGAA  
ATTTTTTAAATCAAAAATGAATCTTTGTGAACAATGTGGATATCATTGAAAATGAGTAG  
TTCAGATAGAATCGAACTTTTGATCGATCCGGGACTTGGGATCCTATGGATGAAGACA  
TGGTTTCTCTGGATCCCATTGAATTTTCATTTCGGAGGAGGAGCCTTATAAAGATCGTATCG  
ATTCTTATCAAAGAAAGACAGGATTAAGTGAAGCCGTTCAAACAGGCATAGGCCAACT  
AAACAGTATTCCCGTAGCAATCGGGGTTATGGATTTTCAGTTTATGGGGGGTAGTATGG  
GATCCGTGGTTCGGGGAGAAAATCACCCGTTTGATTGAGTACGCTACTAAAAATTTCTA  
CCTCTTATTATAGTGTGTGCTTCCGGGGGGGCACGCATGCAAGAAGGAAGTTTGAGCTT  
GATGCAAATGGCTAAAATATCTTCTGCTTTATATGATTATCAATCAAATAAAAAGTTATTC  
TATGTACCAATCCTTACATCTCCTACTACGGGTGGGGTGACTGCTAGTTTTGGTATGTTG  
GGGGATATCATTATTGCCGAACCCAATGCTTACATTGCATTTGCGGGTAAAAGAGTAATT  
GAACAAACATTGAATAAAACAGTACCTGAAGGTTCAACAAGCGGCTGAATATTTATTCC  
AGAAGGGCTTATTCGATCTAATCGTACCACGTAATCCTTTAAAAAGCGTTCTGAGTGAG  
TTATTTAGCTCCACGCTTTCTTTCTTTGAATCAAATCAATTAATAAATGGTAACCATT  
CGAGCCGACGAAATTAGTAATATTATTCGTGAACGTATTGAGCAATATAATAGAGAAGT  
AAAGATTGTAATAACCGGTACCGTACTGCAAGTAGGCGATGGCATTGCTCGTATTCATG  
GTCTTGATGAAGTAATGGCGGGTGAATTAGTAGAATTTGAAGAGGGTACGGTAGGCATT  
GCTCTGAATTTGGAATCAAATAATGTCGGTGTGTATTAATGGGCGATGGTTTGCTGATA  
CAAGAAGGAAGTTCTGTAAAAGCAACAGGAAGAATTGCTCAGATACCCGTGAGTGAG  
GCCTATTTGGGTGCTGTTGTAAATGCCCTGGCTAAACCTATTGATGGTAGAGGTGAAAT  
TTCAGCTTCTGAATATCGGTTAATTGAATCTCCCGCTCCGGGTATTATTTACGACGTT  
AGTATATGAGCCTCTTCAAACGGGGCTTATTGCTGTTGATTTCGATGATCCCTATAGGACG  
TGGTCAGCGAGAATTAATTATTGGGGACAGACAGACCCGGTAAAACAGCAGTAGCAAC  
AGATACGATTCTCAATCAACAAGGCCAAAATGTAATATGTGTTTATGTAGCTATTGGTCA  
AAAAGCATCTTCTGTGGCTCAGGTAGTGACTACTTTCCAGGAAAGGGGGGCGATGGAA  
TACACTATTGTGGTAGCTGAAATGGCGGATCCCCTGCTACATTACAATACCTCGCTCCT  
TATACAGGAGCCGCTCTGGCGGAATATTTTATGTACCGTGAACGACACACTTCAATCAT  
TTATGATGATCCCTCCAACAAGCACAAGCTTATCGACAAATGTCTCTTCTATTACGAA  
GACCGCCCGGTTCGCGAAGCTTATCCAGGGGATGTTTTTTATTTGCATTCACGCCTTTG  
GAAAGAGCTGCTAAATTAAGTTCTCGTTTAGGTGAAGGAAGTATGACTGCTTTGCCAAT  
AGTTGAAACTCAGTCGGGAGATGTTTCGGCTTATATTCCTACTAATGTAATTTTCGATTAC  
TGATGGACAAATATTCTTATCTGCCGATCTATTCAATGCTGGAATCAGACCTGCTATTAAT  
GTGGGTATCTCCGTTTCCAGAGTGGGATCTGCAGCTCAAATTAAGCTATGAAACAAGT  
CGCTGGCAAATTAATAATTGGAAGTGGCGCAATTCGCAGAATTAGAAGCCTTTGCACAA  
TTTGCTTCTGATCTCGATAAAGCTACTCAGAATCAATTGGCAAGAGGTCAACGATTACG  
TGAATTGCTCAAACAATCCCAATCAGCCCCTCTCGCGGTGGAAGAACAGATAATGACT  
ATTTATACCGGAACAAATGGTTATCTTGATTCATTAGAAATTGGACAGGTAAGGAAATTT  
CTTGTTGAGTTACGTACTTACCTAAAACTAATAAACCGAAGTTTCAAGAAATCATATC  
TTCTACTAAGATATTCACCGAGGAAGCAGAAGCCCTTTGAAAGAAGCTATTCAGGAA  
CAGGCGGAACGTTTTATACTTCAGGAACAAGCAATGAGAATAAATCCTACTACTTCAGG  
TTCTGGGGTTTTCCACGCTTGAAAAAAAACCTGGGGAATATCACCCAAATCATTGGT



CCGGTACTGGATGTAGCTTTTCCGCCGGGCAAGATGCCTAATATTTATAATGCTCTGGTA  
GTTAAGGGTCGAGATACTGTCCGTCAACAAATTAATGTGACTTGTGAGGTACAGCAATT  
ATTAGGAAACAATCGAGTTAGGGCTGTAGCTATGAGTGCTACAGACGGTCTAACGAGA  
GGAATGGAAGTGATTGATACGGGAGCTCCTCTAAGTGTTCCGGTCGGTGGAAACGACTC  
TTGGACGAATTTTCAACGTGCTTGGAGAGCCTGTTGATAATTTAGGGCCTGTAGATACT  
CGACAACATCTCCTATTCATAGATCTGCGCCCGCCTTTATACAGTTAGATACAAAATTA  
TCTATTTTTGAAACCGGAATTAAGTAGTAGATCTTTTAGCCCTTATCGCCGTGGAGG  
AAAAATCGGACTATTCCGGGGGGCTGGAGTGGGTAAAACAGTACTCATTATGGAATTG  
ATTAACAATATTGCCAAAGCTCATGGGGGTGTATCCGTATTTGGCGGAGTAGGTGAACG  
TACTCGTGAAGGAAATGATCTTTACATGGAAATGAAAGAATCTGGGGTGATTAATGAAC  
AAAATATTGCAGAATCGAAAGTGGCTCTAGTTTACGGTCAGATGAATGAACCACCGGG  
AGCTCGTATGAGAGTTGGTTTACTGCCCTAACTATGGCTGAATATTTCCGAGATGTTAA  
TGAACAAGACGTACTTCTATTTATCGACAATATCTTCCGTTTCGTCCAAGCAGGATCTG  
AAGTATCTGCCTTATTAGGTAGAATGCCTTCCGCTGTGGGTATCAACCCACCCTTAGTA  
CCGAAATGGGTACTTTACAGGAAAGAATTACTTCGACCAAAGAAGGGTCCATAACTTC  
TATTCAAGCGGTTTATGTACCTGCAGACGATTTGACCGACCCTGCTCCTGCTACGACAT  
TTGCACATTTAGATGCTACTACTGTACTATCAAGAGGATTAGCCGCCAAAGGTATCTATC  
CCGCAGTAGATCCTTTAGATTCAACATCAACTATGCTCCAACCTCGGATTGTTGGTGAG  
GAACATTATGAAACTGCGCAAAGGGTTAAGCAAACCTTACAACGTTACAAAGAACTTC  
AGGACATTATAGCTATTCTTGGGTTGGACGAATTATCCGAAGAGGATCGTTTAACCGTA  
GCAAGAGCGCGAAAAATTGAGCGTTTCTTATCACAACCTTTTTTCGTAGCAGAAGTTT  
TTACTGGTTCTCCAGGGAAATATGTTGGTTTAGCAGAAACAATTAGGGGGTTTCAATTG  
ATCCTTTCCGGAGAATTAGATGGTCTTCTGAACAGGCCTTTTATTTGGTAGGTAACATC  
GACGAAGCTACCGCGAAGGCTATGAACTTAGAAATGGAGAGCAATTTGAAGAAAATG  
ACCTTAAATCTTTGTGTACTGACCCCTAATCGAACTGTTTGGGATTCAAAGTGAACGA  
AATCATTTTCTACTAATAATGGCCAAATTGGCGTATTACCGGATCACGCCTCTATTGC  
CACAGCTGTAGATATAGGTATTTTGAGAATACGCCTTAACGGCCAATGGTTAACGATGG  
CTCTGATGGGTGGTTTTGCTAGAATAGATAATAATGAGATCACTGTTTTAGTAAATGATG  
CGGAGAAGAGTAGTGACATCGATTACAAGAAGCCCAGCAAACGCTTGAAATAGCGG  
AAGCTAATTTAAGAAAAGCTGAAGGAAAGAGACAAAAAATTGAGGCAAATTTAGCTC  
TCCGACGAGCTAGGACACGAGTAGAGACGATCAATGCTATTTTCGATGAAAAATGTAAC  
CGATTCTTTCGTTTCTTTTGGCCACTGGCCGTCCGCCGGGAGTTTCGGGTTAATAACCG  
ATATTTTAGCAACAAATCTAATAAATCTAAGTGTAGTGCTTGGGGTATTGATCTTTTTTG  
GAAAGGGAGTGTTAAGTGATTTATTAGATAATCGAAAACAGAGGATTTGAATACTATT  
CGAAATTCAGAAGAACTCCGCGAAGGGGCCATTGAACAGCTGGAAAAAGCCCAGGGCG  
CGCTTACGAAAAGTGGAATGGAAGCAGATCAGTTTCGGGTGAATGGATACTATGAGA  
TAGAGCGAGAAAAGTGAATTTTATTAATTCACCTTTAAGACTTTGGAACAACCTAGAA  
AATTACAAAACGAACTATTCATTTTGAACAACAAAGGGCGATTAATCAAGTCCGAC  
AACAGGTTTTCCAACAAGCCTTACAAGGGGCTCTAGGAACTCTGAGTAGTTGTTTGAA  
CAACGAGTTACATTTACGTACCATCAGTGCCAATATTGTCATCTTGGGGGCGATGAAAG  
AAATACTGATATGAATCCACTGATTTCTGCCGCTCCGTTATTGCTGCTGGATTGGCTG  
TAGGGCTTGCTTCTATTGGACCTGGAGTTGGTCAAGGTAAGTACTGCTGCGGGCCAAGCTGT  
AGAAGGTATCGCGAGACAGCCCAGGGCGGAGGGAAAAATACGAGGTAAGTTTATTGCTT  
AGTCTAGCTTTTATGGAAGCTTTAACAATTTATGGCCTGGTTGTAGCATTAGCACTTTTA

TTTGCGAATCCTTTTGTATGAATGTTCTATCCTGTTCCATCAACACACTAAAAGGGTTA  
TACGATATATCCGGTGTGGAAGTAGGCCAACATTTCTATTGGAAAATAGGAGGTTTCCA  
AGTCCACGGCCAAGTACTTATTACTTCTTGGGTTGTAATTGCTATCTTATTAGGCTCAGC  
CACTATAGCTGTTTCGGAACCCACAAACCATCCCGACCGGCGGTCAGAATTTCTTCGAAT  
ATGTACTTGAATTCATTTCGAGATGTGAGTAAACTCAAATTGGAGAAGAATATGGTCCT  
TGGGTTCTTTTATTGGAACATGTTTCTTTTATTTTTGTTTCTAATTGGTCAGGAGCGC  
TTTTACCTTGGAAAATCATACAATTACCTCATGGGGAGTTAGCCGCACCCACGAATGAT  
ATAAATACTACTGTTGCTTTGGCTTTACTCACGTCAGTGGCATAATTTCTATGCGGGTCTT  
ACCAAAAAGGGATTAGGTTATTTTCGGGAAATATAATCAACCAACTCCAATCCTTTTACC  
CATTAAACATCTTAGAAGATTTACAAAGCCCTTATCACTAAGCTTTTCGACTTTTCGGAA  
ATATATTAGCTGATGAATTAGTAGTTGTAGTTCTTGTTCCTTAGTACCTTCAGTGGTTC  
TATACCTGTCATGTTCTTGGATTATTTACAAGTGGTATTCAAGCTCTTATTTTTGCAACT  
TTAGCCGCGGCTTATATAGGTGAATCCATGGAGGGCCATCATATGATATTTCAACTTA  
GAGCATATATTAACTCATATTTCTTTTCAATCGTTTCAATTGTAATTACAATTCATTTGAT  
AACCTTATTAGTCGATGAAATCATAAACTATATGATTCGTCAGAAAAGGGAATGATAG  
CTATTTTTTATGTATAACAGGATTATTAGTCACTCGTTGGATTATTTCGAGACATTTCCC  
ACTAAGTGATTTATATGAATCATTAACTTTCTTTCTTGGAGTTTATCAGTTATTCATATAG  
TTCCGTAT-----AAAAAGAAAAAACATTTAAGCACAATAACTGCGTCAAGTGTTATTTTT  
ACCAAGGCTTTGCTACTTCAGGTCTTTTAACTGAAATACATCAATCCGCAATATTAGTA  
CCTGCTCTCCAATCCGAGTGGTTAATAATGCACGTAAGTATGATGATATTGAGCTATGCA  
GCTCTTCTATGTGGATCATTATTATCAGTAGCACTTCTAGTCATTACATTTTCGAAAAAAC  
ATAAATATTTTTTGT-----AAAGAAATCCAATACATGAATGAAAGAAACAATGTTTTAGG  
AACTACTTCT-----GCTAAAAATTATTACAGGTCCCAGTTGATTCAACAGTTGGATTAT  
TGGAGTTATCGTATCATTAGTCTAGGGTTTATCTTTTTAAACCATAGGTATTCTTTCAGGAG  
CAGTATGGGCTAATGAAGCATGGGGATCATATTGGAATTGGGACCCAAAGGAAACTTG  
GGCATTATTACTTGGATCGTATTTGCGATTTATTTACATACTCGAACCAATATAAATTTA  
CGAGGTGCAAATTCGCAATTGTGGCGTCTATAGGCTTTCTTATAATTTGGATATGCTAT  
TTTGGAGTCAATCTATTAGGAATAGGACTACATAGTTATGGTTCATTTACGTTAACGATG  
GCAAAAAGAAAGCATTCACTCCTCTTTTATATCTTGCATCTCTAGTATTTTTGCCCTGG  
TGGATTTCTCTCTCATTAAATAAAAGTCTGGAATCTTGGGTTACTAATTGGTGGAATACT  
AGGCAATCCGAAATTTTTTTGAATGGTATTCAAGAAAAGAATATTCTAGAAAAATTCAT  
AGAATTAGAGGAAATCCTTCTCTTGGAGGAAATGATCAAGGAATACTCGGAGACACAT  
CTACAAAACCTTCGTATA---ATCCACAAAGAAACGATCCAATTCATCAAGATACACAAC  
GAGGATCGTATCCATACGATTTTGCACCTTCTCGACAAATATAATCTGTTTCATTATTCTAA  
GTGGTTATTCTATTTGGGGTAATGAAGAACTTGTTATTCTTAACTCTTGGGCTCAGGAAT  
TCCTATATAACTTAAGTGACACGATAAAAGCTTTTTCTATTCCTTTTATTAAGTATTATG  
TATCGGATTCCATTGCCCCATGGTTGGGAACTAATTATCGGCTCTGTCTACAAAGATTT  
TGGATTTGTTTATAATGATCAAATTTTATCTGGTCTTGTTCCTACTTTTCCAGTCATTCTA  
GATACTTTTTAAATTTTGGATTTCCGTTATTTAAATCGTGTTCCTCCGTCACCTGTAG  
TGATTTATCATTCAATGAATGATATGCCTATTGGTGTTCAAAAGTACCCTTTTCGAAGTC  
CTGGAGAGGAAGATGCATCTTGGGTTGACGTAAAC---CGACTTTATCGAGAAAGATTAC  
TTTTTTTAGCCAAGCGATTGATAGCGAGATCTCGAATCAACTTATTGGTCTTATGGTAT  
ATCTCAGTATCGAGGATGATACCAAAGATCTGATTTTGTATAAACTCTCCTGGCGGAT  
GGGTAATCCCTGGAGTAGCTATTTATGATACTATGCAATTTGTGCGACCAGATGTACATA

CAATATGCATGGGATTAGCTGCTTCAATGGGATCTTTTATCTTGGCCGGAGGAGAAATTA  
CCAAACGTCTAGCATTCCCTCACGCT--GTAATGATCCATCAACCTGCTAGTTCTTTTTAT  
GAGGCACAAACGGGAGAATTTATCCTGGAAGCGGAAGAAGCTGCTGAAACTGCGTGAA  
ACCATCACAAAGGTTTATGTACAAAAACGGGCAAACCCTTTTGGGTTGTCTCGGAAG  
ACATGGAAAGAGATGTTTTATGTCAGCAACAGAAGCCCAAGCTTATGGAATTGTTGAT  
CTTGTAGCGGTTGAGATGAAAGAACAAAAATGGATTCATGAAGGTTAATTACTGAATC  
GCTTCCCAATGGTATGTTCCGGATTGCTTAGATAATGAAGATATGATTCTAGGTTATGTT  
TCAGGAAAGATCCGACGTAGTTTTATACGGATACTGCCAGGCGATAGAGTCAAATTGA  
AGTAAGTCGTTATGATTCAACCAGAGGACGTATAATTTATCGACTTCGCAATAAGAATTC  
GAAAGATATGGAGGAATTCCAAAGATATTTAGAG---GATAGATCTCAACAACACTACTT  
CTTATATCCACTTATCTTTCAGGAGTATATTTATGCACTTGCTCATGATCATGGTTTAGCG  
GGTTATGACAATAAATTCAGTTTACTAATTGTGAAACGTTTAATTGCTCGAATGTATCAG  
CAGAATCATTGATTCTTTCTACTAATGATTCTAACCAAAATCTATTTTTGAGGAAGAAT  
TTGTATTCTCAAATGATATCAGAGGGGTTTGCAGTCATTGTGGAATTCCTTTTTCTCTA  
CAATTAATATCTTCCCTAATAGTCAAATCTCATAATTTACGATCAATTCATTCAATATTCC  
TTTTTTAGAGGACAAAATTTACATTTAATTTATGTGTTAGAGATACTAATACCCTACCC  
CGTACATCTGGAAATCTTGGTTCAAACCTCTTCGCTACTGGGTAAAAGATGCTTCTTCTT  
TGCATTTATTACGATTCTTTCTCCACGAGTATTGTAATTGGAAT-----ACTAAAGCCGGT  
TCTTCTTTTTCAAACAAGACTATTCTTCTTCTATATAATTCTCATCTATGTGAATACG  
AATCCATCTTCATCTTCTCCGTAACCAATCTTCTCATTACGCTCAACATCTTCTGGAA  
CCCTTCTTGAACGAATATATTTCTATGGAAAAATAAAATATCTTGTAAAAGTCTTTGTTA  
AGGCTTTAATCTATTGTTGTTGAAGGATCCTTTCATGCATTATGTTAGGTATCAAGGAA  
AATCAATTCTCGCTTCAAAGGGACGCCCTTTTGGATGAAAAAATGGACATATTGCTTT  
GTTAATTTATGGCAATGTCATTTTTACCTGTGGTCTCAACCGGAAGGATCTGTATAAAC  
CAATTATACAATCATTCCCTCGACCTTCTGGGCTATCTATCAAGTGCGCGGCTAAACCCT  
TCAATGGTACGCGGTCAAATGCTAGAAAATTCATTTCTAAATGATAATGCTATT-----AAT  
AAGTTCGATACTATTGTTCCAATTATTCTCTGATTGGATCATTGGCTAAAGCGAAATTT  
TGTAACGTATTGGGGCATCCTATTAGTAAGGCGGTTTGGACCGATTATCAGATTCTGAT  
ATTATTGACCGATTTGGGCGTATATGCAGAAATATTTCTCATTATCATAGTGGATCCTCAC  
AAAAAAGAGTTTGTATCGAATAAAGTATATACTTCGACTTTCTTGTGCTAGAACTTTG  
GCTCGTAAACACAAAAGTACTGTACGTTCTTTTTTGAAGATTGGGCTCGGGATTATT  
GGAAGAATTCTTACGGCGGAAGAACAAGTTCTTTACTTGACCTTTCCAAGACGGATT  
TGGTATTTGGATATTATTTGTATCAATGATTTGGCCAATCATGAAATGATAATAGAT---ACA  
ACAGAAGTACAA--GCTATCAATTCTTTTTTTAGATTGGAATCC--TTAAAAGAGATATAT  
GGGACCATATGGATGCTTGTCCCTATTTTTACTCCTGTATTAGGAATCACAATAGGTGTA  
CTAGTAATTGTTTGGTTAGAAAGAGAAATATCTGCAGGGATACAACAACGTATTGGACC  
TGAATACGCCGGGCCTTTGGGAATTCTTCAAGCTTTAGCAGATGGTACAAAATTACTTT  
TAAAAGAGAATCTTCTTCCATCGAGAGGAGATACTCGTTTATTTCAGTATCGGACCATCC  
GTAGCAGTTACATCAATTCTACTAAGTTATTTAGTAATTCCTTTTGGCTATCACCTTGTT  
TAGCCGATCTCAGTATCGGTGTTTTTTTATGGATTGCCAATTCAGTATTGCTCCCGTTG  
GCCTTCTTATGTCAGGCTATGGATCAAATAATAAATATTCCTTTTTTAGGTGGTTTACGAG  
CTGCTGCTCAATCAATTAGTTATGAAATACCATTAACCTCTATGTGTGTTATCAATATCTCT  
ATTATCTAACAGTTCAAGTACAGTTGATATAGTTGAAGCGCAGTCAAATATGGTTTTTG  
GGGGTGAATTTGTGGCGTCAACCTATAGGGTTTGTCAATTTTATAATTTTCGTCCTAGC

CGAGTGTGAGAGATTACCCTTTGATTTACCAGAAGCAGAAGAAGAATTGGTAGCAGGT  
TATCAAACCGAATATTCAGGTATAAAATTTGGTTTATTTTACGTTGCTTCGTATCTTAATC  
TACTAGTTTCTTCATTATTTGTAACGGTTCCTTACTTGGGGGGTTGGAATCTTTCTATTCC  
GTACATATCCGTTCCCTGAGATTTTTGAAATAAATAAAGCGAGTAGAGTATTTGGAACAAT  
AACTGGTATCTTAATTACATTAGCTAAAACCTATTTGTTCTTATTTCATTCCCTATCACAACA  
AGATGGACTTTACCAAGGCTAAGAATGGACCAACTATTAATCTTGGATGGAAATTTCT  
TTTACCTATTTCTCTCGGCAATCTATTATTAACAACCTCTTCCCACTTCTTTCACTGATG  
ATCTGGCATGTACAGAATGAAAACCTTCATTCTCGATTCTACGAGAATTTTTATGAAAGC  
CTTTCATTTGCTTCTCTTCGATGGAAGTTTGATTTTCCCAGAATGTATCCTAATTTTTGGC  
CTAATCTTCTTCTGATGATCGATTCAACCTCTGATCAAAAAGATATACCTTGGTTATATT  
TCATCTCTTCAACAAGTTTAGTAATGAGCATAACGGCCCTCTTGTTCGGATGGAGAGAA  
GAACCTATGATTAGCTTTTTCGGGAAATTTCCAAACGAACAATTTCAACGAAATCTTTCA  
ATTTCTTATTTTACTATGTTCAACTCTATGTATTCCTCTATCCGTAGAGTACATTGAATGTA  
CAGAAATGGCTATAACAGAGTTTCTCTTATTTCGTATTAACAGCTACTCTAGGAGGAATGT  
TTTTATGCGGTGCTAACGATTTAATAACTATCTTTGTAGCTCCAGAATGTTTCAGTTTATG  
CTCCTACCTATTATCTGGATATACCAAGAAAGATGTACGGTCTAATGAGGCTACTATGAA  
ATATTTACTCATGGGTGGGGCAAGCTCTTCTATTCTGGTTCATGGTTTCTCTTGGCTATAT  
GGTTCATCCGGGGGAGAGATCGAGCTTCAAGAAATAGTGAATGGTCTTATCAATACAC  
AAATGTATAACTCCCCAGGAATTTCAATTGCGCTCATATTCATCACTGTAGGAATTGGGT  
TCAAGCTTTCCCCAGCCCCTTCTCATCAATGGACTCCTGACGTATACGAAGGATCTCCC  
ACTCCAGTCGTTGCTTTTTCTTTCTGTTACTTCGAAAGTAGCTGCTTCAGCTTCAGCCAC  
TCGAATTTTCGATATTCCTTTTTATTTCTCATCAAACGAATGGCATCTTCTTCTGGAAATC  
CTAGCTATTTCTAGCATGATATTGGGGAATCTCATTGCTATTACTCAAACAAGCATGAAA  
CGTATGCTTGCATATTCGTCCATAGGTCAAATCGGATATGTAATTATTGGAATAATTGTTG  
GAGACTCCAATGATGGATATGCAAGCATGATAACTTATATGCTGTTCTATATCTCCATGAA  
TCTAGGAACCTTTTGCTTGCATTGTATTATTTGGTCTACGTACCGGAACCTGATAACATTCG  
AGATTATGCAGGATTATACACGAAAGATCCTTTTTTTGGCTCTCTCTTTAGCCCTATGTCT  
CTTATCCCTAGGAGGTCTTCCCTCCACTAGCAGGTTTTTTTCGGAAAACCTATTTTATTCTG  
GTGTGGATGGCAGGCAGGCCTATATTTCTTGGTTTTAATAGGACTCCTTACAAGCGTTG  
TTTCTATCTACTATTATCTAAAATAATCAAGTTATTAATGATTGGACGAAACCAAGAAA  
TAACCCCTCACGTGCGAAATTATAGAAGATCTCCTTTCAGATCAAACAATTCATCGAA  
TTGAGTATGATTGTATGTGTGATAGCATCTACTATACCAGGAATATCAATGAACCCGATTA  
TTGCAATTGCTCAGGATACCCTTTTTATGTTTCTGCTTTACGAATATGATATTTTTTGGGC  
ATTTCTAATAATATCAAGTCTTATTCCATTTTTGGCATTTTTAATTTCCGGAGTTTTAGCCC  
CGATTAGCAAAGGGCCAGAGAACTCTCTAGTTATGAATCGGGTATAGAACCAATGGG  
CAACGCTTGGTTACAATTTTCGAATCCGTTATTATATGTTTGCTCTAGTTTTTGTGTTTTT  
GATGTTGAAACGTTTTTCTTTATCCATGGGCAATGAGTTTCGATGTATTAGGTGTATCT  
GTATTTATAGAAGCTTTAATTTTCGTGCTTATCTTAATTGTTGGTTTAGTTTATGCATGGC  
GAAAAGGGGCATTGGAATGGTCT-----ATAATTGTAGTTTTGCCAATATTC  
GCGGGCTCCGTAATTTTATTTCTTCCCCATAGAGGAAATAGAGTAATTCGGTGGTATACT  
ATATGTATATGATTTTAGAACTCCTTCTAACGACCTATGCATTCTGTATCATTTTTCAATT  
CGACGATCCATTAATCCAACCTAGTGGAGGACTATAAATGGATCAATTTTTTTGCTTTCCA  
TTGGAGATTAGGAATAGATGGACTTTCTATAGGACCCATTTTACTAACGGGATTCATCAC  
CACTTTAGCTACTTTAGCGGCTCGGCCAGTTACTCGAGATTCTCGATTATTCATTTCT

AATGTTAGCAATGTACAGCGGGCAAATAGGATCATTTTCTTCTCGGGACCTTTTACTTTT  
TTTCATCATGTGGGAGTTAGAATTAATCCGGTTTATCTACTTTTATCCATATGGGGGGG  
AAAGAAACGCCTTTACTCGGCTACAAAATTTATTTTATACACGGCGGGAGGTTCCATTT  
TTCTCTTAATGGGAGTTCTGGGTGTTGGTTTATATGGTTCTAATGAACCAACATTAATTT  
TTGAAACATCAGTTAATCAGTCATATCCTGTGGCCTTGGAAATAATATTCTATATTGGATT  
TTTTATTGCTTTTGTCTGTCAAATCGCCGATTATACCCCTACATACATGGTTACCAGATACC  
CACGGAGAAGCACATTACAGTACTTGTATGCTTCTAGCCGGAATCTTATTAATAAATGGG  
AGCGTATGGATTGATTCGGATTAATATGGAATTATTGCCCCACGCCATTCTATATTTTCT  
CCGTGGTTGGTGATAGTAGGCACAATACAAATAATCTATGCAGCTTCAACATCTCCCGG  
CCAACGTAATTTAAAAAAAAGAATAGCCTATTCTCTGTATCTCATATGGGTTTCATACT  
TATAGGAATTGGTTCTATAACCGATACGGGACTCAATGGAGCCATTTTACAAATAATCTC  
TCATGGATTATCGGTGCTTCGCTTTTTTTCTTGGCAGGAACGAGTTATGATAGAATACG  
TCTTGTATCTCGACGAAATGGGCGGAATAGCTATCCCAATGCCAAAAATATTACAGAT  
GTTTACAGTAGCTTTTCGATGGCTTCCCTTGCATTACCGGGTATGAGTGGTTTTTGTTCAG  
AATTGATAGTCTTTTTTGAATAATTACCAGCCAAAAATATCTTTTAATGCCAAAAATATT  
AATTACTTTTGTAAATGGCAATTGGGATGATATTAATCCTATTTATTCATTATCTATGTTAC  
GCCAGATGTTCTATGGATAACAAGCTATTTAATGCTCCAAACTCTTATGTTTTTGTATTCTG  
GACCGAGAGAGTTATTTGTTTTCGATCTCTATCTTTCTACCCGTAATAGGTATTGGTATGTA  
CCCGGATTTTGTCTTTCACTATCAGTTGACAAGGTCGAAGTTATTCTATCTAATTTTTTT  
TATAGAATGATGCTCGAACATGTACTTGTTTTTGAGTGCCTATTTATTTTCTGTTGGTCTTT  
ATGGATTGATCACGAGTCGAAATATGGTTAGGGCCCTTATGTGTCTTGAACCTATTTTGA  
ATGCAGTTAATATCAATTTTGTAAATTTTCTGATTTTTTTGATAGTCGTCAATTAAGG  
AGCCATTTTCTCAATTTTGTATAGCTATTGCAGCCGCTGAAGCAGCTATTGGACTGGC  
TATTGTTTTCATCAATTTATCGTAACAGAAAATCAACTCGTATCAATCAATCGAATTTGTT  
GAATAAGATGGAACAGACATGTCAATATGCGTGGATAATACCTTTCCCTCCACTTCCAG  
TTCCCTATGTTAATAGGAGTGGGACTTCTTCTTTTTCCGACGGCAACAAAAATCTTCGT  
CGTATGTGGGCTTTTCAGAGTATTTTATTGTTAAGTATAGTCATGATTTTTTTCGATCAATC  
TGTCTATTACAGCAAATAAATAGCAGTTCTATCTATCAATATGTGTGGTCTTGGATCATCAA  
TAATGATTTTTCTTTAGAATTCGGCTACTTGTATCGACCCACTTACTTCTATTATGTCAATA  
TTAATTACTACTGTTGGAATTGTGGTCTTGTTTATAGTGATAATTATATGTCTCATGATC  
AAGGATATTTGAGATTTTTCGCTTATATGAGTTTTTTTTCAGTACTTCTATGTTAGGATTAGT  
TACTAGTTCTAATTTGATACAAATTTATATTTTTTGGGAATTAGTCGGAATGTGTTTCGTAT  
CTATTAATAGGGTTTTGGTTACACGACCTGTTGCGGCAAATGCTTGCCAAAAGGCGTT  
TGTAACATAATCGTGTGCGGGATTTTGGTTTATTATTGGGAATTTTAGGTTTTTTATTGGATA  
ACAGGTAGTTTCGAATTTGAGATTTATTCAAATATTTCAGTAACAATGAAGTAAATTTT  
TTATTTGTTACTTTGTGTGCCGTTCTATTTTGGCCGTTGCGGTTGCTAAATCTGCACAAT  
TCCCTCTTCATGTATGGTTACCTGATGCCATGGAGGGGCCTACTCCTATTTACAGCTCTTAT  
ACATGCTGCTACTATGGTAGCAGCGGGAATTTTTCTTGTAGCTCGGCTTATTCCTCTTTT  
CATAGTCATCCCTCACATAATGAATTTAATCTCTTTGGTAGGGATAATAACAGTATTATTA  
GGAGCTACTTTAGCCCTTGCTCAAAAAGACATTAAGAGAGGTTTAGCCTATTCCACAAT  
GTCTCAATTTGGTTATATGATGTTAGCTTTAGGTATGGGGTCTTATCGAAGCGCTTTATTT  
CATTTGATTACTCATGCTTATTCGAAAGCATTATTGTTTTTAGGATCCGGATCCGTTATTC  
ATTCATGGAAACTCTTGTGGATATTCTCCAAAGAAAAGTCAGAATATGGTTTTTTATG  
GGGGTTTTAACAAAGCATGTGCCAATTACCAAACGTCCTTTTTTATTAGGTACACTTTC

TCTTTGTGGTATTCCGCCTCTTGCTTGTTTTTGGTCCAAGGATGAAATTCTTAATGATAC  
TTGGTTGTATTCACCAATTTTCGCAATAATAGCTTGGTCTACAGCGGGATTAACCGCATT  
TTATATGTTTTCGAATCTATTTACTTACTTTTTGAAGGACATTTAAACGTTTCATTTTCAA  
AAT TAC-----AAAATAACCCCTTCTATTCAATATCTCTATGGGGTAAAGAAGGTTTCGAAAA  
GGATTAATAAA---TTATTAACTTTATTAACAATGAATTTTTTTTTTCATTTGGCAATAAGAATA  
TTTTTTCATATCCTTATGAATCAGATAATACTATGTTATTTCTATACTTGTATTGGTTCTAT  
TTACTTTGTTTCATTGGATTCTAGGAATTCCTTTCAATTTGGACATATTATCAAATGGTT  
AACTCCGTCTATAAACCTTTTACATCAAATTTGAATAATTTAATAGATTGGTATGAATTT  
TCGAAAGATGCCATTTTTTCAGTTAGTATAGCTTTTTTTTGGAAATGTTTATAGCCTCCTTTT  
TATATAAACCCGTTTATTTCATCTTTGCAAAATTTGGACTTTATTAACTCGTTTGTATTTTT  
TTGGACAAAATAATAAATGGTATATATGGTTGGTCGTGTAATCGTGGTTACATAGATGCT  
TTTTATGCAACATTCTTTACTGGGGGGATAAGAGGATTGGCCGAATTAACCTCTTTTTTTT  
GATAGACAAGTAATTGATGGAATTACAAATGGAGTTGGTGTTTTGAGTTTTTTTTGTAGG  
TGAAAGTATCAAATCTGTAGGTGGCGGG--CGCATCTCTTCTTATCTTTTTCTTGATTTGT  
CTTATGTATCAATCTTTTTATTAATTTACTACATGGATTACCTGGACCAATACATGATTTT  
CTTTTAGTCTTTCTGGGATCGGGTCTTATATTAGGAGGTCTGGGAGTGGTATTACTTCCC  
AATCCAATTTATTCTGCCTTTTTCATTTGGGATTGGTTCTTGTTTGTACATCTTTATTCTATAT  
TCTATCGAACTCCCATTTTGTAGCTGCTGCACAGCTCCTTATTTACGTAGGGGGCCATAAA  
TGTTTTAATTATTTTTGCTGTGATGTTTCATGAATGGTTCCGAATATTACAAAGATTTTCAT  
CTTTGGACCGTTGGAGATGGGGTTACTTCGATGGTTTGTACAAGTATTTTTGTTTCACTA  
ATTACTACTATTCCAGATACGTCATGGTACGGGATTATTTGGACTACAAAATCAAACCAG  
ATTATAGAGCAAGATTTGATAAGCAATAGTCAACAAATTTGGGATTCATCTATCAACAGAT  
TTTTTTCTTCCATTTGAACTCATTTCATAAATCTTTTTAGTTGCGTTAATAGGTGCAATTG  
CCGTAGCTCGTCAAATGACTGCACCAGCTACACGAAATGACCTTATGATAGTAAATCTG  
GGTCCCTCAGCACCCATCAATGCACGGTGTCTTCGACTCATTGTTACTCTAGATGGTGA  
AGATGTTATTGACTGTGAACCAATATTGGGTTATTTACATAGAGGGATGGAAAAAATTC  
GGAAAACCGAACAAATTATACAATATTTACCTTATGTAACACGTTGGGATTATTTAGCTAC  
TATGTTACAGAAGCAATAACTGTAAATGCACCAGAGCAGTTAGGCAATATTCAAGTAC  
CTAAAAGGGCCAGCTATATCAGAGTCATTATGTTGGAGTTAAGTCGTATAGCTTCGCATT  
TGTTATGGCTTGGCCCTTTATGGCAGATATTGGCGCACAGACCCCTTTCTTCTATATTTT  
TCGAGAAAGAGAATTGATATATGACCTATTCGAAGCTGCCACCGGTATGCGAATGATGC  
ATAATTATTTTCGAATCGGAGGAGTAGCTGCTGATTTACCTCATGGCTGGATAGATAAAA  
GTTTGGATTTTTGTGATTTTTTTTTTAACAAGGGTTACTGAATATCAAAAACCTTATTACAC  
GGAACCCTATTTTTTTAGAACGAGTTGAAGGAGTAGGCATTATTGGCGGAGAGGAGGC  
AATAAATTGGGGTTTATCAGGACCAATGCTACGAGCTTCCGGAATACAATGGGATCTTC  
GTAAAGTTGATCATTATGAGTCTTACGACGAATTTGATTGGGGGGTCCAATGGCAAAAA  
GAGGGGGATTCTAGCTCGTTATTTAGTACGAATCAGTGAAATGACAGAATCCATAAA  
AATTATTCAACAGGCTTTAGAAAGGAATTCAGGGGGGCCCTATGAGAATTTAGAAATCC  
GACGTTTTGATAAAGTACGGGATCCAGAATGGAATGATTTTACTATCGATTATCAGT  
AAAAACCTTCTCCGACTTTTGAATTATCAAAGCAAGAACCTTTATGTGAGAGTCGAAG  
CCCCAAAGGGAGAATTGGGGATTTTTCTGATAGGGGATAGGGGTGTTTTTCTTGGAGA  
TGAAAATCCGACCACCGGGTTTTATCAATTTGCAAATCCTTCCTCAGTTAGTTAAAAG  
AATGAAATTGGCTGATATTATGACGATACTAGGTAGCATAGATATCATTTATGGGAGAAGT  
TGATCGTATGTTCTCTATGGTAACTGAGTTCATGAACTATGGTCAACAAACAGTACGAG

CTGCAAGGTATATCGGTCAAGGTTTCATGATTACCTTATCACACGCGAATCGTTTACCTG  
TAACTATTCAATACCCCTACGAAAAATTGATTACATCGGAGCGTTTCCGCGGCCGAATC  
CACTTTGAGTTTGATAAATGCATTGCTTGTGAAGTATGTGTTTCGTGTATGTCCTATAGAT  
CTACCCGTTGTTGATTGGAAATTGGAAATGGATATTCGAAAGAAACGATTGCTTAATTA  
CAGTATTGATTTCCGAATCTGTATATTTTGTGGTAATTGCGTTGAGTATTGTCCAACAAA  
TTGTTTATCAATGACTGAAGAATATGAACTTCTACGTATGATCGTACGAATTGAATTA  
TAATCAAATTGCTTTGGGGCGGTTACCAATGTCAGTAATTGACGATTACACAACCTCGAA  
CTATTTGAATTTG-----ATGCAGGGTCGTTTGTCTGATT  
GGTTAGTCAAGCATGGGCTAATTCATAGATCTTTGGGGTTTGATTACCAAGGGATAGAG  
ACTTTACAAATAAAACCCGAGGATTGGCATTCCATTGCTGTCATTTTATATGTATATGGTT  
ACAATTATCTACGCTCCCAATGCGCCTATGATGTAGCACCAGGTGGACTGTTAGCTAGT  
GTGTATCATCTTACGAGAATAGAGTATGGCGTGGATCAACCAGAAGAGGTATGCATAAA  
AGTATTTGCCCGAGGAGGAATCCTAGAATCCGCTCTGTTTTCTGGGTTTGGAAAAGTG  
TGGATTTTCAAGAACGGGAATCTTATGATATGTTGGGAATTTCTTATGATACTCATCCAC  
GTTTGAACGCATCTTAATGCCTGAAAGTTGGGTAGGATGGCCTTTACGTAAGGATTAT  
ATTGCCCCCAATTTTATGAAATACAAGATGCTCAT-----

-----ATGAATTCATCGAGTTTCCCTTACTTGATCGAACAACCCAAAATTCAGTTAT  
TTCAACTACATCAAACGATCTTTCAAATTGGTCAAGACTCTCTAGTTTATGGCCGCTTCT  
CTATGGTACCAGTTGTTGCTTCATTGAATTTGCTTCACTAATAGGCTCACGATTCGACTT  
TGATCGTTATGGACTAGTCCCAAGATCGAGTCCTAGACAAGCGGACCTAATTTAACAG  
CCGGAACAGTAACAATGAAAATGGCTCCTTCTTTAGTGAGATTATATGAGCAAATGCCT  
GAACCAAAATATGTTATTGCTATGGGAGCATGTACAATTCAGGGGGGATGTTTCAGTAC  
TGATTCTTATAGTACTGTTTCGGGGAGTCGATAAGCTAATTCCTGTCGATGTCTATTTGCC  
AGGCTGTCCACCTAAACCGGAAGCAGTTATAGATGCTATAACAAAACCTTCGTAAGAAA  
ATATCTCGAGAAATCTATGAAGATAGAATTAAGTCTCAACGGGAGAATCGGTGTTTTAC  
AACCAATCACAAGTTTCAGGTTGGGCGTAGTATTCATACTGGAAATTATGATCGAGGAT  
TCCTTTATCAACCGCCATTTACTTCAGAGATCCCTCCCGAAACATTTTTCAAATACAAA  
GTTTCAGTCTTCCCACGAATTAGTGAATATGCAAACCTATAAAGACTTTTTCTTGGATAA  
AGGAACAGATTACTCGATCCATTTCCGCATCGCTCATGATATATATCATAACTCGGACAT  
CCATTTCAAGTGCATATCCCATTTTTGCACAGCAGGGTTATGAAAATCCACGAGAAGCG  
ACTGGGCGTATTGTATGTGCCAATTGCCATTTAGCTAATAAGCCCGTGGATATTGAAGTT  
CCACAAGCCGTACTTCCCTGATACTGTATTTGAAGCAGTTGTTTCAATCCCTTATGATATG  
CAACTAAAACAAGTTCTTGCTAATGGTAAAAGGGGGCTTTGAATGTAGGGGCTGTTC  
TTATTTTACCGGAGGGTTTTGAATTAGCTCCTGTGATCGGATTTCTCCCGAGATGAAA  
GAAAAGATAGGAAATCTTTCTTTTCAGAGCTATCGCCCAAATAAAAAAATATTCTTGT  
GATAGGCCCTGCTCCTGGTCAAAAATATAGTGAAATAACCTTTCCTATTCTTTCCCCCGA  
CCCCGCTACTAAGAAAGATGTTCACTTCTTAAAATATCCTATATACTAGGCGGAAACA  
GGGAAGGGGTCAGATTTATCCCGACGGGAGCAAGAGTAACAATACAGTTTATAATGC  
TACAGCAGCAGGTATAGTAGACAAAATAATACGAAAAGAAAAAGGGGTTACGAAATA  
ACCATAACGGATGCATCGGATGGACGTCAAGTGGTTGATATTATCCCTCCAGGGCCAGA  
ACTTCTTGTTCAGAAGGCGAATCTATCAAATTTGATCAACCATTGACGAGTAATCCTAA  
TGTGGGCGGATTTGGTCAGGGAGATGCAGAAATAGTACTTCAAGATCCATTACGTGTCC  
AAGGCCTTTTGTCTTCTTGGCATCTGTTATTTTGGCACAAATCTTTTTGGTTCTTAAAA

AGAAACAGTTCGAGAAGGTTCAATTGTCCGAAATGAATTTTCATGAGTAAAGTCTATGAT  
TGGTTTGAAGAACGTCTCGAGATTCAGGCGATTGCGGATGATATAACTAGTAAATACGT  
TCCTCCTCATGTAAACATATTTTATTGTCTAGGAGGTATTACGCTTACTTGTTTTTTAGTA  
CAAGTGGCTACGGGGTTTGCTATGACTTTTTACTATCGTCCGACCGTTACTGACGTTTT  
GCTTCGGTTCATAACATAATGACTGAAGCTAATTTTGGTTGGTTAATCCGATCAGTTCAT  
CGATGGTCGGCAAGTATGATGGTTCTAATGATGATCCTGCATGATTTTCGTGTGTATCTC  
ACCGGTGGATTTAAAAACCTCGCGAATTAACCTGGGTTACAGGTGTGGTCTGGCTGT  
ATTGACTGCATCTTTTGGTGTAACCTGGTTATTCCCTACCTCGGGACCAAATTGGTTATTG  
GGCAGTGAAAATTGTAACAGGTGTACCCGAAGCTATTCCTGTAATAGGATCCCCTTGG  
TAGAATTATTGCGTGGAAGTGCTAGTGTGGGACAATCCACTTTGACTCGTTTTTATAGTT  
TACACACTTTTGTATTGCCGCTTCTTACTGCCGATTTATGTTAATGCACTTTCCAATGAT  
ACGTAAACAAGGTATTTCTGGTCCTTTAATGGGAGTAACAAAAAACCTGACTTGAAT  
GATCCTGTATTAAGAGCTAAATTGGCTAAAGGTATGGGTCATAATTATTACGGAGAGCCC  
GCCTGGCCCAACGATCTTTTATATATTTTTCCAGTAGTAATTCTAGGGACTATTGCATGTA  
ACGTAGGCTTAGCGGTTCTAGAACCATCAATGATTGGTGAACCAGCAGATCCATTTGCA  
ACCCCTTTGGAAATATTACCCGAATGGTATTTTTTTCCCGTATTTCAAATACTTCGTACA  
GTACCCAATAAATTATTGGGTGTTCTTTAATGGTTTCAGTACCCACGGGATTATTAACA  
GTACCCTTTTTAGAGAATGTTAATAAATTCCAAAATCCATTTTCGTCTCCAGTAGCGACA  
ACCGTCTTTTTGATTGGTACCGCAGTGGCCCTTTGGTTGGGTTATTGGTGCAACATTACCT  
ATTGATAAATCCCTAACTTTAGGTCTTTTTATGATTGAAGTTTTTCTATTTGGAATCGTGT  
TAGGTCTAATTCCTATTACTTTGGCTGGATTATTCGTAACGTCATATTTACAATACAGGCG  
TGGTGATCAGTTGGACCTTATGCCTACTATAACTAGTTATTTTCGGTTTTCTACTAGCGGC  
TTAACTATAACCTCAGCTCTATTTATTGGTCTTAGCAAGATACGACTTATCATGGATATA  
GTAAGTCTTGCTTGGGCTGCTTTAATGGTAGTCTTTACATTTTCCCTTTACTCGTAGTA  
TGGGGAAGAAGTGGACTCATGATTATTCGTTCCGGGAACCAGAAGTCAAATTTTGG  
TAGATAGGGATCACATAAAAACCTTCTTTCGAGGAATGGGCCAGACCGGGTCATTTCTCA  
AGAACACTAGCTAAAGGCCCTGACACTACCACTTGGATCTGGAACCTACATGCTGATG  
CTCACGATTTTCGATAGCCACACCAGTGATTTGGAGGAGATCTCTCGAAAAGTCTTTAGT  
GCTCATTTTCGGCCAACTCTCCATCATCTTTCTTTGGCTGAGTGGCATGTATTTCCACGGT  
GCTCGTTTTTCTAATTATGAAGCATGGCTAAGCGACCCGACTCACATTGGGCCGAGTGC  
CCAGGTGGTTTTGGCCAGTAGTGGGCCAAGAAATATTGAATGGTGATGTGGGTGGGGG  
TTCCGAGGAATACAAATAACCTCCGGTTTTTTTCAGATTTGGCGAGCATCTGGAATAAC  
TAGTGAATTACAACCTCTATTGACTGCAATTGGTGCATTGATCTTTGCAGCATTAATGCT  
TTTTGCTGGTTGGTTTCATTATCATAAAGCTGCTCCAAAATTGGCTTGGTTTCAAGATGT  
AGAATCTATGTTGAATCACCATTTAGCGGGGCTACTAGGACTGGGGTCTCTCTCTTGGG  
CAGGACATCAAGTACATGTATCTTTACCGATTAACCAGTTTCTAAACGCTGGAGTAGAT  
CCTAAAGAGATAACCACTTCCTCATGAATTTATCTTGAATCGGGATCTTTTGGCTCAACTT  
TATCCCAGTTTTGCTGAGGGAGCAACCCCTTTTTTCACCTTGAATTGGTCAAATATGC  
GGACTTTCTTACTTTTCGCGGAGGATTAGATCCAGTAACTGGGGGTCTATGGCTGACCG  
ATATTGCACACCATCATTTAGCTATTGCAATTCTTTTCTGATAGCGGGTCATATGTATAA  
GACCAACTGGGGCATTGGTTCATGGCTAAAAGATATTTTAGAAGCTCATAAAGGTCCAT  
TTACAGGTCAAGGCCATAAAGGCCTATATGAGATCCTAACAACATCATGGCATGCTCAA  
TTATCTCTTAACTTAGCTATGTTAGGCTCTTTAACCATTGTTGTAGCTCACCATATGTATT  
CCATGCCCCCTTATCCGTATCTAGCTACTGACTATGGTACACAATTGTCGTTGTTACACAC



ATCACATGTGGATTGGTGGATTTCTCATAGTTGGCGCTGCTGCGCATGCAGCCATTTTTA  
TGGTAAGAGACTATGATCCAACACTCGATAACAACGATCTATTAGATCGTGTCCCTTAGGC  
ATCGCGATGCAATCATATCACATCTCAACTGGGCATGTATATTTCTAGGCTTTCACAGTT  
TTGGTTTGTATATTCATAATGATACCATGAGCGCTTTAGGGCGTCCTCAAGATATGTTTT  
AGATACTGCTATCCAATTACAACCCGCTTTTGCTCAATGGATACAAAACACCCATGCTTT  
AGCACCTGGTGCAACGGCTCCTGGTGCAACAACAAGCACCAGTTTAACTTGGGGGGG  
CGGTGATTTAGTAGCAGTGGGTGGCAAAGTAGCTTTGTTACCTATTCCATTAGGAACTG  
CAGATTTTTTGGTACATCATATTCATGCATTTACGATTCATGTGACGGTATTGATACTTCT  
GAAGGGTGTCTATTTGCTCGTAGTTCCCGTTTGATACCGGATAAAGCAAATCTTGGTT  
TTCGTTTTCTTGTGATGGACCTGGAAGAGGGGGAACGTGTCAAGTATCGGCTTGGGA  
TCATGTCTTCTTAGGACTATTCTGGATGTACAATGCAATTTCCGGTAGTTATATTCCATT  
AGTTGGAAAATGCAGTCAGATGTTTGGGGCAGTATAAGTGATCAAGGGGTAGTAACTC  
ATATCACGGGAGGAAACTTTGCGCAGAGTTCCATTACTATTAATGGGTGGCTCCGCGAT  
TTCTTATGGGCACAGGCATCCCAGGTAATTCAGTCTTATGGTTCTTCATTATCTGCATATG  
GGCTTTTATTCCCTAGGTGCTCATTTTGTATGGGCTTTTAGTTTAATGTTTCTATTCAAGTGG  
ACGTGGTTATTGGCAAGAAGTATTGAATCCATCGTTTGGGCTCATAATAAATAAAAGT  
TGCTCCTGCTACTCAGCCGAGAGCCTTAAGCATTGTACAAGGACGTGCTGTAGGAGTA  
ACCCATTACCTTCTGGGTGGAATTGCCACAACATGGGCGTTCTTCTTAGCAAGAATTAT  
TGCAGTAGGAATGGCATTAAAGATTTCCAAGGTTTAGCCAAGGCTTAGCTCAGGACCCC  
ACTACTCGTCGTATTTGGTTTGGTATTGCTACCGCACATGACTTCGAGAGTCATGATGAT  
ATTACTGAGGAACGTCTTTATCAGAATATTTTTGCTTCTCACTTCGGGCAATTAGCAATA  
ATTTTTCTGTGGACTTCCGGAAATCTGTTTCATGTAGCTTGGCAAGGAAATTTGAGTC  
ATGGGTACAGGACCCTTACATGTAAGACCTATTGCTCATGCAATTTGGGATCCTCATT  
TGGTCAACCGGCTGTAGAAGCTTTACTCGAGGAGGTGCTCTTGGCCCAGTGAATATC  
GCTTATTCTGGTGTATTATCAATGGTGGTATAACAATCGGTTTACGCACTAATGAAGATCTTT  
ATACTGGAGCTCTTTTTCTATTATTTCTTTCTACCATATCCTTAATAGCAGGTTGGTTACA  
TCTACAACCGAAATGGAAACCGAGTGTTCGTGGTTCAAAAATGCCGAATCTCGTCTG  
AATCATCATTTGTGTCAGGACTTTCGGCGTAAGTTCCCTTGGCTTGGACAGGGCATTAGT  
ACATGTGGCTATTCTGCATCCAGAGGGGAGTACGTTTCGATGGAATAATTTCTTAGATGT  
ATTACCACACCCCCAGGGGTTAGGCCACTTTTTACAGGTGAGTGAATCTTTATGCTC  
AAAACCCCGACTCAAGTAGTCATTTATTTGGTACCTCCCAAGGAGCAGGAACTGCCAT  
TCTAACCCCTTCTCGGGGGATTCCACCCACAAACGCAAAGTTTATGGCTGACTGATATGG  
CTCATCATCATTTAGCTATTGCATTTATTTTTCTCGTTGCTGGTCATATGTATAGAACTAAC  
TTCGGTATTGGGCACAGTATGAAAGATCTTTTAGATGCACATATTCCTCCGGGGGGGCG  
ATTGGGACGTGGGCATAAGGGTCTTTATGACACAATCAATAATCACTTCATTTTCAATT  
AGGCCTTGCTCTAGCTTCTTTAGGGGTTATTACTTCCCTTGGTAGCTCAACACATGTACTC  
TTTACCTGCTTATGCATTCATAGCACAAGACTTTACTACTCAAGCTGCGTTATATACTCAT  
CACCAATACATCGCAGGATTCATCATGACAGGAGCTTTTGCTCATGGAGCTATATTTTTTC  
ATTAGAGATTACAGTCCGGAACAGAATGAGGATAATGTATTGGCAAGAATGTTAGACCA  
TAAAGAAGCTATCATATCTCATTAAAGTTGGGCCAGCCTCTTTCTGGGGTTCCATACCTT  
GGGACTTTATGTTTATAATGATGTCATGCTTGCCTTTGGTACTCCGGAGAAACAAATCTT  
GATCGAACCTATATTTGCTCAATGGATACAATCTGCTCATGGTAAAACCTTCATATGGTTT  
CGATGTACTTTTATCTTCAACGAATGGCCCGGCATTTAATGCGGGTCGAAGCATATGGTT  
GCCCCGTTGGTTAAATGCTGTTAATGAG-----AATAGTAATCACTATTCTTAACAATAGG

TCCGGGAGACTTTTTAGTTCATCATGCTATTGCTCTGGGTTTACATACGACTACATTGAT  
CTTAGTAAAGGGTGCTTTAGATGCACGTGGTTCCAAGTTAATGCCAGATAAAAAGGATT  
TCGGTTATAGTTTTCCGTGCGACGGCCCCGGACGGGGCGGTACTTGTGATATTTCCGGCT  
TGGGACGCATTTTTATTTGGCAGTTTTTTGGATGTAAATACTATCGGATGGGTTACTTTTT  
ATTGGCATTGGAAGCATATCACATTATGGCAGGGTAACGTTTCACAGTTAATGAATCTT  
CCTTATTTGATGGGCTGGTTAAGAGATTATTTATGGTTAAACTCTTCACAACCTTATCA  
ATGGATATAACCCTTTTGGTATGAATAGTTTATCGGTCTGGGCGTGGATGTTCTTATTTGG  
ACATCTTGTTTGGGCTACTGGATTTATGTTCTTAATTCCTGGCGTGGCTATTGGCAAGA  
ATTGATTGAAACTTTAGCATGGGCTCATGAACGCACACCTTTGGCCAATTTGATTCGTT  
GGAGAGATAAACCGGTGGCCCTTTCCATTGTGCAAGCACGATTGGTTGGATTAGCCCA  
CTTTTCTGTAGGTTATATATTCCTTATGCGGCTTTCTTGATTGCCTCTACATCAGGCAAA  
TTTGGTATGTCACATTCAGTAAAGATTTATGATACATGTATAGGATGACTCAATGTGTCC  
GAGCCTGCCCCACCGATGTATTAGAAATGATACCTTGGGACGGATGTAAAGCTAAACA  
AATTGCTTCTGCTCCAAGAACAGAGGACTGTGTTCGGTTGTAAGAGATGTGAATCTGCC  
TGTTCAACCGATTTCTTGAGTGTTCGAGTTTCTTTATGGCATGAAACAACCTCGCAGCAT  
GGGTCTAGGTTATATGACAACCTTTCCACTTTCCCTCTGTGTTGGTGCCTTTAGTAGGCCT  
AGTATTTCCGGCAATGGCAATGGCTTCTTTATCTCTTCATGTTCAAAGAATAAGACTGT  
TATGCGAGATCTAAAACATATCTCTCCGTGGCACCGGTATTAAGTACTCTATGGTTCCG  
GTCTTTAGCAGGTCTATTGATAGAGATTAATCGTTTTTTCCAGATGCGTTGACATTCCC  
CTTTTT-----ATGACTGCAATTTTAGAGAGACGCGAAAGCGAAAGCCTATGGGGTCGCT  
TCTGTAACCTGGATAACCAGCACCGAAAACCGTCTTTACATTGGATGGTTTGGTGTTTTG  
ATGATCCCTACCTTATTGACCGCAACTTCTGTATTTATTATCGCCTTCATTGCTGCTCCTC  
CAGTAGATATTGATGGTATTCGTGAACCTGTTTCCGGATCTCTACTTTATGGCAACAATA  
TTATCTCAGGTGCCATTATTCCTACTTCTGCAGCTATAGGTTTGCACTTTTACCCAATCTG  
GGAAGCGGCATCCGTTGACGAATGGTTATACAACGGTGGTCCTTATGAACTAATCGTTC  
TACACTTTTTACTTGGTGTAGCTTGTACATGGGTCGTGAGTGGGAGCTTAGTTTCCGT  
CTGGGTATGCGACCTTGGATTGCTGTTGCATATTCAGCTCCTGTTGCAGCTGCTACTGCT  
GTTTTCTTGATCTACCCAATCGGTCAAGGAAGTTTTTCTGATGGTATGCCTCTAGGAATC  
TCTGGTACTTTCAATTCATGATTGTATTCCAGGCTGAACACAACATCCTTATGCACCCA  
TTTCACATGTTAGGCGTAGCTGGTGTATTCCGGCGGCTCCCTATTCAGTGCTATGCATGGT  
TCCTTGGTAACTTCTAGTTTGATCAGGGAAACCACAGAAAATGAATCTGCTAATGAAG  
GTTACAGATTCCGGCAAGAGGGAGAACTTATAATATCGTAGCCGCTCATGGTTATTTT  
GGTCGATTGATCTTCCAATATGCTAGTTTCAACAACCTCTCGTTCCTTACATTTCTTCTA  
GCTGCTTGGCCTGTAGTAGGTATCTGGTTCACTGCTTTAGGTATCAGCACTATGGCTTTC  
AACCTAAATGGTTTCAATTTCAACCAATCTGTAGTTGATAGTCAAGGCCGTGTAATTAAT  
ACTTGGGCTGATATCATTAAACCGTGCTAACCTTGGTATGGAAGTTATGCATGAACGTAAT  
GCTCATAACTTCCCTCTAGACCTAGCTGCTGTGCAAGCTCCATCTACAAATGGAATGGG  
TTTGCCTTGGTATCGTGTTCCATACCGTTGTATTGAATGATCCCGGTCCGGTACTTTCTGT  
CCATATAATGCATACAGCTCTAGTTGCTGGTTGGGCGGGTTCGATGGCTCTATATGAATT  
AGCGGTTTTTGTATCCCTCTGACCCTGTTCTTGATCCAATGTGGAGACAGGGTATGTTCCG  
TTATACCCTTCATGACTCGTTTAGGAATAACCAATTCATGGGGCGGTTGGAGTGTACACA-  
--GGAGGGGCTATACCGAATCCGGGTATTTGGAGTTACGAAGGTGTGGCCGGGGCACAT  
ATTGTGTTTTCTGGCTTGTGCTTCTTGGCAGCTATCTGGCATTGGGTTTATTGGGATCTA  
GAAATTTTTTCTGATGAACGTACAGGAAAACCTTCTTTGGATTTGCCCAAGATCTTTGG

AATTCATTTATTTCTCGCAGGGGTGGCTTGCTTTGGTTTTGGTGCATTTTCATGTAACAGG  
CTTGTATGGTCCTGGAATATGGGTGTCCGATCCTTATGGACTAACGGGAAAAGTACAAT  
CTGTAATCCAGCGTGGGGCGTGGAAAGTTTTGATCCTTTTGTTCGGGAGGAATAGC  
CGCTCATCATATTGCAGCAGGGACATTGGGTATATTGGCCGGTCTATTCCATCTTAGTGT  
CCGCCCCCCCCAACGTCTATACAAAGGATTGCGTATGGGCAATATTGAAACCGTCCTTT  
CCAGTAGTATCGCTGCTGTCTTTTTTGCAGCTTTTGTGTTGCCGGAACCTATGTGGTATG  
GTTTCAGCAACTACCCCGATCGAATTATTTGGGCCTACTCGTTATCAATGGGATCAGGGG  
TACTTCCAGCAAGAGATATATCGAAGAATTAGTGCTGGGCTAGCCGAAAATCAAAGTTT  
ATCAGAAGCTTGGTCTAAAATTCCTGAAAAATTAGCTTTTTATGATTACATCGGCAATAA  
TCCGGCAAAGGGGGATTATTCAGAGCGGGTTCAATGGATAACGGGGATGGAATAGCG  
GTTGGATGGTTAGGACATCCTATCTTTAGAGATAAAGAAGGGCGTGAACCTTTTTGTACG  
TCGTATGCCTACCTTTTTTGAACCTTCCCGGTCGTTTTGGTAGATAGCGACGGAATTGT  
TAGAGCCGATGTTCCTTTTCGAAGGGCAGAATCGAAGTATAGTGTCGAACAAGTAGGT  
GTAAGTGTGAGTTCTACGGTGGCGAACTCAACGGAGTCAGTTATAGTGATCCTGCTAC  
TGTGAAAAAATATGCTAGACGTGCTCAATTGGGTGAAATTTTTGAATTAGATCGTGCTA  
CTTTGAAATCCGATGGTGTTTTTCGTAGCAGTCCAAGGGGTTGGTTTACTTTTTGGACAT  
GCTTCTTTTGTCTTTGCTCTTCTTTTTTGGACATATTTGGCATGGTGTAGAACCTTGTTT  
AGAGATGTTTTTGTGTTATGATCCAGATTTGGATGCTCAAGTAGAATTTGGAGCATT  
CCAAAACTTGGAGATCCAACCTACAAGAAGACAAGTAGTCATGAAAACCTTATATTCC  
CTGAGGAGGTTCTACCCCGTGGAAACGCTCTTTAATGGAACCTTAGCTTTAGCTGGTCG  
TGACCAAGAAACCACTGGTTTTCGCTTGGTGGGCCGGAATGCCCGGCTTATCAATTTAT  
CCGGTAAACTACTCGGGGCTCATGTAGCCCATGCCGGATTAATTGTATTCTGGGCCGGG  
GGAATGAACCTATTTGAAGTGGCTCATTTCGTACCAGAGAAGCCTATGTATGAACAAGG  
ATTAATTTTACTTCCCCACCTAGCTACTCTAGGTTGGGGGGTAGGTCCTGGTGGGGAAG  
TTATAGACACTTTTCCATACTTTGTATCTGGAGTACTTCATTTAATTCCTCTGCAGTATT  
GGGCTTTGGTGGTATTTATCATGCACTTCTAGGGCCTGAGACGCTTGAAGAATCTTTTC  
CATCTTTCGGTTATGTATGGAAAGATAGAAATAAAATGACTACAATTTTAGGTATTTACT  
TAATCTTGTTAGGTATAGGTGCTTTTCTTCTAGTATTCAAGGCTCTTTATTTTGGTGGCGT  
ATATGATACCTGGGCTCCGGGAGGGGGAGATGTAAGAAAAATTACCAACTTTACCCTTA  
GTCCAAGTATTATATTTGGTTATTTACTAAAATCGCCCTTTGGAGGGGAAGGATGGATTG  
TTAGTGTAGACAATTTGGAAGATATAATCGGAGGACATGTATGGTTAGGTTCCATTTGTA  
TACTTGGTGGAACTTGGCATATCTTAACCAAACCCTTCGCATGGGCTCGACGCGCACTT  
GTATGGTCTGGGGAGGCTTACTTATCTTATAGTTTGGGGCTTTATCCGCTTTTGGTTTCA  
TTGCTTGTGTTTTTGTCTGGTTCAATAATACCGCCTATCCTAGCGAGTTTTACGGACCCA  
CTGGACCAGAATCTTCCAAGCTCAAGCATTACTTTTCTAGTTAGAGACCAACGCCTT  
GGGGCTAACGTGGGATCCGCTCAAGGACCTACTGGTTTGGTAAATATTTAATGCGTTC  
CCCGACCGGAGAAGTCATTTTTGGAGGAGAACTATGCGTTTTTGGGATCTGCGTGCC  
CCTTGGTTAGAACCTCTAAGGGGTCCAAATGGGTTGGACTTGAGTAGGCTGAAAAAAG  
ACATAAACCTTGGCAAGAACGGCGTTCTGCAGAATATATGACTCATGCTCCTTTAGGT  
TCTTTAAATTCGTTGGGTGGCGTAGCTACCGAGATCAATGCAGTCAATTATGTCTCTCCT  
AGAAGTTGGTTAGCTACTTCTCATTTTTGTTCTAGGATTTCTTGTTCGTAGGTCATTTG  
TGGCACGCGGGAAGGGCTCGTGCAGCTGCAGCAGGGTTTTGAAAAAGGAATTGATCGT  
GATTTTGAACCTGTCTTTCCATGACCCCTCTTAATATGACTATAGCCCTTGGTAAATTA  
CCGAAGACGAAAAGGATTTATTTGATATTATGGATGACTGGTTACGGAGGGACCGTTTC

GTTTTGTAGGCTGGTCCGGTTTATTGCTCTTTCCTTGTGCCTAATTCGCTTTAGGGGGT  
TGGTTCACAGGTACAACCTTTGTAACCTTCATGGTATAACCCATGGATTGGCCAGTTCCTAT  
TTGGAAGGCTGCAATTTCTTAAGTCCGCGAGTTTCTACTCCTGCTAATAGTTTAGCACAT  
TCTTTATTGTTACTATGGGGTCTGAAGCACAAGGGGATTTTACTCGTTGGTGTCAATTA  
GGCGGTCTGTGGACTTTTGTGCTCTCCATGGTGTCTTCGGACTAATAGGTTTCATGTTA  
CGTCAATTCGAACCTGCTCGATCTGTTCAATTGCGACCTTATAATGCAATCGCATTCTCT  
GGTCCAATTGCTGTTTTTGTCTGTATTCTTGATTATCCACTAGGTCAGTCTGGTTGG  
TTCTTTGCCCTAGTTTTGGTGTAGCAGCTATATTTAGATTTCATCCTCTTTTTTCAAGGAT  
TTCATAATTGGACGTAAACCCATTCATATGATGGGAGTTGCCGGGGTATTGGGCGCT  
GCTTTGCTATGCGCTATTCATGGTGTACTGTAGAAAATACTTTATTTGAAGATGGTGAT  
GGTGCAAATACATTCGCTGCTTTTAAACCCAACCTCAAGCTGAAGAACTTATTCAATGGT  
CACCGCTAACCGCTTTTGGTCCCAAATCTTTGGGGTTGCTTTTTCCAATAAACGTTGGT  
TACATTTCTTTATGTTATTTGTACCAGTAACCGGTTTATGGATGAGTGCTCTTGGAGTAG  
TCGGTCTGGCCCTGAACCTACGTGCCTATGACTTCGTTTCTCAGGAAATTCGTGCGGCG  
GAAGATCCTGAATTTGAGACTTTCTACACCAAAAATATTCTCTTAAACGAAGGTATTCG  
TGCTTGGATGGCAGCTCAAGATCAGCCTCATGAAAACCTTATATTCCCTGAGGAGGTTT  
TACCCCGTGGAACGCTTTATGTCTGGAAGCACAGGAGAACGTTCTTTTGTGATATT  
ATTACCAGTATTCGTTACTGGGTCATTCATAGCATTACTATACCTTCCCTATTCATTGCGG  
GTTGGTTATTCGTCAGCACCGGTTTAGCTTACGATGTGTTTGAAGCCCTCGGCCAAAC  
GAGTATTTACAGAGAACCGACAAGGAATTCATTAATAACTGGCCGTTTTGATCCTTT  
GGAACAACCTCGATGAATTTAGTAGATCTTTTATGACCATAGATCGAACCTATCCAATTT  
TACAGTGCGATGGTTGGCTGTTACGGCCTAGCTGTACCTACCGTTTCTTTTTGGGGT  
CAATATCAGCAATGCAGTTCATCCAACGAATGGCTACACAACTGTTGAGAACGGTTCT  
ATA---TCTCGTCCAAAACCAACTACTGTAGGGAATTTATTGAAACCATTGAATTCGGAAT  
ATGGTAAAGTAGCTCCTGGATGGGGAACAACCTCTTTGATGGGTGTCGCAATGGCCCTA  
TTTGCATATTTCTATCTATTATTTGGAGATTTATAATTCTTCCGTTTTATTGGATGGAAT  
TTCAATGAATATGCTTACTCTCAAACCTTTTCGTTTACACAGTAGTGATATTCTTTGTTTCT  
CTCTTTATCTTTGGATTCCCTATCTAATGATCCGGGGCGTAATCCTGGACGTGAAGAAATG  
GCTGATACTACTGGAAGGATTCTCTTTGGATAATAGGTAAGTACTGTAACCTGGTATTCTTGTG  
ATTGGTTTAAATAGGTATTTTTTTTTATGGTTCATATTCCGGATTGGGTTTCATCCCTGATGC  
TTAATATCTTTAGTTTGATCTGTATCTGTCTTAATTCTGCCCTTTATTCGAGTAGTCTTTTC  
TTCGCCAAATTGCCCGAGGCCTATGCTTTTTTGAATCCAATCGTAGATCTTATGCCAGTC  
ATACCTTTGTCTTTTTTCTCTTAGCCTTTGTTGGCAAGCTGCTGTAAGTTTTTCGAATG  
ACACAATCAAACCCGAACGAACAAAATGTTGAATTGAATCGTACCAGCCTCTACTGGG  
GGTATTACTCATTTTTTGTACTTGCTGTTTTATTTTCCAATTATTTCTTCAATATGGAAGTA  
AATATCTTGCATTTATTGCTACTGCACTGTTCAATCTAGTTCCTACTGCTTTTCTGCTTAT  
CATTTACGTAAAAACAGAAAGTCAAATAAAAATGGAAACAGCAACCCTAGTCGCCATC  
TTTATACTGGTTTACTTGTAAGTTTTACCGGGTACGCCTTATATACCGCTTTTGGGCAAC  
CTTCTCAACAATAAGAGATCCATTCGAGGAACATGGGGACATGGAAGCATTGGTTTAT  
ACATTCCTCTTAGTCTCGACTCTAGGTATAATTTTTTTCGCTATCTTTTTTAGAGAACCGC  
CTAAAGTTCCAACATAAAAAGATGAAAATGACTCTTGCTTTCCAATTGGCTGTTTTTGA  
TTAATTGCTACGTCATCAATCTTATTAATTGGCGTACCCGTTGTATTGCTTCTCCTGATG  
GTTGGTCAAGTAACAAAATGTTTTATTTTCCGGTACATCATTATGGATTGGATTAGTCT  
TTCTGGTGGGTATCCTTAATTCTCTCATCTCT-----ATGTCACCACAAACAGA

GACTAAAGCAAGTGTGGATTCAAAGCTGGTGTTAAAGATTACAGATTGACTTATTATA  
CTCCTGACTATGAAACCAAAGATACTGATATCTTGGCAGCATTCCGAGTAACTCCTCAA  
CCTGGAGTTCACCTGAAGAAGCAGGGGCCGCGGTAGCTGCCGAATCTTCTACTGGTA  
CATGGACAACCTGTGTGGACCGATGGACTTACCAGCCTTGATCGTTACAAAGGGCGATG  
CTACGGAATCGAGCCCGTTGCTGGAGAAGAAAGTCAATTTATTGCTTATGTAGCTTACC  
CATTAGACCTTTTTGAAGAAGGTTCTGTTACTAACATGTTTACTTCCATTGTAGGTAATG  
TATTTGGGTTCAAAGCCCTGCGTGTCTACGTCTGGAAGATCTGCGAATCCCTGTTGCT  
TATGTTAAACTTTCCAAGGCCCGCCTCATGGCATCCAAGTTGAGAGAGATAAATTGAA  
CAAGTATGGTCGTCCTGTTGGGATGTACTATTAACCAAATTTGGGGTTATCTGCTA  
AAAACCTACGGTAGAGCGGTTTATGAATGTCTCCGTGGTGGACTTGATTTTACCAAAGAC  
GATGAGAACGTGAACTCCCAACCATTTATGCGCTGGAGAGATCGTTTCGTATTTTGTGC  
CGAAGCACTTTATAAAGCACAGGCTGAAACAGGTGAAATCAAAGGGCATTACTTGAAT  
GCTACTGCGGGTACATGCGAAGAAATGATGAAAAGGGCTGTATTTGCCAGAGAATTGG  
GAGTTCCTATCGTAATGCATGATTACTTAACAGGGGGATTCACTGCAAATACTACCTTGG  
CTCATTATTGCCGAGATAATGGCCTACTTCTTCACATCCACCGCGCAATGCATGCAGTTA  
TTGATAGACAGAAGAATCATGGTATGCACTTTCGTGTACTAGCTAAAGGGTTACGTATG  
TCTGGTGGAGATCATATTCCTCCGGTACCGTAGTAGGTAACCTTGAAGGGGAAAGAG  
ACATCACTTTGGGCTTTGTTGATTTACTGCGTGATGATTTCAATTGAAAAAGATCGAAGT  
CGCGGTATTTATTTACCCAAGATTGGGTCTCTCTACCAGGTGTTCTGCCCGTGGCTTC  
GGGGGGTATTCACGTTTGGCATATGCCTGCTCTGACCGAGATCTTTGGGGATGATTCCG  
TACTACAGTTCGGTGGAGGAACTTTAGGACACCCTTGGGGAAATGCACCCGGTGGCGT  
AGCTAATCGAGTAGCTCTAGAAGCATGTGTACAAGCTCGTAATGAGGGACGTGATCTTG  
CTCGTGAAGGTAATGAAATTATCCGTGAGGCTGCTAAATGGAGCCCTGAACTAGCTGCT  
GCTTGTGAGGTATGGAAGGAGATAAAATTTGAATTTGAAGCAGTGGATATTTTG-----AT  
GGCGATACATTTATACAAAACCTTCTACCCCGAGCACACGCAATCGAGCCGTAGACAGTC  
AAGTGAATCCAATCCACGAAATAATTTGATCTATGGACAGCATCATTGTGGTAAAGGT  
CGTAATGCCAGAGGAATCATTACCGCAGGGCATAGAGGGGGAGGTCATAAGCGTCTAT  
ACCGTAAAATCGATTTTCGACGGAATGAAAAAGACATATATGGTAGAATCGTAACCATA  
GAATACGACCCTAATCGAAATGCATACATTTGTCTCATACTATGGGGATGGTGAGAA  
GAGATATATTTTACATCCCAGAGGGGCTATAATTGGAGATACCATTGTTTCTGGTACAGA  
AGTTCCTATAAAAATGGGAAATGCCCTACCTTTGACCGATATGCCCTTAGGCACGGCCA  
TACATAACATAGAAATCACACGTGGAAAGGGTGGACAATTAGCTAGAGCAGCGGGTGC  
TGTAGCGAAACTGATTGCAAAGAGGGGAAATCGGCCACATTAATAATTACCTTCTGGG  
GAGGTCCGTTTGTATATCCAAAACTGCTCAGCAACGGTCGGACAAGTGGGGAATGTTG  
GGGTGAACCAGAAAAGTTTGGGTAGAGCCGGATCTAAGCGTTGGCTAGGTAAGCGTC  
CTGTAGTAAGAGGAGTAGTTATGAACCCTGTAGACCATCCCCATGGGGGTGGTGAAGG  
GAGGGCCCCAATTGGGAGAAAAAACCACAACCCTTGGGGTTATCCTGCACTTGG  
GAGAAGAAGTAGAAAAAGGAATAAATATAGTGATAATTTGATTCTTCGTCGCCGTAGTA  
AAATGATTCAACCTCAGACCCTTTTGAATGTAGCGGATAACAGCGGGGCTCGAGAATT  
GATGTGATTTCGAATCATAGGAGCTAGC---AATCGTCGATATGCTCATATCCGTGACGTTA  
TTGTTGCTGTGATCAAAGAAGCAGTGCCAAATATGCCCTAGCAAGATCAGAAGTGGT  
CAGAGCTGTAATTGTACGTACTTGTAAAGAACTCAAACGTGATAACGGTATGATAATAC  
GATATGATGACAATGCTGCGGTTGTCATCGATCAAGAAGGAAACCCAAAGGGAACTCG  
GGTTTTTGGTGCAATTGCCCGGGAATTGAGACAGTTAAATTTTACTAAAATAGTTTCATT

AGCTCCGGAGGTATTAATGCTTAGTCCCAAAGAACCAGATTCCGTAAACAACATAGA  
GGAAGAATGAAGGGAATATCTTATCGAGGTAATCATATTTCTTTCGGTAAATATGCTCTT  
CAGGCACTTGAACCTGCTTGGATCACATCTAGACAAATAGAAGCAGGTGACGAGCAA  
TGACACGAAATGCACGACGTGGTGGAAAAATATGGGTACGTATATTTCCAGACAAACC  
GGTTACAGTAAGACCCGCAGAAACACGTATGGGTTCCGGGAAAGGATCCCCTGAATAT  
TGGGTAGCTGTTGTTAAACCAGGTCGAATCCTTTATGAAATGGGTGGAGTAACAGAAA  
ATATAGCCAGAAAGGCTATTTCAATAGCATCGTCTAAAATGCCTATACGAACTCAATTCA  
TTATTTTGGCAATGACCAGAATTAGACGGGGATATATAGCTCGGCGACGTAGAACAAAA  
ATTCGTTTATTTGCATCAAGCTTTCGAGGGGCTCATTCAAGGCTTACTCGAACAATTACT  
CAACAGAAAATAAGAGCTTTGGTTTCGTCTCATCGGGATAGGGATCGGCAAAAGATAA  
ATTTTCGTCGTTTGTGGATCACTCGAATAAACCGCAGTAATTCGTGAAGGG---GGGGTAT  
CCTATAGTTATAGTAGATTAATACACGATCTGTATAAGAAACAGTTGCTTCTTAATCGTA  
AAATACTTGCACAAATAGCTATATCAAATAAAAATTGTCTTTATATGATTTCCAATGAGAT  
CATAAAAGAAGTAGATTGTAAAGAATCCACCGGAATAATTATGTTAAAGACAGTATACG  
CTTTAGGTCAATATATATCTATGTCTGCTCACAAAGCGCGAAGAGTAATAGATCAAATTC  
GTGGACGTTCTTACGAAGAAACACTTATGATACTAGAACTCATGCCTTATCGAGCATGT  
TATCCATTTTTAAATTGGTTTATTCTGCAGCAGCAAATGCTAGTTCCAATATGGATTCCA  
ACGAATCAAATTTAGTTATTAGTAAAGCTGAAGTCAGCGAGGGTACTATCGTGAAGAAA  
TTAAAACCTCGAGCTCGAGGACGTAGTTTTCCGATAAAAAGACCTACCTGCCATATAAG  
TATTGTAGTGAAAGATATATCCTTAGATGGGGGGTATGGGACAAAAAAATGGATGGAA  
TCAAATATGCAGTATTTACAGACAAAAGTATTCGGTTATTGGGGAAAAAT---CAATATAC  
TTCTAATGTGCAATCAGGATCAACTAGGACAGAAATAAAGCATTGGGTGCAACTCTTCT  
TTGGTGTCAAGGTAATAGCTATGAATAGTCATCGACTTCCGGGAAGGGGTAGAAGAAT  
GGGACCTATTATGGGACAGACAATGCATTACAGACGTATGATCATTACGCTTCAACCGG  
GTTATTCTATTCCACCTCTTAGAAAAGAAAAGAACTATGGCAGTTCCAAAAAACGTA  
TCTATATCAAAAAGCGTATTCGTAAAAATATTTGGAAAAGAAAGGGATATTGGGCAGC  
CTTAAAAGCGTTGTCAATTAGGGAAATCTCTTTCTACCGGAAATTCAAAGGTTTTTTTG  
TGCGACAAACAATAAGATGGCCAAGGGGAAGGATGTCCGAATAACCGTTATTTTGG  
ATGTACCAGTTGTGTTGAAACGGTGTTAAT-----AAGGTATCAACGGGTATTTCCAGAT  
ATATTACTCAAAGAACCAGCACATAACGCCTAATCGATTGGAATTGAGAAAATTCTGT  
CCATATTGTTACAAACATACGATTCATGGGGAGATAAAGAAAATGAAAATAAGAGCTTC  
TGTTTCGTAAAATTTGTGAAAATGTGCGACTAATTCGTAGGCGGGGACGAATTATAGTAA  
TTTGTTCACCAACCAAGACATAAACAAGACAGGGGATGGTTTCGAGAGAAAGTAAGAG  
TATCTACTCGGACACTACAGTGGAAGTGTGTTGAAGCAAGAGCGGACAGTAAGCGTCT  
TTATTATGGACGCTTTATTCTGTCTCCACTTATGAAAGGTCAAGCTGACACAATAGGCAT  
TGCGATGCGAAGAGCTTTGCTTGGAGAACTAGAAGGAACATGTATCACACGTGCAAAA  
TCTGAG-----AAAATACCACACGAATATTCTACCCTAGTGGGTATTCAAGAATCAGTACA  
TGAAATTTTAATGAATTTGAAAGAAATTATATTGAGAAGTAATCTATATGGAACCTTGCGA  
CGCGTCTATTTGTGTCAGGGGTCCTGGATATGTAAGTCTCAAGATATCATCTCACCGCC  
TTAATGTAGAAATCGTTGACAATACACAGCATATAGCTAGCTTGGCGGAACCAATTGATTT  
GTGTATTGGATTACAAATAGAGAGGAATCGCGGATATCTTATAAAAACGCCAAATAACA  
ACTTTGACGGAAGTTAT-----CCTATAGATGCTGTATTCATGCCTGTTTCGAAACGCGAATC  
ATAGTATTCATTCTTATGGGAATGGGAATGAGAAACAAGAGATACTCTTTCTTGAAATAT  
GGACAAATGGAAGTTTAACTCCTAAAGAAGCACTTCATGAAGCCTCCCGGAATTTGAT

TGATTTATTTATTCCCTTTTTACATACAGAAGAAGAA-----AACTTACATTTAGCGGACAA  
TCAA---CACACGGTTCCTTTACCCCCTTTTACCTTTCATGAGAAATTGACT---AAACTAA  
GAAAAAACAAAAA---AAAATAGCATTGAAATCGATTTTTATTGACCAATCAGAAGCTGC  
CTCCCAGGATCTATAATTGCCTTATAAGGTCCAATATATATACATTACTGGACCTTTTGAA  
TAACAGTCAAGAAGACCTTATGAAAATTGAACATTTTCGCATAGAAGATGTAAAAGAG  
ATATTGGGCATTCTAGAAAAGCGT-----TTCGCAATTGATTTACCGAAAAAGCTGATGCT  
CCGAGATGGA---AATGAGGGAATGTCTACAATACCTGGGTTTAATCAGATACAATTTGA  
AGGATTTTGTAGGTTTCAATGATCAGGGCTTGACGGAAGAAGCTTTATAAGTTTCCAAAAA  
TTGAAGATACCGATCAAGAAATTGAATTTCAATTATTTGTGGAAACATATCAATTAGTAG  
AACCGTTGATAAAAAGAAAGAGATGCTGTGTATGAATCACTCACATATCTTCTGAATTAT  
ATGTATCCGCGGGACTCATTGGAAAAGCTGGTAGGGATATGCAAGAACAGACTATTTTT  
TTTGAAACATTCCTCTAATGAATTCTCTGGGAACTTCTATAGTAAATGGAATATATAGA  
ATTGTGATCAATCAAGTATTGCAAAGCCCCGGTATTATTACCGGTCAGAATTGGACCAT  
AACGGAATTTTCGGTGTATACCGGCACCATAATATCAGATTGGGGAGGAAGATCAGAATT  
AGAGATTGATAGAAAAGCAAGGATATGGGCTCGTGTGAGTAGGAAACAAAAATATCT  
ATTCTAGTTCTATCATCAGCTATGGGTTTCAAGAGAAATTCTAGAGAATGTTTGC  
TATCCTGAAATATTTTTGTCTTTTTCTGACTGATAAGGAGAAAAAAAATCGGGTCAA  
AGAAAATGCCATTTTGGAGTTTACCAACAATTTGCTTGTGTAGGCGGGGATCCGGTAT  
TTTCTGAATCCTTATGTAAGGAATTACAAAAGAAATTCTTTCAACAAAAATGTGAATTA  
GGAAGGATTGGTCGACGAAATATGAATCGGAGACTGAACCTTGATATATCCAGAACA  
ATACATTTTTTGTACCGCGAGATATATTGGCAGCCGCGGATCATTGATTGGAATGAAAT  
TTGGAATGGGTACACTTGACGAT-----ATGAATCATTGAAAAATAAACGTATTCGTTCTG  
TAGCAGATCTTTTACAAGATCAATTCGGATTGGCTCTGGTTCGTTTAGAAAATGTGATTC  
GAGGAACTATATGTGGAGCACTTAGG---CATAAATTG---ATACCGACTCCTCAGAATTG  
GTAACCTCAACTCCA-----TTAACAACACTTATGAATCTTTTTTCGGTTTACACCCA  
TTATCTCAAGTTTTGGATCGAACTAATCCATTGACACAAATAGTTTCATGGGAGAAAATT  
GAGTTATTTGGGCCCTGGAGGATTGACAGGGCGAACTGCTAGTTTTTCAATACGAGATA  
TCCATCCTAGTCACTATGGGCGTATTTGCCAATTGACACGTCTGAAGGAATAAATGTC  
GGGCTTATTGGATCTTTAGCAATTCATGCGAGGCTTGGTCGTTGGGGA---TCTCTAGAA  
AGCCCGTTTTAT-----GAAATTTCTGAGAGATCAAAGGG-----GCACGGATGCTTTATT  
TATCACCAGGTAAAGATGAATACTATATGGTAGCGGCGGAAATCTTTGGCCTTGAAT  
CAGGGTATTCAGGAAGAACAGGTTGTTCCAGCTCGATACCGTCAAGAATTCCTGACTAT  
TGCATGGGAACAGGTTTCATCTTTCGAAGTATTTTTTCCCTCCAATATTTTTCTATCGGAGC  
TTCCCTCATTCCTTTTATCGAGCATAATGATGCGAATCGGGCTTTAATGAGTTCGAATAT  
GCAACGTCAAGCAGTTCCTCTTCTCGGTCCGAGAAGTGCATTGTTGGAAGTGGGTTG  
GAACGCCAAGCGGCTATAGATTGAGGGGCTCTTGCTATAGCGGAACACGGGGGAAAGA  
TCATTTATACCGATACTGACAAGATCCTTTTATCAGGTAATGGAAATACTCTAAGCATT  
CATTAGTTATATATCAACGCTCCAACAAAAATACTTGTATGCATCAAAAACCCAGGTT  
AGCGGGGTAAATGCATAAAAAGGGACAAATTTTAGCCCATGGCGCCGCTACAGTTGG  
TGGCGAACTCGCTTTGGGGAAAAACGTATTAGTAGCTTATATGCCATGGGAAGGTTACA  
ATTTTGAAGATGCAGTACTCATTAGCGAGCGCTTGGTATATGAAGATATTTACTTCTTT  
TCACATACGAAAATATGAAATTCAGACTCATGTGACAAGCCAAGGC---CCCGAAAGGG  
TCACTAATGAAATACCGCATTTAGAAGCCATTTACTCCGCAATTTAGACAAAAACGGA  
ATTGTAATGCTGGGATCTTGGGTAGAGACGGGTGATATTTTAGTAGGTAATTAACGCC

CCAAATGGTGAAAGAA---TCATCGTATGCCCGGAAGATAGATTGTTACGAGCCATACT  
TGGCATT CAGGTATCTACTTCAAAGAAAGTTGTCTAAACTACCTATAGGTGGTAGGG  
GTCAGGTTATTGATGTGAGATGGATCCAGAAAAGGGGA---GGTTCTAGTTATAACCCAG  
AAACGATTTCGTGTATATATTTACAGAAACGTGAAATTAAGGTAGGCGATAAAGTAGCT  
GGAAGACATGGAAATAAGGGTATCATTTCAAAATTTTGCCTAGACAAGACATGCCTTA  
TTTGCAAGATGGAAGCCCTGTTGATATGGTCTTCAACCCATTAGGAGTACCTTCACGAA  
TGAATGTAGGACAGATATTTGAATGTTCACTCGGGTTAGCGGGGGGTCTGCTAGACAG  
ACATTATCGAATAGCGCCTTTTGATGAGAGATATGAACAAGAAGCTTCGAGAAAATA  
GTGTTTTCTGAATTATATGAAGCCGGTAAGCAAACAGCGAATCCATGGGTATTTGAACC  
CGAGTATCCGGGAAAAGCAGAATATTTGATGGAAGAACGGGGGATCCTTTTGAACAA  
CCTGTTATAATAGGAAAGCCTTATATCTTGAAATTAATTCATCAAGTTGATGATAAAATCC  
ATGGACGTTCCAGCGGACATTATGCACTTGTTACACAACAACCCCTTAGAGGAAGGGC  
CAAGCAAGGCGGACAACGGGTAGGAGAGATGGAGGTTTGGGCTCTAGAGGGATTG  
TGTTGCTCATATTTTACAAGAGATGCTTACTTATAAATCGGATCATATTAGAGCTCGGCA  
GGAAGTACTTGGTACTACGATCATTGGAGGAACAATACCTAATCCTCAGGATGCTCCCG  
AATCTTTTCGATTGCTCGTTCGAGAACTACGATCTTTGGCTCTGGAAGTGAATCATTCT  
TTGTATCTGAGAAGAATTTCCAGATTAATAGGAAGGAAGCTATGAATCAGAATTTTCT  
TCTATGATCGATCGGTATAAACATCAACAACCTCCGAATTGGATCAGTTTCTCCTCAACA  
AATAAGTACTTGGGCAATAAAATCCTGCCAATGGAGAGATAGTTGGAGAGGTGACA  
AAACCTTATACTTTTCATTACAAAACCAATAAACCGGAAAAGATGGATTATTTTGTGA  
AAGAATTTTGGGCCTATCAAAGCGGAATTTGTGCTTGTGGAAATTATCGAGTAATCG  
GGAATGAAAAGAAGACCCGAAATTTTGTGAACAATGCGGAGTCGAATTTGTTGATTC  
TCGGATACGAAGATATCAAATGGGCTACATCAAACCTCGCATGCCAGTAACCCATGTGT  
GGTATTTGAAACGTCTTCTAGTTATATTGCGAATCTTTTAGATAAACCTCTTAAAGAAT  
TAGAAGGCCTAGTATACTGCGAT-----TTTTCTTTTGGCAGGCC---ATAGCTAAAAACC  
TACTTTCTTACGATTACGAGGTTTCGTTTGAATATGAAATCCAATCCTGGAATAACAGCAT  
CCCGCTTTTACTACCCAAGGCTTCGATACATTCGAAATCGAGAAATCTCTACTGG  
AGCAGGTGCTATCCGAGAACAATTAGCCGATCTAGATTTACGGATTATTATAGATTCTTC  
GTTGGTAGAATGGAAAGAGTTGGGGGAAGAC---GGCCTGCAGGGAATGAATGGGAA  
GATCGAAAAGTTGGAAGACGAAAGGATTTTTTGGTTAGACGTATGGAATTAGCTAAGC  
ATTTTATTCGAACAAATATAGAACCAGAATGGATGGTTTTTGTGTCTATTACCTGTTCTTC  
CTCCTGAGTTGAGACCGATCATTAGATAGATGGGGTAAACTAATGAGCTCAGATATT  
AATGAACTCTATAGAAGAGTTATCTATCGAAACAATACTCTTACCGACCTATTAACAACA  
AGTAGATCAACGCCAGGAGAATTAGTAATGTGTCAGGAGAAATTGGTACAAGAAGCCG  
TAGATATACTTCTTGATAATGGAATCCGCGGACAACCAATGAGGGACGGCCATAATAAA  
GTTTACAAGTCATTTTCAGATGTAATTGAAGGCAAAGAGGGAAGATTCGTGAGACTC  
TGCTTGGCAAACGGGTCGATTATTCAGGGCGTTCGTCATTGTCGTGGGCCCTCACTT  
TCATTACATCGATGTGGATTGCCCGCGAAATAGCAATAGAGCTTTTCCAGACATTTGTA  
ATTCGTGGTCTAATTAGACAACATCTTGCTTCGAACATAGGAGTTGCTAAGAGTAAAAT  
TCGGGAAAAGAACCATTGTATGGGAAATACTTCAGGAAGTTATGCAGGGGCATCCC  
GTATTGCTAAATAGAGCACCGACTCTGCATAGATTAGGCATACAGGCATTCATCCTGTT  
TTAGTGGAAGGTCGTGCTATTTGTTTACATCCATTAGTTTGTAAAGGATTCAATGCAGAC  
TTTGACGGGGATCAAATGGCTGTTTCATGTGCCTTTATCTTTGGAGGCTCAAGCAGAAGC  
ACGTTTACTTATGTTTTCTCATATGAACCTTTTGTCTCCAGCTATTGGGGATCCTATTTCC



GTACCAACTCAAGATATGCTTATTGGACTCTATGTCTTAACGAGCGGGAATCGTCGGGG  
TATTTGTGTAAATAGGTATAATCCATGTAATCGC-----AGAACTATCAAATGAAAGA  
ATTTACGATAATAACTATAAGTATACGAAA-----GAACCTTTTTTTTGTAAATCCTATGATG  
CAATTGGAGCTTATCGGCAGAAACGAATCAATTTAGATAGTCCTTTGTGGCTCCGGTGG  
CGACTAGATCAACGC---GTTATTTCTGCA-----AAAGAAGCCCCCTCGAAGTTCACTAT  
GAATCTTTGGGTACCTATTATGAAATTTATGGGCAATATCTAATAGTAAGAAGTATAAAA  
AAAGAAATTCTATATATATATATATTCGAACACTGTTGGTCATATTTCTTTTTATCGAGAAA  
TCGAAGAAGCTATACAGGGGTTTTGTGTCAGGCCTGTTTCATATGGTCCC-----  
ATGGAGGTACTIONTATGGCAGAACGGGCCAATCTGGTCTTTCACAATAAAGTGATAGACG  
GAACTGCCATGAAACGACTTATTAGTAGATTAATAGATCACTTCGGAATGGCATATACAT  
CACACATCCTGGATCAAGTAAAGACTTTGGGTTTTCAACAAGCTACTGCTACATCCATT  
TCATTAGGAATTGACGATCTTTTAAACAATCCCTTCTAAGAGATGGCTAGTTCAAGATGCT  
GAACAACAAAGTTTAAATTTTGGAAAAACACCACCATTATGGGAATGTACACGCGGTAG  
AAAAATTACGTCAATCCATTGAGATATGGTATGCTACAAGTGAATTTTTGCGACAAGAA  
ATGAATCCTAATTTTAGGATGACTGACCCCTTTAATCCAGTTCATATAATGTCTTTTTTCGG  
GAGCTAGAGGAAATGCATCTCAGGTACATCAATTAGTAGGTATGAGAGGATTAATGTGCG  
GATCCCCAAGGACAAATGATTGATTTACCCATTCAAAGCAATTTACGCGAAGGACTCTC  
TTTAAACAGAATATATTATTTCTTGCTACGGAGCCCGTAAAGGGGTTGTGGATACTGCTGT  
ACGAACCTCAGATGCTGGATATCTCACGCGCAGACTTGTGAAGTAGTTCAACACATT  
GTTGTACGTCGAAAAGATTGTGGCACCGTCCGAGGTATTTCTGTGAGTCCCCGAAATG  
GGATGATGCCG---GAAAGGGTTTTTATCCAAACATTAATTGGTTCGTGTATTAGCGGATGA  
TATATATCTGGGTCCACGATGTATTGCCACCAGAAATCAAGATATTGGTAGTGGACTTGT  
CAATCGATTCATAACC-----TTTCGAGCACAAACCAATATATATTCGAACCTCCCTT  
TACTTGTAGGAGTACATCTTGGATCTGTGCGATTATGTTATGGCCGGAGTCCACTCACGG  
CGATCTGGTTCGAATTGGGAGAAGCTGTGGGTATTATTGCAGGTCAATCTATTGGAGAAC  
CGGGTACTCAATTAACATTAAGAACCTTTCATACCGGCGGAGTATTCACAGGGGGTACT  
GCAGAACATGTGCGAGCCCCTTCTAATGGAAAAATAAAATTCAATGAGGATTTGGTTCA  
TCCGACACGTACACGTCATGGACATCCTGCTTTTCTATGTTCTATAGACTTGTATGTAAC  
TATTGAGAGTGAAGATATTATACATAATGTGAATATTCCACCTAAAAGTTTTCTTTTAGTC  
CAAATGATCAATATGTAGAATCAGAACAAGTGATTGCTGAGATTCCGCGCAGGAACAT  
CCAATTTNTTTAATTTTAAAGAGAAGTTTCGAAAACATATTTATTCTGACTCAGAGGGA  
GAA---ATGCACTGGAATACCGATGTGTATCATGCACCTGCATTTACTTATGGGAATGTTT  
ATCTCTTACCAAAAACAAGTCATTTATGGATATTATTAGGAGAGCCATGCAAA-----TCC  
GATCTAGTCGCCCTCTCGATCCACAAGGATCAAGATCAAATGAACGCCAT-----TCTCT  
TTCTGTCAAGAGAAGATATATTTCTAACCTCTCA-----GTAACATAATGATCAA---GCGAGA  
CACAAATCTTTAGTTTCGGATTTTTCTGGTAAA---GAAGATAGGATTCCTGATTAT---TCA  
GAACTTAATCGA-----ATTGGTCATTGTAATCTCACATATCTG---GCCATTCTCCACGAA  
AATTAT-----GATTTATTGGCAAGGAGACGAAGAAATAGATTCATCATTCCACTCCAATCG  
ATTCAAGAACACGAGAACGCACTAATGCCCTCTTCGGGGATCTCGATTGAAATACCC---  
---ATAAATGGTATTTTCCGTAAAATAAGTATTCTTGCTTATTTTCGATGATCCTCGATACAG  
AAGAAAGAGTTTCGGGAATTACTAAATATGGCACTATAGAAGTGCATTCAATCGTCAAAA  
AAGAGGAT-----TTGATTGAGTATCGAGGA---GTCAAGGAATTTAGGCCAAAATACATGA  
AAGTGGATCGATTCTTTTTTCATCCCGAGGAAGTGCATATCTTACCTGGATCTTCTTCCA  
TAATGGTACGGAACAATAGTATTATTGGGGTAGATACACAAATCACTTTAACTACAAGA

AGCCGAGTAGGCGGATTGGTCCGAGTGGAGAGAAAAAAAAAAAAATAATTGAACTTAAA  
ATATTTTCTGGAGATATCCATTTTCTGGAGAGACGGATAAGATATCCCGACATAGTGGC  
GTCTTGATACCACCAGGAACC-----GGAAAAAAAAAATTCCAAGGAATACAAAAA-----  
TGGAAAAATTGGATCTATATCCAACGG-----ATCACACCTACCAAG-----AAAAAGTATTT  
TGTTTTGGTTCGACCTGTAGTCACATATGAAATAATGGACGGTATAAATTTAGCA---CTT  
TTCTTCCCGGATCTGTTGCAGGAAAGGGATAATGTGCAACTTCGAGTTGTCAATTATAT  
CCTTTATGGAAATGGCAAACCAATTCGGGGATTTTATGACACAAGTATTCAATTAGTTAG  
GACTTGTTTAGTATTAAATTGGGTCCAAGACAAAAA-----AGTTCCTTCTATCGAAGA  
GGCCCGTACTTCCTTTGTTGAAATAAGGATAAATGGTTTGATTTCGAGATTTTCTAAAAAT  
CGACTTAGCAAAATCCCCTATTTTCGTATACCGGAAAAAGGAAAGATCCATCGGGTTCAG  
GATTGATCTCTGAG---AATGGATCAGATCGCACCAATATAAATCCGTTTTCTTCCAGTTT  
TTTCTAT-----TCCAAGGCAAGGATTAAGAATCCCTTAATCAAAACCAAGGAACTATT  
CATACATTGTTGAATAGA-----AATAAGGAATGCCAATCTTTGATAATTTGTGCATCATC  
CAATTGTTTTCGAATGGGTCCA-----TTCAACGATGTAAAATATCACAATGTG-----ATA  
AAAGAATCA---CCCCTAATTCCAATTAGTAATTCGTTGGGACCTTTAGGAACG-----GCC  
CTTCAAATTGCGAATTTTTATTCA-----TTTTCCCACTTA-----ATAACTTATAATCAGATCC  
TG--GTAACATACTATTTGCAACTTGACAATTTAAAA-----CAGAGTTTTAAAGTACTT  
AAA-----TATTATTTAATGGATGAAAAT-----GGGAAAATTTATAATCCCGATCGATGCTG  
TAACATTATTTTGAATCCATTCAATTTGAATTTGGTTTTTTCTCCAGCACAAATTATTGTGAA  
GAGACGTCT---ACAACAATGAGTCTTGGGCAGTTTATTTGTGAAAATGTATGTATAGACA  
AAAATGGACCACAC---CTAAAA-----ACGGGTCAAGTTCTAATTGTTCAA---GTTGACTC  
TGTAAGTAATACGATCCGCTAAGCCTTATTTGGCCACCCCAGGAGCAACTGTTTCATGGCC  
ATTATGGGGAAATCCTTTACGAAGGAGATACATTAGTTACATTTATATATGAAAAATCGC  
GATCTGGTGATATAACGCAGGGTCTTCCAAAAGTCGAACAGGTGTTAGAAGTGCGTTC  
GATTGATTCAATATCGATGAATCTCGAAAAGAGGGTTGAGGGCTGGAACGAATGTATAA  
CAAGAAATCTTGAATTCCTTGGGGGTCTTGATTGGTGCTGAGCTAACTATAGTGCAA  
AGTCGTATTTCTTTGGTTAATAAGATCCAAAAGGTTTATCGATCCCAGGGGGTGCAGAT  
CCATAATAGGCATATAGAAATTATTGTACGTCAAATAACATCAAAAGTGTGGTTTCAGA  
A-----GATGGGATGTCTAATGTTTTTTTACCCGGAGAATTTATTGGATTGTTGCGAGCG  
GAACGAATGGGGCGCGCTTTGGAAGAAGCGATCTGTTACCAAGCCGTCTTATTGGGAA  
TAACAAAAGCATCTCTGAATACTCAAAGTTTCATATCCGAAGCGAGTTTTCAAGAACT  
GCTCGAGTTTTAGCAAAAGCAGCTCTCCGGGGTTCGTATCGATTGGTTGAAAGGCCTGA  
AAGAGAACGTTGTTCTGGGGGGAATGATACCCGTTGGTACCGGATTCAAAGGATTG-----  
-GTGCCCCCTTCGAGGCAACATAAGAACATTCCC-----TTGGAAACCAAAAATAAGAATC  
TATTCGAGGGGGAAATGAGA-----GATATTTTGTTCACCACAGAAAATTTTTTATTCT  
TGCCTTTCAAAGAATTTCCATGATACACCAGAACAATCATTATAGGA-----TTT  
AATGATTCCATGACAAAAAGATATTGGAACATCAATTTGGAAGAGATGATGAAGGCCG  
GAGTTCATTTTGGACATGGTACTAAGAAATGGAATCCTAAAATGGCCCCTTATATCTCTG  
CAAAGCGTAAAGGTATTCATATTACAAATCTTACTAGAAGTCTCGTTTTTTATTAGAAG  
CTTGTGATTTGGTTTTTTGATGCAGCAAGTAGGGGAAAACAATTCCTAATCGTTGGCACT  
AAAAATAAAGCAGCTAACTTAGTAGCATGGGCTGCAATAAAGGCTCGGTGTCAATTATGT  
TAATAAAAAATGGCTCGGCGGTATGTTAACGAATTGGTCCACTACAGAAACGAGACTT  
CATAAGTTTAGAGACTTGAGAACAGAACAAAAAACGGGGAGACTCAACCGTCTTCCG  
AAAAGAGATGCGGCTATGTTGAAAAGACAATTATCTCACTTGCAAACATATCTGGGCG

GGATTAAATATATGACAGGGTTACCAGATATTGTAATCATCGTTGATCAGCACGAAGAAT  
ATACGGCCCTTCGAGAATGTATCACTTTGGGAATTCCAACAATTTGTTTAATCGATACAA  
ATTGTGACCCTGATCTTGCAGATATTTGATTCCAGCGAACGATGACGCTATATCTTCAA  
TCCGATTAATCTTAACAAATTAGTATTCGCAATTTGTGAGGGGCGTTCT--AGCTATATA  
AGAAATCCGATGGGACAAAAATAAATCCACTCGGTTTCAGGCTTGGTACAACCCAAG  
GTCATCATTCCCTTTGGTTTGCACAACCAAAAAATTATTCTGAAGGTTTACAAGAAGAT  
CAAAAAATAAGAGATTTTATCAAGAATTATGTACAAAAAATATGAAAATTTCTCTAG  
C---GTTGAGGGGAATTGCACGTATAGAGATTCAAAAACGAATCGATCTGATCCAGGTCAT  
AATCTATATGGGATTCCCAAAGTTATTAATAGAAAAGTCGACCGCGA-----GGAATCG  
AAGAATTGCAGATGAATCTACAAAAGAATTTAATTGTGTGAACCGAAAACCTTAACATT  
GCTATCACAGAATTGCAAAACCTTACGGAAGCCCTAATATTCTTGCGGAATTTATAGC  
CGGCCAATTAAGAATAGAGTTTCATTTGAAAAGCAATGAAAAGGCTATTGAATTA  
ACTGAACAAGCAGATACAAAAGGAATTC AAGTACAAATTGCAGGGCGTATCGACCGGA  
AAAGAAATTGCGCGTGTGGAATGGATCAGAGAAGGTAGGGTTCCCTGCAAACCATTC  
GAGCTAAAATCGATTATTGTTCTTACAGTTTCAACTATTTATGGAGTATTAGGCATCA  
AAATTTGGATATTTATAGACGGGGAAATGTCGCGTTACCGAGGACCTCGTTTCAAAAA  
ATACGCCGCCTGGGAGCTTTACCGGGACTAATAAAAAGGCCTAGAGCCGGAAGTG  
ATCTTAGAAATCAATCGCGTTCCGGGAAA---AAATCTCAATATCGTATTCGTCTAGAAGA  
AAAACAAAAATTGCGTTTTTATTATGGTCTTACAGAACGACAATTACTTAAATACGTTT  
GTATCGCCGAAAAGCCAAGGGGTCAACAGGTCAGGTTTTACTCCAATTACTTGAAT  
GCGCTTGGATAACATCCTTTTTTCGATTGGGTATGGCTCCGACTATTCCCGGAGCCCGTC  
AATTAGTTAACCATAGACATATTTTAGTCAATGGTCGTATAGTAGATATAGCAAGTTATCG  
CTGCAAACCCCGAGATATTATTACGGCGAGGGATGAAGAAAACCTCTAGAACTCTGATT  
CAAATTTCTCTCGATTTCGTCTCTCAT--GACGAATTGCCAAAACATTTGACCCTTCACC  
CATTCCAA-----TATAAAGGATTAGTCAATCAAATTATAGATAGTAAATGGGTTCGGTTTGA  
AAATAAATGAATTGCTAGTTCGTAGAATATTATTCGCGCCAGACTATGTCACGTCGAGGTA  
CTGCAGAAGAAAAAACTGCAAATCCGATCCAATTTATCGTAATCGATTAGTTAACATG  
TTGGTTAACCGTATTCTGAAACACGGAAAAAAATCATTGGCTTATCAAATTATCTATCGA  
GCCGCGAAAAAGATTCAACAAAAGACAGAAACAAATCCACTATCTGTTTTACGTCAAG  
CAATACGTGGAGTAACCTCCGATATAGCAGTAAAGCAAGACGTGTAGGTGGATCGAC  
TCATCAAGTTCCCATGAAATAGGATCCACACAAGGAAAAGCACTTGCCATTCTGTTGGT  
TATTAGCGGCATCCCGAAAACGTCCGGGTCGAAATATGGCTTTCAAATTAAGTTCCGAA  
TTAGTGGATGCTGCCAAAGGGAGTGGCGATGCCATACGCAAAAAGGAAGAGACTCATA  
GAATGGCAGAGGCAAATAGAGCTTTTGCACATTTTCGTATGGGTAAGGATACTATTGCT  
GACATAATAACCTCTATACGAAATGCTGATATGGATAAAAAAAGAGTGGTTTCGAATAGC  
ATCTACTAATATCACTGAAAATATTGTTAAAATACTTTTACGAGAAGGTTTTATCGAAAA  
CGTGAGAAAACACCAAGAAAACAAAAAGGATTTTTTGGTTTTAACCTACGACATAGA  
AGG-----AATAGGAAAAGGCCTTAT-----AGAAATATTTTAAATTTAAAACGGATCAGT  
CGGCCTGGTCTACGAATCTATTCTAACTATCAACGAATTCCTAGAATTTTAGGCGGGATC  
GGAATTGTAATTTCTACTTCTCGAGGTATAATGACAGACCGAGAGGCTCGACTAGA  
AAGAATTGGCGGAGAGATTTTGTGTTATATATGGATGGCAAAAGCTATACCGAGAAGTG  
GTTTCGCGTAGGAATGGTCGTATTGGTTCACGTAAGAGTACACGTAGAATACCAAAGGG  
GGTATTTCATGTTCAAGCAAGTTTCAATAATACGATTGTGACTGTTACAGATGTACGGG  
GTCGGGTGGTCTCTTGGTCTCTGCCGGCACTTGTGGATTCAAGGGTACAAGAAGGGG

GACGCCGTTTGGCTGCTCAAACCGCAGCAGGAAACGCTATTCGTACAGTAGTGGATCAA  
GGTATGCAACGAGCAGAAGTCATGATAAAAGGACCCGGTCTCGGAAGGGACGCAGCA  
TTACGAGCTATTCGCAGAAGTGGTATACTATTAACCTTTCGTGCGAGATGTAACCCCTATG  
CCACATAATGGCTGTAGACCTCCGAAAAAACGACGTGTGATGCCAACCATTAACAAC  
TTATTAGAAATACAAGACAGCCAATCAGAAATGTCACAAAATCCCCGCGCTTCGGGG  
ATGCCCCCAGCGTCGAGGAACATGTAAGGGTGTATGTGATCACCCCCAAAAAACCA  
AACTCTGCCTTACGTAAAGTTGCCAGAGTACGATTAACCTCTGGATTGAAATCACTGC  
TTATATACCCGGTATTGGCCATAATTCACAAGAACATTCTGTAGTCTTAGTAAGAGGGGG  
AAGGGTTAAGGATTTACCCGGTGTGAGATATCACATTGTTGAGGAACCCTAGATGCTG  
TCGGAGTAAAGGATCGTCAACAAGGGCGTTCTAGTGATGGAGTAAAAAAGCCAAAA  
TGGCAAGGAAAAGTTTGATTTCAGAGGGAGAAGAAGAGGCAAAAATTGGAACAGAAAT  
ATCATTCGATTCGCCGATCCTCAAAAAAAGAAATAAGC-----AAAGTTCTATCGTTAA  
GCGACAAATGGGAAATTTATGGAAAGTTACAATCCCCACCGCGGAATAGTGCACCTAC  
ACGTCTTCATCGACGTTGTTTTTCGACCGGAAGGCCGAGAGCTAACTATCGAGACTTT  
GGACTATCCGGACACATACTTCGTGAAATGGTTCATGCATGTTTGTGGCCAGGGGCGAC  
AAGATCAAGTTGGATGATAAAAAATCCATTCAGTTCAATTATTTGAAA-----GAGGAAA  
ACAAAGACAACAAGGGGTCTGCTGAATTTCAAGTAGTCAGTTTGACCAATAGGATACG  
AAGACTTACTTCACATTTGGAATTGCACAAAAAAGACTATTTATCTCAGAGAGGTCTGC  
GTAAAATTCTAGGAAAGCGTCAACGGCTACTGGCTTATTTGTCAAAAAAAAATAGAGT  
ACGTTATAAAGAATTAATTGGTCGGTTGGATATTCGAGAAACAAAAACTCGT-----ATGG  
TAAAACCTCGTTTGAAACGATGTGGTAGAAAGCAACGAGCCGCTATCGAATCGTTGC  
AATTGATGTTTCGATCCCGAAGAGAAGGAAGAGATCTTCGGAAAGTGGGTTTTTATGAT  
CCGATAAAGAATCAAAGTTGTTTAAATGTTCCCTGCTATTCTATATTTCTTGAAAAAGGC  
GCTCAGCCTACAGGAAGTTCGGGATATTTTAAAGAAGGCGGAGGTTTTTAAG-----  
-----ATGGATAAATCCAAGCGACCTTTTCTTAAATCCAAGCGATCTTTTCGT  
AGGCGTTTGCCCCGATCCAATCGGGGGATCGAATTGATTATAGAAACATGAGTTAAT  
TAGTCGATTTATTAGTGAACAAGGAAAAATATTATCTAGACGGGTGAATAGATTGACCTT  
GAAACAACAACGATTAATTACTATTGCTATAAAACAAGCTCGTATTTTATCTTTGTTACC  
TTTTCTTAATAATGATAAACAAAAACAATTTGAAAGAACCGAGTCGACCGCTAGAACT  
GCTGGTCTTAGAGCCAGAAAAAAGTGACACGTTCACTAAAAAAAATCCTTTTGTAG  
CAAATCGTTTATTAAGAAAAATTGATAAGCTTAACACAAAAGAAGAAAAAGAAATAAT  
ATAACTTGGTCCCGGGCATCTACCATTATAACCCACAATGATCGGCCATACTATTGCTAT  
CCATAATGGAAAGGAGCATTGTCCTATTTATATAACCGATCGTATGGTAGGCCATAAAT  
GGGAGAATTTGCACCTACTTTAAATTTCCGAGGACATGCGAAAAGCGATAATAGATCTC  
GTCGTATGATTTTGAATCTTTTCTACTAGGTAATCTAGTATCCTTATGCATGAAGATAAT  
CAATTCGGTCGTTGTGGTCGGACTCTATTATGGATTTCTGACCACATTCTCCATAGGGCC  
CTCTTATCTCTTCTTCTCCGAGCTCGGGTTATGGAAGAAGGAGAAGAAGGAACCGAG  
AAGAAGGTATCAGCAACAACAGGTTTTATTACGGGACAGCTCATGATGTTTCATATCGAT  
CTATTATGCGCCTCTGCATCTAGCATTGGGTAGACCTCATAACAATACTGTACTAGCTCT  
ACCGTATCTTTGTTTCATTTCTTCTGGAATAATCAAAAAACTTTTTTGATTATGGATCT  
ACTACCAGAAATTCAATGCGTAATCTTAGCATTCAATGCGTATTCCTGAATAATCTCATT  
TTCAATTATTCAACCATTTCAATTTTACCAAGTTCAATGTTAGCCAGATTAGTCAACATTT  
ATATGTTTCGATGCAACAACAAGATGTTATTTGTAACAAGCAGTTTTGTTGGTTGGTTAA  
TTGGTCACATTTTATTTCATGAAATGGGTTGGATTGGTATTAGTCTGGATACGGCAAAATC



-----  
-----  
-----  
-----  
-----AGCCAATTGAAAGGATCTTCT--GATCAATCCAG  
AGATCCTTTAGATTCCATTAGT-----AATGAGGATTCGGAA-----  
-----TATCACACATTGATCAATCAAAGAGAGATTCAACAACATAAAAGAAAGATCGATTCT  
T--TGGGAT-----CCTTCCTTTCTTCAAACGGAACGAACAGAGATAGAATCAGAC-----CG  
ATTCCCGAAA-----TGCCTTTCTGGATATTCC-----TCAATGTCCCGGCTATTCACG--GAA  
CGTGAGAAGCAGATGATTAATCATCTGCTTCCGGAAGAAATCGAAGAATTTCTT-----GG  
GAATCCTACAAGATCCGTTTCGTTCTTTTTTCTCTGACAGATGG-----TCAGAACTTCAT--  
CTGGGTTCGAATCCTACTGAGAGGTCCACTAGAGATCAG-----AAATTGTTGAAGA  
AAACAACAAGATCTTTCT--TTTGTCCCTTCGAGGCGATTCGGAA-----AAGAAAGAAA  
TGGTTAATATATTCAAGATAATTACGTATTTACAAAAT-----ACCGTCTCAATTCATCCTAT  
TTCATCATATCCGGGATGTGATATGGTTCCG---AAGGATGAACCGGAT--ATGGATAGTTC  
CAATAAGATTTTCAATCTTGAACAAAAATCCATTTTTTGATTTA-----TTTCATCTATTCCAT  
GACCGGAACAGGGGAGGATACACGTTA-----CACCACGATTTTGAATCAGAA-----GAG  
AGATTTCAAGAAATGGCAGATTTATCACTCTATCAATAACCGAGCCG--GATCTGGTGT  
ATCATAAGGGATTTGCCTTTTCTATTGATTCCTACGGATTGGATCAAAAACAA-----TTCT  
TGAATGAGGTATTCGACTCCAGGGATGAATCGAAAAAAAATCT-----TTATTGGCTCT  
ACCTCCTTTTTTTTAT-----GAAGAGAATGAATCCTTTTATCGAAGGATCAGAAAAAAT  
GGGTCCGG---ATCTCCTGCGGGAATGATTTGGAAGATCCAAAACCAAAAATAGTGGTAT  
TTGCTAGCAACAACATAATGGAGGCAGTCAATCAATATAGATTGATCCGAAATCTGATT  
CAAATCCAATATAGCACCTATGGG-----TACATAAGAAATGTATTGAATCGATTCTTTTTA  
ATGAAT-----AGATCCGATCGCAACTTCGAATATGGA-----ATTCAAAGGGATCAAAT  
AGGAAAGGATACTCTGAATCATAGAACTATAATGAAATATACGATCAACCAACATTTATC  
GAATTTTAAAAAG---AGTCAGAAGAGATGGTTTCGATCCTCTT-----ATTTTTATTCTCGA  
ACCGAGAGATCCATGAATCGGGATCCTGATGCATATAGATACAAATGGTCCAATGGGAG  
CAAGAATTTCCAGGAACATTTGGAACATTTTCGTTTCTGAGCAGAAGAGCCGT-----TT  
TCAAGTAGTGTTTCGATCGATTACGTATTAATCAATATTCGATTGATTGGTCTGAGGTTATC  
GACAAAAAAGGTTTGTCTAAGCCATTTTCGTTTCTTTTTTGTCCAAG-----  
-----TTGCTTTTCTTTTTGTCTAAC---TCACTTCCTTTTTTCTTT  
GTGAGTTTCGGGAATATCCCCATTCATAGGTCCGAG---ATCTACATCTAT--GAATTGAAA  
GGTCCGAATGATCAACTCTGCAATCAGTTGTTAGAATCAATAGGTCTTCAAATCGTTCA  
TTTGAAAAAATGGAAACCCTTC-----TTATTGGATTTATTGGATGATCATGATACTTCC--C  
AAAAATCGAAATCTTGATCAATGGAGGAACAATATCACCATTTTTGTTCAATAAGATA  
CCA---AAGTGG---ATGATTGACTCATTCCATACTAGA-----ATAATCGCAGGAAATCCTT  
TGATAACACGGATTCCTATTTCTCAACGATATTCCACGATCAAGACAATTGGCTGAATCC  
CGTGAAACCATTTTCATAGAAGTTCATTGATATCTTCTTTTTATAAAGCAAATCGACTTCG  
ATTCTTGAATAATCCACATCACTTCTGCTTCTAT-----TGTAATAAAAGATTCCCTTTTTAT  
GTG-----GAAAAGGCCCGTATCAAT-----AATTATGATTTTACGTATGGA---CAATTCC  
TCAATATCTTGTTCAATCACAACAAA---ATTTTTTCTTTGTGCGTCGGTAAA-----AAAAA  
ACATGCTTTTTGGGGG---AGAGATACTATTTACCAATCGAGTCACAGGTATCTAACATA  
TTCATACCTAACGATTTTCCACAAAGTGGTGGTGACGAAACGCATAACTTGTACAAATC

T-----TTCCATTTTCCAAGTCGATCCGACCCATTTCGTTTCGT-----AGAGCTATTTACTCGA  
TCGCAGACATTTCTGGAACACCTTTAACAGAGGGACAAATAGTCAATTTTGAAAGAAC  
TTATTGTCAACCTCTTTCAGATATGAATCTATCTGATTTCAGAAGGGAAGAACTCGCATCA  
GTATCTCAAT-----TTCAATTCAAACATGGGTTTGATTACACTCCATGTTCTGAGAAATA  
TTTACCATCCGAAAAG-----AGGAAAAAA-----CGGAGTCTTTGTCTAAAG  
-----AAATGCGTTGAGAAAGGGCAGATGTATAGAACCTTTCAACGAGATAGTGCTTTTTTC  
AACTCTCTCAAAATGGAATCTATTCCAAACATATATGCCATGGTTTCTTACTTCGACAGG  
GTACAAATATCTAAATTTTATATTTTTAGATACTTTTTTCAGACCTATTG-----CCGATACTA  
AGTCTA---AGTCAAAAATTTGTATCCATTTTTCATGATATTATGCATGGATCAGATATATCA  
TGCGGAATTCCTCAGAAAAAATTG-----TGGAAGACAAAATGGAATCTG---ATA  
AGTGAGATTTTCGAGTAAGTGTTTACATAAT-----CTTCTTCTGTCCGAAGAAAGGATTCA  
TCGAAAT-----AATGAGTCGCCATTGATATCGACACATCTGAGATCGCCAAATGTTCCGGG  
AGTTC---CTCTATTCAATCCTTTTCTTCTTCTTGTGCTGGATAT---CTCGTTTGTACACA  
TCTTCTCTTTGTTTCCCGG-----GCCTCTAGTGAGTTACAGACAGAGTTTGAAAAGGTCA  
AATCTTTGATGATTCCATCATCTATGATTGAGTTGCGAAAACCTTCTGGATAGGTATCCTA  
CATCTGAACCGAATCTTTCTGGTTAAAGAATCTCTTTCTAGTTGCTCTGGAACAATTAG  
GAGATTCTCTAGAAGAAATACGGGGTTCTGCTTCTGGCGGCAACATGCTATTGGGTGGT  
GATCCCGCT-----TATGGG---GTCAAATCAATACGTTCTAAGAAGAAATATTTGAAT  
ATCAATCTCATCGATATCATCGATCTCATA---AGTATCATACCAAATCCCATCAATCGAAT  
CACTTTTTTCGAGAAATACGAGACATCTAAGTCATACAAGTAAAGAGATCTATTCAATTGAT  
AAGAAAAAGAAAAAATGTGAACGGGGATTGGATTGATGATAAAATAGAATCCTGGGTC  
GCAAACAGTGATTTCGATTGATGATGAAGAAAGAGAATTCTTGGTTCAGTTCTCC-----A  
CCTTAACGACA-----GAAAAAAGGATTGATCAAATTCATTGAGTCTGACT---CATAGTG  
ATCATTTA-----TCAAAGAATGACTCTGGCTATCAAATGATTGAACAACCGGGAG  
CAATTTACTTACGATACTTAGTTGACATTCAT-----AAAAAGTATCTAATGAATTATGAGTT  
CAATACATCTGTTTAGCAGAAAGACGGATATTCCTTGCTCATTATCAGACAATCACTTA  
T-----TCACAAACCTCGTGTGGGGCTAATAGTTTTAATTTCCCATCTCATGGA-----AAA  
CCCTTTTCGCTCCGCTTAGCCTTATCCCCCTCT---AGGGGTATTTTAGTGATAGGTTCTAT  
AGGAACTGGACGATCCTATTTGGTCAAATACCTAGCGACAACTCCTATGTTTCTTTCA  
TTACGGTATTTCTGAACAAGTTCCTGGATAACAAGCCTAAAGGTTTCTTATTGAT-----  
-----GATAGTGAC---ATTGATGATAGTGACGATATTGATGCTAGTGACGATATTGATGCTA  
GTGACGATATTGATGCT-----AGTGACGATATCGATCGTGACCTTC  
ATACGGAGCTG---GAACTGCTA-----ACTATGGATATGATGCCGGAA-----ATA  
GACCGATTTTATATCACCTTCAATTTCGAATTAGCAAAAGCAATGTCTCCTTGCATAATA  
TGGATTCCAAACATTCATGATCTGGATGTGAATGAGTCGAATTACTTCTCCCTCGGTCTA  
TTAGTGAACCATCTCTCCAGG-----GATTGTGAAAGATGTTC---ACTAGAAATATTCT  
TGTTATTGCTTCGACTCATATTCCTCCAAAAGTGATCCCGCTCTAATAGCTCCGAATAA  
ATTAAATACGTGCATTAAGATACGAAGGCTTCTTATTCCACAACAACGAAAGCACTTTT  
TCACCCTTTCATATACTAGGGGATTTTCGCTTGGAAAAGAAAATGTTCCATACT-----AATG  
GATTCGGGTCCATAACCATGGGTTCCAATGCACGAGATCTTGTAGCACTTACCAATGAG  
GCCCTATCGATTAGTATTACACAGAAGAAATCAATTATAGACTAATACAATTAGATCC  
GCTCTTCATAGACAAACTTGGGATTTGCGA-----TCCAGGTAAGATCGGTTCAAGGAT  
CATGGGATCCTTTTCTATCAGATAGGAAGGGCTGTAGCACAAAATGTACTTCTAAGTAA  
TTGCCCCATAGATCCTATATCTATCTATATGAAGAAGAAA-----TCATGTAACGAAGGGGA

TTCTTTTTGTACAAATGGTACTTCGAACTTGGAACGAGCATGAAGAAATTAACGATAC  
TTCTTTATCTTTTGAGTTGTTCTGCCGGATCGGTGCTCAAGATCTTTGGTCTCTACCC---  
---GGACCCGATGAAAAA---AATGGGATCACTTCTTATGGACTCGTTGAGAATGATTCT--  
GATCTAGTTCATGGCCTATTAGAAGTAGAAGGCGCTCTGGTGGGA-----TCCTCGCGGA  
CAGAAAAAGATTGCAGTCAGTTTGATAATGAT-----CGAGTGACATTGCTTCTTCGGCCC  
GAACCAAGGAAT--CCCTTAGATATGATGCAAAATGGATCTTGTTCTATCCTTGATCAGA  
GATTTCTCTATGAAAAAAC-----GAATCGGAGTTTGAAGAA---GGGAAGGAGAAGGA  
GCCCTCGACCCGCAACAG-----ATAGAGGAGGAT-----TTATTTAATCAC-----AT  
AGTTTGGGCTCCT-----AGAATATGGCGCCCT-----TGGGGCTTTCTATTTGATTGTATCG  
AAAGGCCCAATGAATTGGGATTTCCC---TATTGGTCCAGGTCATTTCTGGGGCAAG-----  
CGGATCCTTTATGATGAAGAGGATGAGCTTCAAGAGAATGATTCGGAGTTCTTGCAGA  
GTGGAACCATGCAGTACCAGACACGAGATAGATCTTCAAAGAACAAGGCCTTTTTTCG  
ATAAGCCAATTCATTTGGGACCCTGCAGATCCACTCTTTTTCCCTATTCAA---GATCAG  
CCTTTGTCTCTGTGTTTTACATCGAGAATTATTTGCAGATGAAGAGATGTCAAAGGG  
GCTTCTTACTTCCCAAACAGATCCTCCTACATCTATATATAAACGCTGGTTTATC-----AA  
GAAGACGCAAGAAAAGCACTTCGAATTGTTGATTAATCGCCAGAGATGGTTTAGA-----  
---ACCAATAGTTCATTATCT-----AATGGATCTTCCGTTCTAAT-----ACTCTATCCGAGAG  
TTATCAGTATTTATCAAATCTATTCCTATCTAAC---GGAACGCTATTGGATCAAATGACAA  
AGACATTGTTGAGAAAAAGATGGCTTTTCCCGGATGAAATGAAAATTGGATTC-----ATG  
GAACAGGAGAAAGATTTCCCATTCCTTATGCCTAGATCGAGG---ATAAATGGAAATTTTA  
TTGATAAGACCTTTTCAATTGTAGCCAATATCTTATTACGAATAATTCCCACAACCTCAG  
GAGAAAAAGAGGCATTTACCTATTACAGAGATGGT-----ATGTCAGCTCAATCCGAAGG  
AAATTATGCGGAAGCTTTACAGAATTATTATGAAGCTATGCGACTAGAAATTGATCCCTA  
CGATCGAAGTTATATACTTATAACATAGGACTTATCCACACAAGTAACGGAGAACATA  
CAAAAGCTCTGGAATATTATTTTCGAGCGCTAGAACGAAATCCGTTCTTACCACAAGCT  
TTTAATAATATGGCTGTGATCTGTCATTAC---CGGGGAGAACAGGCCATTCGACAGGGA  
GATTCTGAAATAGCGGAGGCTTGGTTCGATCAAGCCGCTGAGTATTGGAACAAGCTA  
TGGCGCTTACTCCTGGTAATTATATTGAAGCGCATAATTGGTTGAAGATCACGAGGCGT  
TTCGAA-----ATGAGTTGTCGATCAGAACATATATGGATAGAACCTATAACGGGGTCTCG  
AAAAACAAGTAATTTCTGCTGGGCCGTTATCCTTTTTTTAGGGTTCATTAGGATTCTTATT  
GGTTGGAACCTTCGAGTTATCTTGGTAGAAATTTGATATCTTTATTTCCGTCTGAGCAAAT  
CCTTTTTTTTCCACAGGGGATCGTGATGTCTTCTATGGAATCGCGGGTCTCTTTATTAG  
CTCCTATTTGTGGTGCACACTTTCGTTGAATGTAGGGGGTGGTTATGATCGATTTGATAG  
AAAAGAAGGAATGGTGTGTATTTTTTCGTTGGGGATTTCTGGAAAAAATCGTCGCATCT  
TCCTCCGATTCCTTATAAAGATATTAAGTCCGTCAGAATAGAAGTTAAAGAGGGTATTT  
ATGCTCGTCGTGTCCTTTATATGGACATCAGAGGTCAGGGGGCCATTCCCCTGACTCGT  
ACTGATGAGAAT--GTTACTCCACGGGAAATTGAACAAAAAGCTGCCGAATTGGCCTAT  
TTCTTGC GTGTACCGATTGAAGTATTT

>Metapanax

ATGGAAGATGGTGGTTCAATTCGATACTGTTTCTAAGTAAATCAACGGGTAGTCTTGG  
TCCTATTGAAAATACCAGTGAAAGTGAAGATCCGAATATAAATGATATGAAGAAAAATA  
TTCATAGTTACAGTAATGTTGATCATTATTCGGCGTCAAGGACATTCGGAATTTTCATCT  
CTGATGAAACTTTTTTAGTTAGGGATAGTAATGGGAACAGTTATTCATCTATTTTGGATAT  
TGAAATCATATTTTCGAGATTGACAATGGTCAT-----TCTTTTCAGAGTGAAGTAGAAA



GTTCTTTTTATAGTTATCGGAATTCTAGTTATCTGAATAATGGATCTAACAGTGACGATCC  
CCTACTATGATCATTACATGTATGATACTCAATATAGTTGGAATAATCACATTAATAGTTGC  
ATTGACAATTATCTTCAG-----TCTCAAATCTTTATTGAGACTGACATTGTAAGTGGTAGT  
GACAATTACAGTAACAGTTACATTTATAGTTCCATTTGTGGT-----GGTCCGGTATAAGA  
ACCAGCACGAATGGTAGTGATTTAACTATAAGAGAAAGTTCTAATGATCTGGATGTAAC  
TCAAAAATACAGGCATTTGTGGGTTCAATGTGAAAATTGTTATGGATTA AATTATAAGA  
AATTTTTTAAATCAAAAATGAATCTTTGTGAACAATGTGGATATCATTGAAAATGAGTA  
GTTTCAGATAGAATCGAACTTTTGATCGATCCGGGTACTTGGGATCCTATGGATGAAGAC  
ATGGTTTCTCTGGATCCCATTGAATTCATTCGGAGGAGGAGCCTTATAAAGATCGTATC  
GATTCTTATCAAAGAAAGACAGGATTA ACTGAGGCCGTTCAAACAGGCATAGGCCAAC  
TAAACAGTATTCCCGTAGCAATCGGGGTTATGGATTTTCAGTTTATGGGGGGTAGTATGG  
GATCCGTGGTTCGGGGAGAAAATCACCCGTTTGATTGAGTACGCTACTAAAAAATTTCTA  
CCTCTTATTATAGTGTGTGCTTCCGGGGGGGCACGCATGCAAGAAGGAAGTTTGAGCCT  
GATGCAAATGGCTAAAATATCTTCTGCTTTATATGATTATCAATCAAATAAAAAGTTATTC  
TATGTACCAATCCTTACATCTCCTACTACAGGTGGAGTGACTGCTAGTTTTGGTATGTTG  
GGGATATCATTATTGCCGAACCCAATGCCTACATTGCATTTGCGGGTAAAAGAGTAATT  
GAACAAACATTGAATAAAACAGTACCTGAAGGTTCAACAAGCGGCTGAATATTTATTCC  
AGAAGGGCTTATTCGATCTAATCGTACCACGTAATCCTTTAAAAGCGTTCTGAGTGAG  
TTATTTTCAGCTCCATGCTTTCTTTCTTTGAATCAAATTC AATTAAAATGGTAACCATT  
GAGCCGACGAAATTAGTAATATTATTCGTGAACGTATTGAGCAATATAATAGAGAAGTA  
AAGATTGTAAATACCGCACCGTACTGCAAGTAGGCGATGGCATTGCTCGTATTTCATGG  
TCTTGATGAAGTAATGGCGGGTGAATTAGTAGAATTTGAAGAGGGTACGGTAGGCATTG  
CTCTGAATTTGGAATCAAATAATGTCGGTGTGTTATTAATGGGCGATGGTTTGCTGATAC  
AAGAAGGAAGTTCTGTAAAAGCAACAGGAAGAATTGCTCAGATACCCGTGAGTGAGG  
CCTATTTGGGTCGTGTTGTAAATGCCCTGGCTAAACCTATTGATGGTAGAGGTGAAATTT  
CAGCTTCTGAATATCGGTTAATTGAATCTCCCGCTCCGGGTATTATTTACGACGTTTCAG  
TATATGAGCCTCTTCAAACGGGGCTTATTGCTGTTGATTTCGATGATCCCTATAGGACGTG  
GTCAGCGAGAATTAATTATTGGGGACAGACAGACCGGTAAAACAGCAGTAGCAACAG  
ATACGATTCTCAATCAACAAGGCCAAAATGTAATATGTGTTTATGTAGCTATTGGTCAA  
AAGCATCTTCTGTGGCTCAGGTAGTGACTACTTTCCAGGAAAGGGGGGCGATGGAATA  
CACTATTGTGGTAGCTGAAATGGCGGATTCCCCTGCTACATTACAATACCTCGCTCCTTA  
TACAGGAGCCGCTCTGGCGGAATATTTTATGTACCGTGAACGACACACTTCAATCATT  
ATGATGATCCCTCCAAACAAGCACAAGCTTATCGACAAATGTCTCTTCTATTACGAAGA  
CCGCCCCGGTCGCGAAGCTTATCCAGGGGATGTTTTTTATTTGCATTACGCCTTTTGG  
AAGAGCTGCTAAATTAAGTTCTCGTTTAGGTGAAGGAAGTATGACTGCTTTGCCAATAG  
TTGAAACTCAGTCGGGAGATGTTTCGGCTTATATTCTACTAATGTAATTTGATTACTG  
ATGGACAAATATTCTTATCTGCCGATCTATTCAATGCTGGAATCAGACCTGCTATTAATGT  
GGGTATCTCCGTTTCCAGAGTGGGATCTGCAGCTCAAATTAAGCTATGAAACAAGTC  
GCTGGCAAATTA A AATTGGA ACTGGCGCAATTCGCAGAATTAGAAGCCTTTGCACAAT  
TTGCTTCTGATCTCGATAAAGCTACTCAGAATCAATTGGCAAGAGGTCAACGATTACGT  
GAATTGCTCAAACAATCCCAATCAGCCCCTCTCGCGGTGGAAGAACAGATAATGACTA  
TTTATACCGGAACAAATGGTTATCTTGATTCATTAGAAATTGGACAGGTAAGGAAATTC  
TTGTTGAGTTACGTA CTTACCTAAAACTAATAAACCGAAGTTTCAAGAAATCATATCTT  
CTACTAAGATATTCACCGAGGAAGCAGAAGCCCTTTTGAAGAAGCTATTACAGGAACA

GACGGAACGTTTTATACTTCAGGAACAAGCAATGAGAATAAATCCTACTACTTCAGGTT  
CTGGGGTTTCCACGCTTGAAAAAAAAAACCTGGGGAATATCACCCAAATCATTGGTCC  
GGTACTGGATGTAGCTTTTCCACCGGGCAAGATGCCTAATATTTATAATGCTCTGGTAGT  
TAAGGGTCGAGATACTGTCCGGTCAACAAATTAATGTGACTTGTGAGGTACAGCAATTAT  
TAGGAAACAATCGAGTTAGGGCTGTAGCTATGAGTGCTACAGACGGTCTAACGAGAGG  
AATGGAAGTGATTGATACGGGAGCTCCTCTAAGTGTTCCGGTCCGGTGGAACGACTCTT  
GGACGAATTTTCAACGTGCTTGGAGAGCCTGTTGATAATTTAGGGCCTGTAGATACTCG  
CACAACATCTCCTATTCATAGATCTGCGCCCGCTTTATACAGTTAGATACAAAATTATCT  
ATTTTTGAAACCGGAATTAAGTAGTAGATCTTTTAGCCCCTTATCGCCGTGGAGGAAA  
AATCGGACTATTCCGGGGGGCTGGAGTGGGTAAAACAGTACTCATTATGGAATTGATTA  
ACAATATTGCCAAAGCTCATGGGGGTGTATCCGTATTTGGCGGAGTAGGTGAACGTACT  
CGTGAAGGAAATGATCTTTACATGGAAATGAAAGAATCTGGGGTGATTAATGAACAAA  
ATATTGCAGAATCGAAAGTGGCTCTAGTTTACGGTCAGATGAATGAACCACCGGGAGC  
TCGTATGAGAGTTGGTTTGACTGCCCTAACTATGGCTGAATATTTCCGAGATGTTAATGA  
ACAAGACGTACTTCTATTTATCGACAATATCTTCCGTTTCGTCCAAGCAGGATCTGAAGT  
ATCTGCCTTATTAGGTAGAATGCCTTCCGCTGTGGGTATCAACCCACCCTTAGTACCGA  
AATGGGTACTTTACAGGAAAGAATTACTTCGACCAAAGAAGGGTCCATAACTTCTATTC  
AAGCGGTTTATGTACCTGCAGACGATTTGACCGACCCTGCTCCTGCTACGACATTTGCA  
CATTTAGATGCTACTACTGTACTATCAAGAGGATTAGCCGCCAAAGGTATCTATCCCGCA  
GTAGATCCTTTAGATTCAACATCAACTATGCTCCAACCTCGGATTGTTGGTGAGGAACA  
TTATGAAACTGCGCAAAGGGTTAAGCAAACCTTACAACGTTACAAAGAAGTTTCAAGGAC  
ATTATAGCTATCCTTGGGTGGACGAATTATCCGAAGAGGATCGTTTAACCGTAGCAAG  
AGCGGAAAAATTGAGCGTTTCTTATCACACCCTTTTTCGTAGCAGAAGTTTTACTG  
GTTCTCCAGGGAAATATGTTGGTTTAGCAGAAACAATTAGGGGGTTTCAATTGATCCTT  
TCCGGAGAATTAGATGGTCTTCTGAACAGGCCTTTTATTTGGTAGGTAACATCGACGA  
AGCTACCGCGAAGGCTATGAACTTAGAAATGGAGAGCAATTTGAAGAAAATGACCTTA  
AATCTTTGTGTACTGACCCCTAATCGAACTGTTTGGGATTCAAAAGTGAACGAAATAAT  
TTTATCTACTAATAATGGCCAAATTGGCGTATTACCGGATCACGCCTCTATTGCCACAGC  
TGTAGATATAGGTATTTTGAGAATACGCCTTAACGGCCAATGGTTAACGATGGCTCTGAT  
GGGCGGTTTTGCTAGAATAGATAATAATGAGATCACTGTTTTAGTAAATGATGCGGAGA  
AGAGTAGTGACATAGATTCACAAGAAGCCCAGCAAACGCTTGAAATAGCGGAAGCTAA  
TTAAGAAAAGCTGAAGGAAAGAGACAAAAAATTGAGGCAAATTTAGCTCTCCGACG  
AGCTAGGACACGAGTAGAGACGATCAATGCGATTTTCGATGAAAAATGTAACCGATTCT  
TTCGTTTCTTTTGGCCACTGGCCGTCCGCCGGGAGTTTCCGGTTTAATACCGATATTTTA  
GCAACAAATCTAATAAATCTAAGTGTAGTGCTTGGGGTATTGATCTTTTTTGGAAAGGG  
AGTGTTAAGTGATTTATTAGATAATCGAAAACAGAGGATTTTGAATACTATTCGAAATC  
AGAAGAACTCCGTGAAGGGGCCATTGAACAGCTGGAAAAAGCCCGGGCGCGCTTACG  
AAAAGTGGAATTTTATTAATTCCACTTTTAAGACTTTGGAACAACCTAGAAAATTACAA  
AAACGAAACTATTCAATTTGAAACAACAAAGGGCGATTAATCAAGTCCGACAACAGGTT  
TTCCAACAAGCCTTACAAGGGGCTCTAGGAACTCTGAGTAGTTGTTTGAACAACGAGT  
TACATTTACGTACTATCAGTGCCAATATTGGCATCTTGGGGGCGATGAAAGAAATAACT  
GATATGAATCCACTGATTTCTGCCGCTTCCGTTATTGCTGCTGGATTGGCTGTAGGGCTT  
GCTTCTATTGGACCTGGAGTTGGTCAAGGTACTGCTGCGGGCCAAGCTGTAGAAGGTA

TCGCGAGACAGCCCGAGGCGGAGGGAAAAATACGAGGTACTTTATTGCTTAGTCTAGC  
TTTTATGGAAGCTTTAACAATTTATGGCCTGGTTGTAGCATTAGCACTTTTATTTGCGAA  
TCCTTTTGTATGAATGTTCTTTCTGTTCATCAACACACTAAAAGGGTTATACGATATA  
TCCGGTGTGGAAGTAGGCCAACATTTCTATTGGAAAATAGGAGGTTTCCAAGTCCACG  
GCCAAGTACTTATTACTTCTTGGGTTGTAATTGCTATCTTATTAGGCTCAGCCACTATAGC  
TGTTCCGGAACCCACAAACCATCCCGACCGGCGGTCAGAATTTCTTCCAATATGTACTTG  
AATTCATTGAGATGTGAGTAAAACCTCAAATTGGAGAAGAATATGGTCCTTGGGTTCT  
TTTATTGGAACATGTTTCTATTTATTTTGTCTAATTGGTCAGGAGCGCTTTTACCTT  
GGAAAATCATAAATTACCTCATGGGGAGTTAGCCGCACCCACGAATGATATAAATACT  
ACTGTTGCTTTGGCTTTACTCACGTCAGTGGCATAATTTCTATGCGGGTCTTACCAAAA  
GGGATTAGGTTATTTCCGGAAATATATTCAACCAACTCCAATCCTTTTACCCATTAACAT  
CTTAGAAGATTTACAAAGCCCTTATCACTAAGTTTTCGACTTTTCGGAAATATATTAGC  
TGATGAATTAGTAGTCGTAGTCTTGTCTTTAGTACCTTCAGTGGTTCCTATACCTGTC  
ATGTTCTTGGATTATTTACAAGTGGTATTCAAGCTCTTATTTTGGCAACTTTAGCCGCG  
GCTTATATAGGTGAATCCATGGAGGGCCATCATATGATATTTTCAACTTTAGAGCATATAT  
TAACTCATATTTCTTTTCAATCGTTTCAATTGTAATTACAATTCATTTGATAACCTTATTA  
GTCGATGAAATCATAAACTATATGATTCGTCAGAAAAGGGAATGATAGCTATTTTTTTA  
TGATAACAGGATTATTAGTCACTCGTTGGATTATTTCGAGACATTTCCCACTAAGTGAT  
TTATATGAATCATTAATCTTTCTTTTCATGGAGTTTATCAGTTATTCATATAATTCGGTAT----  
-AAAGAGAAAAACATTTAAGCACAATAACTGCGTCAAGTGTATTTTTTACCCAAGGCT  
TTGCTACTTCAGGTCTTTTAACTGAAATACATCAATCCGCAATATTAGTACCCGCTCTCC  
AATCCGAGTGGTTAATAATGCACGTAAGTATGATGATATTGAGCTATGCAGCTCTTCTAT  
GTGGATCATTATTATCAGTAGCACTTCTAGTCATTACATTTTCGAAAAACATAAATCTTT  
TTTGT-----AAAGAAATCCAATACATGAATGAAAGAAACAATGTTTTAGGAACTACTTCT-  
-----GCTAAGAATTATTACAGGTCCAGTTGATTCAACAGTTGGATTATTGGAGTTATCG  
TGTCATTAGTCTAGGGTTTATCTTTTTAAACCATAGGTATTCTTTCAGGAGCAGTATGGGC  
TAATGAAGCATGGGGATCATATTGGAATTGGGACCCAAAGGAAACTTGGGCATTTATTA  
CTTGGATCGTATTTGCGATTATTACATACTCGAACCAATATAAATTTACGAGGTGCAA  
ATTCCGCAATTGTGGCGTCTATAGGCTTTCTTATAATTTGGATATGCTATTTTGGAGTCAA  
TCTATTAGGAATAGGACTACATAGTTATGGTTCATTTACGTTAACGATGGCAAAAAAGA  
AAGCATTCACTCTCTTTTATATCTTGCATCTCTAGTATTTTTGCCCCTGGTGGATTCTCT  
CTCATTTAATAAAAGTCTGGAATCTTGGGTTACTAATTGGTGGAAACTAGGCAATCCG  
AAATTTTTTTGAATGGTATTCAAGAAAAGAATATTCTAGAAAAATTCATAGAATTAGAG  
GAAATCCTTCTCTTGGAGGAAATGATCAAGGAATACTCGGAGACACATCTACAAAACC  
TTCGTATA---ATCCACAAAGAAACGATCCAATTCATCAAGATACACAACGAGGATCGTAT  
CCATACGATTTTGCATTTCTCGACAAATATAATCTGTTTCGTTATTCTAAGTGGTTATTCT  
ATTTGGGGTAATGAAGAACTTGTATTCTTAACTCTTGGGCTCAGGAATTCCTATATAAC  
TTAAGTGACACAATAAAAGCTTTTTCTATTCTTTTACTAACTGATTTATGTATCGGATTCC  
ATTCGCCCCATGGTTGGGAACTAATTATTGGCTCTGTCTACAAAGATTTTGGATTTGTTT  
ATAATGATCAAATTTTATCTGGTCTTGTCTTACTTTTCCAGTCATTCTAGATACACTTTT  
TAAATTTTGGATTTTCCGTTATTTAAATCGTGTCTTCCGTCATTTGTAGTGATTTATCAT  
TCAATGAATGATATGCCTATTGGTGTTCAAAAGTACCCTTTCGAAGTCCTGGAGAGGA  
AGATGCATCTTGGGTTGACGTAAAC---CGACTTTATCGAGAAAGATTACTTTTTTTAGGC  
CAAGCGATTGATAGCGAGATCTCGAATCAACTTATTGGTCTTATGGTATATCTCAGTATC

GAGGATGATACCAAAGATCTGTATTTGTTTATAAACTCTCCTGGCGGATGGGTAATCCCT  
GGAGTAGCTATTTATGATACTATGCAATTTGTGCGACCAGATGTACATAACAATATGCATG  
GGATTAGCTGCTTCAATGGGATCTTTTATCTTGGCCGGAGGAGAAATTACCAAACGTCT  
AGCATTCCCTCACGCT--GTAATGATCCATCAACCTGCTAGTTCTTTTTATGAGGCACAA  
ACGGGAGAATTTATCCTGGAAGCGGAAGAACTGCTGAAACTGCGTGAAACCATCACA  
AGGGTTTATGTACAAAAACGGGCAAACCCTTTTGGGTTGTCTCGGAAGACATGGAAA  
GAGATGTTTTTATGTCAGCAACAGAAGCCCAAGCTTATGGAATTGTTGATCTTGTAGCG  
GTTGAGATGAAAGAACAATAATGGATTCATGAAGGTTTAATTACTGAATCGCTTCCCAA  
TGGTATGTTCCGGATTCGCTTAGATAATGAAGATATGATTCTAGGTTATGTTTCAGGAAA  
GATCCGACGTAGTTTTATACGGATACTGCCAGGCGATAGAGTCAAATTGAAGTAAGTC  
GTTATGATTCAACCAGAGGACGTATAATTTATCGACTTCGCAATAAGAATTCGAAAGATA  
TGGAGGAATTCCAAAGATATTTAGAT--GATAGATCTCAACAACACTACTTCTTATATCCA  
CTTATCTTTCAGGAGTATATTTATGCACTTGCTCATGATCATGGTTTAGCGGGTTATGACA  
ATAAATTCAGTTTACTAATTGTGAAACGTTAATTGCTCGAATGTATCAGCAGAATCATT  
TGATTCTTCTACTAATGATTCTAACCAAAATCTATTTTTGAGGAAGAATTTGTATTCTCA  
AATGATATCAGAGGGGTTTGCAGTCATTGTGGAAATTCCATTTTCTCTACAATTAATATC  
TTCCCTAATAGTCAAATCTCATAATTTACGATCAATTCATTCAATATTTCTTTTTAGAG  
GACAAAATTTACATTTAATTTATGTGTTAGAGATACTAATACCCTACCCAGTCCATCTG  
GAAATCTTGGTTCAAACCTTTCGCTACTGGGTAAGAGATGCTTCTTCTTTCATTTATTA  
CGATTCTTCTCCACGAGTATTGTAATTGGAAT-----ACTAAAGCCGGTCTTCTTTTTTC  
AAAACAAGACTATTCTTCTTCTATATAATTTCTCATCTATGTGAATACGAATCCATCTTC  
ATCTTCTCCGTAACCAATCTTCTCATTACGCTCAACATCTTCTGGAACCCCTTCTTGAA  
CGAATATATTTCTATGGAAAAATAAATATCTTGTAAAAGTCTTTGTAAAGGCTTTTAATC  
TATTGTTGTTGAAGGATCCTTTCATGCATTATGTTAGGTATCAAGGAAAATCAATTCTCG  
CTTCAAAGGGACGCCCTTTTTGATGAAAAAATGGACATATTACTTTGTTAATTTATGGC  
AATGTCAATTTTACCTGTGGTCTCAACCGGGAAGGATCTGTATAACCAATTATACAATC  
ATTCCCTCGACCTTCTGGGCTATCTATCAAGTGCGCGGCTAAACCCCTCAATGGTACGC  
GGTCAAATGCTAGAAAATTCATTTCTAATTGATAATGCTATT-----AATAAGTTCGATACTA  
TTGTTCCAATTATTCCTCTGATTGGATCATTGGCTAAAGCGAAATTTGTAAACGTATTGG  
GGCATCCTATTAGTAAGGCGGTTTGGACCGATTTATCAGATTCTGATATTATTGACCGAT  
TTGGGCGTATATGCAGAAATCTTCTCATTATCATAGTGGATCCTCACAAAAAAGAGT  
TTGTATCGAATAAAGTATATACTTCGACTTCTTGTGCTAGAACTTTGGCTCGTAAACAC  
AAAAGTACTGTACGTGCTTTTTTGAAGATTGGGCTCGGGATTATTGGAAGAATTCCT  
TACGGCGGAAGAACAAGTTCTTTACTTGACCTTTCCAAGACGGATTTGGTATTTGGATA  
TTATTTGTATCAATGATTTGGCCAATCATGAAATGATAATAGAT---ACAACAGAAGTACA  
A--GCTATCAATTCTTTTTTAGATTGGAATCC---TTAAAAGAGATATATGGGATCATATGG  
ATGCTTGTCCCTATTTTTACTCCTGTATTAGGAATCACAATAGGTGTACTAGTAATTGTTT  
GGTTAGAAAGAGAAATATCTGCAGGGATAACAACGTATTGGACCTGAATACGCCGG  
GCCTTTGGGAATTCCTCAAGCTTTAGCAGATGGTACAAAATTACTTTTCAAAGAGAATC  
TTCTTCCATCGAGAGGAGATACTCGTTTATTAGTATCGGACCATCCGTAGCAGTTACAT  
CAATTCTACTAAGTTATTTAGTAATTCCTTTTGGCTATCACCTTGTCTAGCCGATCTCAG  
TATCGGTGTTTTTTTATGGATTGCCATTTCAAGTATTGCTCCCGTTGGCCTTCTTATGTCA  
GGCTATGGATCAAATAATAAATATTCCTTTTTAGGTGGTTTACGAGCTGCTGCTCAATCA  
ATTAGTTATGAAATACCATTAACCTCTATGTGTGTTATCAATATCTCTATTATCTAACAGTTC

AAGTACAGTTGATATAGTTGAAGCGCAGTCAAAATATGGTTTTTTGGGGGTGGAATTTAT  
GGCGTCAACCTATAGGGTTTATCATTTTTCTAATTCGTCCCTAGCCGAGTCTGAGAGAT  
TACCTTTTGATTTACCAGAAGCAGAAGAATTGGTAGCAGGTTATCAAACCGAATAT  
TCAGGTATAAAATTTGGTTTATTTTACGTTGCTTCGTATCTGAATCTACTAGTTTCTTCAT  
TATTTGTAACGGTTCTTTACTTGGGGGGTTGGAATCTTTCTATTCGGTACATATCCGTTCC  
TGAGATTTTTGAAATAAATAAAGCGAGTAGAGTATTTGGAACAATAACTGGTATCTTTAT  
TACATTAGCTAAAACCTTATTTGTTCTTATTCATTCTATCACACAAGATGGACTTTACCA  
AGGCTAAGAATGGACCAACTATTAATCTTGGATGGAAATTTCTTTTACCTATTTCTCTC  
GGCAATCTATTATTAACAACCTCTCCCAACTTCTTTCACTGATGATCTGGCATGTACAG  
AATGAAAACCTCATTCTCGATTCTACGAGAATTTTTATGAAAGCCTTTCATTTGCTTCTC  
TTCGATGGAAGTTTGATTTTCCAGAATGTATCCTAATTTTTGGCCTAATCTTCTTCTGA  
TGATCGATTCAACCTCTGATCAAAAAGATATACCTTGGTTATATTTTATCTCTTCAACAG  
GTTTAGTAATGAGCATAACGGCCCTCTTGTCCGATGGAGAGAAGAACCTATGATTAGC  
TTTTCGGGAAATTTCCAAACGAACAATTTCAACGAAATCTTTCAATTTCTTATTTTACTA  
TGTTCAACTCTATGTATTCCTCTATCCGTAGAGTACATTGAATGTACAGAAATGGCTATA  
ACAGAGTTTCTCTTATTCGTATTAACAGCTACTCTAGGAGGAATGTTTTTATGCGGTGCT  
AACGATTTAATAACTATCTTTGTAGCTCCAGAATGTTTCAGTTTATGCTCCTACCTATTAT  
CTGGATATAACCAAGAAAGATGTACGGTCTAATGAGGCTACTATGAAATATTTACTCATGG  
GTGGGGCAAGCTCTTCTATTCTGGTTCATGGTTTCTCTTGGCTATATGGTTCATCCGGGG  
GAGAGATCGAGCTTCAAGAAATAGTGAATGGTCTTATCAATACACAAATGTATAACTCC  
CCAGGAATTTCAATGCGCTCATATTCATCACTGTAGGAATTGGGTCAAGCTTTCCCC  
AGCCCCCTTCTCATCAATGGACTCCTGACGTATACGAAGGATCTCCCACTCCAGTCGTTG  
CTTTTCTTTCTGTTACTTTCGAAAGTAGCTGCTTCAGCTTCAGCCACTCGAATTTTCGATA  
TTCCTTTTTTATTTCTCATCAAACGAATGGCATCTTCTTCTGGAAATCCTAGCTATTCTTAG  
CATGATATTGGGGAATCTCATTGCTATTACTCAAACAAGCATGAAACGTATGCTTGCATA  
TTCGTCCATAGGTCAAATCGGATATGTAATTATTGGAATAATTGTTGGAGACTCAAATGA  
TGGATATGCAAGCATGATAACTTATATGCTGTTCTATATCTCCATGAATCTAGGAACTTTT  
GCTTGCATTGTATTATTTGGTCTACGTACCGGAACTGATAACATTCGAGATTATGCAGGA  
TTATACACGAAAGATCCTTTTTTGGCTCTCTCTTTAGCCCTATGTCTCTTATCCCTAGGA  
GGTCTTCTCCACTAGCAGGTTTTTTCGGAAAACCTCTATTTATTCTGGTGTGGATGGCA  
GGCAGGCCTATATTTCTTGGTTTTAATAGGACTCCTTACAAGCGTTGTTTCTATCTACTAT  
TATCTAAAATAATCAAGTTATTAATGATTGGACGAAACCAAGAAATAACCCCTCACGT  
GCGAAATTATAGAAGATCTCCTTTCAGATCAAACAATTCATCGAATTGAGTATGATTGT  
ATGTGTGATAGCATCTACTATAACCAGGAATATCAATGAACCCGATTATTGCAATTGCTCA  
GGATAACCTTTTTATGTTTCTGCTTTACGAATATGATATTTTTTTGGGCATTTCTAATAATAT  
CAAGTCTTATTCCTATTTTGGCATTTTTTCATTTCCGGAGTTTTAGCCCCGATTAGCAAAG  
GGCCAGAGAACTCTCTAGTTATGAATCGGGTATAGAACCAATGGGCAACGCTTGGTT  
ACAATTTCGAATCCGTTATTATATGTTTGCTCTAGTTTTTTGTTGTTTTTGATGTTGAAACG  
GTTTTTCTTTATCCATGGGCAATGAGTTTCGATGTATTAGGTGTATCTGTATTTATAGAAG  
CTTAAATTTTCGTGCTTATCTTAATTGTTGGTTTAGTTTATGCATGGCGAAAAGGGGCAT  
TGGAATGGTCT-----ATAATTGTAGTTTTGCCAATATTCGCGGGCTCCGTAA  
TTTTCTTTCTTCCCATAGAGGAAATAGAGTAATTCGGTGGTATACTATATGTATATGTAT  
TTTAGAACTCCTTCTAACGACCTATGCATTCTGTTATCATTTTTCAATTCGACGATCCATTA  
ATCCAACCTAGTGGAGGACTATAAATGGATCAATTTTTTTGCTTTCCATTGGAGATTAGGA

ATAGATGGACTTTCTATAGGACCCATTTTACTAACGGGATTCATCACCACCTTTAGCTACT  
TTAGCGGCTCGGCCAGTACTCGAGATTCTCGATTATTCATTTCTGATGTTAGCAATG  
TACAGCGGGCAAATAGGATCATTCTTCTCGGGACCTTTTACTTTTTTTCATCATGTGG  
GAGTTAGAATTAATCCGGTTTATCTACTTTTATCCATATGGGGGGGAAAGAAACGCCTT  
TACTCGGCTACAAAATTTATTTTATACACGGCGGGAGGTTCCATTTTCTCTTAATGGGA  
GTTCTGGGTGTTGGTTTATATGGTTCTAATGAACCAACATTAATTTTGAACATCAGTT  
AATCAGTCATATCCTGTGGCCTTGGAATAATATTCTATATTGGATTTTTTATTGCTTTTG  
CTGTCAAATCGCCGATTATACCCCTACATACATGGTTACCAGATACCCACGGAGAAGCA  
CATTACAGTACTTGTATGCTTCTAGCCGGAATCTTATTAATAATGGGAGCGTATGGATTG  
ATTCGGATTAATATGGAATTATTACCCACGCCCATTCTATATTTTCTCCGTGGTTGGTGA  
TAGTAGGCACAATACAAATAATCTATGCAGCTTCAACATCTCCCGGCCAACGTAATTA  
AAAAAAGAATAGCCTATTCTCTGTATCTCATATGGGTTTCATACTTATAGGAATTGGT  
TCTATAACCGATACGGGACTCAATGGAGCCATTTTACAAATAATCTCTCATGGATTTATC  
GGTGCTGCGCTTTTTTTCTTGGCAGGAACGAGTTATGATAGAATACGCTTGTTTATCTC  
GACGAAATGGGCGGAATAGCTATCCCAATGCCAAAATATTCACGATGTTTCAGTAGCTT  
TTCGATGGCTTCCCTTGCATTACCGGTATGAGTGGTTTTGTTGCAGAATTGATAGTCTT  
TTTTGGAATAATTACCAGCCAAAATATCTTTAATGCCAAAATATTAATTACTTTTGTA  
ATGGCAATTGGGATGATATTAACCTCTATTATTCATTATCTATGTTACGCCAGATGTTCTA  
TGGATAACAAGCTATTTAATGCTCCAAACTCTTATGTTTTTGGATTCTGGACCGAGAGAGTT  
ATTTGTTTTCGATCTCTATCTTTCTACCCGTAATAGGTATTGGTATGTACCCGGATTTTGTT  
CTTTCACTATCAGTTGACAAGGTCGAAGTATTCTATCTAATTTTTTTTTATAGAATGATGC  
TCGAACATGTAATGTTTTGAGTGCCTATTTATTTTCTGTTGGTCTTTATGGATTGATCAC  
GAGTCGAAATATGGTTAGGGCCCTTATGTGTCTTGAACCTATTTTGAATGCAGTTAATAT  
CAATTTTGTAACATTTTCTGATTTTTTTGATAGTCGTCAATTAAGGAGCTATTTTCTCA  
ATTTTGTATAGCTATTGCAGCCGCTGAAGCAGCTATTGGACTGGCTATTGTTTCATCA  
ATTTATCGTAACAGAAAATCAACTCGTATCAATCAATCTAATTTGTTGAATAAGATGGAA  
CAGACATATCAATATGCGTGGATAATACCTTCCCTTCCACTTCCAGTTCCTATGTTAATAG  
GAGTGGGGCTTCTTCTTTTTCCGACGGCAACAAAAATCTTCGTCGTATGTGGGCTTTT  
CAGAGTGTATTATTGTTAAGTATAGTCATGGTTTTTTTCGATCAATCTGTCTATTCAGCAA  
TAAATAGCAGTTCTATCTATCAATATGTGTGGTCTTGGATCATCAATAATGATTTTTATTA  
GAATTCGGCTACTTGATCGACCCACTTACTTCTATTATGTCAATATTAATTACTACTGTTG  
GAATTGTGGTTCTTGTTTATAGTGATAATTATATGTCTCATGATCAAGGATATTTGAGATT  
TTTCGCTTATATGAGTTTTTTCAGTACTTCTATGTTAGGATTAGTTACTAGTTCTAATTTGA  
TACAAATTTATATTTTTTGGGAATTAGTCGGAATGTGTTTCGTATCTTTAATAGGGTTTTG  
GTTACACGACCTGTTGCGGCAAATGCTTGCCAAAAGGCGTTTTGTAACATAATCGTGTC  
GGGGATTTTGGTTTATTATTGGGAATTTTAGGTTTTTATTGGATAACAGGTAGTTTCGAA  
TTTCGAGATTTATTCAAATATTTCAGTAACAATGAAGTAAATTTTTTATTGTTACTTTGT  
GTGCCGTTCTATTATTTGCCGGTGCGGTTGCTAAATCTGCACAATCCCTCTTCATGTAT  
GGTTACCTGATGCCATGGAGGGGCCTACTCCTATTTTCAGCTCTTATACATGCTGCTACTA  
TGGTAGCAGCGGGAATTTTTCTTGTAGCTCGGCTTATTCCTCTTTTCATAGTCATCCCTC  
ACATAATGAATTAATCTCTTTGGTAGGGATAATAACAGTATTATTAGGAGCTACTTTAGC  
CCTTGCTCAAAAAGACATTAAGAGAGGTTTAGCCTATTCCACAATGTCTCAATTGGGTT  
ATATGATGTTAGCTTTAGGTATGGGGTCTTATCGAAGTGCTTTATTTCAATTTGATTACTCA  
TGCTTATTCGAAAGCATTATTGTTTTTAGGATCCGGATCCGTTATTCATTCAATGGAAC

TCTTGTTGGATATTCTCCAAAGAAAAGCCAGAATATGGTTTTTATGGGGGGTTTAAACAA  
AGCATGTGCCAATTACCAAAACGTCTTTTTTATTAGGTACACTTTCTCTTTGTGGTATTC  
CGCCTCTTGCTTGTTTTTGGTCCAAGGATGAAATTCCTAATGATACTTGGTTGTATTAC  
CAATTTTCGCAATAATAGCTTGGTCTACAGCGGGATTAACCGCATTTTATATGTTTTCGAA  
TCTATTTACTTACTTTTGAAGGACATTTAAACGTTTCATTTTCAAATTAC-----AAAAT  
ACCCCTTCTATTCAATATCTCTATGGGGTAAAGAAGGTTTCGAAAAGGATTAATAAA---T  
TATTAACTTTATTAACAATGAATTTTTTTTTCATTTGGCAATAAGAATATTTTTTCATATCCT  
TATGAATCAGATAATACTATGTTATTTCCCTATACTTGTATTGGTTCTATTTACTTTGTTCAT  
TGGATTCCTAGGAATCCTTTCAATTTGGACATATTATCAAATGGTTAACTCCGTCTATA  
AACCTTTTACATCAAATTTGAAT---TTAATAGATTGGTATGAATTTGCGAAAGATGCCAT  
TTTTTCAGTTAGTATAGCTTTTTTTTGGAAATGTTTATAGCCTCCTTTTTTATATAAACCCGTTT  
ATTCATCTTTGCAAATTTGGACTTTATTAACCTCGTTTGTATTTTTTTTGGACAAAATAAT  
AAATGGTATATATGGTTGGTCGTGTAATCGTGGTTACATAGATGCTTTTTATGCAACATTC  
TTTACTGGGGGGATAAGAGGATTGGCCGAATTAACCTTCTTTTTTTGATAGACAAGTAAT  
TGATGGAATTACAAATGGAGTTGGTGTTTTGTAGTTTTTTTTGTAGGTGAAAGTATCAAAT  
CTGTAGGTGGCGGG---CGCATCTCTTCTATCTTTTCTTGTATTGTCTTATGTATCAATCT  
TTTTATTAATTTACTACATGGATTTACCTGGACCAATACATGATTTTCTTTTAGTCTTTCTG  
GGATCGGGTCTTATATTAGGAGGTCTGGGAGTGGTATTACTTCCCAATCCAATTTATTCT  
GCCTTTTCATTGGGATTGGTTCTTGTTTGTACATCTTTATTCTATATTCTATCGAACTCCCA  
TTTTGTAGCTGCTGCACAGCTCCTTATTACGTAGGGGCCATAAATGTTTTAATTATTTTT  
GCTGTGATGTTTCAATGAATGGTTCCGAATATTACAAAGATTTTCATCTTTGGACCGTTGGA  
GATGGGGTTACTTCGATGGTTTGTACAAGTATTTTTGTTTCACTAATTACTACTATTCCAG  
ATACGTCATGGTACGGGATTATTTGGACTACAAAATCAAACCAGATTATAGAGCAAGAT  
TTGATAAGCAATAGTCAACAAATGGGATTCATCTATCAACAGATTTTTTTCTTCCATTT  
GAACTCATTTCAATAATTCTTTTAGTTGCGTTAATAGGTGCAATTGCCGTAGCTCGTCAA  
ATGACTGCACCAGCTACACGAAATGACCTTATGATAGTAAATCTGGGTCCCTCAGCACCC  
ATCAATGCACGGTGTCTTCGACTCATTGTTACTCTAGATGGTGAAGATGTTATTGACTG  
TGAACCAATATTGGGTTATTTACATAGAGGGATGGAAAAAATTGCGGAAAACCGAACA  
ATTATACAATATTTACCTTATGTAACACGTTGGGATTATTTAGCTACTATGTTTACAGAAG  
CAATAACTGTAAATGCACCAGAGCAGTTAGGCAATATTC AAGTACCTAAAAGGGCCAG  
CTATATCAGAGTCATTATGTTGGAGTTAAGTCGTATAGCTTCGCATTTGTTATGGCTTGGC  
CCCTTTATGGCAGATATTGGCGCACAGACCCCTTCTTCTATATTTTTAGAGAAAGAGAA  
TTGATATATGACCTATTCGAAGCTGCCACCGGTATGCGAATGATGCATAATTATTTTCGGA  
TCGGAGGAGTAGCTGCTGATTTACCTCATGGCTGGATAGATAAATGTTTGGATTTTTGTG  
ATTTTTTTTTAACAAGGGTTACTGAATATCAAAAACCTTATTACACGGAACCCTATTTTTTT  
AGAACGAGTTGAAGGAGTAGGCATTATTGGCGGAGAGGAGGCAATAAATTGGGGTTTA  
TCAGGACCAATGCTACGAGCTTCCGGAATACAATGGGATCTTCGTAAAGTTGATCATT  
TGAGTCTTACGACGAATTTGATTGGGGGGTCCAATGGCAAAAAGAGGGGGATTATT  
GCTCGTTATTTAGTACGAATCAGTGAAATGACAGAATCCATAAAAATTATTCAACAGGC  
TTTGAAGGAATTCAGGGGGGCCCTATGAGAATTTAGAAATCCGACGTTTTGATAAAG  
TACGGGATCCAGAATGGAATGATTTTACTATCGATTATCAGTAAAAAACCTTCTCCG  
ACTTTTGAATTATCAAAGCAAGAATTTATGTGAGAGTCGAAGCCCCAAAGGGAGAAT  
TGGGGATTTTTCTGATAGGGGATAGGGGTGTTTTTCTTGGAGATGGAAAATCCGACCA  
CCGGGTTTTATCAATTTGCAAATCCTTCTCAGTTAGTTAAAAGAATGAAATTGGCTGAT

ATTATGACGATACTAGGTAGCATAGATATCATTATGGGAGAAGTTGATCGTATGTTCTCTA  
TGGTAACTGAGTTCATGAACCTATGGTCAACAAACAGTACGAGCTGCAAGGTATATCGGT  
CAAGGTTTCATGATTACCTTATCACACGCGAATCGTTTACCTGTAACCTATTCAATACCCC  
TACGAAAAATTGATTACATCGGAGCGTTTCCGCGGCCGAATCCACTTTGAGTTTGATAA  
ATGCATTGCTTGTGAAGTATGTGTTTCGTGTATGTCCTATAGATCTACCCGTTGTTGATTG  
GAAATTGGAAATGGATATTCGAAAGAAACGATTGCTTAATTACAGTATTGATTTCCGAA  
TCTGTATATTTTGTGGTAATTGCGTTGAGTATTGTCCAACAAATTGTTTATCAATGACTG  
AAGAATATGAACTTTCTACGTATGATCGTCACGAATTGAATTATAATCAAATTGCTTTGG  
GGCGGTTACCAATGTCAGTAATTGACGATTACACAACCTCGAACTATTTTGAATTTG-----  
-----ATGCAGGGTCGTTTGTCTGCTTGGTTAGTCAAGCATGG  
GCTAATTCATAGATCTTTGGGGTTTGATTACCAAGGGATAGAGACTTTACAAATAAAAC  
CCGAGGATTGGCATTCCATTGCTGTCATTTTATATGTATATGGTTACAATTATCTACGCTC  
CCAATGCGCCTATGATGTAGCACCAGGTGGACTGTTAGCTAGTGTGTATCATCTTACGA  
GAATAGAGTATGGCGTGGATCAACCAGAAGAGGTATGCATAAAAGTATTTGCCCCGAG  
GAGGAATCCTAGAATTCCGTCTGTTTTCTGGGTTTGGAAAAGTGTGGATTTTCAAGAAC  
GGGAATCTTATGATATGTTGGGAATCTCTTATGATACTCATCCACGTTTGAACGCATCT  
TAATGCCTGAAAGTTGGGTAGGATGGCCTTTACGTAAGGATTATATTGCCCCCAATTTT  
ATGAAATACAAGATGCTCAT-----  
-----ATGAATTCC  
ATCGAGTTTCCCTTACTTGATCGAACAACCCAAAATTTCAGTTATTTCAACTACATCAA  
CGATCTTTCAAATTGGTCAAGACTCTCTAGTTTATGGCCGCTTCTCTATGGTACCAGTTG  
TTGCTTCATTGAATTTGCTTCACTAATAGGCTCACGATTCGACTTTGATCGTTATGGACT  
AGTCCCAAGATCGAGTCCTAGACAAGCGGACCTAATTTAACAGCCGGAACAGTAACA  
ATGAAAATGGCTCCTTCTTTAGTGAGATTATATGAGCAAATGCCTGAACCAAAATATGTT  
ATTGCTATGGGAGCATGTACAATTTACAGGGGGGATGTTTCAGTACTGATTCTTATAGTACT  
GTTCCGGGAGTCGATAAGCTAATTCCTGTCGATGTCTATTTGCCAGGCTGTCCACCTAA  
ACCGGAAGCAGTTATAGATGCTATAACAAAACCTTCGTAAGAAAATATCTCGAGAAATTT  
ATGAAGATAGAATTAAGTCTCAACGGGAGAATCGGTGTTTTACAACCAATCACAAGTTT  
CAGGTTGGGCGTAGTATTCATACTGGAAATTATGATCGAGGATTCCTTTATCAACCGCCA  
TTTACTTCAGAGATCCCTCCCGAAACATTTTCAAATACAAAAGTTCAGTCTCTTCCCA  
CGAATTAGTGAATATGCAAACCTAGAAAGACTTTTTCTTGGATAAAGGAACAGATTACTC  
GATCCATTTCCGCATCGCTCATGATATATATCATAACTCGGACATCCATTTCAAGTGCATA  
TCCCATTTTTGCACAGCAGGGTTATGAAAATCCACGAGAAGCGACTGGGCGTATTGTAT  
GTGCCAATTGCCATTTAGCTAATAAGCCCGTGGATATTGAAGTTCCACAAGCCGTACTT  
CCTGATACTGTATTTGAAGCAGTTGTTTCGAATCCCTTATGATATGCAACTAAAACAAGTT  
CTTGCTAATGGTAAAAAGGGGGCTTTGAATGTAGGGGCTGTTCTTATTTTACCGGAGGG  
TTTTGAATTAGCTCCTGTGATCGGATTTCTCCCGAGATGAAAGAAAAGATAGGCAATC  
TTTCTTTTCAGAGCTATCGCCCAAATAAAAAAATATTCTTGTGATAGGCCCTGCTCCTG  
GTCAAAAATATAGTGAAATCACCTTTCCTATTCTTTCCCGGACCCCGCTACTAAGAAA  
GATGTTCACTTCTTAAAATATCCTATATACGTAGGCGGAAACAGGGGAAGGGGTCAGAT  
TTATCCCGACGGGAGCAAGAGTAACAATACAGTTTATAATGCTACAGCAGCAGGTATAG  
TAGACAAAATAATACGAAAAGAAAAAAGGGGTTACGAAATAACCATAACGGATGCATC  
GGATGGACGTCAAGTGGTTGATATTATCCCTCCAGGGCCAGAACTTCTTGTTCAGAAG  
CGAATCTATCAAATTTGATCAACCATTGACGAGTAATCCTAATGTGGGCGGATTTGGT



CAGGGAGATGCAGAAATAGTACTTCAAGATCCATTACGTGTCCAAGGCCTTTTGTCTT  
CTTGGCATCTGTTATTTTGGCACAAATATTTTGGTTCTTAAAAAGAAACAGTTCGAGA  
AGGTTCAATTGTCCGAAATGAATTCATGAGTAAAGTCTATGATTGGTTTGAAGAACGT  
CTCGAGATTCAGGCGATTGCGGATGATATAACTAGTAAATACGTTCCCTCATGTAAAC  
ATATTTATTGTCTAGGAGGTATTACGCTTACTTGTTTTTTAGTACAAGTGGCTACGGGG  
TTTGCTATGACTTTTTACTATCGTCCGACCGTTACTGACGCTTTTGCTTCGGTTCAATAC  
ATAATGACTGAAGCTAATTTTGGTTGGTTAATCCGATCAGTTCATCGATGGTCGGCAAGT  
ATGATGGTTCTAATGATGATCCTGCATGATTTTCGTGTGTATCTCACCGGTGGATTTAAA  
AAACCTCGCGAATTAACCTGGGTTACAGGTGTGGTTCTGGCTGTATTGACTGCATCTTT  
TGGTGTAACTGGTTATTCCTTACCTCGGGACCAAATTGGTTATTGGGCAGTGAAAATTG  
TAACAGGTGTACCCGAAGCTATTCCTGTAATAGGATCCCCTTTGGTAGAATTATTGCGTG  
GAAGTGCTAGTGTGGGACAATCCACTTTGACTCGTTTTTATAGTTTACACACTTTTGTAT  
TGCCGCTTCTTACTGCCGTATTTATGTTAATGCACTTTCCAATGATACGTAAACAAGGTA  
TTTCTGGTCTTTAATGGGAGTAACAAAAAACCTGACTTGAATGATCCTGTATTAAGA  
GCTAAATTGGCTAAAGGTATGGGTCATAATTATTACGGAGAGCCCGCCTGGCCCAACGA  
TCTTTTATATATTTTCCAGTAGTAATTCTAGGGACTATTGCATGTAACGTAGGCTTAGCG  
GTTCTAGAACCATCAATGATTGGTGAACCAGCAGATCCATTTGCAACCCCTTTGGAAAT  
ATTACCCGAATGGTATTTCTTTCCCGTATTTCAAATACTTCGTACAGTACCCAATAAATTG  
TTGGGTGTTCTTTAATGGTTTCAGTACCCGCGGGATTATTAACAGTACCCTTTTTAGAG  
AATGTTAATAAATTCCAAAATCCATTTTCGTTCGTCAGTAGCGACAACCGTCTTTTTGATT  
GGTACCGCAGTGGCCCTTTGGTTGGGTATTGGTGAACATTACCTATTGATAAATCCCTA  
ACTTTAGGTCTTTTTATGATTGAAGTTTTTCTATTTGGAATCGTGTTAGGTCTAATTCCTA  
TTACTTTGGCTGGATTATTCGTAACCTGCATATTTACAATAACAGGCGTGGTGATCAGTTGG  
ACCTTATGCCTACTATAACTAGTTATTTCCGTTTTCTACTAGCGGCTTTAACTATAACCTC  
AGCTCTATTTATTGGTCTTAGCAAGATACGACTTATCATGGATATAGTAAGTCTTGCTTG  
GGCTGCTTTAATGGTAGTCTTTACATTTTCCCTTTCACTCGTAGTATGGGGAAGAAGTG  
GACTCATGATTATTCGTTCCGCGGAACCAGAAGTAAAAATTTTGGTAGATAGGGATCAC  
ATAAAAATCTTTTCGAGGAATGGGCCAGACCGGGTCATTTCTCAAGAACACTAGCTA  
AAGGCCCTGACACTACCACTTGGATCTGGAACCTACATGCTGATGCTCACGATTTTCGAT  
AGCCATACCAGTGATTTGGAGGAGATCTCTCGAAAAGTCTTTAGTGCTCATTTCGGCCA  
ACTCTCCATCATCTTTCTTTGGCTGAGTGGCATGTATTTCCACGGTGCTCGTTTTTCTAA  
TTATGAAGCATGGCTAAGCGACCCGACTCACATTGGGCCGAGTGCCAGGTGGTTTGG  
CCAGTAGTGGGCCAAGAAATATTGAATGGTGATGTGGGTGGGGGCTTCCGAGGAATAC  
AAATAACCTCCGGTTTTTTTTCAGATTTGGCGAGCATCTGGAATAACTAGTGAATTACAA  
CTCTATTGTAAGCAATTGGTGCATTGATCTTTGCAGCATTAAATGCTTTTTGCTGGTTGG  
TTTCATTATCATAAAGCCGCTCCAAAATTGGCTTGGTTTCAAGATGTAGAATCTATGTTG  
AATCACCATTTAGCGGGGCTACTAGGACTGGGATCTCTCTCTTGGGCAGGACATCAAGT  
ACATGTATCTTTACCAATTAACCAGTTTCTAAACGCTGGAGTAGATCCTAAAGAGATAC  
CACTTCCTCATGAATTTATCTTGAATCGGGATCTTTTGGCTCAACTTTATCCCAGTTTGG  
CTGAGGGAGCAACCCCTTTTTTACCTTGAATTGGTCAAATATGCGGACTTTCTTACT  
TTTCGCGGAGGATTAGATCCAGTAACTGGGGGTCTATGGCTGACCGATATTGCACACCA  
TCATTTAGCTATTGCAATTCTTTTCTGATAGCAGGTCATATGTATAAGACCAACTGGGG  
CATTGGTCATGGCCTAAAAGATATTTTAGAAGCTCATAAAGGTCCATTTACAGGTTCAGG  
GCCATAAAGGCCTATATGAGATCCTAACAAACATCATGGCATGCTCAATTATCTTAACT

TAGCTATGTTAGGCTCTTTAACCATTGTTGTAGCTCACCATATGTATTCCATGCCCCCTTA  
TCCGTATCTAGCTACTGACTATGGTACACAATTGTCGTTGTTACACATCACATGTGGAT  
TGGTGGATTTCTCATAGTTGGCGCTGCTGCGCATGCAGCCATTTTTATGGTAAGAGACTA  
TGATCCAACACTCGATAACAACGATCTATTAGATCGTGTCCTTAGGCATCGCGATGCAAT  
CATATCACATCTCAACTGGGCATGTATATTTCTAGGCTTTCACAGTTTTGGTTTTGTATATT  
CATAATGATACCATGAGCGCTTTAGGGCGTCCCTCAAGATATGTTTTAGATACTGCTATC  
CAATTACAACCCGTCTTTGCTCAATGGATACAAAACACCCATGCTTTAGCACCTAGTGC  
AACGGCTCCTGGTGCAACAACAAGCACCAGTTAACTTGGGGGGGCGGTGATTTAGTA  
GCAGTGGGTGGCAAAGTAGCTTTGTTACCTATTCCATTAGGAACTGCAGATTTTTTGGT  
ACATCATATTCATGCATTTACGATTCATGTGACGGTATTGATACTTCTGAAGGGTGTCTA  
TTTTGCTCGTAGCTCCCGTTTTGATACCGGATAAAGCAAATCTTGGTTTTCGTTTTCTTGT  
GATGGACCTGGAAGAGGGGGAACGTGTCAAGTATCGGCTTGGGATCATGTCTTCTTAG  
GACTATTCTGGATGTACAATGCAATTCGGTAGTTATATTCCATTCAGTTGGAAAATGC  
AGTCAGATGTTTGGGCGAGTATAAGTGATCAAGGGGTATTA ACTCATATCACGGGAGGA  
AACTTTGCGCAGAGTTCCATTACTATTAATGGGTGGCTCCGCGATTTCTTATGGGCACA  
GGCATCCCAGGTAATTCAGTCTTATGGTTCTTCATTATCTGCATATGGGCTTTTATTCTA  
GGTGCTCATTGTTGATGGGCTTTTAGTTAATGTTTCTATTTCAGTGGACGTGGTTATTGG  
CAAGAACTTATTGAATCCATCGTTTTGGGCTCATAATAAATTAAGTTGCTCCTGCTACT  
CAGCCGAGAGCCTTAAGCATTGTACAAGGACGTGCTGTAGGAGTAACCCATTACCTTC  
TGGGTGGAATTGCCACAACATGGGCGTTCTTCTTAGCAAGAATTATTGCAGTAGGAATG  
GCATTAAGATTTCCAAGGTTTAGCCAAGGCTTAGCTCAGGACCCCACTACTCGTCGTAT  
TTGGTTTTGGTATTGCTACCGCACATGACTTCGAGAGTCATGATGATATTACTGAGGAAC  
GCTTTTATCAGAATATTTTTGCTTCTCACTTCGGGCAATTAGCAATAATTTTTCTGTGGA  
CTTCCGGAATCTGTTTCATGTAGCTTGGCAAGGAAATTTGAGTCATGGGTACAGGAC  
CCTTTACATGTAAGACCTATTGCTCATGCAATTTGGGATCCTCATTGTTGTTCAACCGGCT  
GTAGAAGCTTTTACTCGAGGGGGTGTCTTGGCCCAGTGAATATCGCTTATTCTGGTGT  
TTATCAATGGTGGTATAACAATCGTTTTACGCACTAATGAGGATCTTTATACTGGAGCTCT  
TTTTCTATTATTTCTTTCTACCATATCCTTAATAGCAGGTTGGTTACACCTACAACCGAAA  
TGGAACCGAGTGTTTCGTGGTTCAAAAATGCCGAATCTCGTCTGAATCATCATTTGTC  
AGGACTCTTCGGCGTAAGTTCCTTGGCTTGGACTGGGCATTTAGTACATGTGGCTATTCT  
CTGCATCCAGAGGGGAGTACGTTTCGATGGAATAATTTCTTAGATGTATTACCACACCCC  
CAAGGGTTAGGCCCACTTTTTACAGGTCAGTGAATCTTTATGCTCAAAAACCCCGACTC  
AAGTAGTCATTTATTTGGTACCTCCCAAGGAGCAGGAACTGCCATTCTAACCCCTTCTCG  
GGGGATTCCACCCACAAACGCAAAGTTTATGGCTGACTGATATGGCTCATCATCATTTA  
GCTATTGCATTTATTTTTCTCGTTGCTGGTCAATGTATAGAACTAACTTCGGTATTGGGC  
ACAGTATGAAAGATCTTTTAGATGCACATATTCCCTCCGGGGGGGCGATTGGGACGTGGG  
CATAAGGGTCTTTATGACACAATCAATAATCCCTTCATTTCAATTAGGCCTTGTCTA  
GCTTCTTTAGGGGTTATTACTTCCTTGGTAGCTCAACACATGTA CTCTTTACCTGCTTAT  
GCATTCATAGCACAAGACTTTACTACTCAAGCTGCGTTATATACTCATCACCAATACATC  
GCAGGATTCATCATGACAGGAGCTTTTGGCTCATGGAGCTATATTTTTTCATTAGAGATTAC  
AGTCCGGAACAGAATGAGGATAATGTATTGGCAAGAATGTTAGACCATAAAGAAGCTA  
TCATATCTCATTTAAGTTGGGCCAGCCTCTTTCTGGGGTTCATACCTTGGGACTTTATG  
TTCATAATGATGTCATGCTTGCTTTGGTACTCCGGAGAAACAAATCTTGATCGAACCTA  
TATTTGCTCAATGGATACAATCTGCTCATGGTAAA ACTTCATATGGTTTCGATGTACTTTT

ATCTTCAACGAATGGCCCGGCATTTAATGCGGGTCGAAGCATATGGTTGCCCGGTTGGT  
TAAATGCTGTTAATGAG-----AATAGTAATTCACTATTCTTAACAATAGGTCCGGGAGACT  
TTTTAGTTCATCATGCTATTGCTCTGGGTTTACATACGACTACATTGATCTTAGTAAAGG  
GTGCTTTAGATGCACGTGGTTCCAAGTTAATGCCAGATAAAAAGGATTTTCGGTTATAGT  
TTCCGTGCGACGGCCCGGGACGGGGCGGTACTTGTGATATTTCCGGCTTGGGACGCAT  
TTTATTTGGCAGTTTTTTGGATGTAAATACTATCGGATGGGTTACTTTTTTATTGGCATTG  
GAAGCATATCACATTATGGCAGGGCAACGTTTCACAGTTTAATGAATCTTCCACTTATTT  
GATGGGCTGGTTAAGAGATTATTTATGGTTAAACTCTTCACAACCTTATCAATGGATATAA  
CCTTTTGGTATGAATAGTTTATCGGTCTGGGCGTGGATGTTCTTATTTGGACATCTTGT  
TTGGGCTACTGGATTTATGTTCTTAATTTCCCTGGCGTGGCTATTGGCAAGAATTGATTGA  
AACTTTAGCATGGGCTCATGAACGCACACCTTTGGCCAATTTGATTTCGTTGGAGAGATA  
AACCGGTGGCCCTTTCCATTGTGCAAGCACGATTGGTTGGATTAGCCCACTTTTCTGTA  
GGTTATATATTCACTTATGCGGCTTCTTGATTGCCTCTACATCAGGCAAATTTGGTATGT  
CACATTCAGTAAAGATTTATGATACATGTATAGGATGTACTCAATGTGTCCGAGCCTGCC  
CCACCGATGTATTAGAAATGATACCTTGGGACGGATGTAAAGCTAAACAAATTGCTTCT  
GCTCCAAGAACAGAGGACTGTGTGCGTTGTAAGAGATGTGAATCTGCCTGTCCAACCG  
ATTTCTTGAGTGTTTCGAGTTTCTTTATGGCATGAAACAACCTCGCAGCATGGGTCTAGGT  
TATATGACAACCTTTCGACTTTCCTCTGTGTTGGTGCCTTTAGTAGGCCTAGTATTTCCG  
GCAATGGCAATGGCTTCTTTATCTCTTCATGTTCAAAAGAATAAGACTGTTATGCGAGAT  
CTAAAACATATCTCTCCGTGGCACCGGTATTAAGTACTCTATGGTTCCGGGTCTTTAGCA  
GGTCTATTGATAGAGATTAATCGTTTTTTTCCAGATGCGTTGACATTCCCCTTTTTT-----A  
TGACTGCAATTTTAGAGAGACGCGAAAGCGAAAGCCTATGGGGTCGCTTCTGTAACCTG  
GATAACCAGCACCGAAAACCGTCTTTACATTGGATGGTTTGGTGTTTTGGATGATCCCTA  
CCTTATTGACCGCAACTTCTGTATTTATTATCGCCTTCATTGCTGCTCCTCCAGTAGATAT  
TGATGGTATTCGTGAACCTGTTTCCGGATCTCTACTTTATGGCAACAATATTATCTCAGG  
TGCCATTATTCTACTTCTGCAGCTATAGGTTTGCACCTTTTACCCAATCTGGGAAGCCGC  
ATCCGTTGACGAATGGTTATAACGGTGGTCCCTTATGAACATAATCGTTCTACACTTTTT  
ACTTGGTGTAGCTTGTTACATGGGTCGTGAGTGGGAGCTTAGTTTCCGTCTGGGTATGC  
GACCTTGGATTGCTGTTGCATATTCAGCTCCTGTTGCAGCTGCTACTGCTGTTTTCTTGA  
TCTACCCAATCGGTCAAGGAAGTTTTTCTGATGGTATGCCTCTAGGAATCTCTGGTACTT  
TCAATTTTCATGATTGTATTCCAGGCTGAACACAACATCCTTATGCACCCATTTACATGT  
TAGGCGTAGCTGGTGTATTTCGGCGGCTCCCTATTAGTGCTATGCATGGTTCCTTGGTAA  
CTTCTAGTTTGATCAGGGAAACCACAGAAAATGAATCTGCTAATGAAGGTTACAGATTC  
GGGCAAGAGGGAGAACTTATAATATCGTAGCCGCTCATGGTTATTTTGGTCGATTGAT  
CTCCAATATGCTAGTTTCAACAACCTCTCGTCTTTACATTTCTTCCCTAGCTGCTTGGCC  
TGTAGTAGGTATCTGGTTCAGTCTTTAGGTATCAGCACTATGGCTTTCAACCTAAATGG  
TTTCAATTTCAACCAATCTGTAGTTGATAGTCAAGGCCGTGTAATTAATACTTGGGCTGA  
TATCATTAACCGTGCTAACCTTGGTATGGAAGTTATGCATGAACGTAATGCTCATAACTT  
CCCTCTAGACCTAGCTGCTGTCGAAGCTCCATCTACAAATGGAATGGGTTTGCCTTGGT  
ATCGTGTTACACCGTTGTATTGAATGATCCCGGTCGGTTGCTTTCTGTCCATATAATGCA  
TACAGCTCTAGTTGCTGGTTGGGCGGGTTCGATGGCTCTATATGAATTAGCGGTTTTTGA  
TCCCTCTGACCCTGTTCTTGATCCAATGTGGAGACAGGGTATGTTTCGTTATACCCTTCAT  
GACTCGTTTAGGAATAACCAATTCATGGGGCGGTTGGAGTGTACACA---GGAGGGGCTAT  
ACCGAATCCGGGTATTTGGAGTTACGAAGGTGTGGCCGGGGCACATATTGTGTTTTCTG

GCTTGTGCTTCTTGGCAGCTATCTGGCATTGGGTTTATTGGGATCTAGAAATTTTTCTG  
ATGAACGTACAGGAAAACCTTCTTTGGATTGCCCCAAGATCTTTGGAATTCATTTATTC  
TCGCAGGGGTGGCTTGCTTTGGTTTTGGTGCATTTTCATGTAACAGGCTTGTATGGTCCT  
GGAATATGGGTGTCCGATCCTTATGGACTAACGGGAAAAGTACAATCTGTAAATCCAGC  
GTGGGGCGTGGAAGGTTTTGATCCTTTTGTTCGGGAGGAATAGCCTCTCATCATATTG  
CAGCAGGGACATTGGGTATATTGGCCGGTCTATTCCATCTTAGTGTCCGCCGCCCCAA  
CGTCTATACAAAGGATTGCGTATGGGCAATATTGAAACCGTCCTTTCCAGTAGTATCGCT  
GCTGTCTTTTTTGCAGCTTTTGTGTTGCCGGAACCTATGTGGTATGGTTCAGCAACTACC  
CCGATCGAATTATTTGGGCCTACTCGTTATCAATGGGATCAGGGGTACTTCCAGCAAGA  
GATATATCGAAGAGTTAGTGCTGGGCTAGCCGAAAATCAAAGTTTATCAGAAGCTTGGT  
CTAAAATTCCTGAAAAATTGGCTTTTTATGATTACATCGGAAATAATCCGGCAAAAGGG  
GGATTATTCAGAGCGGGTTCAATGGATAACGGGGATGGAATAGCGGTTGGATGGTTAG  
GACATCCTATCTTTAGAGATAAAGAAGGGCGTGAACTTTTTGTACGTGCTATGCCTACC  
TTTTTTGAAACCTTCCCGGTCGTTTTGGTAGATAGCGACGGAATTGTTAGAGCCGATGT  
TCCTTTTCGAAGGGCAGAATCGAAGTATAGTGTCGAACAAGTAGGTGTAACCTGTTGAG  
TTCTACGGTGGCGAACTCAACGGAGTCAGTTATAGTGATCCTGCTACTGTGAAAAATA  
TGCTAGACGTGCTCAATTGGGTGAAATTTTTGAATTAGATCGTGCTACTTTGAAATCCG  
ATGGTGTTTTTTCGTAGCAGTCCAAGGGGTGGTTTACTTTTGGACATGCTTCTTTTGCTT  
TGCTCTTCTTTTTTGGACATATTTGGCATGGTGCTAGAACCCTTGTTTCAGAGATGTTTTG  
CTGGTATTGATCCAGATTTGGATGCTCAAGTAGAATTTGGAGCATTCCAAAACTTGG  
GATCCAATAACAAGAAGACAAGTAGTCATGAAAACCTTATATTCCTGAGGAGGTTCTA  
CCCCGTGGAACGCTCTTTAATGGAACCTTAGCTTTAGCTGGTCGTGACCAAGAAACC  
ACTGGTTTTCGCTTGGTGGGCCGGGAATGCCCGGCTTATCAATTTATCCGGTAAACTACT  
CGGGGCTCATGTAGCCATGCCGGATTAATTGTATTCTGGGCCGGGGGAATGAACCTAT  
TTGAAGTGGCTCATTTCGTACCAGAGAAGCCTATGTATGAACAAGGATTAATTTTACTT  
CCCCACCTAGCTACTCTAGGTTGGGGGGTAGGTCTTGGTGGGGAAGTTATAGACACTTT  
TCCATACTTTGTATCTGGAGTACTTCATTTAATTCCTCTGCAGTATTGGGCTTTGGTGGT  
ATTTATCATGCACTTCTAGGGCCTGAGACGCTTGAAGAATCTTTTCCATTCCTCGGTTAT  
GTATGGAAAGATAGAAATAAAATGACTACAATTTTAGGTATTCATTAATCTTGTAGGT  
ATAGGTGCTTTTCTTCTAGTATTCAAGGCTCTTTATTTTGGTGGCGTATATGATACCTGGG  
CTCCGGGAGGGGGAGATGTAAGAAAAATTACCAACTTGACCCTTAGTCCAAGTATTATA  
TTTGGTTATTTACTAAAATCGCCCTTTGGAGGGGAAGGATGGATTGTTAGTGTAGACGA  
TTTGGAAAGATATAATCGGAGGACATGTATGGTTAGGTTCCATTTGTATACTTGGTGGAAAT  
CTGGCATATCTTAACCAAACCCTTCGCATGGGCTCGACGCGCACTTGTATGGTCTGGGG  
AGGCTTACTTATCTTATAGTTTGGGGCTTTATCCGCTTTTGGTTTCATTGCTTGTGTTT  
TGCTCTGGTTCAATAATACCGCCTATCCTAGCGAGTTTTACGGACCCACTGGACCAGAAT  
CTTCCCAAGCTCAAGCATTACTTTTCTAGTTAGAGACCAACGCCTTGGGGCTAACGTG  
GGATCCGCTCAAGGACCTACTGGTTTGGTAAATATTTAATGCGTTCCCCGACCGGAGA  
AGTCATTTTTGGAGGAGAACTATGCGTTTTTGGGATCTGCGTGCCCCCTTGGTTAGAAC  
CTCTAAGGGGTCCAAATGGGTTGGACTTGAGTAGGCTGAAAAAAGACATACAACCTTG  
GCAAGAACGGCGTTCTGCAGAATATATGACTCATGCTCCTTTAGGTTCTTTAAATTCCTG  
GGGTGGCGTAGCTACCGAGATCAATGCAGTCAATTATGTCTCTCCTAGAAGTTGGTTAG  
CTACTTCTCATTTTGTCTAGGATTCCTTGTTCGTAGGTCATTTGTGGCACGCGGGAA  
GGGCTCGTGCAGCTGCAGCAGGGTTTAAAAAGGAATTGATCGTGATTTTGAACCTGT

TCTTTCCATGACCCCTCTTAATATGACTATAGCCATTGGTAAATTTACCGAAGACGAAAA  
GGATTTATTTGATATTATGGATGACTGGTTACGGAGGGACCGTTTCGTTTTTGTAGGCTG  
GTCCGGTTTATTGCTCTTTCCTTGTGCCTATTTTCGCTTTAGGGGGTTGGTTCACAGGTAC  
AACCTTTGTAACCTTCATGGTATACCCATGGATTGGCCAGTTCCTATTTGGAAGGCTGCAA  
TTTCTTAACTGCCGCAGTTTCTACTCCTGCTAATAGTTTAGCACATTCTTTATTGTTACTA  
TGGGGTCCTGAAGCACAAAGGGGATTTACTCGTTGGTGTCAATTAGGCGGTCTGTGGA  
CTTTTGTGCTCTCCATGGTGCCTTCGGACTAATAGGTTTCATGTTACGTCAATTTCGAAC  
TTGCTCGATCTGTTCAATTGCGACCTTATAATGCAATCGCATTCTCTGGTCCAATTGCTG  
TTTTTGTCTGTATTCTTGATTTATCCACTAGGTCAGTCTGGTTGGTTCTTTGCCCTAG  
TTTTGGTGTAGCAGCTATATTTTCGATTCATCCTCTTTTTTCAAGGATTTACATAATTGGACG  
TTAAACCCATTTTCATATGATGGGAGTTGCCGGGGTATTGGGCGCTGCTTTGCTATGCGCT  
ATTCATGGTGCTACTGTAGAAAATACTTTATTTGAAGATGGTGATGGTGCAAATACATTC  
CGTGCTTTTAAACCAACTCAAGCTGAAGAACTTATTCAATGGTCACCGCTAACCGCTT  
TTGGTCCCAAATCTTTGGGGTTGCTTTTTCCAATAAACGTTGGTTACATTTCTTTATGTTA  
TTTGTACCAGTAACCGGTTTATGGATGAGTGCTCTTGGAGTAGTCGGTCTGGCCCTGAA  
CCTACGTGCCTATGACTTCGTTTCTCAGGAAATTCGTGCGGCGGAAGATCCTGAATTTG  
AGACTTTCTACACCAAAAATATTCTCTTAAACGAAGGTATTTCGTGCTTGGATGGCAGCT  
CAAGATCAGCCTCATGAAAACCTTATATTCCCTGAGGAGGTTCTACCCCGTGGAACGC  
TCTTATGTCTGGAAGCACAGGAGAACGTTCTTTTGTGATATTATTACCAGTATTTCGTTA  
CTGGGTCATTCATAGCATTACTATACCTTCCCTATTCAATTGCGGGTTGGTTATTTCGTCAGC  
ACCGGTTTAGCTTACGATGTGTTTGAAGCCCTCGGCCAAACGAGTATTTACAGAGA  
ACCGACAAGGAATTCCATTAATAACAGGCCGTTTTGATCCTTTGGAACAACCTCGATGAA  
TTAGTAGATCTTTTATGACCATAGATCGAACCTATCCAATTTTACAGTGCATGGTTG  
GCTGTTACGGCCTAGCTGTACCTACCGTTTCTTTTTTGGGGTCAATATCAGCAATGCA  
GTTTCATCCAACGAATGGCTACACAACTGTTGAGAACGGTTCTATA---TCTCGTCCAAA  
ACCAACTACTGTAGGGAATTTATTGAAACCATTGAATTCGGAATATGGTAAAGTAGCTC  
CTGGATGGGGAACGACTCCTTTGATGGGTGTGCAATGGCCCTATTTGCGATATTTCTAT  
CTATTATTTTGGAGATTTATAATCTTCCGTTTTTATTGGATGGAATTTCAATGAATATGCTT  
ACTCTCAAACCTTTTCGTTTACACAGTAGTGATATTCTTTGTTTCTCTTTTATCTTTGGAT  
TCCTATCTAATGATCCGGGGCGTAATCCTGGACGTGAAGAAATGGCTGATACTACTGGA  
AGGATTCCTCTTTGGATAATAGGTACTGTAAGTGGTATTCTTGTGATTGGTTTAAATAGGTA  
TTTTTTTTTATGGTTCATATTCCGGATTGGGTTTCATCCCTGATGCTTAATATCTTTAGTTG  
ATCTGTATCTGTCTTAATTCTGCCCTTATTTCGAGTAGTCTTTTCTTCGCCAAATGCCCCG  
AGGCCTATGCTTTTTTGAATCCAATCGTAGATCTTATGCCAGTCATACCTTTGTTCTTTTT  
TCTCTTAGCCTTTGTTTGGCAAGCTGCTGTAAGTTTTTGAATGACACAATCAAACCCGA  
ACGAACAAAATGTTGAATTGAATCGTACCAGCCTCTACTGGGGGTATTACTCATTTTT  
GTAATTGCTGTTTTATTTTCCAATTATTCTTCAATATGGAAGTAAATATTCTTGCATTTAT  
TGCTACTGCACTGTTCAATTCTAGTTCCCTACTGCTTTTTCTGCTTATCATTTACGTAAAAAC  
AGAAAGTCAAATAAAAATGGAACAGCAACCCTAGTCGCCATCTTTATATCTGGTTTAC  
TTGTAAGTTTTACCGGGTACGCCTTATATAACCGCTTTTTGGGCAACCTTCTCAACAATAA  
GAGATCCATTCGAGGAACATGGGGACATGGAAGCATTGGTTTATACATTCCTCTTAGTC  
TCGACTCTAGGTATAATTTTTTTCGCTATCTTTTTTAGAGAACCGCCTAAAGTTCCAAC  
AAAAAG-----ATGACTCTTGCTTTCCAATTGGCTGTTTTTGCATTAATTGCTACGTCA  
ATCTTATTAATTGGCGTACCCGTTGTATTTGCTTCTCCTGATGGTTGGTCAAGTAACAAA

AATGTTTTATTTTCCGGTACATCATTATGGATTGGATTAGTCTTTCTGGTGGGTATCCTTA  
ATTCTCTCATCTCT-----ATGTCACCACAAACAGAGACTAAAGCAAGTGTTG  
GATTCAAAGCTGGTGTTAAAGATTACAGATTGACTTATTATACTCCTGACTATGAAACCA  
AAGATACTGATATCTTGGCAGCATTCCGAGTAACTCCTCAACCTGGAGTTCCACCTGAA  
GAAGCAGGGGCCGCGGTAGCTGCCGAATCTTCTACTGGTACATGGACAACCTGTGTGGA  
CCGATGGACTTACCAGCCTTGATCGTTACAAAGGGCGATGCTACGGAATCGAGCCCCT  
TGCTGGAGAAGAAAGTCAATTTATTGCTTATGTAGCTTACCCATTAGACCTTTTTGAAG  
AAGGTTCTGTTACTAACATGTTTACTTCCATTGTAGGTAATGTATTTGGGTTCAAAGCCC  
TGCGTGCTCTACGTCTGGAAGATCTGCGAATCCCTGTTGCTTATGTTAAAACCTTCCAA  
GGCCCGCCTCATGGCATCCAAGTTGAGAGAGATAAATTGAACAAGTATGGTTCGTCCCC  
TGTTGGGATGTACTATTAACCTAAATTGGGGTTATCTGCTAAAAACTACGGTAGAGCG  
GTTTATGAATGTCTCCGTGGTGGACTTGATTTTACCAAAGACGATGAGAACGTGAACTC  
CCAACCATTTATGCGCTGGAGAGATCGTTTTCGTATTTTGTGCCGAAGCACTTTATAAAG  
CACAGGCTGAAACAGGTGAAATCAAAGGGCATTACTTGAATGCTACTGCGGGTACATG  
CGAAGAAATGATGAAAAGGGCTGTATTTGCCAGAGAATTGGGAGTTCCTATCGTAATG  
CATGATTACTTAACAGGGGGATTCACTGCAAATACTACCTTGGCTCATTATTGCCGAGAT  
AATGGCCTACTTCTTACATCCACCGCGCAATGCATGCAGTTATTGATAGACAGAAGAA  
TCATGGTATGCACTTTCGTGTACTAGCTAAAGGGTTACGTATGTCTGGTGGAGATCATAT  
TCACTCCGGTACCGTAGTAGGTAAACTTGAAGGGGAAAGAGACATCACTTTGGGCTTT  
GTTGATTTACTGCGTGATGATTTTCATTGAAAAGATCGAAGTCGCGGTATTTATTTACC  
CAAGATTGGGTCTCTCTACCAGGTGTTCTGCCCGTGGCTTCGGGGGGTATTCACGTTTG  
GCATATGCCTGCTCTGACCGAGATCTTTGGGGATGATTCCGTACTACAGTTCGGTGGAG  
GAACTTTAGGACACCCCTTGGGGAAATGCACCCCGTGCCGTAGCTAATCGAGTAGCTCT  
AGAAGCATGTGTACAAGCTCGTAATGAGGGACGTGATCTTGCTCGTGAAGGTAATGAA  
ATTATCCGTGAGGCTGCTAAATGGAGCCCTGAACTAGCTGCTGCTTGTGAGGTATGGAA  
GGAGATCAAATTTGAATTTGAGGCAGTGGATATTTTG-----ATGGCGATACATTTATACAA  
AACTTCTACCCCGAGCACACGCAATCGCGCCGTAGACAGTCAAGTGAAATCCAATCCA  
CGAAATAATTTGATCTATGGACAGCATCATTGTGGTAAAGGTCGTAATGCCAGAGGAAT  
CATTACCGCAGGGCATAGAGGGGGAGGTCATAAGCGTCTATAACCGTAAAATCGATTTTC  
GACGGAATGAAAAGACATATATGGTAGAATCGTAAACCATAGAATACGACCCTAATCGA  
AATGCATACATTTGTCTCATACTATGGGGATGGTGAGAAGAGATATATTTTACATCCC  
AGAGGGGCTATAATTGGAGATACCATTGTTTCTGGTACAGAAGTTCCTATAAAAATGGG  
AAATGCCCTACCTTTGACCGATATGCCCTTAGGCACGGCCATACATAACATAGAAATCA  
CACGTGGAAAGGGTGGACAATTAGCTAGAGCAGCGGGTGTGTAGCGAAACTGATTG  
CAAAAGAGGGGAAATCGGCCACATTAATAATTACCTTCTGGGGAGGTCCGTTTGATATC  
CAAAAACCTGCTCAGCAACGGTTCGGACAAGTGGGGAATGTTGGGGTGAACCAGAAAA  
GTTTGGGTAGAGCCGGATCTAAGCGTTGGCTAGGTAAGCGTCCTGTAGTAAGAGGAGT  
AGTTATGAACCCTGTAGACCATCCCCATGGGGGTGGTGAAGGGAGGGCCCCAATTGGG  
AGAAAAAACCACAACCCCTTGGGGTTATCCTGCACTTGGGAGAAGAAGTAGAAAA  
AGGAATAAATATAGTGATAATTTGATTCTTCGTGCGCCGTAGTAAAATGATTCAACCTCAG  
ACCCTTTTGAATGTAGCGGATAACAGCGGGGCTCGAGAATTGATGTGTATTTCGAATCAT  
AGGAGCTAGC---AATCGTCGATATGCTCATATCGGTGACGTTATTGTTGCTGTGATCAA  
GAAGCAGTACCAAATATGCCCTAGCAAGATCAGAAGTGGTCAGAGCTGTAATTGTAC  
GTACTTGTAAGAAGTCAAACGTGATAACGGTATGATAATACGATATGATGACAATGCT

GCGGTTGTCATCGATCAAGAAGGAAACCCAAAGGGAACCTCGGGTTTTTGGTGCAATTG  
CCCGGGAATTGAGACAGTTAAATTTTACTAAAATAGTTTCATTAGCTCCGGAGGTATTAA  
TGCTTAGTCCCAAAGAACCAGATTCCGTAAACAACATAGAGGAAGAATGAAGGGAAT  
ATCTTATCGAGGTAATCATATTTCTTTCGGTAAATATGCTCTTCAGGCACCTGAACCTGC  
TTGGATCACATCTAGACAAATAGAAGCAGGTCGACGAGCAATGACACGAAATGCACGA  
CGTGGTGGAAAAATATGGGTACGTATTTTCCAGACAAACCGGTTACAGTAAGACCCG  
CAGAAACACGTATGGGTTTCGGGGAAAGGATCCCCTGAATATTGGGTAGCTGTTGTAA  
ACCAGGTCGAATCCTTTATGAAATGGGTGGAGTAACAGAAAATATAGCCAGAAAGGCT  
ATTTCAATAGCATCGTCTAAAATGCCTATACGAACTCAATTCATTATTTTGGCAATGACC  
AGAATTAGACGGGGATATATAGCTCGGCGACGTAGAACAAAAATTCGTTTATTTGCATC  
AAGCTTTCGAGGGGCTCATTCAAGGCTTACTCGAACAATTAACAACAGAAAATAAGA  
GCTTTGGTTTCGTCTCATCGGGATAGGGATCGGCAAAAAGAGAAATTTTCGTCTGTTGTG  
GATCACTCGAATAAACGCAGTAATTCGTGAAGGG---GGGGTATCCTATAGTTATAGTAGA  
TTAATACACGATCTGTATAAGAAACAGTTGCTTCTTAATCGTAAAATACTTGCACAAATA  
GCTATATCAAATAAAAATTGTCTTTATATGATTTCCAATGAGATCATAAAAGAAGTAGAT  
TGTAAGAATCCACCGGAATAATTATGTTAAAGACAGTATACGCTTTAGGTCAATATATA  
TCTATGTCTGCTCACAAAGCGCGAAGAGTAATAGATCAAATTCGTGGACGTTCTTACGA  
AGAAACACTTATGATACTAGAACTCATGCCTTATCGAGCATGTTATCCCATTTTTAAATT  
GGTTTATTCTGCAGCAGCAAATGCTAGTTACAATATGGATTCCAACGAATCAAATTTAGT  
TATTAGTAAAGCTGAAGTCAGCGAGGGTACTATCGTGAAGAAATTAACCTCGAGCT  
CGAGGACGTAGTTTTCCGATAAAAAGACCTACCTGCCATATAAGTATTGTAGTGAAAGA  
TATATCCTTAGATGGGGGGTATGGGACAAAAAATGGATGGAATCAAATATGCAGTAT  
TTACAGACAAAAGTATTCGGTTATTGGGGAAAAAT---CAATATACTTCTAATGTCGAATC  
AGGATCAACTAGGACAGAAATAAAGCATTGGGTGCAACTCTTCTTTGGTGTCAAGGTA  
ATAGCTATGAATAGTCATCGACTTCCGGGAAGGGGTAGAAGAATGGGACCTATTATGGG  
ACAGACAATGCATTACAGACGTATGATCATTACGCTTCAACCGGGTATTCTATTCCACC  
TCTTAGAAAAGAAAAGAACTATGGCAGTTCCAAAAAACGTACTTCTATATCAAAAAAG  
CGTATTCGTAAAATATTTGGAAAAGAAAGGGATATTGGGCAGCCTTAAAAGCGTTGTC  
ATTAGGGAAATCTCTTTCTACCGGAAATTCAAAAGGTTTTTTTTGTGCGACAAACAAATA  
AGATGGCCAAGGGGAAGGATGTCCGAATAACCGTTATTTTGGAAATGTACCAGTTGTGTT  
CGAAACGGTGTAAAT-----AAGGTATCAACGGGTATTTCCAGATATATTAACAAGAA  
CCGGCACAATACGCCTAATCGATTGGAATTGAGAAAATCTGTCCATATTGTTACAAC  
ATACGATTCATGGGGAGATAAAGAAAATGAAAATAAGAGCTTCTGTTTCGTAAAATTTGT  
GAAAAATGTCGACTAATTCGTAGGCGGGGACGAATTATAGTAATTTGTTCCAACCCAAG  
ACATAAACAAAGACAAGGGATGGTTCGAGAGAAAGTAAGAGTATCTACTCGGACACTA  
CAGTGGAAAGTGTGTTGAAGCAAGAGCGGACAGTAAGCGTCTTTATTATGGACGCTTTA  
TTCTGTCTCCACTTATGAAAGGTCAAGCTGACACAATAGGCATTGCGATGCGAAGAGC  
TTTGCTTGAGAAATAGAAGGAACATGTATCACACGTGCAAAATCTGAG-----AAAATA  
CCACACGAATATTCTACCCTAGTGGGTATTCAAGAATCAGTACATGAAATTTAATGAAT  
TTGAAAGAAATTATATTGAGAAGTAATCTATATGGAAGTTGCGACGCGTCTATTTGTGTC  
AGGGGTCCTGGATATGTAACGTCTCAAGATATCATCTCACCGCCTTATGTAGAAATCGTT  
GACAATACACAGCATATAGCTAGCTTGGCGGAACCAATTGATTTGTGTATTGGATTACA  
AATAGAGAGGAATCGCGGATATCTTATAAAAACGCCAAATAACAACCTTTGATGGAAGTT  
AT-----CCTATAGATGCTGTATTTCATGCCTGTTTCGAAACGCGAATCATAGTATTCATTCTTA

TGGGAATGGGAATGAGAAACAAGAGATACTCTTTCTTGAAATATGGACAAATGGAAGT  
TTAACTCCTAAAGAAGCACTTCATGAAGCCTCCCGGAATTTGATTGATTTATTTATTTCCC  
TTTTTACATACAGAAGAAGAA-----AACTTACATTTAGCGGACAATCAA---CACACGGTT  
CCTTTACCCCCTTTTACCTTTTCATGAGAAATTGACT---AAACTAAGAAAAAACAAAAA  
---AAAATAGCATTGAAATCGATTTTTTATTGACCAATCAGAAGTGCCTCCCAGGATCTATA  
ATTGCCTTATAAAGGTCCAATATATATACATTATTGGACCTTTTGAATAACAGTCAAGAAG  
ACCTTATGAAAATGGAACATTTTCGCATAGAAGATGTAAAAGAGATATTGGGCATTCTA  
GAAAAGCGT-----TTCGCAATTGATTTACCGAAAAAGCTGATGCTCCGAGATGGA---AAT  
GAGGGAATGTCTACAATACCTGGGTTAATCAGATACAATTTGAAGGATTTTGTAGGTT  
CATTGATCAGGGCTTGACGGAAGAAGCTTTATAAGTTTCCAAAAATGGAAGATACCGATC  
AAGAAATTGAATTTCAATTATTTGTGGAAACATATCAATTAGTAGAACCATGATAAAAG  
AAAGAGATGCTGTGTATGAATCACTCACATATTCTTCTGAATTATATGTATCCGCGGGAC  
TCATTTGGAAAACCTGGTAGGGATATGCAAGAACAAACTATTTTTTTTTGGAAACATTCCT  
CTAATGAATTCTCTGGGAACCTTCTATAGTAAATGGAATATATAGAATTGTGATCAATCAA  
GTATTGCAAAGCCCCGGTATTTATTACCGGTCAGAATTGGACCATAACGGAATTTCCGGT  
GTATACCGGCACCATAATATCAGATTGGGGAGGAAGATCAGAATTAGAGATTGATAGAA  
AAGCAAGGATATGGGCTCGTGTGAGTAGGAAACAAAAAATATCTATTCTAGTTCTATCA  
TCAGCTATGGGTTTGAATCTAAGAGAAATTCTAGAGAATGTTTGCTATCCTGAAATATTT  
TTGTCTTTTCTGACTGATAAGGAGAAAAAATAATCGGGTCAAAGAAAATGCCATTT  
TGGAGTTTTACCAACAATTTGCTTGTGTAGGCGGGGATCCGGTATTTTCTGAATCCTTAT  
GTAAGGAATTACAAAAGAAATCTTTTCAACAAAGATGTGAATTAGGAAGGATTGGTTCG  
ACGAAATATGAATCGGAGACTGAACCTTGATATATCCAGAACAAATACATTTTTTGTACC  
GCGAGATATATTGGCAGCCGCGGATCATTGATTGGAATGAAATTTGGAATGGGTACAC  
TTGACGAT-----ATGAATCATTGAAAAATAAACGTATTCGTTCTGTAGCAGATCTTTTAC  
AAGATCAATTCGGATTGGCTCTGGTTCGTTTAGAAAATGTGGTTCGAGGAACTATATGT  
GGAGCACTTAGG---CATAAATTG---ATACCGACTCCTCAGAATTTGGTAACCTCAACTCC  
A-----TTAACAACACTTATGAATCTTTTTTCGGTTTACACCCATTATCTCAAGTTTT  
GGATCGAACTAATCCATTGACACAAATAGTTCATGGGAGAAAATTGAGTTATTTGGGCC  
CTGGAGGATTGACAGGGCGAACTGCTAGTTTTCGAATACGAGATATCCATCCTAGTCAC  
TATGGGCGTATTTGCCAATTGACACGTCTGAAGGAATAAATGTCGGACTTATTGGATC  
TTTAGCAATTCATGCGAGGATTGGTTCGTTGGGGA---TCTCTAGAAAGCCCGTTTTAT-----  
---GAAATTTCTGAGAGA-----GGG-----GCACGGATGCTTTATTTATCACCAGGTAAAGAT  
GAATACTATATGGTAGCGGCGGGAAATCTTTGGCCTTGAATCAGGGTATTCAGGAAGA  
ACAGGTTGTTCCAGCTCGATACCGTCAAGAATTCCTGACTATTGCATGGGAACAGGTTT  
ATCTTCGAAGTATTTTTTCCCTTCCAATATTTTTCTATCGGAGCTTCCCTCATTCTTTTATC  
GAGCATAATGATGCGAATCGGGCTTTAATGAGTTTGAATATGCAACGTCAAGCAGTTCC  
TCTTTCTCGGTCCGAGAAGTGCATTGTTGGAAGTGGGTTGGAACGCCAAGCGGCTATA  
GATTCAGGGGCTCTTGCTATAGCGGAACACGAGGGAAAGATCATTATAACCGATACTGA  
CAAGATCCTTTTATCAGGTAATGGAATACTCTAAGCATTCCATTAGTTATATATCAACGC  
TCCAACAAAATACTTGTATGCATCAAAAACCCAGGTTTCAGCGGGGTAAATGCATAA  
AAAAGGGACAAATTTTAGCCCATGGCGCCGCTACAGTTGGTGGCGAACTCGCTTTGGG  
GAAAACGTATTAGTAGCTTATATGCCATGGGAAGGTTACAATTTTGAAGATGCAGTAC  
TCATTAGCGAGCGCTTGGTATATGAAGATATTTATACTTCTTTTACATACGAAAATATGA  
AATTCAGACTCATGTGACAAGCCAAGGC---CCCGAAAGGGTCACTAATGAAATACCGC





TGAACAACAAAGTTTCATTTTGGAAAAACACCACCATTATGGGAATGTACACGCGGTA  
GAAAAATTACGTCAATCCATTGAGATATGGTATGCTACAAGTGAATTTTTCGACAAGA  
AATGAATCCTAATTTTAGGATGACTGACCCCTTAATCCAGTTCATATAATGTCTTTTCG  
GGAGCTAGAGGAAATGCATCTCAGGTACATCAATTAGTAGGTATGAGAGGATTAATGTC  
GGATCCCCAAGGACAAATGATTGATTTACCCATTCAAAGCAATTTACGCGAAGGACTCT  
CTTTAACAGAATATATTATTTCTTGCTACGGAGCCCGTAAAGGGGTTGTGGATACTGCTG  
TACGAACCTCAGATGCTGGATATCTCACGCGCAGACTCGTTGAAGTAGTTCAACACATT  
GTTGTACGTCGAAAAGATTGTGGCACCGTCCGAGGTATTTCTGTGAGTCCCCGAAATG  
GGATGATGCCG---GAAAGGGTTTTATCCAAACATTAATTGGTCGTGTATTAGCGGATGA  
TATATATCTGGGTCCACGATGTATTGCCACCAGAAATCAAGATATTGGTAGTGGACTTGT  
CAATCGATTCATAACC-----TTTCGAGCACAACCAATATATATTCGAACCTCCCTT  
TACTTGTAGGAGTACATCTTGGATCTGTGCGATTATGTTATGGCCGGAGTCCACTCACGG  
CGATCTGGTCGAATTGGGAGAAGCTGTGGGTATTATTGCAGGTCAATCTATTGGAGAAC  
CGGGTACTCAATTAACATTAAGAACCTTTCATACCGGCGGAGTATTCACAGGGGGTACT  
GCAGAACATGTGCGAGCCCCTTCTAATGGAAAAATAAAATTCAATGAGGATTTGGTTCA  
TCCGACACGTACACGTCATGGACATCCTGCTTTTCTATGTTCTATAGACTTGTATGTAAC  
TATTGAGAGTGAAGATATTATACATAATGTGAATATTCCACCTAAAAGTTTTCTTTTAGTT  
CAAATGATCAATATGTAGAATCAGAACAAGTGATTGCTGAGATTTCGCGCAGGAACAT  
CCACT--TTGAATTTAAAGAGAAGGTTTCGAAAACATATTTATTCTGACTCAGAGGGAG  
AA---ATGCACTGGAATACCGATGTGTATCATGCACCTGCATTTACTTATGGGAATGTTCA  
TCTCTTACCAAAAACAAGTCATTTATGGATATTATTAGGAGAGCCATGCAA-----TCCG  
ATCTAGTCGCCCTCTCGATCCACAAGGATCAAGATCAAATGAACGCCCAT-----TCTCTT  
TCTGTCAAGAGAAGATATATTTCTAACCTCTCA-----GTAACATAATGATCAA---GCGAGAC  
ACAAATTTCTTAGTTCGGATTTTTCTGGTAAA---GAAGATAGGATTCCTGATTAT--TCAG  
AACTTAATCGA-----ATTGGTCATTGTAATCTCACATATCTG---GCCATTCTCCACGCAA  
ATTAT-----TATTTATTGGCAAAGAGACGAAGAAATAGATTCATCATTCCACTCCAATCGA  
TTCAAGAACACGAGAACGAACATAATGCCCTCTTCGGGTATCTCGATTGAAATACCC-----  
ATAAATGGTATTTTCCGTAAAAATAGTATTCTTGCTTATTTTCGATGATCCTCGATACAGAA  
GAAAGAGTTCGGGAATTACTAAATATGGCACTATAGAAGTGCATTCAATCGTCAAAAAA  
GAGGAT-----TTGATTGAGTATCGAGGA---GTCAAGGAATTTAGGACAAAATACATGAAA  
GTGGATCGATTCTTTTTCATTCCCGAGGAAGTGCATATCTTACCTGGATCTTCTTCCATA  
ATGGTACGGAACAATAGTATTATTGGGGTAGATACACAAATCACTTTAACTACAAGAAG  
CCGAGTAGGCGGATTGGTCCGAGTGGAGAGAAAAAATAAATTGAACTTAAATA  
TTTTCTGGAGATATCCATTTTCTGGAGAGACGGATAAGATATCCCGACATAGTGGCGT  
CTTGATAACCACCAGGAACC-----GGAAAAACAAATTCGAAGGAATCCAAAAA-----TG  
GAAAAATTGGATCTATGTCCAACGG-----ATCACACCTACCAAG-----AAAAAGTATTTG  
TTTTGGTTTCGACCTGTAGTCACATATGAAATAATGGACGGTATAAATTTAGCA---CTTTTC  
TTCCCGGATCTGTTGCAGGAAAGGGATAATGTGCAACTTCGAGTTGTCAATTATATCCTT  
-----GGCAAACCAATTCGGGGATTTATGACACAAGTATTCAATTAGTTAGGACTTGTT  
TAGTATTAATTTGGGTCCAAGACAAAAA-----GGTTCTTCTATCGAAGAGGCCCGTA  
CTTCTTTGTTGAAATAAGGATAAATGGTTTGGATTCGAGATTTTCTAAAAATCGACTTAG  
CAAATCCCCTATTTTCGTATACCGGAAAAAGGAAAGATCCATCGGGTTCAGGATTGATC  
TATGAG---AATGGATCAGATCGACCAATATCAATCCGTTTTCTTCCAGTTTTTTCTAT----  
---TGCAAGGCAAGGATTAAAGAATCCCTTAATCAAACCAAGGAACTATTACATATG

TTGAATAGA-----AATAAGGAATGCCAATCTTTGATAATTTTGTTCATCATCCAATTGTTT  
TCGAATGGGTCCA-----TTCAACGATGTAAAATATCACAATGTG-----ATAAAAGAATC  
A---CCCCTAATTCCAATTAGGAATTCGTTGGGACCTTTAGGAACG-----GCCCTTCAAATT  
GCGAATTTTTATTCA-----TTTTCCCACTTA-----ATAACTTATAATCAGATCCTG---GTAAC  
TAACTATTTGCAACTTGACAATTTAAAA-----CAGAGTTTTCAAGTACTTAAA-----T  
ATTATTTAATGGATGAAAAT-----GGGAAAATTTATAATCCCGATCGATGCTGTAACATTAT  
TTTGAATCCATTCAATTTGAATTGGTTTTTTTCTCCAGCACAATTATTGTGAAGAGACGTC  
T---ACAACAATGAGTCTTGGGCAGTTTATTTGTGAAAATGTATGTATAGCCAAAAATGGA  
CCACAC---CTAAAA-----CCGGGTCAAGTTCTAATTGTTCAA---GTTGACTCTGTAGTAAT  
ACGATCCGCTAAGCCTTATTTGGCCACCCCAGGAGCAACTGTTTCATGGACATTATGGGG  
AAATCCTTTACGAAGGAGATACATTAGTTACATTTATATATGAAAAATCGCGATCTGGTG  
ATATAACGCAGGGTCTTCCAAAAGTCGAACAGGTGTTAGAAGTGCGTTTCGATTGATTC  
AATATCGATGAATCTCGAAAAGAGGGTGTGAGGGCTGGAACGAATGTATAACAAGAAAT  
CTTGGAATTCCTTGGGGGTTCTTGATTGGTGCTGAGCTAACTATAGTGCAAAGTCGTAT  
TTCTTTGGTTAATAAGATCCAAAAGGTTTATCGATCCCAGGGGGTGCAGATCCATAATA  
GGCATATAGAAATTATTGTACGTCAAATAACATCAAAGTGTTGGTTTCAGAA-----GA  
TGGGATGTCTAATGTTTTTTTACCCGGAGAATTTATTGGATTGTTGCGAGCGGAACGAA  
TGGGGCGCGCTTTGGAAGAAGCGATCTGTTACCAAGCCGTCTTATTGGGAATAACAAA  
AGCATCTCTGAATACTCAAAGTTTCATATCCGAAGCGAGTTTTCAAGAAACTGCTCGAG  
TTTTAGCAAAGCAGCTCTCCGGGGTCTGATCGATTGGTTGAAAGGCCTGAAAGAGAA  
CGTTGTTCTGGGGGAATGATACCCGTTGGTACCGGATTCAAAGGATTG-----GTTCCCC  
CTTCGAGGCAACATAAGAACATTCCC-----TTGAAACCAAAAAAAGAATCTATTCTGA  
GGGGAAATGAGA-----GATATTTTGTTCACCACAGAAAATTTTTTGATTCTTGCCTTT  
CAAAGAATTTCCATGATACACCAGAACAATCATTTATAGGA-----TTAATGATT  
CCATGACAAAAGGTATTGGAACATCAATTTGGAAGAGATGATGAAGGCCGGAGTTCA  
TTTTGGACATGGTACTAAGAAATGGAATCCTAAAATGGCCCCTTATATCTCTGCAAAGC  
GTAAAGGTATTCATATTACAAATCTTACTAGAAGTCTCGTTTTTTTATTAGAAGCTTGCG  
ATTTGGTTTTTTGATGCAGCAAGTAGGGGAAAACAATTCTTAATCGTTGGCACTAAAAAT  
AAAGCAGCTAACTTAGTAGCATGGGCTGCAATAAAGGCTCGGTGTCATTATGTTAATAA  
AAAATGGCTCGGCGGTATGTTAACGAATTGGTCCACTACAGAAACGAGACTCCATAAG  
TTTAGAGACTTGAGAACAGAACAAAAACGGGGAGACTCAACCGTCTTCCGAAAAGA  
GATGCGGCTATGTTGAAAAGACAATTATCTCACTTGCAAACATATCTGGGCGGGATTAA  
ATATATGACAGGGTTACCAGATATTGTAATCATCGTTGATCAGCACGAAGAATATACGGC  
CCTTCGAGAATGTATCACTTTGGGAATTCACAATTTGTTTAATCGATACAAATTGTGA  
CCCTGATCTTGCAAGATTTTCGATTCCAGCGAACGATGACGCTATATCTTCAATCCGATT  
AATCTTAACAAATTAGTATTCGCAATTTGTGAGGGGCGTTCT---AGCTATATAAGAAAT  
CCGATGGGACAAAAAATAAATCCACTCGGTTTCAGACTTGGTACAACCCAAGGTCATC  
ATTCCCTTTGGTTTGCACAACCAAAAAATTATTCCGAAGGTTTACAAGAAGATCAAAA  
AATAAGAGATTTTATCAAGAATTATGTACAAAAAATATGAAAATTTCTCTAGC---GTT  
GAGGGAATTCACGATAGAGATTCAAAAAAGAATCGATCTGATCCAGGTCATAATCTA  
TATGGGATTCCAAAGTTATTAATAGAAAGTCGACCGCGA-----GGAATCGAAGAAT  
TGCAGATGAATCTACAAAAGAATTTAATTGTGTGAACCGAAAACCTAACATTGCTATC  
ACAAGAATTGCAAACCTTACGGAAGCCCTAATATTCTTGCGGAATTTATAGCCGGCCA  
ATTAAAGAATAGAGTTTCATTTGAAAAGCAATGAAAAGGCTATTGAATTAACCTGAAC

AAGCAGATACAAAAGGAATTCAAGTACAAATTGCAGGGCGTATCGACGGAAAAGAAA  
TTGCGCGTGTGGAATGGATCAGAGAAGGTAGGGTTCCCCTGCAAACCATTTCGAGCTAA  
AATTGATTATTGTTCCCTATACAGTTTCGAACTATTTATGGAGTATTAGGCATCAAATTTGG  
ATATTTATAGACGGGGAAATGTCGCGTTACCGAGGACCTCGTTTCAAAAAAATACGCCG  
CCTGGGAGCTTTACCGGGACTAACTAATAAAAGGCCTAGAGCCGGAAGTGATCTTAGA  
AATCAATCGCGTTCGGGAAA---AAATCTCAATATCGTATTCGTCTAGAAGAAAAACAA  
AAATTGCGTTTTTCATTATGGTCTTACAGAACGACAATTACTTAAATACGTTTCGTATCGCC  
GGAAAAGCCAAGGGGTCAACAGGTCAGGTTTTACTCCAATTACTTGAAATGCGCTTGG  
ATAACATCCTTTTTTCGATTGGGTATGGCTCCGACTATTCCCGGAGCCCGTCAATTAGTTA  
ACCATAGACATATTTTAGTCAATGGTTCGTATAGTAGATATAGCAAGTTATCGCTGCAAAC  
CCCGAGATATTATTACGGCGAGGGATGAAGAAAACCTCTAGAACTCTGATTCAAATTTCT  
CTCGATTTCGTCTCTCAT--GACGAATTGCCAAAACATTTGACTCTTCACCCATTCCAA--  
----TATAAAGGATTAGTGAATCAAATTATAGATAGTAAATGGGTTCGGTTTGAAAATAAATG  
AATTGCTAGTCGTAGAATATTATTCGCGCCAGACTATGTCACGTCGAGGTACTGCAGAA  
GAAAAAAGTCAAAAATCCGATCCAATTTATCGTAATCGATTAGTTAACATGTTGGTTAA  
CCGTATTCTGAAACACGGAAAAAATCATTGGCTTATCAAATTATCTATCGAGCCGTGA  
AAAAGATTCAACAAAAGACAGAAACAAATCCACTATCTGTTTTACGTCAAGCAATACG  
TGGAGTAACTCCCGATATAGCAGTAAAGCAAGACGTGTAGGTGGATCGACTCATCAA  
GTTCCCATTTGAAATAGGATCCACACAAGGAAAAGCACTTGCCATTCGTTGGTTATTAGC  
GGCATCCCGAAAACGTCCGGGTTCGAAATATGGCTTTCAAATTAAGTTCCGAATTAGTGG  
ATGCTGCCAAAGGGAGTGGCGATGCCATACGCAAAAAGGAAGAGACTCATAGAATGG  
CAGAGGCAAATAGAGCTTTTGCACATTTTCGTATGGGTAAGGATACTATTGCTGACATA  
ATAACCTCTATACGAAATGCTGATATGGATAAAAAAAGAGTGGTTCGAATAGCATCTACT  
AATATCACTGAAAATATTGTTAAAATACTTTTACGAGAAGGTTTTATCGAAAACGTGAG  
AAAACATCAAGAAAACAAAAGGATTTTTTGGTTTTAACCTACGACATAGAAGG-----  
AATAGGAAAAGGCCTTAT-----AGAAATATTTTAAATTTAAAACGGATCAGTCGGCCTG  
GTCTACGAATCTATTCTAACTATCAACGAATTCCTAGAATTTTAGGCGGGATCGGAATTG  
TAATTCTTTCTACTTCTCGAGGTATAATGACAGACCGAGAGGCTCGACTAGAAAGAATT  
GGCGGAGAAATTTTGTGTTATATATGGATGGCAAAGCTATACCGAGAAGTGGTTCACG  
TAGGAATGGGCGTATTGGTTCACGTAAGAGTACACGTAGAATACCAAAGGGGGTTATTC  
ATGTTCAAGCAAGTTTCAATAATACTATTGTGACTGTTACAGATGTACGGGGTTCGGGTG  
GTCTCTTGGTCTCTGCCGGTACTTGTGGATTCAAGGGTACAAGAAGGGGGACGCCGT  
TTGCTGCTCAAACCGCAGCAGGAAACGCTATTCGTACAGTAGTGGATCAAGGTATGCA  
ACGAGCAGAAGTCATGATAAAAGGACCCGGTCTCGGAAGAGACGCAGCATTACGAGC  
TATTCGCAGAAGTGGTATACTATTAACCTTCGTGCGAGATGTAACCCCTATGCCACATAA  
TGGCTGTAGACCTCCGAAAAACGACGTGTGATGCCAACCATTAAACAACCTATTAGA  
AATAAAGACAGCCAATCAGAAATGTCACAAAATCCCCCGCGTTTCGGGGATGCCCCC  
AGCGTCGAGGAACATGTACTAGGGTGTATGTGATCAACCCCAAAAAACCAAACCTCTGC  
CTTACGTAAAGTTGCCAGAGTACGATTAACCTCTGGATTTGAAATCACTGCTTATATACC  
CGGTATTGGCCATAATTCACAAGAACATTCTGTAGTCTTAGTAAGAGGGGGGAAGGGTTA  
AGGATTTACCCGGTGTGAGATATCACATTGTTTCGAGGAACCCTAGATGCTGTGCGGAGTA  
AAGGATCGTCAACAAGGGCGTTCT--AGCAATATGGAG-----ATGGCAAGGAAAAGTT  
TGATTACAGAGGGAGAAGAAGAGGCAAAAATTTGGAACAGAAATATCATTTCGATTTCGCCG  
ATCCTCAAAAAAAGAAATAAGC-----AAAGTTCTATCGTTAAGCGACAAATGGGAAAT

TTATGGAAAGTTACAATCCCCACCGCGGAATAGTGCACCTACACGTCTTCATCGGGCGTT  
GTTTTTCGACCGGAAGGCCGAGAGCTAACTATCGAGACTTTGGACTATCCGGACACAT  
ACTTCGTGAAATGGTTCATGCATGTTTGTGGCCAGGGGCGACAAGATCAAGTTGGATG  
ATAAAAAATCCATTCAGTGAATTATTTTAAA-----GAGGAAAACAAAGACAACAAG  
GGTCTGCTGAATTTCAAGTAGTCAGTTTGACCAATAGGATACGAAGACTTACTTCACAT  
TTGGAATTGCACAAAAAAGACTATTTATCTCAGAGAGGTCTGCGTAAAATTCTAGGAA  
AGCGTCAACGGCTACTGGCTTATTTGTCAAAAAAATAGAGTACGTTATAAAGAATTA  
ATTGGTTCGGTTGGATATTCGAGAAACAAAACTCGT-----ATGGTAAAACCTTCGTTTAA  
ACGATGTGGTAGAAAGCAACGAGCCGTCTATCGAATCGTTGCAATTGATGTTTCGATCCC  
GAAGAGAAGGAAGAGATCTTCGGAAAGTGGGTTTTTATGATCCGATAAAGAATCAAAG  
TTGTTTAAATGTTCCCGCTATTCTATATTTCTTGAAAAAGGCGCTCAGCCTACAGGAAC  
TGTTTCGGGATATTTTAAAGAAGGCGGAGTTTTTTAAG-----ATGGAT  
AAATCCAAGCGACCTTTTCTTAAATCCAAGCGATCTTTTCGTAGGCGTTTGCCCCGAT  
CCAATCGGGGATCGAATTGATTATAGAAACATGAGTTTAAATTAGTCGATTTATTAGTGA  
ACAAGGAAAAATATTATCTAGACGGGTGAATAGATTGACCTTGAACAACAACGATTAA  
TTACTATTGCTATAAAACAAGCTCGTATTTTATCTTTGTTACCTTTTCTTAAATAATGATAA  
ACAAAAACAATTTGAAAGAACCGAGTCGACCGCTAGAAGTCTGGTCTTAGAGCCAG  
AAAAAAGTGACACGTTCACTAAAAAATCCTTTTGTAGCAAATCGTTTATTAAGA  
AAAATTGATAAGCTTAACACAAAAGAAGAAAAAGAAATAATAATAACTTGGTCCCGGG  
CATCTACCATTATACCCACAATGATCGGCCATACTATTGCTATCCATAATGGAAAGGAGC  
ATTTGCCTATTTATATAACCGATCGTATGGTAGGCCATAAATTGGGAGAATTTGCACCTA  
CTTTAAATTTCCGAGGACATGCGAAAAGCGATAATAGATCTCGTCGTATGATTTTGAAT  
CTTTTCTACTAGGTAATCTAGTATCCTTATGCATGAAGATAATCAATTCGGTCGTTGTGGT  
CGGACTCTATTATGGATTTCTGACCACATTCTCCATAGGGCCCTCTTATCTCTTCTCTC  
CGAGCTCGGGTTATGGAAGAAGGAGAAGAAGGAACCGAGAAGAAGGTATCAGCAAC  
AACAGGTTTTATTACGGGACAGCTCATGATGTTTCATATCGATCTATTATGCGCCTCTGCA  
TCTAGCATTGGGTAGACCTCATACAATAACTGTACTAGCTCTACCGTATCTTTTGTTCAT  
TTCTTCTGGAATAATCACAAAACCTTTTTTGTATTATGGATCTACTACCAGAAATTCAATG  
CGTAATCTTAGCATTCAATGCGTATTCCTGAATAATCTCATTTTTCAATTATTCAACCATT  
TCATTTTACCAAGTTCAATGTTAGCCAGATTAGTCAACATTTATATGTTTCGATGCAACA  
ACAAGATGTTATTTGTAACAAGCAGTTTTGTTGGTTGGTTAATTGGTCACATTTTATTCA  
TGAAATGGGTTGGATTGGTATTAGTCTGGATACGGCAAATCATTCTATTAGATCG---ATT  
CGATCTAATAAGTACCTTGTGTCAGAATTGATAAAT-----TCTCGAATCTTTAGTATTCTCT  
TATTTATTACCTGTGTCTACTATTTAGGCAGAATACCGTCACCCATTTTACTAAGAACT  
GAAAGAAACCGAAGAAGATAAACCTCTTGTGACCCTTCTTTTCGATTATAAACGATGG  
AATCGCCCATTACGATACATAAAA---AATAGATTTGAAAGGACTGCAAGAAATGAAATG  
TCACAATATTTTTTTTATACATGCCGAAGTGATGGAAAAGAAAGAATATCTTTTACGTAT  
CCGCCTAGCTTGTCAACTTTTGGAGAAATGATACAAAGAAGGATGTCCTTGCCCACT  
AGAAAACTCTCTTCGGATGAATTGTACAATCATTGGATTTATACTAACAACAAAAA  
ATAACAACCTAAACAACGAGTTTTTAAATAGAATTGAGGCTCTAGATATGGGATTTCTTT  
CTCTGGATATACTCGAAAAAGTACTAGATTGTATAAT-----ACTAAAAAAATTACTTGC  
CTAAAATGTATGATCCCATTTTGAAT---TCATATCGTGTAACAATCAAAAAATATTTTCA  
CCTATAGAGACAATGGAAATAAATAAGATTCATAATATCCTTTACCAAGAGTTTGAACA  
GAAAGGACCTAATGGTCAC-----ATAAAAGAAATCAGTAAAAAAGTCCCTCGATGGT

CATACAAACTTATCGAGTTGGAACAACAGTCGGGCGTACAGATTCGTTCAAGAAAAAC  
TGACGATGTAGTAATTTTTACTCCT-----ATAGAATATTCGCAAGAATCGGATTTTCGTCG  
AGACATAATCAAAGGTTCTATGCGTGCTCAAAGGCGTAAAACCTCCTATTTTGAAACTGT  
TTCAAGCAAATGCGCATTCCCCACTTTTTTTGGACAGA---AGAAAA---AAATCCCCTTTT  
TTTTCTTTTGATATCTCCGAAGTATGAAACTTCTTTTTAGAAATATAAAGGAAAAAGC  
GCGGATAGAA-----TGGGATCTCGTTCATTTCGCAACAACAAGAAGTTTTATAT  
TACTAATTCGAAGCTTAGAAAATATATTATATTACCTTCATTGATAATAGTTAAAAA  
TATTGGGCGTATCTTATTATTCCAACCCCTGAGTGGTCTGAGGATTTACAGGAATGGAA  
GAGAGAAAAGCATATTAATGTACCTATAACGGTGTTCATTATCAGAAAAAGATTTTC  
CCGAAAATTGGTTAACAGAAGGTATTCAGATAAAAATACTATTTCCCTTCTGTTTGAAA  
CCTTGGTACAGATCTAATGAGCAAAAAAAGATAATTTTTGTTTTTTAACGGCTGGTGG  
AATGGAAACCGACCTTCCTTTTGGTCTCCCCGAAAAAGACCTTCCTTTTTTGAGCCCA  
TTTTTAAGGATTTCTA-----GCTCTAAGAGTTTTAATAAG  
AAGAAATTTTTTACAAGGCTCAAAAAGAAACAAAAAGGGGGTTTATCAAAAACGTTTTA  
TTTCTGTTTCTAAAAGAATAAAAAAAGAGCTCTCAAAGTAAATGGTCTATAATCAG  
CAATCAGACAATTCATGACTCGTTTAATAAAATTCGATCTACAGATTGGACAAATTATTC  
ACTGAGAGAAAAAAAATAAAAAATATACTGATAGAACAAGCACAATCAGAAAGAA  
AATAAAGAGTATTACAAAAGAAAAAAA-----AATAAAACAAGTTATAAT-----GT  
AGAATCACCAAAGATATTTGGCAAATATTA-----AAAATACTCGATTAATCTGTAAATT  
ACAGGTTTTTCTAAAATTTTCATTGAAAAATATACATAGATATCTTTCTATATATCATT  
AATATTGCCAGAATGTATACACAACCTTGTT-----ATTCACTTTGACTTATCCTCCTTGT  
GCAAGCATATGTATTTACAAATTATCACAAACCCGAGTTATTAATTTGTATAAGTTAAG  
ATCTGTTCTTGAATATACATCTTTTTTTCTTAAAGACTGCAATAAAAGATTCTTTTACACAA  
GGAATATTTTCATTCCGAATTAGGGCATAACGAAATTTCCAAGTTCTGGAACGAATCAATG  
GAAAAACTGGTTAAGAGGT---TATCAATACAATTTATCTCAGATTAGATGGTCTGGATTA  
ATACCACAAAATGGCGAAATACAATCAATCAACGCCGTATAACTCAAAAAAAAACAA  
AATGGGATTCA-----AAAGACCGA-----TTACTTCATTACAAAAACAA---AATTTTAAAA  
AATACTATAGATATGACCTTTTATCATATAAATCTATTAATGGTGATATTATGTATCCAGAT  
AGAAAATATTTTGATTGGAATATTCTCAACTTTTTTCTAAGATTTTTTGATTGGATGGAA  
ATGAATGAAGAAATACTAAATCGCTGGTCTTCCCAGAATTTGTGCTACTTTATAATGTA  
TACAAAAAAAACCGTGGATTATACCAAGCAAATTACTTCTTTTAAATAACAAAAGTAA  
CATAAAAGTAGAACTAAATGTCTTACTGAACCAGCATTCTTTTTTCAATTGAGATACG  
ACGATGGTTTA---CAAAGAATGATCAATAATATCAAGGCAAGTTATTTCTTGCTTGGACT  
GAAAAATCCAAGAAATCTTACTATATCGTCTATTCAAACAGAGAAAAAAGTCTGGATA  
TAATGCTGATTCGGAAGAGC---TTAACTCTTAGAGAATTGATGAAAGGGGTATTGATTGT  
CGAACCCATTTCGTCTGTCTGTAAAAAAGATGGACAATTTATTATGTATCAAACCATAG  
GTATTTCAATTGATTACATAAGAGTAAGTACAACCATTATGATTTTCTTGTCTGAAAAGA  
TTTTATCGTCTAGACGTCGTAGAGAATTGAGAATTTTAATTTATTCGTGTTTCTTTGGCC  
TAATTATCGATTAGAAGACTTAGCTTGTATGAATCGCTATTGGTTTGATACCAATAATGG  
AAGCAATTTCAAGTATGTTAAGGATATATCCACAATTAATGAAAGGACATCAATTCAAATC  
CTGGATTTTCGAATTGAGAGAGATATTGAGAGAGATCAAGAATTCTCACTATTTCTTAG  
ATTCATGGACCCAATTCAATTCAGTGGGATCTTTCAGTCACATTTTTTTCCACCAAGAA  
CGTTTTATAAACTTTTTGACCCCGAATTTGGAGTATCCTACTTTCA---CGCAATTCA---  
---CAGGGTTCAACAAGCAATCGATATTTACG-----ATCAAGGGT--GTAATACTCTTTG

TAGTAGCGGTCCTTATATATCGT-----ATTAACAGTCGAAATATGGTTCGAAAGAAAA  
AATCTCTATTTGATAGGGCTTCTTCCT-----ATACCTATGAATTCATTGGACCCAG  
AAATGATACATTGGAAGAATCCGTT--GGGTCTTCCAATATCAATAGGTTGATTGTTTCG-  
--CTCCTGTATTTTCCAAAAGGAAAAAAGATCTCTGAGAGTTGTTTCTGAATCCGAAA  
GAGAGTACTTGGGTTCTCCAATAACT-----AAAAAGTGTAGCATGCCTGAATCTAA  
CTGGGGTTCGCGGTGGTGGAGGAAGTGGATCGGAAAAAAGAGG-----GATTCT-----  
-----  
-----  
-----  
-----  
-----  
-----AGCCAATTGAAAGGATCTTC  
T--GATCAATCCAGAGATCCTTTAGATTCCATTAGT-----AATGAGGATTCGGAA-----  
-----TATCACACATTGATCAATCAAAGAGAGATTCAACAATAAAAG  
AAAGATCGATTCTT--TGGGAT-----CCTTCCTTTCTTCAAACGGAACGAACAGAGATAG  
AATCAGAC-----CGATTCCCGAAA-----TGCCTTTCTGGATATTCC-----TCAATGTCCCGG  
CTATTCACG--GAACGTGAGAAGCAGATGATTAATCATCTGCTTCCGGAAGAAATCGAA  
GAATTTCTT-----GGGAATCTACAAGATCCGTTTCGTTCTTTTTTCTCTGACAGATGG-----  
TCAGAACTTCAT--CTGGGTTCTGAATCCTACTGAGAGGTCCACTAGAGATCAG-----  
AAATTGTTGAAGAAACAACAAGATCTTTCT--TTTGTCCCTTCGAGGCGATCGGAA-----  
-----AAGAAAGAAATGGTTAATATATTCAAGATAATTACGTATTTACAAAAT-----ACCGTC  
TCAATTCATCCTATTTTCATCATATCCGGGATGTGATATGGTTCCG---AAGGATGAACCGGA  
T--ATGGATAGTTCCAATAAGATTTTCATTCTTGAACAAAAATCCATTTTTTGGATTTA-----T  
TTCATCTATTCCATGACCGGAACAGGGGAGGATACACGTTA-----CACCACGATTTTGAA  
TCAGAA-----GAGAGATTTCAAGAAATGGCAGATTTATTCACTCTATCAATAACCGAGCC  
G--GATCTGGTGTATCATAAGGGATTTGCCTTTTCTATTGATTCCTACGGATTGGATCAAA  
AACAA-----TTCTTGAATGAGGTATTTCGACTCCAGGGATGAATCGAAAAAAAATCT-----  
----TTATTGGCTCTACCTCCTTTTTTTTAT-----GAAGAGAATGAATCTTTTTTATCGAAGGAT  
CAGAAAAAATGGGTCCGG---ATCTCCTGCGGGAATGATTTGGAAGATCCAAAACCAA  
AAATAGTGGTATTTGCTAGCAACAACATAATGGAGGCAGTCAATCAATATAGATTGATC  
CGAAATCTGATTCAAATCCAATATAGCACCTATGGG-----TACATAAGAAATGTATTGAAT  
CGATTCTTTTTAATGAAT-----AGATCCGATCGCAACTTCGAATATGGA-----ATTCAA  
AGGGATCAAATAGGAAAGGATACTCTGAATCATAGAACTATAATGAAATATACGATCAA  
CCAACATTTATCGAATTTGAAAAAG--AGTCAGAAGAGATGGTTCGATCCTCTT-----ATT  
TTTATTTCTCGAACCGAGAGATCCATGAATCGGGATCCTGATGCATATAGATACAAATGG  
TCCAATGGGAGCAAGAATTTCCAGGAACATTTGGAACATTTTCGTTTCTGAGCAGAAGA  
GCCGT-----TTCAAGTAGTGTTTCGATCGATTACGTATTAATCAATATTCGATTGATTGG  
TCTGAGGTTATCGACAAAAAAGTTTTGTCTAAGCCATTTTCGTTTCTTTTTGTCCAAG-----  
-----TTGCTTTTCTTTTTGTCTAAC--TCACT  
TCCTTTTTTCTTTGTGAGTTTTCGGGAATATCCCATTCATAGGTCCGAG---ATCTACATCT  
AT--GAATTGAAAGGTCCGAATGATCAACTCTGCAATCAGTTGTTAGAATCAATAGGTCT  
TCAAATCGTTCATTTGAAAAAATGGAAACCCTTC-----TTATTGGATTTATTGGATGATCA  
TGATACTTCC---CAAAAATCGAAATTTTGATCAATGGAGGAACAATATCACCATTTTTG  
TTCAATAAGATACCA--AAGTGG---ATGATTGACTCATTCCATACTAGA-----AATAATCGC

AGGAAATCCTTTGATAACACGGATTCTATTTCTCAACGATATTCCACGATCAAGACAAT  
TGGCTGAATCCCGTGAAACCATTTTCATAGAAGTTCATTGATATCTTCTTTTTATAAAGCA  
AATCGACTTCGATTCTTGAATAATCCACATCACTTCTGCTTCTAT-----TGTAATAAAAAGA  
TTCCCTTTTTATGTG-----GAAAAGGCCCGTATCAAT-----AATTATGATTTTACGTATG  
GA---CAATTCCTCAATATCTTGTTCATTCAACAACAAA---ATTTTTCTTTGTGCGTCCGTA  
AA-----AAAAACATGCTTTTTGGGGG---AGAGATACTATTTACCAATCGAGTCACAGG  
TATCTAACATATTCATACCTAACGATTTTCCACAAAGTGGTGGTGACGAAACGTATAACT  
TGTAACAATCT-----TTCCATTTTCCAAGTCGATCCGACCCATTTCGTTTCGT-----AGAGC  
TATTTACTCGATCGCAGACATTTCTGGAACACCTTTAACAGAGGGACAAATAGTCAATT  
TTGAAAGAACTTATTGTCAACCTCTTTCAGATATGAATCTATCTGATTCAGAAGGGAAG  
AACTCGCATCAGTATCTCAAT-----TTCAATTCAAACATGGGTTTGATTCACTCCATGT  
TCTGAGAAATATTTACCATCCGAAAAG-----AGGAAAAA-----CGGAGTC  
TTTGTCTAAAG-----AAATGCGTTGAGAAAGGGCAGATGTATAGAACCCTTTCAACGAGA  
TAGTGCTTTTTCAACTCTCTCAAATGGAATCTATTCCAAACATATATGCCATGGTTCCTT  
ACTTCGACAGGGTACAAATATCTAAATTTGATATTTTAGATACTTTTTTCAGACCTATTG--  
---CCGATACTAAGTCTA---AGTCAAAAATTTGTATCCATTTTTCATGATATTATGCATGGA  
TCAGATATATCATGGCGAATTCTTCAGAAAAAATTG-----TGGAAGACAAAATG  
GAATCTG---ATAAGTGAGATTTTCAGAGTAAAGTGTACATAAT-----CTTCTTCTGTCCGAA  
GAAAGGATTCATCGAAAT-----AATGAGTCGCCATTGATATCGACACATCTGAGATCGCC  
AAATGTTTCGGGAGTTC---CTCTATTCAATCCTTTTCCCTTCTTCTTGTGCTGGATAT---CTC  
GTTTGTACACATCTTCTCTTTGTTTCCCGG-----GCCTCTAGTGAGTTACAGACAGAGTT  
TGAAAAGGTCAAATCTTTGATGATTCCATCATCTATGATTGAGTTGCGAAAACCTTCTGG  
ATAGGTATCTACATCTGAACCGAATCTTTCTGGTTAAAGAATCTCTTTCTAGTTGCTC  
TGGAACAATTAGGAGATTCTCTAGAAGAAATACGGGGTTCTGCTTCTGGCGGCAACAT  
GCTATTGGGTGGTGATCCCGCT-----TATGGG---GTCAAATCAATACGTTCTAAGA  
AGAAATATTTGAATATCAATCTCATCGATATCATCGATCTCATA---AGTATCATACCAAATC  
CCATCAATCGAATCACTTTTTTCGAGAAATACGAGACATCTAAGTCATACAAGTAAAGAG  
ATCTATTCAATTGATAAGAAAAAGAAAAATGTGAACGGGGATTGGATTGATGATAAAAT  
AGAATCCTGGGTCGCAAACAGTGATTTCGATTGATGATGAAGAAAGAGAATTCTTGGTT  
CAGTTCTCC-----ACCTTAACGACA-----GAAAAAAGGATTGATCAAATTCTATTGAGTCT  
GACT--CATAGTGATCATTTA-----TCAAAGAATGACTCTGGCTATCAAATGATTGA  
ACAACCGGGAGCAATTTACTTACGATACTTAGTTGACATTCAT-----AAAAAGTATCTAAT  
GAATTATGAGTTCAATACATCTGTTTAGCAGAAAGACGGATATTCCTTGCTCATTATCA  
GACAATCACTTAT-----TCACAAACCTCGTGTGGGGCTAATAGTTTTAATTTCCCATCTCA  
TGGA-----AAACCCTTTTCGCTCCGCTTAGCCTTATCCCCCTCT--AGGGGTATTTTAGT  
GATAGGTTCTATAGGAACTGGACGATCCTATTTGGTCAAATACCTAGCGACAAACTCCT  
ATGTTCCCTTCATTACGGTATTTCTGAACAAGTTCCTGGATAACAAGCCTAAAGGTTTTC  
TTATTGAT-----GATAGTGAC---ATTGATGATAGTGACGATATTGATGCTAGTGACG  
ATATTGATGCTAGTGACGATATTGATGCT-----AGTGACGATATCG  
ATCGTGACCTTCATACGGAGCTG---GAACTGCTA-----ACTATGGATATGATGCC  
GGAA-----ATAGACCGATTTTATATCACCTTCAATTTCGAATTAGCAAAAGCAATGTCT  
CCTTGCATAATATGGATTCCAAACATTCATGATCTGGATGTGAATGAGTCGAATTAATCTC  
TCCCTCGGTCTATTAGTGAACCATCTCTCCAGG-----GATTGTGAAAGATGTTCC---AC  
TAGAAATATTCTTGTATTGCTTCGACTCATATCCCCAAAAAGTGGATCCCGCTCTAAT



AGCTCCGAATAAATTAATACGTGCATTAAGATACGAAGGCTTCTTATTCCACAACAAC  
GAAAGCACTTTTTACCCTTTCATATACTAGGGGATTTGCTTGGAAAAGAAAATGTT  
CATACT-----AATGGATTTCGGGTCCATAACCATGGGTTCCAATGCACGAGATCCTGTAGC  
ACTTACCAATGAGGCCCTATCGATTAGTATTACACAGAAGAAATCAATTATAGACACTAA  
TACAATTAGATCCGCTCTTCATAGACAACTTGGGATTTGCGA-----TCCCAGGTAAGA  
TCGGTTCAGGATCATGGGATCCTTTTCTATCAGATAGGAAGGGCTGTAGCACAAAATGT  
ACTTCTAAGTAATTGCCCATAGATCCTATATCTATCTATATGAAGAAGAAA-----TCATGT  
AACGAAGGGGATTCTTATTTGTACAAATGGTACTTCGAACTTGGAACGAGCATGAAGA  
AATTAACGATACTTCTTTATCTTTTGAGTTGTTCTGCCGGATCGGTGCTCAAGATCTTT  
GGTCTCTACCC-----GGACCCGATGAAAAA---AATGGGATCACTTCTTATGGACTCGTTG  
AGAATGATTCT--GATCTAGTTCATGGCCTATTAGAAGTAGAAGGCGCTCTGGTGGGA---  
--TCCTCGCGGACAGAAAAAGATTGCAGTCAGTTTGATAATGAT-----CGAGTGACATTG  
CTTCTTCGGCCCGAACCAAGGAAT--CCCTTAGATATGATGCAAAATGGATCTTGTCTA  
TCCTTGATCAGAGATTTCTCTATGAAAAAAC-----GAATCGGAGTTTGAAGAA---GGG  
AAGGAGAAGGAGCCCTCGACCCGCAACAG-----ATAGAGGAGGAT-----TTATT  
TAATCAC-----ATAGTTTGGGCTCCT-----AGAATATGGCGCCCT-----TGGGGCTTCTAT  
TTGATTGTATCGAAAGGCCAATGAATTGGGATTTCCC---TATTGGTCCAGGTCATTTG  
GGGCAAG-----CGGATCCTTTATGATGAAGAGGATGAGCTTCAAGAGAATGATTCGGA  
GTTCTTGCAGAGTGGAACCATGCAGTACCAGACACGAGATAGATCTTCCAAAGAACAA  
GGCCTTTTTTCGAATAAGCCAATTCATTTGGGACCCTGCAGATCCACTCTTTTTTCTATTC  
AAA---GATCAGCCCTTTGTCTCTGTGTTTTTCACATCGAGAATTATTTGCAGATGAAGAGA  
TGTCAAAGGGGCTTCTTACTTCCCAAACAGATCCTCCTACATCTATATATAAACGCTGGT  
TTATC-----AAGAAGACGCAAGAAAAGCACTTTCGAATTGTTGATTAATCGCCAGAGATG  
GTTTAGA-----ACCAATAGTTCATTATCT-----AATGGATCTTTCGGTTCTAAT-----ACTC  
TATCCGAGAGTTATCAGTATTTATCAAATCTATTCCTATCTAAC---GGAACGCTATTGGAT  
CAAATGACAAAGACATTGTTGAGAAAAAGATGGCTTTTCCCGGATGAAATGAAAATTG  
GATTC-----ATGGAACAGGAGAAAGATTTCCCATTCCTTATGCCTAGATCGAGG---ATAAA  
TGGAATTTTTATTGATAAGACCTTTTCAATTGTAGCCAATATCTTATTACGAATAATTTCC  
ACAACCTCAGGAGAAAAAGAGGCATTTACCTATTACAGAGATGGT-----ATGTCAGCTC  
AATCCGAAGGAAATTATGCGGAAGCTTTACAGAATTATTATGAAGCTATGCGACTAGAA  
ATTGATCCCTACGATCGAAGTTATATACTCTATAACATAGGACTTATCCACACAAGTAAC  
GGAGAACATACAAAAGCTCTGGAATATTATTTTCGAGCGCTAGAACGAAATCCGTTCTT  
ACCACAAGCTTTTAATAATATGGCTGTGATCTGTCATTAC---CGGGGAGAACAGGCCATT  
CGACAGGGGAGATTCTGAAATAGCGGAGGCTTGGTTCGATCAAGCCGCTGAGTATTGGA  
ACAAGCTATGGCGCTTACTCCTGGTAATTATATTGAAGCGCATAATTGGTTGAAGATCA  
CGAGGCGTTTTCGAA-----ATGAGTTGTCGATCAGAACATATATGGATAGAACCCTATAACG  
GGGTCTCGAAAAACAAGTAATTTCTGCTGGGCCGTTATCCTTTTTTTTAGGGTCATTAGG  
ATTCTTATTGGTTGGAACCTCCAGTTATCTTGGTAGAAATTTGATATCTTTATTTCCGTCT  
CAGCAAATCCTTTTTTTTTCCACAGGGGGTCGTGATGTCTTTCTATGGAATCGCGGGTCT  
CTTATTAGCTCCTATTTGTGGTGCACACTTTCGTTGAATGTAGGGGGTGGTTATGATCG  
ATTTGATAGAAAAGAAGGAATGGTGTGATTTTTTCGTTGGGGATTTCTGGAAAAAATC  
GTCGCATCTCCTCCGATTCCTTATAAAAGATATTAAGTCCGTCAGAATAGAAGTTAAAG  
AGGGTATTTATGCTCGTCGTGTCCTTTATATGGACATCAGAGGTCAGGGGGCCATTCCCT  
TGACTIONGACTGATGAGAAT--GTTACTCCACGGGAAATTGAACAAAAAGCTGCCGAAT

TGGCCTATTTCTTGCGTGTACCGATTGAAGTATTT

>Schefflera

ATGGAAGATGGTGGTTCAATTCGATACTGTTTCTAAGTAAATCAACGGGTAGTCTTGG  
TCCTATTGAAAATACCAGTGAAAGTGAAGATCCGAATATAAATGATATGAAGAAAAATA  
TTCATAGTTACAGTAATGTTGATCATTATTCGGCGTCAAGGACATTCGGAATTTTCATCT  
CTGATGAAACTTTTTTAGTTAGGGATAGTAATGGGAACCGTTATCCATATATTTTGATAT  
TGAAAATCATATTTTCGAGATTGACAATGGTCAT-----TCTTTTCAGAGTGAAGTAGAAA  
GTTCTTTTTATAGTTATCGGAATTCTAGTTATCTGAATAATGGATCTAACAGTGACGATCC  
CCACTATGATCATTACATGTATGATACTCAATATAGTTGGAATAATCACATTAATAGTTGC  
ATTGACAATTATCTTCAG-----TCTCAAATCTTTATTGAGACTGACATTGTAAGTGGTAGT  
GACAATTACAGTAACAGTTACATTTATAGTTCCATTTGTGGT-----GGTCCGGTATAAGA  
ACCAGCACGAATGGTAGTGATTTAACTATAAGAGAAAGTTCTAATGATCTGGATGTAAC  
TCAAAAATACAGGCATTTGTGGGTTCAATGTGAAAATTGTTATGGATTA AATTATAAGA  
AATTTTTTAAATCAAAAATGAATCTTTGTGAACAATGTGGATATCATTGAAAATGAGTA  
GTTTCAGATAGAATCGAACTTTTGATCGATCCGGGTACTTGGGATCCTATGGATGAAGAC  
ATGGTTTCTCTGGATCCATTGAATTTCAATTCGGAGGAGGAGCCTTATAAAGATCGTATC  
GATTCCTTATCAAAGAAAGACAGGATTA ACTGAGGCCGTTCAAACAGGCATAGGCCAAC  
TAAACAGTATTCCTCGTAGCAATCGGGGTTATGGATTTTCAGTTTATGGGGGGTAGTATGG  
GATCCGTGGTTCGGGGAGAAAATCACCCGTTTGATTGAGTACGCTACTAAAACTTTCTA  
CCTCTTATTATAGTGTGTGCTTCCGGGGGGGCACGCATGCAAGAAGGAAGTTTGAGCCTT  
GATGCAAATGGCTAAAATATCTTCTGCTTTATATGATTATCAATCAAATAAAAAGTTATTC  
TATGTACCAATCCTTACATCTCCTACTACAGGTGGGGTACTGCTAGTTTTGGTATGTTG  
GGGGATATCATTATTGCCGAACCCAATGCCTACATTGCATTTGCGGGTAAAAGAGTAATT  
GAACAAACATTGAATAAAACAGTACCTGAAGGTTCAACAAGCGGCTGAATATTTATTCC  
AGAAGGGCTTATTCGATCTAATCGTACCACGTAATCCTTTAAAAGCGTTCTGAGTGAG  
TTATTTTCAGCTCCACGCTTTCTTTCTTTGAATCAAATTC AATTA AAAATGGTAACCATT  
CGAGCCGACGAAATTAGTAATATTATTCGTGAACGTATTGAGCAATATAATAGAGAAGT  
AAAGATTGTAAATACCGGTACCGTACTGCAAGTAGGCGATGGCATTGCTCGTATTCATG  
GTCTTGATGAAGTAATGGCGGGTGAATTAGTAGAATTTGAAGAGGGTACGGTAGGCATT  
GCTCTTAATTTGGAATCAAATAATGTCGGTGTGTATTAAATGGGCGATGGTTTGCTGATA  
CAAGAAGGAAGTTCTGTAAAAGCAACAGGAAGAATTGCTCAGATACCCGTGAGTGAG  
GCCTATTTGGGTTCGTGTTGTAAATGCCCTGGCTAAACCTATTGATGGTAGAGGTGAAAT  
TTCAGCTTCTGAATATCGGTTAATTGAATCTCCCGCTCCGGGTATTATTTACGACGTTT  
AGTATATGAGCCTCTTCAAACGGGGCTTATTGCTGTTGATTTCGATGATCCCTATAGGACG  
TGGTCAGCGAGAATTAATTATTGGGGACAGACAGACCGGTAAAACAGCAGTAGCAAC  
AGATACGATTCTCAATCAACAAGGCCAAAATGTAATATGTGTTTATGTAGCTATTGGTCA  
AAAAGCATCTTCTGTGGCTCAGGTAGTGACTACTTCCAGGAAAGGGGGGCGATGGAA  
TACACTATTGTGGTAGCTGAAATGGCGGATTCCCCTGCTACATTACAATACCTCGCTCCT  
TATACAGGAGCCGCTCTGGCGGAATATTTTATGTACCGTGAACGACACACTTCAATCAT  
TTATGATGATCCCTCTAAACAAGCACAAGCTTATCGACAAATGCTCTTCTATTACGAAG  
ACCGCCCGGTTCGCGAAGCTTATCCAGGAGATGTTTTTTATTTGCATTCACGCCTTTTGG  
AAAGAGCTGCTAAATTAAGTTCTCGTTTAGGTGAAGGAAGTATGACTGCTTTGCCAATA  
GTTGAAACTCAGTCGGGAGATGTTTCGGCTTATATTCCTACTAATGTAATTTTCGATTACT  
GATGGACAAATATCTTATCTGCCGATCTATTCAATGCTGGAATCAGACCCGCTATTAAT

GTGGGTATCTCCGTTTCCAGAGTGGGATCTGCAGCTCAAATTAAGCTATGAAACAAGT  
CGCTGGCAAATTAATGGAAGTGGCGCAATTCGCAGAATTAGAAGCCTTTGCACAA  
TTTGCTTCTGATCTCGATAAAGCTACTCAGAATCAATTGGCAAGAGGTCAACGATTACG  
TGAATTGCTCAAACAATCCCAATCAGCCCCTCTCGCGGTGGAAGAAGATAATGACT  
ATTTATACCGGAACAAATGGTTATCTTGATTCATTAGAAATTGGACAGGTAAGGAAATTT  
CTTGTTGAGTTACGTACTTACCTAAAACTAATAAACCGAAGTTTCAAGAAATCATATC  
TTCTACTAAGATATTCACCGAGGAAGCAGAAGCCCTTTTGAAAGAAGCTATTTCAGGAA  
CAGACGGAACGTTTTATACTTCAGGAACAAGCAATGAGAATAAATCCTACTACTTCAGG  
TTCTGGGGTTTTCCACGCTTGAAAAAAAAAACCTGGGGAATATCACCCAAATCATTGGT  
CCGGTACTGGATGTAGCTTTTCCACCGGGCAAGATGCCTAATATTTATAATGCTCTGGTA  
GTTAAGGGTCGAGATACTGTTCGGTCAACAAATTAATGTTACTTGTGAGGTACAGCAATT  
ATTAGGAAACAATCGAGTTAGGGCTGTAGCTATGAGTGCTACAGACGGTCTAACGAGA  
GGAATGGAAGTGATTGATACGGGAGCTCCTCTAAGTGTTCCGGTCGGTGGAACTACTC  
TTGGACGAATTTTCAACGTGCTTGGAGAGCCTGTTGATAATTTAGGGCCTGTAGATACT  
CGACAACATCTCCTATTCATAGATCTGCGCCCGCCTTTATACAGTTAGATACAAAATTA  
TCTATTTTTGAAACCGGAATTAAGTAGTAGATCTTTTAGCCCCTTATCGCCGTGGAGG  
AAAATCGGACTATTCGGGGGGGCTGGAGTGGGTAAAACAGTACTCATTATGGAATTG  
ATTAACAATATTGCCAAAGCTCATGGGGGTGTATCCGTATTTGGCGGAGTAGGTGAACG  
TACTCGTGAAGGAAATGATCTTTACATGGAAATGAAAGAATCTGGGGTGATTAATGAAC  
AAAATATTGCAGAATCGAAAGTGGCTCTAGTTTACGGTCAGATGAATGAACCACCGGG  
AGCTCGTATGAGAGTTGGTTTACTGCCCCTAATGAGTGAATATTTCCGAGATGTTAA  
TGAACAAGACGTACTTCTATTTATCGACAATATCTTCCGTTTCGTCCAAGCAGGATCTG  
AAGTATCTGCCTTATTAGGTAGAATGCCTTCCGCTGTGGGTATCAACCCACCCTTAGTA  
CCGAAATGGGTACTTTACAGGAAAGAATTACTTCGACCAAAGAAGGGTCCATAACTTC  
TATCAAGCGGTTTATGTACCTGCAGACGATTTGACCGACCCTGCTCCTGCTACGACAT  
TTGCACATTTAGATGCTACTACTGTACTATCAAGAGGATTAGCCGCCAAAGGTATCTATC  
CCGCAGTAGATCCTTTAGATTCAACATCAACTATGCTCCAACCTCGGATTGTTGGTGAG  
GAACATTATGAAACTGCGCAAAGGGTTAAGCAAACCTTACAACGTTACAAAGAAGTTC  
AGGACATTATAGCTATCCTTGGGTTGGACGAATTATCCGAAGAGGATCGTTTAACCGTA  
GCAAGAGCGCGAAAAATTGAGCGTTTCTTATCACAAACCTTTTTTCGTAGCAGAAGTTT  
TACTGGTCTCCAGGGAAATATGTTGGTTTAGCAGAAACAATTAGGGGGTTTTCAATTG  
ATCCTTTCCGGAGAATTAGATGGTCTTCTGAACAGGCCTTTTATTTGGTAGGTAACATC  
GACGAAGCTACCGCGAAGGCTATGAACTTAGAAATGGAGAGCAATTTGAAGAAAATG  
ACCTTAAATCTTTGTGTACTGACCCCTAATCGAACTGTTTGGGATTCAAAAGTGAACGA  
AATCATTTTATCTACTAATAATGGCCAAATTGGCGTATTACCGGATCACGCCTCTATTGCC  
ACAGCTGTAGATATAGGTATTTGAGAATACGCCTTAACGGCCAATGGTTAACGATGGC  
TCTGATGGGTGGTTTTGCTAGAATAGATAATAATGAGATCACTGTTTTAGTAAATGATGC  
GGAGAAGAGTAGTGACATCGATTCAAGAAGCCCAGCAAACGCTTGAAATAGCGGA  
AGCTAATTTAAGAAAAGCTGAAGGAAAGAGACAAAAAATTGAGGCAAATTTAGCTCT  
CCGACGAGCTAGGACACGAGTAGAGACGATCAATGCGATTTTCGATGAAAAATGTAACC  
GATCTTTTCGTTTCTTTGGGCCACTGGCCGTCCGCTGGGAGTTTCGGGTTTAATACCGAT  
ATTTTAGCAACAAATCTAATAAATCTAAGTGTAGTGCTTGGGGTATTGATCTTTTTTGA  
AAGGGAGTGTTAAGTGATTTATTAGATAATCGAAAACAGAGGATTTTGAATACTATTCG  
AAATTCAGAAGAAGTCCGTGAAGGGGCCATTGAACAGCTGGAAAAAGCCCGGGCGCG

CTTACGAAAAGTGGAAATGGAAGCAGATCAGTTTCGGGTGAATGGATACTCTGAGATA  
GAGCGAGAAAAGTGGAAATTTTATTAATTCAACTTCTAAGACTTTGGAACAACACTAGAAA  
ATTACAAAACGAACTATTCAATTTTGAACAACAAAGGGCGATTAATCAAGTCCGACA  
ACAGGTTTTCCAACAAGCCTTACAAGGGGCTCTAGGAACTCTGAGTAGTTGTTTGAAC  
AACGAGTTACATTTACGTACCATCAGTGCCAATATTGGCATCTTGGGGGCGATGAAAGA  
AATAACTGATATGAATCCACTGATTTCTGCCGCTTCCGTTATTGCTGCTGGATTGGCTGT  
AGGGCTTGCTTCTATTGGACCTGGAGTTGGTCAAGGTACTGCTGCGGGCCAAGCTGTA  
GAAGGTATCGCGAGACAGCCCGAGGCGGAGGGAAAAATACGAGGTACTTTATTGCTTA  
GTCTAGCTTTTATGGAAGCTTTAACAATTTATGGCCTGGTTGTAGCATTAGCACTTTTATT  
TGCGAATCCTTTTGTATGAATGTTCTATCCTGTTCCATCAACACACTAAAAGGGTTATA  
CGATATATCCGGTGTGGAAGTAGGCCAACATTTCTATTGGAAAATAGGAGGTTTCCAAG  
TCCACGGCCAAGTACTTATTACTTCTTGGGTTGTAATTGCTATCTTATTAGGCTCAGCCA  
CTATAGTTGTTCGGAACCCACAAACCATCCCGACCAGCGGTCAGAATTTCTTCGAATAT  
GTACTTGAATTCATTCGAGATGTGAGTAAAACCTCAAATTGGAGAAGAATATGGTCCTTG  
GGTTCCTTTTATTGGAACCTATGTTTCTATTTATTTTGTTCCTAATTGGTCAGGAGCGCTT  
TTACCTTGGAAAATCATACAATTACCTCATGGGGAGTTAGCCGCACCCACGAATGATAT  
AAATACTACTGTTGCTTTGGCTTTACTCACGTCAGTGGCATATTTCTATGCGGGTCTTAC  
CAAAAAGGATTAGGTTATTTGCGGAAATATATTCAACCAACTCCAATCCTTTTACCCAT  
TAACATCTTAGAAGATTTCAAAAGCCCTTATCACTAAGTTTTTCGACTTTTTCGGAAATAT  
ATTAGCTGATGAATTAGTAGTTGTTGTTCTTGTTCCTTAGTACCTTCAGTGGTTCCTATA  
CCTGTCATGTTCCCTTGGATTATTTACAAGTGGTATTCAAGCTCTTATTTTTGCAACTTTAG  
CCGCGGCTTATATAGGTGAATCCATGGAGGGCCATCATATGATATTTTCAACTTTAGAGC  
ATATATTAACCTCATATTTCCCTTTCAATCGTTTCAATTGTAATTACAATTCATTTGATAACC  
TTATTAGTCGATGAAATCATAAACTATATGATTCGTCAGAAAAGGGAATGATAGCTATT  
TTTTTATGTATAACAGGATTATTAGTCACTCGTTGGATTATTTCGAGACATTTCCCACTAA  
GTGATTTATATGAATCATTAATCCTTTCTTTTCATGGAGTTTATCAGTTATTCATATAGTTCCG  
TAT-----AAAAGAAAAAACATTTAAGCACATAACTGCGTCAAGTGTATTTTTTACCCA  
AGGCTTTGCTACTTCAGGCTTTTTAACTGAAATACATCAATCCGCAATATTAGTACCCGC  
TCTCCAATCCGAGTGGTTAATAATGCACGTAAGTATGATGATATTGAGCTATGCAGCTCT  
TCTATGTGGATCATTATTATCAGTAGCACTTCTAGTCATTACATTTCGAAAAACATAAAT  
CTTTTTTTGT-----AAAGAAATCCAATACATGAATGAAAGAAACAATGTTTTAGGAACTAC  
TTCT-----GCTAAGAATTATTACAGGTCCCAGTTGATTCAACAGTTGGATTATTGGAGT  
TATCGTGCATTAGTCTAGGGTTTATCTTTTTAACCATAGGTATTCTTTTCAGGAGCAGTAT  
GGGCTAATGAAGCATGGGGATCATATTGGAATTGGGACCCAAAGGAAACTTGGGCATT  
TATTACTTGGATCGTATTTGCGATTTATTTACATACTCGAACCAATATAAATTTACGAGGT  
ACAAATTCGCAATTGTGGCGTCTATAGGCTTTCTTATAATTTGGATATGCTATTTTGGAG  
TCAATCTATTAGGAATAGGACTACATAGTTATGGTTCATTTACGTTAACGATGGCAAAA  
AGAAAGCATTCACTCCTCTTTTATATCTTGCATCTCTAGTATTTTTGCCCTGGTGGATTTC  
TCTCTCATTTAATAAAAGTCTGGAATCTTGGGTTACTAATTGGTGAATACTAGGCAATC  
CGAAATTTTTTTGAATGGTATTCAAGAAAAGAATATTATAGAAAAATTCATAGAATTAGA  
GGAAATCCTTCTTGGAGGAAATGATCAAGGAATACTCGGAGACACATCTACAAAAC  
CTTCGTATA---ATCCACAAAGAAACGATCCAATTCATCAAGATACACAACGAGGATCGT  
ATCCATACGATTTTGCATTTCTCGACAAATATAATCTGTTTCGTTATTCTAAGTGGTTATT  
CTATTTGGGGTAATGAAGAACTTGTATTCTTAACTCTTGGGCTCAGGAATTCCTATATA

ACTTAAGTGACACAATAAAAAGCTTTTTCTATTCTTTTATTAAGTATTATGTATCGGATT  
CCATTTCGCCCCATGGTTGGGAACATAATTATTGGCTCTGTCTACAAAGATTTTGGATTTGT  
TCATAATGATCAAATTTTATCTGGTCTTGTCTACTTTTCCAGTCATTCTAGATACTT  
TTTAAATTTTGGATTTTCCGTTATTTAAATCGTGTCTTCCGTCACCTGTAGTGATTTATC  
ATTCAATGAATGATATGCCTATTGGTGTTCAAAAGTACCCTTTTGAAGTCCTGGAGAG  
GAAGATGCATCTTGGGTTGACGTAAAC---CGACTTTATCGAGAAAGATTACTTTTTTTAG  
GCCAAGCGGTTGATAGCGAGATCTCGAATCAACTTATTGGTCTTATGGTATATCTCAGTA  
TCGAGGATGATACCAAAGATCTTTATTTGTTTATAAACTCTCCTGGCGGATGGGTAATCC  
CTGGAGTAGCTATTTATGATACTATGCAATTTGTGCGACCAGATGTACATACAATATGCAT  
GGGATTAGCTGCTTCAATGGGATCTTTTATCTTAGCCGGAGGAGAAATTACCAAACGTC  
TAGCATTCCCTCACGCT---GTAATGATCCATCAACCTGCTAGTTCTTTTTTATGAGGCACA  
AACGGGAGAATTTATCCTGGAAGCGGAAGAACTGCTGAAACTGCGTGAAACCCTCAC  
AAGGGTTTATGTACAAAAACGGGCAAACCTTTTGGGTTGTCTCGGAAGACATGGAA  
AGAGATGTTTTTATGTCAGCAACAGAAGCCCAAGCTTATGGAATTGTTGATCTTGTAGC  
GGTTGAGATGAAAGAACAAAAATGGATTCATGAAGGTTTAATTACTGAATCGCTTCCC  
AATGGTATGTTCCGGATTCGCTTAGATAATGAAGATATGATTCTAGGTTATGTTTCAGGA  
AAGATCCGACGTAGTTTTATACGGATACTGCCAGGCGATAGAGTAAAAATTGAAGTAAG  
TCGTTATGATTCAACCAGAGGACGTATAATTTATCGACTTCGCAATAAGAATTCGAAGG  
ATATGGAGGAATTCCAAAGATATTTAGAG---GATAGATCTCAACAACACTACTTCTTATAT  
CCACTTATCTTTCAGGAGTATATTTATGCACTTGCTCATGATCATGGTTTACGGGGTTATG  
ACAATAAATTCAGTTTACTAATTGTGAAACGTTTAATTGCTCGAATGTATCAGCAGAATC  
ATTTTATTCTTTCTACTAATGATTCTAACCAAAATATATTTTTGAGGAAGAATTTGTATTC  
TCAAATGATATCAGAGGGGTTTGCAGTCATTGTGGAAATTCATTTTCTCTACAATTAAT  
ATCTTCCCTAATAGTCAAATCTCATAATTTACGATCAATTCATTCAATATTTCCTTTTTTAG  
AGGACAAAATTCACATTTAATTTATGTGTTAGAGATACTAATAACCCTACCCAGTCCATC  
TGGAATCTTGGTTCAAACCTTTCGCTACTGGGTAAAAGATGCTTCTTCTTGCATTTAT  
TACGATTCTTCTCCACGAGTATTGTAATTGGAAT-----ACTAAAGCCGGTTCTTCTTTT  
TCAAAACAAAGACTATTTCTTCTTCTATATAATTTCTCATCTATGTGAATACGAATCCATCT  
TCATCTTCTCCGTAACCAATCTTCTCATTTACGCTCAACATCTTCTGGAACCCTTCTTG  
AACGAATATATTTCTATGGAAAAATAAAATATCTTGTAAGTCTTTGTTAAGGCTTTTA  
ATCTATTGTTGTTGAAGGATCCTTTCATGCATTATATTAGGTATCAAGGAAAATCAATTCT  
CGCTTCAAAGGGACGCCCTTTTGTATGAAAAATGGACATATTACTTTGTTAATTTATG  
GCAATGTCATTTTTACCTGTGGTCTCAACC GGGAAGGATCTGTATAAACCAATTATACAA  
TCATTCCCTCGACCTTCTGGGCTATCTATCAAGTGC GCGGCTAAACCCTTCAATGGTAC  
GCGGTCAAATGCTAGAAAATTCATTTCTAATTGATAATGCTATT-----ATAAGTTTCGATA  
CTATTGTTCCAATTATTCCTCTGATTGGATCATTGGCTAAAGCGAAATTTTGTAACGTATT  
GGGGCATCCTATTAGTAAGGCGGTTTGGACCGATTATCAGATTCTGATATTATTGACCG  
ATTTGGGCGTATATGCAGAAATATTTCTCATTTATCATAGTGGATCCTCACAAAAAAGAG  
TTTGATCGAATAAAGTATATACTTCGACTTCTTGTGCTAGAACTTTGGCTCGTAAACA  
CAAAGTACTGTACGTGCTTTTTTGAAGATTGGGCTCGGGATTCTTGGGAAGAATTCT  
TTACGGCGGAAGAACAAGTTCTTTACTTGACCTTTCCAAGACGGATTTGGTATTTGGAT  
ATTATTTGTATCAATGATTTGGCCAATCATGAAATGATAATAGAT---ACAACAGAAGTACA  
A---GCTATCAATCTTTTTTTAGATTGGAATCC---TTAAAAGAGGTATATGGGATCGTATG  
GATGCTTGTCCCTATTTTTACTCCTGTATTAGGAATCACAAATAGGTGTACTAGTAATTGTT

TGGTTAGAAAGAGAAATATCTGCAGGGATACAACAACGTATTGGACCTGAATACGCCG  
GGCCTTTGGGAATCCTTCAAGCTTTAGCAGATGGTACAAAATTACTTTTTAAAGAGAAT  
CTTCTTCCATCGAGAGGAGATACTCGTTTATTTCAGTATCGGACCATCCGTAGCAGTTACA  
TCAATTCTACTAAGTTATTTAGTAATTCCTTTTGGCTATCACCTTGTTCTAGCCGATCTCA  
GTATCGGTGTTTTTTTTATGGATTGCCATTTCAAGTATTGCCCCGTTGGCCTTCTTATGTC  
AGGCTATGGATCAAATAATAAATATTCCTTTTTAGGTGGTTTACGAGCTGCTGCTCAATC  
AATTAGTTATGAAATACCATTAACCTCTATGTGTGTTATCAATATCTCTATTATCTAACAGTT  
CAAGTACAGTTGATATAGTTGAAGCGCAGTCAAATATGGTTTTTGGGGGTGGAATTTG  
TGGCGTCAACCTATAGGGTTTATCATTTCCTAATTTTCGTCCTAGCCGAGTGTGAGAGA  
TTACCTTTTGATTTACCAGAAGCAGAAGAAGAAATTGGTAGCAGTTATCAAACCGAATA  
TTCAGGTATAAAATTTGGTTTATTTTACGTTGCTTCGTATCTGAATCTACTAGTTTCTTCA  
TTATTTGTAACGGTTCTTTACTTGGGGGGTTGGAATCTTTCTATTCCGTACATATCCGTT  
CTGAGATTTTTGAAATAAATAAAGCGAGTAGAGTATTTGGAACAATAACAGGTATCTTT  
ATTACATTAGCTAAAACCTTATTTGTTCTTATTCATTCCTATCACAACAAGATGGACTTTAC  
CAAGGCTAAGAATGGACCAACTATTAATCTTGGATGGAAATTTCTTTTACCTATTTCTC  
TCGGCAATCTATTATTAACAACCTCTTCCCAACTTCTTTCACTGATGATCTGGCATGTAC  
AGAATGAAAACCTCATTCTCGATTCTACGAGAATTTTTATGAAAGCCTTTCATTTGCTTC  
TCTTCGATGGAAGTTTGATTTTCCCAGAATGTATCCTAATTTTTGGCCTAATTTCTTCTCT  
GATGATCGATTCAACCTCTGATCAAAAAGATATACCTTGGTTATATTTTCATCTCTTCAAC  
AAGTTTAGTAATGAGCATAACGGCCCTCTTGTTCCGATGGAGAGAAGAACCTATGATTA  
GCTTTTCGGGAAATTTCCAAACGAACAATTTCAACGAAATCTTTCAATTTCTTATTTTAC  
TATGTTCAACTCTATGTATTCCTCTATCCGTAGAGTACATTGAATGTACAGAAATGGCTAT  
AACAGAGTTTCTCTTATTCGTATTAACAGCTACTCTAGGAGGAATGTTTTTATGCGGTGC  
TAACGATTTAATAACTATCTTTGTAGCTCCAGAATGTTTCAGTTTATGCTCCTACCTATTA  
TCTGGATATAACCAAGAAAGATGTACGGTCTAATGAGGCTACTATGAAATATTTACTCATG  
GGTGGGGCAAGCTCTTCTATTCTGGTTCATGGTTTCTCTTGGCTATATGGTTCATCCGGG  
GGAGAGATCGAGCTTCAAGAAATAGTGAATGGTCTTATCAATACACAAATGTATAACTC  
CCCAGGAATTTCAATTGCGCTCATATTCATCACTGTAGGAATTGGGTTCAAGCTTTCCCC  
AGCCCCCTTCTCATCAATGGACTCCTGACGTATACGAAGGATCTCCCACTCCAGTCGTTG  
CTTTTCTTTCTGTTACTTTCGAAAGTAGCTGCTTCAGCTTCAGCCACTCGAATTTTCGATA  
TTCTTTTTTATTTCTCATCAAACGAATGGCATCTTCTTCTGGAAATCCTAGCTATTCTTAG  
CATGATATTGGGGAATCTCATTGCTATTACTCAAACAAGCATGAAACGTATGCTTGCATA  
TTCGTCCATAGGTCAAATCGGATATGTAATTATTGGAATAATTGTTGGAGACTCAAATGA  
TGGATATGCAAGCATGATAACTTATATGCTGTTCTATATCTCCATGAATCTAGGAACTTTT  
GCTTGCATTGTATTATTTGGTCTACGTACCGGAACTGATAACATTCGAGATTATGCAGGA  
TTATACACGAAAGATCCTTTTTTGGCTCTCTCTTTAGCCCTATGTCTCTTATCCCTAGGA  
GGTCTTCTCCACTAGCAGGTTTTTTCGGAAAACCTCTATTTATTCTGGTGTGGATGGCA  
GGCAGGCCTATATTTCTTGGTTTTAATAGGACTCCTTACAAGCGTTGTTTCTATCTACTAT  
TATCTAAAATAATCAAGTTATTAATGATTGGACGAAACCAAGAAATAACCCCTCACGT  
GCGAAATTATAGAAGATCTCCTTTCAGATCAAACAATTCATCGAATTGAGTATGATTGT  
ATGTGTGATAGCATCTACTATAACCAGGAATATCAATGAACCCGATTATTGCAATTGCTCA  
GGATAACCTTTTTATGTTTCTGCTTACGAATATGATATTTTTTGGGCATTTCTAATAATAT  
CAAGTCTTATTCCTATTTTGGCATTTCCTTCCGGAGTTTATGCTCCGATTAGCAAAG  
GGCCAGAGAAACTCTCTAGTTATGAATCGGGTATAGAACCAATGGGCAACGCTTGGTT

ACAATTTTCGAATCCGTTATTATATGTTTGCTCTAGTTTTTGTGTTTTTGTGATGTTGAAACG  
GTTTTTCTTTATCCATGGGCAATGAGTTTCGATGTATTAGGTGTATCTGTATTTATAGAAG  
CTTTAATTTTCGTGCTTATCTTAATTGTTGGTTTAGTTTATGCATGGCGAAAAGGGGCAT  
TGGAATGGTCT-----ATAATTGCAGTTTTGCCAATATTCGCGGGCTCCGTAA  
TTTTCTTTCTTCCCATAGAGGAAATAGAGTAATTCGGTGGTATACTATATGTATATGTAT  
TTTAGAACTCCTTCTAACGACCTATGCATTCTGTTATCATTTTTCAATTCGACGATCCATTA  
ATCCAAC TAGTGGAGGACTATAAATGGATCAATTTTTTTGCTTTCCATTGGAGATTAGGA  
ATAGATGGACTTTCTATAGGACCCATTTACTAACGGGATTCATCACC ACTTTAGCTACT  
TTAGCGGCTCGGCCAGTACTCGAGATTCTCGATTATTCATTTCTGATGTTAGCAATG  
TACAGCGGGCAAATAGGATCATTTTCTTCTCGGGACCTTTTACTTTTTTTCATCATGTGG  
GAGTTAGAATTAATTCCGGTTTATCTACTTTTATCCATATGGGGGGGAAAGAAACGCCTT  
TACTCGGCTACAAAATTTATTTTATACACGGCGGGAGGTTCCATTTTTCTCTTAATGGGA  
GTTCTGGGTGTTGGTTTATATGGTTCTAATGAACCAACATTAATTTTGAACATCAGTT  
AATCAGTCATATCCTGTGGCCTTGGAATAATATTCTATATTGGATTTTTTATTGCTTTTG  
CTGTCAAATCGCCGATTATAACCCCTACATACATGGTTACCAGATACCCACGGAGAAGCA  
CATTACAGTACTTGTATGCTTCTAGCCGGAATCTTATTA AAAATGGGAGCGTATGGATTG  
ATTCGGATTAATATGGAATTATTACCCACGCCCATTCTATATTTTCTCCGTGGTTGGTGA  
TAGTAGGCACAATACAAATAATCTATGCAGCTTCAACATCTCCCGGCCAACGTAATTA  
AAAAAAGAATAGCCTATTCTCTGTATCTCATATGGGTTTCATACTTATAGGAATTGGT  
TCTATAACCGATACGGGACTCAATGGAGCCATTTTACAAATAATCTCTCATGGATTTATC  
GGTGCTGCGCTTTTTTTCTTGGCAGGAACGAGTTATGATAGAATACGCTTGTTTATCTC  
GACGAAATGGGCGGAATAGCTATCCCAATGCCAAAATATTACGATGTT CAGTAGCTT  
TTCGATGGCTTCCCTTGCATTACCGGTATGAGTGGTTTTGTTGCAGAAATTGATAGTATT  
TTTTGGAATAATTACCAGCCAAAATATCTTTAATGCCAAAATATTAATTACTTTTGTA  
ATGGCAATTGGGATGATATTA ACTCCTATTTATTCATTATCTATGTTACGTCAGATGTTCTA  
TGGATACAAGCTATTTAATGCTCCAACTCTTATGTTTTTTGATTCTGGACCGAGAGATT  
ATTTGTTTTCGATCTCTATCTTTCTACCCGTAATAGGTATTGGTATGTACCCGGATTTTGT  
CTTTCACTATCAGTTGACAAGGTCGAAGTTATTCTATCTAATTTTTTTTTATAGAATGATGC  
TCGAACATGTA CTGTTTTGAGTGCCTATTTATTTTCTGTTGGTCTTTATGGATTGATCAC  
GAGTCGAAATATGGTTAGGGCCCTTATGTGTCTTGA ACTTATTTTGAATGCAGTTAATAT  
AAATTTTGTAACATTTTCTGATTTTTTTGATAGTCGTC AATTA AAAGGAGCCATTTTCTC  
CATTTTTGTTATAGCTATTGCAGCCGCTGAAGCAGCTATTGGACTGGCTATTGTTTCATC  
AATTTATCGTAACAGAAAATCAACTCGTATCAATCAATCGAATTTGTTGAATAAGATGG  
AACAGACATATCAATATGCGTGGATAATACCTTTCCCTTCCACTTCCAGTTCCTATGTTAAT  
AGGAGTGGGACTTCTTCTTTTTCCGACGGCAACAAAAAATCTTCGTCGTAATGTGGGCTT  
TTCAGAGTGTGATTGTTAAGTATAGTCATGATTTTTTTCGATCAATCTGTCTATT CAGCA  
AATAAATAGCAGTCTATCTATCAATATGTGTGGTCTTGGATCATCAATAATGATTTTCT  
TTAGAATTCGGCTACTTGATCGACCCACTTACTTCTATTATGTCAATATTAATTACTACTG  
TTGGAATTGTGGTCTTGTTTATAGTGATAATTATATGTCTCATGATCAAGGATATTTGAG  
ATTTTTCGCTTATATGAGTTTTTTTCAGTACTTCTAIGTTAGGATTAGTTACTAGTTCTAATT  
TGATACAAATTTATATTTTTTGGGAATTAGTCGGAATGTGTTTCGATCTATTAATAGGGTT  
TTGGTTCACACGACCTGTTGCGGCAAATGCTTGCCAAAAGGCGTTTGTA ACTAATCGT  
GTCGGGGATTTTGGTTTATTATTAGGAATTTTAGGTTTTTATTGGATAACAGGTAGTTTCG  
AATTTTCGAGATTTATTCAAATATT CAGTAACAATGAAGTAAATTTTTTATTGTTACTTT

GTGTGCCGTTCTATTATTTGCCGGTGCGGTTGCTAAATCTGCACAATTCCCTCTTCATGT  
ATGGTTACCTGATGCCATGGAGGGGCCTACTCCTATTTTCAGCTCTTATACATGCTGCTAC  
TATGGTAGCAGCGGGGATTTTTCTTGTAGCTCGGCTTATTCCTCTTTTCATAGTCATCCCT  
CACATAATGAATTTAATCTCTTTGGTAGGGATAATAACAGTATTATTAGGAGCTACTTTAG  
CCCTTGCTCAAAAAGACATTAAGAGAGGTTTAGCCTATTCCACAATGTCTCAATTGGGT  
TATATGATGTTAGCTTTAGGTATGGGGTCTTATCGAAGTGCTTTATTTCAATTGATTACTC  
ATGCTTATTTCGAAAGCATTATTGTTTTTAGGATCCGGATCCGTTATTCATTCAATGGAAA  
CTCTTGTTGGATATTCTCCAAAGAAAAGCCAGAATATGGTTTTTATGGGGGGTTTAAACA  
AAGCATGTGCCAATTACCAAACGTCTTTTTTATTAGGTACACTTTCTCTTTGTGGTATT  
CCGCCTCTTGCTTGTTTTTGGTCCAAGGATGAAATTCCTAATGATACTTGGTTGTATTCA  
CCAATTTTCGCAATAATAGCTTGGTCTACAGCGGGATTAACCGCATTTTATATGTTTCGA  
ATCTATTTACTTACTTTTTGAAGGACATTTAAACGTTCATTTTCAAATTTT-----AAAAA  
TACCCCTTCTATTCAATATCTCTATGGGGTAAAGAAGGTTGAAAAGGATTAATAAA---  
TTATTAACTTTATTAACAATGAATTTTTTTTCATTTGGCAATAAGAATATTTTTTTCATATCC  
TTATGAATCAGATAATACTATGTTATTTCTATACTTGTATTGGTTCTATTTACTTTTGTTC  
TTGGATTCCTAGGAATTCCTTTCAATTTGGACATATTATCAAAATGGTTAACTCCGTCTAT  
AAACCTTTTACATCAAATTTGAAT--TTAATAGATTGGTATGAATTTTCGAAAGATGCCA  
TTTTTTCAGTTAGTATAGCTTTTTTTTGAATGTTTATAGCCTCCTTTTTATATAAACCCGTT  
TATTCATCTTTGCAAATTTGGACTTAATAAACTCGTTTGTATTTTTTTTGGACAAAATAA  
TAAATGGTATATATGGTTGGTCGTGTAATCGTGGTTACATAGATGCTTTTTATGCAACATT  
CTTTACTGGGGGGATAAGAGGATTGGCCGAATTAACCTCTTTTTTTGATAGACAAGTAA  
TTGATGGAATTACAAATGGAGTTGGTGTTTTGAGTTTTTTTGTAGGTGAAAGTATCAAA  
TCTGTAGGTGGCGGG---CGTATCTCTTCTATCTTTCTTGTATTTGCTTATGTATCAATC  
TTTTTATTAATTTACTACATGGATTTACCTGGACCAATACATGATTTTCTTTTAGTCTTTCT  
GGGATCGGGTCTTATATTAGGAGGTCTGGGAGTGGTATTACTTCCAATCCAATTTATTC  
TGCCTTTTCATTGGGATTGGTTCTTGTTTGTACATCTTTATTTCTATATTCTATCGAACTCCC  
ATTTTGTAGCTGCTGCACAGCTCCTTATTTACGTAGGGGCCATAAATGTTTTAATTATTTT  
TGCTGTGATGTTTCATGAATGGTTCCGAATATTACAAAGATTTTCATCTTTGGACCGTTGG  
AGATGGGGTTACTTCGATGGTTTGTACAAGTATTTTTGTTTCACTAATTACTACTATTCCA  
GATACATCATGGTACGGGATTATTTGGACTACAAAATCAAACCAGATTATAGAGCAAGA  
TTTGATAAGCAATAGTCAACAAATGGGATTCATCTATCAACAGATTTTTTTCTTCCATT  
TGAACTCATTCAATAATTCTTTTAGTTGCGTTAATAGGTGCAATTGCCGTAGCTCGTCA  
AATGACTGCACCAGCTACACGAAATGACCTTATGATAGTAAATCTGGGTCCCTCAGCACC  
CATCAATGCACGGTGTCTTCGACTCATTGTTACTCTAGATGGTGAAGATGTTATTGACT  
GTGAACCAATATTGGGTTATTTACATAGAGGGATGGAAAAAATTGCGGAAAACCGAAC  
AATTATACAATATTACCTTATGTAACACGTTGGGATTATTTAGCTACTATGTTACAGAA  
GCAATAACTGTAAATGCACCAGAGCAGTTAGGAAATATTCAAGTACCTAAAAGGTCCA  
GCTATATTAGAGTCATTATGTTGGAGTTAAGTCGTATAGCTTCGCATTTGTTATGGCTTGG  
CCCCTTTATGGCAGATATTGGCGCACAGACCCCTTTCTTCTATATTTTTCGAGAAAGAGA  
ATTGATATATGACCTATTTCGAAGCTGCCACCGGTATGCGAATGATGCATAATTATTTTCGG  
ATCGGAGGAGTAGCTGCTGATTTACCTCATGGCTGGATAGATAAATGTTTGGATTTTTGT  
GATTTTTTTTTTAAACAAGGGTACTGAATATCAAAAACCTATTACACGGAACCCTATTTTT  
TTAGAACGAGTTGAAGGAGTAGGCATTATTGGTGGAGAGGAGGCAATAAATTGGGGTT  
TATCAGGACCAATGCTACGAGCTTCCGGAATACAATGGGATCTTCGTAAAGTTGATCAT



TATGAGTCTTACGACGAATTTGATTGGGGGGTCCAATGGCAAAAAGAGGGGGATTTCATT  
AGCTCGTTATTTAGTACGAATCAGTGAAATGACAGAATCCATAAAAATTATTCAACAGG  
CTTTAGAAGGAATCCAGGGGGGCCCTATGAGAATTTAGAAATCCGACGTTTTGATAAA  
GTACGGGATCCAGAATGGAATTATTTGACTATCGATTCATCAGTAAAAAACCTTCTCC  
GACTTTTGAATTATCAAAGCAAGAACTTTATGTGAGAGTCGAAGCCCCAAAGGGAGAA  
TTGGGGATTTTTCTAATAGGGGATAGGGGTGTTTTTCTTGGAGATGGAAAATCCGACC  
ACCGGGTTTTATCAATTTGCAAATCCTTCCTCAGTTAGTTAAAAGAATGAAATTGGCTG  
ATATTATGACGATACTAGGTAGCATAGATATCATTATGGGAGAAGTTGATCGTATGTTCTC  
TATGGTAACTGAGTTCATGAACTATGGTCAACAAACCGTACGAGCTGCAAGGTATATCG  
GTCAAGGTTTCATGATTACCTTATCACACGCGAATCGTTTACCTGTAAC TATTCAATACC  
CCTACGAAAAATTGATTACATCGGAGCGTTTCCGCGGCCGAATCCACTTTGAGTTTGAT  
AAATGCATTGCTTGTGAAGTATGTGTTTCGTGTATGTCCTATAGATCTACCCGTTGTTGAT  
TGGAAATTTGGAAATGGATATTCGAAAGAAACGATTGCTTAATTACAGTATTGATTTCCG  
AATCTGTATATTTTGTGGTAATTGCGTTGAGTATTGTCCAACAAATTGTTTATCAATGACT  
GAAGAATATGAACTTTCTACGTATGATCGTCACGAATTGAATTATAATCAAATTGCTTTG  
GGCGGTTACCAATGTCAGTAATTGACGATTACACA ACTCGAACTATTTTGAATTTT-----  
-----ATGCAGGGTTCGTTTGTCTGCTTGGTTAGTCAAGCATGG  
GCTAATTCATAGATCTTTGGGGTTTGATTACCAAGGGATAGAGACTTTACAAATAAAAC  
CCGAGGATTGGCATTCCATTGCTGTCATTTTATATGTATATGGTTACAATTATCTACGCTC  
CCAATGCGCCTATGATGTAGCACCAGGTGGACTGTTAGCTAGTGTGTATCATCTTACGA  
GAATAGAGTATGGCGTGGATCAACCAGAAGAGGTATGCATAAAAGTATTTGCCCCGAG  
GAGGAATCCTAGAATTCCGTCTGTTTTCTGGGTTTGGAAA ACTGTGGATTTTCAAGAAC  
GGGAATCTTATGATATGTTGGGAATCTCTTATGATACTCATCCACGTTTGAAACGCATCT  
TAATGCCTGAAAGTTGGGTAGGATGGCCTTTACGTAAGGATTATATTGCCCCCAATTTTT  
ATGAAATACAAGATGCTCAT-----  
-----ATGAATTCC  
ATCGAGTTTCCCTTACTTGATCGAACAACCCAAAATTTCAGTTATTTCAACTACATCAA  
CGATCTTTCAAATTGGTCAAGACTCTCTAGTTTATGGCCGCTTCTCTATGGTACCAGTTG  
TTGCTTCATTGAATTTGCTTCACTAATAGGCTCACGATTCGACTTTGATCGTTATGGACT  
AGTCCCAAGATCGAGTCCTAGACAAGCGGACCTAATTTTAACAGCCGGAACAGTAACA  
ATGAAAATGGCTCCTTCTTTAGTGAGATTATATGAGCAAATGCCTGAACCAAAATATGTT  
ATTGCTATGGGAGCATGTACAATTTACGGGGGGATGTTTCAGTACTGATTCTTATAGTACT  
GTTCCGGGAGTCGATAAGCTAATTCCTGTCGATGTCTATTTGCCAGGCTGTCCACCTAA  
ACCGGAAGCAGTTATAGATGCTATAACAAA ACTTCGTAAGAAAATATCTCGAGAAATCT  
ATGAAGATAGAATTAAGTCTCAACGGGAGAATCGGTGTTTTACAACCAATCACAAGTTT  
CAGGTTGGGCGTAGTATTCATACTGGAAATTATGATCGAGGATTCCTTTATCAACCGCCA  
TTTACTTCAGAGATCCCTCCC GAAACATTTTCAAATACAAAAGTTTCAGTCTCTTCCCA  
CGAATTAGTGAATATGCAA ACTAGAAAGACTTTTTCTTGGATAAAGGAACAGATTACTC  
GATCCATTTCCGCATCGCTCATGATATATATCATAACTCGGACATCCATTTCAAGTGCATA  
TCCATTTTTTGCACAGCAGGGTTATGAAAATCCACGAGAAGCGACTGGGCGTATTGTAT  
GTGCCAATTGCCATTTAGCTAATAAGCCCGTGGATATTGAAGTTCCACAAGCCGTACTT  
CCTGATACTGTATTTGAAGCAGTTGTTTCGAATCCCTTATGATATGCAACTAAAACAAGTT  
CTTGCTAATGGTAAAAAGGGGGCTTTGAATGTAGGGGCTGTTCTTATTTTACCGGAGGG  
TTTTGAATTAGCTCCTGTCGATCGGATTTCTCCCGAGATGAAAGAAAAGATAGGCAATC

TTTCTTTTCAGAGCTATCGCCCCAATAAAAAAATATTCTTGTGATAGGCCCTGCTCCTG  
GTCAAAAATATAGTGAAATCACCTTTCCTATTCTTTCCCCGGACCCCGCTACTAAGAAA  
GATGTTCACTTCTTAAAATATCCTATATACGTAGGCGGAAACAGGGGAAGGGGTCAGAT  
TTATCCCGACGGGAGCAAGAGTAACAATACAGTTTATAATGCTACAGCAGCTGGTATAG  
TAGACAAAATAATACGAAAAGAAAAAAGGGGTTACGAAATAACCATAACGGATGCATC  
GGATGGACGTCAAGTGGTTGATATTATCCCTCCAGGGCCAGAACTTCTTGTTCAGAAG  
GCGAATCTATCAAATTTGATCAACCATTGACGAGTAATCCTAATGTGGGCGGATTTGGT  
CAGGGAGATGCAGAAATAGTACTTCAAGATCCATTACGTGTCCAAGGCCTTTTGTCTT  
CTTGGCATCTGTTATTTTGGCACAATCTTTTTGGTTCTTAAAAAGAAACAGTTCGAGA  
AGGTTCAATTGTCCGAAATGAATTCATGAGTAAAGTCTATGATTGGTTTGAAGAACGT  
CTCGAGATTCAGGCGATTGCGGATGATATAACTAGTAAATACGTTCCCTCCTCATGTTAAC  
ATATTTTATTGTCTAGGAGGTATTACGCTTACTTGTTTTTTAGTACAAGTGGCTACGGGG  
TTTGCTATGACTTTTTACTATCGTCCGACCGTTACTGACGCTTTTGCTTCGGTTCAATAC  
ATAATGACTGAAGCTAATTTGGTTGGTTAATCCGATCAGTTCATCGATGGTCGGCAAGT  
ATGATGGTCTAATGATGATCCTGCATGTATTTCTGTGTATCTCACCGGTGGATTTAAA  
AAACCTCGCGAATTAACCTTGGGTTACAGGTGTGGTTCTGGCTGTATTGACTGCATCTTT  
TGGTGTAACTGGTTATTCCTTACCTCGGGACCAAATTGGTTATTGGGCAGTGAAAATTG  
TAACAGGTGTACCCGAAGCTATTCTGTAAATAGGATCCCCTTTGGTAGAATTATTGCGTG  
GAAGTGCTAGTGTGGGACAATCCACTTTGACTCGTTTTTATAGTTTACACACTTTTGTAT  
TGCCGCTTCTTACTGCCGTATTTATGTTAATGCACTTTCCAATGATACGTAAACAAGGTA  
TTTCTGGTCCTTTAAATGGGAGTAACAAAAAACCTGACTTGAATGATCCTGTATTAAGA  
GCTAAATTGGCTAAAGGTATGGGTCATAATTATTACGGAGAGCCCGCCTGGCCCAACGA  
TCTTTTATATATTTTTCCAGTAGTAATTCTAGGGACTATTGCATGTAACGTAGGCTTAGCG  
GTTCTAGAACCATCAATGATTGGTGAACCAGCAGATCCATTTGCAACCCCTTTGGAAAT  
ATTACCCGAATGGTATTTCTTTCCCGTATTTCAAATACTTCGTACAGTACCCAATAAATTA  
TTGGGTGTTCTTTTAAATGGTTTCAGTACCCGCGGGATTATTAACAGTACCCTTTTTAGAG  
AATGTTAATAAATTCCAAAATCCATTTCTGTCGTCCAGTAGCGACAACCGTCTTTTTGATT  
GGTACCCGAGTGGCCCTTTGGTTGGGTATTGGTGAACATTACCTATTGATAAATCCCTA  
ACTTTAGGTCTTTTTATGATTGAAGTTTTTCTATTTGGAATCGTGTTAGGTCTAATTCCTA  
TACTTTGGCTGGATTATTTCGTAACCTGCATATTTACAATACAGGCGTGGTGATCAGTTGG  
ACCTTATGCCTACTATAACTAGTTATTTCCGTTTTCTACTAGCGGCTTTAACTATAACCTC  
AGCTCTATTTATTGGTCTTAGCAAGATACGACTTATCATGGATATAGTAAATCTTGCTTGG  
GCTGCTTTAATGGTAGTCTTTACATTTCCCTTTCACTCGTAGTATGGGGAAGAAGTGG  
ACTCATGATTATTCGTTCCGGAACCAGAAGTAAAAATTTGGTAGATAGGGATCACA  
TAAAAACTTCTTTGAGGAATGGGCCAGACCGGGTCATTTCTCAAGAACACTAGCTAA  
AGGCCCTGACACTACCACTTGGATCTGGAACCTACATGCTGATGCTCACGATTTTCGATA  
GCCATAACCAGTGATTGGAGGAGATCTCTCGAAAAGTCTTTAGTGCCCATTTTCGGCCAA  
CTCTCCATCATCTTTCTTTGGCTGAGTGGCATGTATTTCCACGGTGCTCGTTTTTTCTAATT  
ATGAAGCATGGCTAAGCGACCCGACTCACATTGGGCCGAGTGCCAGGTGGTTTGGCC  
AGTAGTGGGCCAAGAAATATTGAATGGTGATGTGGGTGGGGGCTTCGAGGAATACAA  
ATAACCTCCGGTTTTTTTTTCAGATTTGGCGAGCATCTGGAATAACTAGTGAATTACAAC  
CTATTGTAAGCAATTGGTGCATTGATCTTTGCAGCATTAAATGCTTTTTGCTGGTTGGTTT  
CATATCATAAAGCTGCTCCAAAATTGGCTTGGTTTCAAGATGTAGAATCTATGTTGAAT  
CACCATTTAGCGGGGCTACTAGGACTGGGGTCTCTCTTGGGCAGGACATCAAGTAC

ATGTATCTTTACCGATTAACCAGTTTCTAAACGCTGGAGTAGATCCTAAAGAGATACCA  
CTTCCTCATGAATTTATCTTGAATCGGGATCTTTTGGCTCAACTTTATCCCAGTTTTGCT  
GAGGGAGCAACCCCCTTTTTACCTTGAATTGGTCAAATATGCGGACTTTCTTACTTT  
TCGCGGAGGATTAGATCCAGTAACTGGGGGTCTATGGCTGACCGATATTGCACACCATC  
ATTTAGCTATTGCAATTCCTTTCTGATAGCAGGTCATATGTATAAGACCAACTGGGGCA  
TTGGTCATGGCCTAAAAGATATTTTAGAAGCTCATAAAGGTCCATTTACAGGTCAGGGC  
CATAAAGGCCTATATGAGATCCTAACAACATCATGGCATGCTCAATTATCTCTTAACTTA  
GCTATGTTAGGCTCTTTAACCATTGTTGTAGCTCACCATATGTATTCCATGCCCCCTTATC  
CGTATCTAGCTACTGACTATGGTACACAATTGTCGTTGTTACACATCACATGTGGATTG  
GTGGATTTCTCATAGTTGGCGCTGCTGCGCATGCAGCCATTTTTATGGTAAGAGACTATG  
ATCCAACTACTCGATAACAACGATCTATTAGATCGTGTCTTAGGCATCGCGATGCAATCA  
TATCACATCTCAACTGGGCATGTATATTTCTAGGCTTTCACAGTTTTGGTTTGTATATTCA  
TAATGATACCATGAGCGCTTTAGGGCGTCTCAAGATATGTTTTAGATACTGCTATCCA  
ATTACAACCCGTCTTTGCTCAATGGATAAAAACACCCATGCTTTAGCACCTGGTGCAA  
CGGCTCCTGGTGCAACAACAAGCACCAGTTTAACTTGGGGGGGCGGTGATTTAGTAGC  
AGTGGGTGGCAAAGTAGCTTTGTTACCTATTCCATTAGGAACTGCAGATTTTTTGGTAC  
ATCATATTCATGCATTTACGATTCATGTGACGGTATTGATACTTCTGAAGGGTGTCTATT  
TGCTCGTAGCTCCCGTTTTGATACCGATAAAGCAAATCTTGGTTTTCGTTTTCTTGTGA  
TGGACCTGGAAGAGGGGGAACGTGTCAAGTATCGGCTTGGGATCATGTCTTCTTAGGA  
CTATTCTGGATGTACAATGCAATTCGGTAGTTATATTCCATTTAGTTGGAAAATGCAG  
TCAGATGTTTTGGGGCAGTATAAGTGATCAAGGGATAGTAACTCATATCACGGGAGGAA  
ACTTTGCGCAGAGTTCCATTACTATTAATGGGTGGCTCCGCGATTTCTTATGGGCACAG  
GCATCCCAGGTAATTCAGTCTTATGGTCTTTCATTATCTGCATATGGGCTTTTATTCTAG  
GTGCTCATTTTTGTATGGGCTTTTAGTTAATGTTTCTATTTCAGTGGACGTGGTTATTGGC  
AAGAACTTATTGAATCCATCGTTTTGGGCTCATAATAAATTAAGTTGCTCCTGCTACTC  
AGCCGAGAGCCTTAAGCATTGTACAAGGACGTGCTGTAGGAGTAACCCATTACCTTCT  
GGGTGGAATGCCACAACATGGGCGTCTTCTTAGCAAGAATTATTGCAGTAGGAATGG  
CATTAAAGATTTCCAAGGTTTAGCCAAGGCTTAGCTCAGGACCCACTACTCGTCGTATT  
TGGTTTGGTATTGCTACCGCACATGACTTCGAGAGTCATGATGATTAATGAGGAACG  
TCTTTATCAGAATATTTTTGCTTCTCACTTCGGGCAATTAGCAATAATTTTTCTGTGGACT  
TCCGAAATCTGTTTCATGTAGCTTGGCAAGGAAATTTGAGTCATGGGTACAGGACCC  
TTACATGTAAGACCTATTGCTCATGCAATTTGGGATCCTCATTTTGGTCAACCGGCTGT  
AGAAGCTTTTACTCGAGGGGGTGTCTTGGCCCAGTGAATATCGCTTATTCTGGTGT  
ATCAATGGTGGTATAACAATCGGTTTACGCACTAATGAAGATCTTTATACTGGAGCTCTTT  
TTCTATTATTTCTTTCTACCATATCCTTAATAGCAGGTTGGTTACACCTACAACCGAAATG  
GAAACCGAGTGTTCGTGGTTCAAAAATGCCGAATCTCGTCTGAATCATCATTGTGAG  
GACTCTTCGGCGTAAGTTCCTTGGCTTGGACAGGGCATTAGTACATGTGGCTATTCTC  
GCATCCAGAGGGGAGTACGTTTCGATGGAATAATTTCTTAGATGTATTACCACACCCCCA  
AGGGTTAGGCCACTTTTTACAGGTCAGTGGAATCTTTATGCTCAAACCCCGACTCAA  
GTAGTCATTTATTTGGTACCTCCCAAGGAGCAGGAACTGCCATTCTAACCTTCTCGGG  
GGATTCCACCCACAAACGCAAAGTTTATGGCTGACTGATATGGCTCATCATCATTAGCT  
ATTGCATTTATTTTCTCGTTGCTGGTCATATGTATAGAATACTTCGGTATTGGGCACA  
GTATGAAAGATCTTTTAGATGCACATATCCTCCGGGGGGGCGATTGGGACGTGGGCAT  
AAGGGTCTTTATGACACAATCAATAATCCCTTCATTTTCAATTAGGCCTTGTCTAGCT

TCTTTAGGGGTTATTACTTCCTTGGTAGCTCAACACATGTA CTCTTTACCTGCTTATGCAT  
TCATAGCACAAGACTTTACTACTCAAGCTGCGTTATATACTCATCACCATAACATCGCAG  
GATTCATCATGACAGGAGCTTTTGGCTCATGGAGCTATATTTTTTCATTAGAGATTACAGTC  
CGGAACAGAATGAGGATAATGTATTGGCAAGAATGTTAGACCATAAAGAAGCTATCATA  
TCTCATTTAAGTTGGGCCAGCCTCTTTCTGGGGTTCATACCTTGGGACTTTATGTTTAT  
AATGATGTCATGCTTGCCTTTGGTACTCCGGAGAAAACAAATCTTGATCGAACCTATATTT  
GCTCAATGGATAACAATCTGCTCATGGTAAAACCTCATATGGTTTCGATGTACTTTTATCTT  
CAACGAATGGACCGGCATTTAATGCGGGTCGAAGCATAATGGTTGCCCGGTTGGTTAAAT  
GCTGTAAATGAG-----AATAGTAATTCACTATTCTTAACAATAGGTCCGGGAGACTTTTTA  
GTTTCATCATGCTATTGCTCTGGGTTTACATACGACTACATTGATCTTAGTAAAGGGTGCT  
TTAGATGCACGTGGTTCCAAGTTAATGCCAGATAAAAAGGATTTCCGGTTATAGTTTTCC  
GTGCGACGGCCCGGACGGGGCGGTACTTGTGATATTTCCGGCTTGGGACGCATTTTATT  
TGGCAGTTTTTTGGATGTTAAATACTATCGGATGGGTTACTTTTTATTGGCATTGGAAGC  
ATATCACATTATGGCAGGGTAACGTTTCGCAGTTTAAATGAATCTTCCACTTATTTGATGG  
GCTGGTTAAGAGATTATTTATGGTTAAACTCTTCACA ACTTATCAATGGATATAACCCTT  
TTGGTATGAATAGTTTATCGGTCTGGGCGTGGATGTTCTTATTTGGACATCTTGTTTGGG  
CTACTGGATTTATGTTCTTAATTTCTGGCGTGGCTATTGGCAAGAATTGATTGAAACTT  
TAGCATGGGCTCATGAACGCACACCTTTGGCCAATTTGATTTCGTTGGAGAGATAAACCG  
GTGGCCCTTTCCATTGTGCAAGCACGATTGGTTGGATTAGCCACTTTTCTGTAGGTTAT  
ATATTCACTTATGCGGCTTTCTTGATTGCCTCTACATCAGGCAAATTTGGTATGTCACATT  
CAGTAAAGATTTATGATACATGTATAGGATGTA CTCAATGTGTCCGAGCCTGCCCCACCG  
ATGTATTAGAAATGATACCTTGGGACGGATGTAAAGCTAAACAAATTGCTTCTGCTCCA  
AGAACAGAGGACTGTGTCGGTTGTAAGAGATGTGAATCTGCCTGTCCAACCGATTTCT  
TGAGTGTTCGAGTTTCTTTATGGCATGAAACA ACTCGCAGCATGGGTCTAGGTTATATG  
ACA ACTTTGACTTTCCCTCTGTGTTGGTGCCTTTAGTAGGCCTAGTATTTCCGGCAATG  
GCAATGGCTTCTTTATCTCTTCATGTTCAAAGAATAAGACTGTTATGCGAGATCTAAA  
AACATATCTCTCCGTGGCACCGGTATTAAGTACTCTATGGTTCGGGTCTTTAGCAGGTCT  
ATTGATAGAGATTAATCGTTTTTTTCCAGATGCGTTGACATTCCCCTTTTTT-----ATGACT  
GCAATTTTAGAGAGACGCGAAAGCGAAAGCCTATGGGGTCGCTTCTGTA ACTGGATAA  
CCAGCACCGAAAACCGTCTTTACATTGGATGGTTTGGTGT TTTGATGATCCCTACCTTAT  
TGACCGCAACTTCTGTATTTATATCGCCTTCATTGCTGCTCCTCCAGTAGATATTGATGG  
TATTCGTGAACCTGTTTCCGGATCTCTACTTTATGGCAACAATATTATCTCAGGTGCCATT  
ATTCCTACTTCTGCAGCTATAGGTTTGC ACTTTTACCCAATCTGGGAAGCGGCATCCGTT  
GACGAATGGTTATAACAACGGTGGTCCTTATGAACTAATCGTTCTACACTTTTTACTTGGT  
GTAGCTTGTACATGGGTCGTGAGTGGGAGCTTAGTTTCCGTCTGGGTATGCGACCTTG  
GATTGCTGTTGCATATTCAGCTCCTGTTGCAGCTGCTACTGCTGTTTTCTTGATCTACCC  
AATCGGTCAAGGAAGTTTTTCTGATGGTATGCCTCTAGGAATCTCTGGTACTTTCAATTT  
CATGATTGTATTCCAGGCTGAACACAACATCCTTATGCACCCATTTACATGTTAGGCGT  
AGCTGGTGTATTCCGGCGCTCCCTATTCAGTGCTATGCATGGTTCCTTGGTAACTTCTAG  
TTTGATCAGGGAAACCACAGAAAATGAATCTGCTAATGAAGGTTACAGATTCGGGGCAA  
GAGGGAGAAACTTATAATATCGTAGCCGCTCATGGTTATTTTGGTCGATTGATCTTCCAA  
TATGCTAGTTTCAACA ACTCCCGTTCTTTACATTTCTTCTAGCTGCTTGGCCTGTAGTA  
GGTATCTGGTTCACTGCTTTAGGTATCAGCACTATGGCTTTCAACCTAAATGGTTTTCAAT  
TTCAACCAATCTGTAGTTGATAGTCAAGGCCGTGTAATTAATACTTGGGCTGATATCATT

AACCGTGCTAACCTTGGTATGGAAGTTATGCATGAACGTAATGCTCATAACTTCCCTCTA  
GACCTAGCTGCTGTCGAAGCTCCATCTACAAATGGAATGGGTTTGCCTTGGTATCGTGT  
TCATACCGTTGTATTGAATGATCCCGGTCGGTTGCTTTCTGTCCATATAATGCATACAGCT  
CTAGTTGCTGGTTGGGCGGGTTCGATGGCTCTATATGAATTAGCAGTTTTTTGATCCCTCT  
GACCCTGTTCTTGATCCAATGTGGAGACAGGGTATGTTTCGTTATACCCTTCATGACTCGT  
TTAGGAATAACCAATTCATGGGGCGGTTGGAGTGTACA---GGAGGGGATATACCGAAT  
CCGGGTATTTGGAGTTACGAAGGTGTGGCCGGGGCACATATTGTGTTTTTCTGGCTTGTG  
CTTCTTGGCAGCTATCTGGCATTGGGTTTATTGGGATCTAGAAATTTTTTCTGATGAACG  
TACAGGAAAACCTTCTTTGGATTTGCCCAAGATCTTTGGAATTCATTTATTTCTCGCAGG  
GGTGGCTTGTCTTTGGTTTTTGGTGCATTCATGTAACAGGCTTGTATGGTCTGGAATATG  
GGTGTCCGATCCTTATGGACTAACGGGAAAAGTACAATCTGTAAATCCAGCGTGGGGC  
GTGGAAGTTTTGATCCTTTTGTCCGGGAGGAATAGCCTCTCATCATATTGCAGCAGG  
GACATTGGGTATATTGGCCGGTCTATTCCATCTTAGTGTCCGCCCGCCCAACGCTATA  
CAAAGGATTGCGTATGGGCAATATTGAAACCGTCCTTTCCAGTAGTATCGCTGCTGTCT  
TTTTTGCAGCTTTTTGTTGTTGCCGGA ACTATGTGGTATGGTTCAGCAACTACTCCGATCG  
AATATTTGGGCCTACTCGTTATCAATGGGATCAGGGGTACTTCCAGCAAGAGATATATC  
GAAGAGTTAGTGCTGGGCTAGCCGAAAATCAAAGTTTATCAGAAGCTTGGTCTAAAAT  
TCCTGAAAAATTAGCTTTTTATGATTACATCGGCAATAATCCGGCAAAAAGGGGGATTATT  
CAGAGCGGGTTCAATGGATAACGGGGATGGAATAGCGGTTGGATGGTTAGGACATCCT  
ATCTTTAGAGATAAAGAAGGGCGTGAACTTTTTGTACGTCGTATGCCTACCTTTTTTTGA  
AACCTTCCCGGTCGTTTTTGGTAGATAGCGACGGAATTGTTAGAGCCGATGTTCCTTTTTC  
GAAGGGCAGAATCGAAGTATAGTGTCGAACAAGTAGGTGTA ACTGTTGAGTTCTACGG  
TGGCGAACTCAACGGAGTCAGTTATAGTGATCCTGCTACTGTGAAAAAATATGCTAGAC  
GTGCTCAATTGGGTGAAATTTTTGAATTAGATCGTGCTACTTTGAAATCCGATGGTGT  
TTCGTAGCAGTCCAAGGGGTTGGTTTACTTTTGGACATGCTTCTTTTTGCTTGTCTTCT  
TTTTTGGACATATTGGCATGGTGCTAGAACCTTGTTTCAGAGATGTTTTTGTGGTATTG  
ATCCAGATTTGGATGCTCAAGTAGAATTTGGAGCATTCCAAAACTTGGAGATCCA ACT  
ACAAGAAGACAAGTAGTCATGAAAACCTTATATTCCCTGAGGAGGTTCTACCCCGTGG  
AAACGCTCTTTAATGGAACCTTAGCTTTAGCTGGTCGTGACCAAGAAACCACTGGTTTC  
GCTTGGTGGGCCGGGAATGCCCGGCTTATCAATTTATCCGGTAAACTACTCGGGGCTCA  
TGTAGCCCATGCCGATTAATTGTATTCTGGGCCGGGGGAATGAACCTATTTGAAGTGG  
CTCATTTTCGTACCAGAGAAGCCTATGTATGAACAAGGATTAATTTACTTCCCCACCTAG  
CTACTCTAGGTTGGGGGGTAGGTCCTGGTGGGGAAGTTATAGACACTTTTCCATACTTT  
GTATCTGGAGTACTTCATTTAATTTCTCTGCAGTATTGGGCTTTGGTGGTATTTATCATG  
CACTTCTAGGGCCTGAGACGCTTGAAGAATCTTTCCATTCCTCGGTTATGTATGGAAA  
GATAGAAATAAAATGACTACAATTTTAGGTATTCATTAATCTTGTTAGGTATAGGTGCT  
TTTCTTCTAGTATTCAAGGCTCTTTATTTTGGTGGCGTATATGATACCTGGGCTCCGGGA  
GGGGGAGATGTAAGAAAAATTACCAACTTGACCCTTAGTCCAAGTATTATTTGGTTAT  
TTACTAAAATCGCCCTTTGGAGGGGAAGGATGGATTGTTAGTGTAGACGATTTGGAAGA  
TATAATCGGAGGACATGTATGGTTAGGTTCCATTTGTATACTTGGTGGAACTGGCATAT  
CTTAACCAAAACCTTTCGCATGGGCTCGACGCGCACTTGTATGGTCTGGGGAGGCTTACT  
TATCTTATAGTTTAGCGGCTTTATCCGTCTTTGGTTTTCATGCTTGTGTTTTGTCTGGTT  
CAATAATACCGCCTATCCTAGCGAGTTTTACGGACCCACTGGACCAGAAGCTTCCCAAG  
CTCAAGCATTACTTTTTCTAGTTAGAGACCAACGCCTTGGGGCTAACGTGGGATCCGCT

CAAGGACCTACTGGTTTAGGTAAATATTTAATGCGTTCCTCCGACCCGGAGAAGTCATTTT  
TGGAGGAGAACTATGCGTTTTTGGGATTTGCGTGCCCCTTGGTTAGAACCTCTAAGG  
GGTCCAAATGGGTTGGACTTGAGTAGGCTGAAAAAAGACATAACAACCTTGGCAAGAA  
CGGCGTTCCTGCAGAATATATGACTCATGCTCCTTTAGGTTCTTTAAATCCCGTGGGTGGC  
GTAGCTACCGAGATCAATGCAGTCAATTATGTCTCTCCTAGAAGTTGGTTAGCTACTTCT  
CATTTTGTTCTAGGATTCCTTCTTGTTCGTAGGTCAATTTGTGGCACGCGGGAAGGGCTCG  
TGCAGCTGCAGCAGGTTTTGAAAAAGGAATTGATCGTGATTTTGAACCTGTTCTTTCCA  
TGACCCCTCTTAATATGACTATAGCCATTGGTAAATTTACCGAAGACGAAAAGGATTTAT  
TTGATATTATGGATGACTGGTTACGGAGGGACCGTTTCGTTTTTGTAGGCTGGTCCGGT  
TTATTGCTCTTTCCTTGTGCCTATTTTCGCTTTAGGGGGTTGGTTCACAGGTACAACCTTT  
GTAACCTCATGGTATACCCATGGATTGGCCAGTTCCTATTTGGAAGGCTGCAATTTCTTA  
ACTGCCGCAGTTTCTACTCCTGCTAATAGTTTAGCACATTCTTTATTGTTACTATGGGGT  
CCTGAAGCACAAGGGGATTTTACTCGTTGGTGTCAATTAGGCGGTCTGTGGACTTTTTGT  
TGCTCTCCATGGTGTCTTTCGGACTAATAGGTTTCATGTTACGTCAATTCGAACCTGCTCG  
ATCTGTTCAATTGCGACCTTATAATGCAATCGCATTCTCTGGTCCAATTGCTGTTTTTGT  
TCTGTATTCTTGATTTATCCACTAGGTCAGTCTGGTTGGTTCTTTGCCCTAGTTTTGGT  
GTAGCAGCTATATTTGATTCATCCTCTTTTTTCAAGGATTCATAATTGGACGTTAAACC  
CATTCATATGATGGGAGTTGCCGGGGTATTGGGCGCTGCTTTGCTATGCGCTATTCATG  
GTGCTACTGTAGAAAATACTTTATTTGAAGATGGTGATGGTGCAAATACATTCCGTGCTT  
TTAACCCAACTCAAGCTGAAGAACTTATTCAATGGTCACCGCTAACCGCTTTTGGTCC  
CAAATCTTTGGGGTTGCTTTTTTCCAATAAACGTTGGTTACATTTCTTTATGTTATTTGTAC  
CAGTAACCGGTTTATGGATGAGTGCTCTTGGAGTAGTCGGTCTGGCCCTGAACCTACGT  
GCCTATGACTTCGTTTTCTCAGGAAATTCGTGCGGCGGAAGATCCTGAATTTGAGACTTT  
CTACACCAAAAATATTCTCTTAAACGAAGGTATTTCGTGCTTGGATGGCAGCTCAAGATC  
AGCCTCATGAAAACCTTATATTCCCTGAGGAGGTTCTACCCCGTGGAACGCTCTTATG  
TCTGGAAGCACAGGAGAACGTTCTTTTGTGATATTATTACCAGTATTTCGTTACTGGGTC  
ATTCATAGCATTACTATACCTTCCCTATTCATTGCGGGTTGGTTATTCGTCAGCACTGGTT  
TAGCTTACGATGTGTTTGGGAAGCCCTCGGCCAAACGAGTATTTACAGAGAACCGACA  
AGGAATTCCATTAATAACTGGCCGTTTTGATCCTTTGGAACAACCTCAATGAATTTAGTA  
GATCTTTTATGACCATAGATCGAACCTATCCAATTTTACAGTGCGATGGTTGGCTGTTC  
ACGGCCTAGCTGTACCTACCGTTTTCTTTTTTGGGGTCAATATCAGCAATGCAGTTCATCC  
AACGAATGGCTACACAACTGTTGAGAACGGTTCTAGA---TCTCGTCCAAAACCAACT  
ACTGTAGGGAATTTATTGAAACCATTGAATTCGGAATATGGTAAAGTAGCTCCTGGATG  
GGGAACGACTCCTTTGATGGGTGTCGCAATGGCCCTATTTGCGATATTTCTATCTATTATT  
TTGGAGATTTATAATTCTTCCGTTTTATTGGATGGAATTTCAATGAATATGCTTACTCTCA  
AACTTTTCGTTTACACAGTAGTGATATTCTTTGTTTCTCTCTTTATCTTTGGATTCCCTATCT  
AATGATCCGGGGCGTAATCCTGGACGTGAAGAAATGGCTGATACTACTGGAAGGATTC  
CTCTTTGGATAATAGGTACCGTAACTGGTATTCTTGTGATTGGTTTAAATAGGTATTTTTTT  
TTATGGTTCATATCCGGATTGGGTTTCATCCCTGATGCTTAATATCTTTAGTTTGATCTGTA  
TCTGTCTTAATTCTGCCCTTTATTTCGAGTAGTCTTTTCTTCGCCAAATTGCCCGAGGCCT  
ATGCTTTTTTGAATCCAATCGTAGATCTTATGCCAGTCATACCTTTGTTCTTTTTTCTCTT  
AGCCTTTGTTTGGCAAGCTGCTGTAAGTTTTTCGAATGACACAATCAAACCCGAACGAA  
CAAATGTTGAATTGAATCGTACCAGCCTCTACTGGGGGTTATTACTCATTTTTGTACTT  
GCTGTTTTATTTCCAATATTTCTTCAATATGGAAGTAAATATTCTTGCATTTATTGCTAC

TGCACTGTTCAATTCTAGTTCCTACTGCTTTTCTGCTTATCATTACGTA AAAACAGAAAG  
TCAAATAAAATGGAAACAGCAACCCTAGTCGCCATCTTTATATCTGGTTTACTTGTA  
GTTTTACCGGGTACGCCTTATATACCGCTTTTGGGCAACCTTCTCAACA ACTAAGAGAT  
CCATTTCGAGGAACATGGGGACATGGAAGCATTGGTTTATACATTCTCTTAGTCTCGAC  
TCTAGGTATAATTTTTTTCGCTATCTTTTTTAGAGAACCGCCTAAAGTTCCA ACTAAAA  
G-----ATGACTCTTGCTTTCCAATTGGCTGTTTTTGCATTAATTGCTACGTCATCAATCTTA  
TTAATTGGCGTACCCGTTGTATTTGCTTCTCCTGATGGTTGGTCAAGTAACAAAAATGTT  
TTATTTCCGGTACATCATTATGGATTGGATTAGTCTTTCTGGTGGGTATCCTTAATTCTC  
TCATCTCT-----ATGTCACCACAAACAGAGACTAAAGCAAGTGTGGATTCA  
AAGCTGGTGTAAAGATTACAAATTGACTTATTATACTCCTGACTATGAAACCAAGAT  
ACTGATATCTTGGCAGCATTCCGAGTAACTCCTCAACCTGGAGTTCCACCTGAAGAAG  
CGGGGCGCGGTAGCTGCCGAATCTTCTACTGGTACATGGACA ACTGTGTGGACCGA  
TGGACTTACCAGCCTTGATCGTTACAAAGGGCGATGCTACGGAATCGAGCCCGTTGCT  
GGAGAAGAAAATCAATTTATTGCTTATGTAGCTTACCATTAGACCTTTTTGAAGAAGG  
TTCTGTTACTAACATGTTTACTTCCATTGTAGGTAATGTATTTGGGTTCAAAGCCCTGCG  
TGCTCTACGTCTGGAAGATCTGCGAATCCCTGTTGCTTATGTTAAA ACTTTCCAAGGCC  
CGCCTCATGGCATCCAAGTTGAGAGAGATAAATTGAACAAGTATGGTTCGTC CCCCCTGTTG  
GGATGTACTATTAACCTAAATTGGGGTTATCTGCTAAAACTACGGTAGAGCGGTTTAT  
GAATGTCTCCGTGGTGGACTTGATTTTACCAAAGACGATGAGAACGTGAACTCCCAAC  
CTTTTATGCGTTGGAGAGATCGTTTCGTATTTTGTGCCGAAGCAATTTATAAAGCACAG  
GCTGAAACAGGTGAAATCAAAGGGCATTACTTGAATGCTACTGCGGGTACATGCGAAG  
AAATGATGAAAAGGGCTGTATTTGCCAGAGAATTGGGAGTTCCTATCGTAATGCATGAT  
TACTTAACAGGGGGATTCACTGCAAATACTACCTTGTCTCATTATTGCCGAGATAATGGC  
CTACTTCTTCACATCCACCGCGCAATGCATGCAGTTATTGATAGACAGAAGAATCATGG  
TATGCACTTTCGTGTACTAGCTAAAGCGTTACGTATGTCTGGTGGAGATCATATTCACGC  
CGGTACCGTAGTAGGTA AACTTGAAGGGGAAAGAGACATCACTTTGGGCTTTGTTGAT  
TTACTGCGTGATGATTTTCGTTGAAAAAGATCGAAGTCGCGGTATTTATTTACCCAAGA  
TTGGGTCTCTCTACCAGGTGTTCTGCCCGTGGCTTCGGGGGGTATTCACGTTTGGCATA  
TGCCTGCTCTGACCGAGATCTTTGGGGATGATTCCGTA CTACAGTTCGGTGGAGGAACT  
TTAGGACACCCTTGGGGAAATGCACCCGGTGCCGTAGCTAATCGAGTAGCTCTAGAAG  
CATGTGTACAAGCTCGTAATGAGGGACGTGATCTTGCTAGTGAAGGTAATGAAATTATC  
CGTGAGGCTGCTAAATGGAGCCCTGAACTAGCTGCTGCTTGTGAGGTATGGAAGGAGA  
TCAAATTTGAATTTCAAGCAATGGATACTTTG-----ATGGCGATACATTTATACAAA CT  
CTACCCCGAGCACACGCAATCGAGCCGTAGACAGTCAAGTGAAATCCAATCCACGAAA  
TAATTTGATCTATGGACAGCATCATTGTGGTAAAGGTCGTAATGCCAGAGGAATCATTAC  
CGCAGGGCATAGAGGGGGAGGTCATAAGCGTCTATACCGTAAAATCGATTTTTCGACGG  
AATGAAAAAGACATATATGGTAGAATCGTAACCATAGAATACGACCCTAATCGAAATGC  
ATACATTTGTCTCATACTATGGGGATGGTGAGAAGAGATATATTTTACATCCCAGAGG  
GGCTATAATTGGAGATAACCATGTTTCTGGTACAGAAGTTCCTATAAAAATGGGAAATG  
CCCTACCTTTGACCGATATGCCCTTAGGCACGGCCATACATAACATAGAAATCACACGT  
GGAAAGGGTGGACAATTAGCTAGAGCAGCGGGTGTGTAGCGAAACTGATTGCAAAA  
GAGGGGAAATCGGCCACATTA AAATTACCTTCTGGGGAGGTCCGTTTGATATCCAAA  
ACTGCTCAGCAACGGTCGGACAAGTGGGAATGTTGGGGTGAACCAGAAAAGTTTGG  
GTAGAGCCGGATCTAAGCGTTGGCTAGGTAAGCGTCCTGTAGTAAGAGGAGTAGTTAT

GAACCTGTAGACCATCCCCATGGGGTGGTGAAGGGAGGGCCCCAATTGGGAGAAA  
AAAACCCACAACCCCTTGGGGTTATCCTGCACTTGGGAGAAGAAGTAGAAAAAGGAA  
TAAATATAGTGATAATTTGATTCTTCGTCGCCGTAGTAAAATGATTCAACCTCAGACCCT  
TTTGAATGTAGCGGATAACAGCGGGGCTCGAGAATTGATGTGTATTCTGAATCATAGGAG  
CTAGC---AATCGTCGATATGCTCATATCGGTGACGTTATTGTTGCTGTGATCAAAGAAGC  
AGTGCCAAATATGCCCTAGCAAGATCAGAAGTGGTCAGAGCTGTAATTGTACGTACTT  
GTAAAGAACTCAAACGTGATAACGGTATGATAATACGATATGATGACAACGCTGCGGTT  
GTCATCGATCAAGAAGGAAACCCAAAGGGAACCTCGTGTTTTTGGTGCAATTGCCCGGG  
AATTGAGACAGTTAAATTTTACTAAAATAGTTTCATTAGCTCCGGAGGTATTAATGCTTA  
GTCCCAAAGAACCAGATTCCGTAAACAACATAGAGGAAGAATGAAGGGAATATCTTA  
TCGAGGTAATCATATTTCTTTTCGGTAAATATGCTCTTCAGGCACTTGAACCTGCTTGGAT  
CACATCTAGACAAATAGAAGCAGGTCGACGAGCAATGACACGAAATGCACGACGTGG  
TGGAAAATATGGGTACGTATATTTCCAGACAAACCGGTTACAGTAAGACCCGCAGAA  
ACACGTATGGGTTCCGGGAAAGGATCCCTGAATATTGGGTAGCTGTTGTTAAACCAG  
GTCGAATCCTTTATGAAATGGGTGGAGTAACAGAAAATATAGCCCGAAAGGCTATTTCA  
ATAGCATCGTCTAAAATGCCATACGAACCTCAATTCATTATTTGGCAATGACCAGAATT  
AGACGGGGATATATAGCTCGGCGACGTAGAACAAAATTCGTTTATTTGCATCAAGCTT  
TCGAGGGGCTCATTCAAGGCTTACTCGAACAACTACTCAACAGAAAATAAGAGCTTTG  
GTTTCGTCTCATCGGGATAGGGATCGGCAAAAAGAGAAATTTTCGTCGTTTGTGGATCAC  
TCGAATAAACCGCAGTAATTCGTGAAGGG---GGGGTATCCTATAGTTATAGTAGATTAATA  
CACGATCTGTATAAGAAAAAGTTGCTTCTTAATCGTAAAATACTTGCACAAATAGCTATA  
TCAAATAAAAATTGTCTTTATATGATTTCCAATGAGATCATAAAAAAAGTAGATTGTAAA  
GAATCCACCGGAATAATTATGTTAAAGACAGTATACGCTTTAGGTCAATATATATCTATGT  
CTGCTCACAAAGCGCGAAGAGTAATAGATCAAATTCGTGGACGTTCTTACGAAGAAAC  
ACTTATGATACTAGAACTCATGCCTTATCGAGCATGTTATCCCATTTTTAAATTGGTTTAT  
TCTGCAGCAGCAAATGCTAGTTACAATATGGATTCCAACGAATCAAATTTAGTTATTAGT  
AAAGCTGAAGTCAGCAAGGGTACTATCGTGAAGAAATTTAAACCTCGAGCTCGAGGA  
CGTAGTTTTCCGATAAAAAGACCTACCTGCCATATAAGTATTGTAGTGAAAGATATATCC  
TTAGATGGGGGGTATGGGACAAAAAATGGATGGAATCAAATATGCAGTATTTACAGA  
CAAAGTATTCCGTTATTGGGGAAAAAT---CAATATACTTCTAATGTGCAATCAGGATCA  
ACTAGGACAGAAATAAAGCATTGGGTGCAACTCTTCTTTGGTGTCAAGGTAATAGCTAT  
GAATAGTCATCGACTTCCGGGAAGGGGTAGAAGAATGGGACCTATTATGGGACAGACA  
ATGCATTACAGACGTATGATCATTACGCTTCAACCGGGTATTCTATTCCACCTCTTAGA  
AAGAAAAGAACTATGGCAGTTCCAAAAAACGTACTTCTATATCAAAAAAGCGTATTC  
GTAAAAATATTTGGAAAAGAAAGGGATATTGGGCAGCCTTAAAAGCGTTGTATTAGG  
GAAATCTCTTTCTACCGGAAATTCAAAGGTTTTTTTTGTGCGACAAACAATAAGATGG  
CCAAGGGGAAGGATGTCCGAATAACCGTATTTTTGGAATGTACCAGTTGTGTTGAAA  
CGGTGTTAAT-----AAGGTATCAACGGGTATTTCCAGATATATTACTCAAAAAGAACCGGC  
ACAATACGCCTAATCGATTGGAATTGAGAAAATTCTGTCCATATTGTTACAAACATACGA  
TTCATGGGGAGATAAAGAAAATGAAAATAAGAGCTTCTGTTTCGTAAAATTTGTGAAAA  
ATGTCGACTAATTCGTAGGCGGGACGAATTATAGTAATTTGTTCCAACCCAAGACATA  
AACAAAGACAAGGGATGTTTCGAGAGAAAGTAAGAGTATCTACTCGGACACTACAGT  
GGAAGTGTGTTGAAGCAAGAGCGGACAGTAAGCGTCTTTATTATGGACGCTTTATTCTG  
TCTCCACTTATGAAAGGTCAAGCTGACACAATAGGCATTGCGATGCGAAGAGCTTTGC



TTGGAGAAATAGAAGGAACATGTATCACACGTGCAAAATCTGAG-----AAAATACCACA  
CGAATATTCTACCCTAGTGGGTATTCAAGAATCAGTACATGAAATTTAATGAATTTGAA  
AGAAATTATATTGAGAAGTAATCTATATGGAACCTTGCACGCGTCTATTTGTGTCAGGG  
GTCCTGGATATGTAAGTCAAGATATCATCTCACCGCCTTATGTAGAAATCGTTGACA  
ATACACAGCATATAGCTAGCTTGGCGGAACCAATTGATTTGTGTATTGGATTACAAATAG  
AGAGGAATCGCGGATATCTTATAAAAACGCCAAATAACAACCTTTGATGGAAGTTAT-----  
CCTATAGATGCTGTATTCATGCCTGTTGAAACGCGAATCATAGTATTCATTCTTATGGG  
AATGGGAATGAGAAACAAGAGATACTCTTTCTTGAAATATGGACAAATGGAAGTTTAA  
CTCCTAAAGAAGCACTTCATGAAGCCTCCCGGAATTTGATTGATTTATTTATCCCTTTT  
TACATACAGAAGAAGAA-----AACTTACATTTAGTGGACAATCAA---CACACGGTTCCTT  
TACCCCTTTTACCTTTCATGAGAAATTGACT---AAACTAAGAAAAAACAAAAA---AA  
AATAGCATTGAAATCGATTTTTATTGACCAATCAGAAGTGCCTCCAGGATCTATAATTG  
CCTTATAAGGTCCAATATATACATTATTGGACCTTTTGAATAACAGTCAAGAAGACCT  
TATGAAAATTGAACATTTTCGCATAGAAGATGTAAGAGATATTGGGCATTCTAGAAA  
AGCAT-----TTCGCAATTGATTTACCGAGAAAAAGCATGCTCCGAGATGGA---AATGAGG  
GAATGTCTACAATACCTGGGTTTAATCAGATACAATTTGAAGGATTTTGTAGGTTTCATTG  
ATCAGGGCTTGACGGAAGAAGTCTTATAAGTTTCCAAAAATTGAAGATACCGATCAAGA  
AATTGAATTTCAATTATTTGTGGAAACATATCAATTAGTAGAACCGTTGATAAAAAGAAA  
GAGATGCTGTGTATGAATCACTCACATATTCTTCTGAATTATATGTATCCGCGGGACTCAT  
TTGAAAACCTGGTAGGGATATGCAAGAACAACTATTTTTTTTTGGAAACATTCTCTAA  
TGAATTCTCTGGGAACTTCTATAGTAAATGGAATATATAGAATTGTGATCAATCAAGTAT  
TGCAAAGCCCCGGTATTTATTACCGGTCAGAATTGGACCATAACGGAATTTCCGGTGTAT  
ACCGGCACCATAATATCAGATTGGGGAGGAAGATCAGAATTAGAGATTGATAGAAAAG  
CAAGGATATGGGCTCGTGTGAGTAGGAAACAAAAATATCTATTCTAGTTCTATCATCA  
GCTATGGGTTTCAATCTAAGAGAAATTCTAGAGAATGTTTGCTATCCTGAAATATTTTTG  
TCTTTTCTGACTGATAAGGAGAAAAAAAATCGGGTCAAAGAAAATGCCATTTTGG  
AGTTTTACCAACAATTTGCTTGTGTAGGCGGGGATCCGGTATTTTCTGAATCCTTATGTA  
AGGAATTACAAAAGAAATTTCTTTCAACAAAGATGTGAATTAGGAAGGATTGGTTCGACG  
AAATATGAATCGGAGACTGAACCTTGATATATCCAGAACAAATACATTTTTTGTACCGCG  
AGATATATTGGCAGCCGCGGATCATTGATTGGAATGAAATTTGGAATGGGTACACTTG  
ACGAT-----ATGAATCATTGAAAAATAAACGTATTCGTTCTGTAGCAGATCTTTTACAAG  
ATCAATTCGGATTGGCTCTGGTTCGTTTAGAAAATGTGGTTCGAGGAACTATATGTGGA  
GCACTTAGG---CATAAATTG---ATACCGACTCCTCAGAATTTGGTAACTTCAACTCCA-----  
-----TTAACAACACTTATGAATCTTTTTTTCGGTTTACACCCATTATCTCAAGTTTTGGAT  
CGAACTAATCCATTGACACAAATAGTTTCATGGGATAAAATTGAGTTATTTGGGCCCTGG  
AGGATTGACAGGGCGAACTGCTAGTTTTCGAATACGAGATATCCATCCTAGTCACTATG  
GGCGTATTTGCCCAATTGACACGTCTGAAGGAATAAATGTCCGACTTATTGGATCTTTA  
GCAATTCATGCGAGGATTGGTTCGTTGGGGA---TCTCTAGAAAGCCCGTTTTAT-----GA  
AATTTCTGAGAGATCAAAGGG-----GCACGGATGCTTTATTTATCACCAGGTAAAGATG  
AATACTATATGGTAGCGGCGGAAATTTCTTTGGCCTTGAATCAGGGTATTCAGGAAGAA  
CAGGTTGTTCCAGCTCGATACCGTCAAGAATTCCTGACTATTGCATGGGAACAGGTTCA  
TCTTCGAAGTATTTTTCTTCCAATATTTTTCTATCGGAGCTTCCCTCATTCTTTTATC  
GAGCATAATGATGCGAATCGGGCTTTAATGAGTTTGAATATGCAGCGTCAAGCAGTTCC  
TCTTTCTCGGTCCGAGAAGTGCATTGTTGGAACCTGGGTTGGAACGCCAAGCGGCTATA



-----  
-----  
-----  
--ATGGAGGTACTTATGGCAGAACGGGCCAATCTGGTCTTTCACAATAAAGTGATAGAC  
GGAAGTCCATGAAACGACTTATTAGTAGATTAATAGATCACTTCGGAATGGCATATACA  
TCACACATCCTGGATCAAGTAAAGACTTTGGGTTTTCAACAAGCTACTGCTACATCCAT  
TTCATTAGGAATTGACGATCTTTTAACAATCCCTTCTAAGAGATGGCTAGTTCAAGATGC  
TGAACAACAAAGTTAATTTTTGGAAAAACACCACCATTATGGGAATGTACACGCGGTA  
GAAAAATTACGTCAATCCATTGAGATATGGTATGCTACAAGTGAATTTTTGCGACAAGA  
AATGAATCCTAATTTTAGGATGACTGACCCCTTAATCCAGTTCATATAATGTCTTTTTCA  
GGAGCTAGAGGAAATGCATCTCAGGTACATCAATTAGTAGGTATGAGAGGATTAATGTC  
GGATCCCCAAGGACAAATGATTGATTTACCCATTCAAAGCAATTTACGCGAAGGACTCT  
CTTTAACAGAATATATTATTTCTTGCTACGGAGCCCGTAAAGGGGTTGTGGATACTGCTG  
TACGAACCTCAGATGCTGGATATCTCACGCGCAGACTTGTGAAGTAGTTCAACACATT  
GTTGTACGTCGAAAAGATTGTGGCACCGTCCGAGGTATTTCTGTAAGTCCCCGAAATG  
GGATGATGCCG--GAAAGGGTTTTTATCCAAACATTAATTGGTTCGTGTATTAGCGGATGA  
TATATATCTGGGTCCACGATGTATTGCCACCAGAAATCAAGATATTGGTAGTGGACTTGT  
CAATCGATTCATAACC-----TTTCGAGCACAACCAATATATATTCGAAGTCCCTT  
TACTTGTAGGAGTACATCTTGGATCTGTGCGATTATGTTATGGCCGGAGTCCACTCACGG  
CGATCTGGTCGAATTGGGAGAAGCTGTGGGTATTATTGCAGGTCAATCTATTGGAGAAC  
CGGGTACTCAATTAACATTAAGAACCTTTCATACCGGCGGAGTATTCACAGGGGGTACT  
GCAGAACATGTGCGAGCCCCTTCTAATGGAAAAATAAAATTCAATGAGGATTTGGTTCA  
TCCGACACGTACACGTCATGGACATCCTGCTTTTCTATGTTCTATAGACTTGTATGTAAC  
TATTGAGAGTGAAGATATTATACATAATGTGAATATTCCACCTAAAAGTTTTCTTTTAGTT  
CAAAATGATCAATATGTAGAATCAGAACAAGTGATTGCTGAGATTCGCGCAGGAACAT  
CCACT--TTGAATTTTAAAGAGAAGGTTTCGAAAACATATTTATTCTGACTCAGAGGGAG  
AA--ATGCACTGGAATACCGATGTGTATCATGCACCCGCATTTACTTATGGGAATGTTCA  
TCTCTTACCAAAAACAAGTCATTTATGGATATTATTAGGAGAGCCATGCAA-----TCCG  
ATCTAGTCGCCCTCTCGATCCACAAGGATCAAGATCAAATGAACGCCCAT-----TCTCTT  
TCTGTCAAGAGAAGATATATTTCTAACCTCTCA-----GTAACATAATGATCAA--GCGAGAC  
ACAAATTTCTTAGTTCGTATTTTTCTGGTAAA--GAAGATAGGATTCCTGATTAT--TCAG  
AACTTAATCGA-----ATTGGTCATTGTAATCTCACATATCTG--GCCATTCTCCACGCAA  
ATTCT-----GATTTATTGGCAAAGAGACGAAGAAATAGATTCATCATTCCACTCCAATCGA  
TTCAAGAAGACGAGAACGAACATAATGCCCTCTTCGGGTATCTCGATTGAAATACCC-----  
ATAAATGGTATTTTCCGTAAAATAGTATTCTTGCTTATTTTCGATGATCCTCGATACAGAA  
GAAAGAGTTCGGGAATTACTAAATATGGCACTATAGAAGTGCATTCAATCGTCAAAAAA  
GAGGAT-----TTGATTGAGTATCGAGGA---GTCAAGGAATTTAGGCCAAAATACATGAAA  
GTGGATCGATTCTTTTTTCATTCCCGAGGAAGTGCATATCTTACCTGGATCTTCTTCCATA  
ATGGTACGGAACAATAGTATTATTGGGGTAGATACACAAATCACTTTAACTACAAGAAG  
CCGAGTAGGCGGATTGGTCCGAGTGGAGAGAAAAAAAATAATTGAACTTAAATA  
TTTTCTGGAGATATCCATTTTCTGGAGAGACGGATAAGATATCCCGACATAGTGGCGT  
CTTGATAACCACAGGAACC-----GGAAAAACAATTCGAAGGAATCCAAAAA-----TG  
GAAAAATTGGATCTATGTCCAACGG-----ATCACACCTACCAAG-----AAAAAGTATTTG  
TTTTGGTTCGACCTGTAGTCACATATGAAATAACGGACGGTATAAATTTAGCA--CTTTT

CTTCCCGGATCTGTTGCAGGAAAGGGATAATGTGCAACTTCGAGTTGTCAATTATATCC  
TTTATGGAAATGGCAAACCAATTCGGGGATTTTATCACACAAGTATTCAATTAGTTAGG  
ACTTGTTTAGTATTAATTTGGGTCCAAGACAAAAA-----AGTTCTTCTATCGAAGAG  
GCCCCTACTTCCTTTGTTGAAATAAGGATAAATGGTTTGATTTCGAGATTTTCTAAAAATC  
GACTTAGCAAAATCCCCTATTTTCGTATACCGGAAAAAGGAAAGATCCATCGGGTTCAG  
GATTGATCTCTGAG---AATGGATCAGATCGCACCAATATCAATCCGTTTTTCTCCAGTTT  
TTTCTAT-----TCCAAGGCAAGGATTAAGAATCCCTTAATCAAAACCAAGGAACTATT  
CATACATTGTTGAATAGA-----ATAAGGAATGCCAATCTTTGATAATTTGTGCATC  
CAATTGTTTTCGAATGGGTCCA-----TTCAACGATGTAAAATATCACAATGTG-----ATA  
AAAGAATCA---CCCCTAATTCCAATTAGGAATTCGTTGGGACCTTTAGGAACG-----GCC  
CTTCAAATGCGAATTTTTATTCA-----TTTTCCCACTTA-----ATAACTTATAATCAGATCC  
TG--GTAACCTAATTTGCAACTTAACAATTTAAAA-----CAGAGTTTTCAAGTACTT  
AAA-----TATTATTTAATGGATGAAAAT-----GGGAAAATTTATAATCCCGATCGATGCTG  
TAACATTATTTTGAATCCATTCAATTTAATTGGTTTTTTCTCCATCACAATTATTGTGAA  
GAGACGTCT---ACAACAATGAGTCTTGGGCAGTTTATTTGTGAAAATGTATGTATAGACA  
AAAATGGACCACAC---CTAAAA-----CCGGGTCAAGTTCTAATTGTTCAA---GTTGACTC  
TGTAAGTAATACGATCCGCTAAGCCTTATTTGGCCACCCCAGGAGCAACTGTTTCATGGTC  
ATTATGGGGAAATCCTTTACGAAGGAGATACATTAGTTACATTTATATATGAAAAATCGC  
GATCTGGTGATATAACGCAGGGTCTTCCAAAAGTCGAACAGGTGTTAGAAGTGCGTTC  
GATTGATTCAATTTTCGATGAATCTCGAAAAGAGGGTTGAGGGCTGGAACGAATGTATA  
ACAAGAAATCTTGAATTCCTTGGGGGTTCTTGATTGGTGCTGAGCTAACTATAGTGCA  
AAGTCGTATTTCTTTGGTTAATAAGATCCAAAAGGTTTATCGATCCCAGGGGGTACAGA  
TCCATAATAGGCATATAGAAATTATTGTACGTCAAATAACATCAAAAAGTGTTGGTTTCAG  
AA-----GATGGGATGTCTAATGTTTTTTTACCCGGAGAATTTATTGGATTGTTGCGAGC  
GGAACGAATGGGGCGCGCTTTGGAAGAAGCGATCTGTTACCAAGCCGCTTATTGGGA  
ATAACAAAAGCATCTCTGAATACTCAAAGTTTCATATCCGAAGCGAGTTTTCAAGAAAC  
TGCTCGAGTTTTAGCAAAAAGCAGCTCTCCGGGGTCGTATCGATTGGTTGAAAGGCCTG  
AAAGAGAACGTTGTTCTGGGGGAATGATACCCGTTGGTACCGGATTCAAAGGATTG--  
---TTGCCCCCTTCGAGGCAACATAAGAACATTCCC-----TTGGAAACCAAAAATAAGAA  
TCTATTCGAGGGGGAAATGAGA-----GATATTTTGTTCACCACATAAAATTTTTTATTGATC  
TTGCCTTTCAAAGAATTTCCATGATACACCAGAACAATCATTATAGGG-----TT  
TAATGATTCCATGACAAAAGATATTGGAACATCAATTTGGAAGAGATGATGAAGGCCG  
GAGTTCAATTTGGACATGGTACTAAGAAATGGAATCCTAAAATGGCCCCTTATATCTCTG  
CAAAGCGTAAAGGTATTCATATTACAAATCTTACTAGAAGTCTCGTTTTTTATTAGAAG  
CTTGTGATTTGGTTTTTTGATGCAGCAAGTAGGGGAAAACAATTCTTAATCGTTGGCACT  
AAAAATAAAGCAGCTAACTTAGTAGCATGGGCTGCAATAAAGGCTCGGTGTCAATTATGT  
TAATAAAAAATGGCTCGGCGGGATGTTAACGAATTGGTCCACTACAGAAACGAGACTT  
CATAAGTTTAGAGACTTGAGAACAGAAACAAAAACGGGTAGACTCAACCGTCTTCCG  
AAAAGAGATGCGGCTATGTTGAAAAGACAATTATCTCACTTGCAAACATATCTGGGCG  
GGATTAAATATATGACAGGGTTACCAGATATTGTAATCATCGTTGATCAGCACGAAGAAT  
ATACGGCCCTTCGAGAATGTATCACTTTGGGAATTCACAATTTGTTTAATCGATACAA  
ATTGTGACCCTGATCTTGCAGATATTTGATTCCAGCGAACGATGACGCTATATCTTCAA  
TCCGATTAATCTTAACAAATTAGTATTCGCAATTTGTGAGGGGCGTTCT--AGCTATATA  
AGAAATCCGATGGGACAAAAATAAATCCACTCGGTTTCAGACTTGGTACAACCCAAG

ATCATCATTCCCTTTGGTTTGCACAACCAAAAAATTATTCCGAAGGTTTACAAGAAGAT  
CAAAAAATAAGAGATTTTATCAAGAATTATGTACAAAAAATATGAAAATTCCTCTAG  
C---GTTGAGGGGAATTGCACGTATAGAGATTCAAAAACGAATCGATCTGATCCAGGTCAT  
AATCTATATGGGATTCCCAAAGTTATTAATAGAAAGTCGACCGCGA-----GGAATCG  
AGAATTGCAGATGAATCTACAAAAAGAATTTAATTGTGTGAACCGAAAACCTAACATT  
GCTATCACAAGAATTGCAAAACCTTACGGAAGCCCTAATATTCTTGCGGAATTTATAGC  
CGGTCAATTAAGAATAGGGTTTCATTTGAAAAGCAATGAAAAAGGCTATTGAATTA  
CTGAACAAGCGGATACAAAAGGAATTCAGTACAAATTGCAGGGCGTATCGACGGAA  
AAGAAATTGCGCGTGTGGAATGGATCAGAGAAGGTAGGGTCCCCTGCAAACCATTCG  
AGCTAAAATAGATTATTGTTCTTACAGTTCGAACTATTTATGGAGTATTAGGCATCAA  
AATTTGGATATTTATAGACGGGGAAATGTCGCGTTACCGAGGACCTCGTTTCAAAAAA  
TACGCCGCCTGGGAGCTTTACCGGGACTAACTAATAAAAGGCCTAGAGCCGGAAGTGA  
TCTTAGAAATCAATCGCGTTCCGGGAAA---AAATCTCAATATCGTATTCGTCTAGAAGAA  
AAACAAAATTGCGTTTTTATTATGGTCTTACAGAACGACAATTACTTAAATACGTTCGT  
ATCGCCGAAAAGCCAAGGGGTCAACAGGTCAGGTTTTACTCCAATTACTTGAAATGC  
GCTTGGATAACATCCTTTTTTCGATTGGGTATGGCTCCGACTATTCCCGGAGCCCGTCAAT  
TAGTTAACCATAGGCATATTTTAGTCAATGGTCGTATAGTAGATATAGCAAGTTATCGCTG  
CAAACCCCGAGATATTATTACGGCGAGGGATGAAGAAAACCTCTAGAACTCTGATTCAA  
AATTCTCTCGATTCGTCCTCTCAT--GACGAATTGCCAAAACATTTGACTCTTCACCCAT  
TCCAA-----TATAAAGGATTAGTCAATCAAATTATAGATAGTAAATGGGTCCGTTTGAAAA  
TAAATGAATTGCTAGTCGTAGAATATTATTCGCGCCAGACTATGTCACGTGAGGTACTG  
CAGAAGAAAAAAGTCAAAAATCCGATCCAATTTATCGTAATCGATTAGTTAACATGTTG  
GTTAACCGTATTCTGAAACACGGAAAAAATCATTGGCTTATCAAATTATCTATCGAGC  
CGTGAAAAAGATTCAACAAAAGACAGAAACAAATCCACTATCTGTTTTACGTCAAGCA  
ATACGTGGAGTAACCTCCGATATAGCAGTAAAAGCAAGACGTGTAGGTGGATCGACTC  
ATCAAGTTCCCATTGAAATAGGATCCACACAAGGAAAAGCACTTGCCATTCGTTGGTTA  
TTAGCGGCATCCCGAAAACGTCCGGGTGCGAAATATGGCTTTCAAATTAAGTTCCGAATT  
AGTGGATGCTGCCAAAGGGAGTGGCGATGCCATACGCAAAAAGGAAGAGACTCATAG  
AATGGCAGAGGCAAATAGAGCTTTTGCACATTTTCGTATGGGTAAGGATACTATTGCTG  
ACATAATAACCTCTATACGAAATGCGGATATGGATAAAAAAAGAGTGGTTCGAATAGCA  
TCTACTAATATCACTGAAAATATTGTTAAAATACTTTTACGAGAAGGTTTTATCGAAAAC  
GTGAGAAAACATCAAGAAAACAAAAGGATTTTTTGGTTTTAACCTACGACATAGAA  
GG-----AATAGGAAAAGGCCTTAT-----AGAAATATTTTAAATTTAAACGGATCAGTC  
GGCCTGGTCTACGAATCTATTCTAACTATCAACGAATTCCTAGAATTTTAGGCGGGATCG  
GAATTGTAATTCTTTCTACTTCTCGAGGTATAATGACAGACCGAGAGGCTCGACTAGAA  
AGAATTGGCGGAGAAATTTTGTGTTATATATGGATGGCAAAGCTATAACCGAGAAGTGG  
TTCACGTAGGAATGGGCGTATTGGTTCACGTAAGAGTACACGTAGAATACCAAAGGGG  
GTTATTCATGTTCAAGCAAGTTTCAATAATACTATTGTGACTGTTACAGATGTACGGGGT  
CGGGTGGTCTCTTGGTCTCTGCCGGTACTTGTGGATTCAAGGGTACAAGAAGGGGGA  
CGCCGTTTGCTGCTCAAACCGCAGCAGGAAACGCTATTTCGTACAGTAGTGGATCAAGG  
TATGCAACGAGCAGAAGTCATGATAAAAGGACCCGGTCTCGGAAGAGACGCAGCATTAA  
CGAGCTATTCGCAGAAGTGGTATACTATTAACCTTCGTGCGGGATGTAACCCCTATGCCA  
CATAATGGCTGTAGACCTCCGAAAAACGACGTGTGATGCCAACCATTAACAACCTTAT  
TAGAAATACAAGACAGCCAATCAGAAATGTCACAAAATCCCCCGCGCTTCGGGGATGC

CCCCAGCGTCGAGGAACATGTACTAGGGTGTATGTGATCACCCCCAAAAACCAA  
CTGCCTTACGTAAAGTTGCCAGAGTACGATTAACCTCTGGATTTGAAATCACTGCTTATA  
TACCCGGTATTGGCCATAATTCACAAGAACATTCTGTAGTCTTAGTAAGAGGGGGAAGG  
GTTAAGGATTTACCCGGTGTGAGATATCACATTGTTTCGAGGAACCCTAGATGCTGTTCG  
AGTAAAGGATCGTCAACAAGGGCGTTCTAGTGATGGAGTAAAAAGCCAAAAATGGC  
AAGGAAAAGTTTGATTCAGAGGGAGAAGAAGAGGCCAAAAATTGGAACAGAAATATCA  
TTCGATTCGCCGATCCTCAAAAAAAGAAATAAGC-----AAAGTTCTATCGTTAAGCGA  
CAAATGGGAAAATTTATGGAAAGTTACAATCCCCACCGCGGAATAGTGCACCTACACGT  
CTTCATCGACGTTGTTTTTCGACCGGAAGGCCGAGAGCTAACTATCGAGACTTTGGACT  
ATCCGGACACATACTTCGTGAAATGGTTCATGCATGTTTGTTCAGGGGCGACAAGAT  
CAAGTTGGATGATAAAAAATCCATTCAGTGCAATTTTTTTGAAA-----GAGGAAAACAA  
AGACAACAAGGGGTCTGCTGAATTTCAAGTAGTCAGTTTGACCAATAGGATACGAAGA  
CTTACTTCACATTTGGAATTGCACAAAAAAGACTATTTATCTCAGAGAGGTCTGCGTAA  
AATTCTAGGAAAGCGTCAACGGCTACTGGCTTATTTGTCAAAAAAAAATAGAGTACGTT  
ATAAAGAATTAATTGGTTCGGTTGGATATTCGAGAAACAAAAACTCGT-----ATGGTAAA  
CTTCGTTTGAACGATGTGGTAGAAAGCAACGAGCCGTCTATCGAATCGTTGCAATTGA  
TGTTTCGATCCCGAAGAGAAGGAAGAGATCTTCGAAAGTGGGTTTTTATGATCCGATA  
AAGAATCAAAGTTATTTAAATGTTCCCGCTATTCTATATTCCTTGAAAAAGGCGCTCAG  
CCTACAGGAACTGTTCCGGATATTTTAAAGAAGGCGGAGGTTTTTAAG-----  
-----ATGGATAAATCCAAGCGACCTTTTCTTAAATCCAAGCGATCTTTTCGTAGGCG  
TTTGCCCCGATCCAATCGGGGGATCGAATTGATTATAGAAACATGAGTTTAATTAGTCG  
ATTTATTAGTGAACAAGGAAAAATATTATCTAGACGGGTGAATAGATTGACCTTGAAC  
ACAACGATTAATTAATGCTATAAAACAAGCTCGTATTTTATCTTTGTTACCTTTTCT  
TAATAATGATAAA-----CAATTTGAAAGAACCGAGTCGACCGCTAGAACTGCTGGTCTTA  
GAGCCAGAAAAAAGTGACACGTTCACTAAAAAAAATCCTTTTGTAGCAAATCGTTT  
ATTAAGAAAAATTGATAAGCTTAACACAAAAGAAGAAAAAGAAATAATAAATACTTGG  
TCCCGGGCATCTACCATTATACCCACAATGATCGGCCATACTATTGCTATCCATAATGGA  
AAGGAGCATTGTCCTATTTATATAACCGATCGTATGGTAGGCCATAAATTGGGAGAATTT  
GCACCTACTTTAAATTTCCGAGGACATGCGAAAAGCGATAATAGATCTCGTCGTATGAT  
TTTGAATCTTTTCTACTAGGTAATCTAGTATCCTTATGCATGAAGATAATCAATTCGGTC  
GTTGTGGTTCGGACTCTATTATGGATTTCTGACCACATTTCCATAGGGCCCTCTTATCTC  
TTCCTTCTCCGAGCTCGGGTTATGGAAGAAGGAGAAGAAGGAACCGAGAAGAAGGTA  
TCAGCAACAACAGGTTTTATTACGGGACAGCTCATGATGTTTCATATCGATCTATTATGCG  
CCTCTGCATCTAGCATTGGGTAGACCTCATAACAATAACTGTACTAGCTCTACCGTATCTT  
TTGTTTCATTTCTTCTGGAATAATCACAAAACTTTTTTGTATTATGGATCTACTACCAGA  
AATTCATGCGTAATCTTAGCATTCAATGCGTATTCCTGAATAATCTCATTTTTCAATTAT  
TCAACCATTTCAATTTACCAAGTTCAATGTTAGCCAGATTAGTCAACATTTATATGTTTCG  
ATGCAACAACAAGATGTTATTTGTAACAAGCAGTTTTTGTGGTTGGTTAATTGGTCACA  
TTTTATTCATGAAATGGGTTGGATTGGTATTAGTCTGGATACGGCAAAATCCTTCTATTA  
GATCG---ATTCGATCTAATAAGTACCTTGTGTTCAGAATTGATAAAT-----TCTCGAATCTTT  
AGTATTCTCTTATTTATTACCTGTGTCTACTATTTAGGCAGAATACCGTCACCCATTTT  
CTAAGAACTGAAAGAAACCGAAGAAGATAAACCTCTTGTGACCCTTCTTTTCGATTAT  
AAACGATGGAATCGCCATTACGATACATAAAA---AATAGATTTGAAAGGACTGCAAGA  
AATGAAATGTCACAATATTTTTTTTATACATGCCGAAGTGATGGAAAAGAAAGAATATC



AGATCCTTTAGATTCCATTAGT-----AATGAGGATTTCGGAA-----  
-----TATCACACATTGATCAATCAAAGAGAGATTCAACAATAAAAGAAAGATCGATTCT  
T--TGGGAT-----CCTTCCTTTCTTCAAACGGAACGAACAGAGATAGAATCAGAC-----CG  
ATTCCCGAAA-----TGCCTTTCTGGATATTCC-----TCAATGTCCCGGCTATTCACG--GAA  
CGTGAGAAGCAGATGATTAATCATCTGCTTCCGGAAGAAATCGAAGAATTTCTT-----GG  
GAATCCTACAAGATCCGTTTCGTTCTTTTTTCTCTGACAGATGG-----TCAGAACTTCAT--  
CTGGGTTTCGAATCCTACTGAGAGGTCCACTAGAGATCAG-----AAATTGTTGAAGA  
ACAACAAGATCTTTCT--TTTGTCCCTTCGAGGCGATTCGGAA-----AAGAAAGAAA  
TGGTTAATATATTCAAGATAATTACGTATTTACAAAAT-----ACCGTCTCAATTCATCCTAT  
TTCATCATATCCGGGATGTGATATGGTTCCG---AAGGATGAACCGGAT--ATGGATAGTTC  
CAATAAGATTTCAATTCTTGAACAAAAATCCATTTTTTGATTTA-----TTTCATCTATTCCAT  
GACCGGAACAGGGGAGGATACACGTTA-----CACCACGATTTTGAATCAGAA-----GAG  
AGATTTCAAGAAATGGCAGATTTATCACTCTATCAATAACCGAGCCG--GATCTGGTGT  
ATCATAAGGGATTTGCCTTTTCTATTGATTCCTACGGATTGGATCAAAAACAA-----TTCT  
TGAATGAGGTATTGACTCCAGGGATGAATCGAAAAAAAATCT-----TTATTGGCTCT  
ACCTCCTTTTTTTTAT-----GAAGAGAATGAATCTTTTTTATCGAAGGATCAGAAAAAAA  
GGGTCCG---ATCTCCTGCGGGAATGATTTGGAAGATCCAAAACAAAAAATAGTGGTAT  
TTGCTAGCAACAACATAATGGAGGCAGTCAATCAATATAGATTGATCCGAAATCTGATT  
CAAATCCAATATAGCACCTATGGG-----TACATAAGAAATGTATTGAATCGATTCTTTTTA  
ATGAAT-----AGATCCGATCGCAACTTCGAATATGGA-----ATTCAAAGGGATCAAAT  
AGGAAAGGATACTCTGAATCATAGAACTATAATGAAATATACGATCAACCAACATTTATC  
GAATTTGAAAAG---AGTCAGAAGAGATGGTTCGATCCTCTT-----ATTTTTATTTCTCGA  
ACCGAGAGATCCATGAATCGGGATCCTGATGCATATAGATACAAATGGTCCAATGGGAG  
CAAGAATTTCCAGGAACATTTGGAACATTTTCGTTTCTGAGCAGAAGAGCCGT-----TT  
TCAAGTAGTGTTTCGATCGATTACGTATTAATCAATATTCGATTGATTGGTCTGAGGTTATC  
GACAAAAAAGGTTTGTCTAAGCCATTTTCGTTTCTTTTTGTCCAAG-----  
-----TTGCTTTTCTTTTTGTCTAAC---TCACTTCCTTTTTTCTTT  
GTGAGTTTTCGGGAATATCCCCATTCATAGGTCCGAG---ATCTACATCTAT--GAATTGAAA  
GGTCCGAATGATCAACTCTGCAATCAGTTGTTAGAATCAATAGGTCTTCAAATCGTTCA  
TTTGAAAAAATGGAAACCCTTC-----TTATTGGATTTATTGGATGATCATGATACTTCC---C  
AAAAATCGAAATTTCTTGATCAATGGAGGAACAATATCACCATTTTTGTTCAATAAGATA  
CCA---AAGTGG---ATGATTGACTCATTCCATACTAGA-----ATAATCGCAGGAAATCCTT  
TGATAACACGGATTCCTATTTCTCAACGATATCCACGATCAAGACAATTGGCTGAATCC  
CGTGAAACCATTTTCATAGAAGTTCATTGATATCTTCTTTTTATAAAGCAAATCGACTTCG  
ATTCTTGAATAATCCACATCACTTCTGCTTCTAT-----TGTAATAAAAGATTCCCTTTTTAT  
GTG-----GAAAAGGCCCGTATCAAT-----AATTATGATTTTACGTATGGA---CAATTCC  
TCAATATCTTGTTCAATCACAAACAA---ATTTTTTCTTTGTGCGTCGGTAAA-----AAAA  
ACATGCTTTTTGGGG---AGAGATACTATTTACCAATCGAGTCACAGGTATCTAACATA  
TTCATACTAACGATTTCCACAAAGTGGTGGTGACGAAACGTATAACTTGTACAAATC  
T-----TTCCATTTTCCAAGTCGATCCGACCCATTCGTTTCGT-----AGAGCTATTTACTCGA  
TCGCAGACATTTCTGGAACACCTTTAACAGAGGGACAAATAGTCAATTTTGAAAGAAC  
TTATTGTCAACCTCTTTCAGATATGAATCTATCTGATTCAGAAGGGAAGAACTCGCATCA  
GTATCTCAAT-----TTCAATTCAAACATGGGTTTGATTCACTCCATGTTCTGAGAAATA  
TTTACCATCCGAAAAG-----AGGAAAAA-----CGGAGTCTTTGTCTAAAG



-----AAATGCGTTGAGAAAGGGCAGATGTATAGAACCTTTCAACGAGATAGTGCTTTTTTC  
AACTCTCTCAAAATGGAATCTATTCCAAACATATATGCCATGGTTCCTTACTTCGACAGG  
GTACAAATATCTAAATTTGATATTTTTAGATACTTTTTTCAGACCTATTG-----CCGATACTA  
AGTCTA---AGTCAAAAATTTGTATCCATTTTTTCATGATATTATGCATGGATCAGATATATCA  
TGGCGAATTCTTCAGAAAAAATTG-----TGAAGACAAAATGGAATCTG---ATA  
AGTGAGATTTTCGAGTAAGTGTTTACATAAT-----CTTCTTCTGTCCGAAGAAAGGATTCA  
TCGAAAT-----AATGAGTCGCCATTGATATCGACACATCTGAGATCGCCAAATGTTCCGGG  
AGTTC---CTCTATTCAATCCTTTTTCTTCTTCTTGTGCTGGATAT--CTCGTTTGTACACA  
TCTTCTCTTTGTTTCCCGG-----GCCTCTAGTGAGTTACAGACAGAGTTTGAAAAGGTCA  
AATCTTTGATGATTCCATCATCTATGATTGAGTTGCGAAAACCTTCTGGATAGGTATCCTA  
CATCTGAACCGAATTCTTTCTGGTTAAAGAATCTTTTCTAGTTGCTCTGGAACAGTTA  
GGAGATTCTCTAGAAGAAATACGGGGTTCTGCTTCTGGCGGCAACATGCTATTGGGTG  
GTGATCCCGCT-----TATGGG---GTCAAATCAATACGTTCTAAGAAGAAATATTG  
AATATCAATCTCATCGATATCATCGATCTCATA---AGTATCATAACCAAATCCCATCAATCG  
AATCACTTTTTTCGATAAATACGAGACATCTAAGTCATACAAGTAAAGAGATCTATTCATT  
GATAAGAAAAAGAAAAAATGTGAACGGGGATTGGATTGATGATAAAATAGAATCCTGG  
GTCGCAAACAGTGATTGATTGATGATGAAGAAAGAGAATTCTTGGTTCAGTTCTCC----  
--ACCTTAACGACA-----GAAAAAAGGACTGATCAAATTCTATTGAGTCTGACT---CATAG  
TGATCATTTA-----TCAAAGAATGACTCTGGCTATCAAATGATTGAACAACCGGG  
AGCAATTTACTTACGATACTTAGTTGACATTCAT-----AAAAGTATCTAATGAATTATGA  
GTTCAATACATCCTGTTTAGCAGAAAGACGGATATTCCTTGCTCATTATCAGACAATCAC  
TTAT-----TCACAAACCTCGTGTGGGGCTAATAGTTTAAATTTCCCATCTCATGGA-----  
AAACCCTTTTCGCTCCGCTTAGCCTTATCCCCCTCT---AGGGGTATTTTAGTGATAGGTTT  
TATAGGAACTGGACGATCCTATTTGGTCAAATACCTAGCGACAAACTCCTATGTTCCTTT  
CATTACGGTATTTCTGAACAAGTTCCTGGATAACAAGCCTAAAGGTTTTCTTATTGAT----  
-----GATAGTGAC---ATTGATGATAGTGACGATATTGATGATAGTGACGATATTGATGC  
TAGTGACGATATTGATGCT-----AGTGACGATATCGATCGTGACCT  
TCATACGGAGCTG---GAACTGCTAACTATGATGAATGCGCTAACTATGGATATGATGCCG  
GAA-----ATAGACCGATTTTATATCACCTTCAATTCGAATTAGCAAAAGCAATGTCTC  
CTTGATAATATGGATTCCAAACATTCATGATCTGGATGTGAATGAGTTCGAATTACTTCT  
CCCTCGGTCTATTAGTGAACCATCTCTCCAGG-----GATTGTGAAAGATGTTCC---ACT  
AGAAATATTCTTGTTATTGCTTCGACTCATATTCCCCAAAAGTGGATCCCGCTCTAATA  
GCTCCGAATAAATAAATACGTGCATTAAGATACGAAGGCTTCTTATTCCACAACAACG  
AAAGCACTTTTTACCCCTTTCATATACTAGGGGATTTTCGCTTGGAAAAGAAAATGTTCC  
ATACT-----AATGGATTCGGGTCCATAACCATGGGTTCCAATGCACGAGATCTTGTAGCA  
CTTACCAATGAGGCCCTATCGATTAGTATTACACAGAAGAAATCAATTATAGACACTAAT  
ACAATTAGATCCGCTCTTCATAGACAAACTTGGGATTTGCGA-----TCCCAGGTAAGA  
TCGGTTCAGGATCATGGGATCCTTTTCTATCAGATAGGAAGGGCTGTAGCACAAAATGT  
ACTTCTAAGTAATTGCCCCATAGATCCTATATCTATCTATATGAAGAAGAAA-----TCATGT  
AACGAAGGGGATTCTTATTTGTACAAATGGTACTTCGAACTTGGAACGAGCATGAAGA  
AATTAACGATACTTCTTTATCTTTGAGTTGTTCTGCCGGATCGGTCGCTCAAGATCTTT  
GGTCTCTACCC-----GGACCCGATGAAAAA---AATGGGATCACTTCTTGTGGACTCGTTG  
AGAATGATTCT--GATCTAGTTCATGGCCTATTAGAAGTAGAAGGCGCTCTGGTGGGA---  
---TCCTCGCGGACAGAAAAAGATTGCAGTCAGTTTGATAATGAT-----CGAGTGACATTG





AACCGCCCGGAGCTCGTATGAGAGTTGGTTTTGACTGCCCTAACGATGGCGGAATATTTCCGATGTTAATGAACAAGACGTA  
CGAGATGTTAATGAACAAGACGTA  
CGTACTTCTATTTATTGACAATATTTTCCGTTTCGTCCAA  
GCAGGATCCGAAGTATCGGCCTTATTGGGTAGAATGCCGTCCGCCGTCCGGTTATCAACC  
CACCTGAGTACCGAAATGGGCTCTTTACAAGAAAGAATTACTTCTACCAAAGAAGGG  
TCCATAACTTCTATTCAAGCAGTTTATGTACCTGCAGACGATTTGACCGATCCTGCCCT  
GCTACGACATTTGCACATTTAGATGCTACTACCGTACTATCAAGAGGATTAGCTGCCAA  
AGGGATCTATCCAGCAGTAGATCCTTTAGATTCAACTTCAACCATGCTTCAACCTCGGA  
TCGTTGGTGAGGAACATTATGAAATTGCGCAAAGAGTTAAGCAAACCTTTACAACGTTAT  
AAAGAGCTTCAAGACATTATAGCTATCCTTGGATTAGACGAATTATCCGAGGAGGATCG  
TTAACC GTAGCAAGAGCGCGCAA AATTGAGCGTTTCTTATCACAACCTTTTTTTGTAG  
CCGAAGTATTTACTGGTTCTCCAGGGAAATATGTTGGTCTAGCAGAAACCATTAGAGGG  
TTTCAATTGATCCTTTCCGGAGAATTAGATAGTCTTCCTGAACAGGCCTTTTTATTTGGTA  
GGTAATATCGATGAAGCTACCGCGAAGGCTATGAACTTAGAAATGGAGAGCAATTTGA  
AGAAAATGACCTTAAATCTTTGTGTACTGACCCCTAATCGAATTGTTGGGATTCAGAA  
GTGAAAGAAATCATTTTATCTACGAATAGTGGTCAAATTGGCGTATTACCAAACCATGC  
TCCATTGCTACAGCTGTAGATATAGGGATTTTGAGAATACGCCTTAAGGACCAATGGTT  
AACGATGGCTCTGATGGGTGGTTTTGCTAGAATAGGCAATAATGAGATCACTGTTTTAG  
TAAATGATGCGGAAAAGGTAGTGATATTGATCCACAAGAAGCTCAGCAAACCTTTGA  
AATAGCAGAAGCTAATTTGAGAAAAGCTGAAGGAAAGAGACAAATAATTGAGGCAAA  
TCTAGCTCTCCAACGGGCTAGGACAAGAGTAGAGGCTGTCAATGCGATTTCAATGAAA  
AATGTAACCGATTCTTTTCGTTTCT--GGCCGCTGGTCATCTGCCGGGAGTTTCGGATT  
AATACCGATATTTAGCAACAAATCCAATAAATCTAAGTG TAGTGATTGGTGTATTGATCT  
TTTTTGGAAAGGGAGTGTTAAGTGATTTATTAGATAATCGAAAACAGAGGATATTGAAT  
ACTATTCGAAATTCAGAAGA ACTGCGTGGAGGGGCCATTGAACAGCTGGAAAAAGCC  
AAAGCCCGCTTACGGAAAGTTGAAATCGAAGCAGATCAGTTTCGGGTGAATGGATACT  
CTGAGATAGAACGAGAAAAATTGAATTTGGTTAATTCAACTTATAAGACTTTGGAACAA  
TTAGAAAATTACAAAAATGAAACGATTCAGTTTGAACAGCAAAGGGCGATTAATCAAG  
TCCGACAACGGGTTTTCCAACAAGCCTTACAAGGAGCTCTAGGAACTCTGAATAGTTG  
TTTGAACAACGAGTTACACTTACGTACCATTAGTGCCAATCTTGGCATGTTGGGAGCGA  
TGAAAGAAATAACCGATATGAATCCACTGATTTCTGCTGCTTCCGTTATTGCTGCTGGAT  
TGGCTGTAGGGCTTGCTTCTATTGGACCTGGGGTTGGTCAAGGGACTGCTGCGGGTCA  
AGCAGTAGAGGGTATCGCGAGACAGCCGAGGCAGAGGGAAAAATACGAGGTA CTCT  
ATTGCTTAGTCTAGCTTTTATGGAAGCTTTAACGATTTATGGGTTGGTTGTAGCATTAGC  
ACTTTTTATTTGCGAATCCTTTTTGTTATGAATGTGCTATCATGTTCCATTAACACACTAAA  
GGTTATACGATATATCCGGTGTGGAAGTAGGCCAACATTTCTATTGGCAAATAGGGGG  
TTTCCAAGTCCATGGCCAAGTACTTATTACCTCTTGGGTTGTAATTGCTATCTTATTAGGT  
TCAGCTACTATAGCTGTTCCGGAACCCACAAACCATTCGACTGGGGGTCAGAATTTCTT  
CGAATATGTTCTTGAATTCATTCGAGATGTAAGTAAA ACTCAAATTGGAGAAGAATATG  
GCCCTTGGGTTCTTTTTATCGGAACTATGTTTCTATTTATTTTTGTTTCTAATTGGTCAGG  
AGCTCTTTTACCTTGGAAAATCATAGAATTACCTCATGGAGAGTTAGCCGCACCCACGA  
ATGATATAAATACTACTGTTGCTTTGGCTTTACTCACGTCAGCGGCATATTTCTACGCG  
GTCTTAACAAAAAGGGATTAAGTTATTTCCGGAAATATATTCAACCAACCCCATCTTT  
TACCCATTAACATCTTAGAAGATTTACAAAGCCCTTATCACTTAGTTTTCGACTTTTCG  
GAAATATCTTAGCGGATGAATTAGTAGTTGTTGTTCTTGTTCCTTAGTACCCTTAGTAAT



????????????????????????????????????????????????????????????????????????????????????????????  
????????????????????????????????????????????????????????????????????????????????????????????  
????????????????????????????????????????????????????????????????????????????????????????????  
????????????????????????????????????????????????????????????????????????????????????????????  
????????????????????????????????????????????????????????????????????????????????????????????  
????????????????????????????????????????????????????????????????????????????????????????????  
????????????????????????????????????????????????????????????????????????????????????????????  
????????????????????????????????????????????????????????????????????????????????????????????  
????????????????????????????????????????????????????????????????????????????????????????????  
????????????????????????????????????????????????????????????????????????????????????????????  
????????????????????????????????????????????????????????????????????????????????????????????  
????????????????????????????????????????????????????????????????????????????????????????????  
????????????????????????????????????????????????????????????????????????????????????????????  
????????????????????????????????????????????????????????????????????????????????????????????  
????????????????????????????????????????????????????????????????????????????????????????????  
??ATGATAATTGAT--ACAACAGAAATACAA--GCTATCAATTCCTTTTTCTAGATTGGAAT  
CC--TTAAAAGAAGTTTACGGAATGATATGGATGCTTGGCCCTATTTTAACTCTTGTATTA  
GGAATCACACTAGGTGTACTAGTAATTGTTTGGTTAGAAAGAGAAATATCTGCAGGGAT  
ACAACAACGTATTGGACCTGAATACGCCGGGCCTTTGGGACTTCTGCAAGCTCTAGCA  
GATGGTACAAACTACTTTTCAAAGAGAATCTTCTTCCATCTAGAGGAGATACTCGTTT  
ATTCAGTATCGGACCATCCATAGCAGTCATATCAATTTTACTAAGTTATTCAGTAATTCCT  
TTTAGCTATCGCTTTATTCTAGCTGATCTTAGTATTGGTATTTTTTTATGGATTGCCGTTTC  
AAGCCTTGCTCCCGTTGGACTTCTTATGTGCGGGTATGGATCAAATAATAAATATTCCTT  
TTTAGGTGGATTAAGGGCTGCTGCTCAATCAATTAGTTATGAAATACCATTAACTCTATG  
TGTATTATCAATATCTCTACTATCTAACAGTTTAAGTACAGTTGATATAGTTGAAGTGCAG  
TCAAAATATGGTTTATGGGGGTGGAATTTCTGGCGTCAACCTATAGGGTTTATTGTTTTT  
CTAATTTCTTCTCTAGCCGAGTGTGAGAGATTACCTTTTGATTTACCAGAAGCAGAAGA  
AGAATTAGTAGCAGGTTATCAAACCGAATATCCGGTATAAAATTTGGTTTATTTTACGT  
TGCTTCGTATCTAAATCTACTAGTTTCTTCATTATTTGTAACAGTCTTTATTTGGGGGGT  
TGGAATCTTTCTATTCCATACATACCCGTTCCCTGAGCTTTTTTGACATAAATAAAGAAGT  
CAAGTTTTTGGAAACAACAGTCGGTATCTTTATTACATTAGCTAAAACCTATTTGTTCTTG  
TTCATTTCTATTGCAACAAGATGGACTTTGCCGAGACTGAGAATGGACCAACTATTTAA  
TCTTGGCTGGAAATTTCTTTTACCCATTTCTTTAGGTAATCTATTATTAACAACCTTCGTC  
CAACTTCTTTACTGATGATCTGGCATGTACAGAATGAAAACCTCATTCTCGATTCTACG  
AGAATTTTTATGAAAGCCTTTCATTTGCTTCTCTTCGATGGAAGTTTGATTTTCCCAGAA  
TGATACCTAATTTTTGGCCTAATTCCTTCTTCTGATGATCGATTCAACCTCTGATCAAAA  
GATATACCTTGGTTATATTTTCACTCTTCAACAAGTTTAGTAATGAGCCTAACGGCCCTAT  
TGTTCCGATGGAGAGAAGAACCTATGATTAGCTTTTTCGGGAAATTTCCAAACGAACAA  
TTTCAACGAAATCTTTCAATTTCTTATTTTACTATGTTCAACTCTATGTATTCCTCTATCCG  
TAGAGTACATTGAATGTACAGAAATGGCTATAACAGAGTTTCTCTTATTCGTATTAACAG  
CTACTCTAGGAGGAATGTTTTTATGCGGTGCTAACGATTTAATAACTATCTTTGTAGCTC  
CAGAATGTTTCAGTTTATGCTCCTACCTATTATCTGGATATACCAAGAAAGATGTACGGT  
CTAATGAGGCTACTATGAAATATTTACTCATGGGTGGGGCAAGCTCTTCTATTCTGGTTC  
ATGGTTTCTTGGCTATATGGTTTATCCGGGGGAGAGATCGAGCTTCAAGAAATAGTG

AATGGTCTTATCAATACACAAATGTATAACTCCCCAGGAATTTCAATTGCGCTCATATTC  
ATCACTGTAGGAATTGGGTTCAAGCTTTCCCCAGCCCCTTCTCATCAATGGACTCCTGA  
CGTATACGAAGGATCTCCCACTCCAGTCGTTGCTTTTCTTTCTGTTACTTTCGAAAGTAG  
CTGCTCCAGCTTCAGCCACTCGAATTTTCGATATTCTTTTATTTCTCATCAAACGAAT  
GGCATCTTCTTCTGGAAATCCTAGCTATTCTTAGCATGATATTCGGAAATATCATTGCTAT  
TACTCAAACAAGCATGAAACGTATGCTTGCATATTCGTCCATAGGTCAAATCGGATATGT  
AATTATTGGAATAATTGTTGGAGACTCAAATGATGGATATGCAAGCATGATAACTTATAT  
GCTGTTCTATATCTCCATGAATCTAGGAACTTTTGCTTGCATTGTATTATTTGGTCTACGT  
ACCGGAACTGATAACATTCGAGATTATGCAGGATTATACACGAAAGATCCTTTTTTGGC  
TCTCTCTTTAGCCCTATGTCTCTTATCCCTAGGAGGTCTTCCTCCACTAGCAGGTTTTTT  
CGGAAAACCTCTATTTATTCTGGTGTGGATGGCAGGCAGGCCTATATTCCTTGGTTTTAAT  
AGGACTCCTTACAAGCGTTGTTTCTATCTACTATTATCTAAAATAATCAAGTTATTAATG  
ACTGGACGAAACCAAGAAATCACCCCTCACGTGCGAAATTATAGAAGATCTCCTTTAA  
GATCAAACAATTCCATCGAATTGAGTATGATTGTATGTGTGATAGCATCTACTATAACCAG  
GAATATCAATGAACCCGATTATTGCAATTGCTCAGGATACCCTTTTTATGTTTTTGTCTTA  
CGAATATGATATTTTTTGGGCATTTCTAATAATATCAAGTCTTATTCCTATTTTGGCATT  
TCATTTCCGGTATTTTAGCCCCAATTAGGAAAGGGCCGGAGAACTTTTCGAGTTATGAA  
TCGGGTATAGAACCAATGGGCGACGCTTGGTTACAATTTAGAATCCGTTATTATATGTTT  
GCTCTAGTTTTTGTGTTTTTGTATGTTGAAACGGTTTTTCTTTATCCATGGGCAATGAGT  
TTCGATGTGTTGGGTGTATCTGTATTTATAGAAGCTTTAATTTTCGTGCTTATCTTAATC  
TTGGTTTTAGTTTATGCATGGCGAAAGGGAGCATTGGAATGGTCT-----  
-----ATGTGTATTTTAGAACTT  
CTTATAACGACTTATGCATTCTGCTATCATTCCAATTAGATGATCCATTAATCCAACCTAG  
TGGAAGATTATAAATGGATCCGTTTTTTTTGATTTCCATTGGAGATTAGGAATAGATGGAC  
TCTCTATAGGACCTCTTTTACTGACGGGATTCATCACTACTTTAGCTACTTTAGCGGCTT  
GGCCAGTTACTCGAGACTCTCGCTTATTTCAATTCCTGATGTTAGCAATGTACAGTGGG  
CAAATAGGATTATTTCTTCTCGGGACCTTTTACTTTTTTTCTCATGTGGGAGTTAGAA  
TTAATCCCGTTTATCTACTTGTATCCATGTGGGGAGGAAAAAACGTCTGTACTCAGCT  
ACAAAATTTATTTGTACACGGCGGGGGTTCTGTTTTTCTTTAATGGGAGTTCTGGCT  
ATCGGTTTATATGGTTCTACTGAACCAACATTTAATTTTGAAATATTAGCCAATCAGTGCT  
ATCCCGCGGCCGTGGAAATAATATTTTATATTGGATTTTTTATTGCTTTTGTGTTAAATT  
ACCAATCATAACCCTACATACATGGTTACCAGATACCCATGGAGAAGCGCATTATAGTAC  
TTGTATGCTTTTAGCCGGAATCTTATTAATAAATGGGAGCGTATGGATTAGTTCGGATCAA  
TATGGAATTATCCCCCATGCTCATTCTATATTTCTCCTTGGTTGATAATAATAGGTGCA  
CTGCAAATAATCTATGCAGCTTCAATATCCCTCGGTCAACGGAATTTAAAAAAAAGAAT  
AGCCTATTCCTCTGTATCTCATATGGGTTTCATAATTATAGGAATAGGTTCTCTCACGGAT  
ATGGGACTTAACGGAGCCCTTTTACAAATAATCTCTCATGGATTTATTGGTGCTGCACTT  
TTTTTCTTGGCCGGAACAACCTTATGATAGAATACGTCTTATTTATCTTGACGAAATGGGT  
GGAATAGCTATCTCAATGCCAAAAATATCACGATGTTTACGTAGCTTTTCGATGGCTTCA  
CTTGCAATTACCAGGCATGAGTGGTTTTGTTGCTGAATTGATAGTCTTTTTGGGACTAATT  
ACTAGTCAAAAATATCTTTAATGACAAAAGTTCTAATTACTTTTTGTAATGGCAATTGGA  
ATGATATTAACCTATTTATTTATTATCTATGTTACGCCAGATGTTTTATGGATACAAGAT  
ATTTAATATTTCAAACCTTATTTTTGTGATTCTGGACCACGAGAGTATTTCTTTTGATC  
TCTATTTTTTTTACCATACTAGGCGTTGGTATGTACCCGATTTTCGTTCTTTCACTATCAG







ATTGAGGTTCCACAAGCGGTA CTTCCTGATACTGTATTTGAAGCAGTTGTTTCGAATTCC  
TTATGATAACAAGTGAAACAAGTTCTTGCTAATGGTAAGAAGGGGGGTTTGAATGTG  
GGTGCTGTTCTTATTTTACCAGAGGGGTTTGAATTAGCCCCCTCCGATCGTATTTCTCCC  
GAGATGAAAGAAAAGATGGGCAATTTGTCTTTTCAGAGCTATCGCCCTAATAAAAAA  
ATATTCTTGTGATAGGGCCTGTTCCCGGTCAGAAATATAGTGAAATCACCTTTCCTATTC  
TTCCCCCGACCCACTACTAAGAAAGATGTTTACTTTTTAAATATCCTATATATGTAG  
GGGAAATAGGGGAAGGGGTCAGATTTATCCCGACGGAAGCAAAAGTAACAATACGG  
TTTATAATGCTACAGGAGCAGGCAGAGTAAGTAAAATCATAACGAAAAGAAAAGGGGG  
GTATGAAATAACCATAACAGATCCTTTGGATGGACGTCAAGTGGTTGACATTATCCCTC  
CAGGCCCAGA ACTTCTTGTTCAGAGGGTGA AACCATAAAATTTGATCAACCGTTAAC  
GAGTAATCCTAATGTGGGTGGATTTGGTCAGGGAGATGCAGAAATAGTACTGCAAGAT  
CCATTACGTGTCCAAGGTCTTTTGTCTTCTTGGCATCTGTTATTTTGGCACAAATCTTT  
TTAGTTCTTAAAAGAAACAGTTCGAGAAGGTTCAATTGGCTGAAATGAATTTTCATGA  
GTAAAGTCTATGATTGGTTTCGAAGAACGTCTCGAGATTCAGGCGATTGCGGATGATATA  
ACTAGTAAATATGTTCCCTCCCATGTCAATATATTTTATTGTTTAGGGGGAATTACGCTTA  
CTTGTTTTTTAGTACAAGTAGCTACGGGGTTTGCTATGACTTTTTACTATCGTCCGACCG  
T TACTGAAGCTTTTGCCTCTGTTCAATACATAATGACGGAAGCTAACTTTGGTTGGTTAA  
TCCGATCAGTTCATCGATGGTCGGCAAGTATGATGGTTCTAATGATGATTCTACATGTTT  
TTCGTGTGTATCTCACCGGTGGATTTAAAAAACCCCGTGAATTGACTTGGGTTACAGGT  
GTGGTTCTGGCAGTGTGACCGCATCTTTTGGCGTAACTGGTTATTCCCTTACCTCGGGA  
CCAAATTGGTTATTGGGCGGTAAAATTGTAACAGGTGTACCTGAGGCTATTCCCTGTAA  
TTGGATCACCTTTAGTAGAATTATTGCGCGGAAGTGCTAGTGTGGGACAATCCACCTTG  
ACTCGTTTTTATAGTTTACACACTTTTGTATTGCCGCTCCTTACTGCTGTATTTATGTAA  
TGC ACTTTCCAATGATACGTAAACAGGGTATTTCCGGCCCTTAAATGGGAGTAACAAAA  
AAACCTGATTTGAATGATCCTGTATTAAGAGCTAAATTGGCTAAAGGTATGGGTCATAAT  
TATTACGGAGAACCCGCATGGCCCAACGATCTTTTATATATTTTTCCAGTAGTAATTCTA  
GGTACGATTGCATGTAACGTAGGCTTGGCGGTTCTAGAACCATCAATGATTGGTGAACC  
GGCAGATCCGTTTGCAACCCCTCTGGAAATATTACCCGAATGGTATTTCTTTCCCGTATT  
TCAAATACTTCGTACAGTGCCTAATAAATTATTGGGTGTTCTTTTAAATGGTTTCGGTACC  
CGCGGGATTATTAACAGTACCCTTTTTAGAGAATGTTAATAAATTCCAAAATCCATTTG  
CCGTCCAGTAGCGACAACCGTCTTTTTGATTGGTACCGCAGTCGCTCTTTGGTTGGGTA  
TTGGTGCAACATTACCTATTGATAAATCCTTAACTTTAGGTCTTTTTATGATTGAAGTTTT  
TCTATTTGGAATTGTCTTAGGTCTAATTCCTATTACTTTGGCTGGATTATTTCGTAACCTGCA  
TATTTACAATATAGGCGTGGTGATCAGTTGGACCTTATGCTTACTATAACTAGTTATTTG  
GTTTTCTACTAGTGGCTTTAACTATAACTTCAGCTCTATTTATTGGTCTAAGCAAGATAC  
GACTTATTATGGATATAGTAAGTCTTGCTTGGGCTGCTTTAATGGTAGTCTTTACATTTTC  
CCTTTCCTCGTAGTGTGGGGAAGAAGTGGGCTCATGATTATTCGTTTCGCCGGAACCA  
GAAGTAAAATTTTGGTGGATAAGGATCCCGTAAAACCTTCTTTCGAGGAATGGGCCA  
AACCGGGTCATTTCTCAAGAACAATAGCTAAAGGACCGGATACTACCACTTGGATCTG  
GAACCTACATGCCGATGCTCACGATTTTCGATAGTCATACCAGTGATTTGGAGGAGATCT  
CTCGAAAAGTATTTAGTGCCATTTCCGGTCAACTCTCCATCATCTTTCTTTGGCTGAGCG  
GCATGTATTTCCACGGTGCTCGTTTTTCCAATTATGAAGCGTGGCTAAGTGATCCAACCTC  
ACATTTGGGCCAAGTGCCAGGTGGTTTGGCCAATAGTGGGCCAAGAAATATTGAATGG  
TGATGTGGGCGGGGGTTTCCGAGGAATACAAATAACCTCTGGTTTTTTTTTTCAGATTTGGC

GAGCATCTGGAATAACTAGTGAATTACAACCTCTATTGTACCGCAATAGGTGCATTGGTC  
TTTGCAGCGTTAATGCTTTTTGCCGGTTGGTTTCATTATCATAAAGCGGCCCAAAATTG  
GCTTGGTTTCAAGACGTAGAATCTATGTTGAATCACCATTTAGCGGGTCTACTAGGACT  
TGGGTCTCTCTCTTGGGCGGGGCATCAGGTGCATGTATCTTTACCGATTAACCAATTTCT  
AAATGCTGGAGTAGATCCTAAAGAGATACCGCTTCCTCATGAATTTATCTTGAATCGCG  
ATCTTTTGGCTCAACTTTATCCAAGTTTTGCCGAGGGAGCAACCCCATTTTTACCTTG  
AATTGGTCAAAATATGCGGAATTTCTTACTTTTTCGTGGAGGATTAGATCCAGTAACTGG  
GGGTCTATGGTTGACCGATATTGCACATCACCATTTAGCTATTGCTATTCTGTTCTGATA  
GCAGGTACATGTATAGGACCAACTGGGGTATTGGTCATGGCCTAAAAGATATTTTAGA  
AGCCATAAAGGTCCATTTACGGGCCAGGGTCATAAAGGGCTATACGAGATCTTAACAA  
CGTCATGGCATGCTCAATTATCTCTTAACTAGCCATGTTAGGATCTTTAACCATTTGTTGT  
AGCTCACCATATGTATTCCATGCCCCCTTATCCATATCTAGCTACTGACTATGGTACACAA  
CTGTCAATTGTTACACATCACATGTGGATTGGTGGATTTCTGATAGTTGGTGTCTGCTGCG  
CATGCAGCCATTTTTATGGTAAGAGATTATGATCCAACACTACTCGATAACAACGATCTATTA  
GATCGTGTCTTAGACATCGTGATGCAATAATATCACATCTCAACTGGGTATGTATATTC  
TGGGCTTTCACAGTTTTGGTTTTGTATATTCATAATGATACTATGAGCGCCTTAGGGCGTC  
CTCAAGATATGTTTTAGATAACCGCTATACAATTACAACCCGTTTTTGTCTCAATGGATAC  
AAAATACCCACGTTTTAGCCCCGGGCGCAACGGCTCCTGGTGAACGGCAAGCACTAG  
TTAACCTGGGGGGTGGTGATTTAGTATCAGTGGGCGGCAAGGTGGCTTTGTTACCTA  
TTCCATTAGGAACCGCAGATTTTTTGGTACATCATAATCCATGCATTTACGATTCATGTCAC  
AGTTTTGATACTCCTGAAGGGTGTCTATTTGCTCGTAGCTCCCGTTTGATAACGGATAA  
AGCAAATCTCGTTTTTCGTTTTCTTGTGATGGACCTGGAAGAGGGGGTACATGTCAA  
GTATCGGCTTGGGATCATGTCTTCTTAGGACTATTCTGGATGTACAATTCTATTTCCGTA  
GTAATATTCCATTTAGTTGGAAAATGCAGTCAGATGTTTGGGGCAGTATAAGTGATCA  
AGGGGTGGTAACTCATATCACGGGAGGAACTTCGCGCAGAGTTCTATTACTATTAATG  
GGTGGCTCCGGGATTTCTTATGGGCACAGGCATCCCAGGTAATTCAGTCTTATGGTTCT  
TCATTATCTGCATATGGACTTTTTTTCCTAGGCGCTCATTTTGTATGGGCTTTTAGTTTAA  
TGTTTCTATTAGTGGACGTGGTTATTGGCAAGAACTTATTGAATCCATCGTTTGGGCTC  
ATAATAAATTAAGTTGCTCCTGCTACTCAGCCGAGAGCCTTGAGCATTGTACAAGGA  
CGTGCTGTAGGAGTAACCCATTACCTTCTGGGTGGAATTGCCACAACATGGGCATTCTT  
CTTAGCAAGAATTATTGCAGTAGGAATGGCATTAAAGATTTCCAAGGTTTAGCCAAGGGT  
TAGCTCAGGACCCACTACTCGTCGTATTTGGTTTGGTATTGCTACCGCACATGACTTTG  
AAAGTCATGATGATTAATCTGAGGAACGCTTTATCAGAATATTTTTGCTTCTCACTTCG  
GTCAATTAGCAATCATTTTTCTGTGGACTTCCGGAAATCTGTTTCATGTAGCTTGGCAA  
GGAAATTTGAATCATGGGTACAGGACCCTTTACATGTAAGACCTATTGCTCATGCAATT  
TGGGATCCTCATTTTGGTCAACCGGCCGTGGAAGCTTTTACTCGAGGGGGTGTCTCTTG  
GCCAGTGAATATTGCTTATTCTGGTGTATCAGTGGTGGTATAACAATCGGTTTACGCA  
CTAATGAAGATCTTTATACTGGAGCTTTTTTTTTATTATTTCTTTCTGCCATATCCTTAATA  
GCAGGTTGGCTACACTTACAGCCGAAATGGAAACCGAGCGTTTCGTGGTTCAAAAATG  
CCGAGTCTCGTCTGAATCATATTTGTCAGGACTCTTCGGCGTAAGTTCCCTTGGCTTGG  
ACAGGACATTTAGTACATGTCGCTATTCCTGGATCCAGAGGGGAGTCCGTTTCGATGGAA  
TAATTTCTTAGATGTATTACCGCATCCCCAAGGGTTAGGCCCGCTTTTACAGGTCAGTG  
GAATCTGTATGCTCAAAACCCAGATTCAGTAGTCATTTATTTGGGACCTCCAAGGAG  
CAGGAAGTCCATTCTAACCCCTTCTTGGGGGATTCCATCCACAAACACAAAGTTTATGG

TTGACTGATATTGCTCATCATCATTTAGCTATTGCATTTATTTTTCTTGTTGCTGGTCATAT  
GTATAGAACTAATTTTCGGGATTGGACACAGTATCAAGGATCTTTTAGATGCACATATTCC  
TCCGGGAGGGCGATTGGGACGTGGGCATAAGGGTCTTTATGATAACAATCAACAATTCGC  
TTCATTTTCAATTAGGCCTTGCTCTAGCTTCTTTAGGGGTTATTACCTCCTTGGTAGCTC  
AACACATGTACTCTTTACCTGCTTATGCATTCATAGCCCAAGACTTTACTACTCAAGCTG  
CATTATATACCCATCACCAATATATCGCAGGATTCATCATGACAGGAGCTTTTGCTCATG  
GAGCTATATTTTTATTAGAGATTACAACCCAGAGCAAATGAAGATAATGTATTGGCA  
AGAATGTTAGACCATAAGGAAGCTATCATATCTCATTTAAGTTGGGCCAGCCTCTTTCTG  
GGATTCCATACCCTGGGACTTTATGTTTATAATGATGTCATGCTTGCTTTTGGTACTCCG  
GAAAAGCAAATTTTGATCGAACCTATATTTGCTCAATGGATAACAATCGGCTCATGGTAA  
AACTTCATATGGGTTTCGATGTACTTTTATCTTCAACGAGTGGCCCGGCATTCAATGCCGG  
TCGAAGCATCTGGTTGCCTGGTTGGTTAAATGCTATTAATGAA-----AATACTAATTCATT  
ATTCTTAACAATAGGTCCTGGAGACTTTTTGGTTCATCATGCTATTGCCCTGGGTTTACA  
TACAACACTATTGATCTTAGTAAAAGGTGCTTTAGATGCACGCGGTTCCAAGTTAATGC  
CAGATAAAAAGGATTTTCGGTTATAGTTTTCCGTGCGACGGCCCGGACGAGGGGGTAC  
TTGTGATATTTTCGGCATGGGATGCATTTTATTTGGCAGTTTTTTGGATGTTAAATACTATT  
GGATGGGTTACTTTTTATTGGCATTGGAAGCACATCACATTATGGCAGGGTAACGTTTC  
ACAGTTTAATGAATCTTCCACTTATTTGATGGGCTGGCTAAGAGATTATTTATGGTTAAA  
CTCTTCACAACCTTATCAATGGATATAATCCTTTTGGTATGAATAGTTTATCGGTCTGGGCA  
TGGATGTTCTTATTTGGACATCTTGTTTGGGCTACTGGATTTATGTTCTTAATCTCCTGGC  
GTGGATACTGGCAGGAATTGATTGAACTTTAGCATGGGCTCATGAACGCACACCTTTG  
GCCAATTTGATTTCGATGGAGAGACAAACCCGTGGCCCTTTCCATTGTGCAAGCAAGAT  
TGGTTGGATTAGCCCAATTTTCTGTAGGTTATATATTTCACTTATGCAGCTTTCTTGATTGC  
CTCTACATCGGGGAAATTTGGCATGTCACATTACAGTAAAGATTTATGATACATGTATAGG  
ATGTACTCAATGTGTCCGCGCGTGCCCCACCGATGTATTAGAAATGATACCTTGGGACG  
GATGTAAAGCTAAACAAATTGCTTCTGCTCCAAGAACCGAAGACTGTGTTGGTTGTAA  
AAGATGTGAATCTGCCTGCCCAACGGATTTCTTGAGTGTTTCGAGTTTATTTATGGCATG  
AAACAACCCGCAGCATGGGCTAGCTTATATGACAACCTTTCAATTTTCCCTCTATTTTTG  
TGCCTTTAGTAGGCCTAGTATTTCCGGCAATTGCAATGGCTTCTTTATTTCTTTATGTTCA  
AAAAACAAGATTGTTATGCGAGATCTAAAAACATATCTCTCTGTGGCCCCAGTACTAA  
GTACGCTATGGTTTCGGGGCTTTAGCGGGTCTATTGATAGAGATTAATCGTTTTTTTCCGG  
ATGCGTTGACATTCCCCTTTTTTTTCAATTCATGACTGCAATTTAGAGAGACGCGAAAGC  
GAAAGCCTATGGGGTCGCTTCTGTAACCTGGATAACCAGCACCGAAAACCGTCTTTACA  
TTGGATGGTTTGGTGTTTTGATGATCCCTACCTTATTGACCGCAACTTCTGTATTTATTAT  
TGCCTTCATTGCTGCTCCTCCAGTAGATATTGATGGTATTCGTGAACCTGTTTCTGGATC  
TCTACTTTACGGAAACAATATTATTTACAGGTGCCATTATTCCTACTTCTGCAGCTATCGGT  
TTGCACTTTTACCCAATCTGGGAAGCAGCATCCGTTGATGAATGGTTATACAACGGCGG  
TCCTTATGAACTAATTGTTCTACACTTCTTACTTGGTGTAGCTTGTACATGGGTCGTGA  
GTGGGAGCTTAGTTTCCGTCTGGGTATGCGACCTTGGATTGCTGTTGCATATTCAGCTC  
CTGTTGCAGCTGCTACCGCTGTTTTCTTGATCTACCCAATCGGTCAAGGAAGTTTTTCT  
GATGGTATGCCTCTAGGAATTTCTGGTACTTTCAACTTCATGATTGTATTCCAGGCTGAG  
CACAACATCCTTATGCACCCATTTACATGTTAGGCGTAGCTGGTGTATTCCGGCGGTTCC  
CTATTCAGTGCTATGCATGGTTCCTTGGTAACTTCTAGTTTGATCAGGGAAACCACAGA  
AATGAATCTGCTAATGAAGGTTACAGATTCGGTCAAGAGGAAGAACTTATAATATCG

TAGCCGCTCATGGTTATTTTGGCCGATTGATCTTCCAATATGCTAGTTTCAACAACCTCTC  
GTTCTTTACACTTCTTCCTAGCTGCGTGGCCTGTAGTGGGTATCTGGTTCACTGCTTTAG  
GTATCAGCACTATGGCTTTCAACTTAAACGGTTTCAATTTCAACCAATCCGTAGTTGATA  
GTCAAGGCCGTGTAATTAATACTTGGGCTGATATCATCAACCGTGCTAACCTTGGTATGG  
AAGTTATGCATGAACGTAATGCTCATAACTTCCCTCTAGACCTAGCTGCTATCGAAGCTC  
CA---ACAAACGGAATGGGTTTACCTTGGTATCGTGTTCATACTGTTGTATTGAATGATCC  
CGGCCGTTGCTTTCCGTTTCATATAATGCATACAGCTCTGGTTGCTGGTTGGGCGGGCT  
CAATGGCTCTGTATGAATTAGCAGTTTTTGATCCTTCTGACCCTGTTCTTGATCCAATGT  
GGAGACAGGGTATGTTTCGTTATACCCTTCATGACTCGTTTAGGAATAACCAATTCGTGG  
GGAGTTGGAGTATTACA---GGAGGGACTGTAACGAATCCGGGTATTTGGAGTTACGAA  
GGTGTAGCTGGGGCACATATTGTGTTTTCTGGCTTATGCTTTTTTGGCGGCTATCTGGCAT  
TGGGTCTATTGGGATCTAGAAATATTTTGTGATGAACGGACAGGAAAACCTTCTTTGGA  
TTTGCCCAAGATCTTTGGAATTCATTTATTTCTCTCCGGGGTGGCTTGCTTTGGTTTTGG  
TGCATTTTCATGTAACAGGTTTGTACGGTCCTGGAATATGGGTGTCCGATCCTTATGGACT  
AACGGGAAAAGTACAACCTGTAAATCCGTCGTGGGGCGTGGAAGGTTTTGATCCTTTT  
GTTCCAGGAGGAATAGCTTCTCATCATATCGCAGCAGGTACATTGGGCATATTAGCGGG  
TTTATTCATCTTAGCGTCCGACCGCCGCAACGTCTATACAAAGGATTGCGTATGGGAA  
ATATTGAAACCGTACTCTCTAGTAGTATTGCAGCTGTCTTTTTTGCAGCTTTTTGTTGTTG  
CTGGAACCTATGTGGTATGGTTCAGCAACGACCCCTATCGAATTATTTGGTCCCCTCGTT  
ATCAATGGGATCAGGGTTACTTTTCAGCAAGAGATATATCGAAGAGTTAGCGCCGGGCTA  
GCAGAAAATCAAAGTTTATCAGAAGCCTGGGCTAAAATTCCTGAAAAATTAGCTTTTTTA  
TGATTATATCGGCAATAATCCAGCAAAAGGAGGATTATTCAGGGCAGGCTCCATGGATA  
ATGGAGATGGAATAGCGGTTGGATGGTTAGGACACCCTATTTTTAGGGATAAAGAGGG  
GCGTGAGCTTTTTTGTACGTCGTATGCCGACTTTTTTTTTGAAACATTTCCAGTTGTTTTGGT  
AGACGGCGATGGAATTGTTAGAGCCGATGTTCTTTTTAGAAAGGGCAGAATCAAAGTAT  
AGTGTGAAACAAGTAGGTGTAACCGTTGAGTTCTATGGTGGCGAACTCAATGGAGTCA  
GTTATAGTGATCCTGCTACTGTGAAAAAATATGCTAGACGCGCTCAATTAGGTGAAATT  
TTTTGAATTAGATCGTGCAGCTTTGAAATCGGATGGTGTTTTTTCGTAGCAGTCCAAGGGG  
TTGGTTTACTTTTTGGGCACGCTTCGTTTGCTTTGCTCTTCTTCTTCGGACACATTTGGCA  
TGGTGCTAGAACCTTGTTTCAGAGATGTTTTTGCCGGCATTGACCCAGATTTGGATGCTC  
AAGTAGAGTTTGGAGCATTCCAAAACTCGGGGATCCTACTACAAGAAGACAGGCAG  
CC-----GTGGAACGCTCTTTAATGGAACCTTAGCTGTAGCTGGT  
CGTGACCAAGAAACCACCGTTTTGCTTGGTGGGCCGAAATGCCCCACTTATTAATTT  
ATCCGGTAAACTACTAGGAGCTCATGTAGCCACGCCGGGTTAATCGTATTCTGGGCTG  
GAGCAATGAACCTATTTGAAGTGGCTCATTTTGTACCGGAGAAGCCTATGTATGAACAA  
GGATTAATTTTACTTCCCCATCTAGCTACTCTAGGTTGGGGAGTAGGGCCTGGGGGGGA  
AGTTATAGATACCTTTCCATACTTTGTATCTGGAGTACTTCATTTAATTTCTCTGCAGTA  
TTGGGCTTTGGCGGTATTTATCATGCACTTCTGGGACCCGAGACACTGGAAGAATCTTT  
TCCGTTCTTCGTTATGTATGGAAAGATAGAAATAAAATGACCACAATTTTGGGTATTCA  
CTAATCTTGTGGGTCTAGGTGCTTTTCTTCTAGTCTTCAAGGCTCTTTATTTTGGGGG  
TGTATATGATACTTGGGCTCCGGGAGGGGGAGATGTAAGAAAAATTACCAACTTGACCC  
TTAGTCCAATATTATATTTGGTTATTTACTAAAATCTCCCTTGGAGGGGAAGGGTGA  
TTGTTAGTGTGGACGATTTAGAAGATATAATCGGAGGACATGTATGGTTAGGTTCCATTT  
GTATACTTGGTGAATATGGCATATCTTAACTAAACCTTCGCGTGGGCTCGACGTGCC

CTTGTATGGTCTGGGGAGGCTTACTTATCTTATAGTTTAGGGGCTTTAGCCGTCTTTGGT  
TTCATTGCTTGTGTTGTTTTGTCTGGTTCAATAATACCGCTTATCCTAGCGAGTTTACGGA  
CCTACTGGTCCAGAAGCTTCTCAGGCTCAAGCATTACTTTTCTAGTTAGAGACCAACG  
TCTTGGGGCTAATGTAGGATCCGCCCAAGGACCTACTGGTTTAGGTAAATATCTAATGC  
GTTCCCCGACCGGAGAAGTCATTTTTGGAGGAGAACTATGCGTTTTTGGGATCTGCG  
TGCTCCTTGGTTAGAACCTCTAAGAGGTCCAAACGGGTTGGACTTGAGTAGGTTGAAA  
AAAGACATAACAACCTTGGCAAGAACGGCGTTCCGCAGAATATATGACTCATGCTCCTTT  
AGGTTCTTTAAATTCTGTGGGTGGCGTAGCTACCGAGATTAATGCAGTCAATTATGTTTC  
TCCTAGAAGTTGGTTAGCTACCTCTCATTTTTGTTCTAGGATTCTTCTTCTTCGTAGGTC  
TTTGTGGCATGCGGAAGGGCTCGTGCAGCTGCAGCAGGATTTGAAAAGGAATTGAT  
CGTGATTTTGAACCTGTTCTTTCCATGACCCCTCTTAATATGACTATAGCCCTTGGTAAA  
TTACCAAAGACGAAAATGATTTATTTGATATTATGGATGACTGGTTGCGGAGAGACCG  
TTTCGTTTTTGTAGGCTGGTCCGGCCTATTGCTCTTCCGTGTGCCTATTTGCTCTAGG  
GGGTTGGTTTACAGGTACAACCTTTGTAACCTCATGGTATACTCATGGGTTGGCCAGTT  
CCTATTTGGAAGGCTGTAATTTCTTAACAGCCGCAGTTTCTACTCCTGCTAATAGTTTAG  
CACATTCTTTATTGTTACTATGGGGTCCGAAGCACAAGGAGATTTTACCCGTTGGTGT  
CAATTAGGCGGTCTGTGGACTTTTGTGGCTCTGCATGGTGCTTTCGGACTAATAGGTTT  
CATGTTACGTCAATTTGAGCTTGCTCGATCTGTTCAATTGCGACCTTATAATGCAATCGC  
ATTCTCTGGTCCAATTGCTGTTTTTGTCTGTATTCTGATTTATCCACTAGGGCAGTCT  
GGTTGGTTCTTTGCACCTAGTTTTGGTGTAGCGGCTATATTCGATTCATCCTCTTTTTTC  
AAGGATTCATAATTGGACGCTAAACCCATTTCAATGATGGGAGTTGCCGGTGTATTGG  
GGGCTGCTTTGCTATGCGCTATTCATGGTGCTACCGTAGAAAATACTTTATTTGAAGATG  
GTGATGGTGCAAATACATTCGGTGTCTTTAACCCAACCTCAAGCTGAAGAACTTATTCC  
ATGGTCACCGCTAACCGCTTTTGGTCCCAAATCTTTGGGGTTGCTTTTTCCAATAAACG  
TTGGTTACATTTCTTTATGTTATTTGTACCAGTAACCGGTTTATGGATGAGTGCTCTTGG  
AGTAGTCGGTTTTGGCCCTGAACCTACGTGCCTACGACTTCGTTTCTCAGGAAATTCGCG  
CAGCGGAAGATCCGGAATTTGAGACTTTCTACACCAAAAATATTCTATTAACGAAGGT  
ATTCGTGCTTGGATGGCGGCTCAAGATCAGCCTCACGAAAACCTTATATTCCCTGAGGA  
GGTTCTACCACGTGGAACGCTCTTATGTCTGGAAGCACAGGAGAACGTTCTTTTTGCT  
GATATTATTACCAGTATTTCGATATTGGGTCATTCATAGCATTACCATAACCTTCCCTATTCAT  
TGCGGGTTGGTTATTCGTCAGTACCGGTTTAGCTTACGATGTATTTGGAAGCCCTCGGC  
CAAACGAGTATTTACAGAGAGCCGACAAGGAATTCATTAATAACTGGCCGTTTTGAT  
C C T T T G G A A C A A C T C G A T G A A T T A G T A G A T C G T T  
T????????????????????????????????????????????????????????????  
????????????????????????????????????????????????????????????  
????????????????????????????????????????????????????????????  
ATGGCTACACAACTGTTGAGAACAGTTCTAAATCGGG  
C---CCAAGACAACTACTGTAGGGAGTTTATTAACCAATTGAATTCGGAATATGGTAA  
AGTAGCTCCCGGGTGGGGAACGACGCCTTTGATGGGTGTTGCAATGTCTCTATTTGCG  
GTATTTCTATCTATCATTTTTGGAGATTTATAATTCTTCCGTTTTTATTAGATGGAATTTCAAT  
G A A

AGATGTTATGCCAGTCATACCTCTGTTTTTTTTTCTATTAGCTTTTGTGGCAAGCTGCT  
GTAAGTTTTCGAATGACACAATCAAACCCGAACGAACAAAATGTTGAATTGAATCGTA  
CCAGTCTCTACTGGGGGTATTACTCATTTTTGTACTTGCTGTCTTATTTTCCAATTATTT  
CTTCAATATGGAAGTAAATATTCTTGCATTTATTGCTACTGCACTATTCACTTAGTTCCT  
ACTGCTTTTCTACTTATCATTACGTAAAAACAGTCAGTCAAACGATATGGAAACAGC  
AACCTAGTCACCATCTTTATATCTGGTTTACTTGTAAGTTTTACCGGGTACGCCTTATAT  
ACCGCTTTTGGGCAACCTTCTCAACAACCTAAGAGATCCATTCGAGGAACACGGGGACA  
TGGAAGCATTGGTTTATACATTCCTTTTAGTATCGACTCTAGGGATAATTTTTTTCGCTAT  
CTTTTTTCGAGAACCGCCTAAAGTTCCAACATAAAAA-----ATGACTCTGTTTTCCAAT  
TAGCTGTTTTGCATTAATCGCTACTTCATCAATCTTATTGATTAGCGTACCCGTCGTATT  
TGCTTCTCCTGATGGTTGGTCAAGTAACAAAATGTTGTATTTCCGGTACATCATTATG  
GATTGGGTTAGTCTTTCTGGTGGGTATCCTTAATTCTCTCATCTCT-----ATGT  
CACCACAAACAGAGACTAAAGCTTTTGTGGATTCAAAGCGGGTGTAAAGAGTACAA  
ATTGACTTATTACTCCTGAATACGAAACCAAGATACTGATATCTTGGCAGCATTCCG  
AGTAACTCCTCAACCTGGAGTTCCGCCTGAAGAAGCAGGGGCTGCGGTAGCTGCCGA  
ATCTTCTACTGGTACATGGACAACGTGTGTGGACCGATGGACTTACCAGCCTTGATCGTT  
ACAAAGGACGATGCTACCACATCGAGCCCGTTCCTGGAGAAACAGATCAATATATCTGT  
TATGTAGCTTACCCTTTAGACCTTTTTGAAGAAGGTTCTGTTACTAACATGTTTACTTCC  
ATTGTAGGAAATGTATTTGGATTCAAAGCCCTGCGTGCTCTACGTCTGGAAGATTTGCG  
AATCCCTCCTGCTTATATTAACCTTTCCAAGGCCCGCCTCATGGGATCCAAGTTGAGA  
GAGATAAATTGAACAAGTACGGTTCGTCCTGTTGGGATGTACTATTAACCTAAATTG  
GGGTTATCTGCTAAAACTATGGTAGAGCAGTTTATGAATGTCTTCGCGGTGGACTTGA  
TTTTACCAAGATGATGAGAACGTGAACCTCCAGCCATTTATGCGTTGGAGAGATCGTT  
TCTTATTTGTGCCGAAGCACTTTATAAAGCACAGGCTGAAACAGGTGAAATCAAAGG  
GCATTACTTGAATGCTACTGCGGGTACATGCGAAGAAATGATGAAAAGAGCTGTATTTG  
CTAGAGAATTGGGAGTTCCTATCGTAATGCATGACTACTTAACAGGAGGATTCACTGCA  
AATACTAGCTTGGCTCATTATTGCCGAGATAACGGCCTACTTCTTACATTCACCGTGCA  
ATGCATGCAGTTATTGATAGACAGAAGAACCATGGGATACACTTCCGTGTACTAGCTAA  
AGCGTTACGTATGTCTGGTGGGGATCATATCACTCTGGTACCGTAGTAGGTAACCTTG  
AAGGAGAAAGAGACATCACTTTGGGCTTTGTTGATTACTGCGTGATGATTTTATTGAA  
AAAGATCGAAGTCGCGGTATTTATTTTACTCAAGATTGGGTCTCTTACCAGGTGTTATT  
CCCGTGGCTTCGGGGGTATTACGTTTGGCATATGCCTGCTCTGACTGAGATCTTTGG  
GGACGATTCCGTACTACAGTTTGGTGGAGGAACCTTAGGACACCCTTGGGGTAATGCG  
CCAGGTGCCGTAGCTAACCGAGTAGCTCTAGAAGCATGTGTACAAGCTCGTAATGAAG  
GACGTGATCTTGCTGCTGAGGGTAATGCAATTATCCGTGAGGCTAGCAAATGGAGTCCT  
GAACTAGCTGCCGCTTGTGAGGTATGGAAAGAGATCAAATTTGAGTTTAAAGCAGTGG  
ATACTTTGGATAAGATGGCGATACATTTATACAAAACCTTCTACCCCGAGCACACGCAAT  
GGAACCGTAGACAGTCAAGTGAAATCCAATCCACGAAATAATTTGATCTATGGACAGC  
ATCATTGTGGTAAAGGTCGTAATGCCAGAGGAATCATTACCGCAAGGCATAGAGGGGG  
AGGTCATAAGCGTCTATACCGTAAAATCGATTTTCGACGGAATGAAAAGACATATATG  
GTAGAATCGTAACCATAGAATACGACCCTAATCGAAATGCATACATTTGTCTCATACT  
ATGGGGATGGTGAGAAGAGATATATTTTACATCCAGAGGGGCTATAATTGGAGATACC  
ATTGTTTCTGGTATAGAAGTTCCTATAAAAATGGGAAATGCCCTACCTTTGACCGATATG  
CCCTTAGGCACGGCCATACATAACATAGAAATCACACTTGGAAAGGGTGGACAATTAG

TTAGAGCAGCGGGTGCTGTAGCGAACTGATTGCAAAAAGAGGGGAAATCGGCCACATT  
AAAATTACCTTCTGGGGAGGTCCGTTTGATATCCAAAACTGCTCAGCAACAGTCGGA  
CAAGTGGGGAATGTTGGGGCGAATCAGAAAAGTTTGGGTAGAGCCGGATCCAAGCGT  
TGGCTAGGTAAGCGTCCTGTAGTAAGAGGAGTAGTTATGAACCCTGTAGACCATCCCCA  
TGGGGGTGGGAGGGGAGAGCCCCAATTGGTAGAAAAAACCCACAACCCCATGGGG  
TTATCCTGCACTCGGAAGAAGAAGTAGAAAAAGGAATAAATATAGTGATAATTTGATTG  
TTCGTCGCCGACGTAATAATGATTCAACCTCAGACCCATTTAAATGTAGCGGATAACAGC  
GGGGCTCGAGAATTGATGTGTATTTCGAATCATAGGAGCTAGT---AATCGTCGATATGCTC  
ATATTGGTGACGTTATTGTTGCTGTGATCAAACAAGCAGTACCAAATATGCCCCTAGAA  
AAATCCGAAGTAGTCAGGGCTGTAATTGTTTCGTACCTGTAAAGAACTTAAACGTGACA  
GCGGTATGATAATACGATATGATGACAATGCTGCAGTTGTGATTGATCAAGAAGGAAAT  
CCAAAAGGAACTCGAATTTTTGGTGCAATCCCCGGGAATTGAGACAATTAATTTTAC  
TAAAATAGTTTCATTAGCTCCCGAGGTATTAATGCTTAGTCCCAAAGAAGTAACTAGATTCCG  
TAAACAACATAGAGGAAGAATGAAGGGAATATCTTATCGAGGTAATCATATTTGTTTCG  
GTAAATATGCTCTTCAAGCACTTGAACCTGCTTGGATCACATCTAGACAAATTGAAGCA  
GGTCGACGGCAATGACACGAAATGCACGCCGTGGTGGAAAAATATGGGTCCGCATAT  
TTCCAGATAAACAGTTACGGTAAGACCGGCCGAAACACGTATGGGGTCTGGGAAAG  
GATCCCCTGAATATTGGGTAGCTGTTGTTAAACCGGGACGAATACTATACGAAATAGCT  
GGAGTAACCGAAAATATAGCTAGACGGGCTATTTAATAGCAGCATCCAAAATGCCTAT  
ACGAACTCAATTTATTATTTTCGGGAATGACCAGAATTAACGCGGATATATAGCTCGGA  
GACGTAGAACAAAAATTCGTTTATTTGCATCAAGTTTTTCGAGGGGCCATTCAAGACTT  
ACTCGAACGATTACTCAACAGAAAATAAGAGCTTTGGTTTTCGGCTCATCGGGATAGAG  
ATAAGCAAAAGAGAAATTTTCGTCGTTTGTGGATCACTCGGATAAATGCAGTAATTCGA  
GAA---GGAGGAGTATCCTATAGTTATAGTAAATTAATACATGATCTATACAAGAGACAGT  
TGCTTCTTAATCGTAAAATACTGGCCCAAATAGCTATATCAAATAAGAATTGTTTTTATCT  
GATTTCCAACGAAAGAAAAGAA---ACAGATTGGAAAGAATACACCGAAATAATTCTAAT  
AAGAGAAGTATACGCCTTAGGTCGACATATATCTCTATCGGCTGACAAAGCAAGAAGG  
GTAATTGATCAAATTCGCGGACGTTCTTACGAGGAAACACTTATGATACTCGAACTTAT  
GCCCTATAGAGCATGTTATCCAATTTTTAAATTGGTTTATTCTGCAGCGGCAAATGCTGG  
TTACAATATGGGGTCCGCCGAAACCAATTTAGTAATTAGTAAAGCTGAGGTTAATGAGG  
GTACTACCGCAAAGAAATTCAAACCTCGAGCTCGAGGACGTAGTTATGCAATAAAAAG  
AACTACCTGTCAATAACTATTGGAATGAAAGATATATCTTTAGAT-----ATGG  
ATAGAATCAAAAATGCAGTATTTACAGACAAAAGTATTCGGTTATTGGGGAAAAAT---C  
AATATACTTCTAATGTGCAATCAGGATCAACTAGGACAGAACTAAAGCATTGGGTCGAA  
CTCTTCTTTGGTGTCAAGGTAATAGCTATGAATAGTCATCGACTTCCGGGAAAGGGTTCG  
AAGAATGGGACCTATTATGGGACATACAATGCATTACAGACGTATGATCATTACGCTTCA  
ACCGGGTATTCTATTCCACCTCTTAGAAAAGAAAAGAACTATGGCAGTTCCAAAAAAA  
CGTACTTCTGCATCAAAAAAGCGTATTCGTAAAAATTTTTGGAAAAAGAAGGGGTATT  
GGACAGCGTTAAAAGCGTTTTCTTAGGAAAATCTCTTTCTACCGGGAATTCAAAAAG  
TTTTTTGTGCGACAAACAATAAAAATGGCCAAGAGGAAAGATGCGCGAGTAACGGT  
GATTTTGGAAATGTACCAGTTGTATCCGAAACGGT-----GTAAAGAAGGTACCAACGGGCA  
TTCCAGATATATACTCAAAGAACCAGGACAAATACGCCTAATCGATTAGAATTGAGA  
AAATTCTGTCCCTATTGTTACAAACATATGATTCATGGGGAAATAAAGAAAATGAAAAT  
AAGAGCTTCCGTTTCGTAAAATTTGTGAAAAATGTCGACTAATCCGCAGGCGGGGGCGC



ATTATAGTAATTTGTTCCAACCCGAGACATAAACAAAGACAAGGAATGGTTCGAGAGA  
AAATAACAGTATCTACTCGGACACTACAGTGGAAGTGTGTTGAATCAAGAACAGACAG  
TAAACGTCCTTATTATGGTTCGCTTTATTCTGTCTCCACTTATGAAAGGCCAGGCGGACAC  
AATAGGAATTGCGATGCGAAGAGTTTTGCTTGGAGAAATAGAAGGAACGTGTATCACA  
CGTGTA AAAATCTGAG-----AACGTATCCCATGAATATTCTACTATAACGGGTATTCAAGAA  
TCGGTCCACGAAATTTAATGAATTTGAAAGAAATTGTATTGAGAAGTAATCTATATGGA  
ACTTGTGACGCGTCTATTTGTGTCATGGGTCTGGATATGTAAGTCCCAAGATATCATC  
TTACCGCCTTATGTAGAAATCGTCGACAATACACAACATATAGCTAGCTTGACAGAACC  
AATTAATCTGTGTATTGGATTAGAAATCGAAAGAAATCGAGGGTATCTTATAAAAATGCC  
ACAT---A ACTTTGATGGAAGTTAT-----CCTATAGATGCAGTATTCATGCCCGTTTCGAAATA  
TGAATCATAGTATTCATTCCTATGGGAATGGGAATGAAAAACAAGAGATACTGTTTCTC  
GAAATATGGACAAATGGAAGTTTAACTCCGAAAGAAGCACTTCATGAAGCCTCCCGGA  
ATTTGATTGATTTATTTATCCCTTTTTACATAAGGAAGAAGAA-----A ACTTACCTTTAG  
AAGACAATCAA---CGCACGGTTCCCTTTATCCCTTTTTACTTTTTACGATAAATTGGAT---A  
AACTCAGCAAAAATAAAAAA-----ATAACATTGAAATCGATTTTTATTGATCAATCCGAA  
TTGTCTCCAGGGTCTATAATTGCCTCAAAGGTCCAATATATATACATTATTGGACCTTT  
TGAATAACAGTCAAGAAGATCTTATGAAAATTGAACATTTTCGCCTAGAAGATGTA AAA  
CAGATATTGGGCATTCTAGAAAAACAT-----TTCGCAATTGATTTGCAAAAAAAGAAGAT  
GCTCGGGGATGCA---AATGAGGCAATGTCTACAATACCTGGATTTAATCAGATACAGTTT  
GAAGGATTTTGTAGGTTTCATCGATCGGGGTTTGACAGAAGA ACTTTCTAAGTTTCCAA  
AAATTGAAGATCCAGATCATGAAATCGAATTTCAATTATTTGTGGAAAGATATCAATTGG  
TAGAACCTTTGATAAAAGAAAGAAATGCTGTGTATGAATCACTCACATATTCTTCTGAA  
TTATATGTATCCGCGGGATTAATTTGGAAAACCGGTAGGGATATGCAAGAACA AACTATT  
TTGATTGGAAACATTCCTCTAATGAATTCCTAGGAACTTCTATAGTCAATGGACTATAT  
AGAATTGTGATCAATCAAATATTGCAAAGCCCCGGTATTTATTACCGATCAGAATTGGAC  
CATAACGGAATTTTCGGTCTATACCGGCACCATAATATCAGATTGGGGAGGAAGATCAGA  
ATTAGAGATTGATAGAAAAGCAAGGATATGGGCTCGCGTGAGTAGGAAACAAAAAATC  
TCTATTCTAGTTCTATCATCAGCTATGGGTTCGAATCTAAGAGAAATTCTAGACAATGTT  
TATTATCCTGAAATTTTTTTGTCTTTTTCTGAATGATAAGGAGAGAAAAAGAATTGGATCA  
AAAGAAAATGCCATTTTGGAGTTTATCAACAATTTGCTTGTGTAGGTGGGGATCCGGT  
ATTTTCTGAATCCTTATGTAAGGAATTACAAAAGAAGTTCTTTCAACAAAGATGTGAAT  
TAGGAAGGATTGGTCGACGAAATATGAACCAAAGACTGAACCTTGATATACCCAGAA  
CAATACATTTTTGTTACCACGAGACATATTGGCGGCCGCTGATCATTTGATTGGACTGAA  
ATTTGGAATGGGTACACTTGATGAT-----ATGAATCATTTGAAAAATAAGCGCATTTCGTT  
TG TAGCGGATCTTTTACAAGATCAATTCGGATTGTCTCTGGTTCGTTTAGAAAATGTGGT  
TCGAGGAACTATATGTGGAGCAATTCGG---CATAAATTG---ATACCGACTCCTCAGAATT  
TGGTAACTTCAACTCCA-----TTAACAACCACTTATGAATCTTTTTTTGGTTTACACC  
CCTTATCTCAAGTTTTAGACCGAACTAATCCATTGACACAAATAGTTCATGGTAGAAAA  
TTGAGTTATTTAGGTCTTGAGGACTAACAGGACGAACTGCTAGTTTTCGAATACGAGA  
TATCCATCCTAGTCACTATGGTCGTATTTGCCCAATTGACACATCTGAGGGAATCAATGT  
TGGGCTTATTGGATCTTTAGCAATTCATGCGAGGATGGGTCATTGGGGA---TCTCTAGAA  
AGCCCGTTTTAT-----GAAATTTTCGGGAGATCCAGGGGG-----TTACGACTGCTTTATT  
TATCACC GGGGAGGGATGAATACTATATGTTAGCAGCAGGAAATTC TTTGGCGTTGAAT  
CAGGATATTCAGGAAGAACAGGTTGTTCCAGCTCGATATCGTCAAGAATTCCTGACTAT





GGTACGGAACAATAGTATCGTTGGGGTAGATACACAAATTACTTTAAATATAAGAAGCC  
GAGTAGGTGGGTTGGTCCGAGTGGAAAGAAAAAAAAAAGAATTGAACTTAAAATCT  
TTTCTGGAGATATCCACTTTCCTGGAGAGACAGATAAGATATCCCCGACATAGCGGCGTT  
TTGATACCA---CCAGGA---ACGGGAAAACAAAATTCCAAAGAATCCAAAAA-----TGG  
AAAAATTGGATTTATGTTCAACGG-----ATTACACCTAGCAAG-----AAAAAGTATTTGT  
TTTGGTTTCGGCCTGTCGTCACATATGAAATAACGGACGGTATAACTTTAGCAACGCTTT  
TCCCCCGGATCTGTTTCAGGAAAGGGATAATGTGCAACTTCAAGTTGTCAATTATATC  
CTTTATGGAAATGGTAAACCAATTTCGAGGAATTTCTGATAAAAATATTCAATTAGTTCGG  
ACTTGTTTAGTATTGAATTGGCATCAAGGCAAAAAA-----AGTTCTTCTAGTCAAGAA  
GCCCCGTGCTTCCCTTGTGAAATAAGGTCAAATGGTTTGATTTCGACATTTCCCTAAGAAT  
CGACTTGGTGAATCCATTATTTTCATATATCGGAAAAAGGAATGATCCATCGGGCTCAG  
GATTGCTCTCTGAT---AATGGATCAGATTGCACCAATATCAATCCGTTTTCTTCG-----ATT  
TAT-----TCCAAGGCAAGAATTCAACAACCCCTTAATCAAATCAAAGAACTATTCCATA  
CATTATTGAATAGA-----AATACGGGATTCCAATCGTTGATAATTTTGTATCATCCAAT  
TGTTTTCGAATGGGTCCG-----TTCAACGATGGA---AAATATCACAAT-----GTGATAAAA  
GAATCAGATCCTCTAATTCCAATTAAGAATTCGCTAGGGCTTTTAGGAACA-----GCCTT  
TCTAATTGCGAATGTTTATTCA-----TTTTACCATTTA-----ATAACTCATAACCAGATCTTG  
---GTAATAACTATTTACAACCTTGAC-----CAGACTTTTCAAGTAATTAA-----  
-TATTATTTAATCGACGAAAAT-----GAGAAAATTTATAACCCCGACCCATGCAGTAACAT  
TATTTTCAAC-----TTGAATTGGTATTTTCTCCATCCCAATTATTGTCAAGAAACATCT---  
ACAATAATGGGTCTTGGGCAGTTTATTTGTGAAAATATATGTATAGCCAAAAACGCACC  
ACAC---CTAAA-----TCGGGTCAAGTTATACTTGTTCAA---GTTGATTCTGTAGTAATAC  
GATCAGCTAAGCCTTATTTGGCCACCCAGGAGCAACTGTTTCATGGCCATTTTGGAAAA  
ATCCTGTACGAAGGAGACACTTTAATTACATTTATCTATGAAAATCGAGATCTGGTGAT  
ATAACCCAGGGGCTCCCAAAGTGGAACAGGTGTTAGAAGTGCAGCTCGGTTGATTCAA  
TCTCGATGAATCTAGAAAAGAGGGTTGAGGGCTGGAACGAACATATAACAAGAATTCT  
TGGAATGCCGTGGACATTCTTGATTGGTGCTGAGCTAACTATAGTCCAAAGCCGTATCT  
CTTTGGTTAATAAGATCCAAAAGGTTTATCGATCCAGGGGGTGCAGATTCATAATAGG  
CATATAGAAATTATTGTACGTCAAATAACATCAAAGGTGTTGGTTTCAGAA-----GATG  
GAATGTCTAATGTTTTTTCACCCGGAGAATAATTGGATTGTTGCGAGCGGAACGAAC  
GGGGCGTGCCTTGAAGAAGCGGTTTGTACCAGCCCTCTTATTGGGAATAACAAGA  
GCATCTCTCAATACGCAAAGTTTCATATCCGAAGCGAGTTTTCAAGAACTGCTCGAGT  
TTTAGCAAAGCAGCTCTCCGGGGGCGAATCGATTGGTTGAAAGGCCTGAAAGAGAA  
CGTTGTTTTGGGGGGTATGATACCCGTTGGTACCGGATTGAAAGGATTA-----GTGCTCC  
CTTCAAACAACATAACAAGAGTCCC-----CTGGAAACAAAAAAAAACAATCTATTCTGA  
GGGGGAAATGAAA-----GATATTTGTTTCACCACAGAAAATTATTTGATTCT-----  
TTCAAAGAATTTCCACGA-----ATGACAAGAAGATATTGG  
AACATCAACTTGAAGAGATGCTGGAGGCAGGAGTTTCAATTTGGGCATGGTACTAGGA  
AATGGAATCCTAAAATGGCACCTTATATTTCTGCAAAGCGTAAAGGTATTCATATTACAA  
ATCTTACGAGAACTGCTCGTTTTTTATCCGAAGCCTGCGATTTGGTTTTGATGCAGCA  
AGTAGTGAAAACAATTCTTGATTGTTGGTACCAAAAATAAAGCAGCTGATTCAGTAG  
CATGGGCTGCAATAAAGGCCCGGTGTCATTGTGTTAATAAAAAATGGCTCGGCGGGAT  
GTTAACGAATTGGTCCACTACAGAAACGAGACTTCATAAGTTCAGGGACTTAAGAATG  
GAACAAAAACGGGAAGACTCAACCGTCTTCCGAAAAGAGATGCGGCTGTGGTGAA

AAGACAATTATCCCGCTTGCAAACATATCTGGGCGGGATTAAATATATGACAGGGTTAC  
CCGATATTGTAATCATCGTTGATCAGCATGAAGAATATACGGCTCTACGAGAGTGTATCA  
CTTTGGGAATTCCAACAATTTGTTTAATCGATACAAATTGTGACCCTGATCTTGAGATA  
TTTCGATTCCGTCGAATGATGACGCTATATCTTCAATCCGCTTAATTCTTAACAAATTAGT  
ATTCGCAATTTGTGAGGGCCGTTCT---AGCTATATAAGAAATCCTATGGGACAAAAATA  
AATCCACTTGGTTTCAGACTTGGTACAACCCAAAGTCATCATTCACTTTGGTTTGCACA  
ACCAAAAAATTATTCTGAGGGTCTACAAGAAGATCAAAAAATAAGAGATTTTATCAAA  
ACTTATGTACAAAAGAATATGAGAATATCCTCCGGC---GCCGAGGGAATTGCCCGTATAG  
AGATTCAAAAAAGAATCGATTTGATCCAGGTCATAATCTTTATGGGATTCCCAAAGTTAT  
TAATCGAAAGTAGACCGCGA-----GGAATTGAAGAATTACAGATGAATCTACAAA  
AGAATTTCAATTATGTGAACCGAAAACCTAACATTGCTATCACAAGAATTACAAAGCCTT  
ATGGAAACCCTAATATTCTTGCAGAATTTATAGCCGGACAATTAAGAATAGAGTTTCAT  
TTCGAAAAGCAATGAAAAGGCTATTGAATTAACCTGAACAAGCAGATACAAAAGGAAT  
TCAAGTACAAATTTAGGGCGTATCGACGGAAAAGAAATTGCACGTGTGCAATGGATC  
AGAGAGGGCAGGGTTCCCCTACAAACCATTCGAGCTAAAATCGATTATTGTTCTTATAC  
AGTTCCGACTATCTATGGGGTATTAGGCATCAAAATTTGGATTTTATAGACAAGGAAAT  
GTCGCGTTACCGAGGACCTCGTTTCAAAAAATACGCCGCTGGGGGCTTTACCAGGA  
CTAACTAATAAAAGGCCTAAAGCCGGAAGTGATCTTAGAAACCAATCACGTTCCGGGA  
AA---AAATCTCAATATCGTATTCGCCTAGAAGAAAAACAAAAATTGCGGTTTCATTATGG  
TCTTACAGAACGACAATTACTTAAATACGTTTCGTATCGCCGAAAAGCCAAGGGGTCA  
ACTGGCCAAGTTTTACTACAATTACTTGAATGCGTTTGGATAACATCTTTTTTCGATTG  
GGTATGGCTTCGACTATTCCCGCAGCCCGCCAATTAAGTTAACCATAGACATGTTTTAGTG  
AATGGGCGCATAGTAGATATACCAAGTTATCGCTGCAACCTCGAGATATTATTACGGCG  
AAGGATGAACAACAATCCAAAACCTCTGATTCAAAATTTTCTCAACTCTTCCCCTCAT---  
GTGGAAGTACCAAACCATTTGACCCTTCACCCATTCCAA-----TATAAAGGATTAGTCAA  
TCAAATAATAGATAGTAAATGGGTTGGTTTGAAAATAAATGAATTGCTAGTCGTAGAATA  
TTATTCTCGTCAGACTATGTCACGTCGAGGTAAGTGCAGAAGAAAAACAGCAAAATCC  
GATCCAATTTATCGTAATCGATTAGTTAACATGTTGGTTAACCGTATTCTGAAACACGGA  
AAAAATCATTGGCTTATCAAATTATCTATCGAGCCATGAAAAAATTCAACAAAAGAC  
AGAAACAAATCCACTATCTGTTTTACGTCAAGCAATACGTGGAGTAACCTCCCGATATAG  
CAGTAAAAGCAAGACGTGTAGGTGGATCGACTCATCAAGTTCCCATGAAATAGGATC  
CACACAAGGAAAAGCACTTGCCATTCGTTGGTTATTAGCGGCATCCCGAAAACGTCCG  
GGTCGAAATATGGCTTTCAAATTAAGTTCCGAATTAGTGGATGCTGCCAAGGGGAGTG  
GCGATGCCATACGCAAAAAGGAAGAGACTCATAAAATGGCAGAGGCAAATAGAGCTTT  
TGCACATTTTCGTATGGGTAGAGACACTATTGCTGAGATAATAACCTCTATACGAAATGC  
TGATATGGATAGAAAAAGAATTGTTTCGCATAGCATCTACTAATATTACCGAAAATATTGT  
TAAATACTTTTCCGCGAAGGTTTTATCGAAAACGTCAGAAAACGTCGAGAAAAAAC  
AAATATTTTTTGGTTTAAACCCTGCGACATAGAAGG-----AATAGGAAAAGACCCTAT----  
---AGAAATTTTTTAAATTTAAAACGGATCAGTCGACCCGGTCTACGAATCTATTCTAACT  
CTCAACGAATTCCTAGAATTTTAGGTGGGATGGGGATTGTAATCTTTCTACCTCTCGAG  
GTATAATGACAGACCGGGAGGCTCGACTAGAAGGAATCGGCGGAGAAATTTTGTGTTA  
TATATGGATGGCAAAGCTATGCCGAGAAGTGGTTCTCGTAAGAATGTACGTATTAATC  
ACGTAAGAATCCACGTAGAATACCAAAAAGGAGTTATTCATGTTCAAGCAAGTTTCAAC  
AATACCATTGTTACGGTTACAGATGTACGGGGTCGGGTGGTTTCTGGTCTCCTCGGCTGG





TCTTTTTGTATATTATATGGAT-----GATCCGATCCGCAAGGACCATGGTTGGGAATTGTTT  
GATCGTCTTTCTCTGAGGAAGAGGGCGAAATAGAATCAACTTG-----AATTCGGGACCGC  
TATTCGAAATCTTAGTGAAACACTGGATTTCTTATCTCATGTCTGCTTTTTCGTGAAAAAA  
TACCAATTGAAGTGGAGGGT--TTCTTCAAACAACAAAGG---GCTGGGTCAACTATTCA  
ATCAAATGATATTGAGCATGTTTCTCAT-----GTCTTCTCGAGAAACAAGTGGGCTATTTC  
TTTGCAAAATTGTGCTCAATTTTCATCTGTGGCAATTTGCGCCAGGATCTCTTCGTT-----  
AGTTGGGGGAAG---AATCCGCACGAATCGGATTTTTTTGAGGAAC---GTATCGAGAGAGA  
ATTTGATTTGGTTAGACAATGTGTGGTTGGTAAACAAGGATCGG-----TTTTTTAGA---  
--AAAGTACGGAATGTATCGTCAAATATTCAATATGATTCC-----ACAAGA-----TCCAGT  
TTCGTTCAAGTAACGGATTCTAGCCAACTGAAAGGATCTTCT---GATCAATCCAGAGAT  
CATTTGGATTCCATCAGT-----AATGAGGATTCGGAA-----T  
ATCACACATTGATCAATCAAAGAGAGATTCAACCACTAAAAGAAAGATCGATTCTT---T  
GGGAT-----CCTTCCTTTCTTCAAACGGAAGGAACAGAGATAGAATCAGAC-----CGATT  
CCCGAAA-----TGCCTTTCTGGATATTCC-----TCAATGTCCCGGCTATTACAG---GAACGT  
GAGAAGCAGATGATTAGTCATCTGCTTCCGGAAGAAATCGAAGAATTTCTT-----GGGA  
ATCCTACAAGATTGGTTTCGTTCTTTTTTCTCTGATAGATGG-----TCAGAACTTCAT---CTG  
GGTTCGAATCCTACTGAGAGGTCCACTAGAGATCAG-----AAATTGTTGAAGAAAC  
AACAAGATCTTTCT---TTTGTCCCTTCCAGGCGATCGGAA-----AATAAAGAACTGG  
TTAATATATTCAAGATAATTACGTATTTACAAAAT-----ACTGTCTCAATTCATCCTATTTC  
TCAGATCCGGGGTGTGATAGGGTTCTG---AAGGATGAACCGGAT---ATGGACAGTTCCA  
ATAAGATTTCAATTCTTGAACAAAATCCATTTTTTTGATTTA-----TTTCATCTATTCCATGA  
CCGGAACGGGGGAGGATACACGTTA-----CACCACGATTTTGAATCAGAA-----GAGAGA  
TTTCAAGAAATGGCAGATCTATTCACTCTATCAATAACCGAGCCG---GATCTGGTGTATC  
ATAAGGGATTTGCCTTTTCTATTGATTCCTACGGATTGGATCAAAAACAA-----TTCTTGA  
ATGAGGCCAGGGATGAA-----TCGAAAAAGAAATCT-----TTATTGGTTCTACCTCCT  
ATTTTTTAT-----GAAGAGAATGAATCTTTTTTTTCGAAGGATCAGAAAAAAGTGGGTCCG  
G---ATCTCCTGCGGGAATGATTTGGAAGATCCAAAACCAAAAATGGTGGTATTTGCTAG  
CAACAACATAATGGAGGCAGTCAATCAATATAGATTGATCCGAAATCTGATTCAAATCC  
AATATAGTACCTATGGA-----TACATAAGAAATGTATTGAATCGATTCTTTTTAATGAAG---  
-----AGATCCGATCGCAACTTCGAATATGGA-----ATTCAAAGGGATCAAATAGGAAAG  
GATACTCTGAATCATAGAACTATAATGAAATATACGATCAACCAACATTTATCGAATTTG  
AAAAAG---AGTCAGAAGAAATGGTTCGATCCTCTT-----ATCTTGATTTCTCGAACCGAG  
AGATCCATGAATCGGGATCCTGATGCATATAGATACAAATGGTCCAATGGGAGCAAGAA  
TTTTTCAGGAACATTTGGAACATTTTCGTTTCTGAGCAGAAGAGCCGT-----TTTCAAAT  
AGTGTTTCGATCGATTACGTATTAATCAATATTCGATTGATTGGCCTGAGGTTATCGACAA  
AAAAGATTTGTCTAAGCCACTTCGTTTCTTTTTTTTCCAAG-----TCACTT  
CTTTTTTTGTCC-----AAGTTGCTTTTCTTTTTTTGTCTAAC---TCACTTCCTTTTT  
TCTGTGTGAGTTTCGGGAATATCCCCATTCATAGGTCCGAG---ATCTGCATCTAT---GAAT  
TGAAAGGTCCGAATGATCAACTCTGCAATCAGTTGTTAGAATCAATAGGTCTTCAAATT  
GTTCAATTTGAAAAAATGGAAACCCTTC-----TTATTGGAT-----GATCATGATACTTCC---  
CGAAAATCGAAATCTTGATCACTGGAGGA-----AGACCCTTTTTATTCAATAAGATACC  
A---AAGTGG---ATGATTGACTCATTCCATACTAGA-----AATAATCGCAGGAAATCCTTTG  
ATAACGCGGATTCCTATTTCTCAATGATATTCACAATCAAGACAATTGGCTGAATCCCG  
TGAAACCATTTTCATAGAAGTTCATTGATATCTTCTTTTTTATAAAGCAAATCGACTTCGAT



TCTTGAATAATCCACATCACTTCTGCTTCTAT-----TGTAACACAAGATTCCCCTTTTCTG  
TG-----GAAAAGGCCCGTATCAAT-----AATTATGATTTTACGTATGGA---CAATTCCT  
CAATATCTTGTTCAATTCGCAACAAA---ATATTTTCTTTGTGCGTTCGGTAAA-----AAAAA  
CATGCTTTTGGGGG---AGAGATACTATTTACCAATCGAGTCACAGGTATCTAACATAT  
TCATACCTAACGATTTTCCACAAAGTGGT--GACGAAACGTATAACTTGTCCAAATCT----  
----TTCCATTTTCCAAGTCGATACGATCCATTCGTTCTG-----AGAACTATTTACCCGATCG  
CAGACATTTCTGAAACACCTCTAACAGAGGGACAAATAGTCAATTTTGAAGAAGTCTTA  
TTGTCAACCTCTTTCAGATATGAATCTATCTGATTCAGAAGGGAAGAAGTTCATCAGT  
ATCTCAAT-----TCAAACATGGGTTTGATTCACACTCCATGTTCTGAGAAATATTTAC  
CATCCGAAAAG-----AGGAAAAA-----CGGAGTCTTTGTCTAAAG-----A  
AATGCGTTGAGGAAGGGCAGATGTATAGAACCTTTCAACGAGATAGTGTCTTTTCAACT  
CTCTCAAATGGAATCTATTCCAAACATATATGCCATGGTTCCTTACTTCGACAGGGTAC  
AAATATCTAAATTTGCTATTTTGTAGATACTTTTTCAGAACTATTG-----CCGATACTAAGTA  
GC---AGTCAAAAATTTGTATCCATTTTTCATGATATTATGCATGGATCAGGTATATCATGG  
CGAATTCTTCAGAAAAAATGG-----TGTCTTCCACAATGGAATCTG---ATAAGT  
GAGATTTTCGAGTAAGTGTTCATAAT-----CTTCTTCTGTCCGAAGAAATGATTCATCGA  
AAT-----AATGAGTCACCATTGATATCGACACATCTGAGATCGCCAAATGTTTCGGGAGTT  
C---CTCTATTCAATCCTTTTCTTCTTGTGTTGCTGGATAT---CTCGTTTCGTACACATCTT  
TTCTTTGTTTCCCGG-----GCCTCTAGTGAGTTACAGACAGAGTTCGAAAGGGTCAAAT  
CTTTGATGATCCATCATCTATGATTGAGTTGCGAAAACCTTCTGGATAGGTATCCTACAT  
CTGCACCGAATTCTTTCTGGTTAAAGAATCTCTTTCTAGTTGTTCTGGAACAATTAGGA  
GATTCTCTAGAAGAAATACGG-----GCTTCTGGCGGCAACATGCCTGGT-----CCCGCT-  
-----TATGGG---GTCAAATCAATACGTTCTAAGAAGAAATATTTGAATATCAATCTC  
ATCGATATCATCGATCTCATA-----CCAAATCCCATCAATCGAATCACTTTTTCGAGA  
AATACGAGACATCTAAGTCATACAAGTAAAGAGATCTATTCATTGATAAGAAAAAGAAA  
AAACGTGAATGGGGATTGGATTGATGATAAAATAGAATCCTGGGTTCGCGAACAGTGAT  
TCGATTGATGATGAAGAAAGAGAATTCTTGGTTCAGTTCTCC-----GCCTTAACGACA----  
--GAAAAAAGGATTGATCAAATCTATTAAGTCTGACT--CATAGTGATCATTTA-----  
--TCAAAGAATGACTCTGGTTATCAAATGATTGAACAACCGGGAGCAATTTACTTACGAT  
ACTTAGTTGACATTCAT-----AAAAGTATCTATTGAATTATGAGTTCAATACATCCTGTTT  
AGCAGAAAGACGGGTATTCTTGTCTATTATCAGACAATCACTTAT-----TCACAACTT  
CGTGTGGGACTAATACTTTGCATTTCCCATCTCATGGA-----AAACCCTTTTCGCTCCG  
CTTAGCCTTATCCCCCTCT--AGGGGGATTTAGTGATAGGTTCTATAGGAACTGGACGA  
TCCTATTTGGTCAAATACCTAGCGACAACTCCTATGTTTCTTTCATTACGGTATTTCTG  
AACAAGTTCCTGGATAACAAGCCTAAAGGTTTCTTGTGAT-----GATATCGAT--  
ATTGATGATAGTGACGATATTGATGCTAGTGACGATATTGATGCTAGTGAC-----  
-----GATATCGATCGTGACCTTGATACGGAGCTG---GAACTGCTA  
ACTATGATGAATGCGCTAACTATGGATATGATGTCGGAA-----ATAGACCGATTTTATAT  
CACCCTTCAATTCGAATTAGCAAAAGCAATGTCTCCTTGCATAATATGGATTCCAAACAT  
TCATGATCTGGATGTGAATGAATCGAATTACTTATCCTTCGGTCTATTAGTGAACCATCT  
CTCT-----GAAAGATGTTCC--ACTAGAAATATTCTTGTATTGCTTCGACTCATA  
TTCCCCAAAAGTGGATCCCGCTCTAATAGCTCCGAATAAATTAATACGTGCATTAAG  
ATACGAAGGCTTCTTATCCACAACAACGAAAGCACTTTTTCACTCTTTCATATACTAGG  
GGATTTCACTTGGAAAAGAAAATGTTCCATACT-----AACGGATTTCGGTTCATAACCAT

GGGTTCCAATGCAAGAGATCTTGTAGCACTTACCAATGAGGCCCTATCGATTAGTCTTA  
CACAGAAGAAATCAATTCTAGACACTAATACAATTAGATCCGCTCTTCATAGACAACT  
TGGGATTTGCGA-----TCCCAGGTAAGATCGGTTCAAGGATCATGGGATCCTTTCCTATC  
AGATAGGAAGGGCTGTAGCACAAAATGTACTTCTAAGTAATTGCCCATAGATCCTATAT  
CTATCTATATGAAGAAGAAA-----TCATGTAACGAAGGGGATTCTTATTTGTACAAATGGT  
ACTTCGAACTTGGAACGAGCATGAAGAAATTAACGATACTTCTTTATCTTTTGAGTTGT  
TCTGCCGGGTTCGGTCGCTCAAGATCTTTGGTCTCTACCC-----GGACCCGATGAAAAA---  
AATGGGATCACTTCTTATGGACTCGTTGAGAATGATTCG---GATCTAGTTCATGGCCTATT  
AGAAGTAGAAGGCGCTCTGGTGGGA-----TCTTCACGGACAGAAAAAGATTGCAGTCC  
GTTTGAGAATGAT-----CGAGTTACATTGCTTCTTCGGCCCGAACCGAGGAAT---CCCTTA  
GATATGATGCAAAATGGATCTTGTCTATCTTTGATCAGAGATTTCTCTATGAAAAATAC-  
----GAATCGGAGTTTGAAGAA--GGGGAGGGGGGAGGAGCCCTTGACCCGCAACAG---  
-----ATAGAGGAGGAT-----TTATTCAATCAC-----ATAGTTTGGGCTCCT-----AGAAT  
ATGGCGCCCT-----TGGGGCTTTCTATTTGATTGTATCGAAAGGCCCAATGAATTGGGA  
TTTCCC---TATTGGTCCAGGTCATTTTCGGGGCAAG-----CGGATCATTATGATGAAGA  
GGATGAGCTTCAAGAGAATGATTCGGAGTTCTTGCAGAGTGGAACCATGCAGTACCAG  
ACACGAGATAGATCTTCAAAGAACAAGGCCTTTTTTCGAATAAGCCAATTCATTTGGG  
ACCCTGCAGATCCGCTCTTTTTCTATTCAA---GATCAGCCCCCTGGCTCTGTGTTTTTC  
ACATCGAGAATTATTTGCAGATGAAGAGATGTCAAAGGGGCTTCTTACTTCCCAAACA  
GATCCTCCTACATCTATATATAAACGCTGGTTTATC-----AAGAATACACAAGAAAAGCAC  
TTCGAATTGTTGATTAATCGTCAGAGATGGCTTAGA-----ACCAATAGTTCATTATCT---  
--AATGGATCTTTCGGTTCTAAT-----ACTCTATCCGAGAGTTATAAGTATTTATCAACTCTG  
TTCCTATCTAAC---GGAACGCTATTGGATCAAATGACAAAGACATTGTTAAGAAAAAGA  
TGGCTTTTCCCGGATGAAATGAAAATTGGATTC-----ATG-----ATGCCTA  
GATCGCGG---ATAAATGGAAATTTTATTGATAAGACCTTTTCAATTGTAGCCAATATCTTA  
TTGCAAATAATTCCGACAACCTCAGGAGAAAAGGAGGCATTTACCTATTACAGAGATG  
GG-----ATGTCAGCTCAATCCGAAGGAAATTATGCGGAAGCTTTACAGAATTATTATGAA  
GCTATGCGACTAGAAATTGATCCCTATGATCGAAGTTATATACTCTATAATATAGGTCTTA  
TCCATAAAGTAATGGAGAACATACGAAAGCTTTGGAATATTATTTTCGAGCACTAGAA  
CGAAATCCATTCTTACCACAAGCTTTTAATAATATGGCCGTGATCTGTCATTAC---CGGG  
GAGAACAGGCCATTCGCCAGGGAGATTCTGAAATTGCAGAAGCTTGGTTTGATCAAGC  
CGCTGAGTATTGGAAACAGGCTATAGCGCTTACTCCTGGTAATTATATTGAAGCCCATAA  
TTGGTTGAAAATCACGAGGCGTTTCGAA-----ATGAGTTGGCGATCAGAACATATATGGA  
TAGAACTTATAACGGGGTCTCGAAAATAAGTAATTTTTGCTGGGCCCTTATCGTTTTTT  
TAGGTTCAATTAGGATTCTTATTGGTTGGAATTTCCAGTTATCTTGGTAGAAATTTGATATC  
TTTTGTTCCGTCTCAGCAAATCATTTTTTTCCACAAGGAATCGTGATGTCTTTCTACGG  
AATCGCGGGTCTCTTATTAGCTCCTATTTGTGGTGACAATTCCTGGAATGTAGGTAG  
TGGTTATGATCGATTGATAGAAGGGAAGGAAAGGTGTGTATTTTTTCGTTGGGGATTTC  
CTGGAAAAATCGTCGCATATTCCCTCCGATTCTTTATAAAAGATATTCAATCCGTTTCGAA  
TAGAAGTTAAAGAGGGTATTTATGCTCGTCGTGTCCTTTATATGGACATCAGAGGCCGG  
GGGGCTATTCGGTTGACCCGCACTGATGAGAAT--TTGACTCCACGAGAAATTGAACAA  
AAAGCCGCAGAATTGGCCTATTTCTTGCGCGTACCAATTGAAGTCTTT

>Oxalis

ATGGAAAAATGGTGGTTCAATTCGATGTTATCTCTAAGTAAATCAAGTGATAGTCTCGG

TCCTAGTGAACATACCGGTATAAGTGAAGACCCAATTCTAAATGATATGGATAAAAATAT  
TCCTAGTTACAGTAATCTTGATCATTAGTCAACACC-----GAGTATTTAACTCTGATG  
AAACTTTTTTAGTTTCGAGATAGTAATAGGGACAGTTATTCCATAGATTTTGGTATTGAAA  
ATAAACTTTTTGAAATTGATAGCGACCAT-----TCTTTTTTGAGTGAATTA AAAAGTTTTT  
TGTATAGTTATCGGACTTCTAGTCATCTTAATAATGGATCTAAGAAAGATGATTCCTACTA  
TAATCGTTACATGTATGATACGAAATATAATTGGAATAATCACATTA AAAAATTGCATTGAA  
AATTATGTTTCGT-----TCTCAAATCTGTATTGATAGTTACATTTTAAGTAGTAGTGACAATT  
ACAGTGAAAGTTACATTTATAGTTACATTTTTTGGAACGAGGGTTCAGTATAAAAAC  
AACACGAATGGTAGTGATTTAACTATAAGAGAACGTTTCGAAT--CTCGATGTA ACTAAA  
AAATACAAGCATTGTGGGTTCAATGTGAAAATTGTTATGGATTAAATTATAAGAAGTTT  
TTTAAGTCAAAAATGAATATTTGTGAACAATGTGGATATCATTTGAAAATGAATAGTTCA  
GATAGAATTGAACTTTGATTGATCCCGGTACGTGGGATCCTATGGATGAAGACATGGT  
ATCTCTGGATCCCATTGAATTCATTTGGAAGAGGAACCATATAAAGATCGTATTGATTC  
TTATCAAAAAAAGACAGGATTAACCGAGGCTGTTCAAACAGGCACAGGTCAACTAAAT  
GGCATTCCCTGTAGCAATAGGGGTTATGGATTTTCAGTTTATGGGGGGTAGTATGGGATCC  
GTAGTAGGCGAGAAAATTACCCGTTTGGTCGAGTATGCTACCAAAAAATGTTTACCTCT  
TATTCTAGTATGTGCTTCCGGGGGAGCACGCATGCAAGAAGGAAGTTTGAGCTTGATG  
CAAATGGCTAAAATATCTTCCGCTTTATATGATTATCAATCAAATAAAAAGTTATTTTATG  
TACCAATCCTTACCTCTCCTACTACTGGTGGGGTAACAGCTAGTTTTTGGTATGTTGGGG  
GATATCATTATTGCCGAACCCAATGCCTACATTGCATTTGCGGGAAAAAGAGTAATTGA  
ACAAACATTGAATAAGACAGTACCTGAAGGGTCACAAGCGGCTGAATATTTATTCCATA  
AGGGCTTATTTGATCTAATCGTACCACGTAATCTTTTAAAGGCTGTTTTGAGTGAGTTAT  
TTCAACTCCACGCTTTCTTTCCCTTTGAACAAAAAAAAT-----ATGGTAACCATT CAGGCC  
GACGAAATTAGTAATATTATCCGTGAACGTATTGAGCAATATAATAGAGAAGTAAAAATT  
CTAAATACCGGCACCGTACTTCAAGTAGGCGATGGTATTGCGCGTATTTATGGTCTTGAT  
GAAGTAATGGCAGGTGAATTAGTAGAATTTGAAGAGGGTACAATAGGCATTGCTTTGAA  
TTTGAATCAAATAATGTTGGCGTTGTATTAATGGGTGACGGTTTGATGATCCAAGAGG  
GAAGTTCTGTAAAAGCAACAGGAAGAATTGCTCAGATACCAGTAAGTGAGGCTTTTTTT  
GGGTCGTATTGTAAATGCCCTAGCTAAACCTATTGATGGTCGAGGTGAAATTTCCGGCTT  
CTGAATCTCGGTTAATTGAATCTCCCGCTCCAGGGATTATTTGAGACGTTCTGTATATG  
AGCCTCTTCAAACAGGACTTATTGCTATTGATTCAATGATTCCTATAGGACGTGGGCAG  
CGCGAATTAATTATTGGGGACAGGCAAACCTGGTAAAACAGCAGTAGCCACAGATACGA  
TTCTCAATCAACAAGGTCAAATGTAATATGTGTTTATGTAGCTATTGGTCAAAAAGCAT  
CTTCTGTGGCTCAAGTGGTGAATACTTTACAGGAAAGAGGAGCAATGGAATACACTAT  
TGTGGTAGCCGAAACGGCGGATTCTCCGGCTACATTACAATACCTTGCTCCTTATACAG  
GAGCGGCTTTGGCTGAATATTTTATGTATCGTGAACGACACACTTCAATTATTTATGACG  
ATCCTTCAAACAAGCACAGGCTTATCGTCAAATGTCTCTTTTATTACGAAGACCACCC  
GGTCGTGAAGCTTATCCAGGAGATGTTTTTTATTTGCATTTCGCGCCTTTTGGAAAGAGC  
CGCTAAATCAAGTTCTCGTTTAGGCGAAGGAAGTATGACTGCTTTACCAATAGTTGAGA  
CCCAATCAGGAGATGTTTCCGGCTTATATTCTACTAATGTAATTTCCATTACAGATGGAC  
AAATATTCTTATCCGCTGATCTATTCAATGCTGGAATTAGACCCGCGATTAATGTGGGTAT  
TTCCGTTTCCAGAGTAGGATCTGCAGCGCAAATTAAGCCATGAAACAAGTAGCTGGC  
AAATCAAAATTGGAATTGGCGCAATTCGCAGAATTAGAAGCCTTTGCGCAATTCGCCCTC  
TGATCTCGATAAAGCTACTCAAATCAATTGGCAAGAGGTCAACGATTACGTGAGTTGC

TCAAACAATCCCAATCTGCCCCCTAACGGTGGAGGAACAGATAATGACTATTTATAACC  
GGAACGAATGGTTATCTTGATTCTTAGAAATTGGACAAGTAAGGAAATTTCTCGTTGA  
ATTACGTACTIONTAAAAAACAAATAAACCTCAGTTCCAAGAAATCATATCTTCTACCAA  
GACATTCACCGAGGAAGCGGAAGCTCTTTTGAAAGAAGCTATTCAGGAACAGATGGA  
ACGTTTTCGACTTCAGGAACAAGTAATGAAAATAAATCCTACTACTTCTGGTCCTGGAG  
TTTCCGCTTTGAAAAAACAACCTAGGACGTATCGCTCAAATCATTGGTCCGGTACTG  
GATGTGATTTTTTCCCGGGAAAGATGCCTAATATTTACAATGCTCTGGTAGTTAAGGGT  
CGAGATACCGTTGGCCAACAATAATGTGACTTGTGAAGTACAACAATTATTAGGAAA  
TAATCGAGTTCGGGCAGTAGCTATGAGTGCTACAGAGGGTCTAATGAGAGGAATGGAA  
GTGATTGATACAGGAGGTCCTCTAAGTGTTCCAGTCGGCGGAGCGACTCTAGGACGAA  
TTTTCAATGTGCTGGGGGAGCCTATTGATAATTTAGGTCCTGTAGATACTCGCACAA  
NCCCCTATTCATAGATCTGCGCCCGCCTTTATAACAATTAGATACAAAATTATCTATTTTTG  
AAACAGGAATTAAGTAGTAGATCTTTTAGCCCCCTATCGCCGCGGAGGAAAAATAGG  
ACTATTCGGGGGGGCTGGAGTAGGTAACAGTTCTCATTATGGAATTAATTAACAACA  
TTGCCAAAGCTCATGGAGGTGTATCTGTATTTGGCGGAGTAGGCGAACGTACTIONTGA  
AGGAAATGACCTTTACATGGAAATGAAAGAATCTGGAGTAATTAATGAAGAAAATATTG  
CAGAATCCAAAGTGGCTCTAGTCTACGGTCAGATGAATGAACCGCCGGGGGCTCGTAT  
GAGAGTCGGTTTACTGCCCTAACTATGGCGGAATTTTTCCGAGATGTCAATGAACAA  
GACGTACTIONTATTTATCGATAATTTTTTCGTTTCGTACAAGCGGGATCCGAAGTATCC  
GCTTTATTGGGTAGAATGCCTTCCGCTGTAGGTTATCAACCCACCCTTAGTACCGAAAT  
GGGTTCTTTACAAGAAAGAATTACTTCTACCAAAGAAGGGTCCATAACTTCTATTCAAG  
CAGTTTATGTACCTGCGGACGATTTGACCGACCCTGCTCCTGCCACGACATTTGCACAT  
TTAGATGCTACTACTGTACTATCAAGAGGATTAGCTGCCAAAGGTATCTATCCAGCAGTA  
GATCCTTTAGATTCAACGTCAACTATGCTCCAACCTCGAATCGTTGGTGAAGAACATTA  
TGAAACTGCGCAAAGAGTTAAAGAACTTTACAACGTTACAAGAACTTCAGGATATT  
ATAGCTATCCTTGGGTGGACGAATTATCCGAAGAAGATCGCTTAACCGTAGCAAGAGC  
ACGCAAAATTGAGCGTTTCTTATCACAGCCTTTTTTCGTAGCAGAAGTATTTACCGGTT  
CTCCGGGAAAATATGTTGGTCTAGCAGAAACAATTAGAGGGTTTAAATTGATCCTTTCC  
GGAGAATTAGATAGTCTTCTGAACAGGCCTTTTATTTGGTAGGTAACATCGATGAAGC  
TACTGCGAAGGCTACAACTTAGAAACGGAGAACAAATTGAAGAAAATGACCTTAAAT  
CTTTGTGTACTGACCCCGAATCTAATTGTTTGGAAATCCGAAGTGAAAGAAATAATTTTA  
TCGACCAATAGTGGACAAATTGGCATATTACCAAATCACGCGCCTATTGTCACAGCTGT  
AGATATAGGTATTTTGAGAATACGCTTTAATGACCAATGGTTAACGATGGCCCTGATGGG  
TGGTTTTGCTAGAATAGGCAATAATGAGATTACTCTTTTAGTAAATGATGCGGAAAGGG  
GTAGTGACATTGATCCACAAGAAGCTCAGCAAACCTTGAATAGCAGAAGCTAACTT  
GAAAAAAGCTGAAGGCAAGAGAAAAACAATCGAGGCAAATCTAGCTCTCAGACGAG  
CTAGGACACGCTAGAGGCTATCAATGCAATG---ATGAAAAATTAACCGATTCTTTCGT  
TTTCTTGGGTTACTGGTCATCCGCCGGGAGTTTCGGGTTTAAATACCGATATTTTAGCAAC  
AAATCCAATAAATCTAAGTGTAGTTTTTGGTGTATTGATTTTTTTTGGAAAGGGAGTGTT  
AAGTGATTTATTAGATAATCGAAAACAGAGGATCTTGAATACTATTCGAAACTCAGAAG  
AACTACGTGAGGGGGCTATTGAACAATTGGAAAAAGCCCGGGCCCGCTTACGGAAAG  
TGAAATGGAAGCAGATCAGTTTCGAGTGAATGGATACTCTGAAATAGAACGAGAAAA  
GTTAATTTGATTAAGTCAACTTATAAGACTTTTGAACAATTAGAAAATTACAAGAATG  
AAACCATTCTTTTTGAACAACAAGAGCAATTAATCAAGTTCGACAACGAGTTTTCCA

ACAAGCCTTACAAGAAGCTCTAGGAACTCTGAATAGTTGTTTGACCAACGAGTTACAT  
TTACGTACCATCAGTGCTAATATCGGCATGTTTGGGGTGATGAAAGAAATTAAGTATG  
AATCCACTGATTTCTGCCGCTTCCGTTATTGCTGCTGGGTTGGCCGTTGGGCTTGCTTCT  
ATTGGACCTGGAGTTGGTCAAGGTACTGCTGCAGGCCAAGCTGTGCAAGGTATCGCGA  
GACAACCTGAGGCGGAGGGAAAAATACGAGGTACTTTATTACTTAGTCTAGCTTTTATG  
GAAGCTTTAACAATTTATGGACTAGTTGTAGCATTAGCACTTTTATTTGCAAACCCCTTT  
GTTATGAATGTTCTATCATGTTCCATCAACACATTAAGGGTTATATGATATATCCGGTG  
TAGAAGTAGGCCAACATTTCTATTGGAAAATAGGGGGGTTCCAAGTACATGCCCAAGT  
ACTTATTACTTCTTGGGTTGTAATTGCTATTTTATTAAGTTCCGCCGTTGTTGCTGTTCCG  
AATCCACAACTATTCCGACTGACGGTCAGAATTTCTTTGAATATATCCTTGAGTTTATT  
CGAGACGTGAGCAAACTCAGATTGGCGAAGAATATGGCCCATGGGTTCCCTTTATTG  
GAACTATGTTTCTATTTATTTTGTCTAATTGGTCAGGAGCACTTTTACCTTGAAAAT  
CATACAGTTACCTCATGGGGAGTTAGCCGCACCTACGAATGATATAAATACTACCGTTGC  
TTTAGCTTTACTCACATCAGTAGCATATTTCTATGCCGGTCTTAGCAAAAAAGGGTTGG  
GTTATTTTGGTAAATATATTCAACCACTCCAATCCTTTTACCCATTAACGTTCTAGAAGA  
TTTTACAAAACCTTATCGCTTAGTTTTTCGACTTTTTCGGGAATATATTAGCAGATGAATT  
AGTAGTTGTTGTTCTTGTCTTTAGTACCTTTAGTAGTTCCTATACCTGTCATGTTCTT  
GGATTATTTACAAGTGGTATTCAAGCTCTTATTTTGAACCTTTAGCCGCGGCTTATATAG  
GCGAATCCATGGAGGGTCATCATATGATATTTGTGACTTTAGAGCATATATTAACATCAT  
ATCTTTTTCGGTCAATTTCAATTGTAATTATAATTCATTTAATAAGCATATTAGTCAATGAAA  
TCGTAGGACTTTATGATTCGTCCAAAAAGGGCATGATAATTTCTTTTTTCTGTATAACAG  
GATTATTAATTATTCGTTGGATTTATTCGGAACATTTGCCATTAAGTGATTTATATGAATCA  
TTAATCTTTCTTTCATGGAGTTTCTCCATTATTCATATGGTTCCATATTTTAAAAATAAAA  
ATAATTTTTTCAATGCAATAACTGCACCAAGTGCTATTTTTTACCCAAGGCTTTGCTACTT  
CGGGTCTTTTAACTGAAATTCATCAATCTGCAATATTAGTACCCGCTCTCCAATCCCAGT  
GGTTAATGATGCACGTAAGTATGATGGTACTGGGCTATGCAGCTCTTTTATGTGGATCAT  
TATTATCAGTAGCTCTTCTAGTCATTACATTTTCGAAAAATCATAAGGATTTTTTGATAAAA  
GAAAAAAGATCGAATACATTTACGAAAAATAAATGTTTTACAA---GCCTCCTTTCTTTC  
CTCAAGTAATTATTACAGGTCTCAATTGATTCAACAATTAGATCTTTGGAGTTATCGTATT  
ATTAGTATAGGATTTATCTTTTTAACCACGGGTATTCTTTCAGGAGCGGTTTGGGCTAAT  
GAGGCGTGGGATCCTATTGGAATTGGGACCCCAAAGAACTTGGGCTTTTATTACTTG  
GACCATATTTGCAATTTATTTACATACTCGAACAAGTAAGAAATTGGAAGGGGTAAATT  
CTGCGATTGTGGCTTCTACGGGCTTTTTTATAATTTGGATATGCTACTTTGGAGTTAATCT  
ATTAGGAATAGGGCTACATAGTTATGGTTCATTCATATTAACAATGGTAAAAAAGAAAG  
CATTAATTTCCCTTTTATATTTTGCATCTATAGTATTTTTTACCCTGGTGGATCTCTCTCA  
TTTAATAAAAGTCTGGAATCTTGGGTTAGTAATTGGTGGAAATACTAACCAATCCGAAAC  
TTTTTTGAATTATATTCAAGAAAAAAGGATTCTAGAAAACCTCATAGAATTAGAAGAAC  
TATTCTTGTTGGACGAAATGATAAAGGAATACCCAGAAACGCATCTACAAAGGCTTCGT  
ATCAGA---CATAAAGAAACGATCCAATTGATCAAGATGCACAACGAAGATCGTATCCAT  
ACAATCTTGCACTTCTCAACAAATCTAATCTGTTTCCCTTATTCTAAGTGGTTTTTCTATTT  
TAGGTAATGAAGAACTTTTTTATTCTTAATGCGTGGGTTCAAGAATTCCTATATAACTTAA  
GTGATACAATAAAAGCTTTTTTCGATTCTTTTATTAAGTATTATGTATAGGATTCCATTC  
ACCCACGGTTGGGAACATAATGATTGGCTCTATCTACAAAGATTTTGGATTTGCTCATA  
ACGATCAAATTATATCTGGTCTTGTTCACCTTTCCAGTTATTCTAGATACAATTTTTAA

ATATTGGATTTTCCGTTATTTAAATCGTGTATCTCCGTCACCTTGTAGTGATTATCATTCAA  
TGAATGACATGCCTATTGGTGTTCAAAAGTACCCTTTTCGAACTCCTGGTTATCGTCGT  
AAGTCTTGGATTGACATATACAACCGACTTTATCGAGAAAGAGTACTTTTTTTAGGTCA  
AGGGTTGATAGCACGATCTCGAATCAACTTATTGCTCTTATGTTATATCTCAGTCATGA  
GAATGAA---AAAGATCTTTATTTTTTATAAATTCTCCTGGCGGATGGGTAATACCCGGA  
ATAGCCATTTATGATACTATGCAATTTGTGCGACCAGATATACAGACAATATGCATGGGA  
TTTGCCGCTTCAATGGGATCTTTTCTCTTAGTTGGAGGAGCGATTACCAAACGTCTAGC  
ATTCCCTCACGCCAGGGTAATGATTCATCAACCAGCTGCTATTTTTTTTGGAGGACAAG  
TAACAGAGGTTATCCTGGAAGCGGAAGAATACTAAAGTTGCGCGAAATTCTTACAAG  
GGTTTATGCACAAAGAAGCAGGCAAACCTTTATGGGTTGTATCCGAAGACATGGAAAGG  
GATGTTTTTATGTCAGCAACAGAAGCCCAAGCTCATGGAATTGTTGATCTTGTAGCGTT  
T G A  
A????????????????????????????????????????????????????????????  
????????????????????????????????????????????????????????????  
????????????????????????????????????????????????????????????  
????????????????????????????????????????????????????????????  
ATGTATAAATATCAAAGATATTT  
AAAAGTATAGATCCTTGGCAACATGACTTCCTATACCCACTTATCTTTCGGGAGTATAT  
TTATGCACTTGCTCATGATCATTATTAACGGATTATGACAATAAATCGAGTTTACTAATT  
GTAAAACGTTTAAATCCTCGAATGTATCAACAGAATCATTATTTTTTTCTGGTAATGATT  
CTTCCAAAATCCTATTTTTTTGGAAGAATTTATATTCTCAAATGTTATCAGAAGGGCTTG  
CGTTATTGTGGAAATTTCAATTTCCCTACAATTAGTAGCGTCTTAAATCGTAAAATCTTA  
TAATTTAAGATCAATTCATTCATATTTCCCTTTTTTAGAGGACAAATTTTCAGTTTTAAAT  
TGTGTGTTTATTGTAATAACCTATCCCATCCATATGGAAATCTTGATTCAAATCTTC  
GCTACTGGGCGAAAGATGCCTCTTCTTTCGATTTAGTACGGCTCTTTTTCTACGAGTATT  
ATAAGTGAATAGTCTTATTAATAACTCTAGTTCCATTTTTTCAAAGCCAAGATTGTTCT  
TGTTCTTATATAATTCTCATGTATACGAATACGAATCCATTCTTCTTTTTCTCTAACC  
TCTTCTCATTTACGATCAACATCTTCTCGTATTTTTTTTTGAGCGAATCTATTTTTATGGAA  
AAATAGAGCATCTTGCAAAAATCTTTCGCAATAGGGGTATCCTATGGTTATTGAAAGAC  
CCTTTTATGCATTATGTTAGATACCAAGGAAAATCCATTTTGGCTTCAAAGATAACGCGT  
CTTCTGATAAATAAATGGAAATTTTATCTTGTAAATTTATGTCAATGTCATTATTATGCGTG  
GTCTCAACCGGAAAGGGTCTCTATAAACCGATTATCCAGCATTCTCTCAACTTTTTGG  
GATATCTTTCAAGTGTGCGACTAAATCTTTCAGTGGTACGGAGTCAAACGTTGGAACA  
GTCGTTTATAATAGATAAT-----GTTATAAAGAACTCGATACGATAATCCGATTATCCT  
TTGATTGGATCATTGGCAAAATCGAAATTTGTAAACACATTGGGCTATCCCATTAGTAAG  
CCGACTTGGGCGGATTTGTGCGGATTCTGATATTATGGACCGATTGTGCGTATATACAGT  
AATCTTCTCATTATTATAGGGGATCCTCAAAAAAAAAAGAGTTTATATCGAATAAATTATA  
TACTTCGCCTTTCTTGTGTTAAACTTTGGCTCGTAAACACAAAAGTCCTGTACGCGCT  
TTTTTGAAGATTCAATTCGCAATTTTGGGAAGAATTTTTACGGAGAAAGAACAGAT  
TCTATCTTTTATCTTCCAAGACGAATCTGGTATTTGGATATTATTTCTATCAAAGATATG  
GCCAATCATTCAATGATAATTGATACAACA--GAGGTACAA--GATATCAATCTTTTTCC  
AGATTGGAATTCACGTAAGAGAGGCTATGAAATTATATGGGCGCTTGTGCCTATTTTT  
ACTCCTCTATTGGGAATCACAACAGCCATACTAGTAATTGTGTGGTTAGAAAGAGAAAT  
ATCCGCAGGAATACAACAACGTATTGGACCTGAATACGCCGGTCCTTTAGGAATTTTC  
AGGCTCTAGCAGACGGGACAAAACGCTTTTCAAAGAGAATCTTTTGCCATCTAGAGG  
GGATACTCGTTTATTAGTATCGGACCATCCATAGCAGTCATATCAATTTACTAAGCTAT

TCAGTAATTCCTTTTACTCCCACCTTGTTTTAGCTGATTTAAATATCGGAGTTTTTTTAT  
GGATTGCTGTTTCAAGTATTTCTCCATTGGACTTCTTATGTCAGGATATGGATCAAATA  
ATAAATATTCCTTTTAGGCGGTCTACGAGCTGCTGCTCAATCAATTAGTTATGAAATAC  
CATTAACTTTATGTGTGTTATCAATATCTCTACTATCTAACAGTTCAAGTACAGTTGATAT  
AGTTGAGGCACAGTCAAATACGGTTTTTGGGGGTGGAATTTTGGCGTCAACCCACA  
GGTTTTATAGTTTTTCTAATTTCTTCCCTAGCCGAATGTGAGAGATTACCTTTTGATTTGC  
CAGAAGCAGAAGAAGAATTAGTAGCCGGTTATCAAACCGAATACTCAGGTATAAAATT  
TGGTTTTATTTAIGTTGCTTCCCTATCTAAACTTATTAGTTTCTTCATTATTTGTAACAGTTC  
TTACTTTGGCGGTGGAATATTTTCGATTCCATACATATCTGGTACTGACCTTTTTGAAAT  
AAAGAAAGCGGGTGAATTTTTGAAGGGGCTATTGGTATCTTTATTACGTTGGCTAAA  
CTTATTTGTTCTTGTATTTCCTATTACAACAAGATGGACTTTGCCTAGGTTAAGAATGG  
ACCAACTATTAATCTGGGATGGAAATTTCTTTTACCGATTTCTCTAGGTAATCTATTATT  
AACAACTCTTTCCAACTACTTTCACTCATGATCTGGCATGTACAGAATGAAAACCTCA  
TTCTCGATTCTACGAGAATTTTTATGAAAGCCTTTCATTTGCTTCTCTTCGATGGAAGTT  
TTATTTCCAGAAATGTATCCTAATTTTTGGCCTAATTTCTTCTTGATGATCGATTCAAC  
CTCAGATCAAAAAGATATACCTTGGTTATATTTTCATCTCTTCAACAAGTTTAGTAATGAG  
CATAACGGCCCTATTATTCGGATGGAGAGAAGACCCTATGATTAGCTTTTTCGGGAAATTT  
CCAAACGAACAATTTCAACGAAATCTTTCATTTCTTATTTTACTATGTTCAACTCTATG  
TATTCCTCTATCCGTAGAGTACATGGAATGTACAGAAATGGCTATAACAGAGTTTCTGTT  
ATTCGTATTAACAGCTACTCTAGGAGGAATGTTTTTATGCGGTGCTAACGATTTAATAAC  
TATCTTTGTAGCTCCAGAATGTTTCAGTTTATGCTCCTACCTATTATCTGGATATACCAAG  
AAAGATGTACGGTCTAATGAGGCTACTATGAAATTTTACTCATGGGTGGGGCAAGCTC  
TTCTATTCTGGTTCATGGTTTCTTGGCTATATGGTTCATCCGGGGGAGAGATCGAGCT  
TCAAGAAATAGTGAATGGTCTTATCAATACACAAATGTATAACTCCCCAGGAATTTCAAT  
TGCGCTTATATTCATCACTGTAGGAATTGGGTTCAAGCTTTCCCCAGCCCTTCTCATCA  
ATGGACTCCTGACGTATACGAAGGATCTCCCACTCCAGTCGTTGCTTTTCTTTCTGTAC  
TTCGAAAGTAGCTGCTTCAGCTTCAGCCACTCGAATTTTCGATATTCTTTTTATTTCTC  
ATCAAACGAATGGCATCTTCTTCTGGAAATTTCTAGCTATTCTTAGCATGATATTGGGGAA  
TCTCATTGCTATTACTCAAACAAGCATGAAACGTATGCTTGCATATTCGTCCATAGGTCA  
AATCGGATATGTAATTATTGGAATAATTGTTGGAGACTCAAATGGTGGATATGCAAGCAT  
GATAACTTATATGCTGTTCTATATCTCCATGAATCTAGGAACTTTTGGCTTGCATTGTATTAT  
TTGGTCTACGTACCGGAACTGATAACATTCGAGATTATGCAGGATTATACACGAAAGAT  
CCTTTTTTGGCTCTCTCTTTAGCCCTATGTCTCTTATCCCTAGGGGGTCTTCCCTCCACTAG  
CAGGTTTTTTCGGAAAACCTCATTATTTCTGGTGTGGATGGCAGGCAGGCCTATATTTTT  
TGGTTTTCAATAGGACTCCTTACGAGCGTTGTTTCTATCTACTATTATCTAAAATAATCA  
AGTTATTAATGACTGGACGAAACCAAGAAATAACCCCTCACGTGCGAAATTATAGAAG  
ATCCCTTTAAGATCAAACAATTCCATCGAATTGAGTATGATTGTATGTGTGATAGCATC  
TACTATAACCAGGAATATCAATGAACCCGATTATTGAAATGGCTCAGGATACCCTTTTTAT  
GTTTCTGCTTTACGAATATGATATTTCTGGGCCTTTCTAATAATATCTAGTGTTATTCCTA  
TTCTGGCATTCTAATTTCCGGAGTTTTAGCCCCGATTAGCAAAGGGCCAGAGAACTT  
TCTAGTTATGAATCGGGTATAGAACCAATGGGCGATGCTTGGTTACAATTTCGAATTCGT  
TATTATATGTTTGTCTAGTTTTTGTGTTTTTGTATGTTGAAACCGTTTTTCTTTATCCATG  
GGCAATGAGTTTCGATGATTTGGGGTATCCATATTTATAGAAGCTTTAATTTTCGTGCTT  
ATTCTAATTGTTGGTTCAGTCTATGCATGGCGAAAAGGAGCATTGGAATGGTCTACGAA

TTATTTTCCTTGGTTAACAATATTTGTAGTTTGGCCGATATCCGCGGGTCCCTTATTTTC  
TTTCTCCCTCATAGAGGAAATAAGGTAAGTACTAGACAGTATACTTTATTTATATGTACCCTA  
GAACTCCTTTTAATGACCTATGTGTTCTATTACCATTTCCAATTGGACGATCCATTAATGC  
AATTGACCGAGAATTATAAATGGATAAATTTTTTTGATTTTTACTGGAAATTGGGAATAG  
ATGGACTTTCTATAGGACCTATTTACTGACAGGATTTATCACTACTTTAGCTACTTTAGC  
GGCTTGGCCGGTTACGCGAAATTATCGATTATTCATTTTCTTATGTTAGTAATGTATAGC  
GGTCAAATAGGATCATTTTCTTCTCGAGATCTTTTACTTTTTTTTCATCATGTGGGAGTTC  
GAATTAATCCCGTTTATCTACTTTTATCTATGTGGGGCGGAAAGAAACGTCTGTATTCA  
GCGACAAAGTTTATTTTGTACACCGCGGGAAGCTCCATTTTTTTTATTAATGGGAGTATTC  
GGTCTCGGCTTATATGGTTCCAACGAATCAACATTAATTTTGAATATCGGCCAATCAA  
TCGTATCTACAGCGCTGGAATACTATTTTATATTGGATTTCTTATTGCTTTTGCTGTCA  
AATCACCGATTATACCTTTACATACATGGTTACCCGATACCCACGGTGAAGCACATTATA  
GTAATGATGCTTCTAGCTGGAATTTTATTAATAAATGGGAGCGTATGGATTGATTGAA  
TCAATATGGAATTGTTATCCACGCCCATTCTATATTTTCTCCCTGGTTGATGATAGTAGG  
CACAATGCAAATAATCTATGCAGCTTCAACATCTCCTGGTCAACGTAATTTAAAAAAA  
GAATAGCCTATTCCTCCGTATCTCATATGGGTTTTATAATTTTAGGAATTGGCTCTATAAG  
TGATACAGGTCTCAACGGAGCCATTTTACAAATAATATCTCATGGGTTTATTGGTGCCGC  
GCTTTTTTTCTTGGCAGGAACGAGTTATGATAGAATCCGTCTTGTTTATCTCGACGAAAT  
GGGCGGAATGGCTATAAAAATTCAAAAATATTTACAATGTTCAAGTATCTTATCAATGGC  
TTCCCTTGCAATACCAGGTATGAGCGGTTTTTTTTGCAGAATTTATAGTATTTTTTGGAAATA  
ATTACCAGTCAAAAATATCTTTTAATGTTCAAAATAATAATAATTTTTTGGAAATGGCAATT  
GGAATGATATTAACCTCTATTTATTCATTATCTATGTTACGGCAACTGTTCTATGGATACA  
AACTCTTTAATGTTCCATCCTCTTATTTTTTTGATTCTGGACCGCGAGAGTTATTTATTTTC  
GATCGCCATCCTTTTACCTGTAATAGGTATTGGTATTTATCCGGATTTTCGTTTTTTTCATTAT  
CAGTTGACAAGGTGCAAGCTATTATATCTAATTTTTTC-----ATGATATTCGAACATGTAC  
TTATTTTGAGTGCTTATTTATTTTTTATCGGTATCTATGGATTGATCAGGGGCCGAAATAT  
GGTTAGAGCCCTTATGTGTCTTGAACCTATACTGAACGCAGTTAATATAAATTCGTAAC  
ATTTTCTGATTTTTTTGATAGTCGCCAATTAAGGAAATATTTTCTCAATTTTTTGTATA  
GCTATTGCAGCCGCTGAAGCAGCTATTGGACCGGCCATTGTTTCGTCAATTTATCGTAA  
CAGAAAATCAATTCGTATCAATCAATCAAAATTTGTTAAATAAAATGGAACATATATATCA  
ATATTCATTTATCATACCTTTTGTACACTTCCTGTTCCCTATGTTAATAGGAATTGGTCTTC  
TACTTTTTCCGACAGCAACAAAAATCTTCGCCGTATGTGGGCTTTTCCTAGTATTTTAT  
TATTAAGTATTGTTATGATTTTTTTCAGTCGATCTGTCTATTCAGCAAATAAATAGCAGTTC  
TATTTATCTATATGTATGGTCTTGGACTATTAATAATGATTTTTCTTTAGAGTTTGGTTGCT  
TAATTGATCCACTTACTTCTATTCTGTAAATATTAATTACAACCTGTTGGAATTTTGGTTCTT  
ATTTATAGTGACAATTACATGTCTCATGATCAAGGATATTTGAGATTTTTTGGCTTATATGA  
GTTTTTTCAATACTTTAATGTTAGGATTAATTAATACTAGTTCTAATTTGGTACAAATTTATATT  
TTTTGGGAGTTAGTTGGAATGTGTTCTTATTTATTAATAGGTTTTTGGTTACACGACCT  
CTTGCAGCCACTGCTTGTCAAAAAGCCTTTGTAACATAATCGTGTAGGGGATTTTGGTTT  
ATTTTAGGAATTTTAGGTGTTTATTCGACAACGGGTAGTTTCGAATTTCCGGATTTGTT  
CGAAATATCAACAAC---GAGGTTGATTTTTTATTTGTTACTTTGTGTGCCTTTCTATTAT  
TTGCTGGTGCAATTGCTAAATCTGCTCAATCCCCCTTCATGTATGGTTACCTGATGCCA  
TGGAAGGACCTACGCCATTTTCGGCTCTTATACACGCTGCCACTATGGTAGCAGCAGGA  
ATTTTTCTTGTAGCTCGCCTTCTCCTCTTTTTATAGTCATACCTTCTATAATGAATCTAAT



AGCTTTGATAGGTATAATAACAGTACTATTAGGAGCTACCTTAGCTCTTGCTCAAAAAGA  
TATTAAGAGAGGTTTAGCCTATTCTACAATGTCTCAATTGGGTTATATGATGTTAGCCCTA  
GGTATGGGGTCTTATCGGGCTGCTTTATTTTCATTTGATTACTCATGCCTATTCGAAAGCAT  
TGCTATTTTTAGGATCTGGATCAATTATTCATTCAATGGAAGCTGTTGTTGGATATTCTCC  
GACTAAAAGTCAAAATATCCTTCTTATGGGCGGCTTAACAAAATATGTACCAATTACAA  
AAACGCTTTTTTTTATTAGGTACACTTTCCCTTTGTGGTATTCCACCTCTTGCTTGCTTTTG  
GTCCAAAGATGAAATTCTTAATGATAGTTGGTGTATTACCCATTTTTGCAATAATAGC  
TTGTTTCACAGCAGGCTTAACCGCATTTTATATGTTTCGGATCTATTTACTTACTTTTTGAA  
GGACATTTAAATGTTCATTTTCAAATTACAGTGGCAAAAAAACTAGCTTGGTCTATTC  
AATATCTCTATGGGGCAAAGAA---GAATTAATAATAATAAAA---TTATTATCTTTCTTAAC  
AATCAAATTTTTTTTATGTTACTAAGAAT---ACTTTTTCTTATCCTCAGGAGTCGGATAATA  
CTATACTTTTTTCTATGCTTATATTGGTTCTATTTACTTTATTTGTTGGAGCCGTAGGAAAT  
-----ATCAATATATTATCAAAATTGTTAACTCCATCTATAAACCTCTTACATAAAAAATTA  
AAT---TTTGTGGATTCA---GAGTTTGTAACAAATGCAACGTTTTTCGGTTAGTATAGCCTTT  
TTTGGAAATTTACAGCCTCTTTGTTATATAAACCAGTTTATTCATCTTTACAAAATTTGA  
ACTTTCTTAATTCATTTTCAAATCTTTTTGAAAAGGTAATAAATGGAATATATAATTGGTC  
ATATAATCGCGCTTACATAGATGTTTTTTTATGCAAGATTTTTAACTAAGGGTGTAAAGAGG  
ATTCGCTGAACGAATTTCTTTTTTTGATAGACGAATAATCGATACAATTACCAATGGGGT  
TGGTGTACGAGTTTCTTTGTAGGAGAAGGTATAAGATATGTAGGGGGTGGT---CGGATC  
TCGTCTTATCTCCTATTGTATTCATTTTTTGTAGTAATCTTGTTAGTAATT-----ATGCATTT  
GCCTGGACCAATACATAATTTTCTTTTAGTCTTTCTGGGATCAGGTCTTCTATTAGGAGG  
TCTAGGAGTAGTATTACTCAACAATACAATTTATTCTGCCTTTTCGTTGGGGTTGGTTCT  
TGTTTGTATATCTTTATTTTATATTCTATCAAACCTCACATTTTGTTGCTGCTGCGCAGCTC  
CTTATTTACGTAGGAGCTATAAATGTTTTAATCATATTTGCTGTGATGTTTCATGAATAGTT  
CAGAATATTCCAAAGATTTTAATCTTTGGACTGTTGGGAATGGAATTACTTTACTGGTTT  
GTATAAGTATTTTCGTTTTACTAATTACTACTATTCCAGATATATCATGGTATGGTATTATTT  
GGACTACAAGATCAAACCAAATTATAGAACAAAATTGGATAGATAATAGTCAACAAATT  
GGAATTCATTTATTAACAGATTTTTTTCTTCCATTTGAACTTATTTTCGATAATTCTTTTAGT  
TGCTTTGATAGGTGCAATTGCTGTGGCTCGTCAAATGAATGTACCGGCTACAAGAAAA  
GACCTTATGATAGTAAATATGGGTCCTCACCACCCATCAATGCATGGTGTCTTCGACTC  
ATAGTTACTCTAGATGGCGAAGATGTTATTGACTGTGAACCAATATTAGGTTATTTACAC  
CGGGGGATGGAAAAAATTGCGGAAAATCGAACAATTATAACAATATTTGCCTTATGTAAC  
ACGTTGGGATTATTTAGCTACCATGTTACAGAAGCAATAACTGTAAATGGACCCGAAC  
AGTTGGGAAATATTCAAGTACCTAAGAGAGCCAGCTATATCAGAGTAATTATGTTGGAG  
TTGAGTCGTATAGCTTCTCATCTGTTATGGCTTGGCCATTTATGGCAGATCTTGGTGCA  
CAGACTCCCTTCTTCTATATTTTTCAGAGAAAGAGAATTAATATATGATCTATTCGAAGCT  
GCCACCGGTATGAGAATGATGCATAATTATTTTCGATTGGAGGAGTAGCGACTGATCTA  
CCTCATGGCTGGATCGATAAATGTTTTGATTTCTGCGATTATTTTTTAAACAGGGGGTACT  
GAATATCAAAAACCTTATTAAGCGAAATCCTATTTTTTTAGAACGAGTTGAAGGAGTAGG  
TATTATTGATGAAGAAAAAGCAATAAATTGGGGTTTATCAGGACCAATGCTACGAGCTT  
CCGGAATACAATGGGATCTTCGTAAAGTTGATCATTATGAATATTACGACGAATTTGATT  
GGGAAGTCCAATGGCAAAAAGAAGGAGATTCGTTAGCTCGTTATTTAGTCCGAATCGG  
CGAAATGACAGAATCCATAAAAATTATTCAACAGGCTTTGGAGGGAATCCAGGAGGT  
CCTTATGAGAATTTAGAAATACGATGTTTTGATAGAGAAAGTAATTCAGAATGGAATGA

TTTTGAATATAGATTCATTAGTAAAAAAGCTTCTCCTACCTTTGAATTGCCGAAACAAG  
AACTTTATGTGAGAGTCGAAGCCCCAAAAGGAGAGTTGGGAATTTTCTGATAGGGGA  
TCGGAGCAGTTTTCCTTGGAGATGGAAAATTCGCCCGCCGGGTTTTATCAATTTGCAAA  
TTATTCCTCAGTTAGTTAAAAGAATGAAATTGGCTGATATTATGACAATATTAGGTAGCA  
TAGATATAATTATGGGAGAAATTGATCGTATGTTTCCTATGATAACTGGATTCATGAATTA  
TGGTCAACAAACAATGCGAGTTGCAAGATACATTGGTCAAAGTTTCATGATCGCCCTAT  
CCCATGCAAATCGTTTACCTGTAACCTATTCAATATCCTTATGAAAAATTAATAACATCAGA  
TCGTTTCCGCGGCCGAATCCATTTTGAATTTGATAAATGCATTGCTTGTGAAGTATGTGT  
TCGTGTATGTCCTATAGATCTACCCGTTGTTGATTGGAAATTTGAAACAGATATTCGAAA  
GAAACGATTGCTTAATTACAGTATTGATTTTGGAAATCTGTATATTTTGTGGGAAGTGCCT  
TGAGTATTGTCCAACAAATTGTTTATCAATGACTGAAGAATATGAACTTTCTACTTATGA  
TCGTGATGAATTAATTATAATCAAATTGCTTTGGGTCGTTTACCAGTGTGAGTAATTGA  
CGATTATACAATTCGAACAATCGTGAATTCA-----ATGC  
AGGGGCCTTTGTCTGCTTGGTTAGTCAAACATGGGTTAGTTCATAGATCTTTGGGATTC  
GATTATCAAGGAATAGAGACTTTACAAGTAAAGCCCGAGGATTGGCATTCCATTGCGGT  
CATTTTATATGTATATGGTTACAATTATCTACGTTCCCAATGTGCCTATGATGTAGCACC  
GGCGGACTATTAGCTAGTGTGTATCATCTTACGAGAATAGAGTATGGTATAGATCAACCA  
GAAGAGGTATGCATAAAAGTATTTGCCCAAGGAAGAATCCTAGAATTCCGTCTGTTTT  
CTGGGTTTGGAAAAGTGCAGGATTTTCAAGAAAGAGAATCTTATGATATGTTGGGAATTT  
CTTATGATAATCATCCACGCCTGAAACGTATCTTAATGCCTGAAAGTTGGATAGGATGGC  
CTTTACGTAAGGATTATATTGCCCAAAATTTTACGAAATACAAGATGCTCAT-----  
-----ATGGTCTT  
AGTTCTGGAATATTCAGACAATACAAAAAGTCAAATAATAACATTGAGACGTTTATGA  
ATTCCATTGAATTTCCCTATCTTGATCGAACAACCAAAAATTCAGTTATTTCAACTACAT  
CAAATGATCTTTCAAATTGGTCAAGACTCTCCAGTTTATGGCCGCTTCTCTATGGTACCA  
GTTGTTGCTTTATTGAATTTGCTTCATTAATAGGCTCACGGTTTGACTTTGATCGTTATGG  
ACTAGTACCAAGATCTAGTCCTAGACAGGCGGATCTAATTTTAAACAGCCGGCACAGTAA  
CAATGAAAATGGCTCCTTCTTTAGTGAGATTATATGAACAAATGCCTGAACCAAAATAT  
GTTATTGCTATGGGAGCATGTACAATTACAGGGGGGATGTTTCAAGTACCGATTCTTATAGT  
ACTGTTGAGGAGTCGATAAGCTAATTCCTGTGGATGTTTATTTGCCGGGCTGTCCACC  
TAAACCAGAGGCAGTTATAGATGCTATAACAAAACCTTCGTAAGAAAATATCTCAAGAAA  
TCTATGAAGATCGAATTCTATCT-----AAAATCGATGTTTACTACCAATCACAAGTTTC  
ATGTTGGATGCAGTTCTCATACTGGAAATTATGATCAAGGAATAATCTATCAACCACCAT  
CTTCAGAG---ATCCCTCCTGAAACATTTTCAAATATAAAAAGTCAGTATCTTCCTGCGA  
ATTAGTGAATATGCAAACCTAAAATACACTTTTTTGCATAAAGGAAGAGATTACTCGAT  
TCATTTCCATATCGTTTATGATATATAATAAGCCAAACATCCATTTCAAGTGCATATCCT  
ATTTTGCACAGCAGGGTTATGAAAATCCACGAGAAGCAACTGGCCGATTTGTATGTGC  
CAATTGCCATTTAGCTAATAAGCCCGTGGATATTGAGGTTCCACAGGCGGTACTTCCCTG  
ATACTGTATTTGAAGCAGTTGTTTCAATTCCTTATGATATGCAACTGAAACAAGTTCTGG  
CTAATGGTAAAAGGGGGCTTTGAATGTAGGGGCTGTTCTAATTTTGCCTGAGGGGTTT  
GAATTAGCCCCCCCCGACCGTATTTACCCGAGATGAAAGAAAAGATAGGCAATCTGT  
CTTTTCAGAACTATCGCCCCAATAAAAAAATATTCTTGTATAGGTCCTGTTCCCTGGTC  
AGAAATATAGTGAAATCACTTTTCCCTATTCTTTCCCGGACCCCTGCTACTAAGAAAGAT  
GTTAACTTCTTAAAATATCCCATCTACGTAGGCGGGAACAGGGGAAGGGGTCAGATTTA



GGATTAGATCCAGTAACCGGAGGTCTATGGCTGACCGATATTGCACACCATCATTTAGCT  
ATTGCAATTCCTTTTCTGATAGCGGGTCACATGTATAGGACCAACTGGGGCATTGGTCAT  
AGTATAAAAGAGATTTTAGAGGCTCATAAAGGTCCATTTACAGGCCAAGGTCATAAAG  
GCCTATATGAGATCCTAACAACGTCATGGCATGCTCAATTATCTCTAACCTAGCTATGTT  
AGGCTCTTTAACCATTTGTTGTGGCTCACCATATGTATTCCATGCCTCCTTATCCATATCTA  
GCTACTGACTATGGTACACAACCTGTCATTGTTACACATCACATGTGGATTGGTGGATTT  
CTCATAGTTGGCGCTGCTGCACATGCAGCCATTTTTATGGTAAGAGACTATGATCCAAC  
ACTCGATAACAATGATCTATTAGATCGTGTCTTAGGCATCGAGATGCAATCATATCACAT  
CTCAACTGGGTATGTATATTTTTAGGCTTTCACAGTTTTGGTTTATATATTCATAATGATAC  
CATGAGCGCTTTAGGGCGCCCCAAGATATGTTTTAGATACTGCTATAACAATTACAACC  
CGTCTTTGCTCAATGGATACAAAACACCCATGTTTTAGCACCCGGTGCAACGGCCCCTG  
GGGCAACAACAAGCACCAGTTTACTTGGGGGGCGGTGATTTAGTGGCAGTGGGCG  
GCAAGGTTGCTTTGTTACCTATTCCATTAGGAACCGCGGATTTTTTGGTACATCACATTC  
ATGCATTTACGATTCATGTGACGGTATTGATACTCCTGAAAGGTGTTCTATTTGCTCGTA  
GCTCTCGTTTAATAACCGGATAAGGCAAATCTTGGGTTTCGTTTCCCTTGTGATGGACCT  
GGAAGAGGGGGAACATGTCAAGTATCCGCTTGGGATCATGTCTTCTTAGGTCTATTCTG  
GATGTACAATGCAATTTCCGTAGTCATATTCATTTAGTTGGAAAATGCAGTCAGATGT  
TTGGGGTAGTATAAGTGATCAAGGGGTGGTAACTCATATCACAGGCGGAAACTTTGCC  
AGAGTTCCATTACTATTAATGGGTGGCTTCGCGATTTCTTATGGGCACAGGCATCCCAG  
GTAATTCAGTCTTATGGTTCTTCATTATCGGCATATGGCCTTTTTTTCCTAGGTGCTCATT  
TTGTATGGGCTTTTAGTTAATGTTTCTATTTAGCGGGCGTGGTTATTGGCAGGAATTGA  
TTGAATCCATCGTTTGGGCTCATAATAAATAAAAGTTGCTCCTGCTACTCAGCCTAGAG  
CCTTGAGCATTGTACAAGGACGTGCTGTAGGAGTAACCCATTACCTTCTGGGTGGAATT  
GCCACAACATGGGCGTCTTCTTAGCAAGAATTATTGCAGTAGGAATGGCATTAAAGATT  
TCCAAGATTTAGCCAAGGCTTAGCTCAGGACCCCACTACTCGTCGTATTTGGTTTTGGTA  
TTGCTACCGCACATGACTTCGAGAGTCATGATGATTAATCTGAAGAACGTCTTTATCAA  
ACTATTTTTGCTTCTCACTTCGGACAATTAGCAATAATTTTTCTGTGGACTTCCGGAAAT  
CTTTTTCATGTAGCTTGGCAAGGAAATTTGAAGCATGGGTACAGGACCCTTTACATGT  
AAGACCTATTGCGCATGCAATTTGGGATCCTCATTTTGGTCAACCGGCTGTAGAAGCTT  
TACTCGAGGGGGTGTCTTGGCCCAGTGAATATCGTCTATTCTGGTGTATTATCAGTGGT  
GGTATAACAATAGGTTTACGTACTAATGGAGATCTTTATATCGGAGCTCTTTTTCTATTATT  
TCTTTCTGTCATATCCCTAATAGCGGGTTGGTTACACTTACAACCGAAATGGAAACCGA  
GCCTTTCTGTGGTTCAAAAATGCCGAATCTCGTCTCAATCATCATTTGTGAGGACTATTCG  
GAGTAAGTTCCTTGGCTTGGACAGGCCATTTAGTCCATGTCGCTATTCCAGGATCCAGG  
GGGAATACGTTTCGATGGAATAATTTATTAGATGTATTACCACATCCTCAAGGATTAGGC  
CCGCTTTTTTTCAGGTCAGTGGAATCTTTATGCTCAAAACCCTGATTCAAGTAATCATTTA  
TTTGGGACCTCCCGAGGAGCAGGAACTGCCATTCTAACCTTCTCGGAGGATTCCATC  
CGAAACGCAAAGTTTATGGCTGACTGATATGGCACACCATCATTTAGCTATTGCATTTA  
TTTTTCTCATTGCTGGTCATATGTATAGAATACTTTGGGATTGGTCACAGTATAAAAG  
ATCTTTTAGAAGCGCATATTCCTCCGGGGGACGATTGGGACGTGGACATAAAGGTCTT  
TATGACACAATCAATAATTCGATTCATTTCAATTAGGTCTTGCTCTAGCTTCTTTAGGA  
GTTATTACTTCCTTGGTAGCTCAACACATGTAATCTTTACCTGCTTATGCGTTTATAGCGC  
AAGACTTTACTACTCAAGCTGCATTATATACTCATCACCATAACATTGCAGGATTCATCA  
TGACAGGAGCTTTTGCTCATGGAGCTATATTTTTTATTAGAGATTACAATCCGGAACAGA

ATGAGGATAATGTATTGGCAAGAATGTTAGACCATAAAGAAGCTATCATATCCCATTAA  
GCTGGGCCAGCCTCTTTCTGGGATTCCATACTTTGGGACTTTATGTTCATAATGATGTCA  
TGCTTGCTTTTGGTACTCCGGAGAAACAAATCTTGATCGAACCTATATTTGCTCAATGGA  
TACAATCTGCTCATGGTAAAACCTTCATATGGGTTGACGTCCTTTTATCTTCAACGAACG  
GCCCCGCCCTTCAATGCGGGCCAAAGCATATGGTTGCCGGGGTGGTTAAATGCCGTTAAT  
GAG-----AATAGTAATTCACCTATTCTTAAACAATAGGCCCCGGAGACTTTTTGGTTCATCAT  
GCTATTGCTCTAGGTTTACACACAACCTACATTGATCTTGGTAAAAGGTGCTTTAGATGC  
ACGCGGTTCAAAGTTAATGCCAGATAAAAAGGATTTTGGTTATAGTTTTCTTGCGACG  
GTCCGGGACGGGGTGGTACTTGTGATAATTCGGCTTGGGACGCATTTTATTTGGCAGTT  
TTCTGGATGTTAAATACCATTGGATGGGTTACTTTTTTATTGGCATTGGAAGCATATTACAT  
TATGGCAGGGTAATGTTTCACAGTTAATGAATCTTCCACTTATTTGATGGGATGGTTAA  
GAGATTATCTATGGTTAAACTCTTCACAACCTTATCAATGGATATAACCCTTTTGGTATGAA  
TAGTTTATCGGTCTGGGCATGGATGTTCTTATTTGGACATCTTGTTTGGGCTACCGGATT  
TATGTTCTTAATTTCTGGCGCGGATATTGGCAAGAATTGATTGAAACGTTAGCATGGGC  
TCATGAACGCACACCCTTGGCTAATTTGATTTCGATGGAGAGATAAACCAGTGGCTCTTT  
CCATTGTGCAAGCAAGATTGGTTGGATTAGCCCACTTTTCTGTAGGTTATATATTTACTTA  
TGCGGCTTTCTTAATTCCTCTACGTCGGGCAAATTTGGTATGTCACATTCAGTAAAAAT  
TTATGATACATGTATAGGGTGTACTCAATGTGTTGAGCCTGCCCCACAGATGTATTAGA  
AATGATACCTTGGGACGGATGTAAAGCTAAGCAAATTGCTTCAGCTCCAAGAACCGAG  
GATTGTGTTGGCTGTAAGAGATGCGAATCCGCTGTCCAACCGATTTCTTAAGTGTTCG  
AGTTTATTTATGGCATGAAACAACGCGAAGCATGGGTCTAGCTTATATGACAACCTTTGA  
ATTTACCTTCTATTTTTGTGCCTTTAGTGGGCCTAGTATTTCCGGCAATTGCAATGGCTTC  
TTTATCTCTTCATGTTCAAAAAACAAGATTGTTATGCGAGATCTAAAAACATATCTCTC  
CGTGGCACCGGTACTAAGTACTCTATGGTTCGGATCTTTAGCGGGTCTATTAATAGAGAT  
TAACCGTTTATTTCCGGATGCGTTGACATTTCTTTTTTTTCATTCATGACTGCAATTTTA  
GAGAGACGCGAAAGCGAAAGCCTATGGGGTCGTTTCTGTAAGTGGATCACTAGCACTG  
AAAACCGTCTTTACATCGGATGGTTTGGTGTTTTGATGATCCCTACTTTATTGACTGCAA  
CTTCTGTATTTATTATTGCTTTTCATTGCTGCTCCTCCAGTAGATATTGATGGTATTTCGTGA  
ACCTGTTTCTGGATCTTTACTTTACGGAAACAATATTATTTCTGGTGCCATTATTCTACT  
TCTGCAGCTATAGGTTTGCATTTTACCCTATATGGGAAGCGGCATCCGTTGATGAATGG  
TTATAAATGGCGGTCTTATGAGCTAATTGTTTTACATTTCTTGCTTGGTGTAGCTTGT  
ACATGGGTTCGTGAATGGGAACCTAGTTTCCGCTGGGTATGCGTCCTTGGATTGCTGTT  
GCATATTCAGCTCCTGTTGCAGCTGCTACTGCAGTTTTCTTGATCTACCCAATAGGTCAA  
GGAAGCTTTTCTGATGGTATGCCCTAGGAATTTCTGGTACTTTCAATTCATGATTGTA  
TTCCAGGCTGAGCAACATCCTTATGCACCCATTTTCATATGTTAGGTGTAGCTGGTGT  
TTCGGCGGCTCCCTATTTAGTGCTATGCATGGTTCCTTGGTAACTTCTAGTTTGATCAGG  
GAAACCACAGAAAATGAATCTGCTAATGAAGGTTACAGATTCGGTCAAGAGGAAGAA  
ACTTATAATATTGTAGCAGCTCACGGTTATTTGGCCGATTGATCTTTCAATATGCTAGTT  
TCAACAACCTCTCGTTCTTTACATTTCTTCCCTAGCTGCTTGGCCTGTAGTAGGTATCTGGT  
TCACTGCTTTAGGTATCAGTACTATGGCTTTCAACCTAAATGGTTTCAATTTCAACCAAT  
CTGTAGTTGATAGTCAAGGTCGTGTAATTAATACCTGGGCTGATATTATTAACCGTGCTA  
ACCTTGGTATGGAAGTTATGCATGAACGTAATGCTCATAATTTCCCTCTAGATTTAGCGG  
CTGTTGAAGTTCCATCTATAAATGGAATGGGTTTGCCTTGGTATCGTGTTTCATACCGTTG  
TATTGAATGATCCAGGTCGTTTGCTATCTGTCCATATAATGCATACAGCTTTGGTTGCTG

GTTGGGCTGGTTCGATGGCTCTATATGAATTAGCAGTTTTTTGATCCCTCTGACCCTATTC  
TCGATCCAATGTGGAGACAGGGTATGTTTCGTTATAACCTTCATGACTCGTTTAGGAATAA  
CCAATTCATGGGGTGGTTGGAGTATTACA---GGAGGGACTATAACGAATCCGGGTATTT  
GGAGTTACGAAGGTGTGGCTGGGGCACATATTGTGTTTTCTGGTTTGTGCTTCTTGGCA  
GCTATCTGGCATTGGGTGTATTGGGATCTAGAAATTTTTTGTGATGAACGTACAGGCAA  
ACCCTCTTTGGATTTGCCGAAGATTTTTGGAATTCATTTATTTCTCTCTGGGGTGGCTTG  
CTTTGGTTTTGGCGCATTTTCATGTAACAGGATTGTATGGTCCTGGAGTATGGGTATCCGA  
TCCTTATGGACTAACTGGAAGGCTTCAACCTGTAAATCCAGCGTGGGGTGTAGAGGGT  
TTTGATCCTTTCGTTCCGGGAGGAATCGCCTCTCATCATATTGCCGCAGGGACATTAGG  
CATATTAGCGGGTCTATTCCATCTTAGCGTCCGTCCGCCCAACGTCTATACAAAGGATT  
ACGTATGGGTAATATTGAAACCGTCTTTCCAGTAGTATCGCTGCTGTCTTTTTTGCAGC  
TTTTGTTGTTGCTGGAACATGTGGTATGGTTCAGCAACTACTCCCATCGAATTATTTGG  
TCCCACTCGTTATCAATGGGATCAAGGATACTTTCAGCAAGAAATATATAGAAGAGTTA  
GTGCTGGGCTAGCCGAAAATCAAAGTTTATCCGAAGCTTGGTCTAAAATTCCTGAAAA  
ATTAGCCTTTTATGATTACATCGGCAATAATCCAGCAAAGGGGGATTATTCAGAGCGG  
GCTCGATGGACAACGGGGACGGAATAGCTGTTGGTTGGTTAGGACATCCTATCTTTAGA  
GATAAGGAAGGGCGTGAACTTTTTGTACGTCGTATGCCTACCTTTTTTGAACATTTCC  
GGTTGTTTTGGTAGACGGAGACGGAATTGTTAGAGCTGATGTTCCTTTTTCGAAGGGCG  
GAATCGAAGTATAGTGTGCAACAAGTAGGTGTAACGTGTTGAGTTCTATGGTGGAGAAC  
TCAATGGAGTCATTTATAGTGATCCTCCTACTGTGAAAAATATGCTAGACGTGCTCAAT  
TGGGTGAAATTTTTGAATTGGATCGTGCTACTTTGAAATCCGATGGTGTTTTTTCGTAGC  
AGTCCGAGGGGTTGGTTTACTTTTGGACATGCTTCGTTTGCTCTACTCTTTTTTCGGG  
CACATTTGGCATGGCGCTAGAACTTTGTTTCAGAGATGTTTTTGTGGTATTGATCCAGAT  
TTAGATGCTCAAGTTGAGTTTGGAGCATTCCAAAACTTGGAGATCCGACTACAAGAA  
GACAAGCAGTC-----GTGGAAACGCTCTTTAATGGAACTTTAGC  
TTTAGCTGGTCGTGACCAAGAAACCACCGTTTTTCGTTGGTGGGCCGGGAATGCCCGA  
CTTATCAATTTATCCGGTAAACTATTGGGTGCTCATGTAGCCCATGCCGATTAATCGTAT  
TCTGGGCCGGAGCAATGAACCTATTTGAAGTAGCTCATTTTCGTACCAGAGAAGCCAAT  
GTATGAACAAGGATTAATTTTACTTCCCCACCTAGCTACTCTAGGTTGGGGGATAGGCC  
CTGGTGGAGAAGTTATAGACACCTTTCCATACTTTGTATCTGGAGTACTTCACTTAATTT  
CCTCTGCAGTATTGGGCTTTGGCGGTATTTATCATGCACTTCTGGGCCCTGAGACTCTTG  
AGAATCTTTTCCATTCTTTGGTTATGTGTGGAAAGATAGAAATAAAATGACAACAATT  
TTGGGTATTCACTTAATCTTGTAGGTATAGGTGCTTTCCTTCTAGTATTCAAGGCTCTTT  
ATTTTGGGGGCATATATGATACCTGGGCTCCAGGGGGGGGGACGTAAGAAAAATTAC  
CAACCTGACCCTTAGCCCAAGCGTTATATTTGGTTATTTACTAAAATCCCCGTTTGGGGG  
AGAAGGGTGGATTGTTAGTGTAGATGATTTGGAAGATATAATAGGAGGGCATGTATGGT  
TAGGTTCCATTTGTATACTTGGTGGAAATCTGGCATACTTAACCAAACCCTTTGCGTGGG  
CTCGTCGTGCACTTGTCTGGTCTGGAGAAGCTTACTTGTCTTATAGTTTAGGTGCTTTAG  
CTGTTTTTGGTTTCATTGCTTGTGTTTTGTCTGGTTCAATAATACCGCTTATCCTAGTGA  
ATTTTATGGTCCCCTGGACCAGAAGCTTCTCAAGCTCAAGCATTACTTTTCTAGTTA  
GAGATCAGCGTCTTGGGGCTAACGTAGGATCTGCTCAAGGGCCTACCGGTTTAGGTAA  
ATATCTAATGCGTTCACCCACAGGAGAAGTTATTTTTGGAGGAGAACTATGCGTTTTT  
GGGATTTGCGCGCTCCATGGTTAGAACCCTCTGCGGGGTCCCAATGGTTTAGACTTGAGT  
AGGATAAAAAAAGACATACAGCCTTGGCAAGAACGGCGTCTGCGGAATATATGACTC

ATGCTCCTTTAGGTTCTTTAAATTCTGTAGGTGGTGTAGCTACCGAGATCAATGCAGTCA  
ATTATGTCTCTCCTAGAAAGTTGGTTAGCTACCTCTCATTGTTCTAGGATTCTTCCTATT  
TG TAGGTCATTTATGGCATGCGGGAAGGGCTCGTGCAGCTGCAGCAGGATTTGAAAA  
GGAATTGATCGTGATTTTGAGCCTGTTCTTTTCATGACTCCTCTTAACATGACTATAGCA  
CTTGGTAAATTTACCAAAGACGAAAATGATTTATTTGATATTATGGATGACTGGTTACGA  
AGGGACCGTTTCGTTTTTTGTAGGTTGGTCCGGTTATTGCTCTTTCCCTGTGCCTATTT  
GCCTTAGGGGGTGGTTCACAGGTACAACCTTTGTAACTTCATGGTATACCCATGGATT  
GGCTAGTTCTTATTTGGAAGGCTGCAACTTCTTAACTGCCGCAGTTTCGACTCCTGCTA  
ATAGTTTAGCACATTCTTTGTTGTTACTATGGGGCCCTGAAGCACAAGGAGATTTACTC  
GTTGGTGTCAATTGGGCGGTCTGTGGACTTTTGTGCTCTCCACGGCGCTTTCCGATTA  
ATAGTTTTCATGCTACGTCAATTTGAACTTGCTCGATCTGTTCAATTGCGACCTTATAAT  
GCAATCGCATTCTCTGGTCCAATTGCTGTTTTTGTCTGTATTCCTGATTTATCCACTAG  
GCCAGTCTGGTTGGTTTTTTGCGCCTAGTTTTGGTGTAGCAGCTATATTTAGATTTATCC  
TCTTTTTCCAAGGGTTTCATAATTGGACATTGAATCCATTTATATGATGGGAGTTGCCG  
GTGTATTGGGTGCTGCTCTGCTATGCGCTATTCATGGTGCTACCGTTGAAAATACCTTAT  
TTGAAGATGGTGATGGTGCAAATACATTCGCTTTTAAACCAACTCAAGCTGAAGA  
AACTTATTCAATGGTTACTGCTAACCGCTTTTGGTCCCAAATCTTTGGGGTTGCTTTTT  
CAATAAACGTTGGTTACATTTCTTTATGTTATTTGTACCAGTAACCGTTTTATGGATGAG  
CGCTCTTGGAGTGGTCCGTCTGGCTCTGAACCTACGTGCCTATGACTTCGTTTCTCAGG  
AAATTCGTGCAGCGGAAGATCCTGAATTTGAGACTTTCTACACCAAAAATATTCTCTTA  
AACGAAGGTATTCGTGCTTGGATGGCGGCTCAAGATCAGCCTCATGAAAACCTTATATT  
CCCTGAGGAGGTTCTACCCCGTGGAACGCTCTTATGTCTGGAAGCACAGGAGAACGT  
TCTTTTGCTGATATTATTACCAGTATTCGATACTGGGTCATTCATAGCATTACTATACCTC  
CCTATTTATTGCGGGTTGGTTATTCGTGACGACGGGTTTAGCTTACGATGATTTGGAAG  
TCCTCGTCCAAATGAATATTTTACAGAGAGCCGACAAGGAATTCCATTAATAACTGGCC  
GTTTTGATTCCTTGGAACTCAATGAATTTAGTAGATCTTTTATGACCATAGATCGAA  
CCTATCCAATTTTACAGTGCATGGTTGGCTGTTACCGACTAGCTGTACCTACAGTTT  
CTTTTTGGGGTCAATATCAGCAATGCAGTTCATCCAACGAATGGCTACACAAACCATT  
GAGGGTAGTTCTAGATCTGGT--CCAAGACGAACTTTTGTAGGGGATTTATTGAAACCA  
TTGAATTCAGAATATGGTAAAGTAGCTCCTGGATGGGGAACACTCCTTTGATGGGGT  
CGCAATGGCTTTATTTTCGATATTCCTATCTATTATTTGGAGATTTATAATTCGTCTGTTT  
TATTGGACGGAATTTCAATGAATATGCTTACTCTTAACTTTTTGTTTACACAGTAGTGA  
TATTTTTGTTTCTCTCTTTATCTTTGGATTCCATCTAATGATCCAGGACGTAATCCTGG  
ACGTGAAGAAATGGCCGATACTACTGGAAGGATTCTCTTTGGATAATAGGTACTGTAG  
CTGGTATTCTTGTGATCGGTTAATCGGTATTTTCTTTTATGGTTCATATTCCGGATTGGG  
TTCGTCCCTGATGCTTAATATATTTAGTATGATCTGTATCTGTCTTAATCTGTTGTTTATT  
CAAACAGTCTTTTCCTCGTCAAATTGCCCGAGGCCTATGCTTTTTTGAATCCAATTGTG  
GATGTTATGCCAGTAATCCCCCTGTTCTTTTTCTTTTAGCTTTTGTGGCAAGCTGCT  
GTAAGTTTTCGAACGACACAATCAAACCCGAACAAACAAAATGTCGAATTGAATCGTA  
CCAGTCTAFACTGGGGGTTAATFACTCATTTTTGTACTTGCTGTTTTATTTCCAATTATTT  
TTCAATATGGAAGTAAATATTCTCGCATTTATTGCTACTGCACTGTTCAATTTAGTCCCTA  
CTGCCTTCTACTTATAATATATGTAACAGTAAGTCAAATGATATGGAAACAGCAA  
CCCTAGTCGCCATCTTTATTTCTGGTTTACTTGTAAGTTTTACTGGGTATGCCTTATATAC  
TGCTTTTGGGCAACCCTCTCAACAACTCAGAGATCCGTTTCGAGGAACACGGGGACATG

GAAGCATTGGTTTATACATTCTCTTAGTCTCGACTCTAGGAATAATTTTTTCGCTATCT  
TTTTTCGAGAACCCCTATAGTTCCAACATAAAAGGGTGAAAATGACTATTGCTTTCCAA  
TTGGCTGTTTTTGCATTAATTGTTACTTCGTCAATCTTACTGATCAGTGTACCAGTTGTAT  
TTGCTTCTCCTGATGGTTGGTCGAGTAATAAAAATGTTGTATTTCCGGTACATCATTAT  
GGATTGGATTAGTCTTTCTAGTAGGTATCCTTAATTCTCTCATATCT-----ATGT  
CACCACAAACAGAGACTAAAGCAAGTGTGGATTCAAGGCCGGTGTAAAGATTATAA  
ATTGACTTATTATACTCCTGAATATGAAACCAAAGATACTGATATCTTGGCAGCATTCCG  
AGTAACTCCTCAACCTGGAGTTCCTCCCTGAGGAAGCCGGGGCAGCGGTAGCTGCTGA  
ATCTTCTACTGGTACATGGACAACCTGTGTGGACCGATGGGCTTACCAATCTTGATCGTT  
ACAAAGGACGATGCTACCACATCGAGCCTGTTGCTGGAGAAGAAAGTCAATTTATTGC  
TTATGTAGCTTACCCCTTAGACCTTTTTGAAGAAGGTTCTGTTACTAACATGTTTACTTC  
CATTGTGGGTAATGTGTTTGGGTTCAAGGCGCTGCGGGCTCTACGTCTAGAGGATTGTC  
GAATCCCTGTTGCTTATGTTAAAACCTTTTCAAGGCCCGCTCATGGCATCCAAGTTGAG  
AGAGATAAATTGAATAAGTATGGCCGTCCCCTATTGGGATGTACTATTAACCTAAATTA  
GGGTTATCCGCTAAGAATTATGGTAGAGCAGTTTATGAATGTCTCCGCGGTGGACTTGA  
TTTTACCAAAGATGATGAAAACGTGAACTCTCAACCATTTATGCGTTGGAGAGACCGTT  
TCTTATTTTGTGCCGAAGCTATTTATAAATCACAGGCTGAAACCGGGGAAATCAAAGGG  
CATTACTTGAATGCTACTGCAGGTACGTGTGAAGAAATGATTAAGGGGCTGTATTTGC  
TAGAGAATTGGGAGTTCCTATCGTAATGCATGACTACTTAACAGGGGGATTCACTGCAA  
ATACCAGCTTGGCTCATTATTGCCGAGATAATGGTTTACTTCTTACATACATCGTGCAA  
TGCATGCAGTTATTGATAGACAGAAGAATCATGGTATGCACTTTCGTGTACTAGCTAAG  
GCGTTACGTATGTCTGGTGGAGATCATATTCCTCTGGTACCGTAGTCGGTAAACTTGA  
AGGGGAAAGAGAGATCACTTTAGGCTTTGTTGATTTACTACGTGATGATTTTATTGAAA  
AAGATCGAAGCCGTGGTATTTATTTCACTCAAGATTGGGTCTCTTACCAGGGGGTTCTG  
CCTGTGGCTTCAGGGGGTATTCACGTTTGGCATATGCCGGCTCTAACCGAGATCTTTGG  
AGATGATTCGTACTACAATTTGGTGGAGGAACTTTAGGGCACCCCTGGGGAAATGCA  
CCGGGTGCTGTAGCTAATCGAGTGGCTCTAGAAGCATGTGTACAAGCTCGTAATGAAG  
GGCGTGATCTTGCTCGTGAGGGTAATGAAATTATCCGTGAGGCTTGCAAATGGAGTCCT  
GAACTAGCTGCTGCTTGTGAAGTATGGAAAGAGATCAAATTTGAATTTGAAGCAATGG  
ATACTATT-----ATGGCGATACATTTATACAAAACCTTCTACTCCCAGCACACGCAATGGAG  
CCGTAGACAGTCAAGTGAATCCAATACACGAAATAATTTGATCTATGGACAGCATCAT  
TGTGGTAAAGGTCGTAATGCCAGAGGAATCATTACCGCAGGGCATCGAGGGGGAGGTC  
ATAAGCGTCTATACCGTAAAATAGATTTTCGACGGAACGAAAAGACATATATGGTAGA  
ATCGTAACCATAGAATACGACCCTAATCGAAATGCATACATTTGTCTCATACTATGGG  
GATGGTGAGAAGAGATATATTTTACATCCCAGAGGGGCTCTAATTGGAGATACCATTGT  
TTCTGGTACAGAAGTTCTATAAAAATGGGAAATGCCCTACCTTTGACCGATATGCCCTT  
AGGCACGGCCATAATAATAGAAATCACACTTGAAAGGGTGGACAATTAGCTAGA  
GCAGCGGGTGCTGTAGCGAAACTGATTGCAAAGAGGGGAAATCGGCCACATTAATAA  
TTACCTTCTGGGGAGGTCCGTTTGTATCCAAAACTGTTTTCAGCAACAGTCGGACAAG  
TAGGGAATGTTGGGGTGAACCAGAAAAGTTTGGGTAGAGCCGGATCTAAATGTTGGCT  
AGGTAAGCGTCTGTAGTAAGAGGAGTAGTTATGAACCCTGTAGACCATCCCATGGG  
GGTGGTGAAGGGAGGGCCCAATTGGTAGAAAAAACCCGCAACCCCTTGGGGTTAT  
CCTGCACTCGGAAGAAGAAGTAGAAAACGGAATAAATATAGTGATAATTTGATTCTTCG  
TCGCCGTAGTAAAATGATTCAACCTCAGACCCGTTTGAATGTAGCGGATAACAGCGGA



GCCCCGAGAATTGATGTGTATTTCGAATCCTAGGGGCTAGT---AATCGACGATATGCGCATA  
TTGGTGACGTTATTGTTGCTGTAATCAAGGAAACAGTCCCAAATACACCTCTAGAAAAA  
TCAGAAGTGATCAGAGCTGTAATTGTACGCACTTGTAAAGAACTCAAACGTGATAACG  
GTATAATAATACGATATGATGACAATGCTGCAGTTGTTCATTGATCAAGAAGGAAATCCA  
AAAGGAACTCGAATTTTTGGTGCAATCGCAGGGGAATTGAGAAAATTAATTTCACTA  
AAATAGTTTCATTAGCGCCCCGAGGTATTAATGCTTAGTCCAAAAAGAAGCAGATTCCGT  
AAACAACATAGAGGAAGAATGAAAGGAATATCTTATCGAGGTAATCGCATTGTTCGG  
TAAATATGCCCTTCAGGCACTTCAGCCTGCTTGGATTACTTCTAGACAAATTGAAGCAG  
GGAGACGAGCAATGACACGAAATGCACGCCGTGGTGGAAAAATATGGGTACGTATATT  
TCCAGATAAAGCAGTTACAATAAGACCTACTGAAACACGTATGGGTTTCGGGGAAAGGA  
TCCCCCGAATATTGGGTAGCTGTTGTTAAACCTGGTAAAATCCTTTATGAAATGAGCGG  
AGTCGCAGAAAATATAGCCAGAAAAGCTATTTCAATAGCCGCATCCAAAATGCCTATAC  
GAACTCAATTCATTATTTTCGGTAATGACCAGAATTAACGAGGATATATAGCCCCGAGA  
CGTAGAACAAAAATTCGTTTATTTGCATCAAGCTTTCGCGGGGCTCATTACGACTTAC  
TCGAACTATTACTCAACAGAAAATAAGAACTTTGGTTTCGTCTCATCGGGATCGAGATA  
AACAAAAGAGAAATTTGCGTCGTTTGTGGATCATTTCGGATAAATGCAGTAATTCGCGA  
AAAC---AAGGCATCCTGTAGTTATAGTAGACTAATACACAATCTGTACAAAGGGCTGTT  
GCTTCTTAATCGTAAATACTCGCACAAATAGCAATATCAAATAGAAATTCTTTTTATAG  
ATTTCAAATGAGATCATAAAA-----ATGATAAAGGAAGTATATGCTT  
TAGGTCAACATATACCTATGTCTCCTCACAAAGCACAAAGAGTAATTGATCAAATCCGT  
GAACGCTCATATGAGGAAACTCTTATGATATTAGAATCATGCCTTATCGAGCATGTTAT  
CCCATTTTAAAATTGGTTTATTCTGTAGCAGCAAATGCTAGTCACAATATGGGTTTCGAT  
GAAACAAATTTAGTCATTAGTAAAGCTGAAGTTAATGAGGGTACTACTGTGAAAAAATT  
AAAACCCCGAGCTCGAGGACGGAGTTATCCAATAAAACGATCTACCTGTCCATATGACTA  
TTGCATTAAGATATATCTTTATAT-----ATGGATGGAATCAAATATGCAGTAT  
TTACAGACAAAAGTATTCGGTTATTGGGGAAAAAT---CAATATACTTCTAATGTCGAATC  
GGGATCAACTAGGACAGAAATAAAGCATTGGGTGCAACTCTTCTTTGGTGTCAAGGTA  
ATAGCTATGAATAGCCATCGACTCCTGGGAAAGGGTAGAAGAATGGGACCTATTATGGG  
ACATACAATGCATTACAGACGTATGATCATTACGCTTCAACCGGGTATTCTATTCCACC  
T C T T A G A A A G A A A A G A A C  
T????????????????????????????????????????????????????????????????  
????????????????????????????????????????????????????????????????  
????????????????????????????????????????????????????????????????  
-----????????????ATGGCCAAGGG  
CAAAGATGTCCGAGTACGGTTATTTTGGAAATGACTAGTTGTGTTCAAACGATATTA  
ATTCAAAAAAGAATCAAAGGCATTTCCAGATATTAATCTCAAAGAATCGACACAAT  
ACACCTAGTCGATTGGAATTGAGAAAATTTGTCCCTATTGTTACAAACATACGATTCAT  
GGGGAGATAAAGAAAATGAAAATAAGGGCCTCCGTTTCGTAAAATTTGTGAAAATGTC  
GACTGATCCGTCGACGGGGACGAATTATAGTAATTTGTTCCAACCCAAGACATAACA  
AAGACAAGGAATGGTTTCGAGAGAAAGTAACAGTATCTACTCGGACACTACAGTGGA  
GTGTGTTGAATCAAGAGCAGACGGTAAACGTCTTTATTATGGGCGCTTTATTCTGTCTC  
CACTTATGAAAGGTCAAGCGGACACAATAGGCATTGCGATACGAAGAGCTTTGCTTGG  
AGAAATAGAAGGAACATGCATCACACGTGCAAAATCTGAG-----AAAATCCCACATGAA  
TATTCTACCCTAGCAGGTATTCAAGAATCAATACATGAAATTTAATGAATTTGAAAGAA  
ATTGTATTGAGAAGCAATTTGTATGGAATCATGACGCATCTCTTTGTGTCAAAGGTCC  
TGGATATGTAATGCTCAAGACATCATCTTACCCCTTCAGTGGAATCATTGATAATAC

ACAACATATAGCTAGTCTAACAGAACCAATTGAGTTGTGTATTGGATTACAAATCGAGA  
GGAATCGCGGATATCATAAAAAACGCCAAATAACTTTCAA---GACGGA---AGTTATCCT  
ATAGATGCTGTATTTCATGCCTGTTTCGAAATGCAAATCATAGTATTTCATTCTTATAGAAATG  
GGAATGAAAAACAAGAGATGCTTTTTCTTGAAATATGGACAAATGGAAGCTTAACTCC  
TAAAGAAGCACTTCATGAAGCCTCCCGGAATTTGATTGATTTATTTATTCCTTTTCTACA  
TGCGGAAGAAGAA-----AACTCACATTTAGAAACCAATCAA---CACAAGGTTACTTTAC  
CCTTTTTACTTTTTTCATGATAGATTGGCT---AACTAAGAAAAATAAAA---AAAAAATA  
TCATTGAAATATATTTTTATTGACCAATTAGAATTGACCCCTAGGATCTATAATTGCCTCA  
AAAGGTCCAATATACATACATTATTGGACCTTTTGAATAATAGTCAAGAAGACCTTATGA  
ACATTGAACATTTTCACATAGAAGATGTAAAACATATAATGGGCGTTCTAGAAAACAAT  
TTA-----GCAATTGATTTACCAAAGAAAAAATGCTCGTAGATGGAAAT--GAGGGAATG  
TCTACAATACCTGGATTTAATCAGATACAATTTGAAGGGTTTTATAGATTCATTGATCGG  
GGCTTAACAGAAGAACTTTATAAGTTTCCAAAATGGAAGATACAGATCAAGAAATTG  
AATTTCAATTATTTGTGGAAACACATCAATTGGTCAACCTTTGATAAAAGAAAGAGAT  
GCTGTCTATAAATCACTCACATATTCTTCTGAATTATATGTATCCGCGGGATTAATTTGGA  
AAACCTGCAGAAATATGCAAGAACAACAATTTTTATTGGAAACATTCCTCTAATGAAT  
TCCCTGGGAACCTCTATAGTAAATGGAATATACAGAATTGTGATAAATCAAATATTGCAA  
AGCCCTGGTATCTATTACCGATCAGAATTAGACCATAACGGAATTCGGTCTATACCGGC  
ACTATAATATCAGATTGGGGAGGAAGAGTAGAATTAGAGATTGATAGAAAAGCAAGGA  
TCTGGGCTCGTGTAAAGTAGAAAACAGAAAATATCTATTCTAGTTTTATCATCAGCTATGG  
GTTTCGAATCTAAGAGAAATTTTAGAGAATGTTTGCTACCCTGAAATTTTCTTGTCATTCC  
TAAATGATAAGGAGAAAAAACGATTGGGTCAAAGGAAAATGCCATTTTGGAGTTTTA  
TCAACAATTTACTTGTGTAGGTGGAGATCCGGTATTTTCTGAATCCTTATGTAAGGAATT  
ACAAAAGAAATCTTTCAACAAAGATGTGAATTAGGAAGAATTGGTGCACGAAATATG  
AACCAGAGACTTAATCTTGATATACCTCAGAACAATACATTTTTGTACCACGGGATATA  
TTGGCAGCGGCGGATCATTTGATTGGAATGAAATTTGGAATGGGTACACTTGATGAT----  
-ATGAATCATTTAAAAAATAAACGTATTCTGTTCTGTAGCGGATCTCTTACAAGATCAATTT  
GGATTGGCTCTGGTTTCGTTTAGAAAATGTGGTTAGAGGGACTATATGTGGAGCAATTAG  
G---CATAAATTGATA---CCGACTCCTCAGAATTTGGTAACTTCAACTCCA-----TTAA  
CAAGCACTTATGAATCTTTTTTCGGATTACACCCATTATCCCAAGTTTTAGATCGAACTA  
ATCCATTAACACAAACAGTTCATGGGAGAAAATTAAGTTATTTAGGACCCGGAGGATTG  
ACAGGACGAACTGCTAGTTTTTCGGATACGAGATATCCATCCTAGTCACTATGGGCGCAT  
TTGCCCAATTGATACATCTGAAGGAATTAATGTTGGGCTTATTGGATCCTTATCAATTCAT  
GCGAGAATTGGGCATTGGGGG---TCTCTAGAAAGCCCATTTTAT-----AAAATCTCTGA  
GGGATCGAAA-----AAAGTACGGATGCTTTATTTATCACCAAATATAGATGAATACTATAT  
GCTAGCAGCGGAAATCTTTGGCACTTAATCGAGGTTTTTCAGGAAGAACAGGTTGTT  
CCAGCTCGATACCGTCAAGAATTCCTGACTATTGCATGGGAACAGGTTTCATCTTCGAAG  
TATTTTTCCCTCCAATATTTTTCTATTGGAGCTTCCCTTATTCTTTTTATCGAGCATAATG  
ATGCAAATCGGGCTTTAATGAGTTCTAATATGCAACGTCAAGCAGTTCCGCTTTCTCGG  
TCCGAGAAGTGCATTGTTGGAACAGGGTTGGAACGCCAAGTGGCTCTAGATTCAGGG  
GTTCTCGTATAGCCGAACACGGAGGAAAGGTCATTTATACCGATACTGACAAGATCGT  
TTTATCGGAAAACGGGGATACTTTTAGCATTCCGTTAGTTATGTATCAACGTTCCAACAA  
AAATACTTGTATGCATCAAAAACCCAGGCTCAACGAGGTAAATGCATTA AAAAGGGA  
CAAATTTTAGCAGATGGTGCCGCTACGGTTGGTGGTGAACCTCGCTTTGGGTAAAAATGT

ATTAGTAGCTTATATGCCATGGGAGGGTTACAATTTTGAAGATGCGGTACTCGTTAGCGA  
GCGTTTGGTATATGGAGATATTTATACTTCTTTTCACATACGGAAATATGAAATTCAGACT  
CATTTGACAAGCCAAGGT---CCTGAAAGGATCACTAATGAAATACCGCATCTAGAAGCC  
CATTTACTTTCGAAATTTAGACAAAAATGGAATTGTGGTGTGGGATCTTGGGTAGAGAC  
GGGCGATATTTAGTAGGTAATAACACCTCAGATGTCGAAAGAA---TCCTCGTATGCC  
CCCGAAGATAGATTATTACGAGCCATACTTGGTATTCAAGTATCTACTTCAAAGAAACT  
TGTCTTAAATTACCCATAGGCGGGAGGGTTCGAGTTATTGACATACGATGGATCCATAA  
AAAAGGT---GGTTCGAGTTATAATCCAGAAAAGATTAGTGTATATATTTTCACAGAAACGC  
GAAATCAAAGTAGGTGATAAAGTAGCCGGAAGACATGGAAATAAAGGTATCATTCCA  
AAATTTTTCCTAGACAGGATATGCCATATTTGCAAGATGGAAAACCCATTGATATGGTCT  
TCAATCCATTAGGAGTACCTTCACGAATGAATGTAGGACAGATATTTGAATGTTCACTC  
GGGTTAGCGGGGGTCTGCTAGATAGACATTATCGAATAGCACCTTTTGATGAGAGATA  
TGAACAAGAGGCTTCGAGAAAACTGGTGTTTTCTGAATTATATGAAGCCAGTAAGCAA  
ACAGCAAATCCATGGGTATTTGAACCCGAATATCCGGGAAAAAGCAGAATATTTGATGG  
AAGAACAGGAGATCCTTTTGAACAACCTATTATAATAGGAAAACCTTATATCTTGAAATT  
AATTCATCAAGTTGATGATAAAATACATGGACGTTCCAGTGGGCATTATGCACTTGTAC  
ACAACAACCCCTTAGAGGAAGGGCCAAACAGGGGGGACAGCGGATAGGCGAAATGG  
AGGTTTGGGCTCTAGAAGGGTTTGGTGTTCATATTTTACAAGAGATGCTTACTTATA  
AGTCTGATCATATCAGAGCTCGCCAAGAAGTACTTGGTACTACGATCATTGGAGGAACA  
ATATCTAAACCCGAGGATGCTCCAGAATCTTTTCGATTACTTGTTCGAGAACTACGGTC  
TTTGGCTCTGGAAGTGAATCATTTCCTTATATCTGAGAAGAAGTCCAGATTAATAGGA  
AGGAAGTTATGAATTATAATTTTCTTCTATGATCAATCGTTATAAACACCAACAACCTCC  
GAATTGGATTGGTTTCTCCTCAACAAATAAGTGCTTGGGCCAAAAAAATCCTACCTAAT  
GGGGAGATTGTTGGAGAAGTGACAAAACCTTATACTTTTCATTACAAAACCAATAAAC  
CTGAAAAAGATGGATTATTTTGTGAAAGAATTTTGGTCTATAAAAAGTGGAATTTGT  
GCTTGTGGAATATCGAGTAATTGGAGAGACAAAAGAAGATCAAAAATTTTGTGAAC  
AATGCGGAGTTGAATTTGTTGATTCTAGGATACGAAGATATCAAATGGGCTATATCAAAT  
TGGCATGCCAGTAACCCACGTGTGGTATTTGAAACGTCTTCCCAGTTATATCGCAAAT  
CTTTTAGATAAACCTCTTAAAGAATTAGAGGGCCTCGTATACTGCGAT-----TTTTCTTT  
GCAAGGCC---ATAGCTAATAAACCTTCTTTCTTACGATTACGGGGTTCATTTGAATATG  
AAATTCAATCCTGGAATATAGCATCCACTTTTTTTTACTACCCAAGGCTTTGATACAT  
TTCGAAATCGAGAAATTTCTACCGGAGCAGGTGCTATTTCGAGAACAATTAATGATCTG  
GATTTGCGAATTATTATAGATTCTTCTTTGGTAGAATGGAAAGAATTAGGGGAAGAG---G  
GACCCACGGCAATGAATGGGAAGATCGAAAAGTTGGAAGACGAAAGGATTTTTTGG  
TTCGACGCATGGAATTGGCTAAGCATTATTCGAACAAATATAGAACCAGAATGGATG  
GTTTTATGTCTATTACCAGTCCTTCTCCCGAGTTGAGACCCATCATTAGATAGATGGG  
GGTAAACTAATGAGCTCAGATATTAATGAACTATATAGAAGAGTTATCTATCGGAACAAT  
ACCCTTACCGATCTATTAACAACAAGTAGATCTACACCGGGGGAATTAGTAATGTGTCA  
GGAGAAATTGGTACAAGAAGCCGTGGATACACTTCTTGATAATGGAATCCGCGGACAA  
CCAATGAGGGATGGTCATAATAAGGTTTACAAATCGTTTTTCAGATGTAATTGAAGGCAA  
AGAGGGAAGATTTCTGAGACTCTGCTTGGCAAACGAGTTGATTATTCGGGGCGATCT  
GTCATTGTCGTAGGCCCTCGTTTTTATTACATCGATGTGGATTGCCTCGCGAAATAGCA  
ATAGAGCTTTTCCAGACATTTGTAATTCGCAGTTAATTAGACAACATCTTGCTTCGAAC  
ATAGGAGTTGCTAAAAGTAAAATTAGGGAAAAAGAGCCGGTTGTATGGGAAATACTTC

AGGAAGTTATGCAAGGGCATCCTGTATTGTTGAATAGAGCGCCTACTCTGCATAGATTA  
GGTATACAGGCATTCCAACCCATCTTAGTGGAAGGACGCGCTATTTGTTTACATCCATTA  
GTTTGTAAGGGATTCAATGCAGACTTTGATGGGGATCAAATGGCTGTTCATGTGCCTTT  
ATCATTGGAGGCTCAAGCGGAGGCTCGTTTACTTATGTTTTCTCATATGAATCTCTTGT  
TCCAGCTATTGGAGACCCCATTTCCGTACCAACTCAAGATATGCTTATGGGGCTCTATGT  
ATTAACGAGTGGGAATCGTCGAGGTATTTGTGTAAATAGGTATAATCCATATAATCGC-----  
---AGAAATCGGCAAAATGAAAATATTAAGATTAAGGATTATAGGTATAACGAAT-----GGG  
CCCTTTTTTTGTAACCTCCTATGATGCAATTGGAGCTTATCAGCGGAAAAGAATCAATTTA  
GATAGTCCTTTATGGCTGCGATGGCAGCTAGATCAACGC--GTTATTGCTTCA-----AGAG  
AAGCTCCCATCGAAGTTCATGAGTTCGTTGGGTACCTATCATGAGATTTATGGACACT  
ATTTAATAGTAAAAAGTATAAAAAACGAAAATCTTTGTATATACATTTCGAACCACAGTTG  
GTTATATTTCTCTTTATCGAGAAATTGAAGAAGCTATCCAAGGGTTTTGCCGGGCTGTT  
TGGATGGTATC-----ATGGCAGAACGAGCCAATCTAGTCTTTCAC  
AATAAAGCGATAGAAGGAACTGCCATTAACGACTTATTAGCAGATTAATAGATCACTT  
CGAATGGCATATACATCATATATCCTGGATCAAGTAAAAACTCTGGGTTTCCGGCAAG  
CTACTGCTACATCTATTTTCATTAGGAATTGATGATCTTTTAAACAATACCCCTAAGGGGT  
GGTTAGTCCAAGATGCTGAACAACAAAGTTTCCTTTTGGAAAAACATCATCATTACGG  
GAATGTGCACGCGGTAGAAAAATTACGCCAATCCATTGAGATATGGTATGCTACAAGTG  
AATATTTGCGACAAGAAATGAATCCTAATTTTAAGATGACTGAACCTTTTAATCCAGTTC  
ATATAATGTCTTTTTCGGGAGCTAGAGGAAATGCATCTCAAGTACACCAATTAGTTCGGTA  
TGAGAGGATTAATGTCGGATCCCCAAGGACAAATGATTGATTTACCCATTCAAAGCAAT  
TTACGAGAAGGATTGTCTTTAACAGAATATATCATTCTTGCTATGGAGCTCGCAAAGG  
AGTTGTAGATACTGCTGTACGAACATCAGATGCTGGATATCTTACACGGAGACTTGTG  
AGGTAGTTCAACACGTTGTTGTACGTAGAACAGATTGTGGCACCATCCGAGGGATCTC  
TGTGAGCCCTCGAAAGGGGGTGGCGGCG---GAAAGAATTTTTATTCAAACATTAATTGG  
TCGTGTATTAACAGATAATATATATATGGGCTCACGGTGCATCGCTATTCGAAATCAAGA  
CATTGGGATTGGACTTGTTAATCAATTCATAACT-----TTGCGAACACAACCCAT  
ATCTATTCGAACCCCTTTTACTTGTAGGAATACATCTTGGATCTGCCGATTATGTTATGGT  
CGGAGTCCTACTCATGGTGACCTGGTCGAATTGGGCGAAGCTGTAGGTATTATTGCGGG  
TCAATCTATTGGAGAGCCGGTACTCAACTAACATTAAGAACTTTTCATACCGGTGGAG  
TATTCACAGGGGGTACTGCCGAACATGTACGAGCCCCTTCGAACGGAAAAATAAAATT  
TAATGAAGATTTGGTTCAGCCCACACGTACACGTCATGGGCACCCCGCCTTTCTATGTT  
ATATAGACGTCTATGTAACCTATTGAGAGTGAAGATATTCTACATAACGTGACTATTCCGC  
CGAAAAGTTTTCTTTTAGTTCAAAACGATCAATATGTAGAATCAGAACAAGTGATTGCT  
GAGATTCGCGCGGGAACATACACT-----TTAAGGAGAGGGTTCGAAAACATATTTAT  
TCGGACTCAGAAGGAGAA---ATGCACTGGAATACCGACGTATAACCATGCACCTGAATTT  
ACATATAGTAATGTACATCTCTTACCAAAAACAAGTCATTTATGGATATTAACAGGAGCC  
TCGGGCAGA-----GCCAGTGGAGTCCGTTTTCTTTACACAAGGATCAAGATCAAATGA  
ACGTTTCAT-----TCTTCTTCTGTTGAAAGA---AGATGTAATTCTAGGCTT---TCAATAAATA  
ATGATCAA---GTTAGACACAAATTCTTTAGTTTCGAATCTTTTTGGTAAA---GAAAGTAGG  
ATTCCTCATTAT---TCAGAACTTAATCGAGTCTATGTATTGGTCGTTGTAATCTCATAGAT  
CCTGCT---CTTCTTACGAGAATTCTTAT-----TTAATGGCAAAGAGGCGAAGAAAGAAA  
TTTATCATTCCATTACAATCGATTCAAGAACACGAAAAAGAACTAAAGCCCCGGTCCGA  
TATCTCAATTGAAATACCCATAAGT-----GGTATTTTCCGTAGAAATAGTATTTTTCTTAT

TTCGATGATCCTCAATACAGAAGAAGGAGTTCAGGAATTACTAAATATGGGACTATAGG  
GGTGCATTCAATCGTTAAAAAAGAGGAT-----TTGATTGAGTATCGA--GGAGTCAAAGA  
ATTTAAGCAAAAATATAAAAAAGTAGATCGATTTTGTTCATTCCCGAGGAAGTATATAT  
TTTCCCGAATCCTCCTCTATAATGGTACGGAACAATAGTATCATTGGAGTAGATACACA  
AATAACTTTAAATACAAGAAACCGAGTAGGCGGGTTGGTTCGAGTAGAGAAAAAAA  
AAAAAAGATTGAACTTAAAATCGTTTCTGGAGATATTTATTTTCTGGAGAGGCAGATA  
AGATATCTCGACACAGTGGCATCTTGGTACCACGGGAGCGGTAAAAAAG-----AATTC  
TAAGGAATCAAAAAA-----TTGAAAAATTGGATCTATGTCCAACGG-----ATCACCCCT  
ACCAAGAAAAA-----TATTTTGTTCGACCTGTAATCATATATGAAATTATGGAT  
GGTATAAATTTAGCAACACTTTTCCCGCAGGATCTATTGCAGGAAAGGGATAATCTCCA  
ACTTCGAGTTGTCAATTATATCCTTTATAGAAATGGTAAACCAATTCGAGGTATTTCTAA  
CACAAGTATTCAATTAGTTCGTACTTGTTTAGTGTGAATTGGGACCAAGGCAA-----  
-AAGGGTCTTCTATCAAAGAGGCCCTCGCTTCTTTTGTGAAGTAAGTACAAAAGGTT  
TGATTGAGTATTTTATAAGAATTGACTTAGTAAAATCCCATATTTTCGTATATCAAAAAA  
GGGACGATCCAACAGGTTCCGGATTACTCGCT--GATAATGGGCCAGATAGCCCTGATAT  
CAATCCGTTTTAT-----TCCAAAGCAGAG-----ATTCAACCATCACTTAGACAAA  
ATAAAGGAATTAATACGCTGTTGAATCAA-----ATAAAGGAATGCCAGTCGTTGAT  
AATTTGTATCATCCCATTGTTTTCGAATGGGCCA-----TTCAACCGTGTAATAATCA  
C-----AAAGAACCA-----AGAAATTCGTTGGGACCGTTAGGAACA--G  
CAGCCCTTCAAATTACGAATTT-----TATTTATTTTCTCATTAAATA-----ACTCATAATAAT  
ATTTTCG--CTAACGAAT-----TCTTTGCAACTTGACAGT--TAAAACAGACTTTTCAAGC  
ACTT-----AAA--TATTATTTAATAGACGAAAATGGGATA-----ATTTATAATCCCGAGCCAT  
GCAGTAACATCGTTTTGAATCCATTTAATTTGAATTGGTATTTTCTCTATTAT--TATTGTG  
AAGAAAGATCCACAATAATTAGT--CTGGGGCAGTTTTTTTTGTGAAAATTTATGTATAGC  
CAAAAAGGAACCA-----CACCTAAAATCAGGTCAAGTTATAATTGTTCAA---GTGGAT  
TCTGTAGTAATCAGATCAGCTAAGCCTTATTTGGCCACTCCAGGAGCAACTGTTTCATGG  
CCATTATGGAGAAATCCTTTACGAAGGAGATACATTAGTTACATTTATATATGAAAAATC  
TAGATCTGGTGATATAACGCAGGGTCTTCCAAAAGTAGAACAAGTGTTAGAAGTCCGT  
TCGATTGATTCAATATCAATGAACCTAGAAAAGAGAGTTGAGGGTTGGAATGAGTGTAT  
ACAAGAATTCTCGGAATTCCTTGGGGATTCTTGATTGGTGCTGAGCTAATTATAGTAC  
AAAGTCGATTTTCTTGGTTAATAAAAATACAAAAGGTTTATCGATCCAGGGGGTGCAG  
ATCCATAATAGACATATAGAAATTATTGTGCGTCAAATAACATCAAAGTGTTGGTTTCA  
GAA-----GAAGGAATGTCTAATGTTTTTTCCCCCGGAGAGCTAATTGGATTGTTACGA  
GCGGAACGAACGGGACGTGCTTTGGAAGAAACGATCTGTTACCGAGCTATATTATTGG  
GAATAACGAAAGCATCGCTGAATACTCAAAGCTTTATATCCGAAGCGAGTTTTCAAGA  
AACTGCACGAGTTTTAGCAAAAAGCCGCTCTCCGGGGCCGTATCGATTGGTTGAAAGGC  
TTGAAAGAGAACGTTGTTCTAGGGGGTATGATACCCGTTGGTACCGGATTCAAAGGATT  
AGTGCACCGTTTCG-----CGGAAATATAACCACATCCCTTTGGAATTTAAAAGGAATAAC--  
---TTATTCGAGGGGGAAATGAGA-----GATATTTTTTCTATTACAGAGAATTATTTGATT  
CTTGCATTTTAAAGAATTTCCCTGATATATCAGAACAATCGTTTATAGGATTTACTGATTC  
C-----ATGACAAGAAAATATTGGAACATCCATTTGGAAGAGATGATGGAAGCA  
GGAGTTCATTTTGGTCATGGTACTAGGAAATGGAATCCTCGAATGGCACCTTATATCTCT  
ACAAAGCGTAAAGGTATTCATATTACAAATCTTACTAGAACTGCTCGTTTTTTATCAGAA  
GCTTGTGATTTAGTTTTTGTATGCTGCAAGTAGGGGAAAAAGATTCTTAATTGTTGGTAC

CAAAAATAAAGCAGCTGATTTAGTAACACGGGCTGCCATAAGGGCTCGGTGTCATTATG  
TTAATAAAAAATGGCTCGGTGGTATTTTAACGAACTGGTCCACTACAGAAACGAGACTT  
CATAAGTTCAGGGACTTGAGAATGGAACAAAAGACGGGGAGAATCAACCGTCTTCCG  
AAAAGAGATGCGGCTATGTTGAAGAGACAGTTATCTCACTTGCACAGATATCTGGGCG  
GAATTAATATATGACAGGGTTACCCGATATTGTAATAATCGTTGATCAGCAAGAAGAAT  
ATATGGCTCTTCGAGAATGTATAACTTTGGGAATCCAACCAATTTGTTTAATTGATACAA  
ATTGCGACCCGGATCTCGCAGATATTTGATTCCAGCGAATGATGACGCTATAGCTTCAA  
TTCGTTTAATCTTAACAAACTTGTATTTGCAATTTGTGAGGGTCGTTCT--AGCTCTATA  
CGAAATCCCATGGGACAAAAACAAATCCACTTGGTTTTAGACTTGGTACAACCCAAG  
GGCATCATTCTCTTTGGTTTTGCACAACCAAGAAATTTTTCCGAGAGTCTACATGAAGAC  
CAAAAAATACGAAACTGTATCAAGAATTATGTACAAAAAATACAAGAGTATTCTCCGG  
T--ATCGAGGGAATTGCACGTATAGAGATTA AAAAGAAAATAGATCTGATTCAGATCATA  
ATATATATGGGATTCCCAAAGTTATTAATAGAAGGTAGGCCTCGC-----AGAATCGAA  
GAATTACAGACAAATGTACAAAAGA ACTTAATTGTCTGAACCAAAAACTCAACATTG  
CTATTATAAGAATTGCAAATCCTTATGGGCACCCTAATATTCTTGCAGAATTTATCGCTGG  
ACAGTTAAAGAACAGAGTTTCATTTGAAAAGCAATGAAAAAAGCTATTGAATTAACG  
GAACAAGCGGATACAAAAGGAATTCAAGTGCAAATTTAGGGCGTATCGATGGAAAA  
GAAATTGCACGTGTGAATGGATCAGAGAAGGTAGGGTTCCTCTACAACTATTTCGAG  
CAAAAATAGAGTATTGTTCTTATACAGTTAGA ACTATTTATGGAGTATTAGGCATCAAAA  
TTTGATATTTATAGACGAAGAAATGTCACGTTACCGAGGGCCTCGTTTCAAAAAATA  
CGTCGTCTAGGGGCTTTACCGGGACTA ACTAGTAAAAGCCTAACGCCGTAAACTCTTT  
TAGAAATCAATCGCGTTTGGGTA AAA---AAATCTCAATATCGTATTCGTTTAGAAGAAAA  
CAAAAATTGCGTTTTTATTATGGTCTTACAGAACGACAATTACTTAAATACGTTTCGTATC  
GCTGGAAAAGCCAAAGGTCCAACAGGTTCGGGTTTTACTACAATTACTTGAAATGCGAT  
TGGATAACATACTTTTTCGACTGGGTATGGCTTCGACTATTCCGCAAGCCCGCCAATTAG  
TTAATCATAGGCACGTTTTCGTTAATGGTTCGTGTAGTAGATATACCAAGTTATCGCTGTA  
AACCCCGAGATTTTATTACACCGAGGAATGAACAAAATCTAGAGCTCTAATTCGAAAT  
TATCTTGATTCATCTACCCAT--GAGGAATTACCAAAGCATTTA ACTCTTTACCCATTGCA  
A-----TGTAAGGGTTAGTCAATCAAATAATAGATAGTAAATGGGTTGGTTTGAAAATAA  
ATGAATTGCTAGTTGTAGAATATTATTCTCGTCAGACTATGTCACGTTCGAGGTACTGCAG  
AAGAAAAA ACTGCAAAATCCGATCCAATTTATCGTAATCGATTAGTTAACATGTTGGTT  
AACCGTATTCTGAAACACGGAAAAAATCATTGGCTTATCAAATTATCTATCGAGCCAT  
GAAAAAGATTCAACAAAAGACAGAAACAAATCCACTATCTGTTTTACGTCAAGCAATA  
CGTGGAGTAACTCCCGATATAGCAGTAAAAGCAAGACGTGTAGGCGGATCGACTCATC  
AAGTTCCCATTTGAAATAGGATCCACACAAGGAAAAGCACTTGCCATTCGTTGGTTATTA  
GGGCATCCCGAAAACGTCCGGGTCGAAATATGGCTTTCAAATTAAGTTCCGAATTAGT  
GGATGCTGCCAAAGGAGTGGCGATGCCATACGCAAAAAAGAAGAGACTCATAGAAT  
GGCAGAGGCAAATAGAGCTTTTGCACATTTTCGTATGGGTAAGGACACTATTGCTGATA  
TAATAACCGCTATACGAAATGCTGATATGGATCGAAAAGGAACAATTGCAATATCATCTA  
CGAACATCACCGAAAACATTATTA AAATACTTTTACGAGAAGGATTCATTGAAAACGCG  
AGAAAACATCAAGAAAACAACAATATTTTTTGGTTTTAACCTACGACATAAAAGA---  
---AATAGAAAAGACCATATGGA ACT---CTTTCAAATTAATTTAAAACGGATCAGCCG  
GCCTGGTCTACGAATCTATTCTAACTATCAACGAATTCCTAGAATTTTAGGCGGGATGGG  
TATTGTAATCTTTCTACTTCTCGAGGTATAATGACAGACCGAGAAGCTCGACTAGAAA

AAATCGGCGGAGAGGTTTTGTGTTATATATGGATGGCAAACCTATAGCAAGAATTGGT  
TCACGTAGGAATGGACGTATTGGTTCACGTAAGAATGCACGTAGAATACCAAAGGGGG  
TTATTCATGTTCAAGCAAGTTTCAACAATACCATTGTGACTATTACAGATGTACGGGGGC  
GGGTAATTTCTTGGTCCTCCGCCGTTACTTGTGGATTTAGGGGTACAAGAAGAGGGGAC  
ACCATTTGCTGCTCAAACCGCAGCAGGAAATGCTATTTCGAACAGTAGTGGACCAAGGT  
ATGCAACGAGCAGAAGTCGTGATAAAAAGGTCCTGGTCTTGGAAGAGATGCGGCATTAA  
GAGCTATTCGTAGAAGTGGTATACTTTTAAATTTTGTACGGGACGTAACCTCCTATGCCGC  
ATAATGGCTGTAGACCTCCTAAAAACGACGTGTGATGCCAACTATTAAACAACCTATT  
AGAAACATAAGACAGCCAATCAGAAATGTCACGAAATCCCCGCTCTTCGAGGATGTC  
CTCAGCGCCGAGGAACATGTACTAGGGTGTACTATCACCCCCAAAAACCAAACCTC  
TGCCTTACGTAAAGTTGCCAGAGTACGATTAACCTCTGGATTTGAAATCACTGCTTATAT  
ACCCGGTATTGGCCATAATTCACAAGAACATTCTGTAGTCTTAGTAAGAGGGGGAAGG  
GTTAAGGATTTACCCGGTGTGAGATATCACATTGTTTCGAGGAACCCCTAGATGCTGTCCG  
AGTAAAGGATCGTCAACAAGGGCGTTCTAAATATGGGGTCAAAAAGCCAAAAATGGC  
AAAGAAAAGTTTTATTTCAGAGGGAAAAGAAGAGACAAAAACTGGAACAAAAATATCA  
TTCGATTCGTCGATCCTCAAAAAAGAAATAAAA-----AAAGTTCTGTCAATTGAGTGA  
GAAATGGGAAATTCATGGGAAGTTACAATCTCCACCGCGGAATAGTATACCGACACGT  
CTTCATCGACGTTGTTTTTCGACCGGACGGCCGAGAGCTAACTATCGAGACTTTGGGCT  
CTCCGGACACATACTTCGTGAAATGGTTAATGCATGTTTATTACCAGGAGCAACAAGAT  
CAAGTTGGATGGTAAAAAATCCATTATCTTAGTTAGTTCCCAA-----GAAGAAAATA  
GA-----GGATCCGTTGAATTTCAAGTAATAAGTTTCACCAATAAGATACGAAAACCTACC  
TCACATTTGGAATTACATAGAAAAGATTATTTATCTCAAAGAGGCCTACGAAAAATTCT  
AGGAAAACGCCAACGATTGCTGTCTTATTTGTCAAAGAAAATGGAATACGTTATAAAA  
G A A T T A A T T A A T C A A T T A G A T A T T C G A G A A A T A A A A A G C G T - - - -  
-????????????????????????????????????????????????????????????????????????????????????  
????????????????????????????????????????????????????????????????????????????????????  
????????????????????????????????????????????????????????????????????????????????????  
ATGGATAAATCCAAGCGATTCTTTCTTAAATCCAAGCGATCTTTTCGTAGGCGTTTGGCC  
CCGATCCAATCGGGGATCGAATTGATTATAGAAATATGAGTTTAATTAGTCGATTTATTA  
GTGAACAAGGAAAATATTATCTAGACGGGTGAATAGATTAACCTTAAACCAACAACG  
ATTAATTAATGTTGCTATAAAACAAGCTCGATTTTATCTTCGTTACCCTTTCTTAATAAT  
GAAAAA-----CAATTTGAAAGAAACGAGTCAACCACCAAAACTATGGGTCTTAGACCC  
CGAAATAAAGTGACACGT--CTAAAAAAAACCCCTTTTGTAGCGAATCATTATTATTA  
AAATAAATAAACTTAATACAAACACAAAAAAGAAATAATAATAACTTGGGCCAGGGC  
ATCTACTATTATACCCACAATGATTGGCCACACTATAGCTATCCATAATGGAAAAGAGCA  
TTTGCCTATTTATATAACAGATCGTATGGTAGGTCATAAATTGGGGGAATTTGGGCCTAC  
TCTAAATTTCCGTGGACATGCAAAAAATGATAATAAATCTCGACGCATGATTTTGAATC  
TTTTATACTAGGTAATCTAGTATCCTTTTCCATGAAGCTAATCAATTCGGTTGTTGTGGTC  
GGACTCTATTATGGATTTCTGACCACATTCTCCATAGGGCCCTCTTATCTCTTCCTTCTCC  
GAGCTCGGGTTATGGAAGAAGGA-----ACCGAGAAGAAGGTATCAGCAACAACAGG  
TTTTATTACGGGACAGCTCATGATGTTTCATATCGATCTATTATGCGCCTCTGCATCTAGCA  
TTGGGTAGACCTCATACAATAACTGTCCTAGCCCTACCGTATCTTTTGTTCATTTCTTCT  
GGAACAATCACAAACACTTTTTTGTATTATGGATCTACTACCAGAAATTCATGCGTAAT  
CTTAGCATTCAATGTGTATTCCATAAATAATCTCATTTTTCAATTATTCAACCATTTCAATTT

ACCAAGTTCAATGTTAGTCAGATTAGTCAACATTTATATGTTTCGATGCAACAACAAGA  
TGTTATTTGTAACAAGTAGTTTTGTTGGTTGGTTAATTGGTCACATTTTATTCATGAAATG  
GCTTGGATTGGTATTAGTCTGGATACAGCAAAAAAATTCTATTAGATCT--ATTTCGATCTA  
ATAAGTATCTTGTGTCAGAATTGAGAAATTCTATGGCTCGAATCTTTAGTATTCTCTTATT  
TATTACCTGTGTTTACTATTTAGGCAGAATGCCGTCACCCATTTTACTAAGAACTGAA  
AGAAACCGAAGAAGAT-----GTTGTGACCTTTTTTTTCAACTTTAACCGCTGGAATCGTC  
CATTTTCGATATATAAAAACCGATCGATTTGAAACTCCTGTAAAGAACCGAAATGTCACAA  
TATTTTTTTTATACATGTCAAAGTGATGGAAAAGAAAACAATATTTTTTATGTATCCACCC  
AGTTTATCAACCTTTTTTGAATGATACAAAAAAGAATGTTTCTGTTCACGAACGAACA  
AATTTCTACTGTTGAATTACATAATCATTGGAGTTATCGCAACAAACAAAATGGAATA  
AACTAAACAAGGAGTTGATAAACAGAATAAAAAGTCTAAATAAAAAAATTTTCACTTT  
GAATGGATTCAAAAAAAGAGTTAGATTGTGTAATGATGACACTCAAAAAGAATATTTAC  
ATATAATATATGATCCTTTAGGGAGCGGACCCCGCCGTAAAAAA---AAAAAGTTTTTACG  
TCAATACATGAAGTTTTGGATAAATAAAATTCATAGTATTTTTTATCGATACTGTGAAAA  
AAAAAC-----GATACGTCTATTCAAATAAAAGAGATTGATAAAAAAATTCCTCGATGGT  
CACACAAATTAATCGATTTGGAAC TACAAGAGAGACAAGGAATTCGTTCAAGAAAAGC  
TAAACGTGTAATAATTTTTACCGCTGCTTTGATACGTTATTACAACAATCGGACTTTTCG  
TCGAGATCTAATCAAAGGCTCCATGCGAACCCAAAGACGTAAAACGGTCACTTGGGAA  
TTTCTTCAAGCAAATGTGCACTCGCCCGCCTTTTTGGACAGAATAGACAAACCCCTTTT  
TTTTTCTTTTGATATC-----TACGAAC TAATGAAA---ATGTTTATAAGTAGAGAAGAAGAC  
AAAAGAATAGAAATAGCAGAAACCTGGGATAGTCTTATATTTGCTCAAATAATACGAGG  
TTTGGTGTTAATAACTCAATCGACTCTTAGAAAATATATTTAATACCCTTATTAATAATA  
GCTAAAAATTTGGTTTCGTATATTATTATTTCAATTTCTGAATGGTCGGAGGATTTCAAG  
GATTGGACTCGAGAAATCCATGTAAATGTACCTATAATGGAGTTCAATTATCCGAAAG  
AGAATTTCCAAAAAATTGGTTAACAGACGGTATTCAGATAAAGATATTATTCCTTTTCG  
TCTAAAACCTTGGCACAAATATAAAAAAGAACAACAAAAACGATTTTTGTTTTTTAACA  
GTTTGGGGAATGAAAACGGAAC TGCCTTTTCGGATCTCCAAAAAACAAC TTTCACTTT  
TTGAACCAATAAAAAAAAAAATAAAAAAAAAAATTTTAAAGTTAAAAAAAAAGGTGTT  
TTATAATT--ATAAACTTTTAAAAGAAAGAACAGCACTAAATATAAATATCTTAAAAGA  
ACTGACAAAAAAGGTCATCAAAAACATTCTA-----TTTTTAAAAGA ACTATTA AAAAGAA  
ATTTCA-----AAAGATTCGACGATCAAT-----CTAATTCAGGAATCATCTATTCAAATTA  
TCTATAAGTTGG-----TATTCATTGACAAAAAATAATGAAAGATCTGACTGATAGAAC  
AAGTGAAATTAGAAAAAATAAGAAAAATTACAAAAGACAAGAAAAACGTCTAAA  
AAAAAAAATTTCTGATGATAA-----AGCTTAGGATCCCCAAATTACAAATATTA  
TAAGACATGCCTCGTTAATTCATAAATCACATTATCTTATAATTTTGTTTTTTGAAAAAAT  
ATACATAAATATCTTTTA---ATAATTAATATTACCAAGATCAGTACACAAGTTTTTATTC  
CTTATTTTCATCTAACCTATCTTTAGTGTCTCAAGCATATGTATTTTACAAATTATCACAA  
ACCCAAGTTATTAAC TTTCTATAAGTTAAGATCAGCTCTTCAATATACATCTTTTTTCTTA  
AAAATGAAATAAAGGATTATTTTACACAAGGAATATTTCAATTCTGAATTAAGAAATACAC  
AACTTAGAAATTTCTATAATGAATCCATGGAAAATTTGGTTAAAGGCTCATTATCAATAT--  
TTTCCTCATATTAGATGGTCTAGATTAATATCAAAAAAATTGCGGAATAAATTAAT-----C  
ACCATGATATGGCTTATATCAAAGATAATTCATATGAA-----AAAGACCGATTAATTCATG  
ACAAAAACAA---ATTTTTAAAAAACCTATAAATATGATCTTTTAGCATATAAATCTATT  
AATGATGATATTATGGATCCAGATAAAAAATATTTTGGTTGGAGAATTTTAAATTTTTGTC



TTAGATTTTTGATTGGATGGGTATGAATGAAAAAGTATTAAGCCATTTGTTCCCTCCCAA  
AATTTGTGATACTTAACGATATATATAAGATGAAACCATGGATCATACCAATCAAATTACT  
TTTATTAAGTTACAAAATAACACAAAAGTAGATCTTTTTTTCTTTCTAAAAAGATATTT  
ACGTTTTCAATTAAGATGGGATAATTCTTTAAATCAAAGAATTATTAATAATATCAAATA  
TATTGTCTCTTGCTAAGACTAAAACTCCCAAAGAAATTGTTATATCTTCTATTCAAAGA  
GAAGAAATGAGTCTAGATATTTTGATAATCCAAAAAGATTTAACTTTTACAGAATTGATG  
AAAAAAGCAATATTGATTATTGAACCAATTCGTCTGTCTGTAAAAAATGATGAAAAATT  
TATTATGTATCAAATAAGTATTTCAATGATTACACAAGAGTAAACACAATTTTTATGAT  
TTGCTTATTCCTGAAAACATTTTATCTCCTAAACATCGTAAAGAATTGAGAATTGTAATT  
TCTTTCATTTTTCTTTGGCCCAATTATCGATTAGAGGATTTAGCTTGTATGAATCGCTATT  
GGTTTGATACTAATAATAGCAGTCGTTTCAGTATGGTAAGGATGCATATGTATACAATGA  
AAGGACATCAATTCAAATCCTGGATTTTCGAATTGAGAGAGATATTGAGAGAGATCAA  
GAATTCTCACTATTTCTTAGATTCATGGACCAATTCAATTCAGTGGGATCTTTCATTCA  
CATTTTTTCCATCAAGAACGTTTTATAAACTCTTGGACTCCCGAATTTGGAGTATCCT  
ACTTTCA---CGCAATTCA-----CAGGGTTCAACAAGCAATCGATATTTCT-----ACGATCA  
AGGGTATACTACTATTTGTAGTAGCG---TTCCTTATATATCGT-----ATTAACAATCGA  
AAGATGGTTCGAAAGAAAAAATCTCTATTTGACAGGGCTTCTTCTCT-----ATACCTA  
TGAATTCCATTGGACCCAGAAATGATACATTGGAAGAATCTTTT---GGGTCTTCCAATAT  
CAATAGGTTGATTGTTTCG---CTCCTGTATCTTCCAAAAGGAAAAAAGGTCTCTGAGAG  
CTGTTTCTGGATCCGAAAGAGAGTACTTGGTTTCTCCAATAACT-----CAAAGT  
GTATCAGGCCTGAATCTAAATGGGGTTCGTGGTGGTGGAGAACTGGATCGGAAAAAA  
GAGG-----GATTTTAGTTGTAAGATATCTAAT-----GAAACCATCGCTGGAATTGAGATC  
TCATTCAAAGAGAAAGATATCAA---TATCTGGAGTTTCTTTTTTATATTATATGGAT----  
-GATCCGATCTGCAAGGACCATGATTTGGAATTGTTTGATCGTCTTTCTCCGAGGAAGA  
GGCGAAACATAATCAACTTG-----AATTCGGGACAGCTATTTCGAAATCTTAGTGAAAGA  
CTGGATTTGTTATCTCATGTTTGCTTTTCGTGAAAAAATACCAATTGAAGTGGAGGGT---  
TTCTTCAAACAACAAGGA---GCTGGGTCAACGATTCAATCAAATGATATTGAGCATGTT  
TCCCAT-----CTCTTCTCGAGAAACAAGCGGGCTATTTCTTTGCAAATTGTGCTCAATTT  
CATATGTGGCAATTCGCAAGATCTTTCGTT-----AGTTGGGGGAAG---AATCCGCA  
CGAGTCGGATTTTTTTGAGGAAC---ATATCGAGAGAGAATTGGATTTGGTTAGACAATGT  
GTGGTTGGTAAACAAGGATCGG-----TTTTTTAGC-----AAGGCACGGAATGTATCGTC  
AAGTATTCAATATGATTCC-----ACAAGA-----TCTAGTTTCGTTCAAGTAAGGGATTCT  
GGCCAATTGAAAGGATCTTCT--GATCAATCCAGAGATCATTTTCGATTCCATTAGT-----  
---AATGAGGATTTCGGAA-----TATCACACATTGATCAATCAAAG  
AGAGATTCAACAATAAAAGAAAGATCGATTCTT---TGGGAT-----CCTTCCTTTATTCAA  
ACGGAACGAACAGAAATAGAATCAGAC-----CGATTCCCTAAAAGTCAAAGCCTTTCTG  
GGTATTCC-----TCAATGTCCCGGCTATTCACG---GAACGTGAGAAGGAGATGAATAATC  
ATCTGCTTCCGGAAGAAATCGAAGAATTT-----CTTGGAGATCCTACAAGATCTATTCGT  
TCTTTTTTCTCTGACAGATGG-----TCAGAACTTCAT--CTGGGTTCGAATCCTACTGAGA  
GGTCCACTAGAGATCAG-----AAATTGTTGAAGAAAGAACAAGATGTTTCT---TTTG  
TCCCTTCCAGGCGATCGGAA-----AATAAAGAAATAGTTAATATATTCAAGATAATTA  
CGTATTTACAAAAT-----ACCGTCTCAATTCATCCTATTTTCATCAGATCCGGGATGTGATAT  
GGTTCCG---AAGGATGAACGGGAT--ATGGACAGTTCCAATAAGATTTTCATTCTTGAACA  
AAAATCCGTTTTTTGATTTA-----TTTCATTTATTCCATGACCGGAGCAGGGGGGGGATACA

CGTTA-----CACCACGATTTTGAATCAGAA-----GAGAGATTTCAAGAAATGGCAGATCTA  
TTC ACTCTATCAATAACCGAGCCA--GATCTGGTGTATCATAAGGGATTTGCCTTTTCTAT  
TGATTCCCTACGGATTGGATCAAAAACAA-----TTCTTGAATGAGGTATTCAACTCCAGGG  
ATGAATCGAAAAAGAAATCTTTA-----TTGGTTCTACCTCTATTTTTTAT-----GAAGA  
GAATGAATCTTTTTATCGAAGGATCAGAAAAAATGGGTCCGG---ATCTCCTGTGGGAA  
TGATTTGGAAGATCCA-----AAAATAGTGGTATTTGCTAGCAACAACATAATGGAGGCAG  
TCAATCAATATAGATTGATCCGAAATCTGATTCAAATCCAATATAGCACCTATGGG-----T  
ACATAAGAAATGTATTGAATCGATTCTTTTTAATGATGAAT-----AGATCCGATCGCAACT  
TCGAATATGGAATTCOA-----AGGGATCAAATAGGAAATGATACTCTGAATCATATAAC  
TTAATGAAATATACGATCAACCAACATTTATCGAATTTGAAAAG---AGTCAGAAGAA  
ATGGTTCGATCCT-----CTTATTTCTCGAACCGAGAGATCCGTGAATCGGGATCCTAA  
TGCATATAGATACAAATGGTCCAATGGGAACAAGAATTTCCAGGAACATTTGGAACATT  
TCATTTCTGAGCAGAAGAGA-----CATTTTCAAGTAGTGTTTCGATCGATTACGTATTA  
TCAATATTCGATTGATTGGTCTGAGGTTATCGACAAAAAAGATTTGTCTAAGTCACTTC  
GTTTCTTTTTGTCCAAGTTCCTTCTT-----TTTTGTCC-----A  
AGTTCCTTCTTTTTGTCTAACTTACTTCTCT--TTTTCTTTGTGAGTTTCGGGAATATC  
CCCATTATAGGTCCGAG---ATCCACATCTAT--GAATTGAAAGGTCCGAATGATCAACT  
CTGCAATCAGTTGTTAGAATCAATAGGTCTTCAAATCGTTCATTTTAAAAACGGAAAC  
CCTTC-----TTATTGGAT-----GATCATGATACTTCC---CAAAAATCGAAATCTTGATCA  
ATGGAGGAACAATATCACCATTTTTGTTCATAAAGATACCC---AAGTGG---ATGATTGAC  
TCATTCCATACTAGA-----ATAATCACAGGAAATCTTTTGATAACACGGATTCCATTTTC  
TCAATGATATCCCACGATCAAGACAATTGGCTGAATCCCGTGAAACCATTTTCATAGAAG  
TTCATTGATATCTTCTTTTTATAAAGCAAATCGACTTCGATTCTTGAATAATCCACACCAC  
TTGCGCTTCTAT-----TGTAACAAAAGATTCCCCTTT-----TAT--GTGGAAAAGGCCCGT  
ATCAATAATTATGAT-----TTTACGTATGGA---CAATTCCTCGATATCTTGTTCATTTCGCAAT  
AAA---ATATTTTCTTTGTGCAGCGATAAA-----AAAAACATGCTTTTTTGGAG---AGAGA  
TACTATTTACCAATCGAGTCACAGGTATCTAACATATTAATACCTAACGATTTTCCACA  
AAGTGGTGACGAAAGG---TATAACTTGTACAAATCT-----TTCCATTTTCCAATTTCGATC  
CGACCCATTGGTTCGT-----ACAGCTATTTACTCGATCGCAGACATTTCTGGAACACCCC  
TAACAGAGGGACAAATAGTCAATTTTTGAAAGAACTTATTGTCAACCTCTTTCAGATATG  
AATCTATCTGATTCAGAAGGGAAGAATTTGCATCAGTATCTCAAT-----TTCAATTCAAAC  
ATGGGTTTGATTCACTCCATGTTCTGAGAAATATTTACCATTTCGAAAAG-----AGGAA  
AAA-----CGGAGTCTTTGTCTAAAG-----AAATGCGTCGAGAAGGGGCA  
GATGTATAGAACCTTTCAAGGAGATAGTGCTTTTTTCAACTCTCTCAAATGGAATCTATT  
CCAAACATATATGCCATGGTTCCTTACTTCGACAGGGTACAAATATCTAAATTTGATATTT  
TTAGATACTTTTTTCAGAC---CTATTGCCGATACTAAGTAGCAGT-----CAAAAATTTGTATC  
TACTTTTCATGATATTATGCATGGA-----TCATGGCGAATTCTTCAGAAAAAATTG-----  
-----TGTCTTCCACAATGGAAT--CTGATAAGTGAGATTTTGAGTAAGTGTTTACATAA  
T-----CTTCTTCTGTCCGAAGAAATGATTCATCGAAATAATGAGTCA-----CCATTGATATC  
GACACATCTGAGATCGCCAAATGTTCCGGGAGTTC---CTCTATTCATCCTTTTCTTCTT  
CTTGTGCTGGATAT--CTCGTTCGTACACATCTTCTCTTTGTTTCCCGA-----GCCTATAG  
TGAGTTACAGACAGAGTTAGAAAAGGCCAAATCTTTGATGATTCCATCATACATGATTG  
AGTTGCGAAAACCTTCTGGATAGGTATCTACATCTGAACCGAATCTTTTCTGGTTAAAG  
AATCTCTTCTAGTTGCTCTGGAACAATTAGGGGATCTCTAGAAGAAATACGGAGTTC

TGCTTCTGGCGGCAACATGCTATGGGGTAGTGATCCC-----GCTTATGGG---GTCA  
AATCAATACGTTCTAAGAAGAAATATTTGAATATCAAT-----CTCATCGATCTCTTA---A  
GTATCATAACCAAATCCCATCAATCGAATCGCTTTTTTCGAGAAAGACGAGACATCTAAGT  
CATAAAGTAAAGAGATCTATTCATTGATAAGAAAAAGAAAAACGTGAACGGTGATT  
GGATTGATGATAAAATAGAATCCTTGGTCGCCAACAGTGATTTCGATTGATGATAAAGAA  
AGAGAATTCTTGGTTCAGTTCTCC-----ACCTAACGACA-----GAAAAAAGGATTGATC  
AAATTCTATTGAGTCTGACC---CATAGTGATCATTATCA-----AAGAATGACTCTG  
GTTATCAAATGATTGAACAGCCGGGAGCAATTTACTTACGATACTTAGTTGACATTCAT--  
---AAAAAGTATCTAATGAATTATGAGTTCAATACATCCTGTTTAGCAGAAAGACGTATAT  
TCCTTGCTCATTATCAGACAATCACTTAT-----TCACAAACCTCGTGTGGGGCTAATAGTT  
TTCATTTCCCATTTTCATGGA-----AAACCTTTTTCGCTCCGCTTAGCCCTATCCCCCTCT  
---AGGGGTATTTTAGTGATAGGTTCTATAGGAACTGGACGATCCTATTTGGTCAAATACC  
TAGCGACAAACTCCTATGTTCTTTTCATTACAGTATTTCTGAACAAGTTCTGGATAACA  
AGCCTAAGGGTTTTCTTATTGAT-----GATAGTGACGATATTGATGTGAGTGACGA  
TATTGATGTGAGTGACGATATCGACCGT-----  
---GACCTTGATACTGAGCTGGAGCTTCTAACTAGGATGAATGCGCCA-----ACTATGGA  
TATGATGCCG-----GAAATAGACCGATTTTATATCACCTTCAATTCGAATTAGCAAAA  
GCAATGTCTCCTTGCATAATATGGATTCCAAACATTCATGATCTGGATGTGAATGAGTCG  
AATTACTTATCCCTCGGTCTATTAGTGAACCTATCTTTCC-----AGGGATTGTGAAAGAT  
GTTCC---ACTAGAAATATTCTTGTATTGCTTCGACTCATATTCCCCAAAAAGTGGATCC  
CGCTCTAATAGCTCCGAATAAATTAATACATGCATTAAGATACGAAGGCTTCTTATTCC  
ACAACAACGAAAGCACTTTTTCACTCTTTCATATACTAGGGGATTTCACTTGGAAAAGA  
AAATGTTCCATACT-----AATGGATTCGGGTCCATAACCATGGGTTCCAATGTACGAGATC  
TTGTAGCACTTACCAATGAGGCCTTATCGATTAGTATTACACAGAAGAAATCAACTATAG  
ACACTAATATAATTAGATCTGCTCTTCATAGACAACTTGGGATTTGCGA-----TCCCA  
GGTAAGATCGGTTCAAGATCATGGGATCCTTTTTCTATCAGATAGGAAGGGCTGTTGCAC  
AAAATGTACTTCTAAGTAATTGCCCCATAGATCTGATATCTATCTATATGAAGAAGAAA---  
---TCATGTAACGAGGGGGATTCTTATTTGTACAAATGGTACTTCGAACTTGAACGAGC  
ATGAAGCAATTAACAATACTTCTTTATCTTTTGAGTTTTTCTGCCGGATCGGTCTGCTCAA  
GACCTTTGGTCTCTACCC-----GGACCCGATGAAAAA---AATGGGATCACTTATTATGGA  
CTCGTTGAGAATGATTCT--GATCTAGTTTCATGGCTATTAGAAGTAGAAGGCGCTCTGG  
TGGGA-----TCCTCACGGACAGAAAAAGATTGCAGTCAGTTTGATAATGAT-----CGAGT  
GACATTGCTTCTTCGGCCCGACCCAAGGAAT--CCCTTAGATATGATGCAAAATGGATCT  
TGTTCTATCGTTGATCAGAGATTTCTCTATGAAAAA-----TACGAATCGGAGTTTGAAGA  
A--GGGGAAGGA-----GTCCTTGACCCGCAA-----CAAATAGAGGAGGAT-----T  
TATTCAATCAC-----ATAGTTTGGGCTCCT-----AGAACATGGCGCCCT-----TGGGGCTT  
TCTATTTGATTGTATCGAAAGGCCCAATGAATTGGGATTTCC--TATTGGGCCAGGGCA  
TTTCGGGGCAAG-----CGGATCATTCATGATGAAGAGGATGAGCTTGAAGAGAATGAT  
TCAGAGTTCTTGCAGAGTGGAACCATGCAGTGCCAGATACGAGATAGATCTTCCAAAG  
ACAAGGCTTTTTTCGAATAAGCCAATTCATTTGGGACCCTGCAGATCCACTTTTTTTTC  
CTATTCAA---GATCAGCCCTTTGTCTCTGTGTTTTACATCGAGAATTCTTTGCAGATG  
AAGAGATGTCAAAGGGGCTTCTTACTTCCCAAACAGATCCTCCTACCTCTATATATAAA  
CGCTGGTTTATC-----AAGAATACGCAAGAAAAGCACTTCGAATTGTTGATTCATCGCCA  
GAGATGGCTTAGA-----ACCAATAGTTCATTATCT-----AGTGGATTTTCCGTTCTAAT--

---ACTCCATCCGAGAGTTATCAGTATTTATCAAATCTGTTCCCTATCTAAC---GGAACGCTA  
TTGGATCAAATGACAAAGACATTGTTGAGAAAAAATGGCTTTTCCCGGATGAAATGA  
AAATTGGATTC-----ATG-----ATGCCTAGATCTCGG---ATAAATGGAAATT  
TTATTGATAAGACCTTTTCAATTGTAGCCAATATCTTATTACGAATAATCCGACAACCTC  
AGGAGAAAAAGAGGCATTTACCTATTACAGAGATGGG-----ATGTCGGCTCAATCCGAA  
GGAAATTATGCGGAAGCTTTACAGAATTATTATGAAGCTATGCGACTAGAAATTGATCC  
CTATGATCGAAGTTATATACTCTATAACATAGGTCTTATCCACACAAGTAACGGAGAACA  
TACGAAAGCTTTAGAAATATTATTTTCGAGCACTCGAACGAAACCCGTTCTTACCACAAG  
CTTTTAATAATATGGCCGTGATCTGTCATTAC---CGTGGAGAACAGGCCATTCCGGCAGGG  
AGATTCTGAAATTGCGGAGGCTTGGTTTAATCAAGCCACTGAATATTGGAAACAAGCG  
ATAGCGCTTACTCCTGAAAATTATATTGAAGCGCAGAATTGGTTGAAGACTACAAGGCG  
TTTCGAA-----ATGAGTTGGCGATCAGAACGTATATGGATAGAACTTATAGCGGGGTCTC  
GAAAAACAAGTAATTTCTGCTGGGCCTTTATTATTTTTTTAGGTTTATTAGGGTCTTATT  
GGTTGGAAGTCCAGTTATCTTGGCAGGAATTTGATATCTTTATTTTCGTCTCAACAAAT  
AATTTTTTTTCCACAAGGAATCGTGATGTCTTCTATGGGATCGCAGGTCTCTTTATTAG  
CTCTTATTTGTGGTGCATAATTTTCGTGGAATATAGGTAGTGGTTATGATCGATTTCGATAGA  
AAAGAAGGAATAGTGTGTATTTTTTCGTTGGGGATTTCCCGGAAAAAATCGTCGCATCTT  
CCTCCGATTCCTTATGAAAGACGTTCAAGTCCATCAGGATAGAAGTTAAAGAGGGTTTTTT  
ATGCTCGTCGTGTCCTTTATATGAAATTAGAGGCCAGGGGGTCAATCCCTTGACTCGT  
ACTGATGAGAAT---TTGACTCCGCGAGCAATTGAGCAAAAAGCTTCTGAATTGGCCTAT  
TTCTTGC GCGTACCAATTGAAGTTTTT

>Phoradendron

ATGAAAAAGTGGTGGAAAAATGCAATGTTGTCGTTAAGTAAATCAATGGGGAATCTTG  
GTCCTATTGAAACT---AGTCGAAGTGAAGACCAGATTGTTACGGATACATACATGAAGA  
ATGAGGGTTACAGTACTCTTGATTTATTATTCGGTCTCAAGGACATTTTTTTT-----ATC  
TATTATGTATTAGTTAGGAGAAGATATGGGTACGGTTATTACATATATTTTCGATATTGAAA  
ATATTATTTTTGAGATTGAAAATGATCAT-----TCTTTTCTGAGTGAAGTGAACCATTTCA  
TAATTCTCGT-----TATCTGAAA---GGATATAAGAGTGACGATACCCTTTATGATAGTA  
ACATGTATGATAAAGAGAAGAGTTGGAAGAATCACATTAGTAATTGCATTGACAGTTTC  
CTTCATTAT---CAACAAATTGTTATTGATAAATTAATAATAAGTAATAGTCAC---CACAGTG  
ACAGTTCTATTTATAGATTTTTTTTGTGATGATTTTTTCATCCGGTATGAGAATAACTAGCAC  
GAATGGTGATTTTATAATAAAGAAGGTTCTAATGATTCCGATGTCACTCAAAAATACA  
GTCATTTATGGGTTCAATGCGAAAAATTGTTATGGCTTAAATTATAAGAGATTTTTTAAGT  
CAAAAATGAATATTTGTGAACAATGTGGAACTCATTTGAAAATGAGTAGTTCCGGATACA  
ATCGACCTTTTGATAGATCCAGGGACTTGGGATCCCATGGACGAAGACATGGGATCTCT  
GGATCCCATTGAATTTTCATTTCGGAAGAGGAACTTTATAAAGATCGTATCGATTCTTATCA  
AAAAAAGACAGGATTAACGGAGGCTATTCAAACGGGCATAGGTGAGCTAAACGGTATT  
CCCATAGCAATGGGAGTGATGGATTTTTCAGTTTATGGGGGGTAGTATGGGATCCGTTGT  
AGGGGAGAAAATCACTCGTTTGTGATCGAATATGCATCCCATCAATTTCTACCTCTTATTCT  
AGTGTGTGCTTCCGGAGGGGCACGCATGCAAGAAGGAAGTTTGAGCTTGATGCAAAT  
GGCTAAAATATCTGCATCTTTATATGATTTTCAATCCATAAAAAGTTATTTTATATAGCCA  
TCCTTACATCTCCACGACTGGGGGGGTGACAGCGAGTTTTTGGTATGTTAGGGGATATC  
ATTATAGCTGAACCCAATTCTTACATTGCATTTGCAGGTAAAAGAGTCATTGAACAAAC  
ATTGAATAAGACAGTGCCGGAAGGTTACAATCGGCTGAATATTTATCCATAAGGGTT

TATTCGATTCAATCGTACCACGTATTCTTTTAAAAAGTGTTCTTAGTGAGTTATTTCAAC  
TCCACGATATCATTCTTTGAATCAAATTCATCGAAGTAGTAAGTTTTTCGATCCGATG  
AATTTAGTAATATTCTCCGGGAACGTATTGAACAATATCGA---GATGTAAAGATTGTAAAT  
ACTGGTACCCTACTAAAAGTAGGGCGATGGCATTGCTCGTATTTCATGGTCTTGATGAAGT  
AATGGCAGGCGAATTAGTTCGAATTTGAAGAGGGTTCTATTGGTATTGCTCTGAATTTGG  
AATCCAATAATGTGGGTGTTGTATTAATGGGTAATGGTTTGATGATACAAGAGGGAAAGT  
TCTGTAAAAGCAACAGGAAGAATTGCTCAAATACCTGTGAGCGAAGATTTTTTGGGCC  
GTGTTATCAATTCCCTAGCTAAACCGATTGATGGTAGAGGTGAAATTTCCGCTTCTGAAT  
CTCGATTAATTGAATCTCCTGCGCCAGGTATTATTTCTAGACGTTCCATATATGAACCTCT  
TCAAACAGGTCTTATTGCTATTGATTTCGATGATCCCTATAGGTCGTGGTCAACGAGAATT  
AATTATTGGAGACAGACAGACCGGTAAACTGCGGTAGCCACAGATACGATTCTCAAT  
CAACAAGACCAAAATGTAATATGTGTTTATGTAGCTATTGGTCAAAAAGCATCTTCTGT  
GGCTCAGGTAGTGACTACTTTTCAGGAAAGTAGAGCATCGAAATACACTATTGTGGTAG  
CCGAAACGGCGGATTTCGCCGCTACATTACAATATCTCGCTCCTTATACAGGAGCAGCG  
CTGGCTGAATATTTTATGTACCGCGAACAACACACTTCAATTATTTATGATGATCCCTCC  
AAACAAGCACAAGCTTATCGTCAAATGTCTCTTCTATTACGAAGACCCCCCGTTCGCG  
AAGCTTATCCAGGAGATGTTTTTTATTTGCATTACGTCTTTTGGAACGAGCTGCTAAAT  
TAAGTTCTCGTTTAGGCGAAGGAAGTATGACTGCTTTACCAATCGTTGAGACTCAATCG  
GGAGATGTTTCGGCTTATATTCCTACTAATGTTATTTCCATTACAGATGGGCAAATATTTT  
TATCTGCTGATCTATTTTCATGCTGGAATCAGACCTGCTATAAATGTGGGTATTTCTGTTTC  
CAGAGTCGGATCTGCAGCTCAAATTAAGCCATGAAACAAGTAGCCGGAAAATCAAAA  
TTGGAAGTGGCTCAATTCGCAGAATTAGAAGCCTTTGTACAATTCGCTTCTGATCTTGA  
TAAAGGCACTCAGAATCAATTAGCAAGAGGTCAACGATTACGCGAATTGCTAAAACAA  
TCCAATCCGCCCCCTTACGGTGAAGAACAGATAATCACTATTTATACCGGAACGAA  
TGGTTATCTTGACTTATTAGAAATTGGTCAGGTCAGTCAATTTCTCGTTGAGTTACGTAC  
TTACTTCAAAGGAATCAATCTCGGCTCCAAGAAATCATATCGTCTAATAAGACATTTAC  
TGCGGAAGCCGAAAACCTTTTGAAGAGGCTATTACGGAACAAAAGGAACGTTTTTCTA  
TTTCAGGAAAATAAAATGAAAATCAATCCGACGGGTCTT-----ATTTCTACGCTTGAA  
AAAAAAACTTTGGAGGCATTGCTCAAATTATTGGTCCGGTACTAGATGTAGCTTTTAA  
CCCCGGTAAGATGCCAAATATTTACAACGCTCTGATAGTCAAAGGTCGAGATCCTGTAG  
GTCAACCAATTACTGTTACTTGTGAAGTACAGCAATTATTAGGATATCATCGAGTGAGA  
GCTGTGCTATGAGTGCTACAGATGGTCTCAAGAGAGGAATGGAAGTGATTGACACGG  
GAGCTCCTCTAAGTGTTCCAGTTGGGAAAGCCACTCTCGGACGCATTTTCAATGTGCTT  
GGAGAACCTGTTGATAATTTAGGCCCTGTGAATACTCGAACGACATCTCCTATTCATAGA  
TCTGCGCCTGCCTTTATACAGTTAGATACGAAATTATCTATTTTTGAAACAGGAATTTAA  
GTGATAGATCTTTTAGCTCCTTATCGTCGTGGCGGAAAATCGGGCTATTCGGGGGAGC  
GGGAGTCGGTAAAACAGTACTCATTATGGAATTGATCAACAATATAGCCAAAGCTCATG  
GGGGTGATCTGTATTTGGCGGAGTGGGTGAACGTAAGGAAATGATCTTTTAC  
ATGGAATGAAAGAATCTGGAGTCATAAATGAAAAAATATTGCAGAATCCAAGGTGG  
CTCTAGTCTACGGTCAGATGAACGAACCGCCAGGAGCTCGTATGAGAGTTGGTTTTGAC  
CGCCCTAACTATGGCAGAATATTTTCGGGATATTAATGAACAAGACGTAAGTTCTATTTAT  
TGACAATATCTCCGTTTTGTCCAAGCAGGATCCGAGGTATCCGCCTTATTGGGTAGAAT  
GCCTTCTGCTGTGGGTTATCAACCCACTCTTAGTACCGAAATGGGTTCTTTACAAGAAA  
GAATTACTTCTACTAAGGAAGGGTCCATAACGTCTATTCAAGCCGTTTTATGTACCTGCA

GACGATTTGACCGATCCTGCTCCTGCCACAACATTTGCACATTTAGATGCGACTACCGT  
ACTATCCAGAGGATTAGCTGCCAAAGGGATCTATCCAGCAGTCGATCCTTTAGATTCAA  
CGTCAACTATGCTTCAACCTAGGATCGTTGGTGAAGAACATTATGAAACTTCGCAAAG  
AGTGAAGCAAACCTTTACAACGTTACAAAGAACTTCAGGACATAATAGCCATTCTTGGG  
TTGGACGAATTATCCGAAGACGACCGTTTAACCGTAGCTAGAGCGAGAAAATTGAGC  
GTTTCTTATCACAACCCTTTTCGTAGCAGAAGTTTTTACCGGTTCCCCAGGAAAATAT  
GTTGGTTTAACAGAAACAATTAGAGGGTTTTCAATTGATCCTTTCCGGAGAATTAGATAG  
TATTCCTGAACAGGCCTTTTATTTGGTAGGTAACATAGATGAAGCTATCACGAAGGCTAT  
GAAAGAAAACATGGAGAGAAATGGGAAGAAAATGACTTTACATCTTTGTGTACTGACT  
CCTAATCGAATCGTTTGGGATTCAGAAGTGAAGAAAATCATTTTATCTACCAATAGTGG  
GCAAATTGGCGTGTTACCAAACCATGCCCTCTTGCCACAGCGGTAGATATAGGCATTT  
TGAGAATACACCTTAACGACCAATGGTTAACGATGGCTCTGATGGGTGGTTTTGCTAGA  
ATAGGAAATAATGATATTACTGTTTTAGTAAATGATGCAGAGAAGAGTAGTGATATTGAT  
CCACAAGAAGCTCGGCACACTCTTGAATATCAGAAGAACAATTGAAGAAAGCAGAA  
GGAAAGAGACAAATTATCGAGAGAAATCTAGCTCTCAGACGATCGAGGACACGAGTC  
GAGGCTATAATG-----ATGAAAATAGAACCGAATGTTTCGTTTCTTTGCTATCT-----  
GCCGGT--TTCGGGTTGAATACCGATATTTTAGCAACAAATCTAATAAATCTAAGTATAGT  
GCTTGGTATATTGATCTTTATTGGAAAGGGAGTGTTAAGTGATTTATTAGATAATCGAAA  
AAAGAGGATTTTGAATCCAATTCGAAATTCAGAAGAGCTACGCGGAGAGGCCATCGAT  
AAGTTAGAAAAGCCCCGGGCTAATTTACAGAAAGTAAAAATGGAAACAGATCAGTTTC  
GAGTGAATGGATACTCTGAGATAGAACGAGAAAAATCGAATTGGATTCATTCCACTTAT  
CTAACGTTAGAACAATTAGAAAATGACAAAAACCAAACGATTCATTTAGAACAAAAAA  
GAGCGATTAATCAAGTCCAACAACGGCTTTTTCAACAAGCCGTACAAGGATCTTTAGG  
AACTTTGAATAGTTGTTTGAACCACGAGTTACATTTACGTACTATCAGTGCCAATATTAG  
CATGTTTGGGGCGATAAAAGAAATAATGGATATGAATCCACTGATTTCTGCTGCTTCCGT  
TCTTGCTGCTGGATTGGCCGTAGGGCTTGCTTCTATTGGGCCTGGTGTGGGTCAAGGTA  
CTGCTGCAGGCCAAGCTGTAGAAGGTATCGCAAGACAGCCTGAAGCGGAGGGAAAGA  
TACGAGGTACTTTTACTTAGTCTGGCTTTTATGGAAGCTTTAACAATTTATGGATTGG  
TTGTAGCATTAGCACTATTATTTGCGAATCCTTTTGTATGAATATTCTATCATGTTCCATC  
CATCTACAAAAAGGGATCTATAATATATCGGGTGTTGAAGTAGGCCAACATTTCTATTGG  
AAAATAGGGGGTTTACAAGTCCATGCCCAAGTACTTATGACTTCTTGGGTGTAATTGC  
TATTTTATTAGGTTACGCTATACGAACTGTTTCGAAATCCAGAAACGATTCCGACTAACG  
GTCAAAATTTCTTTGAATATATCCTTGAATTCATTTCGAGACCTTTGTTTTACTCAGGTTG  
GAGAAGAATATGGAACCTGGGTTCCCTTTATAGGAACCTATGTTTCTATTTATTTTGTTC  
TAATTGGTCTGGGGCTCTTTTACCTTGGAATAATTATACAATTACCTCATGGGGAGTTAGC  
CGCACCCACGAATGATATAAATACAACGGTTGCTTTAGCTTTACTCACGTCAGTCGCATA  
TTTCTATGCGGGACTTACCAAAAAAGGATTAGGTTATTTTCAGTAAATACATTCAACCAA  
CTCCCATCTTTTACCCATTAACATATTAGAAGATTTTACAAAACCCTTATCGCTTAGTTT  
TCGACTTTTCGGGAATATATTAGCGGATGAGTTAGTAGTTGTTGTTCTTGTTCCTTAGT  
ACCTTTAGTGATTCCAATACCTGTCAIGTTCCTTGGATTATTTACAAGTGGTATTCAAGC  
TCTTATTTTTGCAACTTTAGCCGCGGCTTATATAGGCGAATCTCTGGAAGTTCATCATATC  
ATTTGTTCTATTTTCGAGCAACTATTAATCATATCTATTTGTCGATTGTTCAATTGTAAT  
TACAATTCATTTGATAACTTTTTTGGTCGAT--TTTGTAGAACTTTCTCATTCTCAGAAA  
TCGGTTTACAAGGTACTTTTATATGTATAACAGGACTATTGATGATTGTTGGATTAATTT

GGGTCATTTACCATTAATGATTTATTTGAATCATTAATATTCCTTTCGTGGAGTTTATCC  
ATTCTTCATATATGTATATATTATTTTC---AAAAAAAATTTGATTAGTACCATAACCGAGCTA  
GGTATCATTTTAAACCCAAGTTTTTTTCGAGTTCAAATTTTTTAACTGATCAATATAAAGTT  
GCA---TTAGTACCCGCTCTACAATCCCATTGGTTAATGATGCATGTCAGTATGATACTTTT  
CGTTTATGCAGCTCTTATCTCTGGATCATTATTATCAATCGCACTTCTAGTTATTACATTT  
AACAAAATAGAAGGTTTTTTTTGTAAAAGCTTAGAGATCAAAAAAAAAAATATAAACGA  
TAAATTTTTTAAAAAATACTTATTTTTTTCCGTTAGGAATTACTACAGGTACCAATTGATA  
CAATTGTTGGATTTTTGGAGTTATCGTGTATTTCGTTTTGGTTTTATTTTATTAATATTGG  
TATTATTTCCGGATCAGTATGGGCTAATGAAGCATGGGGATCATATTGGAACCTGGGACCC  
AAAAGAACTTGGTGTTTTTATTACTTGGAGCATATTTACAATTTATTTACATATTCAAAC  
AAATACGAATTGGAGAGGTCCCATTTCTTCAATTGTTGCTTTGATGGGTTTTGTATAAT  
TTGGATATGTTATTTGGAGTCAATTTATTAGAAATCGGGATGCATAGTTATGGTTCATTT-  
-----ATGAAAAATAAAGTTTTTTCTTATTCACATTCTATACTTGTATCTCTTGTATTTTTGC  
CCTGGTGGATCTCTATCTTTTTTAAAAAATGTCTTGAATATTGGGTTCTCAATGGGTGGA  
ATACGAGACAATCCGACCATTTTTTTAAGGACATTCAAGAATTGAGTATTTTAGAAAAA  
TTTATAGAATTAGAGGAAGTCCTCCTTTTGGAGGAAATAATAAAGGAAGATCCGAAGA  
AACATCTACAAAACCTTCATATCGGAATGTACAAAGAAACGATTCAATTGATCAAGATG  
CATAATGCGGATCATATTCATGCCATTTTACACTTCTCAACAAACATCATTCTTTTCGTTA  
TTTTAATCGGTTATTCAATTATTCTAAATGAACAACTTGTAATTCTGAACTCTTGGGTT  
AGGAATTACTATATAACTTAAACGACACAACAAAAGCCTTTTCGATTATTTTAGTAACG  
GATTTATGTATCGGATTCCATTCGACCCATGGTTGGGAACTAATAATTGGCTCTGTATAC  
AAAGATTTTGGATTTTTTCATAATGATCAAATTATATCTGGTCTTGTCTTACTTTTCCAG  
TTATTTTAGATACAATTTTTAAATATTGGATTTCCGTTATTTAAATCGTGTGTCCTCGTCA  
CTGGTAGTGATTTATCACTCAATGAATGACATGCCTATTGGTGTTCOAAGAGTACCTTTT  
CGAATTCCTGGAGAGGAATATTCAACTTGGGTTGACATATAACAACCGACTTTATCGAGA  
AAGATTACTTTTTTTAGGTCAAGGGGTAGATAGTGAGATCTCGAATCAACTTATTAGTCT  
GATGGTATATCTCAGTATAGAGAATGAGACCAAAGATTTTTATTTTTTTATCAACTCTCCT  
GGCGGATGGGTCATACCGGGAGTCGCTATTTATGACACTATGCAATTTGTTTCGACCAGA  
TGACAGACTATATGTATGGGCTTAGCCGCCTCAATGGGATCTTTTATACTGGTTCGGAGG  
ATCGATTACCAAACGTCTAGCATTCCCCACGCCCCGGGTAATGATCCATCAACCTGCTA  
GTTCTTATTTTGGAGGCACAAACAGTCGAATTTATCCTGGAAGCGGAAGAACTACTGAA  
ACTGCGCGAAACCCTGACACAGGTTTATGTACAACGAACGGGTAAGACGTTATGGATT  
GTCCTCGAAGATATGGAAAGGGATGTGTTTATGTCAGCAACAGAAGCCCAAACCTCATG  
G A A T T G T T G A T C T A G T A G C G A T T G A  
A????????????????????????????????????????????????????????????????  
????????????????????????????????????????????????????????????????  
????????????????????????????????????????????????????????????????  
????????????????????????????????????????????????????????????????  
ATGGAACAATTCCAAAGATCTT  
TCGAA---TATATATTTGGGCAACATGAGTTTTTCTATCCACTTATCCTTCAAGAGTTTATTT  
ATGTACTGAATCATGCTCGT-----GTAGGTGATGAGAATCTATTTCAGTTTACTAATTGTGA  
AACGTTTACTTACTCGAATCTATCCACCGAATCATTGTATTTCCGCAACA---TATTCTAAC  
CTAAATCCATATTTTCGAGAAAAACATTTCTTTTCAAATGATACCAGAGGTATTTACAGAA  
ATTTTGGAAATTTCAATTTCCCTATTTTTATTAGCTTCTATAATAAAGAATCTAAAAATTT  
ACGATCAATTCATTCATATTTACTTTTTTAGAGGAAAAATTTCCCATTTAAATTTATATAT  
CAAATATACTTATCCCTATCCTGTCCATCTGAAAATATTGGTTCAAATTTATTCGTTATTG





repeated text block containing multiple lines of identical or similar content, likely representing a large volume of data or a specific type of document structure.



????????????????????????????????????????????????????????????????????????????????????  
????????????????????????????????????????????????????????????????????????????????????  
--ATGCAAAAAAAAAACCTTTTCTTGGATAAAGAAG  
GAAATTACTCGATCTTTTTCCGTATTGCTCATAATTATTATGACTCAGACATCTCTTT  
CCAATGCATATCCCATTTTTGCACAGAAAAGTTATGAAAATCCACGAGATGCAACTGGG  
CGTATAGTATGTGCCAATTGTCATTTAGCTAATAAACCTGTGGATATTGAGGTTCCACAG  
GCAGTACTTCTGATACTGTATTTGAAGCAGTTGTTTCGAATTCCTTATGATATGCAACTG  
AAACAAGTTCTTGCTAATGGTCAAAAAGGGGGTTTGAATGTAGGGGCTGTTATCTTTT  
ACCCGAGGGGTTTGCATTAGCTCCTCCCGATCGTATTTCTCCTGAAATGAAAGAAAAGA  
TAGGAAATCTCTCTTTTCAGAACTATCGGCCTACTAAAAAAATATTCTTGTGATAGGTC  
CTATTCCTGGTCAGAAATATAGTAAATCACCCCTTCTTCTTTCCCCGACCCTGTGA  
CTAAGAAAGATGTTCACTTCTTAAAATATCCCATATATGTAGGTGGAAATAGGGGTAGG  
GGTCAAATTTATCCTGATGGGAGCAAGAGTAACAATACAATTTATAATGCTACAGCAGC  
AGGTTTAGTAAGTCAATCATACAAAAAGAAAAGGGAGGATATGAAATAACCATAGTG  
GATCCATCAGATGAACGTCAAGTAGTTGATTTTATCCCTCCAGGACCAGAATCCTTGT  
TTCAGAGGGAGAATCTATCAAACCTTGATCAACCATTAACAAGTAATCCTAATGTGGGTG  
GCTTTGGTCAGGTAGATGCAGAAATAGTACTTCAAGATTCATTACGTCTCCAAGGCCTT  
TTGCTCTTCTTGGCATCTGTTATTTTGGCACAAATATTTTATGTTCTTAAAAAGAAACAG  
TTTGAGAAGGTTCAATTGTCCGAAATGAATTTTCATGAGTAAAATCTATGATTGGTTTCGA  
AGAACGTCTCGAGATTCAGGCGATTGCAGATGATATTACTAGTAAATATGTTCCCTCCTCA  
TGTCACATATTTTATTGTCTAGGAGGAATTACGCTTACTTGTTTTTTACTACAAGTAGC  
GACAGGGTTTGCTATGACTTTTTACTATCGTCCAACCGTTACAGAGGCGTTTTTCATCGG  
TTCAATATATAATGACTGAAGCCAAGTTTGGTTGGTTAATCCGATCCGTTTCATCGATGGT  
CGGCAAGTATGATGGTATTAATGATGATCTTGCACGTATTTTCGTGTGTATCTTACCGGTG  
GGTTTAAAAAACCTCGCAATTGACTTGGATGACTGGTGTGGTTCTGGCTGTATTAAT  
GCATCTTTTGGTGTAACCTGGTTATTCTTTACCTCGGGATCAAATTGGTTTTTGGGCAGTA  
AAAATTGTAACAGGCGTACCTGAATCTATTCCTTTAATAGGATCCCATTTGGTAGAGTTA  
TTACGCGGAAGTGCTAGTGTGGGACAATCCACCTTGACTCGTTTTTATAGTTTACACAC  
TTTTGTATTGCCCTTCTTACAGCCGTATTTATGTTAATGCACTTTCCAATGATACGCAAA  
CAAGGCATTTCTGGTCCTTTAATGGGAGTAACAAAAAACCCGACTTGAATGATCCTGT  
ATTAAGATCTAAATTGGCAAAAGGGATGGGCCATAATTATTACGGAGAACCCGCATGGC  
CCAATGATCTGTTATATATTTTTCCAGTAGTCATTTCTAGGAACAATTTTCATGTAATGTAGG  
CTTAGCAGTTCTAGAACCATCTATGATAGGTGAACCAGCAGATCCATTTCAACTCCTTT  
GGAAATATTACCAGAATGGTATTTCTTTCCCGTATTTCAAATACTTCGTACAGTACCCAA  
TAAATTTTTGGGTGTTCTTTTAAATGGTTTCAGTACCCTTGGGATTATTCACAGTCCCTTTT  
TTGGAGAATGTTAATCAATTCCAAAATCCATATCGTTCGTCCAGTAGCGACAACCATTTTT  
TTAATTGGTACAGCAGTCGCCCTTTGGTTGGGTATTGGAGCCACATTACCTATAGATAAA  
TCCCTAACGTTAGGTCTTTTTATGATTGAAGTTTTTCTATTTGGAATCGTGTAGGTCTAA  
TTCTTACTTTGGCTGGATTATTCGTAACCTGCATATTTACAATACAGACGTGGTGATCA  
ATTGGACCTTATGTCCACTATCACTCGTTATTTCCGGTATTTTACTAGCGGTTTTTACTATC  
ACCTCCGCTTATTTATTAGTATGAGCAAGATACGACTGATTATGGATATAGTCAGTTTTG  
CTTGGGCTGCTTAAATGGCAGTCTTTACATTTTCCCTTTCACTCGTTGTTTGGGGTAGAA  
ATGGACTCATGATTATTCGTTTGCCGGAACCAGAAGTAAAAATTTTGGTAGAAAGGGAT  
CCCATAAAAACATCTTTTCGAGGAATGGGGGAGACCCGTCATTTCTCAAGAACAATTG  
CGAAGGGTCCAGATACTACCACTTGGATCTGGAACCTACATGCGGATGCTCACGATTC

GATAGCCATAACCAGTGATTTGGAGGAGATATCTCGAAAAGTATTTAGTGCCCATTTTGG  
GCAACTTTCCATCATCTTTCTTTGGCTGAGTGGCATGTATTTCCACGGTGCTCGTTTTTC  
CAATTATGAAGCATGGCTAAGCGATCCAAGTCACATTGGACCAAGTGCTCAGGTGGTT  
TGGCCCATCGTTGGCCAAGAAATATTGAATGGCGATGTGGGCGGGGTTTTTCGAGGAAT  
ACAAATCACTTCTGGTTTTTTTCAGATTTGGCGAGTCTCTGGAATACTAGTGAATTAC  
AACTCTATTGTACCGCCATTGGTGCATTA CTCTTTGCGGCGTTAATGCTTTTTTGCTGGTT  
GGTTCATTATCACAAAGCTGCTCCCAAATTGGCTTGGTTCCAAGATGTATCATCGATGT  
TGAATCACCATTTAGCGGGTCTACTAGGACTGGGCTCTCTTTCTTGGGCAGGACATCAA  
ATACATGTCTCTTTGCCAATTAACCAATTTCTAAACGCAGGAGTCGATCCCAAAGAGAT  
ACCACTTCCTCATGAATTTATCTTGAATCGGGATCTTTTGGCTCAACTTTATCCCAGTTT  
TTTGGAGGGAGCAAGCCCTTTTTTGACCTTGAATTGGTCAAATATGCGGAATTTCTCA  
CTTTTCGTGGAGGATTAGATCCAGTTACTGGGGTCTATGGCTGACCGATATTGCACAC  
CATCATTTAGCTATAGCTATTCTTTTCTTGATATCGGGTCACATGTATAGGACCAACTGGG  
GCATTGGTCACAGCCTAAAAGATATTTTAGAGGCTCATAAAGGTCCATTTACAGGCCAG  
GGACATAAAGGCCTATATGAGATCCTAACCACTTCATGGCATGCTCAATTATCTCTTCAT  
CTAGCTATGTTAGGGTCTTAACTATTGTTGTAGCTCACCATGTATTCCATGCCCCCTT  
ATCCATATCTAGCGACTGACTATGGTACACA ACTTTTCATTGTTACACATCACATGTGGA  
TTGGTGGATTTCTCATAGTTGGTGCTGCTGCGCATGCAGCTATTTTTATGGTCAGAGACT  
ATGATCCAACCACTCGATACAATGATCTATTAGATCGTGTCTTAGACATCGCGATGCAA  
TCATATCACATCTCAACTGGGCATGTATCTTTCTAGGCTTTCACAGTTTTGGTTTTGTATAT  
TCATAATGATACCATGAGCGCTTTAGGACGTCCTCAAGATATGTTTTTCAGATAACCGCCAT  
ACAATTACAACCCGTGTTTGCTCAATGGATACAAACACCCATGCTTTAGCACCTGAGG  
CAACGGCCCCTTCTGCAACAGCAAGCACCAGTTTGACTTGG---GGAGGTGATTTAGTC  
GCAGTCGATGGCAAAGTCGCTTTGTTACCCATTCCTTTAGGAACTGCGGACTTTTTGGT  
ACATCACATTCATGCATTTACAATTCATGTGACGGTACTGATACTCCTGAAAGGGGTTCT  
GTTTGCTCGTAGTTCCCGTTTGATACCGTATAAAGCAAATCTTGGTTTTCGTTTCCCTTG  
TGATGGGCCTGGAAGGGGCGGAACATGTCAAGTATCCGCTTGGGATCATGTCTTCTTAG  
GGCTATTCTGGATGTACAATGCAATTTCTGTAGTTATCTTCCATTTCAGTTGGAAAATGC  
AGTCAGACGTTTGGGGTAGTATAAGTGATCAAGGAGTGTTAACTCATATTACGGGCGGA  
AACTTTGCGCAGAGTGCCATTACTATTAATGGTTGGCTCCGCGATTTCTTATGGGCACA  
GGCATCCCAGGTCATTCAGTCTTATGGTTCTTCATTATCTGCATATGGTCTTTTGTTCCTA  
GGTGCTCATTGTATGGGCTTTTAGCTTAATGTTTCTATTAGCGGGCGTGGTTATTGG  
CAAGAACTTATTGAATCCATCGTTTGGGCTCATAATAAAAATAAAAAGTTGCTCCTGCGAC  
TCAGCCTAGAGCCTTGAGCATTGTACAAGGACGTGCTGTAGGAGTAACCCATTACCTTC  
TGGGTGGAATTGCCACAACATGGGCGTTCTTCTTAGCAAGAATTATTTAGTAGGAATG  
GCATTAAGATTTCCAAGGTTTAGCCAAGGATTAGCTCAGGACCCACGACTCGTCGTAT  
TTGGTTTTGGTATTGCTACCGCACATGACTTCGAGAGTCATGATGATTA CTGAGGAAC  
GTCTTTATCAGAGTATTTTTGCTTCTCACTTCGGACAATTAGCTATCATTTTTCTGTGGAC  
TTCCGGAAATCTATTTTCATGTAGCTTGGCAAGGAAATTTTGGTCAACCGGCTG  
TAGAAGCTTTTACTCGAGGAGGTTCTCTGGGGCCAGTGAATATTGCTTATTCTGGTGT  
ATCAGTGGTGGTATACGATTGGTTTACGCAGTAATGAAGATCTTTATACGGGAGCCGTTT  
TTCTATTATTTCTTCTCTGATCTCTTAATAGGGGGTTGGTTACACCTACAACCGAAAT  
GGAAACCGAGCGTGTCATGGTTTTAAAATGCCGAATCTCGTCTCAATCATATTTGTCA

GGACTATTCGGGGTAAGTTCCTTGGCTTGGACAGGGCATTAGTCCATGTGGCTATTCC  
TGGATCCAGAGGGGAATACGTTTCGATGGAATAATTTTTAGATGTATTACCGCATCCCCA  
AGGGTTAGGACCCCTTTTTACAGGCCAGTGGATACTTTATGCTCAACACCCCGATTAA  
GTAGTCATGTTTTCGGTACTTACCAAGGCGCAGGAACTGCCATTTAAACCCTTTTCGGG  
GGATTTCATAACAAACGCAAAGTTTATGGCTGAGTGATATTGCTCATCATCATTAGCT  
ATAGCATTGTGTTCCCTAGTTTCTGGTCATATGTATAGAATACTTCGGGATTGGGCAC  
AGTATGACAAATCTTTTAGAAGAACAATTCCTCCGGGGGAGGATTGGGACGTGGAC  
ATAAGGGTCTTTATGACACAATCAATAATTCGATTCATTTTCAATTAGGCCCTTGCTTTAG  
CTTCTTTAGGAGTGATTACTTCCCTGGTAGCTCAACACATGTACTCTTACCCGCTTATG  
CGTTCATAGCACAAGACTTTACTACTCAAGCTGCGTTATATACTCATCATCAATATATTGC  
AGGATTCATCATGACAGGAGCTTTTGCCCATGGAGCGATTTTTTTTCATTAGAGATTACAA  
TCCAGAACAGAATGACGATAATGTCTTGGCAAGAATGTTAGACCATAAAGAAGCGATC  
ATATCCCATTTAAGTTGGGCCAGCCTATTTCTGGGGTTCATACCTTAGGACTGTATGTT  
CATAATGATGTCATGCTTGCCTTTGGTACTCCGGAGAAACAAATATTGATCGAACCTATA  
TTTGCCCAATGGATACAATCTGCTCATGGTAAACTGCATATGGCTTTGATGTACTTTTA  
TCTTCAACAGATGGCCAGCATTTTCATGCAGGTCGAAGCATATGGTTGCCTGGTTGGTT  
AAATGCTATTAATGAAGAAAAGAATAGTAATTCACTATTCTTAACAATCGGTCCTGGCG  
ACTTTTTGGTTCATCATGCTATTGCTCTGGGTCTACATACTACCACATTGATATTAGTCAA  
AGGTGCTTTAGATGCACGCGGTTCCAAATTAATGCCAGATAAAAAGGATTTTCGGTTATA  
GTTTTCTTGGCAGGTTCCGGGACGGGGTGGTACTTGTGATATTTTCGGCTTGGGACGCA  
TTTTATTGGCAGTTTTTTGGATGTTAAATACCATTGGATGGGTGACTTTTTATTGGCATT  
GGAAACACATTACATTATGGCAAGGGAATGTTTCACAGTTTAATGAATCTTCTACTTATT  
TGATGGGATGGTTAAGAGATTATCTATGGTTAAACTCTTCACAACCTATTAATGGTTATA  
CCCCTTTTGGTATGAATAGTTTATCAGTCTGGGCATGGATGTTCTTATTTGGACATCTTGT  
TTGGGCGACTGGATTTATGTTCTTAATTTCTTGGCGTGGTTATTGGCAGGAATTGATTGA  
GACATTAGCATGGGCTCATGAGCGCACACCTTTGGCCAATTGGATTTCGATGGAGAGATA  
AACCGGTAGCTCTTCCATTGTGCAAGCAAGATTGGTTCGGCTTAGCCACTTTTCTGTA  
GGATATATATTTCACTTATGCAGCTTTCTTGATTGCCTCCACATCGGGAAAATTTGGTATGT  
CACATTTAGTTAAGATTTATGATACATGTATTGGATGTACTCAATGTGTACGAGCTTGCC  
CTACTGATGTATTAGAAATGATTCCTTGGGAAGGATGTAAAGCGAAGCAAATTGCTTCT  
GCTCCACGAACAGAGGATTGTGTGGGTTGTAAGAGATGTGAATCTGCCTGTCCAACGG  
ATTTCTTAAGTGTTTCGAGTTTATTTATGGAATGAAACAACCTCGCAGCATGGGTCTCGCTT  
ATATGACAATTTCTAAATTTACCTTCTTTTTGTTTCTTTAGTAGGTCTAGTTTTTCCGTC  
AATTGCAATGGCTTCTTTATTTCTTCATGTTCAAAAAACAATATTGTTATGCGAGATCT  
AAAAACGTATCTTTCCACGGCACCGGTACTTAGTATGCTATGGTTTGGATCTTTAGCGG  
GTTTATTGATAGAGATCAATCGCTTTTTCCCGGATGCGTTGATAATACCTTTTTTTTCATT  
TATGACTGCCATTGTAGAGAGACAAGAAAACGAAACCCTATGGTCTCGCTTCTGTAAC  
TGGATAACTAGCACTGACAACCGTCTTTACATTGGATGGTTTGGTGTTTTGGATGATCCCT  
ACCCTATTGACAGCAACTTCTGTATTTATAATTGCTTTTATTGCTGCTCCTTCAGTCGATA  
TTGATGGTATTCGTGAACCAGTATCTGGTTCTCTAATTTATGGAAACAATATTATTCTGG  
TGCTATTATCCGACTTCTGCAGCTATTGGTTTGCATTTTTATCCGATATGGGAAGCGGCA  
TCTGTTGATGAATGGTTATAACAATGGTGGTCCTTATGAGTTAATTGTTCTACACTTCTTAC  
TTGGTATAGCTTTTTATATGGGTTCGTGAGTGGGAACCTTAGCTTCCGTCTTGGTATGCGTC  
CTTGATTGCTGTTGCATATTCAGCTCCTGTAGCAGCAGCTACTGCTGTTTTTTTAAATCT

ATCCCATCGGTCAAGGAAGTTTTCTGATGGTATGCCTCTAGGAATTTCTGGTACTTTCA  
ACTTCATGATAGTATTCCAGGCTGAACACAACATCCTTATGCACCCCTTTCATATGTTAG  
GCGTTGCTGGTGTTCGCGTGGTTCCTTTTCAGTGCTATGCATGGTTCCTTAGTAACCT  
CTAGTTTGATCAGGGAACTACAGAAAATGAATCTGCTAATGCAGGTTACAGATTTGGT  
CAAGAAGAAGAAACGTATAATATCGTAGCTGCTCATGGTATTTTGGCCGATTGATCTTC  
CAATATGCTAGTTTTAATAATTCTCGTTCCTTACATTTCTTCCTTGCTGCTTGGCCTGTG  
TAGGTATCTGGTTCACTGCTTTAGGTATTAGTACCATGGCTTTTAACTTAAATGGTTTCA  
ATTTCAATCAATCTGTAGTTGATAGTCAAGGTCGTGTCATTAATACCTGGGCAGATATTA  
TTAACCGTGCTAATTTAGGTATGGAAGTTATGCATGAACGTAATGCTCATAATTTTCTCT  
AGATTTAGCTGTTATTAACGTTTTCTCCATTGGA---ATGGGTTTACCTTGGTATCGTGTC  
ATACCGTTGTATTGAATGATCCCGGTCGGTTACTTTCTGTCCATATCATGCATACAGCTCT  
GGTTGCTGGTTGGGCCGTTTCGATGGCTCTCTATGAATTAGCAGTTTTTATCCCTCAG  
ACCCCTTCTGGATCCAATGTGGAGACAAGGTTTGTGTTATAACCCTTCATGACTCGT  
TTAGGAATTACCAATTCATGGTCTGGTTGGAATATCACAACAGGAGGGACTATAACGAA  
TCCGGGTATTTGGAGTTACGAAGGCGTGGCTGGGGCACATATAGTATTTTCGGGTTTTT  
GCTTCTTGGCAGCTATCTGGCATTGGGTATATTGGGATCTAGAAAATATTTTGTGATGAAC  
GTACAGGAAAACCTTCTTTGGATTTGCCCAAGATCTTTGGAATTCATTTATTTCTTTCAG  
GGTTGGCTTGCTTTAGTTTTGGTGCATTTTCATGTTACTGGCTTGTATGGTCCCTGGAATAT  
GGGTGTCCGATCCTTATGGACTAACGGGAAAAGTACAACCCGTCAATCCATCGTGGGG  
TG TAGAGGGTTTTGATCCTTTTGTTCAGGGGGCATAGCTTCGCATCATATTGCAGCAG  
GGACTTTGGGCATATTAGCGGGCTTATCCATCTTAGTGCCGTCCGCCCAACGTCTAT  
ACAAAGGATTACGTATGGGCAATATTGAAACTGTTTTGTGCGAGTAGCATAGCGGCTGTC  
TTTTTTGCAGCTTTTTGTGTTTTCTGGAACATGTGGTATGGTTCAGCAACGACTCCGATC  
GAATTGTTTGGCCCCACTCGTTATCAATGGGATCAGGGATACTTCCAGCAAGAAATATA  
TCGAATCGTTGGTGCTGGTTTAGCCGAAAATAAAAGTTTATCAGATGCTTGGTCTCTTAT  
TCCTGAAAAATTAGCCTTTTATGATTATATCGGCAATAATCCGGCTAAAGGGGGATTATT  
CAGAGTTGGCTCCATGGACAATGGGGACGGAATAGCTGTGGGATGGTTAGGACACCCA  
ATCTTTAGAGAGAAAGAAGGTCGTGAACTTTTTGTGCGACGTATGCCTACATTTTTTGA  
AACATTTCCAGTCGTTTTAGTAGACGGAGACGGAATTGTTAGAGCCGATGTTCTTTTC  
GAAGGGCAGAATCAAAGTATAGTGTGAAACAAGTCGGTGTCACTGTTGAATTCTATGG  
TGGTGAACCTCAATGGAGTCAGTTATAGTGATCCTACTATTGTGAGAAAATATGCTAGAC  
GTGCGCAATTGGGTGAAATTTTTGAATTAGATCGTGCTACTTTGAAATCCGATGGCGTT  
TTTCGTAGCAGCCCCAGAGGCTGGTTACTTTTGGACATGCTTCGTTTGCTCTGTTGTT  
TTTCTTTGGACACATTTGGCATGGTGCTAGAACTTTGTTTTCAGAGATGTTTTTGTGTTAT  
TGACCCAGATTTGGATGCTCAAGTGGAATTTGGAACATTCAAAAACTTGGAGATCCC  
ACTACAAGAAGAGTAGTC-----GTGGAAACGCTCTTTAATGGA  
ACTTTAGCTTTAGCTGGTCGTGACCAAGAAACGACCGTTTTCGCTTGGTGGGCCGGGA  
ATGCTCGACTTATCAATTTATCCGGTAAACTACTCGGGGCCCATGTCGCCCATGCCGGAT  
TAATAGTCTTCTGGGCCGGGTCAATGAACTTATTTGAAGTAGCTCATTTTCGTACCGGAG  
AAGCCCATGTATGAACAAGGATTCATTTTACTTCCCCACCTAGCTACTCTAGGTTGGGG  
GATAGGTCCTGGTGGGGAAGTAATAGACACTTTTCCATACTTTGTATCTGGAGTACTTC  
ACGTAATATCCTCTGCAGTATTGGGATTTGGCGGTATTTATCATGCACTTCTGGGACCTG  
AGACTCTTGAAGAATCTTTTCCATTCTTTGGTTATGTATGGAAAGATAGAAATAAAATG  
ACCACCATTTTGGGTATTCACTTAATCTTGTAGGTATAGGTGCGTTTTCTTCTAGTATTGA

AGGCTATTGTTTTTGGAGGTGTATATGATACCTGGGCTCCCGGAGGGGGAGATGTAAGA  
AAAATGACCAACTTGAGCCTTAGTCCAAGTATTATATTTGATTATTTACTCAAATCCCC  
TTTGGAGGAGAAGGCTGGATTGTTAGTGTGGACGATTTGGAAGATATAATCGGAGGAC  
ATGTATGGTTAGGTTCTATTTGTATACTTGGTGGAACTGGCATATCTTAACCAAACCCTT  
TGCATGGGCTCGACGTTCACTTGTATGGTCTGGAGAGGGTTACTTGTCTTATAGTTTAG  
GTGCTTTATCTGTCTTTGGTTTTCAATGCTTGTGCTTTGTCTGGTTCAATAATACTGCTTA  
TCCGAGTGAGTTTTACGGGCCACTGGACCAGAAGCTTCTCAAGCTCAAGCATTACT  
TTTCTAGTTAGAGACCAGCGTTTTGGGGCTAACGTGGGATCTGCTCAAGGCCCTACAG  
GTTTAGGGAAATATTTAATGCGTTCTCCACTGGAGAAGTCATTTTTGGCGGAGAAACG  
ATGCGTTTTTGGGATCTACGTGCTCCATGGTTAGAACCTTTAAGAGGTCCCAATGGTTT  
GGACTTAAGTAGACTGAAAAAAGACATAACAACCTTGGCAAGAACGGCGTTCCGCGGA  
ATATATGACTCATGCTCCTTTAGGTTCTTTAAATTCCGTAGGTGGCGTAGCTACCGAGAT  
CAATGCAGTCAATTATGTCTCTCCTAGAAAGTTGGTTAGCGACTTCGCATTTTCTTCTAGG  
ATTCTTCTATTCGTGGGTCAATTTGTGGCACGCGGGGAGGGCTCGTGCAGCTGCAGCA  
GGATTTGAAAAGGAATCGATCGTGATTTTGAACCTGTTCTTTCCATGACCCCTCTTAA  
CATGACTATTGCCCTTGGTAAATTTACCAAAGACGAAAAT---TTATTTGATATTATGGATG  
ACTGGTTACGCAGGGACCGTTTCGTTTTTGTAGGTTGGTCCGGTCTATTGCTCTTTCCTT  
GTTCCATTTTCGCTTTAGGAGGTTGGTTCACAGGTACCACCTTTGTCACTTCATGGTATA  
CCCATGGATTGGCCAGTTCTTATTTGGAAGGATGCAACTTCTTAACTCCGCCGTTTCG  
ACTCCTGCGAATAGTTTAGCACACTCTTTGTTGTTACTATGGGGCCCCGAAGCACAAAGG  
AGATTTTACTCGTTGGTGTCAATTAGGCGGTCTTTGGACTTTTATTGCTCTCCACGGCGC  
TTTCGGACTAATAGGTTTTATGTTACGTCAATTCGAGCTTGCTCGATCTGTTCAATTGCG  
ACTTTTAATGCAATCGCATTCTCTGCACCAATTGCGGTTTTTATTTCTGTATTTCTGATT  
TATCCACTAGGTCAGTCTGGTTGGTCTTTTGCCTAGTTTTTGGTGTAGCAGCTATCTTT  
CGATTCATCCTATTTTTTCAAGGGTTTCATAATTGGACGTTGAACCCATTCATATGATGG  
GAGTTGCCGGTGTATTGGGTGCTGCCCTGCTATGCGCGATTTCATGGTGCAGCTGTAGAA  
AATACTTTATTTGAAGATGGTGATGGTGCAAACACATTCCGTGCTTTTAAACCCACCCA  
AGCTGAAGAACTTATTCATGGTCAACCGTAACCGATTTTGGTCCCAAATATTGGGG  
TTGCTTTTTCCAATAAACGTTGGTTACATTTCTTTATGTTATTTGTACCAGTAACCGGTTT  
ATGGATGAGTGCTCTTGGAGTCGTCGGTCTGGCTCTGAACCTACGTGCCTATGACTTTG  
TTTCCCAGGAAATCCGTTACGCGGAAGATCCTGAATTTGAGACTTTCTACACCAAAAAT  
ATTCTCTTAAACGAAGGTATTCGCGCTTGGATGGCGGCTCAAGATCAGCCTCATGAAA  
CCTTATCTTCCCTGAGGAGGTTCTACCCCGTGGAACGCTCTTATGTCTGGAAGTACTG  
GAGAACGTTCTTTTGCTGATATTATTACCAGTATTCGATACTGGGTCATTCATAGCATTAC  
TATACCTTCCCTATTTATTGCAGGTTGGTTATTCGTTAGCACAGGTTTLAGCTTATGATGTG  
TTTGGAAAGTCCCTCGGCCAAACGAATATTTTACAGAGAACCGACAAGGAATTCCATTAAT  
CACTCGCCGTTTTGATCCTTTGGAACAACCTCGATGAATTTAGTAGATCCTTTATGACCAT  
AGATCGAACCTATCCCATTTTTTACAGTGCATGGTTAGCTGTTACGGACTAGCTGTAC  
CTACCGTTTTTTTTTTGGGATCCATATCCGCCATGCAATTCATCCAACGAATGGCTACAC  
AAACTGTTGAAGGTCGTTCTAGATCGGGT---CCCAGACGAACCTACATAGGAGATTTATT  
AAAACCATGAATTCAGAATATGGTAAAGTAGCTCCTAGATGGGGAACGACTCCTTTAA  
TGGGTGTCGCAATGGCTCTCTTTGCGATATTTCTATCGATTATTTGGAAATTTTTAATTC  
TTCCGTTTTTACTGGATGGAATTTCAATGAATATGTTTACTCTCAAACCTTTCGTTTTACAC  
AGTAGTGAATTTCTTTGTTTCTCTATTTATCTTCGGATTCCCTGTCTAATGATCCAGGACGT

AATCCTGGGCGTGAA---ATGGCCGATACTACTGGAAGGATTCCCTCTTTGGCTAATAGGTA  
CTATAACTGGTATTCTGTGATTGGTTTAATAGGTATTTCTTTTACGGTTCGTATTCCGG  
ATTGGGTTCCCTCTCGGATGCAATATATC-----GATTGTTTGTATCTGTCTTCATAATTCCTTT  
TTTTCTCGAATAATTATTTTGCCAAATTACCCGAGGCCTACGCTTTTTTTGAATCAAATC  
GTAGATGTTATGCCAGTCATACCTGTACTATTTTTCTCTTAGCATTTTTGTGGCAAGCTG  
CAGTAAGTTTTTCGAACGACACAATCAAATCCTAATGAACAAAATGTGGAATTGAATCGT  
ACCAGTCTTTACTGGGGCTTATTACTTATTTTTGTACTTGCTGTTTTATTTTCCAATTATTT  
CTTCAATATGGAAGTAAATATTCTTGCATTTATTGCTACTGCACTGTTCAATTCTAGTTCCG  
ACTTCTTTTTTACTTATTATTTACGTAAAGACGGTCAGTCAAACAAAGATGCAAACAGC  
AACCTAGTTGCCATCTCTATATCTGGTTTACTTGTAGTTTTACTGGGTATGCTTTTTAT  
ATCGTTTTTGGGCAGCCCTCTCAACATCTCATAGATCCATTGGAAGAACACGGGGACAT  
GGAAGCATTGGTTTATACATTCCTTTTAGTCTCGACTCTAGGAATAATTTTTTTTCGCTATT  
TTTTTTTCGAGAACCGCCTCAAGTTCCAATAACTAACTAATTAATAATGACTATTGCTTTCCA  
ATTGGCTGTTTTTGCATTAATTGCTACTTCATCAATCGTATTGATTAGTGTAGCCTTTGTA  
TTTGCTTCTCCTGATGGTTGGTCAAGTAACAAACATGTTGTATTTCCGGTACTTCATTA  
TGGATTGGATTAGTATTTCTGGTAGGTATCCTAAATTCTATCATCTTT-----ATG  
TCACCACAAACAGAACTAAAGCAAGTGTGGATTCAAAGCAGGTGTTAAAGATTACA  
AATTGACTTATTATACTCCTGATTATAAAACCAAAGATACAGATATCTTGGCAGCATTCC  
GAGTCACTCCTCAACCAGGAGTTCCGCCTGAGGAAGCAGGGGCCGCGGTAGCAGCGG  
AATCTTCTACTGGTACATGGACCACTGTGTGGACCGATGGACTTACCAGCCTGGATCGT  
TACAAAGGACGATGCTACCACATCGAGACCGTGGTAGGAGAAGAAAATCAATTTATTG  
CTTATGTGGCTTACCCCTTAGACCTTTTTGAAGAAGGTTCTGTTACTAACATGTTTACTT  
CCATTGTGGGTAATGTGTTTGGGTTTAAAGCCCTGCGTGCTCTACGTCTGGAGGATCTG  
CGAATACCTCCAGCTTATTTCGAAACTTTTCAAGGCCACCTCATGGCATTCAAGTGGA  
GAGAGATAAATTGAACAAGTATGGTCGTCCTTATTGGGATGTACAATCAAACCTAAAT  
TGGGGTTATCTGCTAAGAACTACGGTAGAGCAGTTTATGAATGTCTTCGTGGTGGACTT  
GATTTTACAAAAGATGATGAGAACGTAAATCCCAACCTTTTATGCGTTGGAGAGACCG  
TTTCGTATTTTGTGCCGAAGCCATTTATAAAGCACAGGCGGAAACAGGCGAAATCAA  
GGCATTACTTAAATGCTACGGCAGGTACATGTGAAGAAATGATCAAAGGGCTGTTTT  
TGCCAGAGAATTAGGAGTCCCAATCATAATGCATGACTACTTAACAGGTGGATTCACTG  
CAAATACTAGCTTGGCTCATTATTGCCGAGATAATGGCCTACTTCTTCACATCCATCGTG  
CAATGCATGCAGTTATTGATAGACAAAAAATCATGGGATACACTTTCGTGTACTAGCG  
AAAGCTTTACGTATGTCTGGTGGAGATCATATCACTCAGGTACTGTTGTAGGTAAACT  
GGAAGGGGAAAGAGACATCACTTTGGGATTTGTTGATTTACTACGAGATGATTTTATTG  
CAAAGACCGAAGTCGTGGTATTTATTTCACTCAAGATTGGGTGTCGCTACCAGGTGTT  
TTGCCCGTCGCTTCGGGCGGTATTCATGTTTGGCATATGCCTGCTCTGACTGAGATCTTT  
GGGGATGATTCTGTACTACAGTTCGGTGGAGGAACCTTAGGACACCCTTGGGGAAATG  
CACCGGTGCCGTAGCTAATCGAGTCGCTCTAGAAGCTTGTGTACAAGCTCGTAATGA  
GGGACGGGATCTTGCTCGTGAGGGTAATGAAATTATCCGTGAGGCTAGCAAATGGAGT  
CCTGAATTAGCTGCTGCTTGTGAGGTATGGAAAGAAATCAAATTTGAATTTCAAGCAAT  
GGATACTTTG-----ATGGCGATACATTTATACAAACTTCTACCCCGAGCACACGTAATG  
GAGCCGTAGACAGTCAAGTGAAATCCAATCCACGAACGAAATTGATCTATGGACAGCA  
CCGTTGTGGGAAAGGTCGTAATGCCAGAGGCATCATTACCGCAGGGCATCGAGGGGGA  
GGTCATAAGCGTCTCTACCGTACAATCGATTTTCGACGGAATGAAAAAGACTTTGTTGG



TAGAATCGTAAACCATAGAATACGATCCTAATCGAAATGCATCCATTTGTCTCATACTA  
TGGGGATGGTGAGAAGAGATATATTTTACATCCAAGAGGGGCTATAATTGGAGATACCA  
TTGTTTCTGGTACAGAAGTTCCTATCAAATGGGAAATGCCCTACCTTTGACCGATATG  
CCCTTAGGCACGGCCATACATAACATAGAAATCACACTTGGAAAGGGTGGACAATTAG  
CTAGAGCAGCGGGTGCTGTAGCGAACTGATTGCAAAAAGAGGGTCAATCGGCCACATT  
AAAATTACCTTCTGGGGAGGTCCGTTTGATATCCAAAACTGCTCAGCAACAGTCGGA  
CAAGTGGGGAATATTGGGGTGAACCAGAAAAGTTTGGGTAGAGCCGGATCTAAGTGTT  
GGCTAGGGAAGCGCCCTGTAGTAAGAGGAGTCGTTATGAACCCTGTAGACCATCCCCA  
TGGGGGTGGTGAAGGAAGGGCCCCATTGGTAGAAAAAACAACAACCCCATGGGG  
TTATCCTGCACTTGAAGAAGAAGTCGAAAAAGG---AAATATAGTGATCATTTGATTCT  
TCGTCGCCGTAGTAAGATGATTCAACCTCAGACCCATTTGAATGTAGCGGACAATAGCG  
GGGCTCGACAATTGATGTGTATTTCGCATCATAGGA---AGT---AATCGACGATATGCTCATA  
TTGGTGACATTATTGTTGCTGTGATCAAAGAAGCAATACCCCATATGCCCTTAGAAAGA  
TCAGAAAGTCGTCAAAGCGGTGATAGTACGTACTTGTAAGAAGCAACTAAAACGTGAAAACG  
GTATGAAAATACGATCTGATGATAATGCGGCAGTTGTCATTGATCAAGAAGGAAACCCA  
AAAGGAACTCGAGTTTTTTGGTGCATTGCCCCGGAATTGAGACAGTTCAATTTTACTA  
AAATAGTTTCATTAGCTCCCGAAGTATTAATGCTTAGTCCCTTAAAAACCAGATTCCGTA  
AACACATAGAGGAAGAATGAAGGGTATATCTTCTCGAGGTAATCGTATTTGTTTCGAT  
CAATTTGCTCTTCAGGCACTAGAACCTGCTTGGATAACATCTAGACAAATAGAAGCCGG  
ACGACGCGCAATGGCACGAAATGTACGTAGAAGTGGAAAAGTATGGGTACGTCTATTT  
CCAGACAAACCAGTTACAGTAAAACCTACAGAAACACGTATGGGTTTCGGGGAAAGGA  
TCTCCCAATATTGGGTAGCTGTCATTAAACCAGGTCGAATACTTTATGAAACGGGCGG  
AGTAACAAAAAATATAGCCAGAAAAGCCATTTTAATAGCGGCGTCCAAAATTCCTATAC  
GAACTCAATTCATTTCAAGAGGAATGACCAGAATTAGACGAGGATATATAGCTCGGAA  
ACGGCGACAAAAAATCCGTTTATTTGCAAGAAGCTTTCGAGGGGCTCATGCAAGACTT  
ACTCGAACTTTGACTCAACAGAAAATAAGAGCTTTGGTTTCGGCTCATCGGGATAGAG  
ATCGAAAAAAAAGATACTTTCGTAGTTTGTGGATCGCTCGGATAAACGCAGTACTTAGC  
GGGAATACATCTTCCCTATTGTTGTTATAGTATTGTAATACACGATCTGCGCAATAGGCAAT  
TGATTATTAATCGTAAAATACTGGCGCAAATTGCAATATCAAATAGGAATTGTCTTTCTAT  
GATTTTCAATGAGATCATAAAAAAATCA-----ATGATAACGGAAACATAC  
GCTTTAAGTCAACATATATACATCTCTGCTCATAAAGCACGAAGAGTCATGGATCAGATT  
CGTGGACGTTCTTACAAAGAAACACTTCAAATACTGGAACTCATGCCTTATCGAGCGT  
GTTATCCCATTGTCAATTGGTTTATTCT--GCAGCAAATGCTAGCTACAATATGGGTTTC  
AACAAAGCAGCTTTAGTTATTAGTCAAGCAGAAGTCAACGAAGGAACTACCGTAAAA  
AAATTAACATCGGGCTCGAGGACGTAGTTCTTCGATCATAAGGAAACTTTGCCATAT  
AACTATAGTATTGAAAGATAAATCCTTATTA-----ATGGATGGAATCCAT--GC  
AGTATTTACAGACAAAAGTATTCCGTTATTGGGAAAAAAGAATCAATATACTTCTAATGT  
CGAATCAGGATCCACTAGGACAGAAATAAAGCATTGGCTCGAACTATTCTTTGGTGTC  
AGGTGATAGCTATGAATAGTCATCGACTCCCGGGAAAGGGAAGAGTGGGACCTACTAG  
TATGGGACATACAATGCATTACAGACGTATGATCATTACGCTTCAACCAGGTCATTCTAT  
TCCACCTCTTAGAGAAAAAGAAAATATGACAGTTCCAAAAAACGTACTTCGATTTTA  
AAAAAGAATATTCGTAAGAGTTTTGGAAAAATAAGGTATACAGGGTATCGCAAAACG  
CGTTGTCAATAGCAAATCTCTTTATACTGGAAAATCAAAGGTTTTTTTT-----AATAAGG  
A A G G

A????????????????????????????????????????????????????????????????????????????????????????  
????????????????????????????????????????????????????????????????????????????????????????  
????????????????????????????????????????????????????????????????????????????????????????  
ATGAAAAAAAAAGGCCTCTGTTTCGTAATAATTTGTGAAACAT  
GTCGACTGATATGTAGGAGGAGACGAATTATAGTCATTTGTTCCAACCCGAGACATAAA  
CAAAGACAA---ATGGTTCGAGATAAAGTAACAATTGCTACTCAGACATTAAAGTGGAAA  
TGTGTTGCATCAAGAGTAGACAATAAGCGTTTTTATTATGGACGTTTTTATTCTGTCTCCA  
CTTATAAAAGGTCAAGCCGACACAATAGGCATTGCGATGCGAAGAGCTTTGCTTGGAG  
AAATAGAAGGAACATGTATCACACGTGCAAAATCTGAT-----CAAATACCACATGAATAT  
TCTACCATACGAGGTATTCAAGAATCCGTACATGATATTTAATAAATTTGAAAGAAATT  
GTATTAAGAAGTAATCTGTATGGAACCTGTAACGCATCTATTTATATCAAAGGTCCAAGG  
TATATCACTGCTCAAGATATTATTTTACCACCTTATGTGGAAATCATCGATCATAACAAA  
TTATTGCTAGTTTAAACAGAACAGATTGATTTTGGTATTGGATTACAAATTGAGAAGAATC  
GAGGATATCGTATCATAACGCCAAAA---AACCTTGAAGGAAATTTT-----TCTATAGAAGC  
CATATTCATGCCTGTTTCGAAATGCAATCATAGCATTCACTAT-----AATGAAAAAC  
TAGAGATACTTTTTCTCGAAATATGGACAAATGGAAGTTTAACTCCGAAAGAAGCCCTT  
CATGAAGCTGCCCAGAAATTAATAGATTTATTTATTCCTTTTTTACATGTGAAGAAAGAA  
-----AAGTTACATGTAGAGGACAATCAA---CACAAG-----TTATCCCTTTTTACTTTTCATG  
ATAGATTGCAA---AACTAAGGAAAACGAAAGAA---AAAATAGCATTGAAATCGATTTT  
TATTGATCAATCAGAATTGTCTCCTAGGATCTATAATTGTCTAAAAAGTTCAAATATACA  
GAACATATTGGACTTATTGAATAAGAATAGAGAAGATTTGATGAAAATAGAACATTTTC  
GCATAGAAGATCTAAAACATATATGGGGTATTCTAGAAATGCAT-----TTAGAAATTGAT---  
-----ATGTTCCGGGATGGAAAT--AAGGGAATGTCTACAATACCTGGGTTTAATCAGA  
TACAATTTGAAGGATTTTGTAGGTTTCATGGATCTGGGCTTGACGGAAGAAGCTTTATAAG  
TTTCCAAAAATGGAAGATACAGATCAAGAATTGGAATTTCAATTATTTGTGGAAACATG  
TCAATTAGTAGAATCGTCGATAAAGGAGAGAGATGCTGTGTATGAATCACTCACATATT  
CTTCTGAATTATATGTATCCGCAGGATTAATTTGGAAACCCAGTAAGGATATGCAAGAAC  
AAACCATTTTTTATGGGAAAATTCCTCTAATGAATTCCTTGGGAACCTTCTATAGTAAATG  
GAATCTATAGAATTGTGATCAATCAATATTGCAAAGCCCCGGTATTTATTACCGGTCAG  
AATTGGACCAGAACGGTATTTCCGGTC---ACTGCGACCATAATATCAGATTGGGGAGGAA  
GATCAGAATTAGAGATTGATCGAAAAGAAAGGATATGGGTTTCGTGTGAGTAGGAAACA  
GAAAATGTCAATTCTAGTTCTATCATCAGCTATGGGTTTCGCATCTAAGAGAAATTCTAGA  
GAATGTTTGCTACCCTGAAATTTTCTTGTCTTTCCTGAATGATAAGGAG---AAAAAAG  
GGGTCCAAAGAAAATTCCATTTTGGAAATTTTTTCAACAATTTGCTTGTATCGGTAGGG  
ATCCGGCATTCTTCTGAATCCTTATGTAAGGAATTACAAAATAAATTCCTTCAACAAAAT  
GTGAATTGGGAAAGATTGGTTCGACGAAATTTGAATCGTAGACTGAACCTTCATATACCT  
CATAACTATCTATTTTTATTACCGCGAGATATATTGGCAGCTGCGGATCATTTGATTGGAA  
TGAAATTTGGAATGGGTACTTGTATGAT-----ACGAATCATTGAAAAATAACGTATT  
CGTTCTGTAGCGGATCTATTACAAGATCAATTCGGATTGGCCCTGGTGCCTTAGAAAA  
TGTGGTTCGAGGGACCATATGTAGATCAATTAGGCAGCATAAATGGATA---CCGACCCT  
CAGCATTGGTCACTTCAACCTCA-----TTAACAACCACTTATGAATCATTTTTTCGG  
CTTACACCATTATCTCAAGTTTTGGATCGAACGAATCCATTGACACAAATAGTGCATG  
GGAGAAAATCGAGTTATTTGGGACCTGGAGGATTGACAGGGCGAACTGCCAGTTTTCA  
AATACGAGATATCCATCCTAGTCACTACGGACGATTTGTCCAATTGACACGTCGGAAG  
GAATCCATGTTGGACTAATTGGATCTATAGCCATTTATGCGAGGATGGGTGATTGGGGG

GGGTCTATAGAAACCCCATTTTAT-----GATATTTCTGAGAGATCAAAAAA-----AGAC  
AGATGCTTTATTTATCACCAAGTATAGATGAATACTATATTATTGTATCGGCGAATAATTT  
GGCATTGAATCAGGGTCTTCAGGAAGAACAGGTTGTGACCGCTCGATACCGTCAAGAA  
TTCTGACTATTGCGTGGGAACAGGTTTCATCTTCGAAGTCTTTTTCCCTCCCAATATTTT  
TCTATTGGAGCTTCCCTTATTCTTTTATCGAGCATAATGATGCAAATAGGTCTTTAATGA  
GTTTCAATATGCAACGTCAAGCAGTTCACCTTATCAGTCCGAGAAGTGCATTGTTGGA  
ACTGGATTGGAACGCCAAGCAGCTCTAGATTACAGGGGTTACTGCTATAGCCGAATGCG  
GCGGAAAGATCATAGAAACCAAT---ATAAGATCATTTTATCGGGCAACGGAGAGTATTT  
AAGCATTCCATTAGTTATATATCAACGTTCCAACAAAAATACTTGTATACATCAAAACCC  
ACAAGTTTGGCAGGATAAATACATGAAAAAGGGACAAATTGTAGCCGACGGTGCCGCG  
ATAGTTGGCGGTGAACCTCGCTTTGGGTAAAAACGTATTAGTTACTTATATGCCATGGGA  
GGTTATAATTTGAAGATGCAATACTCATTAGCGAACGCCTGGTATATGAAGATATTTAT  
ACTTCTTTTACATACGGAAATATGAAATTCAGACTCATGTGACAAGCCGAGGT---CCC  
GAAAGGATCACTAATGAAATACCGCATTTCGAAGCCTATTTACTTCGCCATTTAGACAA  
GAATGGAATTGTTATGCTGGGATCTTGGGTTCGAGGAGGGTGATATTTTAGTGGGTAAAT  
TAACGCCGCAGATGACGAAAGAA---TCGTCTGATGCCCCGGAAGATAGATTATTACGAG  
CGATACTTGGCATTCAAGTATCCACTTCAAAGAAACTTGTCTAAAACCTACCTATTGGT  
GGTAGAGGTGAGTTATTGATGTGAGATGGATCCGGAGG-----GGTTATAGTTATAATC  
CAGAAATAATTTGTATCTATATTTACAGAAACGGAAAATCAAAGTCGGTGATAAAGTG  
GCTGGAAGACATGGAAATAAAGGTATCATTTCAAAAATTTTGTCTAGACAAGATATGCC  
TTATTTGCAAGATGGAAGACCAGTTGATATGGTTTTCAATCCATTAGGAGTACCTTAC  
GAATGAATGTAGGACAGATATTAGAATGTTCACTCGGGTTAGCAGGGGGTATGCTAGAC  
AGACATTATCGAATTGGACCTTTTGATGAGAGATATGAACAAGAGGCTTCGCGAAAACCT  
AGTCTTTTCTGAATTATATAACGCCAGTAATCAAACCTGCAAATCCATGGGTATTGGAACC  
CGAGTATCCAGGAAAAAGTCGAATATTTGATGGAAGAAAGGGGATATTTTTGAACAA  
CCTGTTCTAATAGGAAAGTCTTATATTTTGAATTAATTCATCAAGTGGATGATAAATA  
CATGGGCGTTCCAGTGGATATTACGCACTTGTACACACAGCAACCACTTAGAGGAAGGG  
CTAAGCAGGGGGGACAGCGAGTAGGGGAAATGGAGGTTTGGGCTCTAGAAGGATTTG  
GGGTGGCTCATATTTTACAAGAGATGCTGACTTATAAATCGGATCATATGAGTGCCCGTC  
AGGAAGTACTTGGTACCACGATTATTGGACGGACAATCTCATCATCCCCTGATGTTCCA  
GAATCTTTTCGATTGCTCGTTTCGAGAATTACGATCTTTGGCTCTGGAACCTGAATCATTC  
CTTGTATCTGAAAAGAACTTCCGGATTAATAGGAAGGAAGTT-----ATGATC  
GATCGGTATAAACATCAACAACCTTCGAATTGGATCAGTTTCTCCTCAACAAATAACGGT  
TTGGGCTAACAAAATCCTACCTAATGGCGAGATAGTTGGAGAAGTGACAAAACCCCTAT  
ACTTATCATTACAAAACCCATAAACCGGAAAAAGATGGATTATTTTGTGAAAGAATTTT  
TGGCCCTATAAAAAGTGAATTTGTTCTTGTGGAAATTATGGAATAATCGGAGATGAAA  
AAAAATACCCCATTTTTGTGAAAATGCGGAGTCTTTTTGTGCGATTCTCGAATACGA  
AGATATCAAATGGGCTACATCAAACCTAGCATGCCAGTCACTCATGTGTGGTATTTGAA  
ACGTCTTCCTAGTTATATCGCGAATCTTTTAGATCAATCTCTTAAAGAATTAGAAGGTCT  
AGTATACTGCGAT-----TTTTCTTTTGGCTAGACCTAACATAGTTAAAAAACCCACTTTCTT  
ACGATTAAGAGGTTCAATCGAATATGAAATGCAATCCTGGAAATACAGCATACCGCTTT  
TTTTACTATCCAGGGCTTCGATCAATTCGAAAACGAGAAATATCTACTGGAGCAGGT  
GCTATCCGAGAACAATTAGCCGATCTGGATTTACGAATCATTATAGATCAATCATGGGTT  
GAATGGAAGATTTAGGGGGGAAAGAAGGGCGGCCGGTAATTTTTGGGAAAATCGA

AAGATTGGAATAAGAAAGGATTTTTGGTTAGACGCATTACATTAGCGAAATCTTTTATT  
CGAGCAAATGTCGAACCAGAATGGATGATTTTATGTCTATTACCAGTTCTTCCTCCCGA  
GCTGAGACCCATCATTCAAATCGATGGGGGTAAACGAATGAGCTCGGATATTAATGAAC  
TCTATAGAAGAGTTATCTATCGGAACAATACTCTTATGGATCTATTAACAAAAAGTAGAT  
ATACACCAGGGGAATTAGTCATGTGTCAGGAAAAGTTGGTACAAGAAGCCGTGGATAC  
ACTTCTTGATAATGGAATTCGAGGACAGCCCATGAAGTACGGTCATACTCCAGTTTACA  
AATCGTTTTTCAGATGTCATTGCAGGCAAAGAGGGGAAGATTTTCGTGATACTTTGCTTGGC  
AAACGGGTTGATTATTCGGGACGTTCCGTCATTATCGTAGGCCCTTCACTTTCATTACAT  
CGATGTGGATTGCCTAGAGAAATGGCAATTGAGCTTTTCCAGATATTTGTAATTCGTGGT  
CTAATTAGACAACATCTTGCTTCGAACATAGGAGTTGCTAAGAGTAAAATTCGGGAACA  
AGAACCATTGTATGGGAAATACTTCAGGAAGTCATGCAAGGTCATCCTGTATTGCTGA  
ATAGAGCACCTACTCTGCATAGATTAGGCATACAGGCTTTCCAACCCATTTTAGTGGA  
GGACGTGCTATTTGTTTACATCCTTTAGTTTGTAAGGGTTTCAATGCAGATTTTGATGGG  
GATCAAATGGCTGTTTCATGTACCTTTATCTTTAGAAGCTCAAGCAGAAGCTCGTTTACTT  
ATGTTTTCTCATATGAATCTTTGTCTCCAGCAATGGGTGATCCCATTTCCATACCAACG  
CAAGATATGCTTATTGGACTCTATGTATTGACGAGCGCAAGC---CGAGGTATTTGTGCAA  
ATAGATATGGTTCATGTAATTGCAGACAC-----TTTCAAATAAAAACAATTGACGATAA  
TCATGAGACGTATACAAAA-----CCCCTTTTTCTAATTCTTATGATGCAATTGGAGCTT  
TTCGGCAGAAAAGAATCCATTTGGATAGTATTTTGTGGCTTCGGTGGAACCTAGATCAA  
CGC---GTGAGTGCTTCA-----AGAGAACTACCTTCGAAGTTCACTATGAATCATTGGGT  
ATCTATCATGAAATTAATGAGCACTATCTAAAAAAGGAAATATCAAAAAAGAACTCT  
TTCTATGTACATTCGAACCACGGTTGGTCATATTTATCTTTATCGAGAAATAGAAGAAGC  
CATAAAGGCTTTTCTCGGTGTTGTTTCATATGGTACC-----ATGGCAGAA  
CAACGTGGAGCCCTTTTTTTGGTCTTTCACAATAAAAAAATAGATGGAACCTGTCATGAA  
ACAGCTAATTAGCAGATTCATAGAGCACTTCGGAATGGCATATACATCACACATCCTGG  
ATCAAGTCAAGACTCTGGGTTTCCAGCAAGCTACTAGTACAGCTATTTTCATTAGGAATT  
GATGATCTTTTAACAATACCCTCTAAGGGATGGGTAGTCCAAGATGCTGAAAAA  
GTTTCAGTTTGAAAAGCACCATCATTATGGGAATATACACGCACTCGAAAAATTACGT  
CAATCTATTGAGATATGGTATGAAACAAGTGAATATTTGCGACAAGAAATGAATCCTAAT  
TTAAGATGACTGACCCTTTGAATCCTGTCCATATAATGTCTTTTTTCAGGAGCTAGAGGA  
AATGCATCTCAGGTACACCAATTAGTAGGTATGAGAGGATTAATGGCAGATCCCCACGG  
ACAAATGATTGATTTATCCATTCAAAGCAATTTACGCGAAGGACTTTCTGTAACAGAAT  
ATATCATTTCTTGCTACGGAGCCCGAAAAGGAGTTGTGGATACTGCTGTACGAACATCA  
GATGCTGGATATCTCACGCGCAGACTTGTGGAAGTAGTTCAACACATGGTAGTACGTAG  
AACAGATTGTGGTACCATACGAGGTATTTCTGTGAGTCCCCGAAAAGGT---GTACCG---G  
AAATAAATGTTATCCAAACATTAATGGGTCTGTATTAGCAGATGATATATATATTGGTCA  
ACGATGTATTGCCACTCGAAATCAAGATATTGGGATTGGACTTGTCTATCGATTCCATAAC  
C-----TTTTCGAGTACAATCCATATCTATTCGAACCCCTTTACTTGTAGGGGTAC  
GTCTTGGATCTGTAGATTATGTTATGGCCGGAGTCCTACTCATGGCGACCTGGTCGACTT  
AGGAGAAGCTGTAGGTATTCTTGCAGGTCAATCTATAGGAGAACCGGGAACCTCAACTA  
ACATTAAGAACTTTTCATACCGGTGGAGTATTCACAGGGGATACTGCAGAACATGTAGT  
AGCCTATTCGAATGGAAAATAAAAATTCAATGAGGATTGGGTTTCATCCCACACGTACAC  
GTCATGGATACCCTGCTTTTCTATGTTACATCGACTTGTATGTACATATTGAGAGTGAAG  
ATATGATACATAACGTGAAGATCCAACATAAAAAGCTTTCTTTTAGTTCAAATGATCAAT

ATGTA AAATCAGA ACAGGCGATTGCTGAGAGTCGTGCGGGAATATCGACTTTG---AATT  
TTAAAGAGAGGGTTCGAAAACATATTTATTCTGACTCCGAGGGAGAA---ATACATTGGA  
GTACCGAIGTGTACCATGCACCTGAATTGACATATGGTGATGTTCACTCTTACCAAAAA  
CAAGTCATTTATGGATATTATCAGGAGATCCGTCTGAAT-----ATCGAGTTTTTGCTC  
CACAAGGATCAAGATCAAAGGTTTCT-----TCTCGTTCTGTGCAACCAAGATGGATT  
TCGAACCTCTCA-----ATGACTAATGAT-----CAAAGACAAAAATTTCTTCGTTCCGATT  
TTCTGGTAAAAACGAAGAAGATAGAACGGATTCT---TCAGAACTAAATCGAATCATATG  
CACGGATCGTTGTCATCTCATCTATCTGTC---ATTCTCCACAAAAATTTCTGAT-----TATT  
TGGCAAAGAAGCGACAAAATAGATTTATCATTCCATTCCAATCGATTCTAGAAGGTGAG  
AAAGAACTCATCCACCGCTTAGGTATTTGATTGATATACCTATCAAT-----ATTTCTG  
TAGACAAACTATTTCTTTCTTATTTTCGATGATCCTCGAAAACGA---AAAAGTTCGGGAATG  
ACTCAATATGGG-----GCGCATTCTTCGTTCAA---AAAGAATATTTGGAGATTGAGTA  
TCGA---GTAGTCCAAAAATGTAGTCGAAAATAT---AAAGTTGATCGATTTTTTTTCATTCC  
TGAAGAAGTGCATATATTCCCTGGATCTTATTACATAAAGGTACGGAACAATAGTCTCAT  
TGGAGTAGATACACGAATCGCTTTAAATACAAGAAGCCGATCAGGCGGATTGGTCCAA  
CTAGAGAGAAAAA-----ATTGAACTTAAATATTTTCTGGAGAGATCCATTTTACT  
GGAGAGACAGAGAAGATATGCTACCACAGCGGAATTTTGATACCACCTGGTAGAATGG  
GACAA-----AATGCCAAGGATTCATCAA---AAACGTAACAATGGGATCTATATCCAAC  
AG-----ATTACACCTACA-----AAA-----TTTTTTGTTTTGGTTTCGACCTGTAGTCATATATA  
AAATAGCGGATGGTATAAATTTAGCAACACATTTCCCACTGGATCTGTTGCAGGAAAGG  
GCTCATGTC---CTGCAAGGTGTCAATTATATTTTAGT---ACAAAACCCATGATGGAGGG  
AATGTATGGAACAAGTATTCCATTTCGTTCCGACGTGTTTAGTACTGAATTGGCACCAAG  
ATAAC-----CAAAAAGCTCTTCGAAAGAGGCTTTTGCTTCTTTGCTGAAGTAAGGA  
CTAATGGTTTTGATTTCGAGATTTCTTACGAATTGACTTAGAGAAAAAGTTTTCTTATACCG  
GA---AAAAGAATCATACGTCAGGTTTCAGGATGGATTTATGAT---AATGGATCAGGTTGC  
ACTAATATCCCA-----TTGTATTCTAATACAACAAGG-----ATTCAAGAATCGCTT  
AGCCAACAAAATAAAACTATTCGTACGTTATTATTGAAG-----AGAAATAAAGAAGGTC  
AATCTTTGATCATTTTTGTCATCATCCGATTGTTCTCGAATGGGTCCA-----TTCATCGGTAT  
AAAAAATCTCACAAT-----GCGCATTCCATCATCCAATTAGGAATTCGTTAG  
GACCTTTTCGGAATC-----GACCTTCTCGTTGTGAATTATTATTCA---TTTTACTATTTTTTAA  
TCACT-----CATAATCAGACCTTG---GTCACTAACTATTTGCAACTTGACAAG-----TTA  
AAACAGATTTTTCAAGGACTAAAAAATCT---GTTTTATTAATGGATGAAAATGGGAGA-  
----ATTTTTAATCCCGATCTATGCAGTCACATCATTTTGAATCCATTCAATTTGAATTGGTA  
TTTTCTCCATCAAATGATTGTGAAGAGACATCCATATCTTCTTCTTATCTTGGTCAGTTT  
ATTTGTGAAAATGTATGTATAACTAAAAACAGACCA-----CTCCAATCGGGTCAAGT  
TCTAATTGTTCAA---GTTCAATCTTTAGTTATAAGATCAGCAAAGTCTTATTTAGCTACTC  
CCGGATCAACTGTTTCGTGGTCATTATGGGTCTATACTTTACGAAGGAAACACATTAGTC  
ACATTTCTATATGAAAATCAAATCTGGTGATATAACGCAGGGTCTTCCAAAAGTCGA  
ACACGTTTTAGAAGTTCGTTTCGATTGATTCCATATCGAAGAACCTAGAATCGAGGGTGG  
AGGGATGGAACGAACGTATAACAAGAAGTATTGGACATCCTTGGGTATTCTTGATTGGT  
GCTAAGCTAACTATGTGCAAAGTCGATTTTATTTAGTTAATAAGATCCAAACTCTTTAT  
CGATCTCAGGGAGTGCAGATTCATACGAAACATATCGAGATGATTGTACGTCAAATAAC  
ATCAACAGTTTTGGTTTCAGAA-----AAAGGAATATCTCATGTTTTTTTACCCGGAGA  
ACAAATTGGATTGTTACGAGCGGAACGAACGGGGCGTGCTTTGGAAGAAGGAATCTG

TTATCGAGCGATCTTTTTGGGAATAACGAAAACATCTTTGAATACTCAAAGTTTCATATC  
CGAAGCCAGTTTTCAAGAACTGCTCGAGTTTTAGCAAAGCCTCTATCCGGGGTCGT  
GTTGATTGGTTGAAAGGACTGAAAGAGAACGTTGTTCTGGGTAGGATGATACCAGGGG  
GTACCGGATTCAAAGGATTCGTGCACCGTTTAAGA-----CAACATCACAACATCCCT-----  
TTCGAAACGAAAAAT---AATCTATTCGGGGGGGAAATGATG-----AGATCTTTTTTTCTAC  
CA-----CAGAGGCACATT-----ATG  
AAACGAAAATATTGGAACATTGATCTAGAAGATATGATGGAAGCAGGAATTCATTTGGG  
TCATAGTACTAGGAAATGGAATCCTAGAATGGAACCTTATATCTCTGGAAAGCGCAAAG  
GGATTCATATTACAAATCTTACTATAAGTGCTCGTTTTTTATCAGAAGCTTGTGATTTGGT  
TTTTGATGCAGCAAGTAGAGGAAAACAATTATTAATGGTTGGTACCAAAAATAAAGTAG  
CCGATTCAGTCGCATGGGTTGCTATAAGGGCTCGGTGTCATTATGTTAATAAAAAATGG  
CTCGGTGGTATGTTAACGAATTGGTCCACTACAGAAACGAGACTTCATAAGTTCAGGG  
ACTTGAGAACGGAATTAAGGATAGGCAAACCTCAACTTTATTCCGAAAAGAGATGCAGC  
TATGTTGAAGAGACAATTTAATCAGTTGCAAACATATTTGGGTGGGATTCAATATATGAC  
GGAGTTGCCCGATATTGTAATCATTATTGATCAGCAAGAAGAATATACGGCCCTTCGAG  
AATGTATGGCTTTGGGAATCCAACGATTTGTTTTATCGATACAAATAGCGACCCTGACC  
TTGCGGATATTTTCGATTCCGGCGAATGATGACGCGATAGCTTCAATCCGATTTGTTCTTA  
ACAAATTTTTATTTGCCATTATGAAGGGATTAGCAGCT---TCATTAAGG-----ATGGGAAA  
AAAAATAAATCCACTTGGTTTCAGACTTGACACTACCCATGATCATTATTCCGTTTGGTT  
CGCACAAGCAAAAAATTATTCTCAAGGCTTACAAGAAGATAAAAAAATACGAGATTCT  
ATACAA---TATGTAATAAATAATATGAACATATCTTCTTCG---GGTGTAGGAATTGCACAT  
ATAAATATTCAAAAAAGAATCGATCTGGTTCAGGTCAATATCTATATGGGATTCACAACA  
TTTTTAGTAAGAGAAGGTAGTCGACTGCGA-----ATAATTGACAATTTAGAAATGACCAT  
AAAAAACAATTGAGTTATGTGAACCGAAAAGTCAACATTGCTATTACAAGAATAGCC  
AACCTTACGGAGACCCTAATATTCTTGCAGCATTATAGCCGAACAATTAAGAATAG  
AGTATCATTTTCGAAAGGCCATGAAAAAAGCTATTGAATTAAGTGAACAACAAGCAAAT  
AAAGGAATTCAAATACAAATTGCAGGGCGTATGGATGGAAAAGAAATTGCACGTGTTG  
AATGGATCAGAGAAGGTAAGGTTCCCCTACAATCCATTTCGAGCTAAAATTAATTATGGT  
TCCTATCCAATTCGAACTCTCTATGGACTGTTAGGCATAAAAATTTGGATATTTACAGAA  
GAGGAAATGTCACGTTACAGAGGGCCTCGTTTCAAAAAAATACGCCGTCTAGGGGCTT  
TACCGGGACTAACTAATAAAAGGCCTAGGTCCGGAAGTGATATTAGAAACCCATTCCCT  
TCTGGGAAAAAAGATCTCACTATCGTATTCGTTTAGAAGAAAAACAATAATTGCGGT  
TTCATTATTGCTTACAGAACGACAATTATTGAAATACGTTTCGTATCGCCGGAAAAGCC  
AAAGGGGCATCCGGTCGGGTTTTACTACAACACTTGAATGCGTTTGGATAATATCCT  
TTTTTCGATTGGGTATGACTTCGACTATATCTGGAGCCCGCCAATTGATTAACCATAGACA  
TATTTTAGTTAATGAACGTATTGTGGATATACCAAGTTATCGCTGCAAACCCCAAGAAAT  
TATTACAGCGAGGAATGAAAAAAATCTCAAGTTCTGATTCAAATCATGTGGATTCAT  
CCTCCCAT---AAGGAATTGCCAAAACATTTGACTCTTCAACCCATTCCAA-----TATAAAGG  
ATTCGTCAATCAAATCATAGATAGTCAATGGGTCGGTTTGAAAATAAATGAATTGCTAGT  
CGTAGAATATTATCCCGTCAGACTATGTCACGTCGAGGTAAGTGCAGAAGAAAAAAGTGC  
CCAAATCCGATCCAATTTATCGTAATCGATTTCGTTTACATGTTGGTTAACCGTCTTCTGA  
AACACGGAAAAAATCATTGGCTTATCAAATCTCTATCGAGCCGTGAAAAAGATTCA  
ACAAAAGACAGAAAGAAATCCACTATCTGTTTTACGTCAAGCAATACGTGGAGTAAGT  
CCCGATATAGCAATAAAAAACAAAACGTGTAGGCGGATCGACGAATCAAGTTCCCATGG



CCATAACGGAAAGGAACATTTACCTCTCTTTATAACAGATCGTATGGTAGGCCACAAAT  
TGGGAGAATTTGCACCTACTCTAAAATTCCAGGGCCATGCGAAAAACGATAATCGATCT  
CGTCGTATGATTTATCAATCTTTTCGACTTGATAATCAAGTATTTTATGCATGAAGATAA  
CCCATTCCGGTCATTTTAGTAGGACTCTATTATGGATTTATGACCACATTTTCTCTAGGTCC  
CTCGTATCTATTTTTTTTCGGATTTTCTCCACCAGTGGAAGAAAAT-----AGAACCGAAC  
ACGTATCAGCAATTACCGGTTTTTTGACGGGACAATTCATAATGCTCATATCGATCTTTT  
CTTCTCCTCTACATCTAGCATTAACTAGACCTTATACAGTCACTGTCTAGCTATAACCATA  
CCTTTTTTTTCATTTATTCTCAATAATCACAAACATTGTTTTGATTTTGGAACTAGTACC  
ATAAATTCAATGCGTAATCTCAGCATGCAATGTATATTCCTGAATAATATCATTTTTCAAT  
TTTTAACTTATTCCTTTTACCAAGTTCTATGTCTAGTAATCGTTCACATTGTTATGTT  
TAGATGCCACAATAAGATCTTATTTGTAATAAGCAGTTTTTATTGGTTGGTTAATAGGTATT  
ATTTTTTTCATGAAATGGGTGAAAGTCGGATATGTTTATATATGTCAACAAAAAATAGT  
AATAGAATATTGCTCAATACGAAAAATATTGTATCAGAATTTATAAAAAATATGTCTCGA  
ATATTAAGTATTCTATTATTATAACTTGTATCTACTATTTAGTCAGAATACCTTCCCCTATT  
CTTACTAAAAACGGAAAGAAGGAGAGGGCGAATCATACTCTTGTCACTTTTCTTTTTG  
ACTATCAACAATGGAATCGTCCATTACGATATATAAAAACTATCAATTAGAAAATGATG  
TAAGAAATGAAATGTCAAATTTTTTTTTTATAACATGTTCAAGTGATGGCAAAACAACA  
ATTTCTTTTACATATTTATCCAGTTTGTTCACTTTATTGGAAATGATTAAGAAAGAAAT  
TGTTGTTCAAAAAT-----GATTTATATAATAAGTGGAGATCCACTAATGAACAAA  
AAAAAACAATCAAAGCAACCAATTTTTAAAACGAATGGATGCTTTAGACAAAAAAA  
AC---TTAAAAAATACTCGAAAAAGAAGCTCGATTTTGTAAAT-----AAAGATAAGAAT  
ACTTGCAAAAGCAATATGATCCCTTCGTAAATGGATCCTTTTCGTGGAACA---ACAAAA  
ATTATCTTCCATAAATAGAGTGTGGATAAATAAATTCATGGTATCCTTTACCGACAAAT  
TGAACAGAATTTGAATAATCTAAAA---ATTGGAGTTCAAACAATCTGTAAAAAAGTCC  
AAAATGGTCATACAAATTAATCGAATTGGAACAACAGTTGGGGGAAGATATTCGATCAA  
GAAGAGCAAAACGTATAGTTATCTTTACGGATACATTGATACGTTATTCGCAACAATCAG  
ATTTTCGTGAGATCTAATTAAGGTACCATGCGTGCTCAAAGACGTAAAACAGTTATG  
GGGGAAGTGTTCAGTCAATACATCTTCTTCGCTTTTTTTGGGACAGA-----AGAAATAA  
AATCTTTTTTTTTAATTTTGAGAAATTAAAAAACTAAAGATAATTTTGTAGAACCTAGA  
AGATAAATACGGGAAGAAATAGCAGAAACCTGGGATACCATTTTATTTGCTCAAGGAA  
TACGAGGATGCATGTTAATAATACAATCAATTCTTAGAAAATATTTTTTTCTACCTTTATT  
GATAATAGTTAAAAATTGCAGTCATATGTTATTATTTCAATCTCCCGAGTGGTTAGAGGA  
TTTGAAAAAATGGAATAGAGAGATGCATGTAAAATGTACCTATAATGGTGTTCATTTATC  
AGAAAAAGAATTTCCGAAAAACTGGTTAACAGATGGTCTTCAAATAAAGATCCTATTTCT  
CTTTTTGTTTGAAACCGTGGAGATCTAGGTTA---AAAGAAAAGGATACTTTTTGTATT  
AACAGTTTGGGGAATGGAAGCCGATCTTCTTTTGGTTCGCCTCGCAAAAGACCTTCT  
TTTTTTAAACCTCTTTTCAAAGACTCGAAAAGAAAATAAAATGGATAGAAAAG---ACG  
TTTTTTAGAGTTCTAAGAGTTGTTAGAGATAAAAAATAT-----TTTCTAAGGATTTCAACA  
AAAAAAGAATGGATTATCAAAAATATTTTCGAAAAATAATCAAAAACCTTTTAAAAA  
AAGAAAAT-----GATTCGAAAATAATAAATAGGATGAATCATGAATCATTCAATCCAAT  
ATTTTCCGATTTCTAGTATAAAA---TCAATGCTAGAACAGAAAATGAAAGATCTAATAGAT  
AAAAAAACCAATAACAAT-----AAAATGATAATAAAAGAAAATAAAAAAAGTTCTA  
AAAATAAAAGTACGATTAATAAAAAACTCGAATCACCAAAAATATTTTTTAATATTA  
AAAAAGACT-----CGATTAATAAGAATGAAATATGATTTTCAAAAAATAAAATGAACAA



AAGTGCTATAGATATTATTTTTGTAATTATAAATACTCGAACTATTAATGATGTACAATTT--  
---ATTATTTTG-----TTATCCTTGTCACAAACATATTTATTTTATCAATTTTCAAAAATCC  
AAGTTACAAAATTGGATAAATTTAGATATATCCTTCAAAATACATCGTTGTTTTTAAAAA  
ATGAAATAAAGGAGTTTTTT--ATGGAAAGAATACATTCCGATTCTAAATTACGAAGAAC  
ACTTATGTCTGAAATGAAACAATGGAAATTTTGGTTGTTAAGGTATTATCAATATGATTT  
CTCTCCCATTAGGTGGTATCGACTATCAATAAAAATGGCGAAGAAAG-----AATAGACT  
CGTCAATCAATCTATTATATGTGATTTCTTTTTATATGATATGAAAGTCCAATTCATTCATA  
ATGAAAAAAA---AATATAATAAAAAACGACTTGTGTGATAGTATTCATATAATTTTTTT  
CATGATGGAATTAATATCTATATAGA---TATATATATTGTCAAATTAACCATTTTTTTCTTA  
AAATTTGGAATTGGATTGGAATGAACGAACAAATACTAATAAATTCGTTTCATTCCAAA  
ATTTTCCGATTTTACAATCAATATAAAAATAAAACCTTGGTTAATACCAATTCATTTGCTTT  
GTCTACATTACAGGAATCATACAGAAACAGAACTTGATTTTTTCTTCAAAGGTTGTTT  
TTTTTTCAATTGAGATGGGATGAATCTTTAAATCTAAAATGATCAACAATATCAAGGTA  
TATTGTTTCTTATTAGACTGAAAAATCCAAAGTATATGGTTCTTTCTTCTATTCAAAGA  
GAAGAAATTCGTTTGGATAGAATGTTG---AAGAAGGATATTTCTCTTAAAGAATTAATAA  
AAACTGGAATATTGATTATTGAACCAGTTCGTCTGTCTGTAAAAAAGGATAGAAATTTT  
ATGATGTATCAAACGGTGGCTATTTTCATTGGTTCATAATAGTAAAAAAGAAATAGATTAT  
TTGTTGATTTCTGAAAATATATTCTCAGTTAGACGCTATAGAGAATTTAGAGTAAAAATG  
TCTTTCAATTTTTTTTTTTTCGAATTATAGATTAGAAGATTTGACTTGTATGAATCGATATT  
GGTTAATACCAATAATAGTAGTCGTTTCAGTATGTTAAGAATATGTAAA-----ATGAAAG  
GACATCCATTCAAATCCTGGCTTTTCGAATTGAGAGAGATATGGAGAGAGATCAATCAT  
TCTCACTATTTATTAGATTCATGGACCCCATTCATTTCAGTGGGATCTTTCATTCACATAT  
TTTTCCACCAAGAACGCTTTATAAACTCTTTGACCCCGAATTTGGAGTATCCTACTTT  
TATCACGAATTCA-----CAGGGTTCAACAAGCAATCGATATTTACG-----ATCAAGG  
GTGTTGTAATCTTTGTAGTCGCG---GTCCTTTTATATCGT-----ATTAACAATCGAAAT  
ATGGTTCGAAAGAAAACATCTCTATTTGAGAGGGCTTCTTCCC-----ACTATACCTAT  
GAATTCCATTGGACCCAGAAATGATACATTAGAAGAATCTGTTGGGTTTTCCGATAATAT  
CCATAGGTGGATTGTTTCGCTCCTGTTGTATCTTCCAACAGGAAAAAAGATCTCTGAGA  
GTTTTTTCTGGATCCGAAAGAGAGTCCTTGGGTTCTCCCAAAAACG-----AACA  
ATATCATGCCTGAATCT---AGGGGTTTCGCG---TGGAGTAACTGGATCGGAAAAAAGAA  
TAGGGAGAATACGAGTTGTCAGATGTCAAAT-----AATGAAACCGTCGCTGGAATTGAG  
ATCTCATTCAAAGAGAAAATATATATATATATCCAATCTCTGGAGTTTCTTGTATATTATAT  
GGAT--GATCCGATCCGCAAGGACCATGGG---GAATTGTTTGATCGTCTTCTCTGAGGA  
AGAAGAGGCGAAACATTATCCAC---TTGAATTCGGGACAGCTATTTGAAATCTTAGTGA  
TAGACTGGATTTGTTATCTAATGTCTGCTTTTATTGAAAAAAGACCCGAGGAGGGT-----  
--TTCTTCAAACAACAAGCT-----GGGTCCACTATTCATCCAATGAAATGGAGCATGTAT  
TATCC---CATCTCTTCTCGAGAAACAAGTGGGCGATTTCTTTGCAAATTTGTGTTCAATT  
TTCGATTTGGCAATTCGCAAGATCTCTTCGTT-----AGTTGGGGGAAG-----AATCA  
CGAATCGGATTTTTTGACGAAC-----GTAAGAGAGAATCGA---TGGTTAGACAATGGGTT  
GGTA---ACAAGGATCGG-----TTTTTTAGC---AAGGTACGGAAGCATGTATTGTCCCA  
TATTCATGTGATTCC-----ACAAGA-----AGATCTAGCCAATGGAAAG  
GATCTTCT--GATCAATCCAGAGATCATTTTTGGGATTCCATTATTATTAGTAGTAATGAG  
GATTCGTCGGAA-----TATCACACTTTGATCAATCAAAGAGAGAT  
TCAACCAACAAAAGACAGATCGATTCTT--TGGGAT-----CCTTCTTTATTCAAACGGA

ACGAACAGAGATAGAATCAGAC-----CGATTCCCGAAA-----TGCTTTTCTGGATTTTCC--  
---TCAATGTCCCGGCTATTCACCACGGAACGTGATAAGCAGCAGATGAATCATCTGCTT  
CCGGAAGAATTCGAAGAATGTATT-----GGGAATCCTACAAGATCCATTTCGTTCTTTTTTC  
TCTGACAGATGG-----TCAGAACTTCAT--CTGGGTTCTGAATCCTACTGATAGGTCCACTA  
GAGATCTT-----ACATTGTTGAAGAAACCACAAGATGTTTCT--TTTGTCCCTTCCAG  
GCGATCGGAA-----AAGAAAGAA-----AGGAATCTCAAGAGAATTACGTATACCCAA  
AAG-----ACCGTCTCAATGCATCCTATTTTCATCAGATCCGGGATGTGATATGGTTCCG---A  
AGGATGAACCGGAT--ATGGACAGTTCCAATCAGATTTCTTTCTTGAAAATAAATCCATT  
TTTGGATTTA-----TTTCATCTATTTTCATGACCGGAACAGGGGGGTATACACGTAC-----CA  
CCATGATTATGAATCAGAA-----GAGATATGTCAAATGGCAGATCTATTCACTCTATCA  
ATAACCGAGCCG--GATCTAGTGTATCATAAGGTATTTGCCTTTTTCGATTGATTCCCTACGG  
ATTGGATCAAAAATTA-----TTGAATGAGGTATTCTAC--AGGGATGAATCAAAAATC  
AATCTTTA-----TGGCTGATACTTCCTATTCTTTTTTGAT-----GAAGAGAATGAATCTTTTTC  
TCGAAGGATCAGAAAAAATGGGTCAGG--ATATCCTGCGGGAAT--TTGGAAGATCCA  
AAACCAAAAAGAGTGGTATTTGCTAGCAACAACATAATGGAGACAGTCCATCCATATTC  
TTTGATCCGAAATCTGATGATTCAAATCTATAATAGCACCGAAGGG---TACATAATACATT  
TATGGAATCGATTCTTTTTTCATATCC-----GATCGCTACTTCGAATATGGAATTCCA-  
-----AGGGATCGAATAGAAAATGATACTCTGAATCATAGATCTATAATGAAATATACGAT  
CAACCAACATTTATCGAATTTGTTGCAAAAGAGTCAAAGAAATGGTTTCGATCCT-----  
-CTTTTTGTTATTTATCGAGAGAGATCCATGAATCGGGATCCTAATGCATATAGATACAAA  
TGGTCCAATGGGAGCAATCAATTCCAGGAACATTTGGAACATGTCGTTTCTGAGCAGA  
AGAGCCGT-----TGGATAGTAGTGTTCGATCGCTTACGT--ATACGATATTCGATGGATG  
GT--GGGGTTATCGACAACAAATAT-----TTGTCCAAGTTCCTTCTTTTTGTCCAAG-----  
-----TGGATTCTCTTGTCTAAC--TCACTTCCTT  
TTTTCTTTGTGAGTGTGGGAATATCCCATTCATAGGTCCGAG---ATCCACATCTAT-----  
GAAAAAGGTCCGAATGAA--CTCTGCAATCCGTTGTTAGAATCAATAGGTCTTCCAATC  
GTTCAATTTGAAACAATTGAAACCCTTC-----ATGGAT-----GATCATGAAACTTCCCC  
CAAAAATCTAAATTATTGATCCATGGAGGAAGAATATCACCTTTTTTATTCAATAAGAT  
ACCA--AAGTGG--ATGATTGACTCATTCCATACTAGA-----AAGAATCGCAGTCCATCCT  
TGGATAACACGGATTCCATTTATCAATGATATACCACGATCAAGACAATTGGCTTAATC  
CCGCGAAACCATTTATAGACAATCATTGATATCTTCTTTTTATAAAGCAAATCGACTCC  
GATTCTTGATGAATCAACATCACTTCTGCTTCTAT-----TGTAAGAAACGATTCCCTTTTG  
ATGTGGAAAGA-----AGGGCGGACCGTATCAATAATTATGAT-----ACGTATGGA---CAA  
TTCTCCATATCCTGTTTCATTACAATACAAAACATTTTCTTTGTGCGTCGGTCAA-----  
---AAACATGCTTTTTTTGGAG---AGAGAGACTCTGTCACCAATCGAGTCACAGGTATCAT  
ACATATTCATACCTAACGATTTTCCACAAAGTGGTGACGAAACG-----AATATGTACAAA  
TCT-----TTCCATTTGTTTCGTTCGTACCGATTTTCGCTCTTAGA-----GCTATTGACTACTC  
GATTGCAGACATTTATGGAACACCTCTAACAGAGGGACAAGTCGTCCATTTAGAAAAC  
ACTTCTTGCAACCTCTTTCAGATATGAATCTATCTGCGTCAGAAGGGATTCACTTGCAT  
CCGTATCTCCAT-----TTCAATTCAAACATGAGTTTGATTCCCACTCAACATTCGTGATAAA  
TATGTACCATCCGAAAAG-----AGGAAAAA-----CAGAGTCTTTGTTTATT  
A---ATCAAATGTGTTGAGAAAGGGCAGAAGGATAGAACCATTCCACGGGAAAGTGCTT  
TTTCCACTATCTCAAAATGGAATCTATTCCAAACATATATGCCATGGTTCCCTTACTTCCAC  
AGGGTACAAATATCTATATTTGATATTTGTAGATCCTTTTTTCAGACCTATTG-----CCGATA

CGAAGTAGCAGT--CAAAAATGGGGATCCTTTTTTCATGATATTATTCATGGATCAGATAT  
ATCATGGCGTCTTCTTCAGAAAAAATGG-----TGTATTCCACAACGGAATCTG--  
-ATAAGTGAGATTTTCGAGTCAGTGTTTACATAAT-----CTTCTGTCCGAAGAAATGATTC  
ATCGAAAGAATGAGTCA-----TCGATATCGACACATCTGAGATCGCCAAATGTTCCGG  
AGTTC---CTCTATGCAATCCTTCTCCTTCTCTTTGTTGCTGGATATCTCCTCGTTCGTACA  
CATCTTCTCTTTGTTTCCCGA-----GTCTCTGAGTTACAGACAGAGTTCGAAAAGGTC  
AAATCTTTGATGATTCCATCATGTATGATGGAGTTGCGAAAACCTTCTGGATAGGTATCCT  
ACATCTGAACTGAATTCTTTCTGGTTAAACAAAATCGTTCTAGTTGTTCTGGAACAATT  
AGGAGATTCGTAAAAGAAAGAATACGGGGTGATTCTGTCCGCAACATGTTTTTGGGT  
GGTCCCGCT-----TATGGG-----GTCAAATTACACTCTAAGAAAGATTGGAATAT  
CCATCATCTCATCGATATCATCGATCTCATAAGTATCATAATACCAAATCCCATCCATCGA  
ATCACTTTTTTCGAGAAATACGAGAGATCTAAGTCATACAAGTCAAGATCTCTATTCATTG  
ATAAGAAAAAAAAC---TTGAACGGTGATTGGATGGATGATAAAATAGAATCCTGGGTC  
GCGAACAGTGATTTCGATGGATGATGAAGAAAGAGAATTATTGGTTCAGTTCTCC-----A  
CCACCTTAACGATA---GAAAAAAGGATGGATCCAATTCTATGGAGTCTGACT--CATCGT  
GATCATTTTTCA-----AAGAATGACTCTGGTTATCAAATCATTGAACAACCGGGA  
GCCATTTACTTACGATACGTAGTTGACATTCAT-----ATAAGTATCTAATGAATTATGAGT  
GCCATACATCCTGCTTAGCAGAAAGACGGATATTCCTTGCTCATTATCAGACAATCACTT  
AT-----TCACAATCATGTGGGGCTAATCGTTTTTCATTTCCCATCTTATGGA-----AAAC  
CCTTTTCGCGCTTAGCAGCCCTTTCATCTCCCTCTAGGGGTATCTTAGTGATAGGTTCTAT  
AGGAACTGGACGATCCTATTTGGTCAAATACCTAGCTACAACTCCTATGTTCTTTTTT  
TACGGTATTTCTGAACAAGTTCCTGGATAACAAA---AATGGTTTTCTTATGGATGAGAGT  
-----GACGACGAT--ATGGAGAGTGACGACGATATGGAGAGTGACGAC-----  
-----GATATGGATCTGGATACGGAGCTGGATCTGCTT  
ACTATGATGAATGCGCTACCT-----ATGGATATGATGCCG-----GATATAGACCGATT  
TATATCACCTTCAATTCGAATTAGCAAAAGCCATGTCTCCTTGCATAATATGGATTCCA  
AACATTCATGATCTGGATGTGAATGAGTCGAATTCCTTTCCCTCGGTCTATTAGTGAAC  
TTTCTCTCC-----AGGGATTGTGAAAGAAGTTTT-----CCTATCAATCTTGTTATTGCTTC  
GACTCATAAACCCCAAAAAGTGGATCCCGCTCTAATAGCTCCGAATAATTTAAATACAT  
TCATTAAGATACGAAGGCTTCTTATTCCACAACAACGAAAGCACTTTTTCACTCTAACA  
TATACTAGGGGGTTTTACTTTGAAAAGAAAATGTGCCATACA-----AATGGATTTGGGTC  
CATAACCATGGGTTCCAATGCACTAGATCTTGTGCACTTACCAATGAGGCCCTATCGAT  
TCGTATTACACAGAAGAAATCAATGATAGACTGTAATACAATGAGATCCGCTCTTCATA  
GACAACTTGGTATTTGCGA-----TCCCAGGTAAGATCGGTTACAGGATCATGGAATCC  
TTTTCTATCAGATAGGAAGGGCTGTTGCACAAAATGTACTTCTAAGTCATTGCCCATTC  
CC---ATATCTATCTATATGTATATGAAGAAA---TCATGTAACGAGGGGGTTCTTCTTTGT  
ACAAATGTTACTTCGAACTTGAACGAGCATGAAGAAATTGACGATACTTCTTTATCTT  
TTGAGTTGTTCTGCCGGATGGCTCGCTCAAGATCTTTGGTCTCTACCC-----GGACCC  
GAAAGA---AATGGGATCACTTCTGATGGACTCGTTGAGAATGATTCT--GATCTAGTTCA  
TGGCTTATTAGAAGTAGAAGGCGCTCTGACGGGA-----TCCTCACGGACAGAAAAGA  
GTACAGTCCGTTTGATAATGAT-----CGAGGAGTGACATTGCTTCGGCCCGAACTGAGG  
AAG---AATCCCTTCGATATGCAAAATGGATCTTGTCTATCGTTGATCAGAGATTTCTCTA  
TGAAAAA-----TACGAATCGGAGTTTGAAGAA-----GGGGAAGGAGCCCTCGACCCA  
CAA-----CAGATAATAGAGGAT-----TTATGCAATCAC-----ATTGTTTGGGCTCCT



????????????????????????????????????????????????????????????????????????????????????  
????????????????????????????????????????????????????????????????????????????????????  
????????????????????????????????????????????????????????????????????????????????????  
???ATGGGAACCATTCGAGCCGACGAAATTAGTAATACTATTCGTCAACGTATTAAGCAA  
TATAATAGAAAAGTAAAAATTGTAAATACCGGTACTGTGCTTAAAGTAGGCGATGGTAT  
TGCTCGTATTCATGGTCTTGATGAAGTAATGTCAGGTGAATTAGTAGAATTTGAAGAGG  
GTACAATCGGCATTGCTCTGAATCTGGAATCAACTAATGTTGGTGCTGTATTAATGGGTG  
ACGGTTTGATGATACAAGAAGGAAGTTCTGTAAAGGCAACAGGAAAAATTGCTCAGAT  
ACCCGTGAGTGAGGCCTATCTGGGTCTGTTATAAATGCCCTGGCTAAACCTATTGATG  
GTAGAGGTGAAATTTTCATCTTCTGAATCTCGGTTAATTGAATCTCCCGCTCCGGATATTA  
TTTCTCGACGTTCCGTATATGAGCCTCTCAAACGGGACTTATTGCTATTGATTCGATGA  
TTCCTATAGGACGTGGTCAACGAGAATTAATTATTGGGGACAGACAGACCCGGTAAAAC  
AGCAGTAGCCACAGATACGATTCTCAATCAACAAGGACAAAATGTAATATGTGTTTATG  
TAGCTATTGGTCAAAAAGCATCTTCTGTGGCTCAGGTCGTGACTACTTTTCAGGAACAA  
CGCGCGATGGAATACACTATTGTAGTAGCCGAAATGGCGGATTCCCCTGCTGCATTACA  
ATACCTCGCTCCTTATACAGGAGCAGCTTTGGCTGAATATTTTATGTACCGTGAACAACA  
TACTTTAATCATTTATGATGACCTCTCAAACAAGCACAAGCTTATCGCCAAATGTCTCT  
TCTATTACGAAGACCGCCGGTTCGCGAAGCTTATCCAGGTGATGTTTTTTATTTGCATTC  
ACGCCTTTTGGAAAGAGCCGCTAAATTAAGTTCTCGTTTAGGTGAAGGAAGTATGACC  
GCTTTACCAATAGTTGAGACTCAATCGGGAGATGTTTCGGCTTATATTCCTACTAATGTA  
ATTTTCGATTACTGATGGACAAATATTCTTATCCGCTGATTTATTCAATGCTGGAATCAGA  
CCTGCTATTAGTGTGGGTATCTCTGTTTCCAGAGTAGGGTCTGCGGCTCAAATTAAGC  
TATGAAACAAGTAGCCGGTAAATTAATAATTGGACCTGGCACAATTGGGAGAATTAGAA  
GCCTTTGCACAATTCGCTTCTGATATCGATAAAGGTAATCAGAATCAATTGGCAAGAGG  
TCGACGATTGCGCGAATTGCTCAAACAATCCCAATCAGAACCTCTTACAGTGGAAAGAC  
CAGATAATGACTATTTATACCGGAACAAATGGTTATCTTGATTCATTAGAAATTGGAAAG  
GTAGCGAAATTTCTTGACGACTTACGGAAGTCATTAATAAAGTAAGAAACCTCAGTTCC  
AAGAAATCATATCTTCTACCAAACATTCACCGAGGAAGCAGAAGCCCTTTTGAAAGA  
AGCTATTCAGGAACAGGTGAAATGTTTTATATTTGAGGAAGAGGCAATGAGAATAGATC  
CTACTCCTTCTGGTCCCTGGGGATTCTGGGCTTGAAAAAAAAGATGGGGCGTATCGT  
TCAAATCATTGGTCCGGTCCTAGATGTCGCCTTTCCGTCAGGGAAGATGCCTAATATTTA  
TAACGCTCTGGTAGTTCAAGGTCGAGATACTGTTGGTCAACCAATTAATGTGACTTGTG  
AGGTACAGCAATTAGTAGGAAACAATCGAGTTAGAGCTGTAGCTATGAGTGCTACAGA  
TGGTCTAACGAGAGGAATGGAAGTGATTGACACGGGAGCTCCTCTAAGTGTTCAGTC  
GGTGGAGCGACTCTGGGACGAATTTCAACGTGCTTGGAGAGCCTGTTGATAATTTAG  
GTCCTCTAGATACTCGCACAACATCTCCTATTCATAGATCTGCGCCCGCCTTTATAGAGT  
TAGAGACAAAATTATCGATTTTTGAAACAGGAATTAAGTAGTAGATCTTTTAGCCCTT  
ATCGCCGTGGAGGAAAAATCGGATTATTCGGAGGGGCTGGAGTGGGTAAAACAGTACT  
CATTATGGAATTGATTAACAATATTGCCAAAGCTCATGGAGGTGTATCTGTATTTGGCGG  
AGTAGGCGAACGTACCCGTGAAGGAAATGATCTTTACAAGGAAATGAAAGAAACTGG  
AGTGATTAATGAACAAAATATTGCAGAATCAAAAGTGGCTCTAGTTTACGGTCAGATGA  
ATGAACCACCGGAGCTCGTATGAGAGTCGGTTTACTGCCCTAACTATGGCGGAATAT  
TTCCGAGATGTTAATAAACAAGACGTACTTCTATTTATCGACAATATCTCCGTTTTGTC  
CAAGCGGGATCCGAAGTATCCGCCTTATTGGGTAGAATTCCTTCTGCTGTGGGTATCA

ACCCACCCTTAGTACCGAAATGGGTTCTTTACAAGAAAGAATTACTTCTACTAAGAAAG  
GGTCCATAACTTCTATTCAAGCAGTTTATGTACCTGCAGACGATTTGACCGACCCTGCT  
CCTGCTACGACATTTGCACATTTAGATGCTACTACCGTACTATCAAGAGGATTAGCTGCA  
AAAGGTATCTATCCAGCAGTAGATCCTTTAGATTCAACGTCAACTATGCTTCAACCCCG  
GATCGTTGGTGACAAACATTATAAAATTGCGCAAAGAGTTAAGCAAACCTTTACAACGTT  
ACAAAGAACTTCAGGACATTATCGCTATCCTTGGGTTGGACGAATTATCTGAAGAGGAT  
CGTTTAACCGTATCAAGAGCACGAAAAATTGAGCGTTTTTTTATCACAACCTTTTGTGCT  
AGCAGAAGTATTTACCGGTTCTGGGGGGAAATATGTTGGTCTAGCAGAAACAATTAGA  
GGCTTTCAATTGATCCTTTCCGGAGAATTAGATGGTCTTCCTGAACAGGCCTTTTATTTG  
GTAGGTAACATTGATGAAGCTACCGCGAAGGCTATGAATTTAGAAATGGAGAGCAATTT  
GAAGAAAATGACCTTAAATCTTTGTGTAAGTACCCCTAATCGAATTGTTTGGGATTCCA  
AAGTGAAAGAAATCATTTTATCTACTAATAGTGGCCAAATTGGCGTATTACCAAATCATG  
CACCTATTGCCACAGCTGTAGATATAGGTATTTTGAGAATACGCTTTAACGATCAATGGT  
TAACGATGGCTCTGATGAGTGGTTTTGCTCGAATAGGCAATAACGCGATCACTGTTTTA  
GTAAATGATGCGGAGAAGAGTAGTGACATTGATCCACAAGAAGCTCAGCAAACCTTTG  
AAATAGCAGAAGCTAATTTGAAGAAAGCGGAAGGTAAGAGACAAATAATTGAAGCAA  
ATTTAGCTCTCAGACGAGCTAGGACACGAGTCGAAGCTATCAATGTGATTTACATGAAA  
ATTGTAACCGATTCTTTCAATTTCTTTGGGCTATTGGCCATACGCCGGGAGTTTCGGGTTT  
AATACCGATATTTAGCAACAAATCCAATAAATCTAAGTGTAAGTACTTGGTGGATTGATC  
TTTTTTGGAAAGGGAGTGTTAAGCGATTTATTAGATAATCGAAAACAGAGGATCTTCAA  
TACTATTGCAAATTCAGAAGAAGTGCAGCGGGGGGGTTCATTGAACAAGTAAAGAAAGCC  
CGGGCTCACTTACGGAAAGTGGAATGGAAGCAGATCAGTATAGAGTAAATGGGTACA  
CGGAGATAGAGCAAAAATTTTATCCTTTGAGGACTTCAGCTTCTACGACTTTGGAACAA  
TTAGAAAATAACAAAATGAAACCATTCTTTTTGAACAACAAAGGGCGATTAATCAAG  
TCCGACAACGAGTTTTCCAACAAGCCTTACAAGGAGCTCTAGGAACTCTGAATAGTTG  
TTTGAACACCGAATTACATTTACGTATCATCAGTGCCAATATTGGTATGTTTGGGGCGAT  
GAAAGAAATAACCGATATGAATCCACTGATTTCTGCCGTTCCGTTATTGCTGCTGGATT  
GGCCGTAGGACTTGCTTCTATTGGACCTGGAATTGGTCAAGGGACTGCTGCGGGCCAA  
GCTGTGCAAGGGATCGCGAGGCAGCCCGAGGCGGAGGGAAAAATACGAGGTACTTTA  
TTGCTTAGTTTAGCTTTTATGGAAGCTTTAACAATTTATGGACTGGTTGTAGCATTAGCA  
CTTTTATTTGCTAATCCTTTTGTATGAATGTTCTATCCTGTTCCATCAATACACTAAAAG  
GTTTCTACGAGATATCTGGTGTGGAGGTAGGTCAACATTTCTATTGGAAAATAGGAGGT  
TTCCAAGTCCATGGCCAAGTACTTATTACTTCGTGGGTTGTAATTGCTATCTTATTAGGTT  
CCGCCACTATAGGTGTTTCGGAACCCACAAACCATTCCGACTGACGGTCAGAATTTCTTC  
GAATACGTCCTTGAATTCATTGAGATGTGAGTAAAACCCAAATTGGGGAAGAATATGG  
TCCTTGGGTTCCCTTTATTGGAAGTATGTTTCTATTTATTTTGTTCGAATTGGTCAGGA  
GCTCTTTTACCTTGGAAAATCATACAATTACCTCATGGGGAGTTAGCCGCACCTACGAA  
TGATATAAATACTACTGTTGCTTTGGCTTTACTCACGTCAGTGGCATACTTCTATGCGGG  
TCTTAGCAAAAAAGGCTTGGCTTATTTTGGGAAATACATTCAACCAACTCCAATCCTTT  
TACCCATTAACATCTTAGAAGATTTACAAAACCTTTATCACTTAGTTTTCGACTTTTCG  
GGAATATATTAGCCGATGAGTTAGTAGTTGTTGTTCTTGTTCCTTAGTACCTTTAGTGGT  
TCCTATACCTGTCATGTTCCCTTGGATTATTTACAAGTGGTATTCAAGCTCTTATTTTTGCA  
ACTTTAGCCGCGGCTTATATAGGTGAATCCATGGAGGGCCATCATATGATATTTTTAACTT  
TCGAACATATATTAACCTCATATTTCTTTTTCAATCGTTTCAATTGTAATTACAATTCATTA



CTGGGTAAAAGATGCCTCTTCTTTGCATTTATTACGATTTTTTCTACACGAGTATCCTATT  
TGGAATAGTCTTATTACTAAATCTAGTTTTTCTTTTTCAATACAAAGATTCTTCTTGTTTC  
TATATAATTTAATGTATGTGAATACGAATCTATCTTTGTTTTTCTCCGCAACCAATCTTCT  
CATTTACGCTCAATATCTTCTGAAACCTTTCTAGAACGAATCTCTTTCTATAGAAAAATA  
GAACTA-----GAAGTCTTACTAAGGATTTTATTCTATGGGTGTTTAAAGAGCCTTTCTG  
CATTATGTTAGGTATCGAGGAAAAGCCATTTTGGCTTCAAAGGGACGTTTCTTTTGAT  
GAATAAATGGAAATATTACCTTGTCAATTTCTGGCAATGTTATTTTTATATGTGGTCTCAA  
CCAAGAAGGATCCATATAAACCAATTATCCAACCATTCCCTCGACTTTCTGGGCTATCTT  
TCAACTGTGCGATTAAAGCCTTTAATGGTACGGAGTCAAATGATAGAAAATTCATTTCT  
AATAGAGAATGCTAGT-----AAGAAGTTCGATACTTTAATGCCAATTACTCCAATGATTG  
GATCATTGTCTAAAGCTAAATTTGTAAACGTGTTAGGACATCCCATGAGTAAGCCAGTC  
TGGGCCGCTTTATCCGATTCTGATATTATTGAACGATTCGGGCGTATATATAGAAATCTTT  
CTCATTATTATAGCGGATCATTAAAAAAAATGAGTTTGTATCGAATAAAGTATATACTTCG  
ACTTTCTTGTGCTAGAACTTTGGCTCGTAAACACAAAAGTACGGTACGTGCTTTTTTGA  
AAAGATTAGGAGTGGGATTATTGGAAGAATTTTTTACGGAGGAAGAGCAAGTTTTTTAT  
TTGACCTTCGCAAAACGGGTTTGGTATTTAGATATTATTTGTATCAATGATCTGGCAAAT  
TATGAAATGATTATTAAT--ACAACAAAAGTACAA---GCTATCAATTCTTTTTCTAGATTG  
GAATCC---TTAAAAGAAGTCTATGGGATCATATGGATGTTTGTTCCTATTTTTACTCCTGT  
ATTAGGAATCACAATAGGTGTCCTAGTAATTGTTTGGTTAGAAAGAGAAATATCCGCAG  
GGATAACAACCGTATTGGCCCTGAATACGCTGGCCCTTTGGGAATTCTTCAAGCTCTA  
GCAGATGGGACAAAATTGATTTTTCAAAGAGAATCTTCTTCCATCTAGAGGAGATACTCG  
TTTATTCAGGATTGGGCCATCCATAGCAGTTATATCCATTTTATTAAGTTATTCAGTAATT  
CCTTTTAGTTATCGTCTTATTCTAGCCGATCTCAGTATCGGTGTTTTTTTTATGGATTGCCG  
TTTCAAGCATTGCTCCCGTTGGACTTCTTATGTACAGGATATGGATCAAATAATAAATATT  
CCTTTTTAGGTGGTCTACGAGCTGCTGCTCAATCAATTAGTTATGAAATACCATTAACTT  
TATGTGTCTTATCAATATCTCTACTATCTAACAGTTCAAGCACCGTTGATATAGTTGAAGC  
GCAATCAAATATGGTTTTTGGGGATGGAATTTGTGGCGTCAACCTATAGGGTTTATCAT  
TTTTCTAATTTCTTCCTTAGCCGAGTGTGAGAGATTACCTTTTGATTTACCAGAAGCAGA  
AGAAGAATTAGTAGCAGGTTATCAAACCTGAATATTCGGGTATCAAATTTGGTTTATTTTA  
CATTGCTTCGTATTTAAATCTCCTAGTTTCTTCATTATTTGTAACAGTTCTTTACTTGGGC  
GGTTGGAATCTTTCTATTCCGTACATATTCGTTCCCTGAGCTTTTTTGAAATAATAAAGCA  
AGAAGAGTCTTTGGAACAATAATGGGTATCTTTATTACATTAGCTAAAACCTATTTGTTC  
TTGTTCAATTTCTATCACAACAAGATGGACTTTACCAAGGCTGAGAATGGACCAACTATT  
AAATCTTGGATGGAAATTTCTTTTACCTATTTCTCTAGGTAATCTATTATTAACAACCTCT  
TCCCAACTTCTTTCGCTG-----ATGAAAGCCTTTCA  
TTTGCTTCTCTTCGATGGAAGTTTTATTTTCCCAGAGTGTATCCTAATTTTTAGCCTAATT  
CTTCTTCTGATGATCGATTCAACCTCTGATCAAAAAGATATACCTTGGTTGTATTTTCATCT  
CTTCAACAAGTTTAGTAATGAGCATAACGGCCCTATTGTTCCGATGGAGAGAAGAACCT  
ATAATTAGCTTTTCTGGAAATTTCCAACAACAATTTCAACGAAATCTTTCAATTTCTT  
ATCTTACTATGTTCAATTTCTATGTATTCTCTATCCGTAGAGTACGTTGAATGTACAGAAA  
TGGCTATAACAGAGTTTCTTATTTCATATTAACAGCTACTCTAGGAGGAATGTTTTTAT  
GCGGGGCTAACGATTTAATAACTATCTTTGTAGCTCCAGAATGTTTCAGTTTATGCTCCT  
ACCTATTAGCTGGATATACCAAGAAAGATGTACGGTCTAATGAGGCTACCATGAAATATT  
TACTCATGGGTGGGGCAAGCTCTTCTATTCTGGTTCATGGTTTCTTGGCTATATGGTT



CATCCGGGGGAGAGATCGAGCTTCAAGAAATAGTGAATGGTCTTATCAATACACAAAT  
GTATAACTCCCCAGGAATTTCAATTGCGCTAATATTCATCACTGTAGGAATTGGGTTCAA  
GCTTTCCCCAGCCCCTTCTCATCAATGGACTCCTGACGTATACGAAGGATCTCCCCTC  
CAGTCGTTGCCTTTCTTTCTGTTACTTCGAAAGTAGCTGCTTCAGCTTTAGCCACTCGA  
ATTTTCGATATTCCCTTTTATTTCTCATCAAACGAATGGCATCTTCTTCTCGAAATCTTAG  
CTATTCTTAGCATGATATTGGGAAACCTCATTGCTATTACTCAAACAAGCATGAAACGTA  
TGCTTGCATATTCATCCATAGGTCAAATCGGATATGTAATTATTGGCATAATTGTTGGAGA  
CTTAAATGATGGATATGCAAGCATGATAATTTATATGCTGTTCTATATCTCCATGAATTA  
GGAACCTTTTGCTTGCATTGTATTATTTGGTCTACGTACCGGAACTGATAACATTCGAGAT  
TATGCAGGATTATACACGAAAGATCCTTTTTTGGACTCTCTCTTTAGCCCTATGTCTCTTAT  
CCCTAGGGGGTCTTCTCCACTAGCAGGGTTTTTCGGAAAACCTCTATTTATTCTGGTGT  
GGATGGCAGGCAGGTCTATATTTCTTGGTTTTAATAGGACTCCTTACAAGCGTTCTTTCT  
ATCTACTATTATCTAAAAATAATCAAGTTATTAATGATTGGACGAAACCAAGAAATAACC  
CCTTACGTGCGAAATTATCGACGATCTCCTTTAAGATCAACGAATTCCATCGAATTGAGT  
ATGATTGTATGTGTAATAGCATCTACTATACTAGGAATATCAATGAACCCGATTATTTCAA  
TTGCTCAGGATACCCTTTTT-----AATATGATATTTTTTGGGCATTTCTACTAATATC  
AAGCCTTATTCCTATTTTGGCATTTTTTATTTCCGGAGTTTTAGCCCCGATTAGCAAAGG  
AC---CAGAGAACTCTCTATTTATGAATCGGGTATAG---AACCCATGGGCGACGCTTGGT  
TACAATTTCAAATTCGTTATTATATGTTTGTCTTTTTTGTGTTTTTGTATGTTGAAACGGT  
TTTTCTTTATCCATGGGCAATGAGTTTCGATGTATTGGGCGTATCTGTATTTATTGAAGCT  
TTCATTTTCGTGCTTATCTTAATTGTTGGTTTAGTTTATGCATGGCGAA---AAGGGGCATT  
GGAATACGAATTTTTTCTTGGTTAACAATAATTGTAGTTTTGCCAATATTTGCGGGTT  
TTTTAATTGTCTTTCTTCCCATAGAGGAAATCGGGCAATTCGTTGGTATACTTTATCTAC  
ATGTATACTAGAACTCCTTCTAACGACCTATGTATTCTCTTATCATTTCATTCGGACGAT  
CCATTAATCCAACCTAGTCGAAGATTATAAATGGATCCATTTTTTTTTATTCCACTGGAGAT  
TAGGAATAGATGGACTTTCGATAGGACCCATTTACTGACGGGATTCATCACTACTTTAG  
CAACTTTAGCGGCTTGGCCAGTTACTCGAGATTCTCGATTATTCCATTTCTGATGTTAG  
CAATGTACAGTGGTCAAATAGGATCATTTCCTTCTCGCGACCTTTTACTCTTTTTTCATCA  
TGTGGGAGTTAGAATTAATCCCGTTTATTTACTTCTATCCATGTGGGGAGGGAAGAAA  
CGTCTGTACTCTGCTACAAAATTTATTTTATACACTGCGGGAGGTTCTATTTTTCTCTTAA  
TCGGAGTTCTGGGTGTGCGTTTATATAGTTCTAATGAACCAACATTCAATTTTGAACAT  
TAGCCAATCAATCGTATCCTGTGGCATTGGAAATAATATCTATATTGGATTTTTTATTGC  
TTTTGCTGTCAAATGCGGATTATACCCCTTACATACATGGTTACCAGATACCCATGGAGA  
AGCGCATTACAGTACTTGTATGCTTCTGGCTGGAATCTTATTAATAAATGGGAGCGTATG  
GGTTGGTTCGGTCAATATGGAATTATTACCGCACGCTCATTCTATATTTTCTCCTTGGTT  
AATGATAGTAGGTACAATGCAAATAATCTATGCAGCTTCAACATCTCCTGGTCAACGGA  
ATTTAAAAAAAAGAATAGCATATTCCTCTGTATCTCATATGGGTTTTCTAATTATAGGAAT  
TGGTTCTATAACCGATACAGGACTCAACGGAGCCATTTTACAAATAATCTCTCATGGCTT  
TATTGGTGCTGCACTTTTTTTCTTGGCAGGAACGAGTTATGATAGAACCCGTCTTGCTTA  
TCTCGACGAAATAGGCGGAATAGCTATCCCAATGCCAAAATATTCATGATGTTTCATTAG  
CTTTTCAATGGCTTCTCTTGGCTTACCGGTATGAGTGGTTTTGTTACAGAATTAACAAT  
CTTTTTTGAATAATTACCAGCCAAAATTTCTTTAATGCCAAAATACTAATGACTTT  
TGTAATGGCAATTGGAATGATATTAACCTATTTATTTATCTATGTTACGCCAGATGT  
TCTATGGATACAAGTTATTTAATGTTCCAAACTCTTCTTTTTTTGATTCTGGACCGCGAG

AATTATTTGTTTCGATCTCTATTTTTTTTACCGGTAATAGGTATTGGTATTTACCCTGATTTT  
GTTCTTTTCATTATCCGTTGACAAGGCCGAAATTATTCTCTCTAATTTTTTTTTCTAGAATGA  
TGCTGGAACATGTACTTGTTTTGAGTGCCTATTTATTTTCTATCGGCATTTATGGATTGAT  
CACGAGTCGAAATATGGTTCGAGCTCTTATGTGTCTTGAACCTTATATTGAATGCAGTTAA  
TATCAATTTTGTAACATTTTCTGATTTTTTTGATAATCGTCAATTAAGGAGCTATTTTC  
TCCATTTTTGTATAGCAATTGCAGCCGCGGAAGCGGCTATTGGACTAGCTATTGTTTCC  
TCAATTTGTCGTAACAGAAAATCAACTCGTATTAACCAATCAAATTTGTTGAATAAAAT  
GGAACATACATATCAATATGCGTGGATCATACTTTTTGTTCCACTTTCCATTCCTGTGTTA  
ATAGGAGCGGGCCTTCTTCTTTTCCCAAGGGCAACTAAAAACCTTCGTCGTATGTGGGC  
TTTTCAAAGCGTTTTATTGTTAAGTATAGTCATGATTCTGTGCGATTGATCTGTCTATTAG  
GAAATAAATAGCAGTTCTATCTATCAATATATATGGTCTTGGATTATCAATAATGATTTTTC  
TTTTGAATTTGGATATTTGATCGATCCACTTACTTCTATTATGTTAGTATTAATCACTAGTG  
TTGGAGTTTTGGTTCCTATTATAGTGATAATTATCTGTTTCATGATCAAGGATATTTGCG  
ATTTTTTGCTTATAGATTTTTTTCAGTGCTTCCATGTTGGGATTAGTTATAAGCTCTAAT  
TTAATAGAAATTTATATTTTCTGGGAATTAGTTGGAATGTGTTTCGTATTTATTAATCGGGT  
TTTTGGTTTACACGGCCTGTTGCCGCAAATGCTTGTCAAAAAGCGTTTATAACTAATCGA  
ATCGGAGATTTTGGGTTATTATTAGGAATTTTAGGTTTTTATTGGACAATAGGGAGTTTC  
GAATTTCGGGATTTATTGAAATATTCAATAACAATGAGATCAATGTTTTATTGTTATTT  
TGTGTGCCATTCTATTATTTACTGGTGC GGCGGCTAAATCTGCACAATTCCTCTTCATGT  
ATGGTTACCTGATGCCATGGAAGGACCTACTCCTATTTTCAGCTCTTATCCATGCTGCTAC  
CATGGTAGCAGCGGGTATTTTTCTGTAGCTCGGCTTCTTCTCTTTTCATAGTCATAACC  
TTATGTAATGAATTTTATCTCTTTTATTGGTATAATAACAGTTTTTTTTTAGGAGCTACTTTA  
GCTATTGCTCAAAAAGATATTAAGAGGGGTTTAGCCTATTCTACAATGTCTCAATTGGGA  
TATATCATCTTAGCTCTTGGTATGGGGTCTTATCGAACTGCTTTATTTTCATTTAATTACTCA  
TGCTTATTCAAAGCATTATTGTTCTTAGCATCTGGGTCAGTTATTCATTCAATGGAAC  
AGTTGTTGGATATTCTCCTGAAAAAGTCAGAATCTAGTTCTGATGGGGGGTTTAAACA  
AACACTTACCAATTACAAAATTTCTTTTTTATTAGGTACATTTTCTCTTTGTGGTATTCC  
ACCCCTTGCTTGTTTTTGGTCCAAGGATGAGATTCTAATGATAGTTGGTTATATTACC  
AATTTTCGGAATAATAGCTTGGTTGACAGCAGGATTAACTTCATTTTATATGTTTCGGAT  
CTATTTACTTACTTTTGAGGGGCATTTCAACGCTTATTTTCAAATTATAGTAGCAGGAA  
AAGAATTCATTTCGACTCAATATCTCTATGGGGCAAAGGATGCTCGAACTTATTAACA  
AA---TTAGGAACCTTATTAAGAATGAGTTTTTCTTTGTTTTCCAATAAAAATATTTTTTTA  
TATCCTTATGAATCAGATAATATTATCTTGTTTTGTCTACTTCTATTGATCTTATTTGCTTT  
GTTTGTGGAGTGATAGGAATTCCTTTCGTTTTGGATATATTATCCAAATGGTTAACGCC  
GTCTATAAATCTTTTGCATCAAATTTTAAA---TCTTTGGATTGGGCTGAATTTTGGCAA  
GATGCTATTTTTTCAGTCAGTATAGCCTACTTCGGAATATTTTTTCGCGCTTTTTATCTATA  
AACCTGTTTATTCATCTTTTCAAACCTTGAATTAATTAATTTAATTGGTACTCTTTGTGA  
TAAAATTAATAATTTAATATATAATTGGTCATATAATCGTGCTTACATAGATGCTTTTTTATA  
CAACAACGTTAATGGGAGGGACAAGGGAATTGTCAGAAGTAACTCATTTTTTTGATAG  
ACGCATAATTGATGGAATTACGAATGGAATGGGTGTTATGAGTTTCTTTATAGGGGAAG  
GTATTAATACTAGGGGGGGGG---CGTATCTCTTCTTATCTTTTTCTTTTATTCATCTTATG  
TATCAATCTTTTTATTTCATGTTCTACATGGATTTATCTGGACCAATACATGATTTTCTTTA  
GTCTTCTGGGATTGGGTCTTATATTAGGAAGTCTAGGAGTGATTAATCTCCCAATCCA  
ATTTATCTGCCTTTTCATTGGGATTGGTTTTTTTTTCTATATCCTTTTTTTTATATTCTATCG

AACTCCCATTTTGTAGCTGCTGCGCAGATCCTTATTTATGTAGGAGCTCTAAATGTTTTA  
ATCATATTTGCTGTGATGTTTCATGAATGGTTCAGAATATTACAAAGATTTTATCTTTGGA  
CCGTTGGAGATGGAATTACTTCGCTGGTTTGTACAAGTATTTTGTTCACTAATTACTA  
CTATTCTAGATACGTCATGGTACGGGATTATTTGGGCTACAAGATCCAACCAGATTCTAG  
AGCAAGATTTGATAAGTAATAGTCAACAAATTGGTATTCATTTATCAACAGATTTTTC  
TTCCATTTGAGCTCAATTCATAAATCTTTTAAATTGCTTTAATAGGTGCAATCACTGTAGC  
TCGTCAAATGACCGCACCAGTTACAAGAAAAAATCTCATGATAGTAAATATGGGTCCCTC  
ACCACCCATCAATGCATGGCGTTCCTTCGACTCATCGTTACTCTAGATGGTGAAGATGTTA  
TTGACTGTGAACCAATATTGGGTTATTTACACAGAGGGATGGAAAAAATTGCAGAAAA  
CCGAACAATTATAACAATATTTGCCTTATGTAACACGTTGGGATTATTTAGCTACTATGTTT  
ACAGAAGCCATAACCATAAATGCACCAGAGCAGTTGGGAAATATTCAAGTACCTAAAC  
GGGCGAGCTATATCAGAGTAATTATCTTGAATTGAGTCGTATAGCTTCTCATTATTATG  
GCTTGGACCTTTTATGGCAGATATTGGTACACAACTCCCTTCTTCTATATTTTTCGTGA  
AAGAGAATTGATATATGATTTATTCGAAGCTGCCACCGGTATGCGAATGATGCATAATTA  
TTTTCGTATTGGAGGAATAGCTGCGGATCTACCTCATGGCTGGATAGATAAATGTTTGA  
TTTTTGCATTTATTTTTAAGAGGGGTTGCTGAATATCAAAGCTTATTACACGGAATCC  
TATTTTTTTAGAACGAGTTGAAGGGGCAGGCGTTATTGGTGGAGAGGAAGCAATAAAT  
TGGGGTTTATCAGGACCAATGCTACGAGCTTCCGGAATACAATGGGATCTTCGTAAAGT  
TGATCATTATGAGTGTTATGACGAATTTGACTGGGAAGTCAAATGGCAAAAAGAGGGG  
GATTCATTAGCTCGTTATTTAGTACGAATCGGTGAAATGACAGAATCTATAAAAATTATT  
CAACAGGCTCTGGAAGGAATTCCGGGAGGACCCTATGAGAATTTAGAAATCCGGCGCT  
TTGATAGAGTAAGGAATGCCGAATGGAATGATTTTGAATACCGATTCATTAGTAAAAAA  
CCTTCTCCAACCTTTTGAATTTTCGAAGCAAGAACCTTTATGTAAGAGTTGAAGCTCCAAA  
AGGAGAATTGGGAATTTTTTTGATAGGAGATCAGAATGTTTTTCCTTGGAGATGGAAAA  
TTCGACCGCCGGGTTTTGTCAATTTGCAAGTTCTTCCTCAATTAGTTAAAAGAATGAAA  
TTGGCTGATATTCTGACGATACTTGGTAGCATAGATATCATTATGGGAGAAGTTGATCGT  
ATGTTCCCTATGGTAACTGGGTTTCATGAATTACGGTCAACAAACAGTACGAACTGCAAG  
GTACATTGGTCAAAGTTTCATGATTACCTTATCCCACGTCAATCGTTTCCCTGTAACCTAT  
TCAATACCCTTATGAAAAATTGATCACATCCGAGCGATTCCGGGGTCGAATCCACTTTG  
AATTTGATAAATGCATTGCTTGTGAAGTATGTGTTTCGTGTATGTCCTATAGATCTACCCGT  
TGTAGATTGGAAATTGGAAACCGATATTCAAAGAAACGGTTGTTTAAATTACAGTATTG  
ATTCGGAATCTGTATATTTTGCGGCAATTGCGTTGAGTATTGTCCAACAAATTGTTTAT  
CAATGACTGAAGAATATGAACTTTCTACTTATGATCGTCACGAATTGAATTATAATCAA  
TTGCTTTGGGTCGTTTACCCTGTCAGTAATTGACGATTACACAATTCGAACAATTTTG  
AATTCGCCA-----ATGCAGGGTCATTTGTCTGTTTGGTTAG  
TCAAGCACGGGATAATTCATAGATCTTTGGGCTTTGATTACCAAGGAATAGAACTTTA  
CAAATAAAGCCCGAGGATTGGCATTCTATTGCCATCATTATATGTATATGGTTACAATT  
ATCTACGTTCCCAATGTGCCTATGATGTAGTACCTGGCGGCCAATTAGCTAGTGTCTATC  
ATCTTACGAGAATAGAGTATGGTGTAGATCAACCAGAAGAGGTGCGCATAAAAGTATTT  
GCTCCAAGGAGCAATCCTAGAATCCGCTCTGTTTTCTGGGTTTGGAAAAGTGTGGATTT  
TCAAGAGCGGGAATCTTATGATATGTTGGGAATTTCTTATGATAATCATCCGCGTTTGAA  
ACGTATCTTAATGCCTGAAAGTTGGATAGGGTGGCCCTTACGTAAAGATTATATTGCCCC  
TAATTTTTATGAAATACAAGATGCTCGT-----

-----A

TGAATTCCATTGAGTTTCCCGTACTTGATCGAATAACCCAAAATTCTGTTATTTCAACTA  
CATTAAATGATCTTTCAAATTGGTCAAGACTCTCTAGTTTATGGCCCCTTCTCTATGGTA  
CTAGTTGTTGCTTCATTGAATTTGCTTCACTAATAGGTTACGATTTCGACTTTGATCGTT  
ATGGGCTGGTACCAAGATCGAGTCCTAGACAAGCAGACCTAATTTTAAACAGCCGGAAC  
AGTAACCATGAAAATGGCTCCTTCTTTAGTGAGATTATATGAGCAAATGCCTGAACCAA  
AATATGTTATTGCTATGGGAGCATGTACAATTACAGGGGGGATGTTTCAGTACCGATTCTT  
ATAGTACTGTTTCGGGGAGTCGATAAGCTAATTCCTGTGGATGTTTATTTGCCAGGCTGTC  
CACCTAAACCGGAAGCAGTTATAGATGCTATAACAAAACCTTCGTAAAAAATATCTCGA  
GAAATCTATGAAGATAGAATTAGGTCTCAA--GAGAATCGATGTTTTACTATCAATCACA  
AATTTTCATGTTGGGCACAGTATGAATACTGGAAATTATAATCAAGGATTACTTTATCAAC  
CCCCATCTACTTTTCGATATCCCTATA-----TTTTTCAAATACAAAAGTTCAGTATCCTCCGA  
TGAATTTGGGAATATGCAAACCTAGAAATACTTTTTCTTGGATAAAGGAACAGATTACTC  
GATCCATTTCCATATTGCTCATGATATCTATCATAACTCGGACATCTATTTCAAGTGCATAT  
CCCGTTTTTGCACAGCAGGATTATGAAAATCCACGAGAAGCGACTGGGCGTATTGTATG  
TGCCAATTGCCATTTAGCTAATAAGCCCGTGGATATTGAGGTTCCACAAGCGGTTACTTC  
CTGATACTGTATTTGAAGCACTTGTTTCGAATTCCTTATAATATGCAATTGAAACAAGTTC  
TTTCTAATGGTAAAAAGGGGGCTTTGAATGTGGGGGCTGTTCTTATTTTACCTGAAGGT  
TTTGAATTAGCCCCTCCTGATCGTATTTCCCCCGAGATGAAAGAAAAGATAGGCAATCT  
GTCTTTTCAGAGCTATCGCCCCAATAAAAAAATATTCTTGTGATAGGCCCCGTTCCGG  
GTCAGAAATATAGTAAATCACCTTTCCTATTCTTTCCCCGGATCCCGCCACTAAGAAA  
GATGTTTACTTCTTAAAATATCCTATATACGTAGGCGGAAATAGGGGAAGGGGGCAGAT  
TTATCCCGACGGGAACAAGAGTAACAATACAGTTTATAATGCTCCAGCAGCGGGTATAG  
TAAGCAAATCATAACGAAAAGAAAAGGGGGGTACGAAATAACCATAGCGGATGCATC  
CGATGGACGTCAAGTGATTGATATTATCCCTCCAGGACCGGAACCTTCTTGTTCCGAAG  
GGGAATCTATCAAATTTGATCAACCATTAACGAGTAATCCTAATGTAGGCGGATTTGGTC  
AGGGAGATGCAGAAATAGTACTTCAAGATCCATTACGTCTTCAAGGCCTTTTATTCTTC  
TTAGCATCTGTTGTTTTGGCACAAATCTTTTTGGTTCTTAAAAAGAAACAGTTCGAGAA  
GGTTCAATTGTCCGAAATGAATTTTCATGAGTAAAGTGTATGATTGGTTTCGAAGAACGCC  
TCGAAATTCAGGCGATTGCAGATGATATAACTAGTAAATACGTTCCCTCCCATGTCAACA  
TATTTTATTGTCTAGGAGGAATTACGCTTACTTGTTTTTTAGTACAAGTAGCTACAGGGT  
TTGCTATGACTTTTTACTATCGTCCAACCGTTACTGAGGCTTTTGCTTCTGTTCAATATAT  
AATGACTGAAGCTAACTTTGGTTGGTTAATCCGATCAGTTCATAGATGGTCAGCAAGTA  
TGATGGTCTAATGATGATCCTCCATGATTTTCGTGTGTATCTCACCGGTGGATTTAAAA  
AACCTCGCAATTAACCTTGGGTTACAGGTGTGGTTCTAGGTGTCTTGACCGCATCTTTT  
GGCGTAACTGGTTATTCTTACCTTGGGACCAAATGGTTATTGGGCAGTAAAAATTGT  
AACAGGTGTACCTGAGGCTATTCCTGGAATAGGATCGCCTTTGGTAGAATTATTGCGAG  
GAAGTGCTAGTGTGGGACAATCCACTTTGACTCGTTTTTATAGTTTACACACTTTTGTCT  
TGCCTTTTCTTACGGCTGTATTTATGTTAATGCACCTCCCAATGATACGTAAACAAGGCA  
TTTCTGGTCCTTTAATGGGAGTAACAAAAAACCTGACTTGAATGATCCTGTATTAAGA  
GCTAAATTGGCTAAAGGAATGGGTCATAATTATTACGGAGAGCCTGCATGGCCCAACGA  
TCTTTTATATATTTTTCCAGTAGTCATTCTAGGTAATTTGCATGTAACGTAGGTTTAGCG  
GTTTTAGAACCATCAATGATTGGTGAACCAGCAGATCCATTTGCAACCCCTTGGAAAT  
ATTACCTGAATGGTATTTCTTTCCCGTATTTCAAATACTTCGAACAGTACCCAATAAATTA  
TTGGGTGTTCTTTAATGGTTTCAGTACCTGCGGGATTATTAACAGTACCTTTTTTAGAG

AATGTTAATAAATTTCAAATCCATTTTCGTCGTCCAGTAGCGACAAGCGTCTTTTTGATT  
GGTACGGCAGTGGCCCTTTGGTTGGGTATTGGTGCAACATTACCGATTGATAAATCCCT  
AACTTTAGGTCTTTTTATGATTGAAGTTTTTCTATTTGGAATCGTGTTAGGTCTAATTCCT  
ATTACTTTGGCTGGATTATTCGTAAGTGCATATTTACAATACATACGCGGTGATCAGTTG  
GATCTTATGTCTATTATAACTAGTTATTTTCGTTTTTTATTAGCGGCTTTAACTATAACCTC  
AGCTCTATTTATGGTCTGAGCAAGATACGACTTATTATGGATATAGTAAAGTCTCGCTTG  
GGCTGCTTTAATGGTAGTCTTTACATTTTCTCTTTCACTCGTAGTATGGGGAAGAAGTGG  
ACTCATGATTATTCGTTACCGGAACCAGAAGTCAAATTTTGGTAGATAGGGATCCAG  
TAAAACTTCTTTTCGAGGAATGGGCCAGACCGGGCCATTTCTCAAGAACAATAGCTAA  
AGGCCCGGATACTACCACTTGGATCTGGAACCTACATGCTGATGCTCACGATTTTGATA  
GCCATAACCAGTGATTGGAGGAGATCTCGCGAAAAGTATTTAGTGCCCATTTTGGTCAA  
CTCTCCATCATCTTTCTTTGGCTGAGTGGCATGTATTTCCACGGTGCTCGTTTTTCCAAC  
TATGAAGCATGGTTAAGCGATCCTACTCACATTGCGCCTAGTGCCCAAGTGGTTTGGGC  
AATCGTGGGCCAAGAAATATTAATGGTGATGTGGGCGGGGGTTTCCGCGGAATACAA  
ATAACCTCCGGTTTTTTTCAGATTTGGCGAGCATCTGGAATAACTAGTGAATTACAAC  
CTATTGTAAGCAATTGGTGCATTGATCTTTGCAGCATTAAATGCTTTTTGCTGGTTGGTT  
CCATTATCATAAAGCTGCTCCAAAATTGGCTTGGTTTCAAGATGTCGAATCTATGTTGAA  
TCACCATTAGCGGGTCTACTAGGACTTGGGTCTTTTCTTGGGCGGGACATCAAGTAC  
ATGTATCTTTACCGATTAACCAATTTCTAAACGTTGGAGTAGATCCTAAAGAGATAACGC  
TTCCTCATGAATTTATCTTGAATCGGGATCTTTTGGCTCAACTTTATCCCAGTTTTGCCG  
AGGGAGCAACCCCATTTTTACCTTGAATTGGTCAAATATGCGGAATTTCTTACTTTT  
CGGGGAGGATTAGATCCAGTAACTGGGGTCTATGGTTGACTGATATTGCACACCATCA  
TTAGCTATTGCAATTTTTCCTGATAGCAGGTACATGTATAGGACCAACTGGGGCAT  
TGGTCATGGCCTAAAAGATATTTTAGAAGCGCATAAGGGTCCATTTACAGGCCAGGGCC  
ATAAAGGACTATATGAGATCCTAACAACGTCATGGCATGCTCAATTATCTCTTAACCTAG  
CTATGTTAGGCTCTTTAACCATTGTTGTAGCTCAACATATGTATTCATGCCCCCTTATCC  
CTATCTAGCTACTGACTATGGTACACAACCTGTCATTGTTACACATCACATGTGGATTGG  
TGGATTTCTCATAGTTGGTGCTGCTGCACATGCAGCCATTTTTATGGTAAGAGACTATGA  
TCCAACACTCGATAACAACGATCTGTTAGATCGTGTCTTAGACATCGCGATGCAATCAT  
ATCACACCTCAACTGGGTATGTATATTTTLAGGCTTTCACAGTTTTTGGTTTTGTATATTCAT  
AATGATACCATGAGCGCTTTAGGGCGTCCCAAGATATGTTTTTCAGATACCGCTATACAA  
TTACAACCCGTCTTTTCTCAATGGATACAAAACACTCATGCTTTGGCACCTGGTGCAAC  
GGCTCCTGGTGCAACAACAAGCACCAGTTAACTTGGGGGGTAATGATTTAATAGTG  
GTGGGCGGCAAAGTGGCTTTGTTACCTATTCCATTAGGAACCGCAGATTTTTTGGTCCA  
TCACATTCATGCATTTACGATTCATGTAACGGTATTGATACTCCTGAAAGGTGTTCTATTT  
GCTCGTAGCTCCCGTTTTGATACCGGATAAAGCAAATCTTGGTTTTTCGTTTTCTTGTGAT  
GGACCTGGAAGAGGGGGAACATGTCAGGTATCGGCTTGGGATCATGTCTTCTTAGGCC  
TATTTCTGGATGTACAATGCAATTTAGTAGTCAATTTCCATTTAGTTGGAAAATGCAGT  
CAGATGTTTGGGGCCATATAAGTGATCAGGGAATAGTAACCCATATCACAGGAGGAAAC  
TTTGGCGAGAGTTCCATTACTATTAATGGGTGGCTGCGCGATTTCTTATGGGCACAGGC  
ATCCCAGGTAATTCAGTCTTATGTTTCTTATTATCTGCATATGGCCTTTTTTCTTAGGT  
GCTCATTTTTGTATGGGCGTTTAGTTAATGTTTCTATTAGTGGACGTGGTTATTGGCAA  
GAACTTATTGAATCCATCGTTTTGGGCTCATAATAAATAAAAGTTGCTCCTGCTACTCAG  
CCTAGAGCCTTGAGCATTGTACAAGGACGTGCTGTAGGAGTAACTCATTACCTTCTGGG

CGGAATTGCCACAACATGGGCGTTCTTCTTAGCAAGAATTATTGCAGTAGGAATGGCAT  
TAAGATTTCCAAGGTTTAGCCAAGGCTTAGCTCAGGACCCCACTACTCGTCGTATTTGG  
TTTGGTATTGCTACCGCACATGACTTCGAGAGTCATGATGATATTACTGAGGAACGTCTT  
TATCAGAATAATTTTTGCTTCTCACTTTGGGCAATTAGCAATAATTTTTCTGTGGACTTCTG  
GAAATCTGTTTCATGTAGCTTGGCAAGGAAATTTGAGTCATGGGTACAGGACCCTTA  
CACGTAAGGCTATTGCTCATGCAATTTGGATCCTCATTTTGGTCAACCGGCTGTCTGA  
AGCTTTTACTCGAGGGGGTGTCTTGGCCCAGTGAATATCGCTTATTCTGGTGTATCA  
GTGGTGGTATAACAATTGGGTTACGCACTAATGAAGATCTTTATACTGGAGCCCTTTTTCT  
ATTATTTCTTTCTGCCATATCTTTAATAGCGGGTTGGTTACACCTACAACCGAAATGGAA  
ACCGAGTCTTTCTGGTTCAAAAATGCCGAATCTCGTCTCAATCATCATTTGACAGGAC  
TCTTCGGAGTAAGTTCCTTAGCTTGGACGGGGCATTTAGTACACGTCGCTATTCTCTGGA  
TCCAGAGGAGAGTACGTCCGATGGAATAATTTCTTAGATGTATTACCGCATCCCCAAGG  
GTTAGGTCCACTGTTTACAGGTCAAGTGAATCTTTATGCTCAAAAACACCGATTCAAGTA  
GTCATTTATTTGGTACTTCCCAAGGAGCAGGAAGTCTATTTTAAACCCTTCTCGGGGGA  
TTCCATCCACAACGCAAAGTTTATGGCTGACTGATATTGCTCATCATCATTTAGCTATT  
GCATTTTTTTTTCTTGTGCTGGTCATATGTATAGAACAACCTTCGGAATTGGGCACAGC  
ATGAAAGATCTTTTAGATGCACATATTCTCCGGGGGACGATTGGGGCGTGGCCATAA  
GGGTCTTTATGACACAATCAATAATCAATTCATTTCAATTGGGTCTTGTCTAGCTTC  
TTAGGGGTTATTACTTCCTTGGTAGCTCAACACATGTACTCTTTACCTGCTTATGCATTT  
ATAGCACAAGACTTTACTACTCAAGCTGCGTTATATACGCATCACCAATACATCGCAGG  
GTTTCATCATGACAGGAGCTTTTGTACGAGCTATATTTTTTCATTAGAGATTATAATCC  
AGAACAGAATGAGGATAATGTATTGGCAAGAATGTTAGACCATAAAGAAGCTATCATAT  
CCCATTTAAGTTGGGCCAGCCTCTTTCTGGGGTTCCATACCTTGGGACTTTATGTTTATA  
ATGATGTCATGCTTGCCTTTGGTACTCCGGAGAAACAATCTTGATCGAACCTATATTTG  
CTCAATGGATAACAATCCGCTCATGGTAAACTTCATATGGGTTTGTATGACTTTTATCTTC  
AACGAGTGGCCCGGCATTCAATGCGGGCCGAAGCATATGGTTGCCCCGGTTGGTTAAAT  
GCAGTTAATGAG-----AATAGTAATTCACTATTCTTAAACAATAGGTCCGGGAGACTTTTTA  
GTTTCATCATGCTATTGCTCTAGGTTTACATACAACTACATTGATCTTAGTAAAAGGTGCT  
TTAGATGCGCGCGGTTCCAAGTTAATGCCAGATAAAAAGGATTTCCGGTTATAGTTTTCC  
TTGCGATGGCCCGGACGAGGTGGTACTTGTGATATTTCCGGCTTGGGATGCATTTTATTT  
GGCGGTTTTCTGGATGTTAAATACCATTGGATGGGTTACTTTTTTATTGGCATTGGAAGCA  
CATCACATTATGGCAGGGTAACGTTTCGCAGTTAATGAATCTTCCACTTATTTGATGGG  
ATGGTTAAGAGATTATTTATGGTTAAACTCTTCCCAACTTATCAATGGATATAACCCTTTT  
GGTATGAATAGTTTATCGGTTTGGGCGTGGATGTTCTTATTTGGACATCTTGTGTTGGGCT  
ACTGGATTTATGTTCTTAATTTCTGGCGAGGATATTGGCAGGAATTGATTGAAACTTTA  
GCATGGGCTCATGAACGTACACCTTTGGCCAATTTGATTCGATGGAGAGATAAACCAGT  
GGCACTTCCATTGTGCAAGCAAGATTGGTTGGATTAGCCCACTTTTCTGTAGGTTATAT  
ATTCACTTATGCGGCTTTCTTGATTGCCTCTACATCGGGTAAATTTGGTATGTCACATTC  
AGTAAAAATTTATGATACATGTATAGGGTGTACTCAATGTGTCCGAGCCTGCCCCACAG  
ATGTATTAGAAATGATACCTTGGGACGGGGTGTAAGCTAAGCAAATTGCTTCTGCTCCA  
AGAACAGAGGATTGTGTGCGGTTGTAAGAGATGTGAATCTGCCTGTCCAACGGATTTCT  
TGAGTGTTCGAGTTTATTTATGGCATGAAACAACCTCGCAGCATGGGTCTAGCTTATATGA  
TAACTTTCAACTTTCCCTGTATTTTTGTGCCTTTAGTAGGCCTAGTATTTCCGGCAATAG  
CAATGGCTTCTTTATCTCTTCATATTCAAAAAACAAGATTGTTATGCGAGATTTAAAAA

CATATCTCTCTGCGGCACCGGTAAGTACTCTATGGTTCGTGTCTTTAGCGGGGCTAT  
TAATAGAGATTAATCGTTTTTTTTCCAGATGCGTTGACATTCTCCTTTTTTCATTCTATGAC  
TGCAATTTTAGAGAGACGCGAAAGCGAAAGCCTATGGGGTCGCTTCTGTAACCTGGATA  
ACTAGCACTGAAAACCGTCTTTACATTGGATGGTTTGGTGTTTTGATGATCCCTACCTTA  
TTAACCGCAACTTCTGTATTTATTATTGCCTTCATTGCTGCTCCTCCAGTCGATATTGATG  
GTATTCGTGAACCTGTTTCTGGATCTCTACTTTATGGAAACAATATTATCTCAGGTGCTAT  
TATTCCTACTTCTGCAGCTATAGGCTTGCACTTTTACCCGATATGGGAAGCGGCATCGGT  
TGATGAATGGTTATAACAATGGCGGTCCTTATGAGCTAATTGTTCTACACTTCTTACTTGG  
TGTAGCTTGTATATGGGTGCTGAGTGGGAACTTAGTTTCCGTTTGGGTATGCGACCTT  
GGATTGCTGTTGCATATTCAGCTCCTGTTGCAGCCGCTACTGCTGTTTTCTTGATCTATC  
CAATCGGTCAAGGAAGTTTTTCTGATGGGATGCCTCTAGGAATCTCTGGTACTTTCAAC  
TTCATGATCGTATTCCAGGCTGAGCACAATATCCTTATGCACCCATTTACATGTTAGGT  
GTAGCTGGTGTATTTCGGCGGCTCTTATTAGTGTATGCATGGTTCCTTGGTAACTTCT  
AGTTTGATCAGGGAAACCACCGAAAATGAATCTGCTAATGAAGGTTATAGATTTGGTCA  
AGAGGAAGAACTTATAATATTGTAGCTGCTCATGGTTATTTTGGCCGATTGATCTTCCA  
ATATGCTAGTTTCAACAACCTCTCGTTCCTTACATTTTTTCTAGCTGCTTGGCCTGTAGT  
AGGTATCTGGTTCAGTCTTTAGGTATCAGTACTATGGCTTTTAATCTAAACGGTTTCAA  
TTTTCAACCAATCTGTAGTTGATAGTCAAGGCCGTGTAATTAATACTTGGGCCGATATTAT  
TAACCGTGCTAACCTTGGTATGGAAGTTATGCATGAACGTAATGCTCATAATTTCCCTCT  
AGACTTAGCTGCTATTGAAGCTCCATCTACAACCGGAATGGGTTTGCCTTGGTATCGTG  
TTCATAACCGTTGTATTGAATGATCCCGGTGCGTTCCTTCTGTCCATATAATGCATACAGC  
TTTGGTTGCTGGTTGGGCCGTTCAATGGCTCTGTATGAATTAGCGGTTTTTGATCCCTC  
TGACCCTGTTCTTGATCCAATGTGGAGACAGGGTATGTTTCGTTATACCTTTCATGACTCG  
TTTAGGAATAACCAATTCATGGGGCGGTTGGAGTATCACA--GGGGGACTGTCACGAA  
TCCGGGGATTTGGAGTTACGAAGGTGTGGCCGGGGCACATATTGTCTTTTTCTGGCTTGT  
GCTTCTTGGCAGCTATCTGGCATTGGGTGTATTGGGATCTAGAAAATTTTTGTGATGAAC  
GTACAGGAAAGCCTTCTTGGATTTGCCCAAGATCTTTGGAATTCATTTATTTCTCTCAG  
GGGTGGCTTGCTTTGGTTTTGGGGCATTTCATGTAACAGGCTTATATGGTCCTGGAATAT  
GGGTGTCCGATCCTTATGGACTAACAGGAAAAATACAACCTGTAAATCCAGCGTGGGG  
GGTAGAAGGTTTTGATCCTTTTGTTCGGGAGGAATAGCCTCTCATCATATTGCAGCAG  
GGACGTTGGGCATATTAGCAGGTTTATTCCATCTTAGCGTCCGCCCGCCCAACGTCTG  
TACAAAGGATTGCGTATGGGTAATATTGAAACCGTCCTTTCTAGTAGTATCGCTGCTGTC  
TTTTTTGCGGCTTTTTGTTGTTGCCGGAACCTATGTGGTATGGTTCAGCAACTACCCCGATC  
GAATTTTTGGGCCCACTCGTTATCAATGGGATCAGGGGTACTTCCAACAAGAGATATAT  
CGAAGAGTTGGTGTGCTGAACCTAGCCGAAAATCAAAGTTTATCAGAAGCTTGGTCTAAAA  
TTCCTGAAAAATTAGCTTTTTATGATTACATCGGTAATAATCCGGCAAAAGGGGGATTAT  
TCAGGGCGGGTTCAATGGATAACGGGGATGGAATAGCGGTTGGATGGTTAGGACACCC  
TATTTTTAGAGATATAGAAGGGCGGAACTTTTTGTACGTCGTATGCCTACTTTTTTTGA  
AACATTTCTGTTGTTTTGGTAGACGGCGACGGAATTGTTAGAGCCGACGTTCTTTTC  
GAAGAGCAGAATCGAAGTATAGTGTGCAACAAGTAGGTGTAACCTTTGAGTTCTATGG  
CGGCGAACTCAATGGAGTCAGTTATAGTGATCCTGCTACTGTGAAAAAATATGCTAGAC  
GCGCTCAATTGGGTGAAATTTTTGAATTAGATCGTGCTACTTTGAAATCCGATGGTGTTT  
TTCGTAGTAGTCCAAGGGGTTGGTTTACTTTTTGGGCATGCTTCATTTGCTTTGCTCTTCT  
TCTTCGGGCACATTTGGCATGGTGCTAGAACCTGTTTCAGAGATGTTTTTGCAGGTATT

GACCCCGATTTGGATGCTCAAGTTGAATTTGGAGCATTCCAAAACTTGGAGATCCAA  
GTACAAGAAGACAAGTAGTT-----GTGGAAACGCTCTTTAATGG  
AACTTTAGCTTTAGCTGGCCGTGACCAAGAAACCACAGGTTTCGCTTGGTGGGCCGGA  
AATGCCCGACTTATCAATTTATCCGGTAAACTACTAGGGGCTCATGTAGCCCATGCCGGA  
TTAATTGTATTCTGGGCTGGAGCGATGAACCTATTTGAAGTGGCTCATTTTCTACCCGAG  
AAGCCTATGTATGAACAAGGGTTAATTTTACTTCCGCACCTAGCTACTCTCGGGTGGGG  
GGTAGGTCCTGGTGGAGAAGTTATAGACACCTTTCCATACTTTGTATCTGGAGTACTTC  
ACTTAATTTCCCTCTGCAGTATTGGGCTTTGGCGGTATTTATCATGCACTTCTGGGACCTG  
AGACTCTTGAAGAATCTTTTCCTTTCTTCGGTTATGTATGGAAAAGATAGAAATAAAATG  
ACCACAATTTTAGGTATTCACTTAATCCTGTTAGGTATAGGTGCTTTTCTTCTAGTATTCA  
AGGCTCTTTATTTTGGAGGCCTATATGATACCTGGGCTCCCGGAGGGGGAGATGTAAGA  
AAAATTACCAACTTGACCCTTAGACCAAGTATTCTATTTGGTTATTTACTAAAATCTCCC  
TTTGGGGGAGAAGGATGGATTGTTAGTGTAGACGATTTGGAAGATATAATAGGAGGACA  
TGTGTGGTTAGGTTCCATTTGTATACTTGGTGGAACTCTGGCATATCTTAACCAAACCTT  
CGCGTGGGCTCGACGCGCGCTTGTATGGTCTGGAGAGGCTTACTTGTCTTATAGTTTAG  
CTGCTTATCTGTTTGTGGTTTCGTTGCGTGTTGTTTTGTCTGGTTCAATAATACCGCTTA  
TCCTAGTGAGTTTTACGGACCTACTGGACCAGAAGCCTCTCAAGCTCAAGCATTTACTT  
TTCTAGTTAGAGACCAACGTCTTGGGGCTAACGTGGGATCTGCCCAAGGACCTACCGG  
TTTAGGTAAATATCTAATGCGTTCCCCGACTGGAGAAGTCATTTTTGGAGGCGAAACTA  
TGCGTTTTTGGGATTTGCGTGCTCCATGGTTAGAACCCTCTAAGGGGTCCAAATGGATTG  
GACTTGAGTAGGCTGAAAACGACATAACCTTGGCAGGAACGGCGTTCCGCAGAA  
TATATGACGCATGCTCCTTTAGGTTCTTTAAATTCCGTGGGTGGCGTAGCTACCGAGATC  
AATGCAGTCAATTATGTCTCTCCTAGAAGTTGGTTAGCTACCTCTCATTTTGTCTAGCA  
TTCTTCTTATTCGTAGGTCATTTGTGGCACGCGGGAAGGGCTCGTGCAGCTGCTGCAGG  
ATTTGAAAAGGAATTGATCGTGATTTTGTAGCCTGTTCTTTCCATGACTCCTCTTAATAT  
GACTATAGCCCTTGGTAAATTTACCAAAGACGAAAATGATTTATTTGATATTATGGATGA  
CTGGTTACGGAGGGACCGTTTTCGTTTTTGTAGGCTGGTCTGGTTTATTGCTCTTTCCTTG  
TGCCTATTTGCTTTTAGGGGGTTGGTTTACAGGTACAACCTTTGTAACCTTCATGGTATAC  
TCATGGATTGGCCAGTTCCTATTTAGAAGGCTGCAATTTCTTAACAGCCGCAGTTTCTA  
CTCCGGCTAATAGTTTAGCACATTCTTTGTTGTTACTATGGGGTCCCTGAAGCACAAGGA  
GATTTTACTCGTTGGTGTCAACTAGGTGGTCTGTGGACTTTTGTGCTCTCCATGGCGC  
TTTCGGACTAATAGGTTTCATGTTACGTCAATTCGAACTTGCTCGATCTGTTCAATTACG  
ACCTTATAATGCAATTGCATTCTCTGGCCCAATTGCTGTTTTTGTTTCCGTATTCTGATT  
TATCCACTAGGTCAGTCTGGTTGGTTTTTTTGCGCCTAGCTTTGGCGTATCAGCTATATTT  
CGATTCATCCTTTTTTTTCAAGGGTTTCATAATTGGACGTTGAACCCATTTCATATGATG  
GGAGTTGCCGGTGTATTAGGCGCGGCTTTGCTATGCGCTATTCATGGTGCTACCGTGGA  
AAATACTTTATTTGAAGATGGTGTGGTGC AAATACATTCCGTGCTTTTAACCCA ACTCA  
AGCCGAAGAACTTATTCAATGGTCAACGCCAACCCTTTTGGTCCCAAATCTTTGGG  
GTTGCTTTTTCTAATAAACGTTGGTTACATTTCTTTATGTTATTTGTACCAGTAACCGGTT  
TATGGATGAGTGCTCTTGGAGTAGTCGGTCTAGCCCTGAACCTACGTGCCTATGACTTC  
GTTTCTCAGGAAATTCGCGCAGCGGAAGATCCTGAATTTGAGACTTTCTACACCAAAA  
ACATTCTCTTAAACGAGGGTATTCGTGCTTGGATGGCGGCTCAAGATCAGCCTCATGAA  
AACCTTATATCCCTGAGGAGGTTCTACCCCGTGGAAACGCTCTTATGTCTGGAAGCAC  
AGGAGAACGTTCTTTTGTCTGATATTATTACCAGTATTCGATACTGGGTCATTCATAGTATT



ACGATACCTTCCCTATTCATTGCGGGTTGGTTATTCGTCAGCACGGGCTTAGCTTACGAT  
GTCTTTGGAAGCCCTCGGCCAAACGAATATTTACAGAGAGTCGACAAGGAATTCCAT  
TAATAACTGGCCGTTTTGATCCTTTGGAACAACCTCGATGAATTTAGTAGATCCTTTATGA  
CCATAGATCGAACCTATCCAATTTTTACAGTGCGATGGTTGGCTGTTACGGACTTGCT  
GTACCTACTGTTTCTTTTTTAGGGTCAATATCAGCAATGCAATTTATCCAACGAATGGCT  
ACACAACTGTTGAGAACAGTTCTAGATCAGGT--CCAAGGCGAACTACTGTAGGGAG  
TTTATTGAAACCATTGAATTCGGAATATGGTAAAGTCGCTCCTGGATGGGGAACGACTC  
CTTTGATGGGTGTCGCAATGGCTTTATTTGCAATATTTCTATCTATTATTTGGAGATTTAT  
AATCTTCTGTTTTATTGGATGGAATTTCCATGAATATGCTTACTCTCAAACTTTTGTTT  
CTACAGTAGTGGTATTCTTTATTTCTCTCTTCGTCTTCGGATTCCATCTAATGATCCAGG  
ACGTAATCCAGGACGTGAAGAAATGGCCGATACTACTGGAAGGATTCCCTTTGGCTAA  
TAGGTAAGTAACTGGTATTCTTGTGATCGGTTTACTAGGTCTTTTTCTTTTATGGTTCATA  
TTCCGGATTGGGTTTCATCCCTGATGCTTAATATCTTTAGTTTGATCTTTATCTGTATTAAT  
CTGCTCTTTAT--ACTAGTTTTTTCTTCTCAAATGCCCCGAGGCCTATGCTTTTTTTGAAT  
CCAATTGTAGATGTTATGCCAGTAATACCTGTGCTTTTTTTTTCTTTAGCCTTTGTTTGGC  
AAGCTGCCGTGAGTTTTCGAATGACACAATCAAACCCAAACGAACAAAATGTTGAATT  
GAATCGTACCAGTCTCTACTGGGGGTTATTGCTCATTTTTGTACTTGCTGTTTTATTTCC  
AATATTTCTCAATATGGAAGTAAATATTCTTGCATTTATTGCTACTGCACTGTTCAATTCT  
AATCCTACAGCTTTTCTACTTATCATTACGTAACAAACAGTCAGTCAAATGATATGGA  
AACAGCAACCTTAGTTGCCATCTTTATATCTGGTTTCCTTGTAAGTTTTACTGGGTACGC  
CGTATATACCGCTTTTGGGCAACCTTCTCAACAATAAGAGATCCATTCGAGGAACATG  
GGGACATGGAAGCTTTGGTTTATACATTCTCTTAGTCTCGACTCTAGGGATAATTTTTT  
TCGCTATCTTTTTTCGAGAACCCTAAAGTTCTAACTAAAAGATGAAAATGACTGTT  
GCTTTCCAACCTGGCTGTTTTGTCATTAATTGTTACTTCATCAATCTTATTGATTAGCGTAC  
CCGTTGTATTTGCTTCTCCTGATGGTTGGTCAAGTAATAAAAATGTTGTATTTCCGGTA  
CATCCTTATGGATTGGATTAGTTTTTCTGGTGGGTATCCTTAATTCTCTCATCTCG-----  
-----ATGTCACCACAACAGAGACTAAAGCAAGTGTGGATTTAAAGCTGGTGTTA  
AAGATTACAAATTGACTTATTATACTCCTAACTATGAAACCAAAGATACTGATATCTTGG  
CAGCATTCCGAGTAACTCCTCAACCGGGAGTTCCACCTGAAGAAGCAGGGGCCGCGG  
TAGCTGCGGAATCTTCTACTGGTACATGGACAACAGTGTGGACTGATGGACTTACTAGC  
CTTGATCGTTACAAAGGGCGATGCTACCACATCGAGCCTGTTGCTGGAGACGAAAATC  
AATATATTGCTTATGTAGCTTATCCTTTAGACCTTTTTGAAGAAGGTTCTGTTACTAACAT  
GTTACTTCCATTGTGGGTAATGTATTTGGGTTCAAAGCCCTGCGCGCTCTACGTCTGG  
AAGATCTACGAATCCCTGTAGCGTATGTTAAAACGTTCCAAGGACCGCCTCATGGTATC  
CAAGTTGAAAGAGATAAATTGAACAAGTATGGTCGTCCCCTGTTGGGATGTACTATTAA  
ACCTAAATTGGGGTTATCCGCTAAAACTATGGGAGAGCTGTTTATGAATGTCTCCGCG  
GTGGACTTGATTTTACCAAAGATGATGAGAACGTGAACTCCAACCATTTATGCGTTGG  
AGAGACCGTTTCTTATTTTGTGCCGAAGCACTTTATAAAGCACAGGCGGAAACAGGCG  
AAATCAAAGGGCATTACTTAAATGCTACTGCAGGTACATGCGATGAAATGATGAAAAG  
AGCTGTATTTGCCAGAGAATTAGGAGTTCCTATCGTAATGCATGACTATTTAACAGGGG  
GATTCAGTCAAATACTAGCTTGGCTGAGTATTGCCGAGATAATGGCCTACTTCTTACA  
TCCATCGTGCAATGCATGCAGTTATTGATAGACAGAAGAATCATGGTATACATTTTCGTG  
TACTAGCTAAAGCGTTACGTATGTCTGGGGGAGATCATATTCAGTCCGGTACTGTAGTA  
GGTAACTTGAAGGTGAAAGGGAAATCACTTTGGGCTTTGTTGATTTACTGCGTGATG

ATTATATTGAAAAAGATCGAGGCCGCGGTATTTATTTTTCTCAAGATTGGGTCTCTCTAC  
CAGGTGTTCTACCCGTGGCTTCAGGGGGTATTCACGTTTGGCATATGCCTGCTCTGACC  
GAGATCTTTGGCGATGATTCTGTACTACAATTCGGAGGAGGAACCTTTAGGACACCCTTG  
GGGAAATGCACCGGGTGCCGTAGCTAATCGAGTTGCTCTAGAAGCATGTGTGCAAGCT  
CGTAATGAGGGACGTGATCTTGCTCGTGAGGGTAATGAAATTATCCGTGAGGCTGGCC  
AATGGAGTAATGAACTATCTGCTGCTTGTGCGGTATGGAAGGAGATCAAATTTGAATTC  
CCAGCAATGGATACTTTG-----ATGGCGATACATTTATACAAACTTCTAACCCGAGCAC  
ACGCAATGGAACCGTT-----GCACGA---ATAATTTGACCTATGGGAAGCATCG  
GTGTGGTAAAGGTCGTAATGCCAGAGGAATCATTACCGCAGGTCATAGAGGGGGAGGT  
CATAAGCGTCTCTACCGTAAAATAGATTTTCGCCGTAATGAAAAAACATATATGGTAA  
AATCATAACCAGAGAATATGACCCTAATAGAAATGCATCTATTTGTCTCATACTATGG  
GAATGGTGAGAAGAGATATATTTTACATGCCAAAGGGACTGAAATTGGAAATACCATTT  
TTTCTGGTACAGGAGTTCCCTATAAAAATAGGAAATGCCCTACCTTTGACCCATATGCCCT  
TAGGCACGTCCATACATAACATAGAAATCACGCTTGAAAGGGTGGACAATTAGTTAG  
AGCAGCAGGGACTCTAGCGAACTGATTGCAAAGAGGGGAAATCAGCCACATTA  
ATTACCTTCTGGAGAAGTCCGTTTGATATCCCAAACTGCTCAGCAACAGTCGGACAA  
GTGGGAATGCTGGGGTGAACCAGAAAAGTTTGGGTAGAGCTGGATCTAAACGTTGG  
CTAGGTAAGCGTCCTGTAGTAAGAGGAGTGGTTATGAACCCTGTAGACCATCCCCATGG  
GGGTGGTACAGGGAAGGCCTCAATTGGTAGAAACAAACCCACAACCCCTTGGGGTTAT  
CCTACACTTGAAGACGAAGTAGAAAAAGCATAAATATAGTGATAATTTAATTCTTCG  
TCGACGTAGTAAAATGATTCAACCCAGACCCGTTTGAATGTAGCGGATAACAGTGAG  
GCTCAAGAATTAATGTGTATTTCGAATCATAGGAGCTAGC---AATCGCCGATATGCTCATAT  
TGGTGACGTTATTGTTGCTGTGATTAAGAAGTAGTACCACACGTCGCCCTACGAAAAT  
CTGAAGTAGTCAGAGCTGTAATTGTACGTACCTGTAAAGAACTTAAACGTCGCAATGGT  
ATGATAATACGATATGATGACAATGCTGCAGTTGTCATTGATCAAAGGGAAATCCAAA  
AGGAAGTCGAGTTTTTGGTGCATCGCCCTGGAATTGAGACAGTTAAATTTTACAAA  
ATAATTTCAATTGGCTCCCAGGTTAATGCTTAGTCCCAAAAGAACCAGATTCGGTAA  
ACAACATAGAGGAAGAATGAAGGGAATATCTTATCGAGGGAATCATATATGTTTTGGTA  
AATATGCTCTTCAAGCACTTGAACCCGCTTGGATCACCTCTAGACAAATAGAAGCAGG  
GCGACGAGCAATGACACGAAATGCACGTCGTGGTGGAAAAATATGGGTACGTATATTT  
CCCGATAAACAGTTACAATAAGAACGACAGAAACACGTATGGGTTCGGGTAAAGGAT  
CTCCTGAATATTGGGTAGCTGTTGTTAAACCAGGTCGAATACTTTATGAAATGGGGGGA  
ATCACAGAAAATATAGCCAGAAAAGCTATTTTGATAGCGGCATCCAAAATGCCTATACG  
AACTCAATTTATTATTTTCAGGAATGACCAGAACTTGCCGGGGATATATAGCTCGGAGAC  
GTAGAACA AAAATGCGTTCATTTGCAGTAGGATGGGCT-----CGGTCTCTTACTGGAA  
CTAGTCTTCAATATCAAATAAAAAGCTTTGTATTTCGGCTCATCGGGATAGAGGTAGGCAA  
AAGAGAAATTTTCGTTGTTTGTGGATAACTCGTATAAACGCGTTAATTCGAAAATG-----  
-GTATTTAAT-----AGTAGATTTATACACGATCTGTACAAGAGAGGGGGCTTTCTTAATCGT  
AAAACGCTTTCGCAAGTAGCTACCTTTCATCAGAATTGTTTTTATCTAATTTCTAAGAAG  
AATATA-----ATGCTAAAGGAAGTACACGCTTTAGGT---CATATAT  
CCATGTCCGCTCATAAAGCGCGAAGAGTAATTGATCAAATTCGCGGACGTTCTTACGAA  
GAAACACTTATGATACTAAATGTCATGCCTTATCAAGCATCTTATCCCATTTTAAAAATG  
GTTTTAAATGCCGGAGCAAATGCTAGTTACTAGAGGTTCCAATAAACTAATTTAAT  
AATTAGTAAAGCCGAAGTCAACGAGGGTACTGCCGTGAAGAAATGGAAACCTCGAGC



GAGAGATATATTGGCAGCCGTGGATCATTGATTGGAATTAAATTTGGAATGGTTACACT  
TGACGAT-----ATGAATCATTGAAAAATAAACGTATTCGTTCTGTAGCGGATCTTTTACA  
AGATCAACTCGGCTTGGCTTTAGTTCGTTTAGAAAATGTGGTTGAAGAAAGTATATGTG  
GAGCAATTAGG---CATAAATTAATA---TCGACTCCTCAAAATTTGGTAACTTCAACTCCA-  
-----TTAACAACTACTTATGAGTCTTTTTTTGGCTTACACCCATTATCTCAAGTTTTTG  
ATCGAACTAATCCATTGACACAAATAGTTCATGGGAGAAAATTTAGTTATTTGGGCCCG  
GGAGGATTGACAGGGCGAACTGCTAGTTTTAGGATACGAAATATCCATCCTAGTTACTA  
TGGGCGTATTTGCCCAATTGACACATCTGAAGGAATCAATGTTGGACTTATTGGATCCTT  
ATCAATTCATGCGAGGGTTGGTCATTGGGGC---TTTCTAGAAAGCCCGTTTTTT-----G  
AAATTTGCGAGAAATCAAAAAG-----GGACGGATGCTTTATTTATCACCAGTTATAGAT  
GAATACTATATGTTAGCGTCAGGAAATCTTTGTCATTGAGTCAGGATAGTCAGGAAGA  
ACAGTTTGTCCAGCTCGATACCGTCAAGAATTCTTGACTATTGCATGGGAACGGGTTT  
ATCTTCGATGATTTTTCCCTTCCAATTTTTTCGATTGGAGTTTCTCTCATTCTTTTTATC  
GAGCATAATGATGCGACTCGGGCTTTAATGAGTTCAAATATGCAACGTCAAGCAGTTCC  
GCTTTTTAGGTCCGAGAAGTGCATTGTTGGAAGTGGCTTGGAACGTCAAGCGGCTTTA  
GATTCAGGGGCGCTTGTATAGCGGAACACGAGGGAAAGATCATTATAACCGATACTGA  
CAAGATCGTTTTATCAGGTAATGGAGATACTCTAAGCATTCCATTAGTTATGTATCAACG  
TTCCAACAAAATACTTGTATGCATCAAAAACCCCGAGTTCCGCAGGGTAGATGGATTA  
AAAAAGGACAAATTTAGCGGACGGTGCCGCTACAGTTGGTGGCGAACTCGCTTTGG  
GAAAAATCTATTAGTAGCTTATATGCCATGGGAAGGTTACAACCTCTGAAGATGCAGTA  
CTCATTAAACGAGCGCTTGGTATATGGAGCTATATATACTTCTTTTCAGATATGGAAATATG  
AAATTCAGGTTTATGTGACAAACGAAGGC---CCTGAAAGGGTCACTAATAAGATACCGC  
ATTTAAAAGCCATAAATTACGCAATTTAGACAAAATGGAATTTGTGATGCTGGGATCT  
TGGGTCAAGACGGATGATATTTTAGTAGGTAATTAACGCCCCAGATGGTGAAGAAG  
AATCGTTGTATGCTCCGGAAGATAGATTATTACGAGCCGTACTTGACATTCAGGTATCTA  
CCTTTAAAGAACTTGCCTAAACTACCTACAGGTGTTAGGGGTCGAGTTATTGATGTG  
AGATGGATCGAGAGT-----TCTATTGATAATCCAGAAACGATTCGTGTATATATTTTA  
CAAAAACGTGAAATCAAAGTAGGCGATAAAGTAGCCGGAAGGCATGGAAATAAAGGT  
ATTATTTCAAAAATTTTACCTAGACAAGATATGCCCTATTTGCAAGATGGAAGGCCAGTC  
GATATGGTCTTCAACCCATTAGGCGTACCTTACGAATGAATGTAGGCCAGATATTTGAA  
TGTTTCGCTGGGATTAGCGGGGAGTCTGCTAGACCGACATTATCGAATAGTGCCTTTTGA  
TGAGAGATATGAACAAGAAGCTTCGCGAAAACCTAGTGTTTTCTGAATTATATGAAGCCA  
GTAAGCAAACAGCGAATCCATGGGTATTTGAACCCGAATATCCAGGAAAAAGTAGACT  
GTTAATGGAAGAACGGGGGATTCTTTTGAACAACCTGTTATAATAGGAAAGTCTTATA  
TCTTGAATTAATTCATCAAGTTGATGATAAAATCCATGCACGTTCTCTGGGCCTTATG  
CACTTGTTACACAACAACCCCTTAGAGGAAGGGCCAAGAAAGGGGGACAACGGGTAG  
GAGAAATGGAGGTTTGGGCTCTAGAGGGATTGGTGTGCTCATATTTTACAAGAGATG  
CTTACTTATAAATCTGATCATACTAGAACTCGCCGTAAAGTATATGATACTATGCTCAGTG  
GAGGAATAATGCCTAATCCTAAGGGGGCTCCAGAATCTTTTGAATTGCTCGTTTCGAGAA  
CTACGATCTTTGGCTCTGGAAGTGAAGCATTTCCTTATATCTGAGAAGAACTTCCAGATT  
AAA-----ATGATCGACCGGTATAAACATCAACAACCTCCGAATTGGA  
TTAGTTTCTCCTGAACAATAAGTACTTGGGCCGATAAAATCCTACCTAATGGAGAGAT  
AGTTGGAGAGGTGAAAAACCTATACTTTTCATTACAAAACCAATAAACCGCAAAA  
GATGGATTATTTTGTGAAAGAATTTTGGGCCTATAAAAAGTAGAATTTGTGCTTGTGG

AAATTCTAGAGGAATTGGAGATAAAAAAGAAAACCTGCGATTTTGTGAACAATGTGGG  
GTTGAATTTGTAACCTCTTGGACACGAAGATATCAAATGGGCTACATCAAACCTAGCACG  
TCCAGTAACCCATGTATGGTATTTGAAACGTCCTCCTAGTTTCGATTGCGAATCTTTTAGA  
TAAACCTCTTAAAGAATTAGAGGGCCTAGTATACTGCGAT-----TTTTCTTTTGCTAAGCC  
C---ATAGCTAAAAACCTACTTTCTTACGATTACGAGGTTCAATTCGAATATGAAATCCAA  
TCCGTGTAAGAAAGCATCCCACTTTTTTTTACTCGACAGGTCCTATATAGATTTTCGAGAT  
CGAGAGATCTCTACTGGAGCAGGTGCGATTACGACCAATTAGCCGATCTAGATTTACG  
AATTATTCTAGATTCTTCATTGGTAGAATGGAAAGAATTAGAGGAAGAT--GGGCCACA  
GGGAAAAAATCGAAAGATCGAAAAATTGCAAGAAGAAAGGCTTTTTTGGTTAGACGC  
ATGCAATTAACATAAGCATTAAATTCAAACAAATATAGAACCAGAATGGATGGTTTTGTCT  
CTATTACCAGTTCTTCCCTCCCGAGTTAAGACCGATCATTCAAATAGATGGGGGTAAGCT  
AATGAGCTCGGATATTAATGAACTCTATAGAAGAGTTATCTTTTCGTAACAACCTATCTTAC  
GACTCTATTAACAAAT---AAATATACGCCAGTAGAGCTCATAATGTGCCAGGAGAAATTG  
GTACAACAAGCCGTGGATACACTTCTTGATAATGGAATCCGCGGACAACCAATCAGGG  
ATGGTCATAATAAAGTTTACAAGTCGTTTTCCGATTTGATTCAAGGAAAAGAGGGAAGA  
TTTTCGTGAGACTCTGCTTGGCAAACGGGTCGATTATTCGGGGCGTTCCGTCATTGTCTG  
GGTCTTCACTTTTCATTACATCAATGTGGATTGCCCGCGAAATAGCAATAGAGCTTTT  
CCAGGCATTTGTAATTCGTGCTCTAATTATACAACAACCTTGCTTTGAGCTCAGCAGTTG  
CGAAGAGACAAATTGTGAAAAACAACCCATTGTATGGGAAATGTTGCAGGAAGTTAT  
GCAGGGGCATCCTGTTTTGTTGAATAGAGCACCCACTTTGCATAAATTGGGCATACAGG  
CATTCCAGCCCATTTTAGTGGAAGGACGCGCTATTTGTTTACATCCATTAGTTTGTAAAG  
GATTCAATGCAGACTTTGATGGAGATCAAATGGCTGTTTCATGTACCTTTATCTTTGGAG  
GCTCAAGCAGAGGCTCGTTTACTTATGTTTTCTAATATGAATCTTTTGTCTCCCGCTATT  
GGGGATCCCATTTGCGTACCAACTCAAGATATGCTTATGGGACTCTATATATTAACGAGT  
GGAAATCGTCGAGGTATTTGTGTAAATAGATATAATCCATATAATCGCAAAAAC-----TA  
TCAAAATGAAAGAATTGAAGATAATAAT---AGTATATAAAAGAAAAAGAACCTCTTTT  
TTGTACTTCCCTATGATGCAATTGGAGCTTATCGACAGAAACGAATCAATTTAGATAGCCC  
GCTGTGGCTCCGGTGGCGACGAGATCAACGC---GTTATTTCTTCA-----AGAGAAGCTCC  
CCTTGAGGTTCACTATGAATCTTTGGGTACTTATTATGAGATTTATGAGTACTATCGAATA  
GCAAGAAATATAAAAAAAGAACTCTTTCTATATATATTCGAACCACTGTTGGTCATCTT  
TCTCTTTATCGAGAAATCGAAGAAGCGATAAAGGGTTTTGCCGACCTGTTTCATATAG  
TACC-----ATGGAGGTACTIONTATGGCAAAGGGGCCAATTTGGTCTTTTACA  
ATAAGGTGATAGACGGAACCTGCTATGAAACAACCTTATTAGTCGATTAATAGATCACTTC  
GGAATGGCATATACATCACACATCCTGGATCAAGTAAAGACTCTGGGTTTCCAGCAAGC  
CACTGCTACATCCATTTTCATTAGGAATTGATGATCTTTTAAACAATACCGTCGAAAGGATG  
GCTAGTTCAAGATGCTGAAATCCAAAGTTTTCTTTTGGAAAAACACCACCATTATGGCA  
ATGTACACGCGGTAGAAAAGTTACGTCAATCCATTGACATATGGTATGCTACAAGTGAA  
TATTTGCGACAAGAAATGAATCAAATTTTAGGATGACTGATCCTTTTAAATCCAGTCCAT  
ATAATGTCTTTTTCGGGAGCTAGAGGAAATGCATCTCAGGTACATCAATTAGTAGGTATG  
AGAGGATTAATGTCCGATCCCCAAGGACAAATGATTGATTTACCCATTCAAAGCAATTT  
ACGTGAAGGACTCTCTTTAACAGAATATATCGTTTTCTTGCTACGGAGCCCGCAAAGGG  
GTTGTGGATACTGCTGTACGAACAGCCGATGCTGGATATCTCACGCGCAGACTTGTTGA  
AGTAGTTCAACATATTGTTGTACGTGCAACAGATTGTGGCACTGTCCGGGGTATTTCTG  
TGAGTCCCTCAAATGGGAGGATGCCG---GAAAGCATTTTTATCCAAACATTAATCGGCC

GTGTATTATCGGATGATATATATACGGGTCCACGATGCATTGCCACTCGAAATCAAGATAT  
TGGGATTGGACTTATCAATCGATTCATAACC-----TTTCGAGCACAACCAATATC  
GATTCGAACGCCCTTACTTGTAAAGAGTACATCTTGGATCTGTTCGATTATGTTATGGCCG  
GAGTACTATTTCATGGTACTTAGTTCGAATTGGGAGAAGCTGTAGGTATTATTGCAGGTC  
AATCTATTGGAGAACCCGGTACTCAATTAACATTAAGAAGCTTTTCATACCGGCGGAGTA  
TTTACGGGGGGTACTGCAGAACATGTACGAGCCCCTTCTAATGGAAAAATAAAATTCAA  
TGAAAATTTGGTTCATCCAACACGTACACGTCATGGATATCCTGCTTTTCTATGTTCTAT  
AGATTTGTATGTAAC TATTGAGAGTGAAGATATTCTACATAATGTGACTATTCCATCAAA  
AAGTTTTCTTTAGTTCAAATGATCAATATGTAGAATCCGAACAAATAATTGCTGAGAT  
TCGTGCGGGAACATCCACT---TTGAATTTGAAAGAGCGAGTTCTAAAACATATTTATTCT  
GCCTCAGGCGGAGAA---ATGCACTGGAGTACCGATGTGTATCATGCACCTAAATTTCCA  
TATGGTAATGTTTCATCTCTTACCAAAAACAAGTCATTTATGGATATTATCAGGAGGGCCA  
TGCAGA-----TTCAGTATAGCCTCCTTTTCGCTCCACAAGGACCAAGATCAAATGAACG  
CTCAT-----TCTCTTTCTGTCAAGCGAAGAGATATTTTGAATCCCTCA-----TTGACTAATG  
ATCAA---GAGAGATACAAATTATTTAGTTCAGGTTTTTCTGGTAAA---GAAAATAGGATT  
CCTGATTAT--TCAGAACTTAATCGAATCGCAGGCACGGGTCATTATAATCTTATATATCCT  
--GCCATTCTACACGATAATTTA-----GATTTATTGGCAAAGAGACGAAGAGATAGATTGA  
TTATTCCACTCCAATCGATTCAAGAACTAGAGAAAGAACTAATGTCCTCTTCAGGTATT  
TTAATTGACGTACCC-----ATAAATGGTATTTTCCGTAGAAATAGTATTGTTGCTTCTTTTG  
ATGATCCTCGATACAGAAAAAGAGTTCGGCTTTTACTAAATATGAGACTCTAGAAGTG  
CATTCAATCGTTAAAAAAGAGGAT-----TTTATTGAGTATGAGTATGAAGTCACGGAATTT  
AGGACAAAAGACATGAAAGTAGATCGATTTTTTTTCATTCCCGAGGAAGTGCATCGCTT  
ACCTCTATCTTCTTCCATAATGATACGGAATAATAGTATCATTGGGGTAGATACACAAATC  
ACTTTAAATACAAGAAGCCGAGTAGGCGGGTTAGTCCGAGTGGAAAGAAAAATAAATA  
GAATTGAACTTCAAATCTTTTCTGGAGATATCCATTTTCGTGGAGAGACAGATAAGATAT  
CCCCTACAGCGGCGTCTTAATACCACCTGGAATA-----GGAAAAAAGGATTTCAAAGT  
ATCTAAAAAA-----TTGCAAAATTGGATCTGTGTCCAACAG-----ATCATACCCACCAAT---  
---AAAAAGTATTTTATTTTGGTTCGACCTGTAATCACATATGAAATAATGGACTGTATAAA  
TTTTACA--CCTTTCCCCCGGATATGCTGCAAGAAAGGGATAATGTGCAACTTCAAGTT  
GTTAATTATATCTGTTATGGAAATGTCAAACCAATTTCGGTAATTTCTGACACAAGTATT  
CAATTAGTTCGACTTGTTTAGTCTTGAATTGGGACCAAGACAAAAAA-----AATTCT  
TCGATCGAAGAGGCCCTGCTTCTTTGTTGAAATAAGGACAAATGGTTTGATTTCGAGA  
TTTCATAAGAATTGACTTAGTGAAATCCTCTATTTTCATATACTGAAAAAAGAAATGATCC  
ATCGGGTTCAGAATGGATCTCTGAT--AATGGATCAGATCGGACCAATATCAATCCGTTT  
TTTTCCACTTTTTTCTATTCCAAG---GAAAAGATTCAAATTCACAATCCCTTAACCAAA  
ATGAAGGAACTCTTCATACGTTGTTGAATAGA-----AATAAGGAATGCCAATCTTTCAT  
AATTTTGTATCATCCAAC TGTCTCGAATGGGTCCA-----TTCAATGATGGAAAATCGT  
CCAATGTG-----ATAAAAGAATCA---CCGCTAATGCCAATTAGGAATTTGTTGGGCCCT  
TTAGGGACA-----GCCTTTAAAATTGCTAATTTTTTTTCA-----TTTTACTATTTA-----ATAA  
CCTATAATCAGATCTGG---GTAAC TAACTATTTACAAC TTGACAATTTCAA-----GAG  
ACTTTTCAAGTACTTAAA-----TACTATTTAATGGATGAAAAG-----GGGAAAATTTATA  
ATGCCAATCCTTGCAGTAATATCATTTTGAATCCATTCAATTTGAATTGGTATTTTCTCTA  
TCACAATTATTGTGAAAAGACATCT--ATAAAAATGAGTCTCGGACAGTTTATTTGTGAA  
AATGTATATATAGCCAAAAACGGGCCACAC---CTAAAA-----TCAGGTCAAGTTCTAATT

GTTCAA---GTTGACTCTGTAATAATACGATCAGCTAAGCCCTATTTGACCACTCCAGGAA  
CAACTATTAATGGCCATTATGGGGAAATCCTTTACGAAGGAGATACATTACTTACATTC  
TATATGAAAAATCGAGATCTAGTGATATAACGCAAGGTCTTCCAAAAGTGGAATAATG  
TTCGAAGTGC GTTCGATTGATTCAATATCGATGAATCTAGAAAAGAGGGTTGAGGCTTG  
GAACGAATGTATAACAAAAATTCTTGGAATCCTTGGGGGTTTTTGGATTGGTGCTGAGC  
TAACTATAGTGCAAAGTCGTATCTCTTTGGTTAATAAGATCCAAGAGGTTTATCGATCCC  
AGGGGGTGCAGATCCATAATAGGCATATCGAACTTATTGTACGTCAAATAACATCAAAA  
GTGTTGGTTTTAGAA-----GATGGAATGTCTAATGTTTTCTTACCCGGAGAACTAATTG  
GATTGTTGCGAGCGGAACGAATGGGGCGTGCTTTGGAAGAAGCGATCCATTACCGAGC  
TGTCTTATTGGGAATAACAAGAGCATCTCTGAATACTCAAAGTTTCATATCTGAAGCGA  
GTTTTCAAGAACTGCTCGAGTTTTAGCAAAAAGCTGCTCTCCGGGGTCTGATCGATTG  
GTTGAAAGGCTTGAAAGAGAATGTTGTTCTGGGGGAATGATACCCATTGGTACCGGA  
TTCAAAGGATTA-----ATTCCCCCTTTAAGACAACATAACAACATTCT-----TTGGAAC  
CAAAAAGCAGAATCGATTCAAAGGAGAAATGAAA-----GATATTTTGTTCGACCCATA  
AAAATTATT-----ATGACAAG  
AAGGTATTGGAACATCAATTTGGAAGAGATGATGGAGGCAAGAGTTCATTTGGCCAT  
CGTATTAATAAATGGAACCCTAAAATGGCACCTTATATCTGGGCAAAGCGTAAAGGTAT  
GCATATTACAAATCTTGCTCTAACTACTCGTTTTTTTATCAGAAGCTTGATTTGGTTTTT  
GATGCAGCACGTAGGCGAAAGCGAATCTTAATTGTTGGTACCAAAAAGAGAGTAGCTG  
ATTCAGTAGCACGGGCTGCAATAAAGGCTCGATGTCATTATGTTAATAAAAATGGCTC  
GGTGGTATGTTAACAATTTGGTCCACTACCGAAAGGAGACTTTGTAAGTTCAAAAAT  
TGAGACTGGAATAAAAATGGTCAGACGCAATCTTCTGAAAAGAGAGATGCAGCTA  
GGTTGAAAAGAAAATTATCTCACTTGCAAACATATCTGGGCGGGATTAATATATGACG  
GCCATACCCGATATTGTAATCATTATTGATCAGCACAAAGAATATACAGCTCTTCGAGAA  
TGTATTATTTTGGGAATCCAACAATTTGTTTAATCGATACAAATTGTGACCCCGATCTT  
GTAGATTTTCCGATTCCAGCGAACGATGACACTAGAGCTTCAATCCGATTCATTCTTACC  
AAATTAGTATTCGCAATTTGTGAGGGTCTGTTCTAGCAATAAAATAAAGCCT---ATGGGAC  
AAAAAATAAATCCACTGGGTTTCAGACTAGGTACAACCCAAAACCATCATTCTGTTG  
GTTTGAACAACCAAAAAACTATTCCGAAGGTCTAATAGAAGATCAAAACATACGAGAT  
TATATTGAAGATTTTGTACAAGAAAATATAAGAATCGCCTCTAGC---CTCTCGGGAATTA  
CGCGTATAAAGATTCTAAAAGGCACCGATCTGACCGAGGTCCAAATCTCTCTGGCATT  
CCAAAATTATTAAGAAATTCCA-----ATGGAAGAATTACAGACGAATCTA  
CAAAAAAATTTGATTGTCTACTACGAAAAATCAACATTGCTACTACAACAATTGCAA  
AACCTTACAGAAATCCTATTATCTTGCACAATATATAGCCGGACAATTAGAACATAGAG  
TTCCGTTTTGAAAAGCAATGAAAAGGGCTATTGCAAAAAGCGAAAAAAGAAAAGATAA  
AAGGAATTCGAGTACAAATTGCAGGTTCGGCTCGGTGGAAGAGACATTGCACGTGTCG  
AATGGATCAGAAAGGGTCCGGTTCCCCTACAAACCATTTCGAGCTAAAATTGATTATTGT  
TCCATCCAGTTCGAACTATCTATGGGGTATTAGGTATCAAAATTTGGATATTT-----A  
TGTCGCGTTACCGAGGACCTCGTTTTCAAAAAAATACGCCGTCTAAGAGCTTTACCAGG  
ACTAACTAATAAAGACCTAAA---CCCAGAAATGCTCGTCAATCGCGTTTCGTGAAAAG  
GAAAAAATCTAAATATTGTATTTCGTCTACAAGAAAAACAAAAATTGCGGTTTCATTATG  
GTCTTACAGAACGACAATTAATAACGTTTCGTATCGCCGGGAAGGCCAAGGGTCC  
AACGGGTCAAGTTTTATTACAATTAATTGAAATGCGTTTGGATAACACCCTTTTTCGATT  
GGGTATGGCTTTGACTATTCCCGGAGCCCGACAATTAGTTAACCATAGACATGTTTTAGT

TAATGGTCGTATAATAGATATACCAAGTTATCGTTGCAAACCCCGAGATATTATTACAGC  
AAGGGATGAACGAAAATCCAGAGCTTTGATTCAAAATTCGTTTGATTCACTCCGTCGTA  
AGTTCAAATTGCCAAACCATTTAACTCTTTACCGAATCCAATAT-----AAAGGATTAGTTA  
ATCAAATAATAGATAGTAAATGGGTCGGTTTGAAAATAAACCAAATGCGAGTCGTAGAA  
TATTACTCTCGTCAGACTATGCCACGTCGAGGTACTGCAAAAAAAAAAACAGCAAAT  
CGGATCCAATTTATCGTAATCGATTAGTTAATATGTTGGTTAACCGTATTCTGAAACACG  
GAAAAAAAAATCATTGGCTTATCAAATCTCTATCGAGCCCTGAAAAAGATTCAACAAAA  
GACAGAAAAAAAAATCCACTACTTGTTTTACGTCAAGCAATACGTCGAATAACTCCCAAG  
ATAGGAGTAAAAGTAAAACGTAAAAGGCGATCGACTCGGCAAGTTCCCATTTGAAATAA  
AACCCCTACAAGGAAAAGTACTTGCCATTCGTTGGTTATTAGCGGCATCGCGAAAACGT  
ACGGGTCGAAATATGGCTTTCAAATTAAGTTCCGAATTAGTGGATGCTGCCAAAGGGA  
GAGGCGGGGCCATACGTAAAAAGGAAGAGACTCATAGAATGGCAGAGGCAAATAGAG  
CTTTGGCCATTTTCGTATGAATAGAGACACTATTGCGGAAATACTAACGTCTATACGAA  
ATGCTGACATGAATAGAAAAGAGTAGTTCGAGTAGCATCTACTAATATTACCGAAACC  
ATTGTGAAAATCCTTTTACAAGAAGGTTTATCGAAAACGTGAGGAAACATCGAGAAA  
GCAACCAATCTTTTTTGGTTTTAAACCTGCGATATAGAAGG-----AATAGGGAAAGCATA  
AAC-----ATTTTAAATTTAAAACGGATCAGTCGACCGGGTCTACGAATTTATTCTA  
ATTATCAACGAATTCCTAGAATTTTAGGTGGAATGGGAATTGTAATCTTTCTACTTCTC  
GAGGTATAATGACAGATCGAGAGGCTCGACTAAAAAAATAGGAGGAGAAATTTTGTG  
TTATATATGGATGCCAAAACTATACGTAGAATCTATTTCCGTAGGAAT-----AA  
GAATACACGTAAACTAACAAAAGGAGTTATTCATATTCAAGCAAGTTTCCATAATACCA  
TTGTGACTGTTACAGATGTAAGAGGTCGAGTGGTTTCTTGGTCCTCTGCCGGTACTTGT  
AGATTTAGAGCTAAAAGAAGAGCGACCCCTTTTGCTGCTCAAACCACAGTGGTAAATG  
CTATTCGTCCAGTAGTGGATCAAGGTCTGAAACGAGCAAAAGTCATGATAAAAGGGCC  
CGGTCGAGGAAGAGACGCAGCATTACGAACTATTCGTAAAAACGGTATACGATTA  
ACTTGCATACGGGATGTAACCCCTATGCCACATAATGGCTGTAGACCTCCTAAAAAAGACG  
TGTGATGCCAACGATTAACAACCTTATTAGAAATACAAGACAGCCAATTAGAAATGTCA  
GGAAATCTCCCGCTCTTAGGGGATGCCCTCAGCGTCGAGGAAGCTGTATTAGGGTGTAT  
ACTATCACCCCTAAAAACCAAACCTCTGCCTTCCGTAAAGTTGCCAGAGTAAATTA  
CCTCTGGATTTGTTATCACTGCTTATATACCTGGTATTGGCCATACTTTACAAGAACATTC  
TG TAGTCTTAGTAAGAGGGGGAAGGGTTAAGGATTTACCCGGTGTGAGATATCACATTG  
TTCGAGGAGCCCTAGATGCTGTCCAGTAAAGGATCGTCAACAAGGGCGTTCTAAATA  
TGGGGTAAAAAAGCCAAAAATGGCAAGGAAAAGTTTGATTTCAGAGGGAGGAGAAAA  
GGGAAAAATGGCACAGAAATATGATTTGATTTCGTATCCTCAAAAAAAGAAATAAG  
C-----AAAGTTCGTTCCGGTGAGTGACCACTTAGAAATTCATGGAAAGTTACAATCCCC  
ACCACGGAATAGTGCACCTACACGCTTCGTGACGTTGTTTTTTGACCGGAAGAGCG  
AGAGCTAACTATCGAGACTTTGGACTATCCGGACATACTTCGTGAAATGGTTCACGC  
ATGTTTGTGGCAGGGGCAACAAGATCAAGTTGGATGGTAAAAAATTCATTTATTTCCG  
TTATTTCAAAAAA-----GAAAAGGAAGAAAACCCGGGATCTGTTGAATTTCAAGTATT  
CCGTTCTACCAATAAGATACGAAGACTTTTCTTACATCTGGAATTGCACAAAAAGGACT  
ATTTATCTCAGAGAGGTCTGCGAAAAATTTGGGAAAACGTCAACGTCTGCTAGCTTAT  
TTGTCAAAAAAATAAAGTACGGTACAAAGAATTAATAGGTCAGTTGAATATTCGAG  
AGAAAACAAAGCCGTTAATTATGGTAAAACCTTCGTTTGAAACGATATGGTAGAAAGCA  
ACGAGCCGTCTATCGAATCGTTGCAATTGATGTTTCGATCTCGAAGAGAGGGGAAGAGAT





repeated text lines





ATGGTCTCTCTGGATCCCATTGAATTTCAATTCGGAGGAGGAACCTTATAAAGATCGTATT  
GATTCTTATCAAAGAAAAACAGGATTAAGTACTGAGGCTGTTCAAACAGGCACAGGCAA  
CTAAACGGCATTCCCATAGCAATTGGGGTTATGGATTTTCAATTTATGGGGGGTAGTATG  
GGATCCGTAGTGGGCGAGAAAATCACCCGTTTGATCGAGTATGCTACCAATAAATTTTT  
ACCTCTTATTCTAGTGTGTGCTTCCGGAGGGGCGCGCATGCAAGAAGGAAGTTTGAGC  
CTGATGCAAATGGCTAAAATATCTTCCGCTTTATATGATTATCAATCAAATAAAAGGTTAT  
TCTATGTGTCAATTCTTACATCTCCTACTACTGGTGGGGTAACAGCTAGTTTTGGTATGT  
TGGGGGATATCATTATTGCTGAACCCAATGCCTATATTGCATTTGCAGGTAAAAGAGTAA  
TTGAACAAACATTGAATAAGACAGTACCTGAAGGTTTACAAGCGGCTGAATATTTATTC  
CATAAGGGCTTATTTCGATTCAATCGTACCACGTAATCTTTTAAAAGGTGTTCTGACTGAG  
TTATTTTCAGCTCCACGCCTTTTTTTCCTTTGACTCAAATTTAATCAAGATGGTAACCATT  
AGAGCCGACGAAATTAGTAATATTATCCGTGAACGCATTGAGCAATATAATAGAGAAGT  
AACGATTGTAAATACCGGTACCGTACTTCAAGTAGGTGACGGCATTGCTCGTATTTATG  
GTCTTGATGAAGTAATGGCAGGTGAATTAGTAGAATTTGAAGAGGGTACTATAGGCATT  
GCTCTTAATTTGGAATCAAATAATGTCCGGTGTGTATTAAATGGGTGATGGTTTGATGATA  
CAAGAGGGAAAGTTCTGTAAAAGCAACAGGAAGAATTGCTCAGATACCAGTGAGTGAG  
GCTTATTTGGGTCGTGTTATAAATGCCCTGGCTAAACCTATTGATGGTTCGAGGTGAAATT  
TCATCTTCTGAATCTCGGTTAATTGAATCTCCCGCTCCCGGTATTATTTTCGAGACGTTCC  
GTATATGAGCCTCTTCAAACAGGACTTATTGCTATTGATTTCGATGATCCCTATAGGACGC  
GGTCAGCGAGAATTAATTATTGGGGACAGACAGACCCGGTAAAACAGCAGTAGCCACA  
GATACGATTCTCAATCAACAAGGGCAAATGTAATATGTGTTTATGTAGCTATTGGTCAA  
AAAGCATCTTCTGTCGCTCAGGTAGTACTACTTTCCAGGAAAGGGGAGCGATGGAAT  
ACACTATTGTAGTAGCCGAAACGGCGGATTCCCCAGCTACATTACAATACCTCGCTCCT  
TATACAGGAGCAGCTCTGGCTGAATATTTTATGTACTGTGAACGACACACTTTAATCATT  
TATGATGATCTCTCAAACAAGCACAGGCTTATCGCCAAATGTCTCTTCTATTACGAAG  
ACCGCCGGGTCGCGAAGCTTATCCAGGAGATGTTTTTTATTTGCATTCACGCCTTTTGG  
AAAGAGCCGCTAAATCAAGTTCTCGTTTAGGTGAAGGAAGTATGACGGCTTTACCAAT  
AGTTGAGACCCAGTCGGGAGATGTTTCAGCTTATATTCCTACTAATGTCATTTCCATTAC  
AGATGGACAAATATTCTTATCTGCCGATTTATTCAATGCTGGAATCAGACCTGCTATTAA  
TGTGGGTATTTCCGTCTCCAGAGTAGGATCCGCAGCTCAAATTAAGCCATGAAACAA  
GTAGCCGGCAAATTAATAATTGGAATTGGCGCAATTCGCAGAATTAGAAGCCTTTGCGC  
AATTCGCTTCTGATCTTGATAAAGCTACCCAGAATCAATTGGCAAGGGGTCAACGATTA  
CGTGAGTTGCTCAAACAATCCAATCAGCCCCTCTCACGGTGAAGAACAGATAATGA  
CTATTTATACTGGAACGAATGGTTATCTTGATTCAATAGAAATTGGACAGGTAAGGAAAT  
TTCTCGTTGAGTTACGTACTIONTAAACGAATAAACCTCAGTTCCAAGAAATCATA  
TCTTCCACCAAGACATTCACCGAGGAAGCAGAAGCCCTTTTGAAGAAGCTATTCAGG  
AACAGATGGAACGCTTTCTACTTCAGGAACAAGTAATGAGAATCAATCCTACTACTTCT  
GGTCTTGGGATTTCCACGCTTGAAAACAAAACCTGGGACGTATCGCTCAAATCATTG  
GCCCCGTACTGGATGTAGCCTTTCCCCGGGGAAGATGCCTAATATTTACAACGCTCTG  
GTAGTTAAGGGCCGAGATACTGTCCGGTCAACAAATTAATGTGACTTGTGAGGTACAGC  
AATTATTAGGAAATAATCGAGTTAGAGCTGTAGCTATGAGCGCTACAGATGGTCTAATG  
AGAGGAATGGAAGTGATTGACACGGGAGCTCCTCTAAGTGTTCCAGTCGGCGGAGCG  
ACTCTAGGACGAATTTTCAACGTGCTTGGAGAGCCTGTTGATAATTTAGGTCCTGTAGA  
TACTCGCACAAACATCTCCTATTATAGATCCGCGCCTGCCTTTATACAGTTAGATACAAA

ATTATCTATTTTTGAAACAGGAATTAAGTAGTAGATCTTTTAGCCCCTTATCGTCGTGG  
AGGAAAAATTGGACTATTTGGGGGAGCTGGAGTGGGTAAAACAGTACTCATTATGGAA  
TTGATCAACAACATTGCCAAAGCTCATGGAGGTGTATCCGTATTTGGCGGAGTAGGTGA  
ACGTACTCGTGAAGGAAATGATCTTTACATGGAAATGAAAGAGTCTGGAGTAATTAATG  
AACAAAATATTGCAGAATCAAAGTGGCTCTAGTCTACGGTCAGATGAATGAACCACC  
GGGAGCTCGTATGAGAGTTGGTTGACTGCCCTAACCATGGCGGAATATTTCCGAGATG  
TTAATGAACAAGACGTACTTCTATTTATTGACAATATCTTCCGTTTCGTCCAAGCAGGAT  
CCGAAGTATCCGCCTTATTGGGGAGAATGCCTTCCGCTGTGGGTATCAACCCACCCTT  
AGTACCGAAATGGGTCTTTACAAGAAAGAATTACTTCTACCAAAGAGGGGTCCATAA  
CTTCTATTCAAGCAGTTTATGTACCTGCGGACGATTTGACCGACCCTGCTCCTGCCACG  
ACATTTGCACATTTAGATGCTACTACTGTACTATCAAGAGGATTAGCTGCCAAAGGTATC  
TATCCAGCAGTAGATCCTTTAGACTCAACGTCAACTATGCTCCAACCTCGGATCGTTGG  
TGAGGAACATTATGAAACTGCGCAAAGAGTTAAGCAAACCTTTACAACGTTACAAAGAA  
CTTCAGGACATTATAGCTATCCTTGGGTGGACGAATTATCCGAAGACGATCGCTTAAC  
CGTAGCAAGAGCACGAAAAATTGAGCGTTTCTTATCACAACCCTTTTTCGTAGCAGAA  
GTATTTACCGGTTCTCCGGGAAATATGTTGGTCTAGCCGAAACAATTAGAGGATTTAA  
ATTGATCCTTTCCGGAGAATTAGATGGTCTCCCTGAACAGGCCTTTTATTTGGTAGGTAA  
CATCGATGAAGCTACTGCGAAGGCTACGAACTTAGAAATGGAGAGCAATTTGAAGAAA  
ATGACCTTAAATCTATGTGTACTTACCCCTAATCGAATTGTTTGGGATTCAGAAGTGAAA  
GAAATCATTTTATCTACTAATAGTGGACAAATTGGCGTATTACCAAATCACGCGCCTATT  
GCCACAGCTGTAGATATAGGTATTTGAGAATACGCCTTAATGACCAATGGTTAACTATG  
GCTCTGATGGGCGGTTTTGCTAGAATAGGCAATAATGAGATCACTATTTTAGTAAATGAT  
GCGGAGAAGGGTAGTGACATTGATCTACAAGAAGCTCAGCAAACGCTTGAAATAGCG  
GAAGCTAACTTGAGAAAAGCGGAAGGCAAGAGACAAACAATTGAGGCAAATCTAGCT  
CTCAGACGAGCTAGGACACGAGTAGAGGCTATCAATGTAATTTGATGAAAAATGTAA  
CCGATTCTTCGTTTCCTTGGGTCACTGGCCATCCGCCGGGAGTTTCGGGTTTAATACC  
GATATTTTAGCAACAAATCCAATAAATCTAAGTGTAGTGCTTGGTGTATTGATCTTTTTT  
GGAAAGGGAGTGTTAAGTGATTTATTAGATAATCGAAAACAGAGGATTTTGAATACTAT  
TCGAAATTCAGACGAATTATGCGGGGGGCCATCGAACAACTGGAAAAAGCCCGCGC  
CCGCTTACGGAAAGTGGAATGGAAGCAGATCAGTTTCGAGTGAATGGATACTCTGAG  
ATAGAACGAGAAAAAGTGAATTTGATTAATTCAACTTATAAGACTTTGGAACAATTAGA  
AAATTACAAAATGAAACCATTCATTTTGAACAACAAAGAGCGATTAATCAAGTCCGA  
CAACGAGTTTTCCAACAAGCCTTACAAGGAGCTCTAGGAACCTCTGAATAGTTGTTTGA  
ACAACGAGTTACATTTACGCACCATCAGTGCTAATATTGGCATGTTTGGGGCGATGAAA  
GAAATAATTGATATGAATCCACTGATTTCTGCCGCTTCCGTTATTGCTGCTGGGTGGCT  
GTCGGGCTTGCTTCTATTGGACCTGGGGTCCGGTCAAGGTACTGCTGCGGGCCAAGCTG  
TAGAAGGTATAGCGAGACAGCCCGAGGCGGAGGAAAAATACGAGGTACTTTATTGCT  
TAGTCTGGCTTTTATGGAAGCTTTAACAATTTATGGACTGGTTGTAGCATTAGCGCTTTT  
ATTTGCGAATCCCTTTGTTATGCATGTTATATCATGTTCCATCAACACACTAAA---TTAT  
ACGATATATCTGGTGTGGAAGTAGGCCAGCATTCTATTGGCAAATAGGGGGTTTCCAA  
GTCCATGCTCAAGTACTTATTACTTCTTGGGTGTAATTGCTATCTTATTAGGCTCAGCCC  
TTATAGCGGTTCCGAATCCACAAACCATTCCGACTGACGGTCAAATTTCTTCGAATAT  
GTTCTTGAATTCATTCGAGACGTGAGCAAACTCAGATTGGAGAAGAATATGGTCCGT  
GGGTTCCCTTTATTGGGACTATGTTTCTATTTATTTTTGTTTCTAATTGGTCAGGGGCTCT

TTTGCCCTGGAAAATCATACAGTTACCTCAGGGGGAGCTAGCCGCACCCACGAATGATA  
TAAATACTACTGTTGCTTTAGCTTTACTCACGTCAGTAGCATATTTCTATGCGGGTCTTAC  
CAAAAAGGATTAGGGTATTTTCAGAAAATATATTCAACCAACTCCAATCCTTTTACCCAT  
TAACATATTAGAAGATTTACAAAAACCTTTATCACTTAGTTTTTCGACTTTTCGGGAATAT  
ATTAGCCGATGAATTAGTAGTTGTTGTTCTTGTTCCTTTAGTACCTTTAGTGGTTCCTATA  
CCCGTCATGTTCTTGGATTATTTACAAGCGGTATTCAAGCTCTTATTTTTGCAACTTTA  
GCTGCGGCTTATATAGGCGAATCCATGGAGGGTCATCATATGATATTTCAACTTTAGAG  
CATATATTAACCCATATATCCTTTTCTGTCGTTTCAATTGTAATTACAATTCATTTGATAAC  
CTTATTAGTC--GAAATCGTAGAACTATATGATTCGTCCGAAAAGGGCATGATAGCTAAC  
TTTTTCTCTATAACAGGATTATTAGTCACTCGGTGGATTATTTCAGGGCATTCCCATTAA  
GTGATTTATATGAATCATTAATCTTTCTTTTCATGGAGTTTCTCTGTTATTCATATGGTTCG  
TATTTTAAAAACATAAAAATCATTAAAGCGCAATAACCGGGCCAAGTGCTATTTTTACC  
CAAGGCTTTGCTACTTCGGGTCTTTTAAACCGAAATACATCAATCCGCAATATTAGTGCCT  
GCCCTCCAATCCCAGTGGTTAATAATGCACGTAAGTATGATGGTATTGGGTATGCAGCT  
CTTTTATGTGGATCATTATTTTCAGTAGCTATTCTAGTCATTACATTTTCGAAAAGTCCTAA  
GGTTTTTTGGTAAAAGCAAAAAGATCCAATATATGAATGAAAGACGCAATCTTTTACTA  
-----TCTTTTATGTTTTCTAGAAATTATTACAGGTCTCAATTGATTCAACAATTAGATTATT  
TGAGTTATCGTATTATTAGCCTAGGATTTATCTTTTTAACCATAGGTATTCTTTTCGGGATC  
GGTATGGGCAAACGAGGCATGGGGATCATATTGGAATTGGGACCCAAAGGAAACTTGG  
GCATTTATTACTTGGACTATATTTCGCGGTTTATTTACATACTCGAACAAATATAAATTTGG  
CCGGCGTAAATTCCGCAATTGTGGCTTCTATAGTTTTTCTTCTCATTGGATATGCTATTT  
TGGGGTTAATCTATTAGGAATAGGGCTACATAGTTATGGTTTATTTAGATTAAATATGGCA  
AAAAAGAAAGCATTTCCTTCTATATCTTGCATCTATAGTATTTTTGCCCCGGGTGG  
ATCTCTTTCTCATTAAATAAAAGTCTGGAATCTTGGGTTACTAATTTGTGGAATACTAGG  
CAATCCGAAACTTTTTTTGAATGATATTCAAGAAAAGCGTATTCTAGAAAATTCATAGA  
ATTAGAGGAACTCTTCCTGTTGGACGAAATTATAAAGGAATATCCGCAAACACATCTAC  
AAAAGCTTCGTATAGGAATGCACAAAGAGACGATTCAATTGATCAAGATGCACAACGA  
GGATCGTATCCATACGATTTTGCACCTCTCGACAAATATAATCTGTTTCGTTATTCTAAGT  
GGTATTCTATTCTGGGTAATGAAGAACTTGTTATTCTTAACTCTTGGGTTCAAGAATTC  
CTATATAACTTAAGCGACACAATAAAAGCTTTTTCTATTCTTTTATTAAGTATTATGTA  
TCGGATTCCATTCACCCACGGTTGGGAATAATGATTGGCTATGCTACAAAGATTTT  
GGATTTGTTTATAACGATCAAATCTATCTGGTCTTGTTCCTTTCCAGTCAATTCTAG  
ATACAATTTTAAAATATTGTATCTTCCGTTATTTAAATCGTGTATCTCCGTCACCTTGAGT  
GATTTATCATTCAATGAATGACATGCCTATTGGTGTTCGAAGAGTACCTTTTCAACTTCC  
TGGAGAAGGATTTGTATCTTGGATTGACATATAACCGACTTTATCGAGAAAGATTAC  
TTTTTTTAGGCCAAATGGTTGATACCGTTATCTCGAATCACCTTATTGCTCTTATGGTATA  
TCTACTCTAGAAAGCGATACCAAAGATCTGTATTTATTTATAAACTCTCCTGGCGGATG  
GGTAATGCCCGGAATAGCGATTTATGATACTATGCAATTTGTACGACCCGATGTACAGAC  
AATATGCATGGGATTCGCCGCTTCCATGGGATCTTTTCTCCTGGTCGGAGGAAAAATTA  
CCAAACGTATAGCATTCCCTCACGCCAGGGTAATGATCCATCAACCTGCTGCGGCTTTT  
TATGGAGCACAAACGGGGGAATTTGTCTGGAAGCGGAAGAATTACTGAAACTACGCG  
AAATCATGACAAGTATTTATGCACAAAGAACGGGCAAACCCTTATGGGTTGTATCTGAA  
GACATGGAAAGGGATACTTTTATGTCAGCAACAGAAGCCCAAGCTCATGGACTTGTG  
A T C T T G T A G C G G T T A A

A????????????????????????????????????????????????????????????????????????????????????????  
????????????????????????????????????????????????????????????????????????????????????????  
????????????????????????????????????????????????????????????????????????????????????????  
????????????????????????????????????????????????????????????????????????????????????????  
ATGGAGGAATTTCAAGGATATTT  
CGAACTAGATAGATCCTGGCAACATGACTTCCTATAACCACTTAGCTTTTCGGGAGTATAT  
TTATGCACTTTCTCATGATCATGATTTAGTGGGTTATGACAATAAATTTAGTTCAATAATT  
GTAAAACGCTTAATTACTCAAATGTATAAACAGAATCATTTTCTTATTTCTACTAATGATT  
CTAACCAAATCCATTTTTTTGGGAAGAATTTGTATTCTCAAATGATATCAGAGGGATTTA  
CAGTCATTGTGGAAATTGCATTTTCCCTACGATTAGTATCTTTCTTAATAGCAAAAATCTCA  
TAATTTACGATCAATTCATTCAATATTTCTTTTTTAGAGGACAAATTATCACATTTAAAT  
TTTGTGTCAGATGTACTAATACCCTACCCTATCCATCTGGAAATCTTGATTCAAACCCTT  
CATTACTGGGTGAAAGATGCCTCTTCTTTGCATTTAGTACGGTCTTTCTTCACGAGTAT  
TGTAATTGGAATAGTCTTATTACTAAATATATTTCCGTTTTTTCAAACCAAGATTATTCT  
TGTTCCCTATATAATTCGCATGTATATGAATACGAATCCATCTTCCTTTTTCTCCGTAACCA  
ATCTTCTCATTTACGATCAACATCTTTTGTAGTCCTTCTTGAGCGAATATAATTTCTATGGA  
AAAATGGAACATCTTGTAAGTCTTTGCTAATTTTCAGATCCTATGGTTGTTCAAGGAT  
CCTTTTATGCATTATGTTAGATATCAAGGAACTCAATTTTGGCTTCAAAGATAACGCT  
CTTCTGATGAATAAATGGAAATATTACCTTGTCAATTTATGGCAATGTCATTTTTACATGT  
GGTCGCAACCAGGAAGGATCTATATAACCAATTAGCCAAAGATTCCCTCGACTTTCTG  
GGCTATCTTTCAAGTGTGCAACTAAATCTTCAGTGTTACGGCTTCAAATGCTAGAAAA  
TTCATTTATAATAGATAAT-----TCTAGGAAGAGATTGATAACAATAGTTCCAATTATTCCT  
CTGATTGGATCATTGGCTAAAGCAAAAATTTGTAACACATTAGGGCATCCATTAGTAA  
GCCAGCCTGGGCCGATTCATCAGATTCTGATATTATCGAACGATTTGCGCGTATATGTAG  
AAATCTTTCTCATTATTACAGCGGATCCTCAAAAAAAAAAAGTTTGTATCGAATAAAATA  
TATACTTCGACTCTCTTGTGTGAAAACTTTGGCTCGTAAACACAAAAGTACTGTACGCG  
CTTTTTTGAAAAGATTAGGTTTCGGAATTATTGGAAGAATTCCTTACGGAGGAAGAGCA  
AGTTCTTTCTTTGATCTTACCAAGACGGATTTGGTACTTGGATATTATTGTATCAATGAT  
CTGGCCAATCAT--ATGATAATTGATAACAACC---GAAGTACAAGATATCAAT--TCTTTTTC  
CAGATTGGAATCC---TAAAAGAGGTTTATGGGATCATATGGATGCTTATCCCTATTTTTT  
TTCTGTATTGGGAATCACAATAAGTGTACTAGTAATTGTATGGTTAGAAAGAGAAATAT  
CTGCAGGATAACAACGATTTGGGCTGAATACGCCGGTCTTTGGGAATCTTCAA  
GCTCTAGCAGATGGGACAAAACACTTTTTCAAAGAGAATCTTCTTCCATCTAGAGGGG  
ATACTCGTTTATTCAGTATCGGACCATCCATAGCAGTCGTATCAATTCTACTAAGTTATTC  
AGTAATTCCTTTTAGTTATCGCCTTGTTTTAGCGGATCTCAATATCGGTGTTTTTTTATGG  
ATTGCCATTTCAAGCATTGCTCCTATTGGACTTCTTATGTCAGGATATGGATCAAATAATA  
AATATTCCTTTTTAGGTGGTCTACGAGCTGCTGCTCAATCGATTAGTTATGAAATACCATT  
AACTCTATGTGTGTTATCAATATCTCTACTATCTAACAGTTCAAGTACAGTTGATATAGTT  
GAGGCGCAGTCAAATATGGTTTTTGGGGATGGAATTTGTGGCGTCAACCTATAGGATT  
TCTCATTTTTATAATTTCTTCCCTAGCGGAATGTGAAAGATTACCTTTTGATTTACCAGA  
AGCAGAGGAAGAATTAGTAGCAGGTTATCAAACCGAATATTAGGATCAAATTTGGTT  
TATTTTACGTTGCTTCCATCTAAATCTATTAGTTTCTTATTATTGTAAACAGTTCTTTAC  
TTGGGCGGTTGGAATATCTCTATTCCGCACATATTGGTTACTGAGCTATTTAAAATAAAT  
AACGCGAGTGAATCTTTGGAACGACAATTGGTATCTTTATTACATTAACATAAACTTAT  
TTGTTCTTGTTCAATTCGATCGCAACAAGATGGACTTTACCTAGGATAAGAATGGACCA  
ACTATTAATCTTGGATGGAATTTCTTTTACCTATATCTTGGTAATCTATTATTAACA



ACTTCTTCCCAACTCCTTTCACTGATGATCTGGCATGTACAGAATGAAAACCTTCATTCTC  
GATTCTACGAGAATTTTTATGAAAGCCTTTCATTTGCTTCTCTTCGATGGAAGTTTTATTT  
TCCCAGAATGTATCCTAATTTTTGGCCTAATTCCTTCTTGATGATCGATTCAACCTCTGA  
TCAAAAAGATATACCTTGGTTATATTTTCATCTCTTCAACAAGTTTAGTAATGAGCATAAC  
GGCCCTATTGTTCCGATGGAGAGAAGAACCTATGATTAGCTTTTCGGGAAATTTCCAAA  
CGAACAAATTTCAACGAAATCTTTCAATTTCTATTTTACTATGTTCAACTCTATGTATTCC  
TCTATCCGTAGAGTACATTGAATGTACAGAAATGGCTATAACAGAGTTTCTGTTATTTCGT  
ATTAACAGCTACTCTAGGAGGAATGTTTTTATGCGGTGCTAACGATTTAATAACTATCTT  
TGTAGCTCCAGAATGTTTCAGTTTATGCTCCTACCTATTATCTGGATATACCAAGAAAGA  
TGTACGGTCTAATGAGGCTACTATGAAATATTTACTTATGGGTGGAGCAAGCTCTTCTAT  
TCTGGTTCATGGTTTTCTTGGCTATATGGTTCATCCGGGGGGGAGATCGAGCTTCAAG  
AAATAGTGAATGGTCTTATCAATACACAAATGTATAACTCCCCAGGAATTTCAATTGCGC  
TTATATTCATCACTGTAGGAATTGGGTTCAAGCTTTCCCCAGTCCCTTCTCATCAATGGA  
CTCCTGACGTATACGAAGGATCTCCACTCCGGTTCGTTGCTTTTTCTTTCTGTTACTTTCGA  
AAGTAGCTGCTTCAGCTTCAGCCACTCGAATTTTGGATATTCCTTTTTATTTCTCATCAA  
ACGAATGGCATCTTCTTCTGAAAATCCTAGCTATTCTTAGCATGATATTGGGCAATCTCA  
TTGCTATTACTCAAACAAGCATGAAACGTATGCTTGCATATTCGTCCATAGGTCAAATCG  
GATATGTAATTATTGGAATAATTGTTGGAGACTCAAATGGTGGATATGCGAGCATGATAA  
CTTATATGCTGTTCTATATCTCCATGAATCTAGGAACTTTTGCTTGCATTGTATCATTGG  
TCTACGTACCGGAACTGATAACATTCGAGATTATGCAGGATTATACACGAAAGATCCTTT  
TTTGGCTCTCTTTTAGCCCTATGTCTCTTATCCCTAGGAGGTCTTCCCTCACTAGCAGG  
TTTTTTCGGAAAACCTCCATTTATTCTGGTGTGGATGGCAGGCAGGCCTATATTTCTTGGT  
TTCAATAGGACTCCTTACGAGCGTCTTTCTATCTACTATTATCTAAAAATAATCAAGTTA  
TTAATGACTGGACGAAACCAAGAAATAACCCCTCACGTGCGAAATTATAGAAGATCCC  
CTTAAAGATCAAACAATTCCATCGAATTGAGTATGATTGTATGTGTGATAGCATCTACTAT  
ACCAGGAATATCAATGAACCCGATTATTGCAATTGCTCAGGATACCCTTTTTATGTTTCT  
GCTTTACGAATATGATATTTTCTGGGCATTTCTAATAATATCAAGCCTTATTCCTATTTTGG  
TATTTCTAATTTCCGGAGTTTTAGTCCCGATTAGCAAAGGGCCAGAGAAACTTTCTAGT  
TATGAATCGGGTATAGAACCGATGGGCGATGCTTGGTTACAATTTCGAATCCGTTATTAT  
ATGTTTGTCTAGTTTTTGTGTTTTTGTATGTTGAAACGGTTTTTCTTTATCCATGGGCAA  
TGAGTTTCGATGTATTGGGGGTATCCGTATTTATAGAAGCTTTCATTTTCGTGCTTATCCT  
AATTGTTGGTTCAGTTTATGCATGGCGAAAGGGAGCATTGGAATGGTCTACGAATTATT  
TTCCTTGGTTAACAATAATTGTCATTTTTCCGATATCCGCGGGTTCTTTAATTTTCTTTCT  
CCCTAATAGAGGAAATAAAGTTACTAAATGGTATACTTTATGTATATGTGTCTTAGAACT  
CCTTCTAACAGCCTATGCATTCTGTTATCATTTCOAATTGGACGATCCATTAATCCAACCTC  
GCGGAGGATTATAAATGGATCAACTTTTTGATTTTTACTGGAGATTGGGAATAGATGG  
ACTTTCTATAGGACCCATTTTACTGACAGGATTATCACCCTTTAGCTACTTTAGCGGC  
TTGGCCAGTTACTCGGGATTCCCGATTATCCATTTTCTGATGTTAGCAATGTACAGTGG  
TCAAATAGGATCATTTTCTTCTAGAGACCTTTTGCTTTTTTTCATCATGTGGGAGTTAGA  
ATTAATTTCCGTTTATCTACTTCTAGCCATGTGGGGGGGAAAGAAACGGCTGTATTCCGG  
CTACAAAATTTATTTTGTACTGTCAGGAAGTTCGGTTTTTCTATTAATAGGGGTTCTGG  
GTATCGGTTTATATGGTTCCAATGAACCAACATTAATTTTGAACATTAGCCAATCAAT  
CGTATCCTGTGGCACTAGAAATAATATCTATATTGGATTTTTTATTGCTTTTGGCTGTCAA  
ATCACCGATTATACCTTACATACCTGGTTACCAGACACCCATGGAGAAGCACATTACA

GTACTTGTATGCTTCTAGCTGGAATCTTATTA AAAATGGGAGCGTATGGATTGGTTAGAA  
TCAATATGGAATTATTGCCCCACGCTCATTCTATATTTTCTCCCTGGTTGATGATAATAGG  
CACAATTCAAATAATCTATGCAGCTTCAACGCTCCTGGTCAACGTAATTTAAAAAAGA  
GAATAGCCTATTCTTCGGTATCTCATATGGGTTTCATAATTATAGGCATTGGCTCTATAAC  
CGATACAGGCCTCAATGGATCCATTTTACAAATAATTTCTCATGGATTTATTGGCGCTCT  
GCTTTTTTTCTTGGCAGGAACAAGTTATGATAGAATACGTCTTGTTTATCTTGACGAAAT  
GGGTGGAATGGCTATCCCAATTCCCAAATATTCACGATGTTTCAAGTATCTTATCGATGGC  
TTCCCTTGCATTACCGGGCATGAGTGGTTTTTTTTGCAGAATTGATAGTATTTTTTGGAAAT  
AATTACCAGTCAAAAATATCTTTTAATGCCAAAATACTAATGATTTGTGTAATGGCACT  
TGGAATGATATTAACCTCTATTTATTCAATTATCTATGCTACGCCAGATGTTTTATGGATACA  
AGCTATTTAATGCTCAAAACTATTCTTTTTTTGATTCTGGACCACGAGAGTTATTTGTTT  
CGATATCTATCTTTCTACCCGTAATAGGTATTGGTATTTATCCGGATTTCTGTTCTTTCACTA  
TCAGTTGACAAGATTGAAGCTATTCTATCTAATTATTTTTTCGAGAATGATGCTCGAACAT  
GCCCTTGTTTTGAGTGCCTATTTATTTTCTATCGGTATCTATGGATTGATTACGAGTCGAA  
ATATGGTTAGGGCTCTTATGTGTCTTGAACCTATATTGAATGCGGTTAATATAAATTTGT  
AACCTTTTCTGATTTTTTTTGATAGTCGCCAATTAAGGAAATATTTTCTCCATTTTTGTT  
ATAGCTATTGCGGCCGCTGAAGCAGCTATTGGACCGGCTATTGTTTCGTC AATTTATCGT  
AACAGAAAATCAACTCGTATCAATCAATCGACTTTGTTGAATAAAAATGGAACATACATA  
TCAATATTCATGGATCATACCTTTCTGTTCCACTTCCAGTTCCTATGTTAATAGGGGTGGG  
ACTTCTACTTTTTCCAACGGCAACAAAAATCTTCGCCGTATGTGGGCTTTTCTAGTAT  
TTTATTATTAAGTATAGTTATGGTTTTTTTCGCTTGATCTATCTATTAGCAATGAATATAA  
GTTATATCTATCAATATGTATGGTCTTGGACCATCAATAATGATTTTTCTTTAGAGTTCCG  
CCATTTGATCGACCCACTTACTTCTATTATGTCAATATTAATCACTACTGTTGGAATTATG  
GTTCTTATTTATAGTGACAATTATATGTCTCATGATCAAGGATATGTGAGATTTTTTGCTTA  
TATGAGTTTTTTCAATACTTCAATGCTGGGATTAGTCACGAGTTCTAATTTGATACAAAT  
TTATATTTTTTGGGAATTAGTTGGAATGTGTTCTTATCTATTAATAGGGTTTTGGTTCACA  
AGACCTATTGCGGCGAATGTTTGTCAAAAAGCCTTTGTAAC TAATCGTGTAGGGGATTT  
TGGTTTATTATTAGGAATTTTAGGTCCTTATTGGATAACGGGTAGTTTTGAATTCAGGAT  
TTGTTTCAACTATTCAATAAC---GAGGTTAATTTTTTATTGTTACTTTGTGCGCCTTCCT  
ATTATTTACCGGTGCGGTTGCTAAATCCGCCCAATCCCCCTTCATGTATGGTTACCAGA  
TGCCATGGAAGGGCCTACTCCTATTTTCGGCTCTTATACATGCTGCTACTATGGTAGCGGC  
GGGAGTTTTTCTTGTAGCTCGGCTTCTCCTCTTTTTATCGTCATACCTTACGTAATGAAT  
CTAATATCTTTGATAGGTATAATAACAGTATTATTAGGAGCTACTTTAGCTCTTGCTCAAA  
AAGATATTAAGAGAAGTTTAGCCTATTCTACAATGTCTCAATTGGGTTATACGATGTTAG  
CTCTAGGTATGGGATCTTATCGAGTCGCTTTATTTCAATTTGATTACTCATGCTTATTCTAA  
AGCATTGTTATTTTTAGGATCCGGATCAATCATTCAATGGAAC TATTGTTGGATAT  
TCTCCAGATAAAAGCCAAAATATGGTTCTTATGGGCGGTTTAAAAAAGTATGTTCCAAT  
TACAAAACCTTCTTTTTTATTAGGTACACTTTCTCTTTGTGGTATTCACCCCTTGCTTGT  
TTTTGGTCCAAAGATGAAATTCTCAACGATAGTTTGTGTTATTACCGATTTTCGCAATA  
ATAGCTTGTCTACAGCAGGACTAACCGCATTTTATATGTTTCGGATTTATTTACTTACTT  
TTGAGGGACATTTAAACGTTAATTTTCAAATACAGTGGAAAAAAAAGTAGCTTTTTTT  
TCTTCAATATCTATATGGGGTAAAAAAGGACCAAAGCGATTAAAAAA-----TTATT  
AACAAATGAATCTTTTTCTGGCAATAAGACT-----TTATCTTATCCCATGAATCGGAAAA  
TACTATGCTATTTCTATGCTTGTATTGGCCCTATTTACTTTGTTTGTGGAGCCGTAGGA

-----TTCTATTTGGATATATTATCAA AATTGTTAACTCCATCTATAAACCTTTTACATCAA  
ATTCAAAT--TTTGTGGATTGG---GAATTTGTGACAAATGCAACTTTTTTCAGTCAGTATAG  
CGTATTTCCGGAATATTTATAGCGTTTTTTTTCTATAAGCCTGTTTATTCATCATTACAAAAT  
TTTAACTTACTAAATTCATTTGCTATTTCTTTGGGACAAAATAAGAAATGTGATATATGATT  
GGTCATATAATCGCGGTTACATAGATACTTTTTACACAATATCTTTAACTGAGGGTATAAG  
AGGATTAGCAGAACTAACTCATTCTTTTGATAGACGAATAATTGATGGAATTACGAATG  
GGATAGGTATTACAAGTTTTTTTTGTAGGCGAGGGTATAAAATATGTAGGGGGCGGT---CG  
CATCTCTTCTTATCTATTATTCTATTTATTTATGTATTAATCTTTTTAGTAATTTATTACATG  
GATTTGCCTGGAACAATACATGATTTTCTTTTAGTCTTTCTGGGATCAGGTCTTATATTAG  
GGGGTCTAGGAGTGGTATTACGTACCAACCCAATCTATTCTGCCTTTTCATTGGGATTGG  
TTCTTGTTTGTATATCCTTATTTCTATATCCATCAA AACTCCCATTTTGTAGCTGCTGCACA  
GCTCCTTATTTACGTGGGGGCTATAAATATTTAATCATATTTGCTGTGATGTTTATGAAT  
GGTTCAGAATATTACAAGGATTTAATCTTTGGACCGTTGGGGATGGGGTACTTCGCT  
GGTTTGCACAAGTATTTTTGTTTCACTAATTACTATTATTCTCGATACGTATGGTATGGG  
ATTATTTGGACTACAAGATCAAACCAGATTATAGAGCAAGATTTGATAAATAATAGTCAA  
CAAATTTGGAATTCATTTATCAACAGATTTTTTTCTTCCATTTGAACTTATTTCAATAATC  
TTTTAGTTTCTTTGATAGGTGCAATTGCTATGGCCCGTCAGATGAATGCACGAGCTACA  
GGAAAAGACCTCATGATAGTCAATATGGGACCTCACCACCCATCAATGCATGGTGTCT  
TCGACTCATCGTACTCTAGACGGAGAAGATGTTATTGACTGTGAACCAATATTGGGTT  
ATTTACACAGAGGGATGGAAAAAATTGCGGAACACCGAACCAATTATACAATATCTCCCT  
TATGTAACACGTTGGGATTATTTAGCTACTATGTTTACAGAAGCAATAACTGTAAATGGG  
CCGGAACAGTTGGGAAATATTCAAGTACCTAAAAGAGCTAGCTATATCAGAGTAATTAT  
GTTGGAGTTGAGCCGTATAGCTTCTCATCTGTTATGGCTTGGTCCTTTTATGGCAGATAT  
TGGTGCACAACTCCCTTCTTCTATATTTTCAGAGAAAGAGAATTAGTATATGATCTATT  
CGAAGCTGCCACTGGTATGAGAATGATGCATAATTATTTTCGTATCGGAGGAGTAGCGG  
CTGATCTACCTCATGGCTGGATAGATAAATGTTTGGATTTCTGCGATTATTTTTTAACAG  
GGGTTTCGTGAATATCAAAA AACTTATTACGCGAAATCCTATTTTTTTTAGAACGAGTTGAG  
GGAGTAGGCATTATTGGTACAGAGGAAGCAATAAATTGGGGTTTATCAGGACCAATGCT  
ACGAGCTTCCGGAATCCAATGGGATCTTCGTAAAGTTGATCATTATGAGTGTTATGACG  
AATTTGATTGGCAAGTCAAATGGCAAAAAGAAGGAGATTCATTAGCTCGTTATTTAGTC  
CGAATCAGTGAAATGACGGAATCCATAAAAATTATTCAACAGGCTCTGGAAGGAATC  
CAGGAGGGCCCTATGAGAATTTAGAAGTCCGATGCTTTGATAGAGAAAGGGACCCCGA  
ATGGAATGATTTTGAATATCGATTCATTAGTAAAAA AACTTCTCCGACTTTTGAATTGCC  
GAAACAAGA AACTTTATGTGAGAGTCGAAGCCCCTAAAGGAGAATTGGGAATTTTTCTG  
ATAGGAGATCAGAGTGGTTTTCTTGGAGATGGAAAATTCGCCCGCCGGGTTTTATCAA  
TTTGCAAATCTTCTCAGTTAGTTAAAAGAATGAAATTGGCTGATATTATGACGATACT  
AGGTAGCATAGATATCATTATGGGAGAAGTTGATCGTATGTTCCCTATGGTAACTGGGTT  
CATGAATTATGGTCAACAAACAGTACGGGCTGCAAGGTACATTGGTCAAAGTTTCATGA  
TTACCTTATCTCATGCAAATCGTCTACCTGTA ACTATTCAATATCCTTATGAAAAATTAAT  
TACATCCGAGCGTTTTCTGTGGTTCGAATCCATTTGAAATTTGATAAATGCATTGCTTGTGA  
AGTATGCGTTCGTGTATGTCCTATCGATTTGCCCGTTGTTGATTGGAAATTTGGAAACGAA  
TATTCGAAAGAAACGATTGCTTAATTACAGTATTGATTTCCGGAATCTGTATATTTTGTGGT  
AACTGCGTTGAGTATTGTCCAACAAATTGTTTATCAATGACTGAAGAATATGAACTTTCT  
ACTTACAACCGTCACGAATTA AATTATAATCAAATTGCTTTGGGGCGTTTACCAATATCA

GTCATTGATGATTATAACAATTAACAATTTTGAATTCG---ATAGATAAAAACCTCGTGAT  
TAAAGAGGGATTTCAAATTAATAATATGCAGGGTCCTTTGTCTACTTGGCTCGTCAAAC  
ATGGGCTAGTTTCATAGATCTTTGGGCTTCGATTACCAGGGAATAGAGACTTTACAAATA  
AAGCCCGAGGATTGGCACTCCATTGCTGTCATTTTATATGTATATGGTTACAATTATCTAC  
GTTCCCAATGTGCCTATGATGTAGCACCTGGCGGACTGTTAGGCAGTGTGTATCATCTTA  
CGAGAATAGAGTCGGGTGTAGATCAACCCGAAGAGGTATGCATAAAAAGTATTTGCCCC  
AAGGAGTAATCCGAGAATTCCGTCTGTTTTCTGGGTTTGGAAAAGTGCGGATTTTCAA  
GAACGGGAATCTTATGATATGTTGGGAATCTCTTATGATAATCATCCCCGACTGAAACGT  
ATCTTAATGCCGAAAGTTGGATAGGATGGCCTTTACGTAAAGATTATATTGCCCCCAAT  
TTTTATGAAATCCAAGATGCTCAT-----  
-----ATGAA  
TTCCATTAAATTTCCCTTACTTGAGCGAACAGCCCAAATTCAGTTATTTCAACTACATC  
AAATGATCTTTCAAATTTGGTCAAGACTTTCCAGTTTATGGCCGCTTCTTTATGGTACCAG  
TTGTTGCTTCATTGAATTTGCTTCATTAATAGGATCACGATTTCGACTTTGATCGTTATGGA  
CTGGTACCAAGATCGAGTCCTAGACAGGCCGATCTAATTTAACAGCCGGTACCGTAAC  
AATGAAAATGGCTCCTTCTTTAGTGAGATTATATGAACAAATGCCTGAACCAAAATACG  
TTATTGCTATGGGAGCCTGTACAATTACAGGGGAATGTTTAGTACCGATTCTTATAGTA  
CTGTTCCGGGGAGTCGATAAGCTAATTCCTGTGGATGTATATTTGCCGGGCTGTCCACCTA  
AACCGGAGGCAGTTATAGATGCTATAACAAAACCTTCGTAAGAAAATATCTCGAGAAATC  
TATGAAGATCGAATTAGGTCTCAACAGGGGAATCGGTGTTTTACTACCAATCATAAGTT  
TCATGTTGTCCACAGTCCTCATACTGGAAATTATGAGCAAGGATTACTCTATCAACCAG  
CATCTCCTTCAGAGATCCCT--GAAACATTTTTCAAATACAAAAGTTCAGTATCTTCCTA  
CGAACTAGGAAATATGCAAATTAGAAATACCTTTTCTTGGATAAAGGAAGAGATTACTC  
GATCCATTTCCGTATTGCTCATGATATATATAAATACTCGGGCATCCATTTCAAATGCCTAT  
CCCATTTTTGCACAGCAGGGTTATGAAAACCCACGAGAATCGACTGGGCGTATTGTATG  
CGCCAATTGTCAATTTAGCTAATAAGCCCGTGGATATTGAGGTTCCACAAGCGGTACTTC  
CAGATACTGTATTTGAAGCTGTTGTTTCGAATTCCTTATGATATGCAACTGAAACAAGTTC  
TTGCTAATGGTAAAAGGGGTCGTTGAATGTGGGGGCTGTTCTTATTTTACCTGAGGGG  
TTTGAATTAGCTCCGCCCCGATCGTATTTCCGCCGAGATGAAAGAAAAGATAGGCAATCT  
GTCTTTTTCAGAGCTACCGCCCCACTAAAAAAAATATTCTTGTGATAGGTCCCTGTTCCCG  
GTCAGAAGTATAGTGAAATCGCCTTTCTTATTCTTTCCCGGACCCCGCTACTAATAAA  
GATGTTCACTTCTTAAAATATCCCATATACGTGGGCGGGAACAGAGGAAGGGGTTCAGAT  
TTATCCCGACGGGAGCAAGAGTAACAATACAGTTTATAATGCTACAGCAGCGGGTATAG  
TAAGCAAAATCATACGAAAAGAAAAGGGGGGATACGAAATAACCATAGTGGATGCATC  
GGATGGACGTCAAGTAGTTGATATTATCCCTCCAGGACCAGAACTTCTTGTTCGGAGG  
GCGAATCTATCAAATTTGATCAACCATTAACGAGTAATCCTAATGTGGGTGGATTTGGC  
CAGGGGGATGCAGAAATAGTACTTCAAGATCCATTACGTGTTCAAGGCCTTTTGTCTT  
CTTAGCATCTGTTGTTTTGGCACAAATCTTTTTGGTTCCTTAAAAGAAACAGTTTGAGA  
AGGTTCAATTGTCCGAAATGAATTCATGAGTAAAGTCTATGATTGGTTCGAAGAACGT  
CTTGAGATTCAGGCAATTGCAGATGATAACTAGTAAATACGTTCCCTCCTCATGTCAAT  
ATATTTTATTGTCTAGGAGGAATTACGCTTACTTGTTTTTTAGTACAAGTCGCTACGGGT  
TTTGCTATGACTTTTTACTATCGTCCGACCGTTACTGAGGCTTTTGCTTCGGTTCAATAC  
ATAATGACTGAAGCTAACTTTGGTTGGTTAATCCGATCAGTTCATCGATGGTCGGCAAG  
TATGATGGTATTAATGATGATTCTGCACGTATTCGTGTGTATCTCACTGGTGGTTTTAAA

AAACCGCGGAATTGACTTGGGTTACCGGTGTGGTTCTGGCTGTATTGACCGCATCTTT  
TGGTGTAAACGGGTTATTCCTTACCTCGGGACCAAATTGGTTATTGGGCAGTAAAAATTG  
TAACAGGCGTGCCGGAAGCTATTCCTGTACTAGGATCGCCTTTGGTAGAGTTATTACGC  
GGAAGTGCTAGTGTTGGACAATCCACTTTGACTCGTTTTTATAGTTTACACACTTTTGTA  
TTACCTCTTCTTACTGCCGTATTTATGTTAATGCATTCCTAATGATACGTAAGCAAGGTA  
TTTCGGGTCCTTTAATGGGAGTAACAAAAAACCTGACTTGAATGATCCTGTATTAAGA  
GCCAAATTGGCTAAAGGGATGGGTGATAATTATTACGGAGAACCCGCATGGCCCAATGA  
TCTTTTATATATTTTTCCAGTAGTCATTTTAGGTACAATTGCATGTAACGTAGGCTTAGCG  
GTTCTAGAACCATCAATGATTGGGGAACCCGCGGATCCATTTGCAACTCCTTTGGAAAT  
ATTACCCGAATGGTATTTCTTTCCCGTATTTCAAATTCCTCGTACAGTGCCCAACAAGTT  
ATTGGGTGTTCTTTAATGGTTTCAGTCCCTGCGGGATTATTAACAGTACCTTTTTTTGGA  
AAATGTTAATAAATTCCAAAATCCATTTTCGTCGTCCAGTAGCGACAACCGTCTTTTTGAT  
TGGTACCGTAGCGGCCCTTTGGTTGGGATTGGAGCAACATTACCTATTGATAAATCCCT  
AACTTTAGGTCTTTTTATGATTGAAGTTTTTCTATTTGGAATCGTCTTAGGTCTAATTCCT  
ATTACTTTGGCTGGATTATTCGTAAGTGCATATTTACAATACAGACGTGGTGATCAGTTA  
GACCTTATGCCTACTATACTAGTTATTTTCGGTTTTCTACTAGCGGCTTAACTATAACCT  
CAGTTCTATTTATTGGTCTGAGCAAGATACGACTTATTATGGATATAGTAAGTCTCGCTT  
GGGCTGCTTTAATGGTAGTTTTTACATTTTCCCTTTCCTCGTGGTATGGGGAAGAAGT  
GGACTCATGATTATTCGTTCCGCGGAACCAGAAGTAAAAATTTTGGTAGATAGGGATCC  
CATAAAAACCTTCTTTCGAAGAATGGGCCAGACCGGGTCATTTTTCAAAAACAATAGCT  
AAGGGACCTGATACTACCCTTGGATCTGGAACCTACATGCCGATGCTCACGATTTTCGA  
TAGCCATAACCAATGATTTGGAGGAGATCTCTCGAAAAGTATTTAGTGCCCATTTTCGGCC  
AACTCTCCATCATCTTTCTTTGGCTGAGTGGCATGTATTTCCACGGTGCTCGTTTTTCCA  
ATTATGAAGCATGGCTAAGCGATCCTACTCACATTGGACCTAGTGCCAGGTAGTTTTGG  
CCAATAGTGGGTCAAGAAATATTGAATGGTGATGTGGGCGGGGGTTCCGCGGAATAC  
AAATAACCTCTGGTTTTTTTCAGATTTGGCGAGCATCTGGAATAACTAGTGAATTACAA  
CTCTATTGTAAGCAATTGGTGCCTTGGTATTTGCAGCTTTAATGCTTTTTGCGGGTTGG  
TTCCATTATCACAAAGCTGCTCCAAAATTGGCTTGGTTCCAAGATGTAGAATCTATGTTA  
AATCACCATTTAGCAGGGCTACTAGGACTTGGGTCTCTTTCTTGGGCGGGACATCAAGT  
CCATGTATCTTTACCGATTAACCAATTTCTAAACGCTGGAGTAGACCCTAAGGAGATCC  
CACTTCTCATGAATTTATCTTGAATCGGGATCTTTTGGCCCAACTTTATCCAAGTTTTG  
CCGAGGGAGCAACCCCGTTTTTTACCTTGAATTGGTCAAATATGCGGAATTTCTTACT  
TTTCGTGGAGGATTAGATCCAGTAACTGGGGGTTTATGGTTAACCGATATTGCACACCA  
TCATTTAGCTATTGCAATTCCTTTCTGATAGCGGGTCACATGTATAGGACCAACTGGGG  
CATGGTTCATGGTCTAAAAGATATTTTAGAGGCTCATAAAGGTCCATTTACAGGCCAGG  
GCCATAAAGGACTATATGAGATCTTAAACACTTCATGGCATGCTCAATTATCTCTTAACC  
TAGCTATGTTAGGCTCTTTAACCATTGTTGTAGCTCACCATATGTATTCCATGCCCCCTTA  
TCCATATCTAGCGACTGACTATGGTACACAACTGTCATTGTTACACATCACATGTGGAT  
TGGTGGATTTCTCATAGTGGGTGCTGCTGCGCATGCAGCCATTTTTATGGTAAGAGACT  
ATGATCCAACACTCGATAACAACGATCTATTAGATCGTGTCCCTTAGGCACCCGATGCAA  
TCATCTCACATCTCAACTGGGTATGTATATTTCTAGGCTTTCACAGTTTTGGTTTTGTATAT  
TCATAATGATACGATGAGCGCTTTAGGGCGTCCACAAGATATGTTTTCAGATACCGCCAT  
ACAATTACAACCCGTCTTTGCTCAATGGATACAAAACACCCATGCTTTAGCACCGAGTG  
CAACCGCCCTGGTGCAACAACAAGCACCAGTTTACTTGGGGGGGTGCTGATTTAGT

AGCAGTGGGCGGCAAAGTTGCTTTGTTACCTATTCCATTAGGAACCGCGGATTTTTTGG  
TACATCACATTCATGCATTTACGATTCATGTGACGGTATTGATACTCCTGAAAGGTGTTT  
TATTTGCTCGTAGCTCACGGTTGATACCGGATAAAGCAAATCTTGTTTTTCGTTTCCCTT  
GTGATGGGCCCCGACGAGGGGGGACATGTCAAGTATCTGCTTGGGATCATGTCTTCTTA  
GGGCTATTTGGATGTACAATGCAATTTCCGGTAGTCATTTTCCATTTTCAGTTGGAAAATG  
CAGTCAGATGTTTGGGGTTCGTATAAGTGATCAAGGGGTGGTAACTCATATCACAGGAG  
GAAATTTTGCAGAGTTCCATTACTATTAATGGGTGGCTTCGCGATTTCTTATGGGCAC  
AGGCATCCCAGGTAATTCAGTCTTATGGTTCTTCATTATCTGCATATGGCCTTTTTTTCCT  
AGGTGCTCATTTTGTATGGGCTTTTAGTTAATGTTTTTATTTCAGCGGGCGCGGTTATTG  
GCAAGAACTTATTGAATCCATCGTTTGGGCTCATAATAAATTAAGTTGCTCCTGCTAC  
TCAGCCTAGAGCCTTGAGCATTGTACAAGGACGCGCTGTAGGAGTAACCCATTACCTTC  
TGGGTGGAATTGCCACAACATGGGCGTTCTTCTTAGCAAGAATTATTGCAGTAGGAATG  
GCATTAAGATTTCCAAGGTTTAGCCAAGGCTTAGCTCAGGACCCCACTACTCGTCGTAT  
TTGGTTTGGTATTGCTACCGCACATGACTTCGAGAGTCATGATGATATTACTGAGGAAC  
GTCTTTATCAGAATATTTTGGCTTCTCACTTCGGGCAATTAGCAATCATTTTTCTGTGGA  
CTTCCGAAATCTATTTTCATGTAGCTTGGCAAGGAAATTTGAGGCGTGGGTACAGGAC  
CCTTTACATGTAAGACCTATTGCTCATGCAATTTGGGATCCTCATTTTGGTCAACCGGCT  
GTGGAAGCTTTTACTCGAGGGGGTGTCTTGGTCCAGTGAATATCGCTTATTCTGGTGT  
TTATCAGTGGTGGTATAACAATTGGTTTACGTAATAATGAAGATCTTTATACTGGAGCTCT  
TTTTCTATTATTTCTTCTGCCATATCCTTAATAGGGGGTTGGTTACATTTACAACCGAAA  
TGGAACCGAGCGTTTCATGGTTCAAAAATGCCGAATCCCGTCTCAATCATCATTTGTC  
AGGACTGTTTGGAGTAAGTTCCTTGGCTTGGACAGGGCATTAGTCCATGTCGCTATTC  
CTGGATCCAGGGGAGAATACGTTTCGATGGAATAATTTCTTAGATGTATTACCACATCCCC  
AAGGGTTAGGCCCACTTTTTACAGGTCAGTGGAAATCTTACGCTCAAAAACCCCGATTCA  
AGTAGTCATTTATTTGGTACCGCCCAGGGATCAGGAACTGCCATTCTAACCCTTCTCGG  
GGGATTCCATCCACAAACGCAAAGTTTATGGCTGACTGATATTGCTCATCATCATTTAGC  
TATTGCATTTATTTTCTCGTTGCTGGTTCATATGTATAGAATACTTTCGGGATTGGGCAC  
AGTATAAAAGATCTTTTGAAGCACATATTCCCCGGGGGGACGATTGGGGCGTGGAC  
ATAAGGGTCTTTATGACACAATCAATAATTCGATTCATTTTCAATTAGGCCTTGCTCTAG  
CCTCTTTAGGGGTATTACGTCCTTGGTAGCTCAACACATGTACTCTTTACCTGCTTATG  
CGTTCATAGCACAAGACTTTACTACTCAAGCTGCGTTATATACTCATCACAATACATCG  
CAGGATTCATCATGACAGGAGCTTTTGTCTATGGAGCTATATTTTTCATTAGAGATTACA  
ATCCGGAACAGAATAAAGATAATGTATTGGCAAGAATGTTAGACCATAAAGAAGCTATC  
ATATCCCATTTAAGTTGGGCCAGCCTCTTTCTGGGGTTCATACTTTGGGACTTTATGTT  
CATAATGATGTCATGCTTGCTTTTGGTACTCCGGAAAAACAAATCTTGATCGAACCTATA  
TTTGCCAGTGGATCCAATCTGCTCATGGTAAACTTCATATGGGTTTCGATGTACTTTTA  
TCTTCAACGAATGGCCAGCATTCAATGCGGGTCAAGCATATGGTTGCCTGGCTGGTT  
AAATGCTGTTAATGAG-----AATAGTAATCACTATTCTTAAACAATAGGTCCTGGCGACTT  
CTTGGTTCATCATGCTATTGCTCTAGGCTTACATACAACTACATTGATCTTAGTAAAAGG  
TGCTTTAGATGCACGTGGTTCCAAGTTAATGCCAGATAAAAAAGATTTTCGGTTATAGTT  
TTCTTGTGATGGTCCGGGACGAGGTGGTACTTGTGATATTTTCGGCTTGGGACGCATTT  
TATTTGGCAGTTTTCTGGATGTTAAATACCATTGGATGGGTTACGTTTTATTGGCATTGG  
AAGCACATCACATTATGGCAGGGTAACGTTTCACAGTTTAAATGAATCTTCCACTTATTTG  
ATGGGGTGGTTAAGAGATTATCTATGGTTAAACTCTTCACAACCTTATCAATGGGTATAAC

CCTTTTGGTATGAATAGTTTATCAGTCTGGGCGTGGATGTTCTTATTTGGGCATCTTGTTT  
GGGCTACTGGATTTATGTTCTTAATTTCTGGCGTGGATATTGGCAGGAATTGATTGAAA  
CTTAGCATGGGCTCATGAACGCACACCTTTGGCTAATTTGATTTCGATGGAGAGATAAA  
CCAGTGGCTCTTTCCATTGTGCAAGCAAGATTGGTTGGATTAGCCACTTTTCCGTAGG  
TTATATATCACTTATGCGGCTTTCTTGATTGCCTCTACATCGGGCAAATTTGGTATGTCA  
CATTCAGTAAAGATTTATGATACATGTATAGGTTGACTCAATGTGTCCGAGCATGCCCC  
ACGGATGTATTAGAAATGATACCTTGGGACGGATGTAAAGCTAAGCAAATTTGCTTCTGC  
TCCAAGAACGGAGGACTGCGTTGGTTGTAAGAGATGTGAATCCGCCTGTCCAACGGAT  
TTTTTGAGTGTTTCGAGTTTATTTATGGCATGAAACAACCTCGAAGCATGGGTCTAGCTTAT  
ATGACAATTCTCAACTTACCCTCTATTTTGGTGCCTTTAGTGGGCCTAGTATTTCCGGCA  
ATTGCAATGGCTTCTTTATTTCTTTTTGTTCAAAGAAACAAAATTTTTATGCGAGATCTA  
AAAACATATCTCTCCGTGGCACCGGTACTAAGTGCTCTATGGTTCGGTTCCTTTGGCAGG  
TCTATTGATAGAGATCAATCGTTTTTTCCAGATGCGCTGACATTCCCTTTTTTTTCATTT  
ATGACTGCAATTTTAGAGAGACGCGAAAGCGAAAGCCTATGGGGTCGCTTCTGTAAC  
GGATAACCAGCACTGAAAATCGTCTTTACATTGGATGGTTTGGTGTGTTTATGATCCCTA  
CCTTATTGACCGCAACTTCTGTATTTATTATCGCCTTCATTGCAGCTCCTCCAGTAGATAT  
TGATGGTATTCGTGAACCTGTTTCAGGATCTCTACTTTATGGAAACAATATTATCTCTGG  
TGCCATTATTCCACTTCTGCAGCTATAGGTTTGCACTTTTACCCAATATGGGAAGCGGC  
GTCCGTTGATGAATGGTTATAACAATGGTGGTCCTTATGAGCTAATTGTTCTACACTTCTT  
ACTTGGTGTAGCTTGTTACATGGGTCGTGAGTGGGAACCTAGTTTCCGTCGGGTATGC  
GCCCTTGGATTGCTGTTGCATATTCAGCTCCTGTTGCAGCTGCTACTGCTGTTTTCTTGA  
TCTACCCAATTGGTCAAGGAAGTTTTTCTGATGGTATGCCTCTAGGAATCTCTGGTACTT  
TCAACTTCATGATTGTATTCCAAGCTGAGCACAACATCCTTATGCACCCATTTACATGT  
TAGGCGTAGCTGGTGTATTTCGGCGGCTCCCTATTTCAGTGCTATGCATGGTTCCTTGGTAA  
CTTCTAGTTTGATCAGGGAAACCACAGAAAATGAATCTGCTAATGCAGGTTACAGATTC  
GGTCAAGAGGAAGAAACTTATAATATCGTAGCTGCTCATGGTTATTTTGGCCGATTGATC  
TTCCAATATGCTAGTTTCAACAATTCTCGTCTTTACATTTCTTCTAGCTGCTTGGCCTG  
TAGTAGGTATCTGGTTCACTGCTTTAGGTATCAGCACTATGGCTTTCAACCTAAACGGTT  
TCAATTTCAATCAATCTGTAGTTGATAGTCAAGGTCGTGTAATTAATACCTGGGCTGATA  
TTATTAACCGTGCTAACCTTGGTATGGAAGTTATGCATGAACGTAATGCTCATAACTTCC  
CTCTAGACCTAGCTGTTGTCGAAGCTCCATCTACAAATGGAATGGGTTTGCCTTGGTAT  
CGTGTTCAACCGTTGTATTGAATGATCCCGGTCGTTTACTTGCTGTCCATATAATGCATA  
CAGCTCTGGTTGCTGGTTGGGCCGGTTTCGATGGCTCTATATGAATTAGCAGTTTTTGATC  
CCTCTGACCCTGTTCTTGATCCAATGTGGAGACAGGGTATGTTTCGTTATAACCCTTTATGA  
CTCGTTTAGGAATAACCAATTCATGGGGCGGTTGGAATATCACA---GGAGGGACTATAA  
CGAATCCAGGTATTTGGAGTTACGAAGGTGTGGCCGGGGCACATATTGCTTTTTCTGGC  
TTGTGCTTCTTGGCCGCTATCTGGCATTGGGTGTATTGGGATCTAGAAATATTTTGTGAT  
GAACGTACAGGAAAACCTCTTTGGATTTGCCAAAGATTTTTGGCATTCAATTAATTTCTC  
TCAGGAGTGGCTTGCTTTGGTTTTGGCGCATTTTCATGTAACAGGATTGTATGGTCCTGG  
CATATGGGTGTCCGATCCTTATGGATTAACCGGAAAGGTACAATCTGTAAATCCAGCGT  
GGGGTGTGGAAGGTTTTGATCCTTTTTGTTCCGGGAGGAATAGCCTCTCATCATATTGCA  
GCAGGGACCTTGGGCATATTAGCGGGCCTATTCCATCTTAGTGTCCGTCCGCCCAACG  
TCTATATAAAGGATTACGTATGGGAAATATTGAAACCGTCCTTTCCAGTAGTATCGCTGC  
TGTCTTTTTTGCAGCTTTTGTAGTTGCTGGGACTATGTGGTATGGTTCAGCAACTACCCC

CGTCGAATTATTTGGTCCCCTCGTTATCAATGGGATCAGGGATACTTTCAGCAAGAAA  
TATATCGAAGAGTTAATGCTGGGCTAGCCGAAAATCAAAGTTTATCAGAAGCTTGGTGC  
AAAATTCCTGAAAAATTAGCTTTTTTATGATTATATTGGCAATAATCCAGCAAAAAGGGGGA  
TTATTCAGAGCAGGCTCAATGGACAACGGGGATGGAATAGCTGTTGGGTGGTTAGGGC  
ACCCTATCTTTCGAGATAAAGAAGGGCGTGAACTTTTTGTCCGCCGTATGCCTACTTTT  
TTTGAAACATTTCCGGTTGTTTTGGTAGACGGAGACGGAATTGTTAGAGCCGATGTTCC  
TTTTAGAAGGGCAGAATCGAAGTATAGTGTGCAACAAGTAGGTGTAACCGTTGAGTTC  
TATGGCGGCGAACTCAATGGAGTCAGTTATAGTGATCCTGCTACTGTGAAAAAATATGC  
TAGACGTGCTCAATTGGGTGAAATTTTTGAATTAGATCGTGCTACTTTGAAATCCGATG  
GTGTTTTTCGTAGCAGTCCAAGGGGTTGGTTTACTTTTGGACATGCTTCATTTGCTTTGC  
TCTTCTTCTTTGGGCACATATGGCATGGTGCTAGAACCCTTGTTTCAGAGATGTTTTTGTCTG  
GTATTGACCCGGATTTGGATGCTCAAGTGGAATTTGGAGCATTCCAAAAACTTGGAGAT  
CCAACACTACAAGAAGACAAGCAGTC-----GTGGAAACGCTCTTTA  
ATGGAACCTTTAGCTTTAGCTGGTCTGTGACCAAGAAACCACCGTTTTCGCTTGGTGGGC  
CGGCAATGCCCGACTTATCAATTTATCCGGTAAACTGCTGGGGGCTCATGTAGCCCATG  
CCGGATTAATCGTATTCTGGGCCGGAGCAATGAACCTATTTGAAGTGTCTCATTTTCGTAC  
CAGAGAAGCCCATGTATGAACAAGGATTAATTTTACTTCCCCACCTAGCTACTCTAGGC  
TGGGGGATAGGTCCTGGTGGAGAAGTTATAGACACCTTCCATACTTTGTATCTGGAGT  
ACTTCACTTAATCTCCTCGGCAGTATTGGGCTTTGGCGGAATTTATCATGCACTTCTGGG  
ACCTGAGACTCTTGAAGAATCTTTTCCATTCTTCGGGTATGTATGGAAAGATAGAAATA  
AAATGACCACAATTTTGGGTATTCAATTAATCTTGTAGGTATAGGTGCTTTTCTTCTAGT  
ATTCAAGGCTCTTTATTTTGGGGGCATATATGATACCTGGGCTCCGGGGGGGGGAGATG  
TAAGAAAATAACCAACTTAACCCTTAGCCCAAGTGTATATTTGGTTATCTACTAAAAT  
CGCCCTTTGGAGGAGAAGGATGGATTGTTAGTGTGGACGATTTGGAAGATATAATTGGA  
GGGCATGTATGGTTAGGTTCCATTTGTATATTTGGTGGAACTTGGCATATCTTAACCAAA  
CCCTTTGCATGGGCTCGCCGTGCACTTGTATGGTCTGGGGAGGCTTACTTATCTTATAGT  
TTAGGTGCTTTAGCGGTTTTTGGTTTCATTGCTTGTGCTTTGTCTGGTTCAATAATACC  
GCTTATCCTAGTGAGTTTTATGGGCCCACTGGACCAGAAGCTTCTCAAGCTCAAGCATT  
TACTTTTCTAGTTAGAGACCAACGTCTTGGGGCTAACGTGGGATCCGCTCAAGGACCTA  
CTGGTTTAGGTAAATATCTAATGCGTTCCCAACTGGAGAAGTCATTTTTGGAGGAGAA  
ACTATGCGTTTTTGGGATCTGCGTGCTCCCTGGTTAGAACCCTTACGGGGTCCCAATGG  
GTTGGACTTGAGTAGGCTGAAAAAAGACATAACAACCTTGGCAAGAACGGCGTTCTGC  
GGAATATATGACTCACGCTCCTTTAGGTTCTTTAAATTCTGTGGGTGGCGTAGCTACCGA  
GATCAATGCAGTCAATTATGTCTCTCCTAGAAAGCTGGTTAGCTACCTCTCATTTTGTCT  
AGGCTTCTTCCATTTCGTAGGTCATTTATGGCACGCGGGAAGGGCTCGTGCAGCTGCAG  
CAGGATTTGAAAAAGGAATTGATCGTGATTTTGAACCTGTTCTTTCCATGACCCCTCTT  
AACATGACTATAGCCCTTGGTAAATTTACCAAAGACGAAAAT---TTATTTGATATTATGGA  
TGACTGGTTACGGAGGGACCGTTTTCGTTTTTGTGCGTTGGTCCGGTCTATTGCTCTTTC  
CTTGTGCCTATTTTGTCTTAGGGGGTTGGTTCACAGGTACAACCTTTGTAACCTTCATGGT  
ATACCCATGGATTGGCCAGTTCCTATTTGGAAGGCTGCAACTTCTTAACCGCCGCAGTT  
TCTACTCCTGCGAATAGTTTAGCGCATTCGTTATTGTTACTATGGGGTCTGAAGCACAA  
GGAGATTTTACTCGTTGGTGTCAATTAGGCGGTCTGTGGACTTTTGTGCTCTCCACGG  
CGTTTTCGGGCTAATAGGTTTCATGTTACGTCAATTTGAACTTGCTCGATCTGTTCAATT  
GCGACCTTATAATGCAATCGCATTCTCTGCTCCAATTGCGGTTTTTGTCTGTATTCTCTG



ATTTATCCACTAGGTCAGTCTGGTTGGTTCTTTGCGCCTAGTTTTGGTGTAGCAGCTATA  
TTTCGATTCATCCTCTTTTTCCAAGGATTCATAATTGGACATTGAACCCGTTTCATATGA  
TGGGAGTTGCCGGTGTATTGGGCGCTGCTCTGTTATGCGCTATTCATGGTGTACCGTA  
GAAAATACTTTATTTGAAGATGGTGATGGCGCAAATACATTCCTGCTTTTTAACCCAAC  
TCAAGCTGAAGAACTTATTCAATGGTTACCGCTAACCGCTTTTGGTCCCAAATCTTTG  
GGTTGCTTTTTCCAATAAACGTTGGTTACATTTCTTTATGTTATTTGTACCAGTAACCG  
GTTTATGGATGAGTGCTCTTGGAGTGGTCGGTCTGGCTCTGAACCTACGTGCCTATGAC  
TTCGTTTTCCAGGAAATCCGTGCAGCAGAAGATCCTGAATTTGAGACTTTCTACACCA  
AAAATATTCTCTTAAACGAAGGTATTCGTGCTTGGATGGCGGCTCAAGATCAGCCTCAT  
GAAAACCTTATATTCCCTGAGGAGGTTCTACCCCGTGGAACGCTCTTATGTCTGGAAG  
CACAGGAGAACGTTCTTTTGCTGATATTATTACCAGTATTCGATACTGGGTCATTCATAG  
CATTACTATTCCCTCCCTATTCATTGCGGGTTGGTTATTCGTCAGCACGGGTTTAGCTTAC  
GATGTGTTTGGGAAGCCCTCGTCCAAACGAGTATTTACAGAGAGCCGGCAAGGAATTC  
CATTAACTGAGGCGTTTTGATTCTTTGGAACAACCTCGATGAATTTAGTAGATCTTTTA  
TGACCATAGATCGAACCTATCCAATTTTACAGTGCGATGGTTGGCTGTTACGGACTA  
GCTGTACCTACGGTTTCTTTTTGGGGTCAATATCAGCAATGCAGTTCATCCAACGAAT  
GGCTACACAAACCGTTGAGGGTAGTTCTAGA---GCTCGTCCAAAACAACTGGTATAG  
GGAGTTTATTGAAACCGTTGAATTCGGAATATGGTAAAGTAGCTCCTGGATGGGGA  
ACTCCTTTGATGGGTGTCGCAATGGCTCTATTTGCGATATTCCTATCTATTATTTGGAGA  
TTTATAATTCTTCCGTTTTACTGGACGGAATCTCAATGAATATGCTTACTCTTAACTCTT  
TGTTTACACGGTAGTGATATTCTTTGTTTCTCTTTCATCTTCGGATTCTATCTAATGAT  
CCAGGACGTAATCCTGGGCGTGAAGAAATGGCCGATACTACTGGAAGGATTCTCTTT  
GGATAATAGGTACTGTAACCTGGTATTGCTGTGATCGGTTTACTAGGTATTTCTTTTATGG  
TTCATATCCGGATTGGGTTTCATCCCTGATGCTTAATATCTTTAGTTTGATCTGGATCTGT  
ATTAATTCTACCCTTTATTCGAGCAGTTTTTTCTTCGCCAAATTACCCGAGGCCTACGCT  
TTTTTGAATCCAATCGTAGATGTTATGCCAATAACCTCTTCTTTTTTCTTCTTAGCCT  
TTGTTTGGCAAGCTGCTGTAAGTTTTTCGAATGACACAATCAAACCCGAACGAACAAAA  
TGTTGAATTGAATCGTACCAGTCTCTACTGGGGTTATTACTCATTTTTGTACTTGCTGT  
TTATTTTCCAATATTTCTTCAATATGGAAGTAAATATTCTCGCATTATTGCTACTGCGC  
TGTTCAATTCTAGTTCCCTACTGCTTTTTTACTTATAATATACGTAAAAACAGTCAGTCAA  
GTGATATGGAACAGCAACCCTAGTCGCCATCTCTATATCTGGGTTACTTGTAAGTTTTA  
CTGGGTACGCCTTATATACTGCTTTTGGGCAACCCTCTCAACAATAAGAGACCCATTC  
GAAGAACACGGGGACATGGAAGCATTGGTTTATACATTCCTTTTAGTCTCGACTCTAGG  
AATAATTTTTTCGCTATCTTTTTTCGAGAACCGCCGAAAGTTCCAATAAAAAGATGA  
AAATGACTATTGCTTTCCAATTGGCTGTTTTTGCATTAATTGTTACTTCATTAATCTTACT  
GATTAGTGTAACCGTTGATTTGCTTCTCCTGATGGTTGGTCGAGTAACAAAAATGTTGT  
ATTTCCGGTACATCATTATGGATTGGATTAGTCTTTATGGTGGGTATACTTAATTCTCTC  
ATCTCT-----ATGTCACCACAAACAGAGACTAAAGCAAGTGTTGGATTCAAA  
GCTGGTGTAAAGATTATAAATTGACTTATTATACTCCGGACTATGAAACCAAGGATACT  
GATATCTTGGCAGCATTCCGAGTAACTCCTCAACCTGGAGTTCCGCCTGAGGAAGCAG  
GGGCCGACAGTAGCTGCTGAATCTTCTACTGGTACATGGACAACGTGTGTGGACCGATGG  
GCTTACCAGCCTTGATCGTTACAAAGGGCGATGCTACCACATCGAGCCCGTTCCTGGA  
GAAGAACTCAATTTATTGCTTATGTAGCTTACCCCTTAGACCTTTTTGAAGAAGGTTCT  
GTTACTAACATGTTTACTTCGATTGTGGGTAATGTATTTGGGTTCAAAGCCCTGCGCGCT

CTACGTCTGGAGGATCTGCGAATCCCTACTGCTTATGTTAAAACCTTTCCAAGGCCCGCC  
TCATGGCATCCAAGTTGAGAGAGATAAATTGAACAAGTACGGCCGCCCTATTGGGAT  
GTAATAAACCCTAAATTGGGGTTATCCGCTAAGAACTACGGTAGAGCGGTTTATGAA  
TGTCTCCGCGGTGGACTTGATTTTACCAAAGATGATGAAAACGTGAACTCCAACCATT  
TATGCGTTGGAGAGATCGTTTCTTATTTTGTGCCGAAGCACTTTATAAAGCACAGACGG  
AAACAGGTGAAATCAAAGGGCATTACTTGAATGCTACTGCAGGTACATGTGAAGAGAT  
GATGAAAAGGGCTGTATTTGCCAGAGAGTTGGGAGTTCCTATCGTAATGCATGACTACT  
TAACAGGGGGATTCACTGCAAATACTAGCTTGGCTCATTATTGCCGAGATAATGGCCTA  
CTTCTTCACATCCATCGTGCAATGCATGCAGTTATTGATAGACAGAAGAATCATGGTATA  
CACTTTTCGTGTACTAGCTAAAGCCTTACGTATGTCTGGTGGAGATCATATTCCTCCGGT  
ACCGTAGTAGGTAAACTTGAAGGAGAAAGAGAAATCACTTTAGGTTTTGTTGATTTACT  
ACGTGATGATTTTATTGAAAAAGATCGAAGCCGCGGTATCTATTTCACTCAAGATTGGG  
TCTCTTACCAGGTGTTCTGCCCGTGGCTTCTGGGGGTATTACGTTTTGGCATATGCCCTG  
CTCTGACCGAGATCTTTGGAGATGATTCCGTAACAATTCGGTGGAGGAACTTTAGGA  
CATCCTTGGGGAAATGCACCGGGTGTCTGTAGCTAATCGAGTAGCTCTAGAAGCATGTGT  
ACAAGCTCGTAATGAGGGACGTGATCTTGCTCGTGAGGGTAATGAAATTATTCGTGAG  
GCTAGCAAATGGAGTCCTGAACTAGCTGCTGCTTGTGAAGTATGGAAGGAGATCAAAT  
TTGAATTTGAAGCGATGGATACTTTG-----ATGGCGATACATTTATACAAAACCTTCTACCC  
CGAGCACACGCAATGGAGCCGTAGACAGTCAAGTGAAATCCAATCCACGAAATCATT  
GATCTATGGACAGCATCGTTGTAGTAAAGGTCGTAATGCCAGAGGAATCATTACCGCAA  
GGCATAGAGGGGGAGGTCATAAGCGTCTATACCGTAAAATCGATTTTCGACGGAATGA  
AAAAGACATATATGGTAGAATCGTAACCATAGAATACGACCCTAATCGAAATGCATACAT  
TTGTCTCATACTATGGGGATGGTGAGAAGAGATATATTTTACATCCCAGAGGGGCTAT  
AATTGGAGATAACCATTGTTTCTGGTACAGAAGTTTCTATAAAAATGGGAAATGCCCTAC  
CTTTGACCGATATGCCCTTAGGCACGGCCATACATAACATAGAAATCACACTTGGAAAG  
GGTGGACAATTAGCTAGAGCAGCGGGTGTGTAGCGAAACTGATTGCAAAAAGAGGGG  
AAATCGGCCACATTAATAATTACCTTCTGGGGAGGTCCGTTTGATATCCAAAAACTGCTC  
AGCAACAGTCGGACAAGTGGGGAAATGTTGGGGTGAACCAGAAAAGTTTGGGTTCGAGC  
CGGGTCTAAATGTTGGCTAGGTAAGCGTCCTGTAGTAAGAGGAGTAGTTATGAACCCTG  
TAGACCATCCCCATGGGGTGGTGAAGGGAGGGCCCCAATTGGTAGAAAAAACCCG  
CAACCCCTTGGGGTTATCCTGCACTTGAAGAAGAAGTAGAAAAAGGAATAAATATAG  
TGATAATTTGATTCTTCGTCGCCGTAGTAAAATGATTCAACCTCAGACCCATTTGAATGT  
AGCGGACAATAGCGGGGCCGAGAATTGATGTGTATTTCGAATCATAGGAGCTAGC---AA  
TCGCCGATATGCTCAGATTGGTGACGTTATTGTTGCTGTGATCAAGGAAGCAGTACCAA  
ATGCGCCTCTAGAACGATCAGAAGTGATCAGAGCTGTAATTGTACGTACTTGTAAAGAA  
CTCAAACGTGACAACGGTATGATAATACGATATGATGACAATGCTGCAGTTATTATTGAT  
CAGGAAGGAAATCCAAAAGGAACTCGAGTTTTTGGTGCGATCGCTCGGGAATTGAGA  
CAGTTAAATTTCACTAAAATAGTTTCACTAGCACCCGAAGTATTAATGCTTAGTCCCAA  
AAGAACGAGATTCCGTAAACAACATAGAGGCAGAATGAAAGGAATATCTTATCGAGGT  
AATCATATTTGTTTCCGGTAGATATGCTCTTCAAGCACTTGAACCCGCTTGGATCACATCT  
AAACAAATAGAAGCAGGACGACGAGCAATGACACGAAATGCACGCCGTGGTGGAAA  
ACTATGGATACGTATATTTCCAGACAAACCAGTTACAGTAAGACCTACGGAAACACGTA  
TGGGTTCCGGGAAAGGATCTCCCGAATATTGGGTAGCTGTAGTTAAACCAGGTAGAAT  
ACTTTATGAAATGAGCGGAGTAGCAGAAAATATAGCCAGAAAGGCTATTTCAATAGCG

GCGTCCAAAATGCCTATACGAACTCAATTCATTATTTTCGGGAATGACCAGAATTAGACG  
AGGATATATAGCTCGGAGACGTCTGAAGAAAAATTAGTTTATTTGCATCAAGCTTTCGAG  
GGGCTCATTCAAGACTTACTCGAACTATTACTCAACAGAAAATAAGAGCTTTGGTTTCG  
GCTCATCGGGATAGAGATAAGAAAAAGAGAGATTTTCGTCGTTTGTGGATCACTCGGAT  
AAATGCAGTAATTCGCGAGAAT--AAGGTATCCTATAGTTATAGTAGATTAATACACAATC  
TGTACAAGAGGCAGTTGCTTCTTAATCGTAAAATACTTGCACAAATAGCTATATTAATA  
AGACTTGTCTTTATATGATTTCCAATGAGATCAGAAAA-----ATGAT  
AAAGGAAGTATCCGCTTTAGGTCAACATATATGTATGTCCGCTCAAAAAGCGCGAAGA  
GTGATTGATCAGATTCGTGGACGCTCATACGAAGAAACACTTATGATATTAGAATTCATG  
CCTTATCGAGCATGTTATCCATTTTTAAATTGGTTTATTCTGCAGCAGCAAATGCTAGT  
AACAAATATGGGTTTTTCGTGAAGAAAGTTTAGTCATTTGTAAGGCCGAAGTCAACGAGG  
GTACTACTGTAAAAAATTA AACCTCGAGCTCGAGGACGGAGTTTTCCGATAAAAAG  
ACCGACTTGTCATATAACGATTGTATTGAAAGATATATCCTTAGAT-----ATGG  
ATGGAATCAAATATGCAGTAGTTACAGACAAAAGTATTCGGTTATTGGTGAAAAAT--CA  
ATATACTTATAATGTCGAATCAGGATCAACTAGGACAGAAATAAAGCATTGGGCCGAAC  
TCTTCTTTGGTGTCAAGGTAATAGCTATGAATAGTCATCGACTCCCGGGAAAGGGTAGA  
AGAATGGGACCTATTATGGGACATACAATGCATTACAGACGTATAATCATTACGCTTCAA  
CCGGGTTATTCTATTCCACCTCTTAGAAAGAAAAGAACTATGGCAGTTCCAAAAAAC  
GTACTTCTATATCCAAAAAGCGTATTTCGTAAAAATATTTGGAAAAGGAGGGGGTATTGG  
GCAGCGTTGAAAGCTTTTTTCGTTAGCCAAATCTCTTTCTACTGGGAATTCAAAAAGCTT  
TTTTGTGCGACAAAGACAAATAATGGCCAAGGGTAAAGATGTTCGAATAACGGTTATTT  
TAGAATGTACCAGTTGT--GTTTCGAAAG-----AGTAATAAGGGA-----GGCATTTCAGAT  
ATAGTACTCAAAAAGAAATCGATACAATACGCCTAGTCGATTGGAATTGAGAAAATTCTGT  
CCCTGTTGTTACAAACATACGGTTCACGGGGAGATAAAGAAAATGAAAATAAGGGCCT  
CCGTTTCGTAAAATTTGTGAAAAATGTCGACTGATCCGTAGGAGAGGCCGAATTATAGTA  
ATTTGTGCCAATCCGAGACATAAACAAAGACAAGGAATGGTTCGAGAGAAAAGTAACA  
GTATCTACTCGGACACTACAGTGGAAGTGTGTTGAATCAAGAGCAGACCGTAAACGTC  
TTTATTATGGACGCTTTATTCTGTCTCCACTTATGAAAGGTCAAGCTGACACAATCGGCA  
TTGCAATGCGAAGAGCTTTGCTTGGAGAAATAGAAGGAACATGTATCACACGTGCAAA  
ATCTGAG-----AAAATACCCCATGAATATTCTACCATAGTAGGTATTCAAGAATCAGTACA  
TGAAATTTTAATGAATTTGAAAGAAATTGTATTGAGAAGTAATCTGTATGGAACCTCGCG  
ACGCGTCTATTTGTATCAAAGGTCCGGGATATGTAAGTCTCAAGACATCATTTTACCAC  
CTTCTGTGCGAAATCGTTGATAATACACAGCATATAGCTAGCCTAACGGAACCAATGGAT  
TTGTGTATTGGATTACAAATCGAGAGGAATCGCGGATATAGTATAAAAACACCAAATAA  
CTTTCACGACGGAAGTTAT-----CCTATAGATGCTGTATTTCATGCCTGTTTCGAAATGTGAA  
TTATAGTATTCAATCTTATGGGAATGGGAATGAAAAACAAGAGATACTTTTTCTCGAAAT  
ATGGACAAATGGAAGTTTAACTCCTAAAGAAGCACTTCATGAAGCCTCTCGGAATTTG  
ATTGATTTATTTATTCCTTTTTCTACATGCGGAAGAAGAC-----AACGGACATTTAGAGAA  
CAATCAC--CACAAGCTTACTTTACCCCTTTTTACTTTTCATGATAGATTGGCT--AACT  
AAGAAAAAGAAAAAAAAGAAATAGTATTAATAATATATTTTTATTGACCAATCAGAAT  
TGTCTCCAGAATCTATAATTGCCTCAAAAGATCAAATATACATACATTATTGGACCTTTT  
GAATAACAGTCAAGAAGACCTTCTGAAAATTGAAGATCTTCGCATCGAAGATGTAAAA  
CAAATATTGGACATTTCTCGAAATAGAA-----AACACAATTGATTTACCGAAGAACAAGAT  
GCTGGGGGATGGAAT--GAGGGAATGTCTACAATACCTGGGTTTAATCAGATACAATTT

GAAGGATTTTGTAGGTTTCATTGATCAGGGATTAACAGAAGAACTTTATAAGTTTCCAAA  
AATTGAAGATCCAGATCAAGAAATTGAATTTCAATTATTTGTGGAAACATATCAATTGGT  
CGAACCGTTGATAAAAGAAAGAGATGCTGTATATGACTCACTCACATATCTTCTGAATT  
ATATGTATCCGCGGGATTAATTTGGAAAACCAATAGGGATATGCAAGAACAAAAAATTT  
TTATTGGCAACATTCCGCTAATGACTTCCCTGGGAACTTCTATAGTAAATGGAATATACA  
GAATTGTGATCAATCAAATATTGCAAAGCCCCGGCATATATTACCGATCAGAATTGGACC  
ATAACGGAATTTTCAGTCTATACTGGCACCATAATATCAGATTGGGGAGGAAGATTAGAA  
TTAGAGATTGATAGAAAAGCAAAGATATGGGCTCGTGTGAGTAGGAAACAGAAAATAT  
CTATTCTAGTTCTATCATCAGCTATGGGATCGAATCTAAGAGAAATTCTAGAGAATGTTT  
GCTACCCTGAGATTTTCTTGTCTTTCCTGAATGATAAGGAGAAAAAAAATTTGGGTCA  
AAAGAAAATGCGATTTTGGAGTTTTATCAACAATTGGCTTGTGTAGGCGGAGATCCGGT  
ATTTTCTGAATCCTTATGTAAGGAATTACAAAAGAAATTTTTTACCAAAAATGTGAATT  
AGGAAGGATTGGTGCAGCAAATATGAACCAGAGCCTGAATCTTGATATACCTCAGTAC  
AATACATTTTTGCTACCGCGGGATATATTGGCAGCCACGGATCTTTTGATTGGAATGAAA  
TTTGGAAATGGGTACACTTGACGAT-----ATGAATCATTGAAAAATAAACGTATTCGTTCT  
GTAGCGGATCTCTTACAAGATCAATTCGGATTGGCTCTGGTTCGTTTAGAAAATGTGGT  
TAGAGGAACTATATACGGAGCAATTAGG--CATAAATTGATA---CCGACTCCTCAGAATT  
TGGTAACTTCAACTCCA-----TTAACAACCACTTATGAATCTTTTTTCGGATTACACC  
CATTATCTCAAGTTTTGGATCGAACTAATCCATTGACACAAATAGTTCATGGGAGAAAA  
TTGAGTTATTTGGGCCCTGGAGGATTGACAGGGCGAACTGCTAGTTTTTCGGATACGAGA  
TATCCATCCTAGTCACTATGGACGCATTTGCCCAATTGACACGTCTGAAGGAATCAATG  
TTGGACTTATTGGATCCTTAGCAATTCATGCGAGGATTGGTCATTGGGGG---TCTCTAGA  
AAGCCCATTTTAT-----GAAATCTCTGAGAGATCAAAA-----AAAGTACGGATGCTTTAT  
TTCTACCAAATAGAGATGAATACTATATGGTAGCGGCAGGAAATTTTGGCGCTGAA  
TCGGAGTATTCAGGAAGAAGAGGTTGTTCCAGCTCGATACCGTCAAGAATTCCTGACT  
ATTGCATGGGAACAGGTTTCATCTTCGAAGTATTTTTCCCTTCCAATTTTTTCTATTGGA  
GCTTCCCTCATTCTTTTATCGAGCATAATGATGCGAATCGGGCTTTAATGAGTTCTAATA  
TGCAACGTCAAGCAGTTCCACTTCTCGGCCGAGAAGTGCATTGTTGGAACCTGGGTT  
GGAACGCCAAGTGGTTTTAGATTGAGGAGTTTCCGCGATAGCCGAACACGAGGGAAA  
GATCATTTATACCGATACTGACAAGATCATTATTCGGGCAATCGAGATACTCTAAGCAT  
TCCATTAGTTATGTATCAACGCTCGAACAAAAACACTTGTATACATCAAAACTCCCAGG  
TTCGGCGGGGTAAATGCATTA AAAAGGGACAAATTTTAGCAGATGGTGCCGCTACAGT  
TGGCGGCGAACTCGCTTTGGGGAAAAACATATTAGTAGCTTATATGCCGTGGGAAGGTT  
ACAATTTTGAAGATGCGGTACTCATTAGCGAGCGTCTAGTATATGGAGATATTTATACTT  
CTTTTACATACGGAAATATGAAATTCAGACTCATGTGACAAGCCAAGGC---CCCGAAA  
GGATCACTAACGAAATACCGCATCTAGAAGCCCATTTACTTCGCAATTTAGACAAAAAT  
GGAATTGTGATGCTGGGATCTTGGGTGGAGACGGGCGATATTTTAGTAGGTA AATTAAC  
GCCCCGGGTGGCCAAAGAA---TCATCGTATGCCCCCGAAGATAGATTATTACGAGCCAT  
ACTTGCCATTCAGGTATCCACTTCAAAGGAACTTGTCTAAA ACTACCTATAGGTGGTA  
GGGGTCGAGTTATTGATGTGAGATGGATCCAGAAAAAGGGG---GGTTCAGTTATAATC  
CGGAAATGATTCGTGTATATATTTACAGAAACGTGAAATCAAAGTAGGTGATAAAGTA  
GCTGGAAGACATGGAAATAAAGGTATCATTTCAAA AATTTGCCTAGACAAGATATGCC  
TTATTTGCAAGATGGAAGACCCGTTGATATGGTCTTCAACCCGTTAGGAGTACCTTCAA  
GAATGAATGTAGGACAGATATTTGAATGCTCGCTCGGGTTAGCGGGAGGTCTGCTAGAT

AGACATTATCGAATAGCACCTTTTGATGAGAGATATGAACAAGAGGCTTCGAGAAAAC  
TAGTGTTTTCTGAATTATATGAAGCCAGTAAGCAAACAGCGAATCCATGGGTATTTGAA  
CCCGAGTACCCGGGAAAAAGCAGAATATTTGATGGAAGAACGGGAGATCCTTTTGAAC  
AACCTGTTATAATCGGAAAGCCTTATATCTTGAAATTAATTCATCAAGTCGATGATAAAA  
TACATGGACGTTCCAGTGGGCATTATGCACTTGTTACACAACAACCCCTTAGAGGAAG  
GGCCAAGCAAGGGGGACAACGGATAGGAGAAATGGAGGTTTGGGCTCTAGAGGGATT  
TGGTGTGCTCATATTTTACAAGAGATGCTTACTTATAAATCTGATCATATTAGAGCTCGC  
CAAGAAGTACTTGGTACTACGATCATTGGAGGAACAATACCTAAACCTGAGGATGCTC  
CAGAATCTTTTCGATTGCTCGTTCGAGAACTACGATCTTTGGCTCTGGACCTGAATCAT  
TTCCTTGTATCTGAGAAGAACTTCCAGATTAATAGGAAGGAAGCT-----ATGA  
TCGATCGGTATAAACATCAACAACCTCCGAATTGGATTAGTTTCTCCTCAACAATAACT  
GCTTGGGCCAATAAAATCTTACCTAATGGAGAGATAGTTGGAGAGGTGACAAAACCCT  
ATACTTTTCATTACAAAACCAATAAACCGGAAAAAGATGGATTATTTTGTGAAAGAATT  
TTTGGGCCTATAAAAAGTGGAAATTTGTGCTTGTGGAAATTATCGAGTAATCGGAAATGA  
AAAAAAGACCCGAAATTTTGTGAACACTGTGGAGTTGAATTTGTTGATTCTCGGATA  
CGAAGATATCAAAATGGGATACATCAAACTGGCATGTCCAGTAACCCATGTGTGGTATTT  
GAAACGTCTTCCCTAGTTATATCGCGAATCTTTTAGATAAACCTCTTAAAGAATTAGAAGG  
CCTAGTATACTGCGAT-----TTTTCTTTTGCTAGGCCT--ATAACTAAAAAACCCACTTTCT  
TACGATTACGAGGTTCAATTCGAATATGAAATCCAATCCTGGAAATACAGCATCCCGCTTT  
TTTTTACTACCCAAGGCTTCGATACATTTCGAAATCGAGAAATTCGACTGGAGCAGGT  
GCTATCCGAGAACAATTAGCCGATCTAGATTTTTCGAATTATTATAGATTATTCGTTGGTAG  
AATGGAAAGAATTAGGGGAAGAA---GGACCCGCGGGTAATGAATGGGAAGATCGAAA  
AATTGGAAGAAGAAAGGATTTTTTGGTTAGACGCATGGAATTAGCTAAGCATTTTATTC  
GAACAAATATAGAACCAGAATGGATGGTTTTATGTCTATTACCAGTTCTTCCCTCCCGAGT  
TGAGACCGATCATTAGATAGATGGGGGAAAACTAATGAGCTCAGACATTAATGAACT  
CTATAGAAGAGTTATCTATCGGAACAATACTCTTACCGATCTATTAACAACAAGTAGATC  
TACGCCGGGGGAATTAGTAATGTGTCAGGAGAAATTGGTACAAGAAGCCGTGGATACA  
CTTCTTGATAATGGAATCCGCGGACAACCAATGAGGGATGGTCATAATAAGGTTTACAA  
GTCGTTTTTCAGATGTAATTGAAGGCAAAGAGGGGAAGATTTTCGTGAGACTCTGCTTGGC  
AAACGGGTGCTATTTCGGGCCGTTCTGTCAATTGTCTGGGCCCGCACTTTCATTACA  
TCGATGTGGATTGCCTCGCGAAATAGCAATAGAGCTTTTCCAGACATTTGTAATTCGTG  
GTCTAATTAGACAACATTTTGTCTCGAACATAGGAGTTGCTAAGAGTAAAATTCGAGAA  
AAAGAGCCCATTGTGTGGGAAATACTTCCAGGAAGTTATGCAGGGGCATCCTGTATTGCT  
GAATAGAGCGCCTACTCTGCATAGATTAGGCATACAGGCATTCCACCCCATTTTAGTGG  
AAGGACGTGCTATTTGTTTACATCCATTAGTTTGTAAAGGATTCAATGCAGACTTTGATG  
GGGATCAAATGGCTGTTTCATGTACCTTTATCGTTGGAGGCTCAAGCGGAGGCTCGTTTA  
CTTATGTTTTCTCATATGAATCTTGTCTCCAGCTATTGGGGATCCATTTCCGTACCGA  
CTCAAGATATACTTATGGGACTCTATGTATTAACGAGCGGGAATCGTCGAGGTATTTGTG  
CAAATAGATATAATCCATGTAATCACAAAAAC-----TATCAAATAAAAGAATTGACGA  
TAATAACTATAAGAATACGAAAGAAAAAGAACCCTTTTTTTGTAATTCCTATGATGCACT  
TGGAGCTTATCGGCAGAAAAGAATCAATTTAGATAGTCCTTTGTGGCTACGGTGGCGAC  
TAGATCAACGC---GTTATTGATGCA-----AGAGAAGCTCCCATCGAGGTTCACTATGAAT  
CTTTGGGGACCTATCATGAGATTTATGGGCACTATCTAATAGTAAGAAGCGTCAAAAAA  
GAAAATCTTTGTATATACATTTCGAACCACTGTTGGTCATATTTCTTTTATCGAGAAATC

GAAGAAGCTATACAAGGGTTTTGTCTGGGCCTGCTCATATAGTACC-----AT  
GGAGGTACTTATGGCAGAACGGGCCAATCTGGTCTTTCACAATAAAGTGATAGATGGA  
ACTGCCATTAACGACTTATTAGCAGATTAATAGATCACTTCGGAATGGCATATACATCA  
CACATCCTGGATCAAGTAAAGACTCTGGGTTTTCAACGAGCCACTGCTACATCAATTC  
ATTAGGAATTGATGATCTTTTAACAATACCTTCTAAGGGATGGCTAGTCCAAGATGCTGA  
ACAACAAAGTTTGATTTTTCGAAAAACACCATCATTATGGGAATGTACACGCGGTAGAA  
AAATTACGCCAATCCATTGAGATATGGTATGCTACAAGTGAATATTTGCGACAAGAAAT  
GAATCCTAATTTTAGGATGACTGACCCTTTTAATCCAGTCCATATAATGTCTTTTTTCGGG  
GGCTAGAGGAAATGCATCTCAAGTGCACCAATTAGTGGGTATGAGAGGATTAATGTCG  
GATCCCCAAGGACAAATGATTGATTTACCCATTCAAAGCAATTTACGCGAAGGACTTTC  
TTTAACAGAATATATCATTCTTGCTATGGAGCCCGCAAAGGAGTTGTGGATACTGCTAT  
ACGAACATCAGATGCTGGATATCTTACGCGCAGACTTGTTGAAGTAGTTCAACACATTG  
TTGTACGTAGAACAGATTGTGGCACCATCCGAGGGATTTCTGTGAGTCCTCGAAATGG  
GATGATGCCG---GAAAGAATTTTGATCCAAACATTAATTGGTCGTGTATTAGCGGATGAT  
ATATATATGGACTCAGATGCATTGCTATTTCGAAATCAAGATATTGGGATTGGACTTGTC  
AATCGATTATAACC-----TTTCGAACACAATCAATATCTATTTCGAACCCCCTTT  
ACGTGTAGAAGTACATCTTGGATCTGTTCGATTATGTTATGGTCGGAGTTCCACTCATGGC  
GACCTGGTTCGAATTGGGAGAAGCTGTAGGGATTATTGCGGGTCAATCTATTGGAGAAC  
CAGGGACTCAATTAACATTAAGAACTTTTCATACCGCGGAGTATTTACGGGGGGTACT  
GCAGAATATGTACGCTCCCCTTCTAATGGAAAAATCAAATTCATGAGGATTTGGTTCA  
TCCCACACGTACACGTCATGGGCATCCTGCTTTTTTATGTTATATAGACTTATACGTA  
ACTATTGAGAGTGAAGATATTATACATAACGTGACTATTCTCCAAAAAGTTTTCTTTTAGTT  
CAGAATGATCAATATGTAGAAGCAGAACAAGTGATTGCTGAGATTCGCGGGGGGAACAT  
ACACTTTC---AATTTTAAGGAGAGGGTTCGAAAACATATTTATTCTGACTCAGAGGGGG  
AA---ATGCACTGGAGTACTGATGTGTACCATGCACCTGAATTTACGTATAGTAATGTCCA  
TCTCTTACCAAAAACAAGTCATTTATGGATATTATCAGGAGGTTTCATGCAGA-----TTTAG  
TGTAGTTCCTTTTGCCCCTCCACAAGGATCAAGATCAAATGTATCTTCAT-----TCTGTTTC  
TGTCGAACGA---AGAGAGAGTTCTAGCCTC---TCAGCGAATAATGATCAA---GTGAGAC  
ACAAATTCCTTAATTCGGATCCTTATGGGAAA---AAAGTTCGGATTTCTGGTTAT--TCAG  
AACTAAATCGAATCATATGTATTGGTCATTGTAATTTTCATATATCCTGCT---ATTCTTCAG  
AGAATTCTGAT-----TTATTGGCAAAGAGGCGAAGAAATAGATTGATCATTCCATTCCAA  
TCGATTCAAGAACAAGAGAAAGAACTACTGTTCGATTTCAGGTATCTCGATTGAAATAC  
CTATAAAT-----GGTATTTTTTCGTAGAAATAGTATTCTTGCTTATTTTCGATGATCCTCGATA  
CAGAAGAAACAGTTCAGGAATTACTAAATATGGGACTATAGGGGTGCATTCAATCGTCA  
AAAAAGAAGAT-----TTGATTGAGTATCGA---GGAGTCAAAGAATTTAAGCCAAAATACA  
TGAAAGTAGATCGATTTTTTTTCATTCCCGAGGAAGTACATATTTTACCCGAATCTTCTT  
CCATAATGGTACGCAACAATAGTATCATTGGAGTAGATACACGAATCGCTTTAAATACAA  
GAAGCCGAGTAGGCGGATTGGTCCGAGTGGAAAGAAAAAAAAAAAAAAAAAATTGAACTG  
AAAATCTTTTCTGGAGATATTCATTTTCTGGAGAGACAGATAAGATATCCCGGCACAG  
TGGCATCTTGATACCACCGGGAACGGGACAAACA-----AATTCTAAGGAATCAAAAAGA  
-----TTGAAAAATTGGATCTATGTTCAACGG-----ATCACACCTACCAAGAAAAAG-----TA  
TTTTGTTTTGGTTCGACCCGTAGTCACATATGAAATAGCGGGCGGTATAAATTTAGCAAC  
ACTTTTCCCCCAGGATCTGTTGCGGGAGGGGGATACTATGCAACTTCGAGTTGTCAATT  
ATATCCTTTTATGGAAACAGCAAATCAATTCGGGGAATTTCTGCCACAAGTATTCAATTAG

TTCGGA CT TGT TTAG TGT TGA ATT GGG ACCA AGA CAAA ----- AAA AGT TCT TCT ATCG  
AAGAGGCCCATGCTTTCTTTGTTGAAGTAAGTACAAATGGTCTGATTGAGATTTTCTA  
AGAATCGACTTAGTGAAATTCCATATTCGTATATCAGAAAAAGGAATGATCCTTCAAG  
TTCAGGATTGATTTCT--GATAATAAATTAGATTGCACCAAGATCAATCCGTTTTATTCTA  
TTTATTCCAAGGCAAGG-----ATTCAACAATCACTTGGTCAAATCAAGGAACTA  
TTCGTACGTTGTTGAATAGA-----AATAAGGAATGCCAATCTTTGATAATTTGTCATCA  
TCTAATTGTTTTCGAATGGGTCCA-----TTCAACGATGTAAAATATCACAAT-----GTGAT  
AAAAGAT-----CCTCTAATTCCAACTAGGAATTCGTTGGGCCCTTTAGGCACA-----GCC  
TTCAAATTGCAAATTT-----CATTCATTTTACCATTTAATAACT-----CATAATCAGATCTC  
G--GTA ACTAAACTTGC AACTTGATAAT-----TAAAACAGACTTTTCGAGTACTT----  
--AAG--TATTATTTAATGGATGAAAACGAAAGA-----ATTTATAATCCCGATCCATGCAGT  
AATATCGTTTTGAATCCATTCAATTTGAATTGGTATTTTCTACATGATAATTATTGTGACG  
AAACATCCAAAATAATTAGT--CTTGGGCAGTTTATTTGTGAAAATGTATGTATAGCCAA  
AAACGGACCA-----CATCTAAAATCGGGTCAAGTTTTTAATTGTTCAA--GTTGACTCTT  
TAGTAATAAGATCAGCTAAGCCTTATTTGGCCACTCCAGGAGCAACTGTTTCATGGCCAT  
TATGGAGAAATACTTTACAAAGGGGATACATTAGTTACATTTATATATGTAAAATCGAGA  
TCTGGCGATATAACGCAGGGTCTTCCAAAAGTGGAACAGGTGTTAGAAGTTCGTTCAA  
TTGATTCAATATCTATGAACCTAGAAAAGAGAGTTGAGGGTTGGAACGAGCGTATAAC  
AAGAATTCTTGGAATTCCTTGGGGATTTTTGATTGGTGCTGAGCTAACTATAGTGCAAA  
GTCGTATCTCTTTGGTTAATAAGATCCAAAAGTTTATCGATCCAGGGGGTGCAGATC  
CATAATAGGCATATAGAAATTATTGTACGTCAAATAACATCAAAGCGTTGGTTTCAGAA  
-----GATGGAATGTCTAATGTTTTTTTACCCGGAGAACTAATTGGATTGTTGCGAGCGG  
AACGAACGGGGCGTGCTTTGGACGAAGCGATCTGTTACCGAGCCCTTATTGGGAAT  
CACGAGAGCATCTCTGAATACTCAAAGTTTCATATCCGAAGCGAGTTTTCAAGAAACC  
GCTCGAGTTTTAGCAAAGCTGCGCTACGGGGTTCGATCGATTGGTTGAAAGGCCTAA  
AAGAAAACGTTGTTCTAGGGGGTATGATACCCGTTGGTACCGGATTCAAAGGATTAGTG  
CACCGTTCA-----AGTCAACATAAGAACATTCCTTTGGAAACCAAACAAAAGAAT-----T  
TATTCGAGGGGGAAATGAGA-----GATATTTTGTTCACCACAAAGAATTATTTCGATTCT  
TGCATTTCAAAGAATTTACATGATACATCAGAACAATCATTTATAGGATTTAATGATTCC--  
-----ATGACACGAAAGTATTGGAACATCGGTTTGGAAAGAGATGATGGAAGCAGG  
AGTTCATTTTGGTCATGGTACTAGGAAATGGAATCCTAGAATGGCACCTTATATCTCTGC  
AAAGCGTAAAGGTATTCATATTACAAATCTTACTAGAACTGCTCGTTTTTTTATCAGAAGC  
TTGTGATTTAGTTTTTGTGATGCAGCAAGTAGGGGAAAACAATTTTAAATTGTTGGTACTC  
AAAATAAAGCGGCTGGTTCAGTAGCACGGGCTGCAATAAGAGCTCGGTGTCATTATGTT  
AATAAAAAATGGCTCGGTGGTATGTTAACGAATTGGTCTACTACAGAAACGAGACTTCA  
TAAGTTCAGAGACTTGAGAACGGAACAAAAGACGGGGAGACTCAGCCGCTTCCGAA  
AAGAGATGCAGCTGTGTTGAAGAGACAATTATCTCACCTGCAAACATATTTGGGTGGG  
ATTAAATATATGACGGGGTTACCAGATATTGTAATCATCGTTGATCAGCAAGAAGAATAT  
ACGGCTCTTCGAGAATGTATCACTTTGGGAATCCAACGATTTGTTTAAATAGATACAAAT  
TGTGACCCCGATCTCGCAGATATTCGATTCCAGCAAATGATGACGCTATAGCTTCAATC  
CGATTAATTTCTAACAATAATTAGTATTCGCAATTTGTGAGGGTCGTTCT--AGCTATATACG  
AAATCCTATGGGGCAAAAATAAATCCACTTGGTTTCAGACTTGGTACAACCCAAGGG  
CATCATTCTCATTGGTTTTGCACAACCAAAAAATTATTCCGAAGGTCTACAAGAAGATAA  
AAAAATACGAGACTGTATAAGAATTATGTAAAAAAAATAAAAAAATATCCTCTGGT--

-GTCGAGGGAATTGCACGTATAGAAATTCAAAAAAGAATCGATCTGATTCAGGTCATAA  
TCCATATGGGATTCCCAAAGTTATTAATAGAAAGTAGA-----CCGCAAAGAATCGAA  
GAATTACAGATAAATGTACAAAAAACTGAATTGTGTGAACCGAAAACCTCAACATTG  
CTATTACAAGAATTGCAAACCCTTACGGGCACCCGAATATTCTTGCAGAATTTATAGCC  
GGACAATTAAGAATAGAGTTTCATTTGCAAAGCAATGAAAAAGCTATTGAATTAA  
CTGAGCAAAGCGGATACAAAGGGAATTCAAGTACAAATTGCGGGGCGTCTCGACGGAA  
AAGAAATTGCGCGTGTTCGGATGGATCAGAGAAGGTAGAGTTCCTCTACAAACCATTG  
AGCTAAAATTGATTATTGTTCCCATACAGTTCGAACTATCTATGGGGTATTAGGCATCAA  
AATTTGGATAATTTATAGACGAGGAAATGTCGCGTTACCGAGGGCCTCGTTTCAAAAAA  
TACGCCGTCTGGGCGCTTTACCGGGACTAACTAGTAAAAGGCCGAGAGCCGGAAGCGA  
TCTTAGAAACCAATCACGCCCCGTGAAA---AAATCTCAATATCGTATTCGTTTAGAAGA  
AAAACAAAATTGCGTTTTTCATTATGGTCTTACAGAACGACAATTACTTAAATATGTTG  
GATCGCAGGAAAAGCCAAAGGGTCAACAGGTTCGGGTTTTACTACAATTACTTGAAATG  
CGTTTGGATAACATCCTTTTTCCGATTGGGTATGGCTTCGACTATTCCTCAAGCCCGCCAG  
TTAGTTAACCATAGACATATTTTAGTTAATGGCTGCATAGTAGATATACCAAGTTATCGCT  
GCAAACCCCAAGATATTATTACAGCAAGGAATGAAAAAAAATCTAGAACTCTGATTCA  
AAATTATCTTGATTATCCCCC---CATGAGGAATTGCCAAAACATTTGACTCTTCACCCA  
TTCCAA-----TATAAAGGATTAGTCAATCAAATAATAGATAGTAAATGGGTTCGGTTTGAA  
AATAAATGAATTGCTAGTCGTAGAATATTATTCTCGTCAAACCTATGTCACGTCGAGGTAC  
TGCAGAAGAAAAAACTGCAAATCCGATCCAATTTATCGTAATCGATTAGTTAACATGT  
TGGTTAACCGTATTCTGAAACACGGAAAAAAATCATTGGCTTATCAAATTATCTATCGA  
GCCGTGAAAAAGATTCAACAAAAGACAGAAACAAATCCACTATCTGTTTTACGTCAAG  
CAATACGTGGAGTAACTCCCGATATAGCAGTAAAGCAAGACGTGTAGGCGGATCGAC  
TCATCAAGTTCCCATTGAAATAGGATCCACACAAGGAAAAGCACTTGCCATTCTGTTGGT  
TATTAGGGGCATCCCGAAAGCGTCCGGGTTCGAAATATGGCTTTCAAATTAAGTTCCGAA  
TTAGTGGATGCTGCCAAAGGGGGTGGCGATGCCATACGCAAAAAGGAAGAGACTCATA  
GAATGGCAGAGGCAAATAGAGCTTTTGCACATTTTCGTATGAGTAGGGACACTATTGCT  
GACATAATAACCTCTATACGAAATGCTAACATGGATAGAAAAGGAACGGTTCGACTACC  
ATCTACTAACATCACTGAAAACATTGTTAAAATACTTTTACGAGAAGGTTTTATCGAAA  
ACGTGAGGAAACATCGAGAAAGAAACAAATATTTTTGGTTTCAACCCTACGACATAG  
AAGA-----AATAGGAAAATACCATATAGA-----ACTTTTTTAAATTTAAAACGGATCAGT  
CGGCCTGGTCTACGAATCTATTCTAACTATCAACGAATTCCTAGAATTTTAGGCGGGATG  
GGGATTGTAATTCTTTCTACTTCTCGAGGTATAATGACAGACCGAGAAGCTCGACTAGA  
AGAAATCGGTGGAGAAATTTGTGTTATATATGGATGGCAAACTTATACCAAGAATTG  
GTTACGTAGGAATGCACGTATTGGTTCACGTAAGAATGCACGTAGAATACCAAAGGG  
AGTTATTCATGTTCAAGCAAGTTTCAACAATACCATTTGTGACTGTTACAGATGTACGAG  
GTCGGGTATTCTTGGTCTCCGCCGGTACTTGTGGATTCAGGGGTACACGAAGAGGT  
ACACCATTTGCTGCTCAAACCGCAGCAGGAAATGCTATTCGGACAGTAGTGGATCAAG  
GTATGCAACGAGCAGAAGTCATGATAAAAGGGCCGGTCTCGGAAGAGATGCAGCATT  
ACGCGCTATTTCGTAGAAGTGGTATCTTATTAAGTTTTCGTACGGGATGTAACCCCTATGCC  
ACATAATGGCTGTCGACCCCTAAAAAAGACGTGTAATGCCAACTATTAACAACCTTA  
TTAGAAACACAAGACAGCCAATTAGAAATGTCACGAAATCCCCCGCTCTTGGGGGATG  
TCTCAGCGCCGAGGAACATGTACTAGGGTGTATACTATCACCCCAAAAAACCAAAC  
TCTGCCTTACGTAAAGTTGCCAGAGTACGATTAACCTCTGGATTGAAATCACTGCTTAT



ATACCTGGTATTGGCCATAATTTACAAGAACATTCTGTAGTCTTAGTAAGAGGGGGAAG  
GGTTAAGGATTTACCCGGTGTGAGATATCACATTGTTTCGAGGAACCCTAGATGCTGTCTG  
GAGTAAAGGATCGTCAACAAGGGCGTTCTAAATATGGGGTCAAAAAGCCAAAAATGG  
CAAAGAAAAGTTTGATTCAGAGGGAGAAGAAGAGGCAAAAATTGGAACAAAAATATC  
ATTTGATTCGTCGATCCTCAAAAAAGAAATAAGC-----AAAGTCCCGTCGTTGAGTG  
ATAAATGGAAAATTCATGGAAAGTTACAATCCTACCACGTAATAGTGCACCTACGCGT  
CTTCATCGACGTTGTTTTTCGACTGGAAGACCGAGAGCTAACTATCGAGACTTTGGGCT  
ATCTGGACACATACTTCGTGAAATGGTTCATACAGGTTTGTGGCCAGGGGCAACAAGAT  
CAAGTTGGATGATAAAAAATTCATTCATCTCAGTTATTTTGCAAGAA---AAAAAGAAG  
AA---AAGAGGGGGTCCATTGAATCTCAAATATTCAGTTTCACCAATAAGATACGAAGAC  
TTACTTCACATTTGGAATTCCACAGAAAAGACTATTCATCTCAGAGAGGCCTAAAGAA  
AATTCTGGGAAAACGTCAACGGTTGCTGTCTTATTTGTCAAATAAAAATAGAATACGTT  
ATAAAGAATTAATTAGTCAGTTGGATATTCGGGAGTCAAAAAATCGT-----ATGGTAAAA  
CTTCGTTTGAAGCGATGTGGTAGAAAGCAACGAGCCGTTTATCGAATCGTTGCAATTGA  
TGTTTCGATCCCGAAGAGAAGGAAGAGATCTTCGAAAGTGGGTTTTTATGATCCGATA  
ATAATCAAACCTATTTAAATGTTCCCTGCTATTCAATATTTCCCTTGAAACAGGCGCTCAA  
TCTACAGGAACGTTCATGATATTTCAAAGAAGGCGGGAGTTTTTACGGAACCTCGCCT  
TAATCAA---ACGAATTTCAATATGGATAAATCCAAGCGACTCTTTCTTAAATCCAAACGA  
TCTTTTCGTAGGCGTTTGCCCCGATCCAACCGGGGATCGAATTGATTATAGAAACAT  
GAGTTTAATTAGTCGATTTATTAGTGAACAAGGAAAAATATTATCTAGACGGGTGAATA  
GATTGACTTTAAAACAACAACGATTAATTACTATTGCTATAAAAACAAGCTCGTATTTTAT  
CTTCGTTACCTTTTCTTAATAATGAGAAA-----CAATTTGAAAGAAGCGAGTCGACTACT  
AGAACTACTGGTCTTAGAACCCAGAAAAAAGTGACACGTTCACTAAAAAAAATCCT  
TTTGTAGCGAATCATTTATTAAAAAAATGATAAGCTTAACACAAAGTCGGAAAAAGA  
AATAATACTAACCTGGTCCCGAACATCTACCATTATACCACAATGATCGGCCATACTAT  
TGCTATCCATAATGGAAGGGAACATTTACCTATTTATATAACAGATCGTATGGTAGGCCAT  
AAATTGGGAGAATTTTCACCTACTATAAATTTCCGTGGACATGCAAAAAATGATAATAG  
ATCTCGTCGTATGATTTTTCCACTTTTGATACTAGGTAATCTAGTATCCTTATGCATGAAG  
ATAATCAATTCGGTCGTTGTGGTCGGACTCTATTATGGATTTCTGACCACATTCTCCATA  
GGGCCCTCTTATCTCTTCTCCGAGCTCGGGTTATGGAAGAAGGAGAAGAAGGAA  
CCGAGAAGAAGGTATCAGCAACAACCTGGTTTTTATTGCGGGACAGCTCATGATATCATA  
TCGATCTATTATGCGCCTCTGCATCTAGCATTGGGTAGACCTCATAACAATACTGTCCTA  
GCTCTACCGTATCTTTTGTTCATTTCTTCTGGAACAATCACAACACTTTTTTTGATTATG  
GATCTACTACCAGAAATTCAATGCGTAATCTTAGCATTCAATGTGTATTCTGAATAATC  
TCATTTTTCAATTATTCAACCATTTCAATTTACCAAGTTCAATCTTAGCCAGATTAGTCAA  
CATTTCTATGTTTCGGTGCAACAACAAGATGTTATTTGTAACAAGTAGTTTTGTTGGTTG  
GTTAATTGGTCACATTTTTTTTCATGAAATGGATTTCGATTGGTATTAGTCTGGATACAGCA  
AAATAATTCTATTAGATCT---ATTCGATCGAATAAGTACCTTGTGTGAGAATTGAGAAATT  
CTATGGCTCGAATCTTTAGTATTCTTATTTATTACTTGTGTCTACTATTTAGGCAGAATA  
CCGTCACCCATTCTACTAAGAACTGAAAGAAACCGAAGAAGATAAACCTGTTGTGA  
TTCTTCTTTTAGACTATAAACGATGGAATCGGCCATTGAGATATATAAAAAATAATCGTT  
TTGAAAATACTGTAAGAAATGAGGTGTCGCAATATTTTTTTTTATCTATATAGAAGTGCTG  
GAAAAGAAAGAATATCTTTTACGTATCCACCTAGTTTGTCAACTTTTTTAGAAATGATAC  
AAAAAAGATGTCTTTGTTTACA-----AAAATATCCTTTGATGAATTGTATAATAATTGGG

TTTATACCAATAAACAAAAAAGCAACTTAAGCAACGAGTTTATAAATAGAATTGAA  
ACTTTAGAT-----ATTGTTCTGGATGTACTCGAAAAATGACTAGATTGTGTAATGATG  
ATACTAAAAAGAATACTTGGCTAAAATTTATGATCCT-----GGCCCCTATCGTGGACA  
AATAAAAAAATGGCTTTTACCTATAGAGGTGCTTTGGATAAATAAATTCATGGTATACT  
TTATCACAATTTGAATCGAAAGATACAACGTTCCTCGGTAGTGAATAAAAGAAATTA  
GTAAAAAAGTTCCTAAATGGTCATATAAATTAATCGAGTTAGAACAACAGGAAAGAGA  
CGAGATTCGTTCAAGAAAAGCCAAACGTGTAGTGATTTTTACTGATGCTTTGATACGTT  
ATTCACAACAATCGGATTTTCGTGCGAGACACAATCAAAGGCTCTGTGCGCGCCCAAAG  
ACGTAAAACAGTTATTTGGGAACTGTTTCAAGCAAATGTGCATTCCCCACCTTTTTTTGG  
ACAGACTAGAAAAATCT-----TTTTTTTTTTCCTTTTCGGCCG-----ATGAAATTTATTTTT  
AGAAATAGAGAAGAGAAAGCACGGATAGAAATAGCAGAAGCTTGGGATATCATTATAT  
TTGCTCAAGTAATAAGAGGTTCCGTGTTAGTAACCCAATCAATTCTTAGAAAATATGTTA  
TATTACCTTCGTTGATAATAGCTAAAAATATCGCCCCGTATGCTATTATTTCAATTTCCCGA  
GTGGTCCGAGGATTTAAAGTATTGGAATAGAGAAATGCATGTTAAATGCACCTATAATG  
GCGTTCAATTATCAGAAACAGAATTTCCGCAAACTGGTTAACGGACGGTATTCAGATA  
AAGATTCTATTTCTTTTTGCCTAAAACCTTGGCACAGATCTAAG-----CAAAAAAATGA  
TTTTTGTTTTTTAACAGTTTGGGGCATGGAACTGAACTTCCTTTTCGGTTCTCCCCGAA  
ACCGACGTTTCGTTTTTTGAACCCATTTTTAAAGAACTCAAAAAAAAATTAGAAAAGT  
GAAAACGCTTCGTTTTCTAGTT---ATAAGAGTTTTAAAAGAAAAGAACAAAAATTTTTCT  
AAAGGTGTCAAAGAAACACAAAATGGGTCATCAAAGCATTCTA-----TTTATAAAA  
GGAATAATAAAGAGCTTTCAAAAAGAAATGATTCGATAATCAGGAATAGTATGATTCA  
CGAATCG---ATTCAAATTCGAGCTATGAATTTGACAAAT---TCACTGACAGAAAAAAA  
TGATAGATCTGACTGATAAAACAATCACAATAAACAATAAATAAATAAATAAATAAATAA  
GACAAGAAAAAAGTTCTAACAAAACCAGTTATCATGCTAAACTAGTAGAATCTCCAA  
AAAATATTTGGCAGATATTAATA-----AATGCTCGATTAATCCGCAAATCATATCATTTTTT  
CAAATTTTTAATTGAAAGGATATACCTAAATATTCTTTTCTCTATGATGAATAGTCCTAGA  
ATCCATGCACAACAT-----TGTGACTTATACTCCTTGTACACAAGCATATGTCTTT  
TACAAATTATCACAACACT---GTTATTACTTATATAAGTTAAGATCCGTCCTTAAATATA  
TCTCTTTGTCTTAAGAACGAAATAAAGGATGATTTTGAACAAGGAATTTTTCGTTCCAA  
ATTAAGATATAGGAACCTTCAG---TATGAAATGAATCAATGGAAACCCTGGTTAAAGGG  
GCATTATCAATATGATTTATCTCAGATTAGATGGTCCAGATTAGTACCACAAAATGGCG  
AAATAGAGTCAGTTGTATAGCTCAAATAAATAAATAAAGAAATGGGATTCATATGAAA  
AAAAC-----CAATTAATTCATTACGAAAAACAA---AATTTTAAAAAACACTATAGATA  
TCGTTTATCATATAAATTTATTAATGATGATATTATGGATCCGGATAGAAAATAT-----  
-----TTTTTTGATTGGATGGGAATGAATGAAGAAATACTAAATCGTTGGTTCTT  
CCCAGAATTTGTACGACTTTATAGTGCATATAAGATTATACCGTGGATTATACCAATCAAA  
TTCTTTCTTTTCAATAGCAAC-----ACAGAAGCAGAGCTTGATTTCTTTCTAAAAGGTA  
TTTGTGTTTTCAATTGAGATGGAAT-----GATCAAAGAATGATCAATAATATCAAATAT  
ATTGTCTCCTTCTTAGCCTGATAAATCCAAGAGAAATTGCTATATCCTCTATTCAAAGGG  
GAGAAATGAGTCTGGATATTCTGATGATTCAGAAAGATTTCACTCTTACAGAATTGATG  
AAAAGGGGAATCTTGATTATCGAACCCCTTCGTCTGTCTGTAAAAAATGATGGACAATT  
TATTATGTACCAAACCGTAGGTATTTCACTTTCATAAGAGTAAACATCATTATGATTG  
CTTGTTACT--GAAAATGTTTTGCCCTTAGACGTTAGAGAATTGAGAAGTCTAATTT  
TTATCAGATTTTTTTGGCCCAATTATCGATTAGAAGATTTAGCTTGTATGAATCGCTATTG

GTTTAATAGCAATAATGGGGGTCGCTTTAGTATGATAAGGATACATATGTATCCAATGAA  
AGGACATCCATTCAAATCCTGGATTTTCGAATTGAGAGAGATATTGAGAGAGATCAAGA  
ATTCTCACTATTTCTTAGATTCATGGACCCAATTCAATTCAGTGGGATCTTTCATTACAT  
TTTTTCCACCAAGAACGTTTTATAAACTCTTGGACCCCGAATTTGGAGTATCCTACT  
TTCA---CGCAATTCA-----CAGGGTTCAACAAGCAATCGATATTTTC-----ACGATCAAGG  
GTGTAGTACTATTTGTAGTAGCG---GTCTTTATATATCGT-----ATTAACAATCGAAATA  
TGGTCGAAAGAAAAAATCTTTATTTGACAGGACTTCTTCCT-----ATACCTATGAA  
TTCCATTGGACCCAGAAATGATACATTGGCAGAATCTTTT---GGGTCTTCCAATATCAAT  
AGGTTGATTGTTTTCG---CTCCTGTATCTTCCAAAAGGAAAAAAGATCTTTGAGAGCTCT  
TTCCTGGATCCGAAAGAGAGTACTTGGGTTCTCCCAATAACT-----AAAAGTGTAT  
CATGCCTGAATCTAACTGGGGTTCGCGGTGGTGGAGGAACTGGATCGGAAAAAAGAG  
A-----GATTCTAGTTGTAAGATATCTAAT-----GAAACCGTCGCTGGAATTGAGATCTCA  
TTCAAAGAGAAAGATATCAAA---TATCTGGAGTTTCTTTTTGTATATTATATGGAT-----GA  
TCCGATCCGCAAGGACCATGATTGGGAATTTTTTGATCGTCTTTCTCCGAGTAAGAGGC  
GAAACATAATCAACTTG-----AATTCGGGACAGCTATTCGAAATCTTAGTGAAAGACTG  
GATTTGTTATCTCATGTTTGCTTTTCGTGAAAAAATACCAATTGAAGTGGAGGGT---TTC  
TTCAAACAACAAGGA---GCTGGGTCAACTATTCAATCAAATGATATTGAGCATGTTTCC  
CAT-----CTCTTCTCGAGAAACAAGTGGGCTATTTCTTTGCAAAATTGTGCTCAATTCAT  
ATGTGGCAATTCCGCCAAGATCTCTTCGTT-----AGTTGGGGGAAG---AATCCGCACG  
AATCGGATTTTTTGAGGAAC---ATATCGAGAGAGAATTGGATTTGGTTGGACAATGTGT  
GGTTGGTAAACAAGGATCGA-----TTTTTTAGC-----AAGGTACGGAACGTATCGTCAA  
ATATTCAATATGATTCC-----ACAAGA-----TCTAGTTTCGTTCAAGTAACGGATTCTAG  
CCAATTGAAAGGATCTTCT--GATCAATCCAGAGATCATTTTCGATTCCATTAGT-----  
AATAAGGATTTCGAA-----TATCACACATTGATCAATCAAAGA  
GAGATTCAACAATAAAAGAAAGATCGATTCTT--TGGGAT-----CCTTCCTTTCTTCAAC  
CGGAACGAACAGAGATAGAATCCGAC-----CGATTCCCTAAA-----TGCTTTCTGGATAT  
TCC-----TCAATGTCCCGGATATTCACG---GAACGTGAGAAGCAGATGAATAATCATCTG  
CTTCCGGAAGAAATCGAAGAATTT-----CTTGGGAATCCTACAAGATCCATTTCGTTCTTT  
TTTCTCTGACAGATGG-----TCAGAACTTCAT--CTGGGTTTCGAATCCTATTGAGAGGTCC  
ACTAGAGATCAG-----AAATTGTTGAAGAAAGAACAAGATCTTTCT--TTTGTCCCT  
TCCAGGCGATCGGAA-----AATAAAGAAATAGTTAATATATTT-----ACGTATTTAC  
AAAAT-----ACCGTCTCAATTCATCCTATTTTCATCAGATCTGGGATGCGATATGGTTCCG---  
AAGGATGAACTGGAT--ATGGACAGTTCCAATAAGATTTCAATTCTTGAACAAAAATCCAT  
TTTTTGAT-----TTATTTTCATGACCGGAACAGGGGGGATACACGTTA-----CACCA  
CGATTTTGAATCAGAA-----GAGAGATTCAAGAAATGGCAGATCTATTCACTCTATCAA  
TAACCGAGCCG---TATCTGGTGTATCATAAGGGATTTGCCTTTTCTATTGATTCCTACGGA  
TTGGATCAAAAACAA-----TTCTTGAATGAGGTATTCAACTCCAGGGATGAATCGAAAA  
AGAAATCTTTA-----TTGGTTCTACCTCCTATTTTTTAT-----GAAGAGAATGAATCTTTT  
TATCGAAGGATCAGAAAAAATGGGTCCGG--ATCTCCTGCGGGAATGATTTGGAAGAT  
CCAAAACCAAAAAGAGTGGTATTTGCTAGCAACAACATAATGGAGGCAGTCAATCAAT  
ATAGATTGATCCGAAATCTGATTCAAATCCAA-----TATAGCACCTATGGGTACATAAGAA  
ATGTATTGAATCGATTCTTTTAATGAAT-----AGATCTGGTCGCAACTTCGAATATGGA  
ATTCAAAAAATTCAAAGGGATCAAATAGGAAATGATACTCTGAATCATAGAACTATAAT  
GAAATATACGATCAACCAACATTTATCGAATTTGAAAAAG---AGTCAGAAGAAATCGTT

CGATCCT-----CTTATTTTTATTCTCGAACCGAGAGATCCATGAATCGGGATCCTAATGC  
ATATAGATACAAATGGTCCAATGGGAGCAAGAATTTCCAGGAACATTTGGAACATTTTCG  
TTTCTGAGCAGAAGAGCCGT-----TTTGAAGTAGTGTTTCGATCGATTACGTATTAATCA  
ATATTCGATTGATTGGTCTGAGGTTATCGACAAAAAAGATTTGTCTAAGTCACTTCGTTT  
CTTTTTGTCCAAGTTACTTCTC-----TTTTGTCC-----AAGTT  
GCTTATCTTTTTGTCTAACTCACTTCCT--TTTTCTTTGTGAGTTTCGGGAATATCTCCAT  
TCATAGGTCCGAA---ATCCACATCTAT--GAATTGAAAGGTCCGAATGATCAACTCTGCA  
ATCAGTTGTTAGAATCAATAGGTCTTCAAATCGTTCATTTGAAAAAATTGAAACCCTTC-  
----TTATTGGAT-----GATCATGATACTTCC---CAAAAATCGAAATCTTGATCAATGGA  
GGAACAATATCACCATTTTTGTTCATAAAGATACCA---AAGTGG---ATGATTGACTCATT  
CATACTAGA-----AATAATCGCAGGAAATCTTTTGATAACACGGATTTCCTATTTCTCAATG  
ATATCCCACGATCAAGACAATTGGCTGAATCCCGTGAAACCATTTCATAGAA GTTCATT  
GATATCTTCTTTTTATAAAGCAAATCGACTTCGATTCTTGAATAATCCACATCACTTCTGC  
TTCTAT-----TGTAACAAAAGATTCCTTTT-----TTT--GTGGAAAAGGCCCGTATCAAT  
AATTATGAT-----TTTACGTATGGA---CAATTCCTC-----TTGTTCAATTCGCAACAAA---AGA  
TTTTCTTTGTGCGGCGGTAAA-----AAAAACATGCTTTTTTTGGAG---AGAGATACTATTT  
CACCAATCGAGTCACAGGTATCTAACATATTCATACTTAACGATTTTCCACAAAGTGGT  
GACGAAAGG---GATAACTTGTACAAATCT-----TTCCATTTTCCAATTCGATCCGATCCA  
TTAGTTCGT-----AGAGCTATTTACTCGATCGCAGACATTTCTGGAACACCTCTAACAGA  
GGGACAAATAGTCAATTTTGA AAAA ACTTATTGTCAACCTCTTTCAGATATGAATCTATC  
TGATTCAGAAGAGAAGGACTTGCATCAGTATCTCAAT-----TTCAATTCAAACATGGGTT  
TGATTCACTCCATGTTCTGAAAAATATTTACCATCCGAAAAG-----AGGAAAAA-----  
-----CGGAGTCTTTGTCTAAAG-----AAATGCGTTGAGAAAGGGCAGATGTATA  
GAACCTTTCAACGAGATAGTGCTTTTTCAACTCTCTCAAATGGAATCTATTCCAAACA  
TATATGCCATGGTTCCTTACTTCGACAGGGTACAAATATCTAAATTTGATATTTTTAGATA  
CTTTTTAGAC---CTATTGCCGATACTAAGTAGCAGT-----CAAAAATTTGTATCCATTTTT  
CATGATATTATGCATGGATCAGATATATCATGGCGAACTCTTCAGAAAAAATTG-----  
-----TGTCTTCCACAATGGAAT---CTGATAAGTGAGATTTTCGAGTAAGTGTTTACATAAT--  
---CTTCTTCTGTCCGAAGAAATGATTCATCGAAATAATGAGTCA-----CCACTGATATCGA  
CACATCTGAGATCGCAAATGTTTCGGGAGTTC---CTCTATTCAATCCTTTTCTTCTTCTT  
GTTGCTGGATAT---CTCGTTCGTACACATCTTCTCTTTGTTTCCCGA-----GCCTATAGTGA  
GTTACAGACAGAGTTCGAAAAGGTCAAATCTTTGATGATTCCATCATAATGATTGAGT  
TGCGAAAACCTTCTGAATAGGTATCCTACATCTGAACTGAATCTTTCTGGTTAAAGAAT  
CTCTTTCTAGTTGCTCTGGAACAATTAGGAGATTCTCTAGAAGAAATACGGGGTTCTGC  
TTCTGGCGGCAACATGCTATGGGGTGGTGGTCCC-----GCTTATGGG---GTCAAAT  
CAATACGTTCTAAGAAGAAATATTTGAATATCAAT-----CTCATCGATCTCATA---AGTAT  
CATACCAAATCCCATTAATCGAATCACTTTTTTCGAGAAATACGAGACATCTAAGTCATAC  
AAGTAAAGAGATCTATTCAATTGATAAGAAAAAGAAAAACGTGAACGGTGATTGGATT  
GATGATAAAATAGAATCCTGGGTCGCGAACAGTTATTCGATTGATGATAAAGAAAGAGA  
ATTCTTGGTTCAGTTCTCC-----ACCTTAACGACA-----GAAAAAAGGATTGATCAAATTC  
TATTGAGTCTGACT---CATAGTGATCATTATCA-----AAGAATGACTCTGGTTATC  
AAATGATTGAGCAACCGGGAGCAATTTACTTACGATACTTAGTTGACATTCAT-----AAA  
AAGTATCTAATGAATTATGAGTTCAATACATCCTGTTTAGCAGAAAGACGGATATTCCTT  
GCTCATTATCAGACAATCACTTAT-----TCACAAACCTCGTGTGGGGCTAATAGTTTTTCAT

TTCCCATCTCATGGA-----AAACCCTTTTCGCTCCGTTTAGCCCTATCCCCCTCT---AGG  
GGTATTTTAGTGATAGGTTCTATAGGAACTGGACGATCCTATTTGGTCAAATACCTAGCG  
ACAACTCCTATGTTCCCTTCATTACAGTATTTCTGAACAAGTTCTGGATAACAAGCCT  
AAAGTTTTCTTATTGAT-----GATATTGAT-----GACGATGATATCGATATTGATGCT  
AGTGACGATATTGAT-----GATAGTGACGATATCGATCGT  
GACCTTGATATGGAGCTGGAGCTTCTAACTATGATGAATGCGTTA-----ACTATGGATA  
TGATGCCG-----GAAATAGACCGATTTTATATCACCTTCAATTTCGAATTAGCAAAAGC  
AATGTCTCCTTGCATAATATGGATTCCAAACATTCATGATCTGGATGTGAATGAGTCGAA  
TTACTTATCCCTCGGTCTATTAGTGAACATCTCTCC-----CGGGATTGTGAAAGATGTT  
CC---ACTAGAAATATTCTTGTATTGCTTCGACTCATATTCCCCAAAAGTGGATCCCGC  
TCTAATAGCTCCGAATAAATTAATACCTGCATTAAGATACGAAGGCTTCTTATTCCACA  
ACAACGAAAGCACTTTTTCACTCTTTCATATACTAGGGGATTTCACTTGGAAAAGAAAA  
TGTTCCATACT-----AATGGATTCGGGTCCATAACCATGGGTCCAATGCACGAGATCTTG  
TAGCACTTACCAATGAGGCCCTGTCGATTAGTATTACACAGAAGAAATCAATTATAGAC  
ACTAATAACAATTAGATCTGCTCTTCATAGACAACTTGGGATTTGCGA-----TCCCAGG  
TAAGATCGGTTCAGGATCATGGGATCCTTTTCTATCAGATAGGAAGGGCTCTTGCACAA  
AATGTACTTCTAAGTAATTGCCCATAGATCCTATATCTATCTATATGAAGAAGAAA-----T  
CATGTAACGAAGGGGATTCTTATTTGTACAAATGGTACTTCGAACTTGGAACGAGCATG  
AAGAAATTAACGATACTTCTTTATCTTTTGAGTTGTTCTGCCGGATCGGTCGCTCAAGA  
CCTTTGGTCTCTACCC-----GGACCCGATGAAAA---AATGGGATCACTTCTTATGGACT  
CGTTGAGAATGATTCT---GATCTAGTTCATGGCCTATTAGAAGTAGAAGGCGCTCTGGTG  
GGA-----TCCTCACGGACAGAAAAAGATTGCATTCAGTTTGATAATGAT-----CGAGTGA  
CATTGCTTCTTCGGCCCGAACCAAGGAAT---CCCTTAGATATGATGCAAAATGGATCTTG  
TTCTATCGTTGATCAGAGATTTCTCTATGAAAA-----TACGAATCGGAGTTTGAAGAA---  
GGGAAGGCCGAAGGAGTCCCTCGACCCGCAA-----CAGATAGAGGAGGAT-----  
TTATTCAATCAC-----ATAGTTTGGGCTCCT-----AGAATATGGCGCCCT-----TGGGGCT  
TTCTATTTGATTGTATCGAAAGGCCCAATGAATTAGGATTTCCC---TATTGGGCCGGGTC  
ATTTACAGGGCAAG-----CGGATTCTTTATGATGAAAAGGATGAGCTTCAAGAGAATGA  
TTCGGAGTTCTTGCAGAGTGGAACCATGCAGTACCAGACACGAGATAGATCTTCCAAA  
GAACAAGGCTTTTTTCGAATAAGCCGATTCATTTGGGACCCTGCGGATCCACTCTTTGT  
CCTATTCAAG---GATCAGCCCTTTGTCTCTGTATTTTCAATCGAGAATTCTTTGCAGAT  
GAAGAGATGTCAAAGGGGCTTCTTACTTCCCAAACGGATCCTCCTACATCTATATATAA  
ACGCTGGTTTATC-----AAGAATACGCAAGAAAAGCACTTCGAGTTGTTGATTCATCGCC  
AGAGATGGCTTAGA-----ACCAATAGTTCATTATCT-----AATGGATTTTCCGTTCTAAT  
-----ACCCTATCCGAGAGTTATCAGTATTTATCAAATCTCTTCCTATCTAAT---GGAGCGCT  
ATTGGATCAAATGACAAAGACATTGTTGAGAAAAAGATGGCTTTTCTCGGATGAAATG  
AAAATTGGATTC-----ATG-----ATGCCTAAATCGCGG---ATAAATGGAAA  
TTTTATTGATAAGACCTTTTCACTTGTAGCCAATATCCTATTACGAATAATTCCGACAAC  
TCAGGAGAAAAAGAGGCATTTACCTATTACAGAGATGGG-----ATGTCGGCTCAATCCG  
AAGGAAATTATGCAGAAGCTTTACAGAATTATTATGAAGCTATGCGACTAGAAATTGAT  
CCCTATGATCGAAGCTATATACTCTATAACATAGGCCTTATTCACACAAGTAACGGAGAA  
CATACGAAAGCTTTAGAATATTATTTTCGGGCACTAGAACGAAATCCCTTTTACCCCAA  
GCTTTTAATAATATGGCTGTGATCTGTCAATTAC---CGGGGAGAACAGGCCATTCGACAGG  
GAGATTCTGAAATTGCGGAAGCTTGGTTTGTATCAAGCCGCTGAGTATTGAAACAGGC

TATAGCGCTTACTCCTGGTAATTATATTGAAGCGCAGAATTGGTTGAAGATCACGAGGC  
GTTTCGAA-----ATGAGTTGGCGATCAGATCATATATGGATAGAACTTATAGCGGGGTCTC  
GAAAAACAAGTAATTTATGCTGGGCCTTTATCCTTTTTTTAGGTTTCATTGGGATTCTTATT  
CGTCGGAGTTTCCAGTTATCTTGGTAGGAATTTGATATCTTTATTTCCACCTCAGCAAAT  
CATTTTTTTTCCACAAGGGATCGTGATGTCTTCTATGGAATCGCAGGTCTCTTTATTAG  
CTCCTATTTGTGGTGCACAATTCGTGGAATGTAGGTAGTGGTTATGATCGATTTCGATAG  
AAAAGAAGGAATAGTGTGTATTTTTCGTTGGGGATTTCTGGAATAAATCGTCGCATTT  
TTCTACGATTTCTTATGAAAGATATTCAGTCCATCAGAATAGAAGTTAAAGAAGGTATTT  
ATGCTCGTCGTGTCCTTTATATAGAAATAAGAGGCCAGGGGGCCATTCCCTTGACTCGT  
ACTGATGATAAT---TTGACTCCACTAGAAATTGAGCAAAAAGCTGCTGAATTGGCCTATT  
TCTTGCGTGTGCCAATTGAAGTATTT

>Ximenia

ATGGAAAAGTGGCGATTCAATTCGATATTATCTCTAAGTAAATCAATGGACGGTCTTGG  
TCCTATTGAAAATACCAGTGGAAAGTGTAGATCGGGTTTTAAATGATACGGAGAAAAACA  
TTCATAGTTACAGTCATTTTTATTATTTATTCGGCGTCAGAGATAATTGGAATTTTCATCTC  
TGATGACACTTTTTTAGTTAGGTATAGAAATGGAGGCGTTTTTACATATATTTTGATATT  
GAAAATCATATTTTTGAGATTGACAATGATCAT-----TCTTTTCTTAATGAAGTAGAAAGT  
TCTTTTTATAGTTATCAGAATTCAGTTATCTGAATAATGGATCTAAGAGTGACGACCCCT  
ACTATGATCGTTACATGTATGATGGTAAATATAGTTGGAATAATCACATTAATAGTTGCAT  
TGACAGTTATCTTCAT-----TCTCAGATCCATATTGATAGTTCCATTTAAGCGGTAATGAT  
AATTACAGT-----TACGTTTCGAGTTTCATTTGTGGTAGCGAGAGTTCCGGTATAAAAAC  
TAGCACGAATGGTAGTGATTTAACTATAAGAGAAAGCTCTAATGATCCCGATGCAACTC  
AAAAATACAGGCATTTGTGGGTTCAATGCGAAAATTGTTATGGATTAATTAATAAGAAA  
TTTTTTAAGTCAAAAATGAATATTTGTGAACAATGTGGATATCATTTGAAAATGAGTAGT  
TCGGATAGAATCGAACTTTCGATTGATCCAGGTACTTGGGATCCTATGAATGAAGACAT  
GGTATCTCTGGATCCCATTTGAATTTCAATTTGGAGGAGGAACCTTTATAAAGATCGTATCGA  
TTCTTATCAAAGAACGACAGGATTAACGGAGGCTGTTCAAACGGGCATAGGTCAACTA  
AACGGTATTCCTGATCAATTTGGAGTTATGGATTTTCAGTTTATGGGGGGTAGTATGGGA  
TCCGTAGTAGGGGAGAAAATCACCCGCTTGATCGAATATGCTACCAATAGATTTTTACC  
CCTTATTATAGTGTGTGCTTCCGGGGGAGCACGTATGCAAGAAGGAAGTTTGAGCTTGA  
TGCAAATGGCTAAAATCGCTTCTGTTTTACATGATTATCAATCGAATAAAAAGTTATTCT  
ATGTATCAATCCTTACATCCCCACTACGGGTGGGGTGACAGCTAGTTTTGGTATGTTGG  
GGGATATCATTATTGCTGAACCCAATGCCTACATTGCATTTGCAGGTAAGAGTAATTG  
AACAAATATTGAATACGACAGTACCCGAAGGTTCAACAAGTGGCTGAATATTTATTCCAT  
AAGGGCTTATTGATCCAATCGTACCACGTAATCCTTTAAAAGGCGTTCTGAGTGAGTT  
ATTGCAGTTCCACGCTTTCTTTCTTTGAATTTTAATTCAATCAAGATGGTAACCGTTCA  
AGCTGACGAAATTCGTAATGTTATCCGAGAACGTATTGAGCAATATAATAGAGAAGTCA  
AAATTGTAATACCGGTATCGTGCTTCAAGTAGGCGATGGCATTGCTCGTATTCATGGTC  
TTGATGAAGTAATGACAGGTGAATTAGTAGAATTTGAAGAGGGTACGATAGGCATTGCT  
CTGAATTTGGAATCAAATAATGTTGGTGTGTTAATGGGTGACGGTTTAAATGATACAA  
GAGGGAAGTTCTGTAAAAGCAACAGGAAGAATTGCTCAAATACCAGTGAGTGAGTCTT  
ATTTGGGTCGTGTTATAAATGCACTGGCTAAACCTATTGATGGTAGAGGTGAAATTTCA  
GCTTCTGAATCTCGGTTAATTGAATCTCCCGCTCCAGGTATTATTTGAGACGTTCCGTA  
TATGAGCCTCTTCAAACAGGGCTTATTGCTATTGATTCGATGATCCCTATAGGACGTGGT

CAGCGAGAATTAATTATTGGGGACAGACAGACCGGTAAAACAGCAATAGCCACGGATA  
CGATTCTTAATCAACAAAGTCAAATGTAATATGTGTTTATGTAGCCATTGGTCAAAAA  
GCATCTTCTGTGGCTCAGGTAGTGACTACTTTCCAGGAAAAGGGAACGATGGAATACA  
CTATTGTGGTAGCCGAAACGGCGGATTCTCCTGCTACATTACAATACCTCGCCCCTTATA  
CAGGAGCAGCTATGGCTGAATATTTTATGTACCGCGAACGACACACTTCAATTGTTTAT  
GATGATCTCTCCAAACAAGCGCAAGCTTATCGCCAAATGTCTCTTCTATTACGAAGACC  
ACCTGGTCGCGAAGCTTATCCAGGAGATGTTTTTTATTTGCATTACGCCTTTTGGAAA  
GAGCTGCTAAATCAAGTTCTCGTTTAGGTGAAGGAAGTATGACTGCTTTACCAATAGTT  
GAGACTCAATCGGGAGATGTTTCAGCTTATATTCCTACAAATGTAATTTCCATTACAGAT  
GGGCAAATATTCTTATCTGCCGATCTCTTCAATGCTGGAATCAGACCTGCTATTAATGTG  
GGTATTTCCGTTTTCCCGAGTAGGATCTGCAGCTCAAATTAAGCCATGAAACAGGTAGC  
TGGCAAATTCAAATTGAACTGGCACAATTCGCAGAATTAGAAGCCTTTGCGCAATTC  
GCTTCTGATCTCGATAAAGCTACTCAGAATCAATTGGCAAGAGGTCAACGATTGCGAG  
AATTGCTCAAACAATCCCAATCGGCCCTCTCGCGGTGGAAGAACAGATAACGACTAT  
TTATACCGGTACGAATGGTTATCTTGATTCATTAGAAATTGGGCAGGTAAGGAAATTTCT  
CGTTGAGTTACGTACTTACTTAAAAACGAATAAACCTCAGTTCCAAGGGATCATATCTT  
CTACCAAGACATTCACCGAGGAAGCAGAAGCCCTTTTGAAGAAGCCATTCAGGAAC  
AGATGGAACGCTTTCTACTTCAGGAAAAAGCAATGAGAATCAATCCTACCCTTTAAC  
CCCGGGTTTTCCGCGCGTGAAAAAAAAAACTTGGGGCGTATCACTCAAATCATTGGTC  
CGTACTGGATGTAGCTTTTCCCCCGGGCAAGATGCCCAATATTTACAACGCTCTGGTC  
GTTAAGGGTCGAGATACTGTCCGTCAACTAATTAATGTGACTTGTGAGGTACAGCAATT  
ATTAGGAAATAGTCGAGTTAGAGCTGTGGCTATGAGTGCTACATATGGTCTAATGAGAG  
GAATGGAAGTGATTGACACGGGAGCTCCTCTAAGTGTCCAGTCGGTGGAGCGACTCT  
CGGACGAATTTCAACGTGCTTGGGGAGCCTGTTGATAATTTAGGGCCTGTTGACTC  
GCACGACATCCCCTATTCATAGATCTGCGCCCCGCCCTTATCCAGTTAGATACAAAATTAT  
CTATTTTTGAAACAGGAATTAAGGTAGTAGATCTTTTAGCTCCTTATCGCCGTGGAGGA  
AAAATTGGACTATTCGGAGGGGCTGGAGTAGGTAAAACCGTACTCATTATGGAATTGAT  
CAACAATATTGCCAAAGCTCATGGGGGTGTATCTGTCTTTGGTGGAGTGGGTGAACGTA  
CTCGTGAAGGAAATGATCTTTACACGGAAATGAAAGAATCTGGAGTAATTAATGACCA  
AAATATTGCAGAAATCAAAGTGTCTCTAGTCTACGGTCAAATGAATGAACCGCCAGGA  
GCTCGTATGAGAGTTGGTTTGACTGCCCTAACTATGGCAGAATATTTTCGAGATGTTAAT  
GAACAAGACGTA CT TCTATTTATCGACAATATCTTCCGTTTCGTCCAAGCAGGATCCGA  
GGTATCCGCCTTATTGGGTAGAATGCCTTCCGCTGTGGGTATCAACCCACCCTTAGTAC  
CGAAATGGGTCTTTTACAAGAAAGAATAACTTCTACCAAGGAAGGGTCCATAACTTCTA  
TTCAAGCAGTTTATGTACCTGCGGACGATTTGACCGACCCCTGCTCCTGCCACGACATTC  
GCACATTTAGATGCTACTACCGTACTATCAAGAGGGTTGGCTGCCAAAGGTATCTATCC  
AGCAGTAGATCCTTTAGATTCAACGTCAACTATGCTCCAACCTCGAATCATTGGTGAGG  
AGCATTATGAAACTGCGCAAAGAGTTAAGCAAACCTTTACAACGTTACAAAGAACTCCA  
GGACATTATAGCTATTCTTGGGTGGACGAATTATCCGAAGAAGACCGTTTAACCGTAG  
CAAGAGCACGAAAATTGAGCGTTTCTTATCACAACCCTTTTTCGTAGCAGAAGTATTT  
ACCGGTTCTCCAGGGAAATATGTTAGTTAACAGAAACAATTAGAGGGTTTCAATTGAT  
CCTTCCGGAGAATTAGATAGTCTTCTGAACAGGCCTTTTATTTGGTAGGTAACATCGA  
TGAAGCTACCGCGAAGGCTATGAACTTAGAAATGGAGAGCAAATTGAAGAAAATGAC  
CTTAAATCTTTGTGTACTGACTCCTAATCGAATTGTTTGGGATTCAGAAGTGAAAGAAA

TCATTTTATCTACTAAAAGTGGCCAAATTGGCATATTACCAAACCACGCCCTATTGCCG  
CAGCTGTAGATATAGGTATTTTGAGAATACGTCTTAACGACCAATGGTTAACGATGGCTC  
TGATGGGTGGTTTTGCTAGAATAGGCAATAATGAGATCACTGTTTTAGTAAATGATGCG  
GAGAAGGGGAGTGATATTGATCCACAAGAAGCTCGGCAAACCTTTGAAATAGCGGAA  
GCTAACTTGAGGAAAGCTGAAGGCAAGAGACAAACAATCGAGGCAAATCTAGCTATC  
AGACGAGCTAGGACGCGAGTAGAGGCTATCCATTCGATTTTCGATGAAAAAGATGACCG  
ATTCTTTCGTTTCCTTGGGTCACTGGCCATCTGCCGGGAGTTTCGGGTTTAATACCGATA  
TTTTAGCAACAAATCCAATAAATCTAAGTGATGACTTACTGTATTGATTTTTTTTTGGAA  
AGGGAGTGTTAAGTGATTTATTAGATAATCGCAAACAGAGGATTTGAATACTATTTCGA  
AATCCGAAGAAGCTGCGCGGAAGGGCTATCGAACAAGTGGAAAAAGCCCGGGCTCGC  
TTACGTAAAGTAGAAATGGAAGCAGATCAGTTTCGAGCGAATGGATACTCTGAGATAG  
AACGAGAAAAATTCAATTTGATTAATTCAACTTATAAGACTTTGGAACAATTAGAAAAT  
TACAAGAATGAAACTATTTATTTTGAACAACAAAGGGTGATTCATCAAGTTCAGCAGTG  
GGTTTTCCAACAAGTCTTACAAGGAGCTTTAGGAACTTTGAATAGTTGTTTGACCCAA  
AAATTACATTTACGTACTATCAGTGCCAATATTGGCATGTTTGGGTGATAAAAAGAAATA  
ACCAATATGAATCCACTGATTTCTGCTGCTTCCGTTATTGCTGCTGGATTGGCCGTAGGG  
CTTCTTCTATTGGTCTTGGAGTTGGTCAAGGTACTGCTGCGGGCCAAGCTGTAGAAG  
GTATTGCAAGACAGCCCGAAGCGGAGGGAAAGATCCGAGGTACTTTATTGCTTAGTTT  
GGCTTTTATGGAAGCTTTAACAATTTATGGATTGGTTGTAGCATTAGCGCTTTTATTTGC  
GAATCCTTTTGTATGGATGTTCTATTATGTTCCATCAACACACTAAAAGGATTGTACGA  
TATATCCGGTGTGGAAGTAGGCCAACATTTCTATTGGAAAATAGGAGGTTTCCAAGTCC  
ATGCCCAAGTGCTTATTACTTCGTGGGTTGTAATTGCTATCTTAATAGGTTCCGCCACTAT  
AGCTCTTTGGAATCCACAAACCATTCCGACCGATGGTCAGAATTTATTCGAATATGCC  
TTGAATTTATTCGAGACGTGAGCAAACTCAAATTGGAGAAGAATACGGTCTTGGGT  
TCCTTTTATTGGAAGTATGTTTCTATTTATTTTGTCTAATTGGTCGGGGGCTCTTTTA  
CCTTGGAAAATCATAAGTTACCTCAAGGAGAGTTTGCCGCACCCACGAATGATATAAA  
TACTACCGTTGCTTTAGCTTTACTCACGTCAGTGGCATATTTCTATGCGGGTCTTACTAA  
AAAAGGATTAGATTATTTCAATAAATACATTCAGCCAACCTCCAATCCTTTTACCCATTAA  
CATCTTAGAAGATTTACAAAACCTTTATCACTTAGTTTTCGACTTTTCGGGAATATATT  
AGCTGATGAATTAGTAGTTGTTGTTCTTGTCTTTAATACCTTCAGTGGTTCCTATACCC  
GTTATGTTCTTGGATTATTTACAAGTGGTATTCAGGCTCTTATTTTTGCAACTTTAGCTG  
CGGCTTATATAGGCGAATCCATGGAGGGTCATCATATGATATTTCCACTTTAGAACATAT  
ATTAAGTCAATGTTCTTTTTCAATCGTTTTCAATTGTAATTACAATTCATTTGATAATTTAT  
TCGTCGATGAAATCACGGGACTCTATGATTCGTCAAAAAAGGGCATGATAGTGACTTTT  
TTCTGTATAACAGGACTATTCGTTACTCGTTGGACTTATTCGAGGCATTTCCCATTAAT  
GATTTATCTGAATCATTAATCTTCTTTTCGTGGAGTTTACCATTATTCATAGAGTTTTAT  
TTTTGTATAAACATAAAAAGTCATTTAAGCGCAATACCTATGTCAGGTGCTATTTTGACCC  
AAGGTTTTGTCACTTCAGGTCTTTTAACTCAAATGCATCAATCCACAATATTAGTACCCG  
CTCTTAAATCTCAGTGGTTAATGATGCATGTAAGTATGATAATATTGGGCTATGCATCTCT  
TTTATGTGGATCATTATTATCAGTAGGACTTCTAGTCAATTACATTTAGAAAAATCATAAGA  
GTTTTTGGTAAAAGTAATGAAATCCTAAATATGAATGAAAGAAGGAATGTTTTACGAAA  
TACTTCTTTTTTACTGCTAGGAATTATTATAGGTTTCAATTGATTCAACAATTGGATCAT  
TGGAGTTACCGTGTATTGGTTTAGGGTTTCTATTTTTAACCATAGGTATTCTTTACGGC  
GCAGTATGGGCTAATGAAGCATGGGGATCATATTGGAATTGGGATCCAAAAGAACTTC



AGCATTTATTACTTGGACTATTTTTCGCGATTTATTTACATACTCAAACAAATAAAAATTGG  
AAAGGTACAAATTCTGCAATTGTGGCTTCTATGGGTTTTCTTCTAATTTGGATATGCTATT  
TTGGGGTCAATCTACTAGGAATAGGGTTACATAGTTATGGTTCATTTCCGTTAACAAATGA  
AAAAAAGAAAGCATTCACTCACATTCTATATCTTGTCTCTATAGTATTTTTACCCTGGC  
GGATCCCTCTCTCATTACTAAAAGTCCGGAATCTTGGGTTATTAATTGGGGGAATACTA  
GACAATCCGAAATTTTTTTAAATGAGATTCAAGAAACGAGTATTCTAGAAAACCTTCATA  
GAATTAAGGGAACCTCTTGTGGACGAAATGATAAAGGAATATCCGGAGACACATCT  
AAAAAATTTTCGTATAGGAATCCACAAAGAAACGATTCAATTGATCAAATGTATAATG  
AGGACCATATCCATACGATTTTTCGCTTCTCAACAAACATAATCTGTTTTGTTATTCTAA  
GTGGTTATTCTATTATGGGTAATGAAGAACCTGTTATTCTTAACTCTTGGGTTCAAGAAT  
TCCTATATAACTTAAGCGACACAATAAAAGCTTTTTCTATTCTTTTAGTAACTGATTTATG  
TATTGGATTCCATTCCCCCATGGTTGGGAACATAATGATTGGCTCTGTCTACAAAGATTT  
TGGATTTGCTCATAACGATCAAATTATATCTGGTCTTGTTCACTTTTCCAGTCATTCTA  
GATACAATTTTTAAATATTTGATCTTCCGTTATTTAAATCGTGTATCCCCGTCACCTGTAG  
TGATTTATCGTTCACTGAATGACATGCCTATTGGTGTTCAAAAGTACCTTCTCGAATTC  
CCGGAGAGGAATATGCAACTTGGGTTGACATATACAATCAACTTTATCGAGAAAGATTT  
CTTTTTTTAGGCCAAGCGGTTGATAGCGAAATTTTCGAATCAACTTATTGGTCTTATGGTA  
TATCTCAGTATAGAGGATGATACCAAGATCTTTATTTATTTATAAACTCTCCTGGCGGAT  
GGTAATACCCGGAATAGCTATTTATGATACTATCCAATTTGTGCGACCAGATGTCCATA  
CAATATGCATGGGGTTAGCCGCTTCAATGGGATCTTTTATCCTGGTTCGGAGGAGAGATT  
ACCAAACGTCTAGCATTCCCTCACGCCAGGGTAATGATCCATCAACCTGCTAGTTCTTA  
TTTTGAGGCACAAACGGGAGAATTTATCCTGGAAGCGGAAGAAGAACTACTGAAACTGCGT  
GAAACCCTCACAGGGGTTTATGGACAAAGAACGGGCAAACCTTATGGGTTGTATCCG  
AAGACATGGAAAGGGATGTTTTTATGTCAGCAACAGAAGCCCAAGCTCATGGAATTGT  
TGATCTTGTAGCGGTTGAAATGAAAGAACAATAATGGATTTCATGAGGGTTTAATTACTG  
AATCACTTCCCAATGGTATGTTCCGGGTTTCGTTTAGATAATGAAGATCTAGTTCTAGGTT  
ATGTTTCAGGAAGAATCCGACGTAGTTTTTATACGGGTACTACCAGGAGATAGGGTCAAA  
ATTGAAATAAGTCGTTATGATTCAACCAGAGGGCGTATAATTTATAGACTACGCAACAA  
GGATTCGAACGATATGGAGAAATTCCAAAGACATTTAAAA---AATAGATCTCGACAATA  
TGACTTCTATATCCACTTATTTTTCAAGAGTATATTTATGTACTTGCTTATGATCAT-----G  
TAGGTTATAAAAATGAATTCAGTTCACTAATTGTGAAACGTTTAATTATTCGAATGTATC  
AACAGAAGCATTGCTTATTTCCGATAATGATTTCGAATCCAAATCCATTTTTTGGGAAGA  
ATTTGTATTCTCAAATGATATTAGAAGGATTCGCAATCATTTTGGAAATGCCATTTTCCTT  
ACAATTAGTATCTTTCCTAATAAAAAAATCTCATAATTTGCGATCAATTCATTCAATATTT  
ACTTTTTTAGAGGACAAATTATCCCATTTAAATTATATGTCAAATATACTAATACCCTATC  
CCGTCCATTTGGAAATCTTGGTTCAAATTCTTCTATACTGGGTAAAAGATACCTCTTCTT  
TGCATTTCTTGCATTTTTTCTCCATGAGTATCGTAAT-----TGGAATAGTCTTAAATTCAT  
TTCCATCCTTTCAAACAAAGATTGTTCTTGTTCCTATATAATTCTCATGTATATGAATAC  
GAATCCATCTTCGTTTTTCTTCGTAACCAATCTTCTCATTACGATCAACATCTTCTGGA  
ACCCTTCTTGAGCGAATATATTTCTATGGAAAATAGAACATGTCAA---GTCTTTACTA  
AGGATTTGATCCCATGGTTGTTCAAGGATCTTTTCATGCATTATATTAGATATCAAGGAA  
AATCGATTCTAGCTTCAAAGGGACGCCTCTTCTGATGAATAAATGGAAATATTACCTT  
GCCAATTTCTGGCAATGTCGTTTTTATGTGTGGTTTCAACCAGGA-----AGCGTTTATATA  
ACC---AATCATTCTTCGATTTTTATAGGCTACTTTTCAAGTGTGCGACTCAATCCTGCAG



repeated text



GATAGGCAATCTGTCTTTTCAGAGCTATCGCCCCACTAAAAAAATATTCTTGTGATAG  
GTCCCGTTCCTGGTCAGAAATATAGTGAATCGTCTTTCCTATTCTTCCCGAACCCCTG  
CTACTAAGAAAGATGTTCACTTCTTAAAATATCCCATATATGTAGGCGGGAACAGGGGA  
AGGGGTCAGATTTATCCTGACGGGAGTAAAAGTAAACAATACAGTTTATAATGCTACAGC  
ATTCGGTGTAATAAGTAAAATCATAAGAAAAGGGGGATATGAAATATCCATAG  
TAGATGCATCGAATGGACGTCAAGTGGTTGATATTATCCCTCCAGGACCAGAACTTCTT  
GTTTCAGAGGGGGAATCTATCAAACCTTGATCAACCATTAACGAGGAATCCTAATGTGGG  
TGGATTTGGTCAAGGAGAGGCAGAAATAGTACTTCAAGATCCATTACGTATCCAAGGTT  
TTTTGTTCTTCTTGGCGTCTGTTATTTGGCACAAATCTTTTTGGTTCTTAAAAAGAAAC  
AGTTCGAGAAGGTTCAATTGTCCGAAATGAATTCATGAGTAAAGTTTATGATTGGTTC  
GAAGAACGTCTCGAGATTCAGGCAATTTCCGGATGATATACTAGTAAATACGTTCCCTCC  
TCATGTCAACATATTTTATTGTCTAGGAGGAATTACACTTACTTGTTTTTTAGTACAAGTA  
GCTACGGGGTTTGGCTATGACTTTTTACTATCGTCCGACTGTTACTGAGGCTTTTGCTTCT  
GTTCAATACCTAATGACTGAAGCTAACTTTGGTTGGTTAATCCGATCAGTTCATCGATGG  
TCGGCAAGTATGATGGTCCTAATGATGATCCTGCATGTATTCGTGTGTATCTCACCGGT  
GGATTTAAAAACCTCGCGAATTGACTTGGGTTACAGGTGTGGTTCTGGCTGTATTGAC  
GGCATCTTTTGGTGTAACCTGGTTATTCTTACCTCGGGACCAAATTGGTTATTGGGCAGT  
CAAATGTAACAGGTGTCCCTGAAGCTATTCTGTAAATAGGATCGCCTTTGGTAGAGT  
TATTACGCGGAAGTGCTAGTGTGGGACAATCCACTTTAACTCGTTTTTATAGTTTACACA  
CTTTTGTATTGCCTCTTCTTACTGCCGTATTTATGTTAATGCACTTCCCAATGATACGTAA  
ACAAGGTATTTCTGGTCCGTTAATGGGAGTAAACAAAAAACCCGACTTGAATGATCCT  
GTATTAAGAGCGAAATTGGCTAAAGGGATGGGTCATAATTATTACGGAGAGCCCGCGTG  
GCCCAACGATCTTTTATATATTTTTCCTGTAGTAATTCTAGGAAC TATTGCATGTAACGTA  
GGCTTAGCGGTTCTAGAACCATTAATGATTGGTGAACCAGCCGATCCATTTGCAACTCC  
TTTGAAATATTACCAGAATGGTATTTTTTTCCCGTATTTCAAATACTTCGTACAGTACCC  
AATAAATTATTGGGTGTTCTTTTAAATGGTTTCAGTCCCTACGGGATTATTAACAGTACCTT  
TTTTAGAGAATGTTAATAAATTCCAAAATCCATTTTCGTCTCCAGTAGCGACAACCTGTC  
TTTTTGATTGGTACTGCAGTGGCCCTTTGGTTGGGTATTGGCGCAACATTACCTATTGAT  
AAATCCCTAACTTTAGGTCTTTTTATGATTGAAGTTTTTCTATTTGGAATCGTGTTAGGTC  
TAATTCCTATTACTTTGGCTGGATTATTTGTAACCTGCATATTTACAATACAGACGCGGGGA  
TCAGTTAGACCTTATGCCTACTATAATTAGTTATTTTCGGTTTTTCTACTAGCGGCTTTAACT  
ATAACTTCAGTTCTATTTATTGGTCTGAGCAAGATACGACTTATTATGGATATAGTAAGTC  
TCGCTTGGGCTACTTTAATGGTAGTCTTTACATTTTCCATTTCACTCGTAGTATGGGGGA  
GAAGTGGACTCATGATTATTCGTTCCGCCGAACCAGAAGTCAAATTTTGGTAGATAGA  
GATCCCATAAAACTTCTTTTCGAGGAATGGGCCAGACCCGGTCAATTTCTCAAAAACAAT  
AGCTAAGGGCCCCGATACTACCCTTGGATCTGGAACCTACATGCTGATGCTCATGATT  
TCGATAGCCATAACCAGTGATTTGGAGGAGATCTCTCGAAAAGTATTTAGTGCCCATTT  
GGTCAACTCGCTATCATCTTTCTTTGGCTGAGTGGCATGTATTTCCACGGTGCTCGTTTT  
GCCAATTATGAAGCATGGCTAAGCGATCCTACTCACATTGGGCCTAGTGCCAGGTGGT  
TTGGCCAATAGTGGGCCAAGAAATATTGAATGGCGATGTGGGCGGGGGTTTTCCGAGGA  
ATACAAATAACCTCTGGGTTTTTTTCAGATTTGGCGAGCATCTGGAATAACTAGTGAATTA  
CAACTCTATTGTACCGCAATTGGTGCATTGATCCTTGCAGCGTTAATGCTTTTTGCTGGT  
TGGTTCCATTATCACAAAGCCGCTCCAAAATTGGCGTGGTTCCAAGATGTAGAATCCAT  
ATTGAATCACCATTTAGCGGGGCTACTAGGCCTTGGGTCTCTTTCTTGGGCGGGACATC

AAATACATGTATCTTTGCCAATTAACCAATTTCTAAATGCTGGAGTAGATCCTAAAGAGA  
TACCACTTCCTCATGAATTTATTTTGAATCGGGATCTTTTGGCTCAACTTTATCCTAGTTT  
TTCCGAGGGGAGCAACCCCATTTTTTACCTTGAATTGGTCAAAAATATGCGGAATTTCTTA  
CTTTTCGTGGAGGATTAGATCCAGTAACCGGGAGTCTATGGCTGACTGATATTGCACAC  
CATCATTTAGCTATTGCAATTCTTTTCTTGATAGCGGGTCACATGTATAGGACCAACTGG  
GGCATTGGTCACGACCTAAAAGACATTTTAGAGGCTCATAAAGGTCCATTTACAGGTCA  
GGGCCATAAAGGCCTATATGAGATCCTAATAACGTCATGGCATGCTCAATTAGCTCTTAA  
CCTAGCTATGTTAGGCTCTTTAACCATTGTTGTGGCTCACCATATGTATTCCATGCCCCCT  
TATCCATATCTGGCTACTGACTATGGTACACAACCTGTCATTGTTACACATCACATGTGG  
ATTGGTGGATTTCTCATAGTTGGTGTCTGCTGCGCATGCAGCTATTTTTATGGTAAGAGAC  
TATGATCCAACACTCGATACAACGATCTATTAGATCGTGTCTTAGACATCGCGATGCA  
ATCATATCGCATCTCAACTGGGCATGTATATTTCTAGGCTTTCATAGTTTTGGTTTTATATAT  
TCATAATGATACCATGAGCGCCTTAGGACGCCCTCAAGATATGTTTTCGGATACCGCTAT  
ACAATTACAACCCGTCTTTGCTCAATGGATACAAAACACCCATGCTTTAGCACCTGGCG  
CAACGGCTCCTAGTACAACAACGAGCACTAGTTTGGGG-----GGTGGCGATTTAGTAGC  
AGTGGGCGGCAAAGTAGCTTTGTTACCCATTCCATTAGGAACTGCGGATTTTTTGGTCC  
ATCACATTCATGCATTTACAATTCATGTGACGGTATTGATACTCCTGAAAGGTGTTCTAT  
TTGCTCGTAGTTCCCGCTTGATATCGGATAAAGCAAATCTTGGTTTTTCGTTTTCCCTTG  
ATGGACCTGGAAGGGGGGGGACATGTCAAGTATCCGCATGGGATCATATCTTCTTAGGG  
CTATTCTGGATGTACAATGCAATTTCCGGTAGTAATATTTCAATTCAGTTGGAAAATGCAG  
TCAGATGTTTGGGGTAGTATAAGTGATCAAGGGGTGATAACTCATATCACGGGAGGAAA  
CTTTGCGCAGAGTTCCATTACCATTAATGGGTGGCTCCGCGATTTCTTATGGGCCCAGG  
CATCTCAGGTAATTCAGTCTTATGGTTCTTCATTATCTGCCTATGGCCTTTTTGTTTCTAGG  
TGCTCATTTTTGTATGGGCTTTTAGTTTAAATGTTTCTATTCAGCGGGCGTGGTTATTGGCA  
AGAACTTATTGAATCCATCGTTTGGGCTCATAATAAATTAAGTTGCTCCTGCTACTCA  
GCCTAGAGCCTTGAGCATTATACAAGGACGTGCTGTAGGGGTAATCATTACCTTCTGG  
GTGGAATTGCCACAACATGGGCGTTCTTCTTAGCAAGAATTATTGCAGTAGGAATGGCA  
TTAAGATTTCCAAGTTTLAGCCAAGGCTTAGCCAGGACCCCACTACTCGTCGTATTTG  
GTTTGGTATTGCTACCGCACATGACTTCGAGAGTCATGATGATTAATGAGGAACGTC  
TGTATCAGAATATTTTTGCTTCTCACTTCGGGCAATTAGCAATAATTTTTCTGTGGACTT  
CCGAAAATCTGTTTCATGTAGCTTGGCAAGGAAATTTTGTAGTCATGGGTACAGGATCCT  
TTACATGTAAGACCTATTGCTCATGCAATTTGGGATCCTCATTTTGGTCAACCGGCTGTG  
GAAGCTTTTACTCGAGGGGGTGTCTTTGGACCAGTGAATATCGCTTATTCTGGTGTTTA  
TCAGTGGTGGTATAACAATCGGTTTACGCACTAATGAAGATCTTTATACTGGAGCCCTTTT  
TCTATTATTTCTTTCTGCCATATCCTTAATAGCGGGTTGGTTACATCTACAACCGAAATGG  
AAACCGAGCATTTTCATGGTTCAAAAATGCCGAATCTCGTCTCAATCATTTGTTCAGG  
ACTTTTCGGGGTAAGTTCCTTGGCTTGGGCCGGGCATTTAATCCATGTCGCCATTCCCG  
GATCCCGGGGGGAATACGTTTCGATGGAATAATTTGTAGATGTATTACCGCATCCCCAA  
GGATTAGGACCACTTTTTACAGGTCAATGGAATCTTTATGCTCAAAACCCCGATTCAAG  
TAGTCATTTATTTGGTACCCCCAGGGGGGGGGACTGCCATTCTAACCTTCTCGGGG  
GATTTTCATCCACAAACGCAAAGTTTATGGTTGACTGATATCGCTCATCACCATTTAGCTA  
TTGCATTTATTTTTCTCGTCGCCGGTTCATATGTATAGAACTAACTTCGGGATTGGGCACA  
GTATAAAAAATATTTTAGAAGCACATACTCCTCCGGGGGGTTCGATTGGGACGTGGGCAT  
AAGGGTCTTTATGACACAATCAATAATTCGATTCATTTTCAATTAGGTCTTGCTCTAGCC

TCTTTAGGGGTTATTACTTCCTTGGTAGCTCAACACATGTACTCTTTACCCGCTTATGCG  
TTCATAGCACAAGACTTTACTACTCAAGCTGCGTTATATACTCATCATCAATACATCGCA  
GGATTCATCATGACAGGGGCTTTTGCCCATGGAGCTATATTTTTTCATTAGAGATTATAATC  
TGGAACAGAATGAGGATAATGTATTGGCAAGAATGTTAGACCATAAAGAAGCTATCATA  
TCCCATTTAAGTTGGGCCAGTCTTTTTCTGGGGTTCCATACCTTGGGACTTTATGTTTAT  
AATGATGTCATGTTTTGCCTTTGGGACTCCGGAGAAACAAATCTTGATCGAACCTATATT  
TGCCCAATGGATAACAATCTGCTCATGGTAAACTTTCATATGGATTTCGATGTACTTTTATCT  
TCAACGAATGGTCTGGCATTCAATGCGGGTTCGAAGCATATGGTTGCCTGGTTGGTTAA  
TGCTATTAATGAA-----AATAGTAATTCACTATTCTTAACAATAGGTCCGGGAGACTTTTT  
AGTTCATCATGCTATTGCTCTAGGTTTACATACTACATTGATATTAGTAAAGGTGC  
TTTAGATGCACGCGGTTCCAAGTTAATGCCAGATAAAAAAGATTTTCGGTTATAGTTTTCT  
CTTGCGATGGTCCAGGACGAGGTGGTACTTGTGATATTTTCGGCTTGGGACGCATTTTAT  
TTGGCGGTTTTCTGGATGTTAAATACCATTGGATGGGTTACTTTTTATTGGCATTGGAAG  
CACATCACATTATGGCAGGGTAACTTTTACAATTTAATGAGTCTTCTACTTATTTGATG  
GGATGGTTAAGAGATTACCTATGGTTAACTCTTCACTACTTATCAATGGGTATAACCCT  
TTTGGTATGAATAGCTTATCGGCTGGGCATGGATGTTCTTATTTGGACATCTTGTTTTGG  
GCTACTGGATTTATGTTTTTAATTTCTGGCGTGGATATTGGCAGGAATTGATTGAGACT  
TTAGTATGGGCTCATGAGCGCACGCCTTTGGCTAATTTGATTTCGATGGGGAGATAAACC  
AGCGGCTCTTTCCATTGTGCAAGCAAGATTGGTTGGATTAGCCACTTTTCTGTAGGTT  
ATATATTCACTTATGCGGCTTTCTTGATTGCCTCTACATCGGGCAAATTTGGTATGTCACA  
TTCAGTAAAAATTTATGATACATGTATAGGGTGCCTCAATGTGTCCGAGCCTGCCCTAC  
AGATGTATTAGAAATGATACCTTGGGATGGATGTAAAGCTAAGCAAATTGCCTCTGCTC  
CAAGAACAGAGGACTGTGTTGGTTGTAAAAGATGTGAATCCGCCTGTCCAACAGACTT  
CTTAAGTGTTCGAGTTTATTTATGGCATGAAACAACCTCGCAGTATGGGTCTAGCGTATAT  
GACAACTCTAAACTTACCCTCTATTTTTGTGCCTTTAGTTGGTTTAGTATTTCCGACAAT  
TGCAATGACTTCTTTATTTCTTCATGTTCAAAAAACAAGATTATTATGCGAGATCTAAA  
AACATATCTCTCCGTAGCACCGGTAAGTACTTTATGGTTCGGGTTTTTTGGCGGGTCT  
ATTGATTGAGATCAATCGCTTTTTCCCGATGCGTTGACATTCCTTTTTTTC-----ATGAC  
TGCAATTTTAGAGAGACGCGAAAGCGAAAGTCTATGGAGTCGTTTCTGTAGCTGGATA  
ACTAGCACTGAAAACCGTCTTTACATTGGATGGTTTGGTGTTTTGATGATCCCTACCTTA  
TTGACTGCAACTTCTGTATTTATTTATGCTTTCATTGCTGCTCCTCCAGTAGATATTGATG  
GTATTCGTGAACCTGTTTCTGGATCTCTACTTTATGGAAACAATATTATCTCCGCGCCA  
TTATTCCTACCTCTGCAGCTATAGGTTTACACTTTTACCCGATATGGGAAGCGGCATCTG  
TTGATGAATGGTTATAACAATGGTGGTCCTTATGAACTAATTGTTCTACATTTCTTACTTGG  
TGTAGCTTGTTACATGGGTCGTGAGTGGGAACTTAGCTTCCGTCTAGGTATGCGCCCTT  
GGATTGCTGTTGCATATTCAGCTCCTGTTGCAGCCGCTACTGCTGTTTTCTTGATCTATC  
CAATTGGTCAAGGAAGCTTTTCTGATGGTATGCCTCTAGGAATCTCTGGTACTTTCAAC  
TTCATGATTGTATTCCAGGCCGAGCACAATATCCTTATGCATCCATTTTCATATGTTAGGCG  
TAGCTGGTGTATTCGGGGGCTCCCTATTCAGTGCTATGCATGGTTCCTTGGTAACTCTA  
GTTAATCAGGGAAACCACAGAAAATGAGTCTGCTAATGCGGGTTACCGATTCCGGTCA  
AGAGGAAGAACTTATAATATCGTAGCCGCTCATGGTTATTTTGGCCGATTGATCTTCCA  
ATATGCTAGTTTCAACAATTCTCGTTCTTTACATTTCTTCTAGCTGCTTGGCCTGTAGTA  
GGTATTTGGTTCACTGCTTTAGGTATCAGCACTATGGCTTTCAACTTAAATGGTTTTCAAT  
TTCAACCAATCCGTAGTTGATAGTCAAGGTCGTGTAATCAATACCTGGGCCGATATCATT

AACCGCGCTAATCTTGGTATGGAAGTTATGCATGAACGTAATGCTCATAACTTCCCTCTC  
GACTTAGCTGCTGTCGAAGCTCCATCTACAAATGGAATGGGTTTACCTTGGTATCGTGT  
TCATACCGTCGTATTGAATGATCCCGGTCGGTTGCTTTCTGTCCATATAATGCATACAGC  
TTTGGTTGCTGGTTGGGCCGGTTCGATGGCTCTATATGAATTAGCAGTTTTTGATCCCTC  
TGATCCCGTTCTTGATCCAATGTGGAGACAAGGTATGTTTCGTTATACCCTTCATGACTCG  
TTTAGGAATAACCACTTCATGGGGTGGTTGGAGTATCACA---GGGGGGACTATAACGAA  
TCCGGGTATTTGGAGTTACGAAGGCGTGGCCGGGGCCCATATTGTATTTTTCTGGTTTTGT  
GCTTTTTAGCAGCTATCTGGCATTGGGTGTATTGGGATCTAGAAATATTTTTGTGATGAAC  
GCACAGGAAAACCTCTTTGGATTTGCCCAAGATCTTTGGAATTCATTTATTTCTCTCA  
GGGGTGGCTTGGTTTTGGTGCATTTTCATGTAACAGGTTTGTATGGTCCTGGAATA  
TGGGTTTTCCGATCCTTATGGACTAACTGGAAAAGTACAATCTGTAAATCCAGCGTGGGG  
TGTGGAGGGTTTTGATCCTTTTGTCCGGGGGAATAGCCTCTCATCATATTGCAGCAG  
GAACATTAGGCATATTAGCAGGACTATTCATCTTAGTGTCCGTCCGCCCAACGTCTAT  
ACAAAGGATTACGTATGGGAAATATTGAAACCGTTCTTTCCAGTAGTATTGCTGCTGTC  
TTTTTGCAGCTTTTGTGTTGCTGGAACCTATGTGGTATGGTTCAGCAACTACTCCGATC  
GAATTATTTGGTCCCCTCGTTATCAATGGGATCAGGGATACTTCCAGCAAGAAATATAT  
CGAAGAGTTGGTGTGGGCTAACCGAAAATCAAATTTATCAGAAGCTTGGTCTAAAA  
TTCCTGAAAAATTAGCTTTTTATGATTACATTGGCAATAATCCGGCAAAAGGGGGATTAT  
TCAGAGCAGGCTCAATGGACAACGGGGACGGAATAGCTGTTGGATGGTTAGGACACC  
CTATCTTTAGAGATAAAGAGAGGGCGCGAACTTTTTGTACGCCGTATGCCTACTTTTTTTG  
AAACATTTCCAGTCGTTTTTGGTAGACGGAGATGGAATTGTTAGAGCCGATGTTCCTTTT  
AGAAGGGCAGAATCGAAGTATAGTGTGCAACAAGTAGGTGTAACCTGTTGAGTTCTATG  
GTGGCGAACTCAATGGAGTCAGTTATAGTGATCCTGCTACTGTGAAAAAATATGCTAGA  
CGTGCTCAATTAGGTGAAATTTTTGAATTAGATCGTGCGACTTTGAAATCCGATGGGGT  
TTTTCGTAGCAGTCCAAGGGGTGGTTTACGTTTGGACATGCTTCGTTTTGCTCTGCTCT  
TTTTCTTCGGACACATTTGGCATGGTGCTAGAACCTTGTTTAGAGATGTTTTTGCTGGTA  
TTGACCCAGATTTGGATGCTCAAGTGGAAATTTGGAACATTTCAAAAACCTGGGGATCC  
AACTACAATAAAACAAGTAGTC-----GTGGAAACGCTCTTTAAT  
GGAACCTTAGCTTTAGCCGGTCGTGACCAAGAAACTACCGGTTTCGCTTGGTGGGCCG  
GGAATGCCCCACTTATCAATTTATCCGGTAAACTACTTGGGGCTCATGTAGCTCATGCCG  
GATTAATCGTATTCTGGGCCGGAGCAATGAACCTATTTGAAGTGGCTCATTTTCGTACCG  
GAGAAGCCCATGTATGAACAAGGATTAATTTACTTCCCACCTAGCTACTCTAGGTTG  
GGGGTAGGTCCTGGTGGGGAAGTTATAGACACTTTTCCATACTTTGTATCTGGGGTAC  
TTCACTTAATTTCTTCTGCAGTATTGGGCTTTGGCGGTATTTATCATGCACTTCTGGGAC  
CTGAGACTCTTGAAGAATCTTTTCCATTCTTCGGTTATGTATGGAAAGATAGAAATAAA  
ATGACCACAATTTGGGTATTCATTAATCTTGTTAGGTATAGGCGCCTTTCTTCTAGTAT  
TCAAAGCCCTTTATTTGGGGGTGTATATGATACCTGGGCTCCCGGAGGGGGAGATGTA  
AGAAAAATTACCAACCTGACCCTTAGCCCAAGTGTTATATTTAGTTATTTACTAAAATCT  
CCTTTTGGGGGAGAAGGATGGATTGTTAGTGTGGACGATTTGGAAGATATAATCGGAG  
GACATGTATGGTTAGGTTCCATTTGTATACTTGGTGGAATCTGGCATATCTTAACCAAAC  
CCTTTGCATGGGCTCGCCGTGCACTTGTATGGTCTGGAGAGGCTTACTTGTCTTATAGTT  
TAGGCGCTTTATCTGTTTTTGGTTTCACTGCTTGTTGCTTTGTCTGGTTCAATAATACTG  
CTTATCCTAGTGAGTTTTACGGGCCACTGGACCAGAAGCTTCTCAAGCTCAAGCATTT  
ACTTTTCTAATTAGGGACCAGCGTCTTGGGGCTAACGTAGGATCCGCTCAAGGACCTAC



TGGTTTAGGTAAATATCTAATGCGTTCCCCGACTGGAGAAGTCATTTTTGGGGGAGAAA  
CTATGCGTTTTTGGGATCTACGTGCTCCCTGGTTAGAACCTCTAAGGGGTCCCAATGGT  
TTGGACTTGAGTAGACTGAAAAAGACATAAACCTTGGCAAGAACGGCGTTCCGCG  
GAATATATGACTCATGCTCCTTTAGGTTCTTTAAATTCCGTGGGTGGCGTAGCTACCGAG  
ATCAATGCAGTCAATTATGTCTCTCCTAGAAGTTGGTTAGCTACCTCTCATTTTTGTTCTA  
GGATTTTTTCTATTTGTAGGTCAATTTGTGGCACGCGGGAAGGGCTCGTGCAGCTGCAGC  
AGGATTTGAAAAAGGAATCGATCGTGATTTGGAACCTGTTCTTTCCATGACCCCTCTTA  
ACATGACTATAGCCCTTGGTAAATTTACCAAAGACGAAAAT---TTATTTGATATTATGGAT  
GATTGGTTACGTAGAGACCGTTTTCGTTTTTGTAGGTTGGTCCGGTCTATTGCTCTTCCCT  
TGTGCCTATTTTCGCTTTAGGAGGTTGGTTCACAGGTACAACCTTTGTAACCTTCATGGTAT  
ACCCATGGATTGGCCAGTTCCTATTTGGAAGGCTGCAATTTCTTAACGCCGCAGTTTC  
TACTCCTGCTAATAGTTTAGCCATTCTTTGTTGTTACTATGGGGTCCTGAAGCACAAGG  
AGATTTTACTCGTTGGTGTCAATTCGGCGGTCTATGGACTTTTTGTTGCTCTCCACGGCG  
CTTTTGGACTAATAGGTTTCATGTTACGTCAATTCGAACTTGCTCGATCTGTTCAATTGC  
GACCTTATAATGCAATCGCGTTCTCGGCTCCAATTGCTGTTTTTGTCTGTATTCTGAT  
TTATCCACTAGGTCAGTCTGGTTGGTTCTTTGCACCCAGTTTTGGTGTAGCAGCTATATT  
TCGATTCATCCTTTTTTTTTCAAGGGTTTCATAATTGGACGTTGAACCCATTTTCATATGATG  
GGAGTTGCCGGGGTATTAGGTGCTGCTCTGCTATGCGCTATTCATGGTGCTACCGTAGA  
AAATACTTTATTTGAAGATGGTGATGGTGCAAATACATTCCGTGCTTTTAACCCAACCC  
AAGCTGAAGAACTTATTCAATGGTCACCGCTAACCGATTTTGGTCCCAAATCTTTGGG  
GTTGCTTTTTTCTAATAAACGTTGGTTACATTTCTTTATGTTATTTGTACCAGTAACTGGTT  
TATGGATGAGTGCTCTTGGAGTAGTTGGTCTGGCTCTGAACCTACGTGCCTATGACTTT  
GTTCCCAAGAAATCCGCGCAGCGGAAGATCCTGAATTTGAGACTTTCTACACCAAAA  
ATATTCTCTTAAACGAGGGTATTCGTGCTTGGATGGCGGCTCAAGATCAGCCTCATGAA  
AACCTTATATCCCTGAGGAGTTCTACCCCGTGGAAACGCTCTTATGTCTGGAAGCAC  
AGGAGAACGTTCTTTTGTGATATTATTACCAGTATTCGATACTGGGTCATTCATAGCATT  
ACTATACCCTCTCTATTTCATTGCAGGTTGGTTATTCGTTAGCACAGGTTTAGCTTACGAT  
GTGTTTGGAAAGTCCTCGGCCAAACGAATATTTTACAGAGAGCCGACAAGGAATTCCAT  
TAATAACTGGACGTTTTGATCCTTTGGAA-----ATGACCATAGATCGAAC  
CTATCCAATTTTTACAGTGCGATGGTTAGCTGTTACGGACTAGCTGTACCTACCGTTTC  
TTTTTTGGGGTCAATATCAGCAATGCAGTTCATCCAACGAATGGTTACACAAACCGTTG  
AGGGTAGTTCTAAATTTGGT---CCAAGACGAACTAGTATAGGGAATTTATTAACCATT  
GAATTCAGAAATATGGTAAAGTAGCTCCTGGATGGGGAACACTCCTTTGATGGGTGTCG  
CAATGACTTTATTTGCGATATTTCTATCTATTTTATAGAAATTTATAATTTCTCCGTTTTAT  
TGAATGGAATTTCAATGAATATGCTTACTCTCAAACCTTTCGTTTATACAGTAGTGATATT  
CTTTGTTTCTCTCTTCATTTTCGGATTCCTGTCTAATGATCCAGGACGTAACCCTAGAGG  
TGAAGAAATGGCTGATACTACTGGAAGGATTCTCTTTGGCTAATAGGTACTGTAACCG  
GTATTCCTGTGATCGGTTTAAATAGGTATTTCTTTTATGGTTTCATATTCGGGATTGGGTTT  
ATCTCTGATGCTTAATATCTTTAATTTGATCTATATCTGTTTTTCATTCTGTCTTTATTTCGA  
GTAGTTTTTCTTCGCCAAATTACCTGAAGCCTACGCTTTTTTGAATCCAATCGTAGATG  
TTATGCCAGTCATAACCCGTGCTCTTTTTTCTCTTAGCATTTGTTTGGCAAGCTGCTGTAA  
GTTTTCGAACGACACAATCAAACCCAAACAAACAAAATGTTGAATTGAATCGTACCAG  
TCTCTACTGGGGTTATTAATCAATTTTGTACTTGCTGTCTTATTTTCCAATTTTCTTCA  
ATATGGAAGTCAATATTCTCGCATTATTGCTACTGCACTGTTTCATTCTAGTTCCTACTGC

TTTTTTACTTATCACTTATGTAAAAACAATTGGTTCAAAT---ATGGAAACAGCAATTCTA  
GTCGCCATCTCTATATCTGGTTTACTTGTAAAGTTTACTGGGTACGCCTTATATAACCGCTT  
TTGGGCAACCCCTACAACAATAAGAGATCCATTCGAAGAACACGGGGACATGGAAG  
CATTGGTTTATACATTTCTTTTAGTCTCGACTCTAGGAATACTTTTTTTTCGCTATCTTTTTT  
CGAGAACCGCCTAAAGTTCCAATAAAAAGATGAAAATGACTATTGTTTTCCAATTGG  
CTGTTTTTGCATTAATTGCTACTTCATCAATCTTACTGATTAGTCTACCCGTTGTATTTGT  
CTCTCCCGACGGTTGGTCAAGTAACAAAAATGTTGTATTTTCCAGTACATCATTATGGAT  
TGGGTTAGTCTTTCTGGTGGGTATCCTTAATTCCCTCATCTCT-----ATGTCAC  
CACAAACAGAGACTAAAGCAAGTGTGGATTCAAAGCTGGTGTAAAGATTACAAATT  
GACTTATTATACTCCTGACTATGAAACCAAAGATACTGATATCTTGGCAGCATTCCGAGT  
CACTCCTCAACCTGGAGTTCCACCTGAGGAAGCAGGAGCTGCGGTAGCTGCCGAATCT  
TCTACTGGTACATGGACAACGTGTGTGGACTGACGGACTTACCAGCCTTGATCGTTACAA  
AGGACGATGCTACCACATCGAGCCCGTTGCTGGAGAAGAACTCAATTTATTGCTTATG  
TAGCTTACCCCTTAGACCTTTTTGAAGAGGGTTCGGTACTAACATGTTTACTTCCATTG  
TGGGTAATGTATTTGGGTTCAAAGCCCTTCGCGCTCTACGTTTGGAGGATCTGCGAATT  
CCTCCTGCTTATTCTAAAACCTTTTCAAGGCCCGCCTCATGGCATCCAAGTTGAGAGAGA  
TAAATTGAACAAGTATGGCCGCCCTTATTGGGATGTACTATTAACCTAAATTGGGGTT  
ATCTGCTAAGAATTACGGTAGAGCAGTTTATGAATGTCTCCGCGGTGGACTTGATTTTA  
CCAAAGATGATGAGAACGTAAACTCCCAACCATTATGCGTTGGAGAGATCGTTTCTTA  
TTTTGTGCCGAAGCACTTTATAAAGCACAGGCCGAAACAGGTGAAATCAAAGGGCATT  
ACTTGAATGCTACTGCAGGTACATGCGAAGAAATGATGAAAAGGGCTGTATTTGCCAG  
AGAATTGGGAGTTCCTATCGTAATGCATGACTACTTAACAGGGGGATTCACTGCAAATA  
CTAGCTTGGCTCATTATTGCCGAGATAATGGCTTGCTTCTTCACATCCATCGTGCAATGC  
ATGCGGTTATTGATAGACAGAAGAATCATGGTATGCACTTTCGTGTACTAGCTAAAGCC  
TTACGTCTGTCTGGTGGAGATCATATTCACGCTGGTACCGTAGTAGGTAAACTTGAAGG  
GGAAAGAGACATCACTTTGGGCTTTGTTGATTTACTACGTGATGATTTTGTGAAAAAG  
ACCGAAGTCGCGGTATTTATTTCACTCAAGATTGGGTCTCGTTGCCAGGCGTTATACCC  
GTAGCTTCGGGGGGTATTACGTTTGGCATATGCCTGCTTTGACCGAGATCTTTGGAGA  
TGATTCCGTACTIONACAGTTCGGTGGAGGAACCTTAGGACACCCTTGGGGAAATGCGCCG  
GGTGCCGTAGCTAATCGAGTAGCTCTAGAAGCATGTGTACAAGCGCGTAATGAGGGAC  
GTGATCTTGCTCGTGAGGGTAATGAAATTATCCGTGAGGCTAGCAAGTGGAGTCCGGA  
ACTCGCTGCTGCTTGTGAGGTATGGAAGGAGATCAAATTTGAATTCGAAGCAGTGGAT  
ACTTTG-----ATGGCGATACATTTATACAAAACCTTCTACTTCGAGCACACGCAATGGAGC  
CGTAGACAGTCAAGTGAAATCCAATCCACGAAATAATTTGATCTATGGACAGCACCGTT  
GTGGTAAAGGTCGTAATGCCAGAGGCATCATTACCGCAGGGCATAGAGGGGGAGGTCA  
TAAGCGTCTATACCGTAAAATCGATTTTCGACGGAATGAAAAAGACGTATATGGTAGAA  
TCGTAACCATAGAATACGACCCTAATCGAAATGCATACATTTGTCTCATACTATGGGG  
ATGGTGAGAAGAGATATATTTTACATCCCAGAGGGGCTATAATTGGAGATACCATTGTTT  
CTGGTACAGAAGTTCCTATAAAAATGGGAAATGCCCTACCTTTGACCGATATGCCCTTA  
GGCACGGCCATACATAACATAGAAATCACACTTGGAAAGGGTGGACAATTAGCTAGAG  
CAGCGGGTGTGTAGCGAAACTTATTGCAAAAAGAGGGGAAATCGGCCACATTAATAATT  
ACCTTCTGGGGAGGTCCGTTTGTATCCAAAAACTGCTCAGCAACAGTCGGACAAGTG  
GGGAATGTTGGGGCGAACCCAGAAAAGTTTGGGTAGAGCCGGATCTAAGTGTGGCTA  
GGTAAGCGTCTGTAGTAAGAGGAATAGTTATGAACCCTGTAGACCATCCCCATGGGG

GTGGTGAAGGGAGGGCCCCAATTGGTAGAAAAAACAACAACCCCTTGGGGTTATC  
CTGCACTTGGAAGAAGAAGTAGAAAAGGGAATAAATATAGTGATAATTTGATTCTTCGT  
CGCCGTAGTAAAATGATTCAACCTCAAACCCATTTGAATGTAGCGGACAATAGCGGAG  
CTCGAGAATTGATGTGTATTCGAATCGTAGGAACTAGC---AATCGCCGATATGCTCATAT  
TGGTGACGTTATTGTTGCTGCGATCAAAGAAGCAGTACCTAATATGCCCTTAGCAAGAT  
CAGAAGTGGTCAGAGCTGTAATTGTACGTACCTGTAAAGAACTCAAACGTGAAAACG  
GTATGATAATACGATATGATGACAATGCTGCGGTTGTCATTGATCAAGAAGGAAATCCA  
AAAGGAACTCGAGTTTTTTGGTGCATCGCCCGGAATTGAAACACTTCAATTTTACTA  
AAATAGTTTCATTAGCTTCTGAGGTATTAATGCTTAGTCCCAAAGAACCAGATTCCGT  
AAACAACATAGAGGAAGAATGAAGGGAATATCTTATCGGGGTAATCGTATTTGTTTCGG  
TAAATACGCCCTTCAGGCACCTTGAACCCAATTGGATCACATCTAGACAAATAGAAGCA  
GGACGACGAGCAATGACACGAAATGCCCGTCGTGGTGGAAAAATATGGGTACGTATAT  
TTCCAGACAAATCAGTTACAGTAAAACCTACAGAAACACGTATGGGTTCGGGGAAAGG  
ATCTCCCGAATATTGGGTAGCTGTCTGTTAAACCAAGGCAAATACTTTATGAAATGGGCG  
GAGTAACAGAAAATATAGCCAGAAAAGCTATTTCAATAGCGGCGTCCAAAATGCCTATA  
CGAACTCAATTAATTTTTCAGGAATGACCAGAATTAGACGAGGATATATAGCTCGAAG  
ACGTAGAACAAAATTCGTTTATTTGCATCAAGCTTTCGGGGGGCTCATTCAAGGCTTA  
CTCGAACTATTACTCAACAGAAAATAAGAGCTTTGGTTTCTTCTCATCGGGATAGAGAT  
AGGCAAAAGAGAGATTTTCGTCGTTTGTGGATCACTCGGATAAATGCAATAATTCGCGA  
GAAT---GGAGTATCCTATAGTTATAGTAGATTAATACATAATCTGTACAAGAAGCAATTGC  
TTCTAATCGTAAAATACTTGCACAAATAGCTATATCAAATAGGAATTGTCTTTATATGAT  
TTCCAATGAGATCATAAAA-----ATGATAAAGGAAGCATATGCTTTA  
AGTCAATATATATGTATGTCTGCTCACAAAGCACGAAGAATAATTGATCAAATTCGTGGA  
CGTTCTTACATGGAAACACTTATGATACTAGAATTCATGCCTTATCGAGCATGTTATCCTA  
TTTTGAAATTGGTTTAT---ACAGCAGCAAATGCTAGTCACAATATGGGTTTCAGCAAAG  
GGGATTTAGTTATTACTAAAGCTGAAGTCAACGACGGTACCGTCGTAAAAAAATTGAA  
ACCTCAGGCTCGAGGACGTAGTTATCCAACAAAAAAACCCTTGTATATAACTATTG  
TATTAAGGCATACCCTTATAT-----ATGGATGGAATCAAATATGCAGTATTT  
ACAGACAAAAGTATTCGTTATTGGGGAAAAAT---CAATATACTTCTAATGTGCAATCAG  
GATCAACTAGGACAGAAATAAAGCATTGGGTGCAACTCTTCTTTGGTGTCAAGGTAAT  
AGCTATGAATAGTCATCGACTCCCGGGAAAGGGTAGAAGAATGGGACTTATTATGGGA  
CATAAATGCATTACAGACGTATGATCATTACGCTTCAACCAGGTTATTCTATTCCACCT  
CTTAGAAAAGAAAAGAACAATGGCAGTTCCAAAAAACGTACTTCTGTGACAAAAAA  
CGTTCTCGAAAAAAATTTGGAAAAGAAAAGCGTATTGGGTAGCATTAAAAACTTTTT  
CGTTAGCGAAATCTCTTTCTATTGGAAATTCCAAAGTTTTTATATGCAACAAATAGACA  
AAATGACCAAGGGTAAAGATGTCCGAGTAACGGTTATTGTGGAATGTACCAATTGTGTC  
CGAAAT-----AAGGAATCGACGGGCATTTCCAGATATATTACTCAAAGAATCGG  
CACAATACGCCTAGTCGATTGGAATTGAGAAAATTTTGTCCCTATTGTTTCAAACATAC  
GATTCATGAGGAGATAAAGAAAATGAAAATAGGTGCCTCTGTTTCGTAGAATTTGTGAA  
AAATGTCGACTGATCCGTAGGCGGGGCCGGATGATAGTAATTTGTTCCAATCCGAGACA  
TAAACAAAGACAAGGAATGGTTCGAGAGAAAGTAACAATAGCTACTCGAACATTACAG  
TGAAATGTGTTGAATCAAGGGTAGACAGTAAGCGTCTTTATTATGGACGTTTTATTCT  
GTCTCCACTTATGAAAGGTCGAGCTGATACAATAGGCATTGCAATGCGAAGAGTTTTGC  
TTGGAGAAATAGAAGGAACATGTATCACACGTGCAAAATCTGAG-----CAAGTACCACA

TGAATATTCCACCGCAATAGGTATTCAAGAATCAATACATGAAATTTTAATGAATTTGAA  
AGAAATTGTATTGAGAAGTAATCTGTATGGAACCTTGCAACGCATCTATTTGTGTCAGGG  
GACCTAGATATATAACTGCTCAAGATATCATTTCACCGCCTTCTGTGGAAATCGTTGATA  
ATACACAGTATATAGCTAGTTTGACGGAACCAATTGATTTTTGTATTGAATTACAAATCG  
AGAGGAATCGCGGATATCATATAAAAATGCCAAAT--AACTTTGACGGAAGTTAT-----CC  
TATAGATGCTGTATTCATGCCTGTTTCGAAATGCGAATCATAGTATTCATTCCTATGGGAAT  
GGAAATGAAAAACAAGAGATACTTTTTCTCGAAATATGGACAAACGGAAGTTAACTC  
CGAAAAAAGCACTTTATGAAGCCTCTCAAAATTTAATTGATTTATTTATTCCTTTTCTAC  
ATGCGGAAGAAGAA-----AACTTACATTTAGAAGACAATCAA---CACAAGGTTATTTTAC  
CTCTTTTTACCCCGCATGATAGATTGGCT---AACTACGGA AAAACAAGGAA---AAAATA  
GCATTGAAATCTATTTTTATTGATCAATCAGAATTGCCCTCCAGGATTTATAATTGCCTAA  
AAAGATCCAATATACATACATTATTGGACCTTTTCAATAACAGCCAAAAAGATCTTATGA  
AAATTGAACATTTTCGCGTAGAAGATGGAAAACAGATATTGGGCATTCTAGAAAAGCAT  
-----TTCGCAGTTGATTTACCGAAAAATAAGATGCTCCGGGATGGAAAT--GAGGGAATG  
TCTACAATACCTGGGTTTAATCATATACAATTTGAAGGATTTTGTAGGTTTCATTGATCAG  
GGATTGACGGAAGA AACTTTATAAGTTTCCAAAAATTGGAGATACAGATCAAGAAATTG  
AATTTCAATTGTTTGTGGAAACATATCAATTGGTAGAGTCGTTGATAAAAGAGAGAAAT  
GCTGTGTATGAATCACTCACATATTCTTCTGAATTATATGTATACGCGGGATTAATTTGGA  
AAACCAATAGAGATATACAAGAACAACAATTTTTATTGGAAACATTCCTCTAATGAAT  
TCCCTGGGAACCTCTATAGTAAATGGAATATACAGAATTGTGATCAATCAAATATTGCAA  
AGCCCGGGTATTTATTACCGTCCAGAATTGAACCATAACGGAATTTCCGGTCTATACTGGC  
ACAATAATATCAGATTGGGGAGGAAGATCAGAATTAGAGATTGATAGAAAAGAAAGGA  
TATGGGCTCGTGTGAGTAGGAAACAGAAAATATCTATTTTAGTTCTATCATCAACTATGG  
GTTTCGAATCTAAGAGAAATTCTAGAGAATGTTTGCTACCCCGAAATTTTCTTGTCTTTCC  
TGAATCTGAATGAGAAGAAAAAATGGGGTCAAAGAAAATGCCATTTTGGAGTTTAA  
TCAACAATTTGCTTGTGTAGGCGGAGATCCAGCATTTTCTGAATCCTTATGTAAGGAATT  
ACAAAAGAAATCTTTCAACAAAAATGTGAATTAGGAAGGATTGGTCGACGAAATATG  
AACCGGAAACTGAATCTTGATATACCTCAGAATAATACATTTTTATTACCACGAGATATA  
TTGGCAGCCGTGGATCATTTGATTGGAATTAATTTGGAATGGGTACACGTGACGAT----  
-ATGAATCATTTGAAAAATAAACGTATTTCGTTCTGTAGCGGATCTCTTACAAGATCAATT  
CGGATTGGCCTTGGTTTCGTTTAGAAAATGTGGTTTCGAAGA AACTATATGTGGAGCAATTA  
GG---CATAAATTGATA---CCGACCCCTCAGAATTTGGTAACTTCAACTCCA-----TTA  
ATAACCACTTATGAATCTTTTTTCGGTTTATACCCATTATCTCAAGTTTTGGATCAAATA  
ATCCATTGACACAAATAGTTCATGGAAGAAAATCGAGTTATTTGGGCCCTGGAGGATTG  
ACAGGGCGAACTGCTAGTTTTTCGGATACGAGATATCCATCCTAGTCACTATGGATGTATT  
TGCCCAATTGACACGTCTGAAGGAATCAATGTTGGACTTATTGGATCTTTAGCAATTCA  
TGCGAGGATTGGTCATTGGGGG---TCTCTAGAAAGCCTATTTTATGATGTTTATGAAATT  
TCTGAAAGATCAAAAAAATA---ATACGGATGCTTTATTTATCATCAAGTAAAGATGAAT  
ACTATATGATAGCGGCGGGAAATCTTTGGCATTGAATCAGGGTATTCAGGAAGAACAG  
GTTGTTCCAGCTCGATACCGTCAAGAATTCCTGACTATTGCATGGGAACAGGTTTCATCT  
TCGAAGTATTTTTCCCTTCCAATATTTTTCTATTGGAGCTTCCCTCATTCTTTTATCGAG  
CATAATGATGCAAATCGGGCTTTAATGAGTTCTAATATGCAACGTCAAGCAGTTCCGCT  
TTTTTCGGTCCGAAAAGTGCAATTGTTGGAACCTGGGTTGGAATGCCAAGCGGCTCTAGAT  
TCAGGGGTTCCCGCTATAGCCGAACGCGGGGGCAAGATCATTTATACCGATACTGACAA

GATCGTTTTATCGGGTAATGGAGATACTTTAAGCATTCCATTAGTTATGTATCAACGTTCC  
AACAAAAAGACTTGTATGCATCAAAAACCACAAGTTCAACGGGATAAATGCATTA  
AGGGACAAATTTAGCCGACGGTGTCTACAGTTGGCGGCGAACTCGCTTTGGGAAA  
AAACGTATTAGTCGCTTATATGCCATGGGAAGGTTACAATTCTGAAGATGCGATACTCAT  
TAGCGAGCGTCTGGTATATGAAGACATTTATACTTCTTTTCACATACAGAAATATGAAAT  
CCAGACTCATGTGACAAGCCAAGGT---CCCGAAAGGATCACTAATGAAATACCTTATTT  
AGAAACCCATTTACTCCGCAATTTAGATAAAAATGGAATTGTGAAGCCGGGATCTTGGG  
TAGAAACGGGTGATATTTTAGTAGGTAATAACACCTCAGAGAGCGAAAGGA---TTGT  
CGTATGTCCCGGAGGATAGATTATTACGAGTAATACTTGGCATTCAAGCAGCCACTTCA  
AAGGAACTTGTCTAAACTACCTATAGGTGGTAGAGGTCGAGTTATTGATGTGAGATG  
GAGTCAGAAA---AAGAGGGGTTCCAGTTATAATCCGGAAACGATTTCGTGTATATATCTC  
ACAGAAACGTGAAATCCAAGTAGGTGATAAAGTGGCCGGAAGACATGGAATAAAGG  
TATCATCTCCAAAATTTGCCTAGACAAGATATGCCTTATTTACAAGATGGAAGACCTGC  
TGATATGGGTTTTAATCCATTAGGAGTACCTTCACGAATGAATGTAGGACAGATATTTGA  
ATGCTCACTCGGGTTAGCGGGGGATCTGCTAAACAGACATTATCGAATAGTACCTTTTG  
ATGAGAGATATGAACAAGAGGCTTCGAGAAAAGTGTGTTTTCTGAATTATATGAAGCC  
AGTAAGCAAACAGCGAATCCATGGGTATTTGAACCCGAGTATCCAGGAAAAAGTAGAA  
TATTTGATGGAAGAACGGGGGATCCTTTTGAACAACCTGTTATAATAGGAAAGCCTTAT  
ATCTTGAAATTAATTCATCAAGTTGATGATAAAATACATGGGCGTTCCGGCGGACATTAC  
GCGATTGTTACACAACAACCCCTTAGAGGAAGGGCTAAGCAGGGGGGGCAACGGGTA  
GGGGAAATGGAGATTTGGGCTCTAGAAGGATTTGGCGTTGCTTATATTTTACAAGAGAT  
GCTTACTTATAAATCTGATCATATTAGAGCTCGCCAGGAAGTACTTGGTACTACGATCAT  
CGGAGGAACAATATCGAATCCTGAGGATGCTCCAGAATCTTTTCGGTTGCTCGTTGAG  
AACTACGATCTTTGGCTCTGGAATAAAGCATTGCCTTGTATCTGAGAAGAAGTCCAG  
ATTAATAGGAGGGAAGTT-----ATGATCGATCGGTATAAACATCAACAACCTCC  
GAATTGGATTAGTTTCTCCTCAACAAATAAGTGCTTGGGCCAATAAAATCCTACCTACT  
GGAGAGATGGTTGGAGAGGTGACAAAACCTATACTTTTCATTACAAAACCAATAAAC  
CTGAAAAAGGTGGATTATTTTGTGAAAAAATTTTGGGCCATAAAAAGTGGAAATTTGT  
GCTTGTGGAAATTATCGAGTAATTGGAGATGAAAAAGAAGACTCAAATTTTGTGAAC  
AATGCGGAGTCGAATTTGTTGAGTCTCGAATACGAAGATATCAAATGGGCTACATCAA  
CTAGCATGCCAGTAACCCACGCGTGGTATTTGAAACGTCTTCCTAGTTATATCGCAAAT  
CTTTTAGATAAACCTCTTAAAGAATTAGAAGGCCTAGTATACTGCGAT-----TTTTTTTT  
GCTAGGCCT---ATAGCTAAAAACCTACTTTCTTACGATTACGAGGTTTCATTCGAATATG  
AAATCCAATCCTGGAATAACAGCATCCACTTTTTTTTTACTACCCAAAGCTTCGATACAT  
TTCGAAATCGAGAAATCTCTACTGGAGCAGGTGCTATCCGAGAACAATTAGCCGATCTG  
GATTTGCGAATTATTATAGATTACTCATTGGTAGAATGGAAAGAATTAGAGGAGGAA---G  
GGCCACAGGGAATGAATGGGAAGATCGAAAAGTTGGAAGAAGAAGGGATTTTTTTGG  
TTAGACGTATGGAATTAGCTAAACATTTTATTTCGAACAAATGTAGAACCAGAATGGATG  
ATTTTGTGTCTATTACCAGTTCTTCCCTCCGATCTGAGACCAATTATTCAGATAGATGGG  
GGTAAACTAATGAGCTCGGATATTAATGAACTATATAGAAGAGTTATTTATCGGAACAAT  
ATTCTTACCGATCTATTAACAACAAGTAGATCTACACCAGGGGAACTAATAATGTGTCA  
GGAAAAATTGATACAAGAAGCCGTGGATACACTTCTTGATAATGGAATTCGCGGACAA  
CCAATGAGAGACGGTCATAATAAAGTTTACAAATCATTTTCAGATGTAATTGAAGGCAA  
AGAGGGACGATTTTCGTGAGACTTTACTTGGCAAACGGGTTCGATTATTCGGGGCGTTCC

GTCATTGTCGTAGGCCCTTCACTCTCATTCTATCGATGTGGATTGCCCTGTGAAATAGCA  
ATAGAGCTTTTCCAGATATTTGTAATTCGTTGTCTGATTAGACAACATCTTGCTTCGAAC  
ATAGGAATTGCTAAGAGTAAAATTCGGGAAAAAGAACCGATTGTATGGGAAATACTTC  
AGGAAGTTATGCAGGGGTGTCCGGTATTGCTGAATAGAGCACCTACTTTGCATAGATTA  
GGCATAACAGGCATTCCAACCCATTTTAGTGGAAGGACGTGCTATTTGTTTACATCCATTA  
GTTTGTAAGGATTCAATGCAGACTTTGATGGGGATCAAATGGCTGTTTCATGTGCCTTT  
ATCTTTGGAGGCTCAAGCAGAGGCCCGTTTACTTATGTTTTTCTCATATGAATCTCTTGTC  
TCCAGCTATTGGTGATCCCATTTCCGTACCAACCCAAGACATGCTTATCGGACTCTATGT  
ATTAACAAGCGGGAATCGTCGAGGTATTTGTGCAAATAGGTATAATCCATCTAATTGCA  
GAAAC-----TATCAAATGAAAGAATTGACGAT-----TATAGGTATACGAAA-----GAAC  
CCCTTTTTTGTAAATTCCTATGATGCAATCGGAACTTATCGGCAGAAAAGAATCAATTTAG  
GTAGTTCTTTATGGCTTCGGTGGCGACTAGATCAATGC--GTTATTGCTTCA-----AGAGA  
AGCTCCCATCGAAGTTCATTATGAATCTTTGGGTACCTCTCATGAGATTTATGGGTACTA  
TCTAATAGTAAAAAGTGTAAAAAAAGAAATCTTTGTATATATATTCGAACCATGGTTGG  
TCATATTTCTCTTTATCGAGAAATCGAAGAAGCCATACAAGGGGTTTGTTCGGGCCTGCT  
CATATGGTACC-----ATGGAGGTACTIONTATGGCAGAACGGGCCAATTTGGTC  
TTTACAATAAAGTGATAGATGGAACCTGCCATGAAACGACTTATTAGTCGATTAATAGAT  
CACTTCGGAATAGAATATACATCACACATTCTGGATCAAGTAAAGACTCTAGGTTTCCA  
GCAAGCCACTGCTACATCCATTTTATTAGGAATTGATGATCTTTTAAACAATACCCTCTAA  
GGGATGGCTAGTCCAAGATGCTGAAAAACAAAATTTGATTTTGGAAAAACATCATCATT  
ATGGGAATGTACACGCGGTAGAAAAATTACGTCAATCCATTGAGATATGGTATGCTACA  
AGTGAATATTTGCGACAAGAAATGAATCCTAATTTTAGGATGACTGACCCTTTTAAATCC  
GTCCATATAATGTCTTTTTTCGGGAGCTAGAGGAAATGCATCTCAGGTACACCAATTAGT  
AGGTATGAGAGGCTTAATGTCAGATCCACAAGGACAAATGATTGATTTACCCATTCAA  
GCAATTTACGCGAAGGACTTTCTTTAACAGAATATATCATTCTTGCTACGGAGCCCGC  
AAAGGAGTTGTGGATACTGCGGTACGAACATCAGATGCTGGATATCTCACGCGCAGAC  
TTGTTGAAGTAGTGCAACCCATTGTTATACGTAGAACAGATTGTGGTACTATACGGGGT  
ATTTCTGTGAGTTCTCGAAAGGGAATGATGCCA---GAAAGAATGTTTATCCAAACATTA  
ACGGGTCGTGTATTAGCAGATGATATATATATGGGTCCGCGCTGCATTGCCACTCGAAAT  
CAAGATATTGGGATTGGACTTGTGATCGATTTCATAACC-----TTTCGACCCCA  
ATCAATATCTATTCGAACCTCCTTTACTTGTAGGAGTACATCTTGGATCTGTGATATGT  
TATGGCCGGAGTCTACTCATGGCGACCTGGTTCGAATTAGGCGAAGCTGTAGGTATTAT  
TGCAGGTCAATCTATTGGAGAACCAGGTACTCAACTAACACTAAGAACTTTTCATACCG  
GTGGAGTATTCACAGGGGGTACAGCAGAACATGTACGAGCCCCCTCTAATGGAAAAAT  
CAAATTCATGAGGATTTGGTTCATCCTACACGTACACGTCATGGGCACCCTGCTTTTCT  
ATGTTATATCGACTTGGATATAACTATTGAAGGTGAGGATATTCTCCATAACGTGAACAT  
TCCACCAAAAAGCTTTATTTTAGTTCAAATGATCAATATGTAGAATCAGAACAACGA  
TTGCTGAGATTCGCGCGGGAACATCCACTTTG---AATTTTAAAGAGAAGGTTTCGAAAAC  
ATATTTATTCTGACTCAGAAGGGGAA---ATGCATTGGAGTACCGATGTATACCATGCATC  
TGAATTTACATATGGTAATGTTCAICTCTTACCAAAAACAAGCCATTTATGGATATTATCG  
GGAGGTCCGTGCGGA-----TCCAATGTAACCTTTTTTTGCTCCACAAGGATCAAGATC  
AAACGAGCGGTTCAT-----TCTCGTTCTGTGCAACGACGATATATTTCTAACCTCTCA-----  
GTGACTAATAACCGA---GTGAAACACAAATCTTTTAGTTTCAGATCGTTCTGGTAAAAAA  
GAAGGTAGGATTCCTGATTAT---TCAGAACTTAATCGAATCATATGCACGGGTCATTGTA

ATCTCATATACTCGGCC---ATTCTTCACAAGAATTCGGAT-----TTATTGGCAAAGAGGGCG  
AAGAAATAGATTCGTCAATCCATTCCAATCGATTCAAGAACGAGAGAAAGAACTAATG  
TCCTGCTCAGGTATCTCGATTGAAATATCCATACATAGT-----ATTTTCCGTAGAAAAAGT  
ATTCTTGCTTATTTTCGACGATCCTCGAAACAGAAGAAAGAGTTCAGGAATTACTAAATA  
TGGG-----GCGCATTCAAACGTCAAAAACAAAAAAGAGGATTTGATTAAGTATCGA---  
GGAGTCAAAGAATTTAGGTCCAAATACATGAAAGTAGATCGATTTTTTTTCATTCCCGA  
GGAAGTGCATATCTTGCCAGATCTTTTTTCATAATGGTACGGAACAATAGTATCATTGG  
AGTAGATACACGAATCGCTTTAAATATAAGAAGCCCGACAGACGGATTGGTCCGAGTT  
GAGAGAAAAAAAAGG---ATTGAACTTAAAATCTTTTCTGGAGATATCCATTTTCCTGGA  
GAGACAGATAAGATATCCCAACACAGTGGCATCTTGATACCACCAGGAATGGGAAAAA  
CA-----AATTTCAAGGAATCCAAAAA---TTGAAAAAT---TGGATCTATATCCAACGG-----  
ATTACACTTACCAAGAACAAG-----TATTTTGTTTTGGTTCGACCCGTCGTCACATATAAA  
ATAGCGGACGGTATAAATTTAGCAACACTTTTTCCACAGGATTTGTTGCAGGAAAGGGA  
TAATGTGCAACTTCGAGTTGTCAACTATATCCTTTATGGATATGGCAAACCAATTCGGGG  
AATTTCTGGCACAAGTATTCAATTCGTTCCGGGCATGTTTAGTATTGAAGTGGGGACAAG  
ACAAA-----AAAAGCTCTTCGATAGAAGGGGCCCATGTTTCCTTTGTGAAGTAAGG  
ACAAACGGTTTGATTTCGAGATTTCTAAGAATTGACCTAGTAAAATCCATTTTCGTATACC  
GGA---AAAAGGAATAATCCGATAGGTTTCAGAATTGATCTCTGAT---AATGGATCAGATCG  
CAACAATATCAATCCGTTTTATTCCATTTATTCCAAGGCAACAAGT-----ATTCAAGA  
ATCACTTAGCCAA---AATCAAACACTATTCGTACGTTGTTGAAT-----AGAAATAAGGAAT  
GCCAATCTTTGAGAATTTTGTGCATTCATTTCGATTGTTCTCGAATGGGTCCA-----TTCAACG  
GTGTAATAATATCGCAAT-----AAAGAATCAATTAATAATTAGGAATTCGTTG  
GGCCCTTAGGGATA-----GCCCTTCAAATTGCGAATTTTTATTCA---TTTTACCAT---TTA  
ATAACT-----CATAATCAAACCTCTG---GTAACACTATTTTCAACTTGACAAT-----TTA  
AAACAGACTTCTCAAGTATTTAAATAT-----TTTTAATGGATGAAAATGGGAAA-----A  
TTTATAATCCCGATCCGTGTAGTAACATCATTTTGAATCCATTCCATTTGAATTGGTACTT  
TCTCCATCACAATTATTGTGAAGAGACATCCACAATAATTAGT---CTTGGACAGTTTATTT  
GTGAAAATGTATGTATAGCCAAAAACAGACCACAT-----CTAAAATCGGGTCAAGTTAT  
AATTGTTCAA---GTAACTCTGTAGTAATAAGATTAGCTAAGCCCTATTTAGCCACTCCG  
GGAGCAACTGTTTCATGGCCATTATGGGGAAACCCTTTACGAAGGAGATACATTAGTTAC  
ATTTATATATGAAAATCGAGATCTGGTGATATAACACAAGGCCTTCCAAAAGTGGAAC  
AAGTGTTAGAAGTTCGTTTCGGTTGATTCAATATCGATGAACCTGGAAAAGAGGGTTGA  
GGGTTGGAACGAACGTATAACAAGAATTCTTGGAAATTCCTTGGGGATTCTTGATTGGTG  
CTGAGCTAACTATAGTGCAAAGTCGTATTTCTTTGGTTAATAAGATCCAAAAGATTTATC  
GATCCCAGGGGGTACAGATCCATAATAGACATATAGAAATTATTATACGGCAAATAACAT  
CAAAAGTGTGGTCTCAGAA-----GATGGAATGTCTAATGTTTTTTTCACCTGGAGAAC  
TAATTGGATTGTTACGAGCGGAACGAACAGGGCGTACTTTGGAAGAAGCGGTCTGTTA  
CCGAGTTATCTTATTGGGAATAACGAAAACATCTTTGAATACTCAAAGTTTTATATCCGA  
AGCGAGTTTTCAAGAACTGCTCGAGTTTTAGCAAAAAGCTTCTCTCCGGGGTCGTATC  
GATTGGTTGAAAGGCTTGAAAGAGAACGTTGTTTTGGGGGGACTGATACCCGTTGGTA  
CCGATTT---GGATTAGTGCACCGTTCAAAG-----CAACATAACAATATTCTT-----TTGGA  
AACCAAAAAGAAGAATCTATTTCGAGGGGGAAATGAGA-----GATATTTTGTCCACCAC  
AGAGGATTTTGTATTCTCGCATTTTTAAAAATTTCCATAATATGTTATGTCAAACAAG  
CATTTA-----ATGACAAGAAGATATTGGAACATCCATTTGGAAGAGAT

GATGGAAGCAGGAGTTCATTTTGGTCATGGTACTAGGAAATGGAATCCTAGAATGGCG  
CCGTATATTTCCGGAAGCGCAAAGGTATTCATATTACAAATCTTACTAGAACCGCCCGT  
TTTTTATCAGAAGCTTGTGATTTAGTTTTTATGATGCAGCAAGTGGAGGAAAACAATTTTT  
AATTGTTGGTACCAAAAATAAAGTAGCTGATTCAGTAGCATGGGCTGCAATAAGGGCTC  
GGTGCCATTATGTTAATAAAAAATGGCTCGGCGGTATGTTAACGAATTGGTCCACTACA  
GAAACGAGACTTCATAGATTCAGGGACTTGAGAACAGAGCAAAGGCGGGGAGACTC  
AACCGTCTTCCGAAAAGAGATGCAGCTATGTTGAAGAGACAATTATCTCATTTGCAAA  
CATATCTGGGTGGGATTAATATATGACGGGGTTGCCTGATATTGTAATCATCGTTGATC  
AGCAAGAAGAATATATGACCTTTCGAGAATGTATCGCTTTGGGAATCCAACGATTTGT  
TTAATCGATACAAATTGTGACCCCGACCTCGCAACTATTTCAATCCGGCGAACGATGA  
TGCTATAGCTTCAATCCGATTAATCTTAATAAATTAGTATTCGCAATTTGTGAAGGTCAT  
TCT--AGCTATATAAGAAATCCTATGGGACAAAAATAAATCCACTCGGTTTCAGACTTG  
GTACAACCAAGATCATTATCCCTTTGGTTTTGCACAACCAAAAAAATTTCCGAAGGT  
TTACAAGAAGATCAAAAAATACGGAATTGTATCAAGAATTATGTACAAAAAATATGAG  
AATGCTTTCCGGT---GTCGAGGGAATTGAACGTATAGAGATTCAAAAAAGAATCGATCT  
GATCCAGGTTATAATCTATATGGGATTTCCAAAGTTATTAATAGAAGGTAAACCACGA----  
-----GGAATCGAAGAACTACAAATAAACATACAAAAAGAATTAATTTATGTAAACCGA  
AAACTCAACATTGCTATTACAAGAATAGTAAACCTTACGGACACCCTAATAATCTTGC  
AAAATTTATAACCGGACAATTAAGAATAGAGTTTCATTTGCAAGGCCATGAAAAAA  
GCTATTGAATTAGCTGAGCAAGCAGATACAAAAGGAATCAAGTACAAATTGCAGGAC  
GTATCGACGGAAAAGAAATTGCACGTGTGCAATGGATCAGAGAAGGTAGAGTTCTCT  
ACAAACCATTCAAGCTAAAATGGATTATTGTTCCCTATCCAATTCGAACTATCTATGGAGC  
ATTCGGTATCAAAATTTGGCTATTTACAGCCGAGGAAATGTCACGTTACCGAGGGCCTC  
GTTTCAAAAAAATACGCCGACTGGGGGCTTTACCGGGACTAACTAATAAAAGGCCTAG  
GGCCAGAAGTGATCTTAGAAACCAATCGCGTTCGGGAAA---AGATCTCAATATCGTAT  
TCGTTTAGAAGAAAAACAAAATTGCGGCTTCATTATGGTCTTACAGAACGGCAATTCC  
TTAATACGTTTCGTATCACCGGAAAAGCCAAAGGGTCAACAGGTCAGGTTTTACTACA  
ACTACTTGAAATGCGTTTTGGATAACATCCTTTTTTCGATTGGGTATGGCTTCGACTATTCC  
TGGAGCCCGACAATTAGTTAACCATAGACATATTTTAGTTAATGGTCGTGTAGTAGATAT  
ACCAAGTTATCGCTGCAAACCCCGAGATATTATTACGGCGAGGGATGAACAAAAATCC  
AAAGCTCTGATTCAAAATTATCTTGATTCATCCCCCAT---AAGGAATTGCCAAAACATT  
TGGCTCTTCGCGCATTCCA-----TATAAAGGATTGTTAATCAAATAATAGATAGTAAAT  
GGGTCGGTTTTGAAAATAAATGAATTGTTAGTCATAGAATATTATTCTCGTCAGACTATGT  
CACGTCGAGGTACTGCAGAAGAAAAAACTGCAAAATCCGATCCAATTTATCGTAATCG  
ATTAGTTAACATGTTGGTTAACCGTATTCTGAAACACGGAAAAAATCATTGGCTTATC  
AAATTCTCTATCGAGCCGTGAAAAAGATTCAACAAAAGACAGAAACAAATCCACTCTC  
TGTTTTACGTCAAGCAATACGTGGAGTAACTCCCGATATAGCAGTAAAAGCAAGACGT  
GTAGGCGGATCGACTCATCAAGTTCCCATGAAATAGGATCCACACAAGGAAAAGCAC  
TTGCCATTCGTTGGTTATTAGGGGCATCCCGAAAACGTCCGGGTAGAAATATGGCTTTC  
AAATTAAGTTCCGAATTAGTGGATGCTGCCACAGGGAGTGGCGATGCCATACGCAAAA  
AGGAAGAGACTCATAGAATGGCAGAGGCAAATAGAGCTTTTGCACATTTTCGTATGGG  
TAGGGACACTATTGCTGATAAAATAACCTCTATACGAAATGCCGACATGGATAGAAAAG  
GAACGGTTCGAATAACCTCTACTACCATCACCGAAAACATTGTTAAAATACTTTTACGA  
GAAGGTTTTATCGAAAACGTGAGAAAACATCGGGAAAGCCACAAATATTTTTTGGTTT



CAACCCTGCGACATAGAAGG-----AATAGAAAAGAACCATATAGAAGA-----AATATTTT  
AAATTTAAAACGGGCCAGTCGCCCTGGTCTACGAACCTATTCTAGCTATCAACGAATTT  
CTAGAATTTTAGGTGGGATGGGGGTTGTAATTTCTTTCTACTTCTCGAGGTATAATGACAG  
ACCGAGAGGCTCGACTAGAAAAAATCGGCCGAGAAATTTTGTGTTATATATGGATGGC  
AAAGCCTATACCAAGAATTGGTTCACGTAGGAATGGACGTATTGGTTTACGTAAGAGTG  
CACGTAGAATACCAACAGGAGTTATTCATGTTCAAGCAAGTTTCAACAATACCATTGTG  
ACTGTTACAGATGTACGAGGTCGGGTGATTTCTTGGTCCTCCGCGGGTACTTGTGGATT  
CAGGGGTACAAGAAAAGGGACACCATTGCTGCGCAAACCACAACAGGAAATGCTAT  
TCGTACAGTAATGAATCAAGGTCTGCAACAAGCAGAAGTCGTGATAAAGGGTCTGGT  
CTCGGGAGAGATGCAGCATTACGAACCTATTTCGTAGAAGTAGTATACTATTAAGTTTCGT  
ACGAGATGTAACCCCTATGCCACATAATGGCTGTAGACCTCCTAAAAAAGACGTGTAA  
TGCCAACTATTAACAACCTTATTAGAAACACAAGACAGCCAATCAGAAATGTTACGAA  
ATCCCCCGCCCTTCGGGGATGTCTCAGCGCCGAGGAACATGTATTAGGGTGTATACTA  
TCACCCCCAAAAACCAACTCTGCCTTACGTAAAGTTGCCAGAGTACGATTAACCTC  
TGGATTTGAAATCACTGCTTATATACCTGGTATTGGCCATAATCACAAGAGCATTCTGT  
AGTCTTAGTAAGAGGGGGAAAGGGTTAAGGATTTACCTGGTGTGAGATATCACATTGTT  
GAGGAACCCTAGATGCTGTGCGGAGTAAAGGATCGTCAACAAGGGCGTTCTAAATATGG  
GGTCAAAAAGCCAAAAATGGCAAAGAAAAGTTTGATTACAGAGGGAGAAAAAGAGAC  
AAAAATTGGAACAGAAATATCATTGATTTCGTGATCCTCAAAAAAAAAAATCAGC-----  
----AAAGTTCGTCGTTGAACGACAAATGGAAAATTCATGGAAAGTTACAATCCCCACC  
ACGGAATAGTGCACCTACACGTCTTCATCGACGTTGTTTTTCGACCGGAAGACCGAGA  
GCTAACTATCGGGACTTTGGGCTATCCGGACACATACTTCGTGAAATGGTTCATGCATG  
TTTGTGGCCAGGGGCAACAAGATCAAGTTGGATGGTAAAAAATTCATTTATTTTCAGTCA  
TTTTCGAAAGAAGAAAAAGAAGAAAACAGG-----GGATCCGTTGAATTTCAAGTATTCA  
GTTTTACCAATAAGATACGGGAGACTTACTTCGCATTTGGAATTACATAGAAAAGACTATT  
TATCTCAAAGAGGTCTACTGAAAATTTCTGGGAAAACGTCAACGACTGATAGCTTATTTG  
TCAAAAAAAAAATAGAATACGTTATAAAGAATTAATTGGTCAGTTGAATATTCGGGAGCC  
AAAAACTCGT-----ATGGTAAAACCTCGTTTGAAACGATGTGGTAGAAAGCAACGAGCC  
GTCTATCGAATTGTTGCAATTGATGTTTCGATCCCGAAGAGAAGGAAGAGATCTTTGCAA  
AGTGGGTTTTTATGATCCGATAAAGAATCAAACCTATTTAAATATTTCTGTTATTTTATATT  
TCCTTGACAAAGGTGCTCAACCTACAGGAACGTTCATGATATTCTAAAGAAGGCGGA  
GGTTTTTAAA-----ATGGATAAATCAAACGACCCTTTCTTAAATCC  
AAGCGATCTTTTCGTAGGCGGTTGCCCCGATTCATCGGGGGATCAAATTGATTATAG  
AAACATGAGTTTAATTAGTCGATTTATTAGTGAACAAGGAAAAATATTATCTAGACGAG  
TGAATAGATTGACCTTGAACAACAACGATTAATTACTATTGCTATAAAACAAGCTCGTA  
TTTTATCTTCGTTACCGTTTCTTAATAATGAGAAA-----CAATTTGAAAGAGCTGAGTCG  
ACCACTAGAACTACAGGCCTTAGAACCAGAAAAAAA-----ATACAAAAAATCCTT  
TTGTAGCGAATCATTATTAATAAAGATTGATAAGCTTAACATAAACGCGAAAAAAGAA  
ATAATAAATACTTGGTCCCGGCATCTACCATTATACCCACAATGCTCGACCATACTGTT  
GCTATCCATAATGGAAAGGAGCATTGCTTATTTATATAACAGATCGTATGGTAGGCCAC  
AAATTGGGAGAATTTTACCTACTCGAAATTTCTGGGGTTCATGCGAAAAACGATAATCG  
ATCTCGTCGTATGATTTTCAATCTTTTCTACTAGGTAATCTAGTATCCTTATGCATGAAG  
ATAATCAATTCGGCCGTTGTGGTCGGACTCTATTATGGATTTCTGACCACATTCTCCATA  
GGGCCCTCTTATCTCTCCTTCTCCGAGCTCAGGTTATGGAAGAAGGAGAAGAAGGAA

CCGGGAAGAAGGTATCAGCAACAACCTGGTTTTATTACGGGACAGCTCATGATGTTTCATA  
TCGATCTATTATGCGCCTCTGCATCTAGCATTGGGTAGACCTCATAACAATACTGTCCTA  
GCTCTACCGTATCTTTTGTTCATTTCTTCTGGAACAATCACAAACTTTTTTGATTATG  
GATCGACTACCAGAAATTCAATGCGTAATCTCAGCATTCAATGTATATTCTGAATAATC  
TCATTTTTCAATTATTCAACCATTTTCAATTTACCAAGTTCAATGTTACCCAGATTAGTCAA  
CATTTATATGTTTCGATGCAACAACAAGATGTTATTTGTAACAAATAGTTTTGTTGGTTG  
GTTAATTGGTTACATTTTATTTCATGAAATGGGTTGGATTGGTATTAGTCTGGATACGGCA  
AAATCATTCTATTAGATCTCTTATTTCGATCTAATAAGTACCTTGTGTCAGAATTGAGAAAT  
TCTATGGCTCGAATATTTAGTATTCTCTTATTTATTACCTGTGTCTACTATTTAGGCAGAAT  
ACCGTCACCTATTCTTACTAAGAACTGAAAGAAGCCGAAGAAGATAAACCTTTTTGTG  
ACTCTTCTTTTTGACTATAAACGATGGAATCGTCCATTGCGATATATAAAAAACGATCGA  
TTTGAAAATGCTGTAAGAAATGAAATGTCACAATATTTTTTTTATACATGCCGAAGTGAT  
GGAAAACAAAAAATATCTTTTACGTATTCACCTAGTTTGTCAACTTTTTTTGGAAATGATA  
CAAAGATATCTTTCTTTGTCCACAATAGAAAAATTCTCCTCTGATGAACTGTATAATTAT  
TGGATTTATAACCAATGAACAAAAAAGGAAC---CAAAGCAACGAGTTTCTAAATAGAATT  
GAGGCTCTAGACAAAGAATCTCCTTTTCTGGATATACTTGAAAAAAGGACTAGATTATG  
TAATGATGAACTGAAAAAGAATACTTGCCTAAGATATATGATCCTTTCTTGAACGGAC  
CCTATCGTGGAACAATCAAAAAATTGTCTTCACCTATAGAGACAGTTTGGATAAATAAG  
ATTCATGATATCCTT---CGAGAATTTAAACAGAAAGATCCCAATAACCAATCTATTGGAG  
TAAAAAAAATCAGTAAAAAAGTCCCTCGATGGTCATACAAATTAATCGAGTTGGAACA  
ACAAGAGGGG---GAGATCCGCTCAAGAAAAGCCAAACGTGTAGTGATTTTTACTGATT  
CTTTGATACGTTATTCGCAACAATCGGATTTTCGTCGAGACATAATCAAAGGTTCCATGC  
GTGCTCAAAGGCGTAAAACGGTCATTTGGGAACTGTTTCGAGCAAATGTACATTCCCC  
ACTTTTTTTGGACAAAATAGGTAAACTCCCTTTTTTTTTCTTTTGAATC-----TCCGGACT  
AATGAACTAATTTTTAGAAATAGAGAAGAGAAAGCACGGATAGAAATAGCAGAAGCC  
TGGGATACCATTCTATTTGCTCAAGTAATAAGAGGTTCCATGTTAGTAACCCAATCAATT  
CTTAGAAAATATATTCTATTACCTTCATTGATAATAGCTAAAAATATCGGCCGTATGTTATT  
ATTTCAATTTCCCGAATGGTCCGAGGATTTAAAAGAATGGAATAGAGAGATGCATGTTA  
AATGTACCTATAATGGTGTTCATTATCCGAAACAGAATTTCCGAAAAACTGGTTAACA  
GATGGTATTCAAATAAAGATCCTATTTCTTTCTGTTTGAACCTTGGCACAGATCTAAG  
AAAAGGCAAAAAGATGATTTTTGTTTTTTAACAGTTTGGGGAATGGGAGCTGAACTGC  
CCTTTGGTTCTCCCCGAAAAGGACCTGCTTTTTTTGAACCTATTTTTAAAGAACTCGAA  
AAAAAATTAGAAAATTGAAAAAGAAGCATTTCCTAGTT---CGAAGAGTTTTAAAAGA  
AAGAACAAAATTGTTTCTAAAGGTCTCAAAAGAAACAAAAAATGGGTTATCAAAAA  
C-----ATTTTAAAAGAATAATAAAAAACCTTTCAAAGTAAATGATTCTATAATCA  
GTAATCGGATGATTCATGAATCGTCCATTCAAATCGATCTATGGATTGGACAAAGTATC  
TACTGACAGAAAAAAAATGAAAGATCTGACTGATAGAACAAACACAATCAGAAATC  
AAATAGAAATAATTACAAAAGACAAGAAAAAAGTCCTAACAAAATAAATTATAATGCT  
AAAAAGTTAAAATCACCAAAAAGATTTGGCAGATATTAGAAAGAAGAAATGCTCGCT  
TAATTCGTAAATCACATTATTTTATAAAATTTTGGATTGAAAAGATATACATAGACATCCT  
TTTATGCATCATTAATATTTCCAGTATCAATGCACAACCTTTTT---CACTTTATTTTCATGTGA  
CTTATCCTCCTTGTCAACAAGCATATGTATTTTACAAATTATCACAAATCCAAGTTATTAAC  
TTGTATAAGTTAAGATATGTCCTTCAATATACATCTTTTTTTCTTAAAGAAATGAAATAAAGG  
ATTATTTTACACAAGGAATATCCAATTCCAAATAAGACATAAGAACTTCGGAATTCT

GAAACGAATCAATGGAAAACTGGTTAAGGGGTCATTATCAATACGATTTATCTCCGAT  
TAGATGGTCTAGATTAGTACCACAAAAATGGCGAAATAAAGTCAATCAACATTGTATGG  
TTCAAAAT--AACAAATGGGATTTATATGAAAAAGTCCAA-----TTAATTCATTACGAAAA  
ACAAGAAAATTTTAAAAAACACTATAGATACGATCTTCTATCATATAAATCTATTAGTGA  
TGATATTAGGGATCCGAATAGAAAATATTTGGATTGGAGAATTATCCATTTTGTCTTAGA  
TTTTTGGATTGGATGGGAATGAATGAAGAAATACTAAATCGTTGGTTCTTCCCAGAATT  
TGTAATACTTTATAATGGATATAAGATTAAACCATGGGTTATACCAATCAAATTACTTCTT  
TTAAATTACAAGAGCAACGCAGAAGCAGAAGCTCGATTTCTTCCTGAAAAGGTATTTGC  
TTTTTCAATTGAGATGGGATGATCCTTTGAATCAAAAAATTCTCAATAATATCAAGGTAT  
ATTGTTTCTGCTTAGACTGATAAACCCAAGAGAAATTGCGCTATCCTCTATTCAAAGA  
GGAGAAATGAGTCTGGCTATAATGCTGATTCAGAAGAATTTAACTCTTACAGAATTAAT  
GAAA--GGGATATTGATTATCGAACCAGTTCGTCTGTCTGTAAAAAGCGATAGACAATTT  
ATTATGTATCAAACCATAGGTATTTTCATTGGTTCATAAGAGTAAGCACAAATCATTATGATT  
TGCTTGTTTCTGAAAATATTTTATCGCCCAGACGTTGTAGAGAATTGAGAATTCTAATTT  
GTTTCAGATTTCTTTGGCCCAATTATCGATTAGAAGATTTAGCTTGTATGAATCGCTATTG  
GTTTGATACCAATAACGGCAGTCGTTTCGATATGTTAAGGATACATATGTATCCAATGAA  
AGGACATCAATCAAATCCTGGATTTTCGAATTGAGAGAGATATTGAGAGAGATCAAG  
AATTCTCACTATTTCTTAGATTCATGGACCCAATTC AATTCAGTGGGATCTTTCATTCAC  
ATTTTTTCCACCAAGAACGTTTTATAAACTCTTTGACCCCGAATTTGGAGTATCCTA  
CTTCA---CGCAATTCA-----CAGGGTTCAACAAGCAATCGATATTTC-----ACGATCAA  
GGGTGTAGTACTCTTTGTAGTAGCG--GTCCTTATATATCGT-----ATTAACAATCGAA  
ATATGGTCGAAAGAAAAAATCTCTATTTGATAGGGCTTCTTCCT-----ATACCTATG  
AATCCATTGGACCCAGAAATGATACATTGGAAGAATCTTTT--GGGTTTTCCAATATCA  
ATAGTTGATTGTTTCG---CTCCTGTATCTTCCAAAAGGAAAAAAGATCTCTGAGAGTT  
GTTTCCTGGATCCGAAAGAGAGTACTTGGGTTCTCCAATAACT-----AAAAAGTGT  
ATCATGCCTGAATCTAACCGGGGTTTCGCGGTGGTGGAGGAACTGGATCGGAAAAAAG  
AGG-----GATTCTAGTTGTAAGATATCTAAT-----GAAACCGTCGCTGGAATTGAGATCT  
CATTC AAAGAGAAAGATATCAAA---TATCTGGAGTTTCTTTTTGTATATTATATGGAT-----  
GATCCGATCCGCAAGGACCATGATTGGGAATTGTTTGATCGTCTTTCTCTGAGGAAGAG  
GCGAAACATAATCAACTTG-----AATTCGAGACA ACTATTTGAAATCTTAGTGAAAGACT  
GGATTTGTATCTCATGTCTGCTTTTCTTGAAAAATACCAATTGAAGTGGAGGGT--TT  
CTTCAAACAACAAGGA---GCTGGGTCAACTATTCAATCAACTGATATTGAGCATGTTTC  
CCAT-----CTCTTCTCGAGAAACAAGTGGGCTATTTCTTTGCAA AATTGTGTTCAATTTCA  
TATGTGGCAATTCCGCCAAGATCTCTTCGTT-----AGTTGGGGGAAG---AATCCGCGCG  
AATCGGATTTTTTGAGGAAC---ATATCGAGAGAGAATTGGATTTGGTTAGACAATGCGT  
GGTTGGTAAACAAGGATCGG-----TTTTTTAGC-----AAGGTACGGAATGTATCGTCAA  
ATATTCAATATGATTCC-----ACAAGA-----TCTAGTTTCGTTCAAGTAACGATTCTAG  
CCAATTGAAAGGATCTTCT--GATCAATCCATAGATCATTGGATTCCATTAGT-----A  
ATGAGAATTCGGAA-----TATCACACATTGATCAATCAAAGAG  
AGATTCAACA ACTAAAAGAAAGATCGATTCTT--TGGGAT-----CCTTCCTTTCTTCAAAC  
GGAACGAACAGAGATAGAATCAGAC-----CGATTTCCGAAA-----TGCTTTTCTGGATAT  
TCC-----TCAATGTCCCGGCTATTCACG---GAACGTGAGAAGCAGATGATTATTCATCTGC  
TTCCGGAAGAAATCGAAGAATTT-----CTGGGAATCCTACAAGATCCATTGTTCTTTT  
TTCTCTGACAGATGG-----TCAGA ACTTCAT--CTGGGTTTCGAATCCTACTGAGAGGTCC

ACTAGAGATCAG-----AAATTGTTGAAGAAACAACAAGATGTTTCT--TTTGTCCCT  
TCCAGGCGATCGGAA-----AATAAAGAAATGGTTAAGATATTCAAGATAATTACGTA  
TTTACAAAAT-----ACCGTCTCAATTCATCCTATTTTCATCAGATCCGGGATGTAATATGGTT  
CCG---AAGGATGAACCGGAT--ATGGACAGTTCCAATAAGATTTTCATTCTTGAACAAAA  
TCCATTTTTGGATTTA-----TTTCATCTATTCCATGACCGGAACAGGGGGAGATACACGTT  
A-----CACCACGATTTTGAATCAGAA-----GAGAGATTTCAAGAAATGGCAGATCTATTC  
ACTCTATCAATAACCGAGCCG---GATCTGGTGTATCATAAGGGATTTGCCTTTTCTATTGA  
TTCCTACGGATTGGATCAAAAACAA-----TTCTTGAATGAGGTATTCAACTCCAGGGATG  
AATCGAAAAAGAAATCTTTA-----TTGGTTCTACCTCCTATTTTTTAT-----GAAGAGAA  
TGAATCTTTTTATCGAAGGATCAGAAAAAATGGGTCCG---ATCTCCTGCGGGAATGA  
TTTGGAAGATCCAAAACCAAAAATAGTGGTATTGCTAGCAACAACATAATGGAGGCA  
GTCAATCAATATAGATTGATCCGAAATCTGATTCAAATCCAATATAGCACCTATGGG-----  
TCCATAAGAAATGTATTGAATCGATTCTTTTTTATGAAT-----AGATCTGATCGCAACTT  
CGAATATGGAATTCAA-----AGGGATCAAATAGGAAATGATATTCTGAATCATAGAACT  
ATAATGAAATATACGATCAACCAACATTTCTCGAATTTGAAAAAG---AGTCAGAAGAAA  
TGGTTTCGATCCT-----CTTATTTTTATTTCTCGAACCGAGAGATCCATGAATCGGGATCCT  
AATGCATATAGATACAAATGGTCCAATGGGAGCAAGAATTTCCAGGAACATTTGGAACA  
TTTCGTTTTCTGAGCAGAAGAGTCGC-----TTTCAAGTAGTGTTTCGATCGATTACGTATT  
AATCAATATTCGATTGATTGGTCTGGGGTTATCGACAAAAAAGATTTGTCTAAGTCACTT  
CGTTTCTTTTTGTCCAAGTCACTT-----CTTTTTTTGTCC-----  
AAGTTGATTCTCTTCTGTCTAACTCACTTCCCT--TTTTCTTTGTGAGTTTCGGGAATAT  
CCCATTTCATAGGTCCGAG---ATCCACATCTAT--GAATTGAAAGGTCCGAATGATCAAC  
TCTGCAATCAGTTGTTAGAATCAATAGGTCTTCAAATCGTTCATTTCAAAAAATTGAAA  
CCCTTC-----TTATTGGAT-----GATCATGATACTTCC--CAAAAATGGAAATTCTTGATC  
AATGGAGGAAGAATATCACCATTTTTGTTCAATAAGATACCA---AAGTGG---ATGATTGA  
CTCATTCCACTAGTA-----AATAATCGCGGGAATCCTTTGATAACACGGATTCTTATTT  
CTCAATGATATCCACGATCAAGACAATTGGCTGAATCCCGCGAAACCATTTTCATAGAA  
GTTCAATTGATATCTTCTTTTTATAAAGCAAATCGACTTCGATTCTTGAATAATCCACATCA  
CTTCTGCTTCTATTGTTATTGTAACAAAAGATTCCCTTTT-----TAT--GTGGAAAAGGC  
CCGTATCAATAATTATGAT-----TTTACGTATGGA---CAATTCCTCAATATCTTGTTCAATCA  
CAAGAAA---ATATTTTCTTTGTGCGTCGGTAAA-----AAAAACATGCTTTTTTTGGAG---A  
GAGATACTATTTACCAATCGAGTCGCAGGTATCTAACATATTCATACCTAACGATTTTC  
CACAAAGTGGTGACGAAACG---TATAACTTGACAAATCT-----TTCCATTTTCCAATT  
CGTACCGATCCATTTGTTCGT-----AGAGCTATTTACTCGATTGCAGACATTTCTGGAACA  
CCTCTAACAGAGGGACAAATAGTCAATTTTGAAAGAACTTATTGTCAATCTCTTTTCAGA  
TATGAATCTATCTGATTCAGAAGGGAATAACTTGCATCAGTATCTCAAT-----TTCAATTC  
AAACATAGGTTTGATTCACACTCCACGTTCTGAGAAATATTTACCATCTGAAAAG-----A  
GGAAAAA-----CAGAGTCTTTGTCTAAAG-----AAATGCGTTGAGAAAG  
GGCAGATGTATAGAACCTTTCAACGAGATAGTGCTTTTTTCAACTCTCTCAAAATGGAAT  
CGATTCCAAACATATATGCCATGGTTCCCTTACTTCGACAGGGTACAAATATCTAAATTTG  
ATATTTTTAGATACTTTTTTCAGAC---CTATTGCCGATACTAAGTAGCAGT-----CAAAAATT  
TGTATCCATTTTTTCATGATATTATGCATGGATCGGATATATCATGGCAAATTCTTCAGAAA  
AAATTG-----TGTCTTCCACAATGGAAT--CTGATAAGTGAGATTTTCGAGTAAGT  
GTTTACATAAT-----CTTCTTCTGTCCGAAGAAATGATTCATCGAAATAATGAGTCA-----C

CATTGATATCGACACATCTGAGATCGCCAAATGTTTCGGGAATTC---CTCTATTCAATCCTT  
TTCCTTCTTCTTGTGCTGGATAT--CTCGTTCGTACACATCTTCTCTTTGTTTCCCAA----  
-GCCTCTAGTGAGTTACAGACGGAGTTCGAAAAGGTCAAATCTTTGATGATTCCATCCT  
ACATGATTGAGTTGCGAAAACCTTCTGGATAGGTATCCTACATCTGAACTGAATTCTTTCT  
GGTTAAAAAATCTCCTTCTAGTTGCTCTGGGACAATTAGGAGATTCTTTAGAAGAAATA  
CGGGGTTCTGCTTCTGGTGGCAACATGCTATTGGGGGGTGGTCCC-----ATTTATG  
GG---GTCAAATCAATACGCTCTAAGAAGAAATATTTGAATATCAATCTCATCGATATCCTC  
GATCTCATA---AGTATCATAACCAATCCCATCAATCGAATCACTTTTTTCAAGAAATACGA  
GATATCTAAGTCATACAAGTAAAGAGATCTATTCATTGATAAGAAAAAGAAAAACGTA  
AACGGTGATTGGATTGATGATAAAATAGAATCCTGGGTTCGCGAACAGTGATTTCGATTGA  
TGATGAAGAAAGAGAATTCTTGGTTTCAGTTCTCC-----ACCTAACGACA-----GAAAAA  
AGGATTGATCAAATTCTATTGAGTCTGACT--CATAGTGATCATTTATCA-----AAG  
AATGACTCTGGTTATCAAATGATTGAACAACCGGGAGCAATTTACTTACGATACTTAGT  
TGACATTCAT-----AAAAAGTATCTAATGAATTATGAGTTCAATACATCCTGTTTAGCAGA  
AAGACGGATATTCCTTGCTCATTATCAGACAATCACTTAT-----TCACAAACTTCGTGTGG  
GGCTAATAGTTTTTCATTTCCCATCTCATGGA-----AAACCCTTTTCGCTTCGCTTAGCC  
CTATCCCCCTCT--AGGGGTATTTTAGTGATAGGTTCTATAGGAACTGGACGATCCTATTT  
GGTCAAATACCTAGCGACAAACTCCTATGCTCCTTTCATTACGGTATTTCTGAACAAGTT  
CCTGGATAACAAACCTAAAGGTTTTCTTATTGAT-----GATATCGAT-----GA  
TGATATCGATATTGATGAT-----AGT  
GATCTTGATACGGAGCTGGAGCTGCTAACTATGATGAATGCGCTA-----ACTATGGATA  
TGATGCCG-----GAAATAGACCGATTTTATATCACCCTTCAATTCGAATTAGCAAAAGC  
AATGTCTCCTTGCATAATATGGATTCCAAACATTCATGATCTGGATGTGAATGAGTCCAA  
TTACTTATCCCTCGGTCTATTAGTGAACATCTCTCC-----AGGGATTGTGAAAGATGTT  
CC---ACTAGAAATATTCTTGTATTGCTTCGACTCATATTCCCCAAAAGTGGATCCCGC  
TCTAATAGCTCCGAATAAACTAAATACATGCATTAAGATACGAAGGCTTCTTATTCCACA  
ACAACGAAAGCACTTTTTCACTTTTTCATATACTAGGGGATTTCACTTGGAAAAGAAAA  
TGTTCCATACT-----AATGGATTTCGGGTCCATAACCATGGGTTCCAATGCGCGAGATCTTG  
TAGCACTTACCAATGAGGCCCTATCGATTAGTATTACACAGAAGAAATCAATTATAGAC  
ACTAATAACAATTAGATCCGCTCTTCATAGACAACTTGGGATTTGCGA-----TCCCAGG  
TAAGATCGGTTTCAGGATCATGGGATCCTTTTCTATCAGATAGGAAGGGCTGTTGCACAA  
AATGTACTTCTAAGTAATTGCCCATAGATCCTATATCTATCTATATGAAGAAGAAA-----T  
CATGTAACAAAGGGGATTCTTATTTATACAAATGGTACTTCGAACTTGGAACGAGCATG  
AAGGAATTAACGATACTTCTTTATCTTTTGAGTTGTTCTGCCGGATCGGTTCGCTCAAGAT  
CTTTGGTCTCTACCC-----GGACCCGATGAAAAA---AATGGGATCCCTTCTTATGGACTC  
GTTGAGAATGATTCT--GATCTAGTTCATGGCCTATTAGAAGTAGAAGGCGCTCTGGTGG  
GA-----TCCTCACGG-----AAAGATTACAGTCAGTTTGATAATGAT-----CGAGTGACATTG  
CTTCTTCGGCCCGAACCGAGGAAT--CCCTTAGATATGATGCAAAATGGATCTTGTCTA  
TCGTTGATCAGAGATTTCTCTATGAAAAA-----GACGAATCGGAGTTTGAAGAA-----G  
GA-----GCCCTCGACCCACAA-----CAGATAGAGGAGGAT-----TTATTCAATCAC  
-----ATAGTTTGGGCTCCT-----AGAATATGGCGCCCT-----TGGGGCTTTCTATTTGATTG  
TATCGAAAGGCCCAATTCATTGGGATTTCCC---TATTGGGCCAGGTCATTTCCGGGGCAA  
G-----CGGATCGTTTATGATGAAGAGGATGAGCTTCAAGAGAATGATTTCGGAGTTCTT  
GCAGAGTGGAACCATGCAGTACCAGACACGAGATAGATCTTCCAAGAACAAGGCTT

TTTTCGAATAAGCCAATTCATTTGGGACCCTGCGGATCCACTCTTTTTTCTATTCAAA---  
GATCAGCCCCTTGTCTCTGCGTTTTTCACATCGAGAATTCTTTGCAGATGAAGAGATGTC  
AAAGGGACTTCTTACTTCCCAAACAGATCCTCTACATCTATATATAAACGCTGGTTTAT  
C-----AAGAATACGCAAGAAAAGCACTTCGAATTGTTGATTAATCGCCAGAGATGGCTT  
AGA-----ACCAATAATTCATTATCT-----AATGGATCTTTCGGTTCTAAT-----ACTCTATC  
CGAGAGTTATCAGTATTTATCAAATCTGTTCCCTATCTAAC---GGAACGCTATTGGATCAAA  
TGACAAAGACATTGTTGAGAAAAAGATGGCTTTTCCC GGATGAAATGAAAATTGATGT  
A-----ACAGGAGAAAGATTTCCCATTCCCT-----ATGCCTAGATCGCGG---GTAAATGAAAA  
TTTTATTGATAAGACCTTTTCAATTGTAGCCAATATCTTATTACGAATAATTCCGACAAC  
TCAAGAGAGAAAGAGGCATTTACCTATTACAGAGATGGG-----ATGTCAGCGCAATCCG  
AAGGAAATTATGCGGAAGCTTTACAAAATTATTATGAAGCTATGCGACTAGAAAATTGAT  
CCCTATGATCGAAGTTATATACTCTATAACATAGGCCTTATCCACACAAGTAATGGAAAA  
CATACAAAAGCTTTGGAATATTATTTTCGAGCACTAGAACGAAACCCATTTTTTACCACA  
AGCTTTTAATAATATGGCCGTAATCTGTCAATAC---CGGGGAGAACAGGCCATTGAGCAG  
GGAGATTCTGAAATTGCGGAGGCTTGGTTCAATCAAGCCGCTGAGTATTGGAAACAAG  
CTATTGCGCTTACTCCGGGTAATTATATTAAGGCGCATAATTGGTTGAAGATTACAAGCC  
GTTTCGAA-----ATGAGTTGGCAATCAGAACGTATATGGATAGAACTTATAACAGGTTCT  
CGAAAAATAAGTAATTTTTTCTGGGCCTGTATCCTTTTTTTTAGGTTCCCTTAGGATTCTTAT  
TGGTTGGAACCTCCAGTTATCTGGGTAGGAATTTGATATCTTTATTTCCGTATCAACAAA  
TAATTTTTTTTTCCACAAGGGATCGTGATGTCTTTCTATGGGATTGCGGGTCTCTTTATTA  
GCTCCTATTTGTGGTGCACAATTTTCGTGGAATATAGGTAGTGGTTATGATCGATTGATA  
GAAAAGAAGGAATAGTGTGTATTTTTCGTTGGGGATTTCTTGGA AAAAATCGTTCGCATC  
TTCTCCGATTCTTTATGAAAGATATTCAGTCCATCAGAATAGAAGTTAAAGGGGGTATT  
TATACTCGTTCGTTCCTTTATATGAAATCAGGGGCCAAGGGATTATTCTTTGACTCGT  
ACTGATGAGAAT--TTGACTCCACGAGAAATTGAACGAAAAGCTGCCGAATTGGCCTAT  
TTCTTGC GTTACCAATGGAATTGAAA
