# Supplementary material for: A precise chloroplast genome of Nelumbo nucifera (Nelumbonaceae) evaluated with Sanger, Illumina MiSeq, and PacBio RS II sequencing platforms: insight into the plastid evolution of basal eudicots
Source: PubMed Central journal article supplement (PMC4245832; doi:10.1186/s12870-014-0289-0), 2014-11-19
Supplement: 12870_2014_289_MOESM7_ESM.pdf [file 12870_2014_289_MOESM7_ESM.pdf]

Additional file 7. Fossil constraints used in the MCMCtree analyses in this study.

| Fossil constraints | Constraint Node                                     | Min age (Mya) | Max age (Mya) | References                |
|--------------------|-----------------------------------------------------|---------------|---------------|---------------------------|
| Root               | Gymnosperms with Angiosperms                        | 290           | 310           | Moore <i>et al.</i> 2010  |
| Eudicots           | Crown with stem group eudicots                      | 125           |               | Moore <i>et al.</i> 2010  |
| Calycanthaceae     | <i>Calycanthus</i> with <i>Liriodendron</i>         | 113           |               | Crepet <i>et al.</i> 2004 |
| Platanaceae        | <i>Platanus</i> with <i>Buxus</i> and core eudicots | 113           |               | Crepet <i>et al.</i> 2004 |
| Platanaceae        | <i>Platanus</i> with <i>Nelumbo</i>                 | 110           |               | Crane <i>et al.</i> 1993  |
| Malpighiales       | <i>Populus</i> with <i>Morus</i>                    | 90            |               | Crepet <i>et al.</i> 2004 |
| Fabaceae           | <i>Glycine</i> with <i>Morus</i>                    | 60            |               | Crepet <i>et al.</i> 2004 |
| Monocots           | Poales with other monocots                          | 115           |               | Linder <i>et al.</i> 2005 |

#### References:

Crane PR, Pedersen KR, Friis EM, Drinnan AN: **Early Cretaceous (Early to middle Albian) platanoid inflorescences associated with Sapindopsis leaves from the Potomac Group of eastern North America.** *Syst Bot* 1993, **18**: 328–344.

Crepet WL, Nixon KC, Gandolfo MA: **Fossil evidence and phylogeny: the age of major angiosperm clades based on mesofossil and macrofossil evidence from Cretaceous deposits.** *Am J Bot* 2004, **91**:1666–1682.

Linder HP, Rudall PJ: **Evolutionary history of Poales.** *Annu Rev Ecol Evol Syst* 2005, **36**: 107–124.

Moore MJ, Soltis PS, Bell CD, Burleigh JG, Soltis DE: **Phylogenetic analysis of 83 plastid genes further resolves the early diversification of eudicots.** *Proc Natl Acad Sci USA* 2010, **107**(10):4623–4628.
